# Supplementary material for: Taxonomic and Environmental Variation of Metabolite Profiles in Marine Dinoflagellates of the Genus Symbiodinium
Source: MDPI journal article supplement (doi:10.3390/metabo5010074), 2015-02-16

B184:26

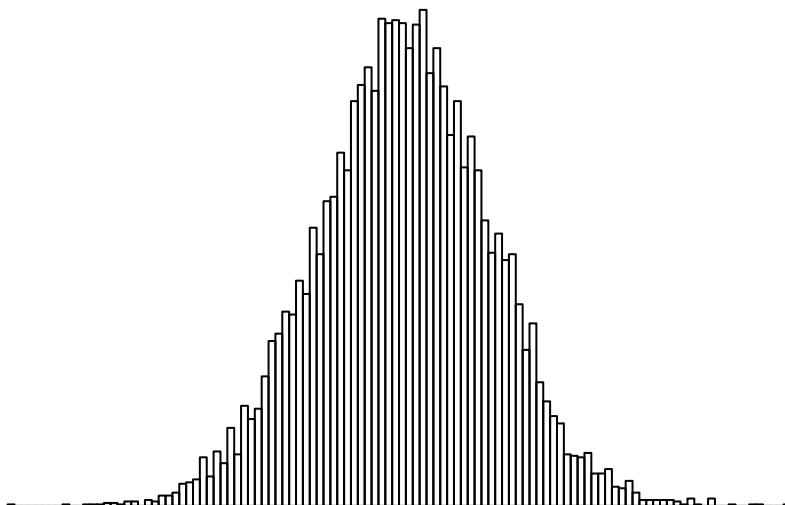

B184:18

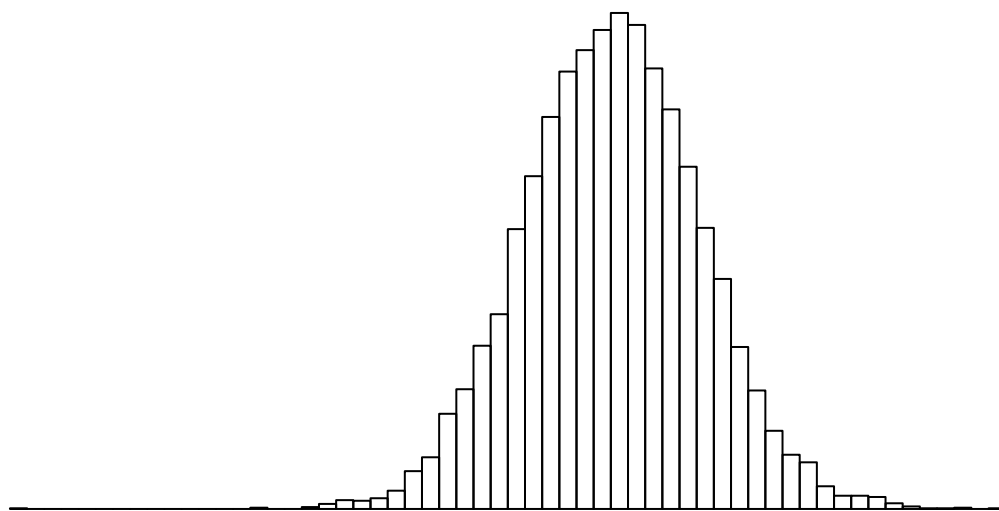

-5.5      -5.0      -4.5      -4.0      -3.5      -3.0      -2.5      -2.0

Amino Acid 2

B184:26 – B184:18

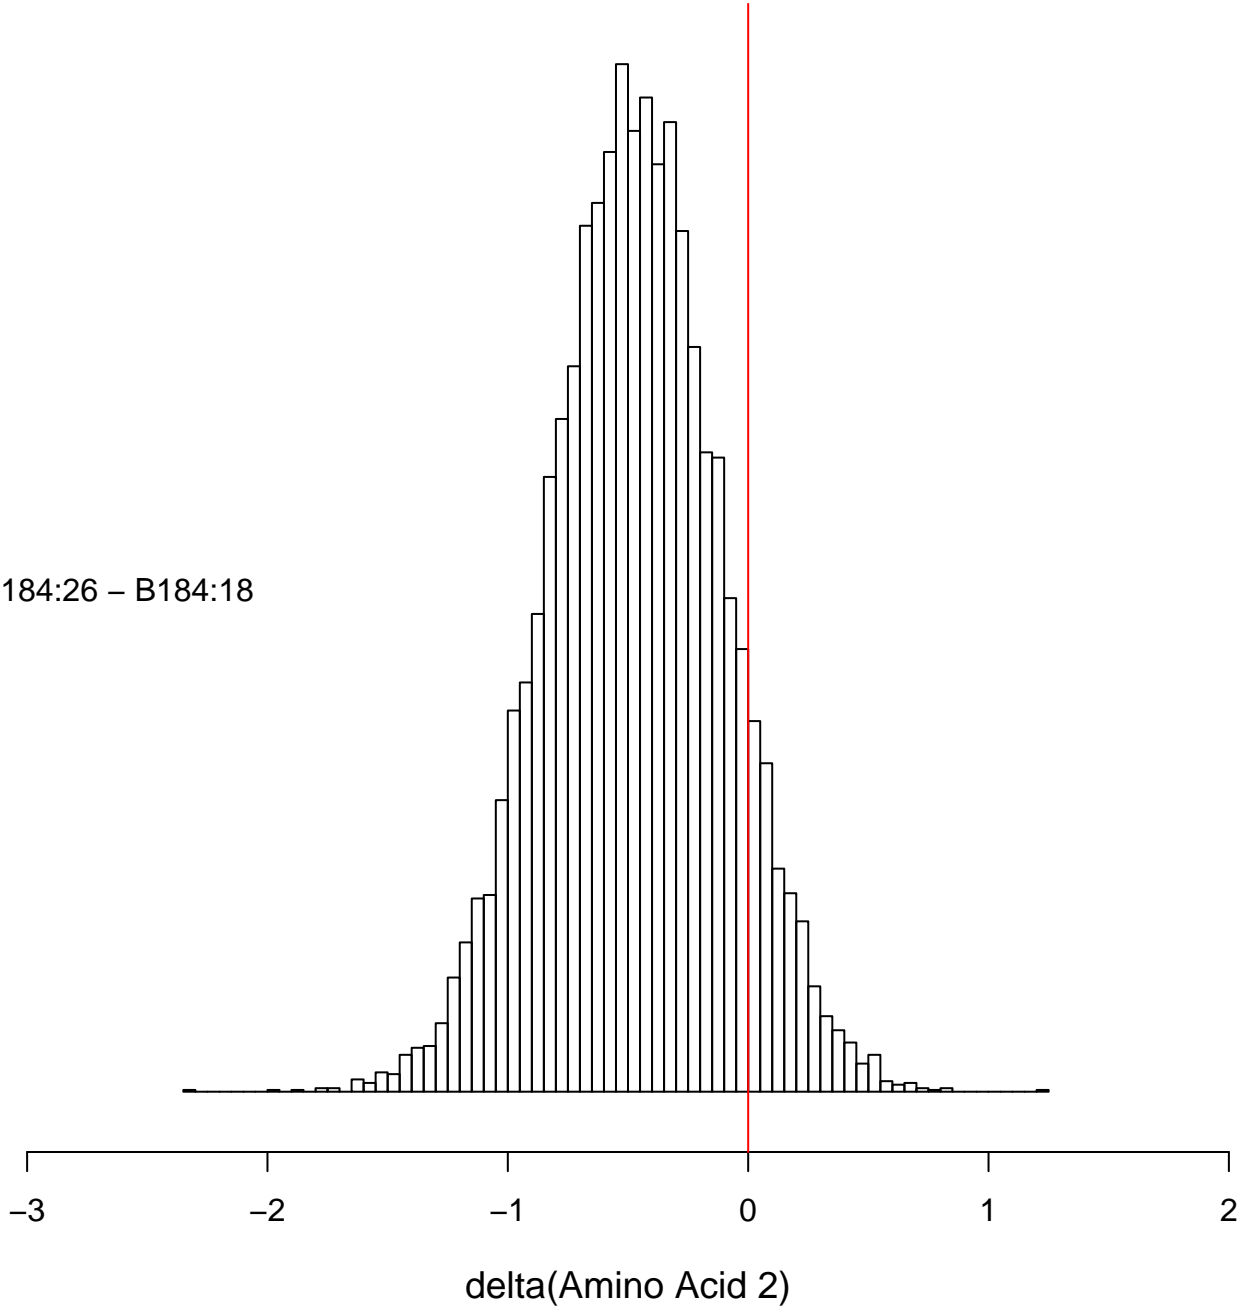

B184:26

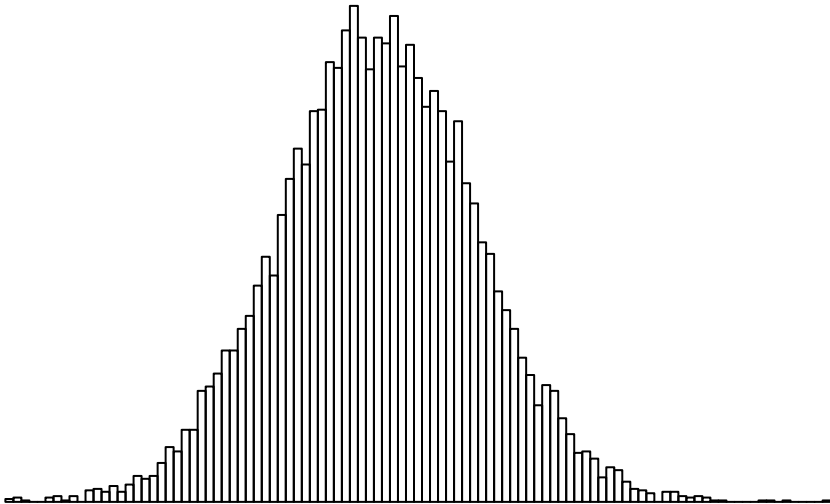

B184:18

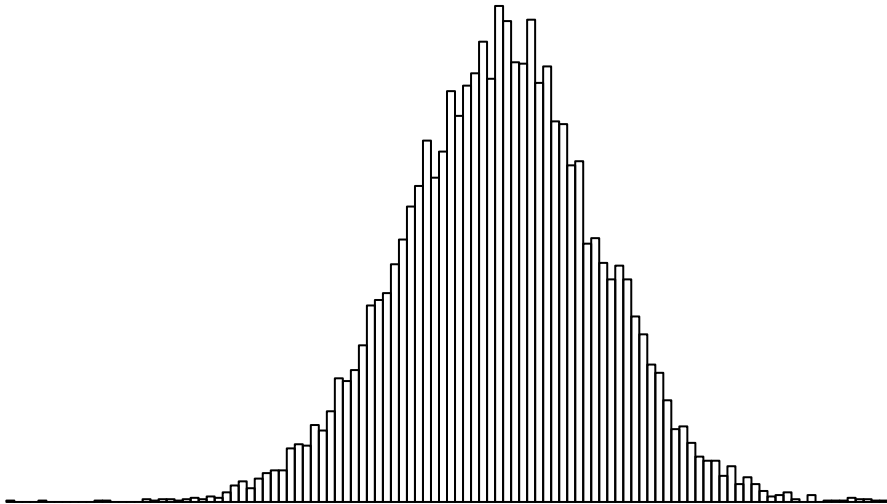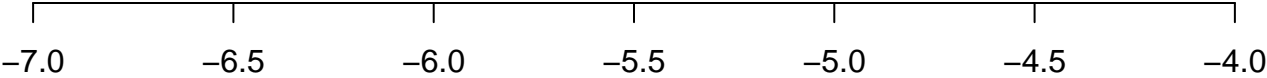

Amino Acid 3

B184:26 – B184:18

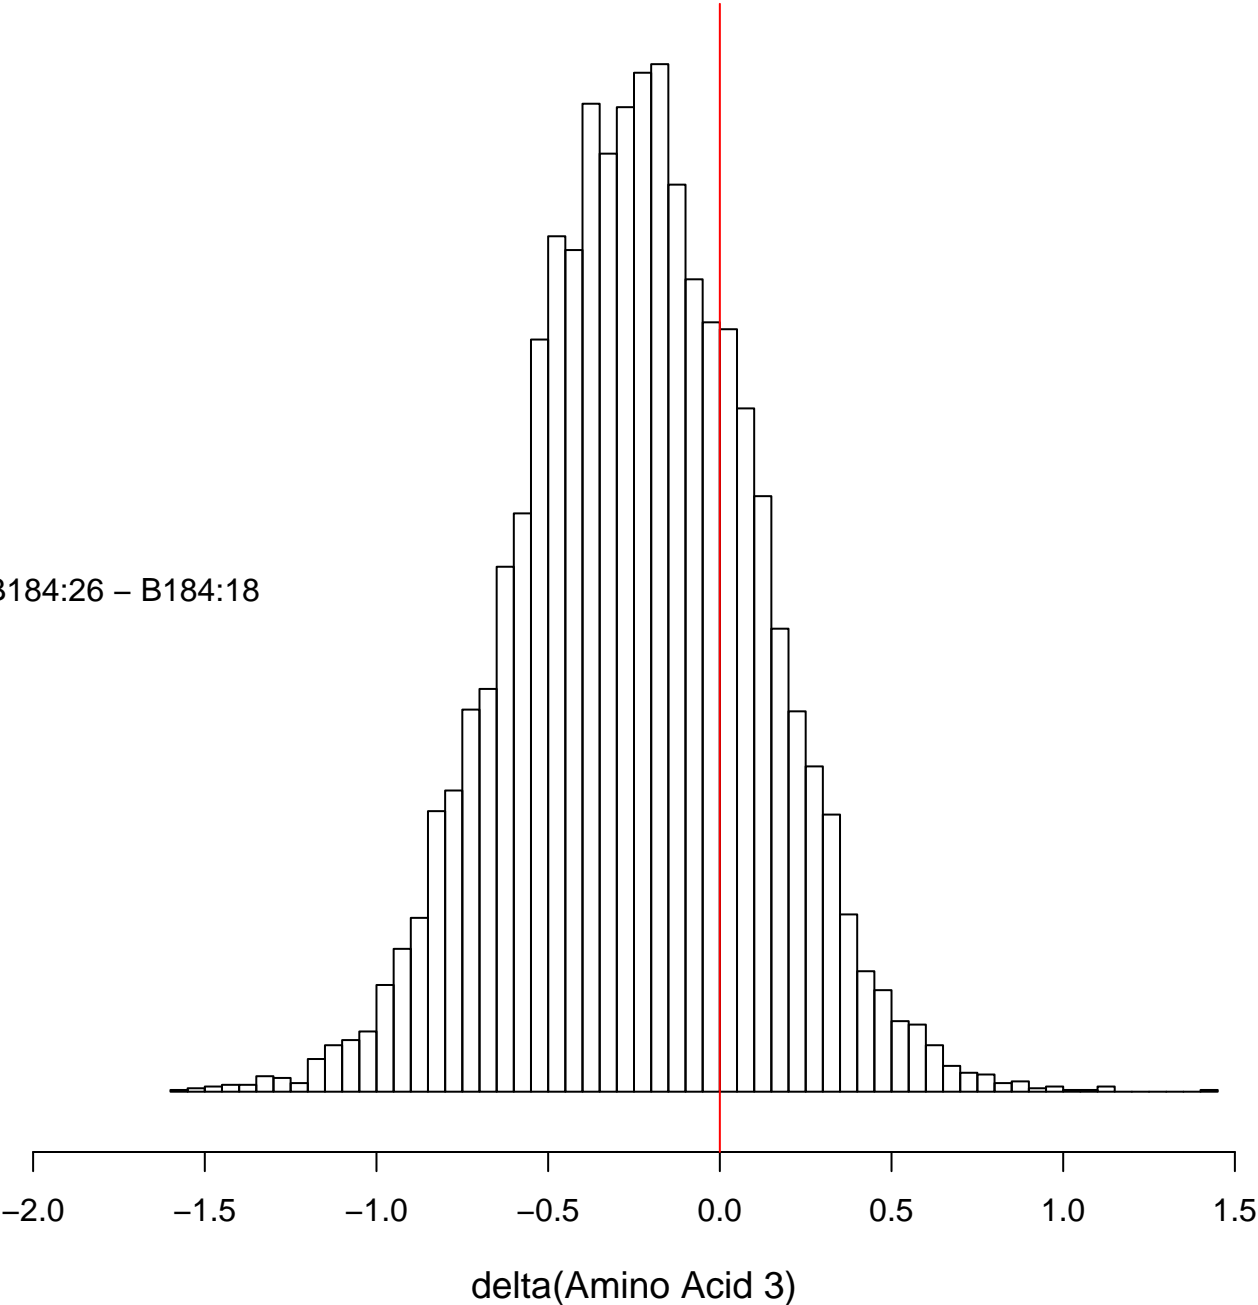

B184:26

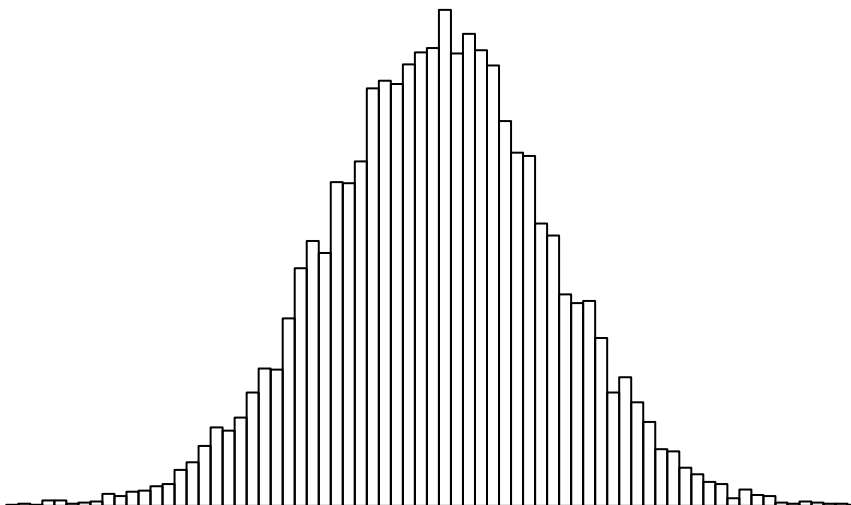

B184:18

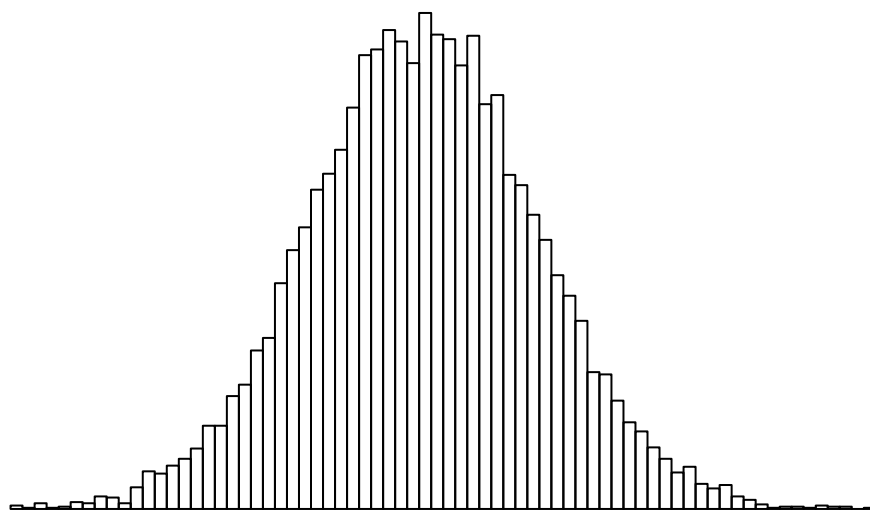

-8

-7

-6

-5

-4

-3

Alanine

B184:26 – B184:18

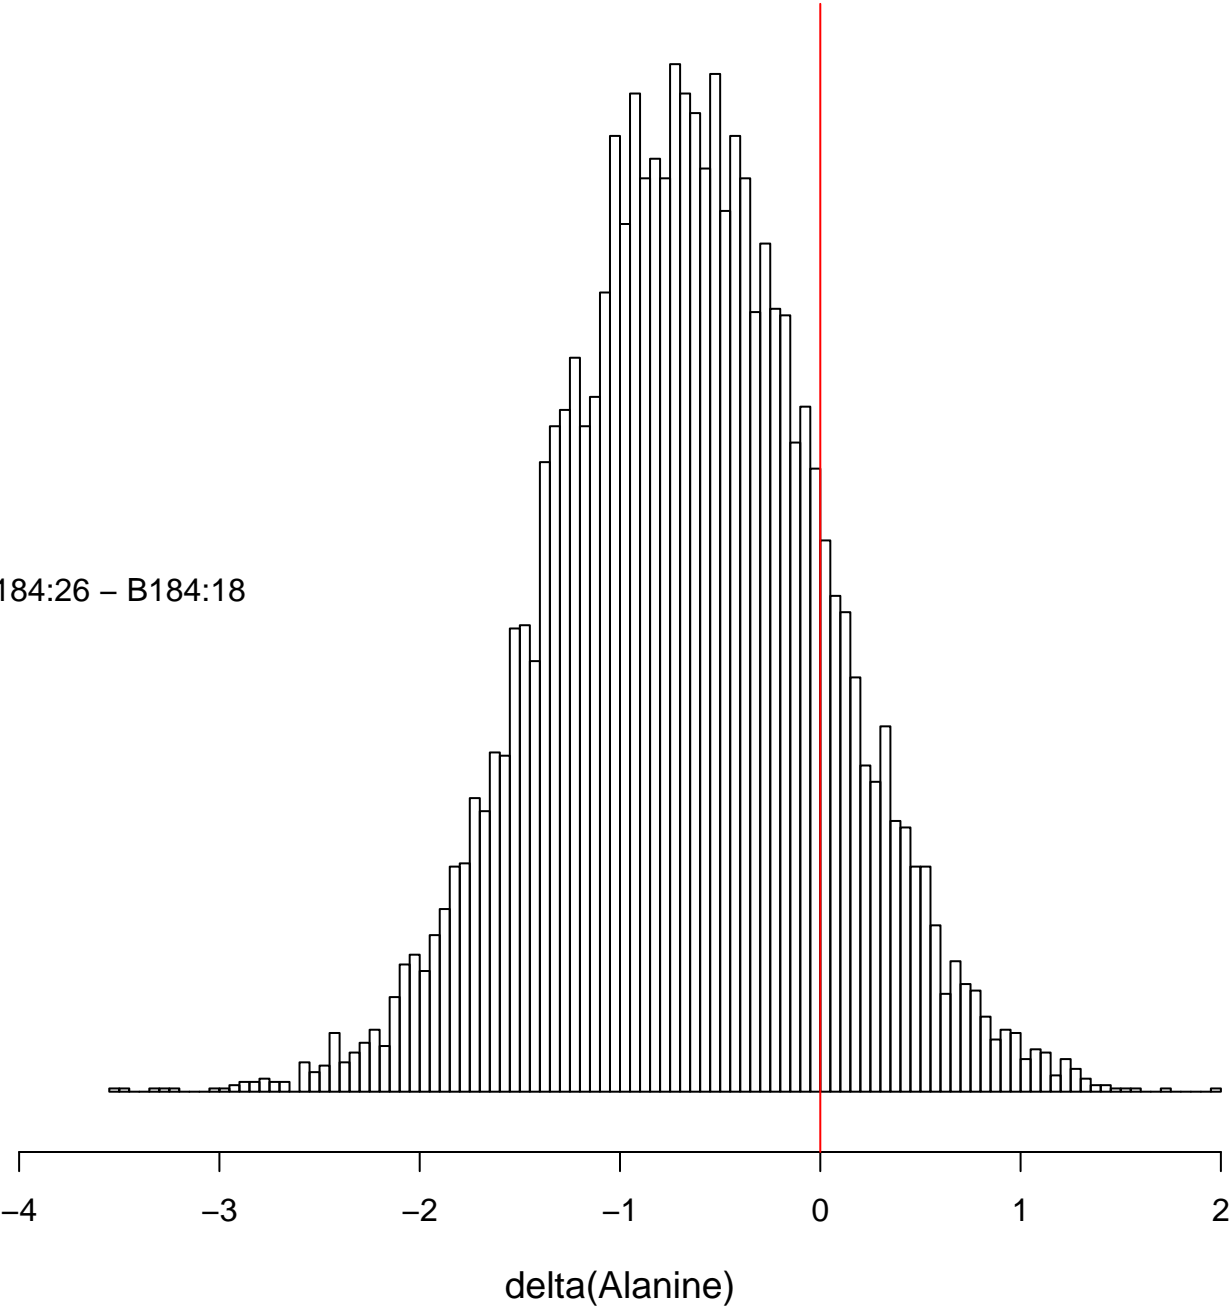

B184:26

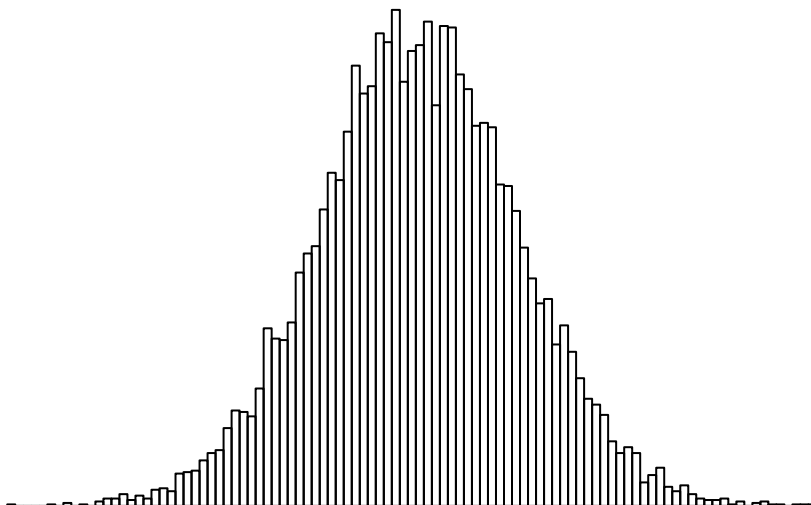

B184:18

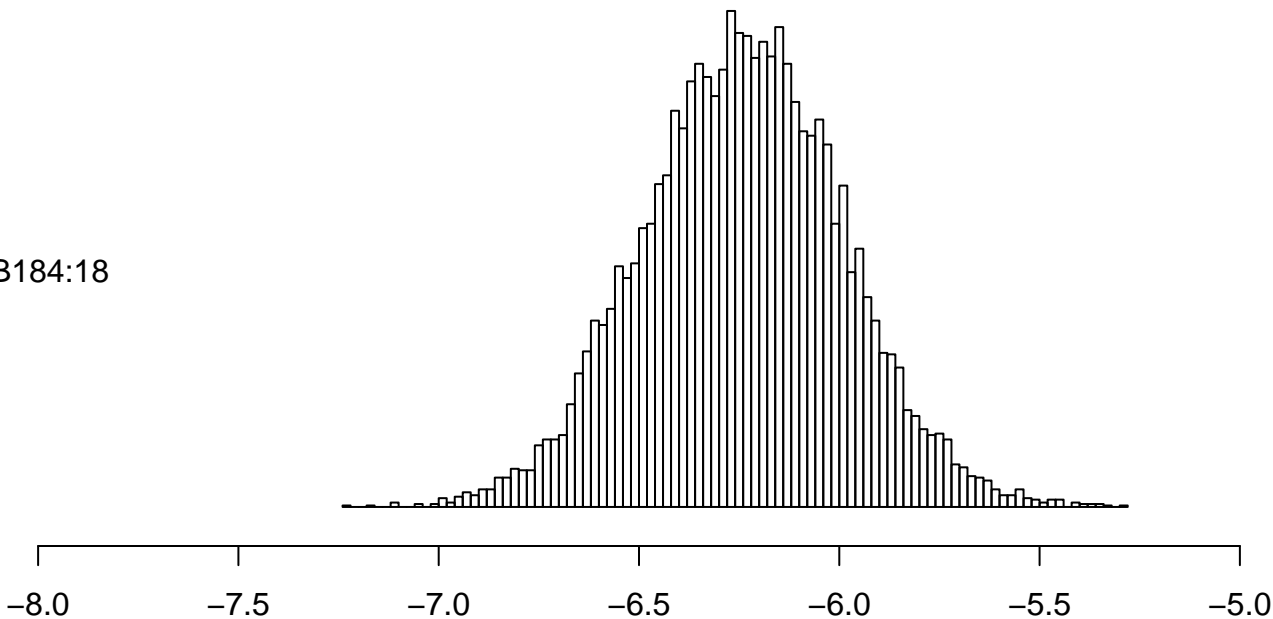

Amino Acid 4

B184:26 – B184:18

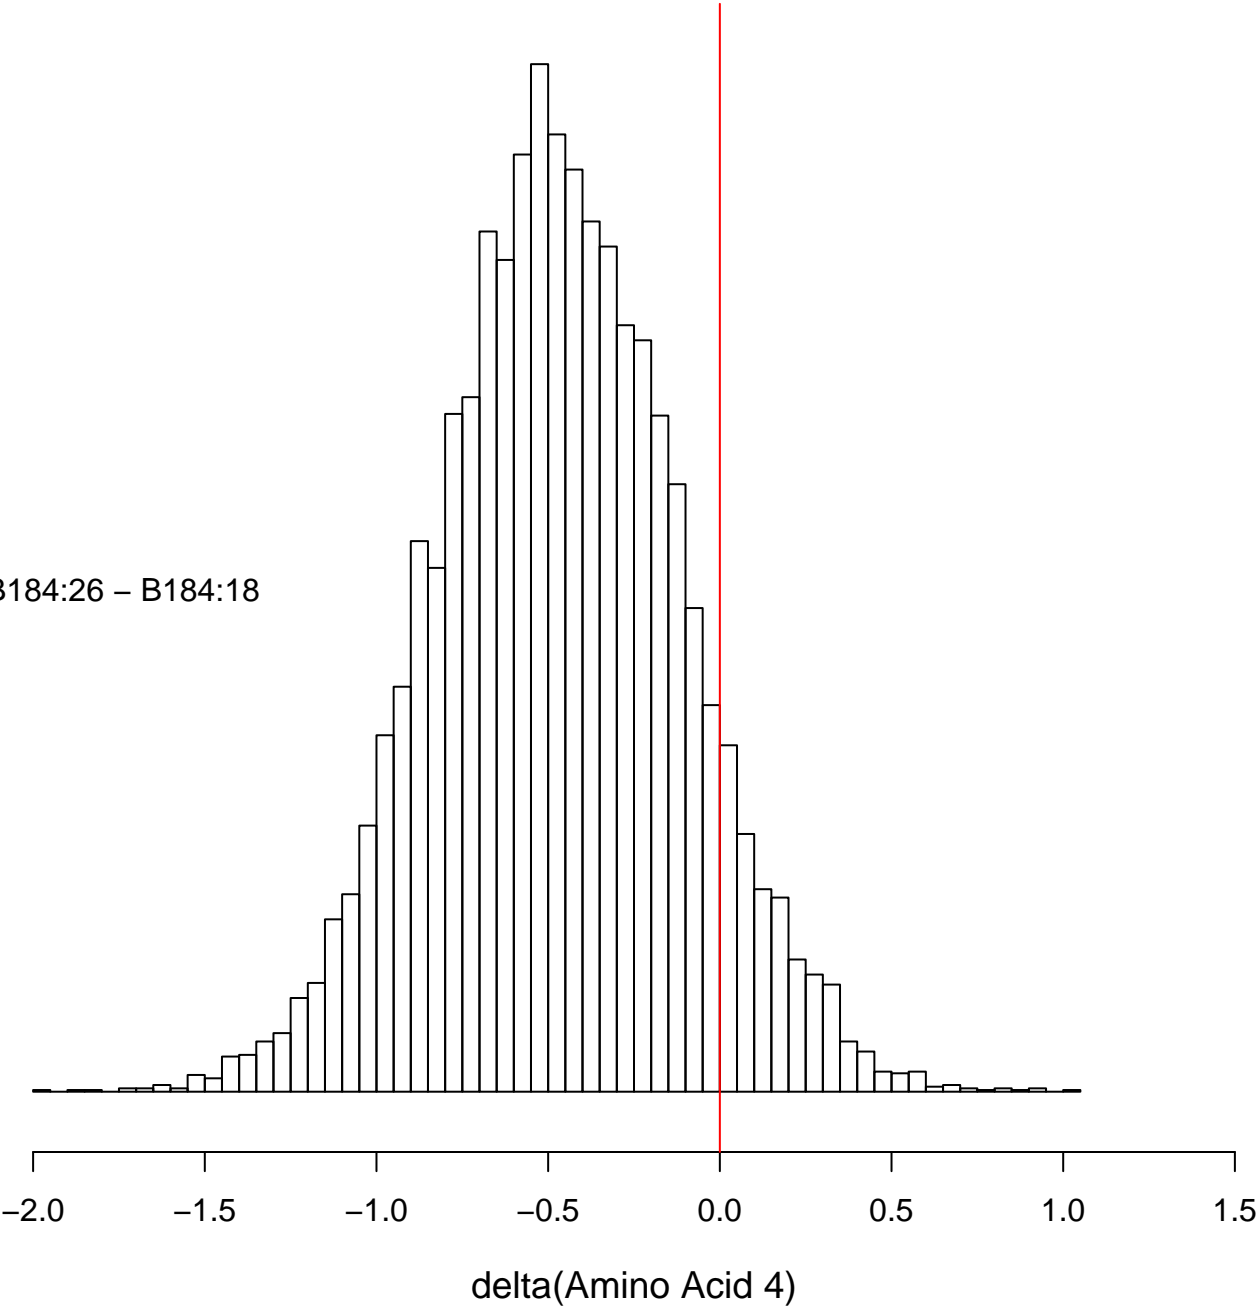



B184:26

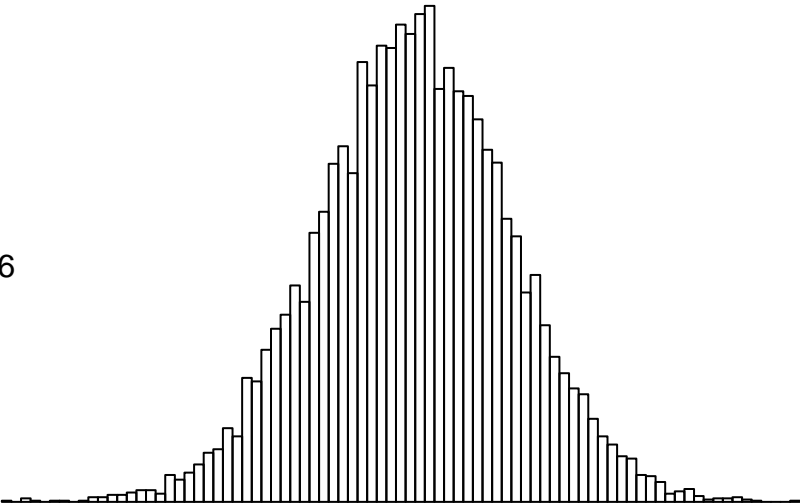

B184:18

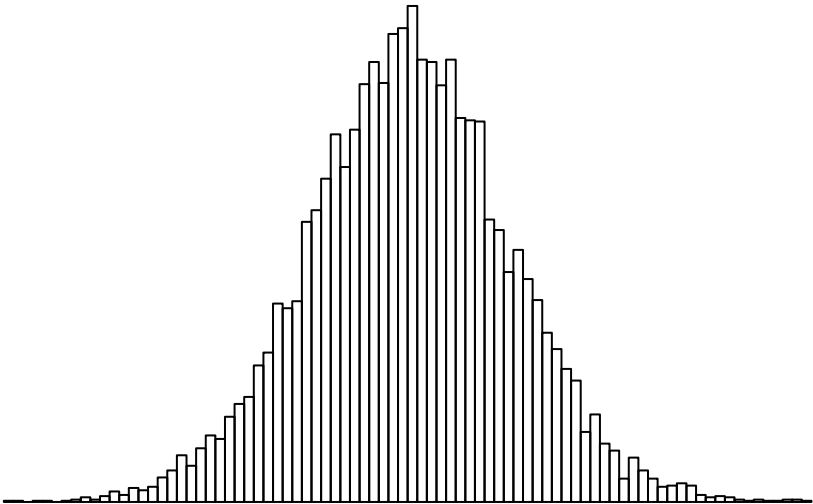

-7.5      -7.0      -6.5      -6.0      -5.5      -5.0

Amino Acid 6

B184:26 – B184:18

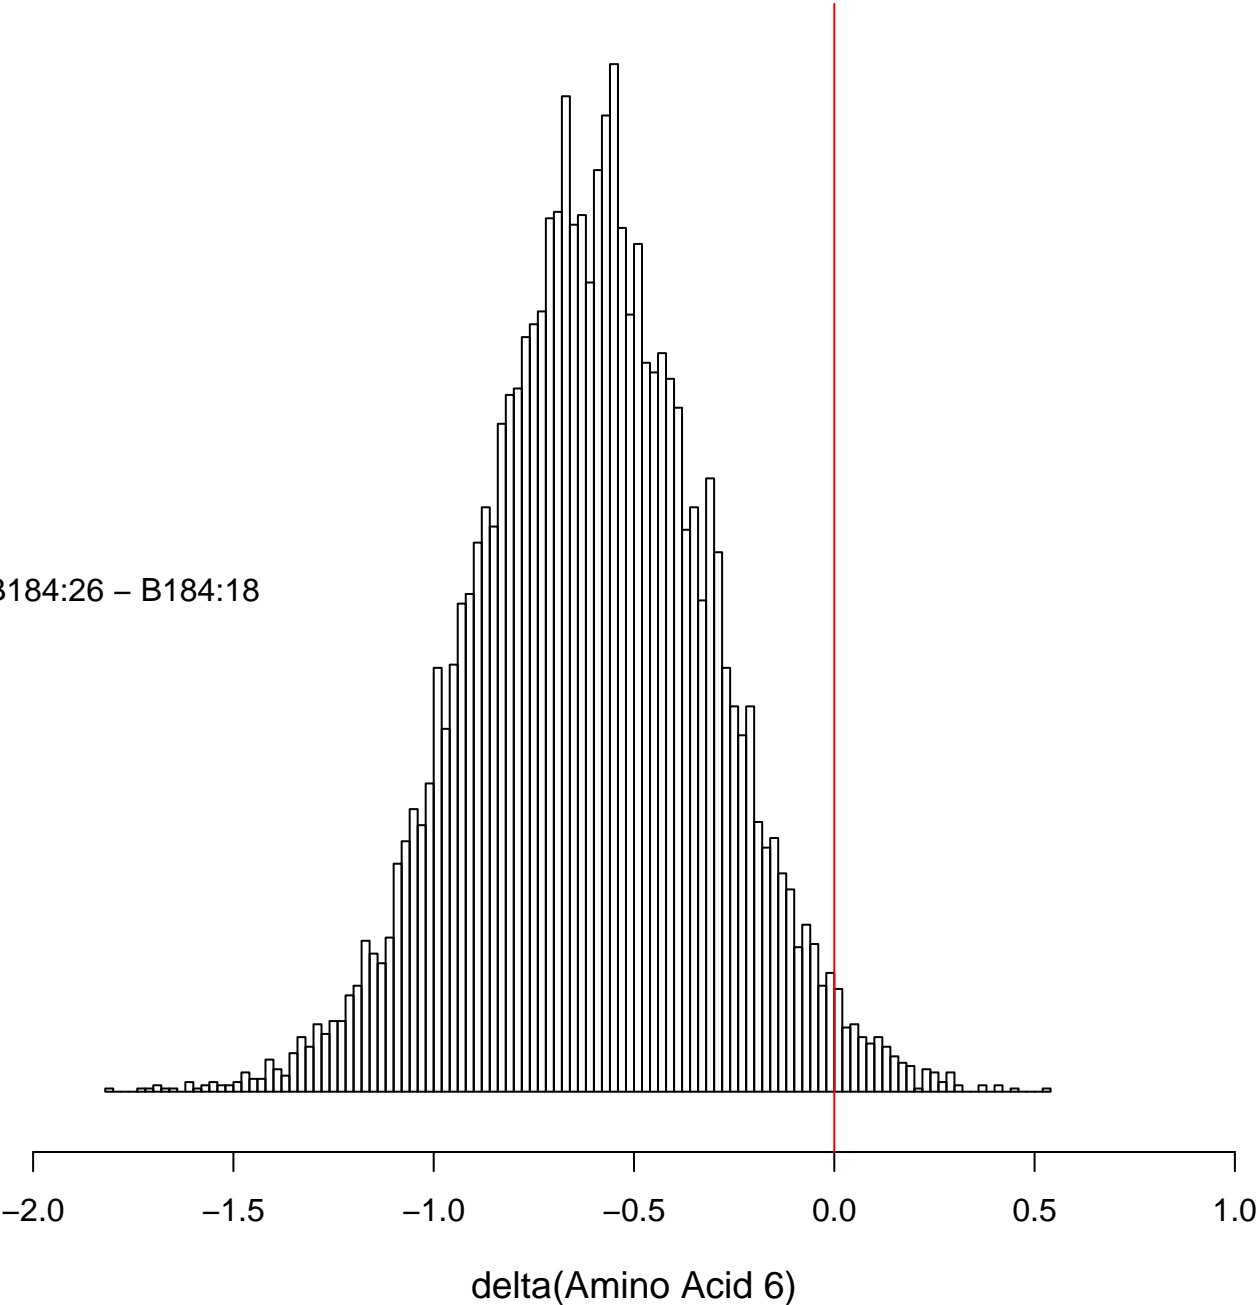

B184:26

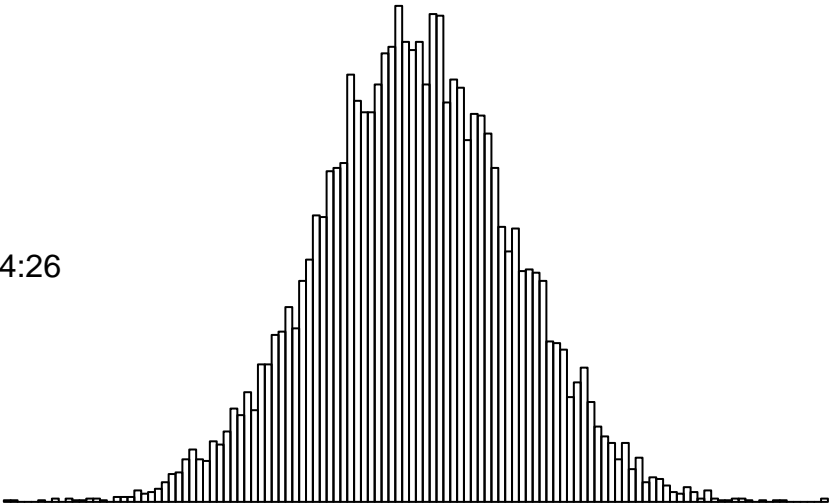

B184:18

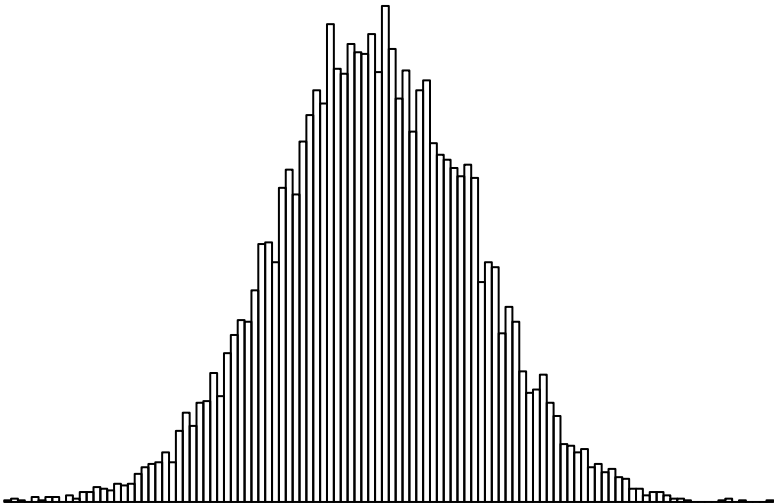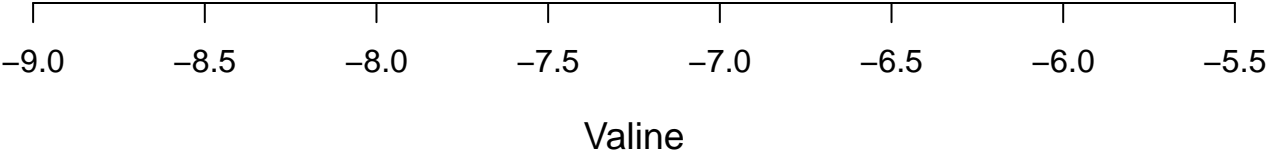

B184:26 – B184:18

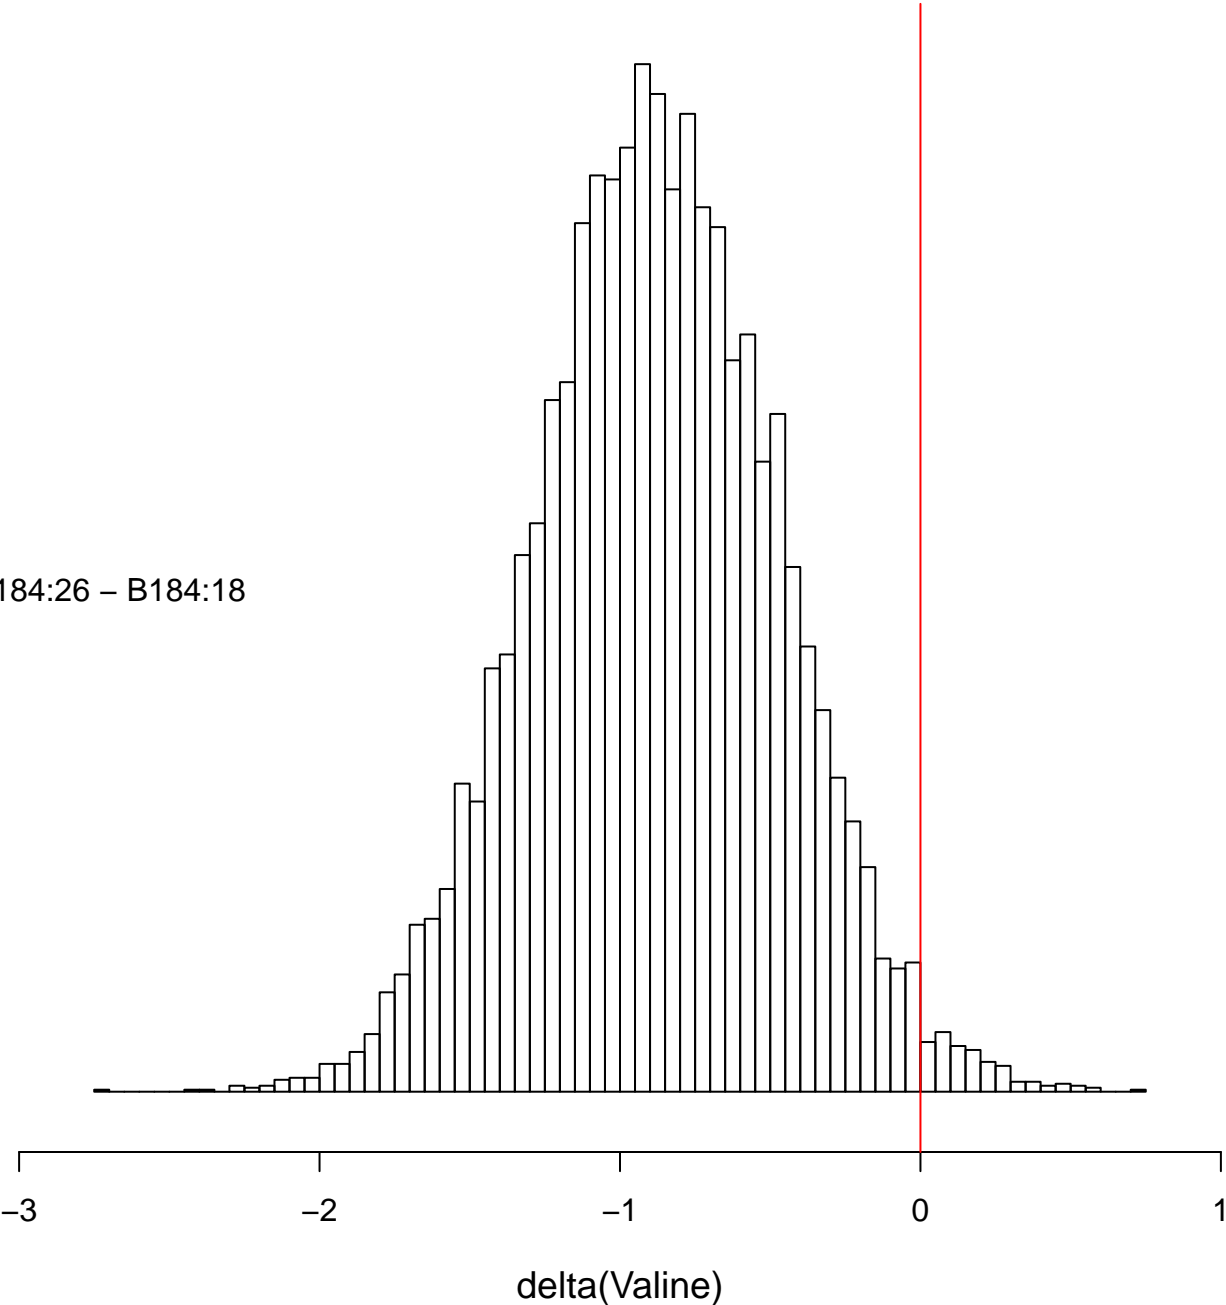

B184:26

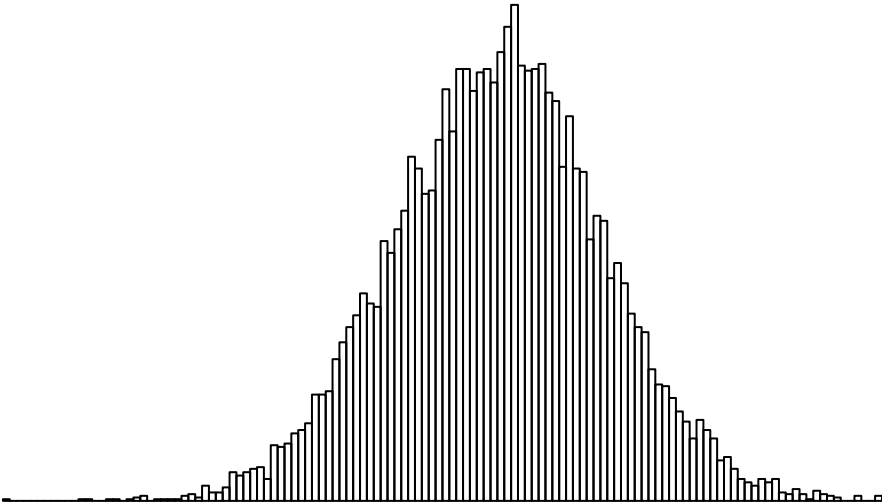

B184:18

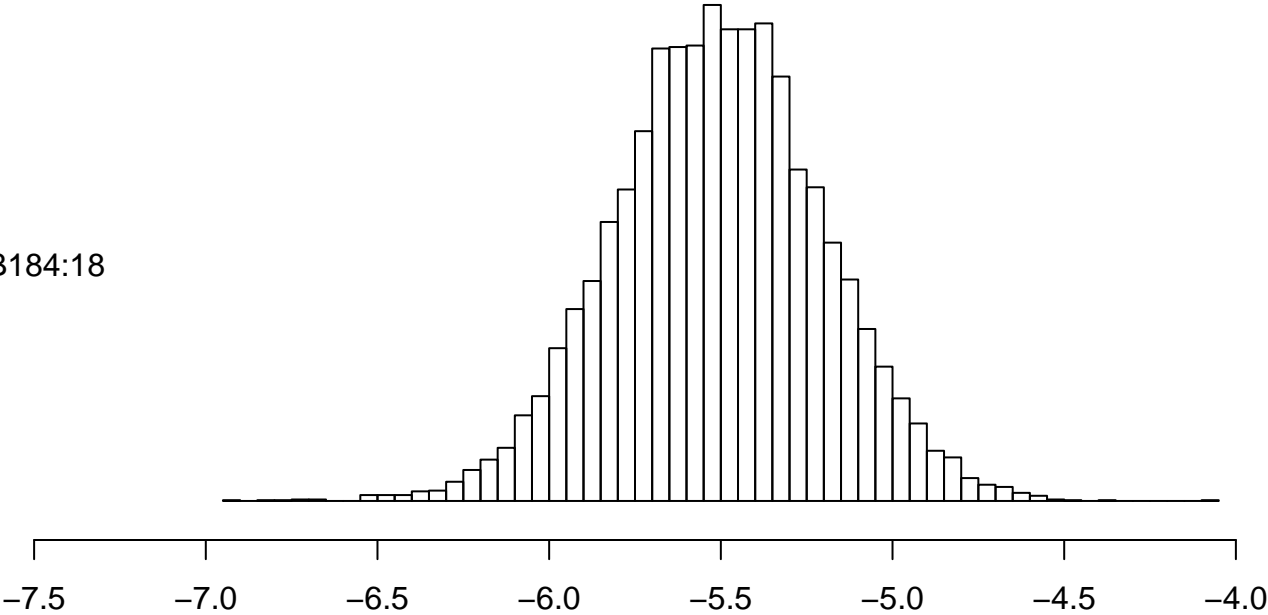

Amino Acid 7

B184:26 – B184:18

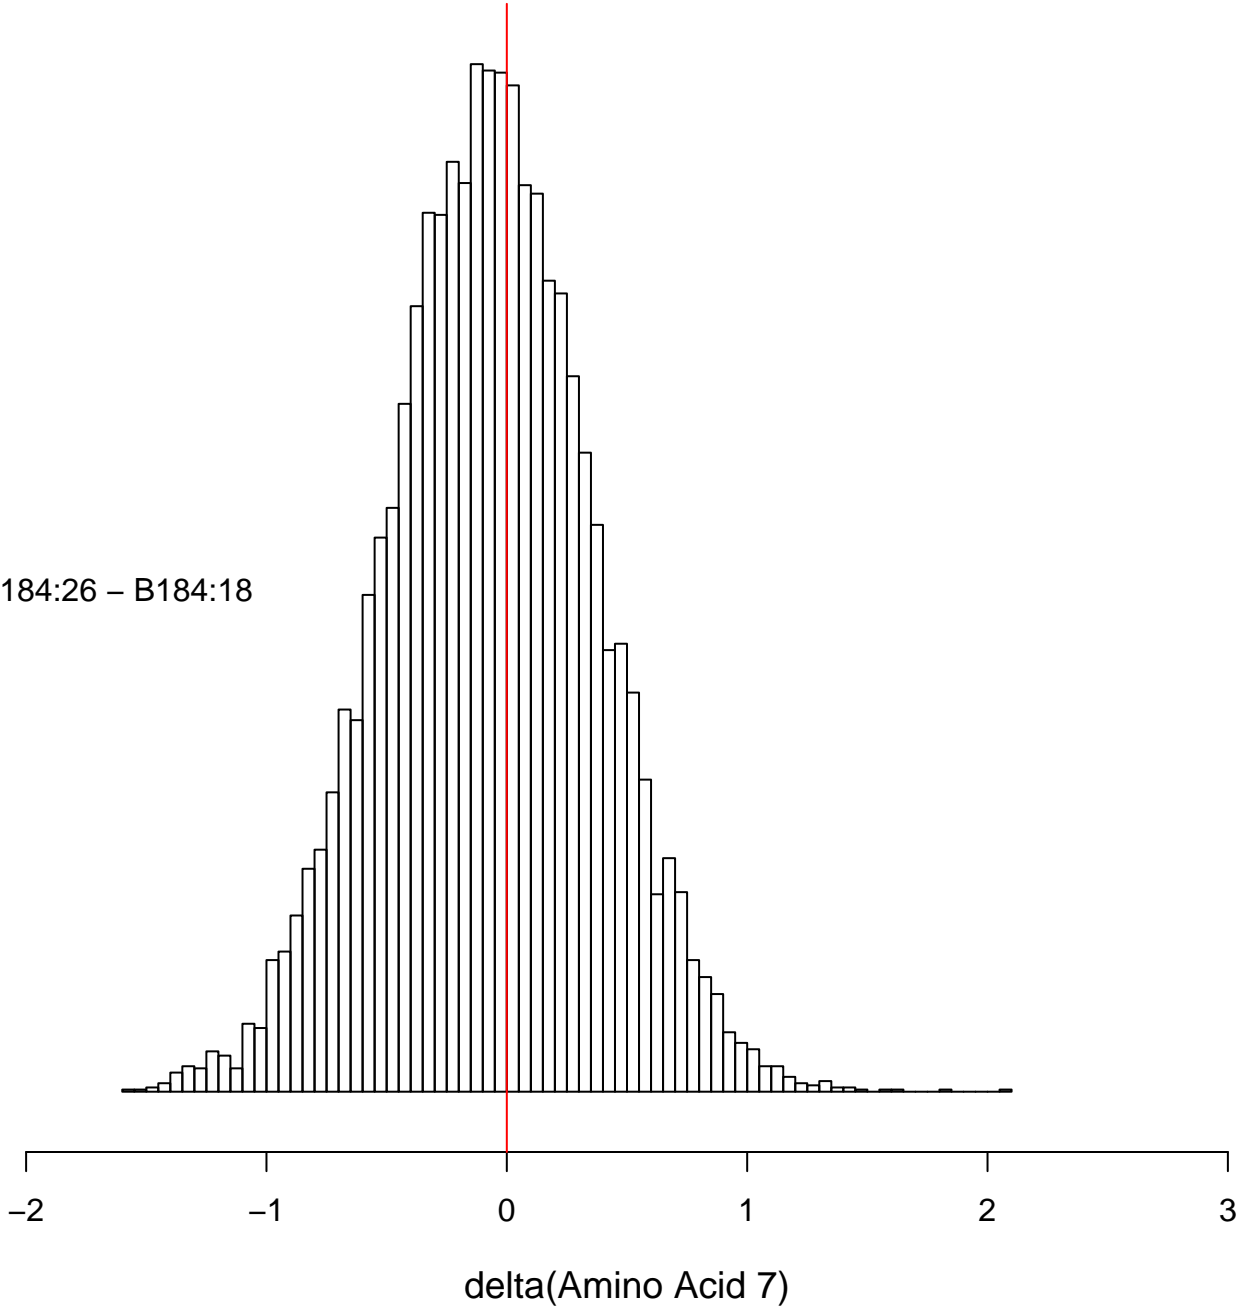

B184:26

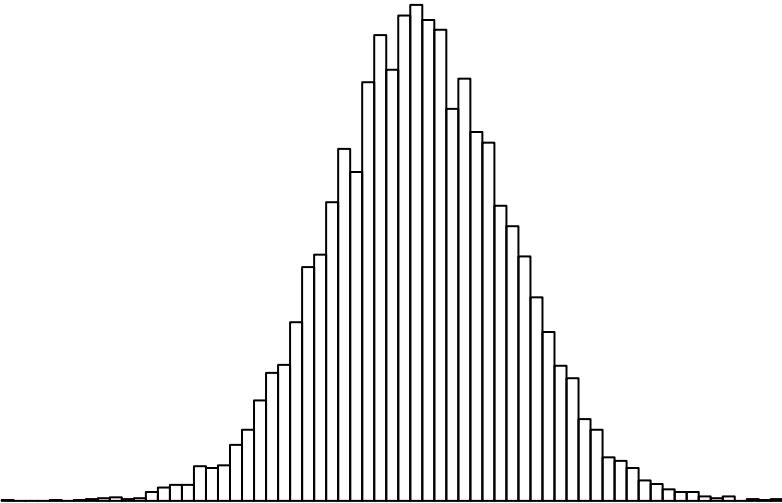

B184:18

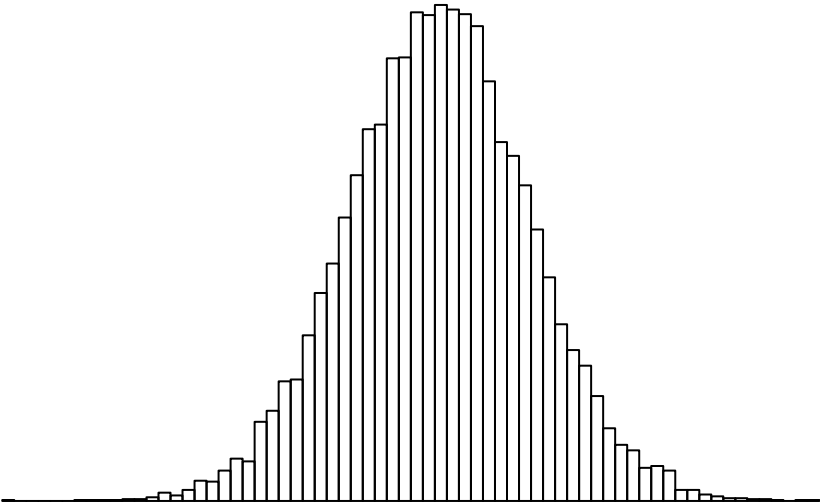

Glycine

B184:26 – B184:18

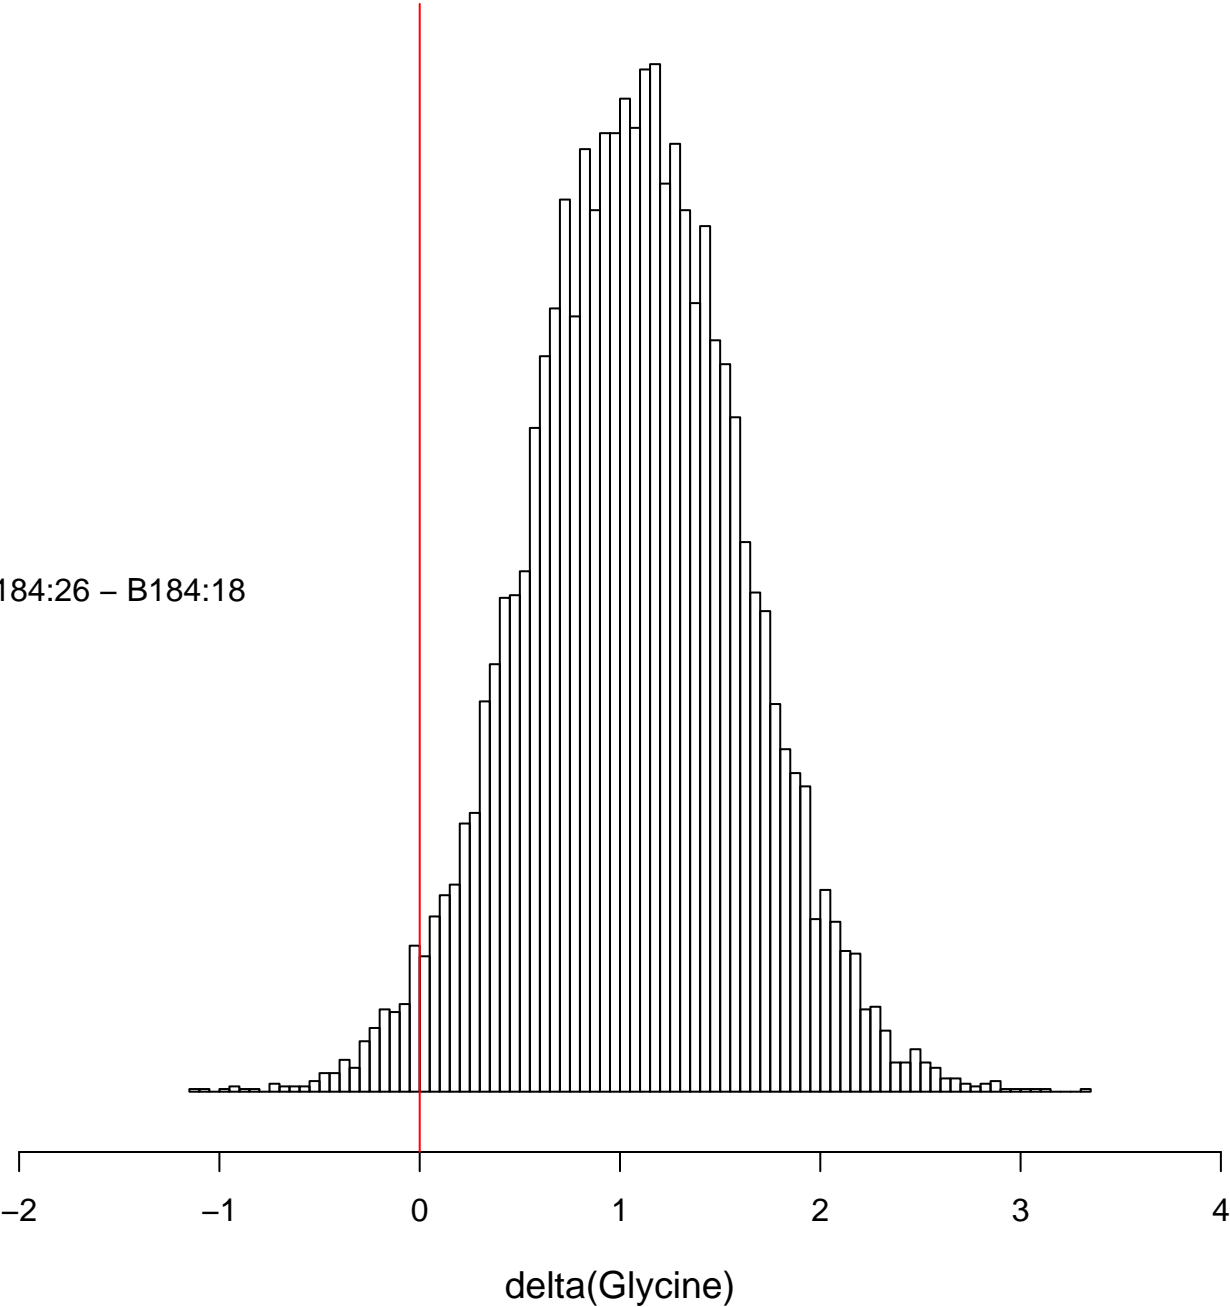



B184:26

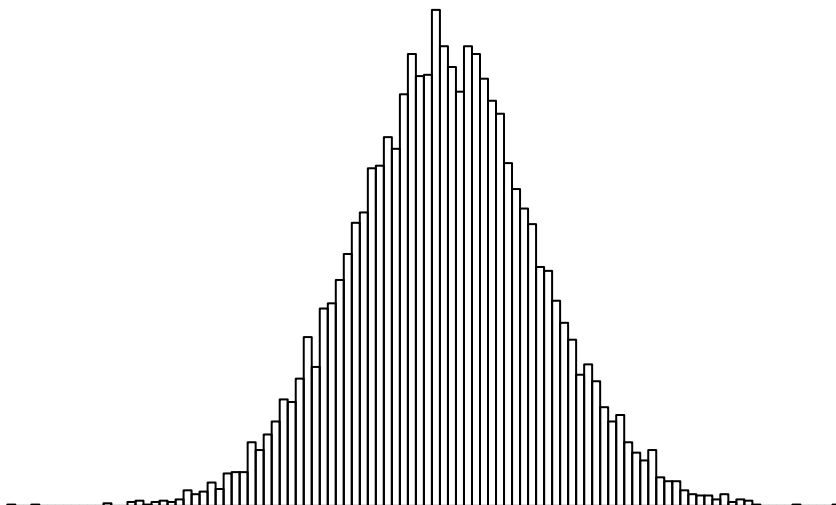

B184:18

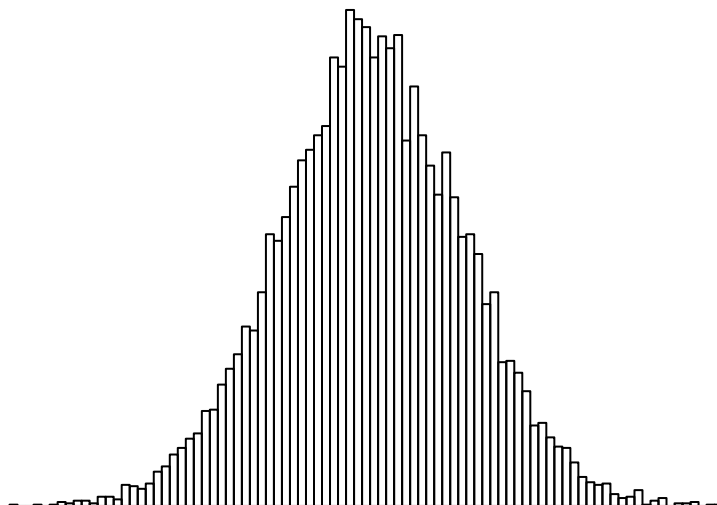

-9.0

-8.5

-8.0

-7.5

-7.0

-6.5

-6.0

Amino Acid 8

B184:26 – B184:18

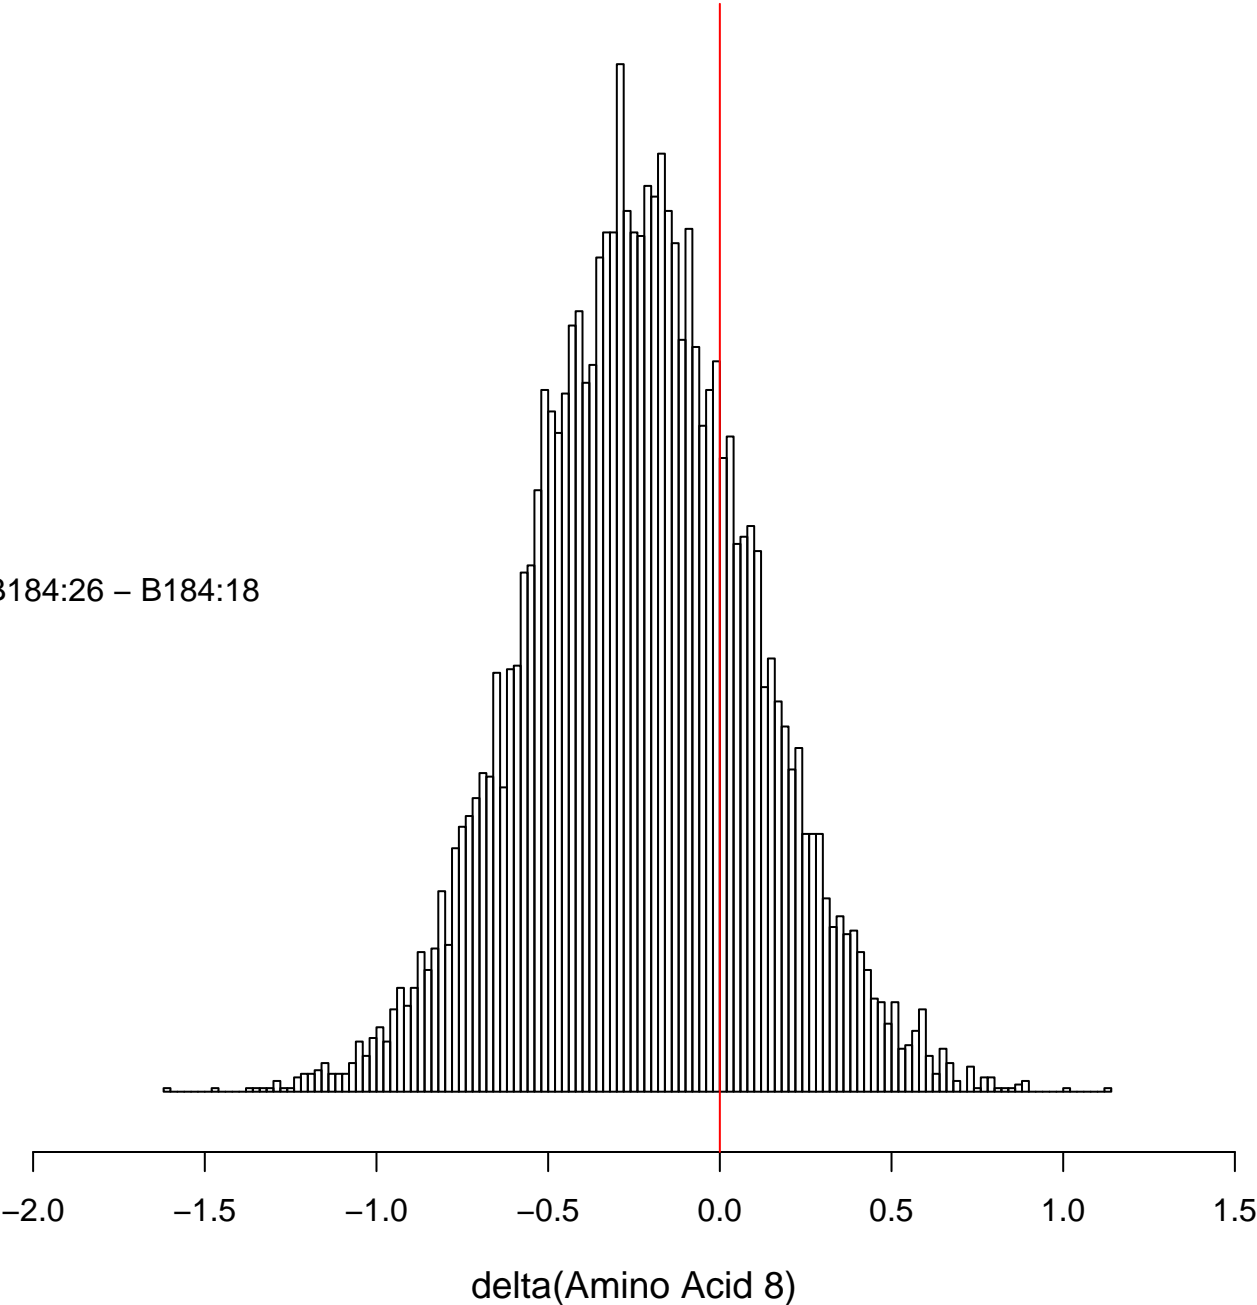

B184:26

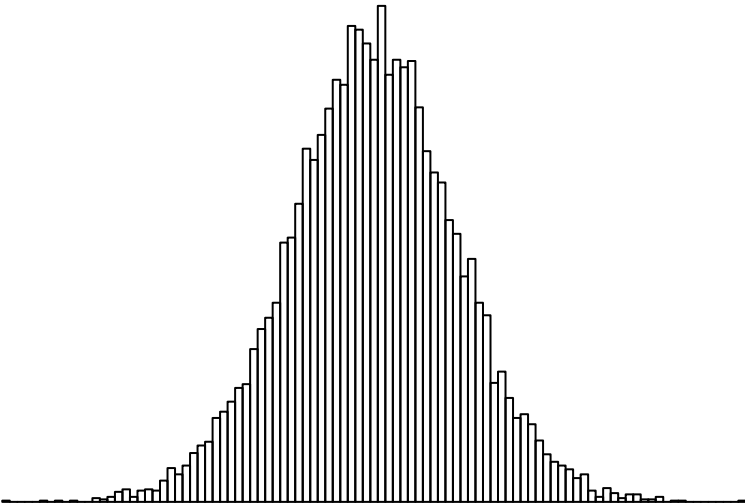

B184:18

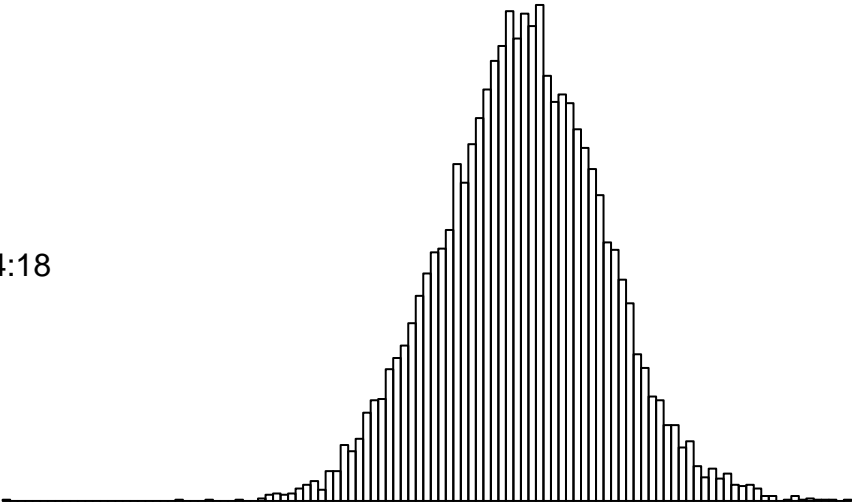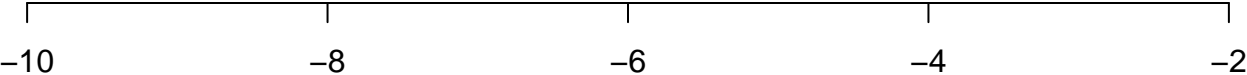

Amino Acid 10

B184:26 – B184:18

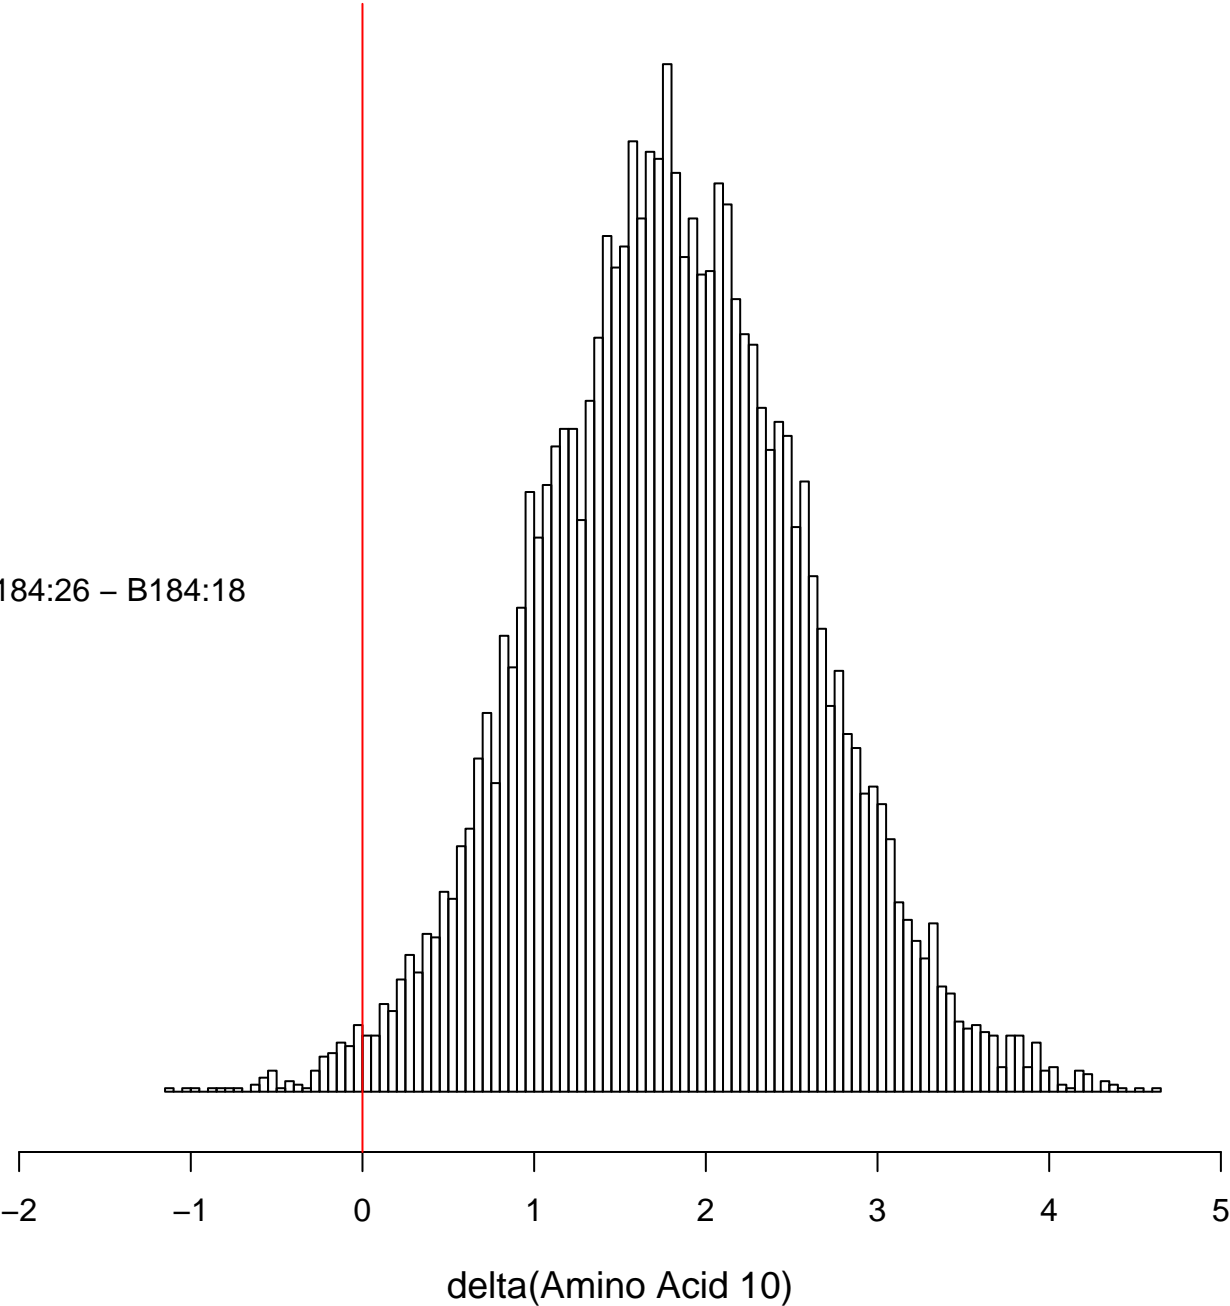

B184:26

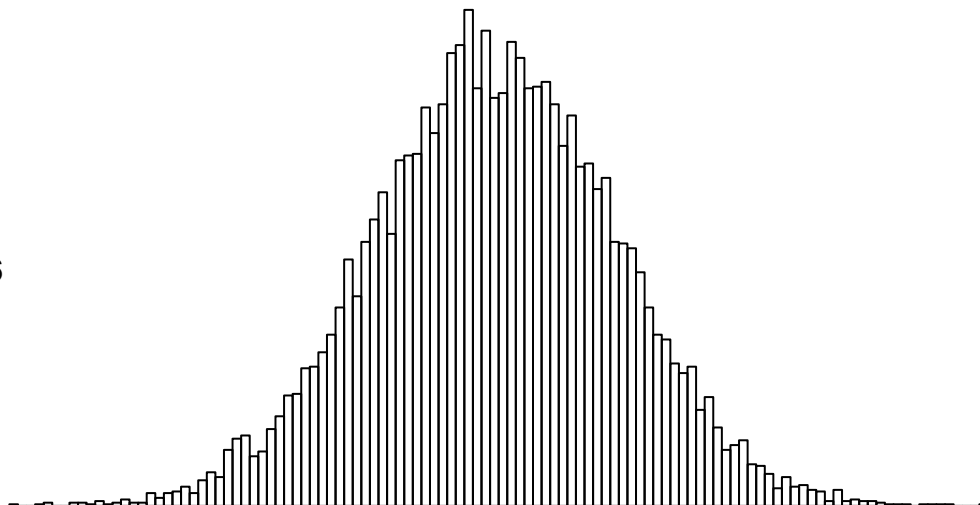

B184:18

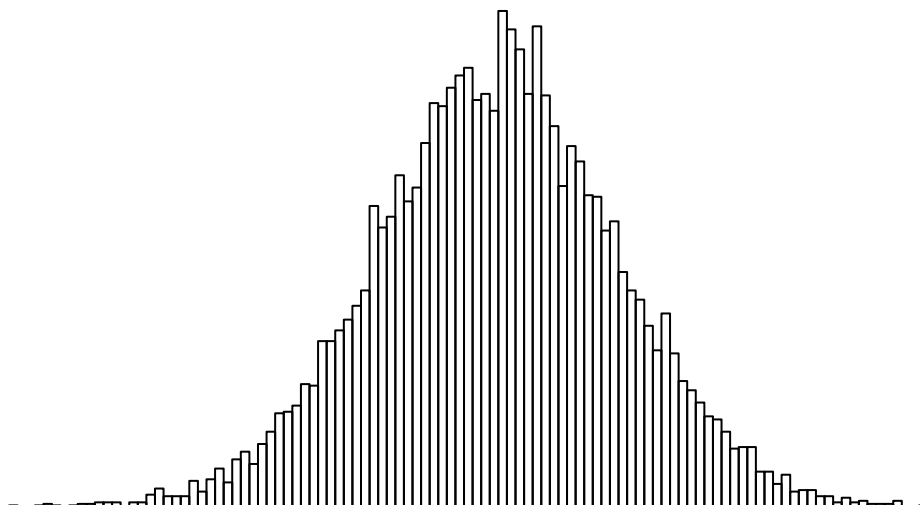

-6.5

-6.0

-5.5

Disaccharide 2

B184:26 – B184:18

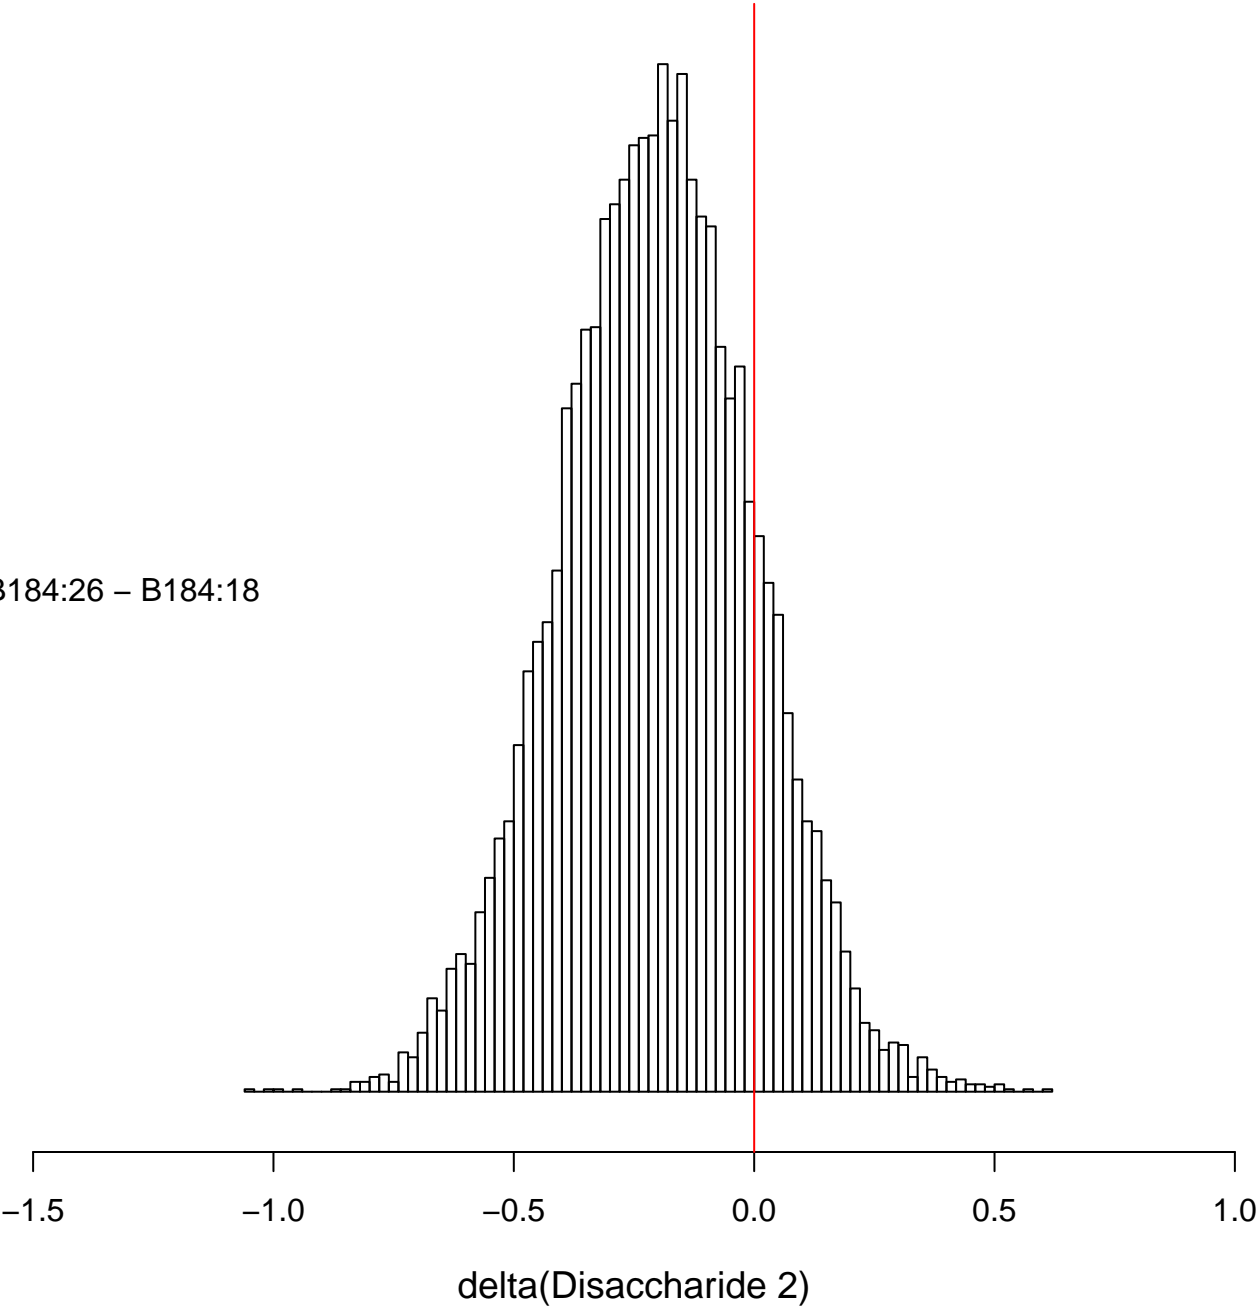

B184:26

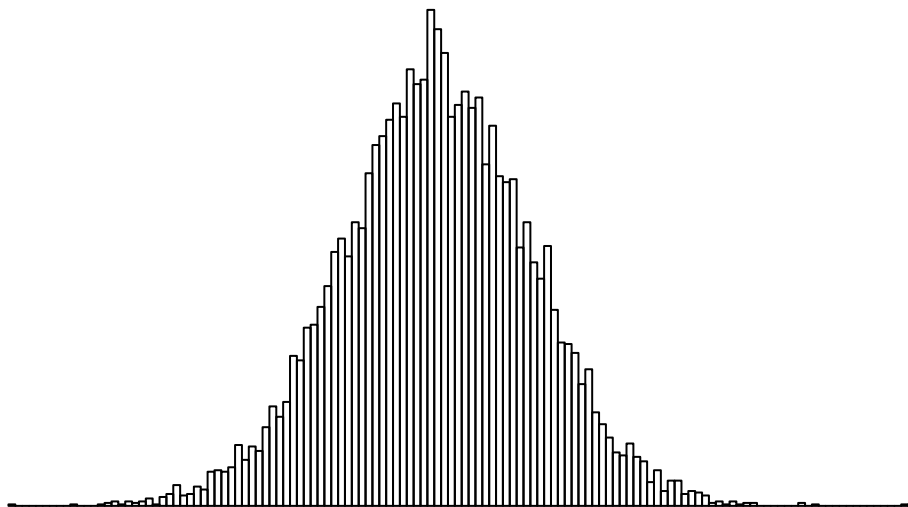

B184:18

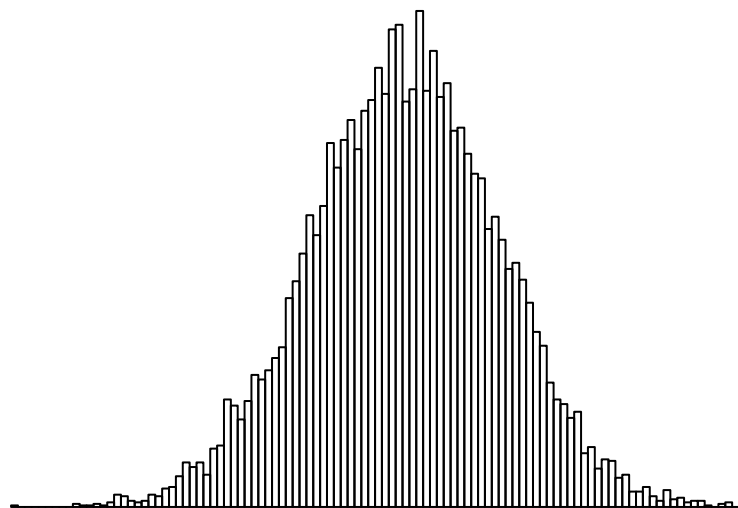

-8.0      -7.5      -7.0      -6.5      -6.0      -5.5      -5.0      -4.5

Disaccharide 3

B184:26 – B184:18

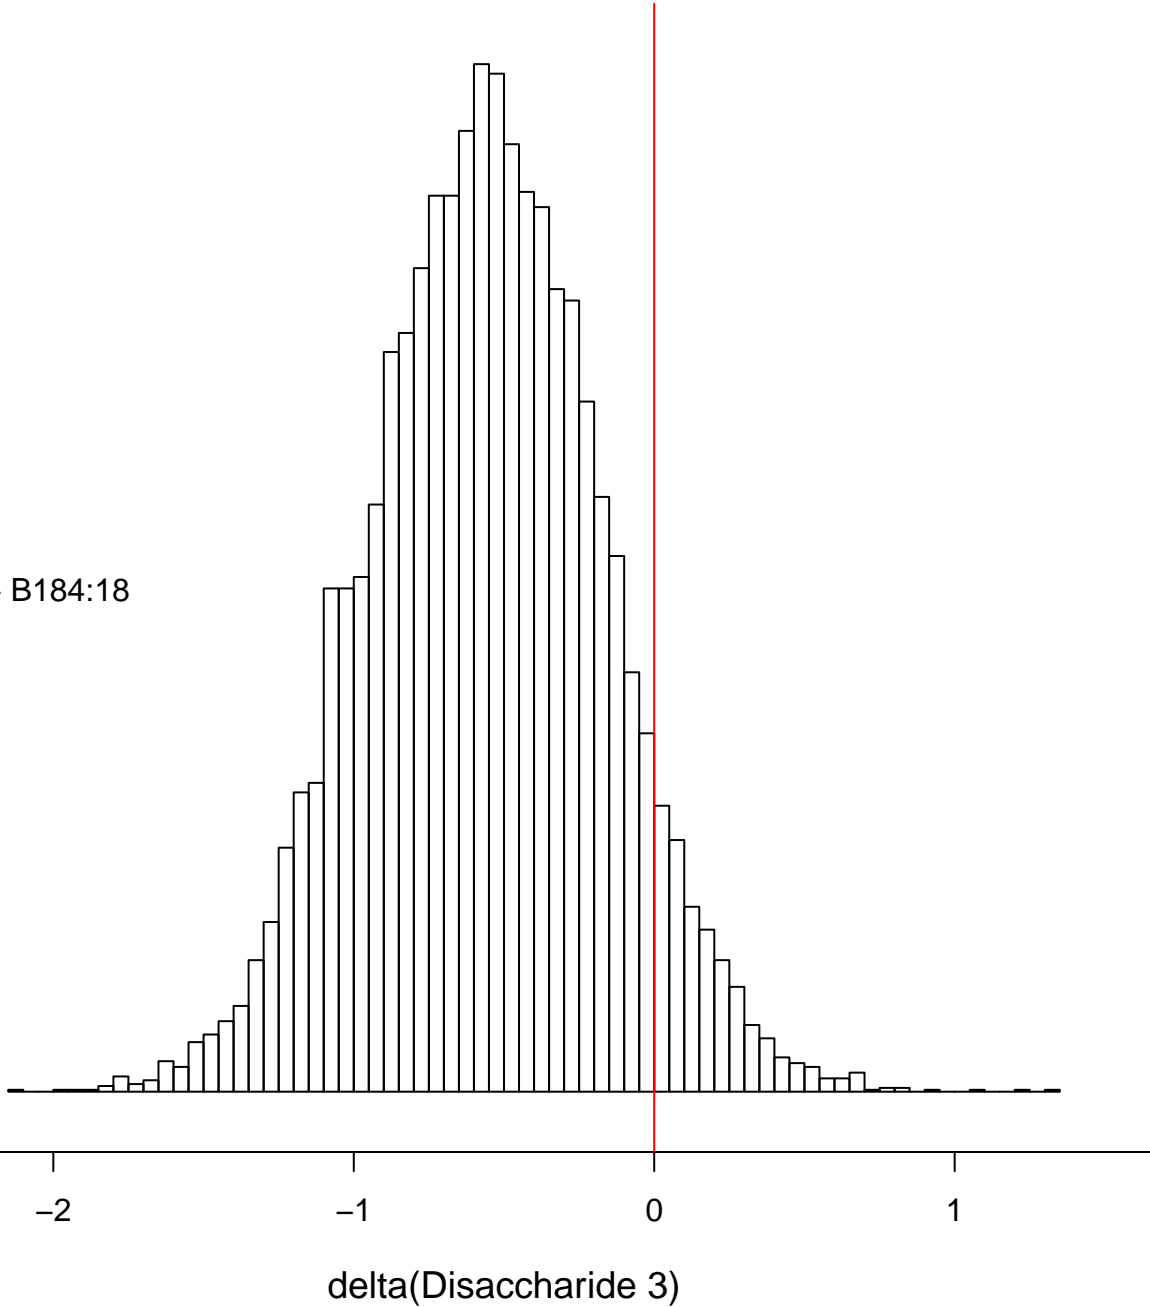



B184:26

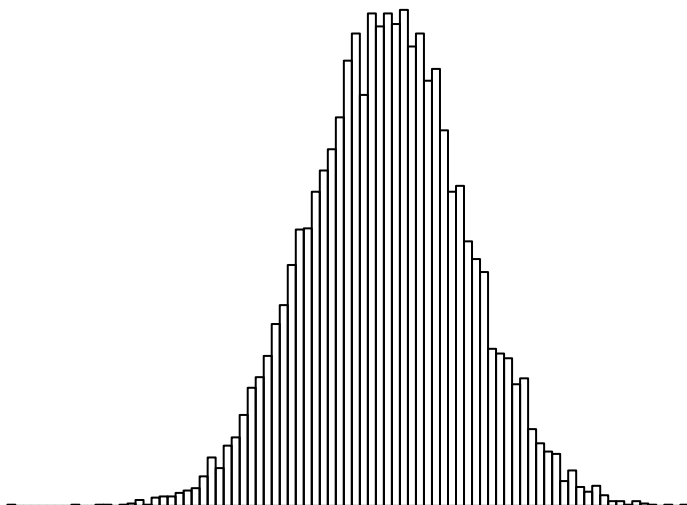

B184:18

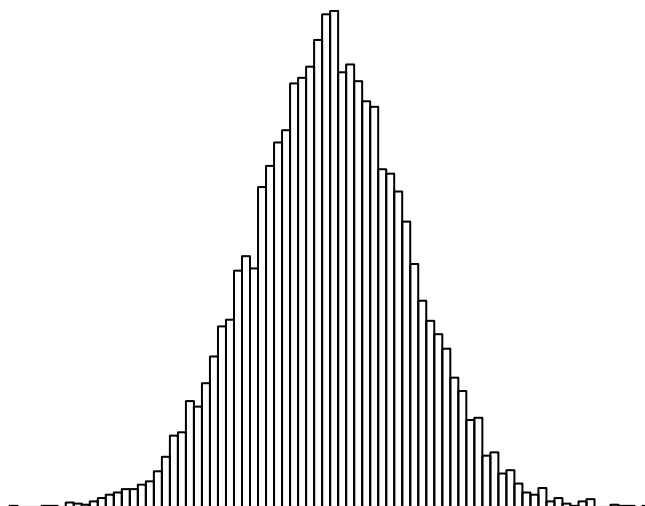

-7.5      -7.0      -6.5      -6.0      -5.5      -5.0      -4.5

Disaccharide 4

B184:26 – B184:18

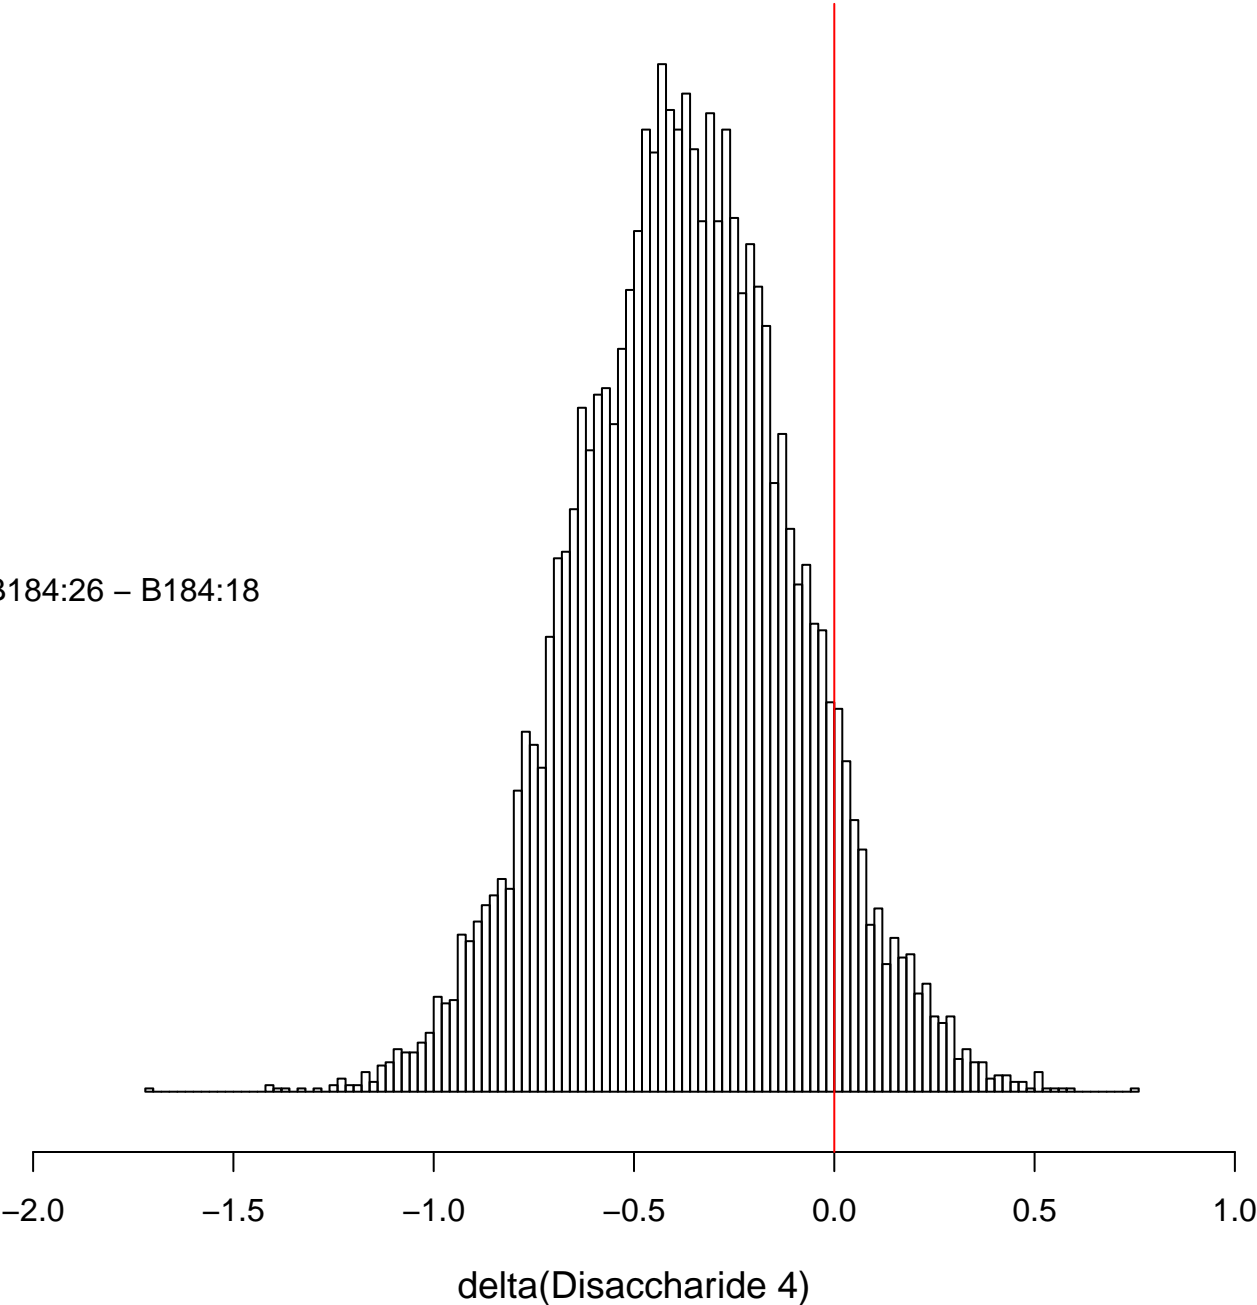

B184:26

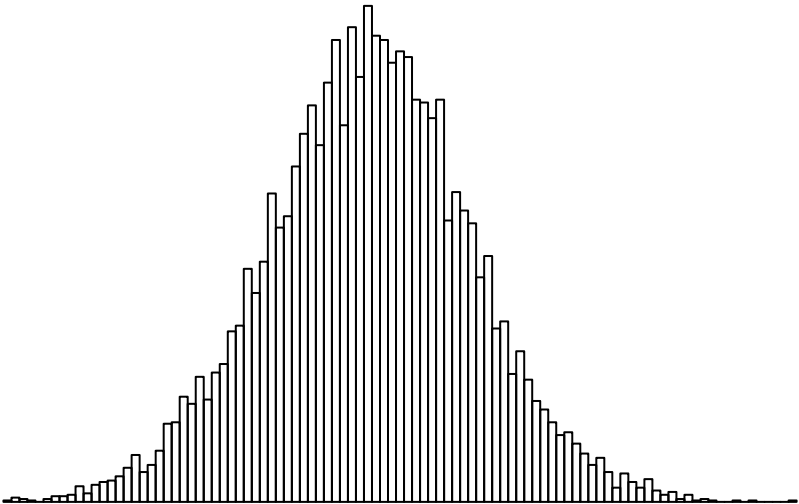

B184:18

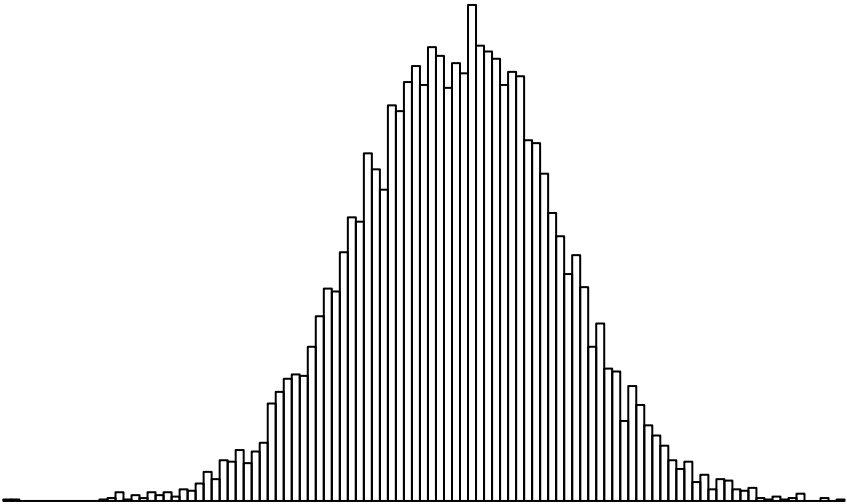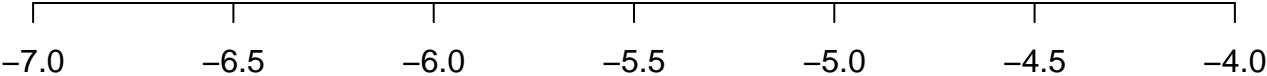

Disaccharide 5

B184:26 – B184:18

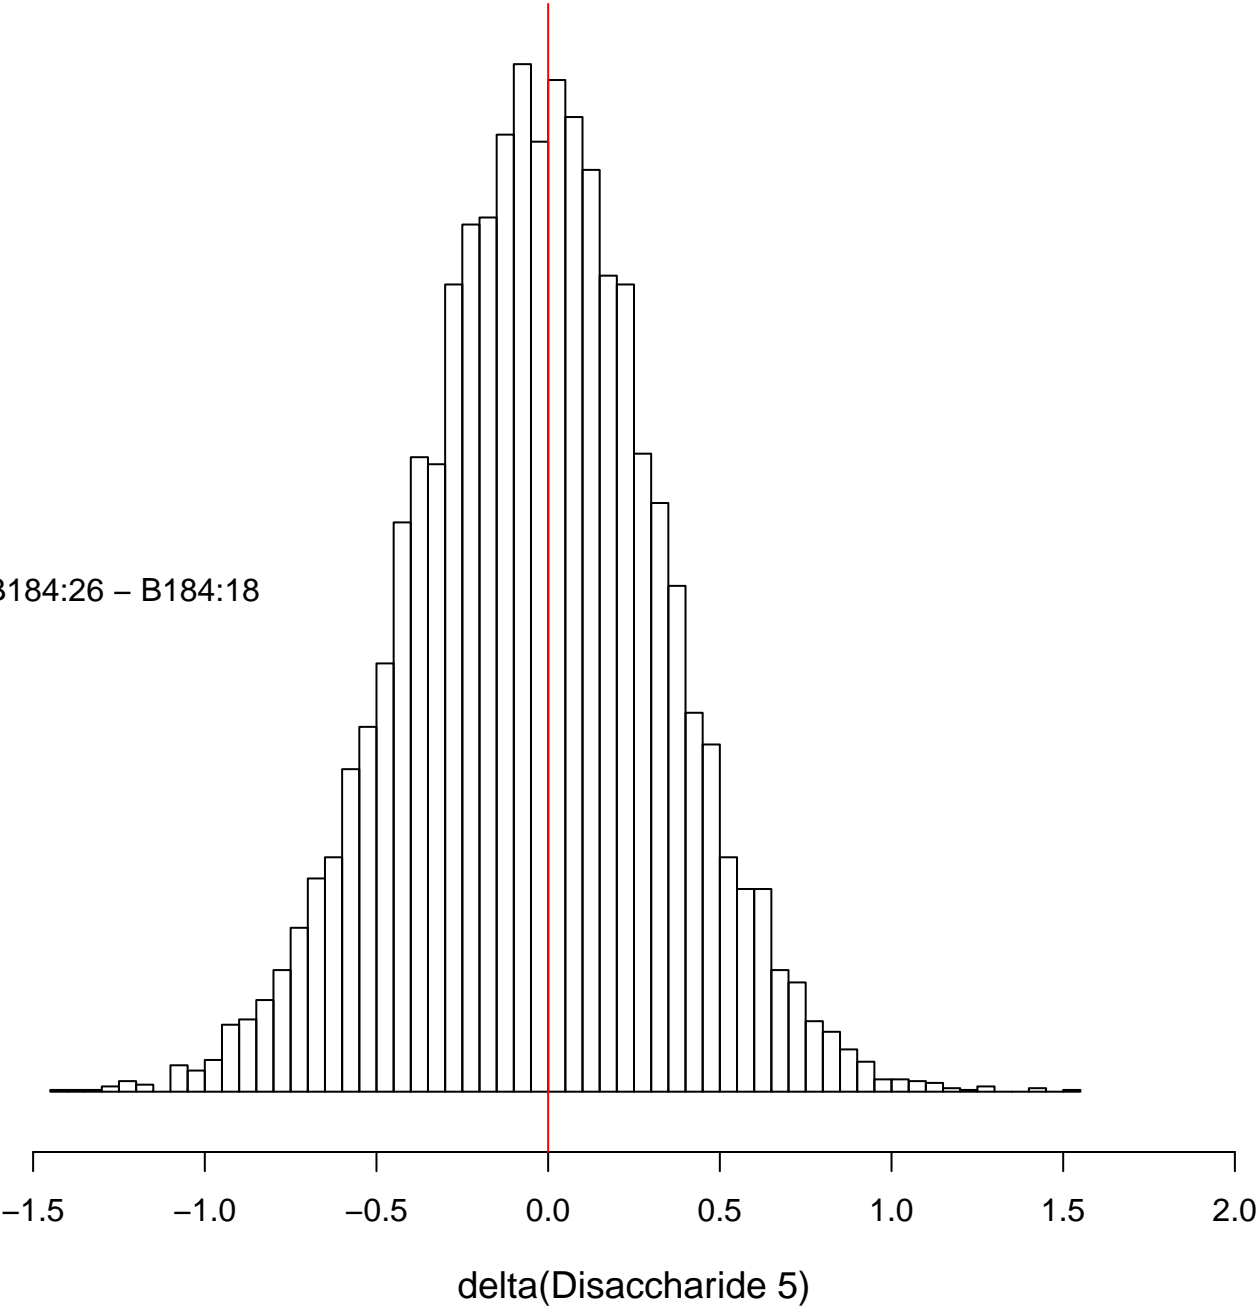

B184:26

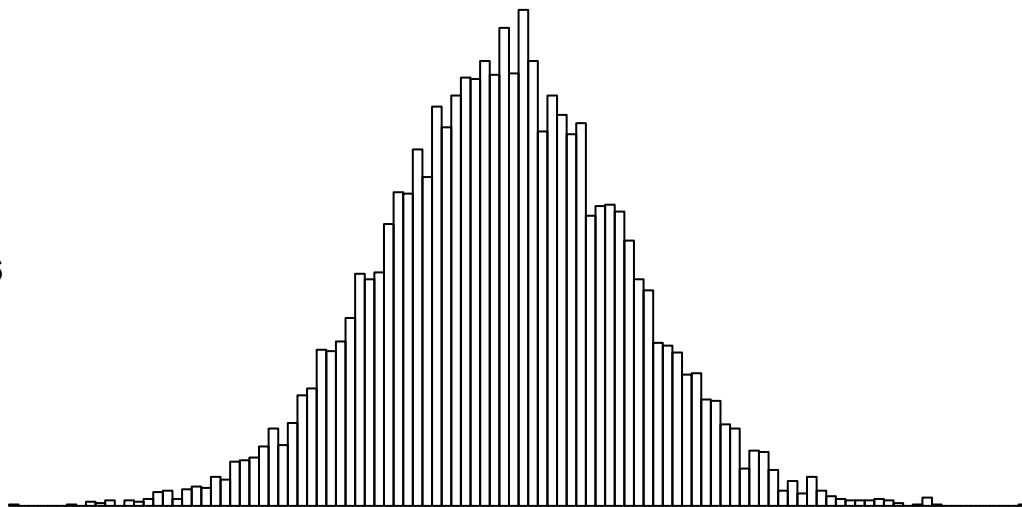

B184:18

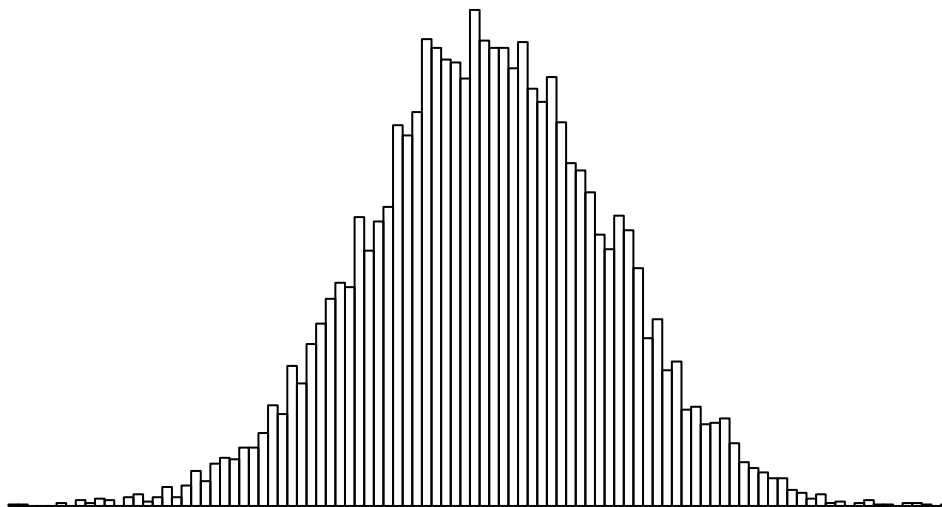

-6.0

-5.5

-5.0

-4.5

-4.0

-3.5

Disaccharide 6

B184:26 – B184:18

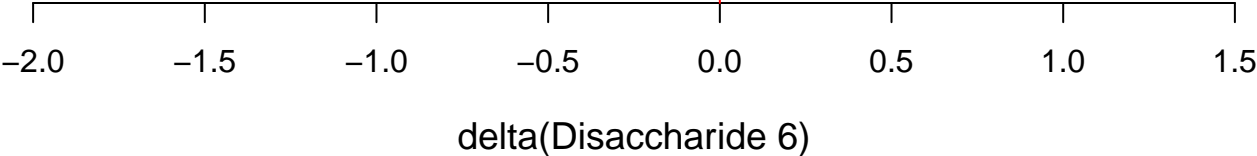

B184:26

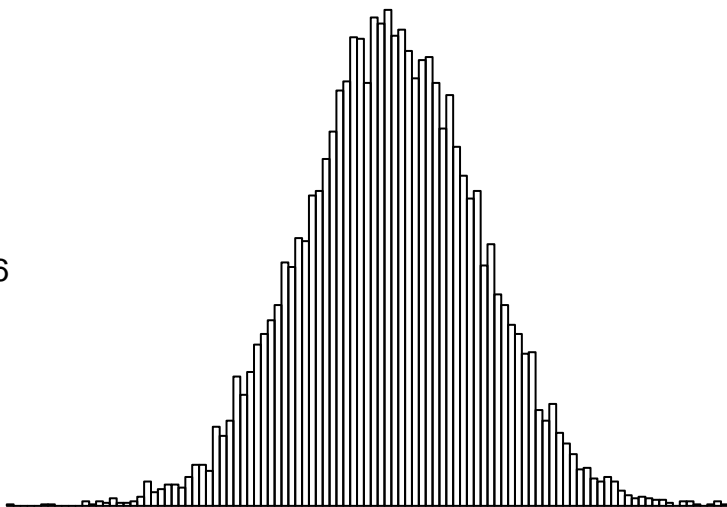

B184:18

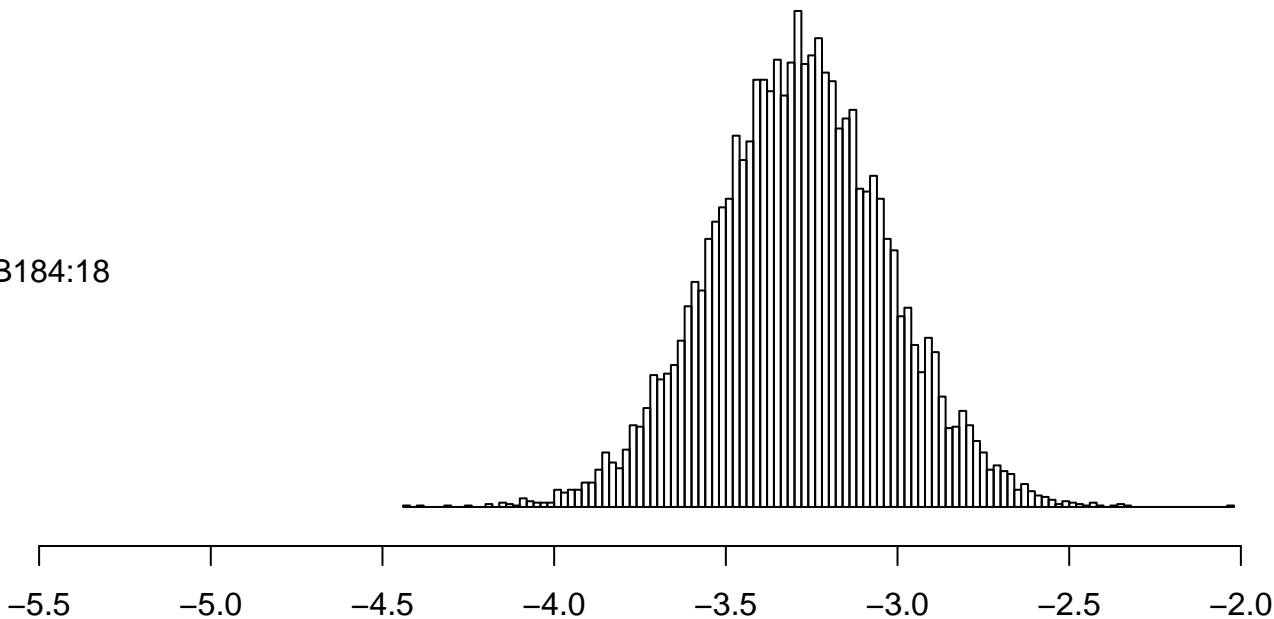

Disaccharide 7

B184:26 – B184:18

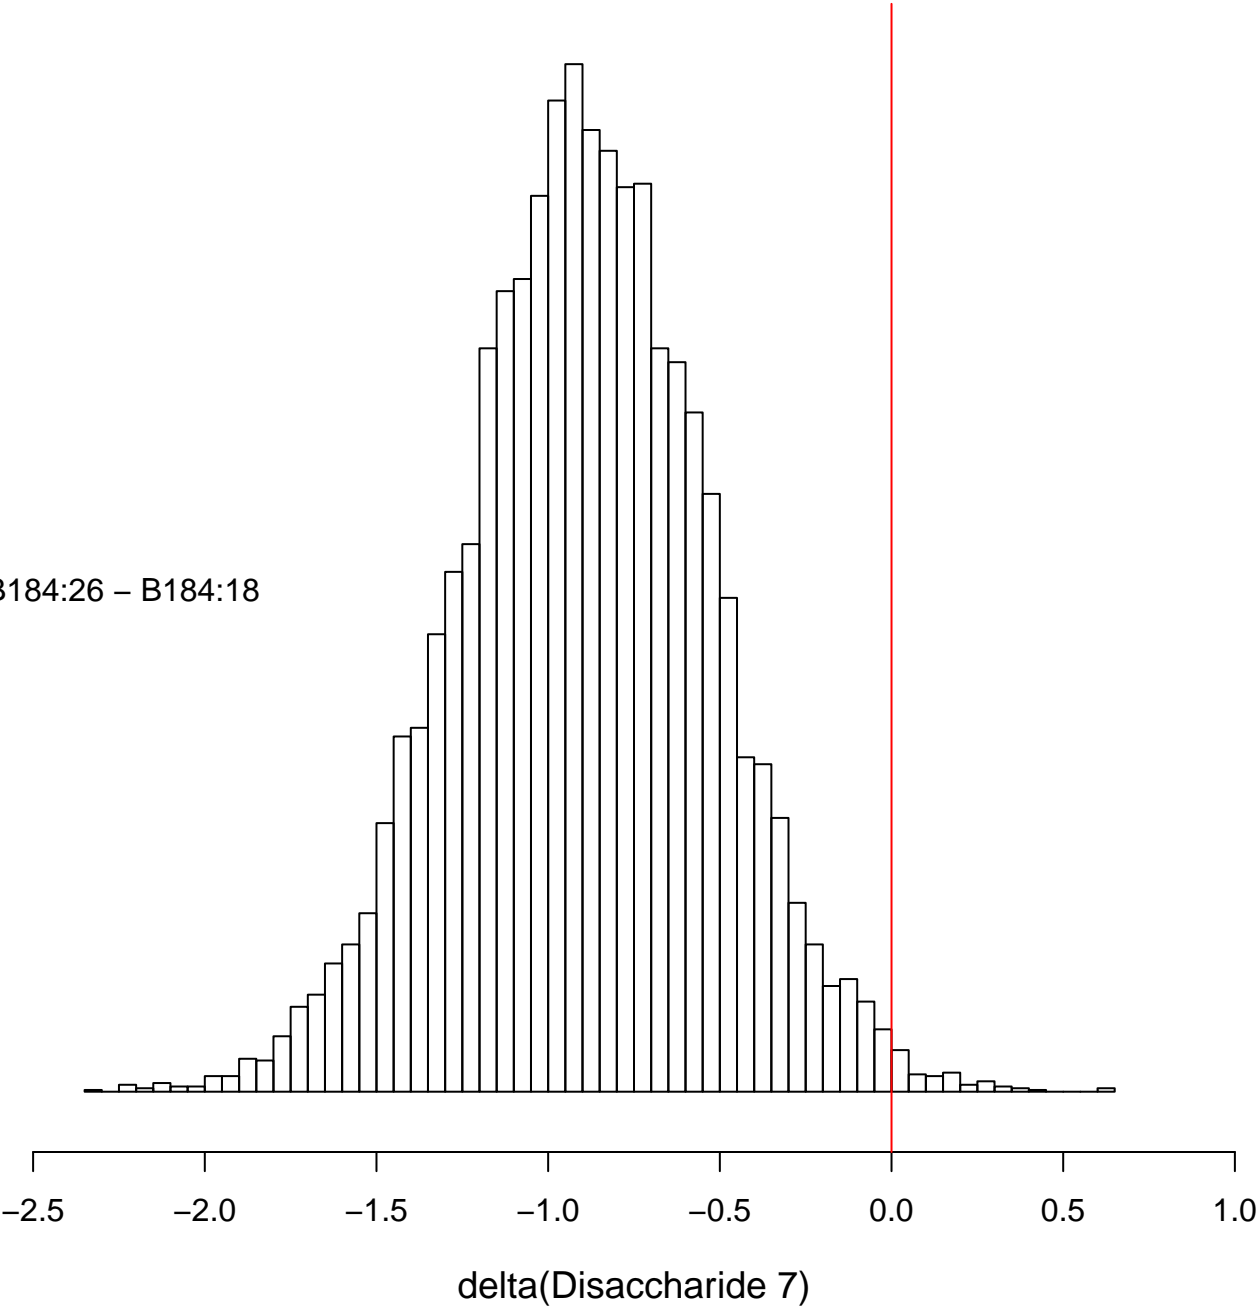



B184:26

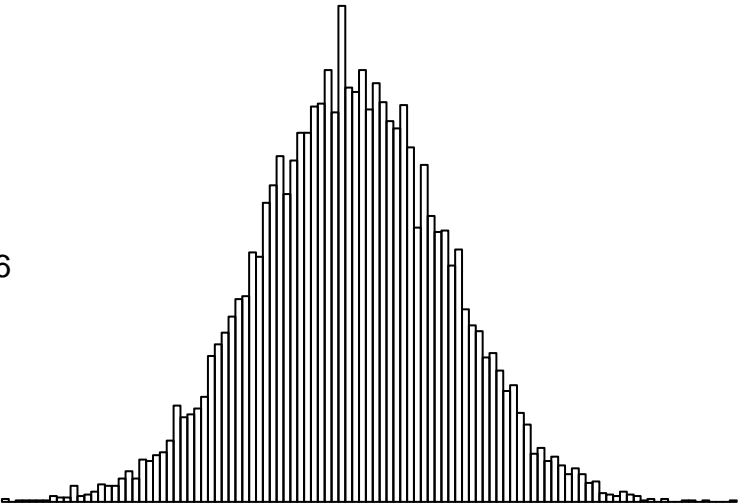

B184:18

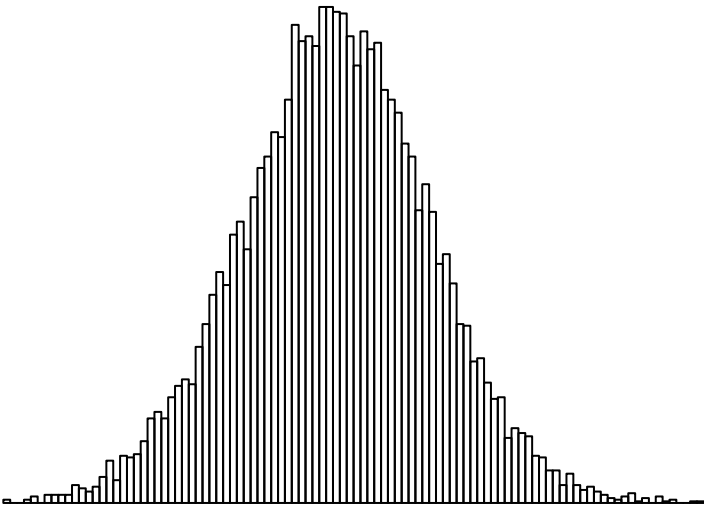

-7.0      -6.5      -6.0      -5.5      -5.0      -4.5      -4.0      -3.5

Disaccharide 8

B184:26 – B184:18

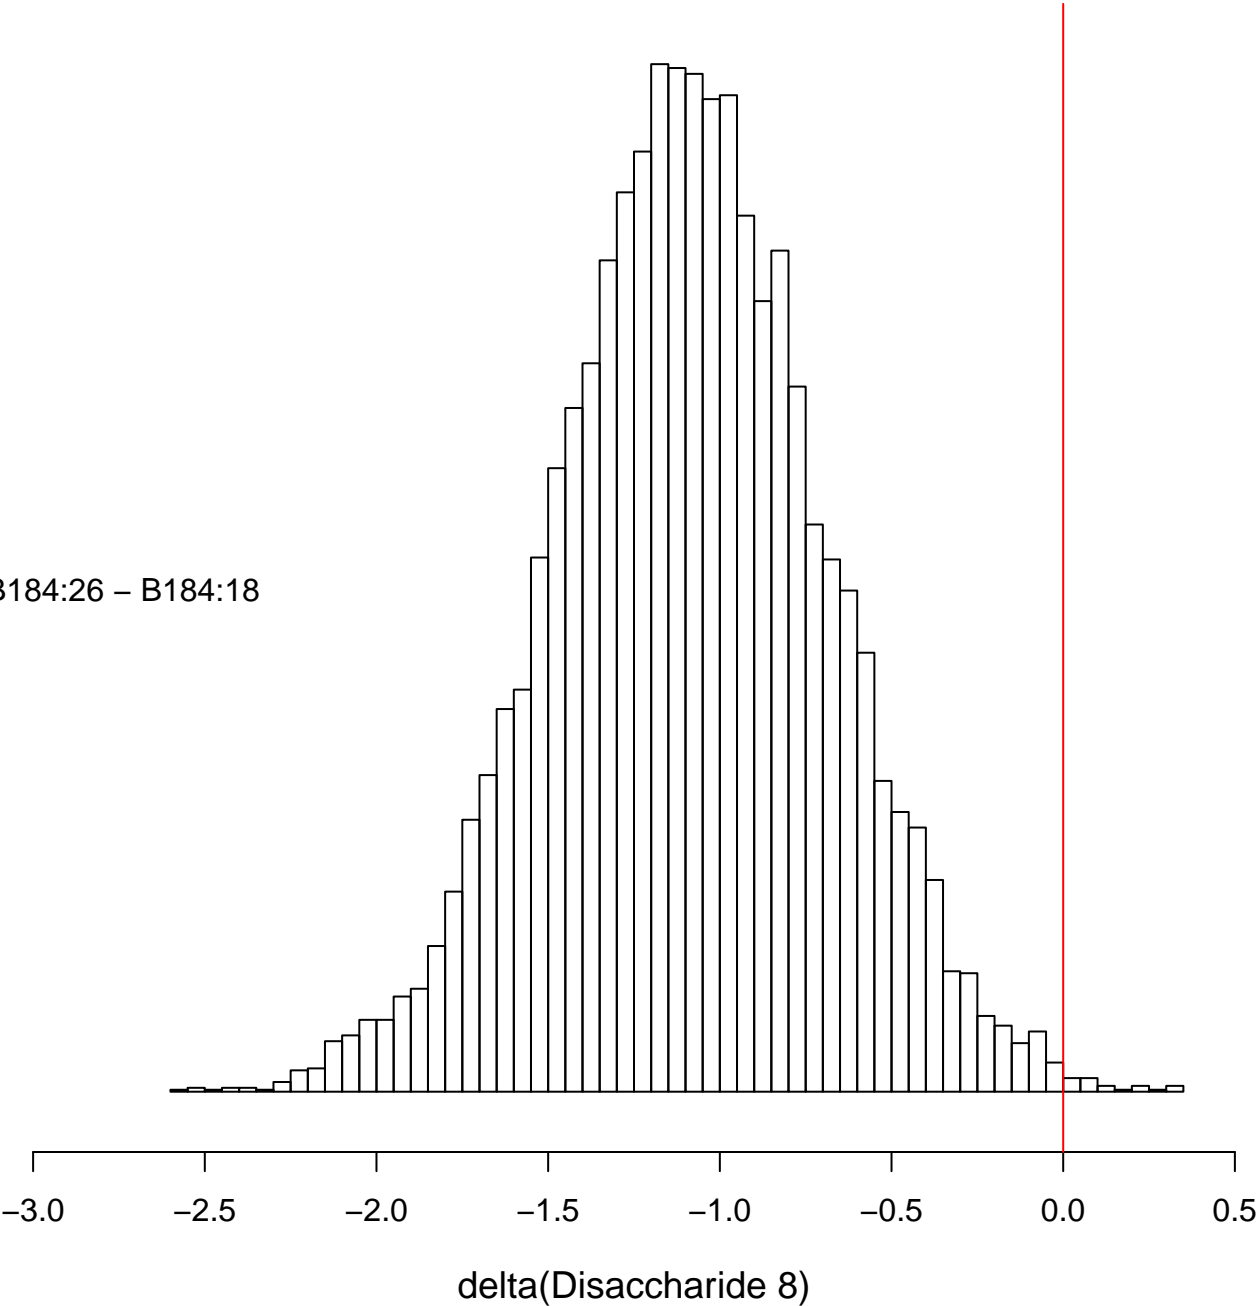

B184:26

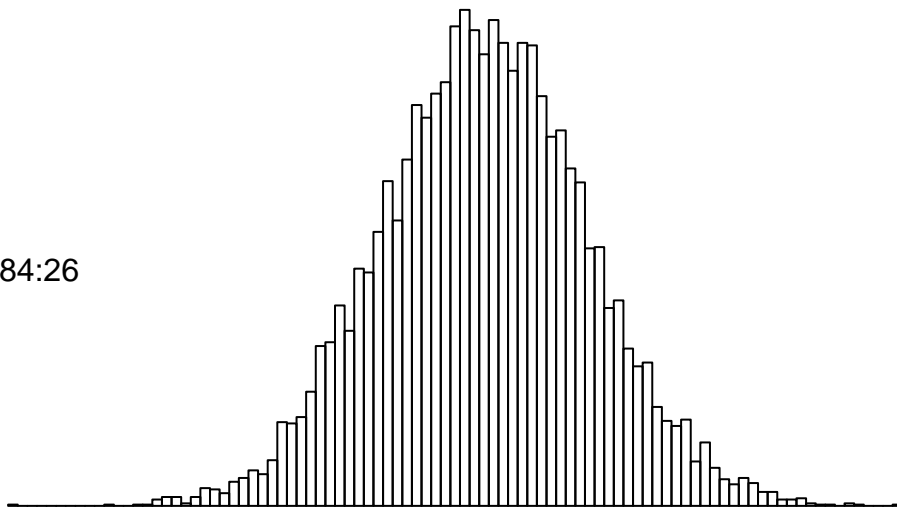

B184:18

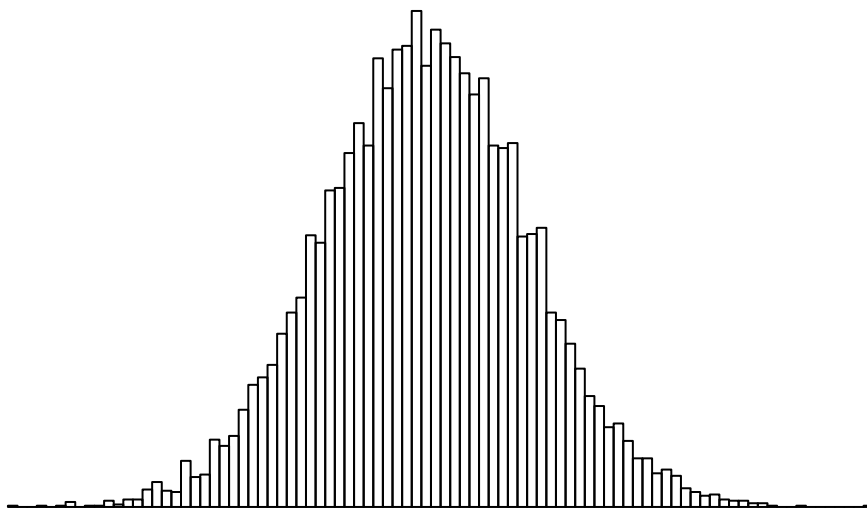

-8.0

-7.5

-7.0

-6.5

-6.0

-5.5

Disaccharide 9

B184:26 – B184:18

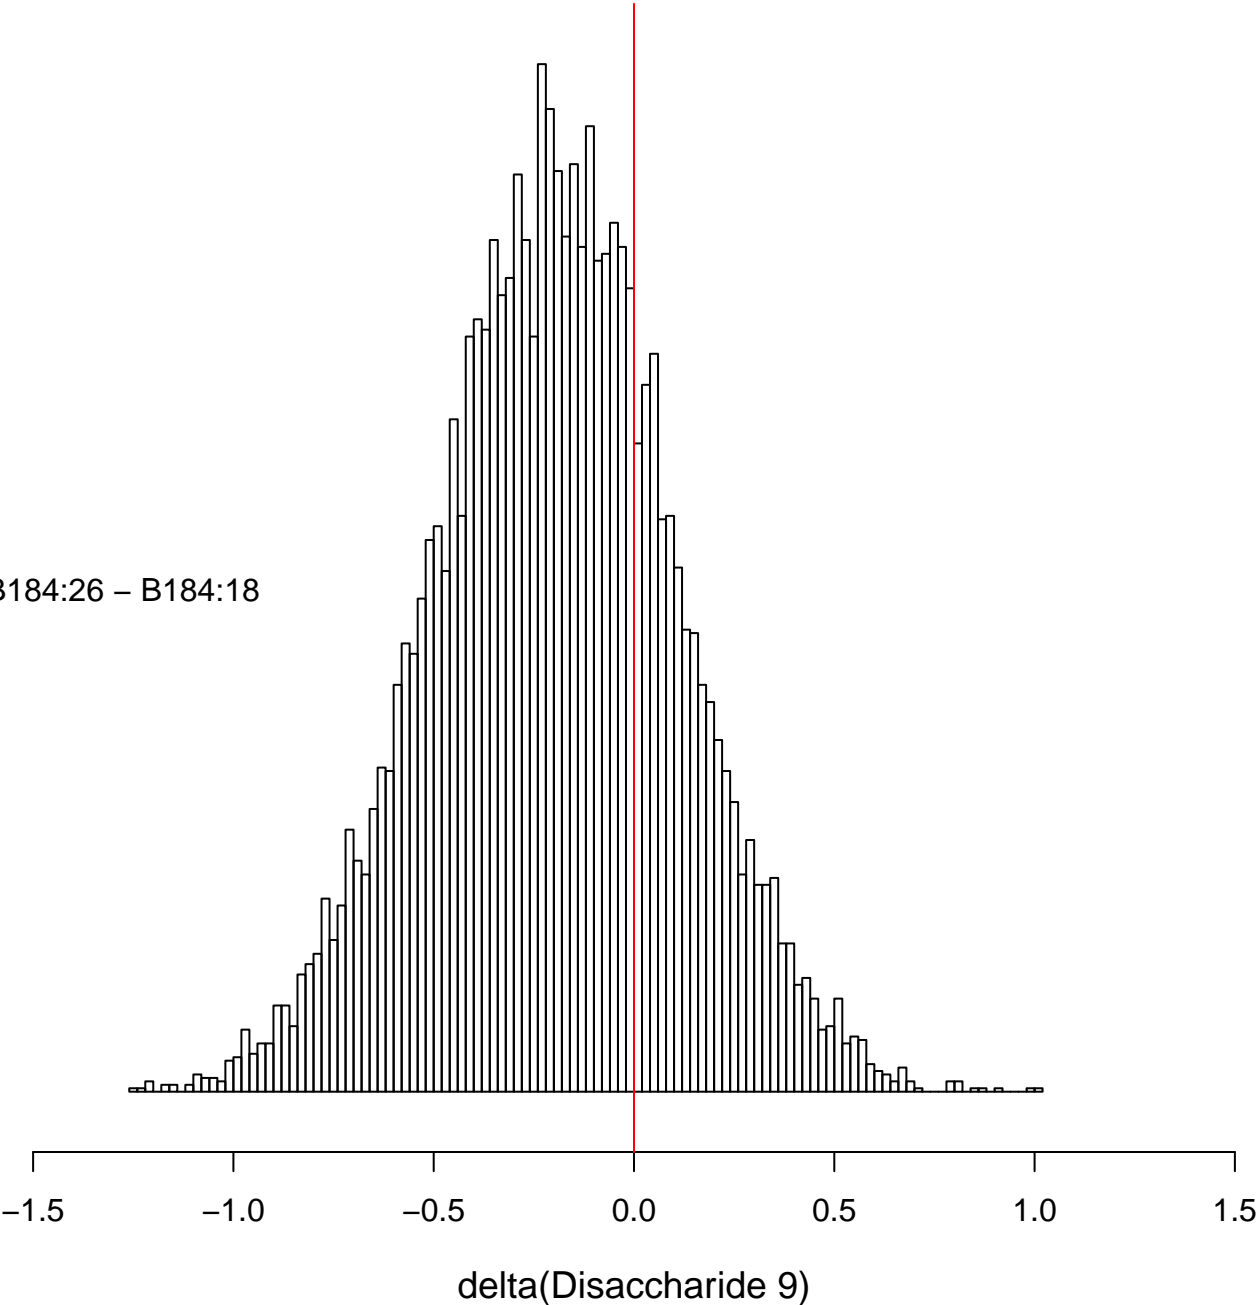

B184:26

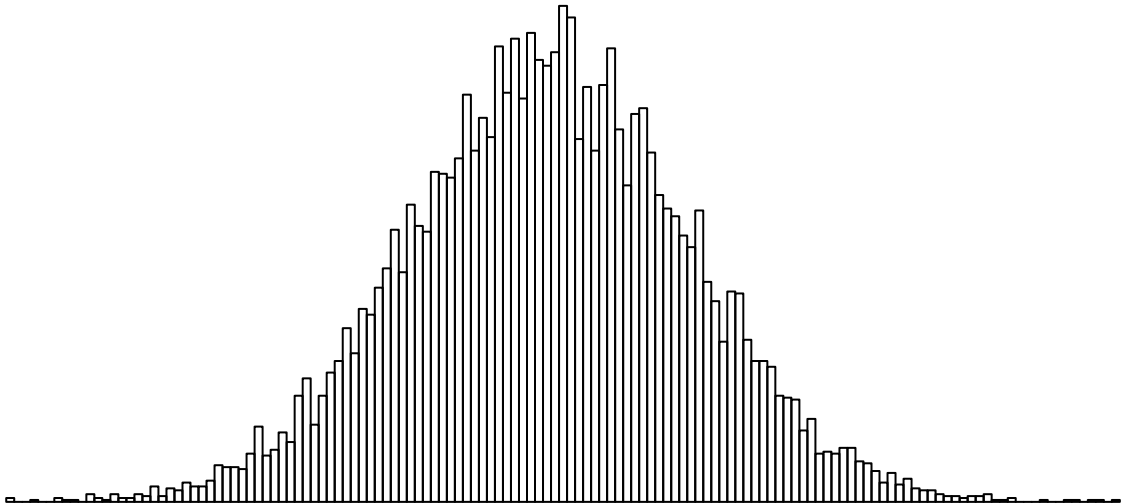

B184:18

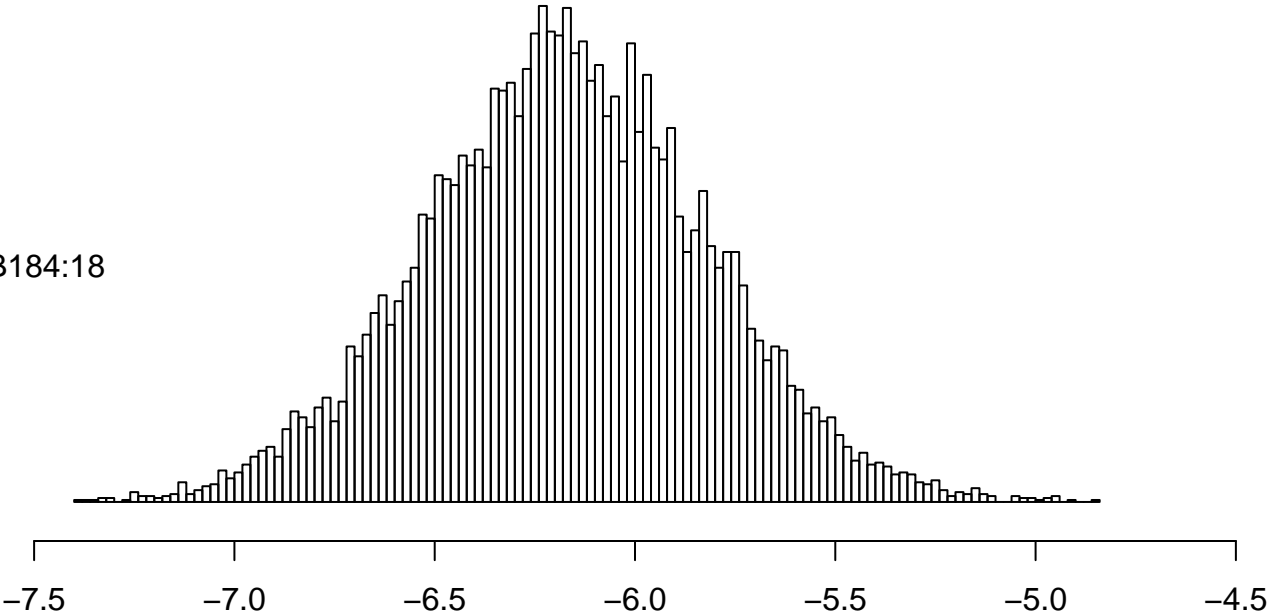

C12:0 Fatty Acid

B184:26 – B184:18

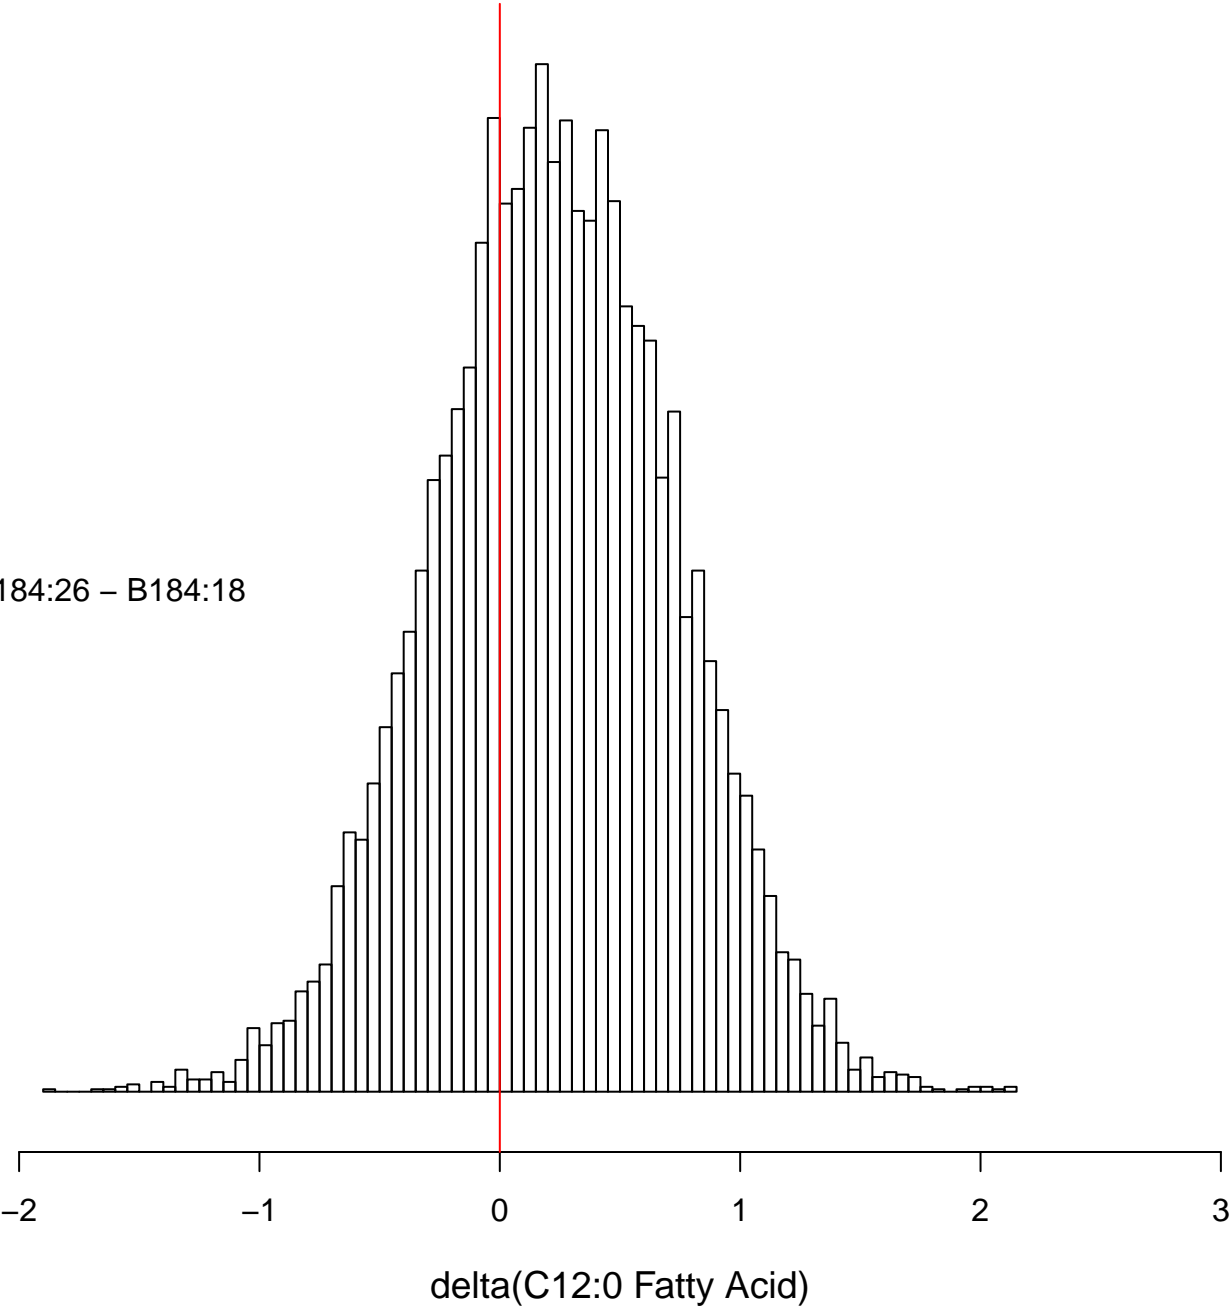

B184:26

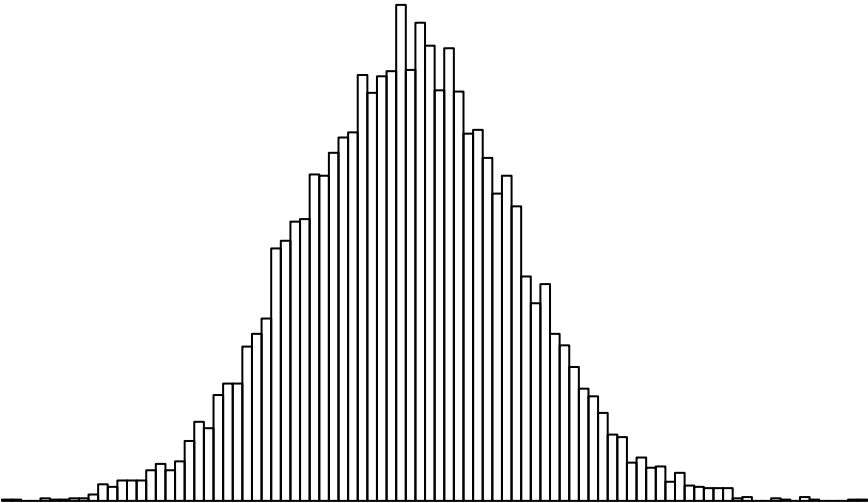

B184:18

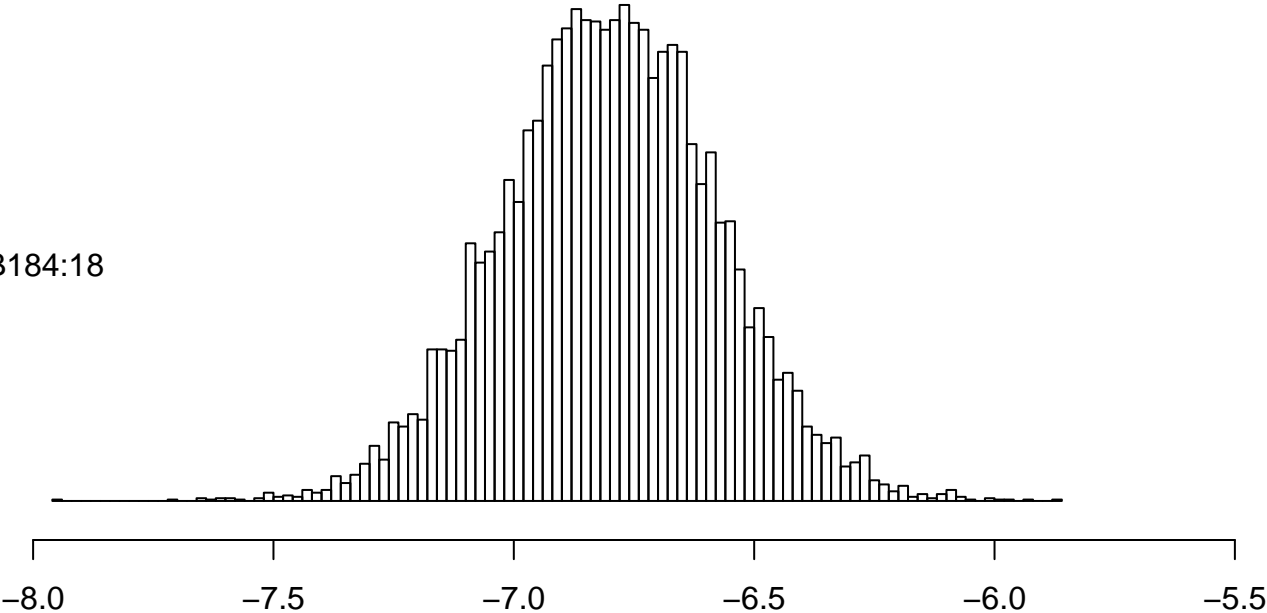

C14:1 Fatty Acid

B184:26 – B184:18

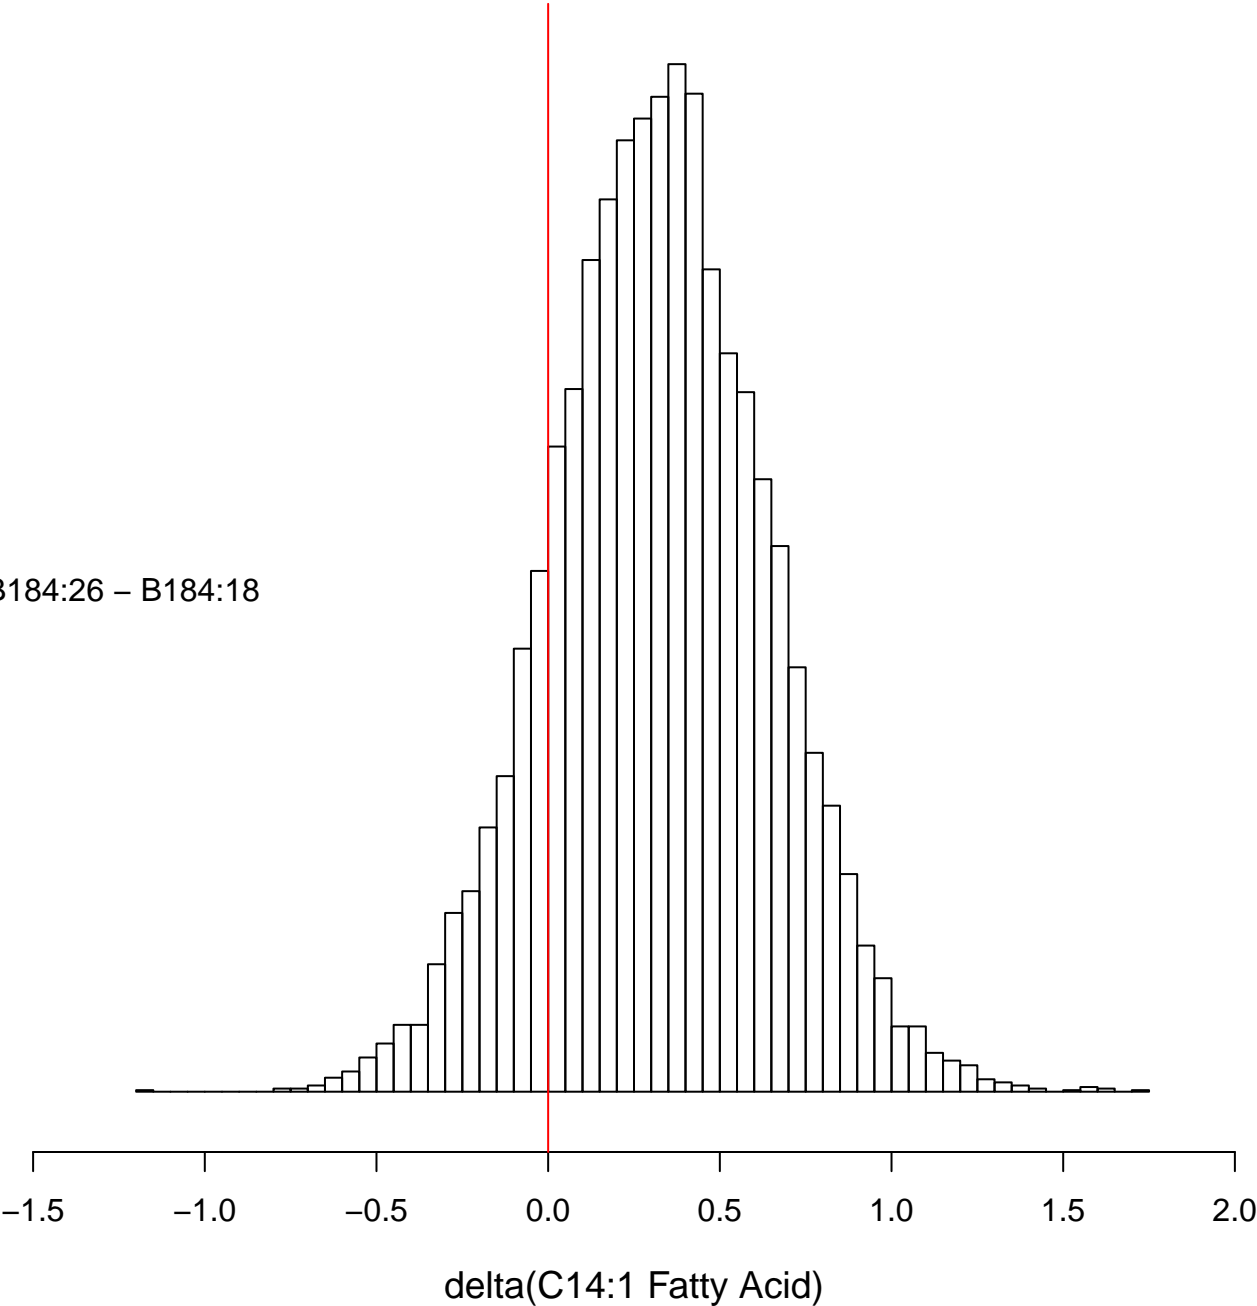



B184:26

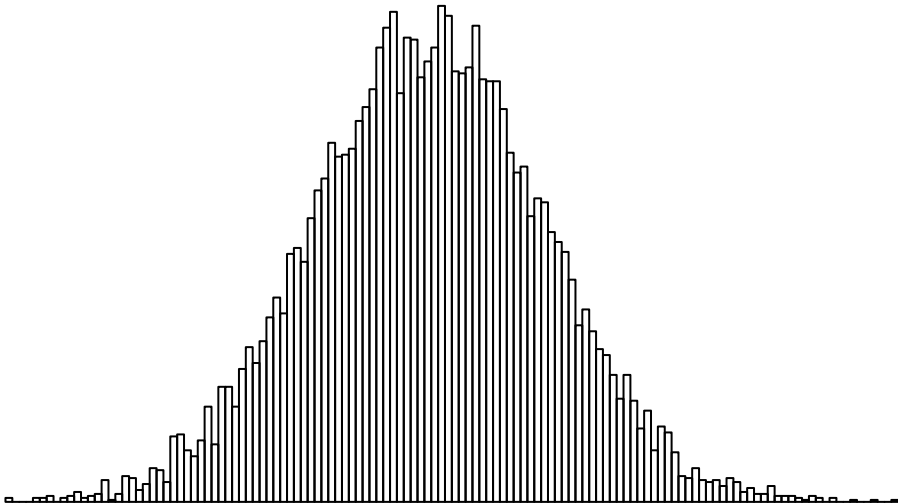

B184:18

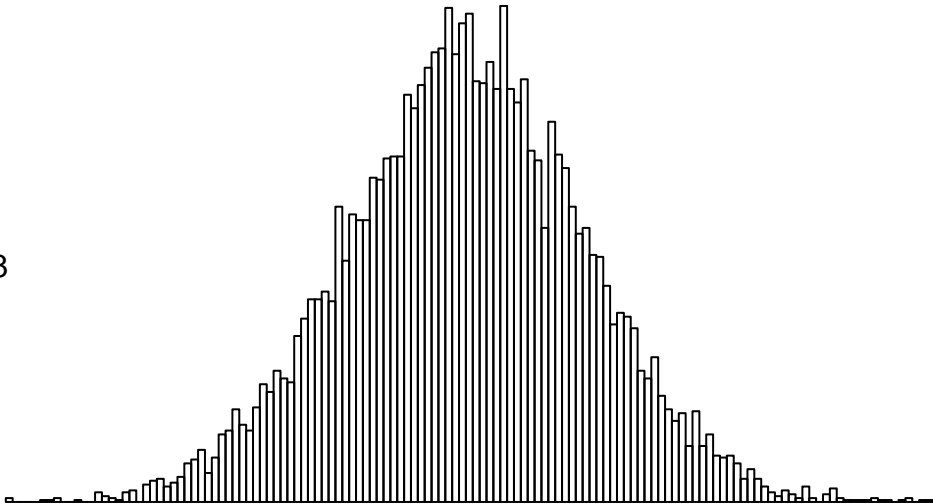

-7.0      -6.5      -6.0      -5.5      -5.0      -4.5      -4.0      -3.5

C14:0 Fatty Acid

B184:26 – B184:18

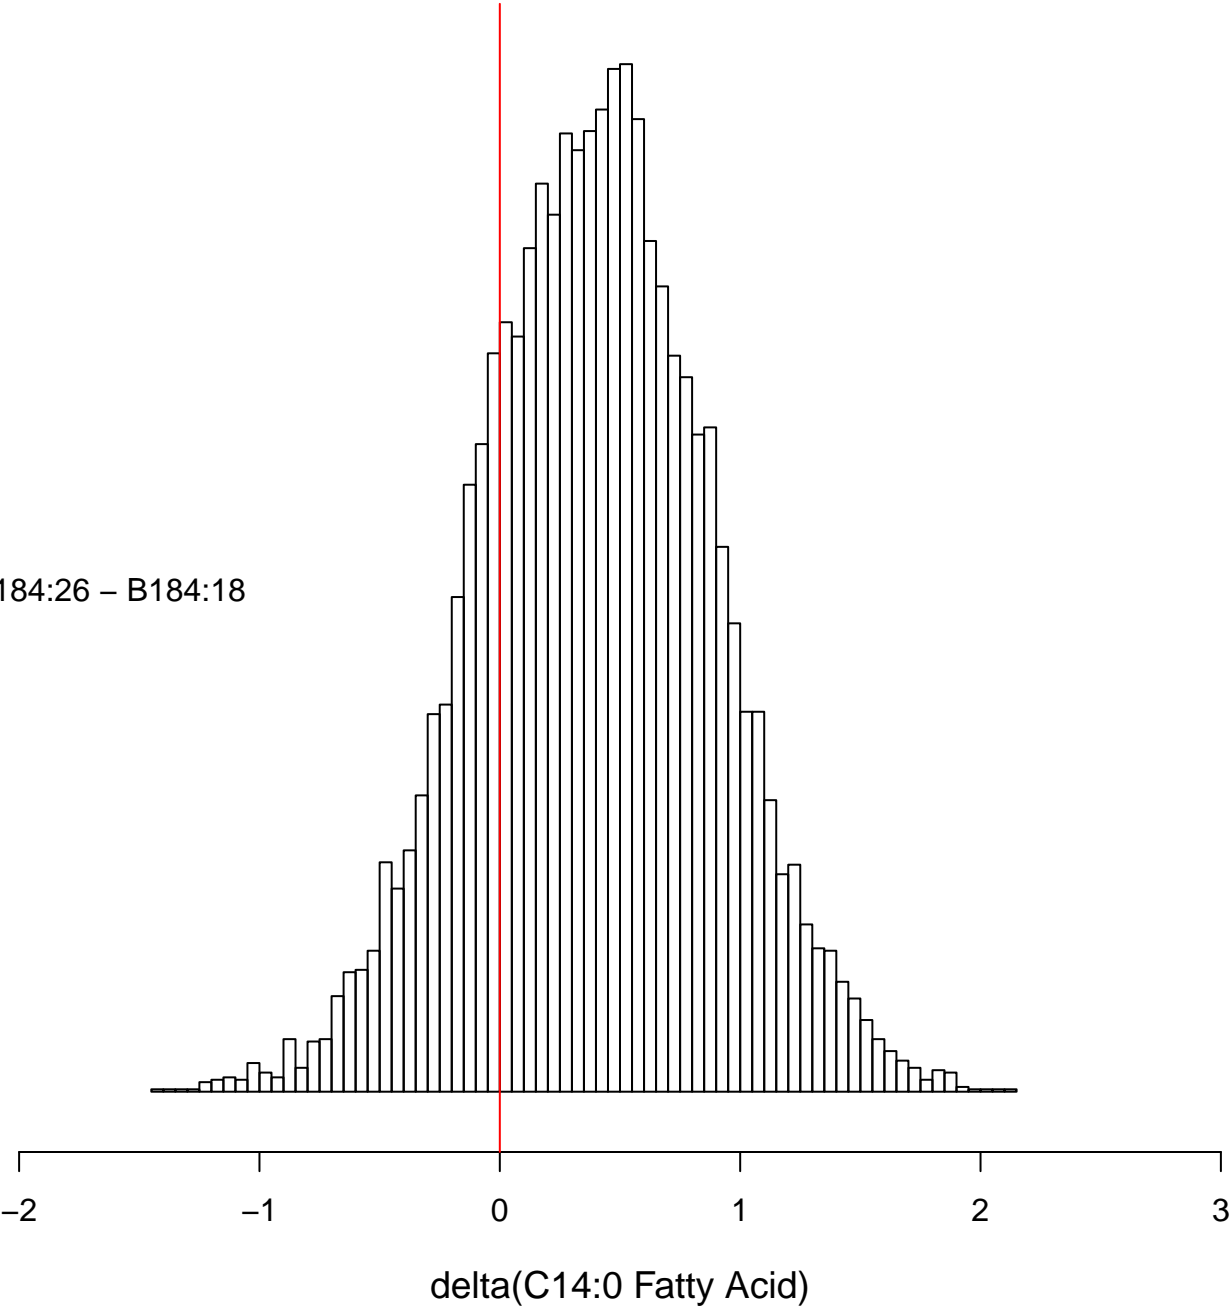

B184:26

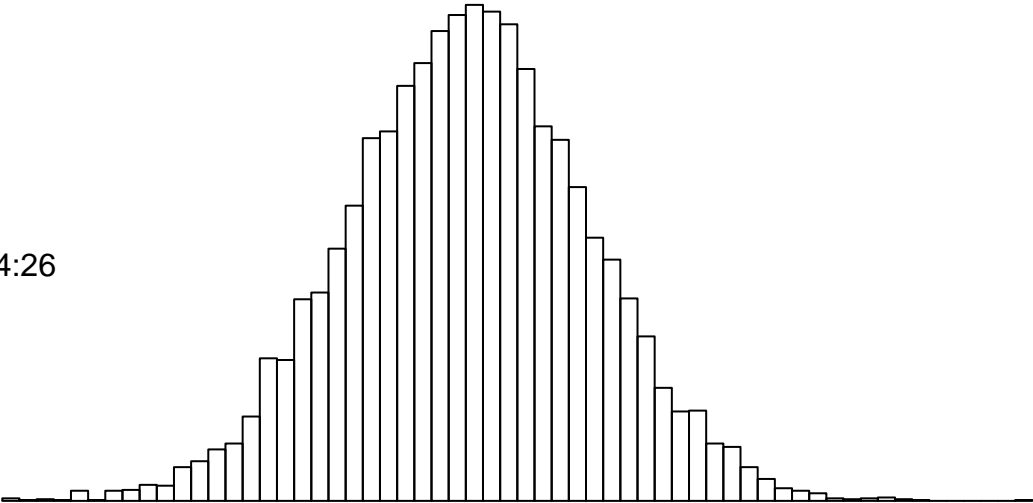

B184:18

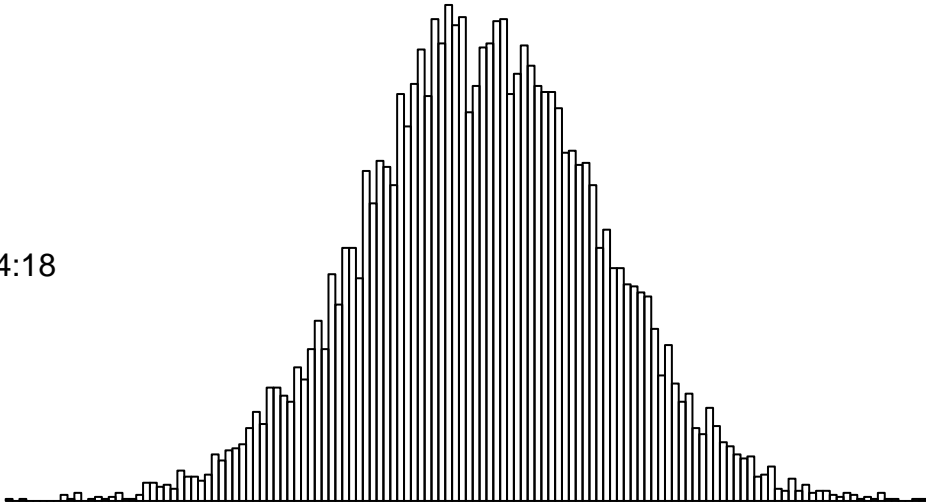

C16:1 Fatty Acid

B184:26 – B184:18

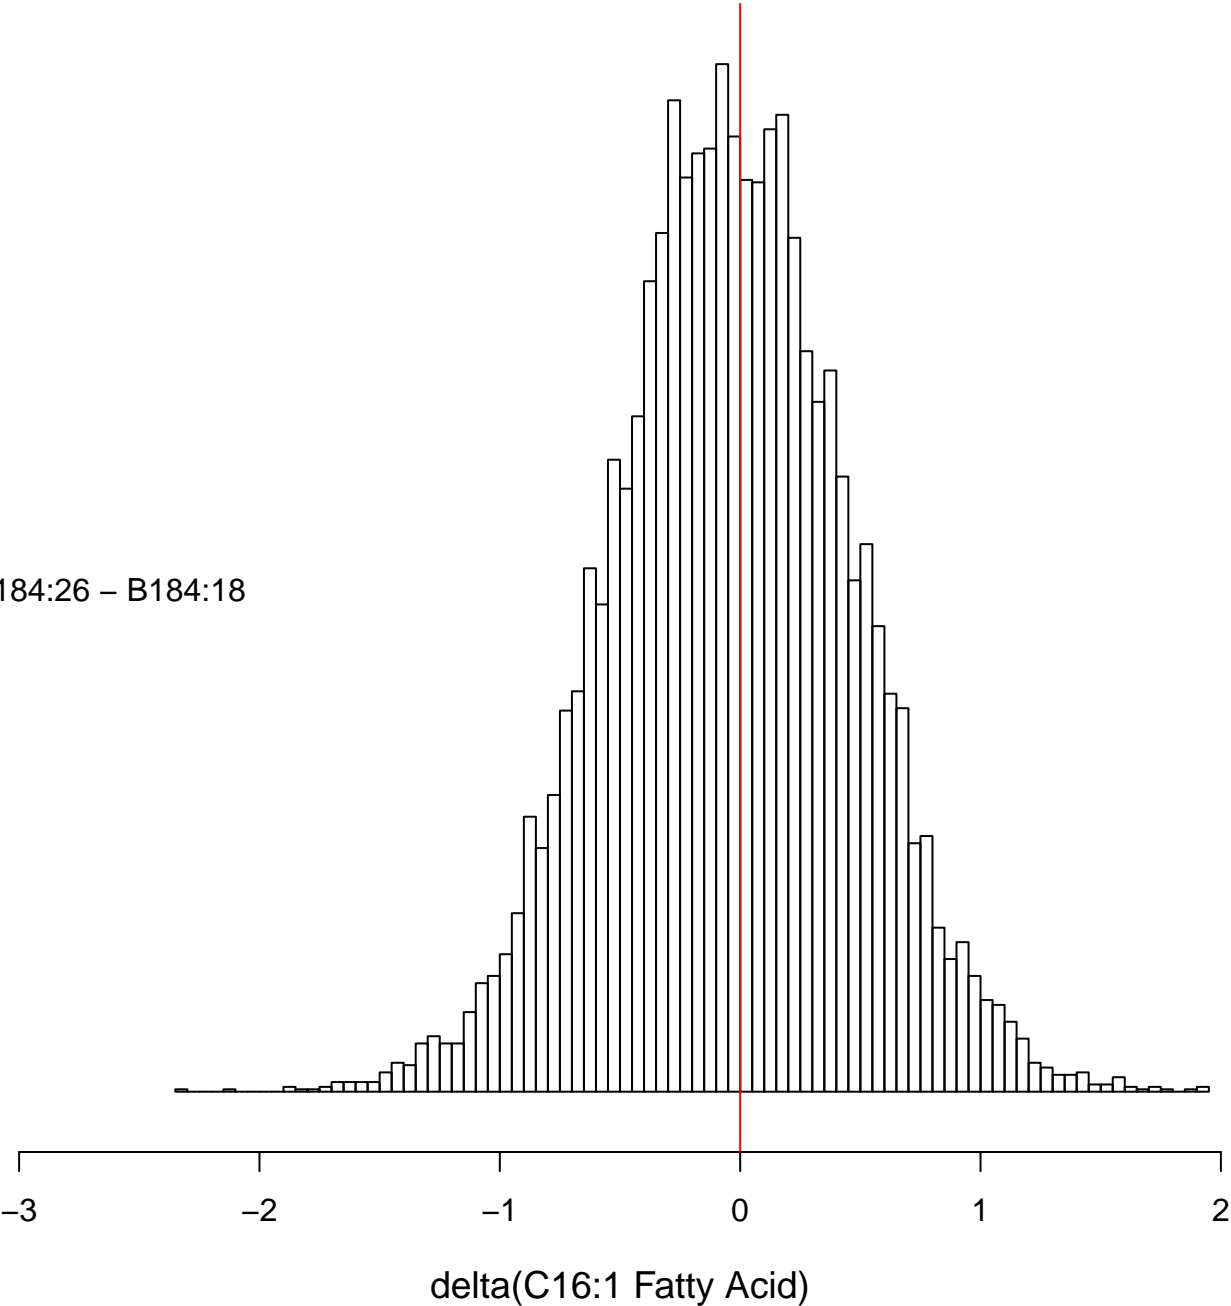

B184:26

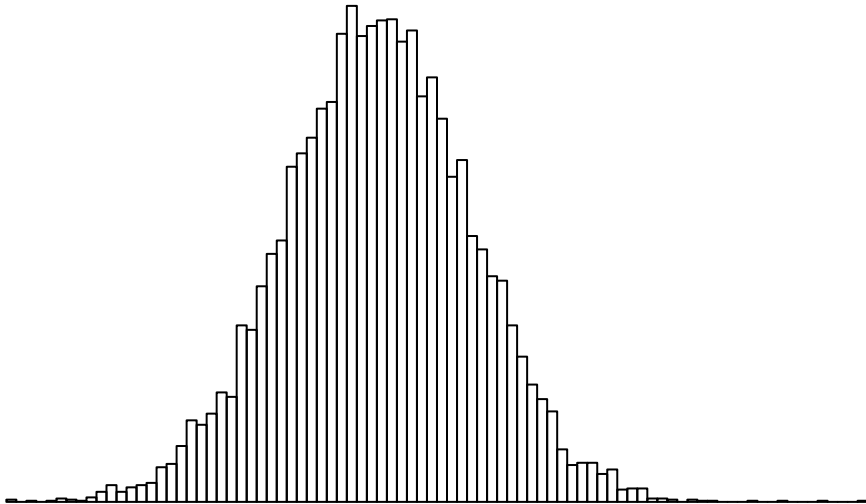

B184:18

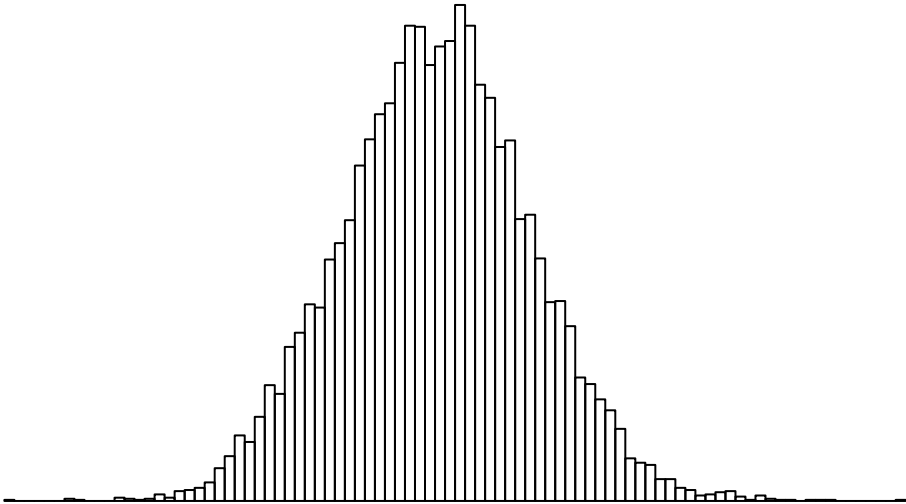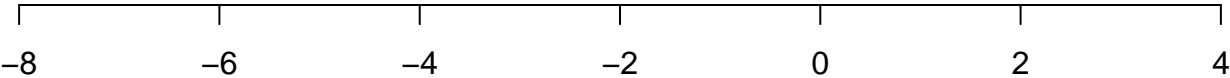

C16:0 Fatty Acid

B184:26 – B184:18

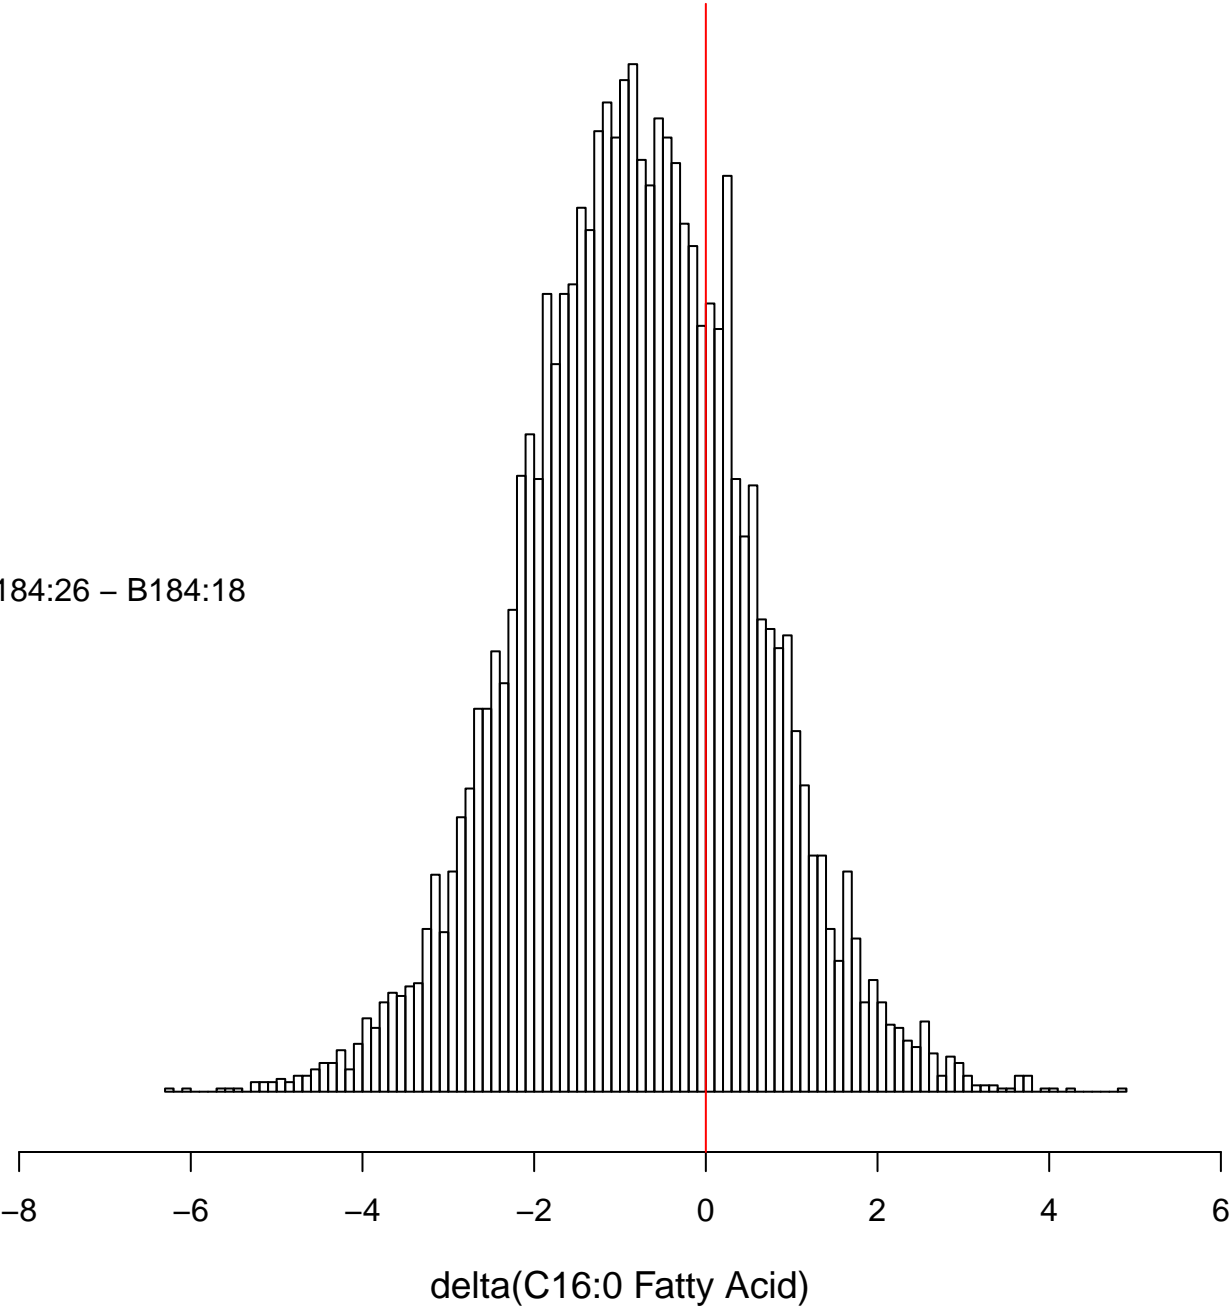

B184:26

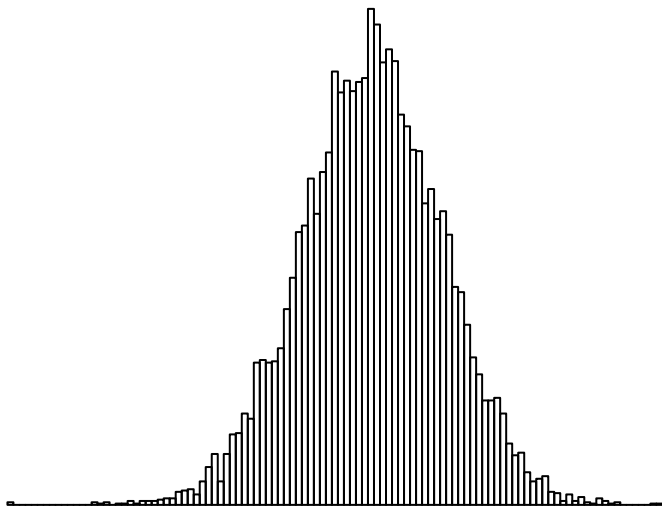

B184:18

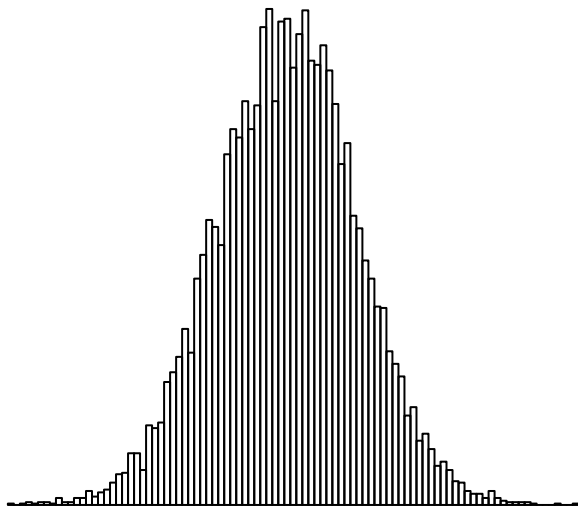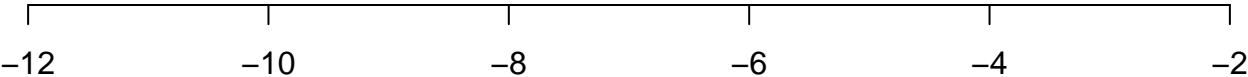

Polyunsaturated Fatty Acids 1

B184:26 – B184:18

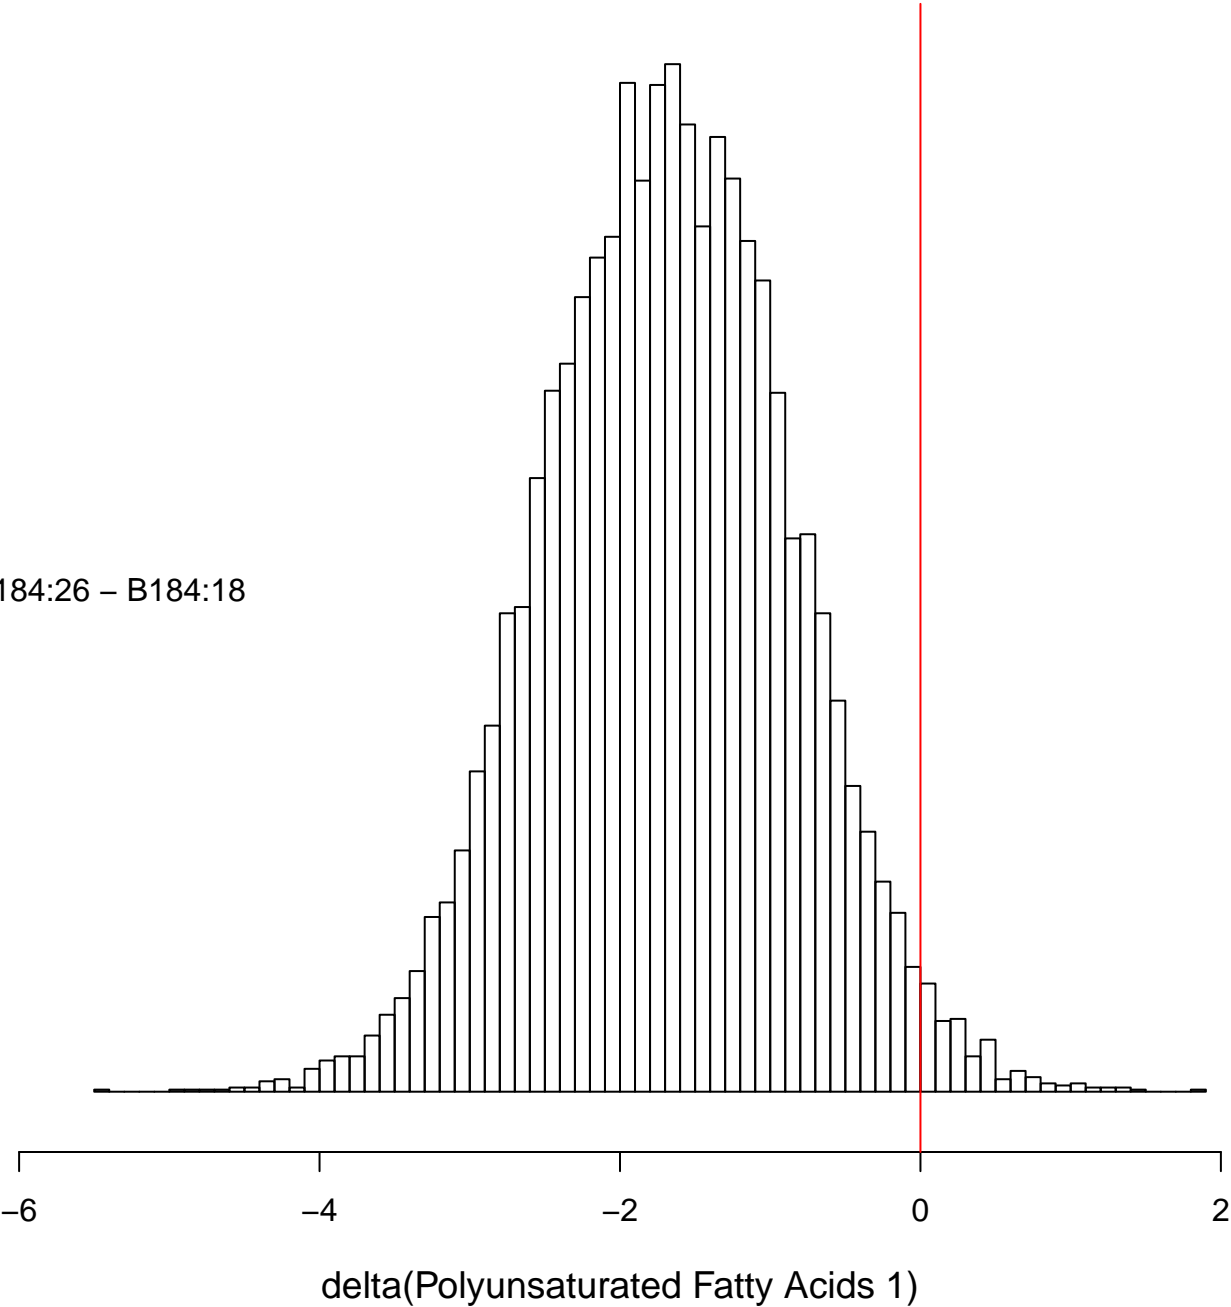



B184:26

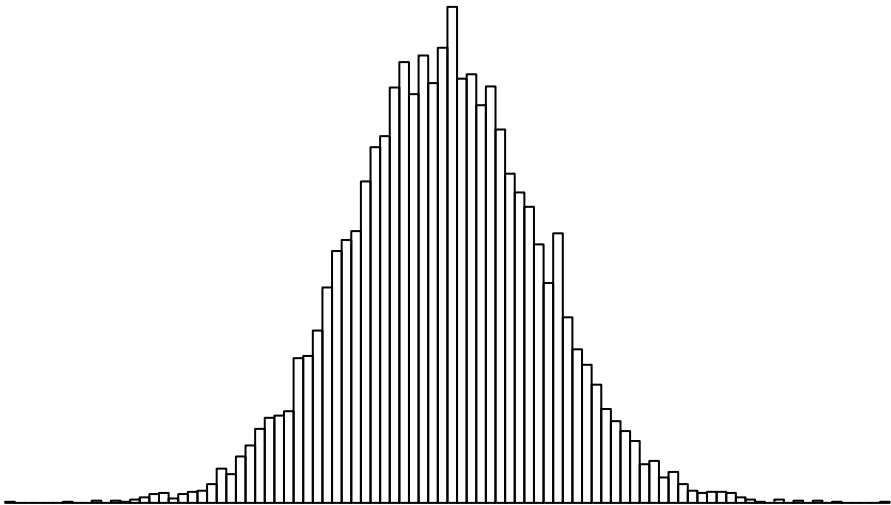

B184:18

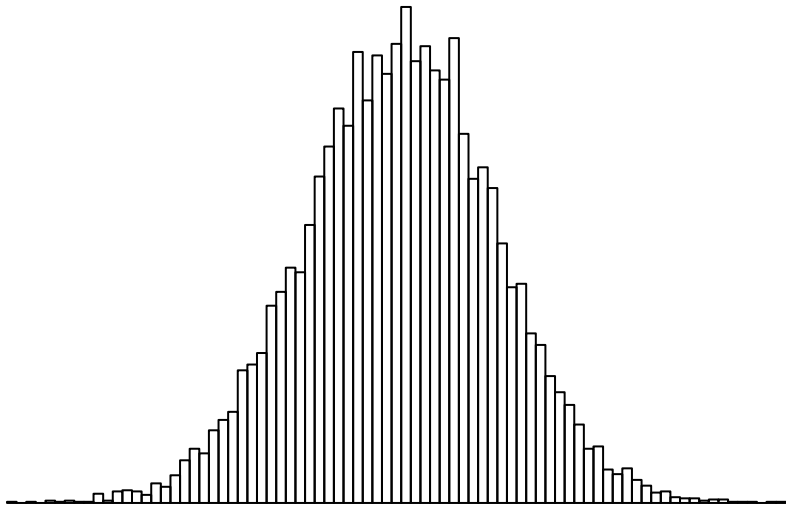

-9.0      -8.5      -8.0      -7.5      -7.0      -6.5

Polyunsaturated Fatty Acids 3

B184:26 – B184:18

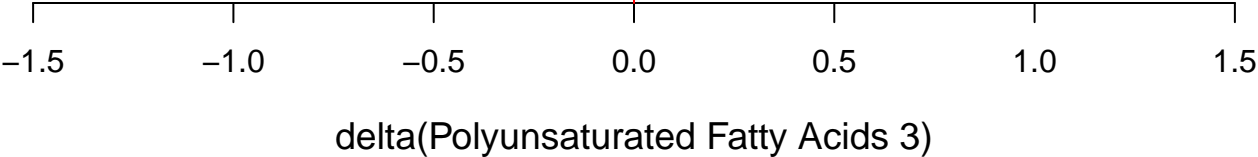

B184:26

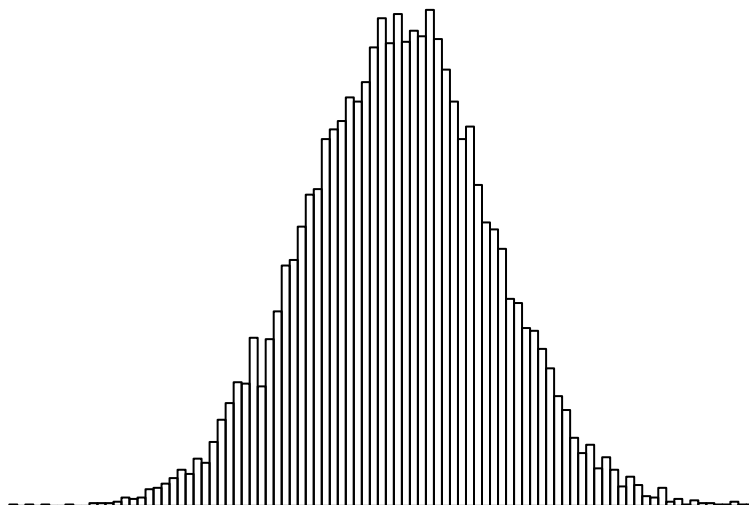

B184:18

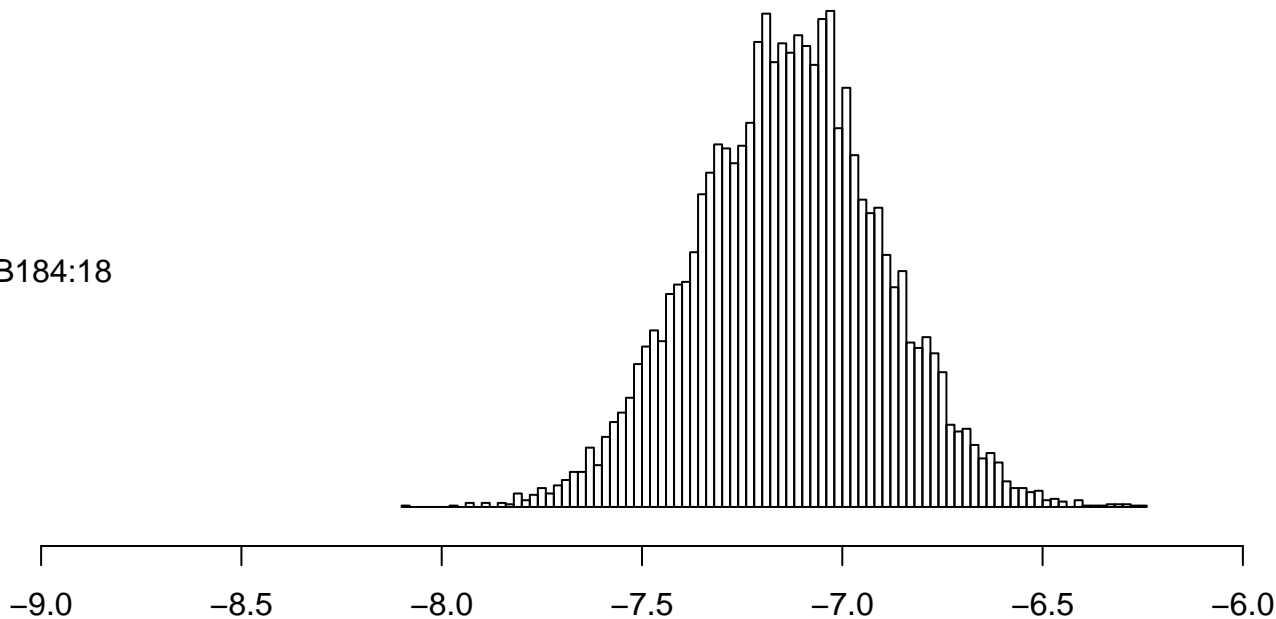

C18:2 Fatty Acid

B184:26 – B184:18

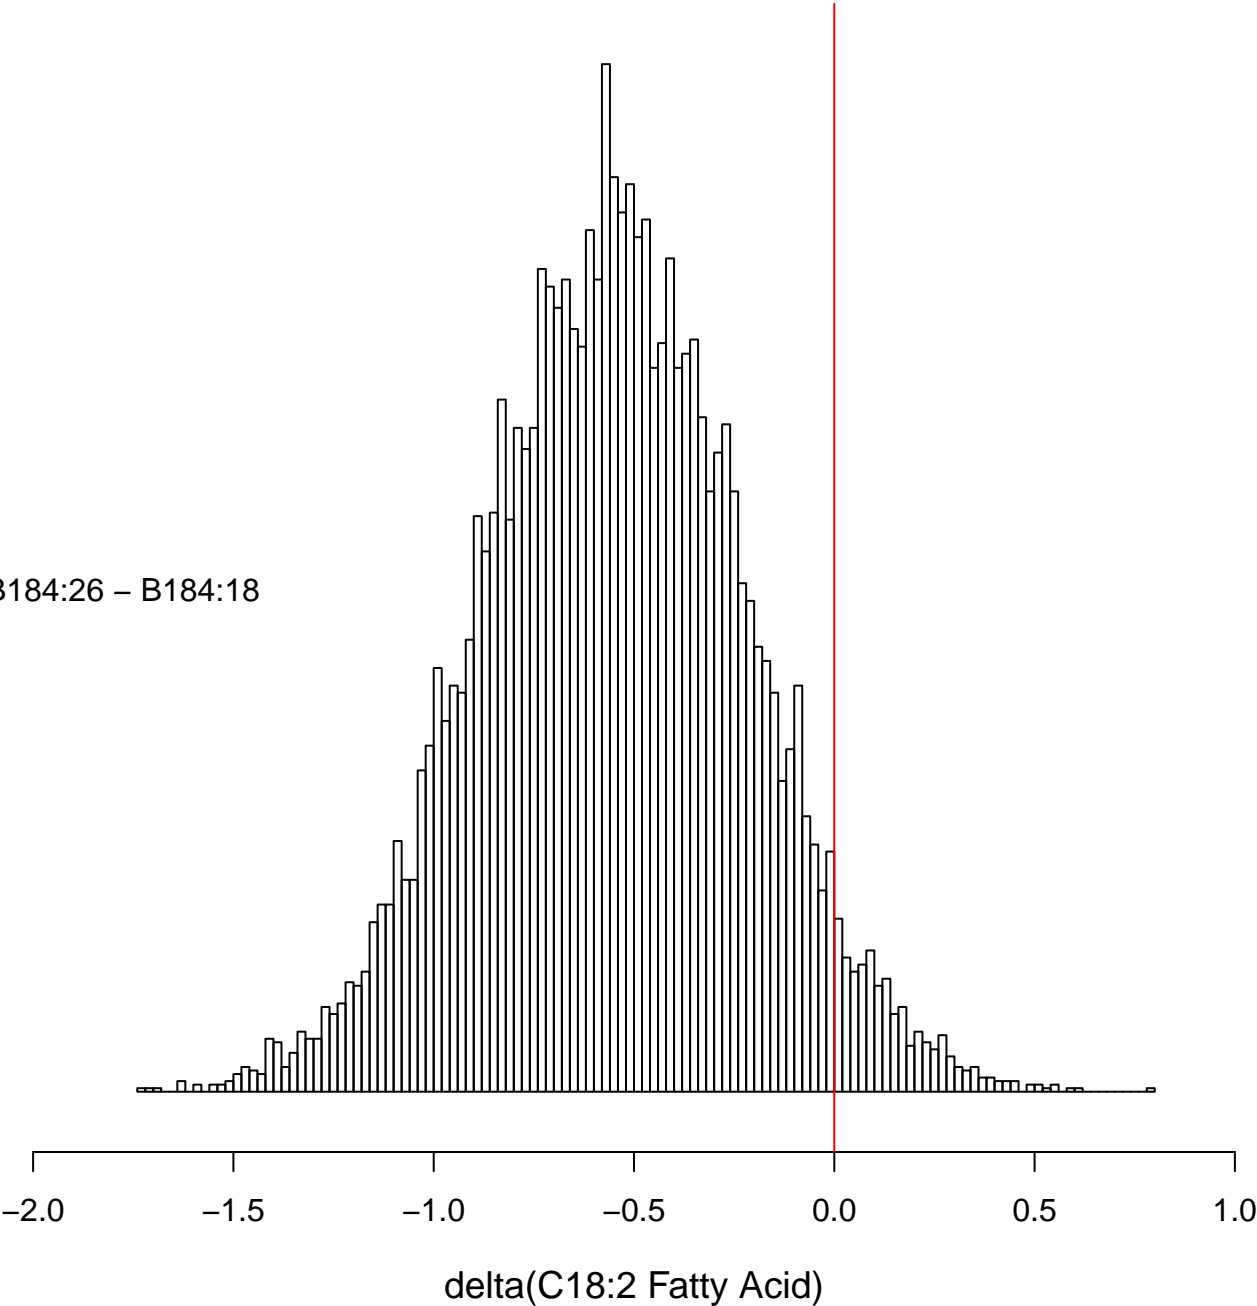

B184:26

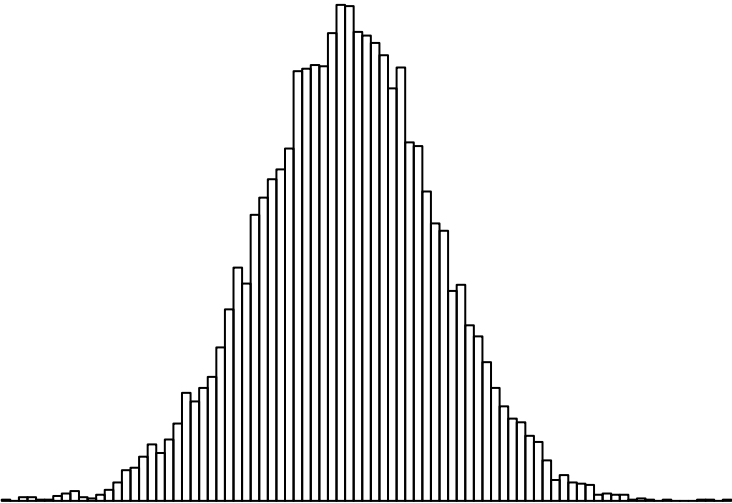

B184:18

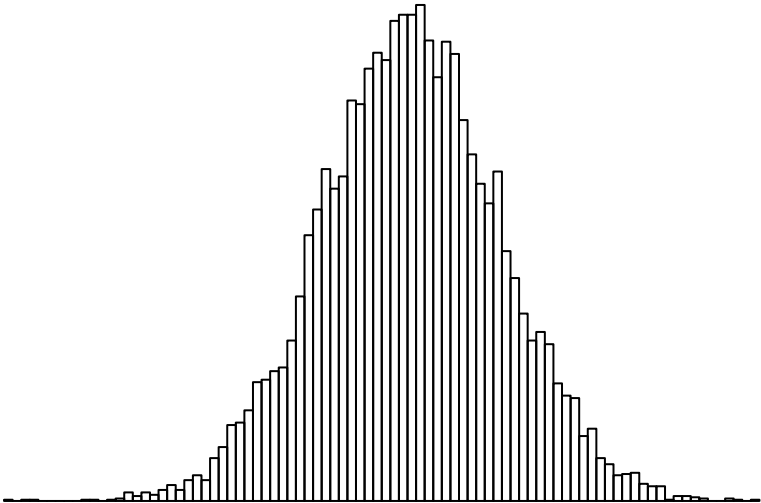

-8 -7 -6 -5 -4 -3 -2 -1

C18:0 Fatty Acid

B184:26 – B184:18

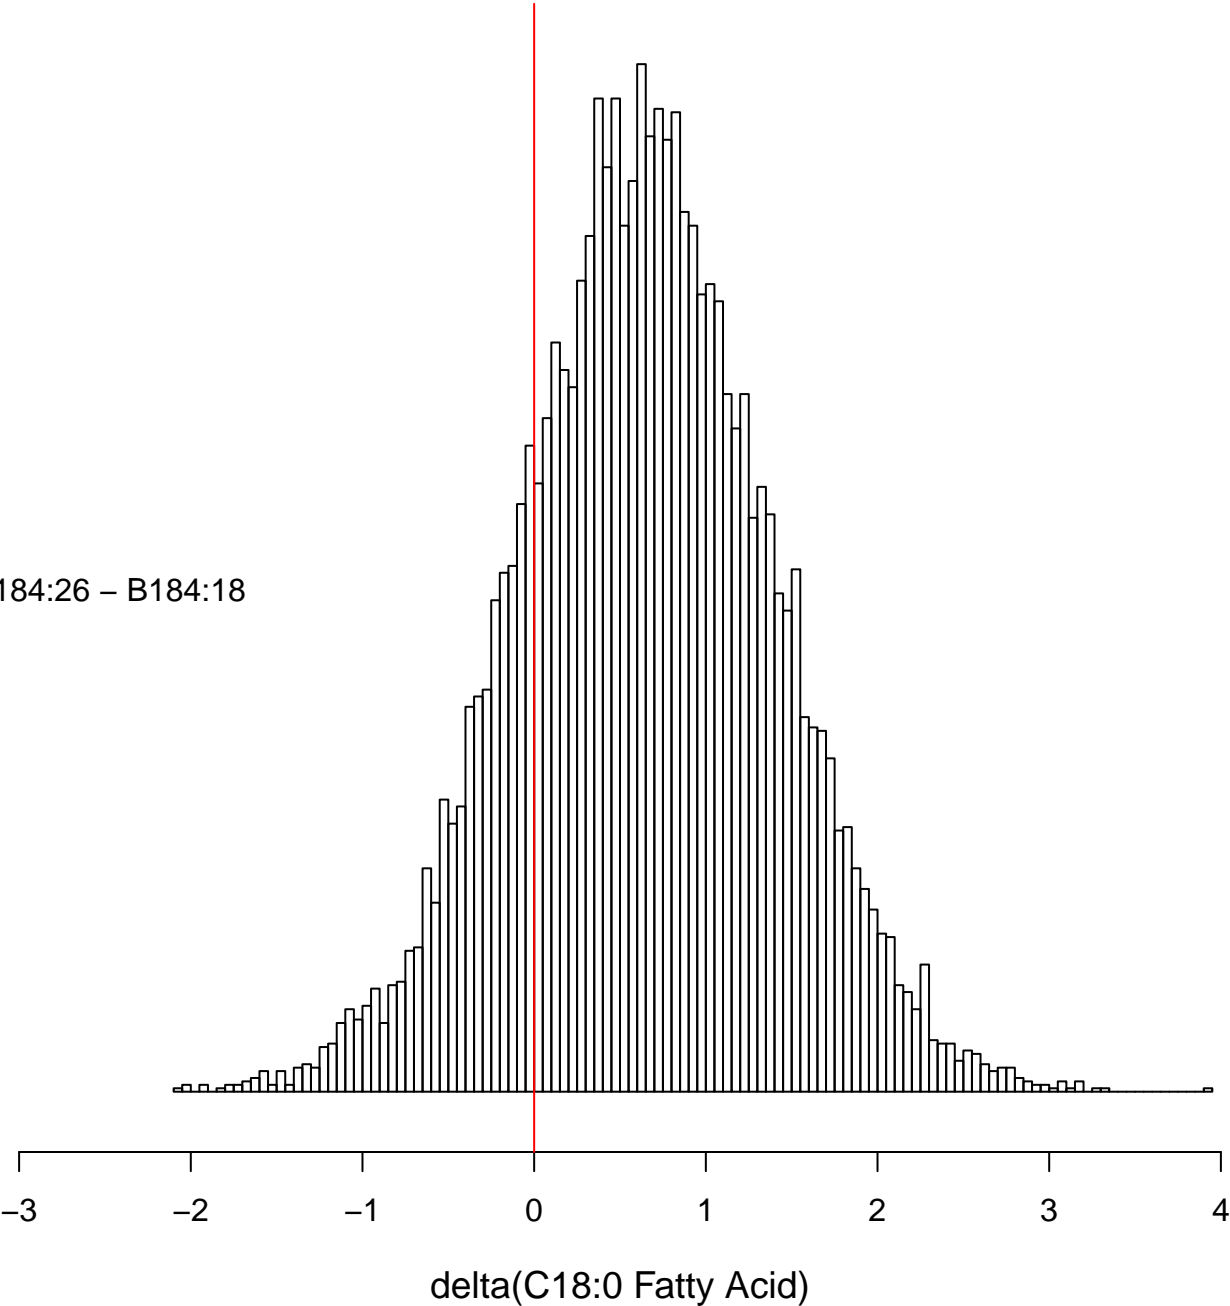

B184:26

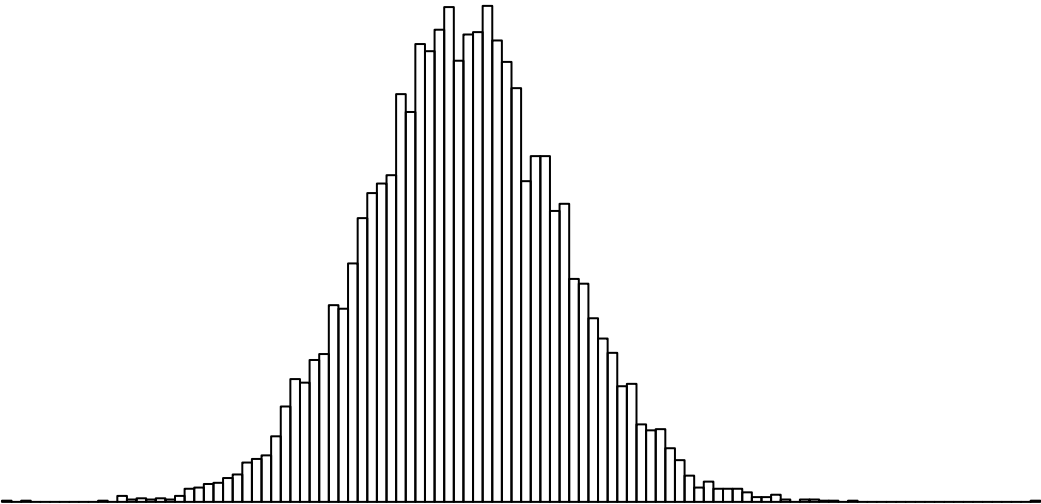

B184:18

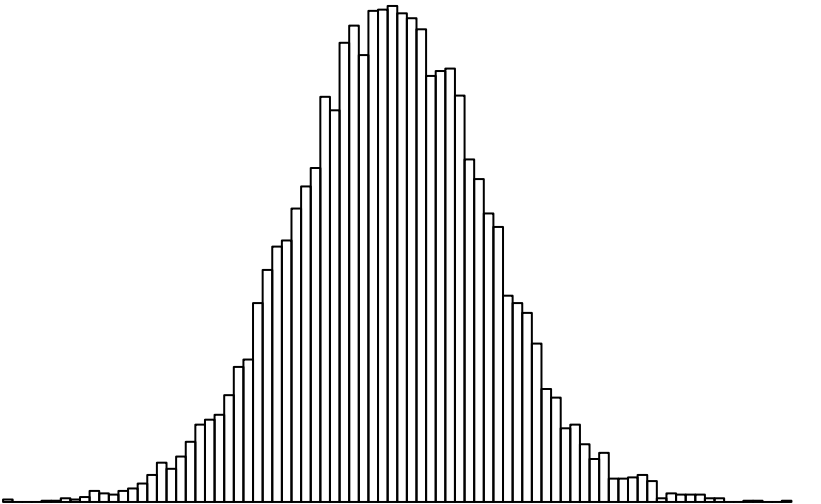

-8.5      -8.0      -7.5      -7.0      -6.5      -6.0

Unidentified Fatty Acid 2

B184:26 – B184:18

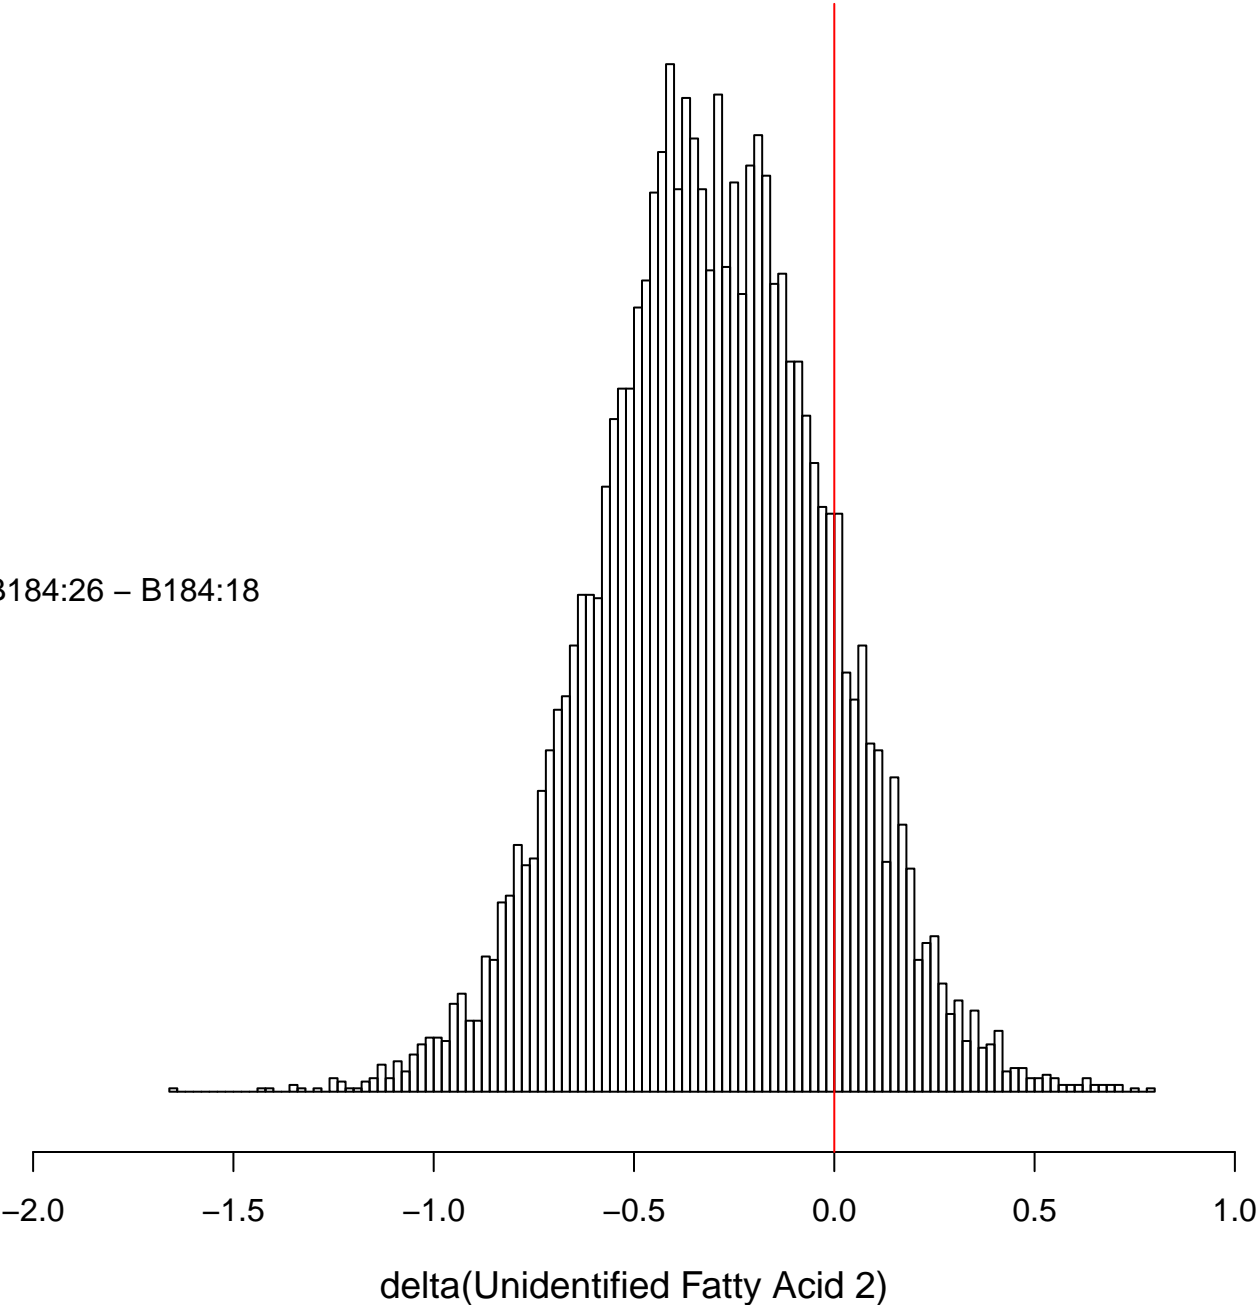



B184:26

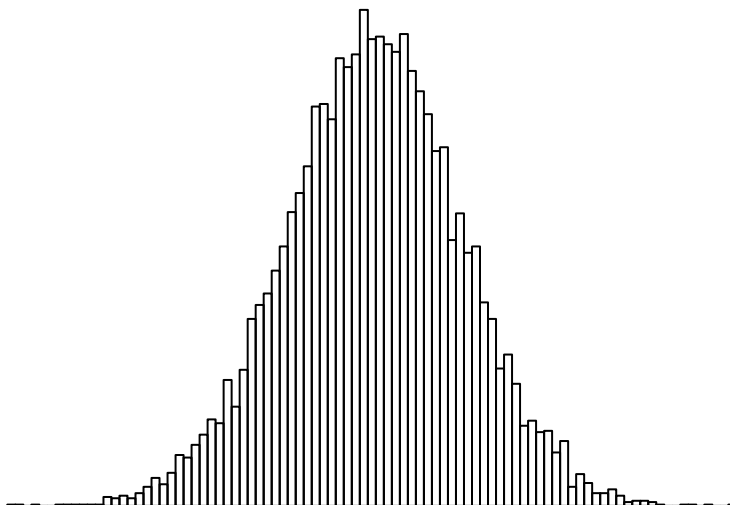

B184:18

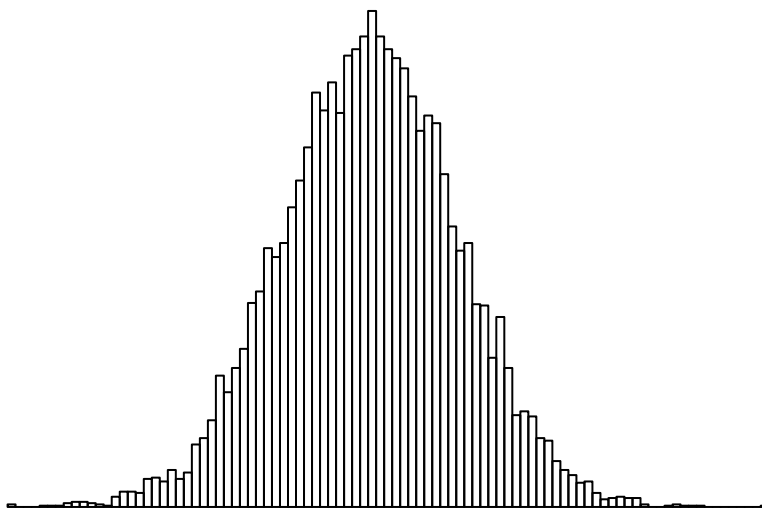

-4.5      -4.0      -3.5      -3.0      -2.5      -2.0      -1.5

Glycerol

B184:26 – B184:18

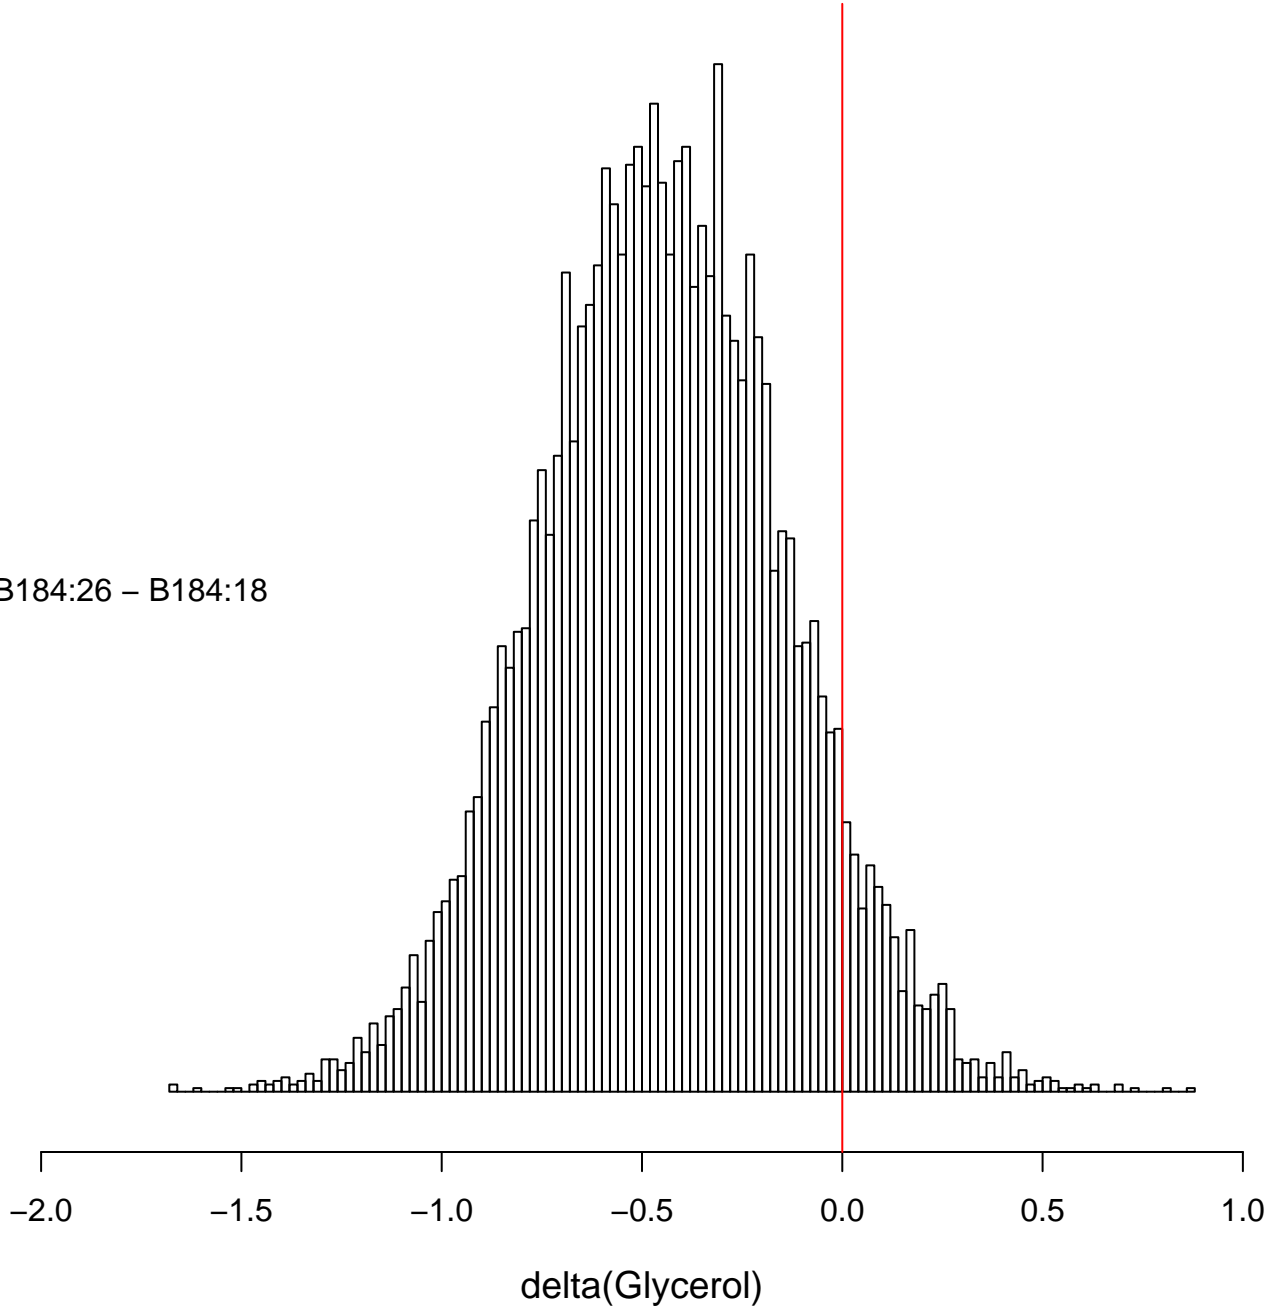

B184:26

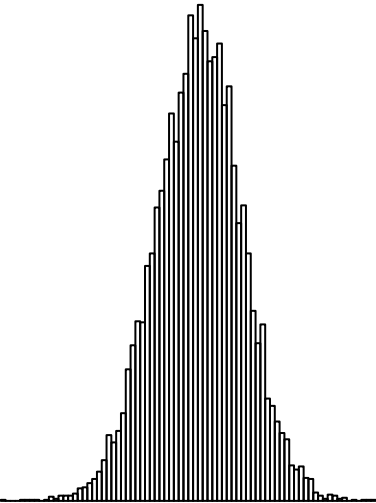

B184:18

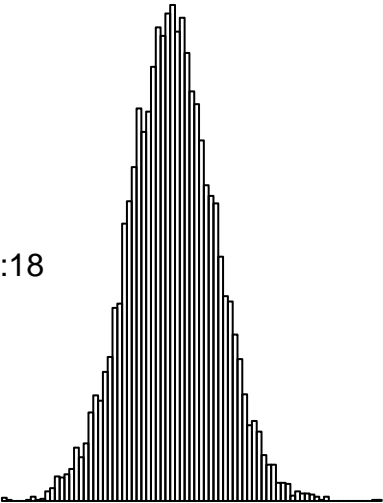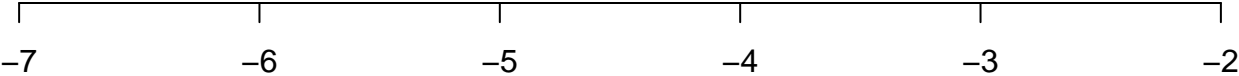

Inositol 1

B184:26 – B184:18

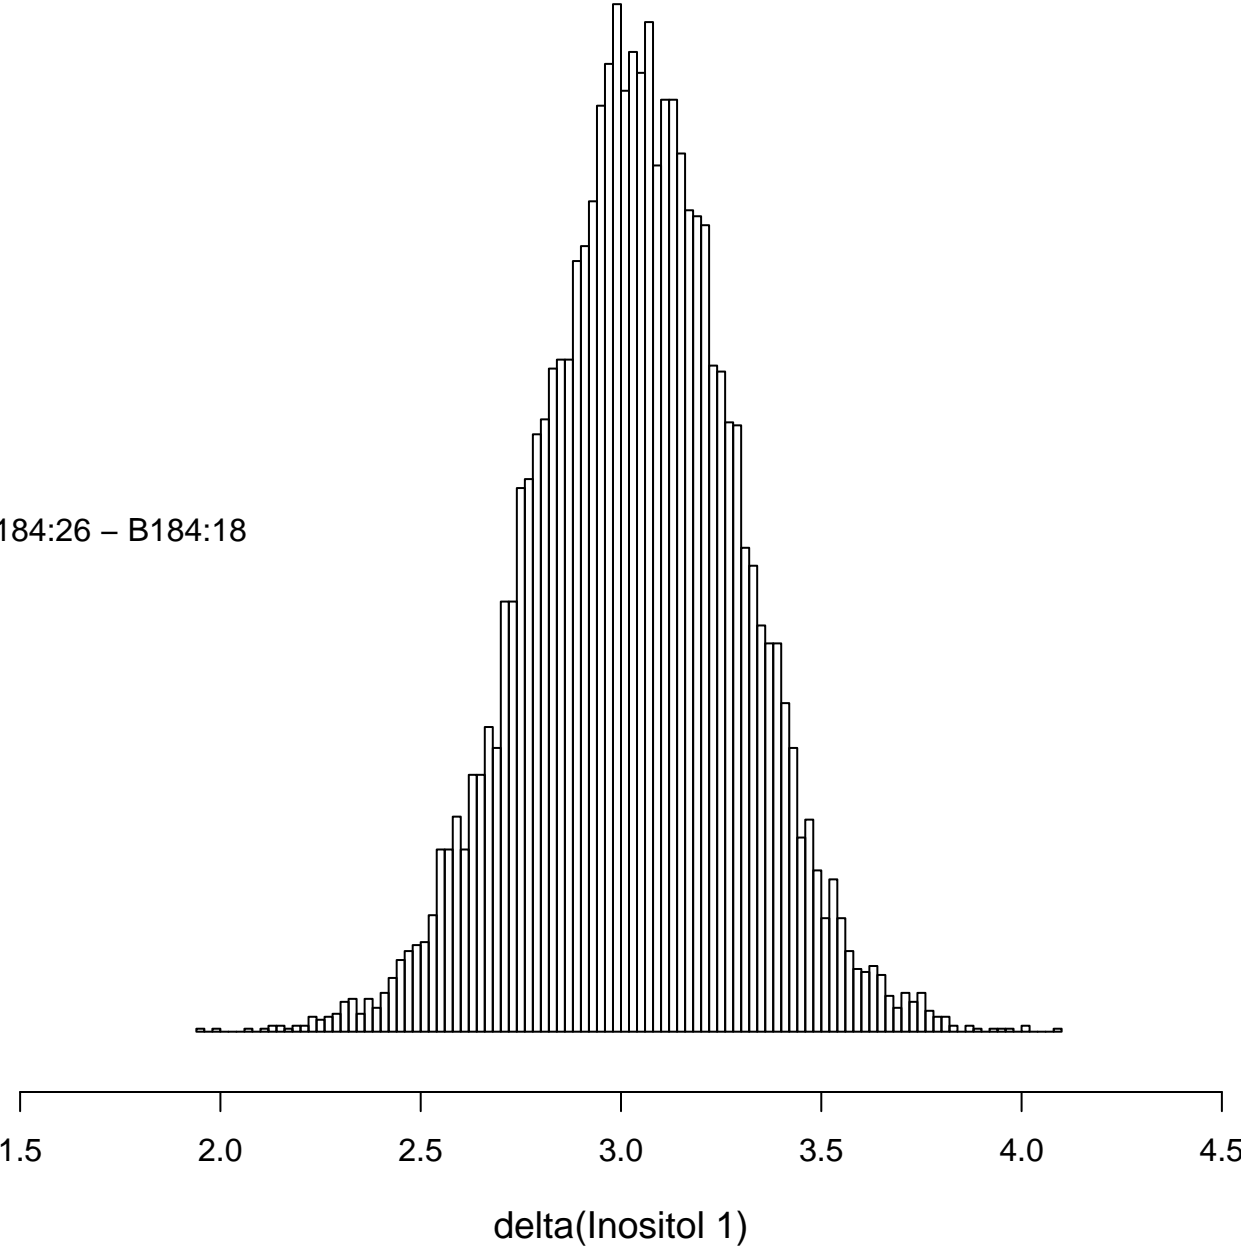

B184:26

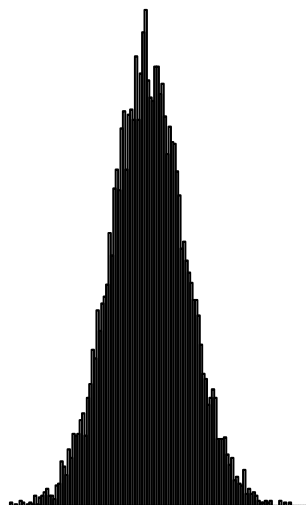

B184:18

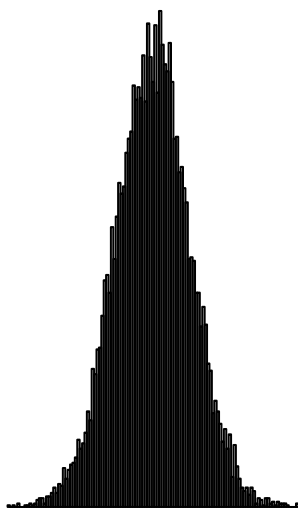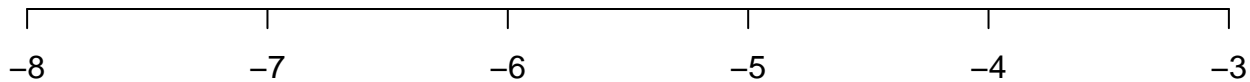

Inositol 2

B184:26 – B184:18

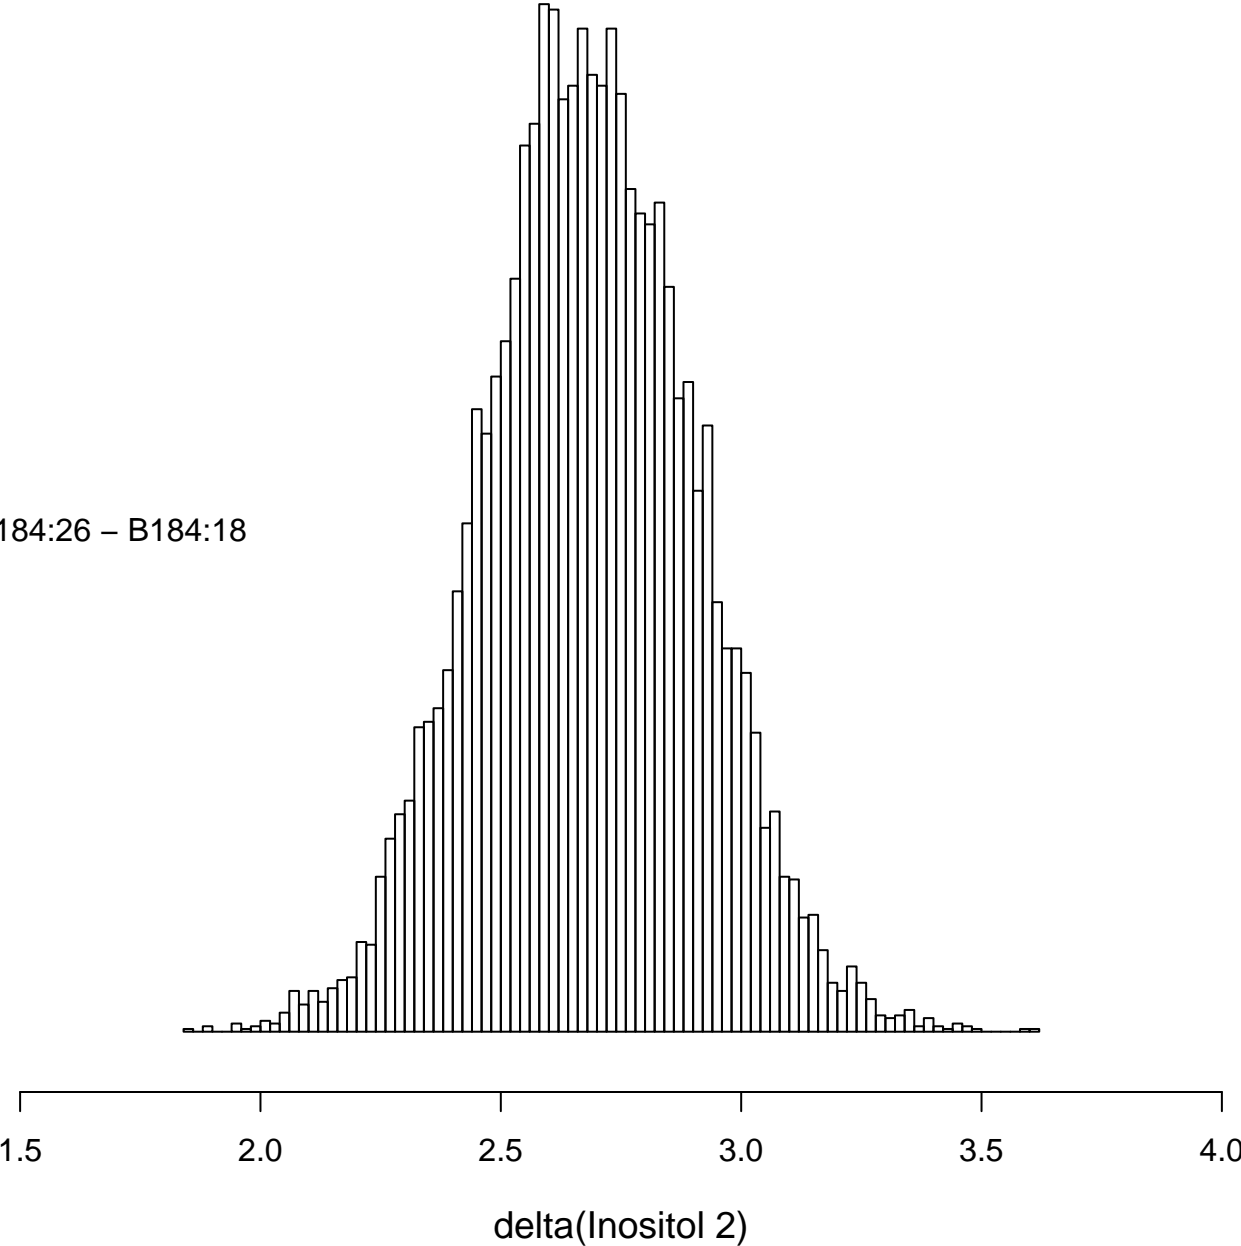

B184:26

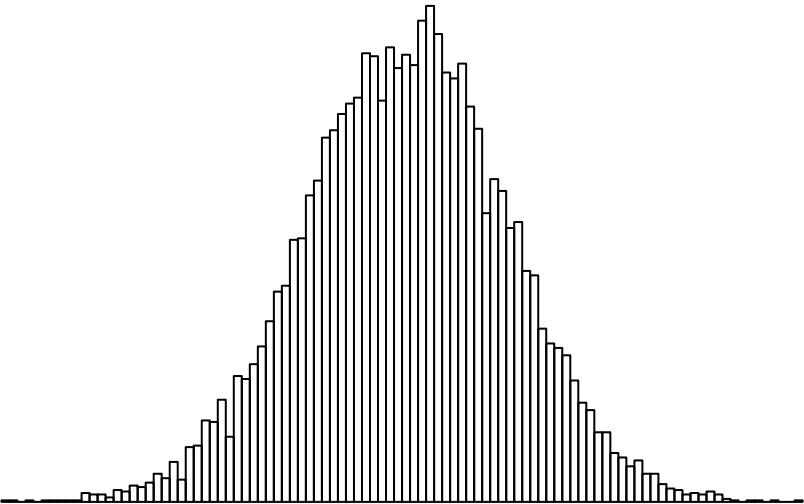

B184:18

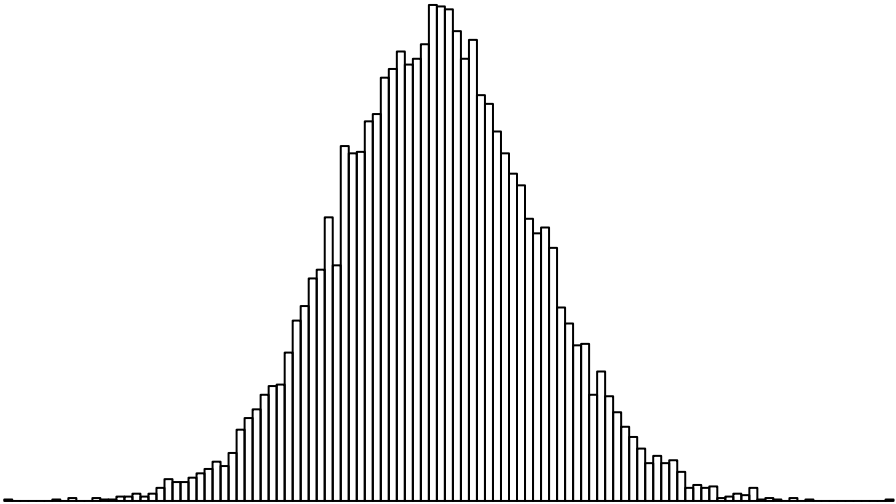

-10.0      -9.5      -9.0      -8.5      -8.0      -7.5      -7.0

C29 Sterol 1

B184:26 – B184:18

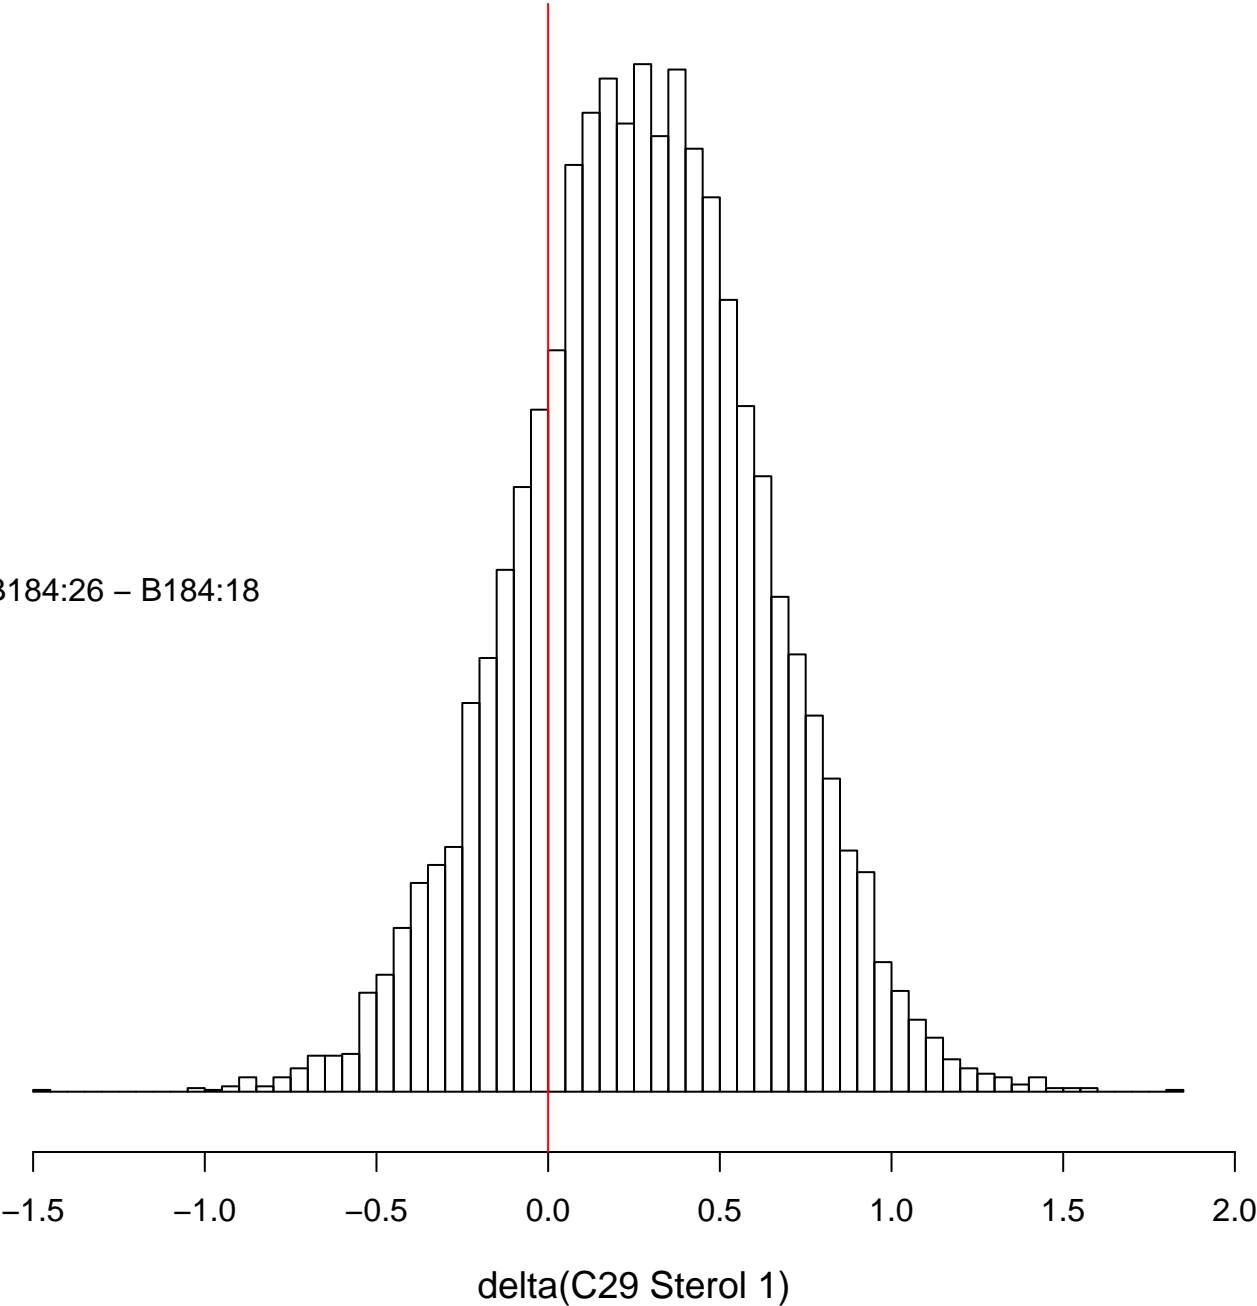



B184:26

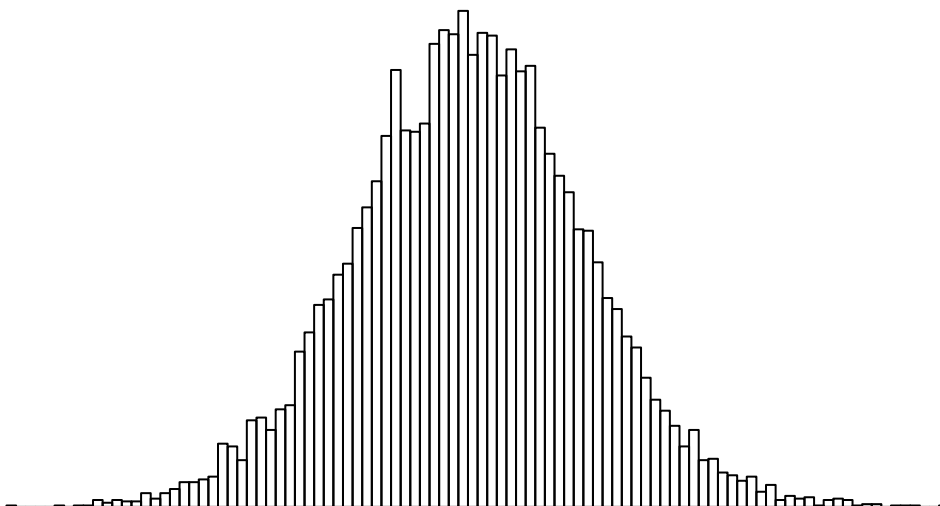

B184:18

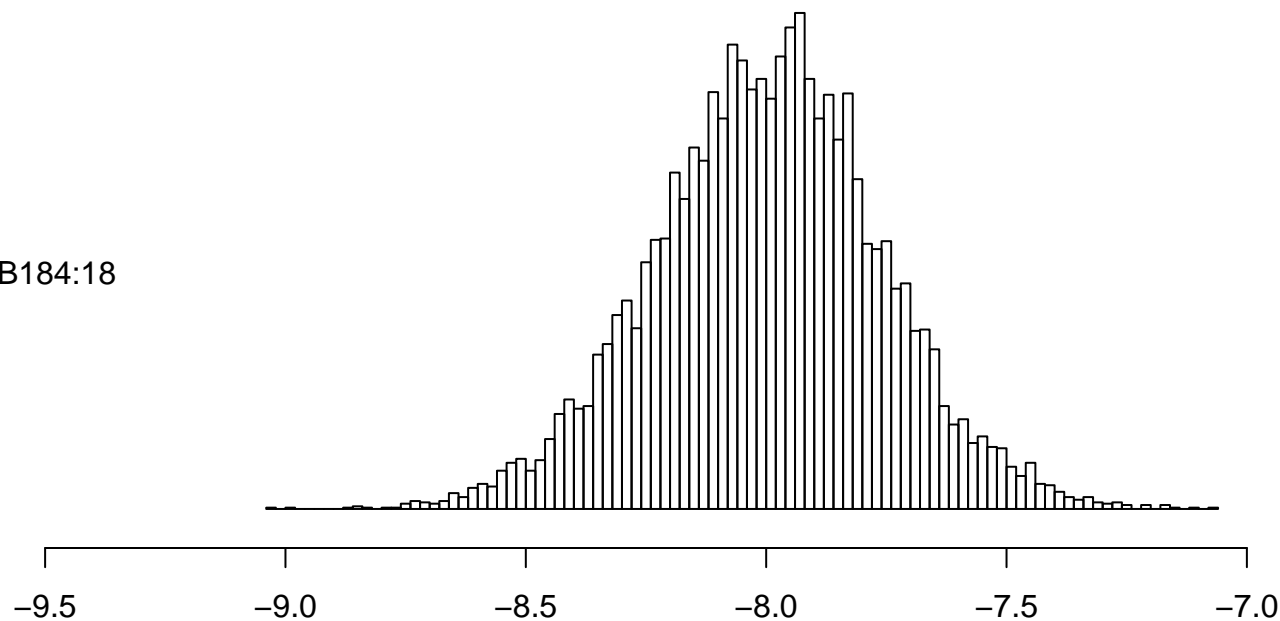

C29 Stanol 1

B184:26 – B184:18

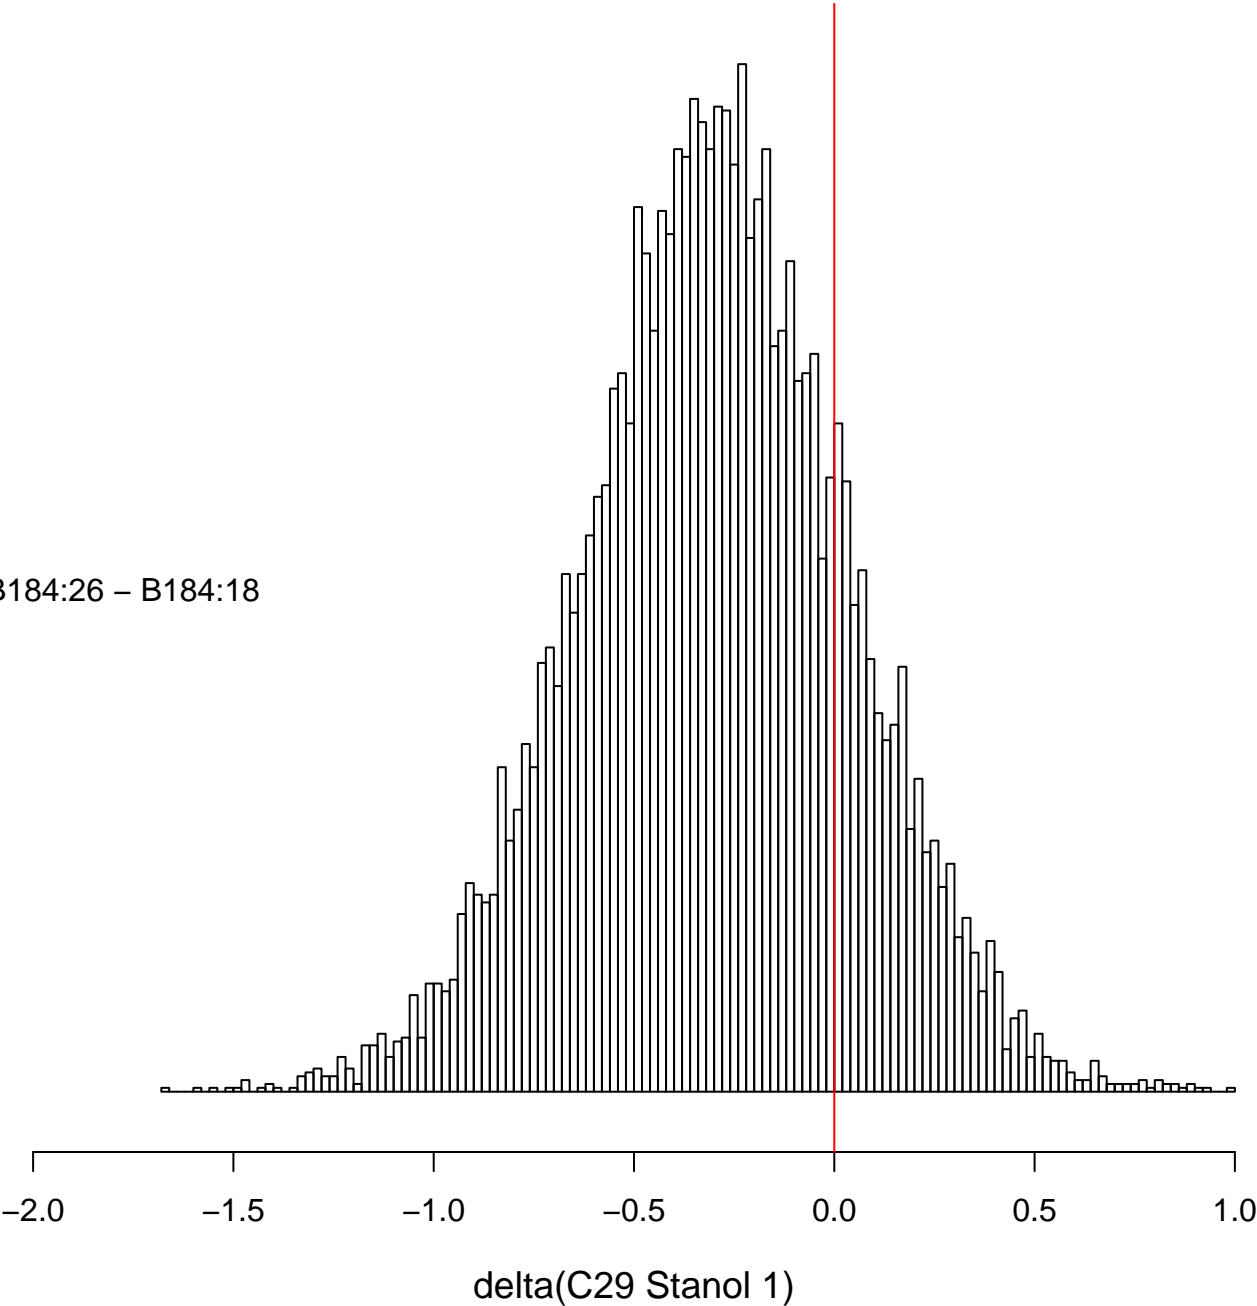

B184:26

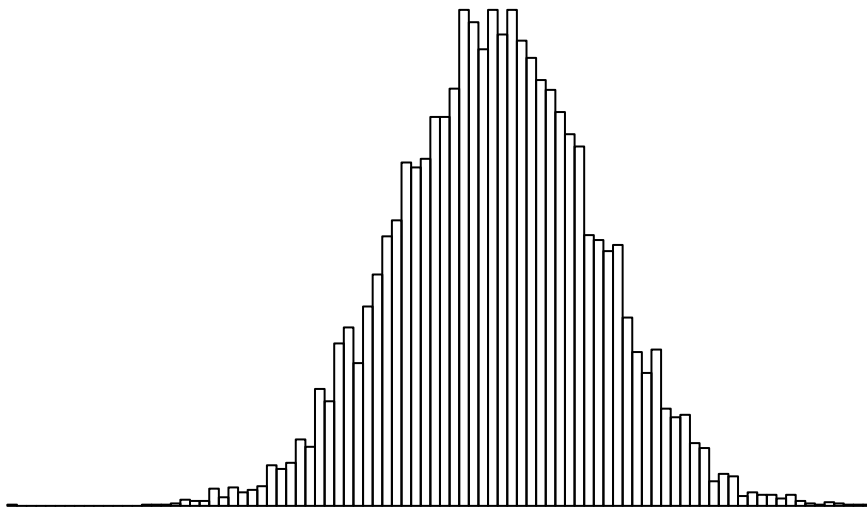

B184:18

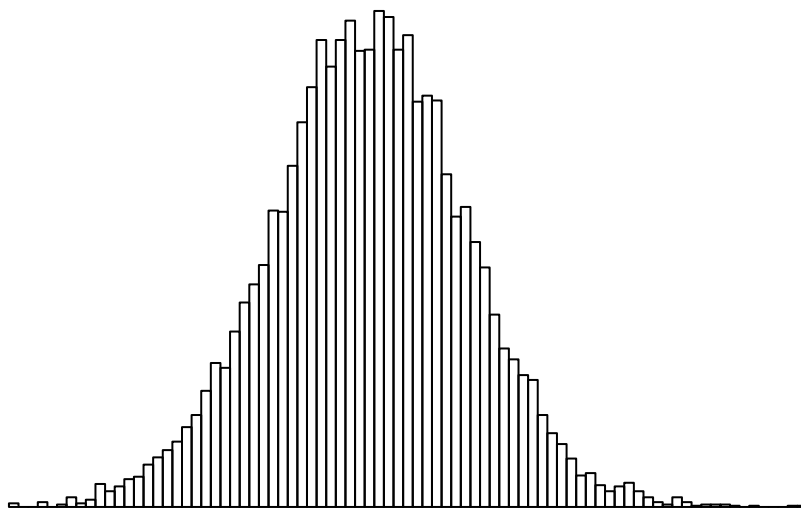

-9.5

-9.0

-8.5

-8.0

-7.5

-7.0

C27"5,22 Sterol

B184:26 – B184:18

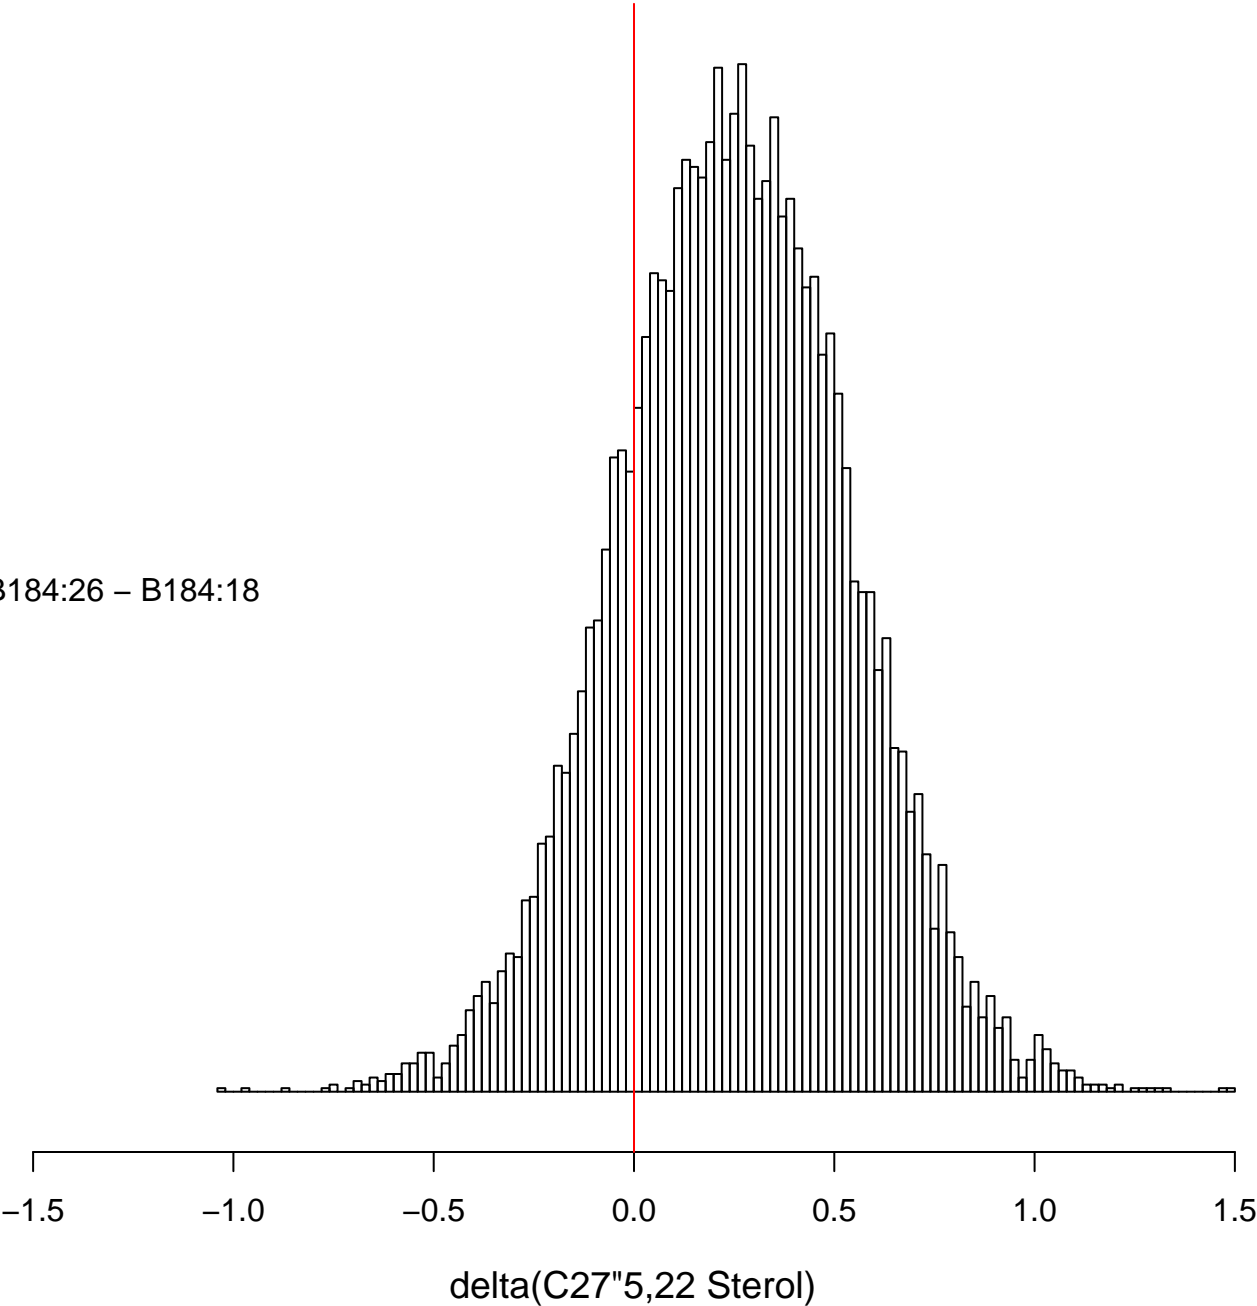

B184:26

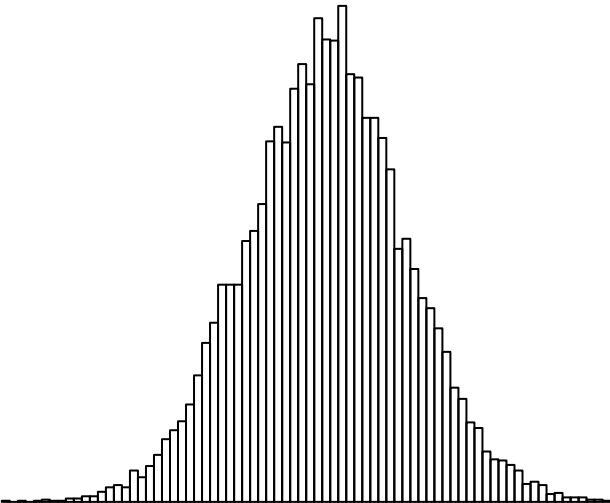

B184:18

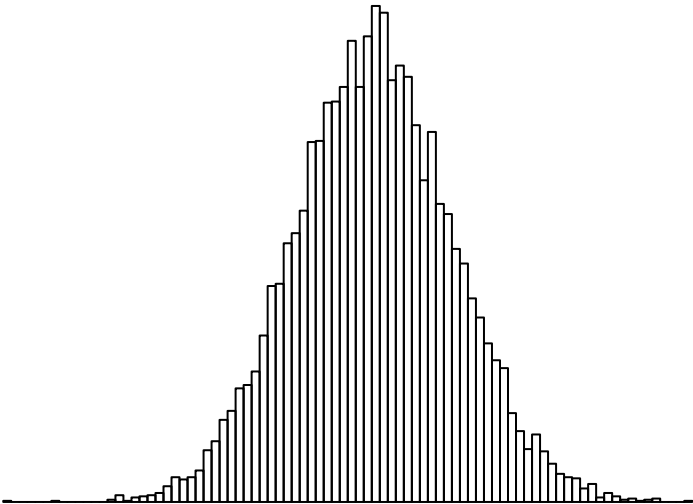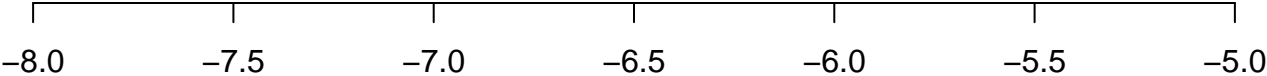

C27"5 Sterol

B184:26 – B184:18

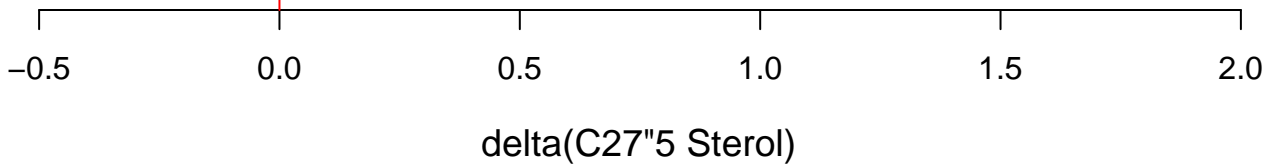

B184:26

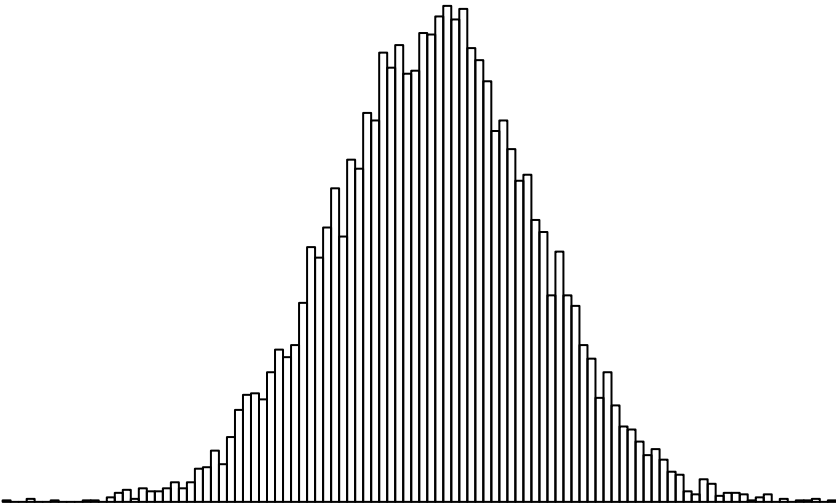

B184:18

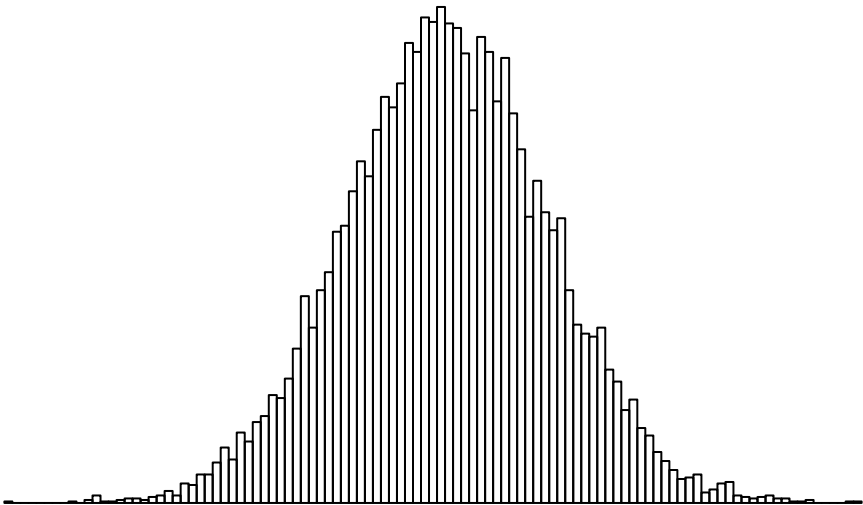

-9.0      -8.5      -8.0      -7.5      -7.0      -6.5      -6.0

C28"5,22 Sterol

B184:26 – B184:18

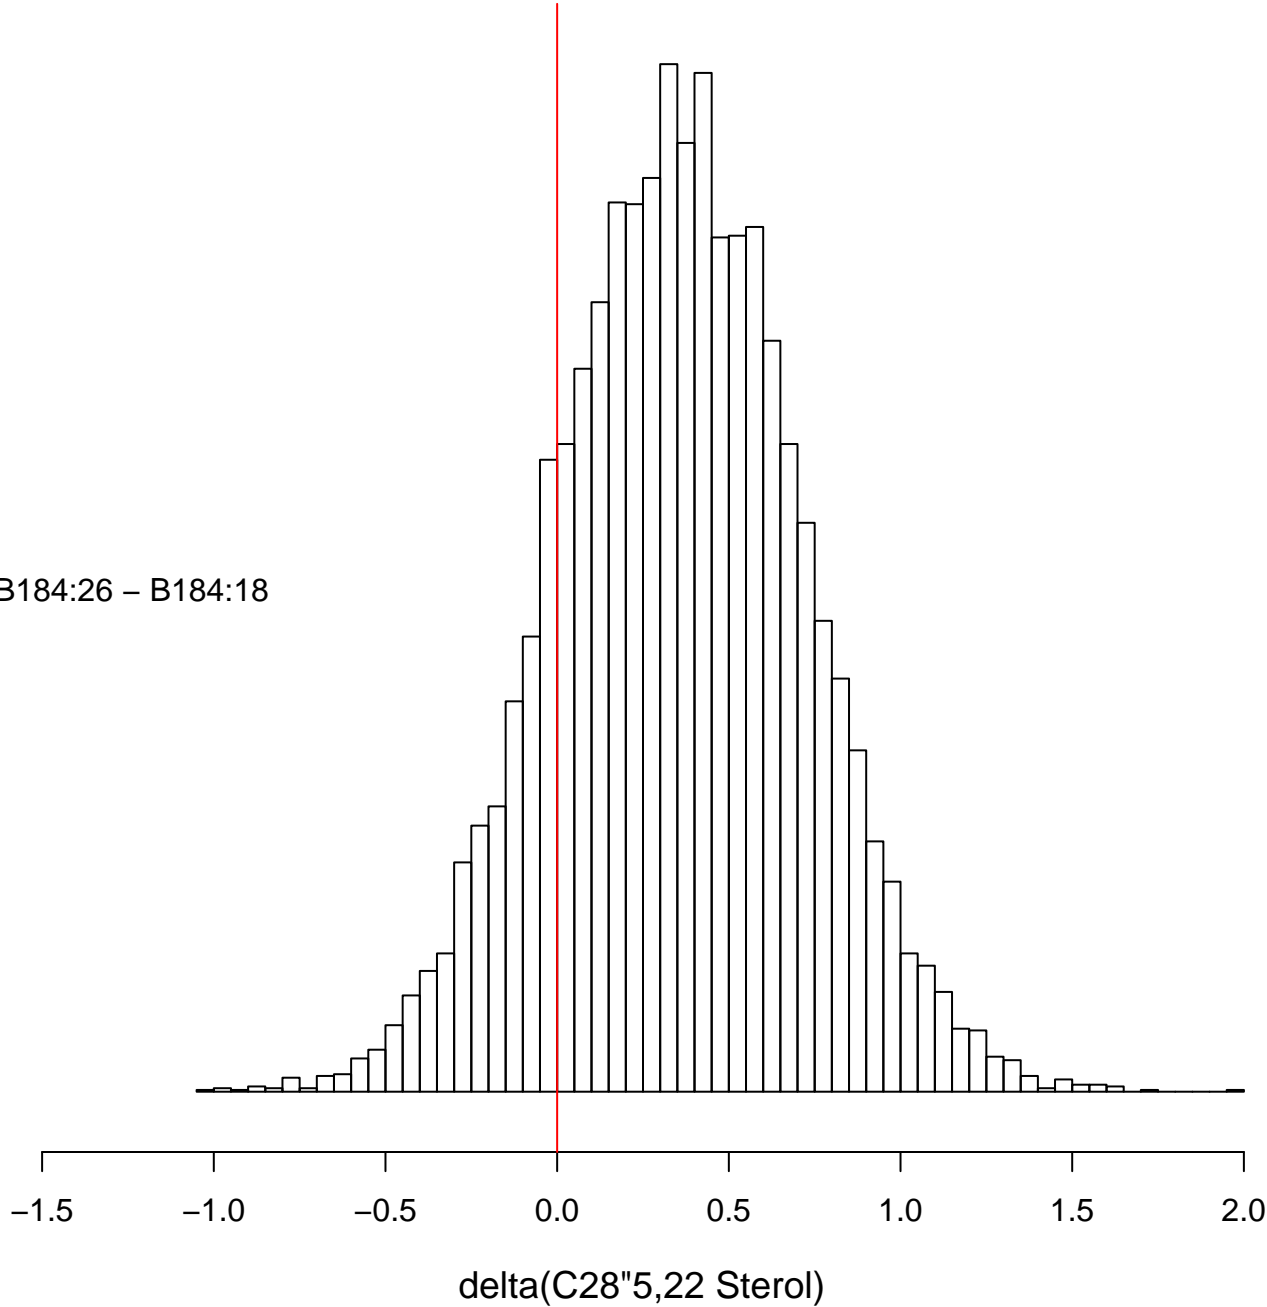



B184:26

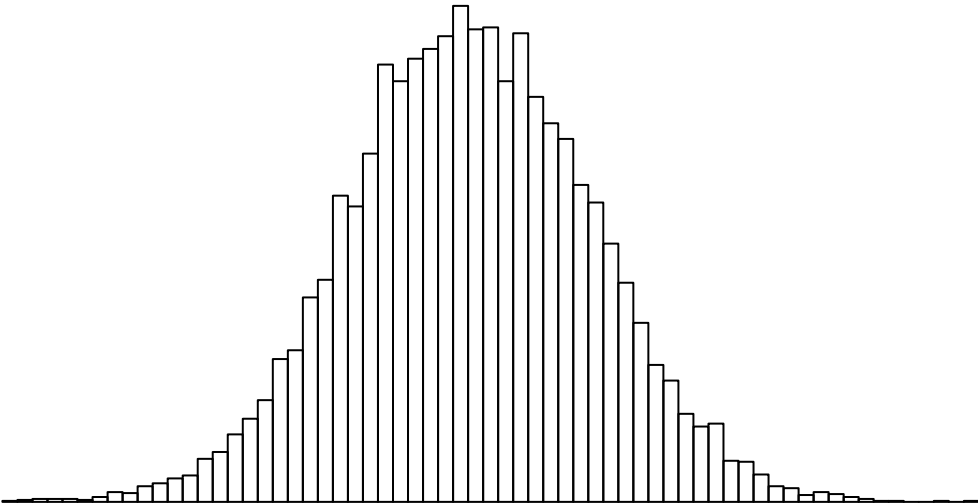

B184:18

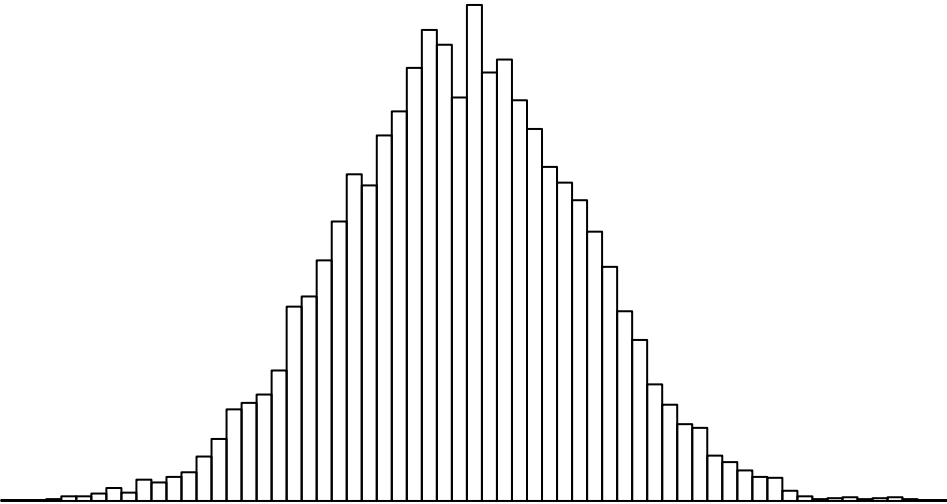

-9

-8

-7

-6

-5

C28<sup>5</sup> Sterol

B184:26 – B184:18

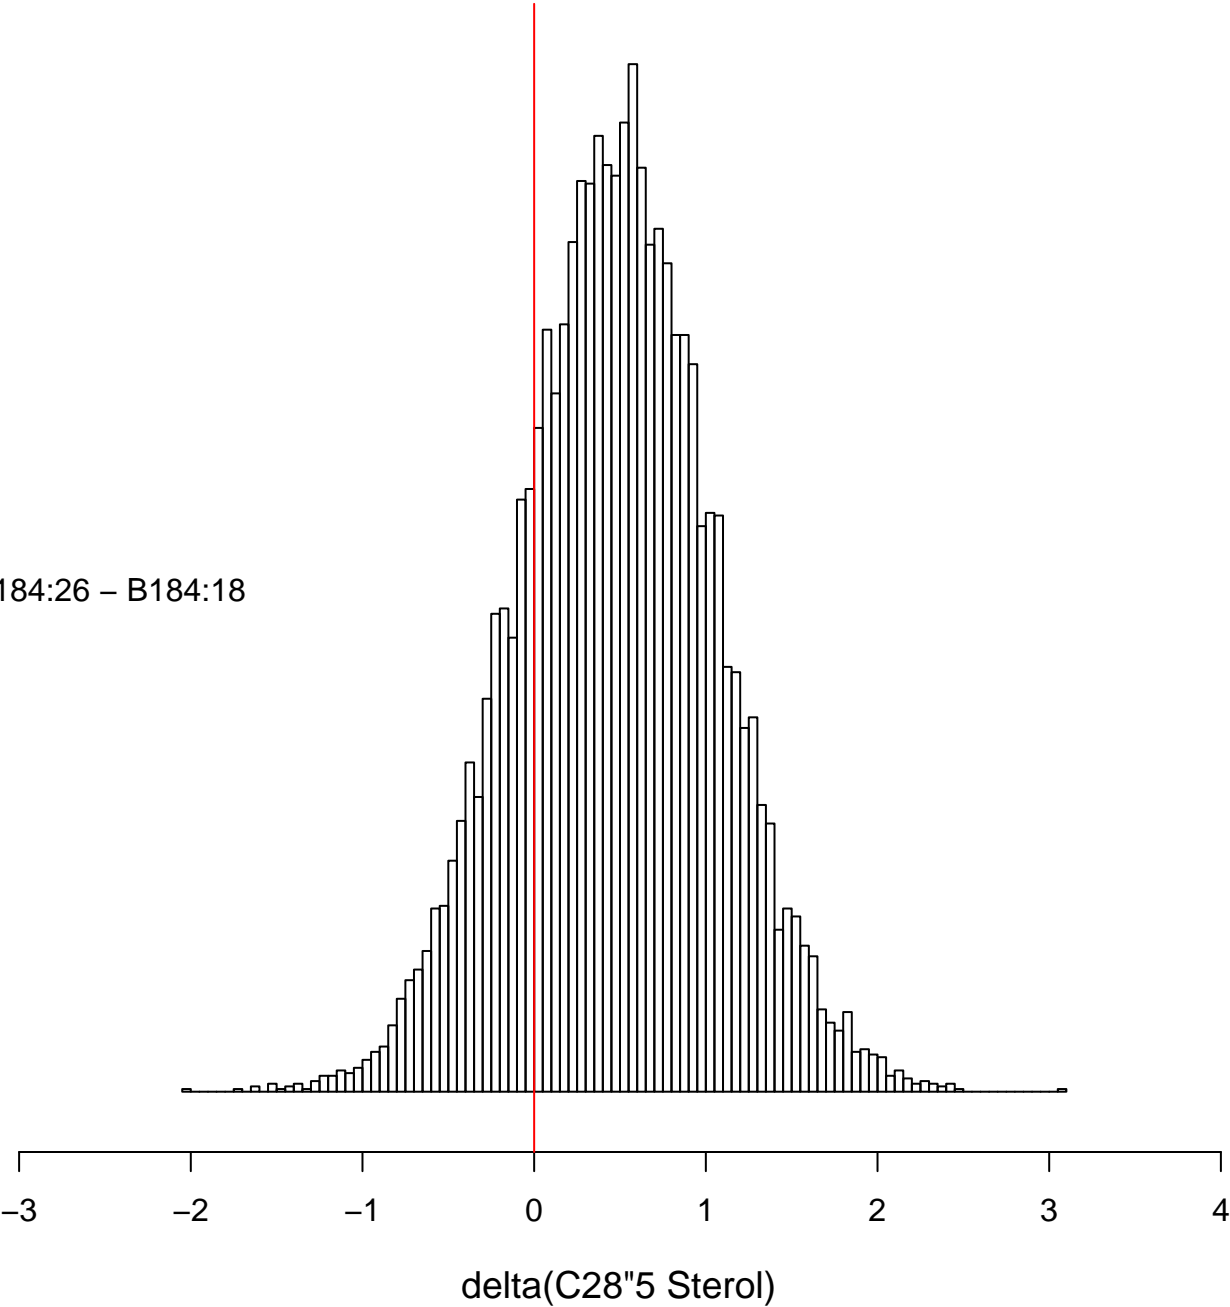

B184:26

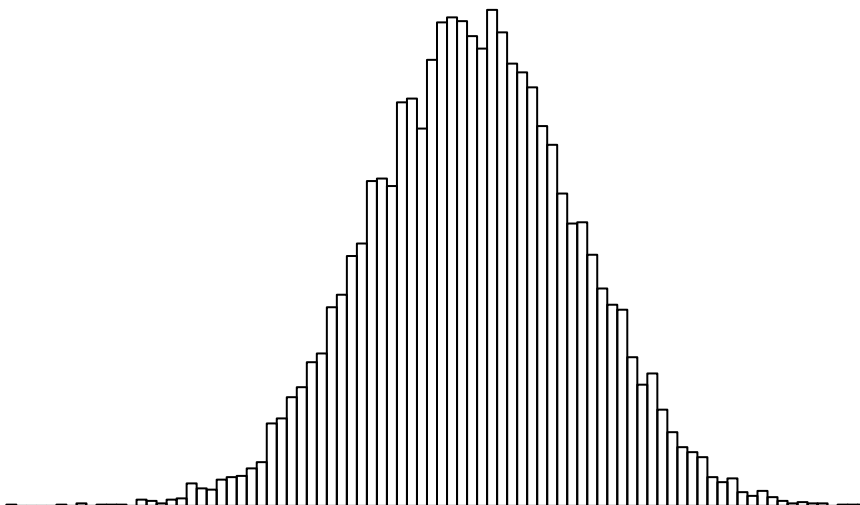

B184:18

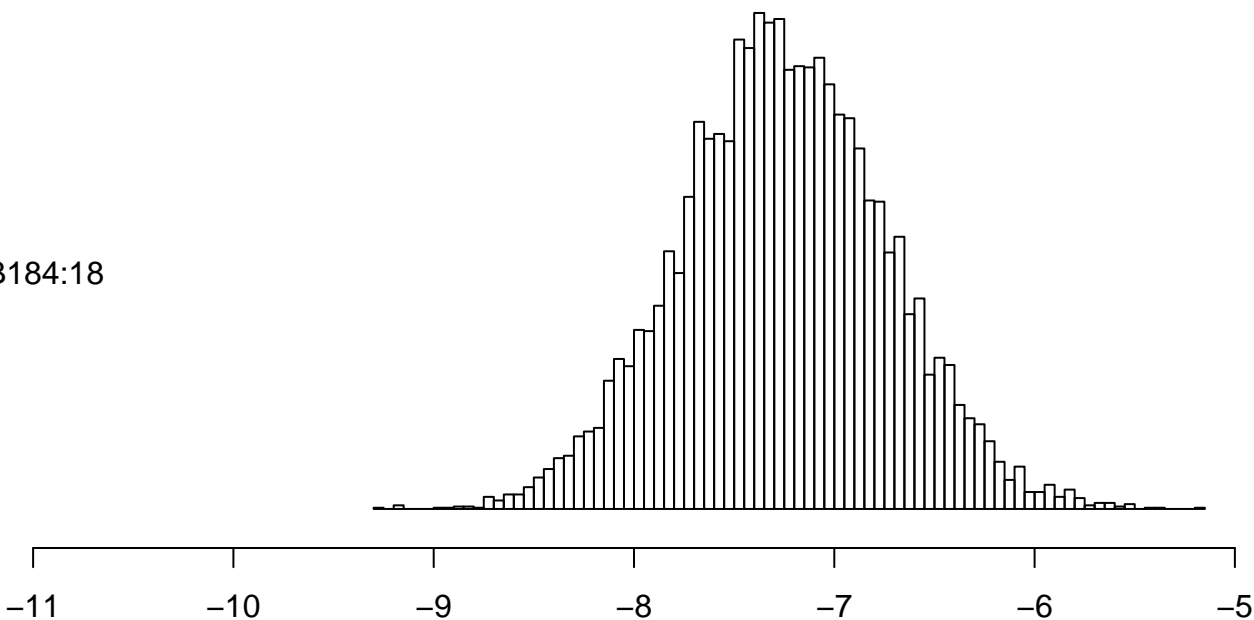

C29<sup>5,22</sup> Sterol

B184:26 – B184:18

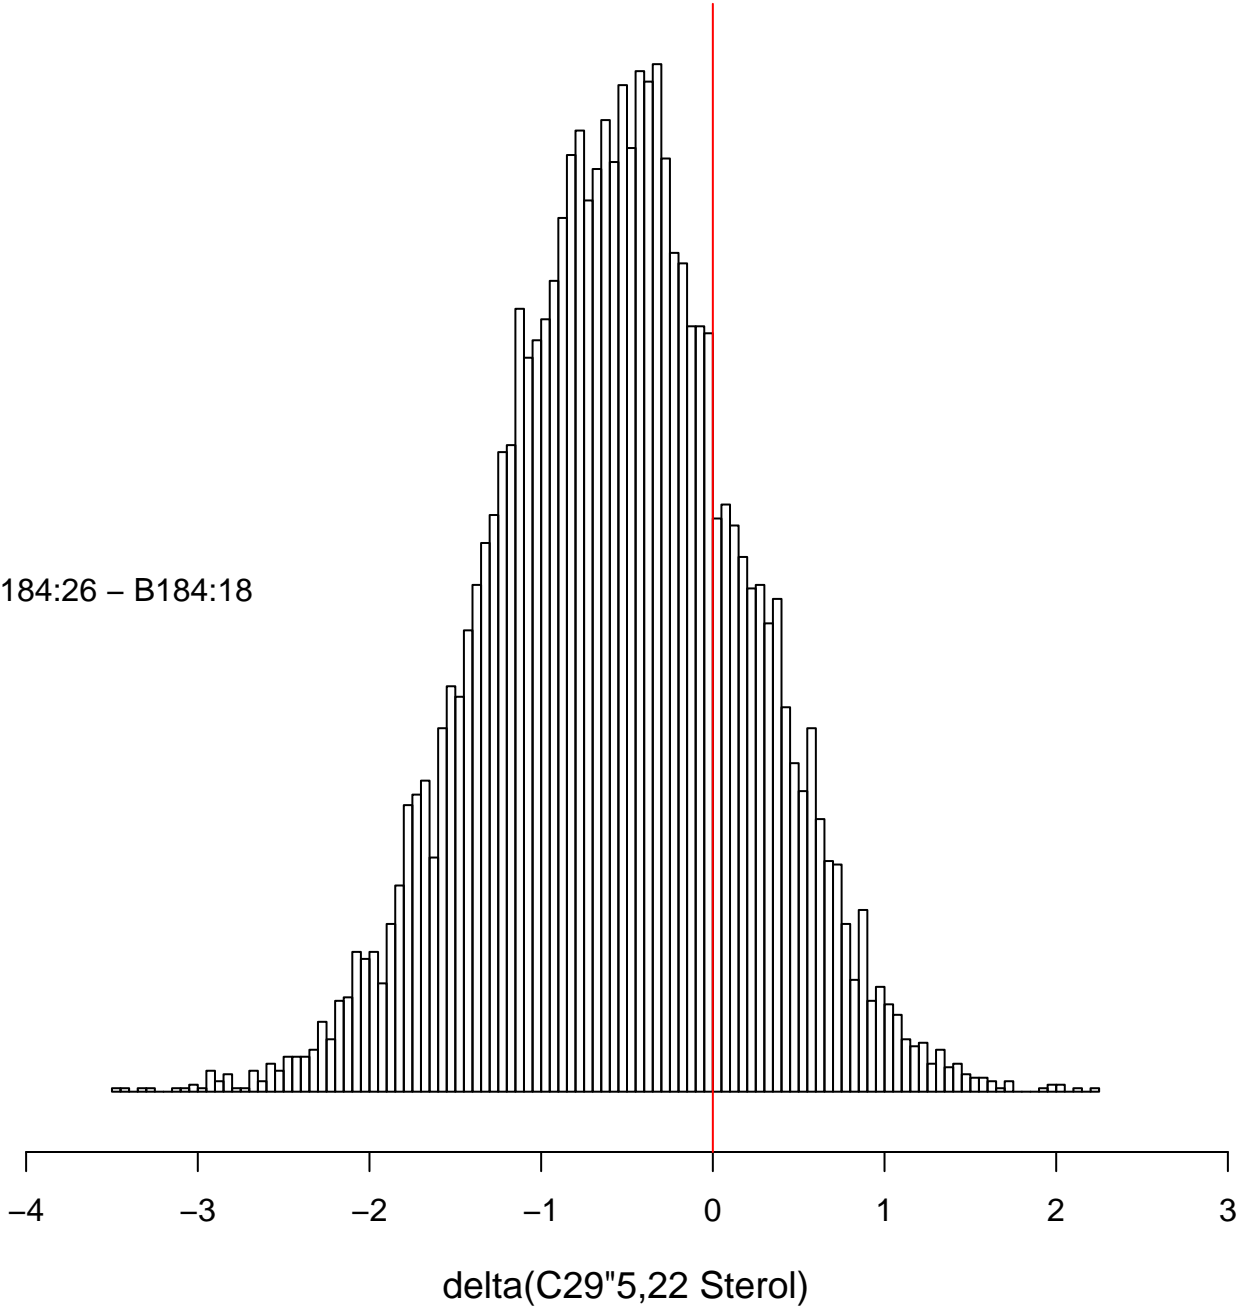

B184:26

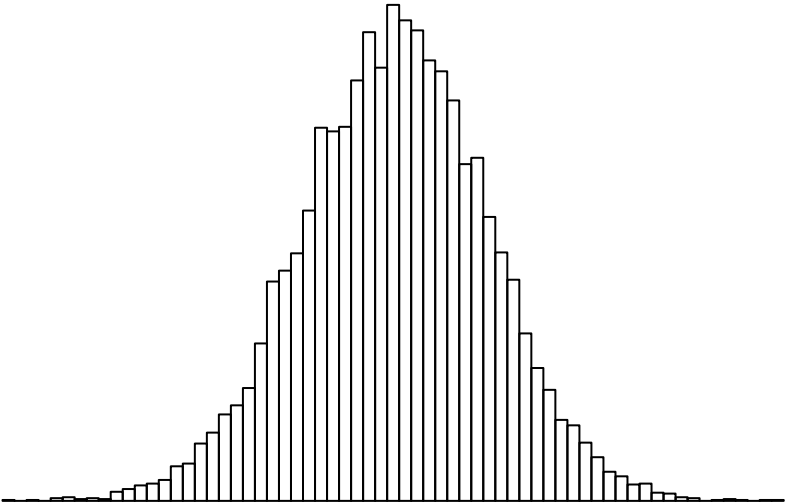

B184:18

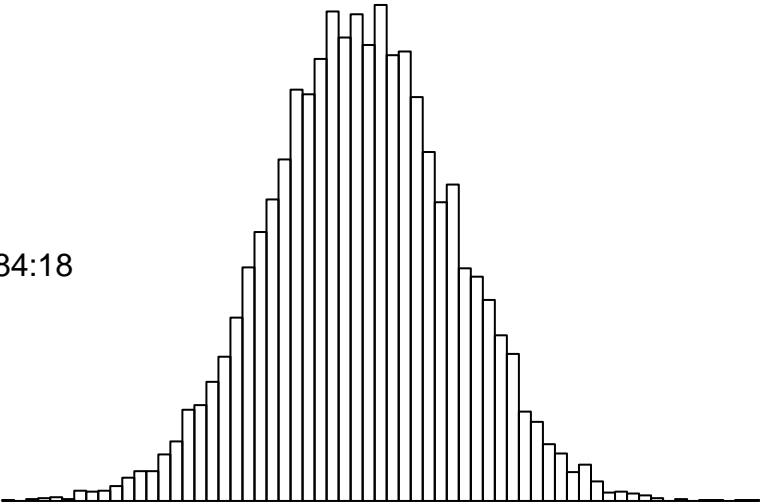

C29 Sterol 2

B184:26 – B184:18

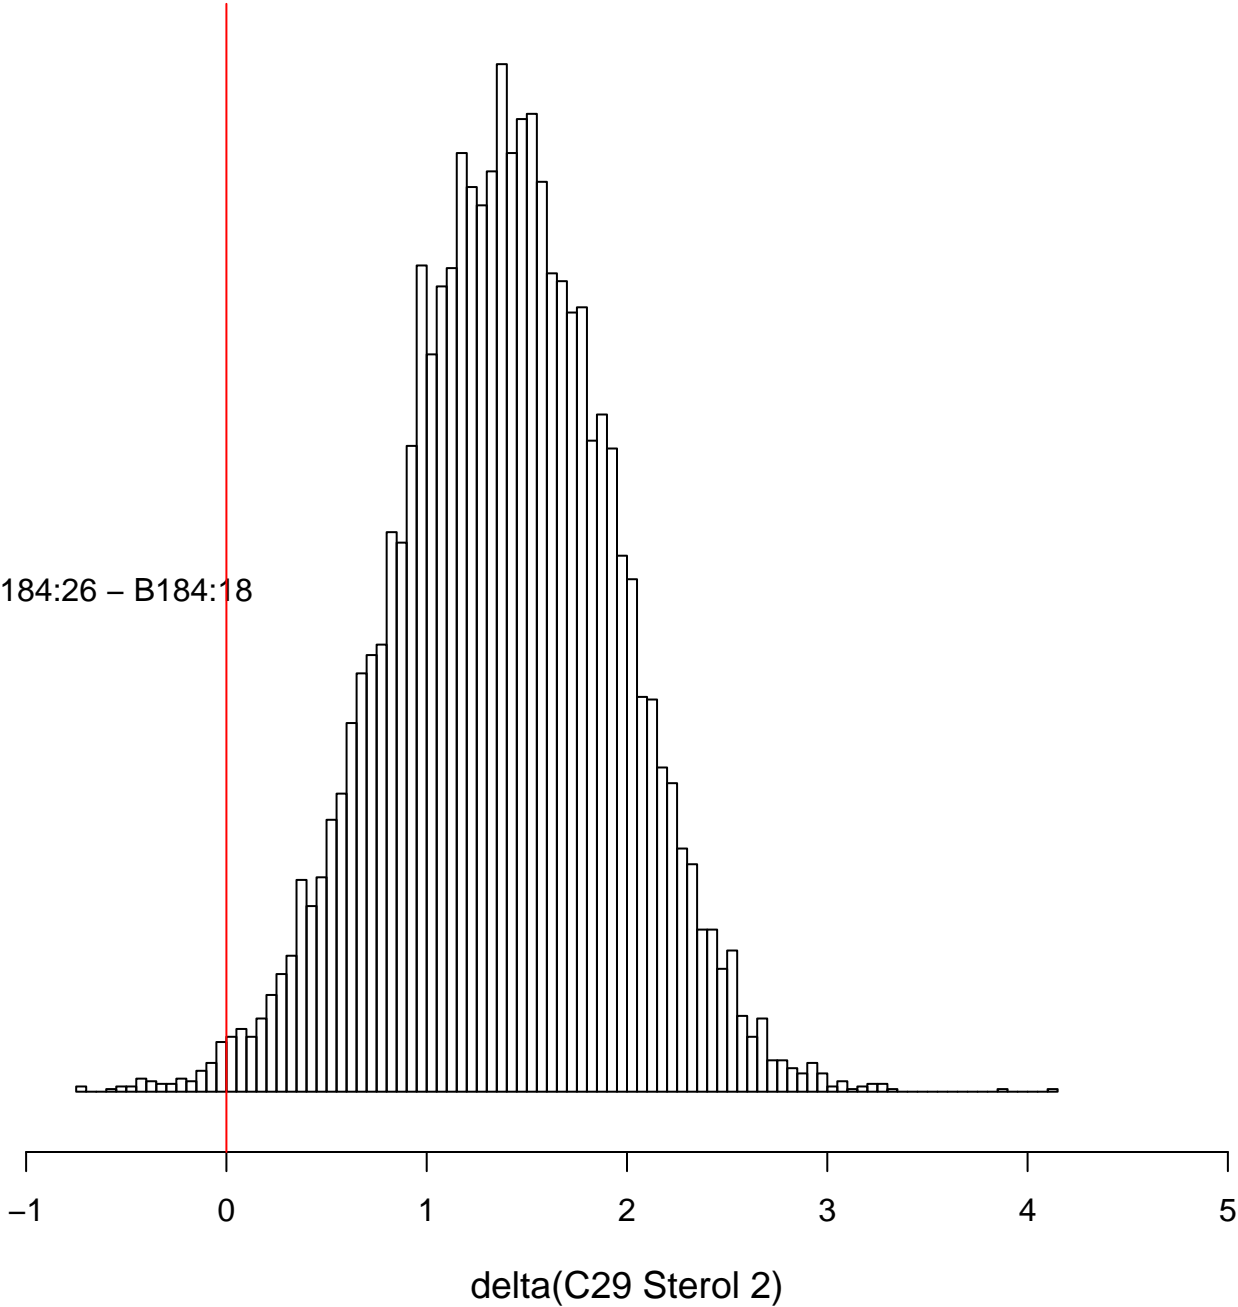

B184:26

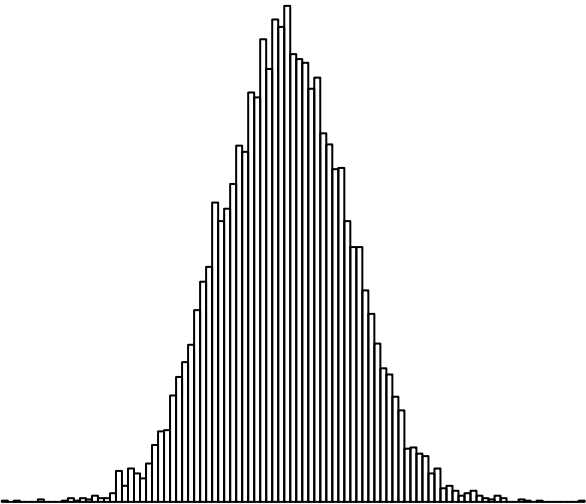

B184:18

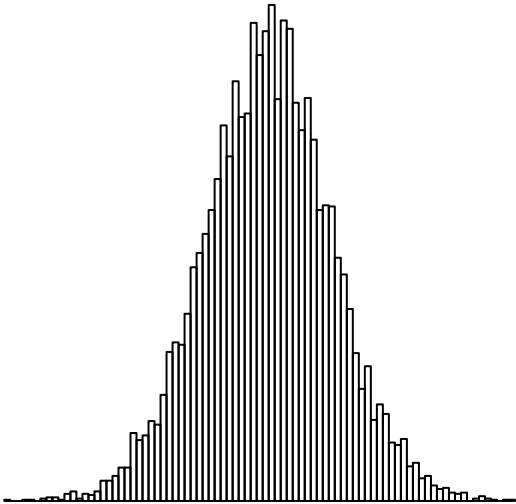

-6

-5

-4

-3

C29 Stanol 2

B184:26 – B184:18

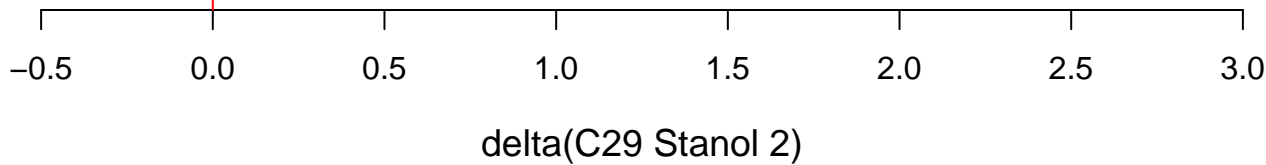



B184:26

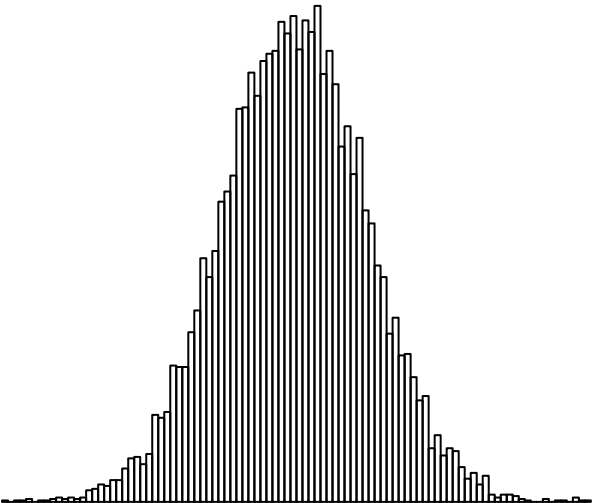

B184:18

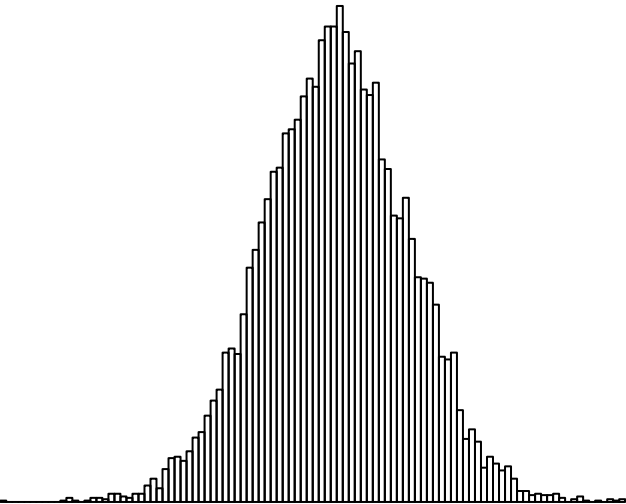

C29 Sterol 3

B184:26 – B184:18

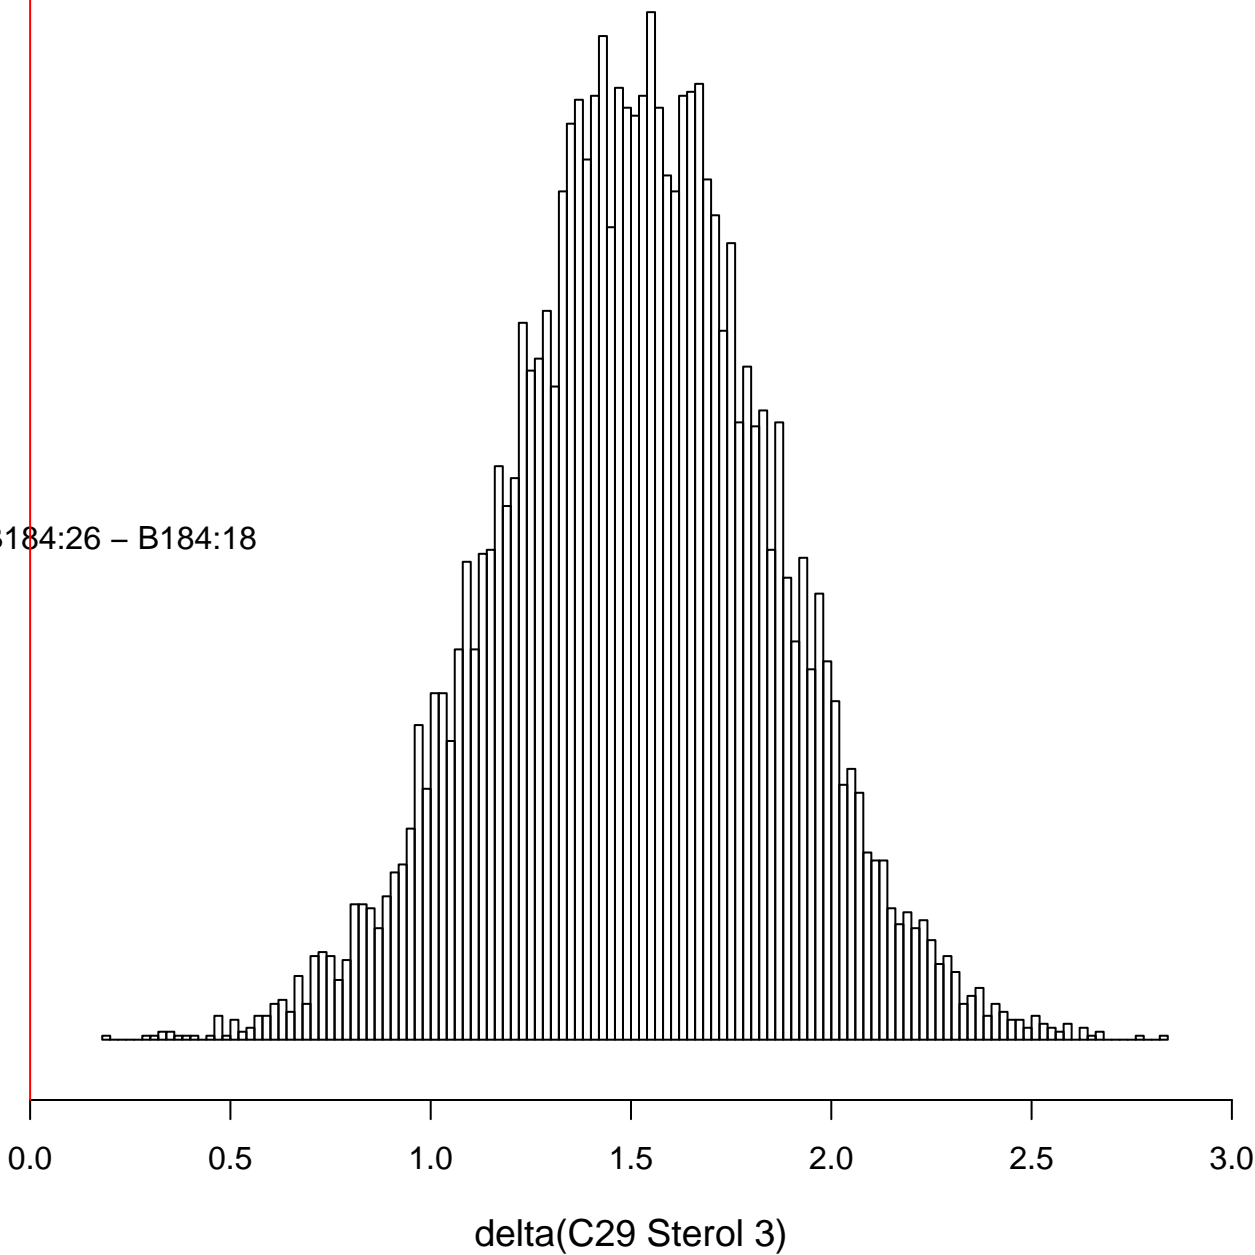

B184:26

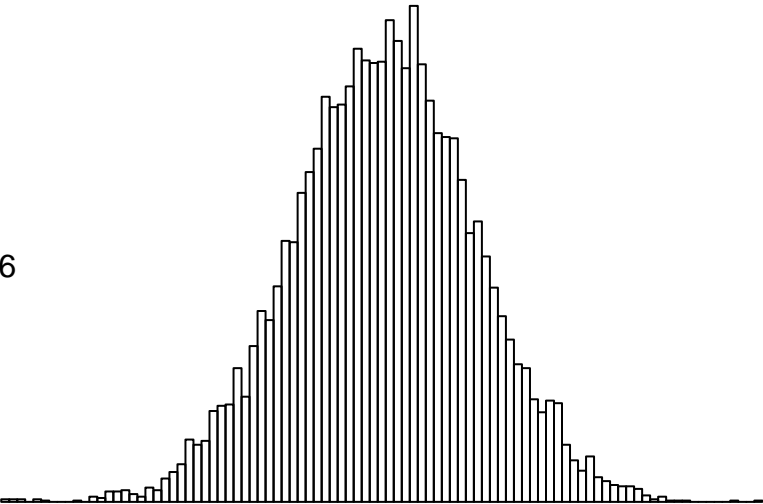

B184:18

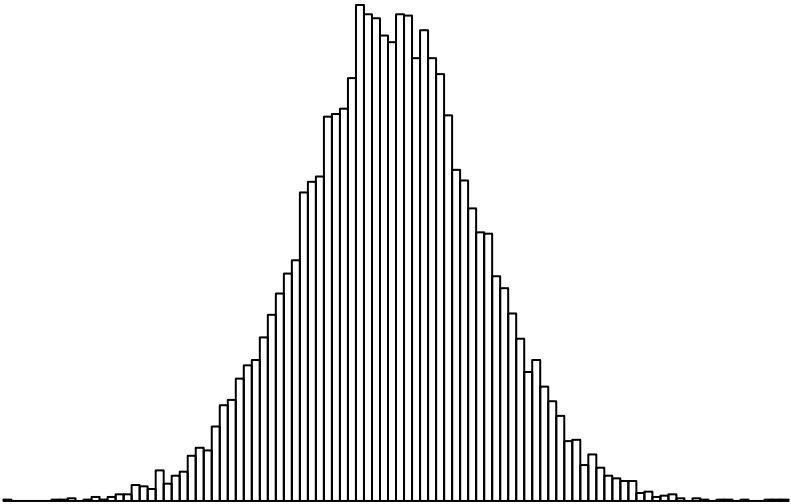

-9.5      -9.0      -8.5      -8.0      -7.5      -7.0      -6.5

C30 Sterol

B184:26 – B184:18

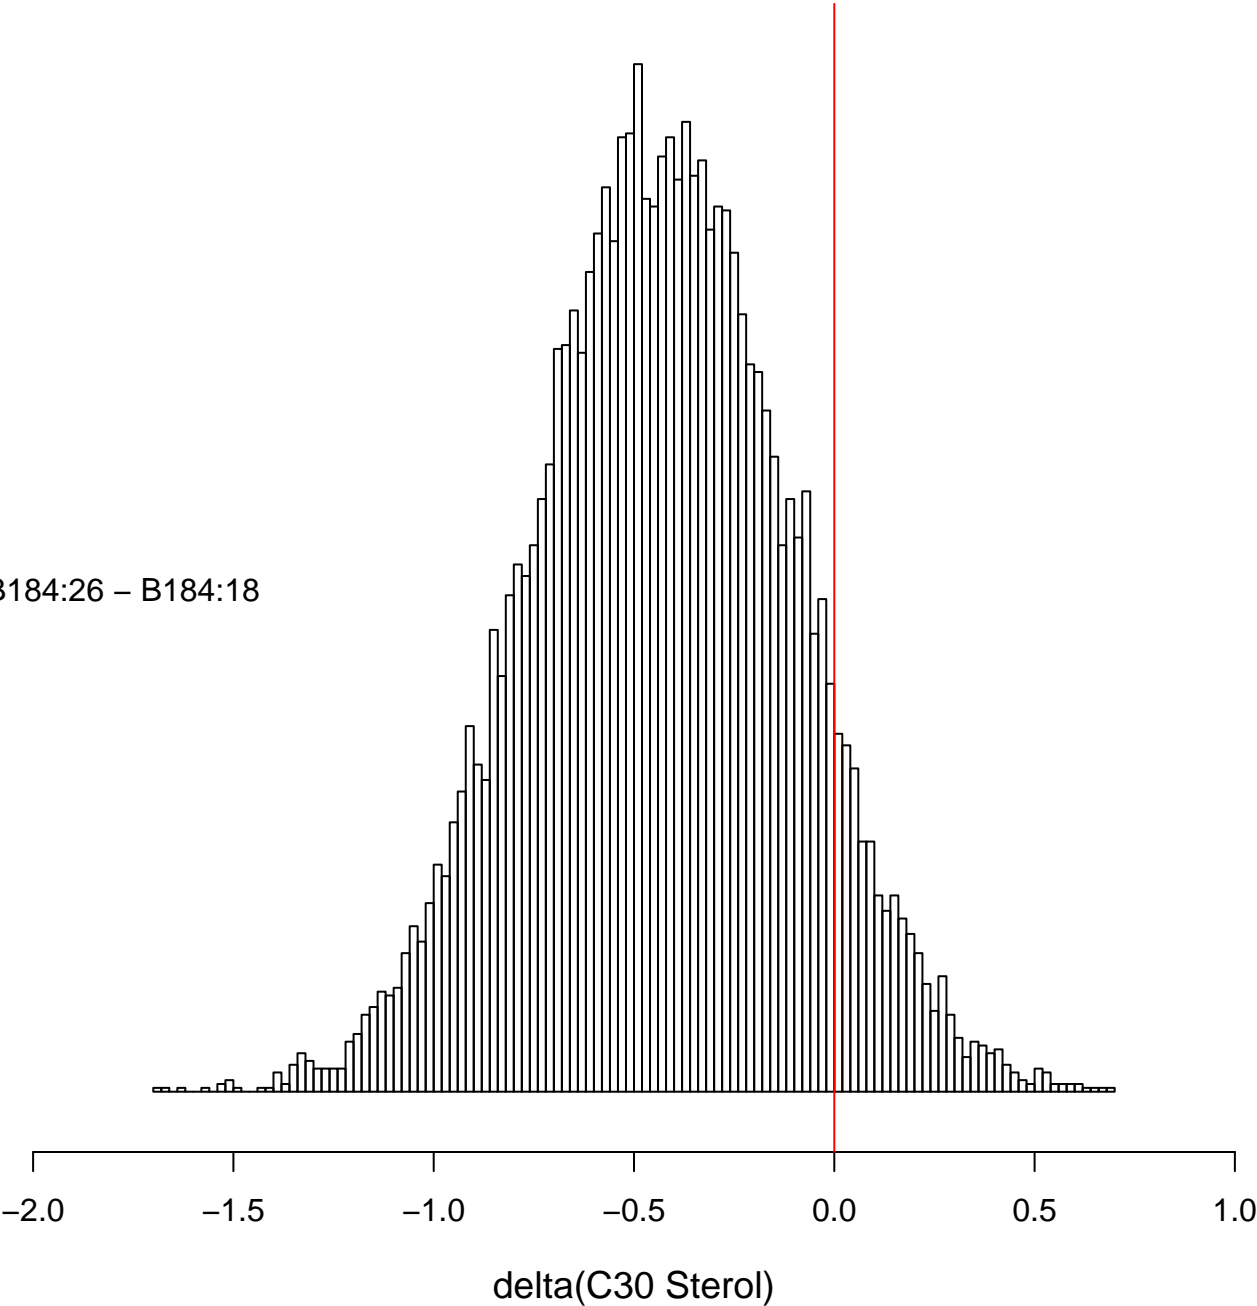

B184:26

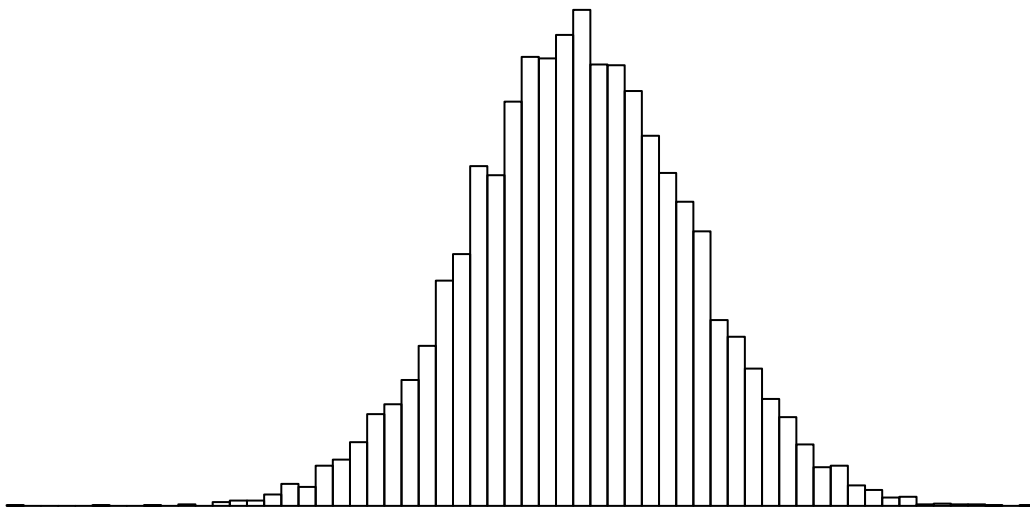

B184:18

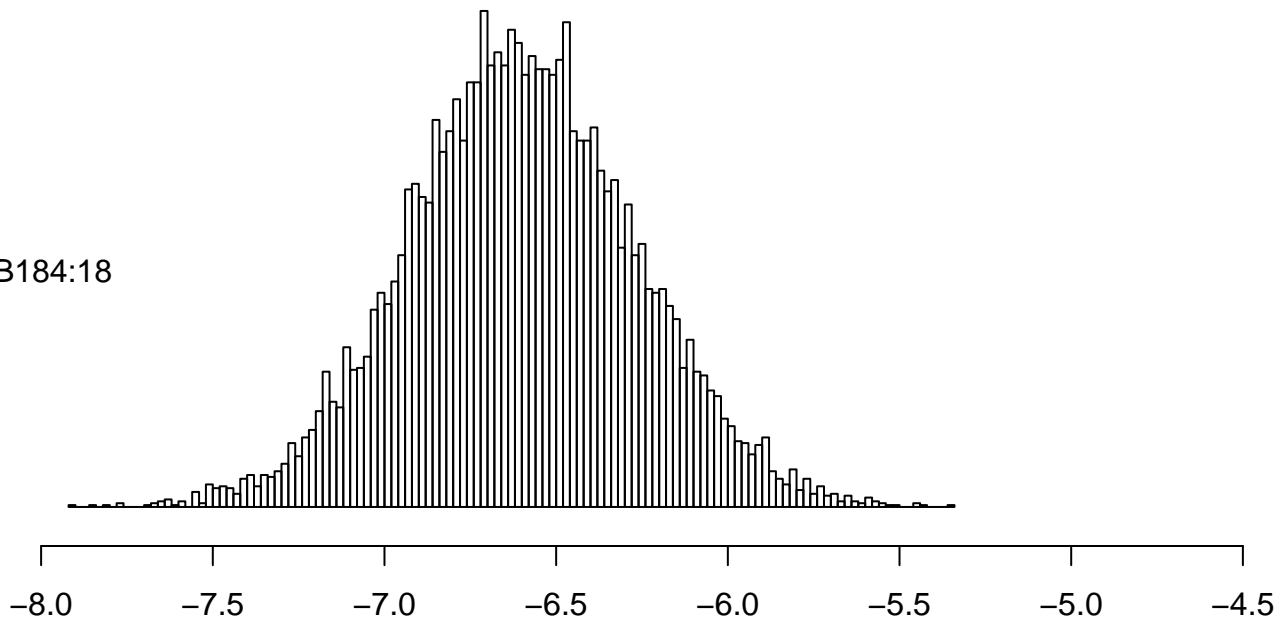

C30"5 Sterol

B184:26 – B184:18

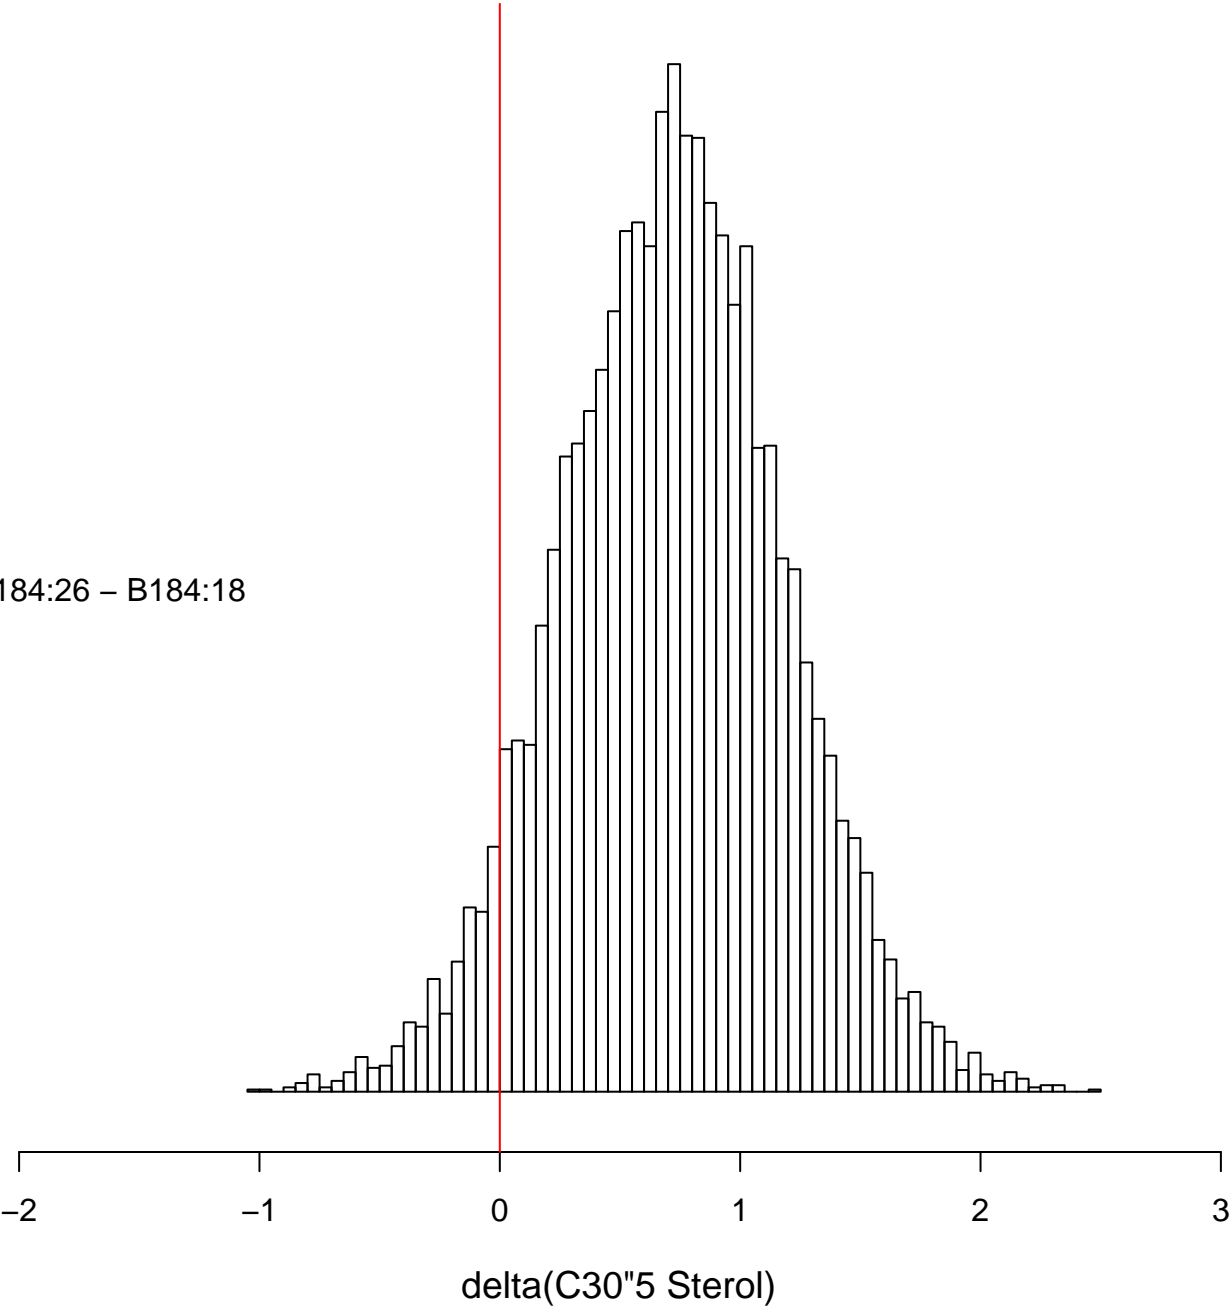

B184:26

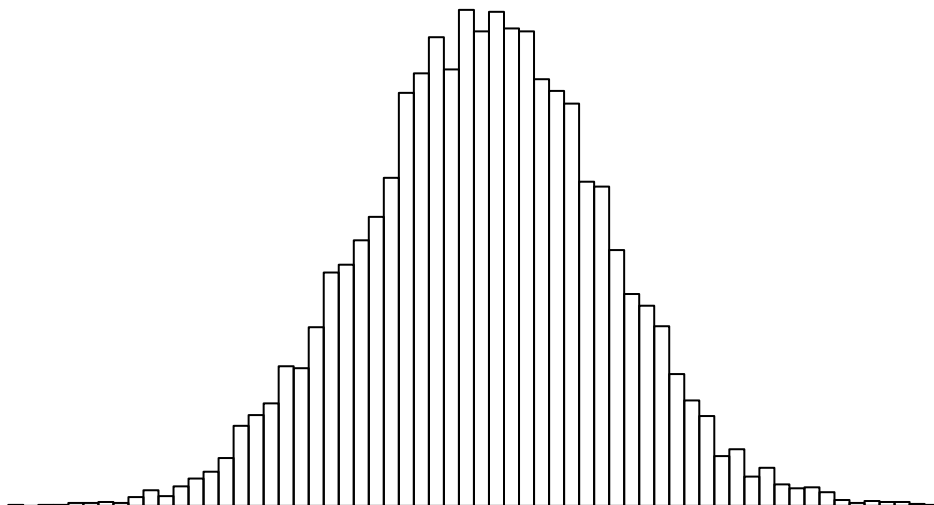

B184:18

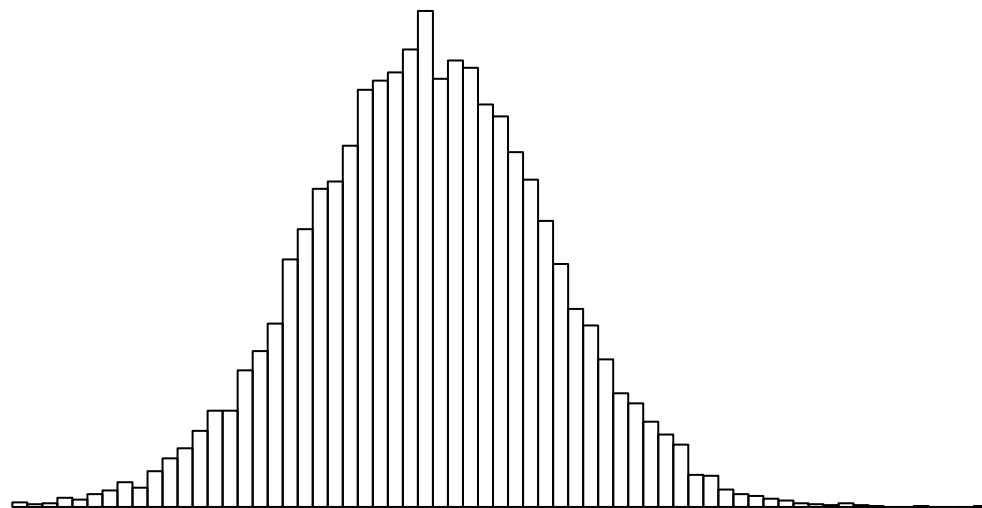

-8

-7

-6

-5

-4

Open Hexose 1

B184:26 – B184:18

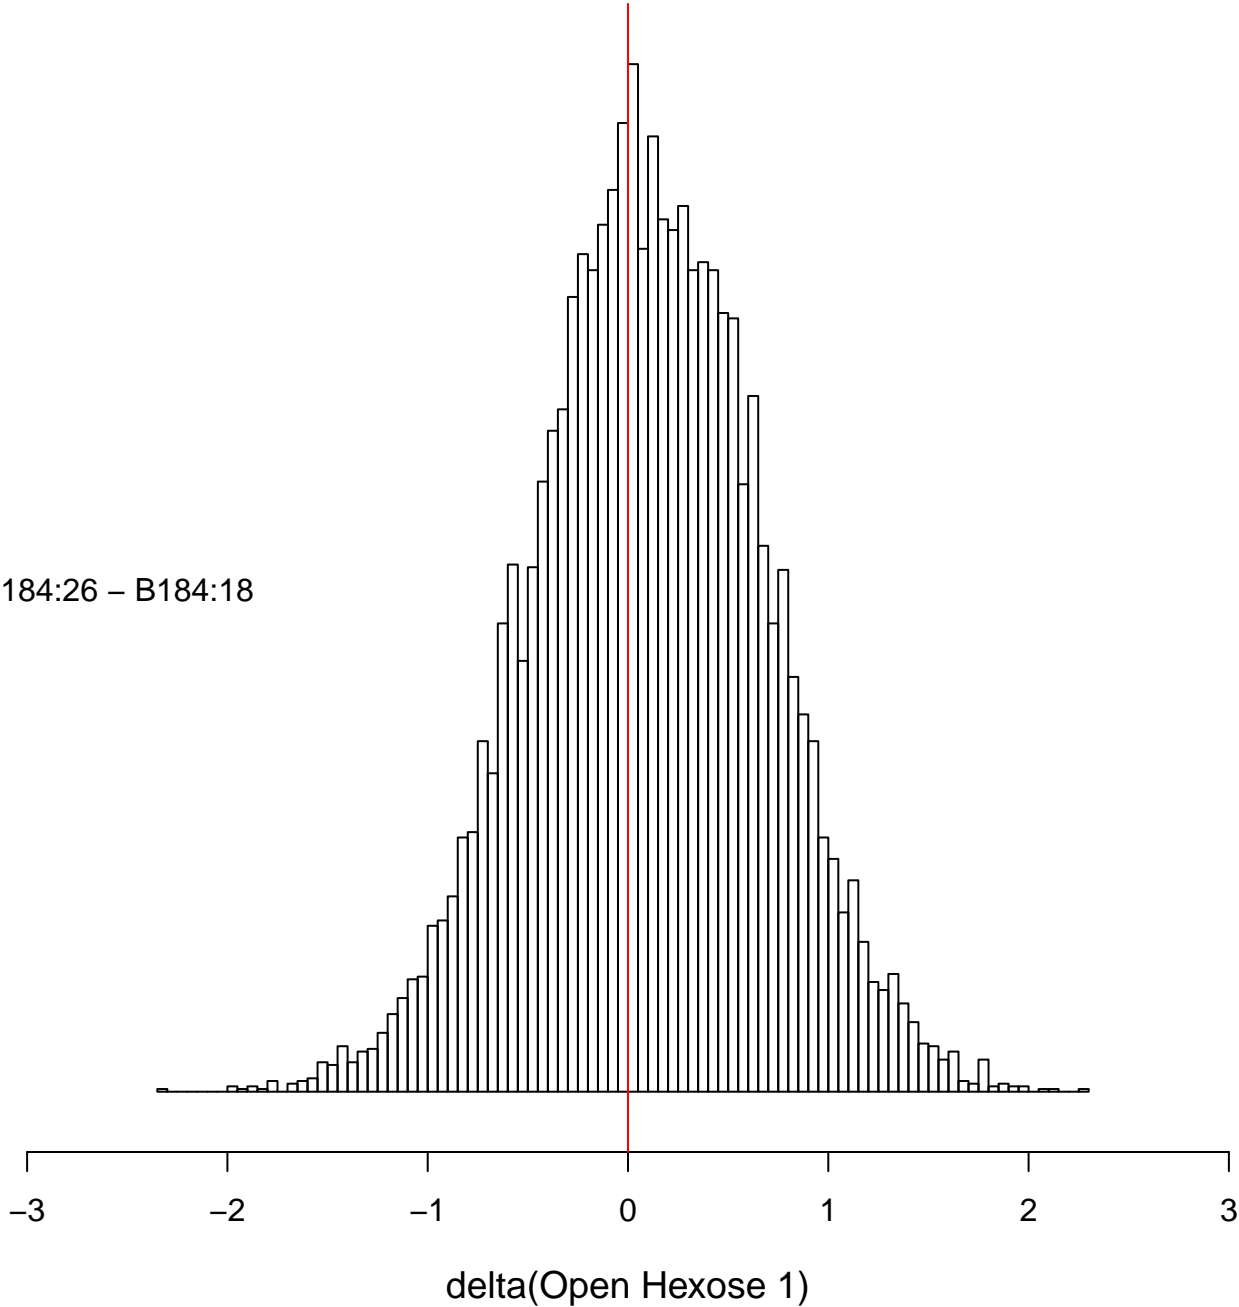



B184:26

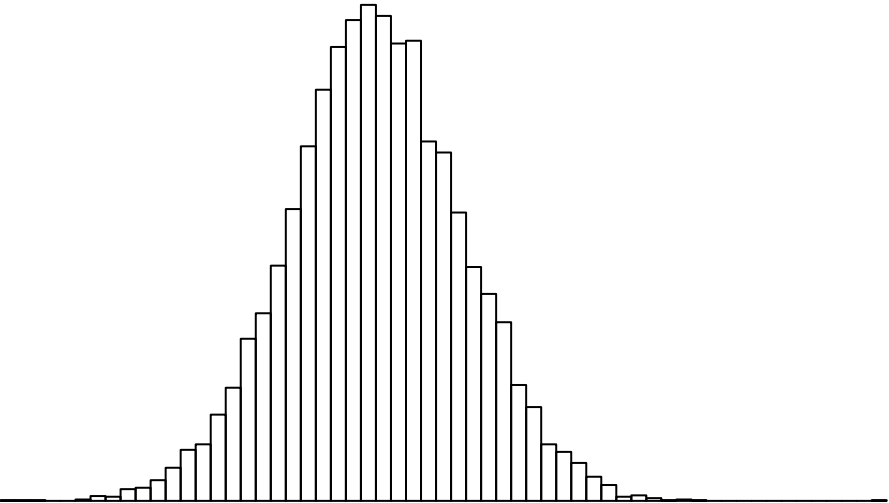

B184:18

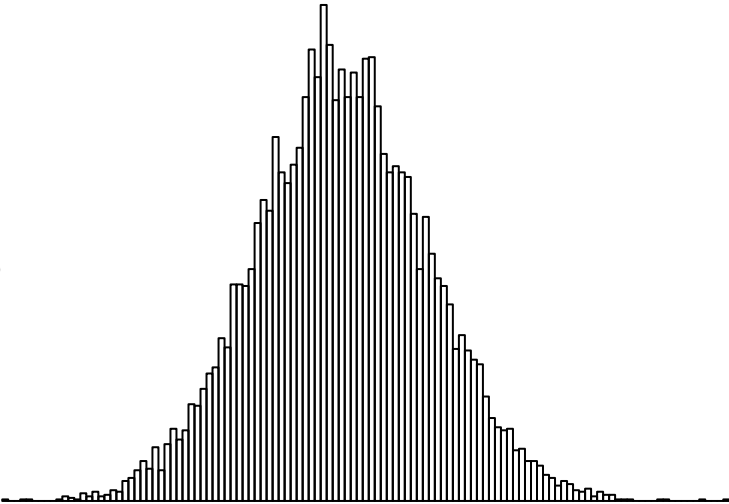

Closed Hexose 1

B184:26 – B184:18

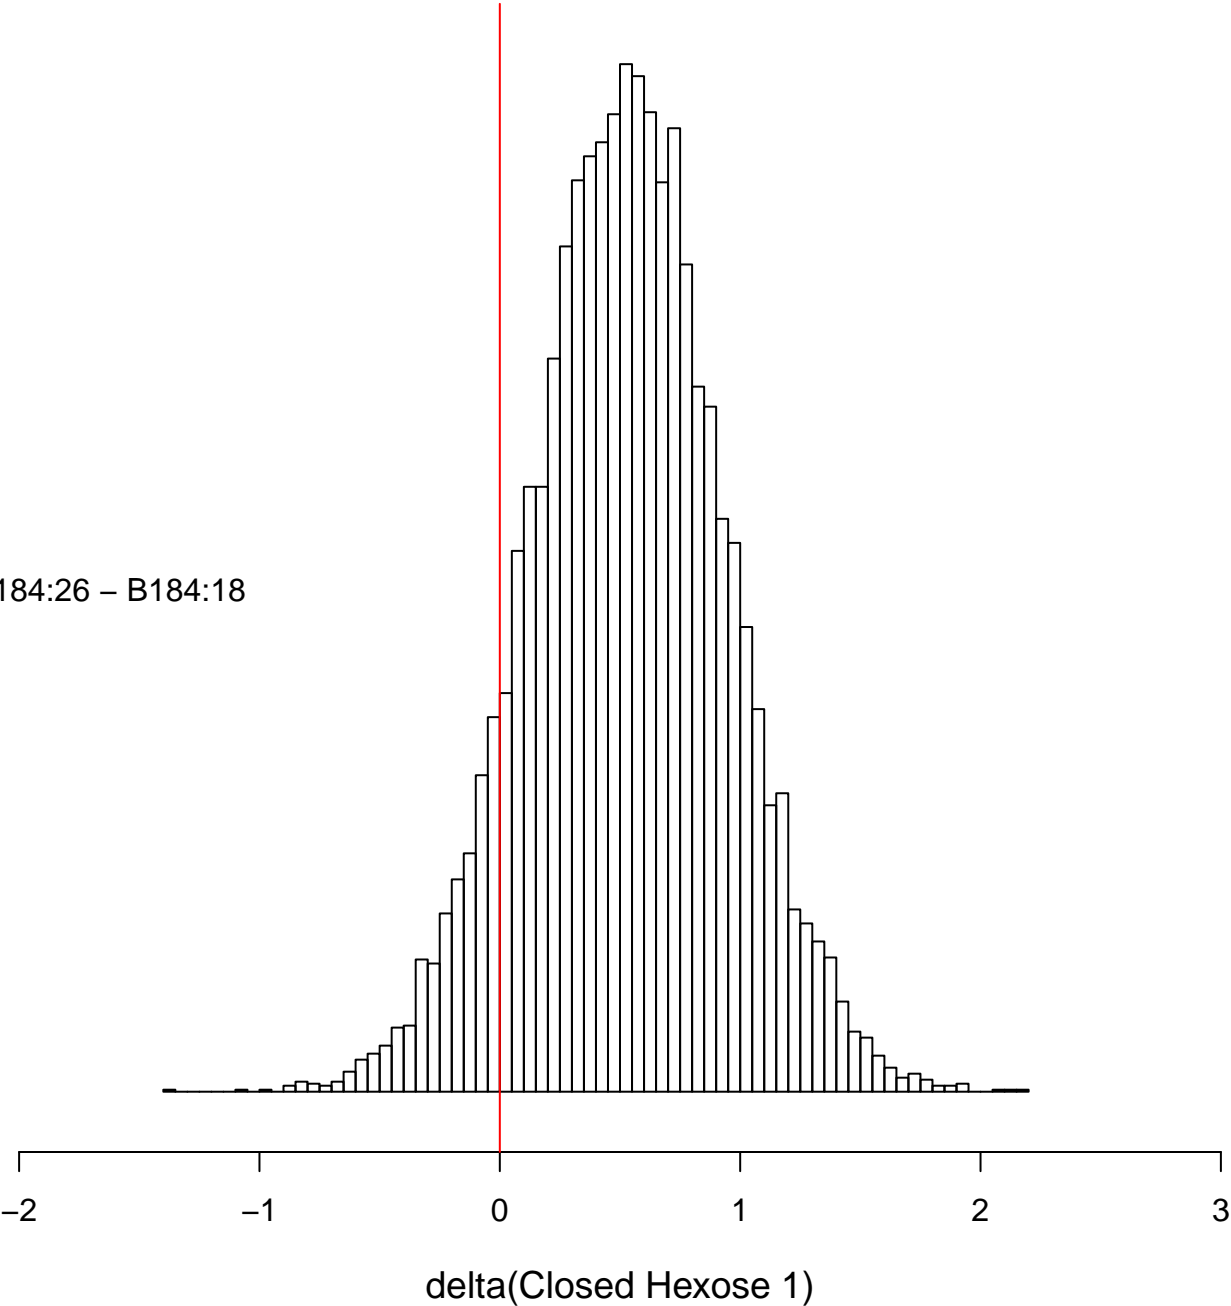

B184:26

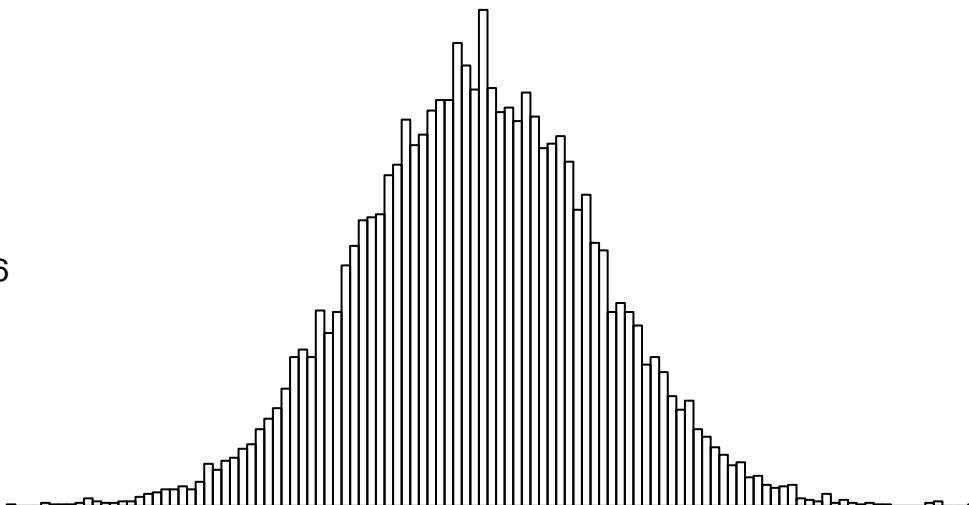

B184:18

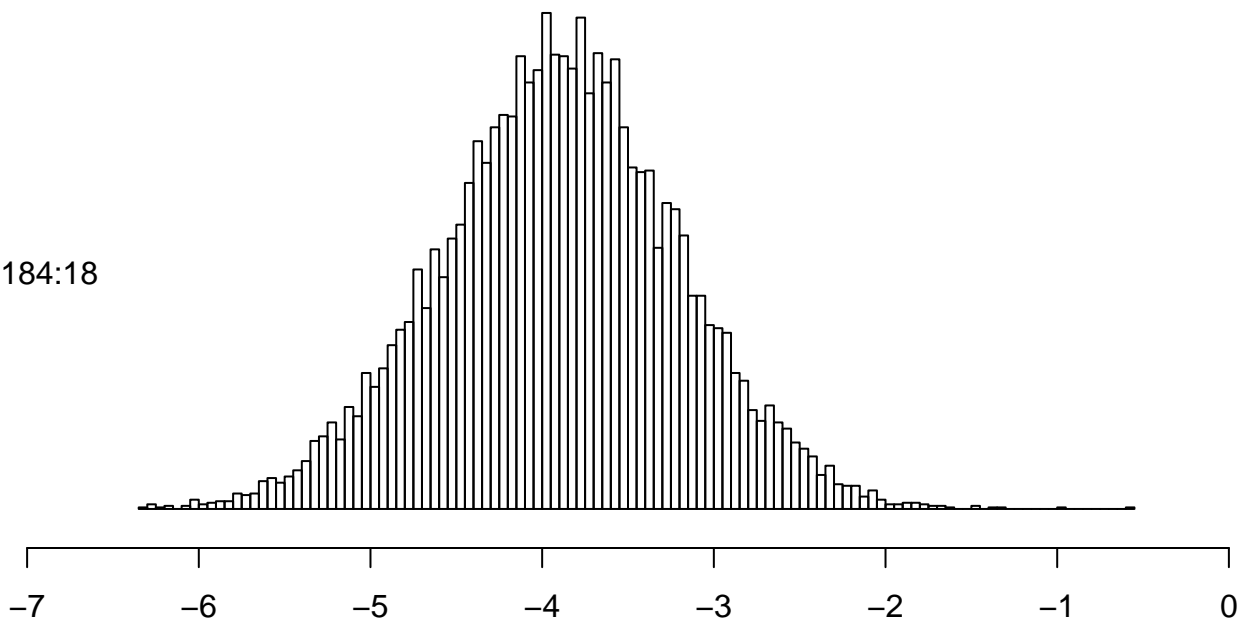

Closed Hexose 2

B184:26 – B184:18

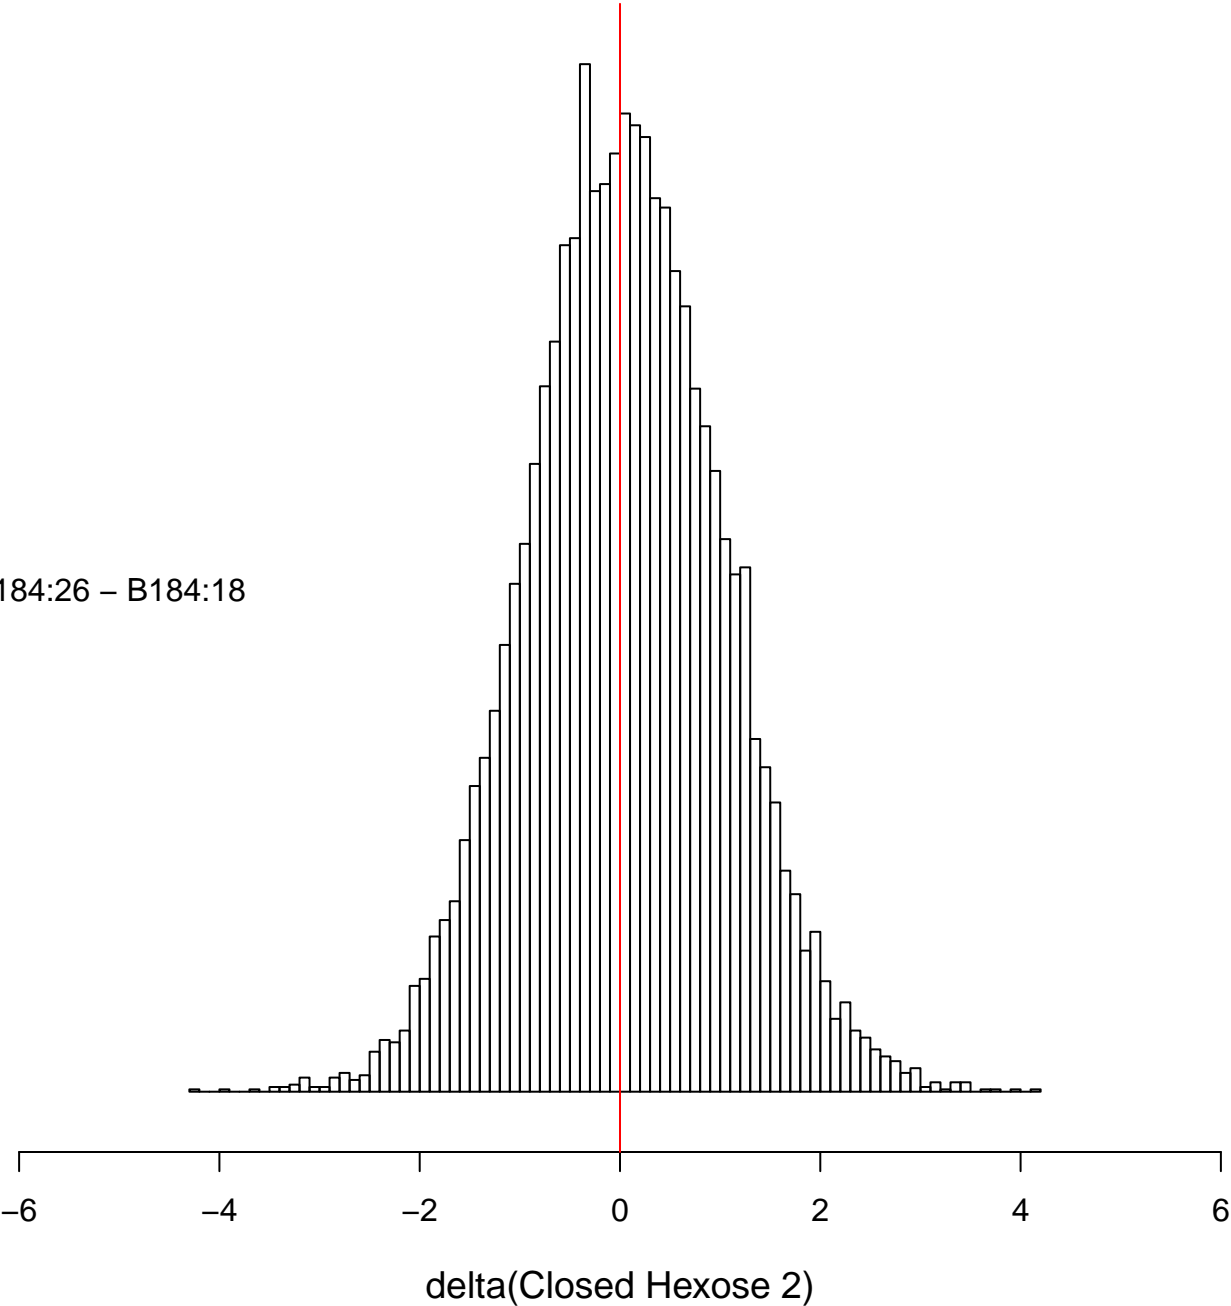

B184:26

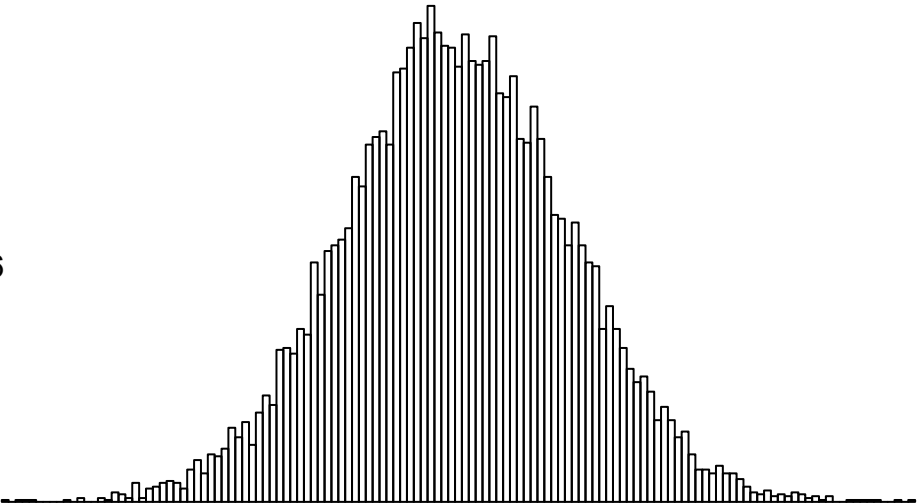

B184:18

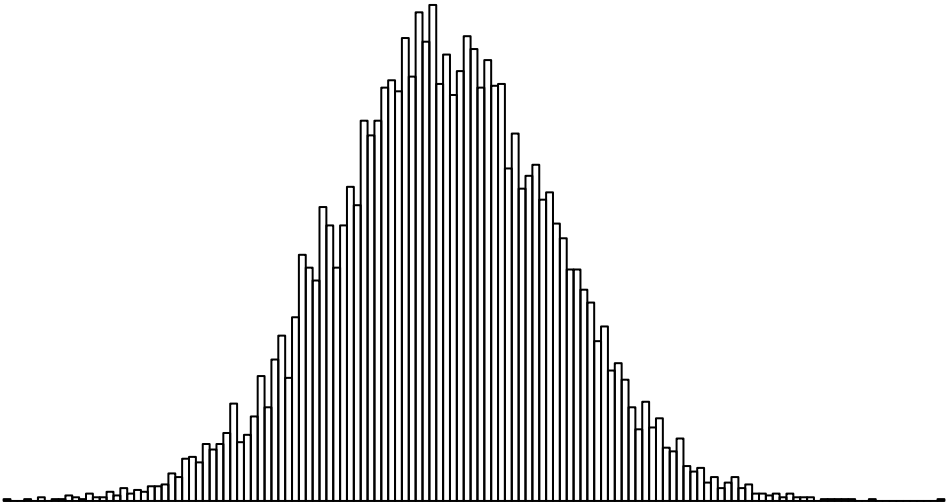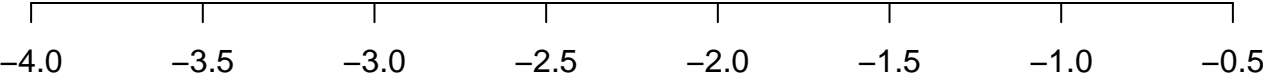

Open Hexose 2

B184:26 – B184:18

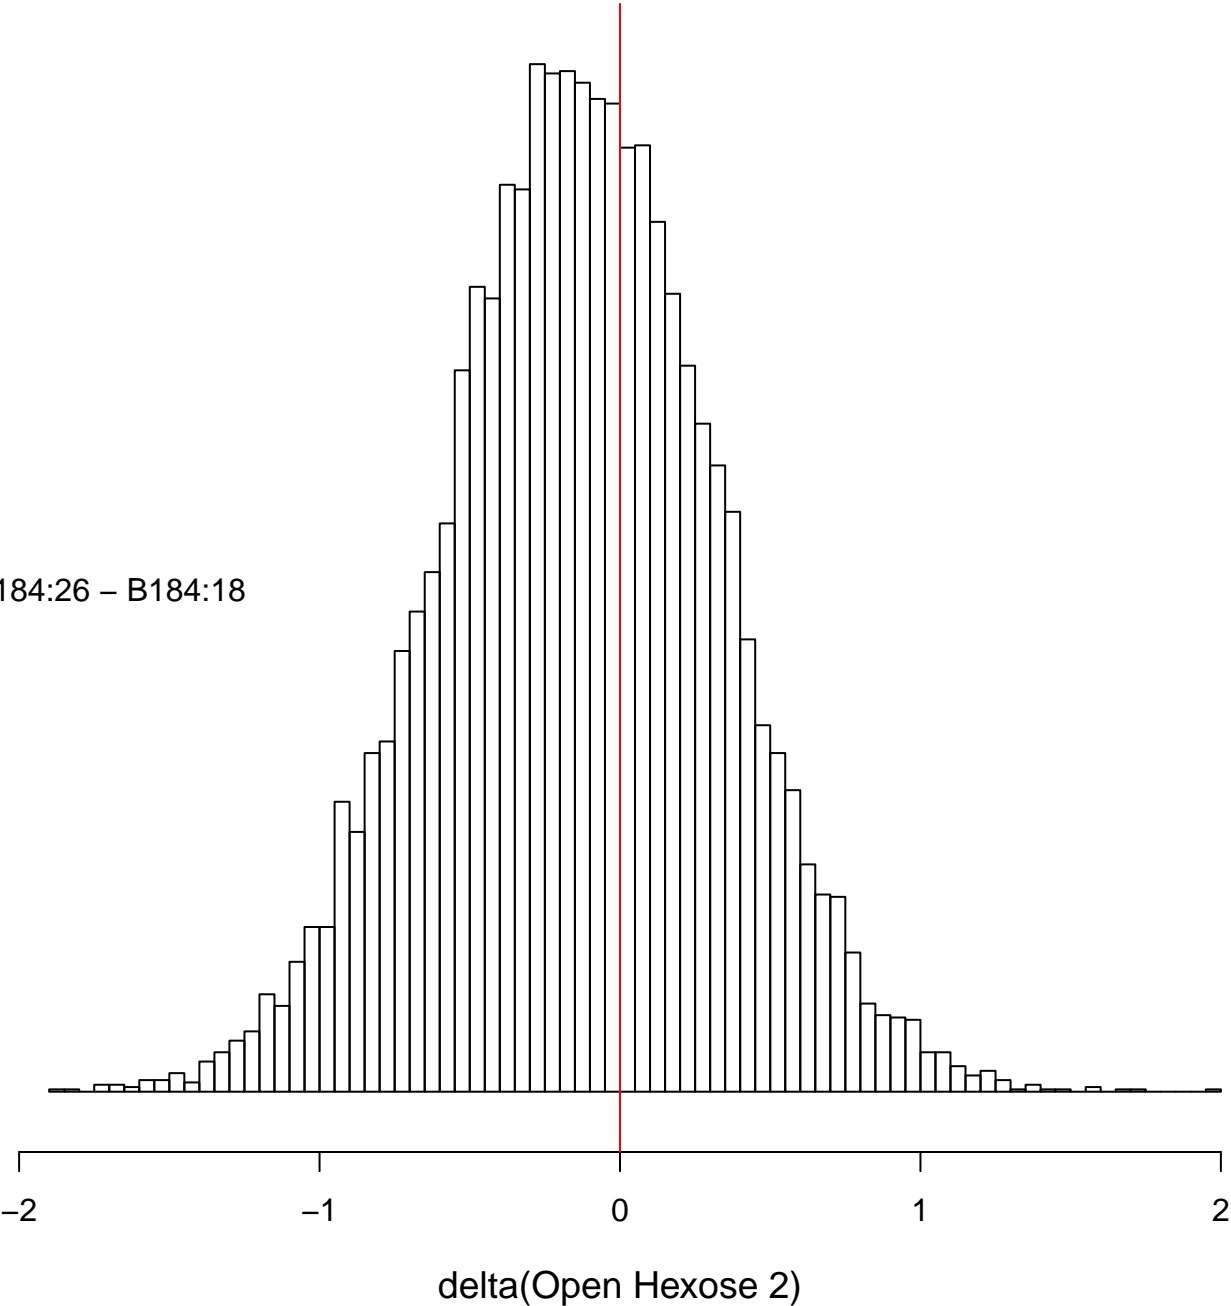

B184:26

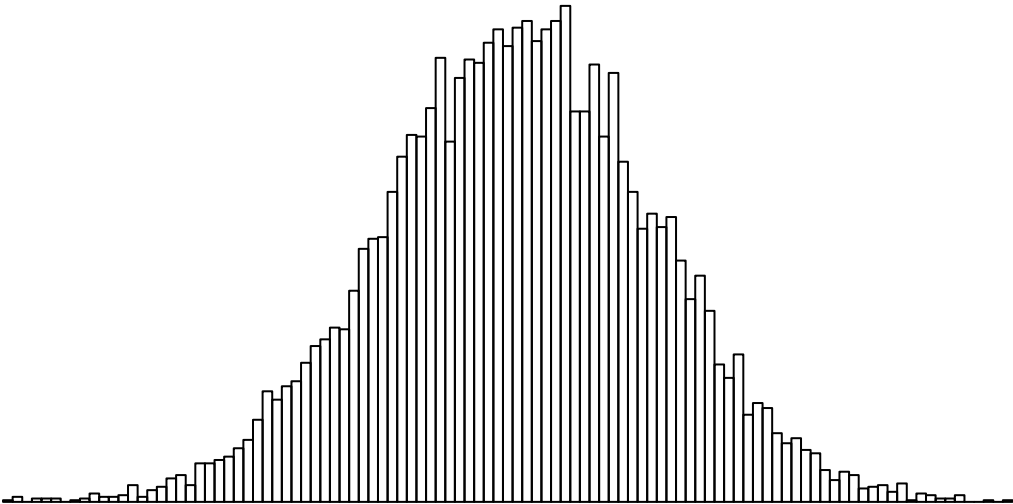

B184:18

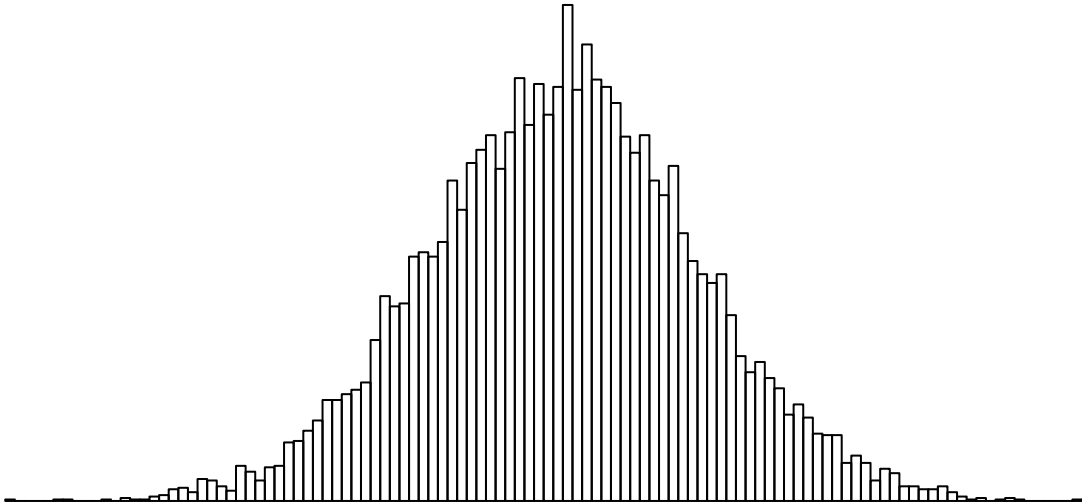

-5.5                      -5.0                      -4.5                      -4.0                      -3.5                      -3.0

Open Hexose 3

B184:26 – B184:18

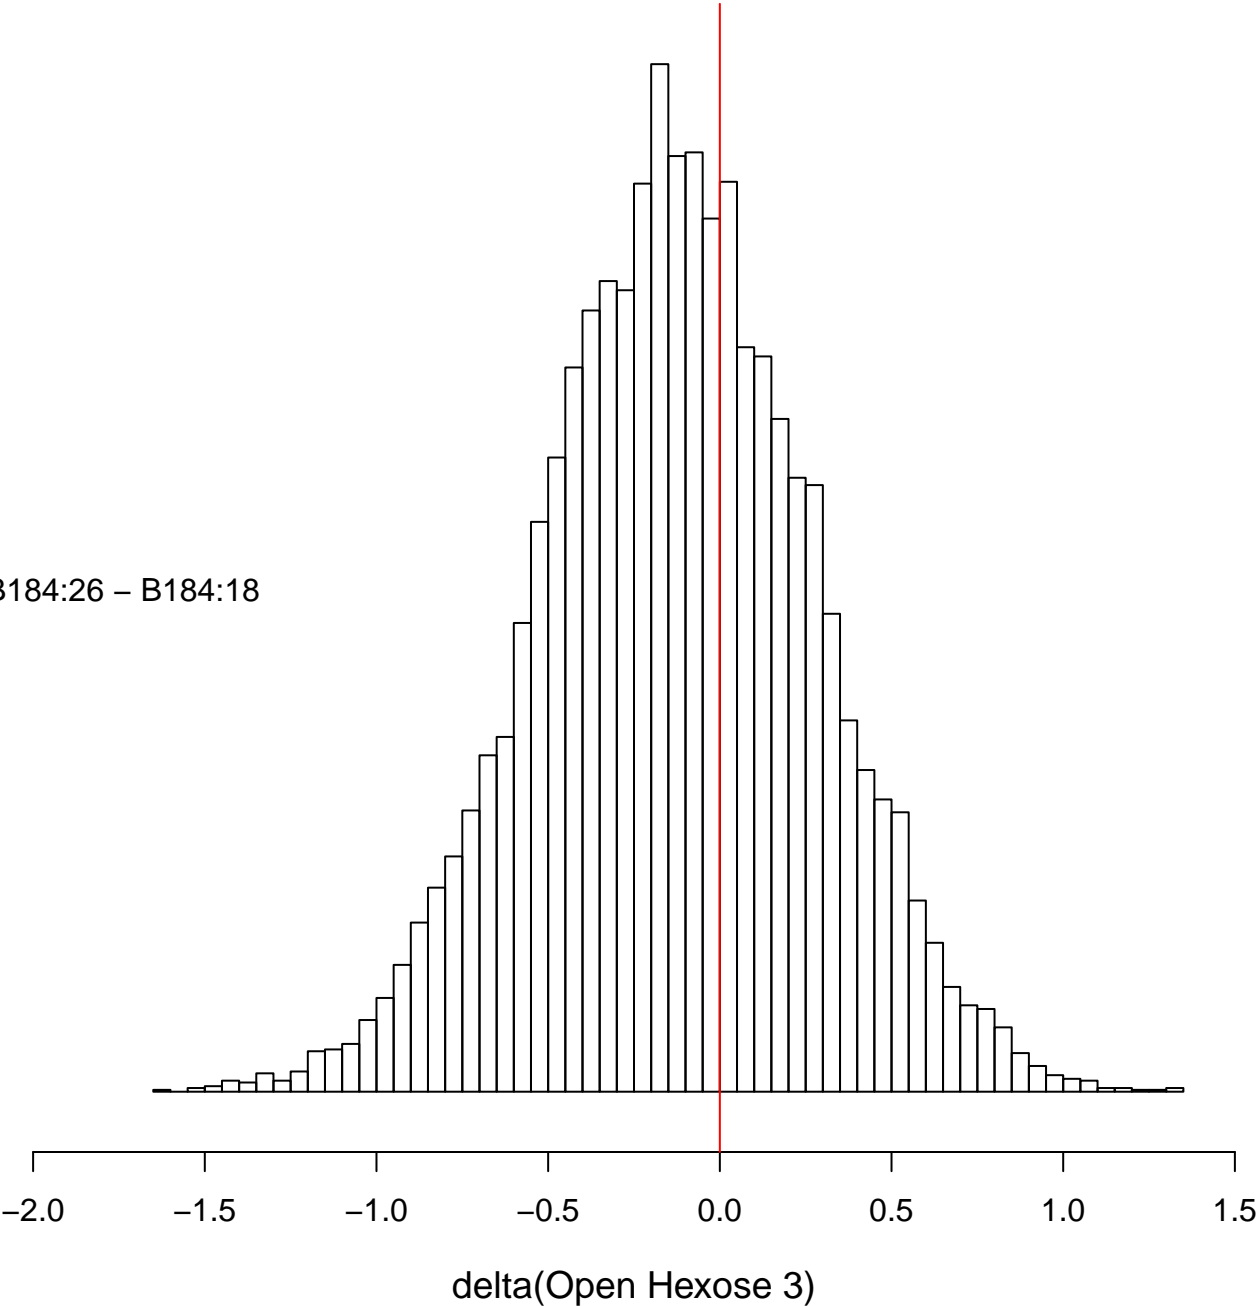



B184:26

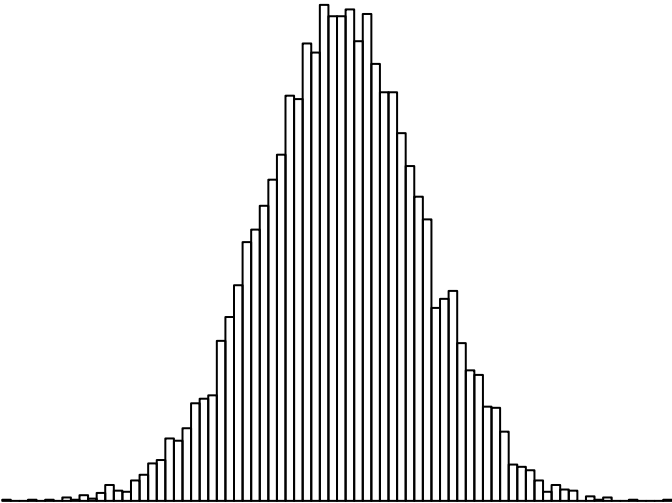

B184:18

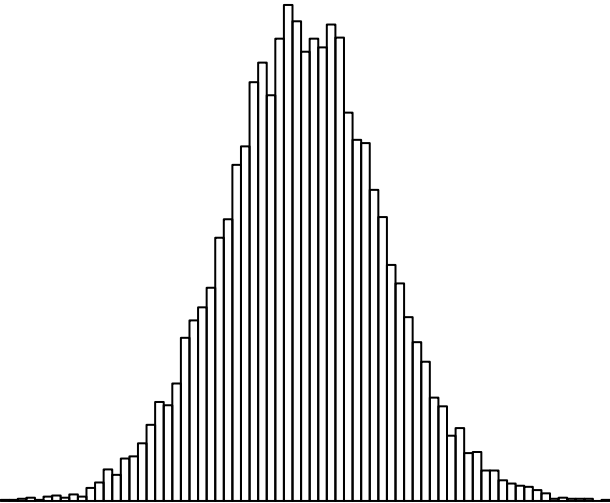

Closed Hexose 3

B184:26 – B184:18

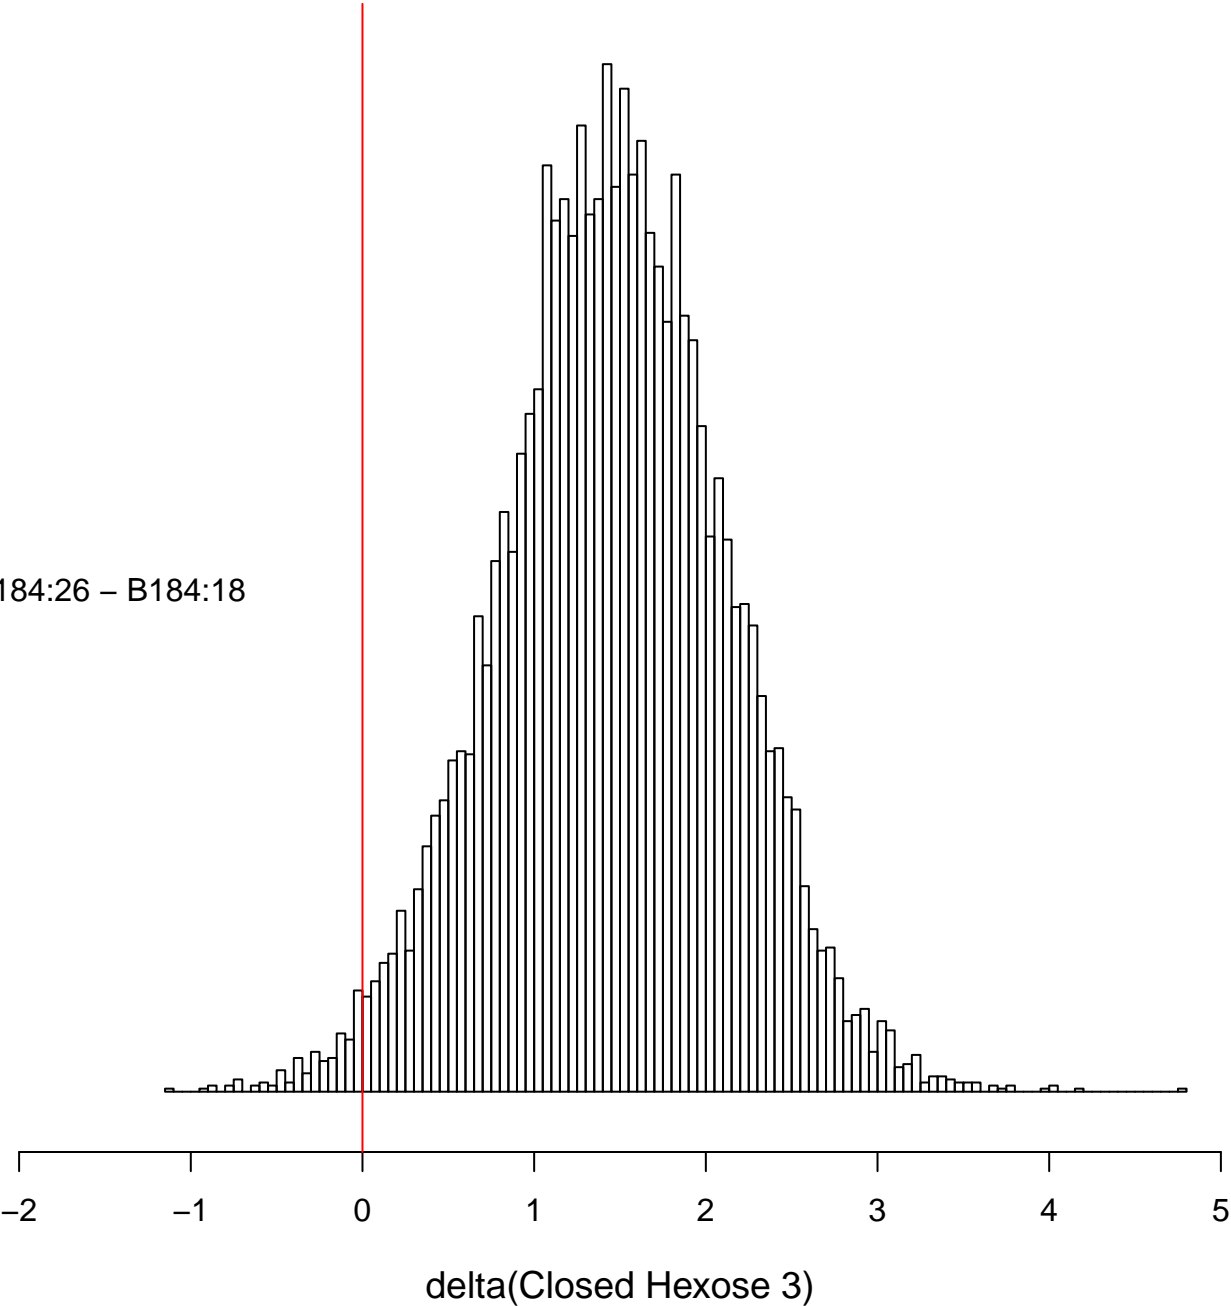

B184:26

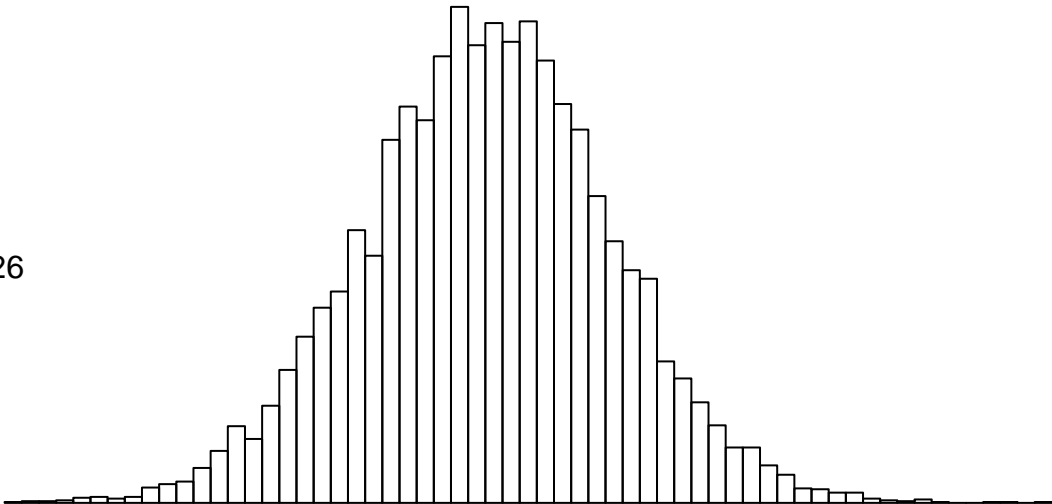

B184:18

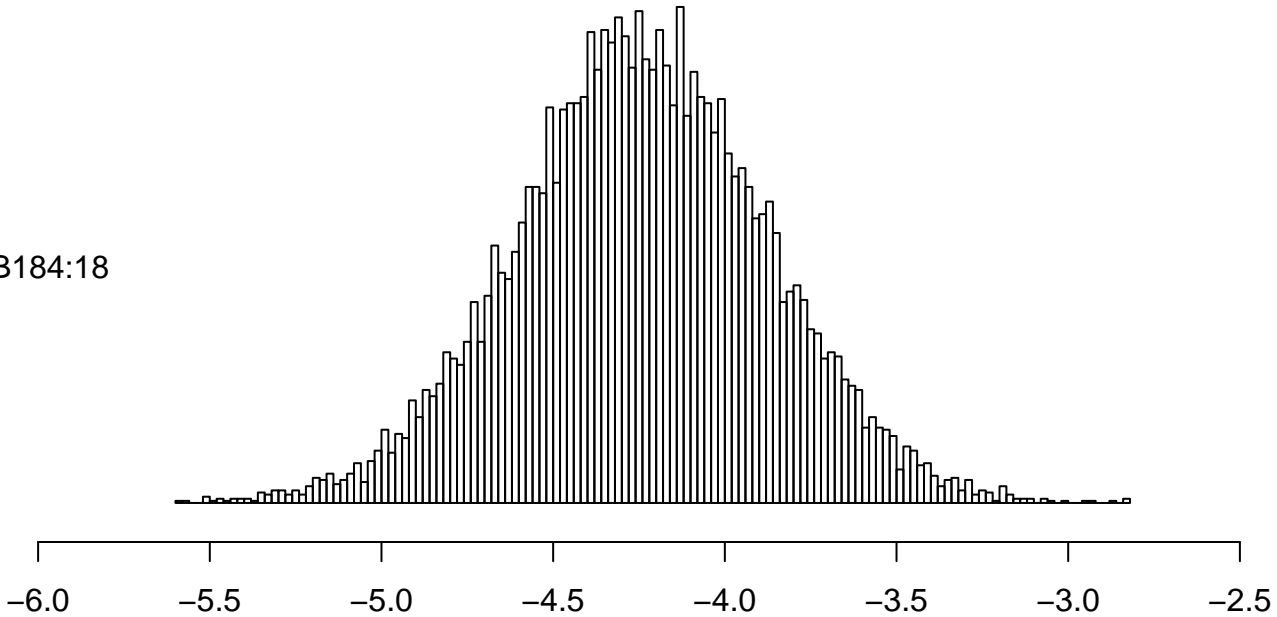

Closed Hexose 4

B184:26 – B184:18

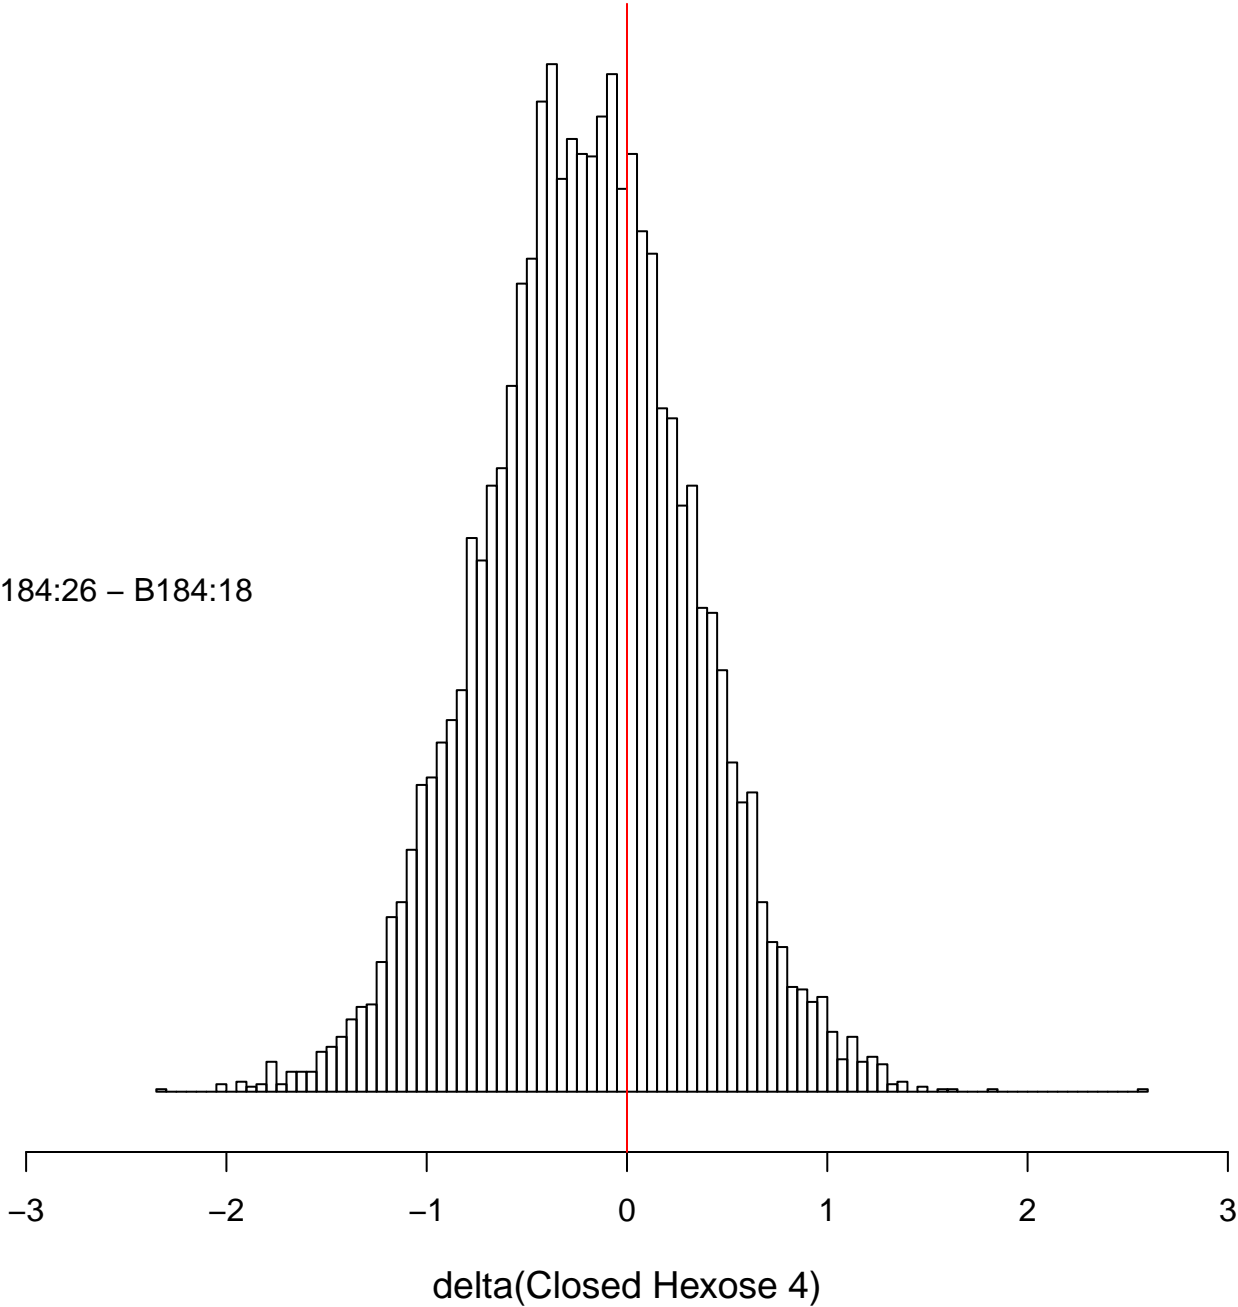

B184:26

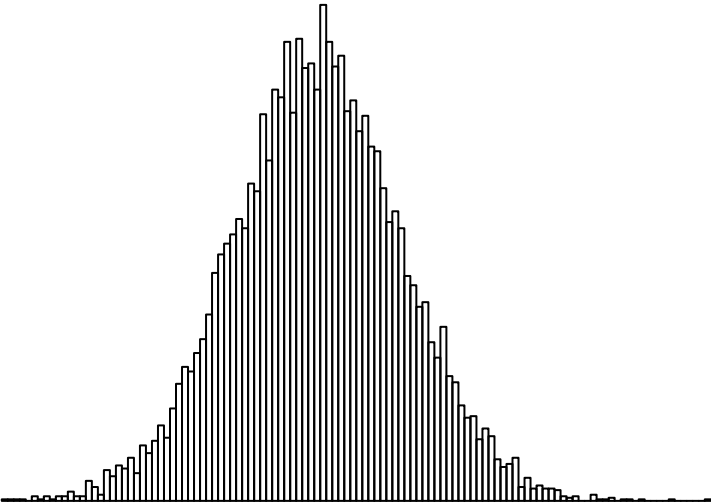

B184:18

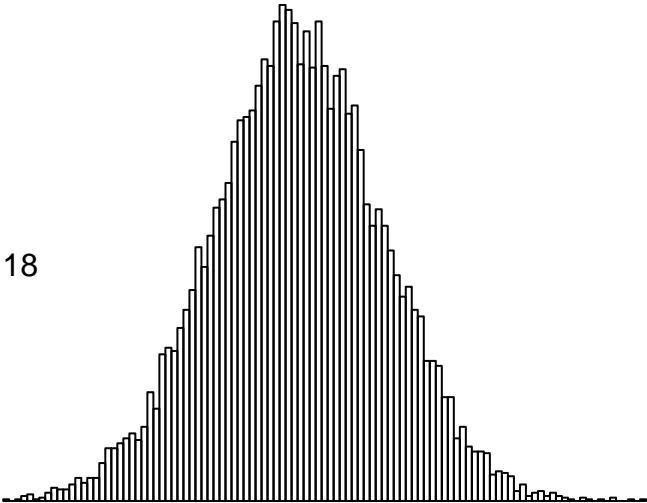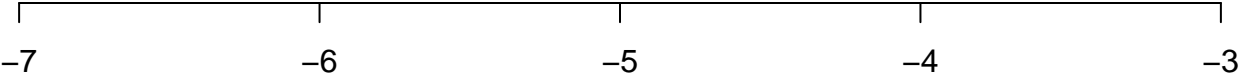

Hexose 1

B184:26 – B184:18

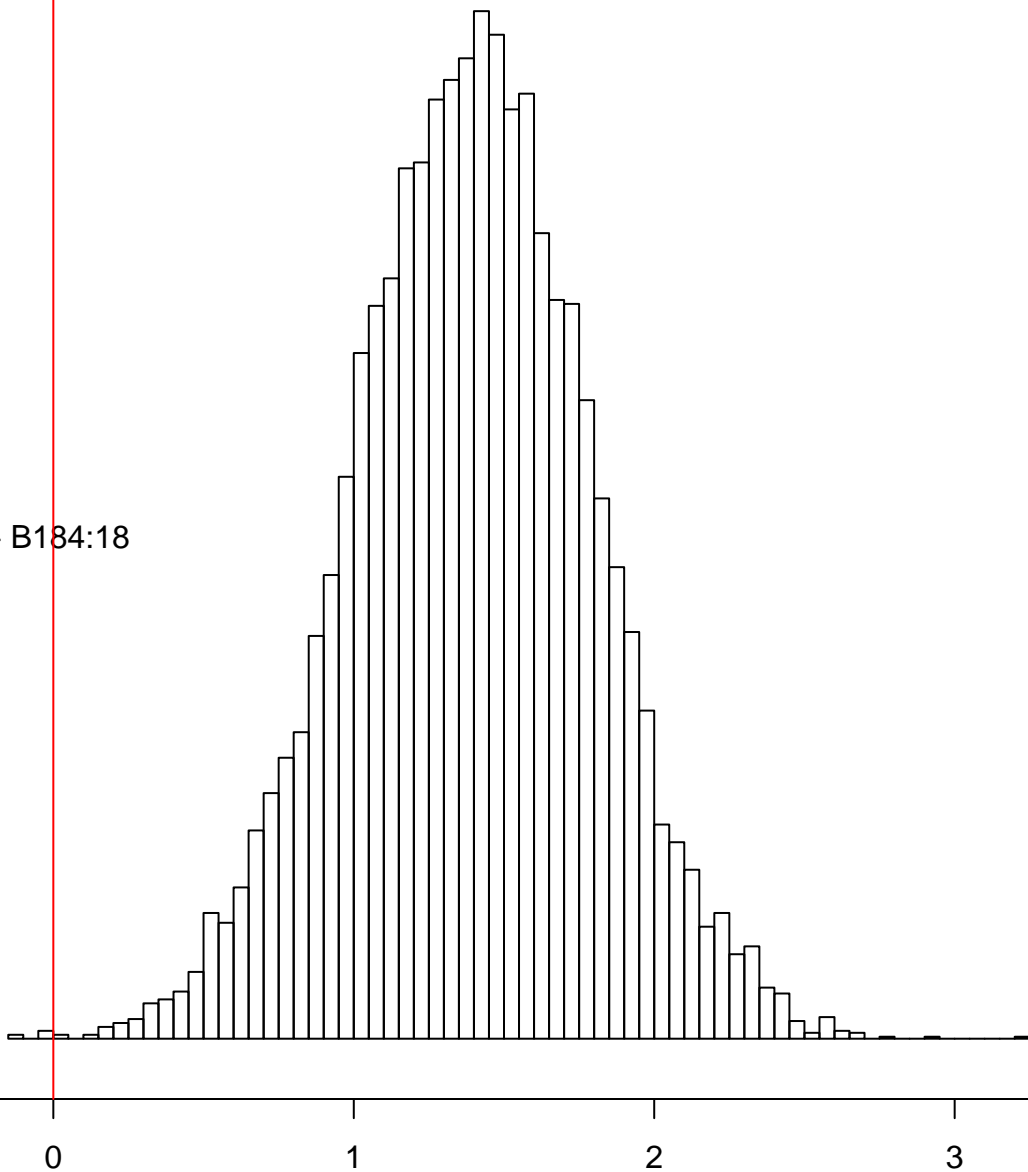

delta(Hexose 1)

B184:26

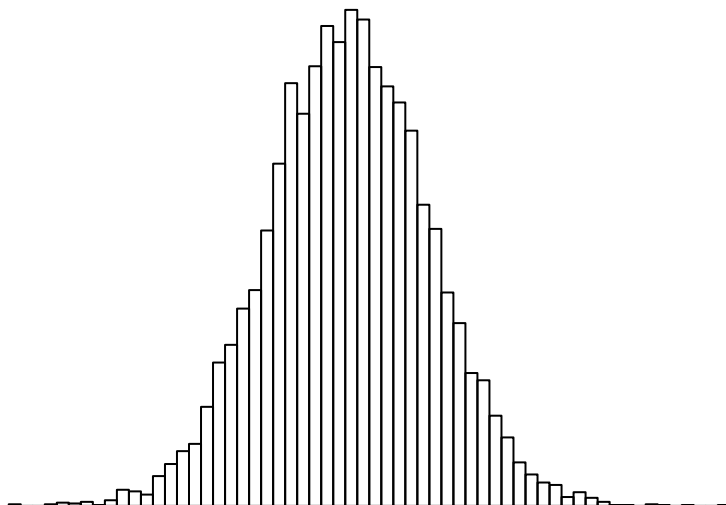

B184:18

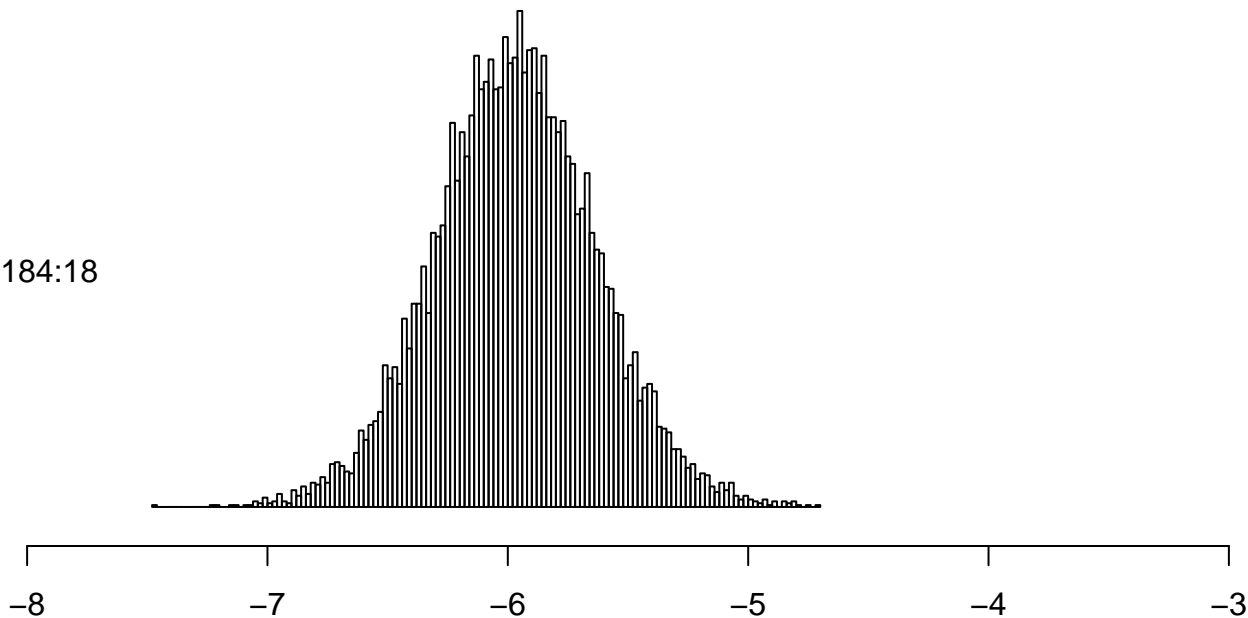

Closed Hexose 5

B184:26 – B184:18

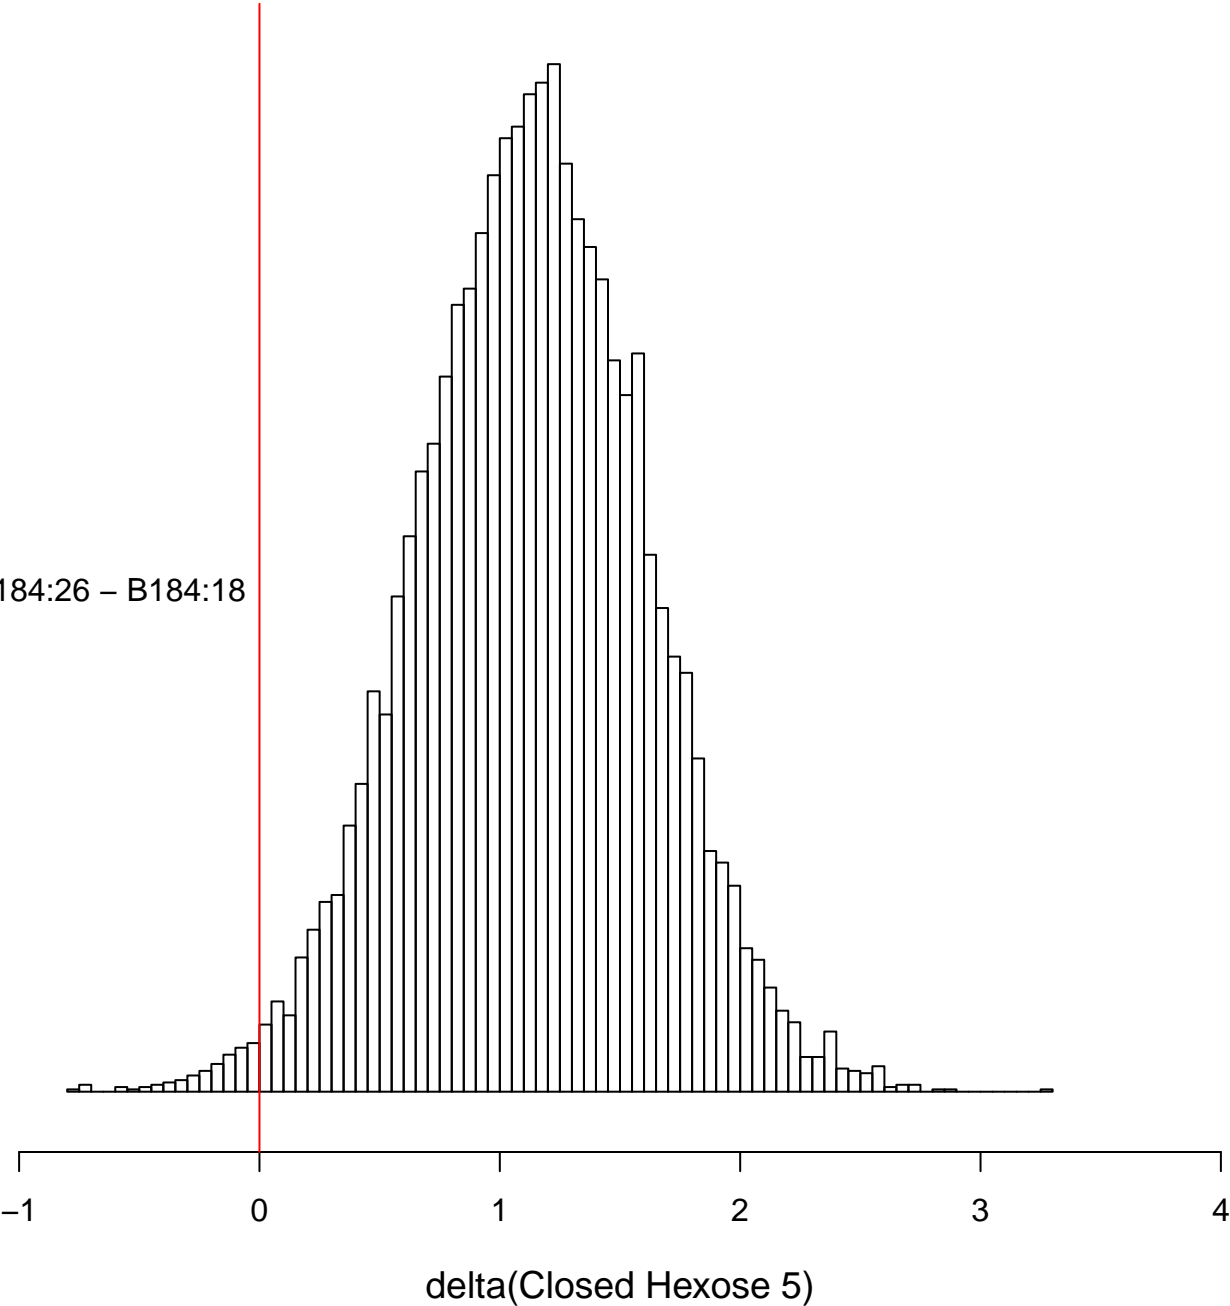



B184:26

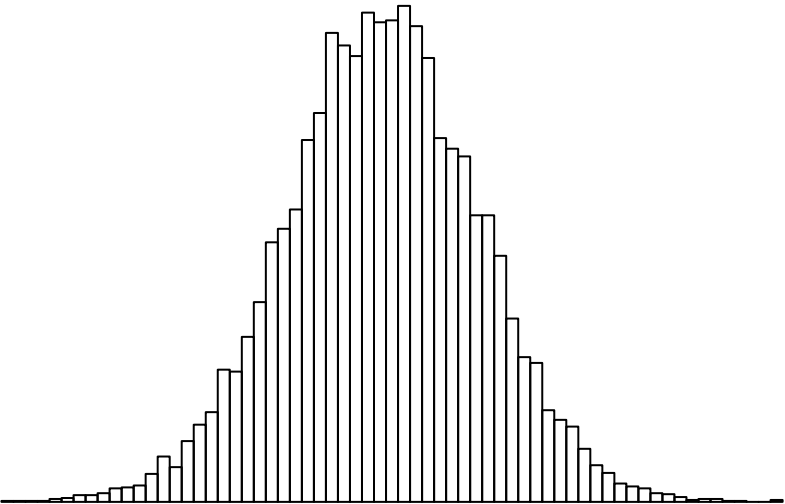

B184:18

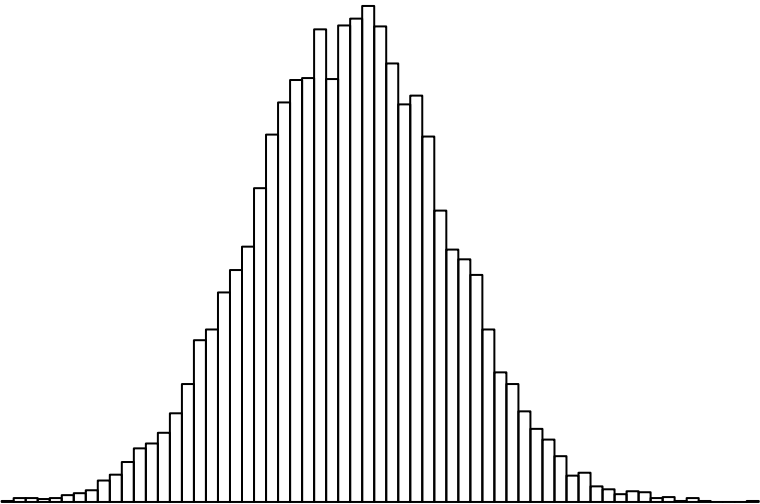

-10      -9      -8      -7      -6      -5

Open Pentose 1

B184:26 – B184:18

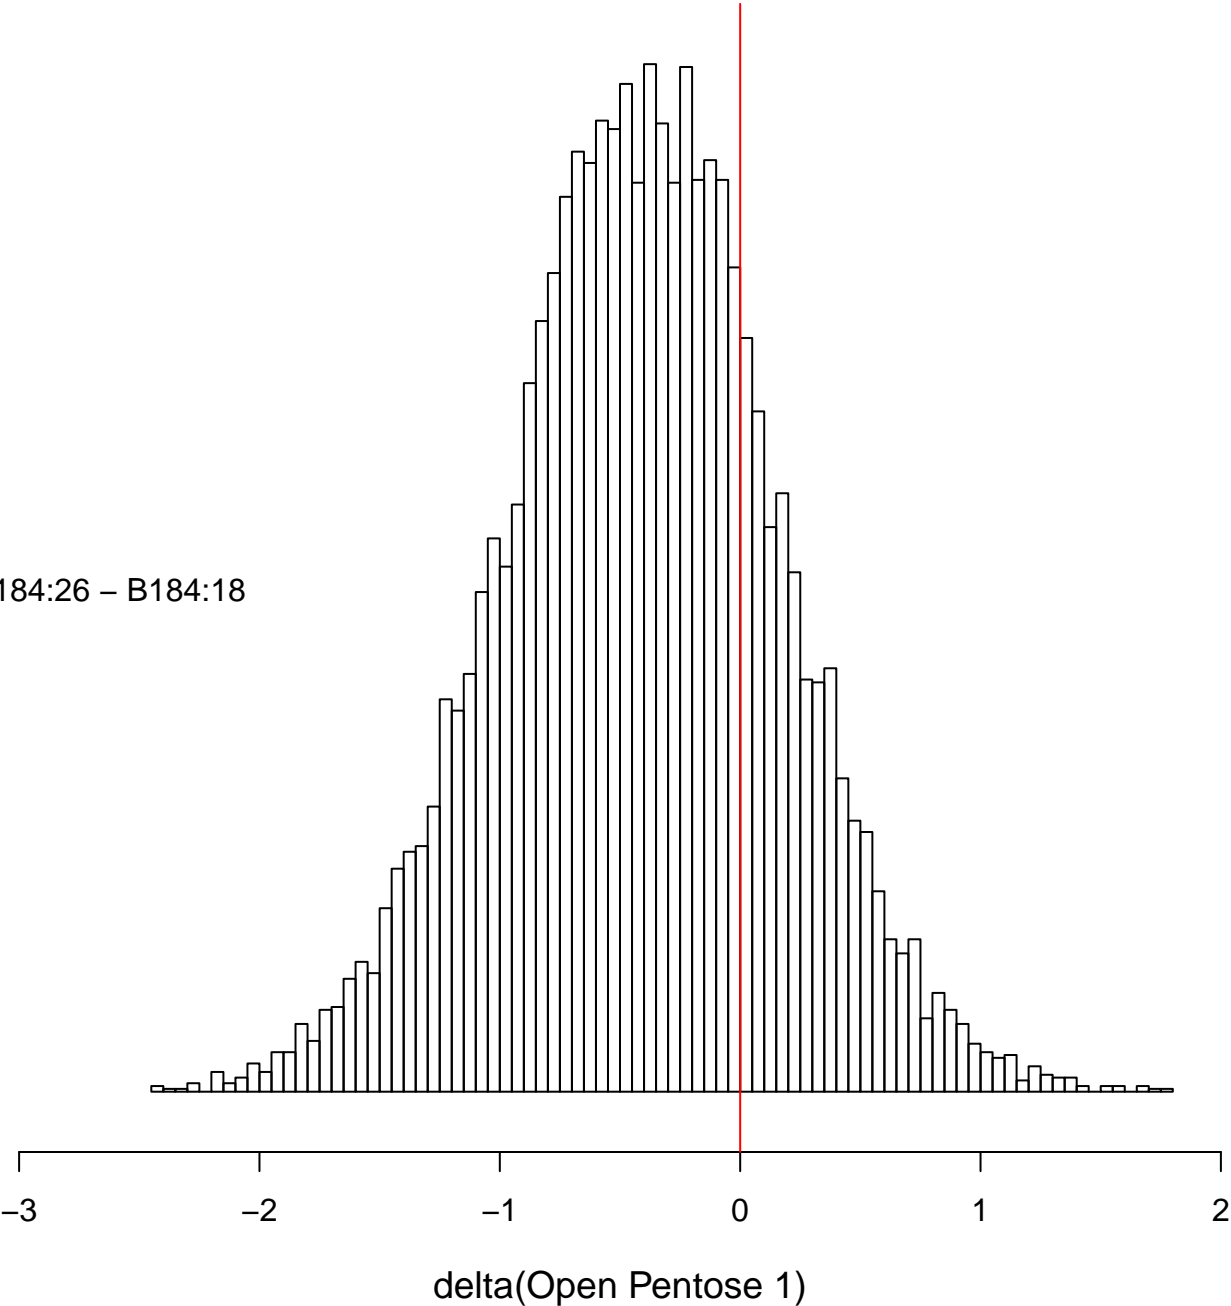

B184:26

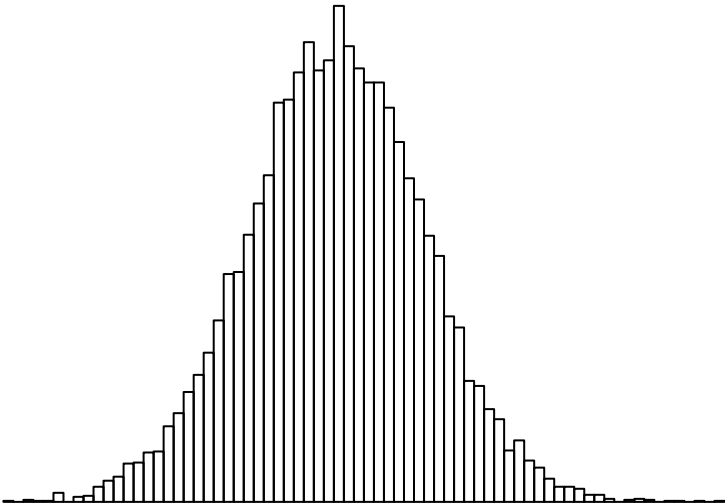

B184:18

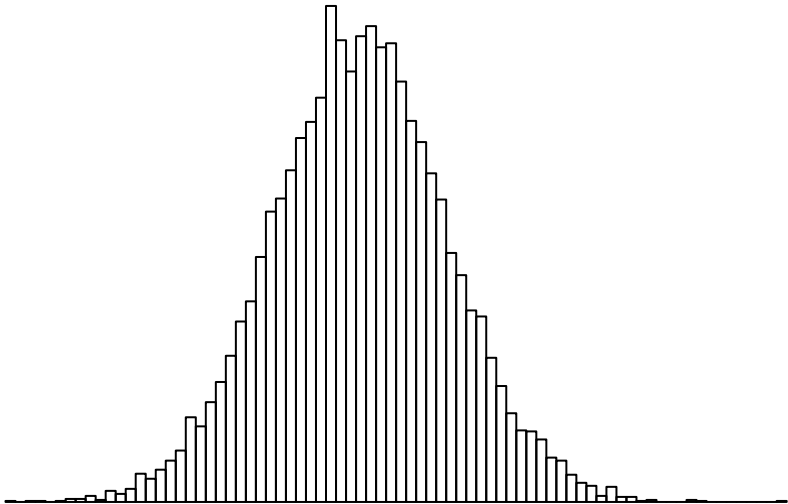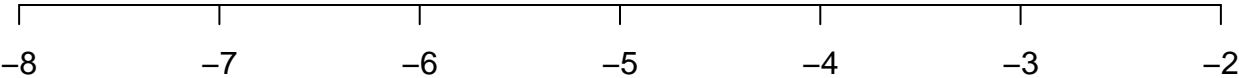

Open Pentose 2

B184:26 – B184:18

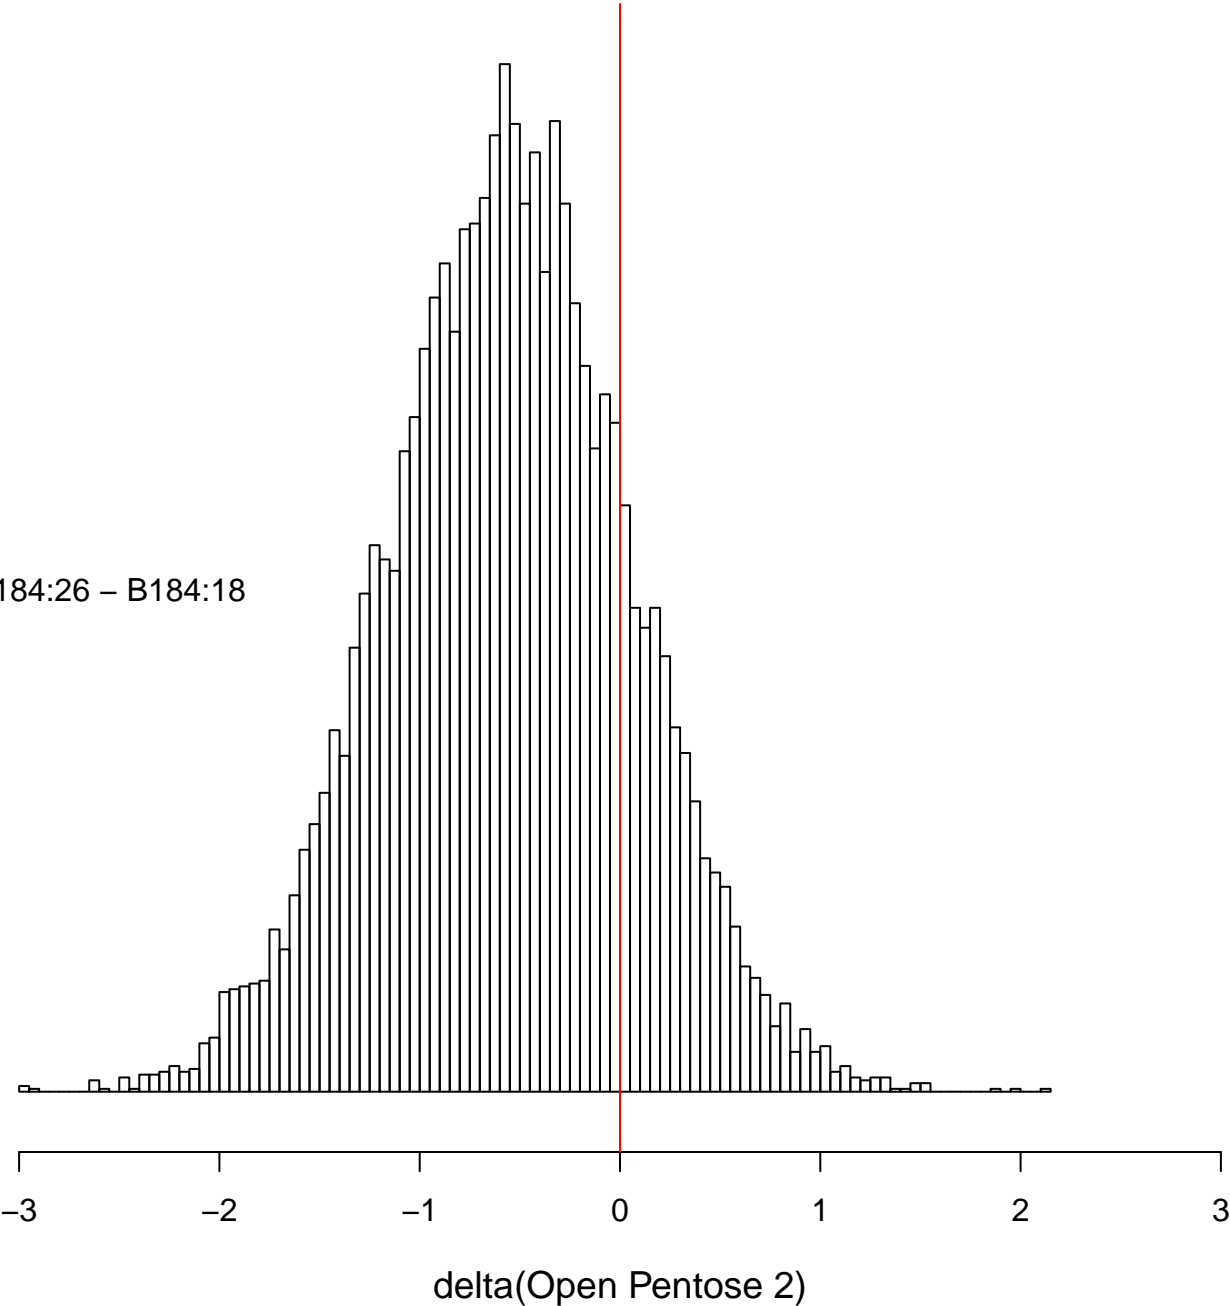

B184:26

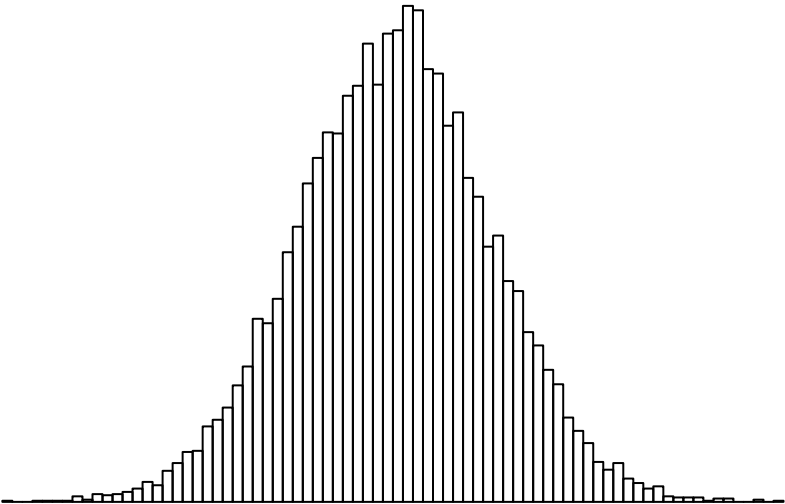

B184:18

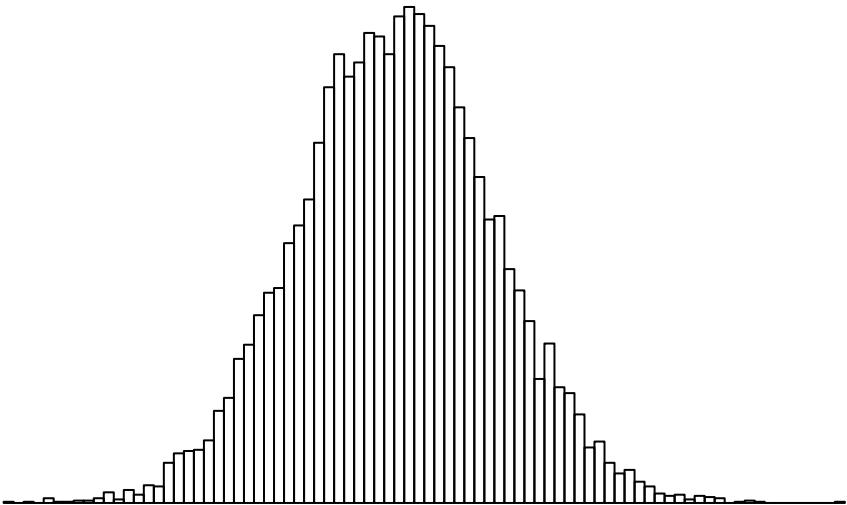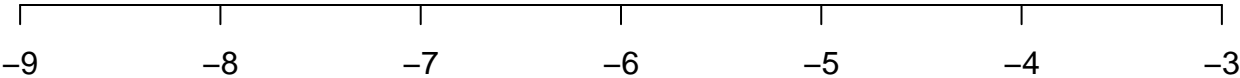

Closed Pentose 1

B184:26 – B184:18

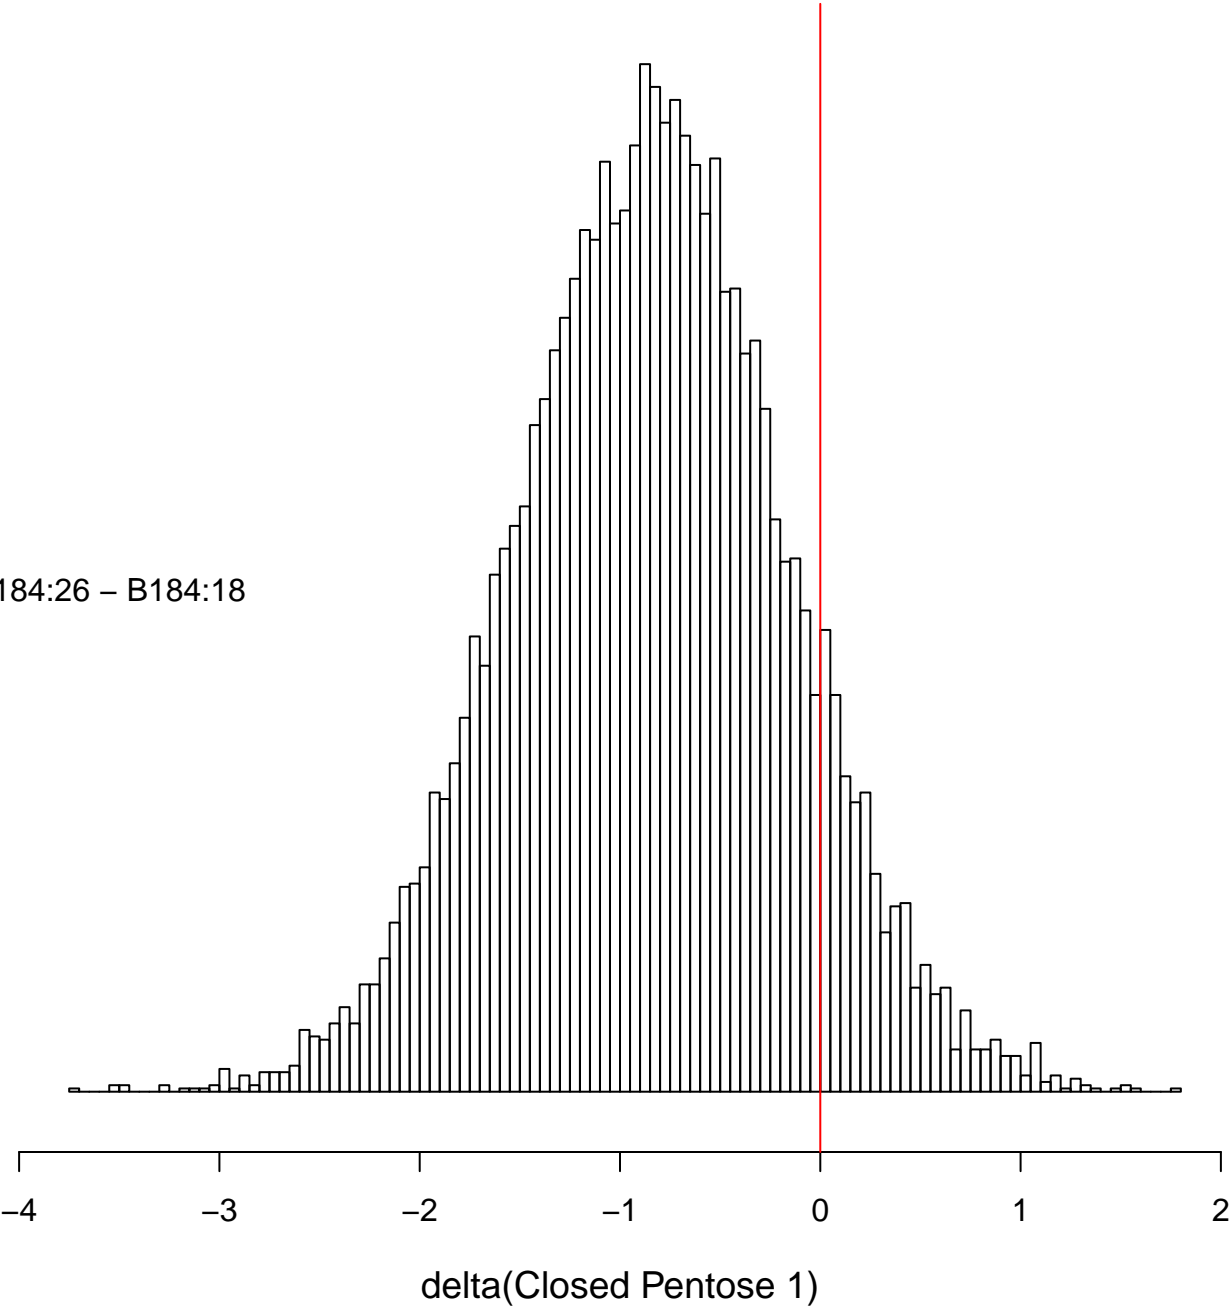

B184:26

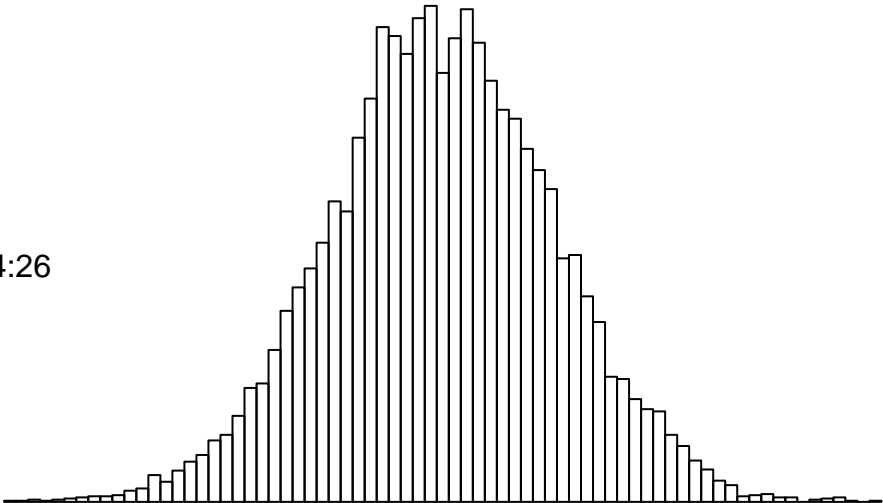

B184:18

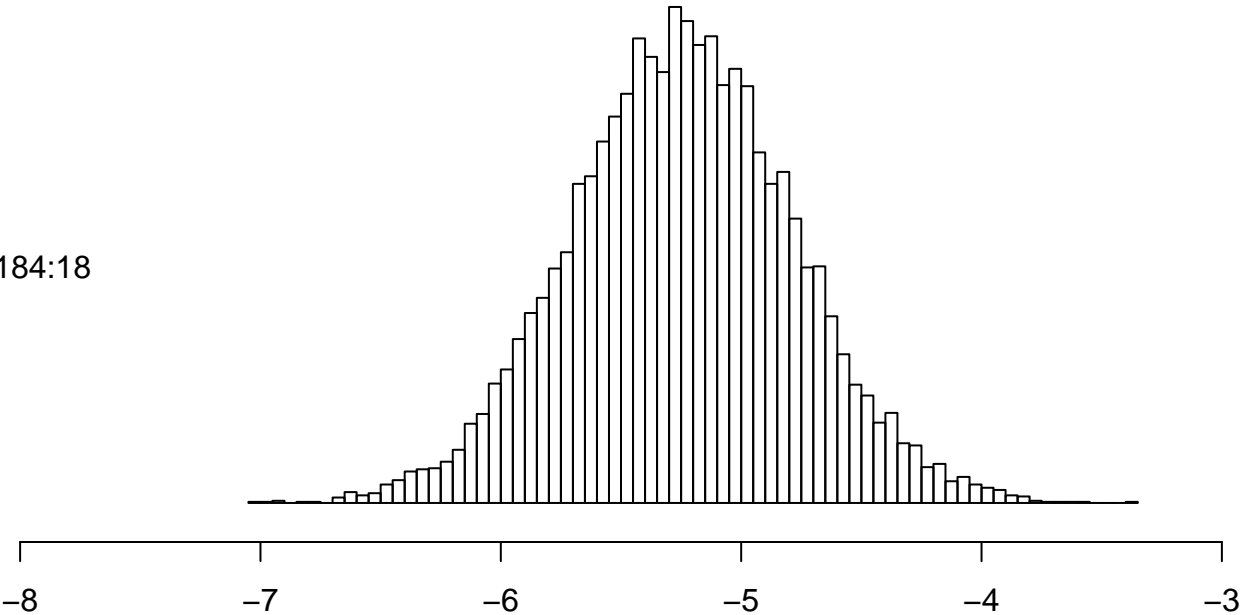

Closed Pentose 2

B184:26 – B184:18

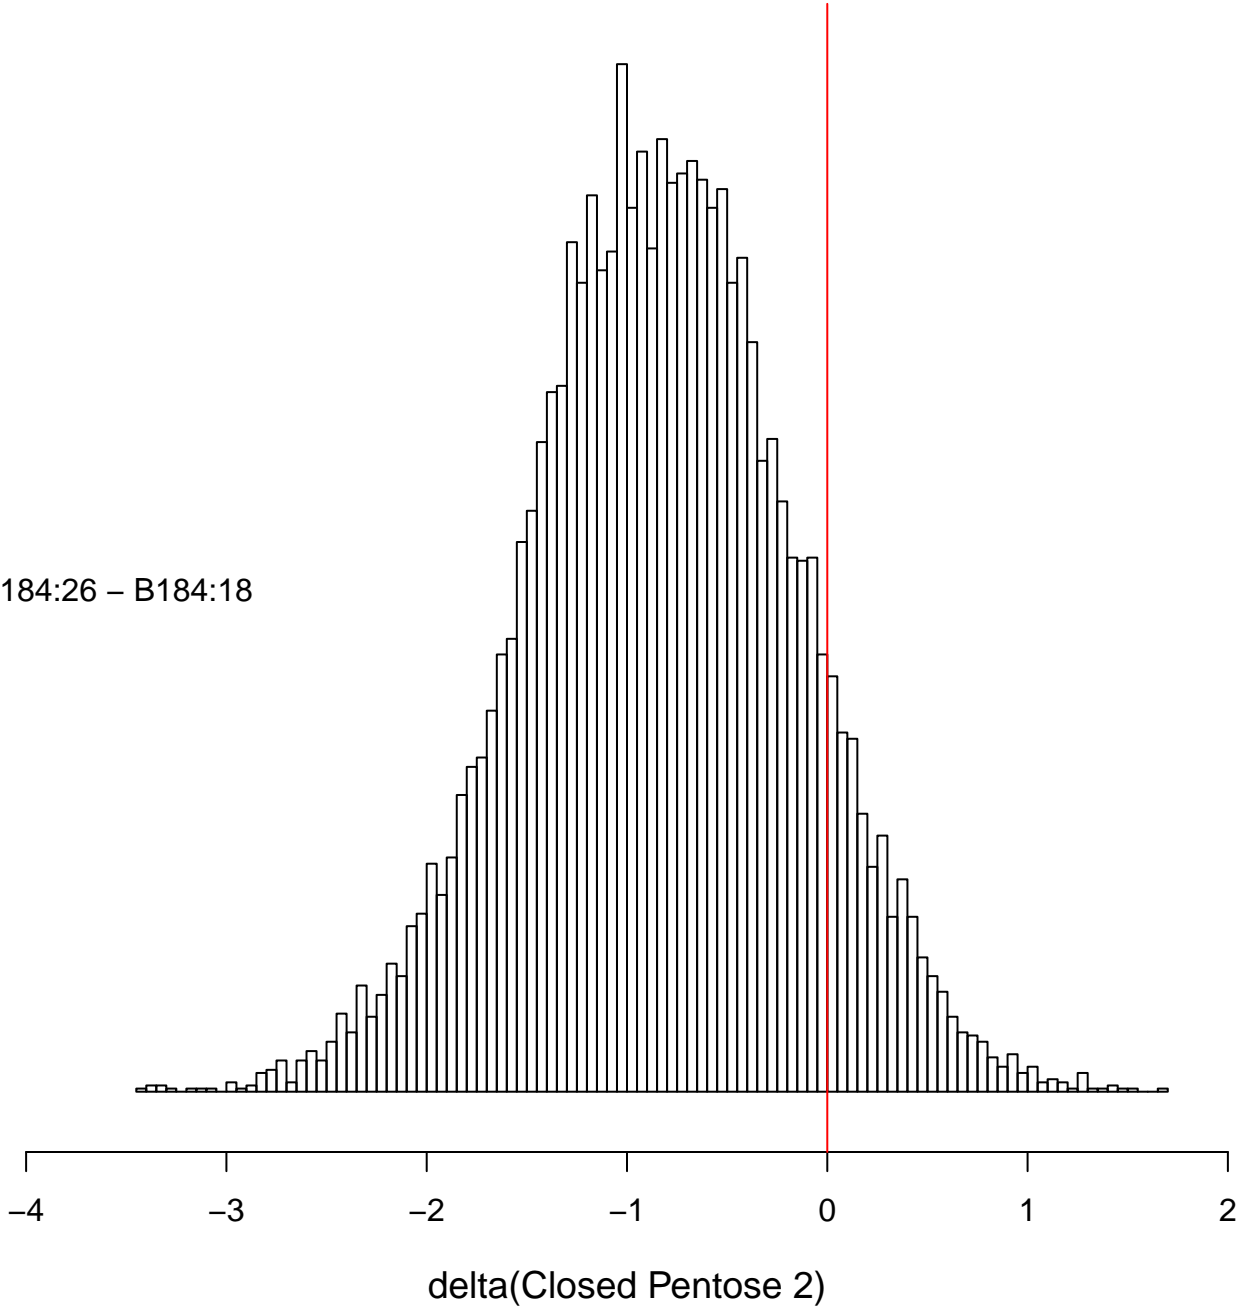



B184:26

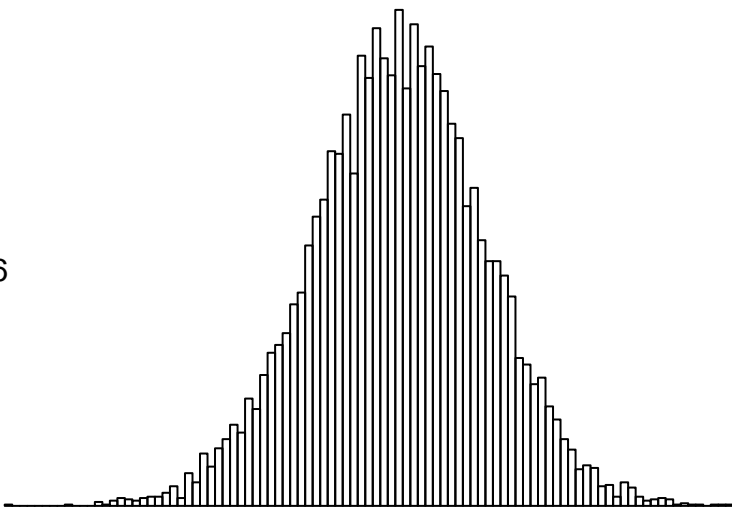

B184:18

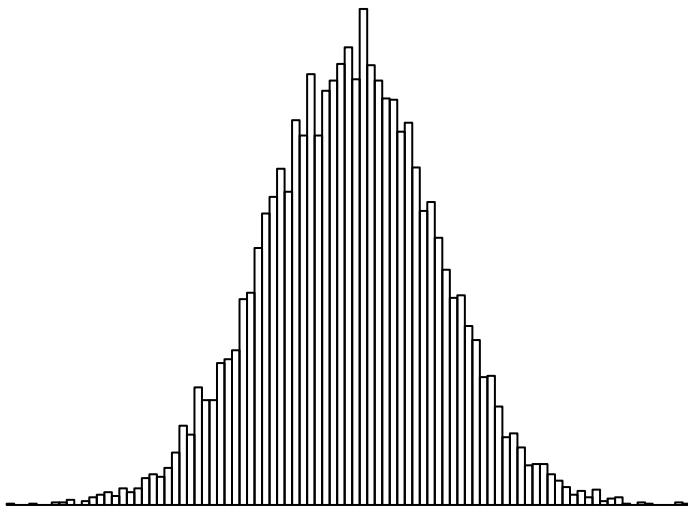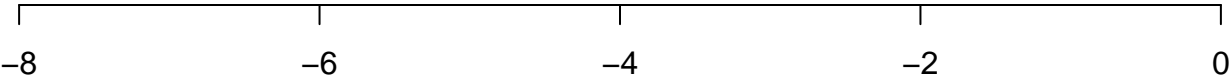

Pentose 1

B184:26 – B184:18

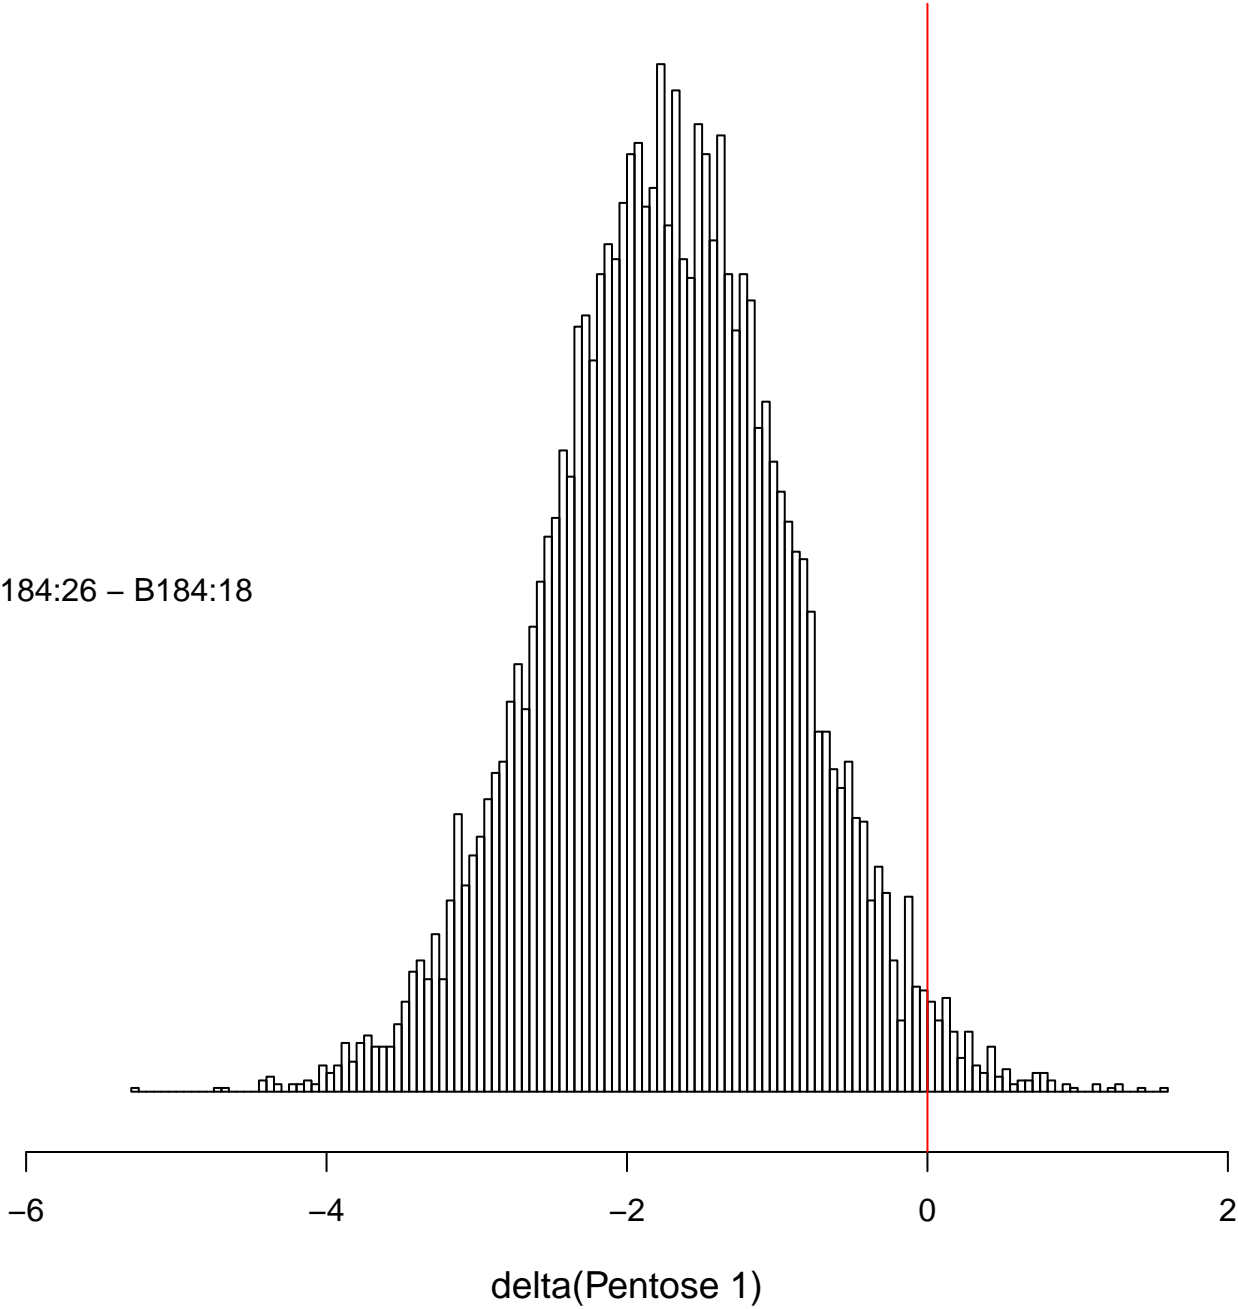

B184:26

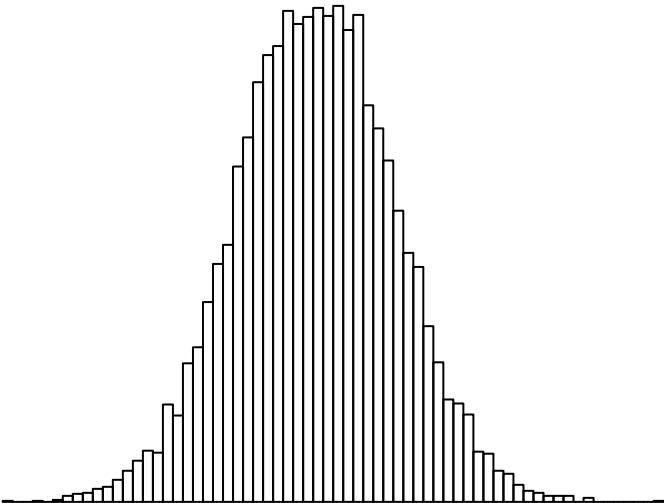

B184:18

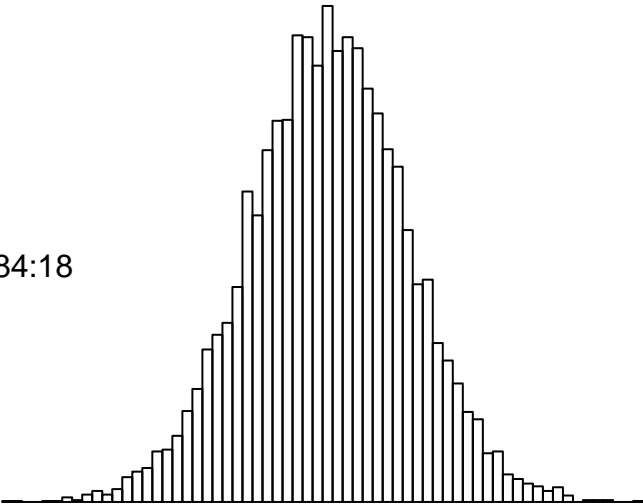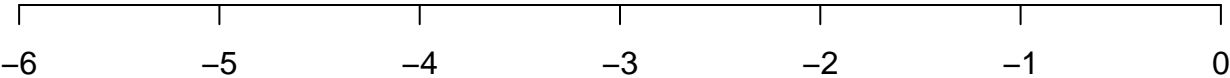

Open Pentose 3

B184:26 – B184:18

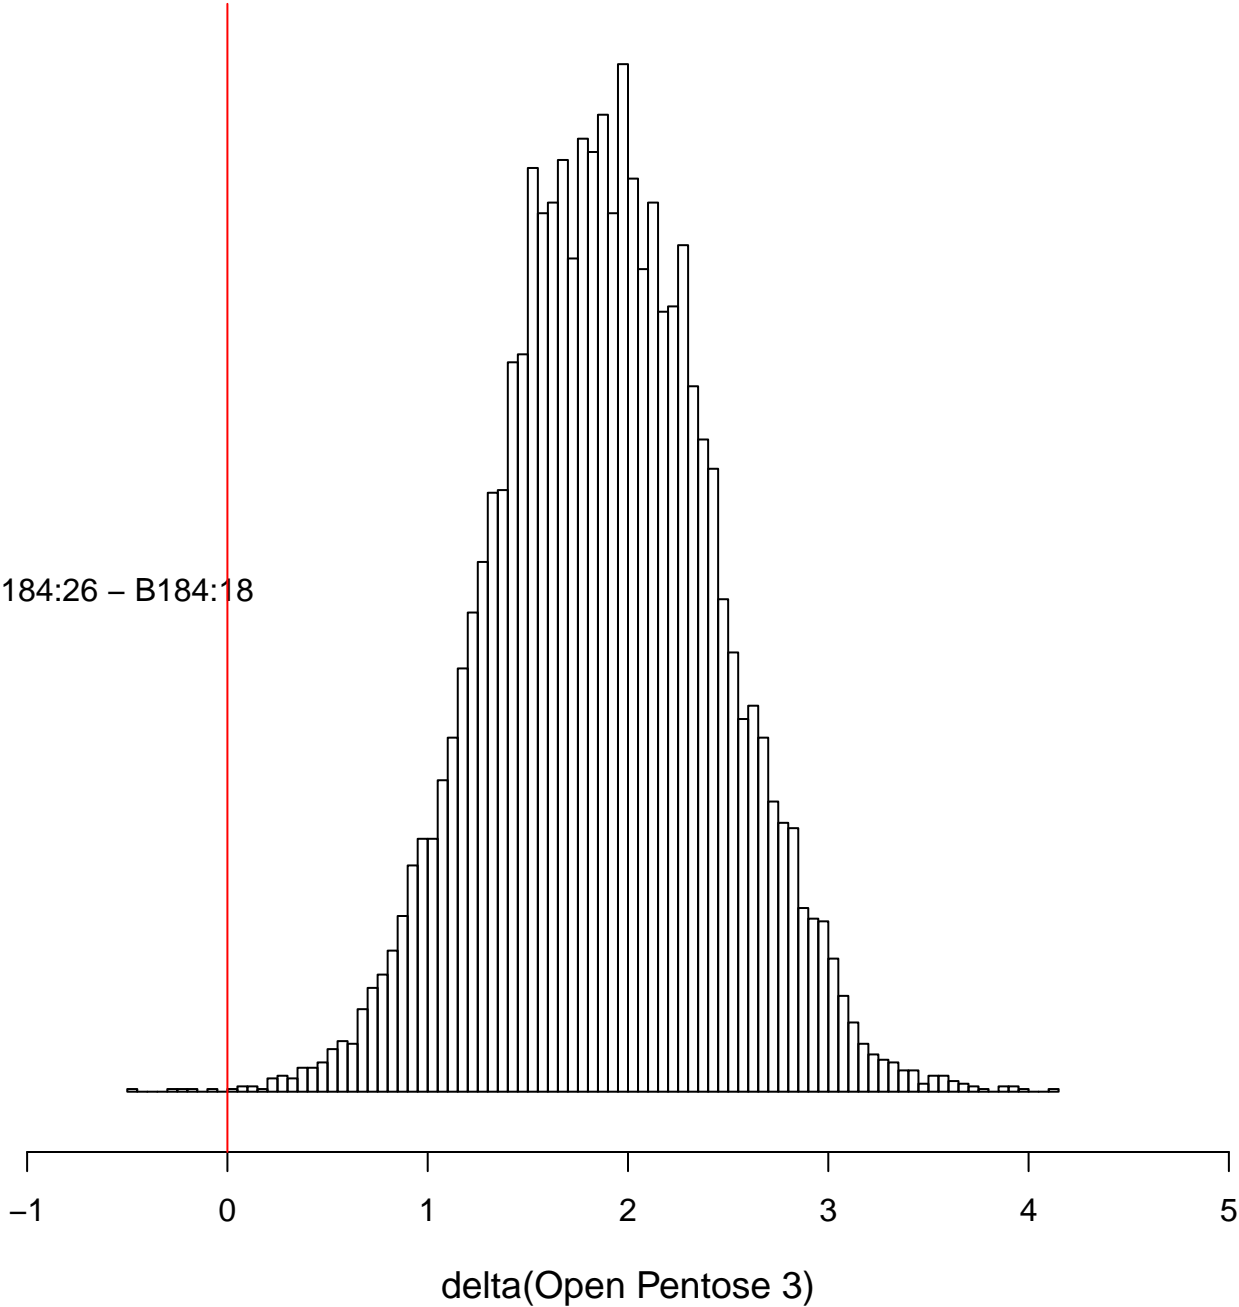

B184:26

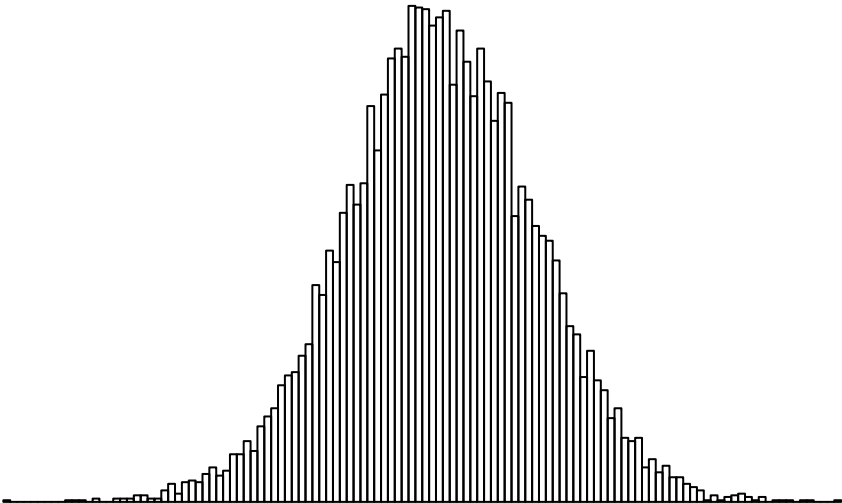

B184:18

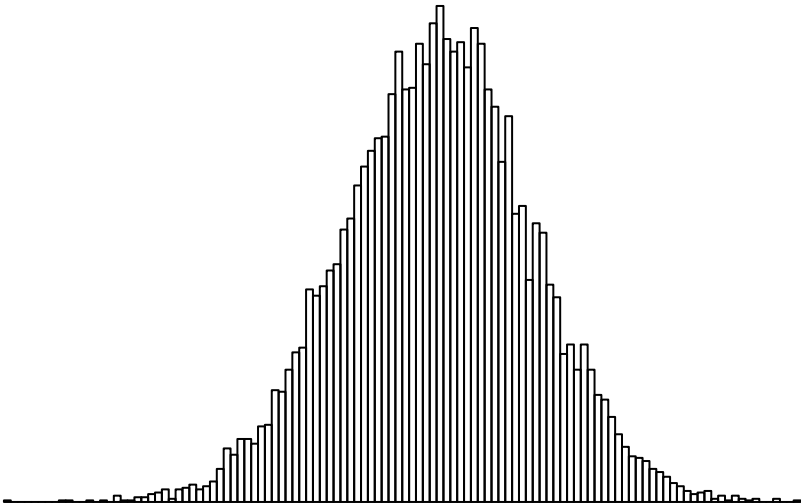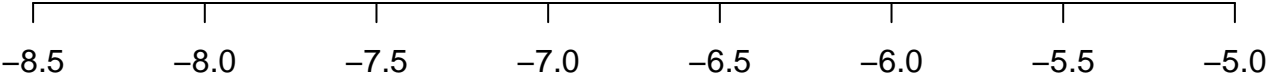

Sugar 1

B184:26 – B184:18

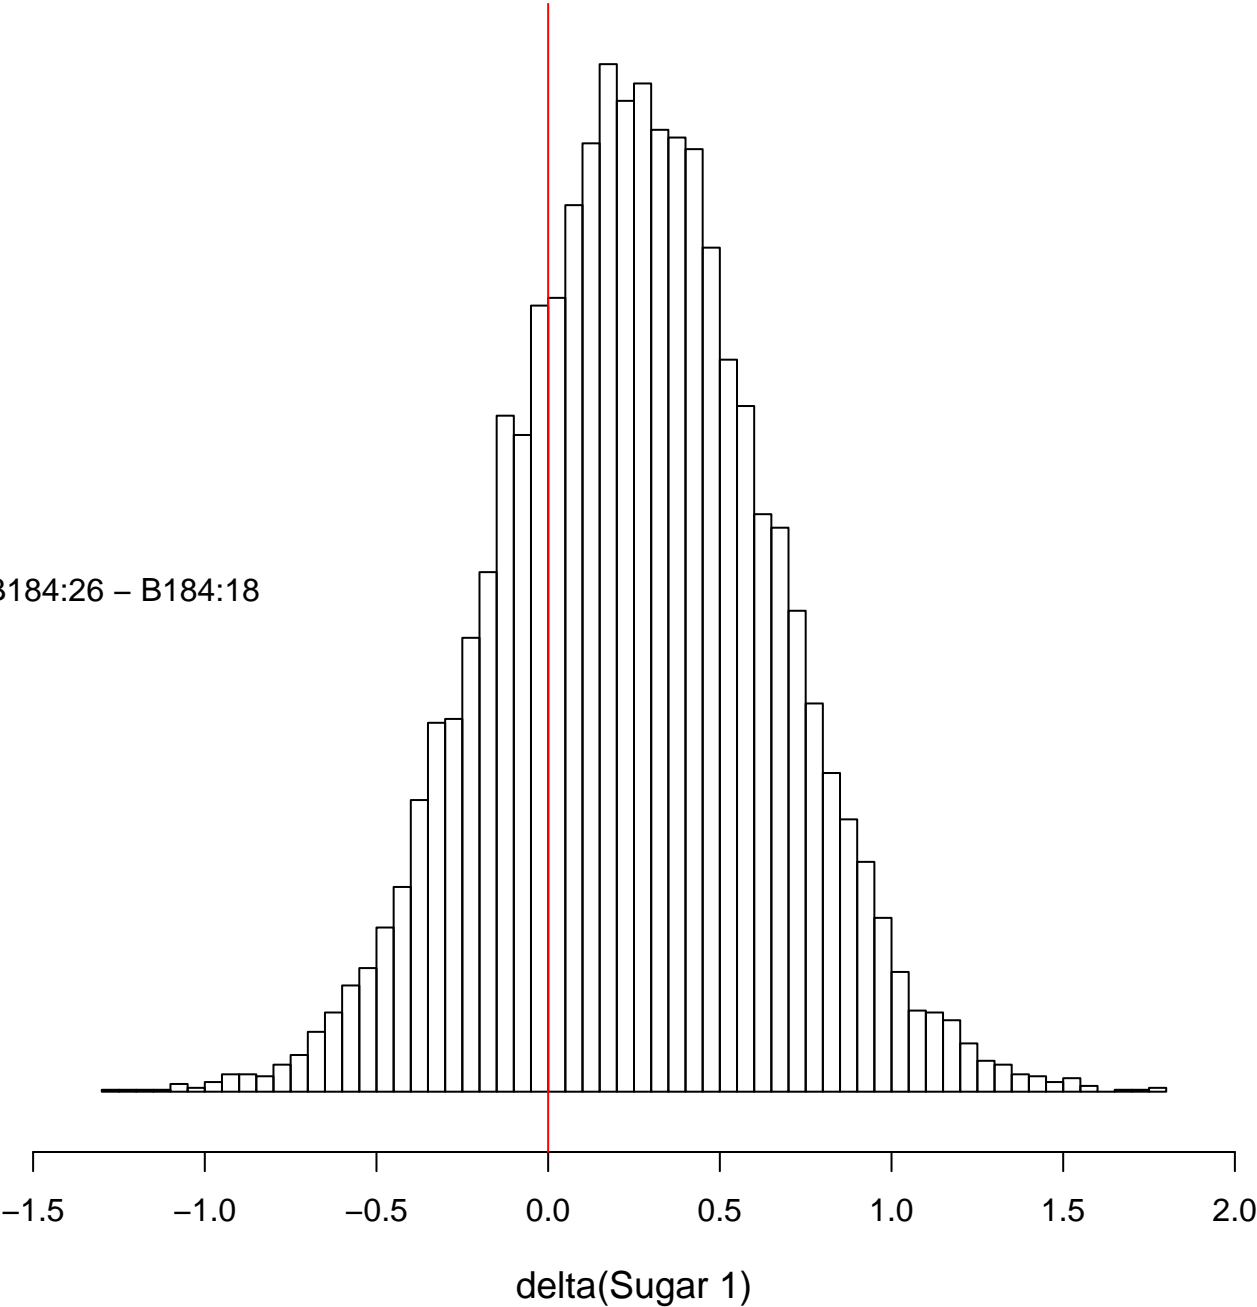

B184:26

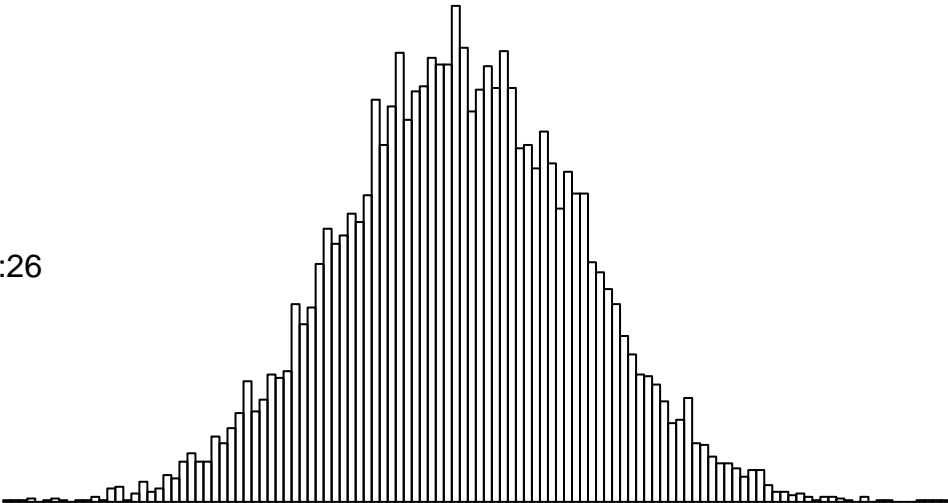

B184:18

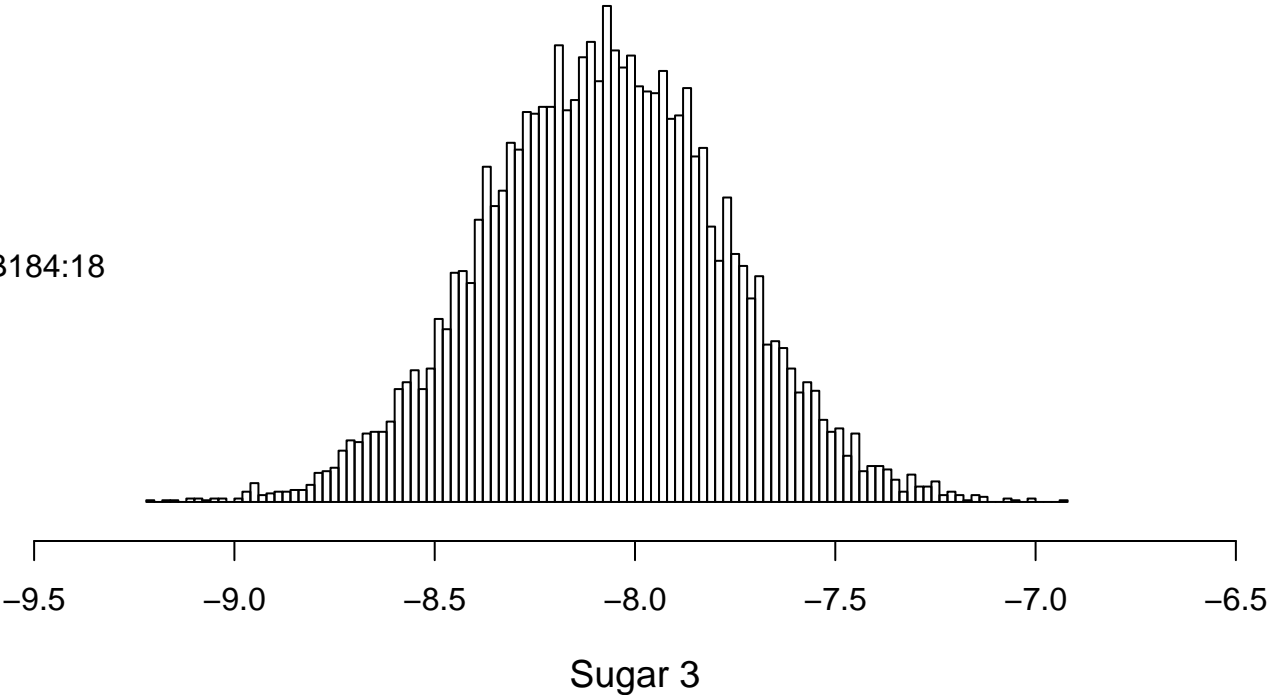

B184:26 – B184:18

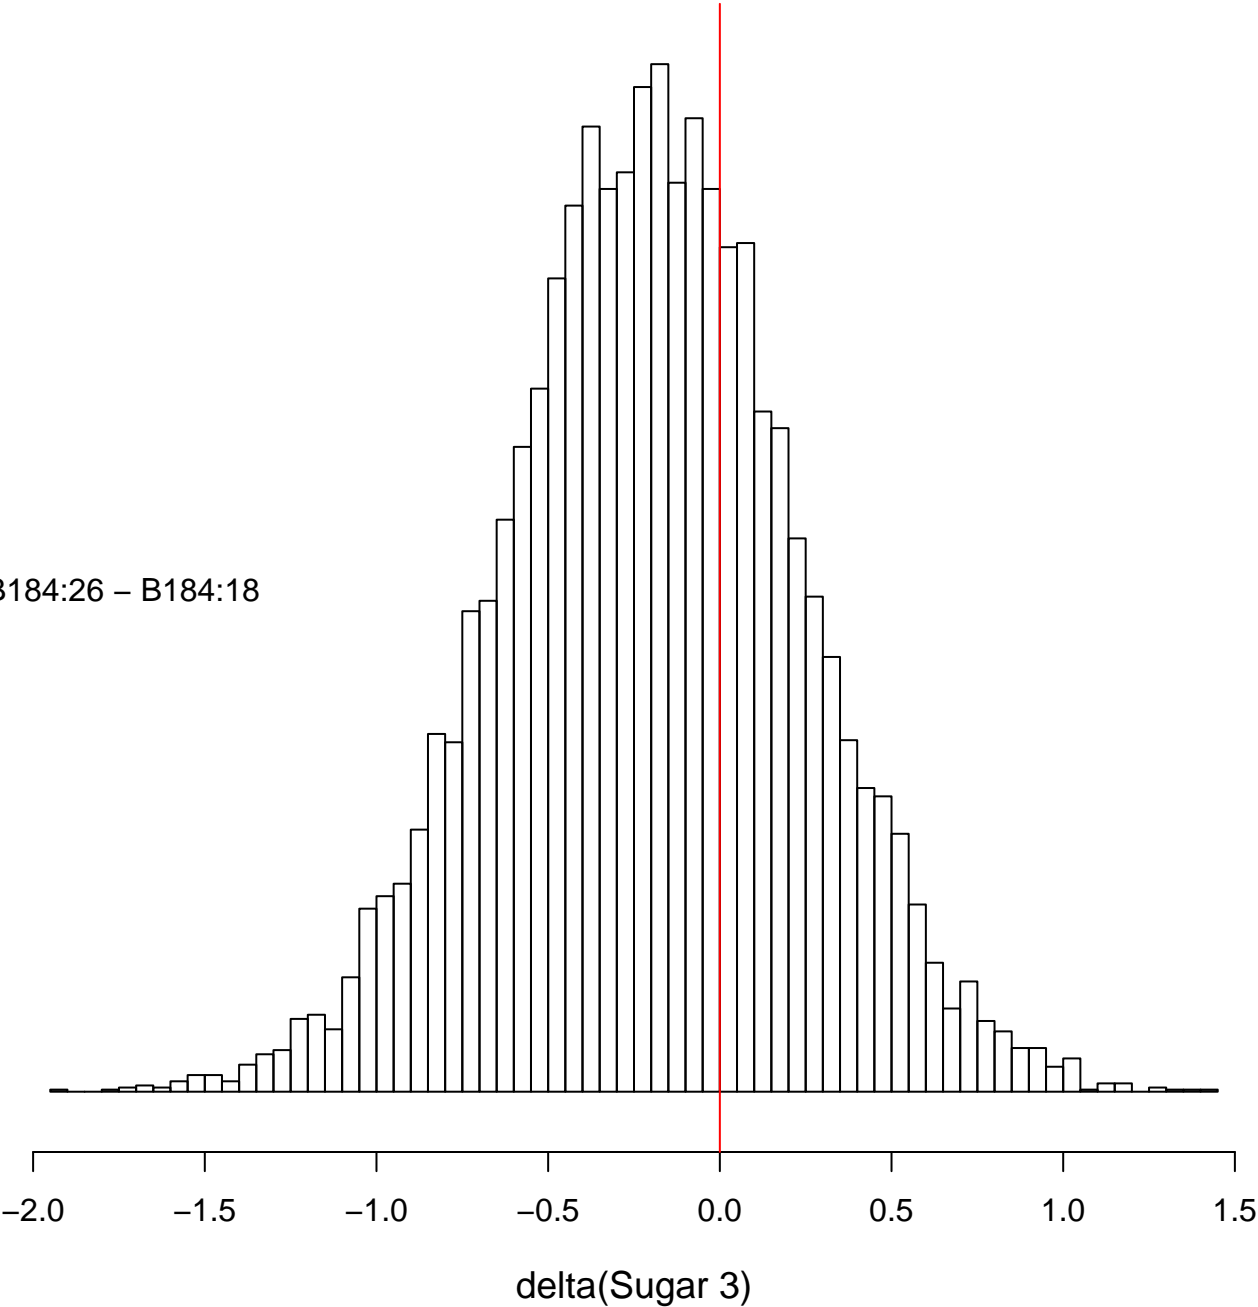



B184:26

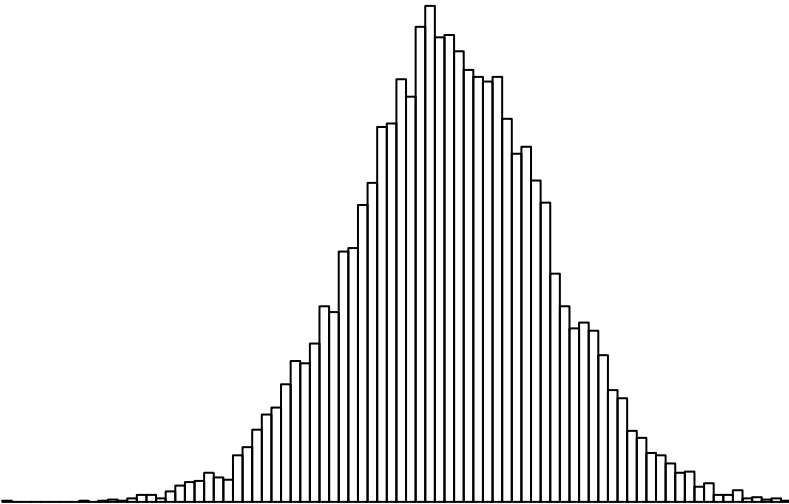

B184:18

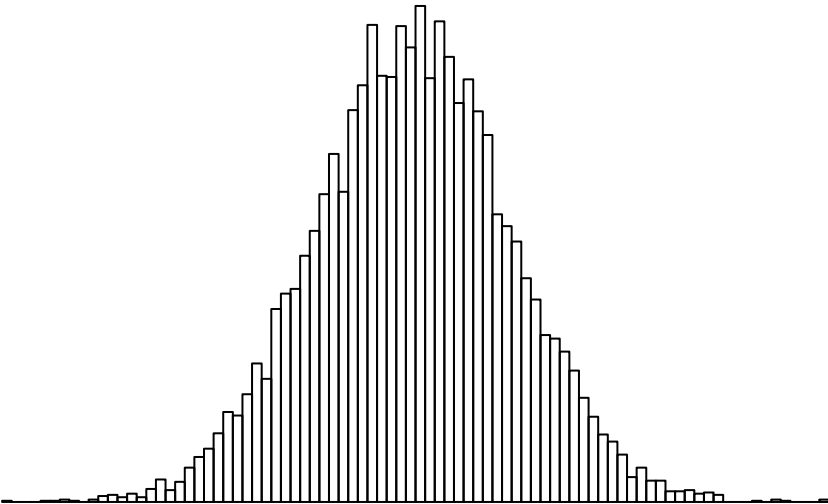

-8.5                      -8.0                      -7.5                      -7.0                      -6.5                      -6.0

Sugar 4

B184:26 – B184:18

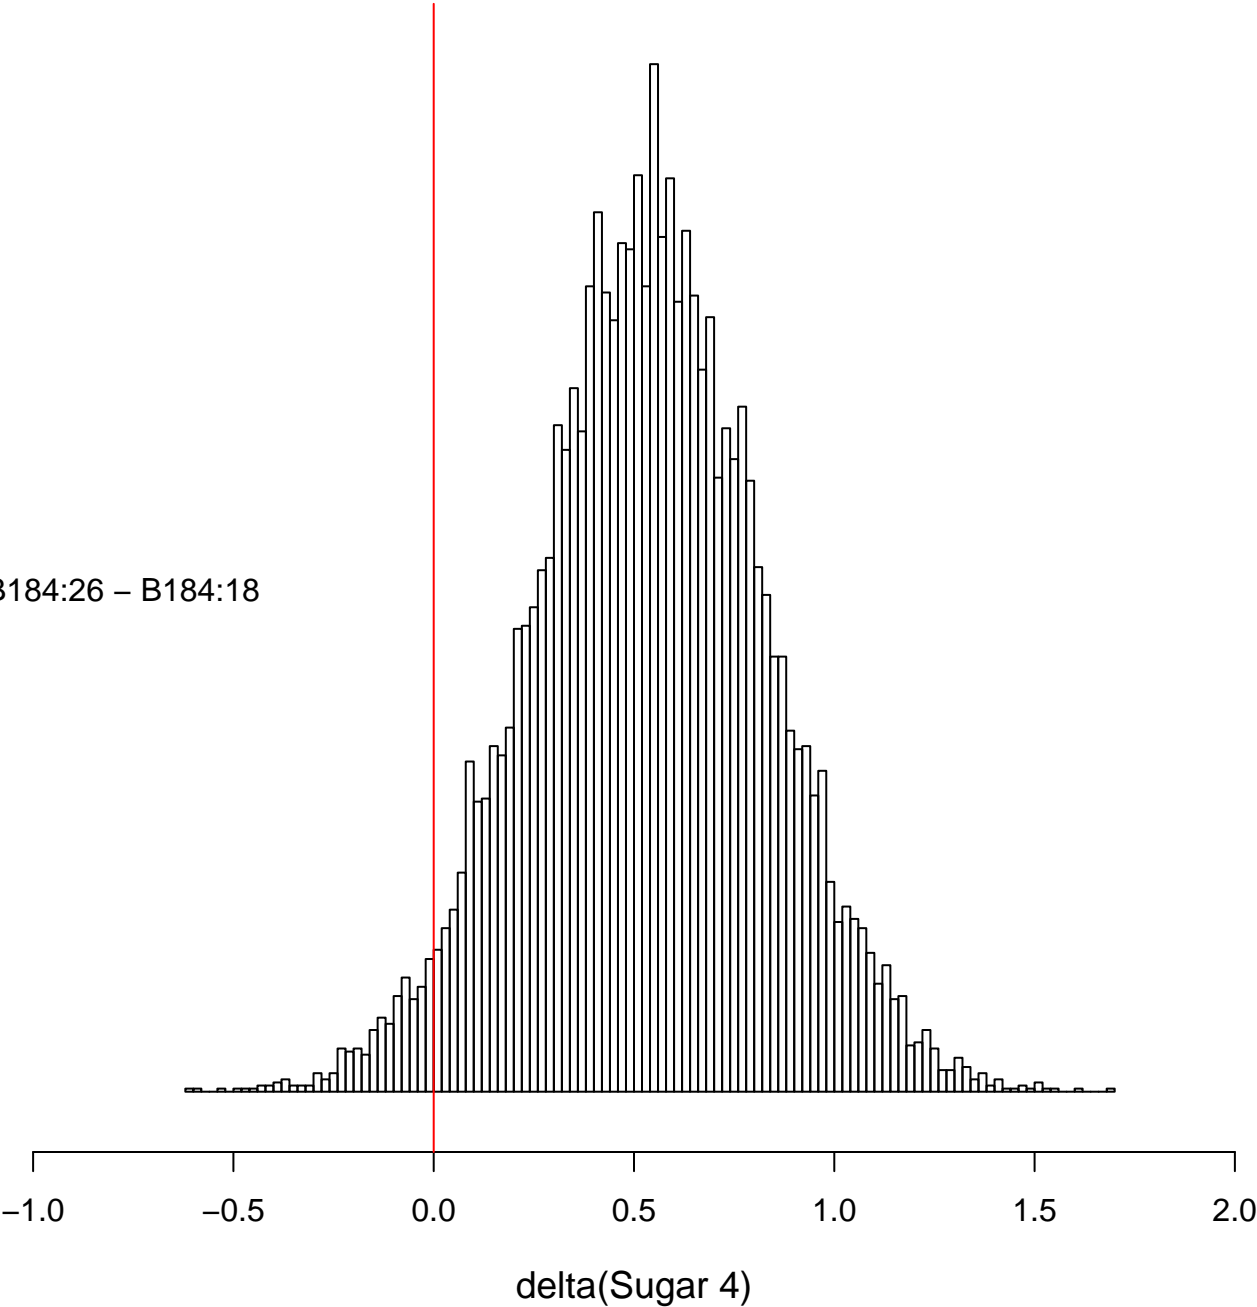

B184:26

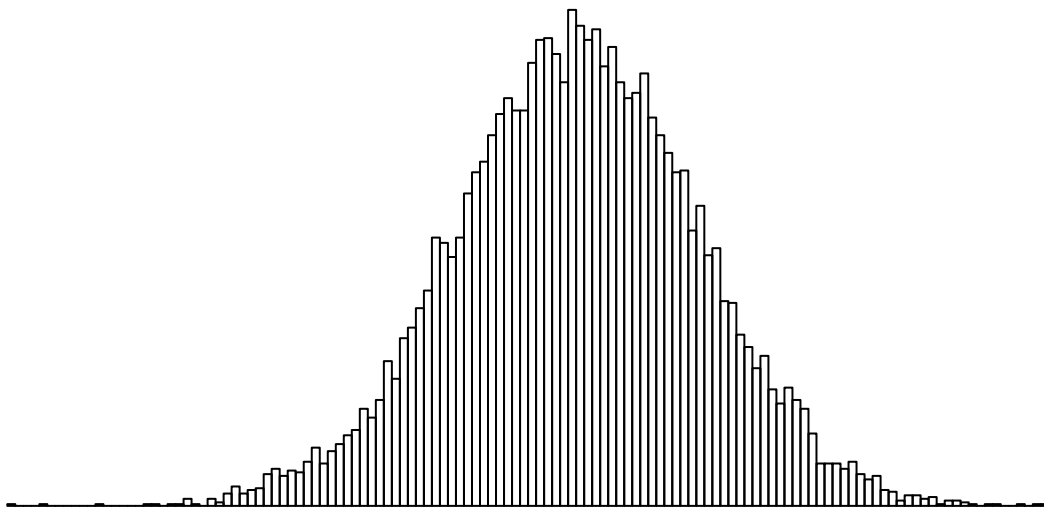

B184:18

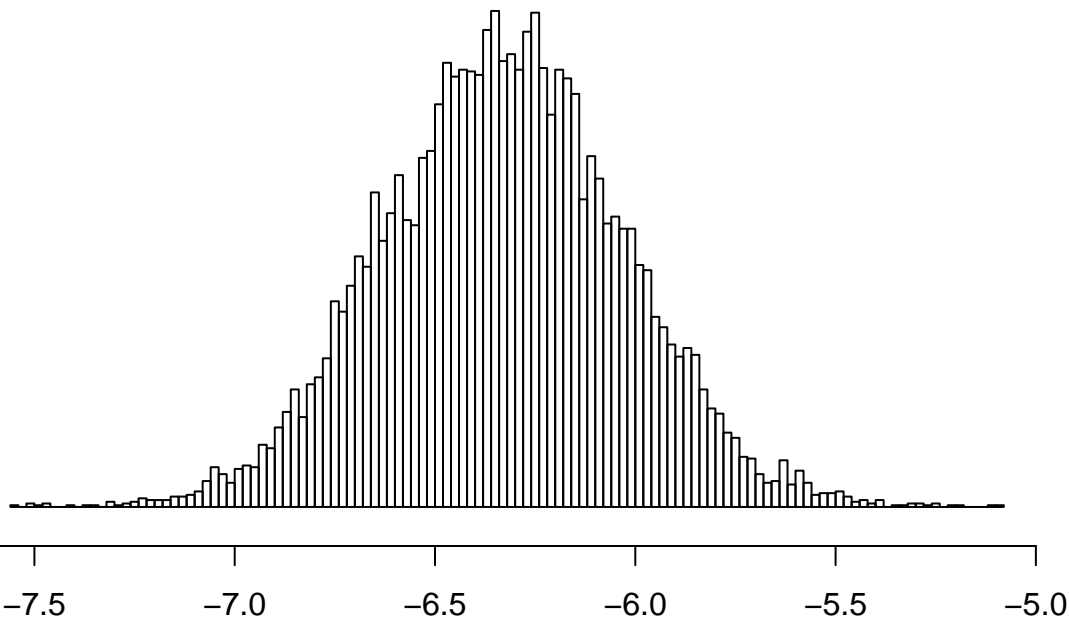

-8.0

-7.5

-7.0

-6.5

-6.0

-5.5

-5.0

Sugar 5

B184:26 – B184:18

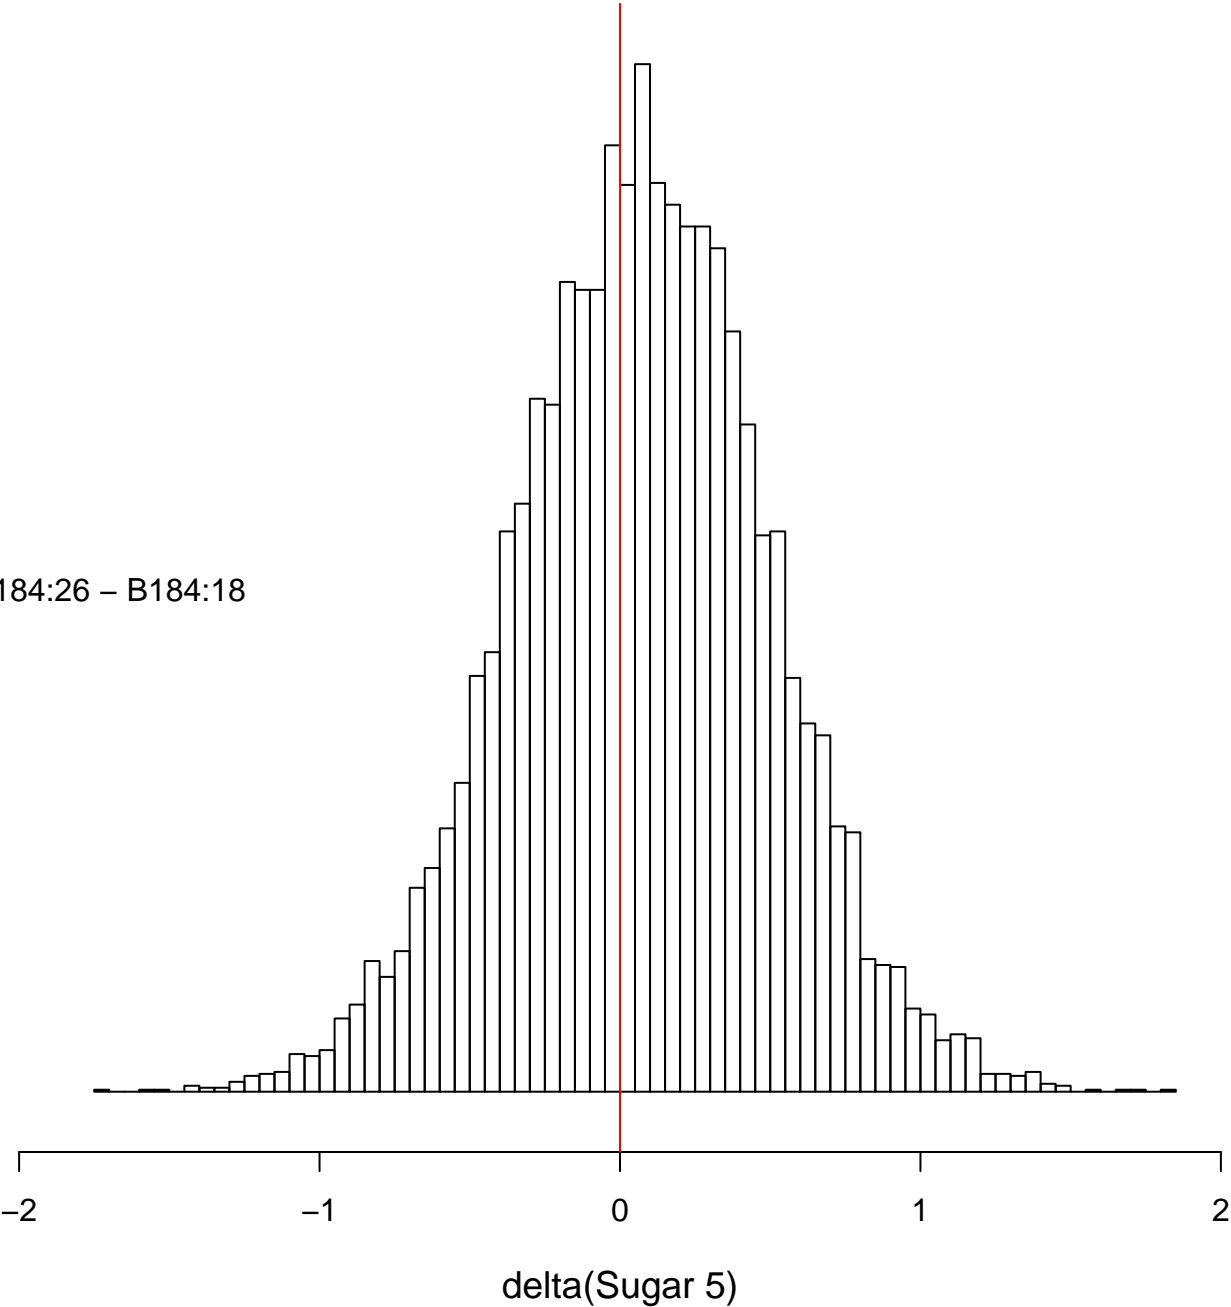

B184:26

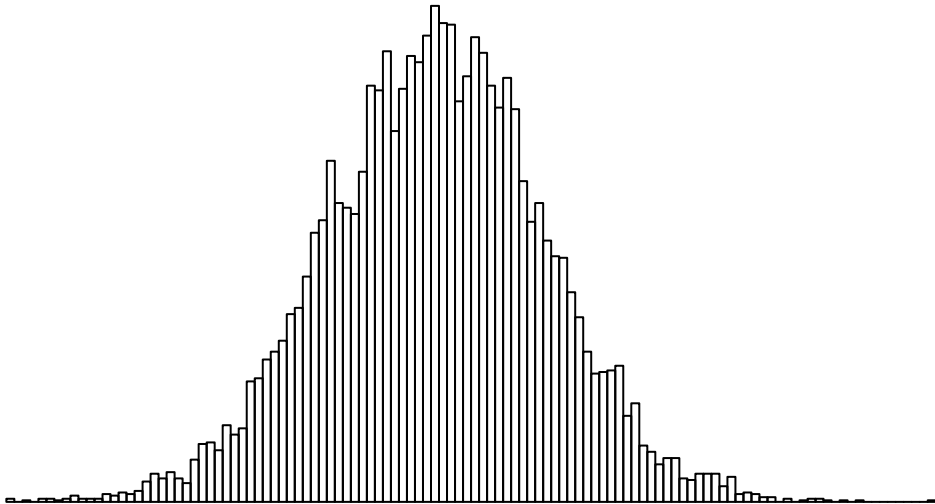

B184:18

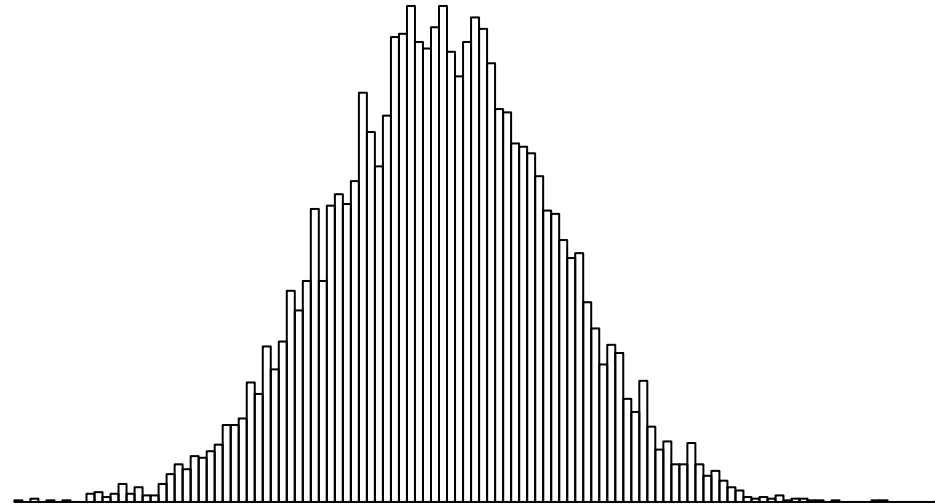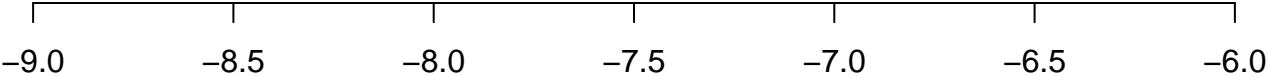

Sugar 6

B184:26 – B184:18

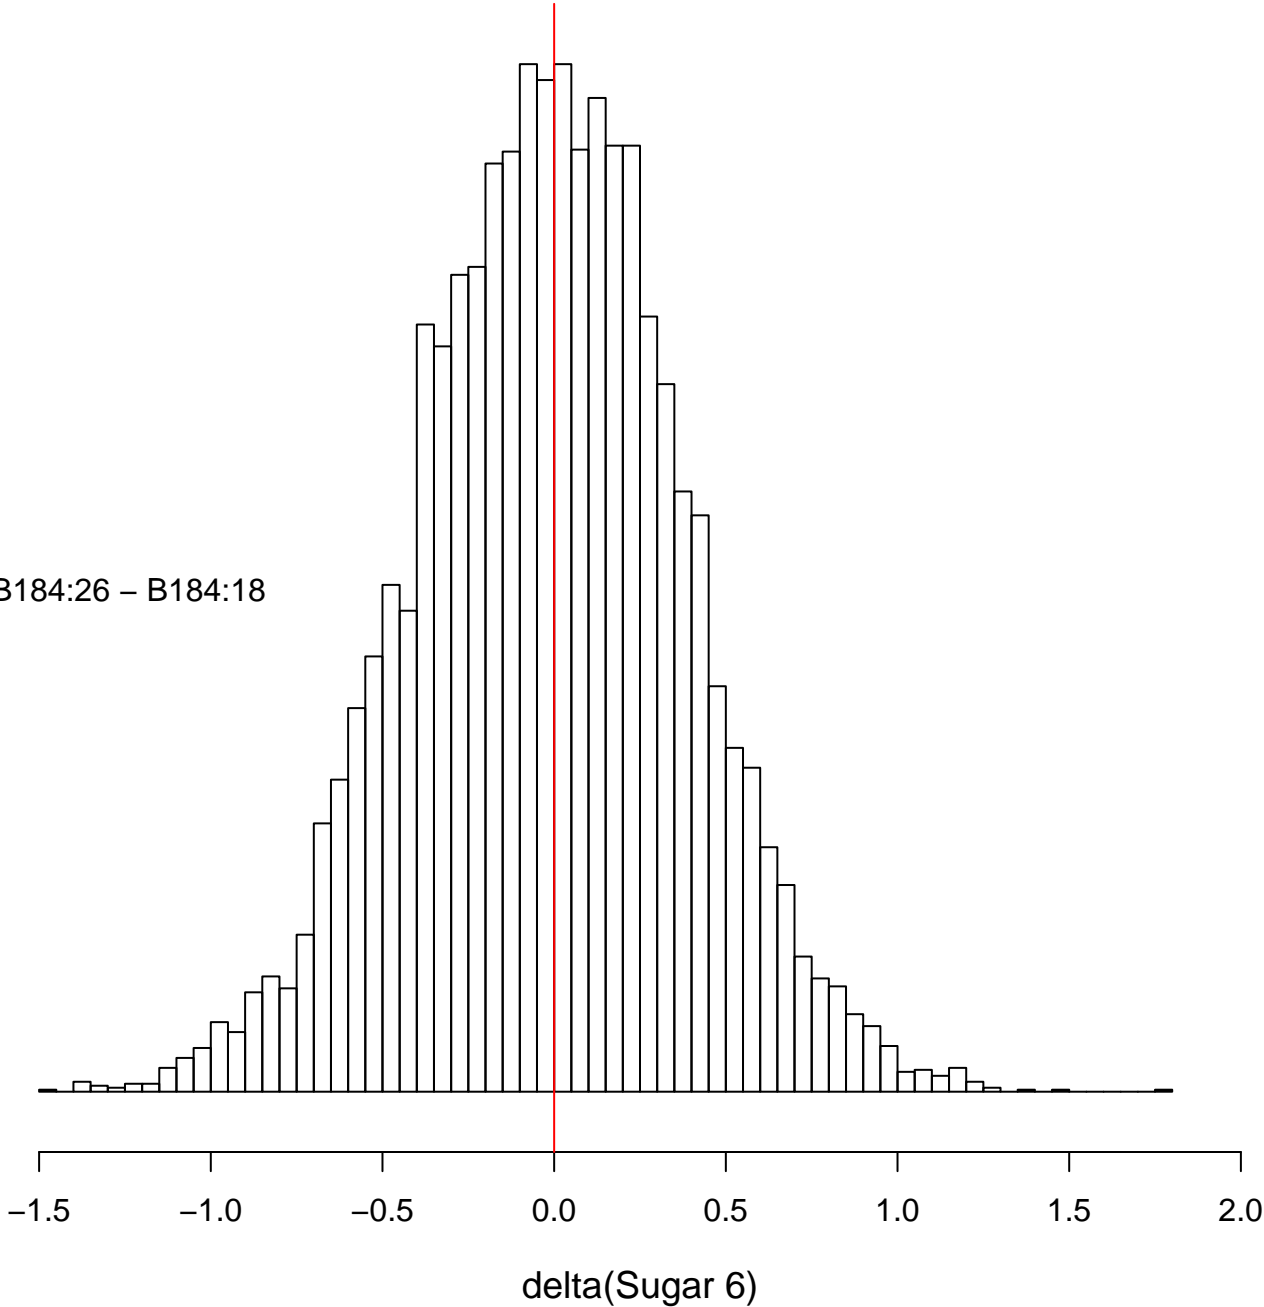

B184:26

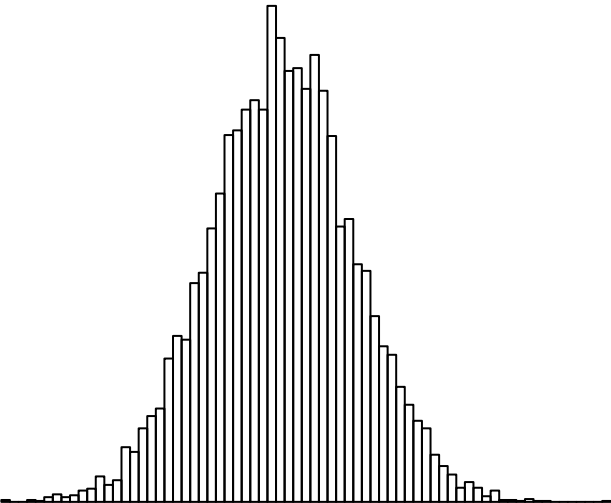

B184:18

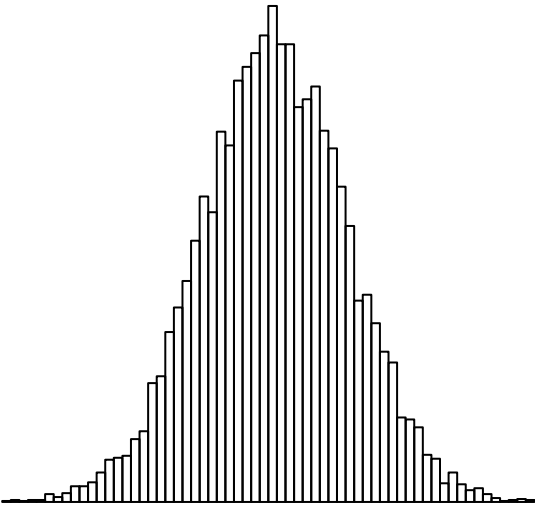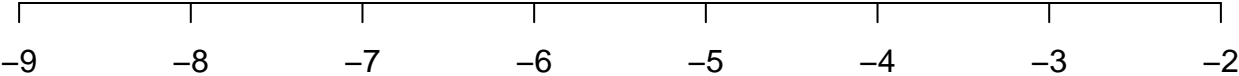

Sugar 7

B184:26 – B184:18

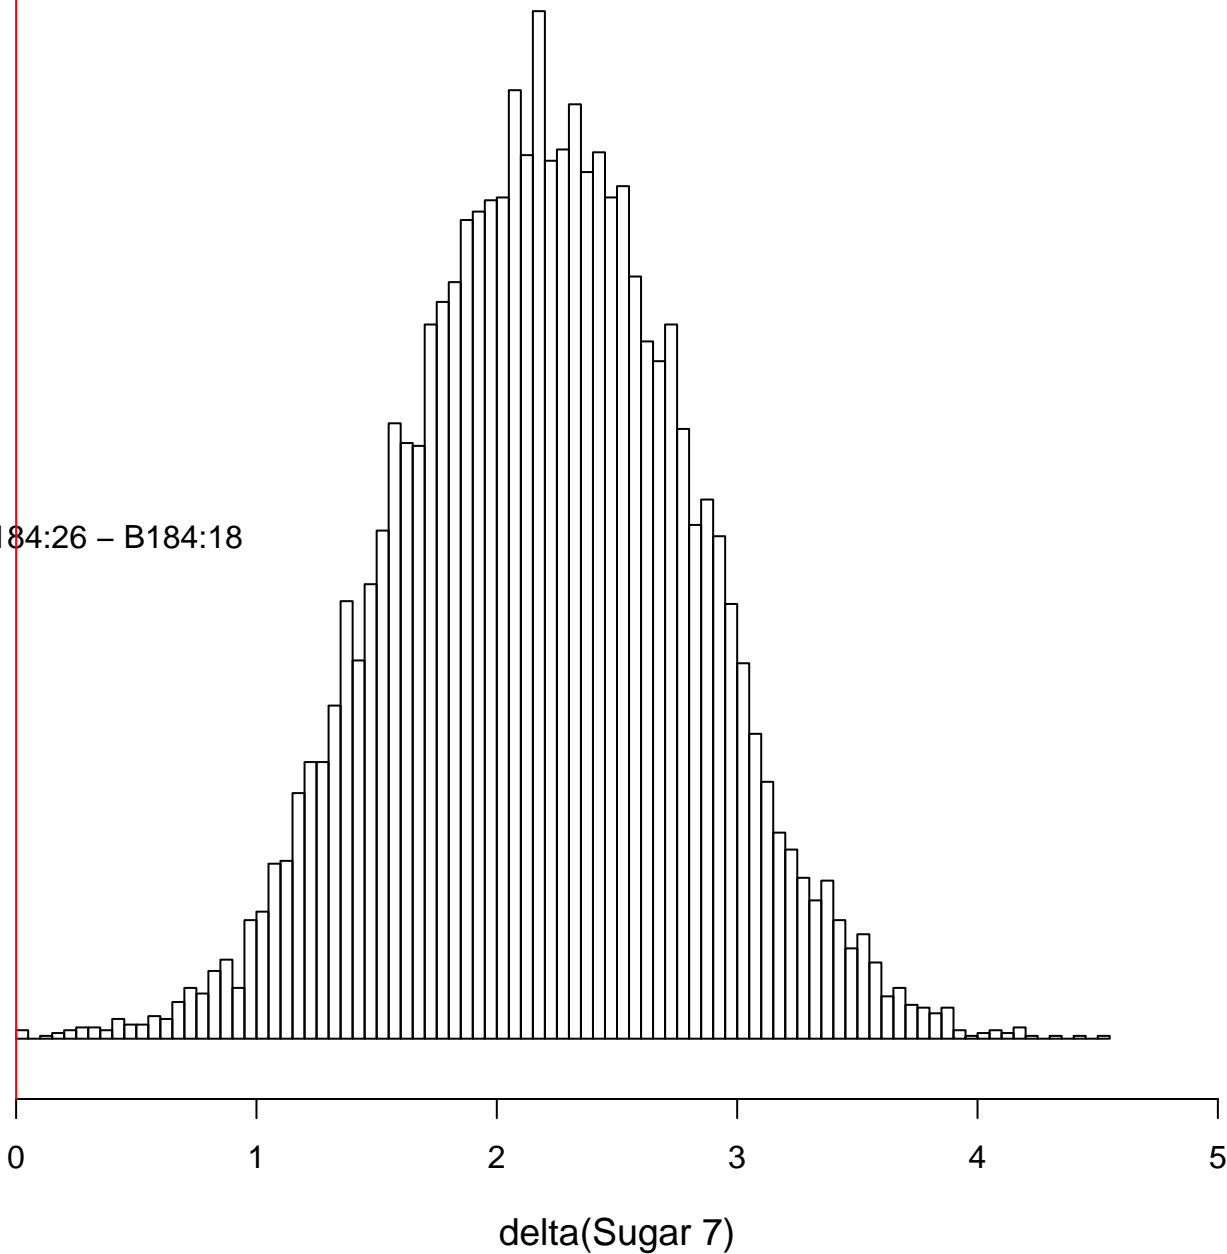



B184:26

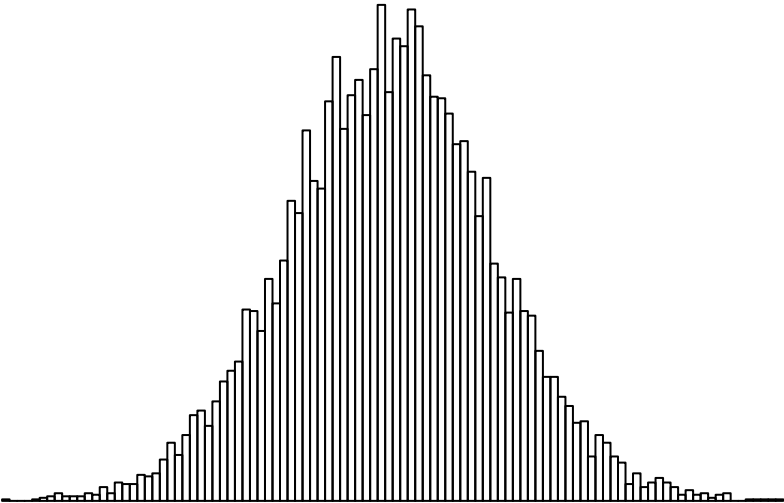

B184:18

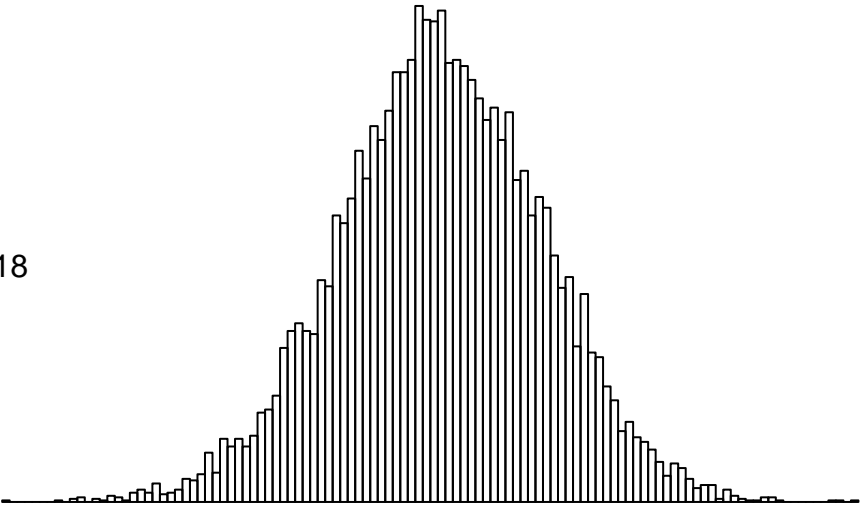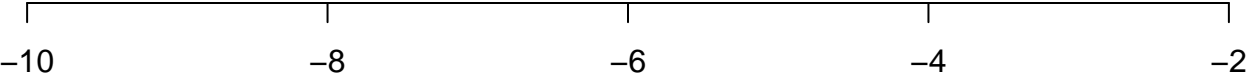

Sugar 8

B184:26 – B184:18

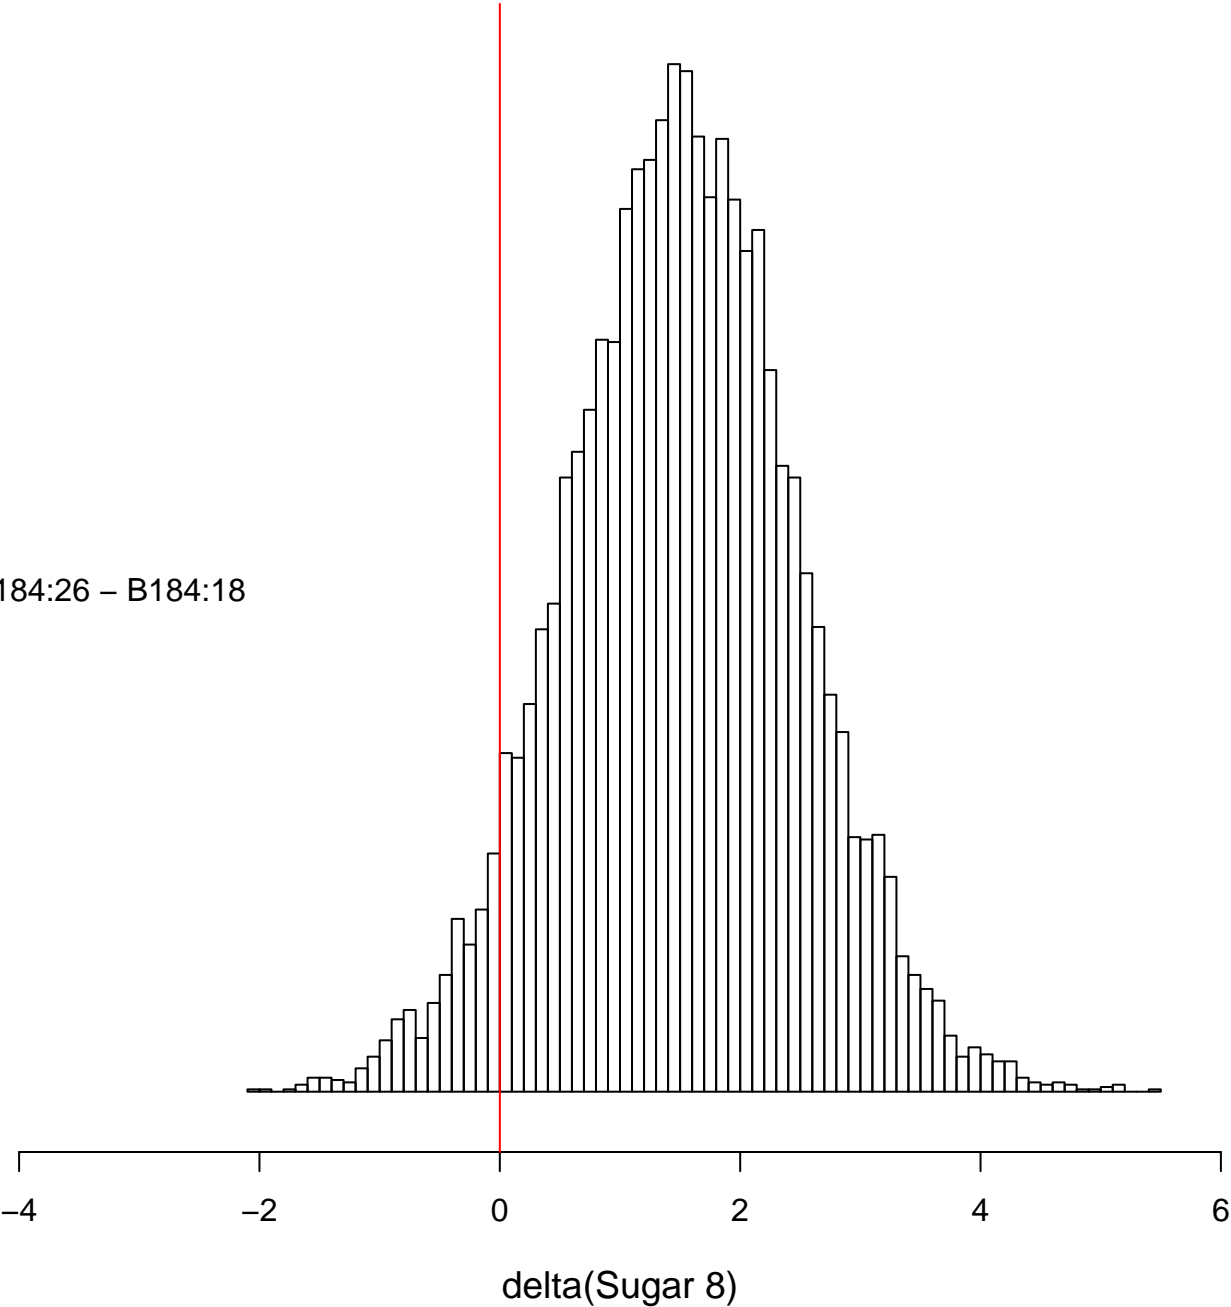

B184:26

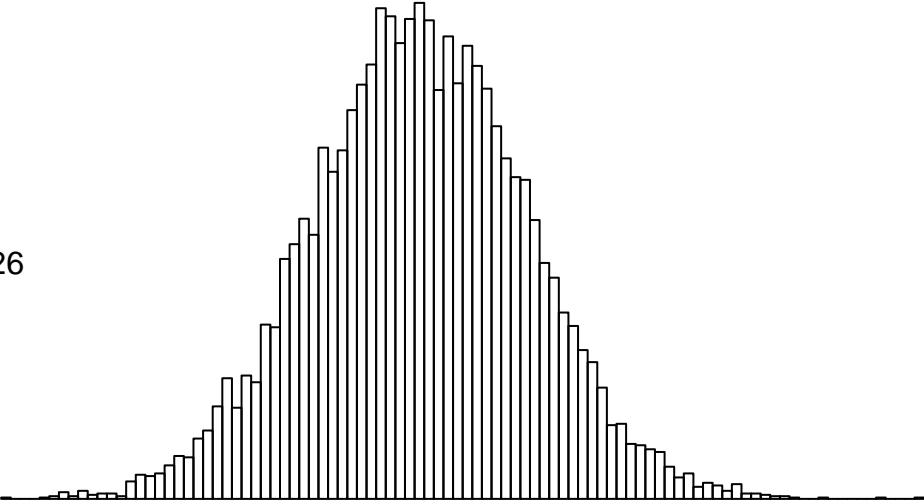

B184:18

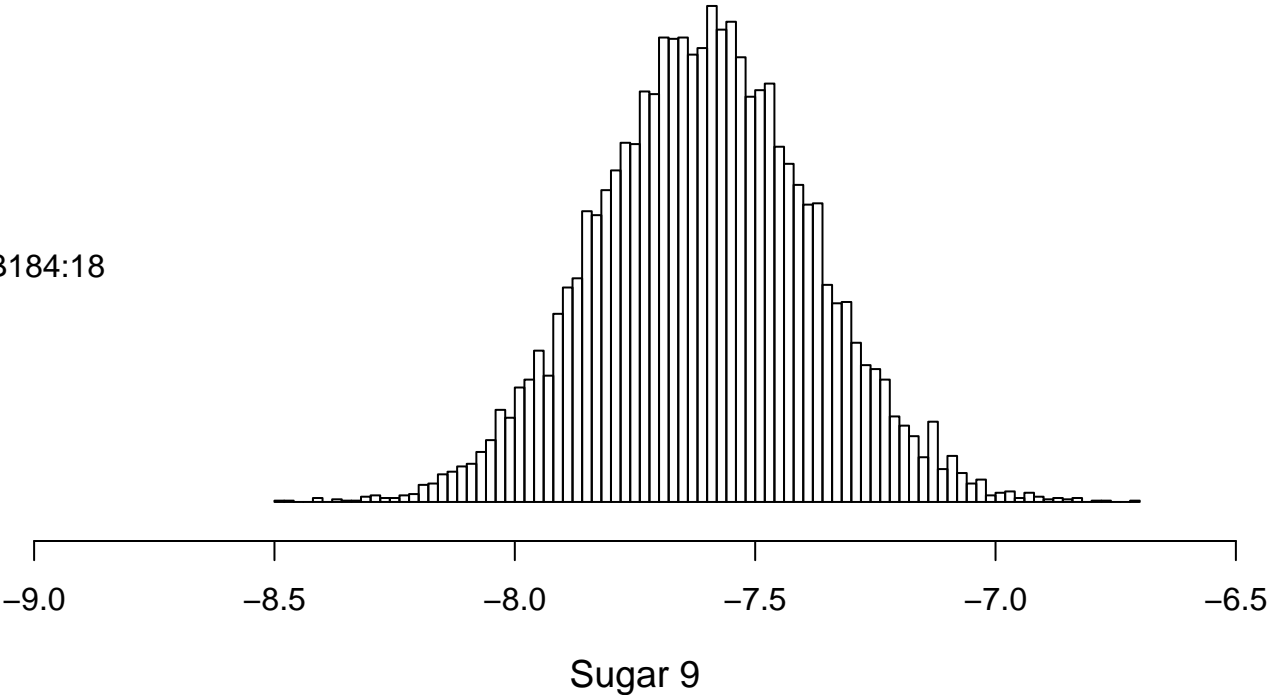

B184:26 – B184:18

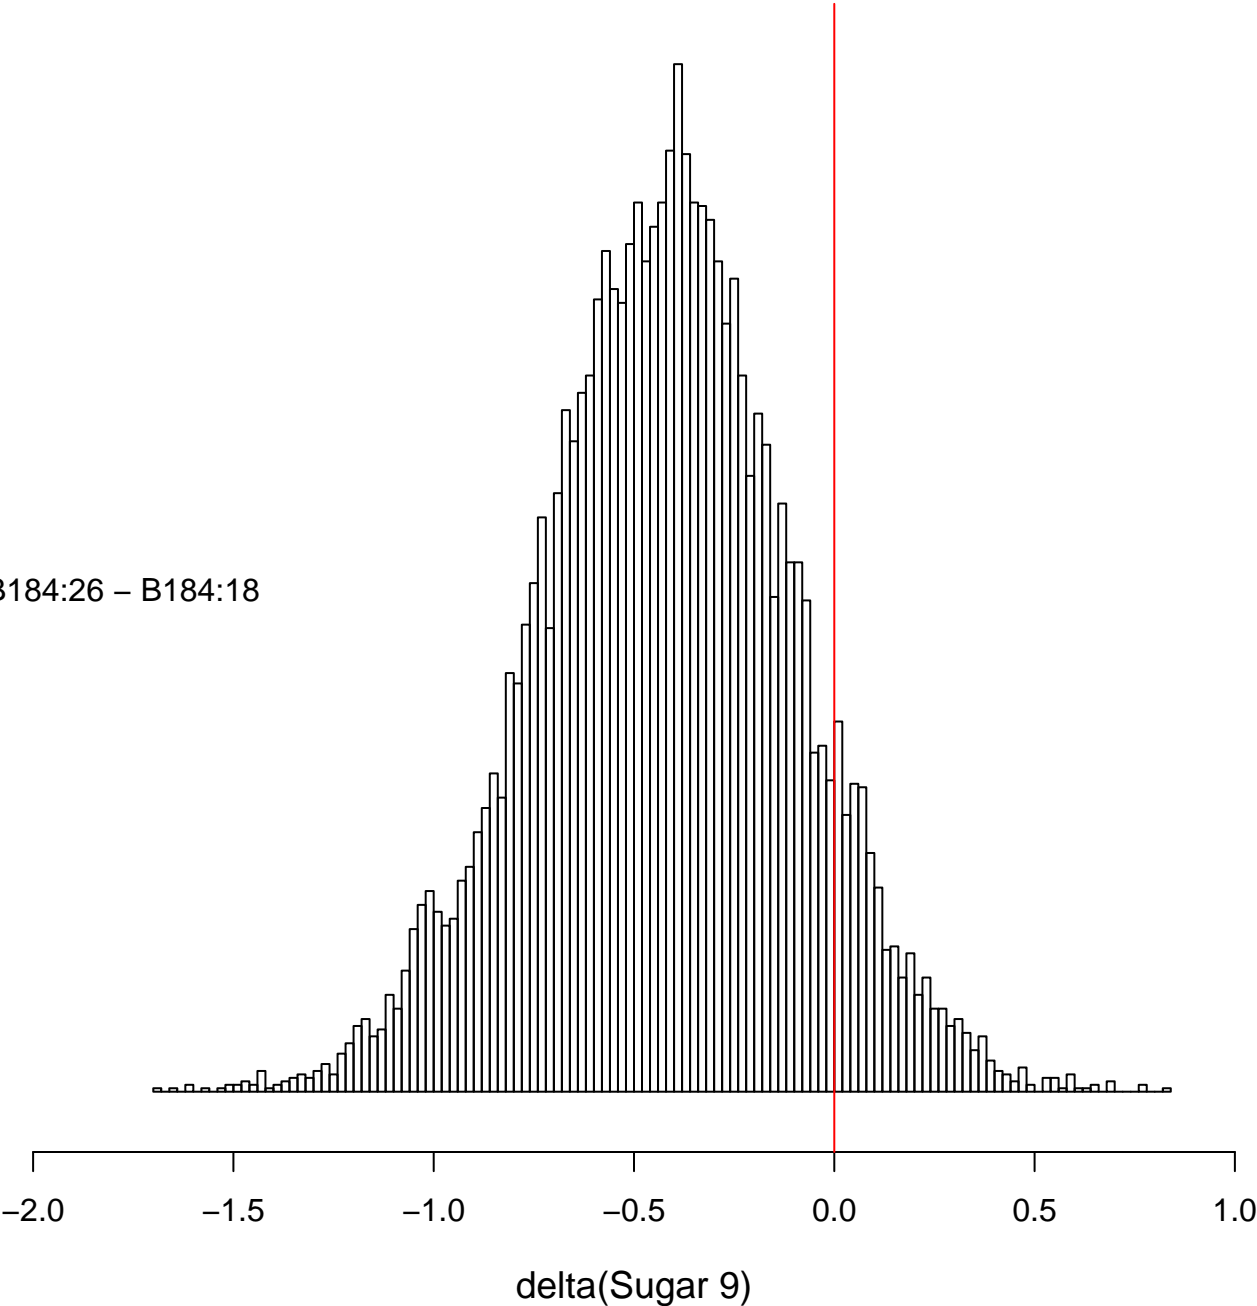

B184:26

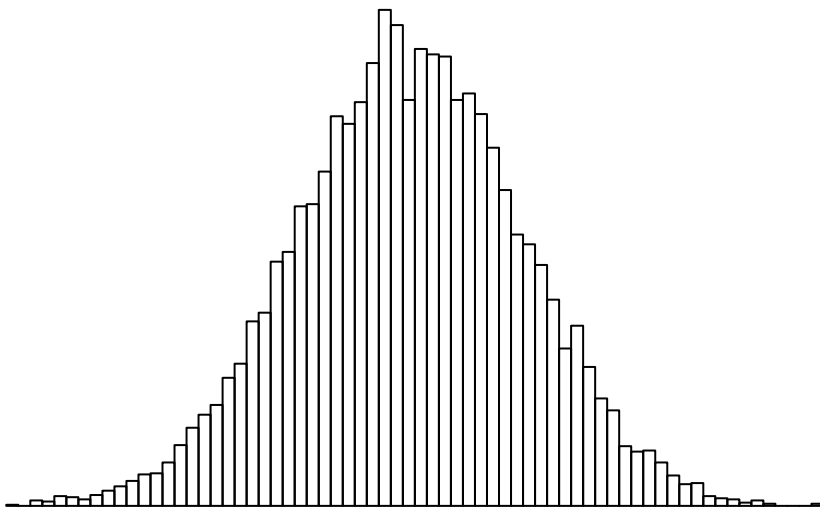

B184:18

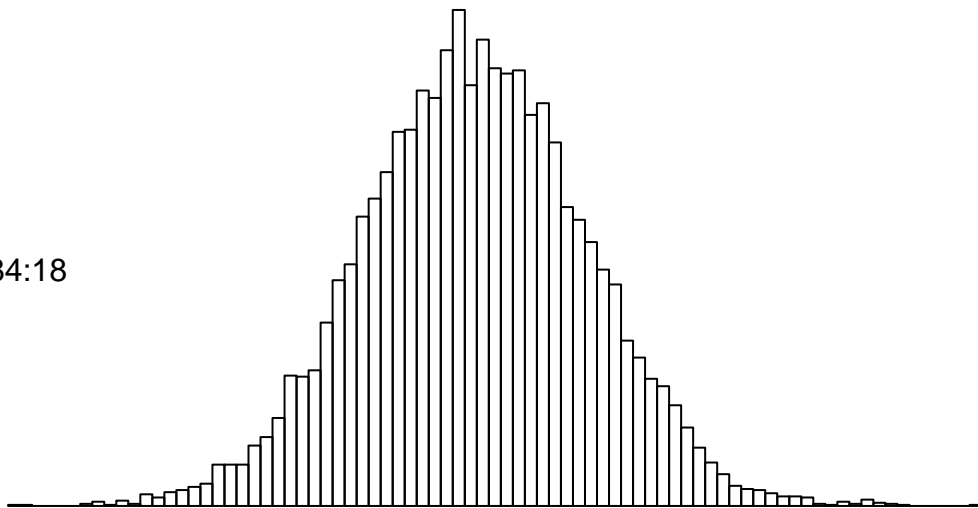

-8      -7      -6      -5      -4      -3

Sugar 10

B184:26 – B184:18

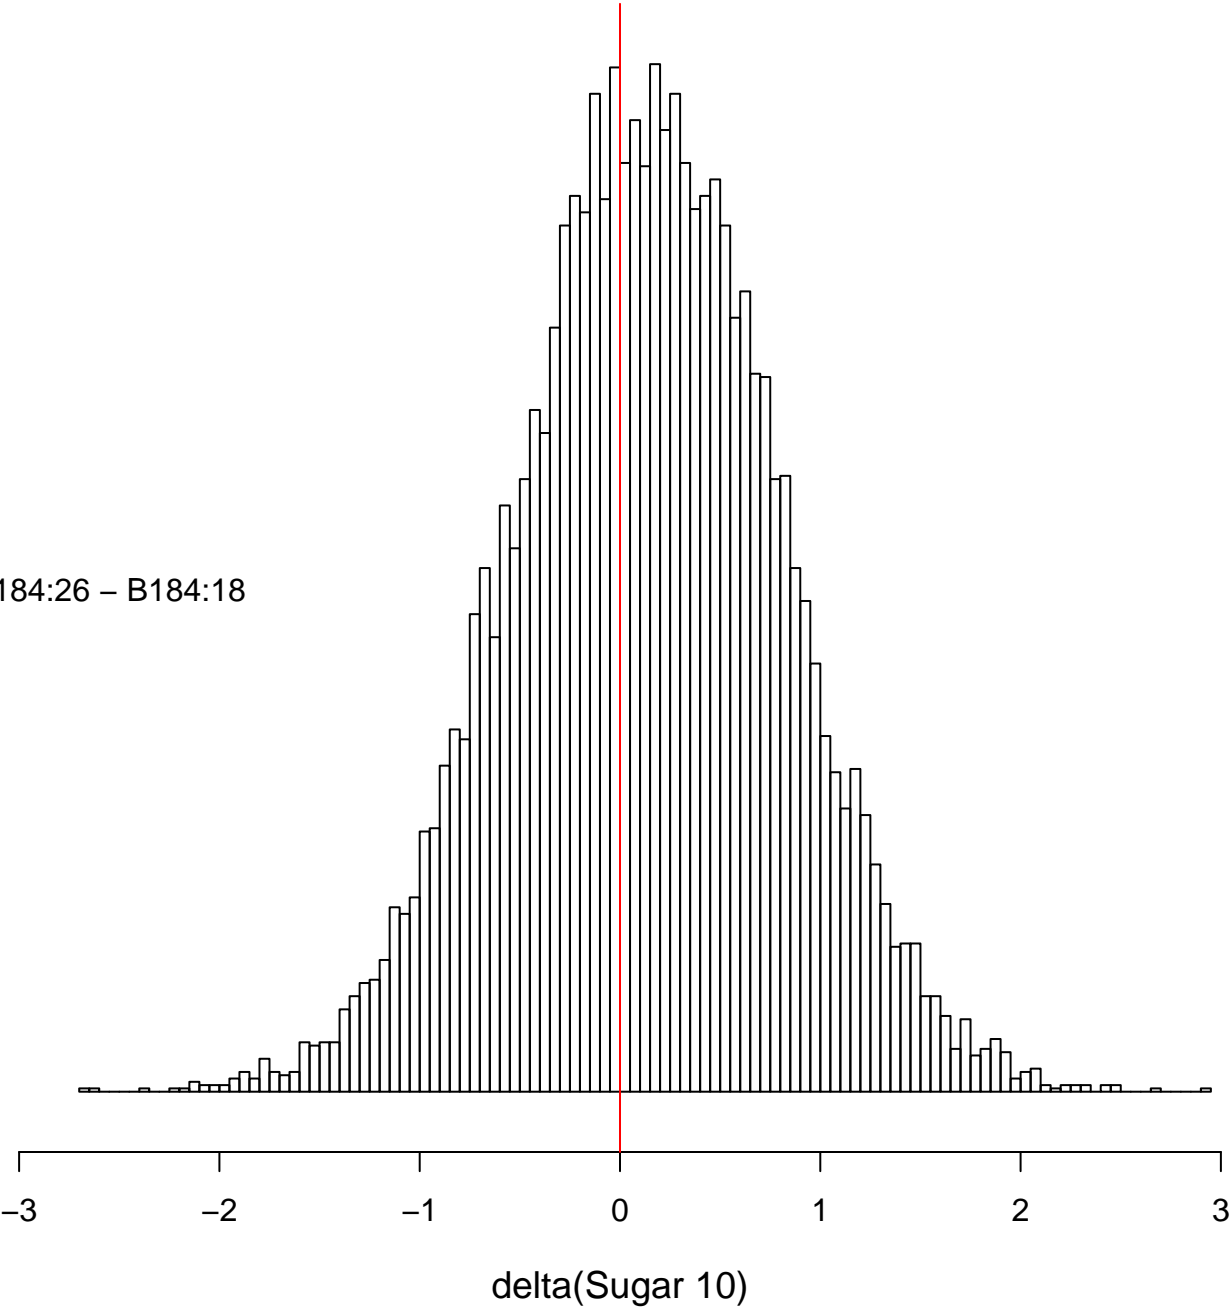

B184:26

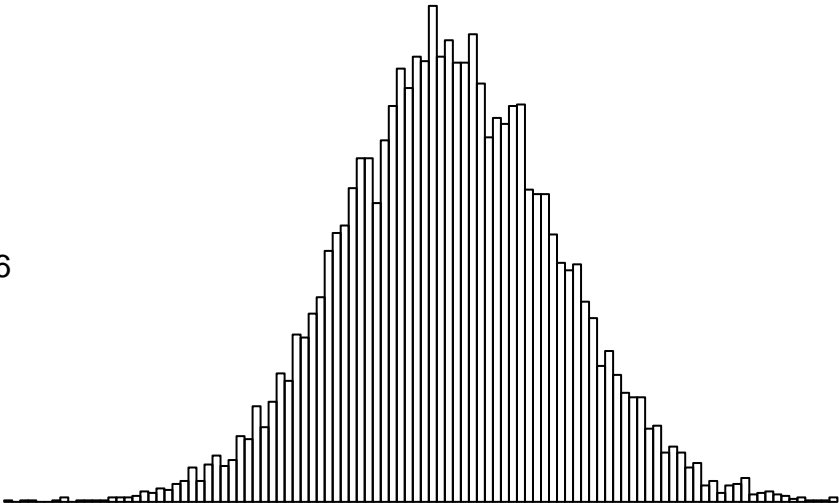

B184:18

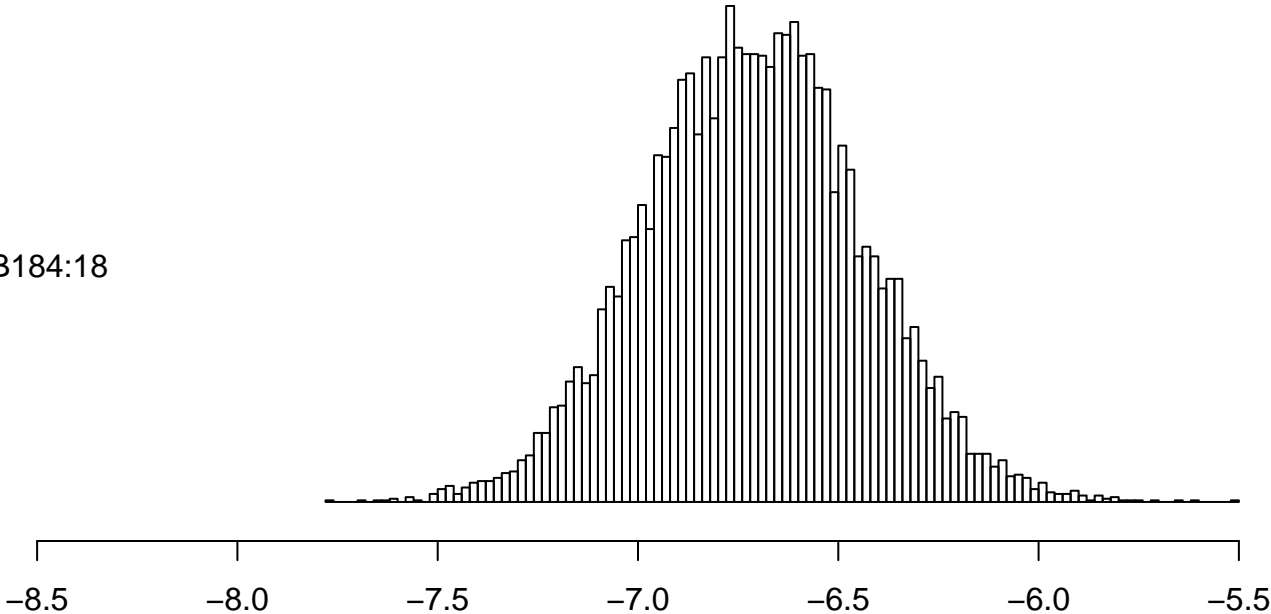

Sugar 11

B184:26 – B184:18

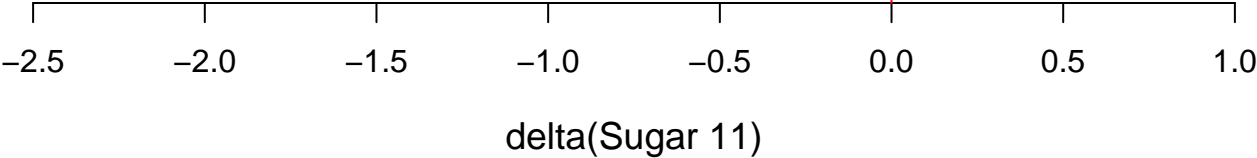



B184:26

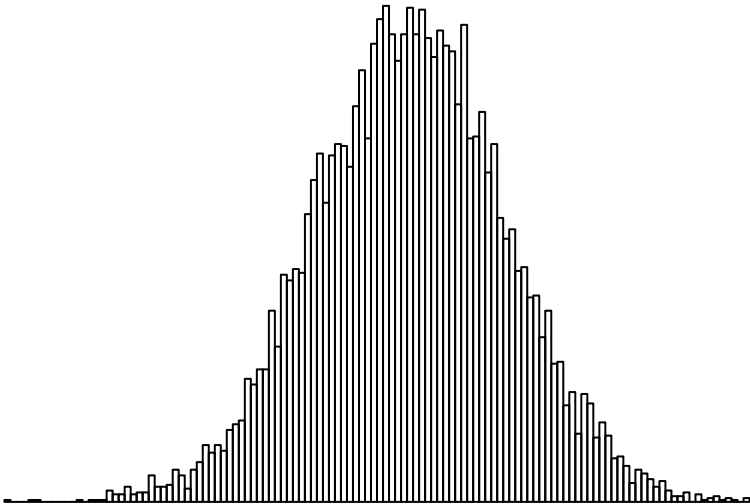

B184:18

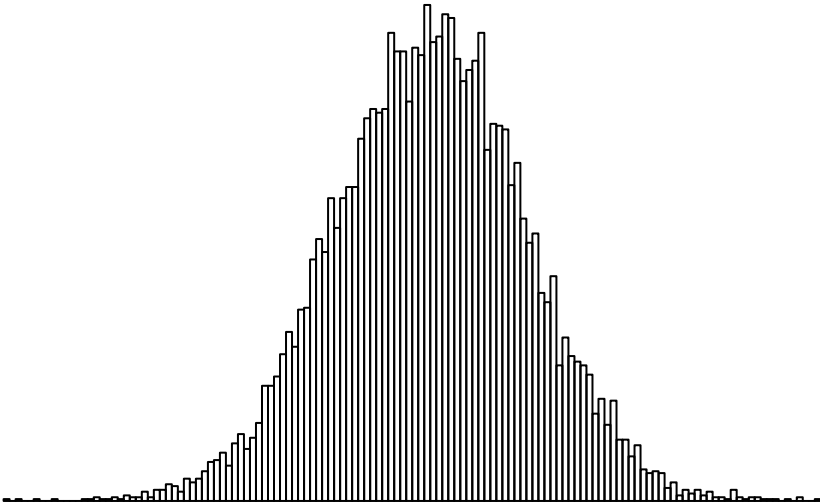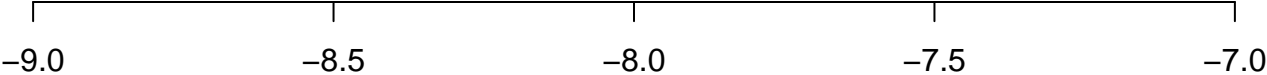

Sugar 12

B184:26 – B184:18

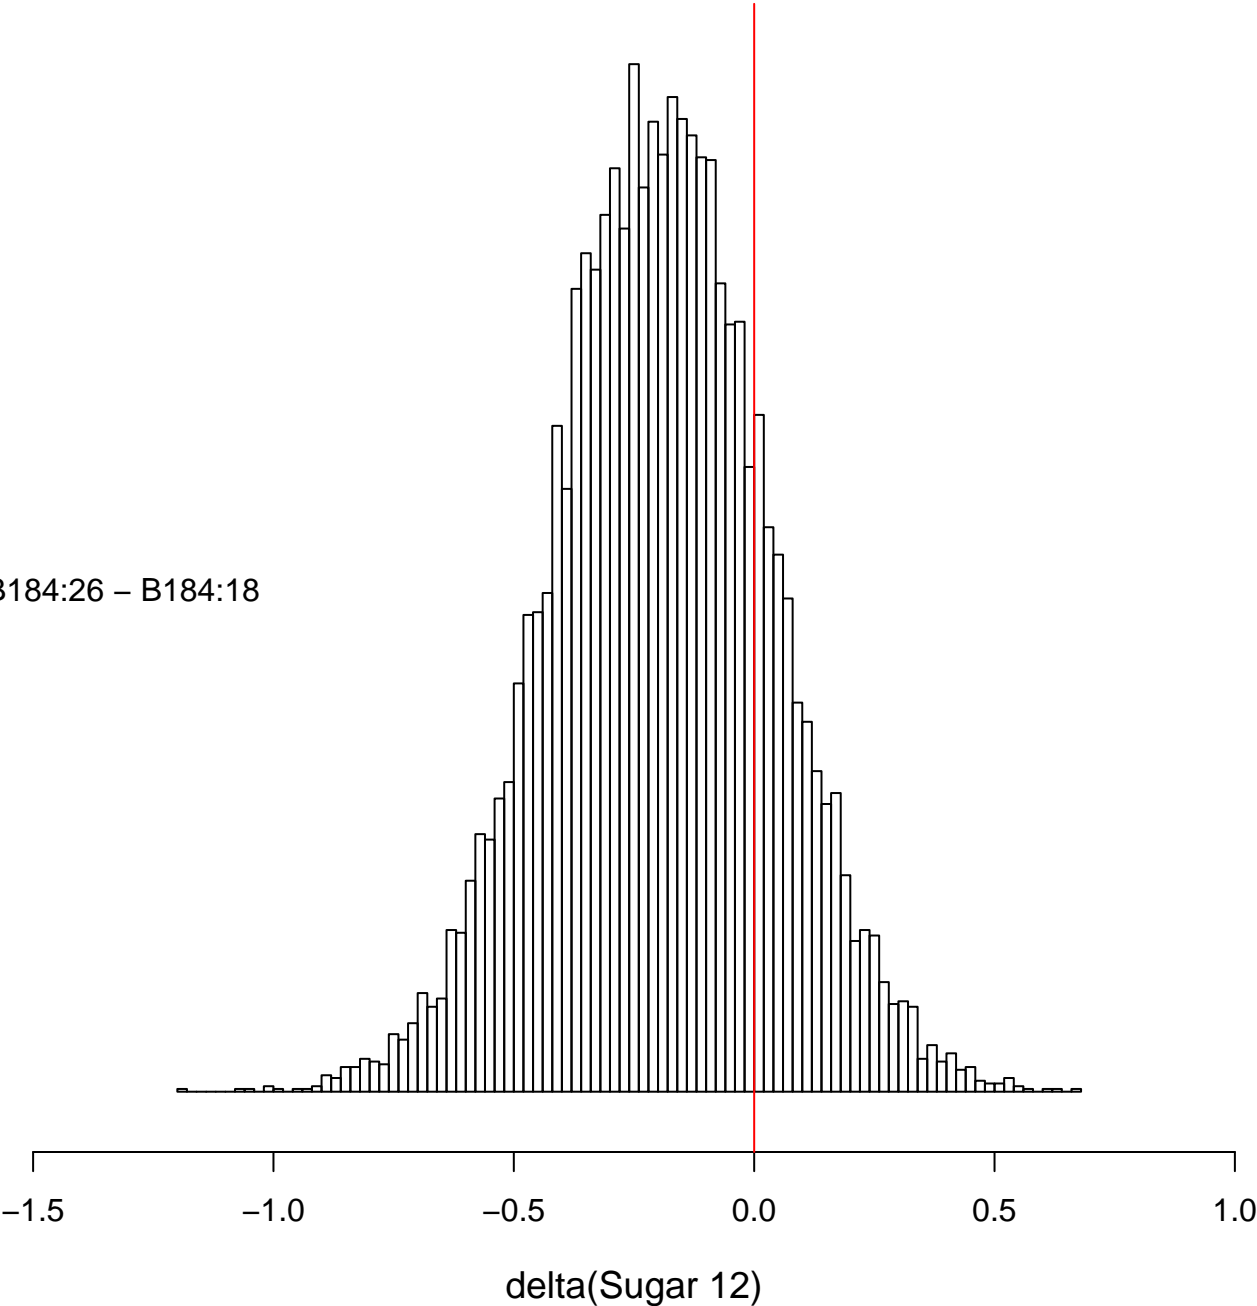

B184:26

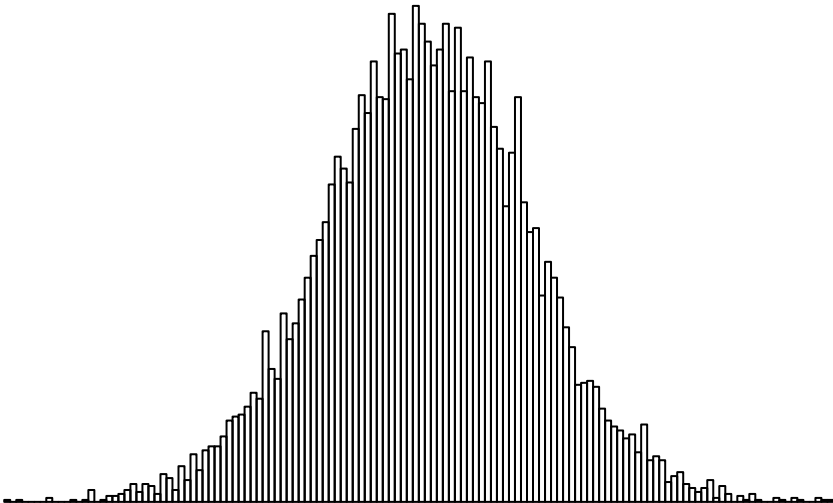

B184:18

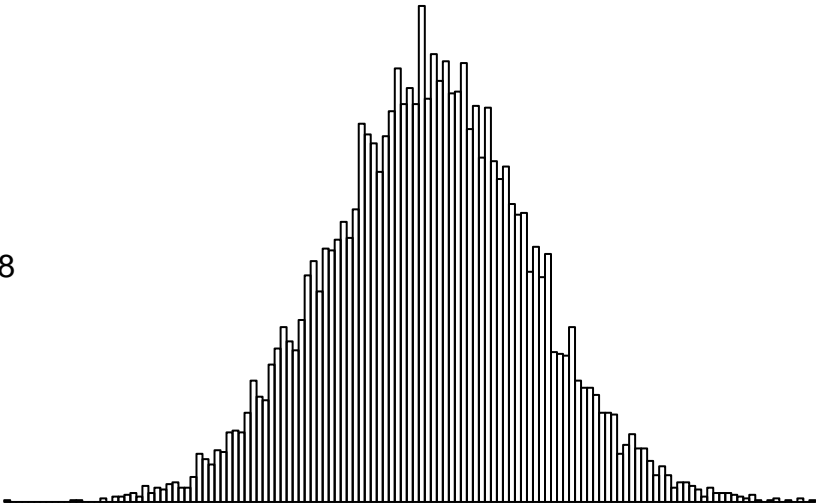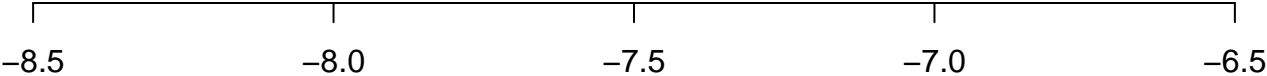

Sugar 14

B184:26 – B184:18

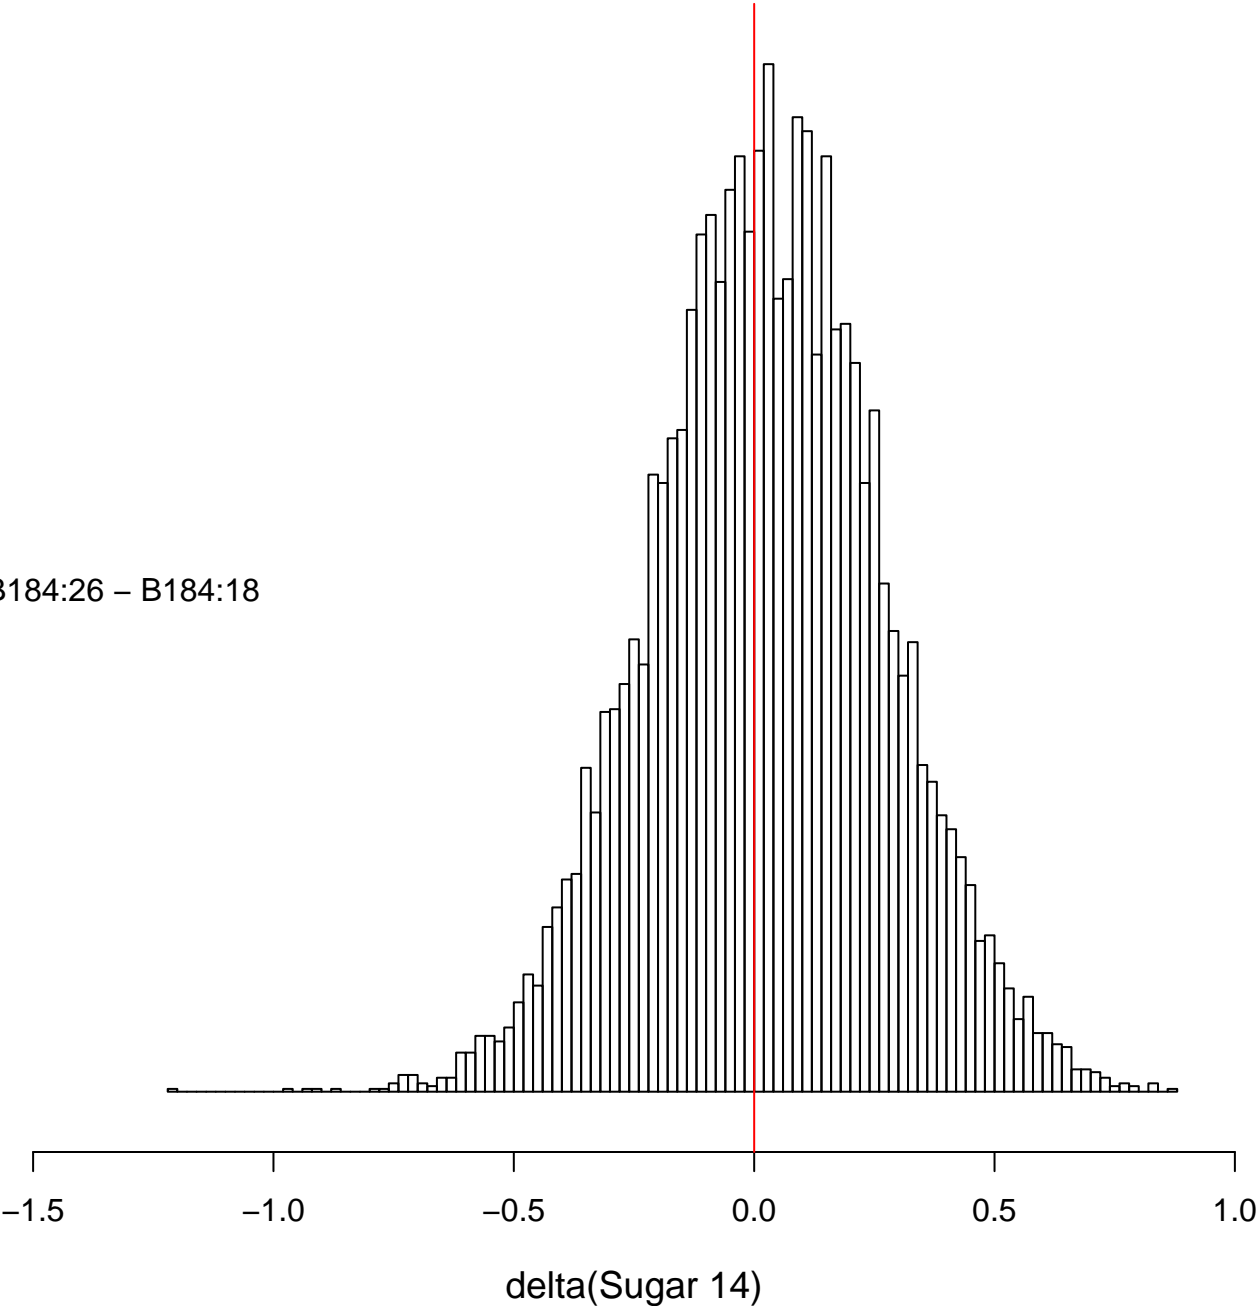

B184:26

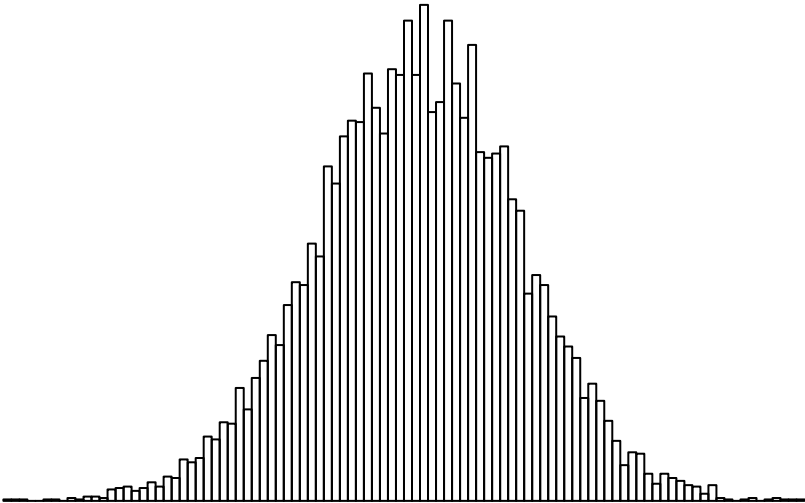

B184:18

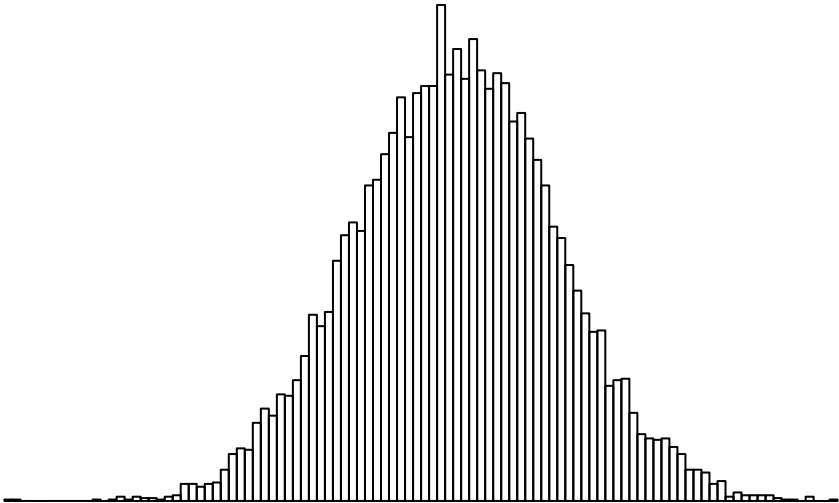

-9.0      -8.5      -8.0      -7.5      -7.0      -6.5      -6.0

Sugar 16

B184:26 – B184:18

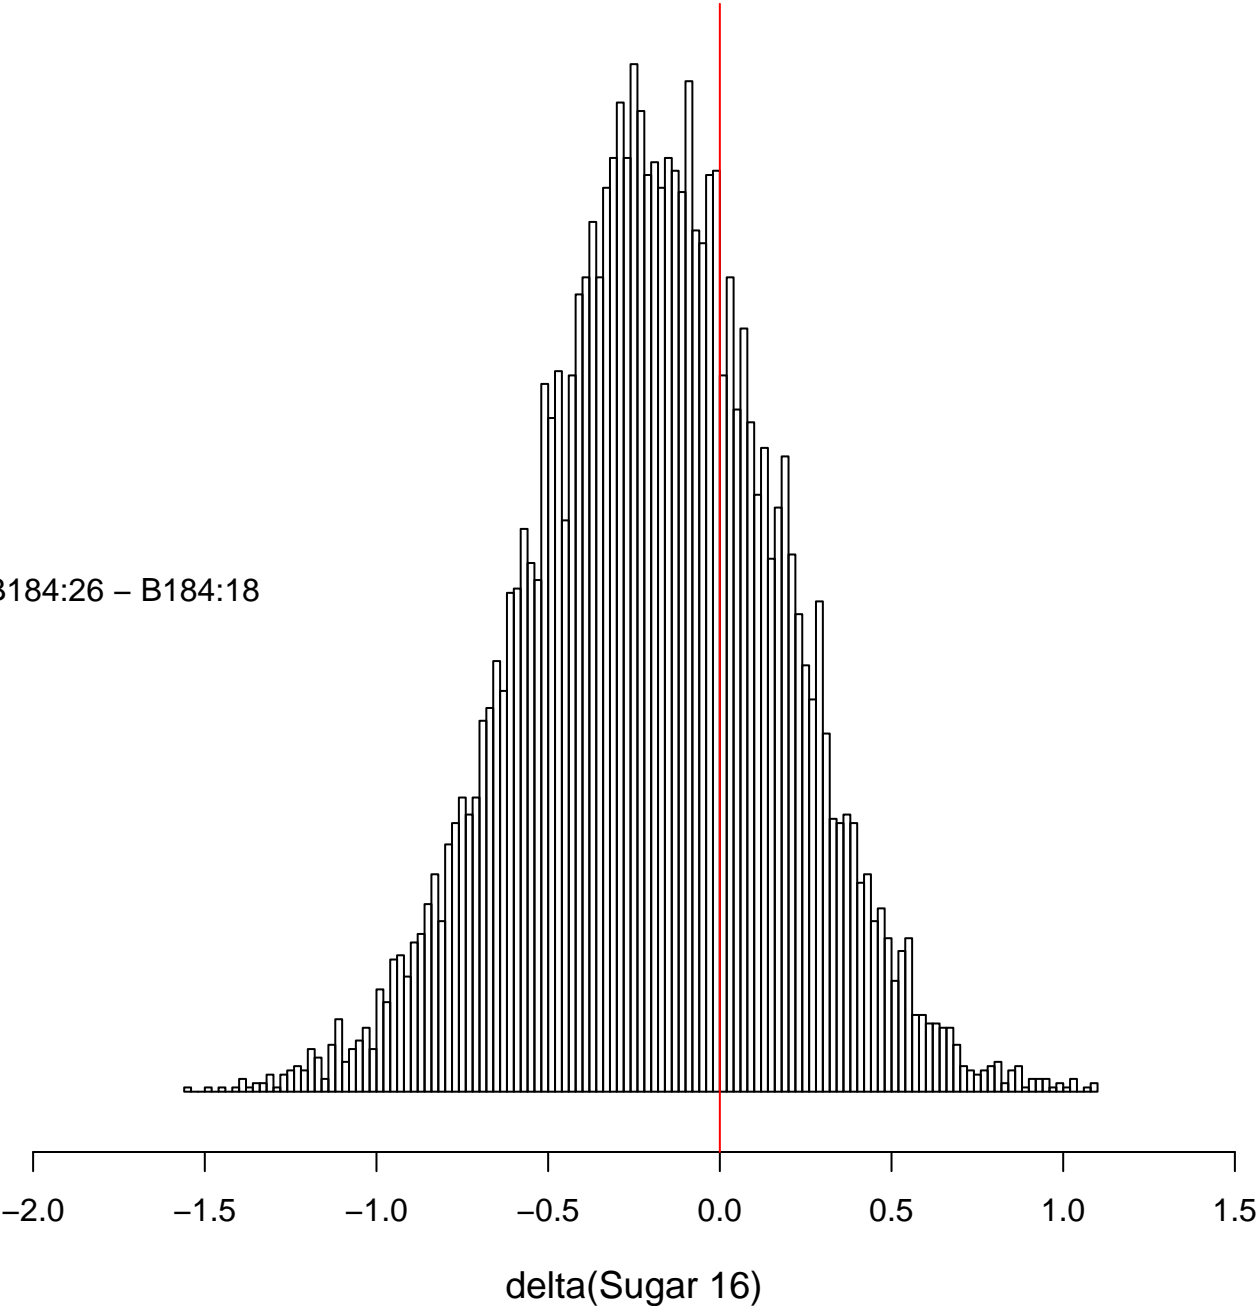

B184:26

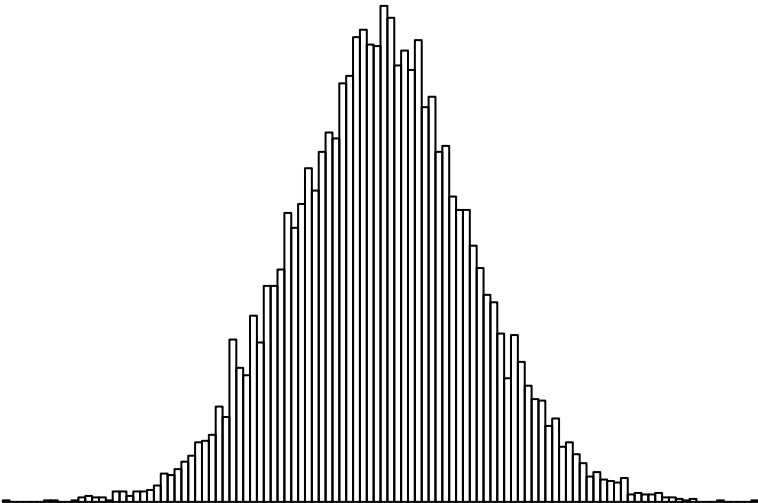

B184:18

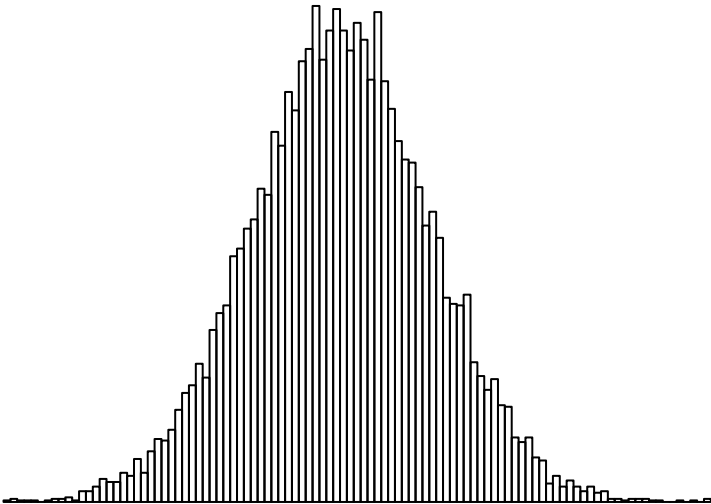

-6.5      -6.0      -5.5      -5.0      -4.5      -4.0      -3.5      -3.0

Sugar 17

B184:26 – B184:18

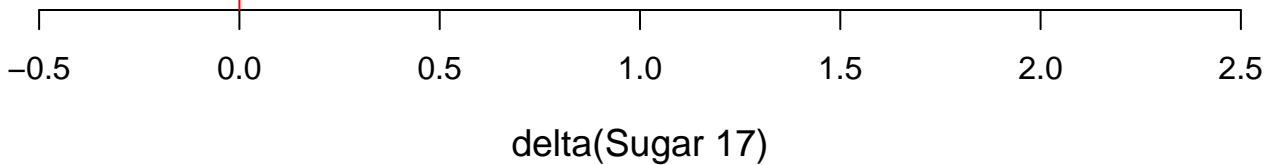



B184:26

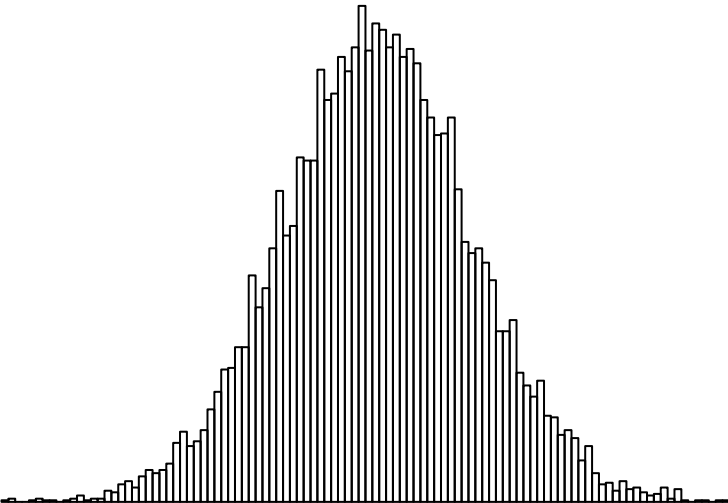

B184:18

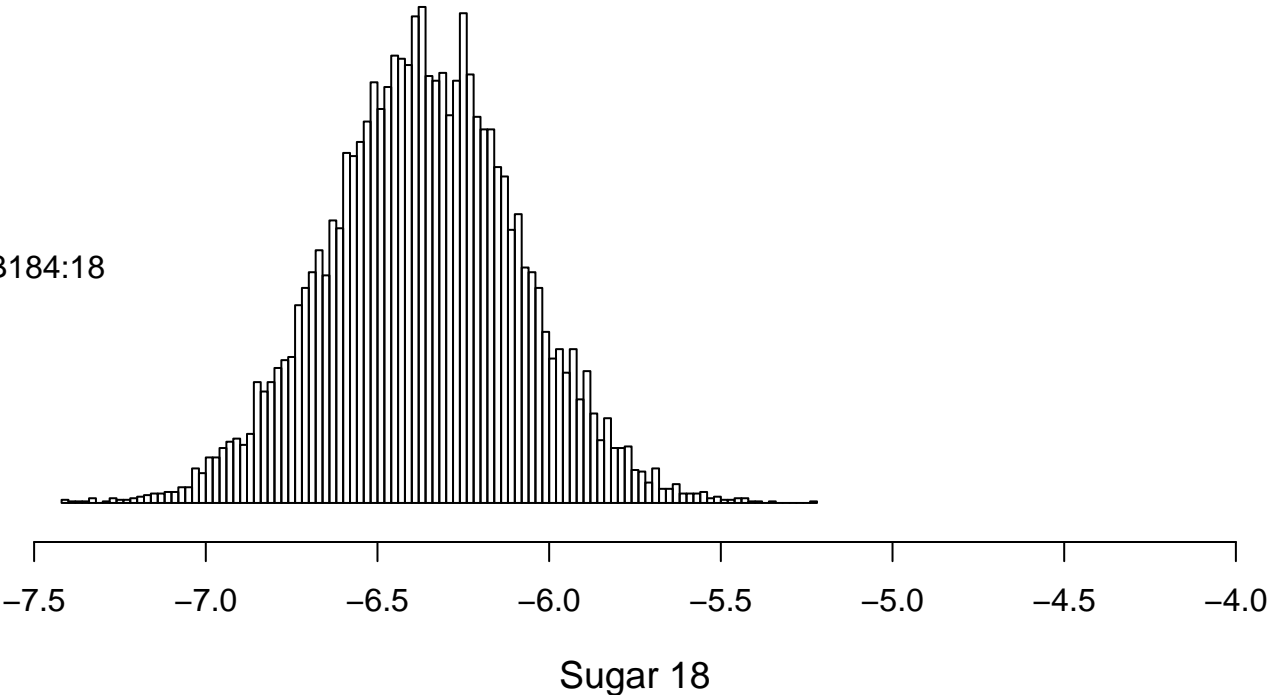

B184:26 – B184:18

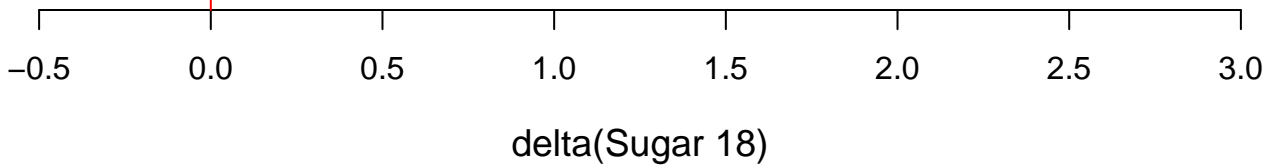

B184:26

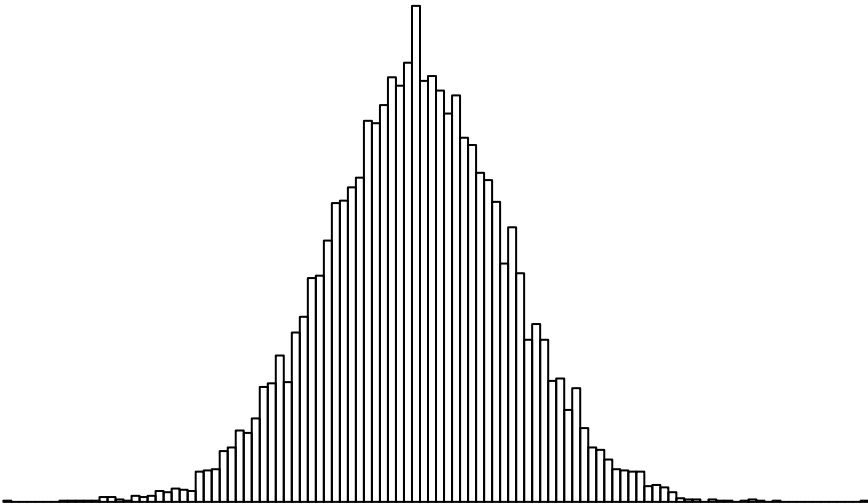

B184:18

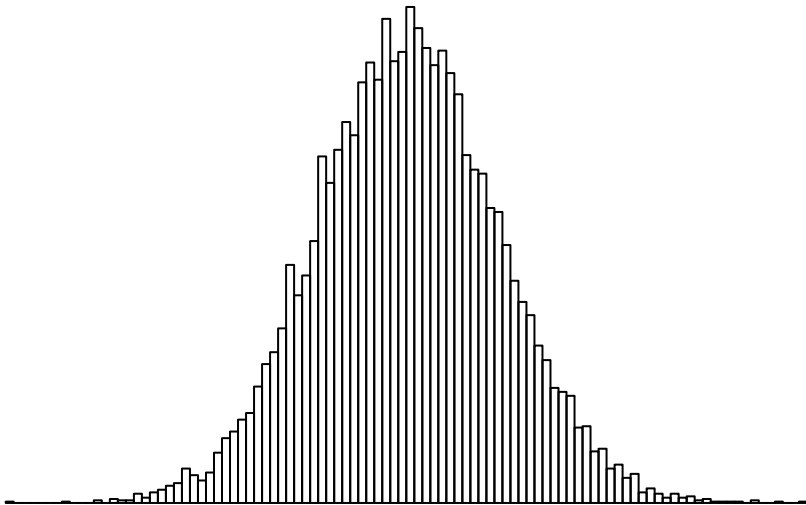

-9.0      -8.5      -8.0      -7.5      -7.0      -6.5      -6.0

Sugar 20

B184:26 – B184:18

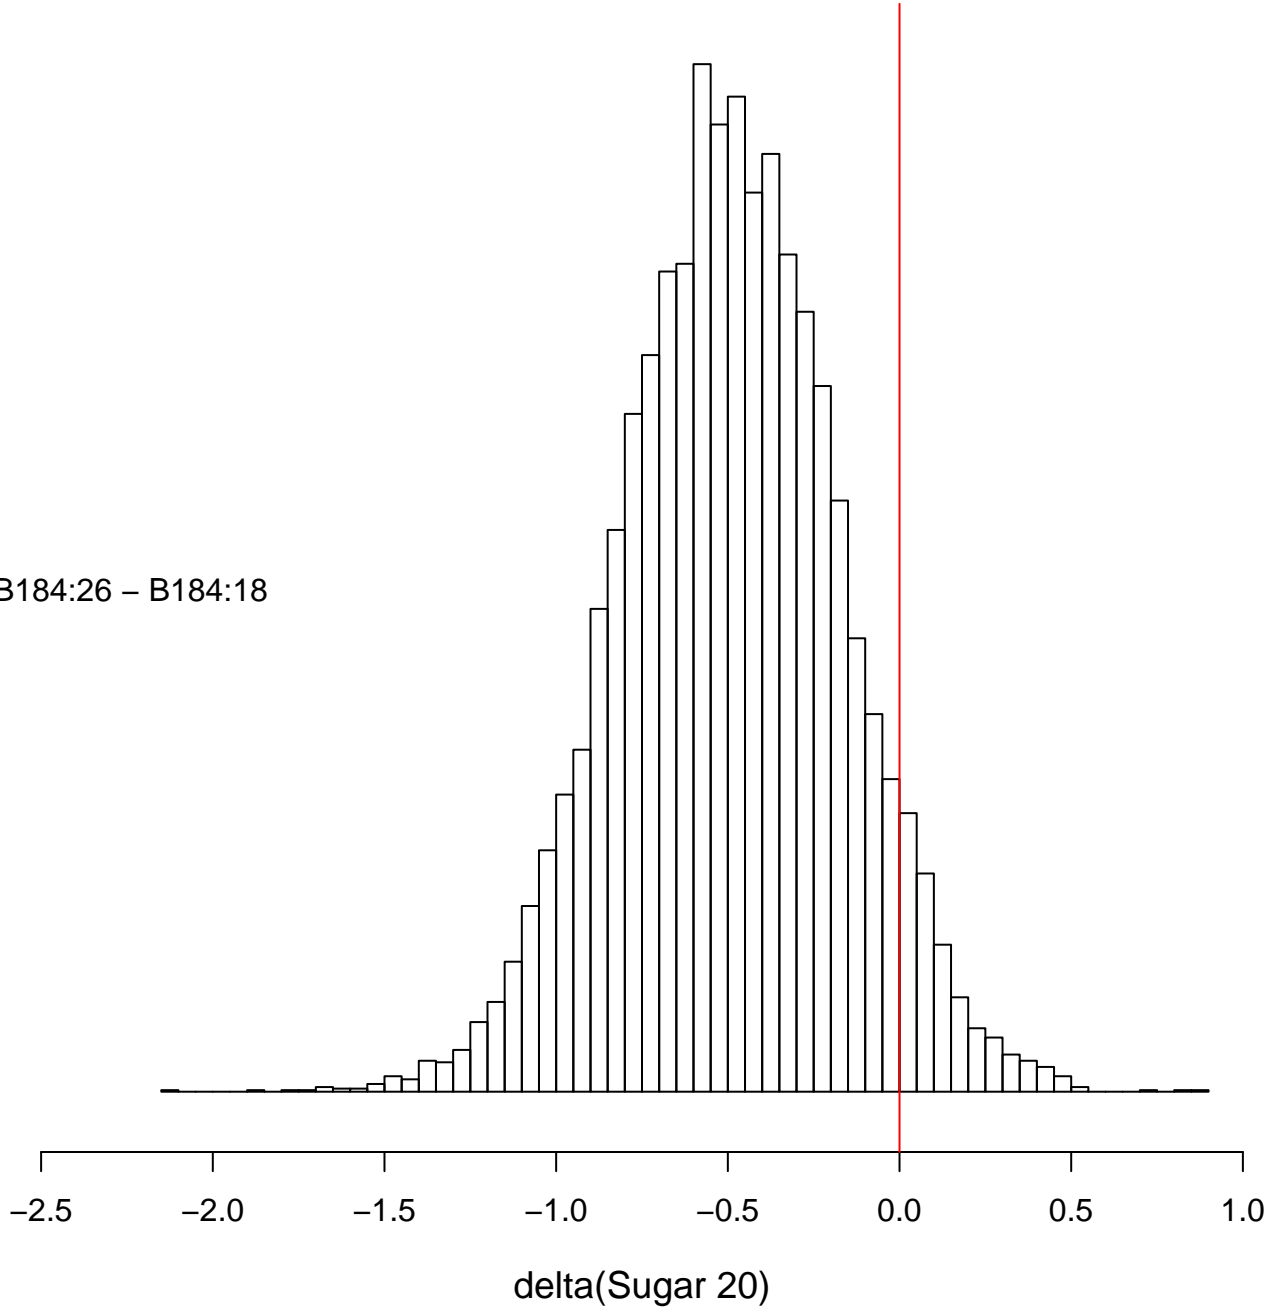

B184:26

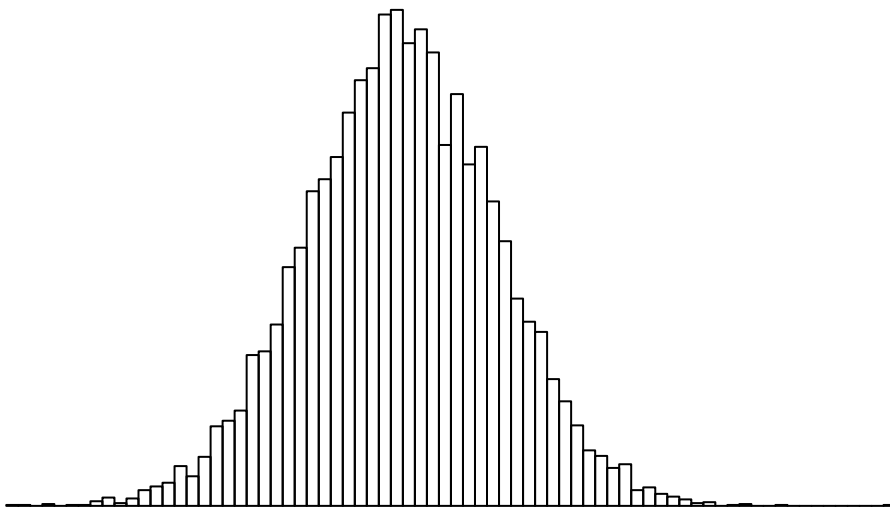

B184:18

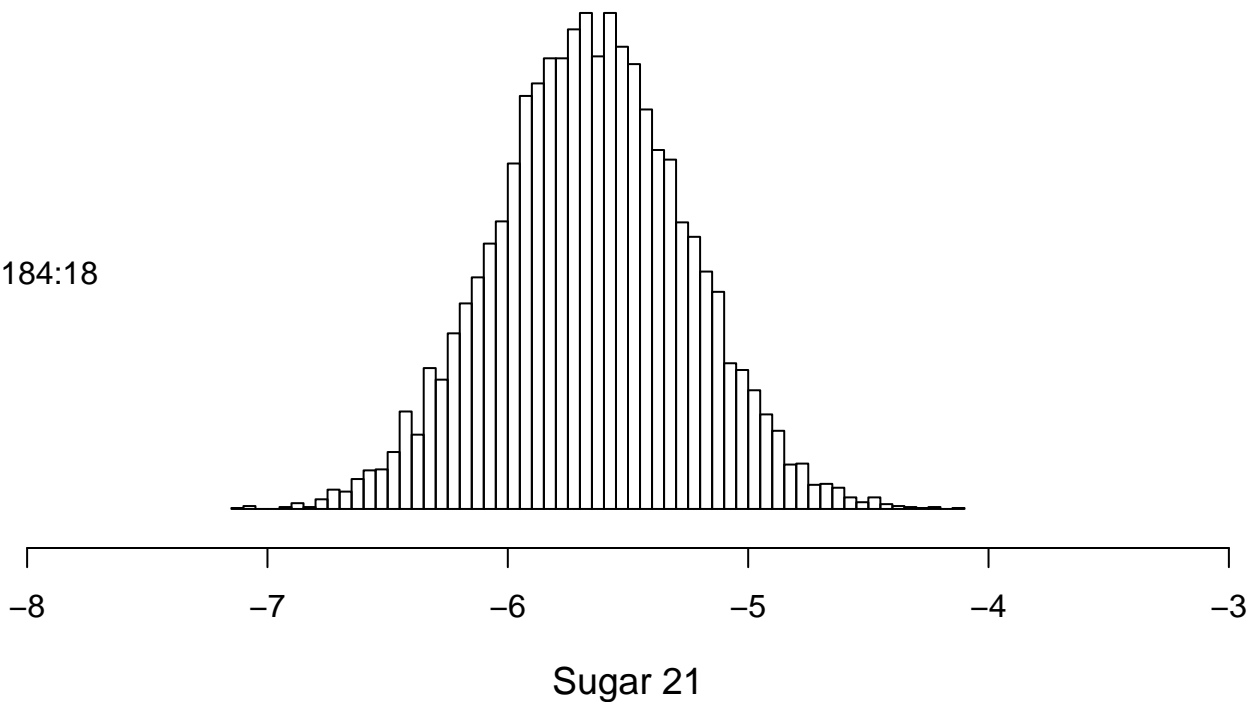

B184:26 – B184:18

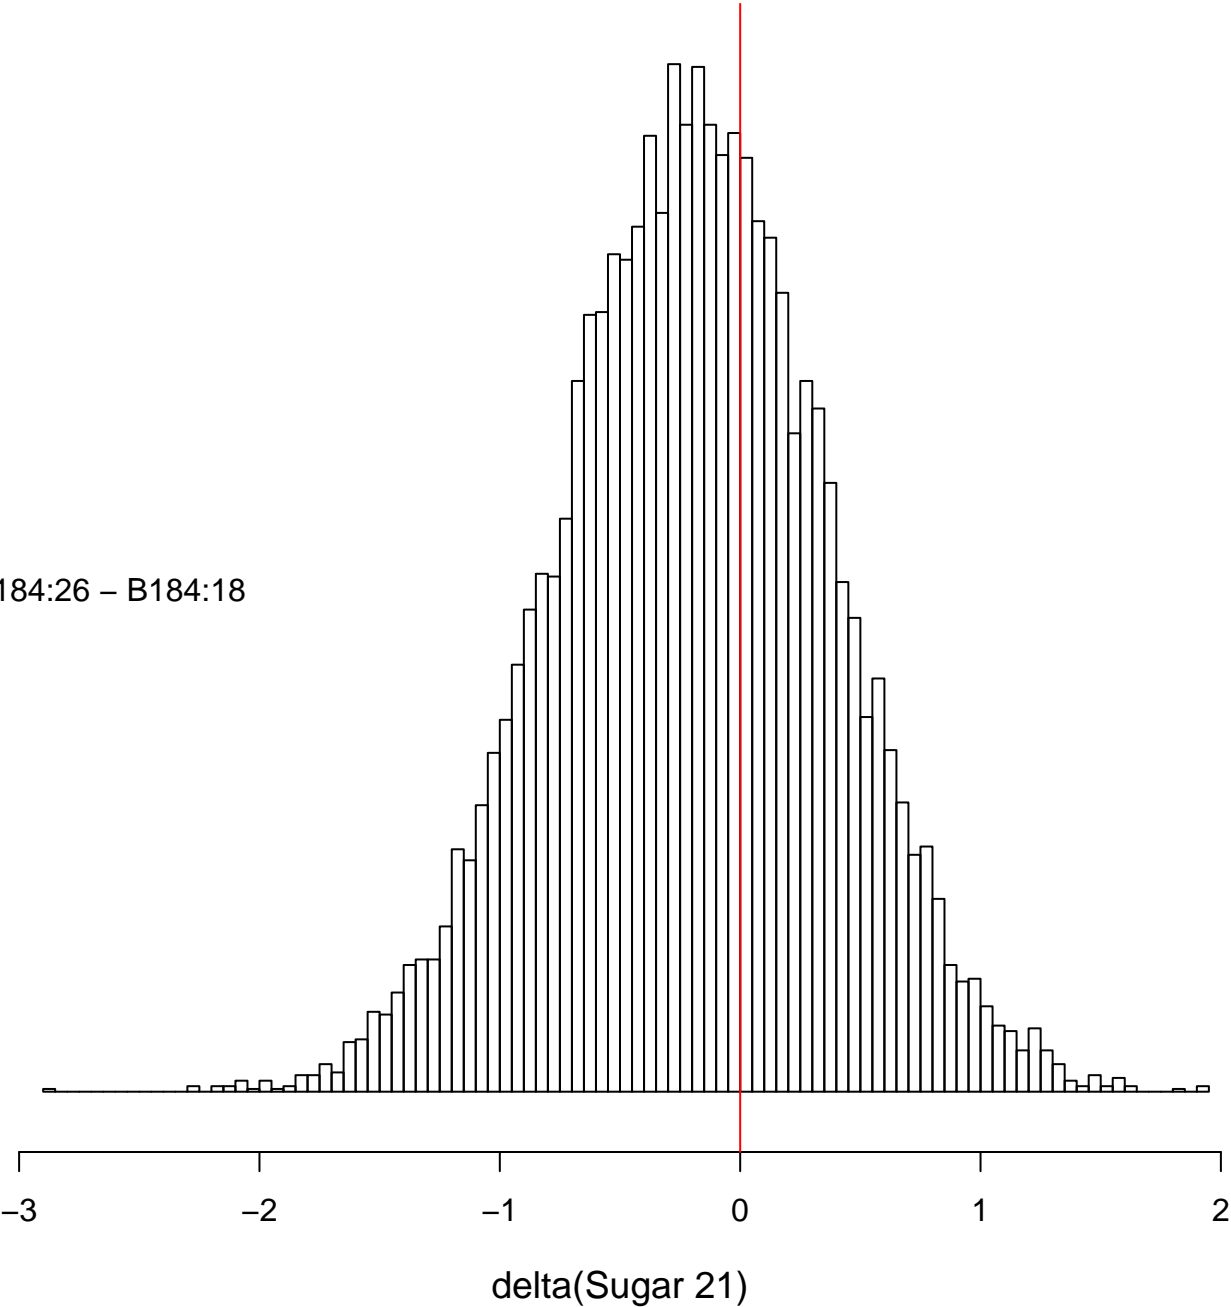

B184:26

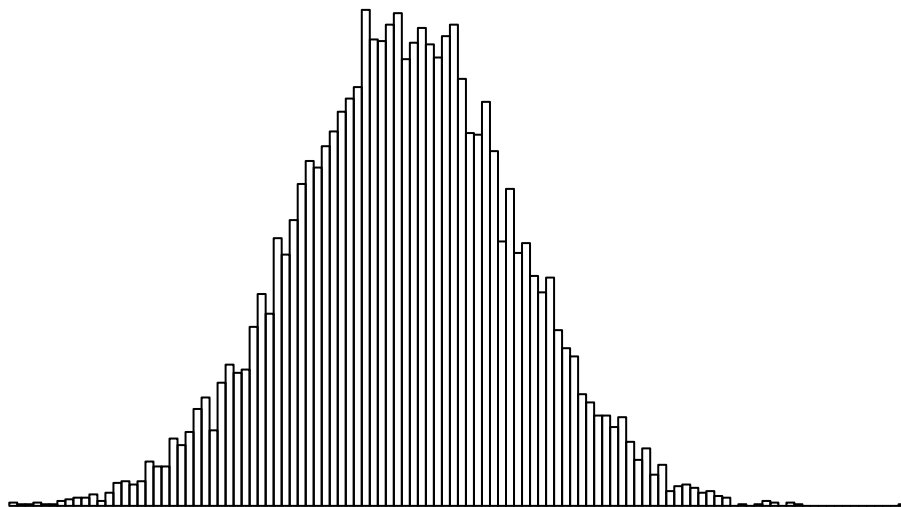

B184:18

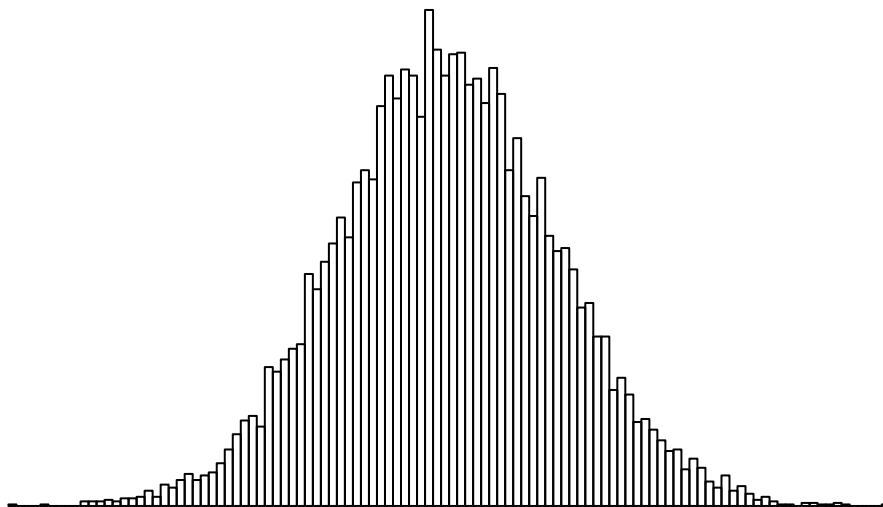

-6.5      -6.0      -5.5      -5.0      -4.5      -4.0      -3.5

Sugar 22

B184:26 – B184:18

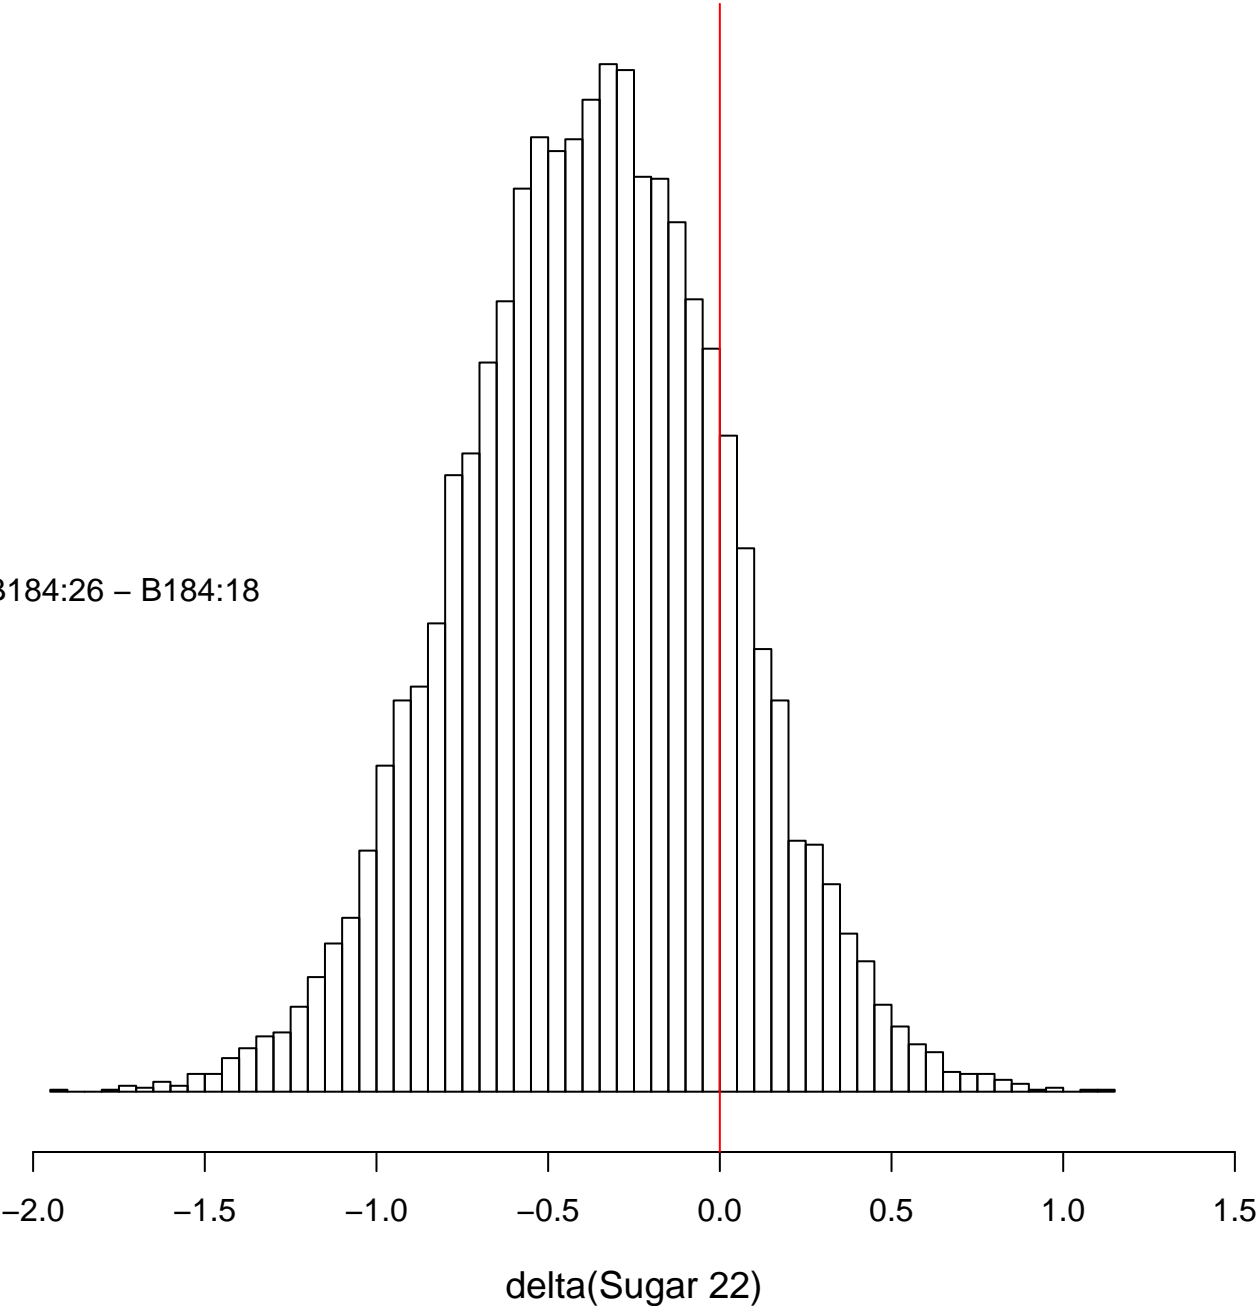



B184:26

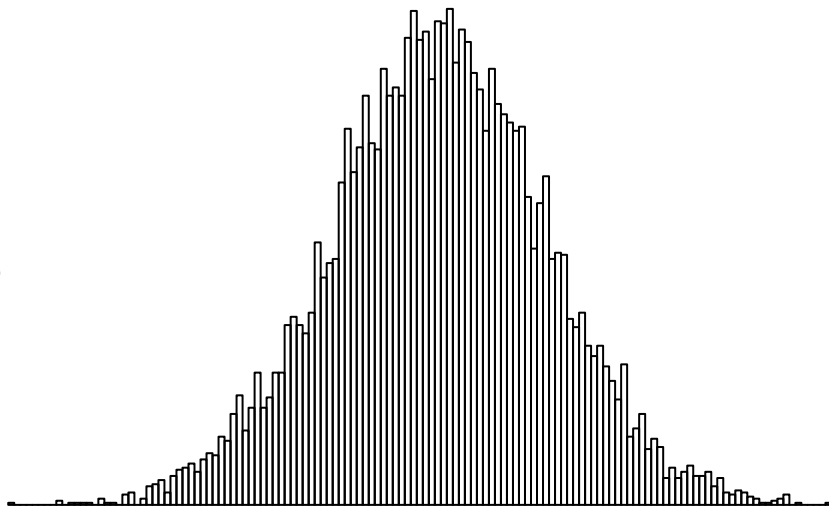

B184:18

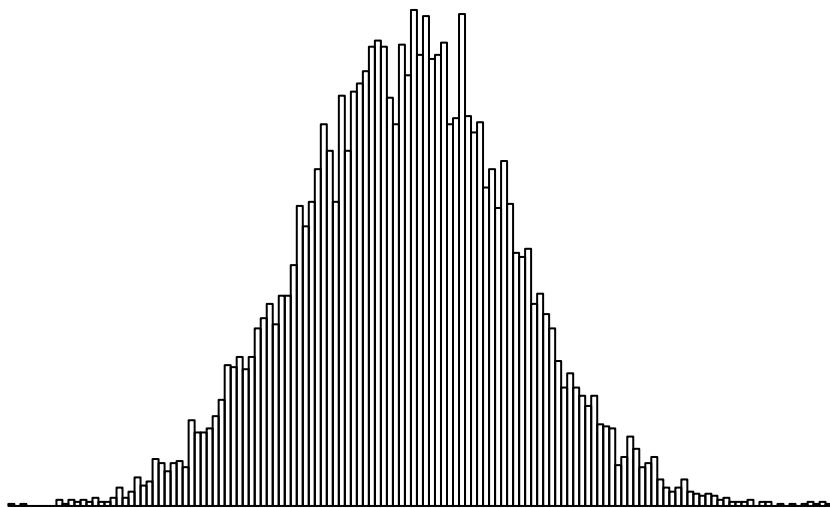

-7.5

-7.0

-6.5

-6.0

-5.5

Sugar 23

B184:26 – B184:18

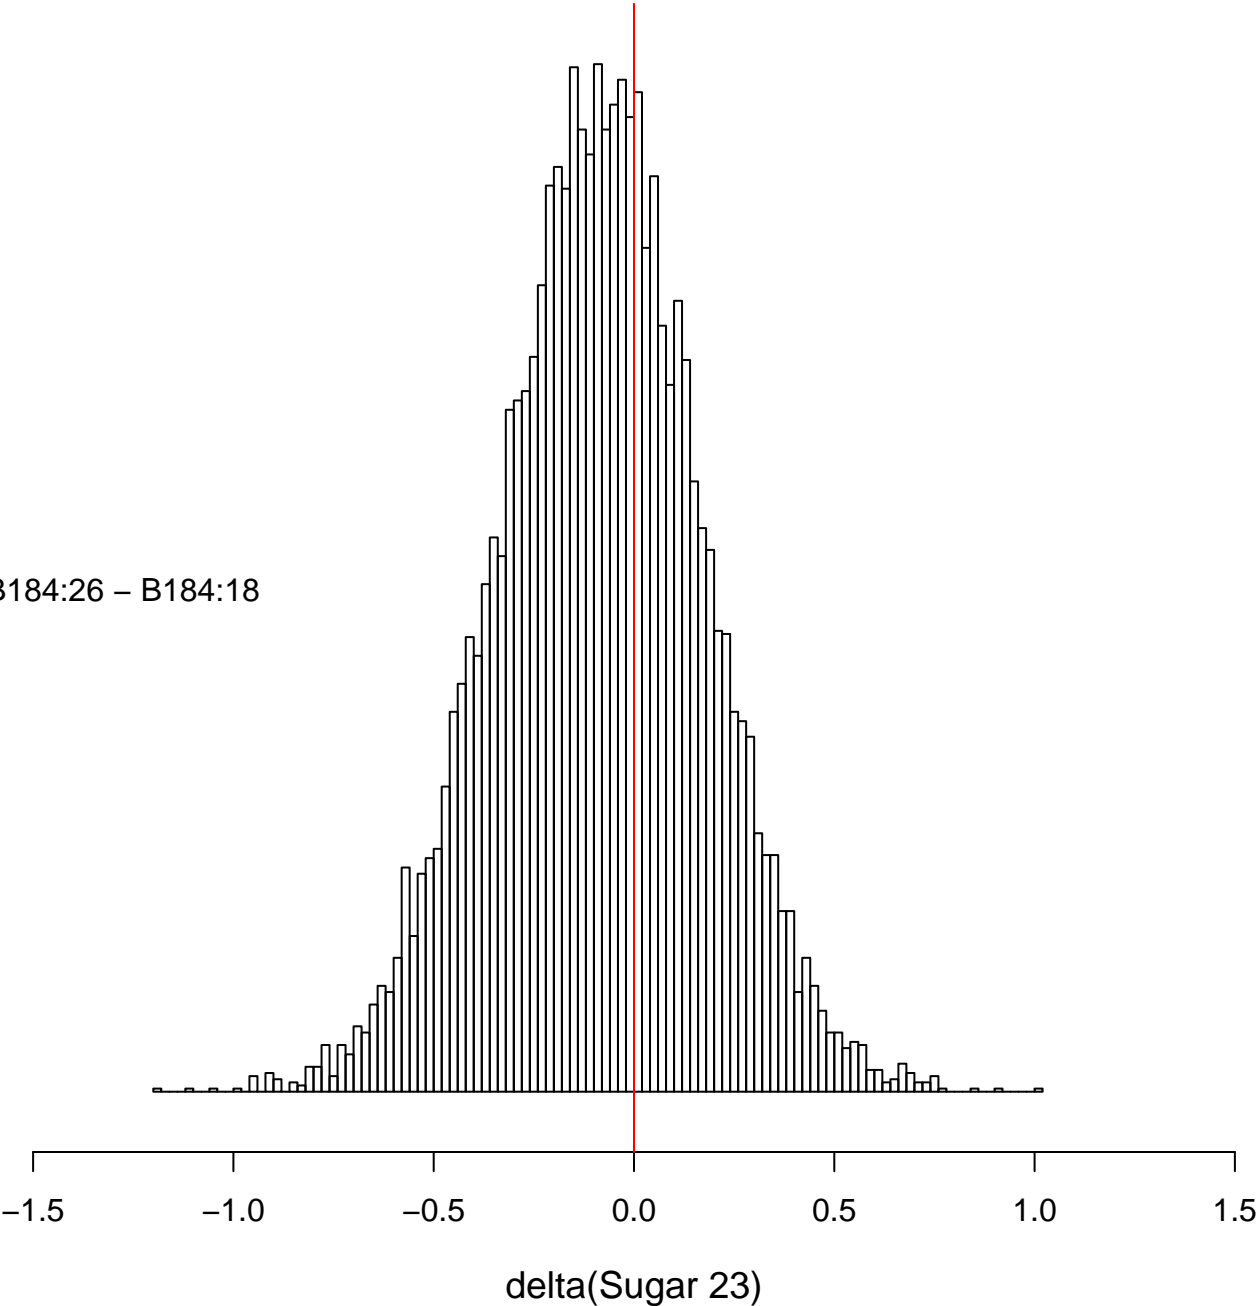

B184:26

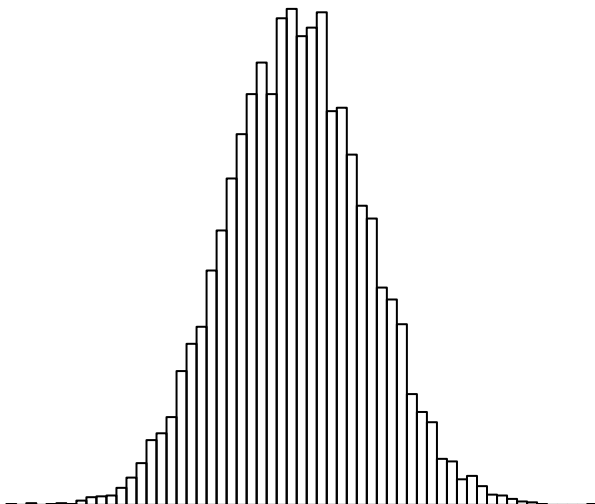

B184:18

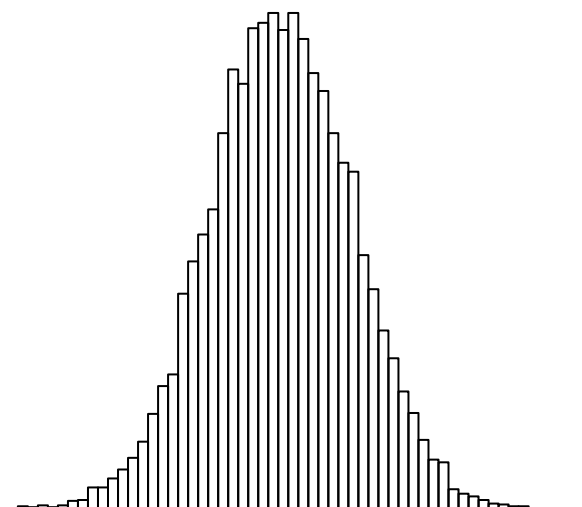

-9 -8 -7 -6 -5 -4 -3

Sugar 24

B184:26 – B184:18

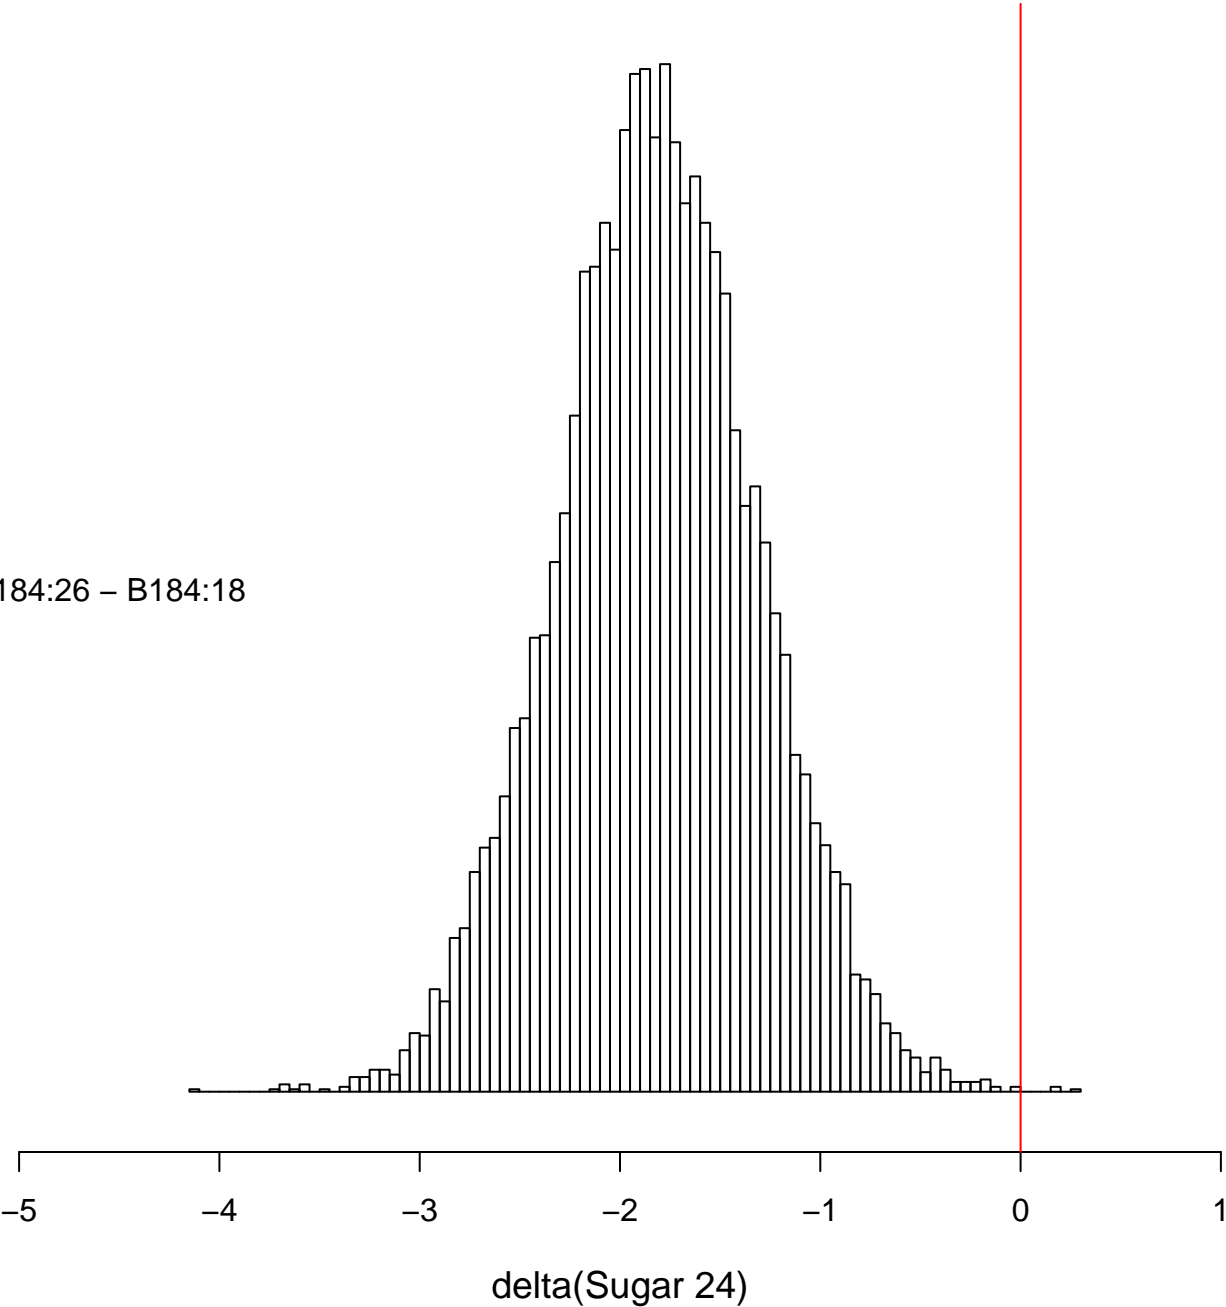

B184:26

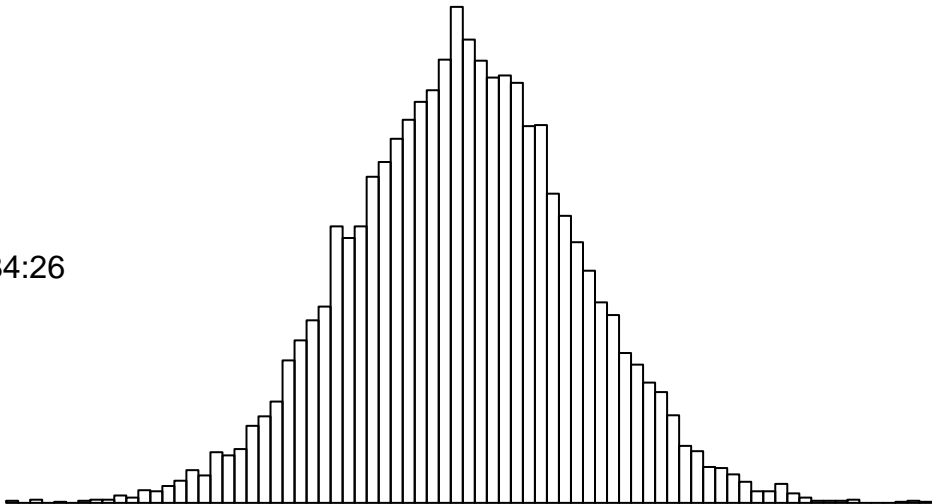

B184:18

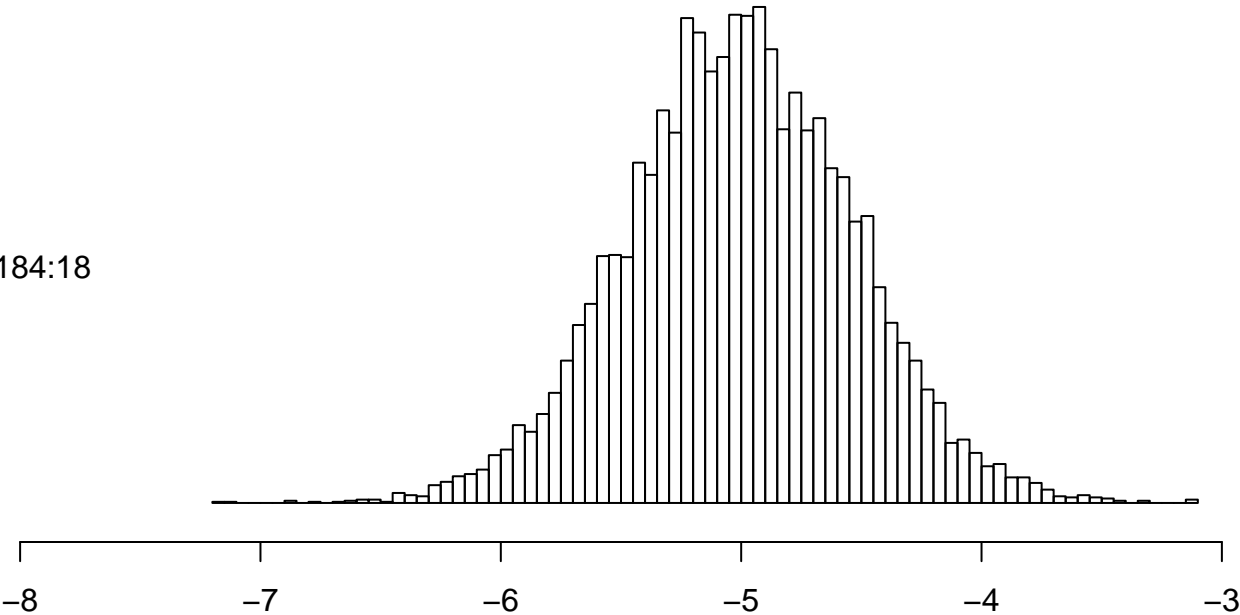

Alcohol 1

B184:26 – B184:18

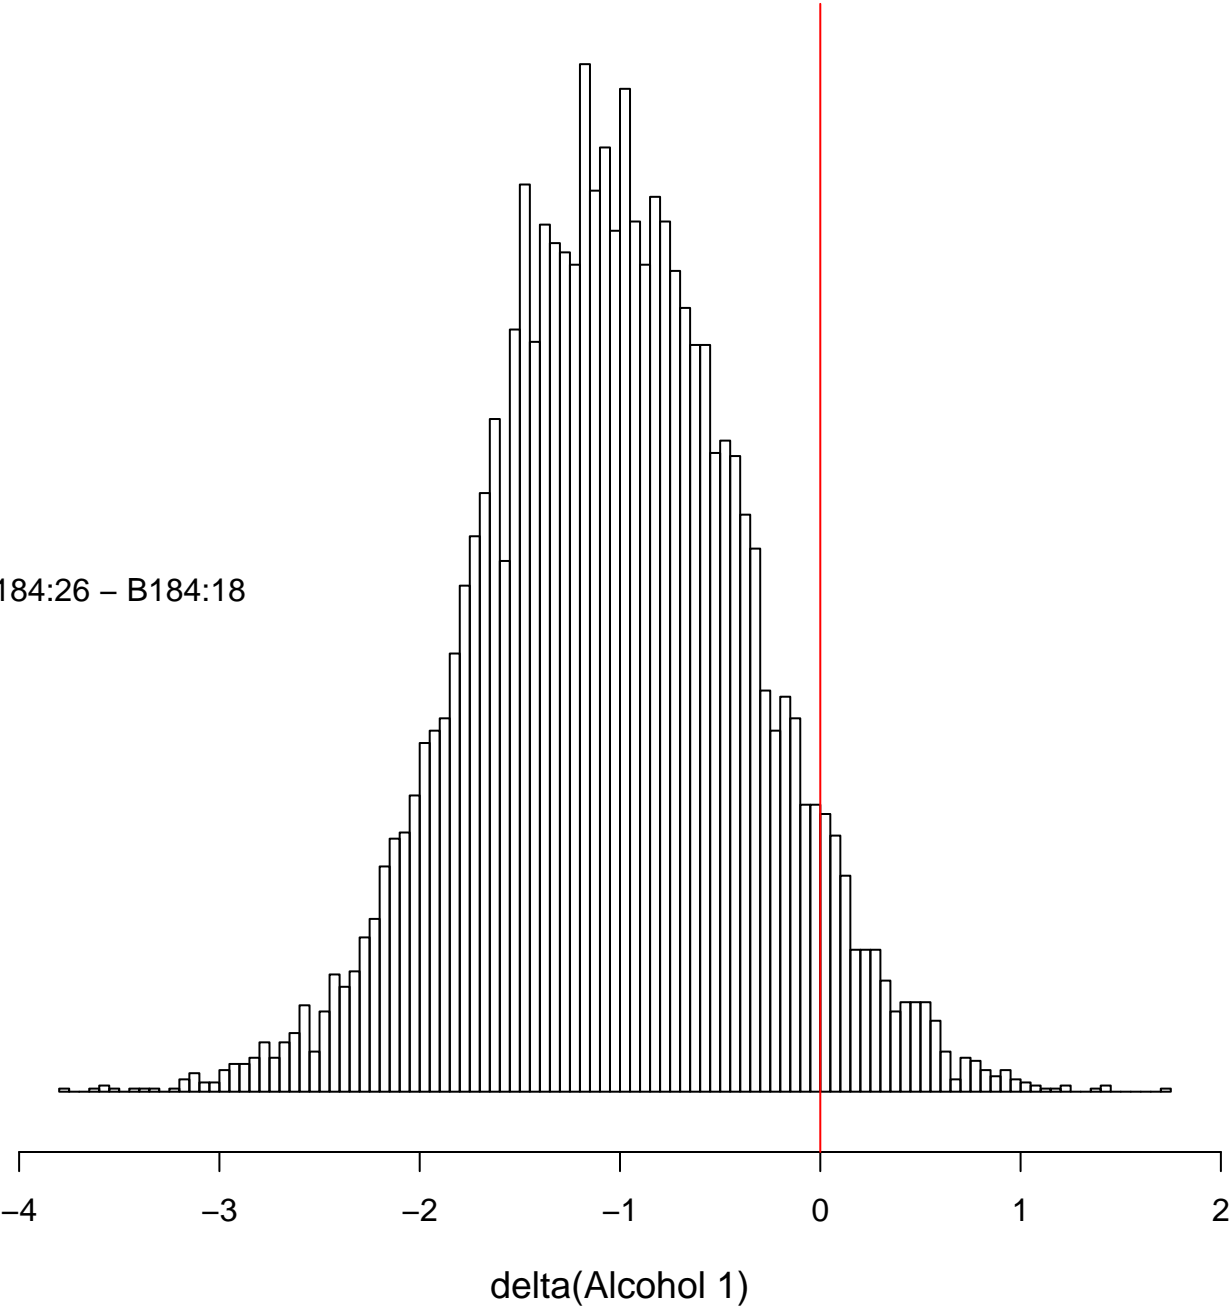

B184:26

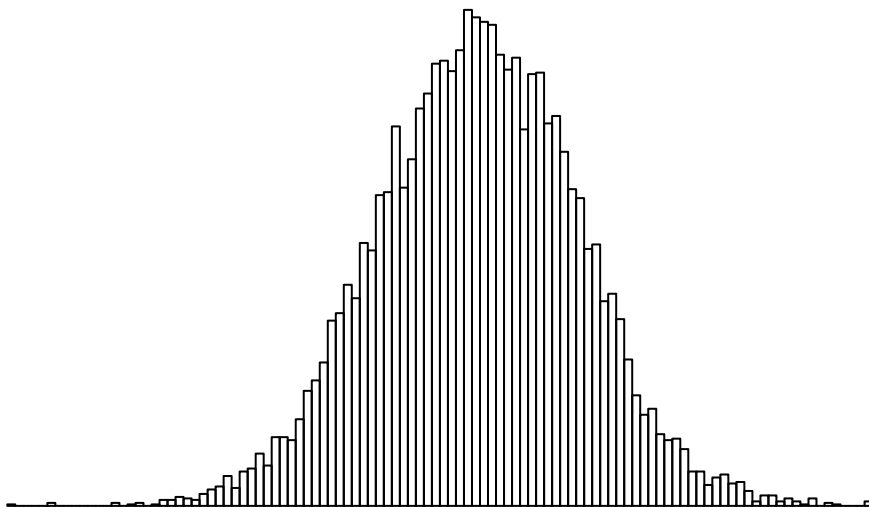

B184:18

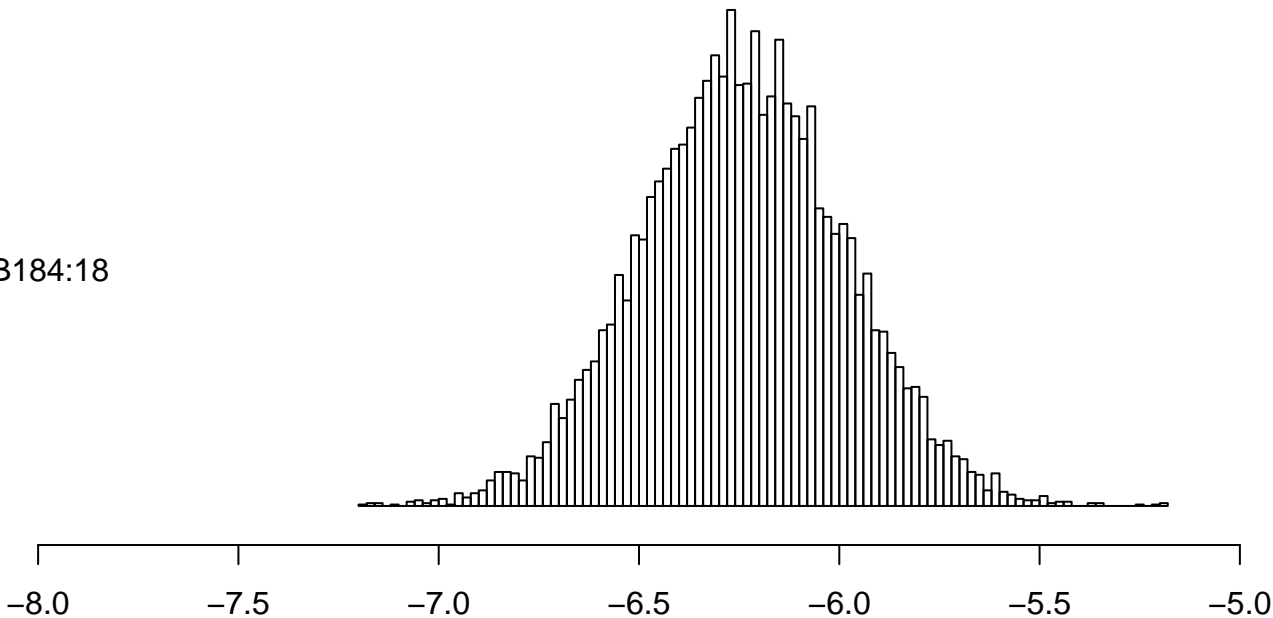

Hydrocarbon 1

B184:26 – B184:18

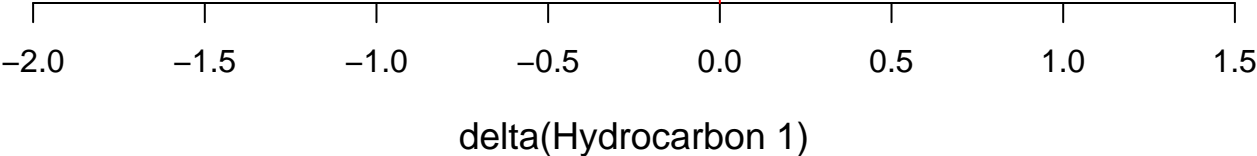



B184:26

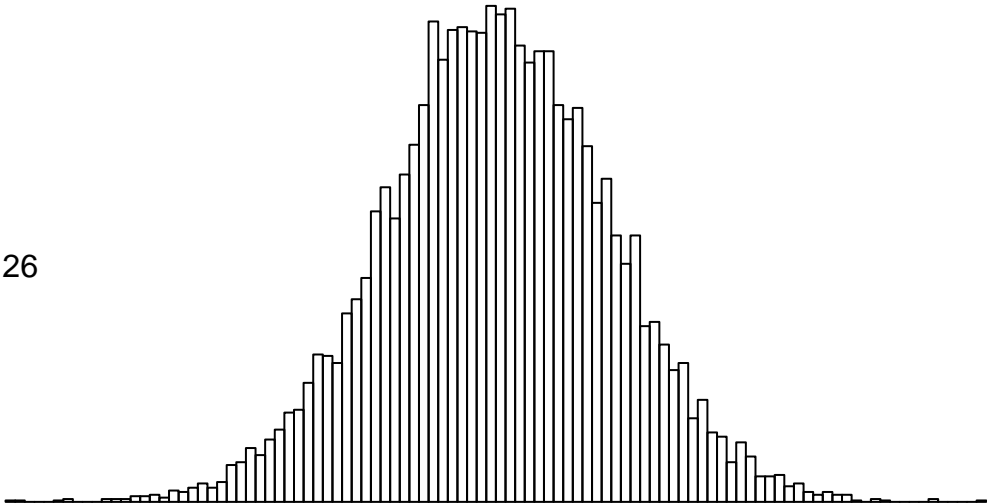

B184:18

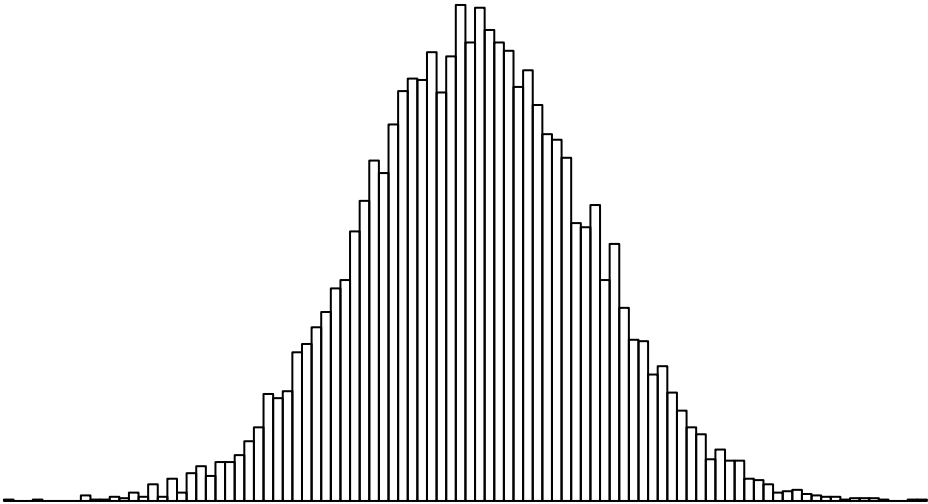

-7.0      -6.5      -6.0      -5.5      -5.0      -4.5

Hydrocarbon 2

B184:26 – B184:18

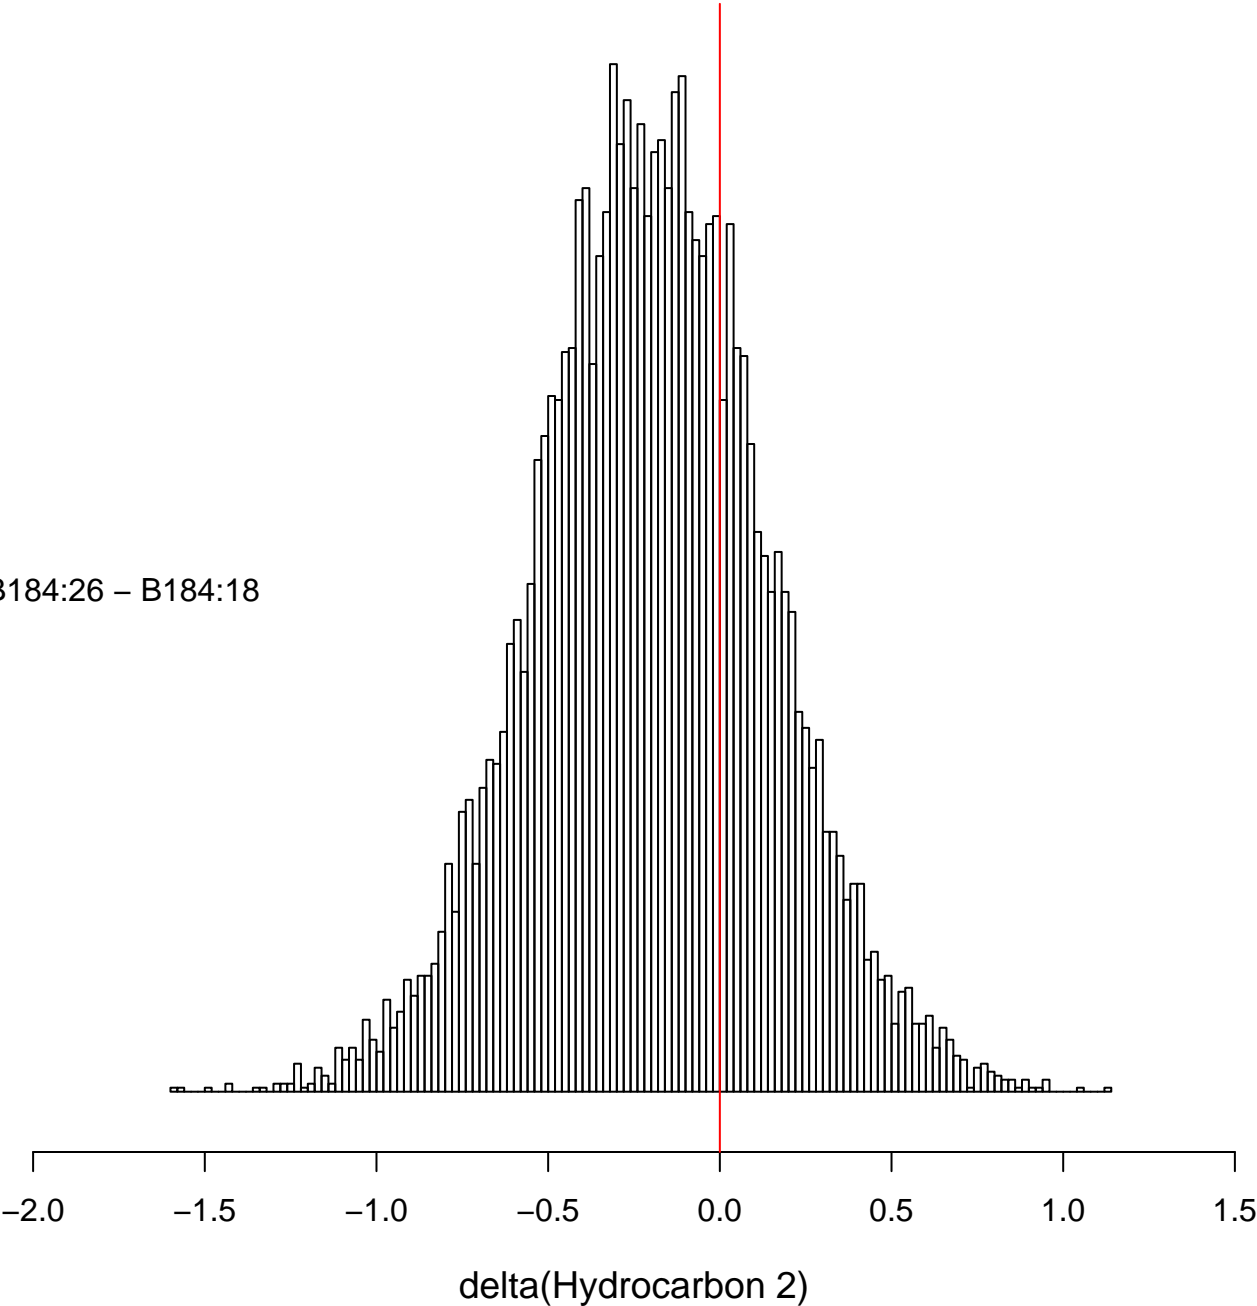

B184:26

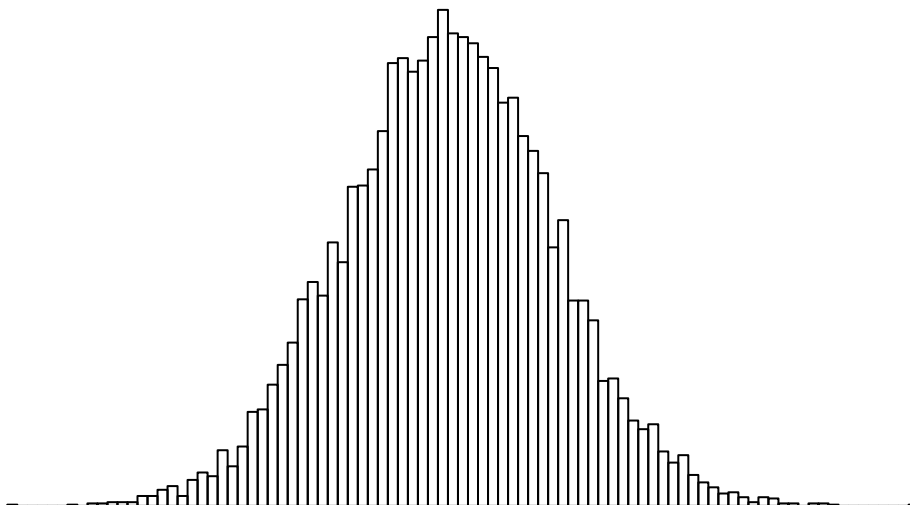

B184:18

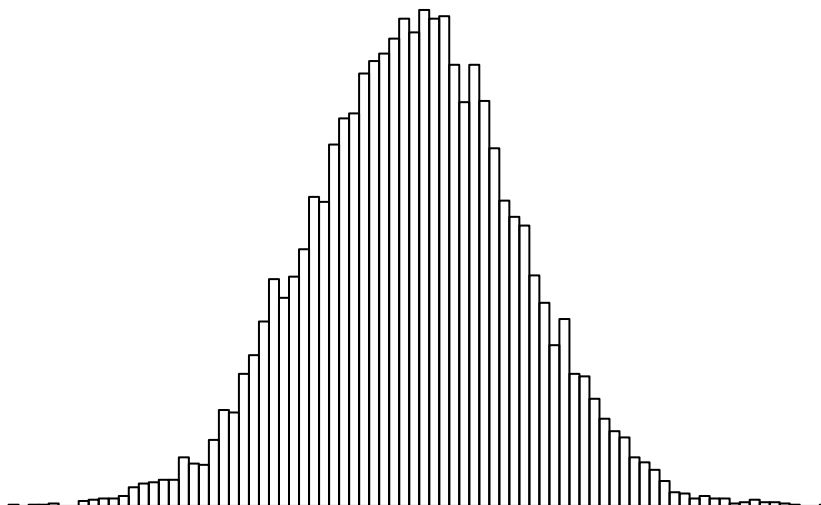

-10      -9      -8      -7      -6      -5      -4

Hydrocarbon 3

B184:26 – B184:18

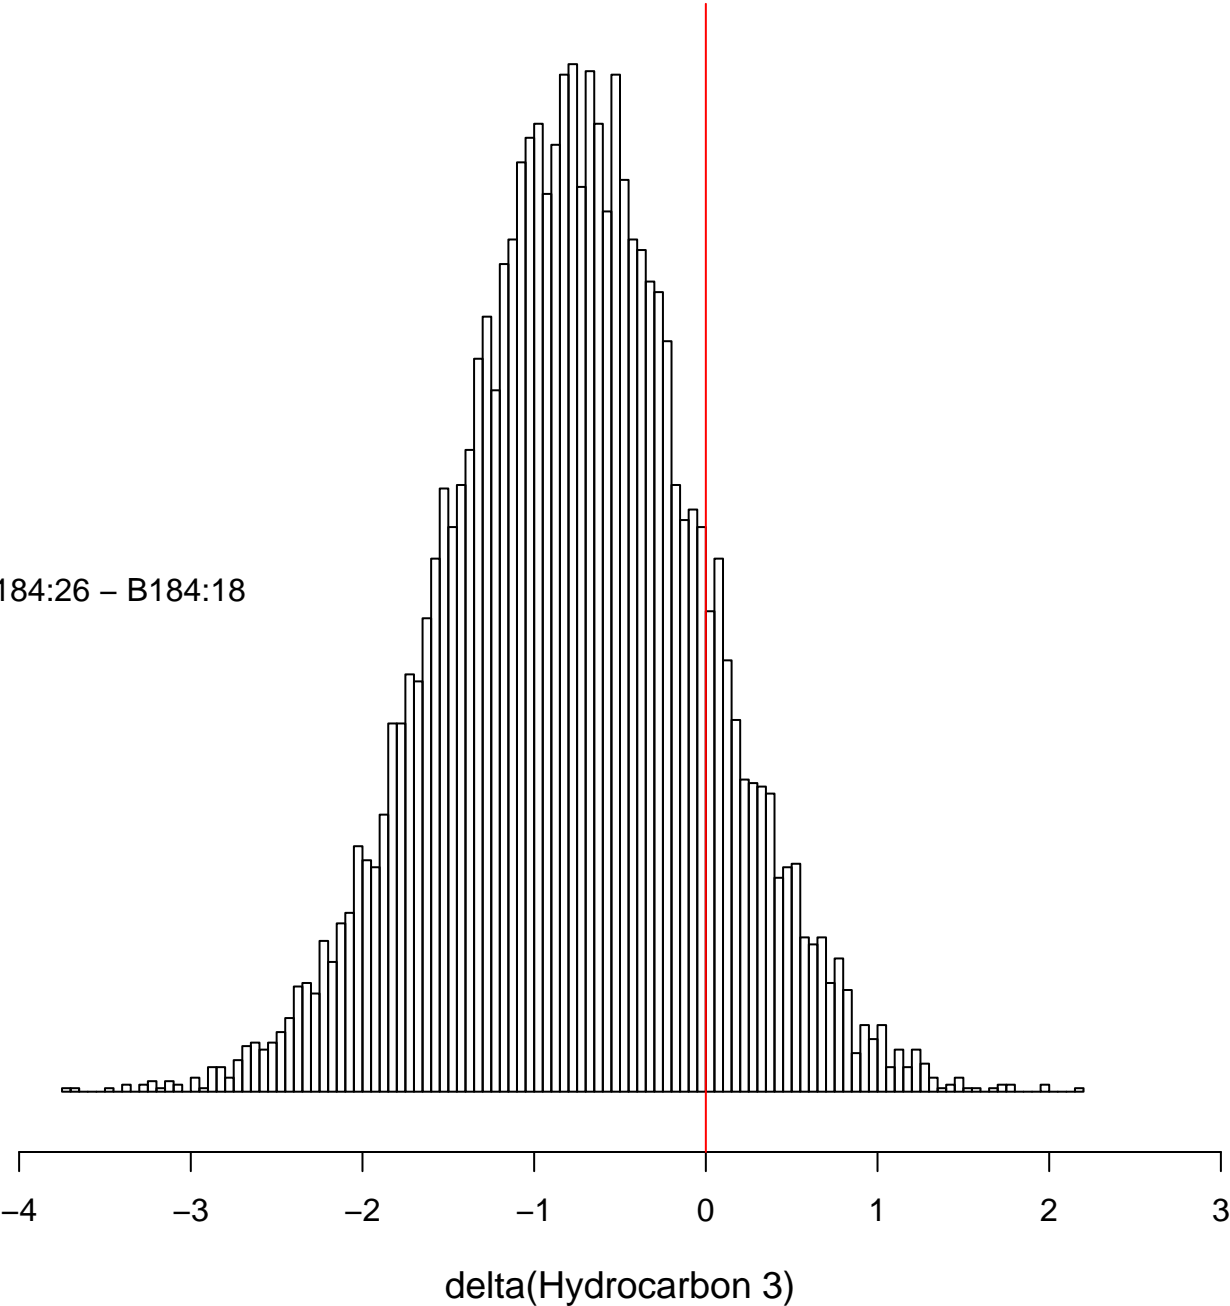

B184:26

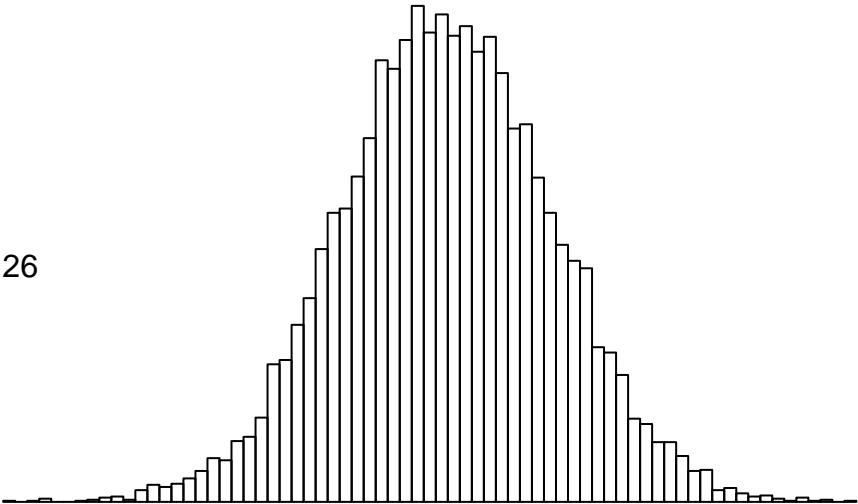

B184:18

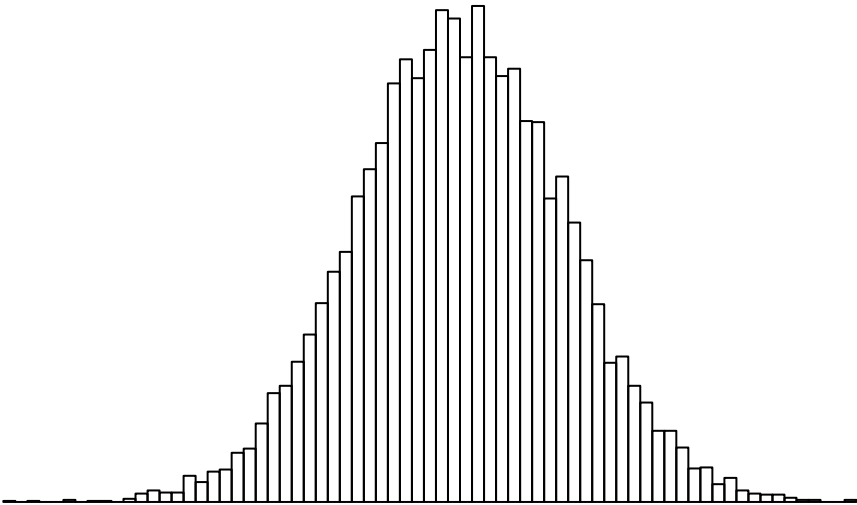

-8.5                      -8.0                      -7.5                      -7.0                      -6.5

Hydrocarbon 4

B184:26 – B184:18

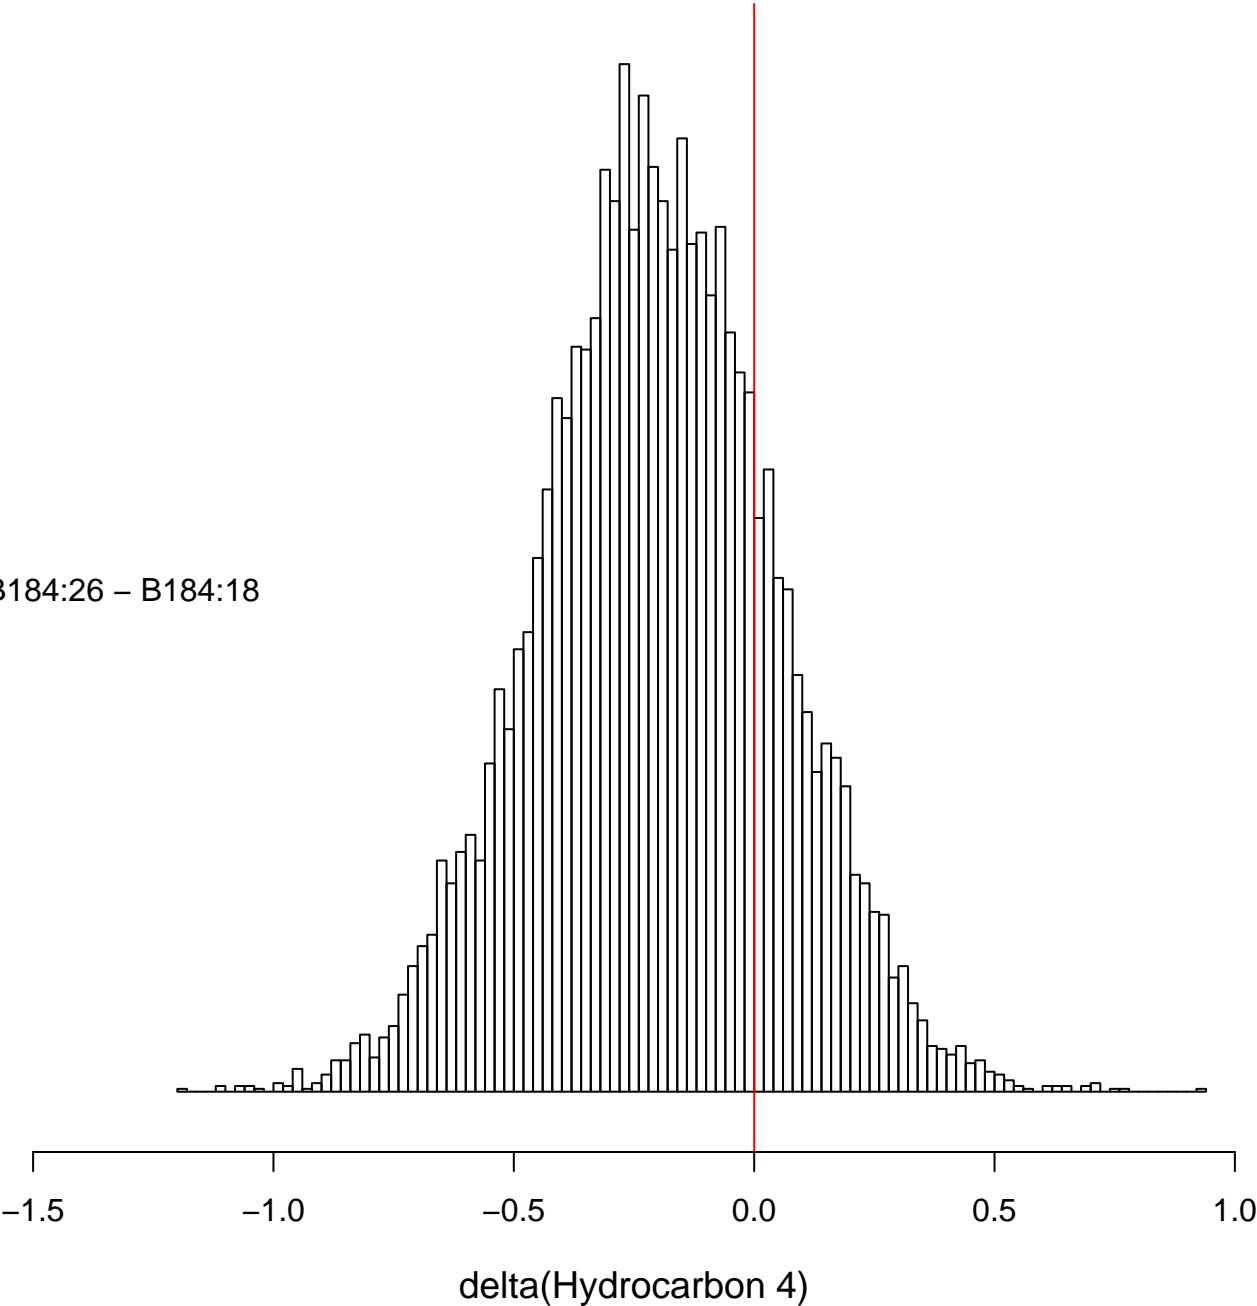

B184:26

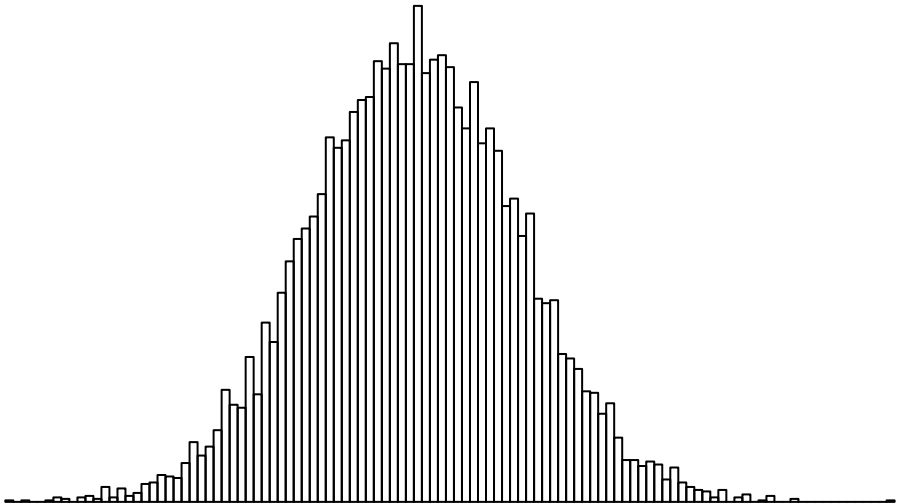

B184:18

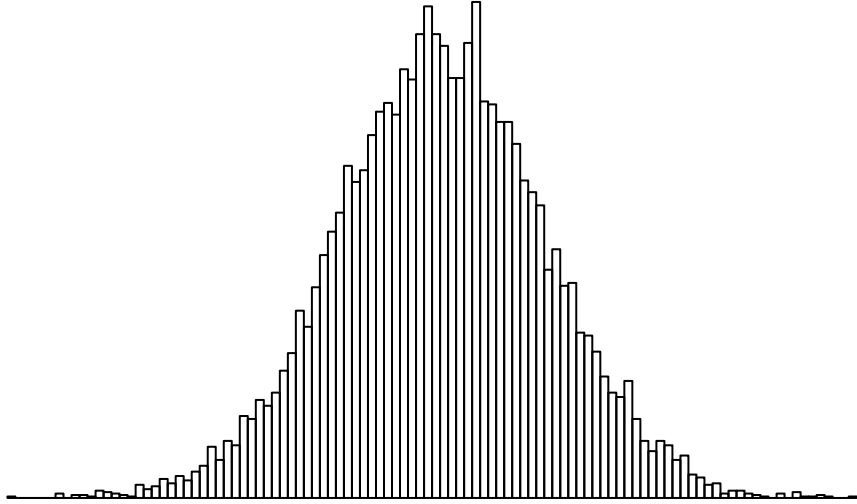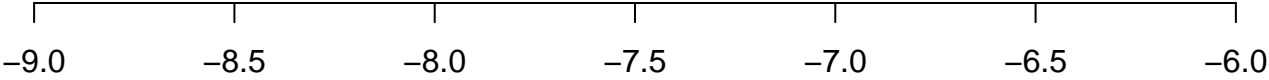

Unidentified Metabolite 1

B184:26 – B184:18

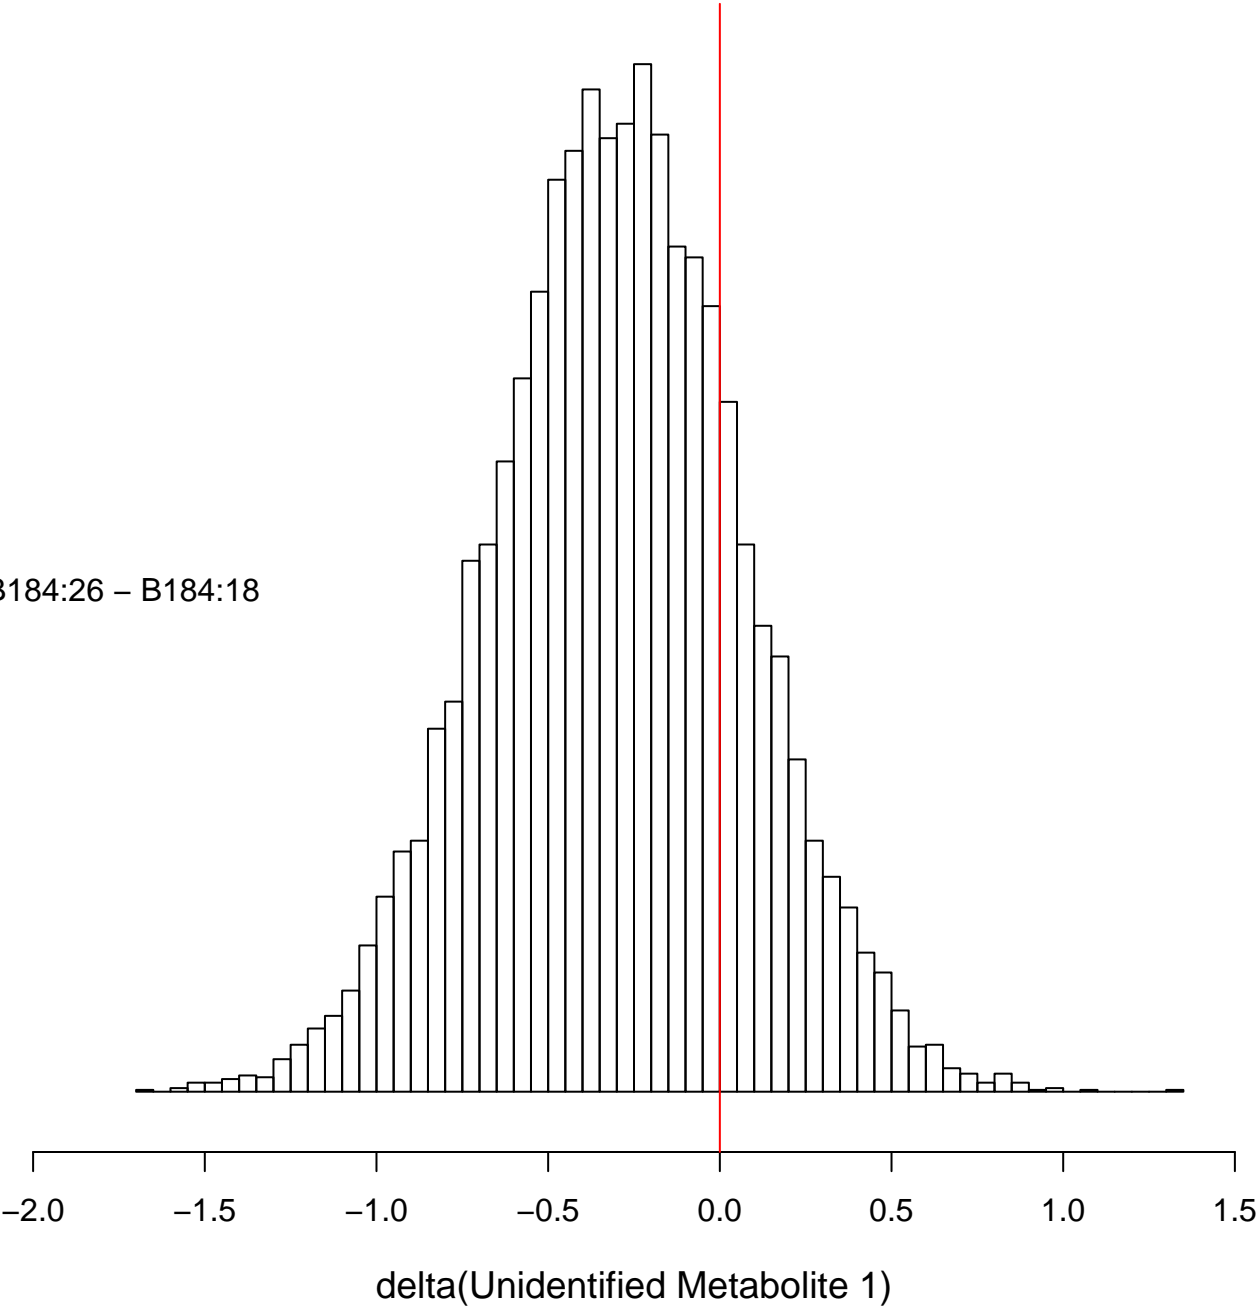



B184:26

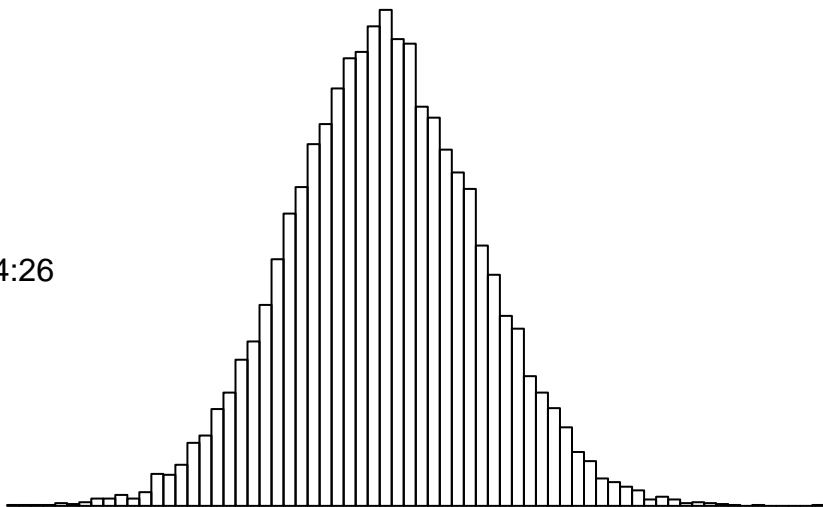

B184:18

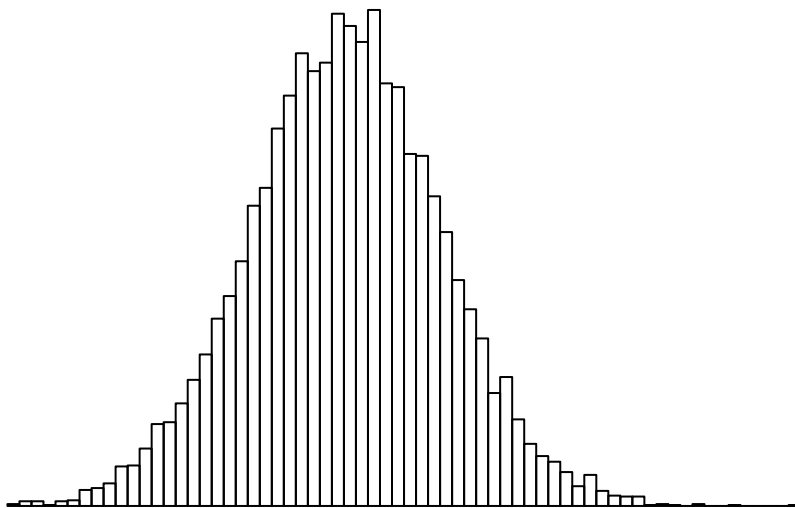

-10

-9

-8

-7

-6

-5

Unidentified Metabolite 2

B184:26 – B184:18

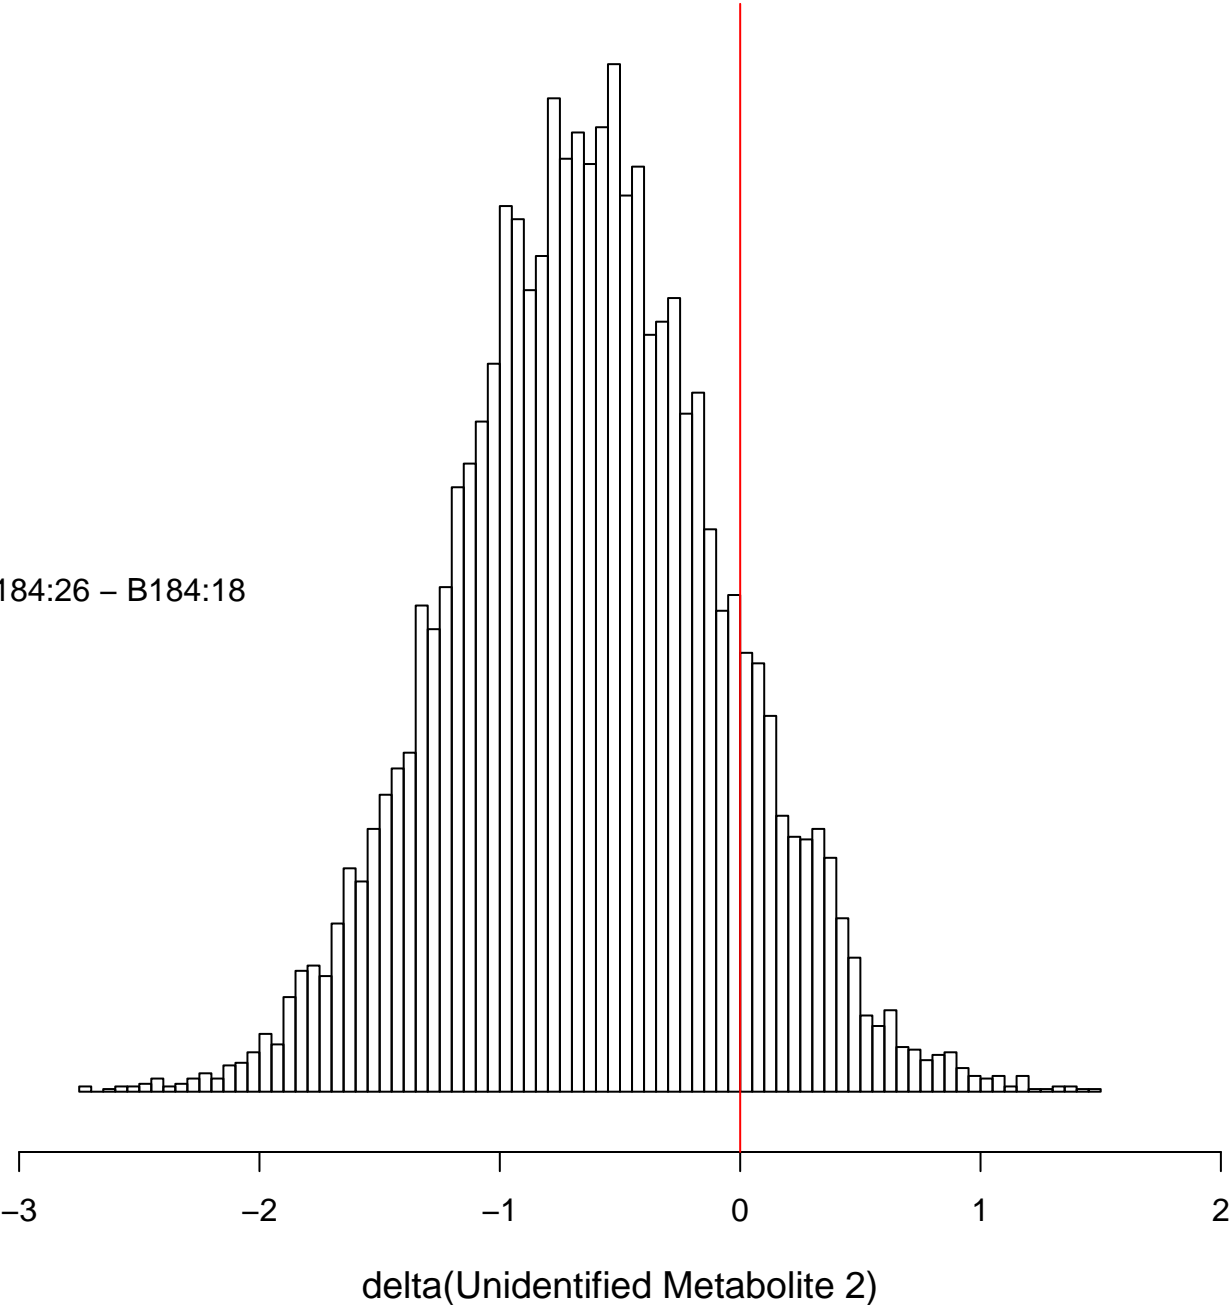

B184:26

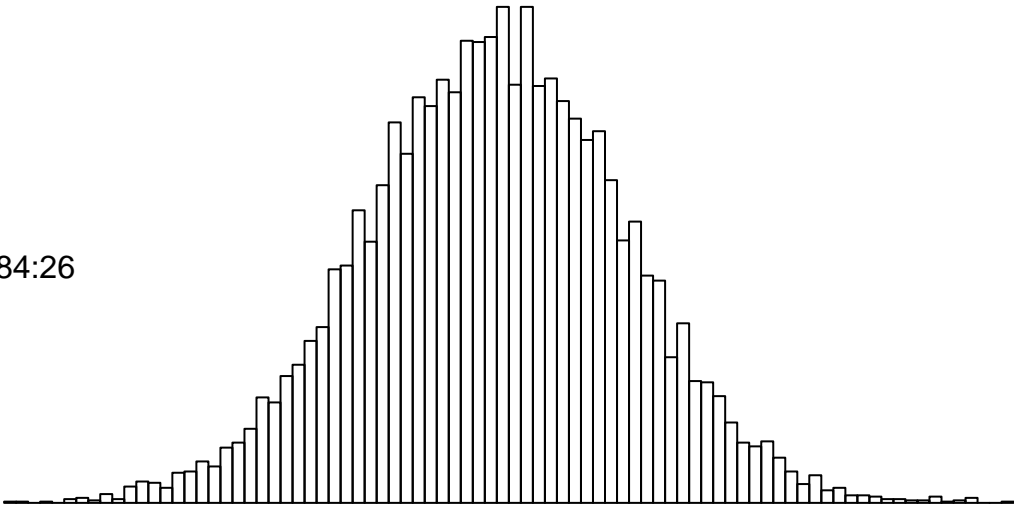

B184:18

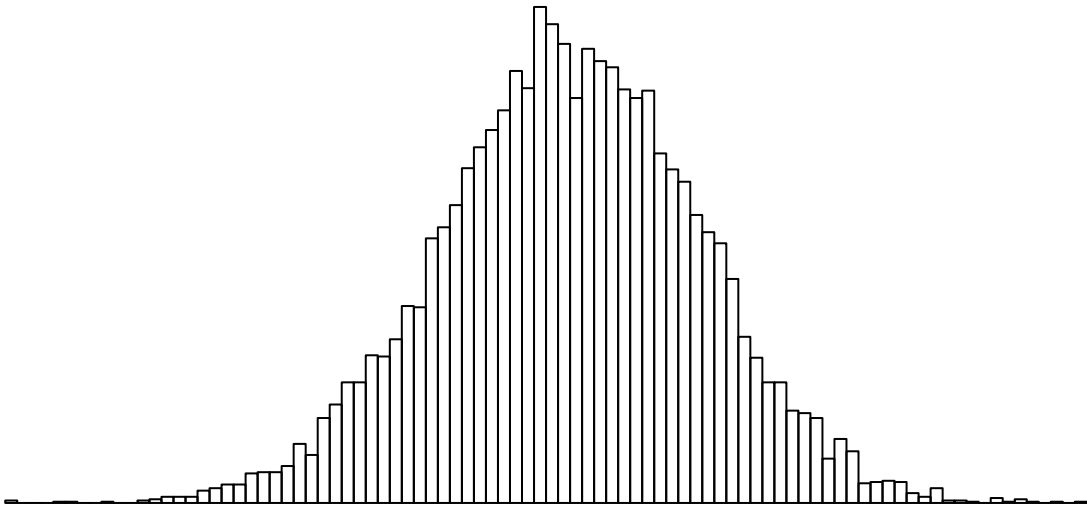

-9.5                      -9.0                      -8.5                      -8.0                      -7.5

Unidentified Metabolite 3

B184:26 – B184:18

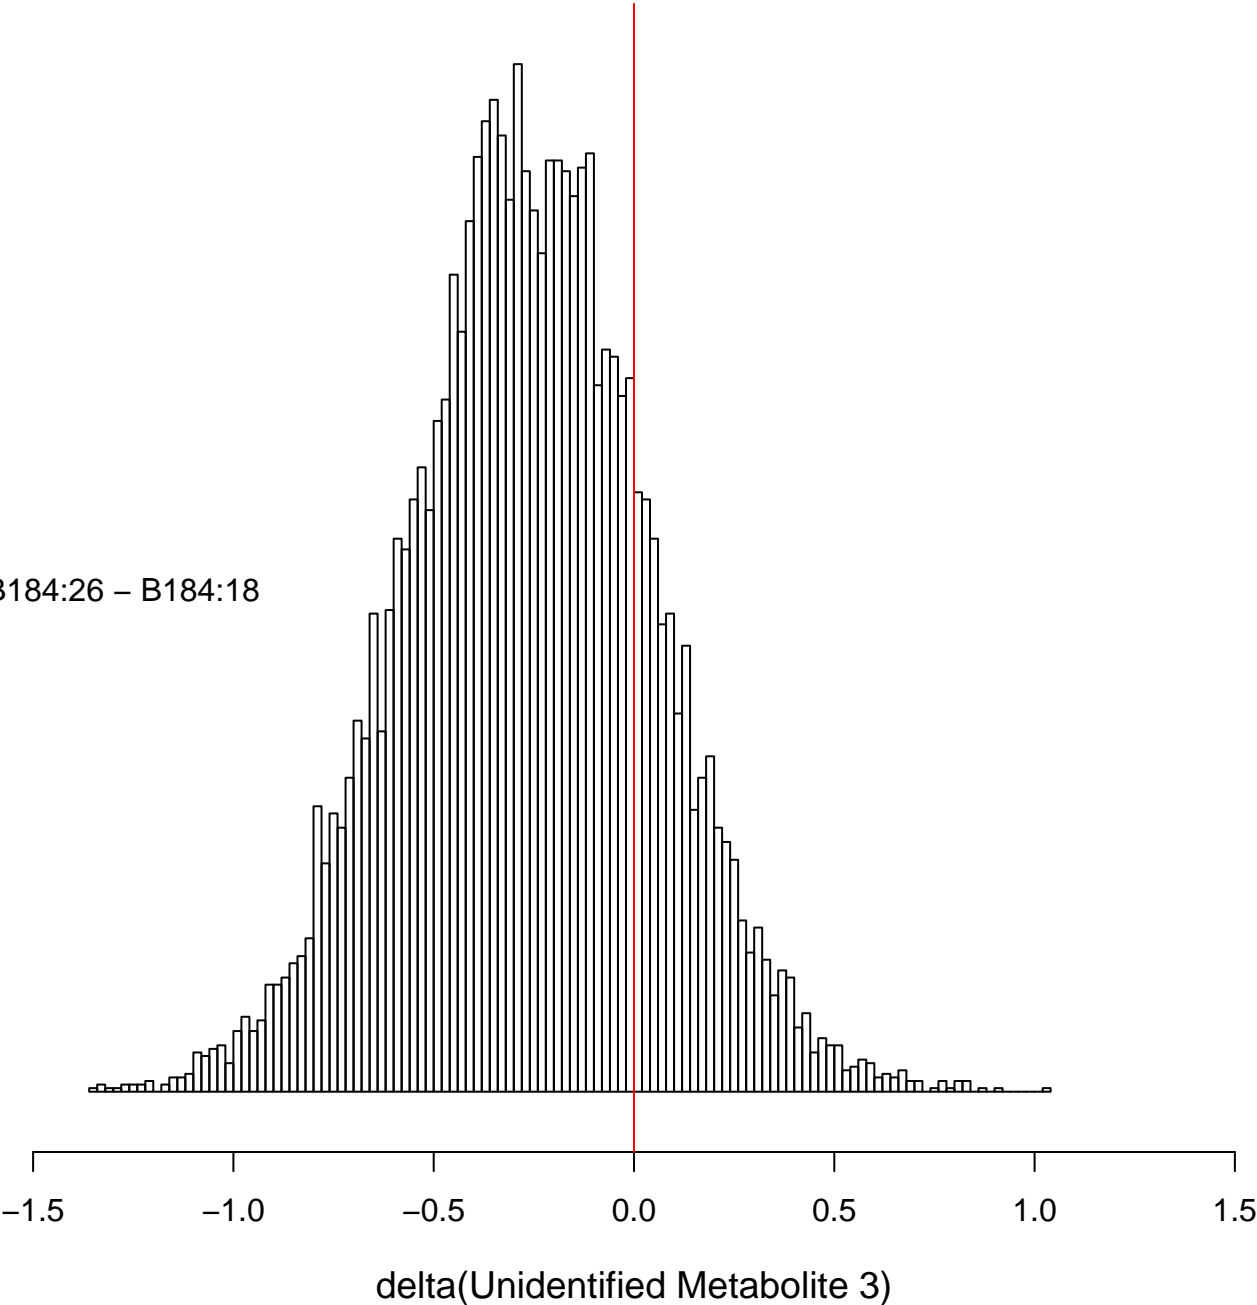

B184:26

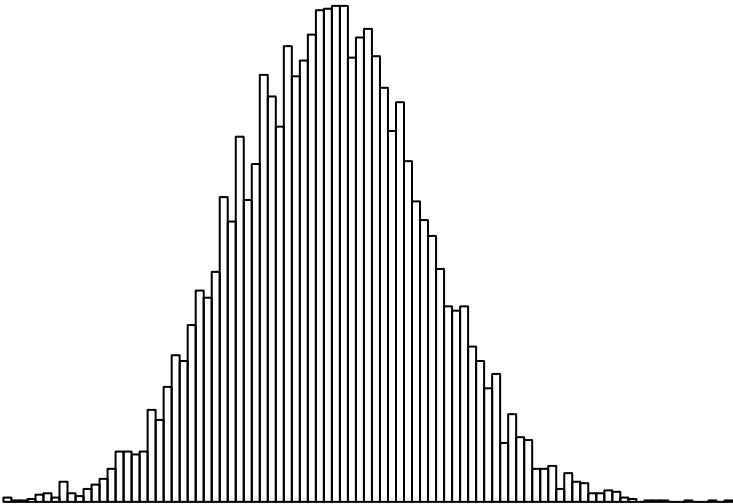

B184:18

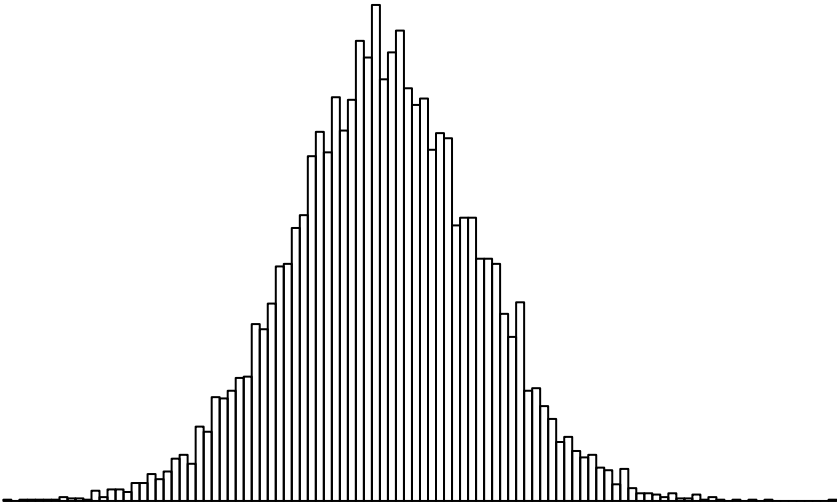

Unidentified Metabolite 4

B184:26 – B184:18

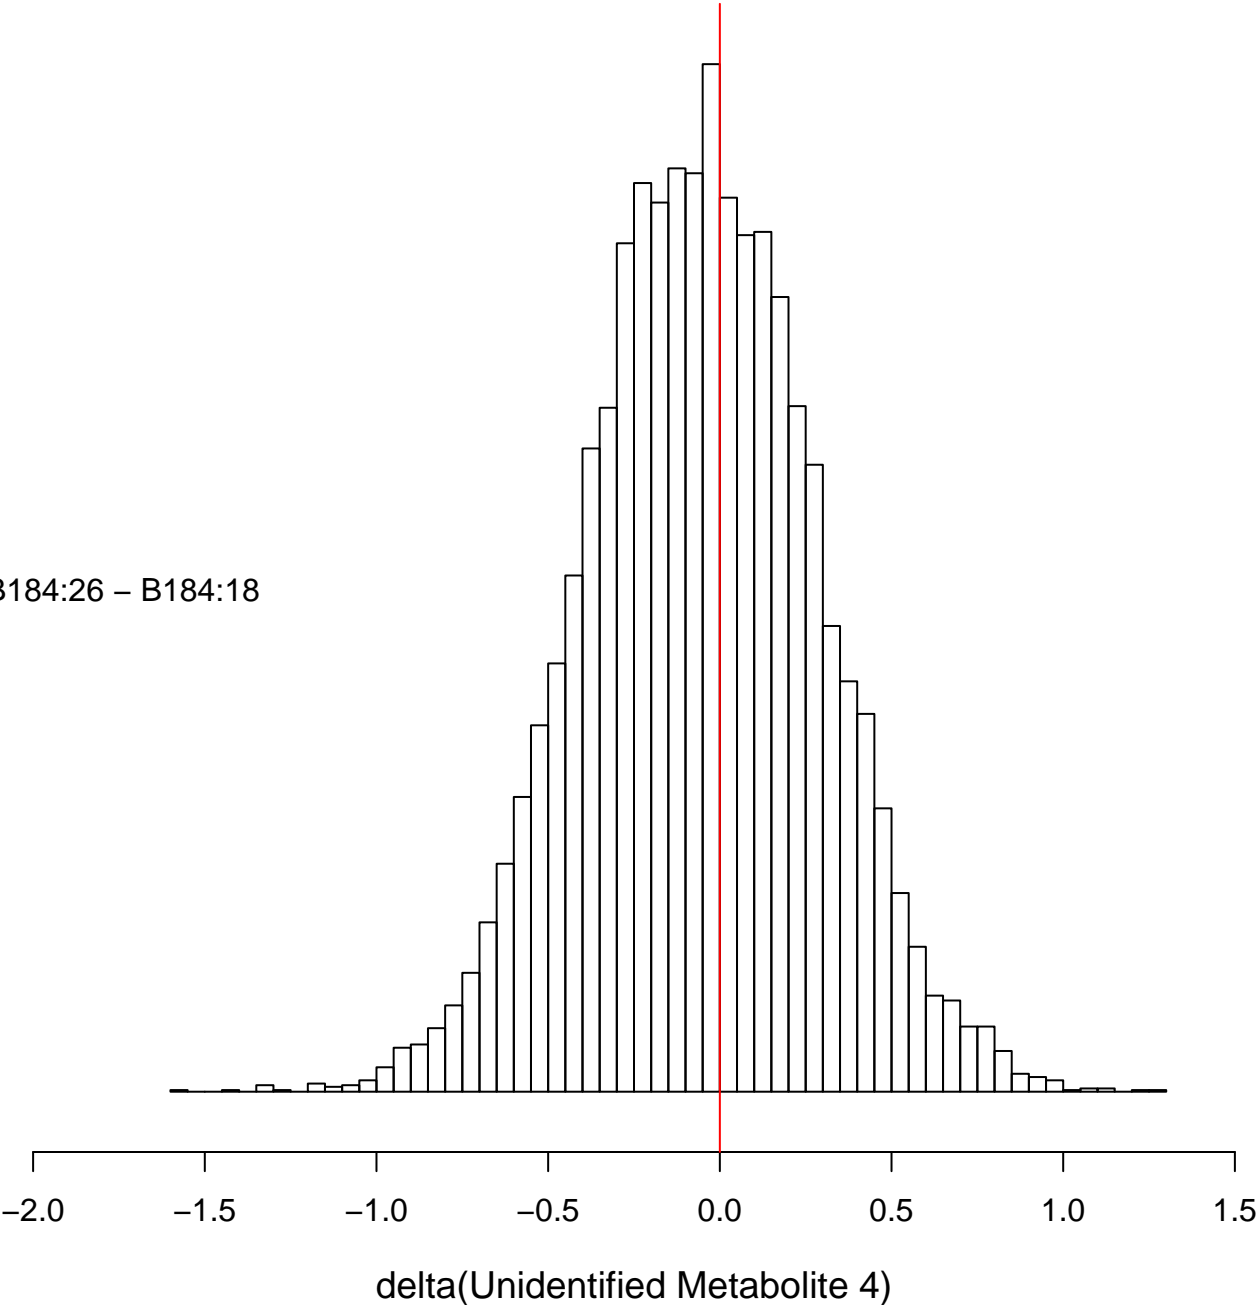

B184:26

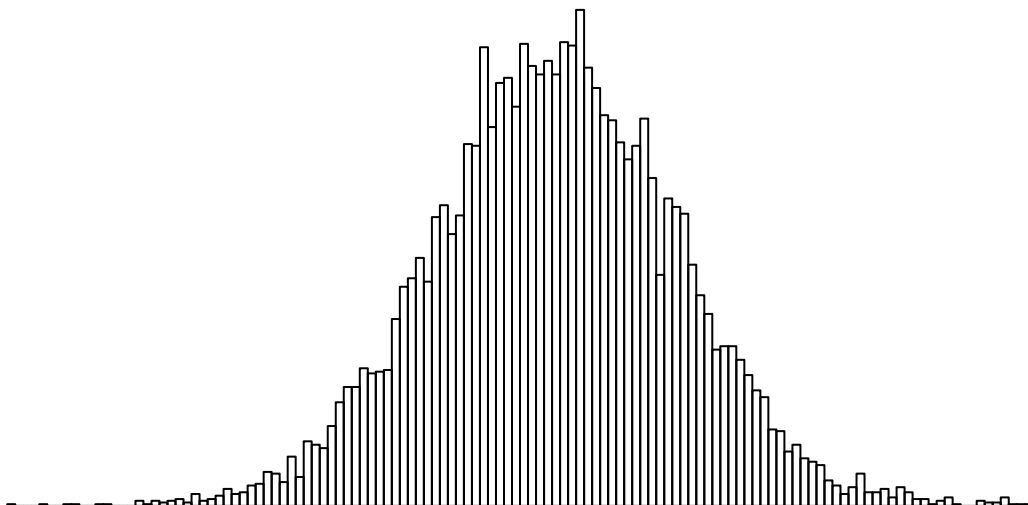

B184:18

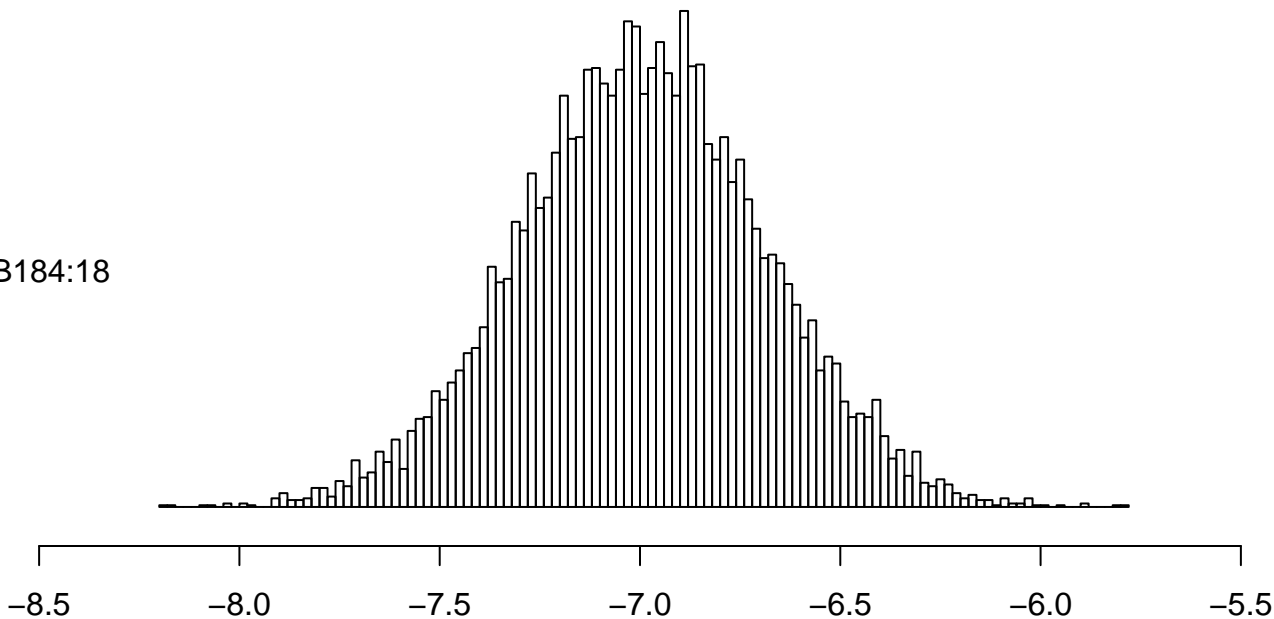

Unidentified Metabolite 5

B184:26 – B184:18

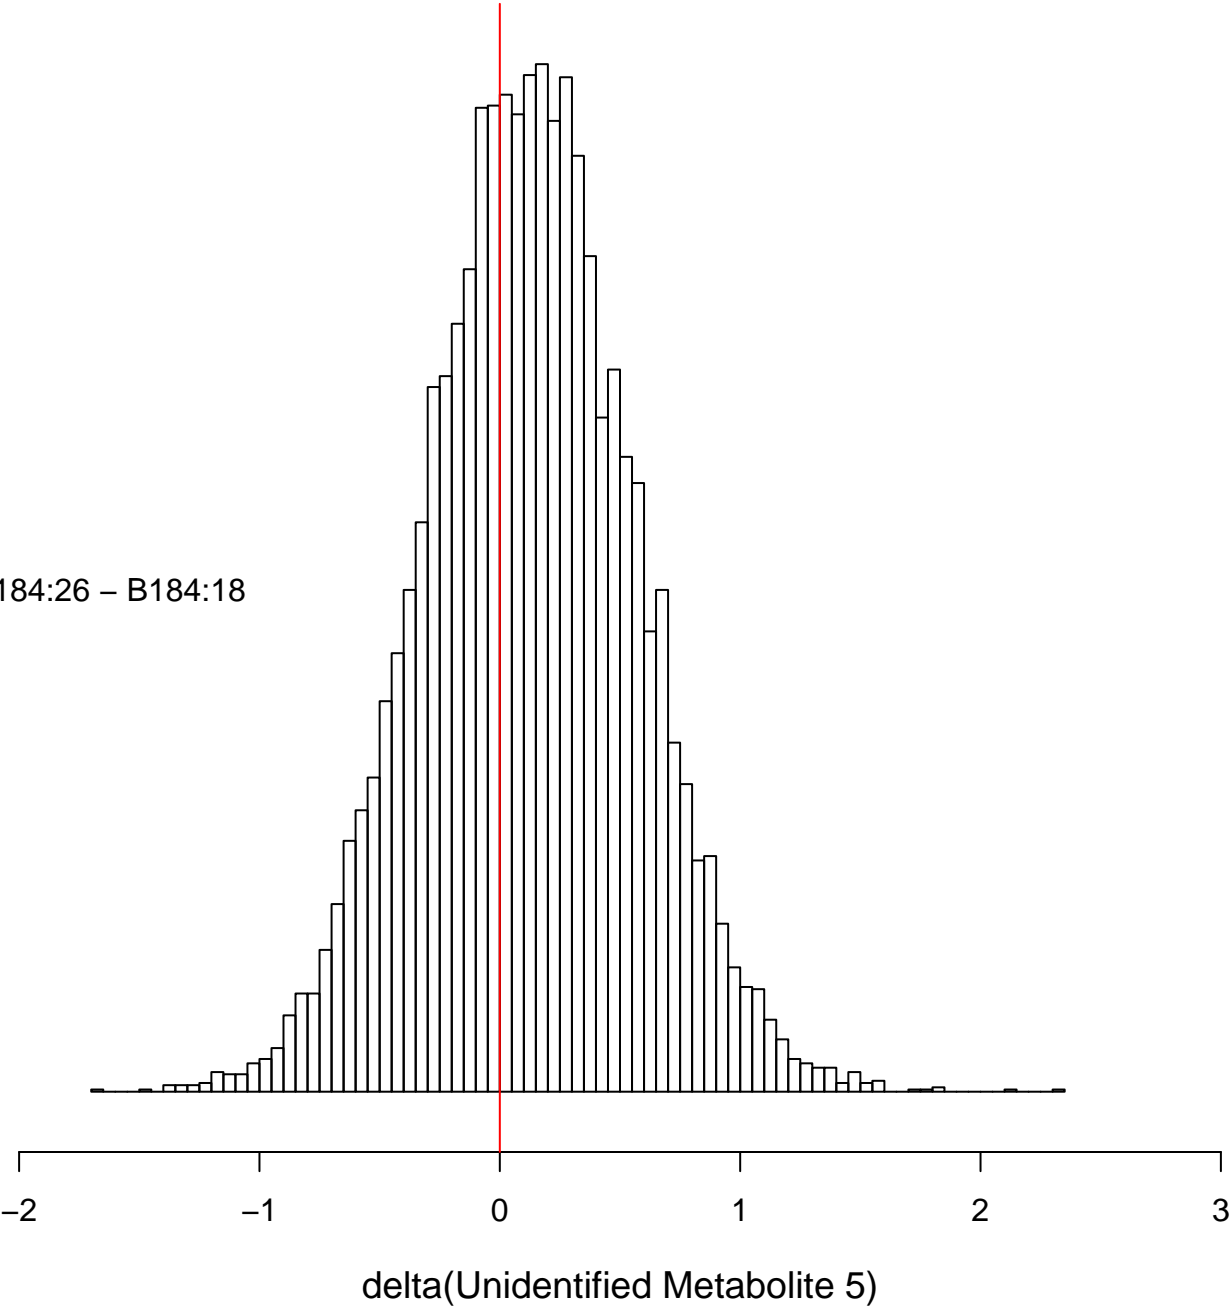



B184:26

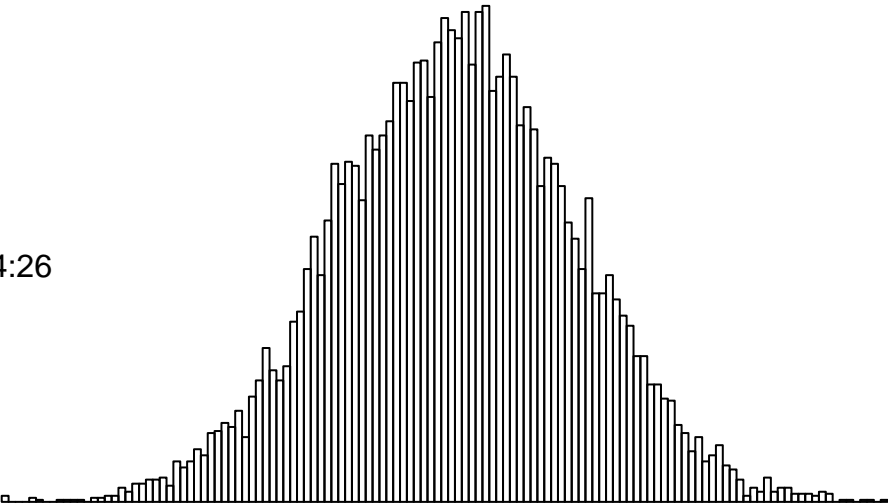

B184:18

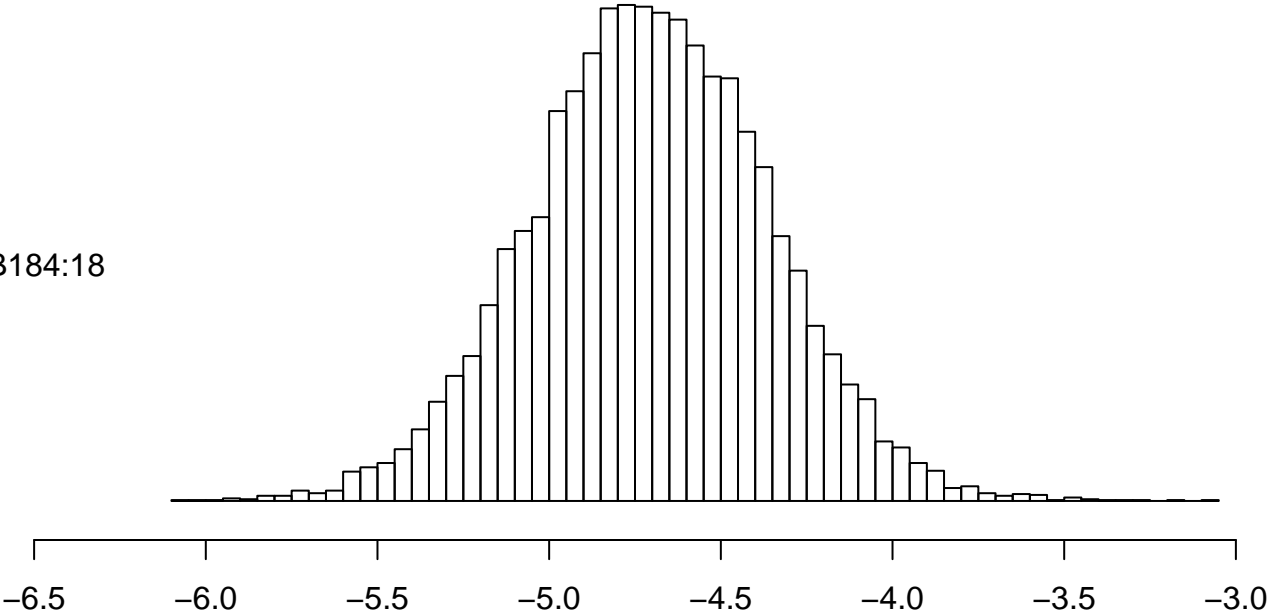

Unidentified Metabolite 6

B184:26 – B184:18

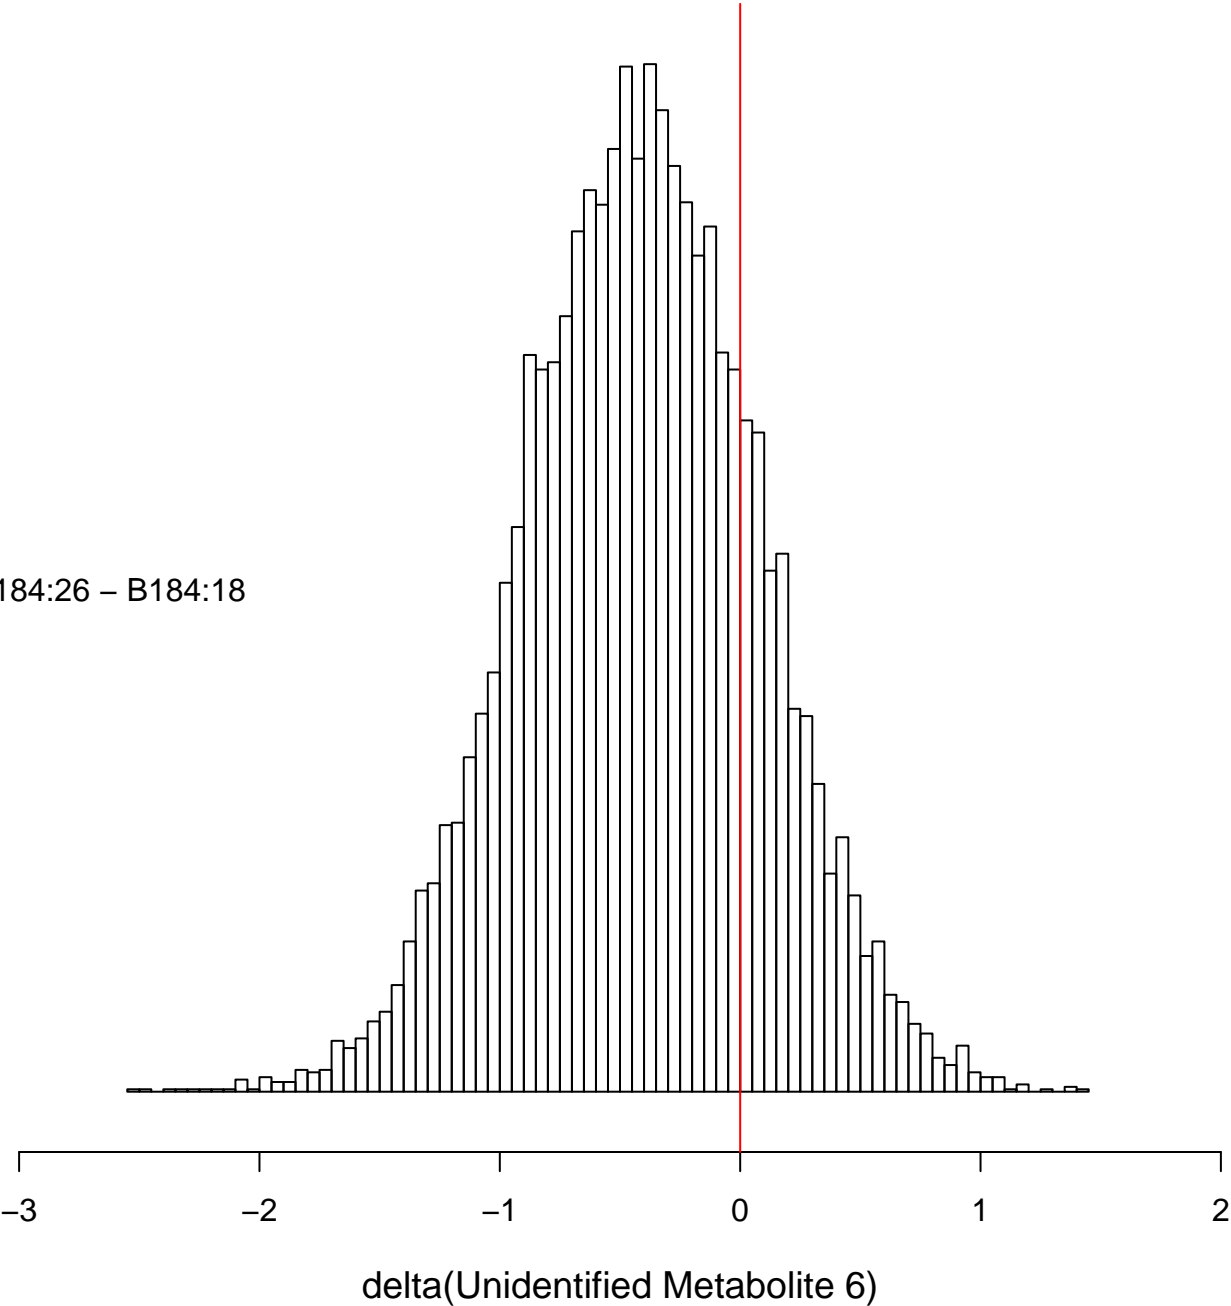

B184:26

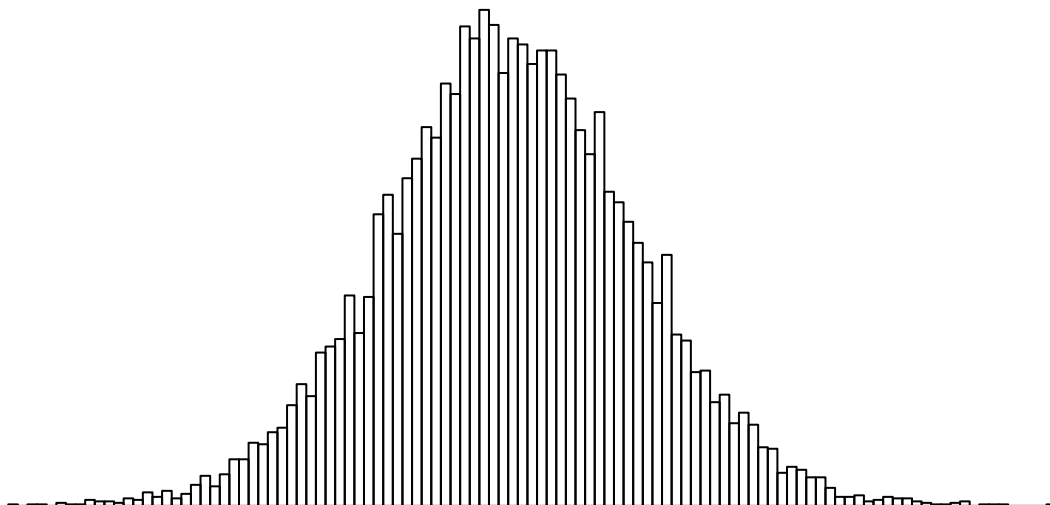

B184:18

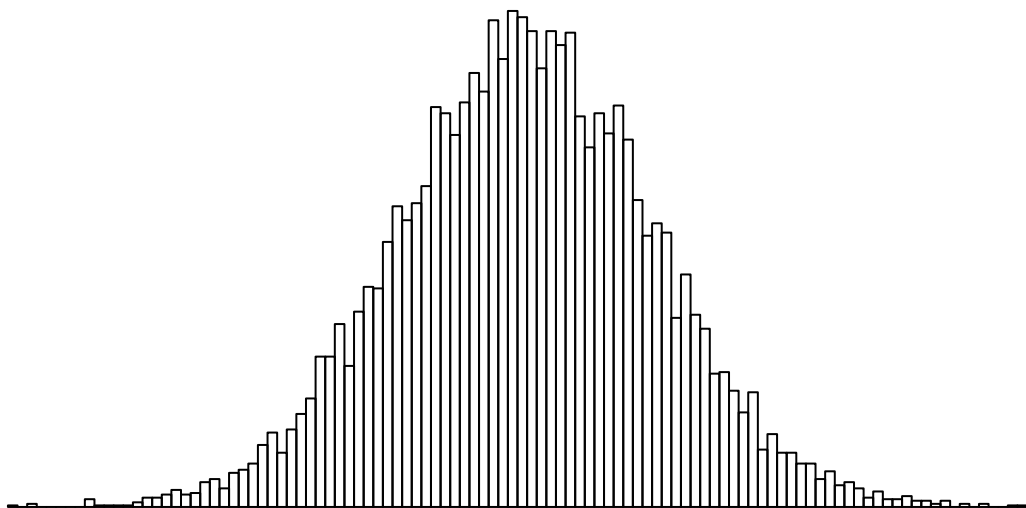

-7.5      -7.0      -6.5      -6.0      -5.5      -5.0

Unidentified Metabolite 7

B184:26 – B184:18

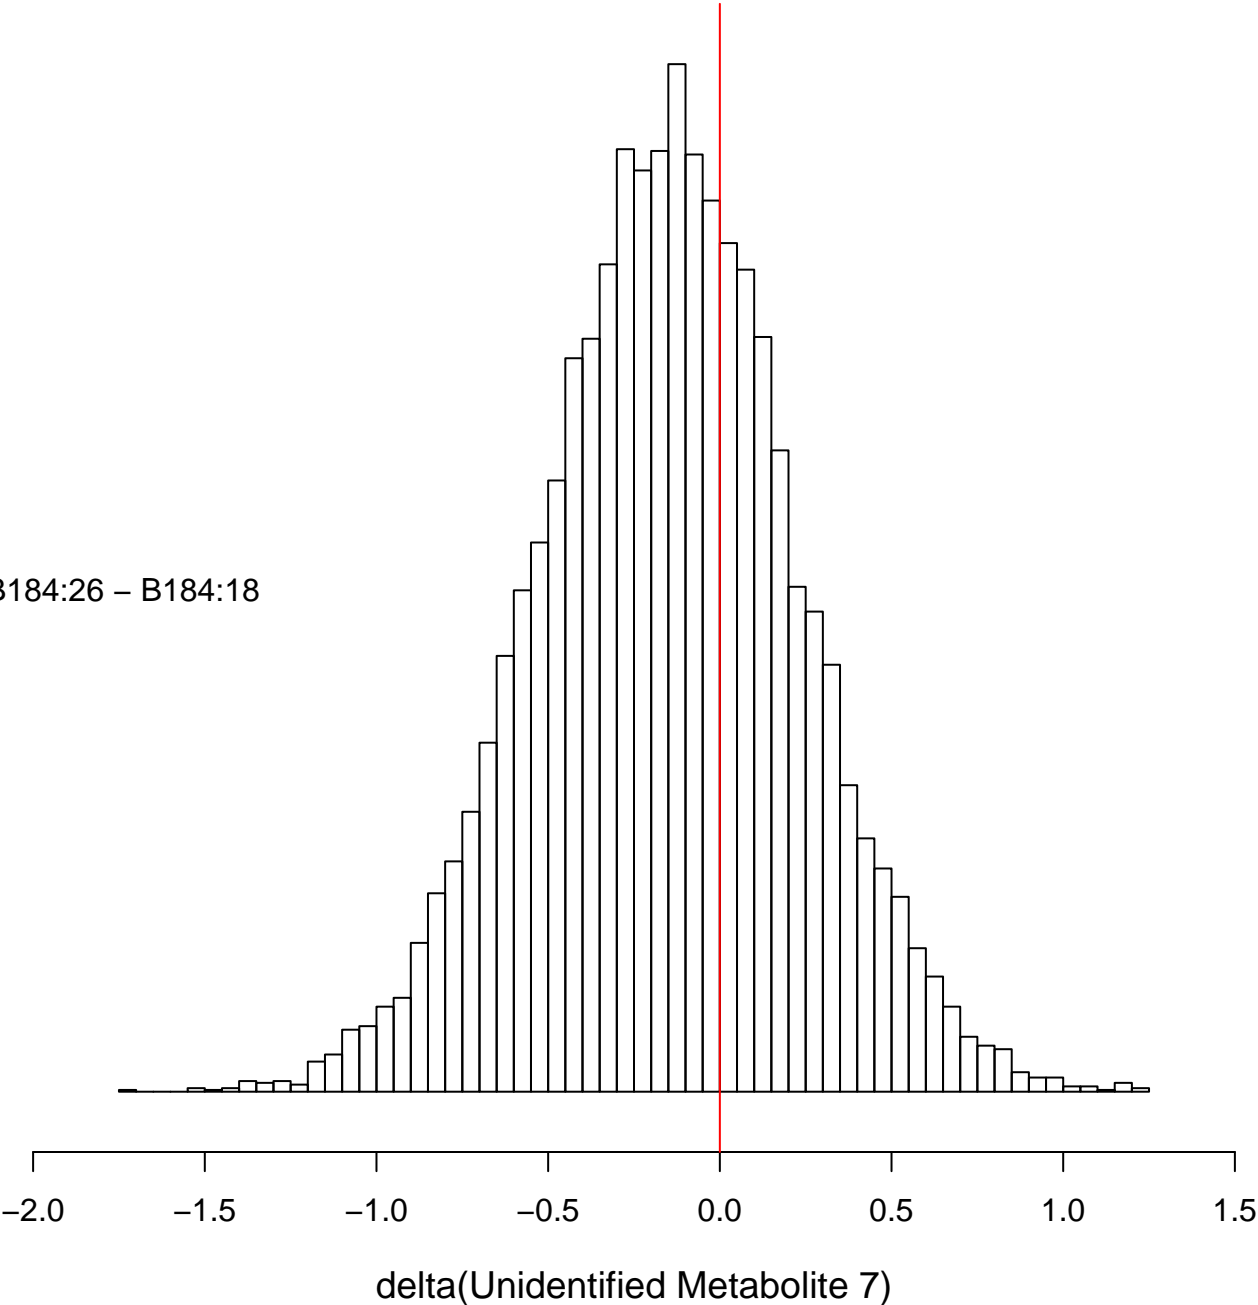

B184:26

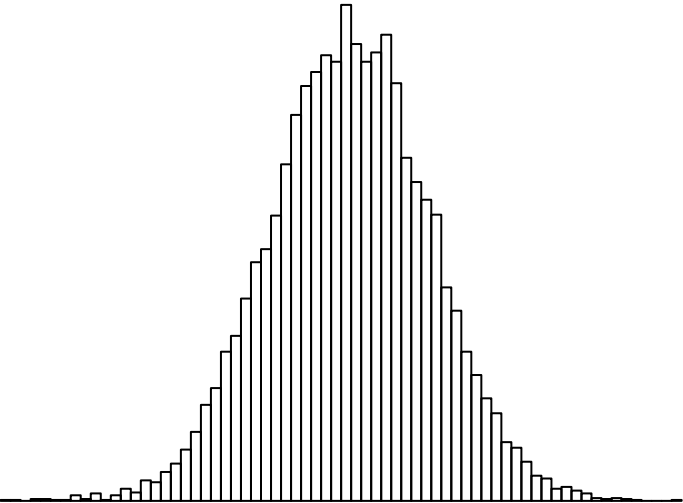

B184:18

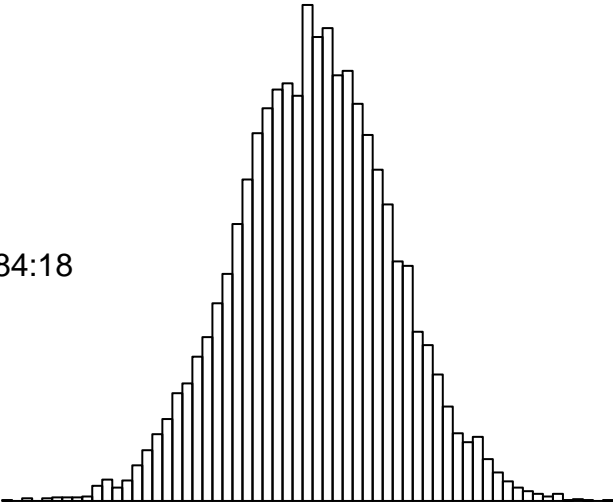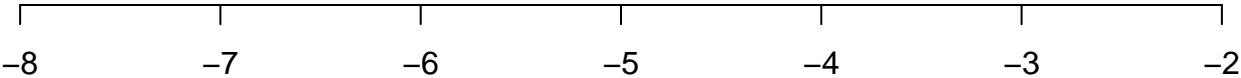

Unidentified Metabolite 8

B184:26 – B184:18

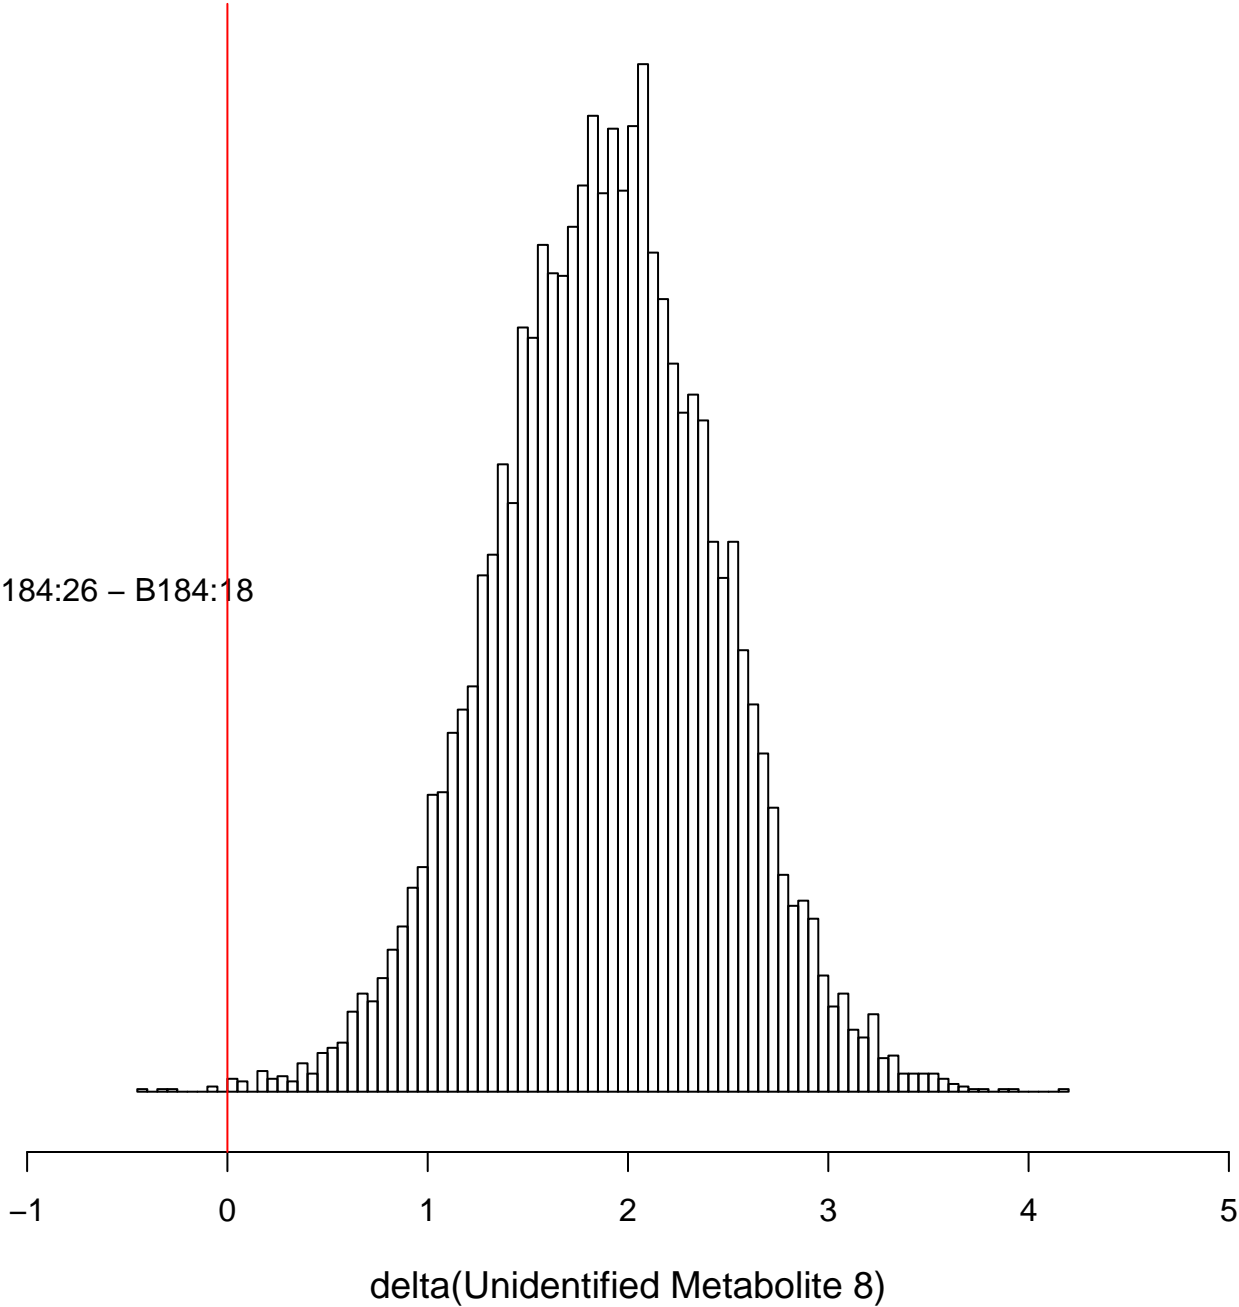

B184:26

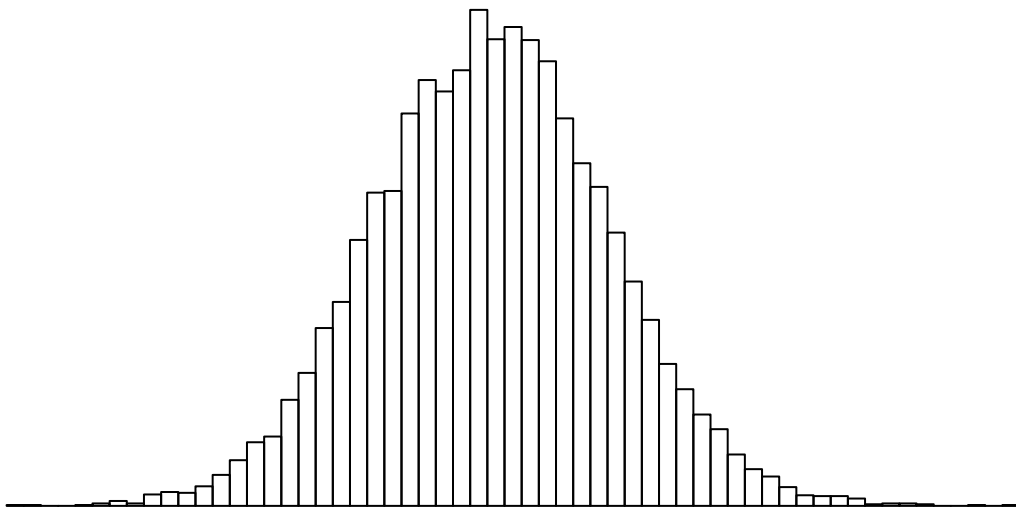

B184:18

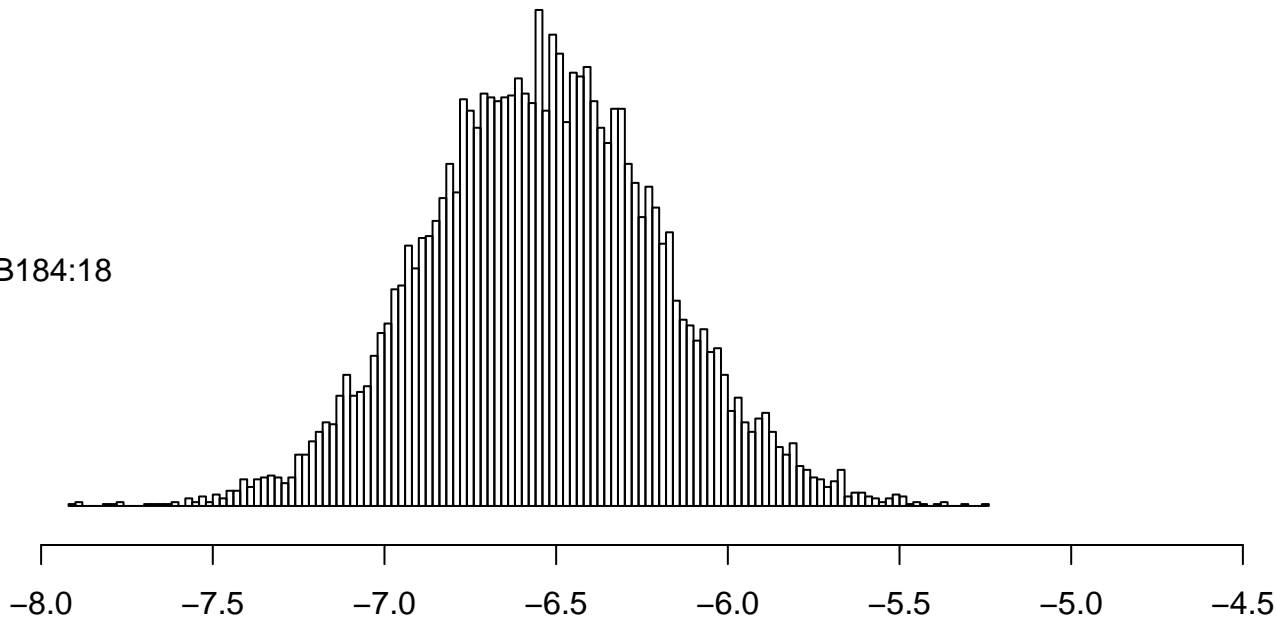

Unidentified Metabolite 9

B184:26 – B184:18

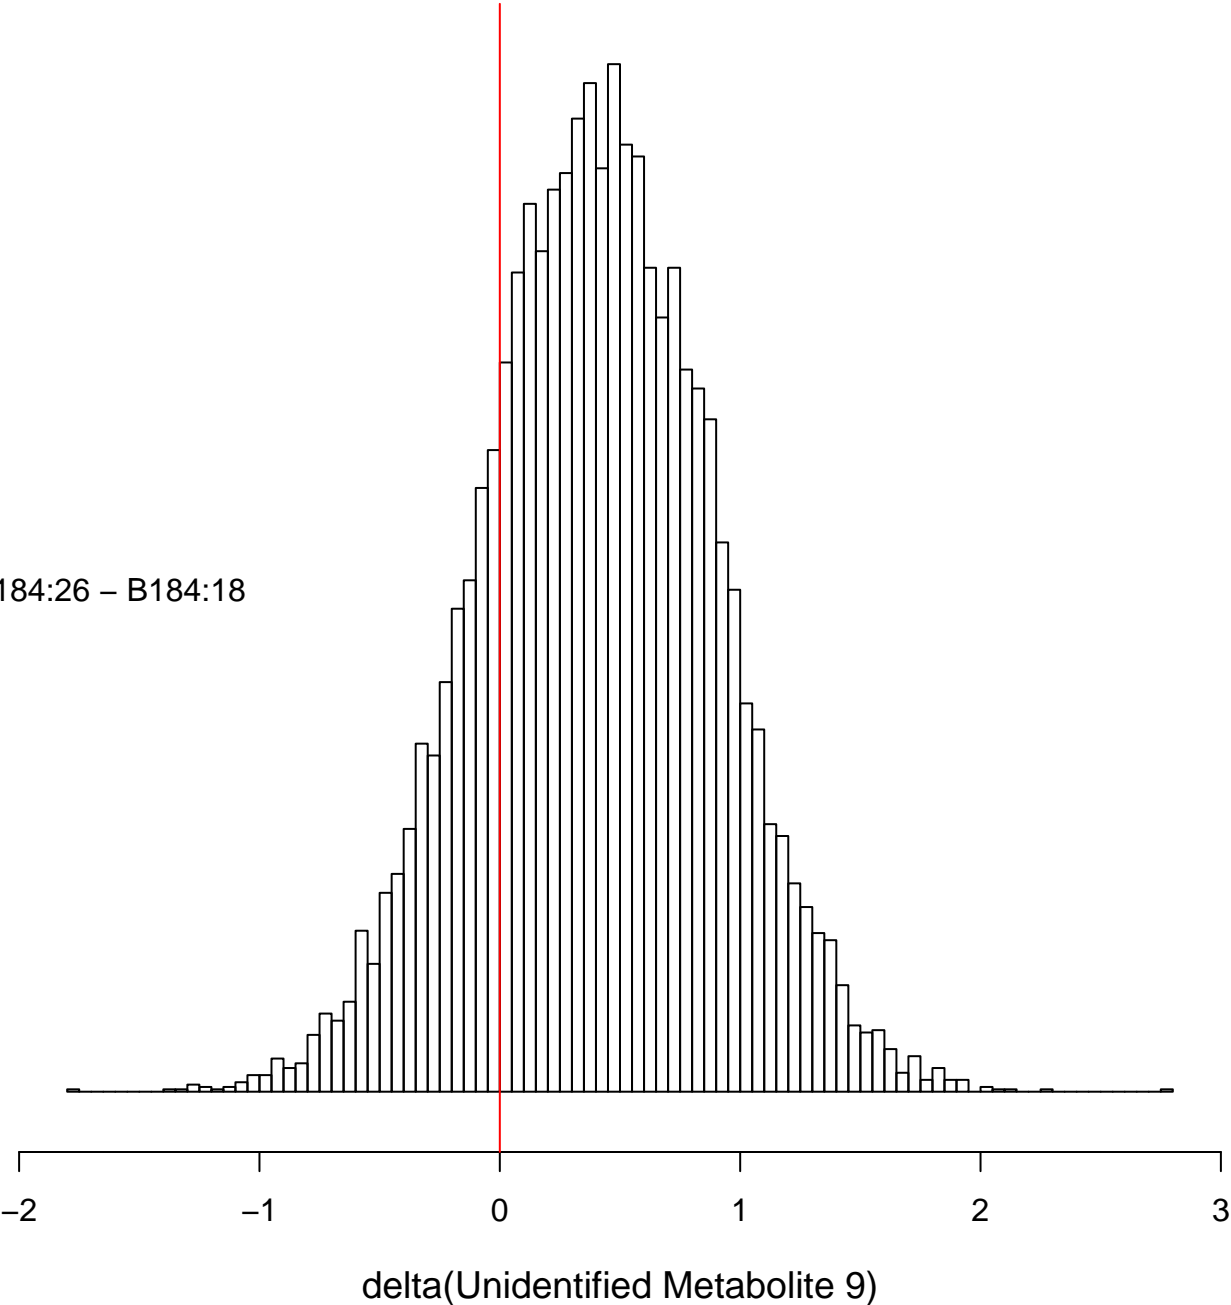



B184:26

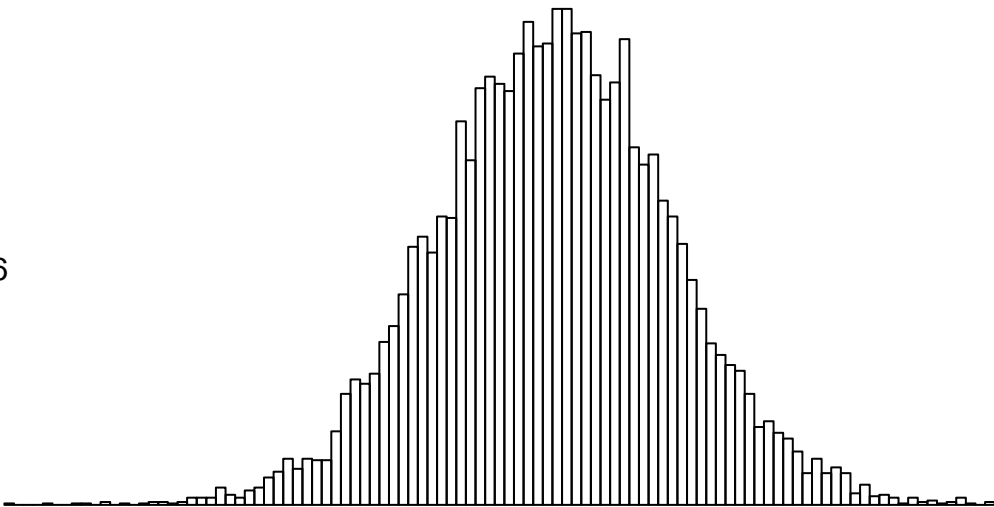

B184:18

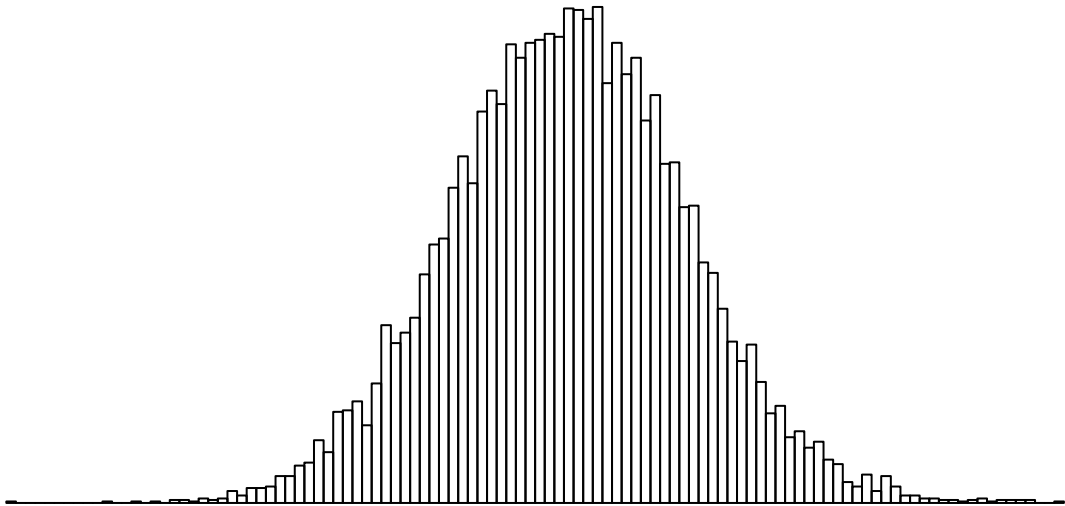

-8.0      -7.5      -7.0      -6.5      -6.0      -5.5

Unidentified Metabolite 10

B184:26 – B184:18

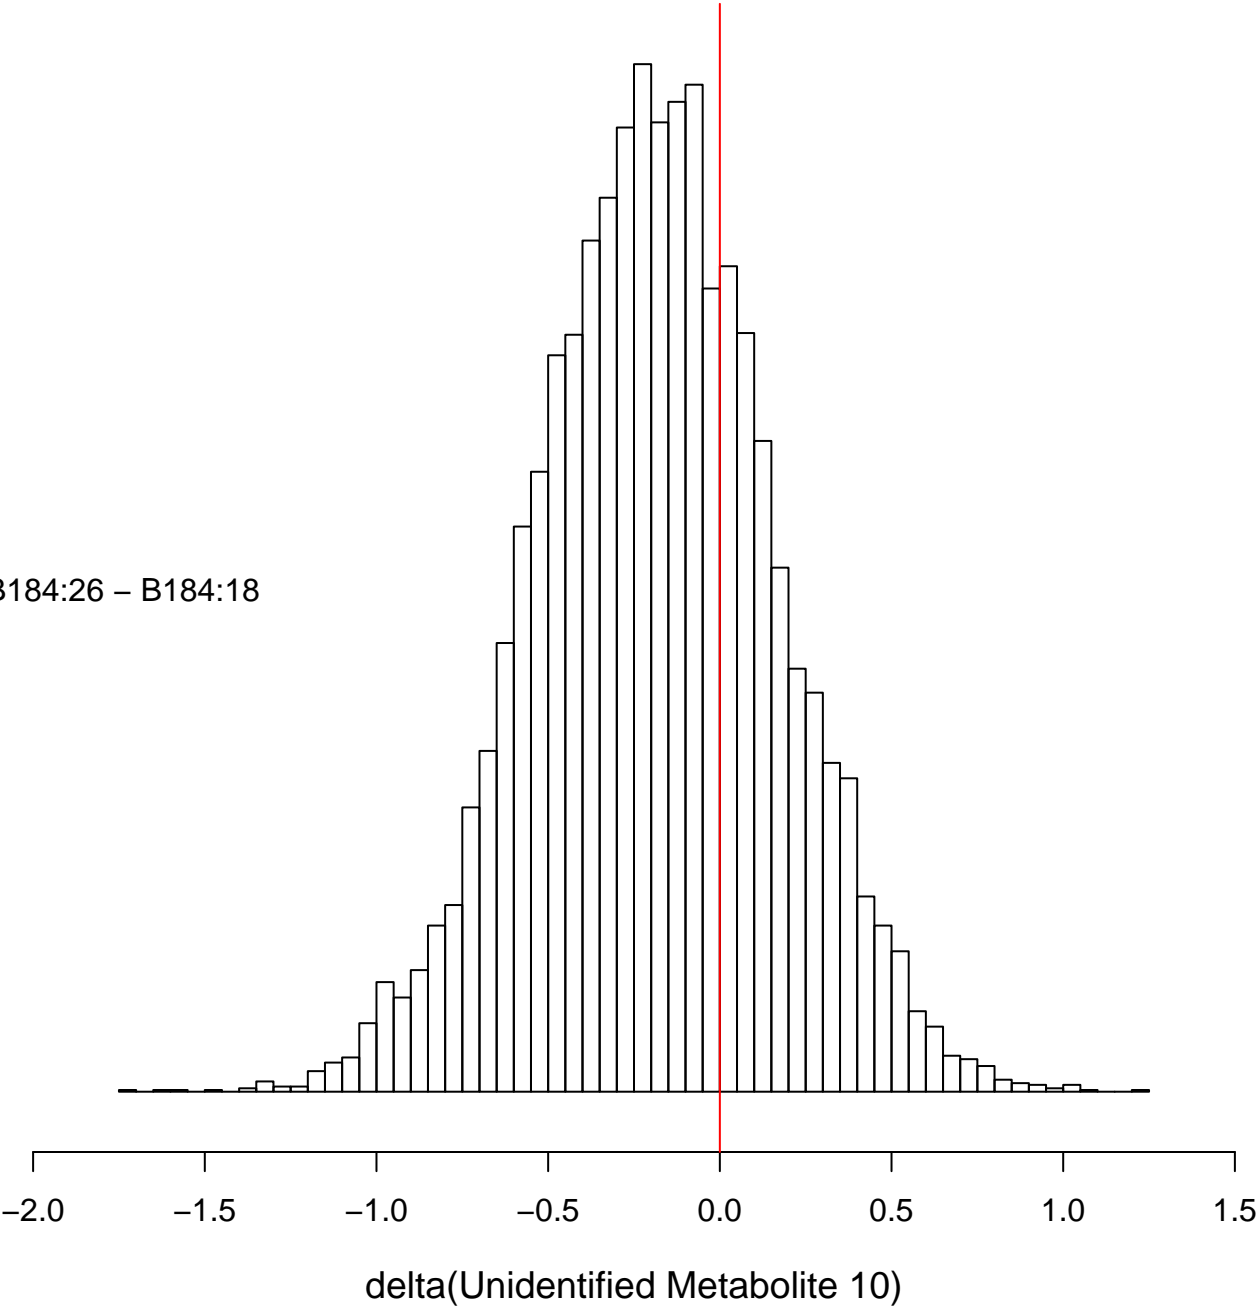

B184:26

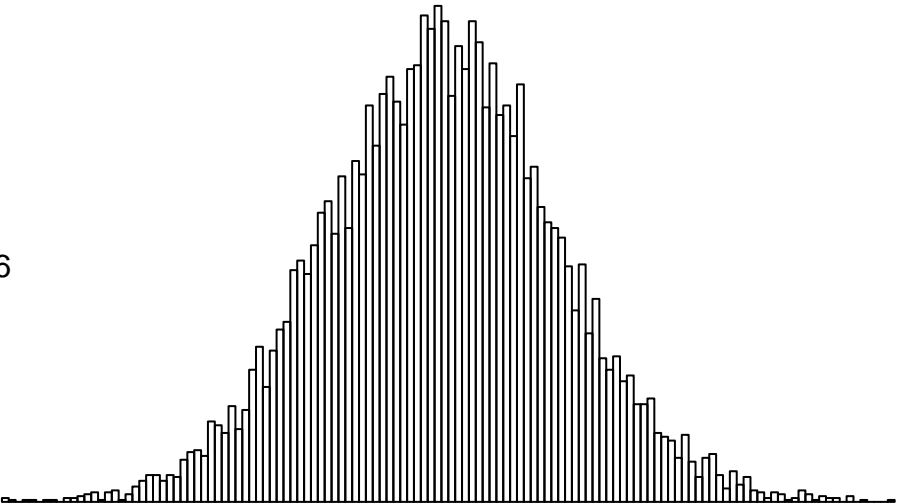

B184:18

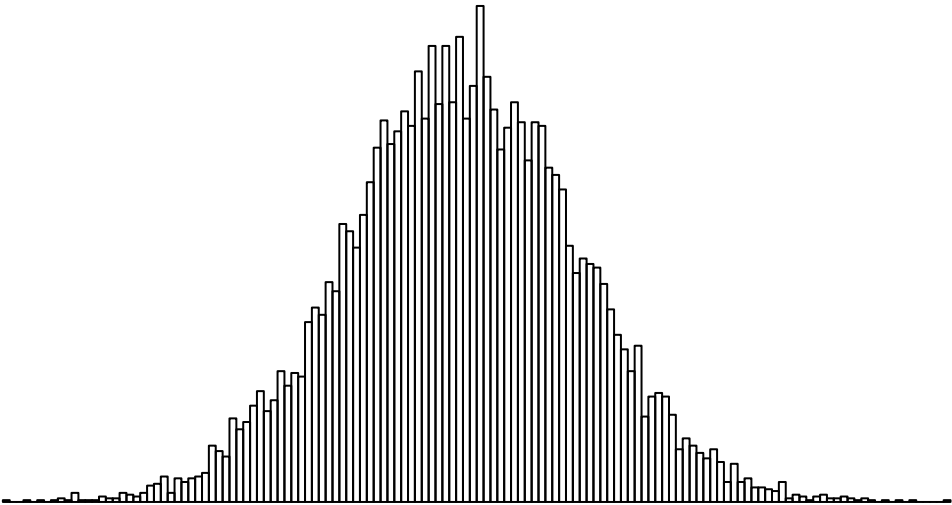

-6.0      -5.5      -5.0      -4.5      -4.0      -3.5      -3.0      -2.5

Unidentified Metabolite 11

B184:26 – B184:18

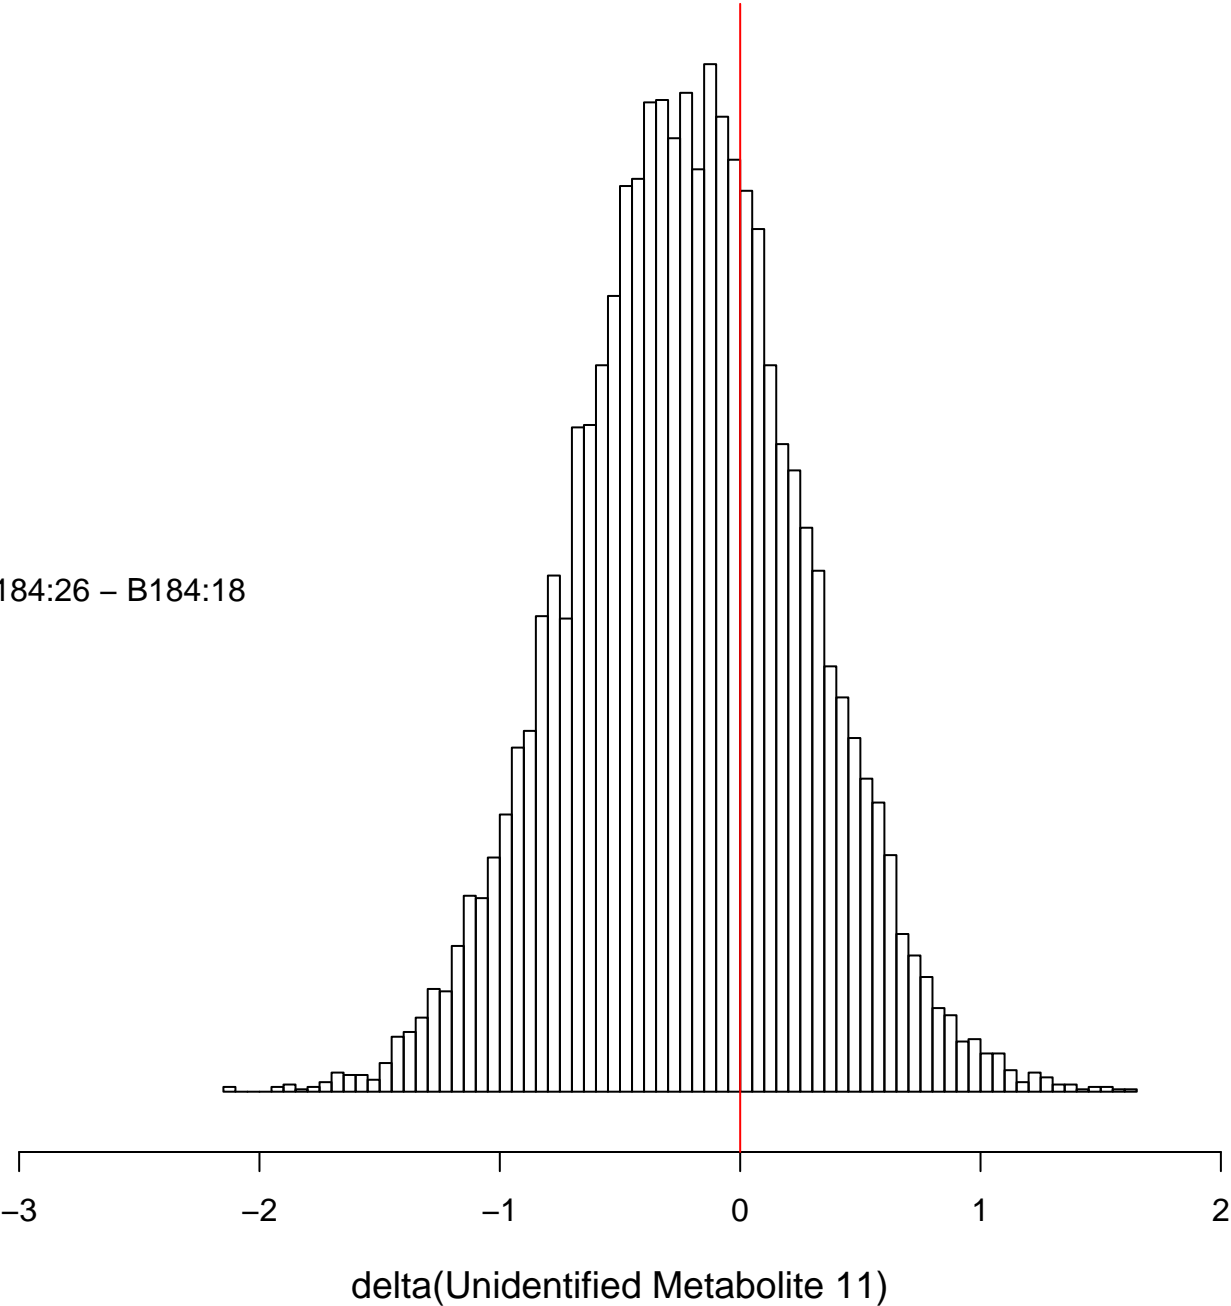

B184:26

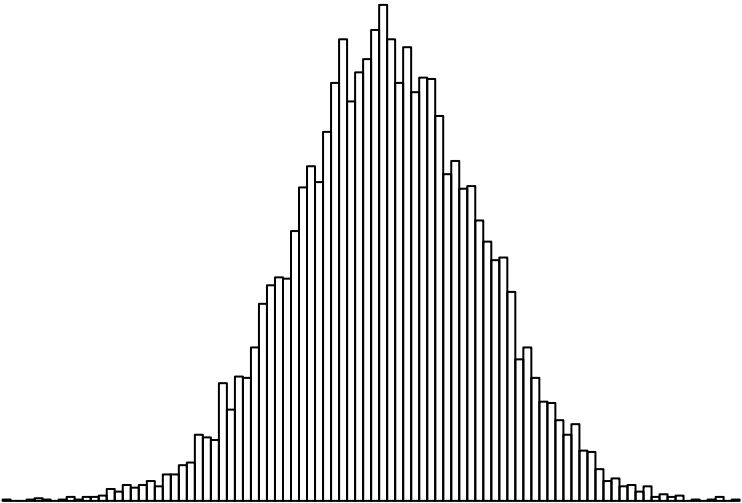

B184:18

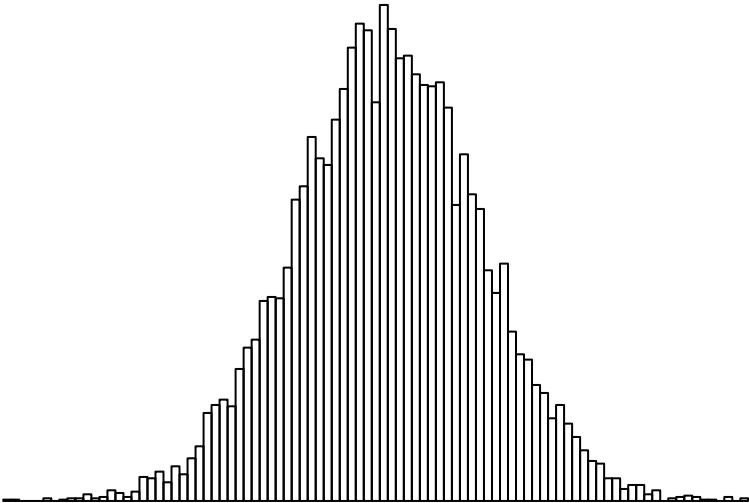

Unidentified Metabolite 12

B184:26 – B184:18

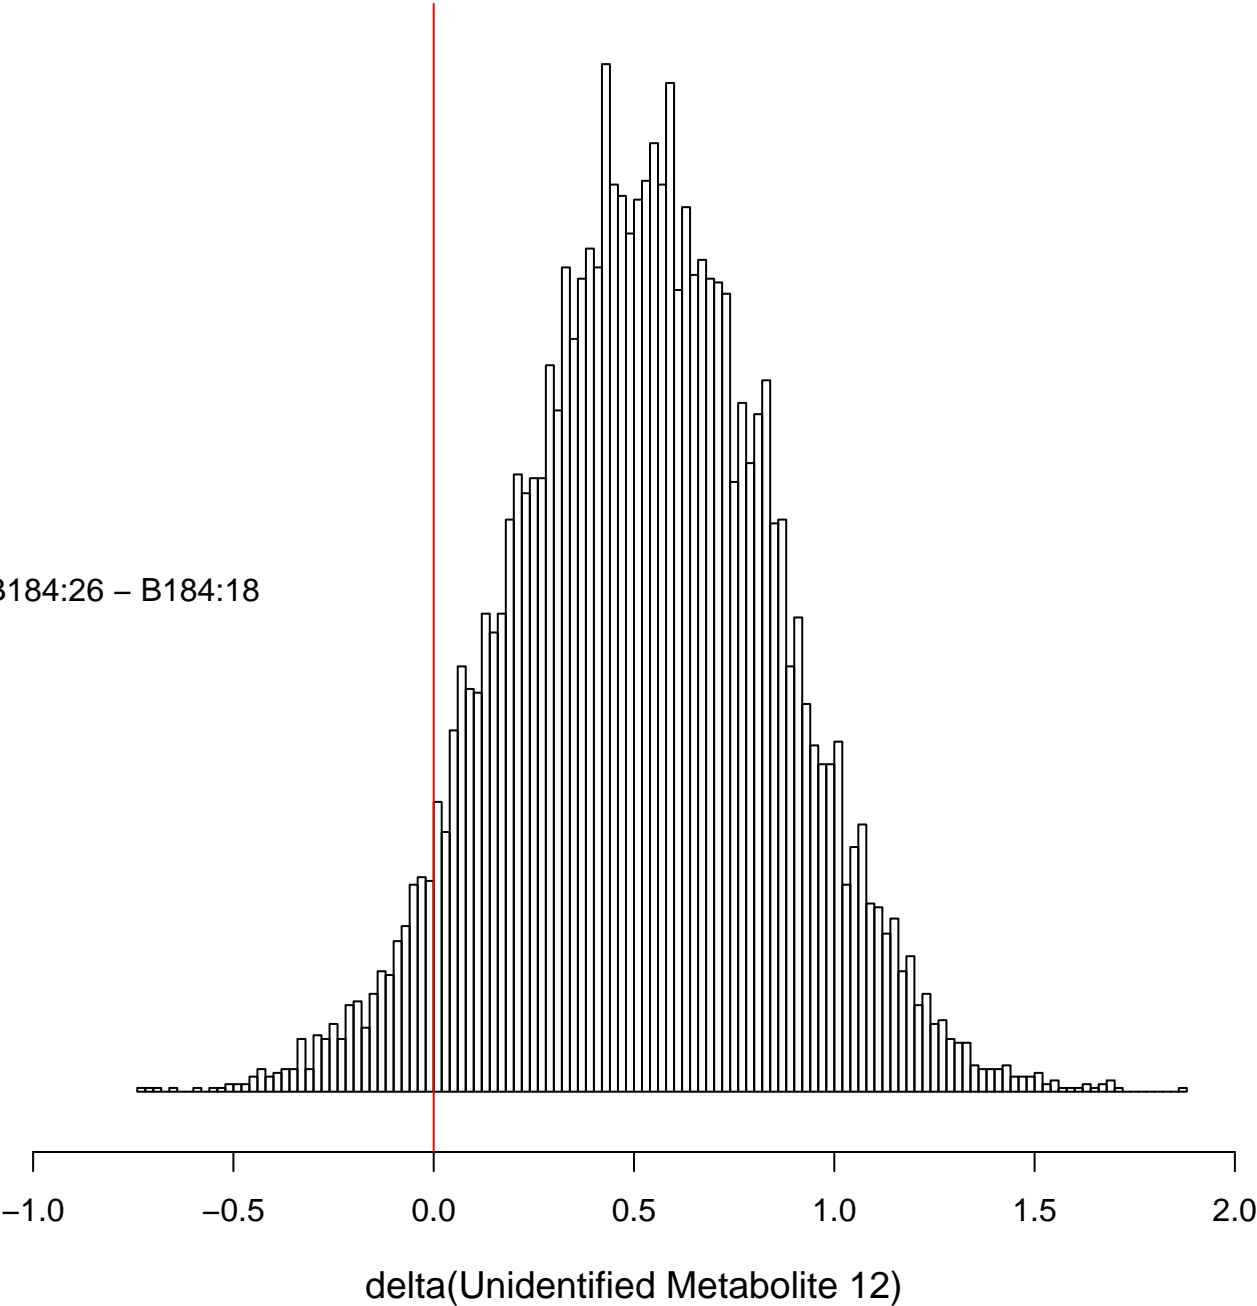

B184:26

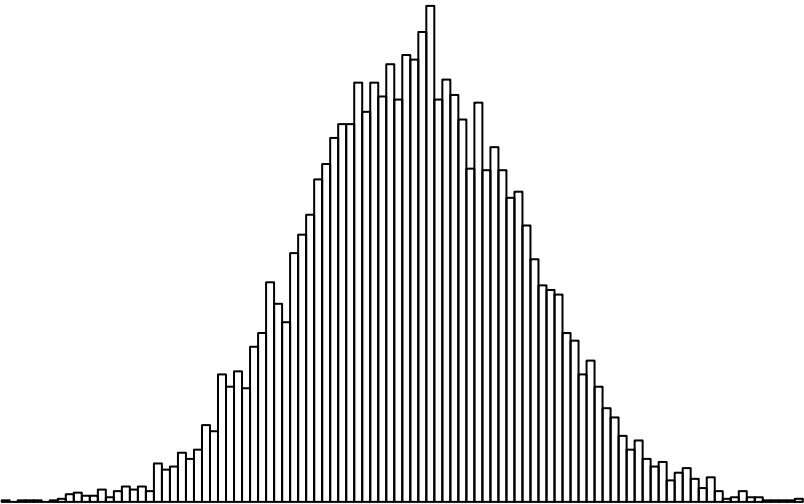

B184:18

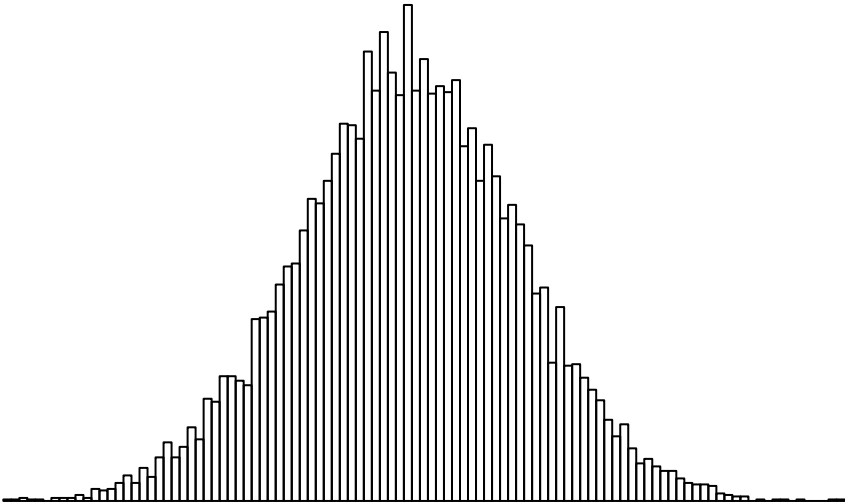

Unidentified Metabolite 14

B184:26 – B184:18

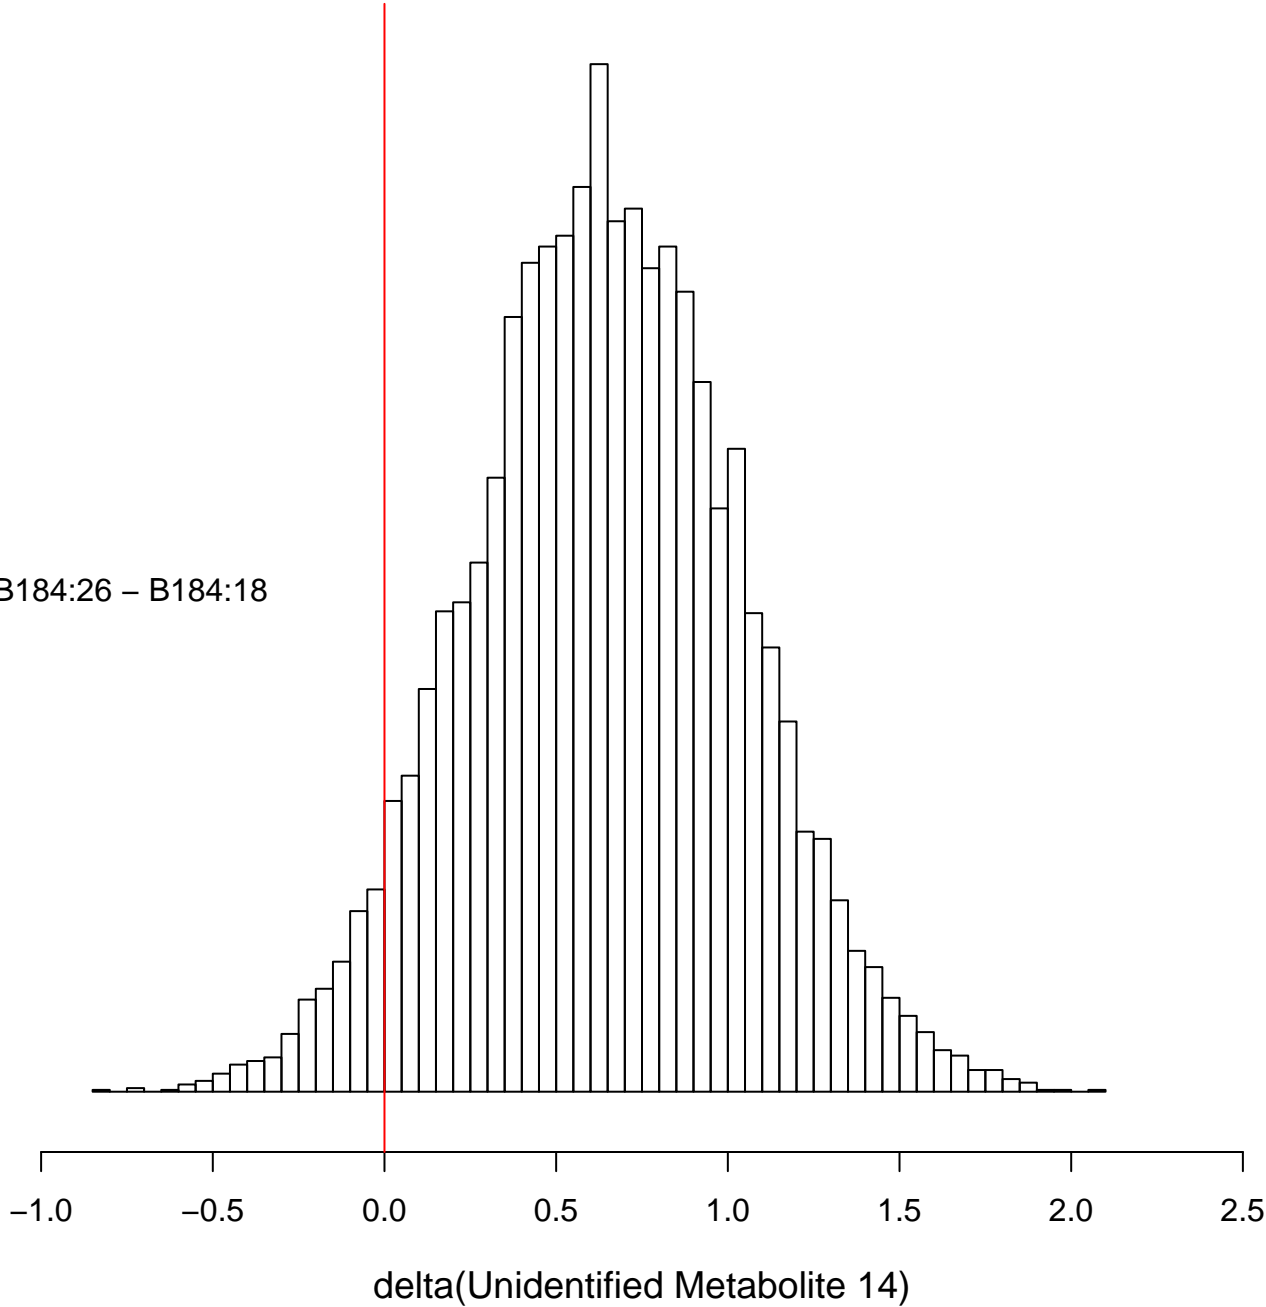



B184:26

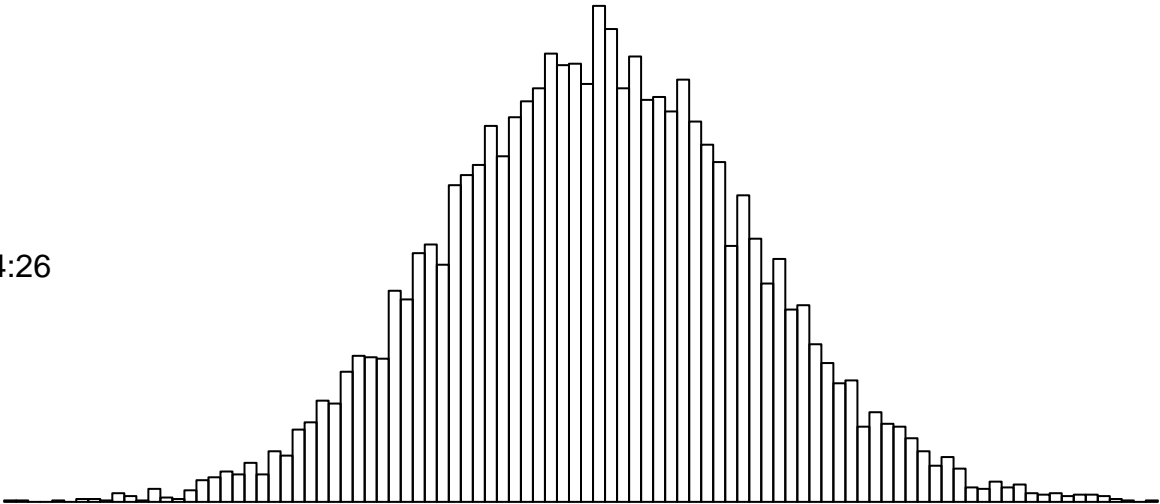

B184:18

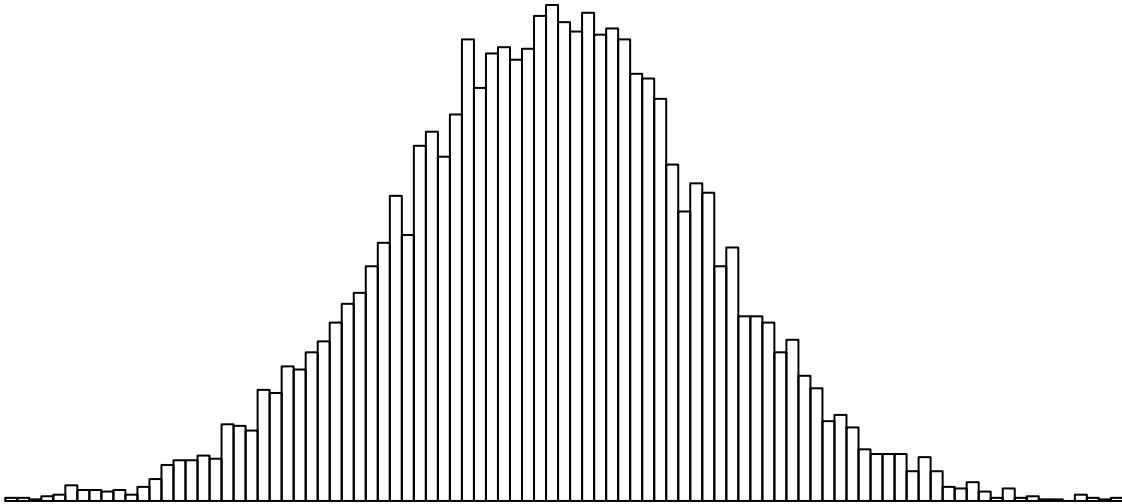

-7.5                      -7.0                      -6.5                      -6.0                      -5.5

Unidentified Metabolite 16

B184:26 – B184:18

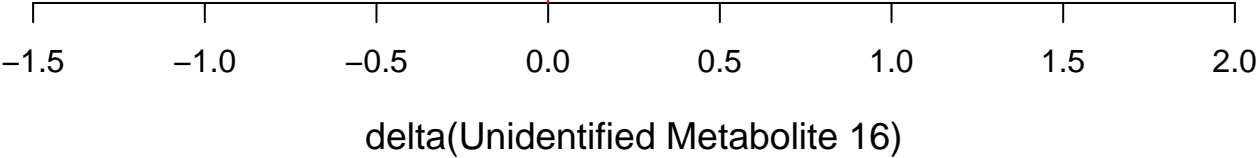

B184:26

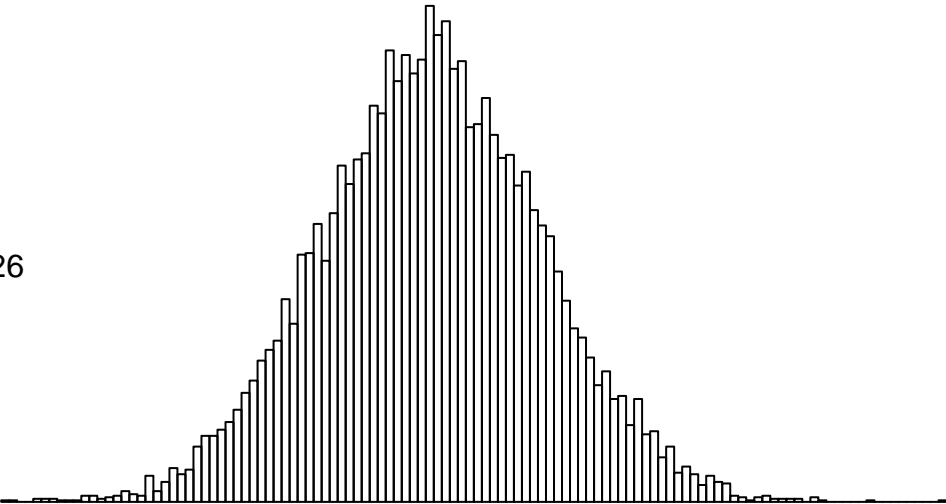

B184:18

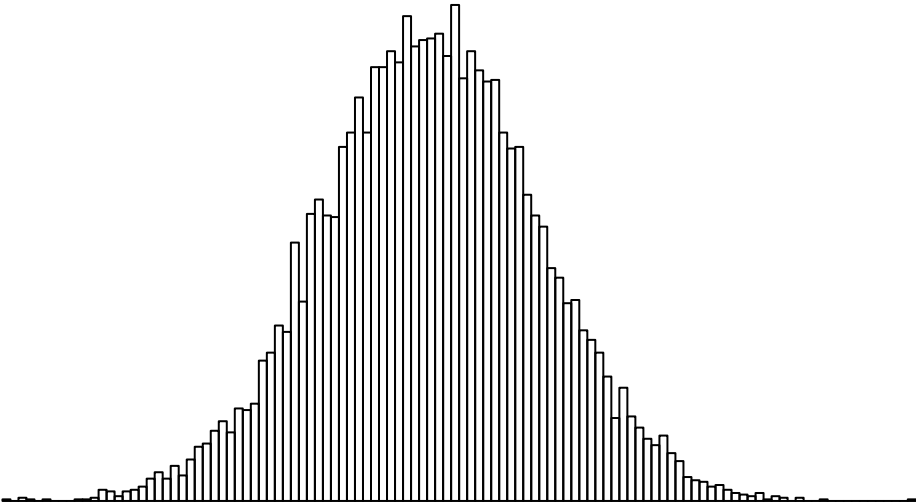

Unidentified Metabolite 17

B184:26 – B184:18

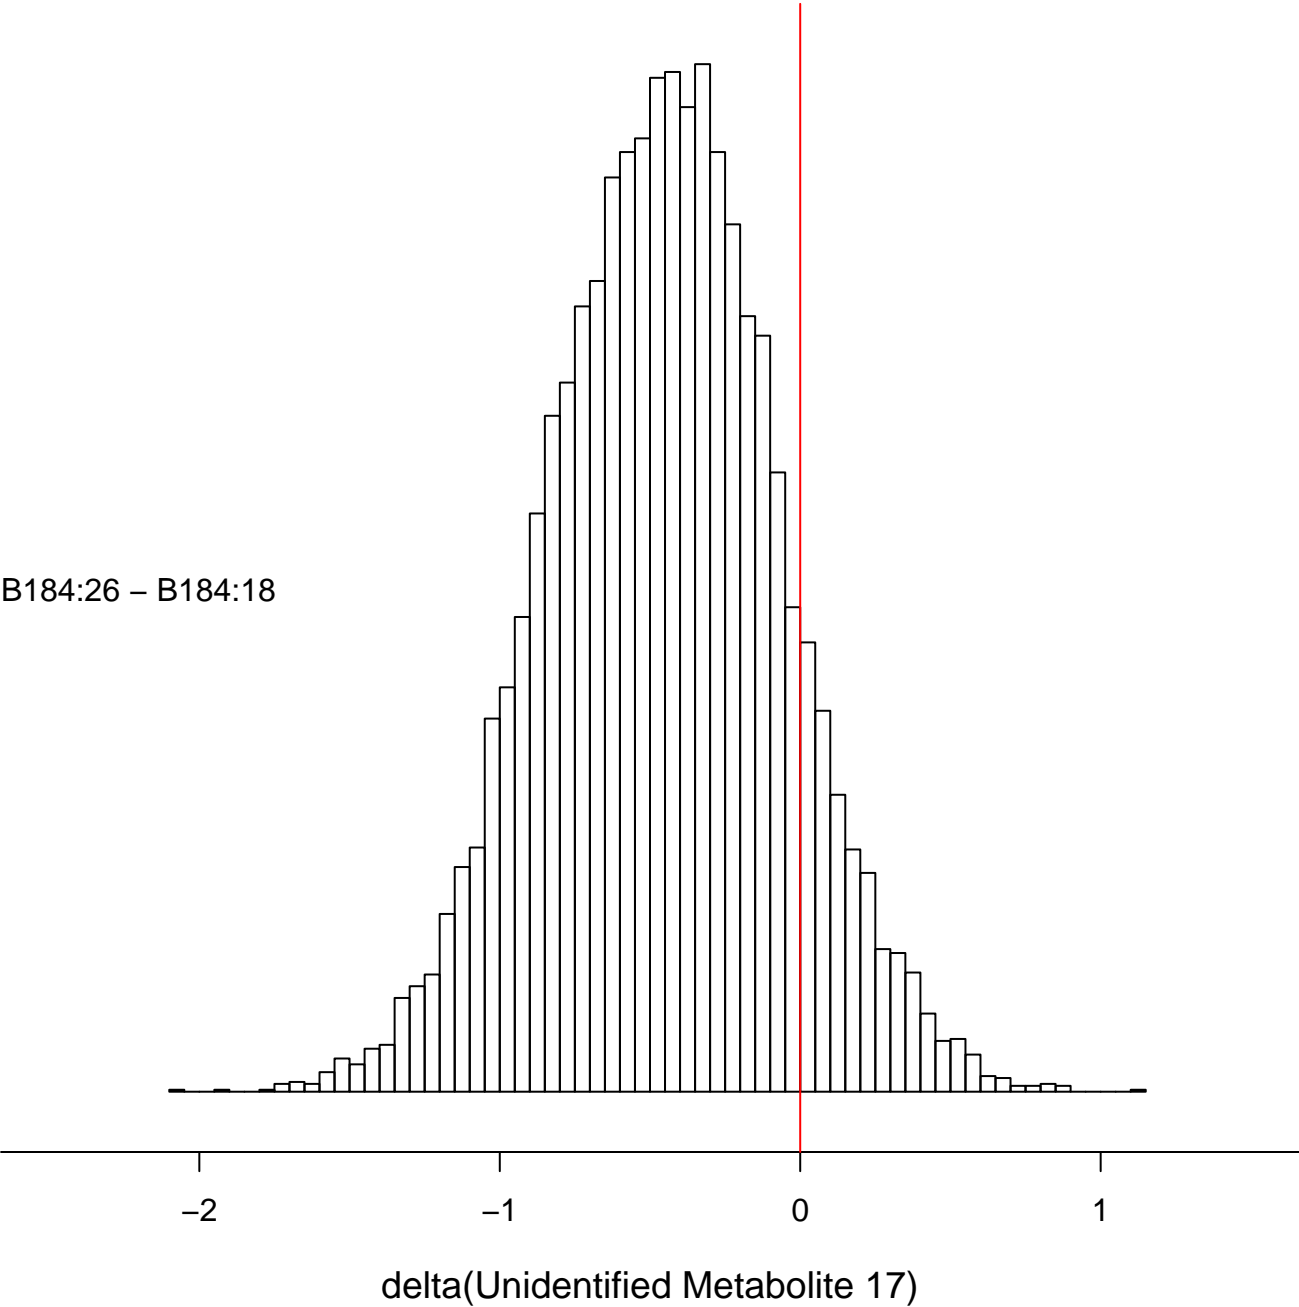

B184:26

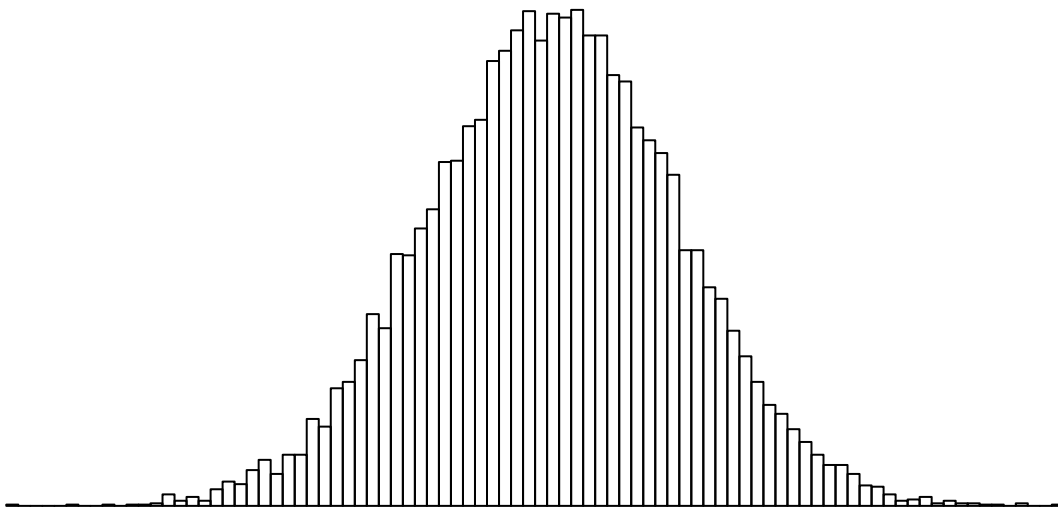

B184:18

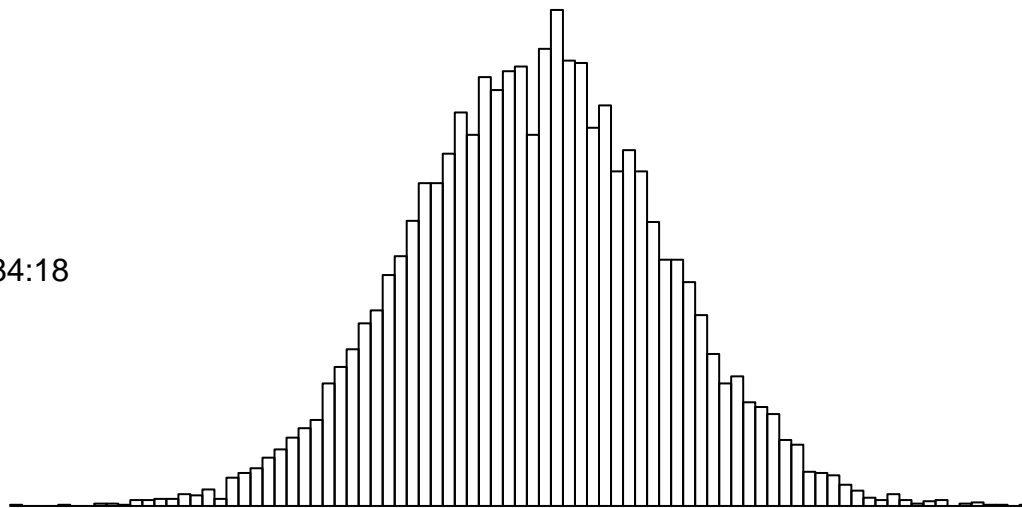

-7.5                      -7.0                      -6.5                      -6.0                      -5.5

Unidentified Metabolite 18

B184:26 – B184:18

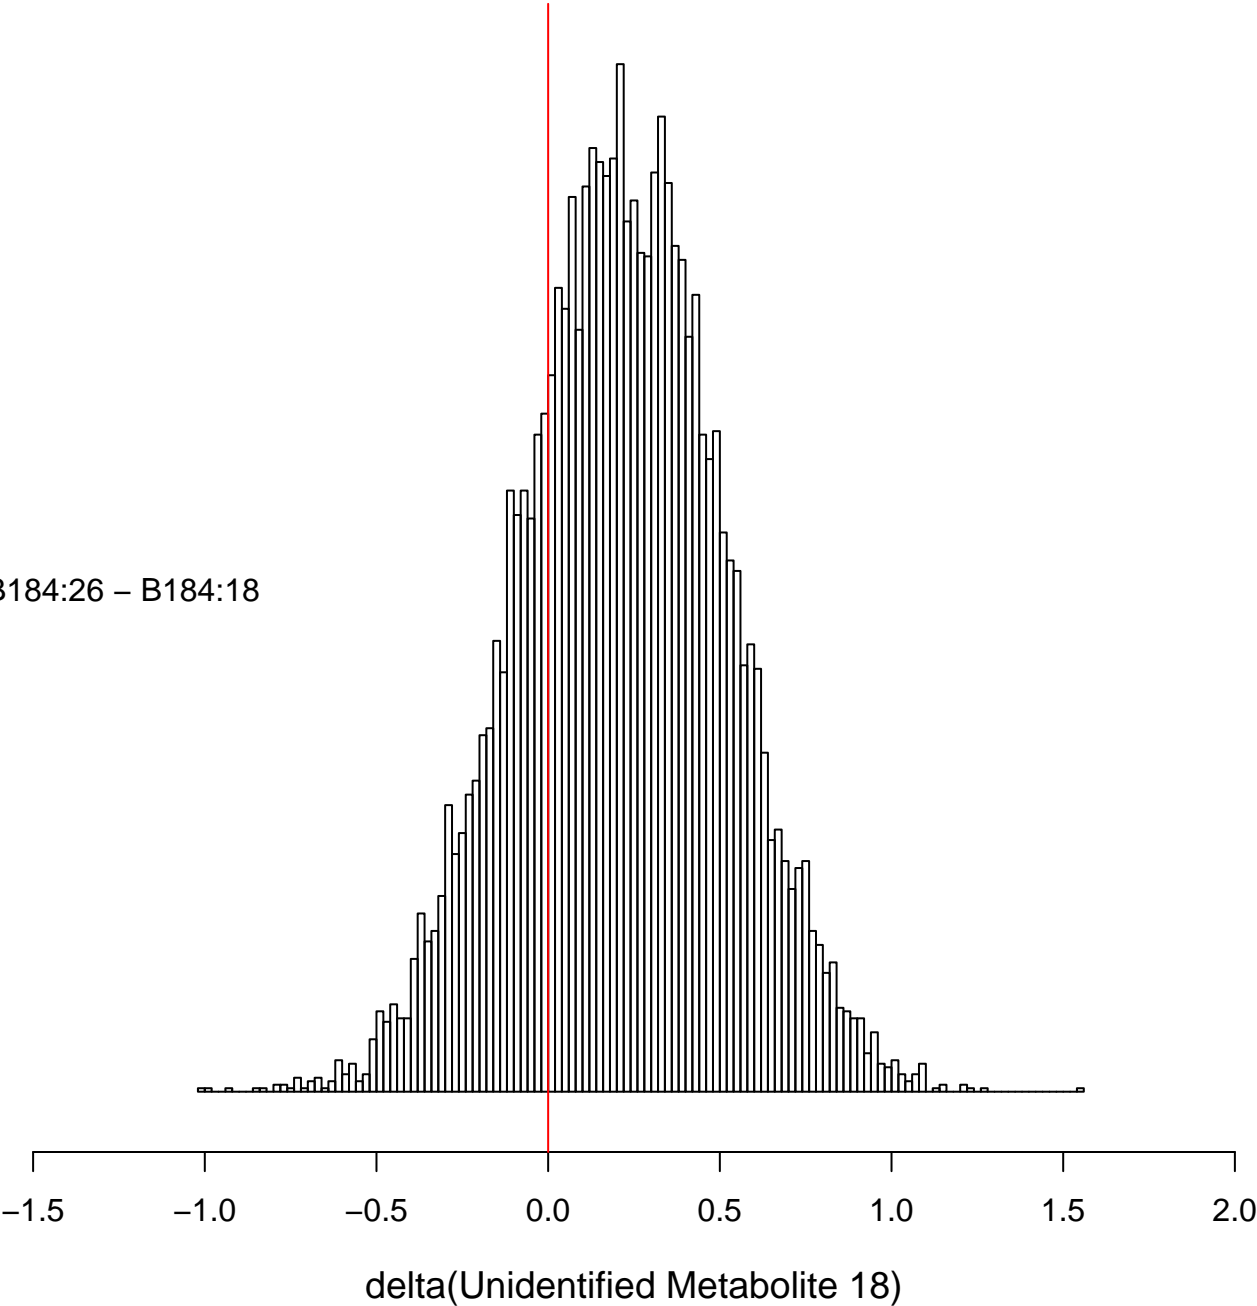

B184:26

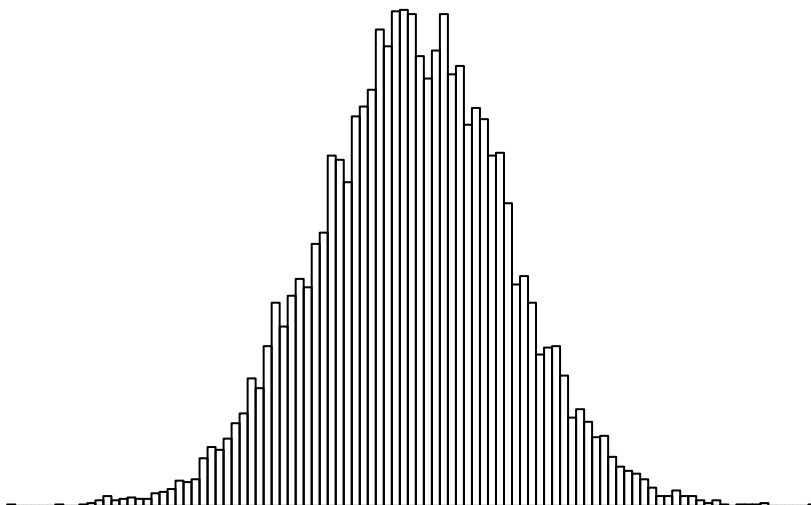

B184:18

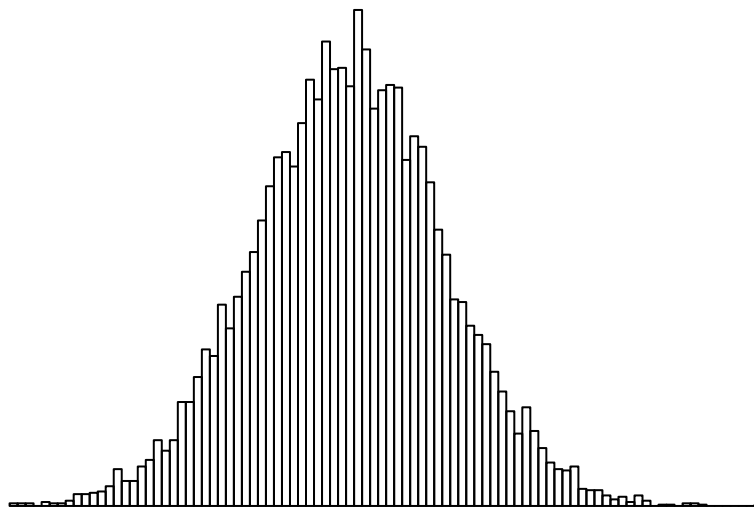

-6.5      -6.0      -5.5      -5.0      -4.5      -4.0      -3.5

Unidentified Metabolite 20

B184:26 – B184:18

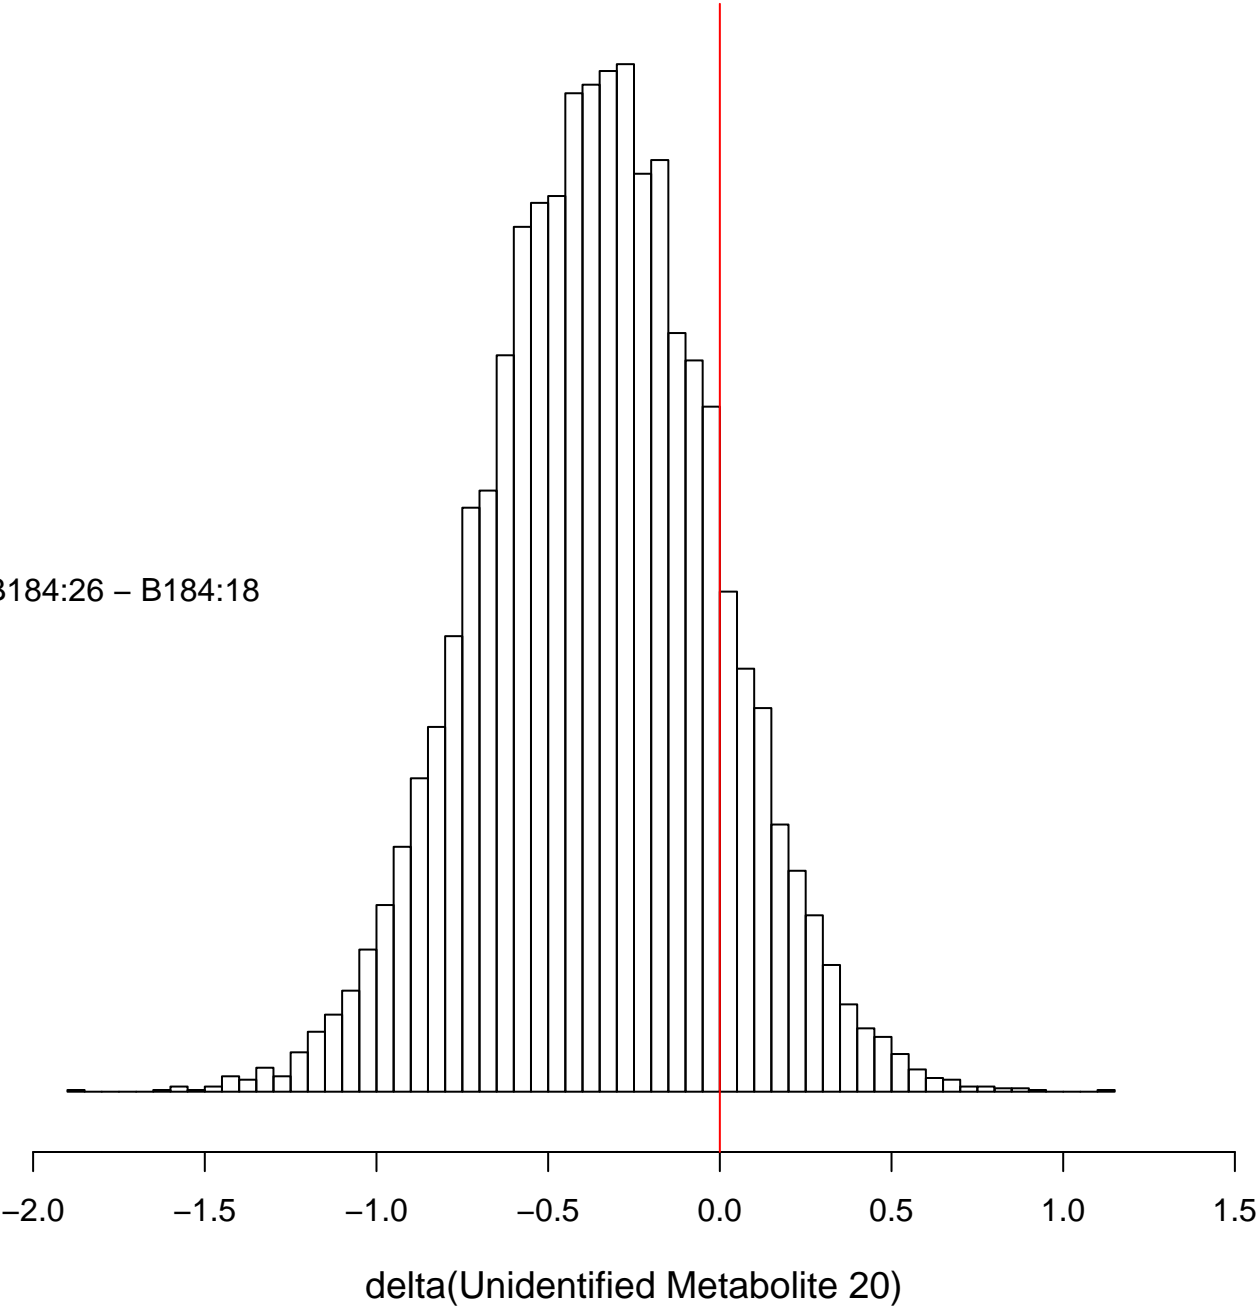



B184:26

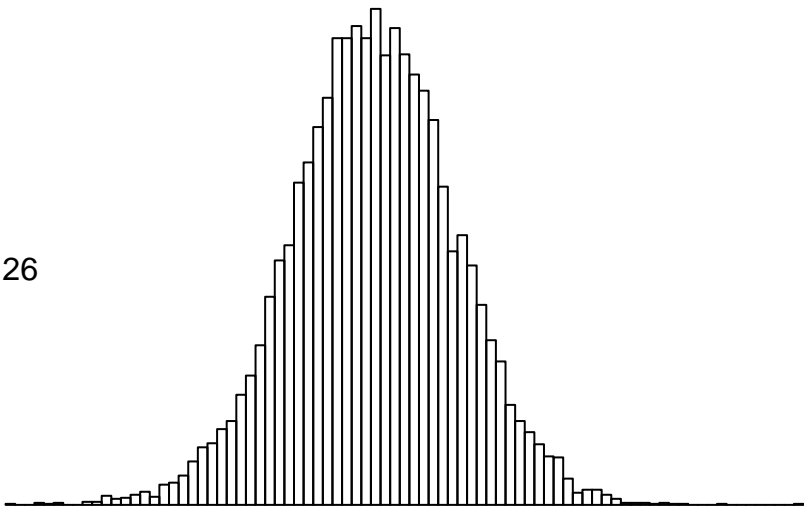

B184:18

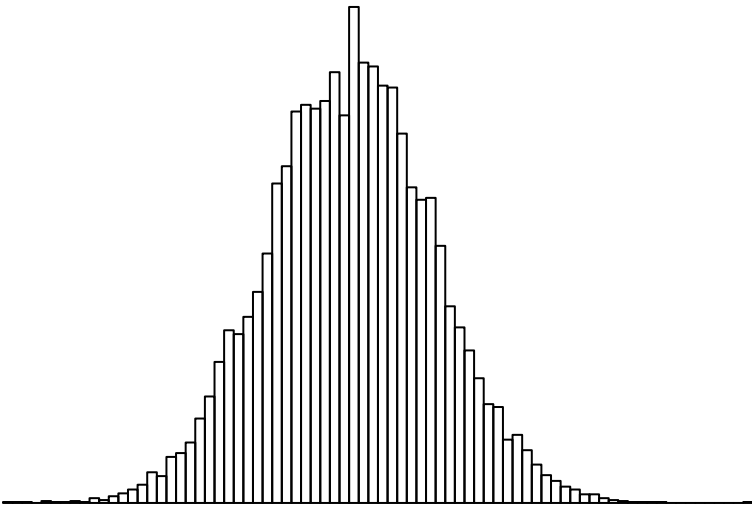

-8.5      -8.0      -7.5      -7.0      -6.5      -6.0

Unidentified Metabolite 22

B184:26 – B184:18

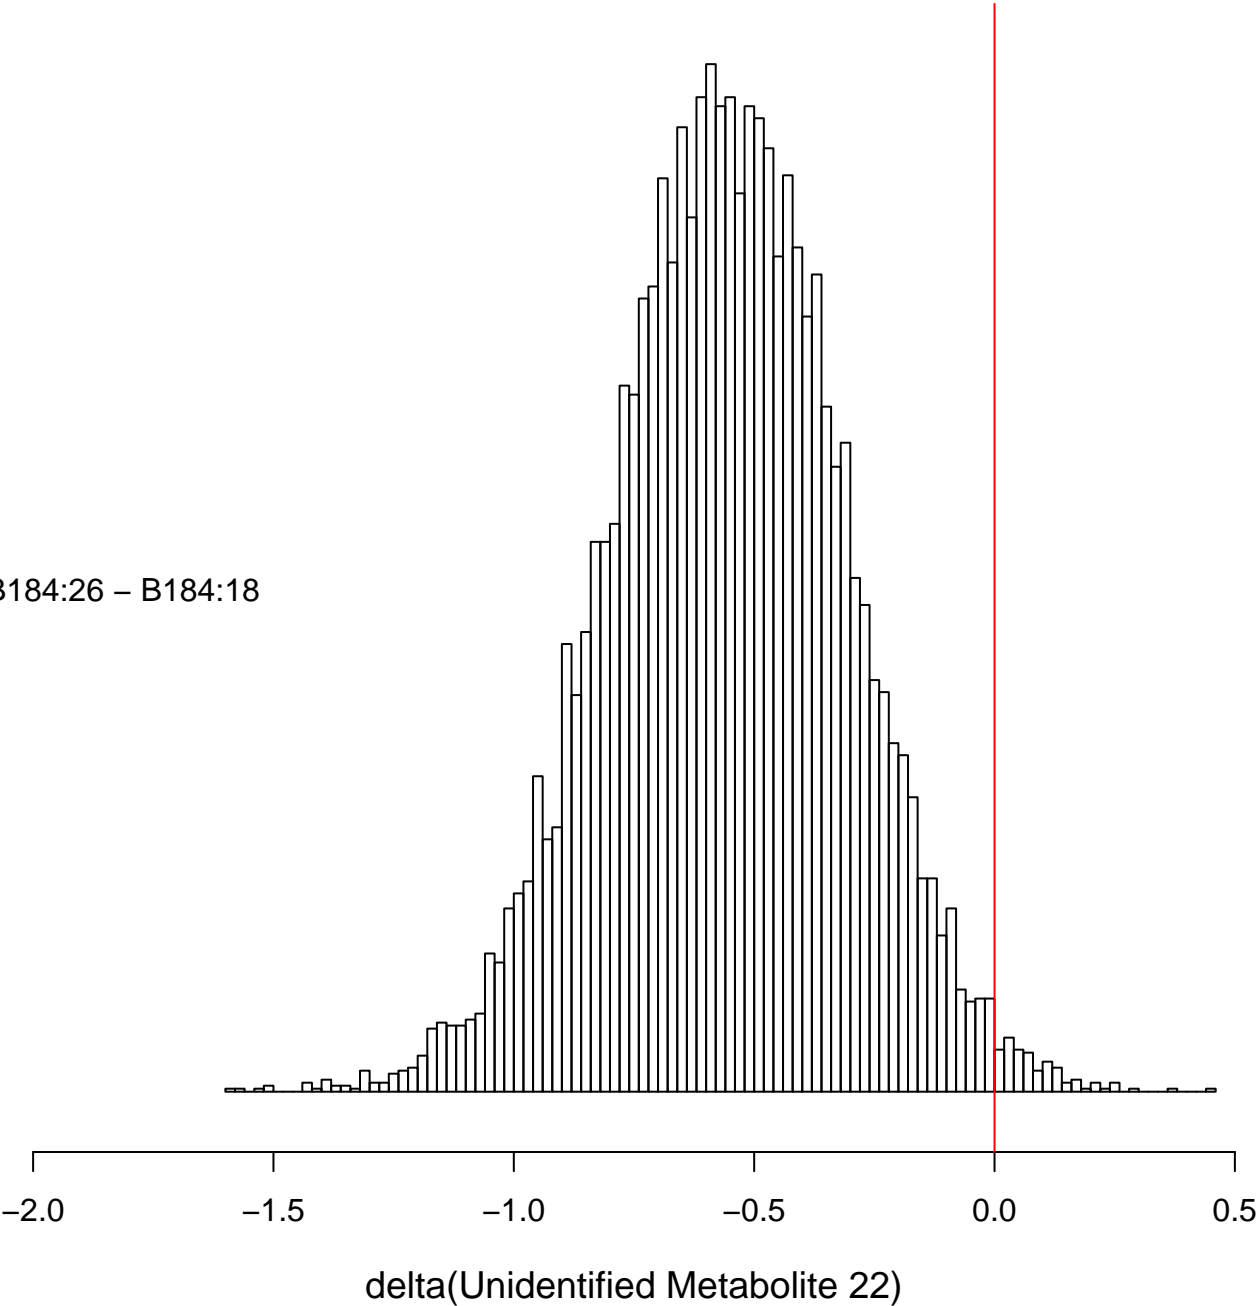

B184:26

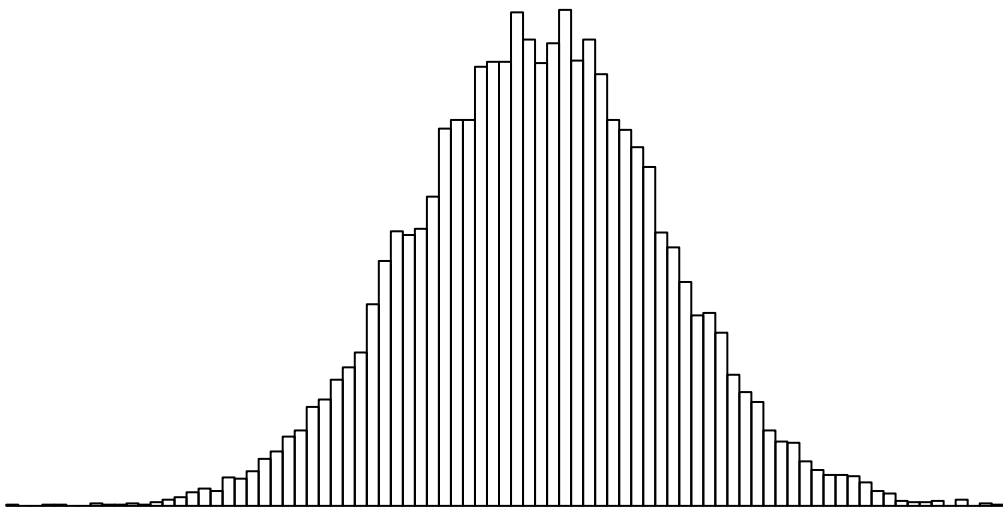

B184:18

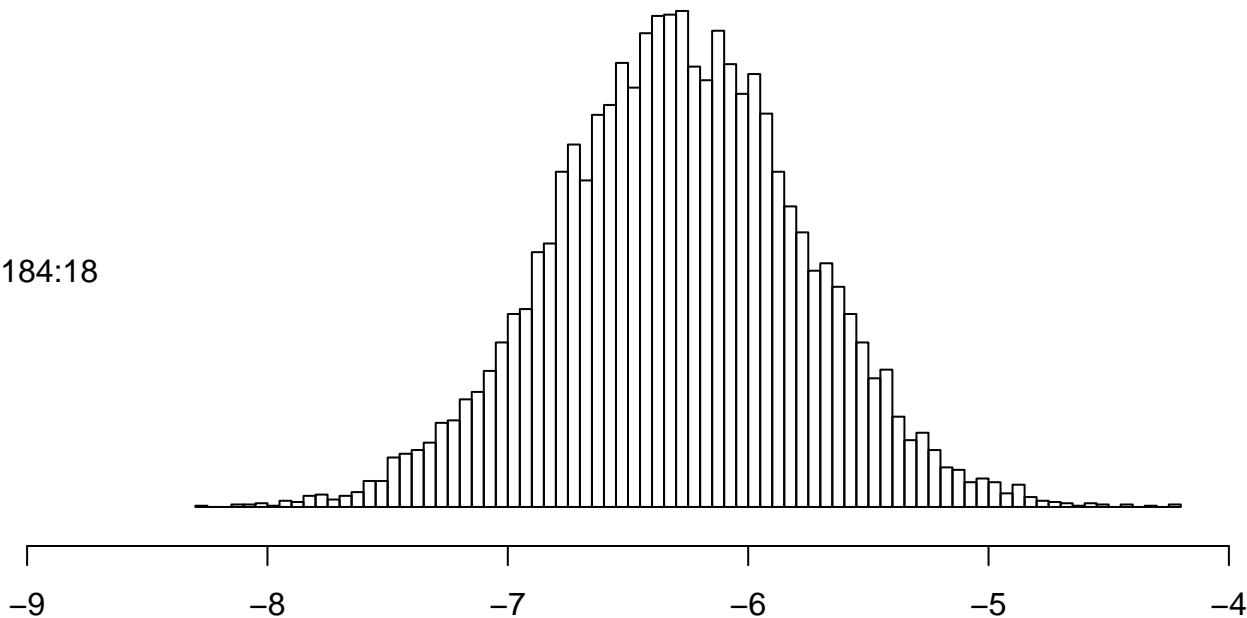

Unidentified Metabolite 23

B184:26 – B184:18

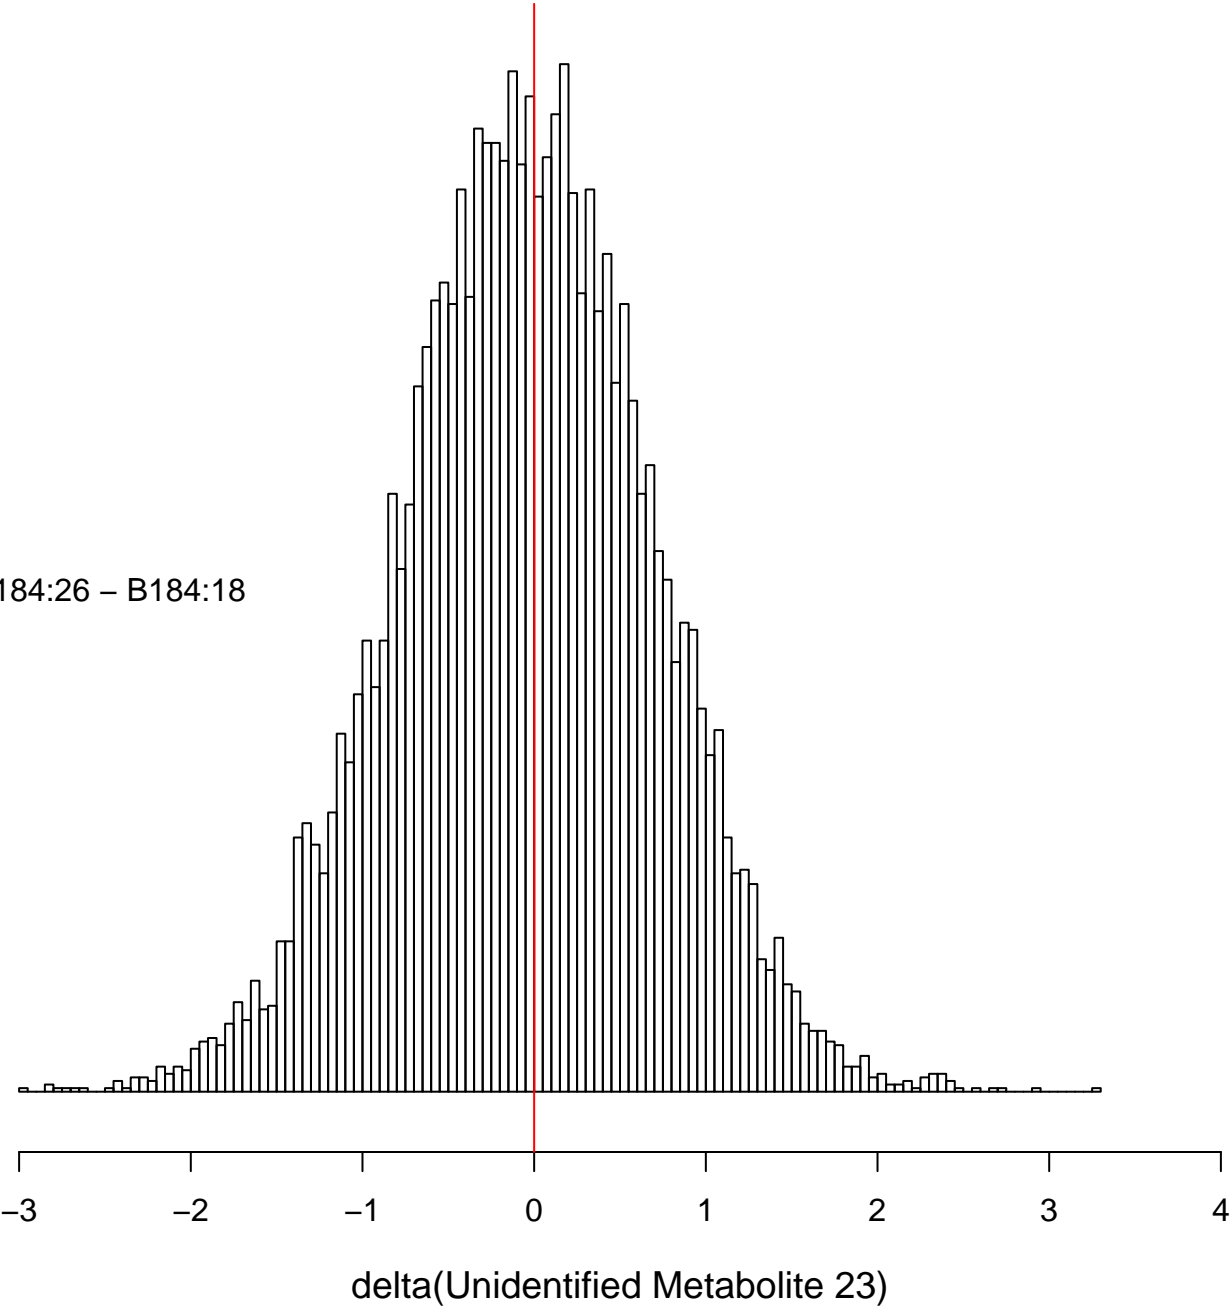

B184:26

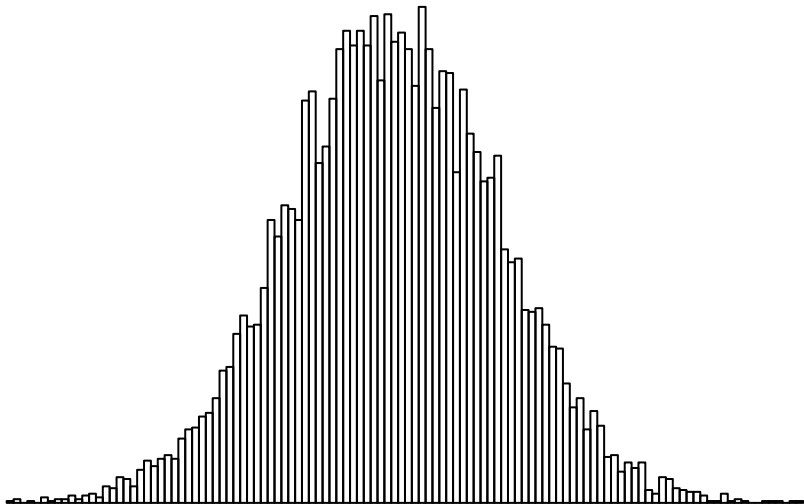

B184:18

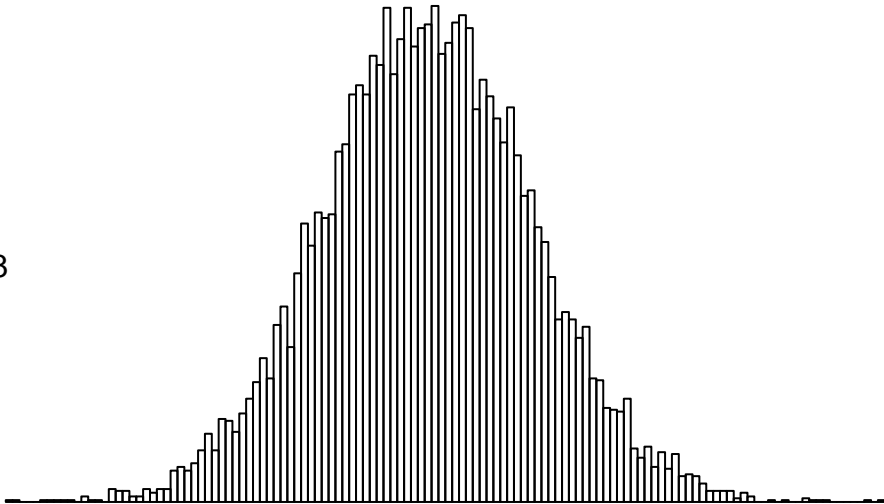

-7.0      -6.5      -6.0      -5.5      -5.0      -4.5      -4.0      -3.5

Unidentified Metabolite 24

B184:26 – B184:18

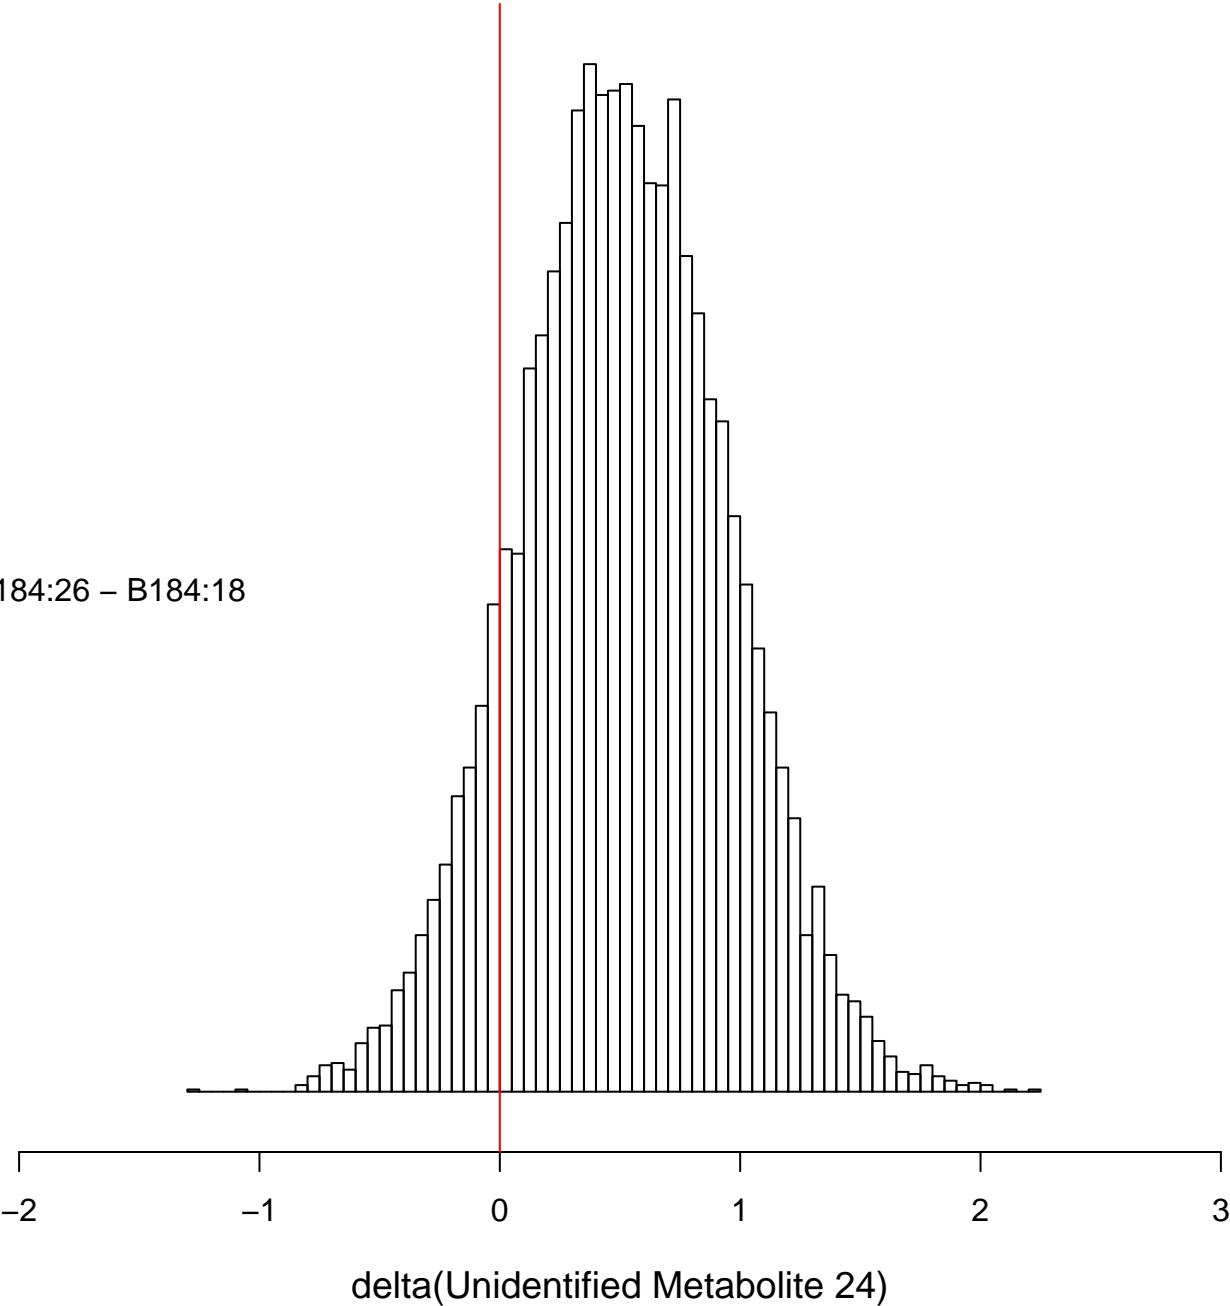

B184:26

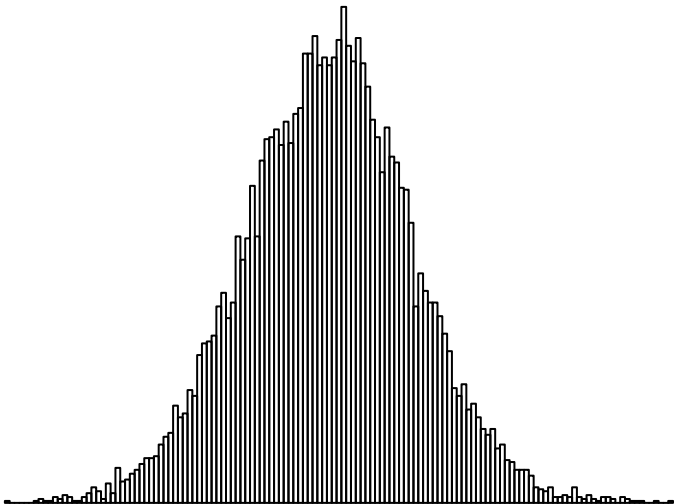

B184:18

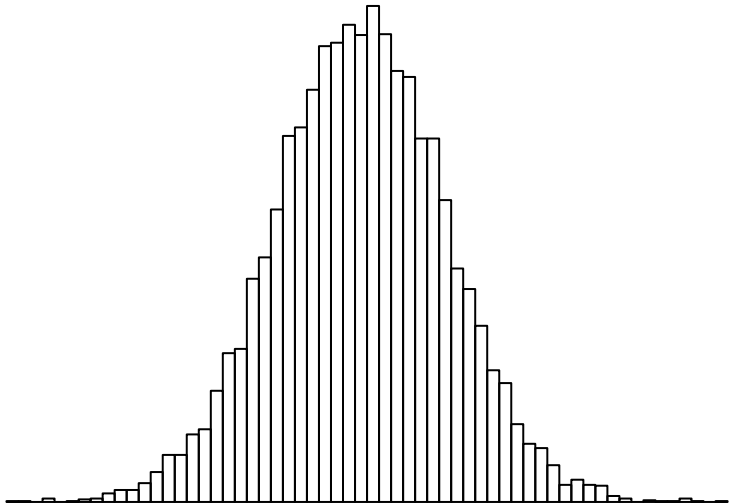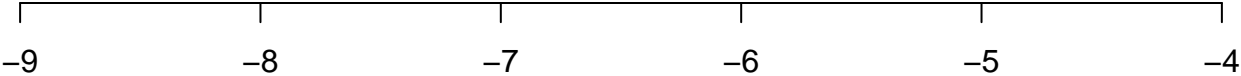

Unidentified Metabolite 25

B184:26 – B184:18

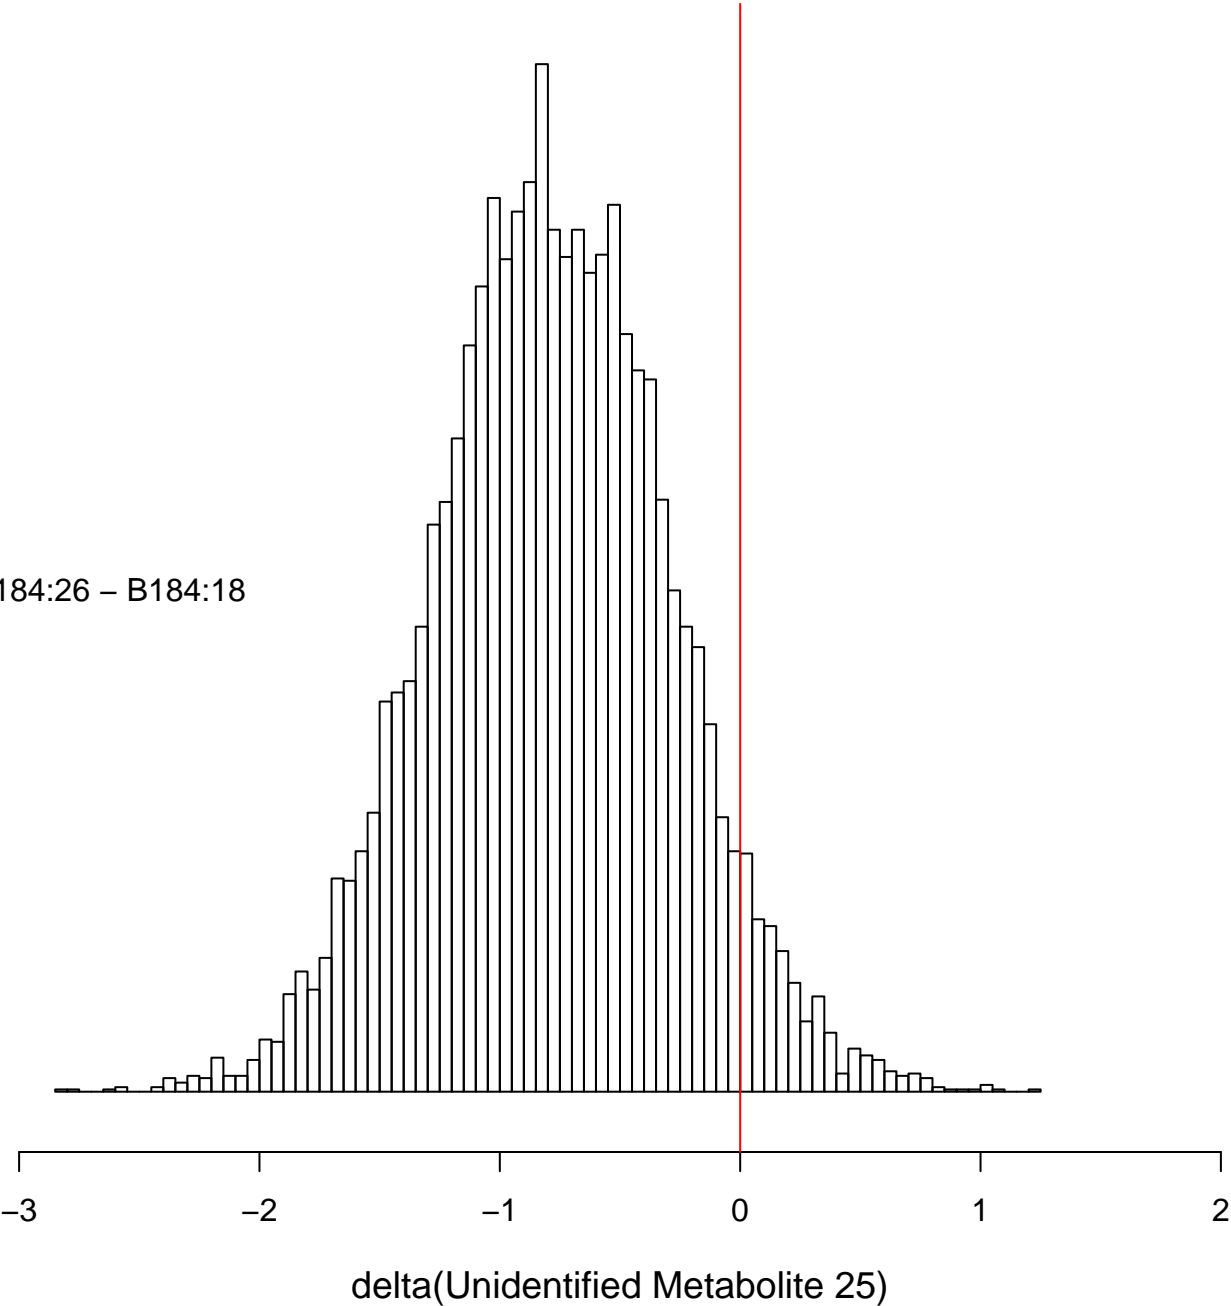



B184:26

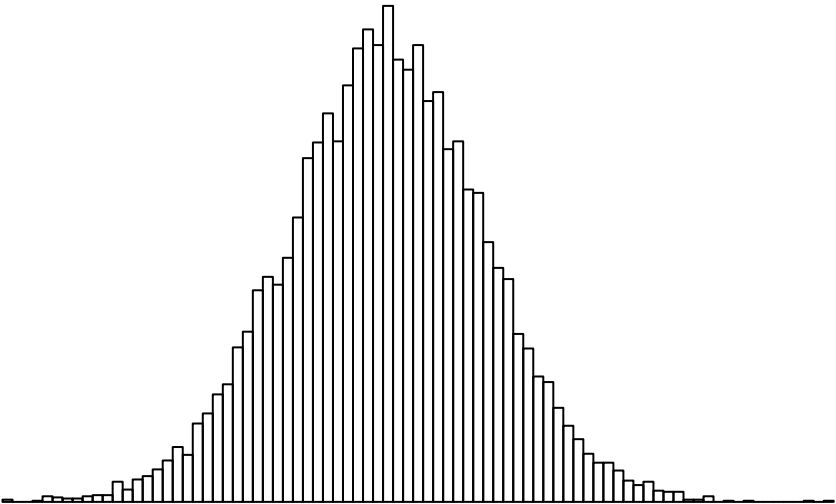

B184:18

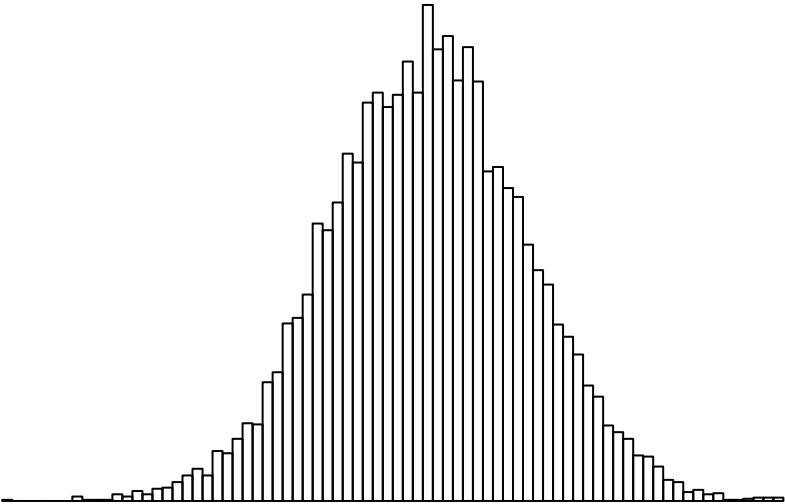

-9 -8 -7 -6 -5 -4 -3

Unidentified Metabolite 26

B184:26 – B184:18

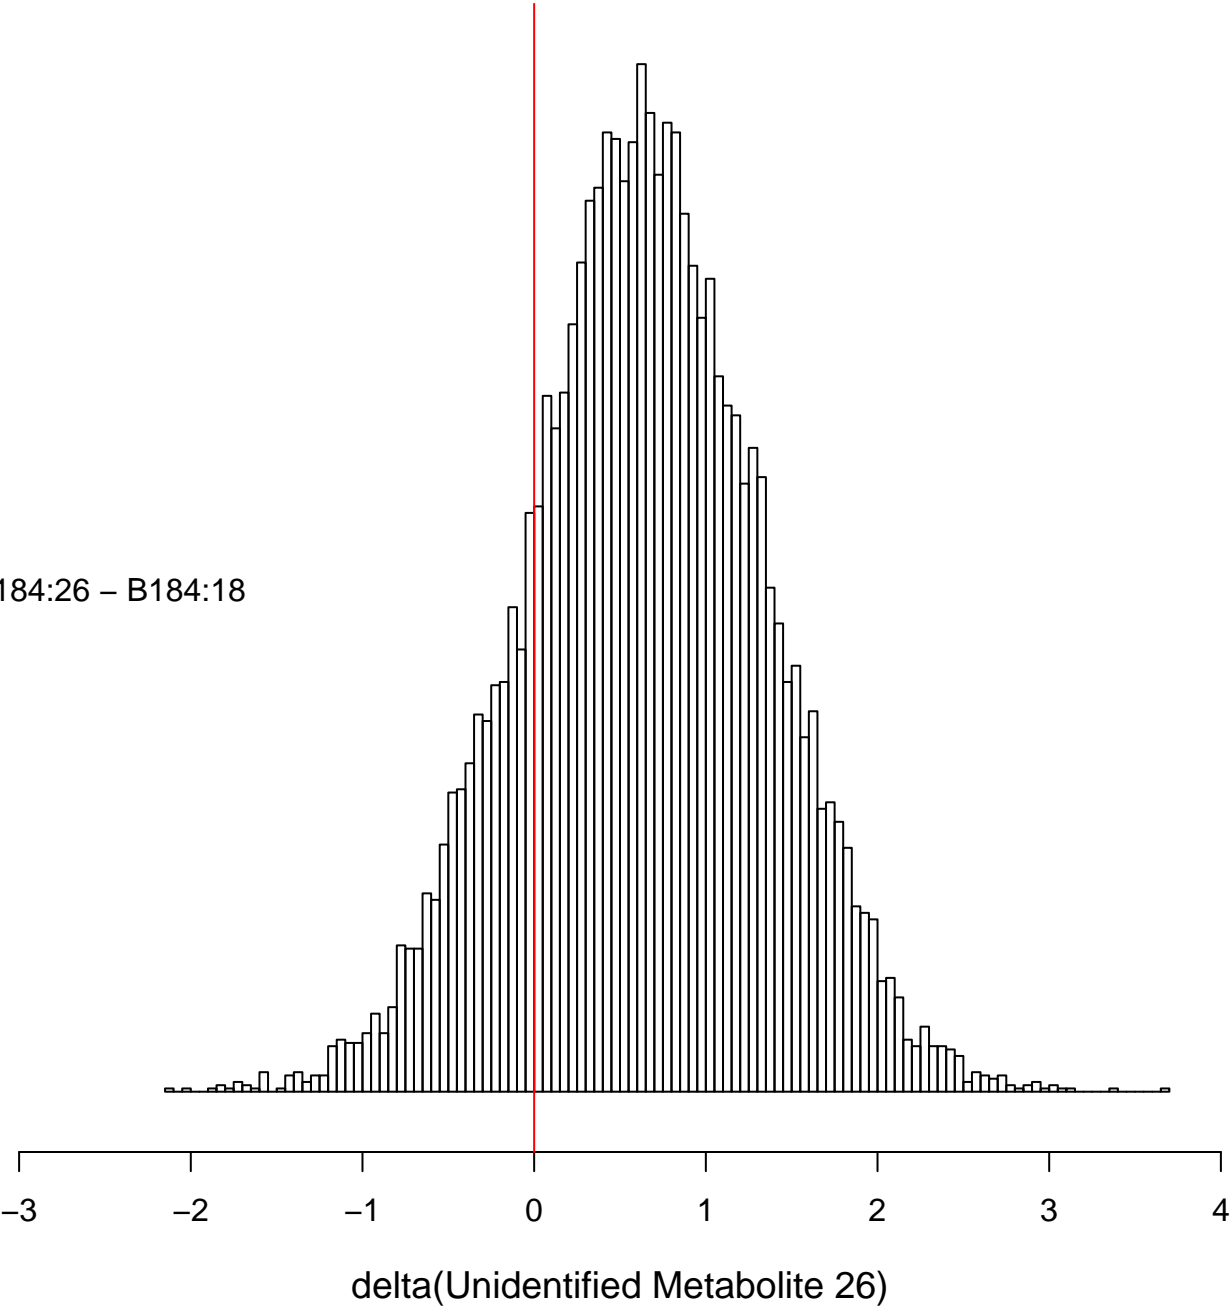

B184:26

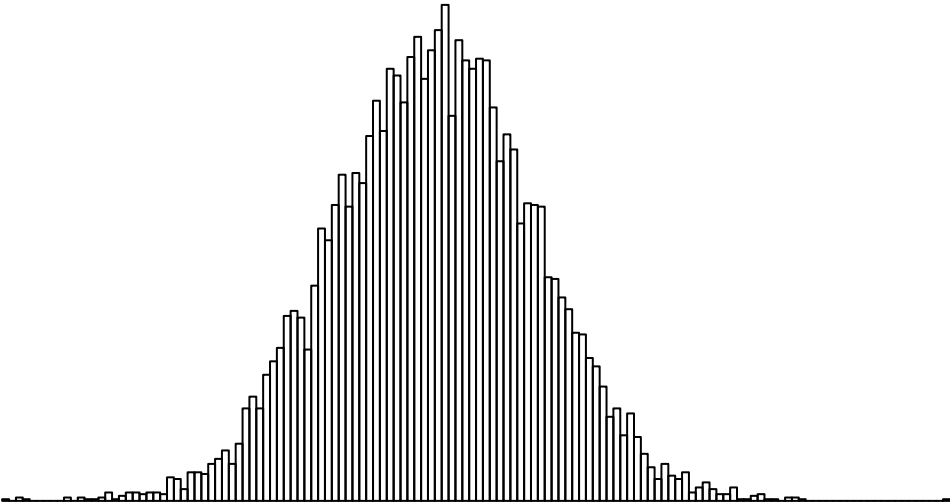

B184:18

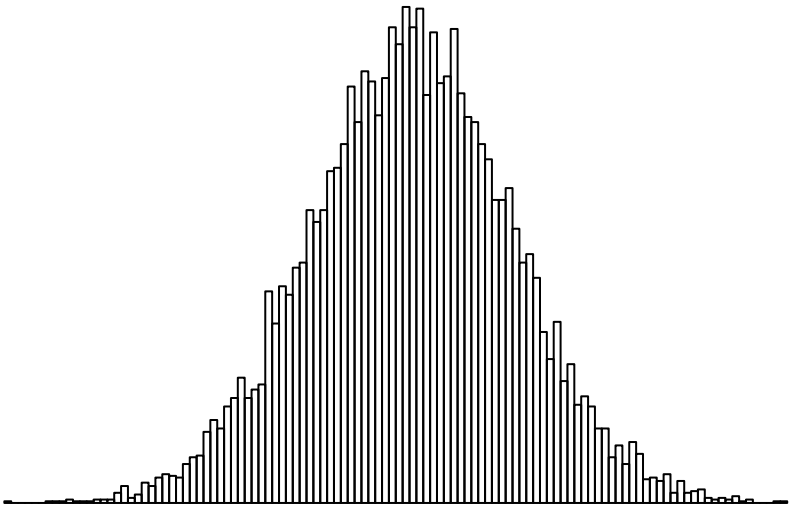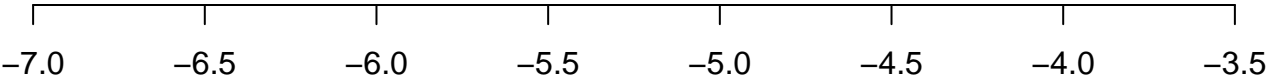

Unidentified Metabolite 27

B184:26 – B184:18

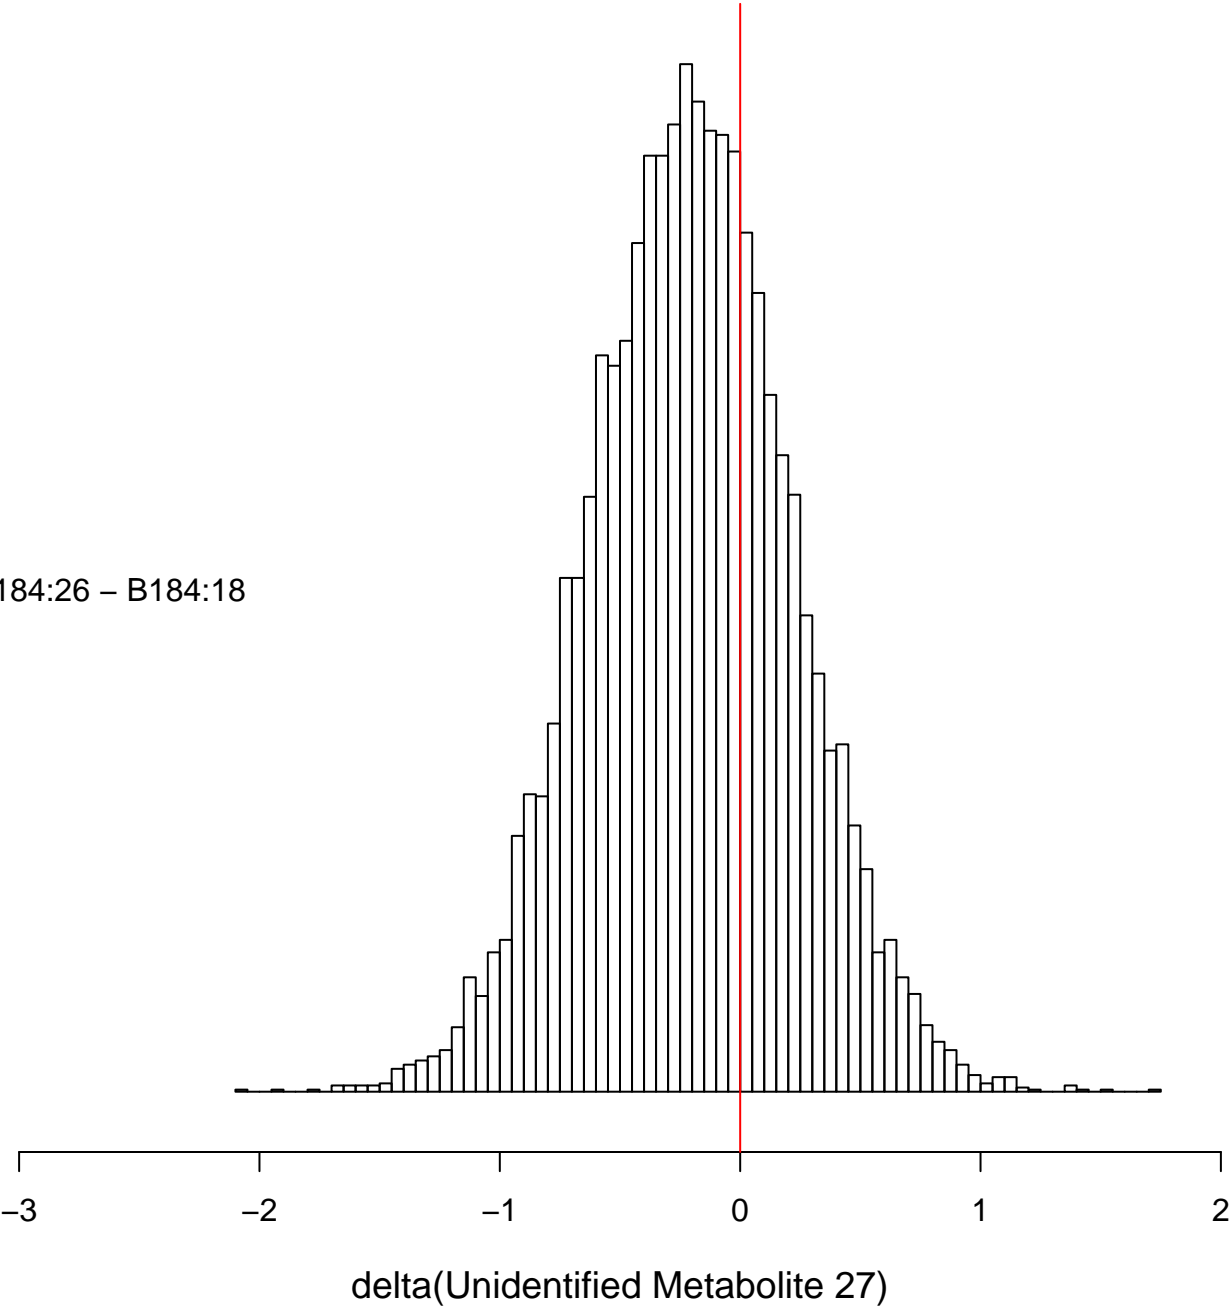

B184:26

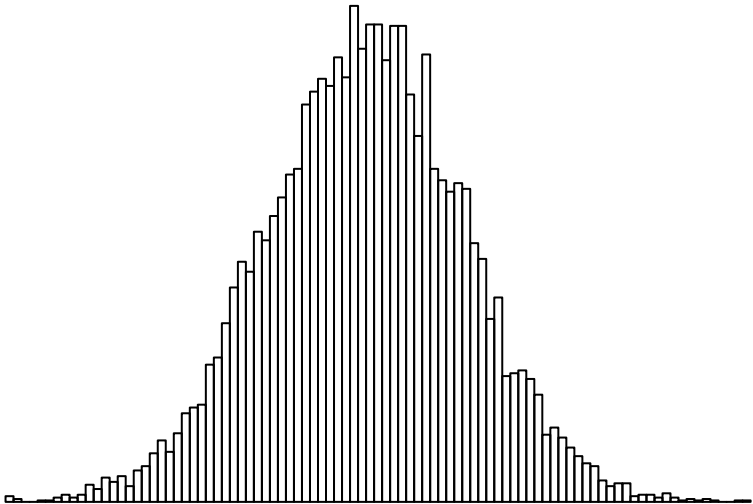

B184:18

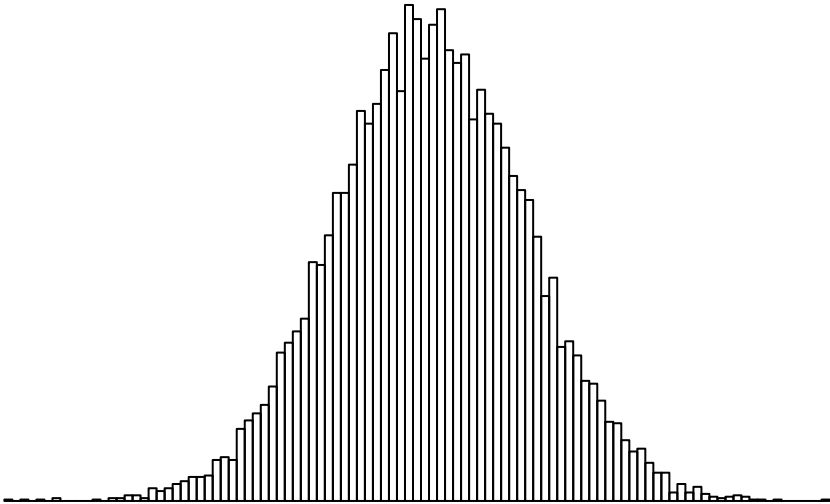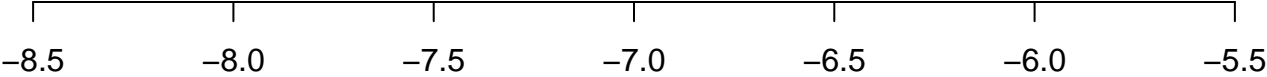

Unidentified Metabolite 29

B184:26 – B184:18

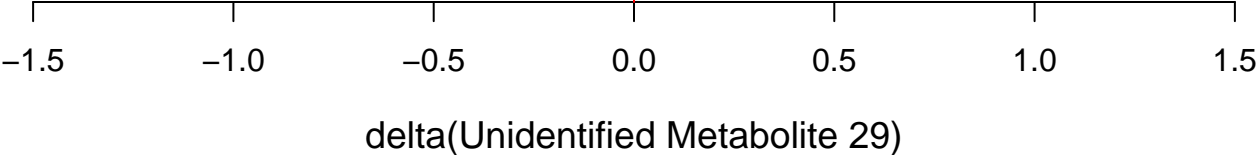

B184:26

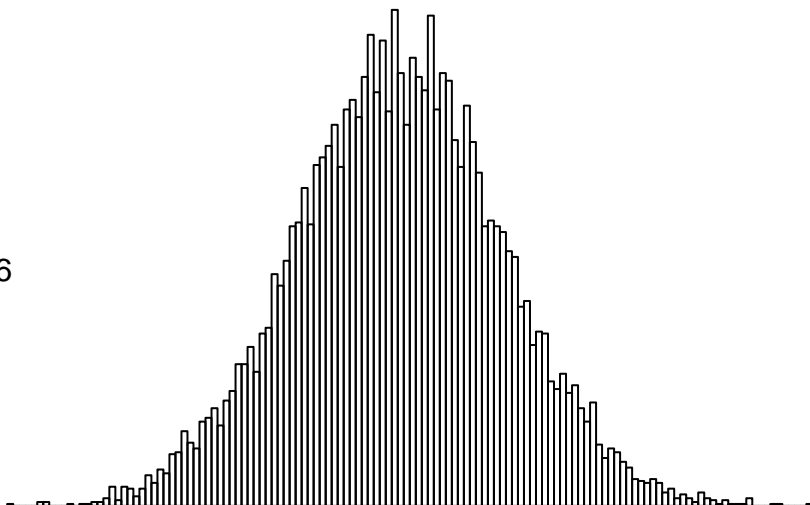

B184:18

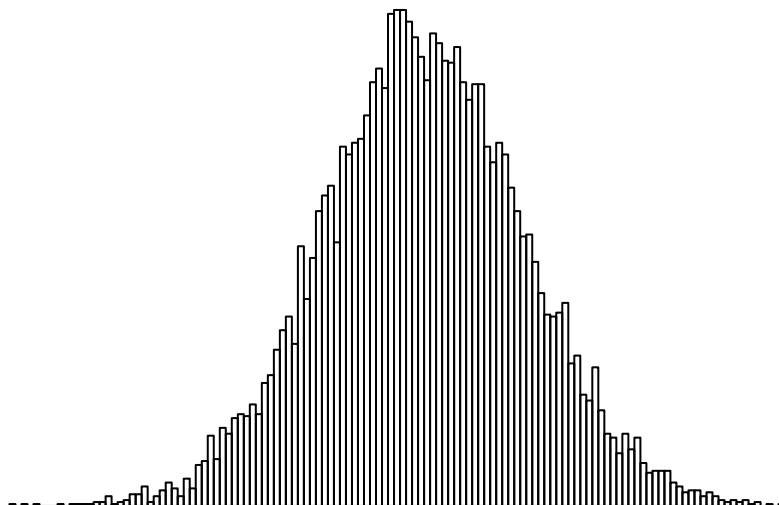

-9.0

-8.5

-8.0

-7.5

-7.0

Unidentified Metabolite 30

B184:26 – B184:18

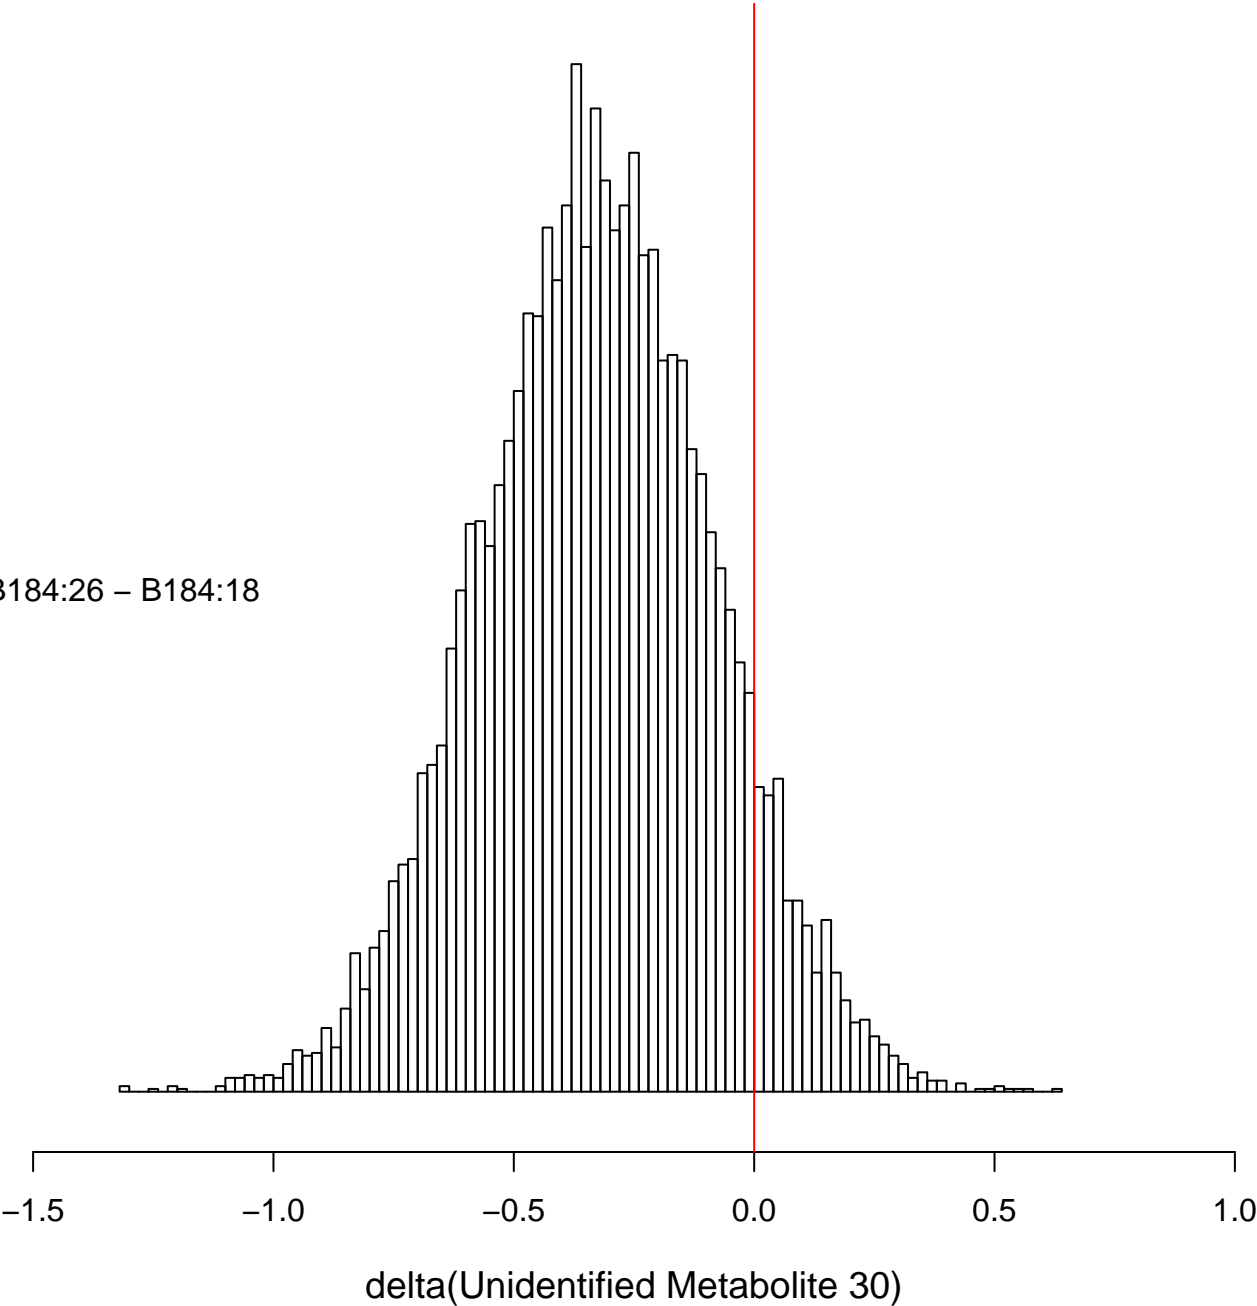



B184:26

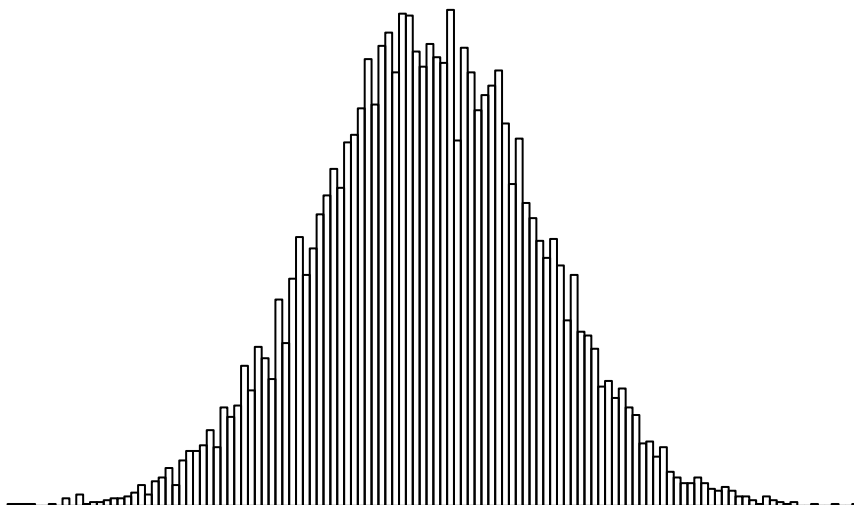

B184:18

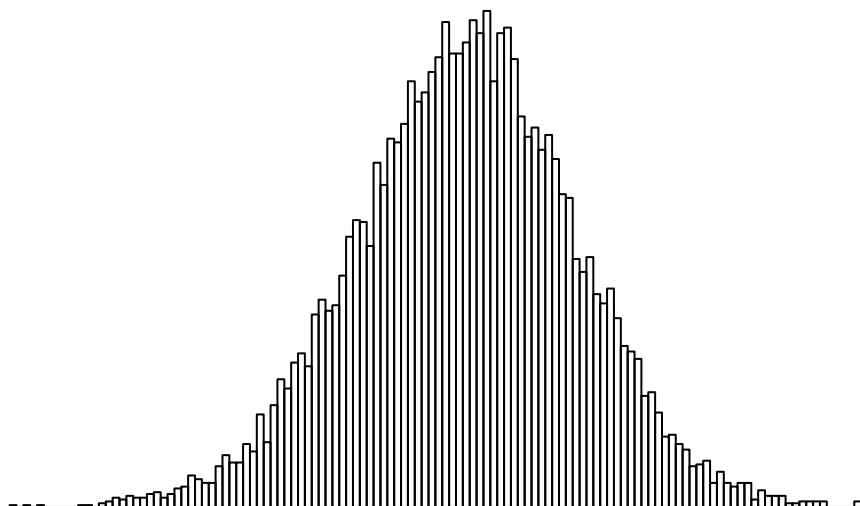

-10.0      -9.5      -9.0      -8.5      -8.0      -7.5      -7.0      -6.5

Unidentified Metabolite 31

B184:26 – B184:18

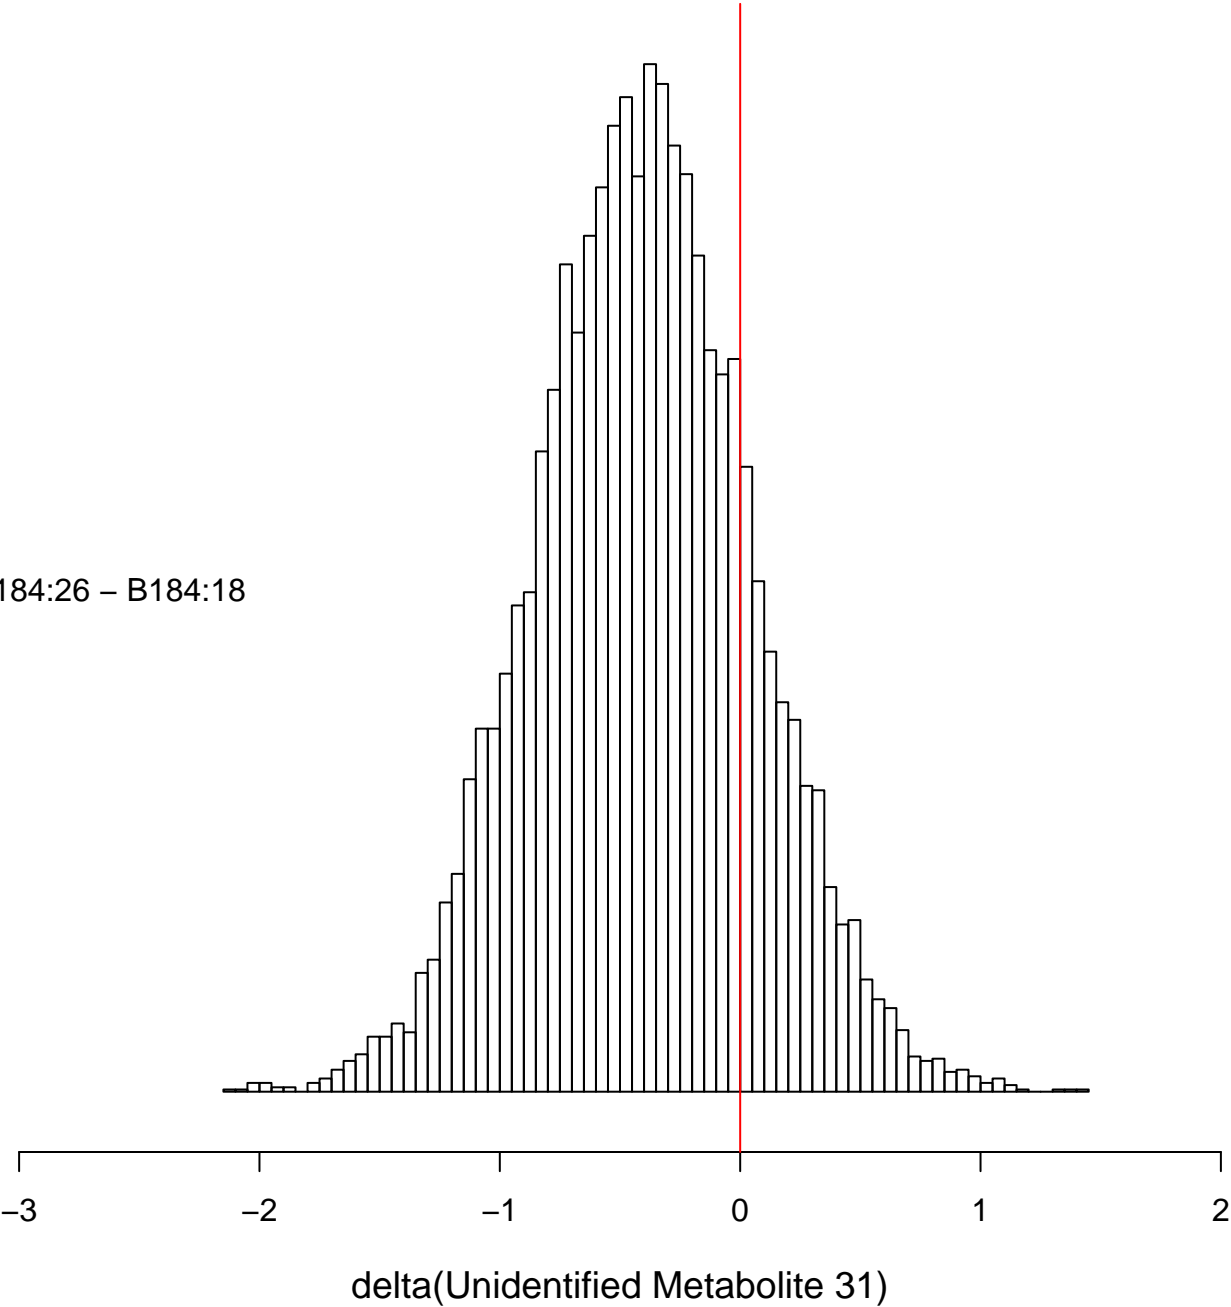

B184:26

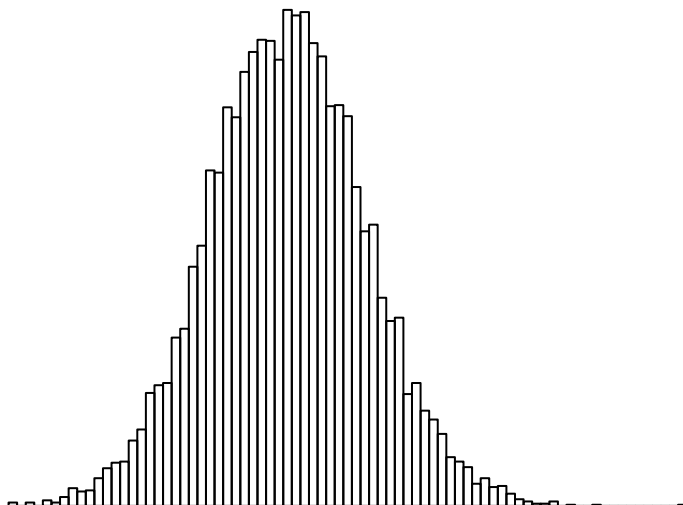

B184:18

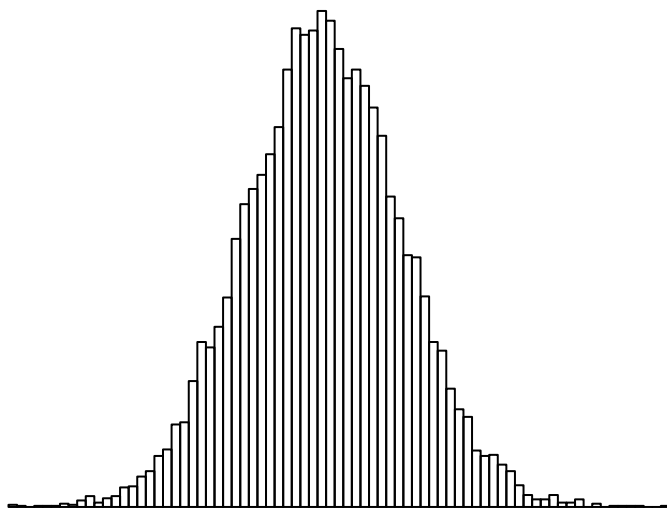

-13

-12

-11

-10

-9

-8

-7

-6

Unidentified Metabolite 32

B184:26 – B184:18

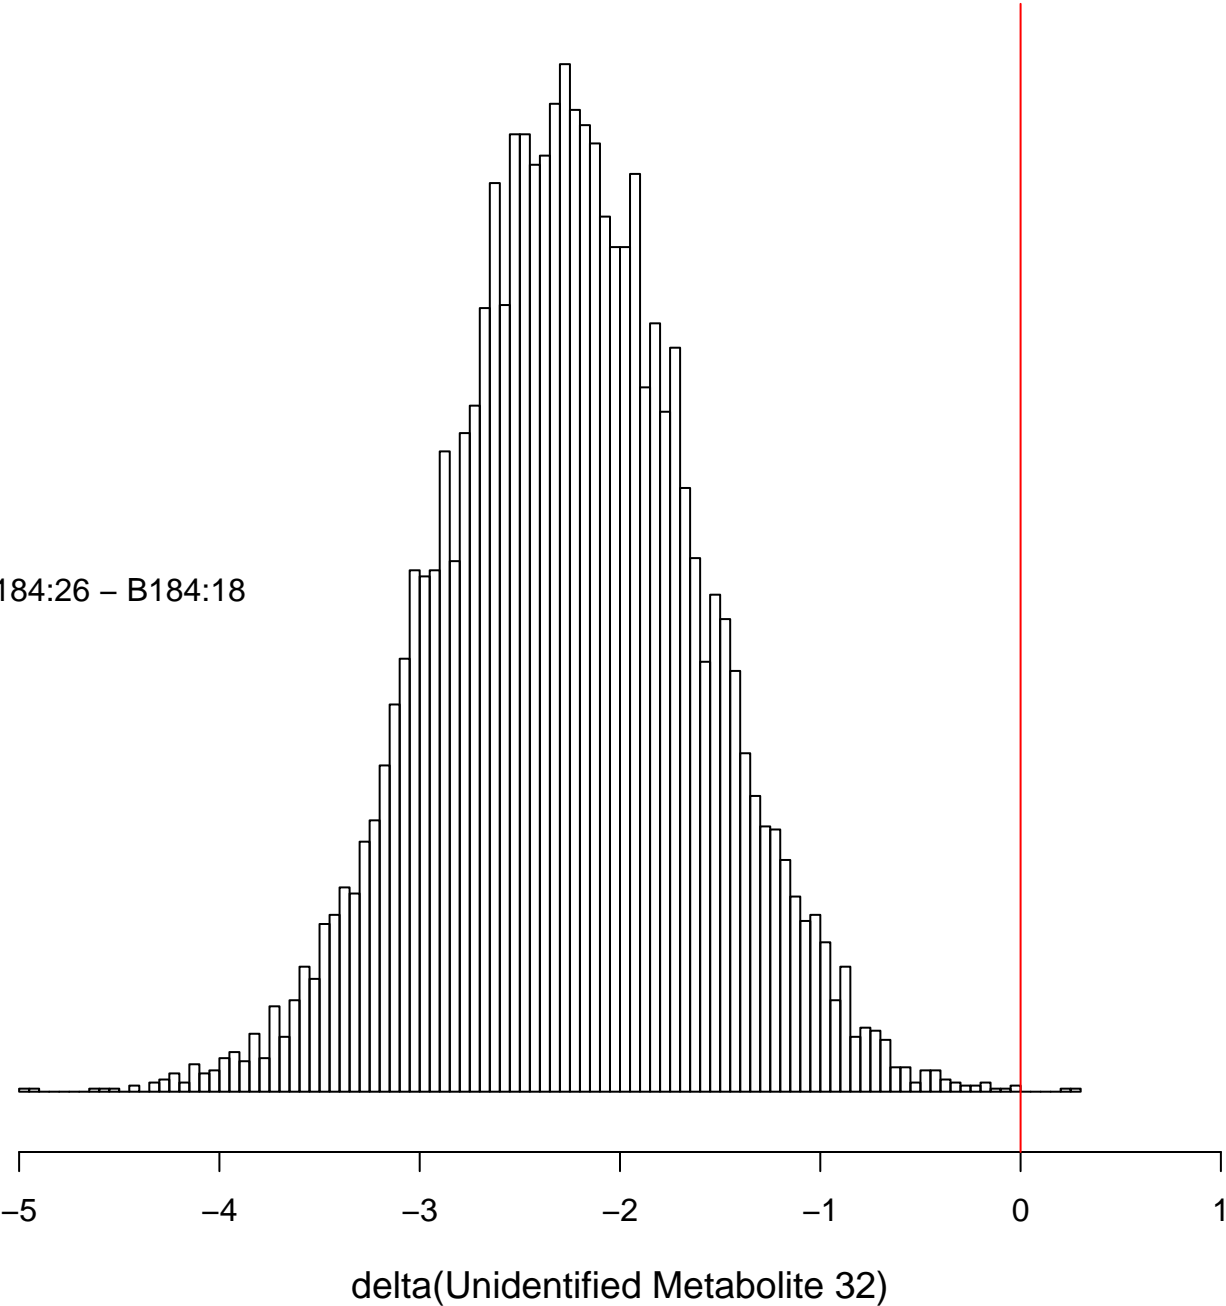

B184:26

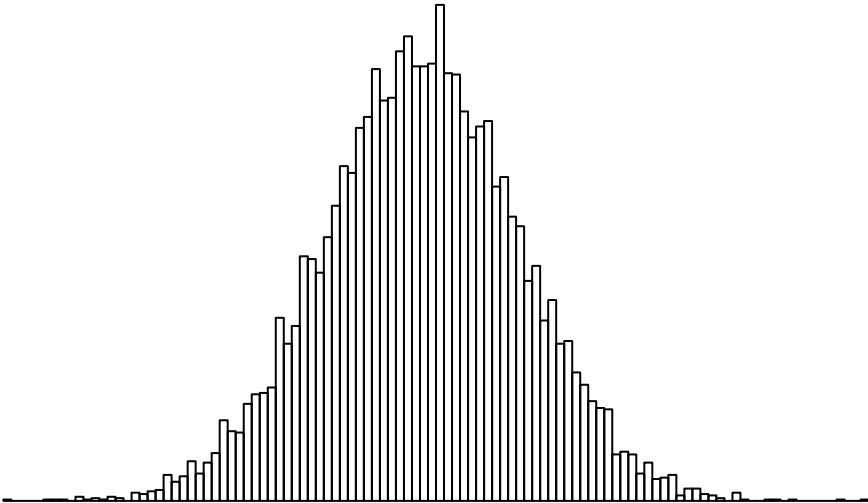

B184:18

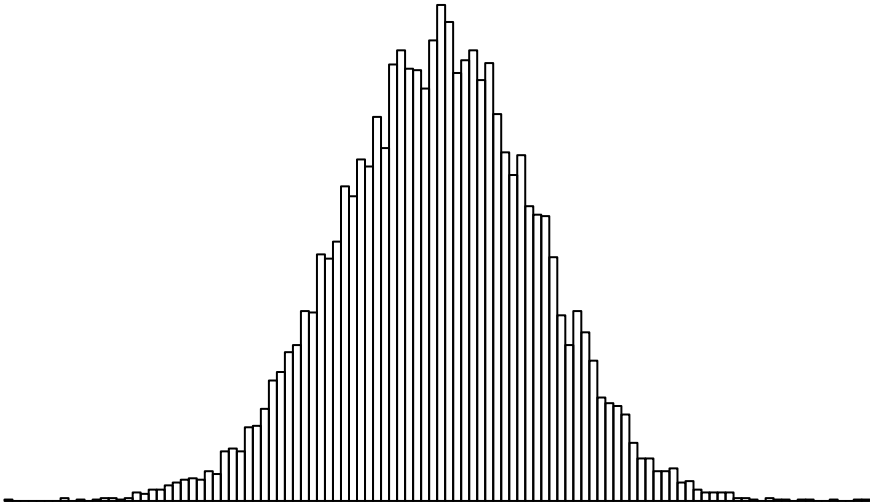

-9.0      -8.5      -8.0      -7.5      -7.0      -6.5      -6.0

Unidentified Metabolite 33

B184:26 – B184:18

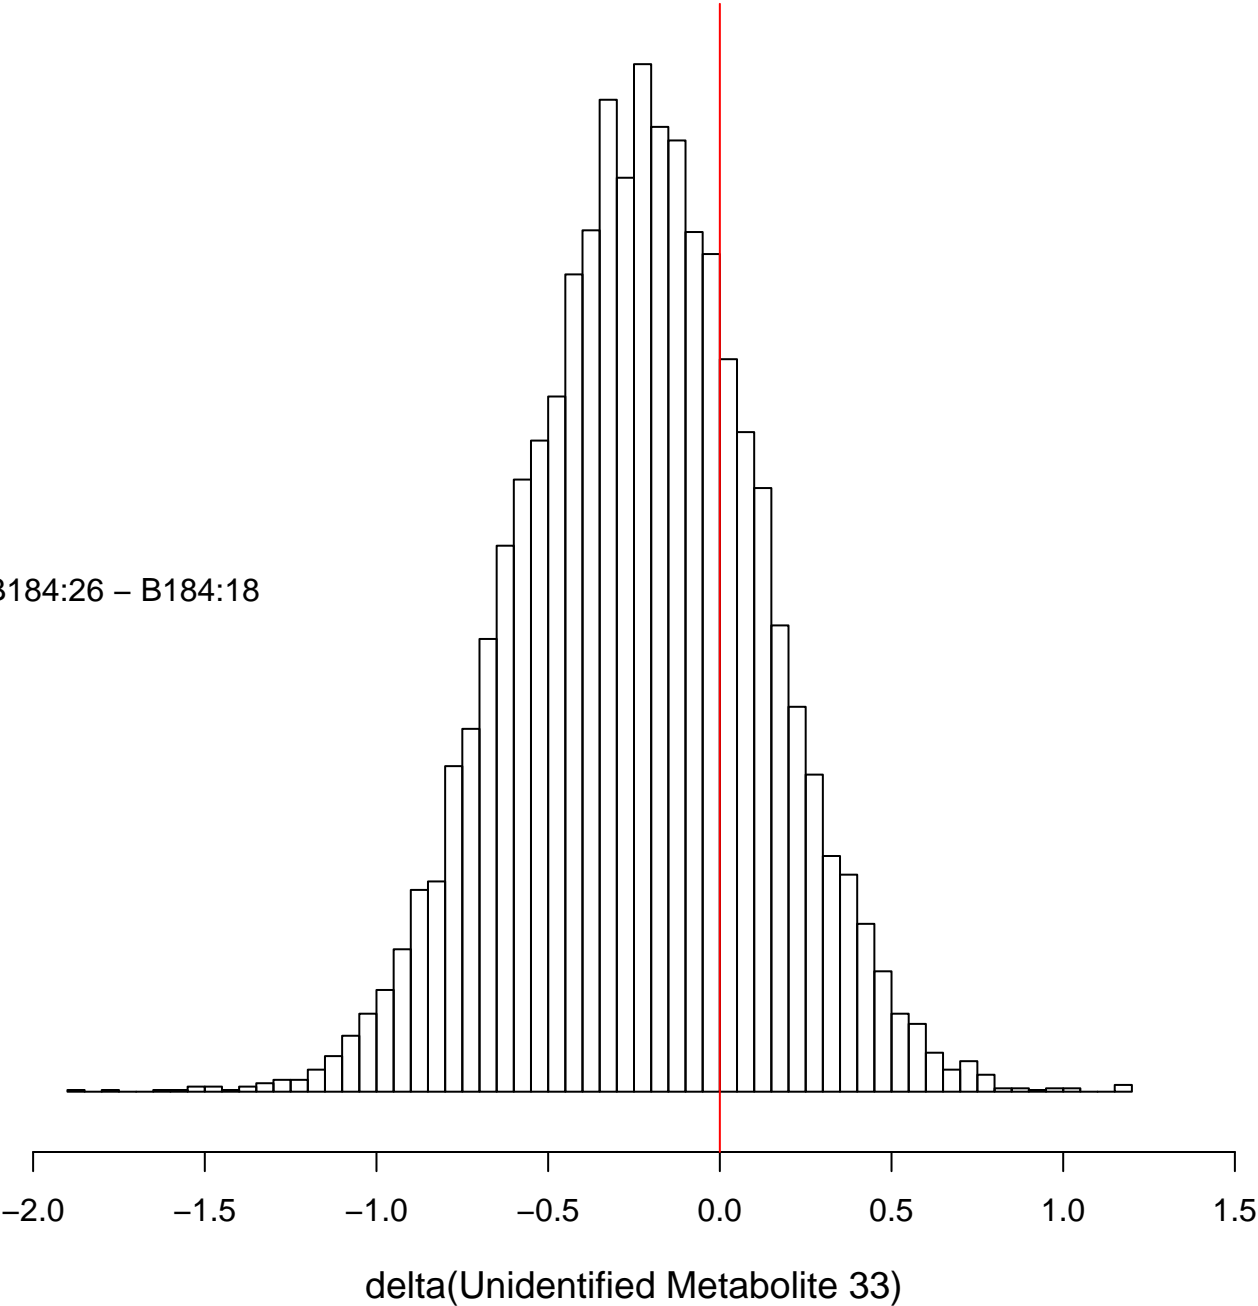

B184:26

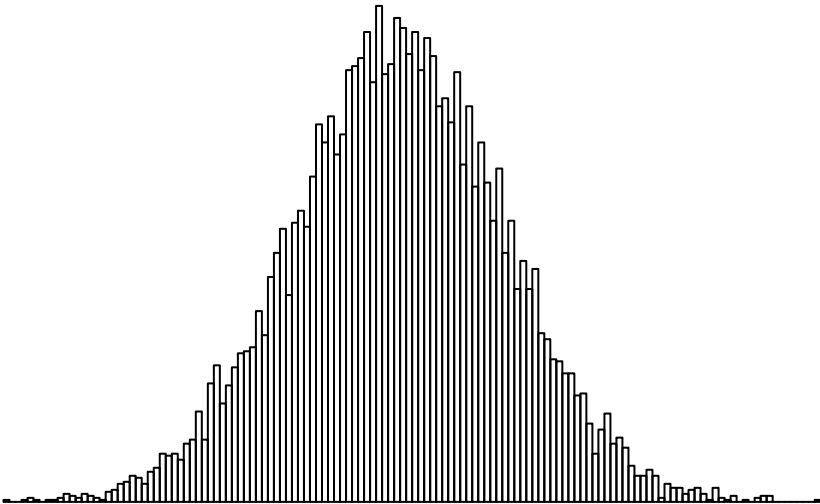

B184:18

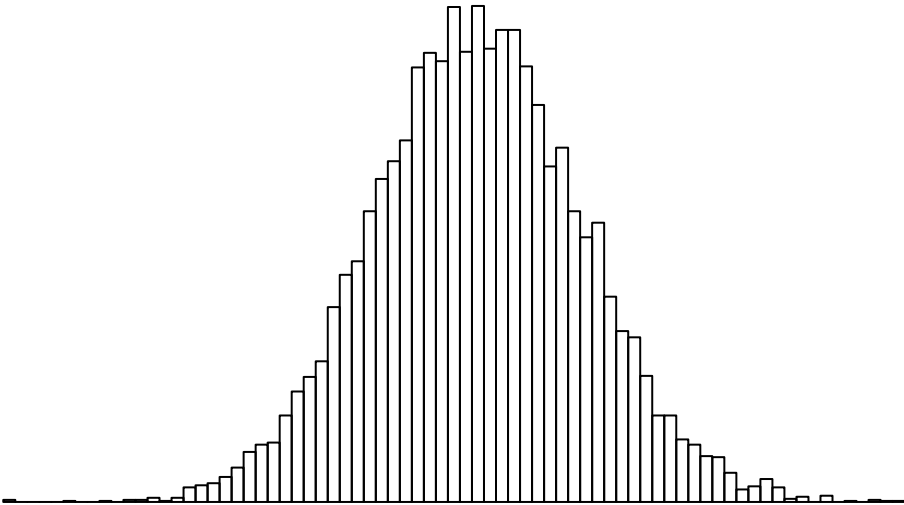

-9.0                      -8.5                      -8.0                      -7.5                      -7.0

Unidentified Metabolite 34

B184:26 – B184:18

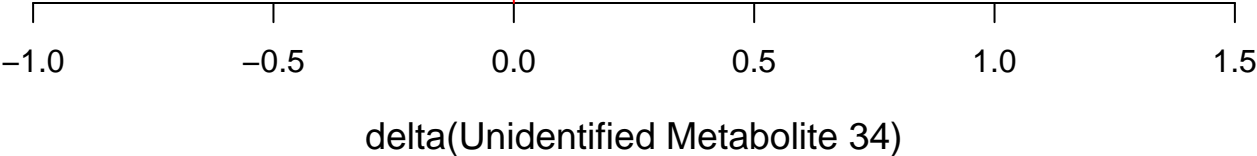



B184:26

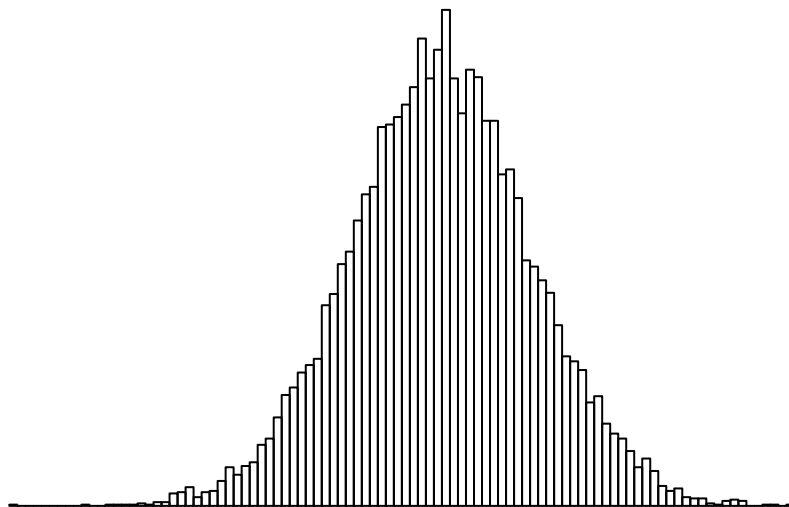

B184:18

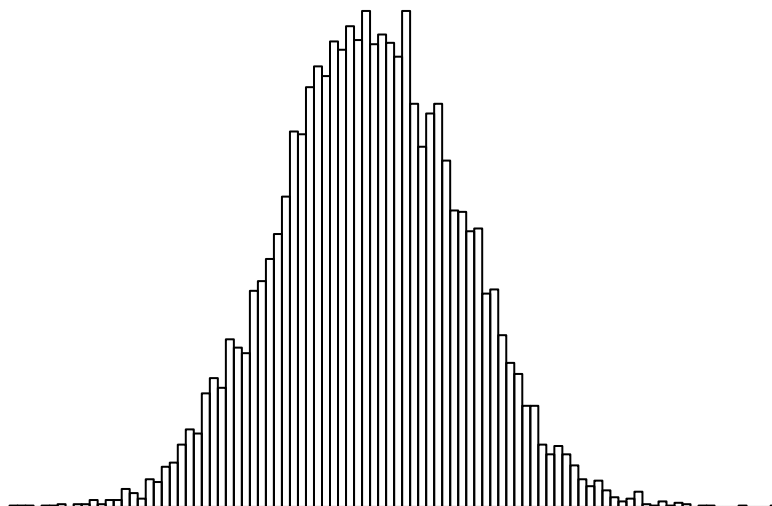

-8.0

-7.5

-7.0

-6.5

-6.0

-5.5

-5.0

Unidentified Metabolite 35

B184:26 – B184:18

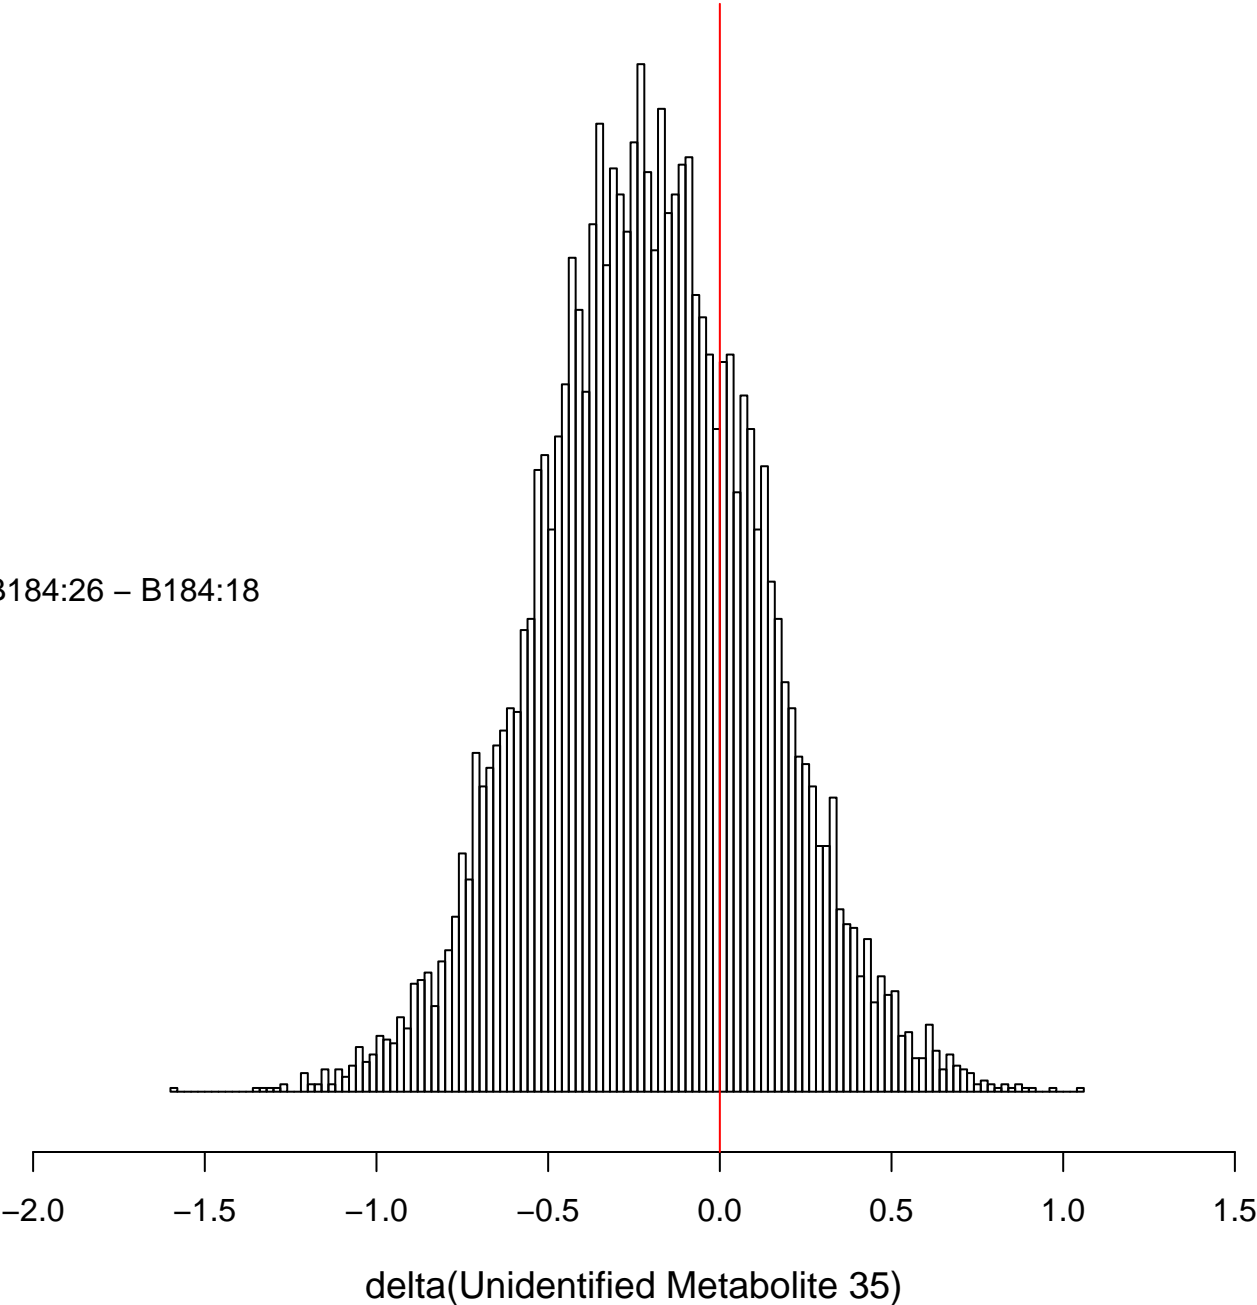

B184:26

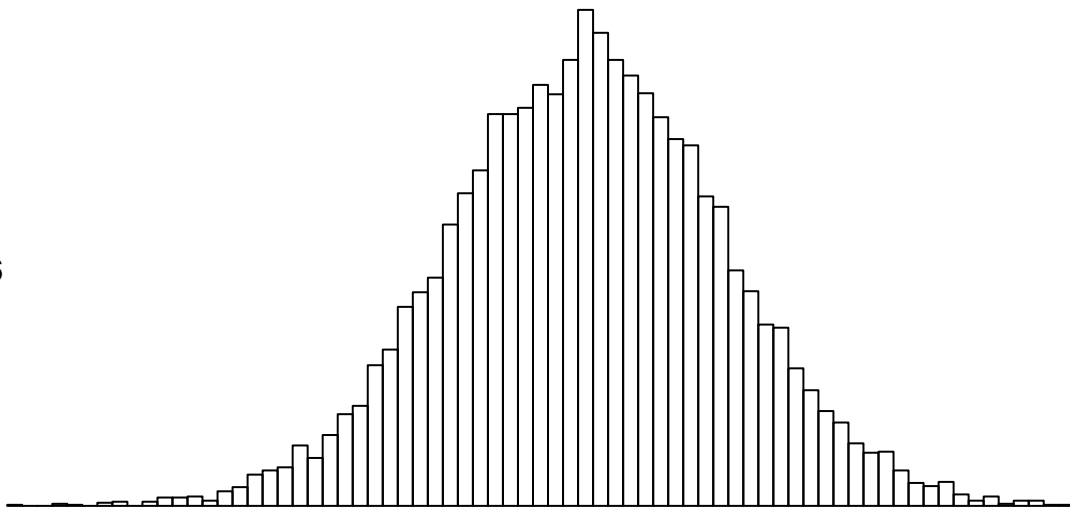

B184:18

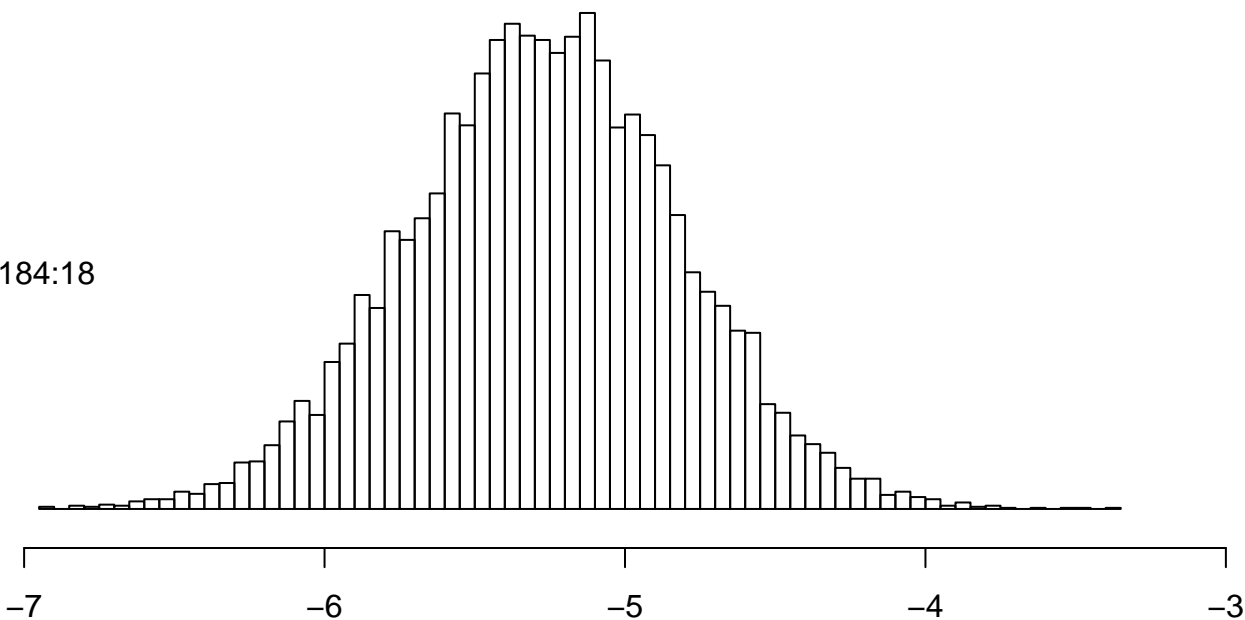

Unidentified Metabolite 36

B184:26 – B184:18

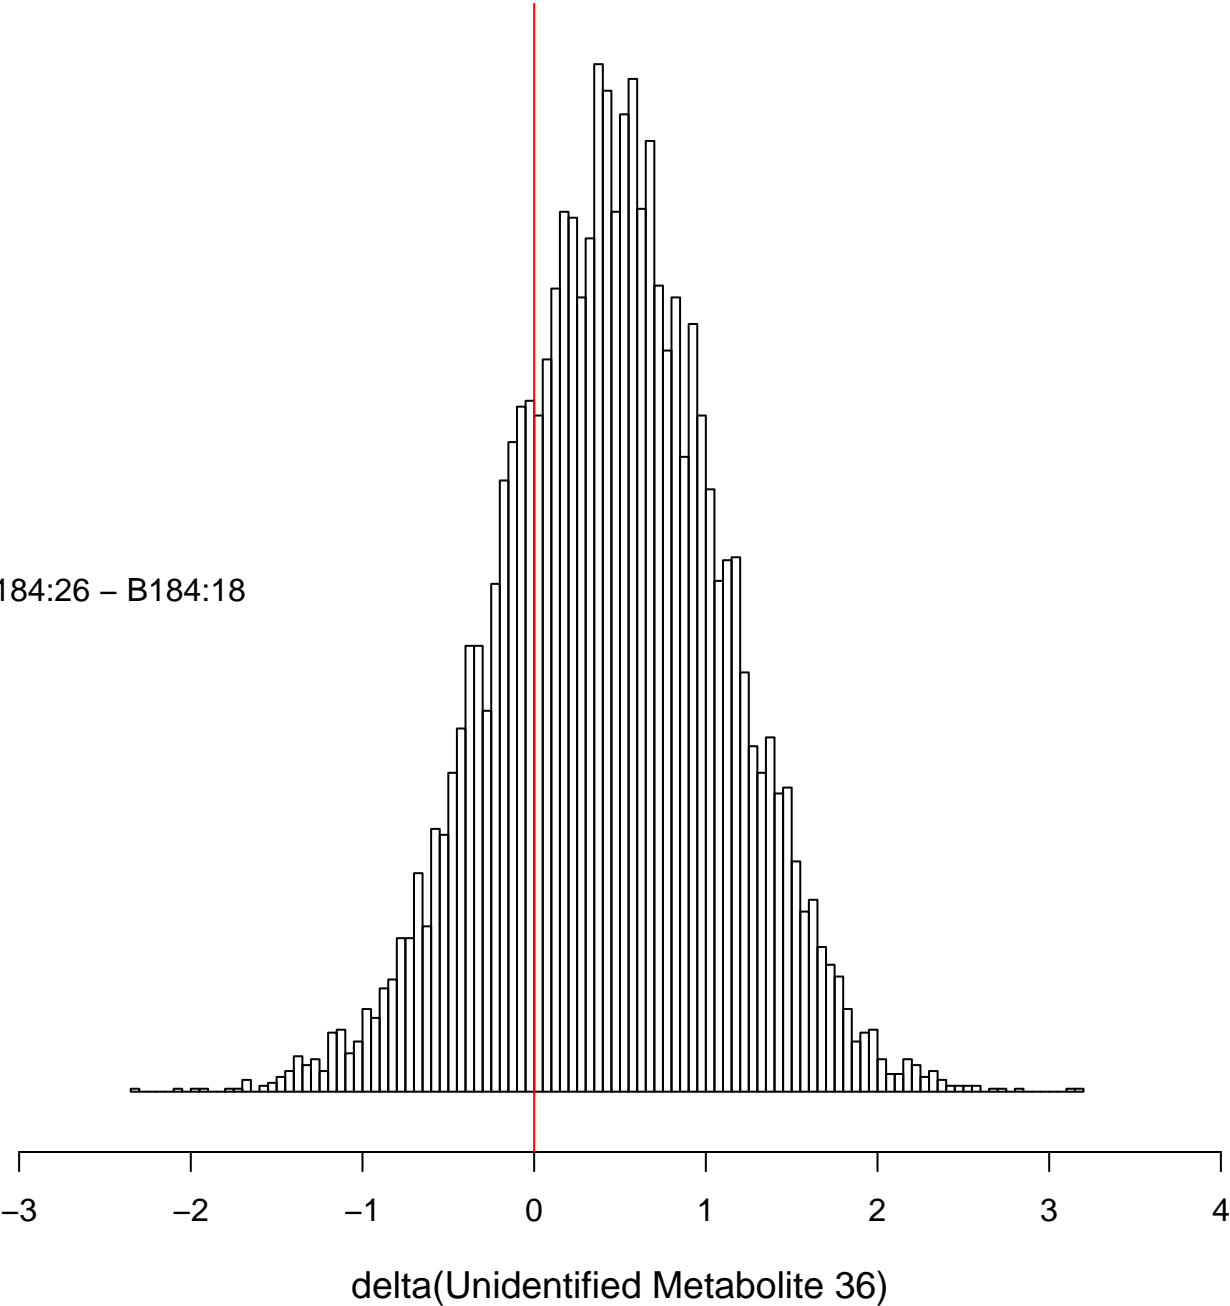

B184:26

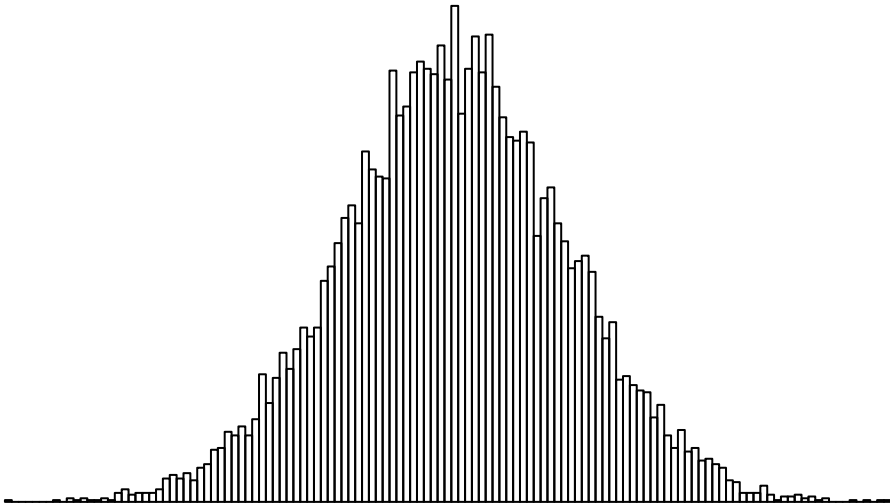

B184:18

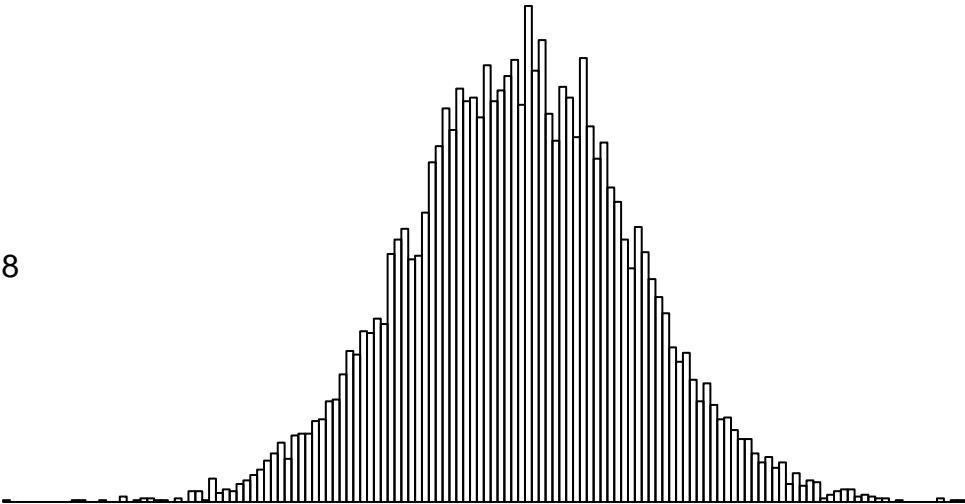

-8.5      -8.0      -7.5      -7.0      -6.5      -6.0      -5.5      -5.0

Unidentified Metabolite 38

B184:26 – B184:18

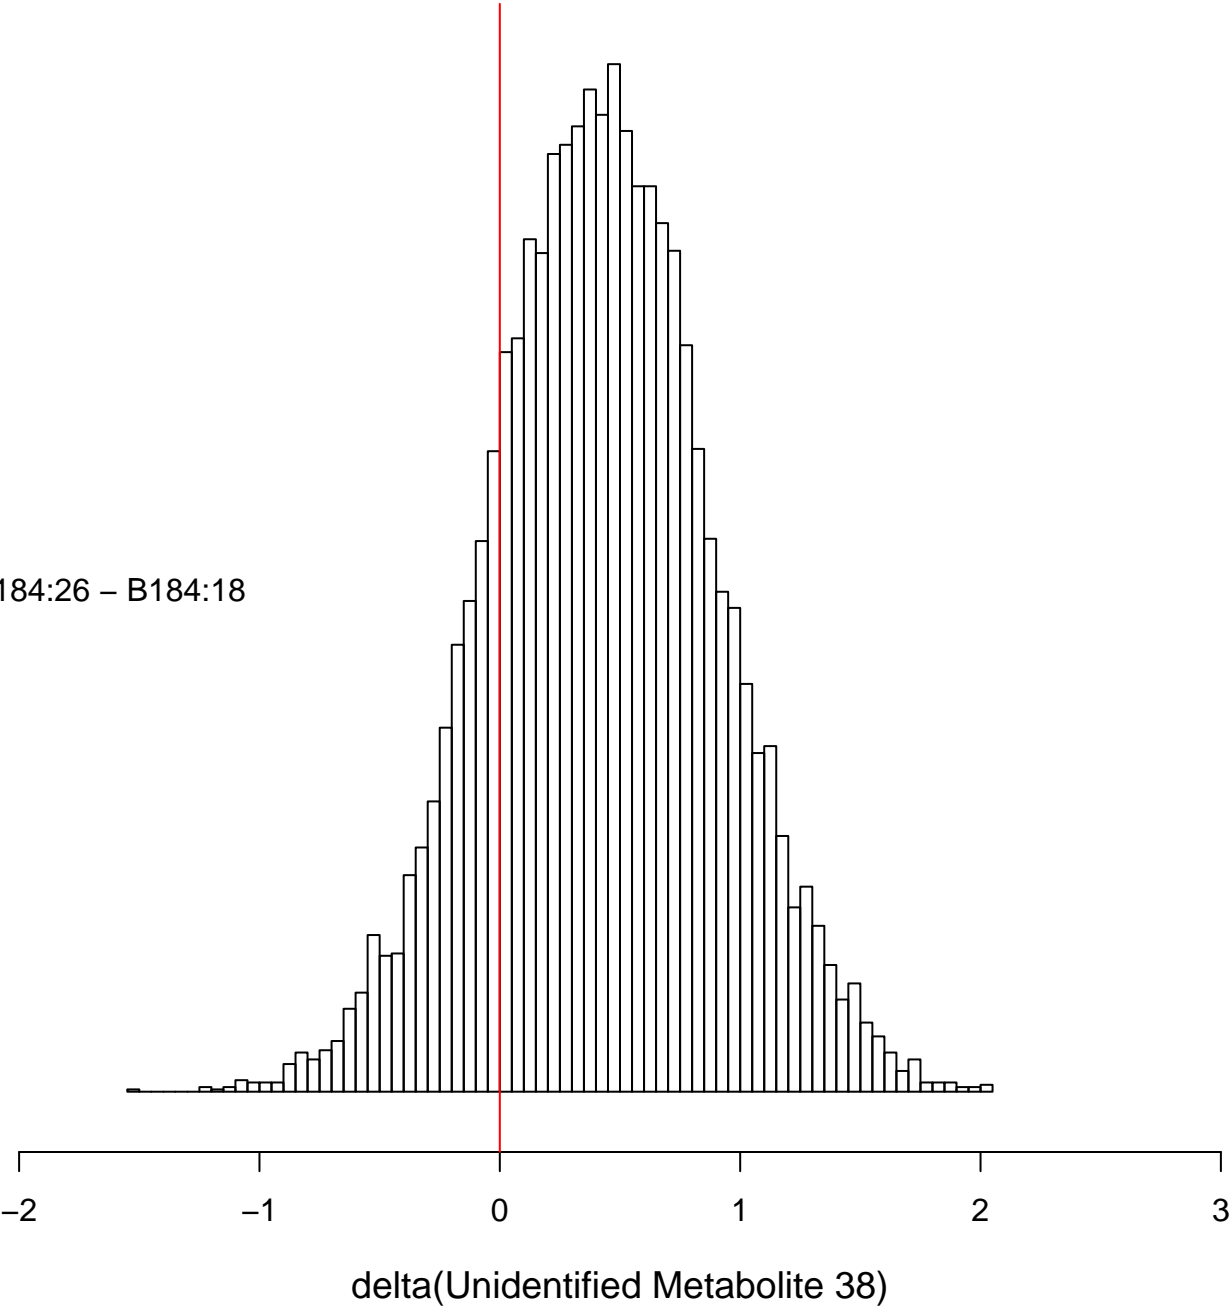

B184:26

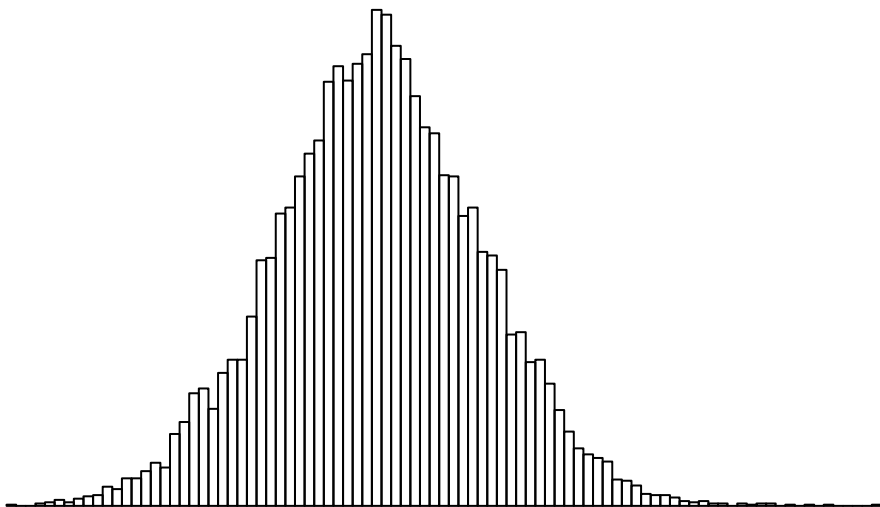

B184:18

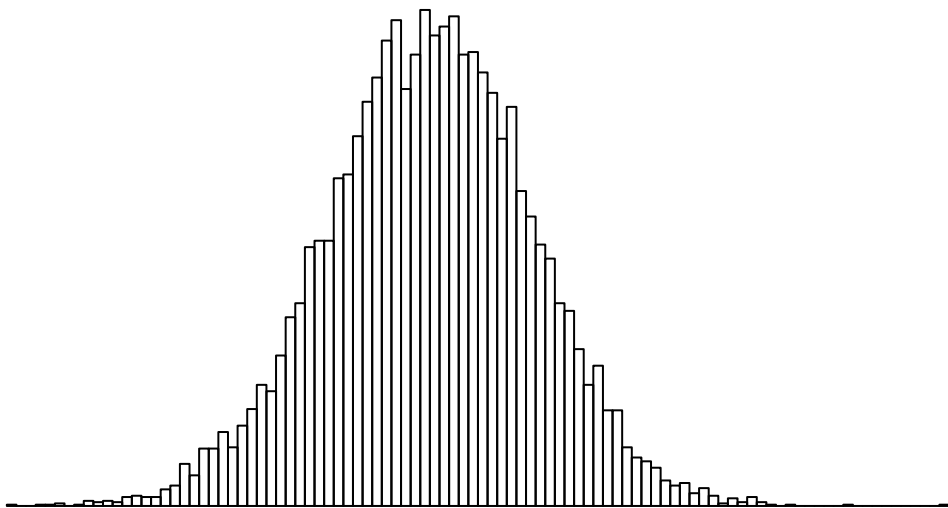

-8.5      -8.0      -7.5      -7.0      -6.5      -6.0

Unidentified Metabolite 39

B184:26 – B184:18

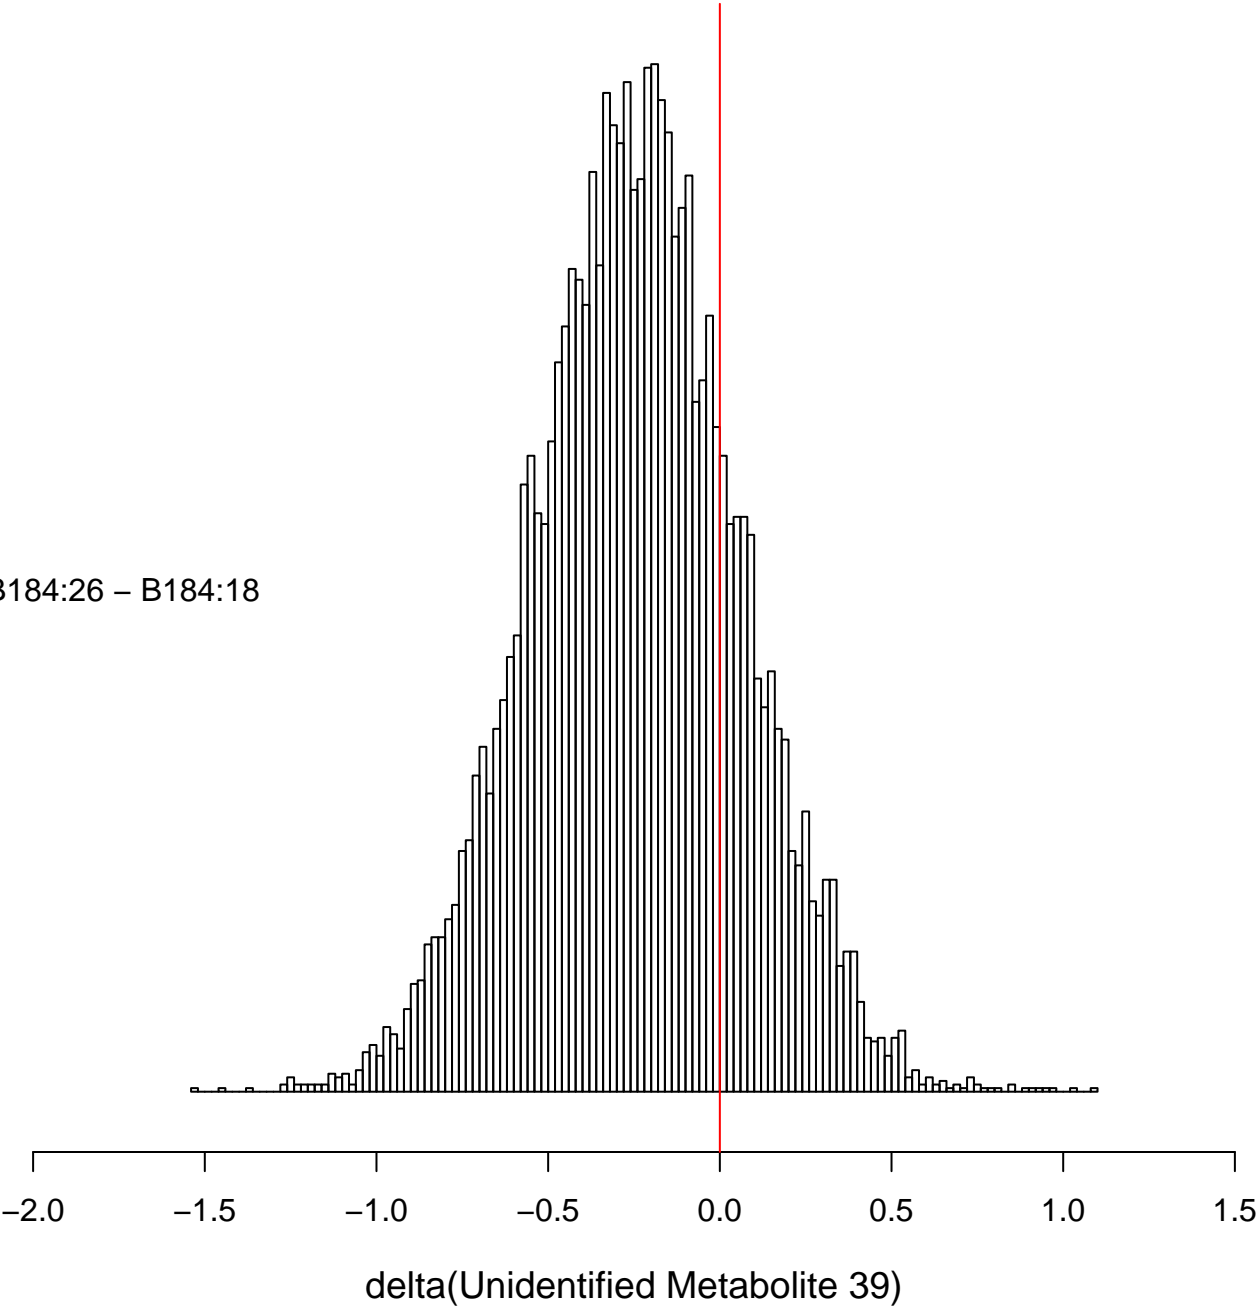



B184:26

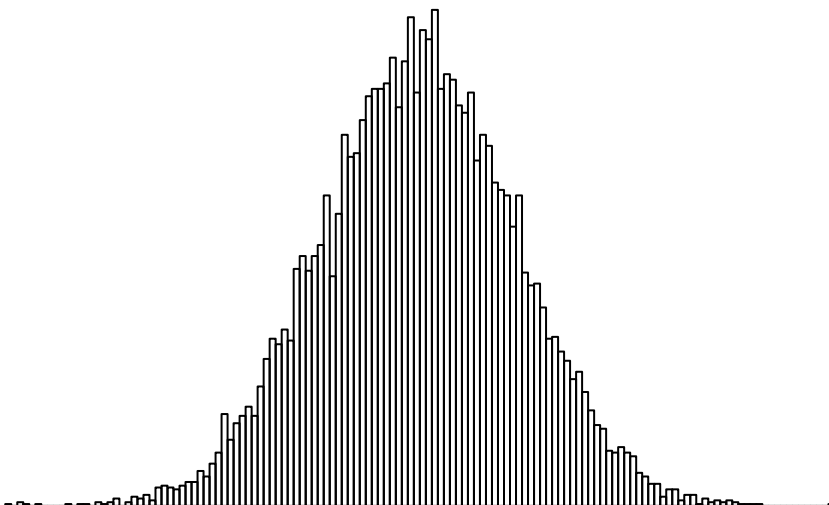

B184:18

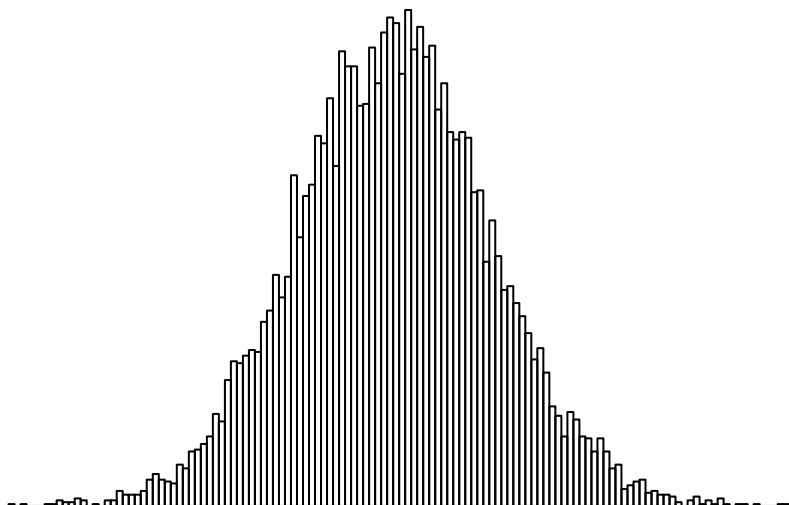

-8

-7

-6

-5

Unidentified Metabolite 42

B184:26 – B184:18

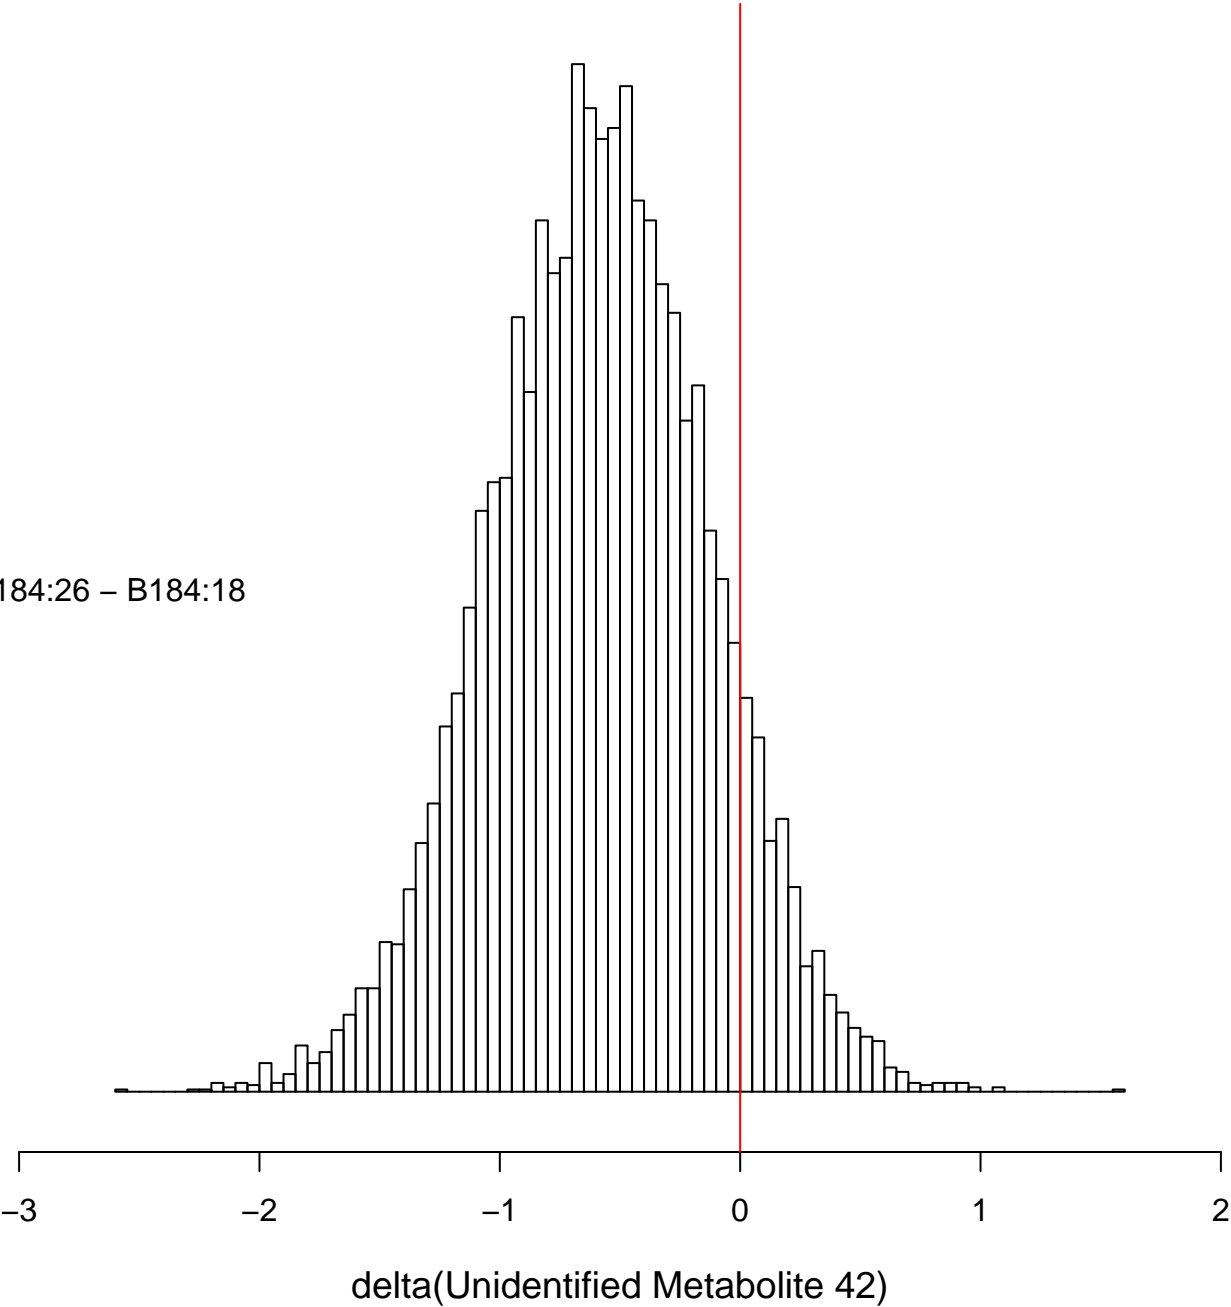

B184:26

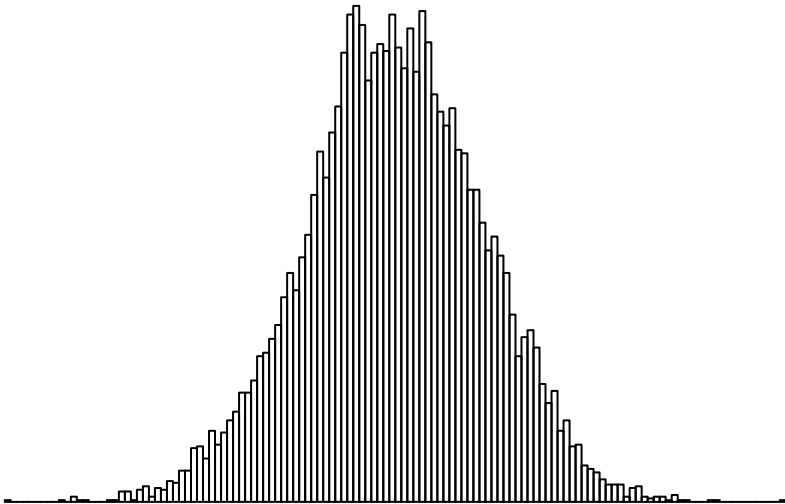

B184:18

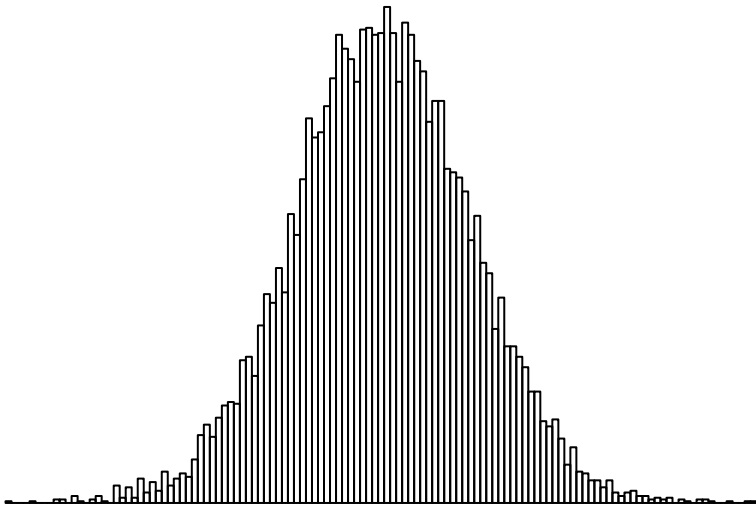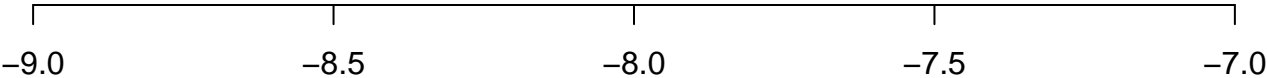

Unidentified Metabolite 43

B184:26 – B184:18

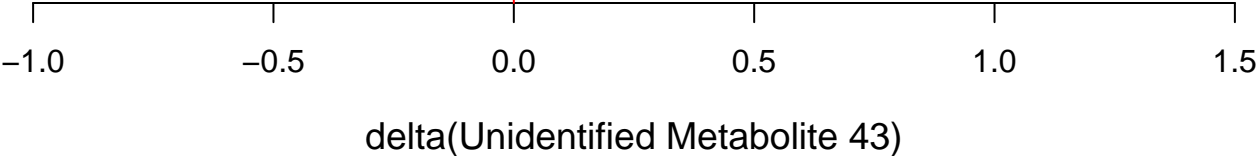

B184:26

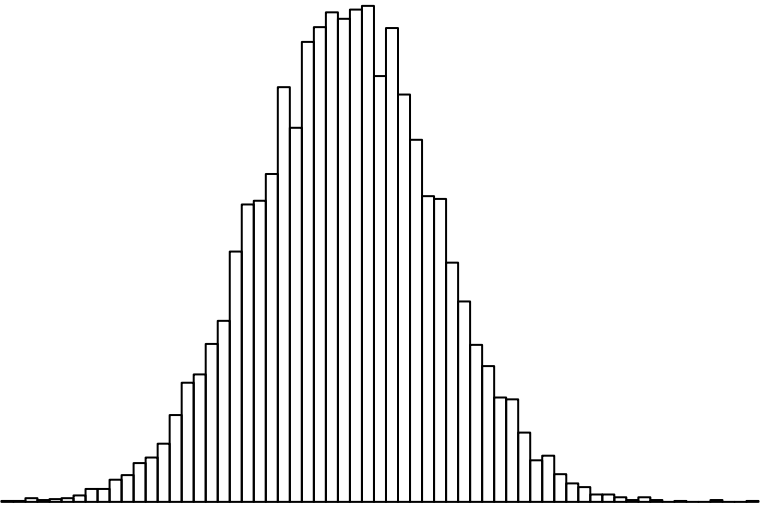

B184:18

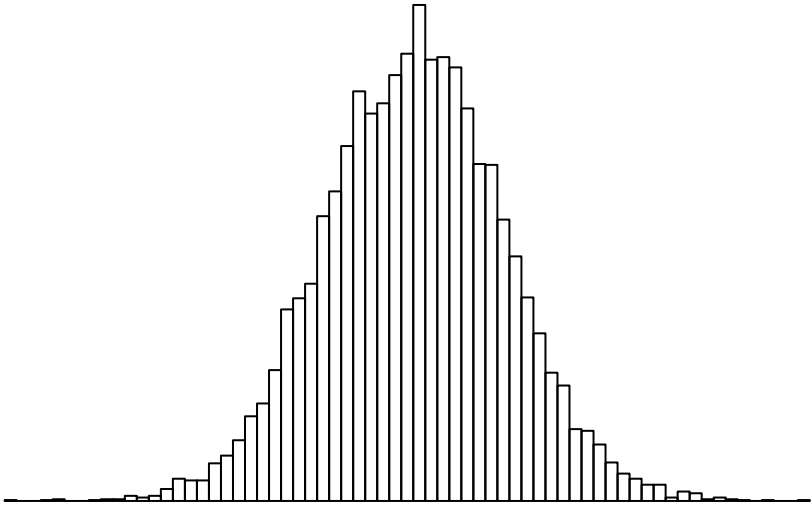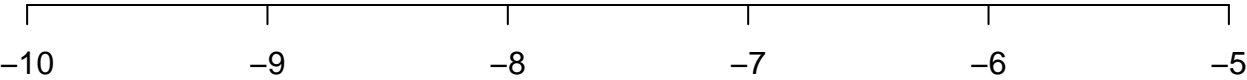

Unidentified Metabolite 45

B184:26 – B184:18

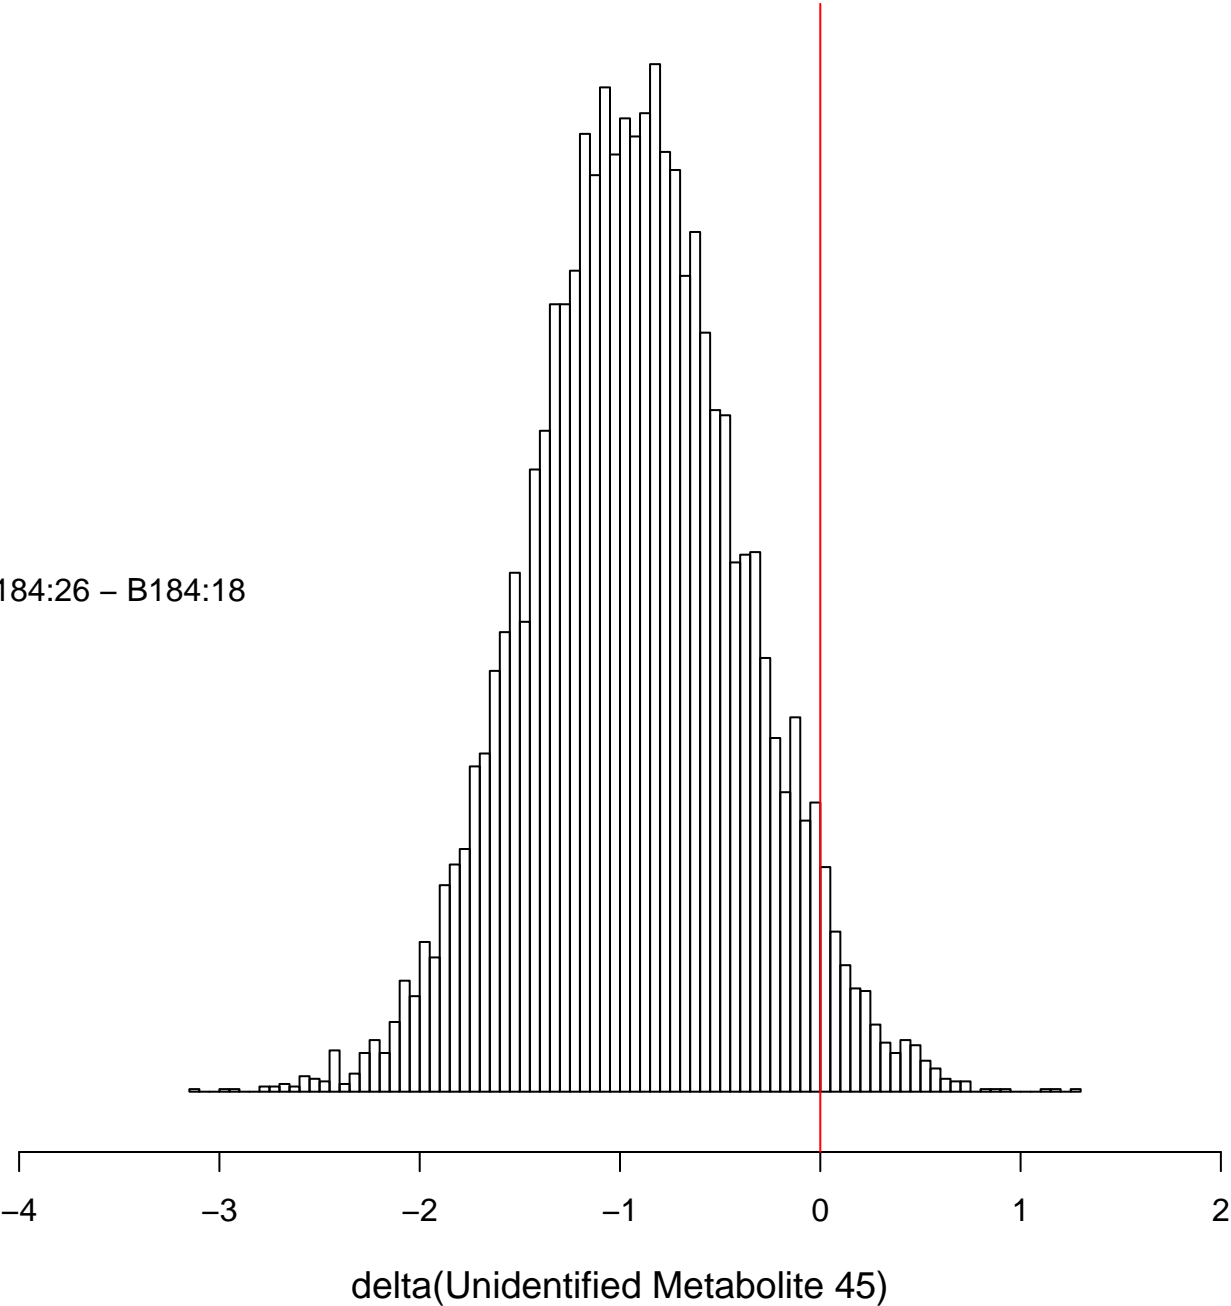

B184:26

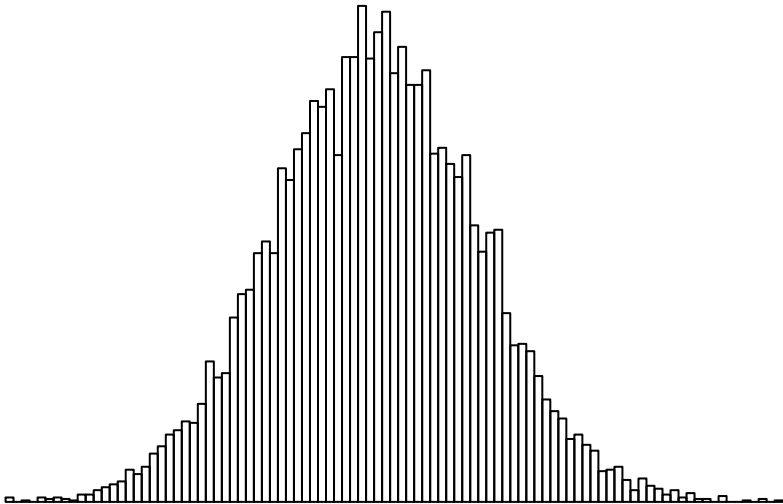

B184:18

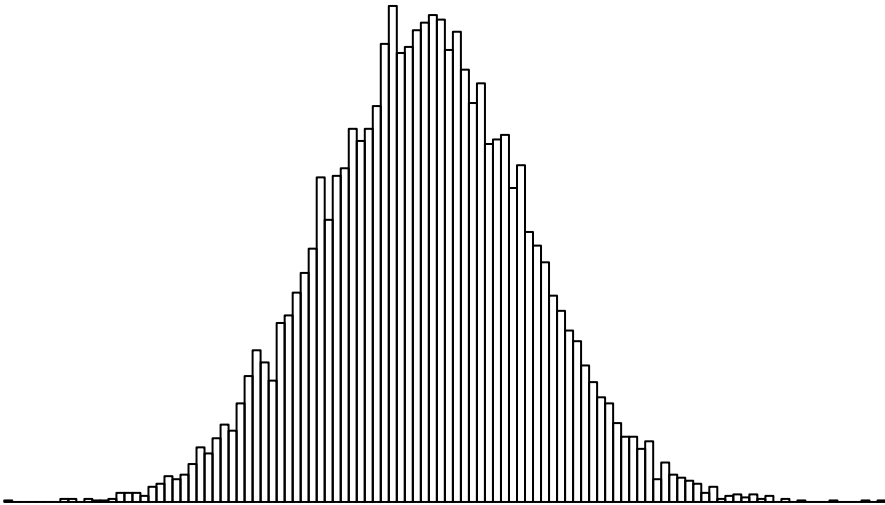

Unidentified Metabolite 47

B184:26 – B184:18

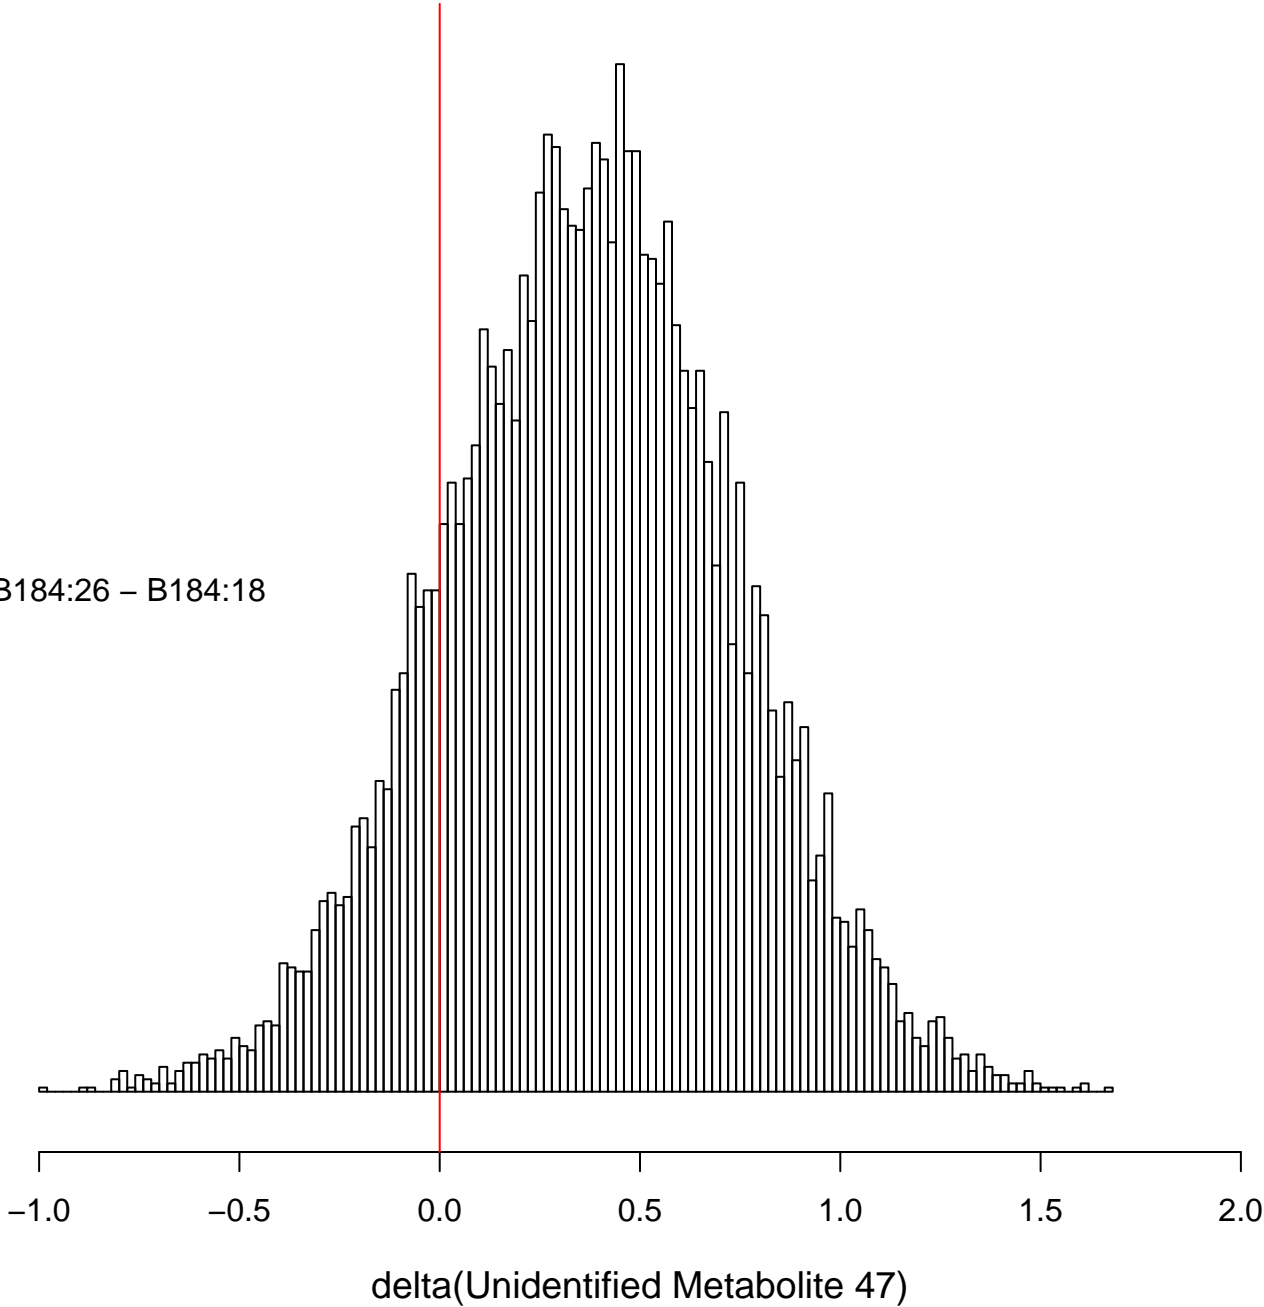



B184:26

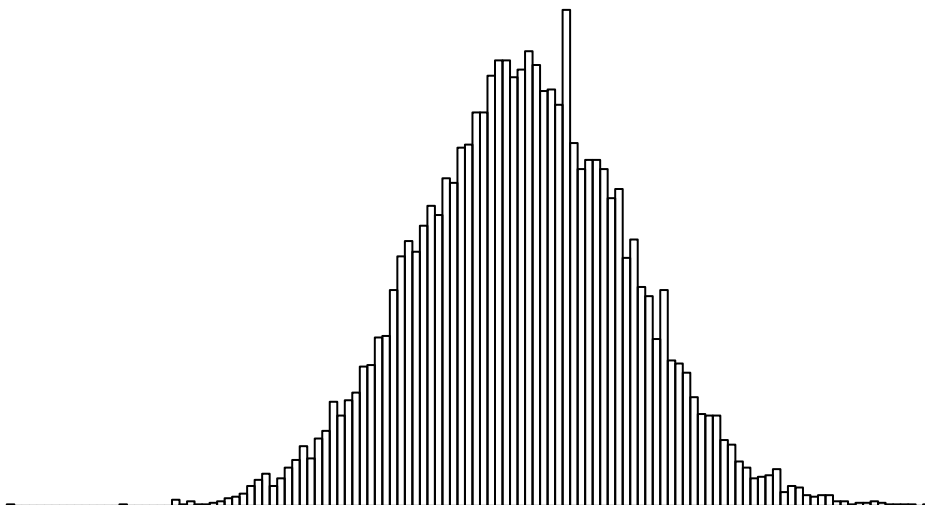

B184:18

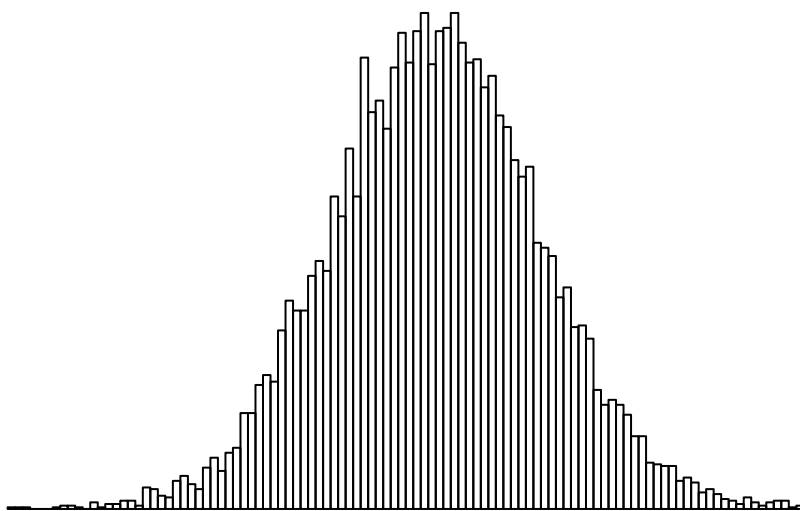

-8.0

-7.5

-7.0

Unidentified Metabolite 48

B184:26 – B184:18

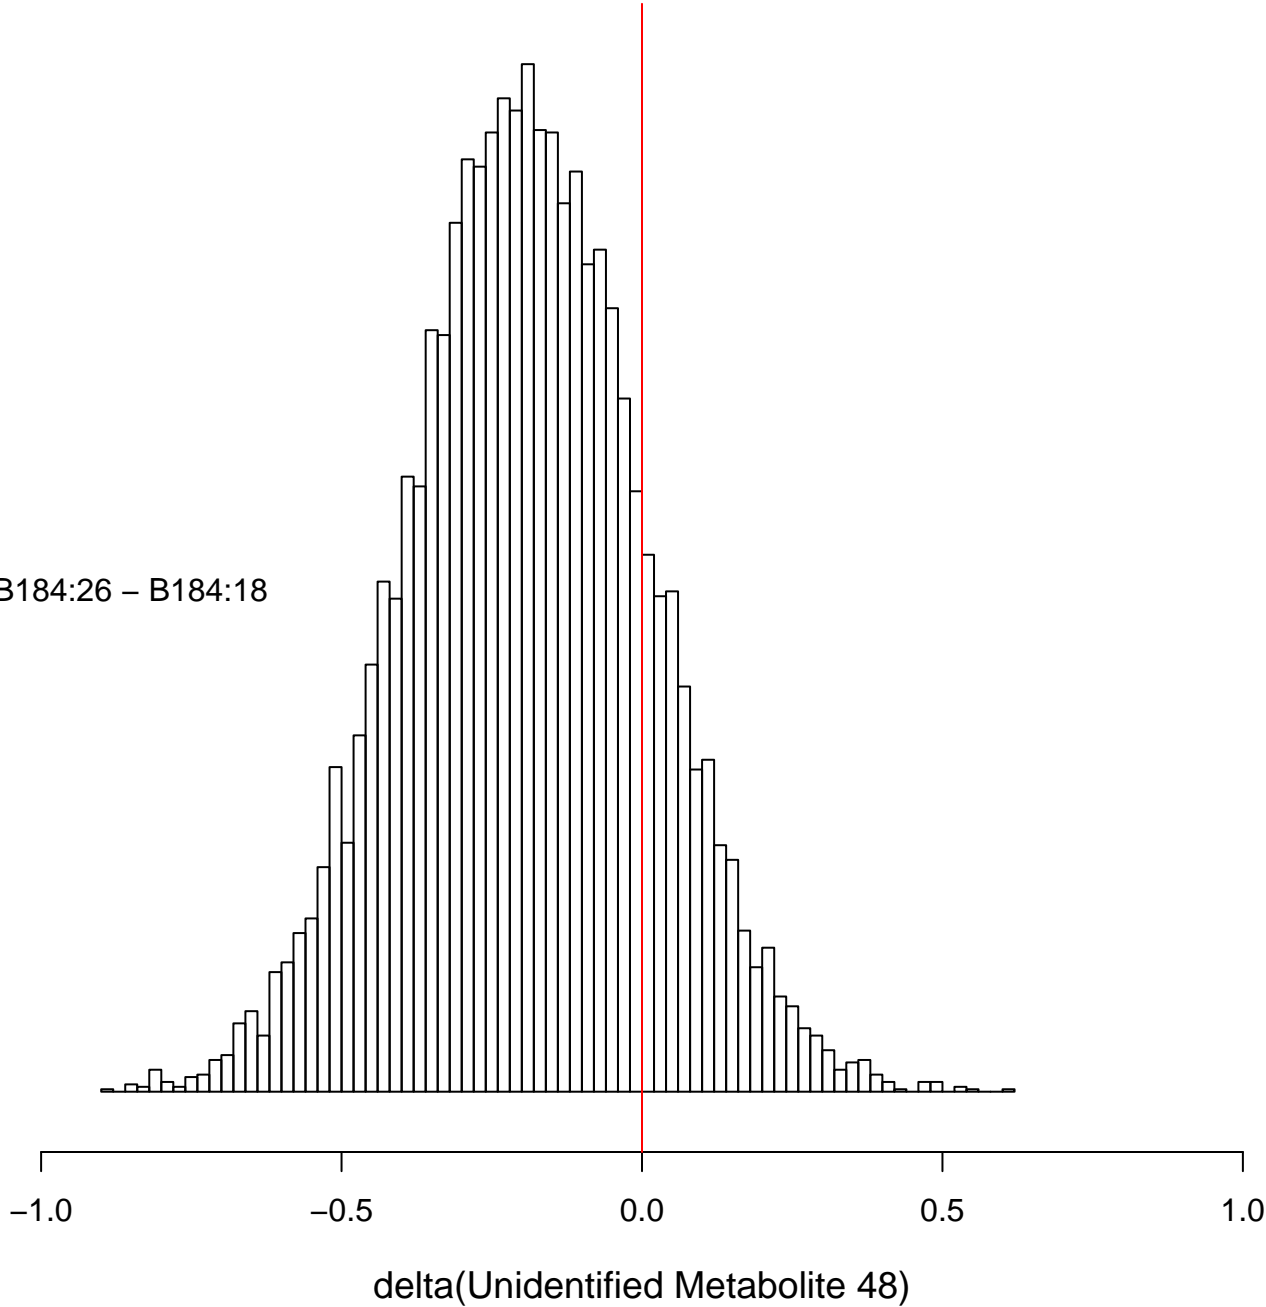

B184:26

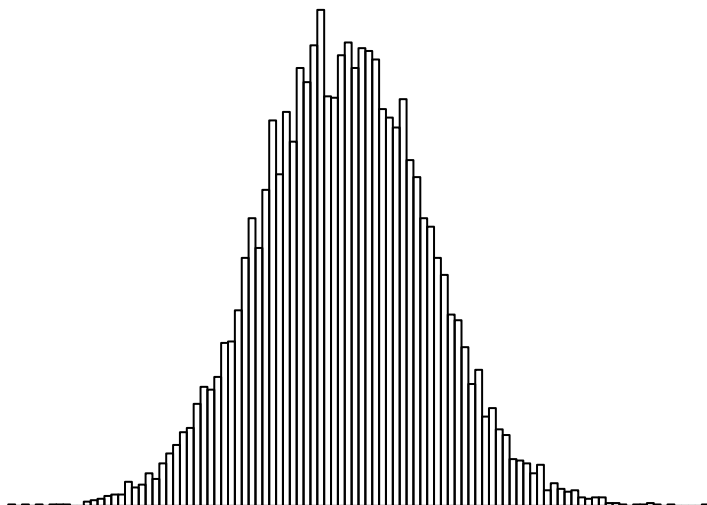

B184:18

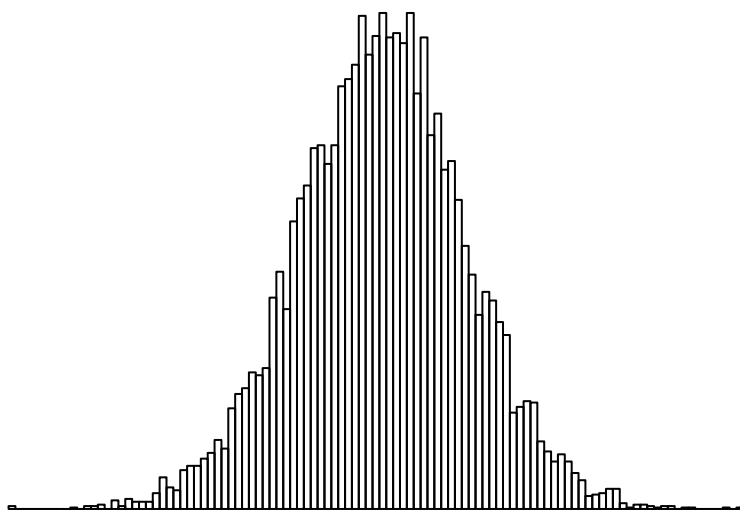

-9.5      -9.0      -8.5      -8.0      -7.5      -7.0      -6.5      -6.0

Unidentified Metabolite 49

B184:26 – B184:18

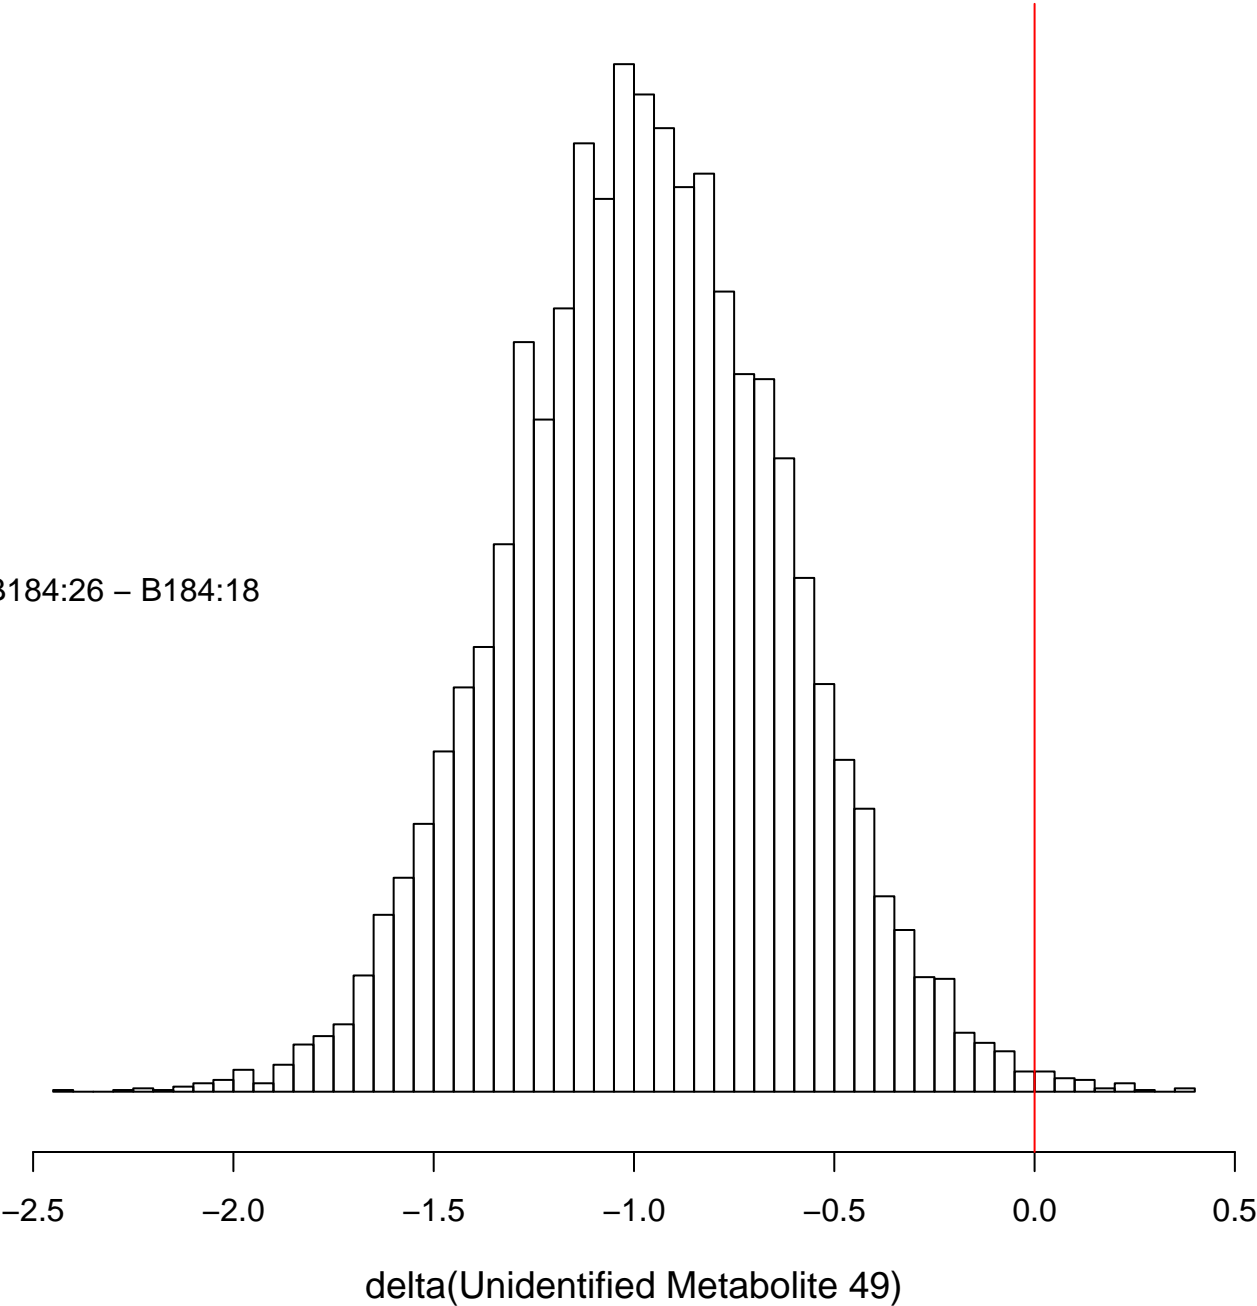

B184:26

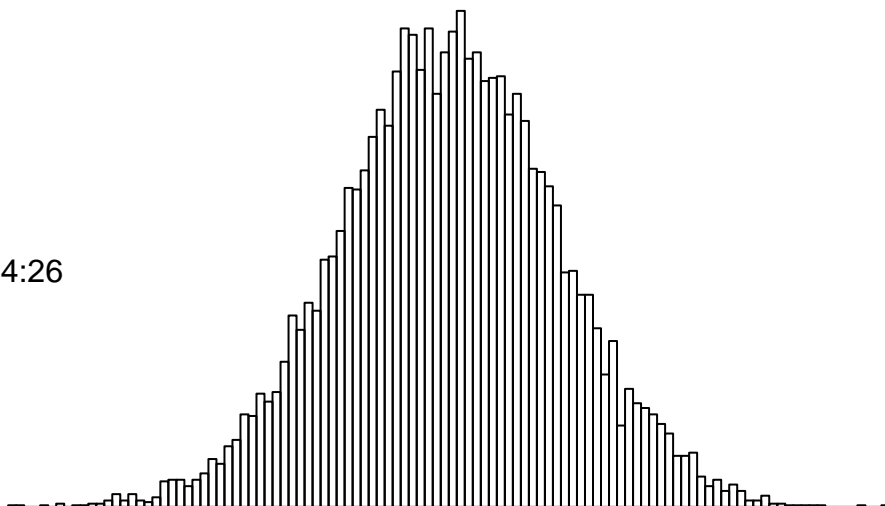

B184:18

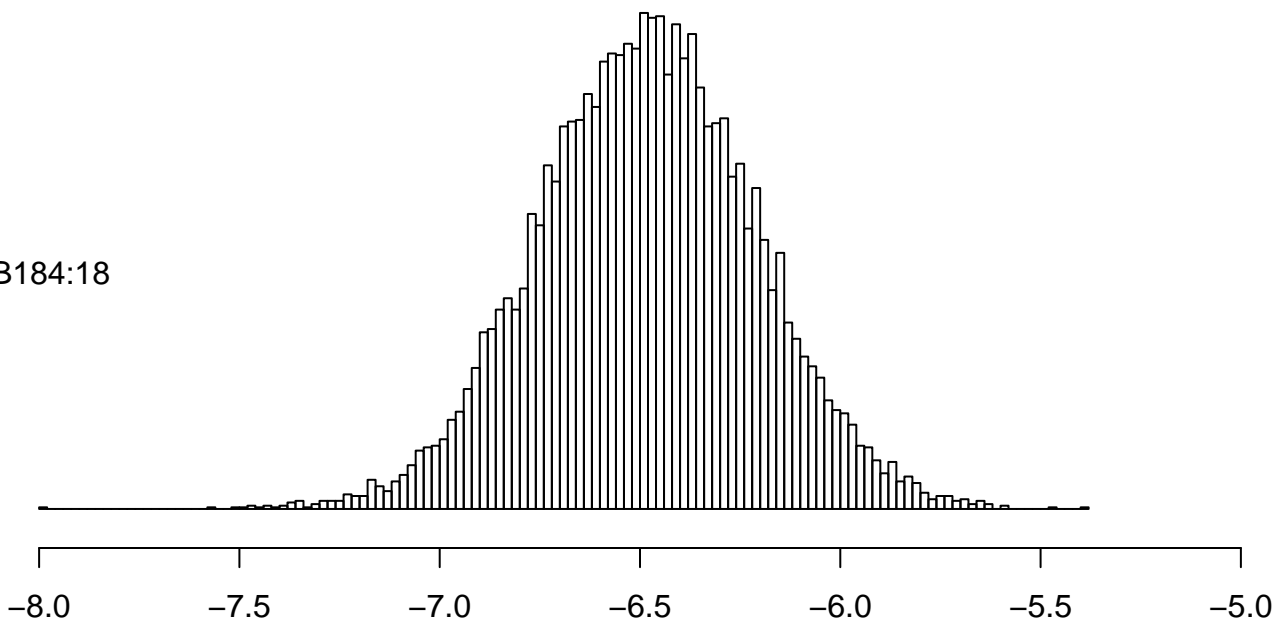

Unidentified Metabolite 50

B184:26 – B184:18

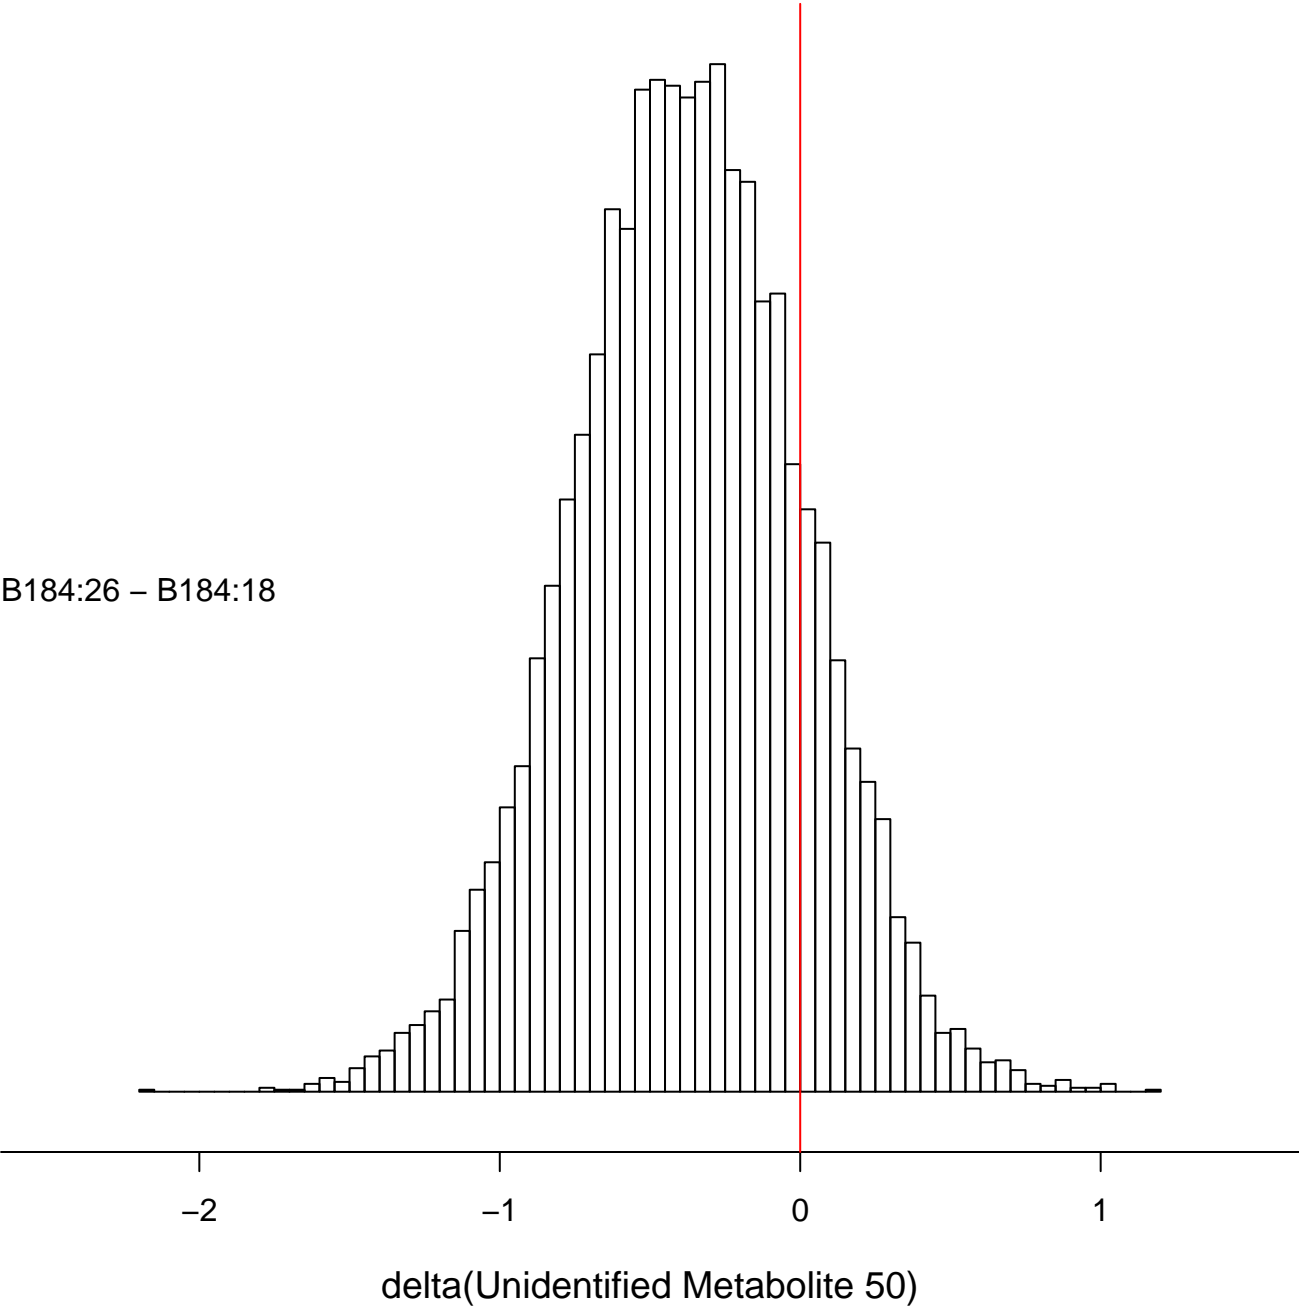

B184:26

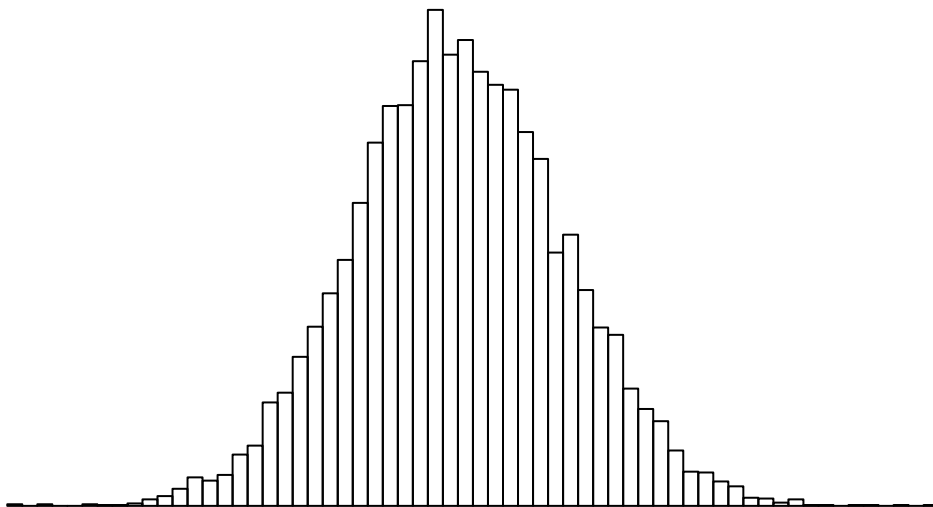

B184:18

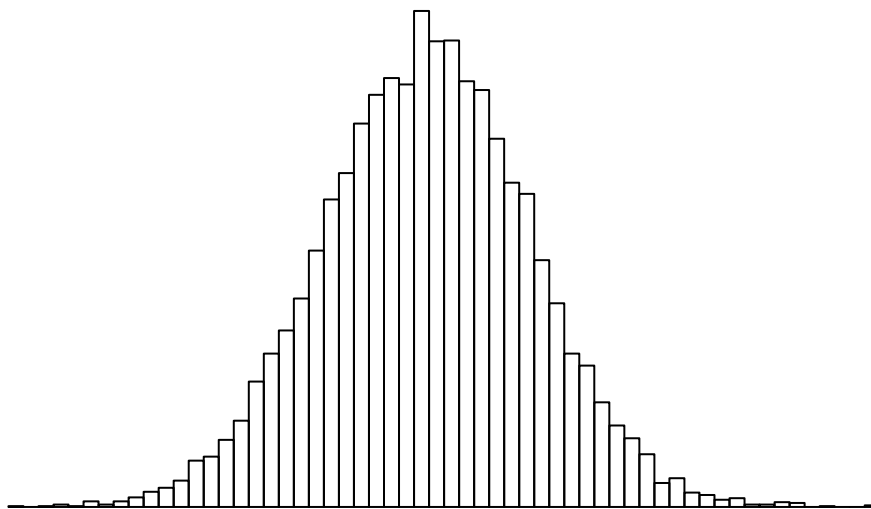

-8

-7

-6

-5

Unidentified Metabolite 51

B184:26 – B184:18

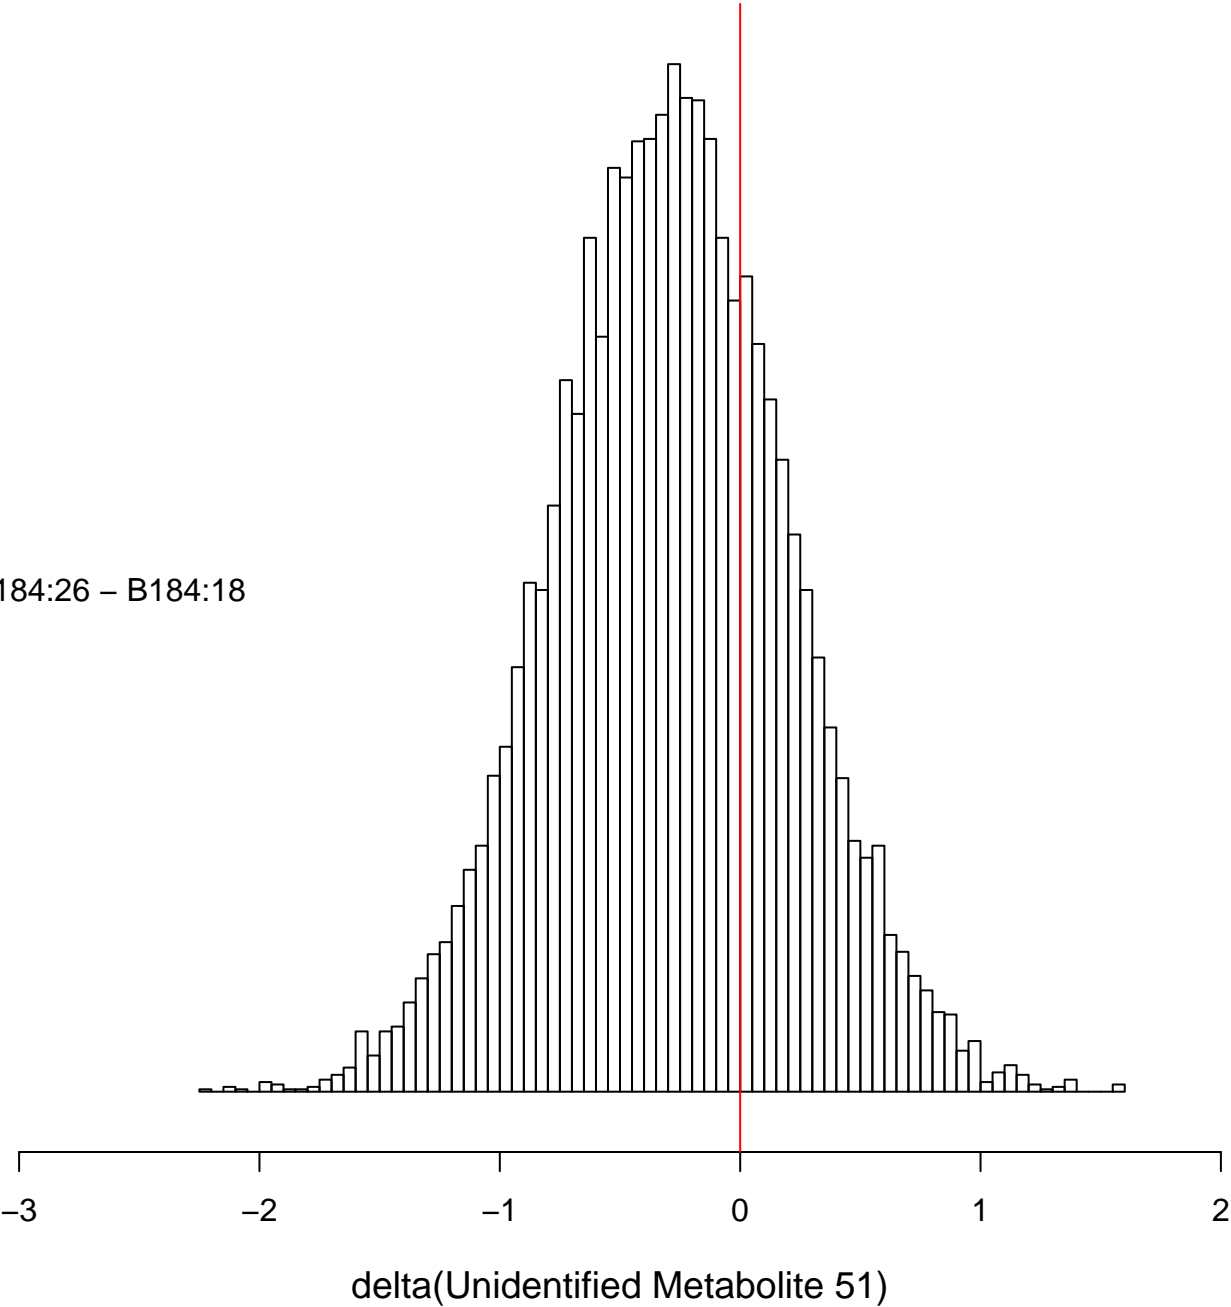



B184:26

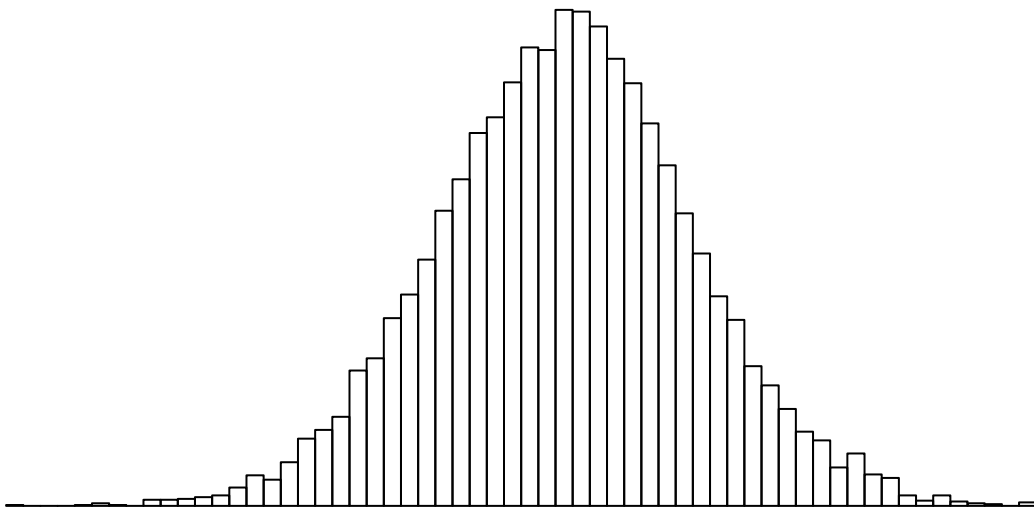

B184:18

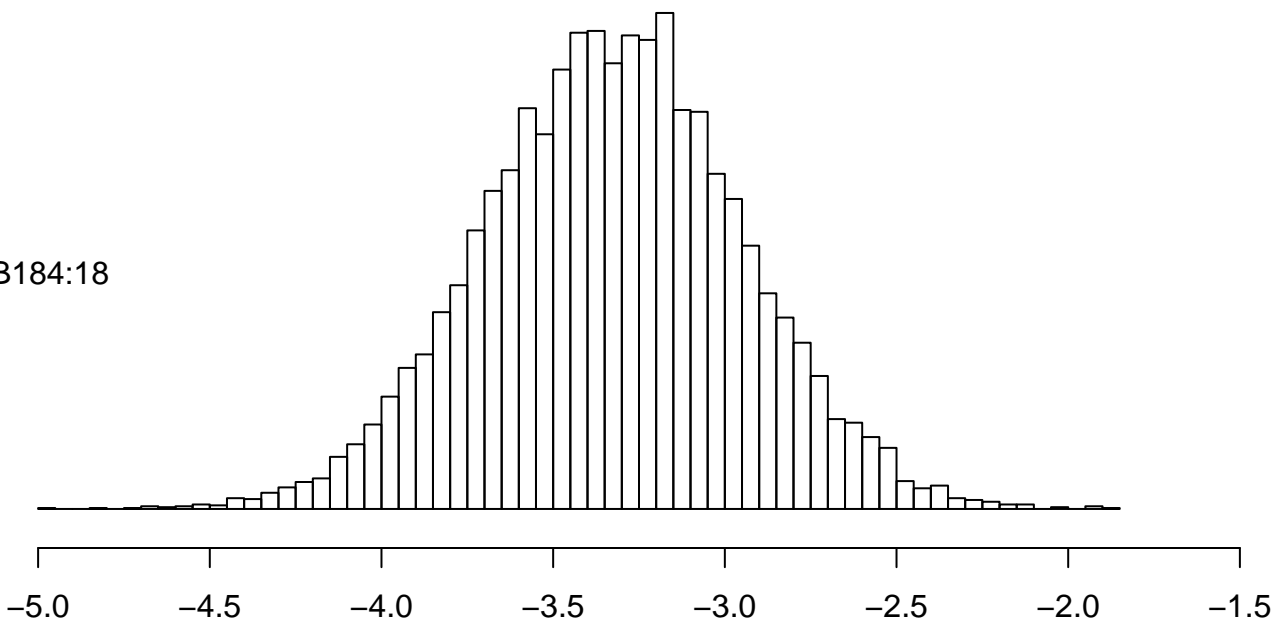

Unidentified Metabolite 55

B184:26 – B184:18

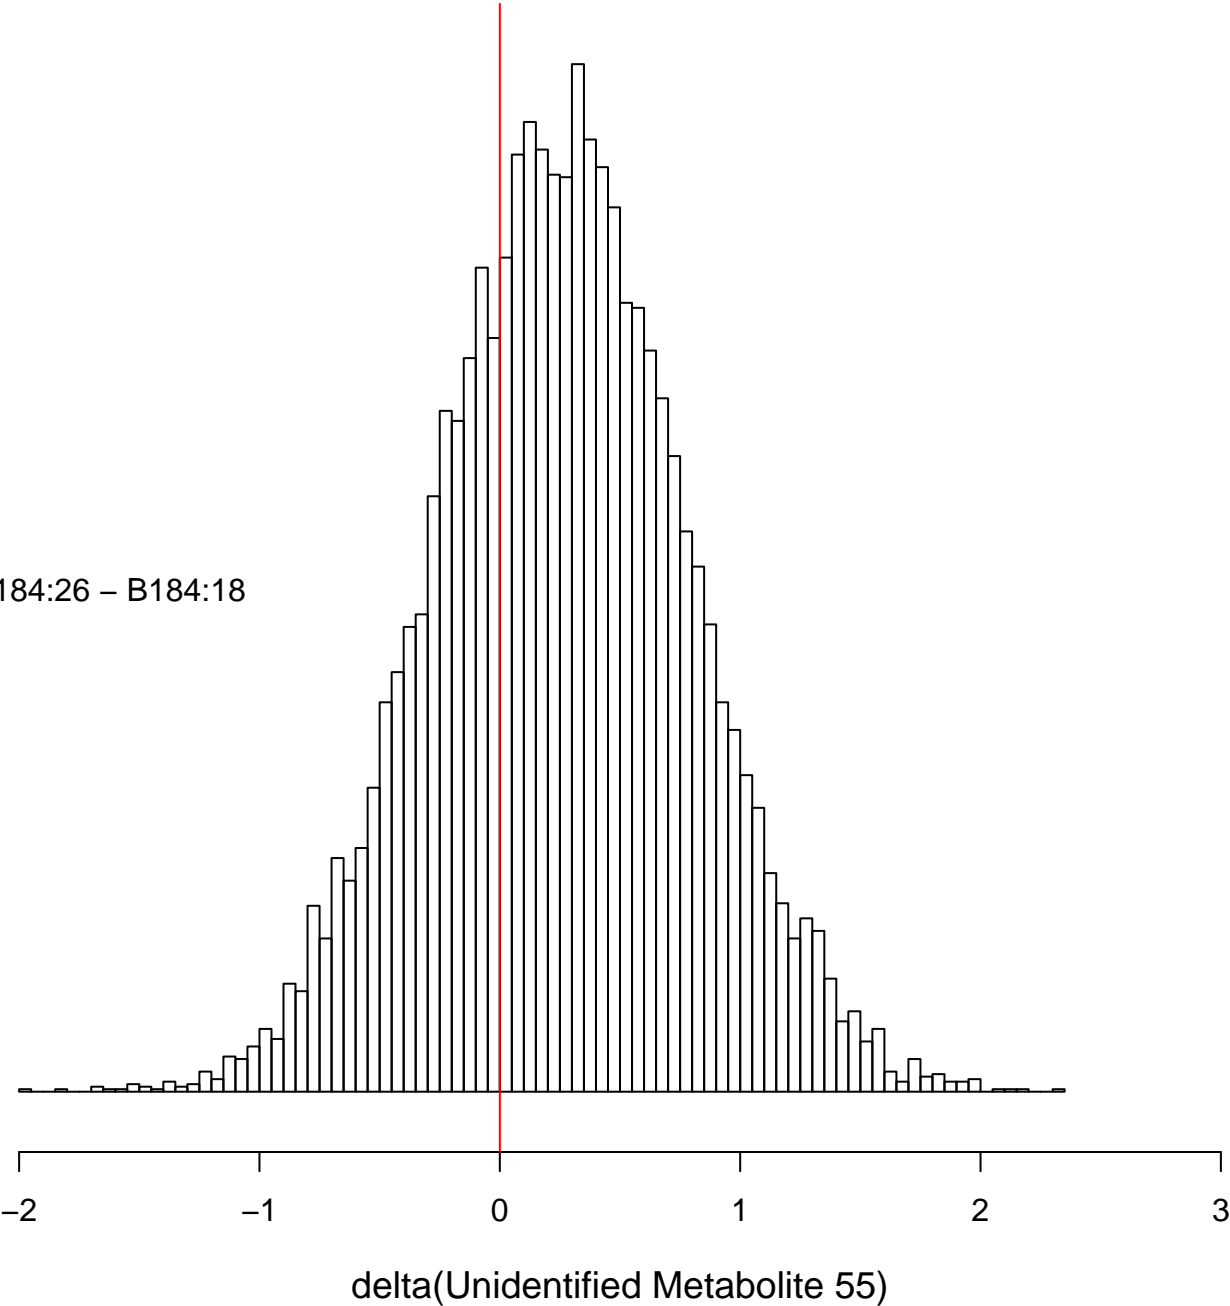

B184:26

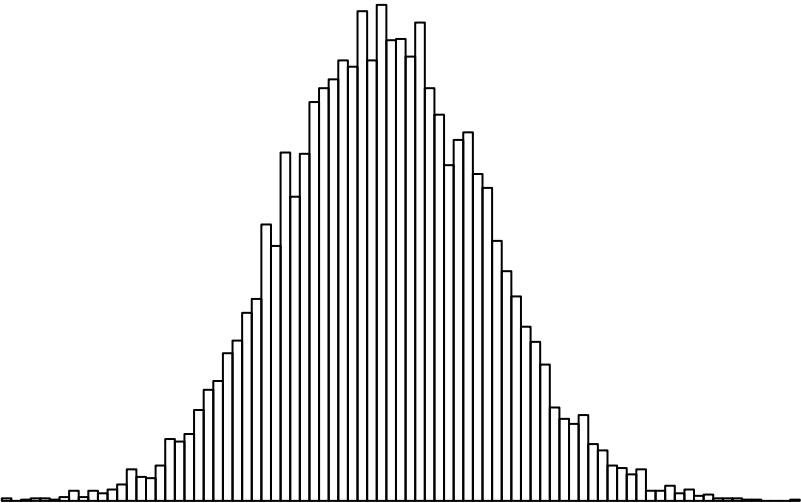

B184:18

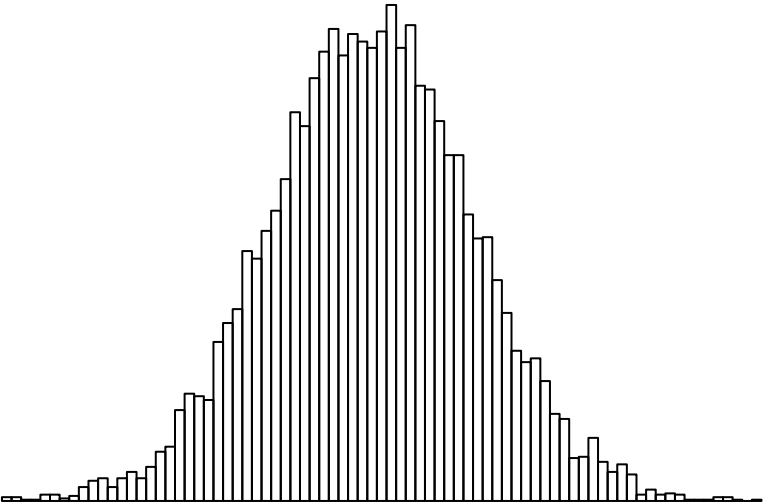

-9.0      -8.5      -8.0      -7.5      -7.0      -6.5

Unidentified Metabolite 56

B184:26 – B184:18

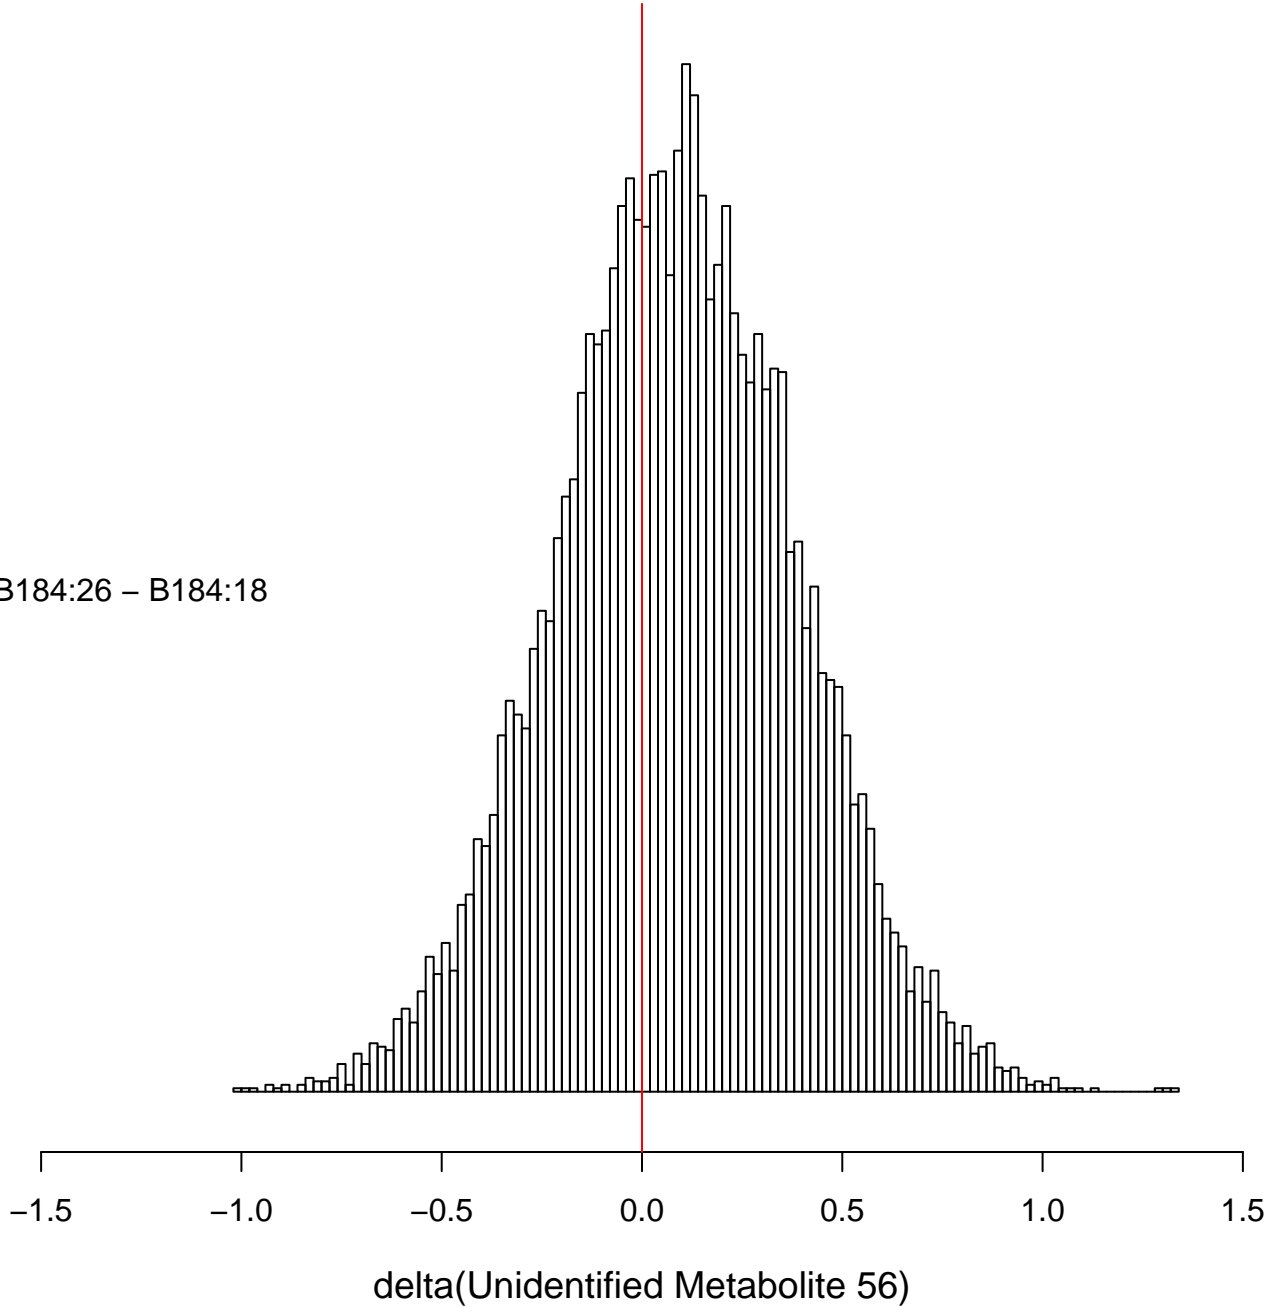

B184:26

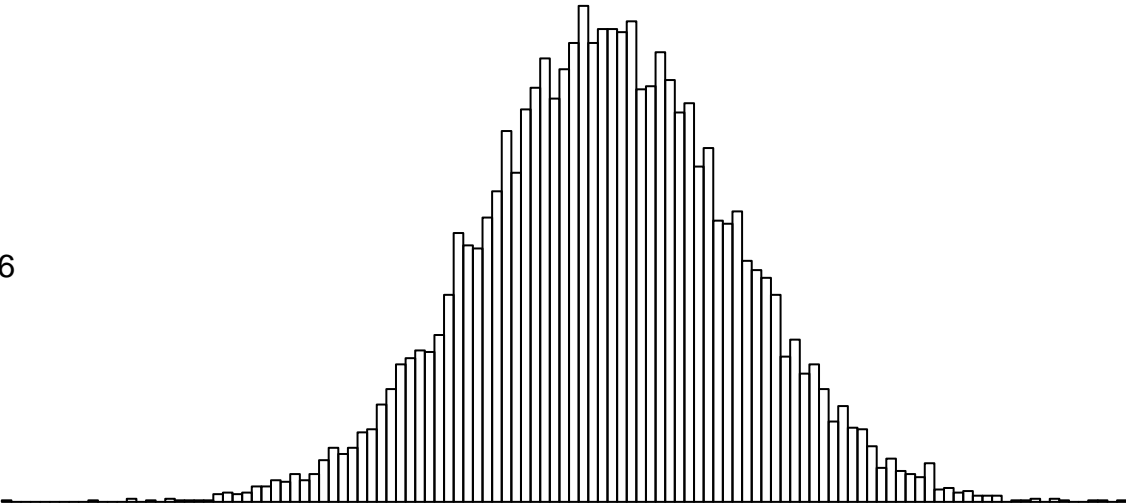

B184:18

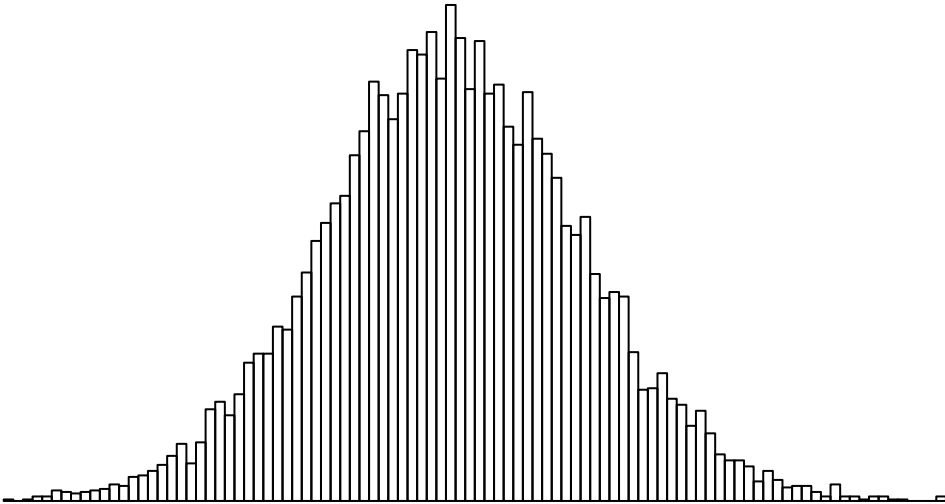

-7.5      -7.0      -6.5      -6.0      -5.5      -5.0

Unidentified Metabolite 58

B184:26 – B184:18

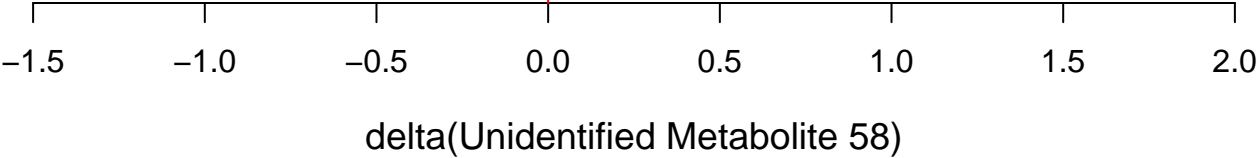

B184:26

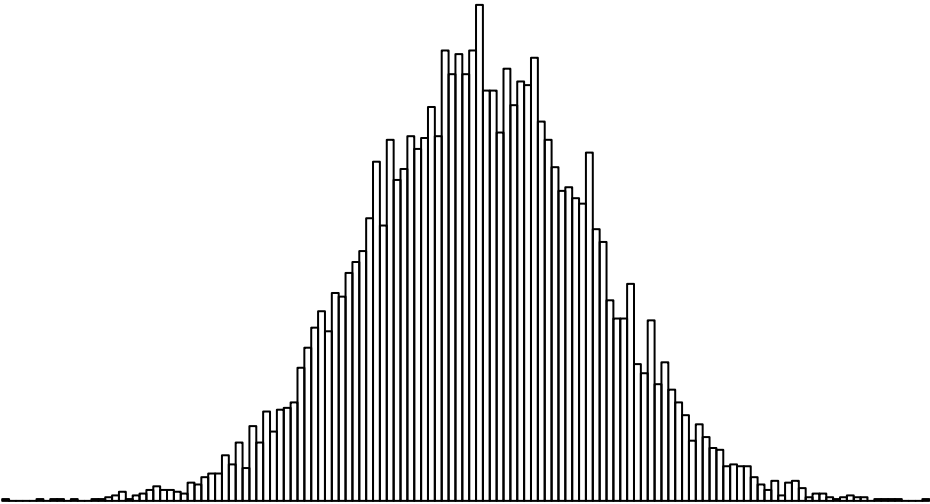

B184:18

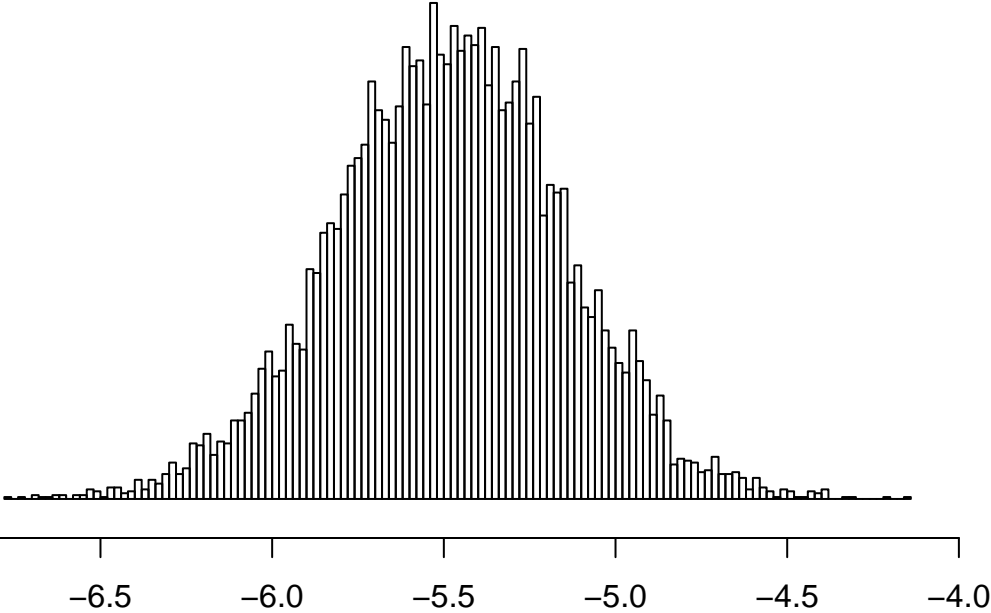

Unidentified Metabolite 59

B184:26 – B184:18

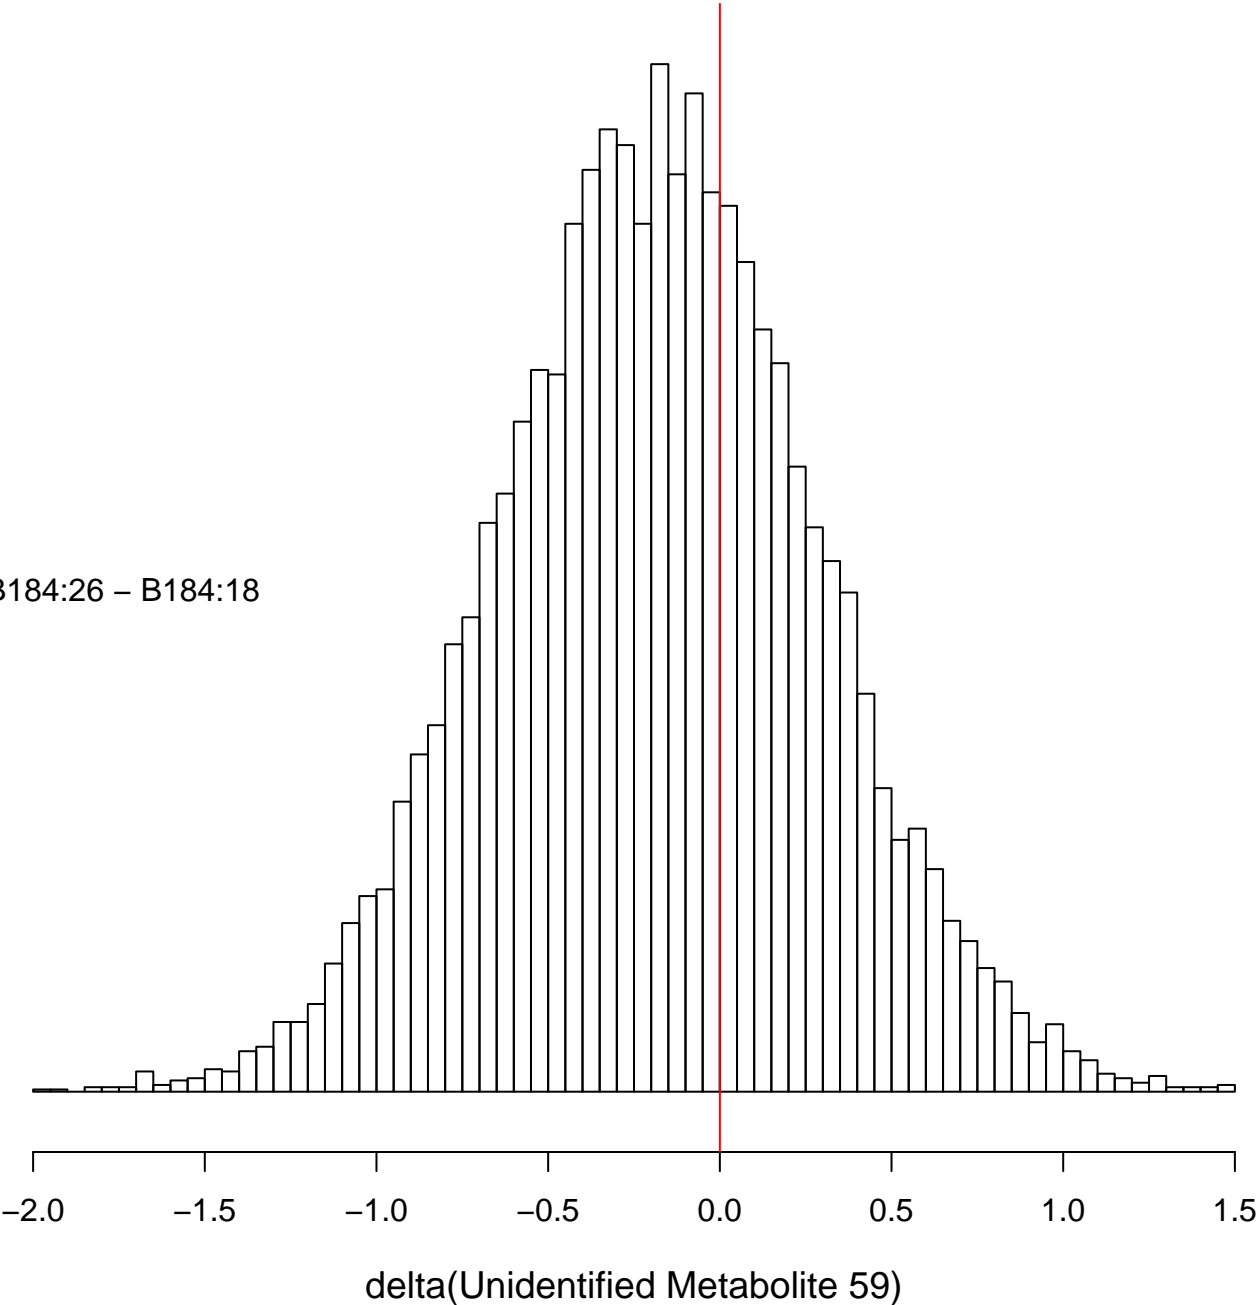



B184:26

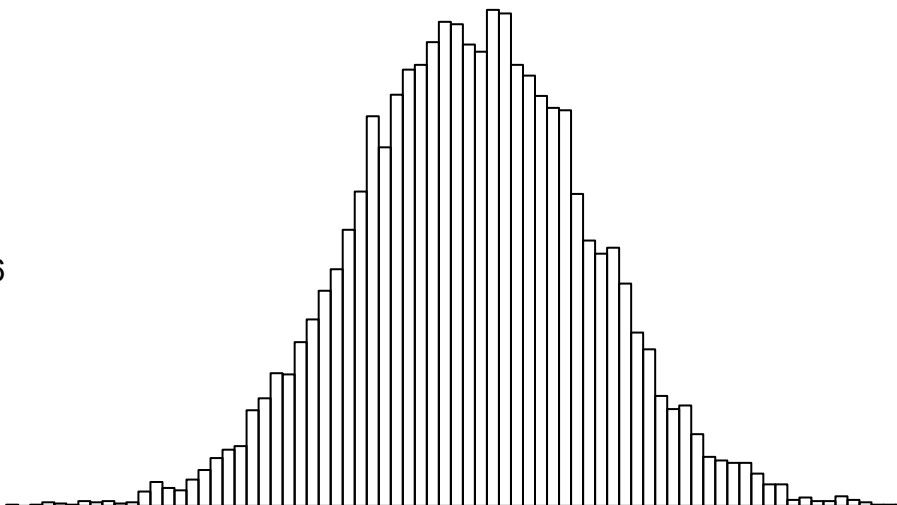

B184:18

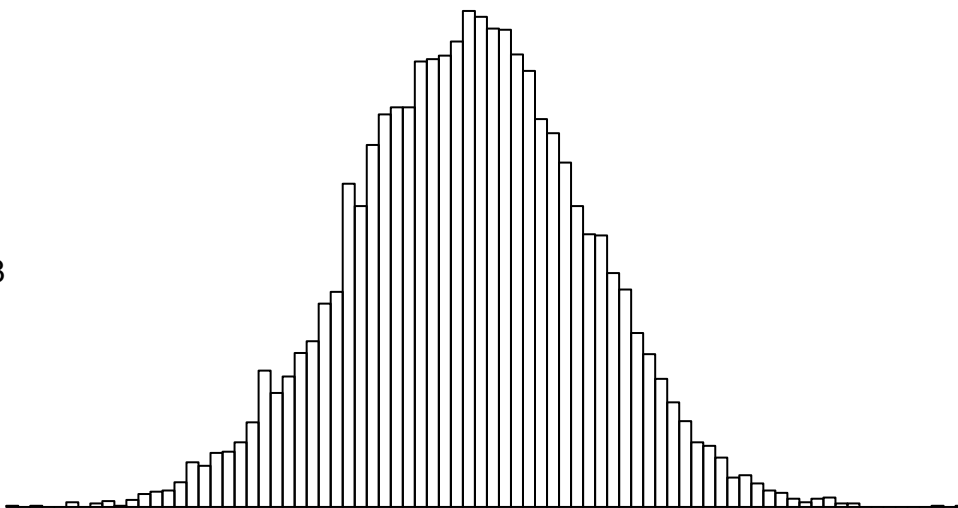

-8.5

-8.0

-7.5

-7.0

-6.5

Unidentified Metabolite 60

B184:26 – B184:18

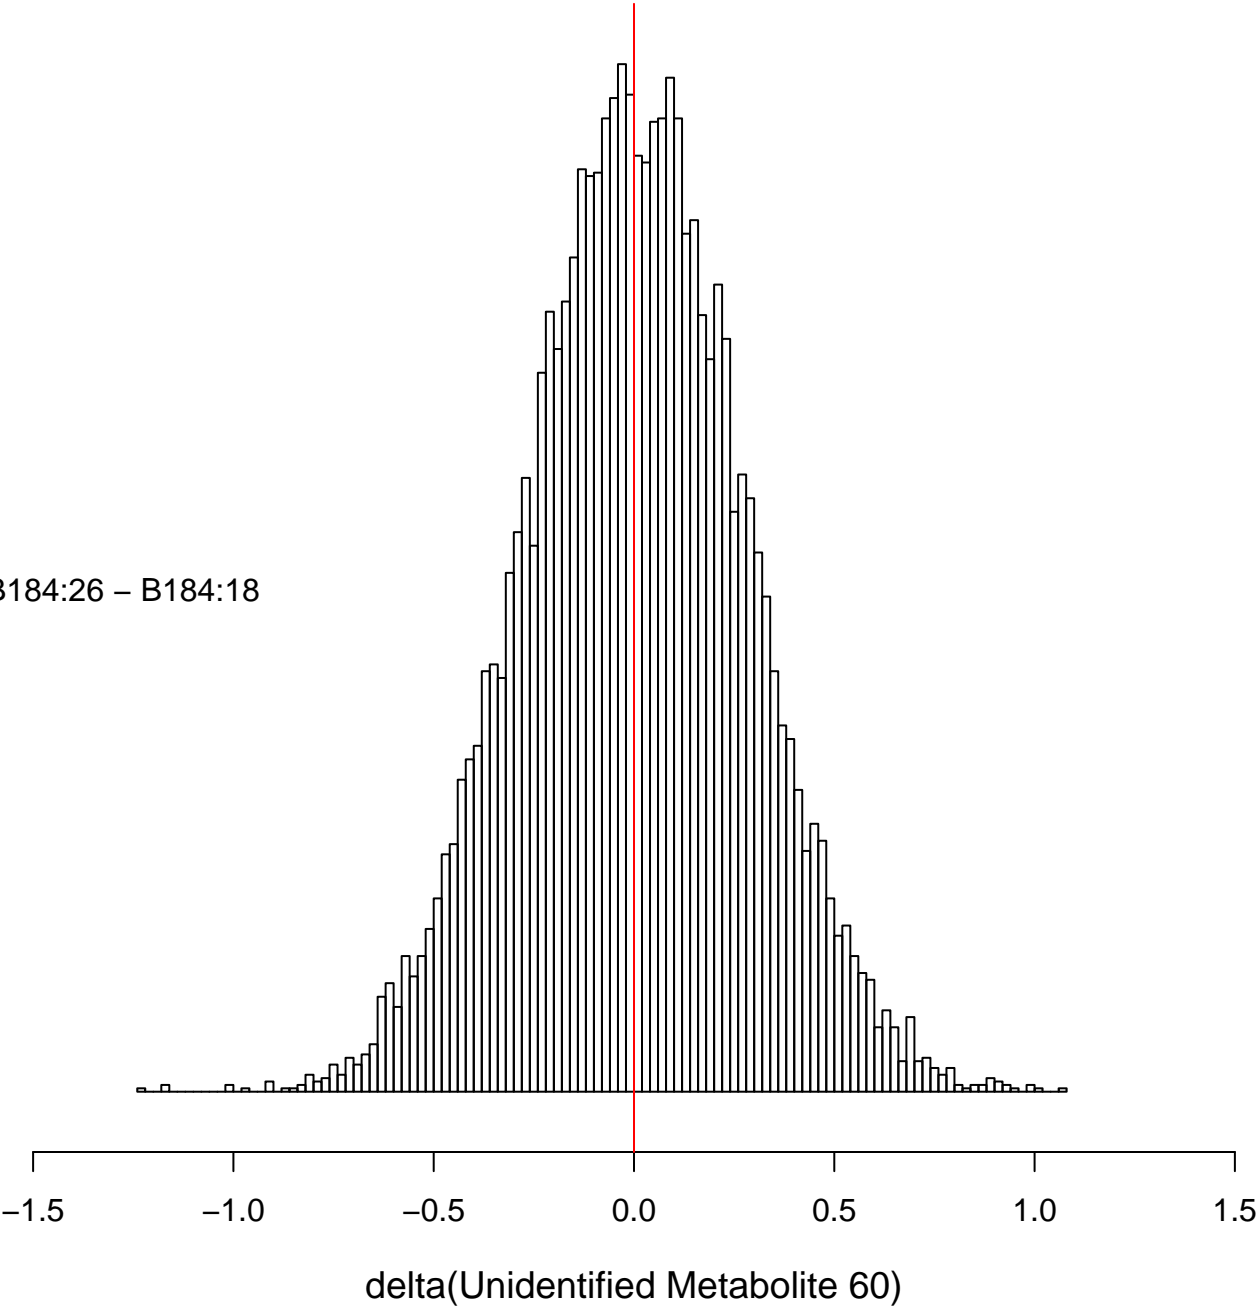

B184:26

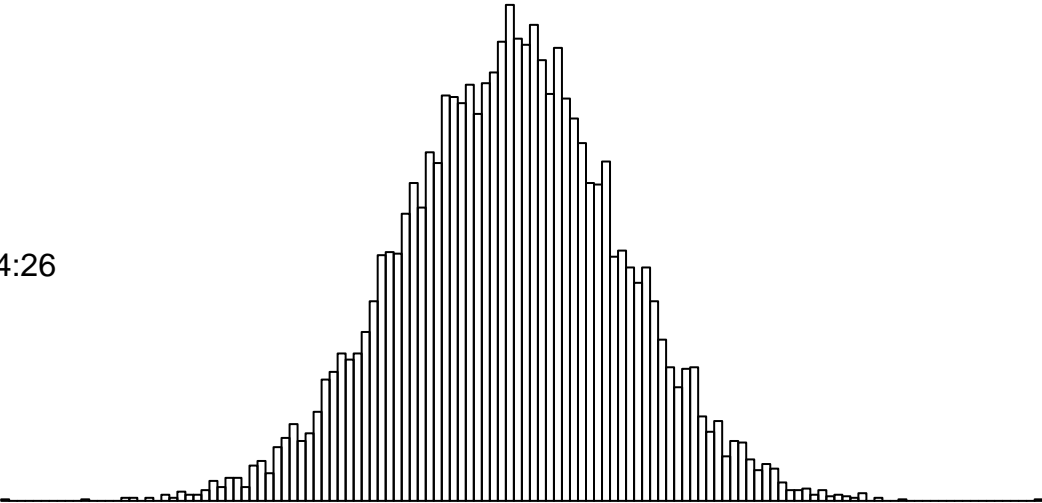

B184:18

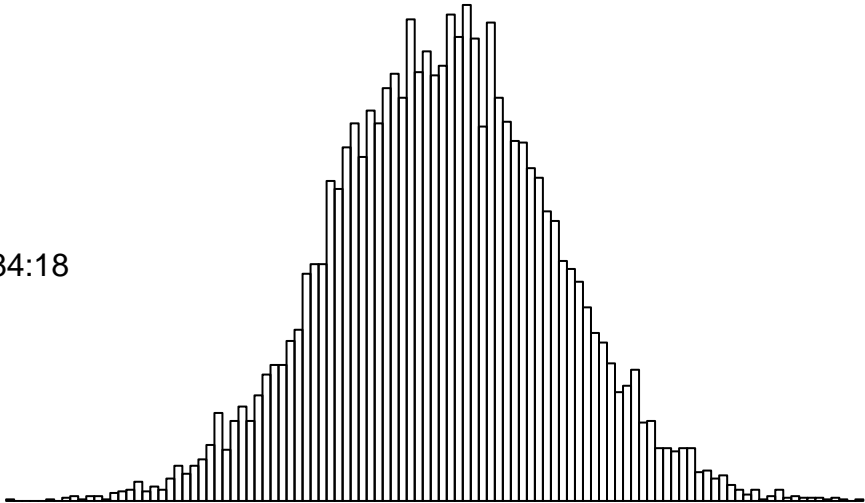

Unidentified Metabolite 61

B184:26 – B184:18

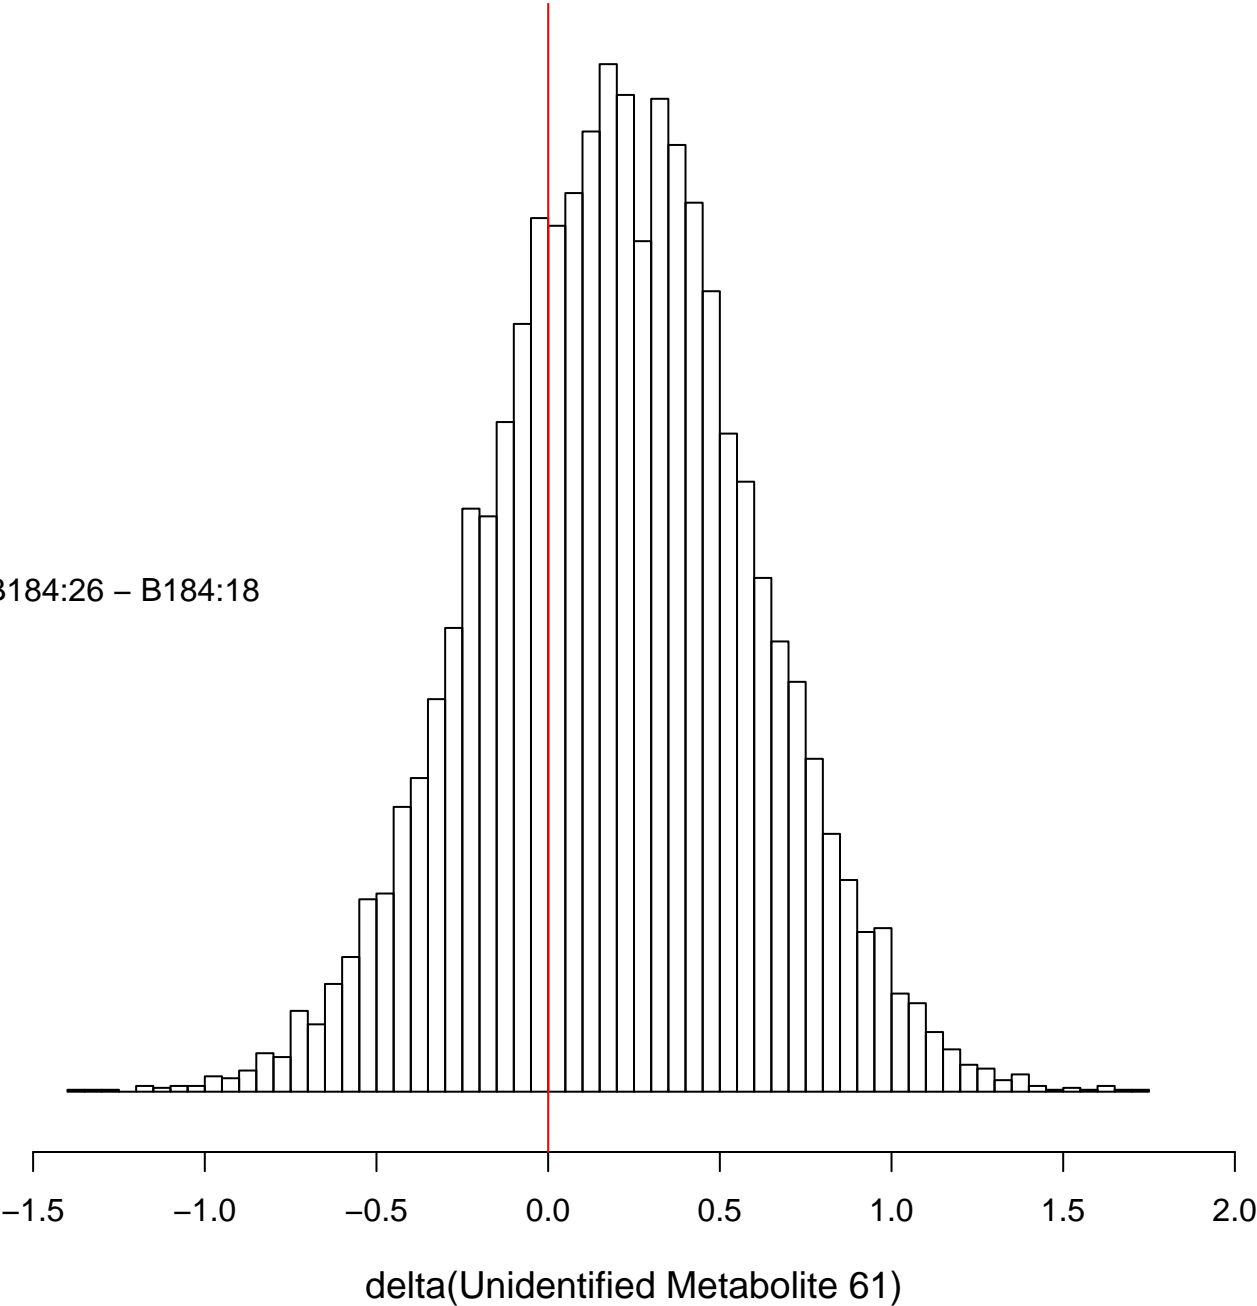

B184:26

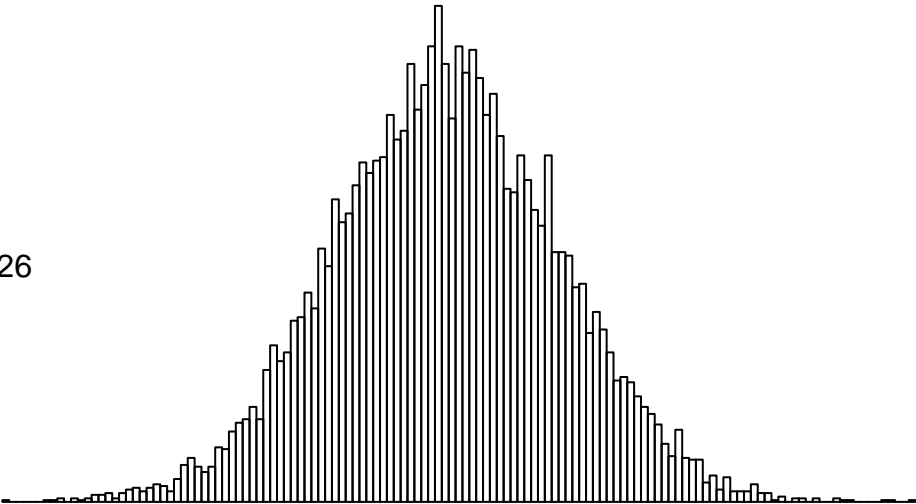

B184:18

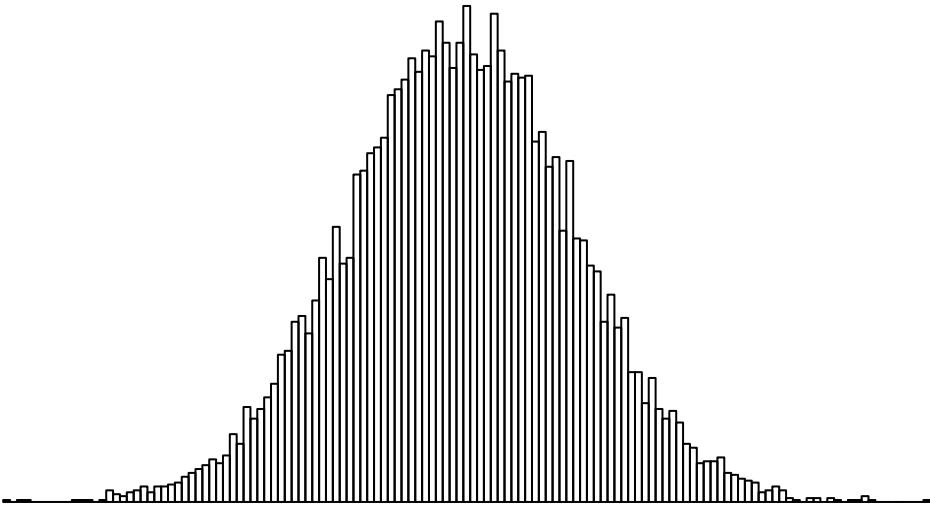

-10.0      -9.5      -9.0      -8.5      -8.0      -7.5      -7.0      -6.5

Unidentified Metabolite 62

B184:26 – B184:18

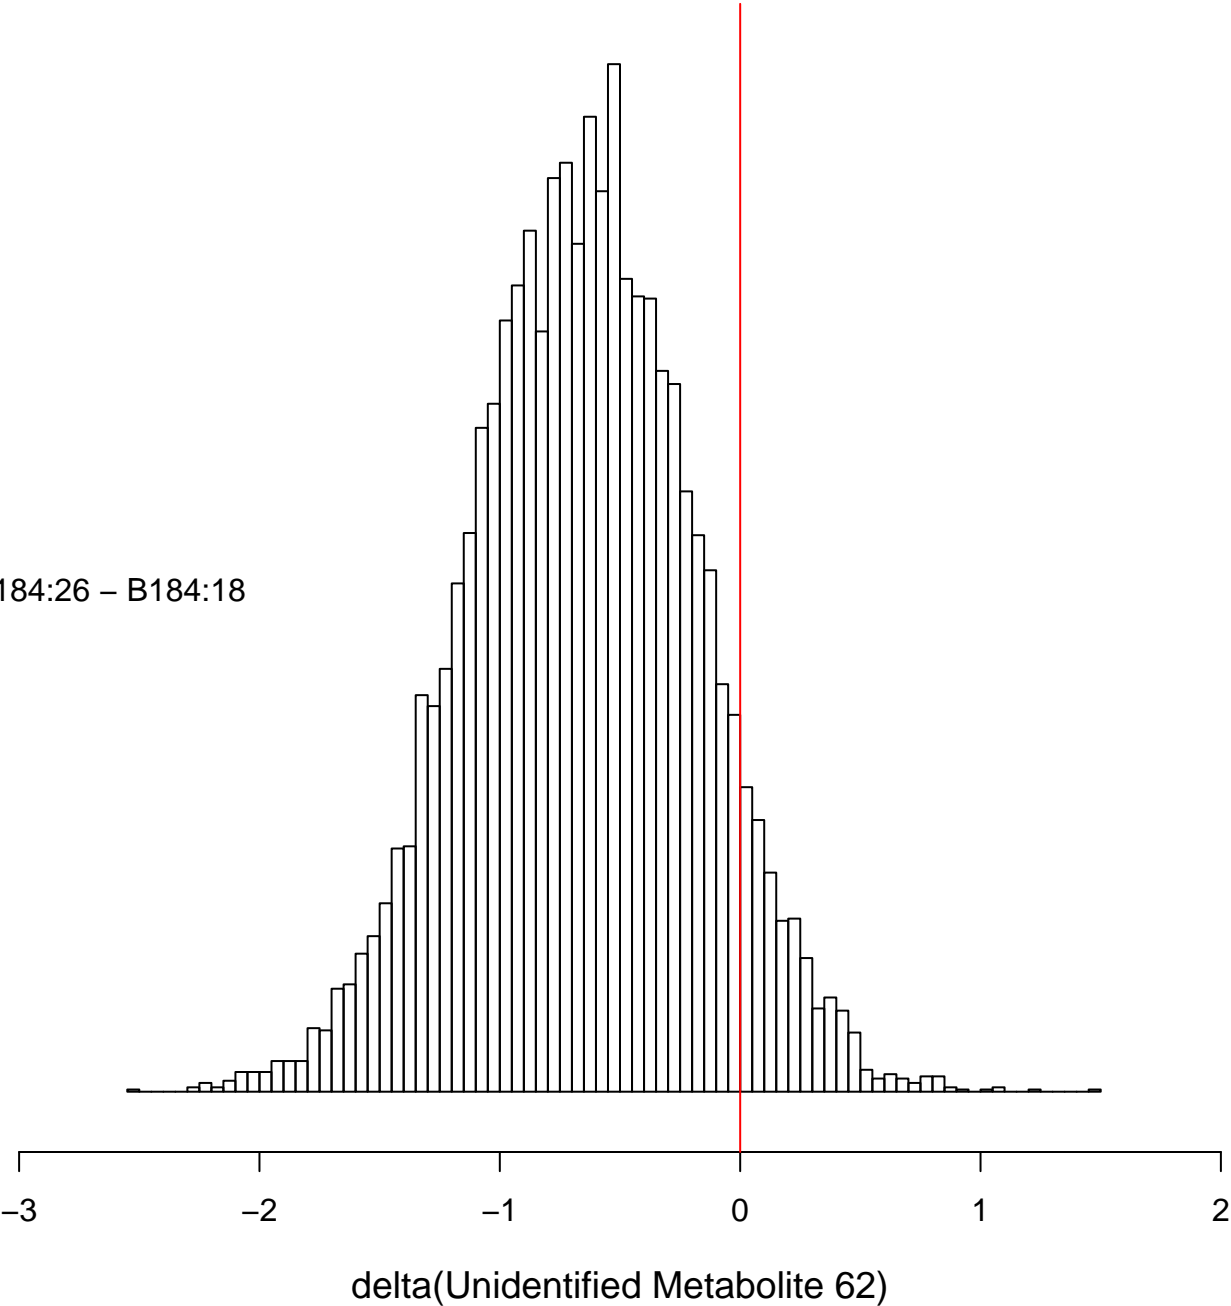

B184:26

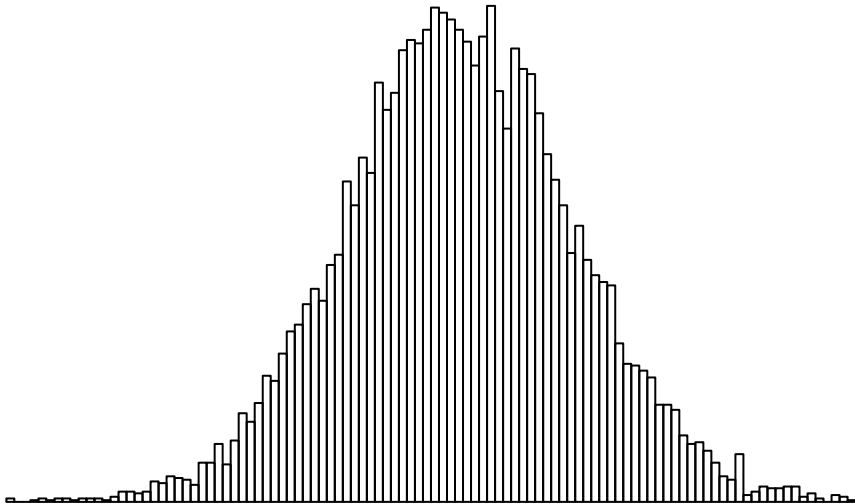

B184:18

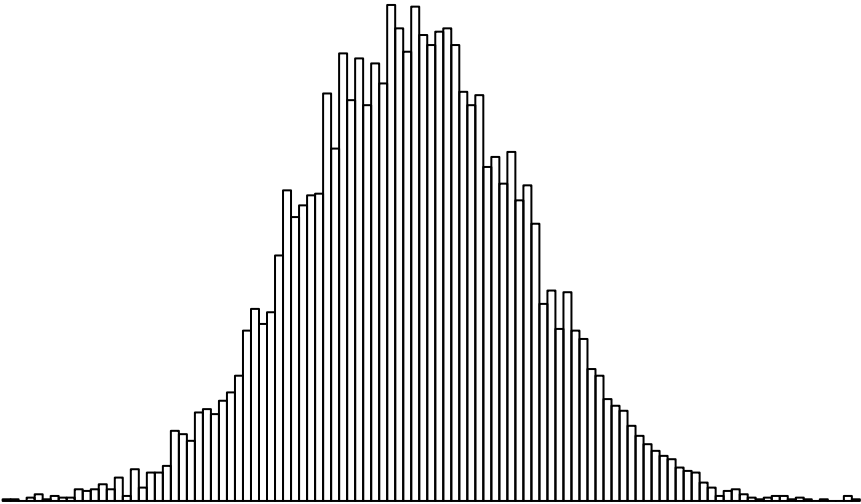

-7.5      -7.0      -6.5      -6.0      -5.5      -5.0      -4.5

Unidentified Metabolite 63

B184:26 – B184:18

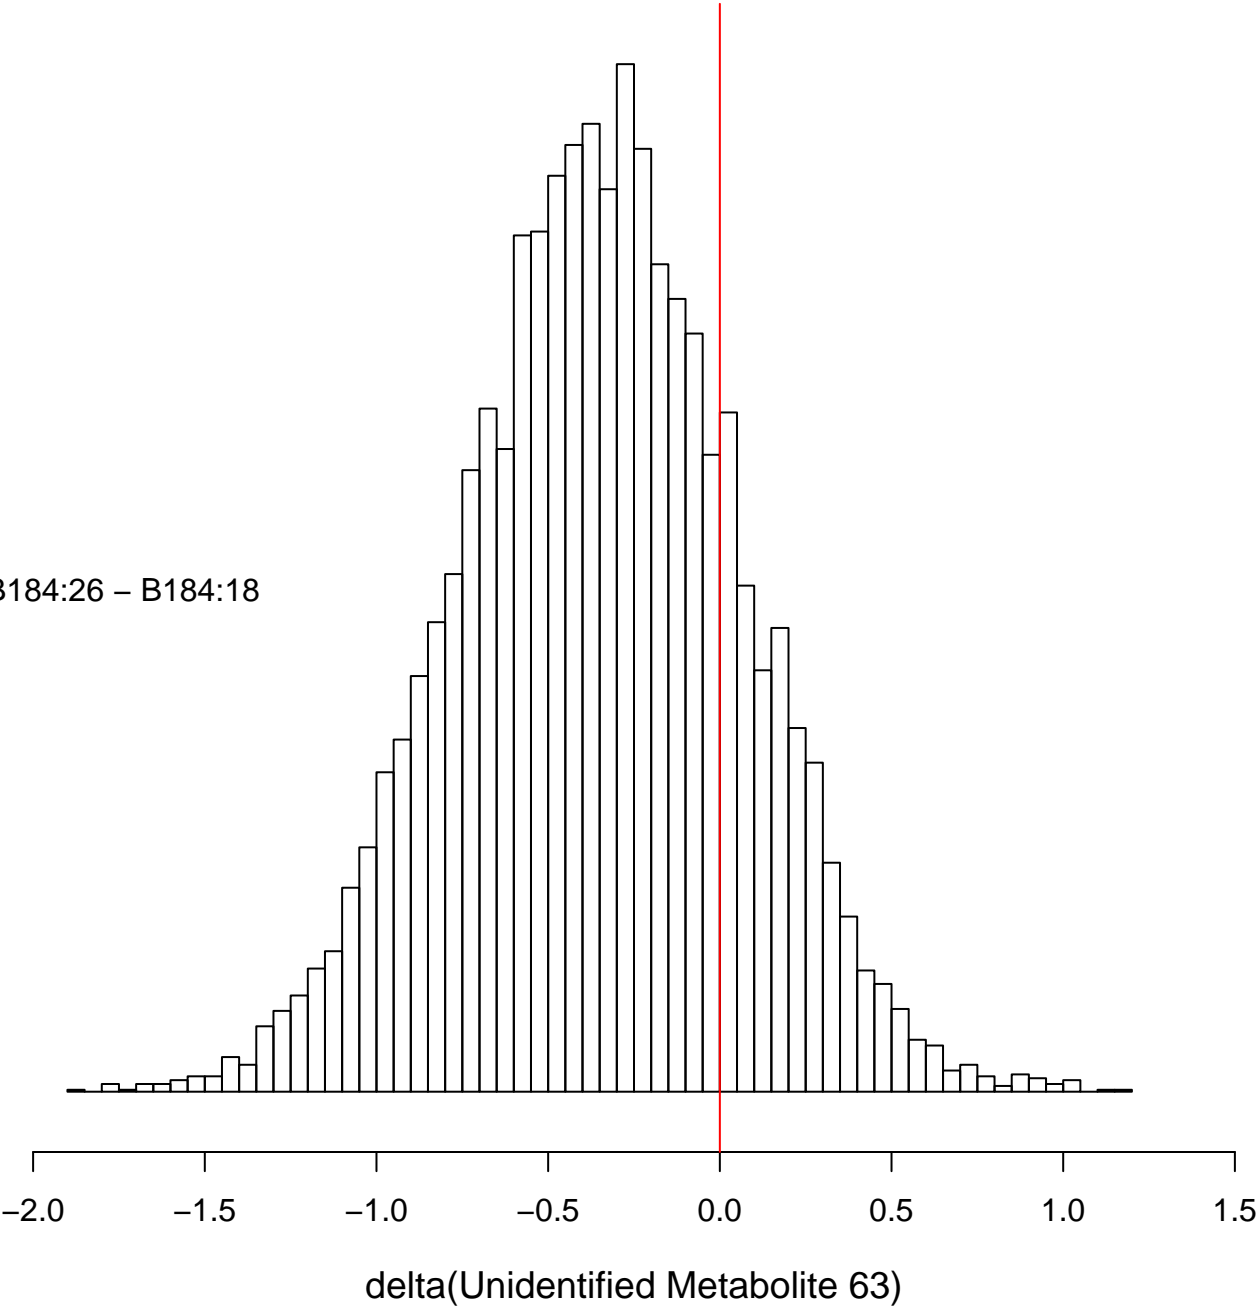



B184:26

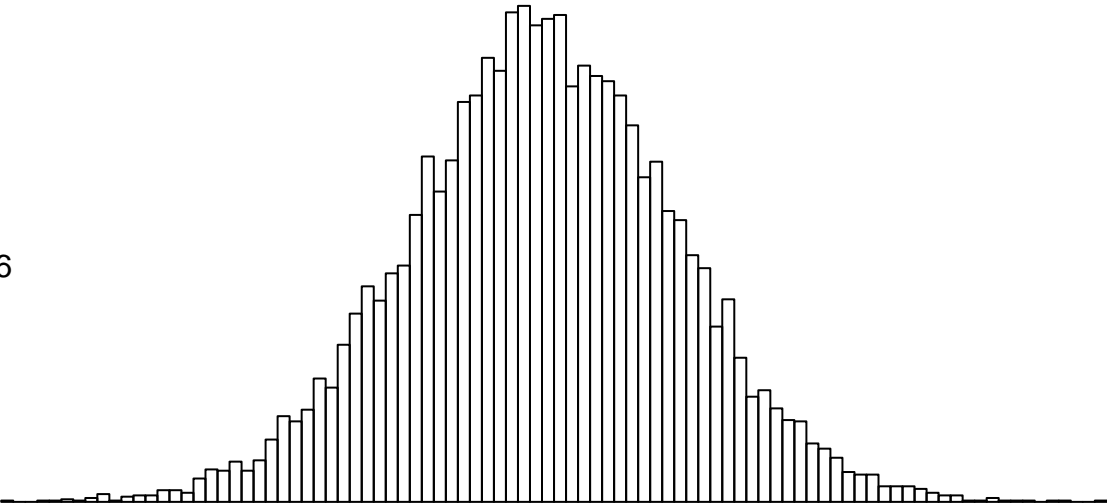

B184:18

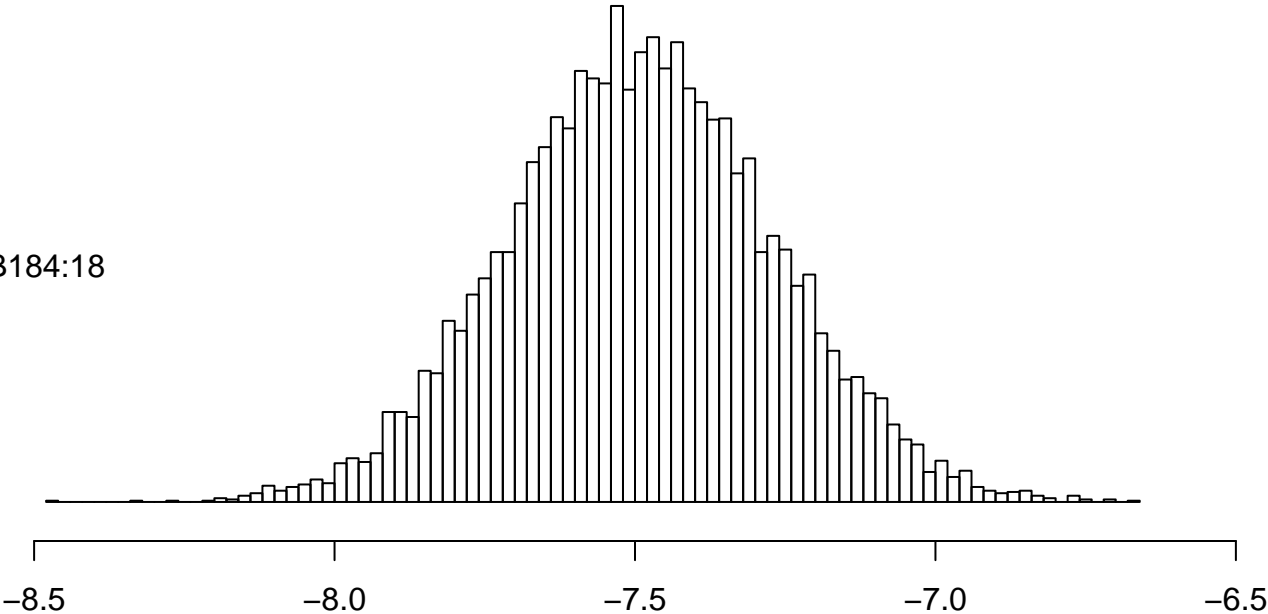

Unidentified Metabolite 65

B184:26 – B184:18

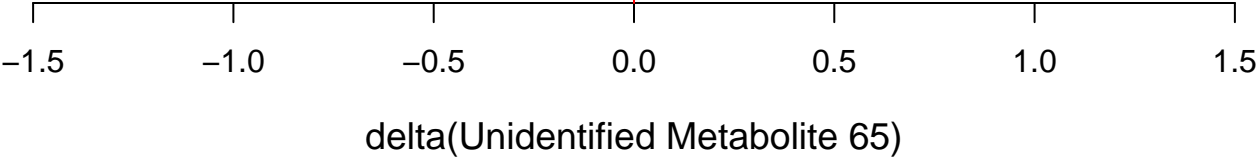

B184:26

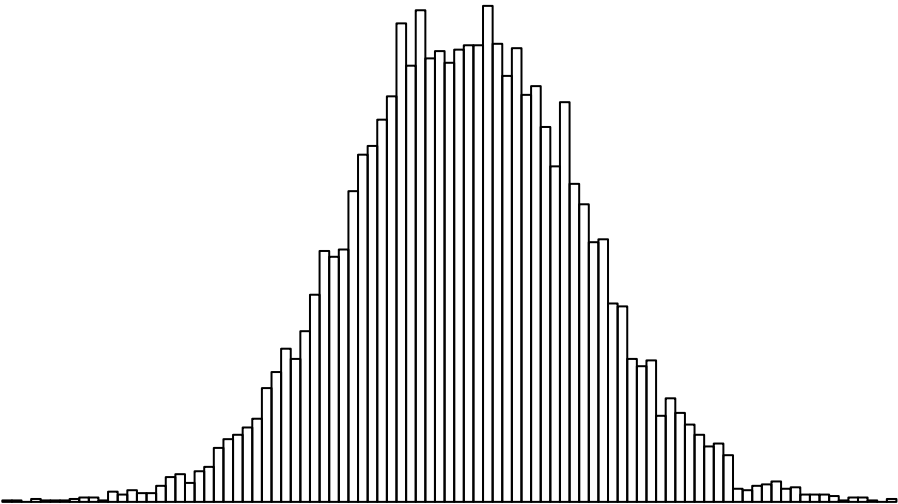

B184:18

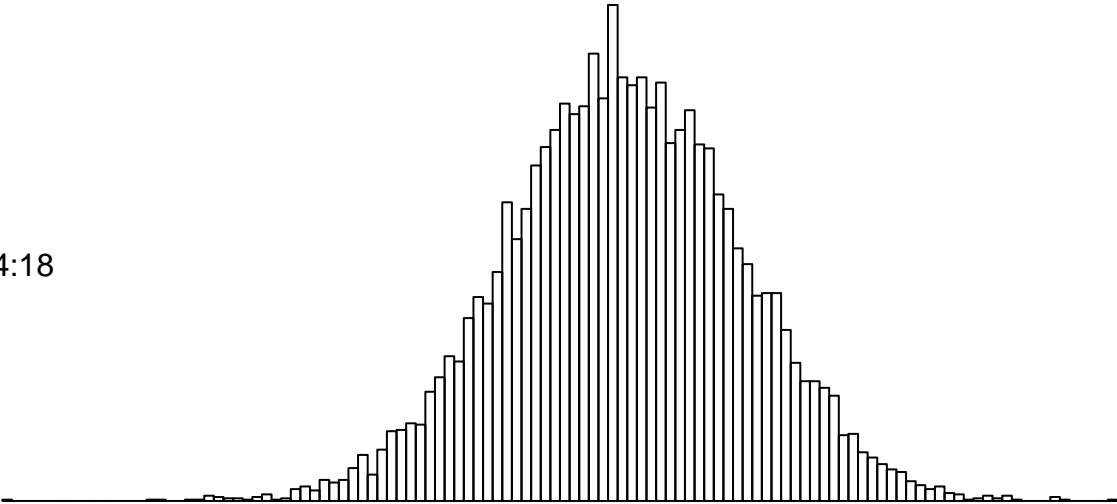

Unidentified Metabolite 68

B184:26 – B184:18

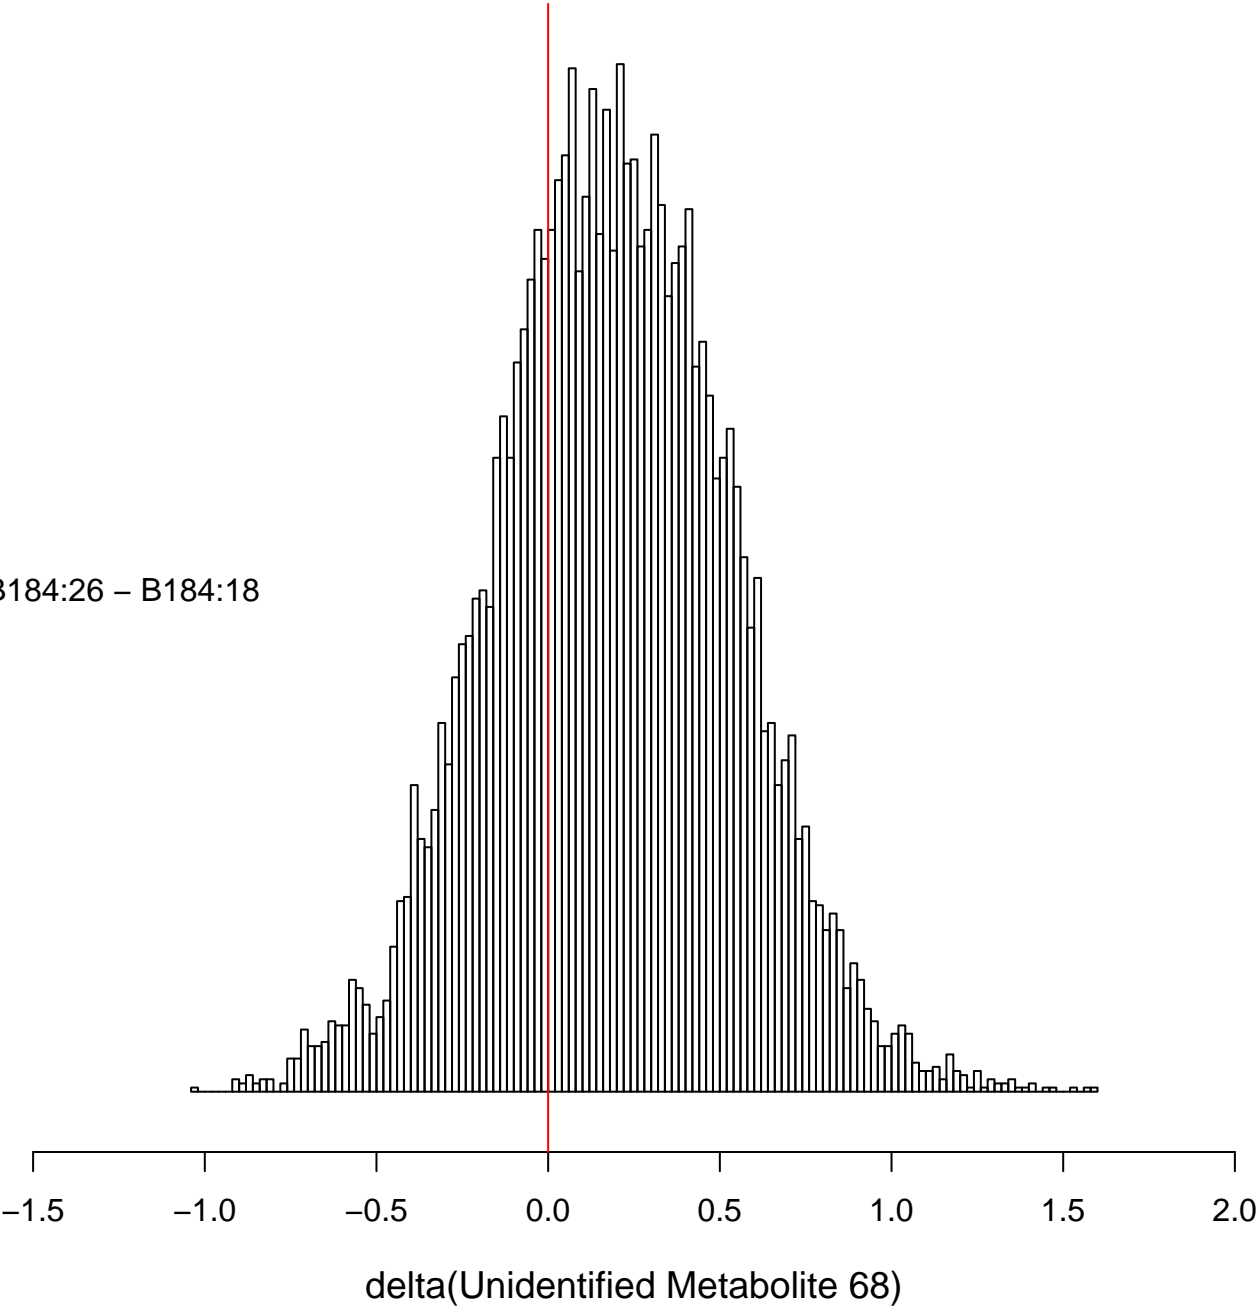

B184:26

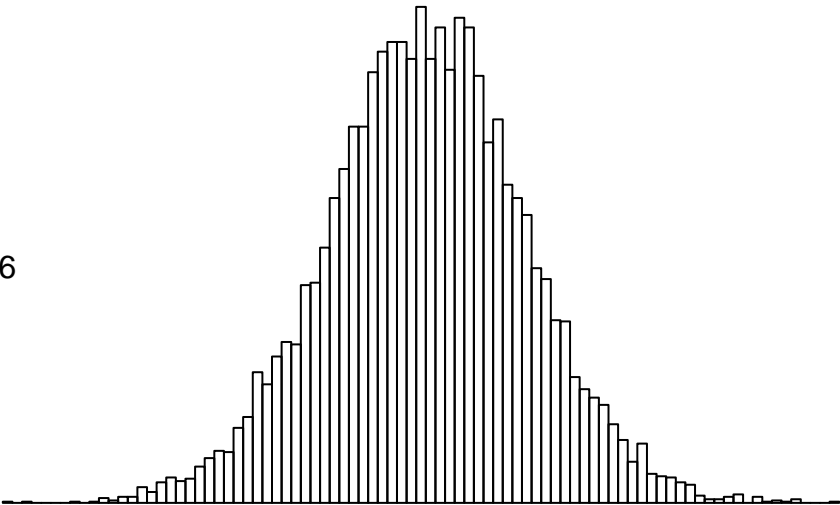

B184:18

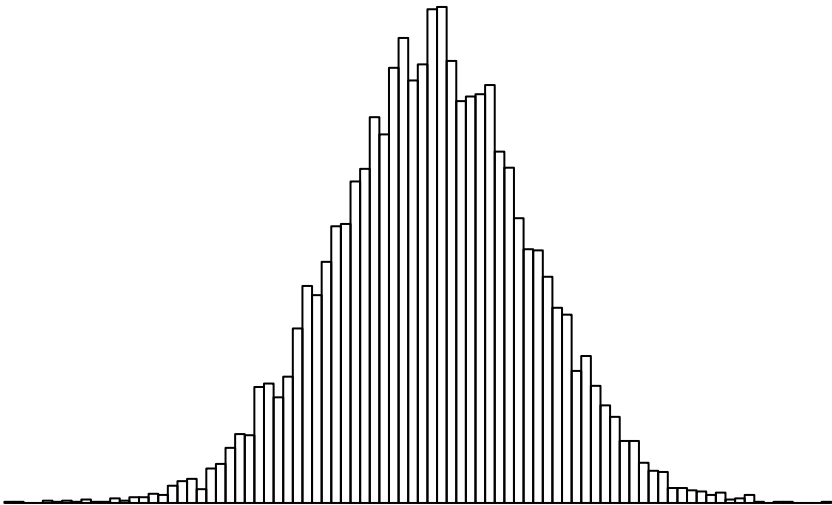

-7.0      -6.5      -6.0      -5.5      -5.0      -4.5

Unidentified Metabolite 69

B184:26 – B184:18

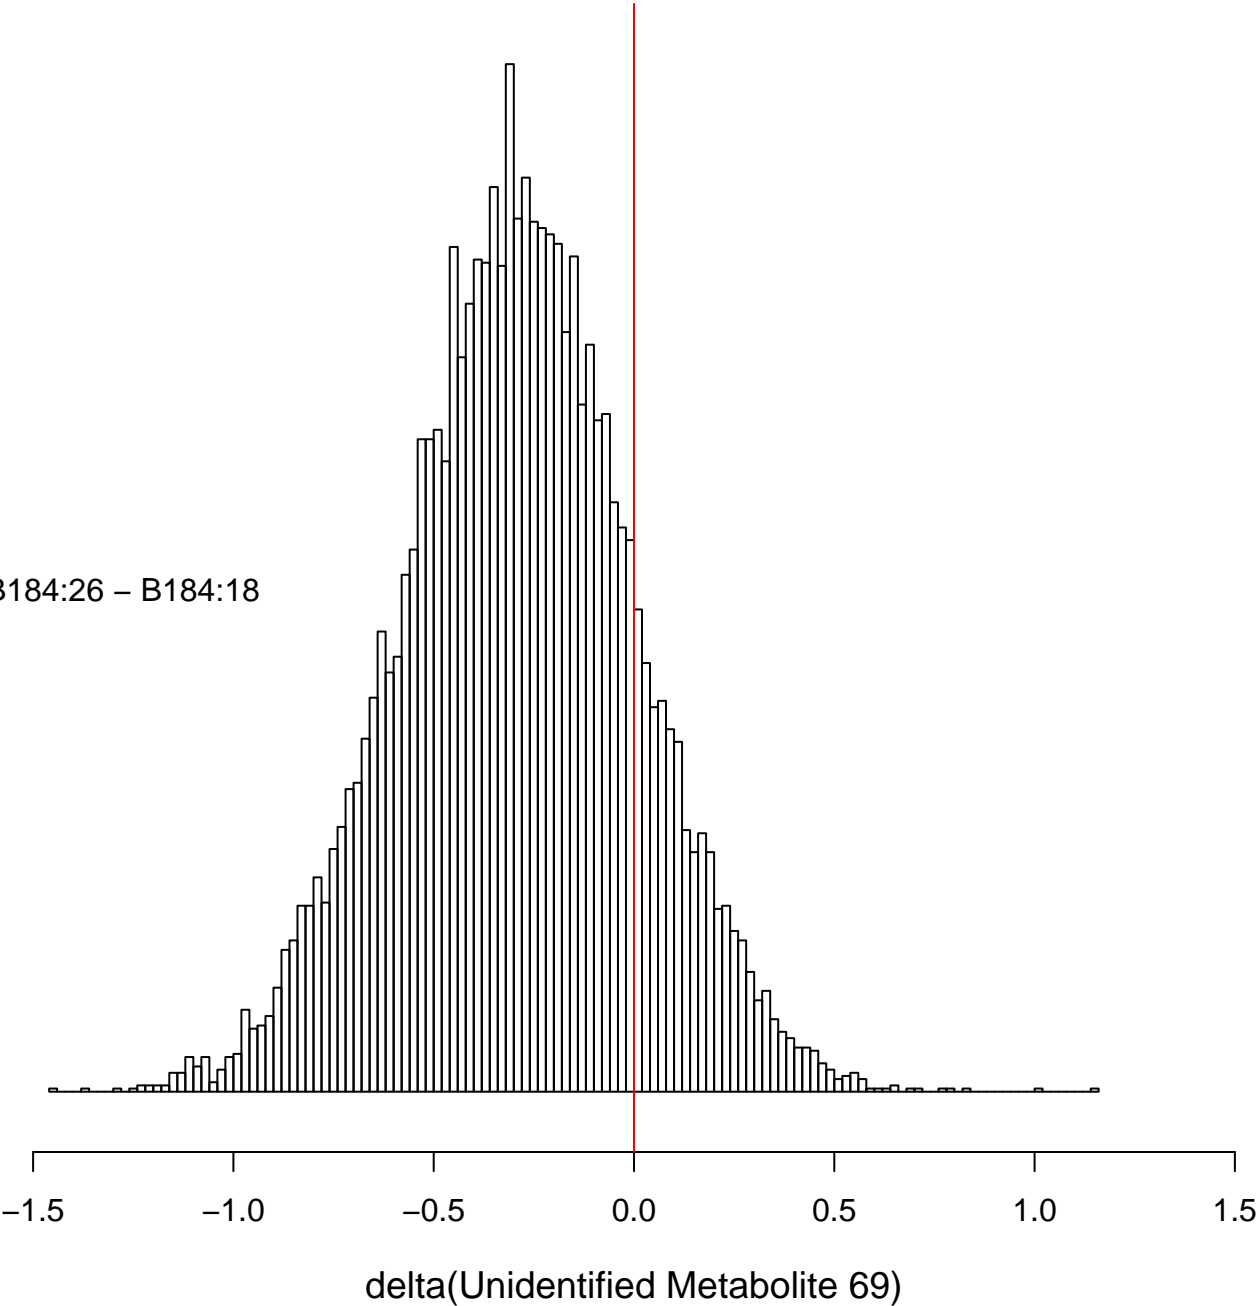

B184:26

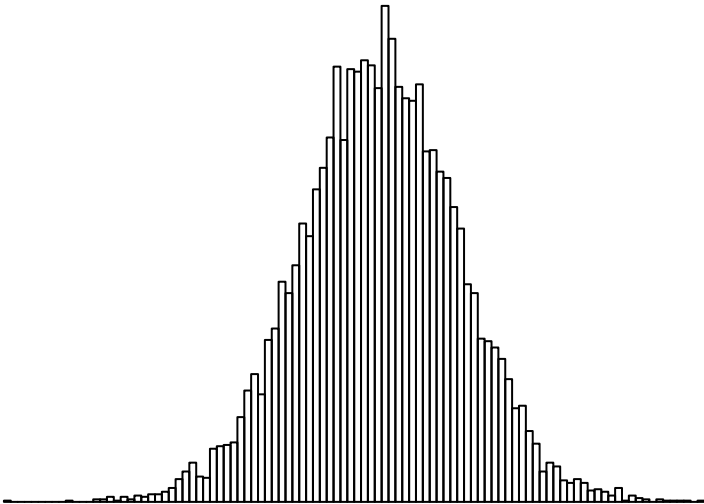

B184:18

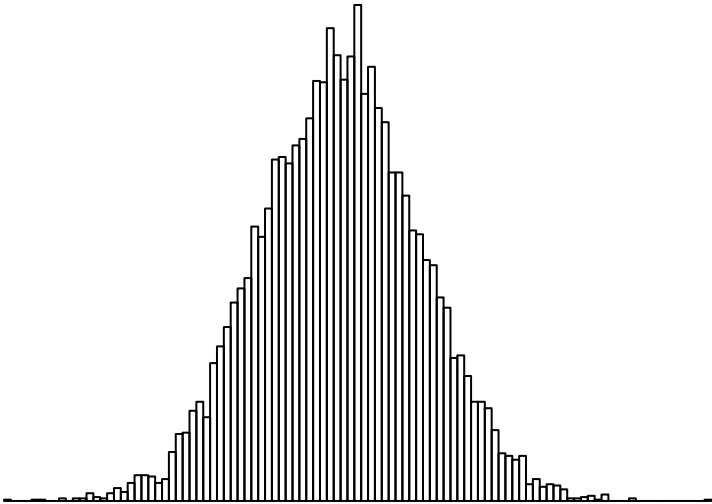

-9.0      -8.5      -8.0      -7.5      -7.0      -6.5      -6.0      -5.5

Unidentified Metabolite 70

B184:26 – B184:18

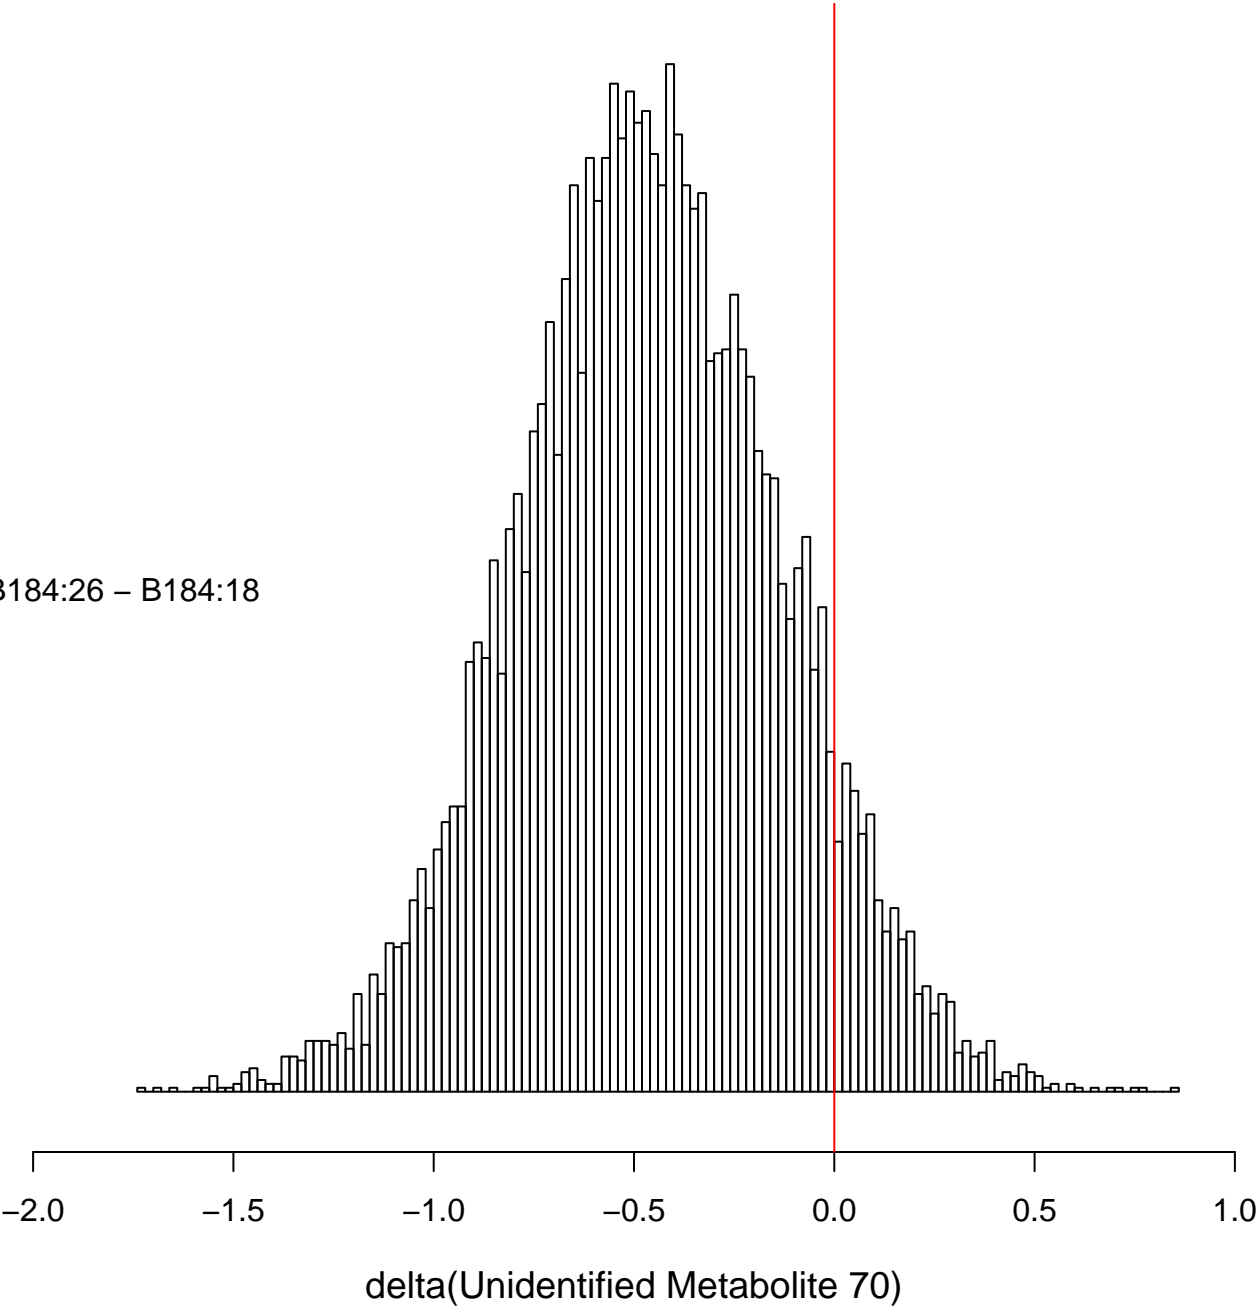



B184:26

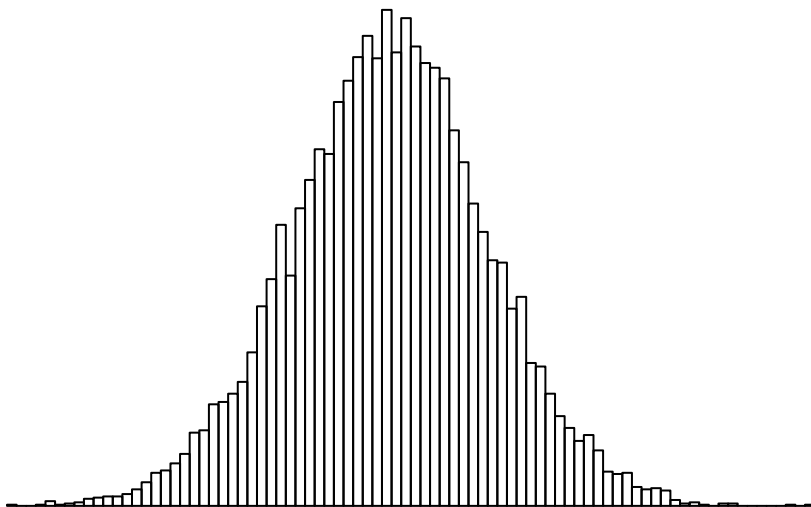

B184:18

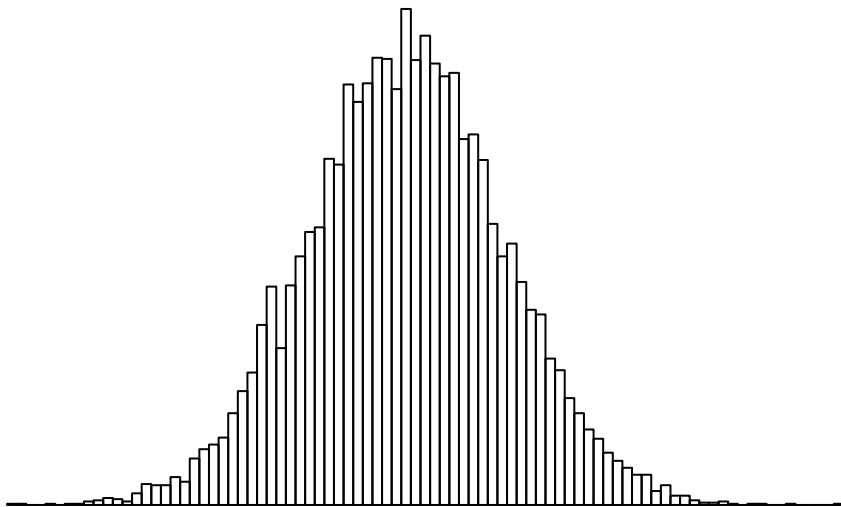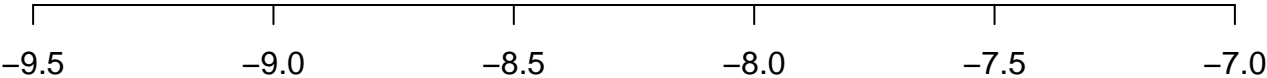

Unidentified Metabolite 71

B184:26 – B184:18

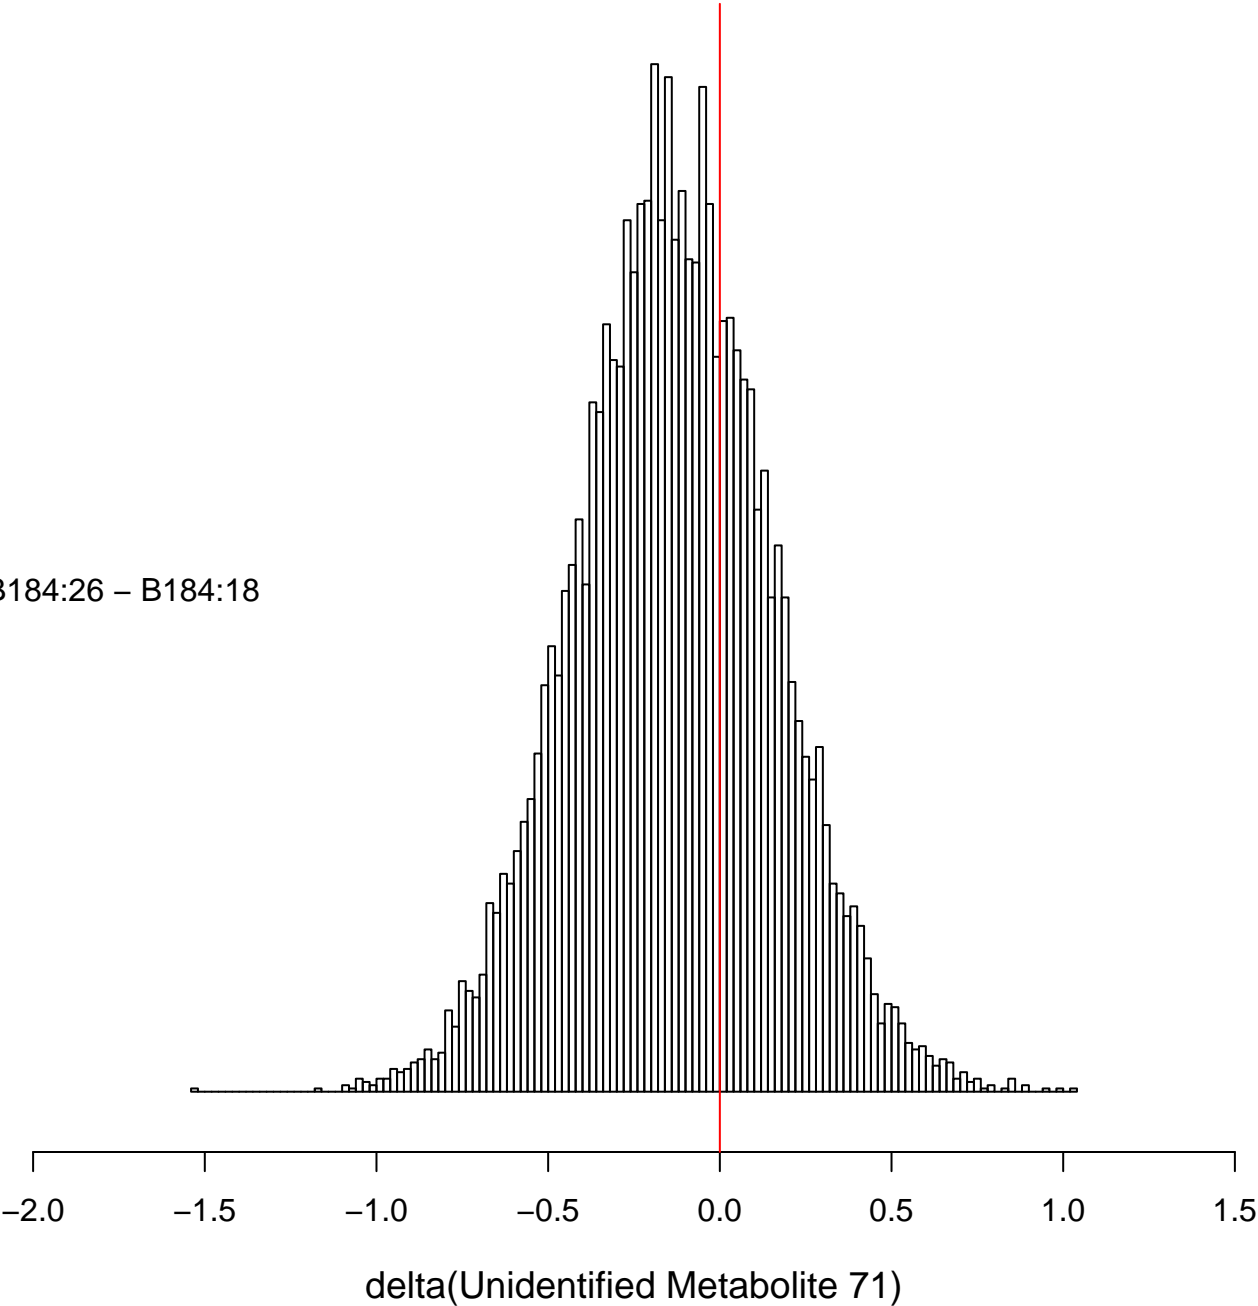

B184:26

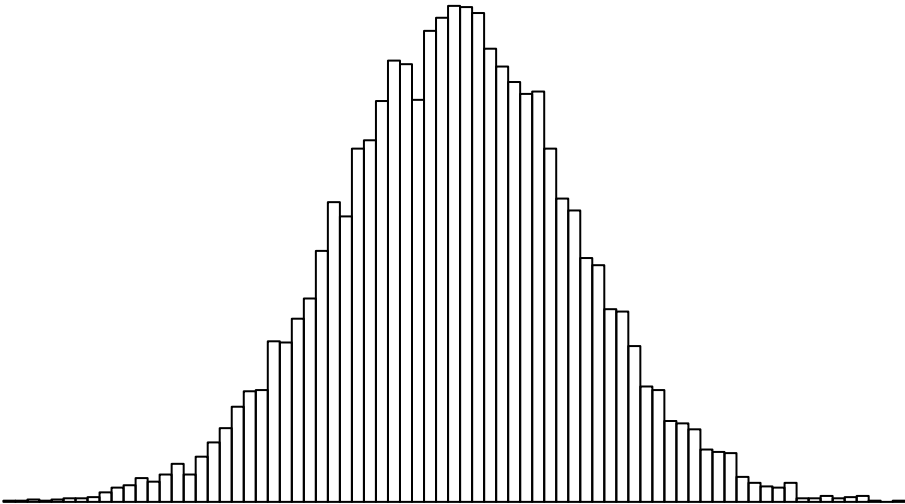

B184:18

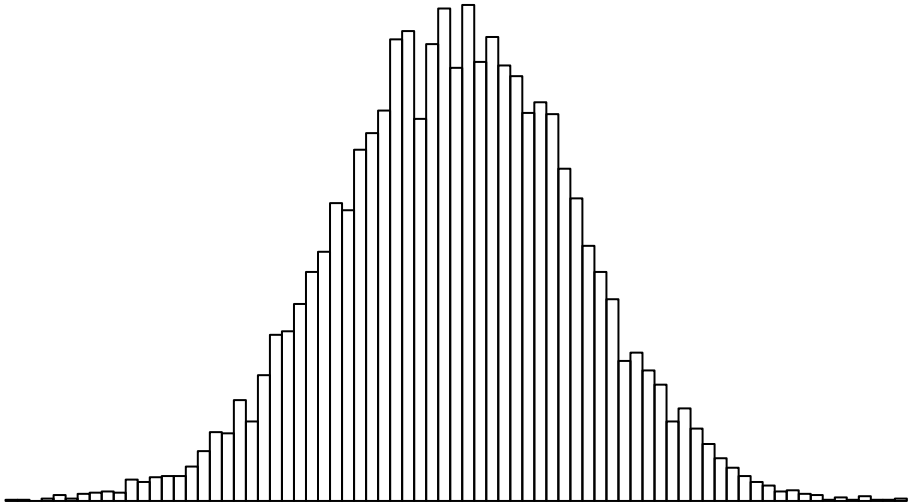

-7.0

-6.5

-6.0

-5.5

-5.0

Unidentified Metabolite 72

B184:26 – B184:18

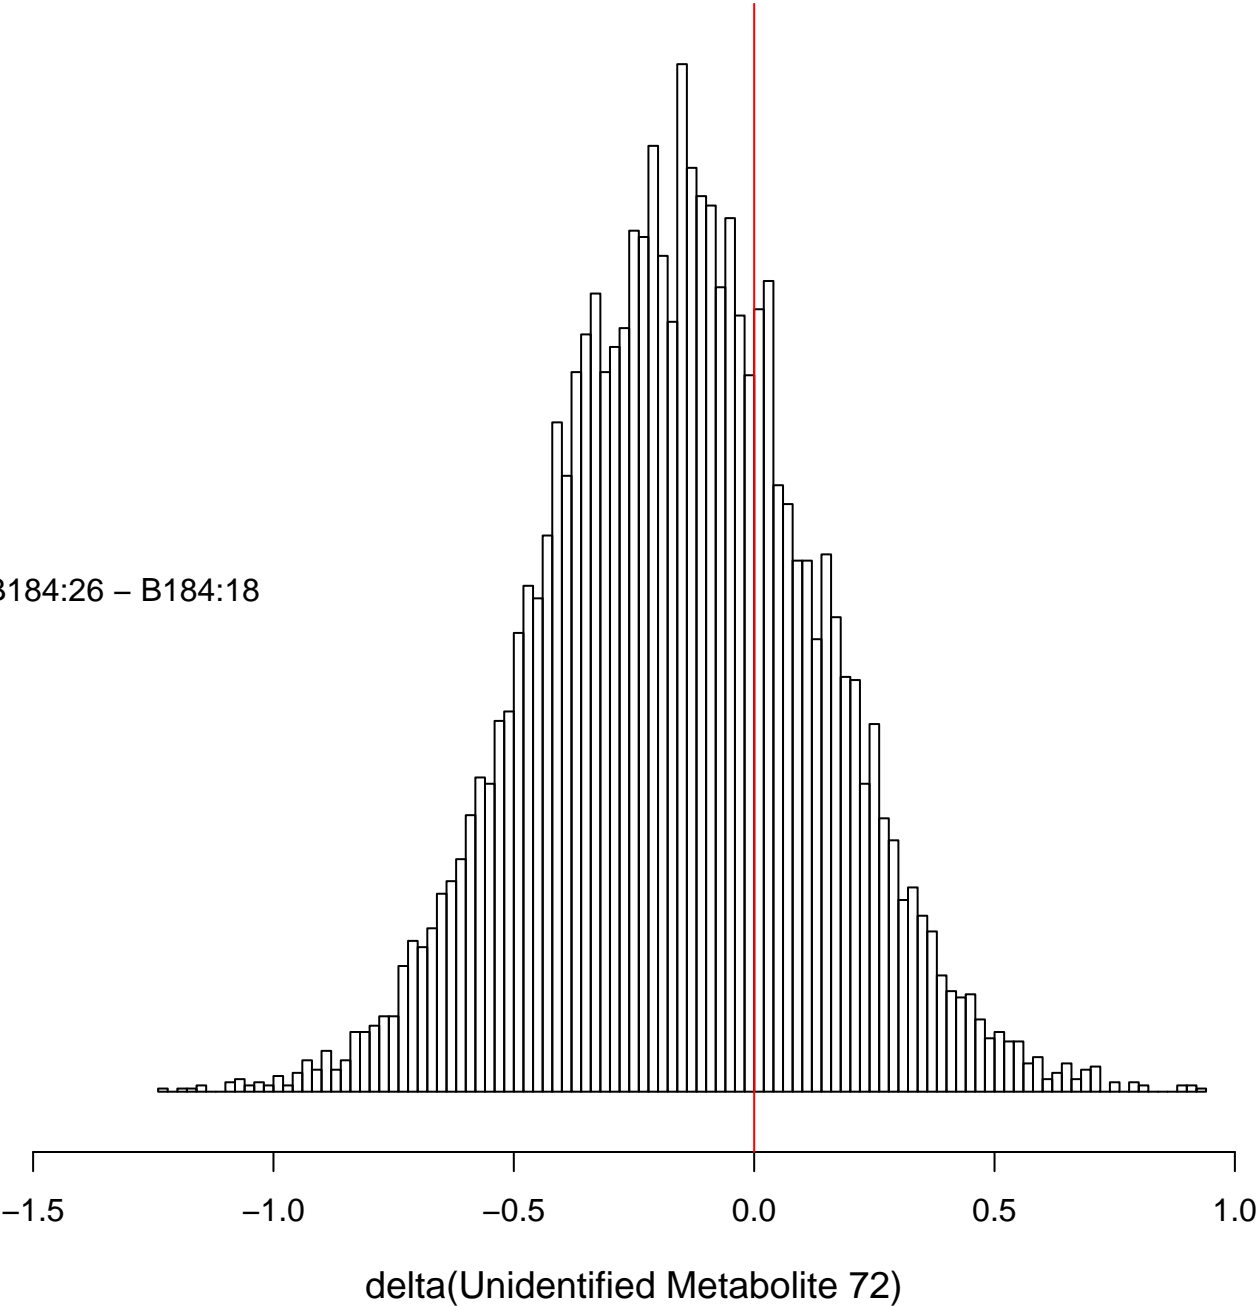

B184:26

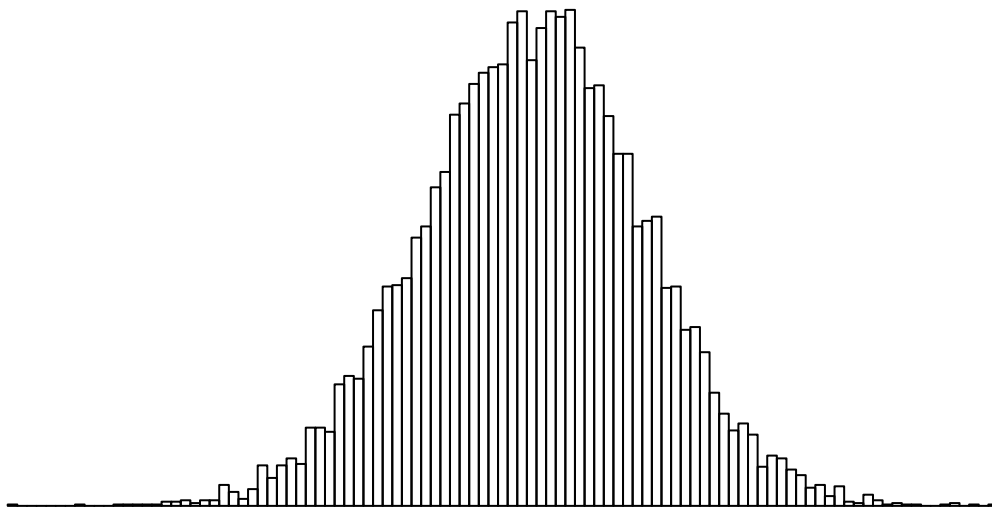

B184:18

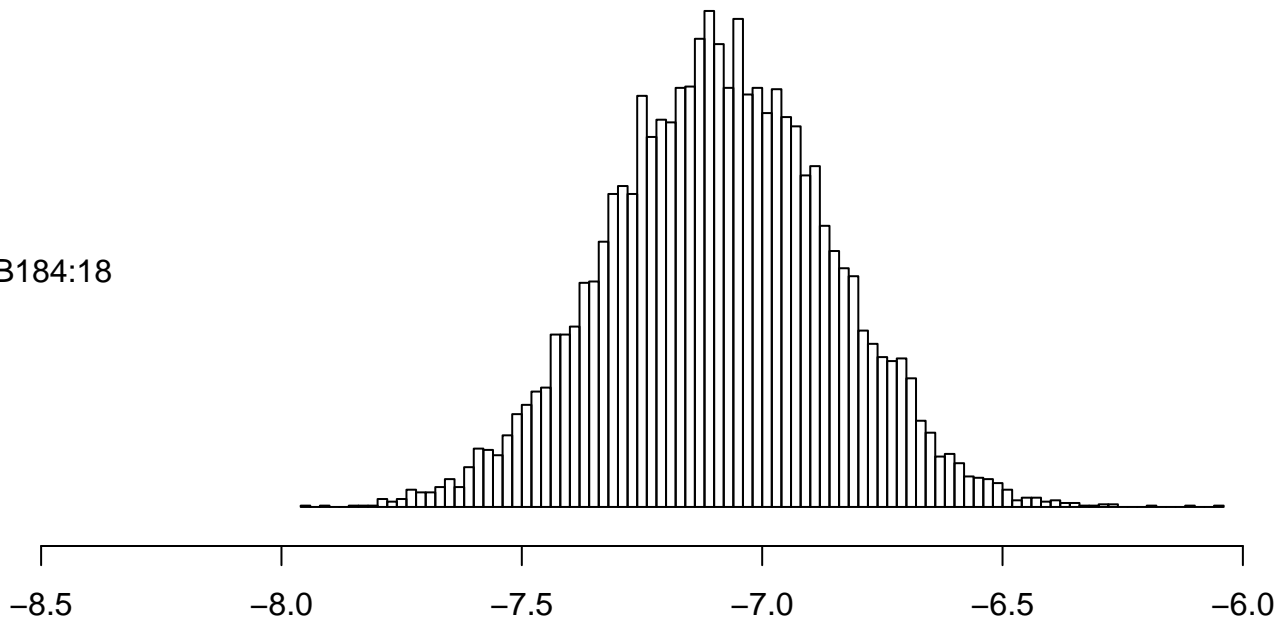

Unidentified Metabolite 73

B184:26 – B184:18

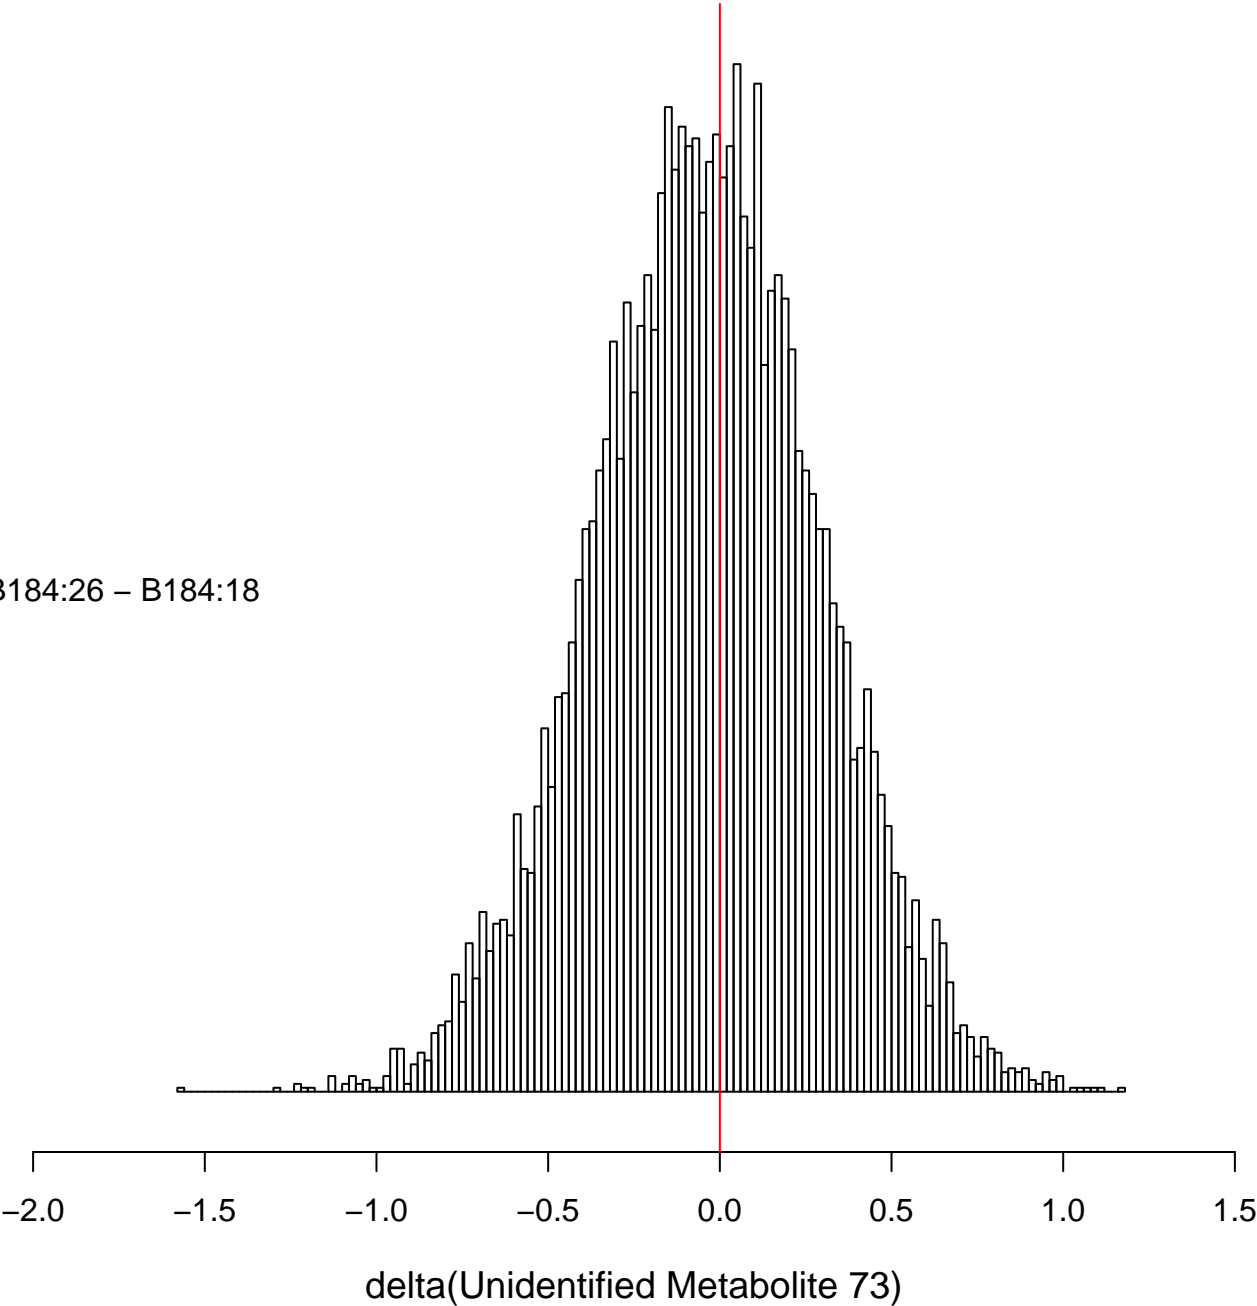

B184:26

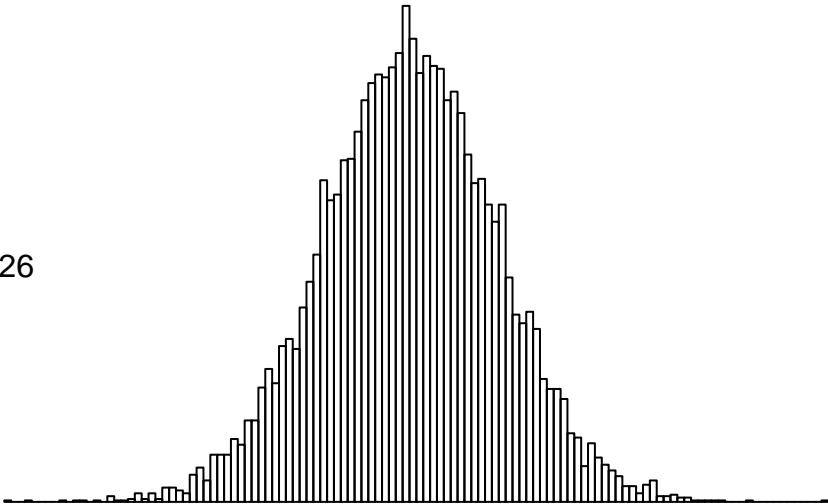

B184:18

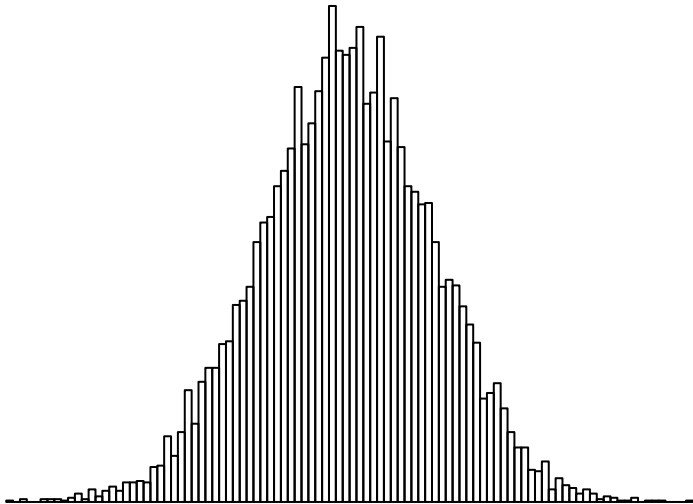

-10.0      -9.5      -9.0      -8.5      -8.0      -7.5      -7.0      -6.5

Unidentified Metabolite 74

B184:26 – B184:18

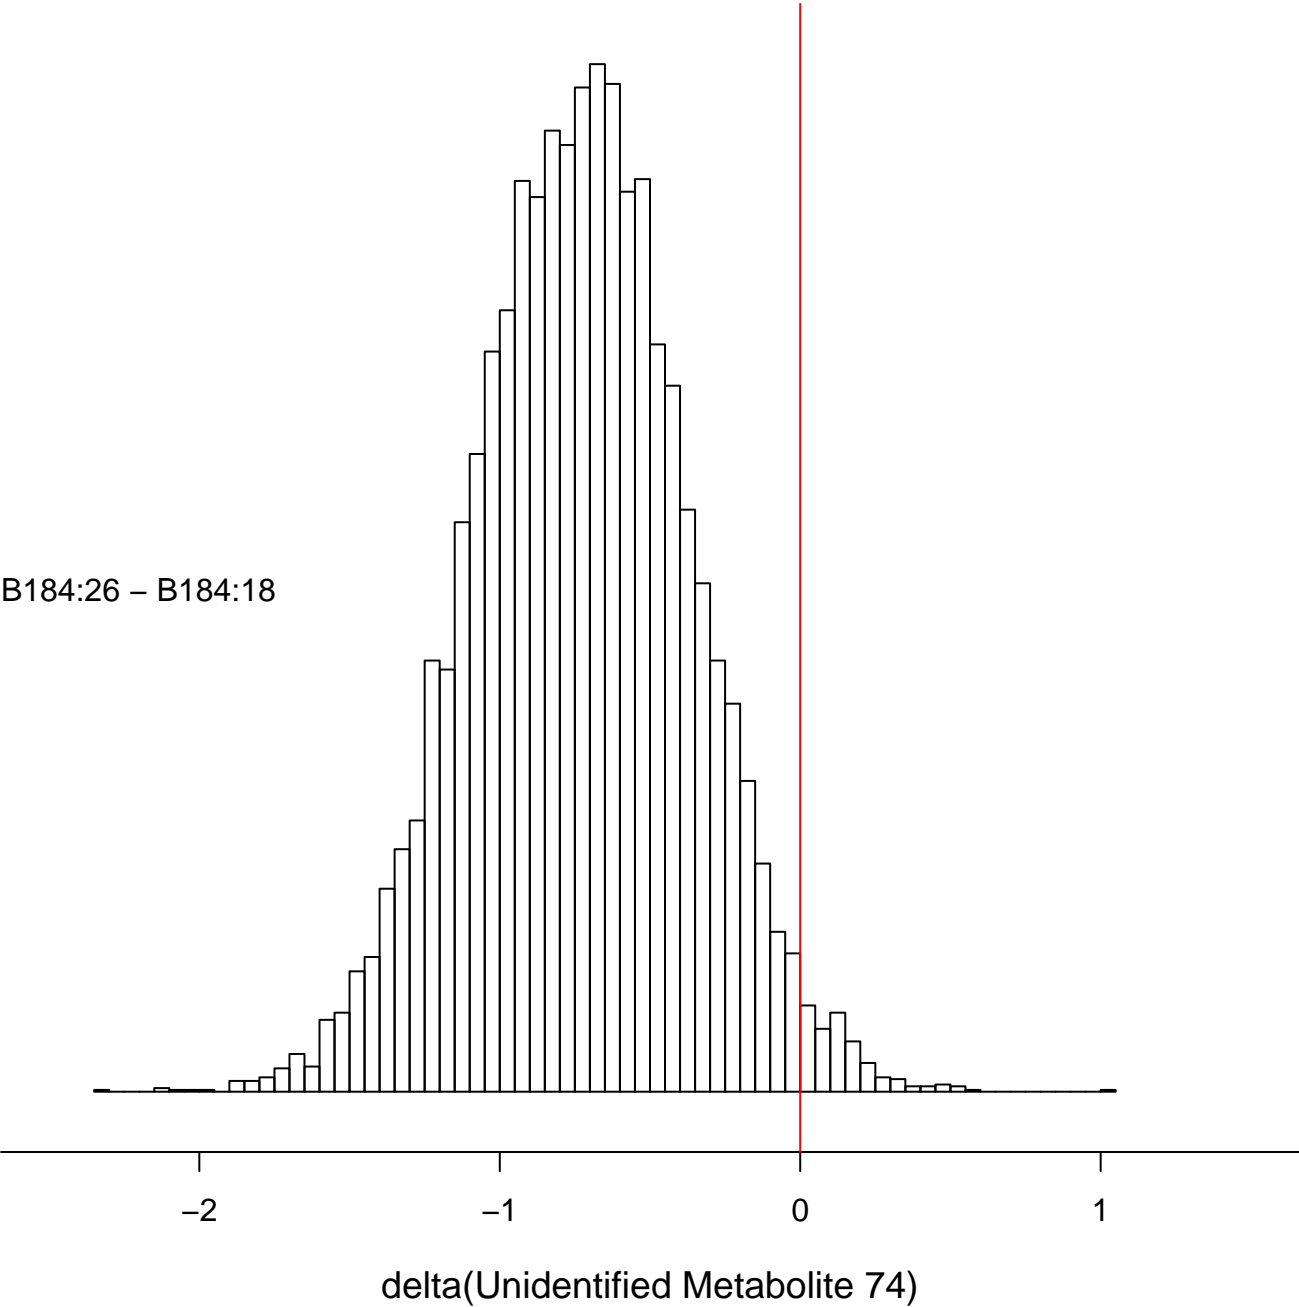



B184:26

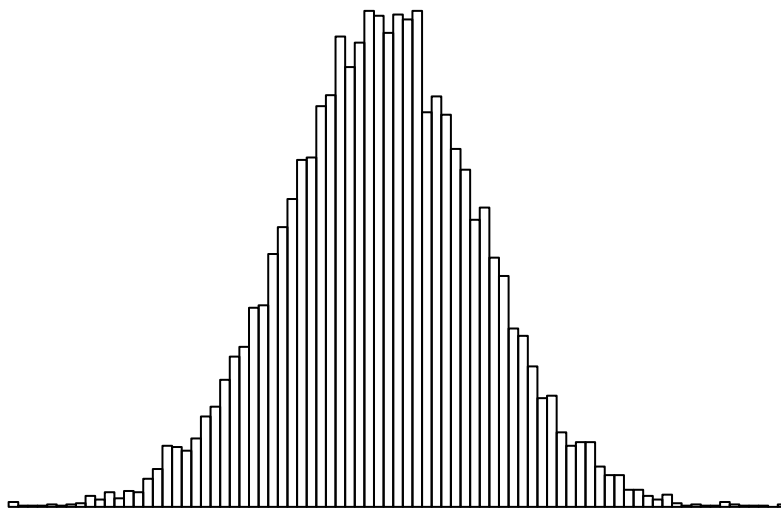

B184:18

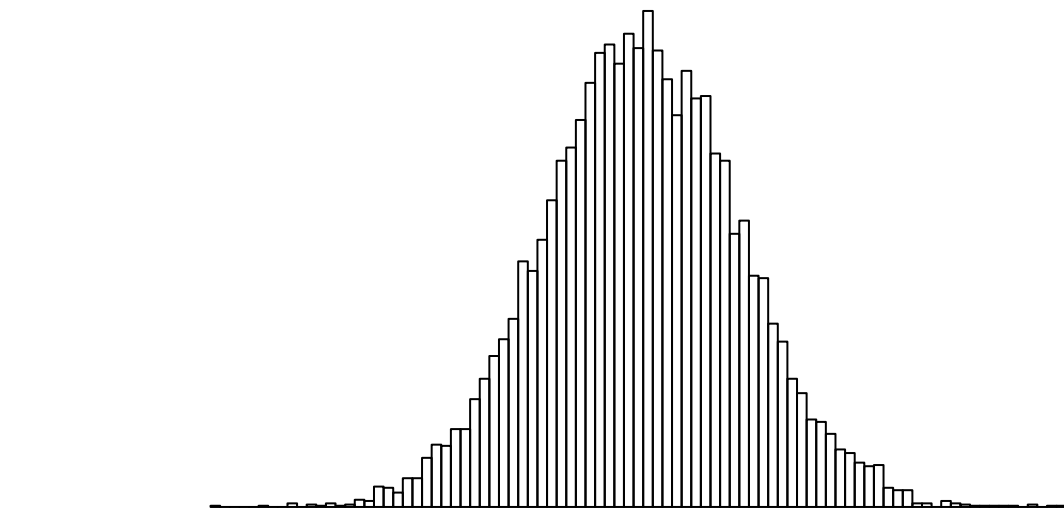

-10.5      -10.0      -9.5      -9.0      -8.5      -8.0

Unidentified Metabolite 75

B184:26 – B184:18

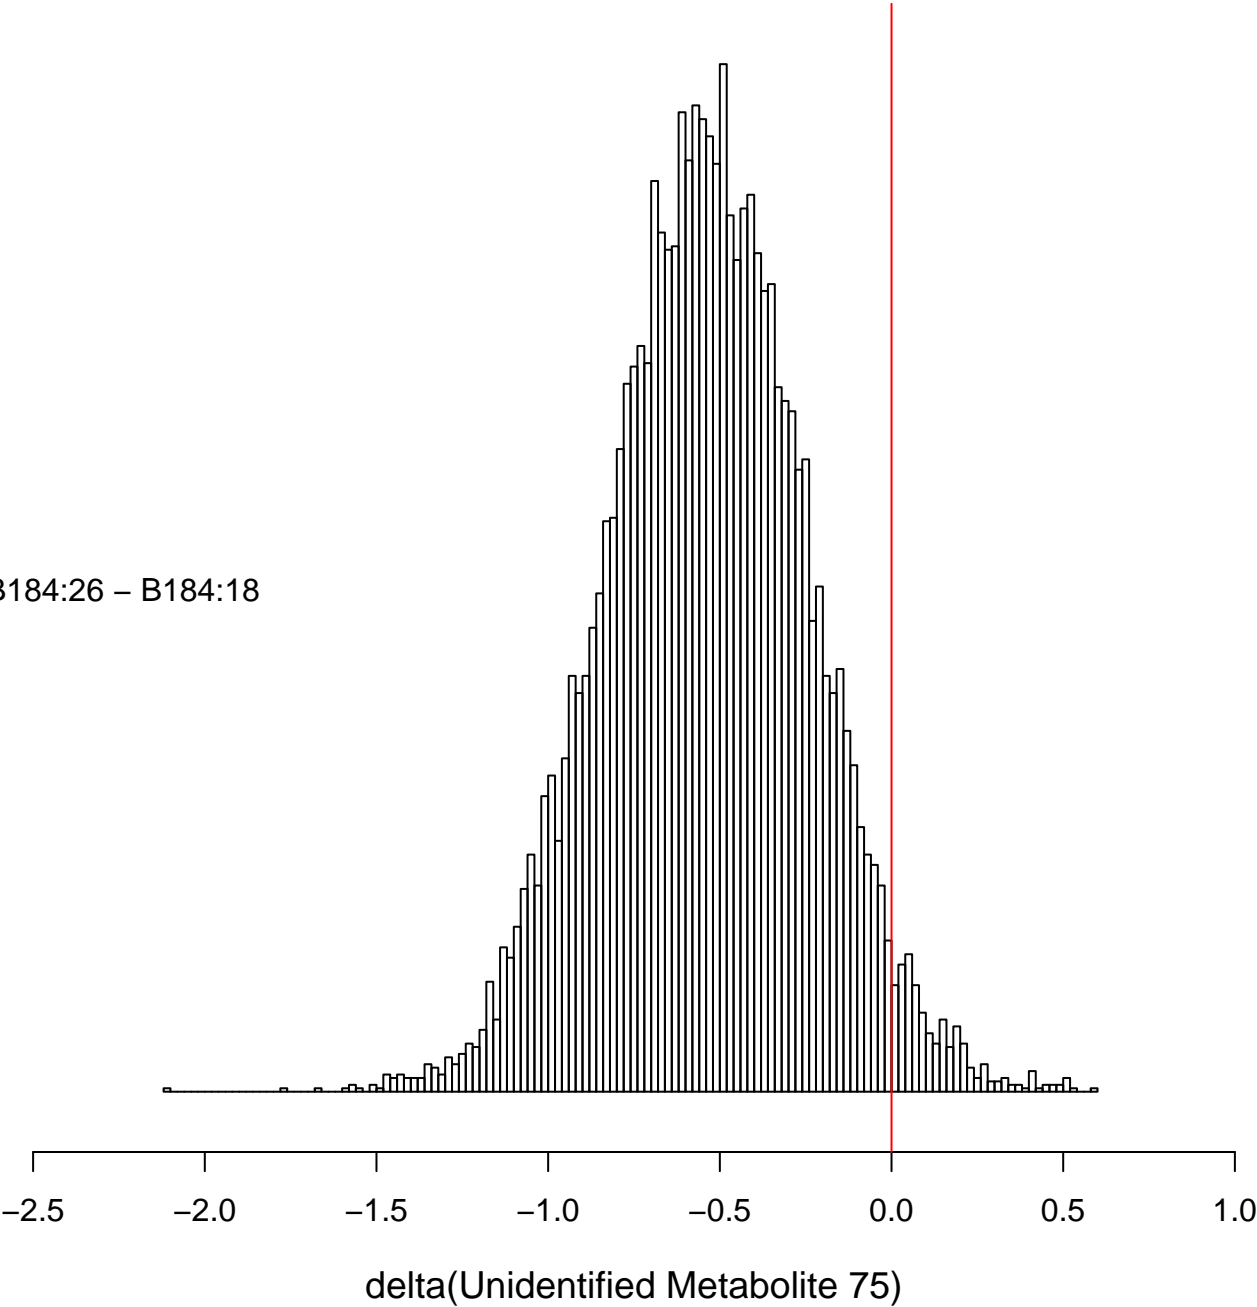

B184:26

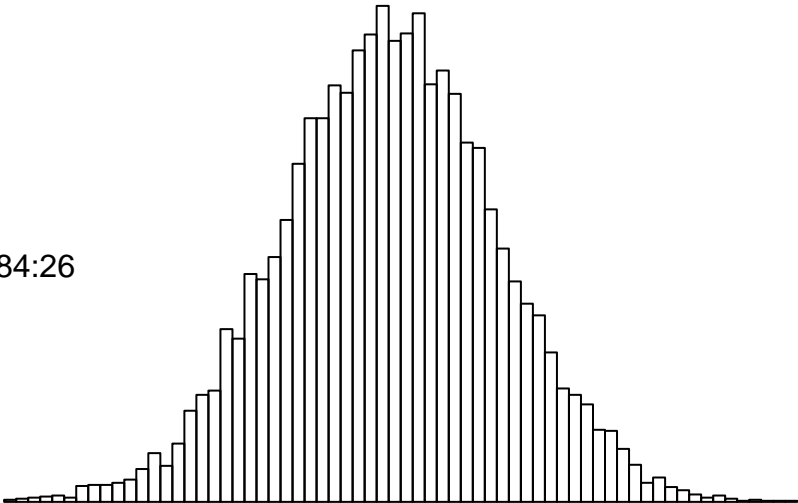

B184:18

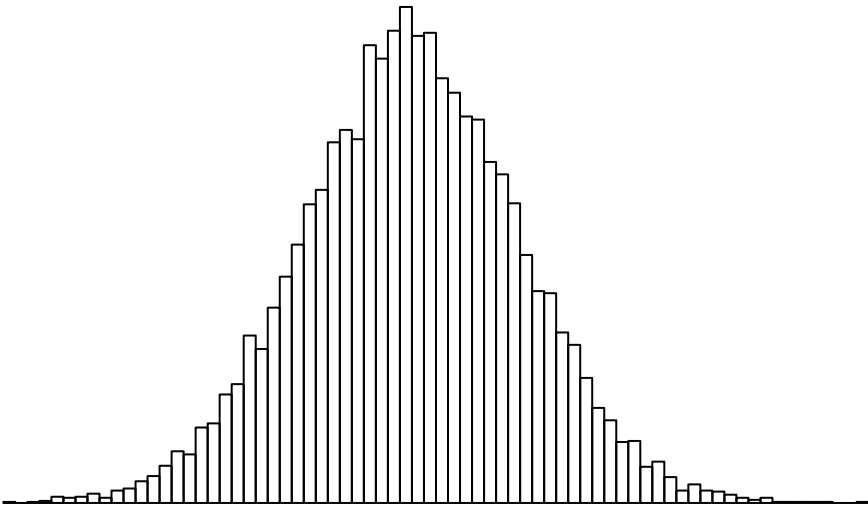

-8 -7 -6 -5 -4 -3

Unidentified Metabolite 76

B184:26 – B184:18

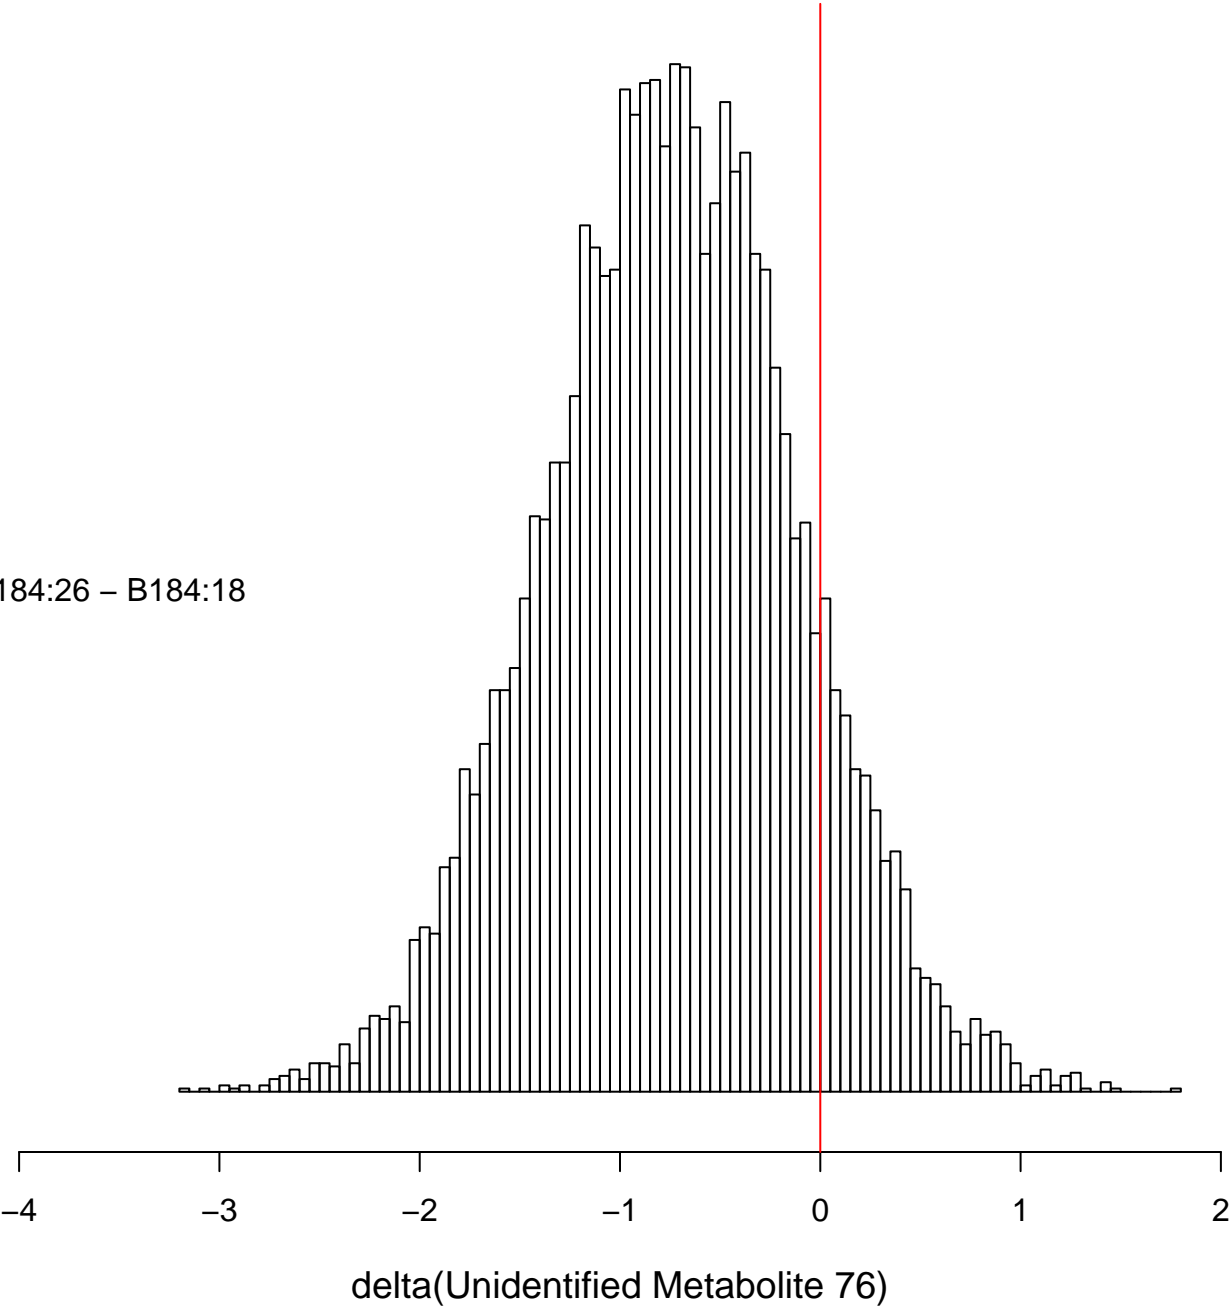

B184:26

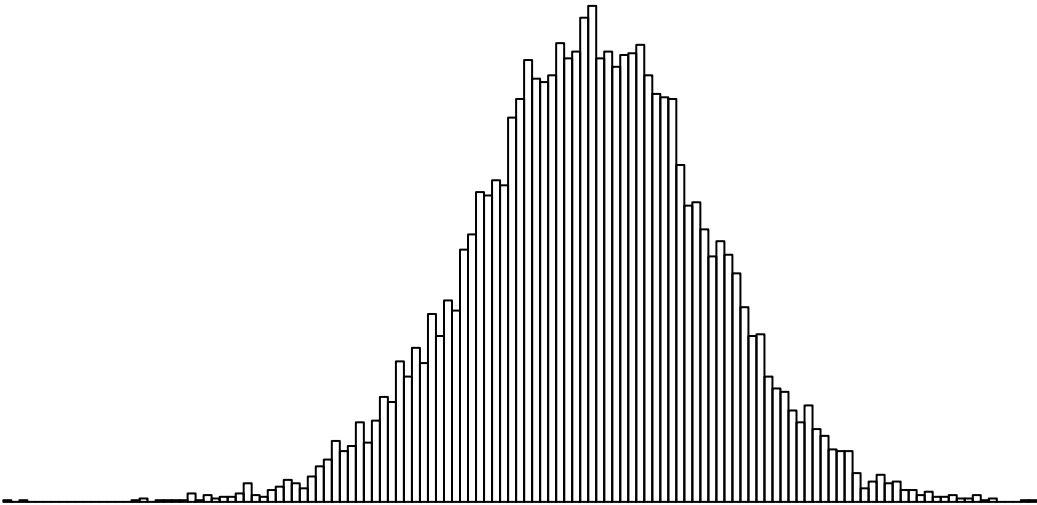

B184:18

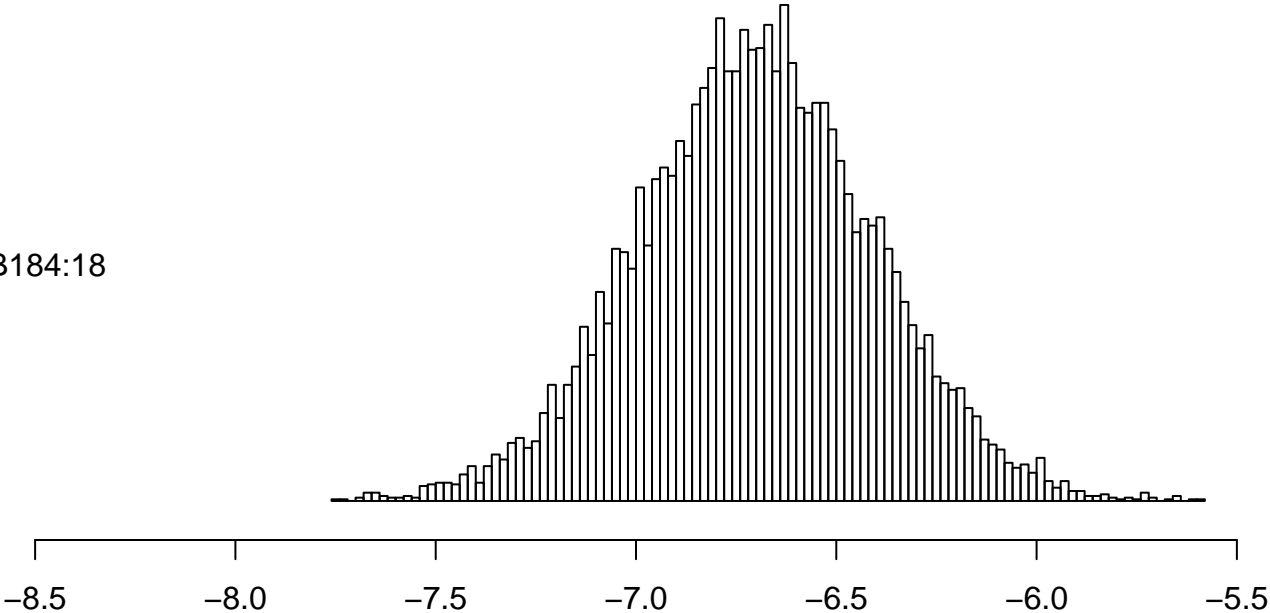

Unidentified Metabolite 77

B184:26 – B184:18

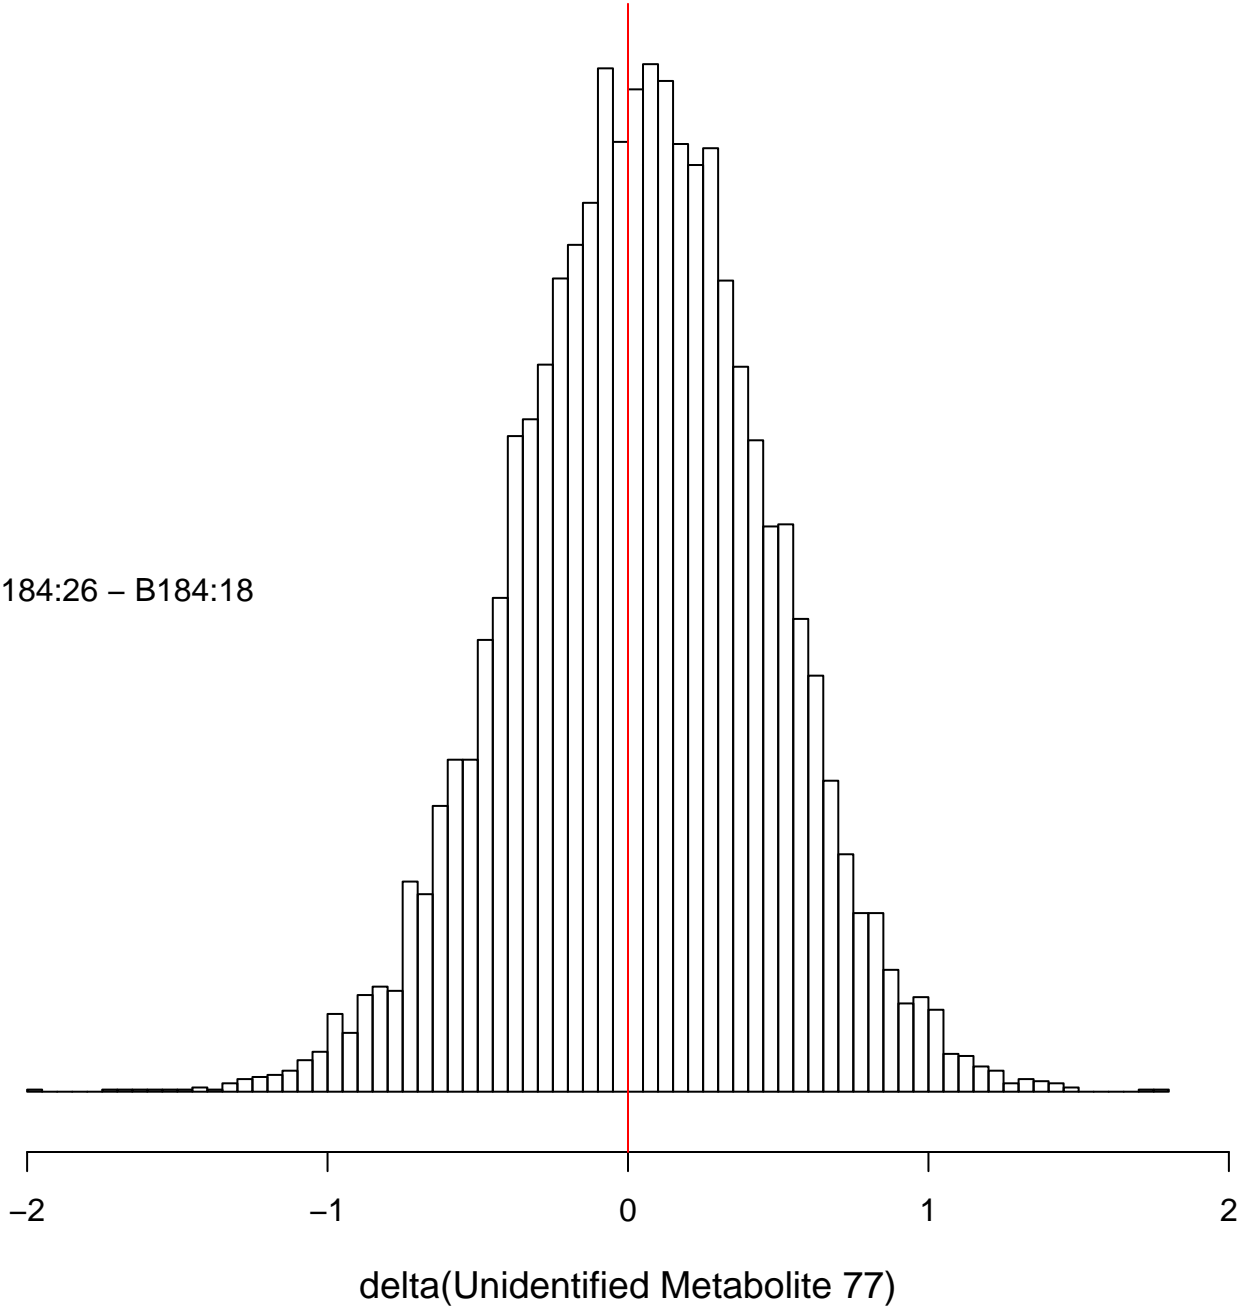

B184:26

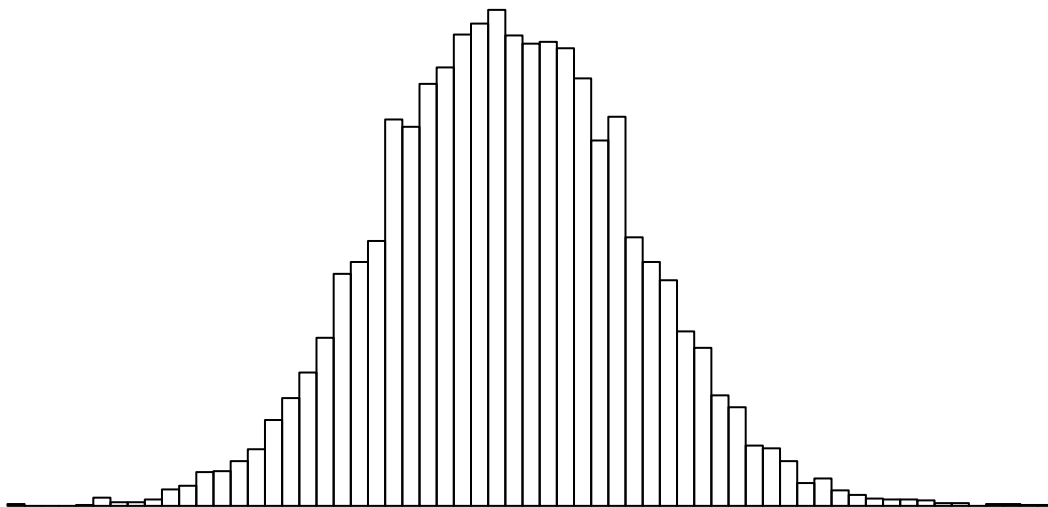

B184:18

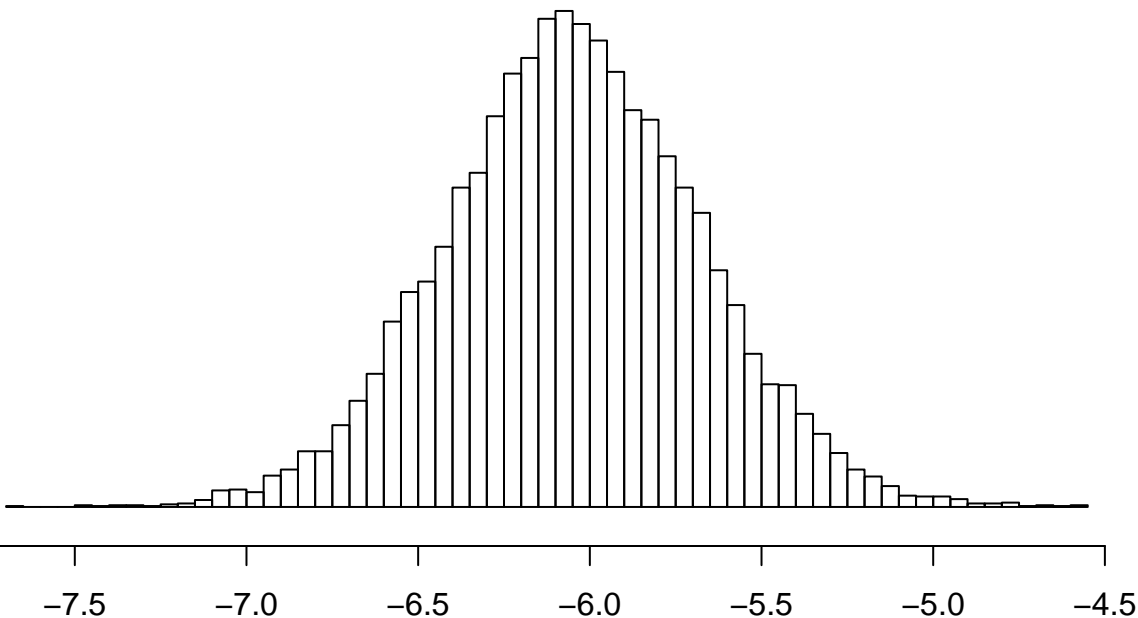

Unidentified Metabolite 78

B184:26 – B184:18

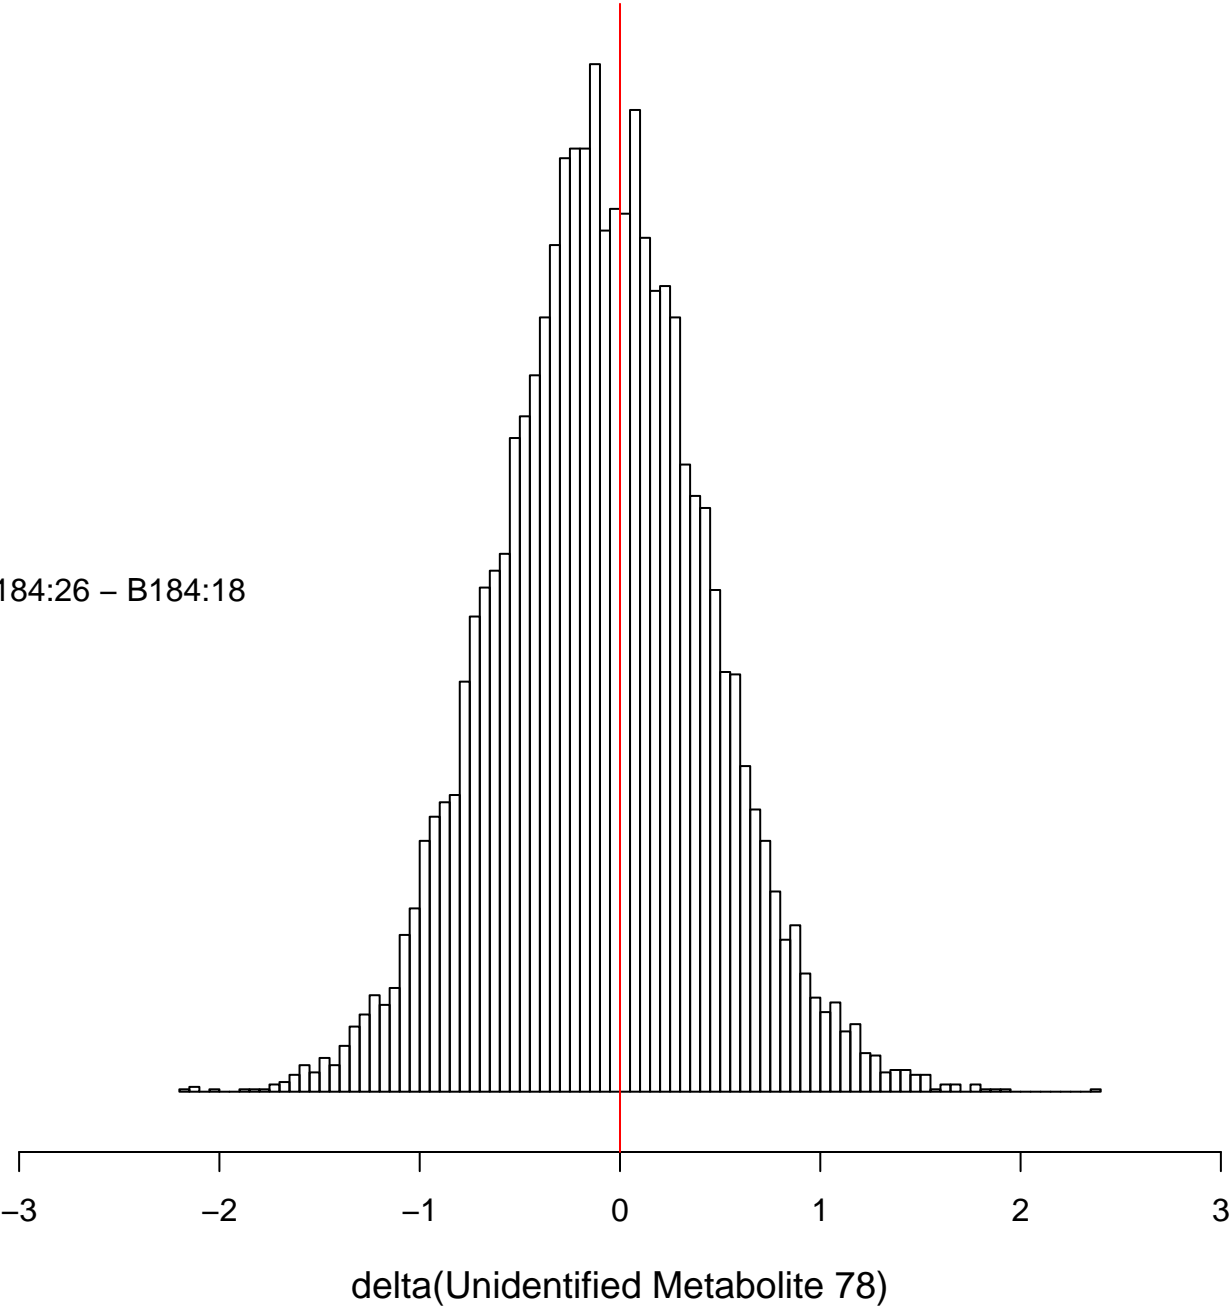



B184:26

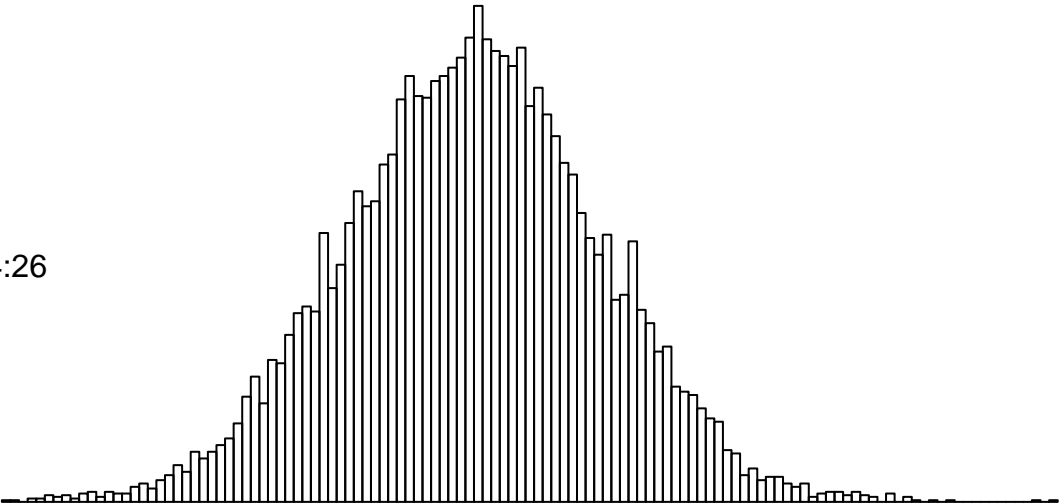

B184:18

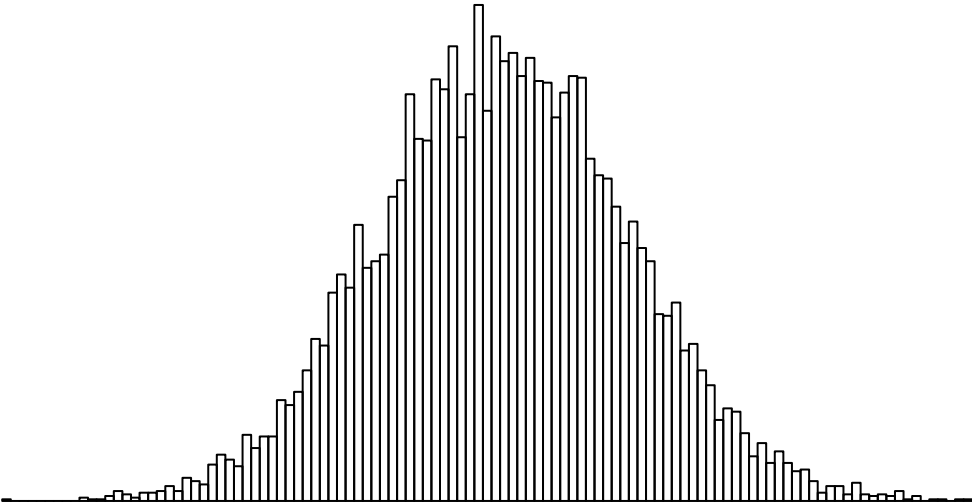

-8.5

-8.0

-7.5

Acid 2

B184:26 – B184:18

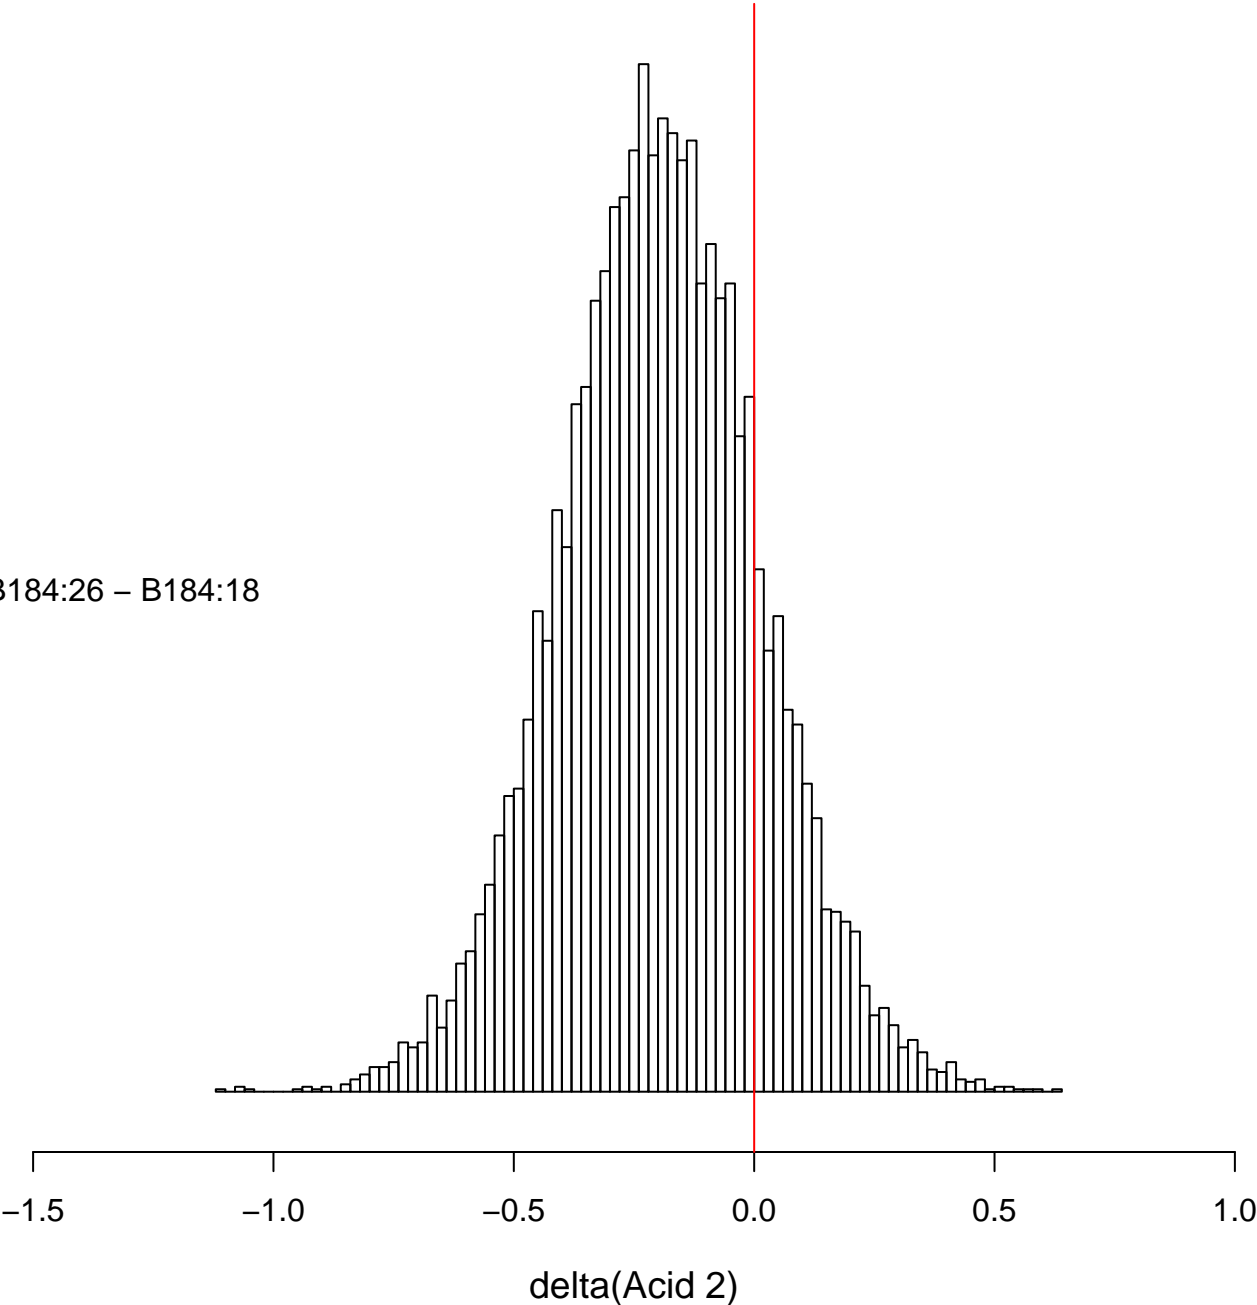

B184:26

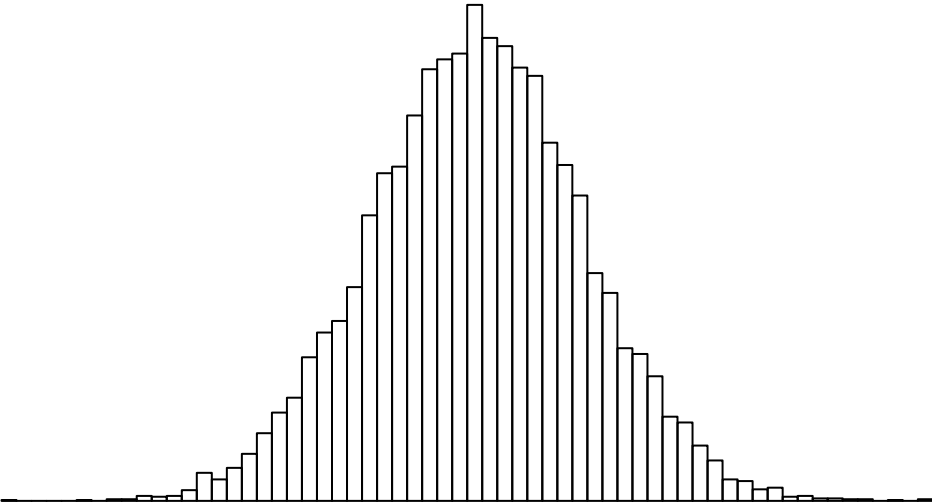

B184:18

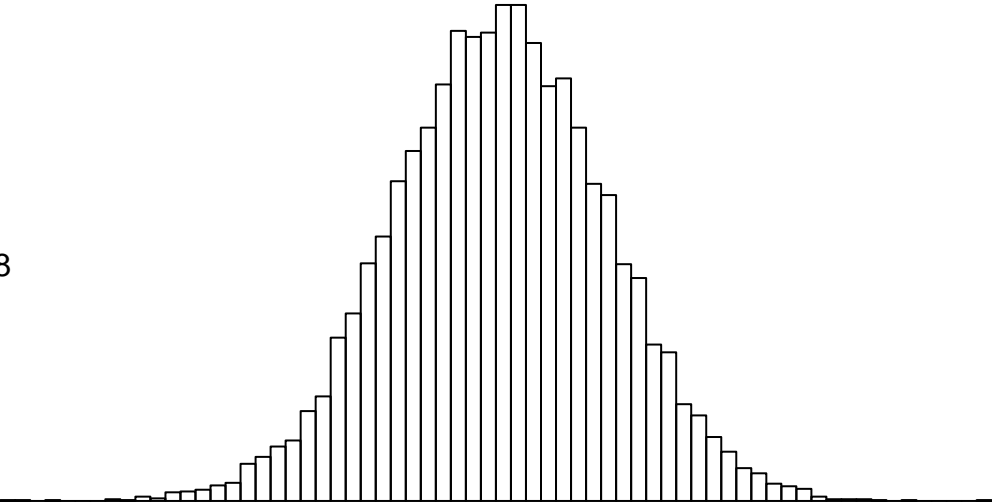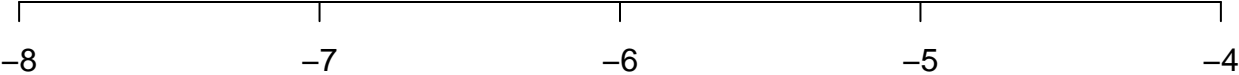

Acid 3

B184:26 – B184:18

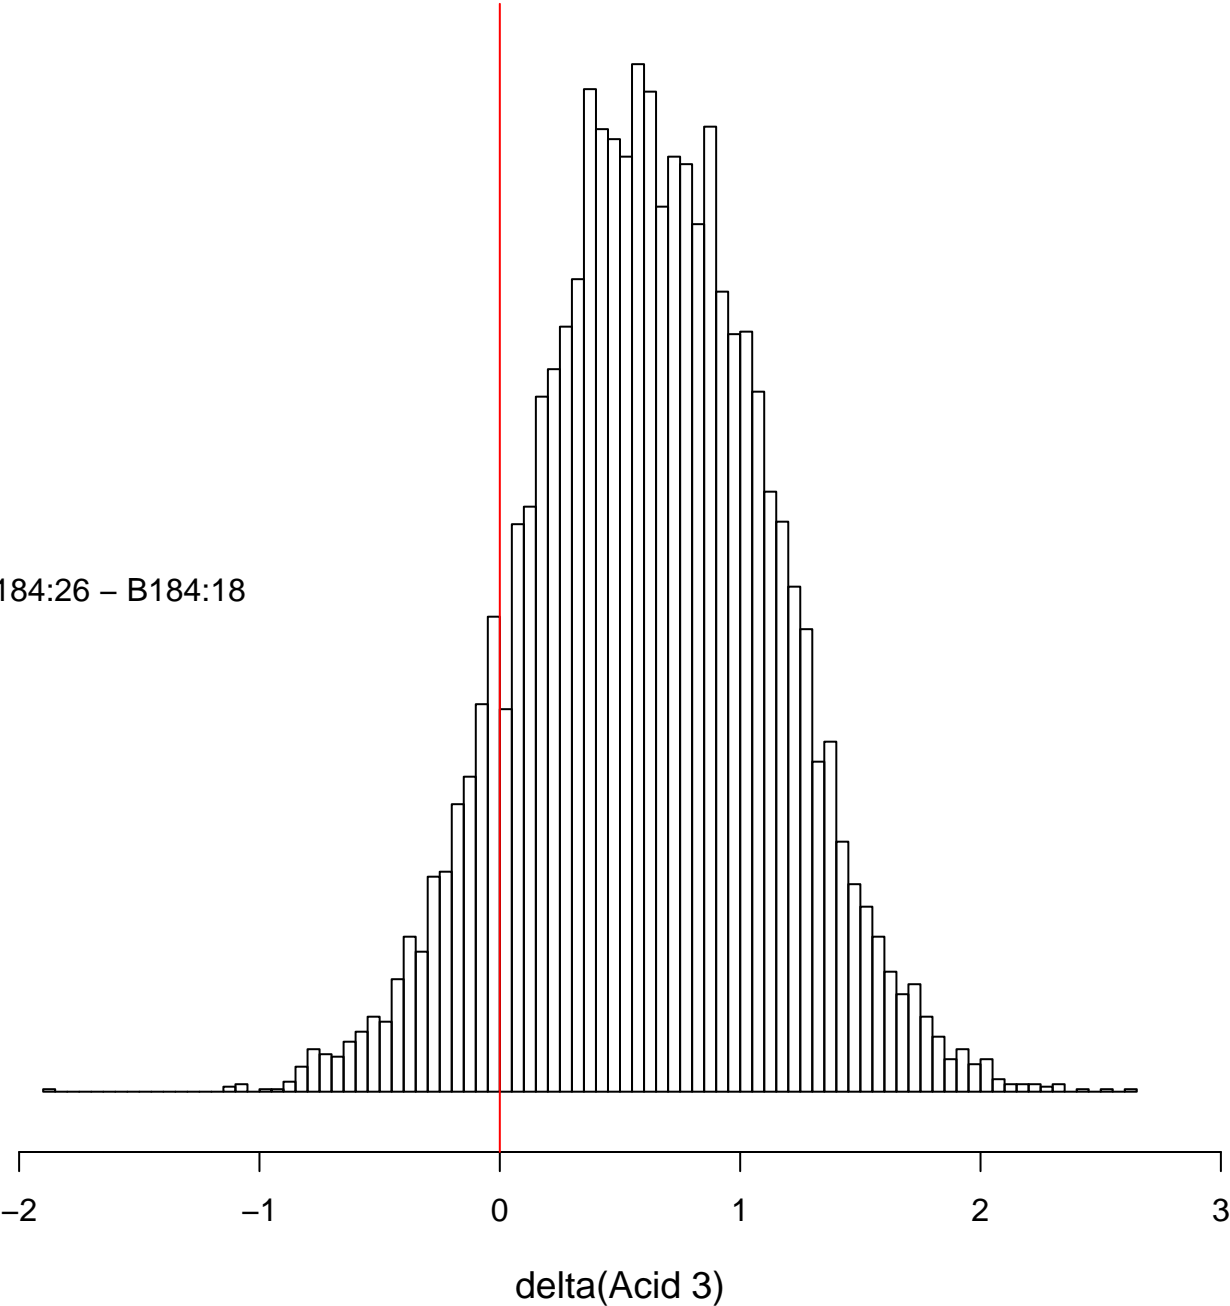

B184:26

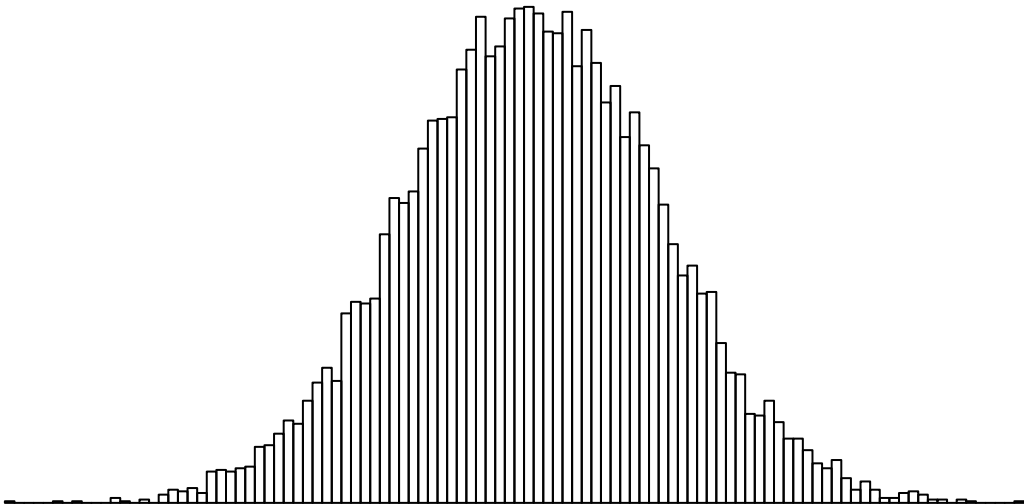

B184:18

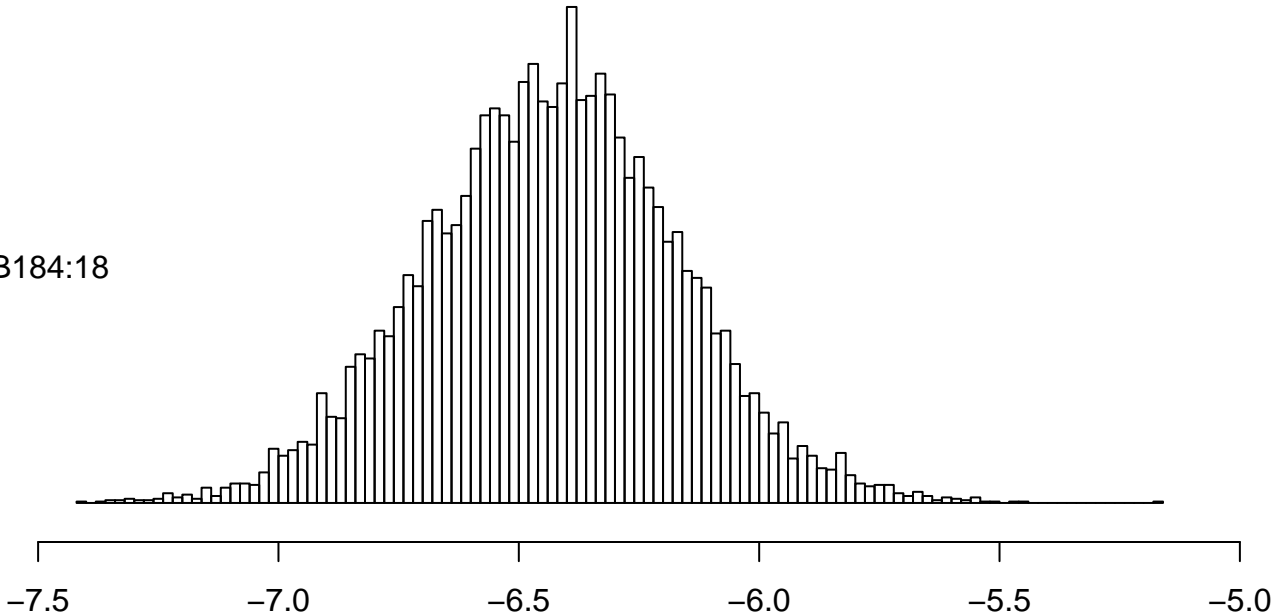

Acid 6

B184:26 – B184:18

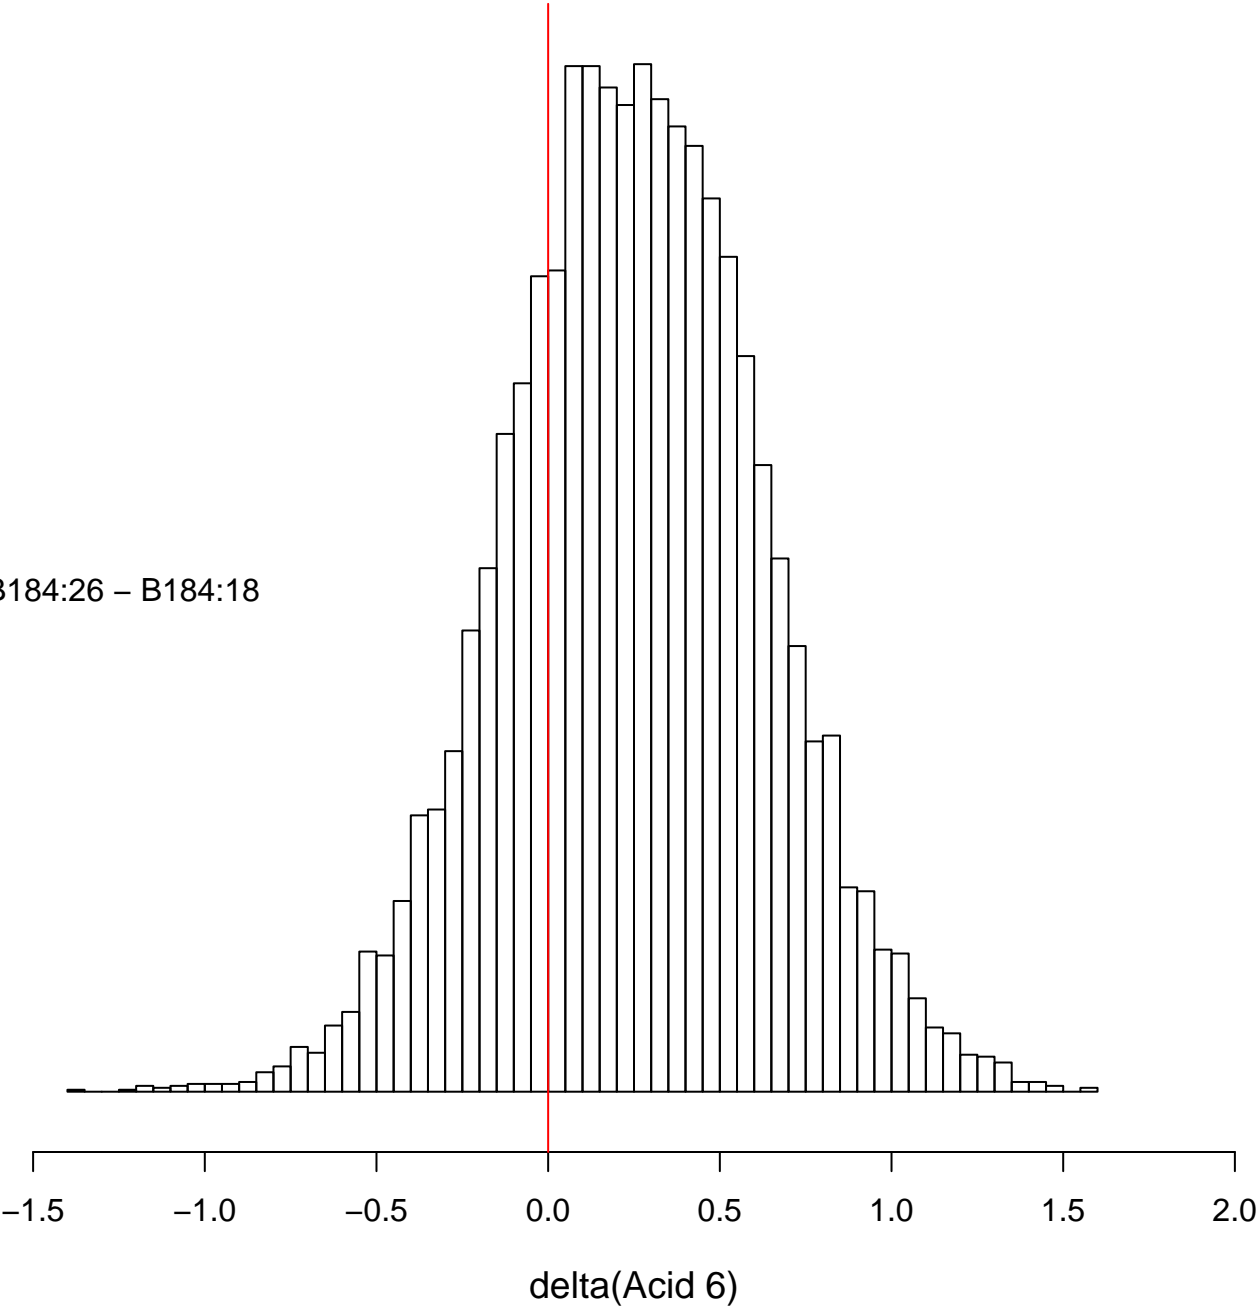

B184:26

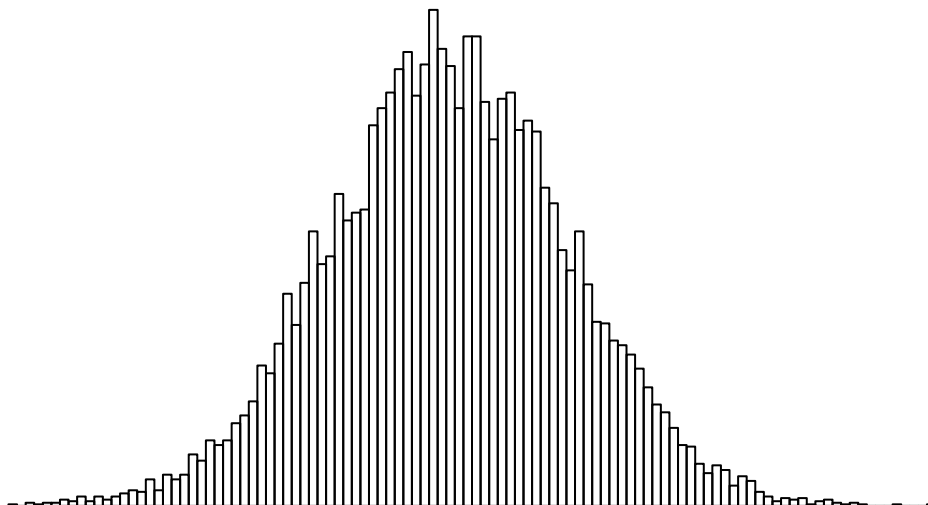

B184:18

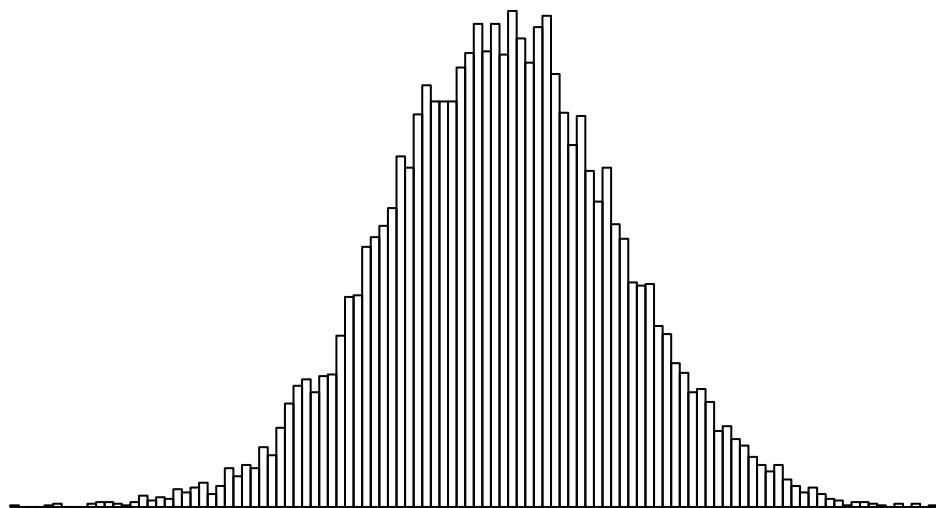

-8.0      -7.8      -7.6      -7.4      -7.2      -7.0      -6.8      -6.6

Acid 7

B184:26 – B184:18

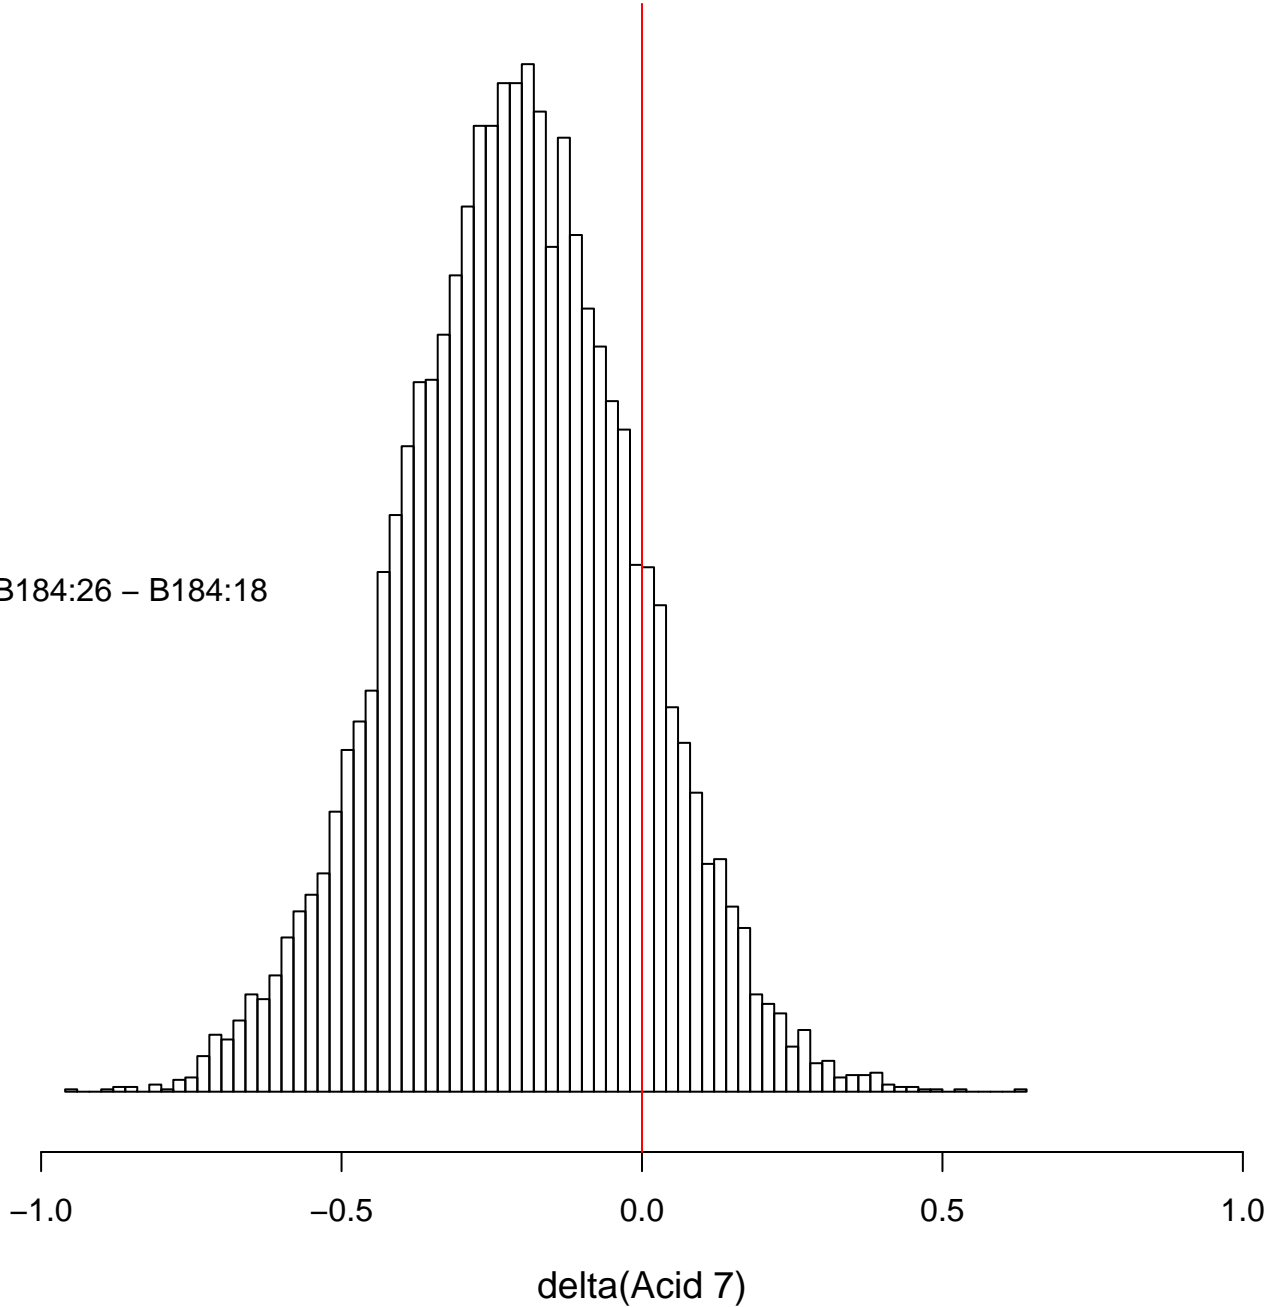



B184:26

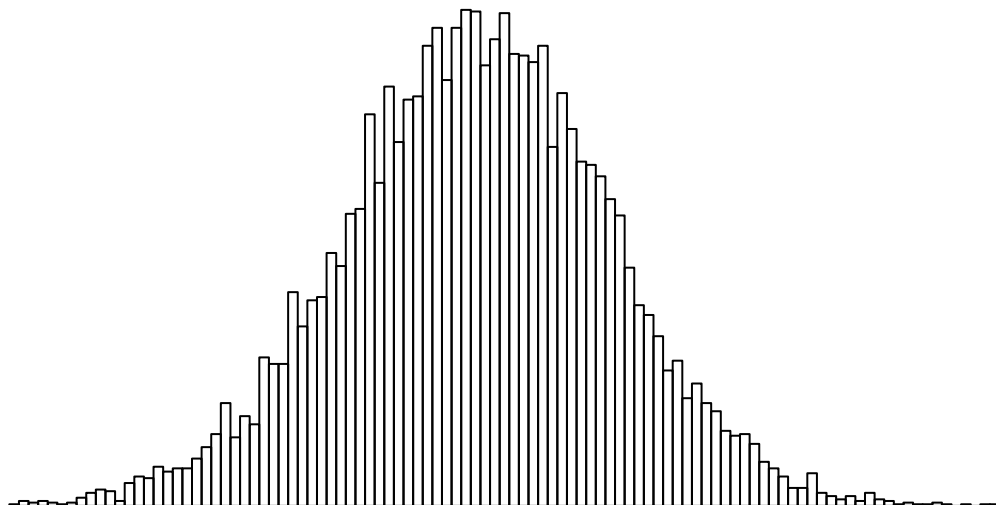

B184:18

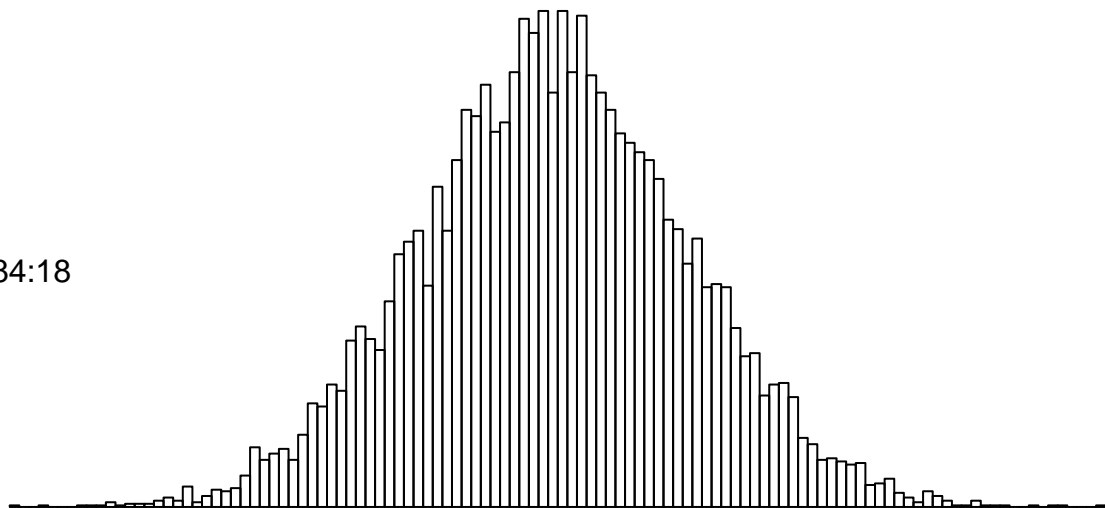

-4.5

-4.0

-3.5

-3.0

-2.5

-2.0

Acid 8

B184:26 – B184:18

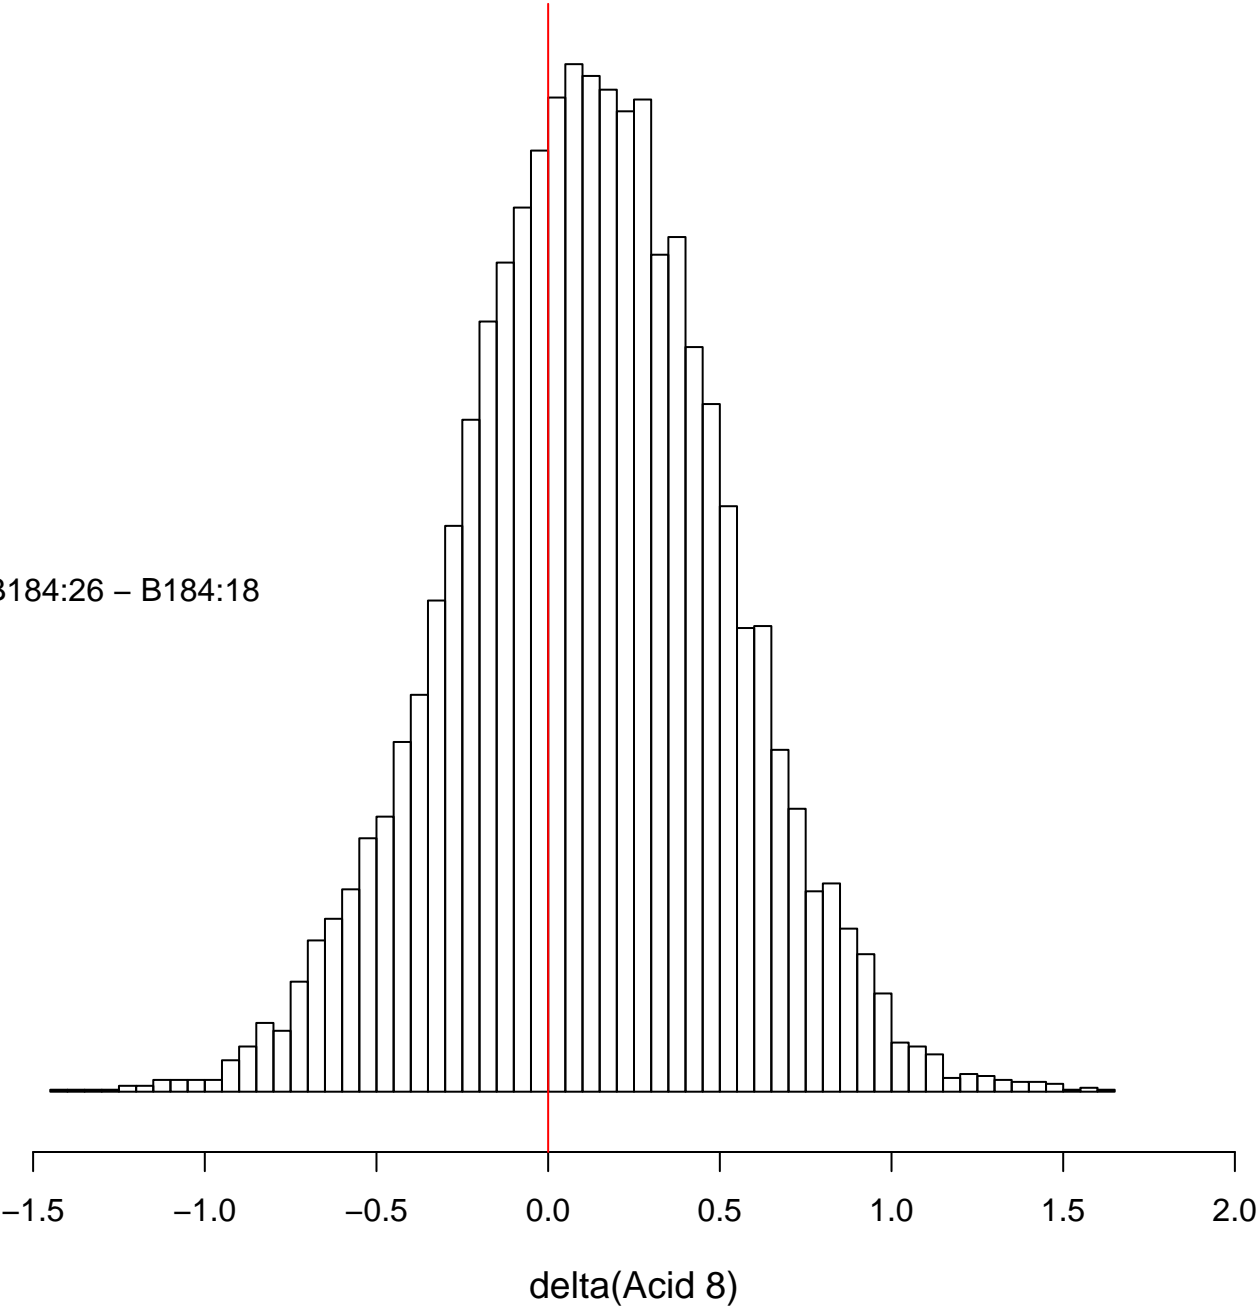

B184:26

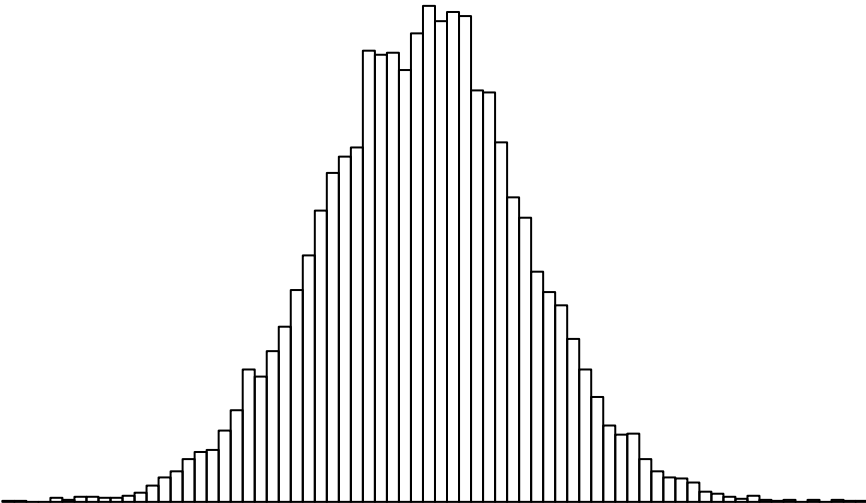

B184:18

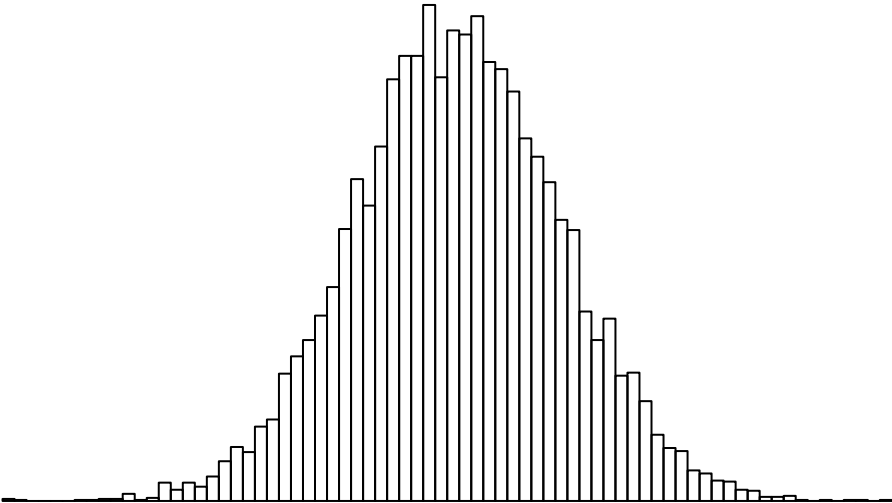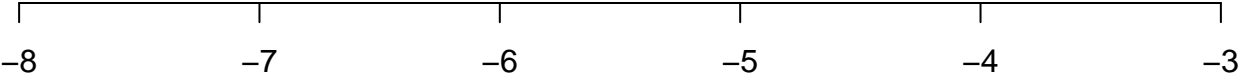

Acid 9

B184:26 – B184:18

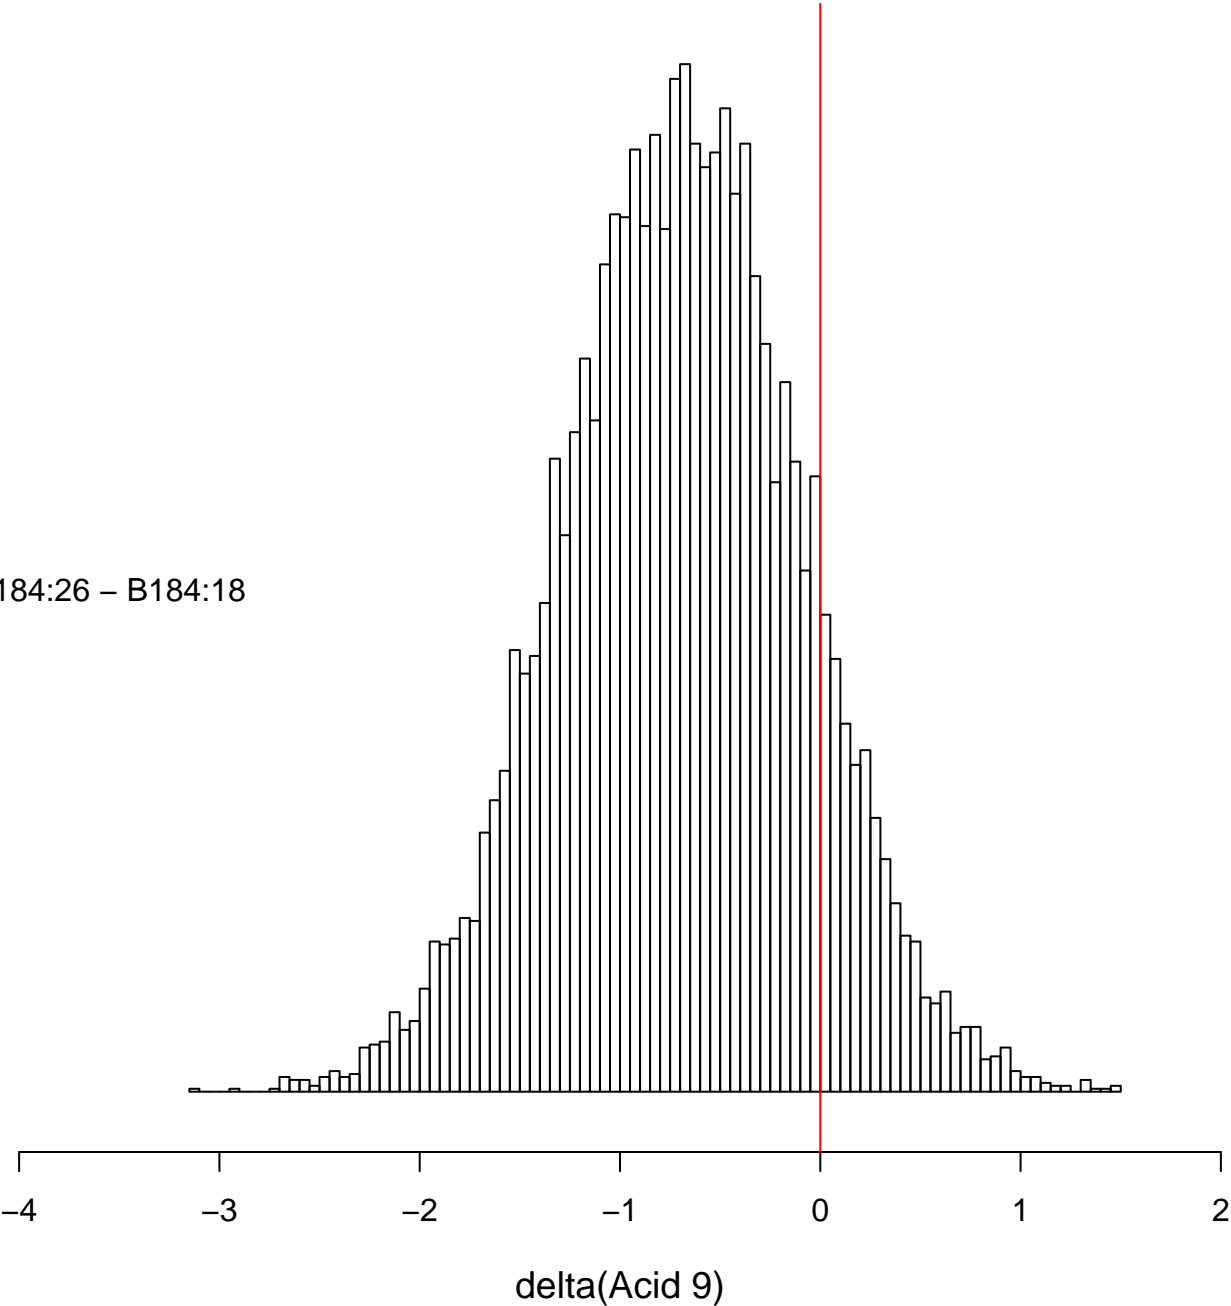

B184:26

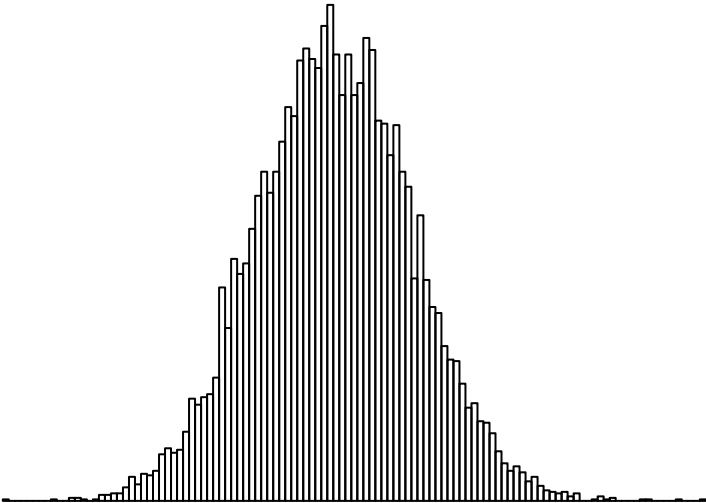

B184:18

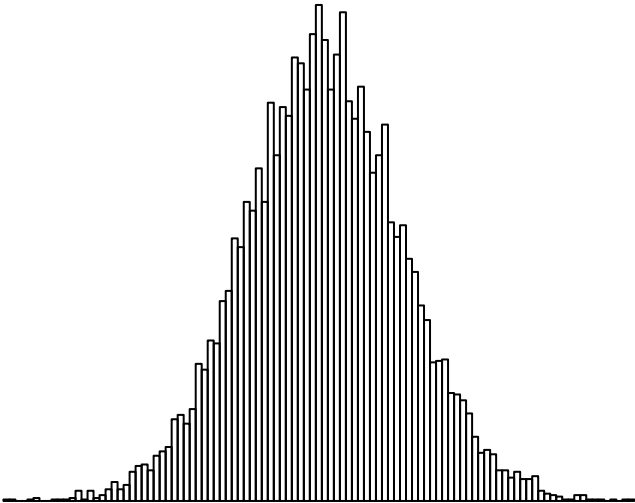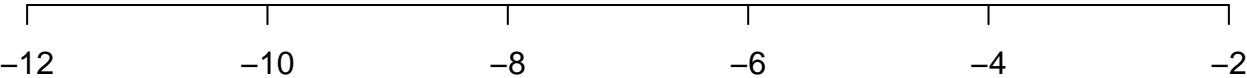

Acid 10

B184:26 – B184:18

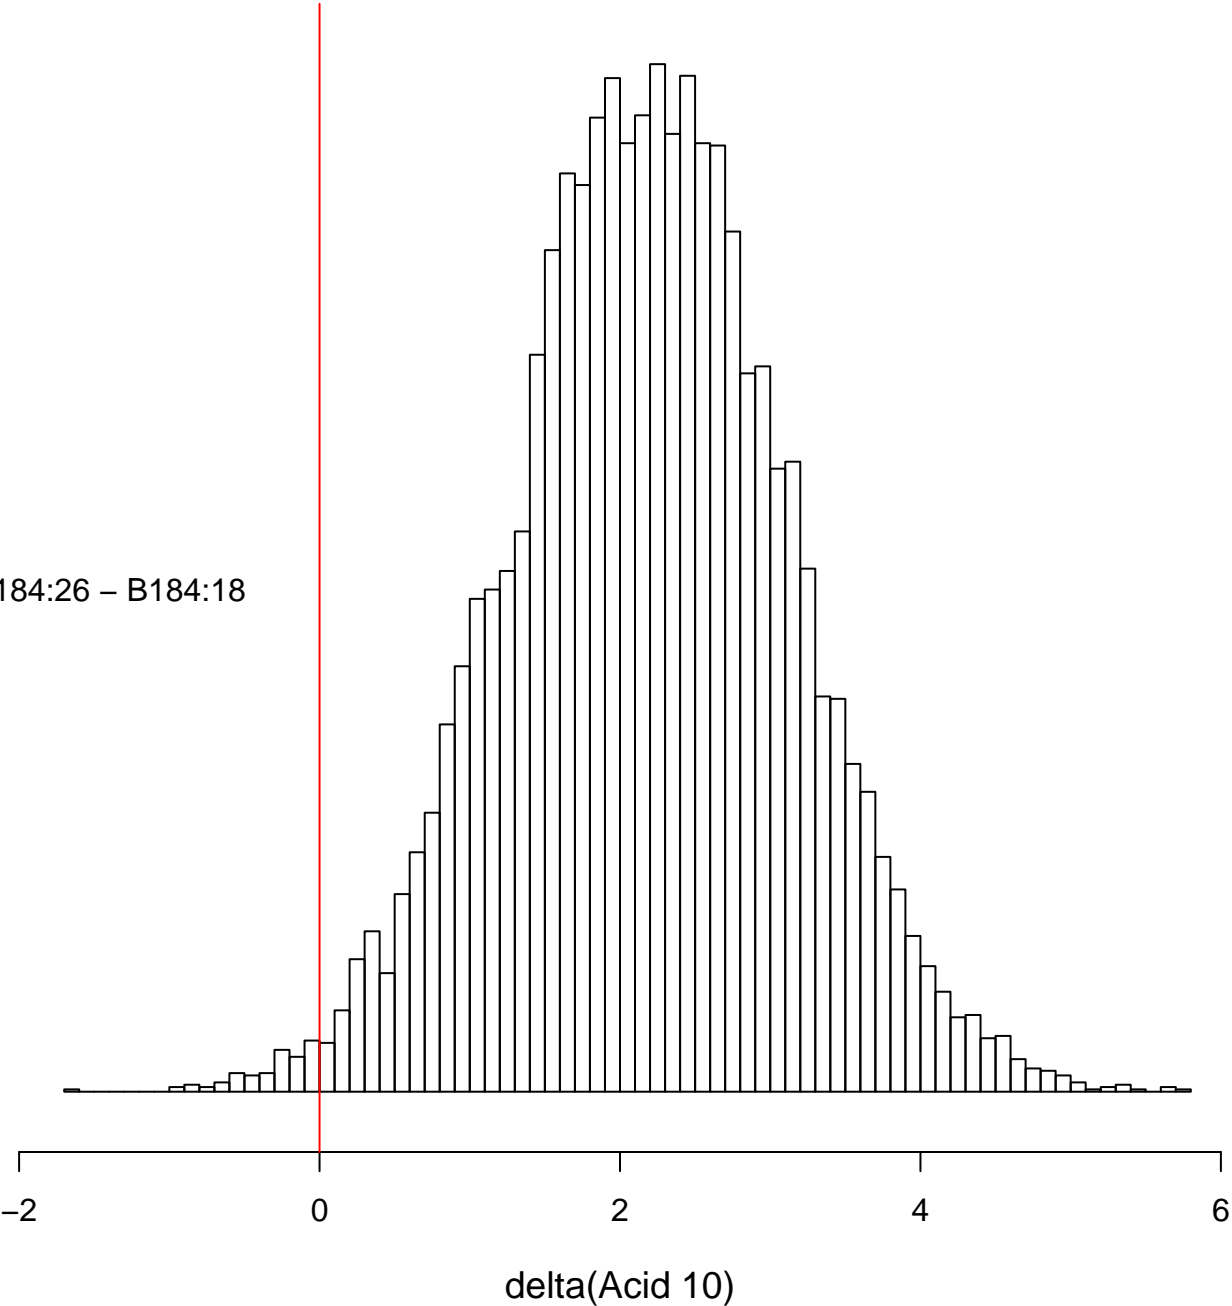

B184:26

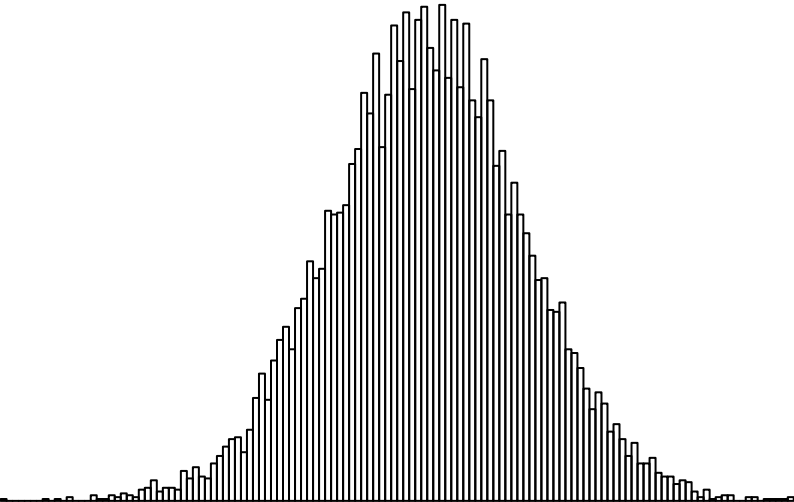

B184:18

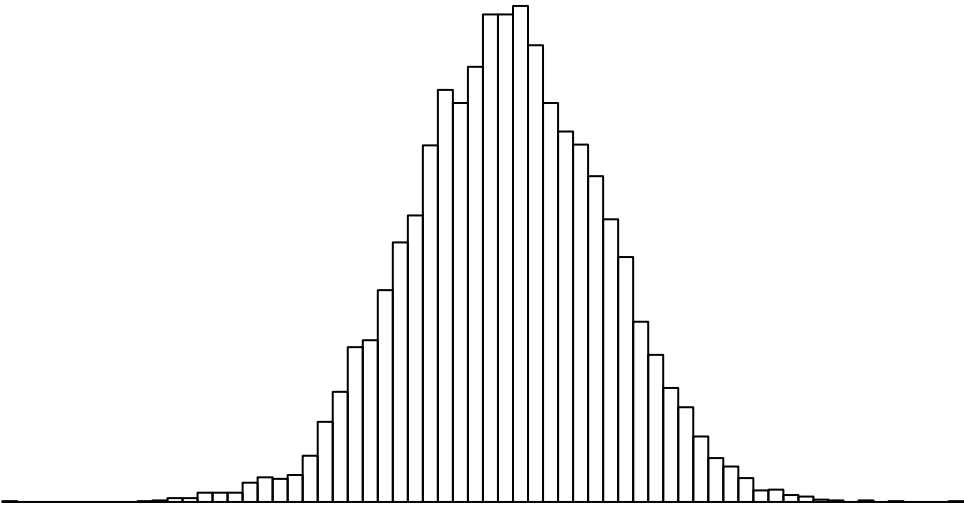

-8

-7

-6

-5

Acid 11

B184:26 – B184:18

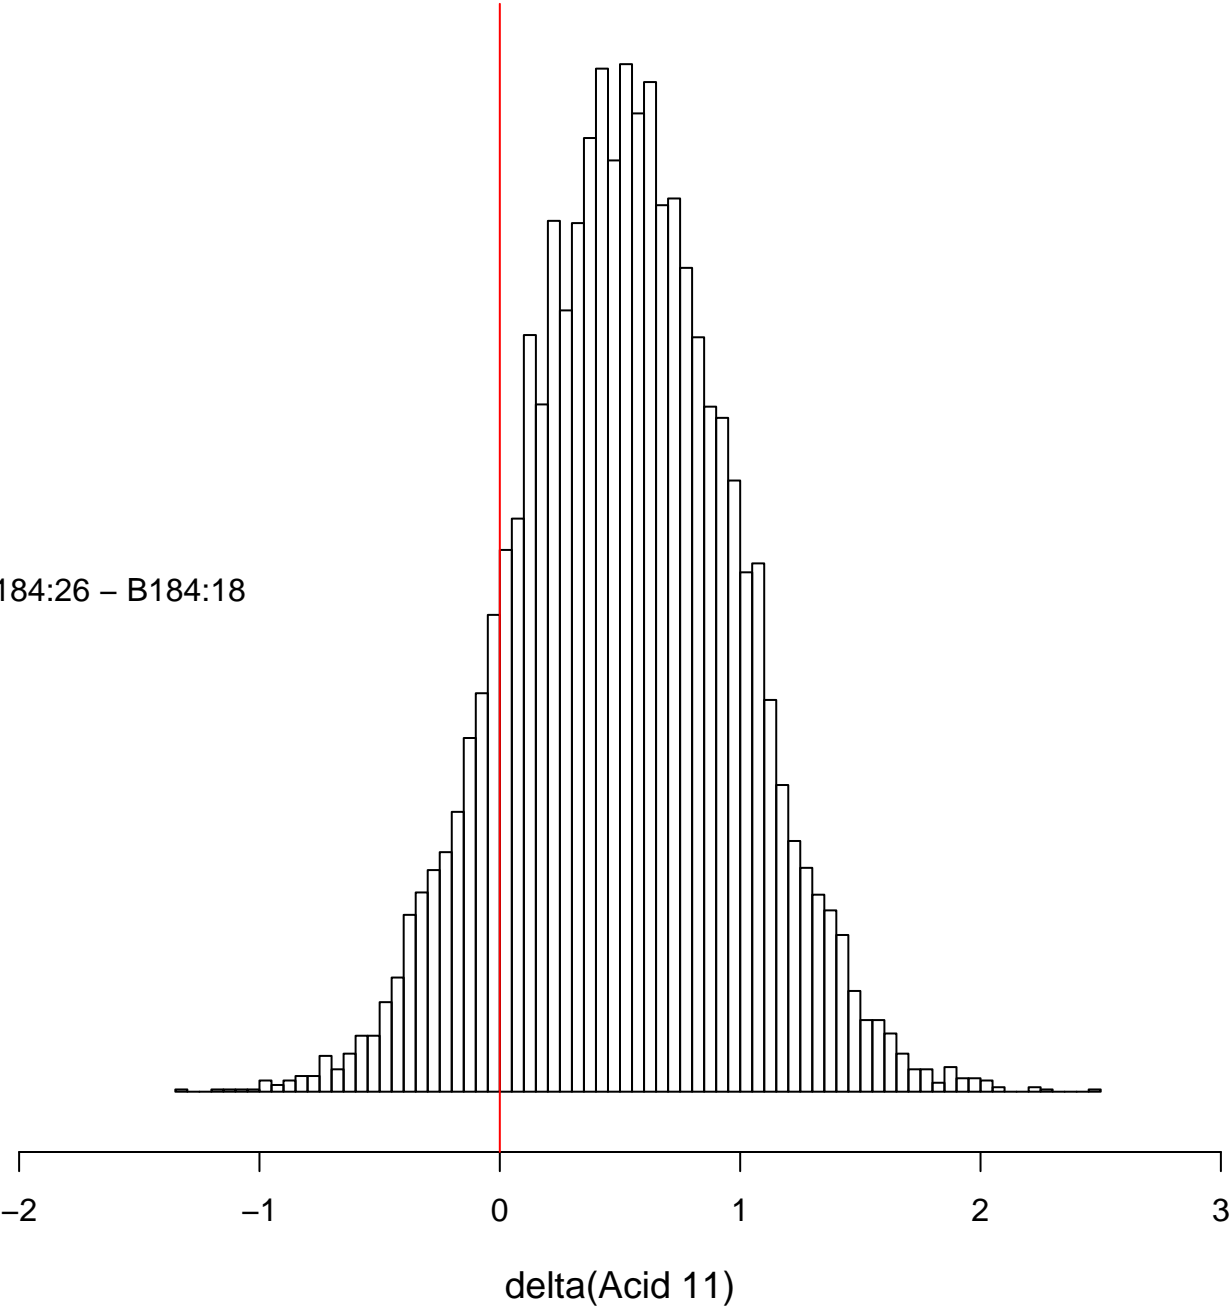



B184:26

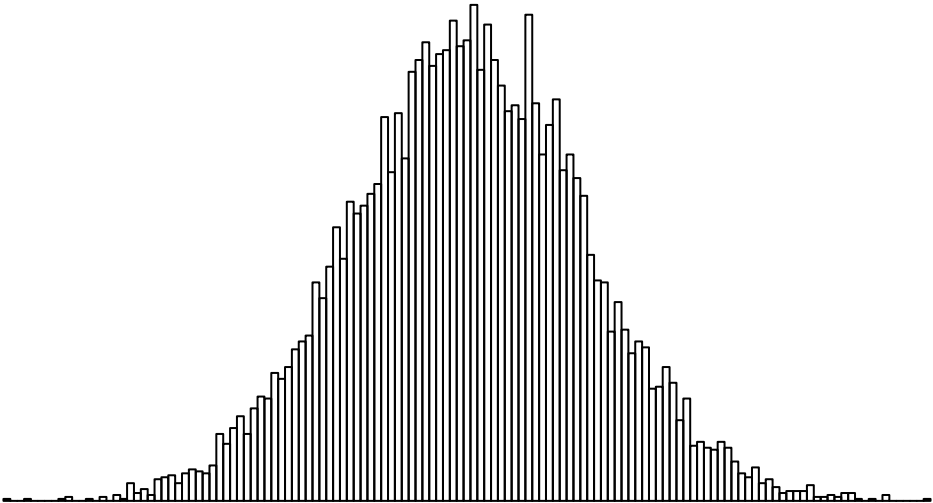

B184:18

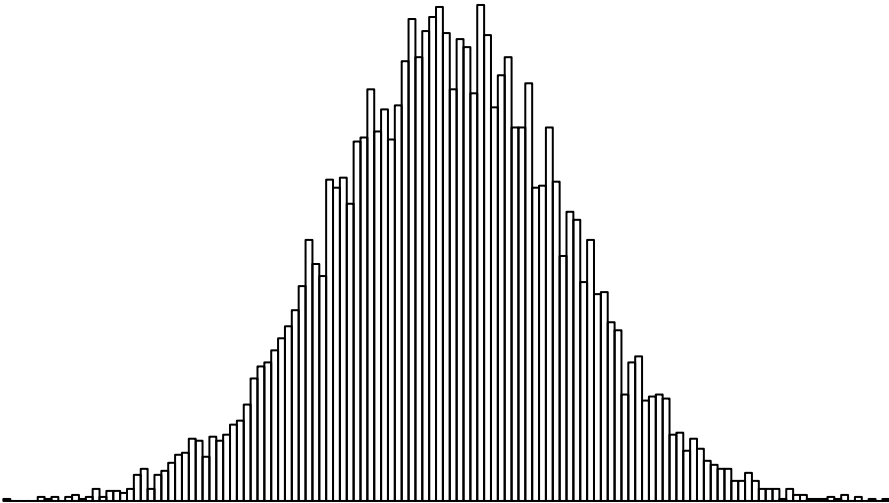

-7.5      -7.0      -6.5      -6.0      -5.5      -5.0      -4.5      -4.0

Acid 12

B184:26 – B184:18

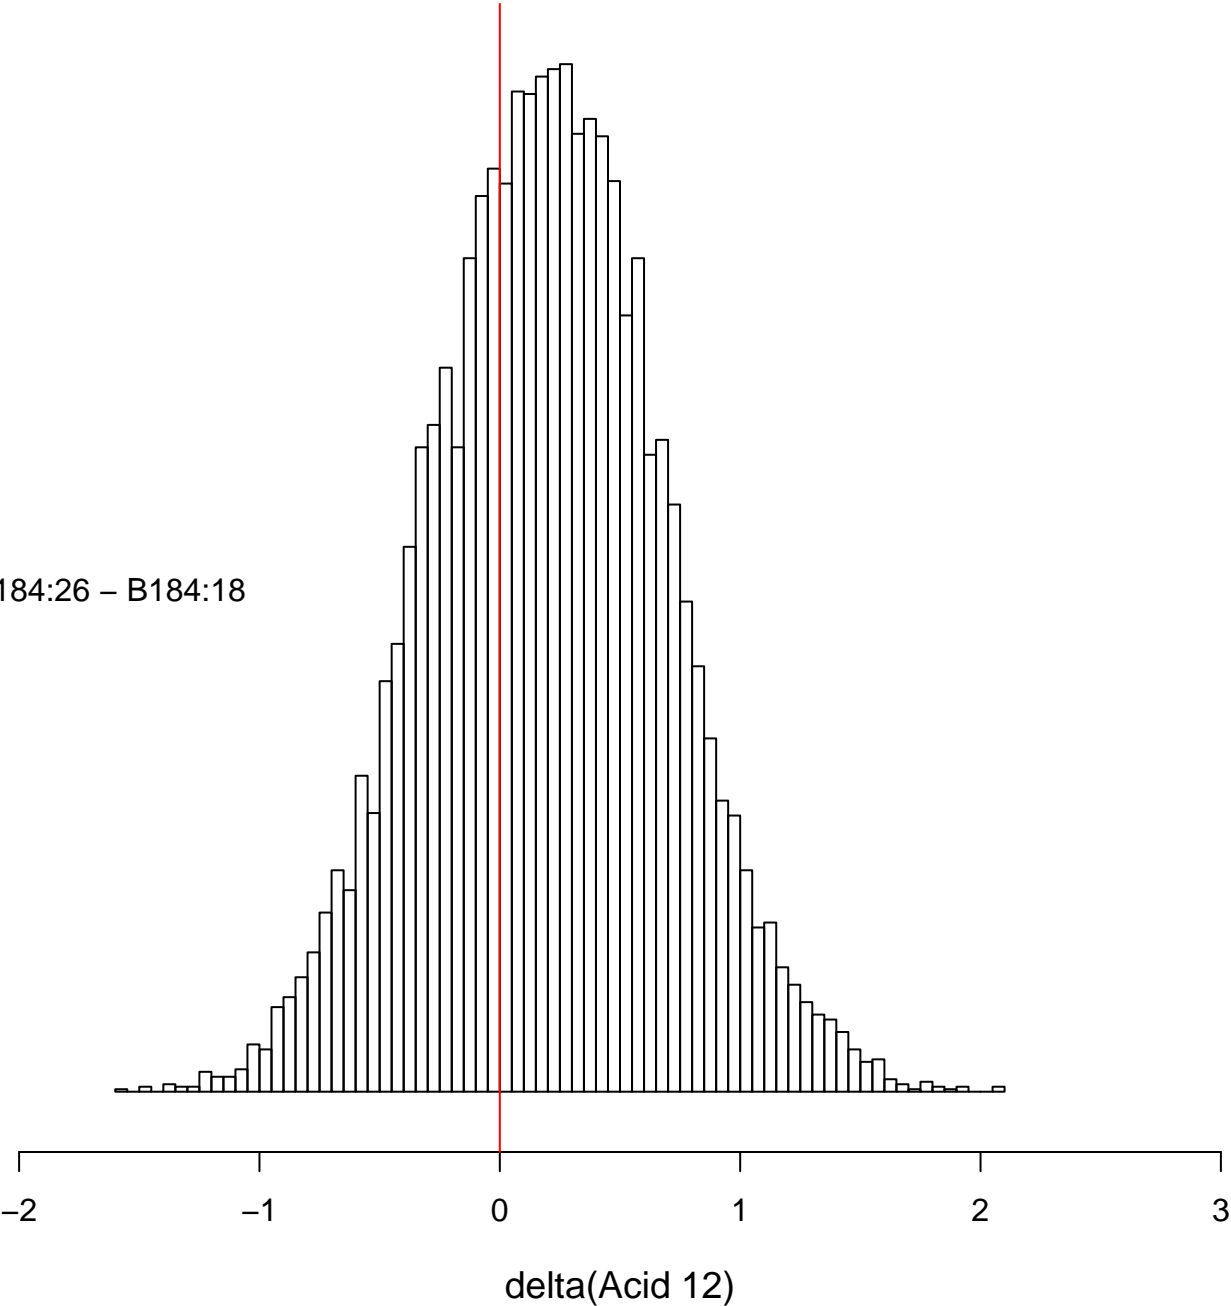

B184:26

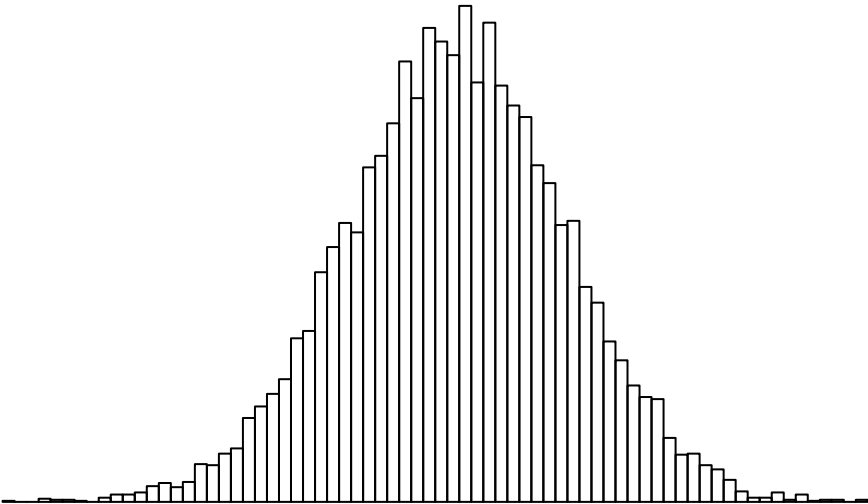

B184:18

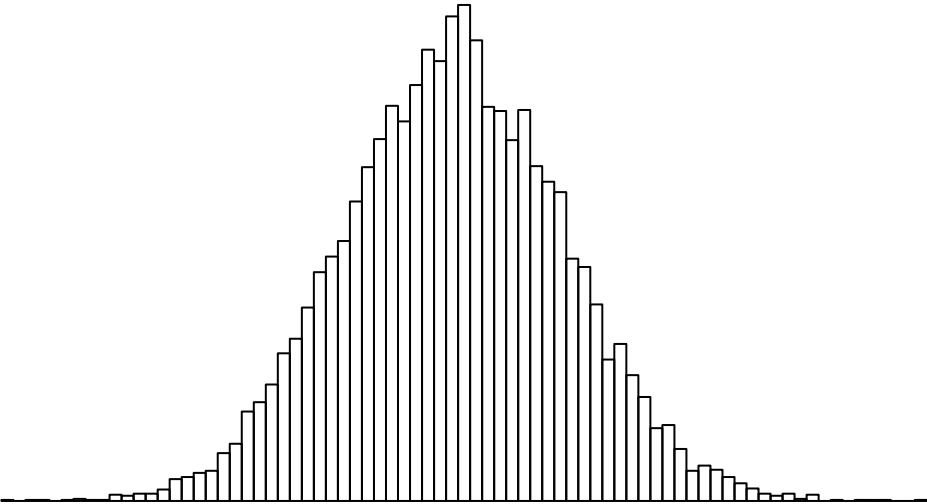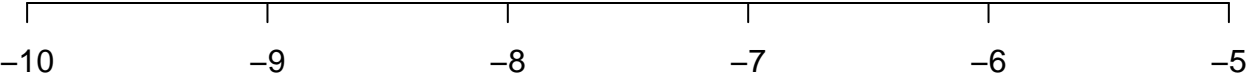

Acid 13

B184:26 – B184:18

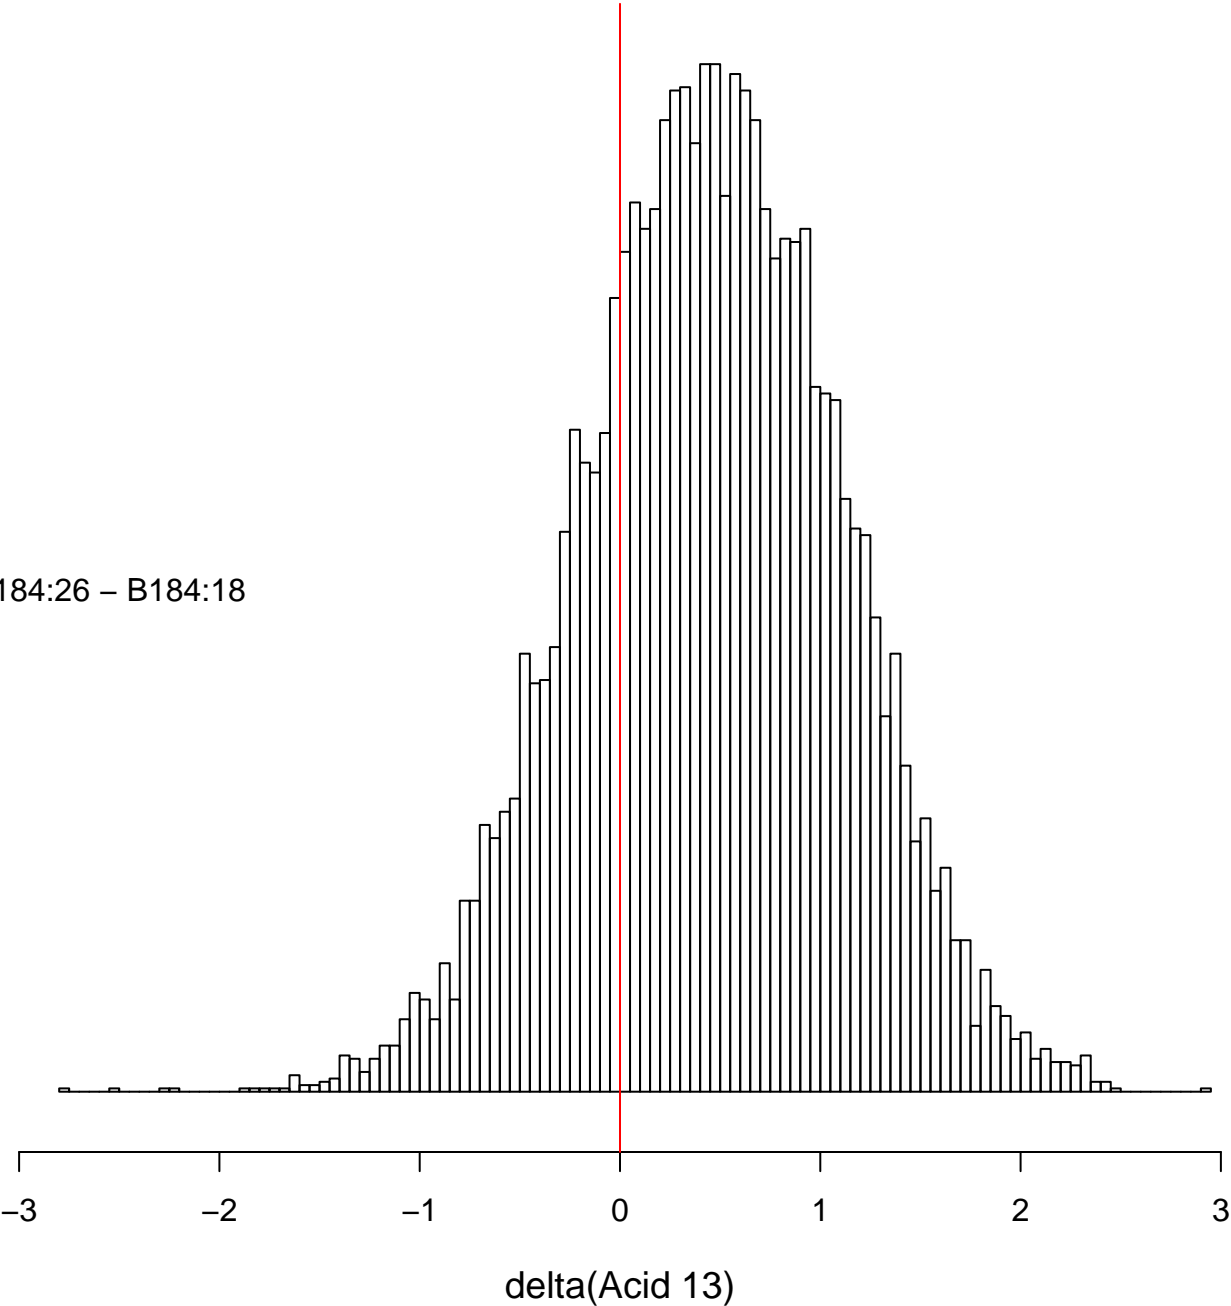

B184:26

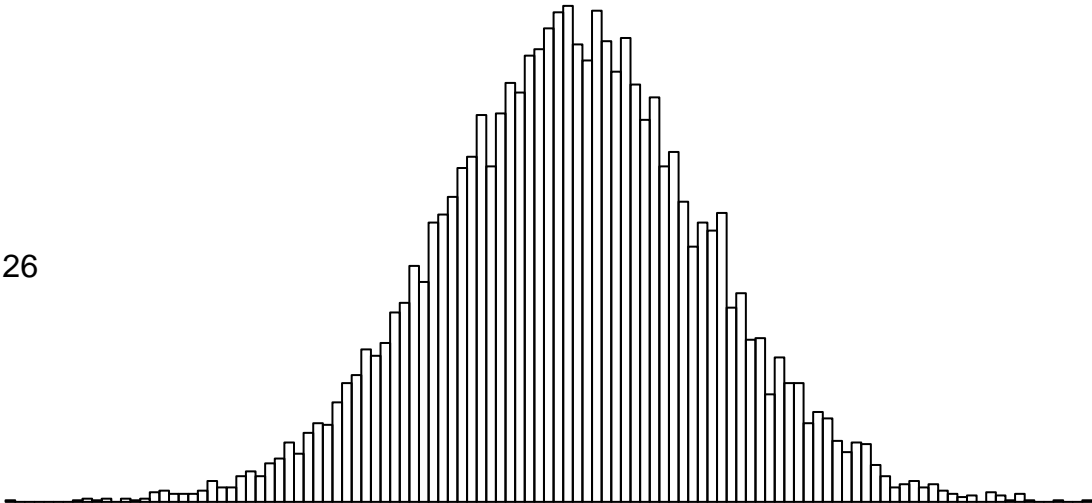

B184:18

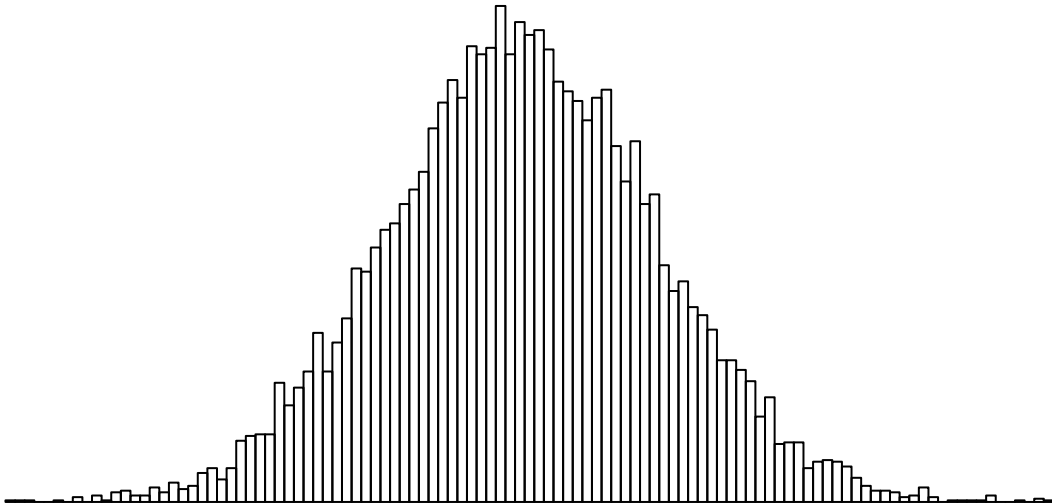

-7.5                      -7.0                      -6.5                      -6.0                      -5.5                      -5.0

Acid 14

B184:26 – B184:18

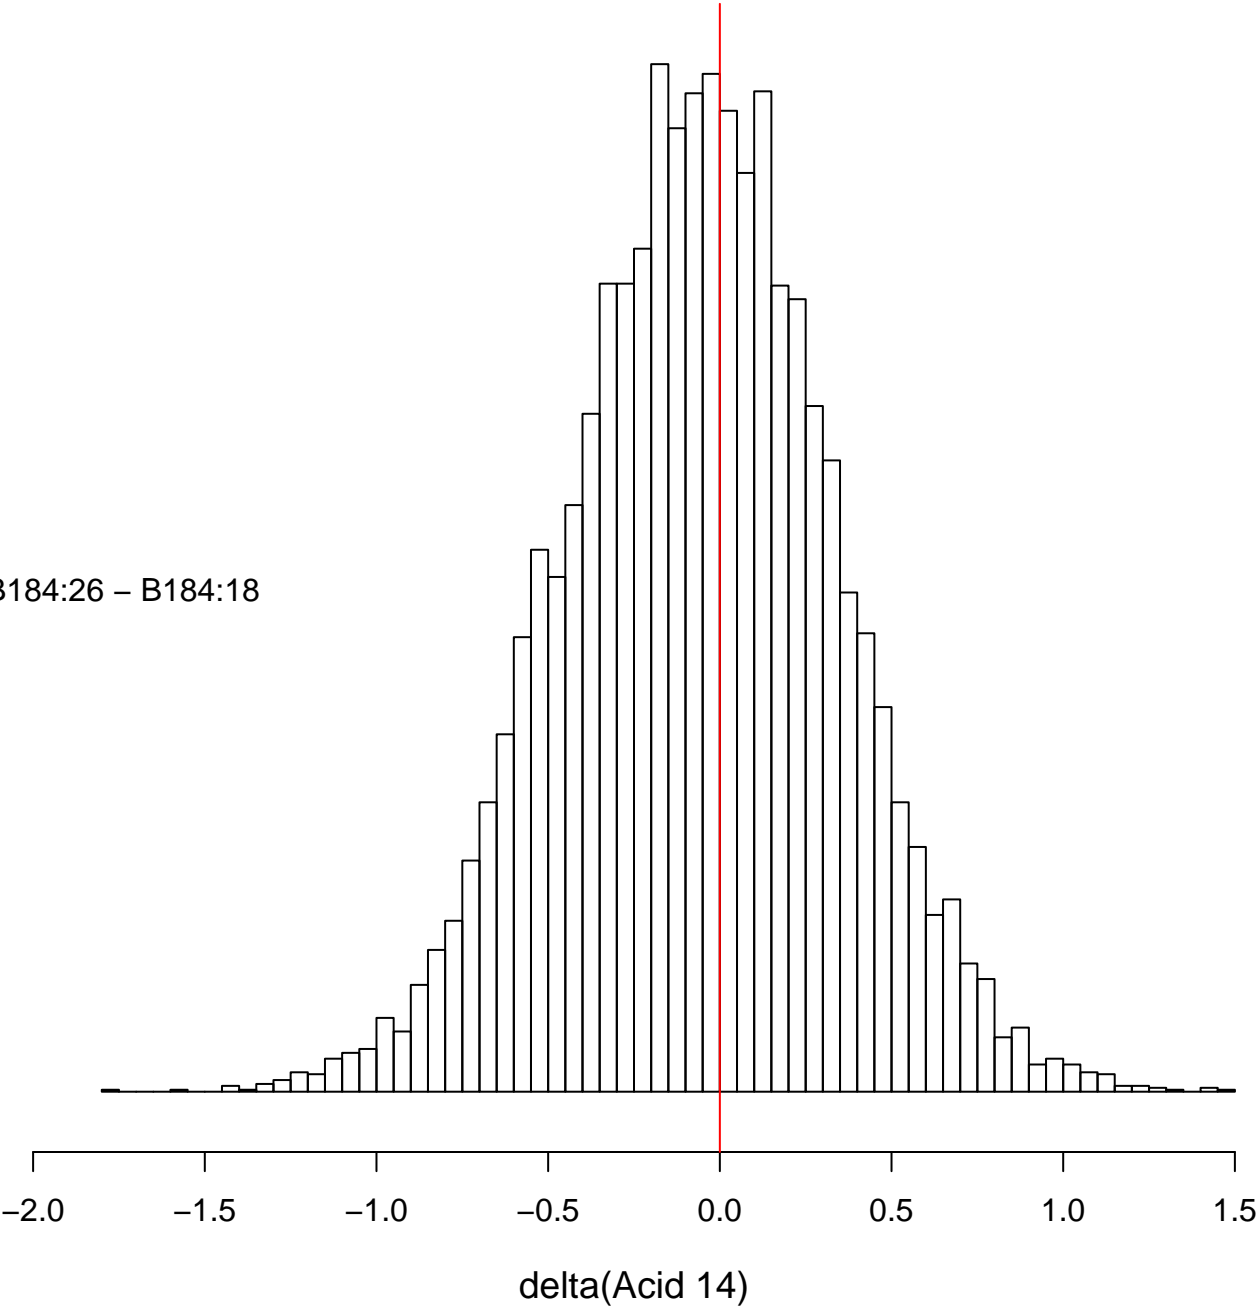

Supplement: s1 [file s1]
