# Supplementary material for: Taxonomic and Environmental Variation of Metabolite Profiles in Marine Dinoflagellates of the Genus Symbiodinium
Source: MDPI journal article supplement (doi:10.3390/metabo5010074), 2015-02-16

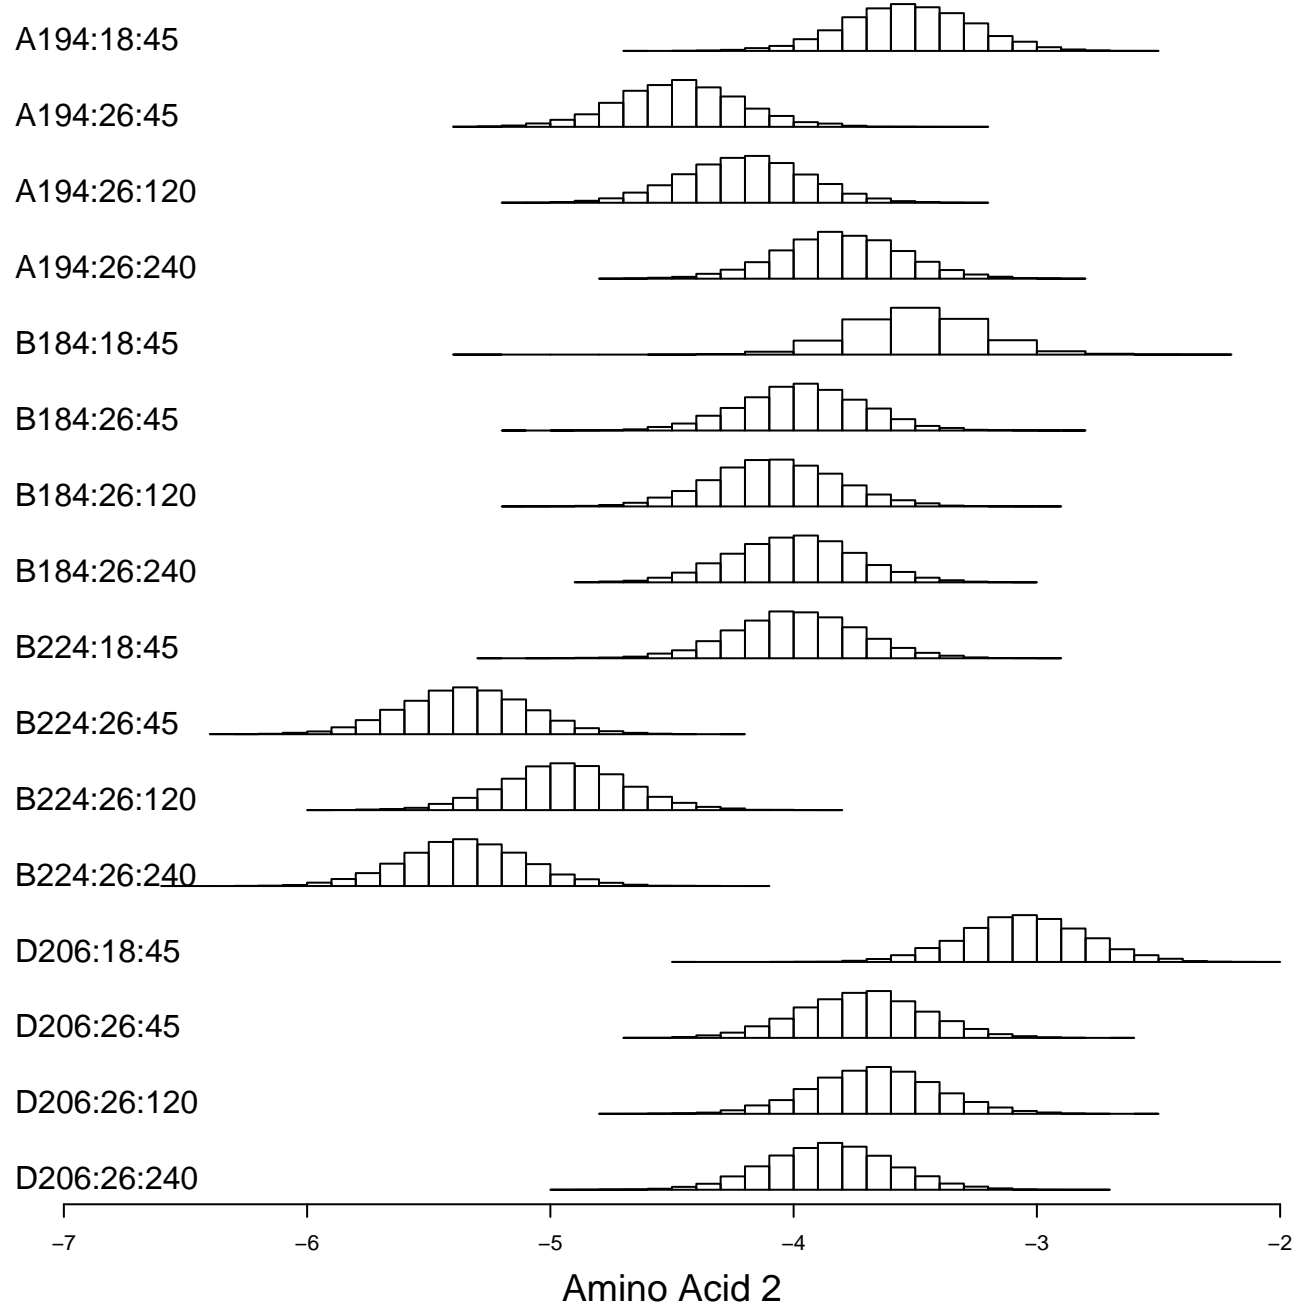

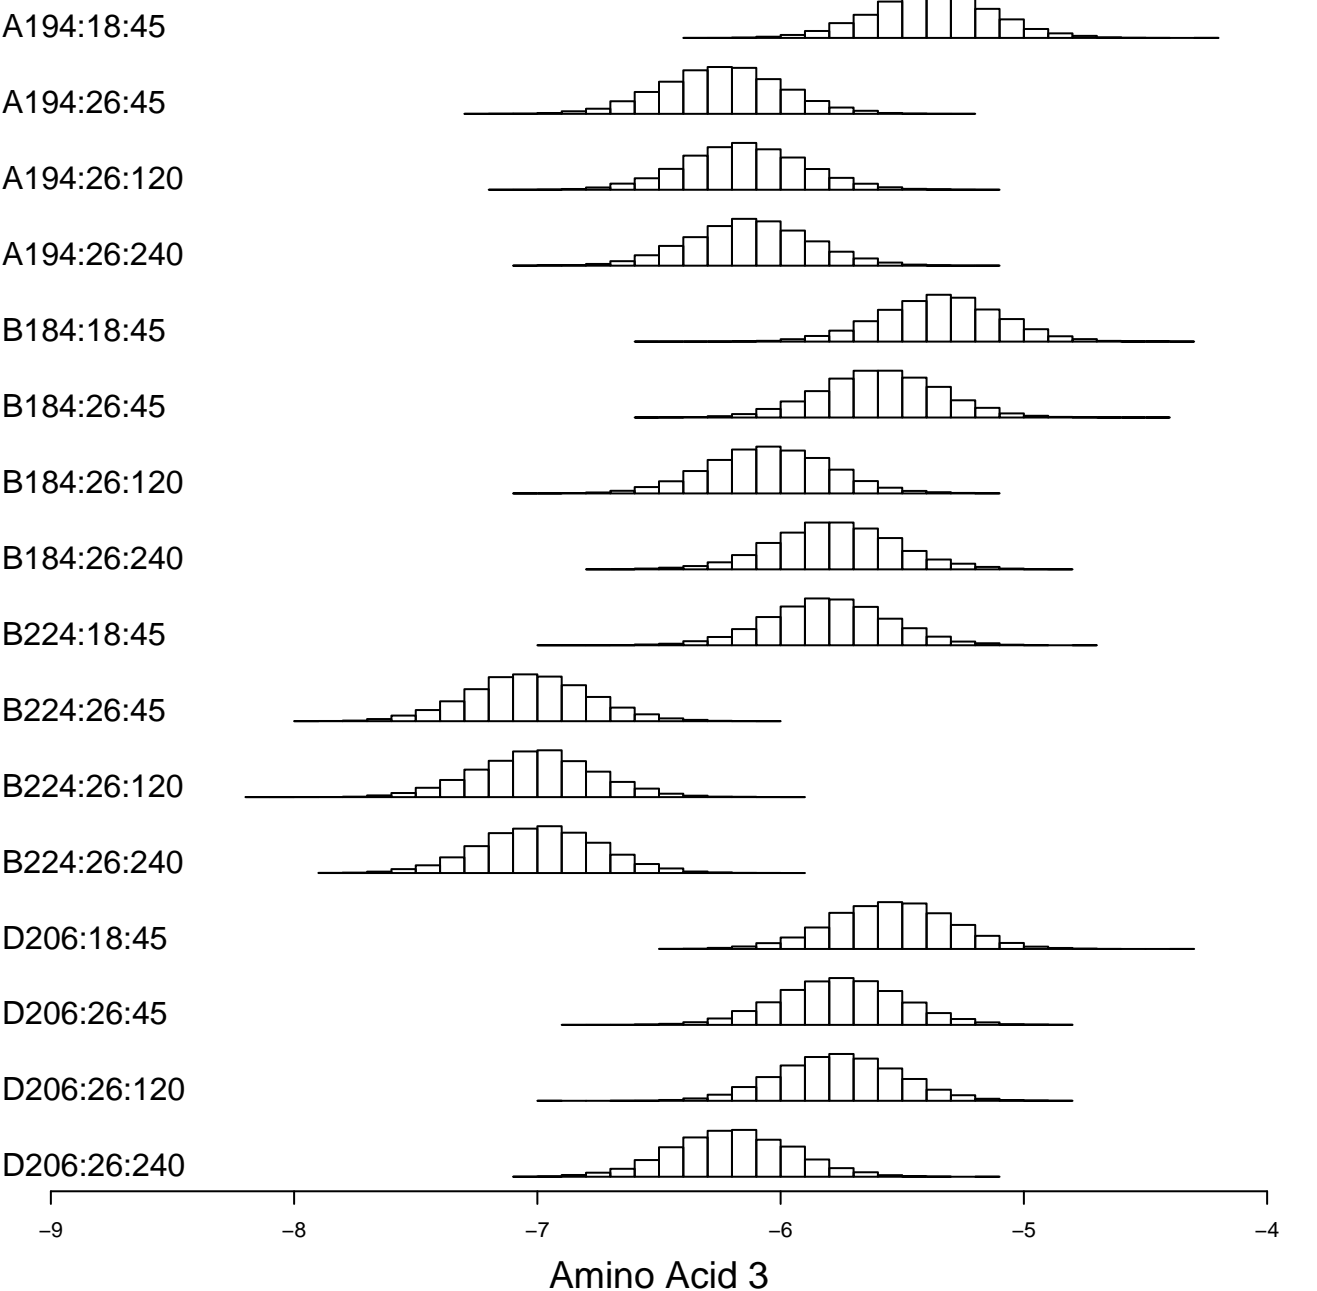

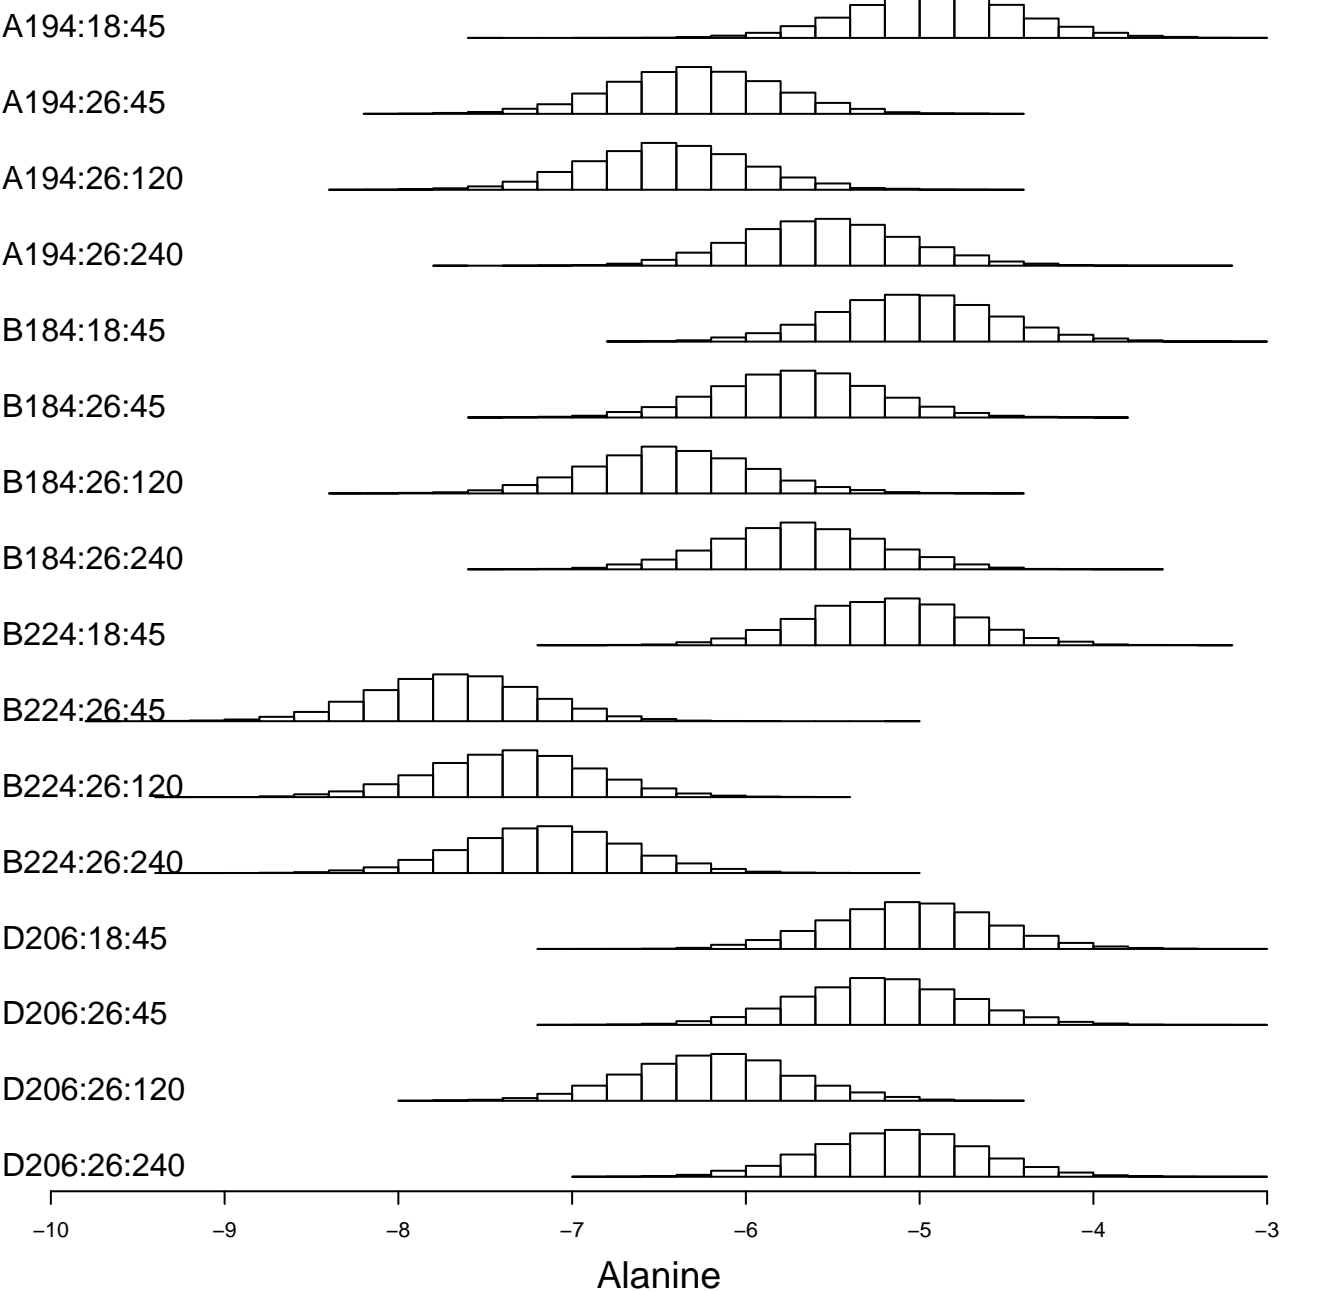

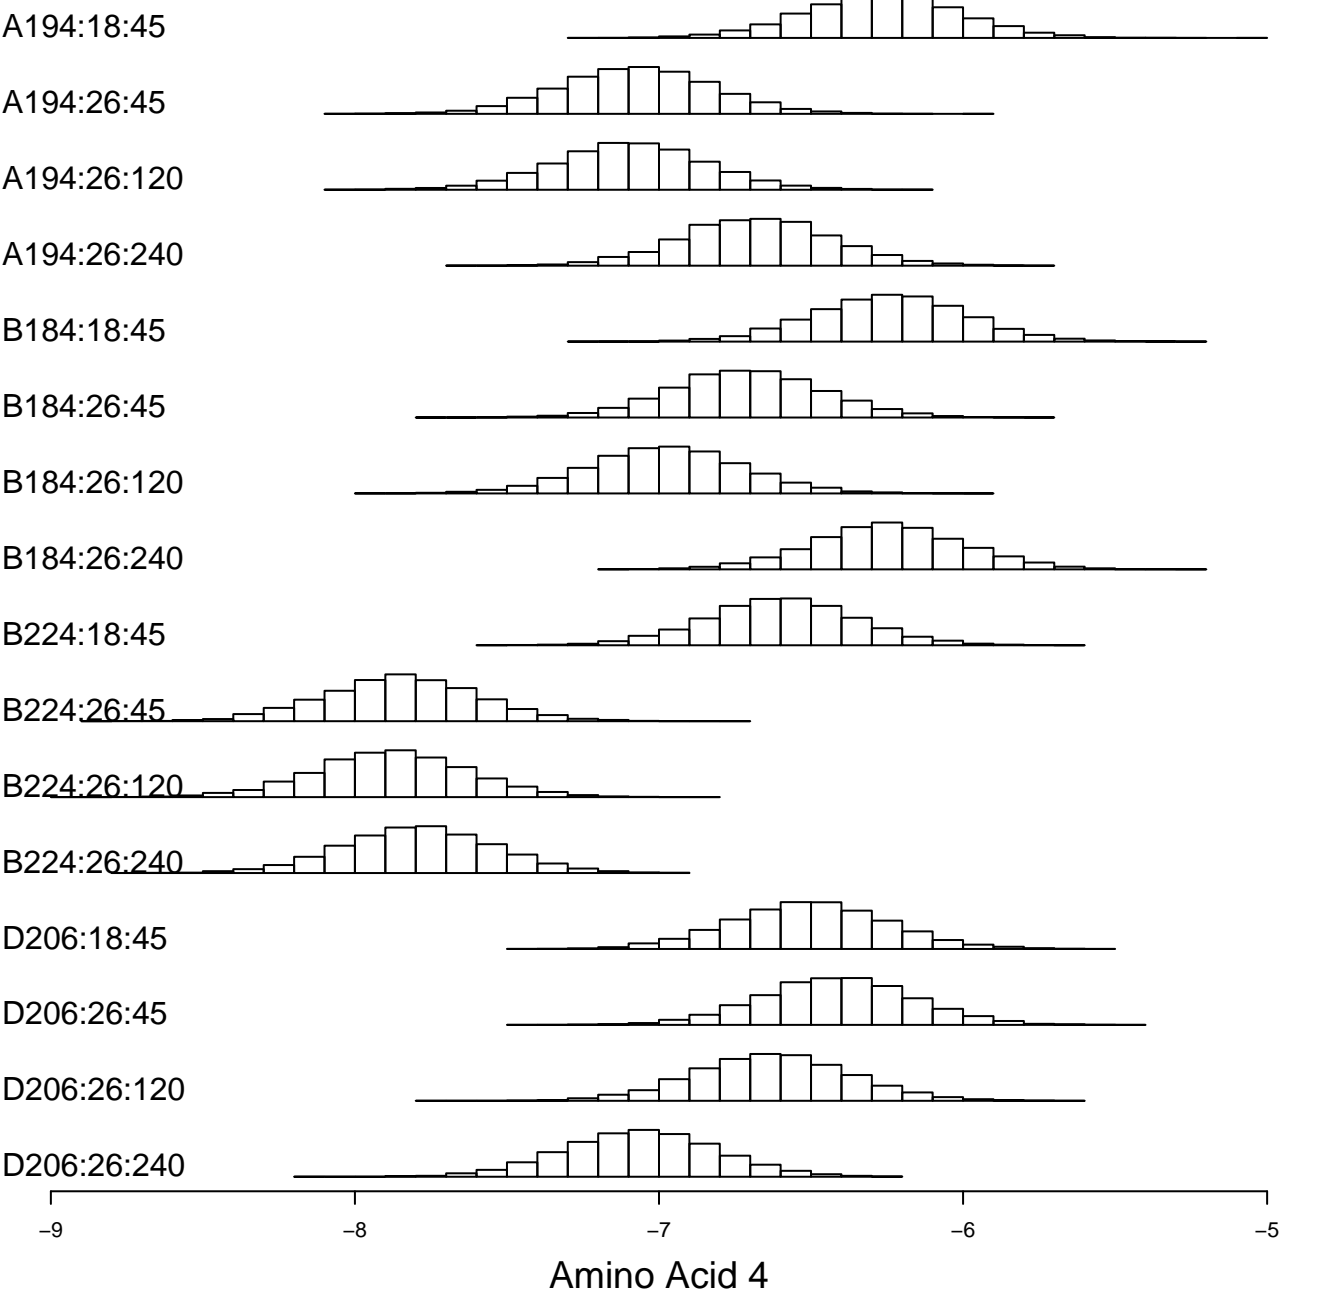

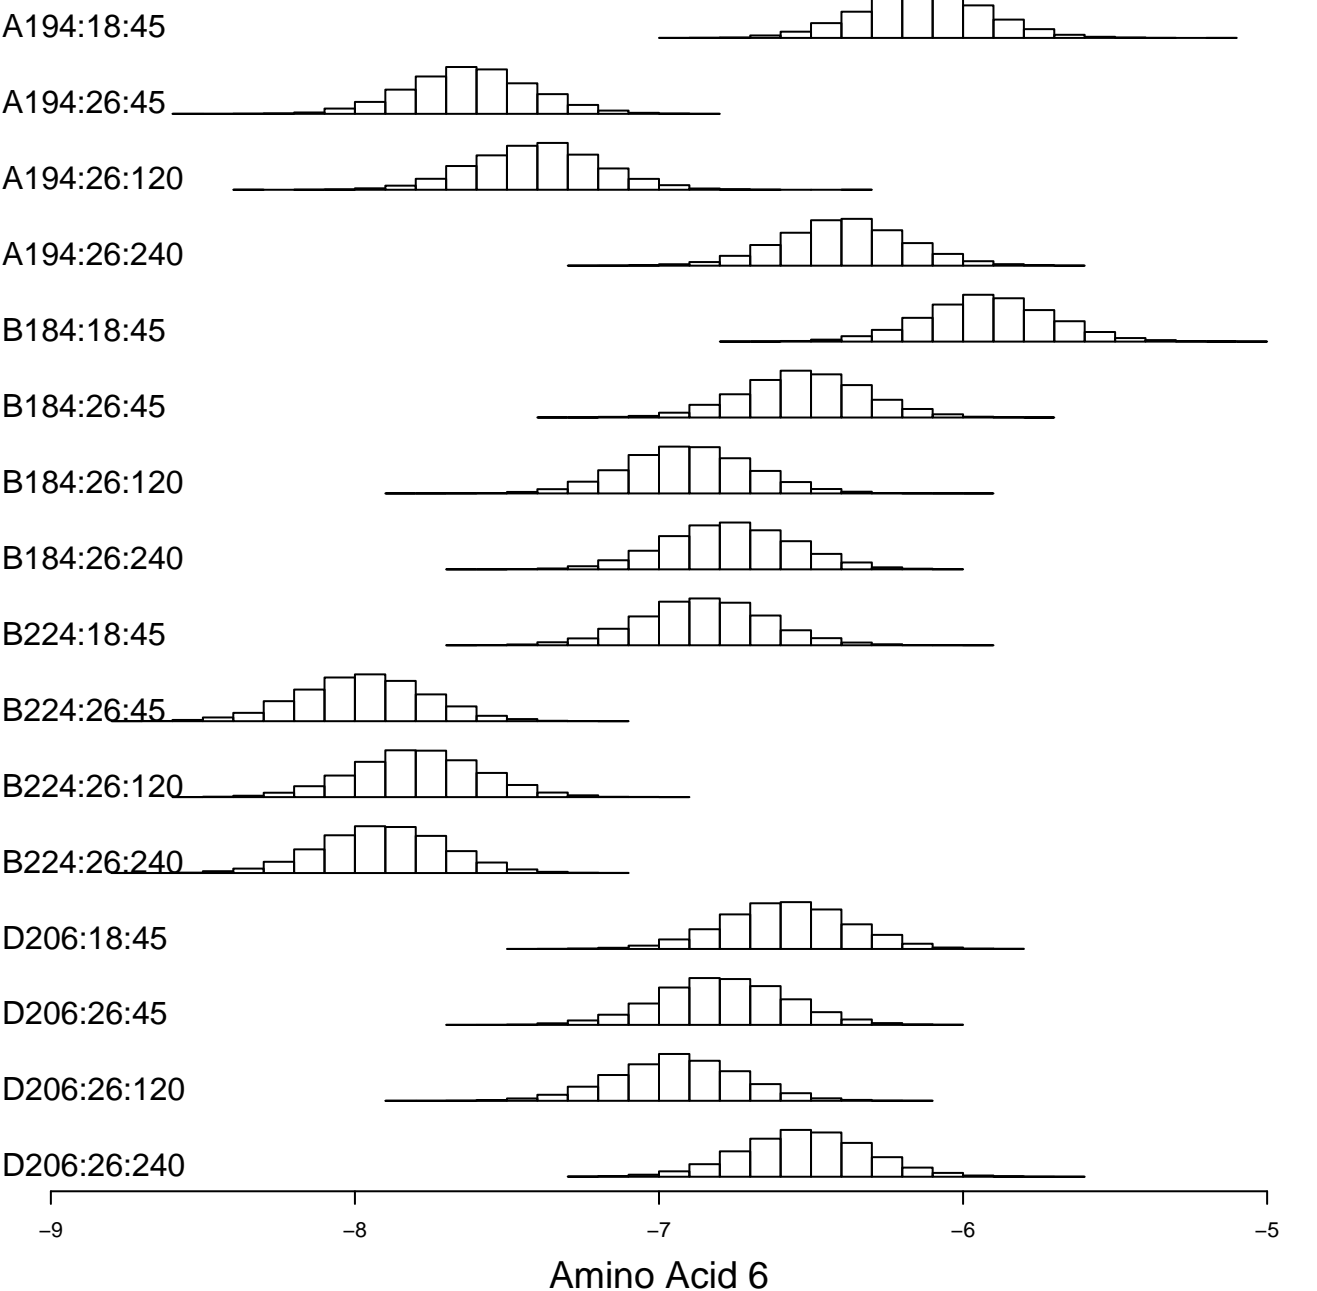

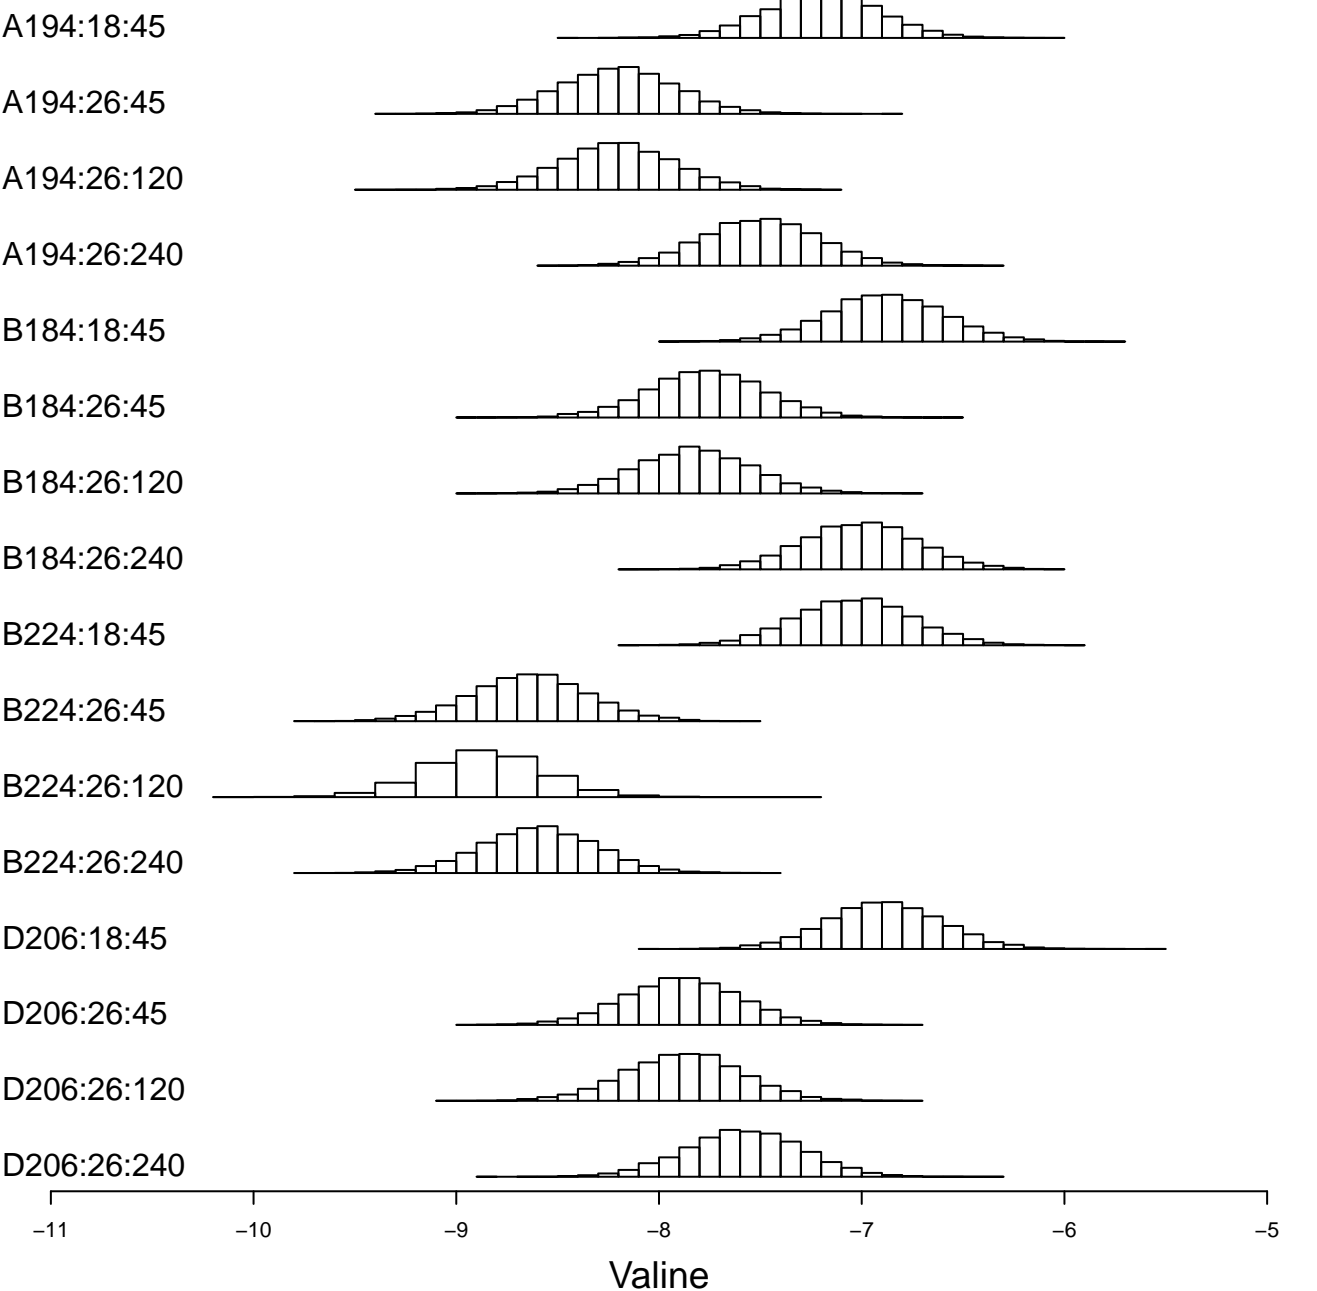

A194:18:45

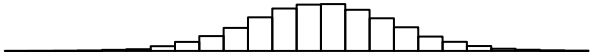

A194:26:45

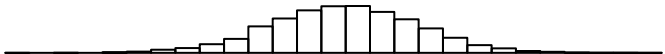

A194:26:120

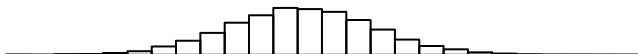

A194:26:240

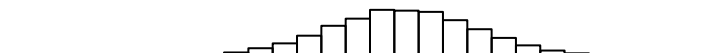

B184:18:45

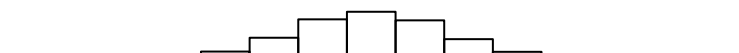

B184:26:45

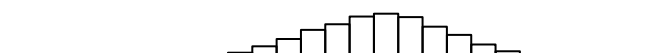

B184:26:120

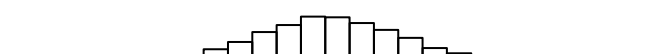

B184:26:240

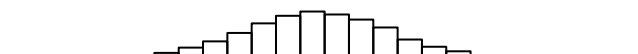

B224:18:45

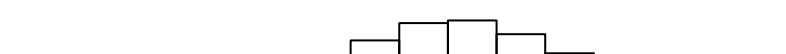

B224:26:45

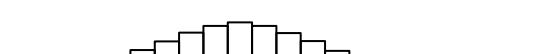

B224:26:120

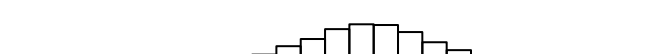

B224:26:240

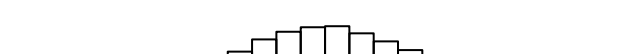

D206:18:45

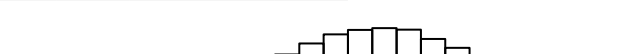

D206:26:45

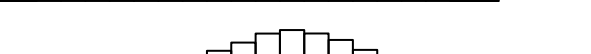

D206:26:120

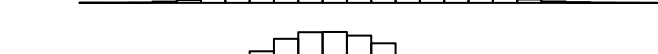

D206:26:240

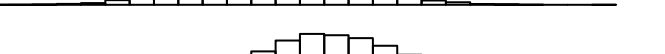

-9 -8 -7 -6 -5 -4

Amino Acid 7

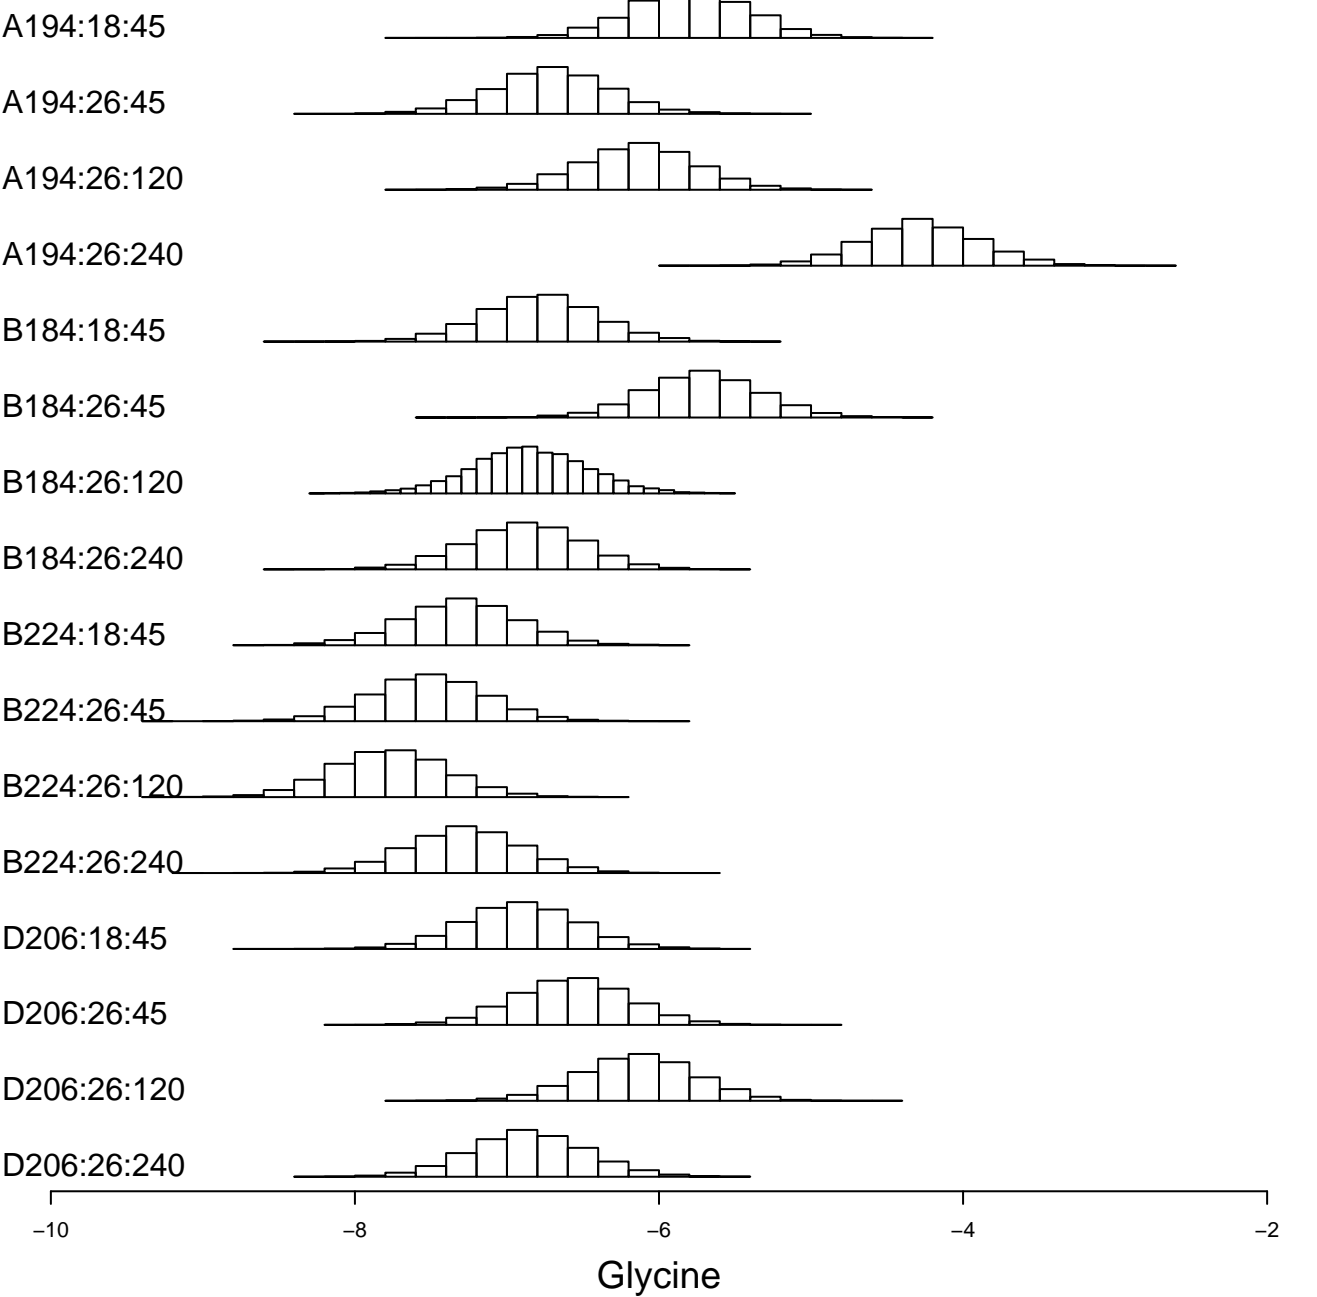



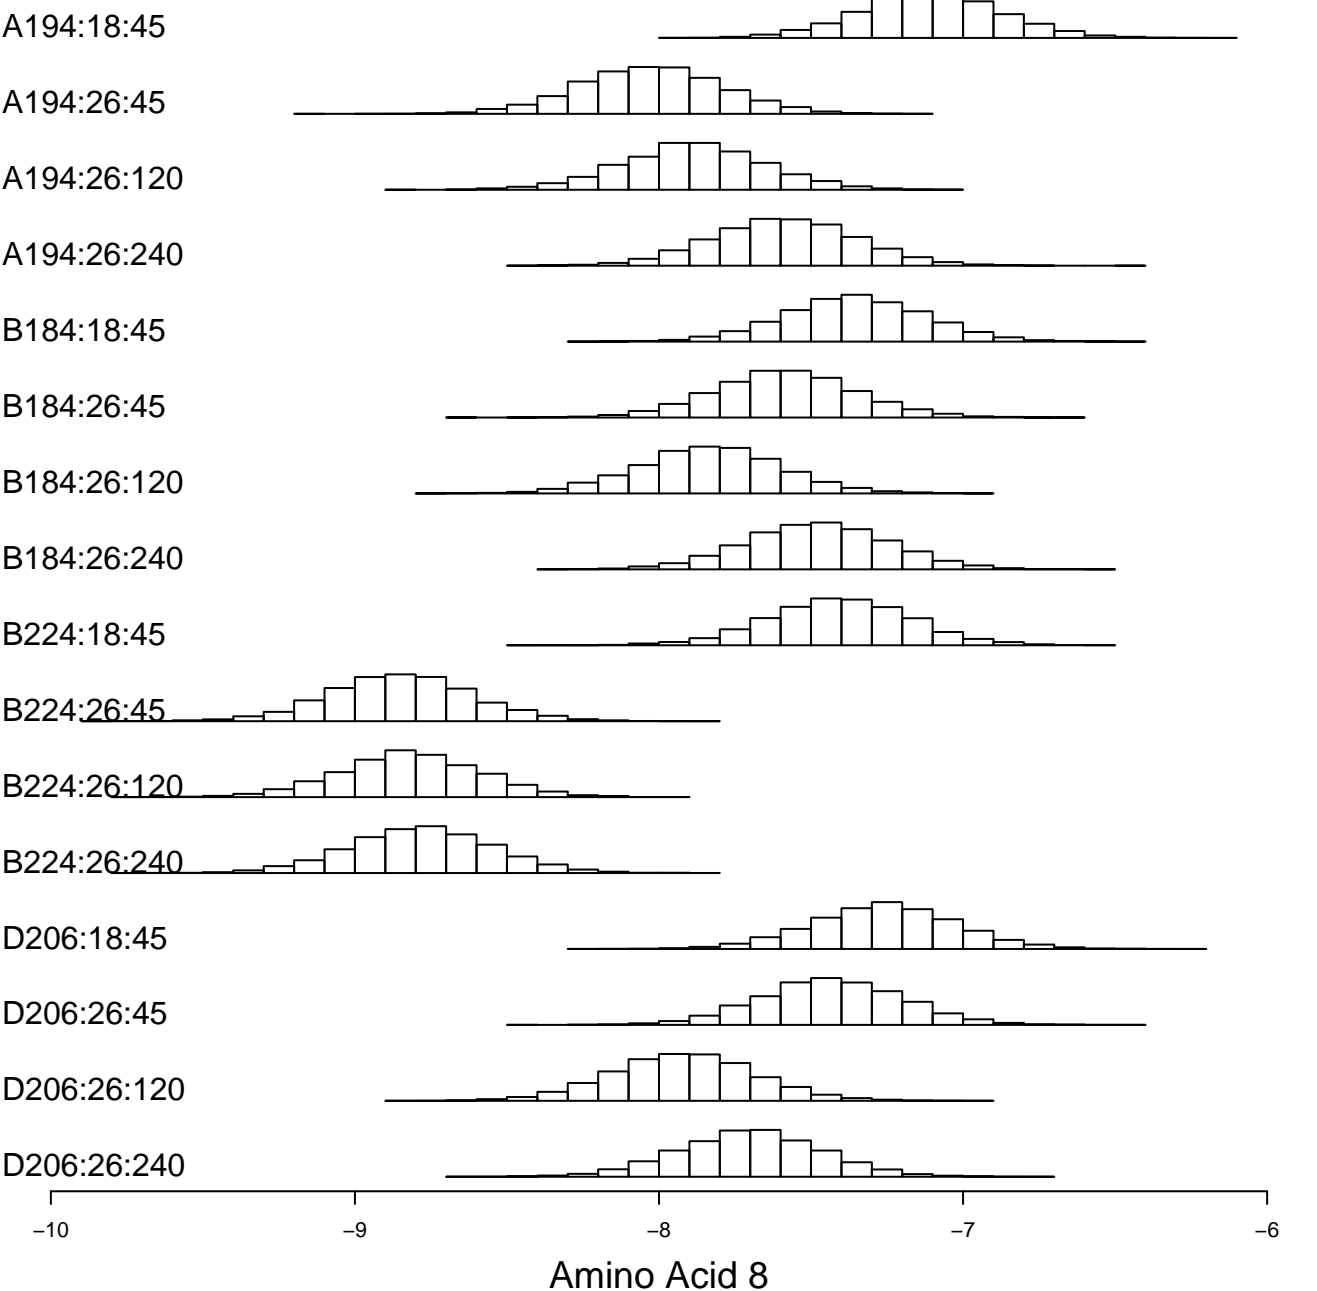

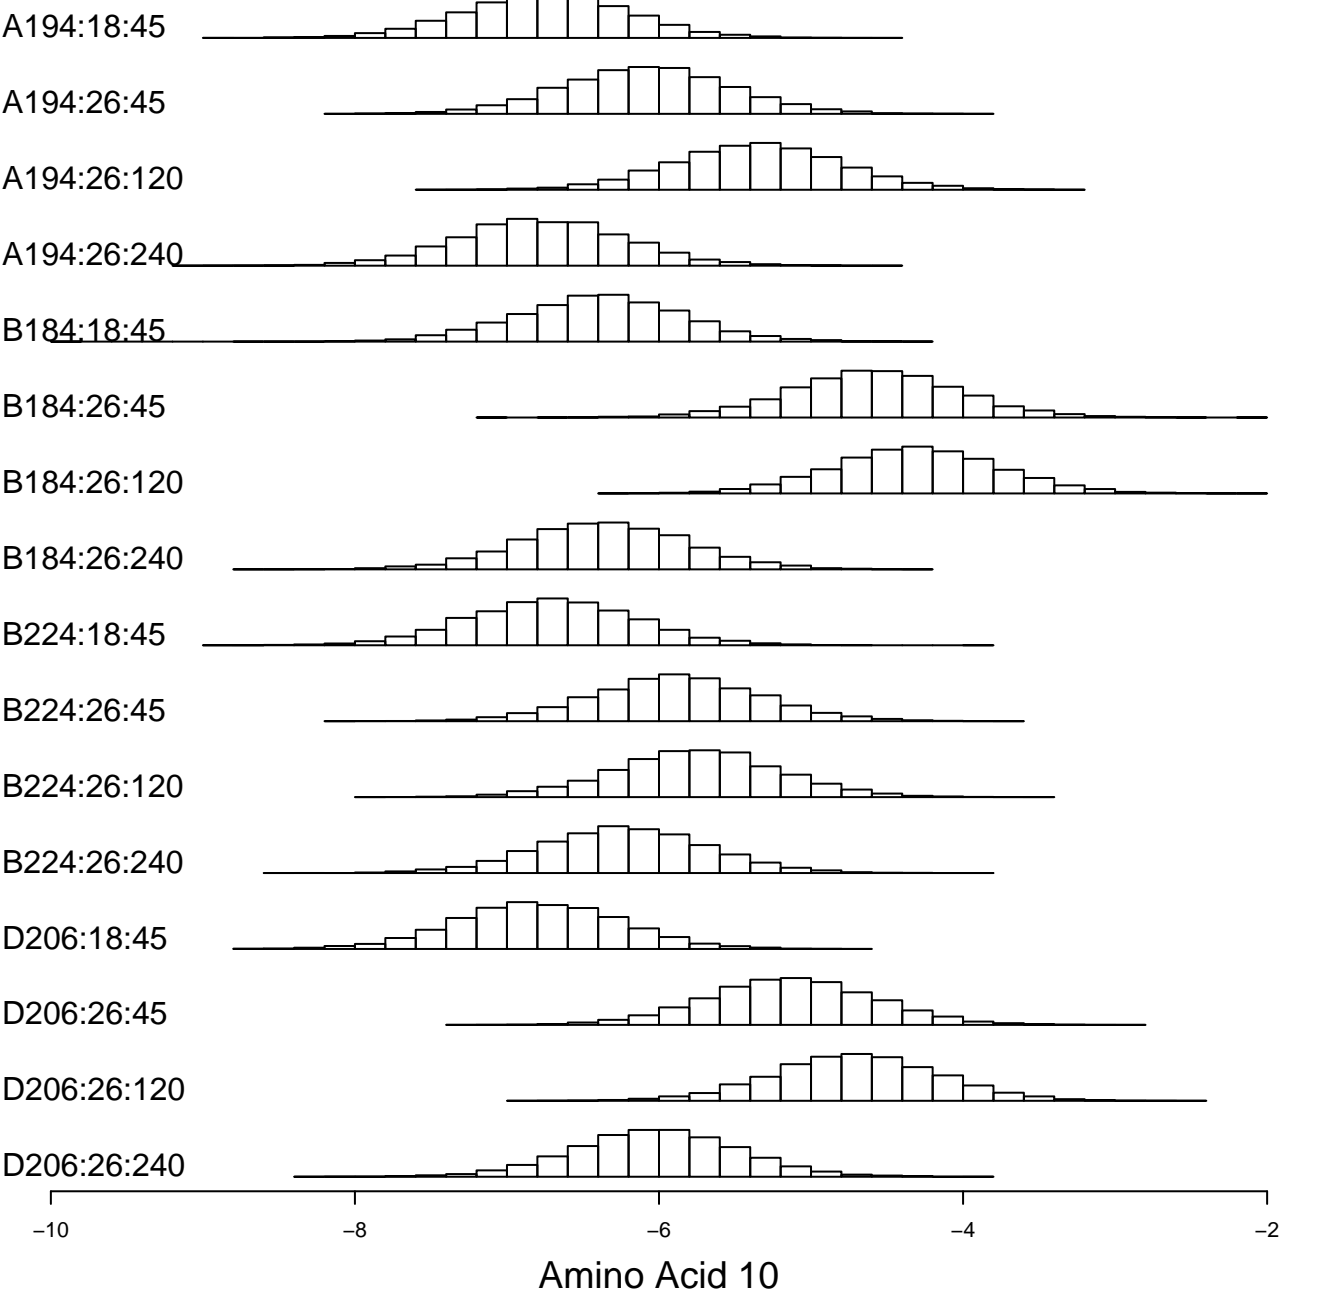

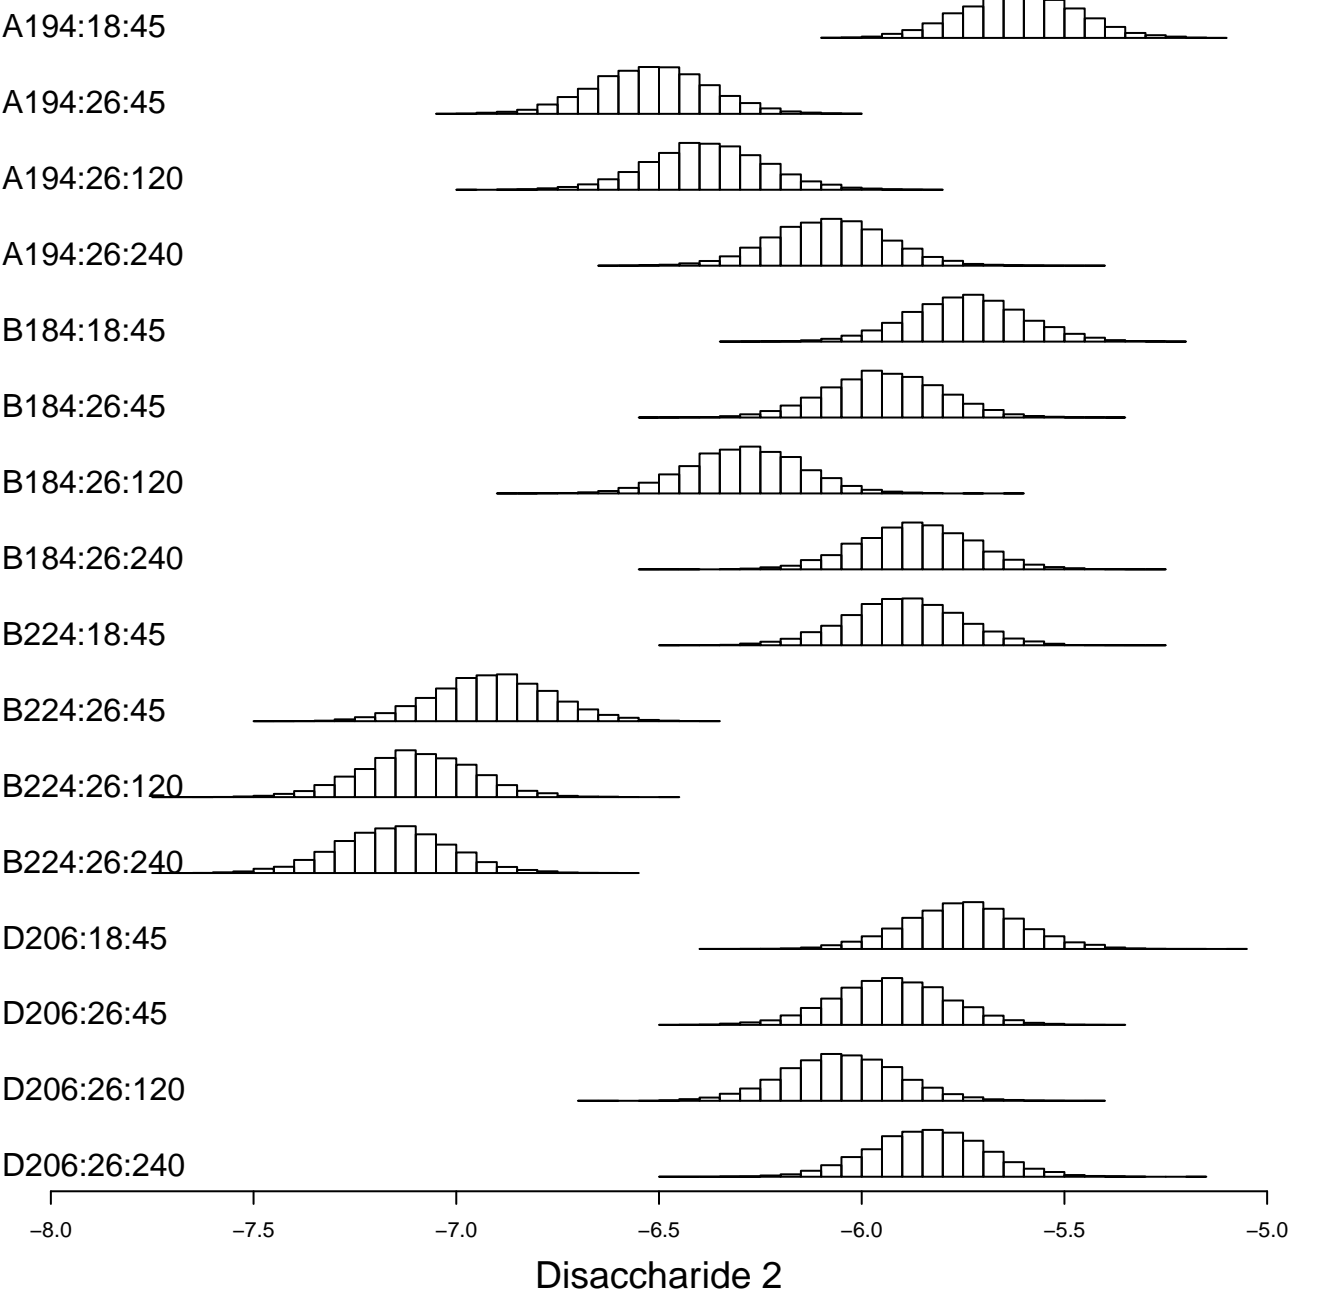

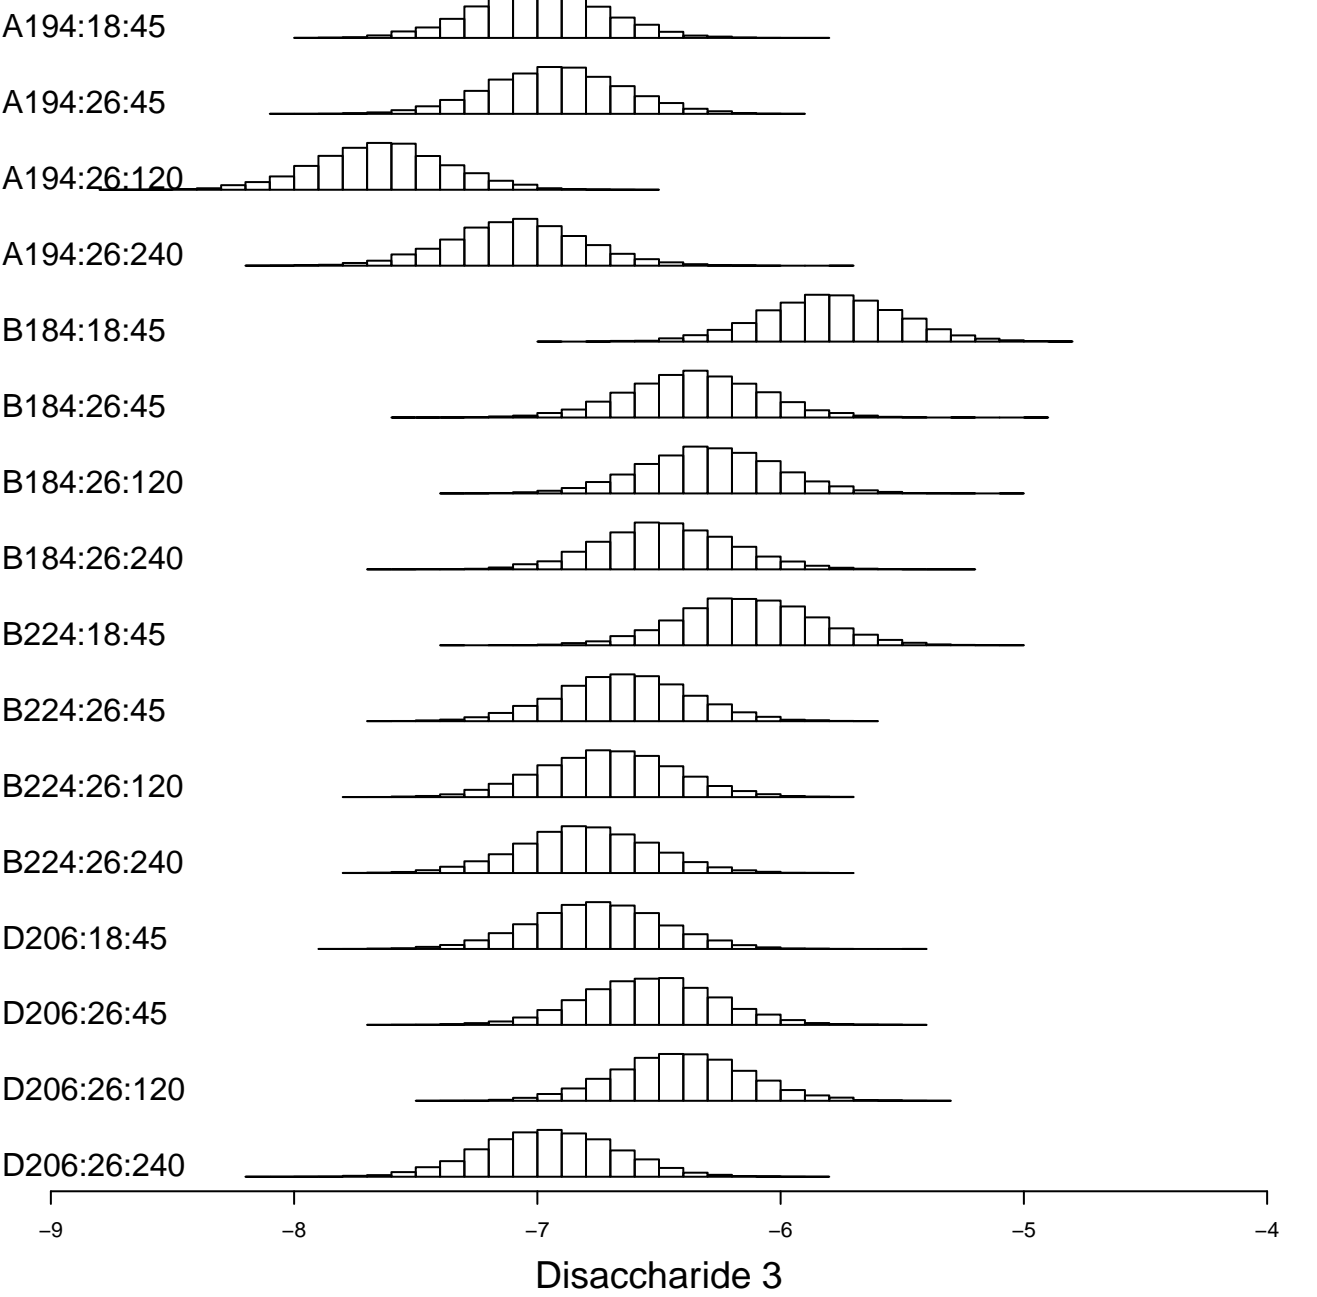

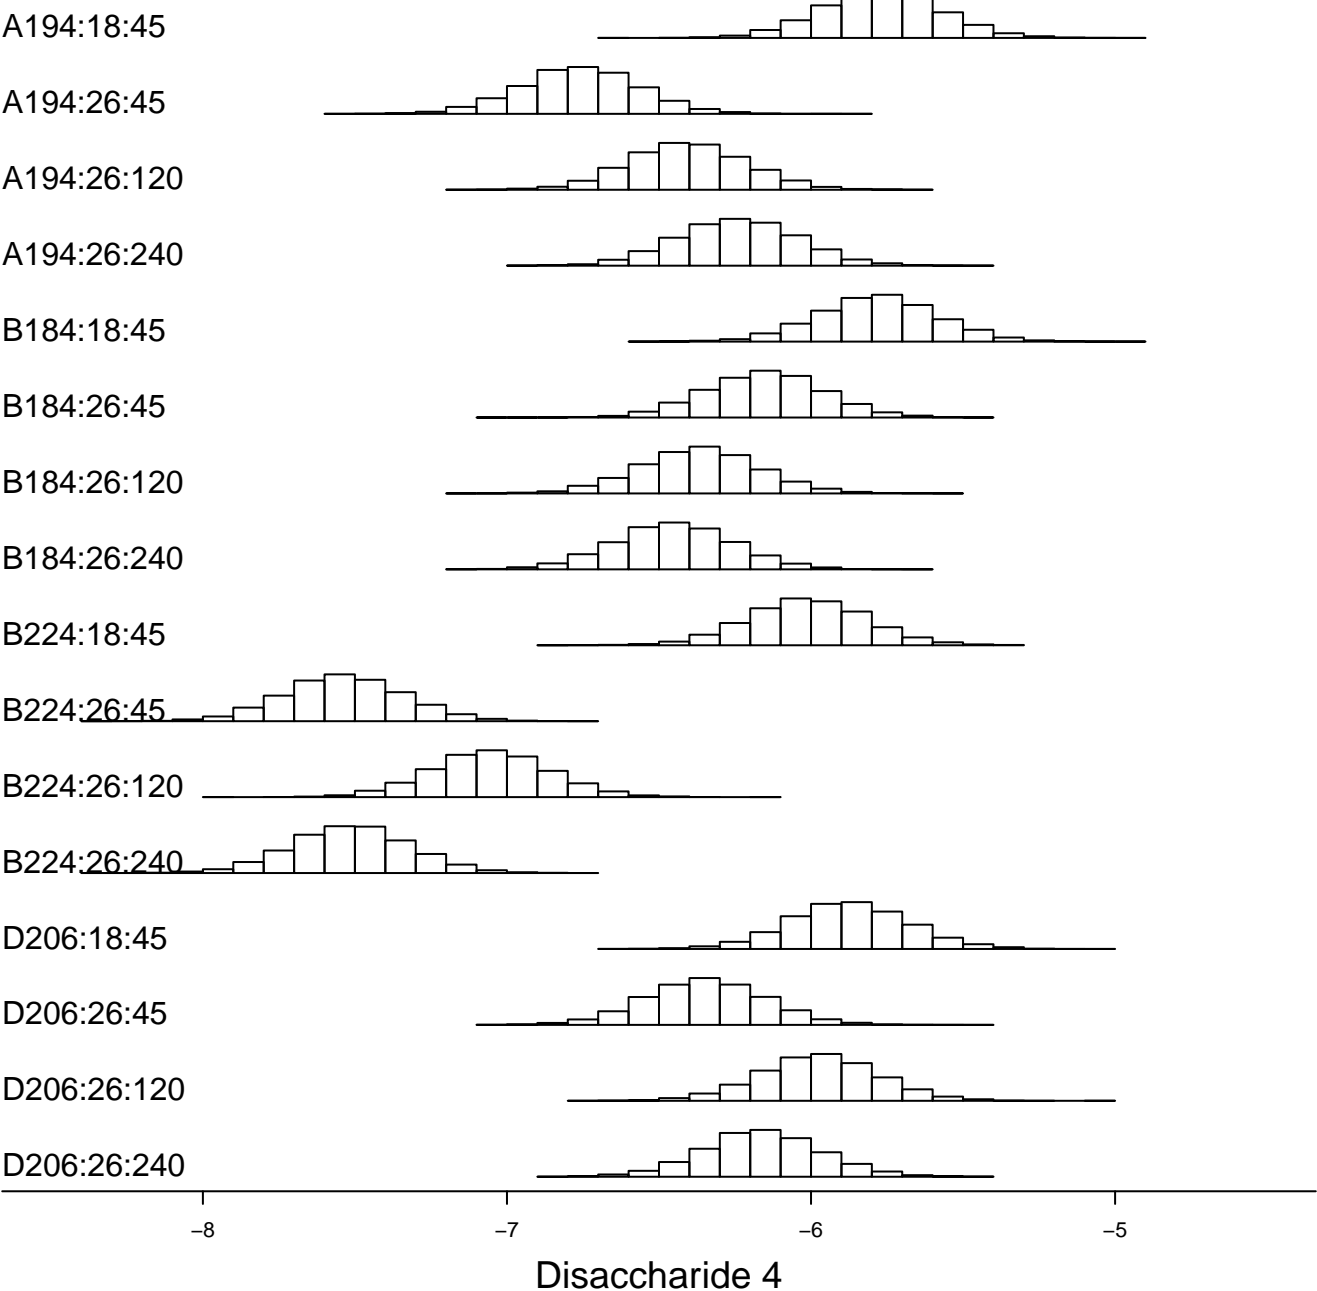

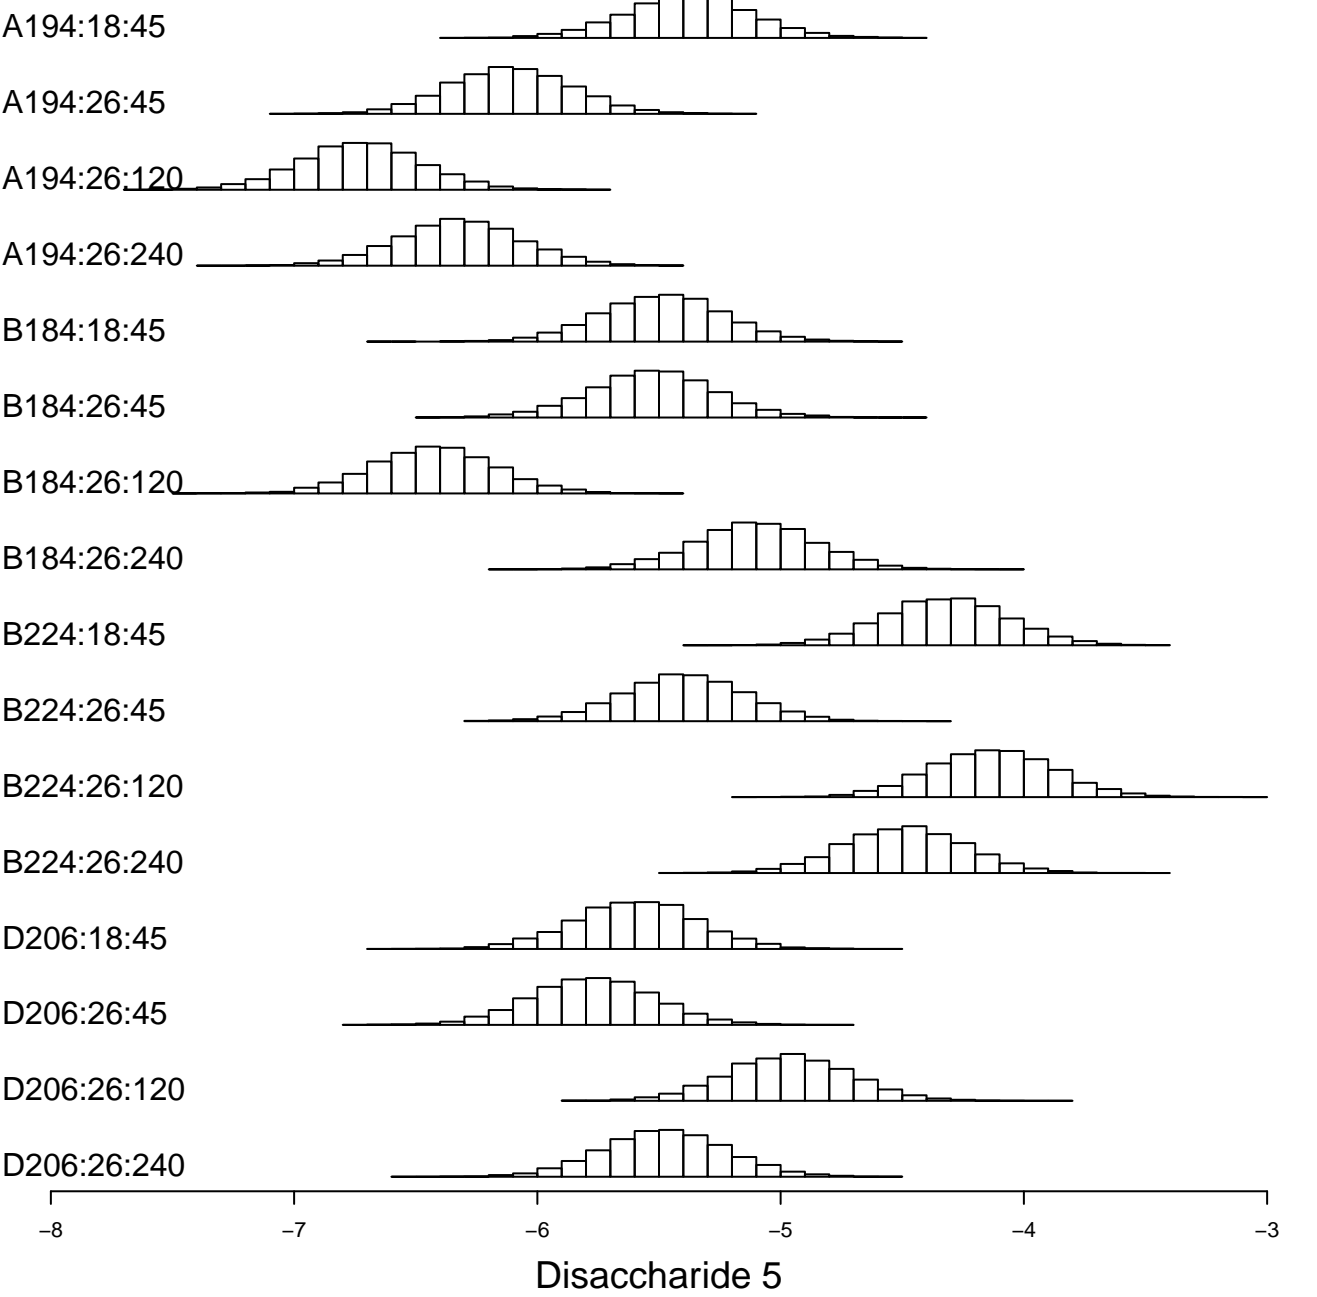

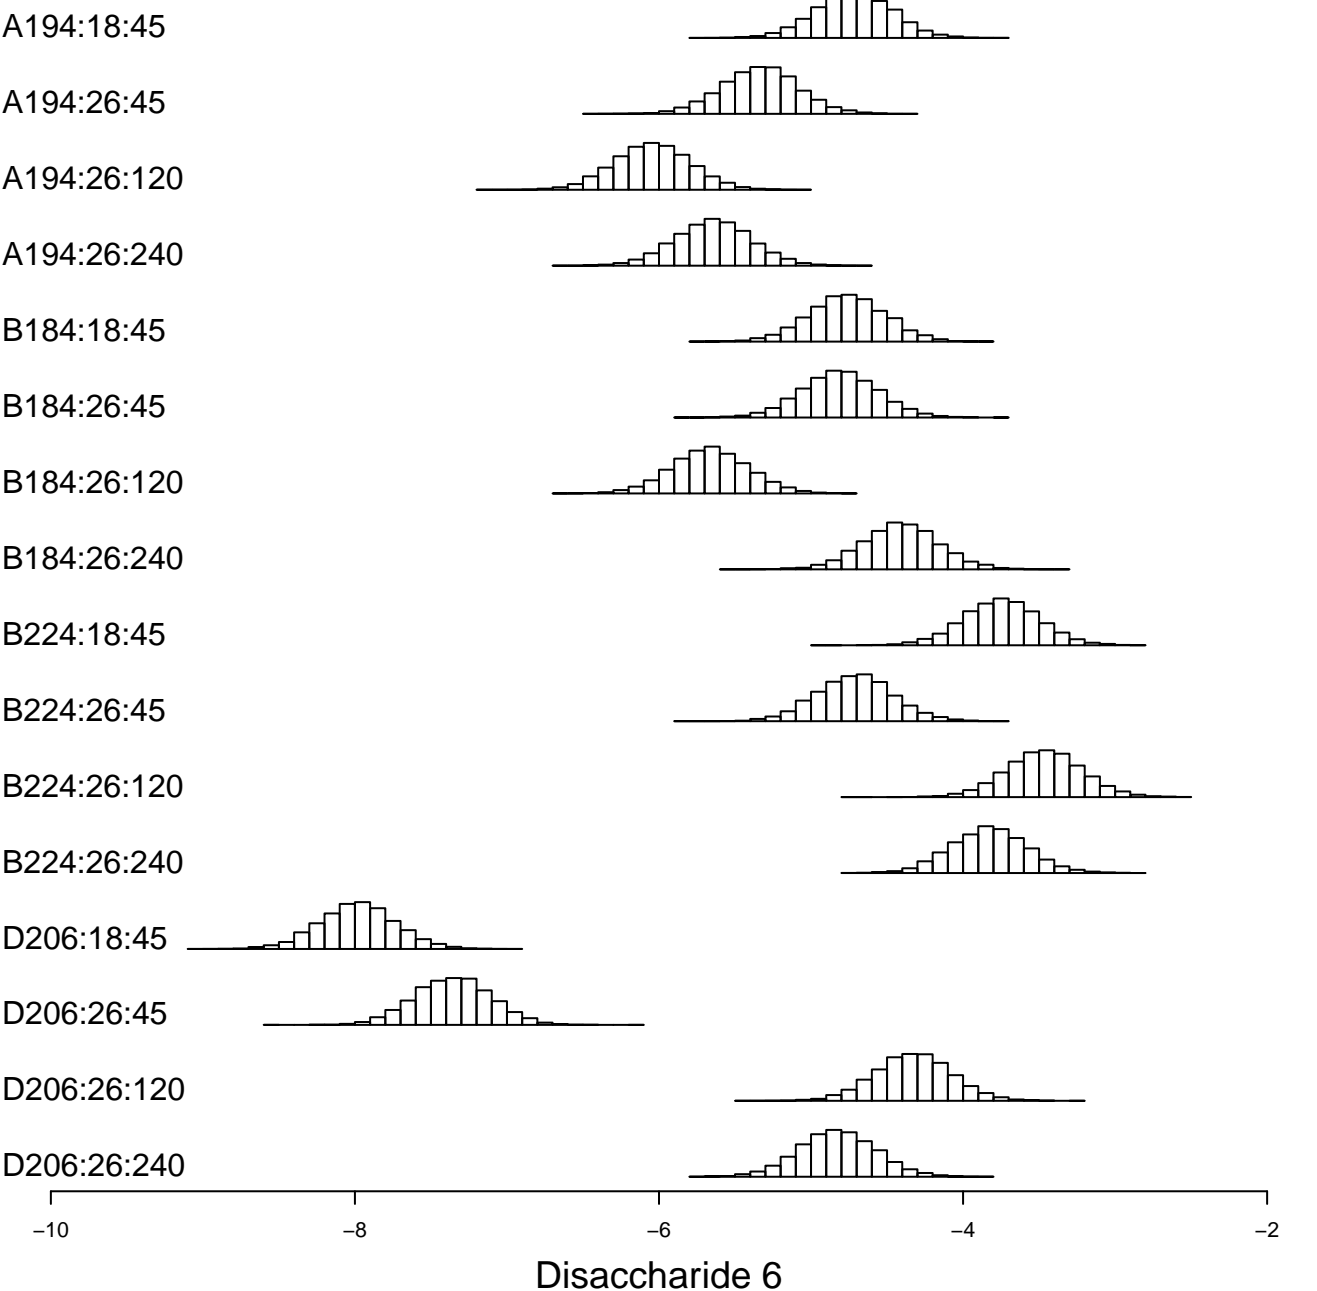

A194:18:45

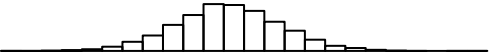

A194:26:45

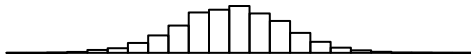

A194:26:120

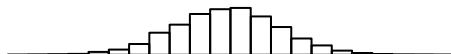

A194:26:240

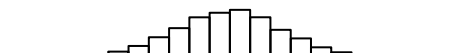

B184:18:45

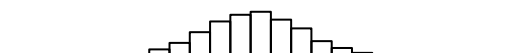

B184:26:45

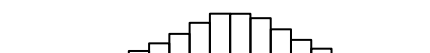

B184:26:120

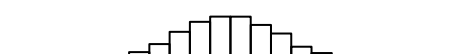

B184:26:240

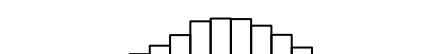

B224:18:45

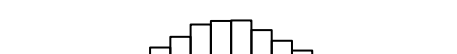

B224:26:45

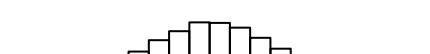

B224:26:120

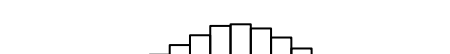

B224:26:240

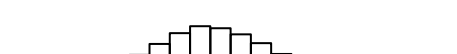

D206:18:45

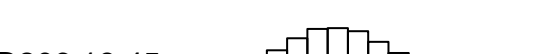

D206:26:45

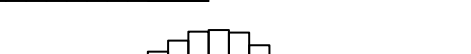

D206:26:120

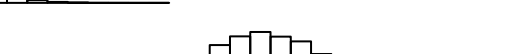

D206:26:240

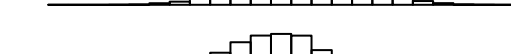

-8 -7 -6 -5 -4 -3 -2

Disaccharide 7



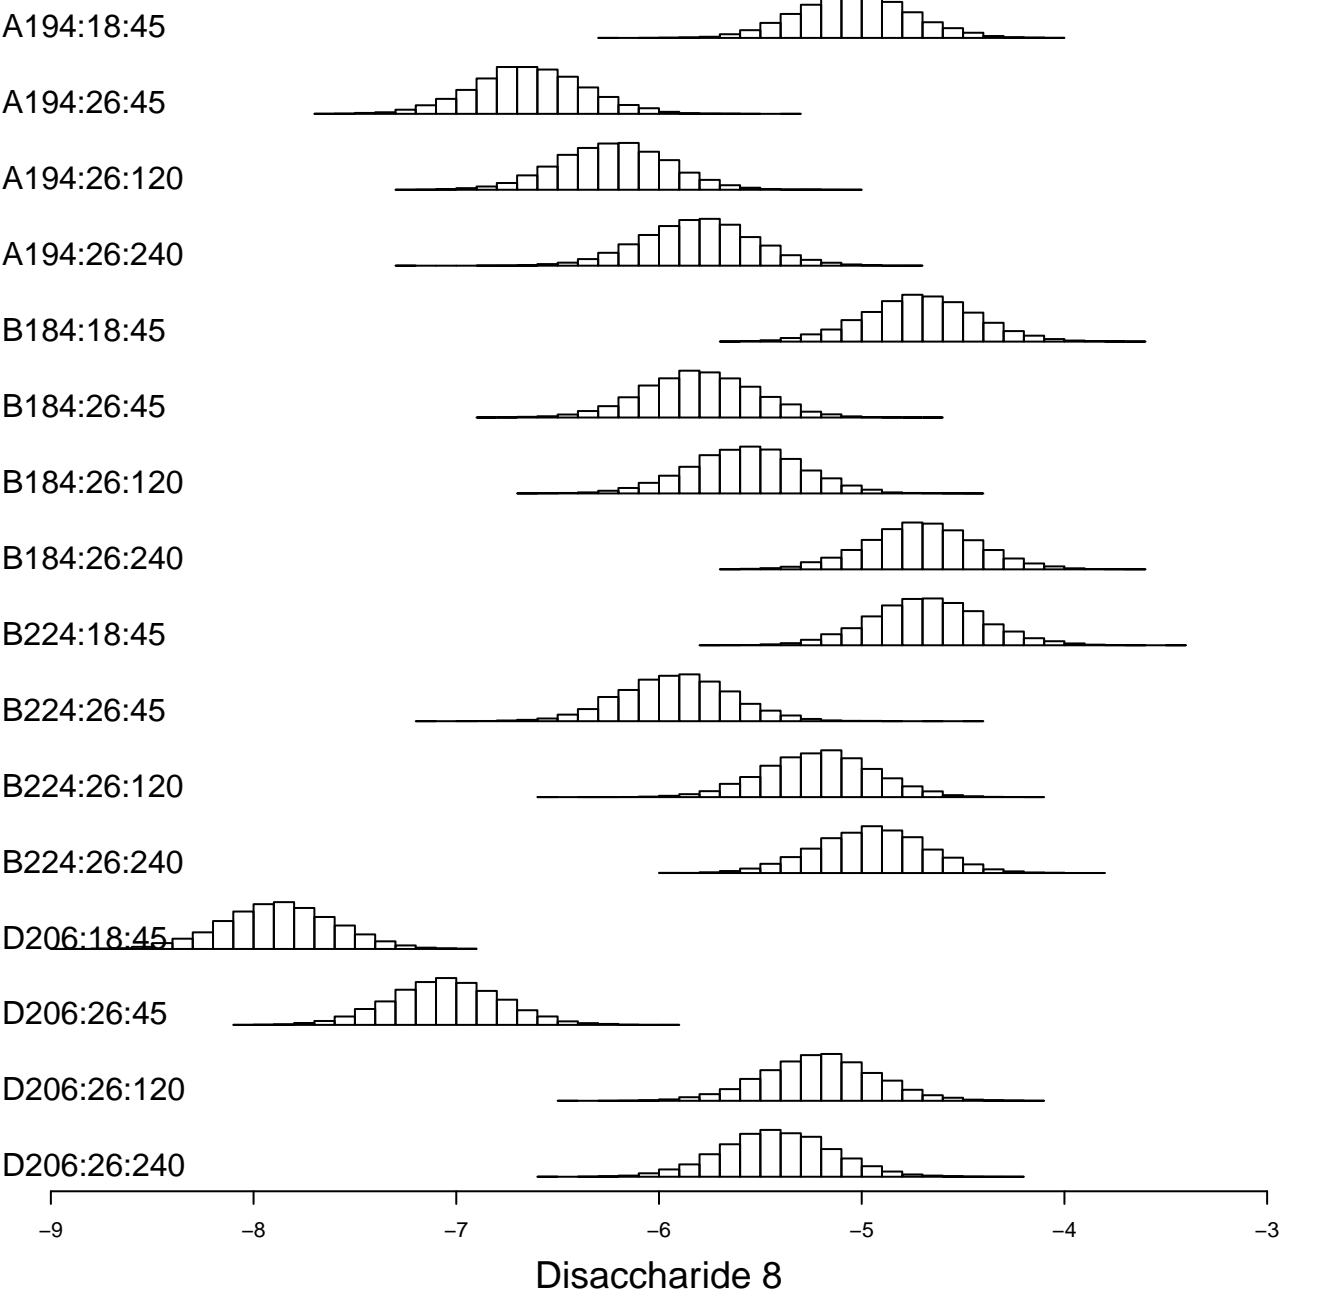

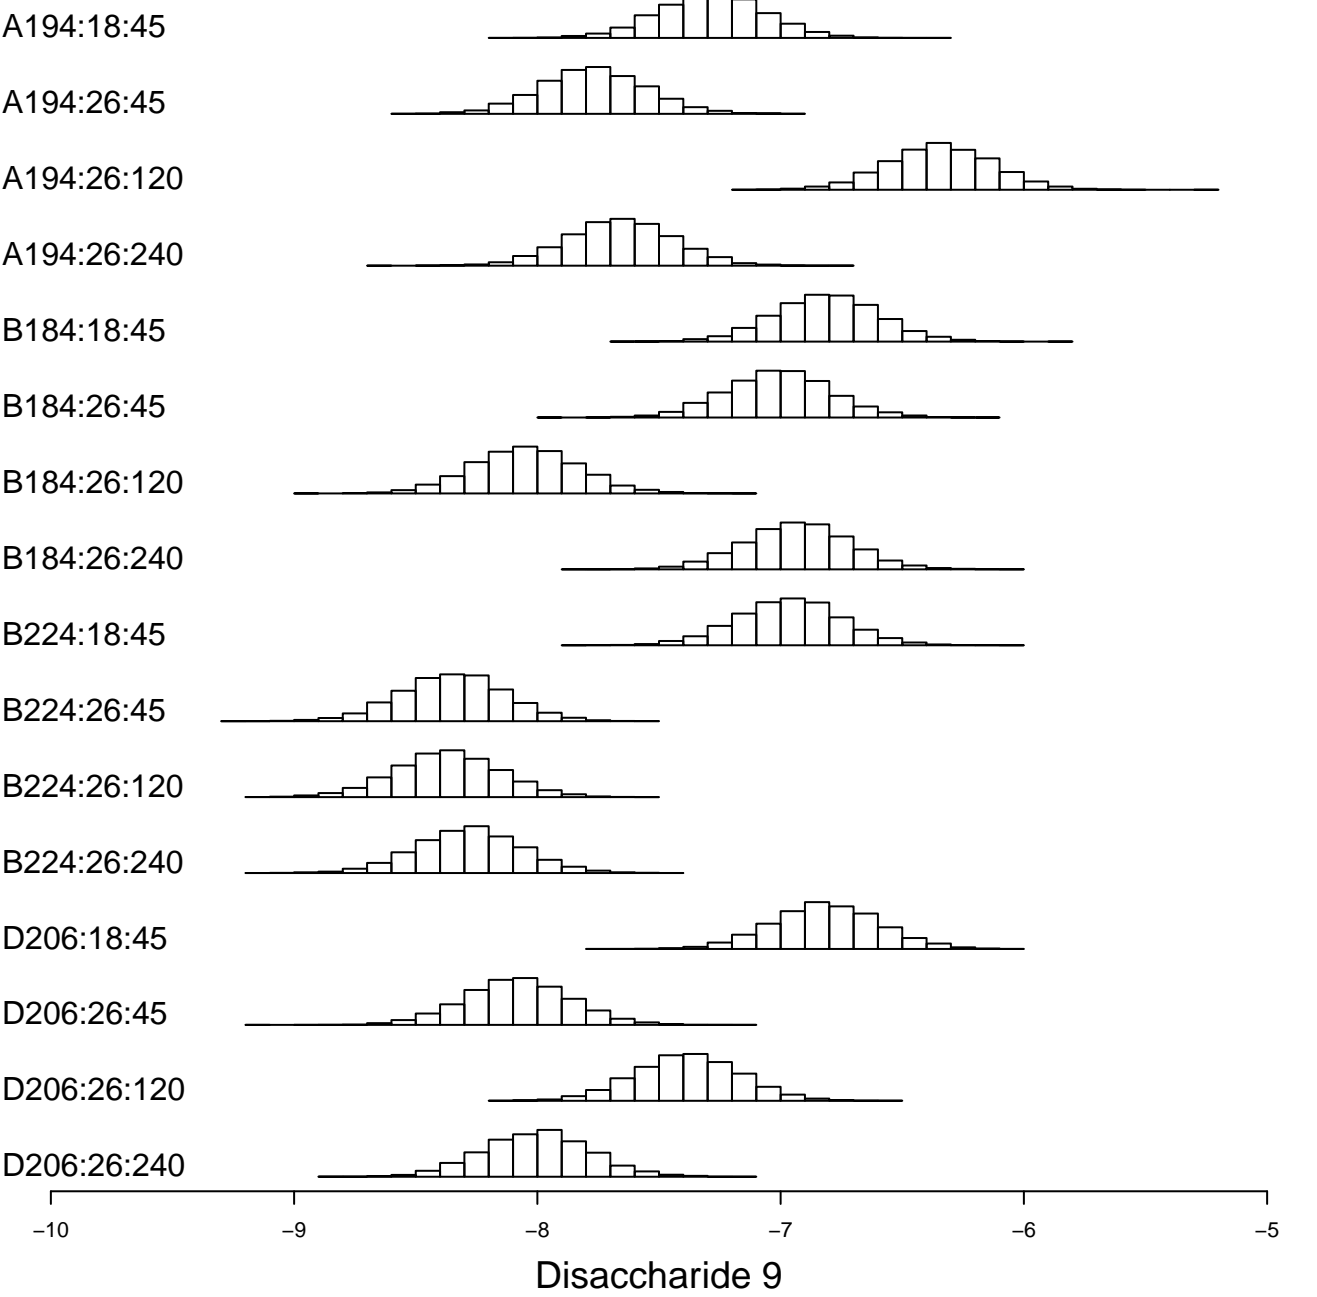

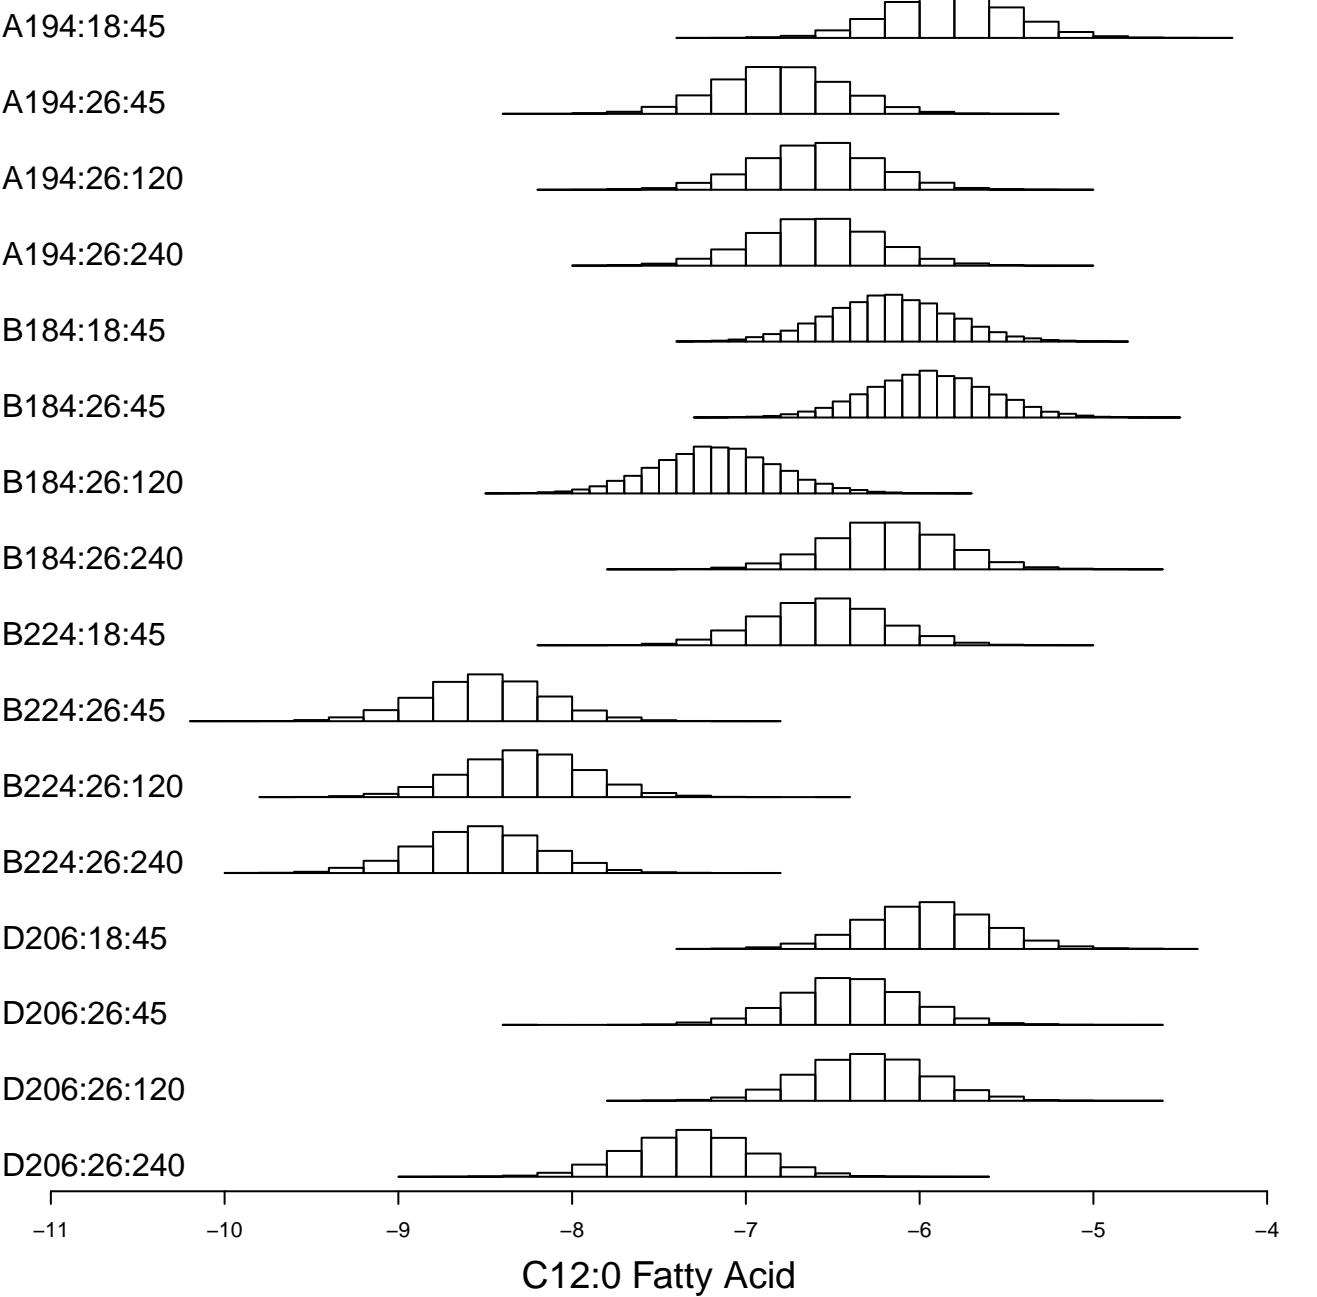



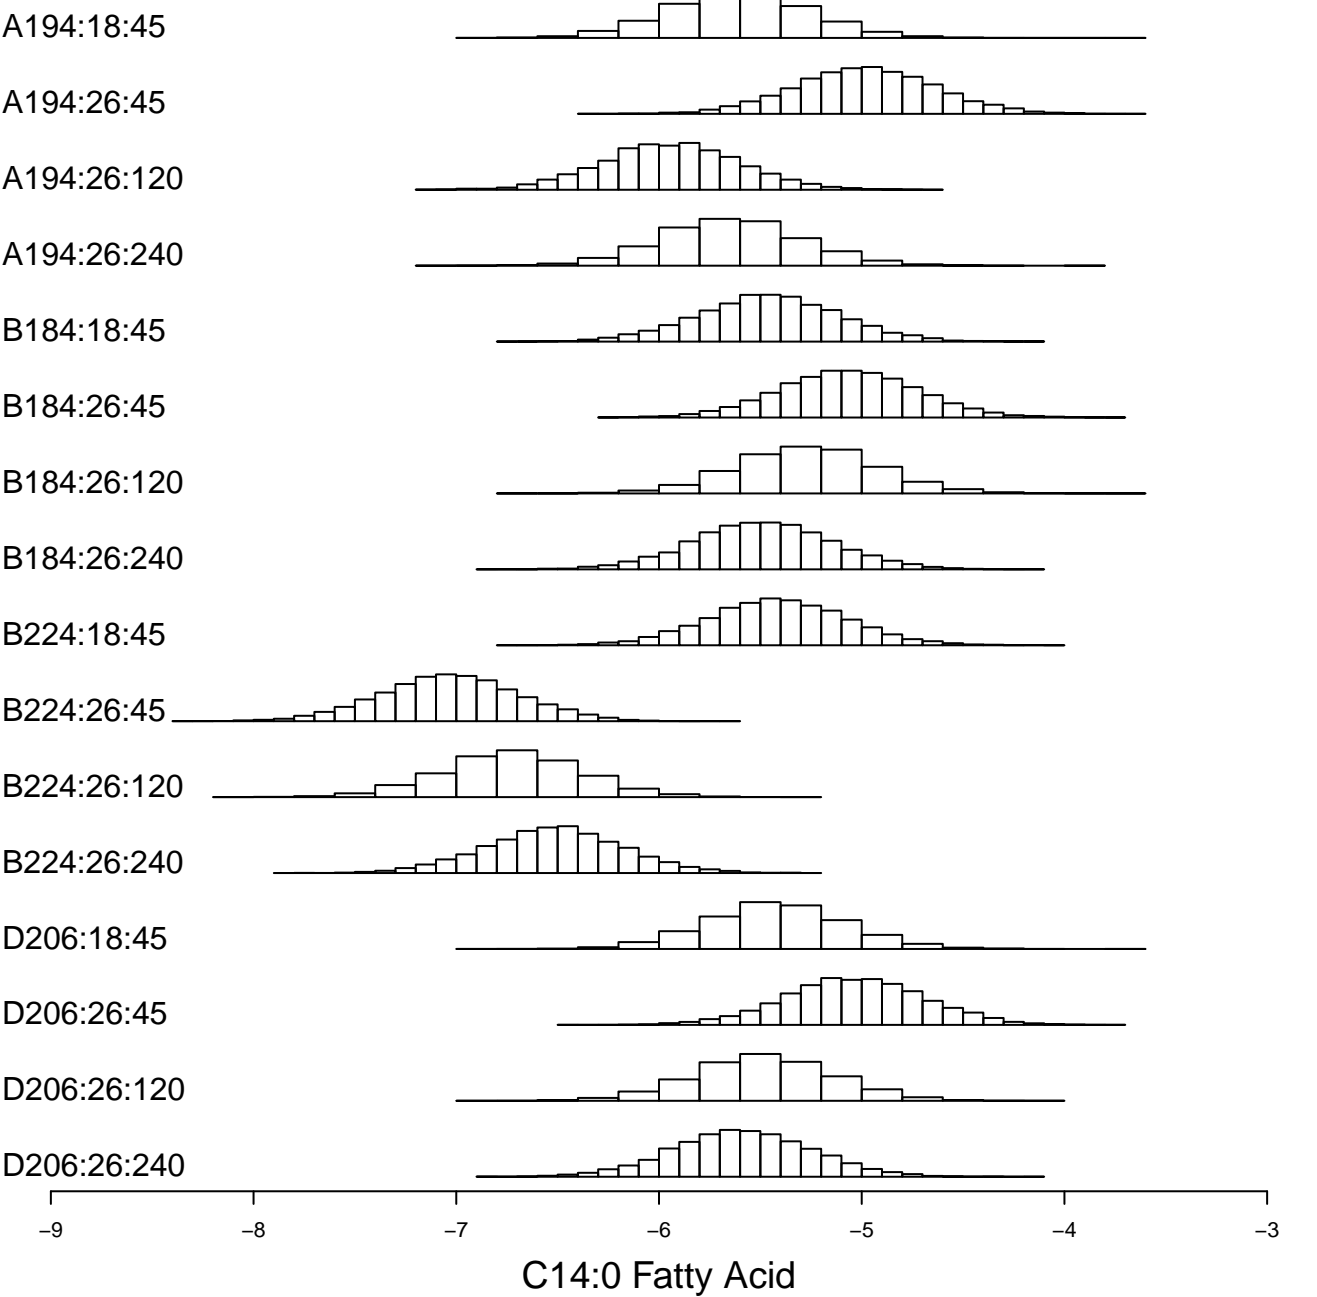

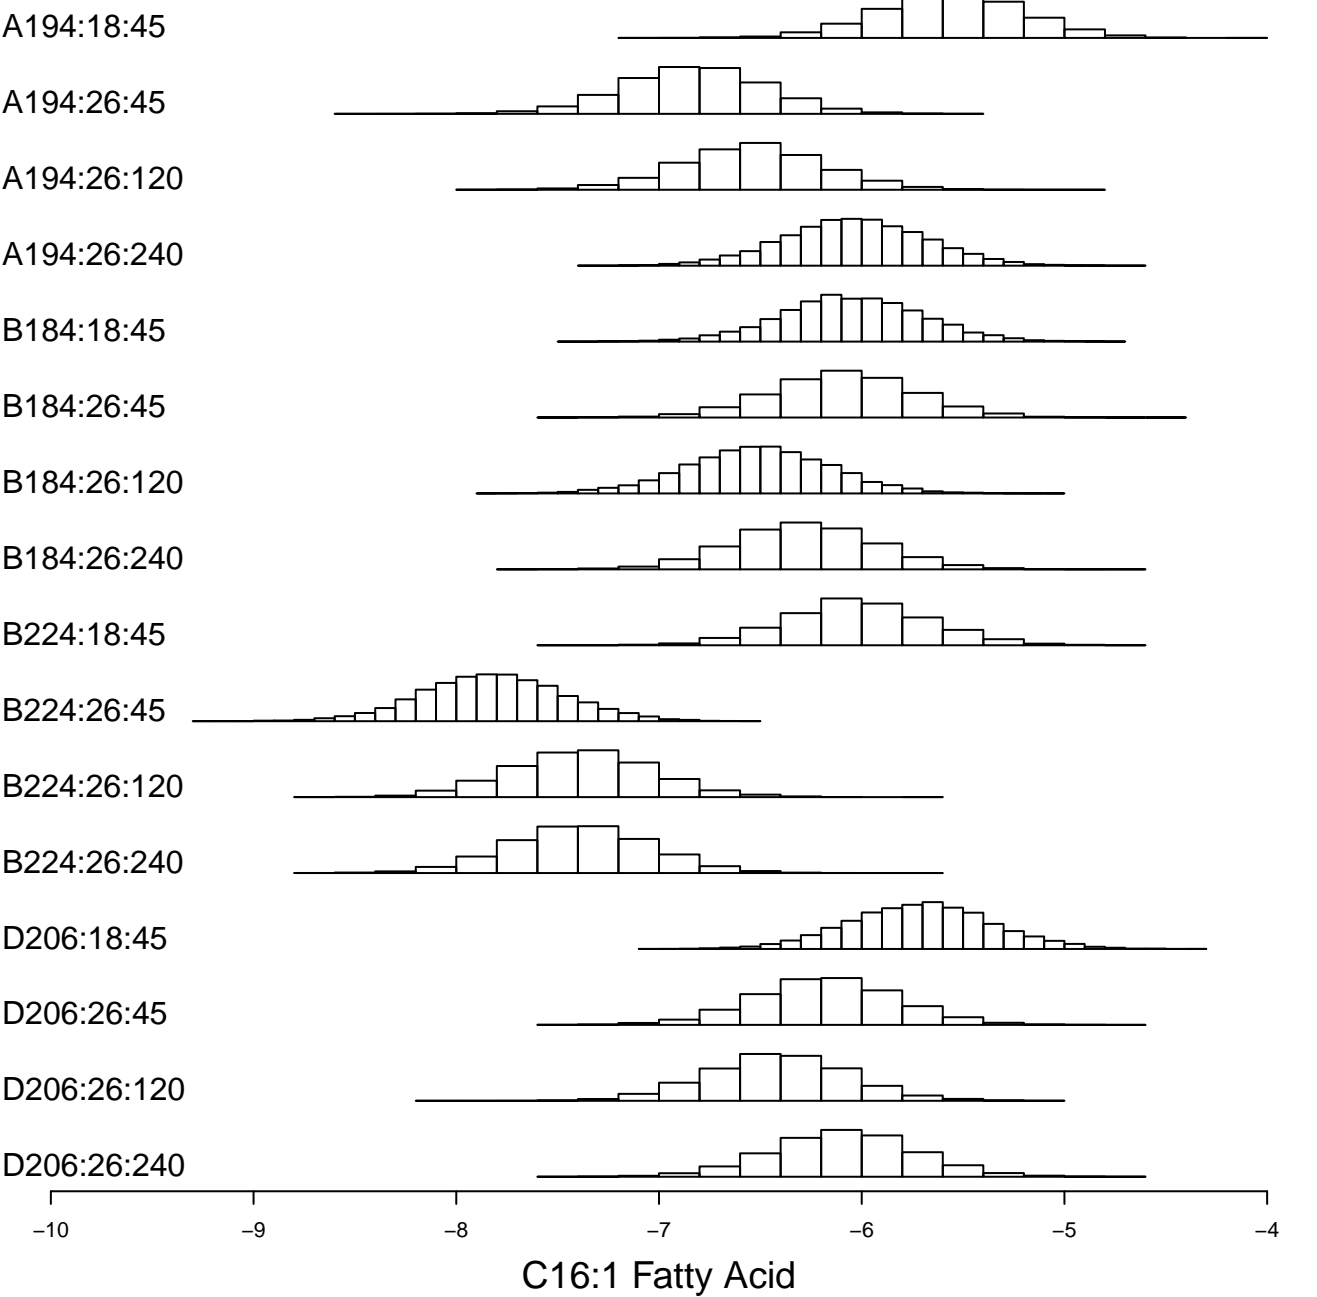

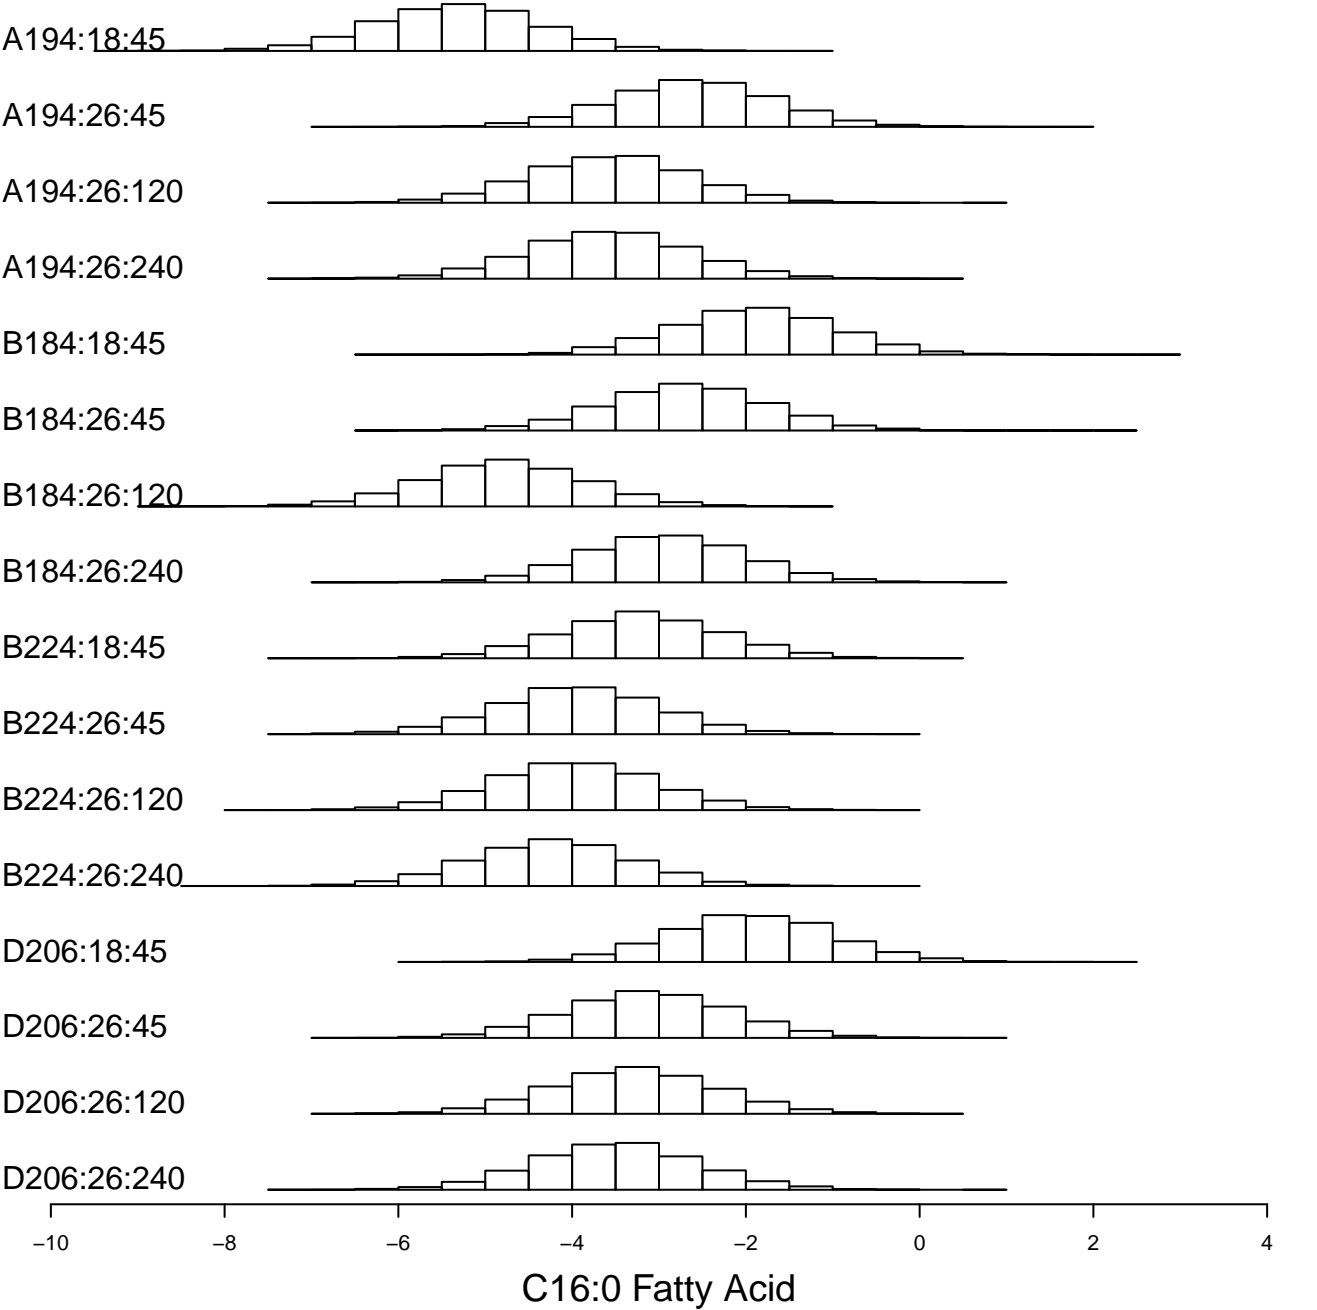

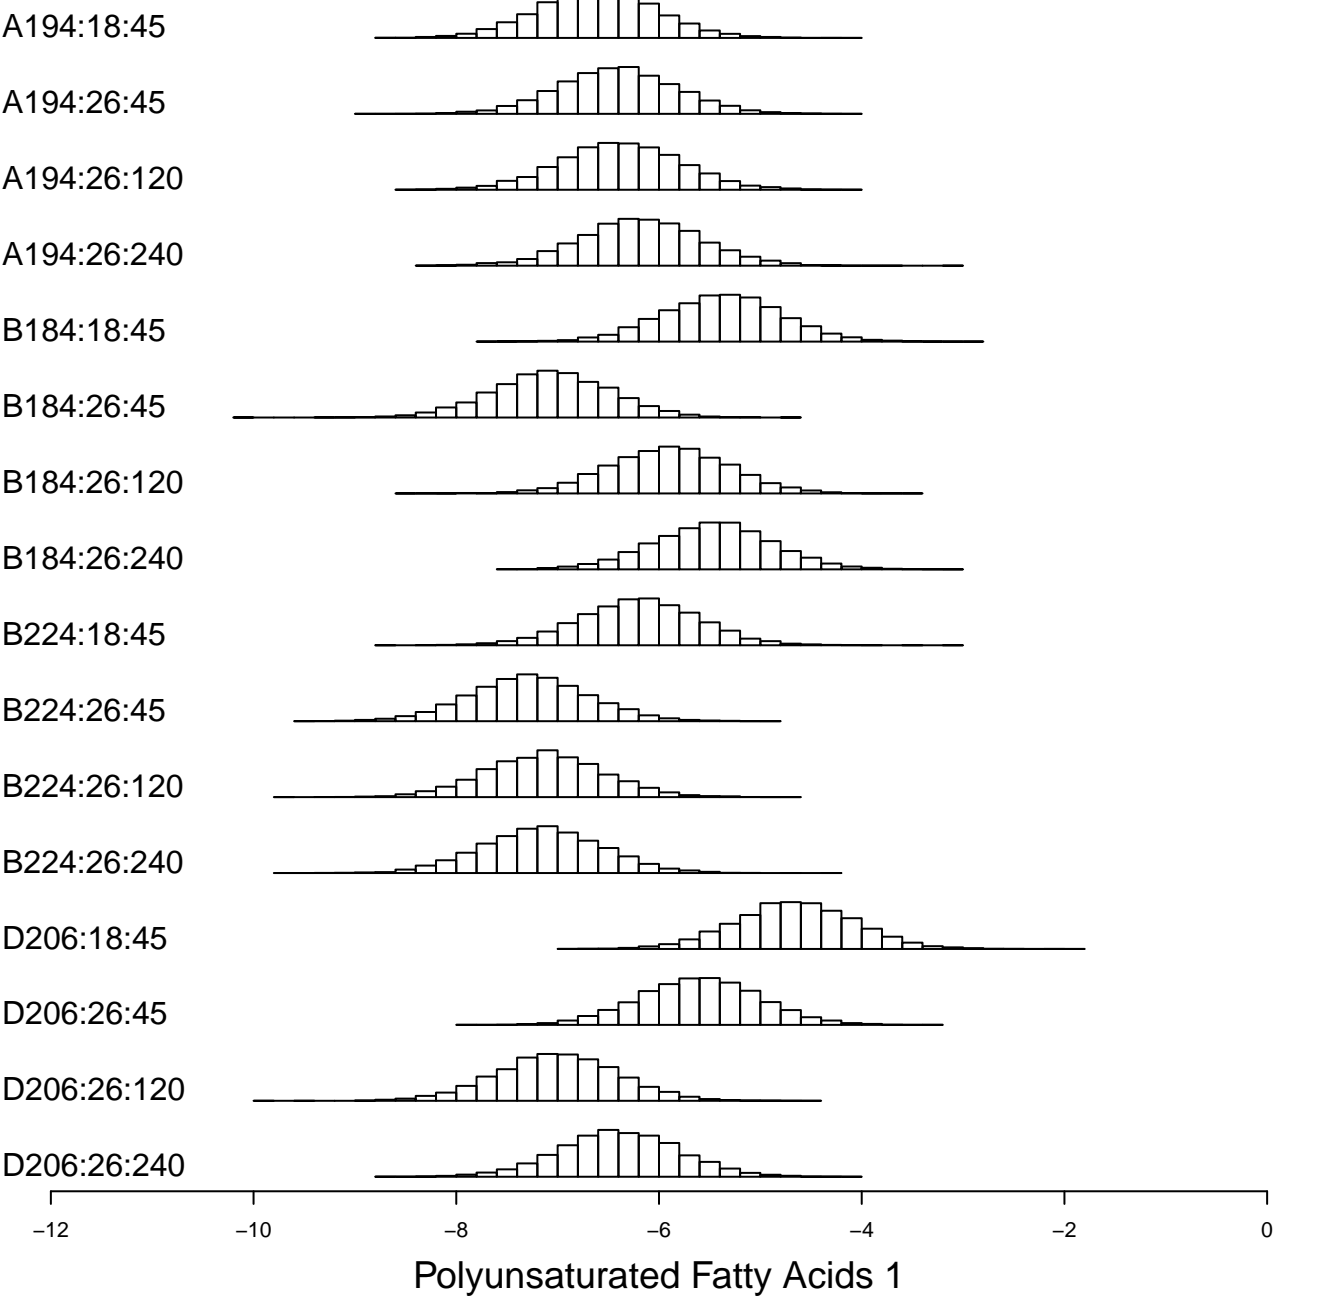



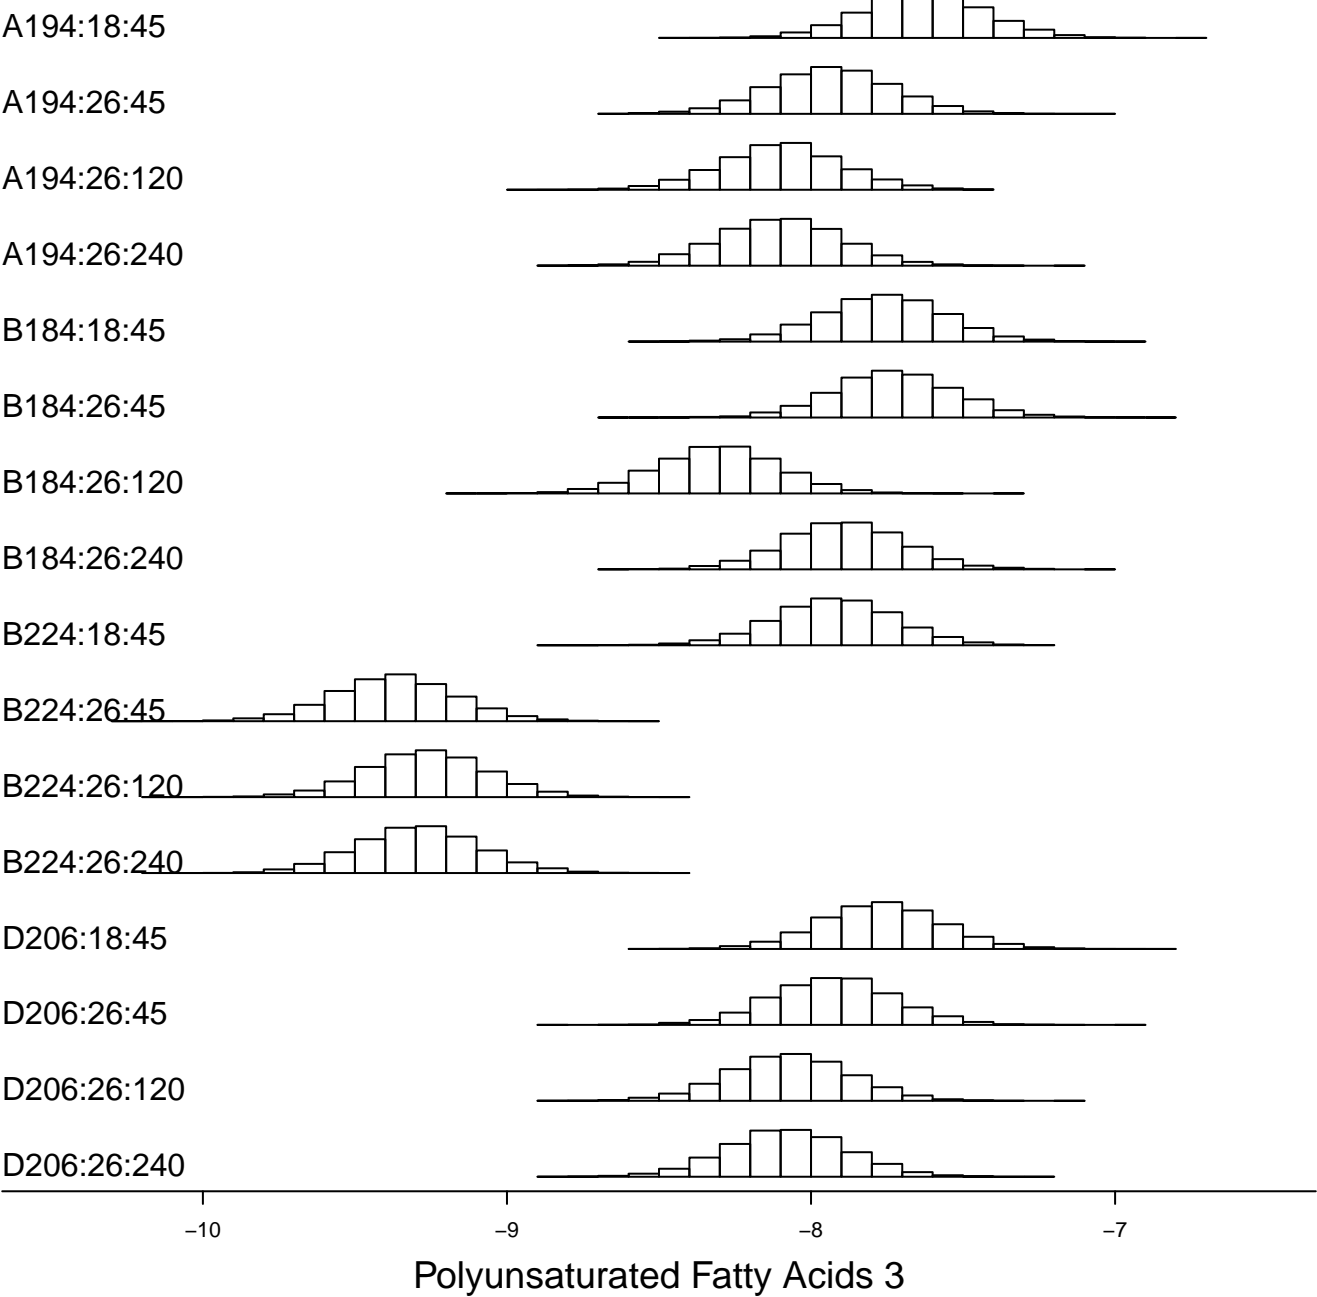

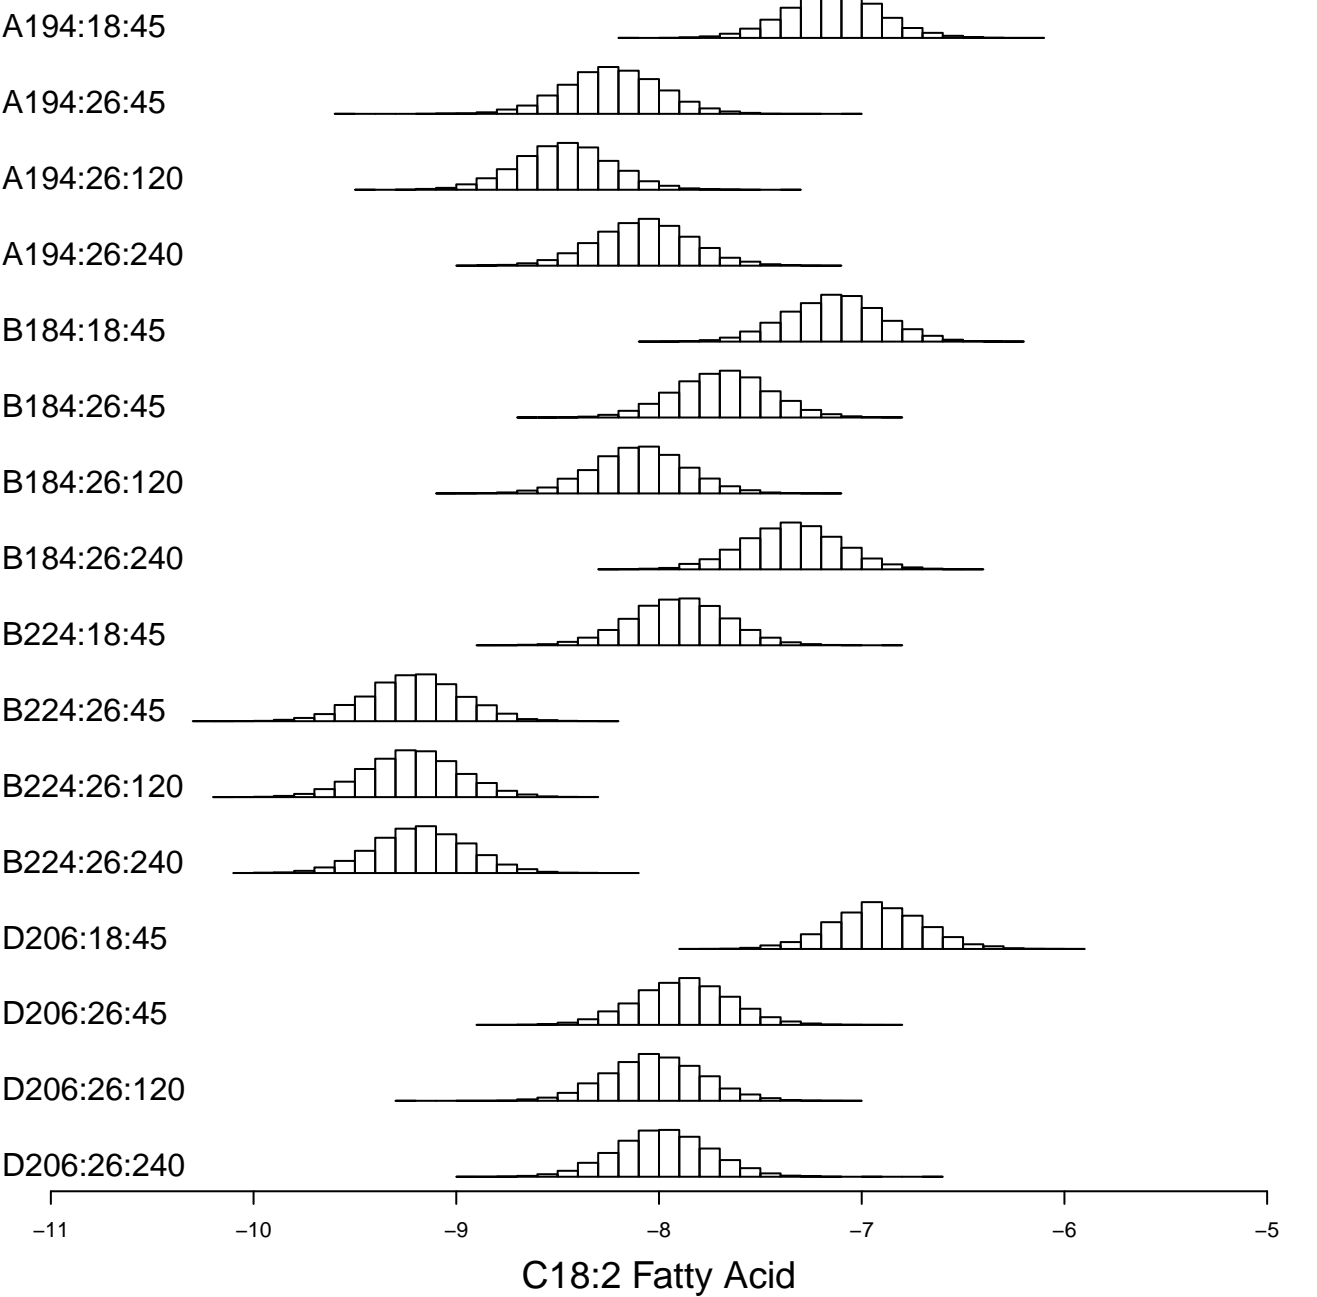

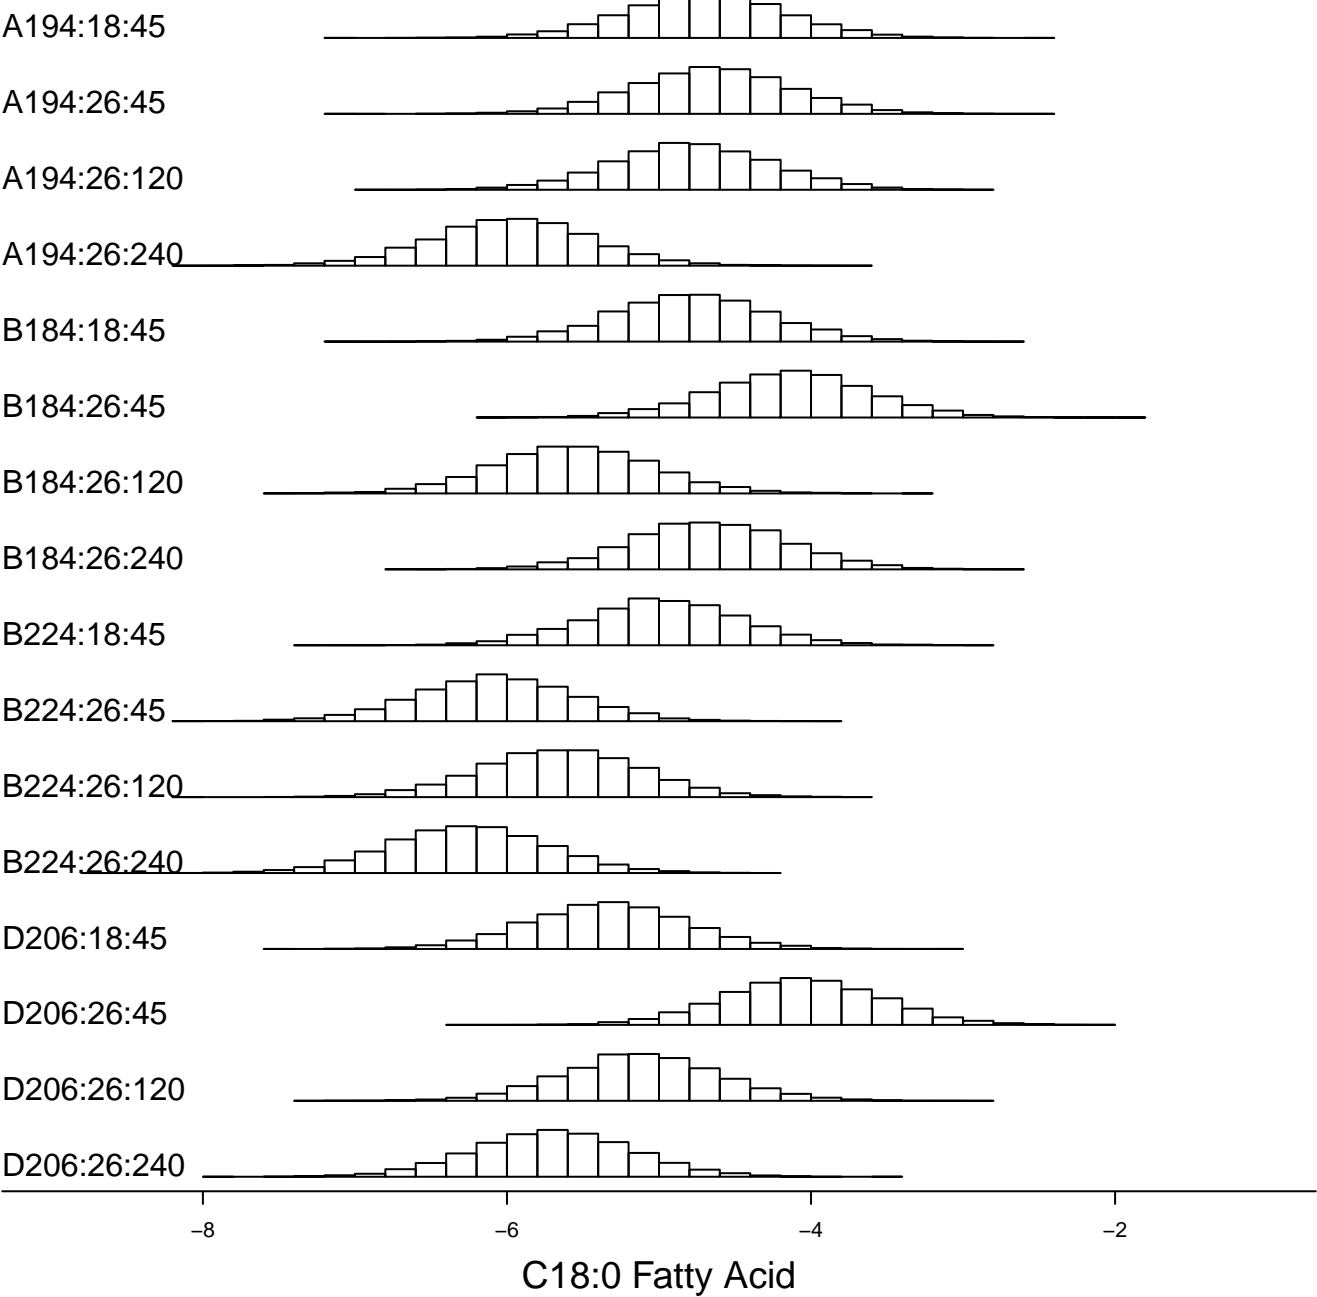

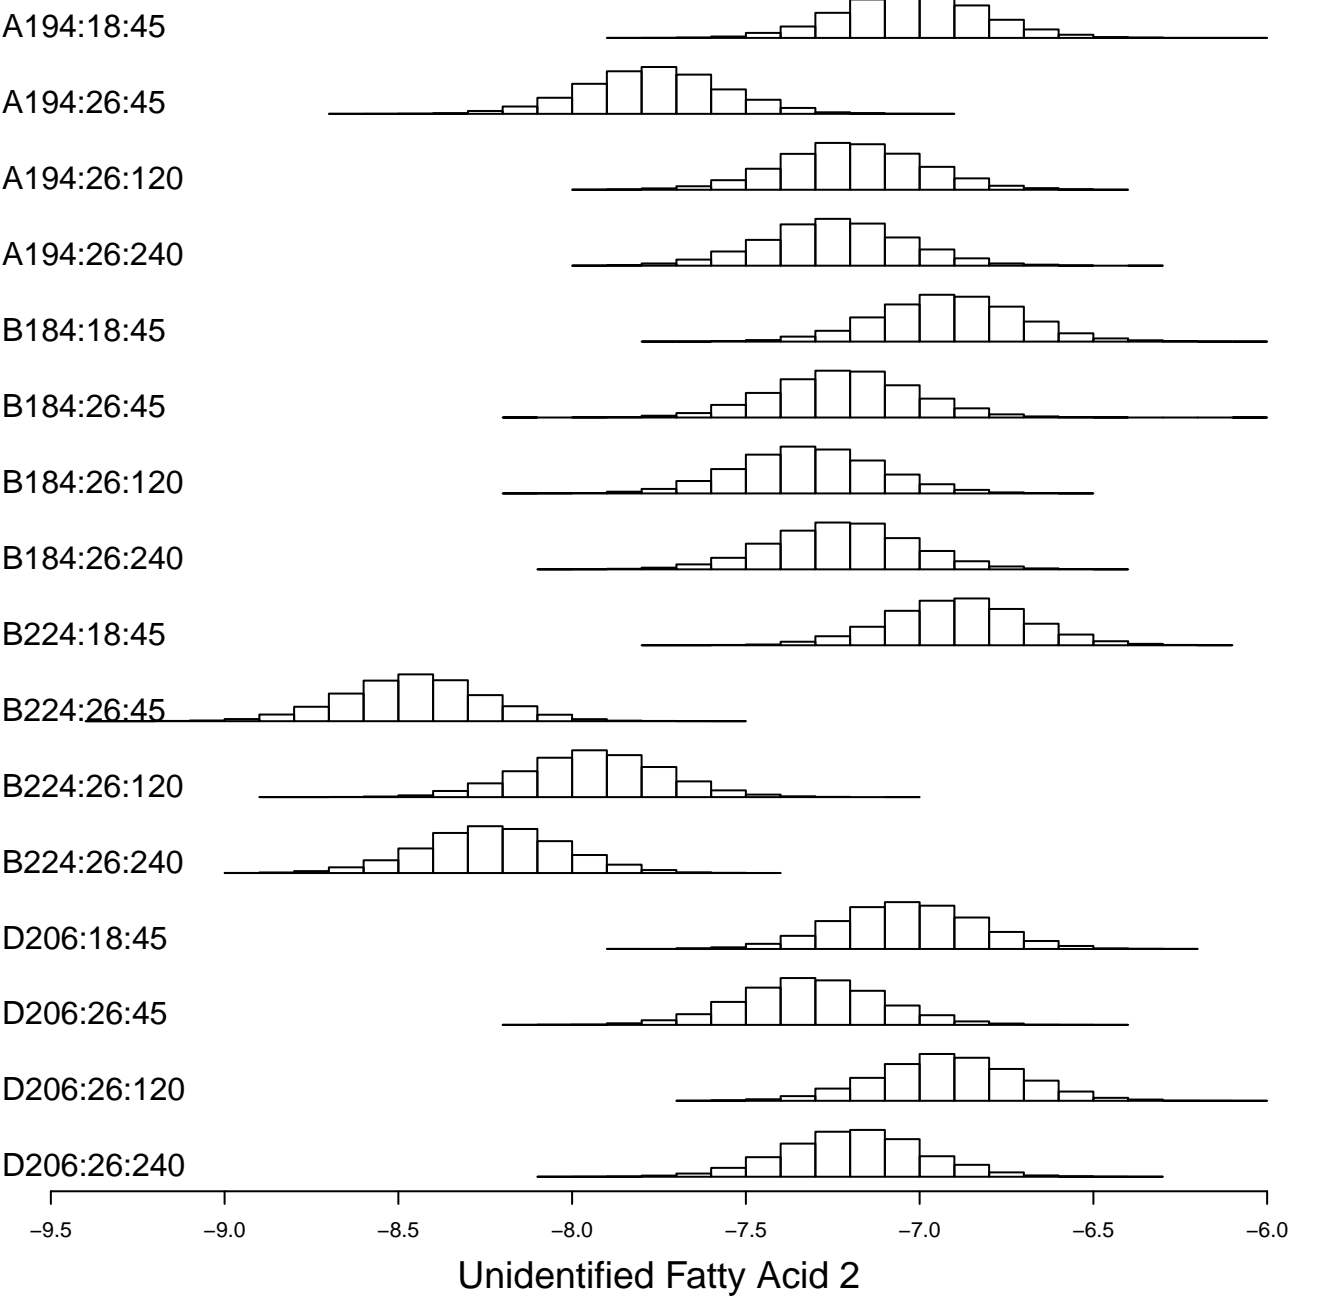

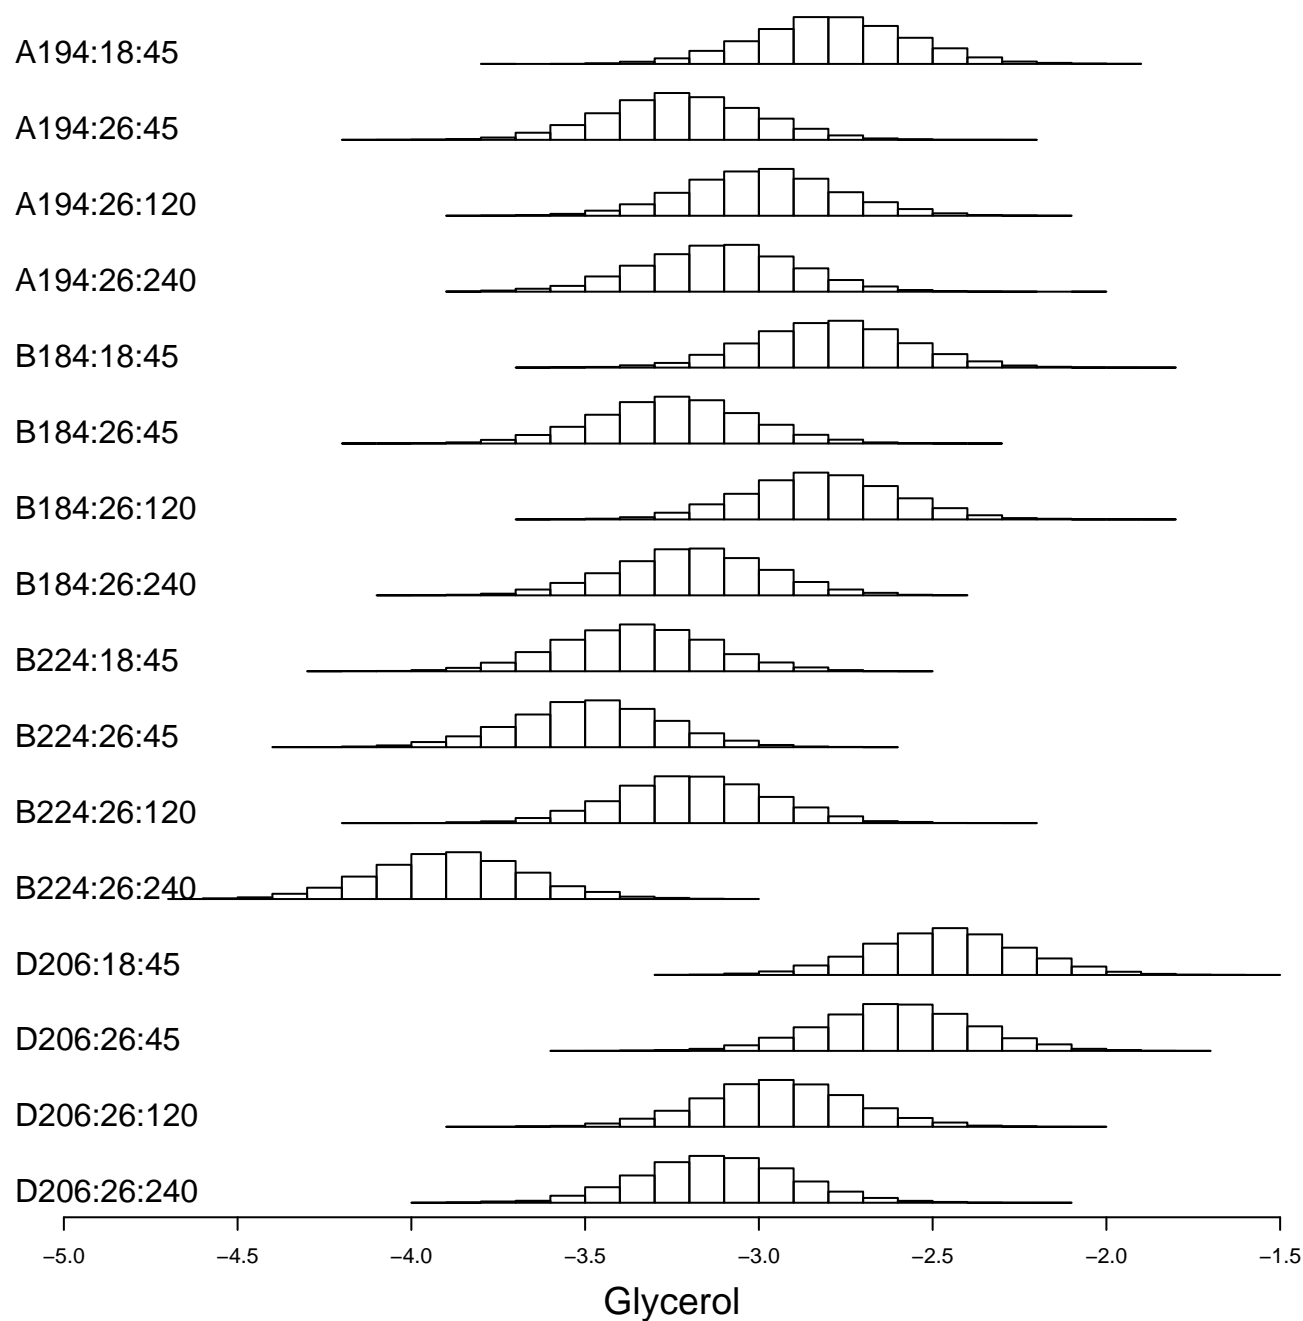

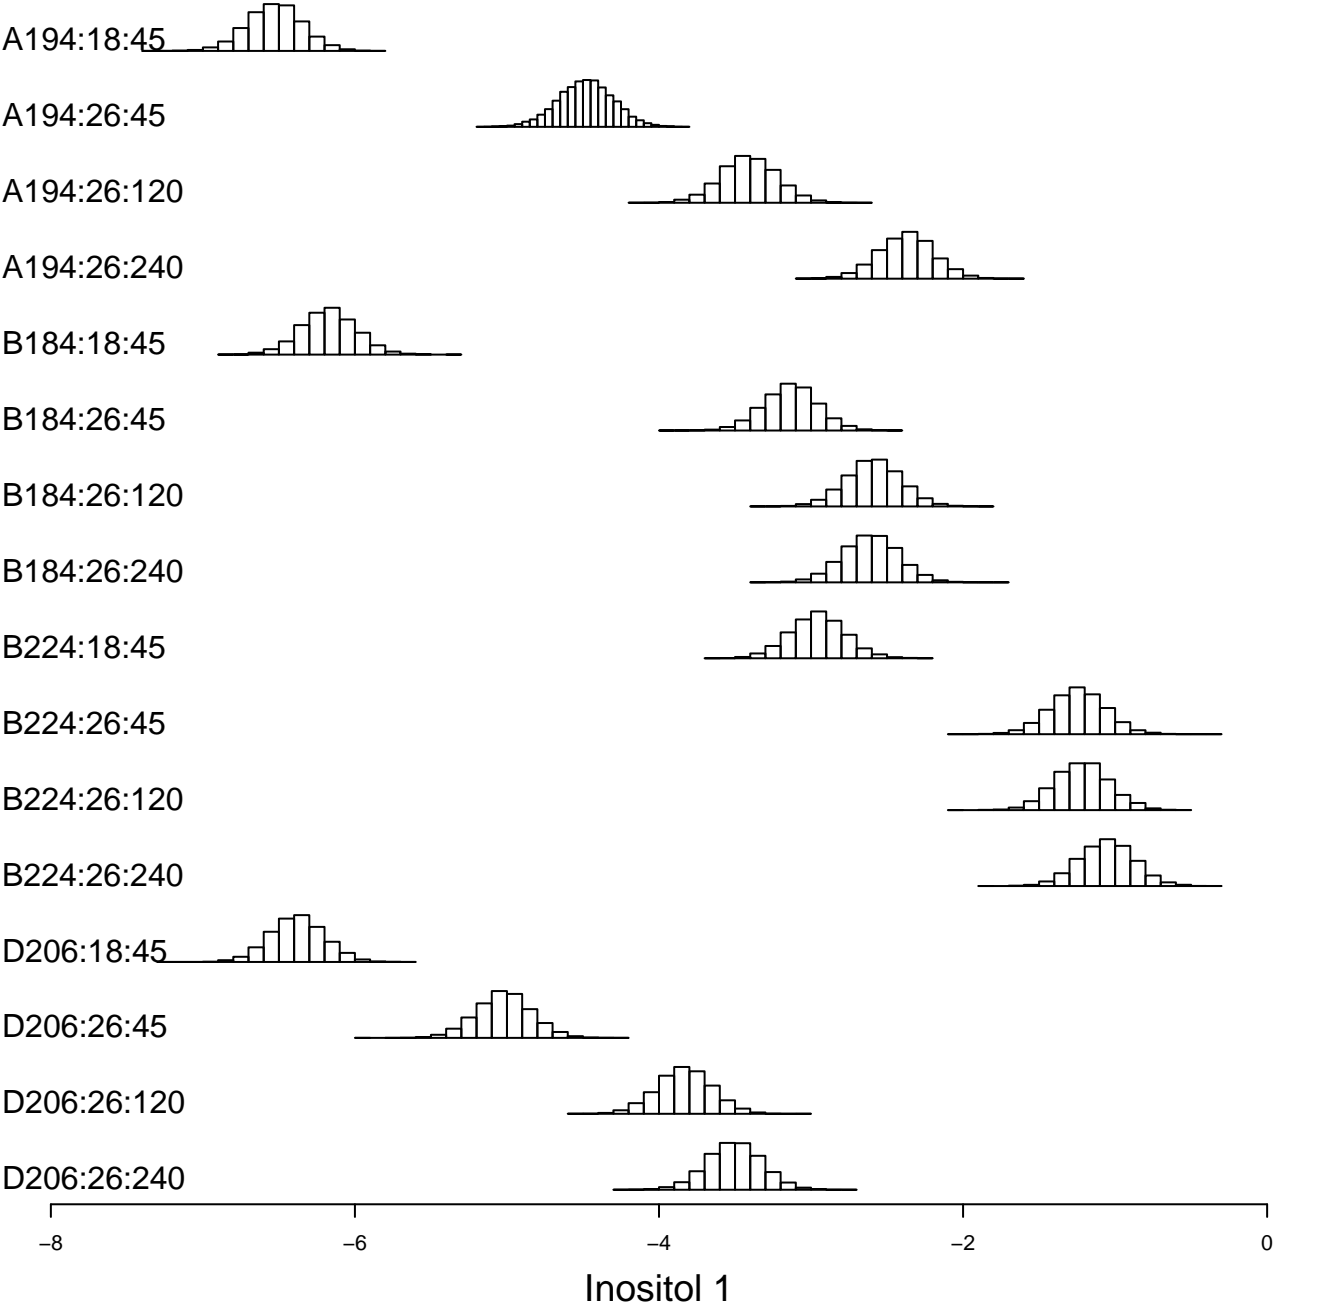

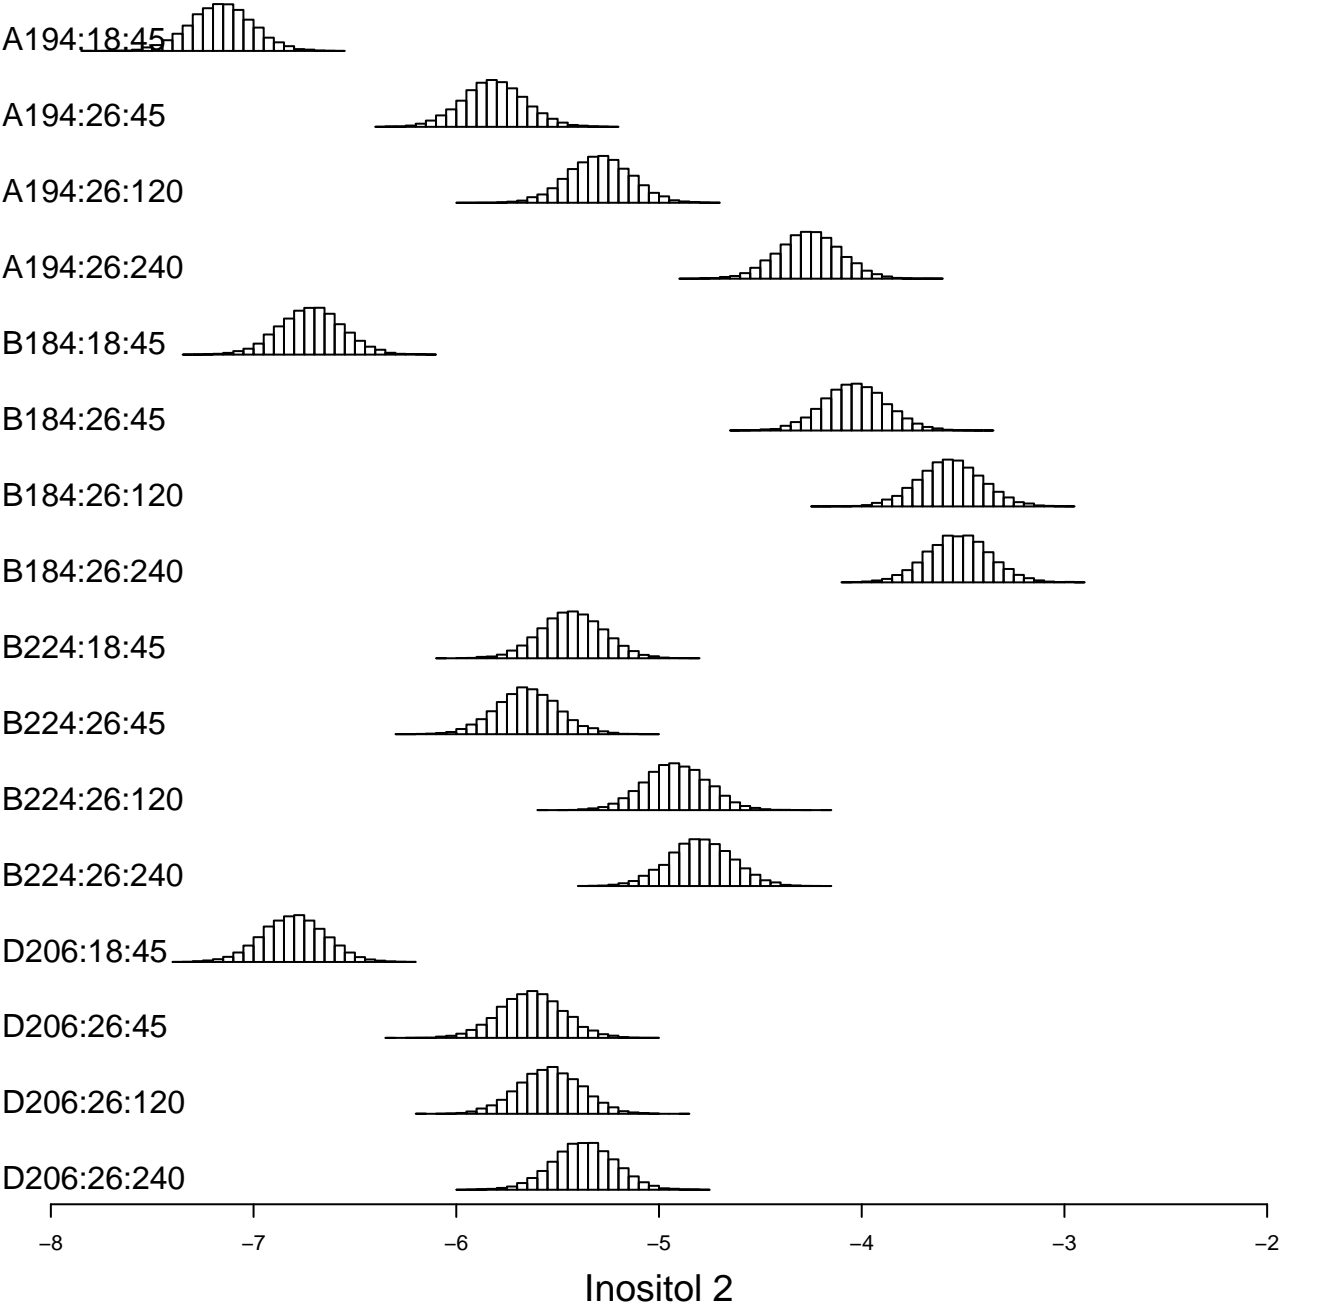

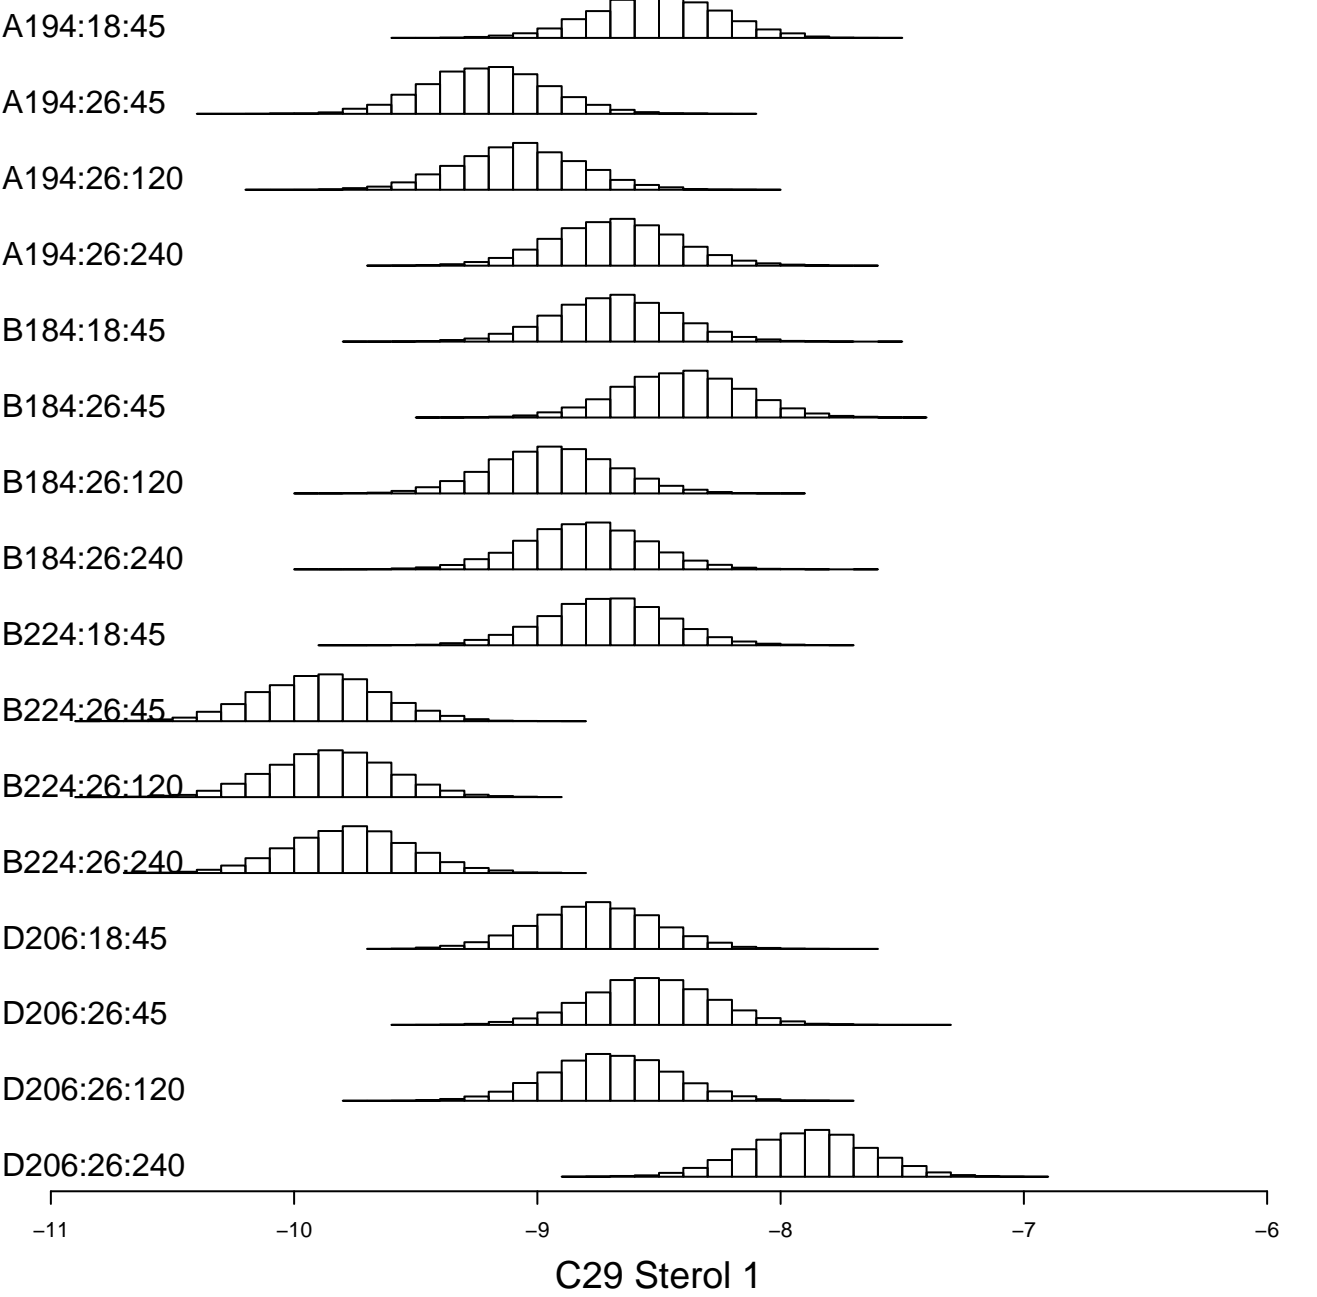



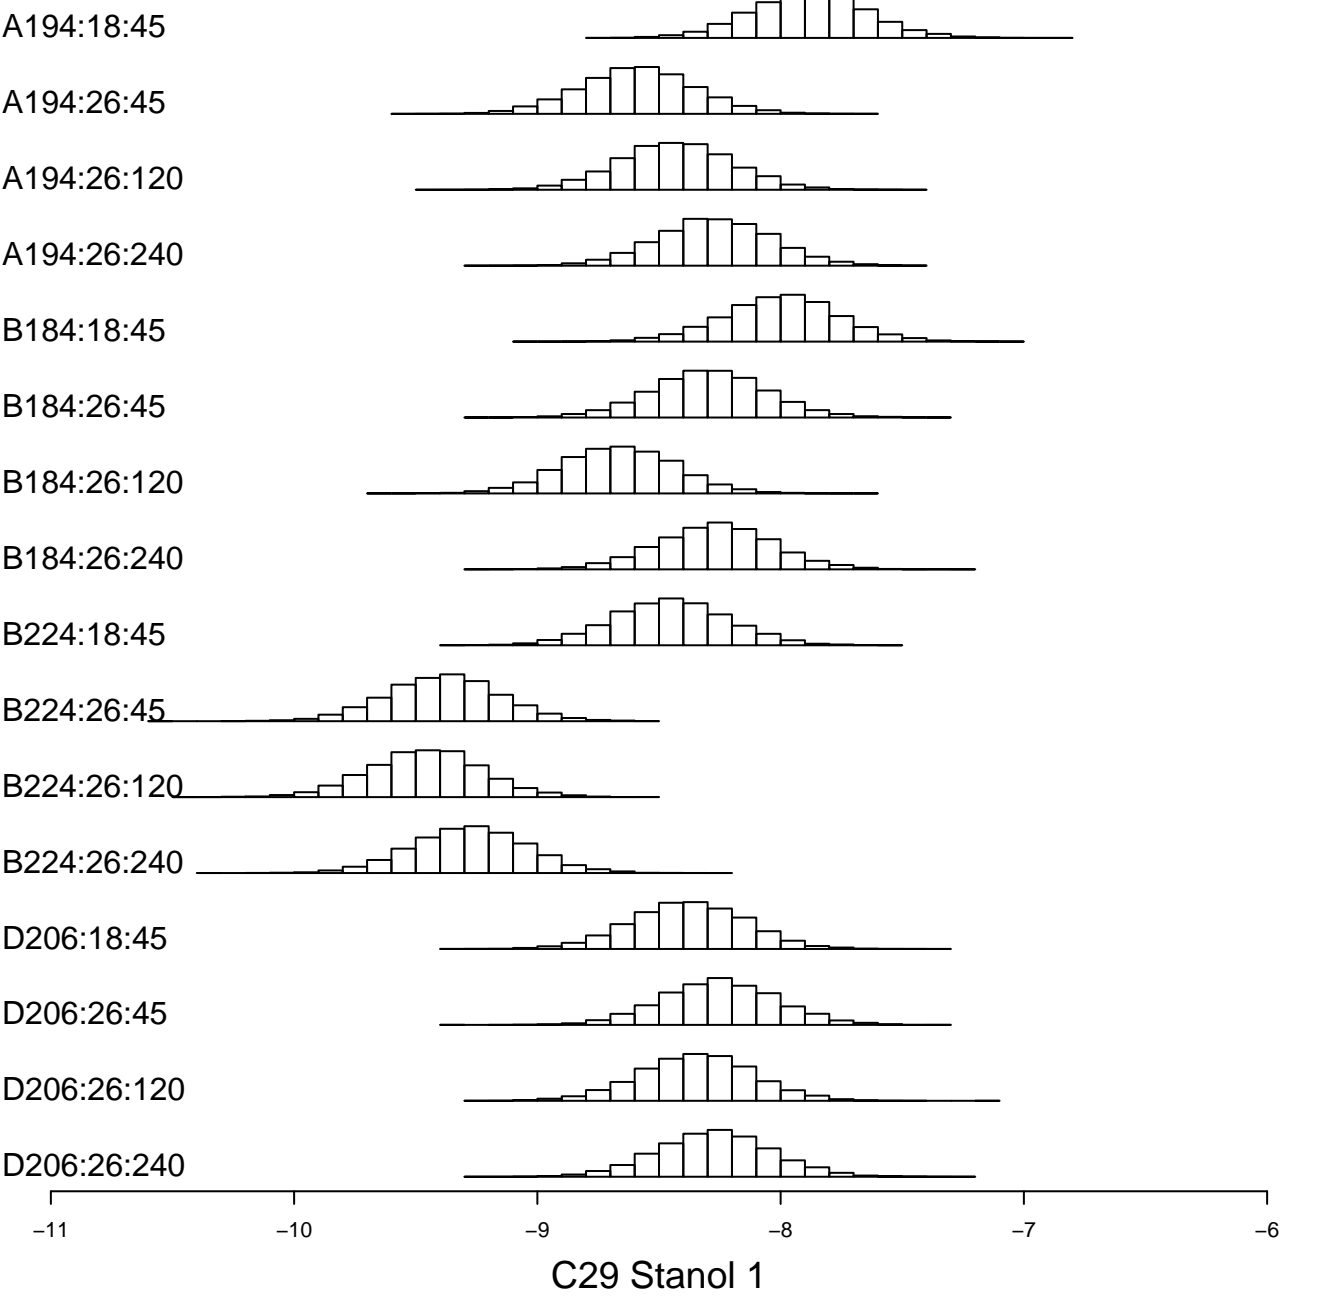

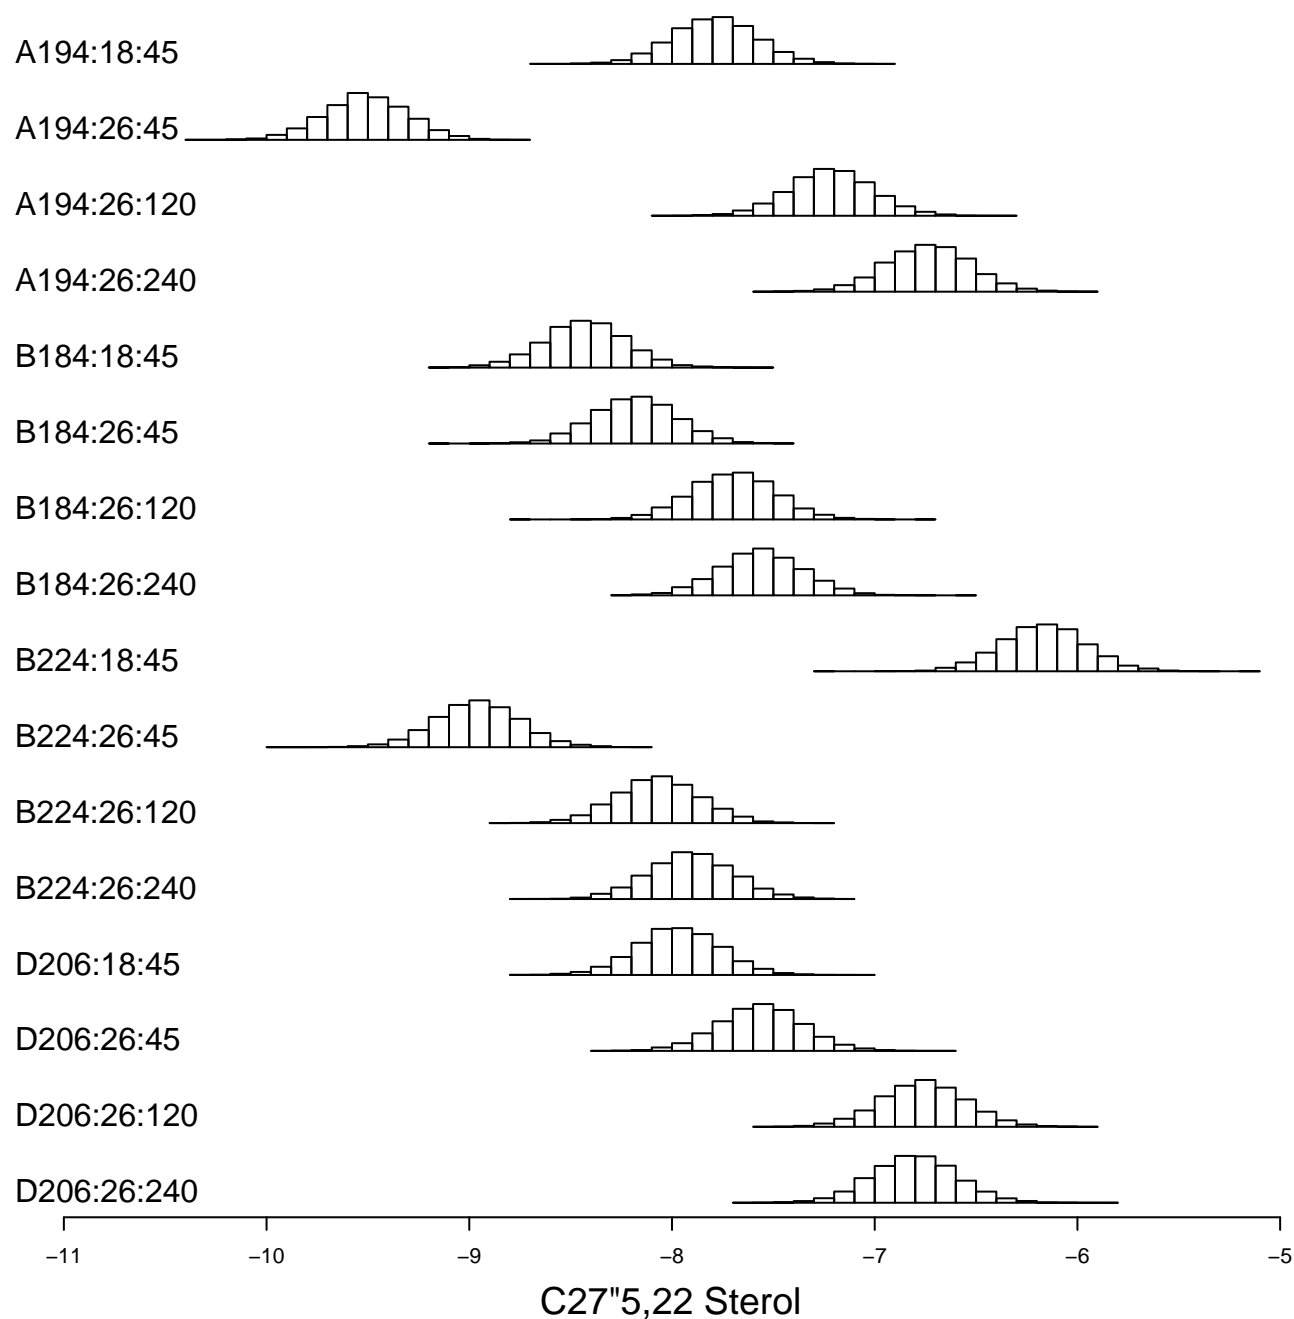

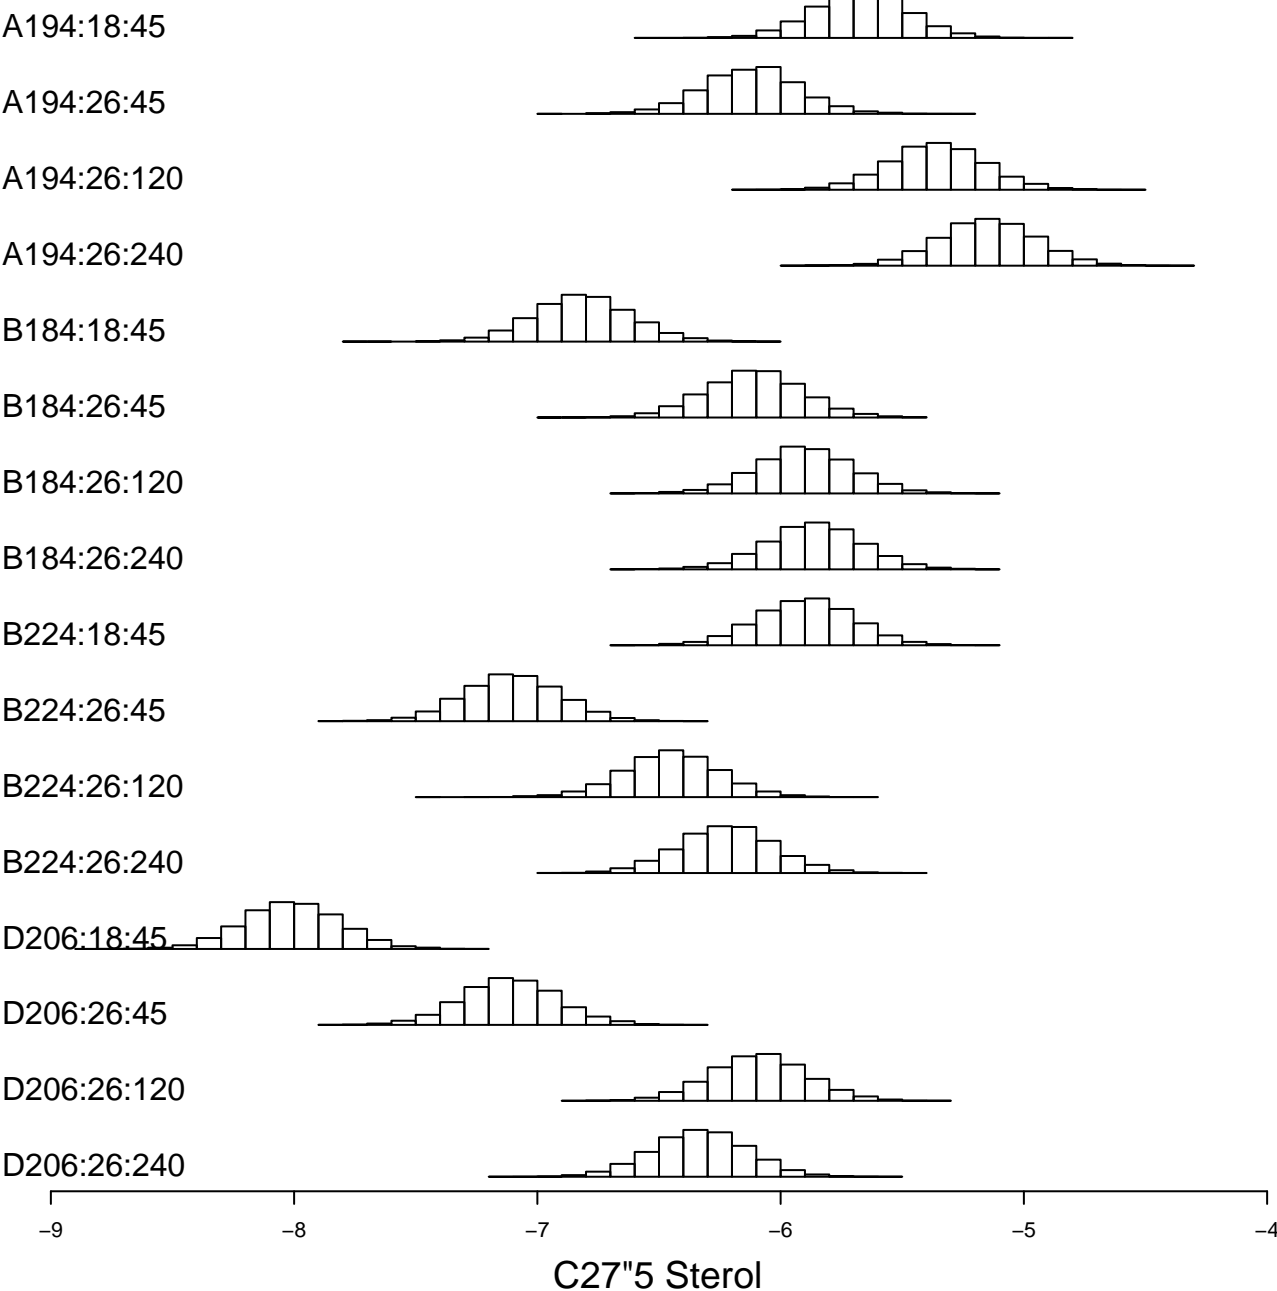

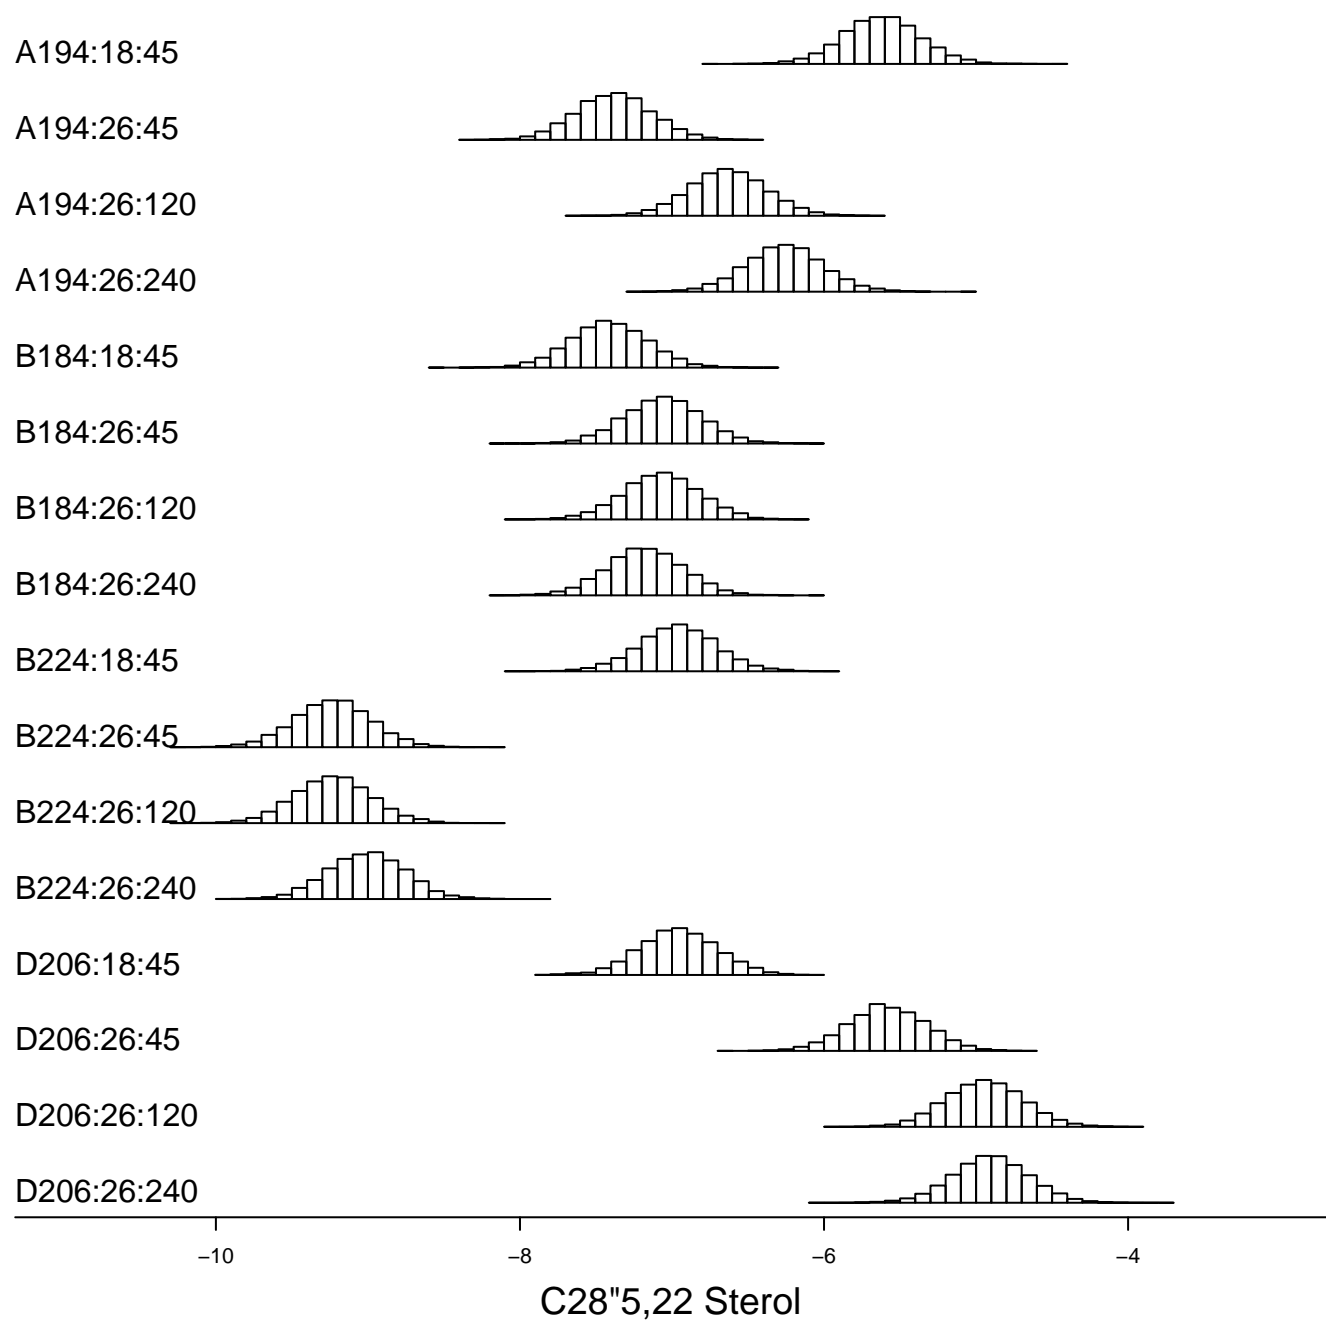

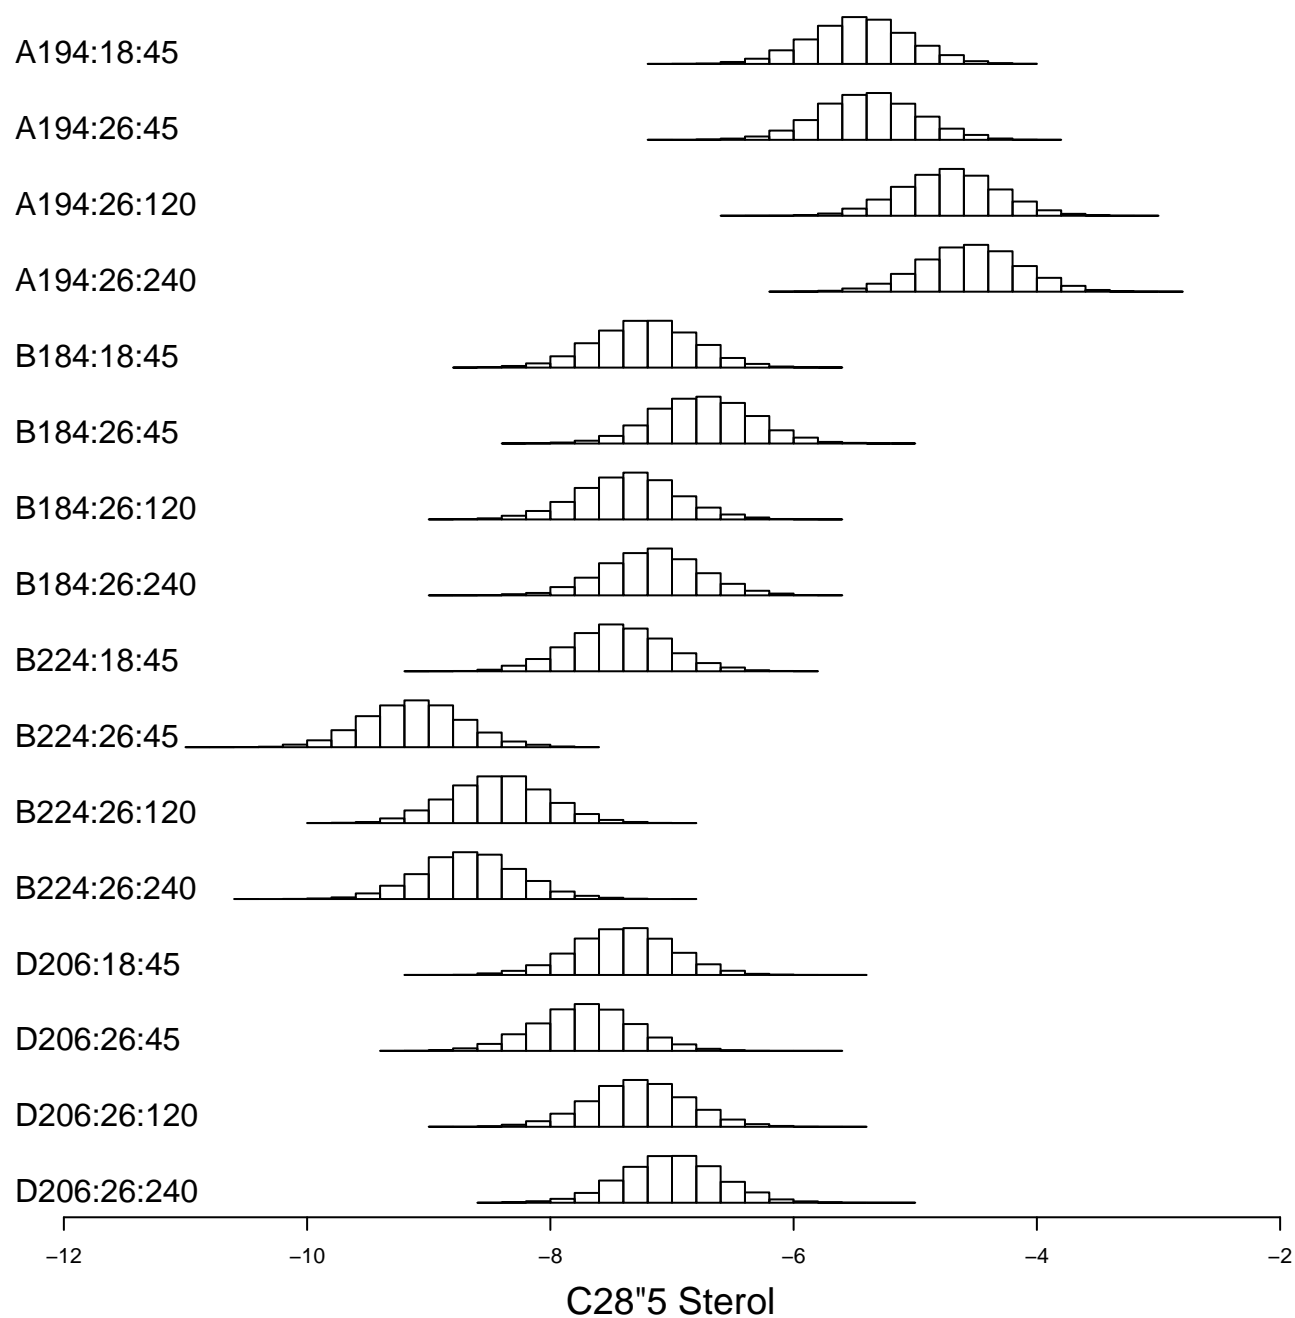

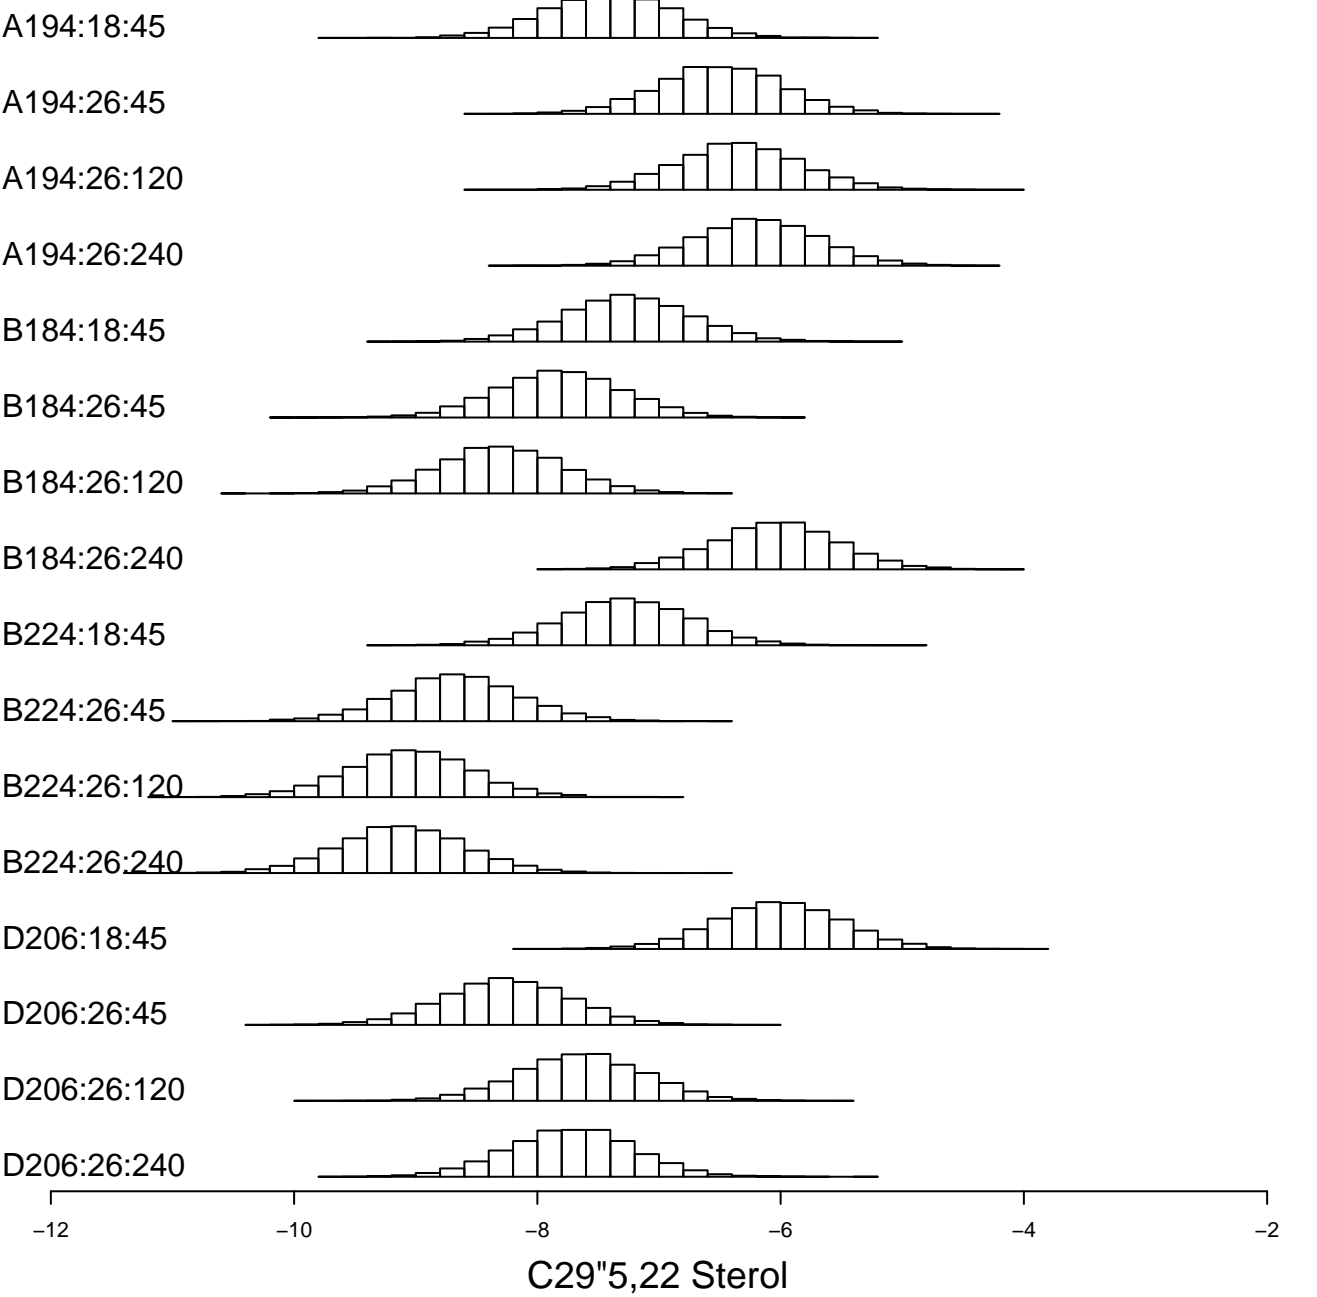

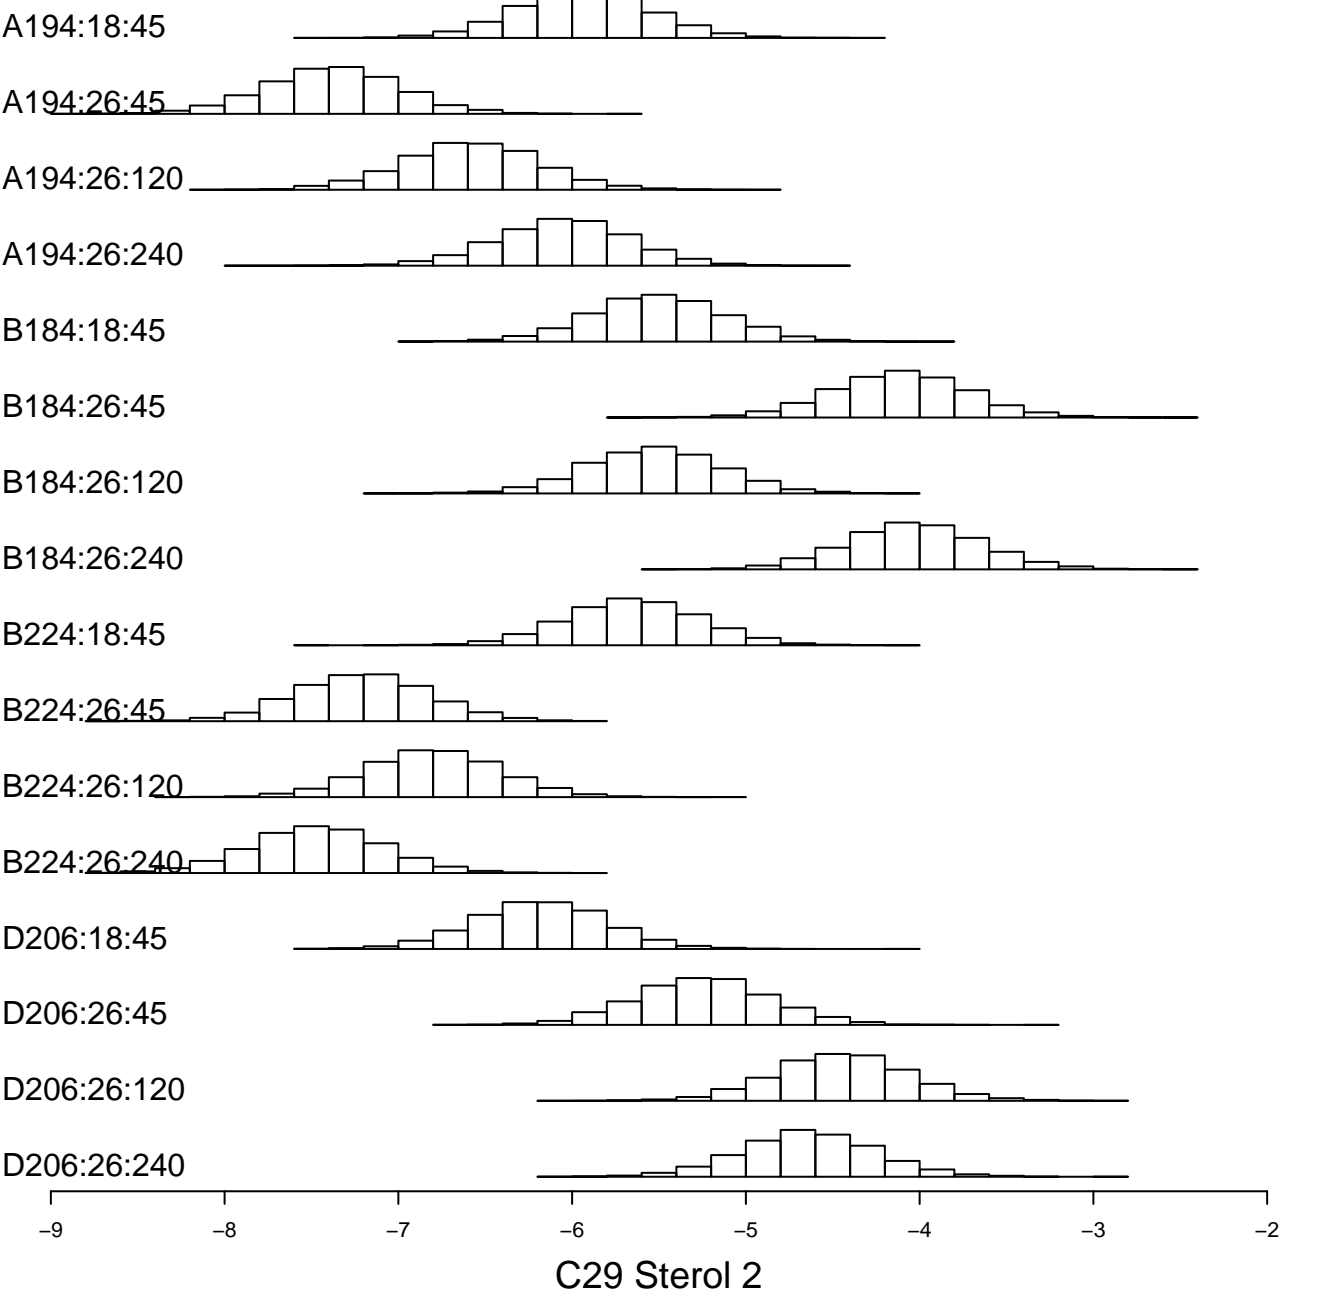

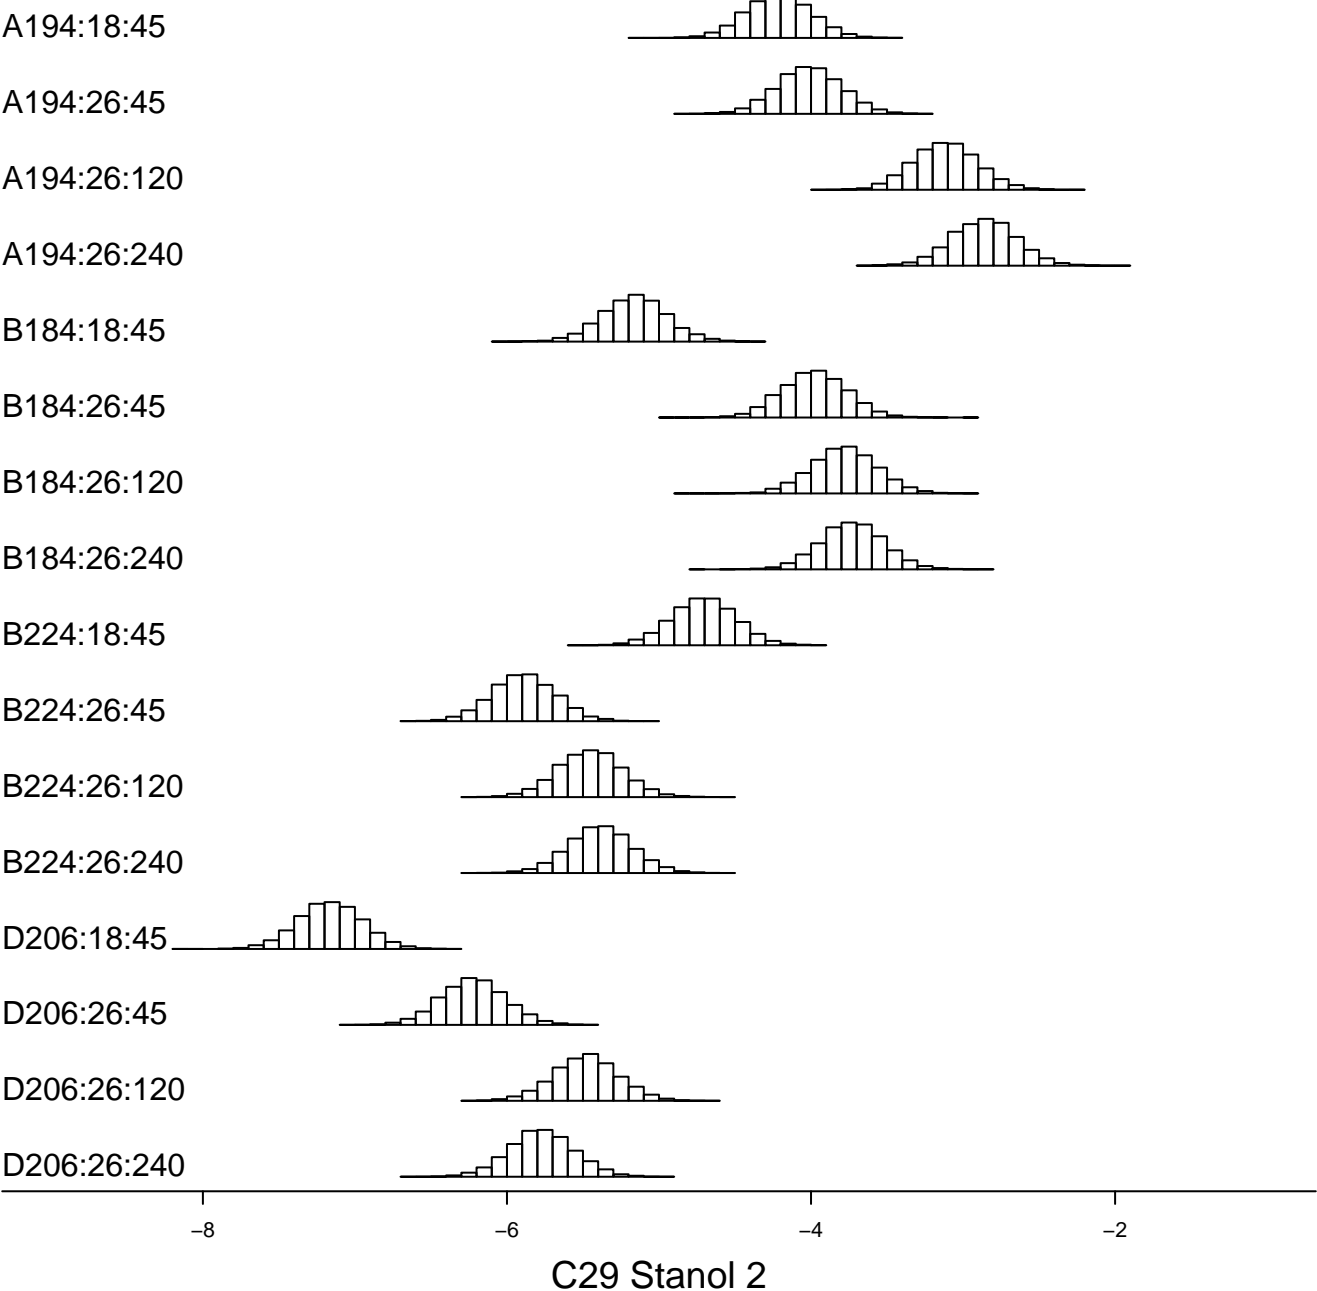



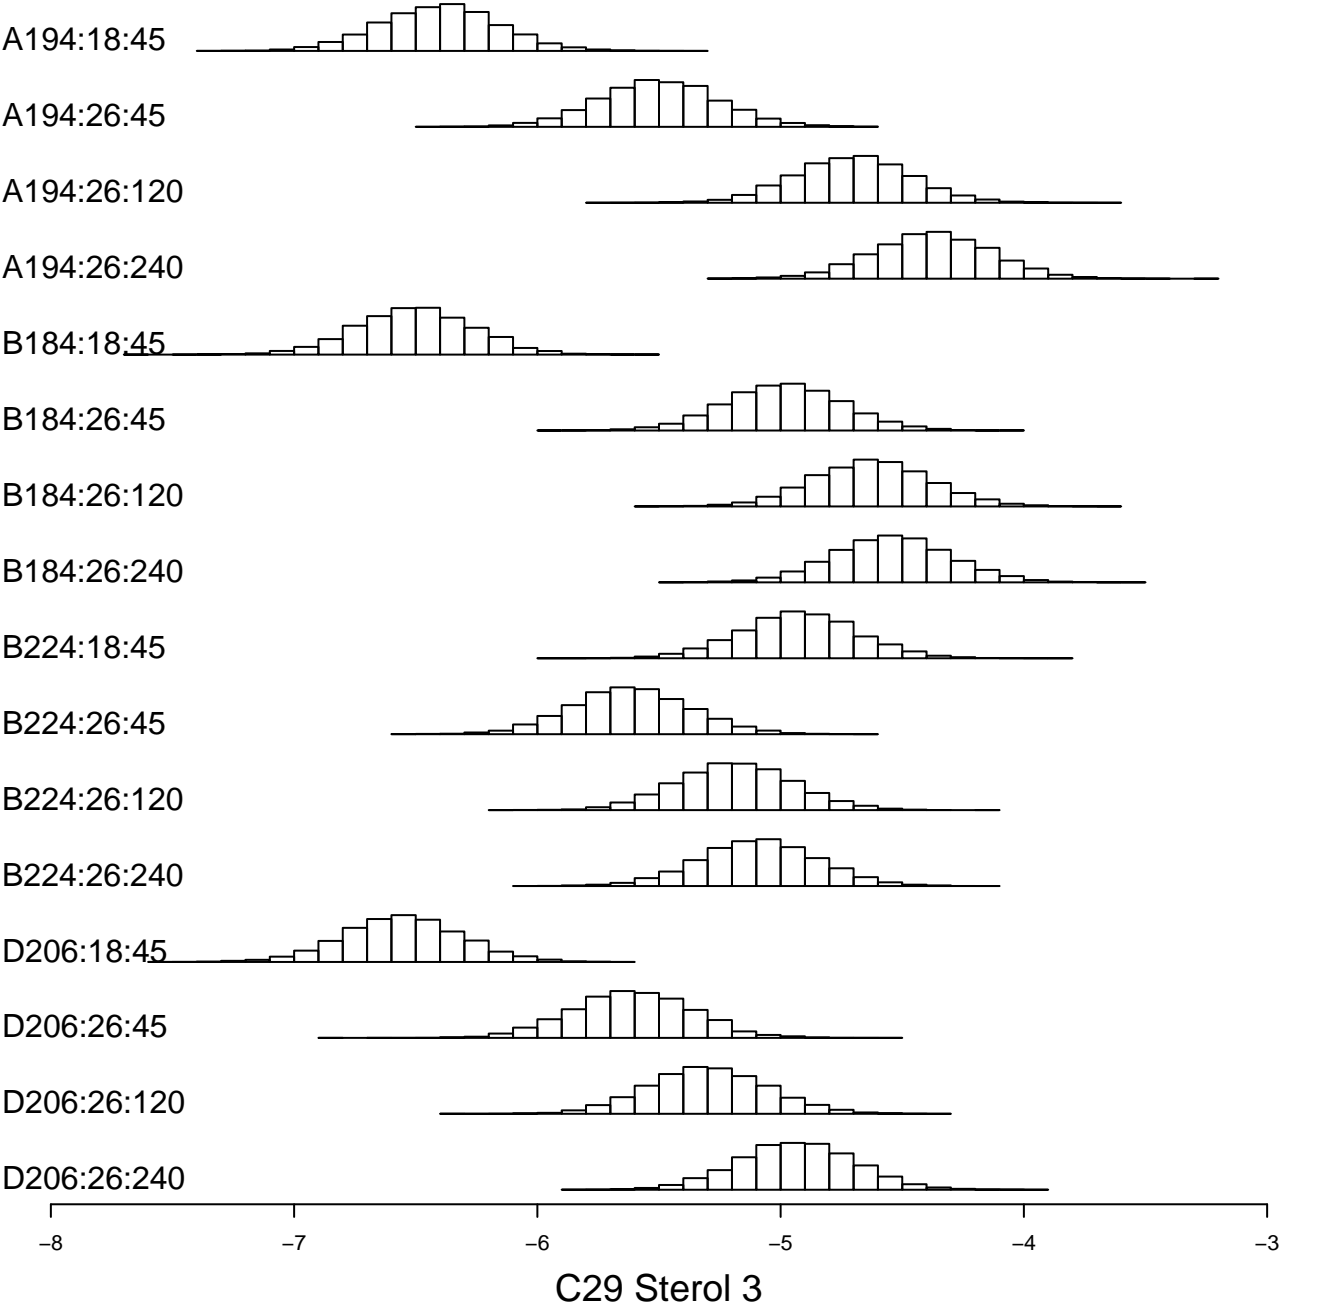

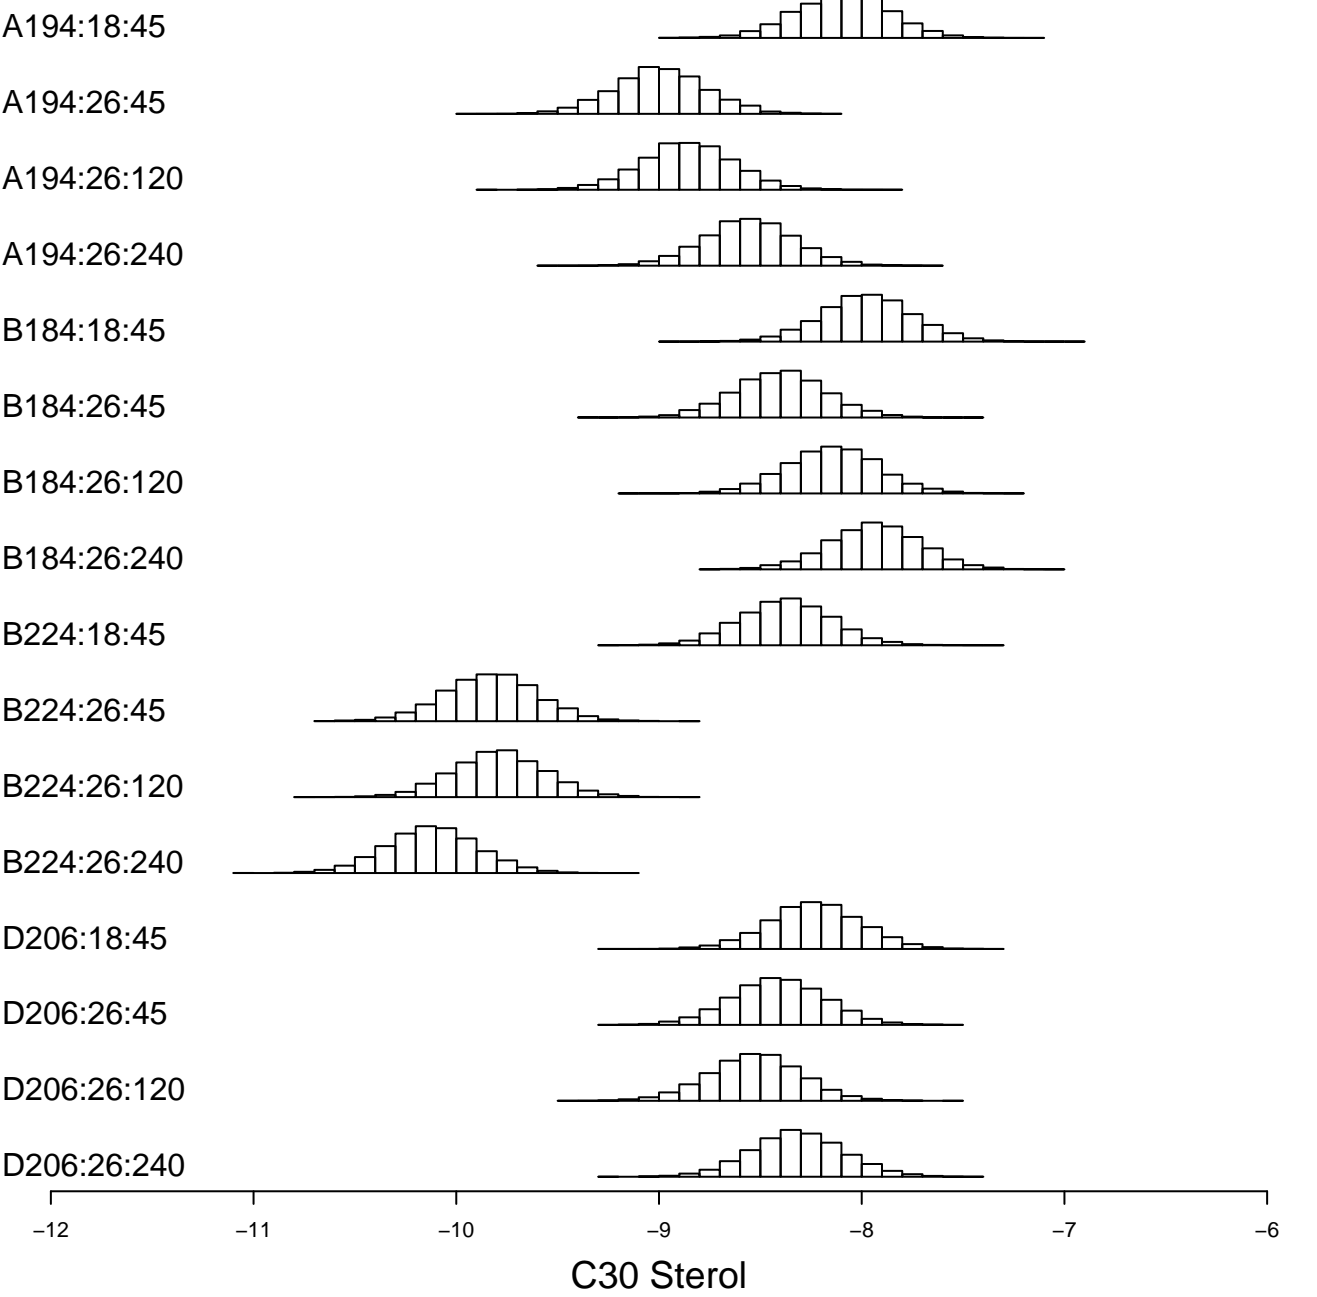

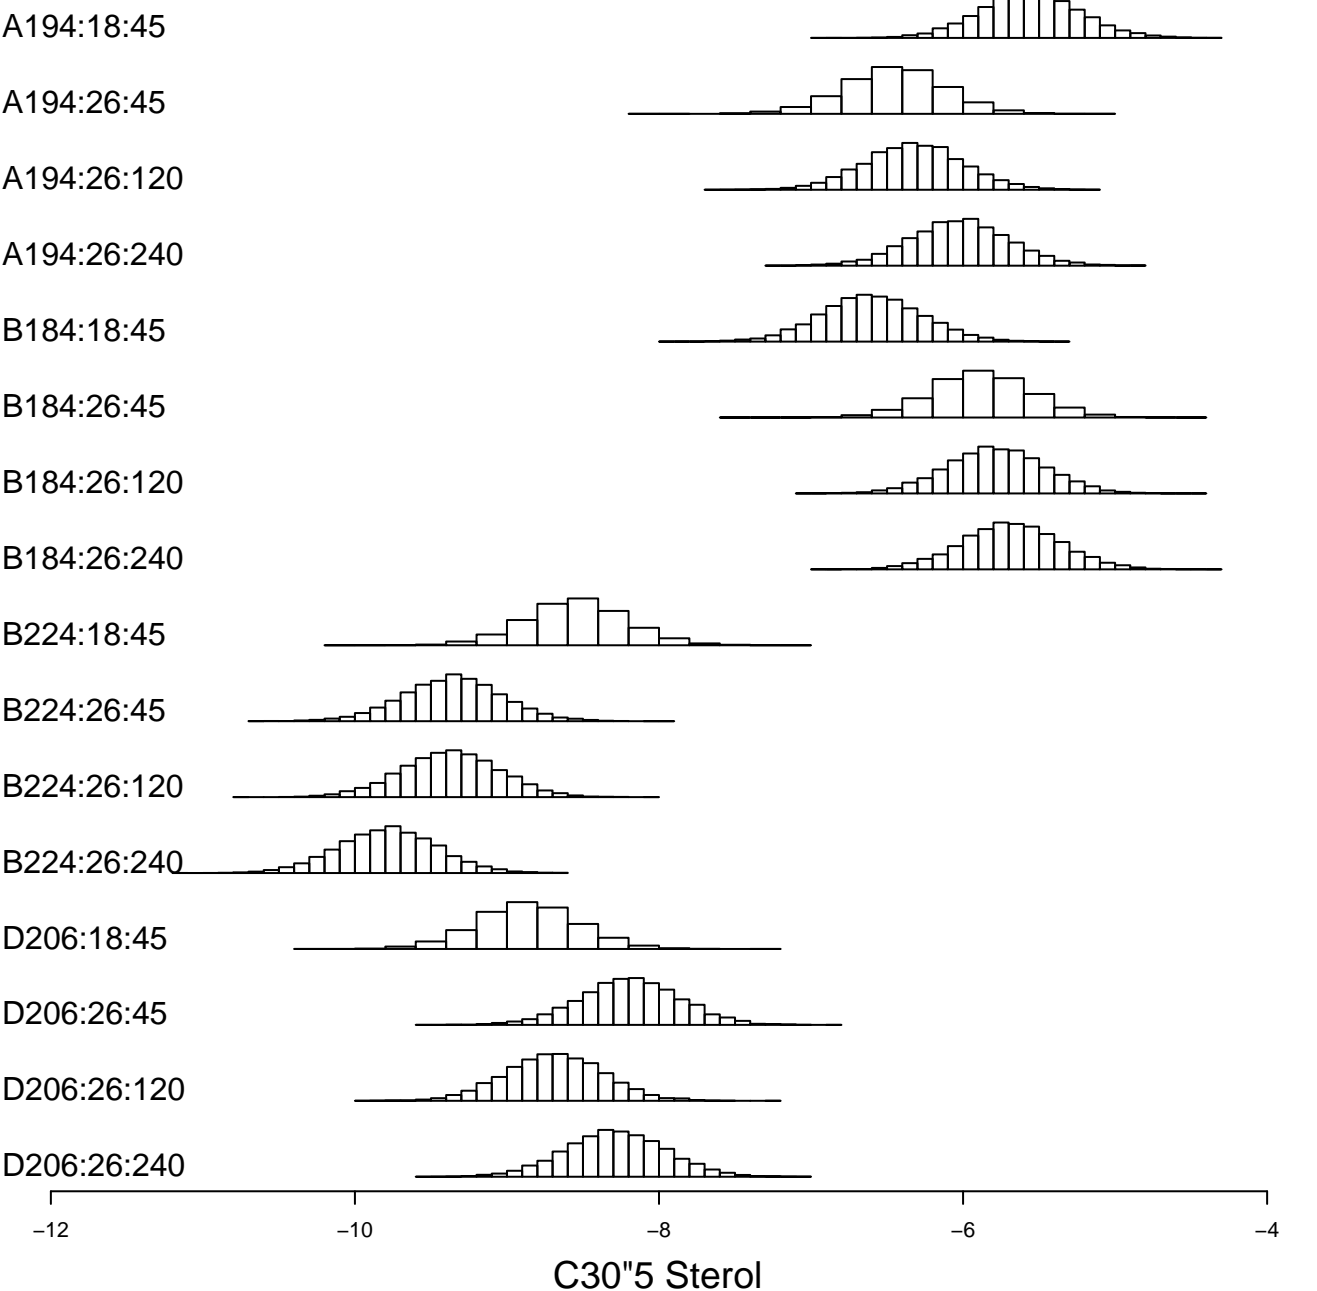

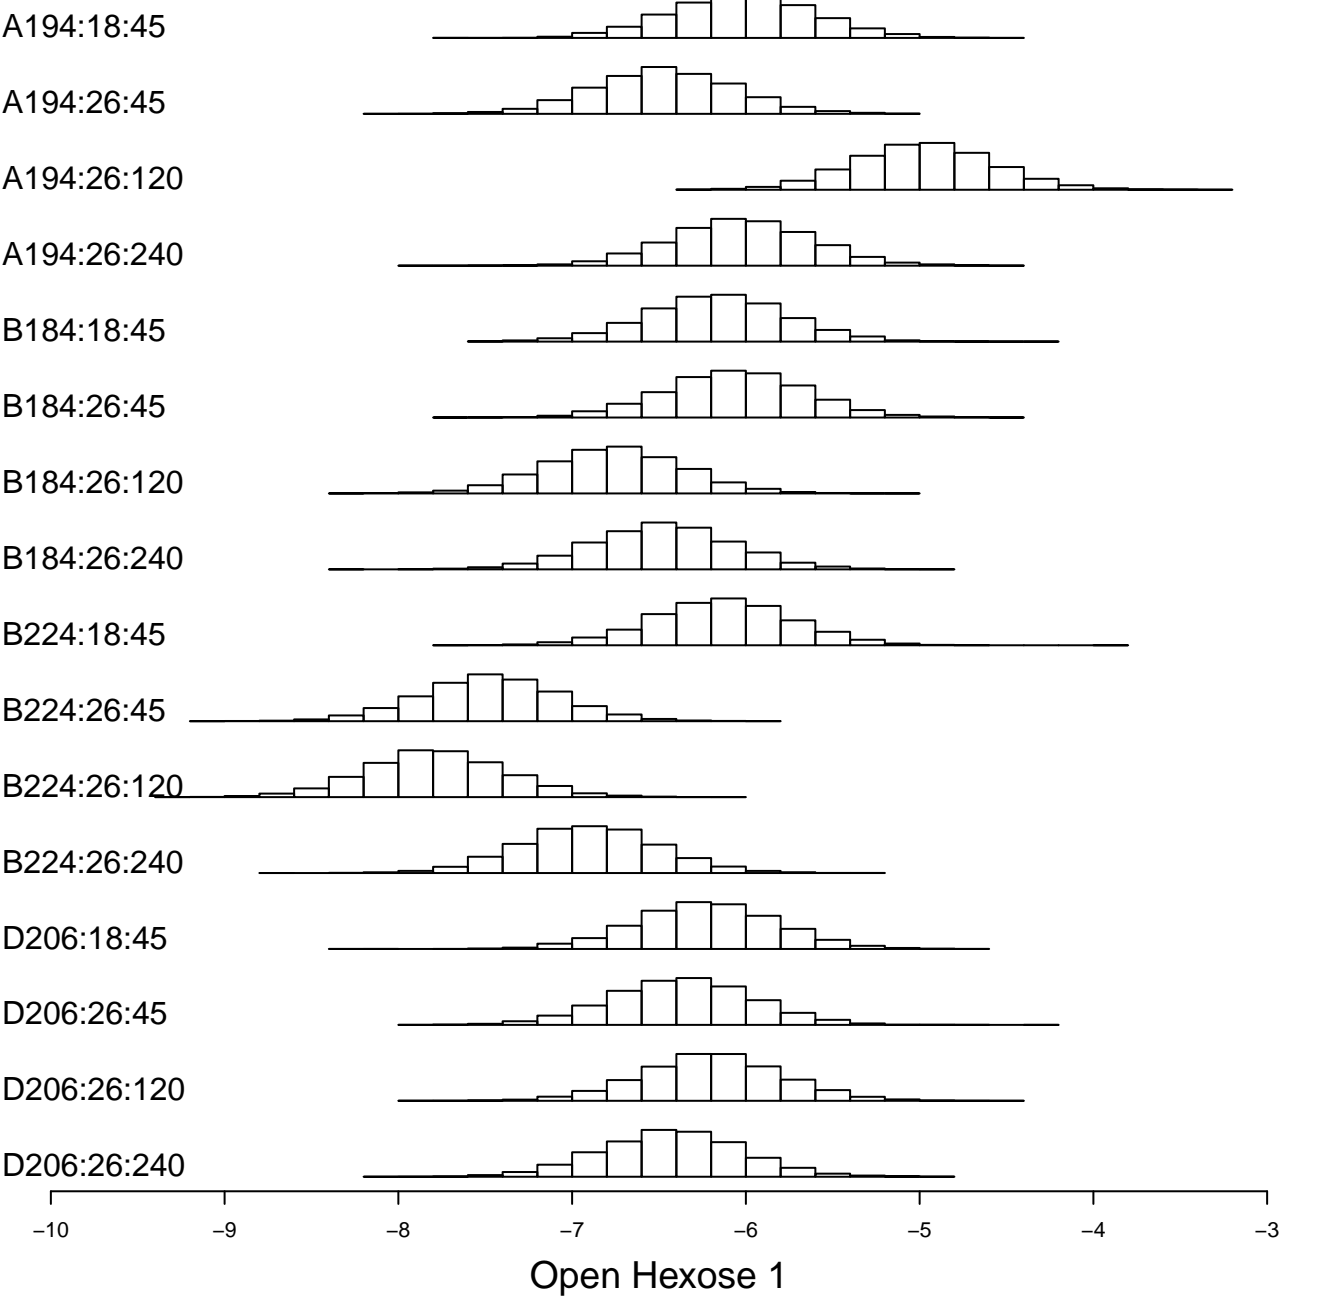

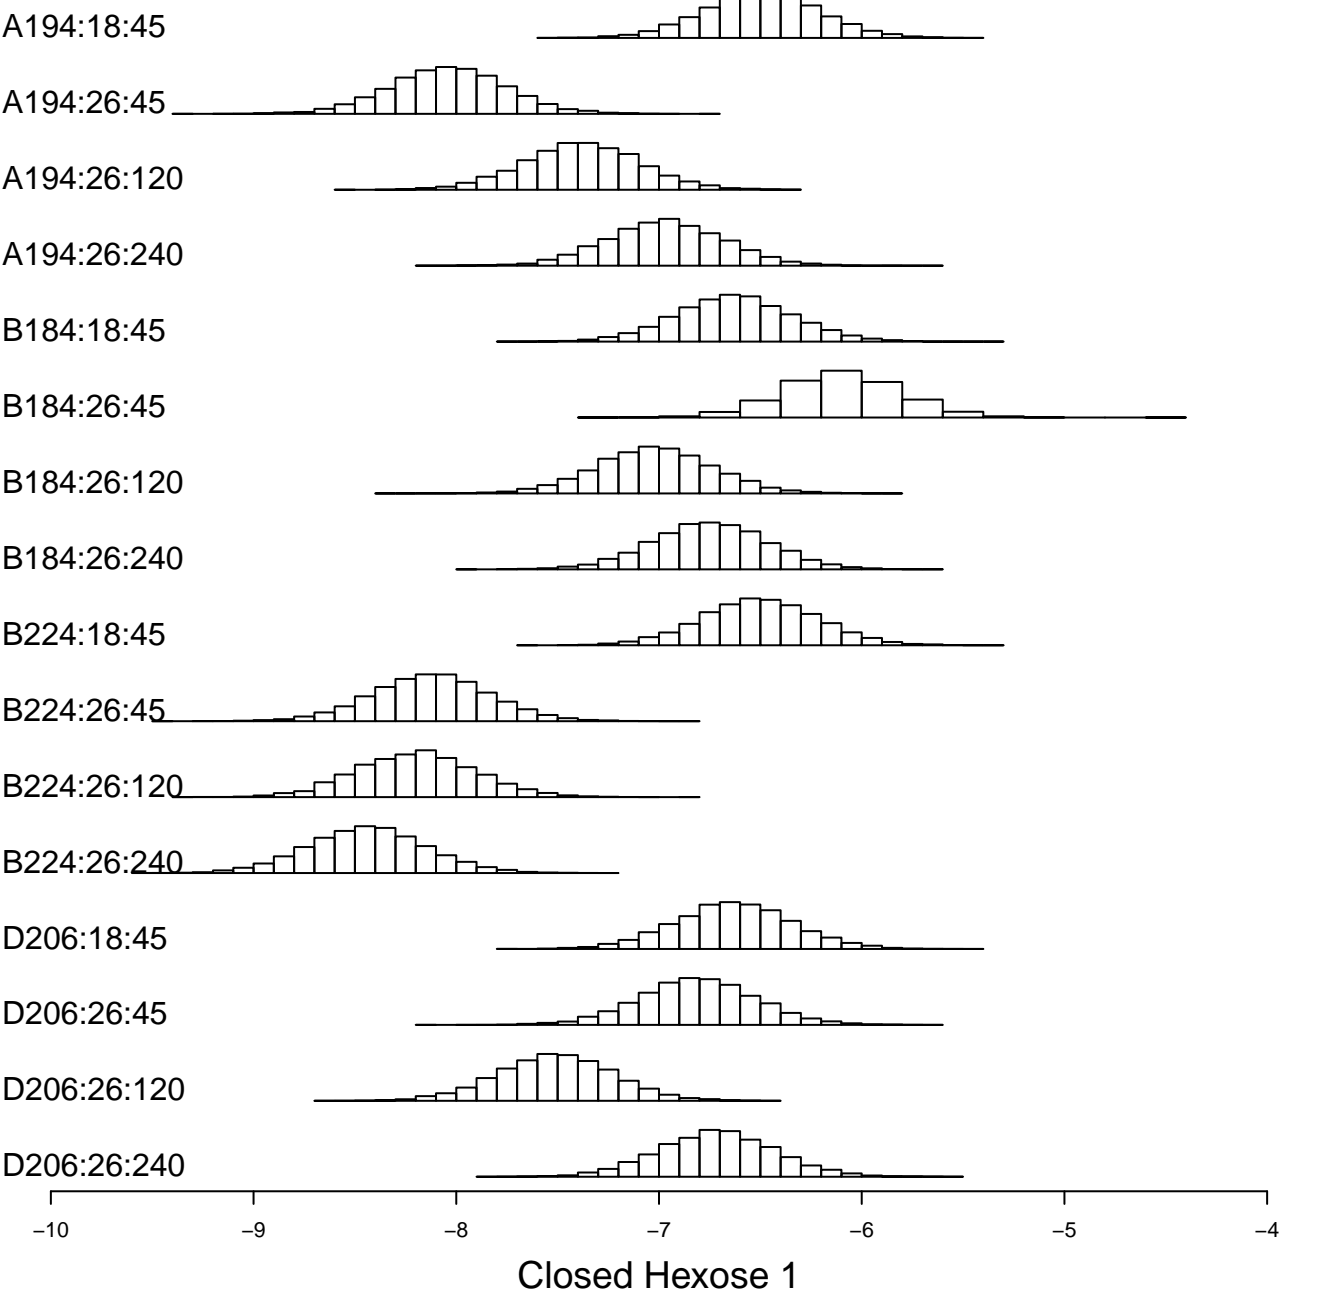

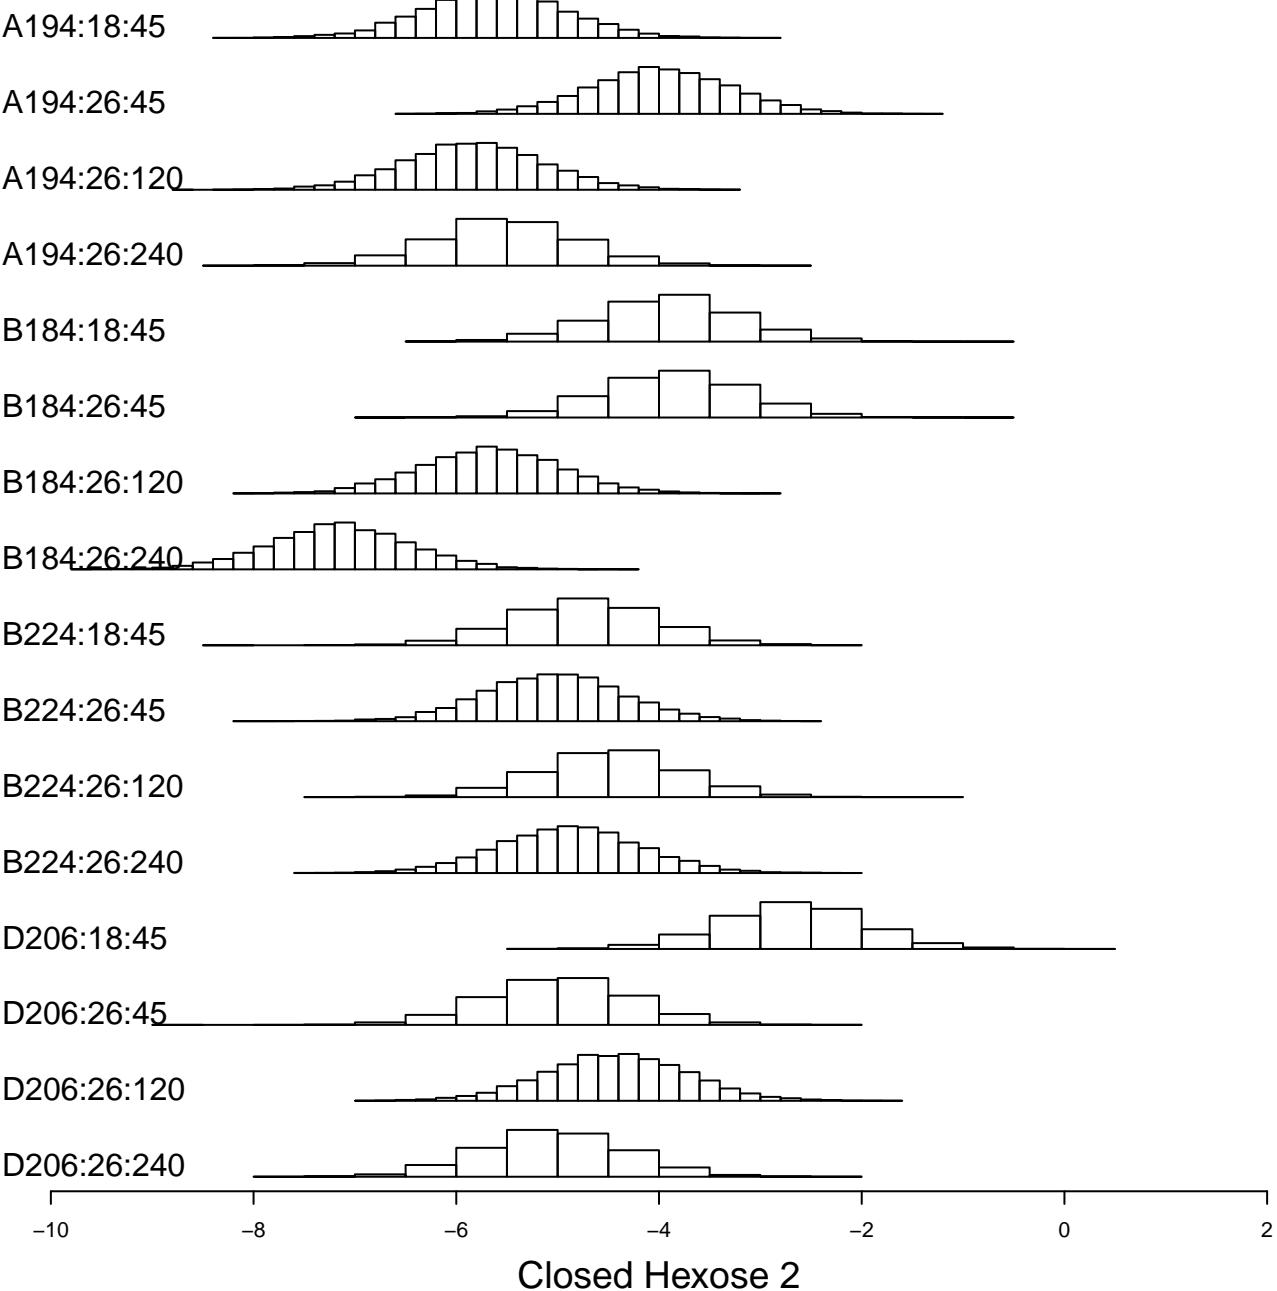

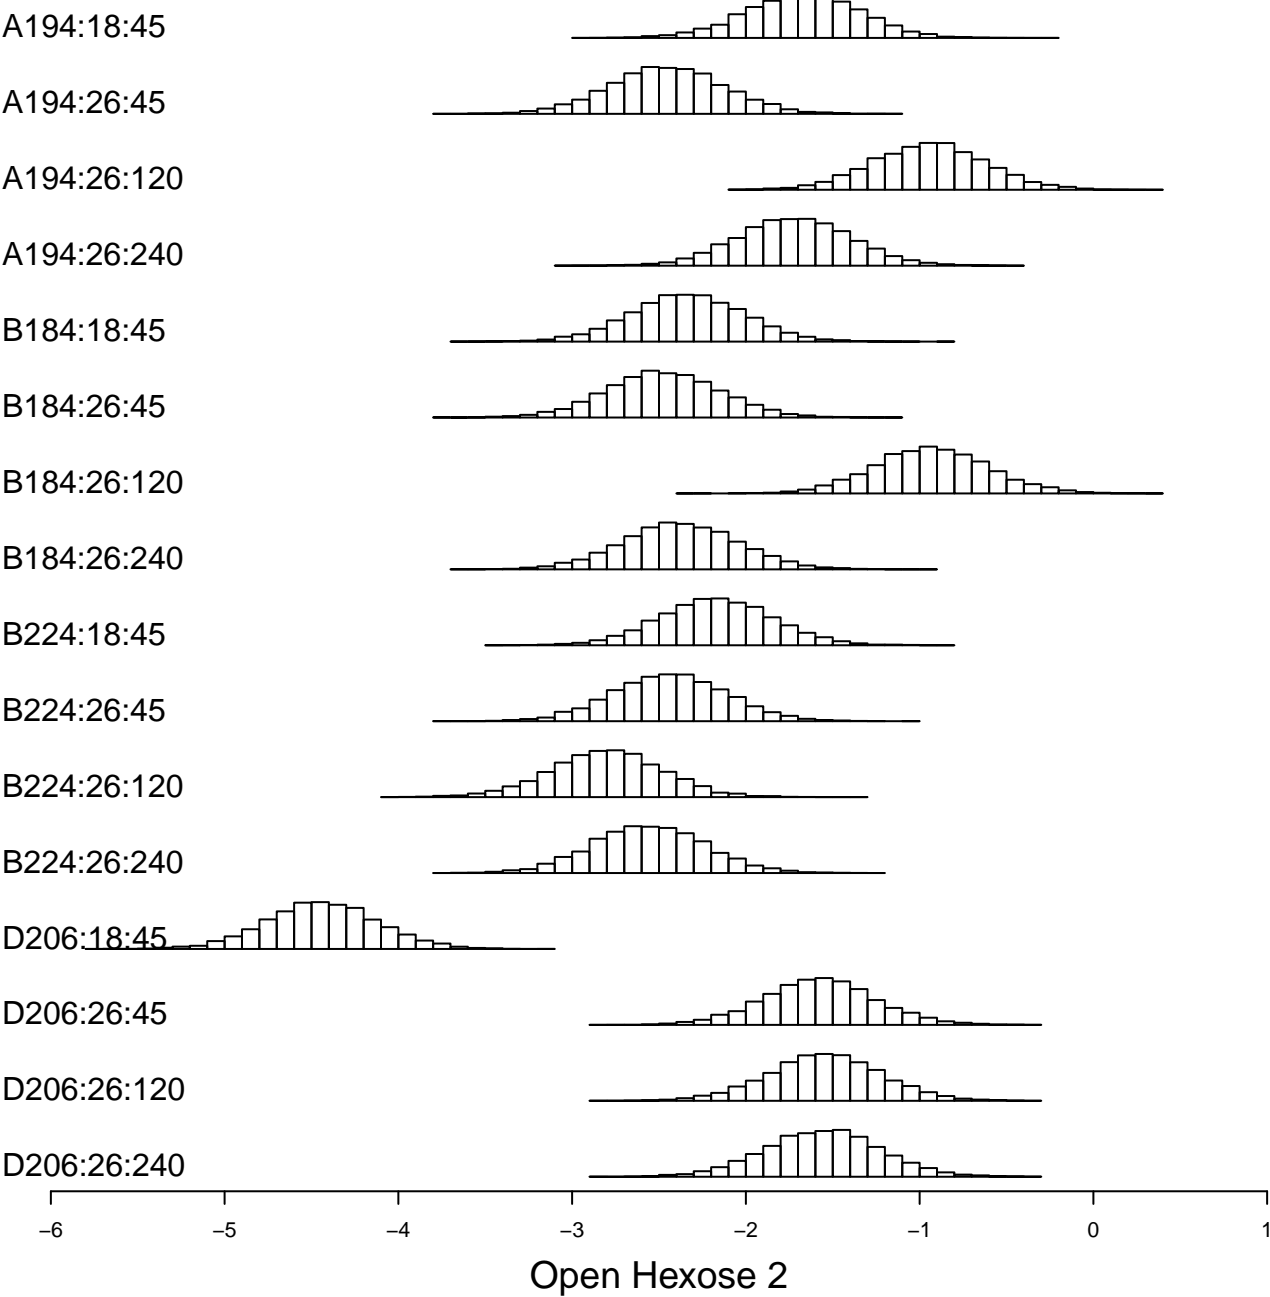

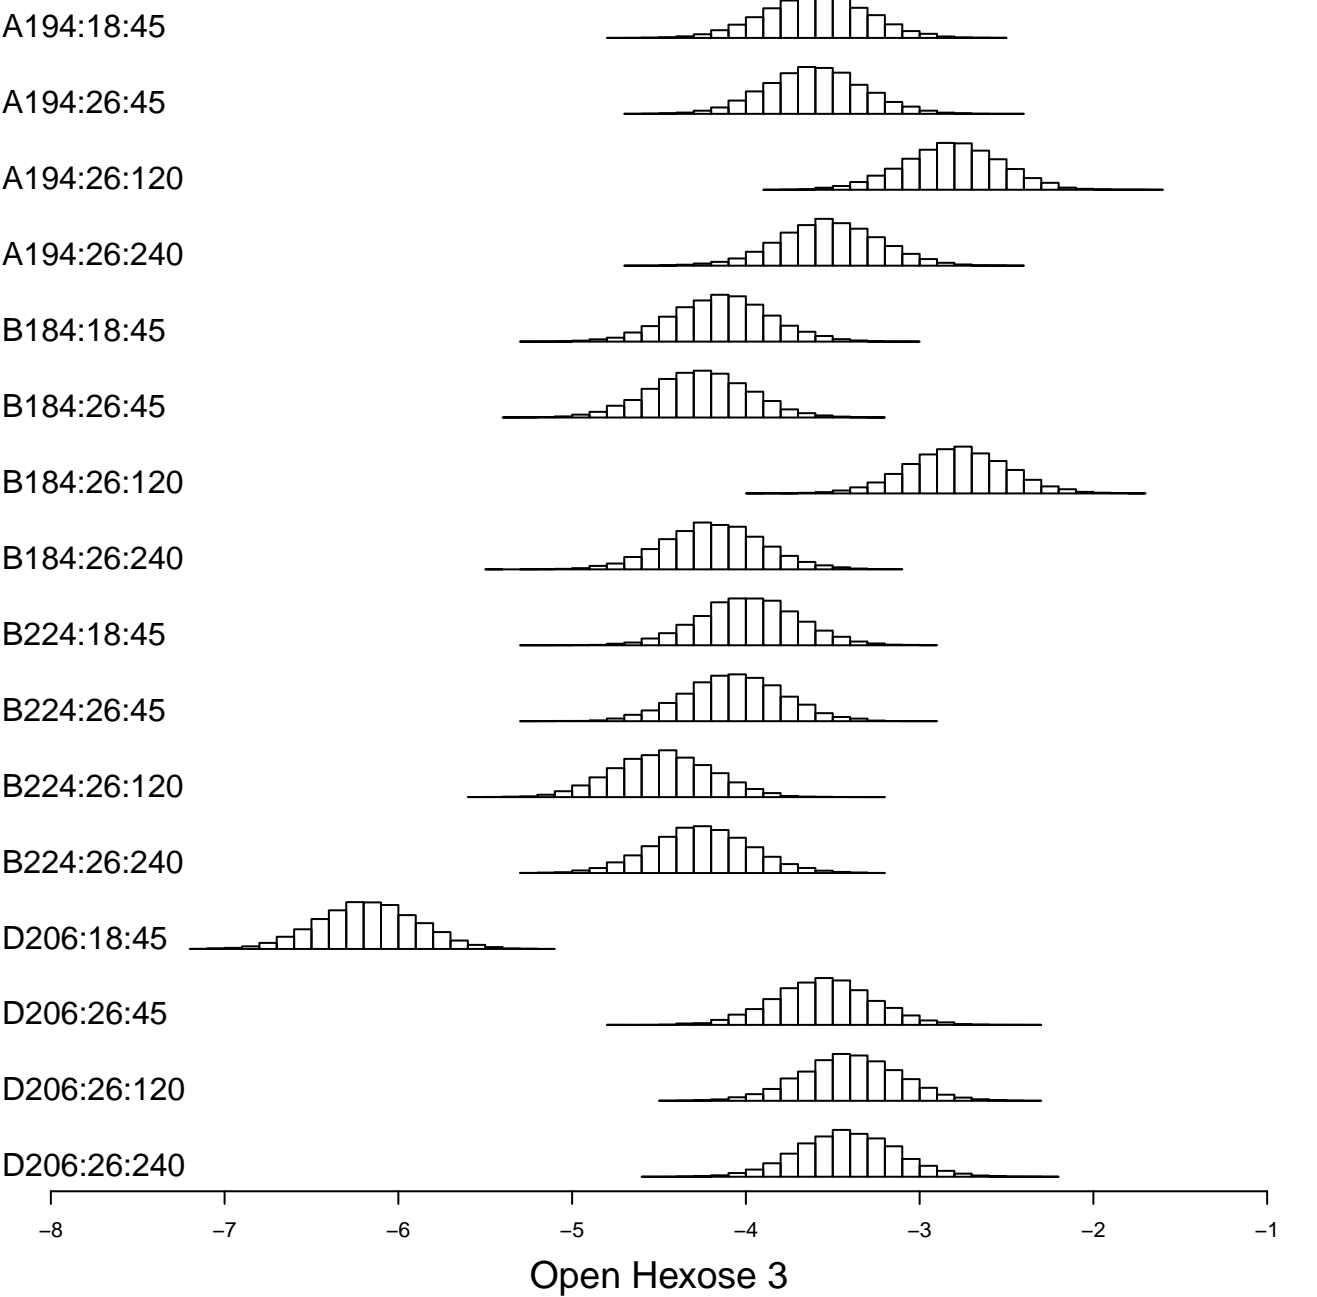



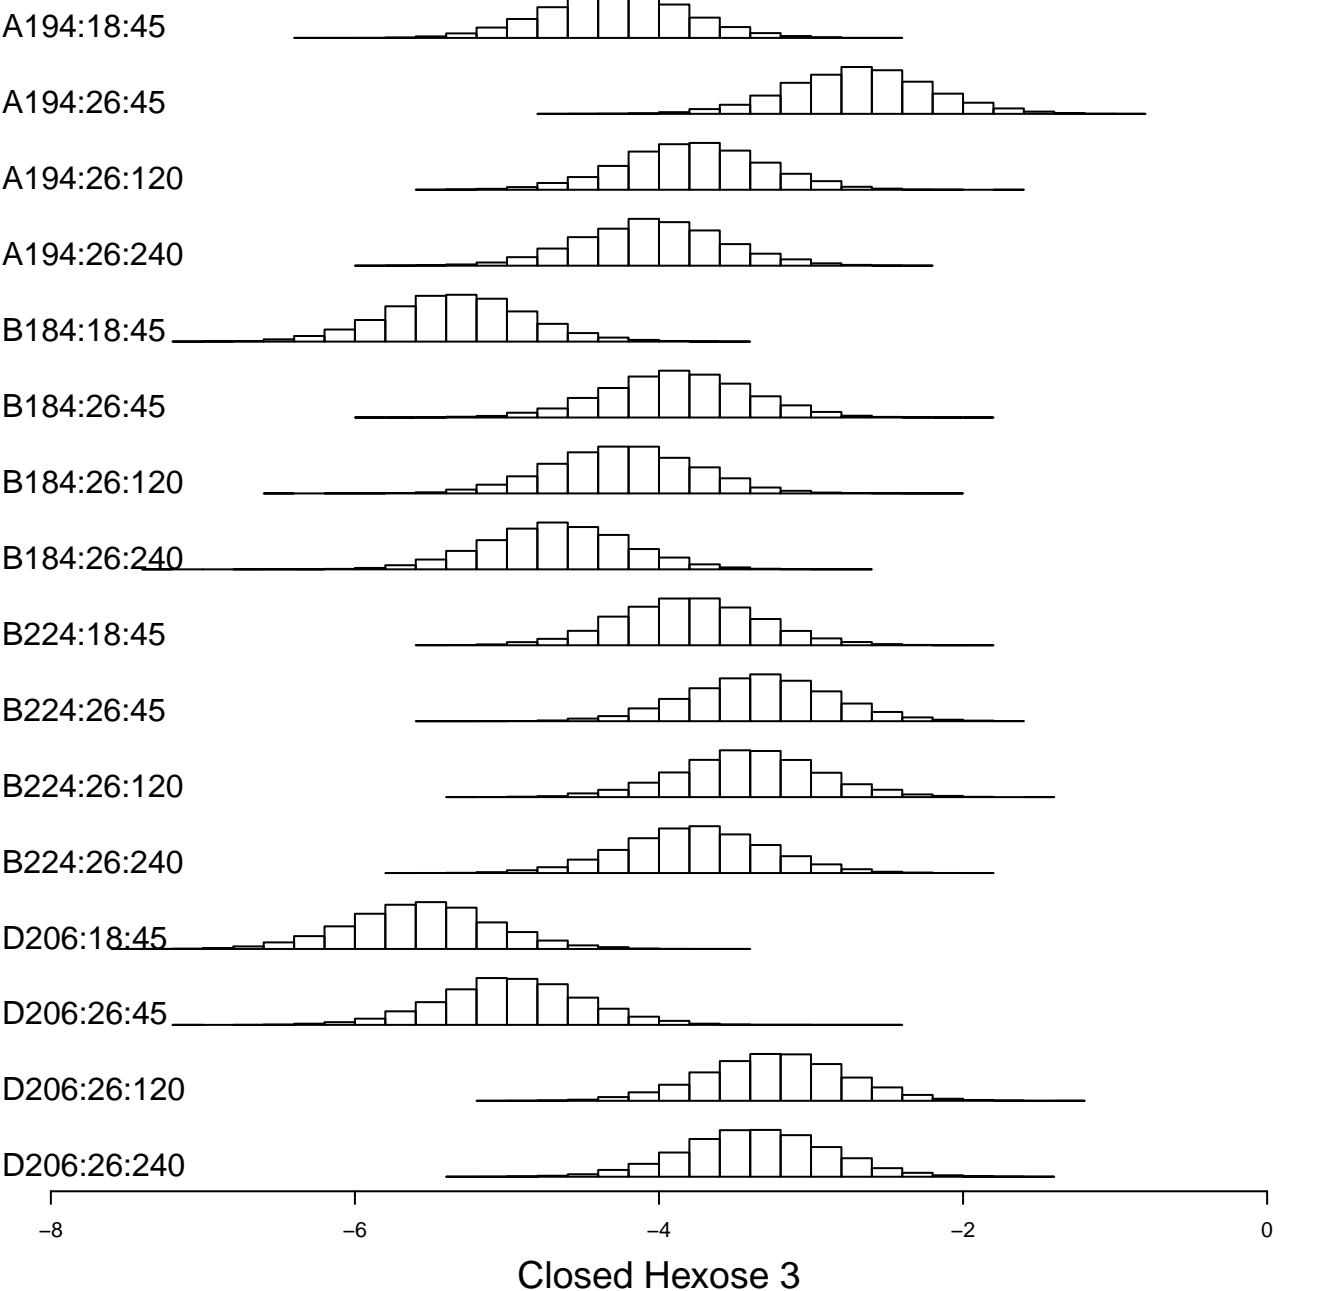

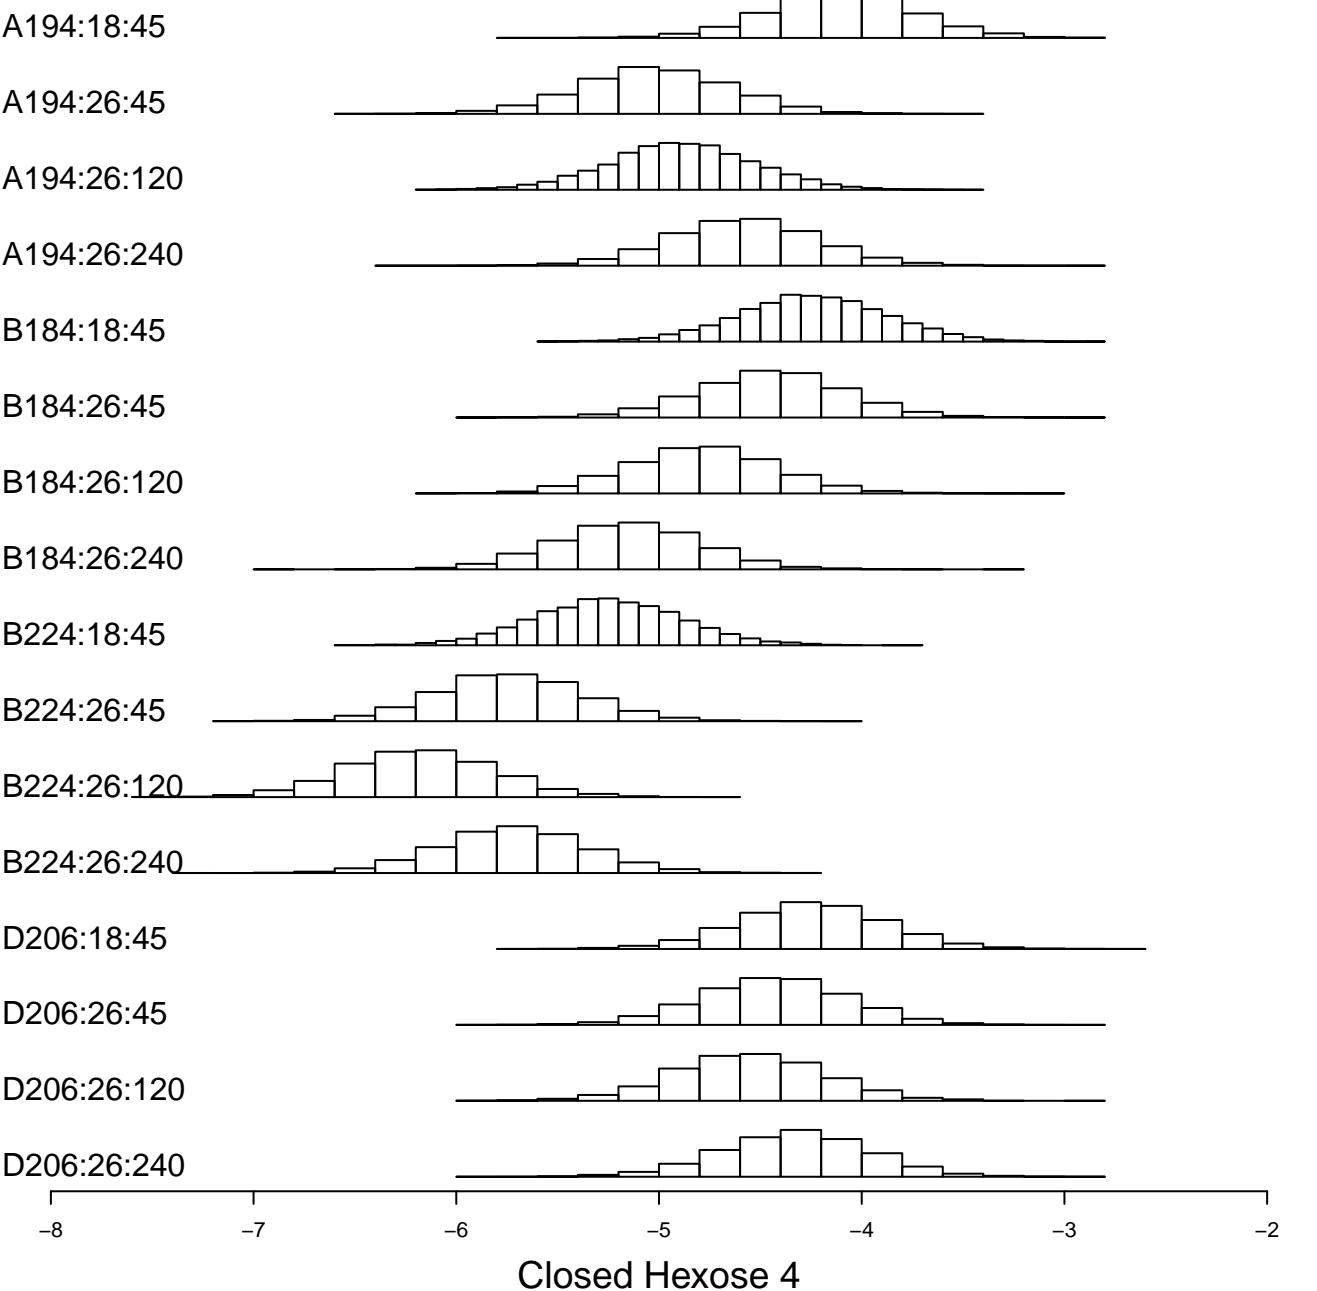

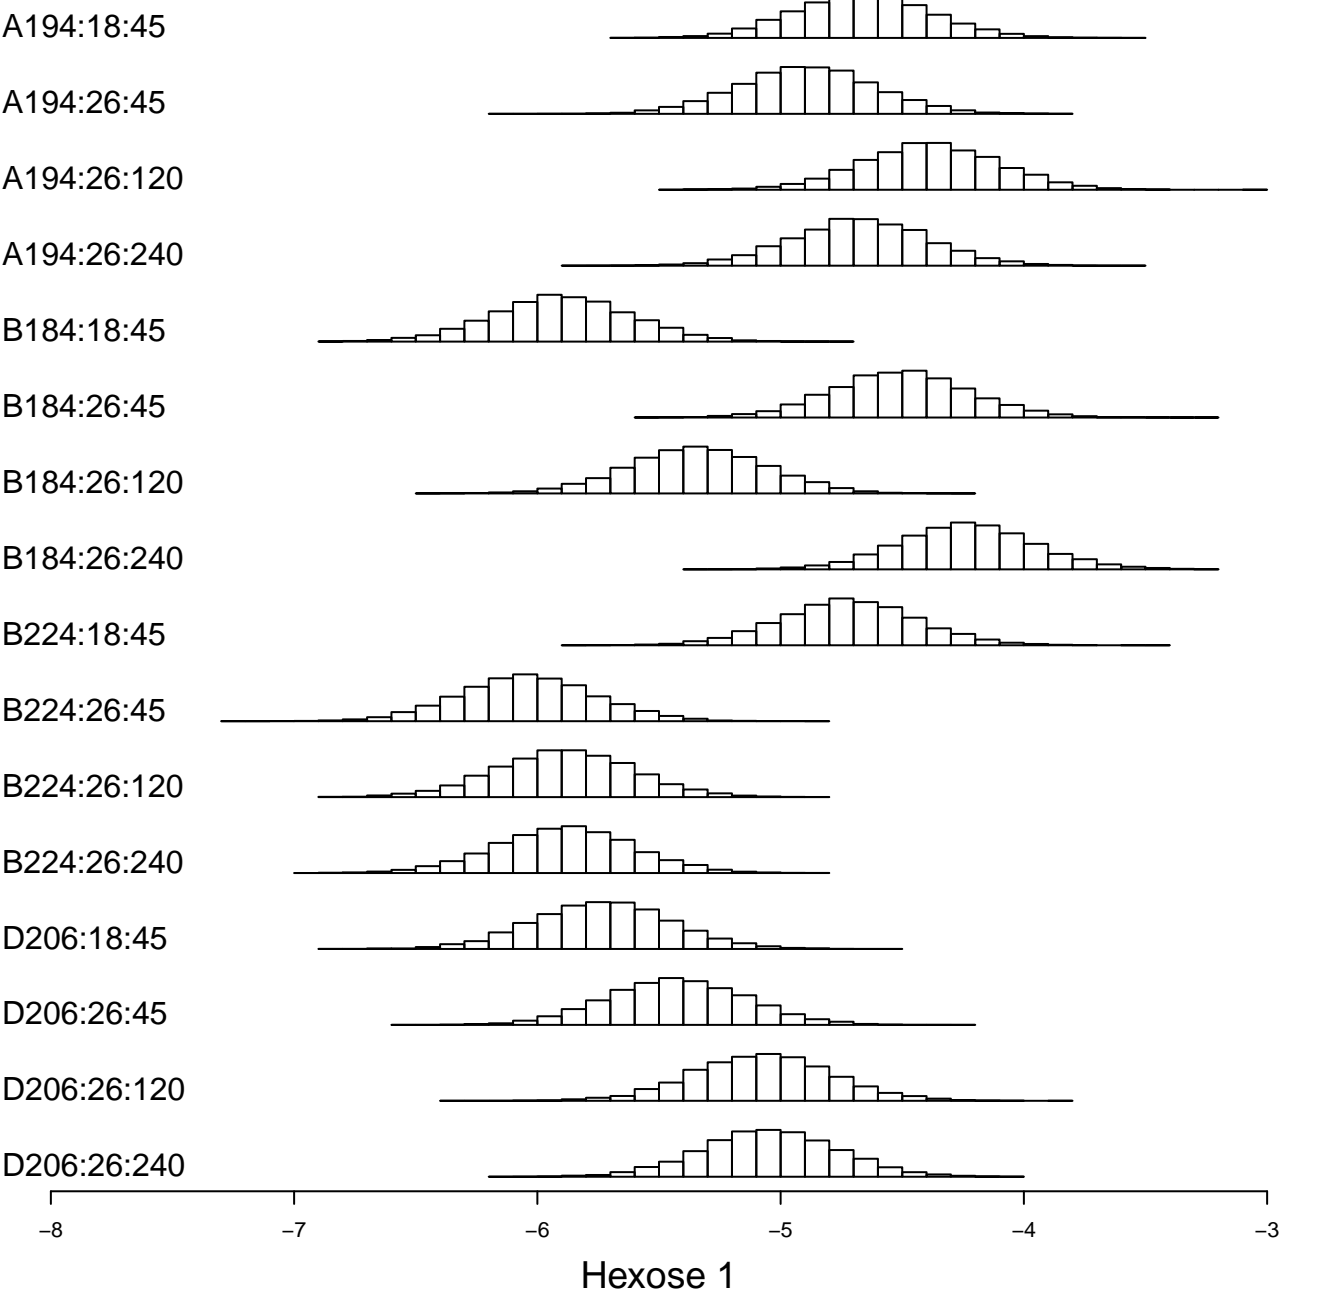

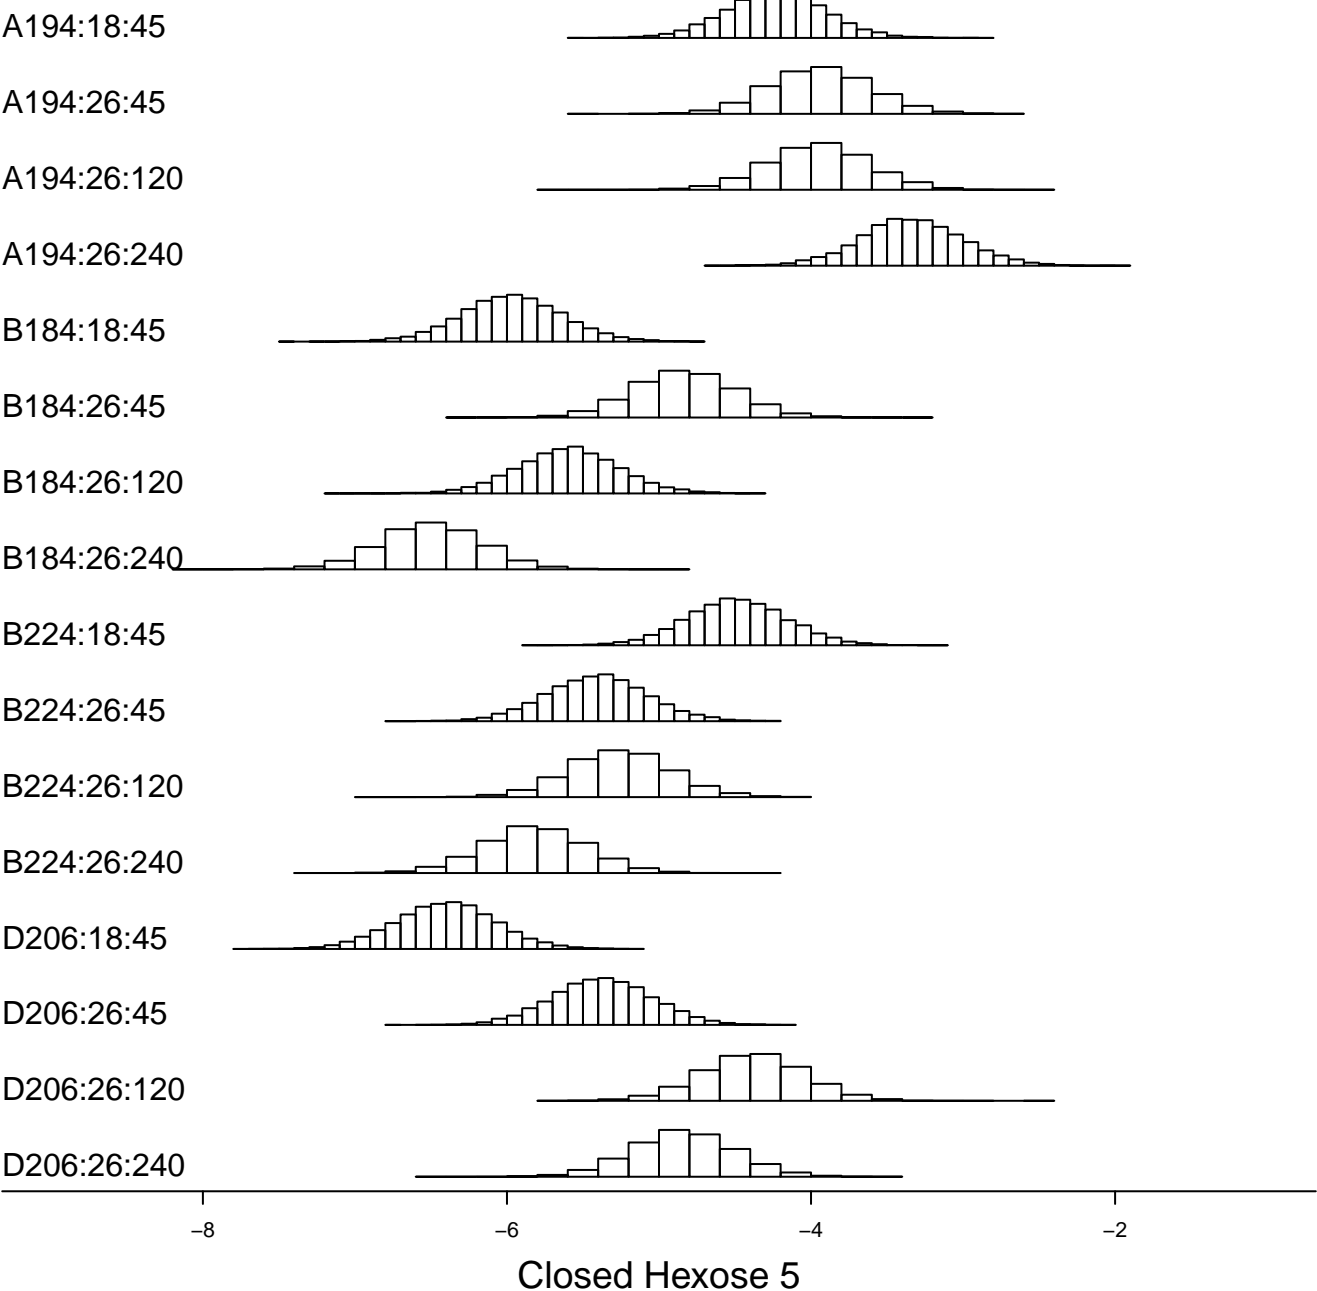

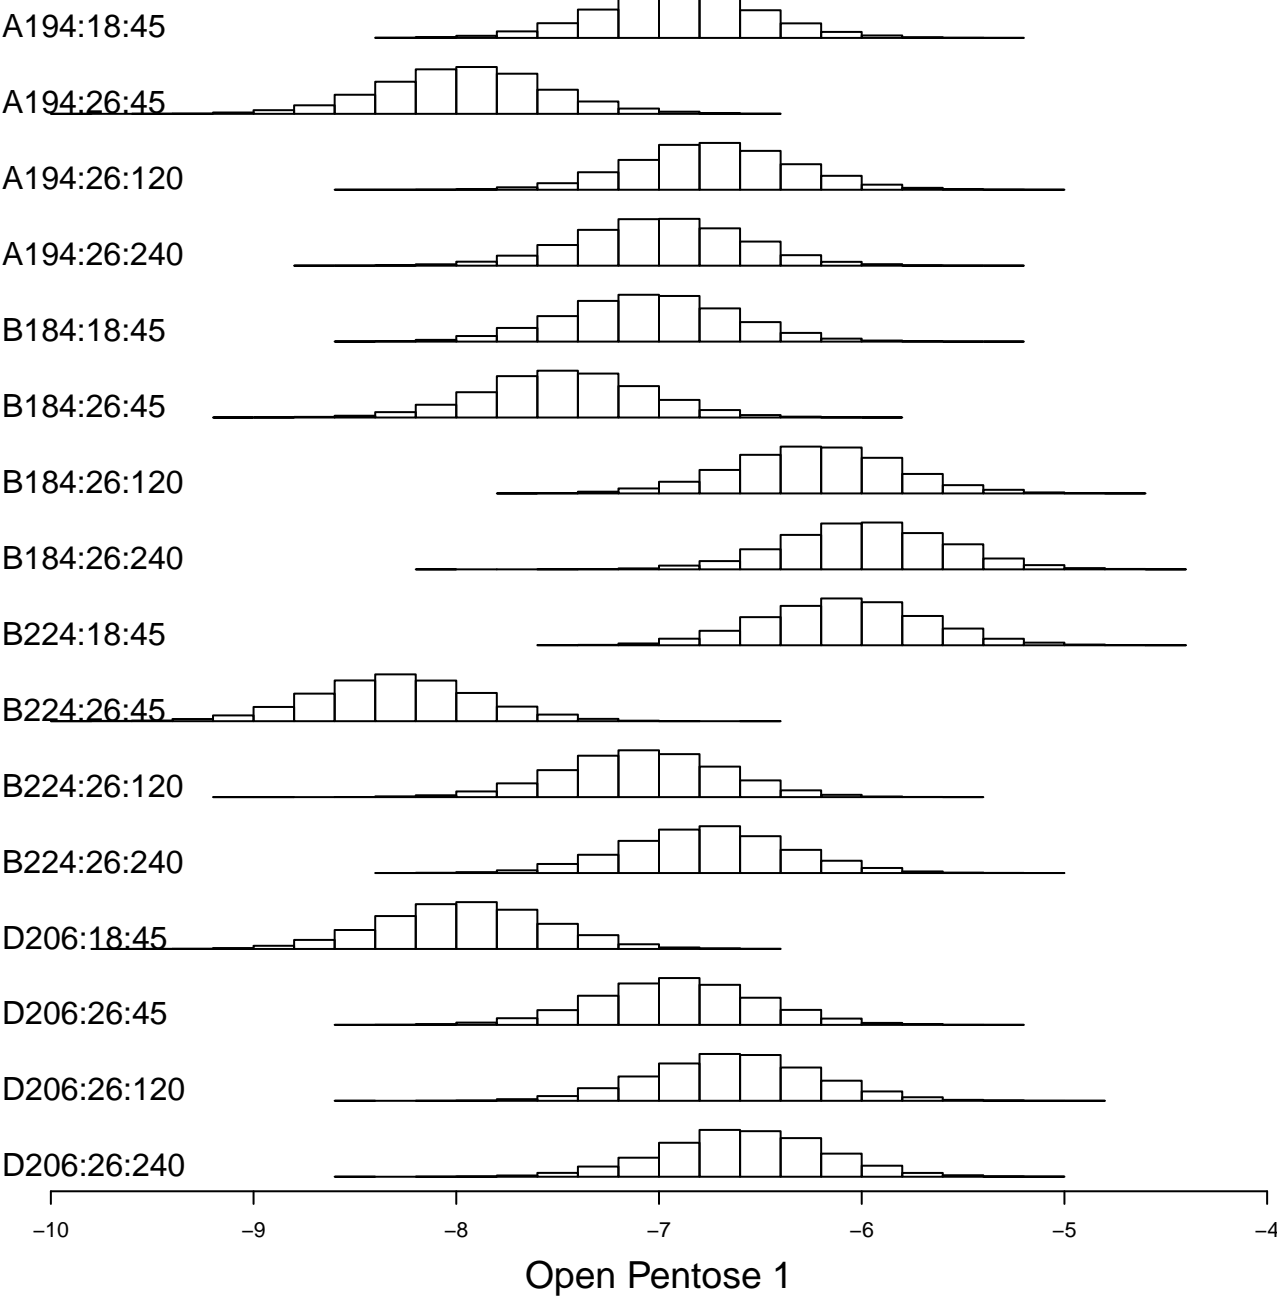

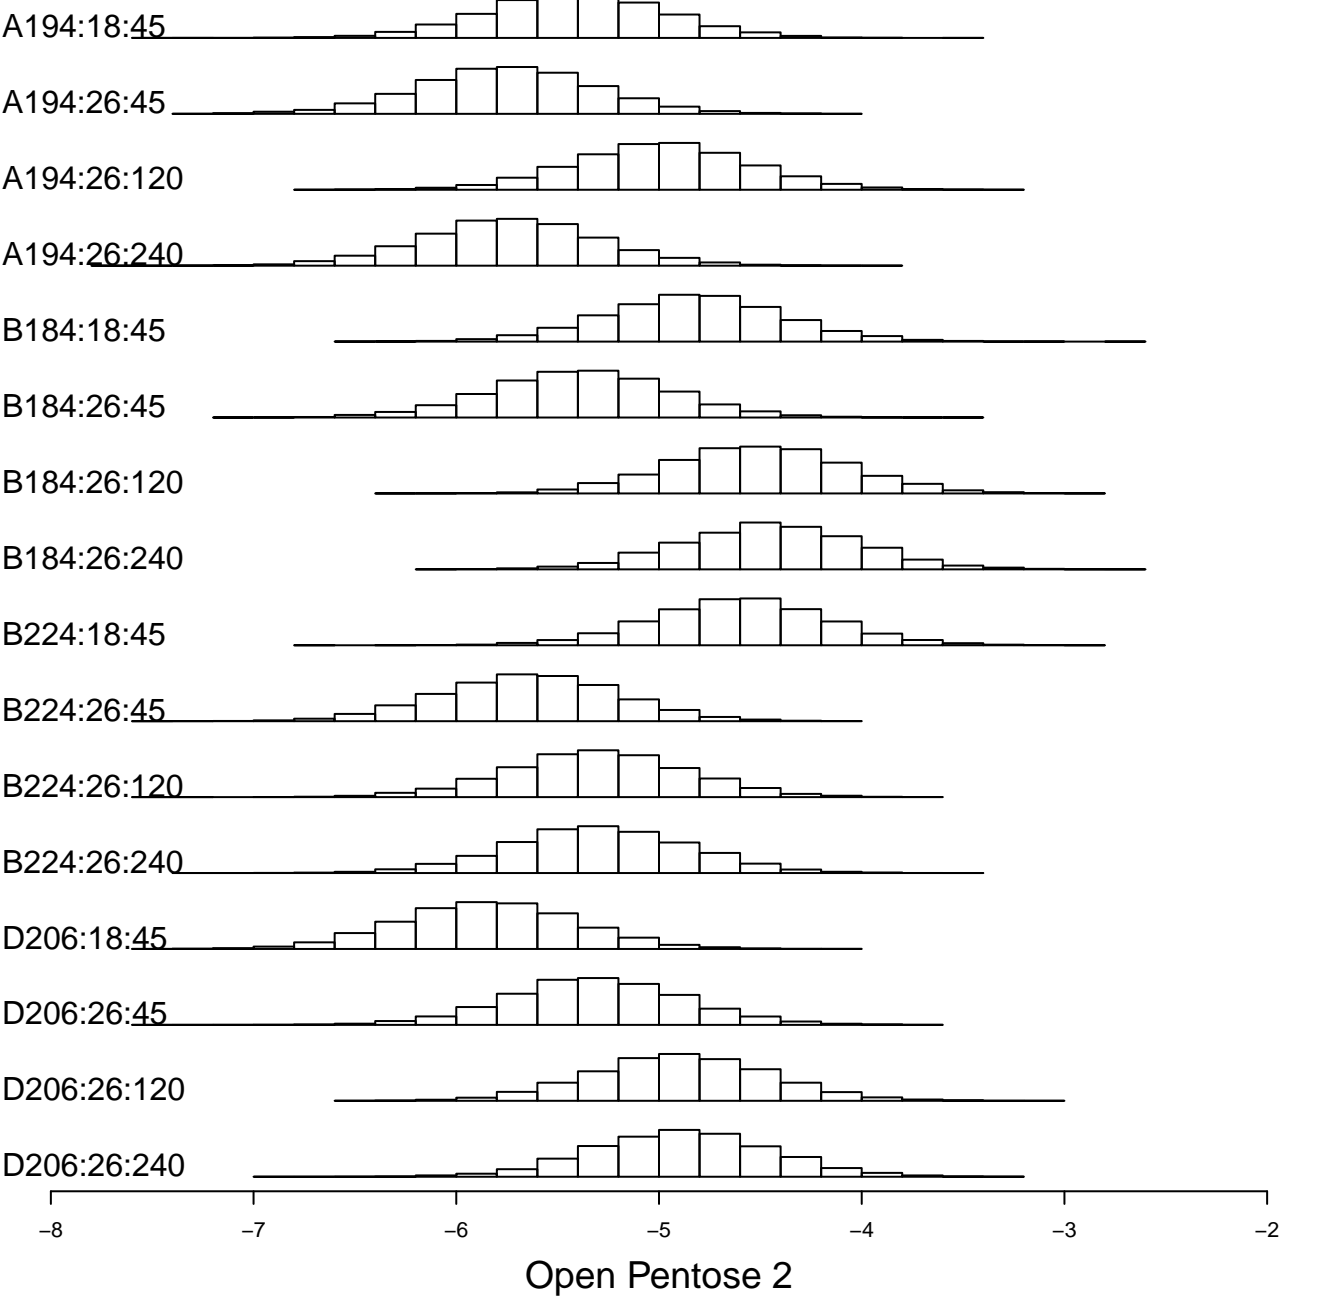

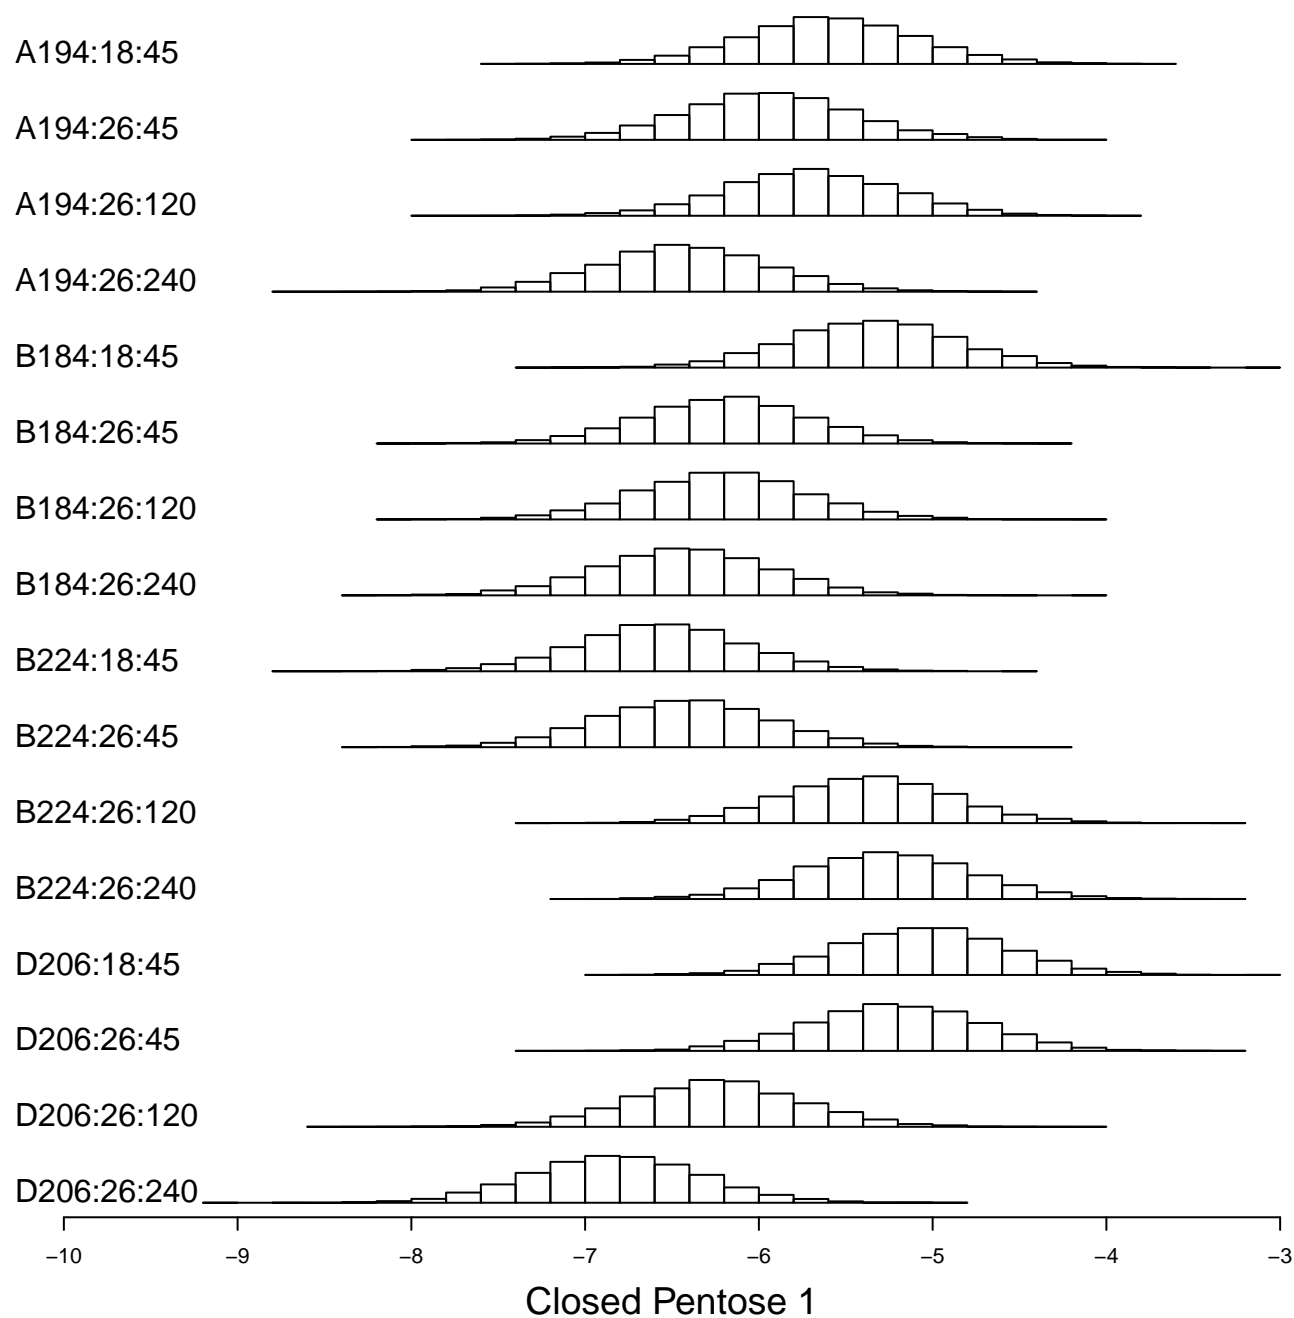

A194:18:45

A194:26:45

A194:26:120

A194:26:240

B184:18:45

B184:26:45

B184:26:120

B184:26:240

B224:18:45

B224:26:45

B224:26:120

B224:26:240

D206:18:45

D206:26:45

D206:26:120

D206:26:240

-10      -9      -8      -7      -6      -5      -4      -3

Closed Pentose 2

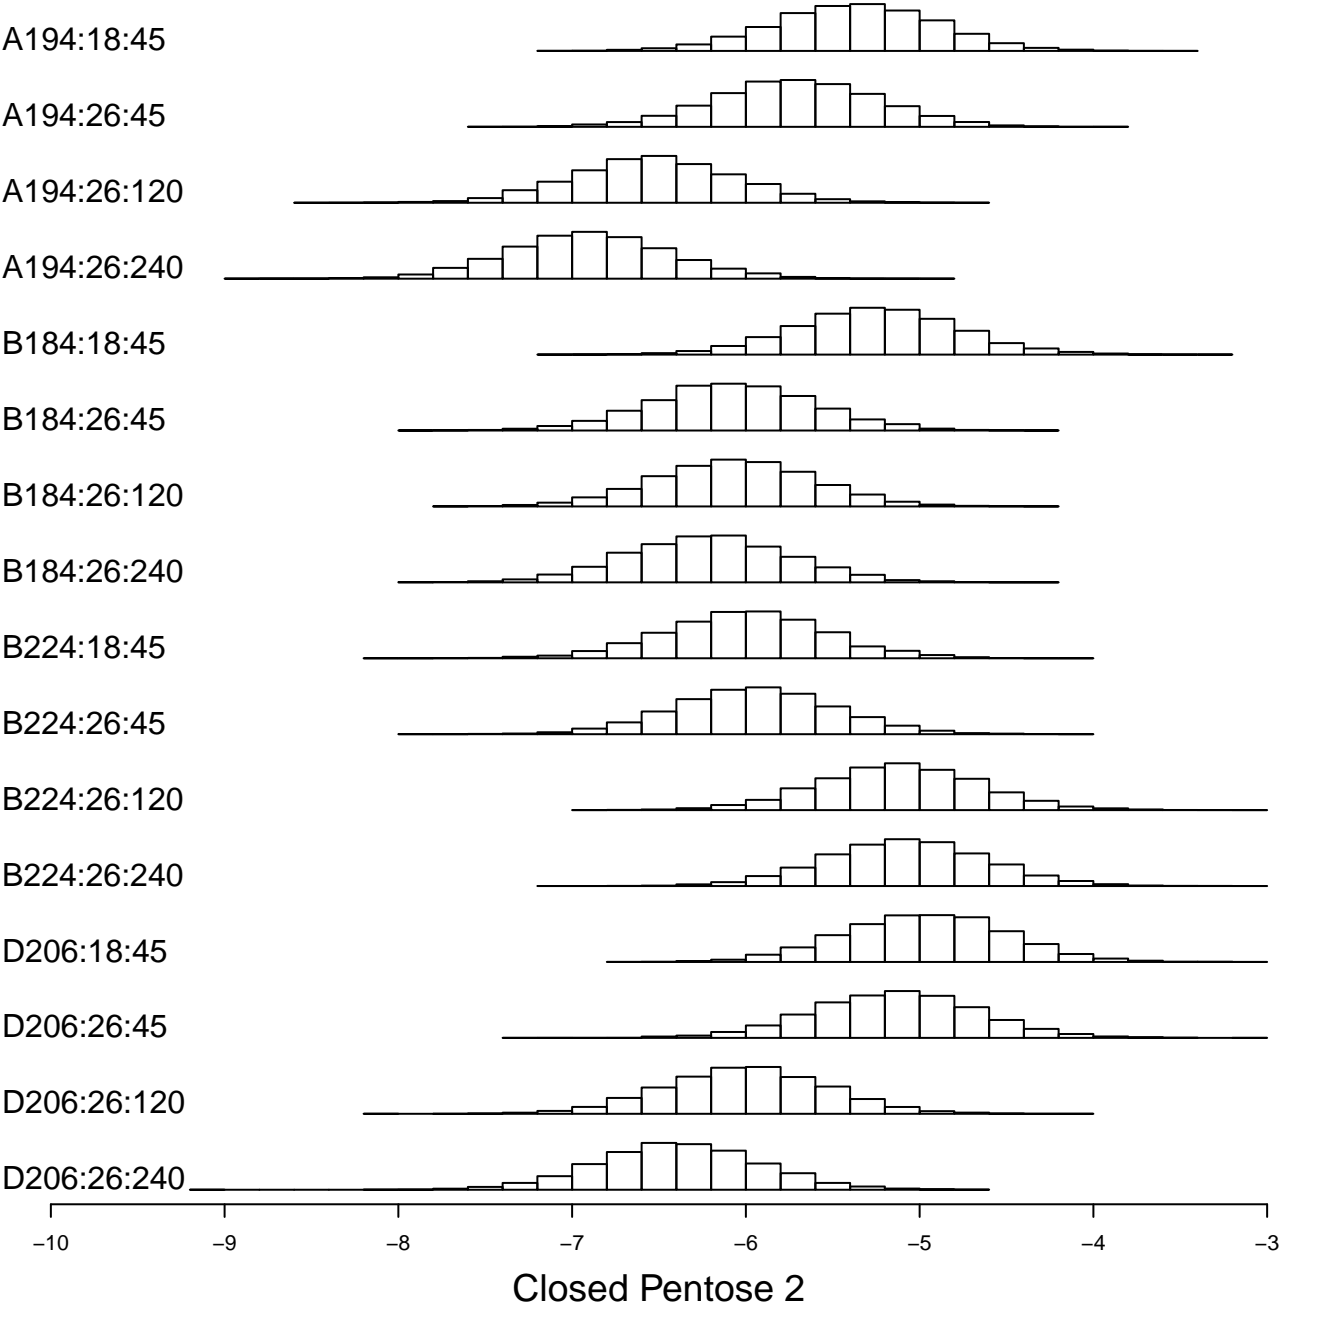



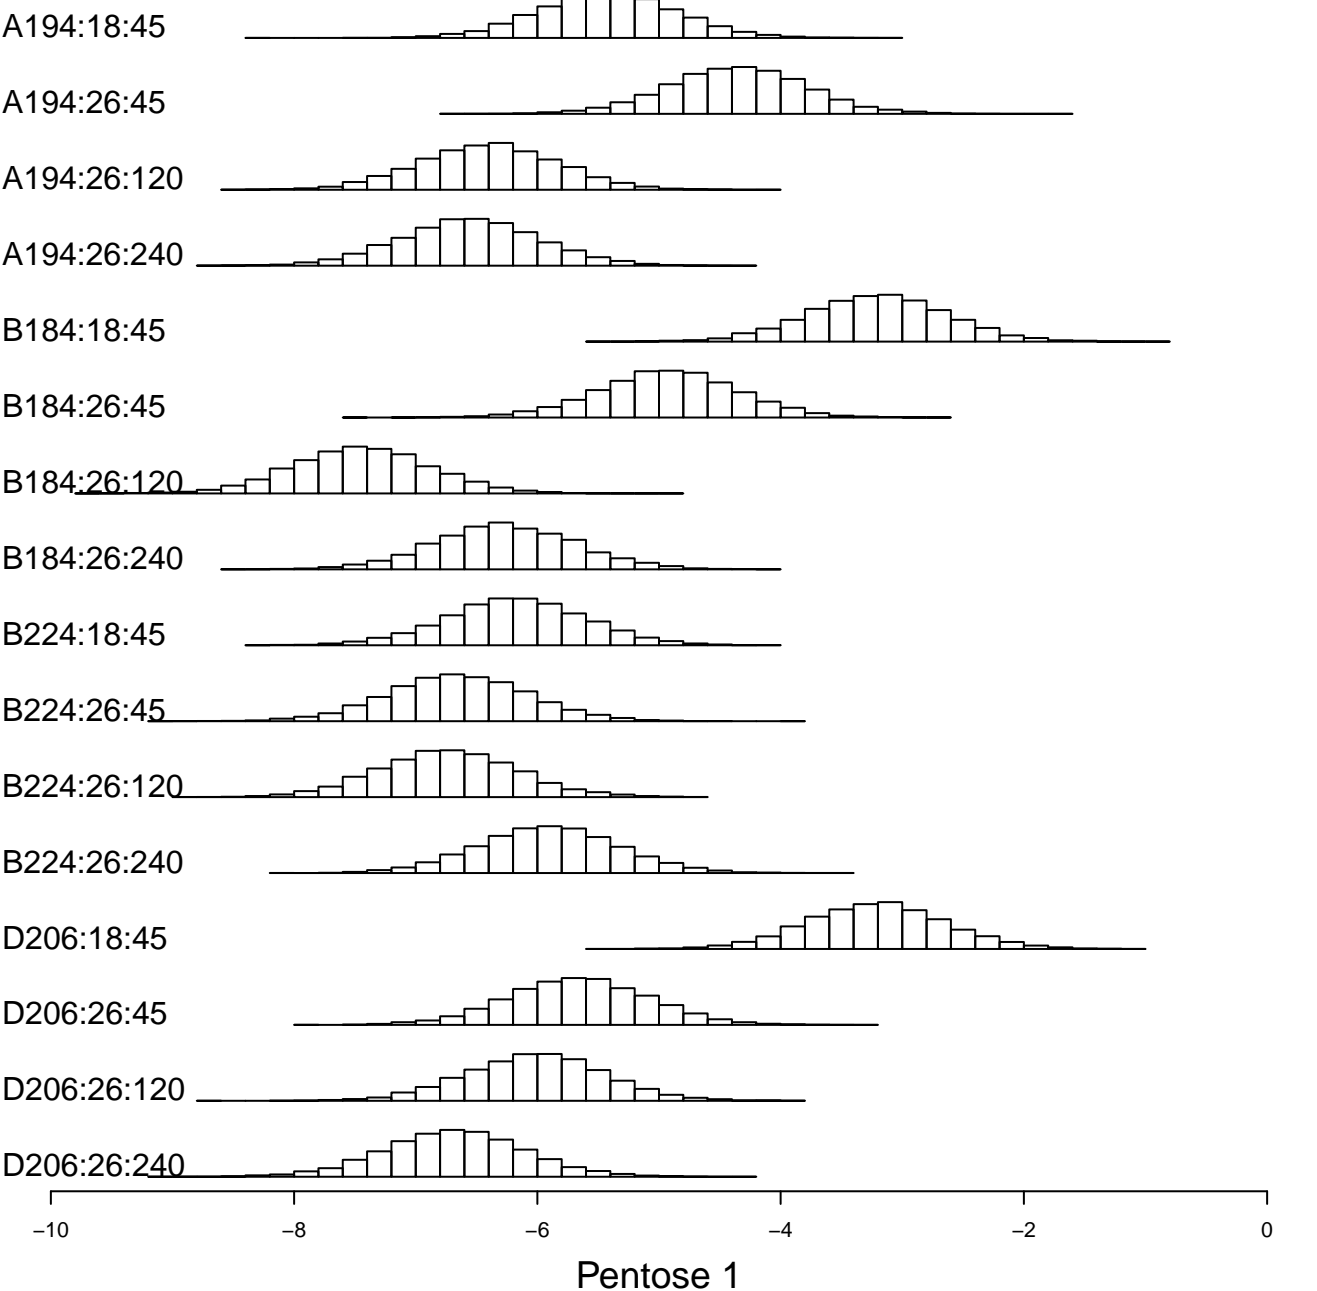

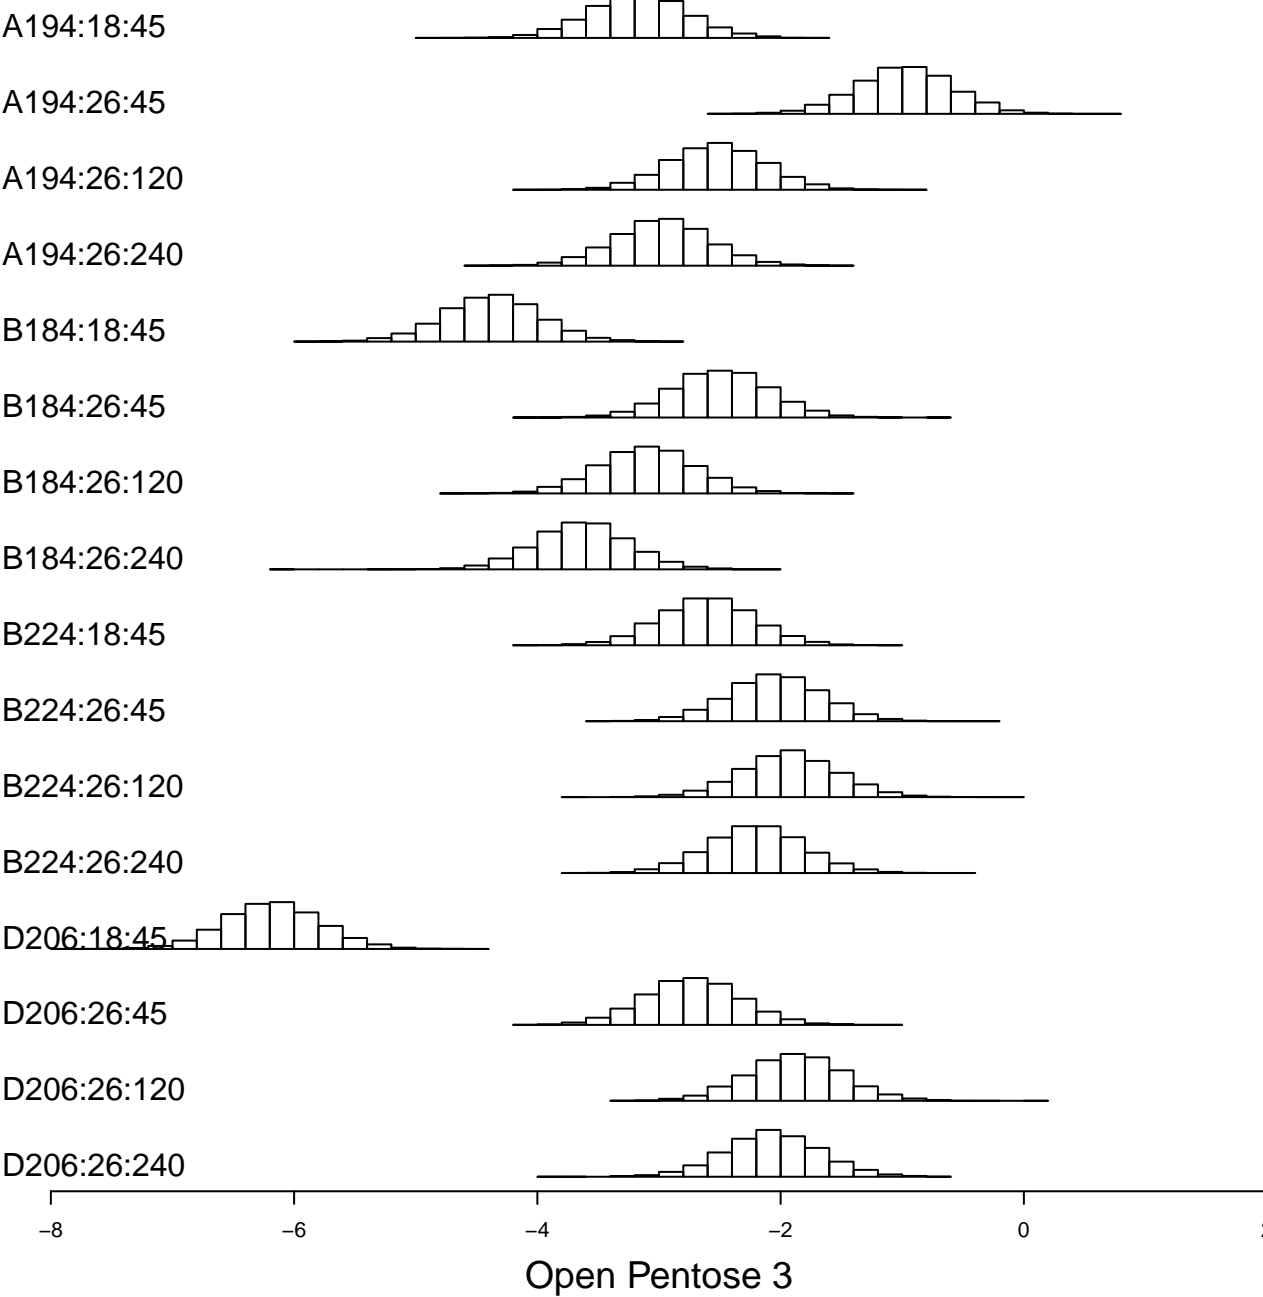



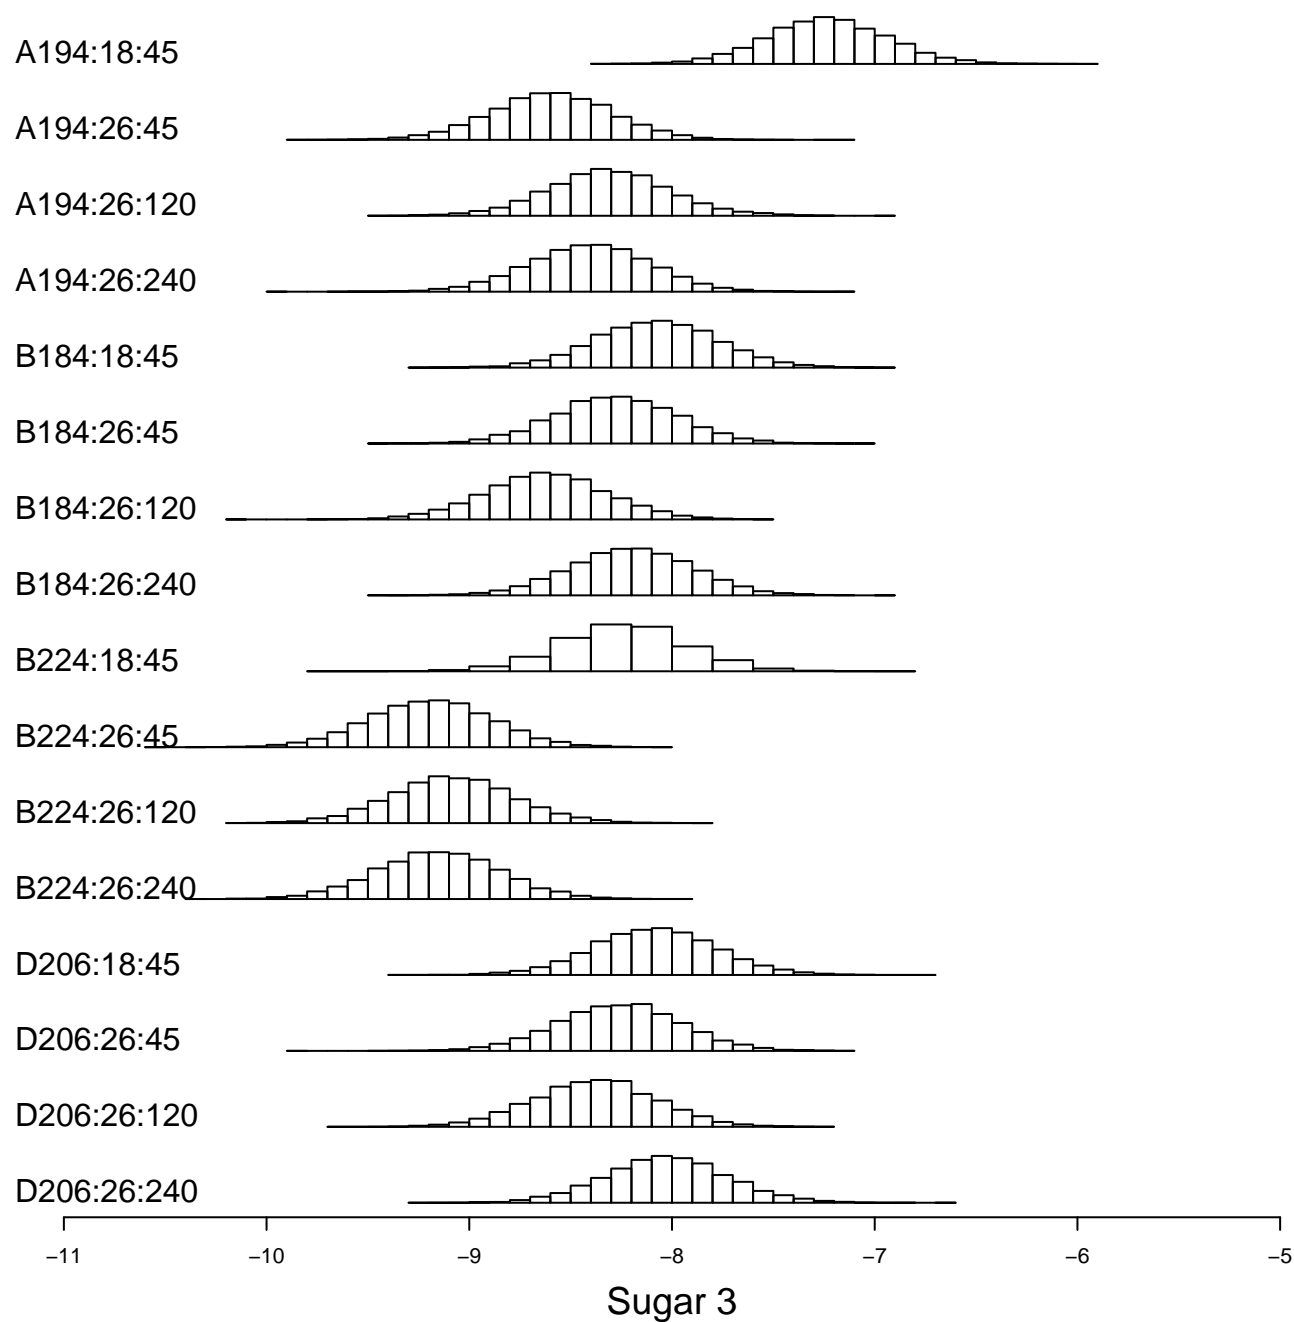

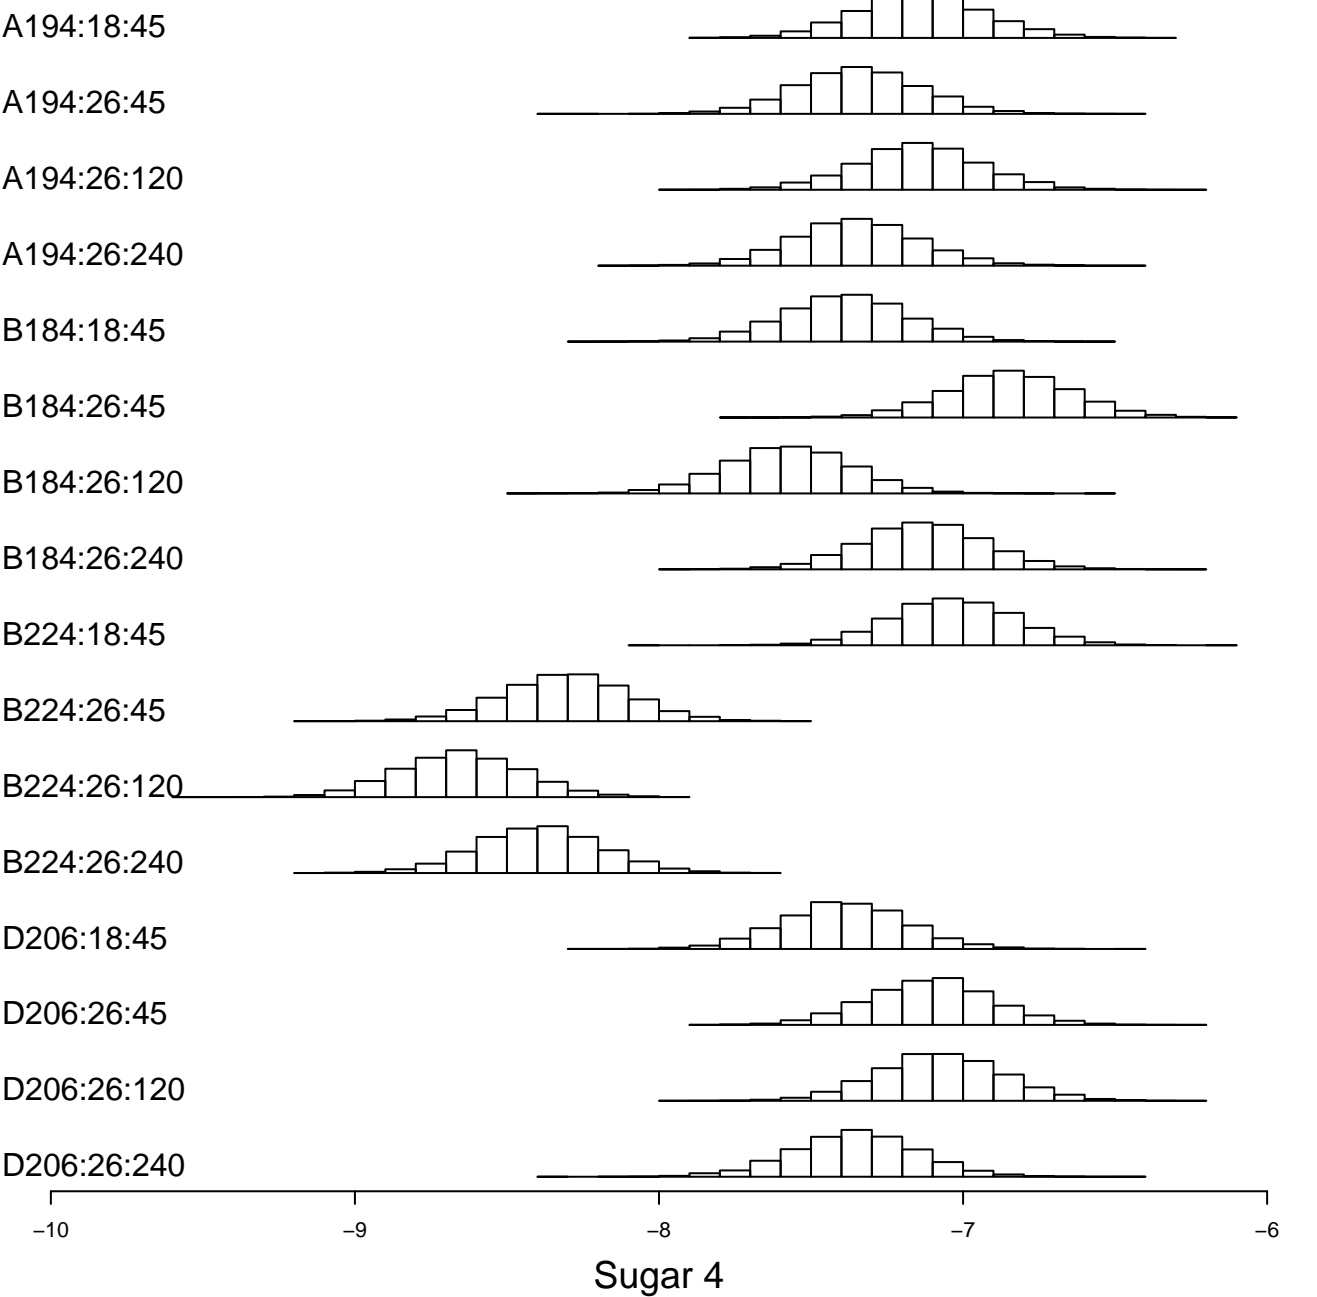

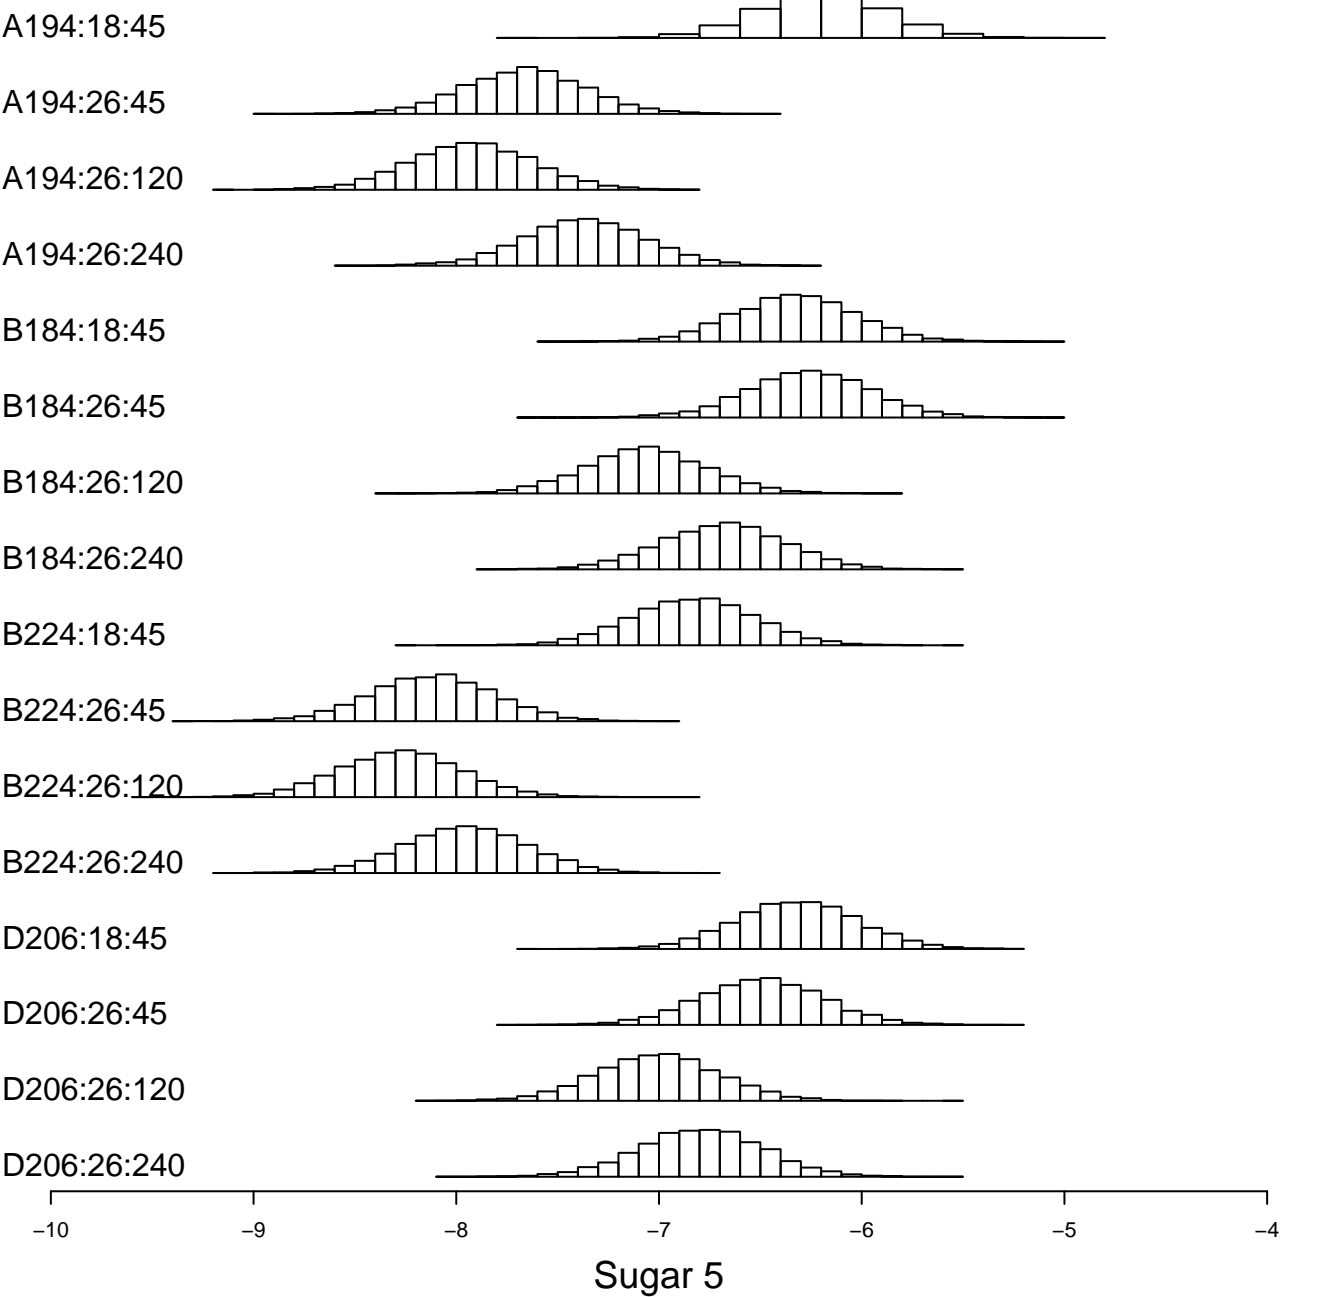

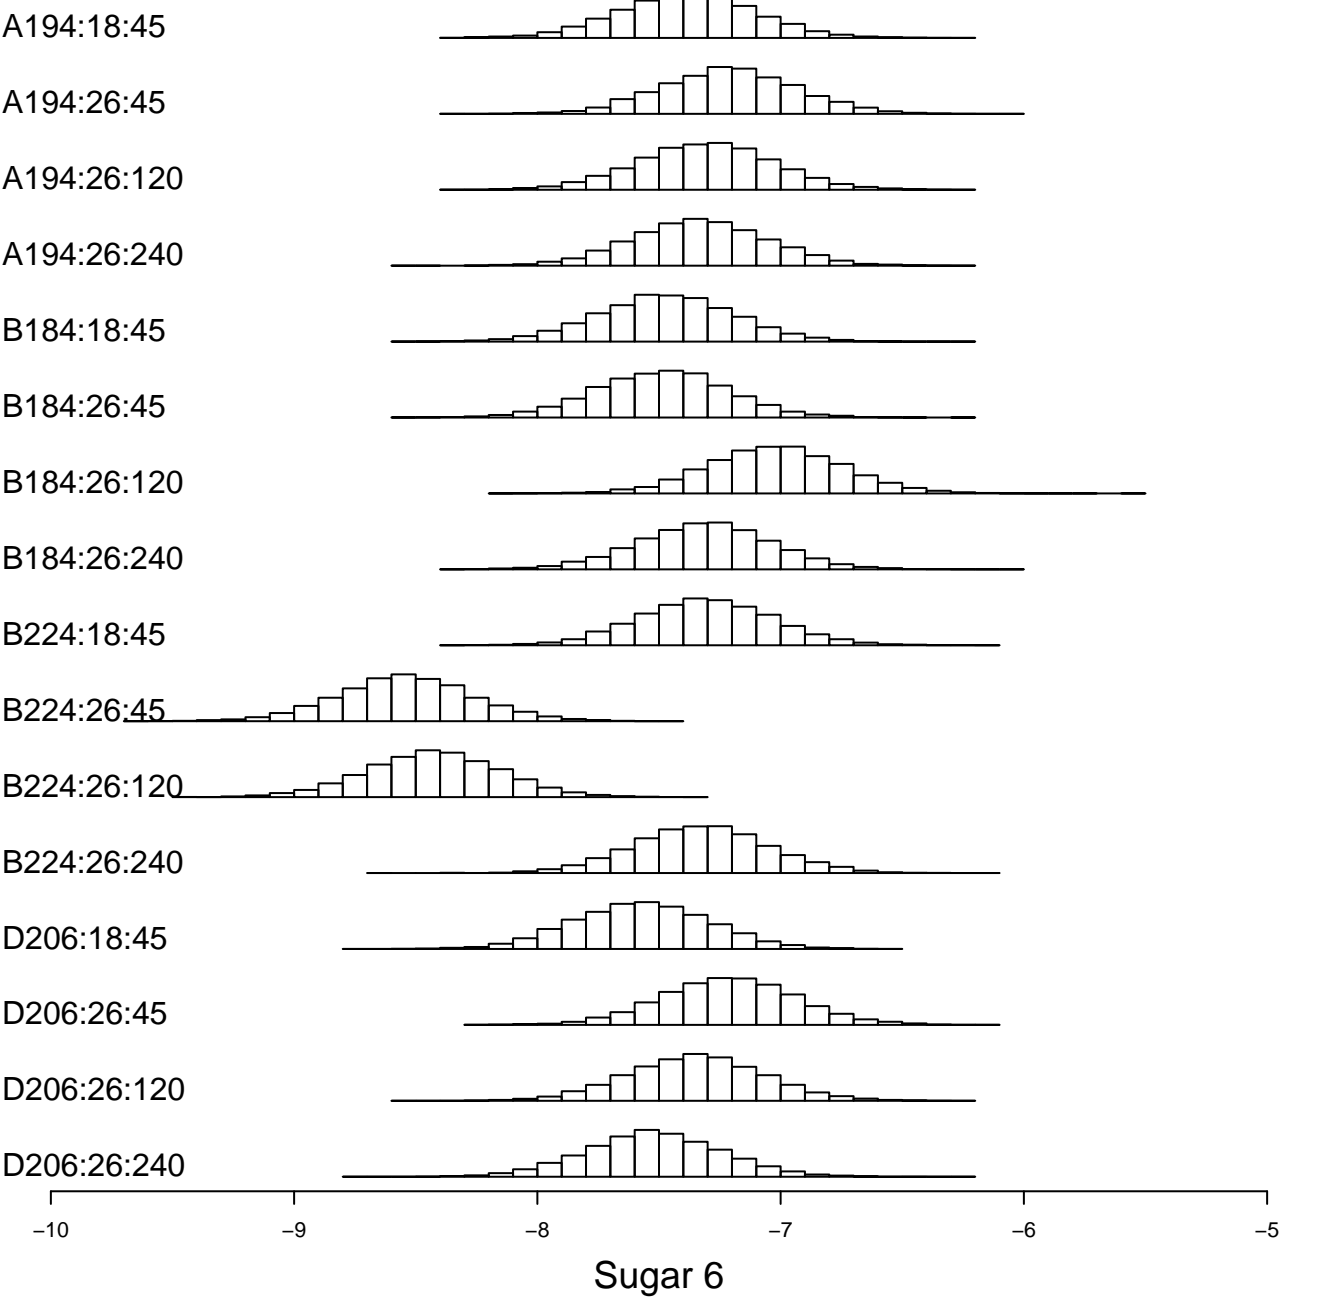

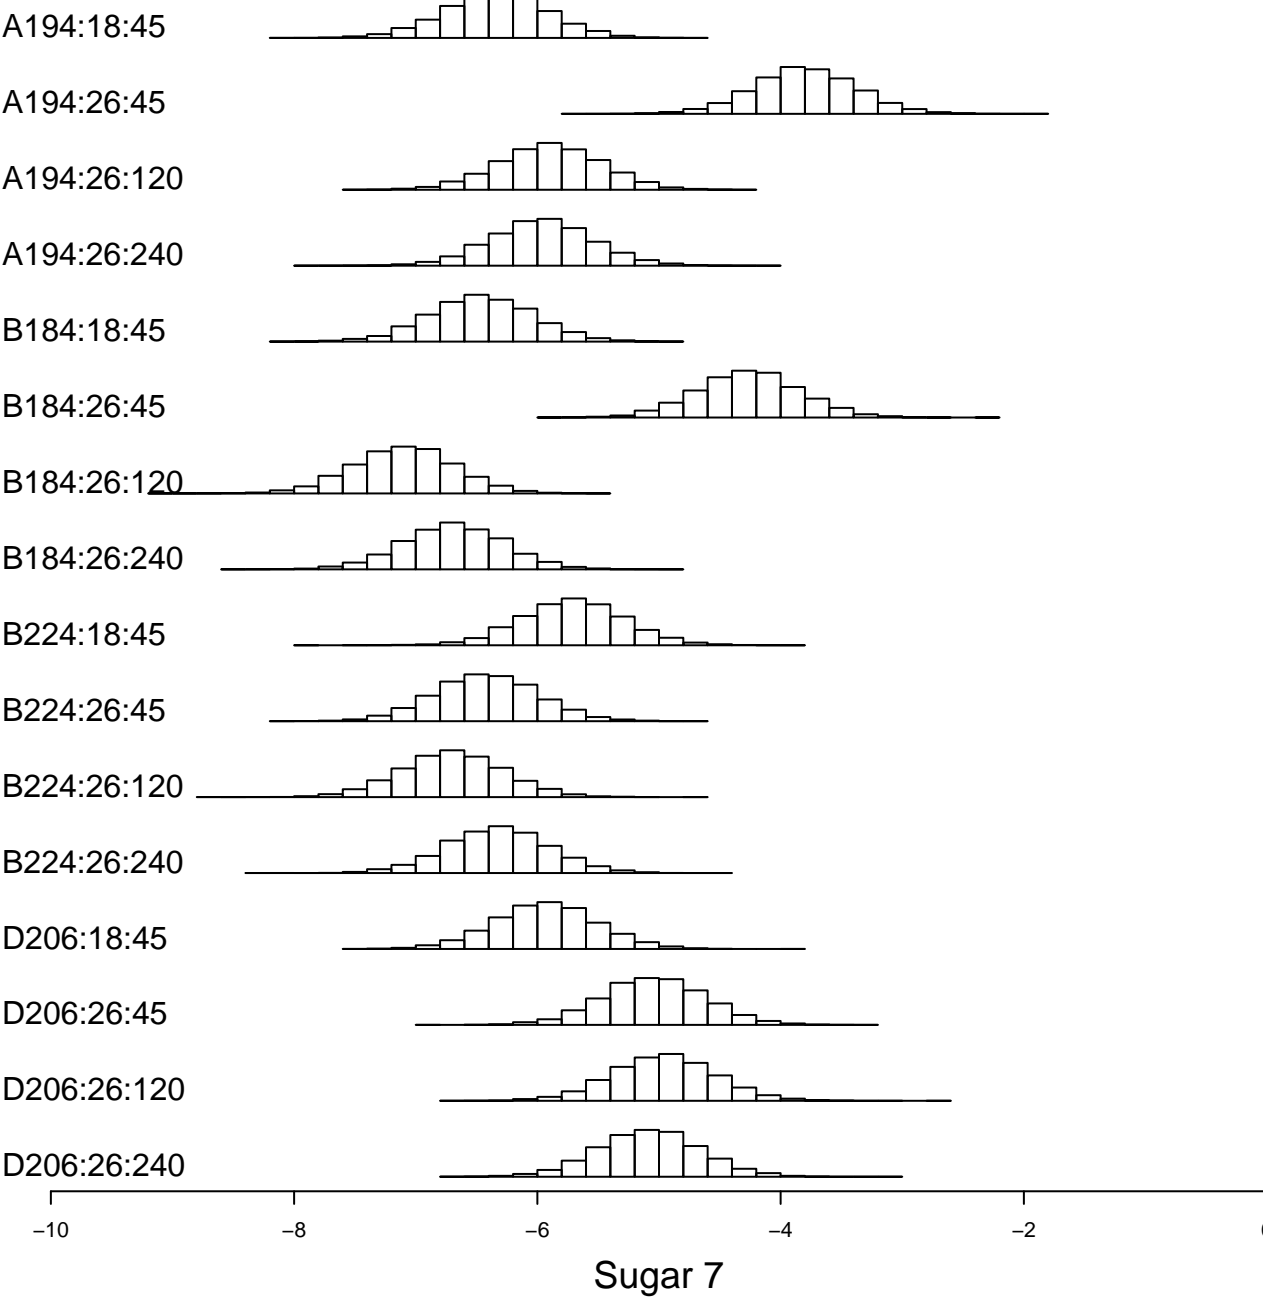



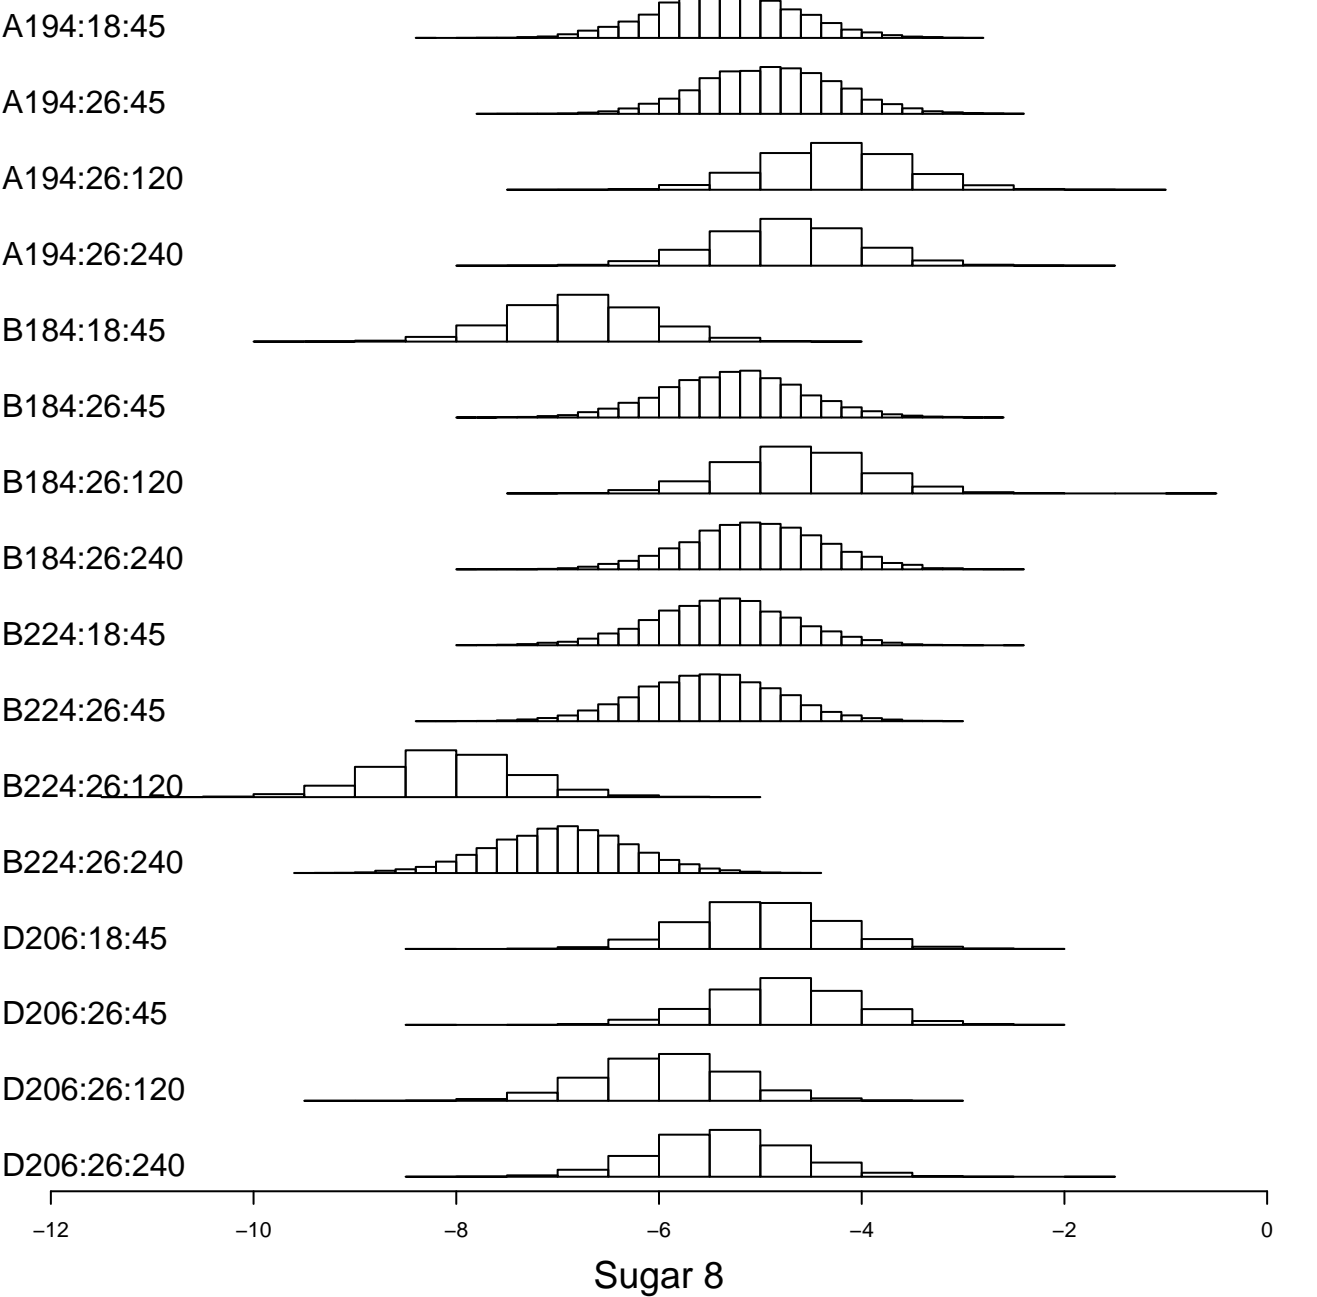

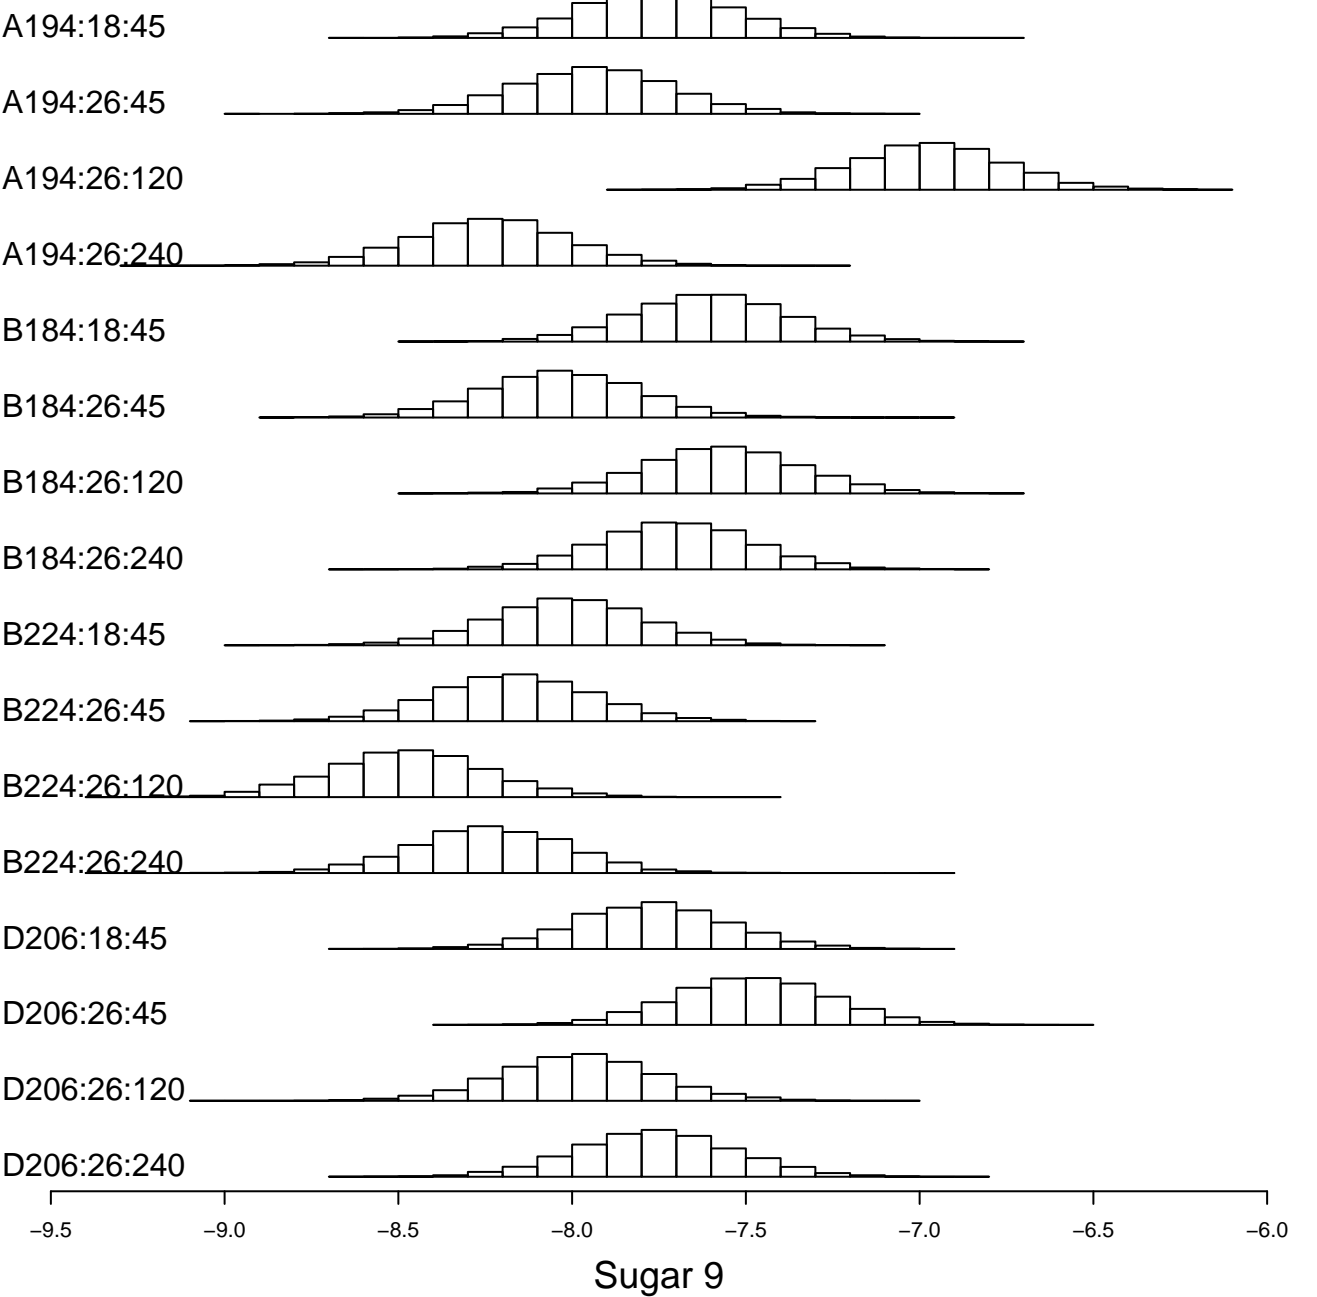

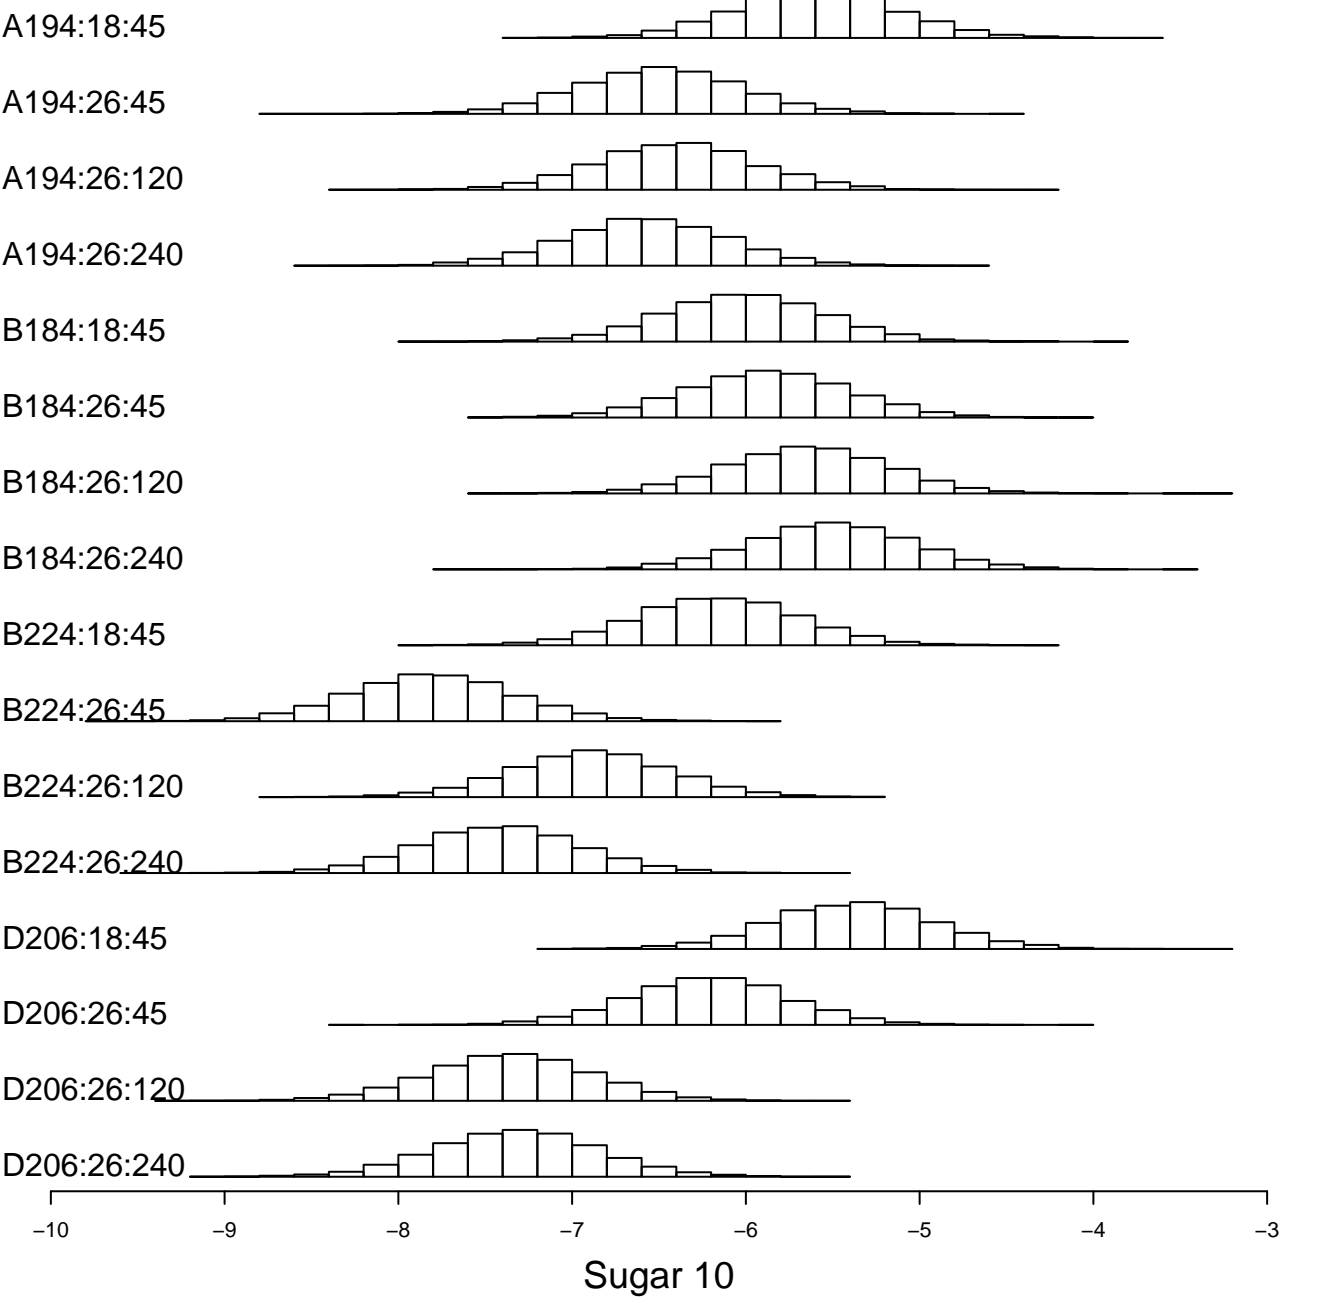

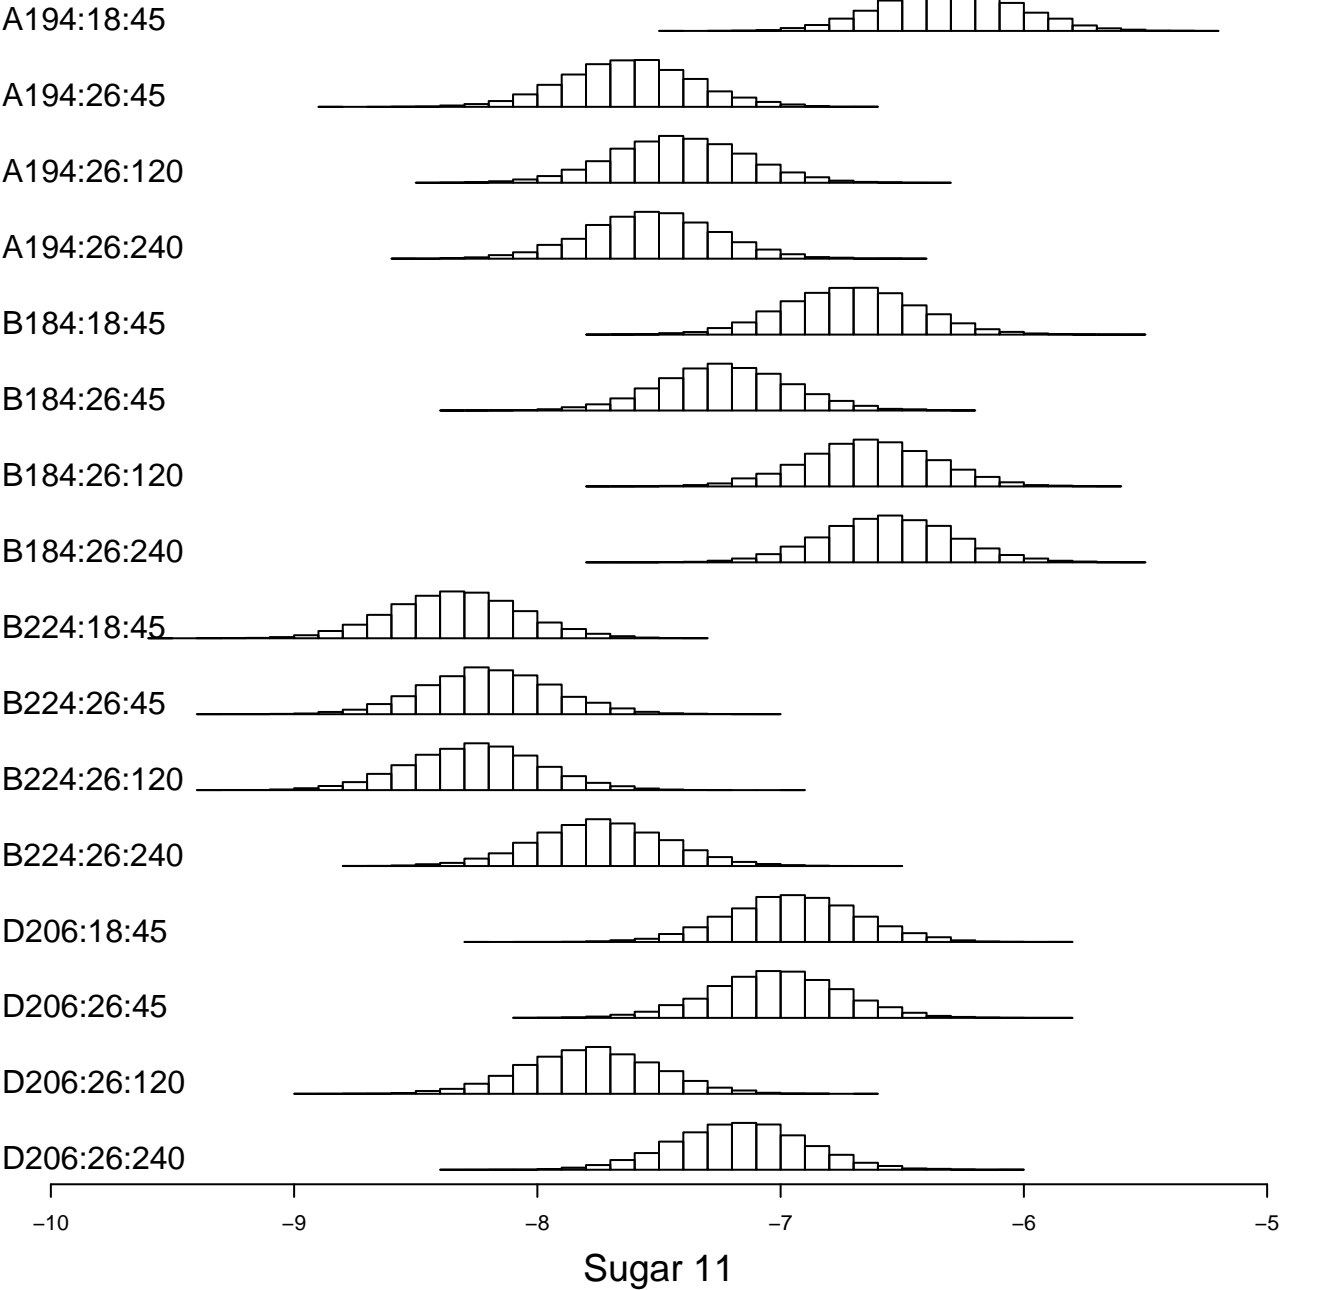

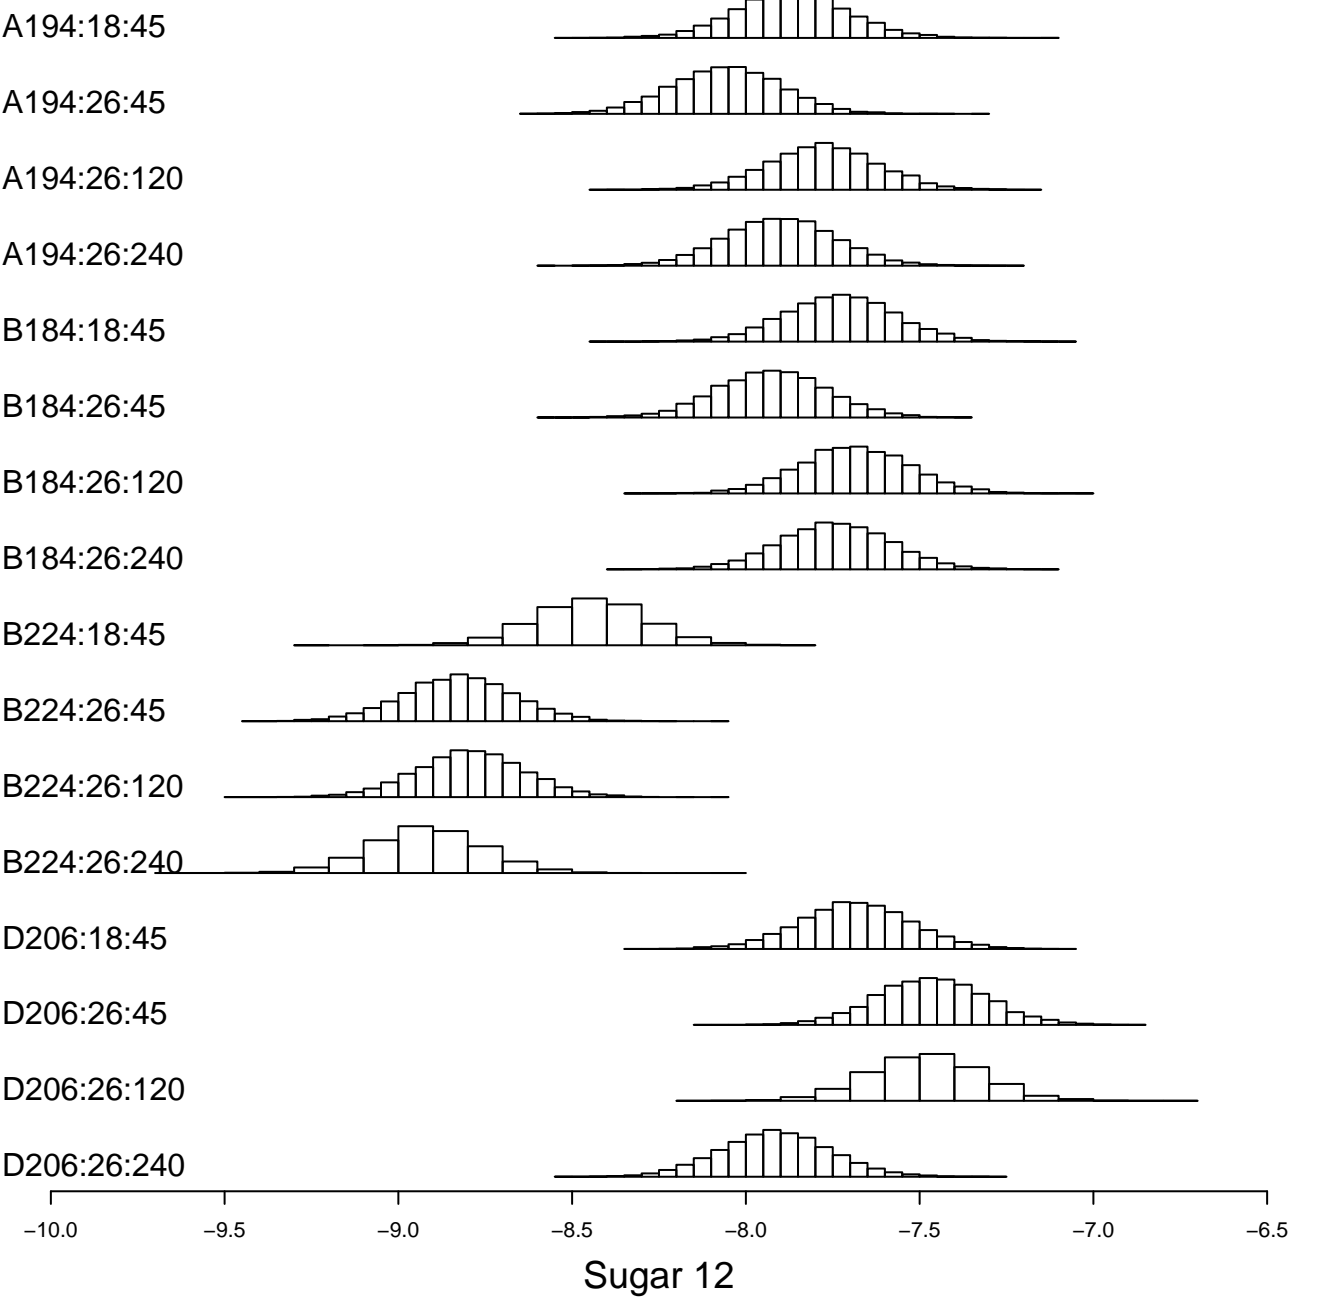

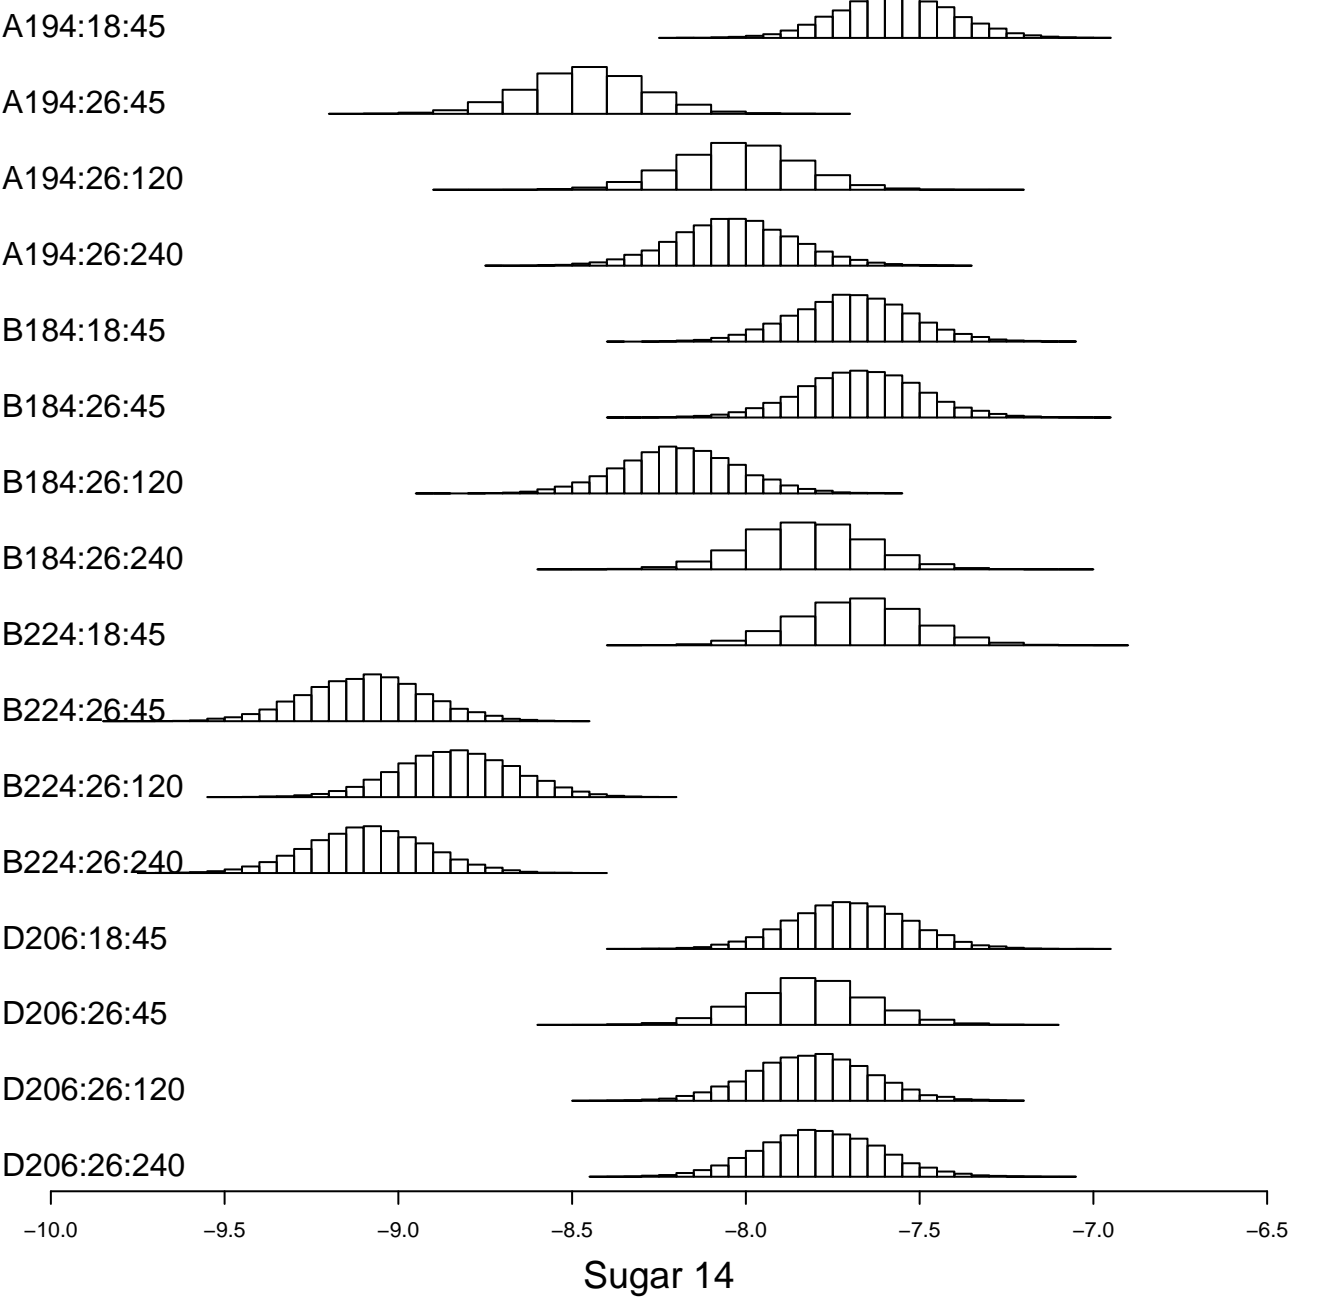

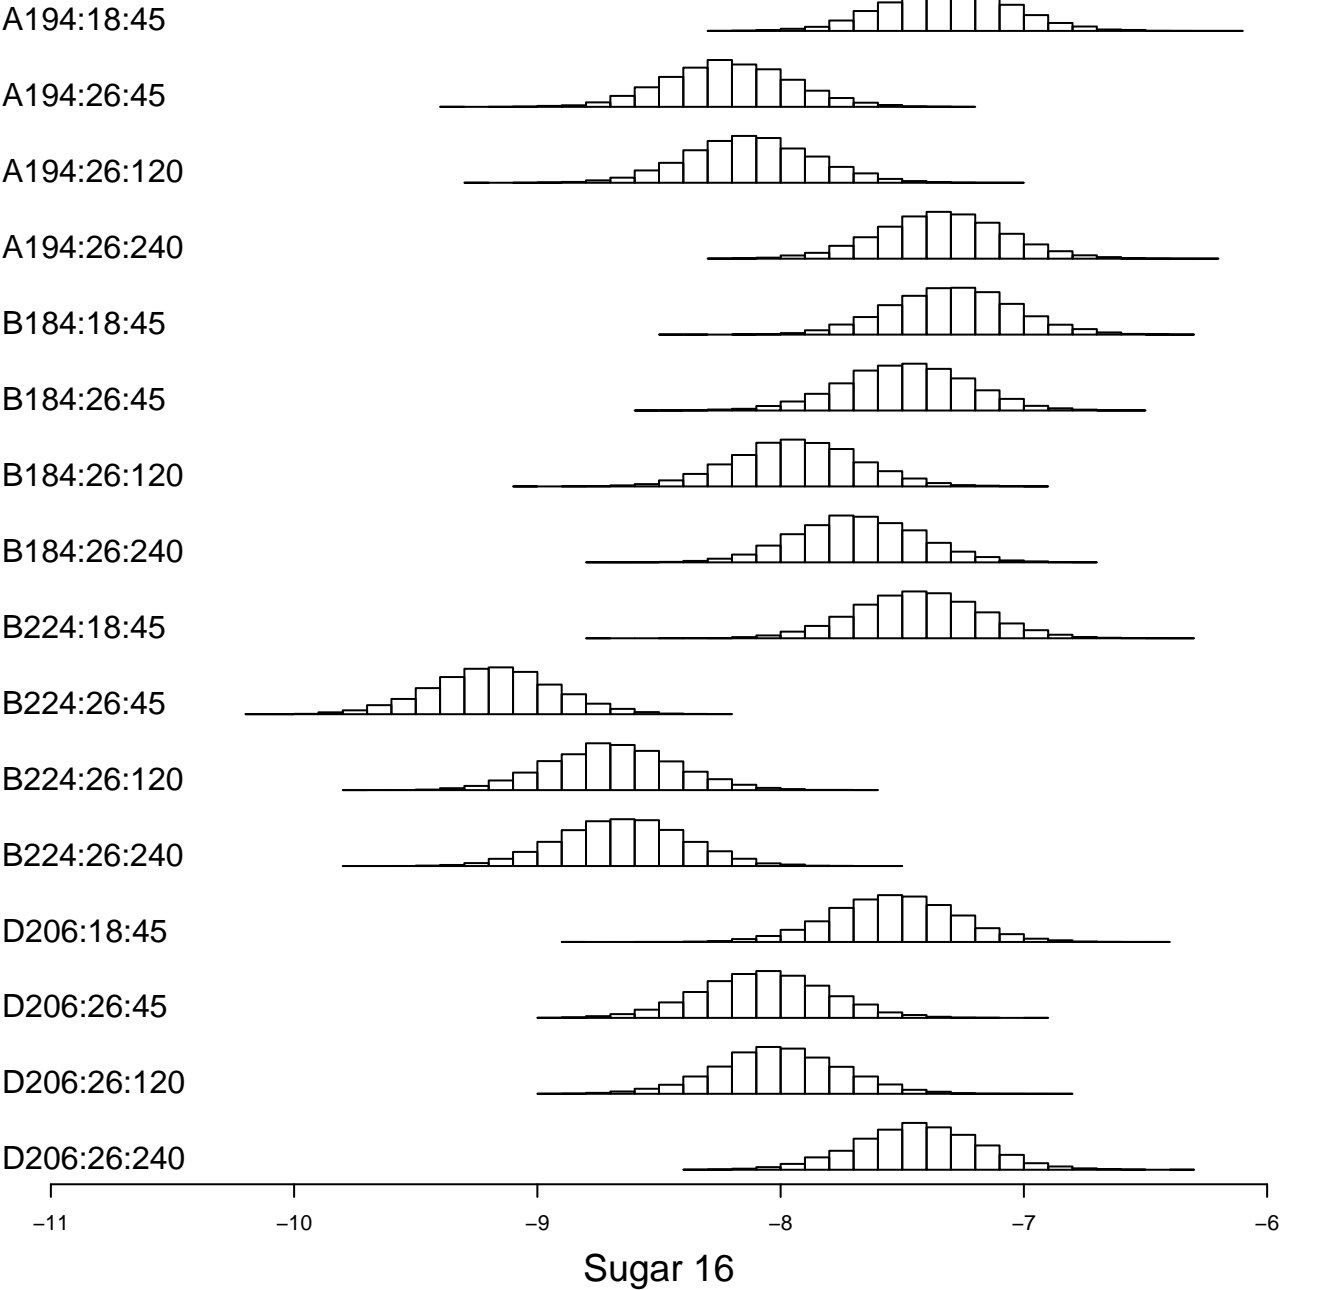

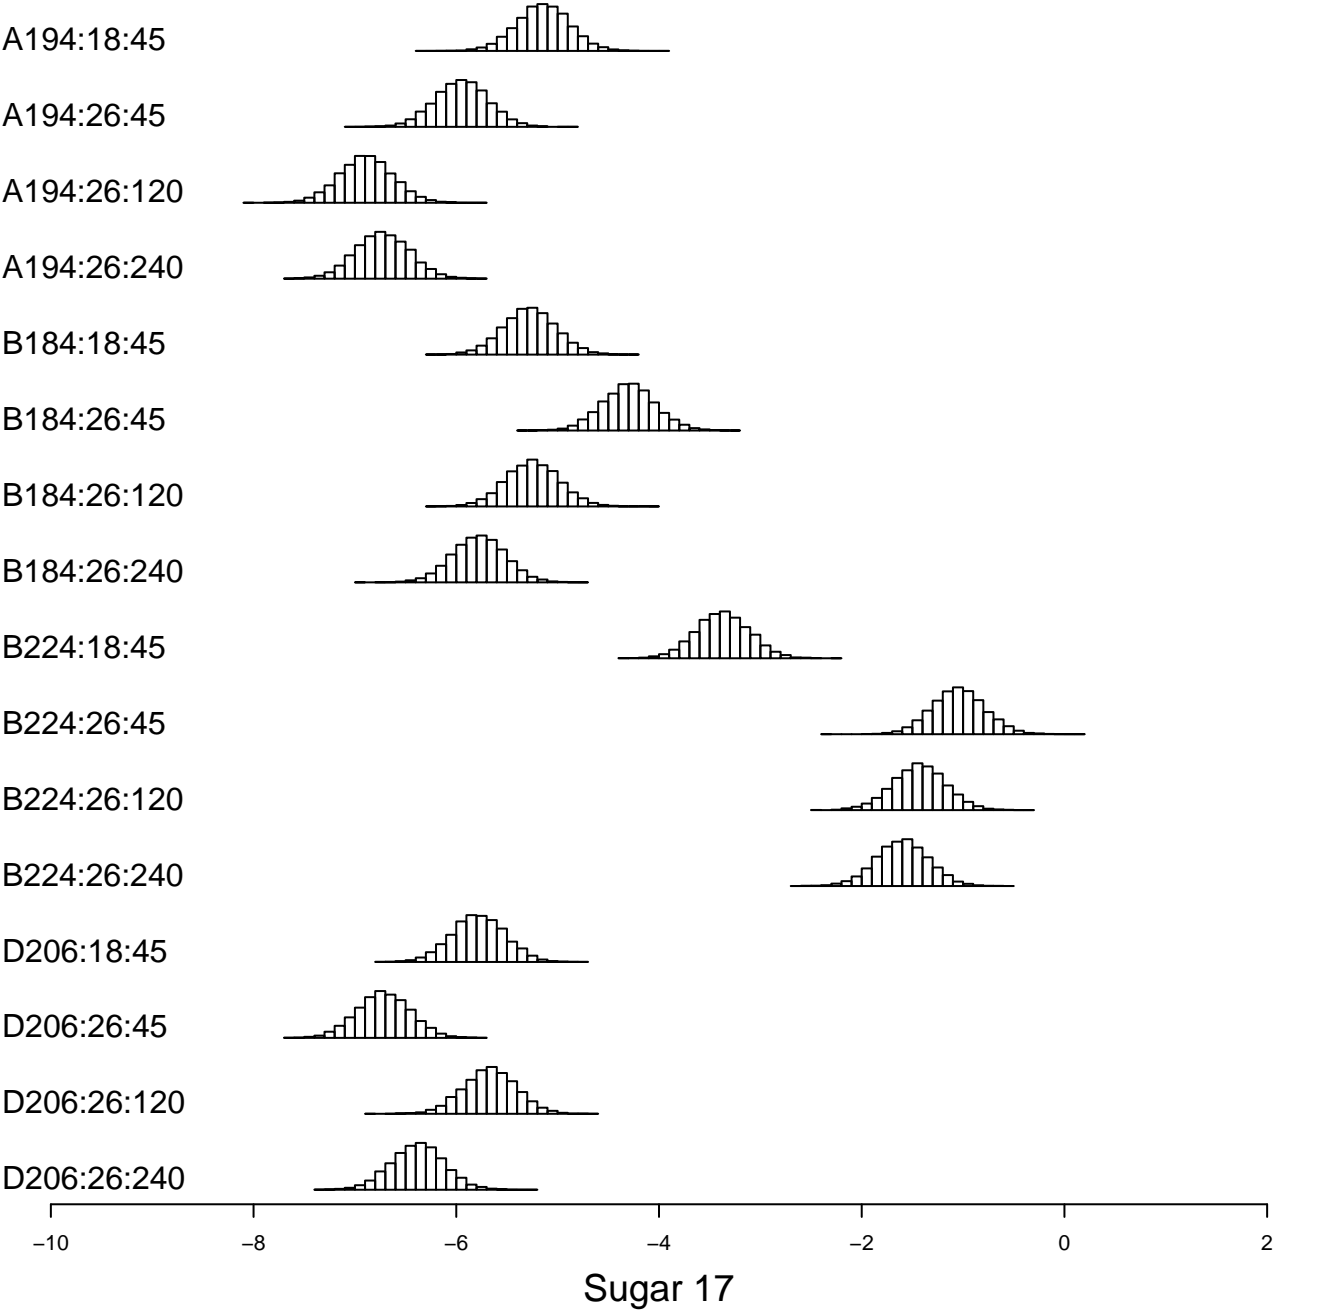



A194:18:45

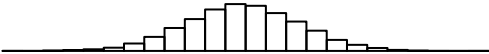

A194:26:45

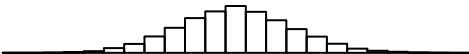

A194:26:120

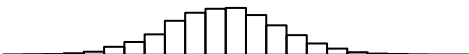

A194:26:240

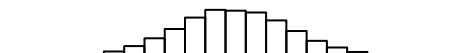

B184:18:45

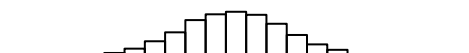

B184:26:45

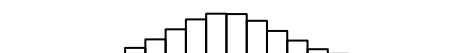

B184:26:120

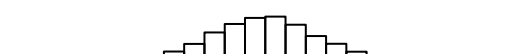

B184:26:240

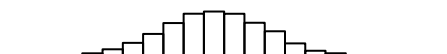

B224:18:45

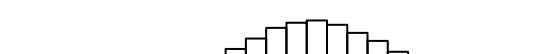

B224:26:45

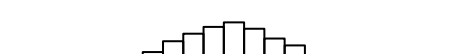

B224:26:120

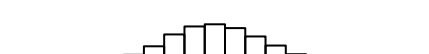

B224:26:240

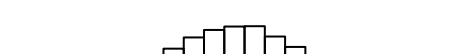

D206:18:45

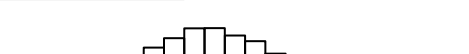

D206:26:45

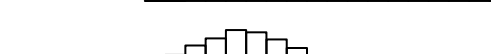

D206:26:120

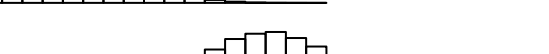

D206:26:240

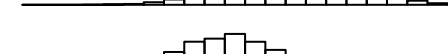

-9 -8 -7 -6 -5 -4

Sugar 18

A194:18:45

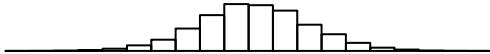

A194:26:45

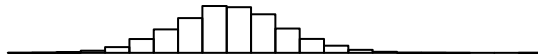

A194:26:120

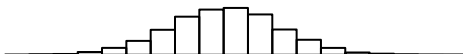

A194:26:240

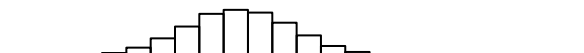

B184:18:45

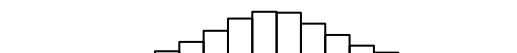

B184:26:45

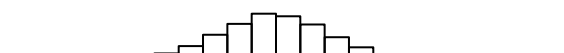

B184:26:120

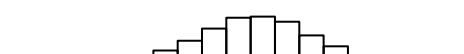

B184:26:240

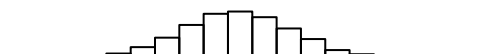

B224:18:45

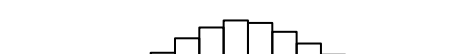

B224:26:45

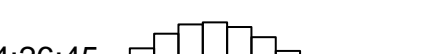

B224:26:120

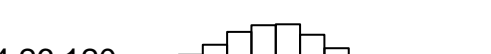

B224:26:240

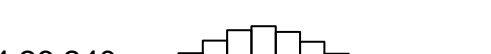

D206:18:45

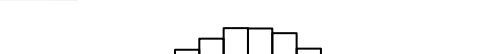

D206:26:45

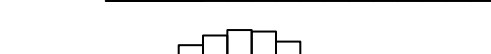

D206:26:120

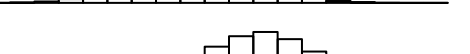

D206:26:240

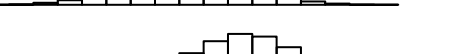

-10      -9      -8      -7      -6      -5

Sugar 20

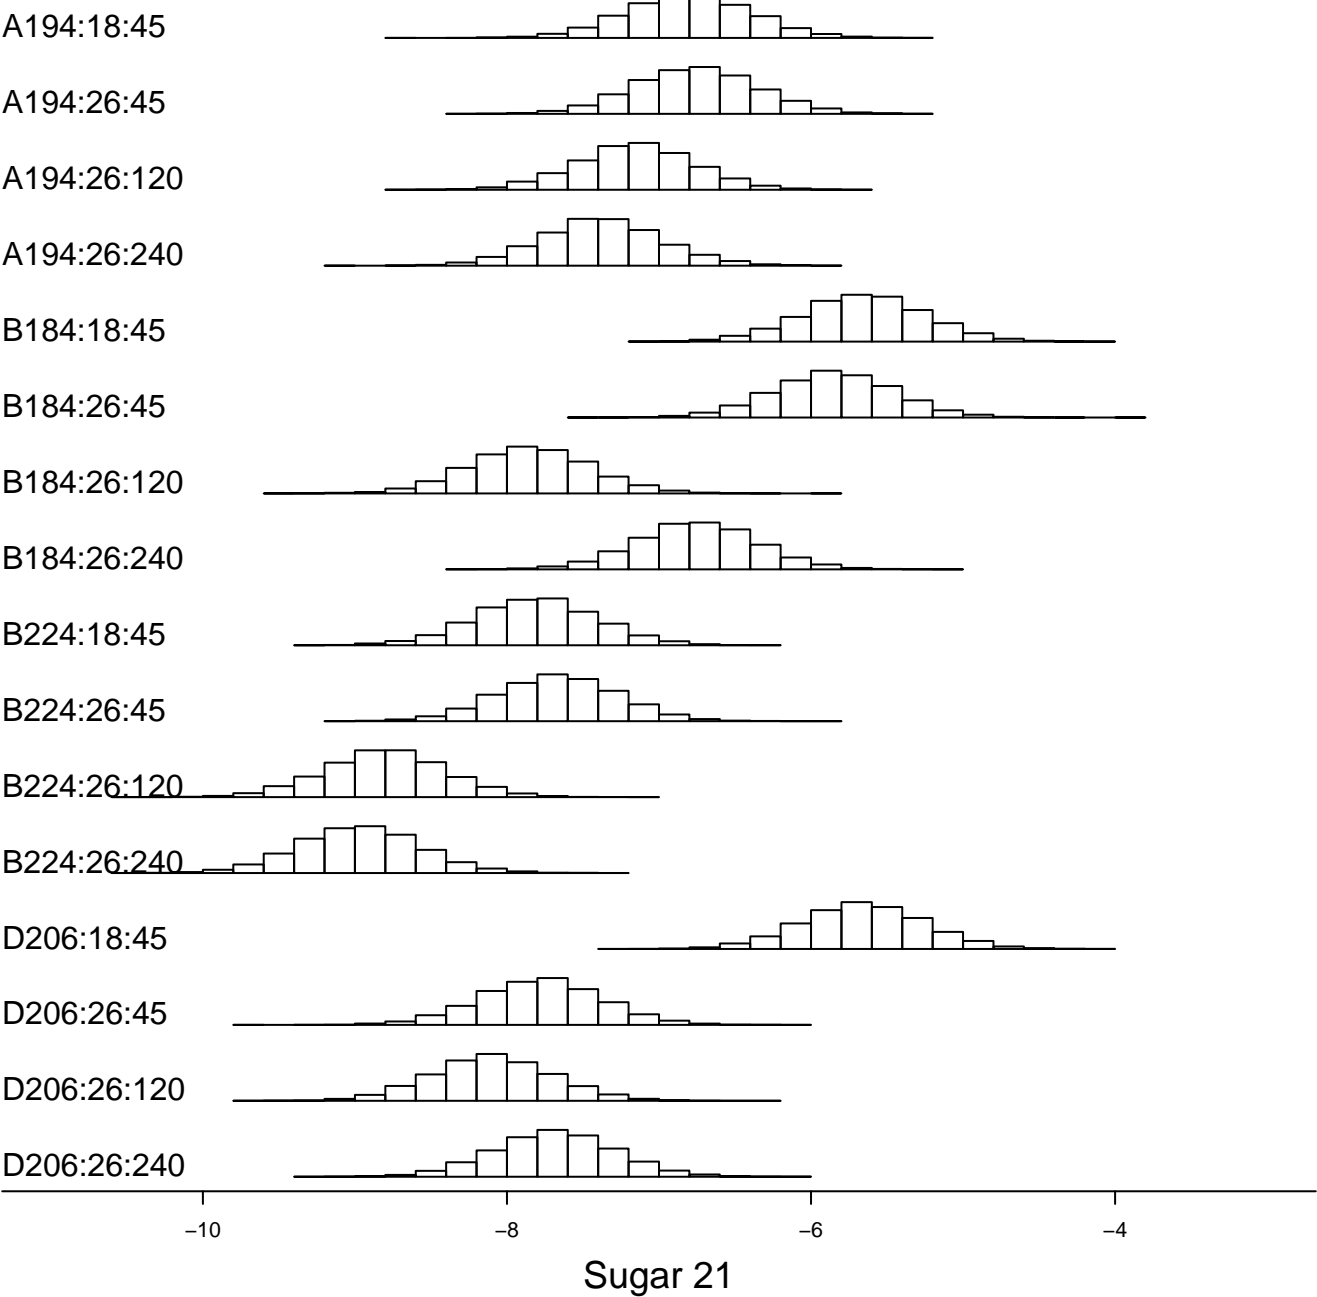

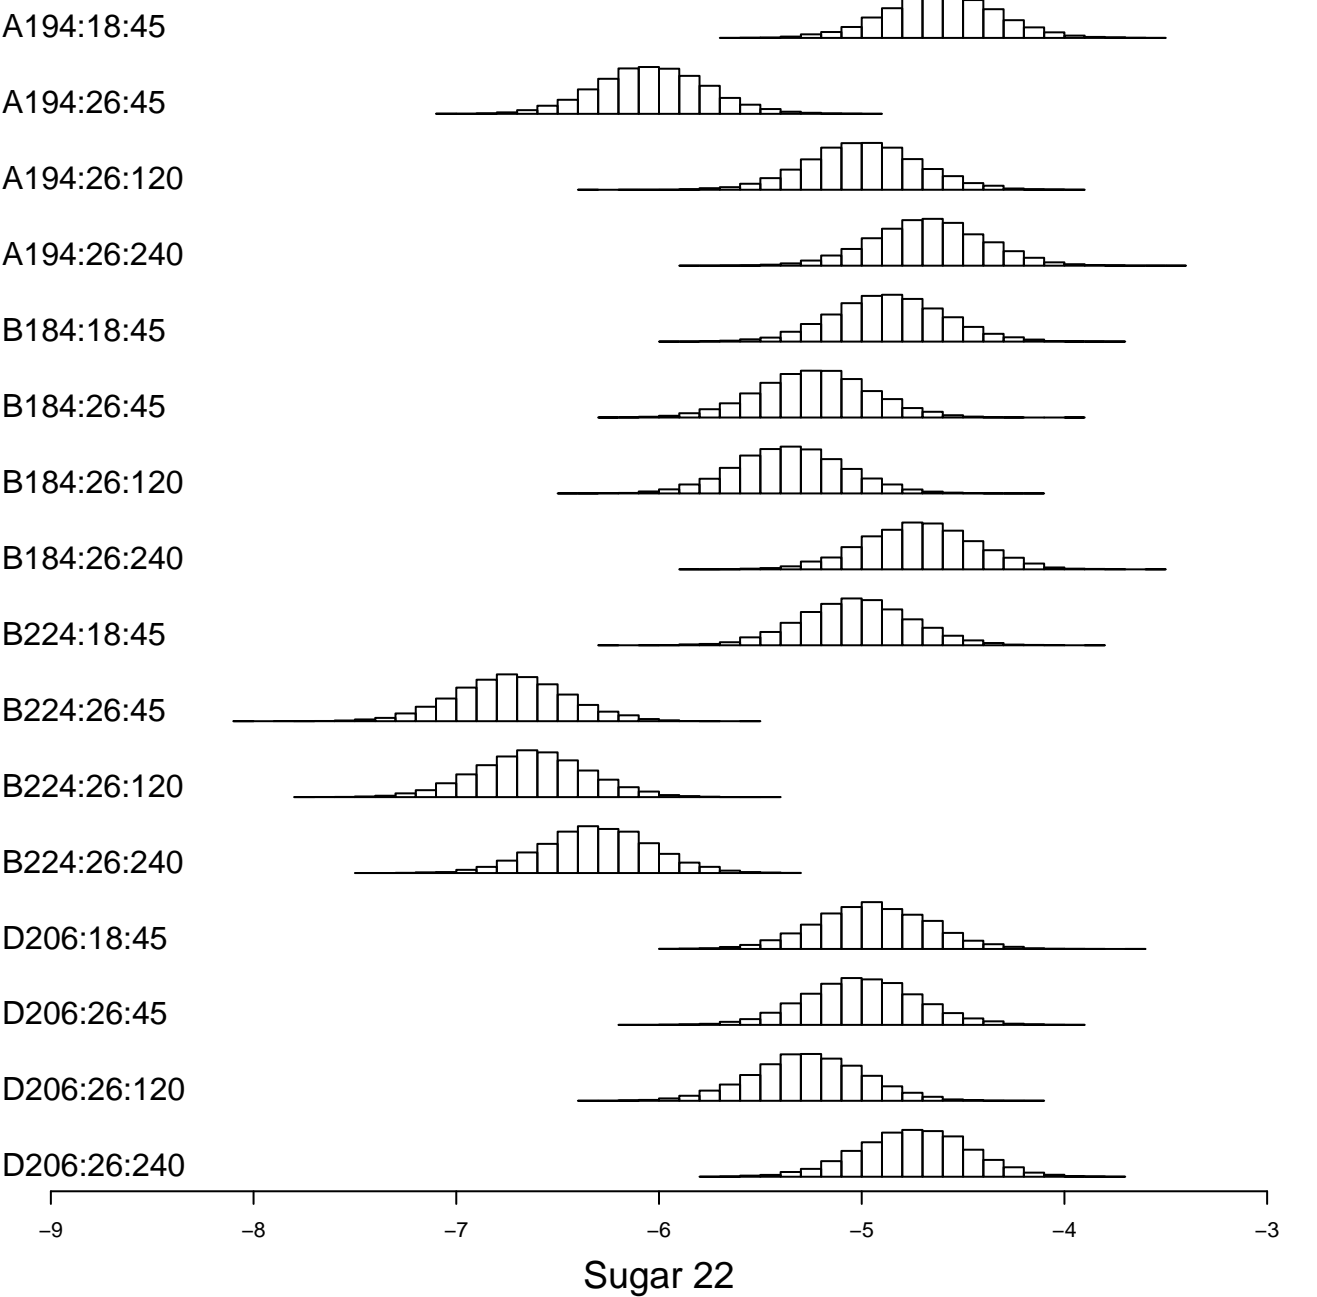

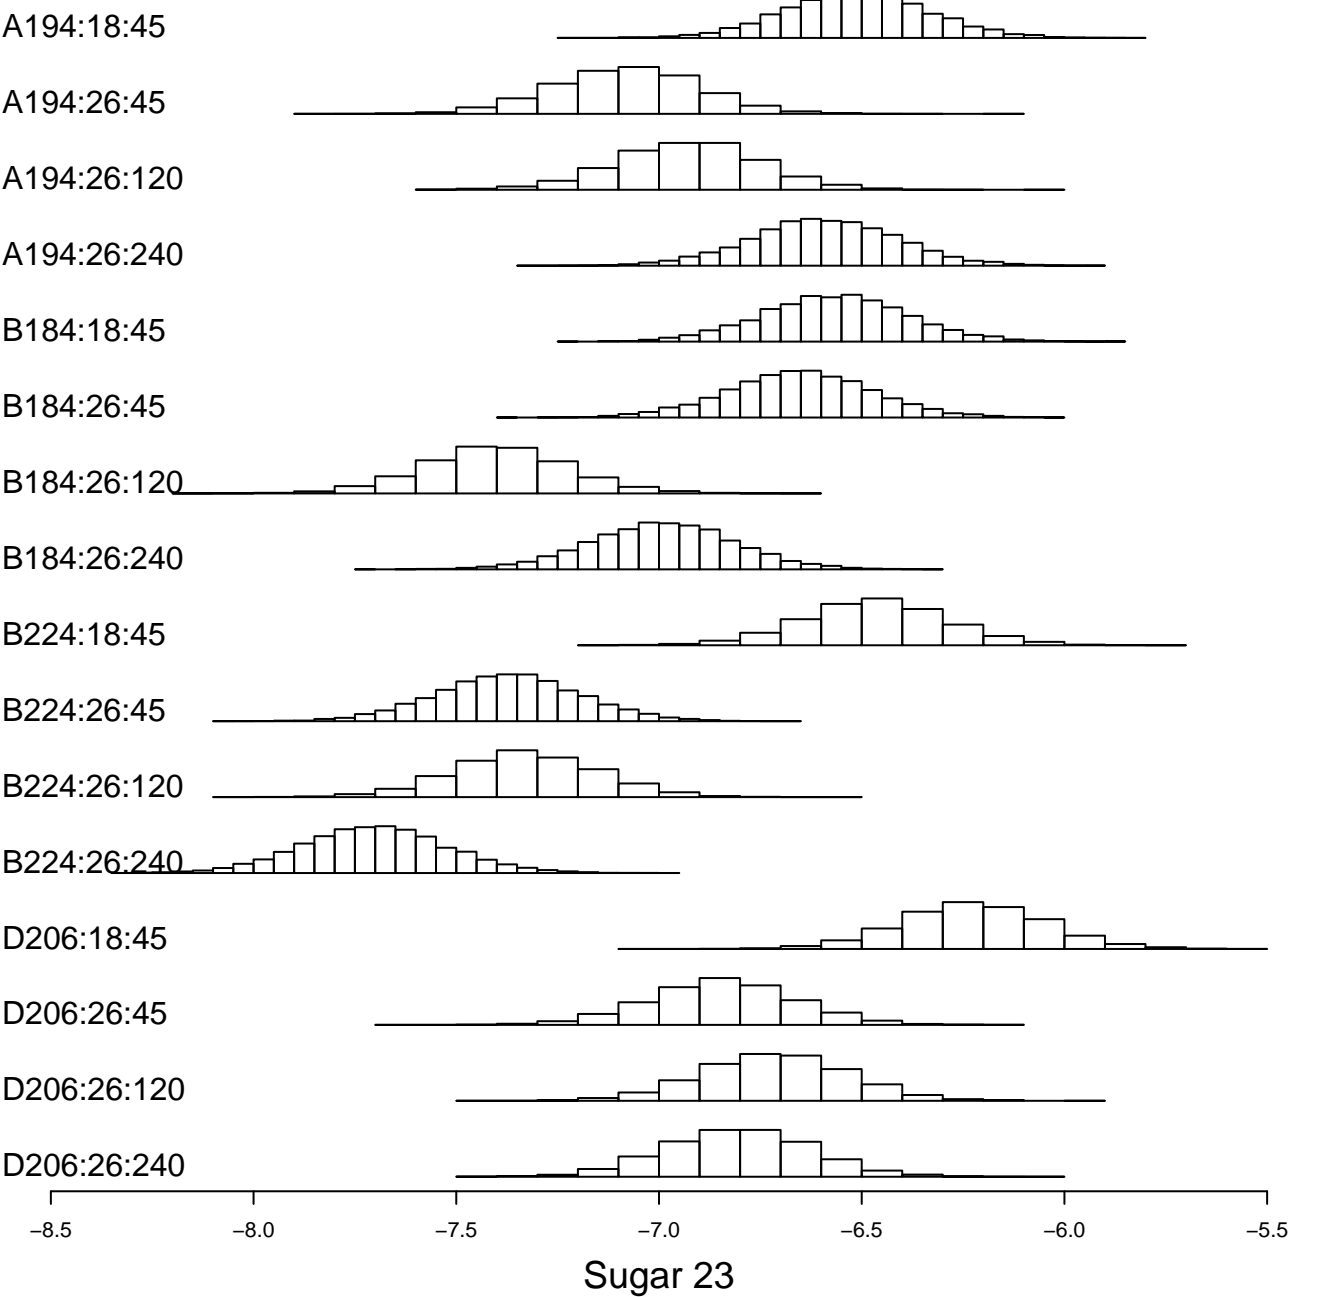

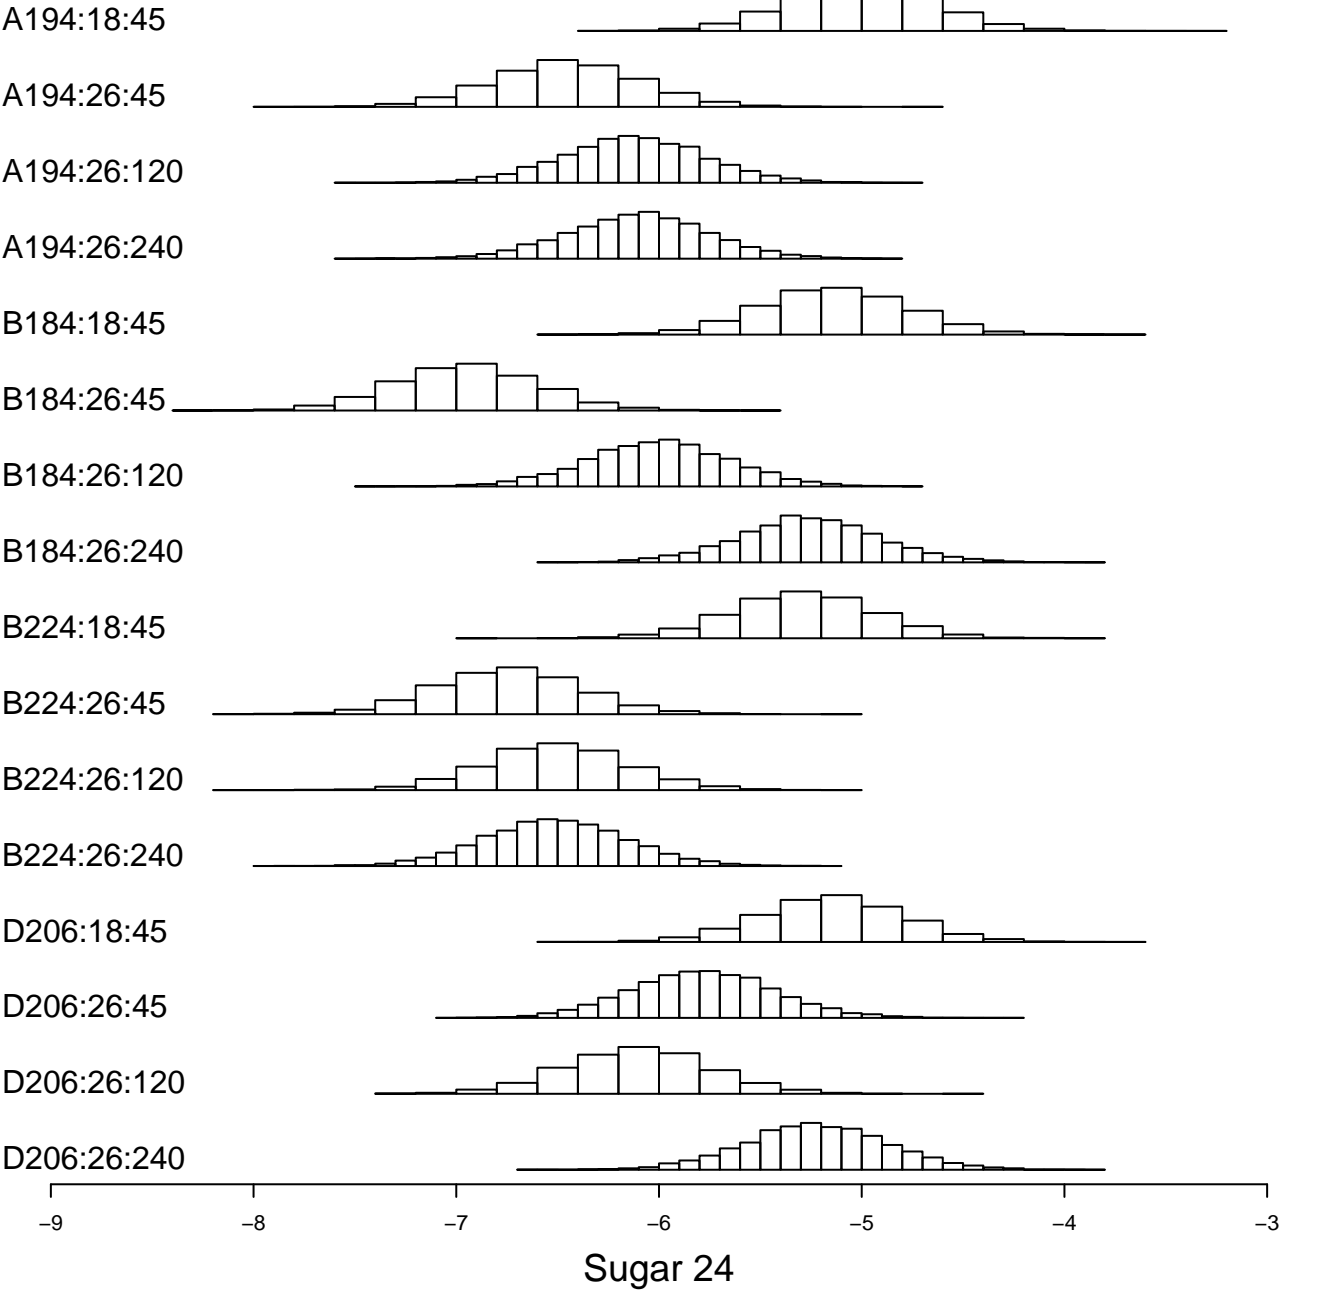

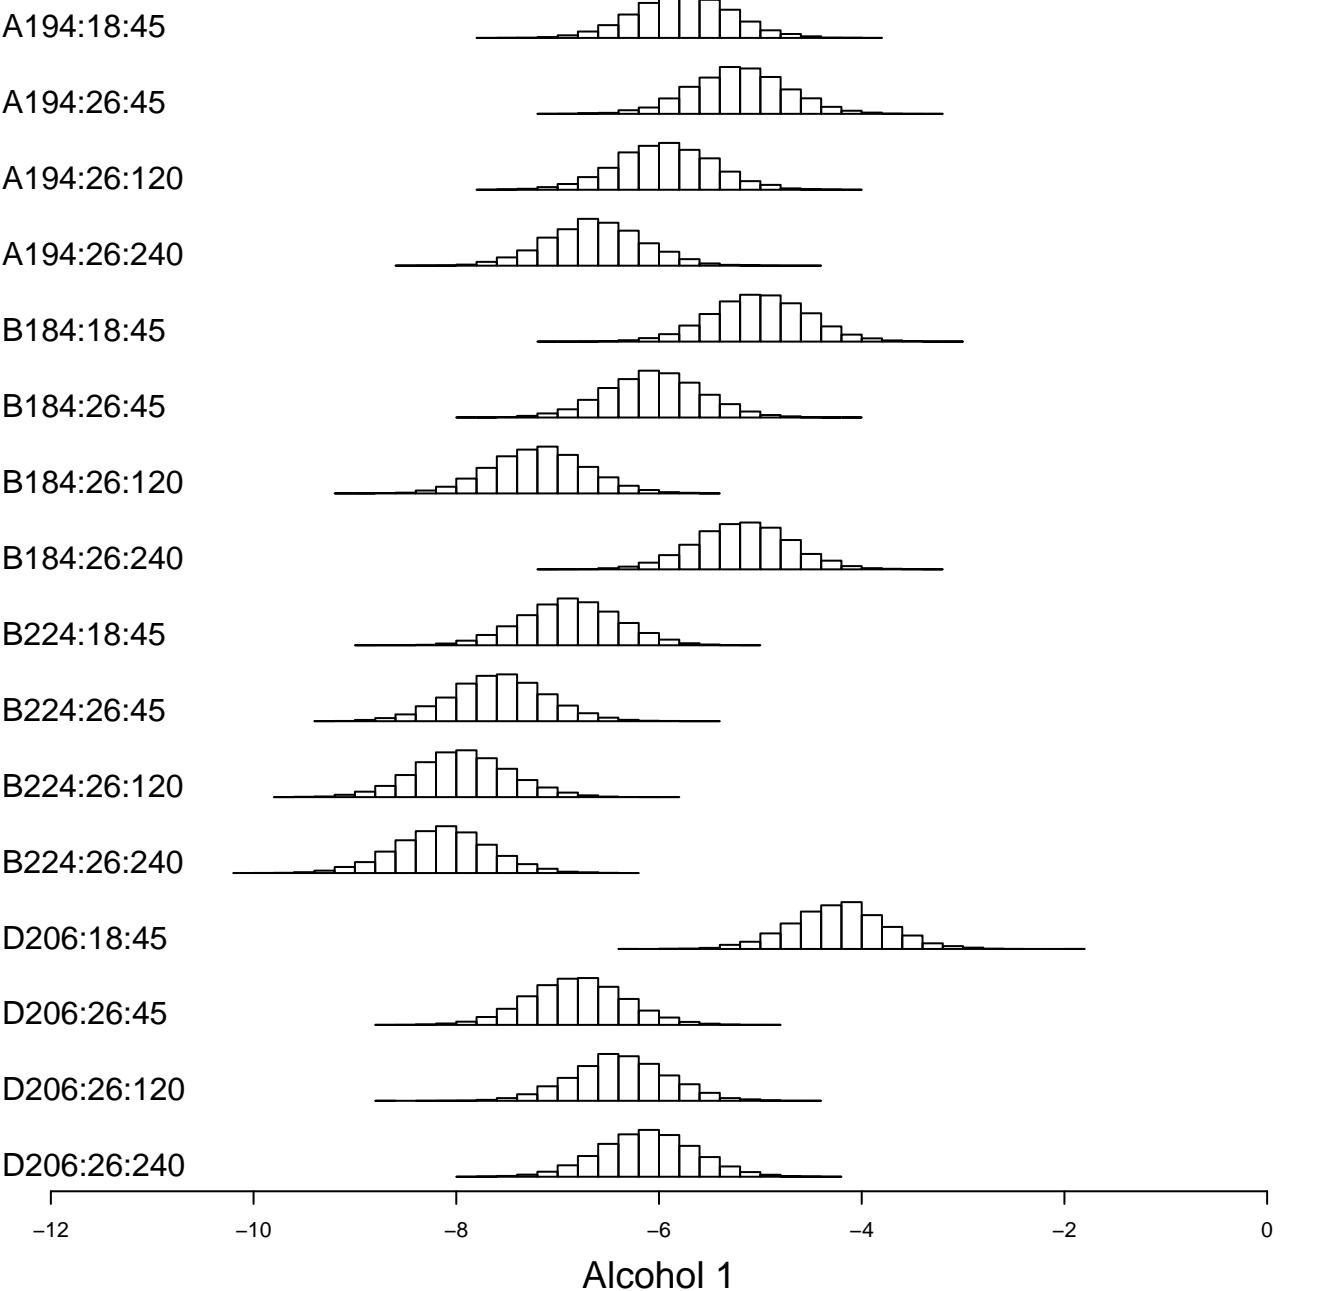

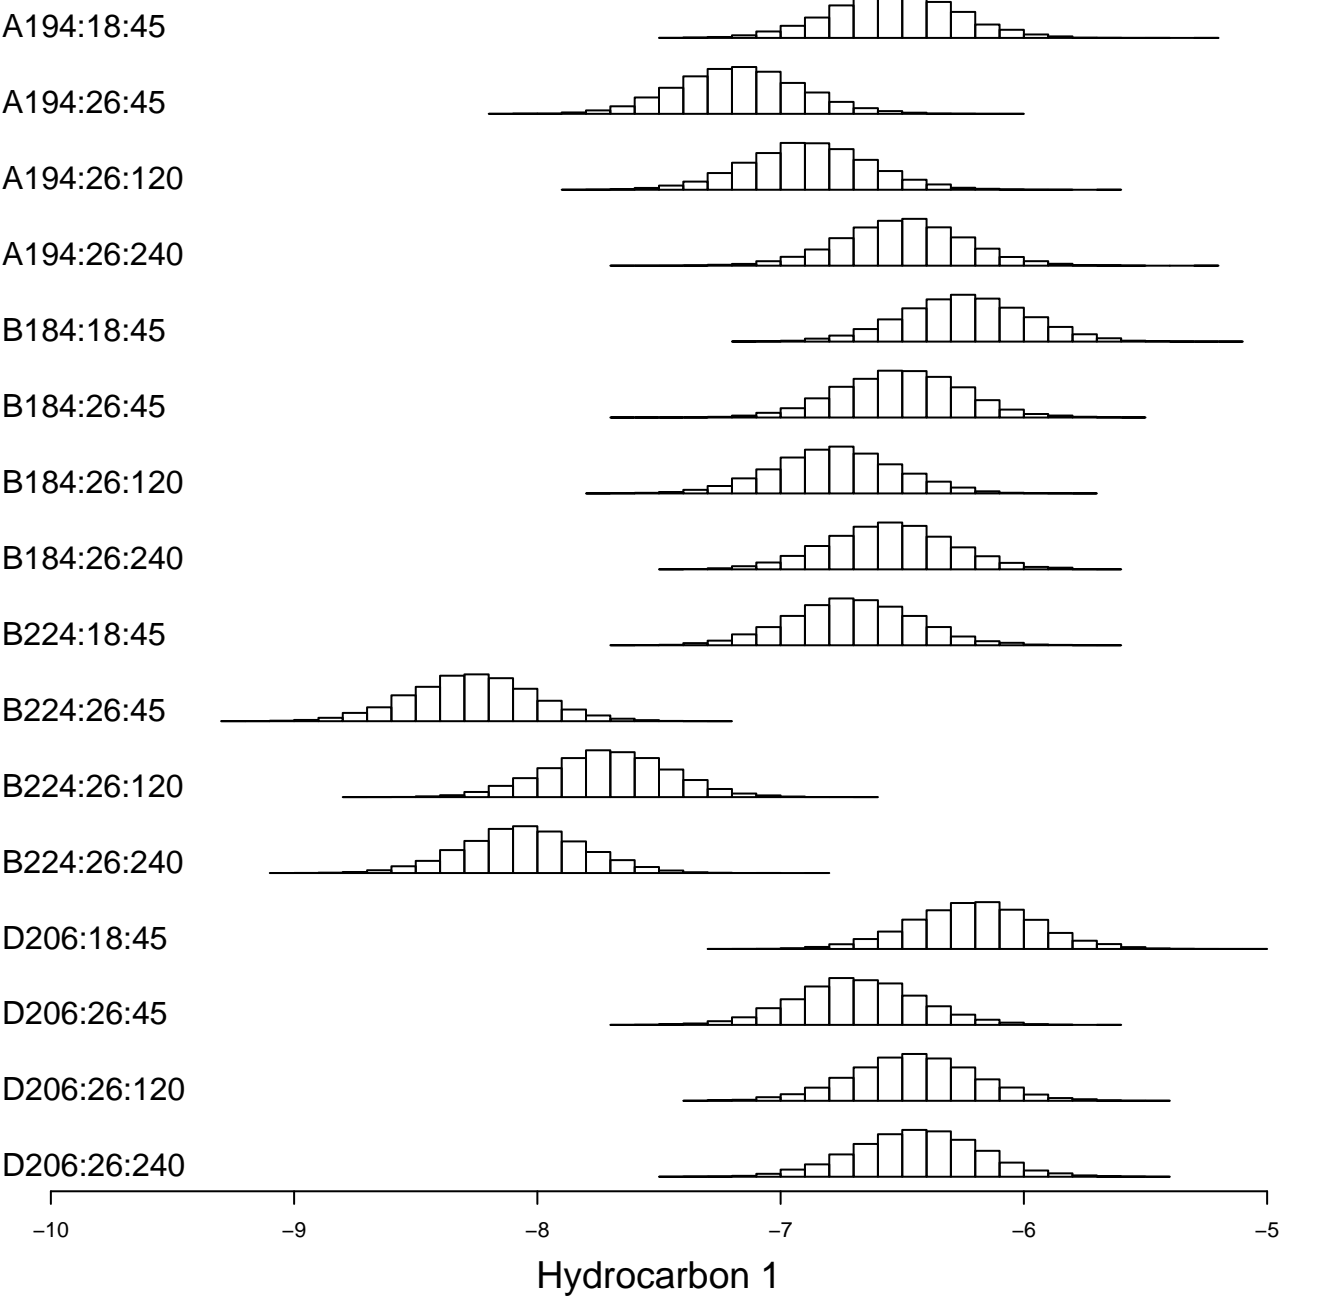



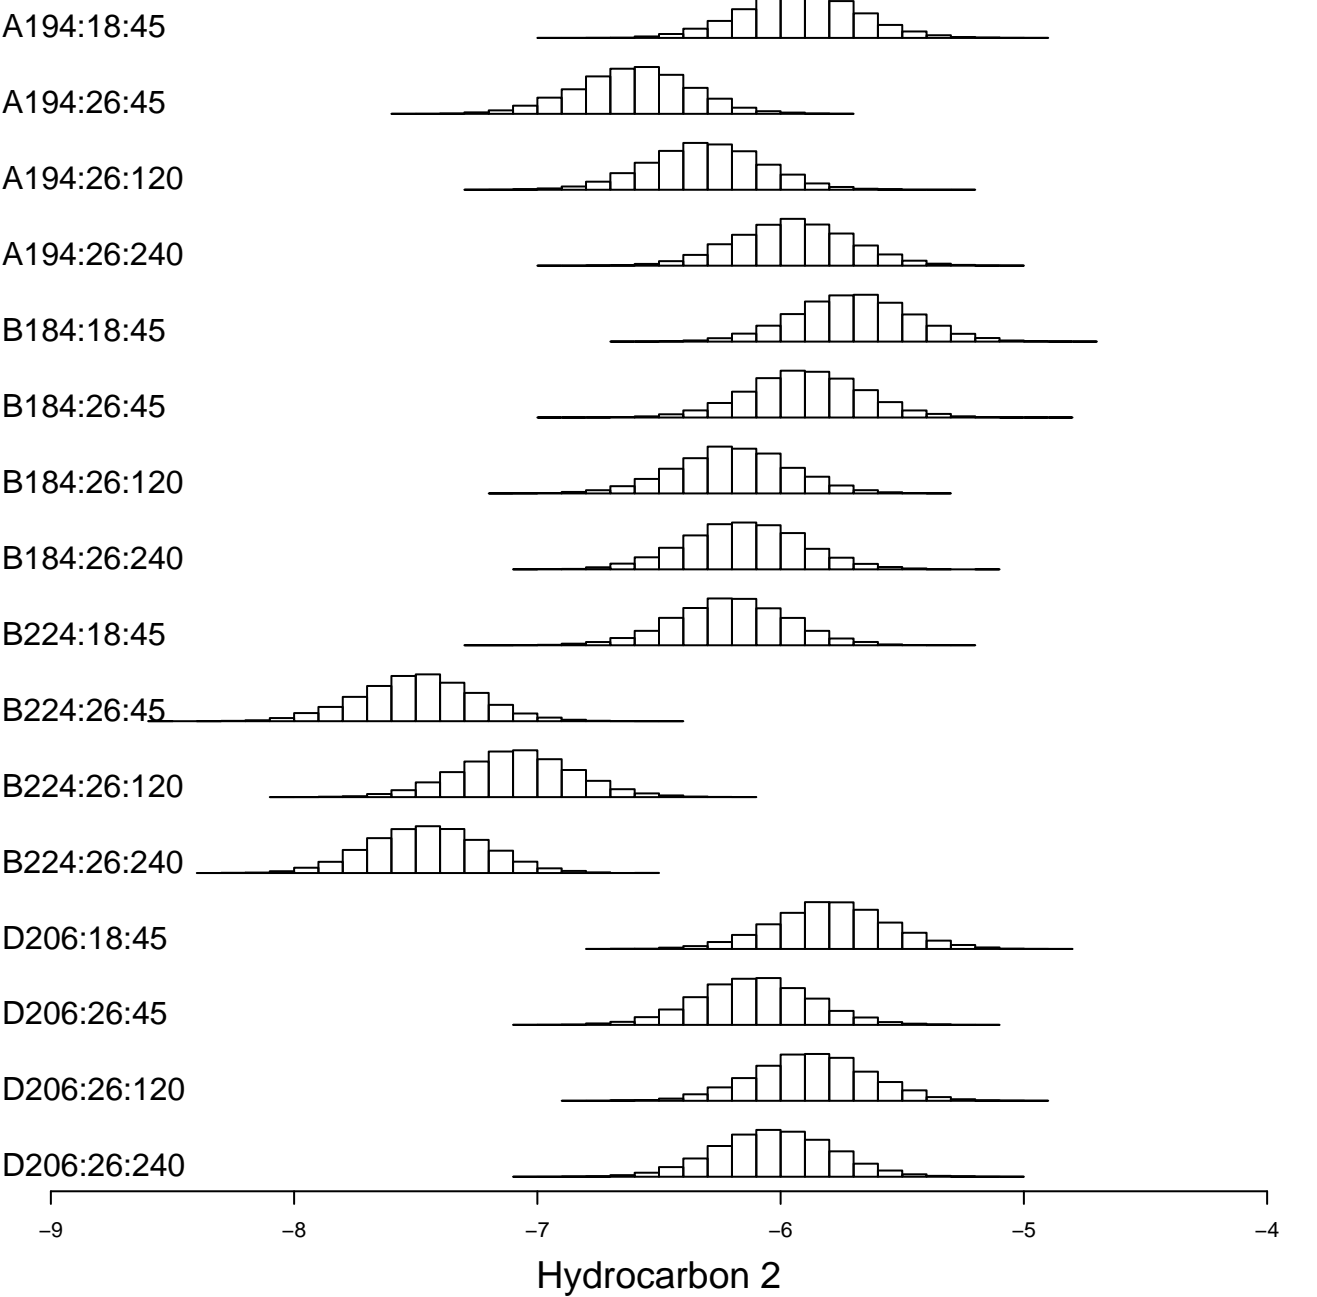

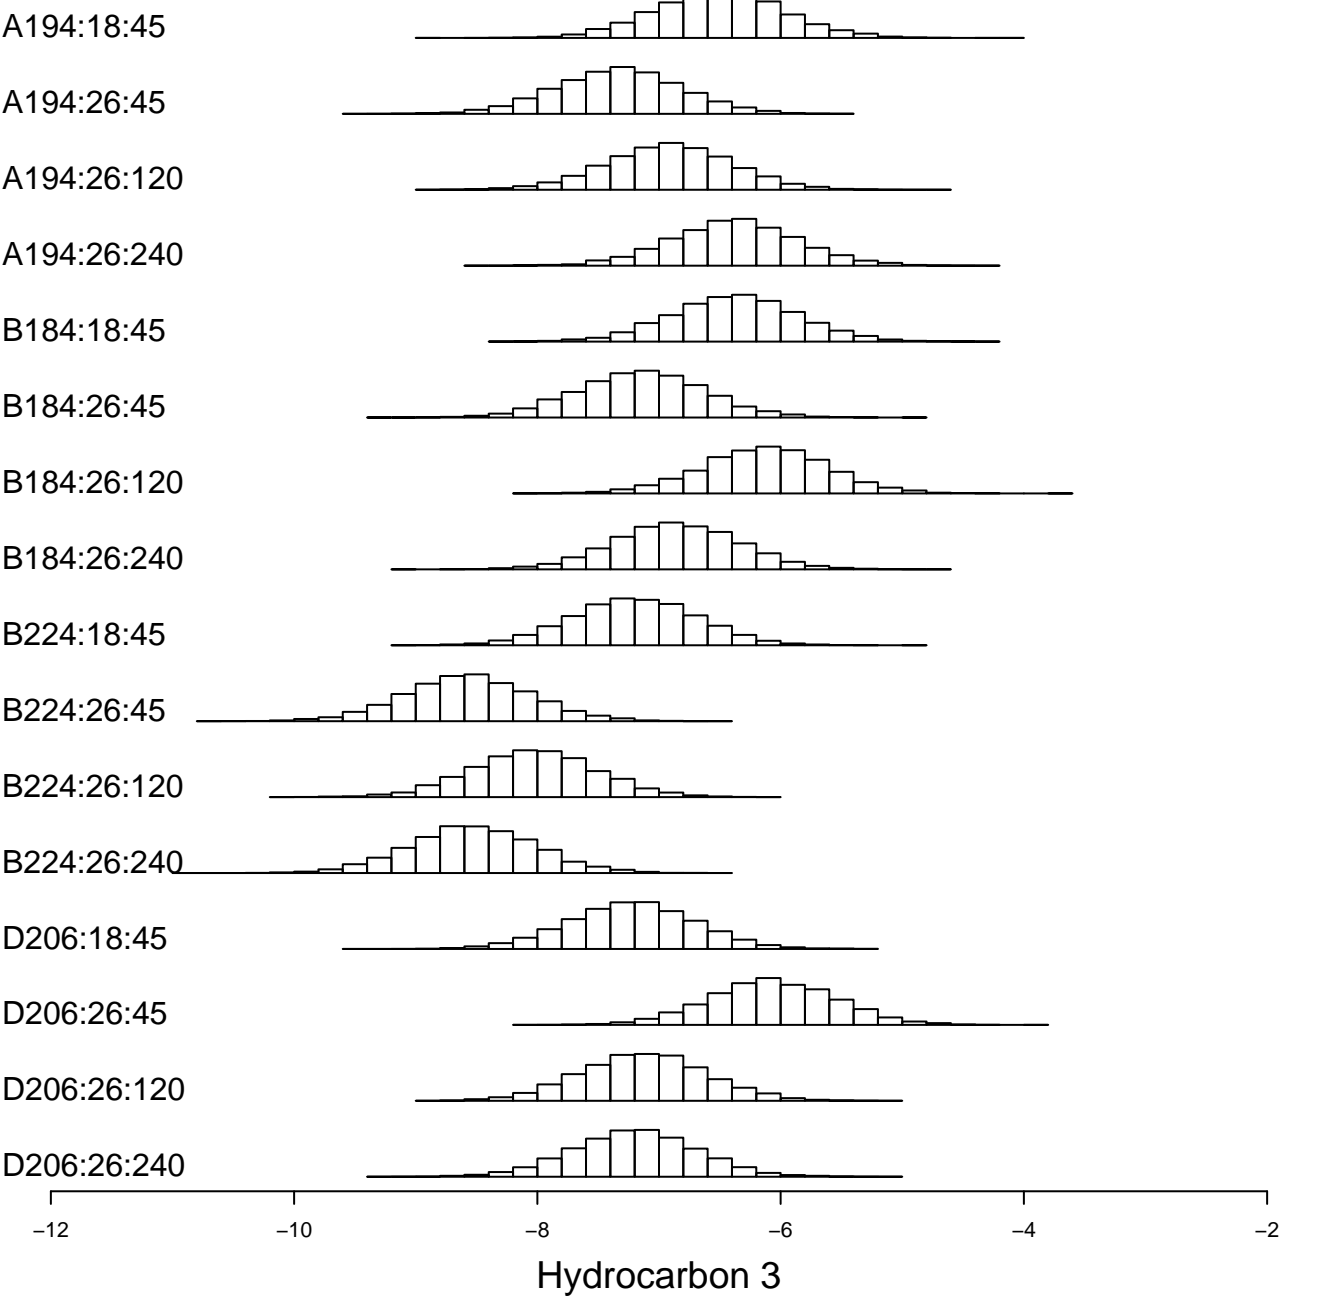

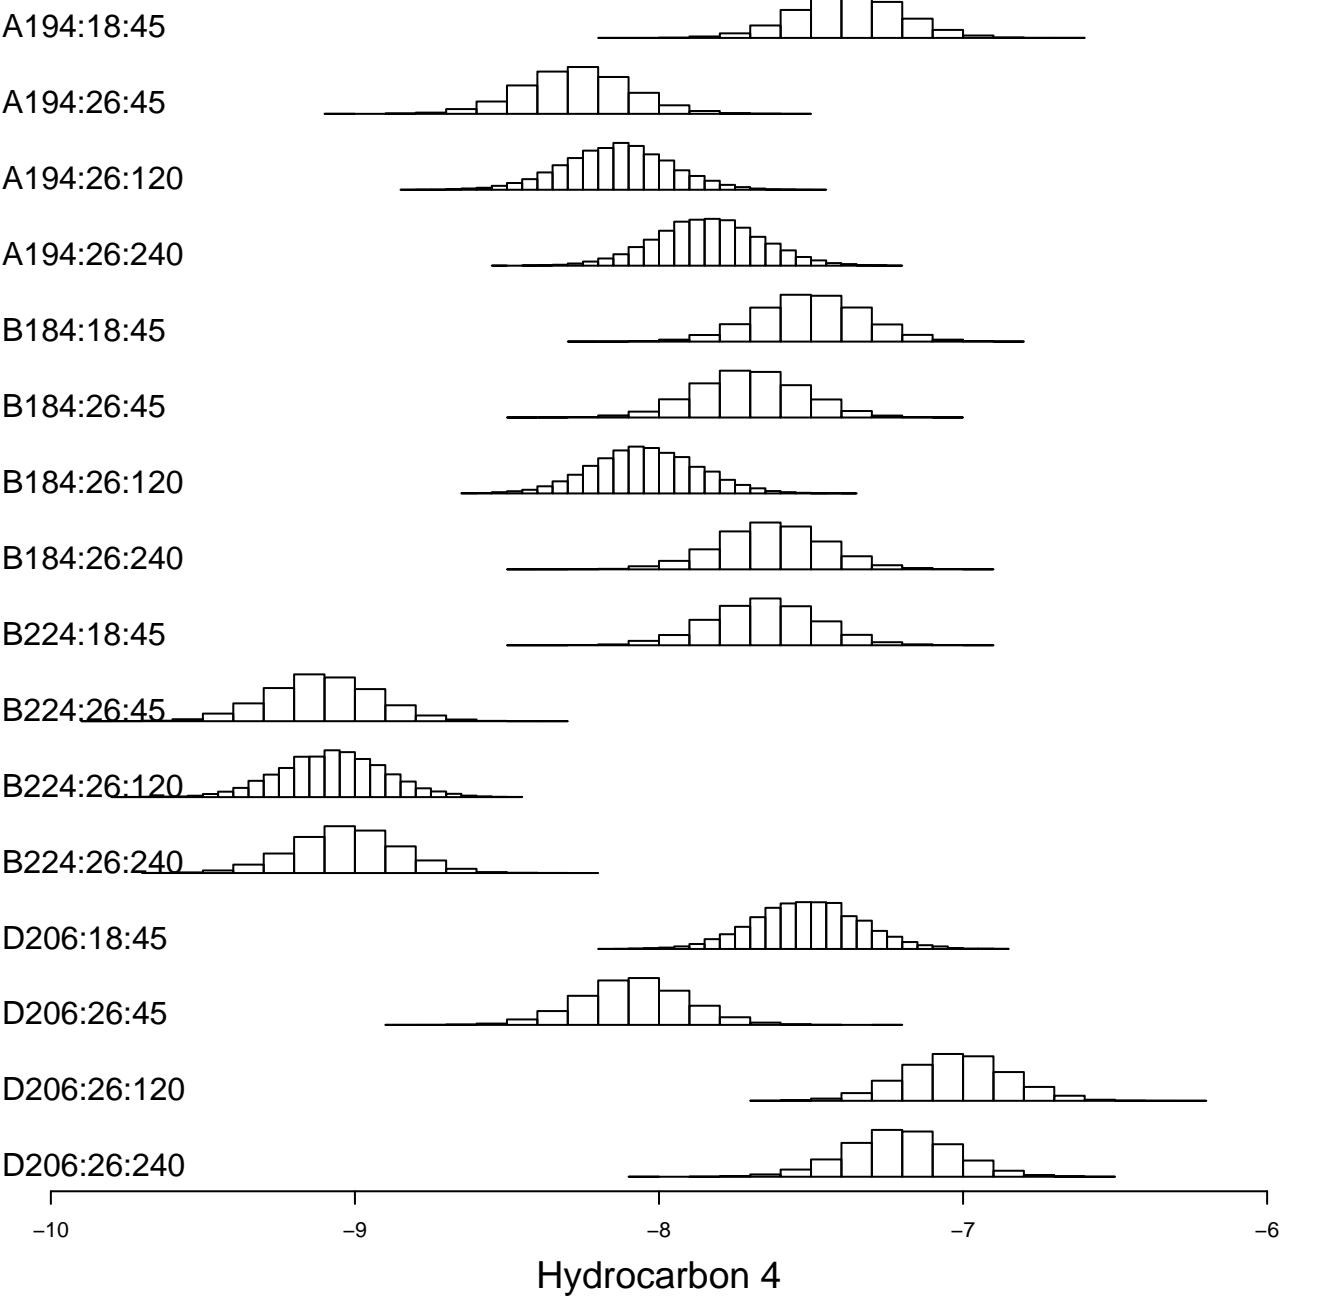

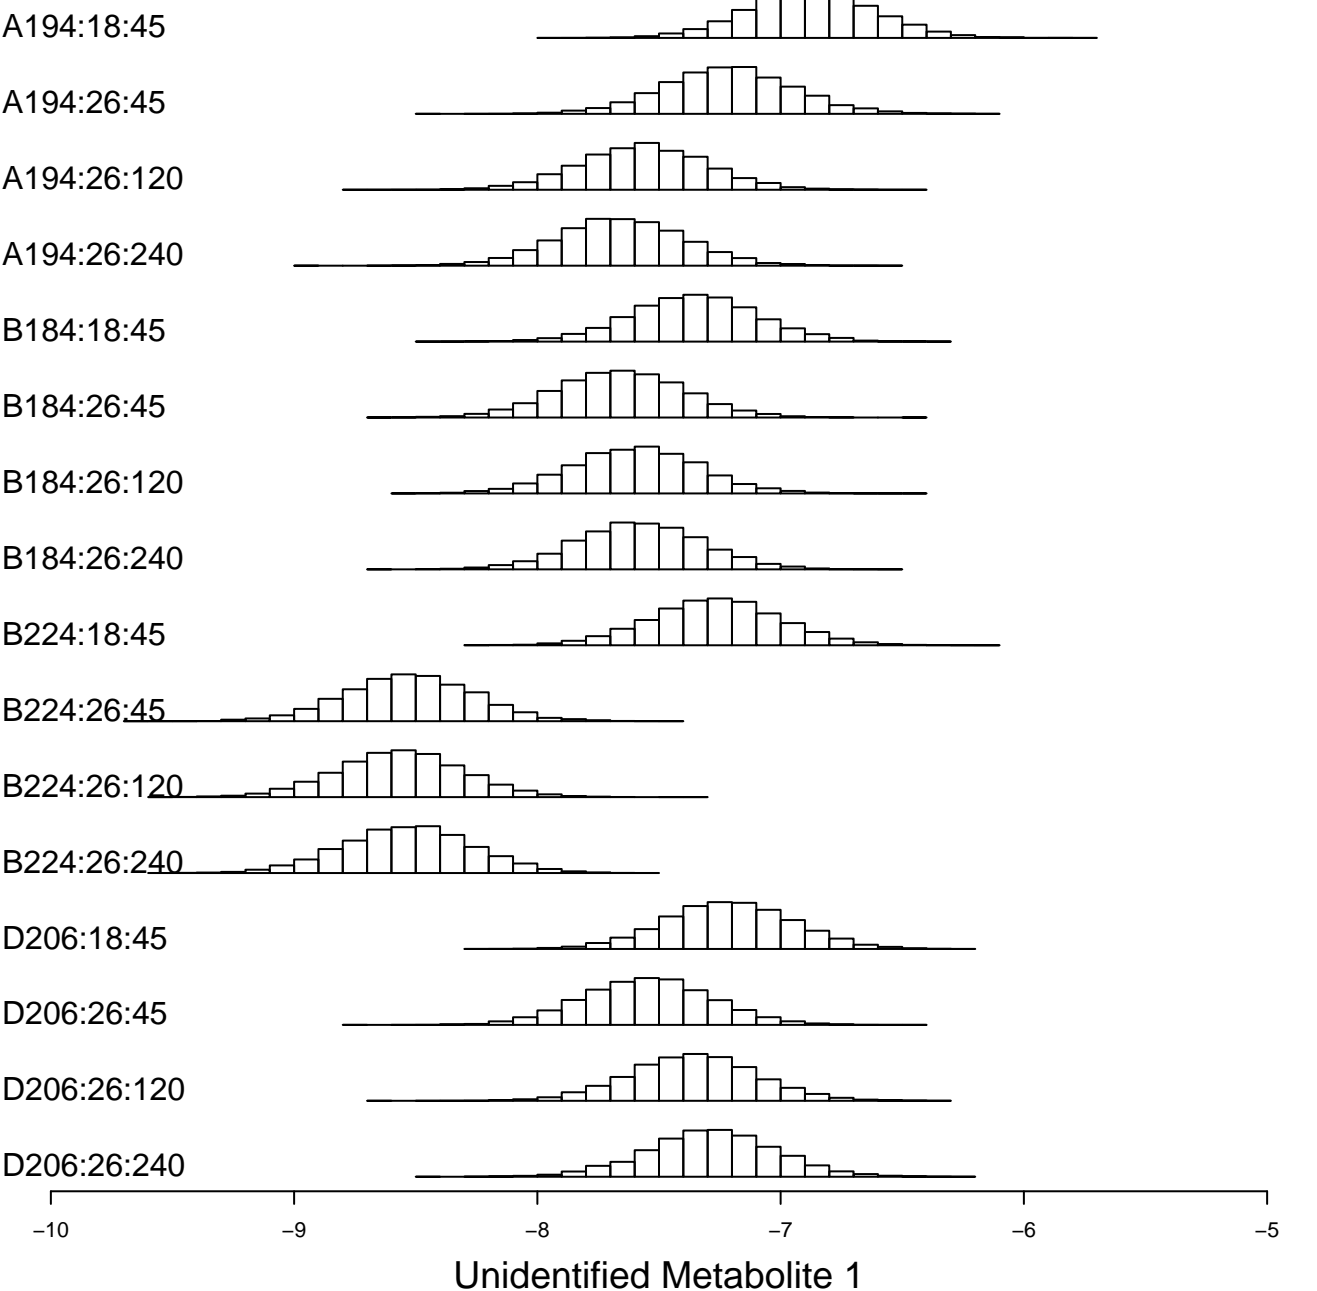

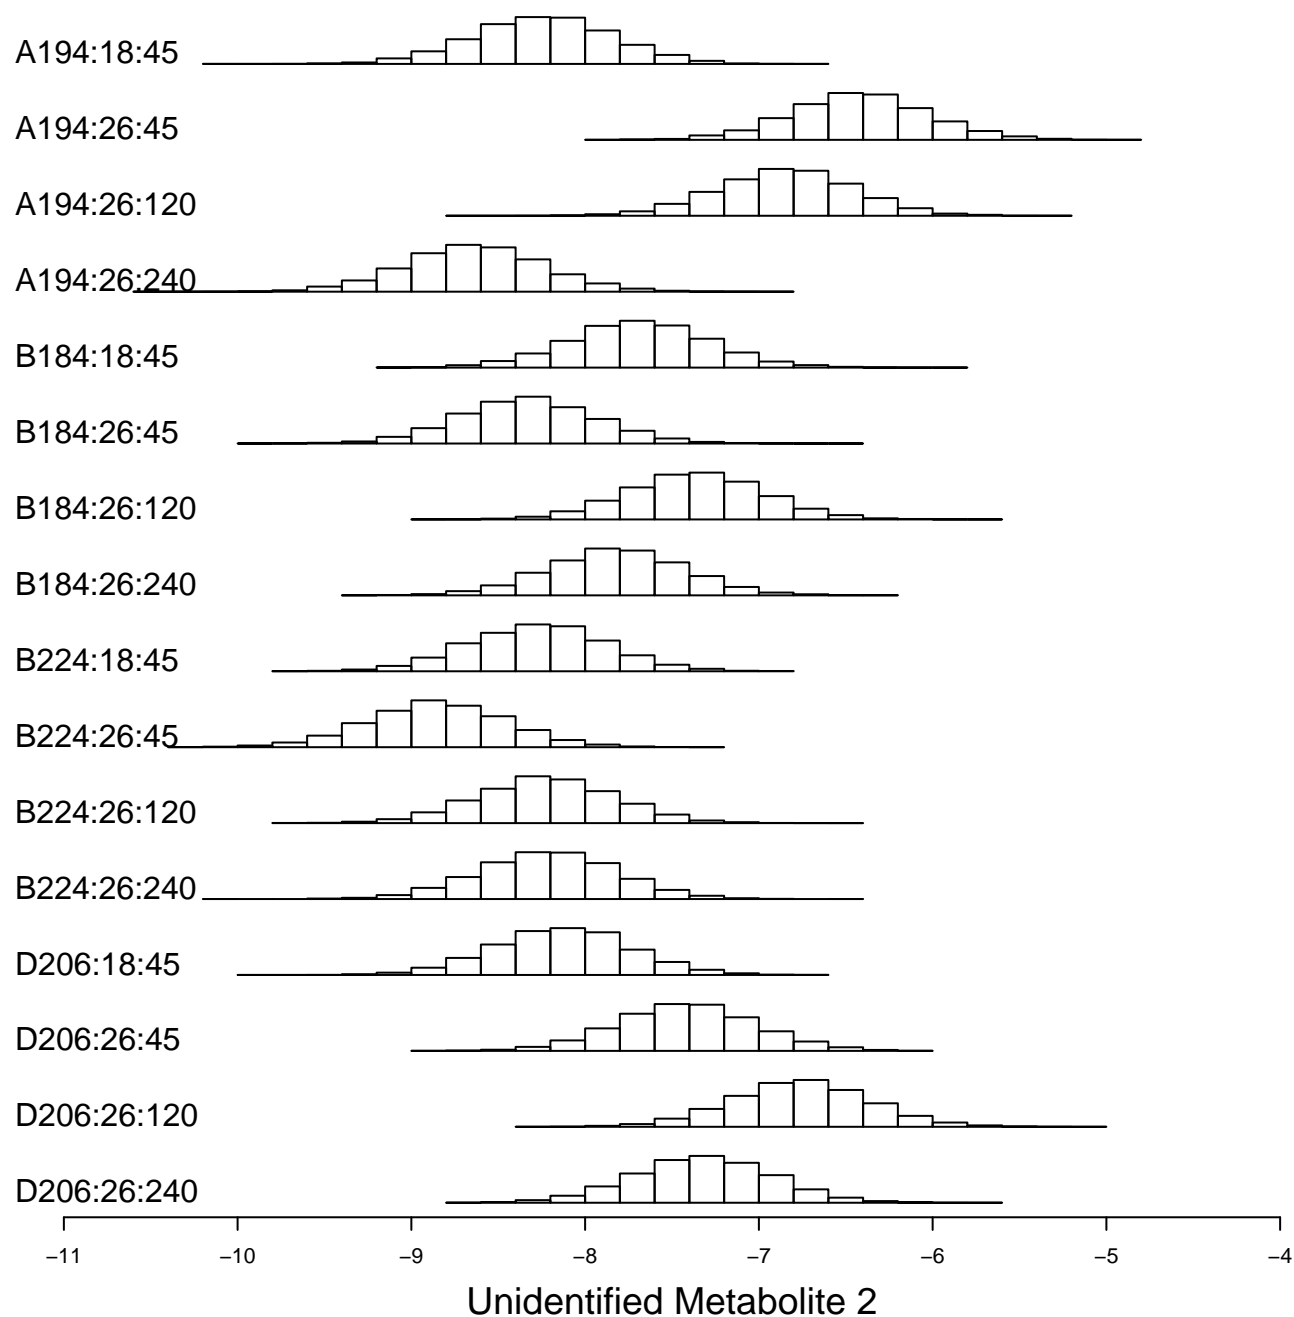

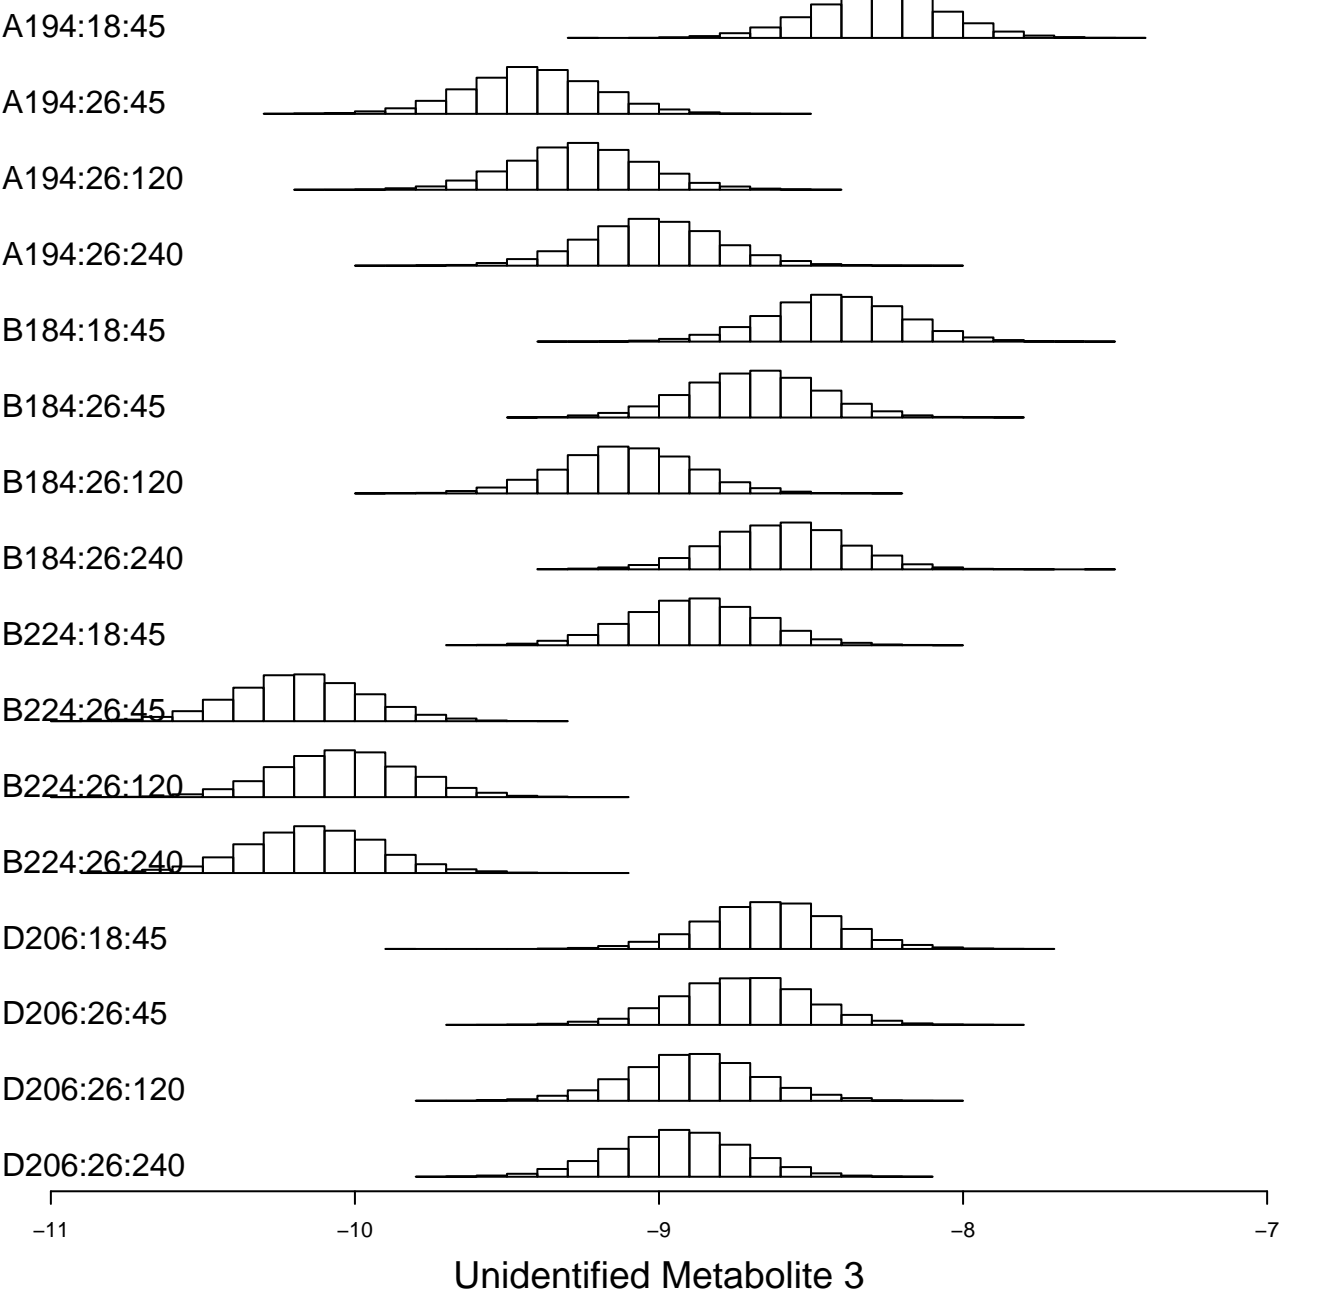

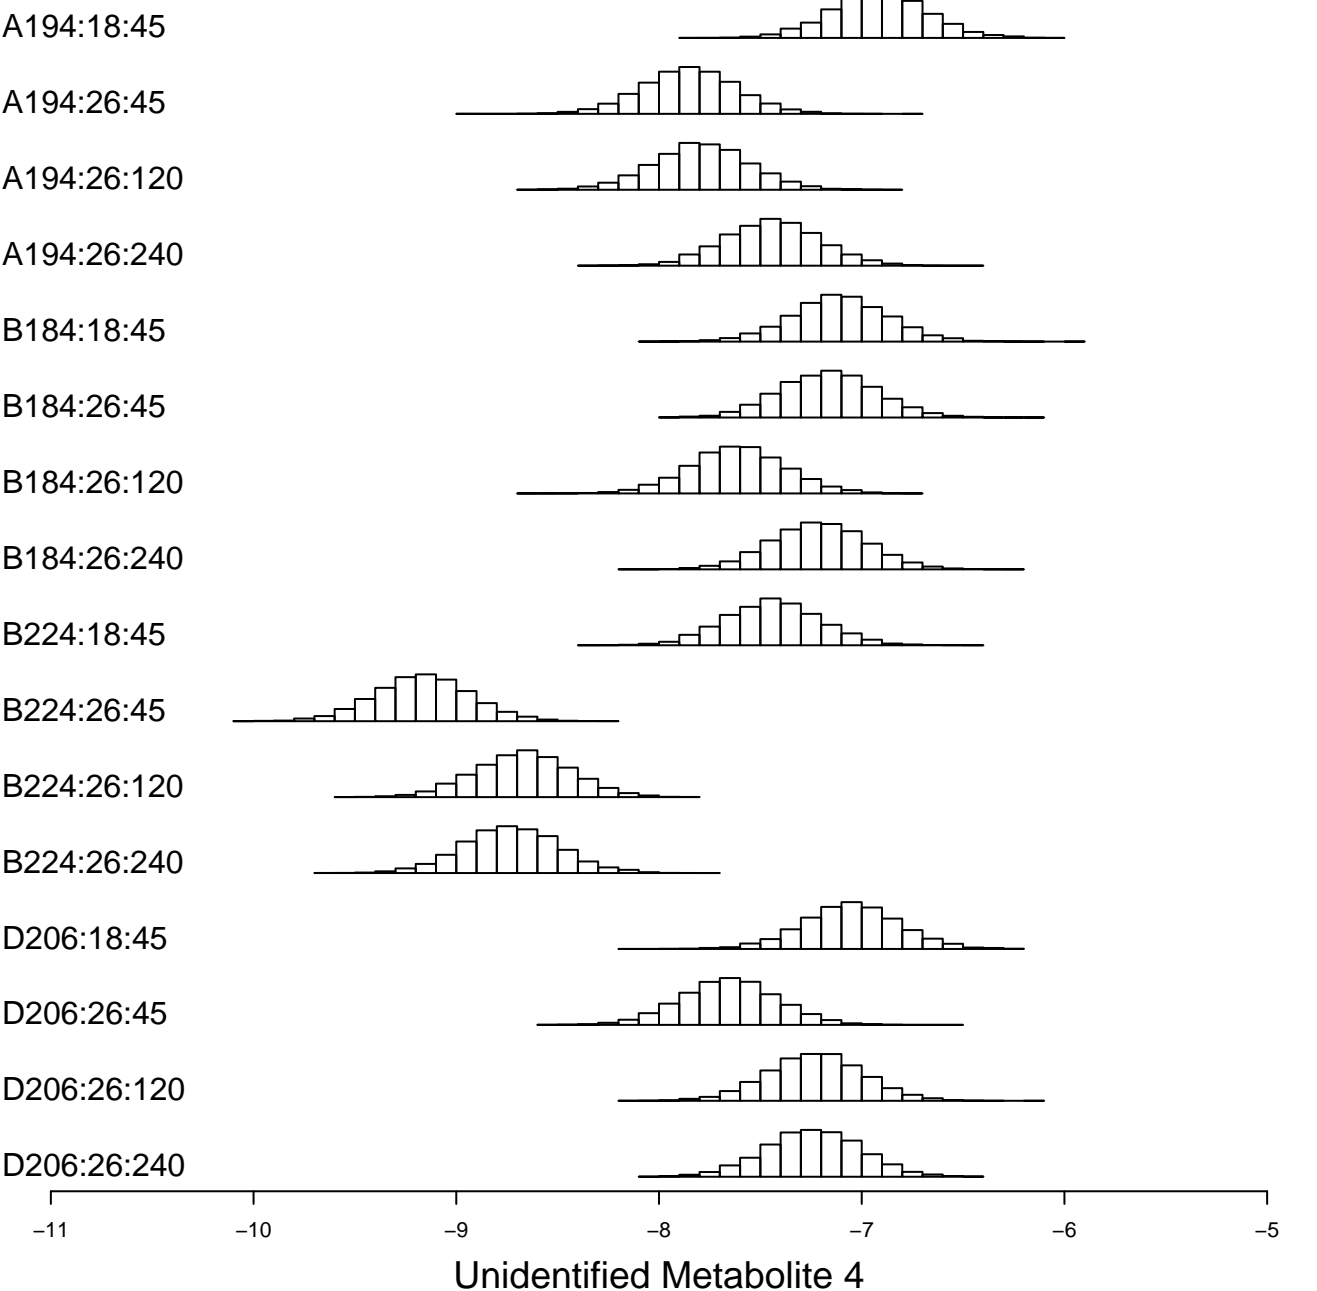

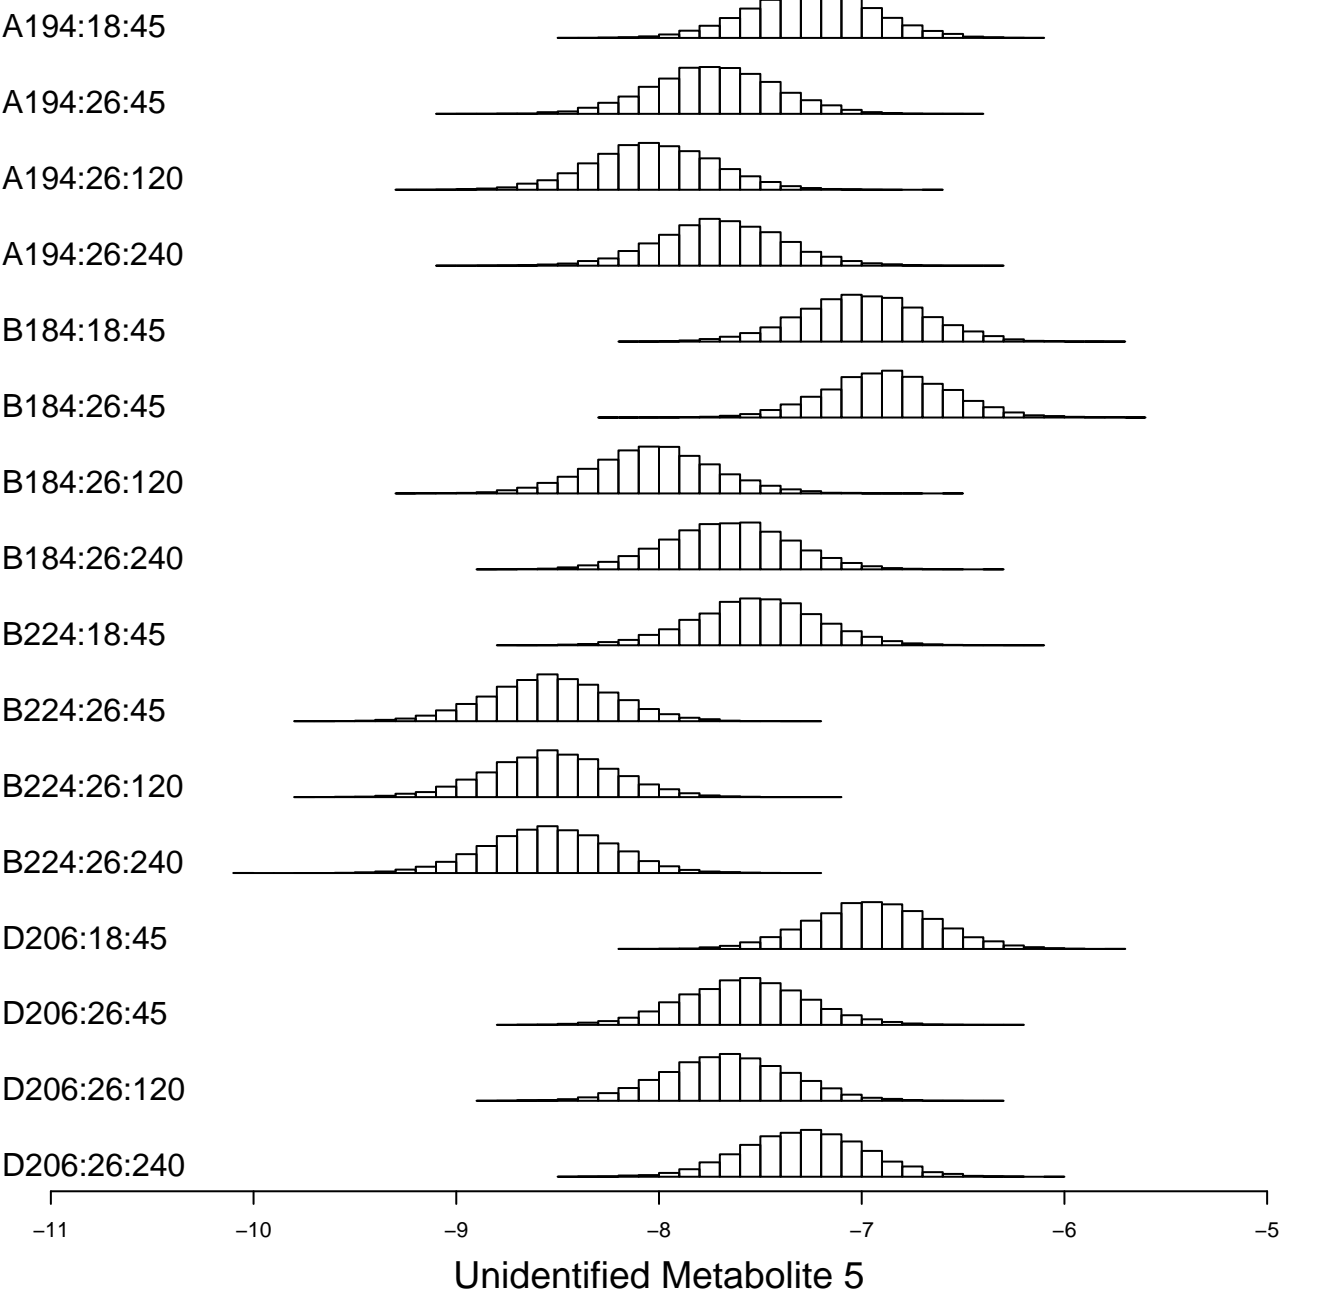



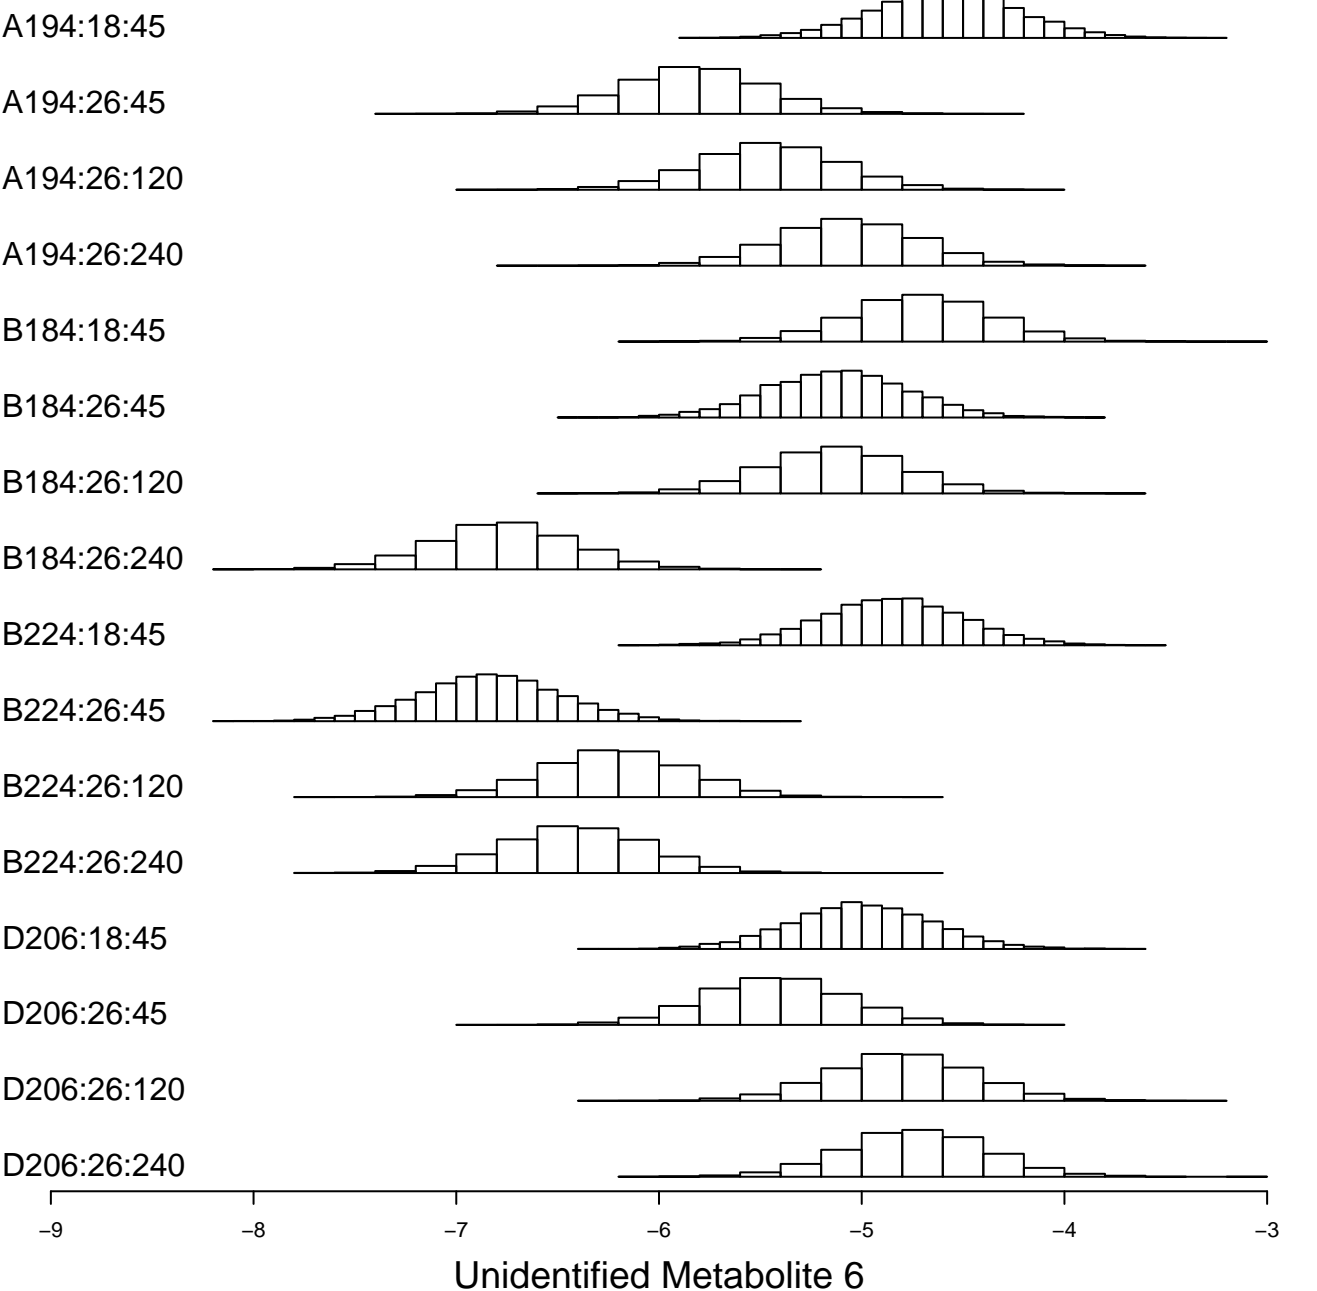

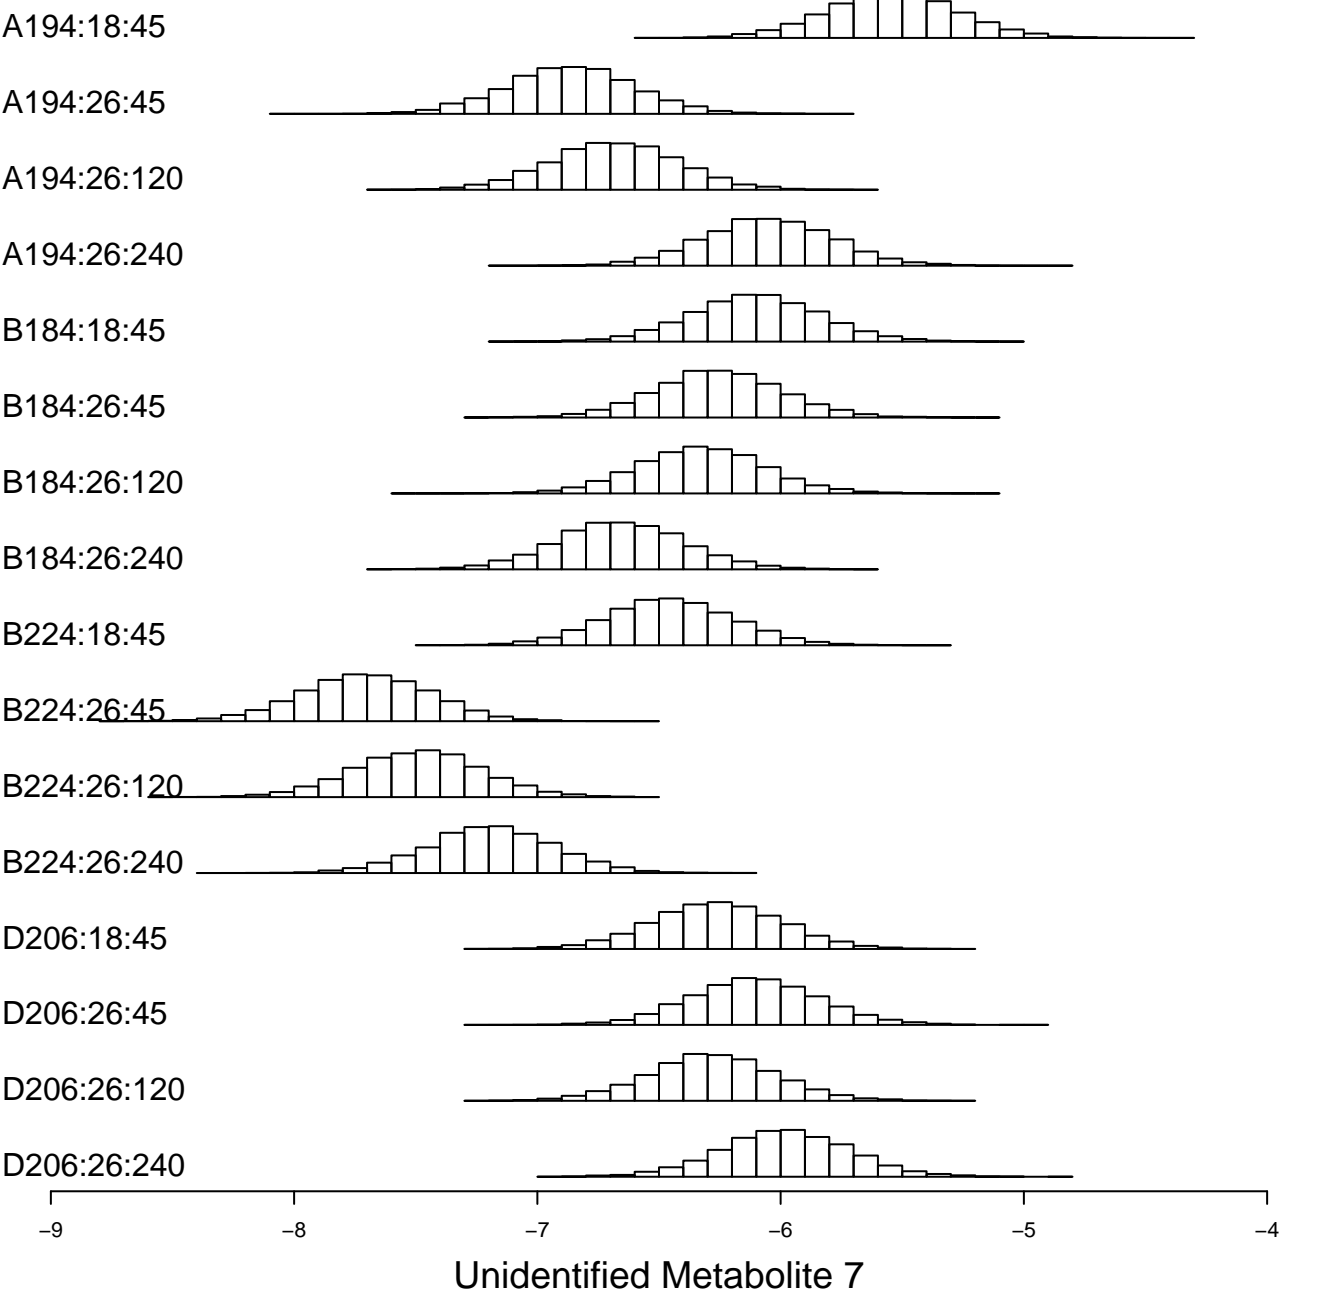

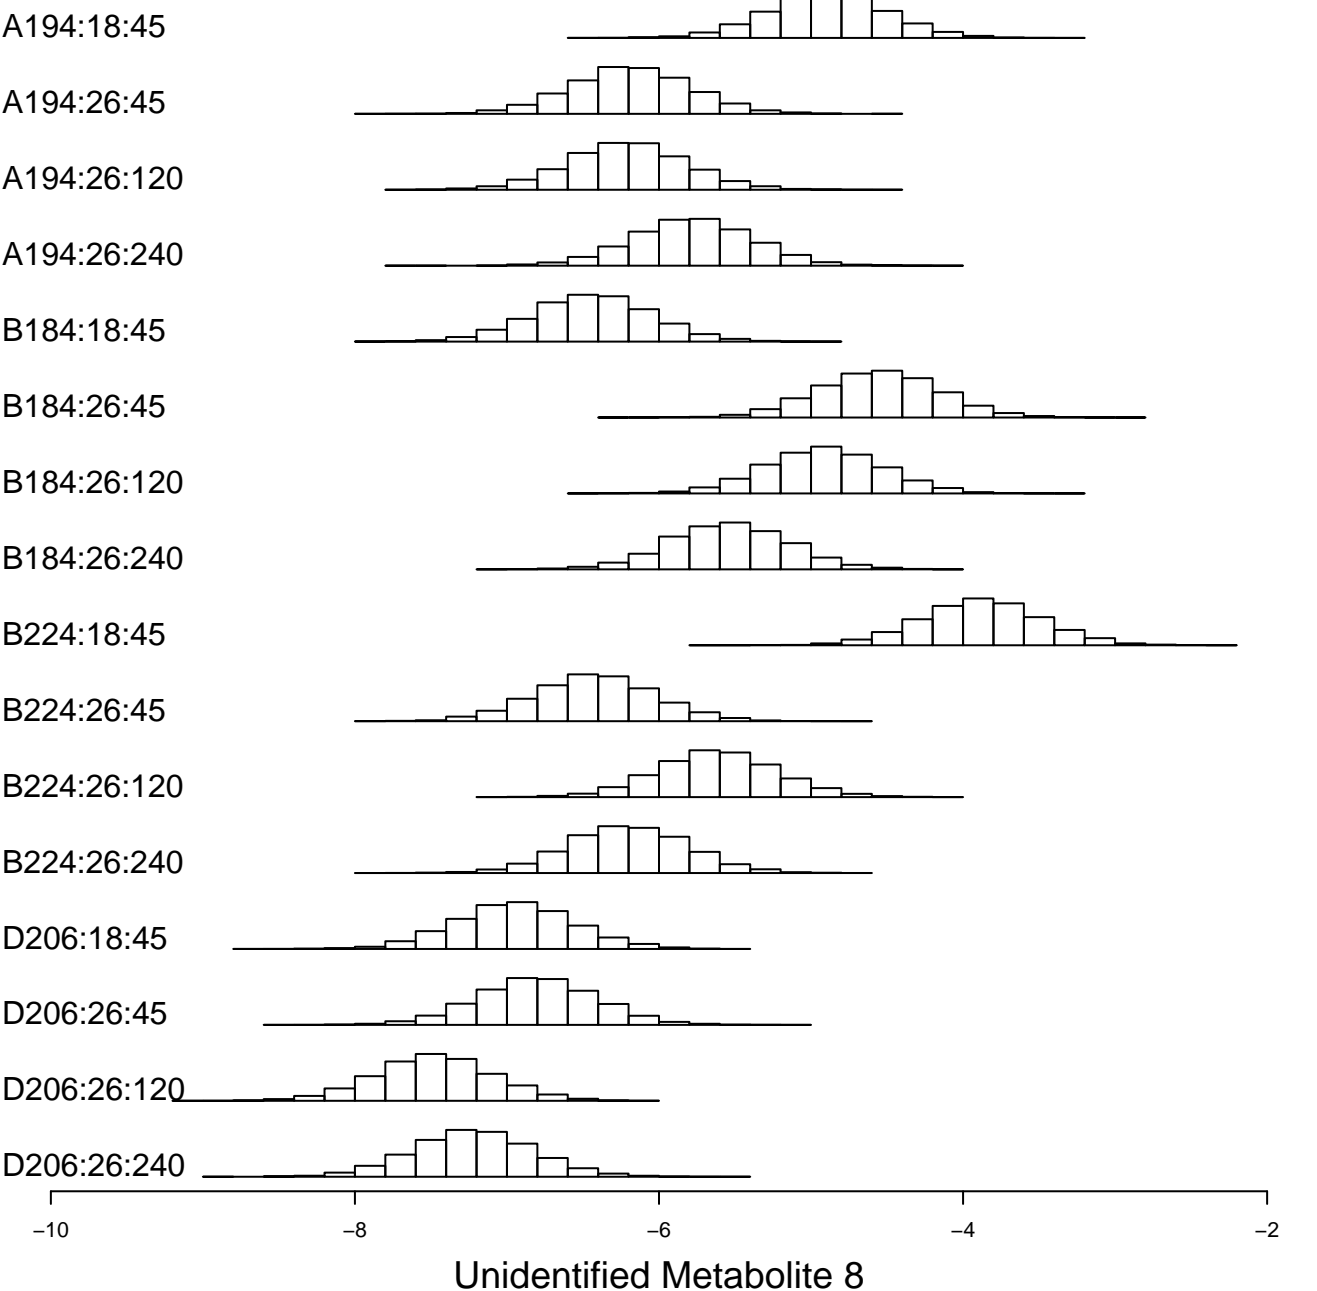

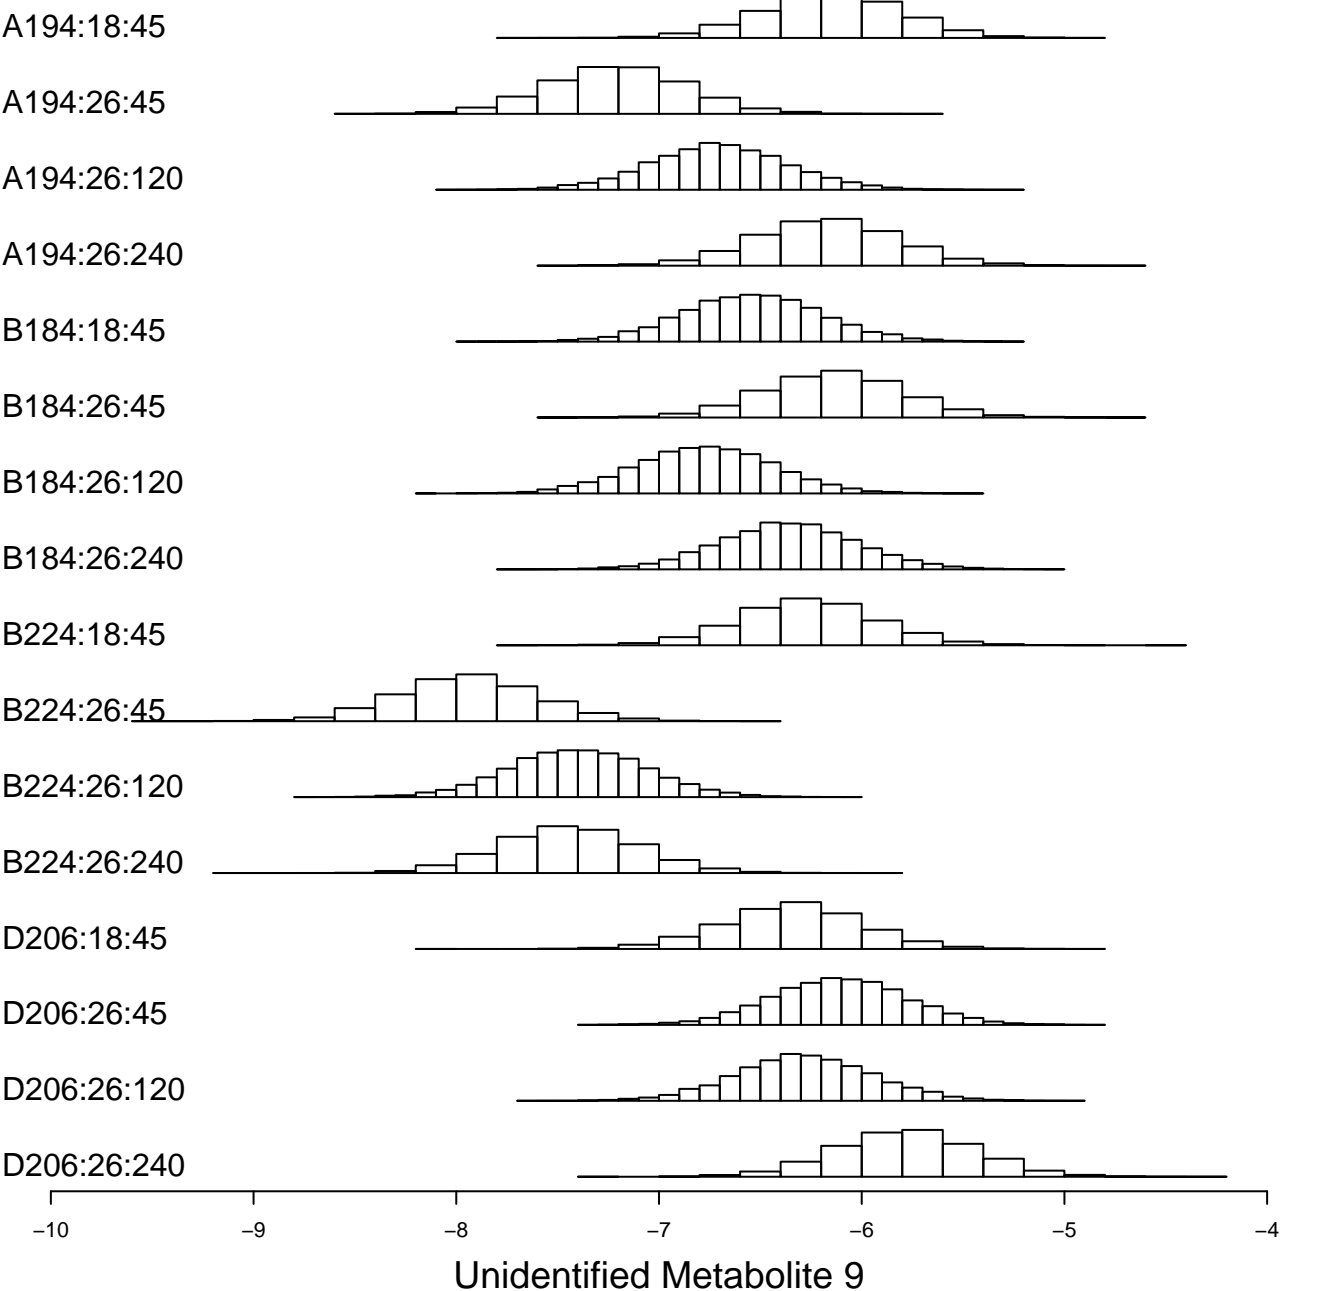

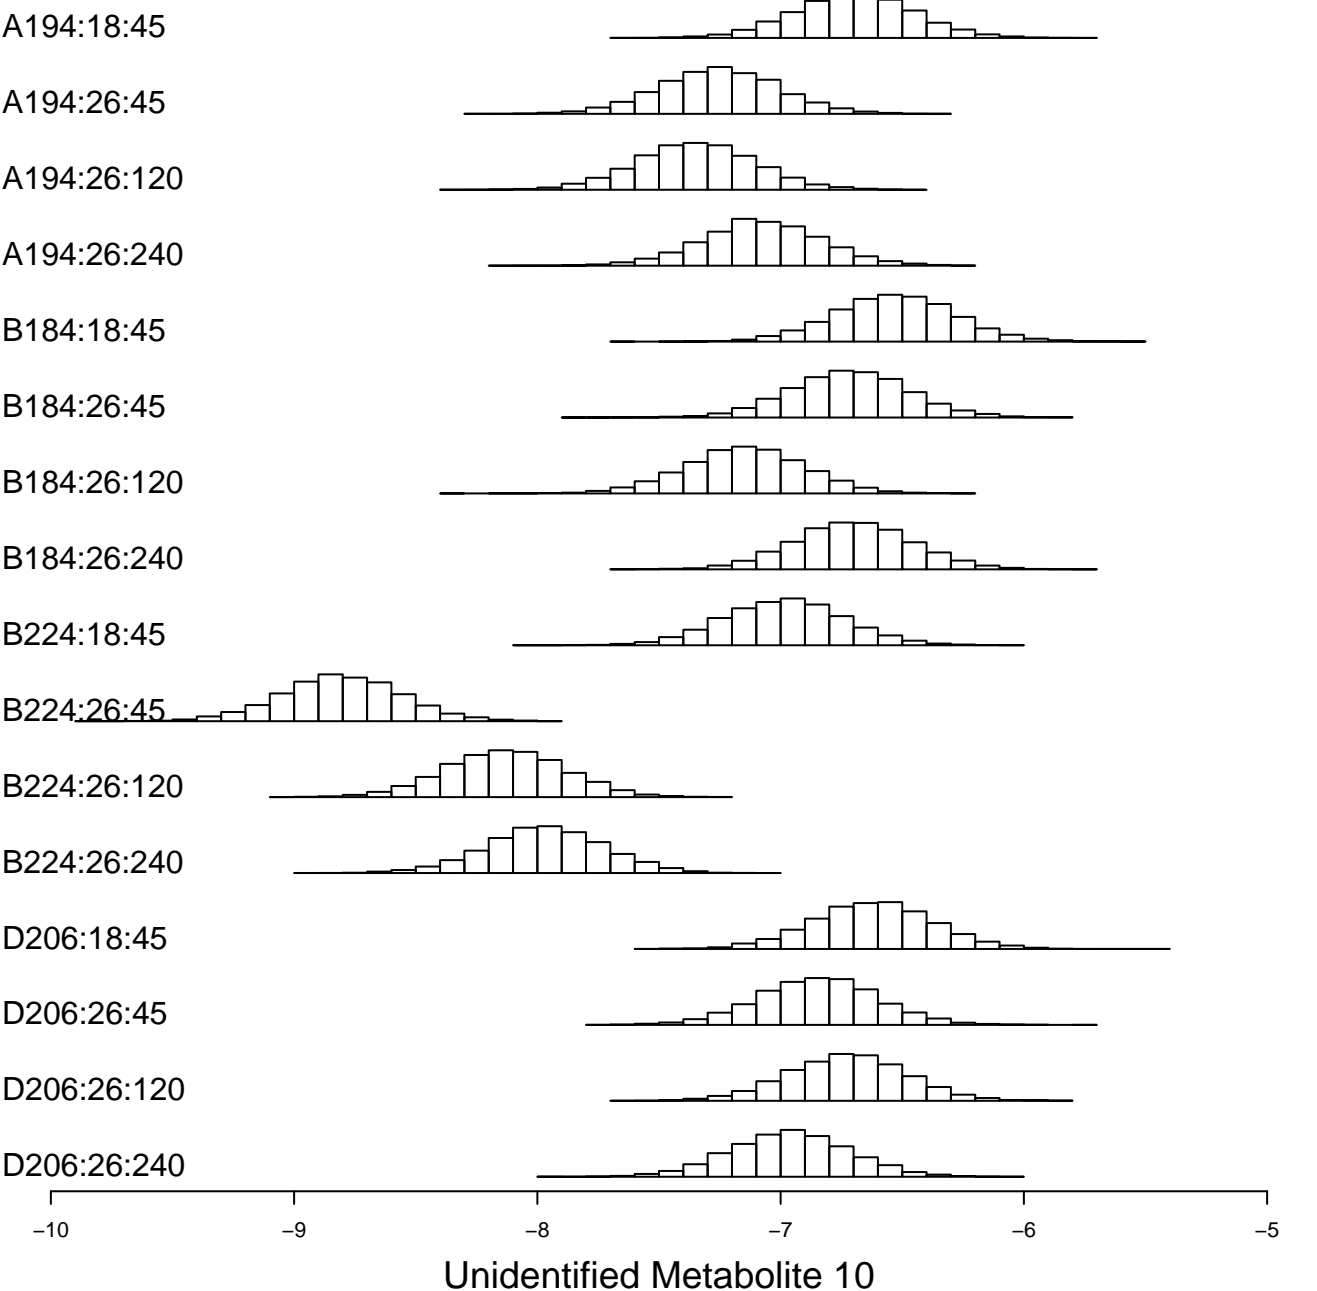

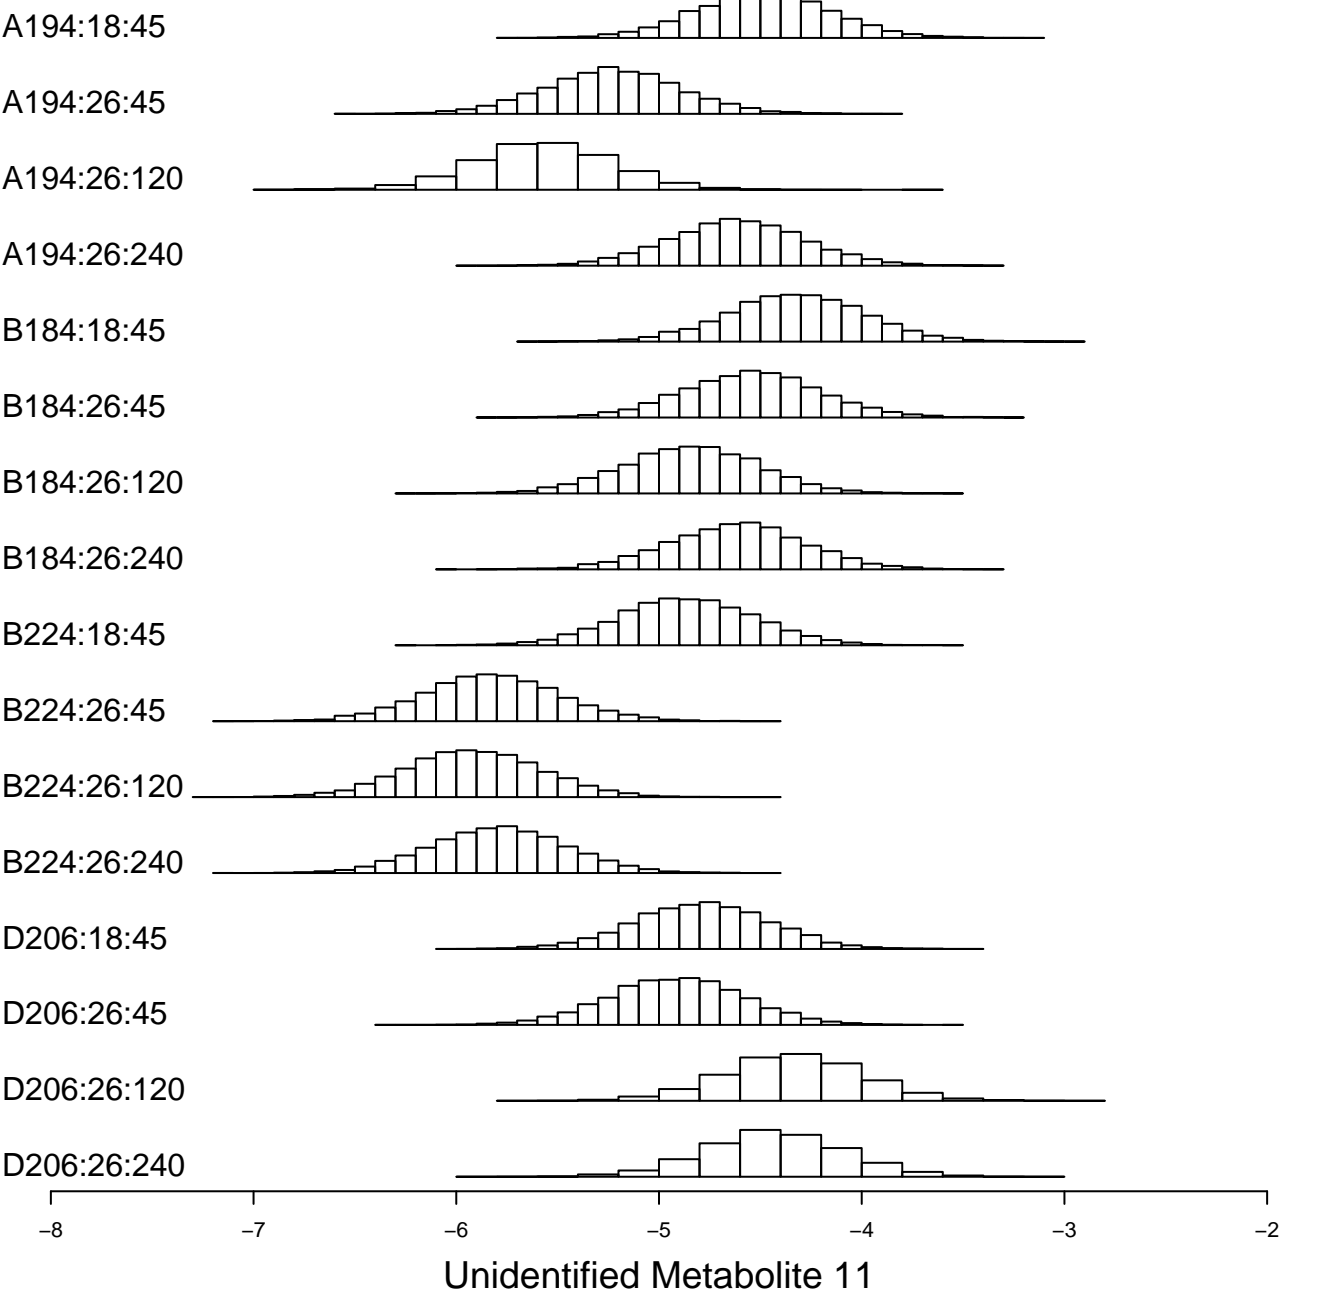

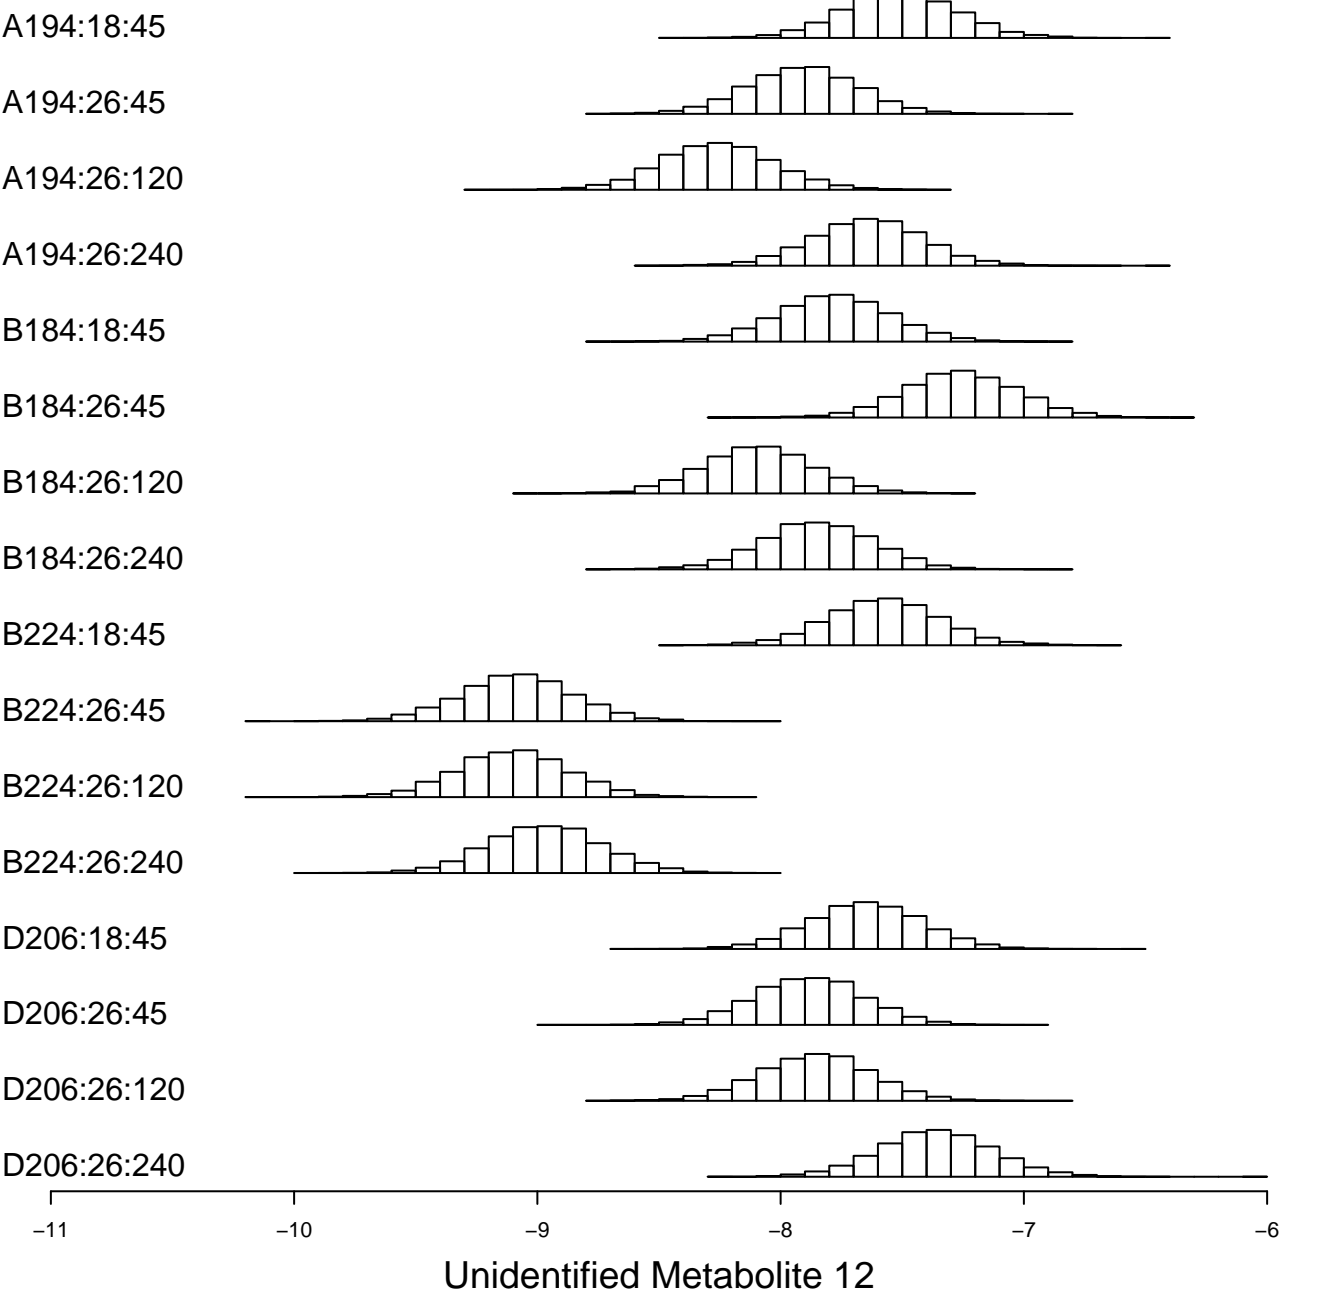

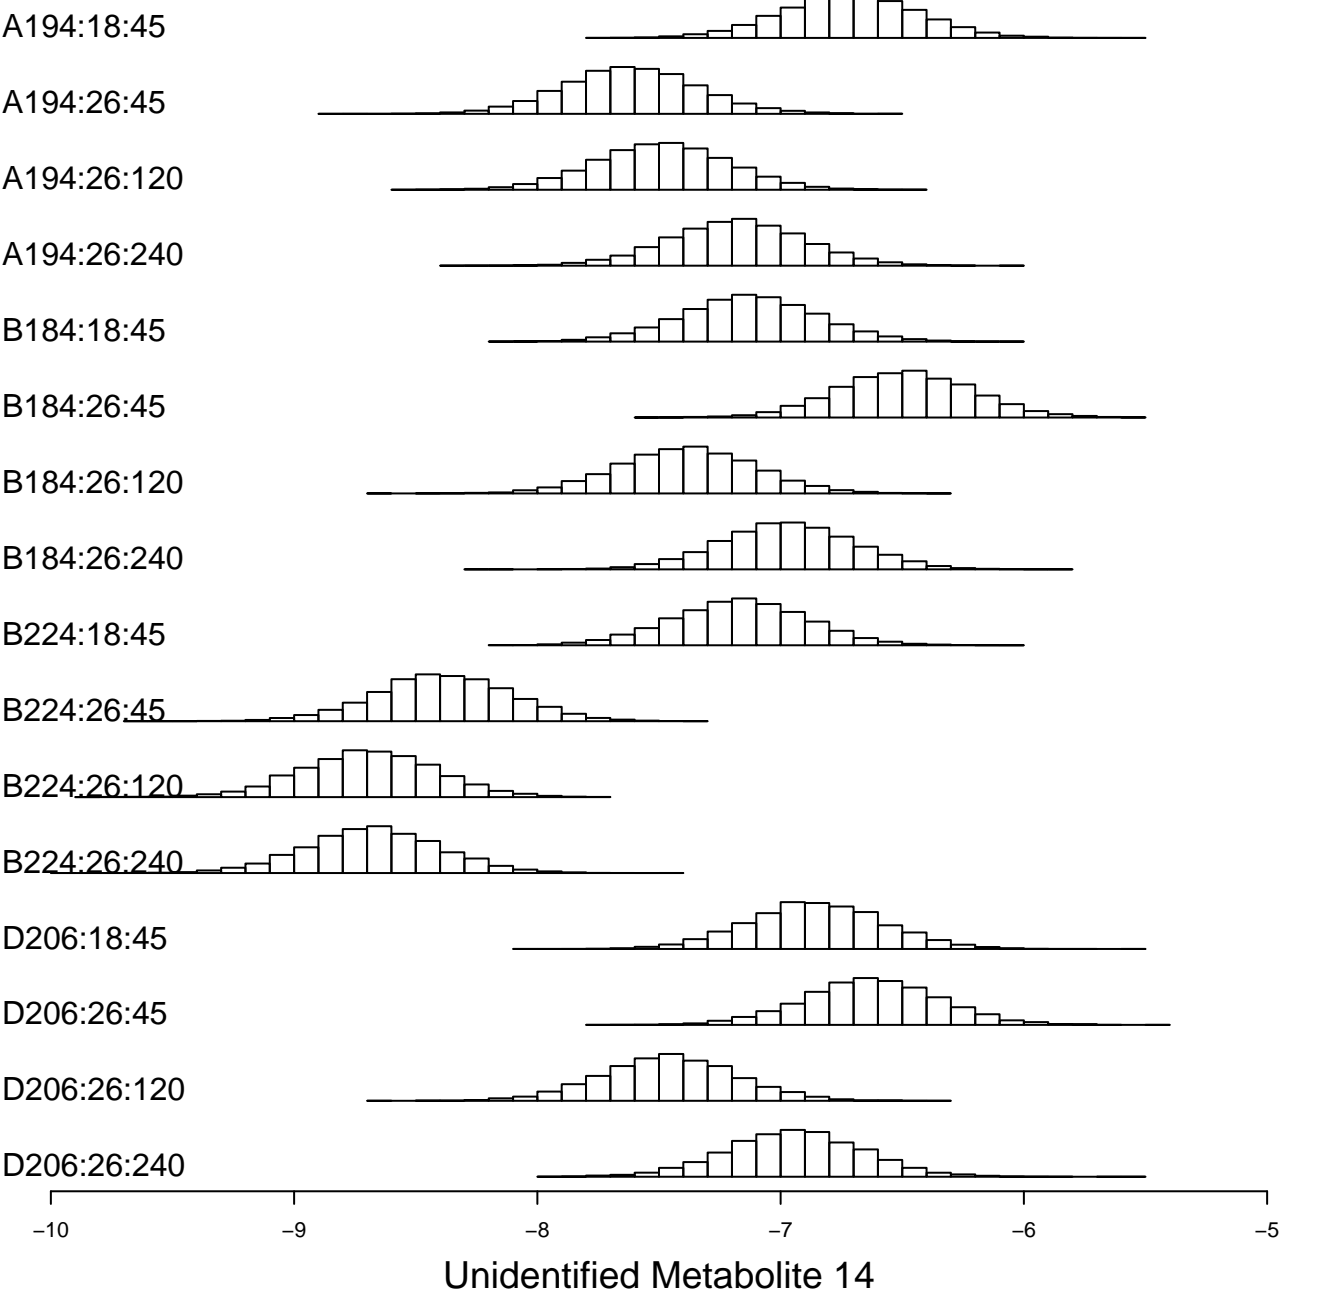



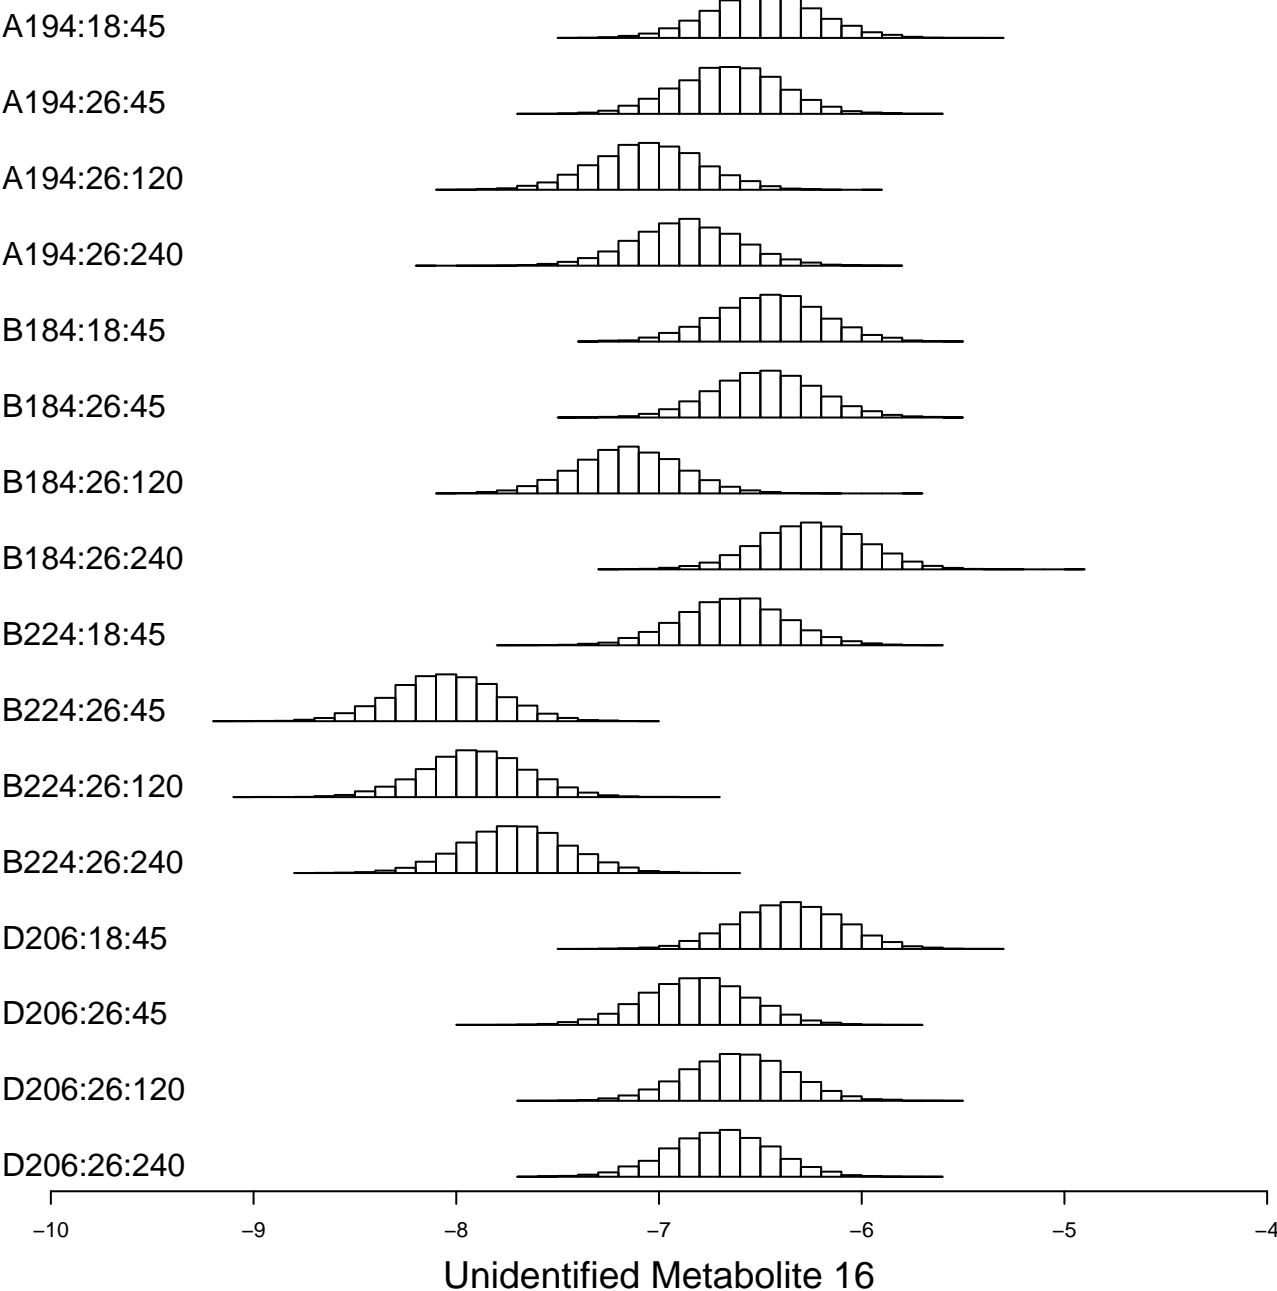

A194:18:45

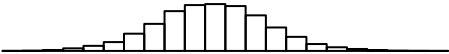

A194:26:45

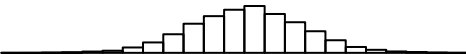

A194:26:120

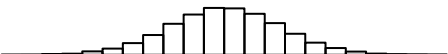

A194:26:240

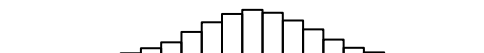

B184:18:45

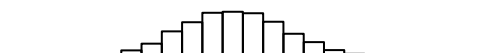

B184:26:45

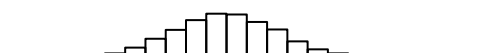

B184:26:120

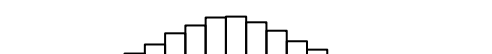

B184:26:240

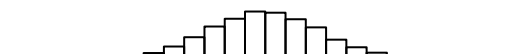

B224:18:45

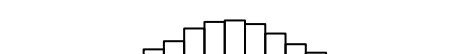

B224:26:45

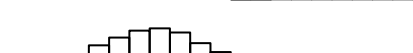

B224:26:120

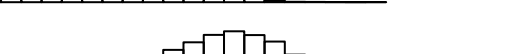

B224:26:240

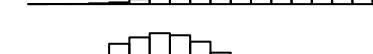

D206:18:45

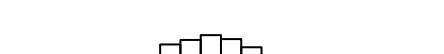

D206:26:45

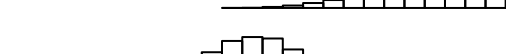

D206:26:120

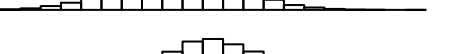

D206:26:240

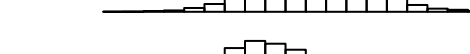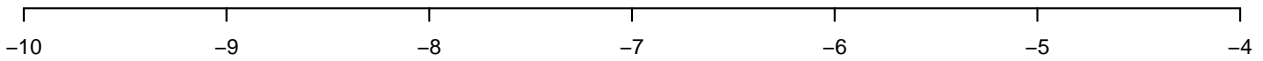

Unidentified Metabolite 17

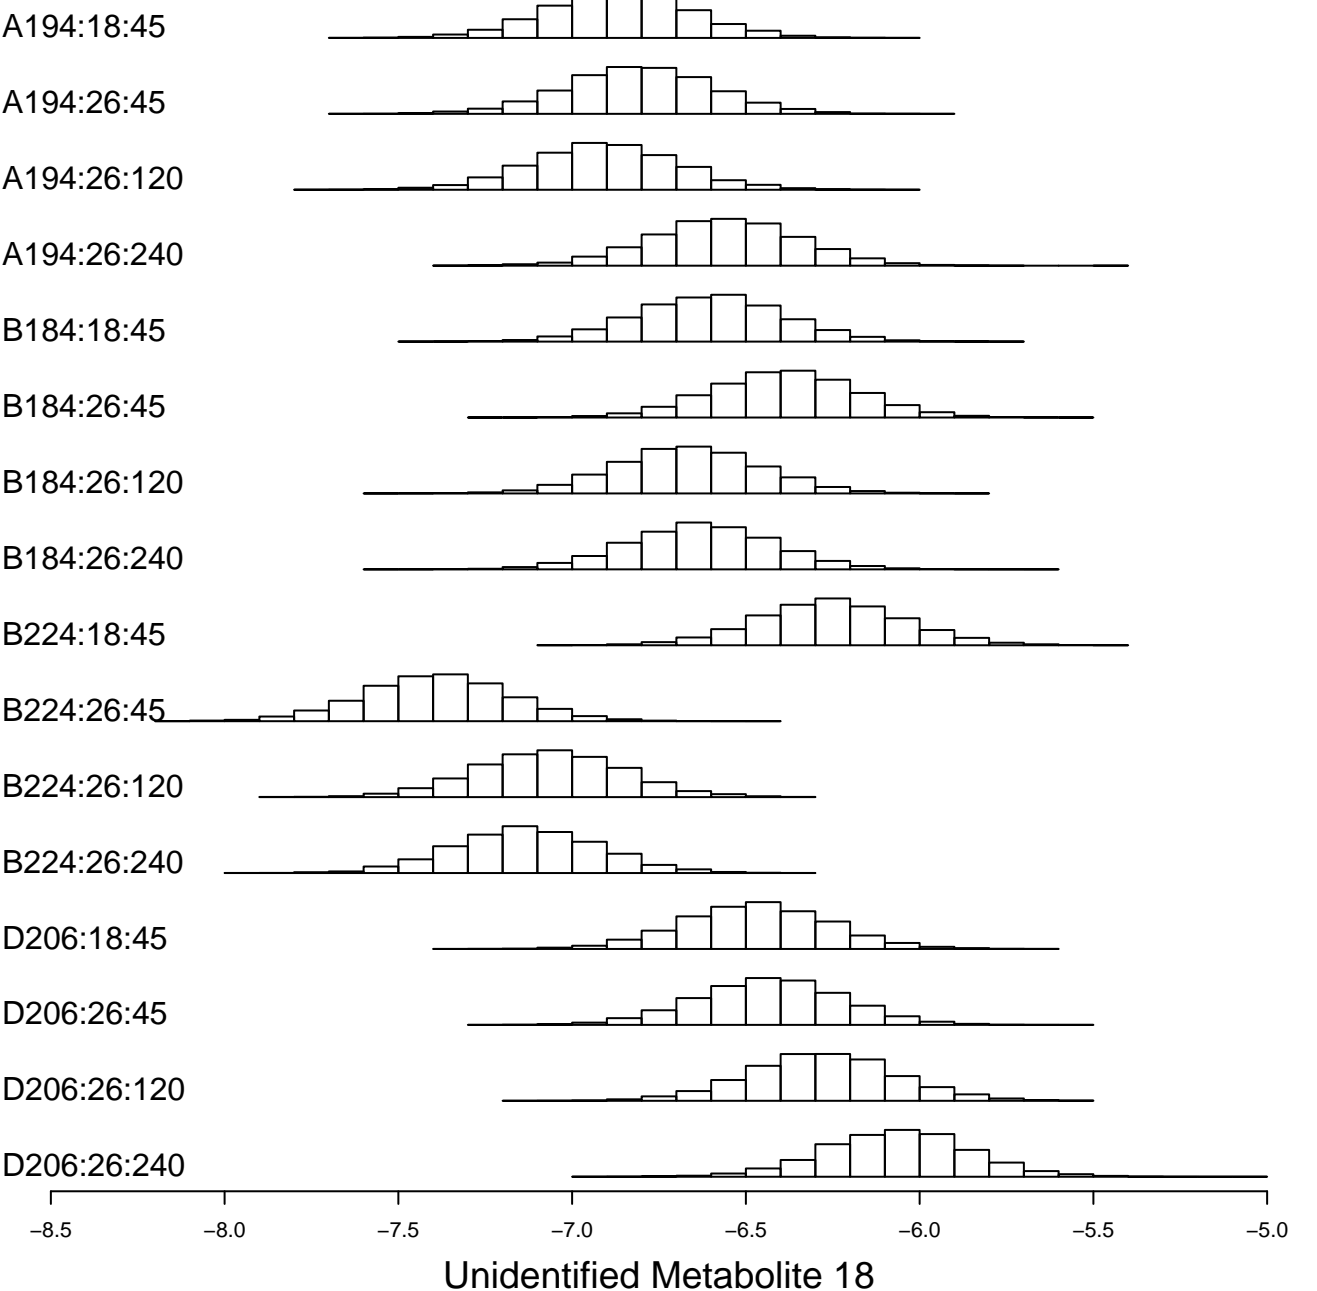

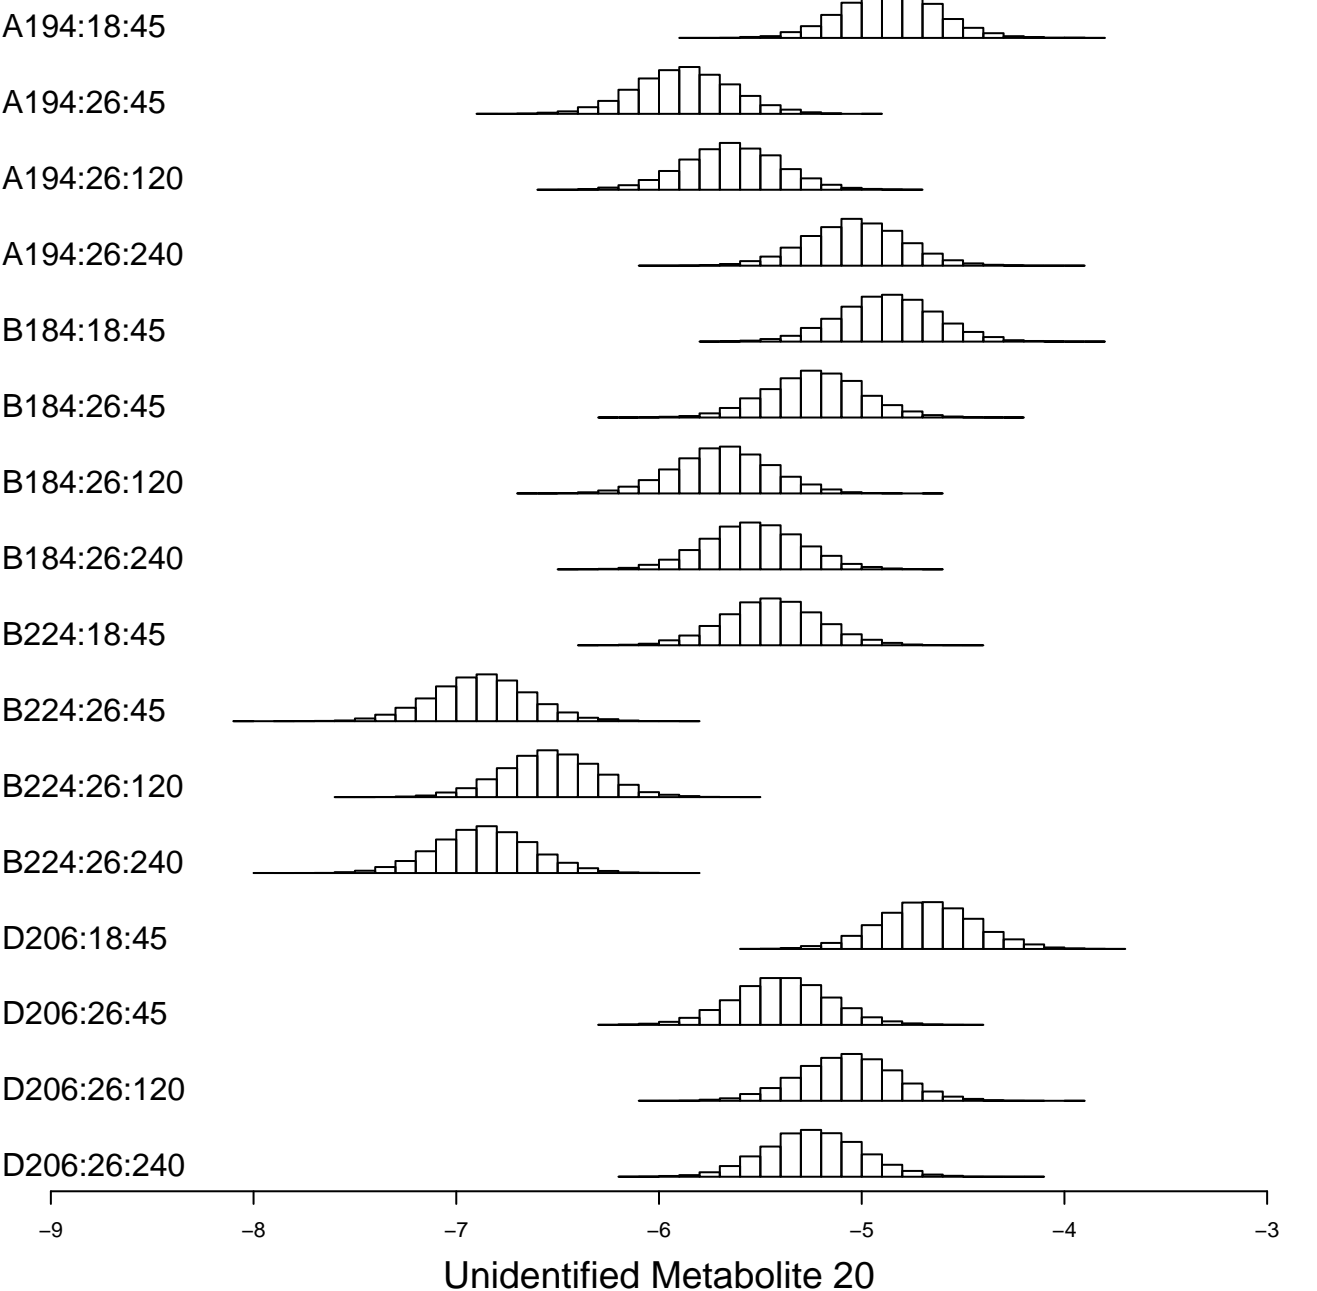

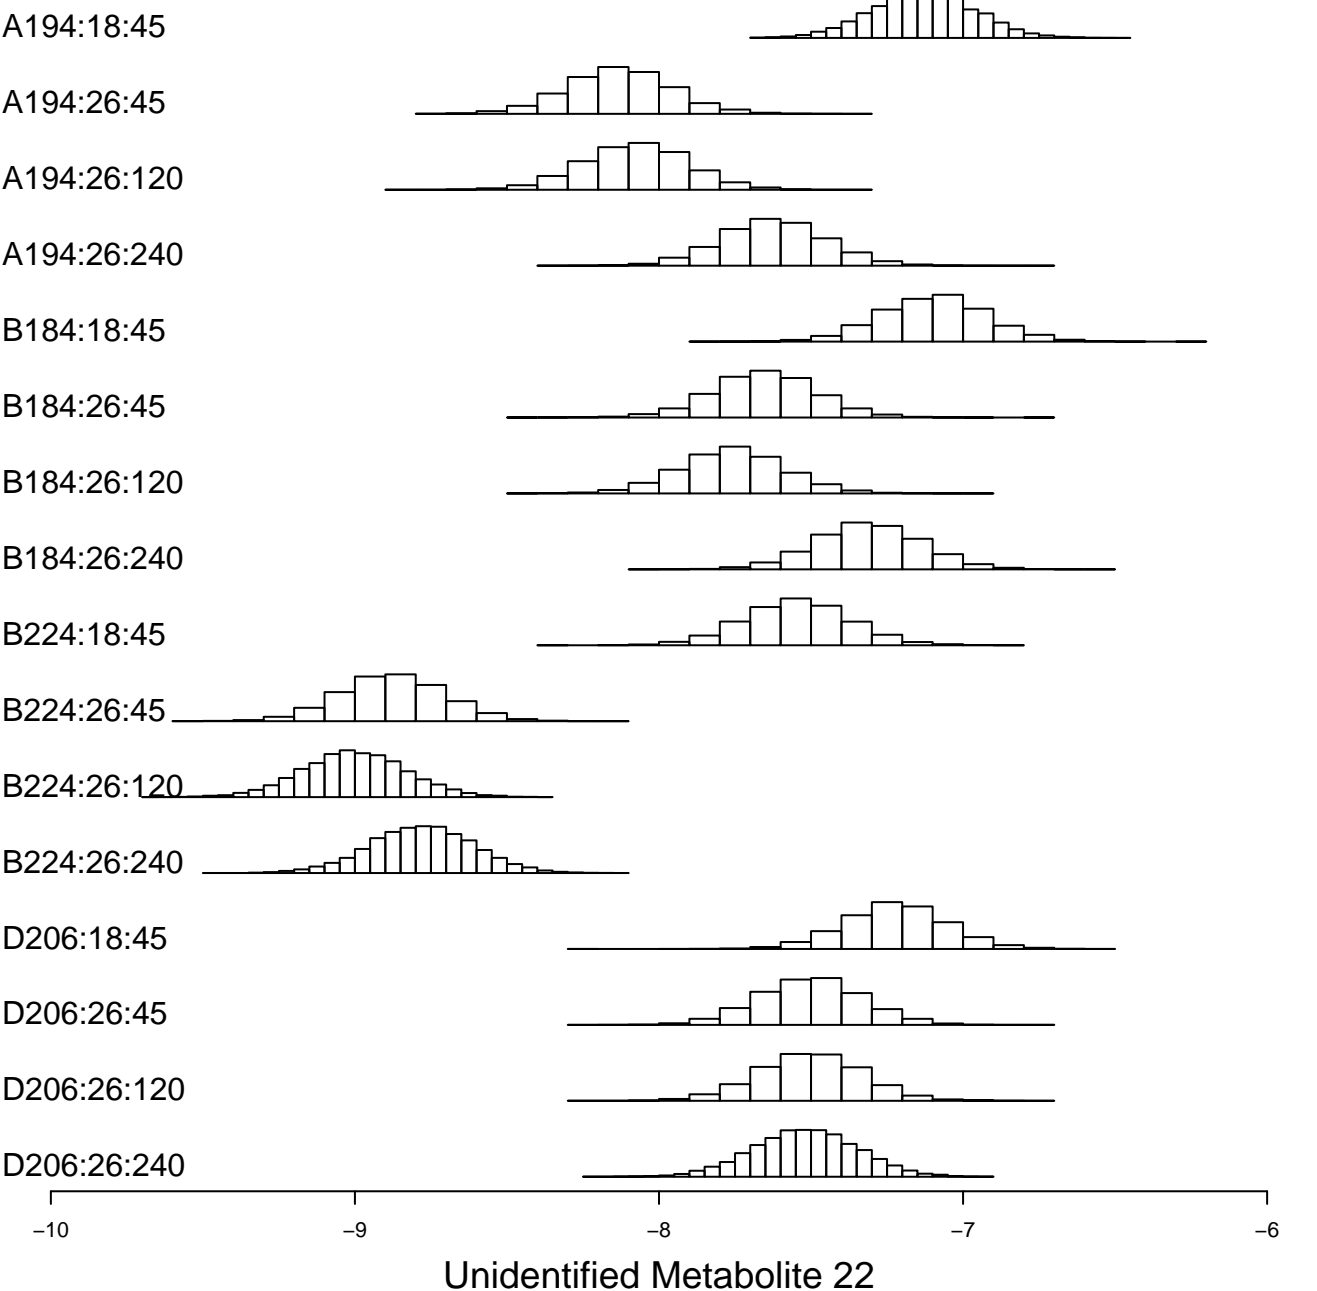

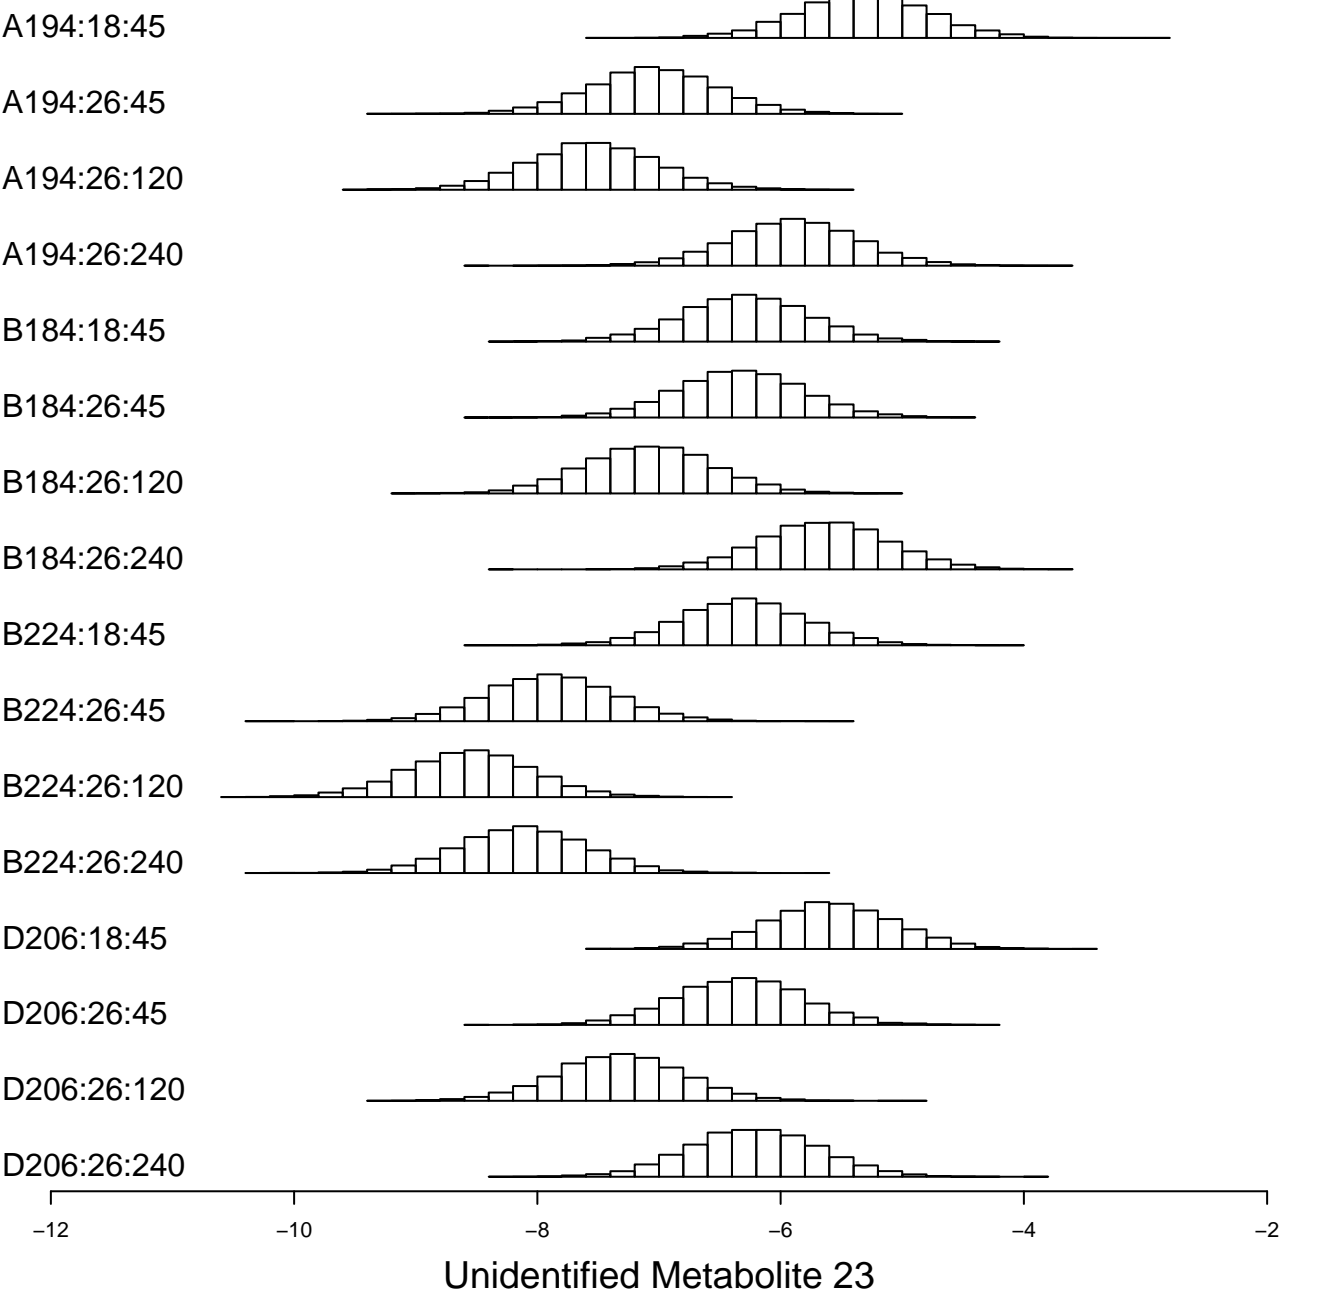

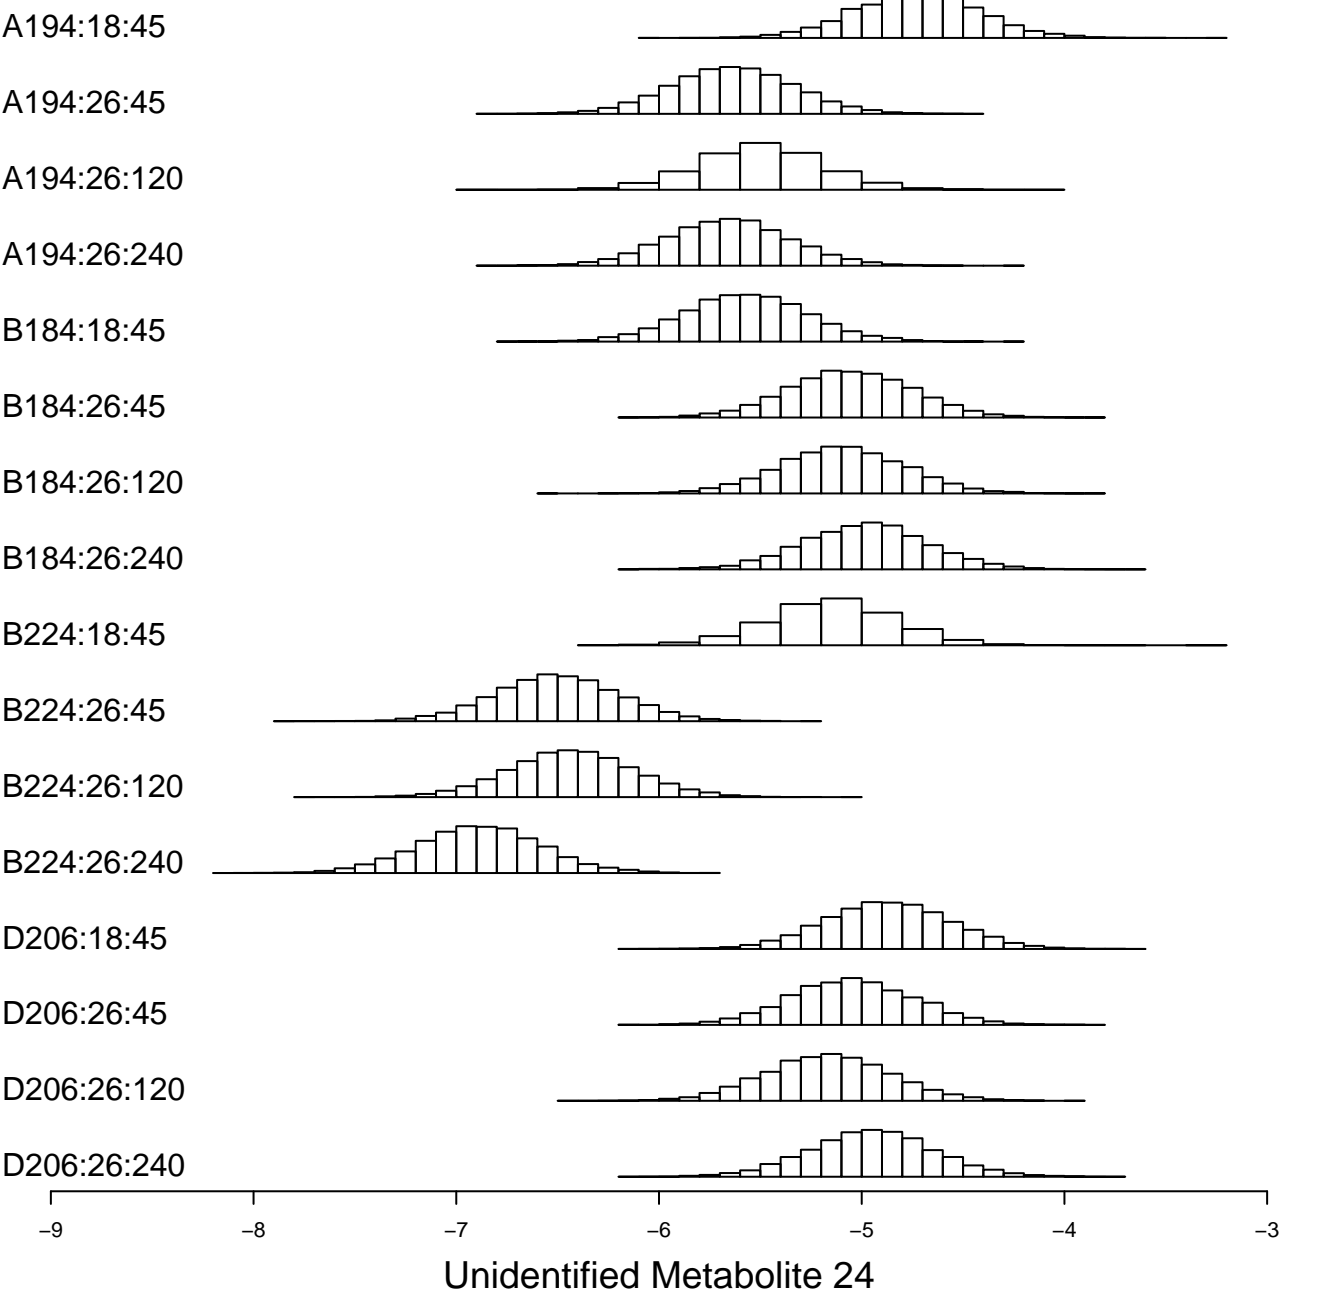

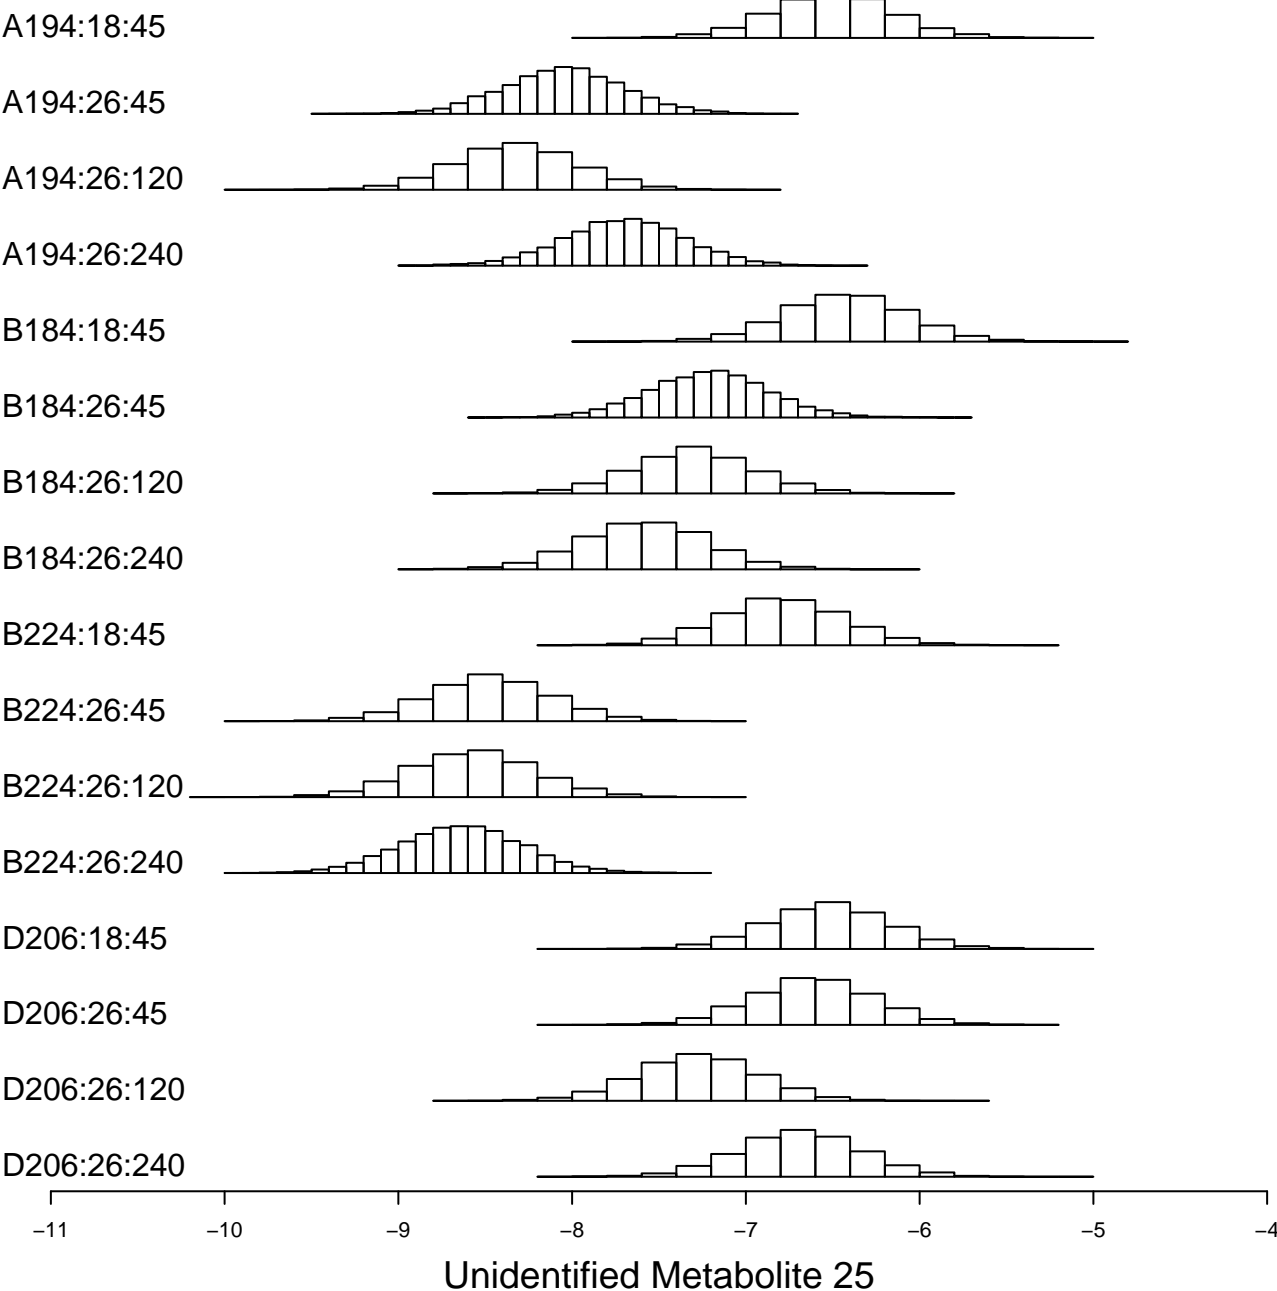



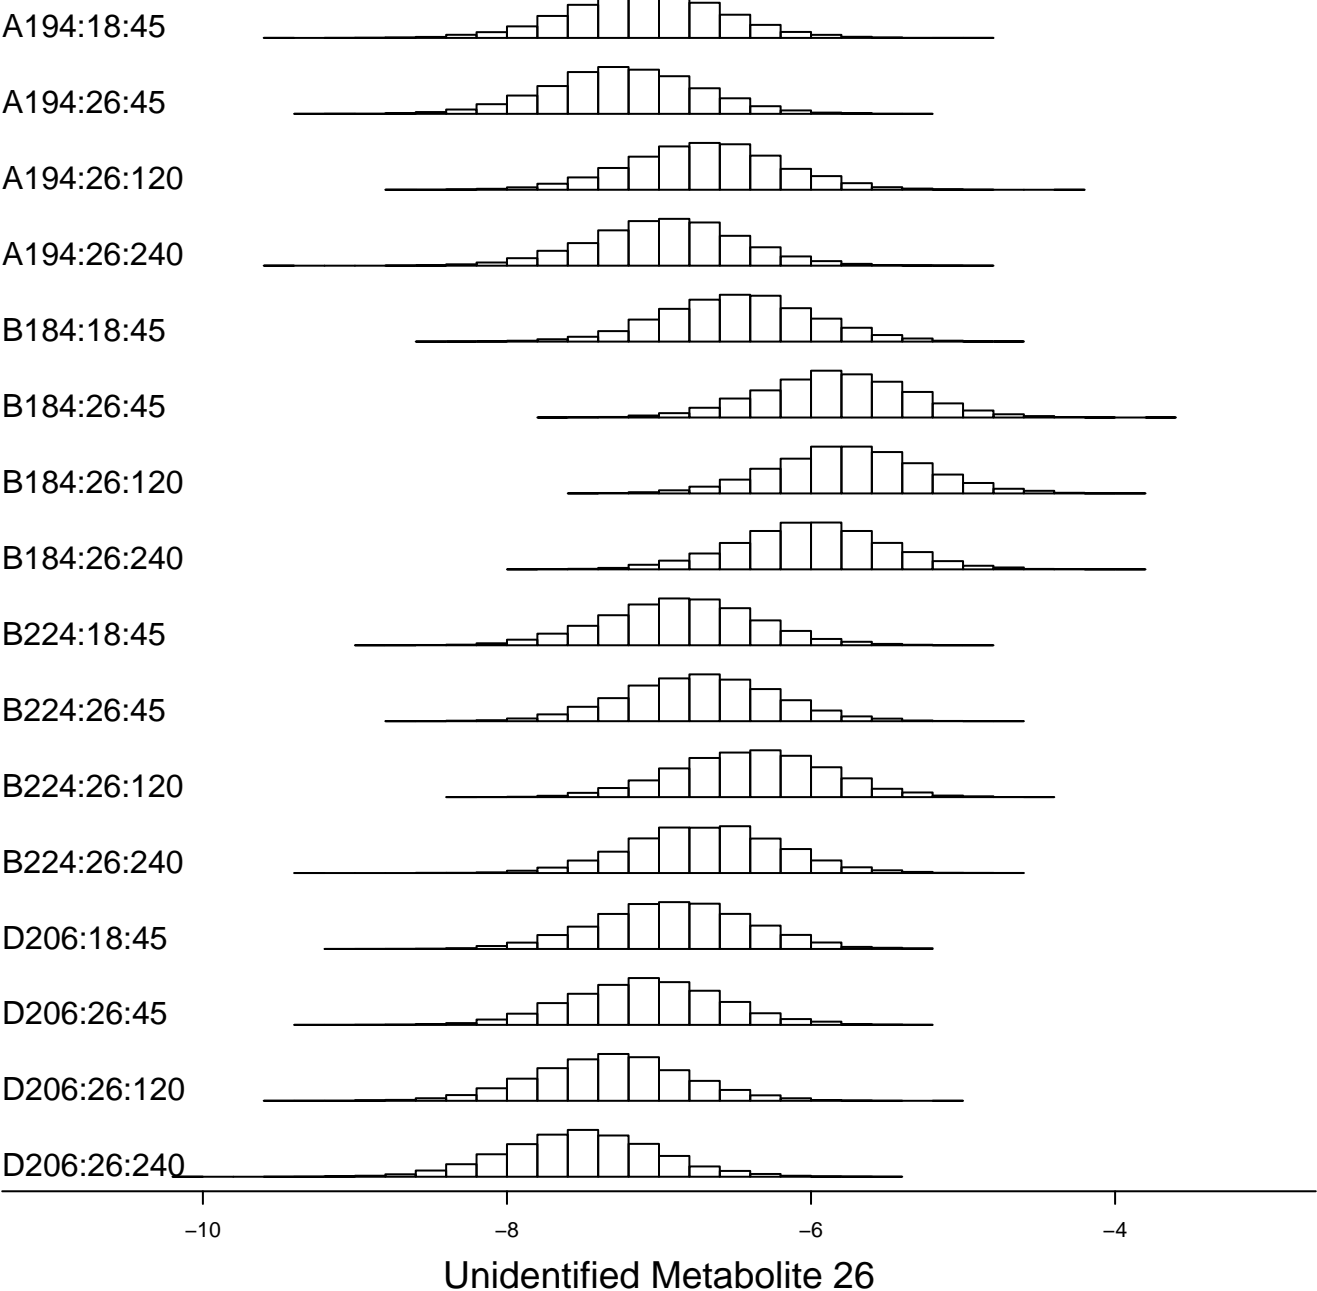

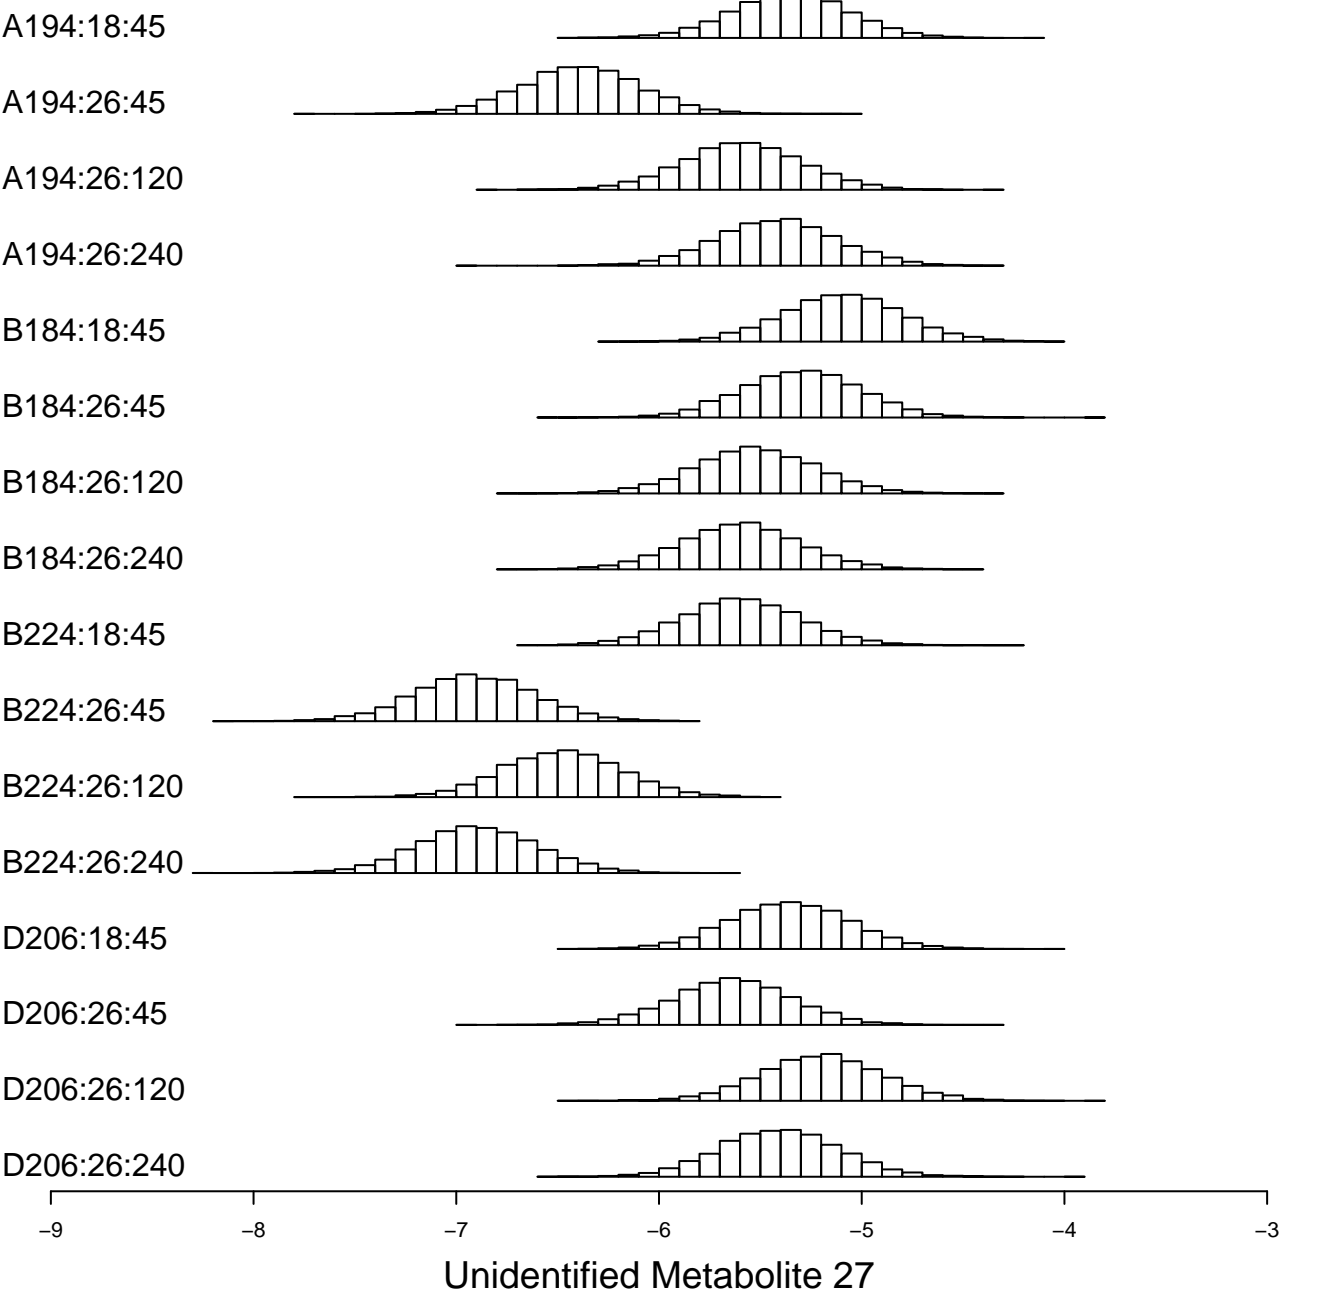

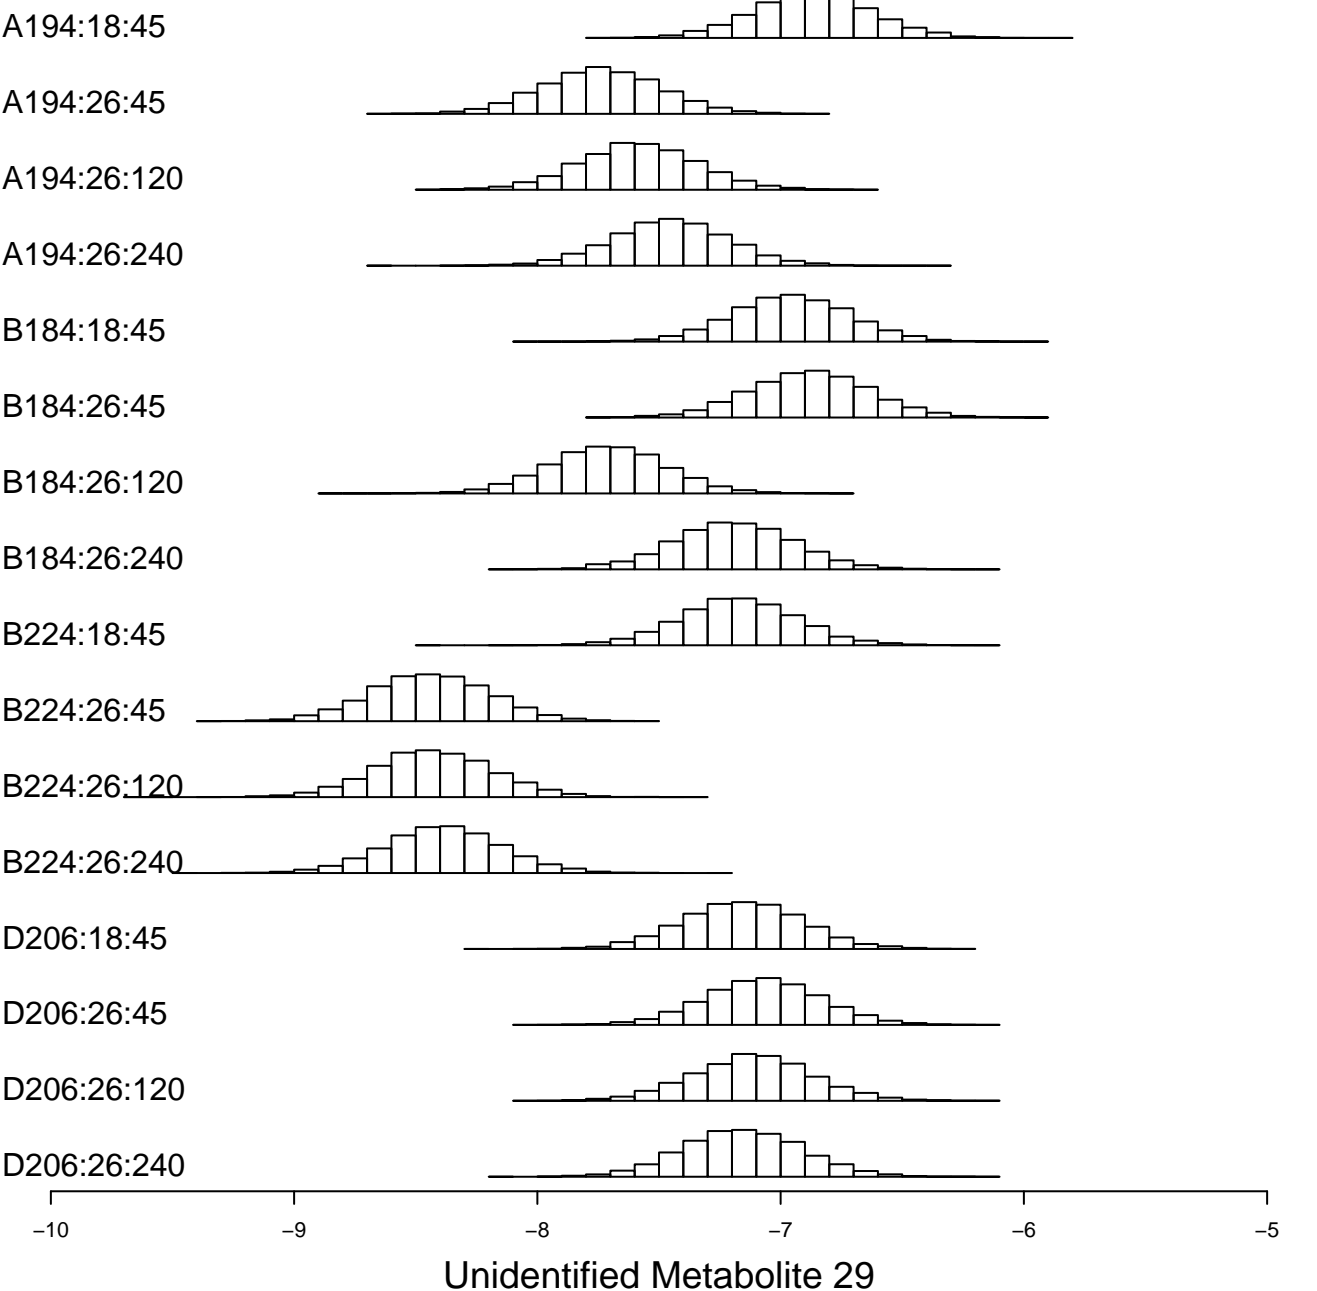

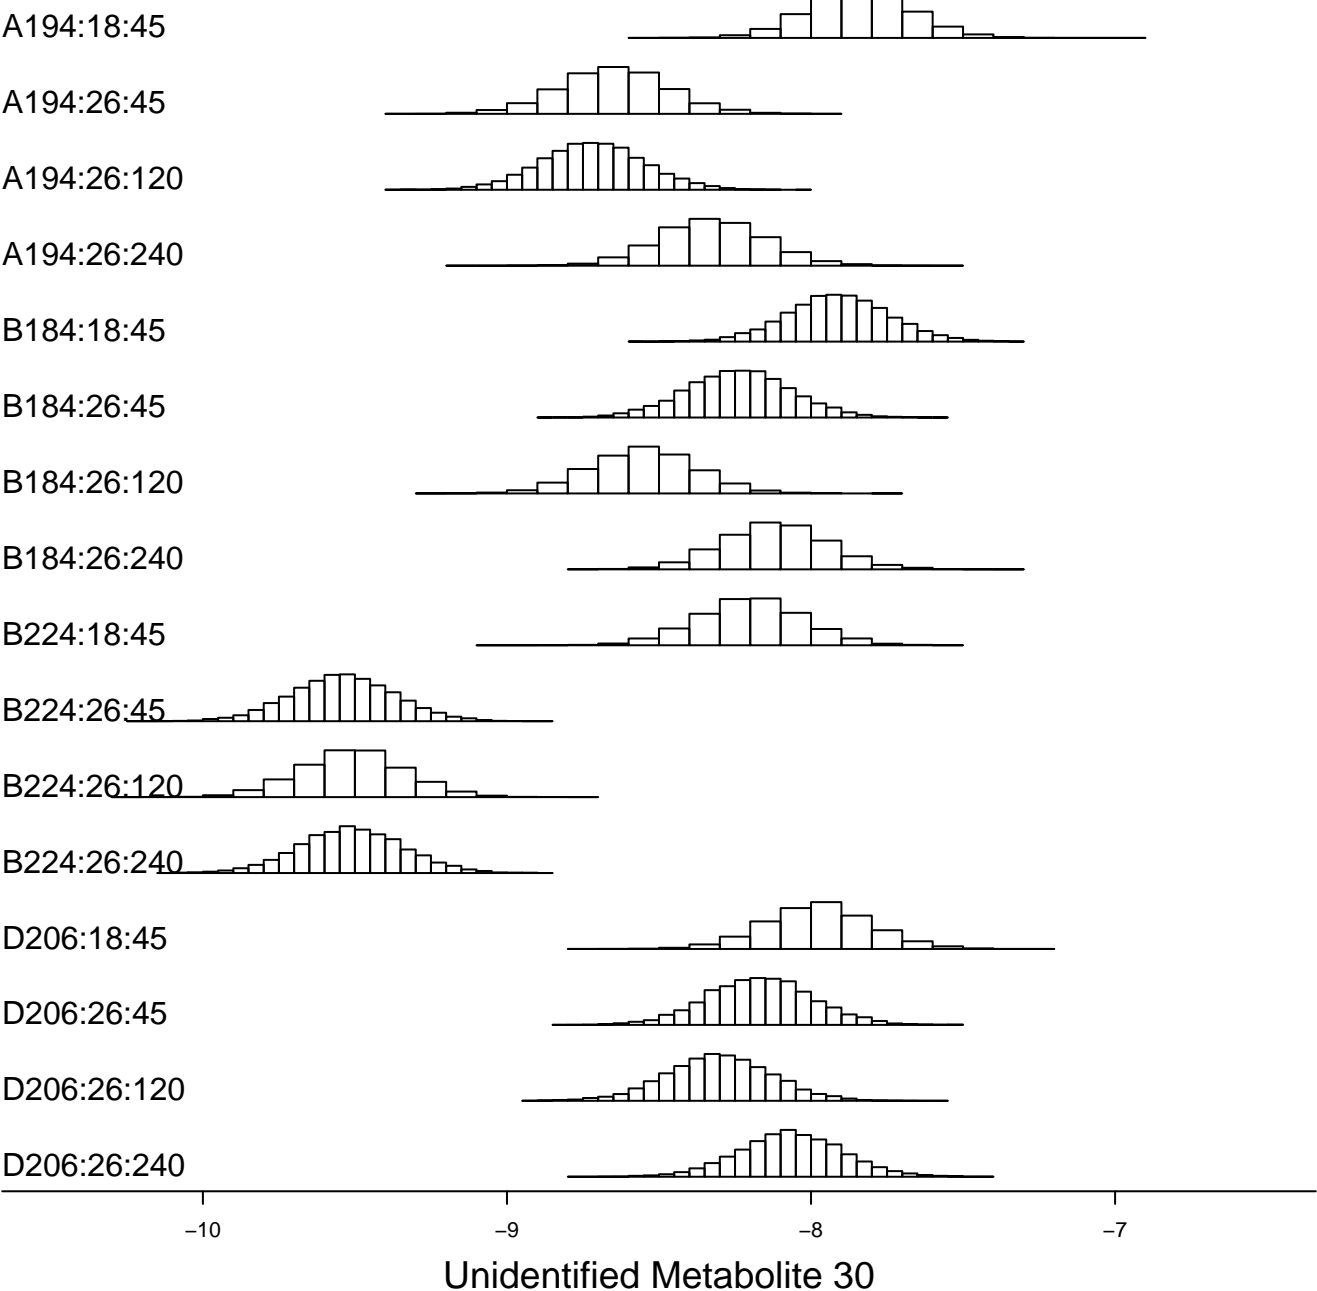

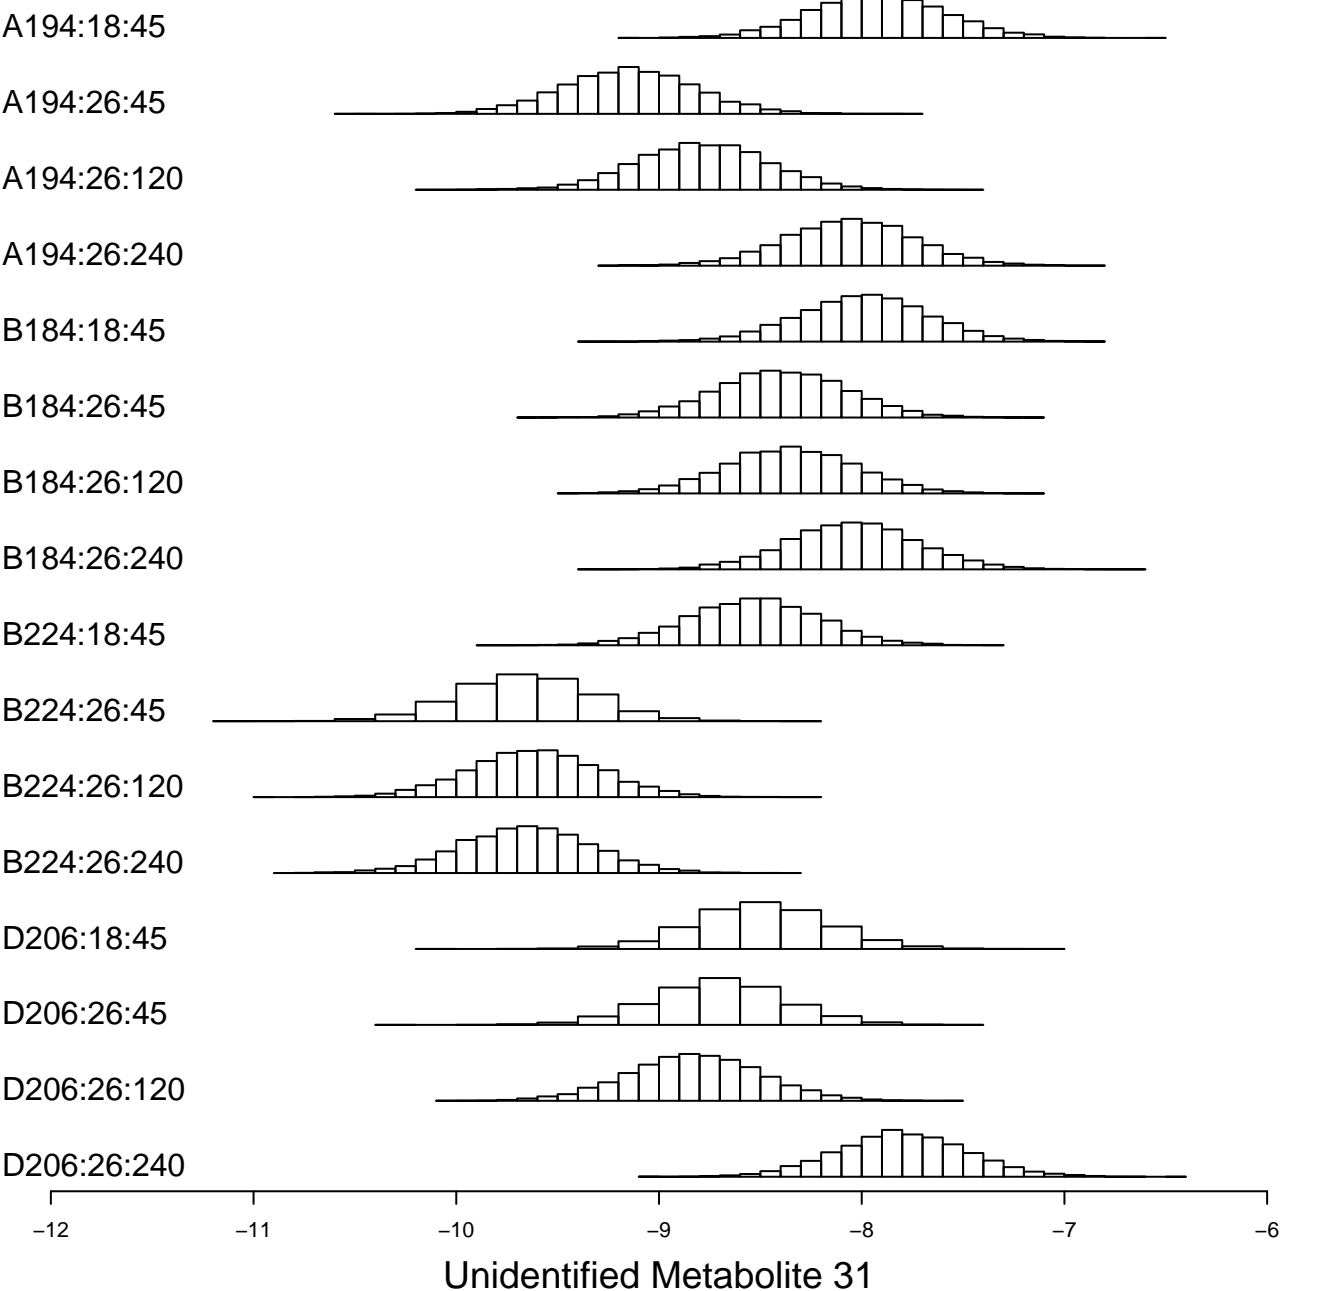

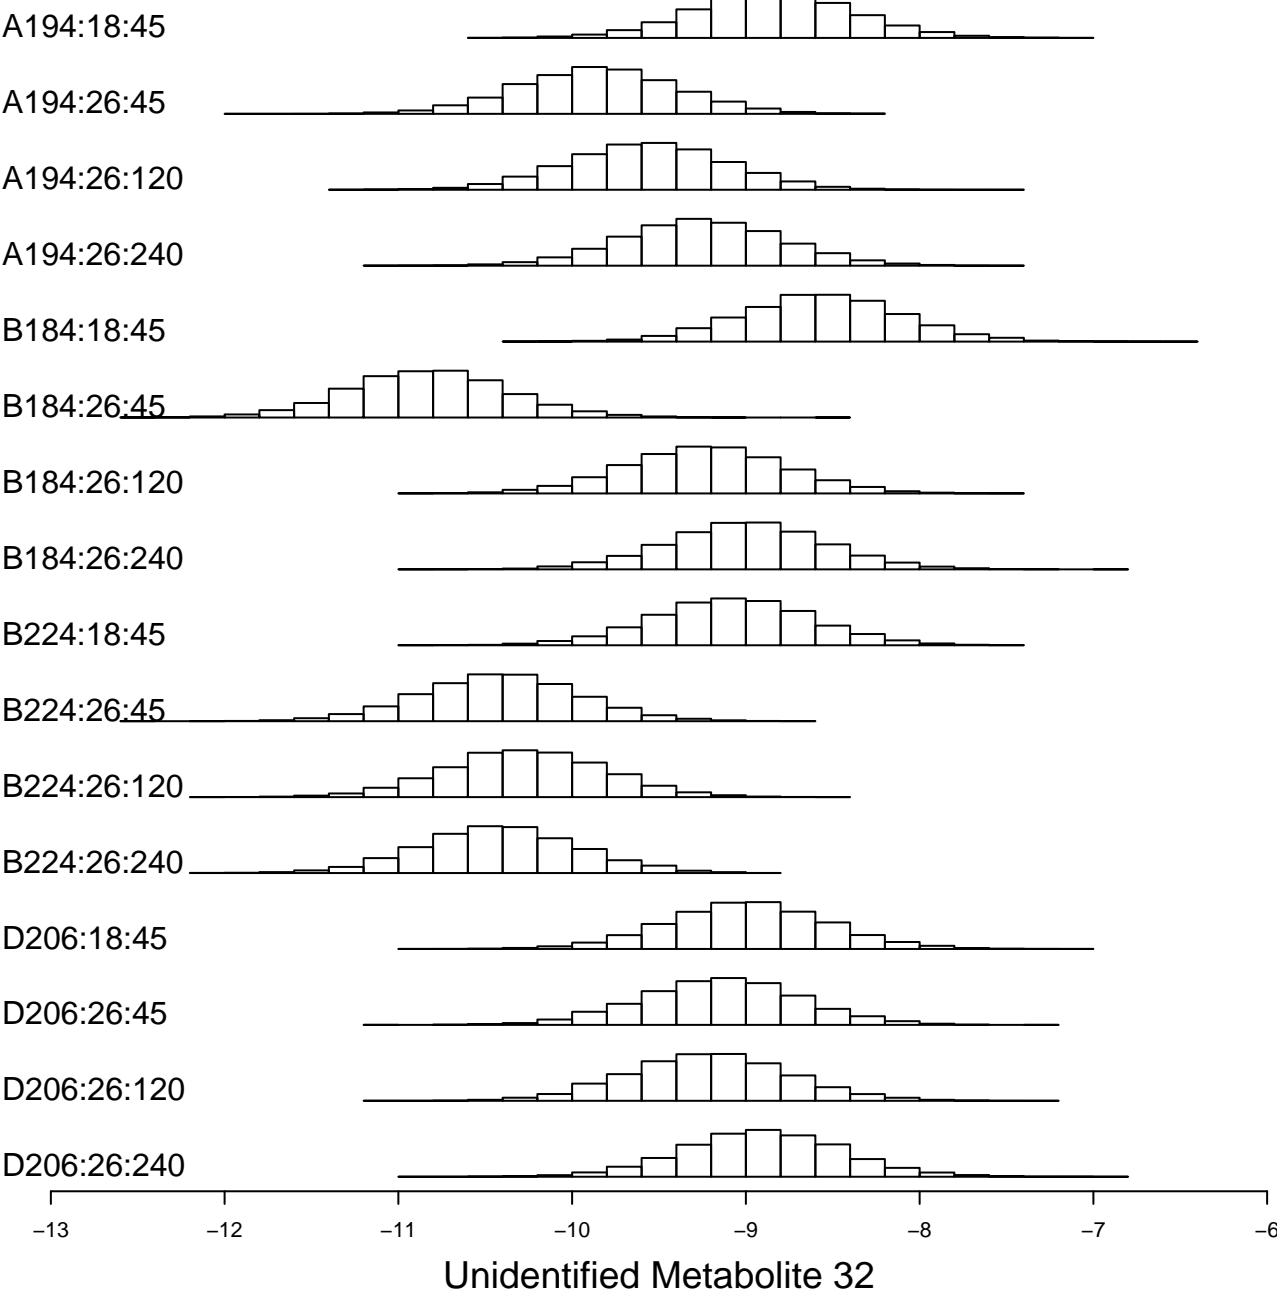

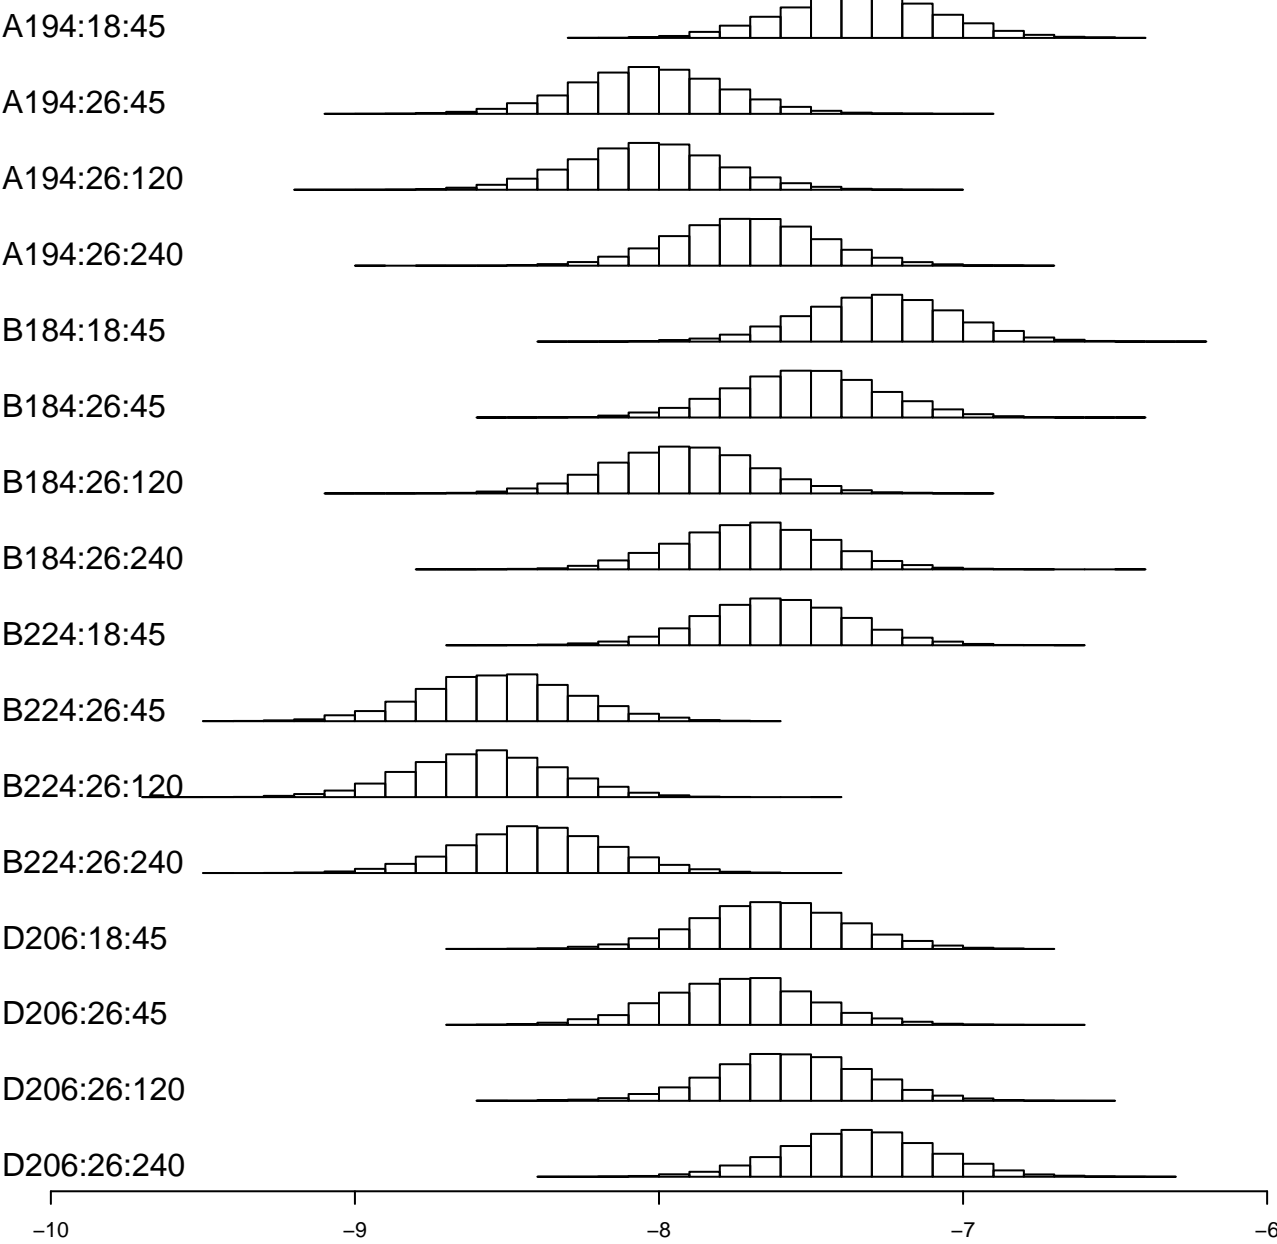

Unidentified Metabolite 33

| Number of children | Frequency |
|--------------------|-----------|
| 0                  | 5         |
| 1                  | 15        |
| 2                  | 25        |
| 3                  | 30        |
| 4                  | 25        |
| 5                  | 10        |

A histogram showing the frequency of the number of children per family. The x-axis represents the number of children (0 to 10), and the y-axis represents the frequency (0 to 10). The distribution is roughly bell-shaped, peaking at 3 children with a frequency of 10.

| Number of Children | Frequency |
|--------------------|-----------|
| 0                  | 1         |
| 1                  | 2         |
| 2                  | 4         |
| 3                  | 10        |
| 4                  | 8         |
| 5                  | 4         |
| 6                  | 2         |
| 7                  | 1         |
| 8                  | 1         |
| 9                  | 1         |
| 10                 | 1         |

B224:26:45

B224:26:120

A histogram showing the distribution of values for the variable B224:26:240. The x-axis represents the value range, and the y-axis represents the frequency. The distribution is roughly bell-shaped, centered around 100, with a peak frequency of approximately 10.

| Number of children | Frequency |
|--------------------|-----------|
| 0                  | 1         |
| 1                  | 2         |
| 2                  | 3         |
| 3                  | 4         |
| 4                  | 3         |
| 5                  | 1         |

| Number of children | Frequency |
|--------------------|-----------|
| 0                  | 5         |
| 1                  | 10        |
| 2                  | 15        |
| 3                  | 50        |
| 4                  | 45        |
| 5                  | 35        |
| 6                  | 10        |

-7

### Unidentified Metabolite 34



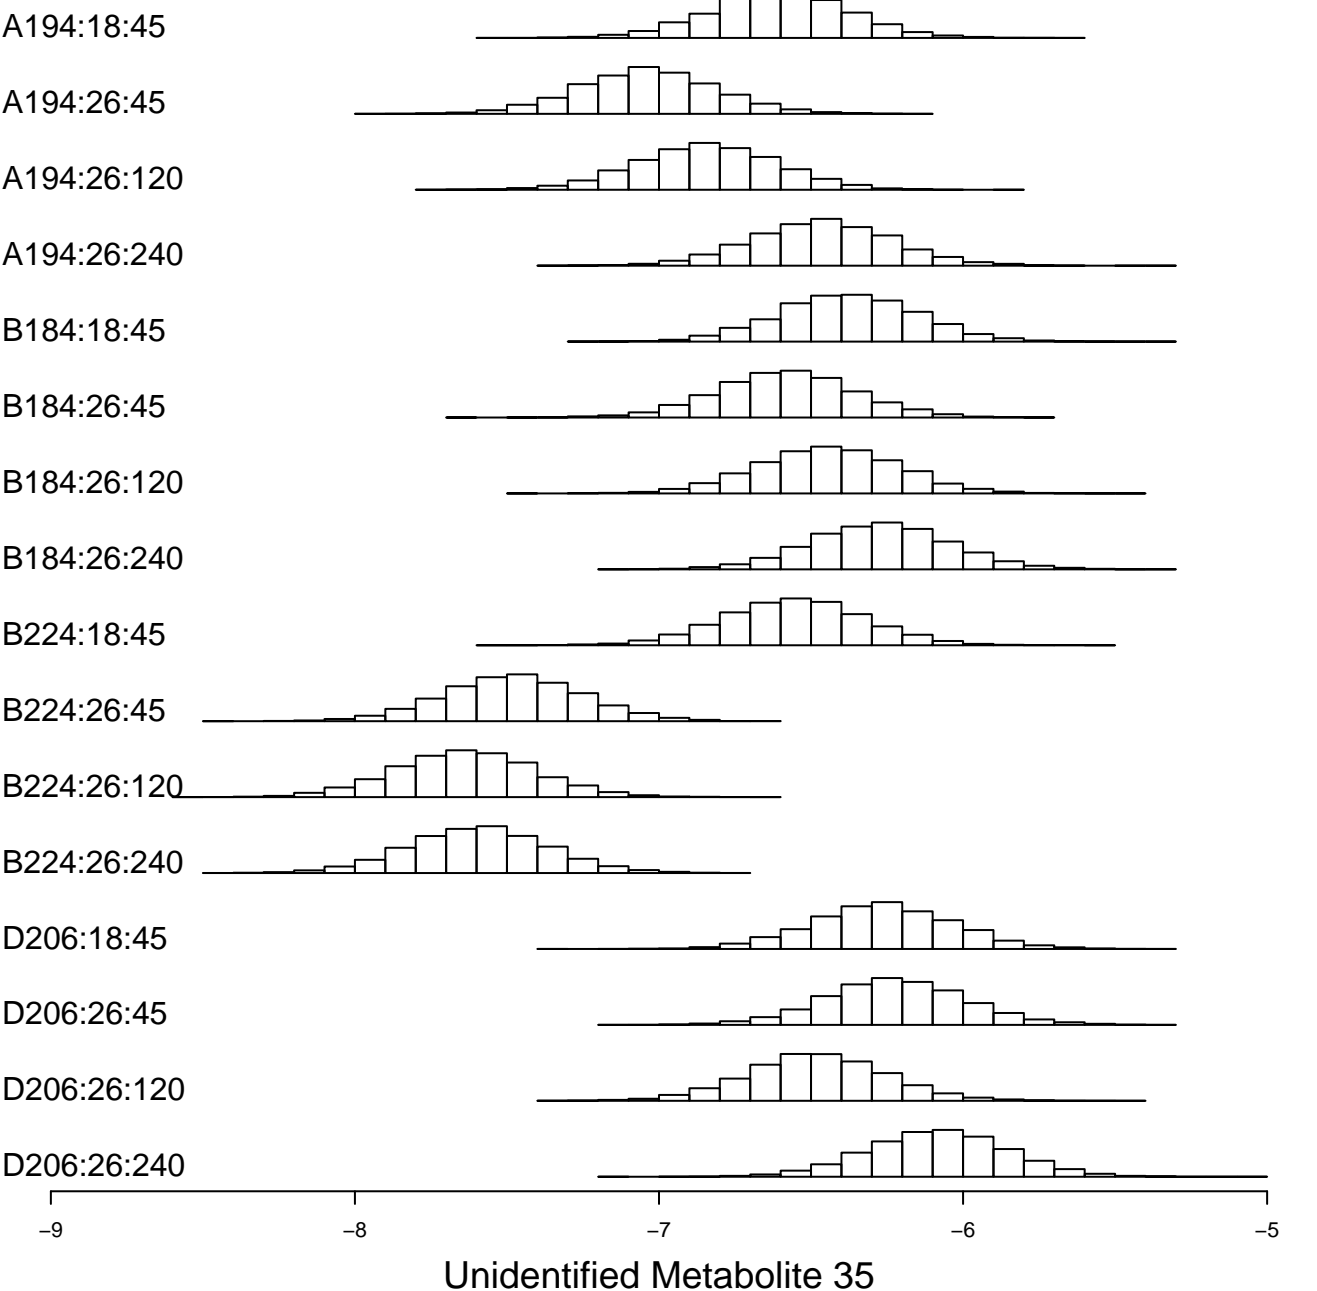

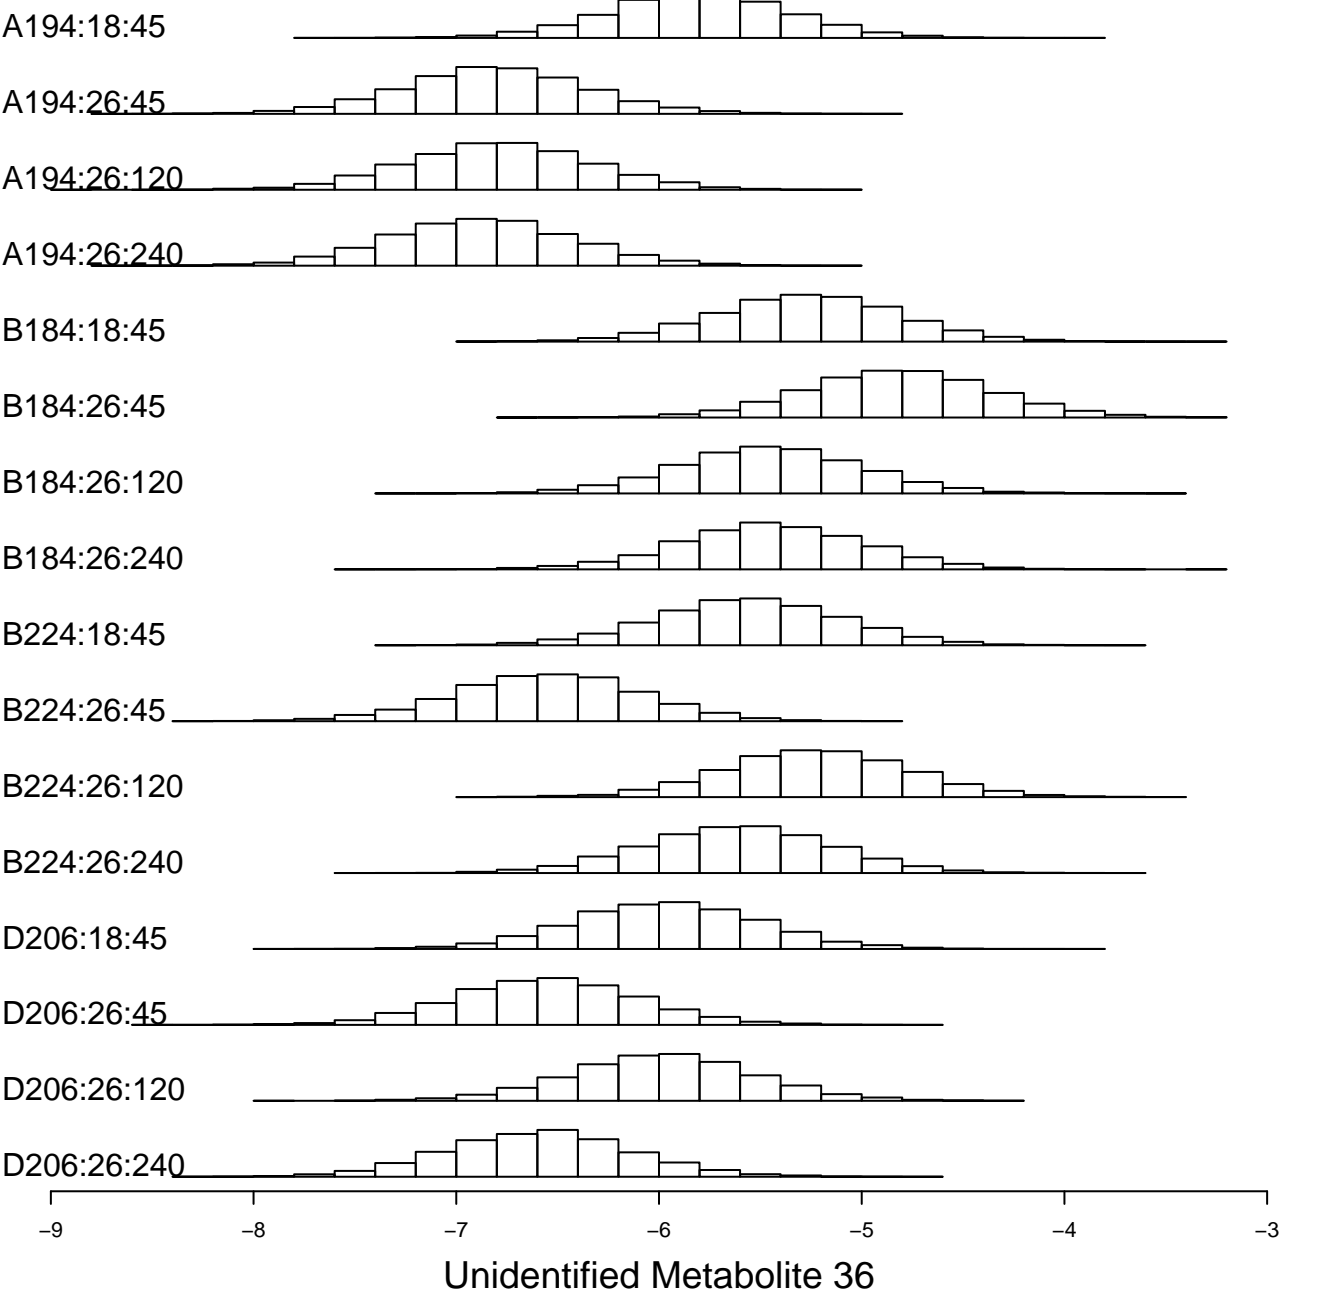

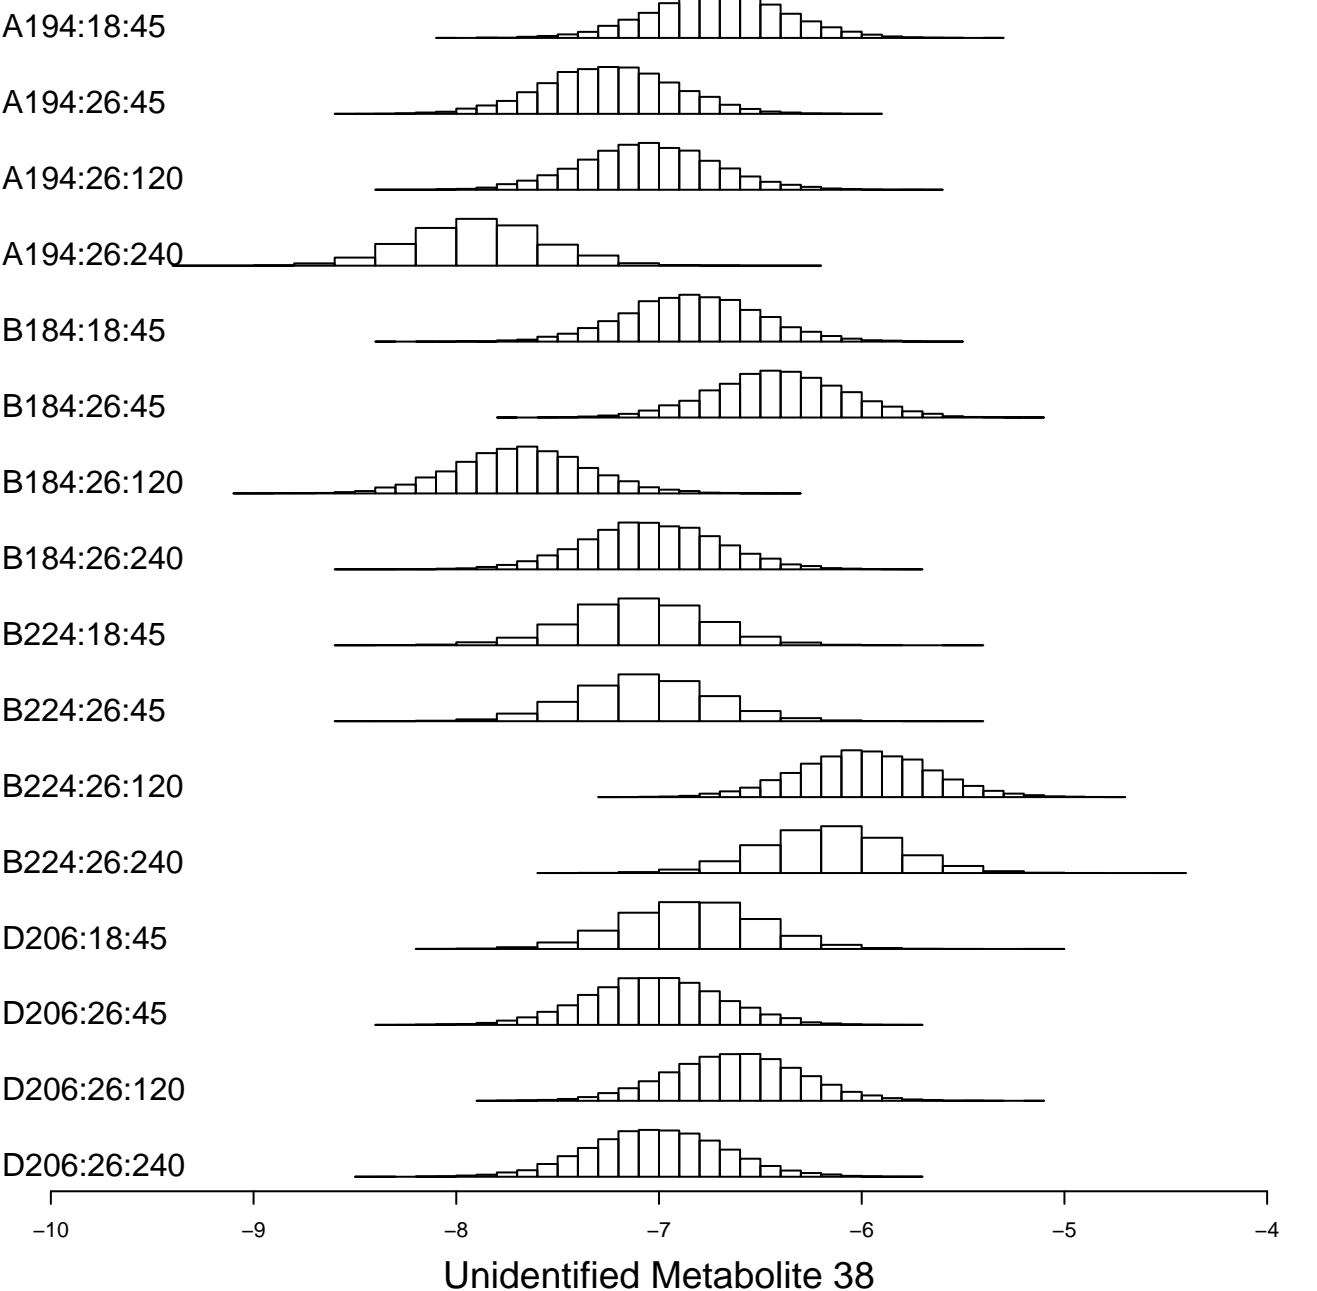

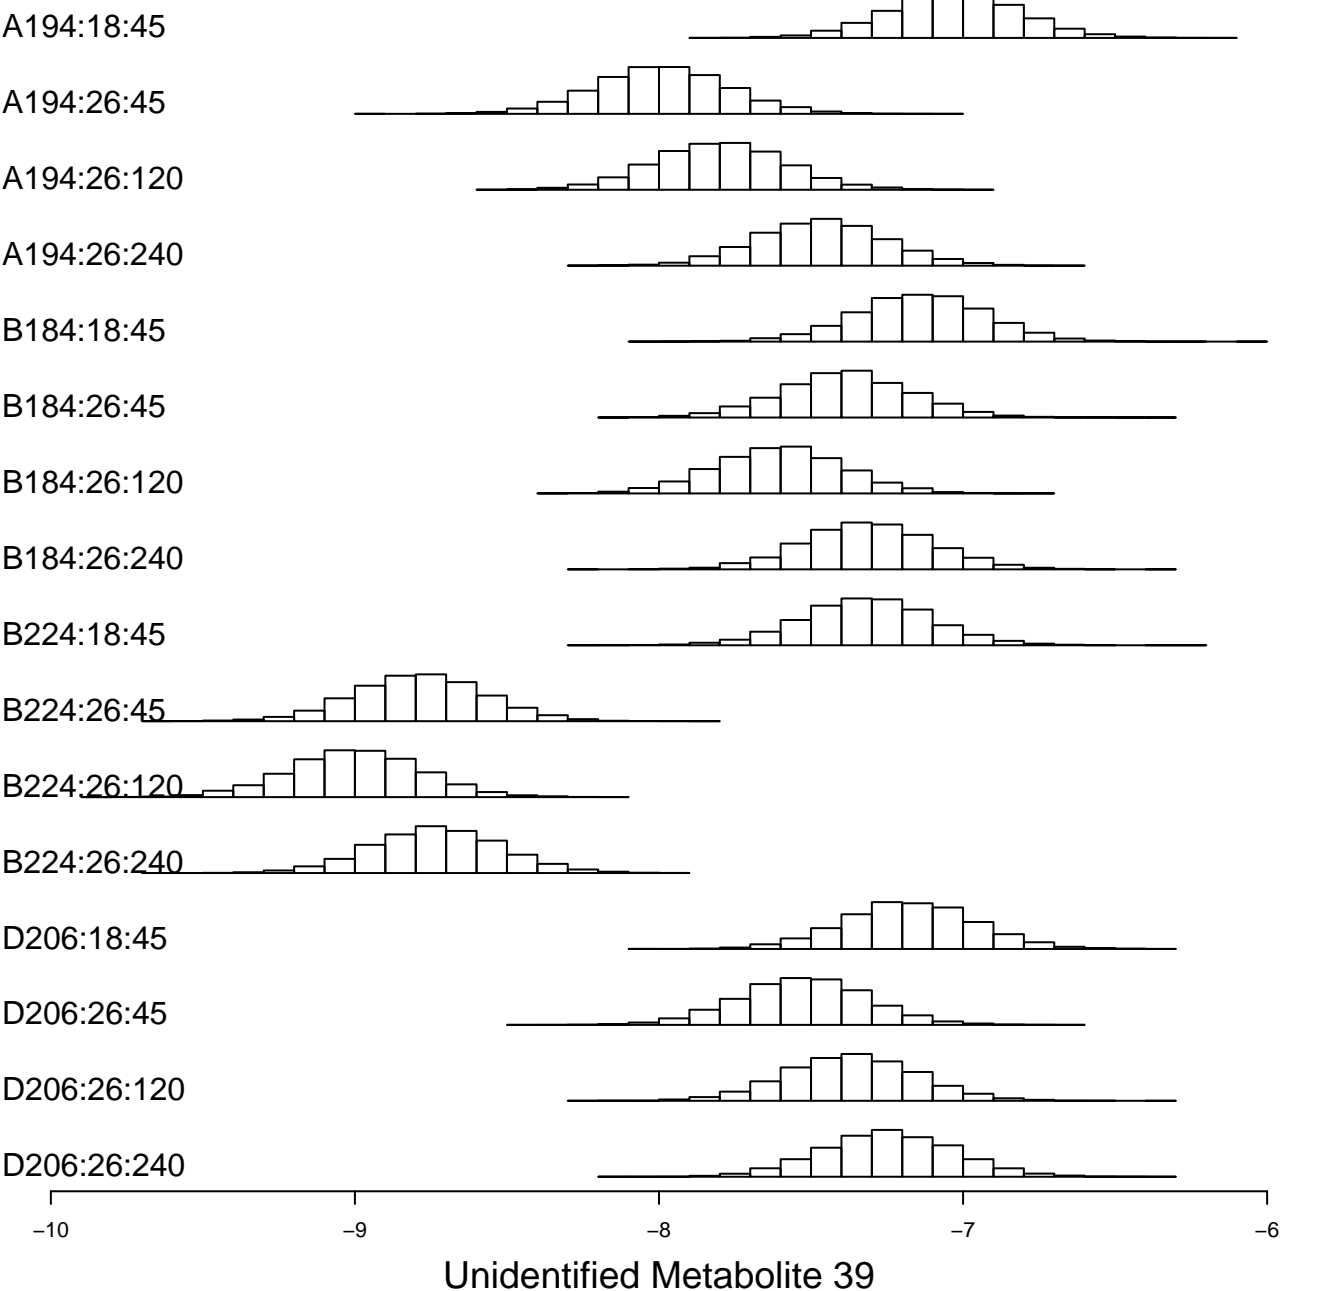

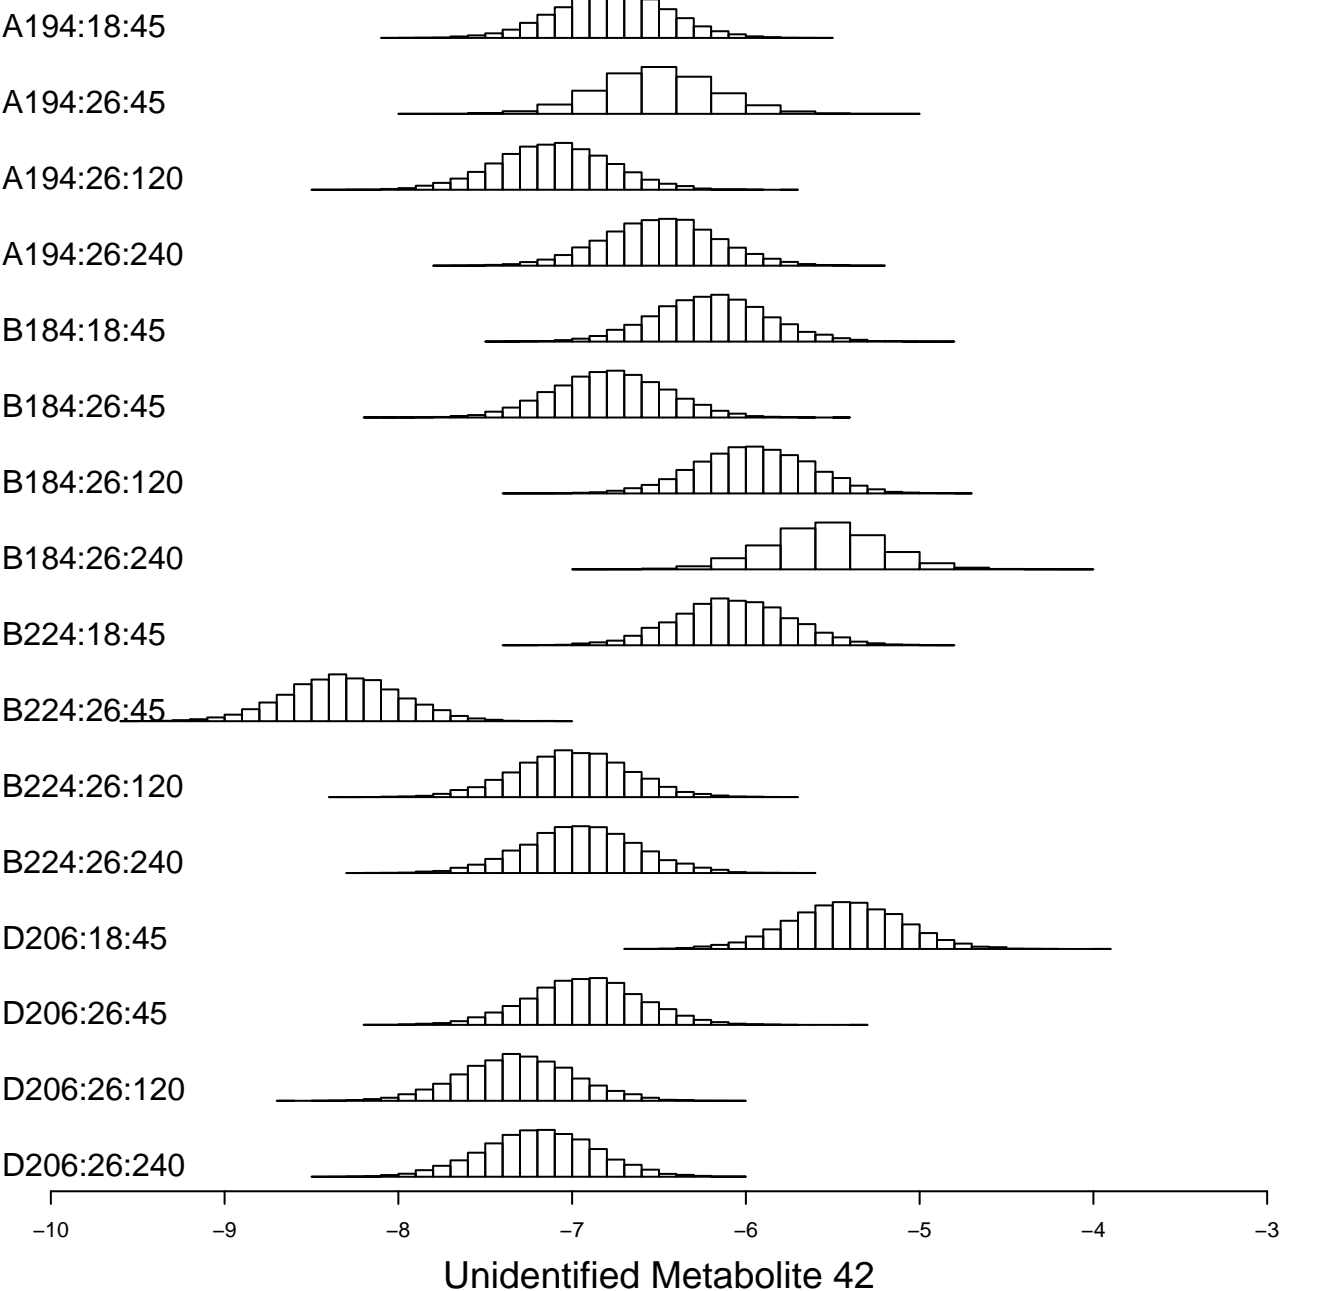

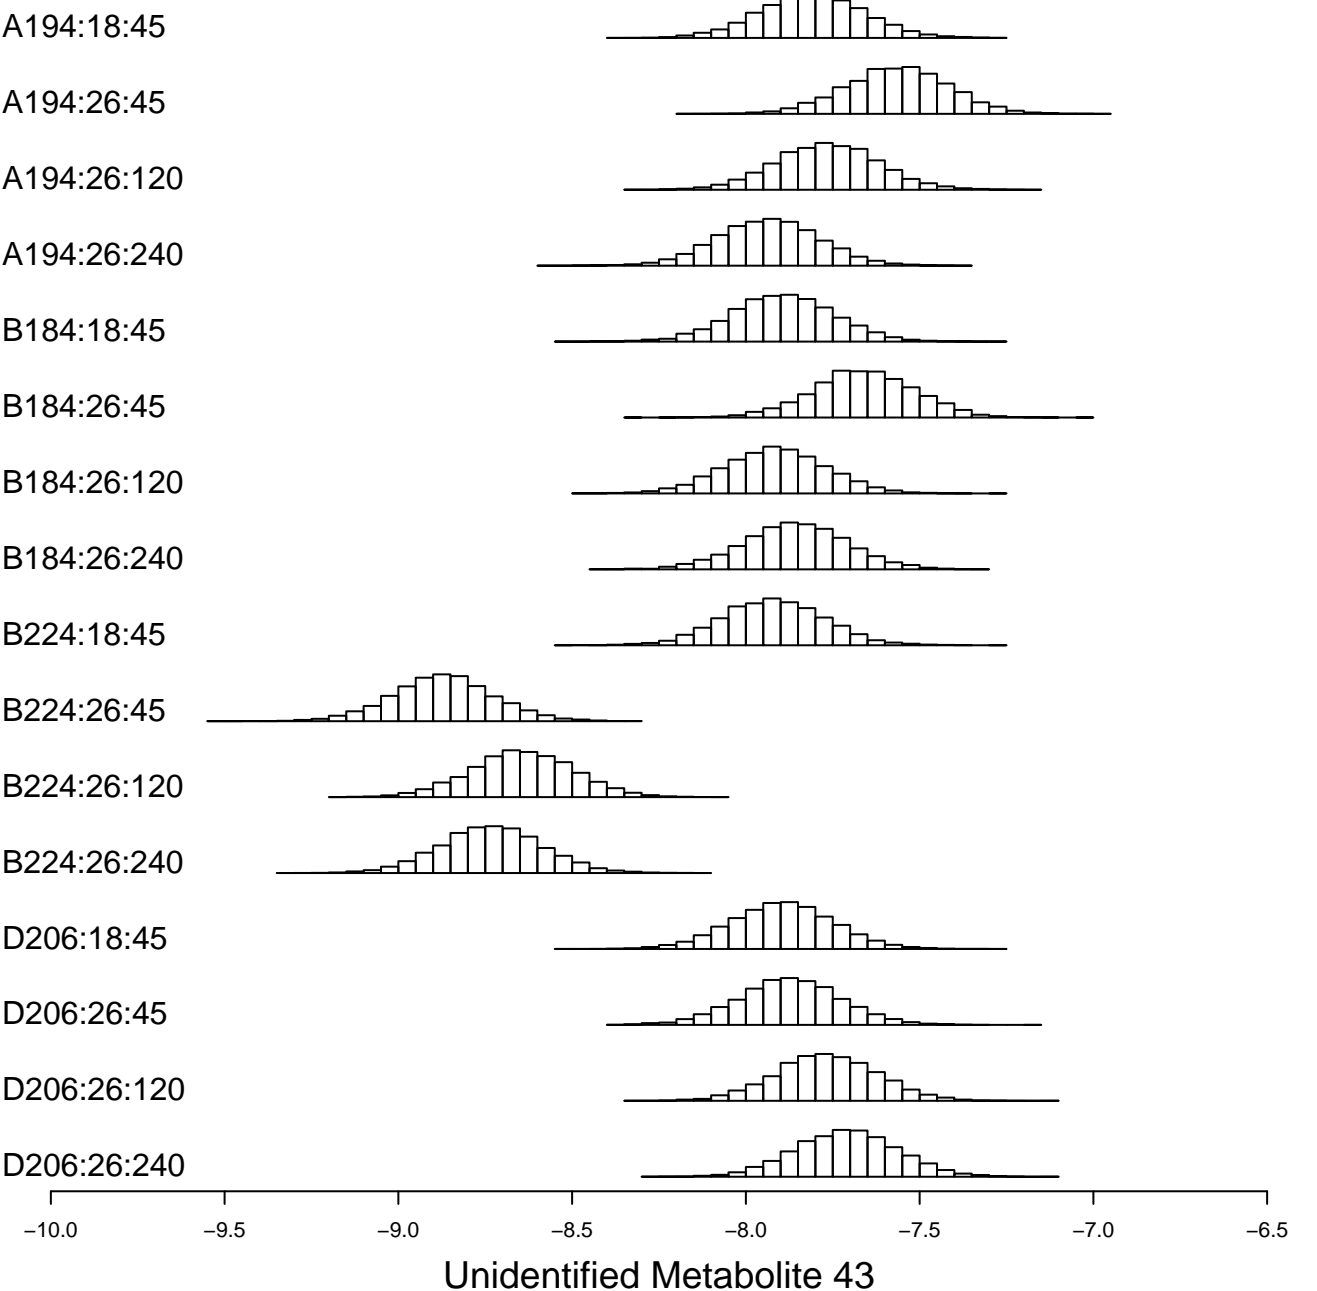

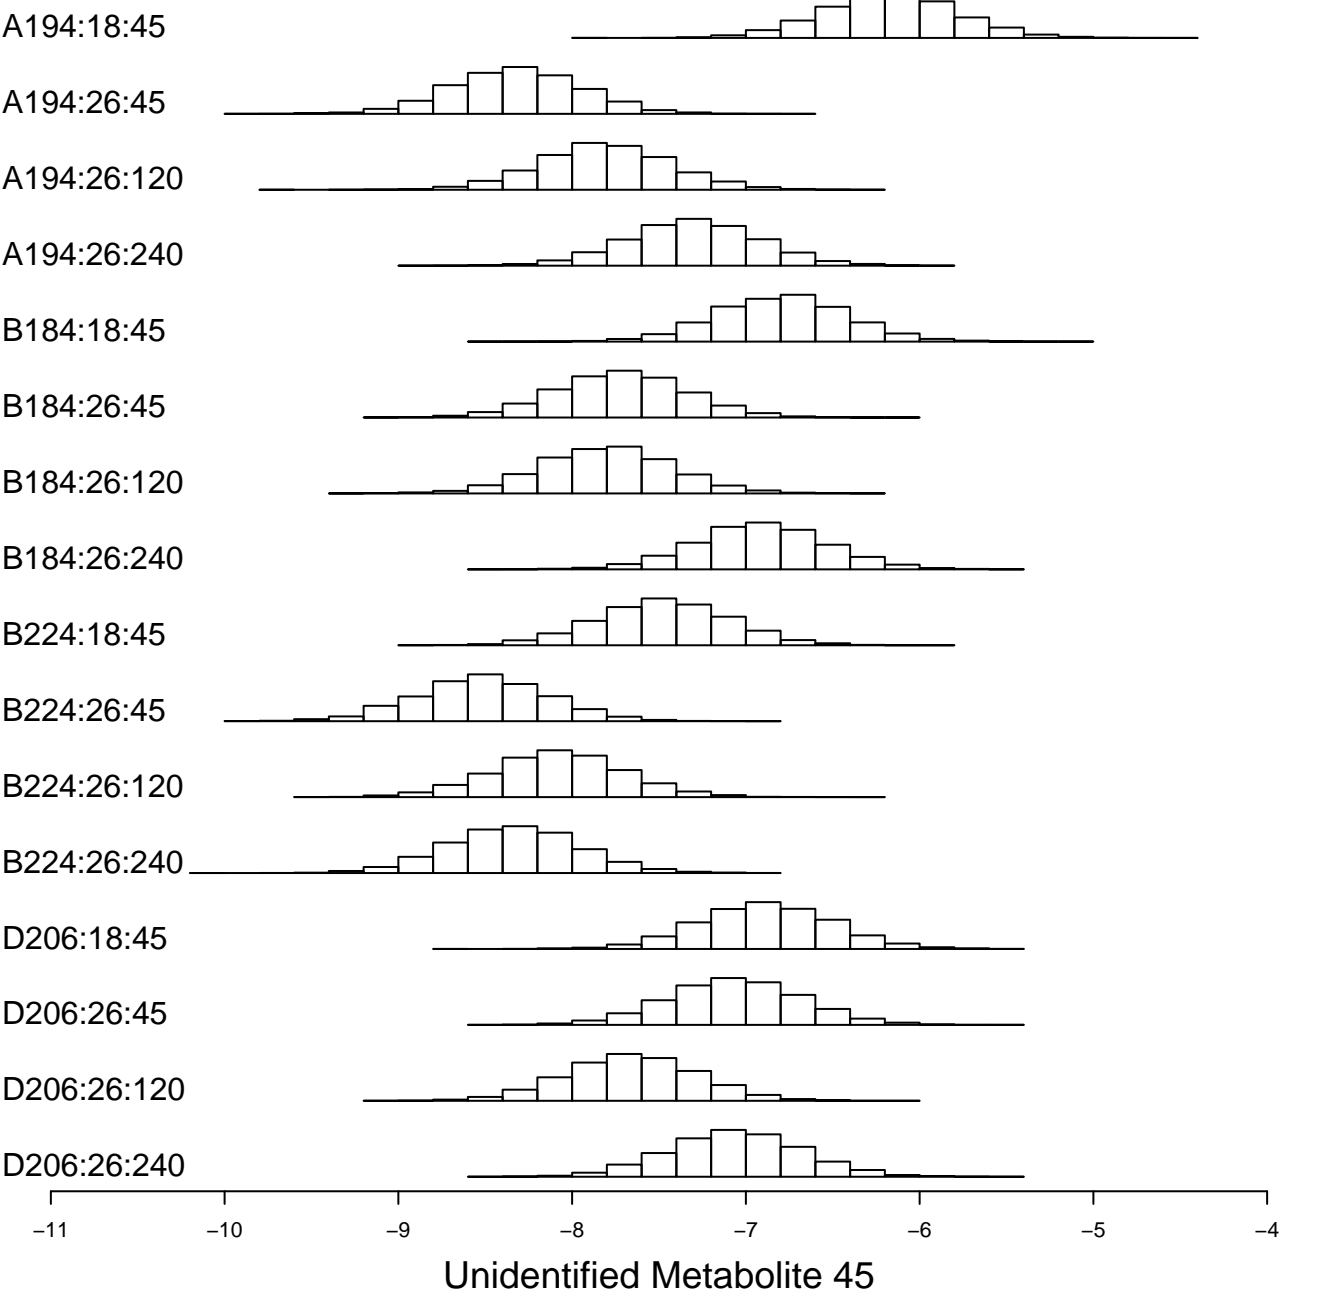

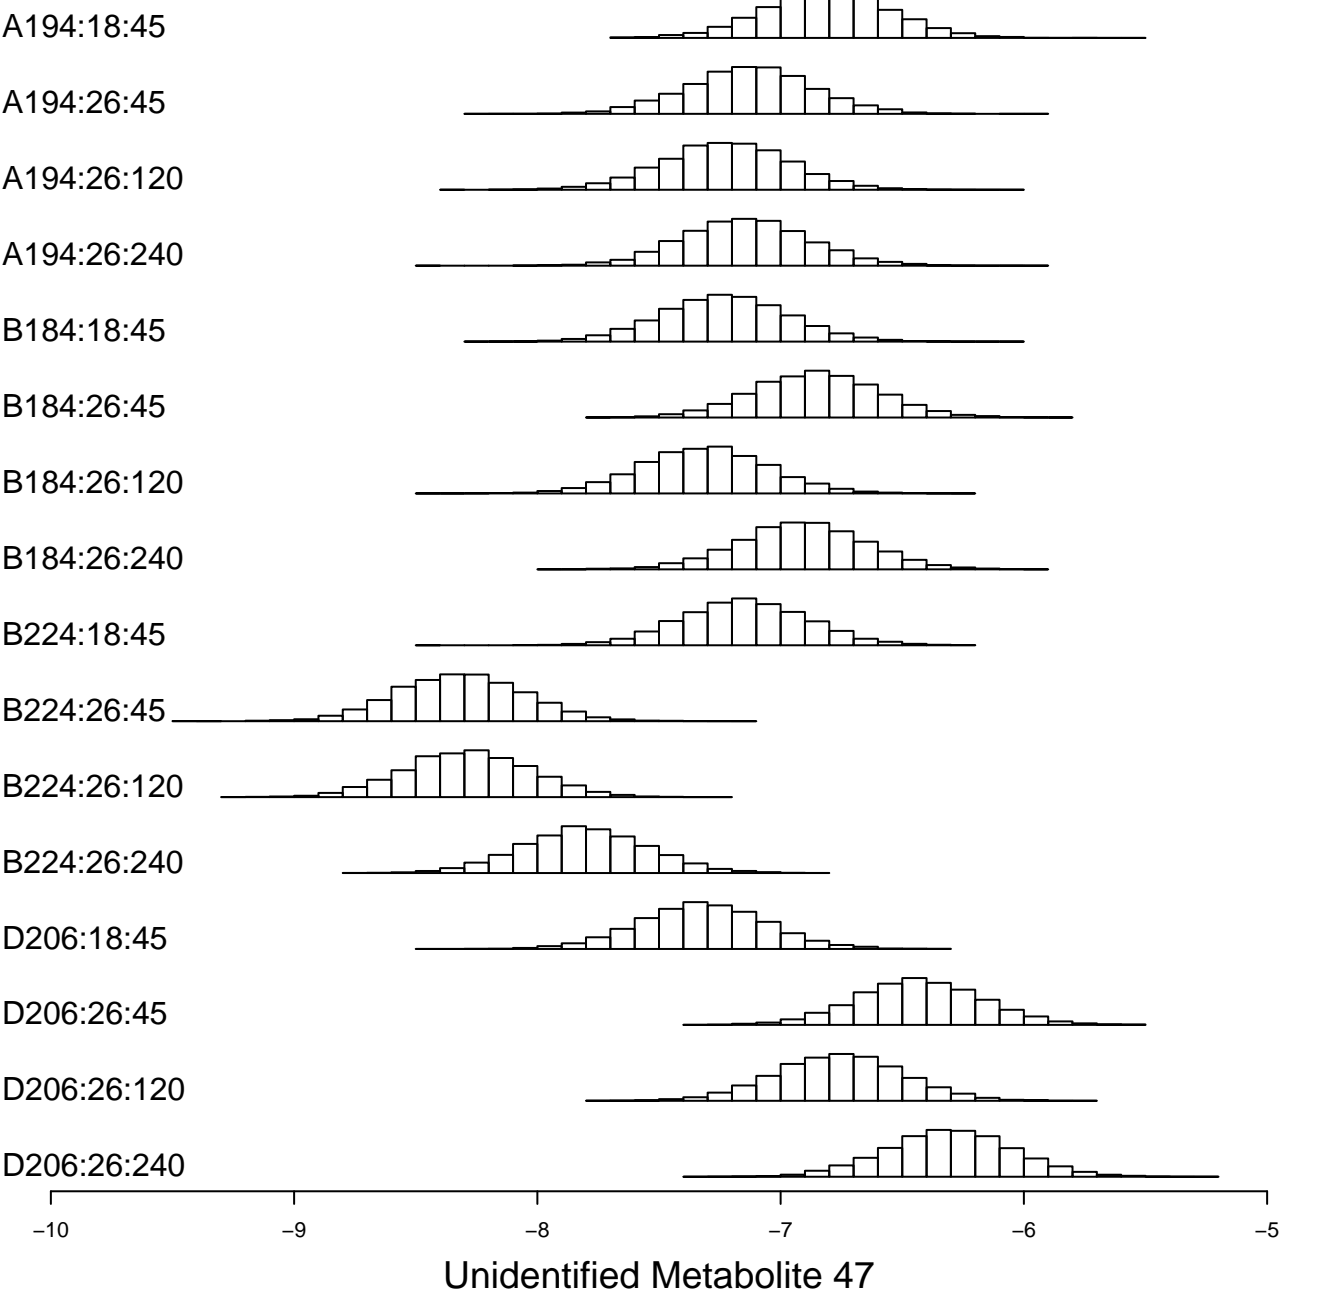



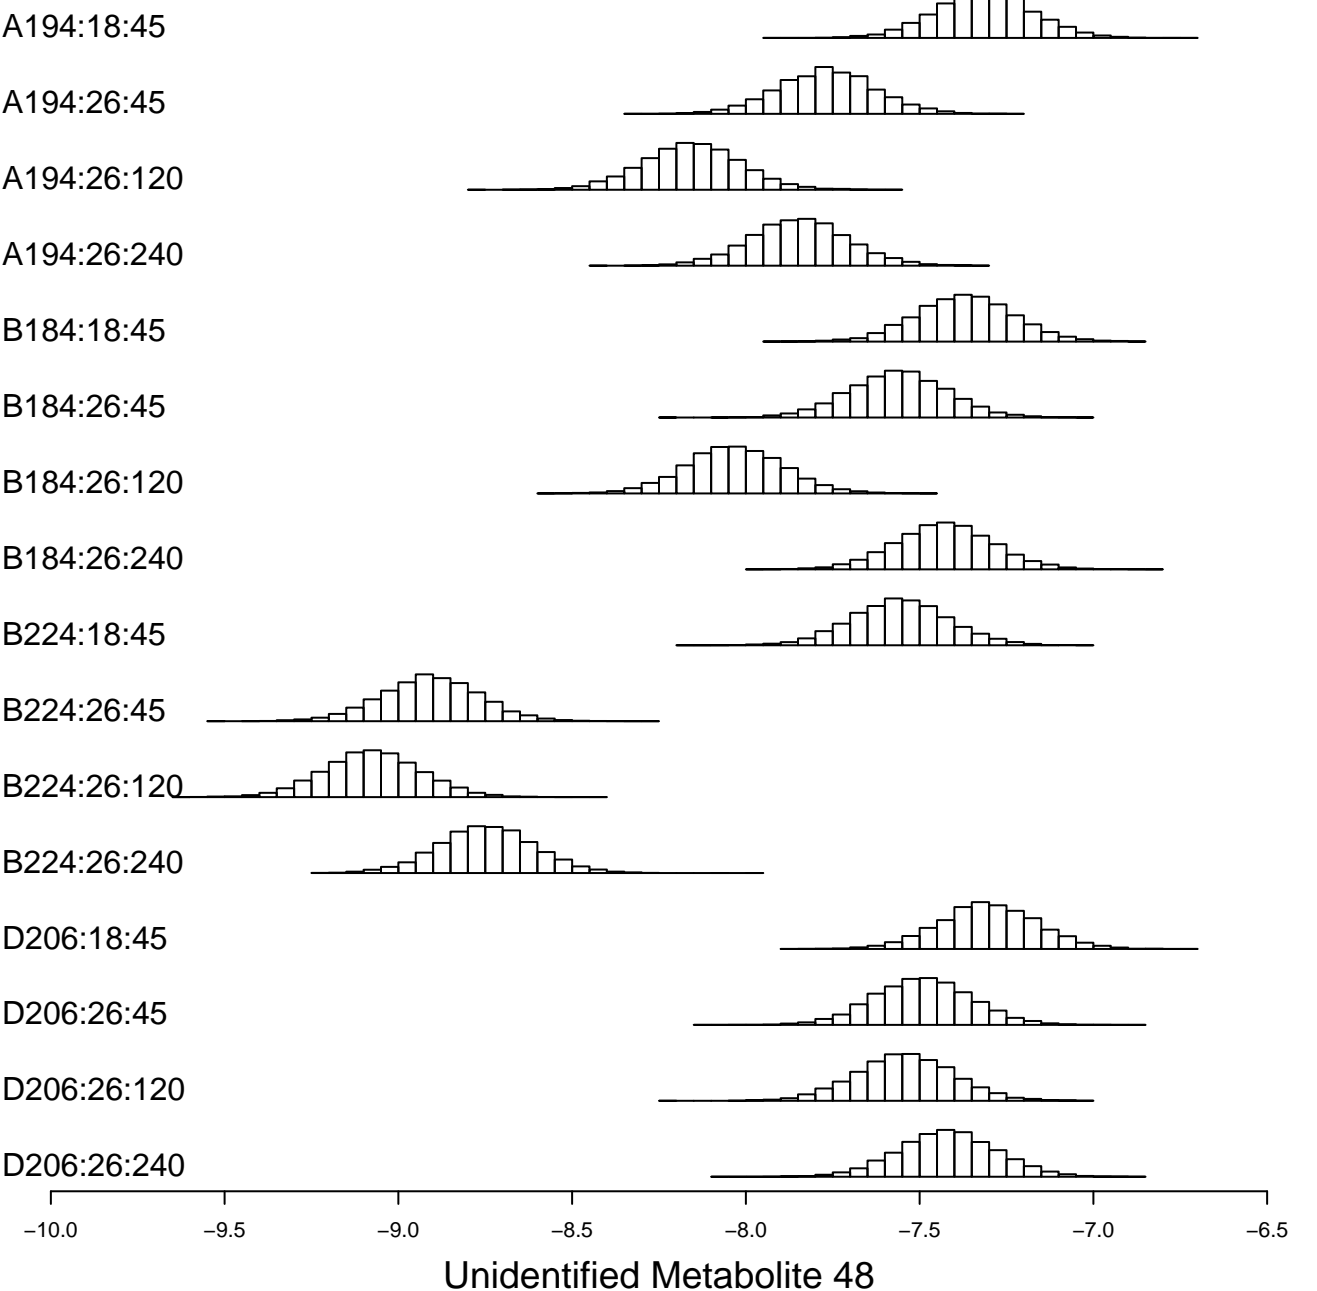

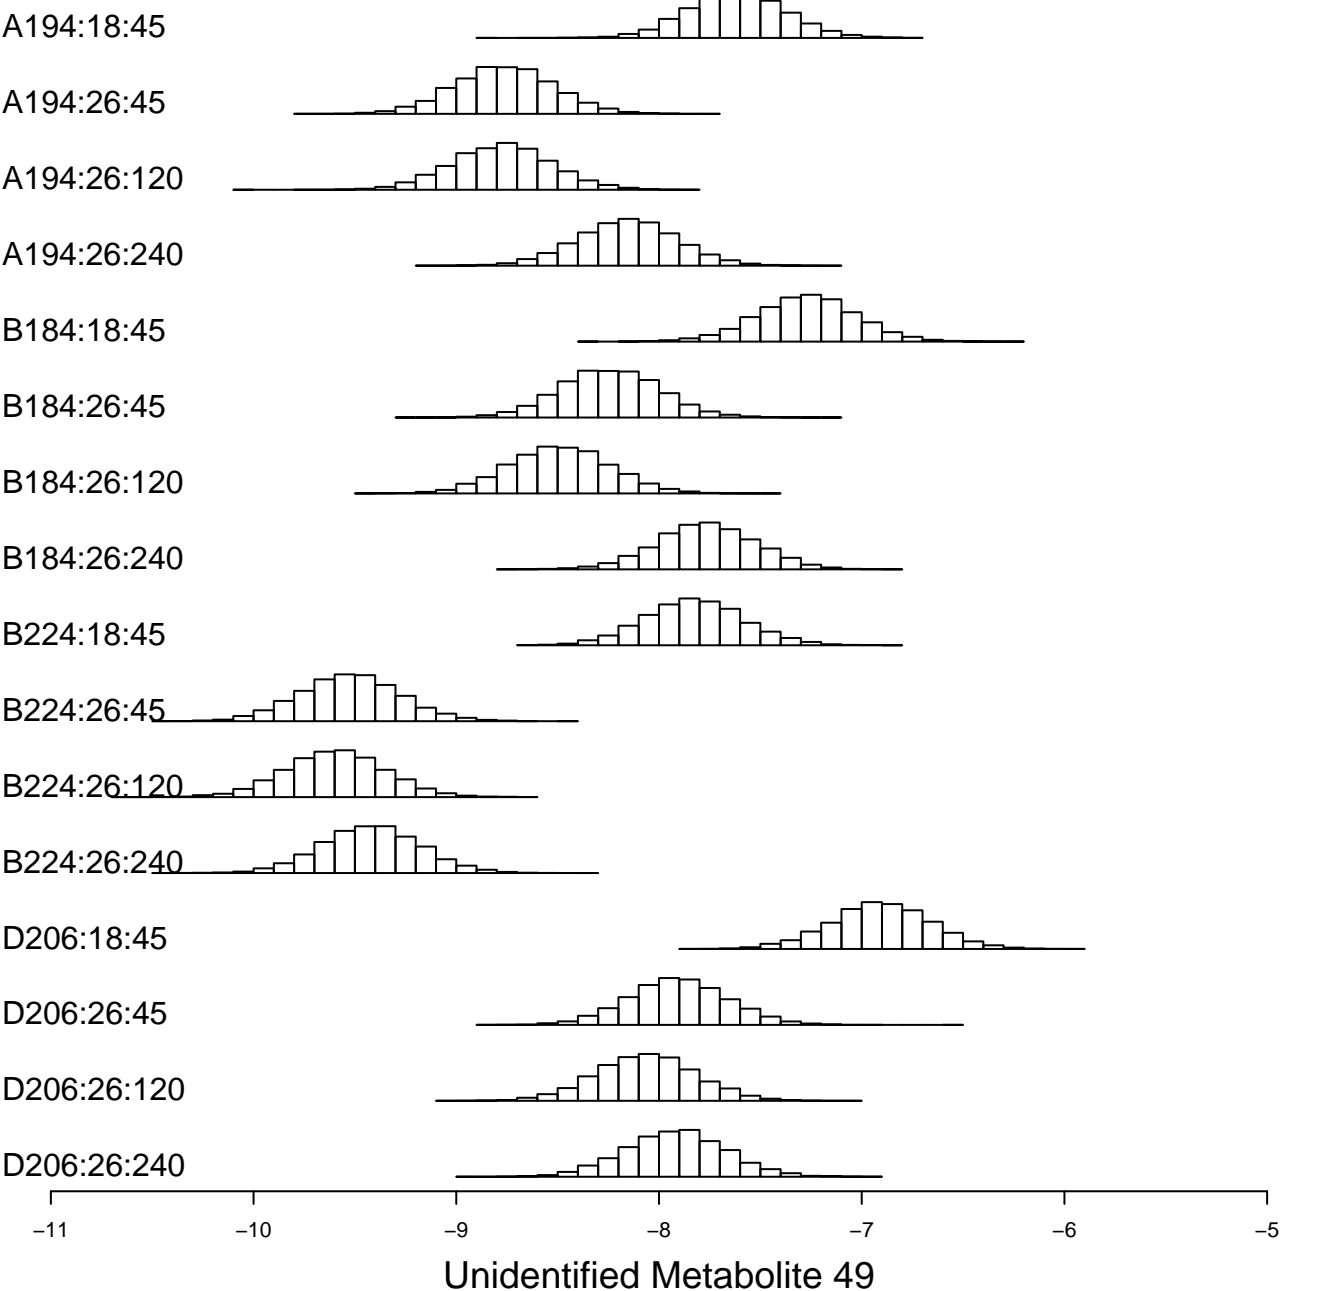

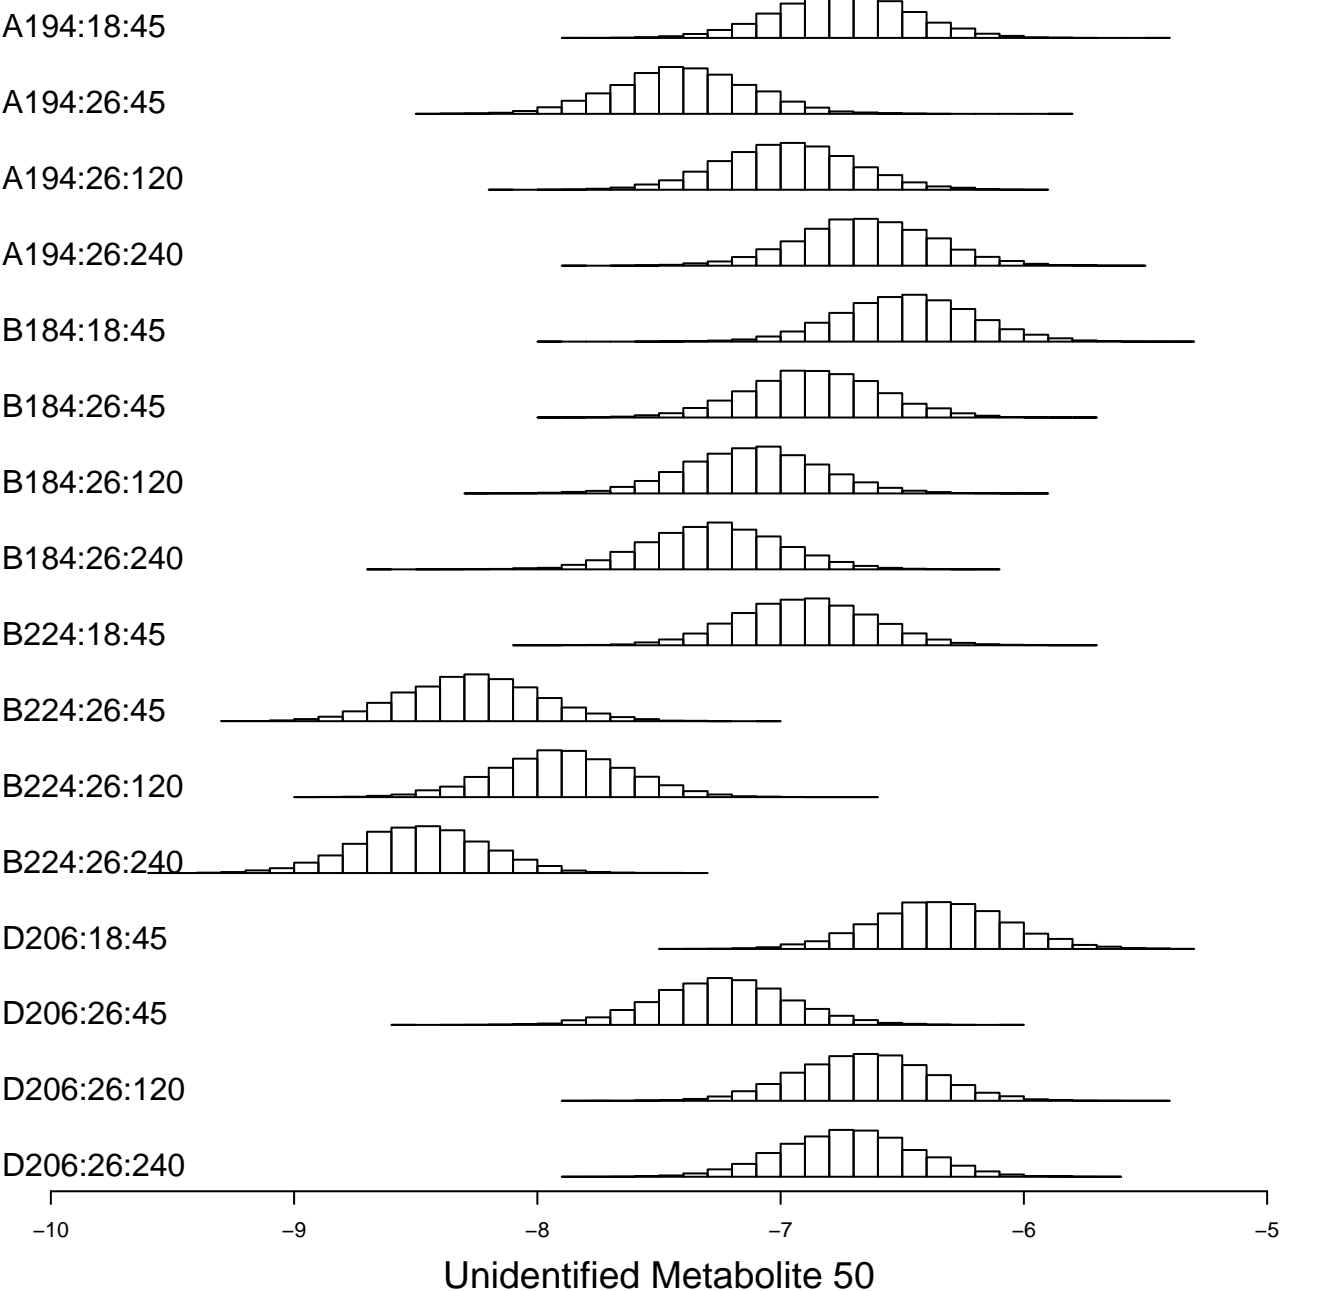

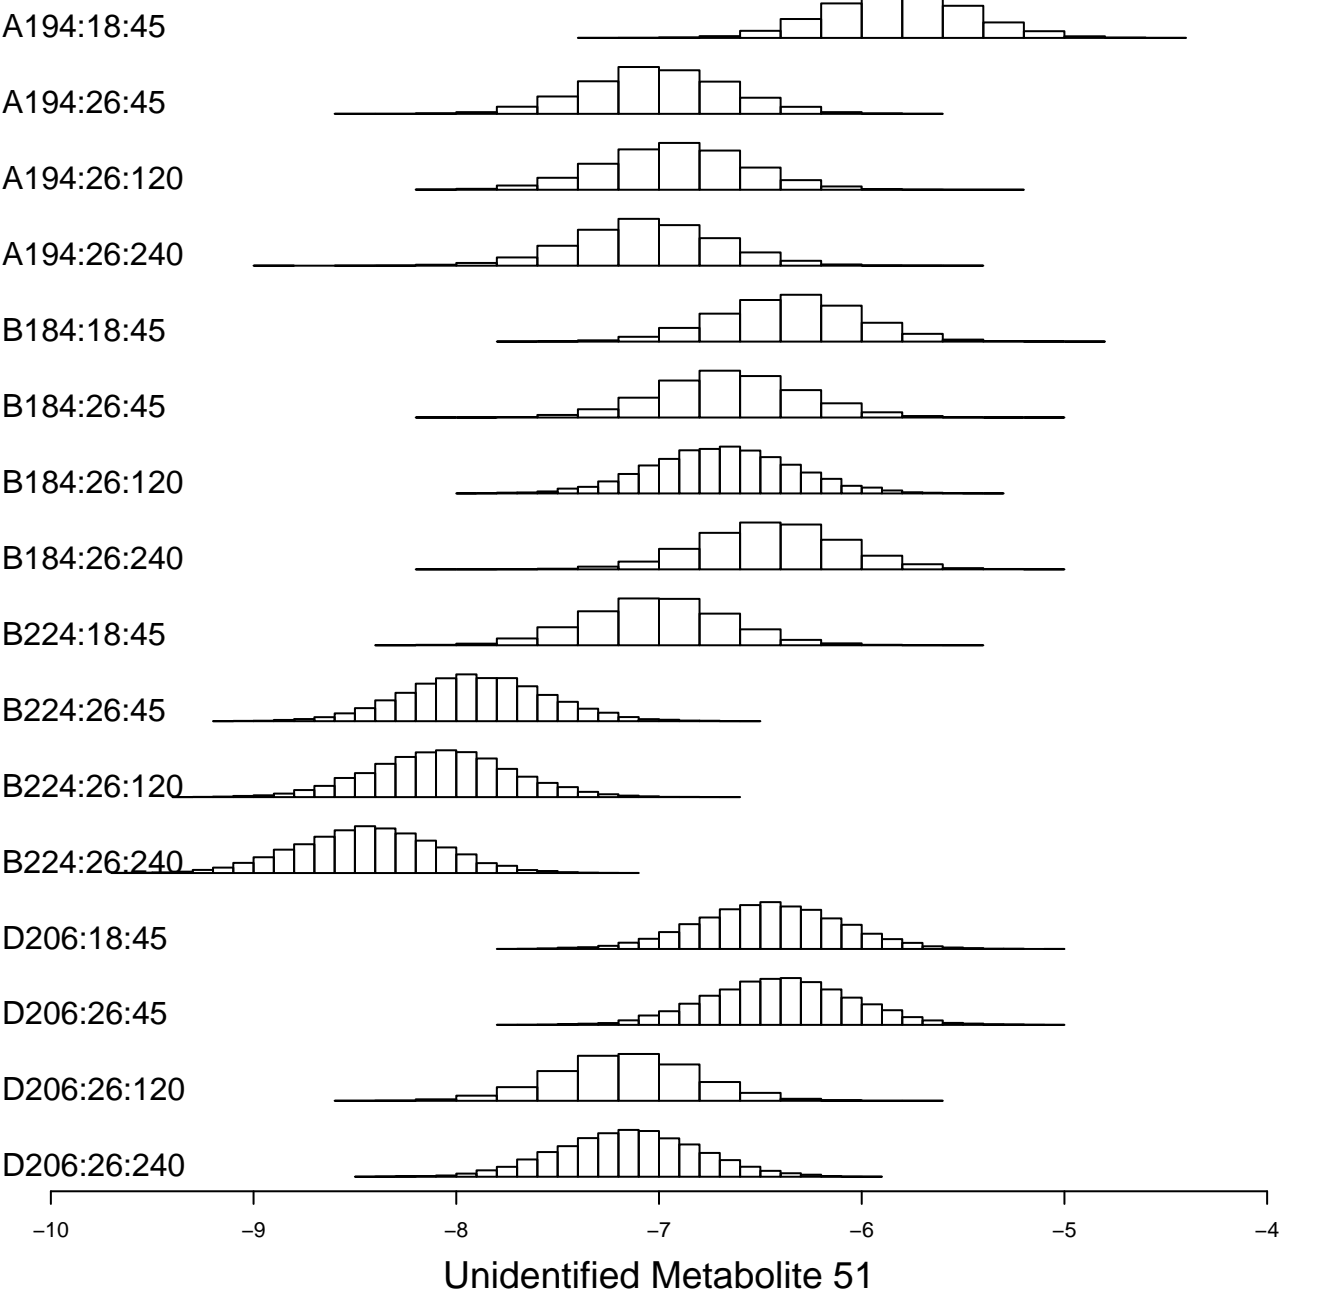

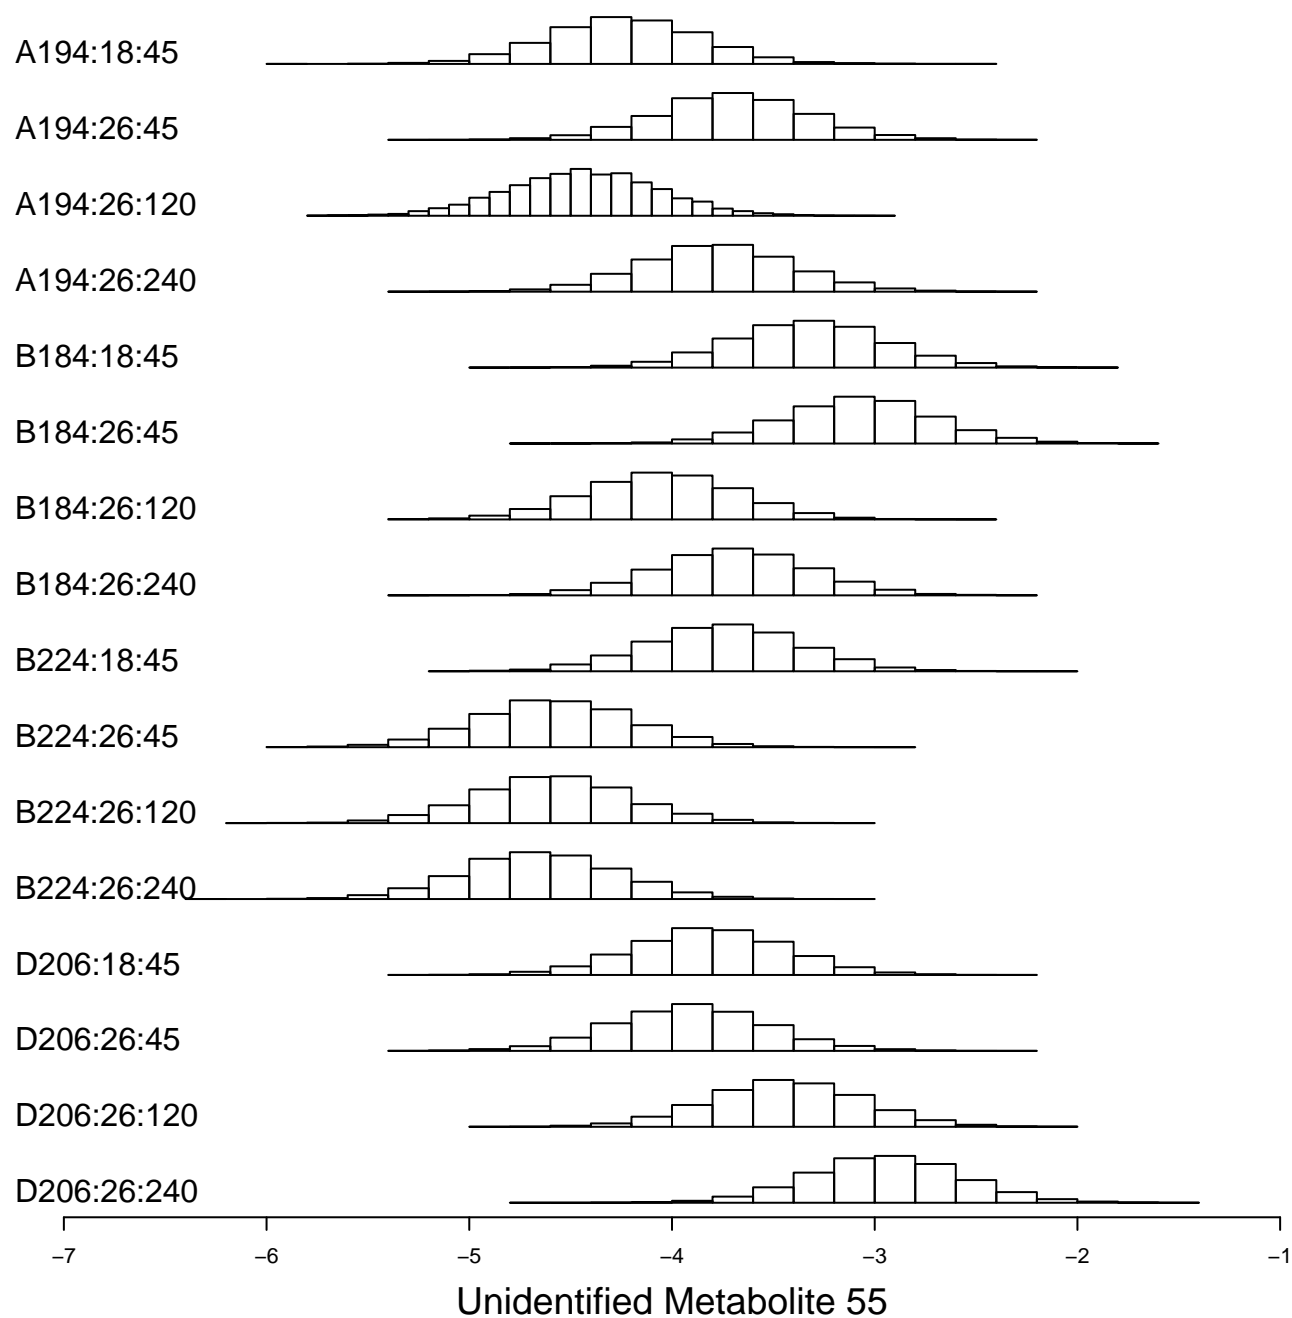

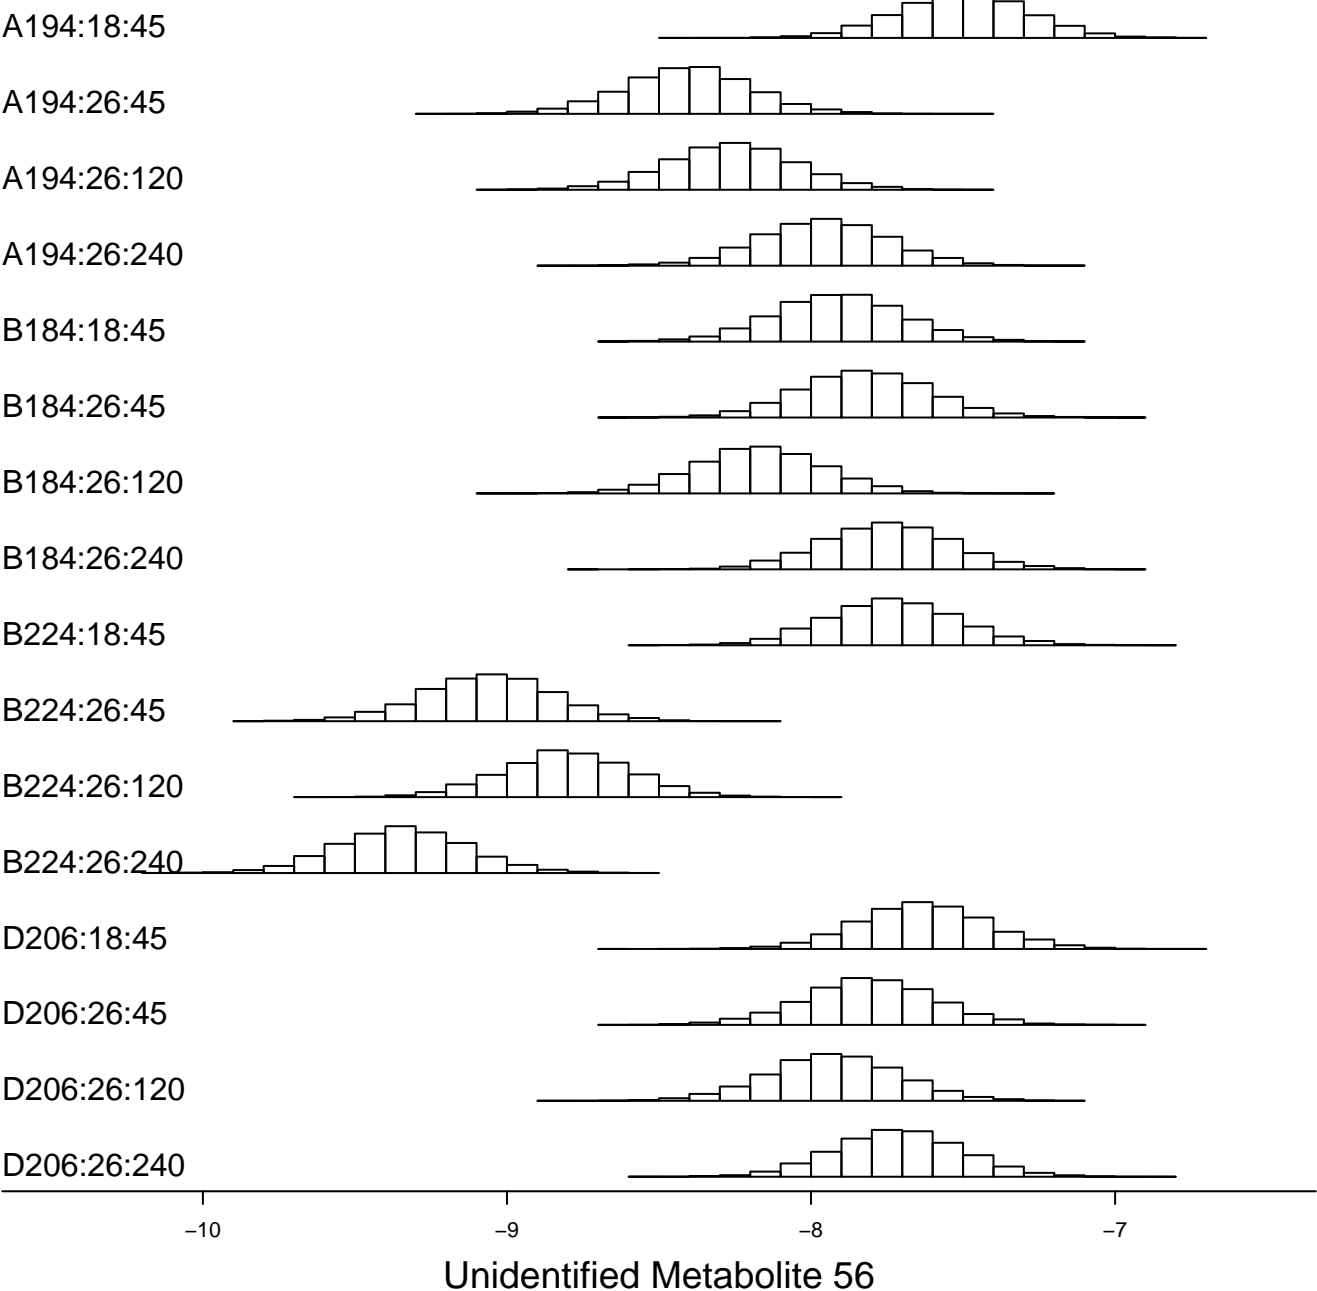

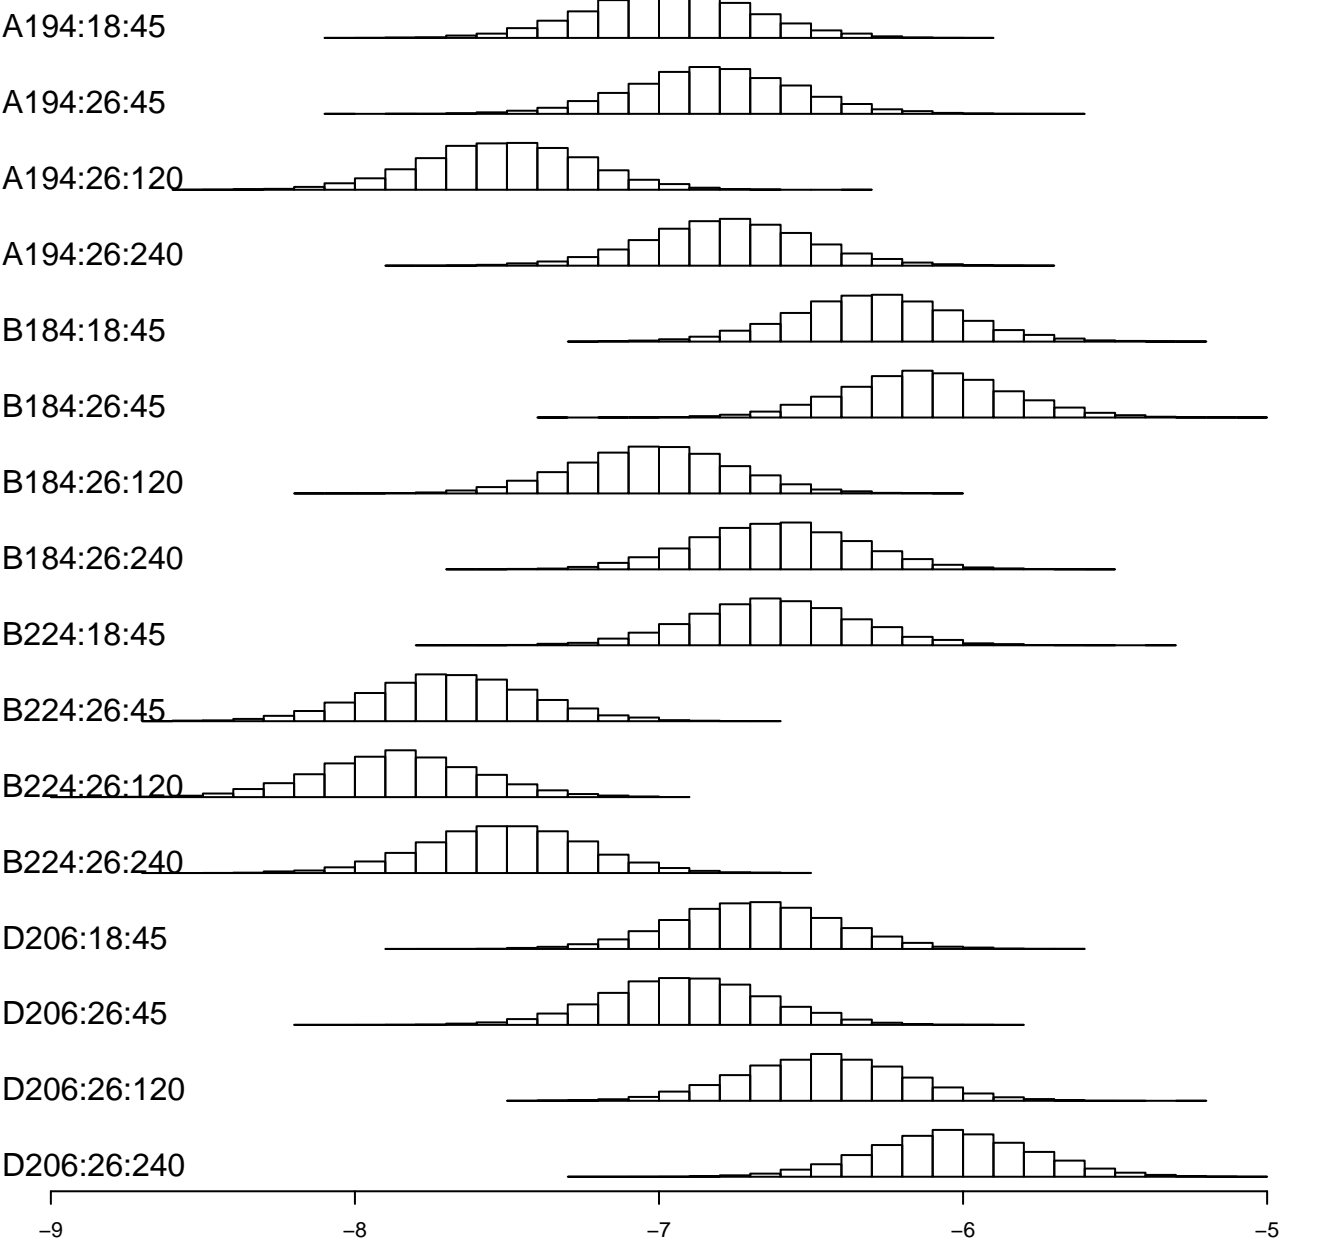

Unidentified Metabolite 58

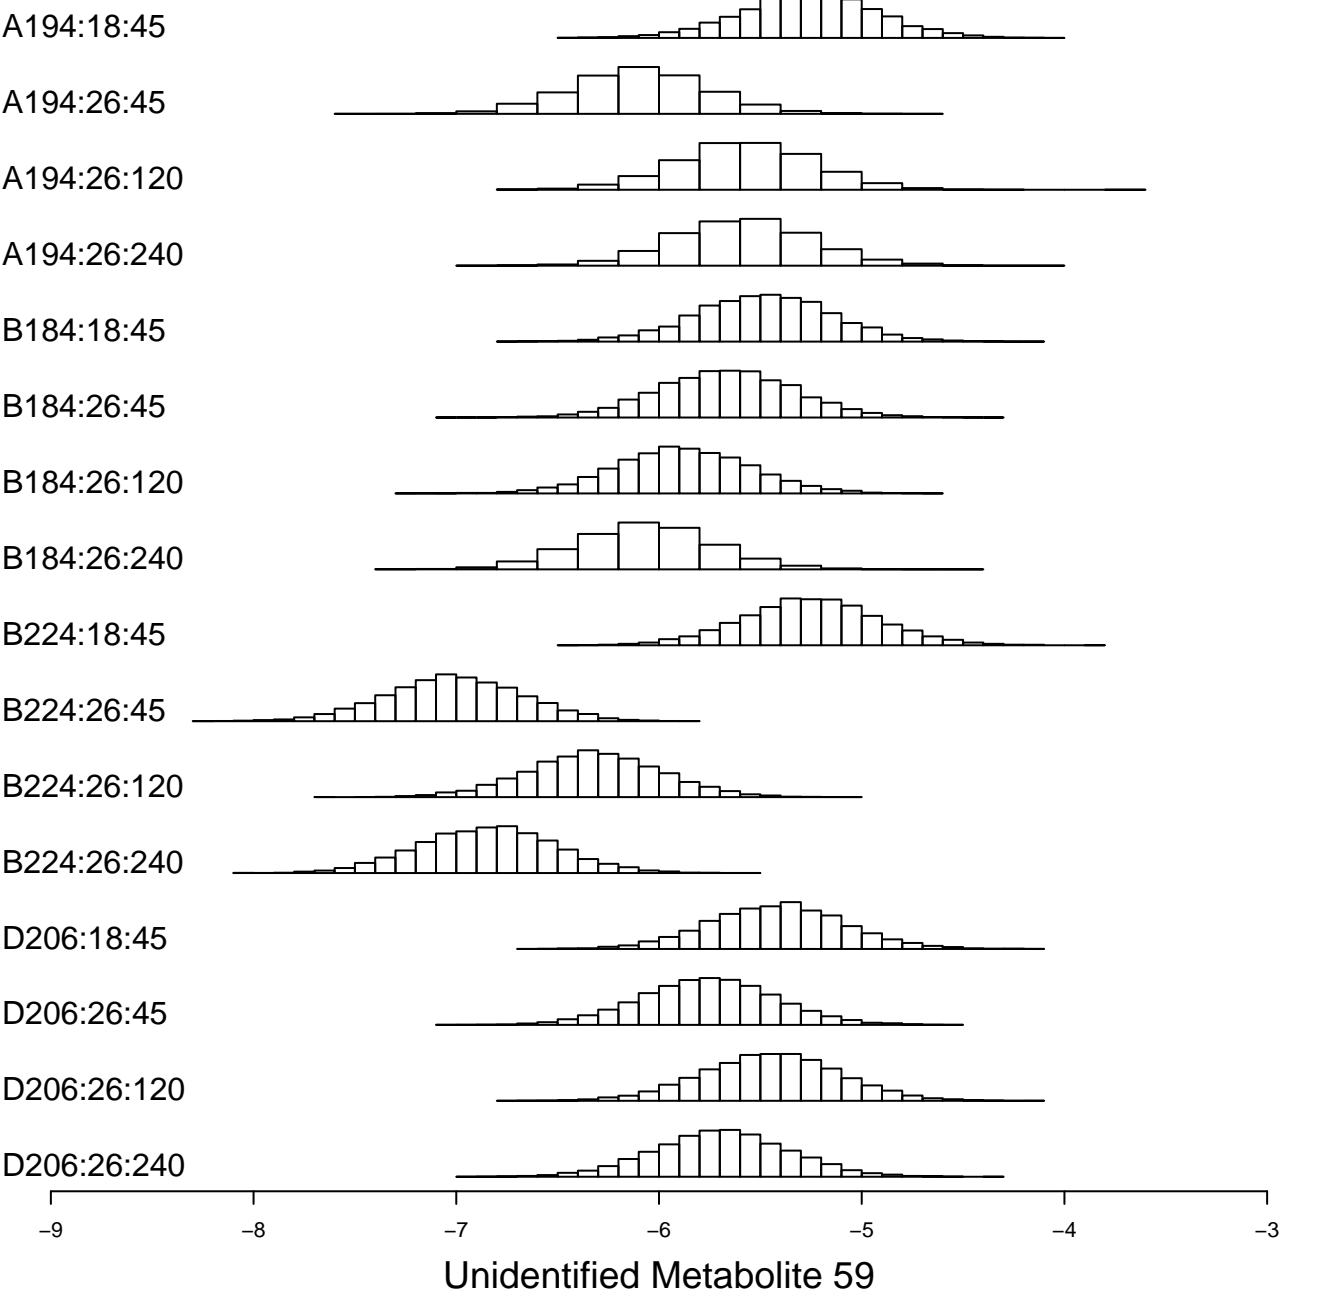



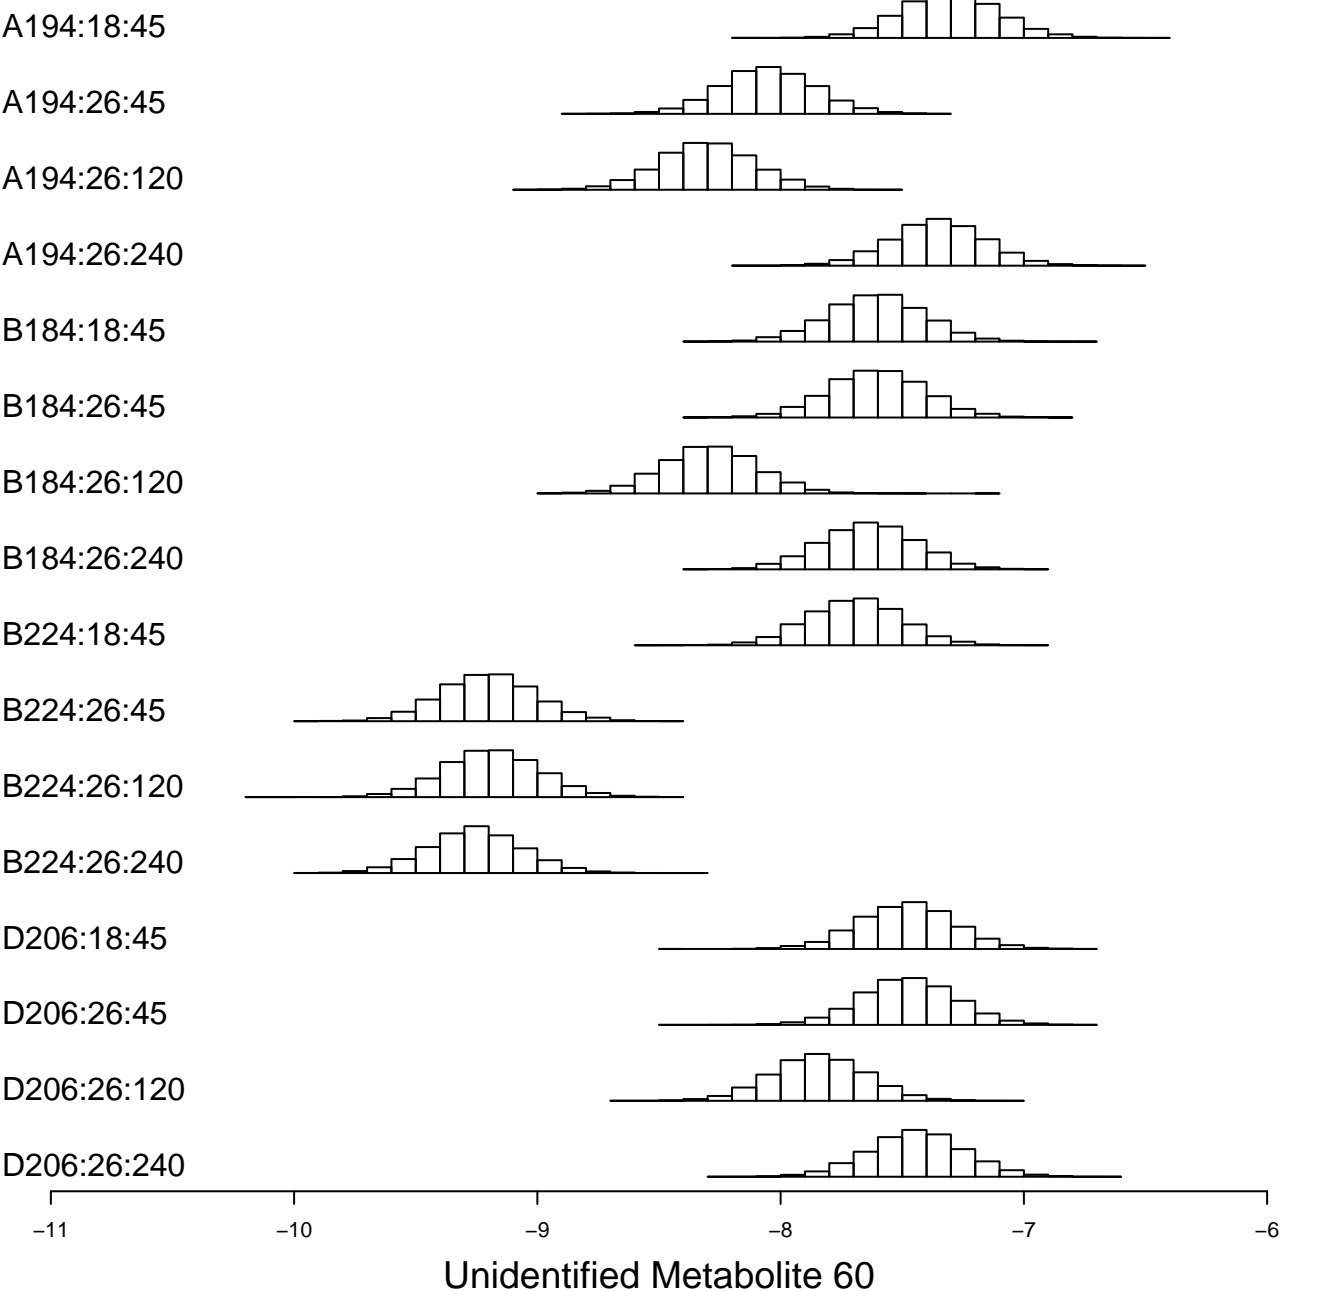

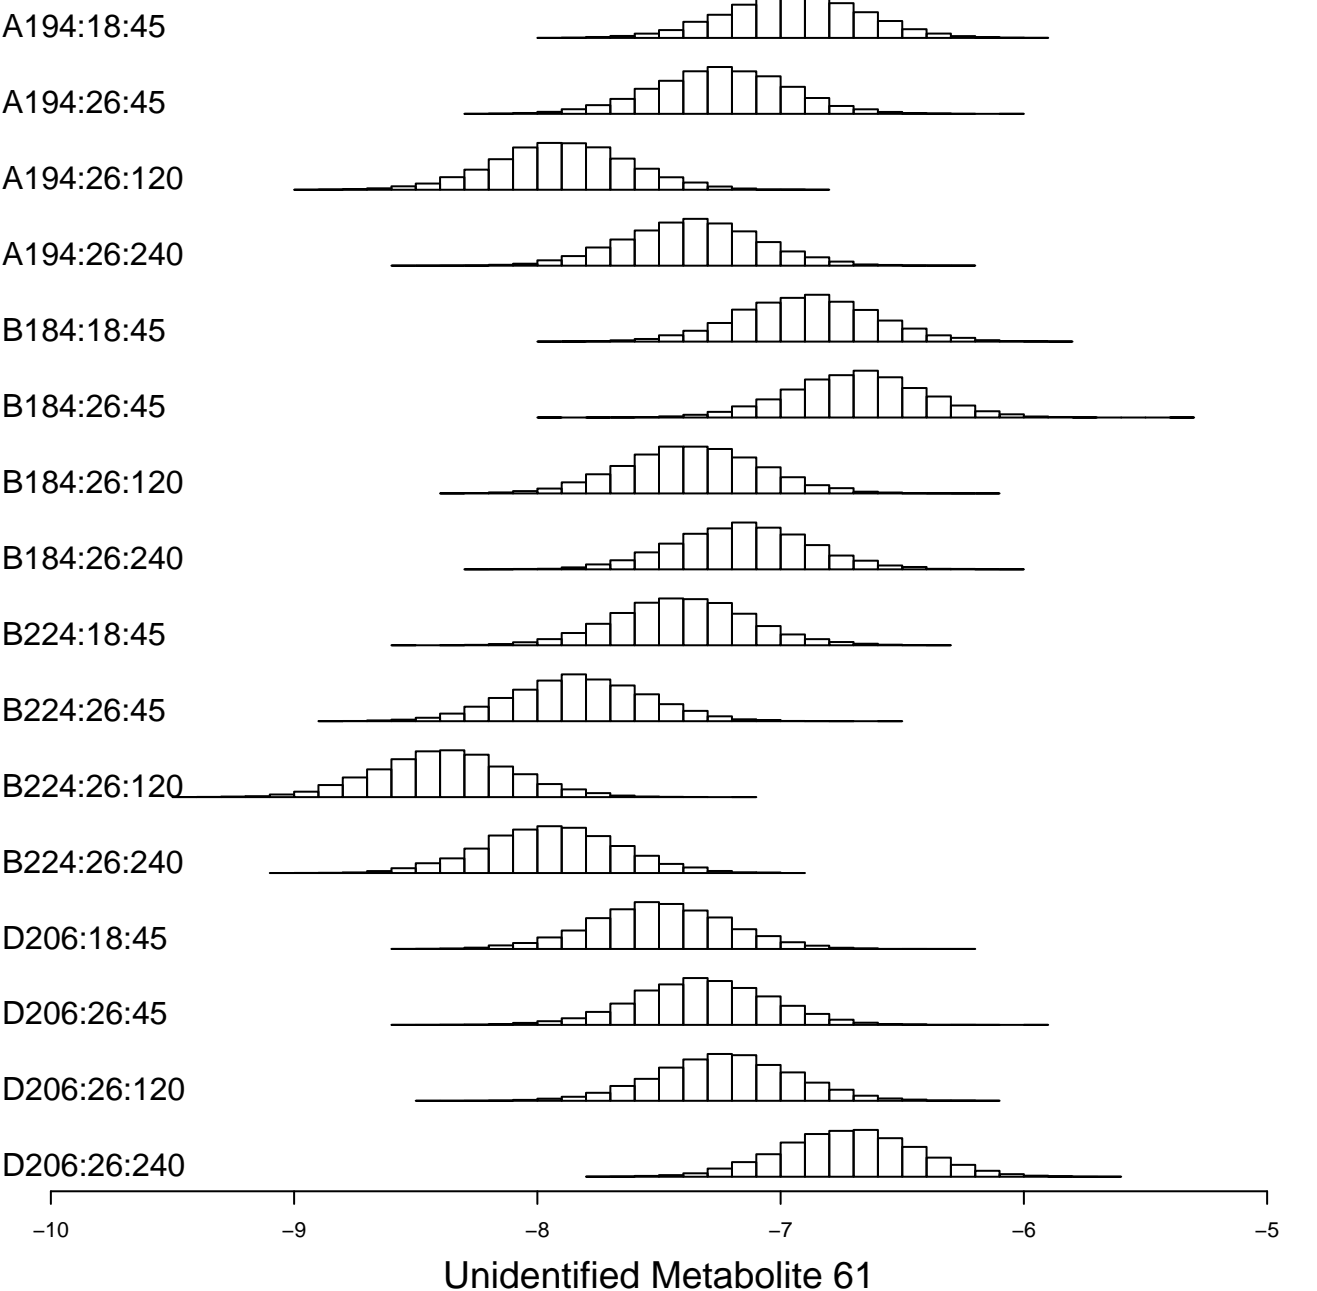

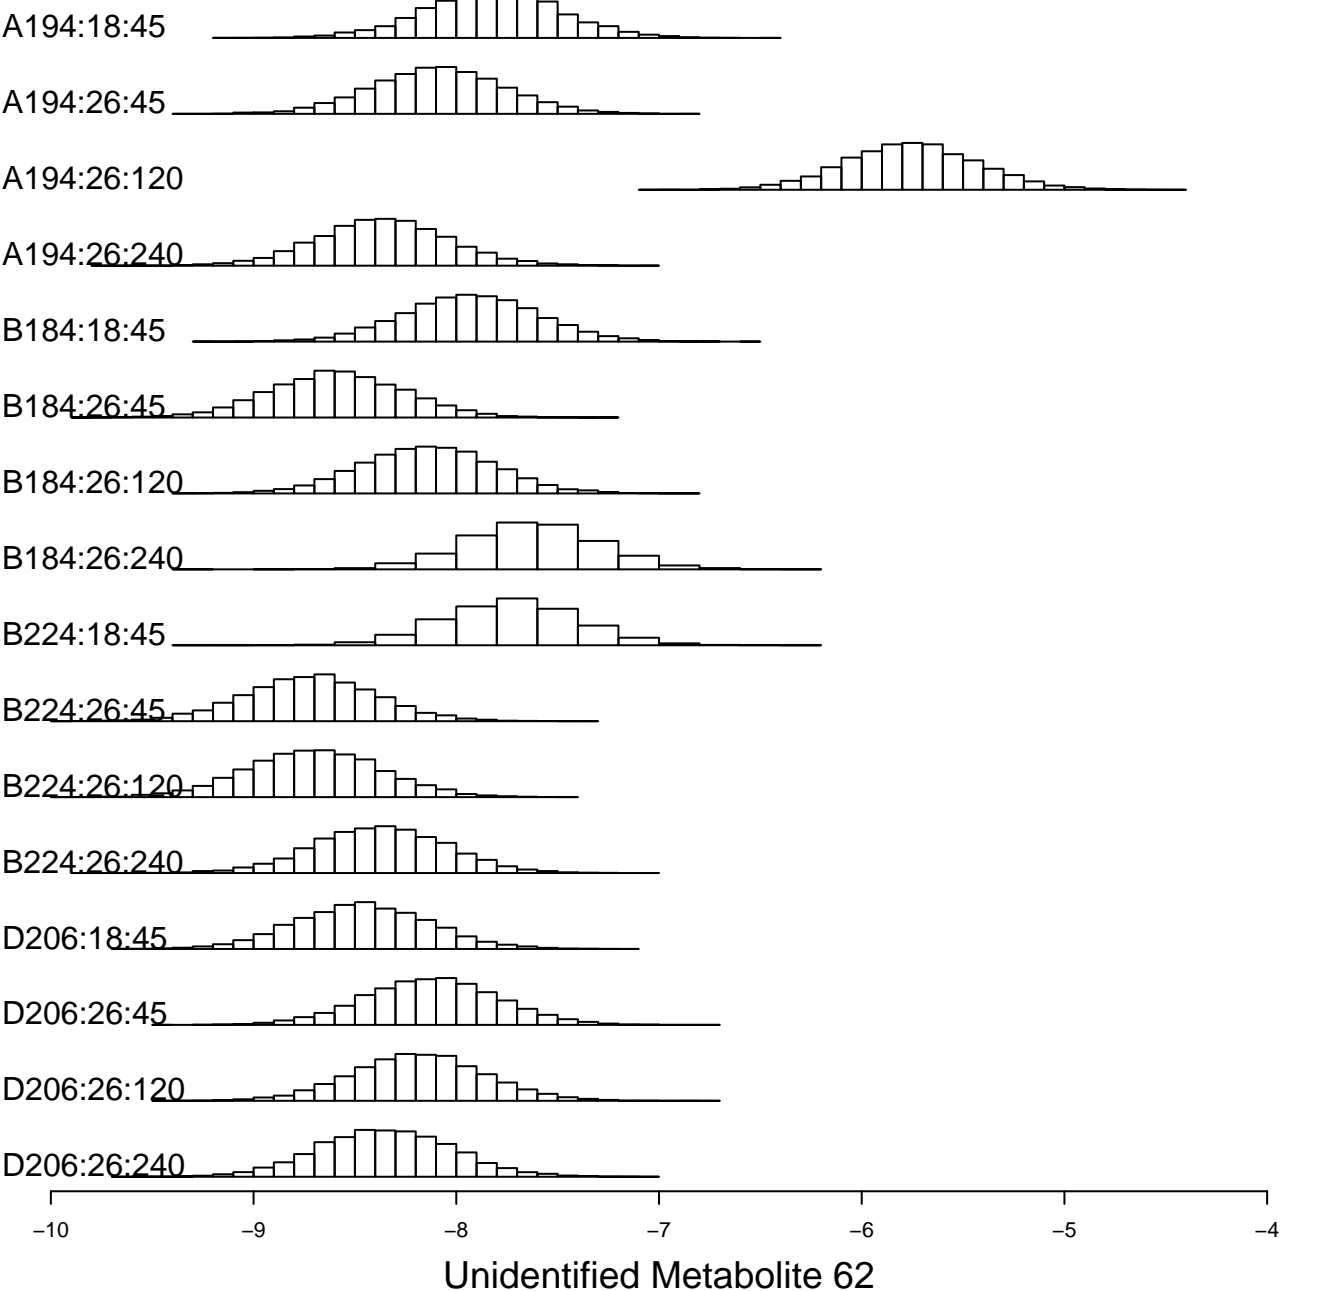

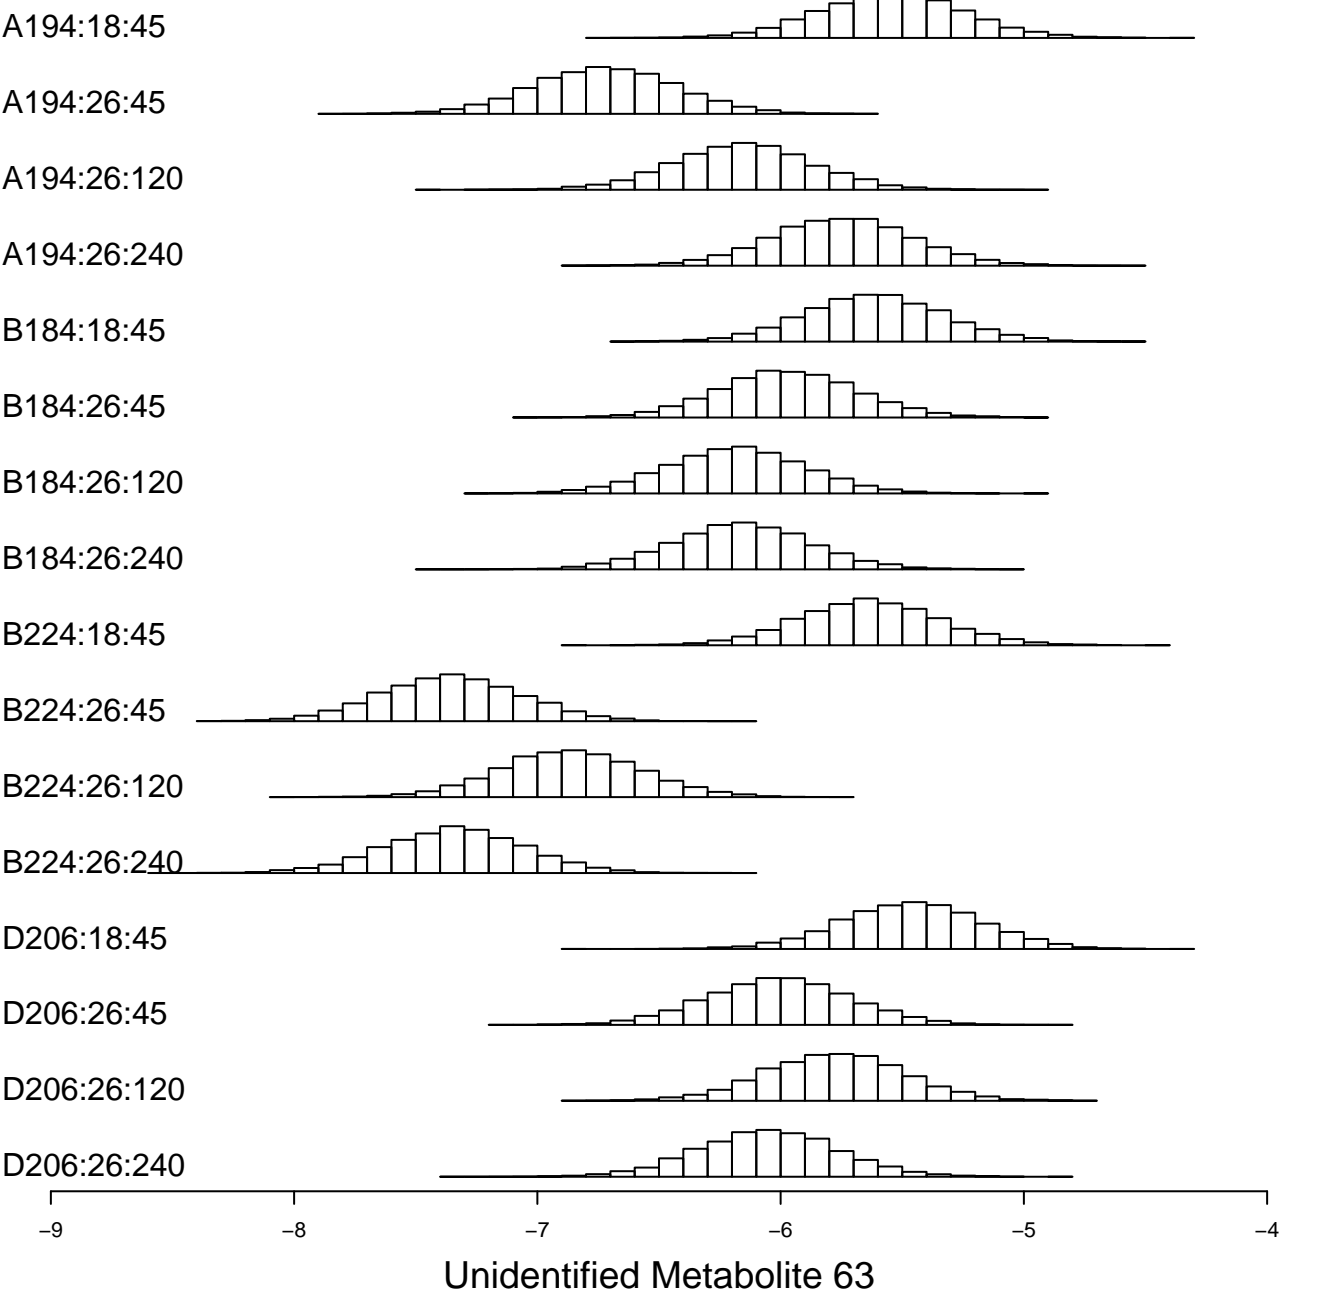

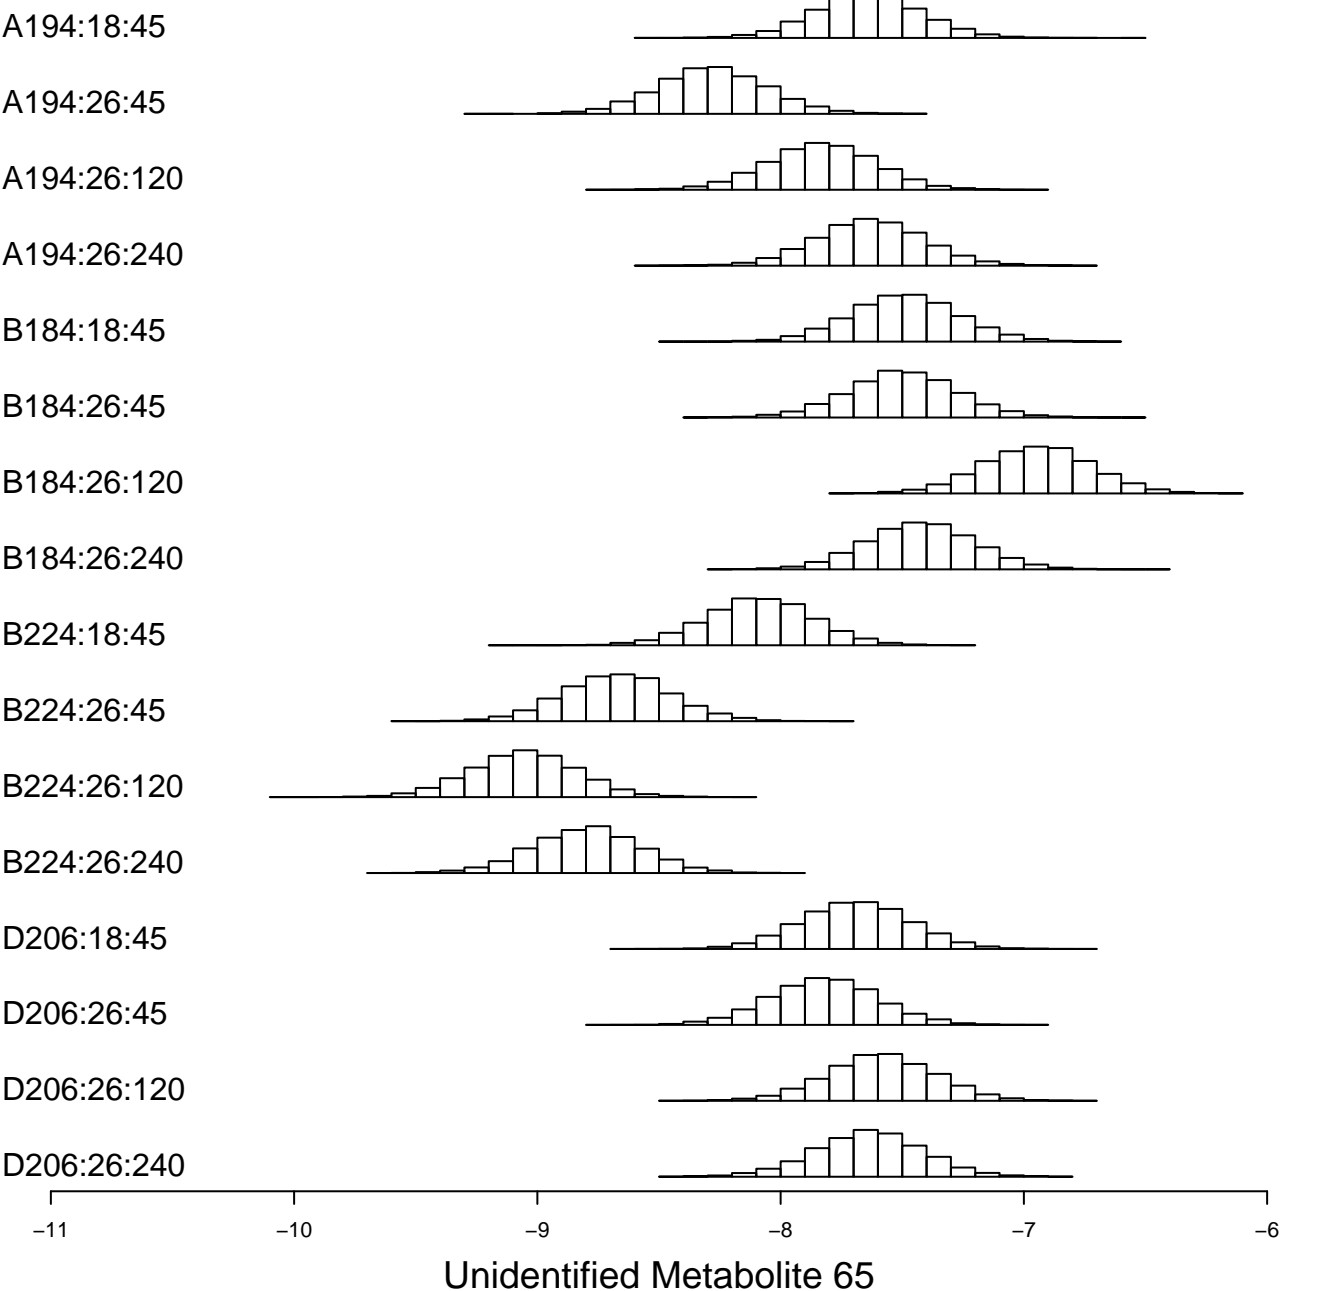

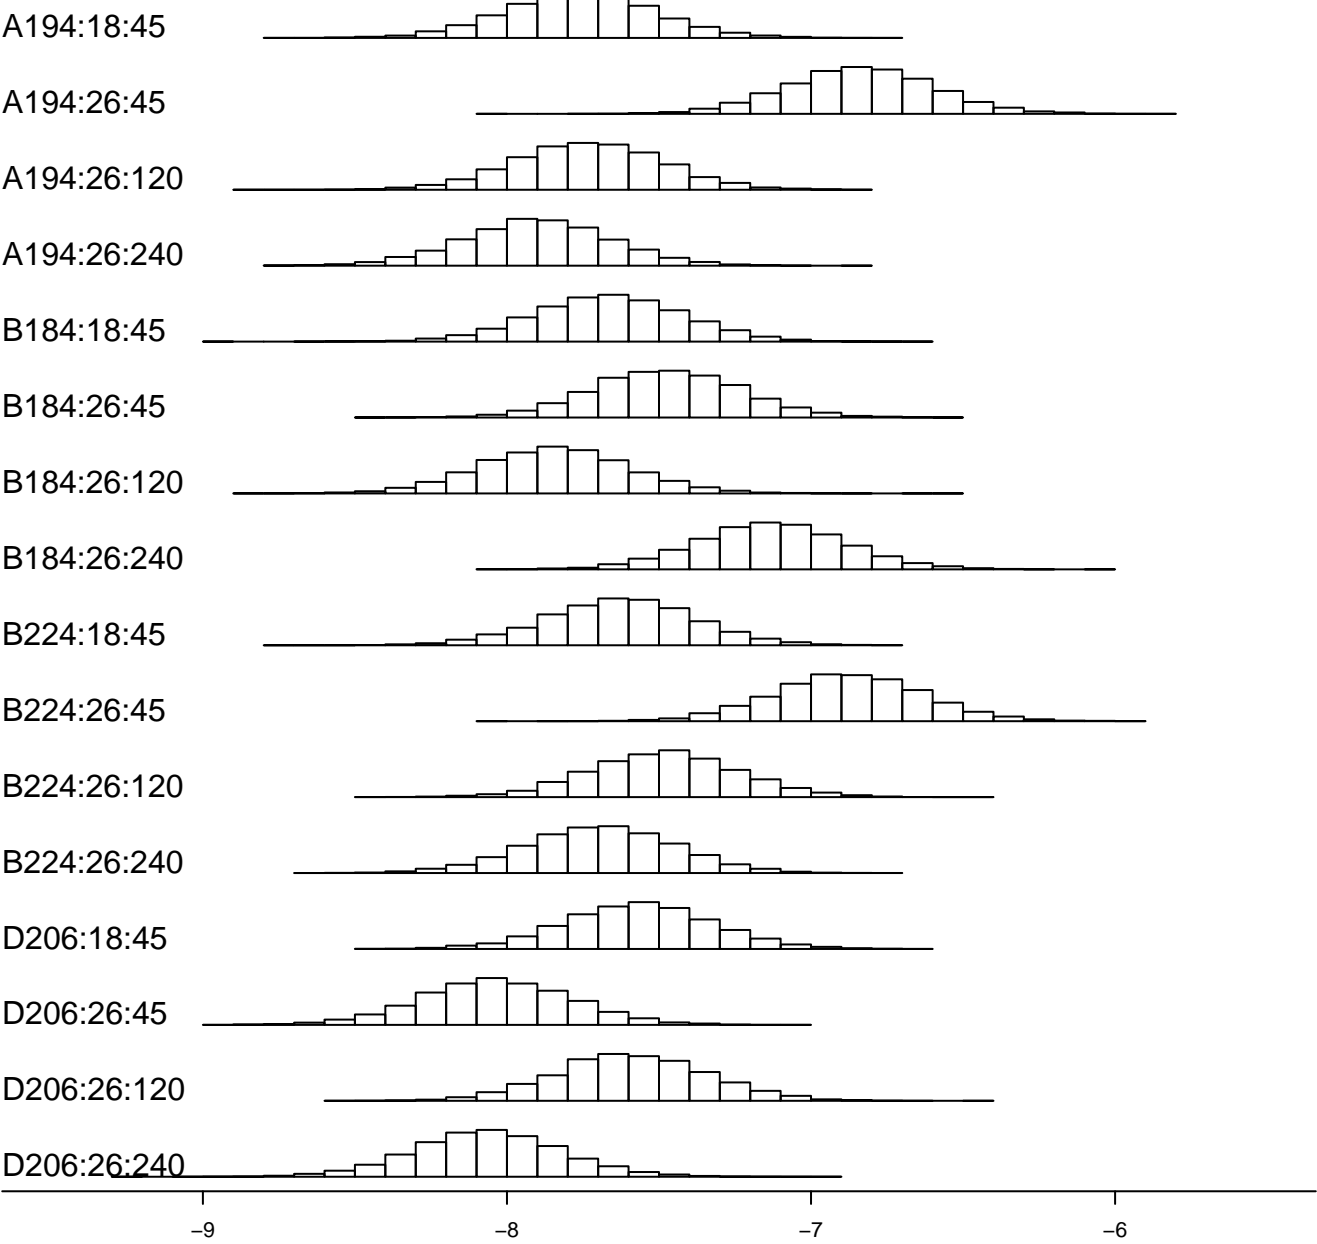

Unidentified Metabolite 68

A194:18:45

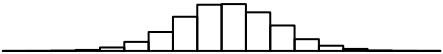

A194:26:45

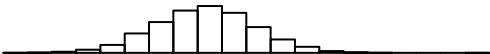

A194:26:120

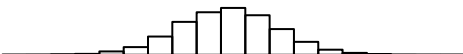

A194:26:240

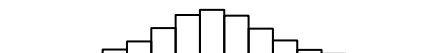

B184:18:45

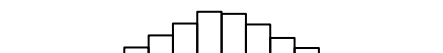

B184:26:45

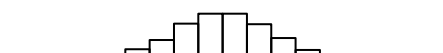

B184:26:120

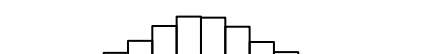

B184:26:240

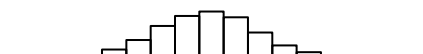

B224:18:45

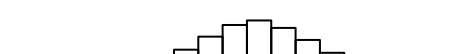

B224:26:45

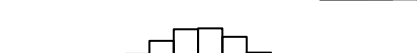

B224:26:120

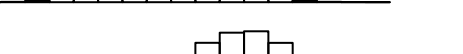

B224:26:240

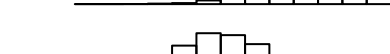

D206:18:45

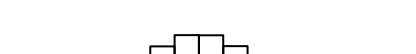

D206:26:45

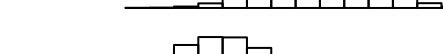

D206:26:120

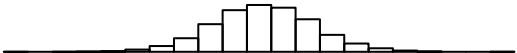

D206:26:240

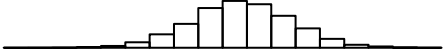

-9 -8 -7 -6 -5 -4

Unidentified Metabolite 69

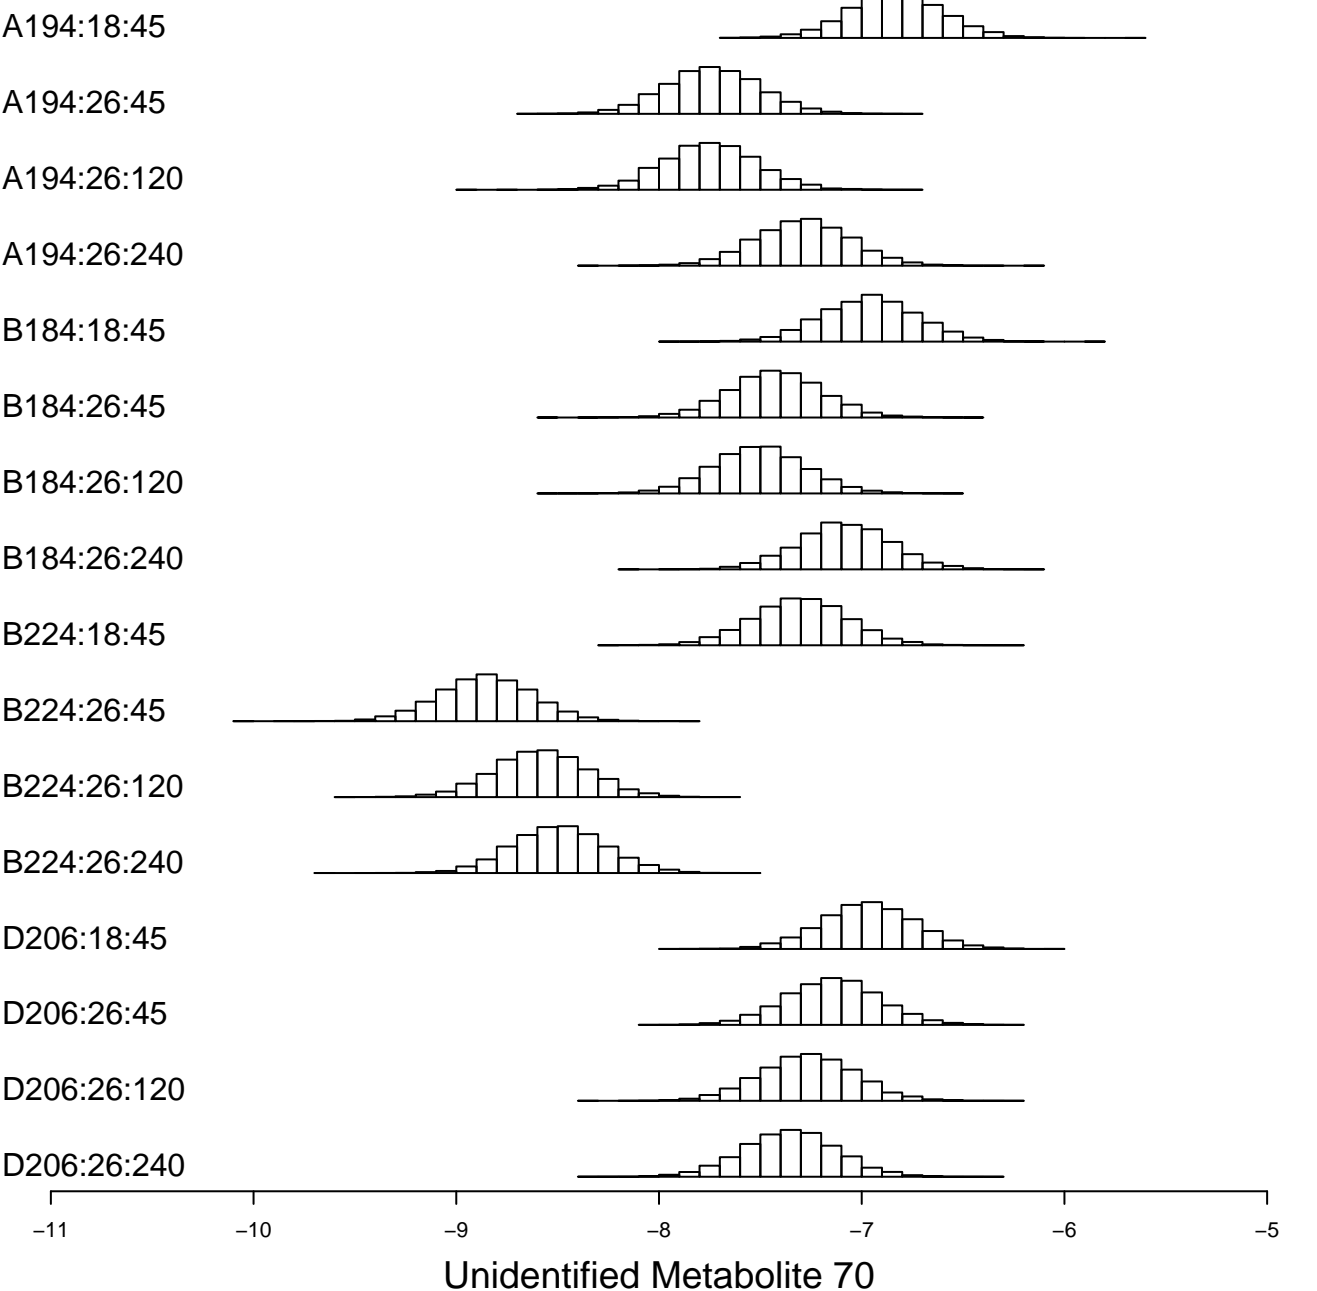



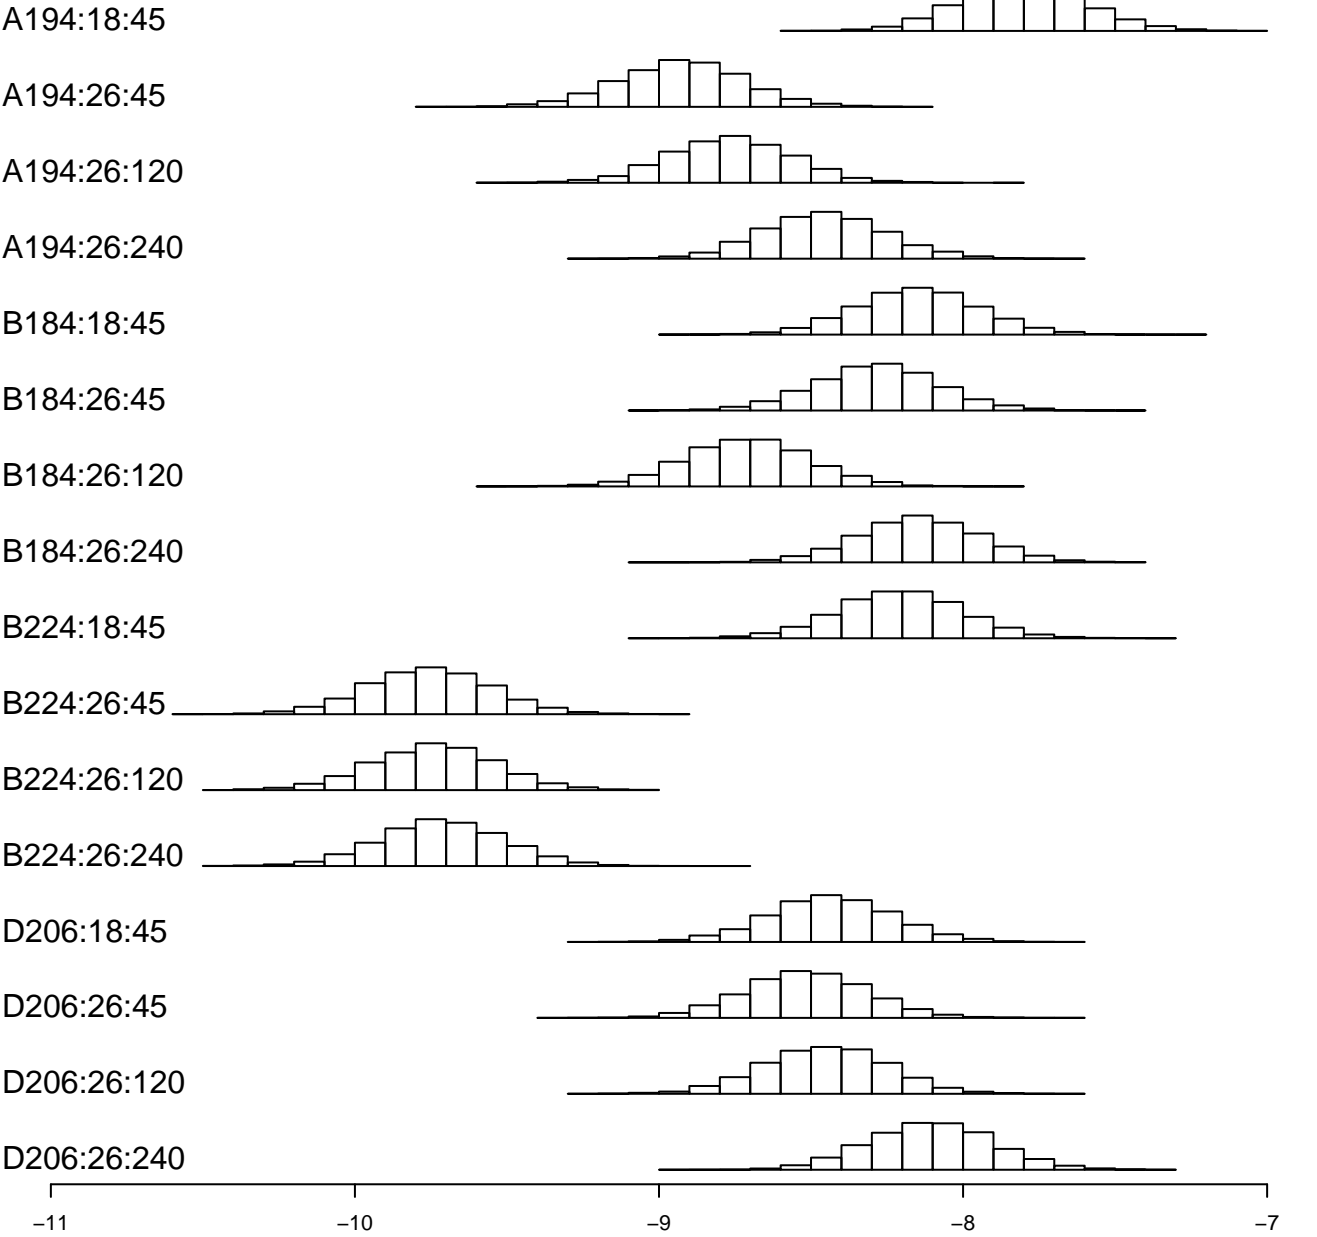

Unidentified Metabolite 71

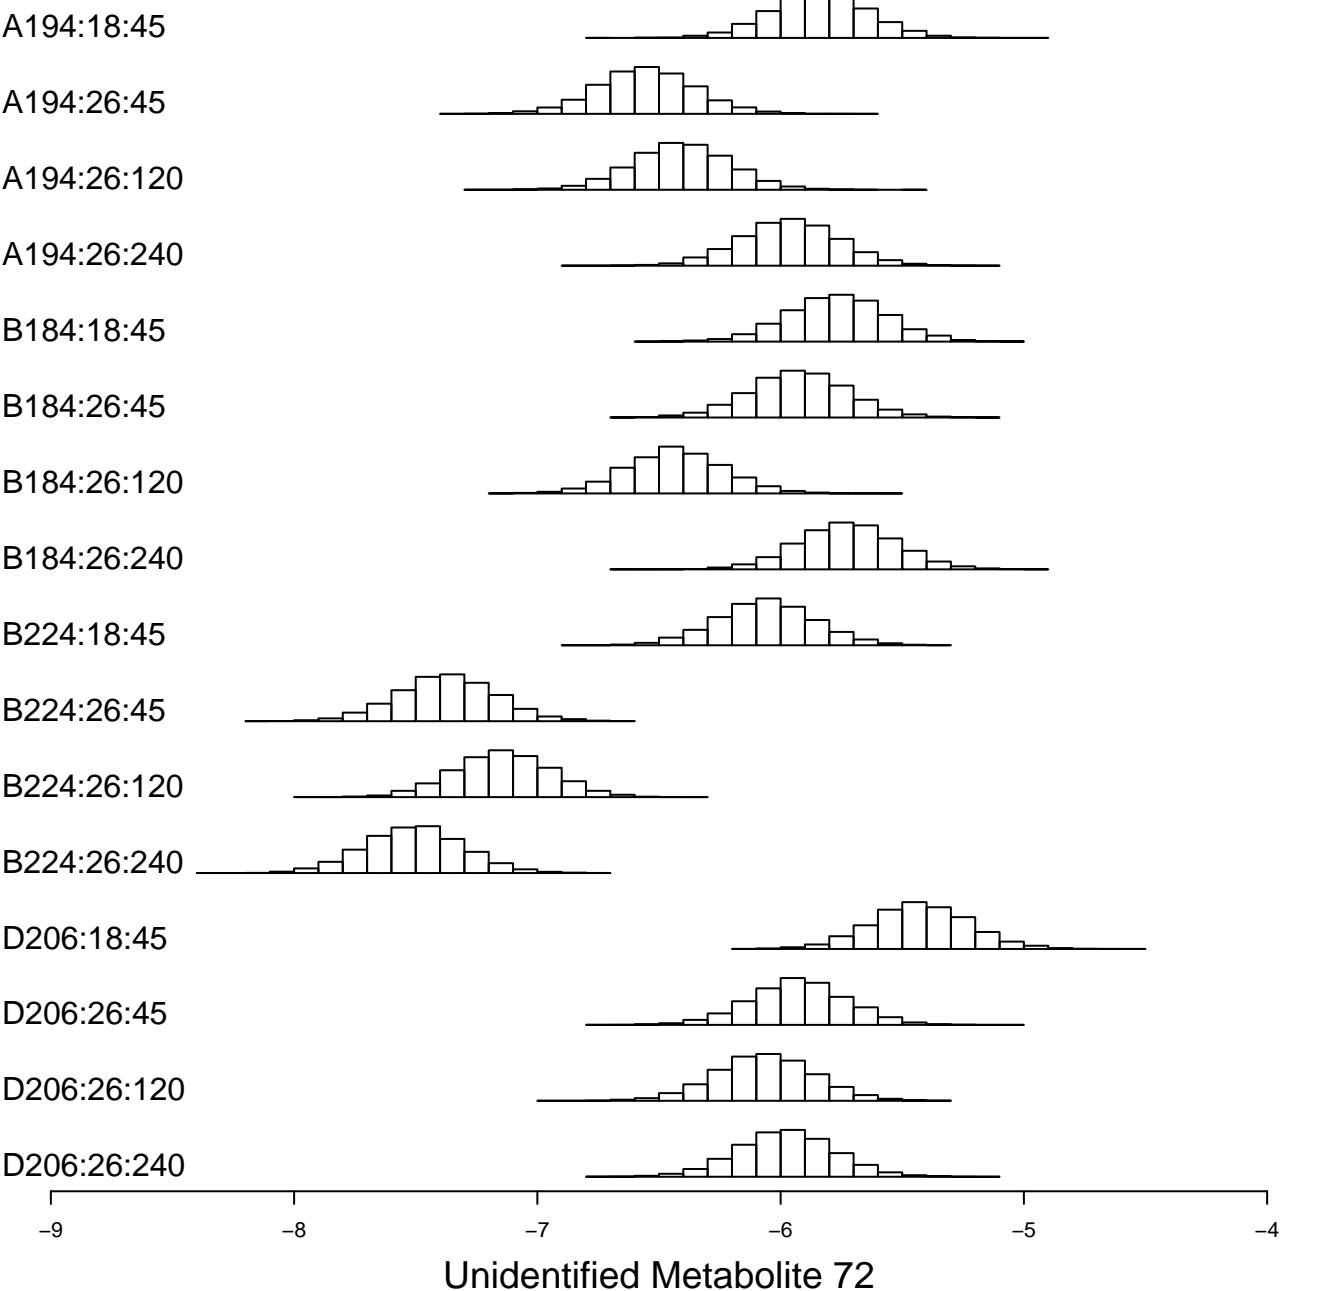

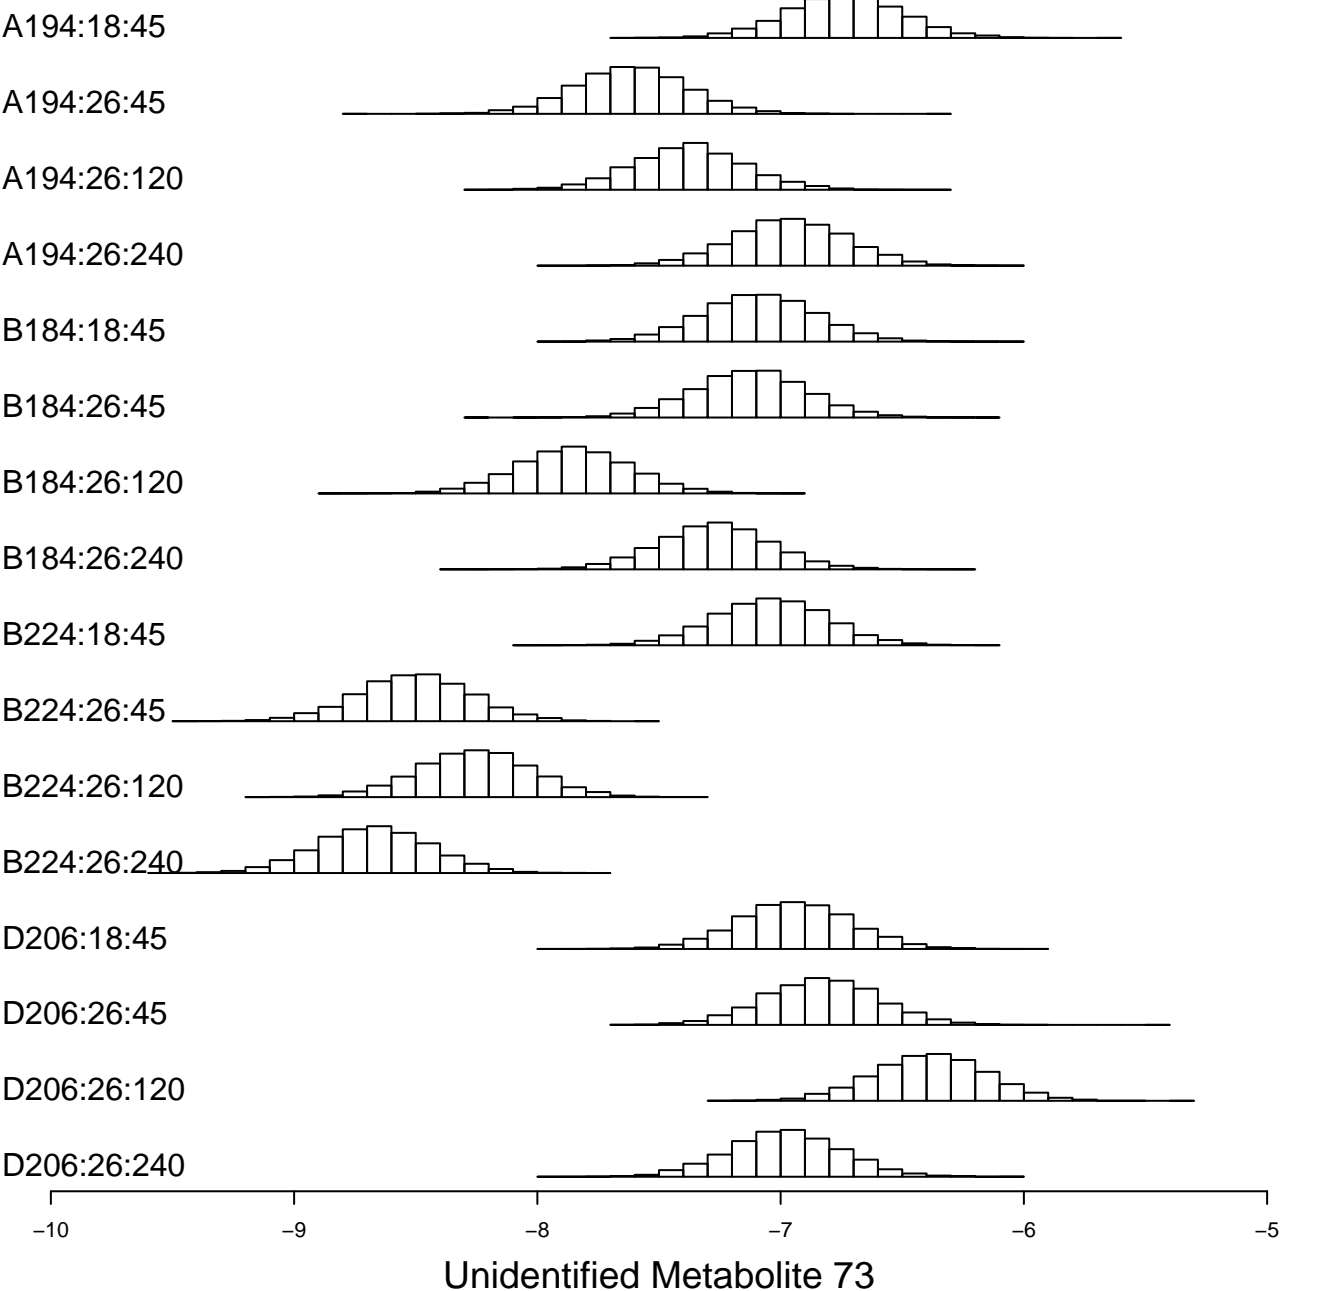

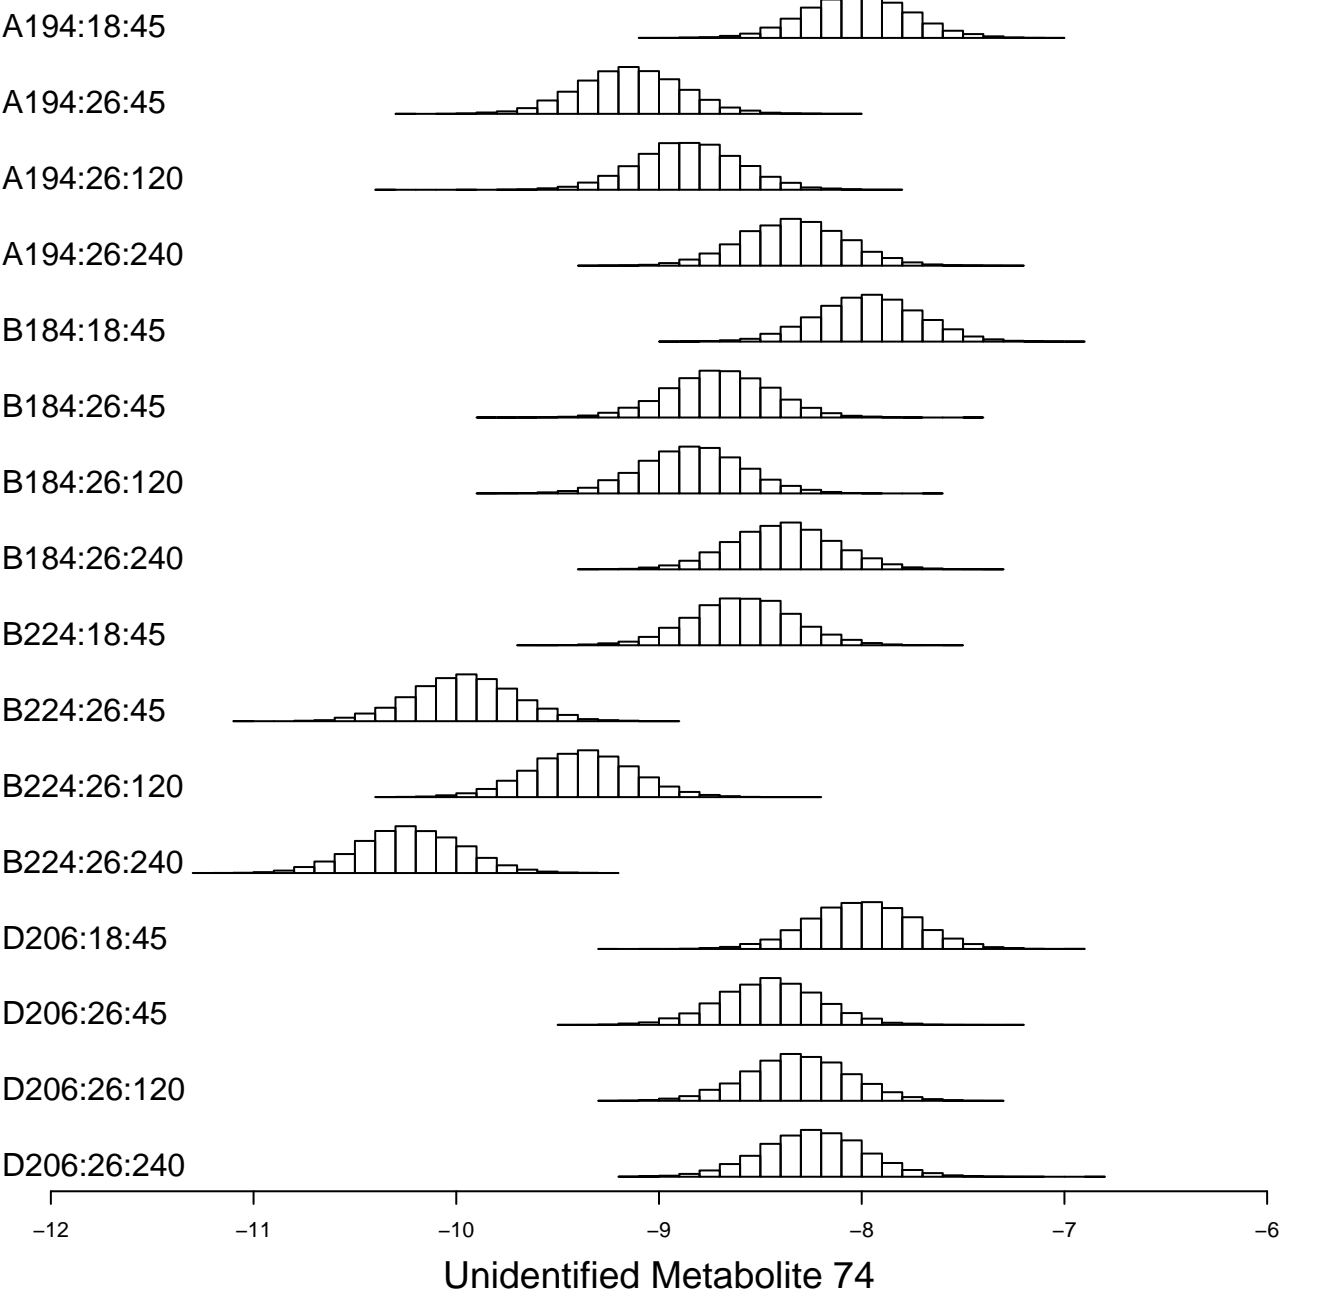

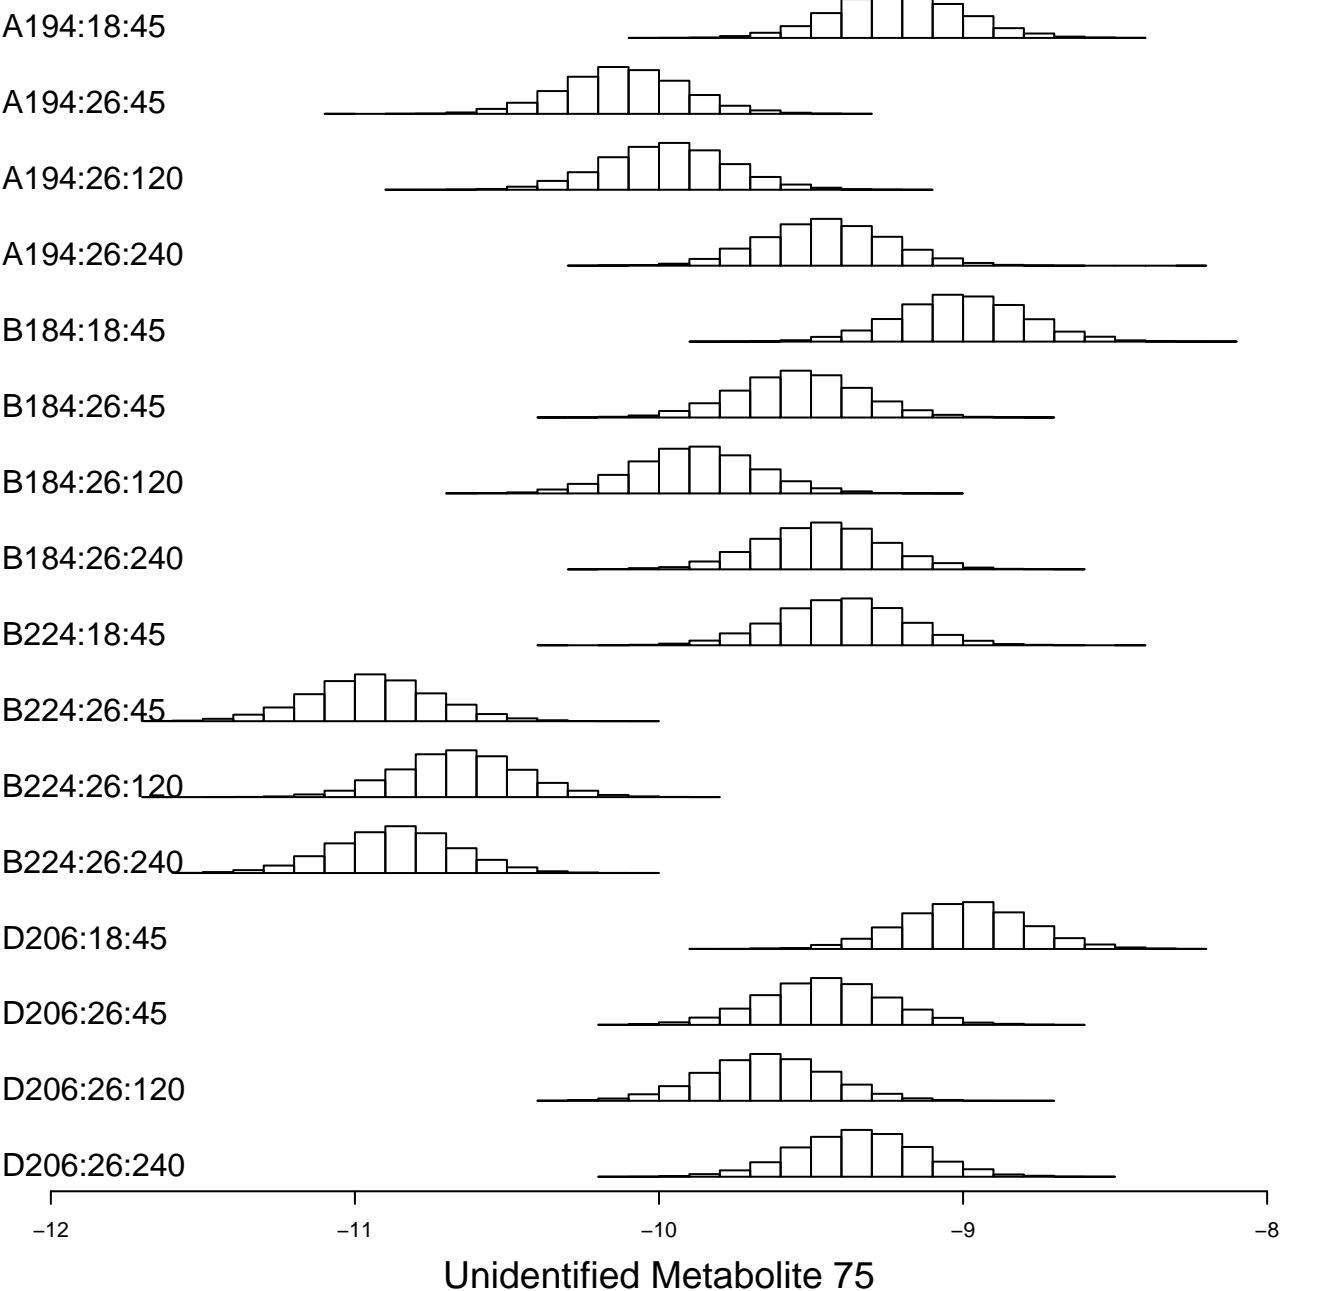

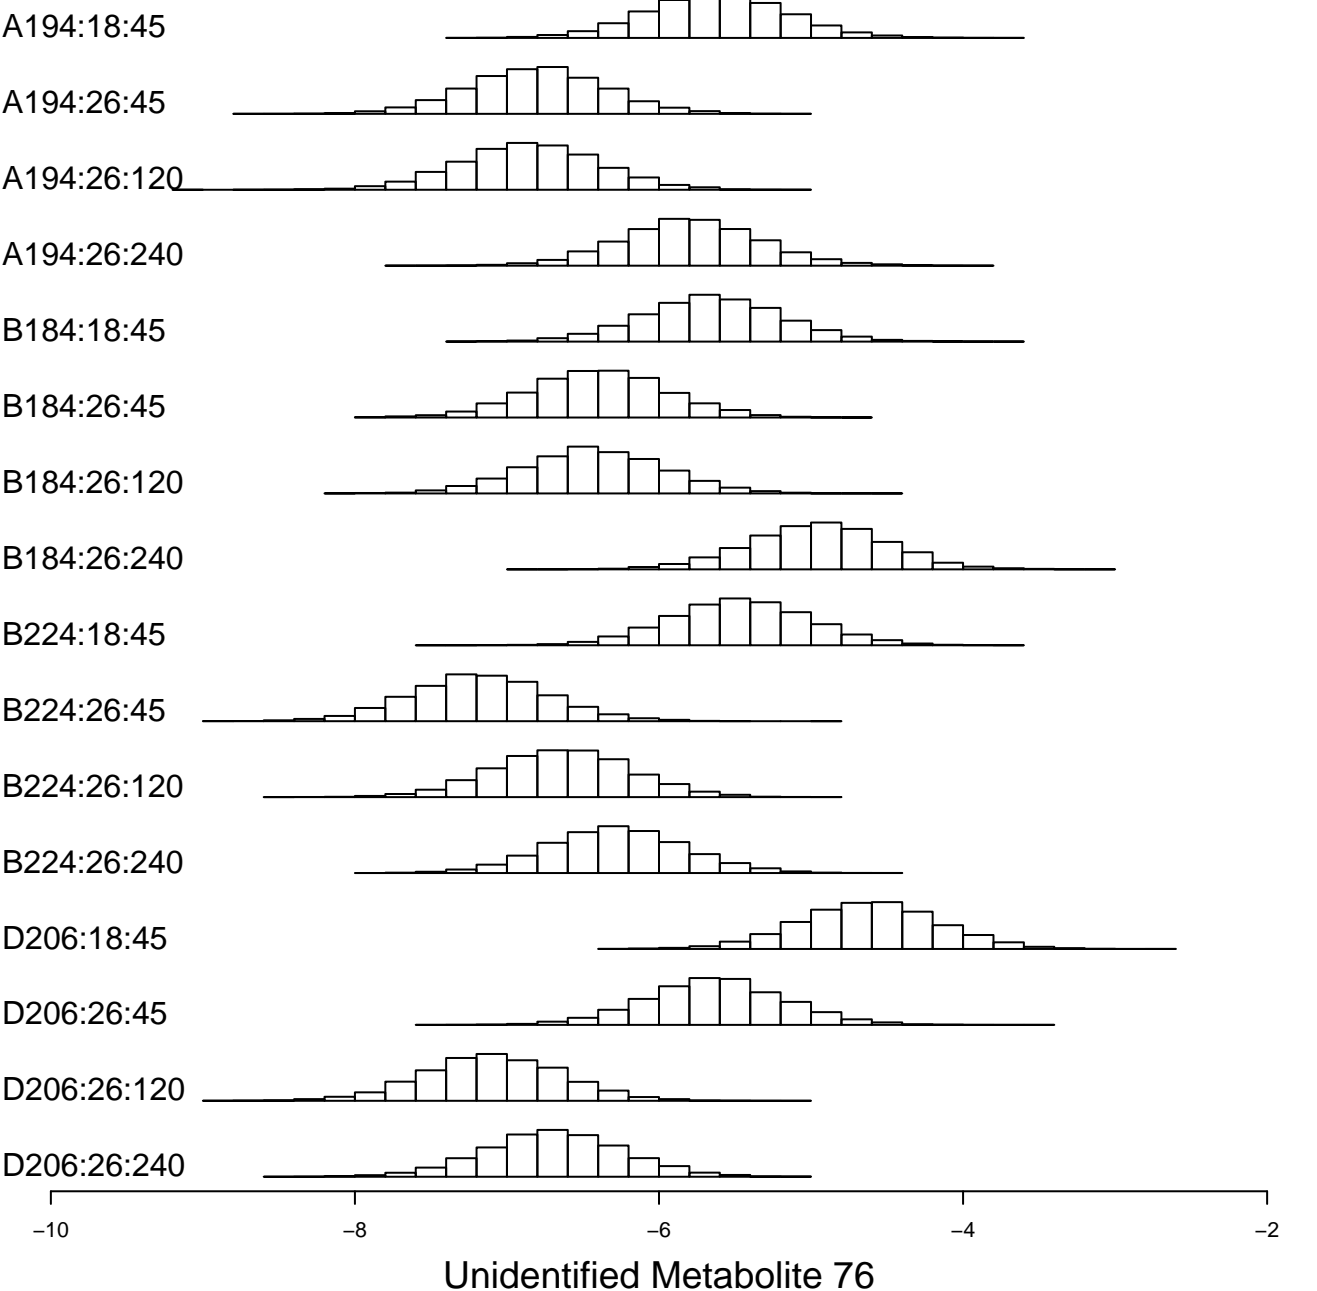

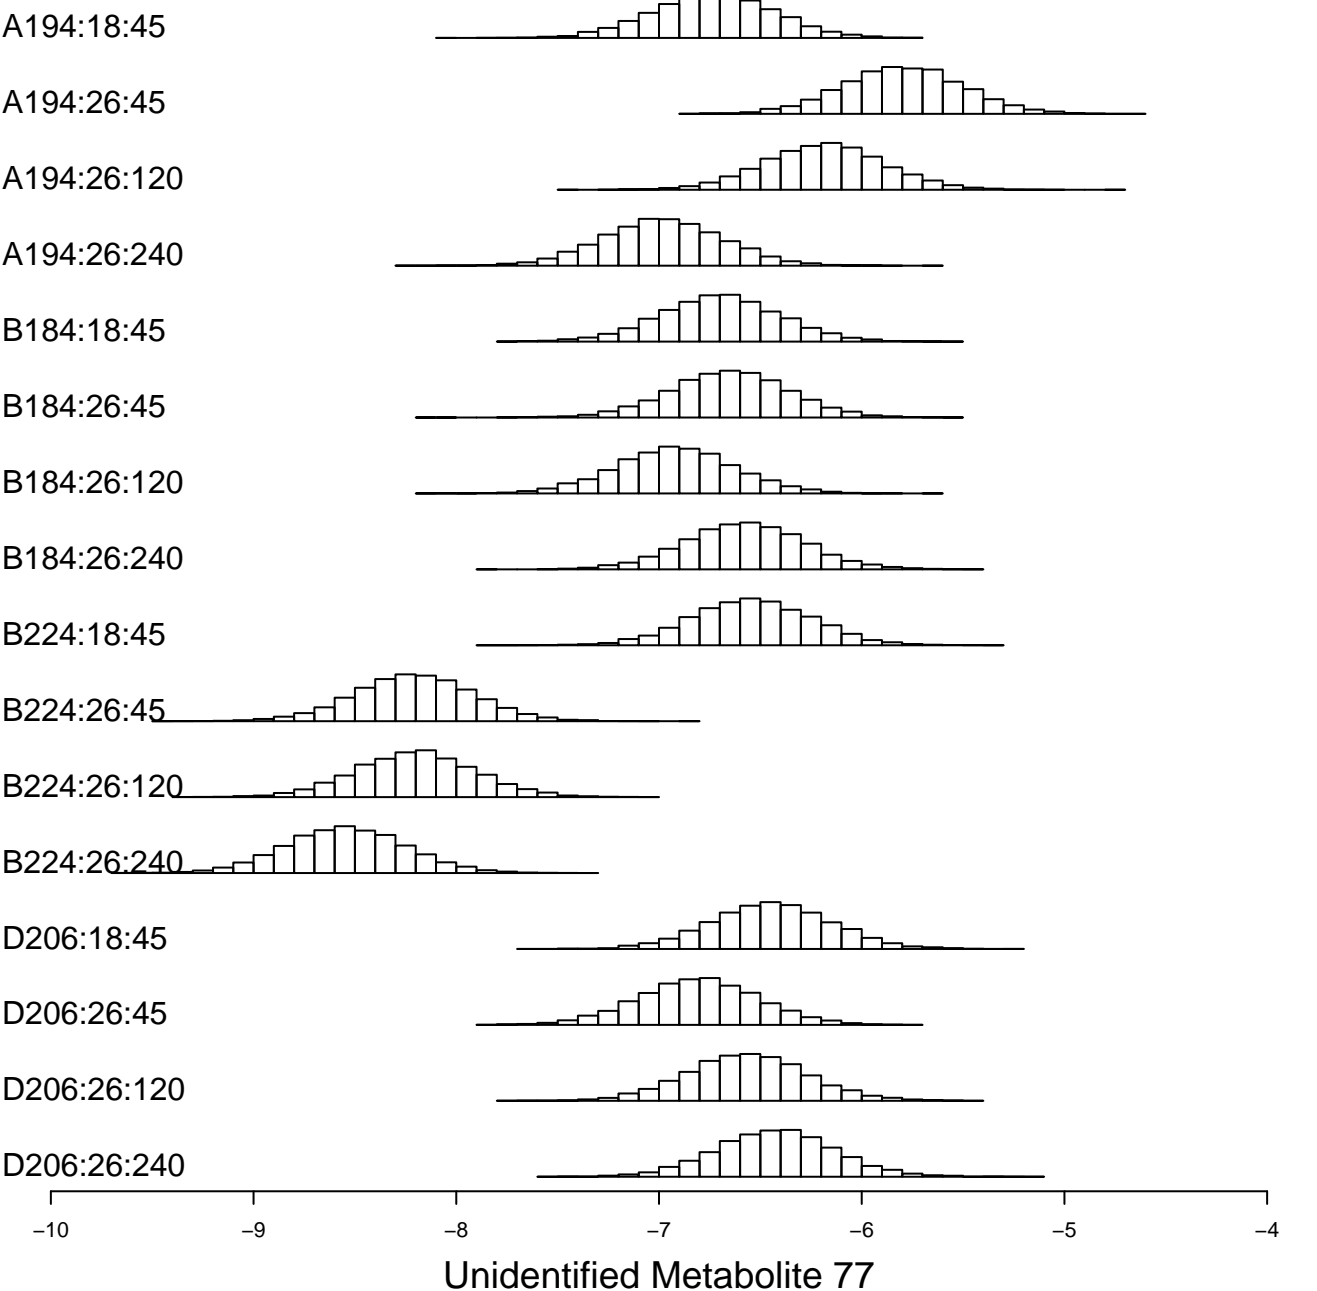

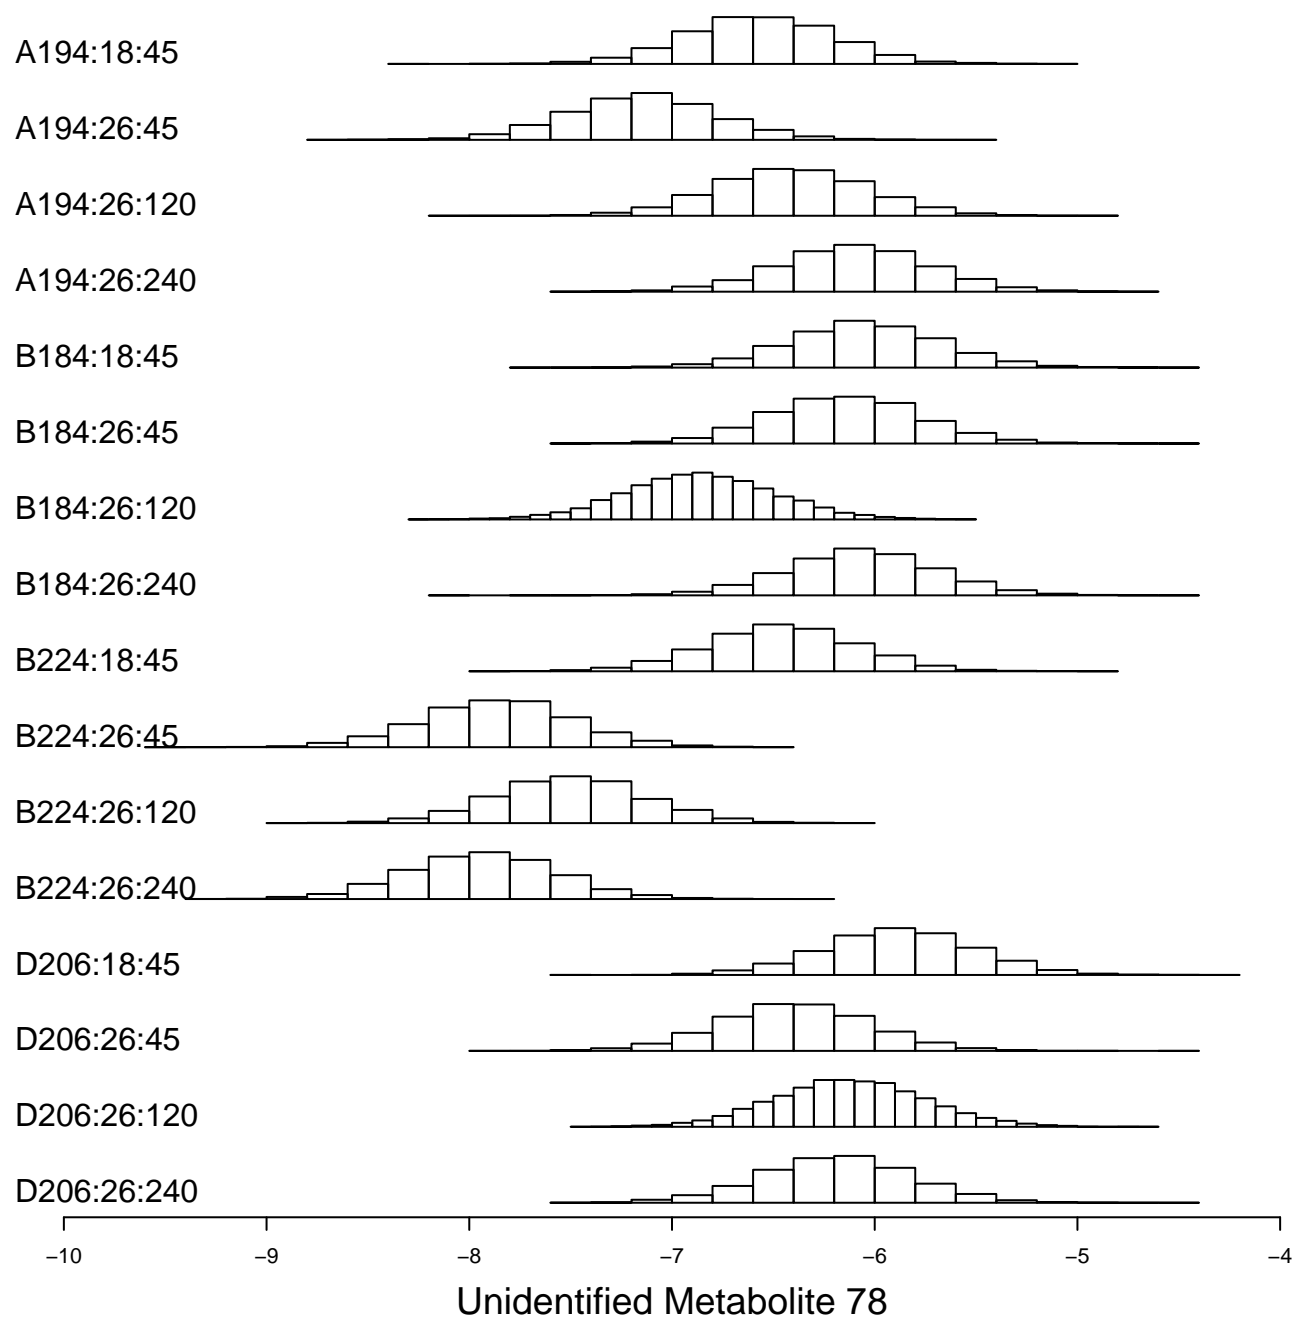



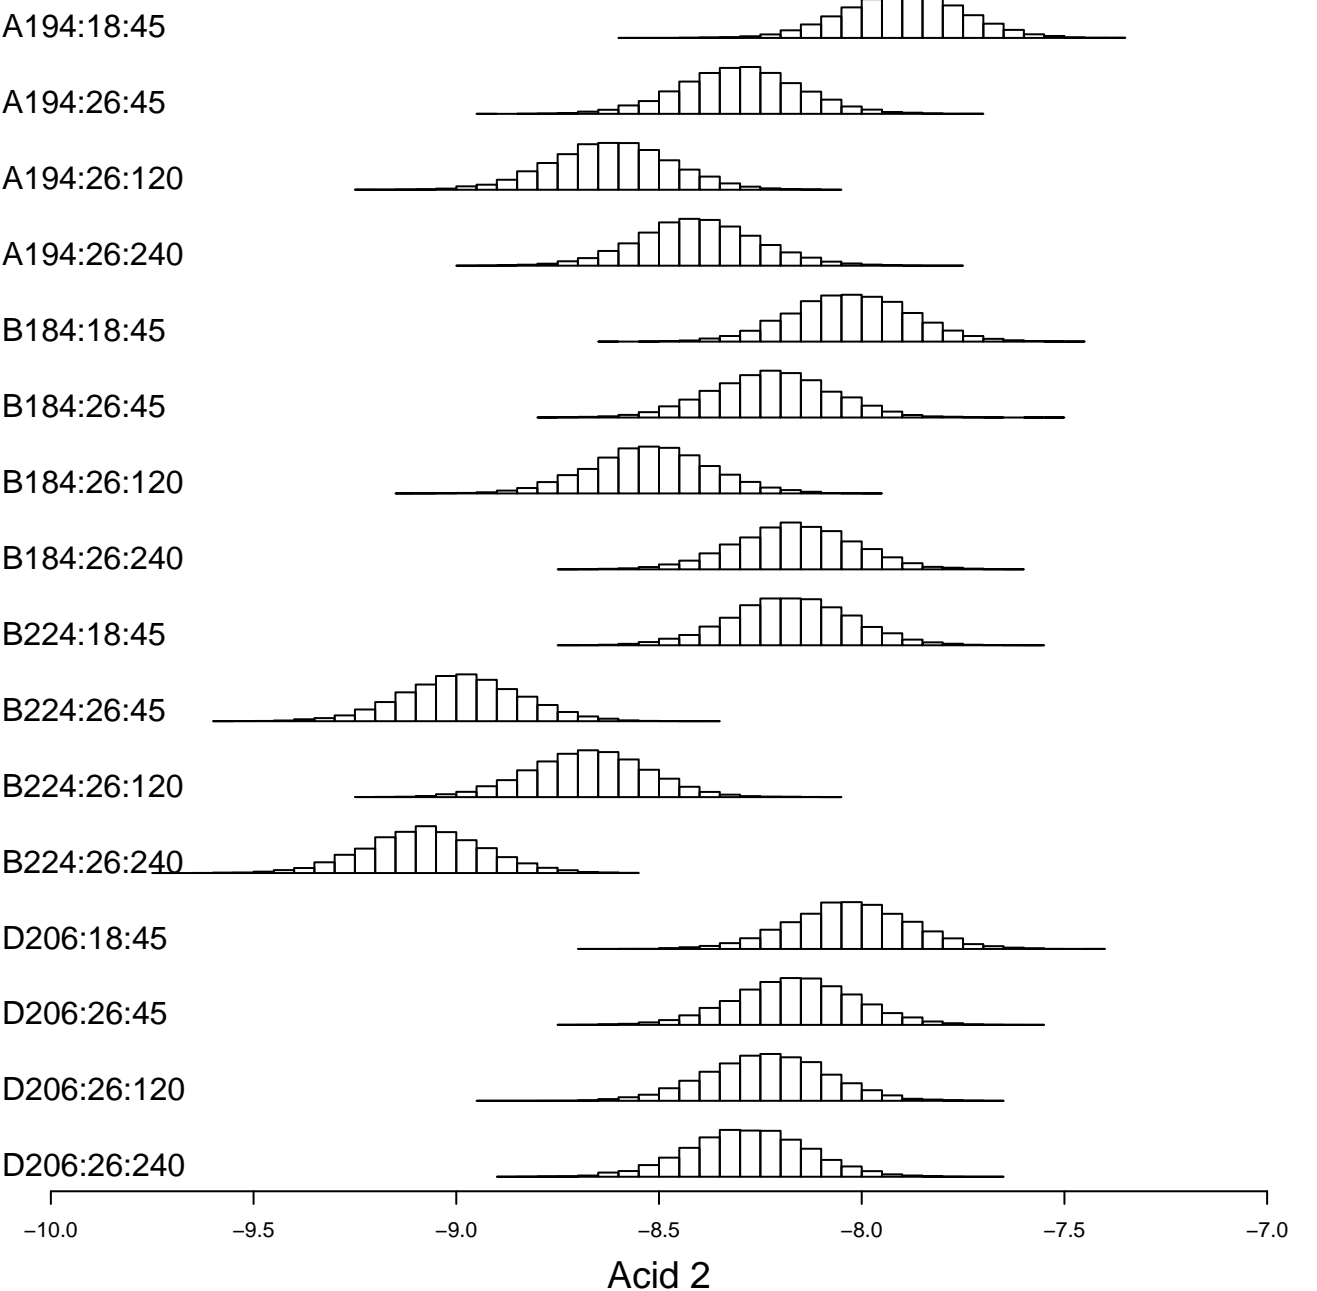

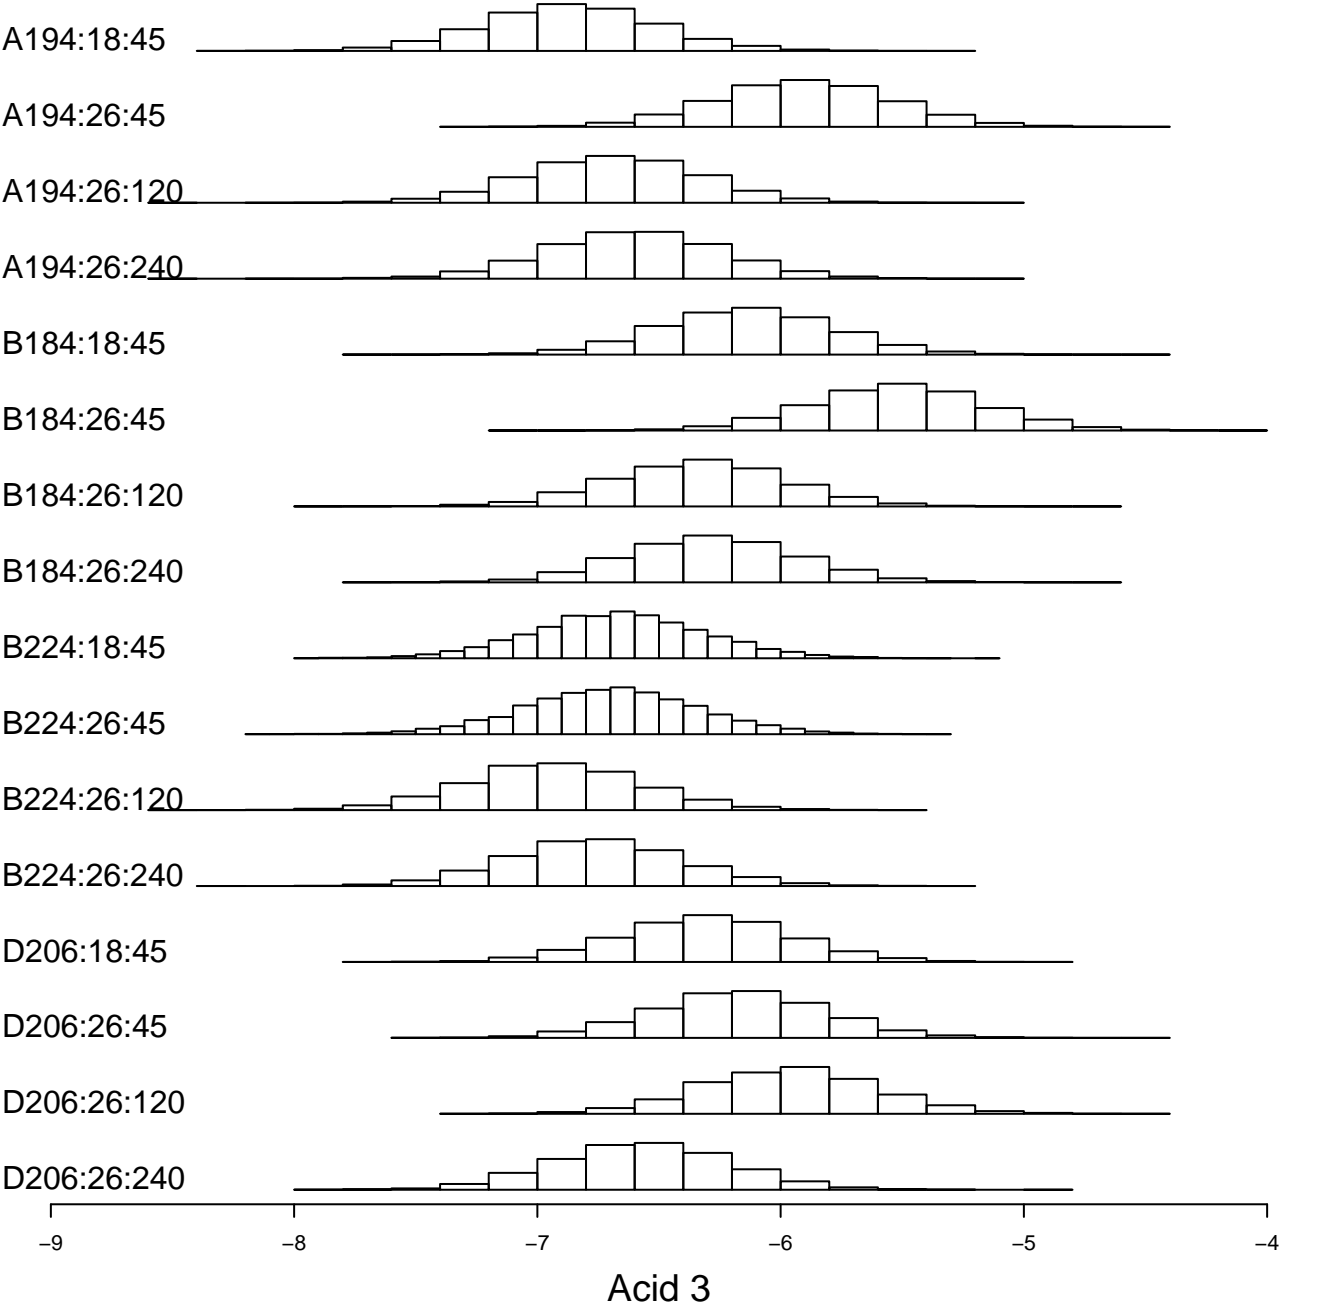

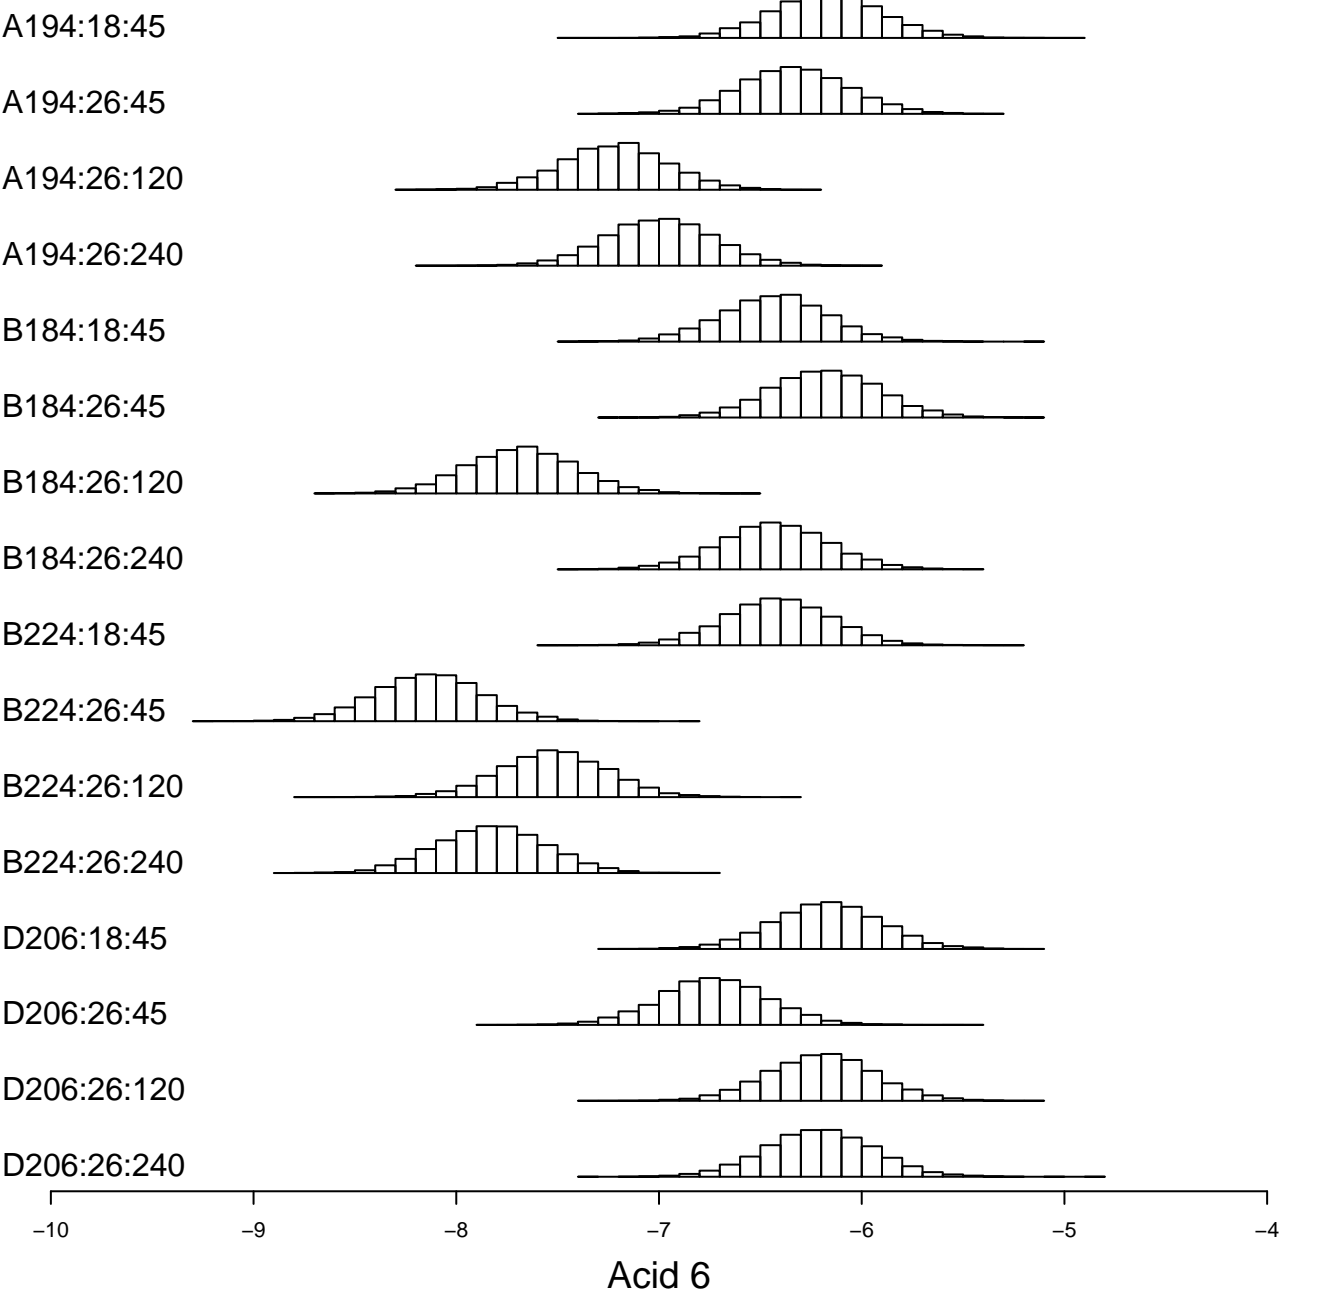

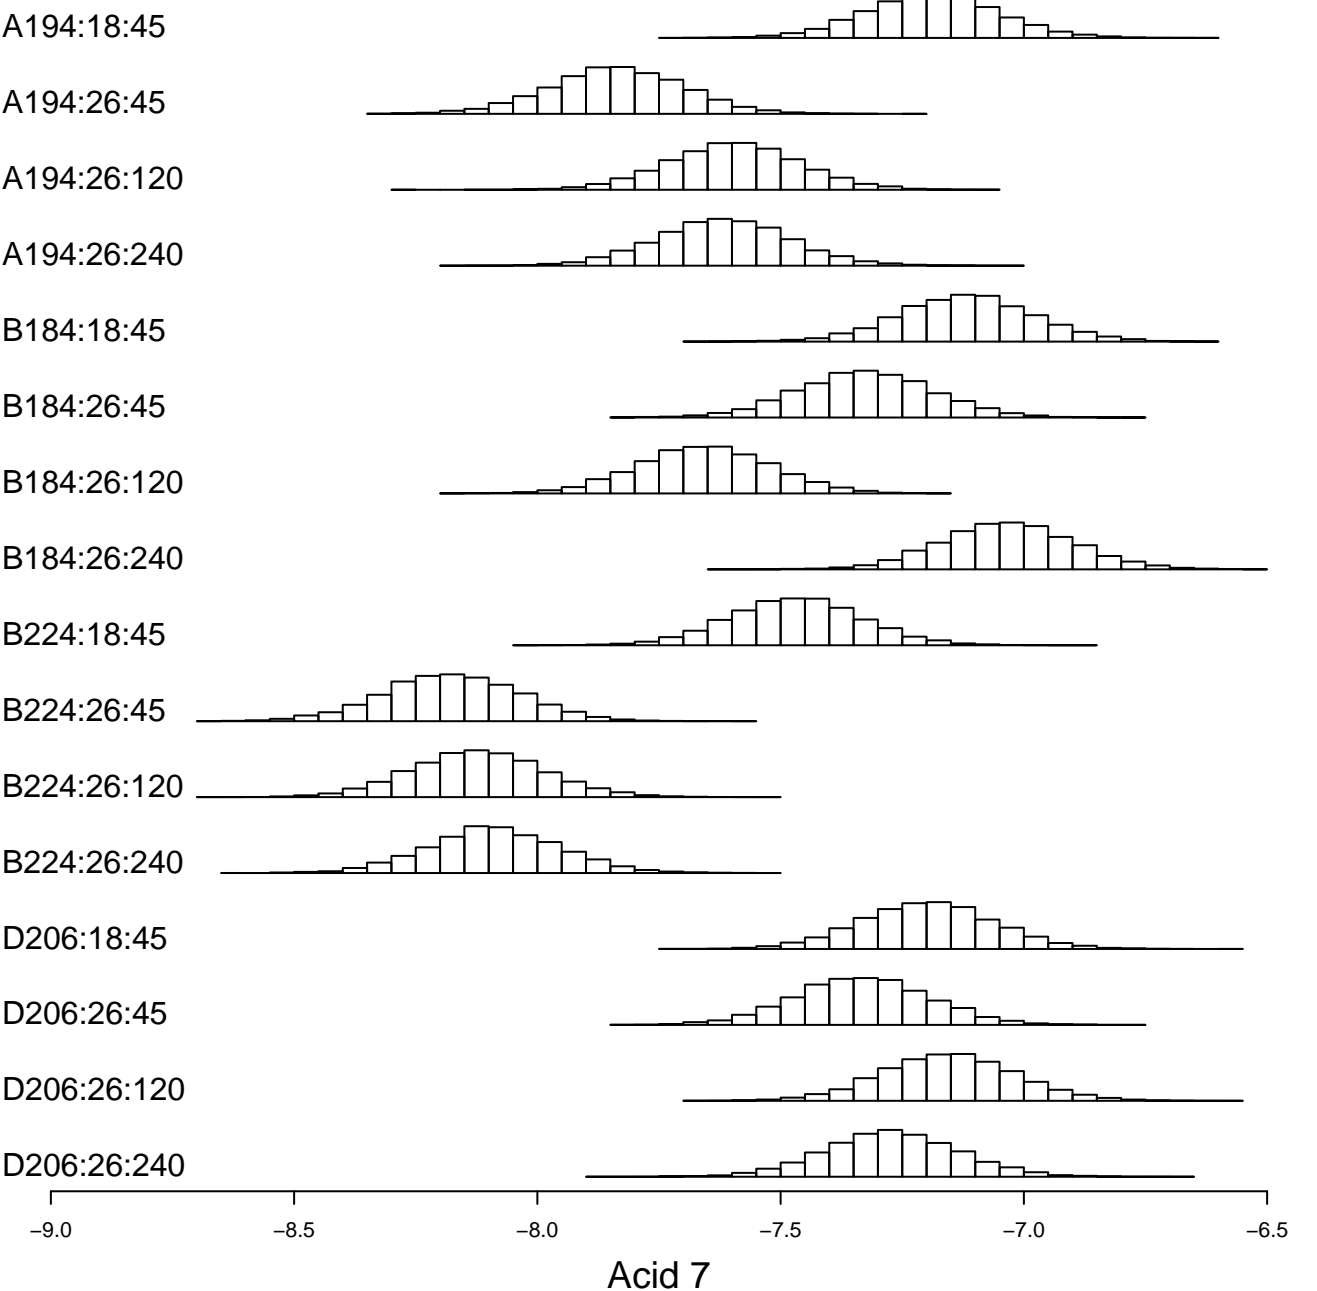

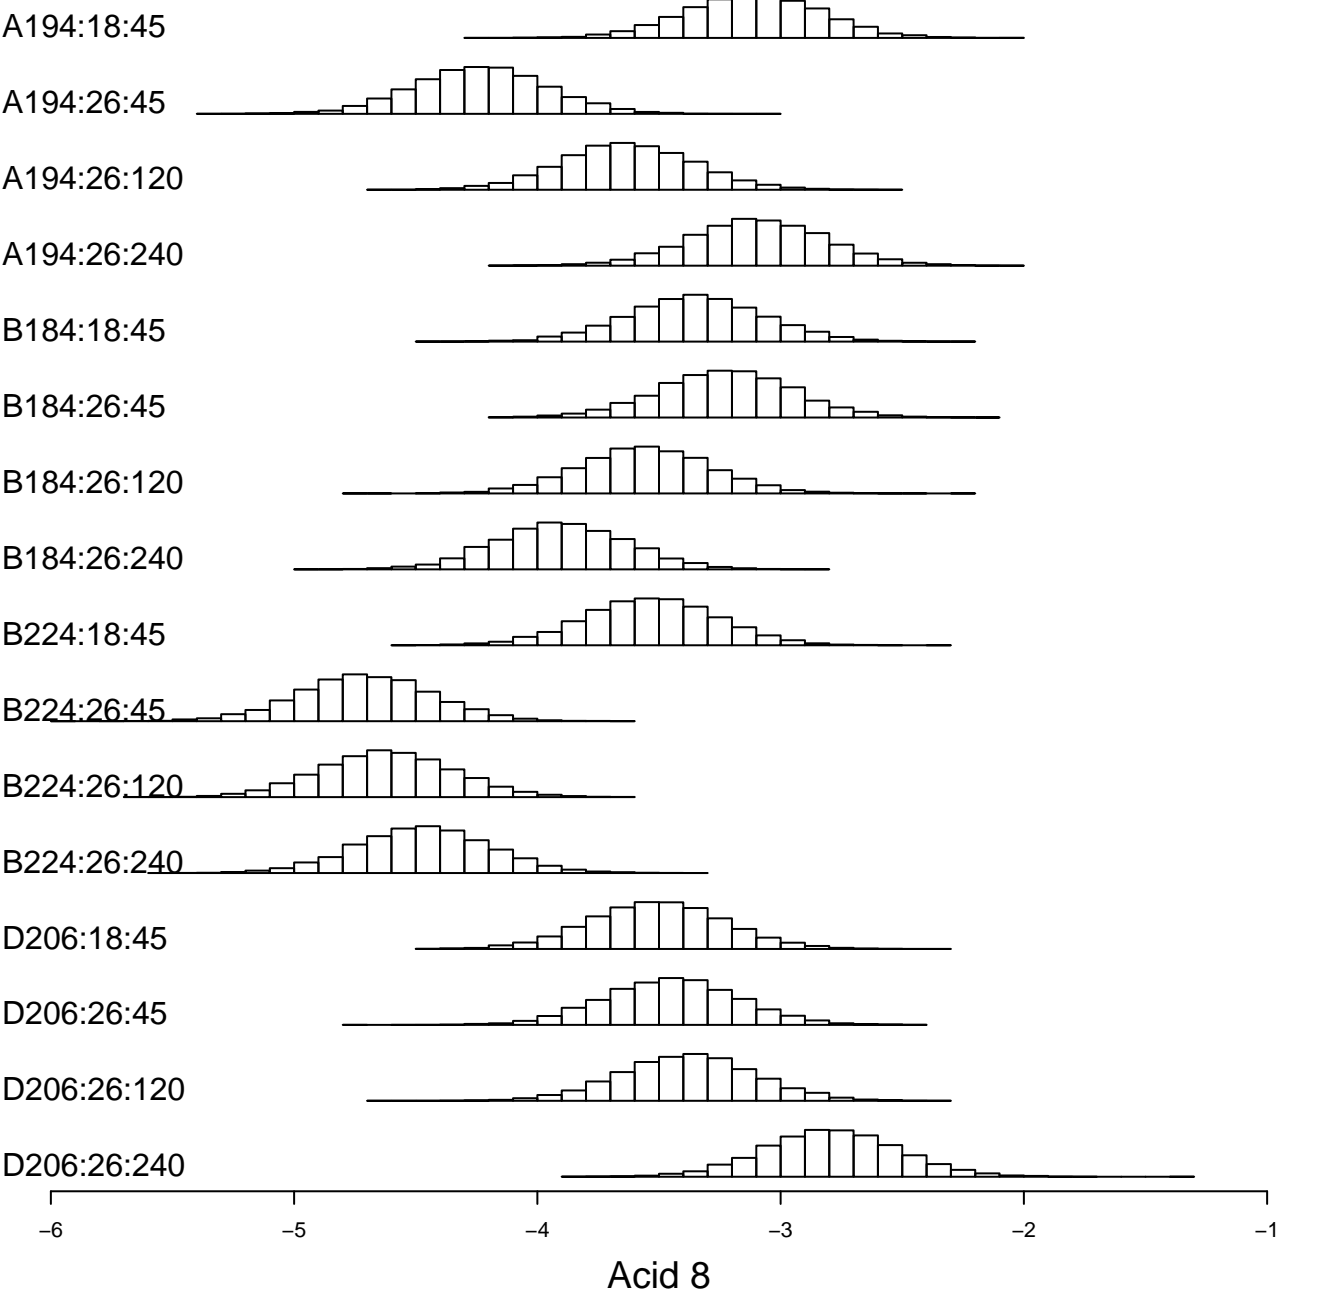

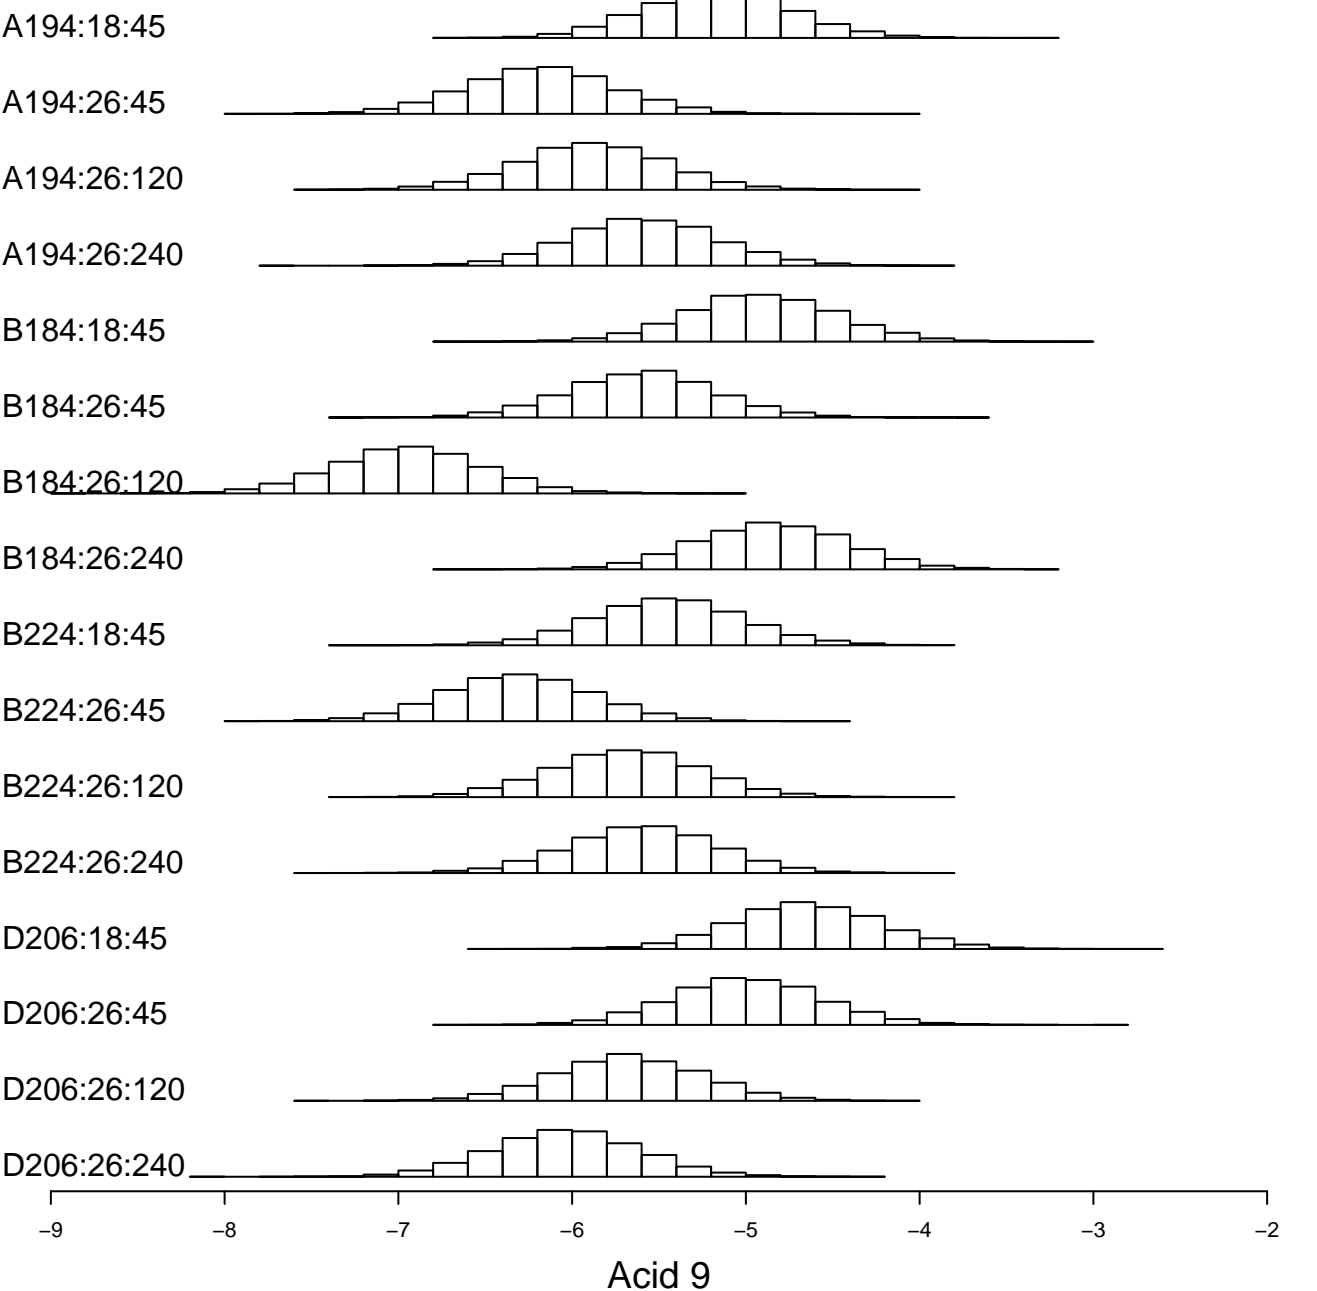

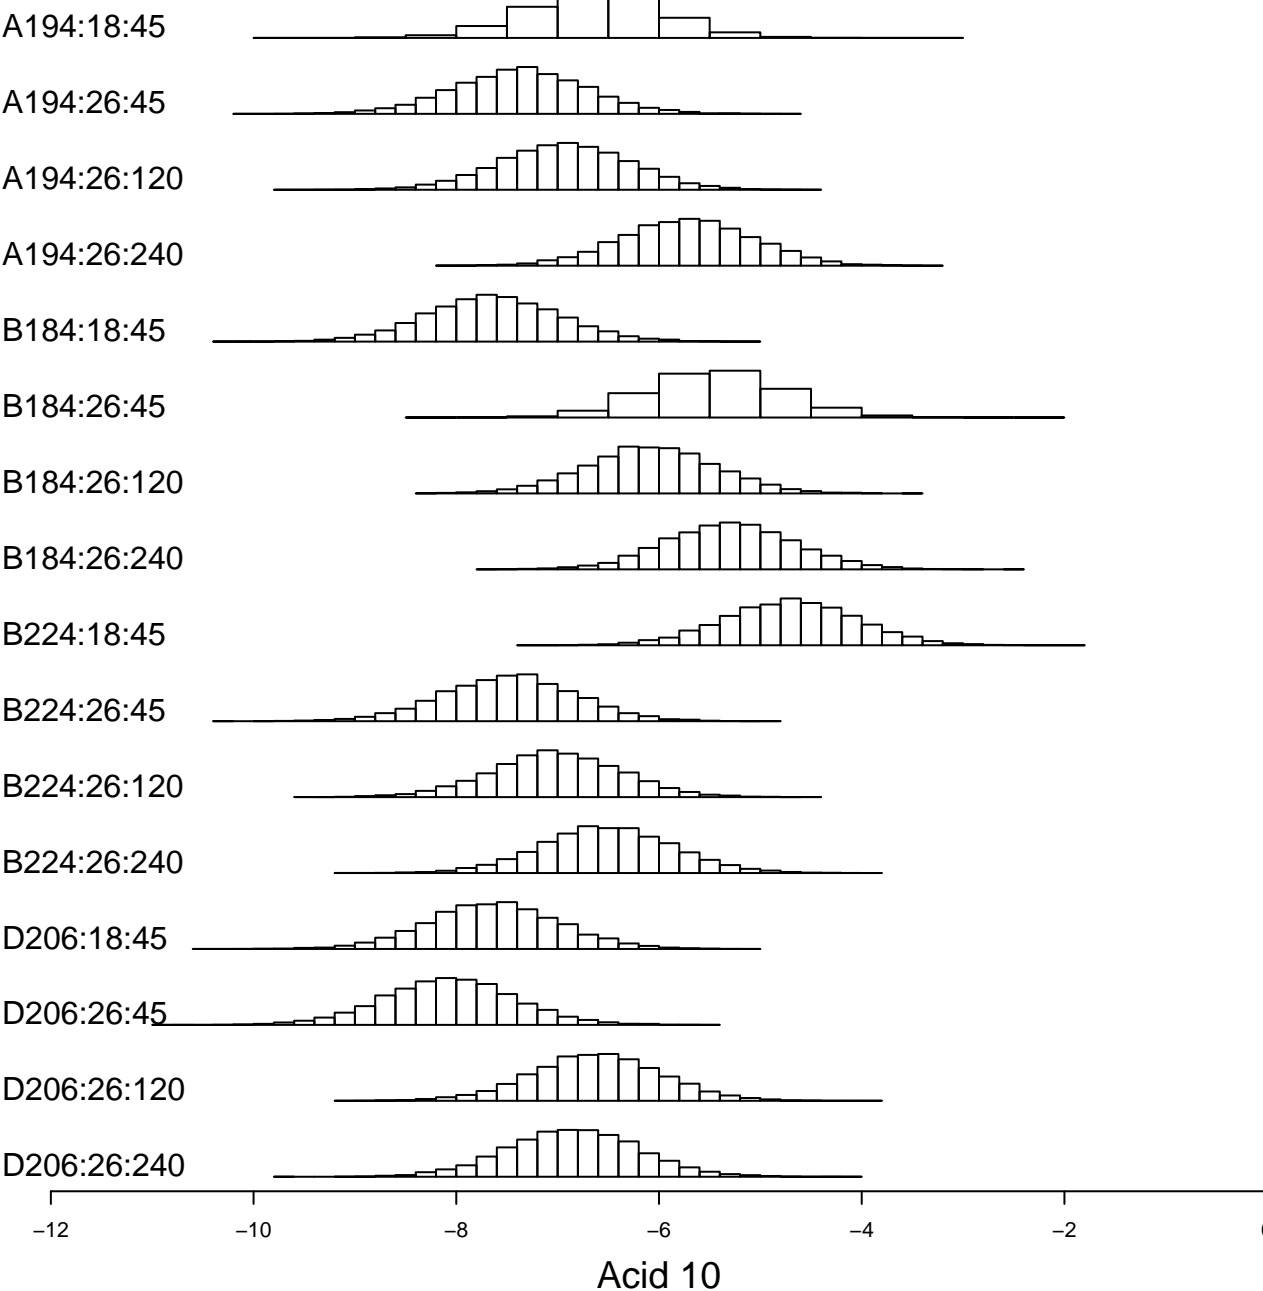

A194:18:45

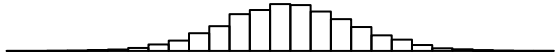

A194:26:45

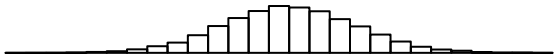

A194:26:120

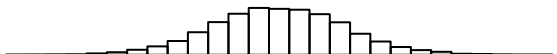

A194:26:240

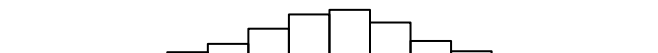

B184:18:45

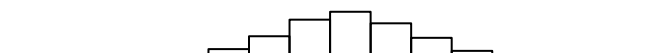

B184:26:45

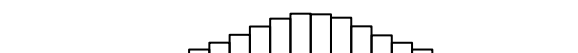

B184:26:120

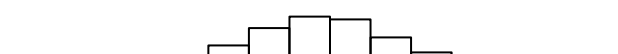

B184:26:240

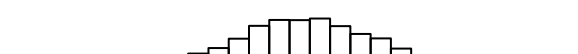

B224:18:45

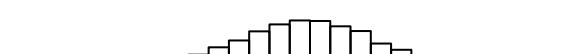

B224:26:45

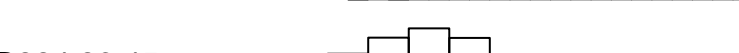

B224:26:120

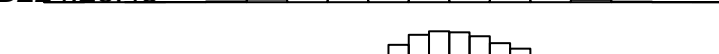

B224:26:240

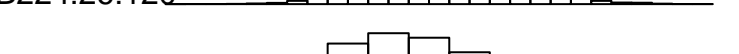

D206:18:45

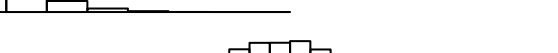

D206:26:45

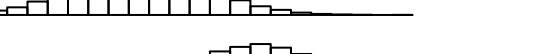

D206:26:120

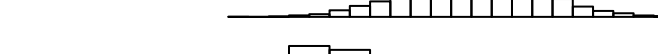

D206:26:240

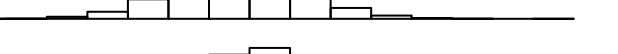

-10      -9      -8      -7      -6      -5      -4

Acid 11



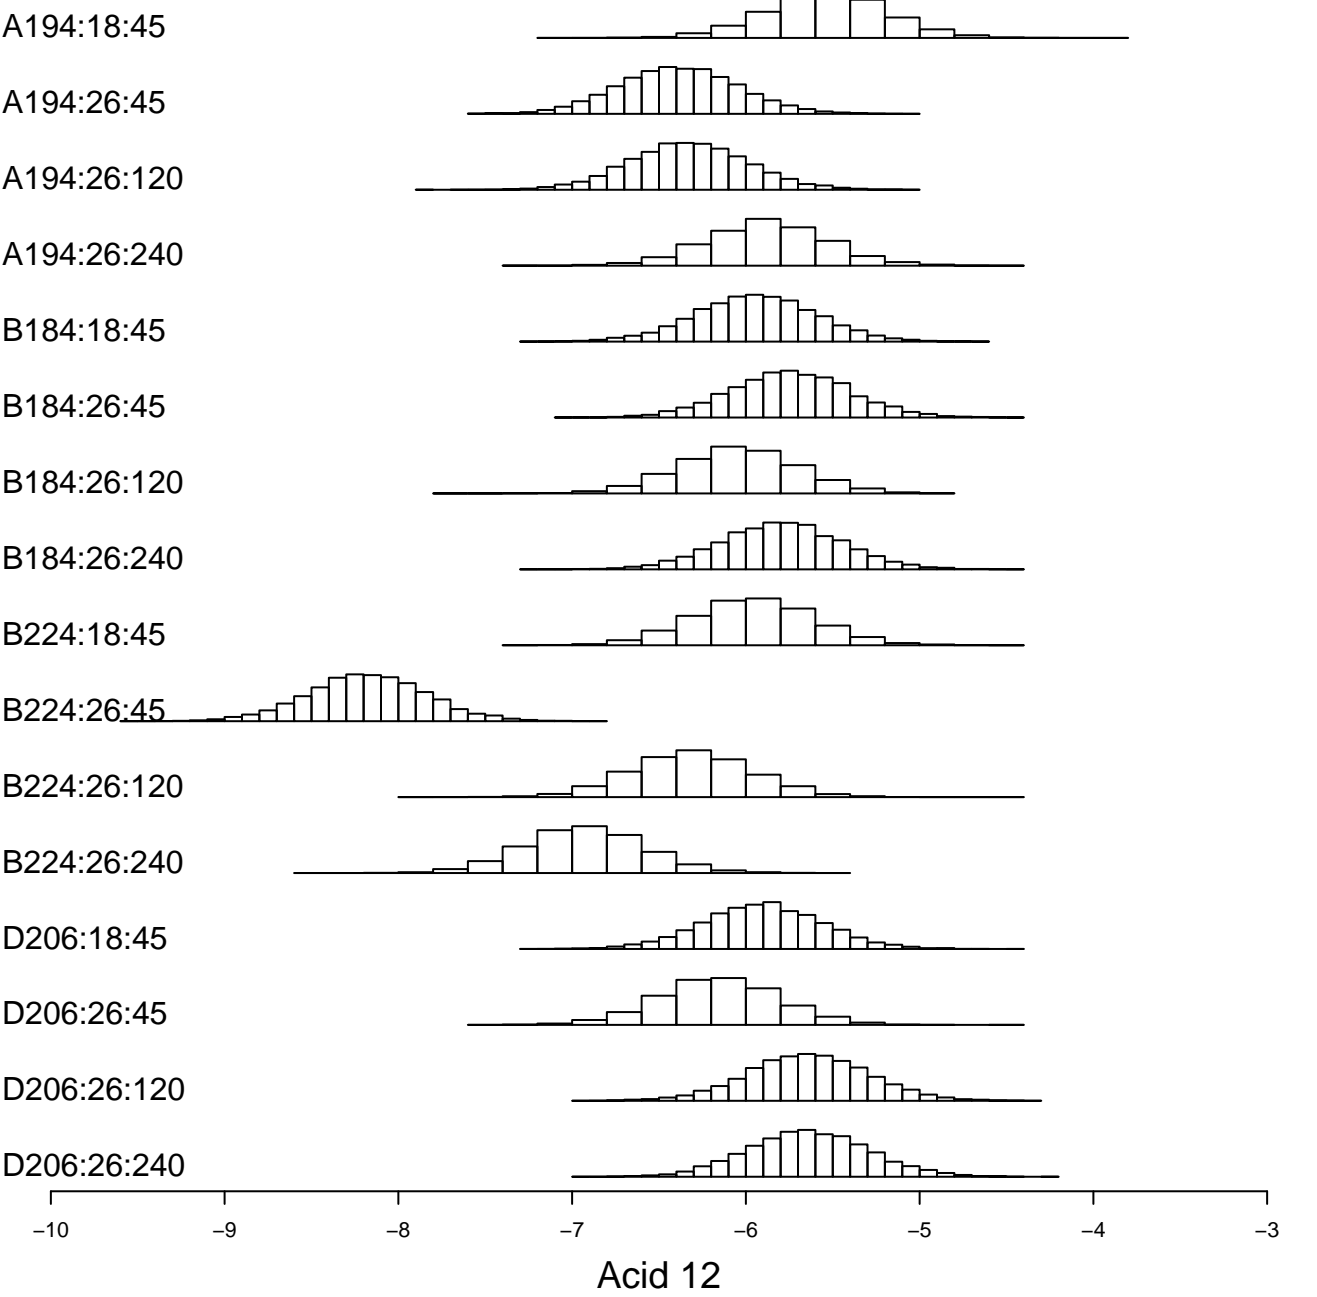

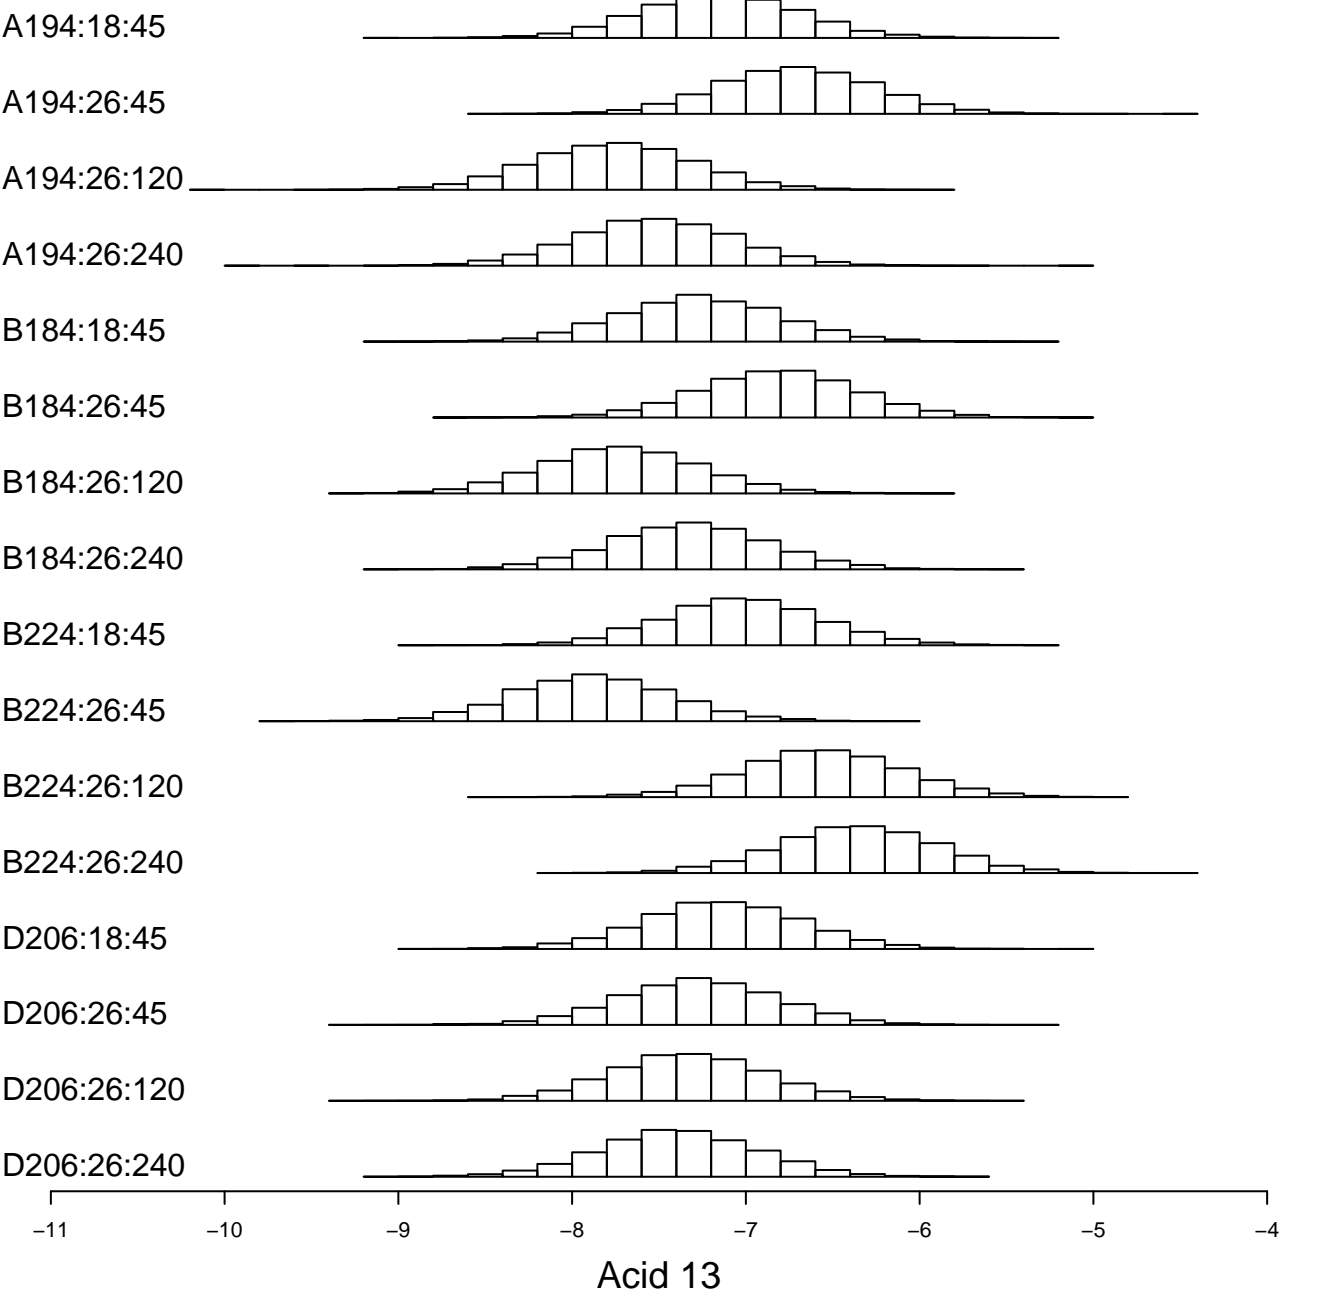

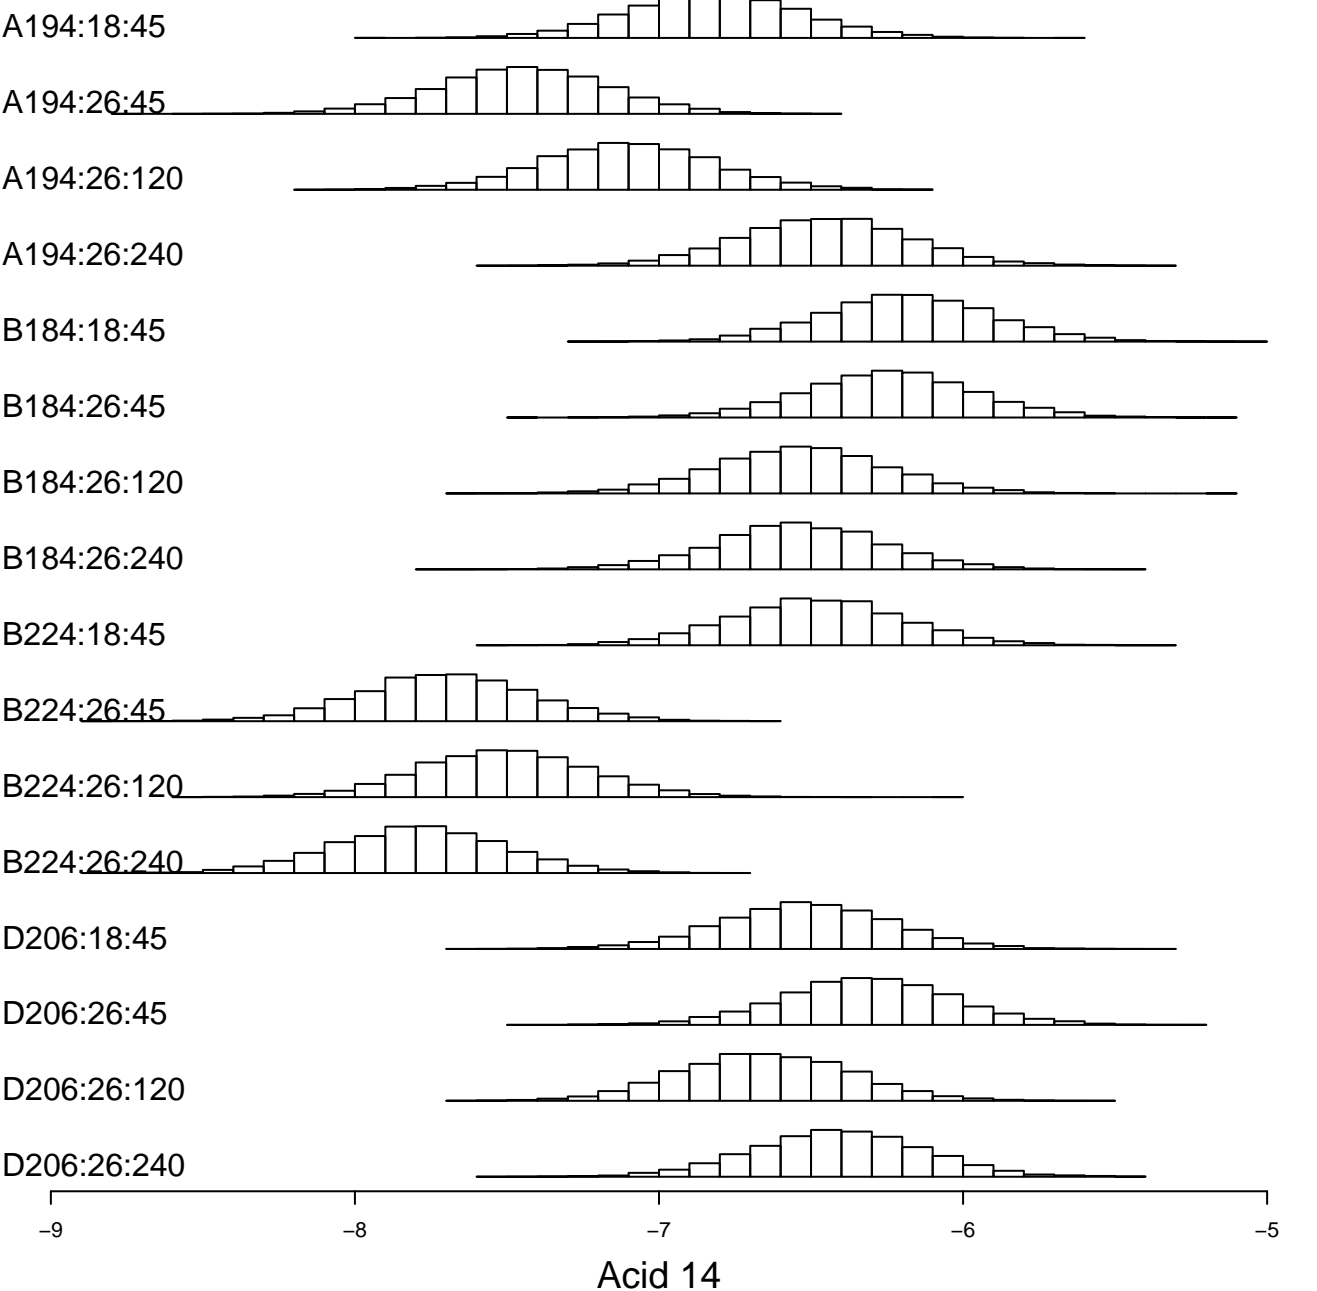

Supplement: s1 [file s1]
