# Supplementary material for: Taxonomic and Environmental Variation of Metabolite Profiles in Marine Dinoflagellates of the Genus Symbiodinium
Source: MDPI journal article supplement (doi:10.3390/metabo5010074), 2015-02-16

B224:26

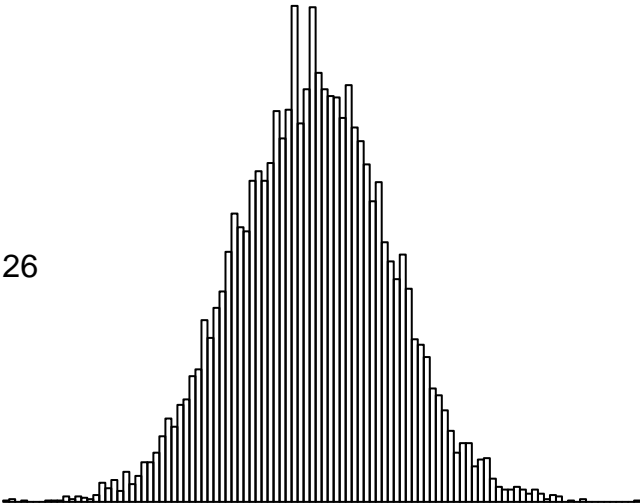

B224:18

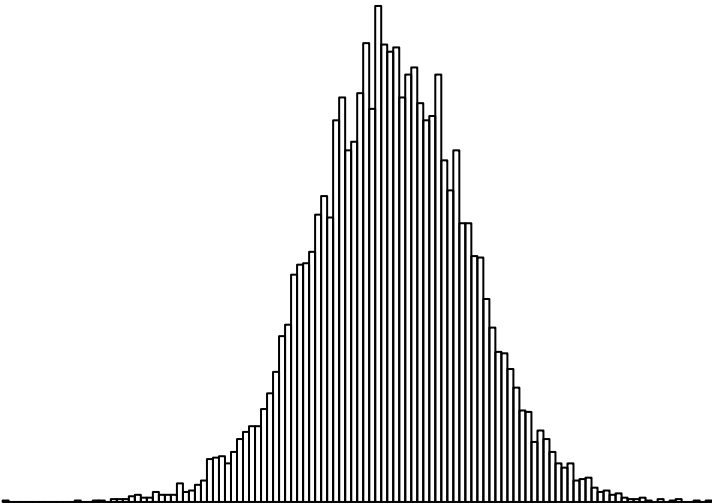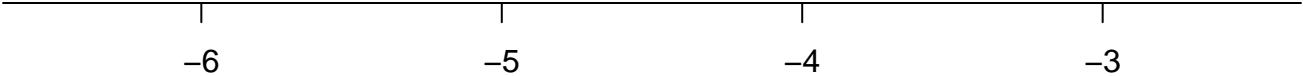

Amino Acid 2

B224:26 – B224:18

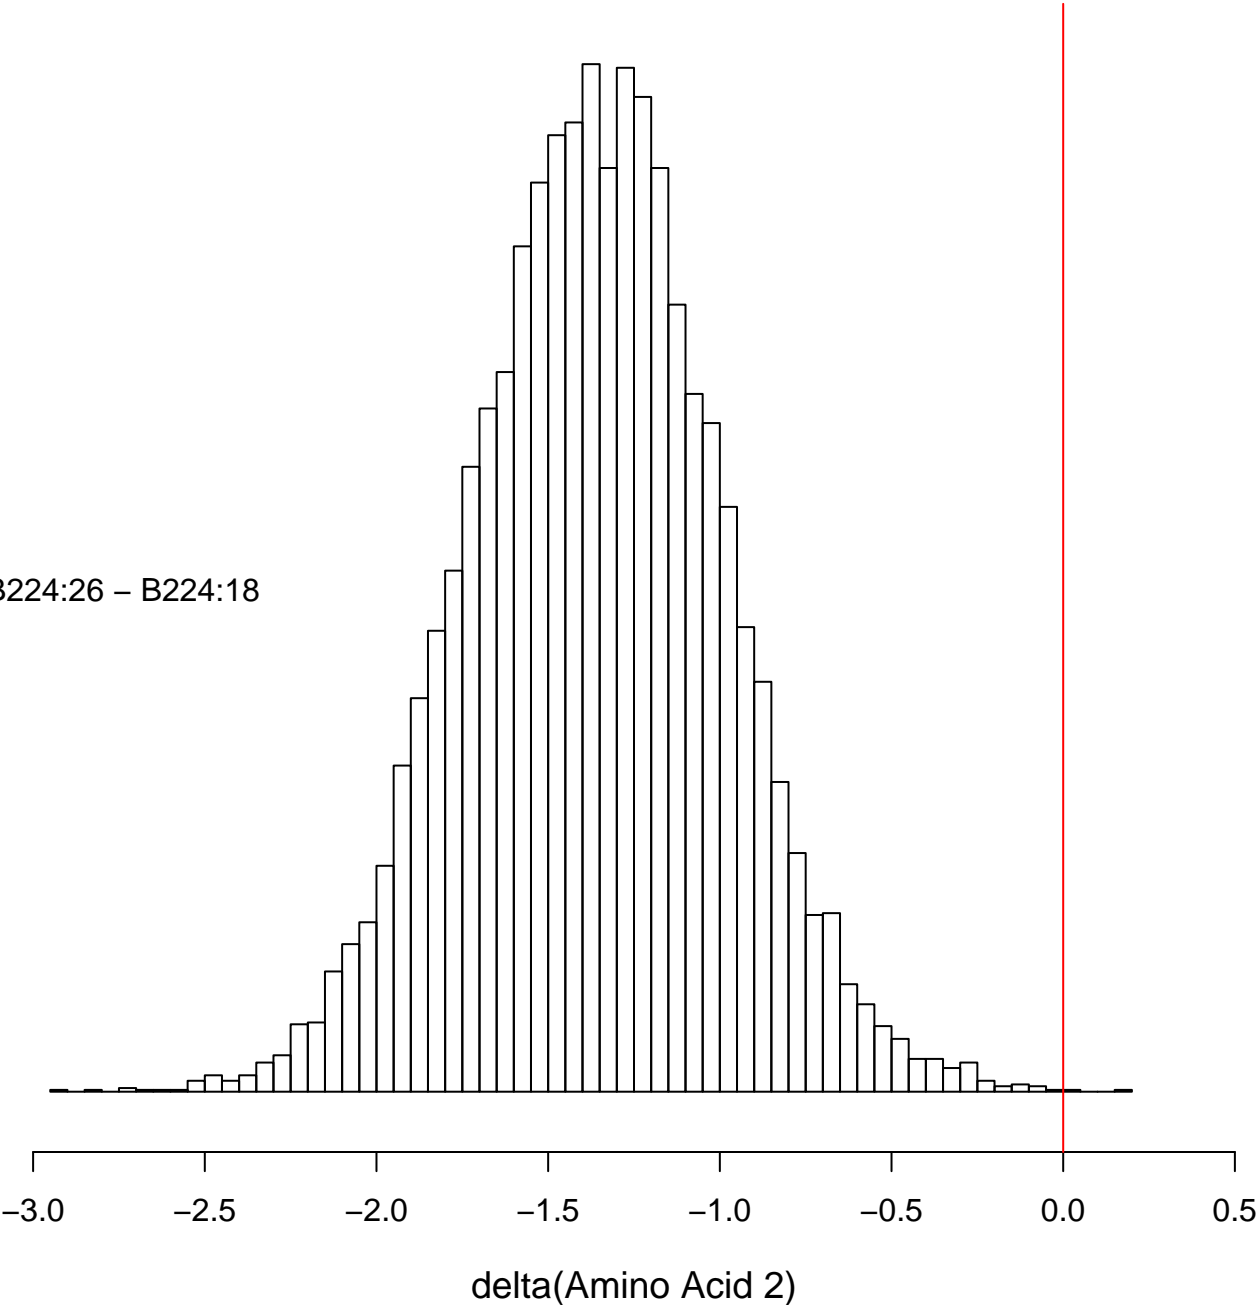

B224:26

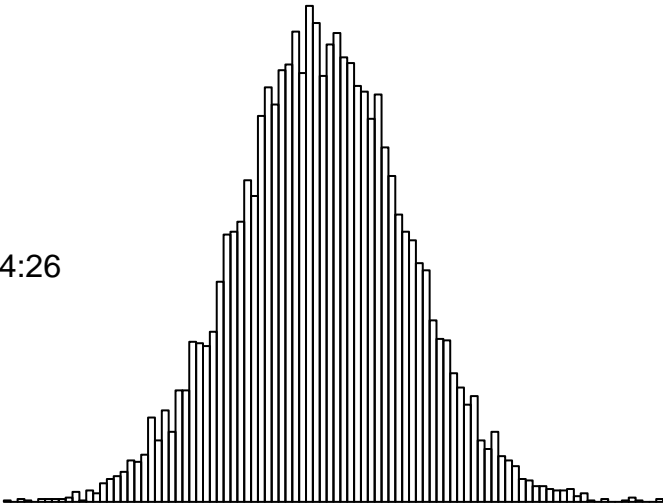

B224:18

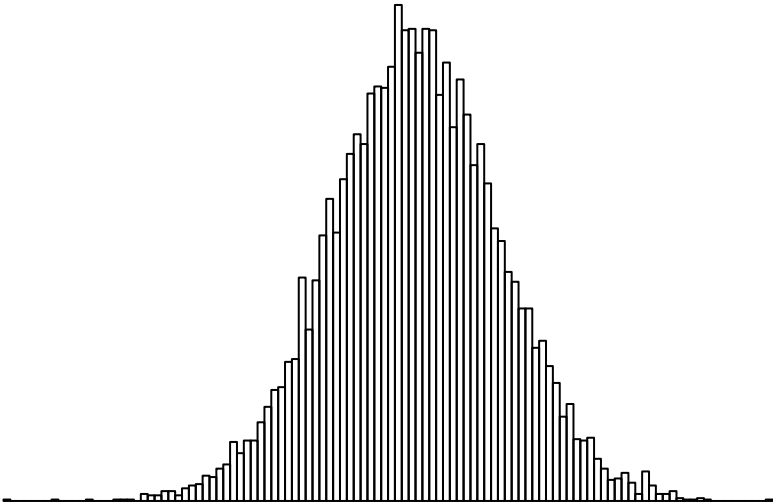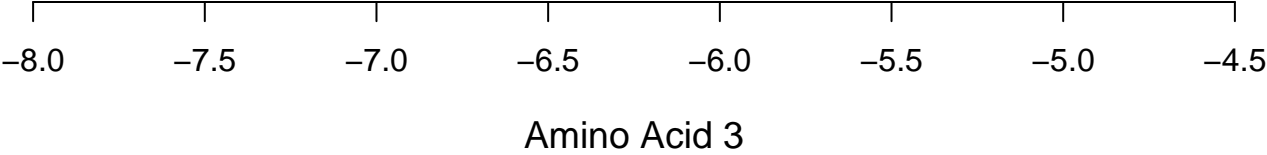

B224:26 – B224:18

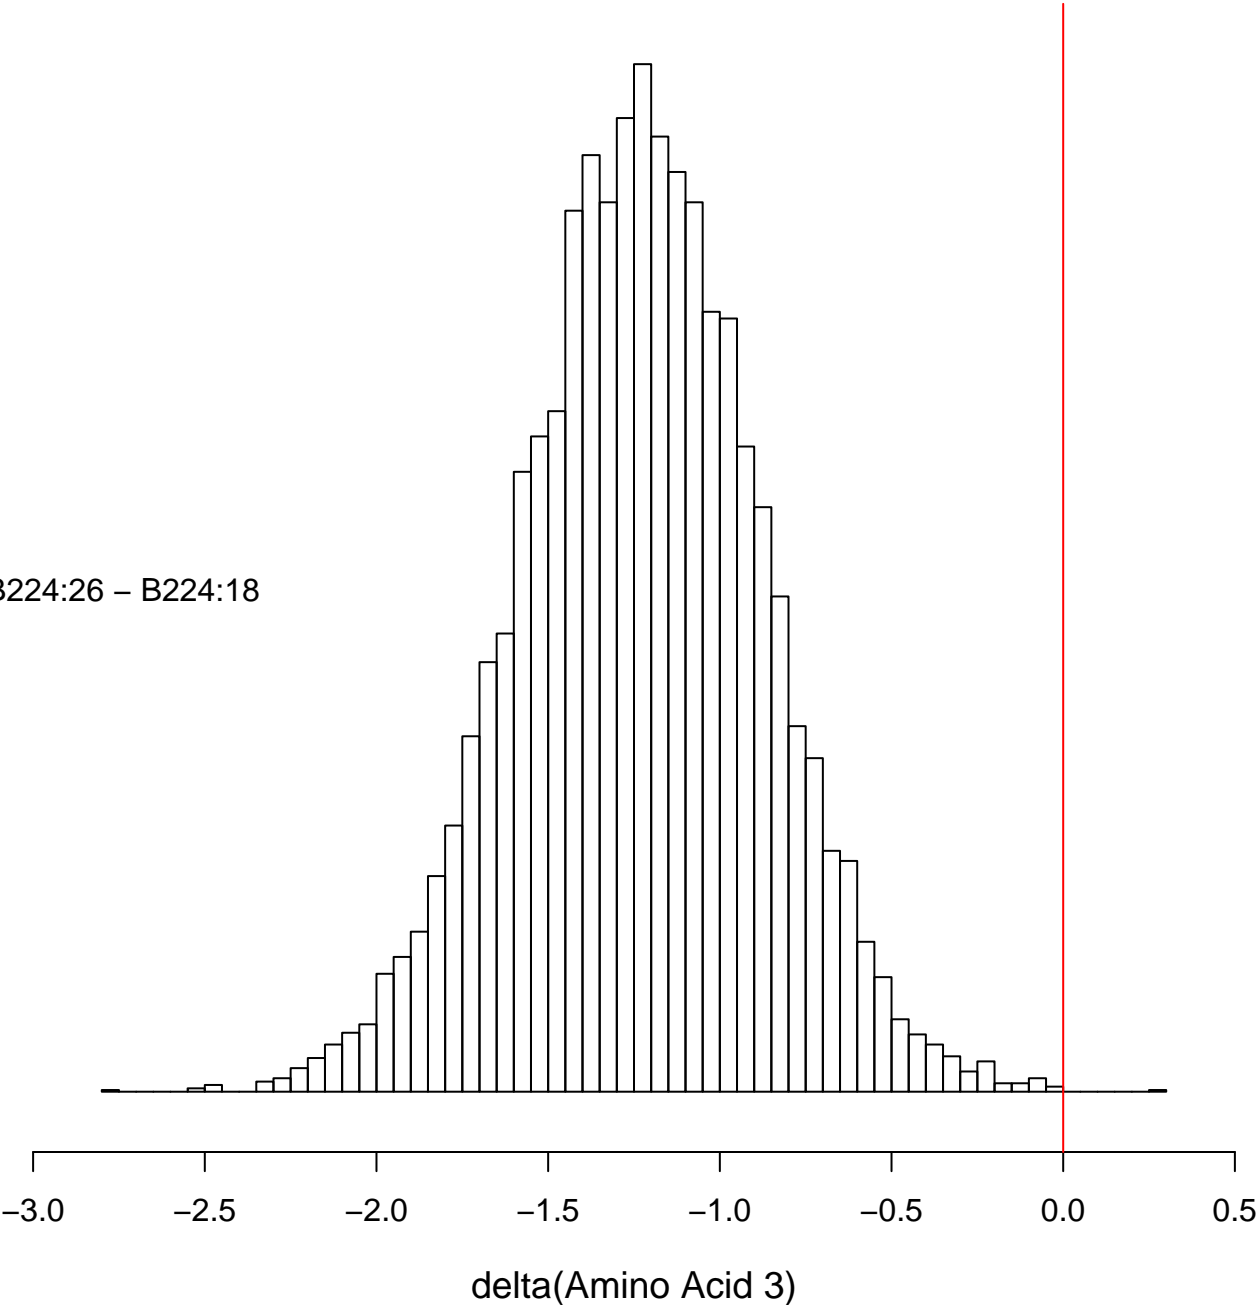

B224:26

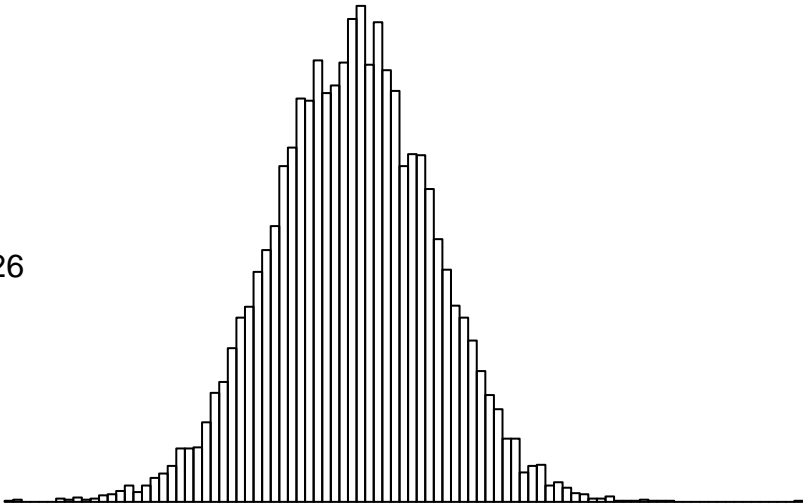

B224:18

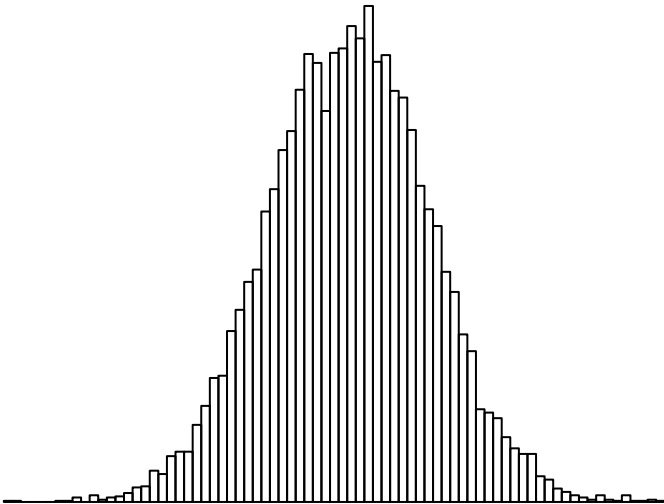

-10      -9      -8      -7      -6      -5      -4      -3

Alanine

B224:26 – B224:18

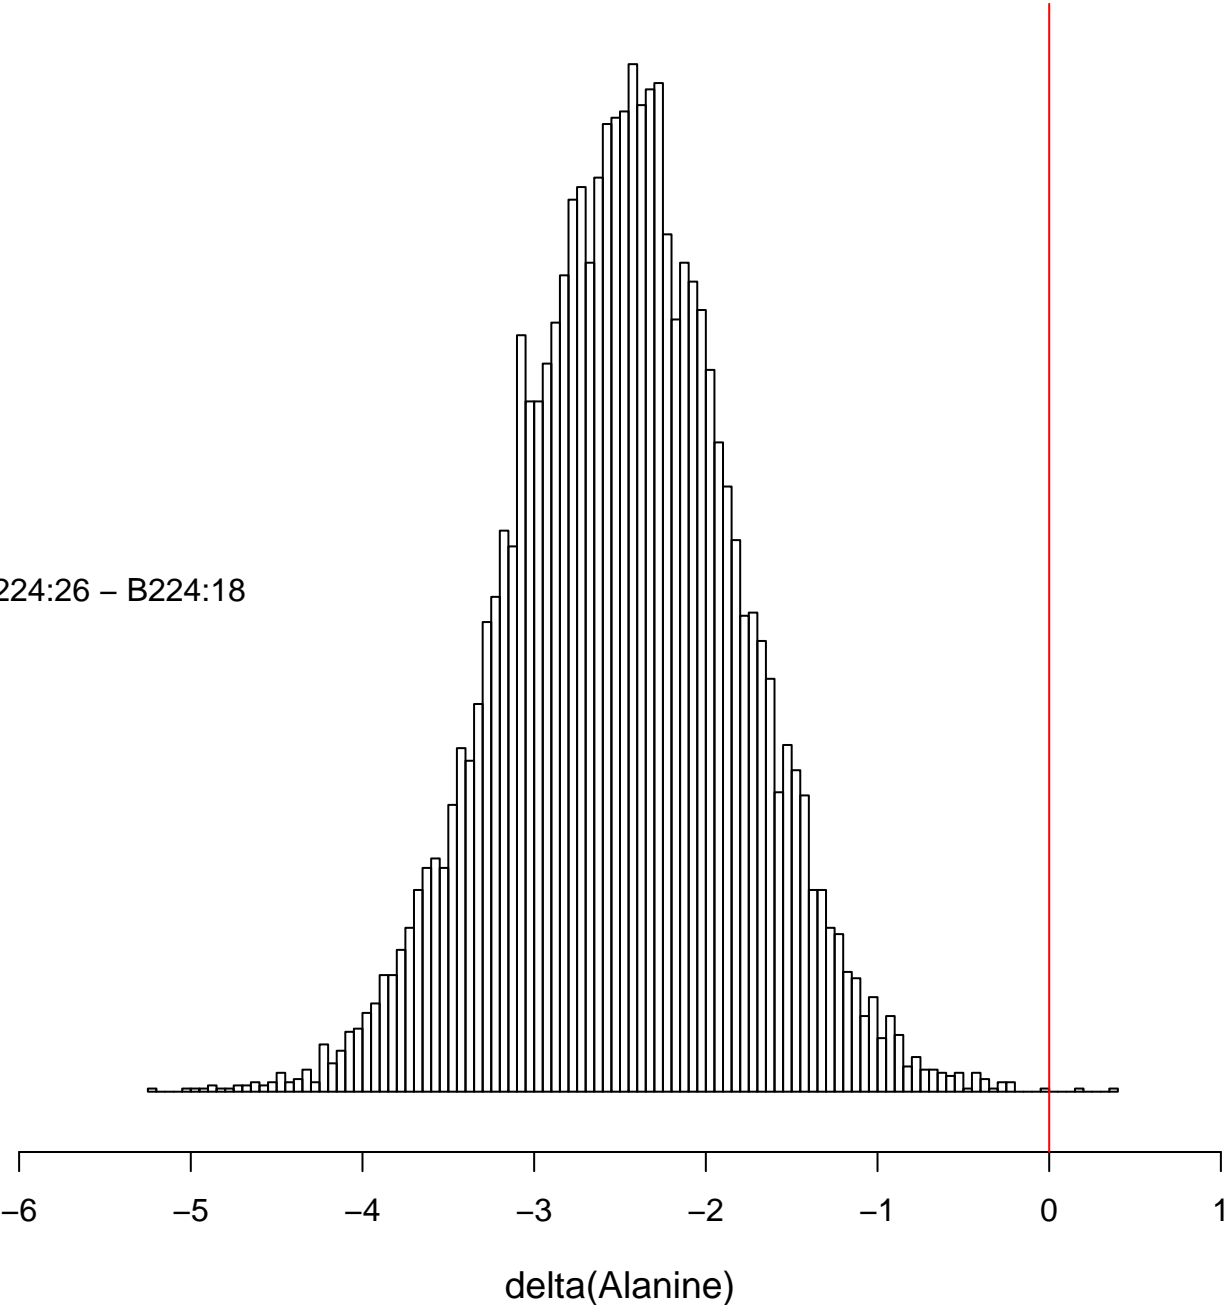

B224:26

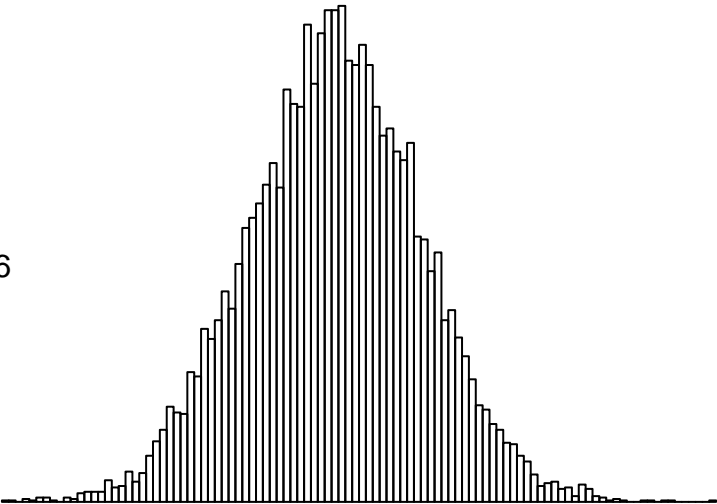

B224:18

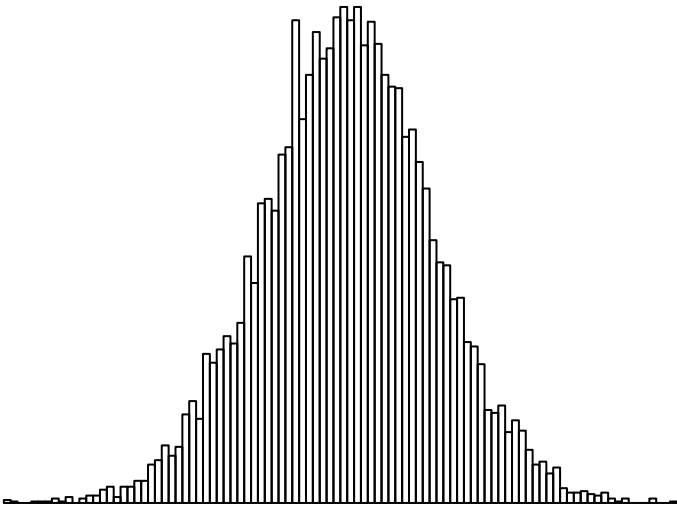

-9.0      -8.5      -8.0      -7.5      -7.0      -6.5      -6.0      -5.5

Amino Acid 4

B224:26 – B224:18

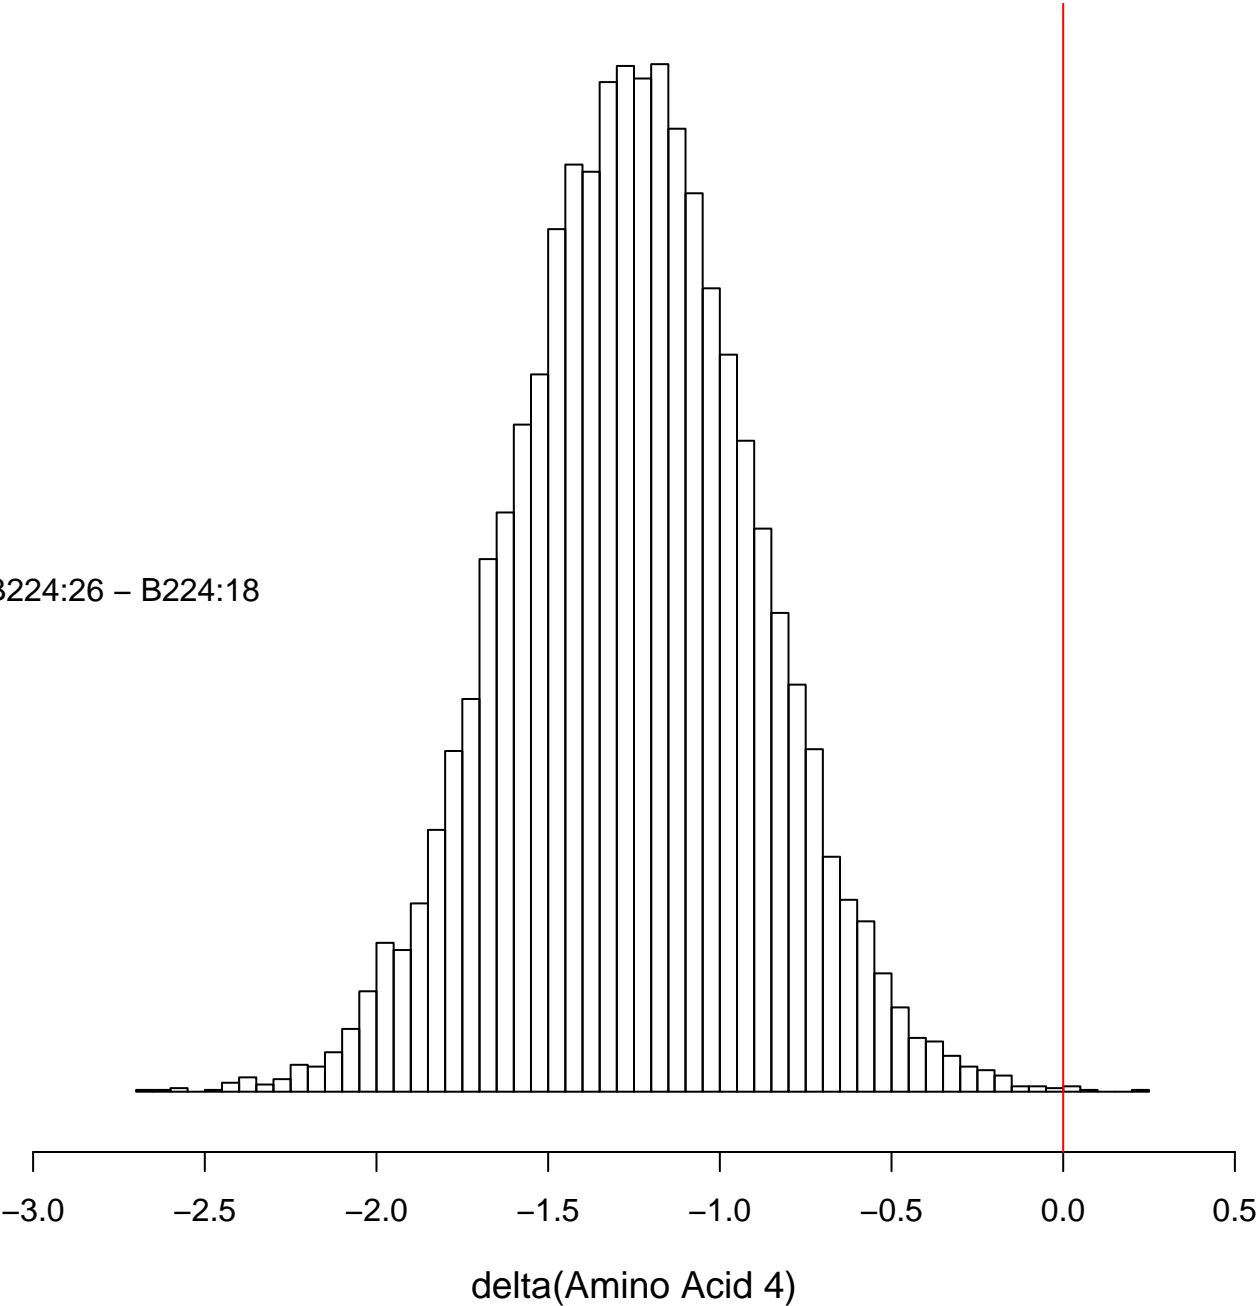



B224:26

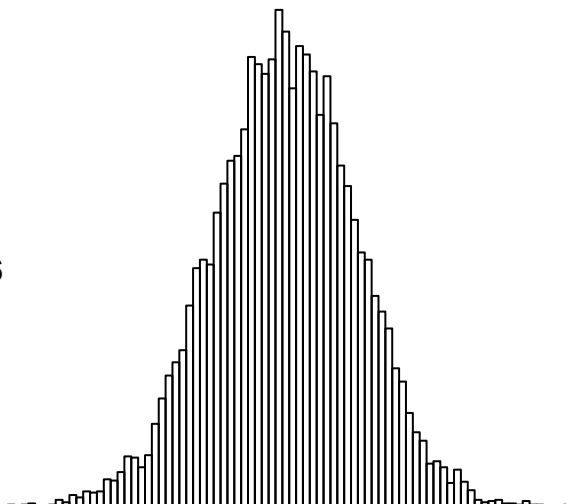

B224:18

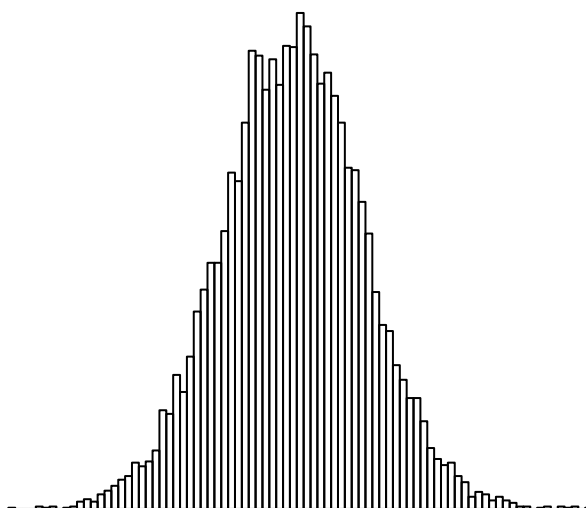

-9.0      -8.5      -8.0      -7.5      -7.0      -6.5      -6.0      -5.5

Amino Acid 6

B224:26 – B224:18

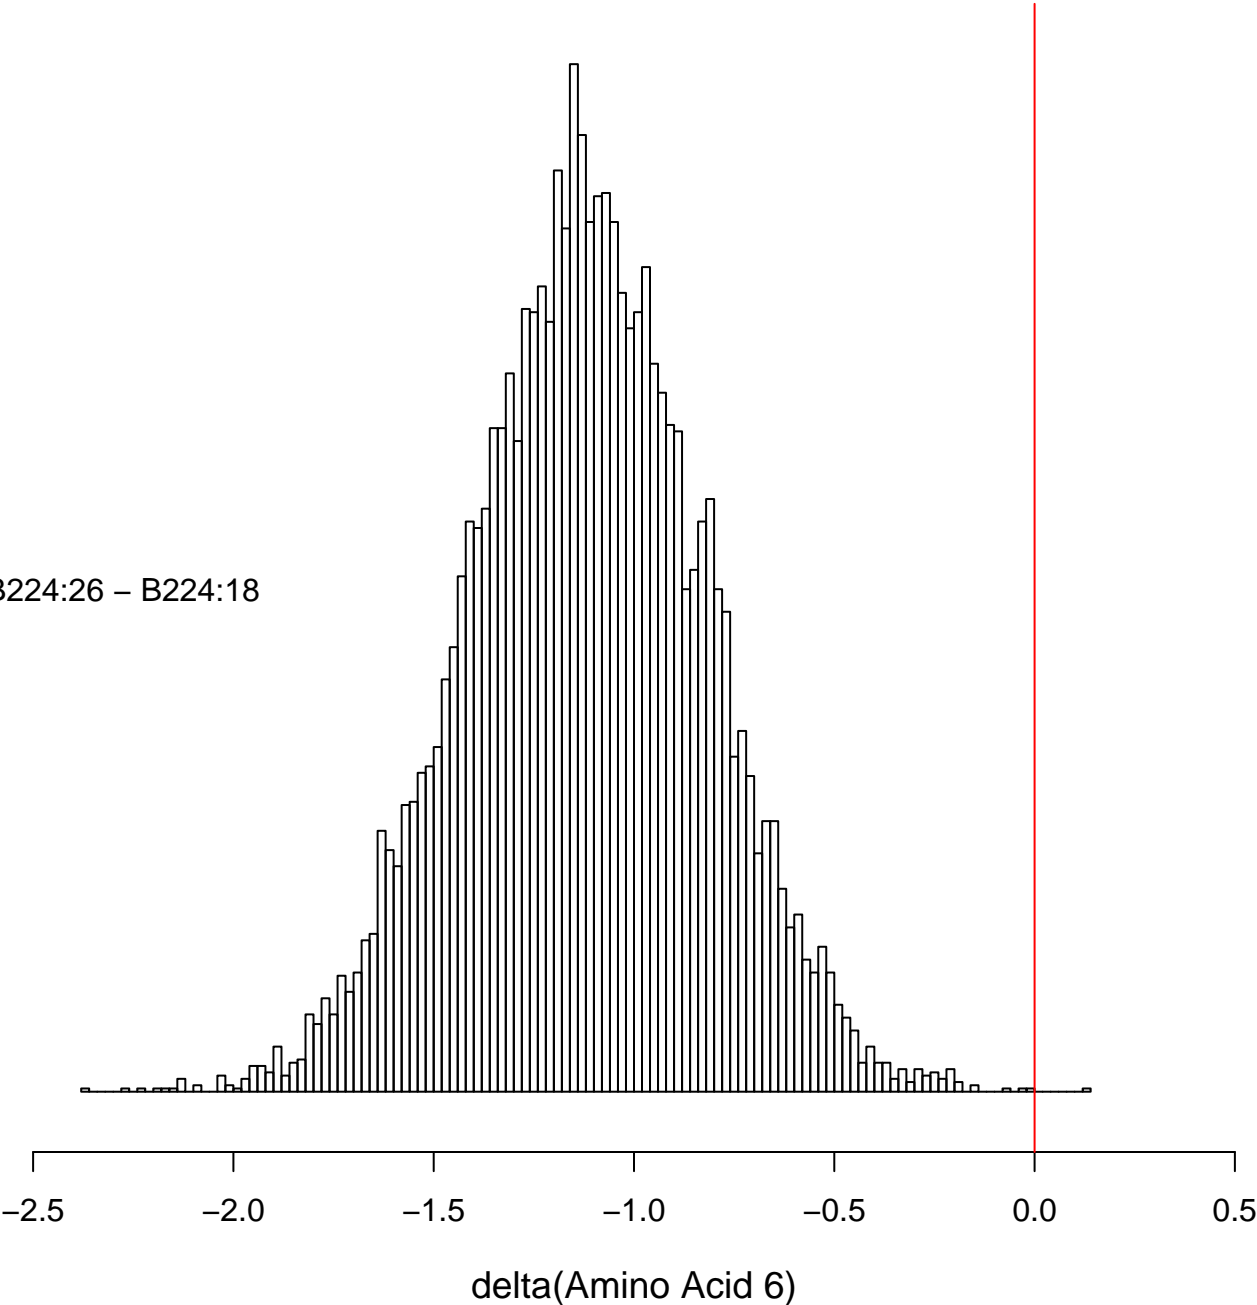

B224:26

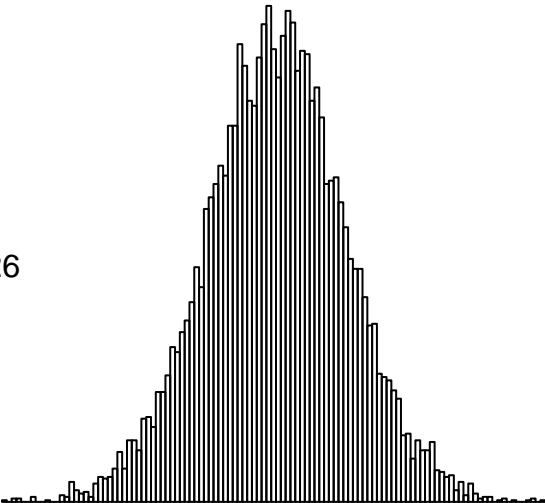

B224:18

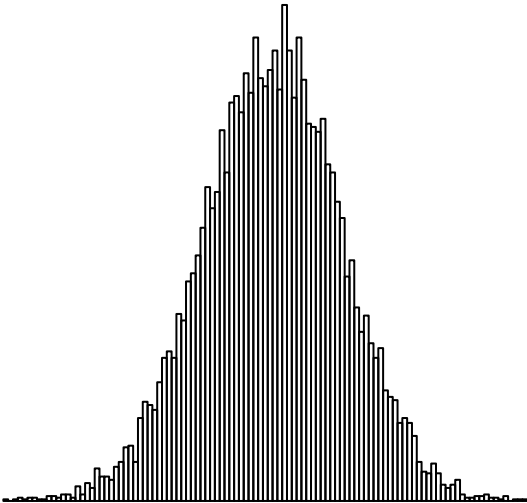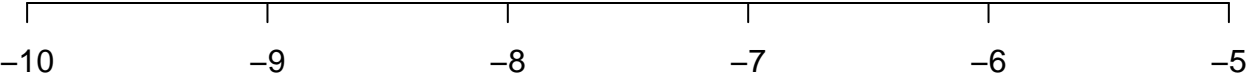

Valine

B224:26 – B224:18

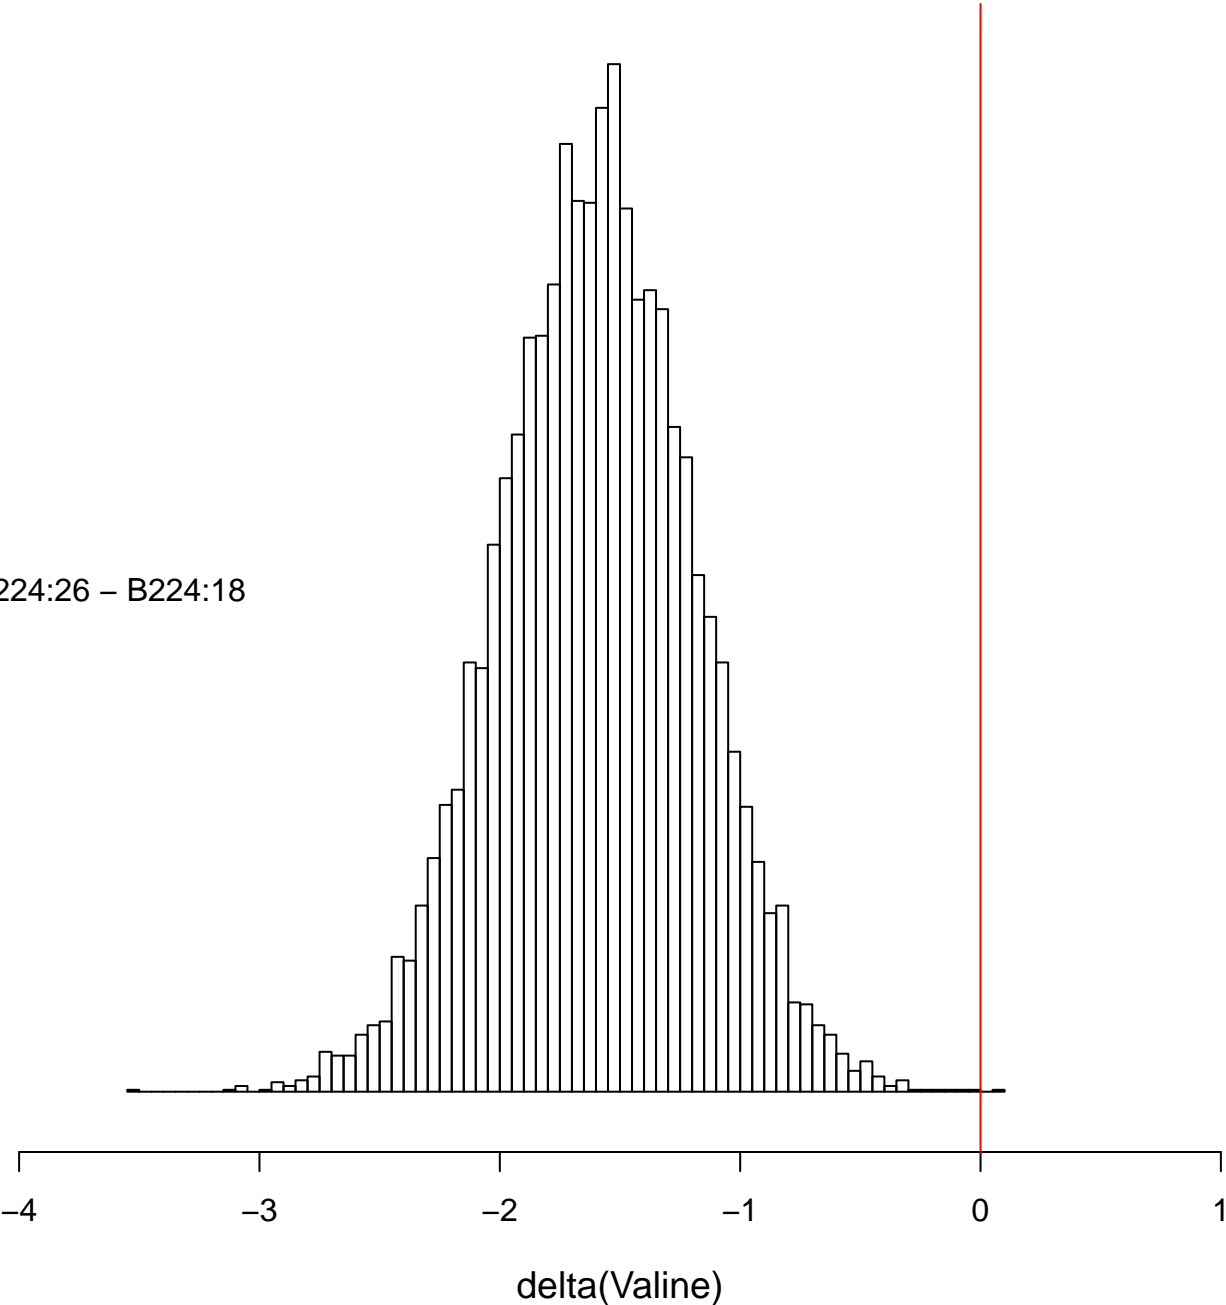

B224:26

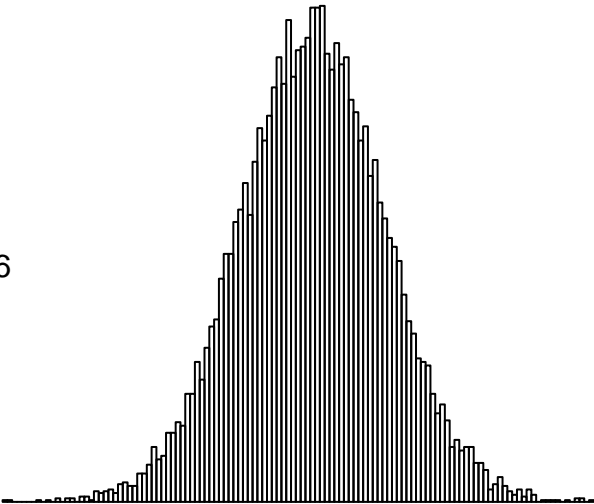

B224:18

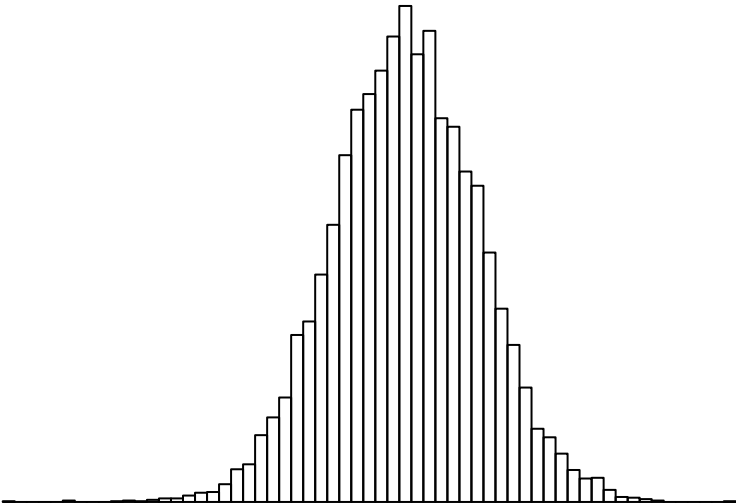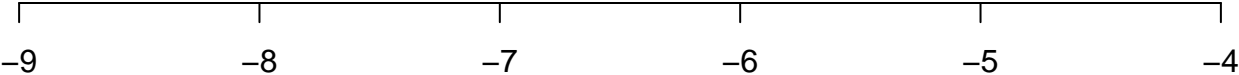

Amino Acid 7

B224:26 – B224:18

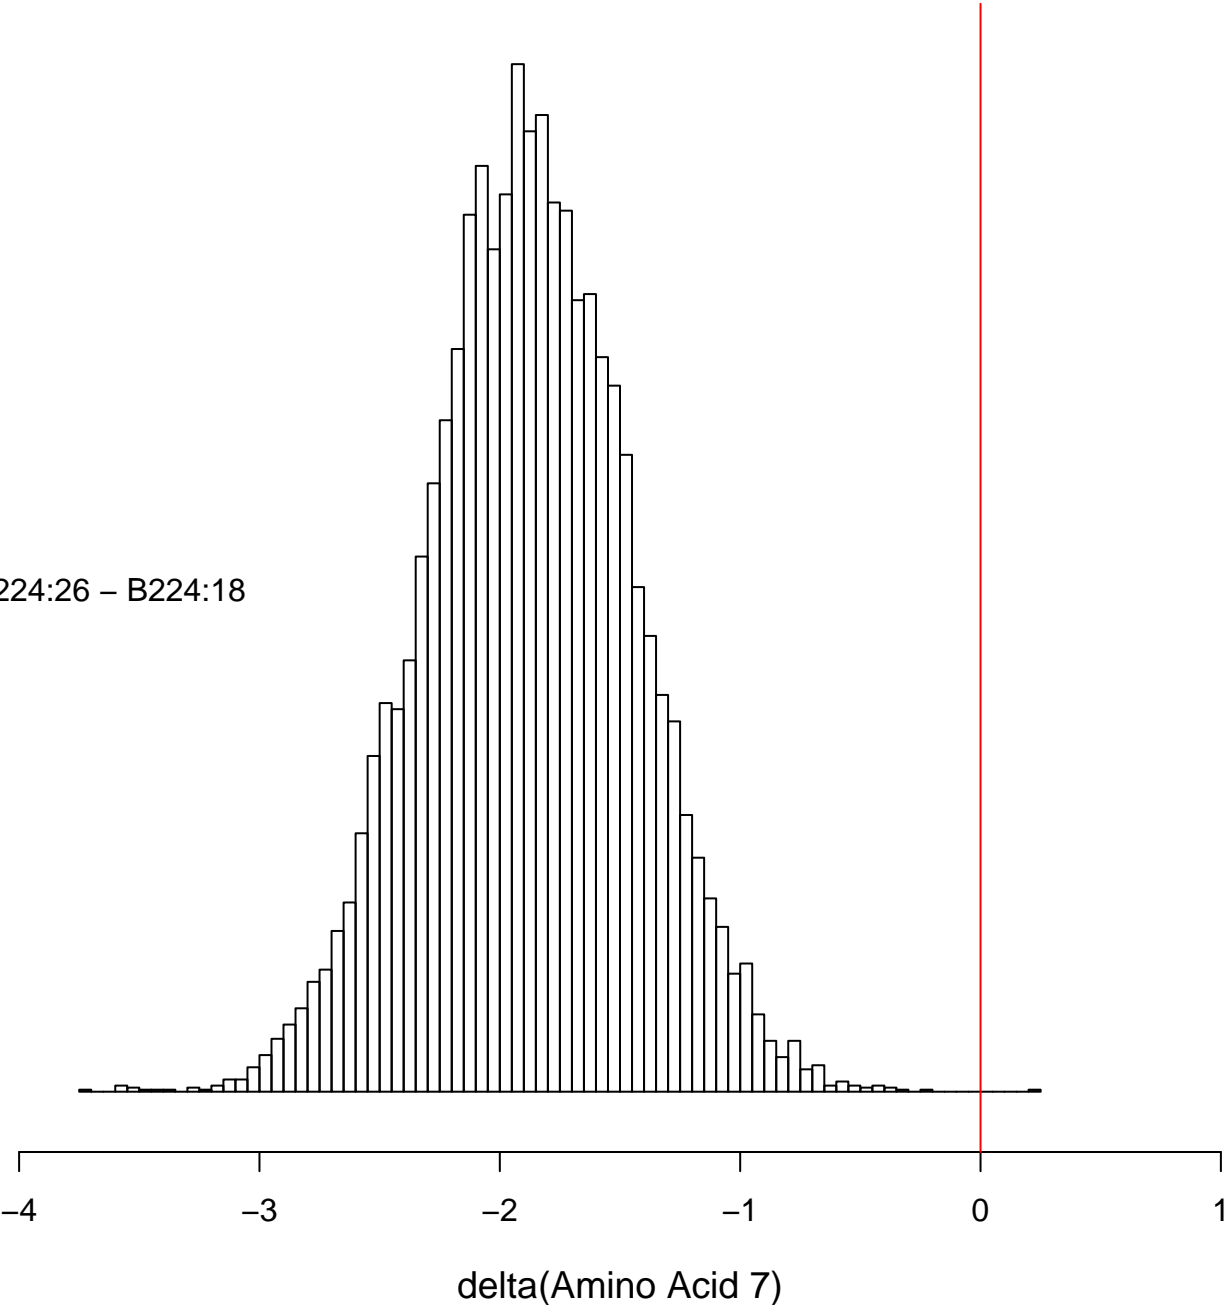

B224:26

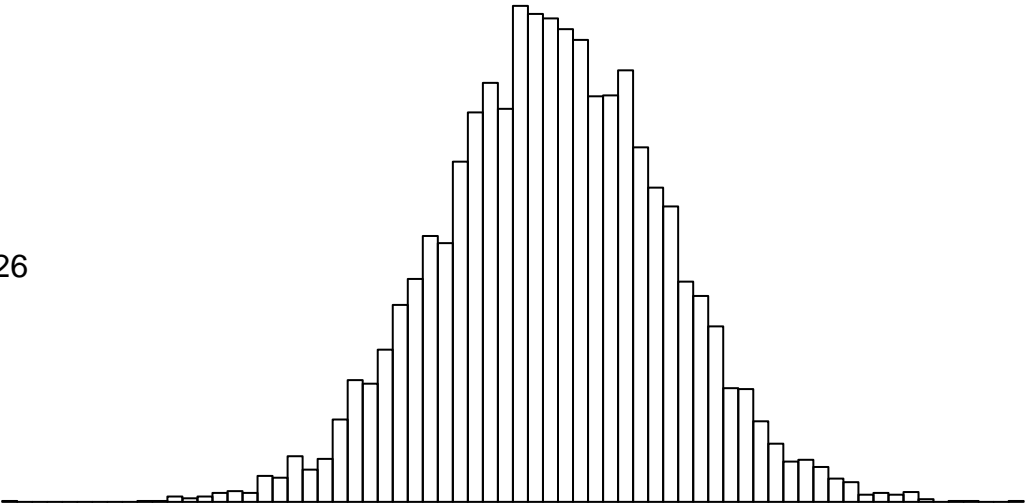

B224:18

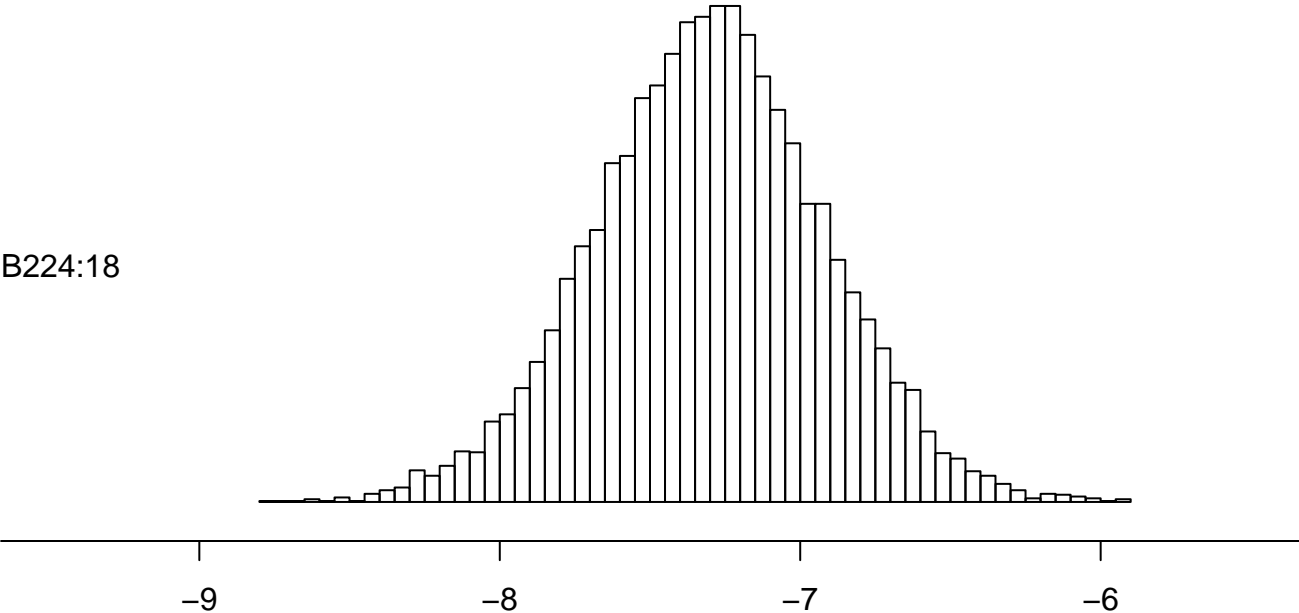

Glycine

B224:26 – B224:18

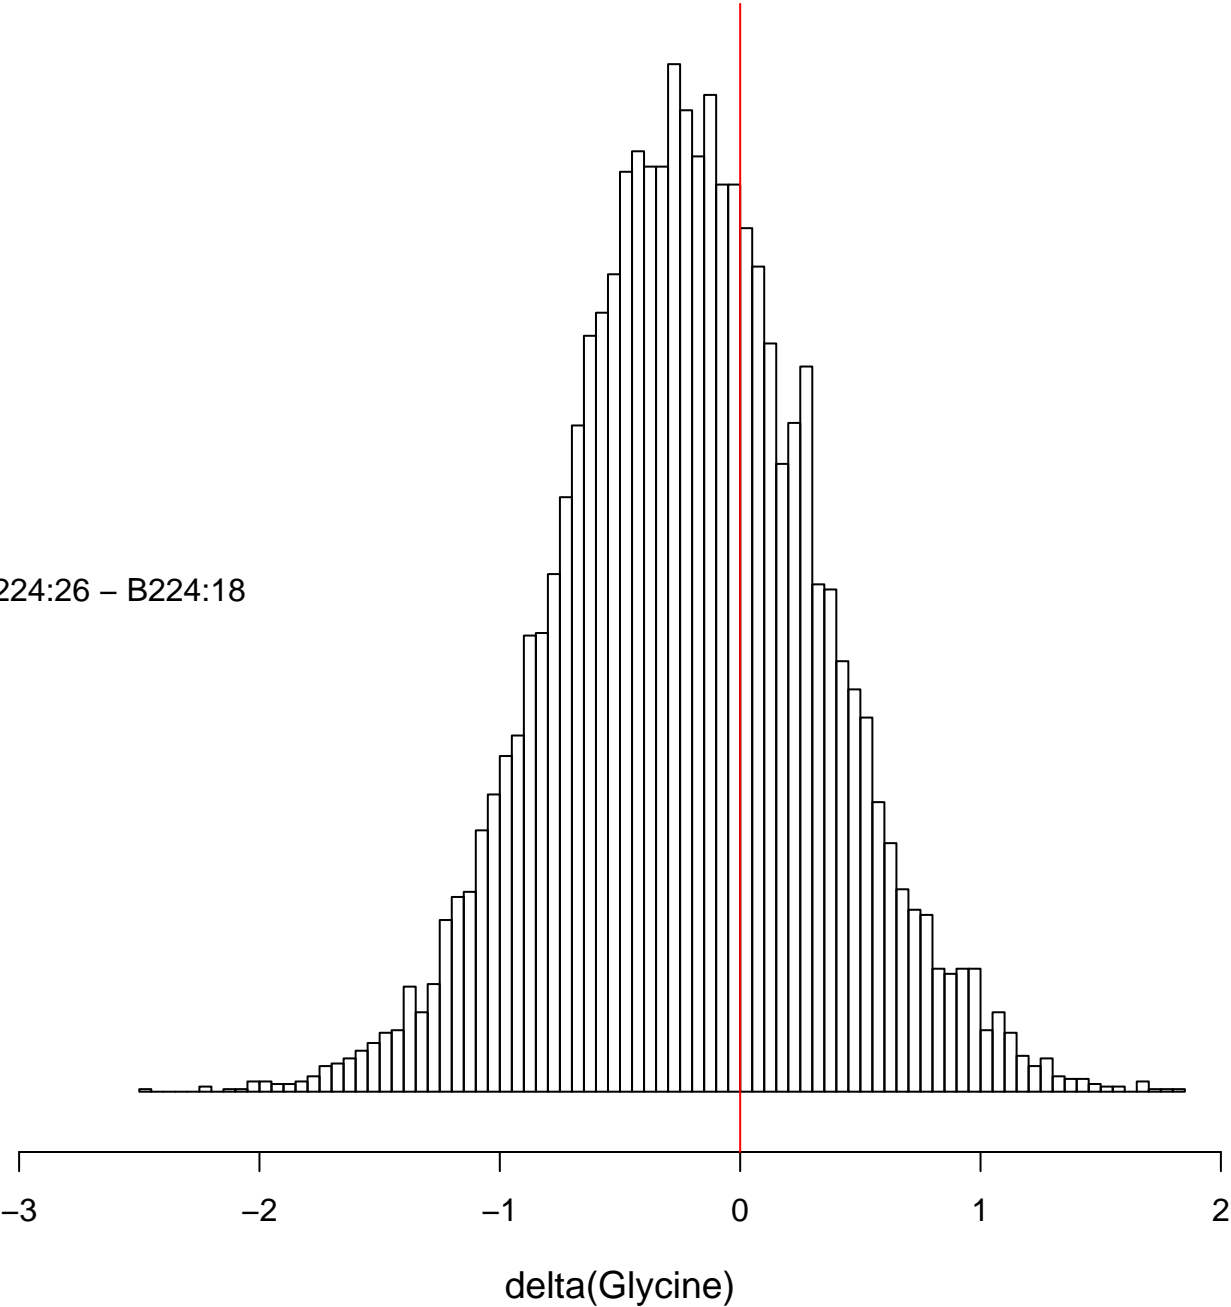



B224:26

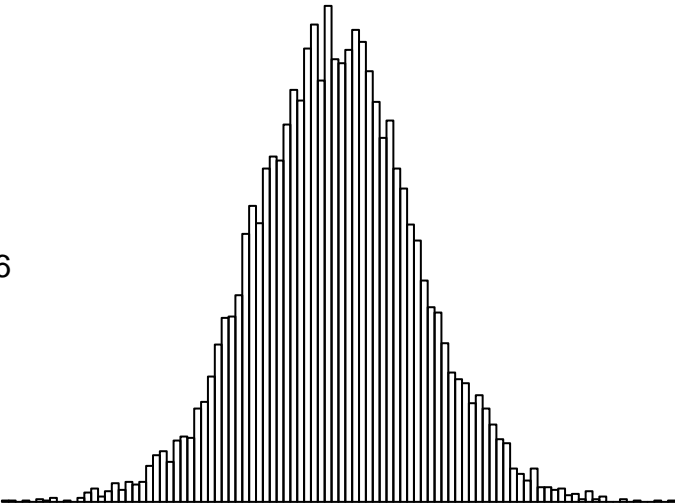

B224:18

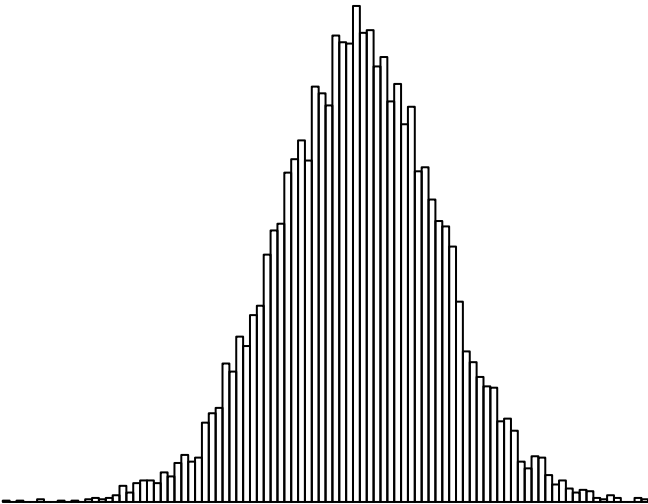

-10.0      -9.5      -9.0      -8.5      -8.0      -7.5      -7.0      -6.5

Amino Acid 8

B224:26 – B224:18

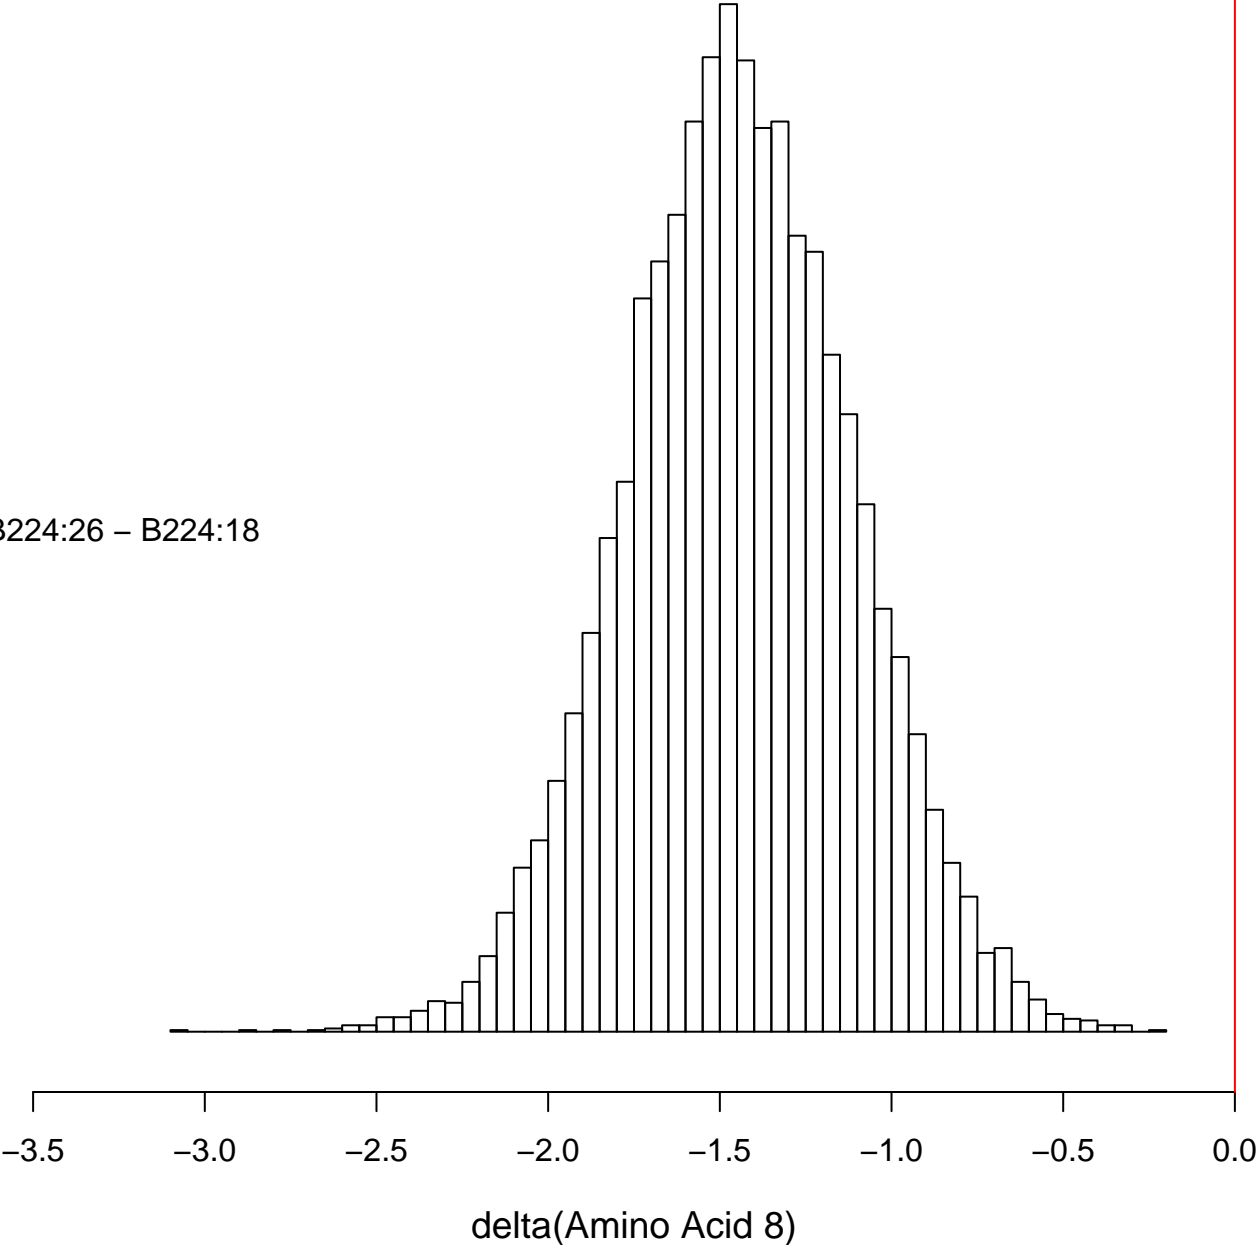

B224:26

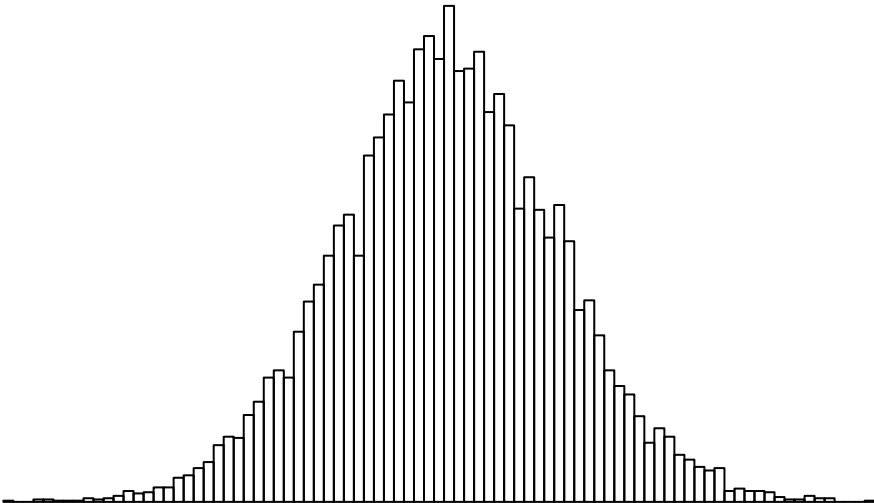

B224:18

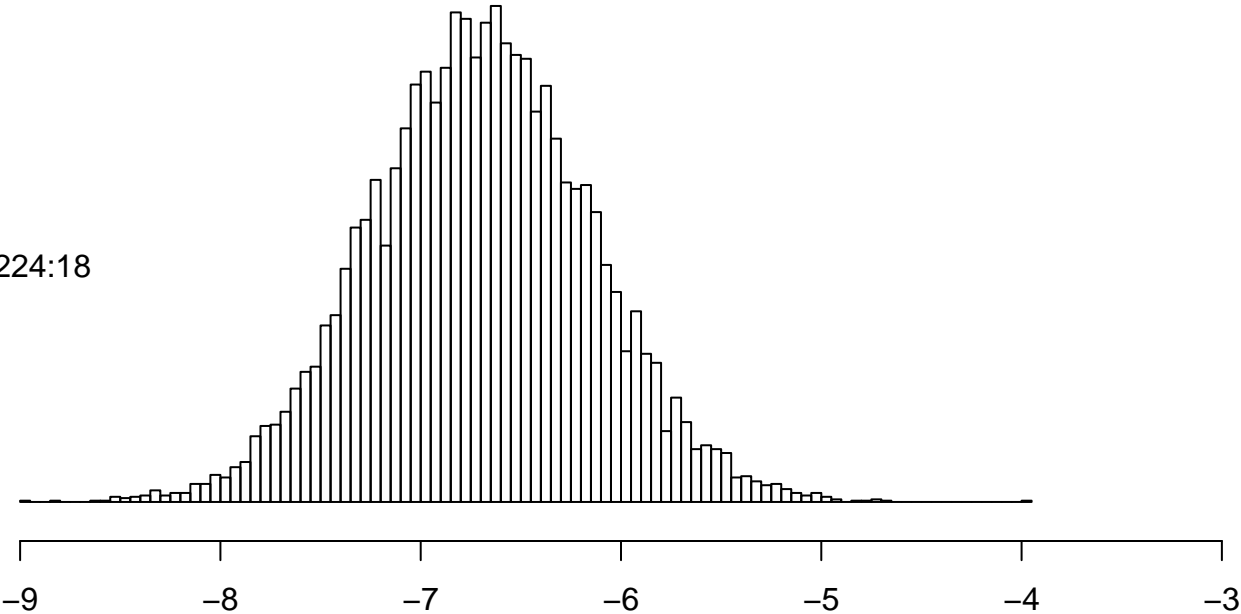

Amino Acid 10

B224:26 – B224:18

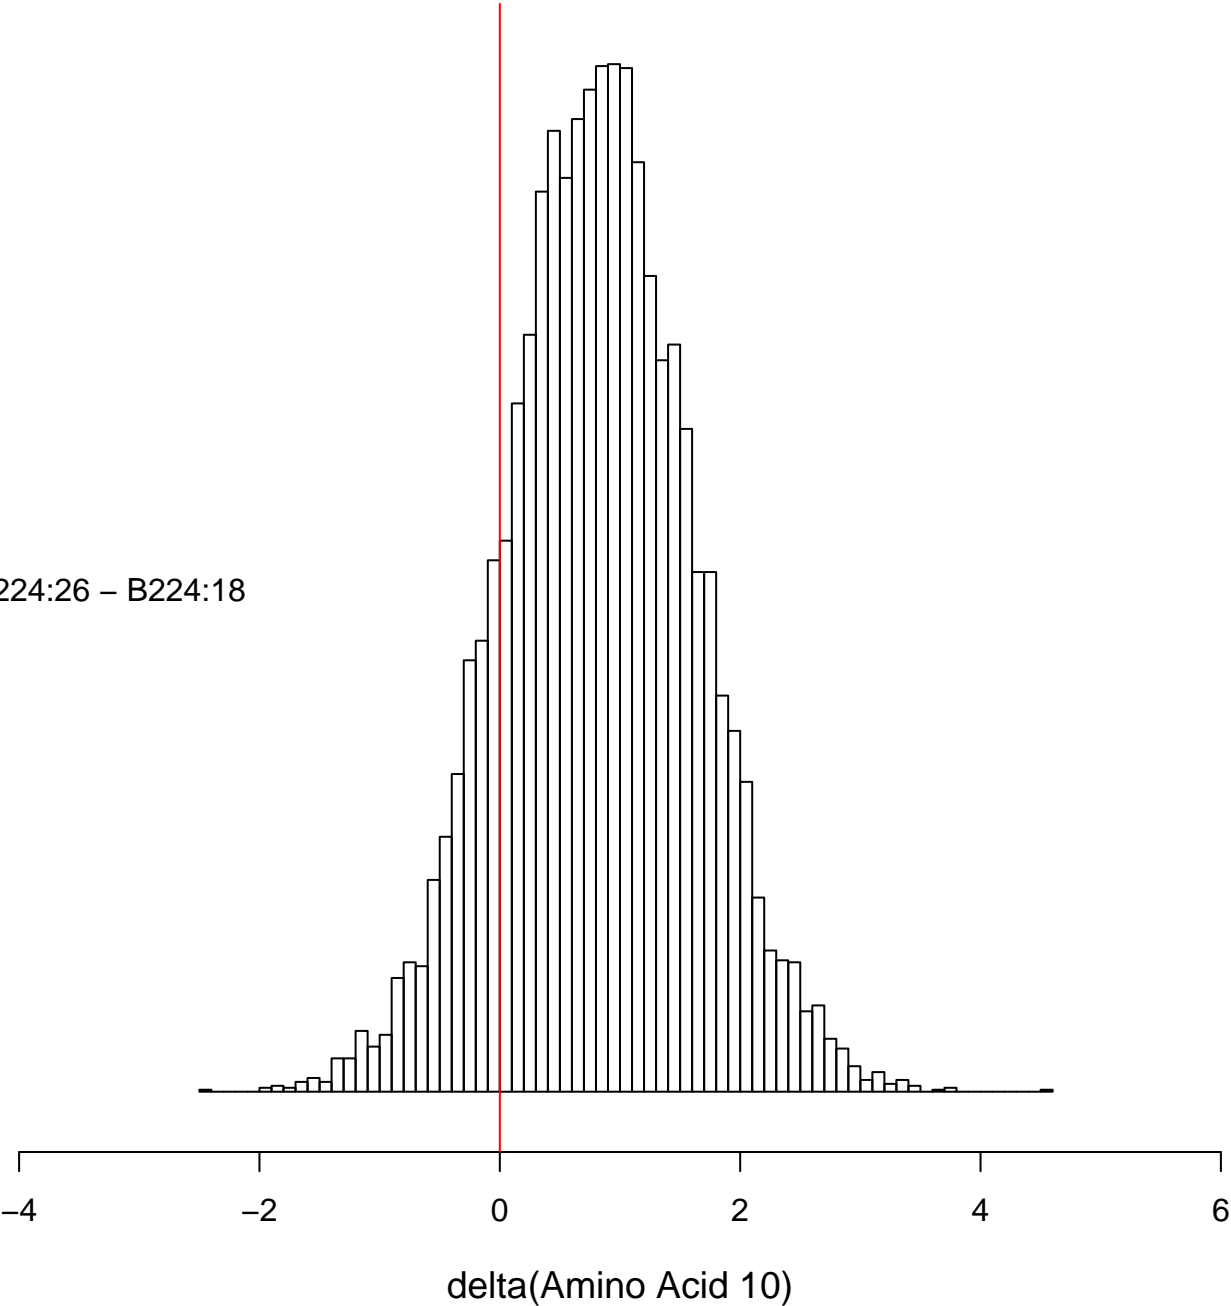

B224:26

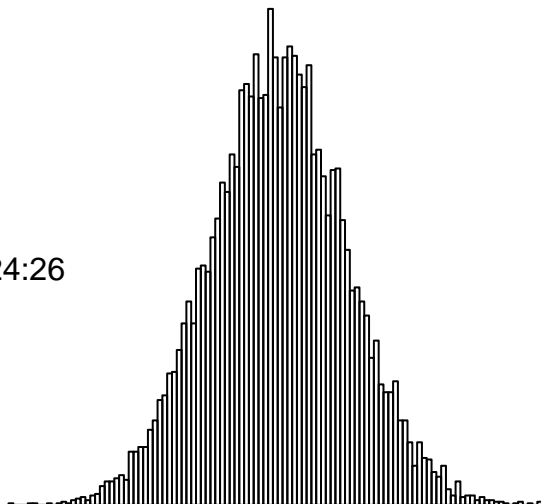

B224:18

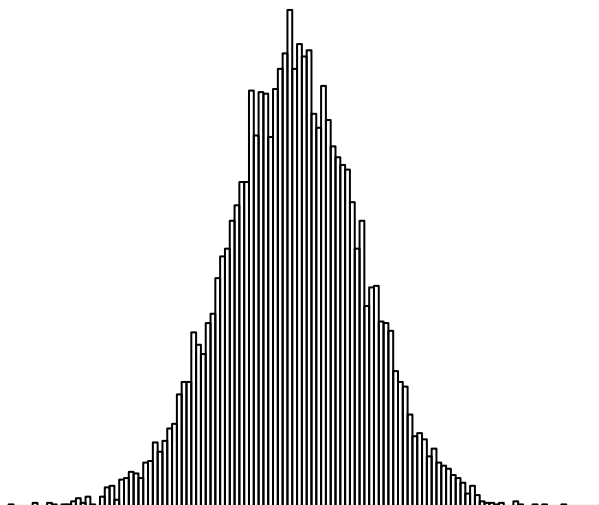

-7.5      -7.0      -6.5      -6.0      -5.5      -5.0

Disaccharide 2

B224:26 – B224:18

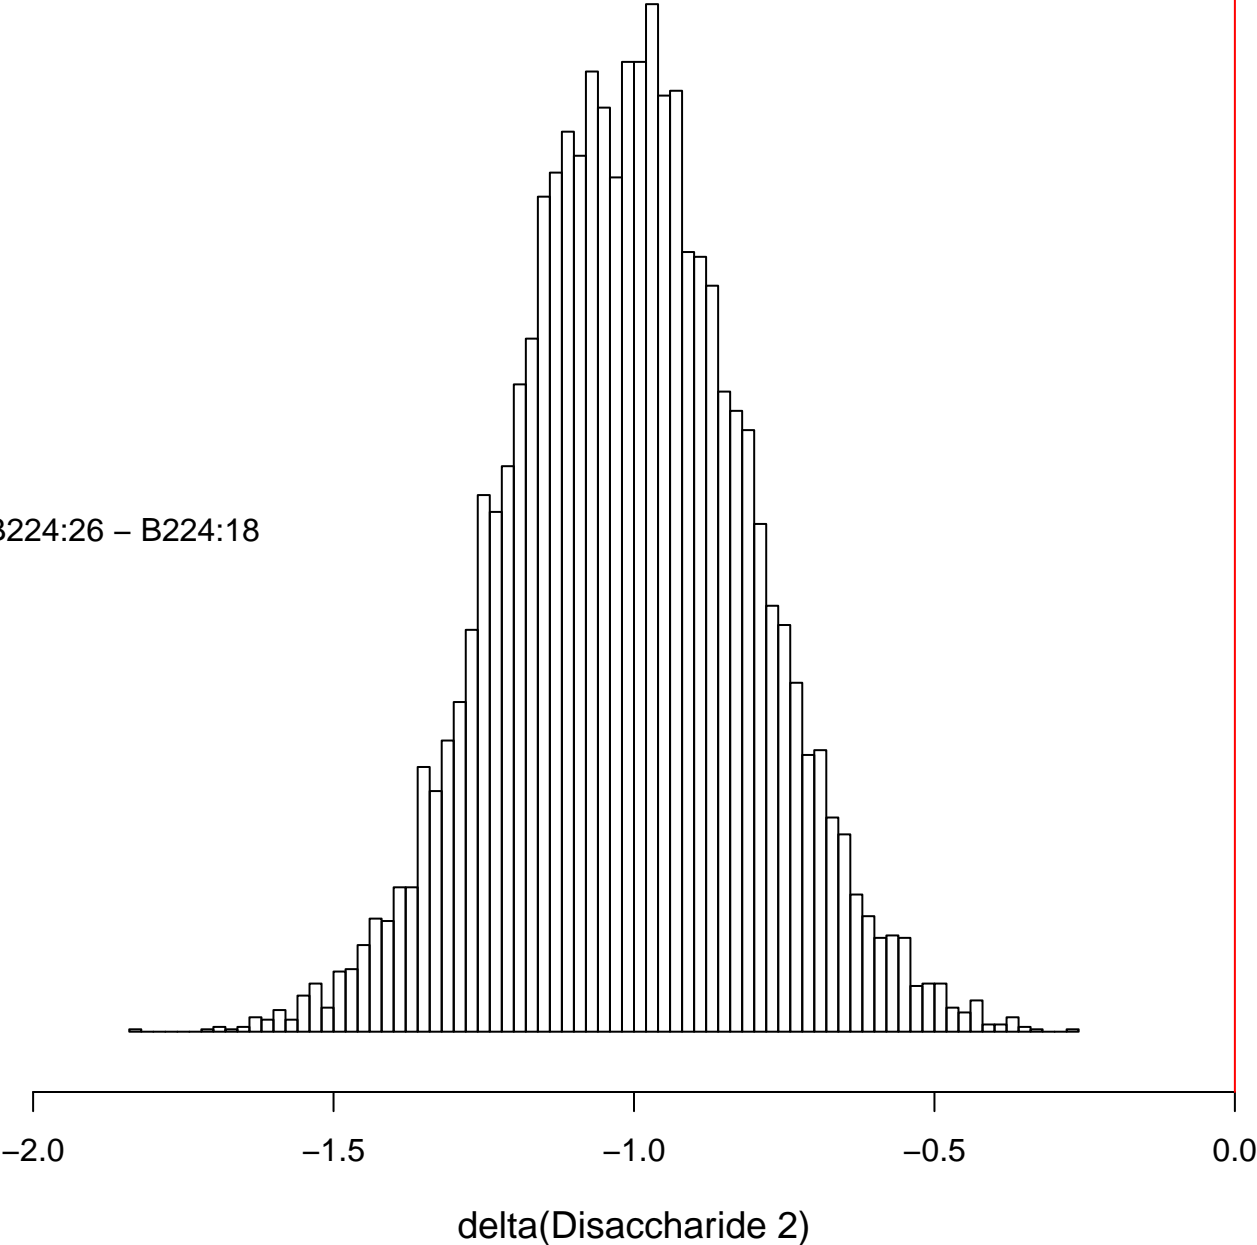

B224:26

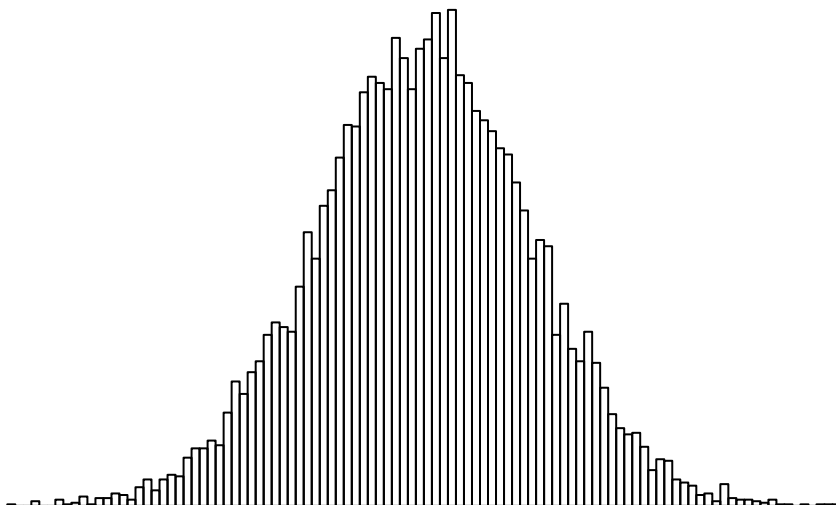

B224:18

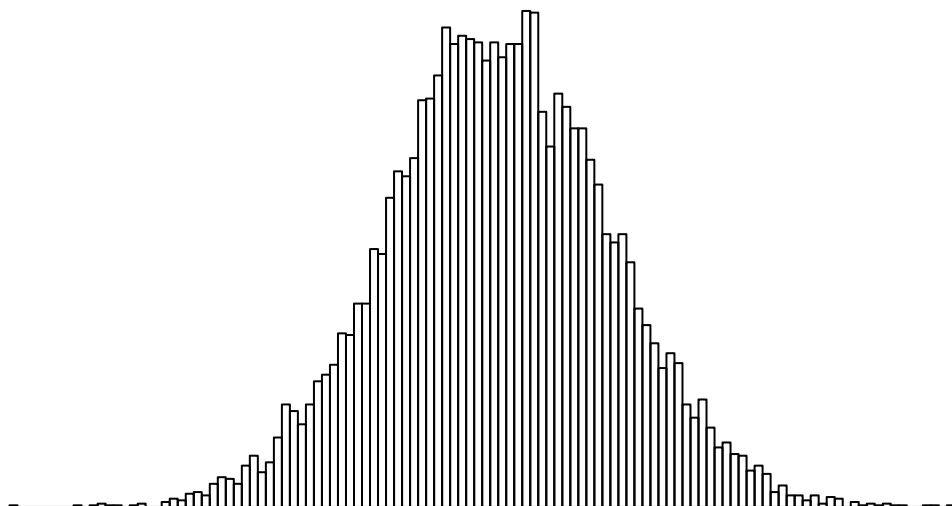

-8.0

-7.5

-7.0

-6.5

-6.0

-5.5

-5.0

Disaccharide 3

B224:26 – B224:18

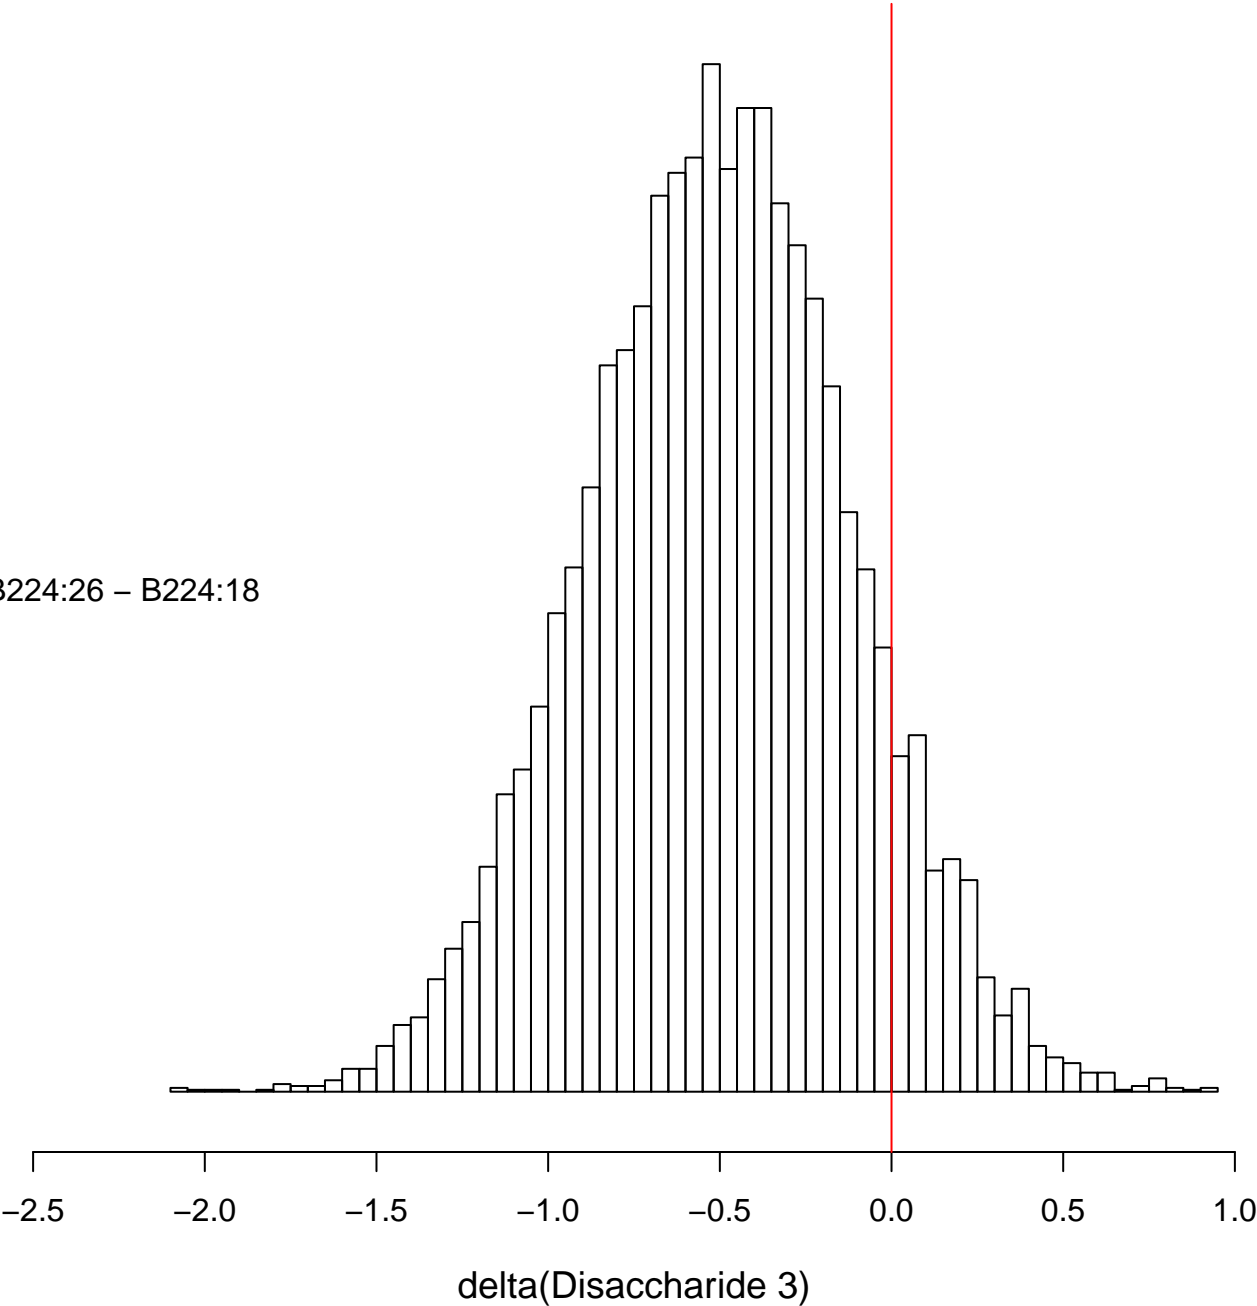



B224:26

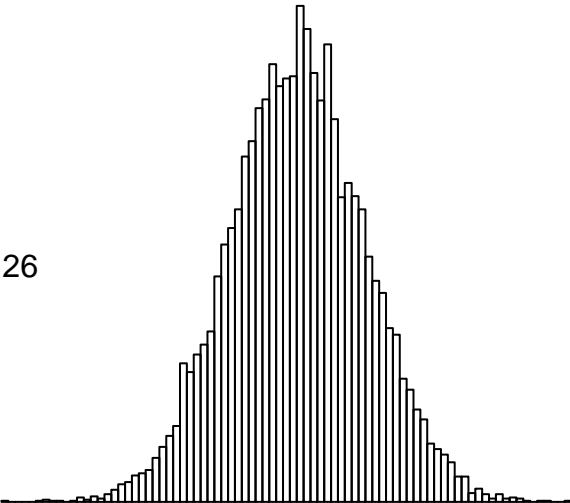

B224:18

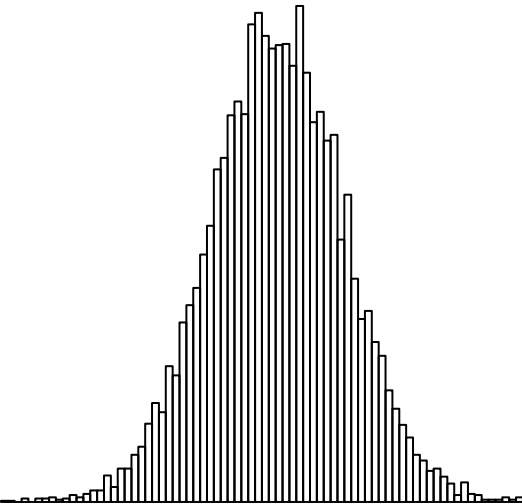

-8.5      -8.0      -7.5      -7.0      -6.5      -6.0      -5.5      -5.0

Disaccharide 4

B224:26 – B224:18

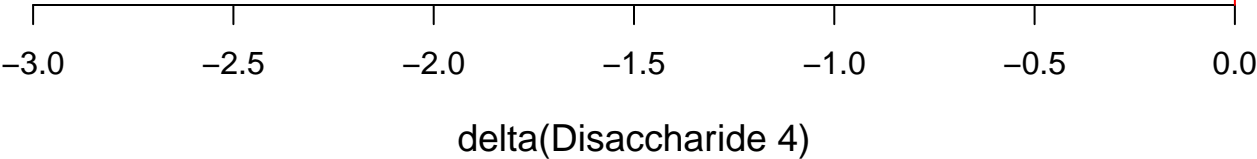

B224:26

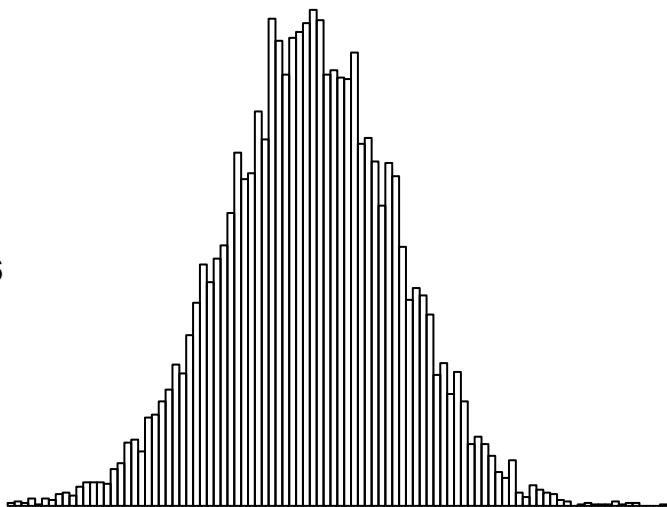

B224:18

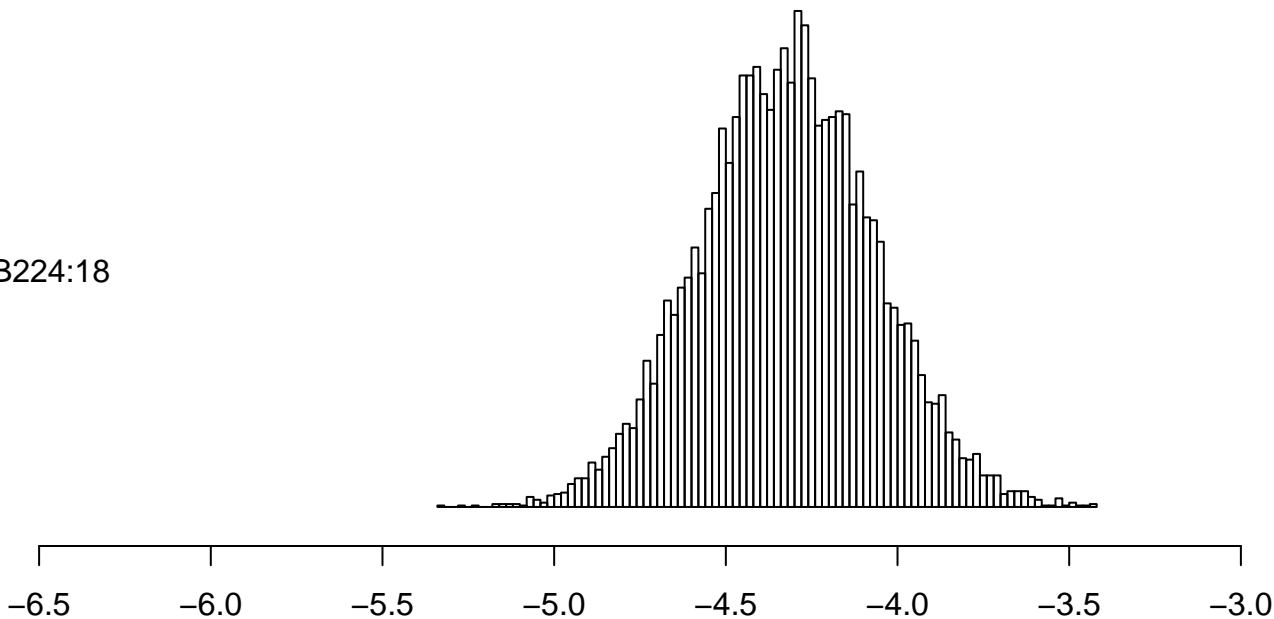

Disaccharide 5

B224:26 – B224:18

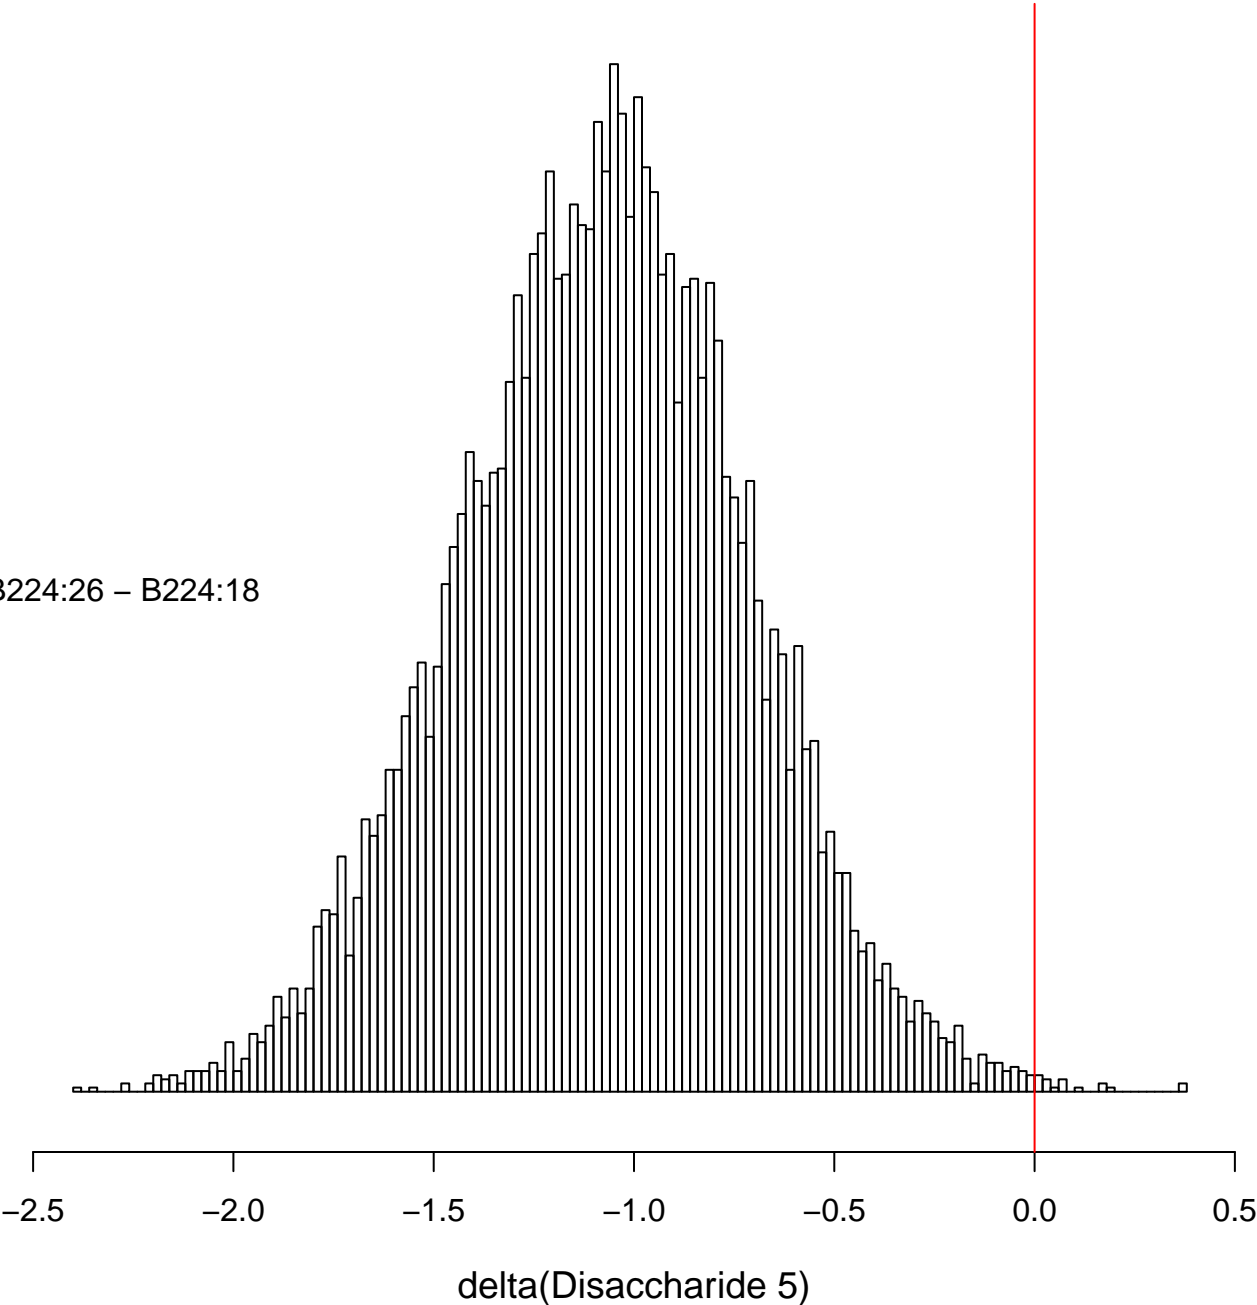

B224:26

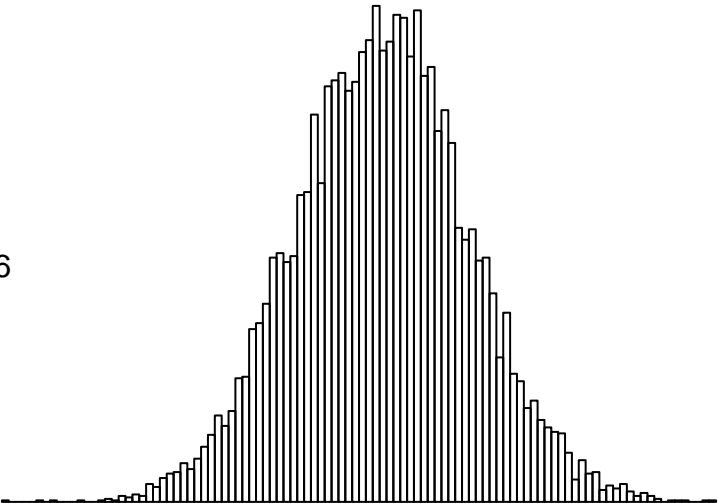

B224:18

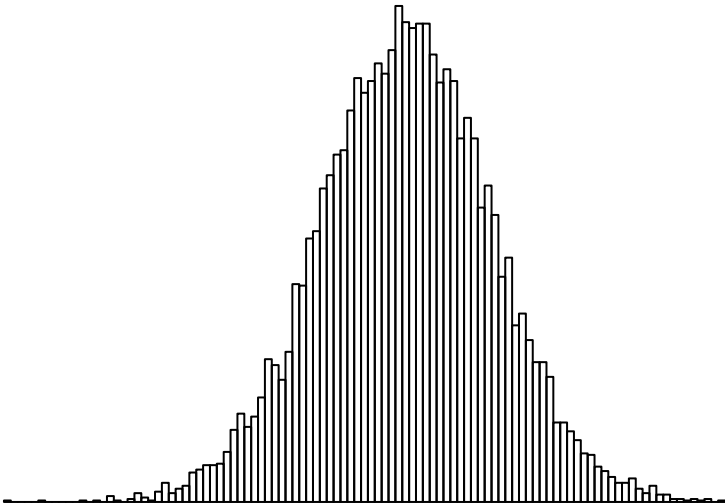

-6.0      -5.5      -5.0      -4.5      -4.0      -3.5      -3.0      -2.5

Disaccharide 6

B224:26 – B224:18

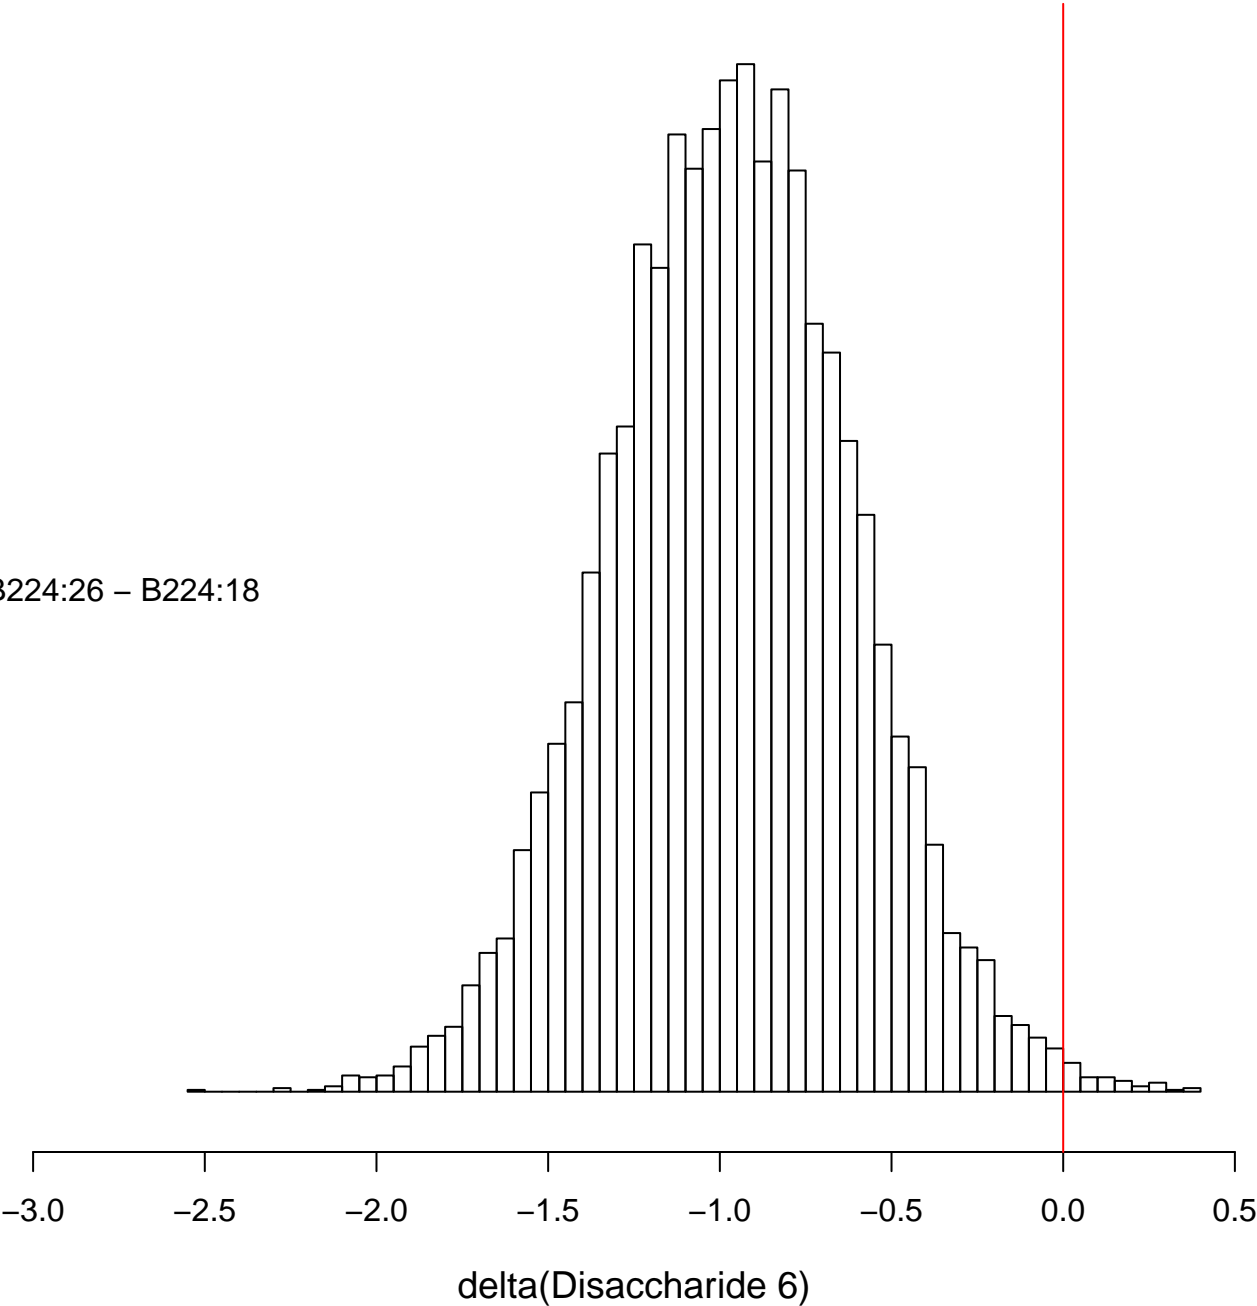

B224:26

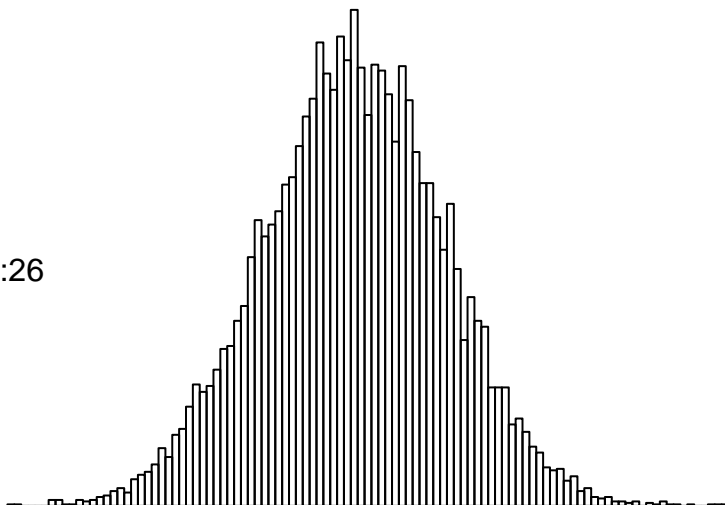

B224:18

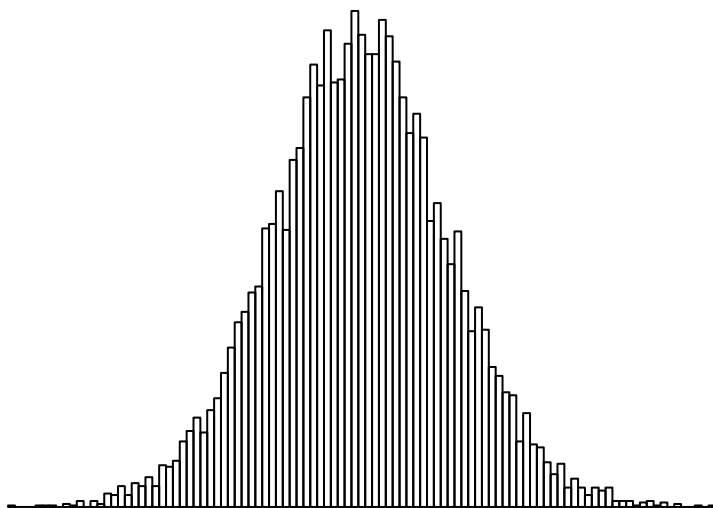

-5.5      -5.0      -4.5      -4.0      -3.5      -3.0      -2.5      -2.0

Disaccharide 7

B224:26 – B224:18

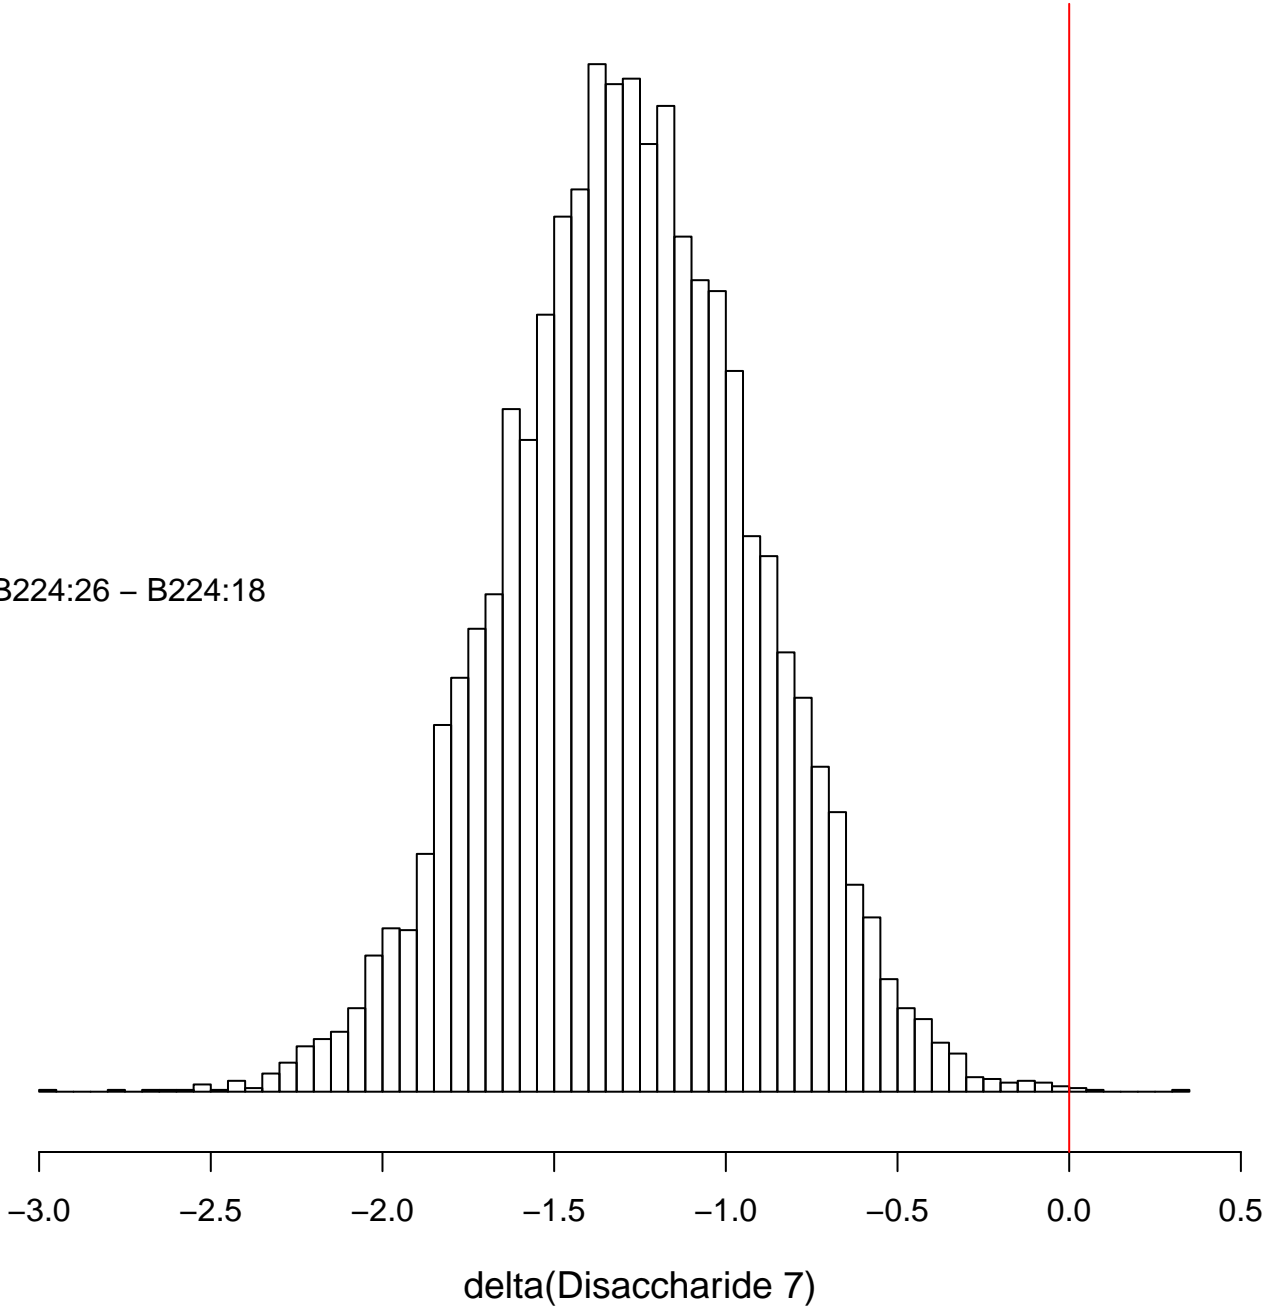



B224:26

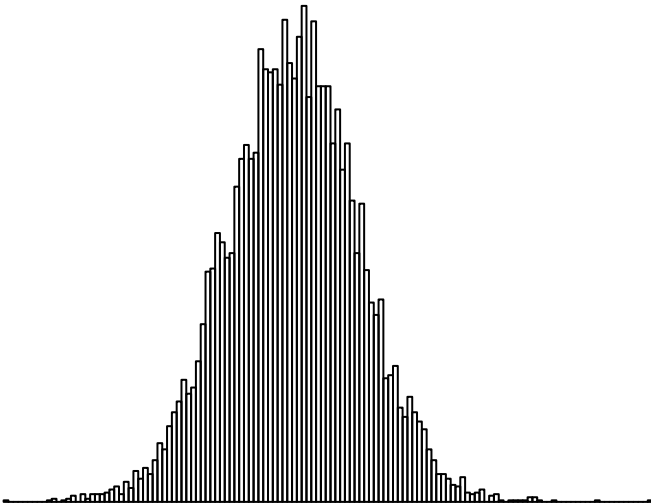

B224:18

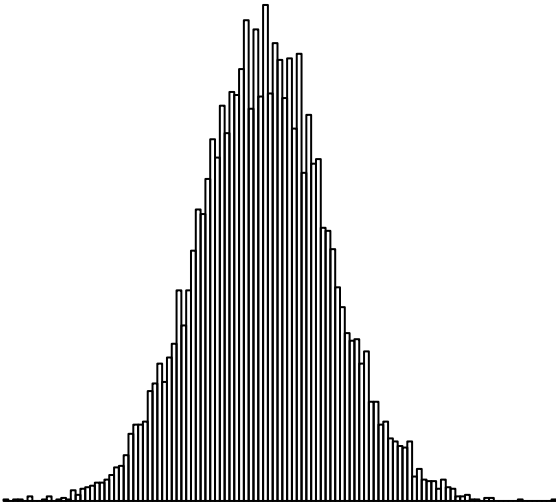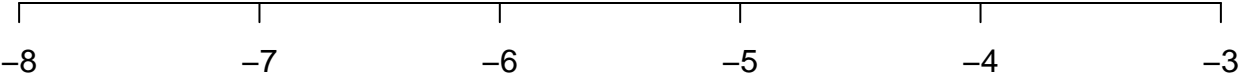

Disaccharide 8

B224:26 – B224:18

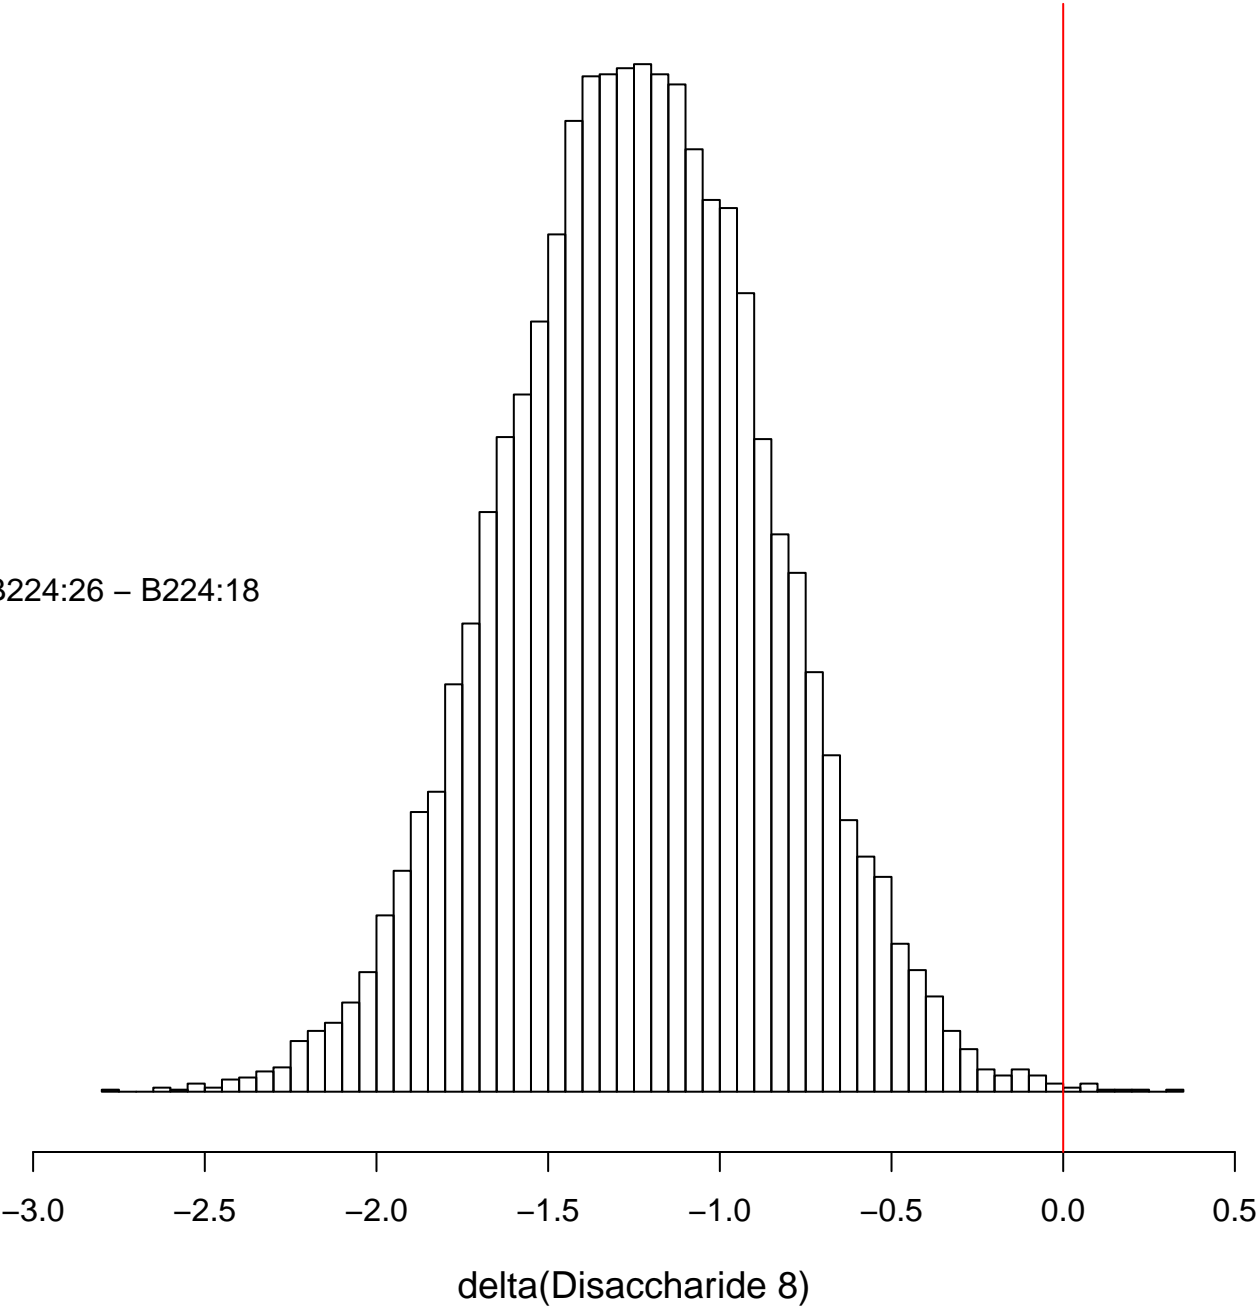

B224:26

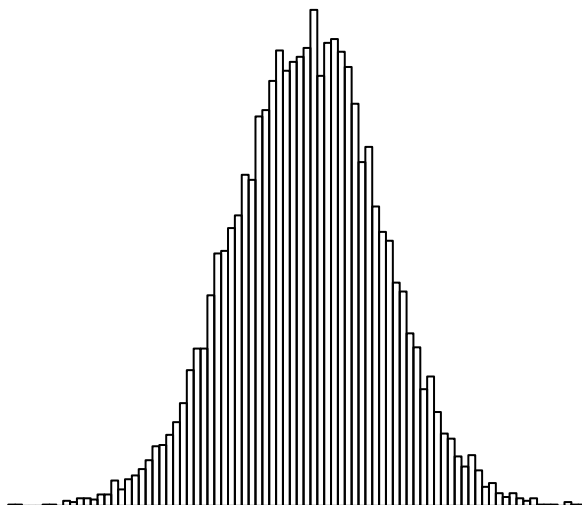

B224:18

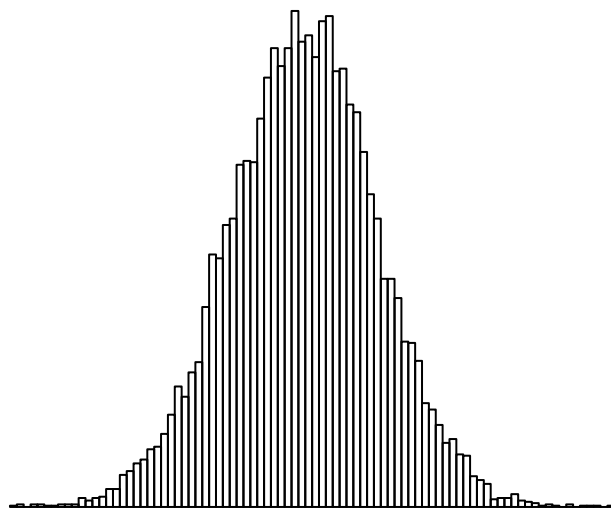

-9.5      -9.0      -8.5      -8.0      -7.5      -7.0      -6.5      -6.0

Disaccharide 9

B224:26 – B224:18

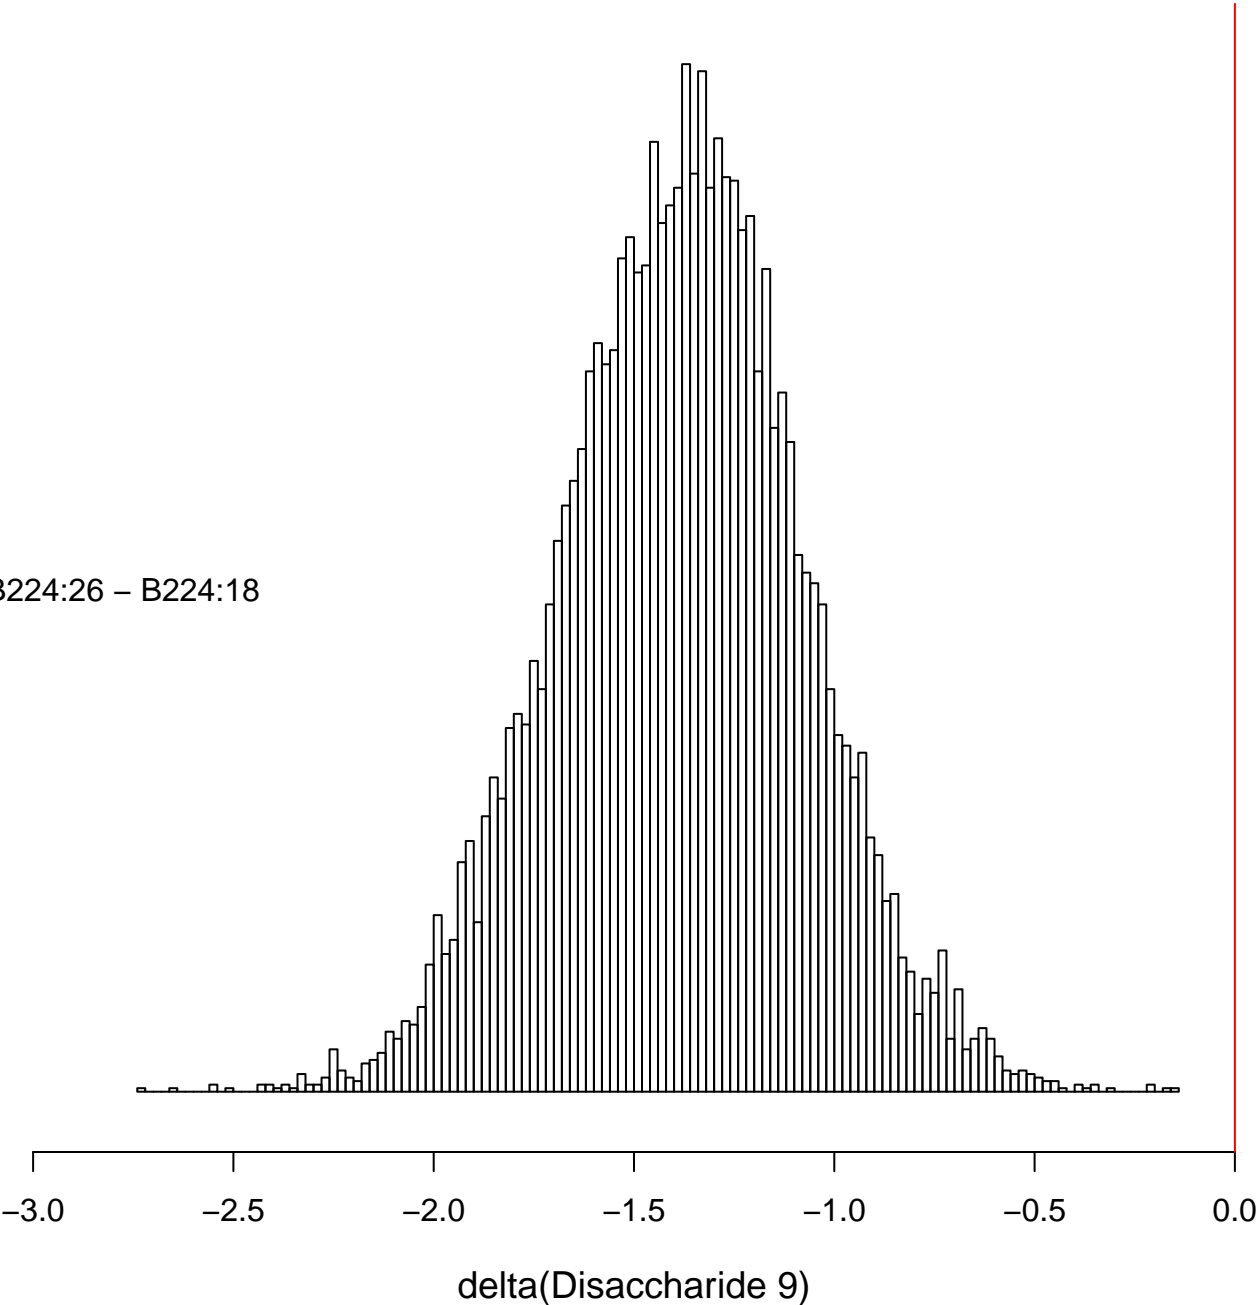

B224:26

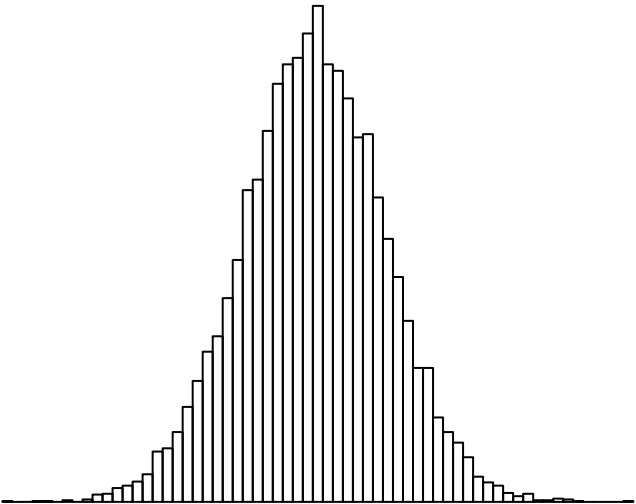

B224:18

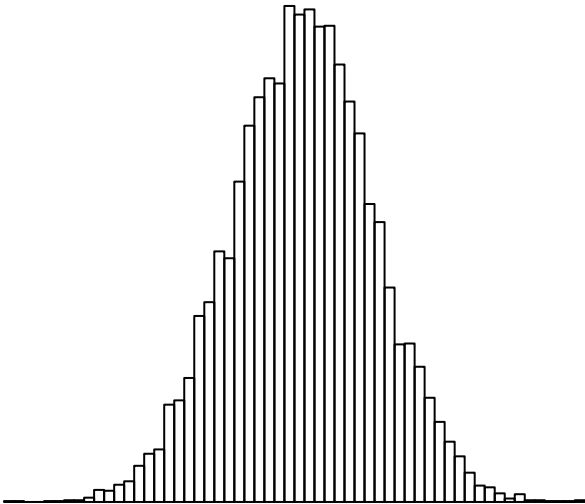

-11      -10      -9      -8      -7      -6      -5

C12:0 Fatty Acid

B224:26 – B224:18

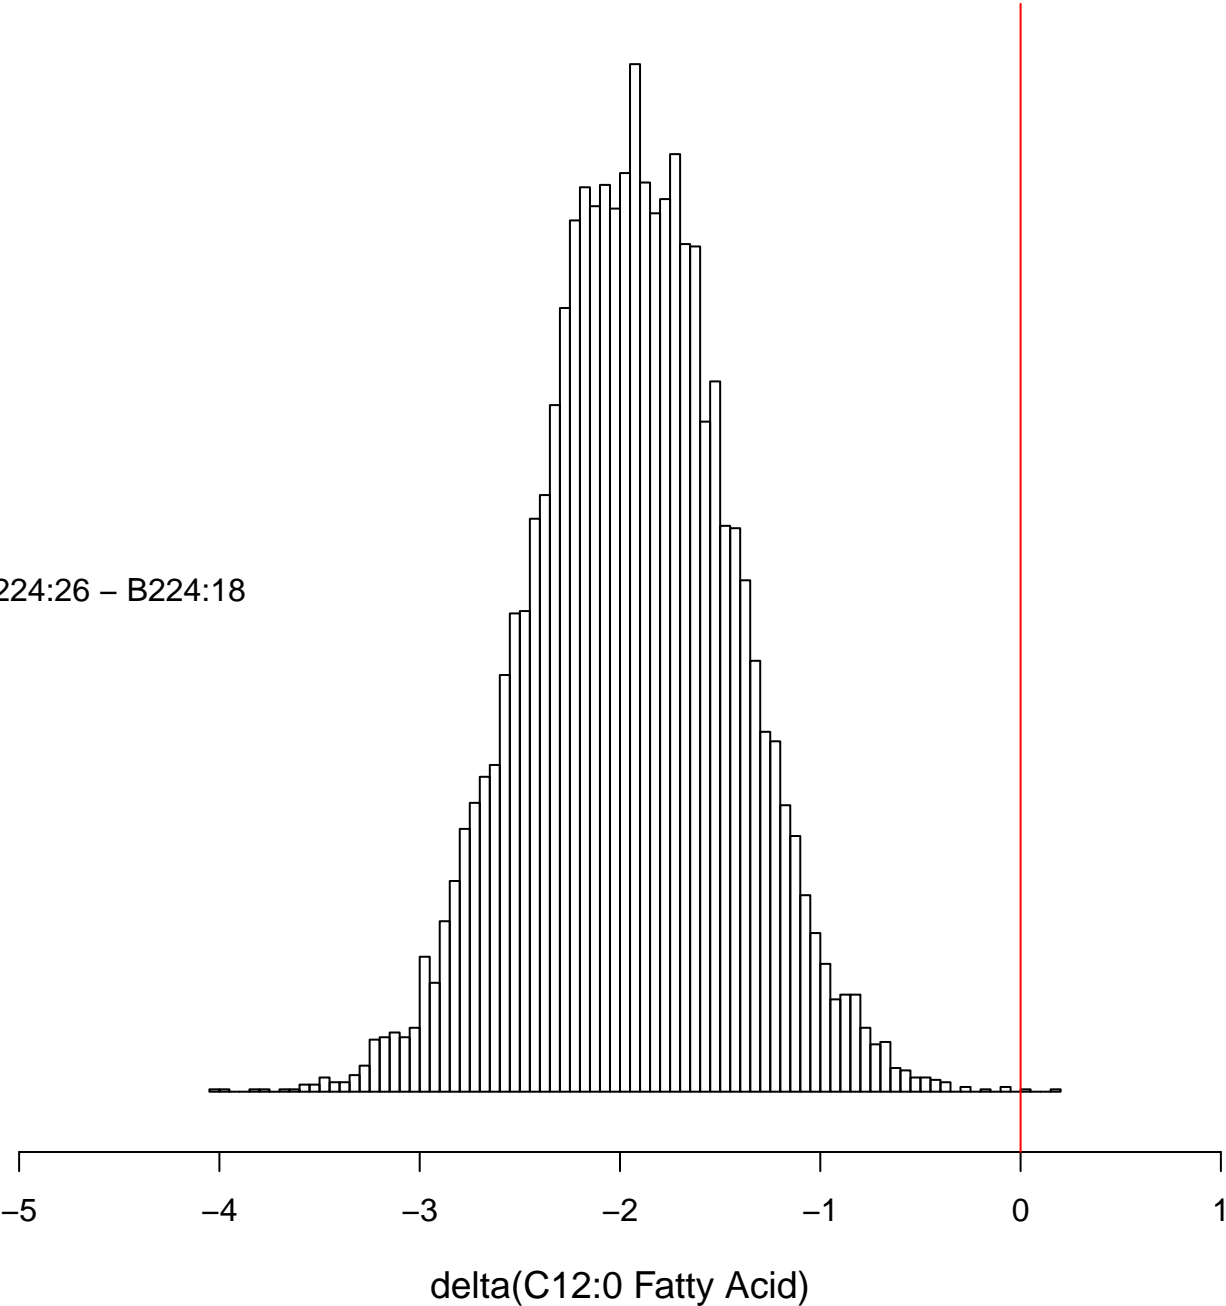

B224:26

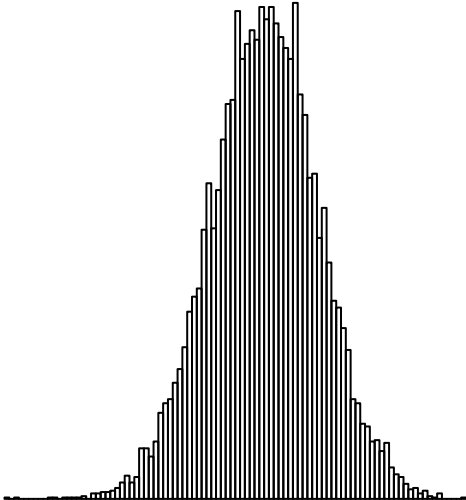

B224:18

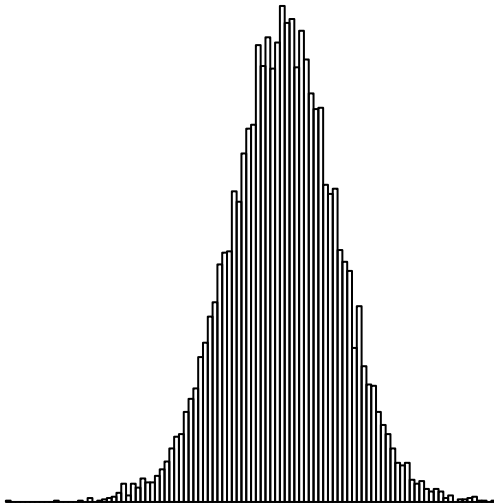

C14:1 Fatty Acid

B224:26 – B224:18

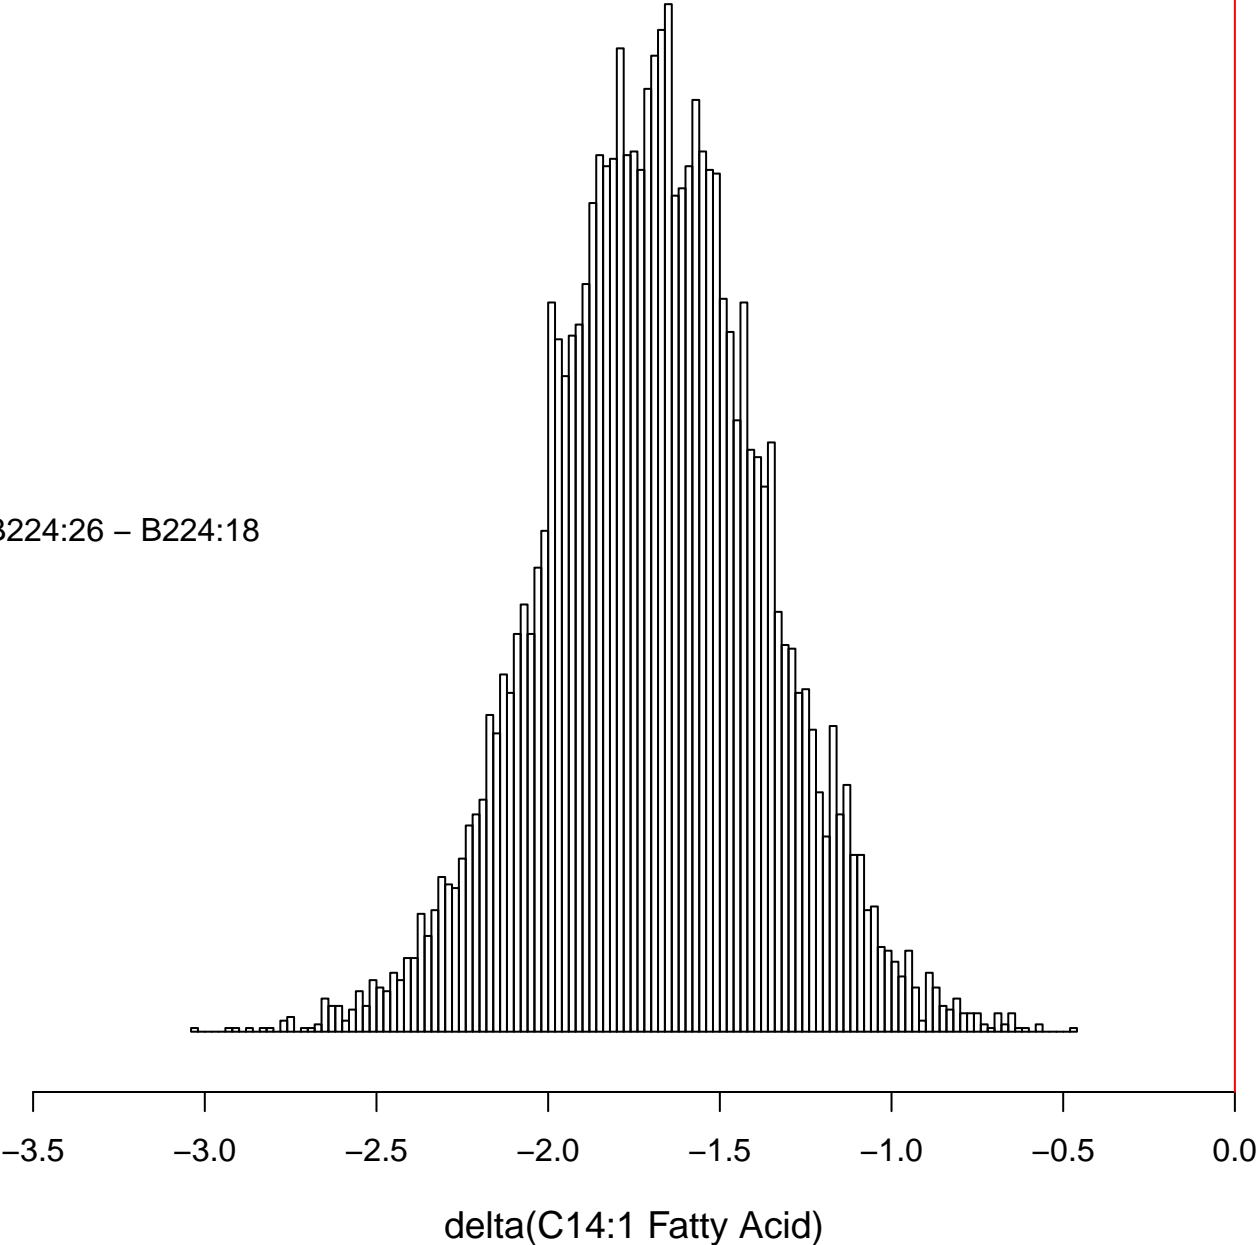



B224:26

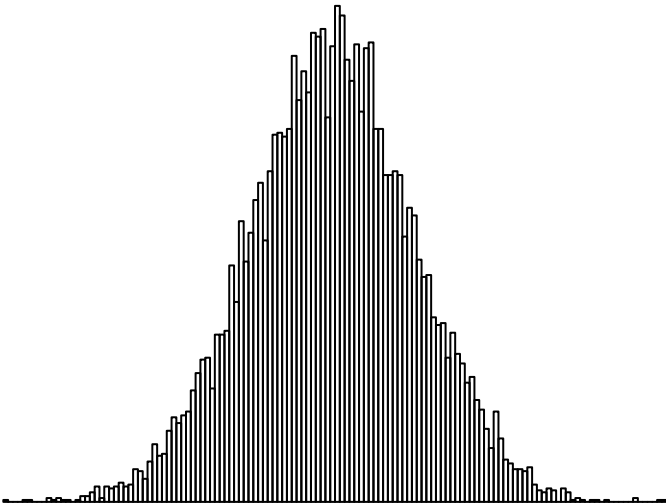

B224:18

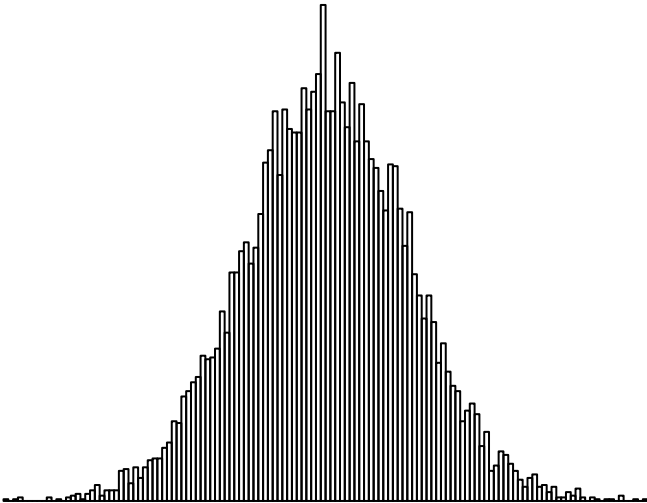

-9 -8 -7 -6 -5 -4

C14:0 Fatty Acid

B224:26 – B224:18

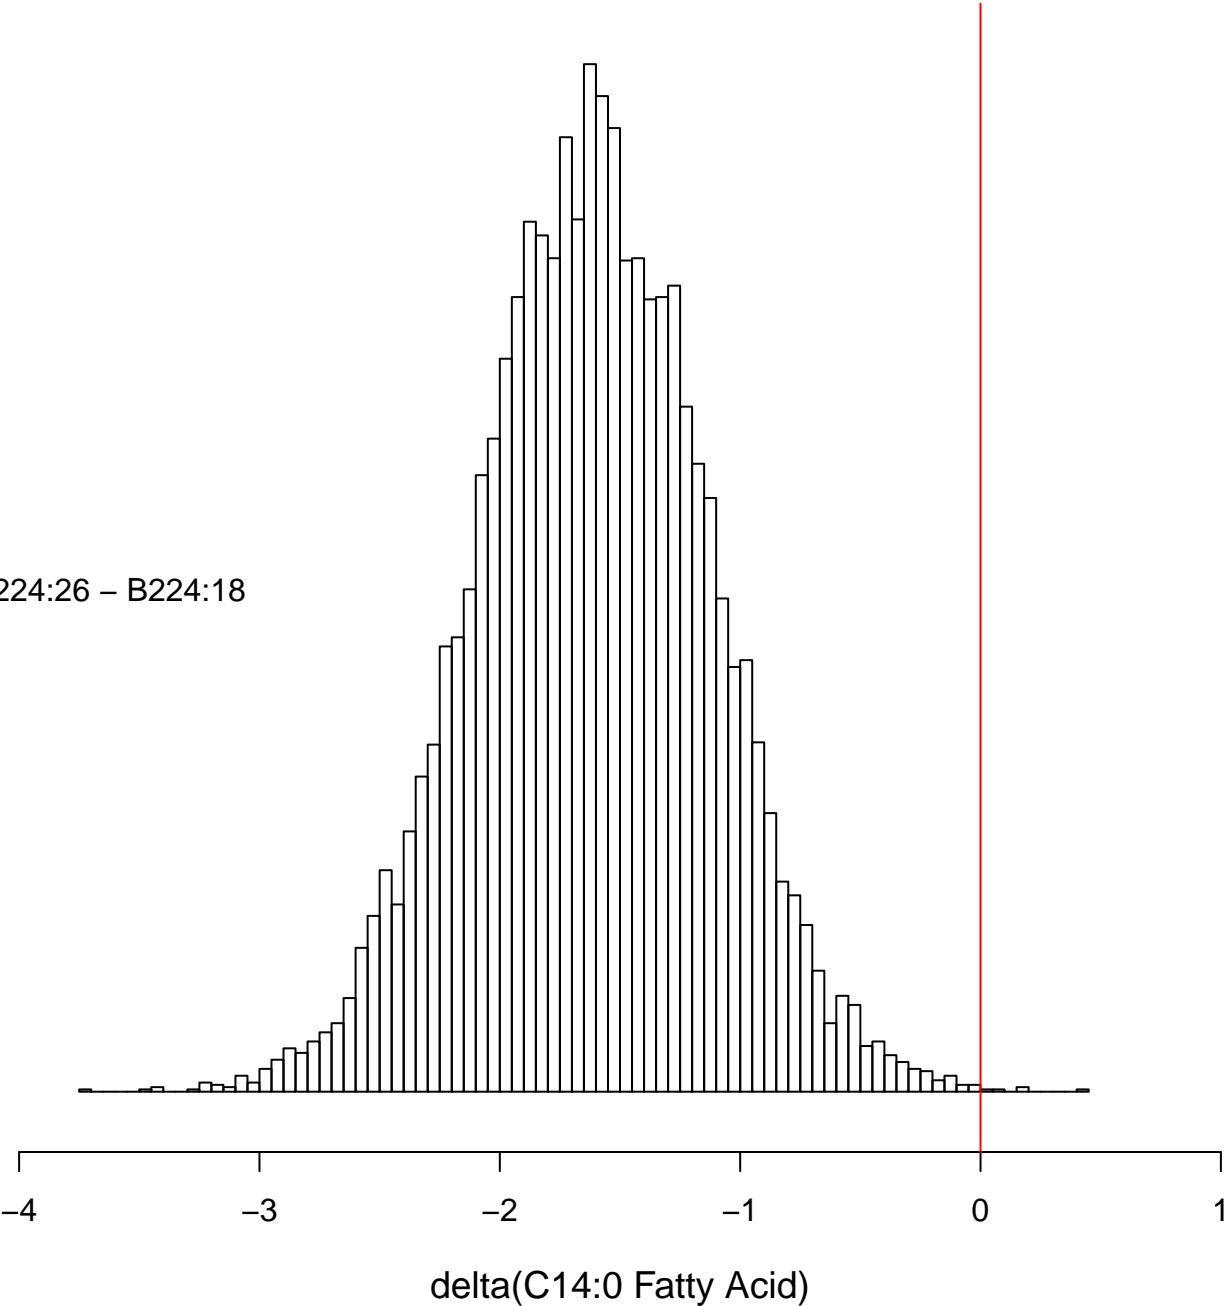

B224:26

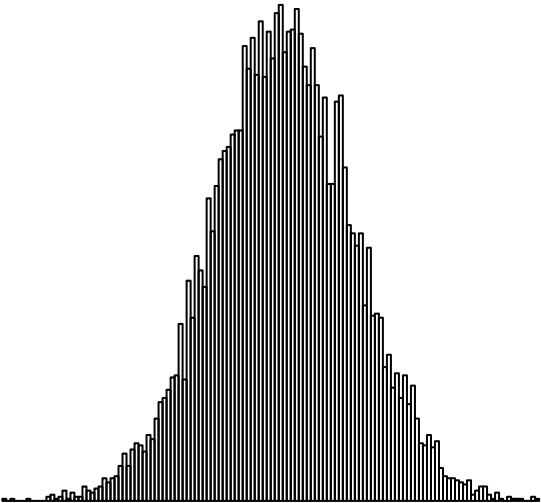

B224:18

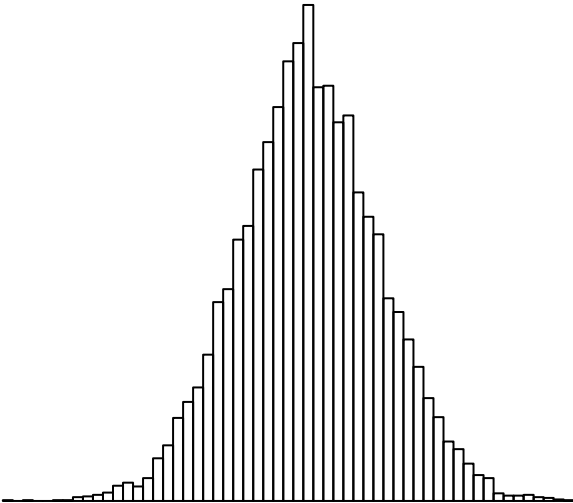

-10      -9      -8      -7      -6      -5      -4

C16:1 Fatty Acid

B224:26 – B224:18

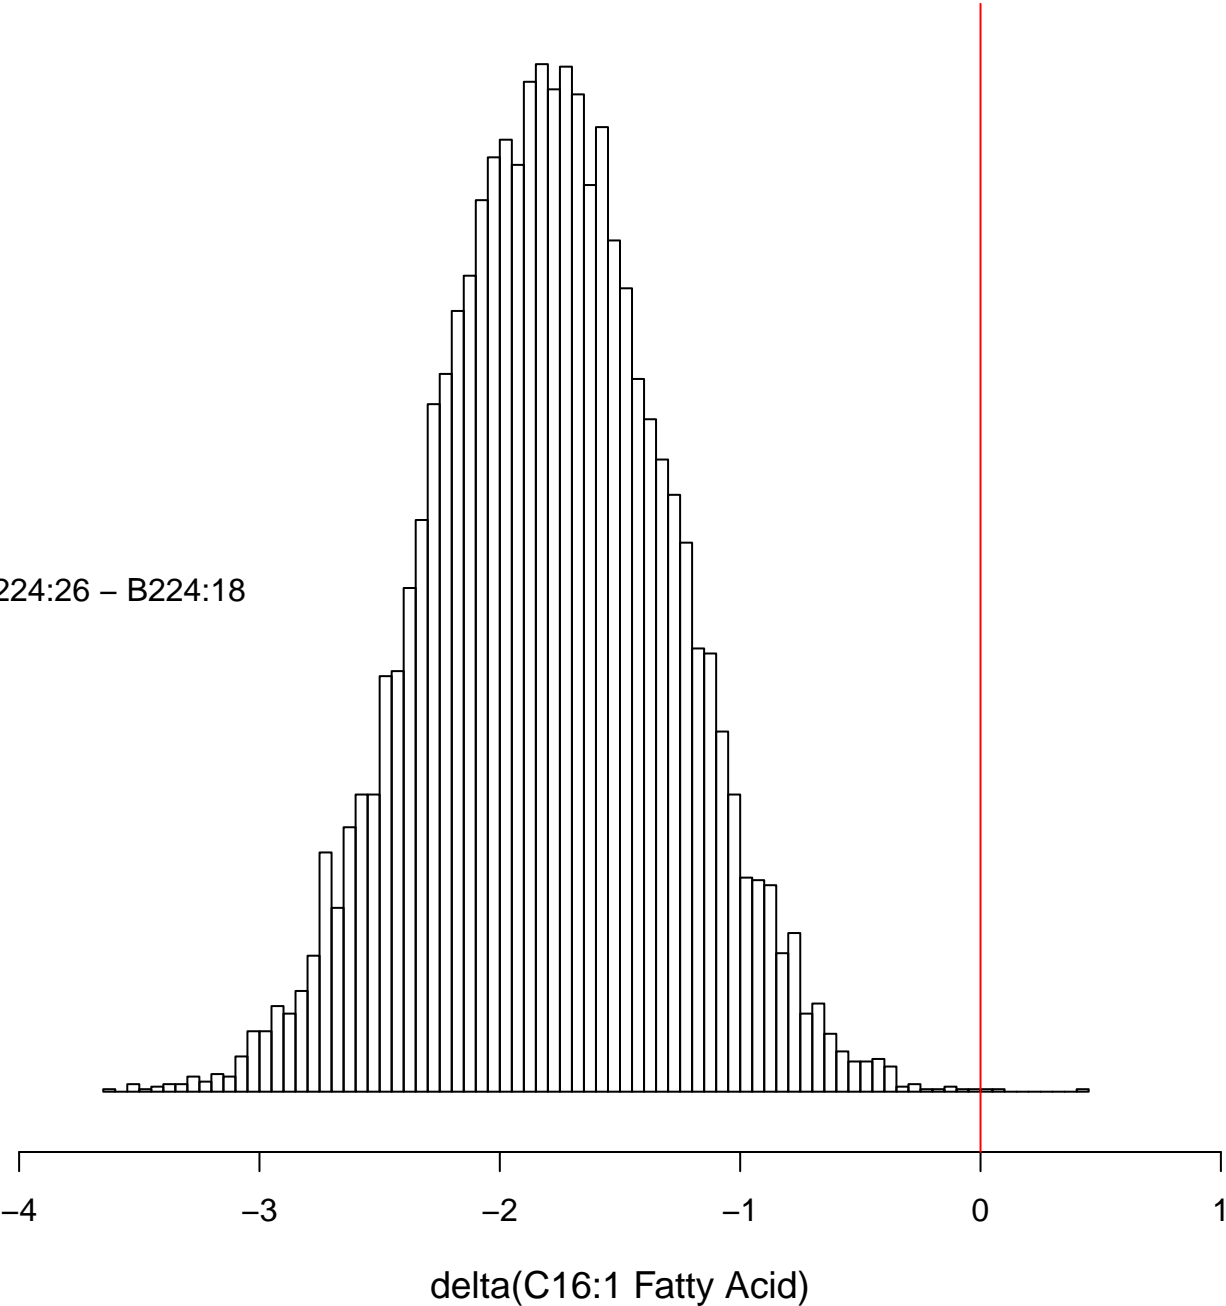

B224:26

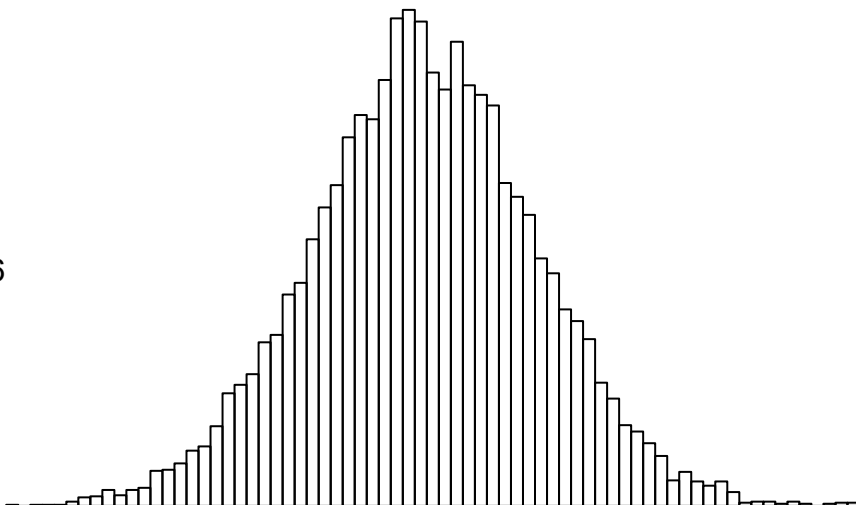

B224:18

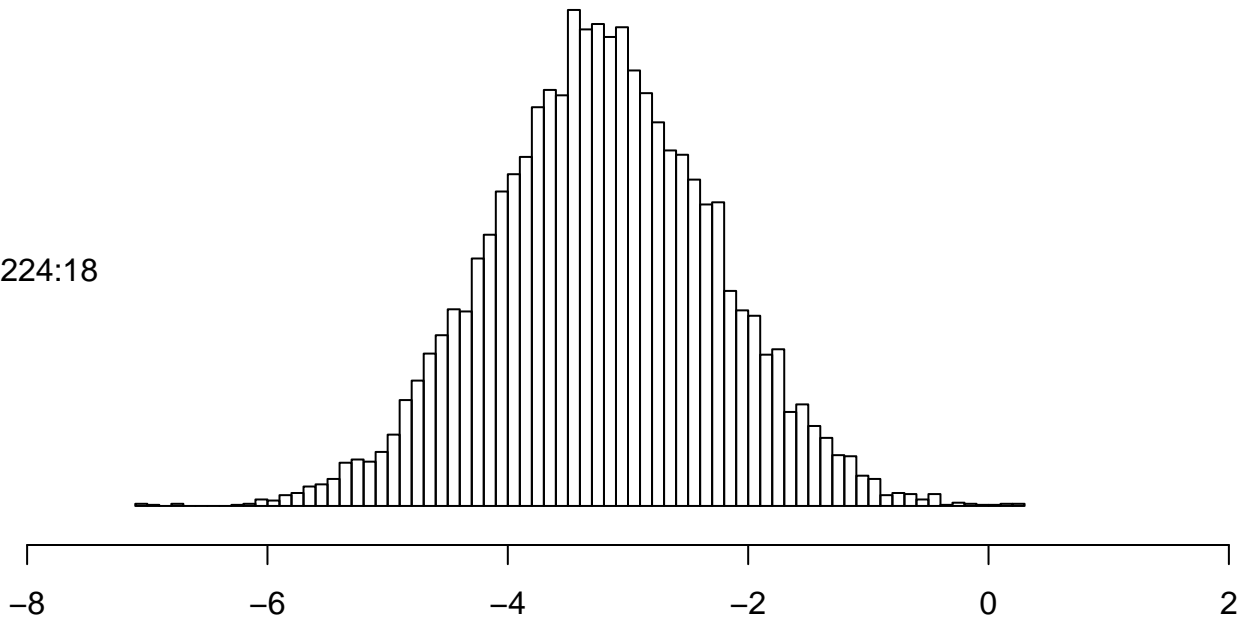

C16:0 Fatty Acid

B224:26 – B224:18

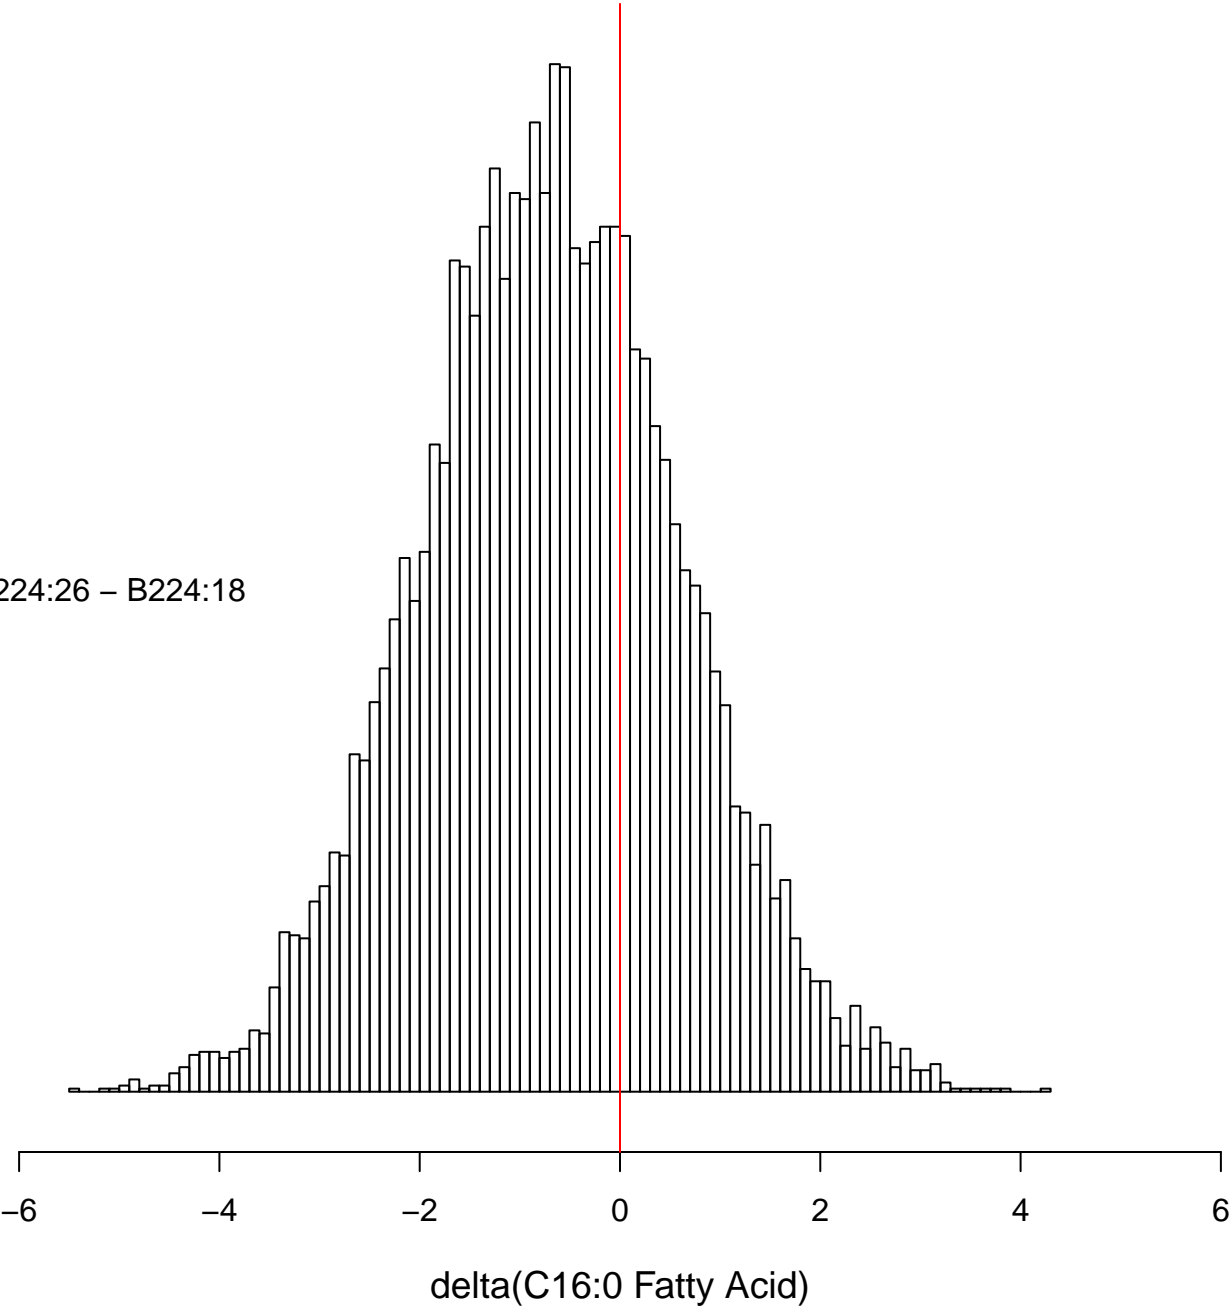

B224:26

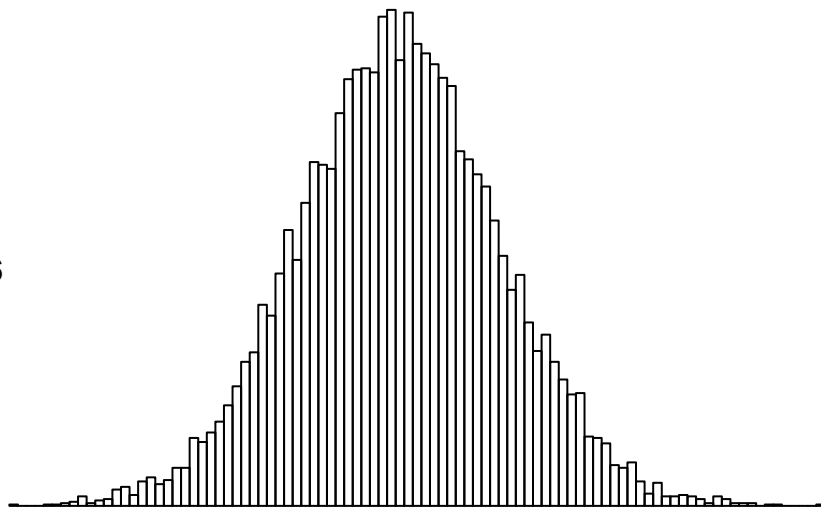

B224:18

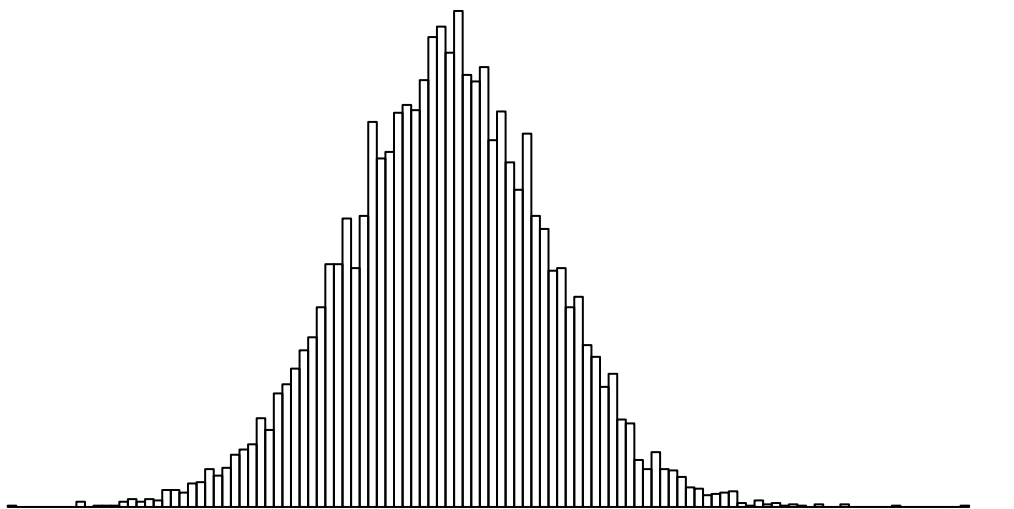

-10

-9

-8

-7

-6

-5

-4

-3

Polyunsaturated Fatty Acids 1

B224:26 – B224:18

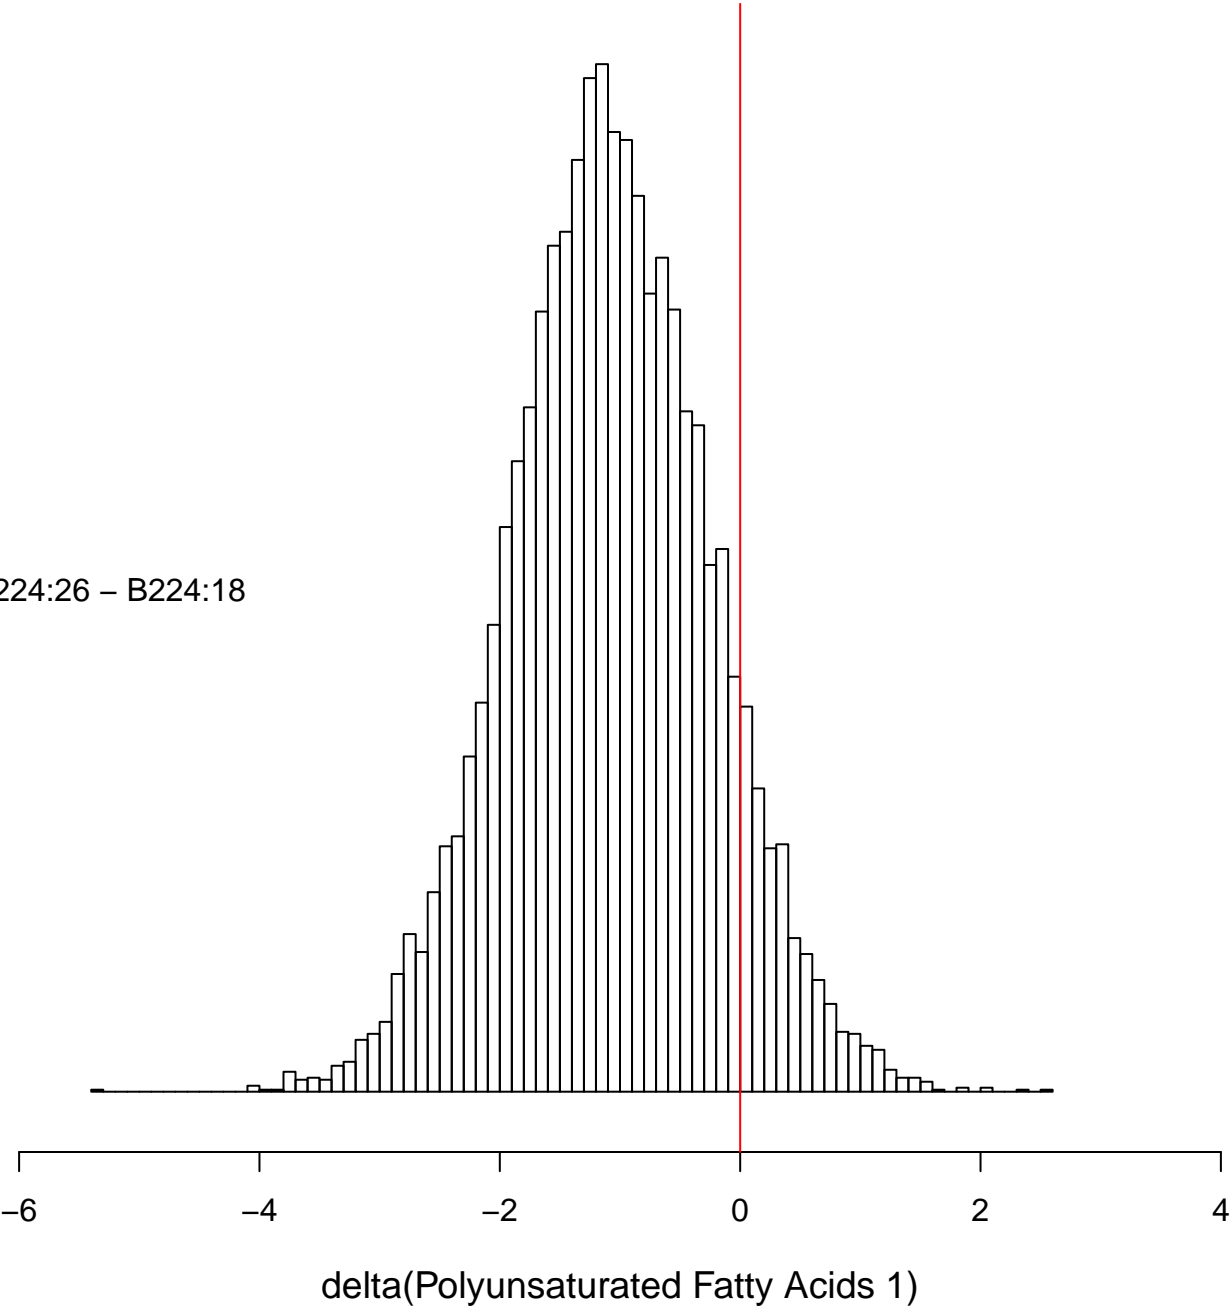



B224:26

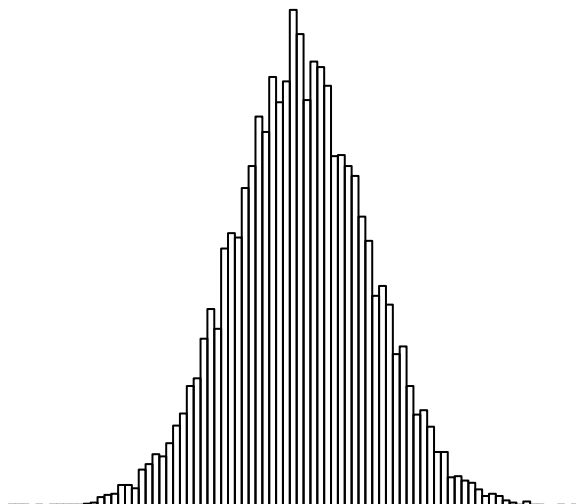

B224:18

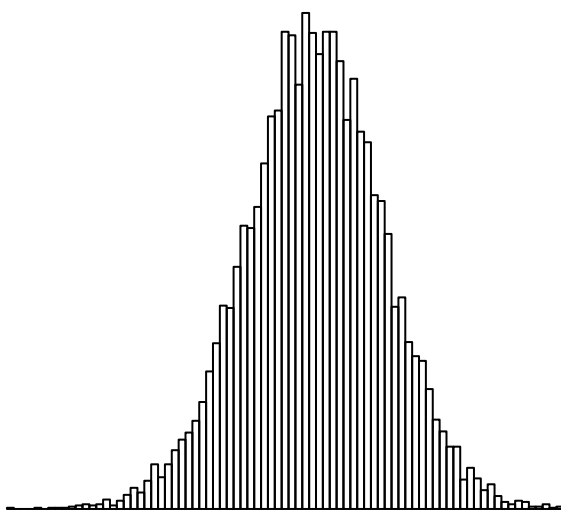

-10.5      -10.0      -9.5      -9.0      -8.5      -8.0      -7.5      -7.0

Polyunsaturated Fatty Acids 3

B224:26 – B224:18

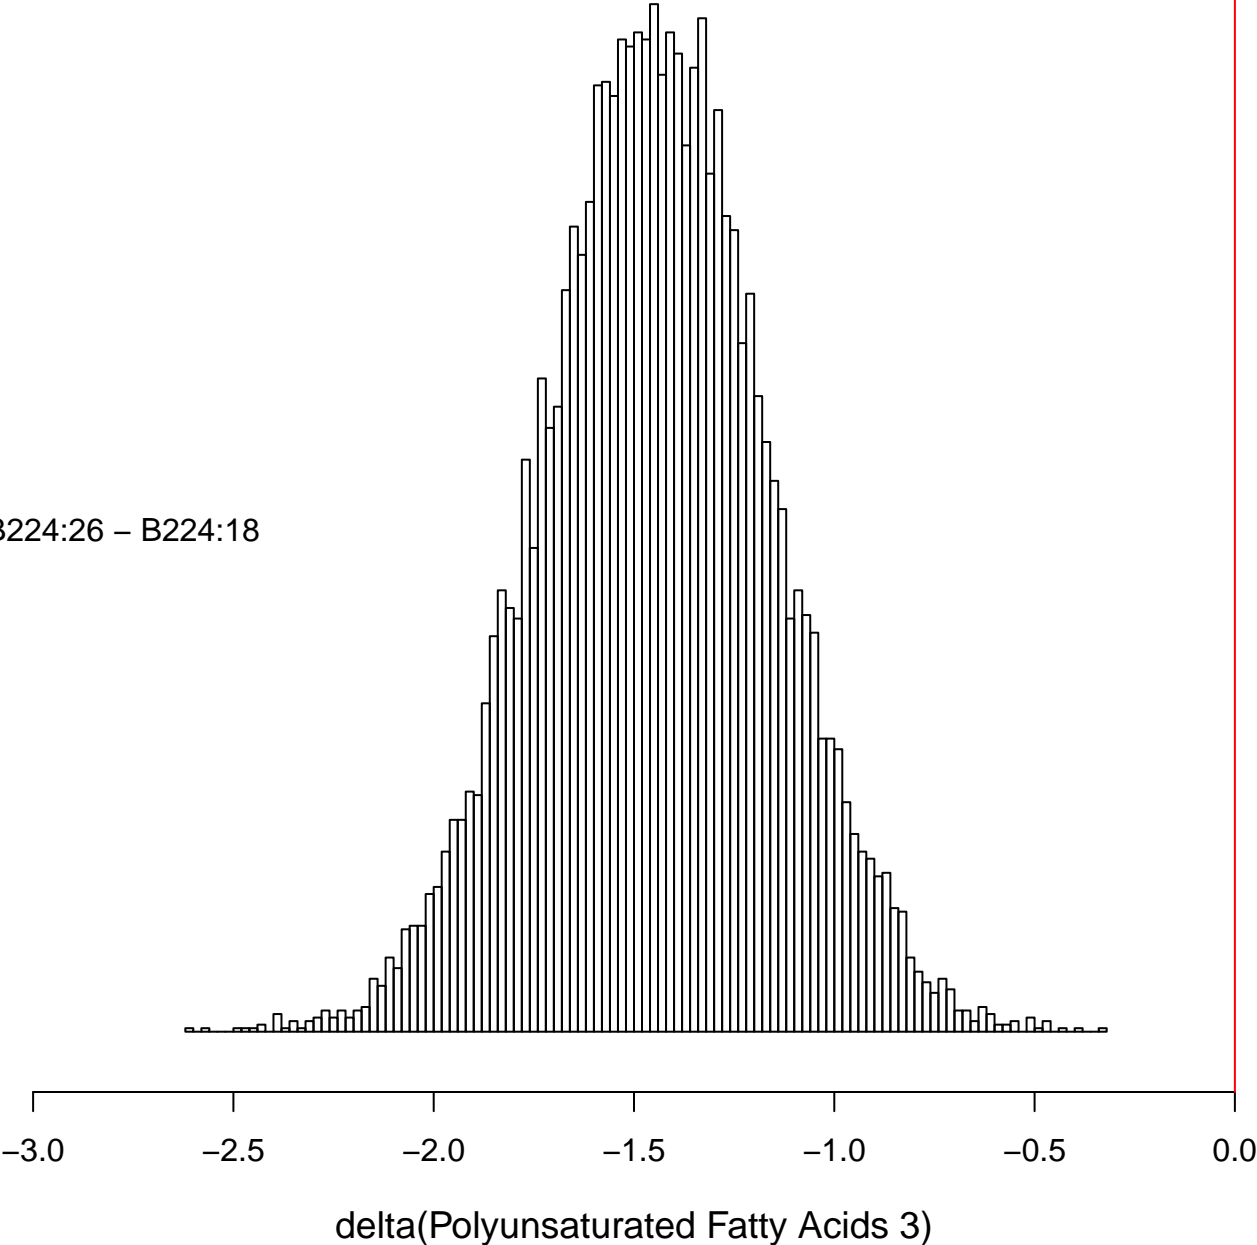

B224:26

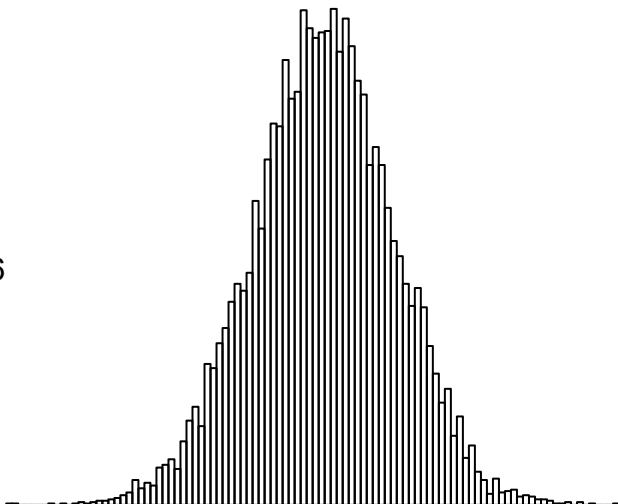

B224:18

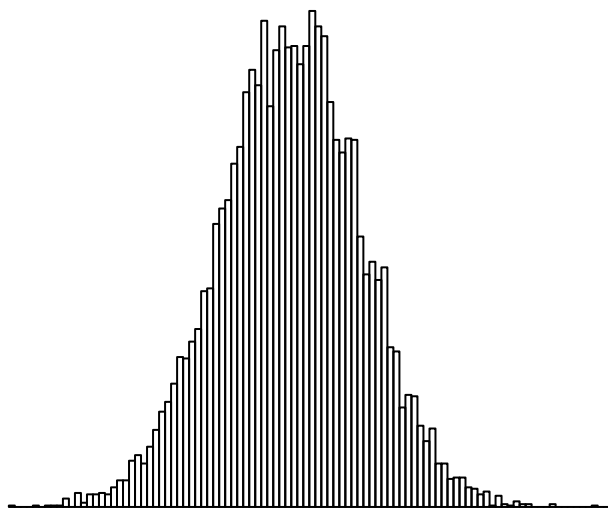

-10

-9

-8

-7

C18:2 Fatty Acid

B224:26 – B224:18

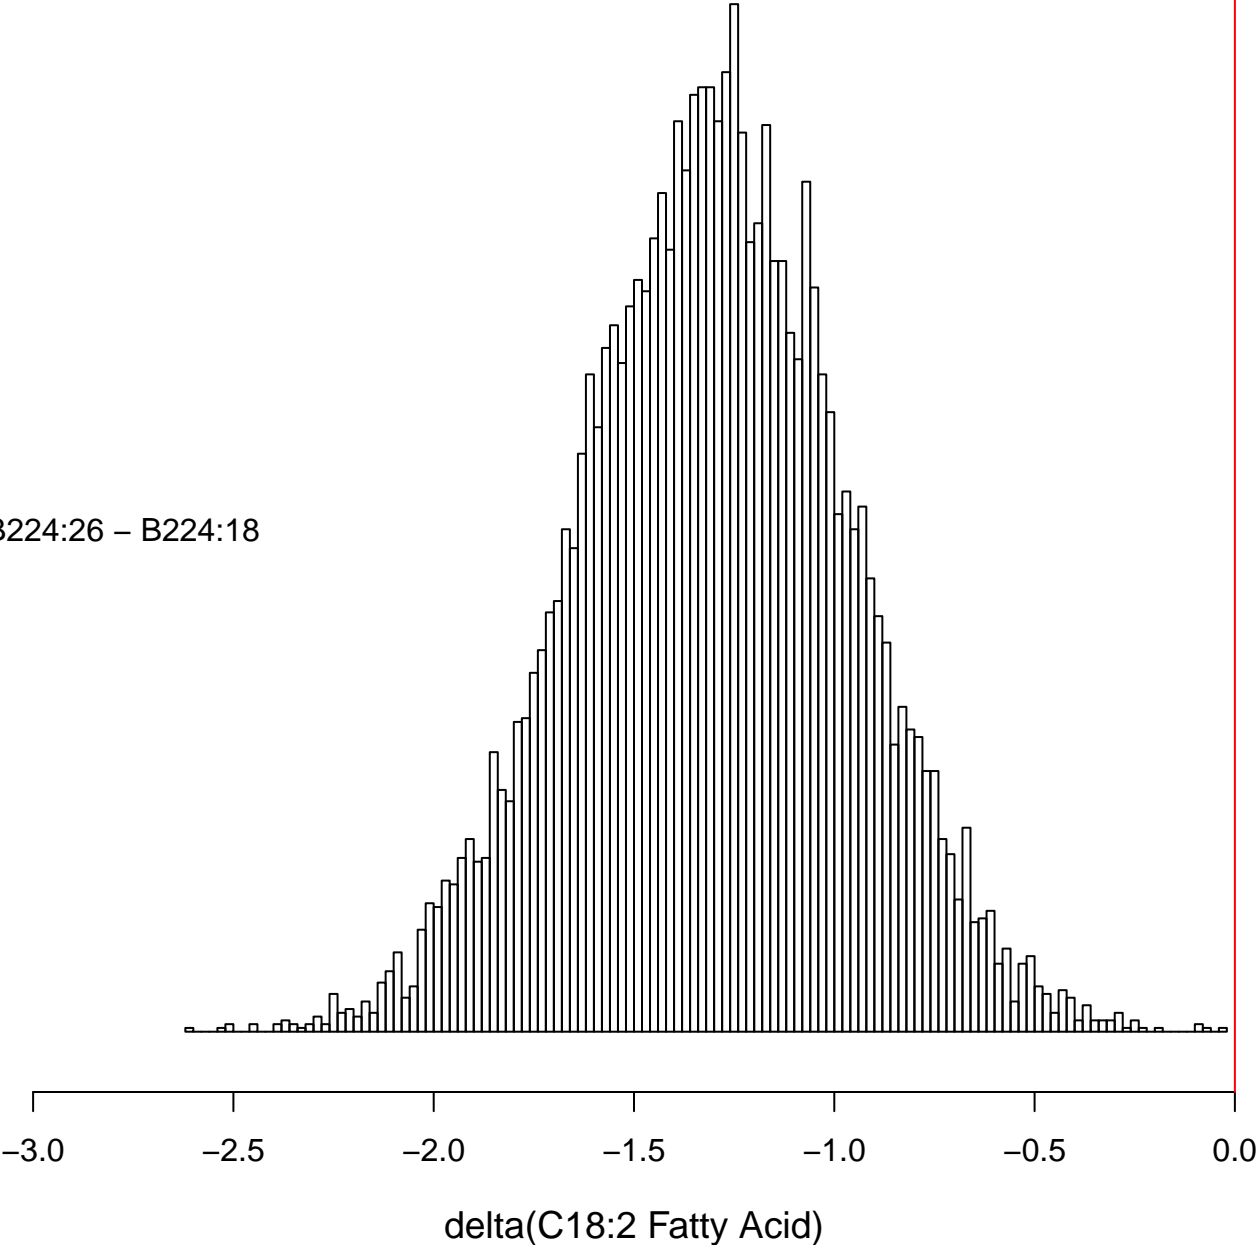

B224:26

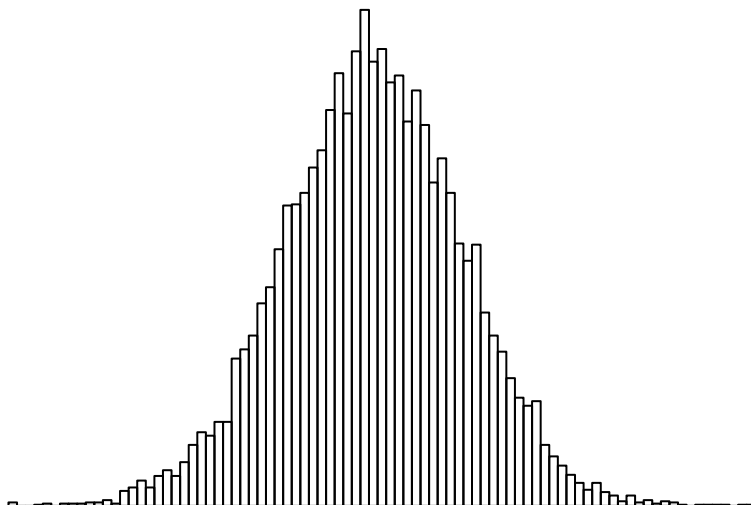

B224:18

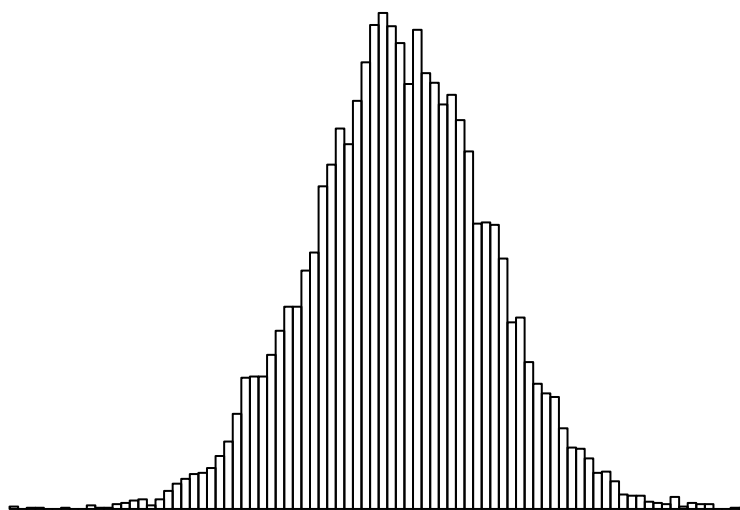

-9 -8 -7 -6 -5 -4 -3 -2

C18:0 Fatty Acid

B224:26 – B224:18

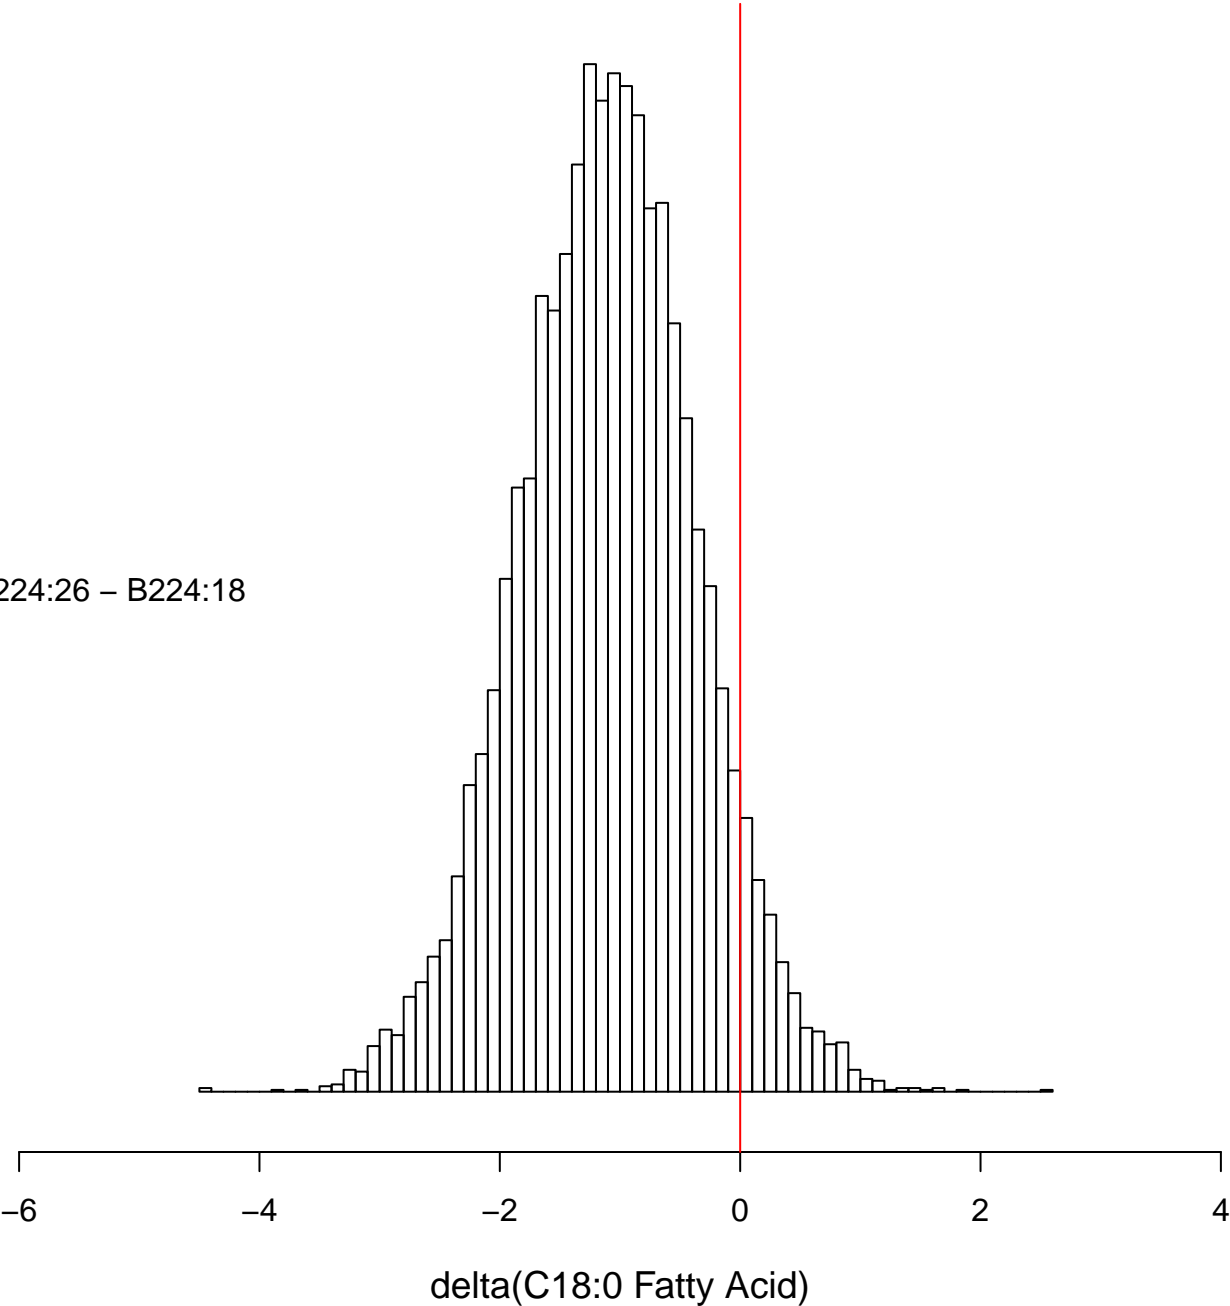

B224:26

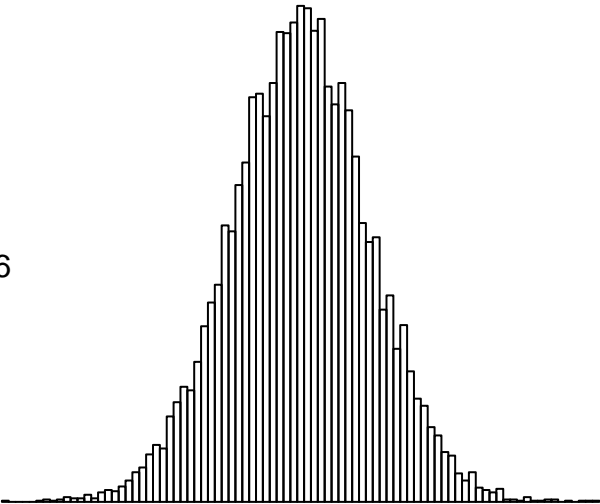

B224:18

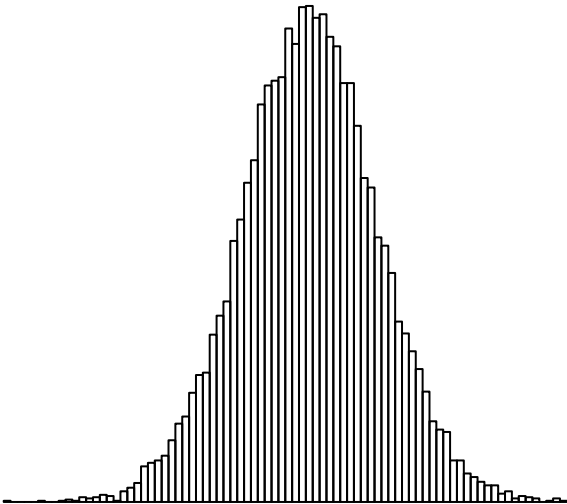

-9.5      -9.0      -8.5      -8.0      -7.5      -7.0      -6.5      -6.0

Unidentified Fatty Acid 2

B224:26 – B224:18

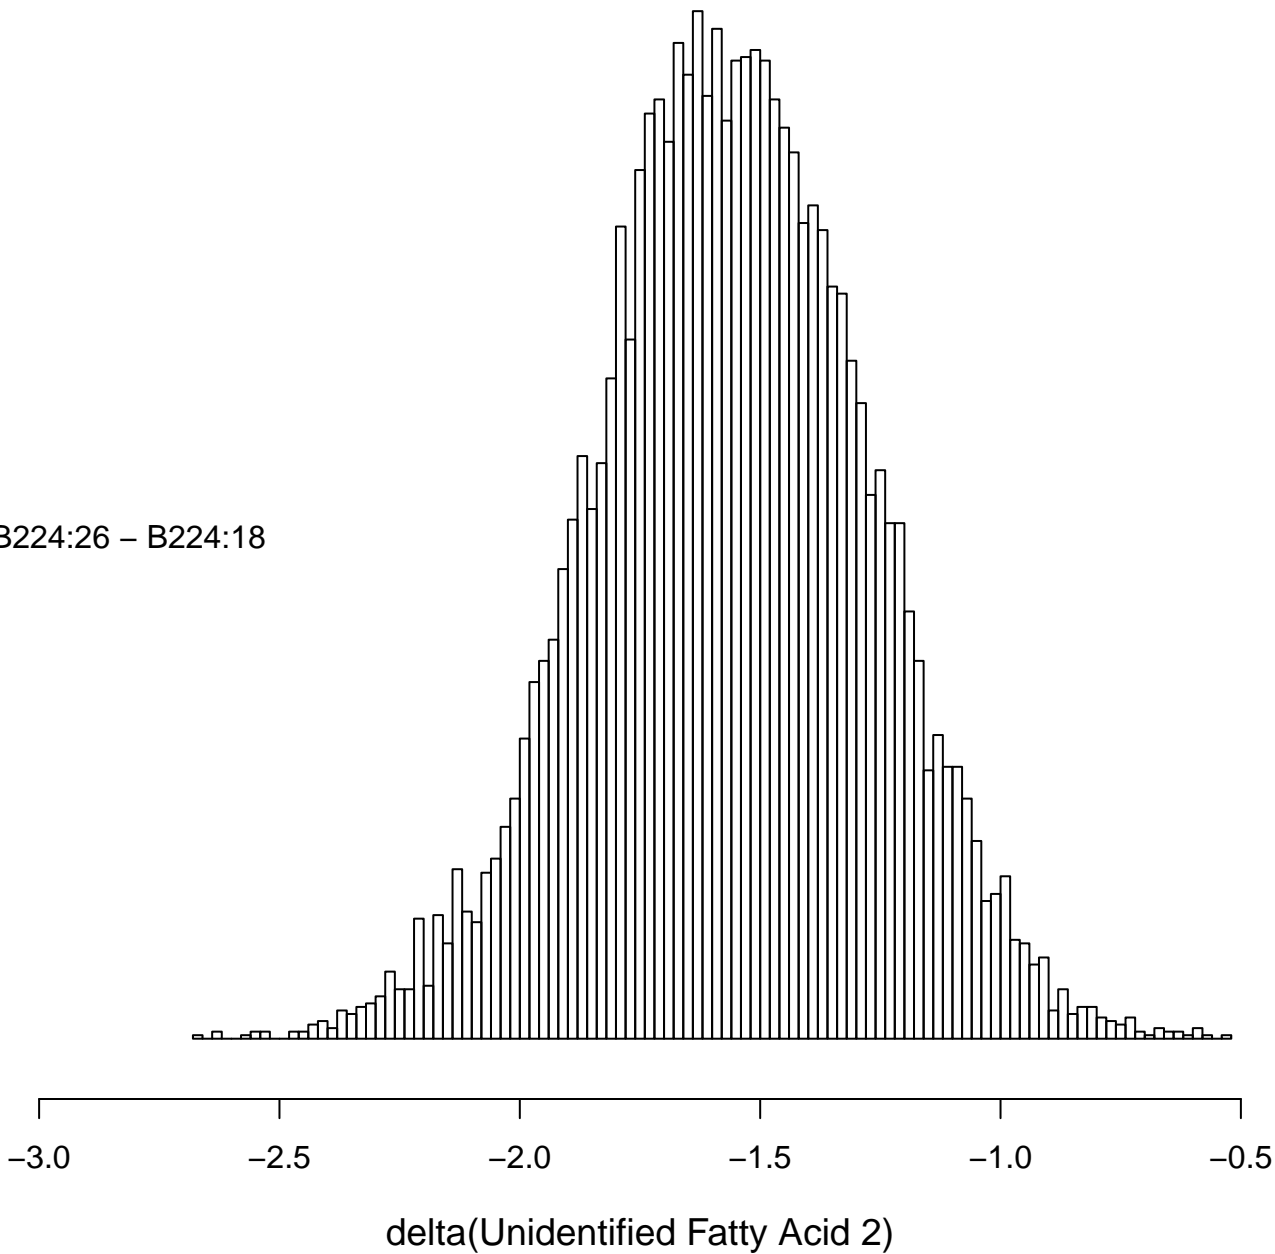



B224:26

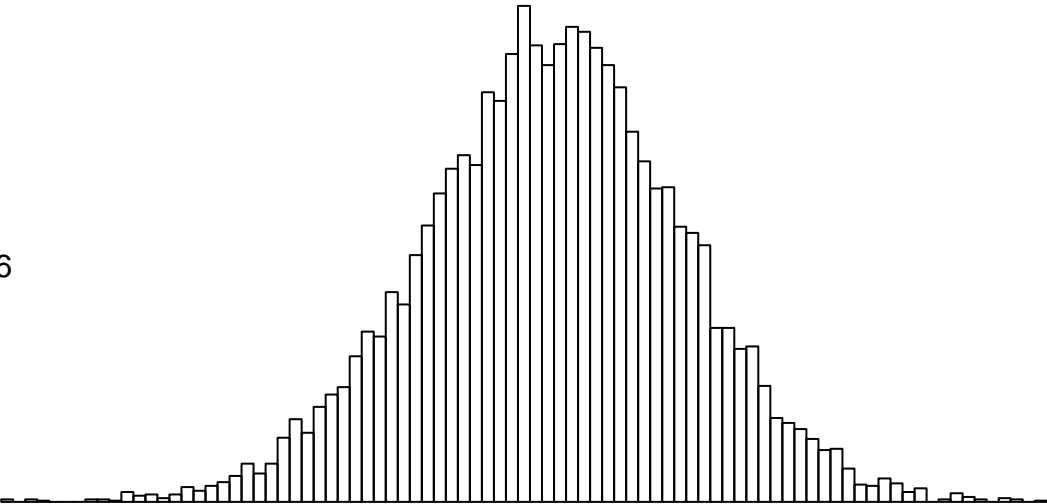

B224:18

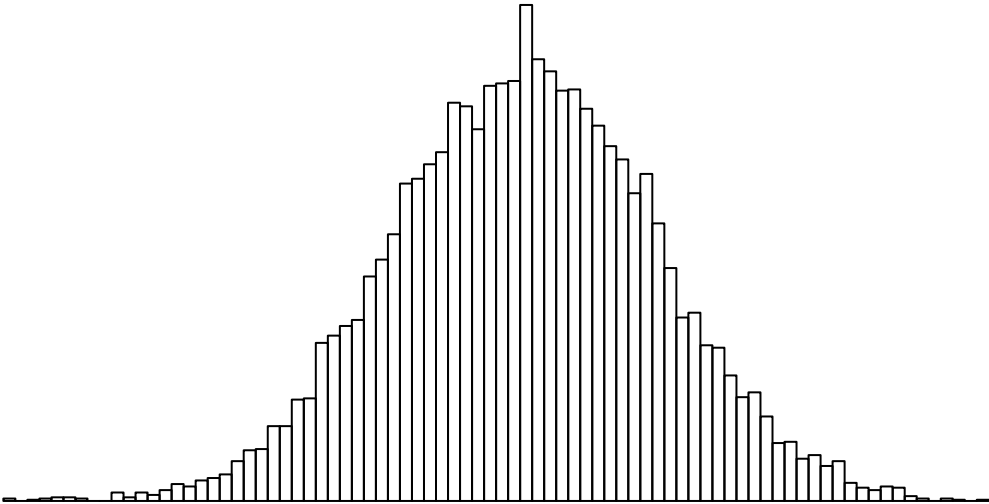

-4.5                      -4.0                      -3.5                      -3.0                      -2.5

Glycerol

B224:26 – B224:18

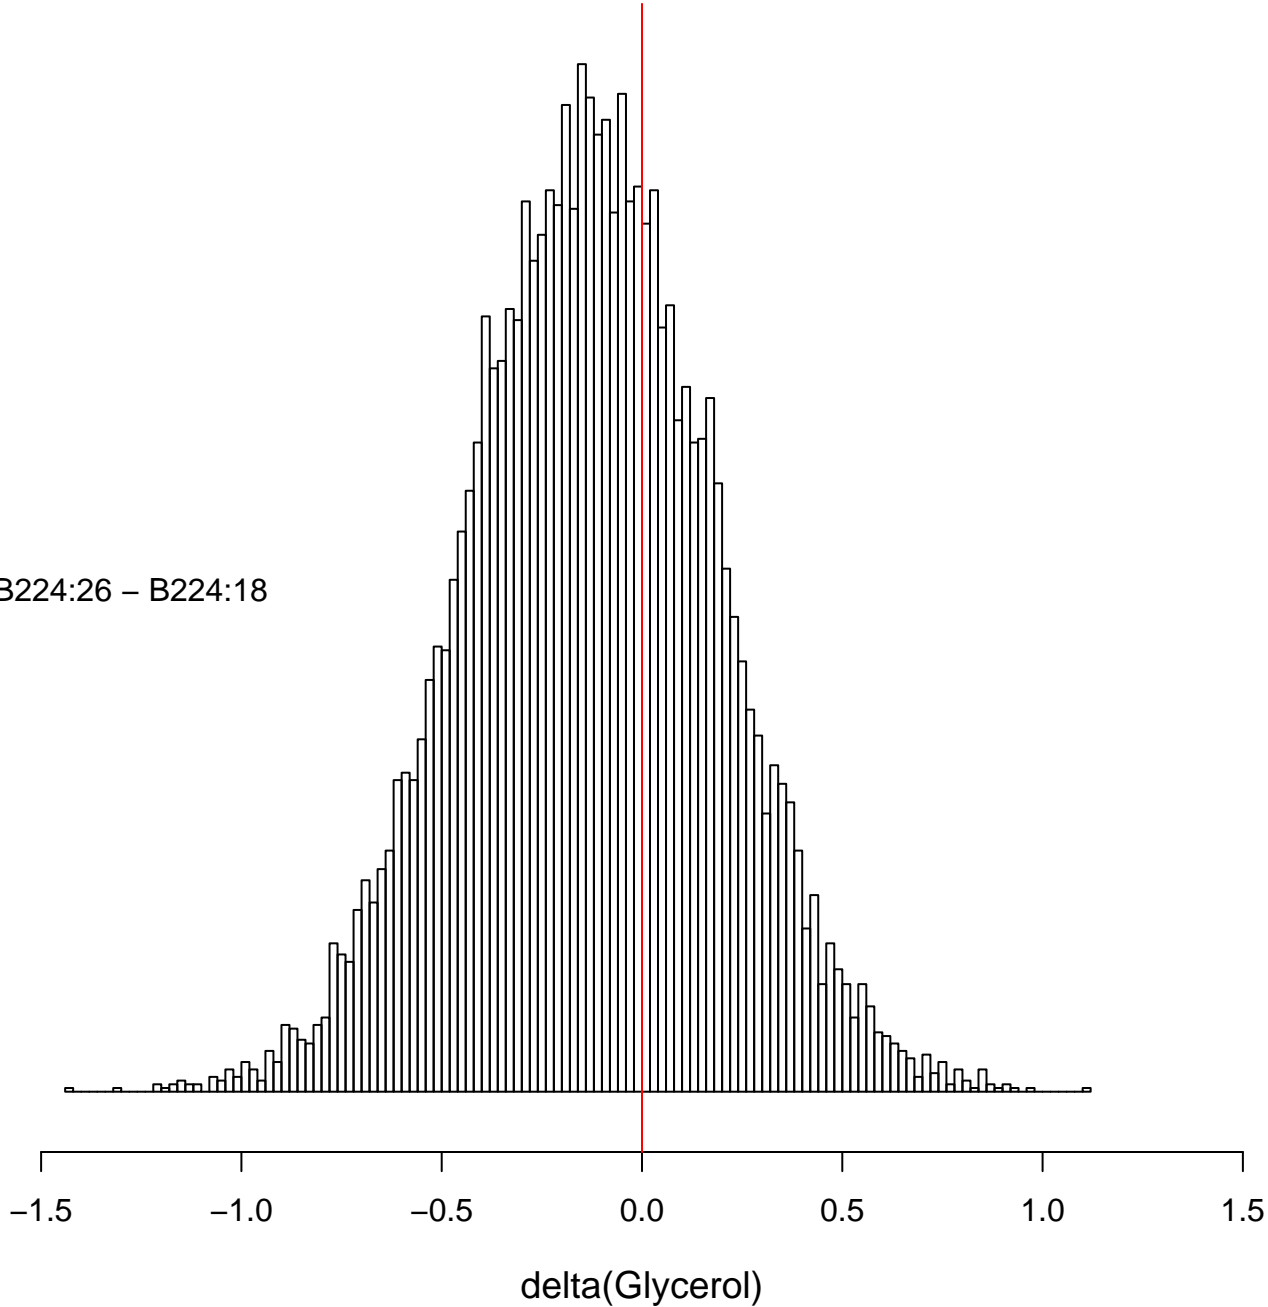

B224:26

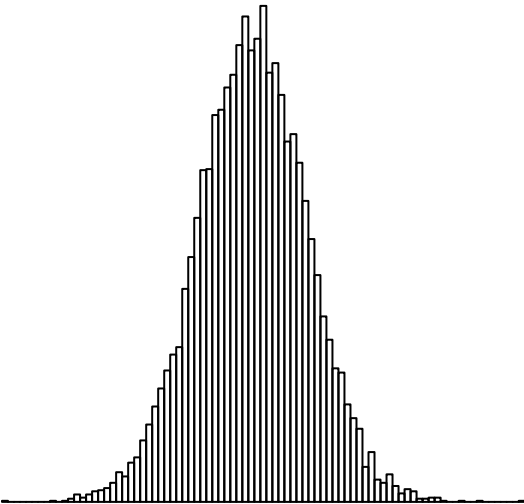

B224:18

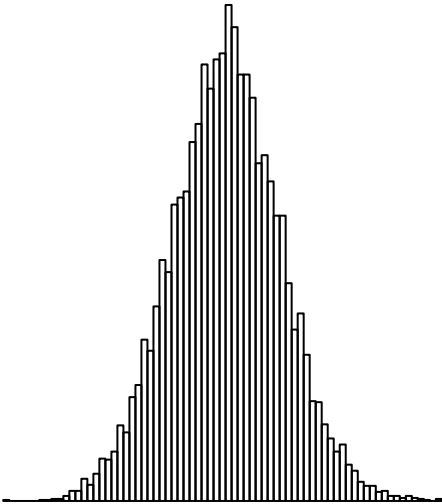

-4 -3 -2 -1 0

Inositol 1

B224:26 – B224:18

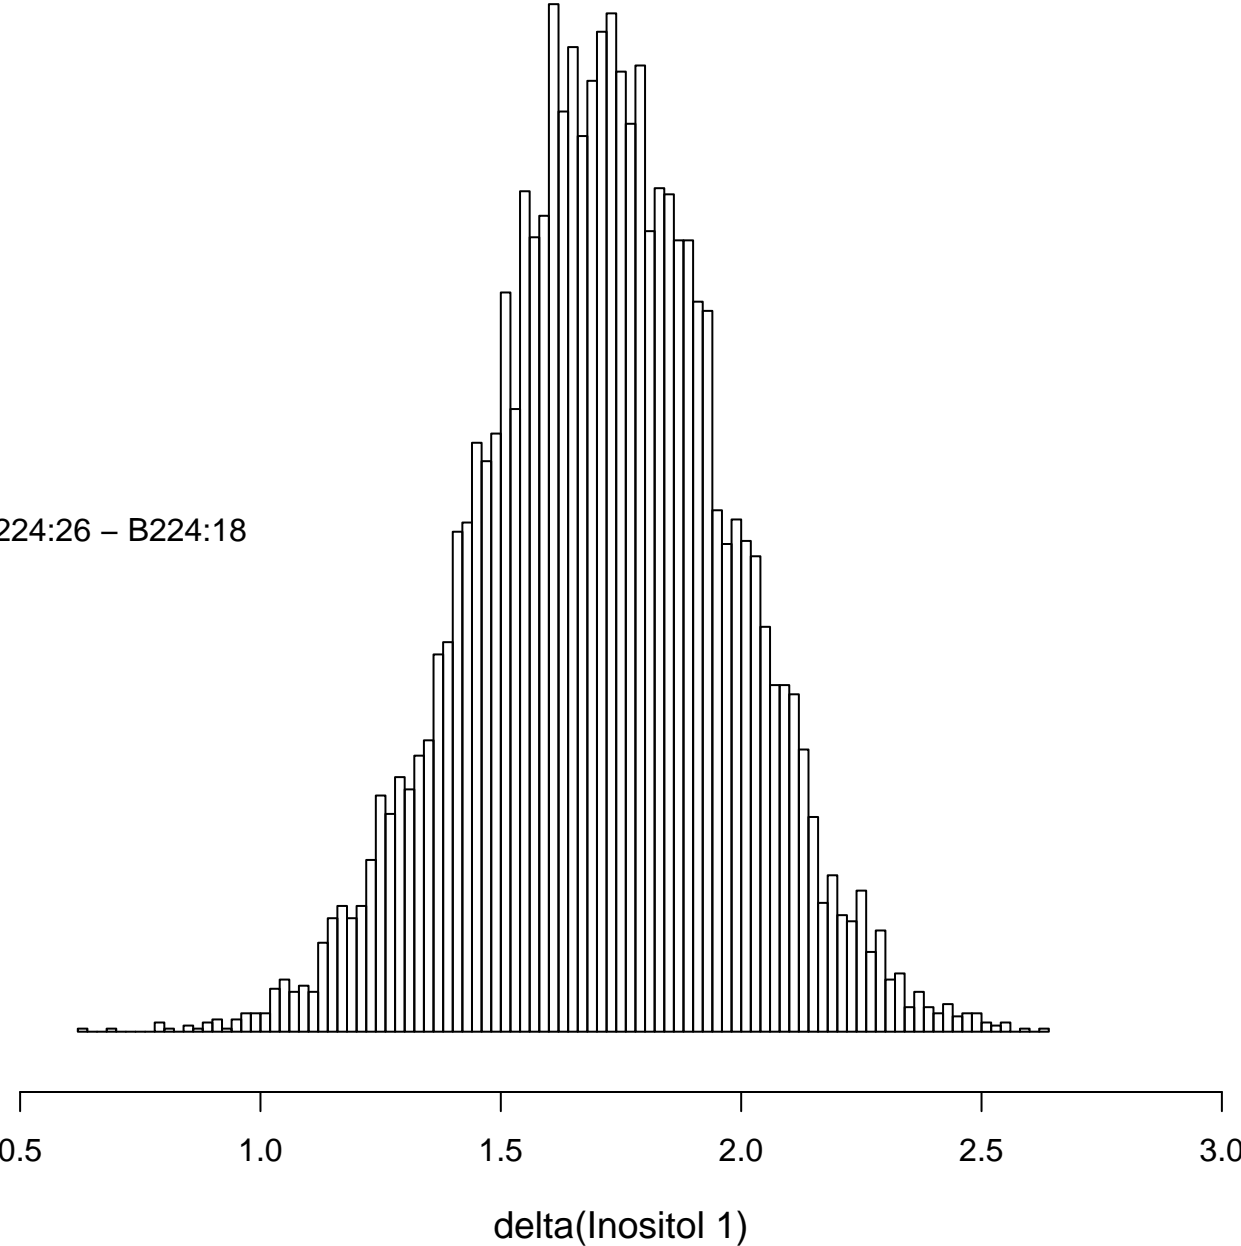

B224:26

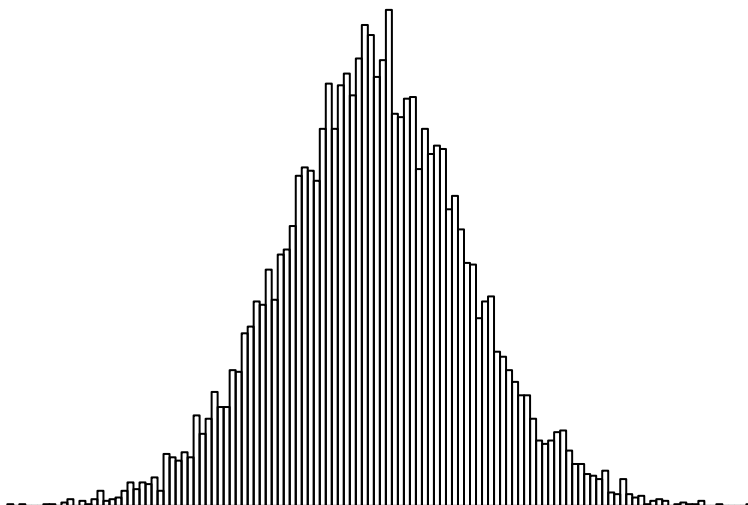

B224:18

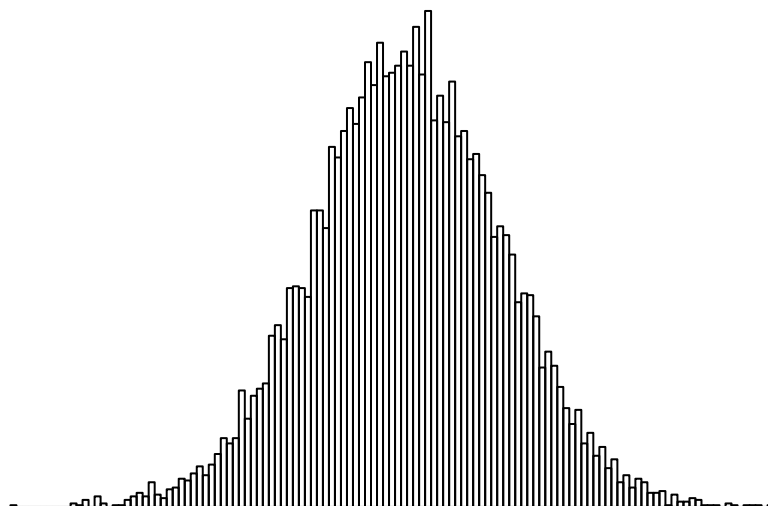

-6.5

-6.0

-5.5

-5.0

-4.5

Inositol 2

B224:26 – B224:18

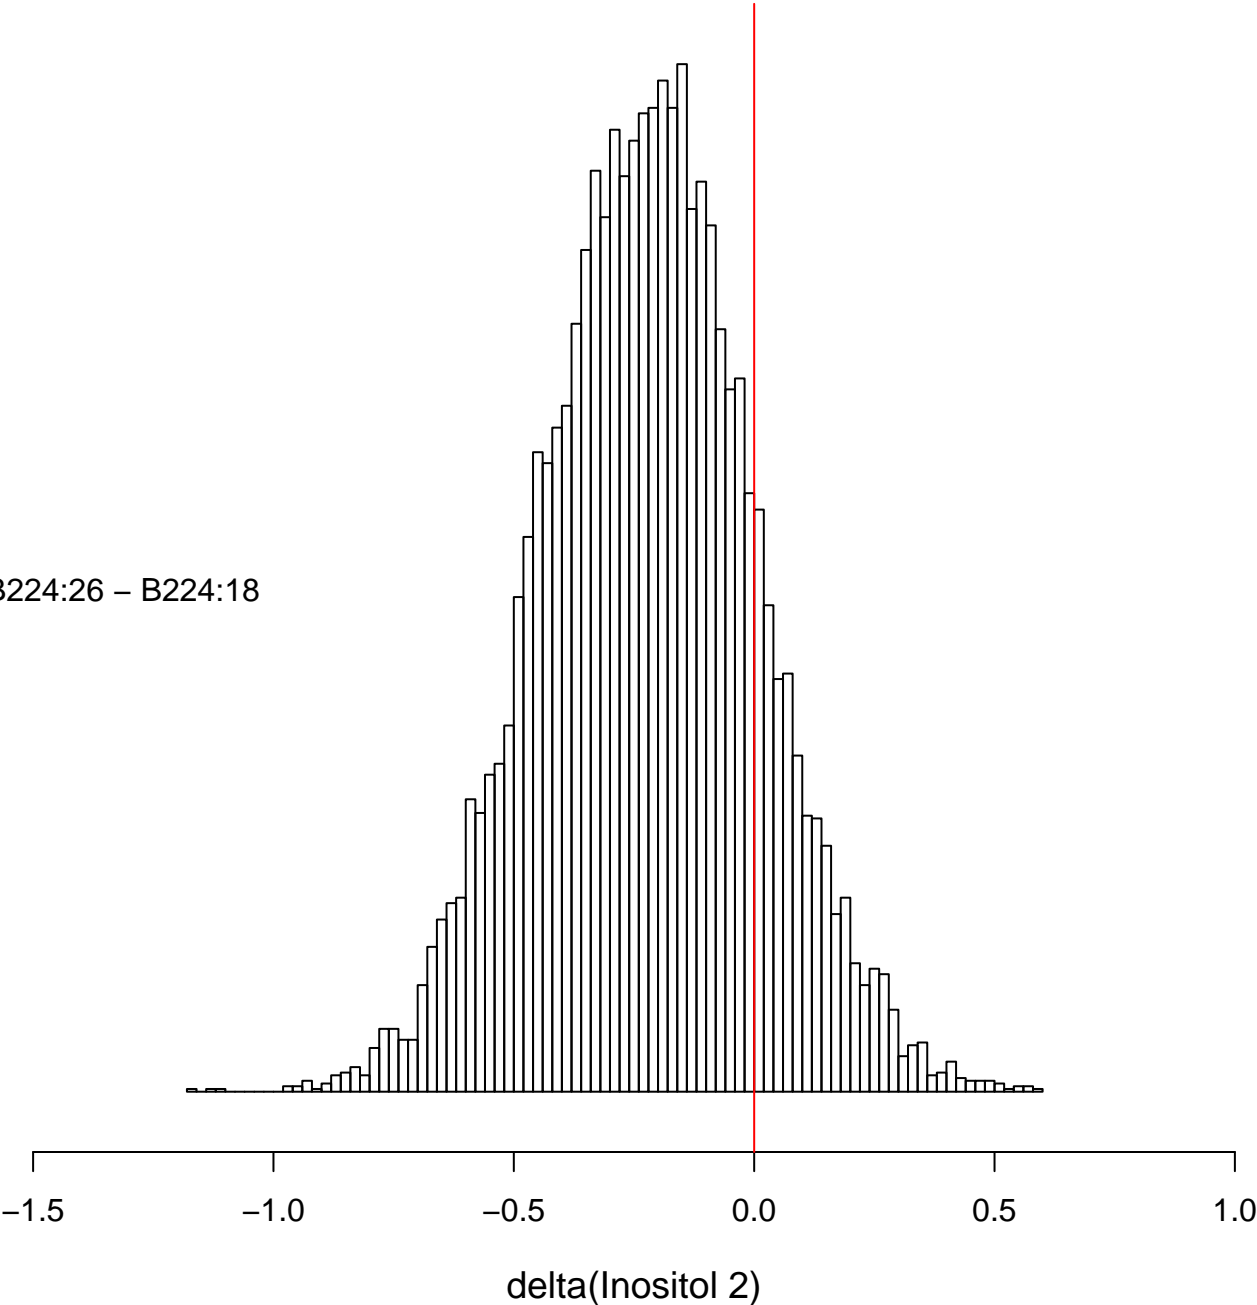

B224:26

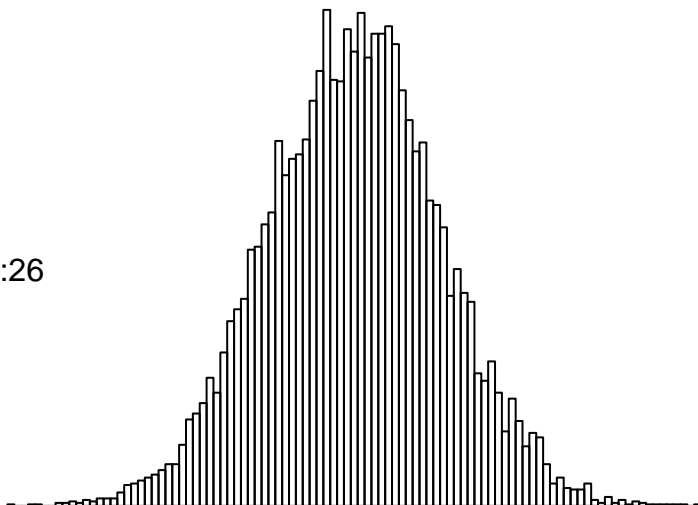

B224:18

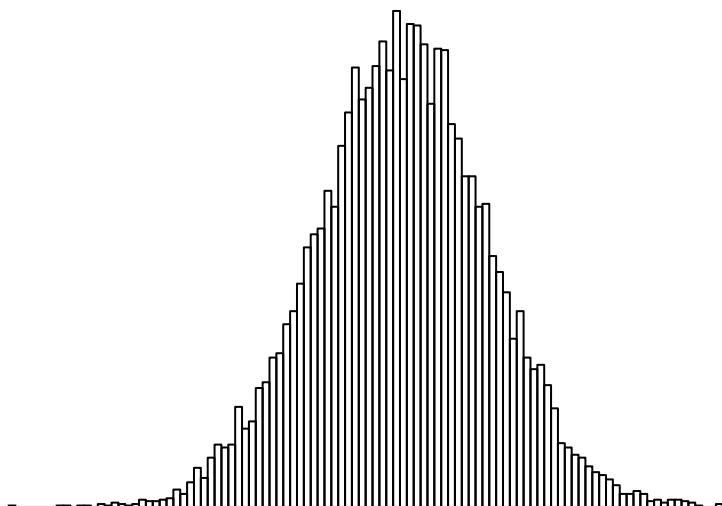

-11.0      -10.5      -10.0      -9.5      -9.0      -8.5      -8.0      -7.5

C29 Sterol 1

B224:26 – B224:18

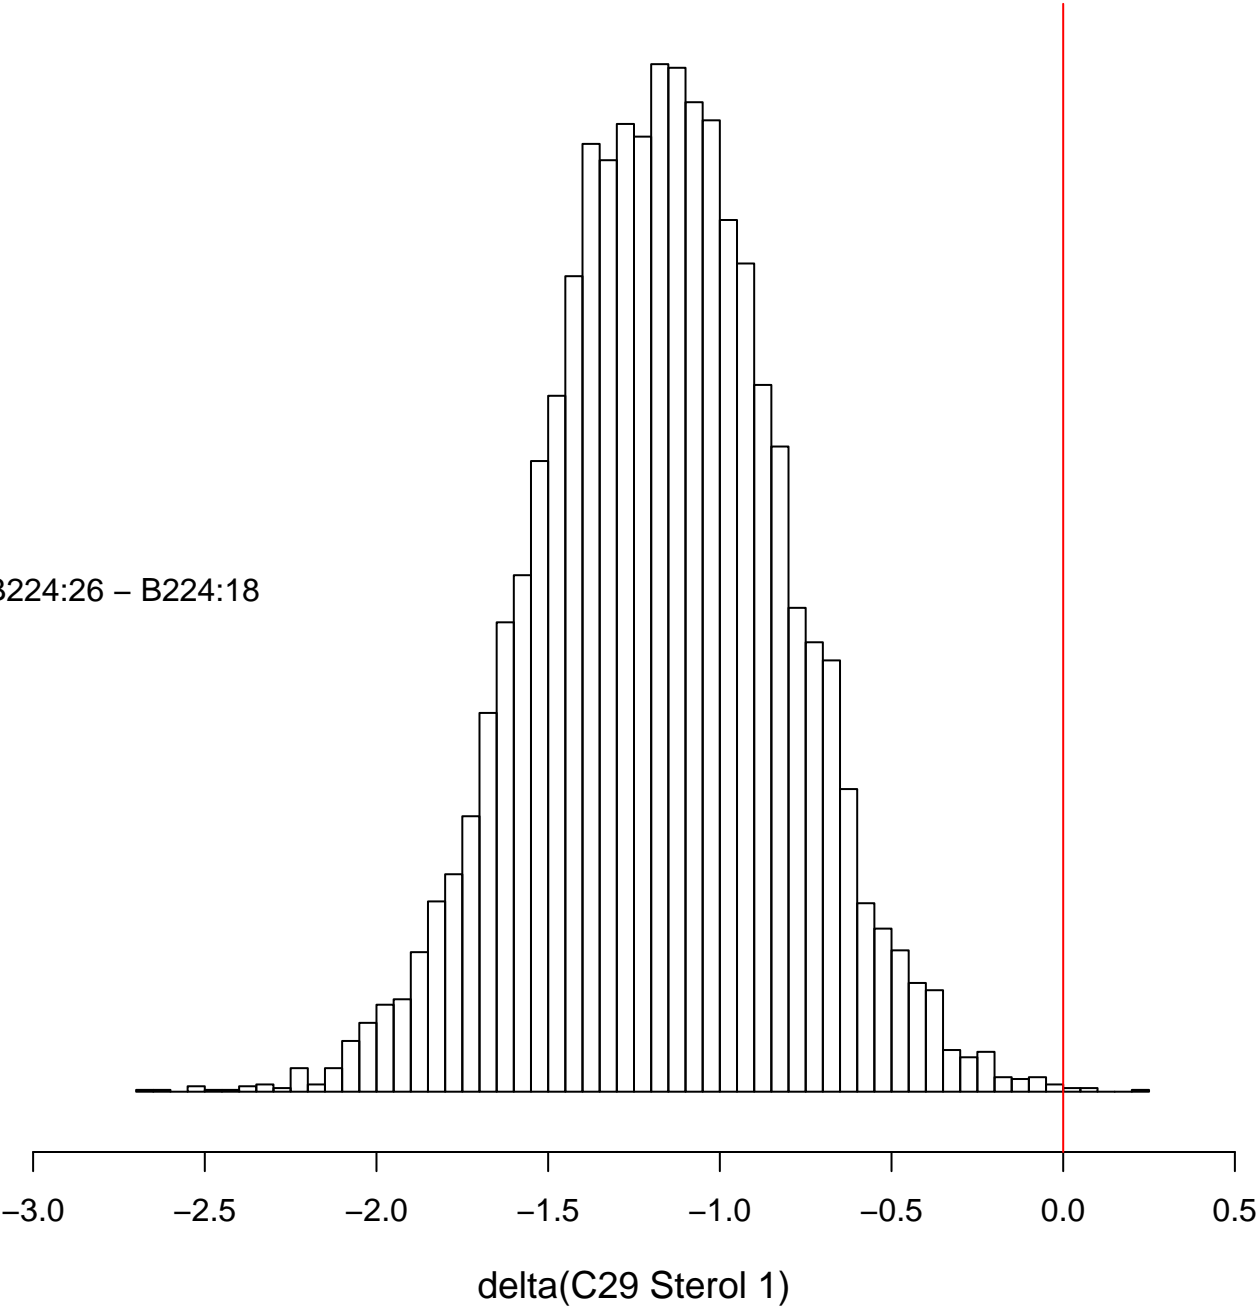



B224:26

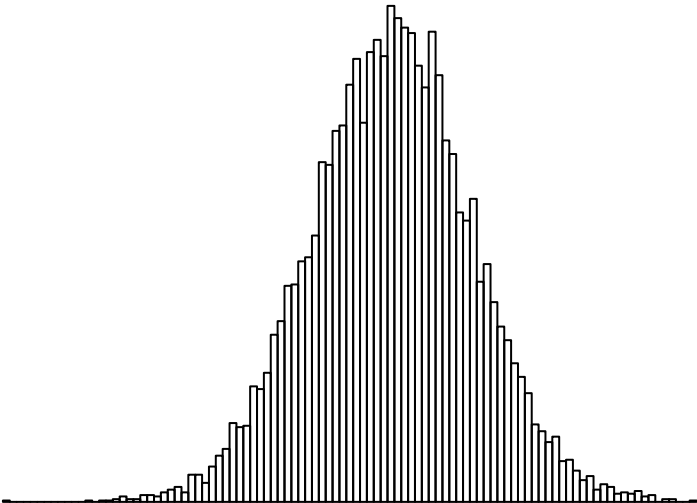

B224:18

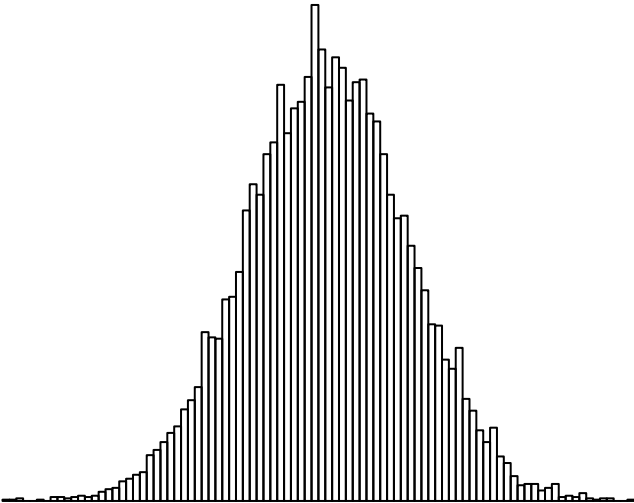

-11.0      -10.5      -10.0      -9.5      -9.0      -8.5      -8.0      -7.5

C29 Stanol 1

B224:26 – B224:18

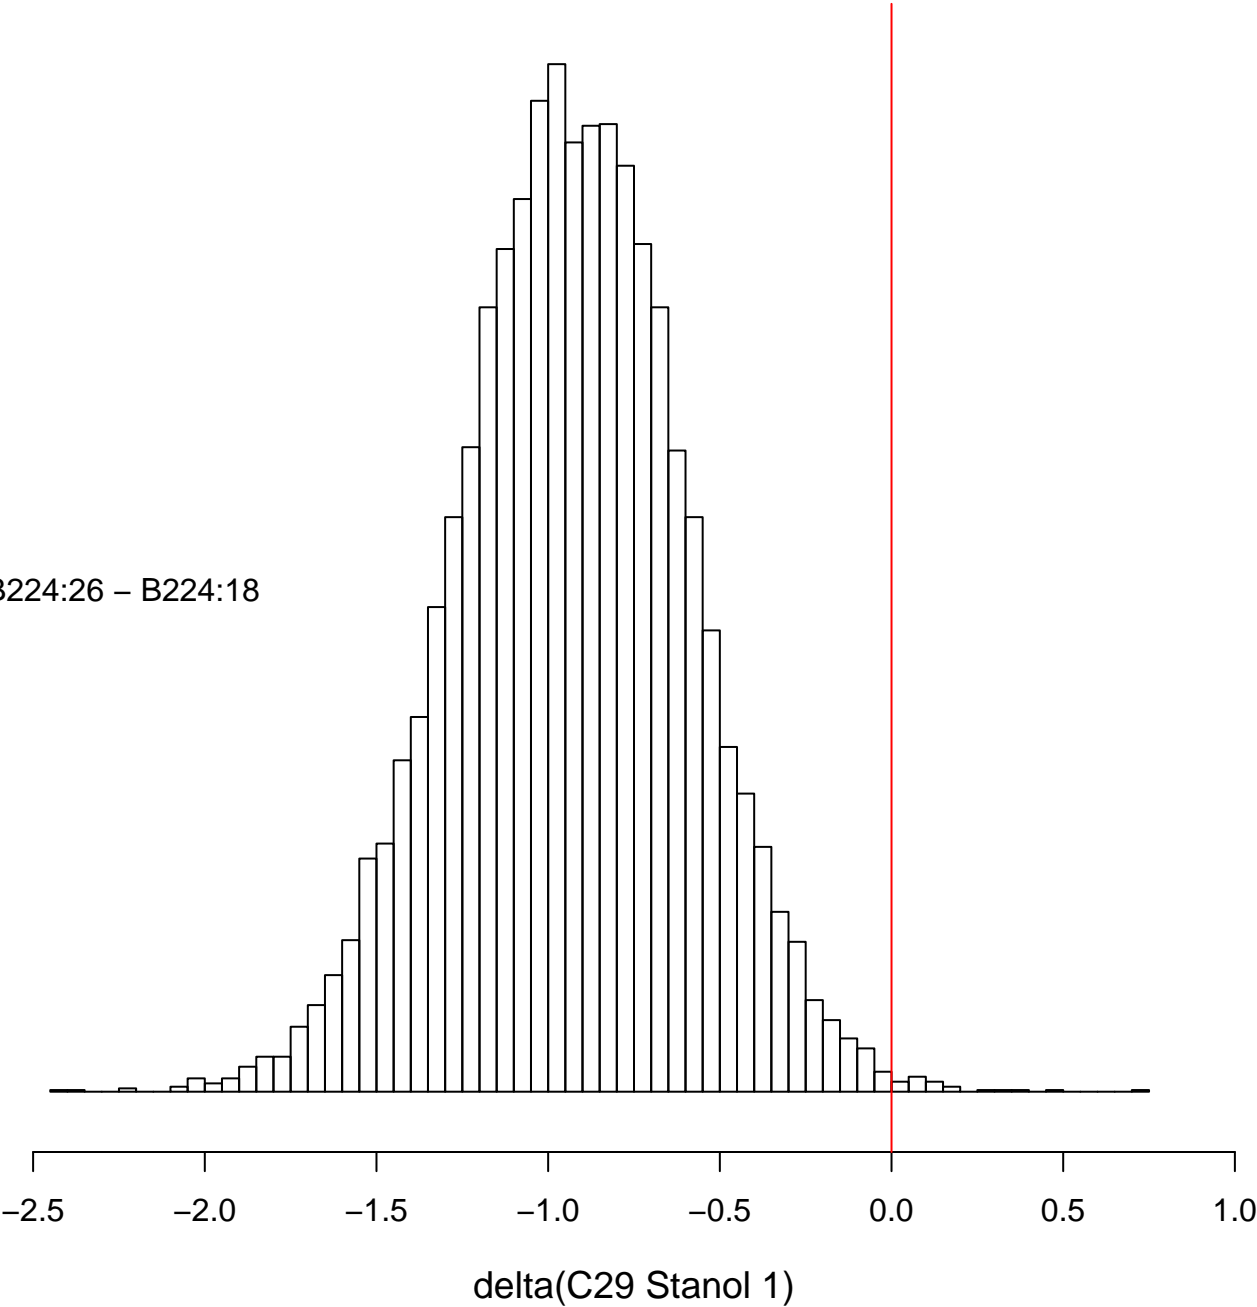

B224:26

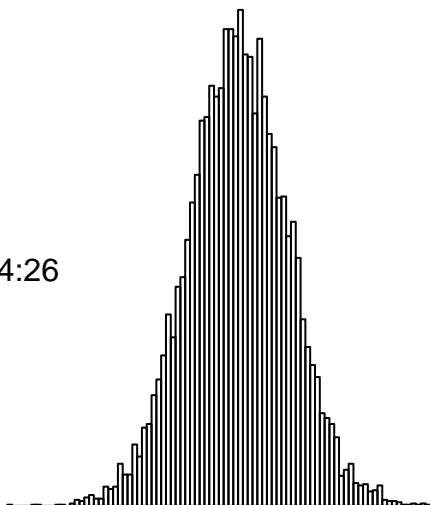

B224:18

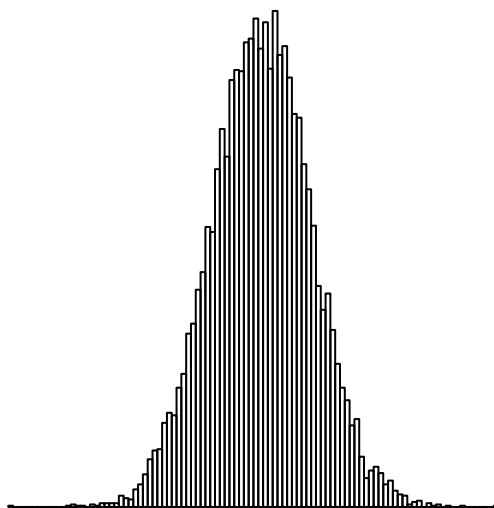

-10

-9

-8

-7

-6

-5

C27<sup>5,22</sup> Sterol

B224:26 – B224:18

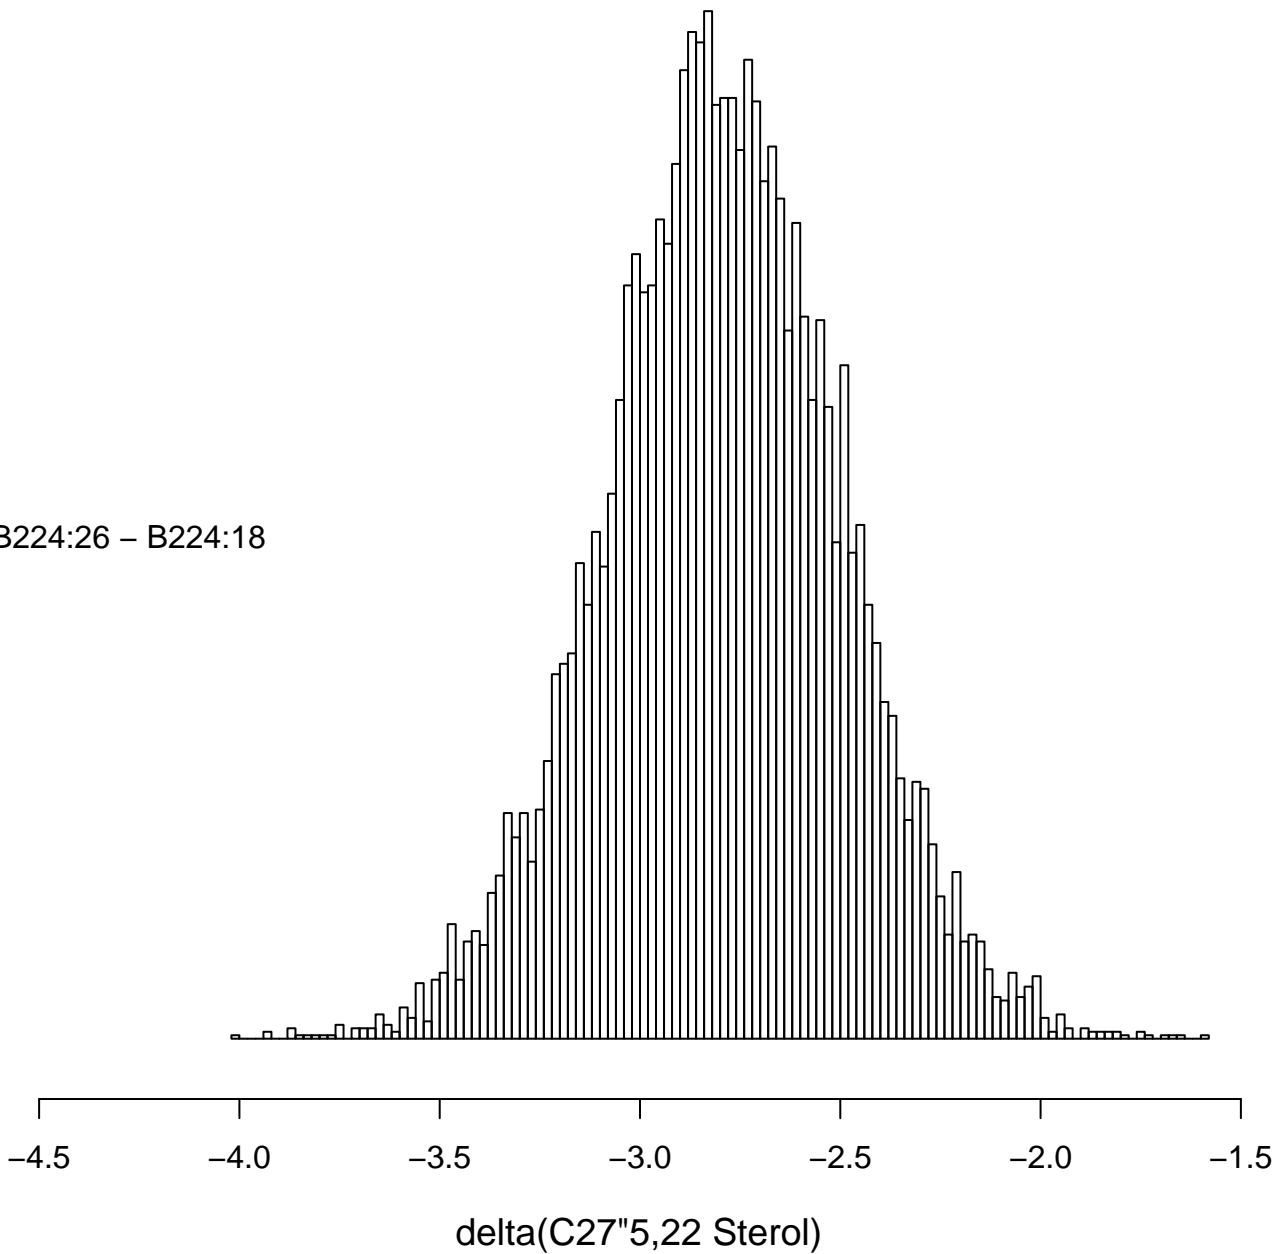

B224:26

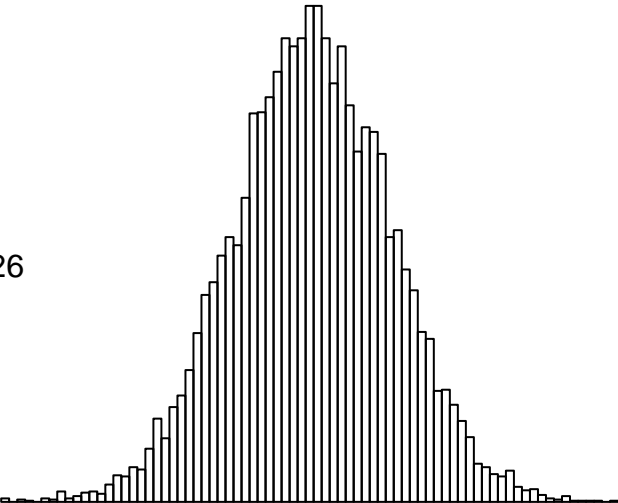

B224:18

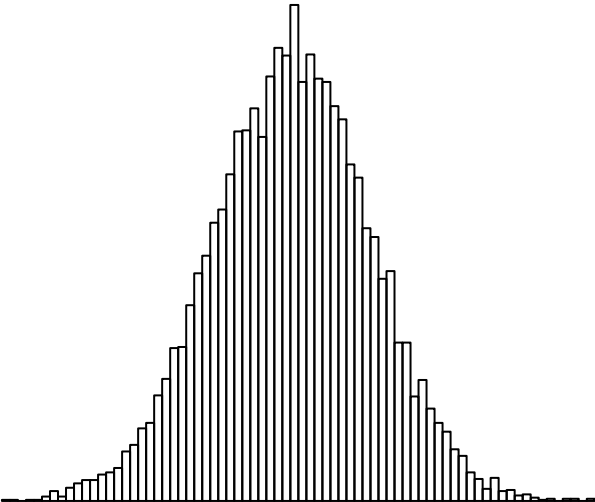

-8.0      -7.5      -7.0      -6.5      -6.0      -5.5      -5.0

C27"5 Sterol

B224:26 – B224:18

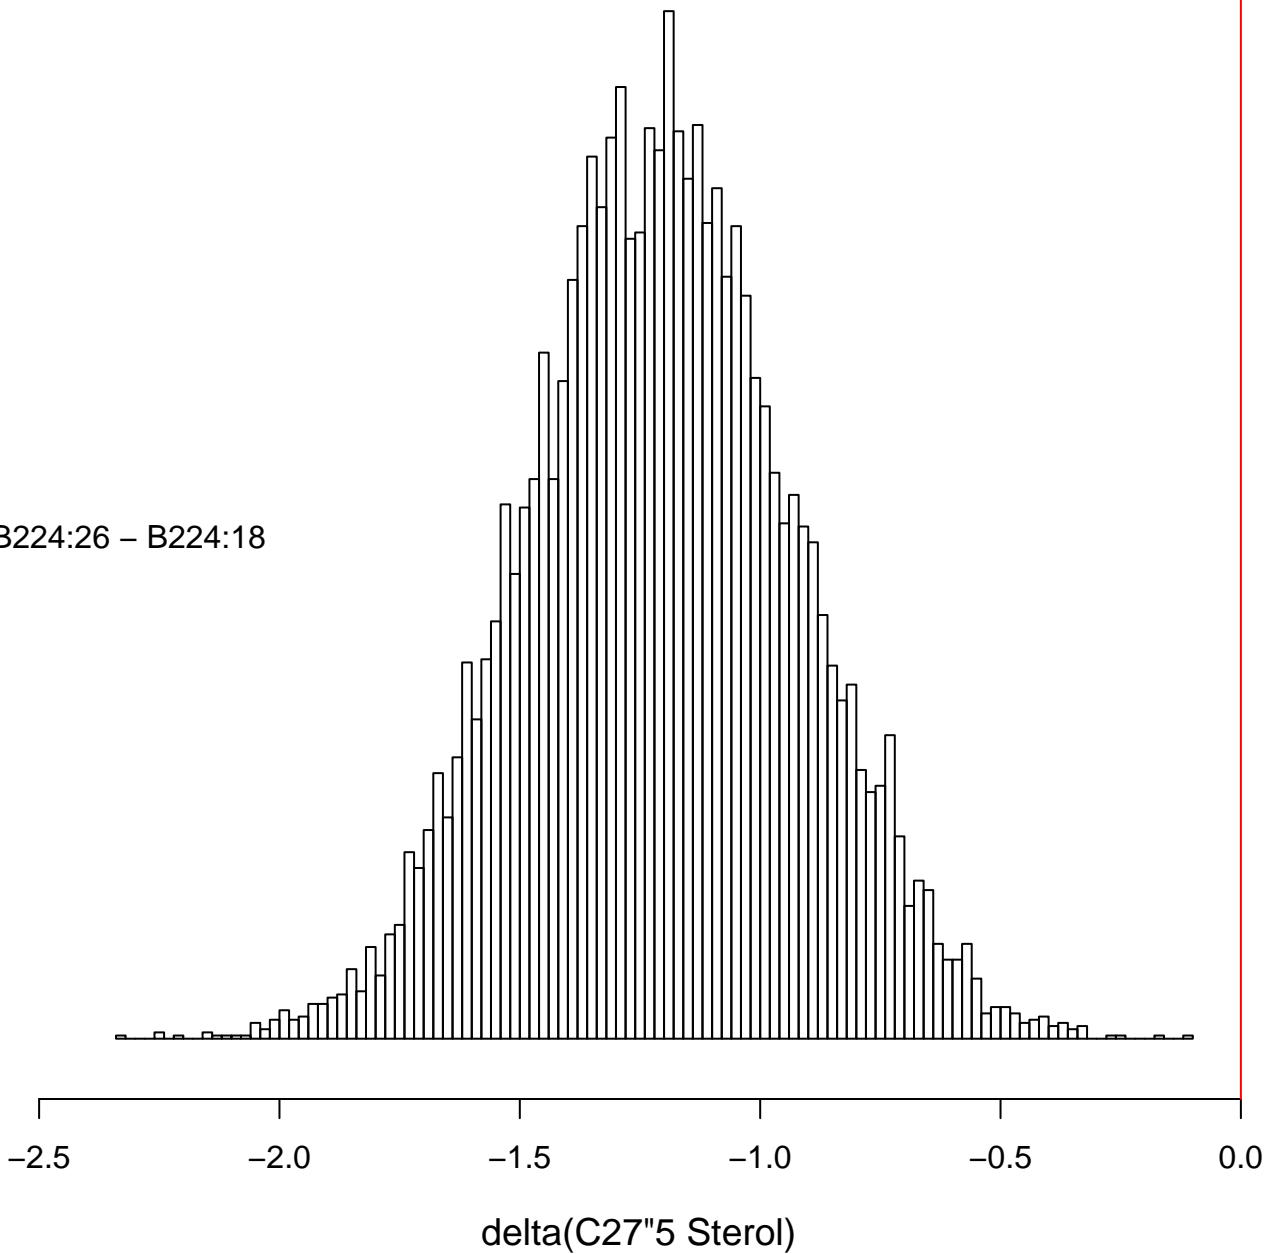

B224:26

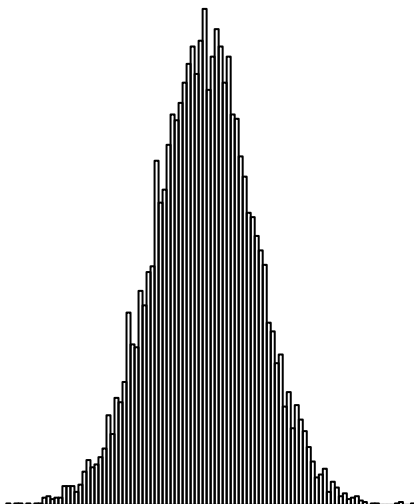

B224:18

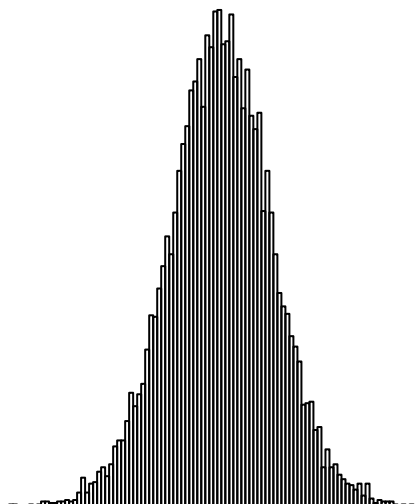

-11

-10

-9

-8

-7

-6

-5

C28"5,22 Sterol

B224:26 – B224:18

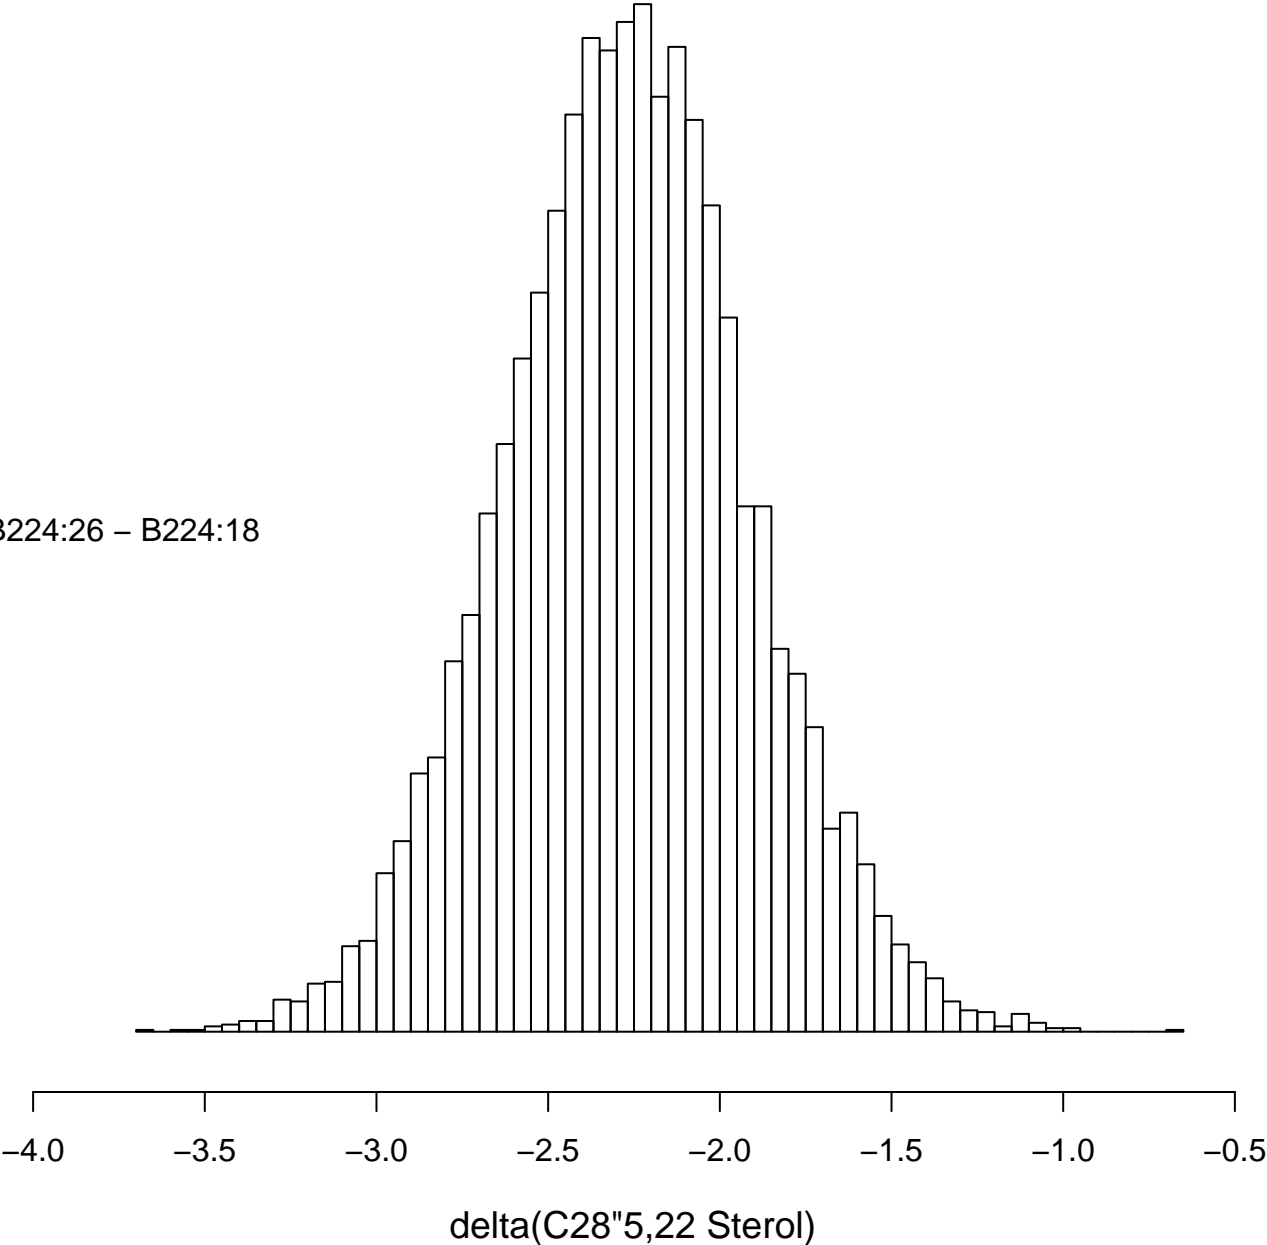



B224:26

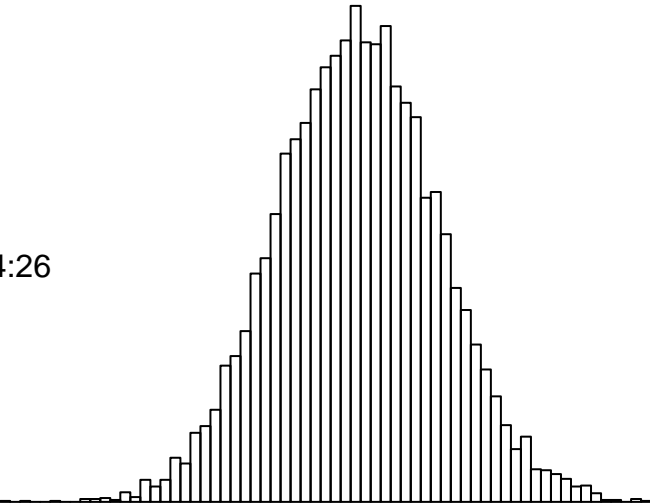

B224:18

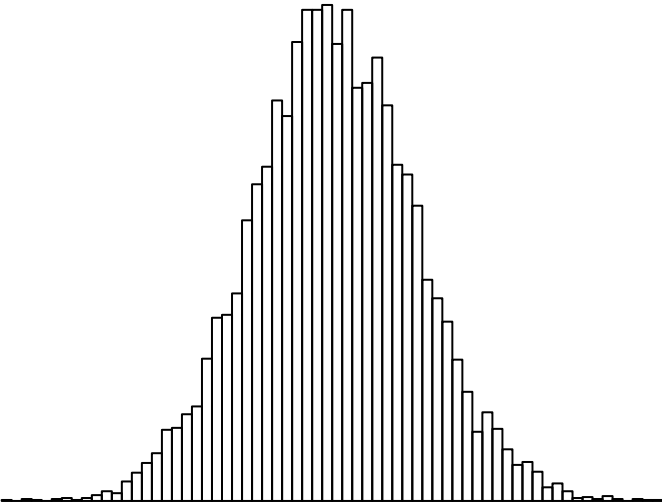

-11      -10      -9      -8      -7      -6      -5

C28<sup>5</sup> Sterol

B224:26 – B224:18

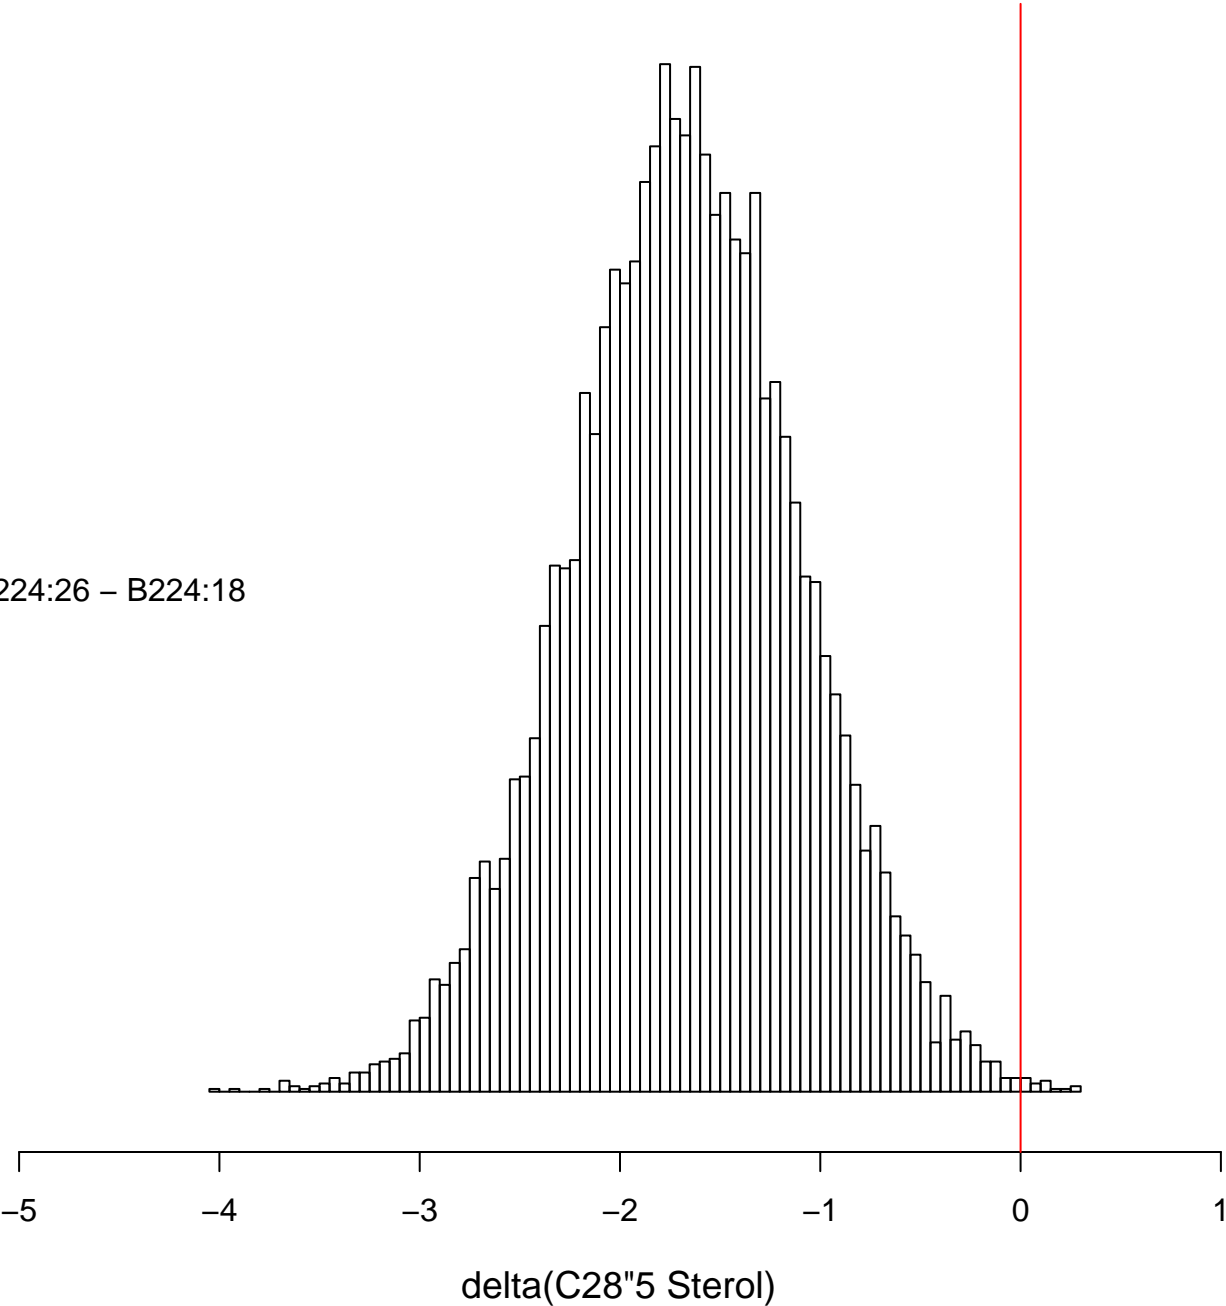

B224:26

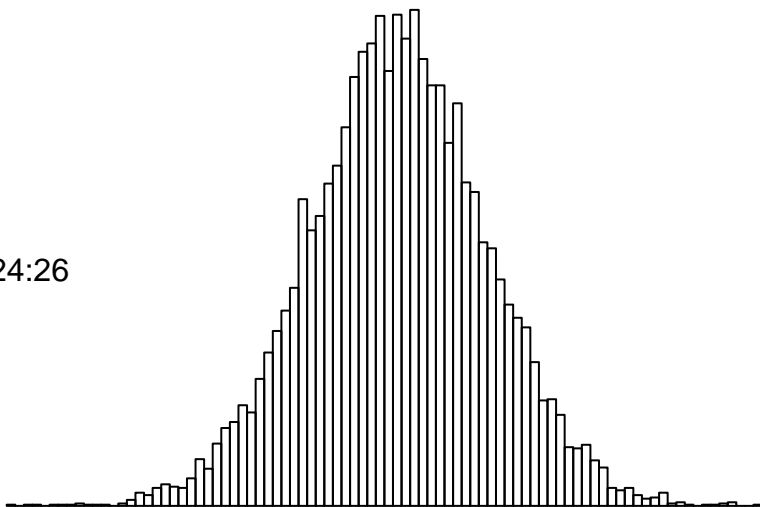

B224:18

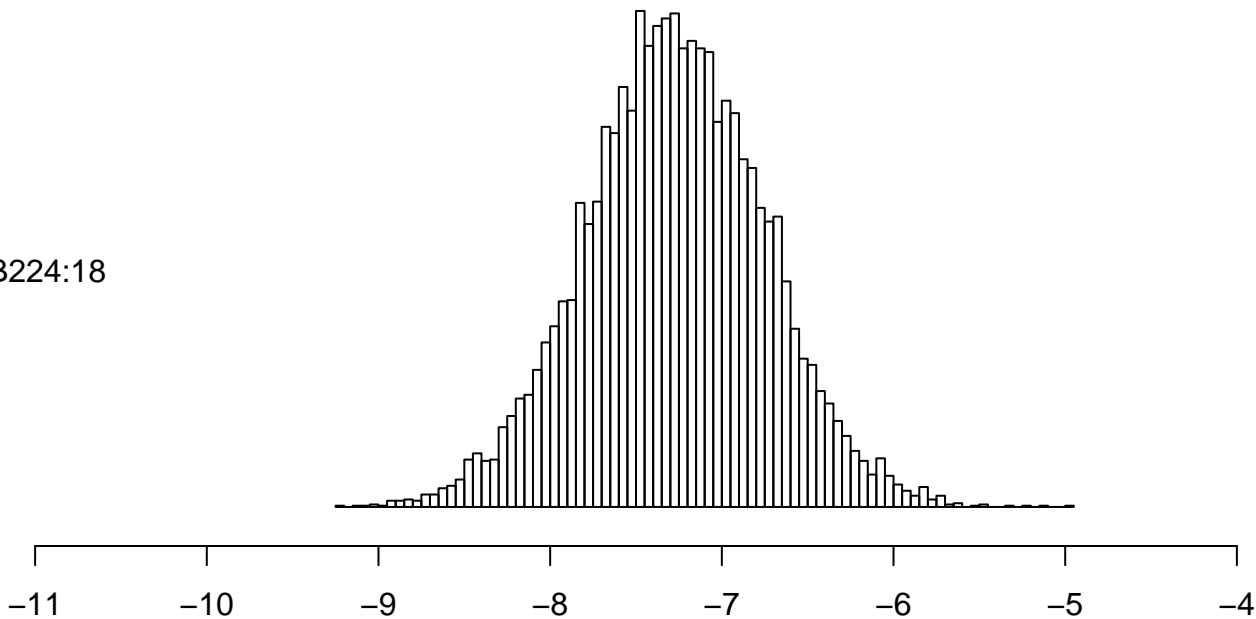

C29<sup>5,22</sup> Sterol

B224:26 – B224:18

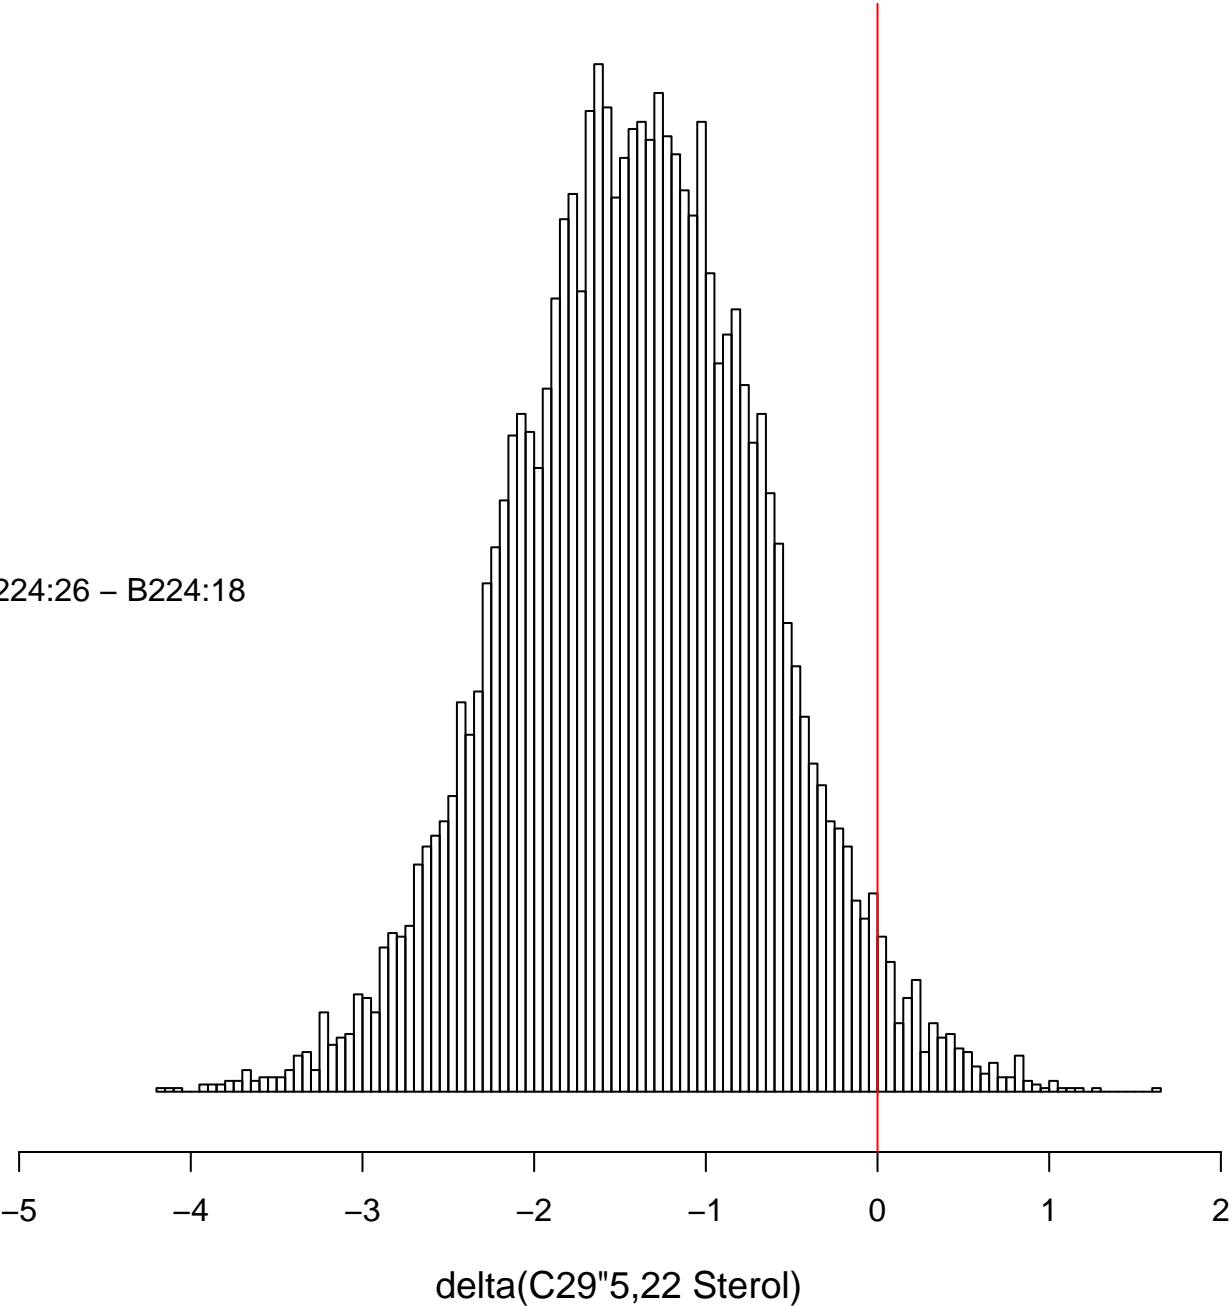

B224:26

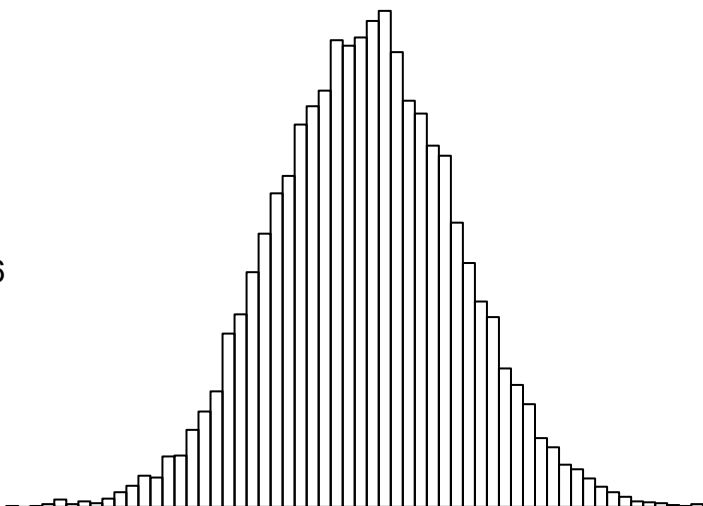

B224:18

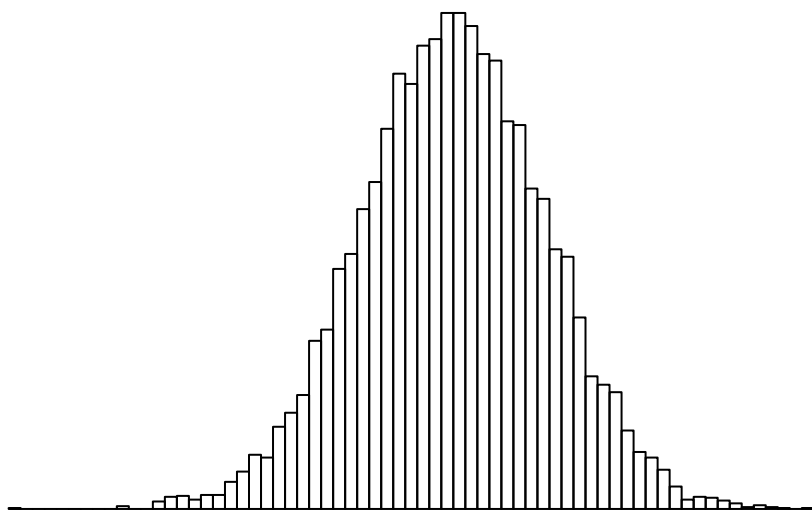

-9

-8

-7

-6

-5

-4

C29 Sterol 2

B224:26 – B224:18

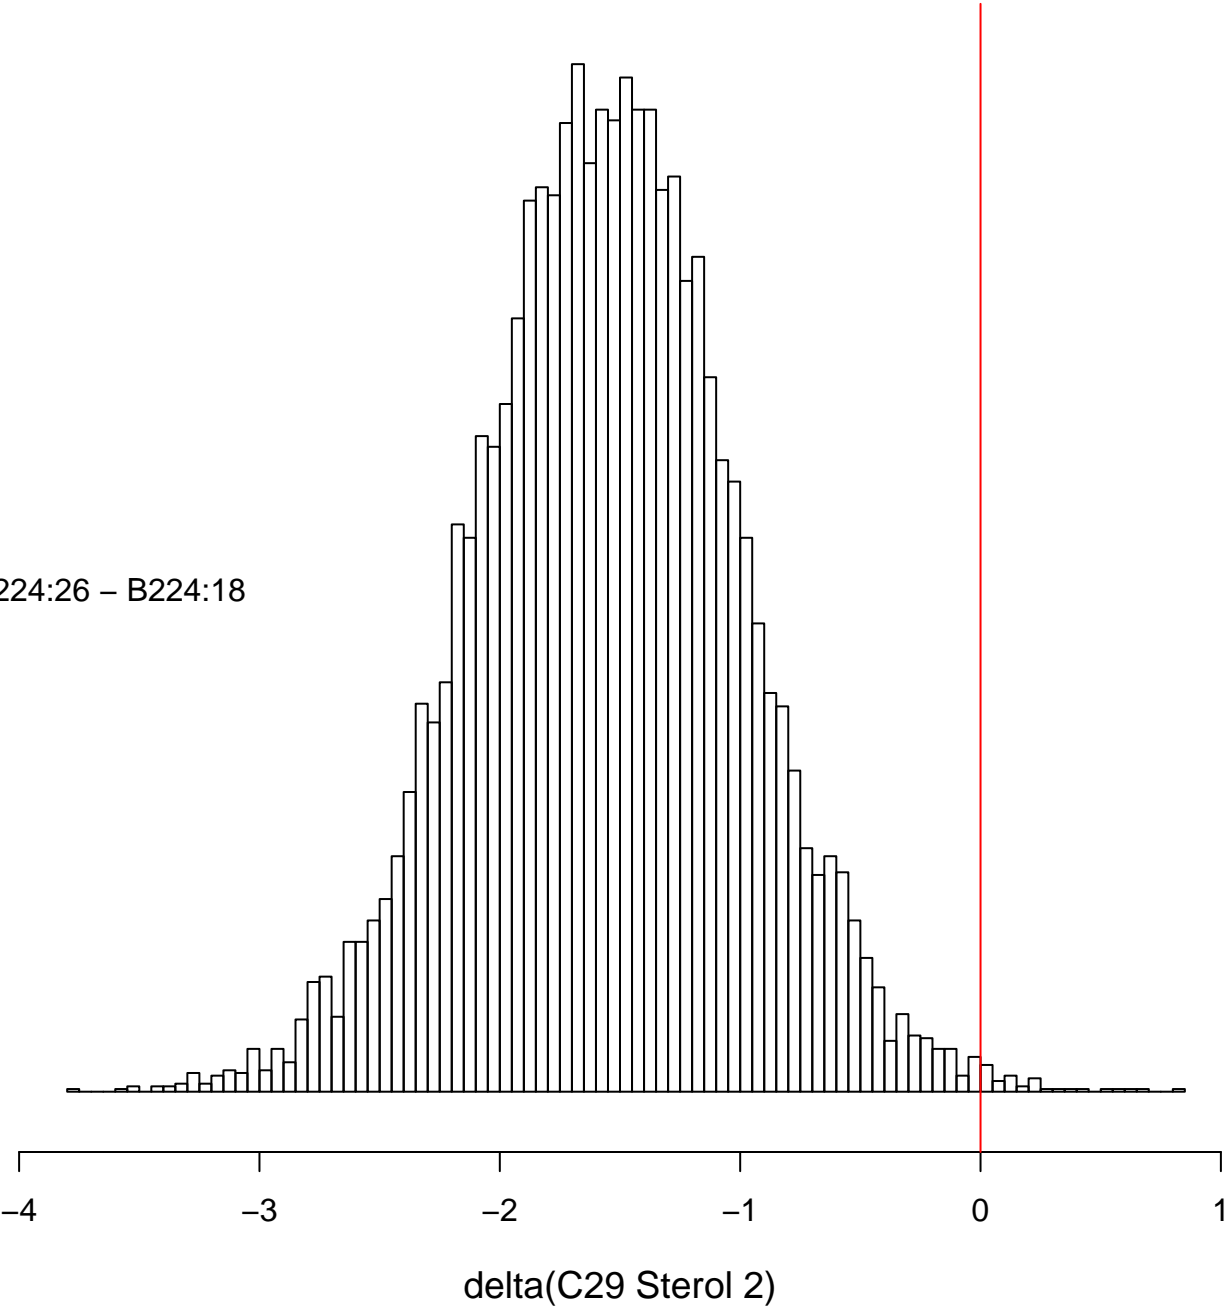

B224:26

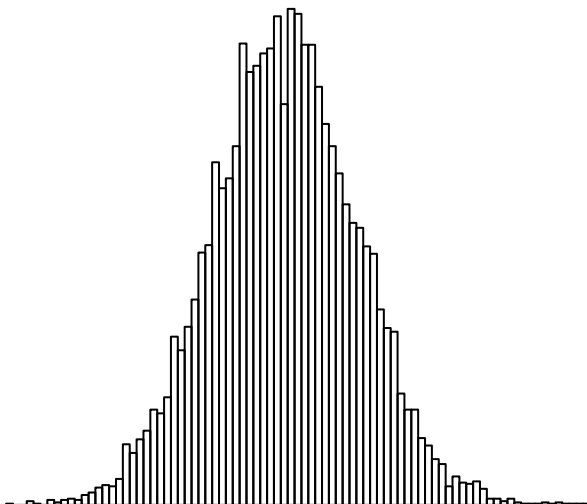

B224:18

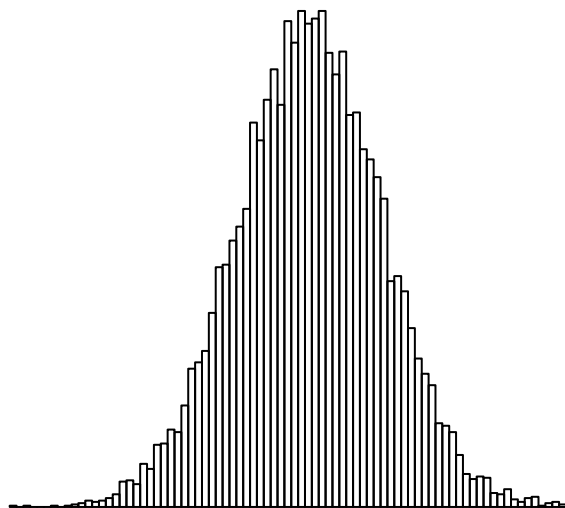

-7.0      -6.5      -6.0      -5.5      -5.0      -4.5      -4.0      -3.5

C29 Stanol 2

B224:26 – B224:18

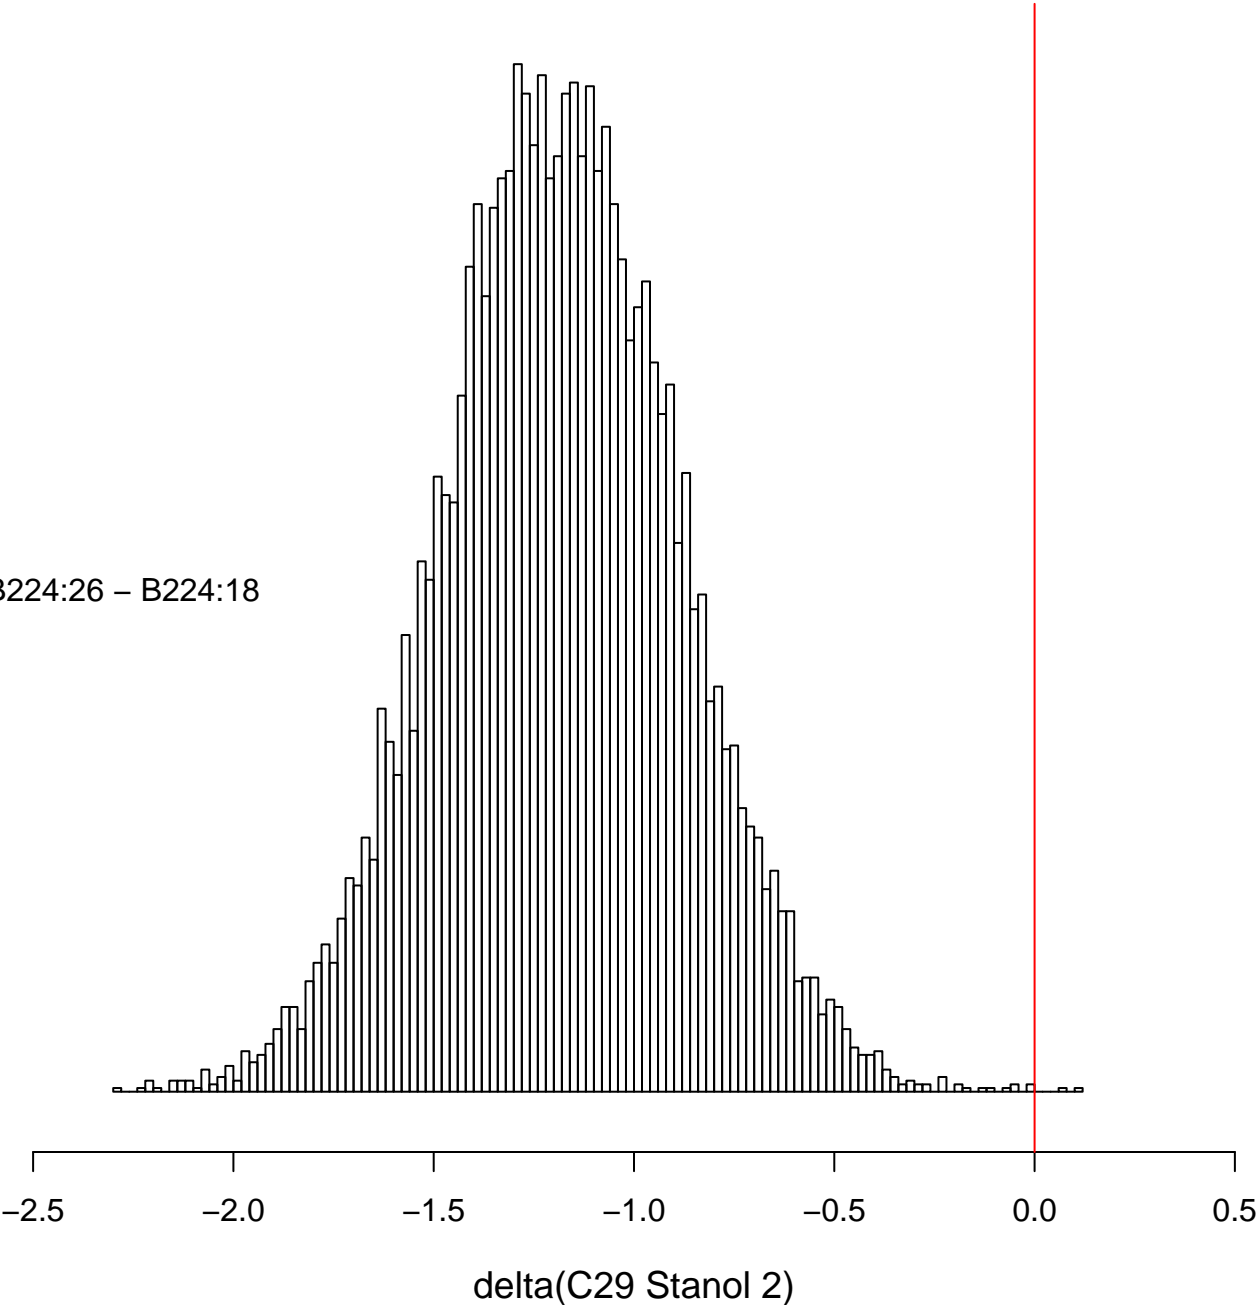



B224:26

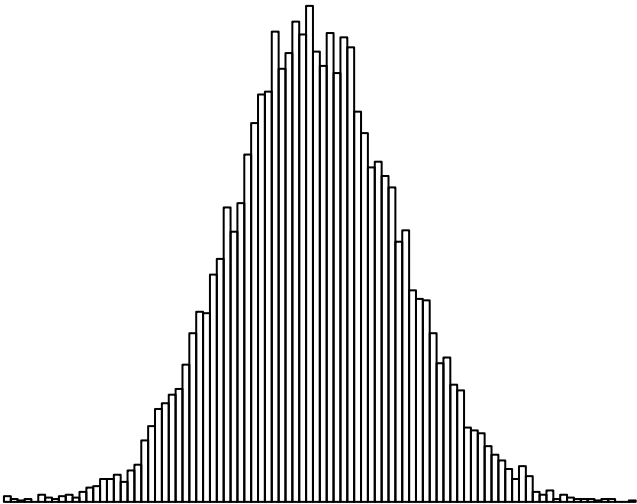

B224:18

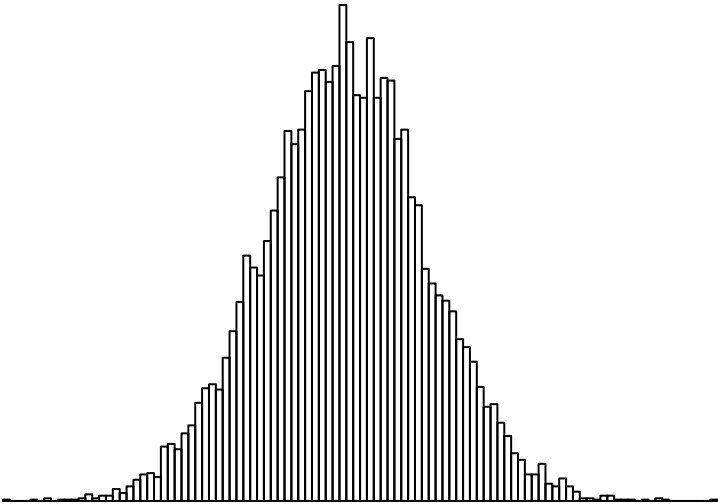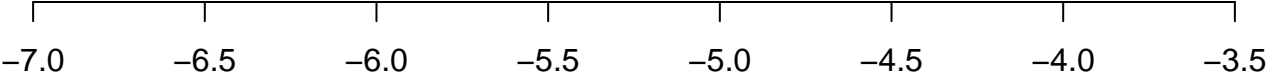

C29 Sterol 3

B224:26 – B224:18

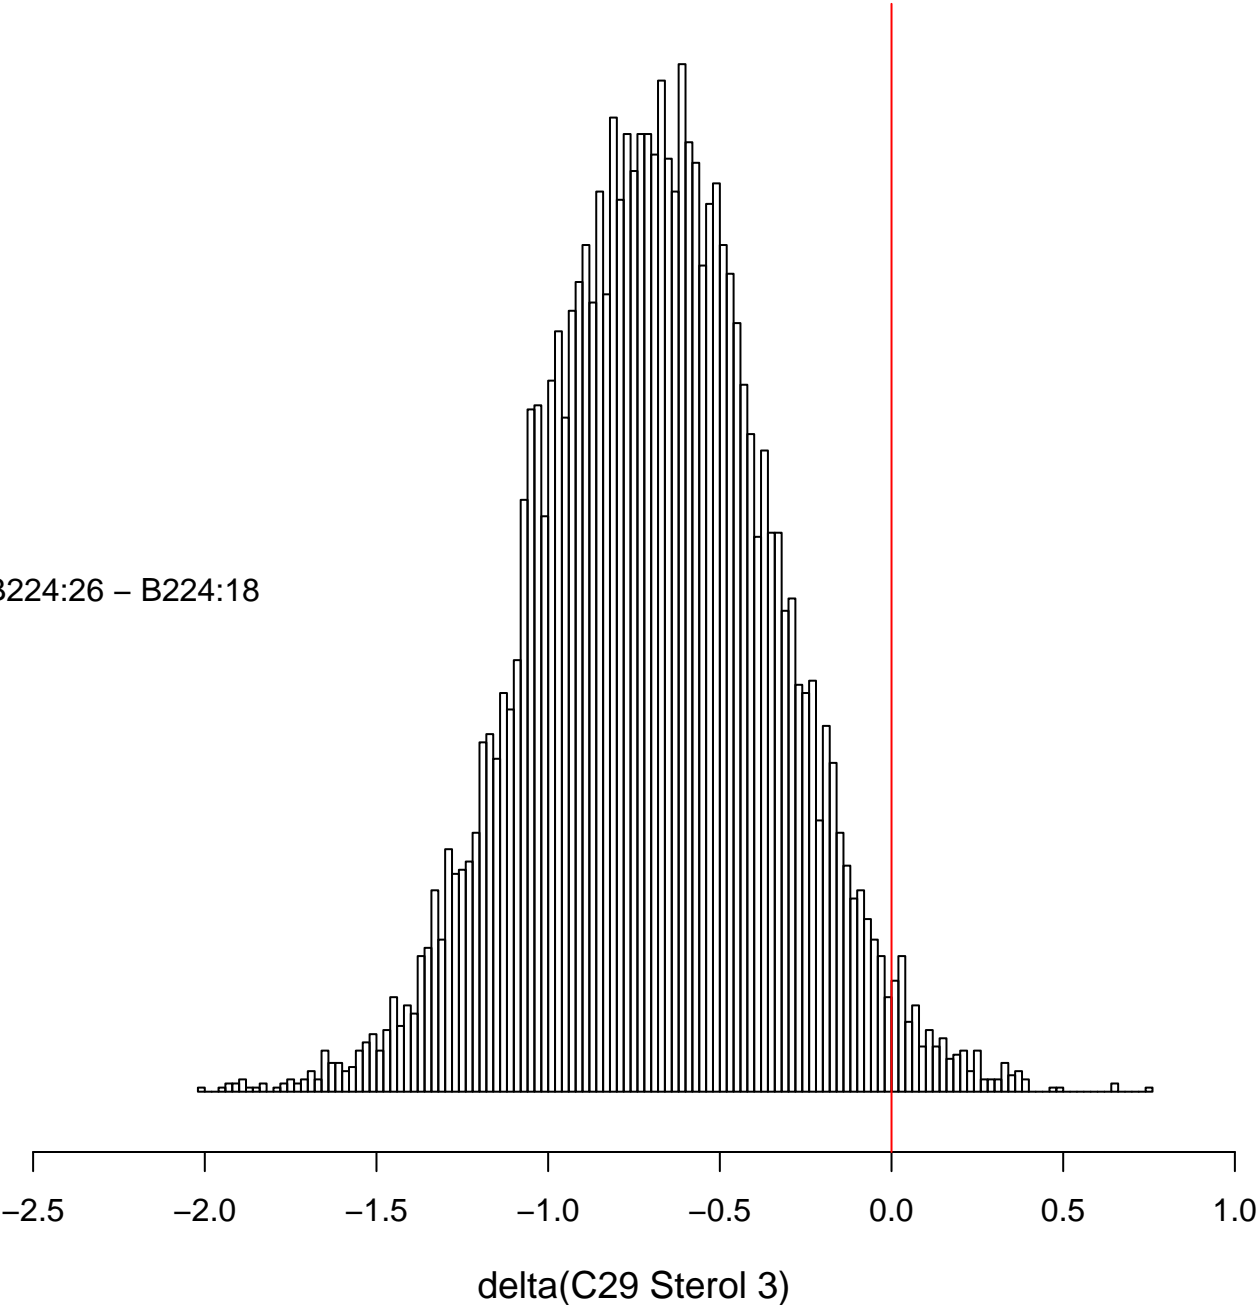

B224:26

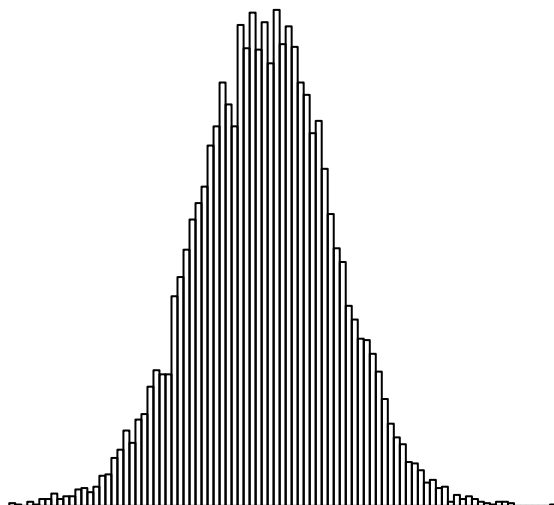

B224:18

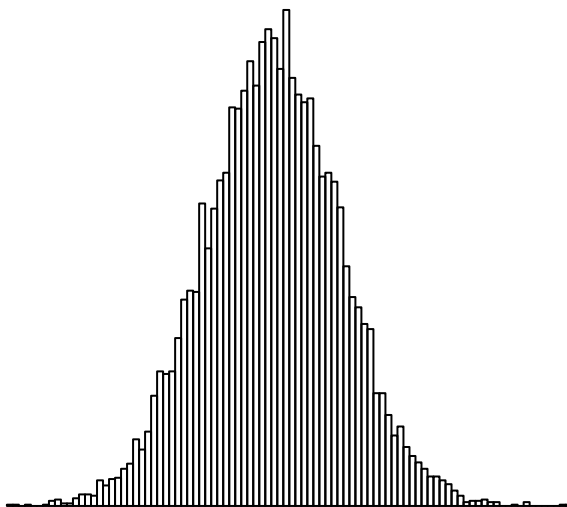

-11

-10

-9

-8

-7

C30 Sterol

B224:26 – B224:18

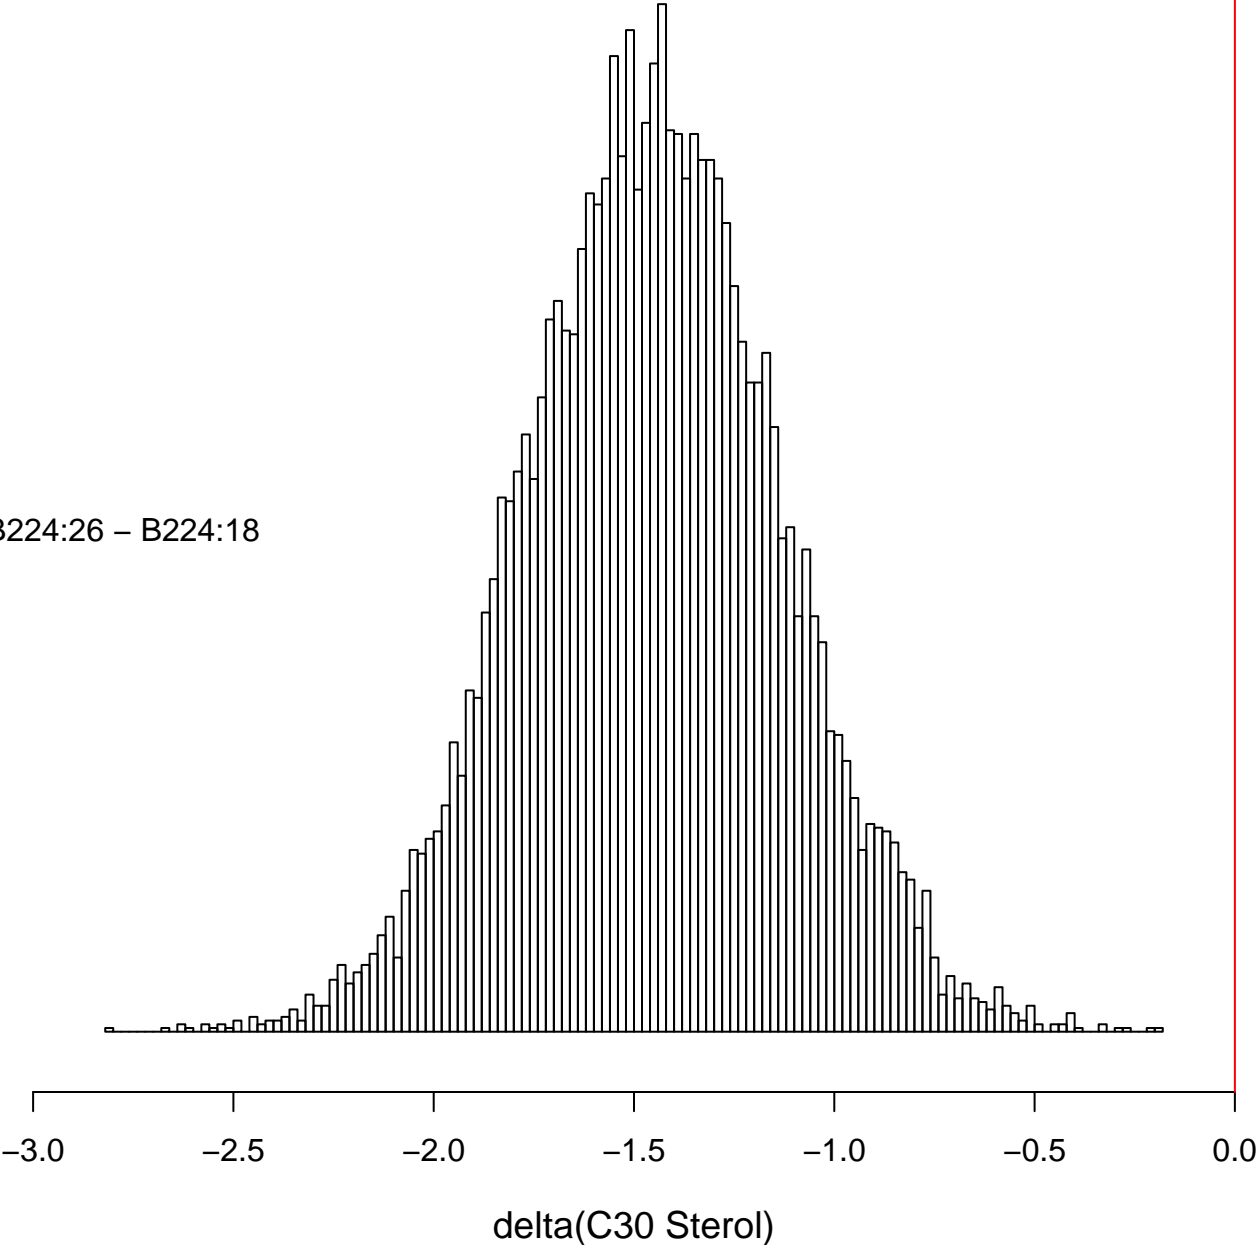

B224:26

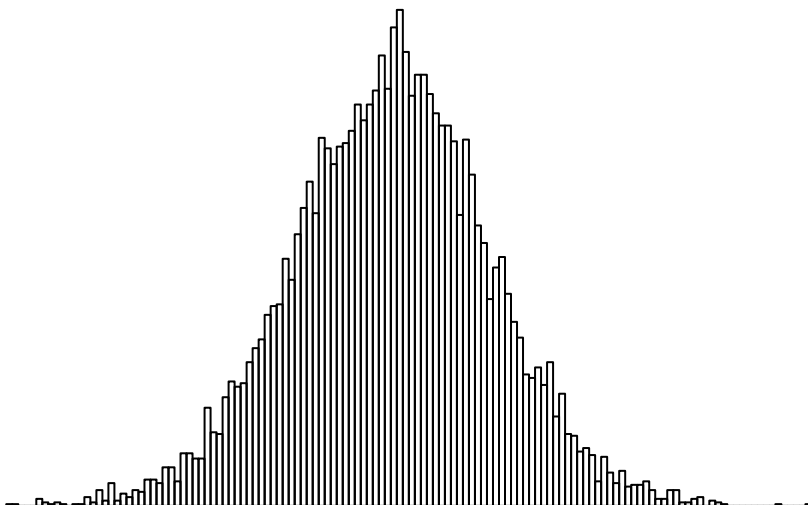

B224:18

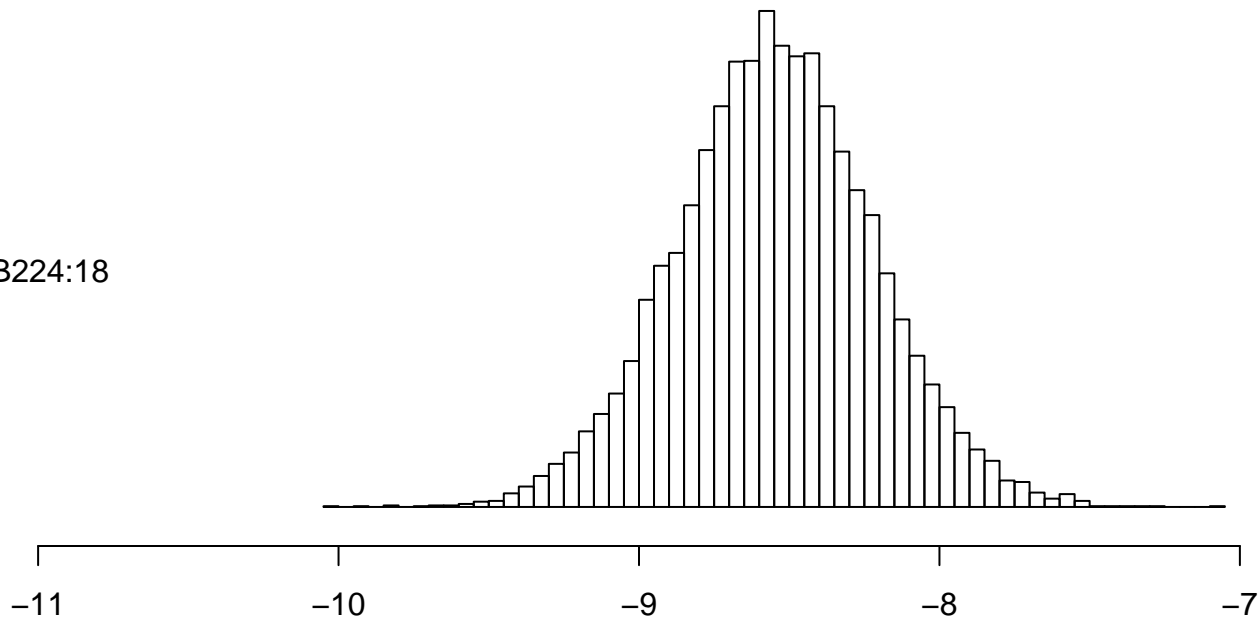

C30<sup>5</sup> Sterol

B224:26 – B224:18

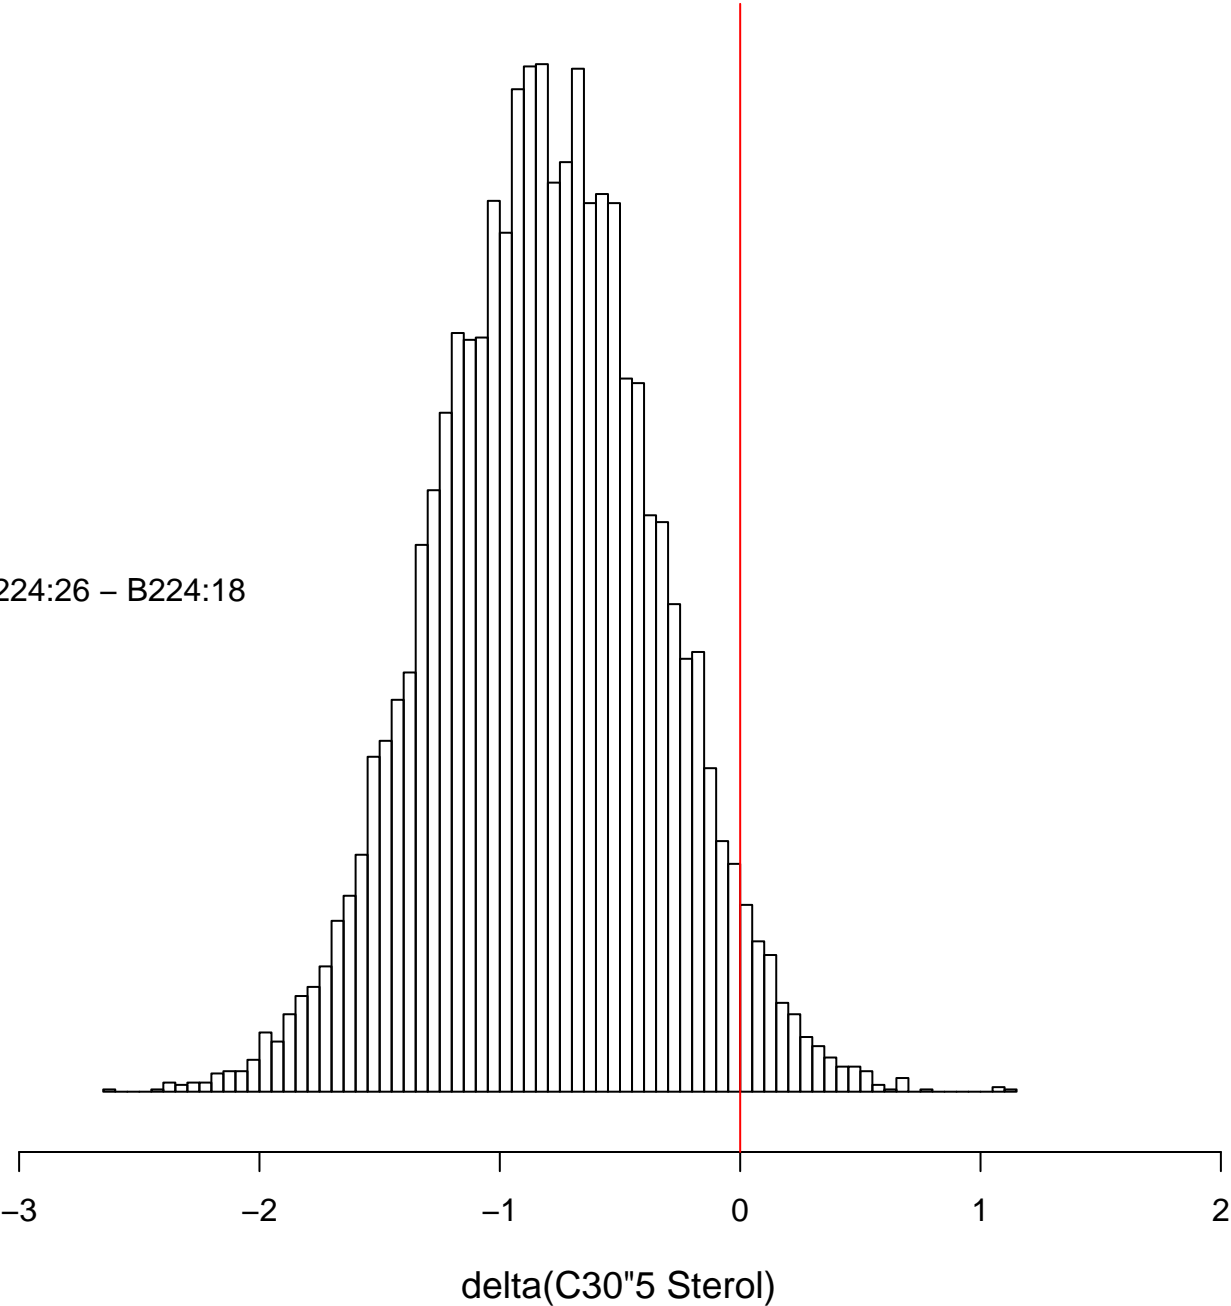

B224:26

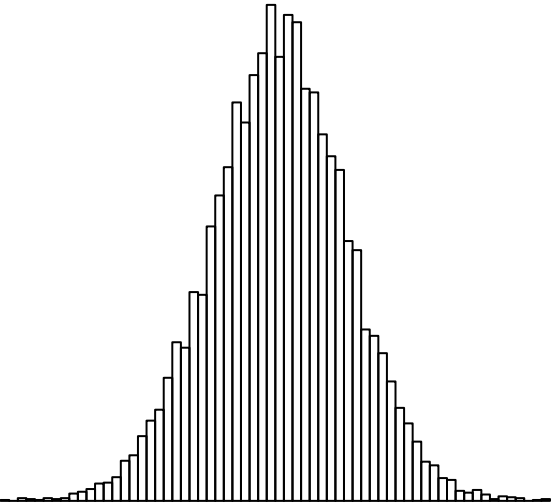

B224:18

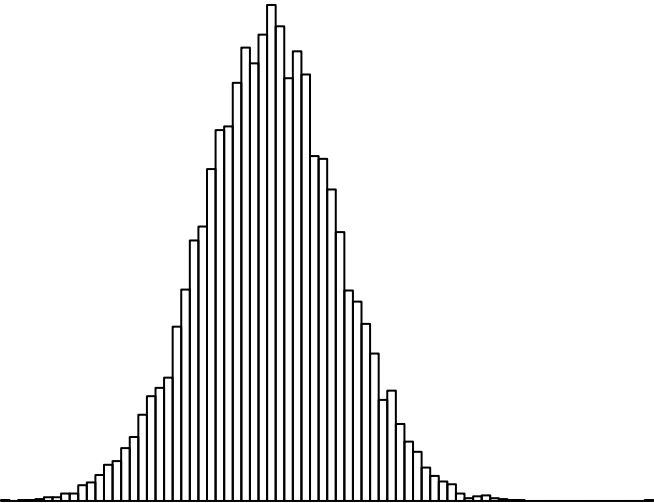

-10      -9      -8      -7      -6      -5      -4      -3

Open Hexose 1

B224:26 – B224:18

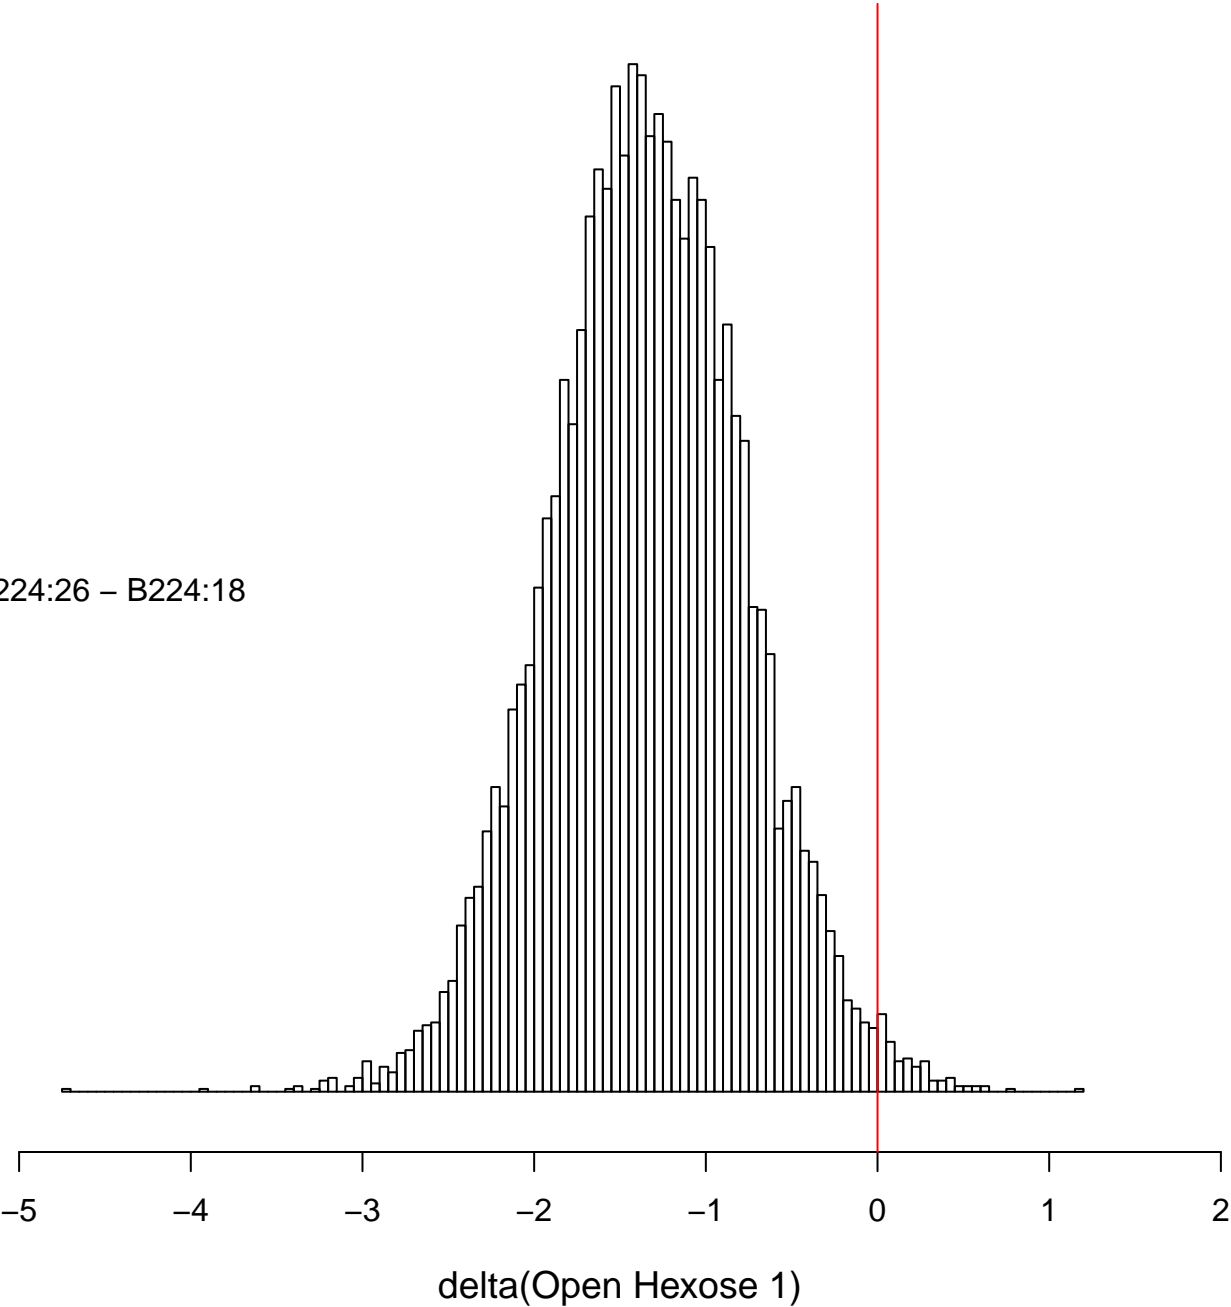



B224:26

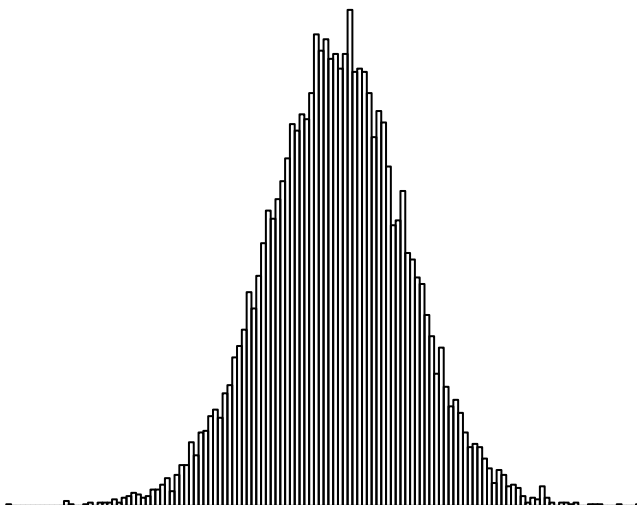

B224:18

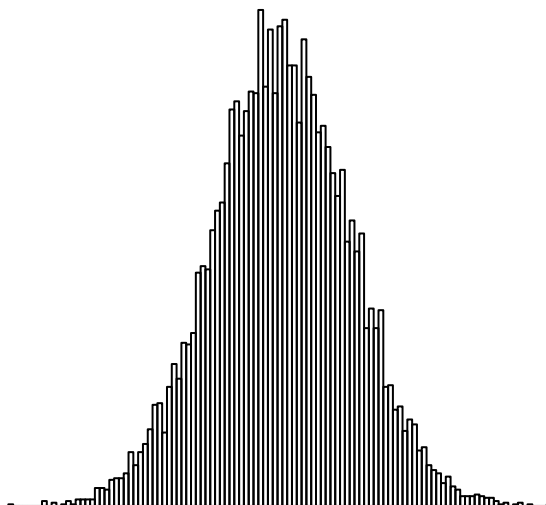

-10      -9      -8      -7      -6      -5

Closed Hexose 1

B224:26 – B224:18

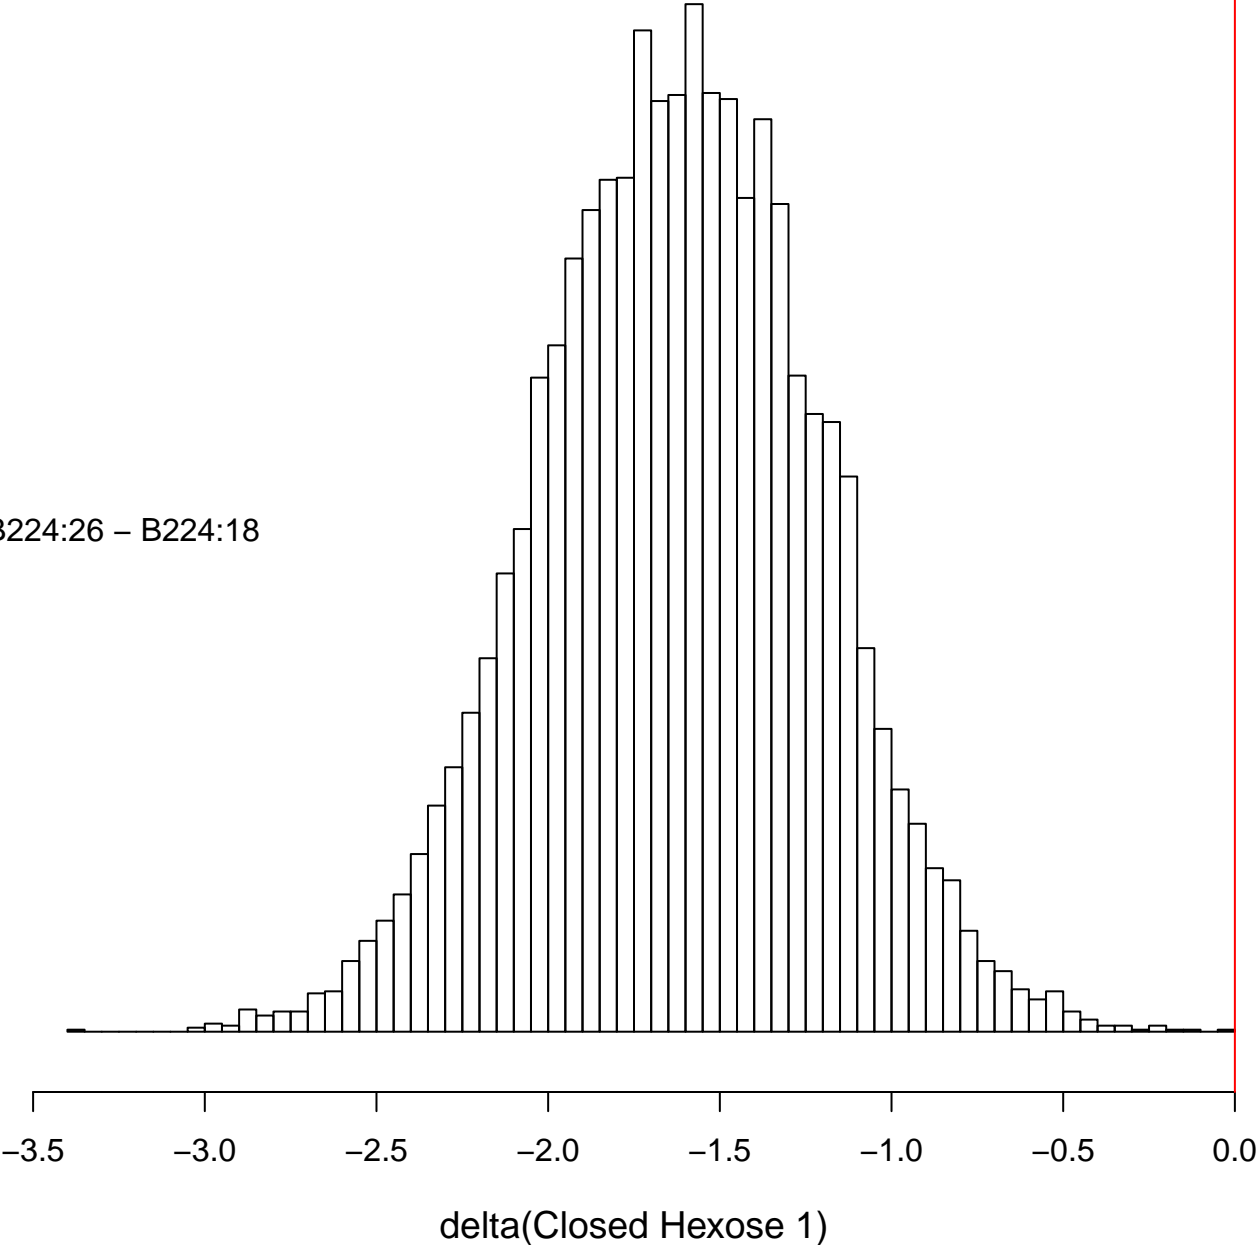

B224:26

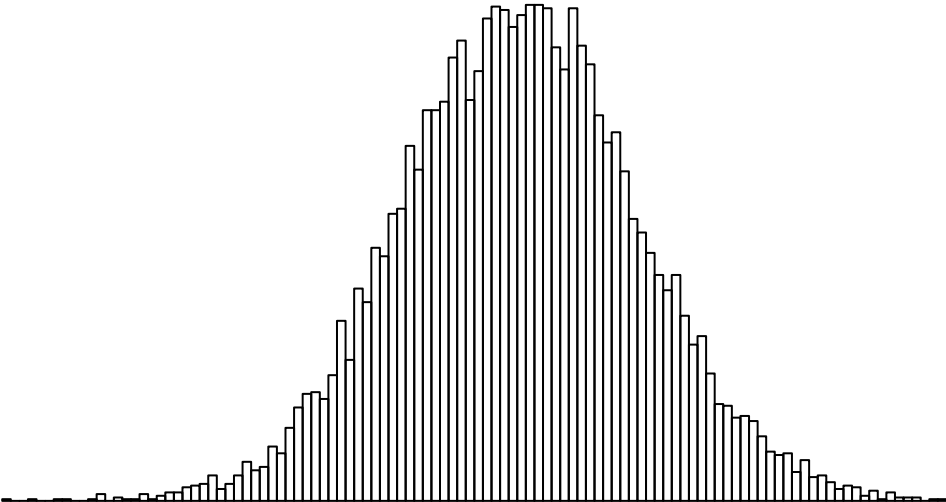

B224:18

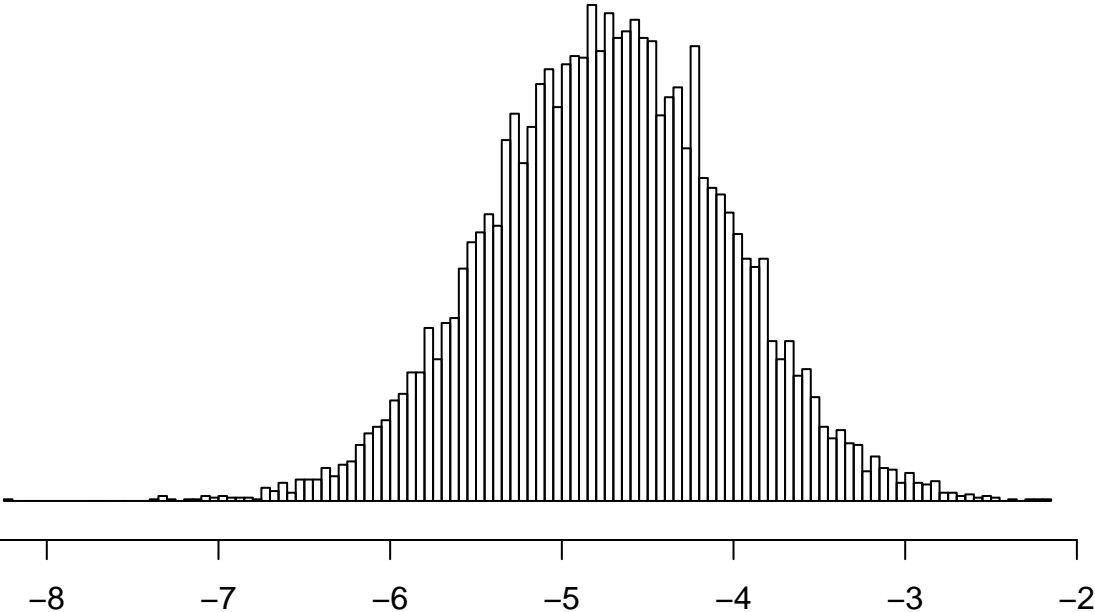

Closed Hexose 2

B224:26 – B224:18

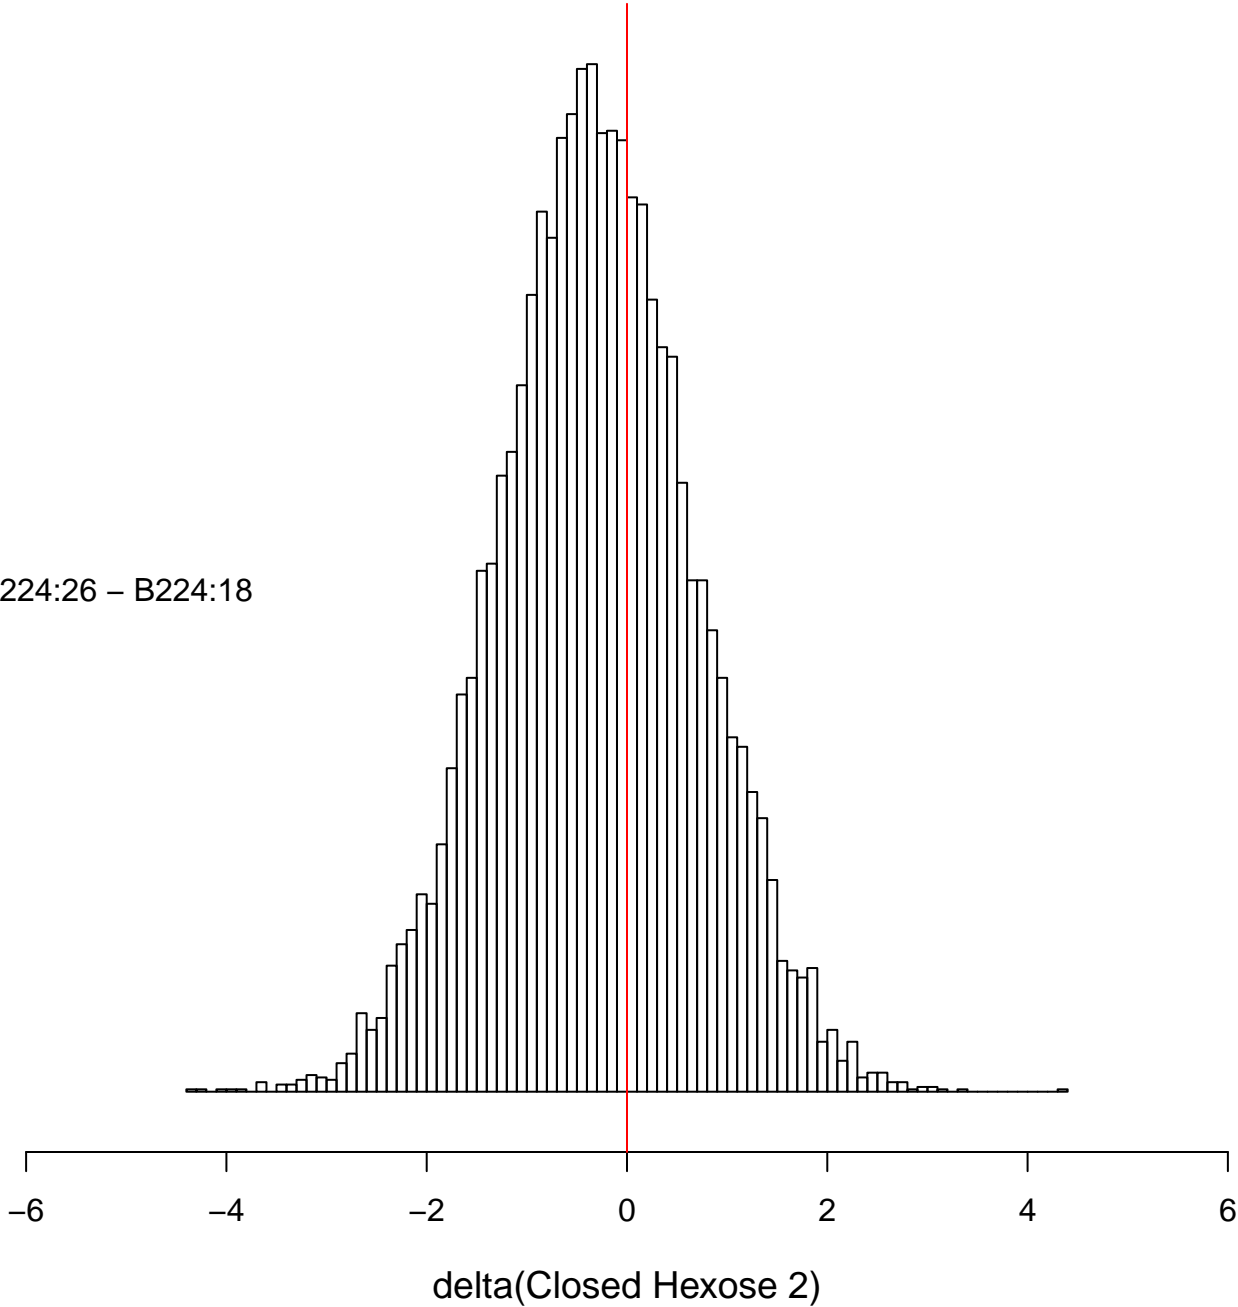

B224:26

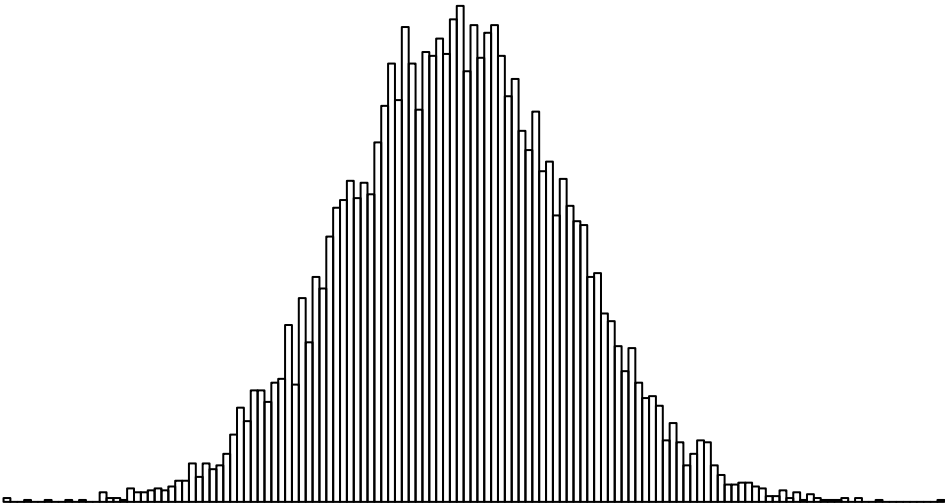

B224:18

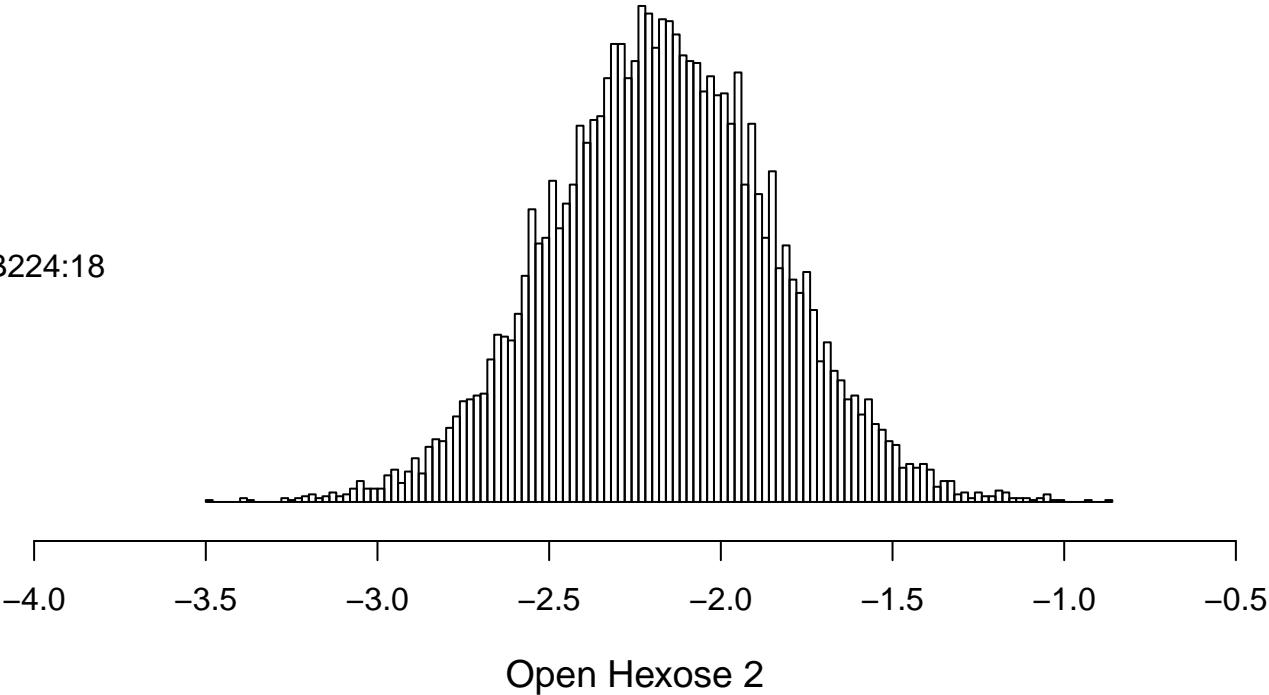

B224:26 – B224:18

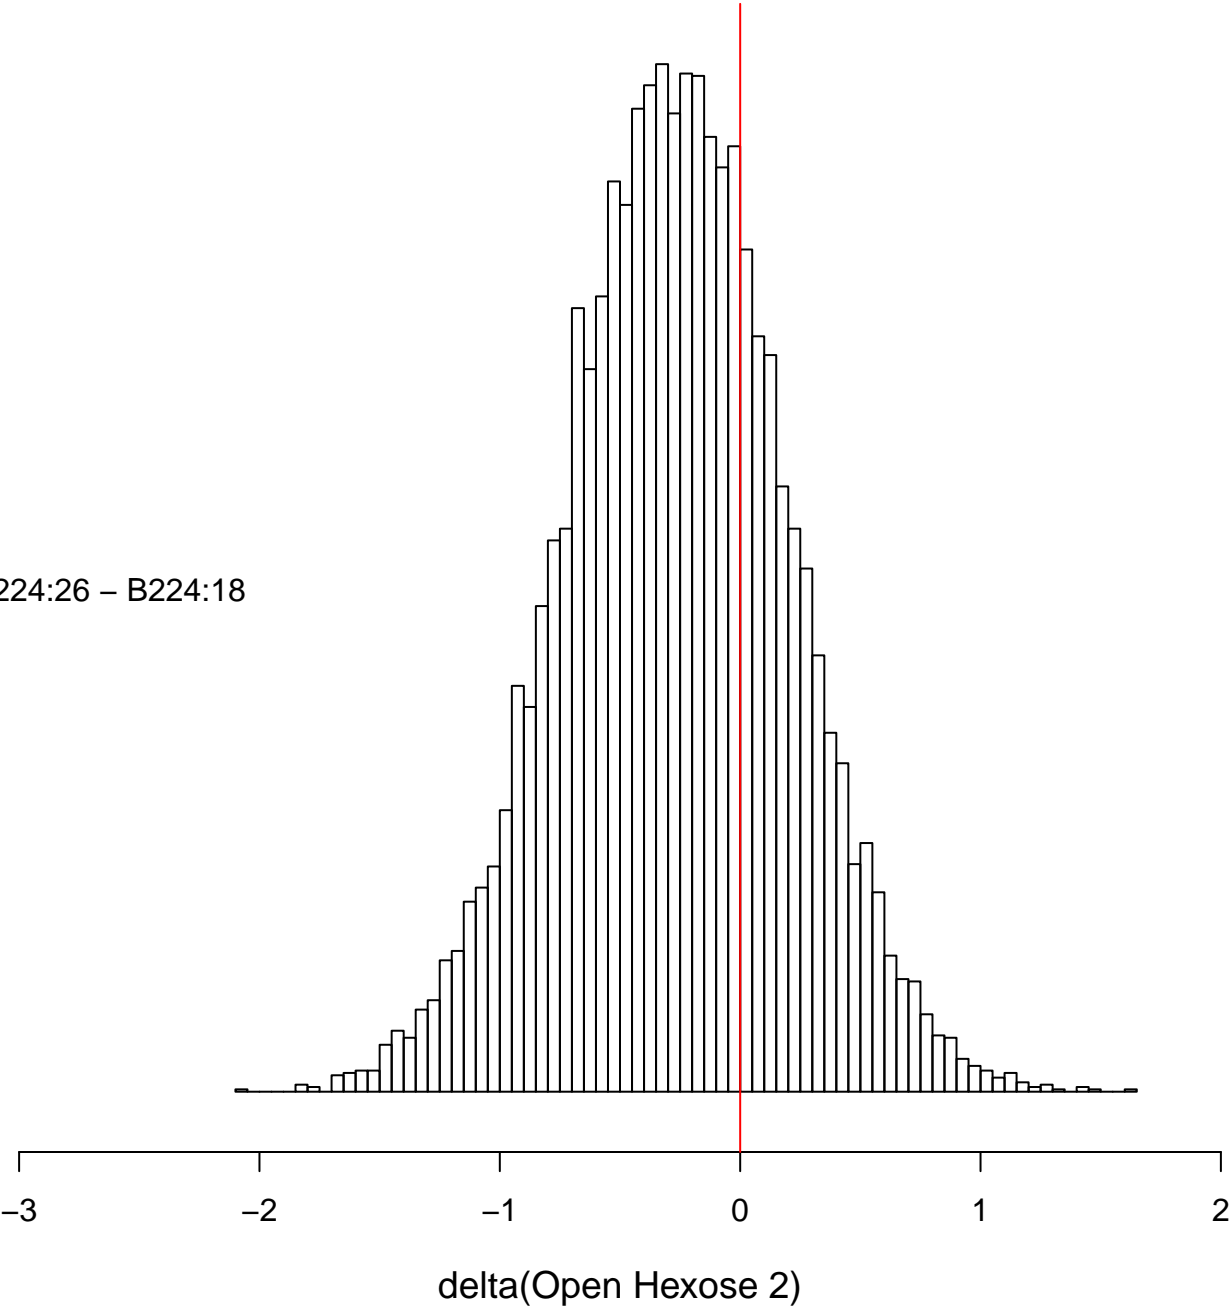

B224:26

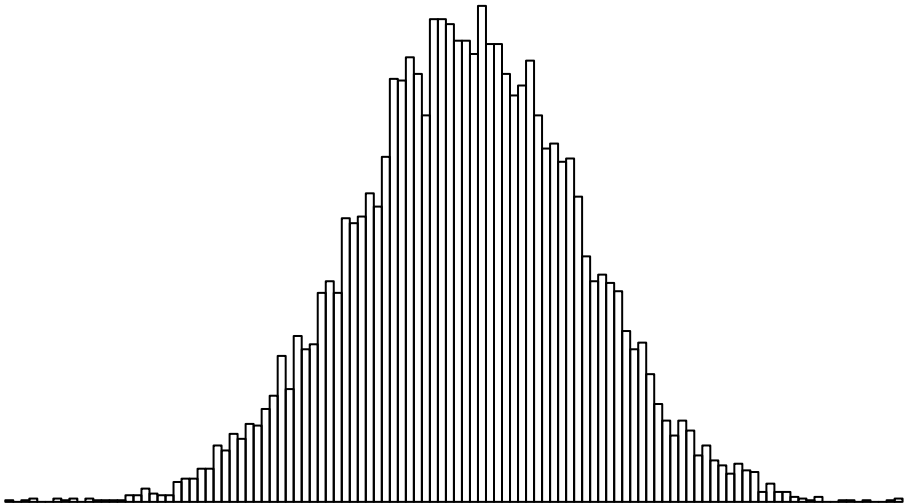

B224:18

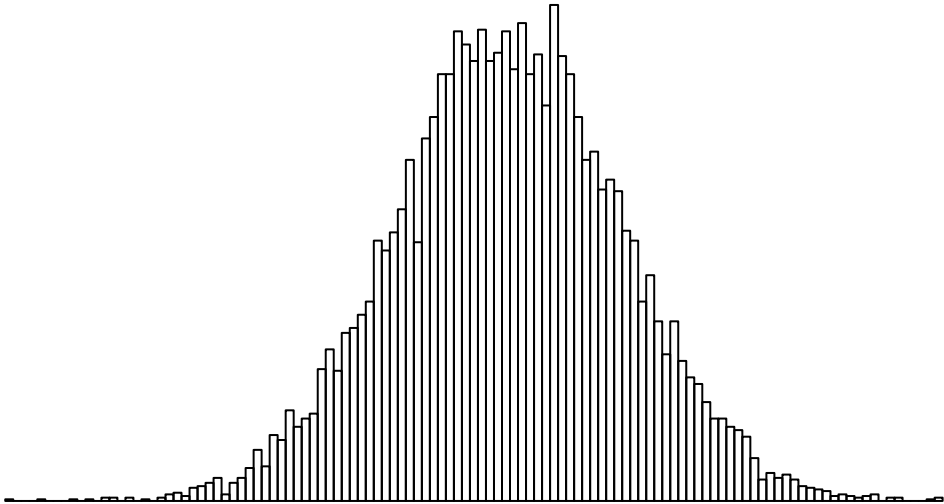

-5.5      -5.0      -4.5      -4.0      -3.5      -3.0      -2.5

Open Hexose 3

B224:26 – B224:18

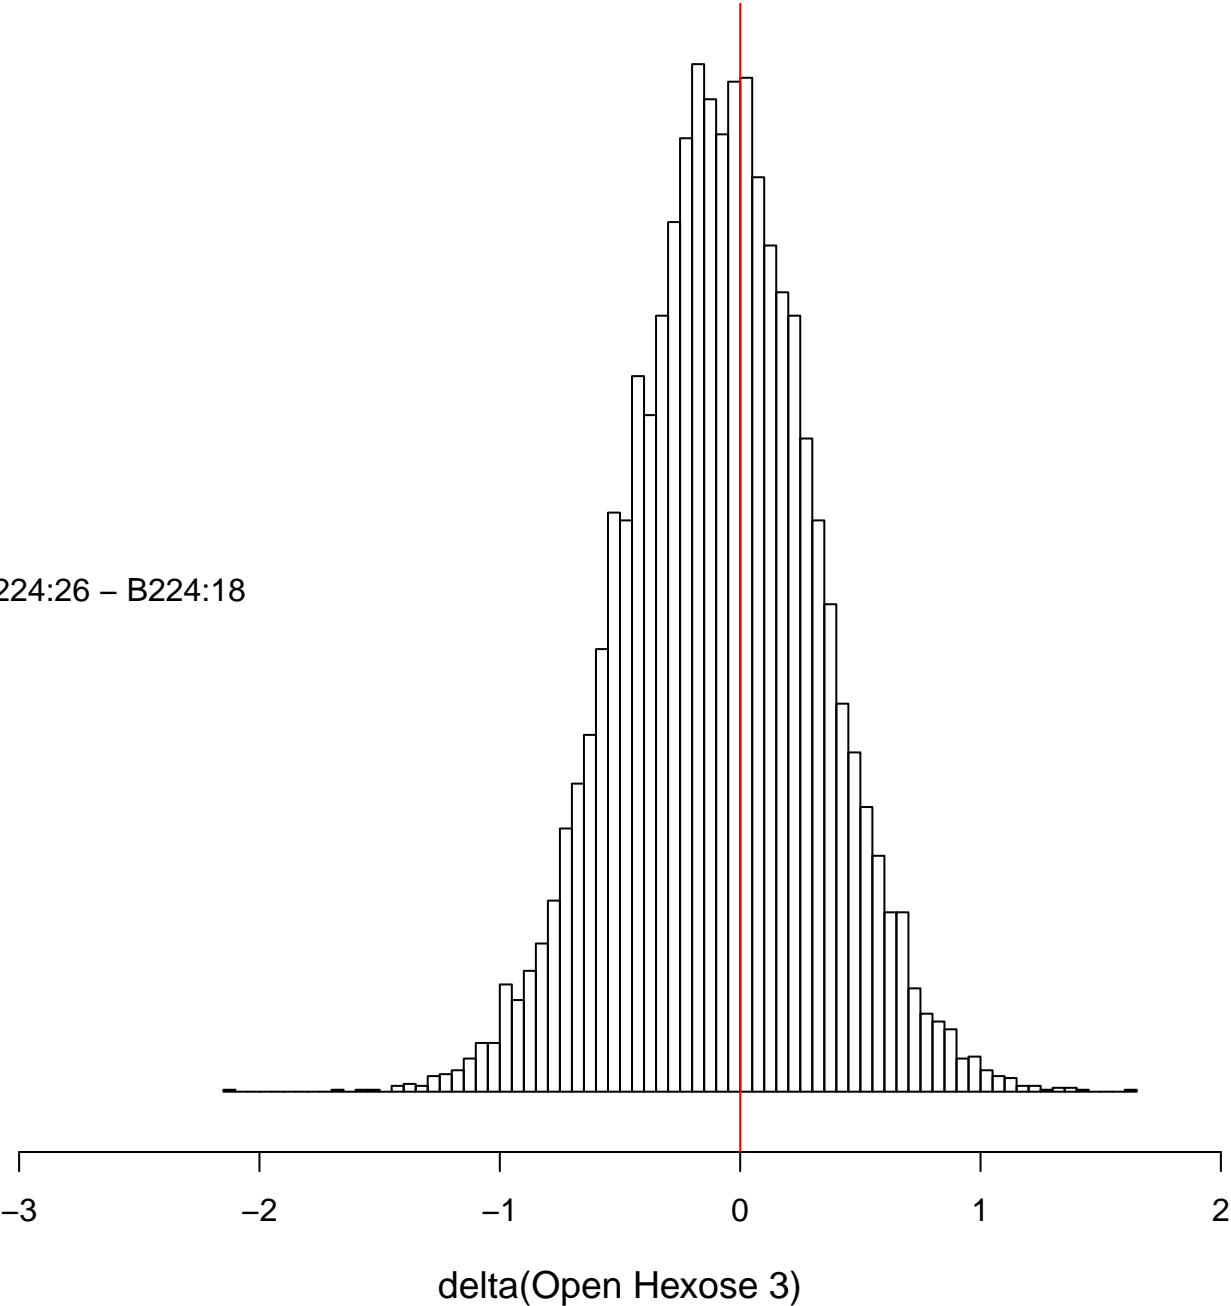



B224:26

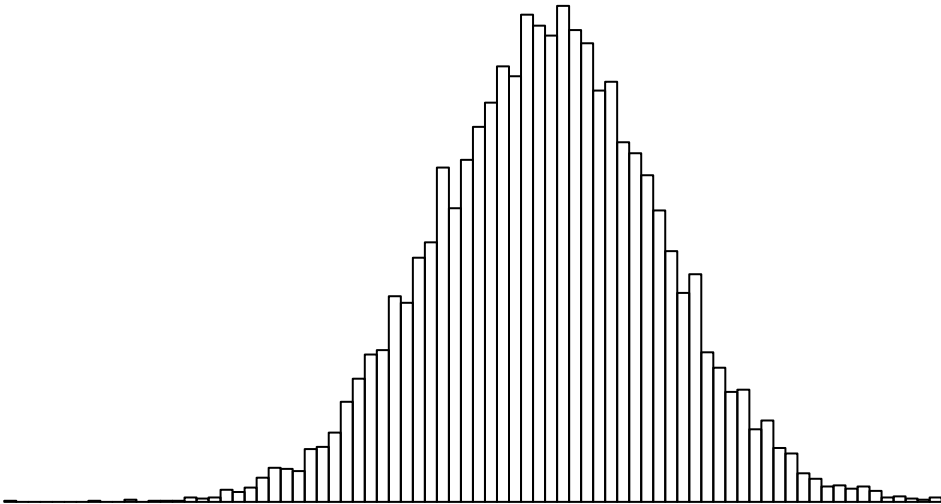

B224:18

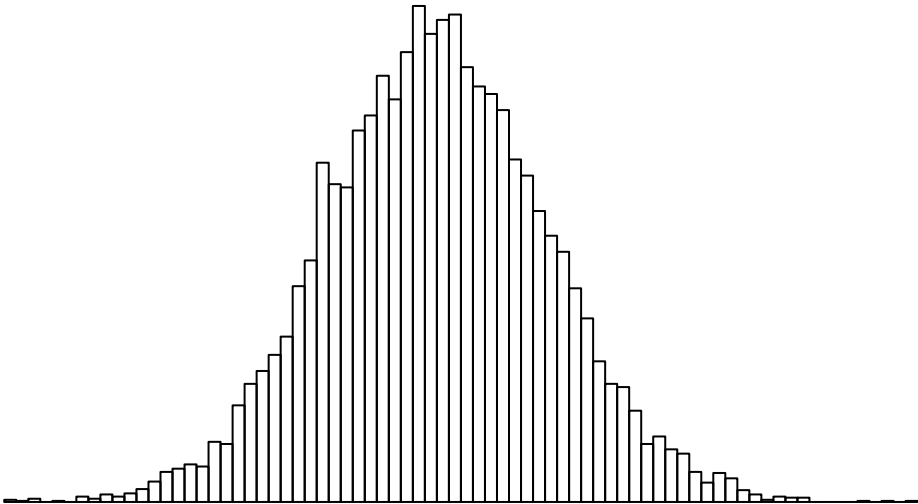

Closed Hexose 3

B224:26 – B224:18

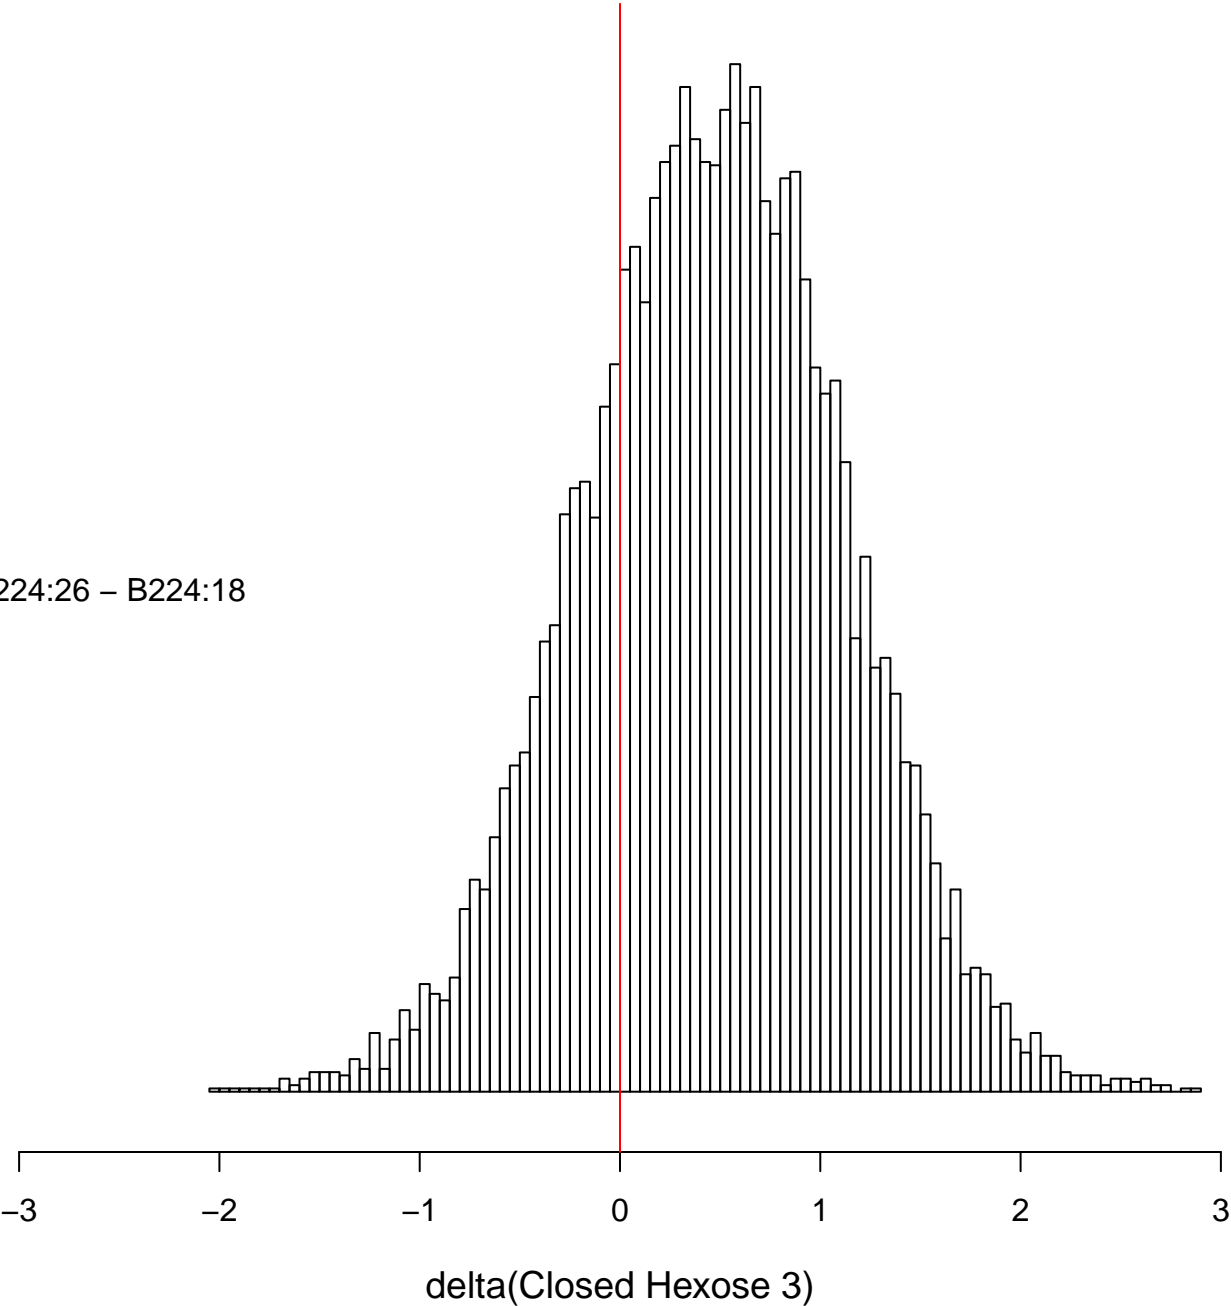

B224:26

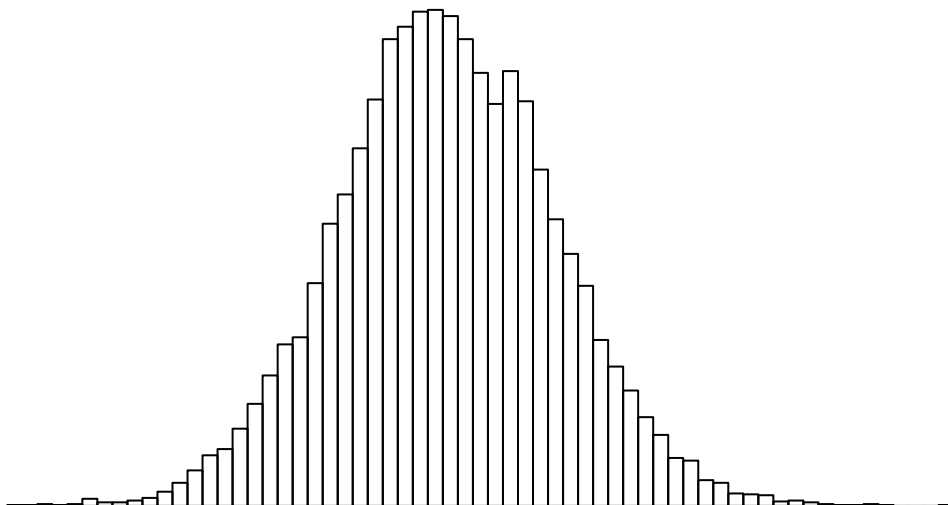

B224:18

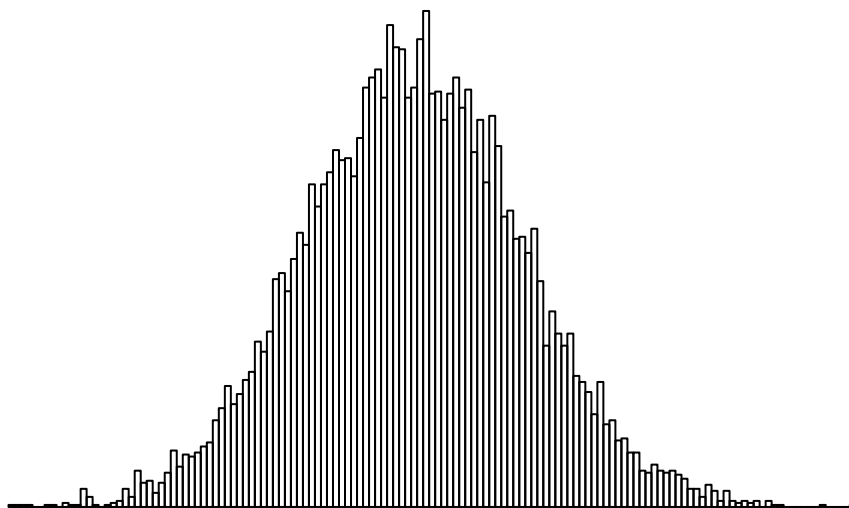

-7

-6

-5

-4

Closed Hexose 4

B224:26 – B224:18

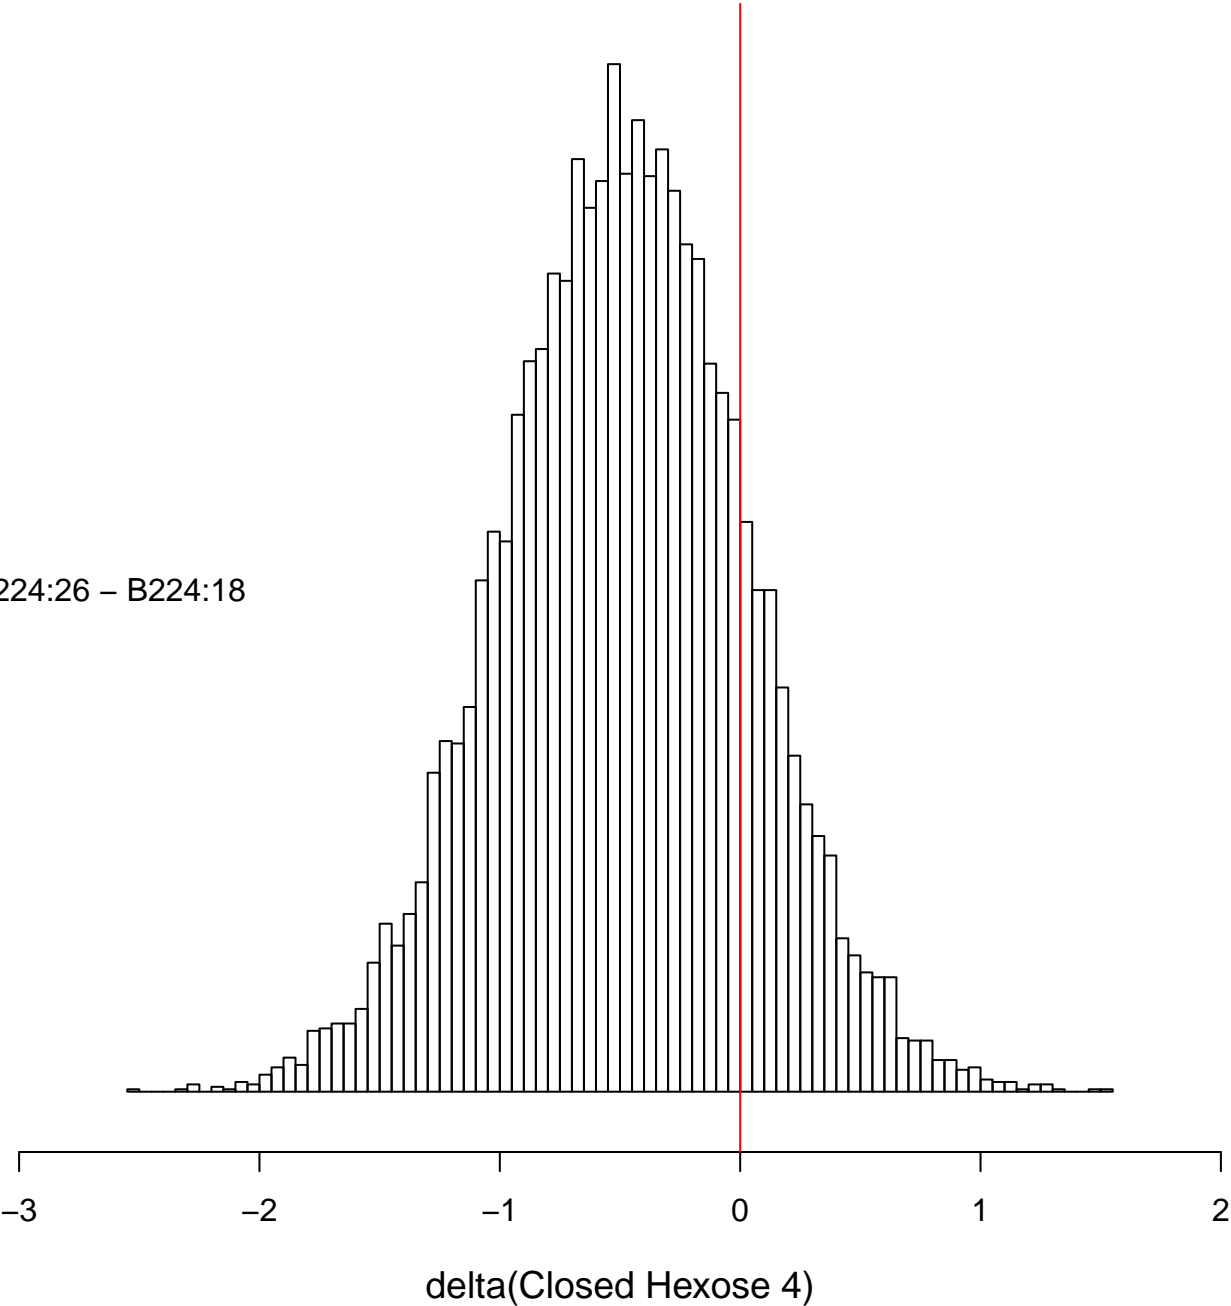

B224:26

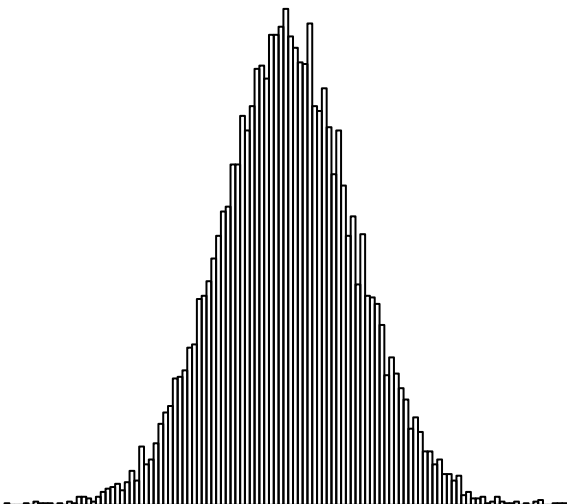

B224:18

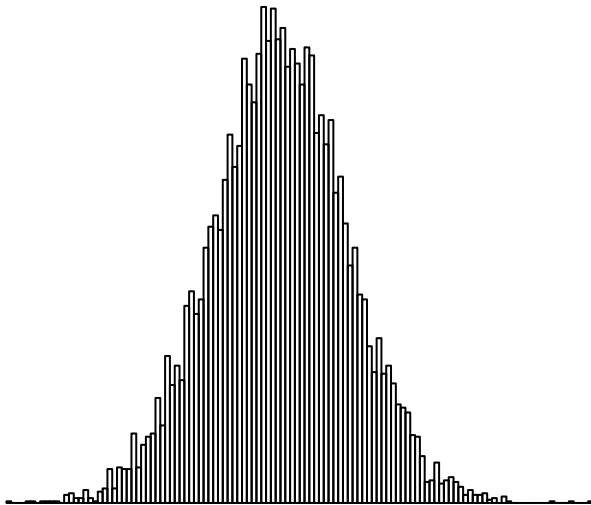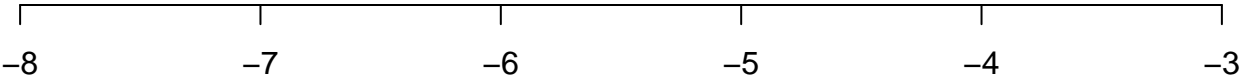

Hexose 1

B224:26 – B224:18

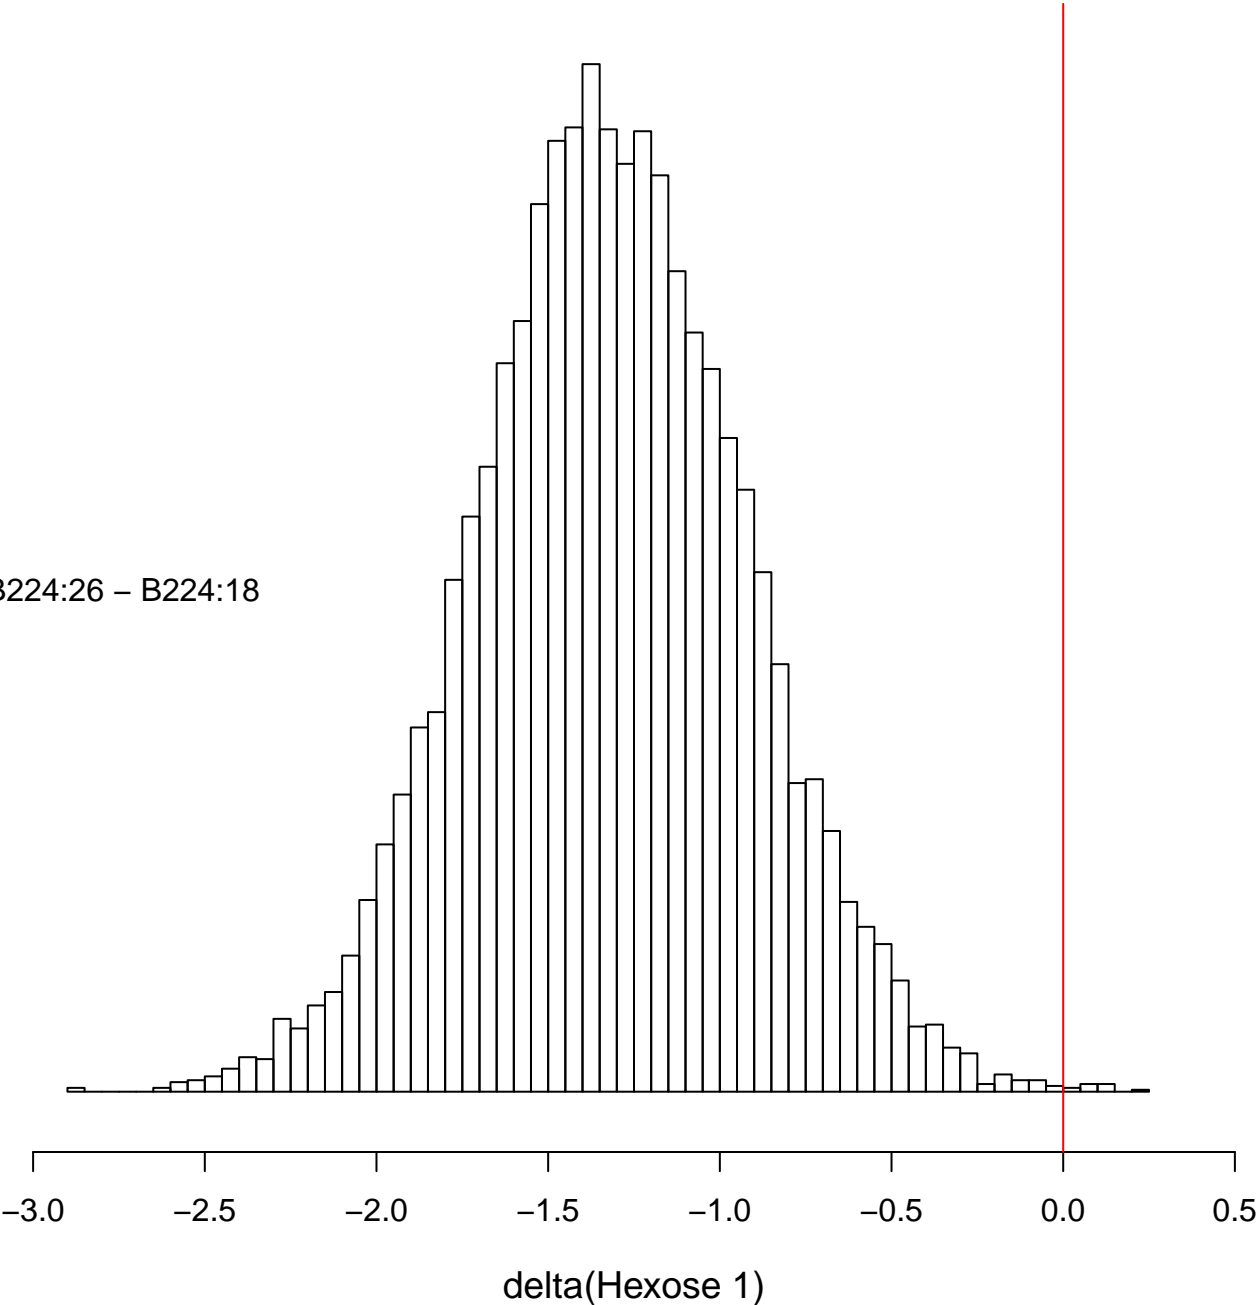

B224:26

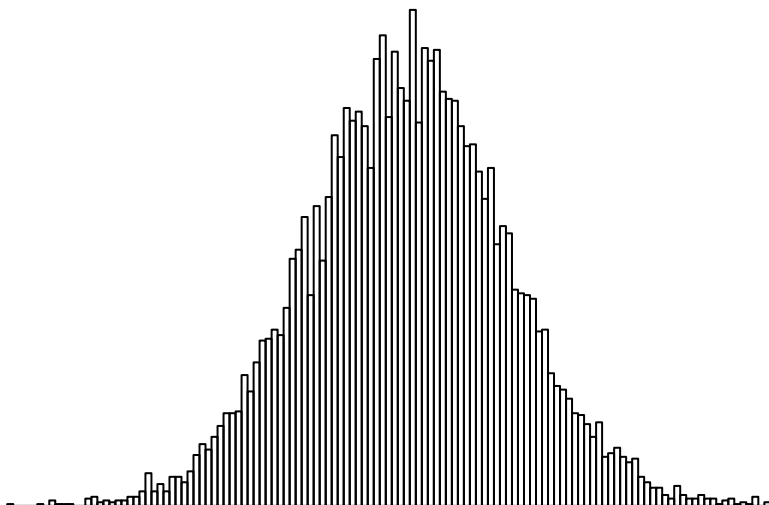

B224:18

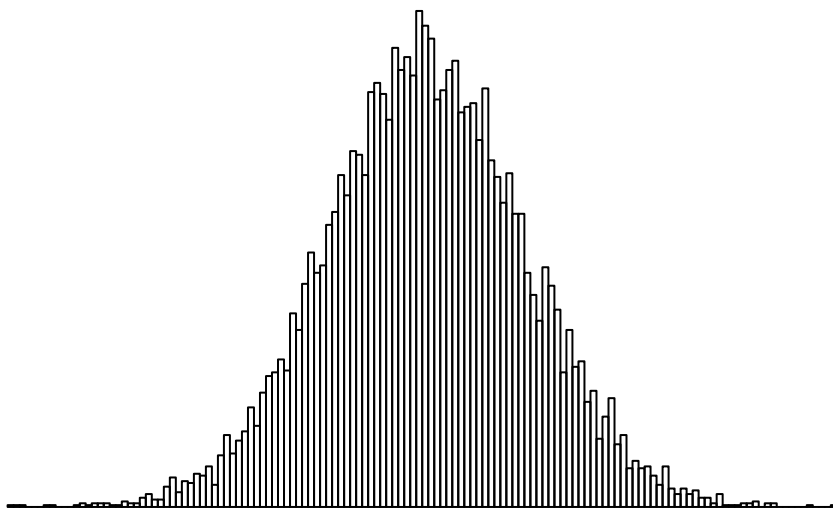

-7

-6

-5

-4

-3

Closed Hexose 5

B224:26 – B224:18

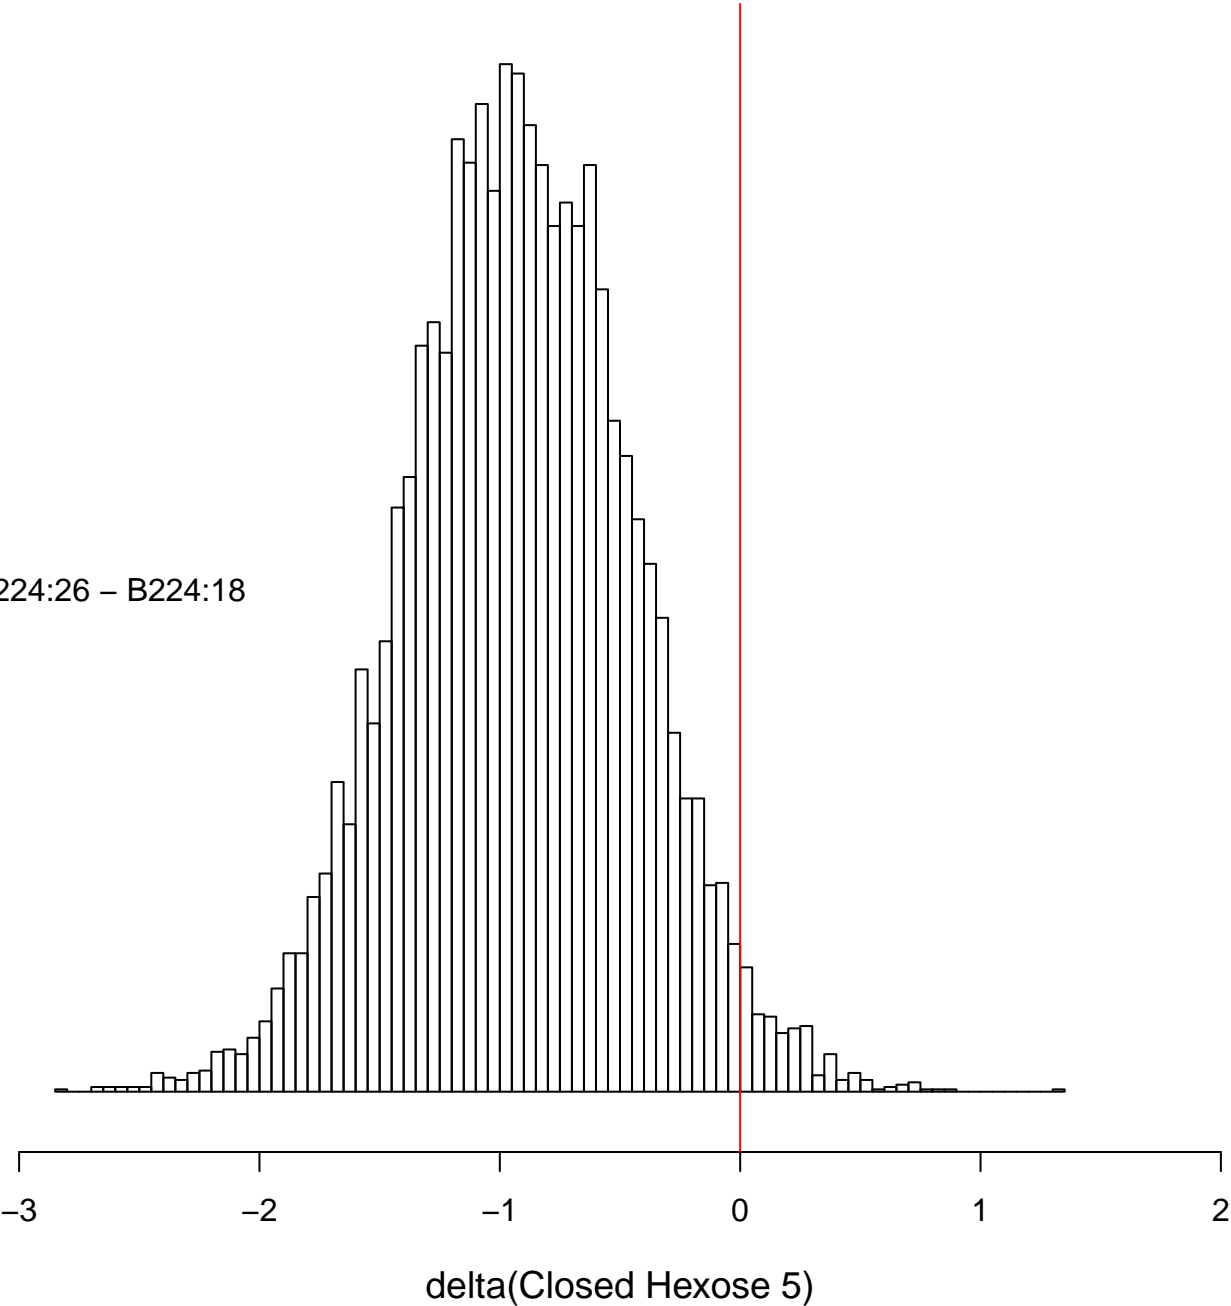



B224:26

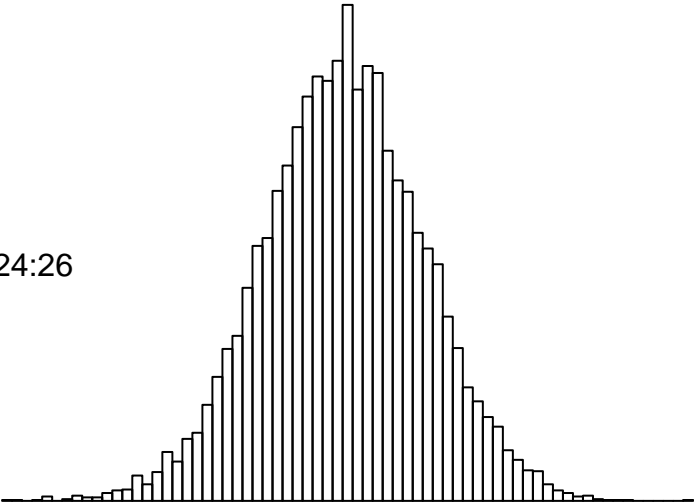

B224:18

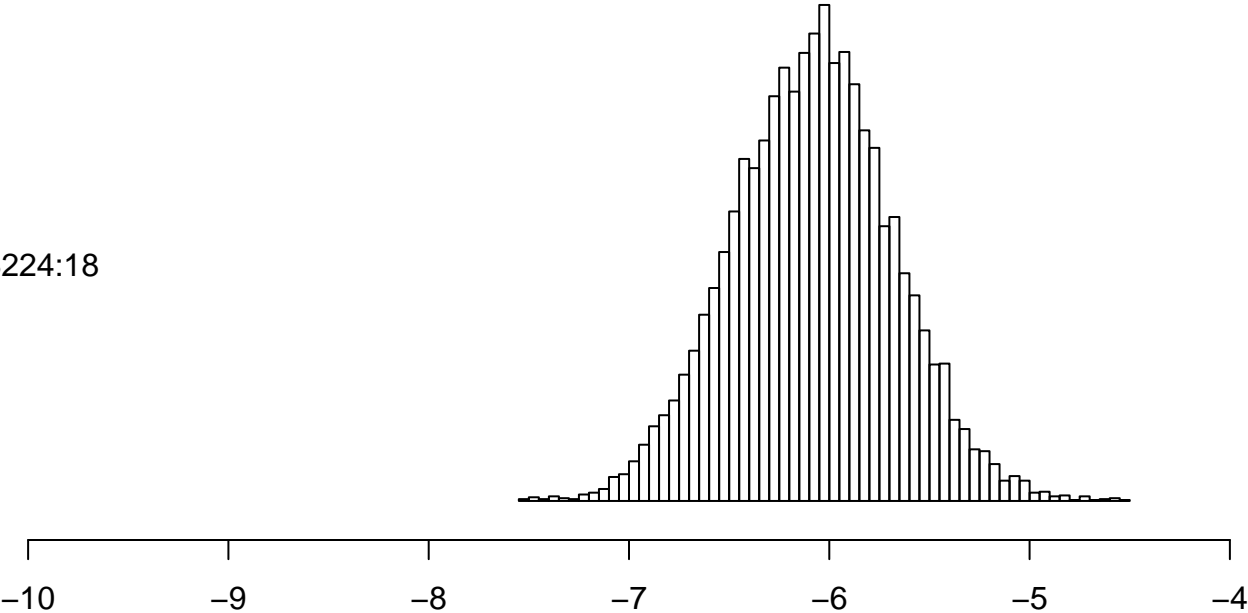

Open Pentose 1

B224:26 – B224:18

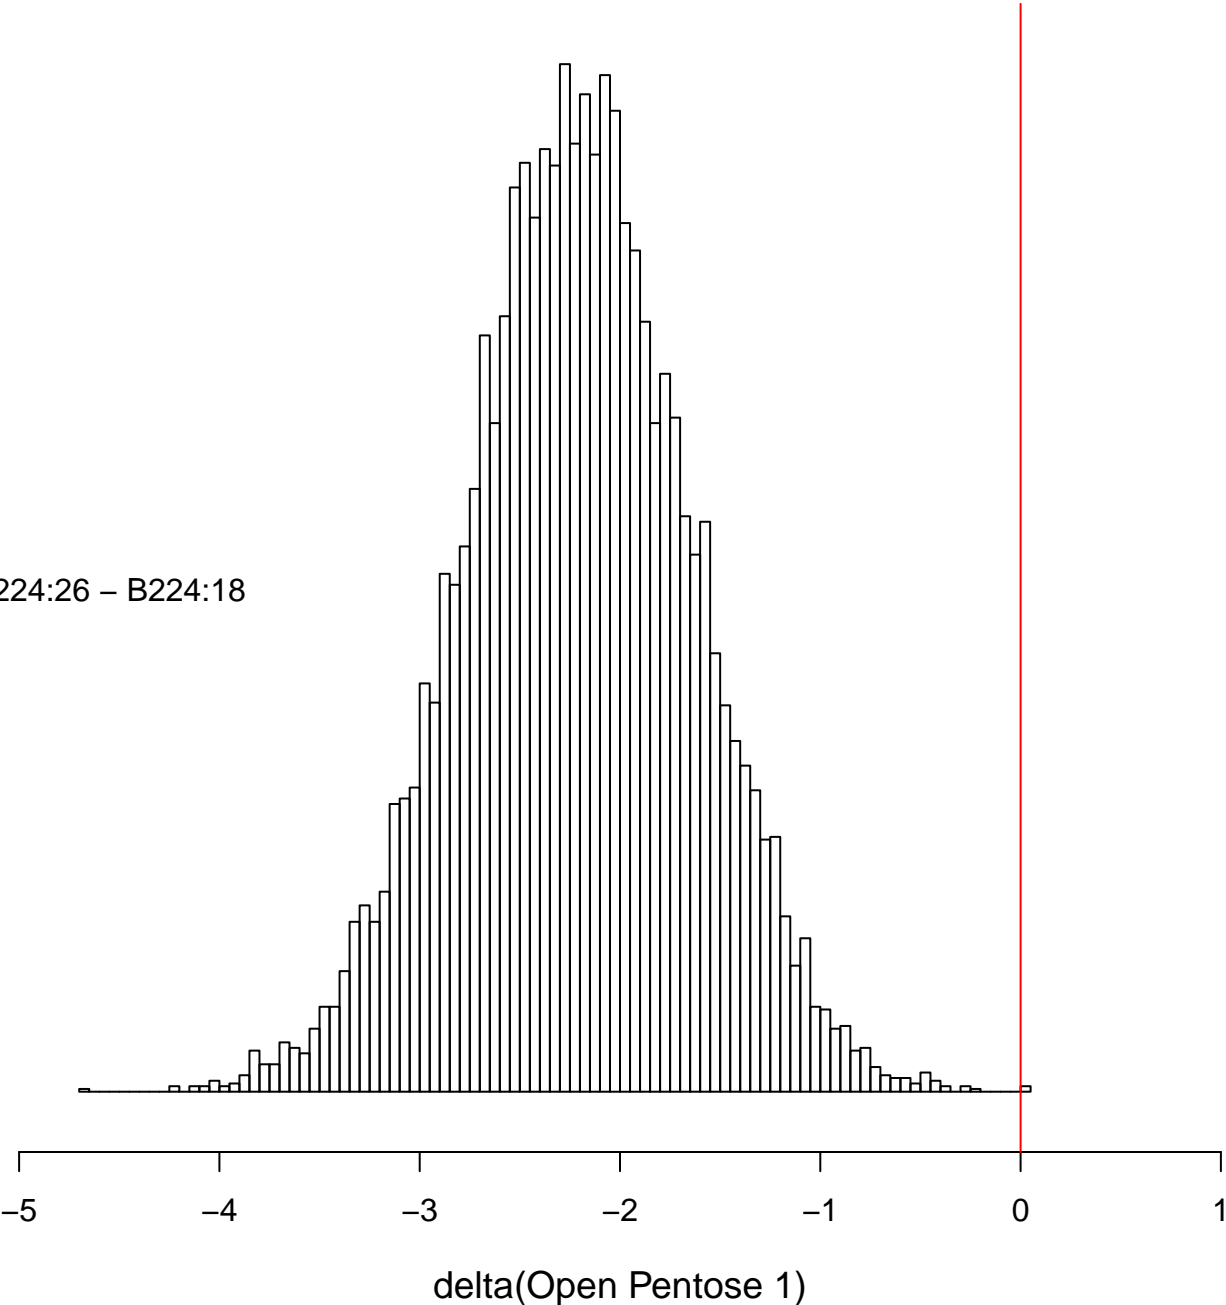

B224:26

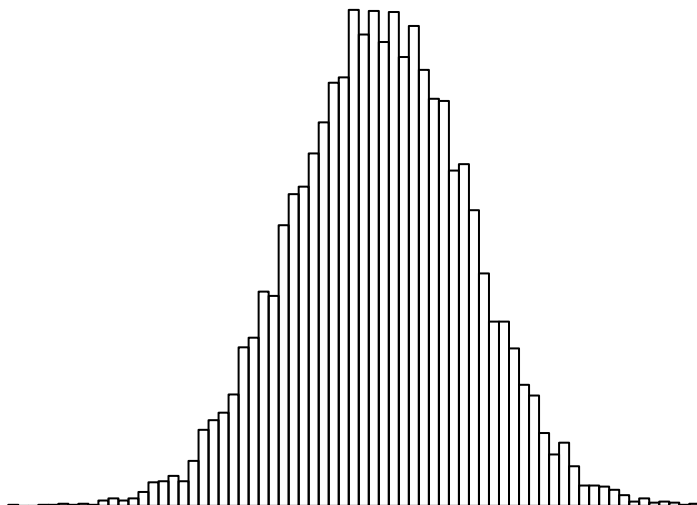

B224:18

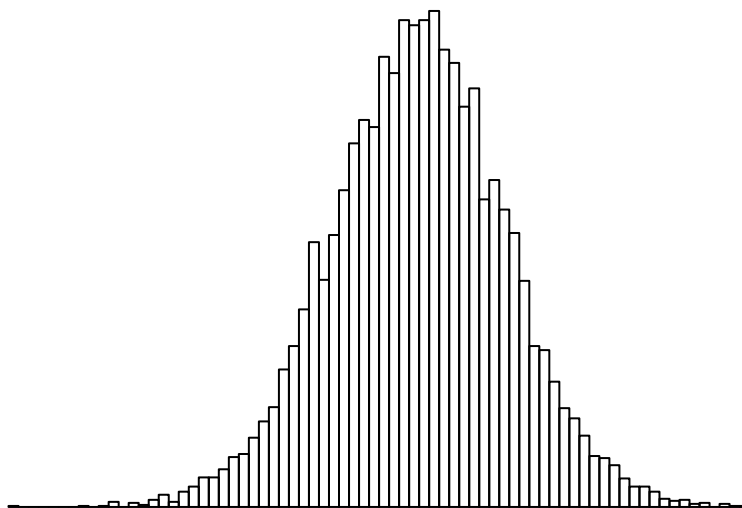

-8 -7 -6 -5 -4 -3 -2

Open Pentose 2

B224:26 – B224:18

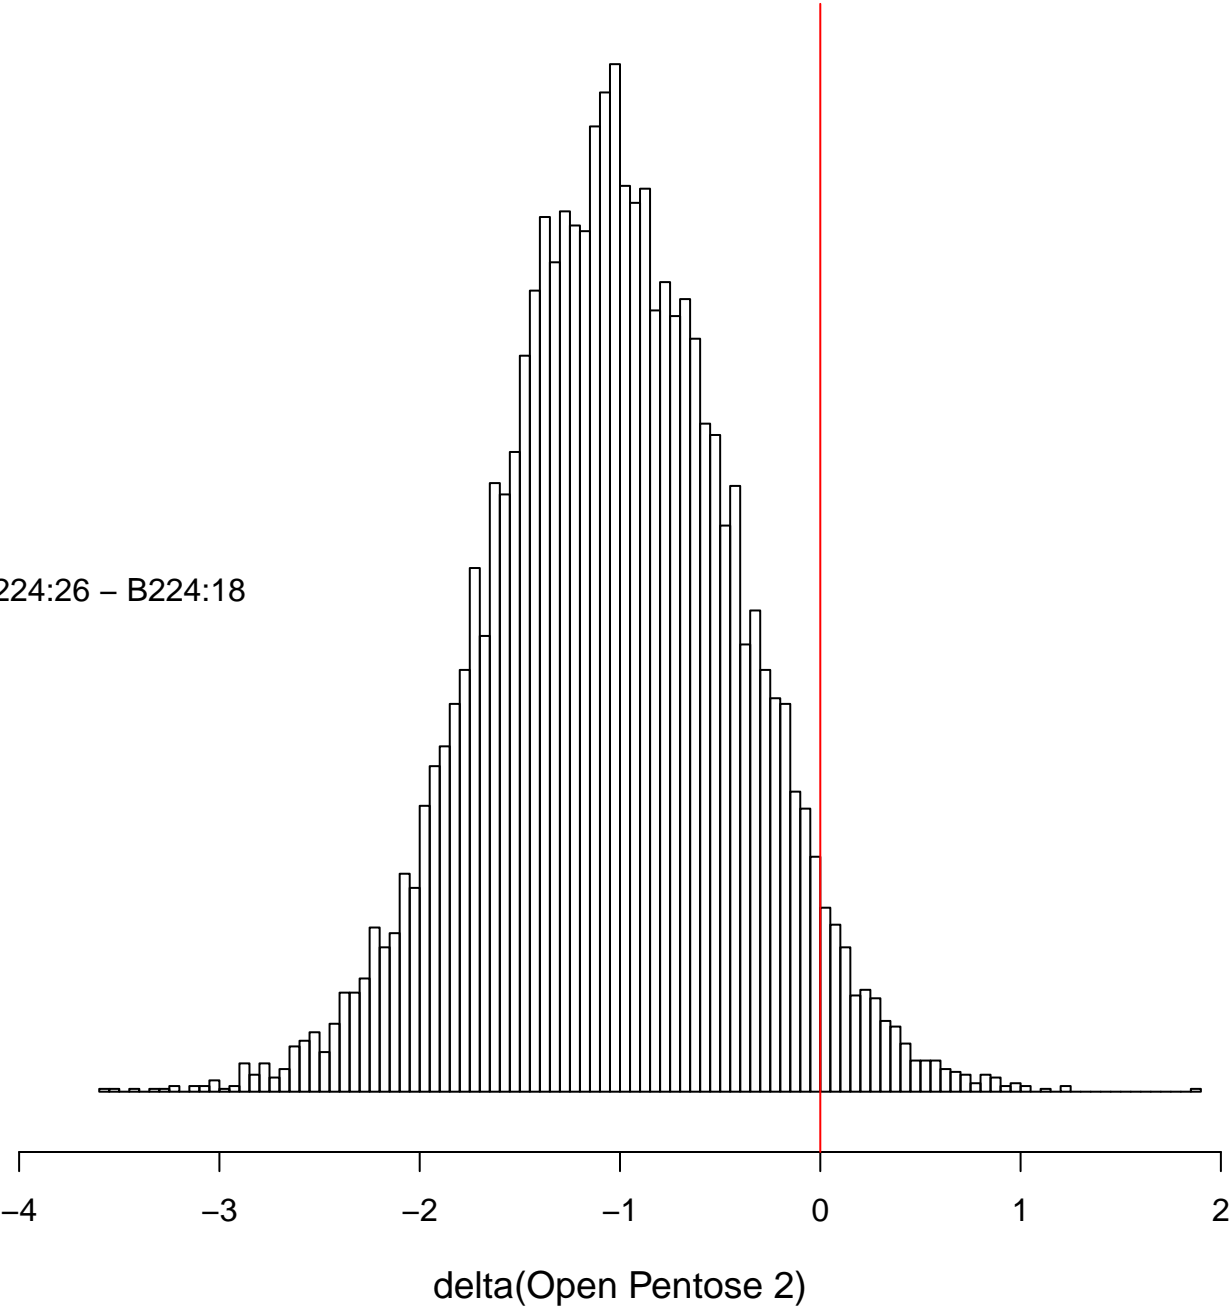

B224:26

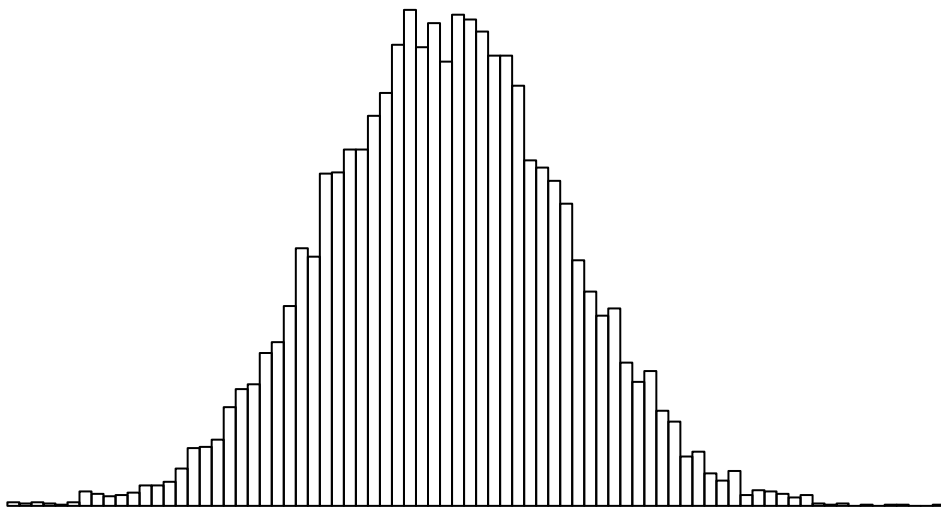

B224:18

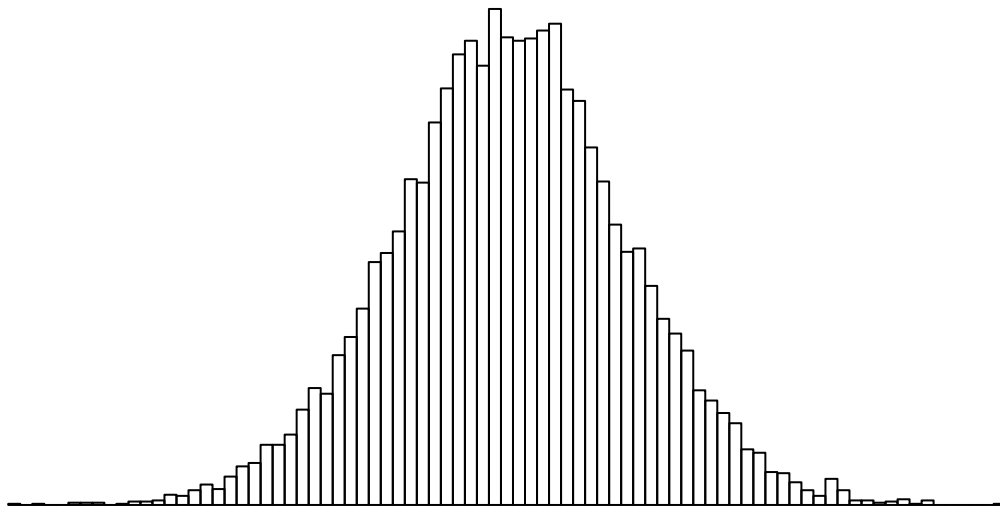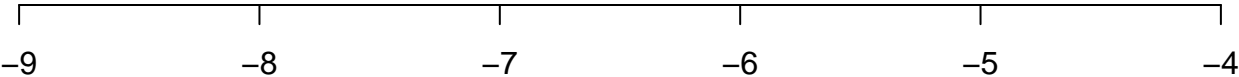

Closed Pentose 1

B224:26 – B224:18

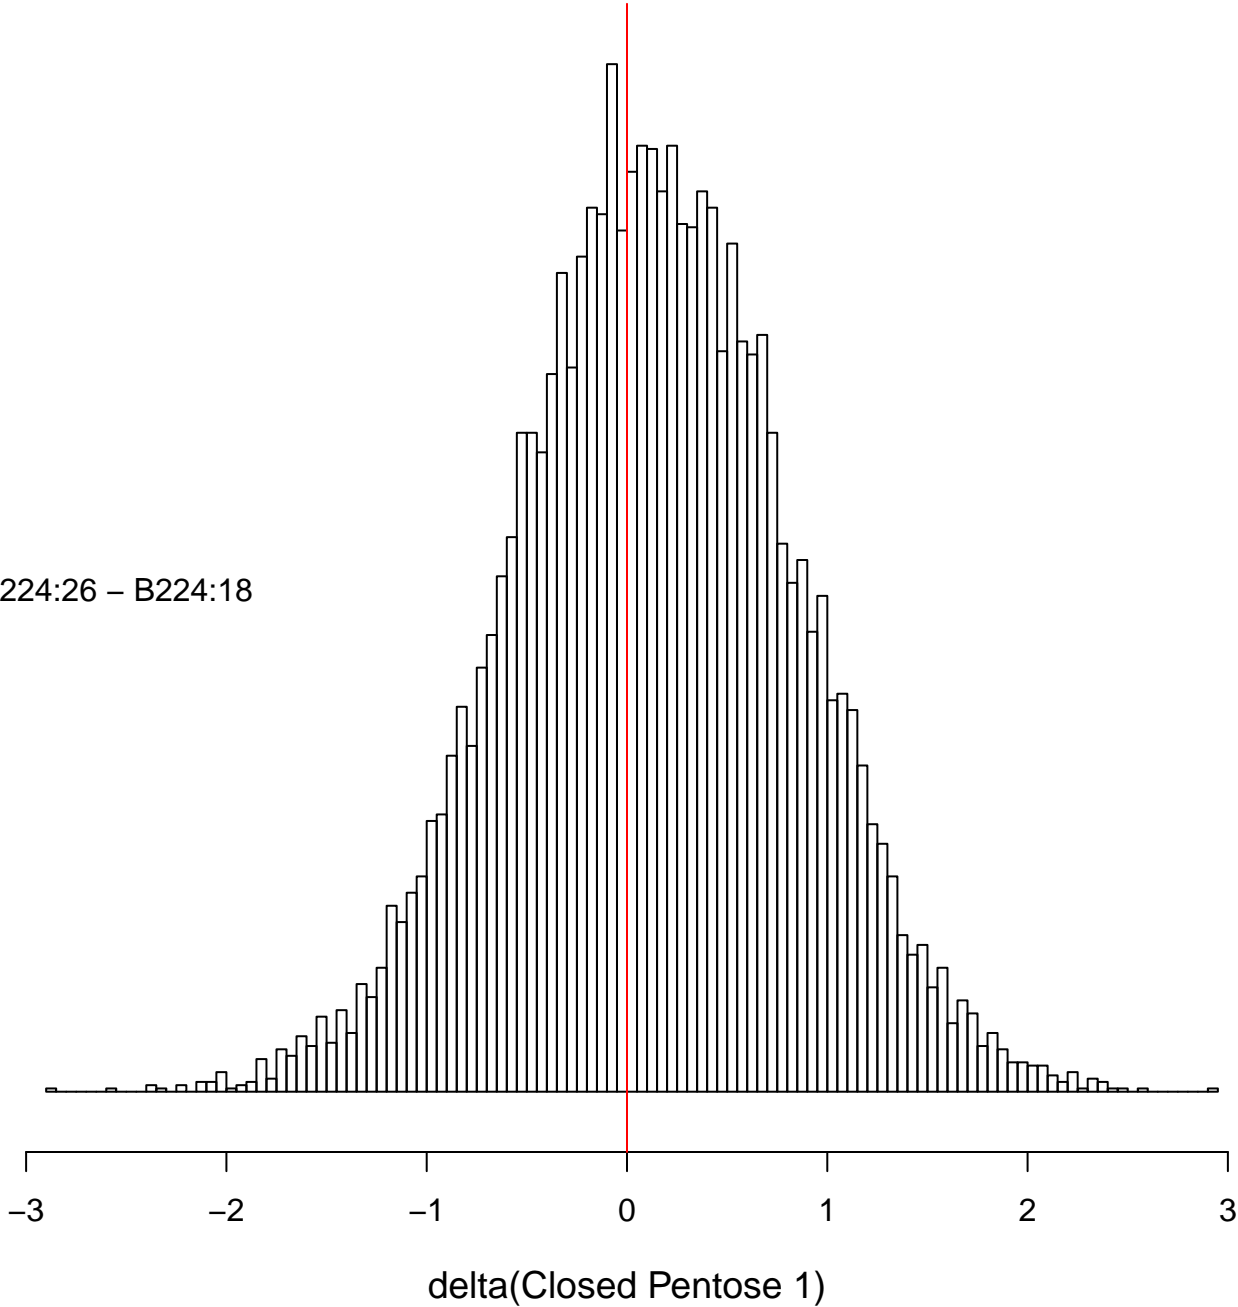

B224:26

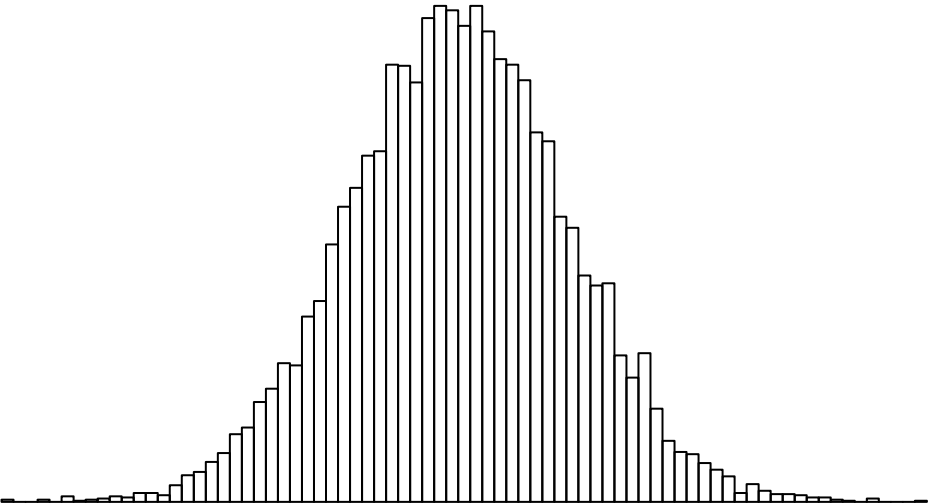

B224:18

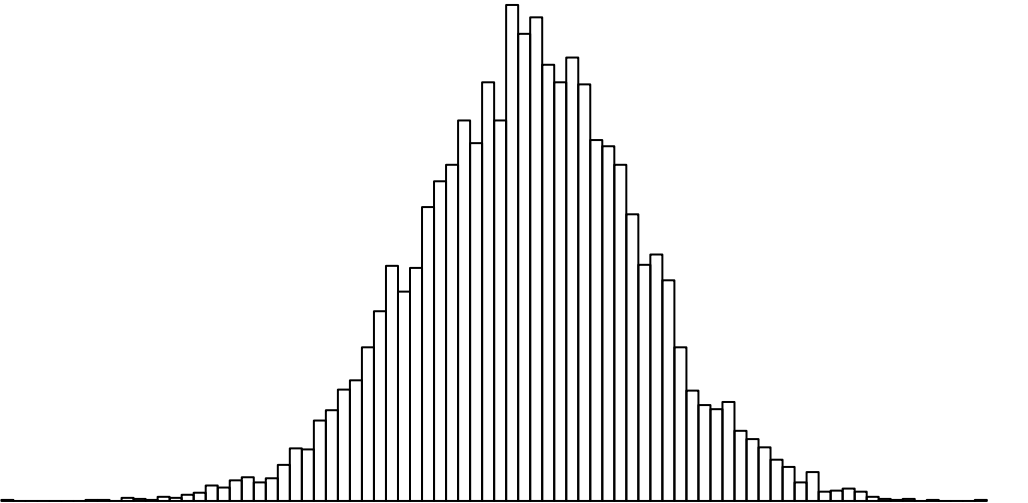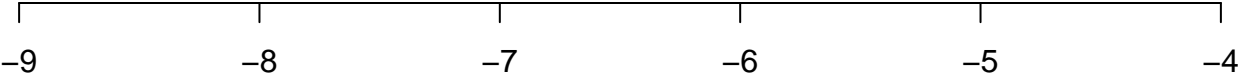

Closed Pentose 2

B224:26 – B224:18

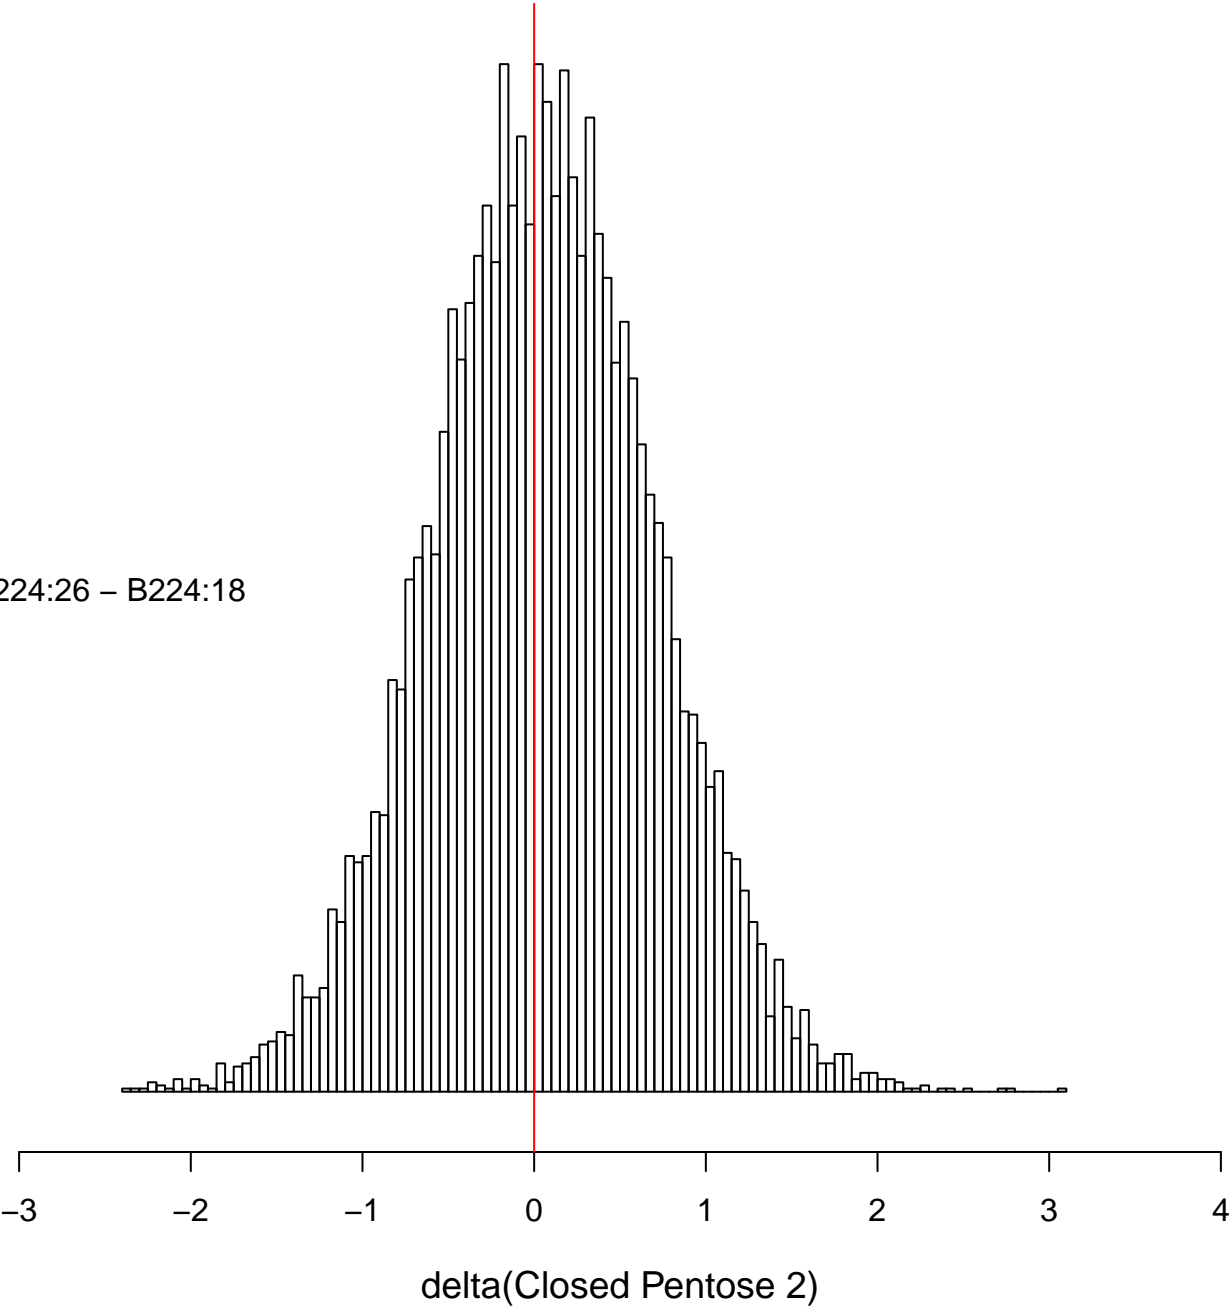



B224:26

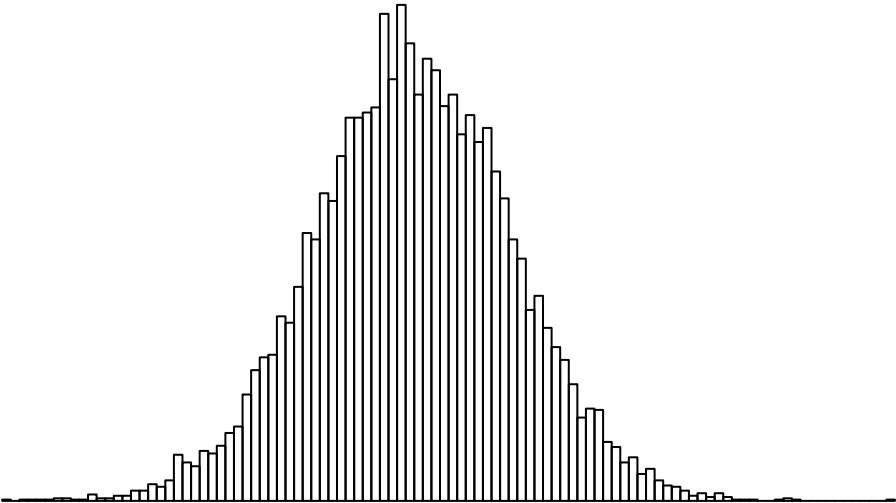

B224:18

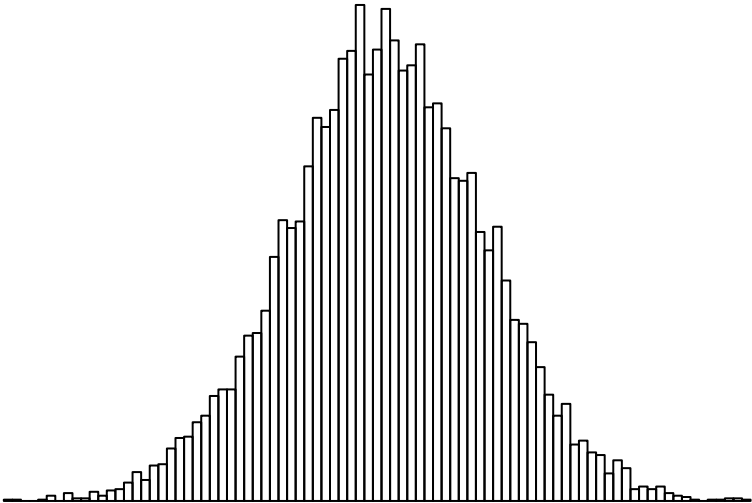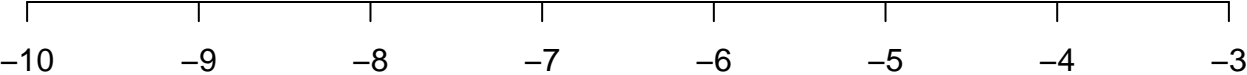

Pentose 1

B224:26 – B224:18

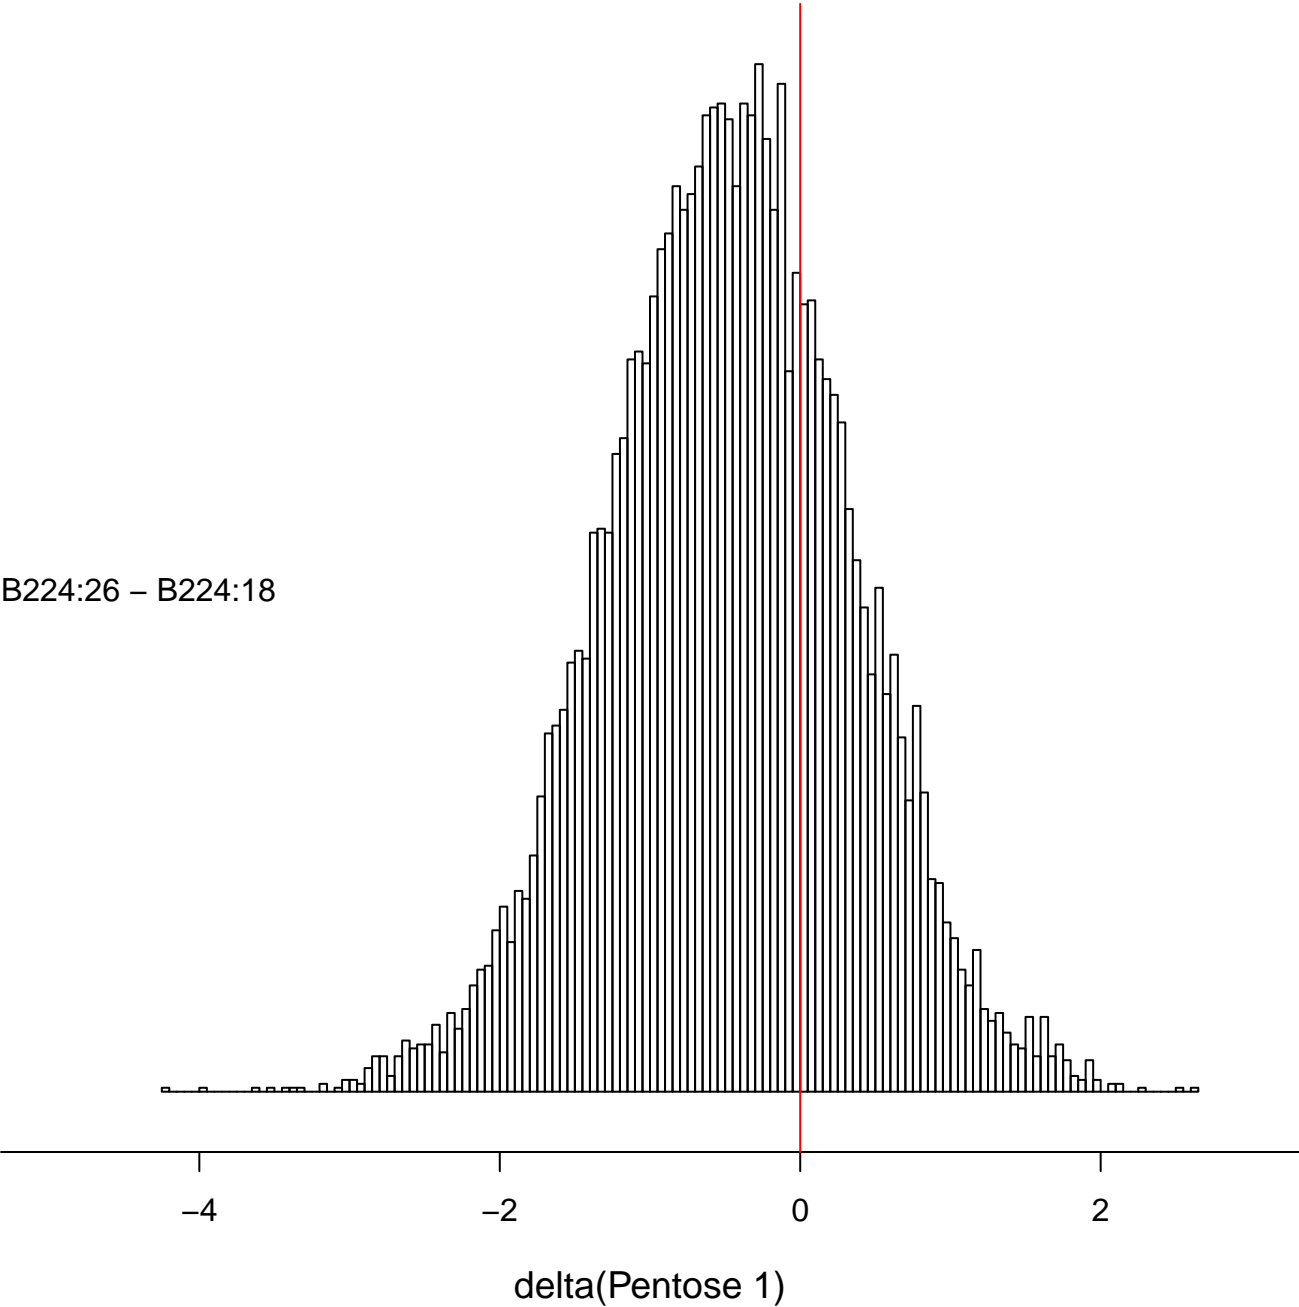

B224:26

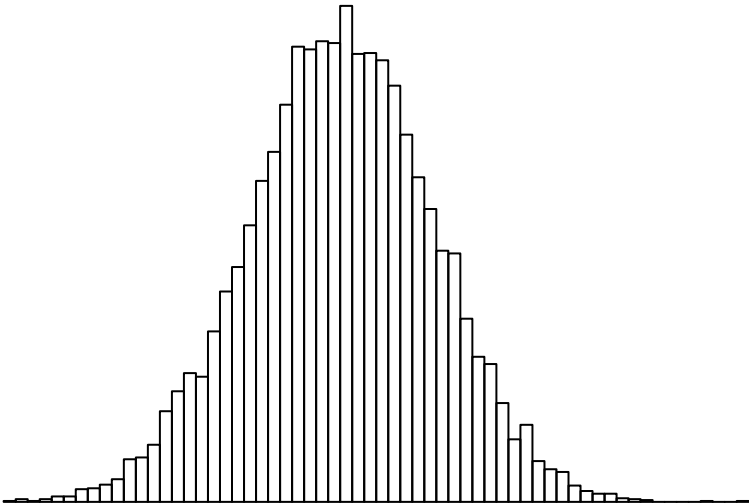

B224:18

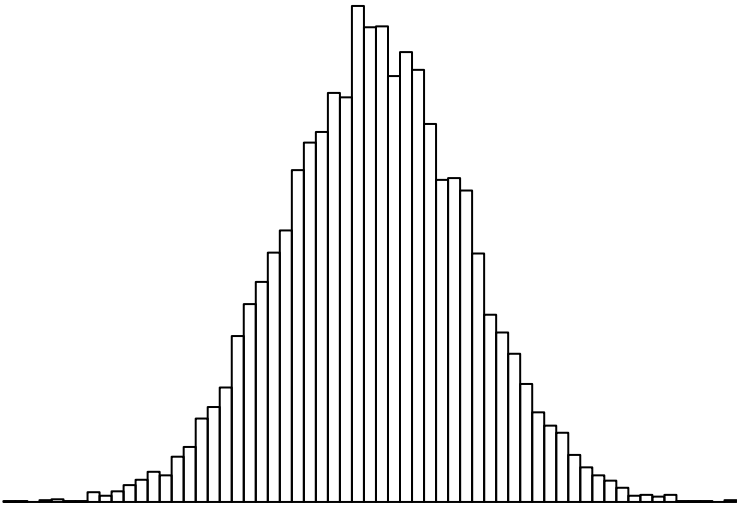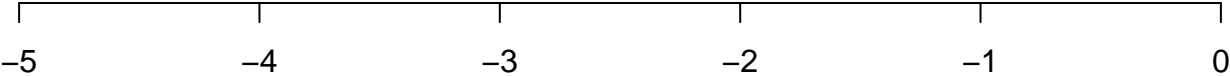

Open Pentose 3

B224:26 – B224:18

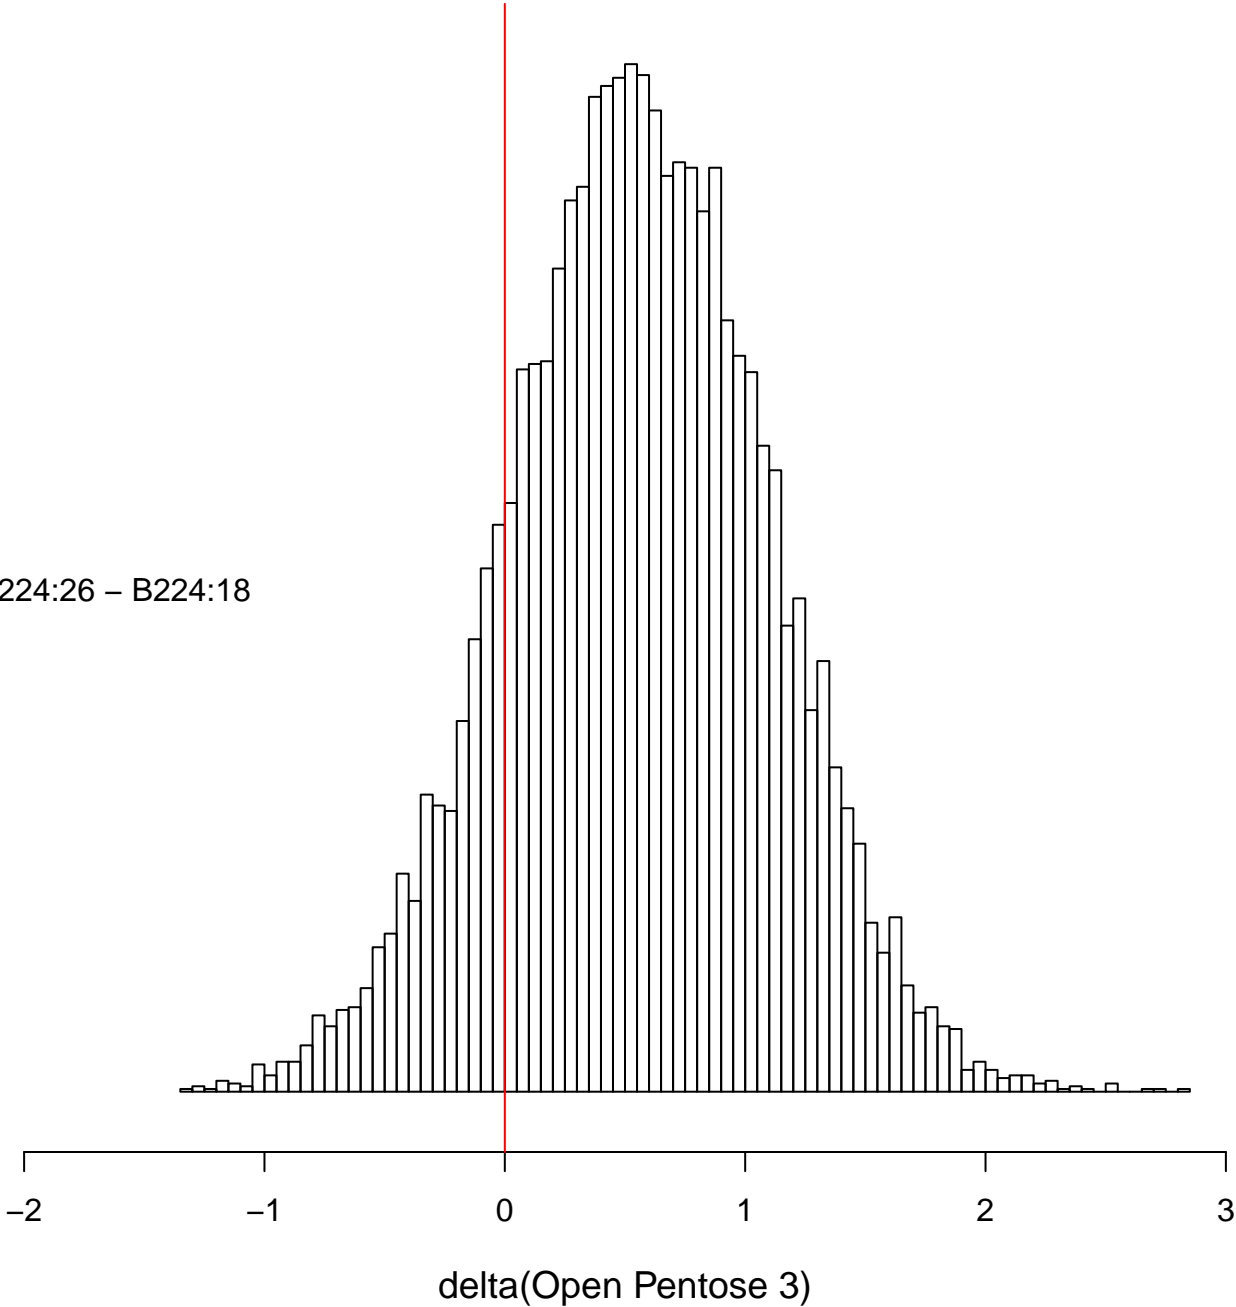

B224:26

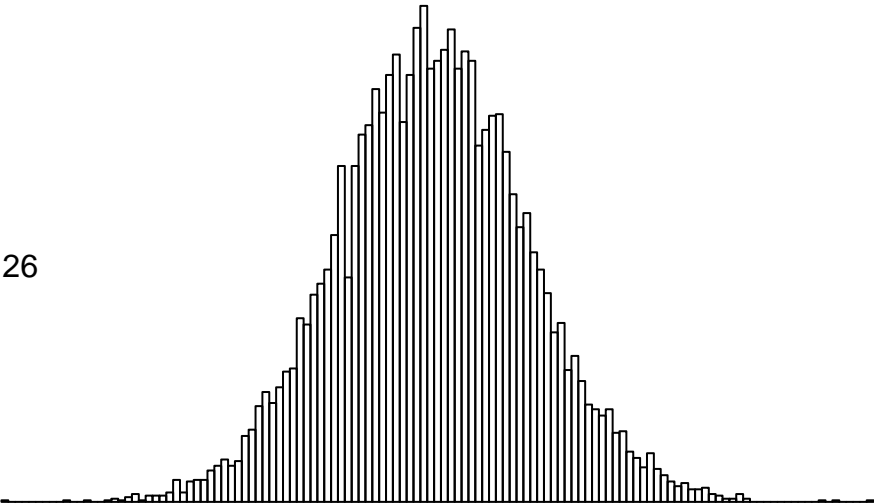

B224:18

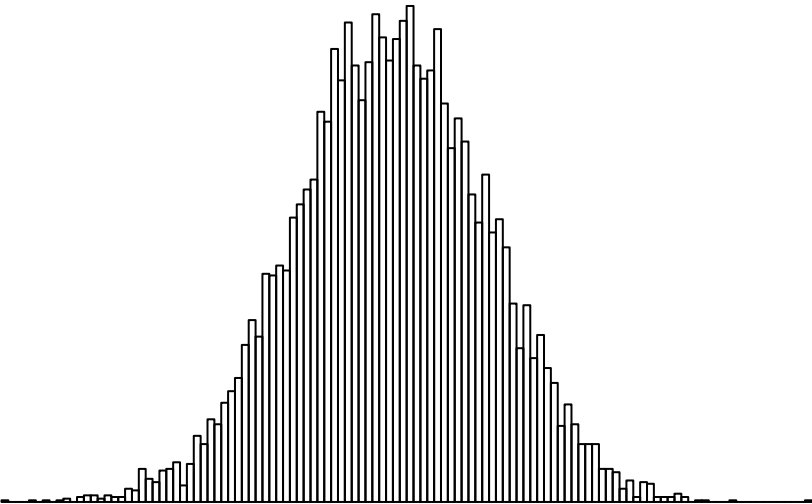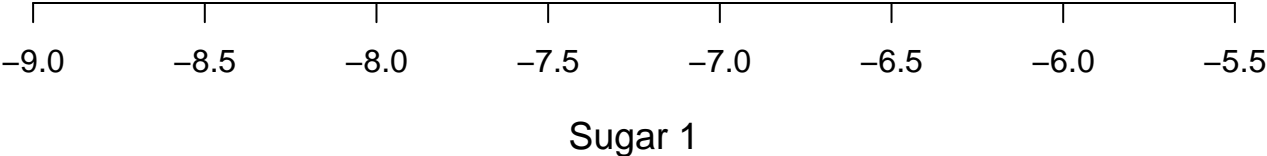

B224:26 – B224:18

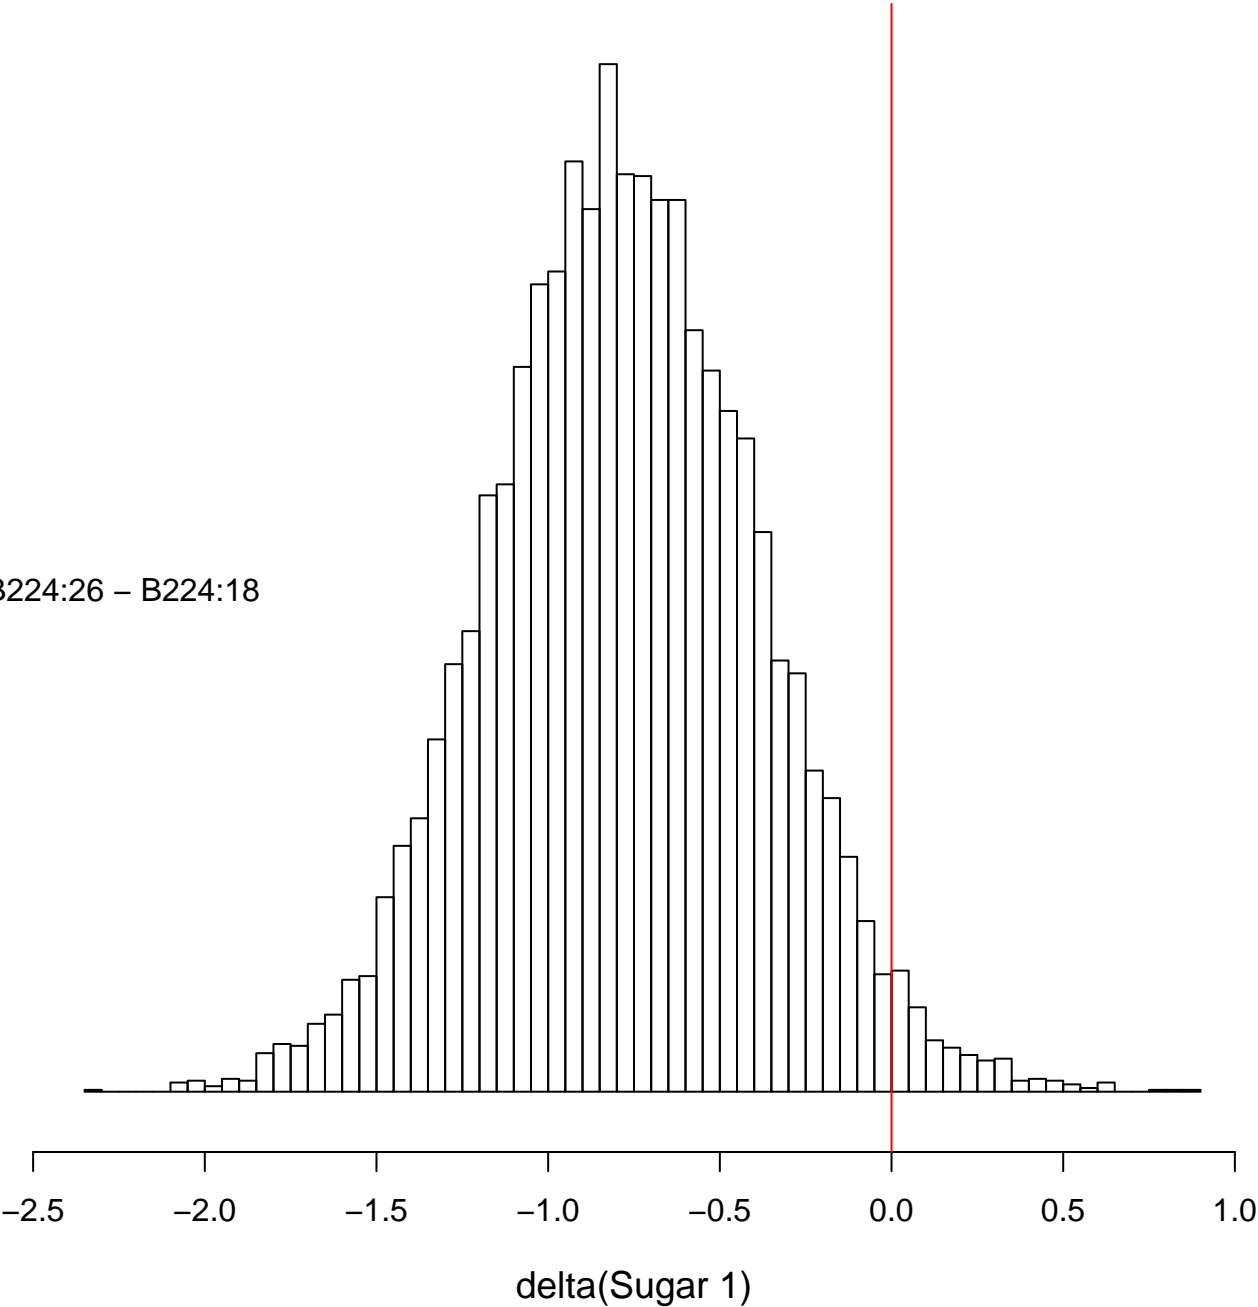

B224:26

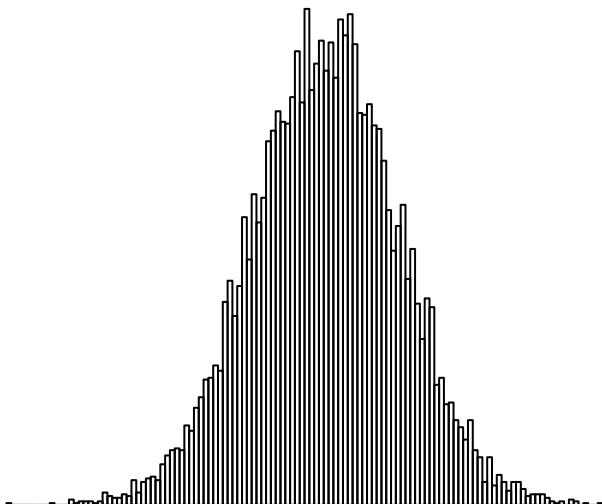

B224:18

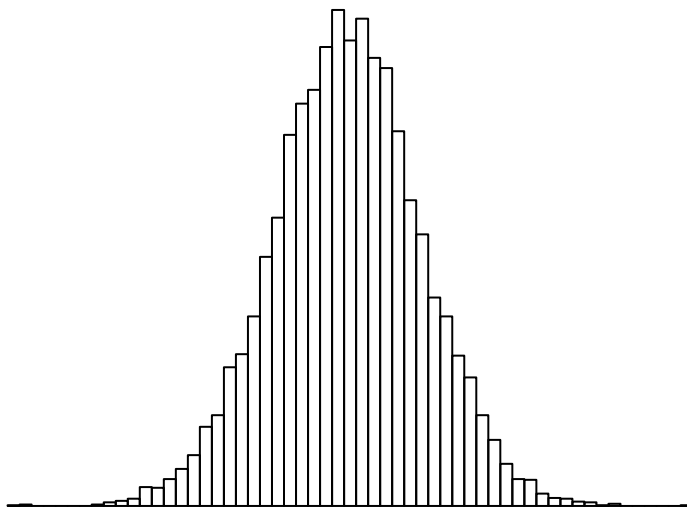

-11      -10      -9      -8      -7      -6

Sugar 3

B224:26 – B224:18

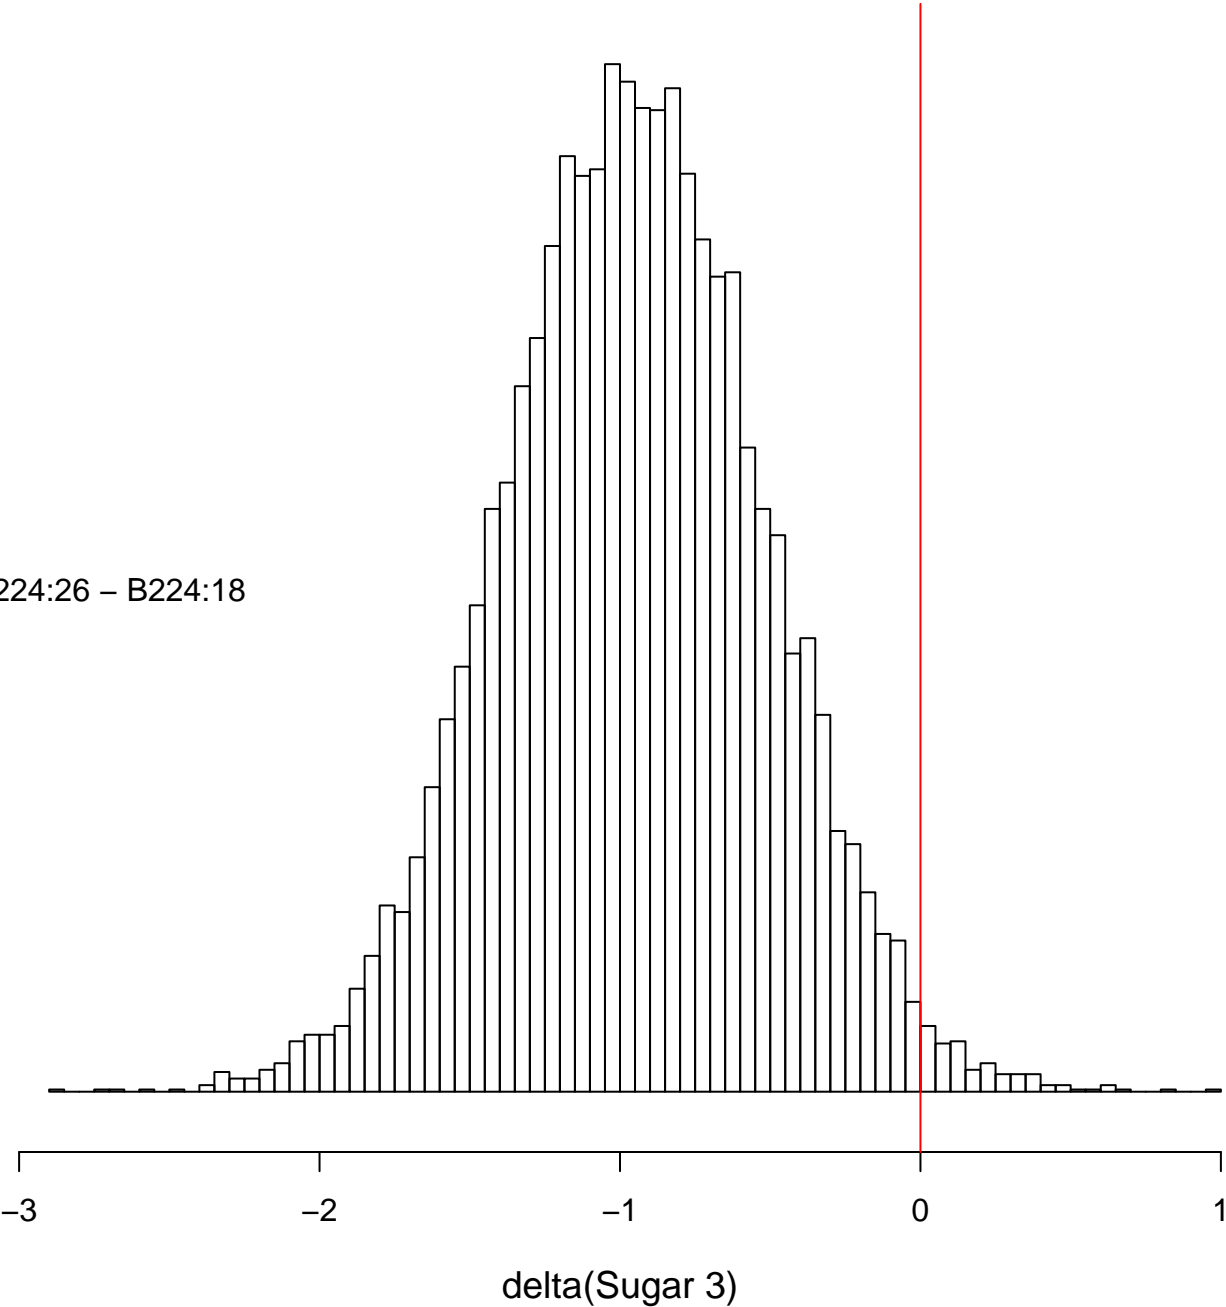



B224:26

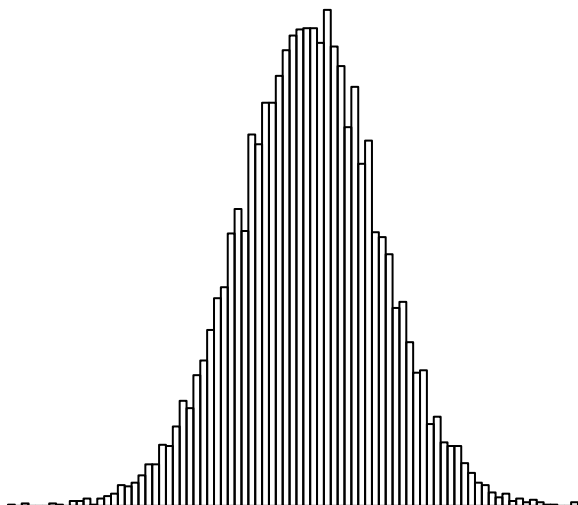

B224:18

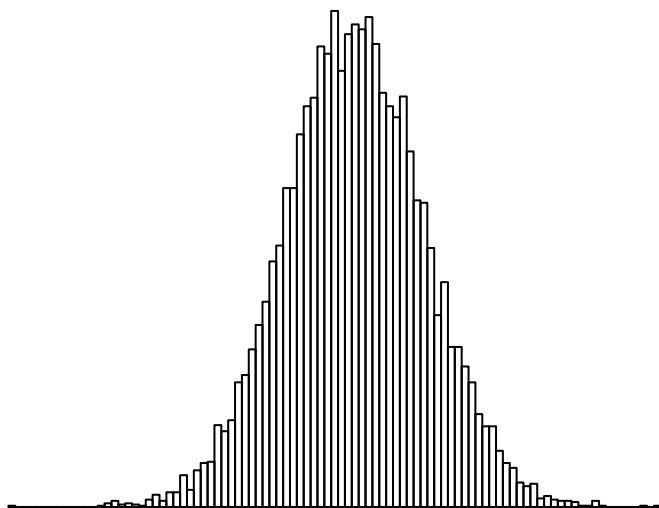

-9.5      -9.0      -8.5      -8.0      -7.5      -7.0      -6.5      -6.0

Sugar 4

B224:26 – B224:18

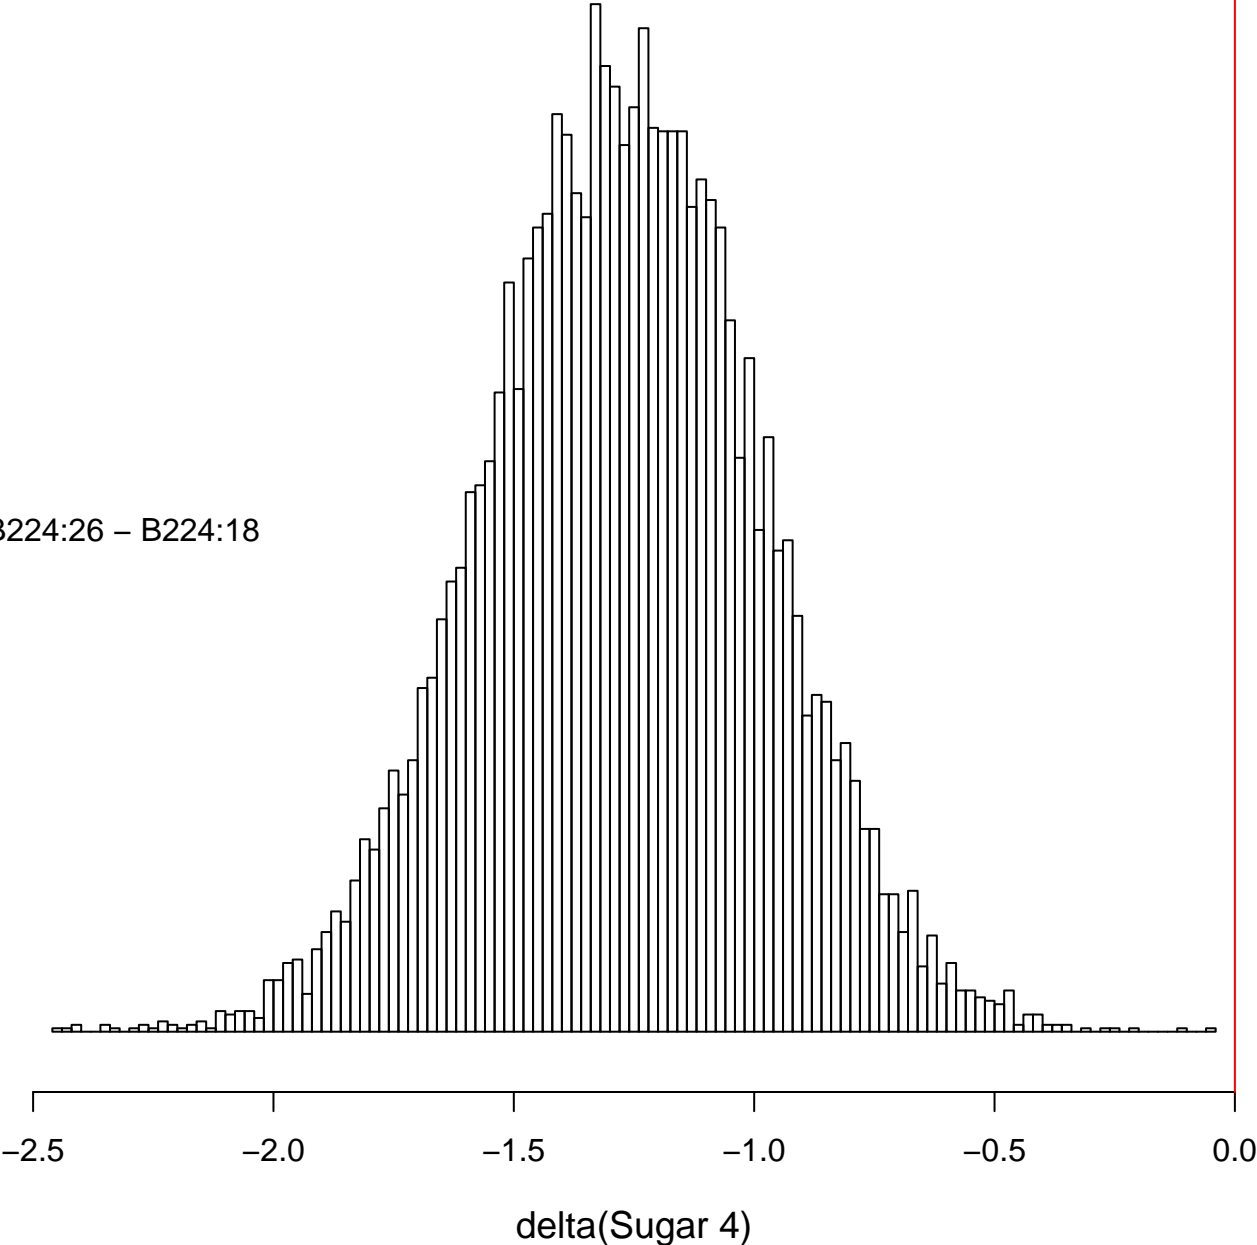

B224:26

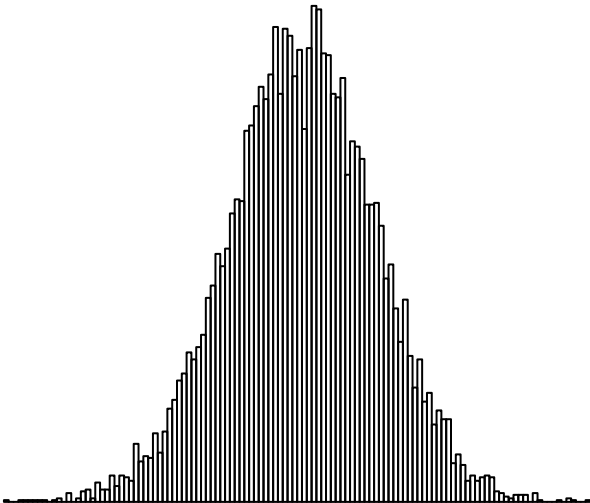

B224:18

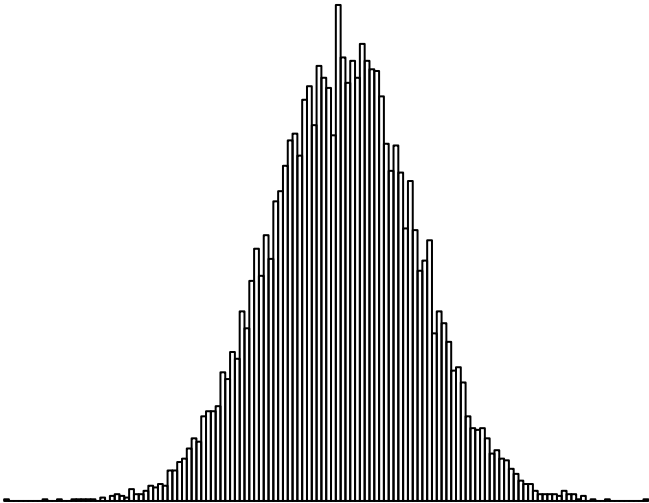

Sugar 5

B224:26 – B224:18

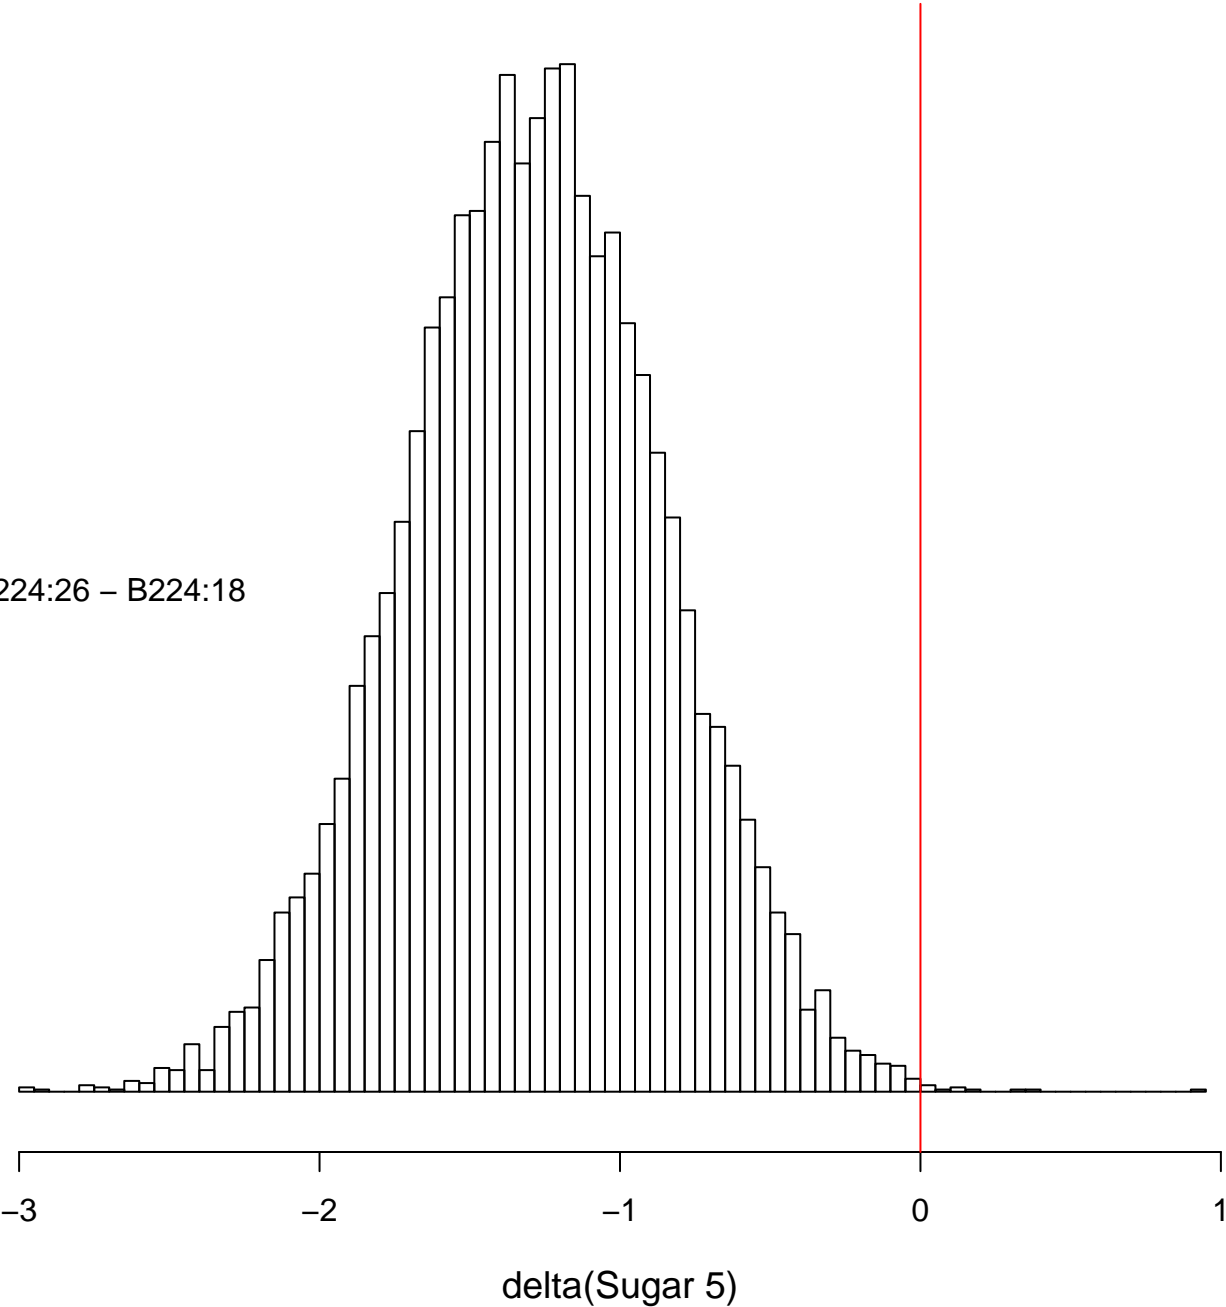

B224:26

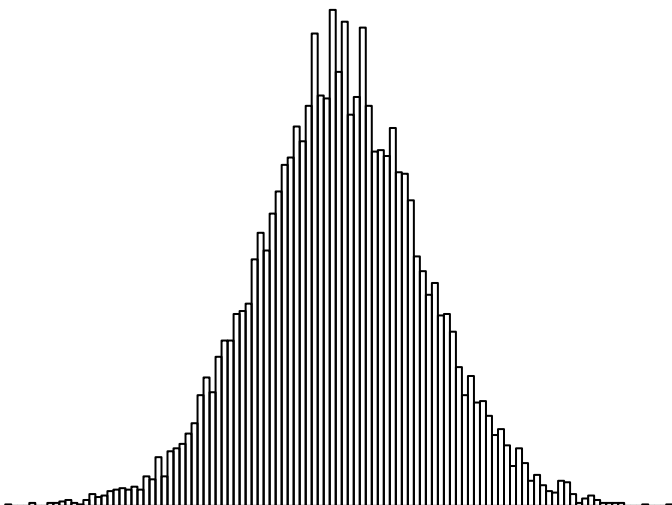

B224:18

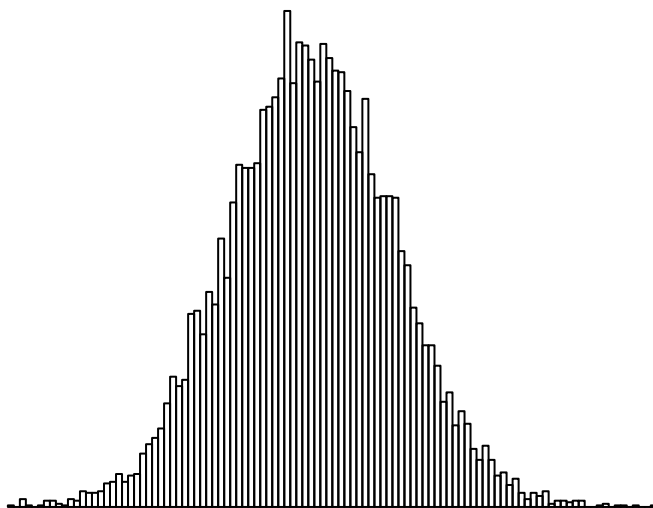

-10

-9

-8

-7

-6

Sugar 6

B224:26 – B224:18

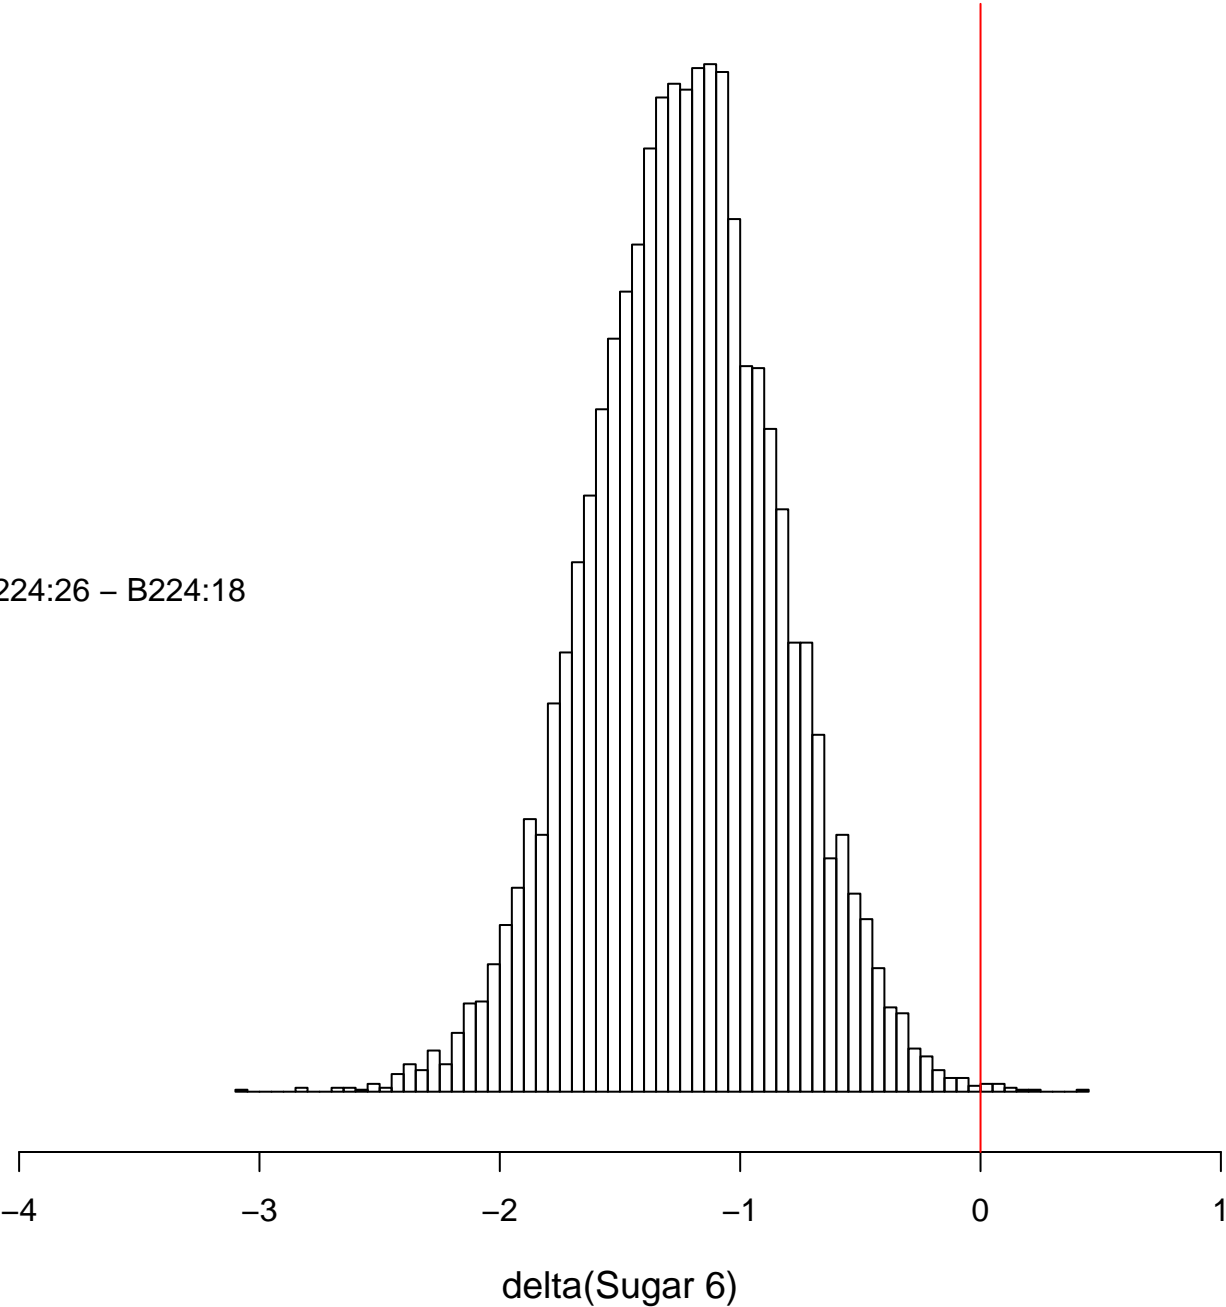

B224:26

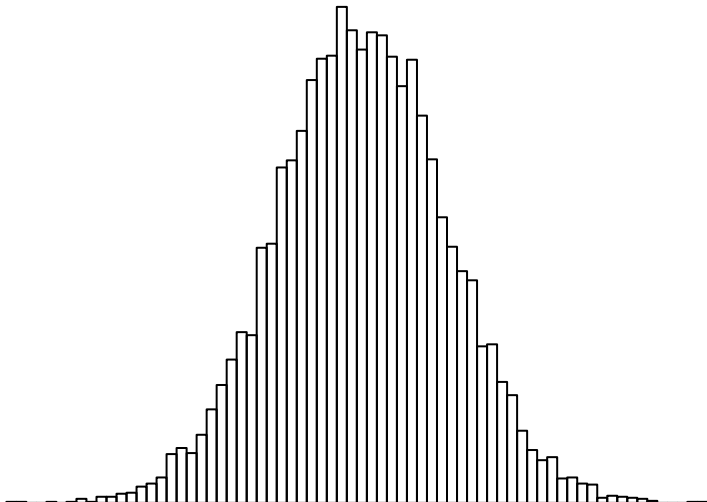

B224:18

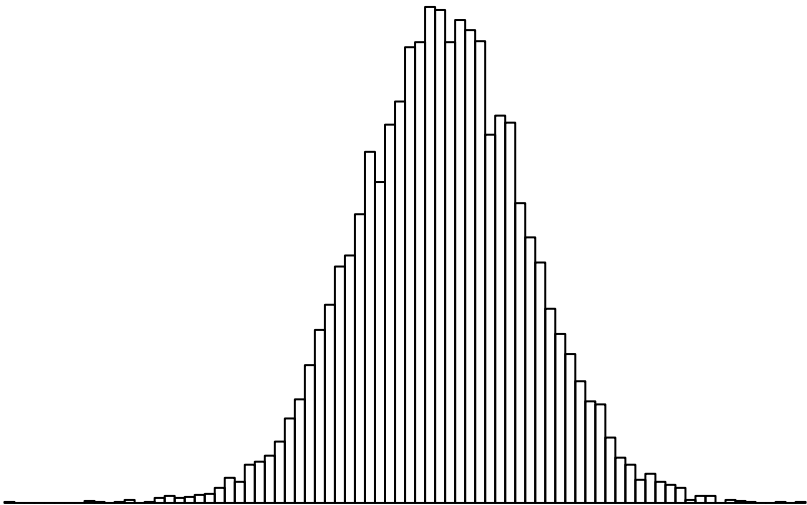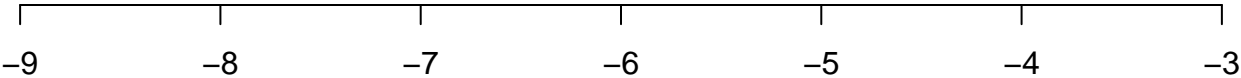

Sugar 7

B224:26 – B224:18

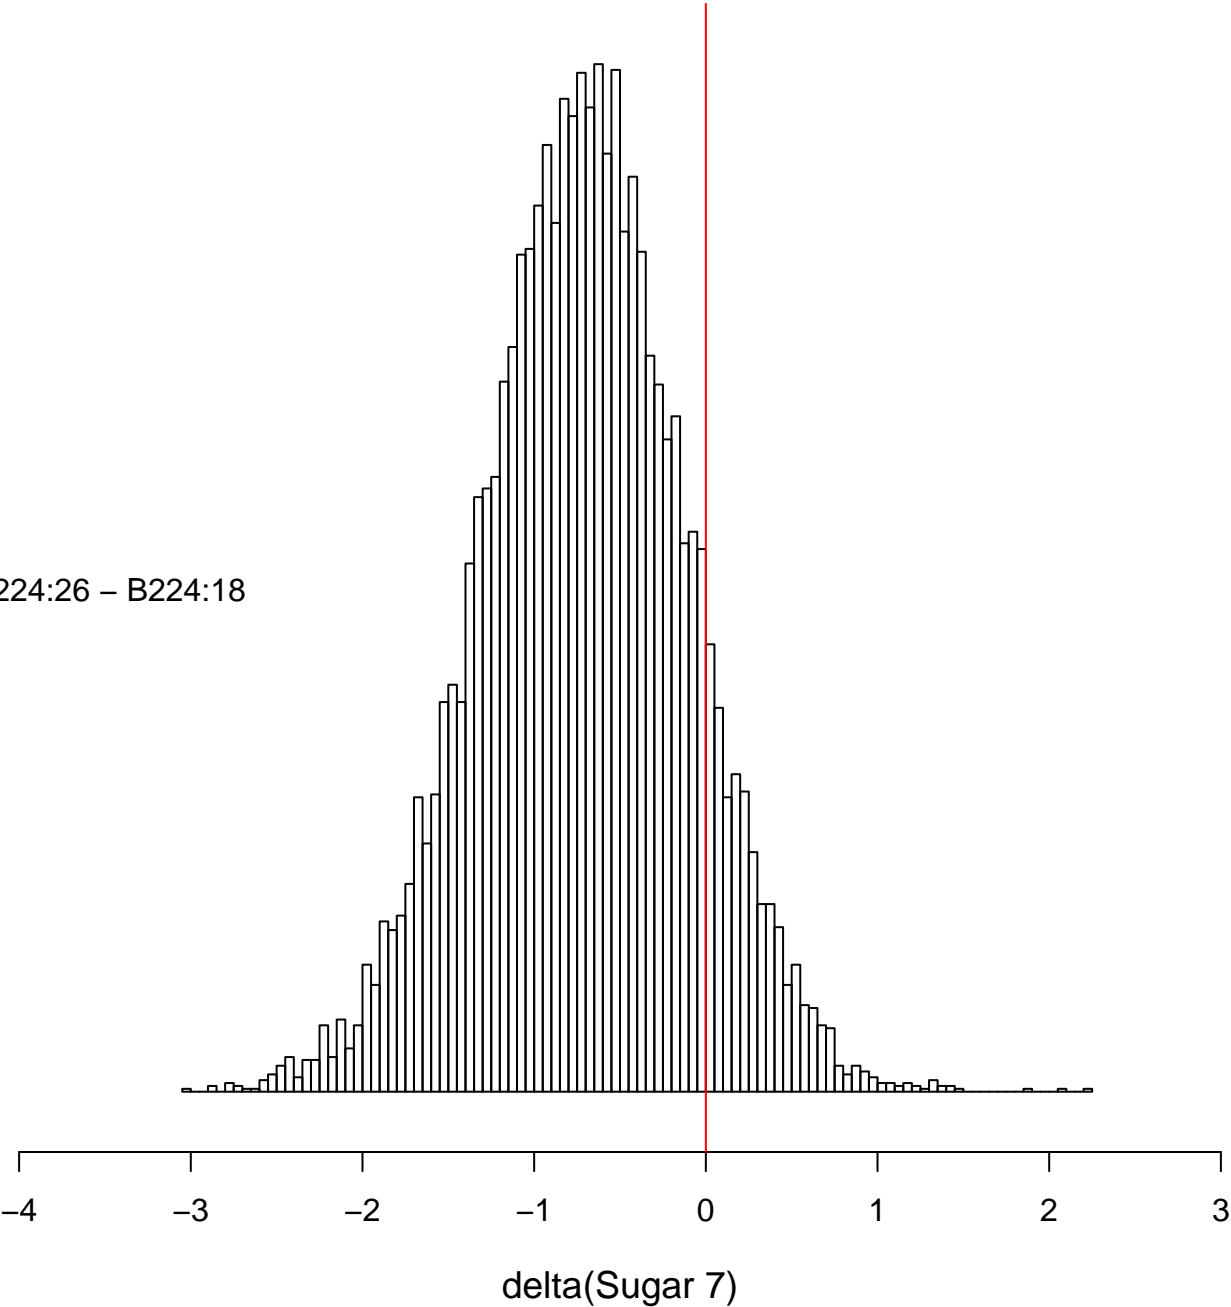



B224:26

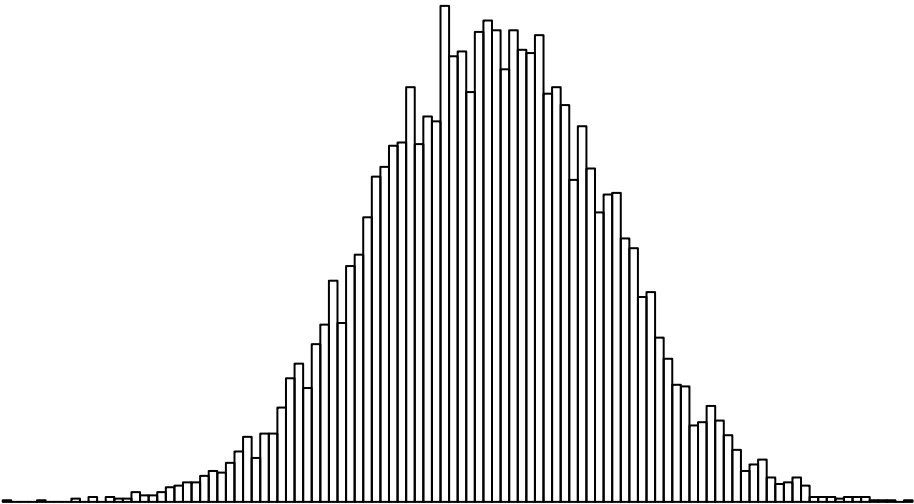

B224:18

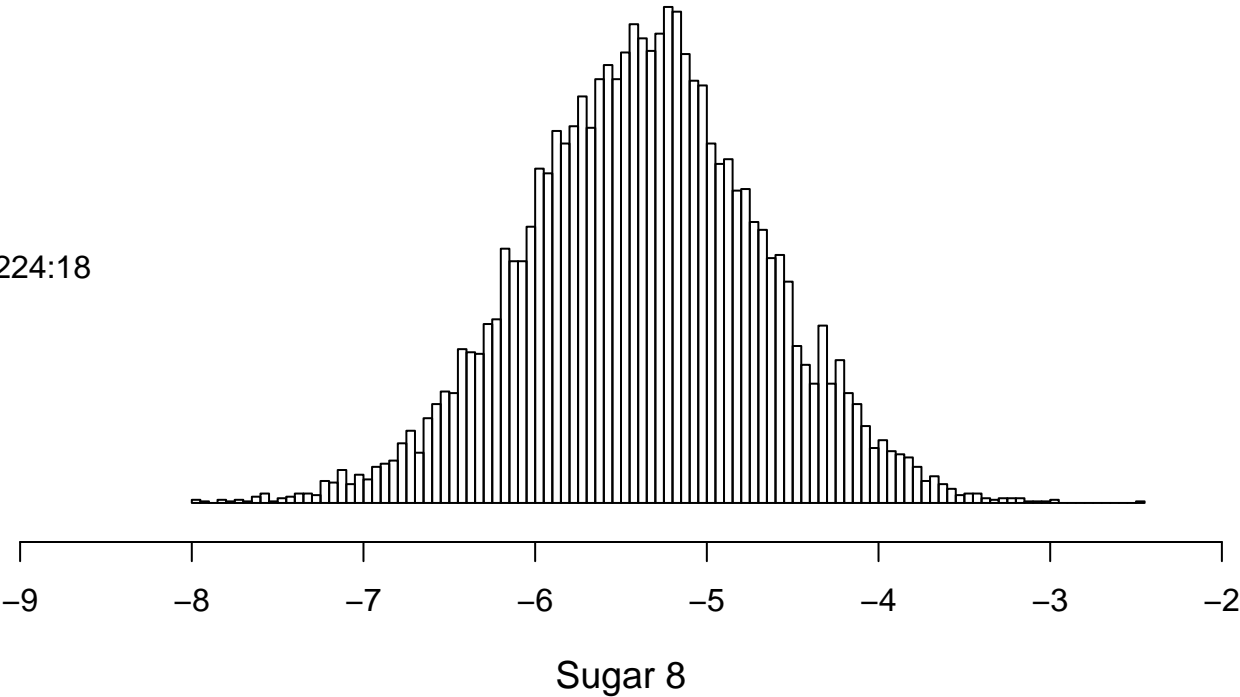

B224:26 – B224:18

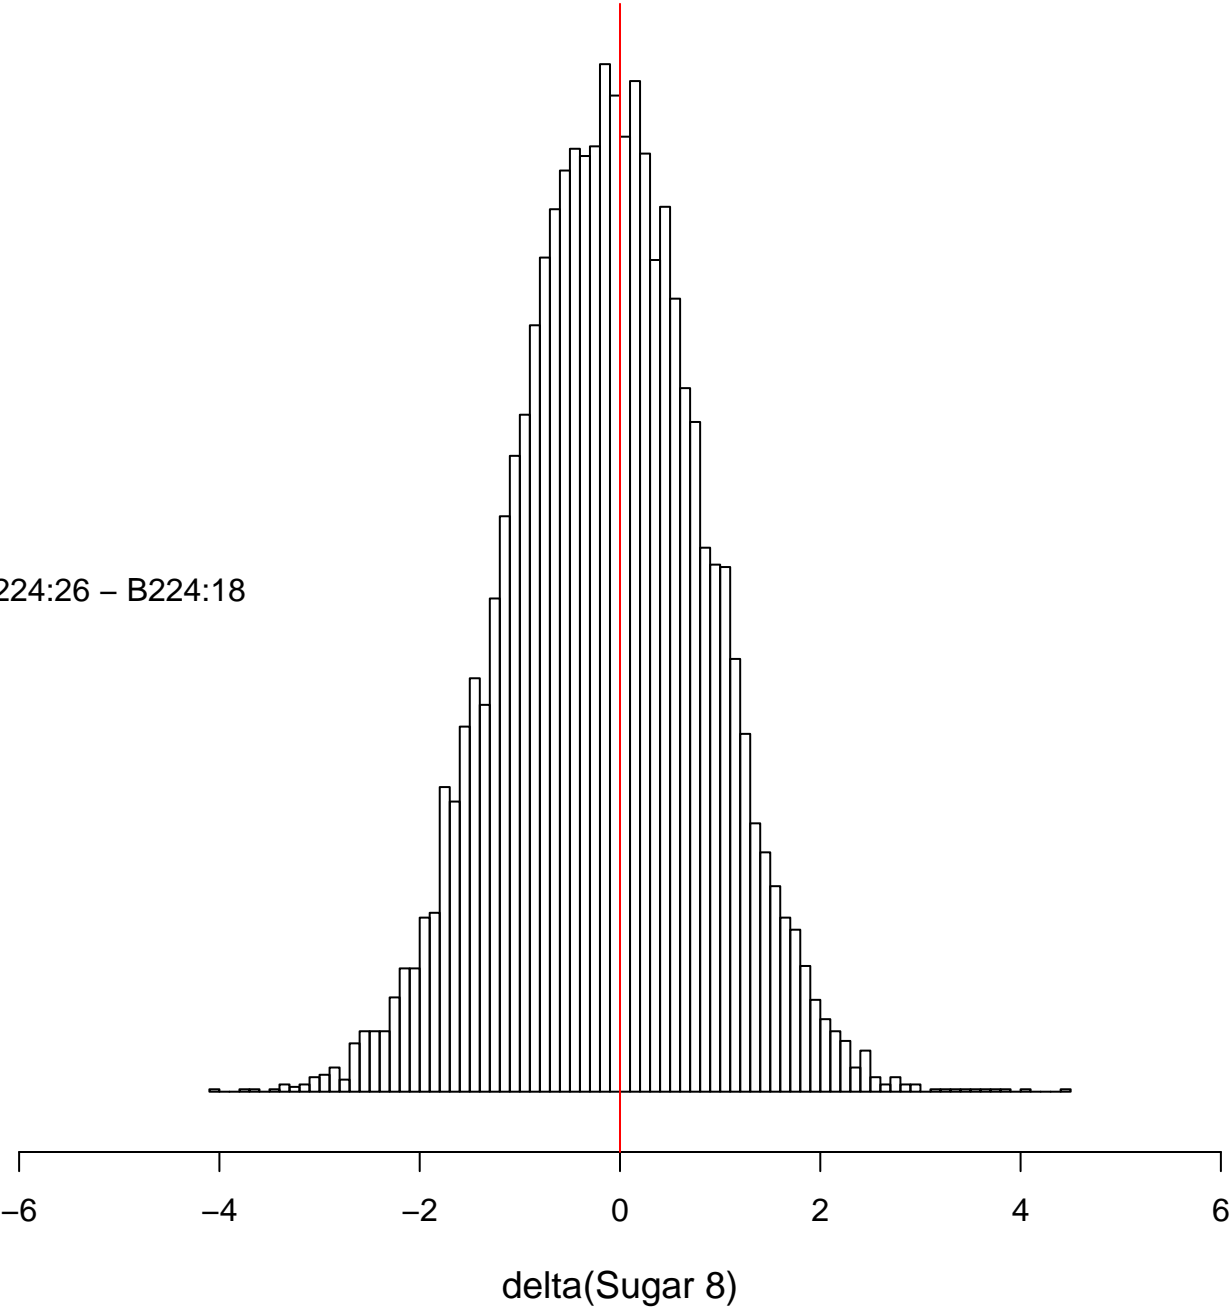

B224:26

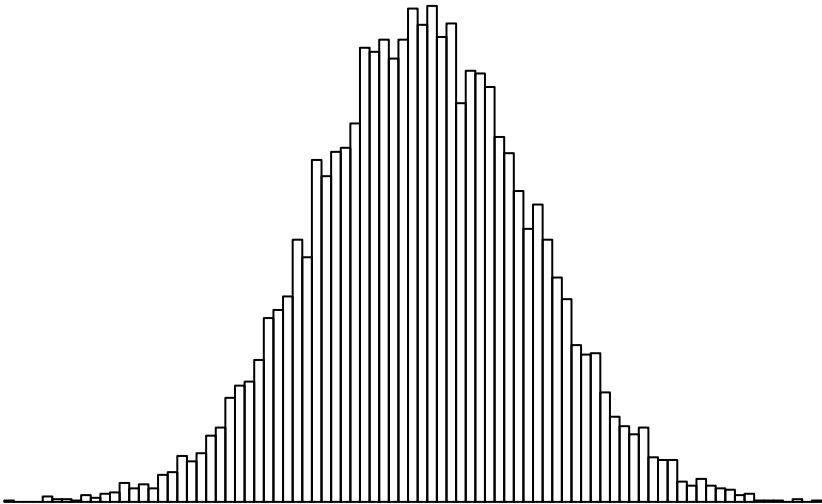

B224:18

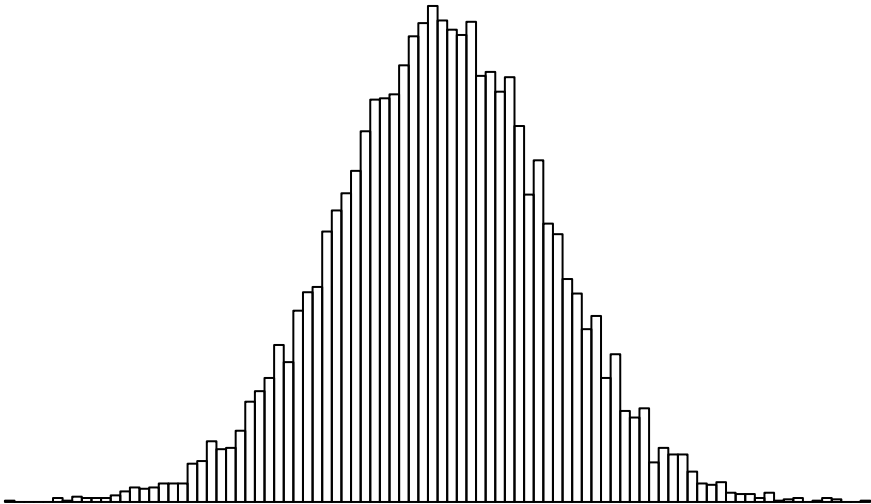

-9.5                      -9.0                      -8.5                      -8.0                      -7.5                      -7.0

Sugar 9

B224:26 – B224:18

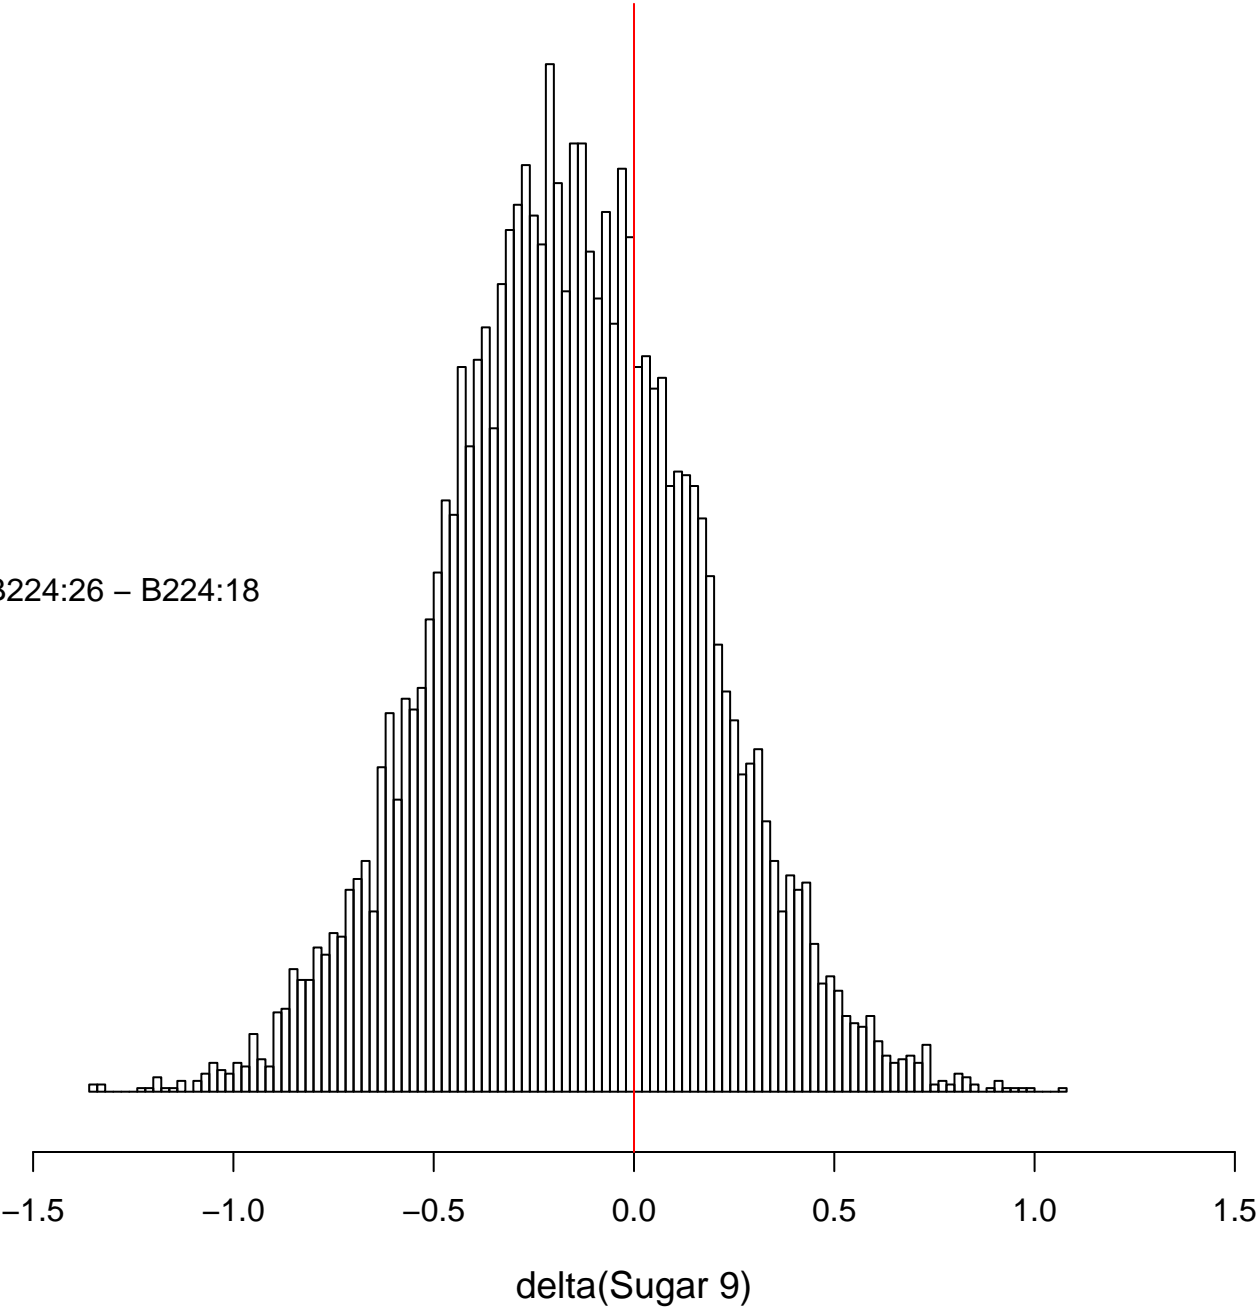

B224:26

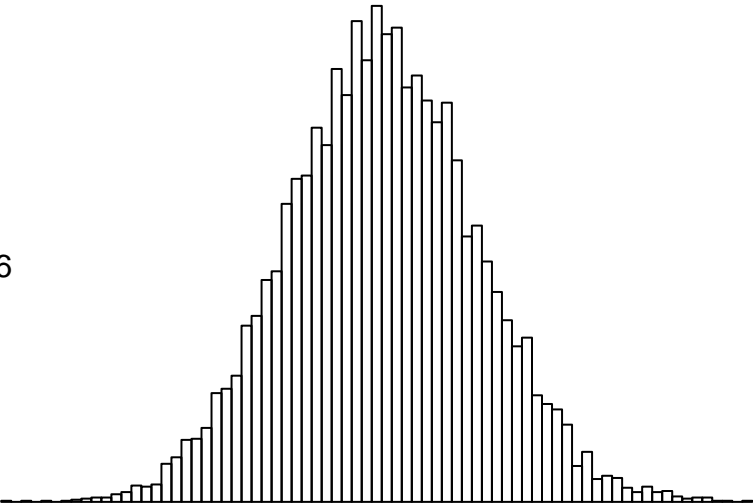

B224:18

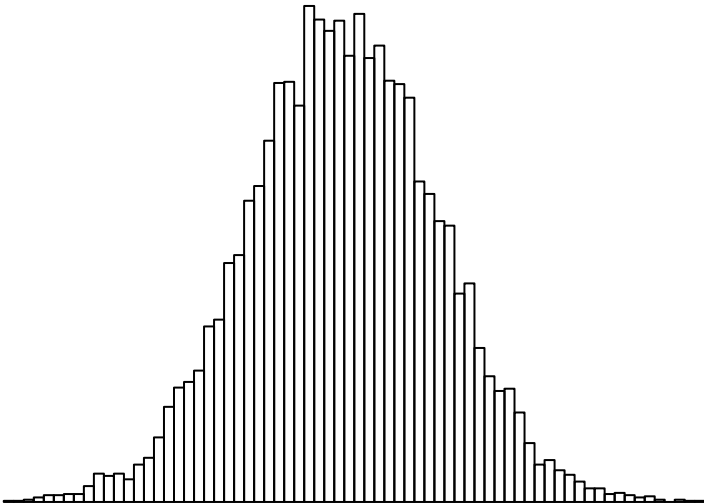

-10                      -9                      -8                      -7                      -6                      -5                      -4

Sugar 10

B224:26 – B224:18

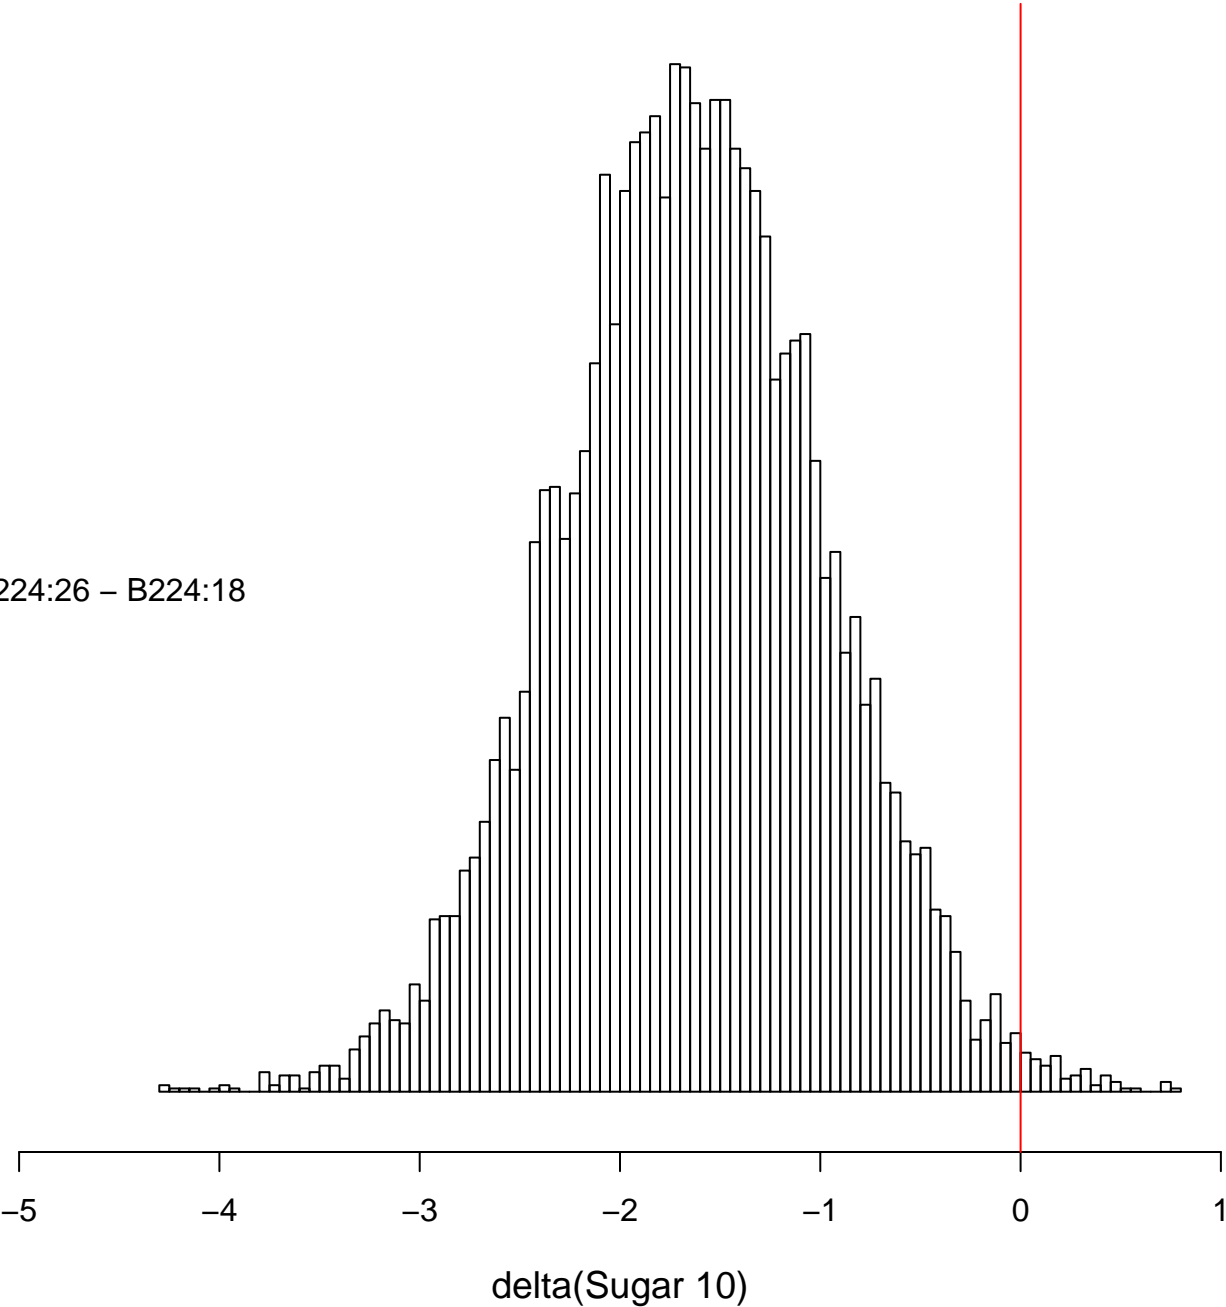

B224:26

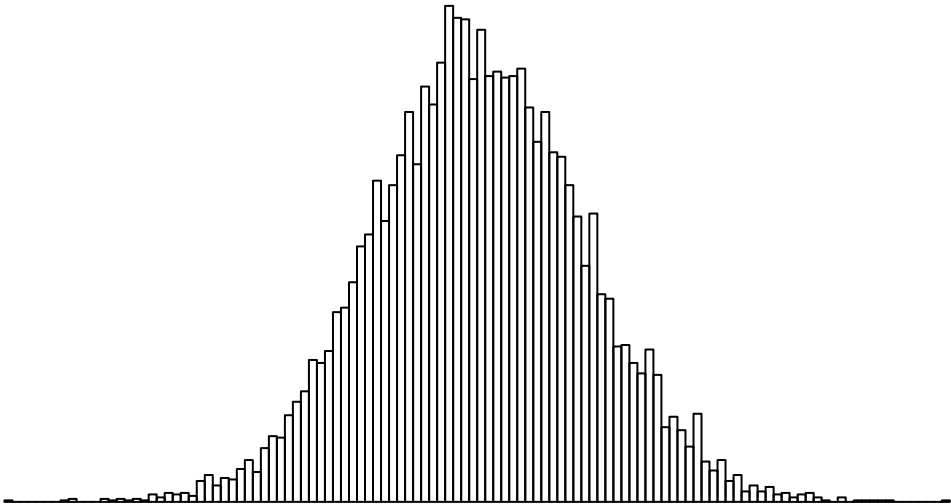

B224:18

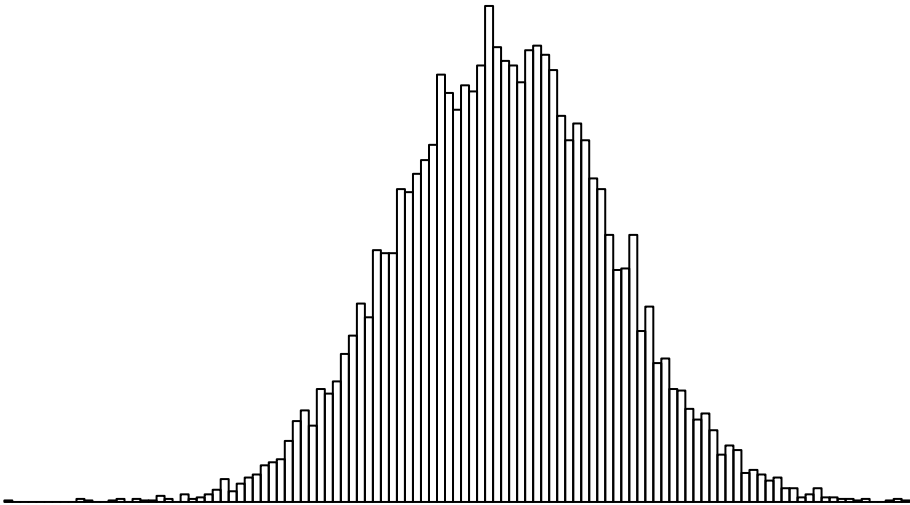

-10.0      -9.5      -9.0      -8.5      -8.0      -7.5      -7.0

Sugar 11

B224:26 – B224:18

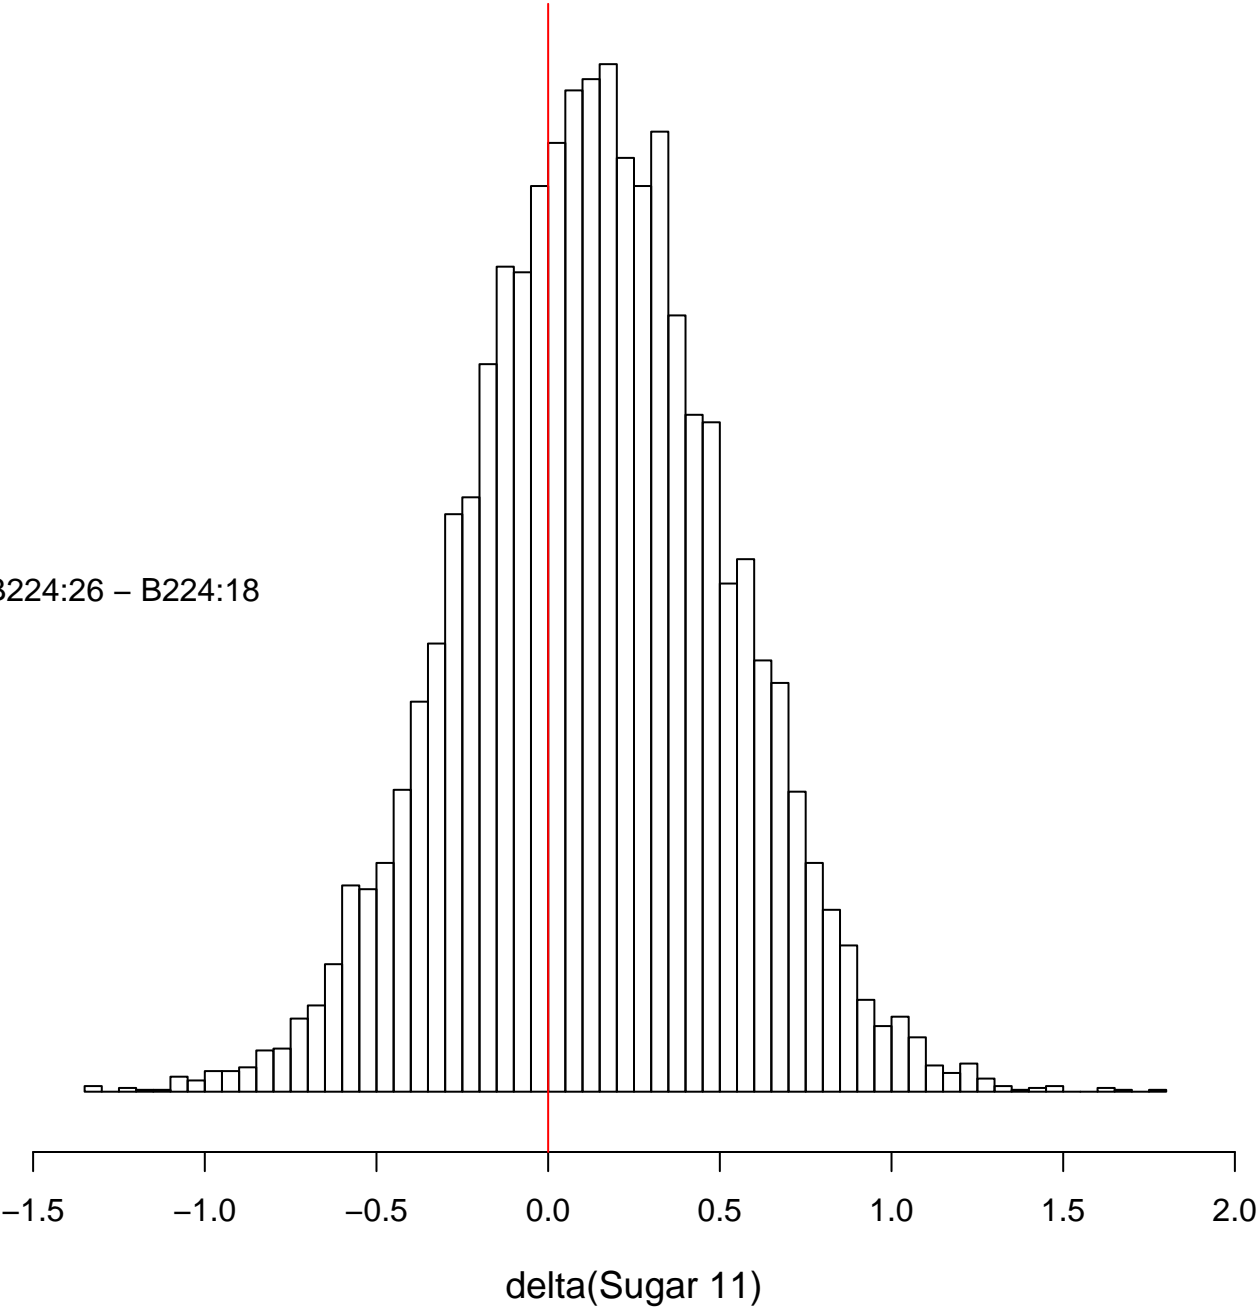



B224:26

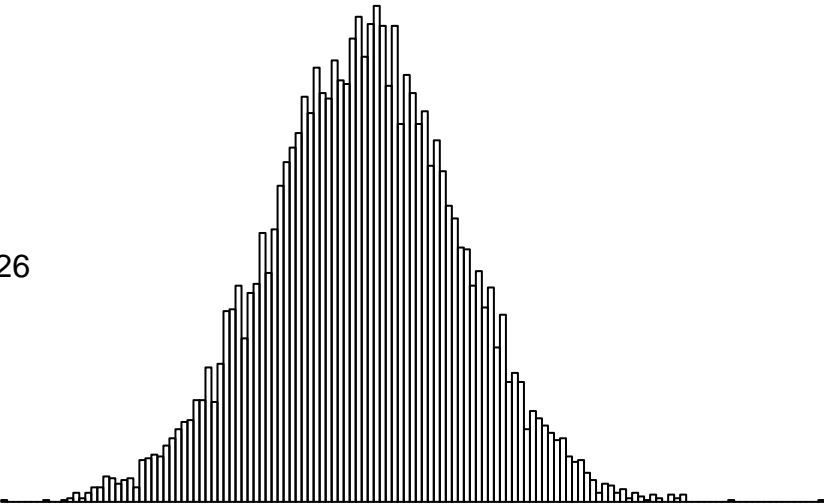

B224:18

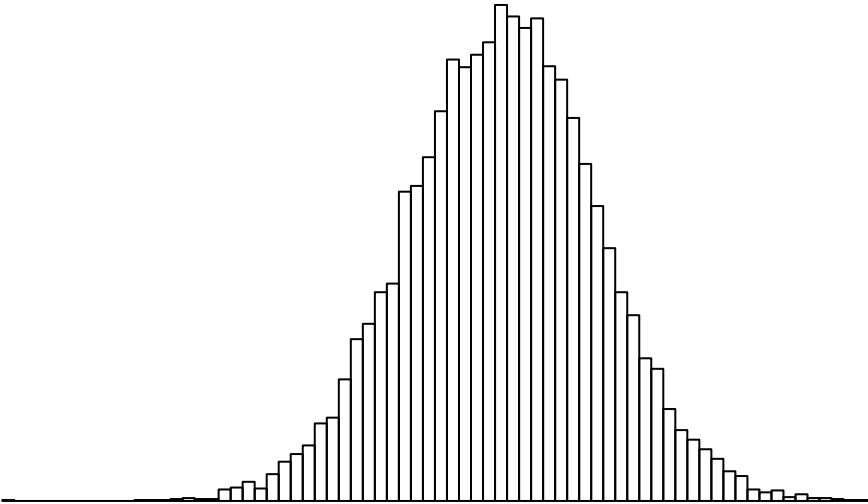

-9.5                      -9.0                      -8.5                      -8.0                      -7.5

Sugar 12

B224:26 – B224:18

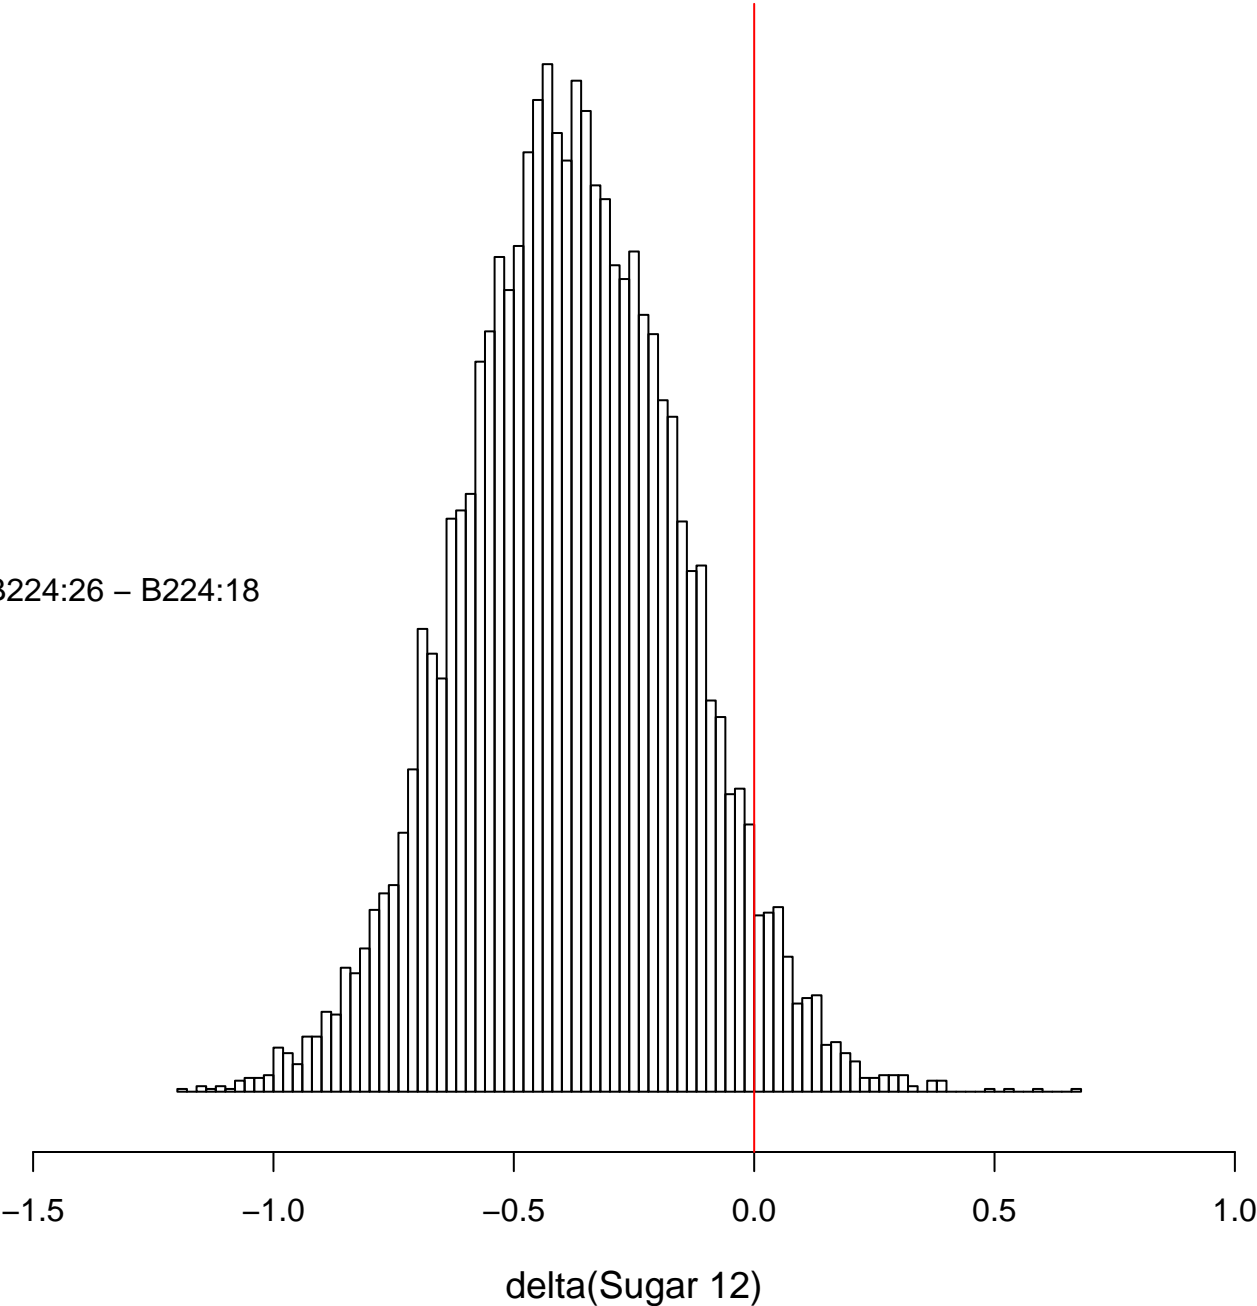

B224:26

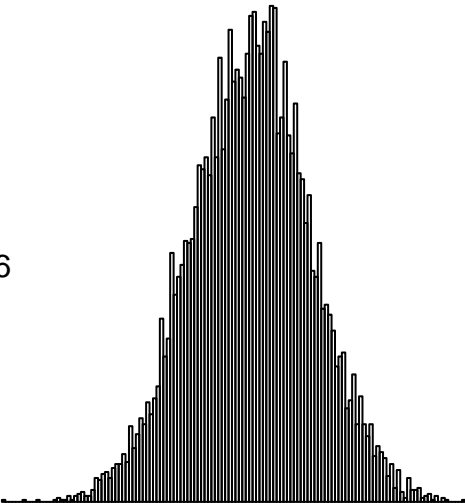

B224:18

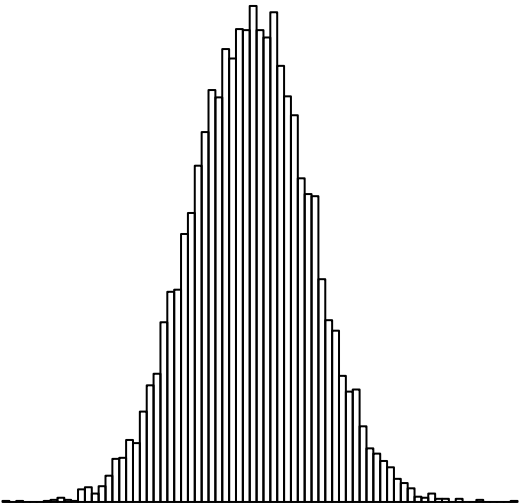

-10.0      -9.5      -9.0      -8.5      -8.0      -7.5      -7.0      -6.5

Sugar 14

B224:26 – B224:18

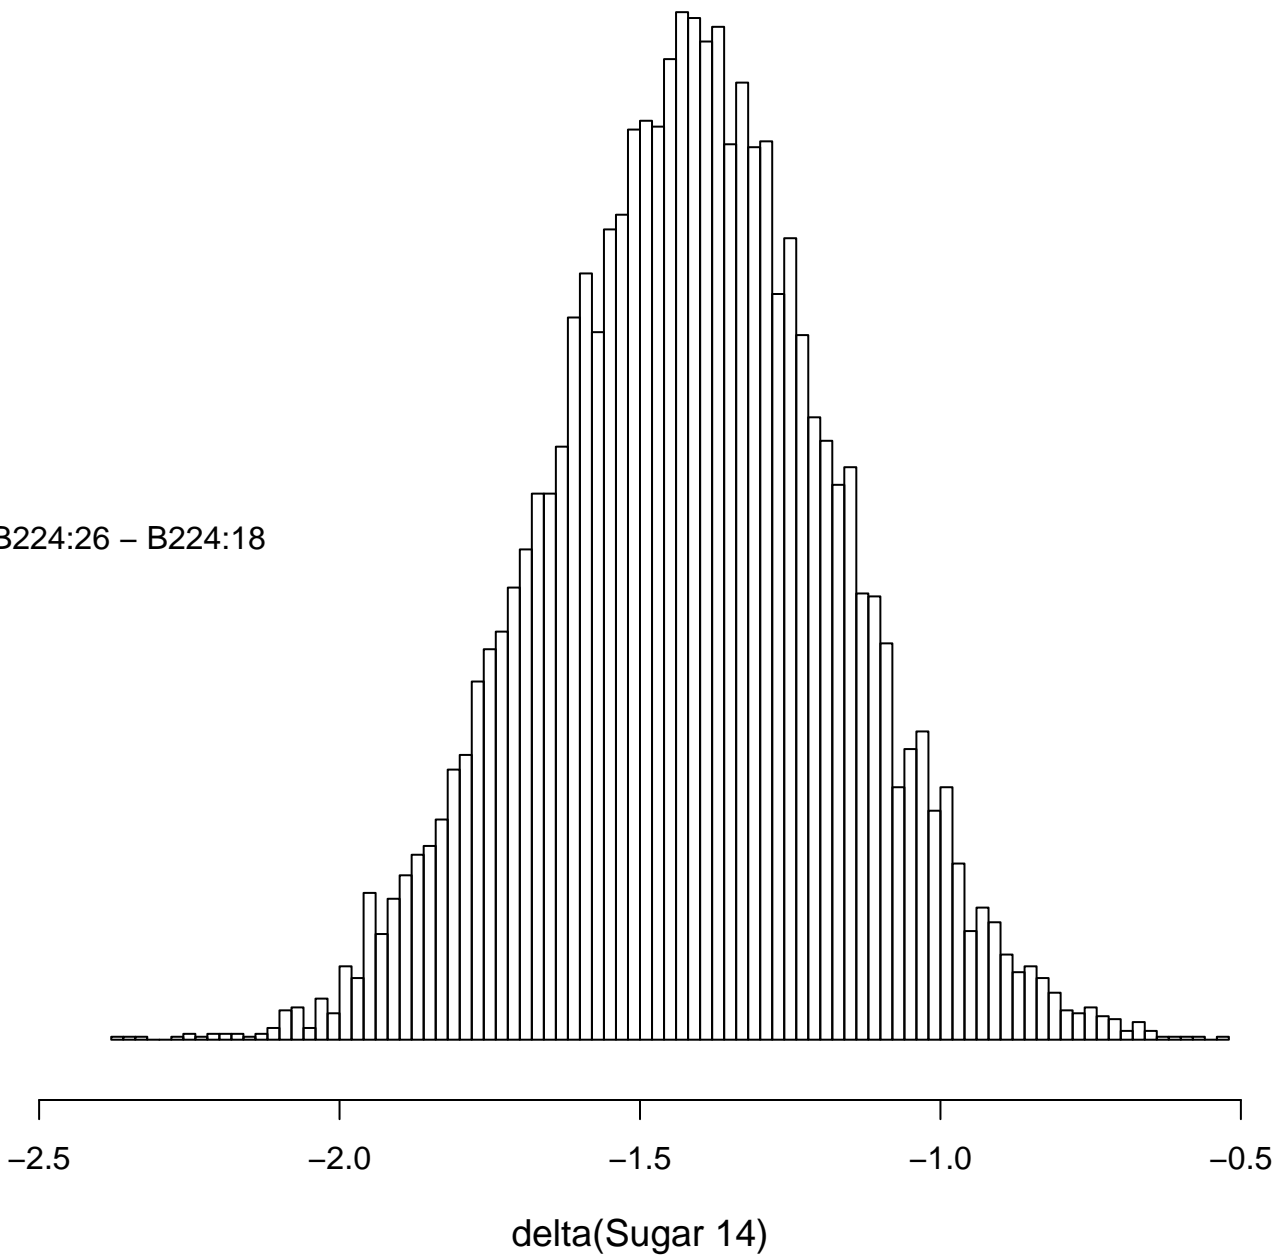

B224:26

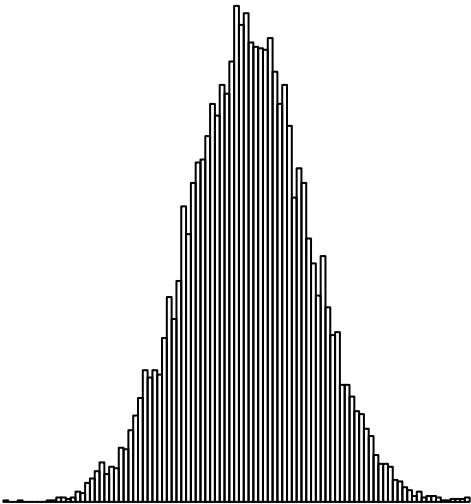

B224:18

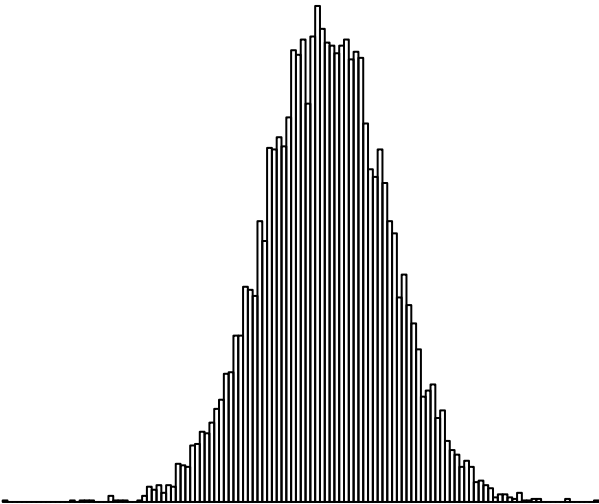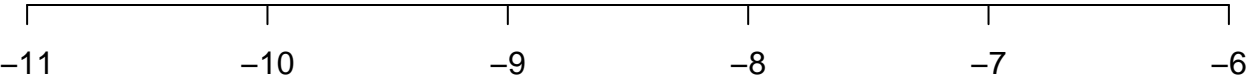

Sugar 16

B224:26 – B224:18

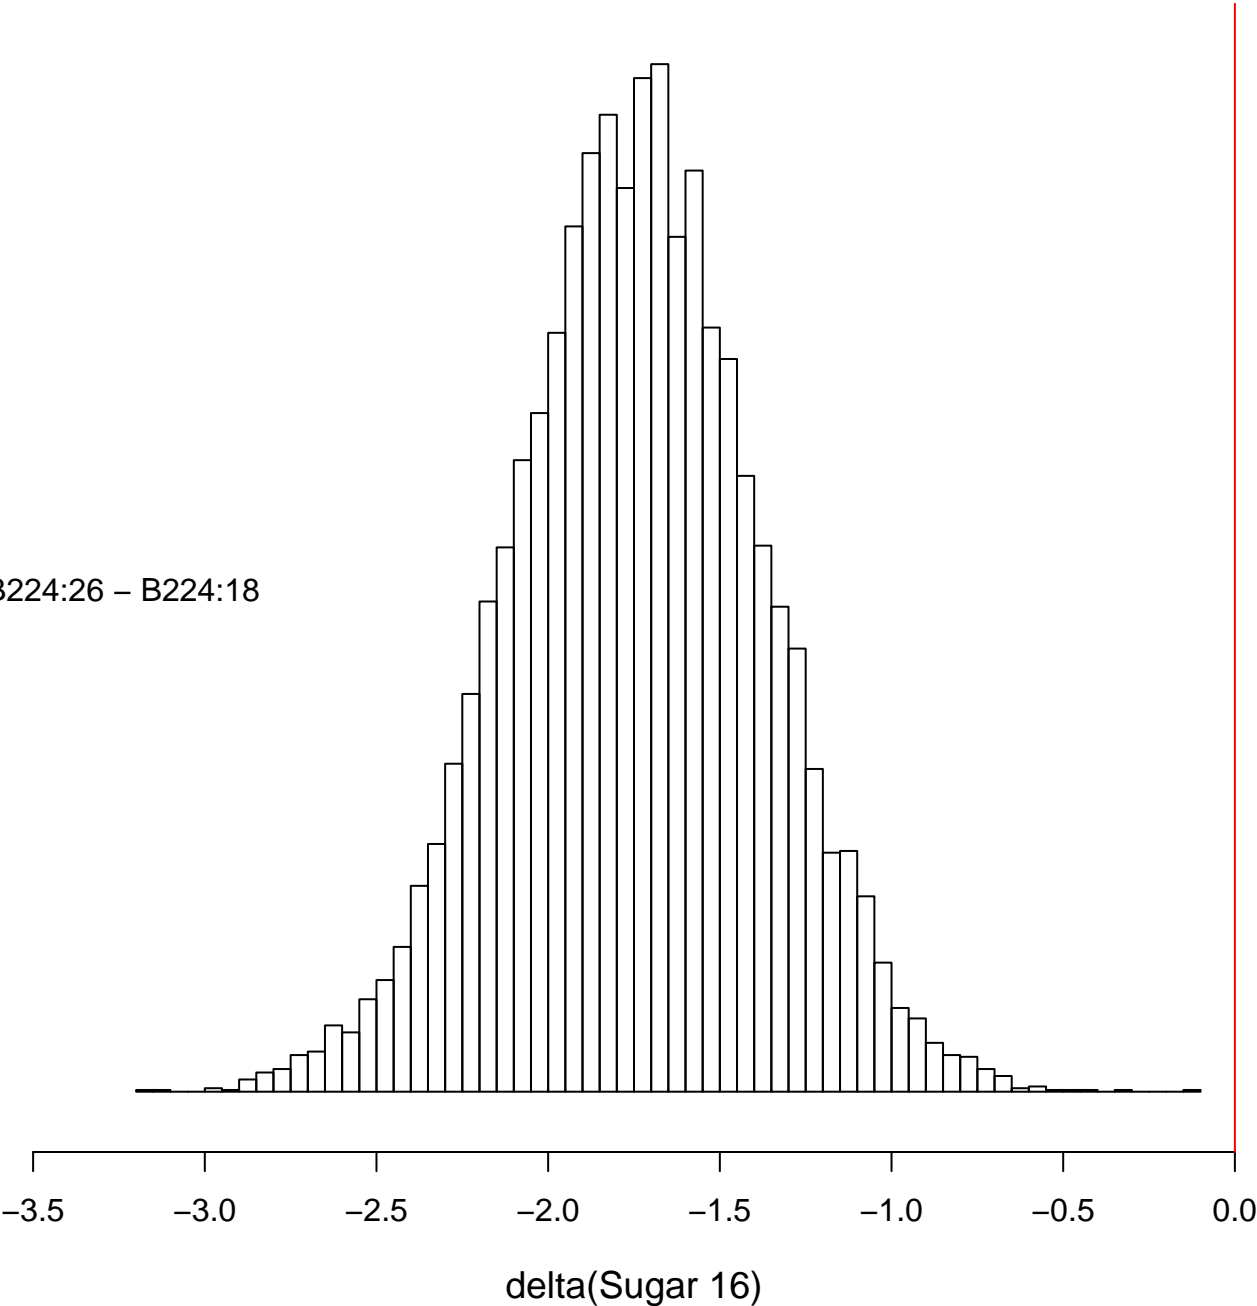

B224:26

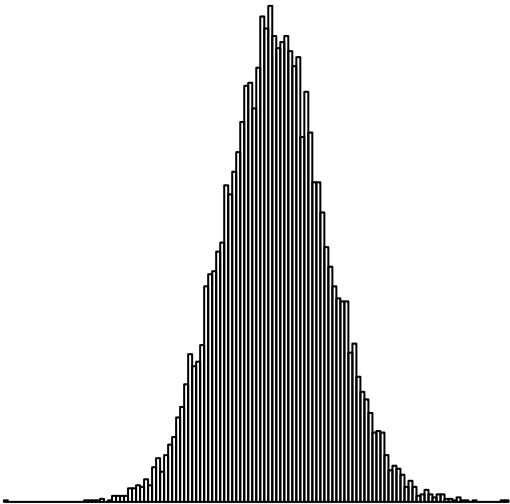

B224:18

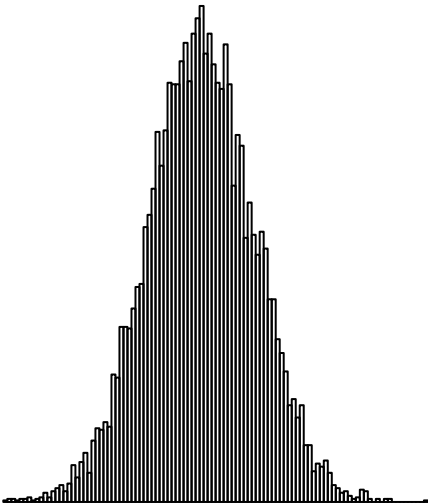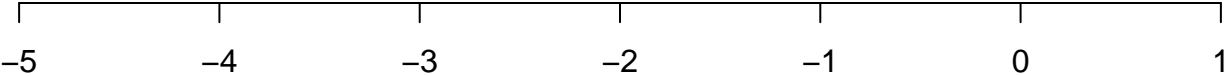

Sugar 17

B224:26 – B224:18

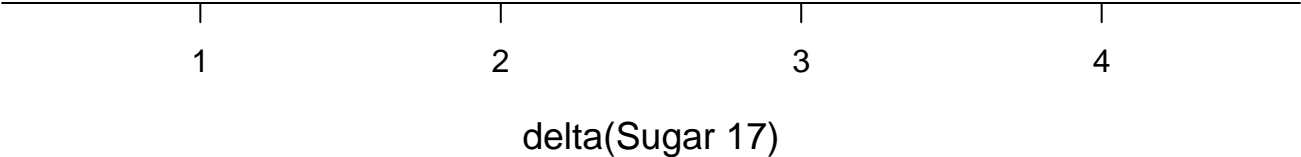



B224:26

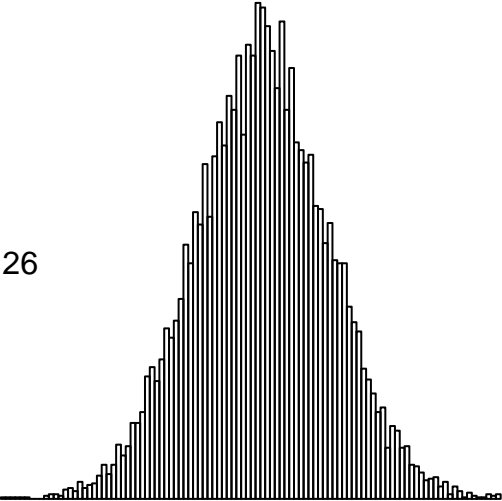

B224:18

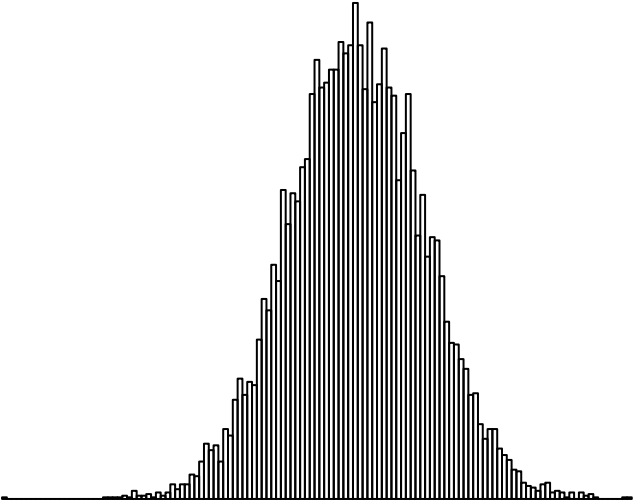

Sugar 18

B224:26 – B224:18

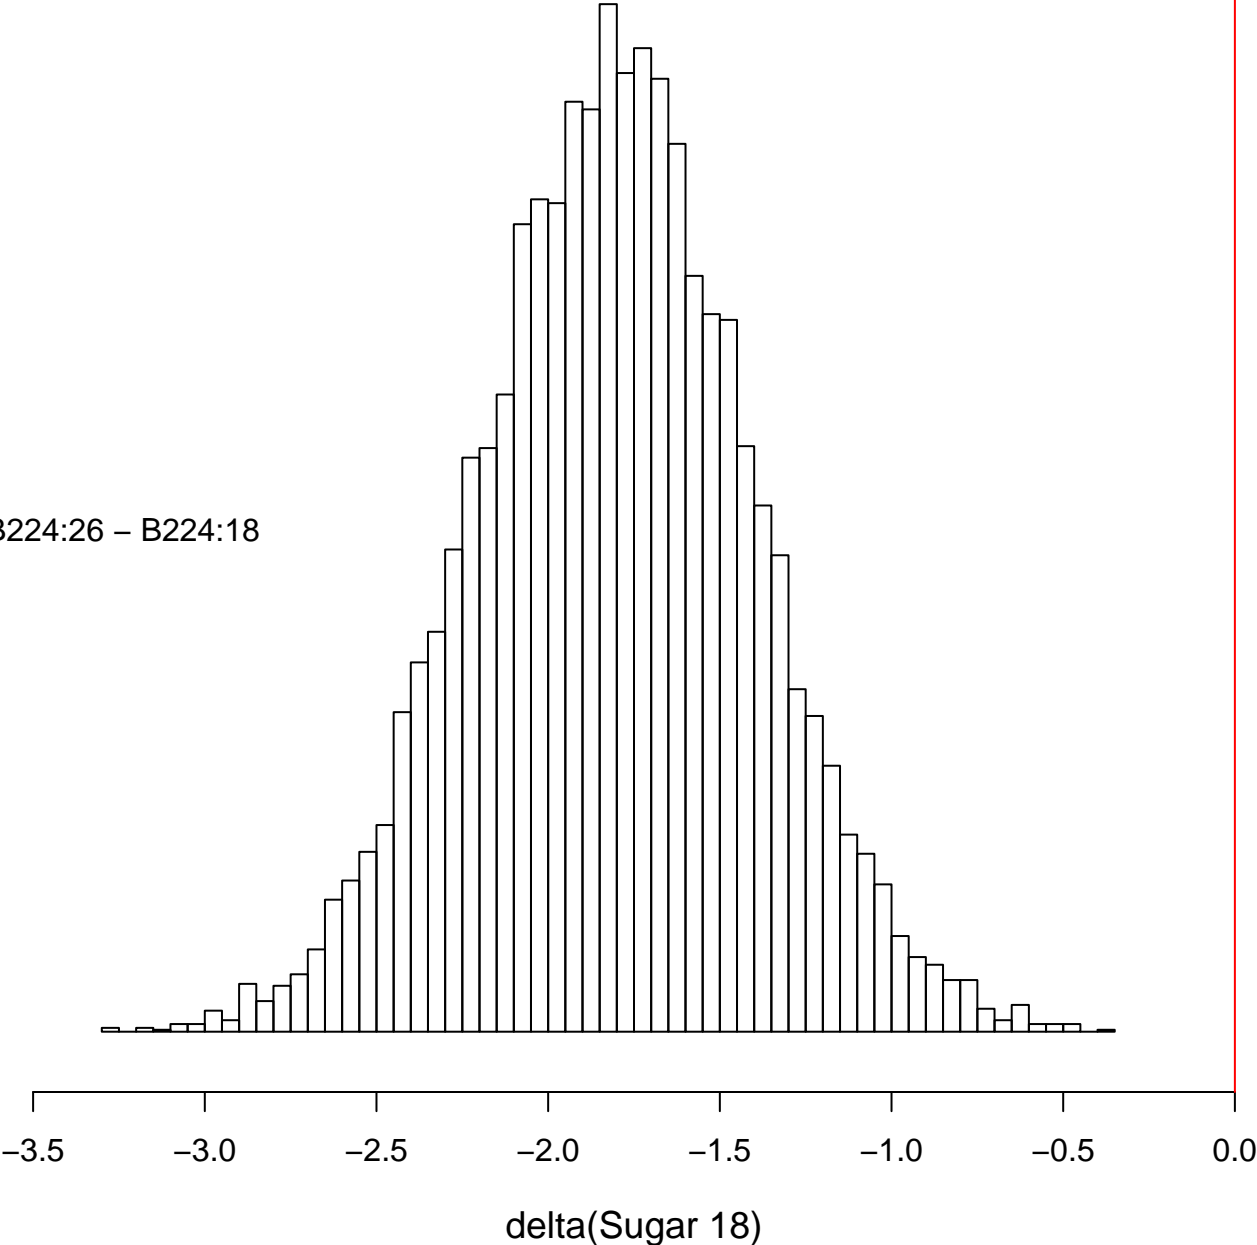

B224:26

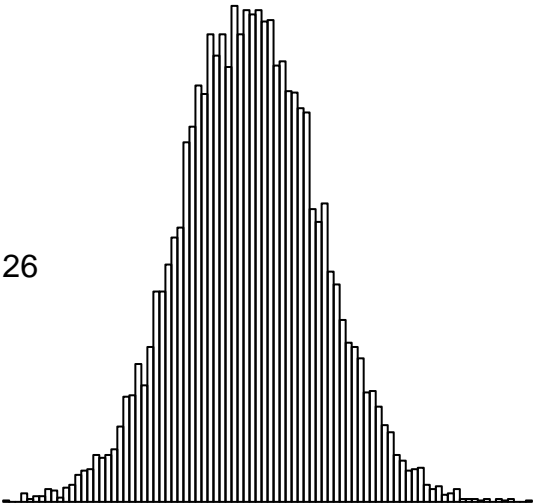

B224:18

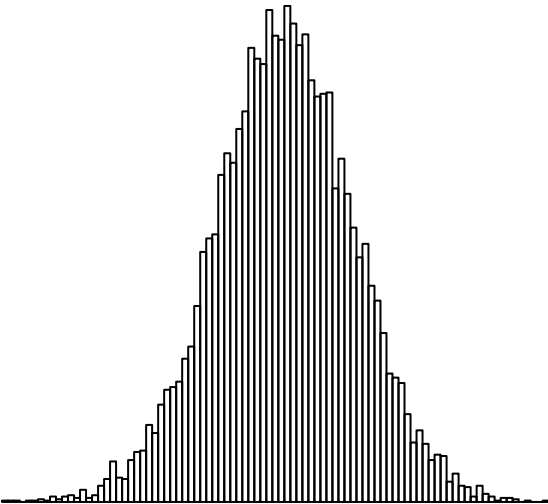

-10                      -9                      -8                      -7                      -6

Sugar 20

B224:26 – B224:18

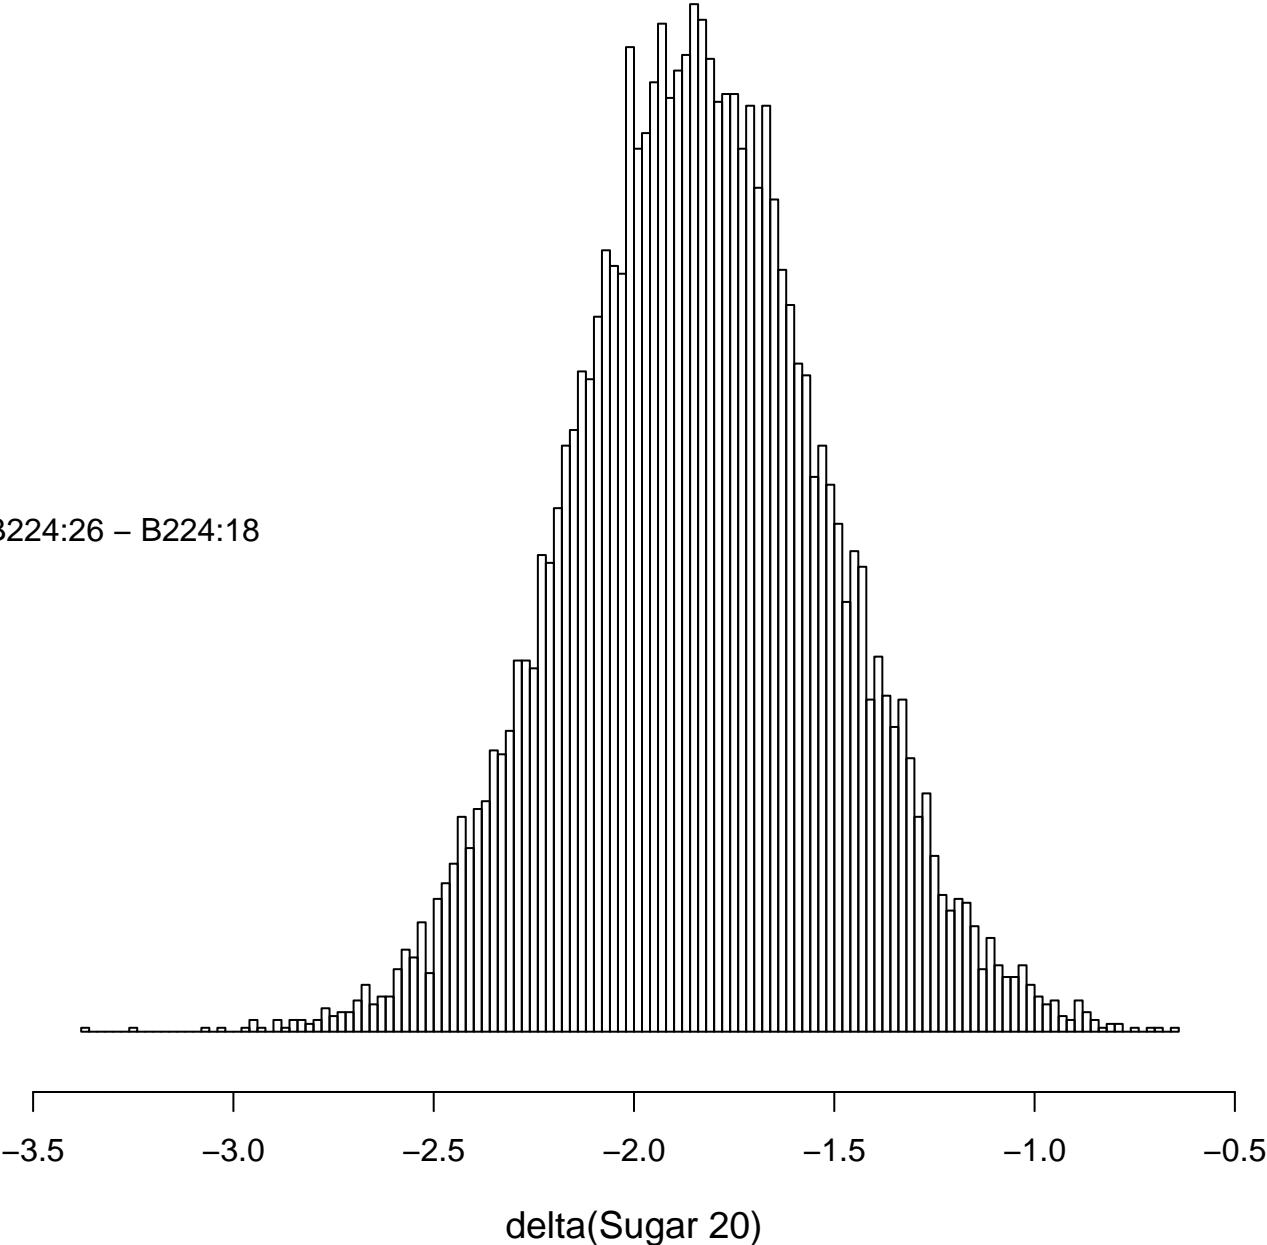

B224:26

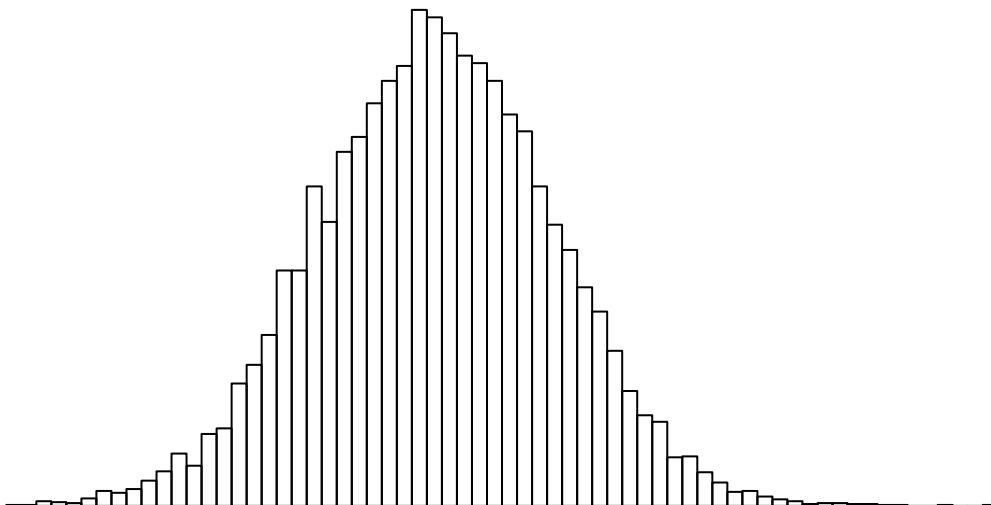

B224:18

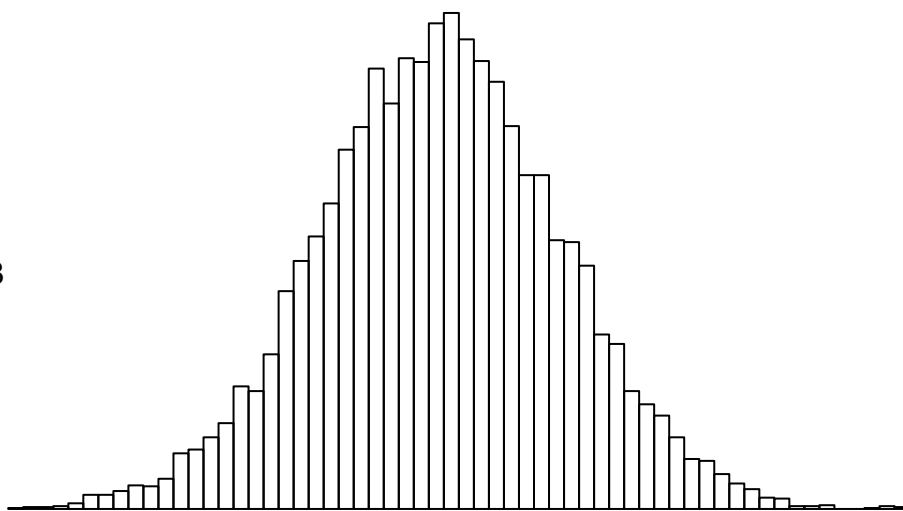

-9

-8

-7

-6

Sugar 21

B224:26 – B224:18

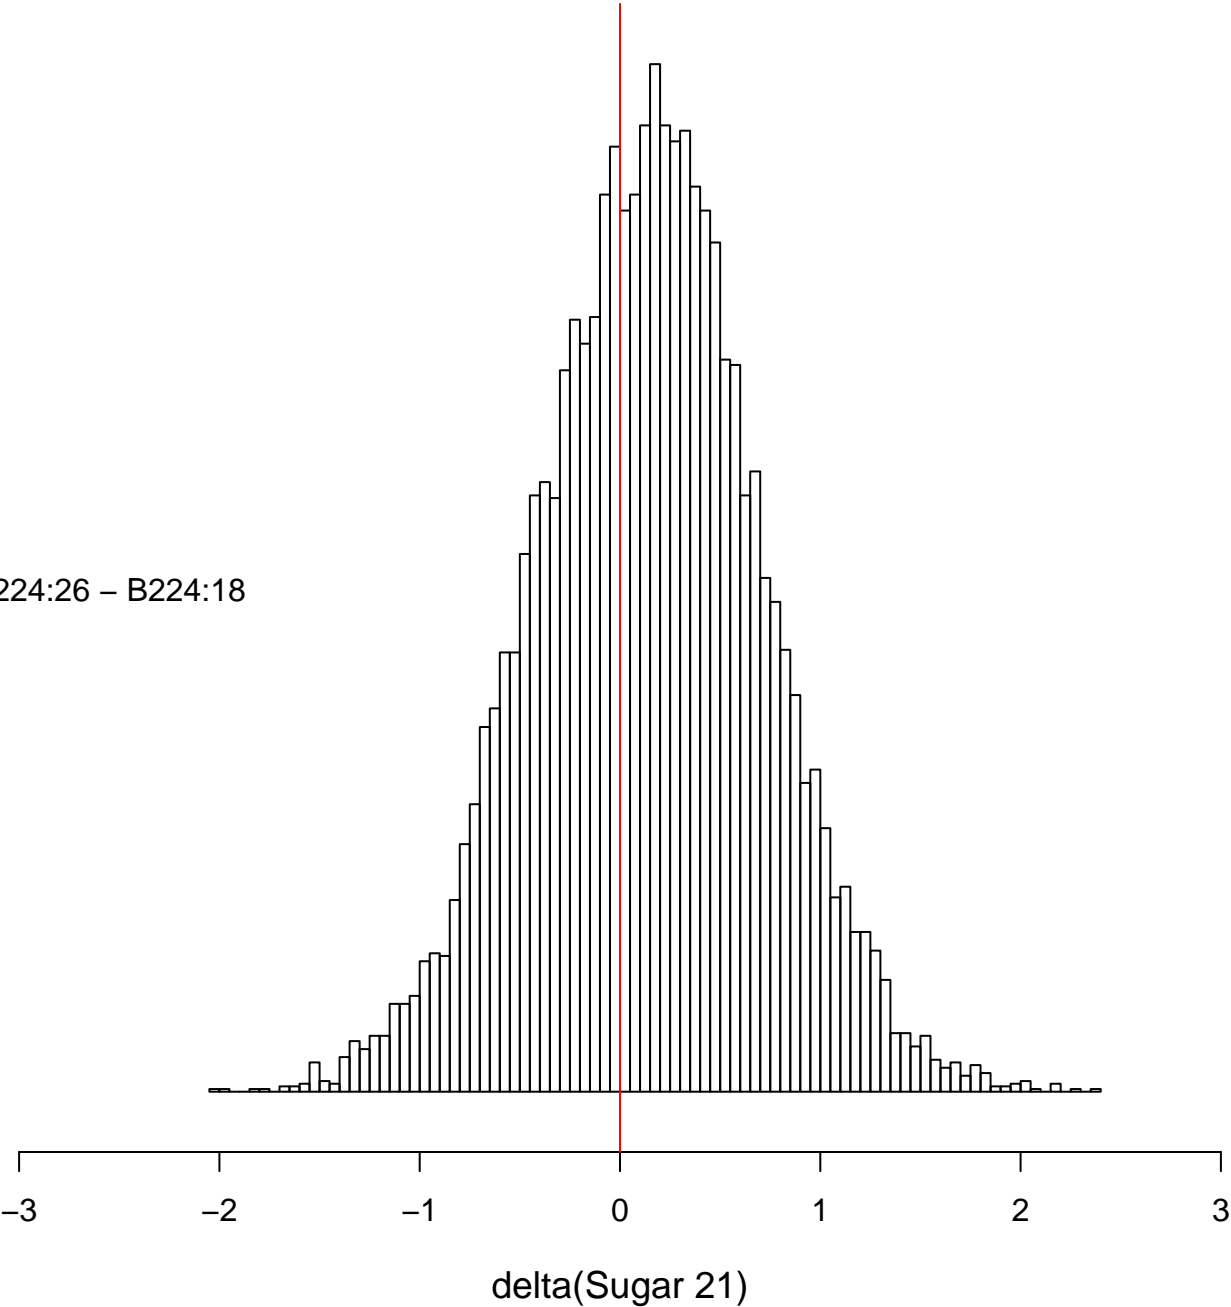

B224:26

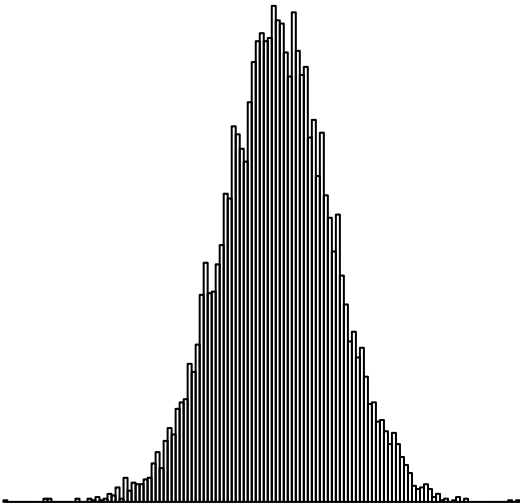

B224:18

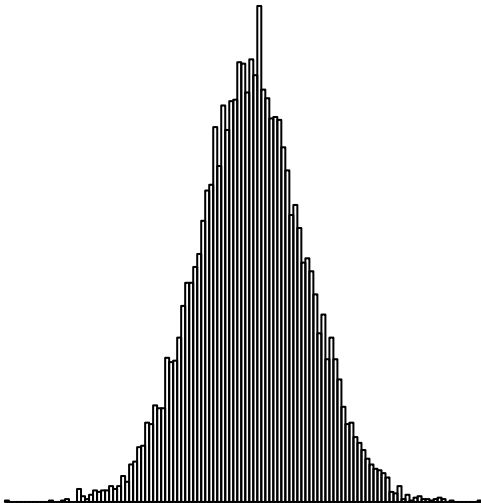

Sugar 22

B224:26 – B224:18

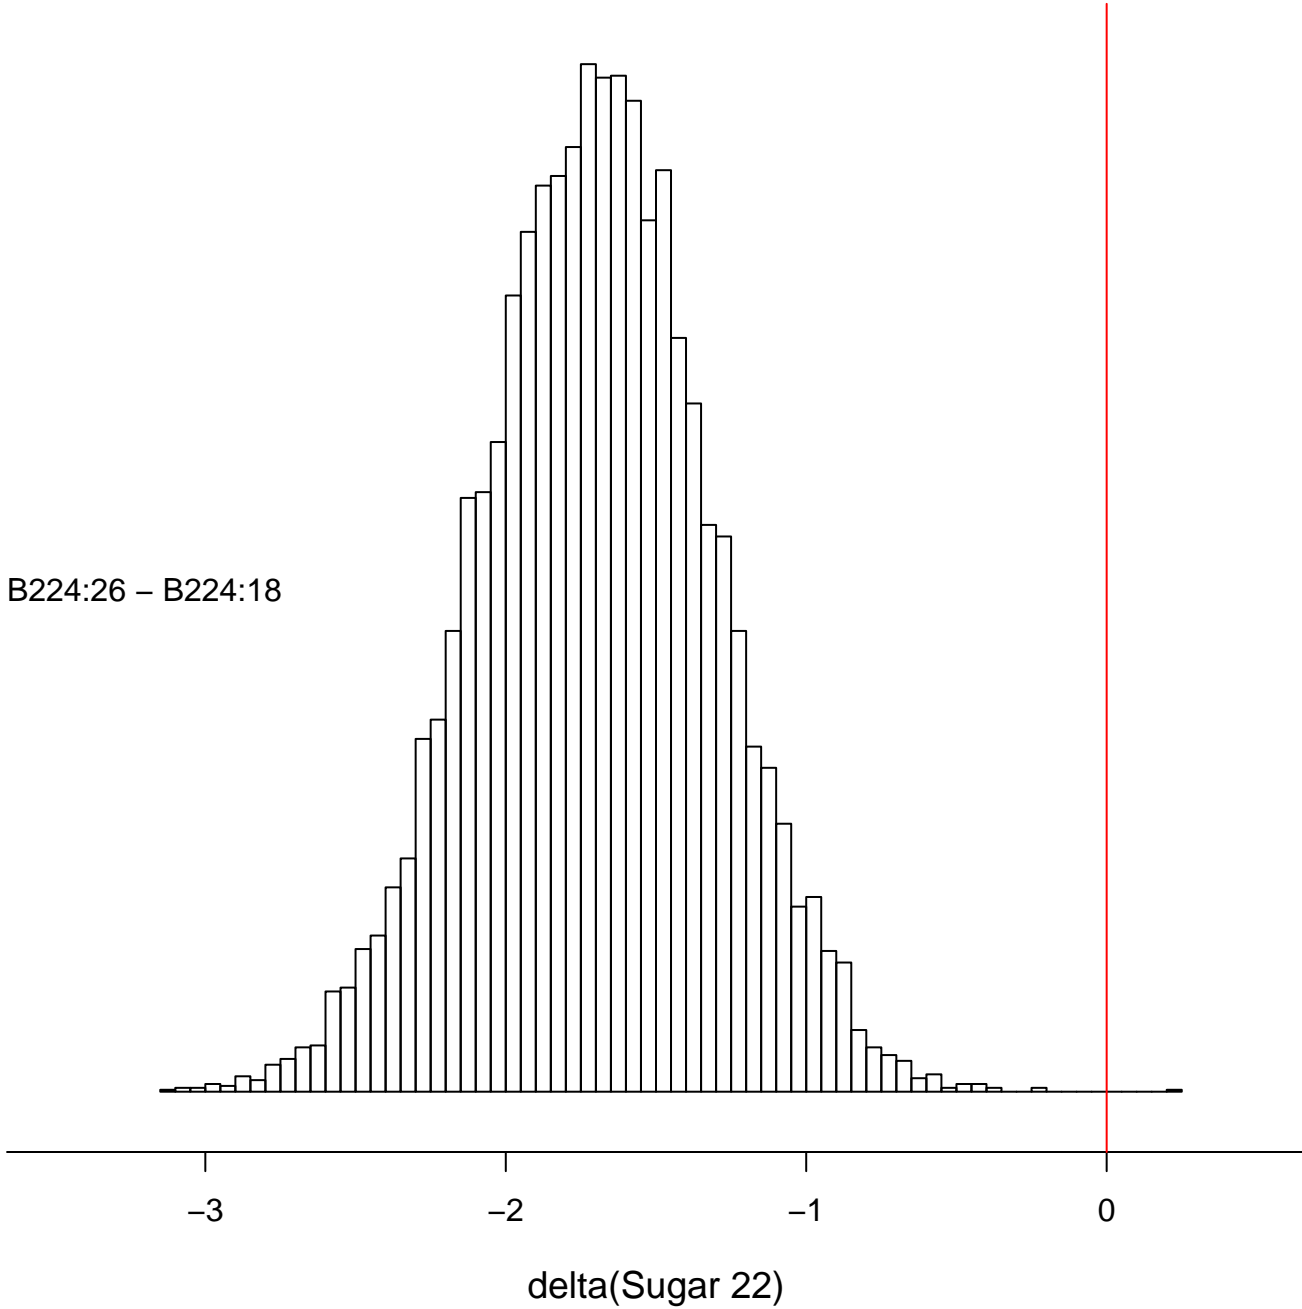



B224:26

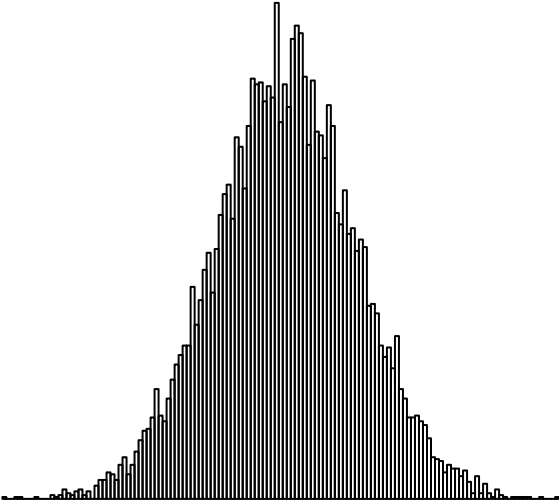

B224:18

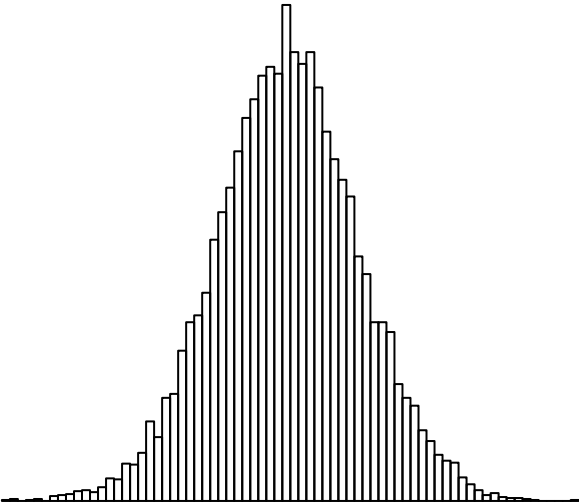

-8.5      -8.0      -7.5      -7.0      -6.5      -6.0      -5.5

Sugar 23

B224:26 – B224:18

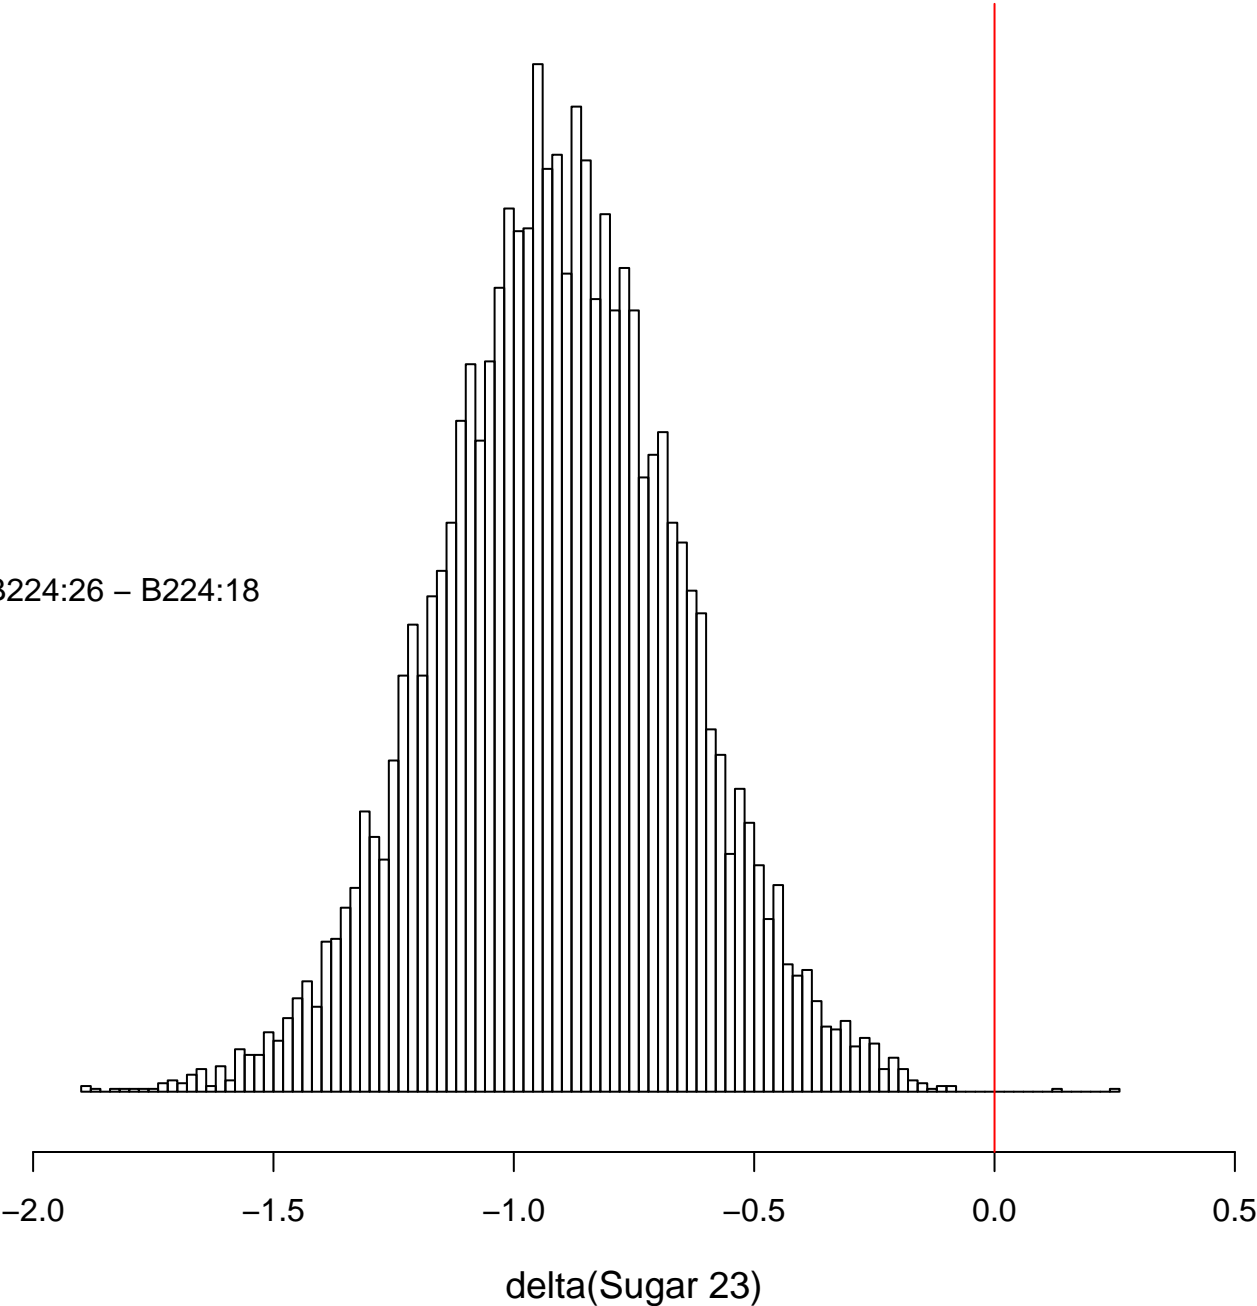

B224:26

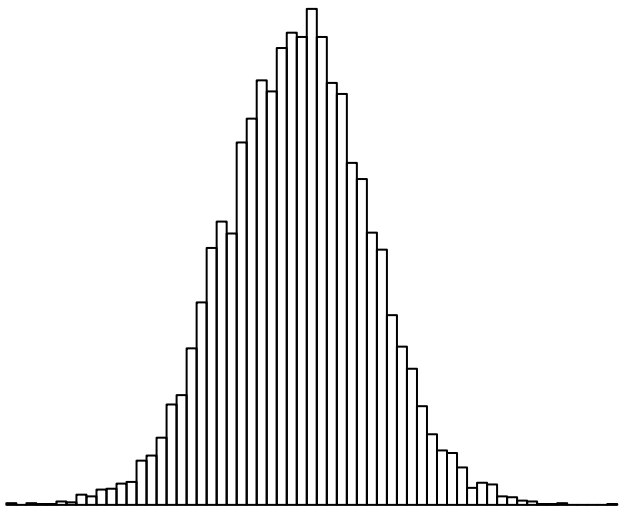

B224:18

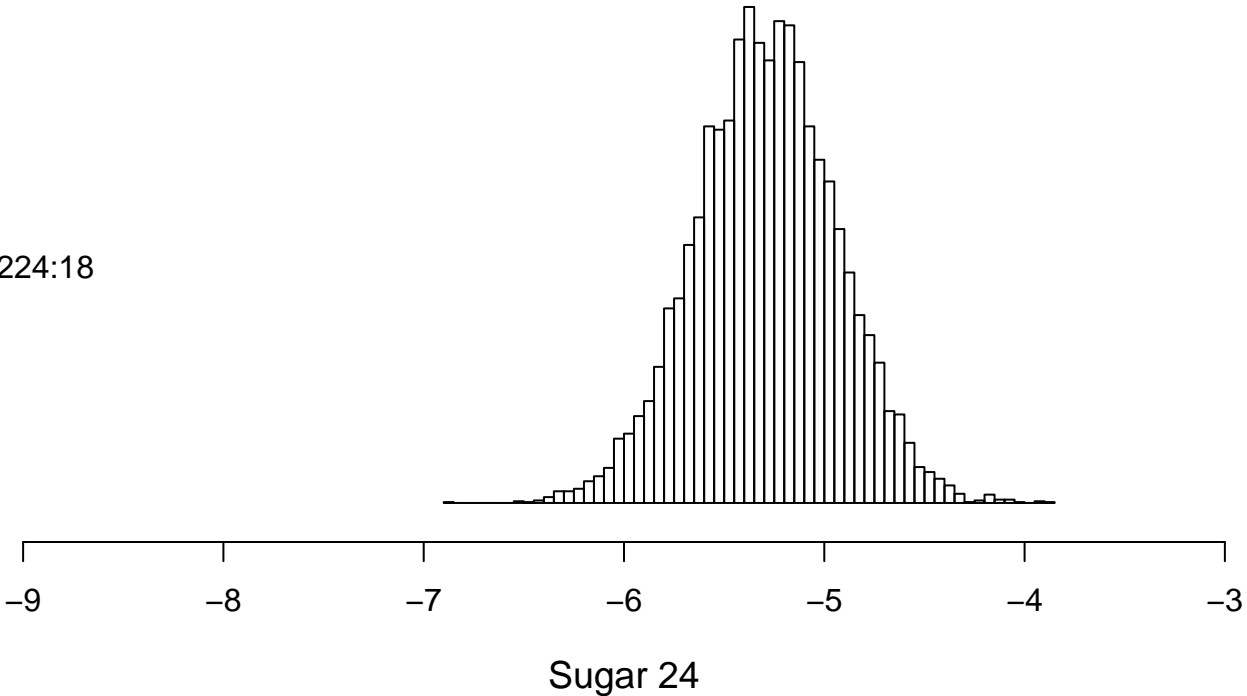

B224:26 – B224:18

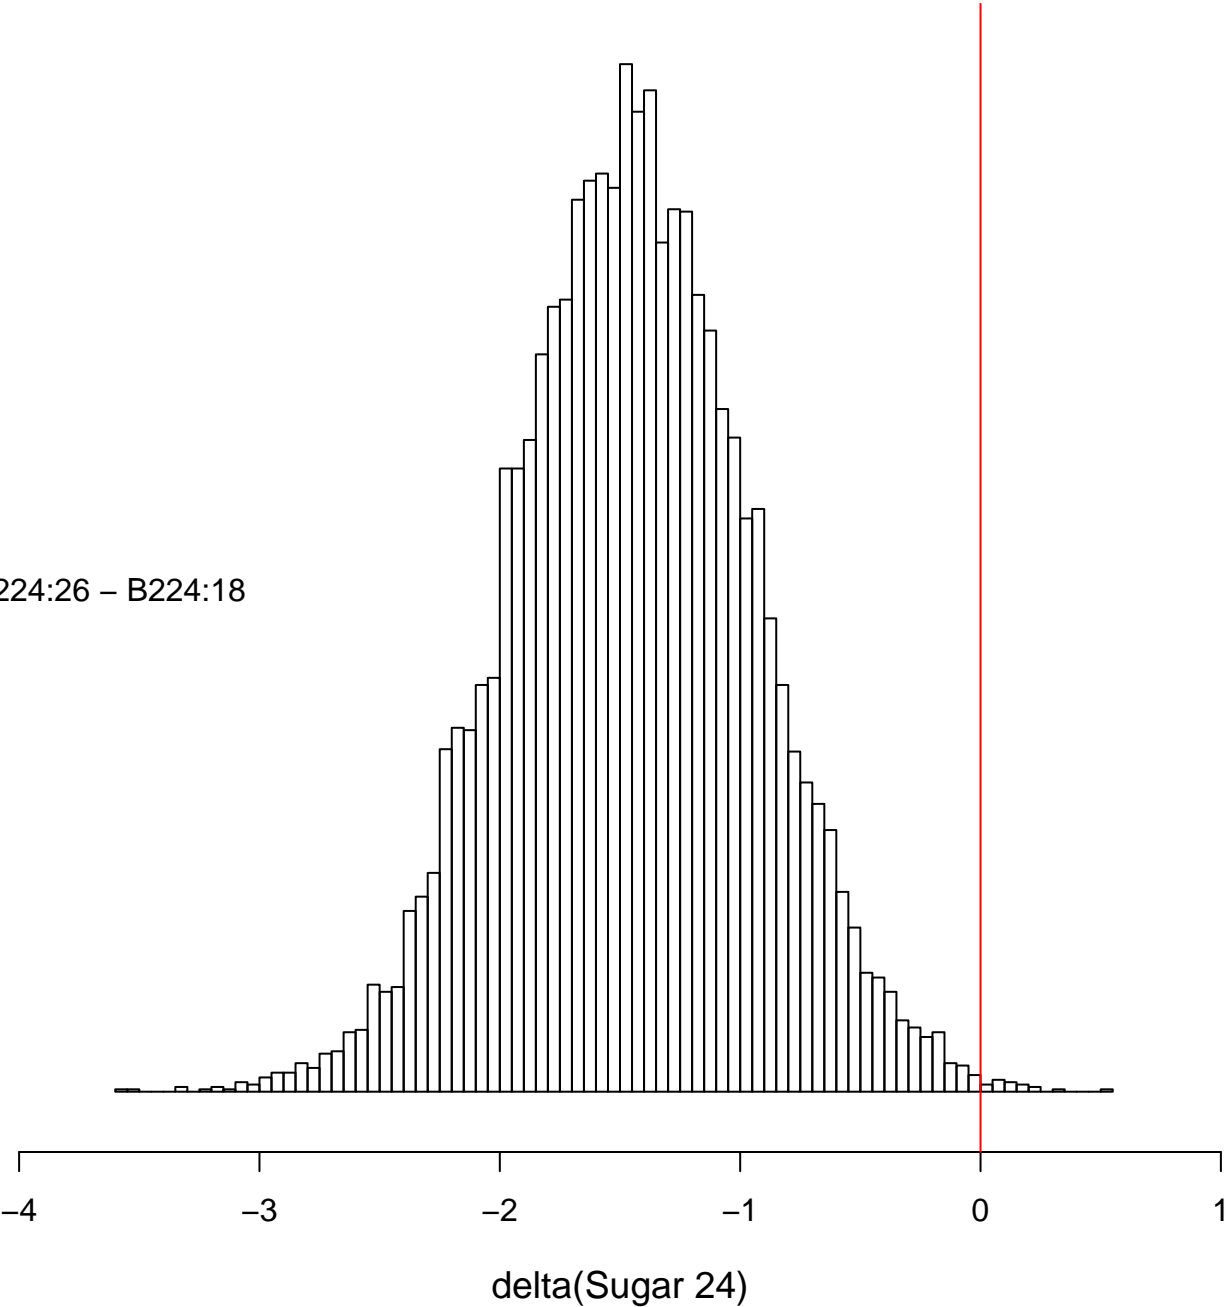

B224:26

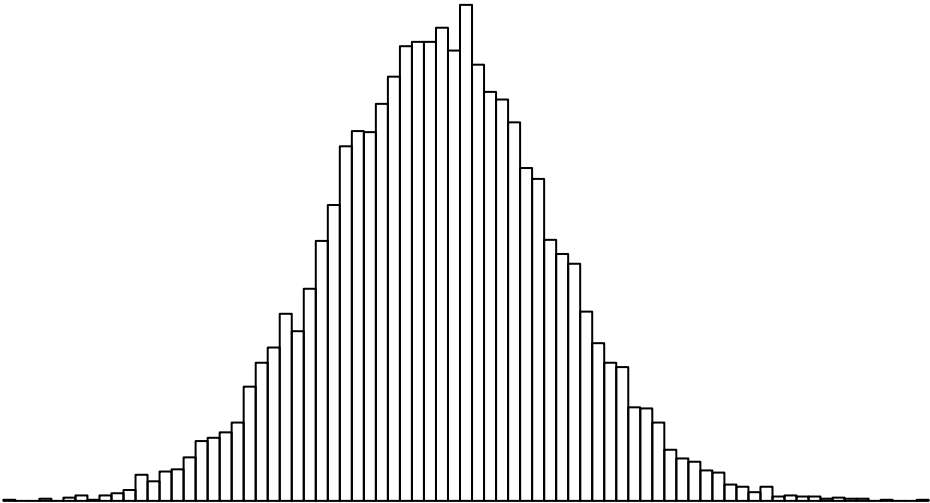

B224:18

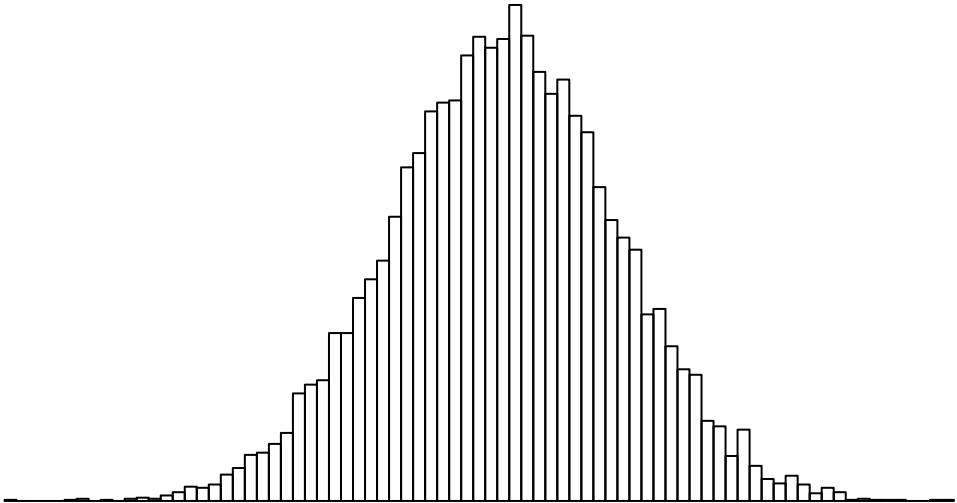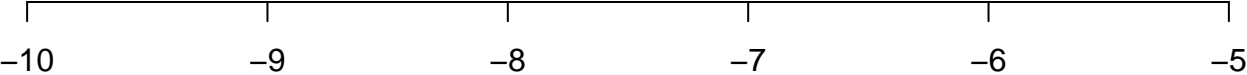

Alcohol 1

B224:26 – B224:18

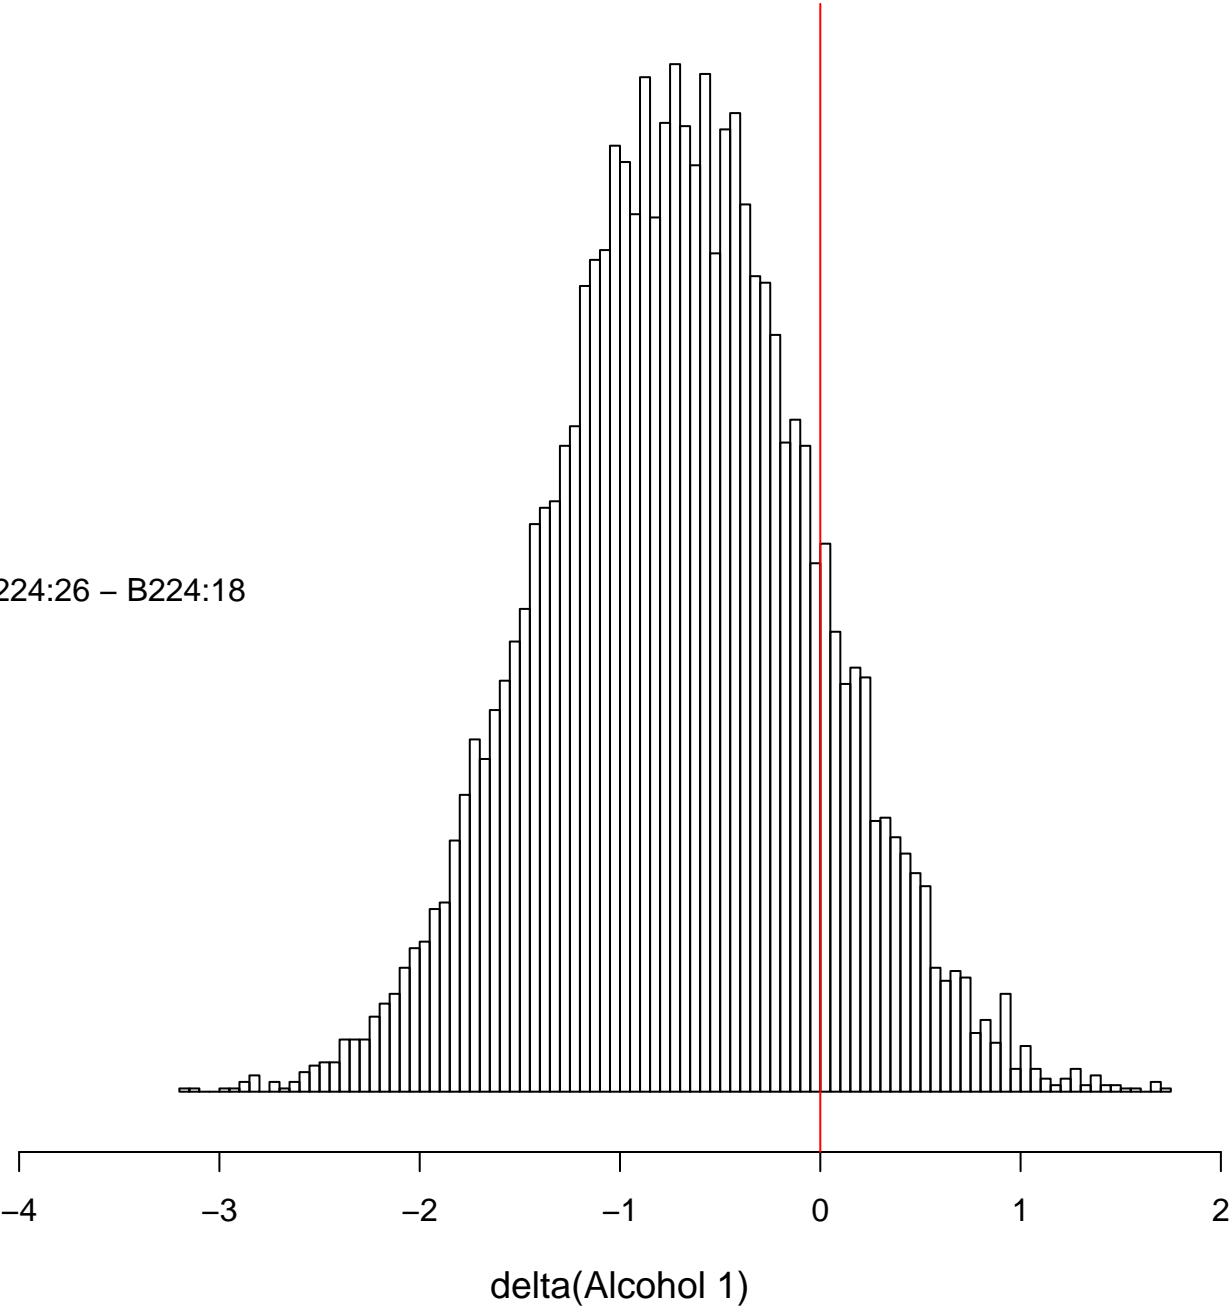

B224:26

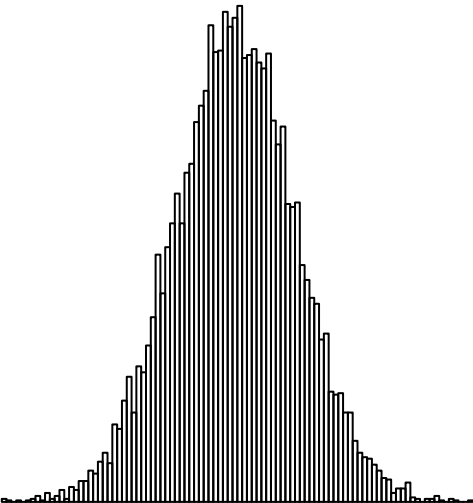

B224:18

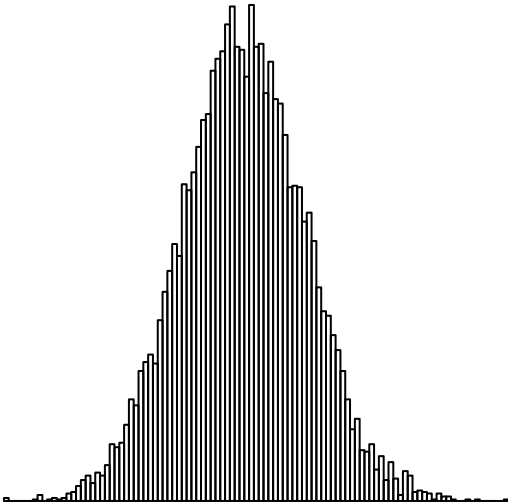

Hydrocarbon 1

B224:26 – B224:18

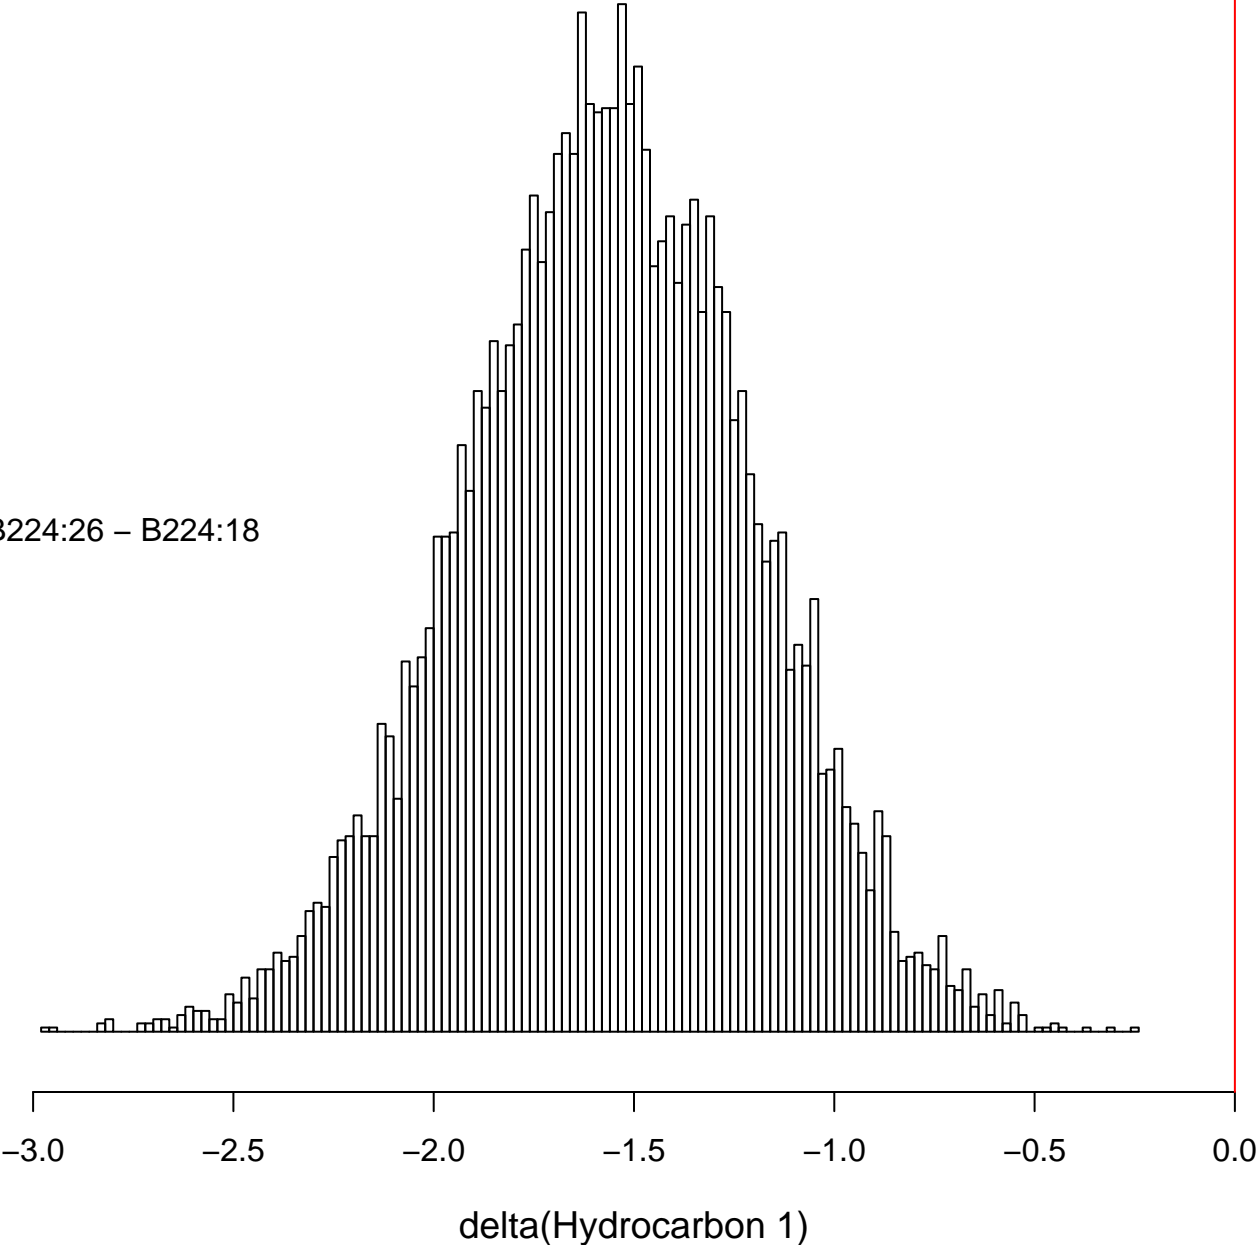



B224:26

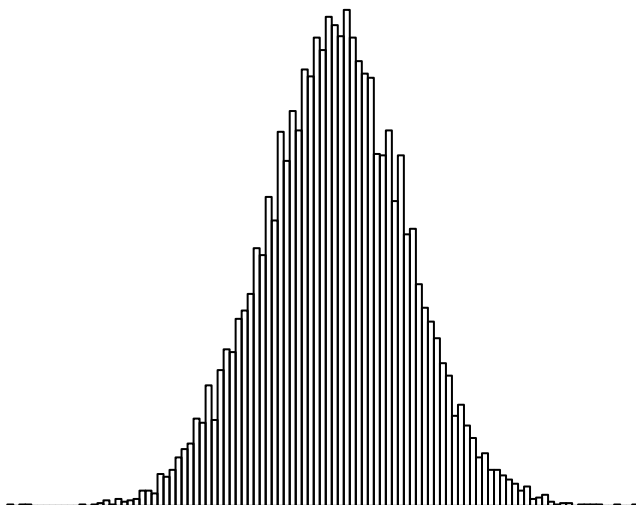

B224:18

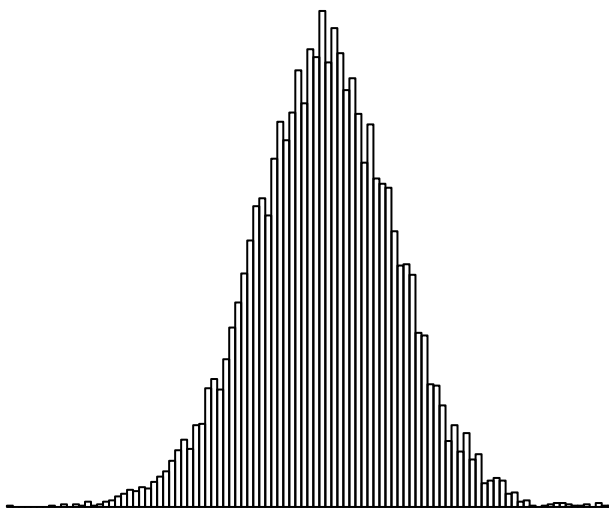

-9

-8

-7

-6

-5

Hydrocarbon 2

B224:26 – B224:18

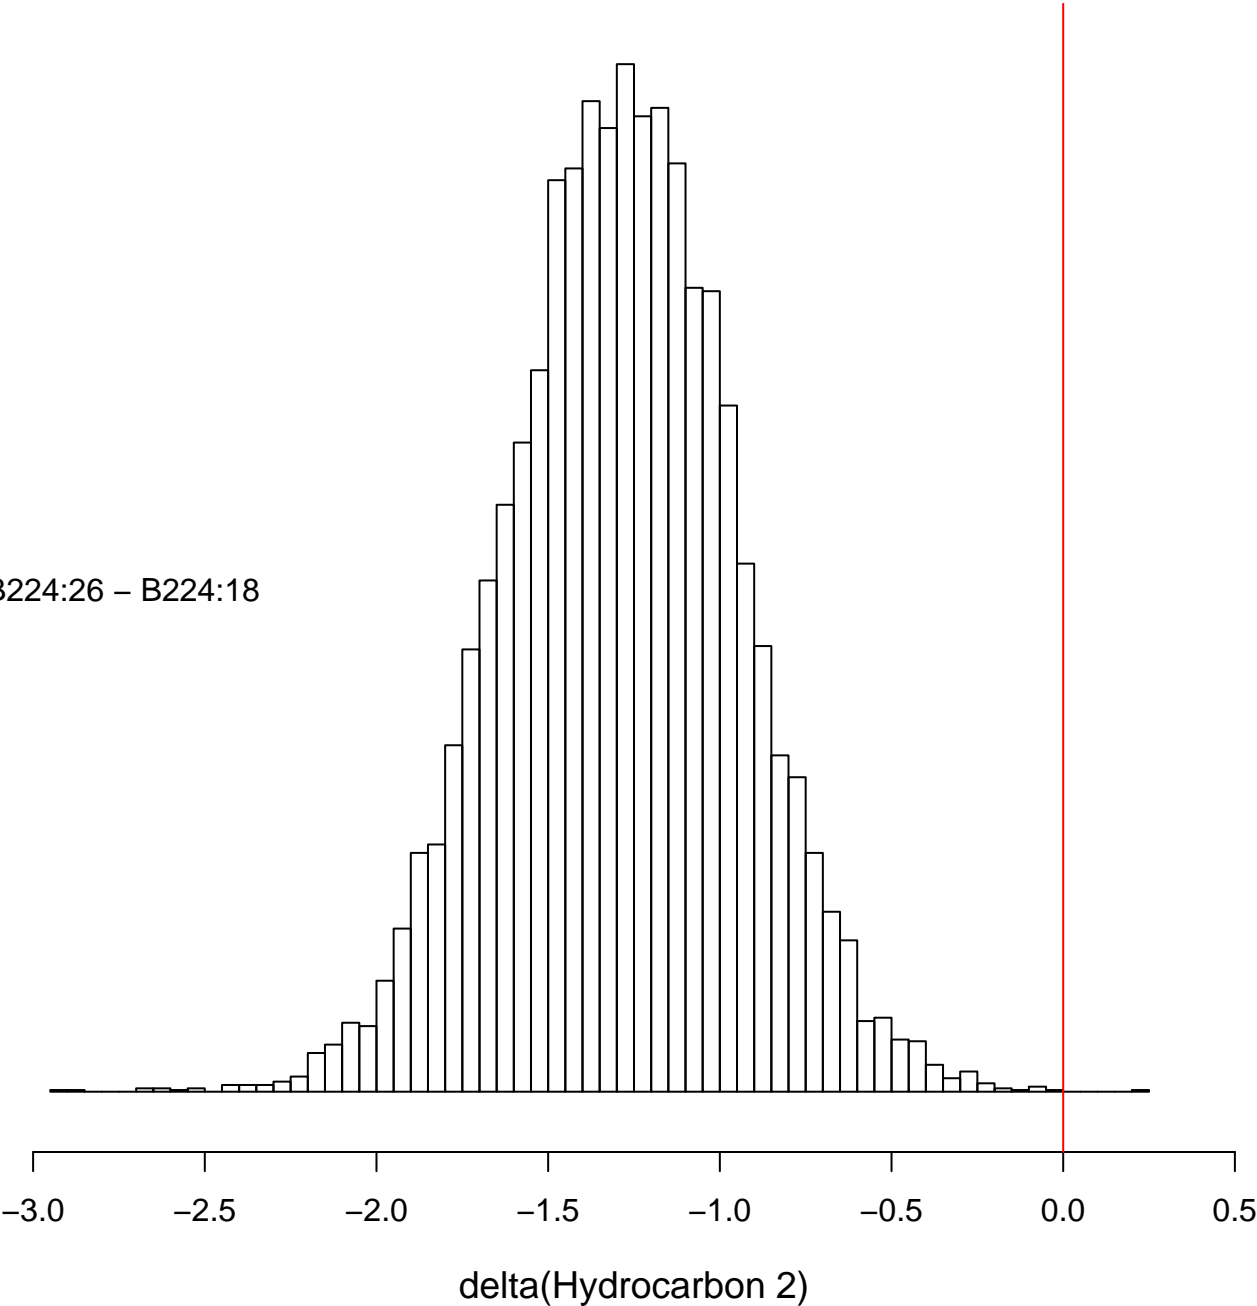

B224:26

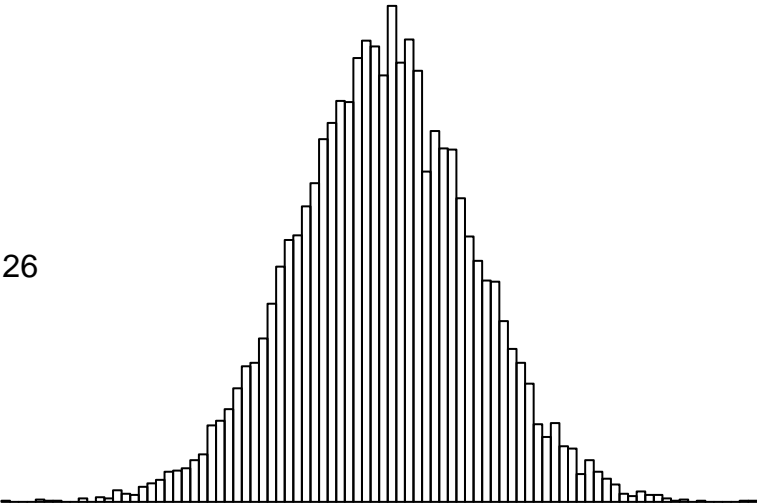

B224:18

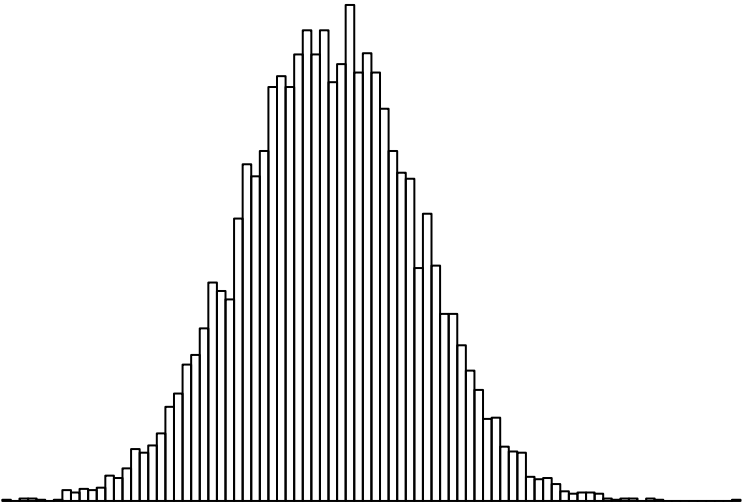

-11      -10      -9      -8      -7      -6      -5      -4

Hydrocarbon 3

B224:26 – B224:18

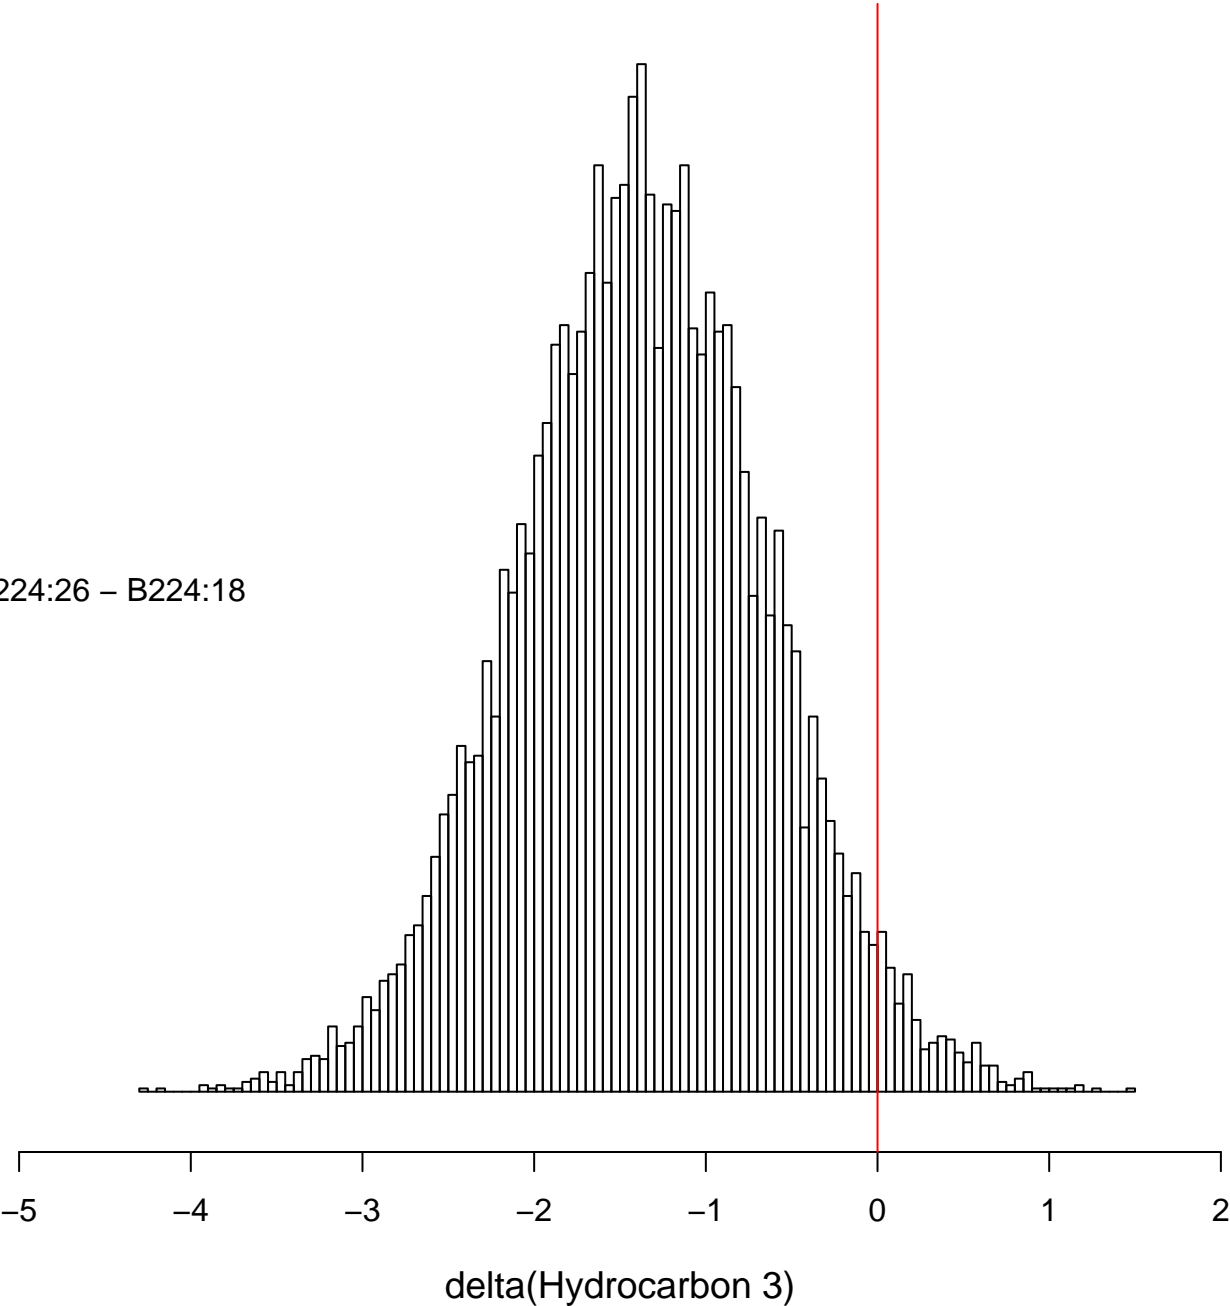

B224:26

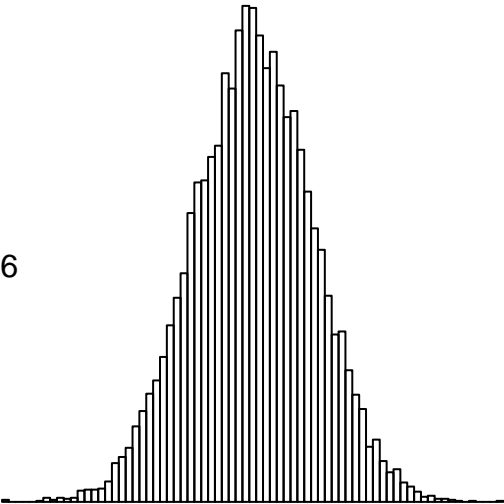

B224:18

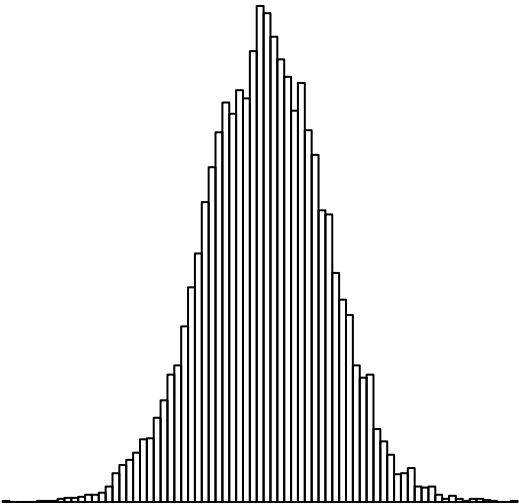

-10.0      -9.5      -9.0      -8.5      -8.0      -7.5      -7.0      -6.5

Hydrocarbon 4

B224:26 – B224:18

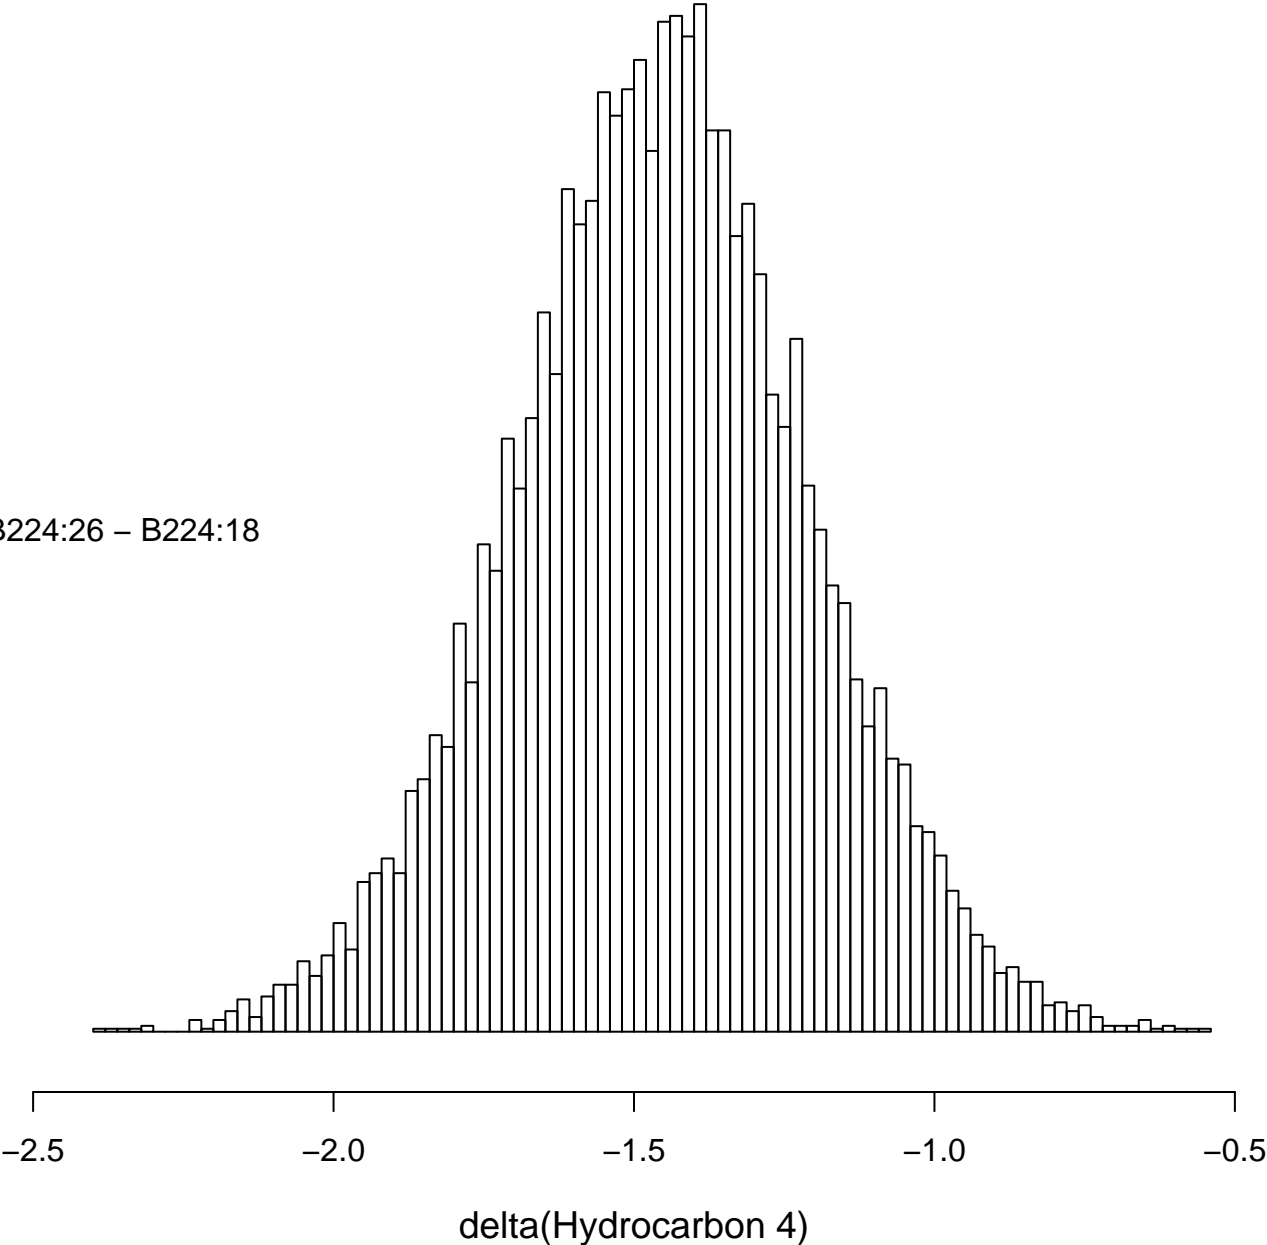

B224:26

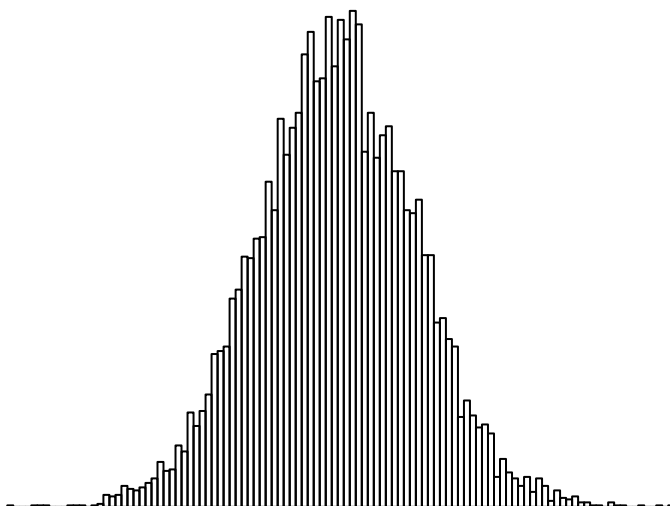

B224:18

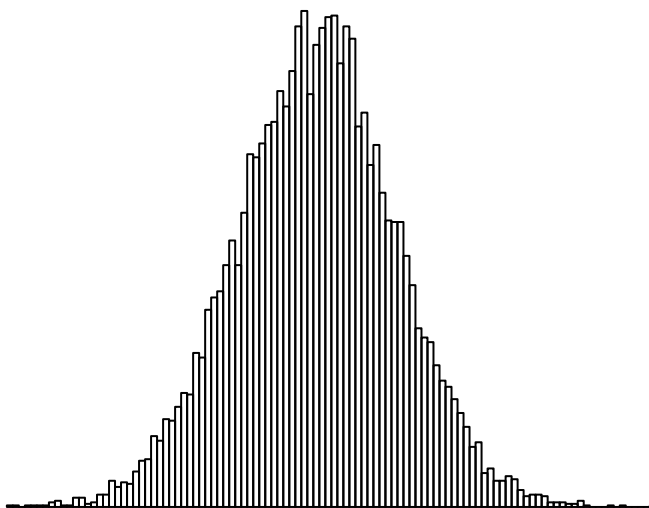

-10

-9

-8

-7

-6

Unidentified Metabolite 1

B224:26 – B224:18

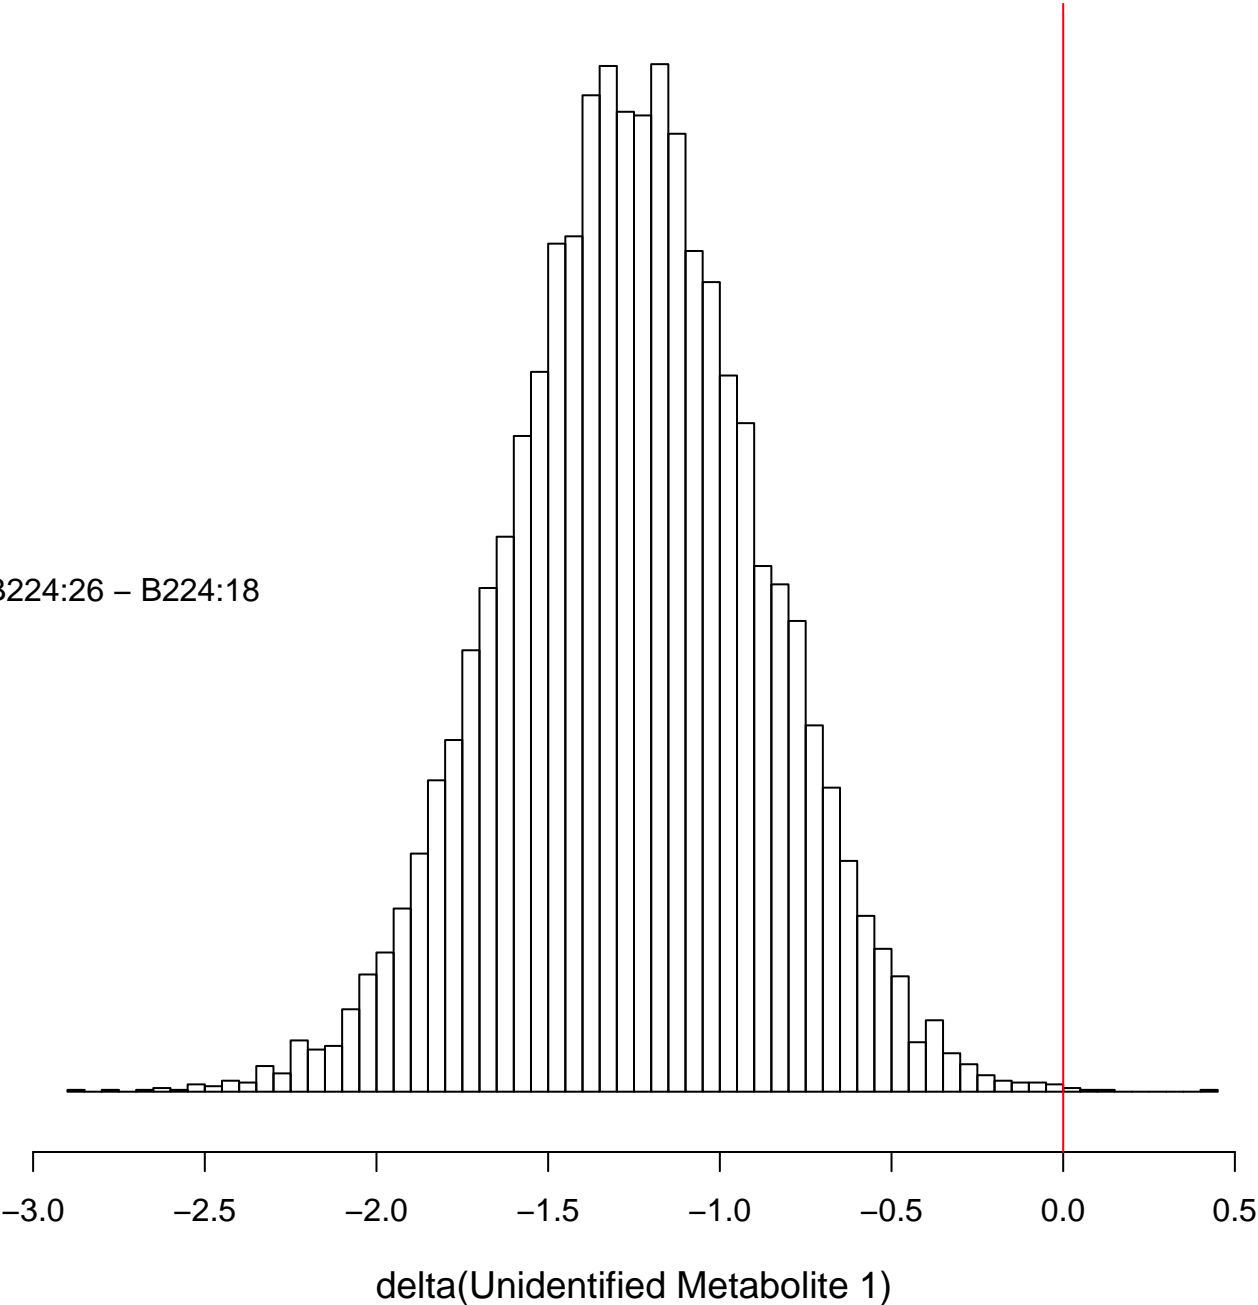



B224:26

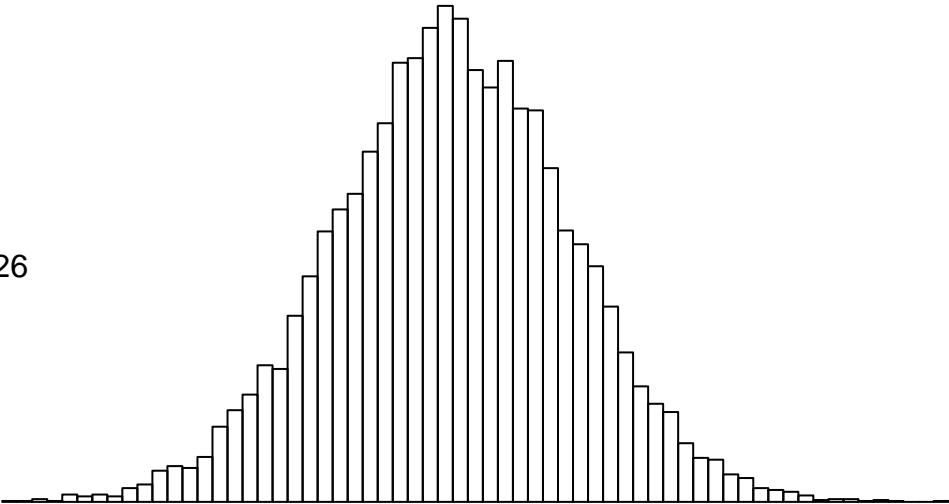

B224:18

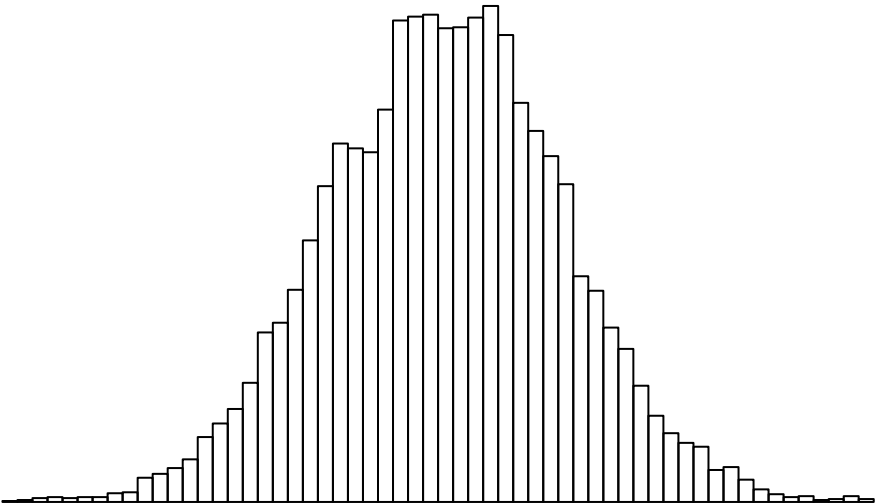

-10

-9

-8

-7

Unidentified Metabolite 2

B224:26 – B224:18

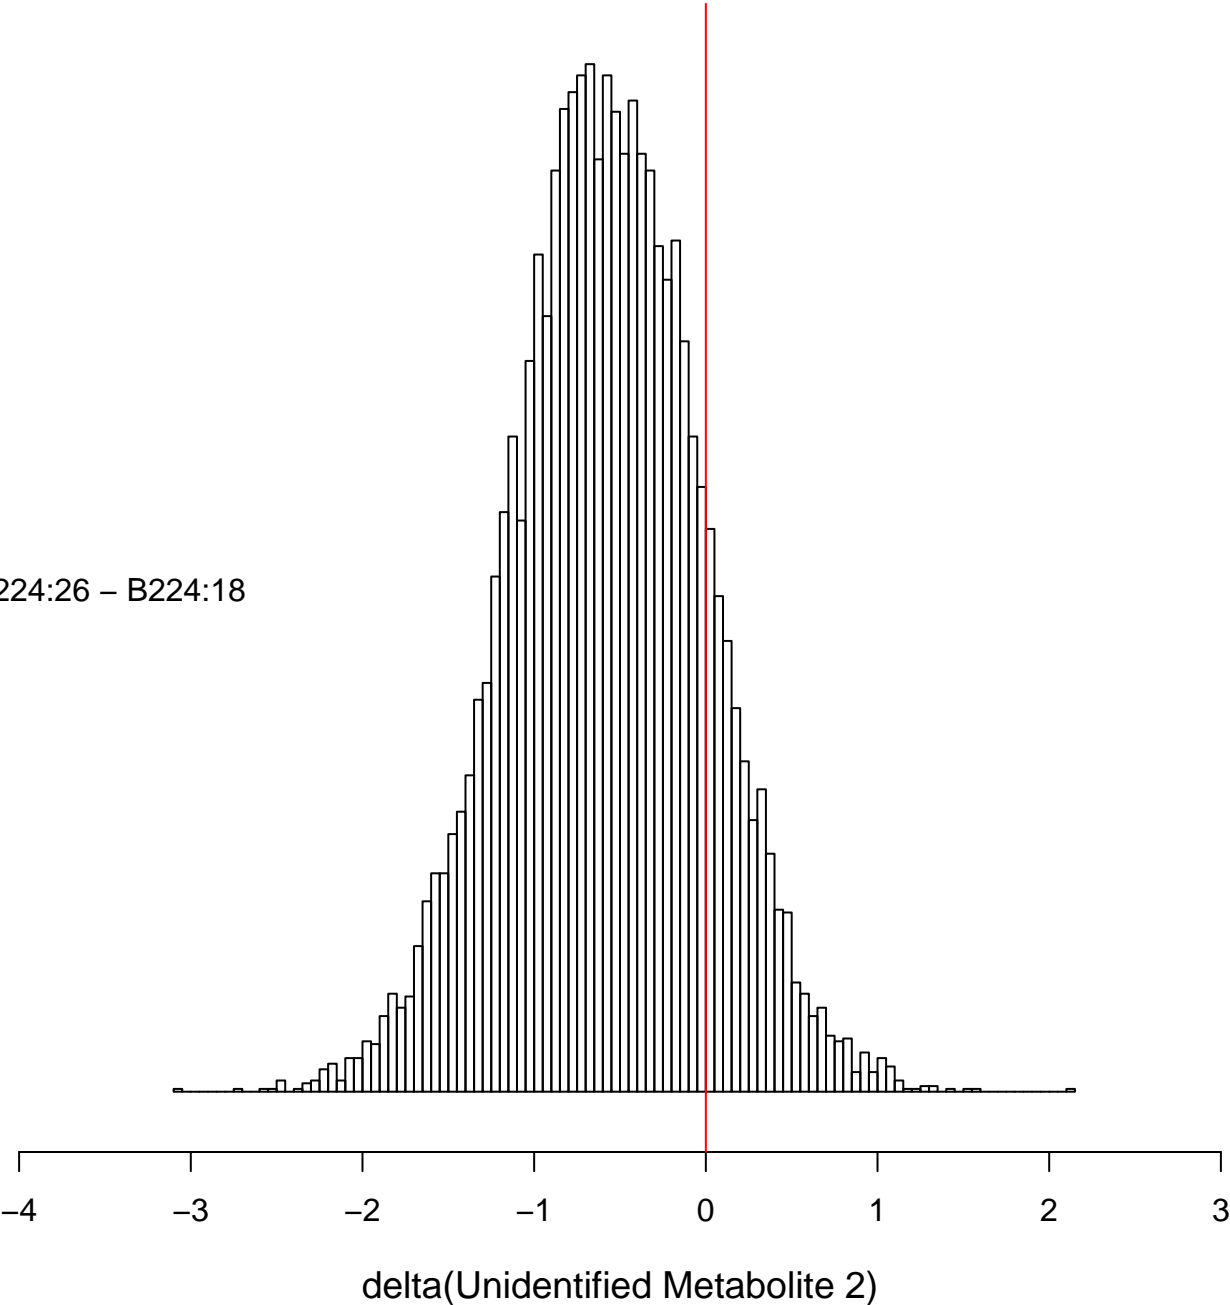

B224:26

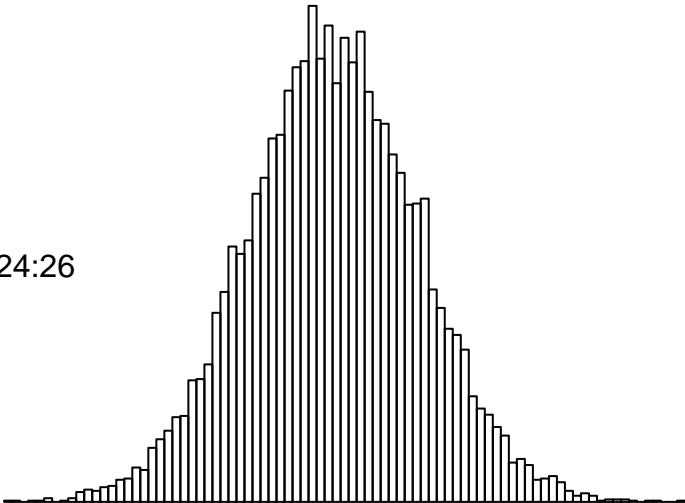

B224:18

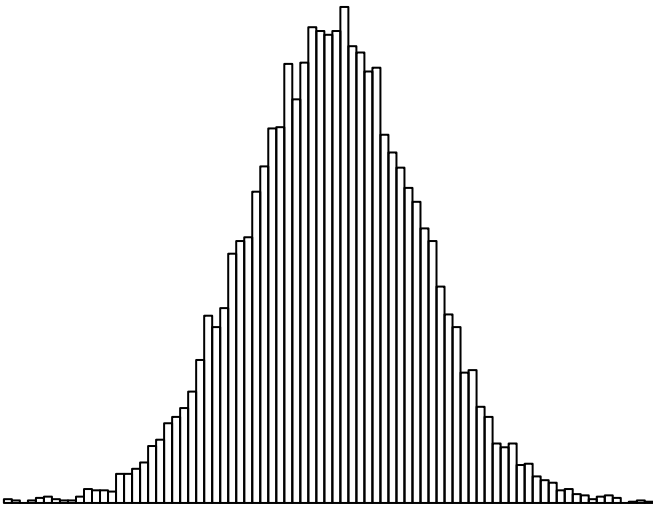

-11.0      -10.5      -10.0      -9.5      -9.0      -8.5      -8.0

Unidentified Metabolite 3

B224:26 – B224:18

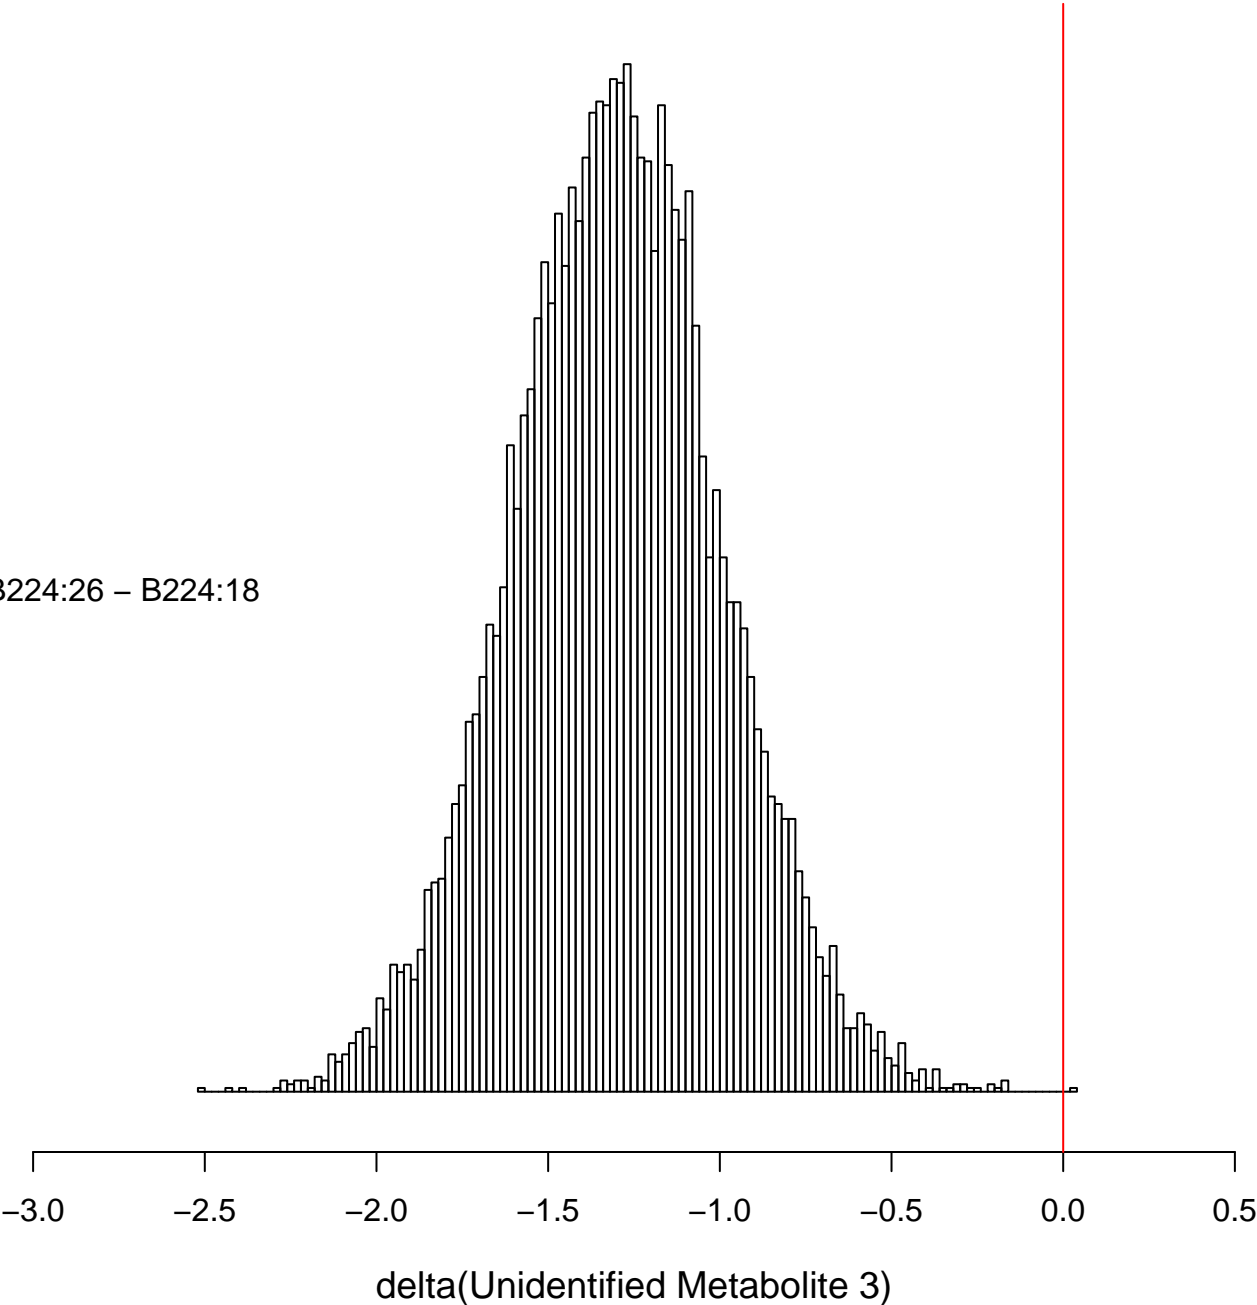

B224:26

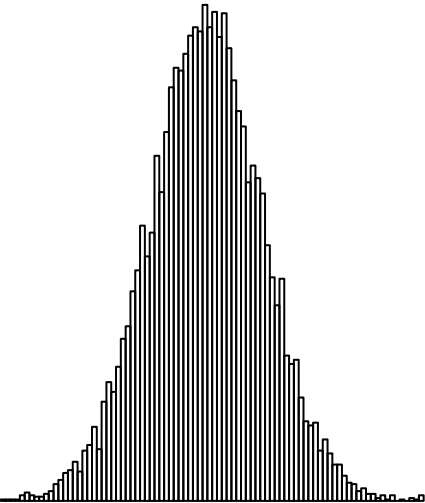

B224:18

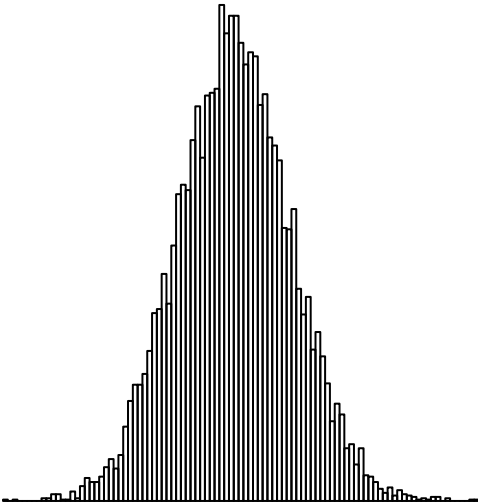

Unidentified Metabolite 4

B224:26 – B224:18

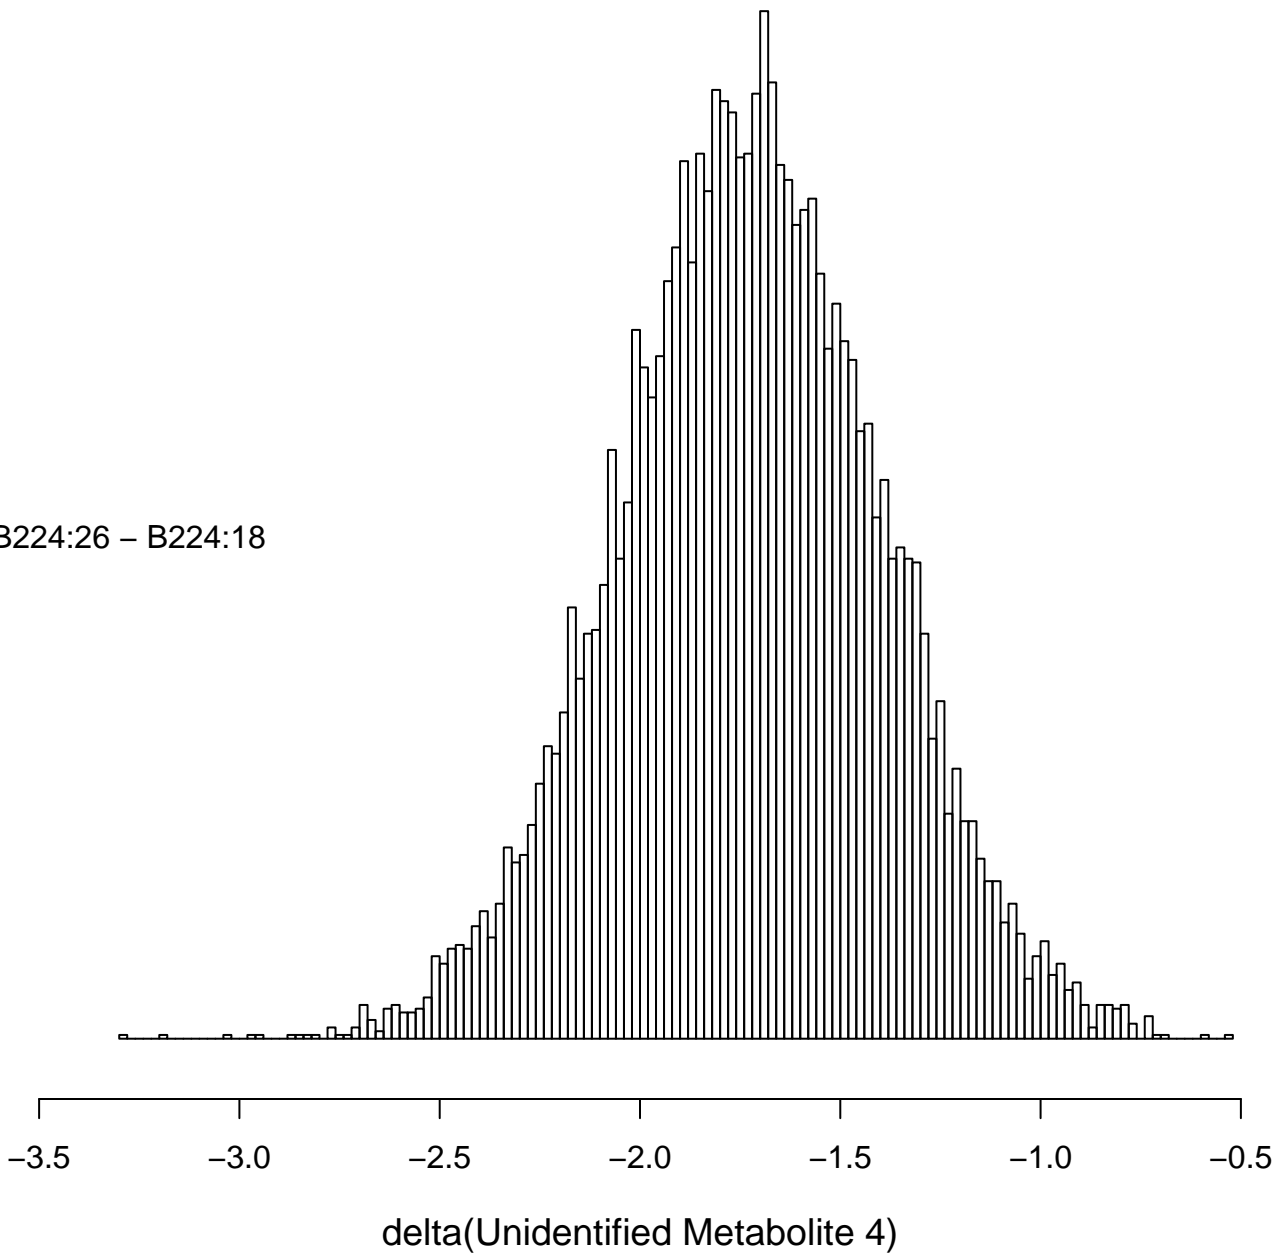

B224:26

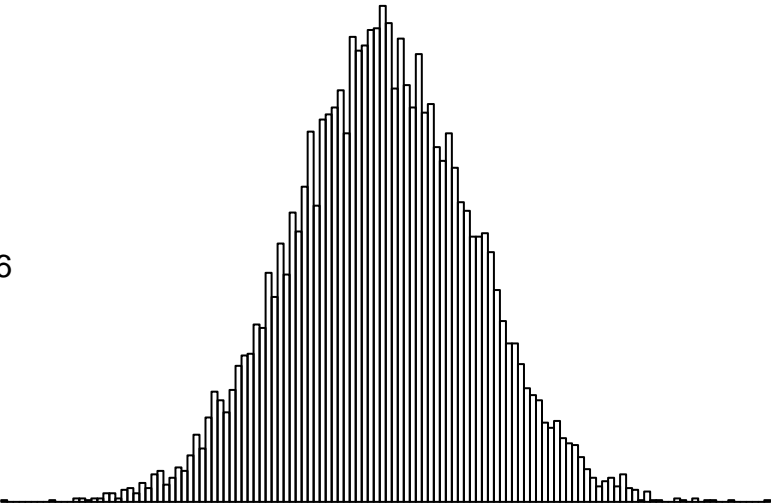

B224:18

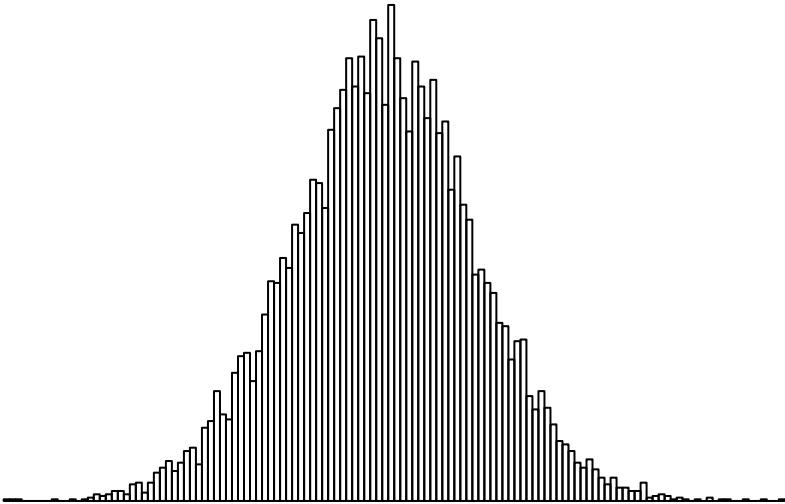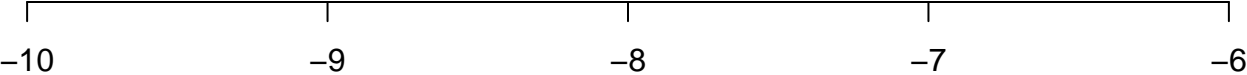

Unidentified Metabolite 5

B224:26 – B224:18

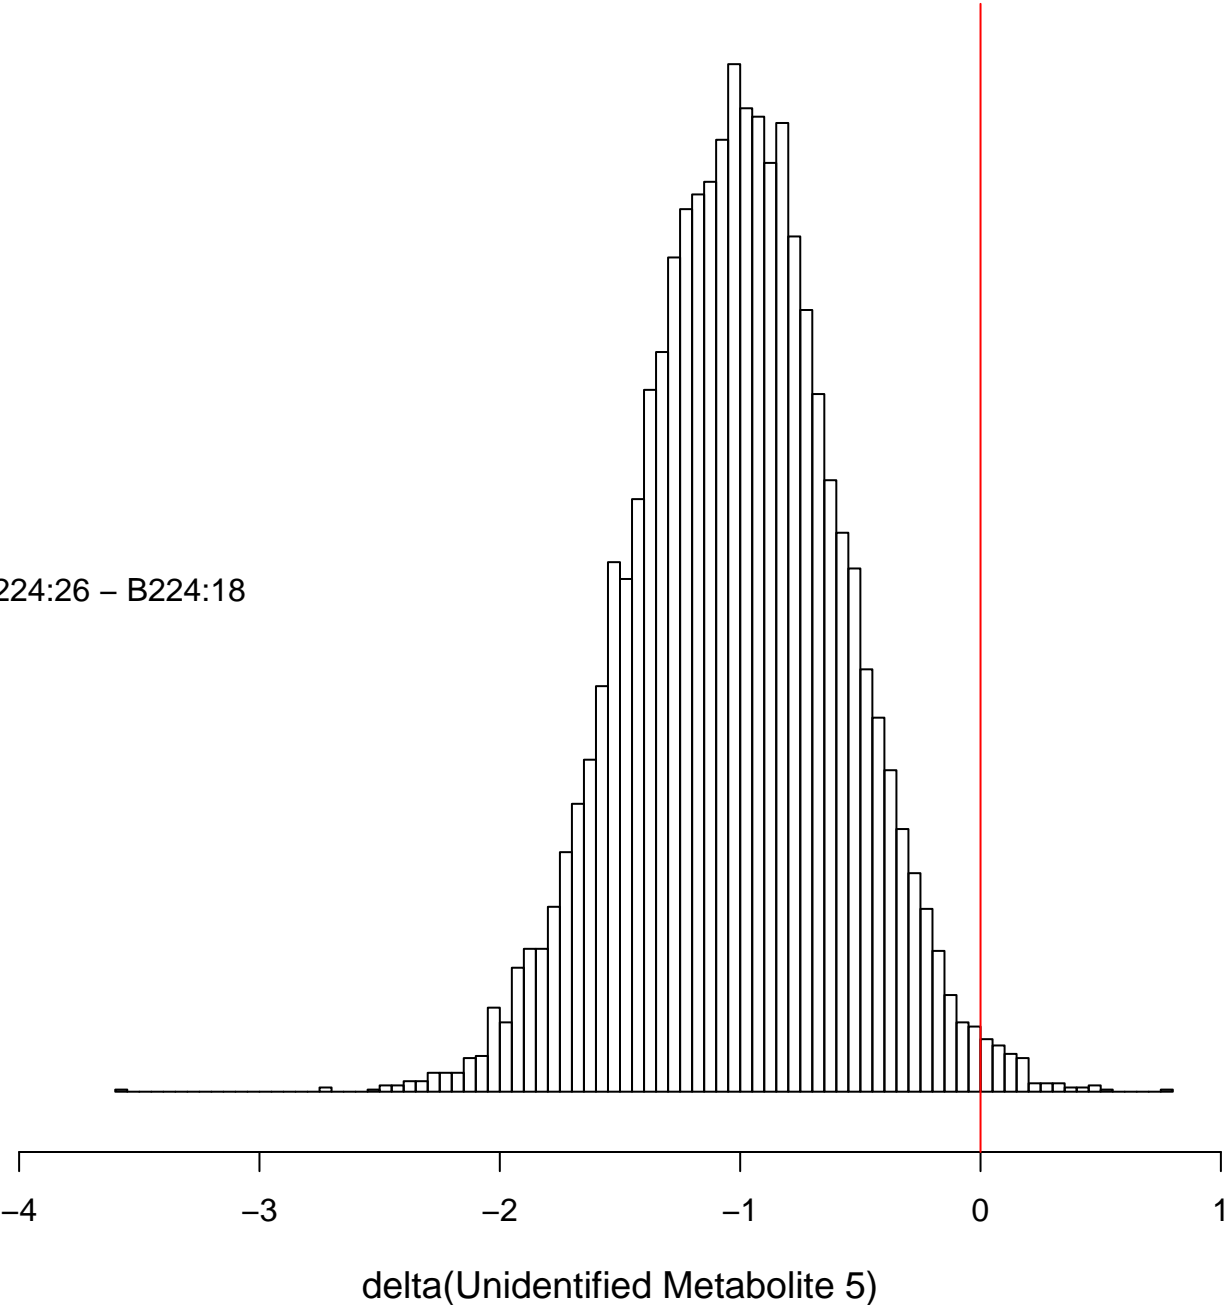



B224:26

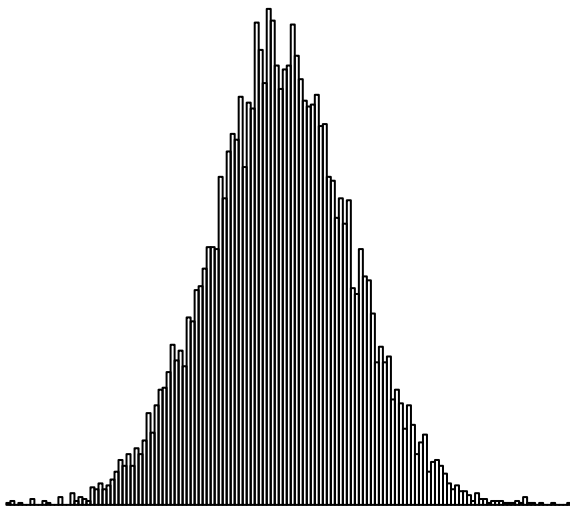

B224:18

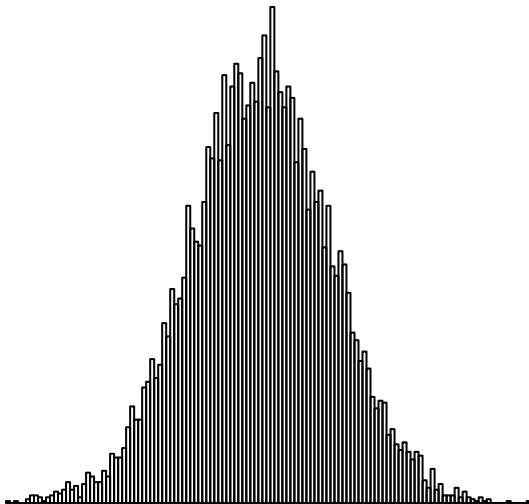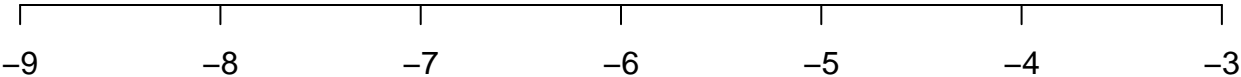

Unidentified Metabolite 6

B224:26 – B224:18

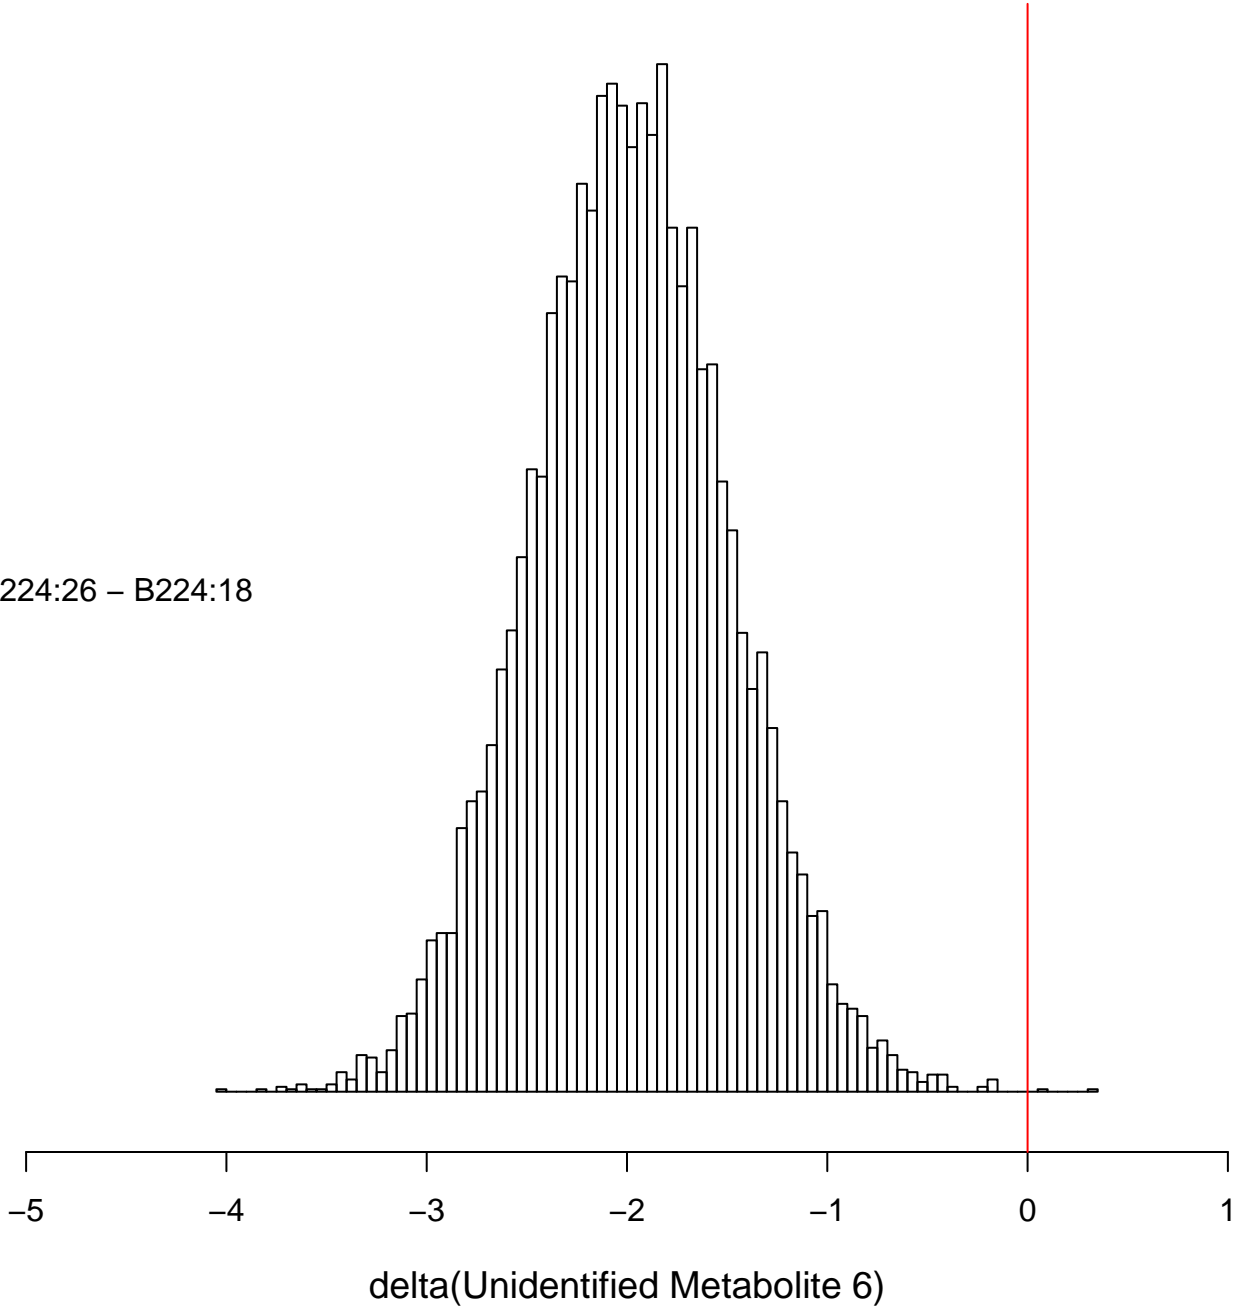

B224:26

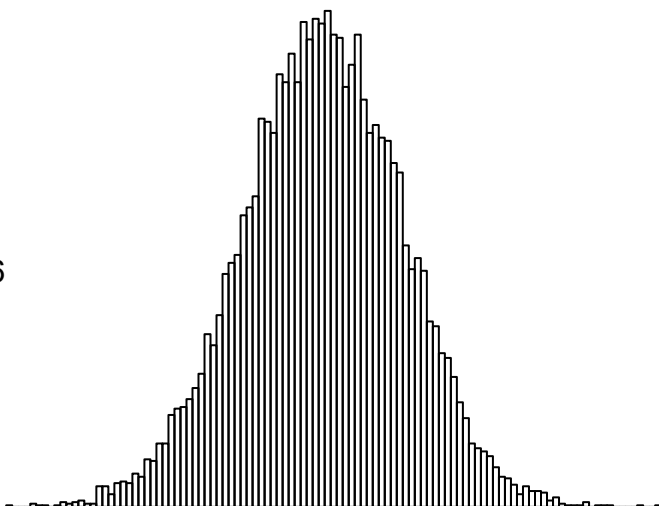

B224:18

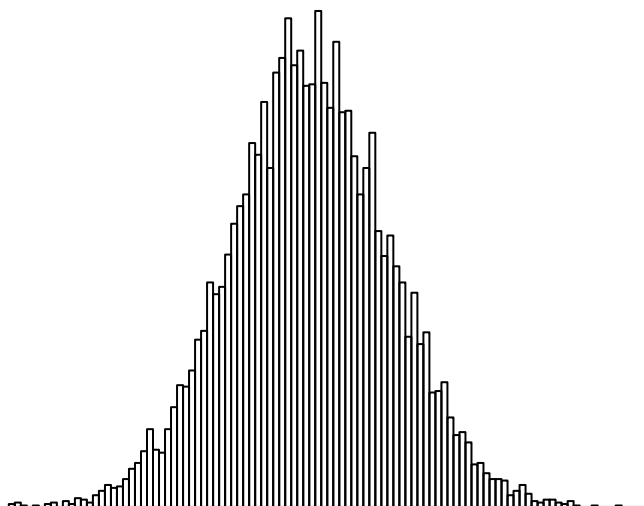

-9

-8

-7

-6

-5

Unidentified Metabolite 7

B224:26 – B224:18

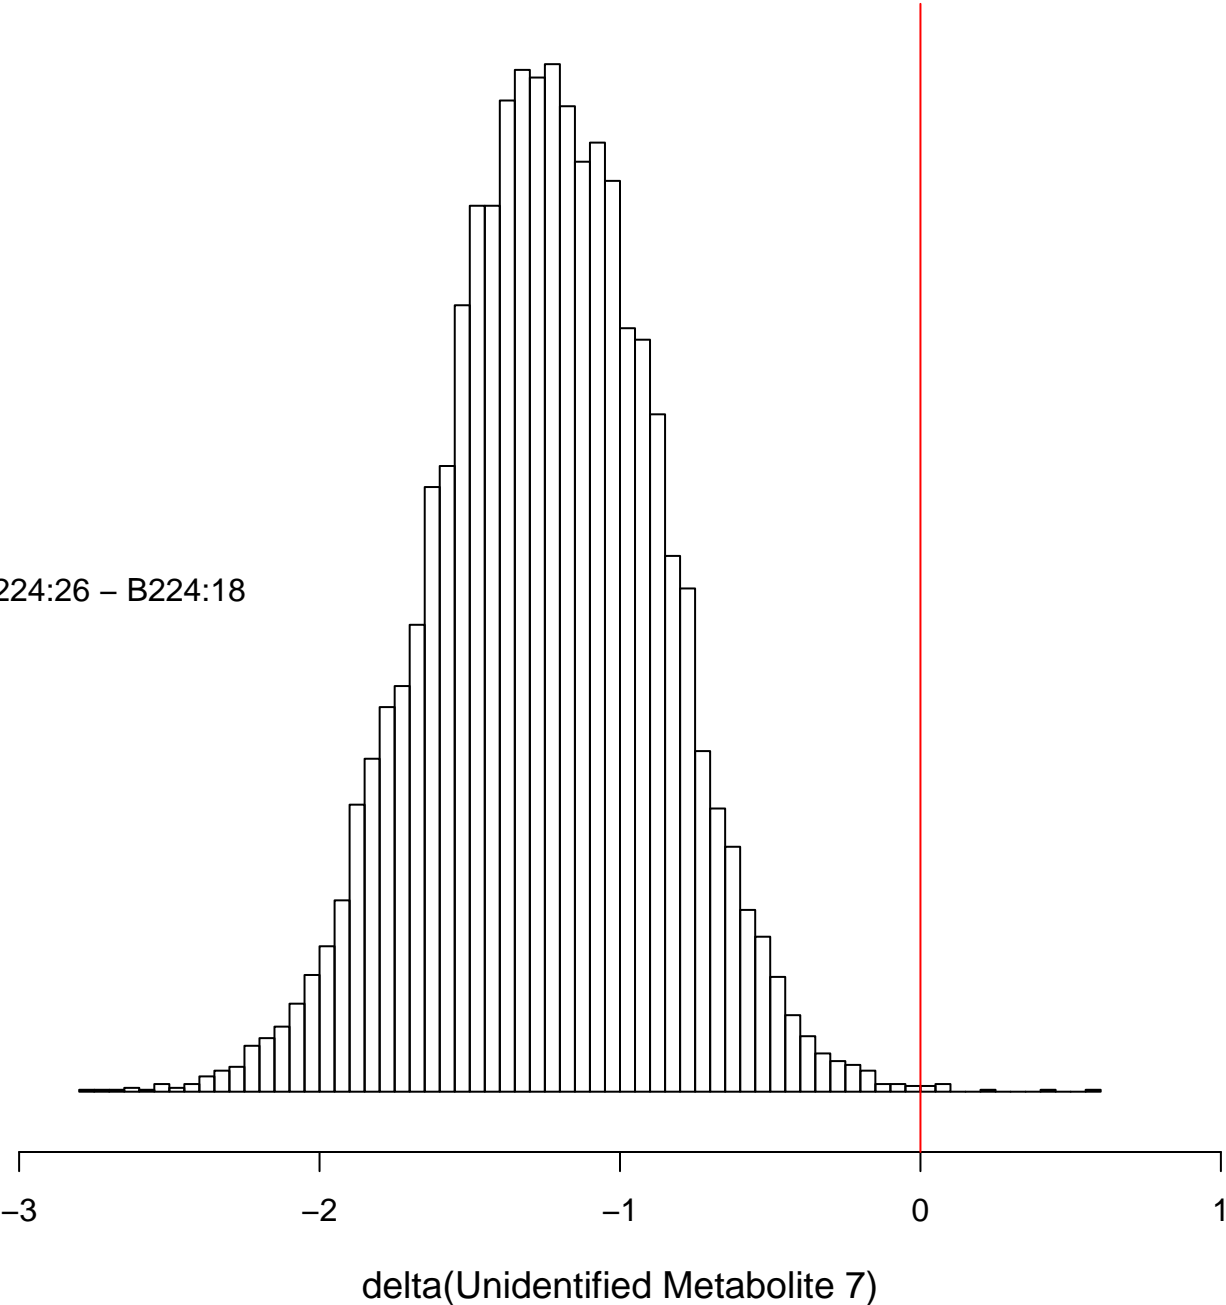

B224:26

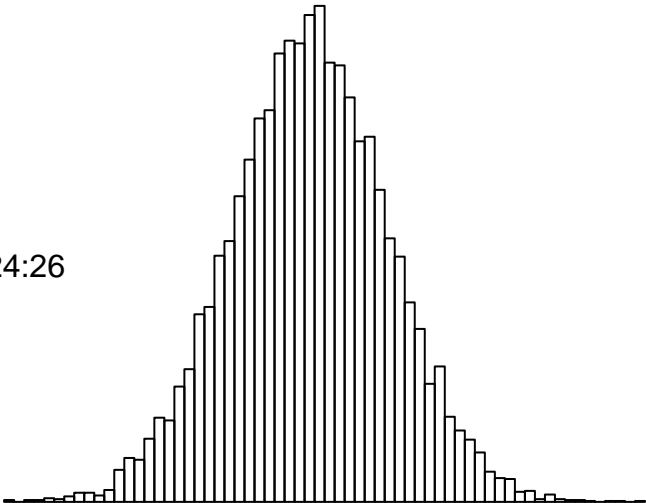

B224:18

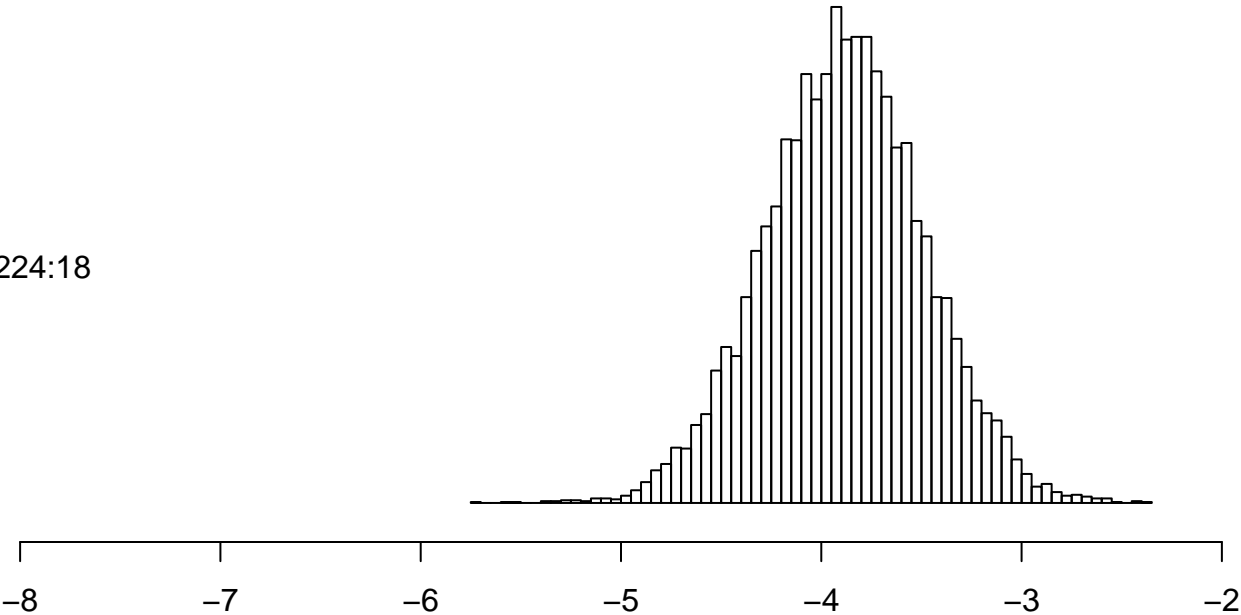

Unidentified Metabolite 8

B224:26 – B224:18

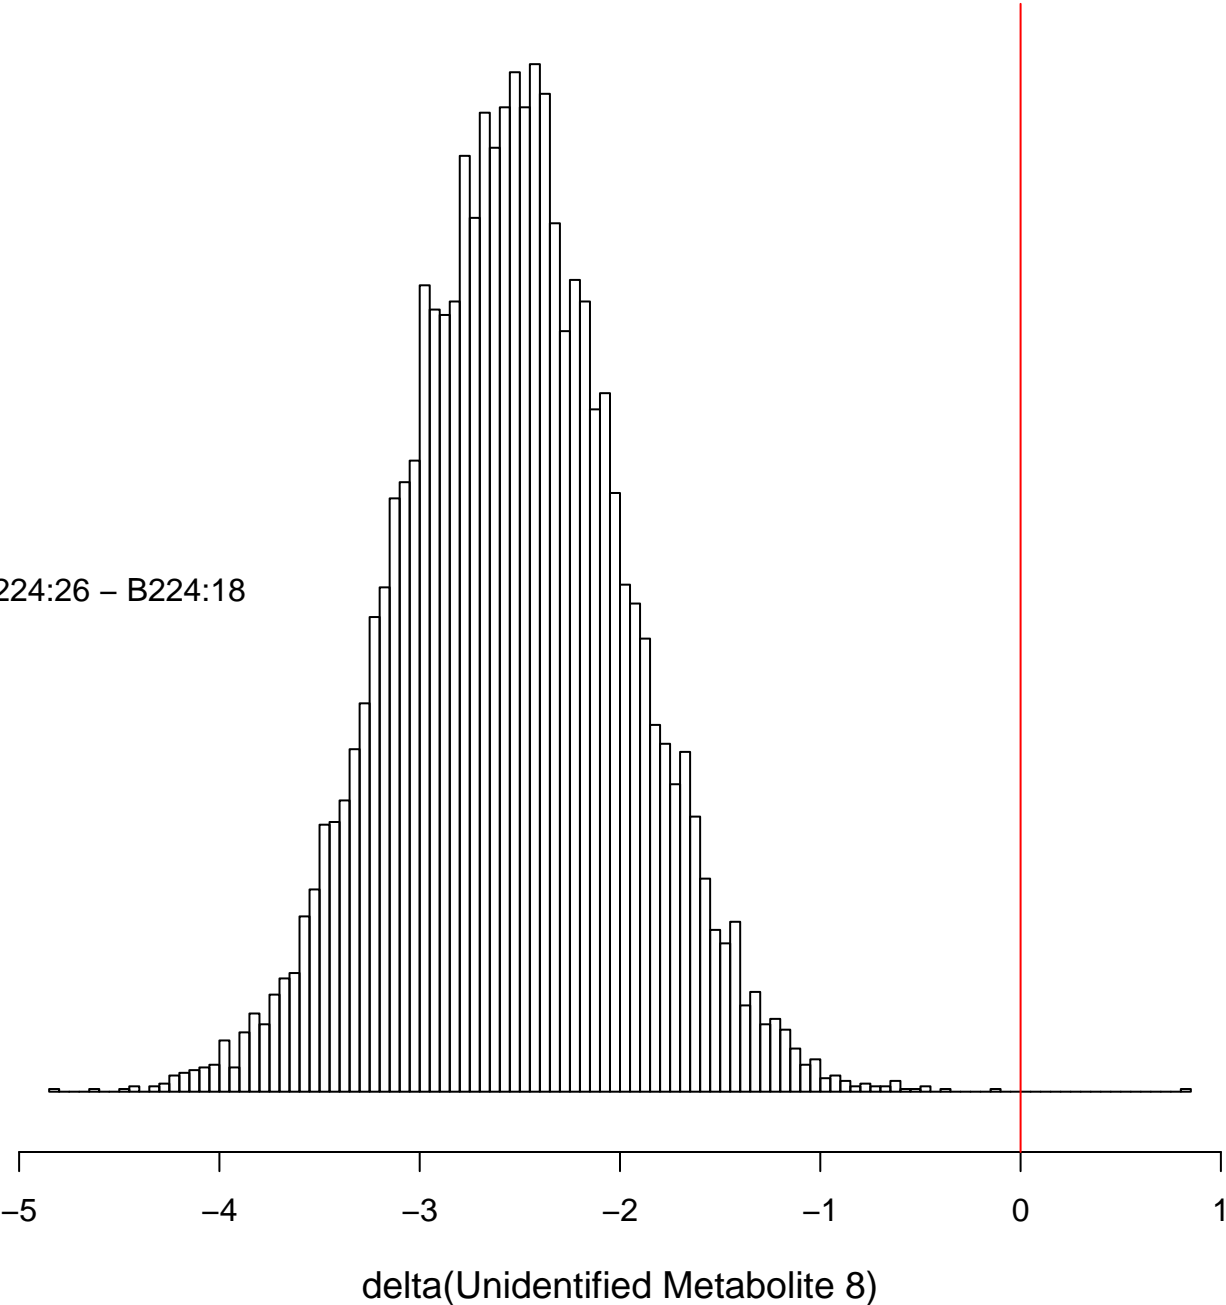

B224:26

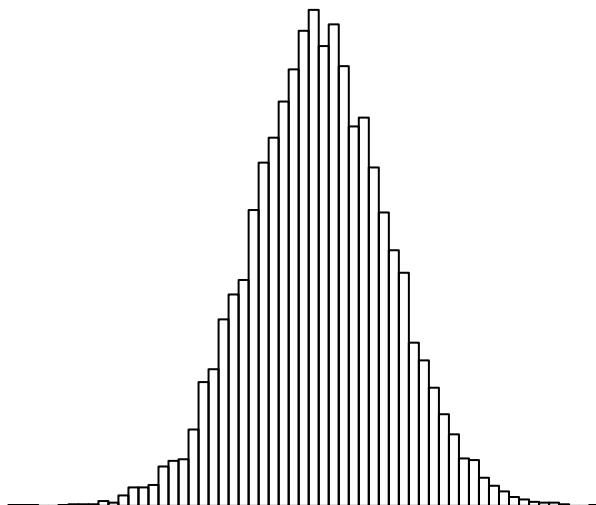

B224:18

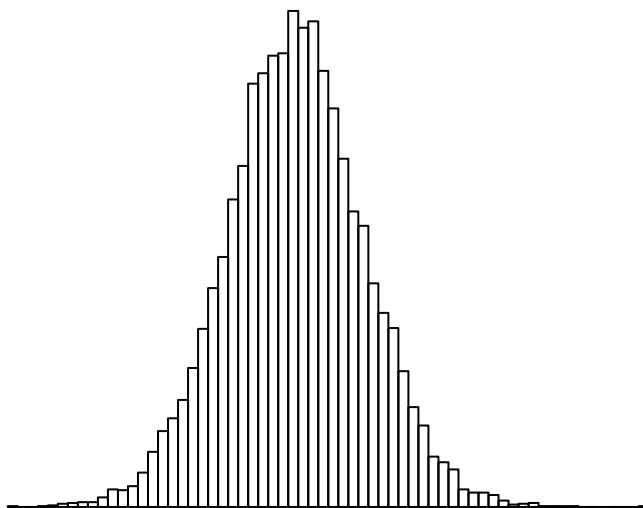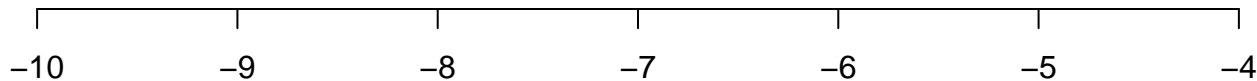

Unidentified Metabolite 9

B224:26 – B224:18

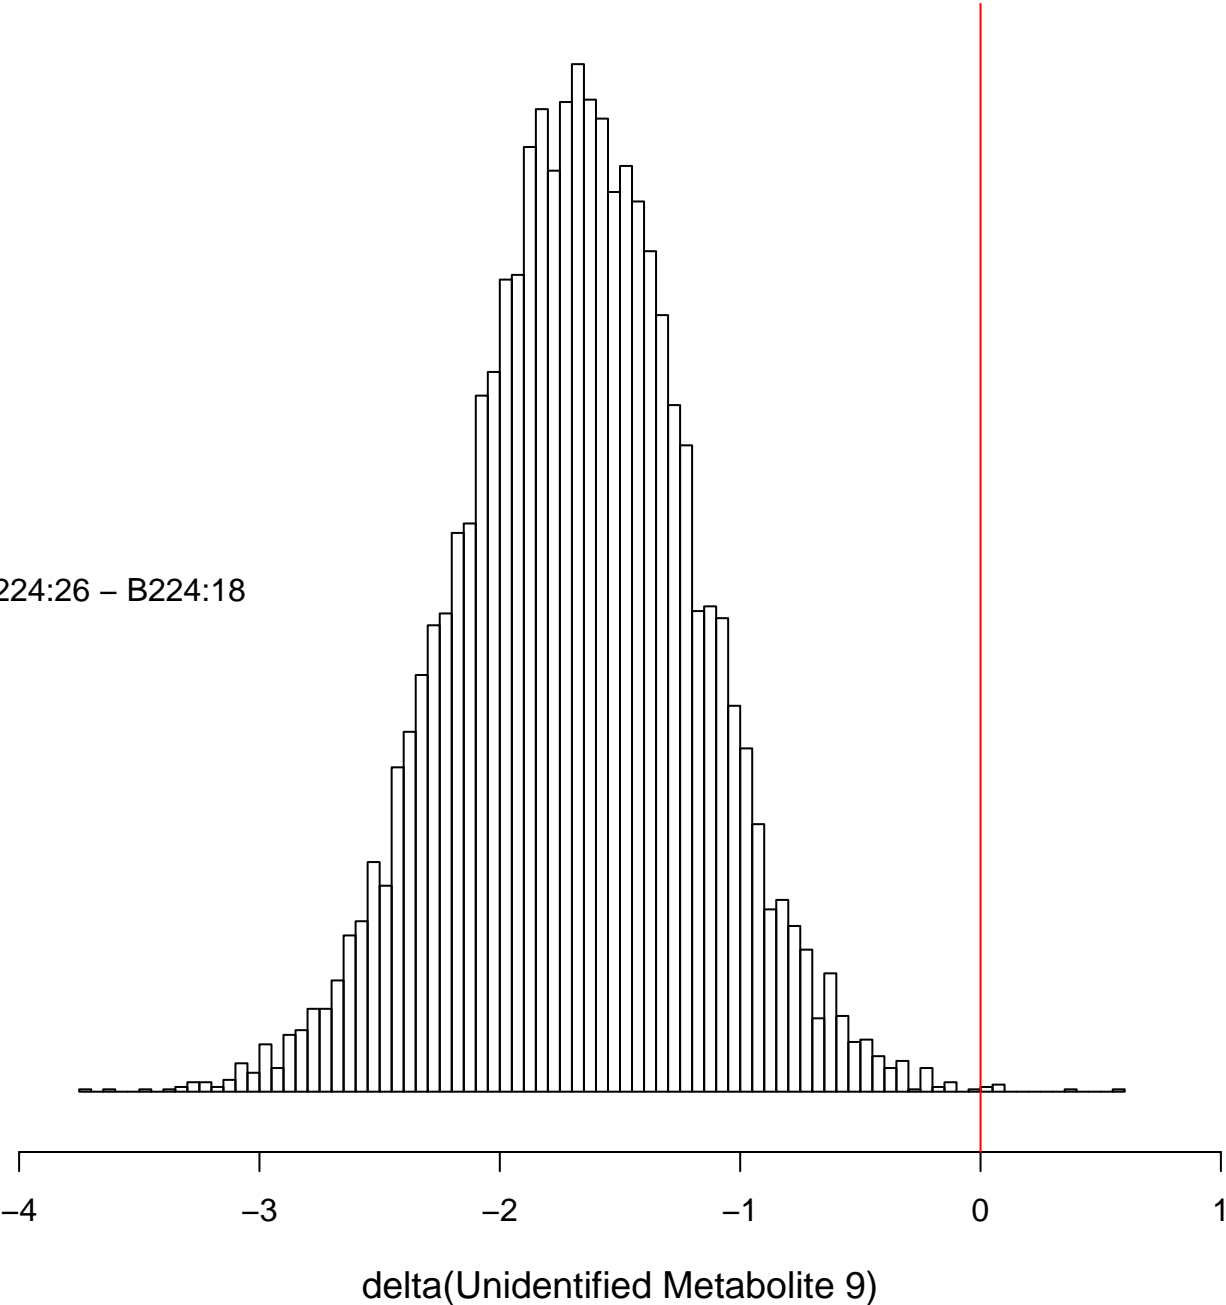



B224:26

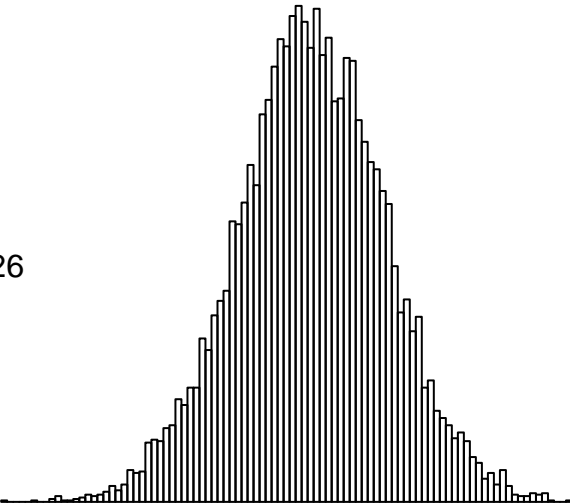

B224:18

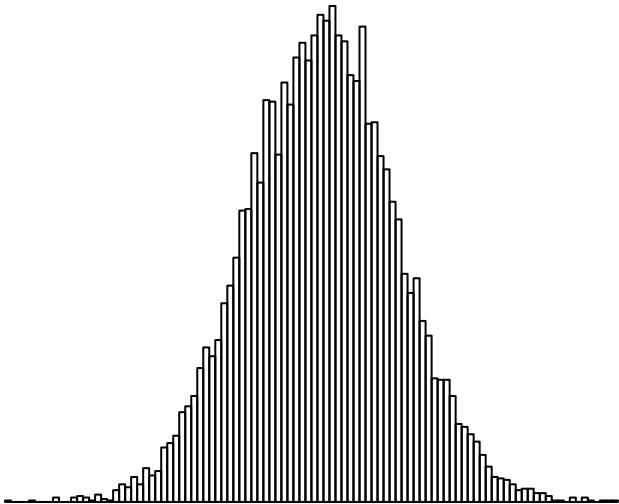

-10                      -9                      -8                      -7                      -6

Unidentified Metabolite 10

B224:26 – B224:18

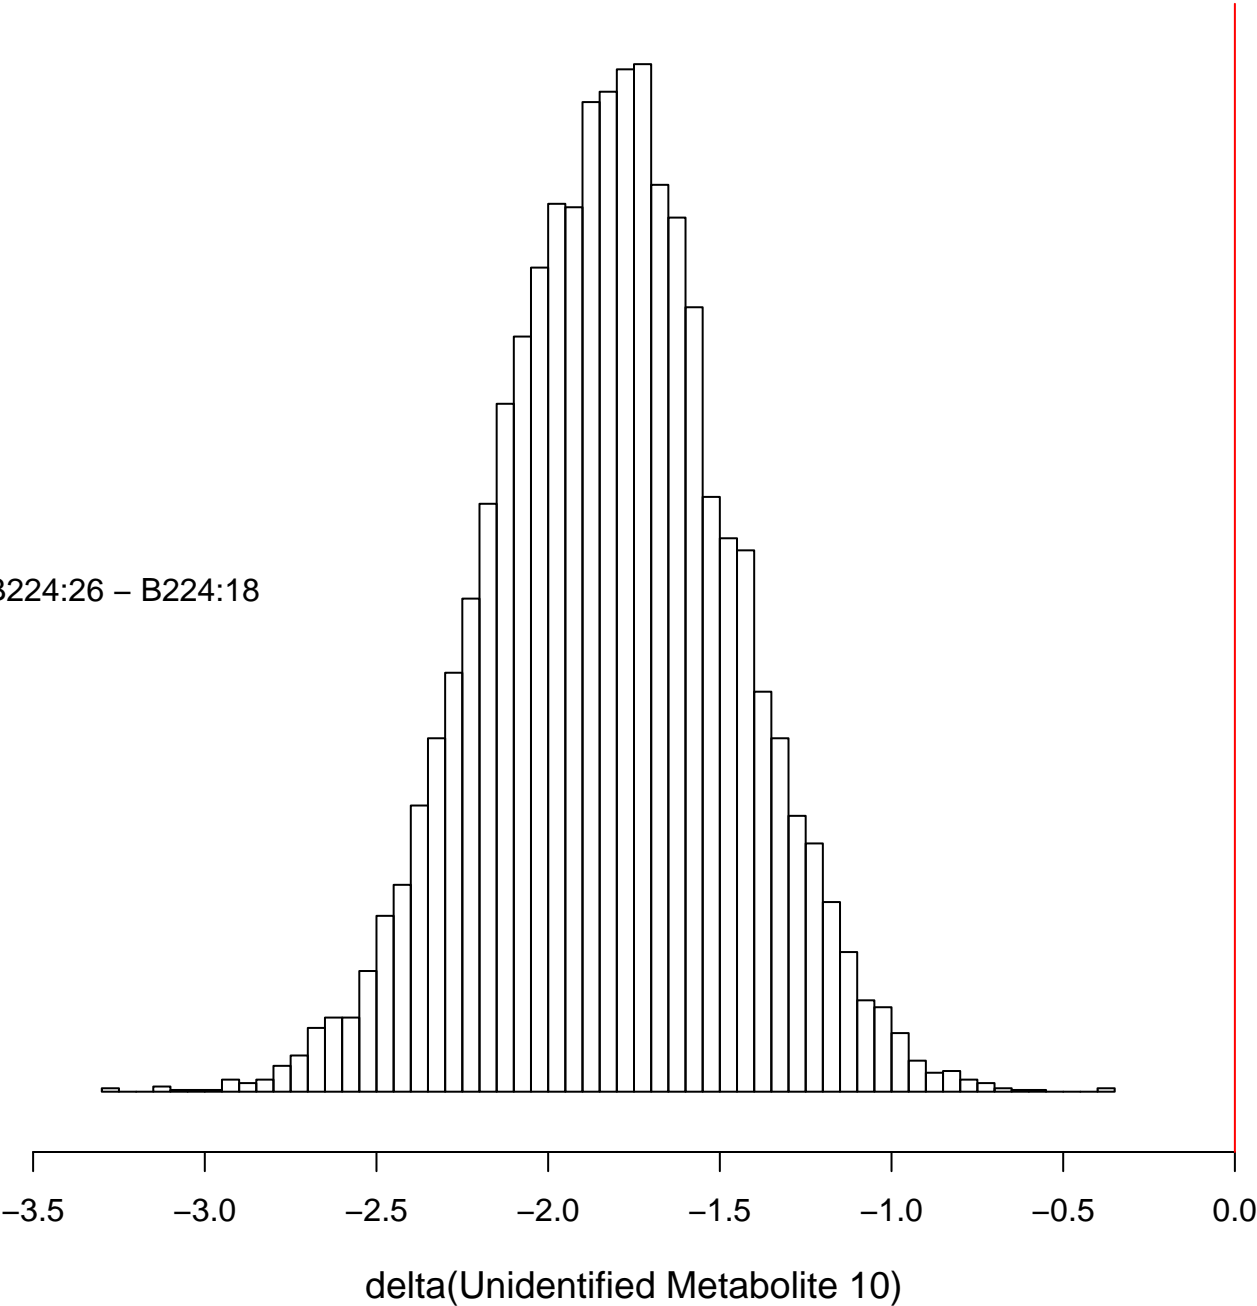

B224:26

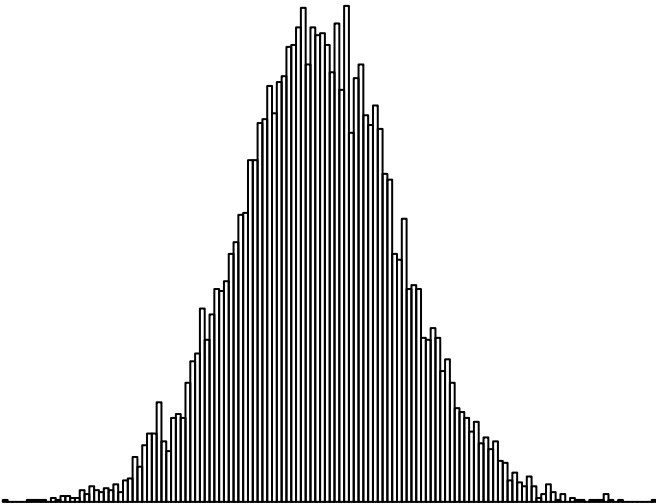

B224:18

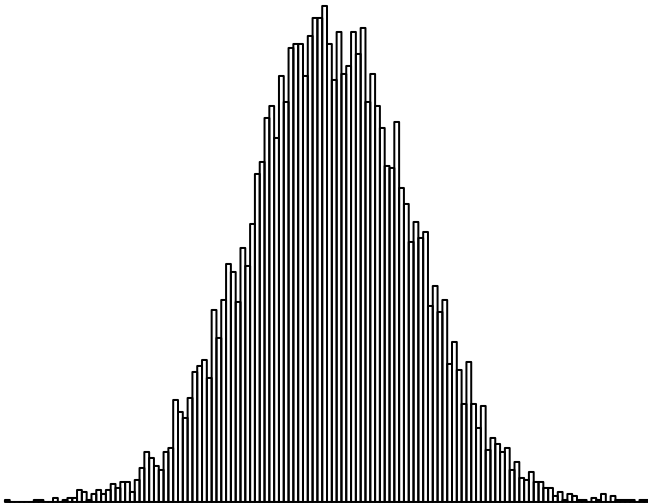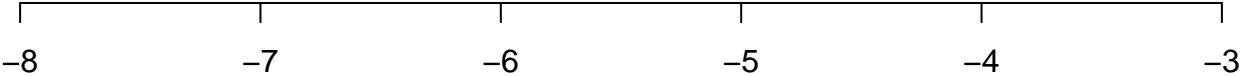

Unidentified Metabolite 11

B224:26 – B224:18

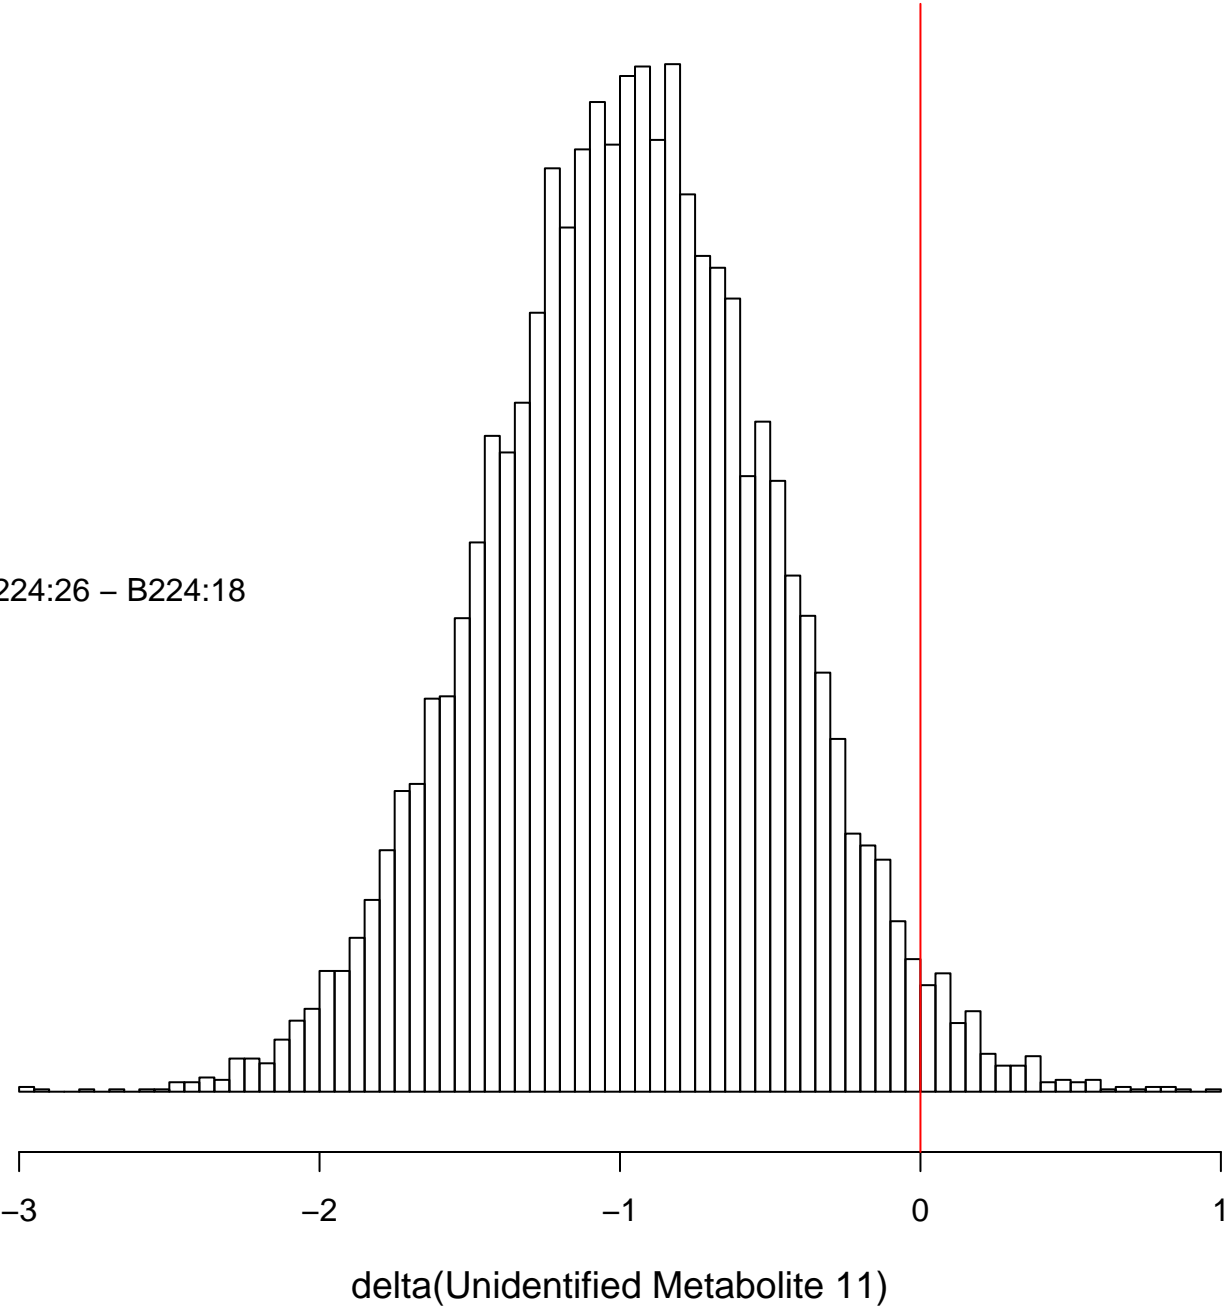

B224:26

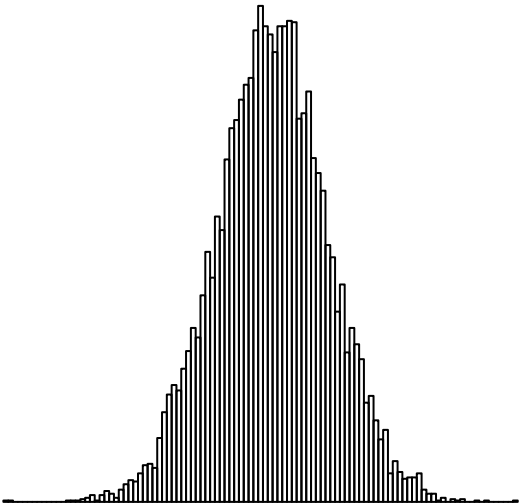

B224:18

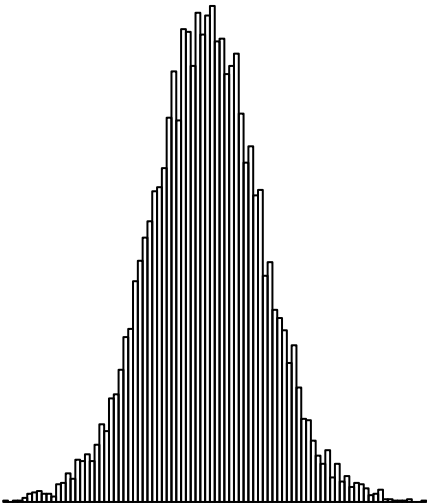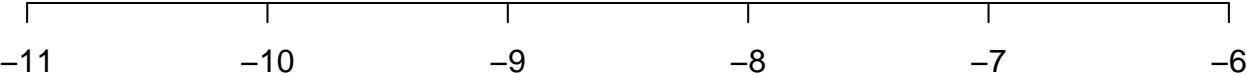

Unidentified Metabolite 12

B224:26 – B224:18

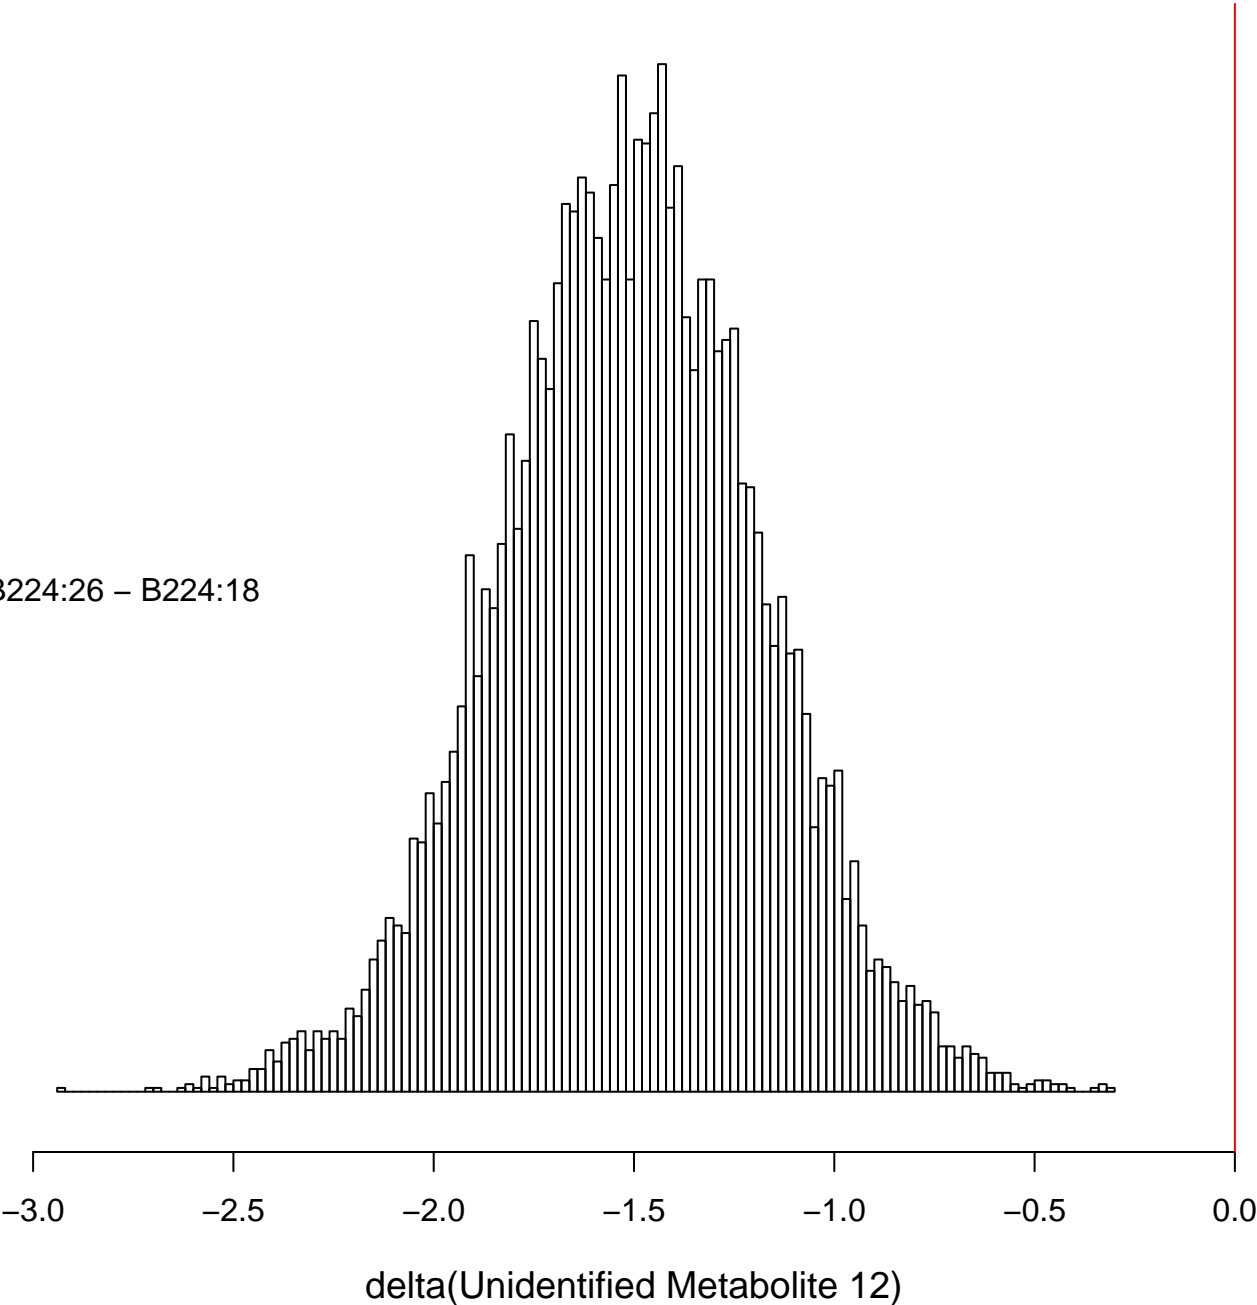

B224:26

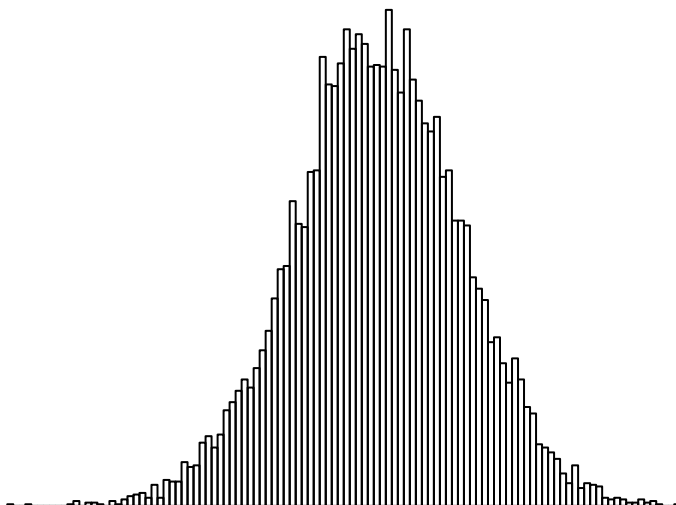

B224:18

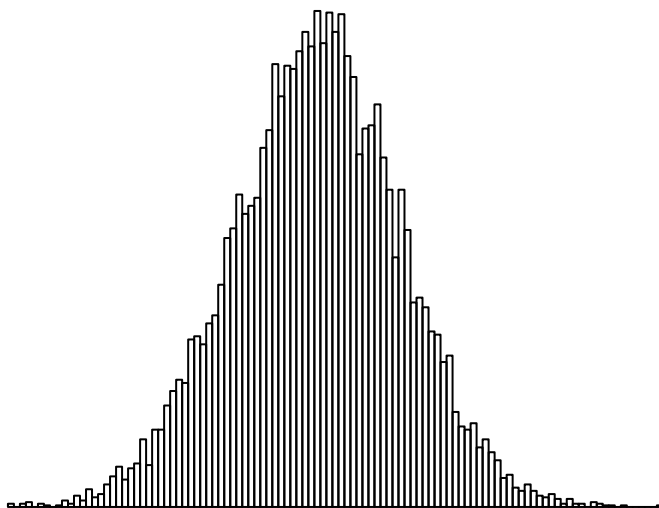

-10                      -9                      -8                      -7                      -6

Unidentified Metabolite 14

B224:26 – B224:18

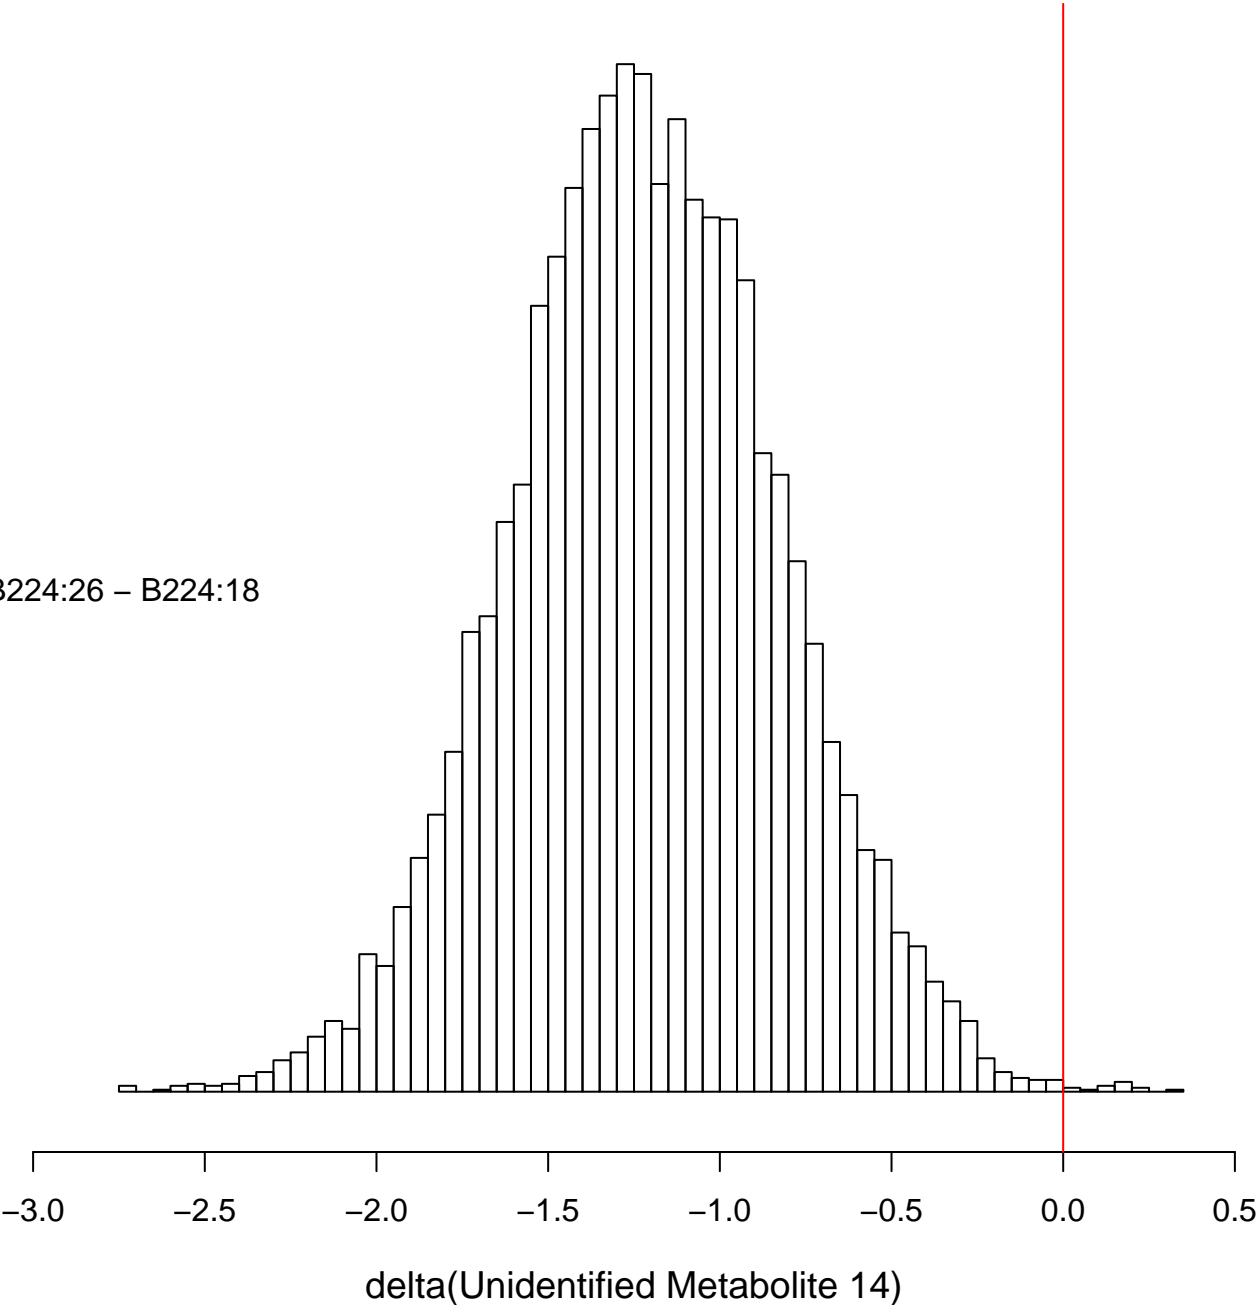



B224:26

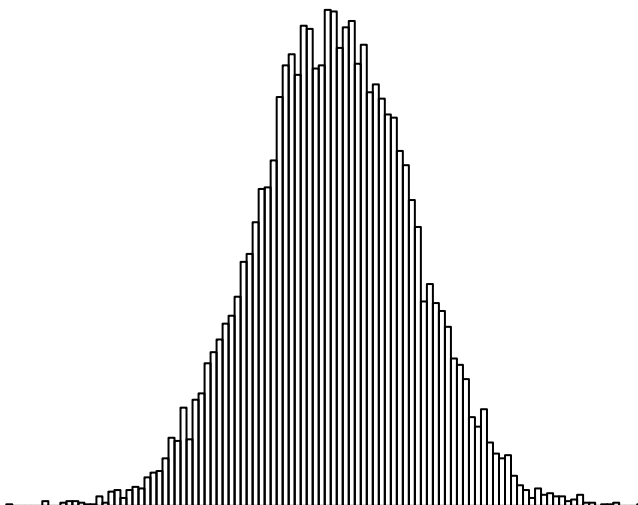

B224:18

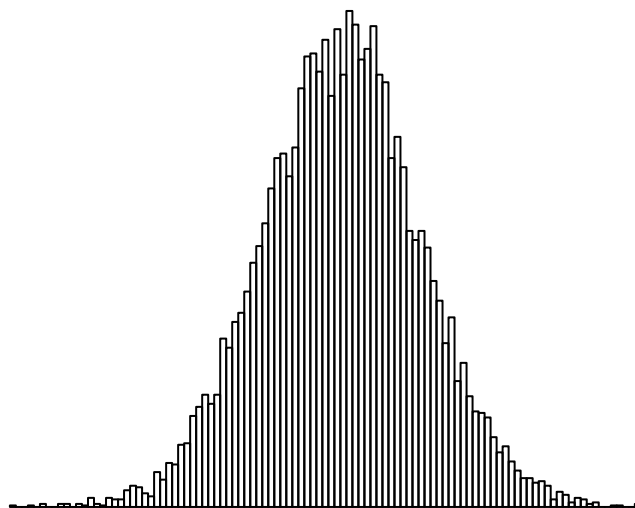

-9

-8

-7

-6

Unidentified Metabolite 16

B224:26 – B224:18

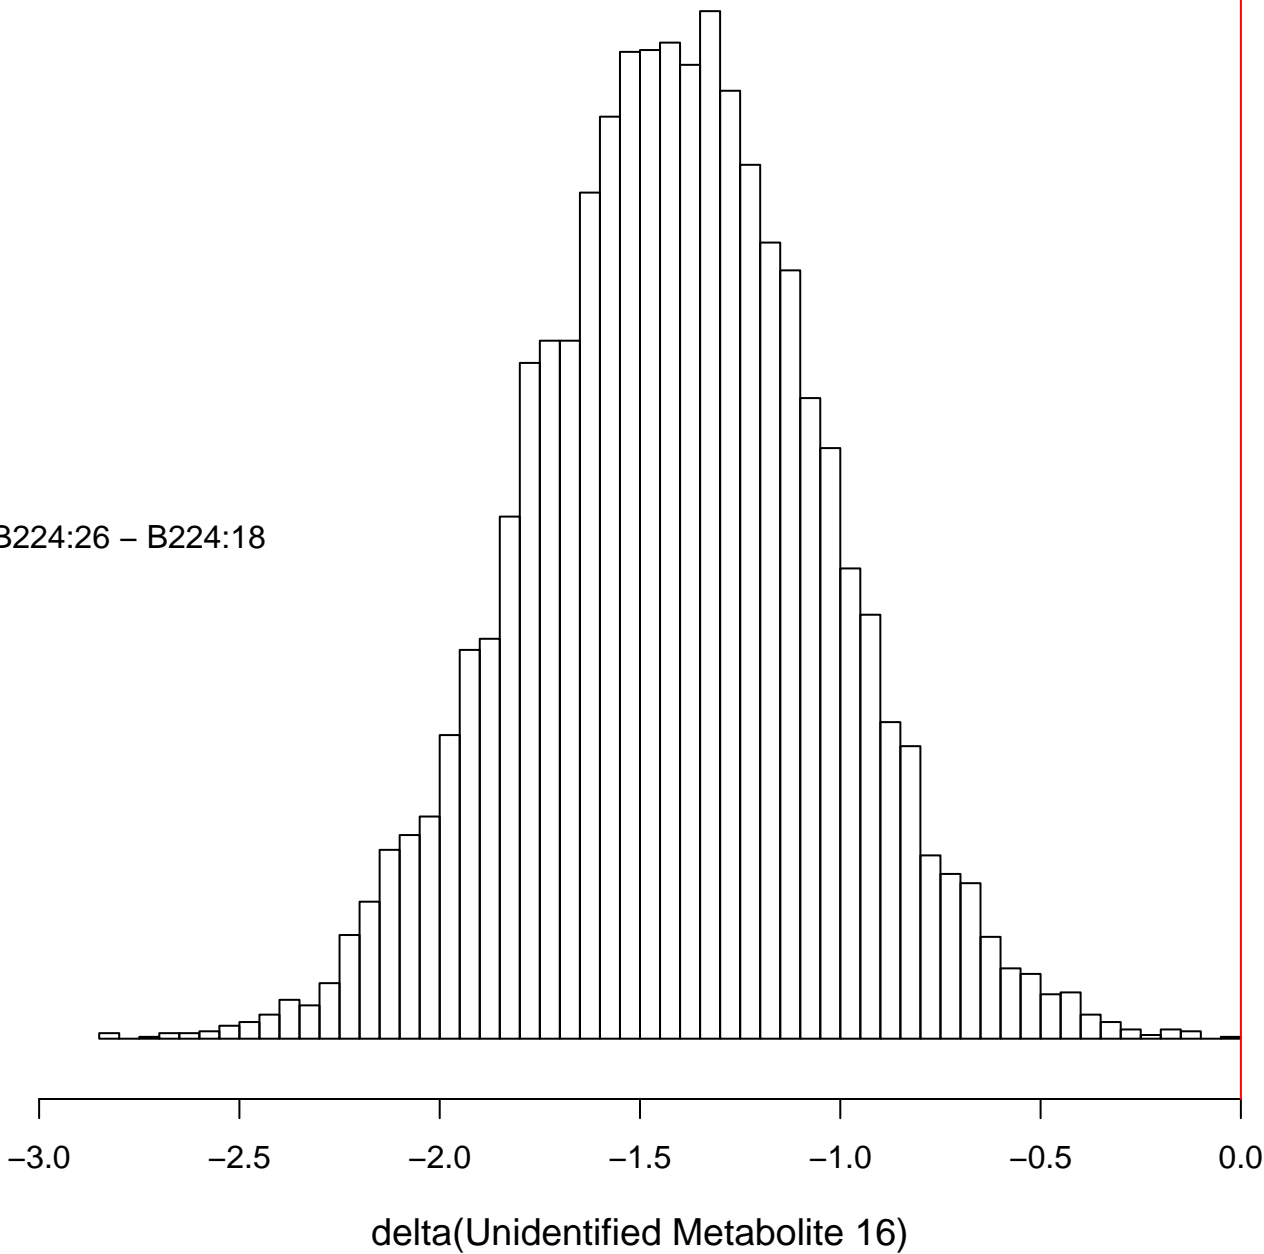

B224:26

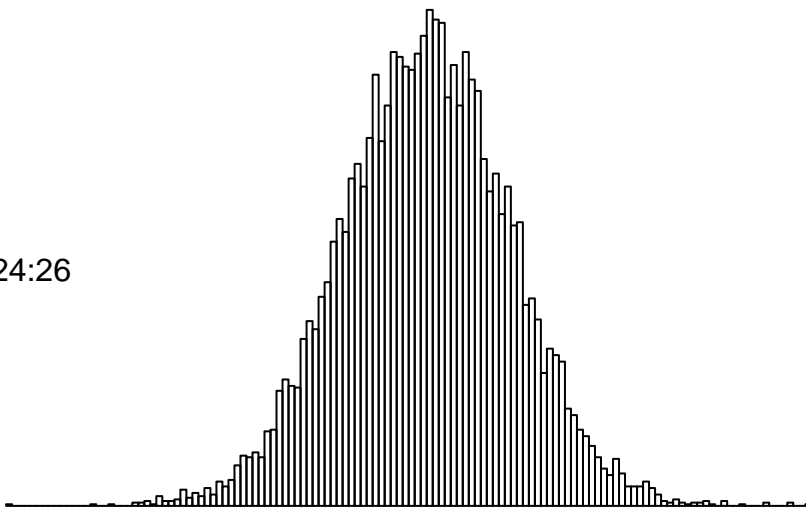

B224:18

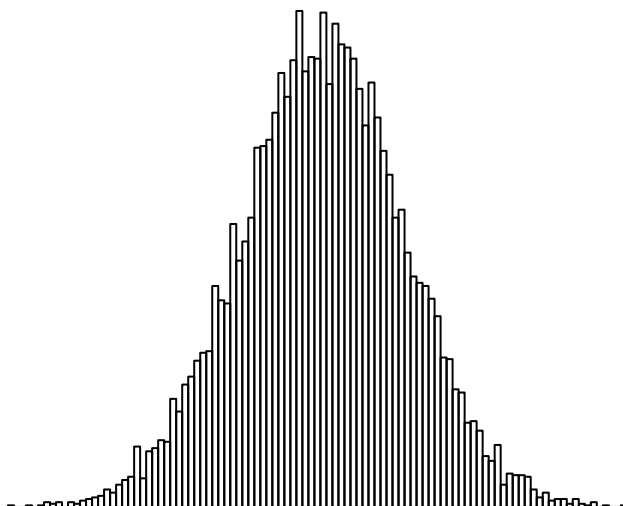

-10

-9

-8

-7

-6

Unidentified Metabolite 17

B224:26 – B224:18

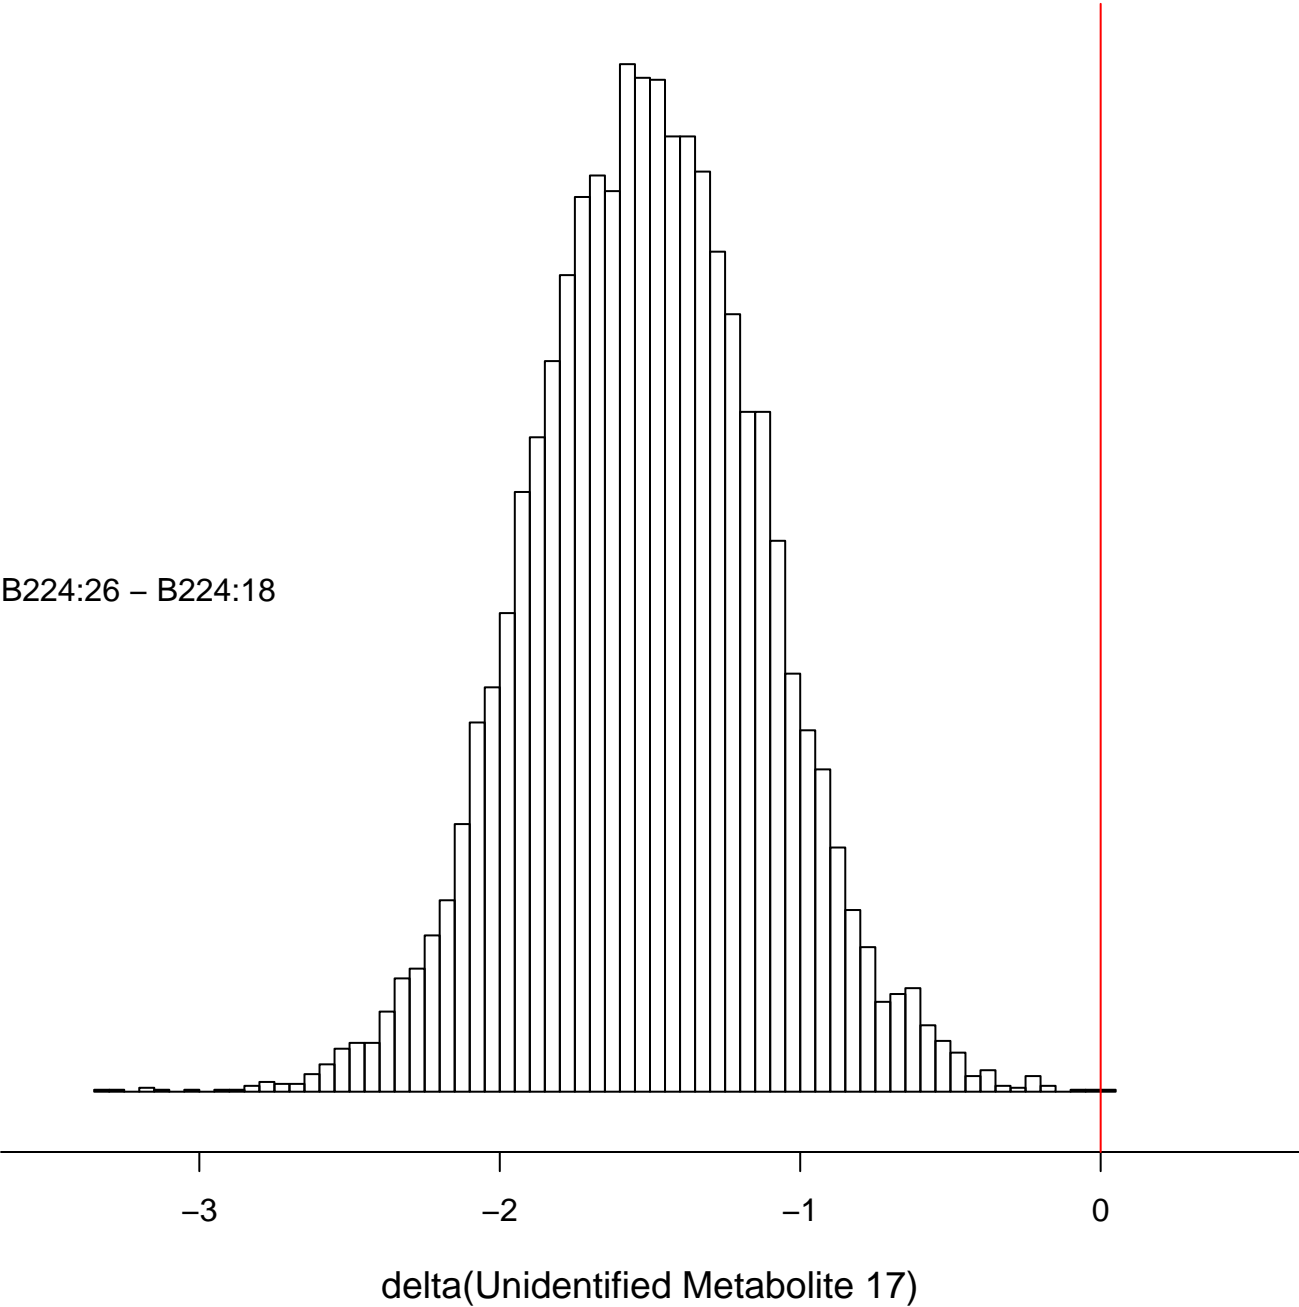

B224:26

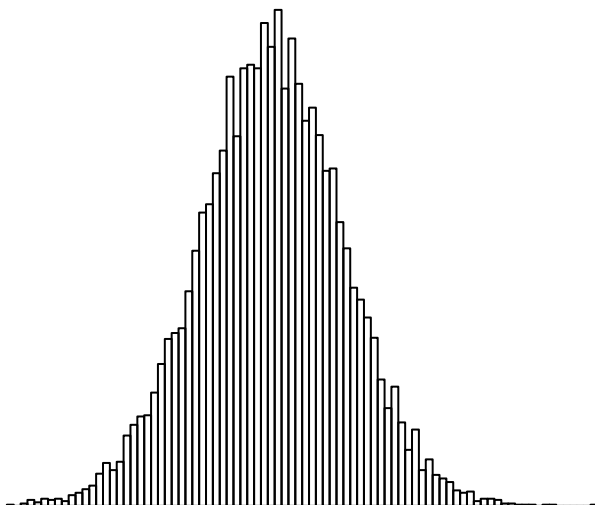

B224:18

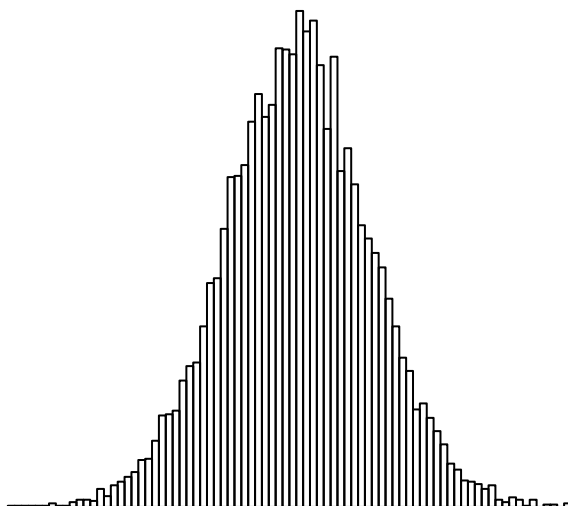

-8.5      -8.0      -7.5      -7.0      -6.5      -6.0      -5.5      -5.0

Unidentified Metabolite 18

B224:26 – B224:18

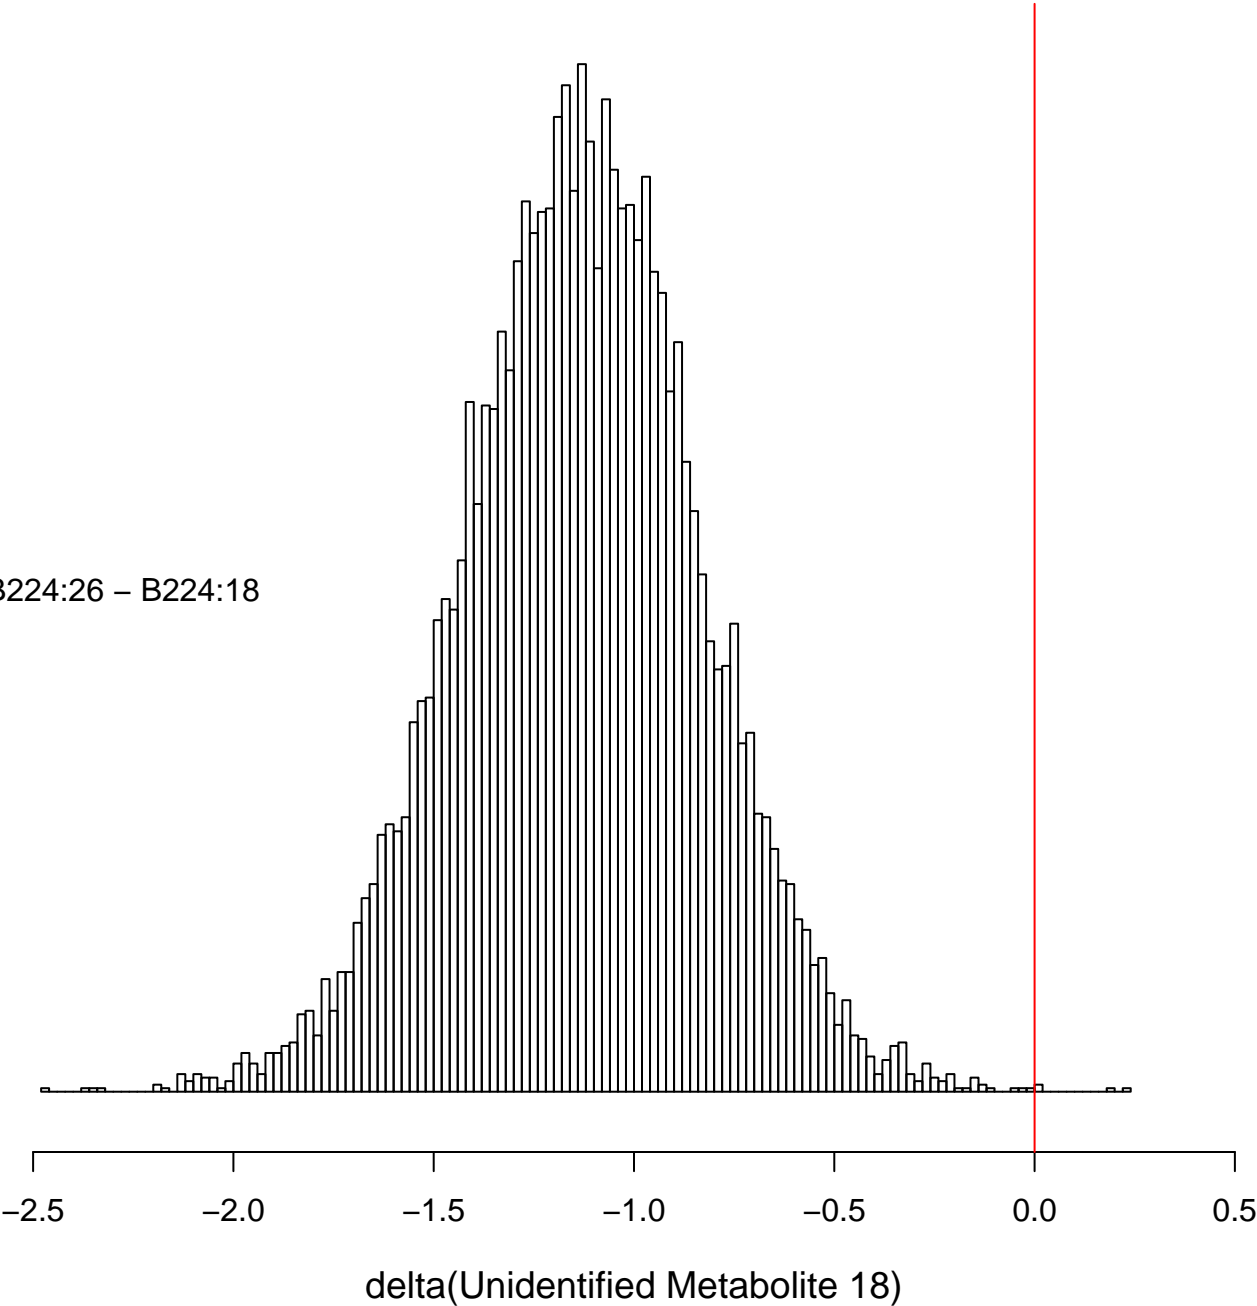

B224:26

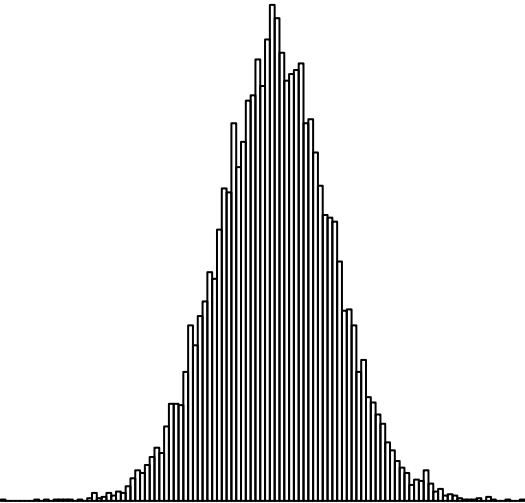

B224:18

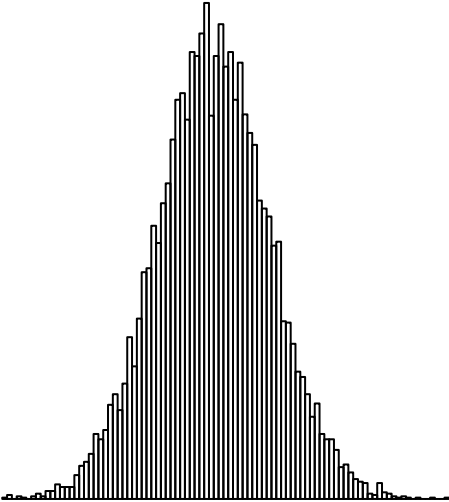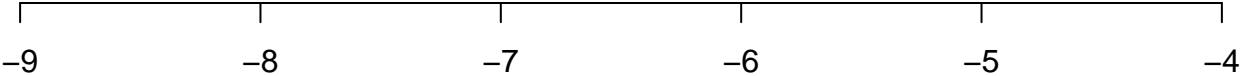

Unidentified Metabolite 20

B224:26 – B224:18

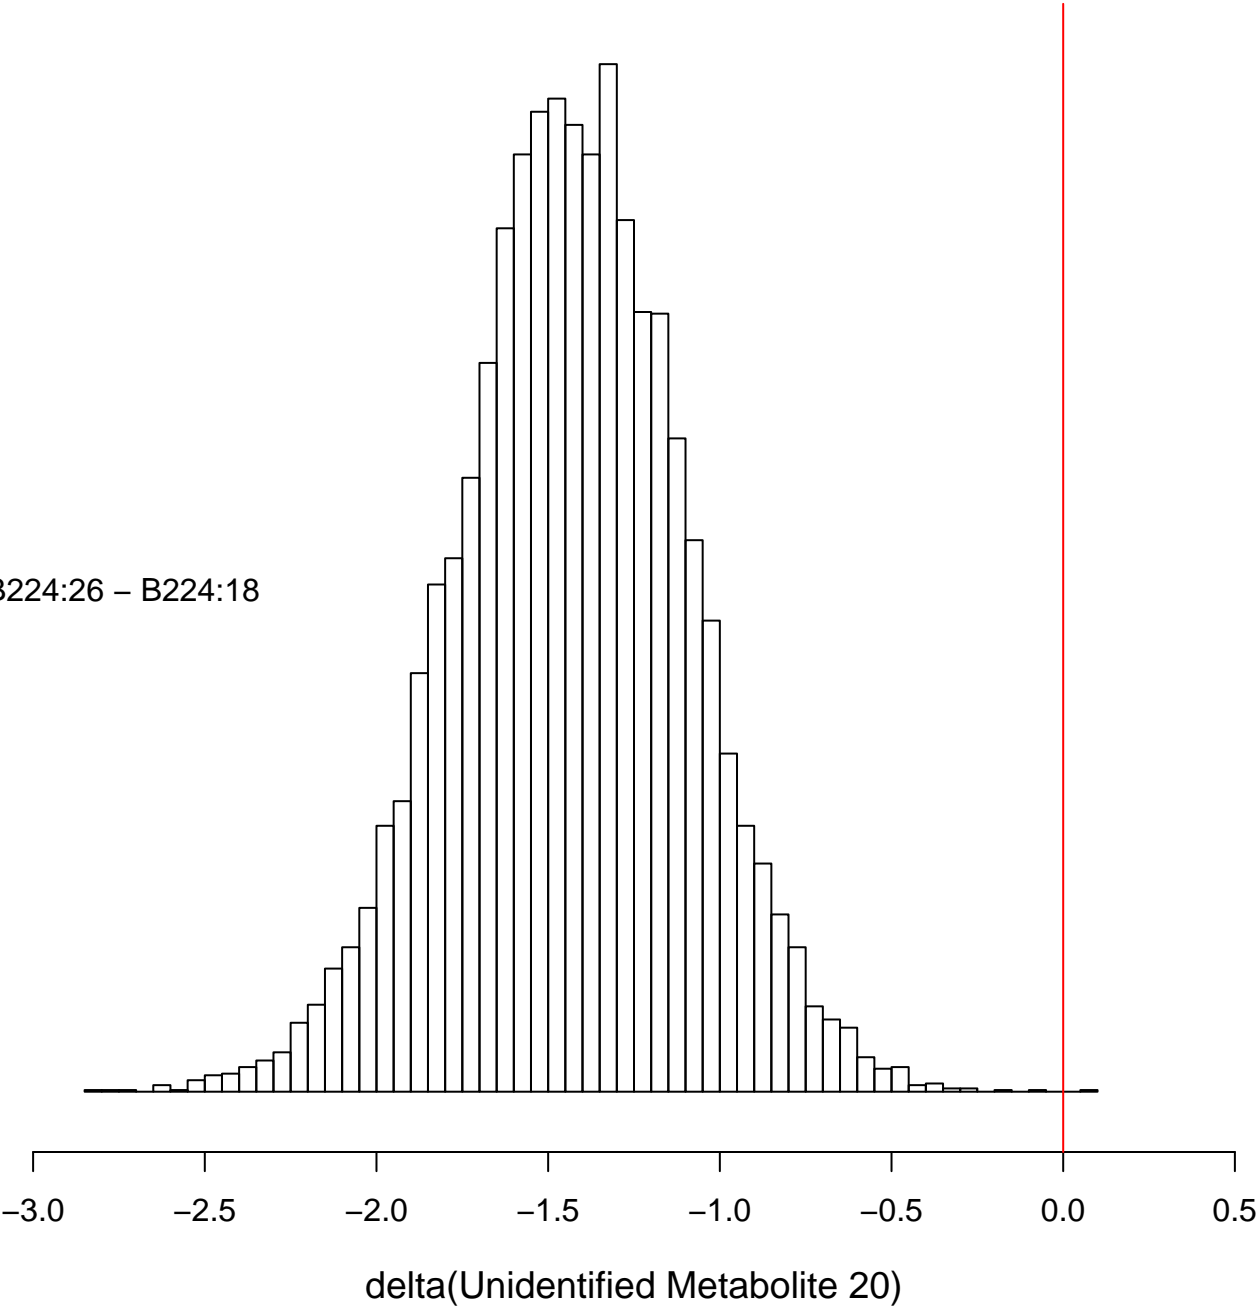



B224:26

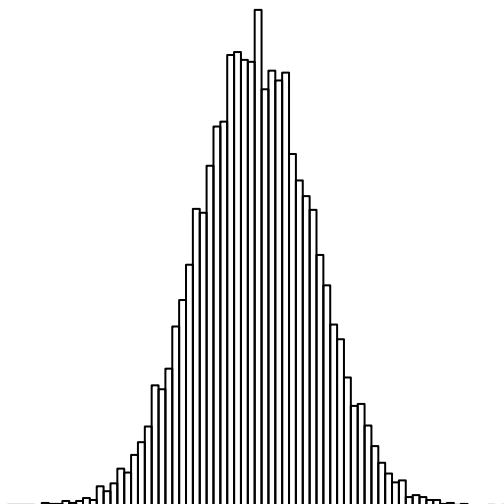

B224:18

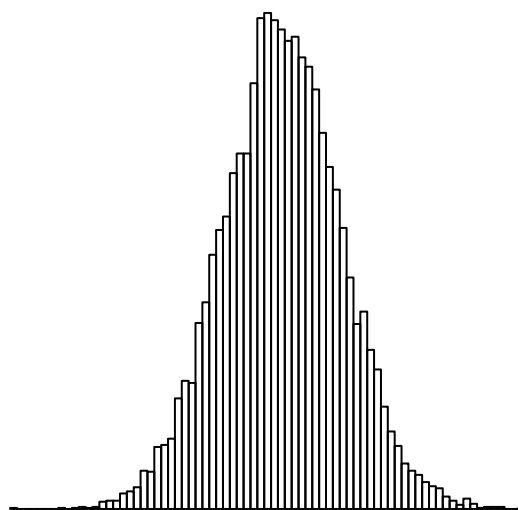

-10.0      -9.5      -9.0      -8.5      -8.0      -7.5      -7.0      -6.5

Unidentified Metabolite 22

B224:26 – B224:18

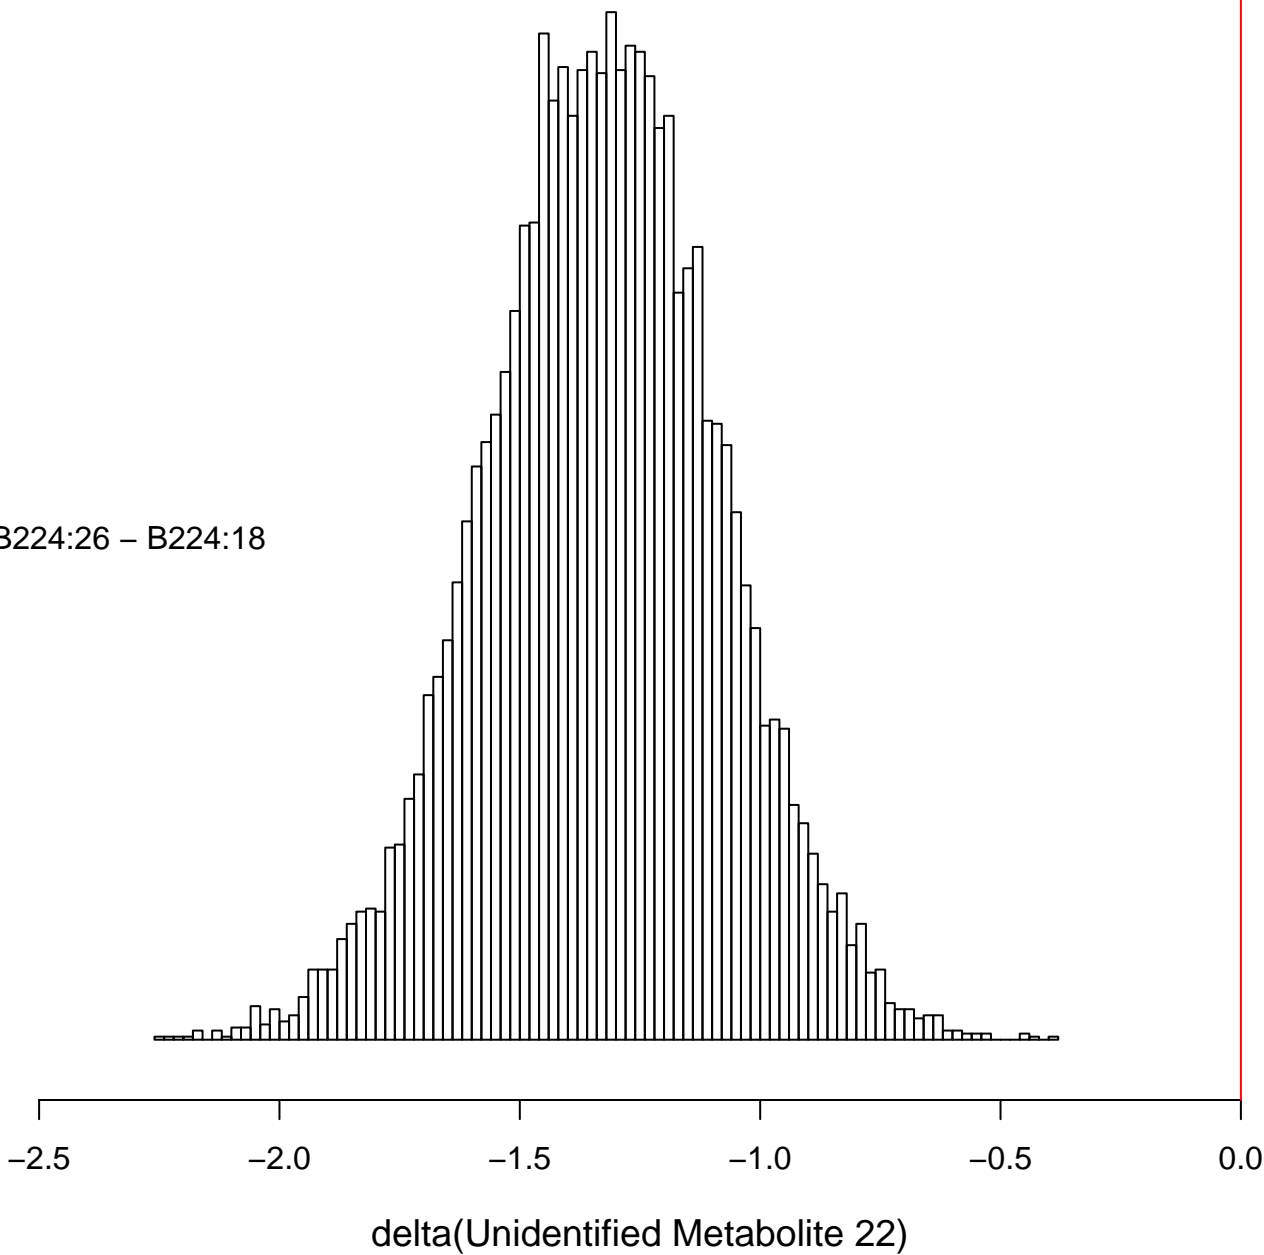

B224:26

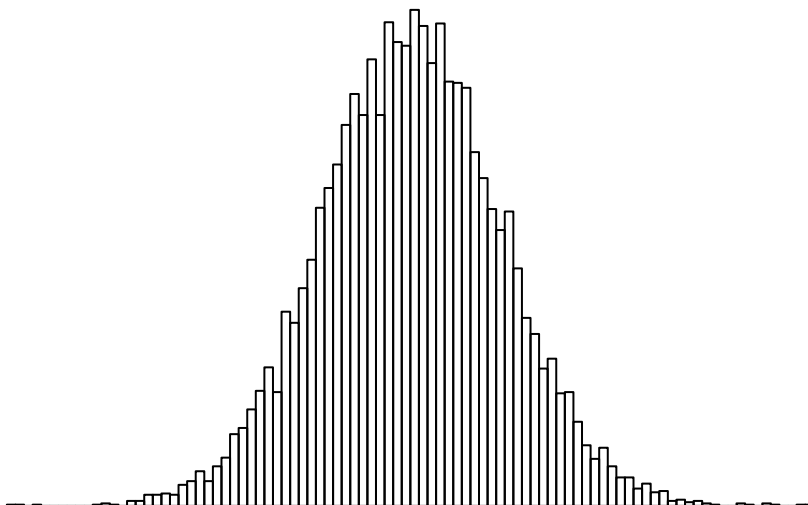

B224:18

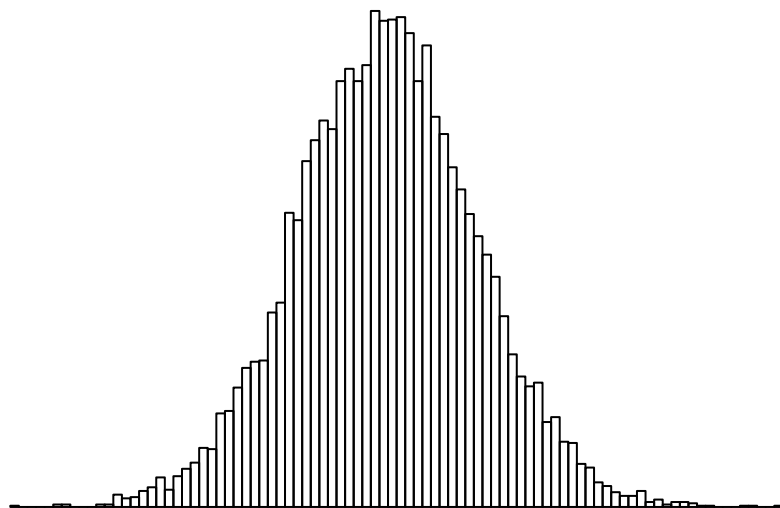

-11      -10      -9      -8      -7      -6      -5      -4

Unidentified Metabolite 23

B224:26 – B224:18

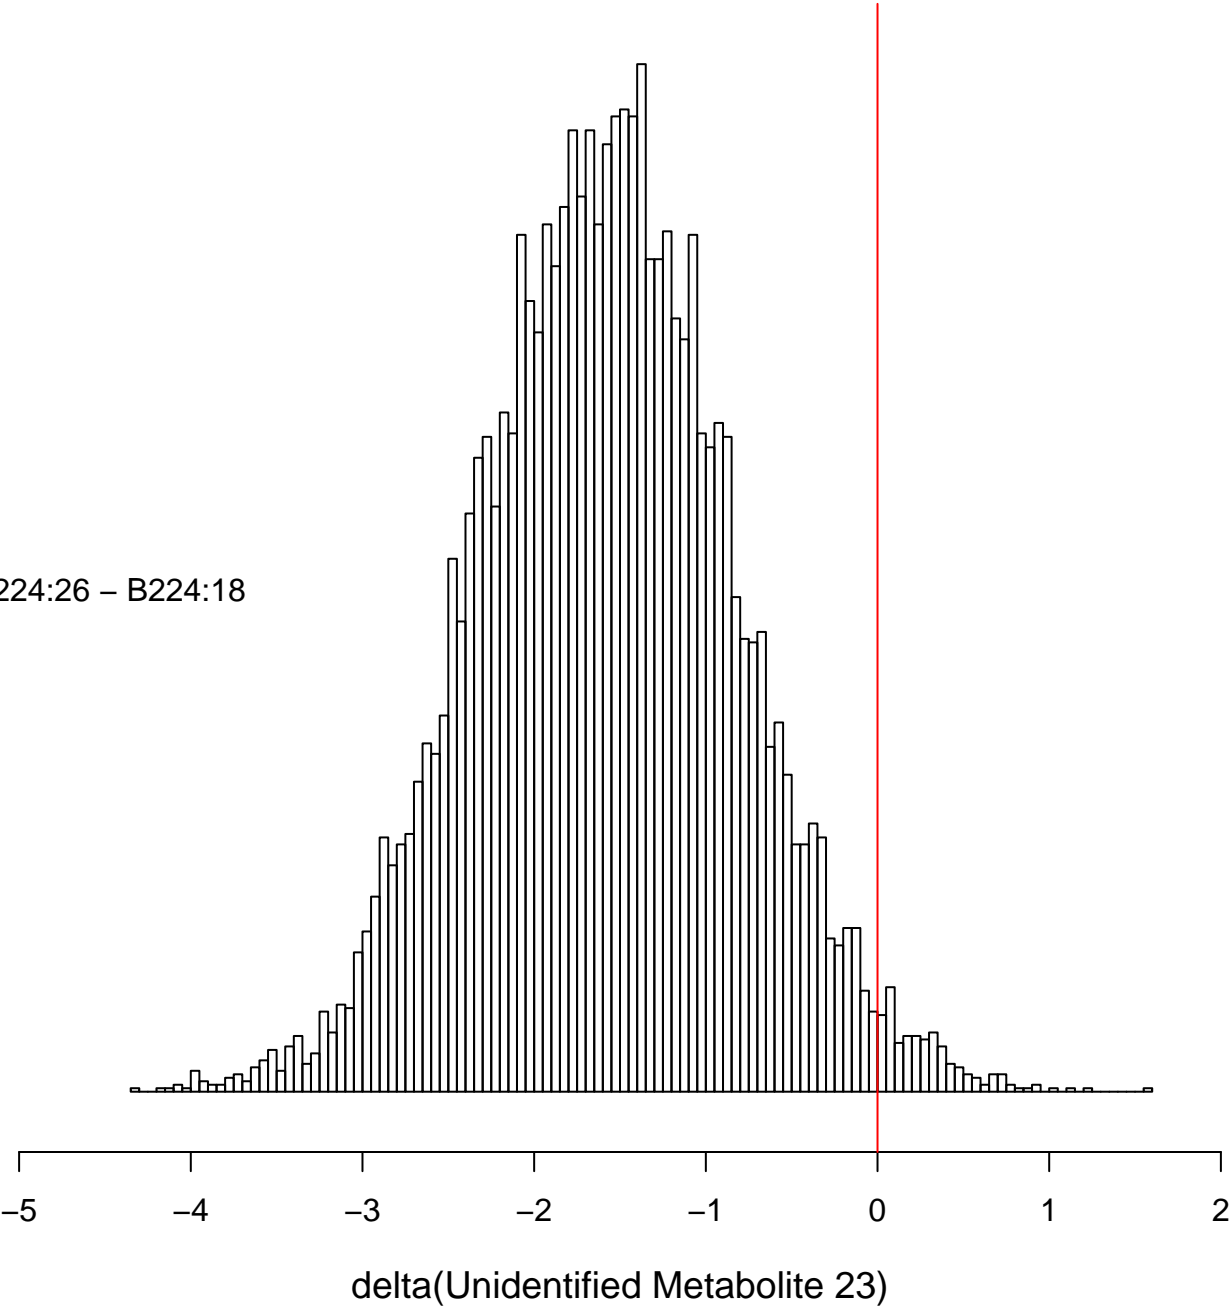

B224:26

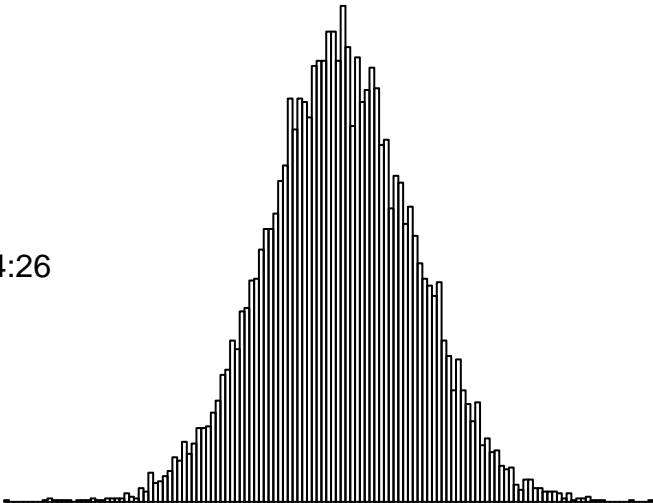

B224:18

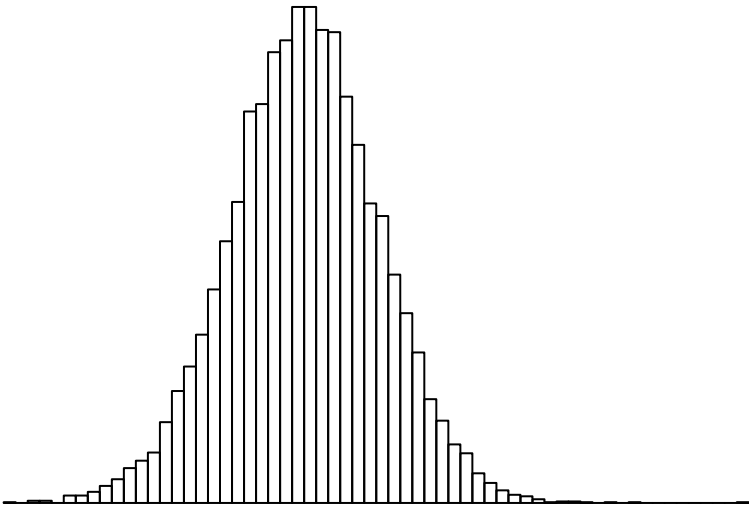

Unidentified Metabolite 24

B224:26 – B224:18

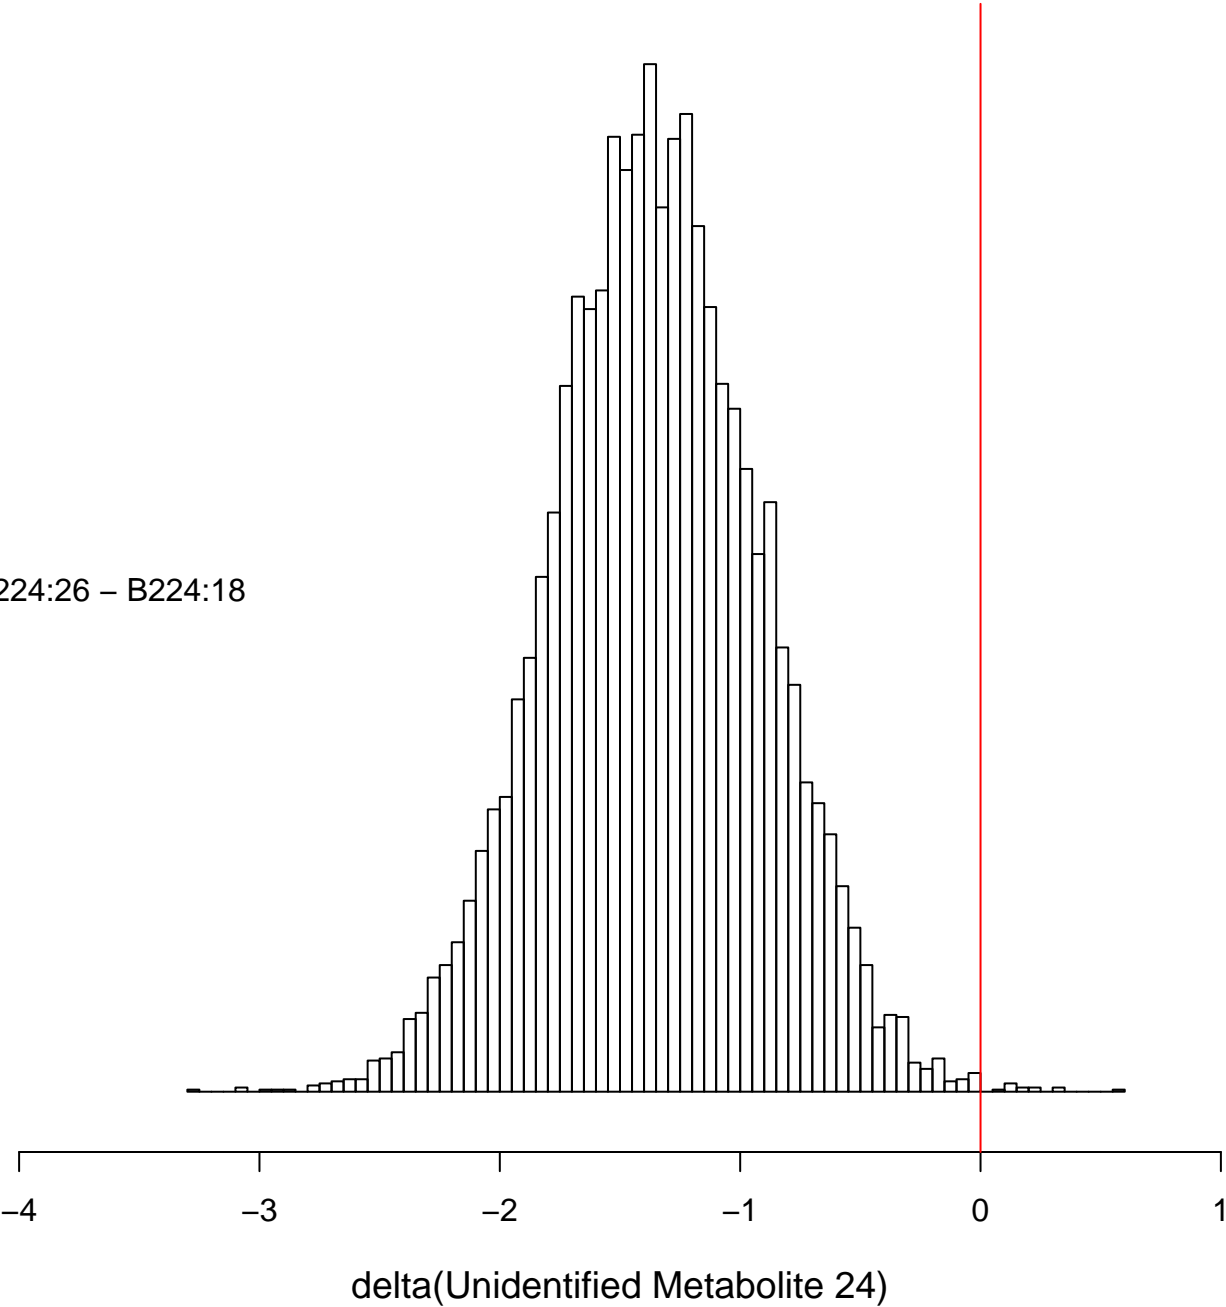

B224:26

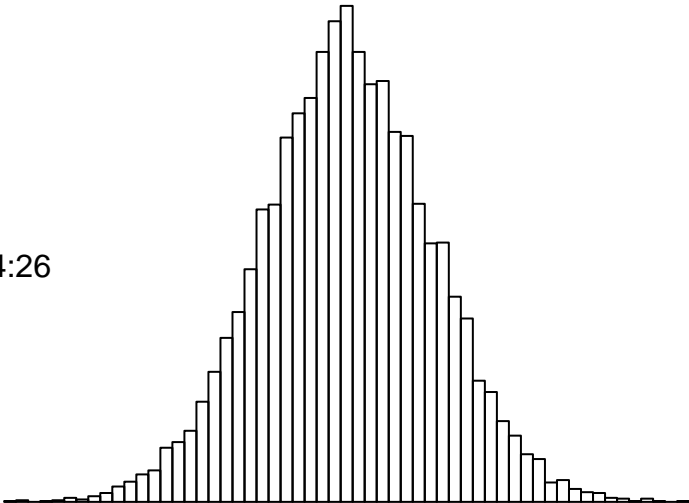

B224:18

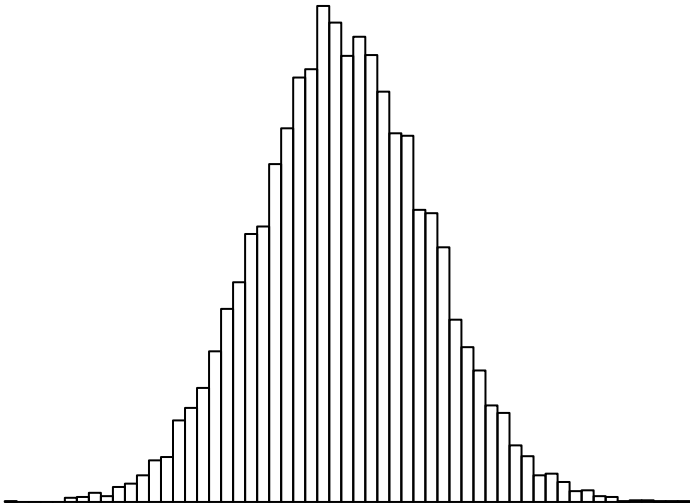

-10                      -9                      -8                      -7                      -6                      -5

Unidentified Metabolite 25

B224:26 – B224:18

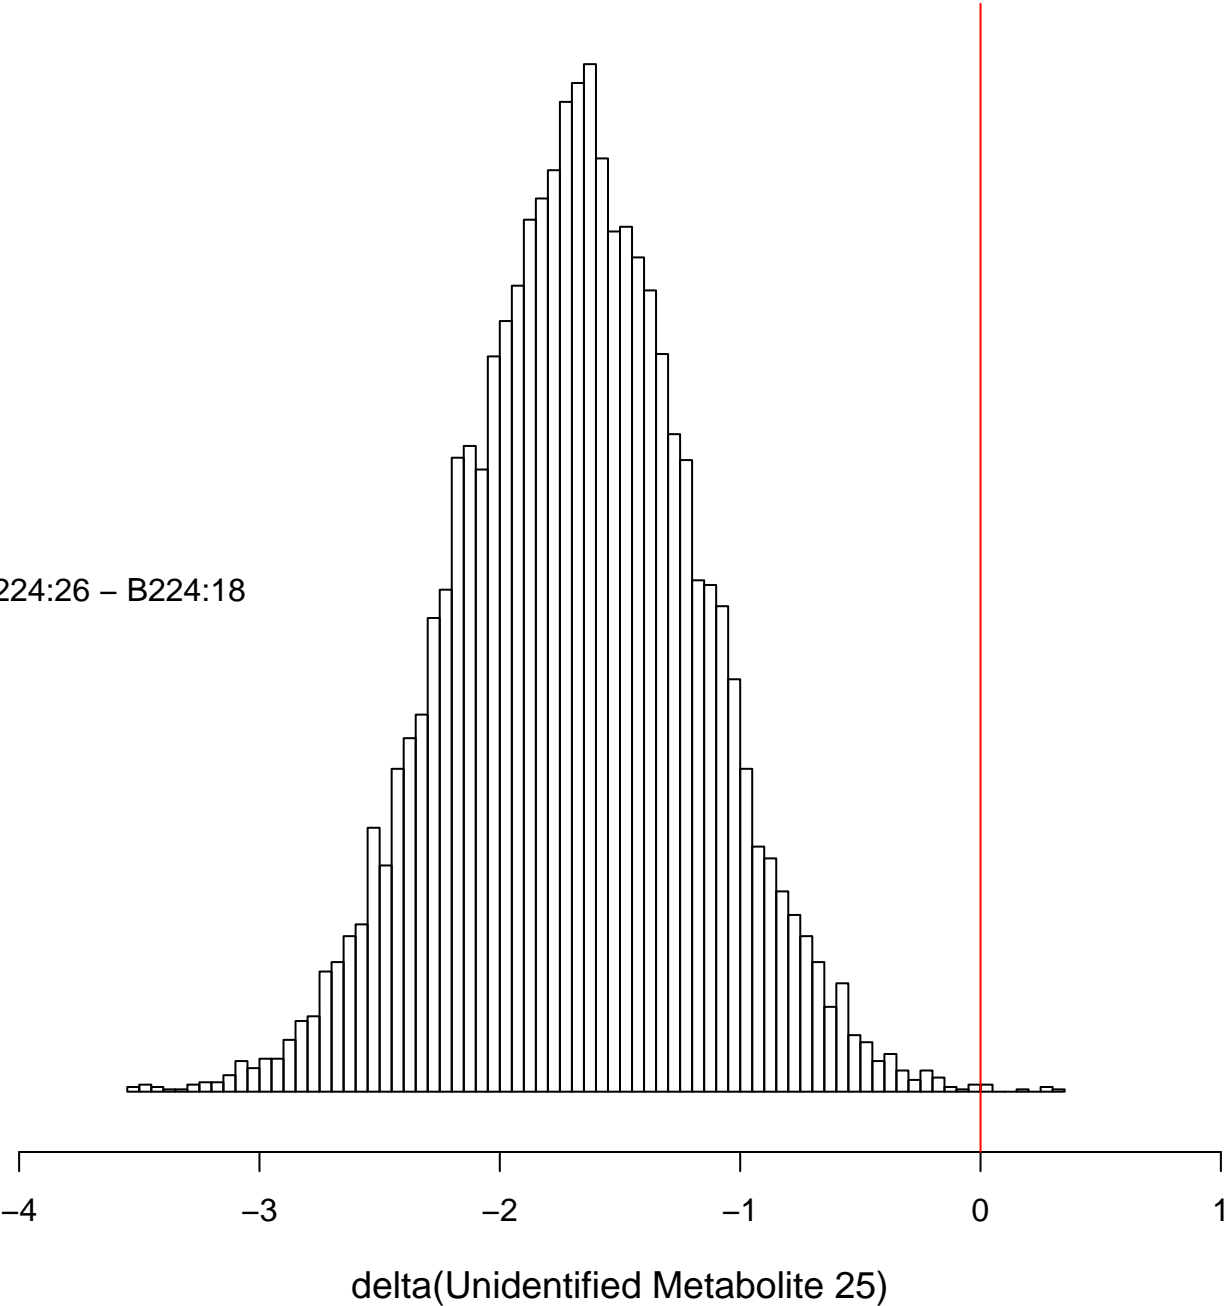



B224:26

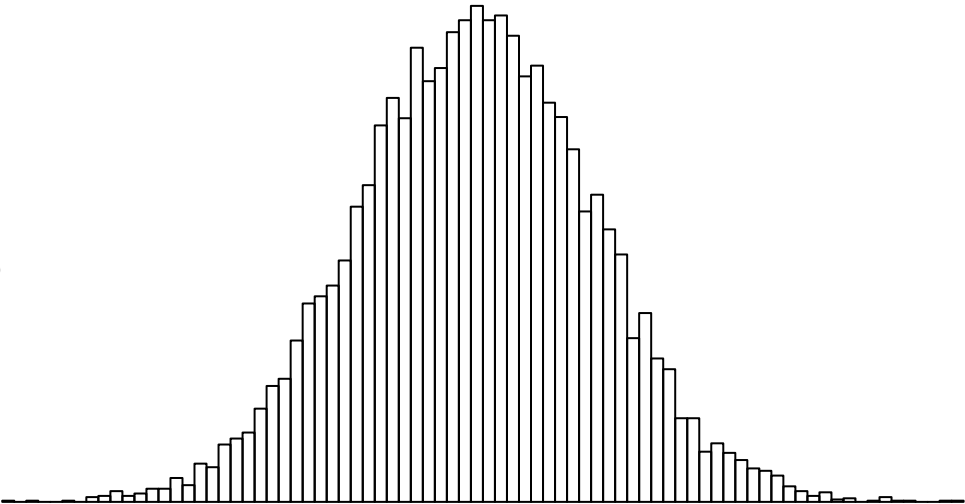

B224:18

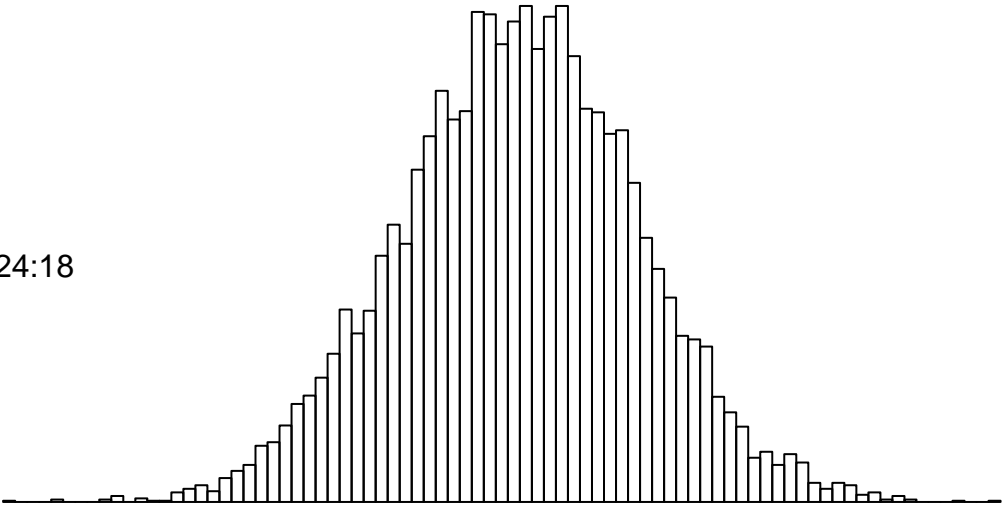

-9 -8 -7 -6 -5 -4

Unidentified Metabolite 26

B224:26 – B224:18

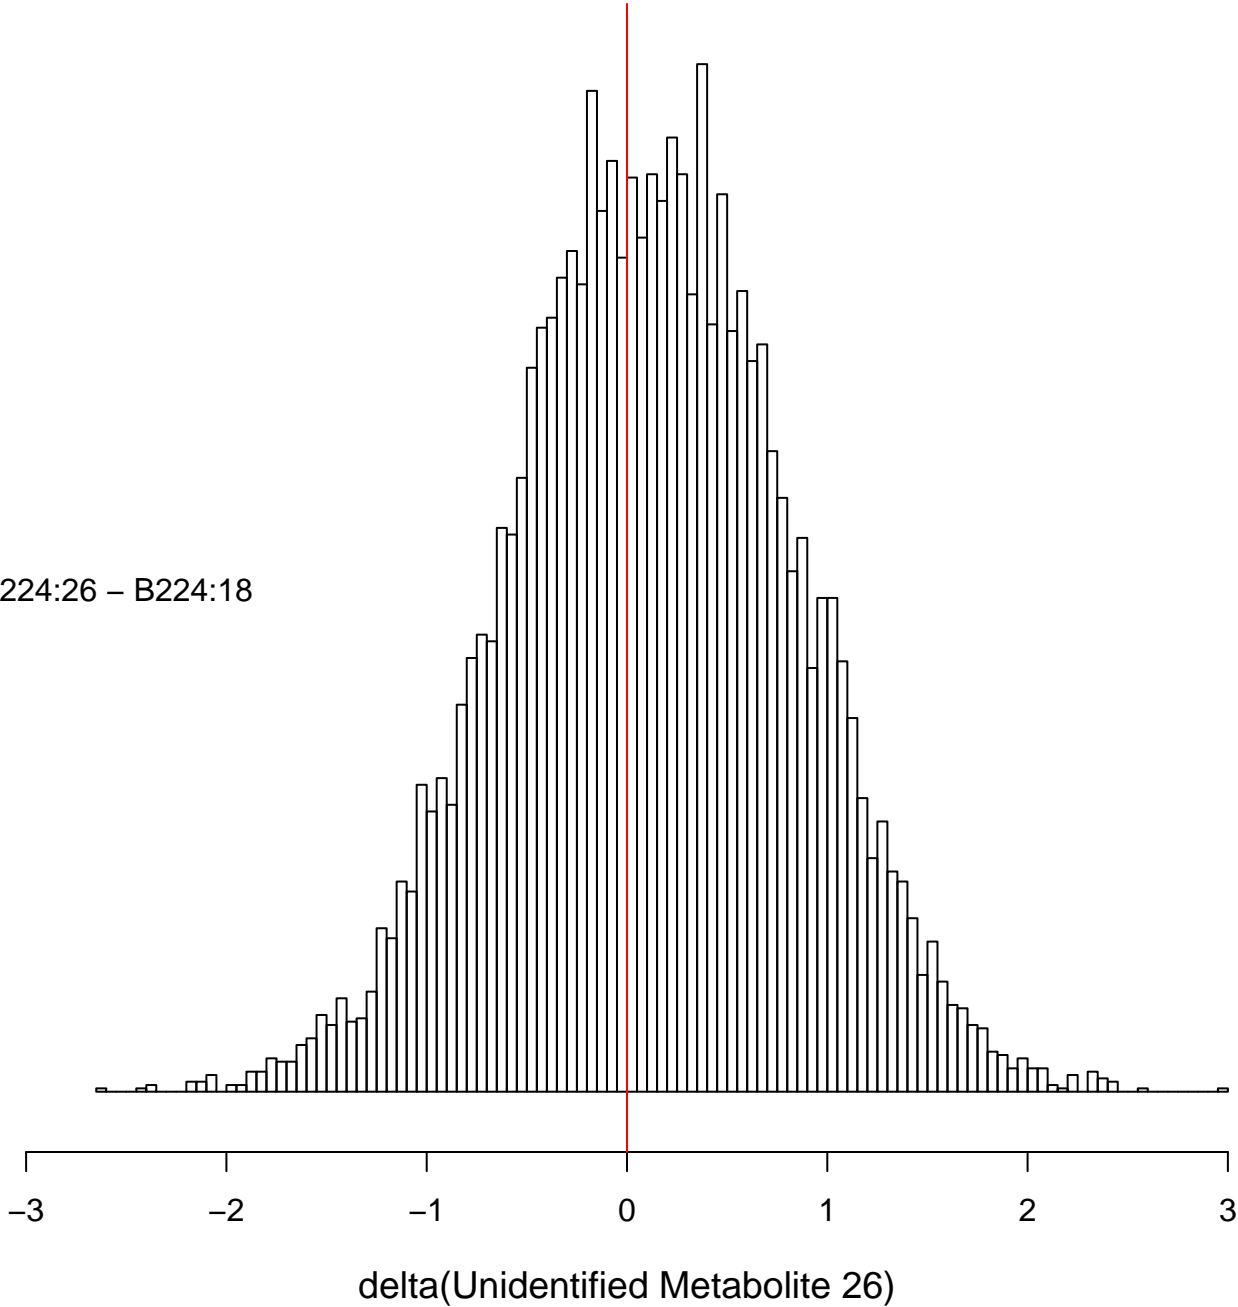

B224:26

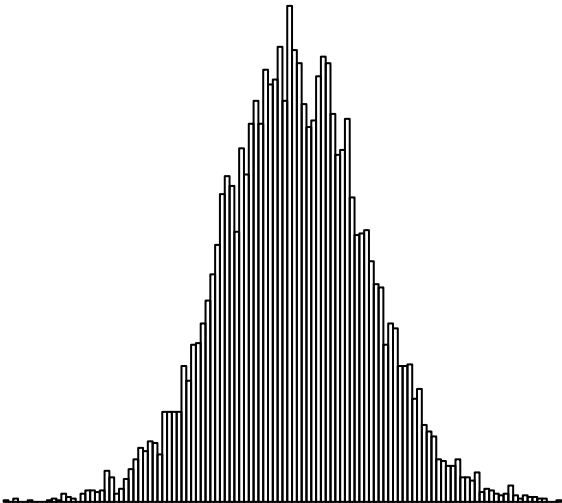

B224:18

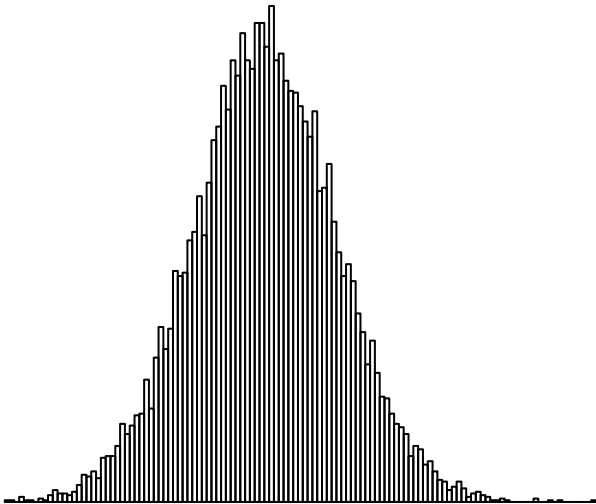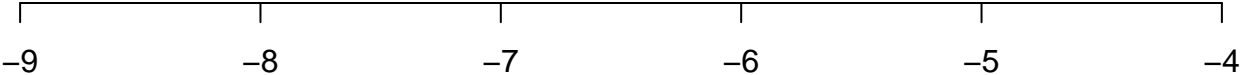

Unidentified Metabolite 27

B224:26 – B224:18

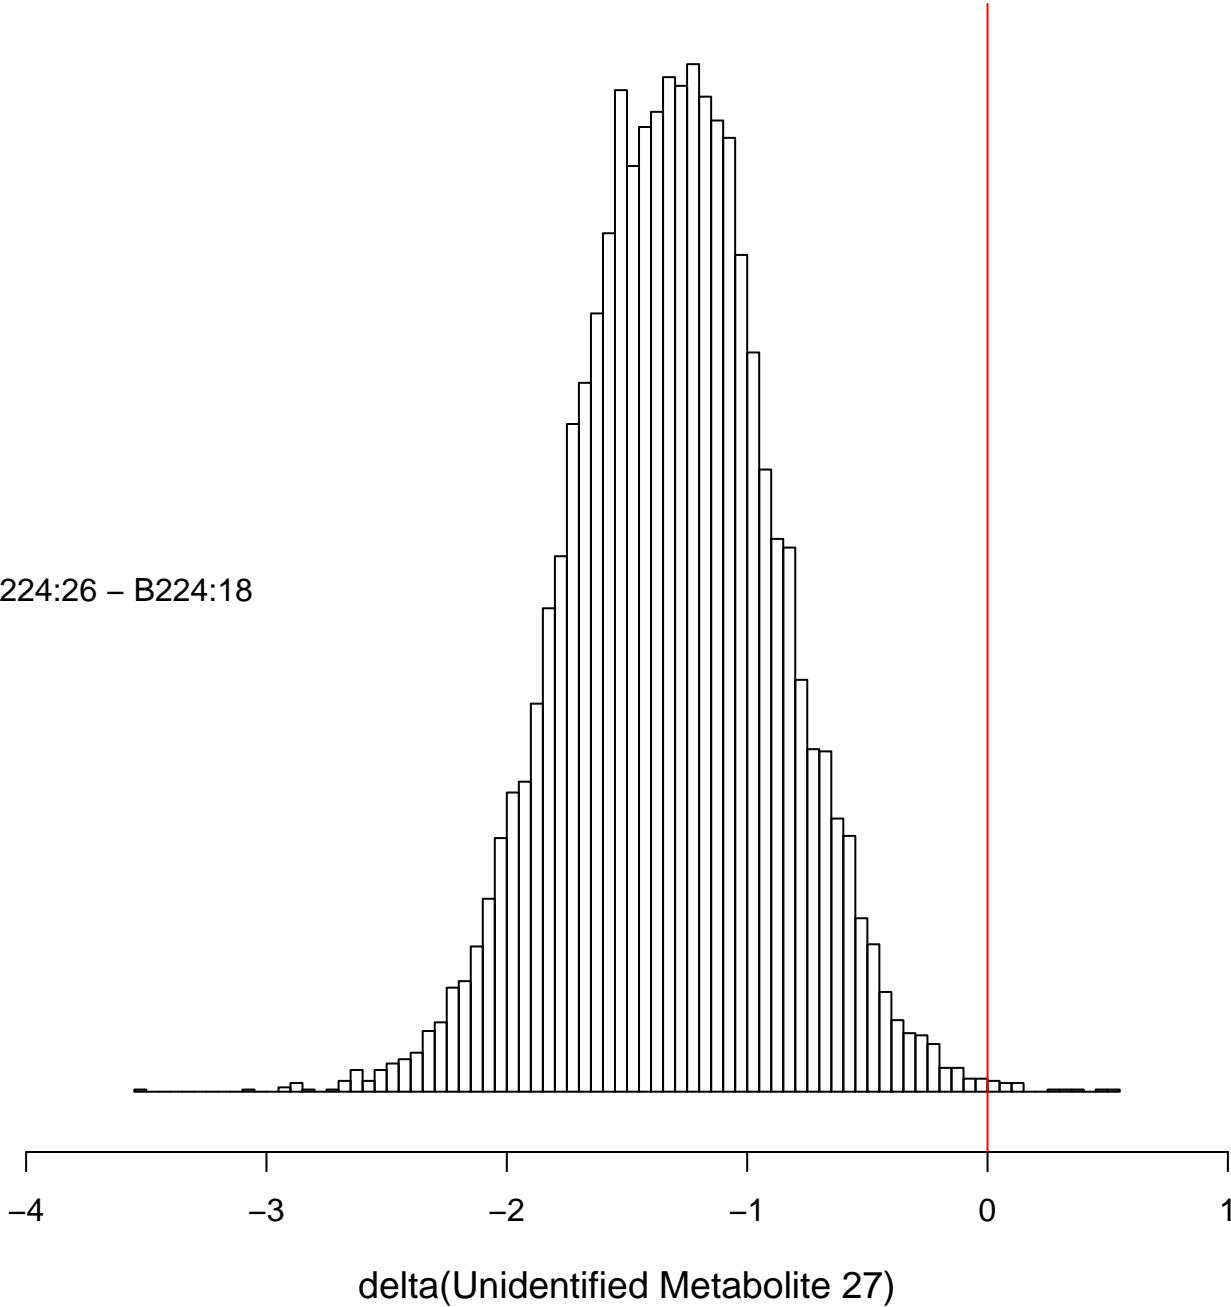

B224:26

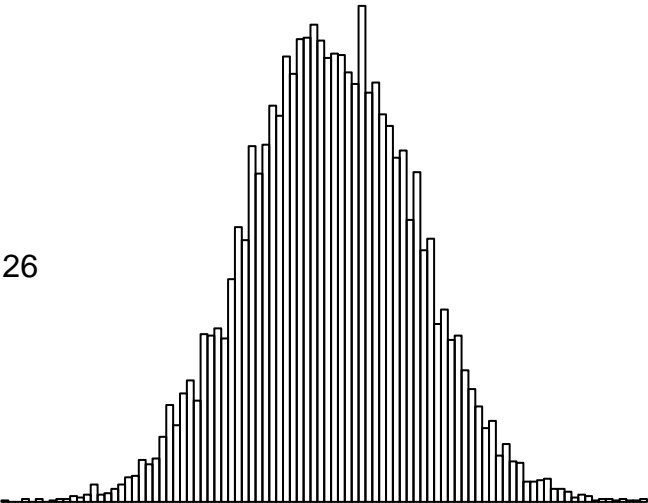

B224:18

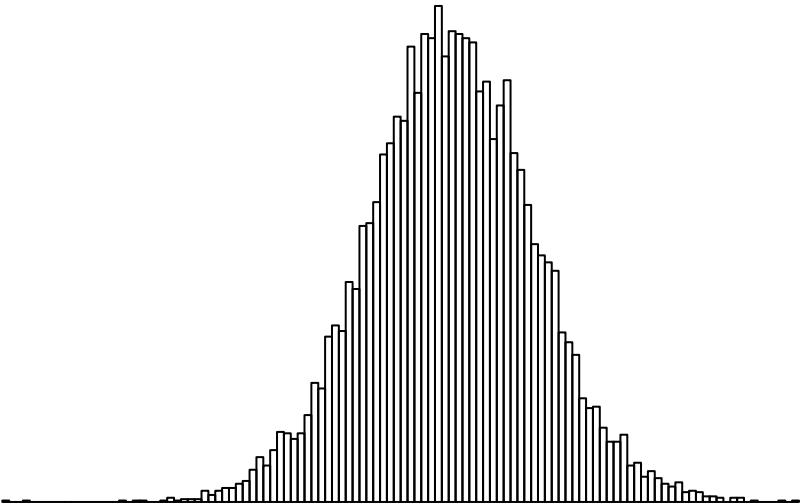

Unidentified Metabolite 29

B224:26 – B224:18

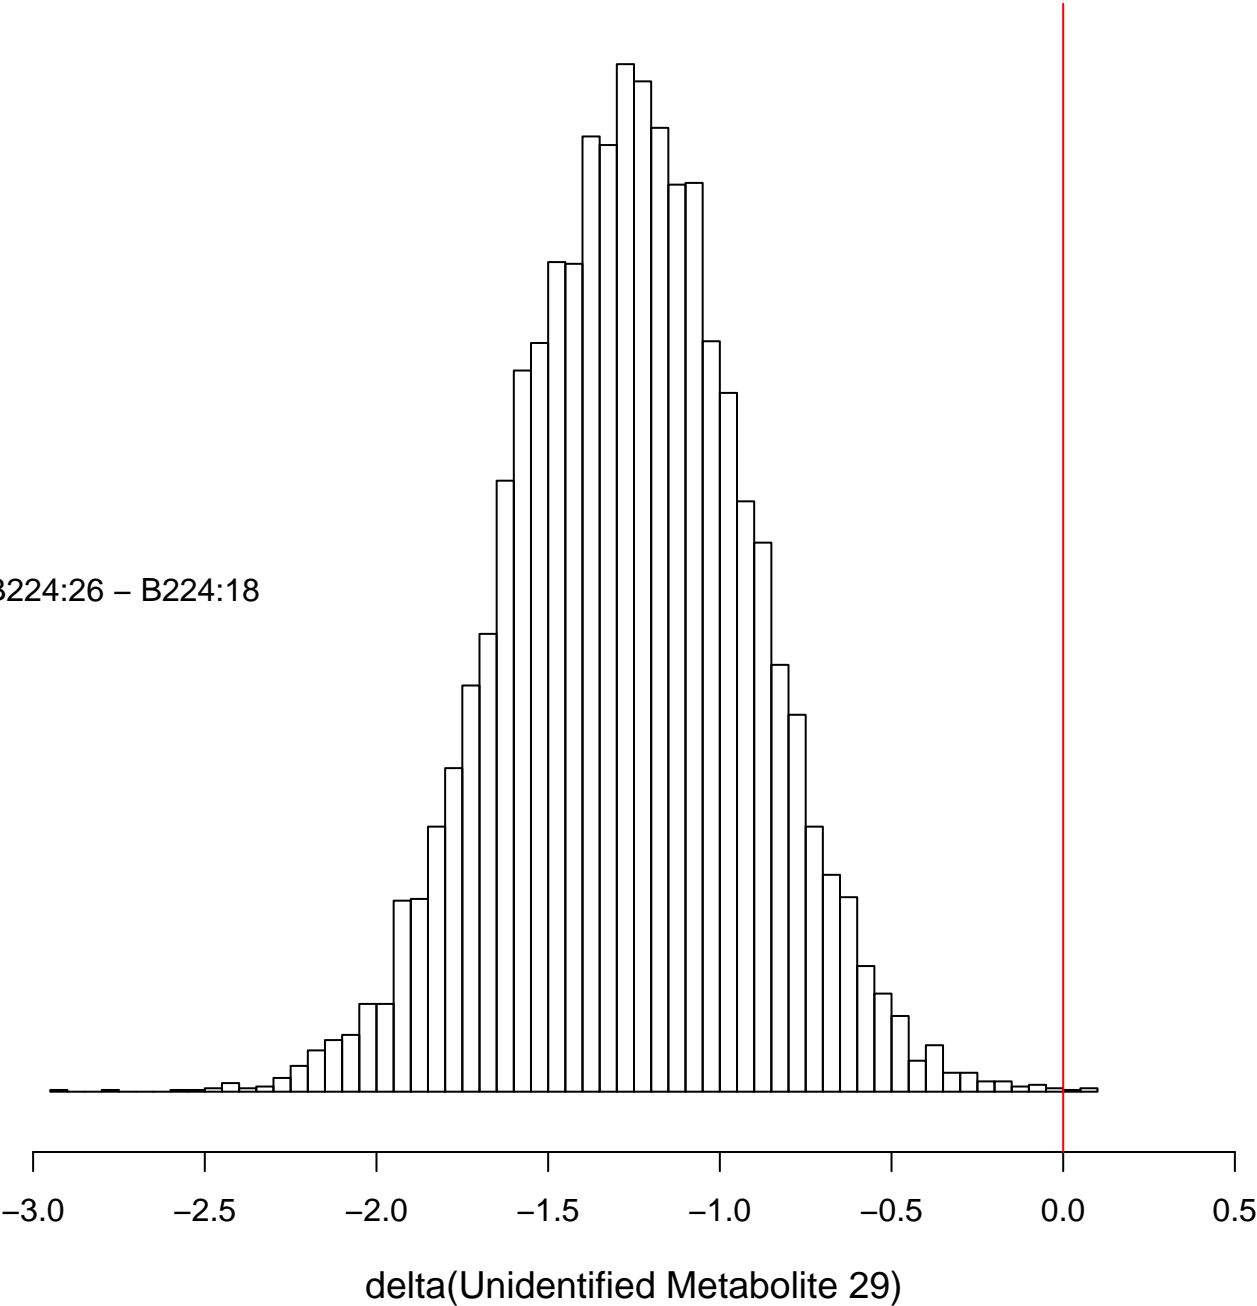

B224:26

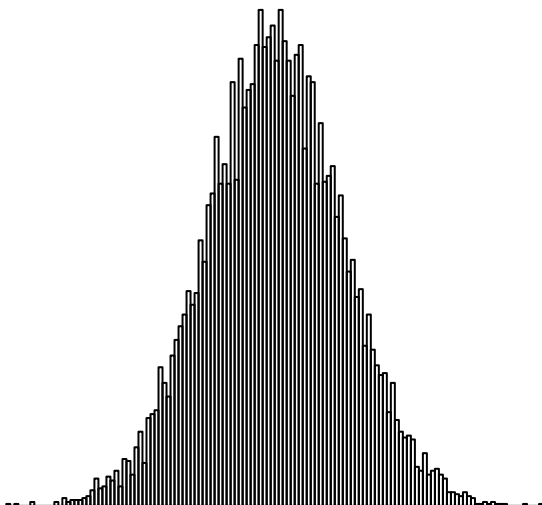

B224:18

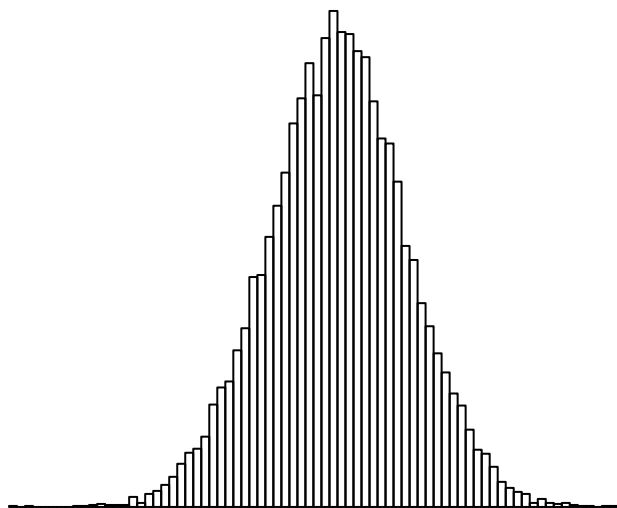

-10.5      -10.0      -9.5      -9.0      -8.5      -8.0      -7.5

Unidentified Metabolite 30

B224:26 – B224:18

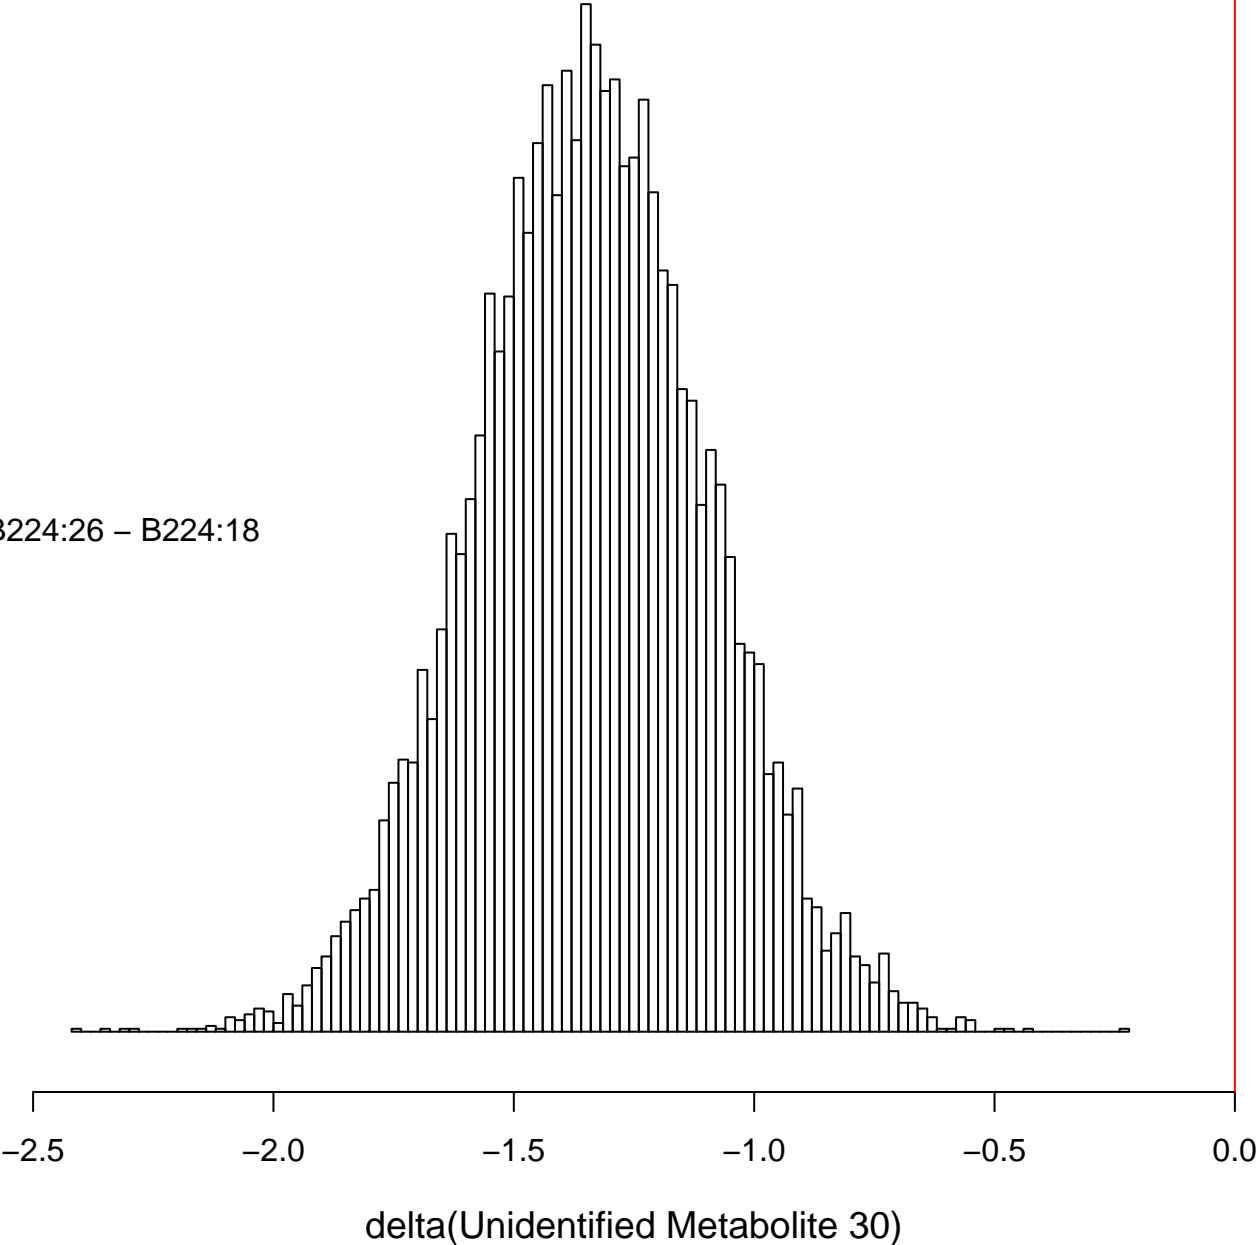



B224:26

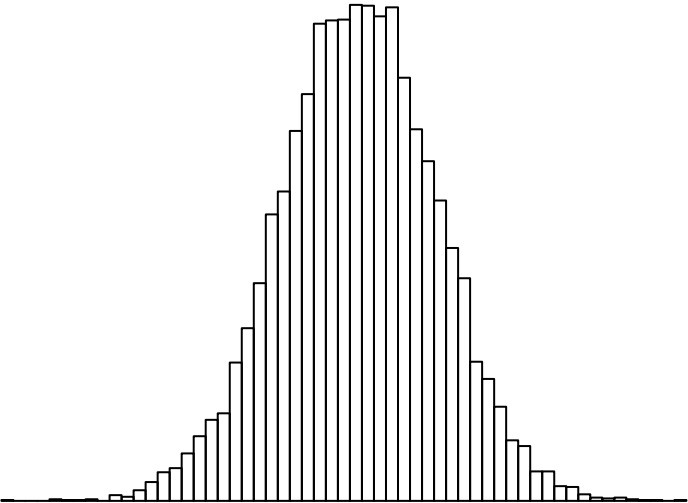

B224:18

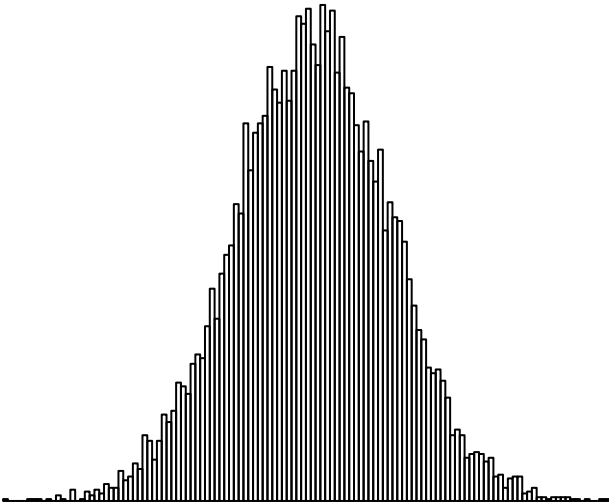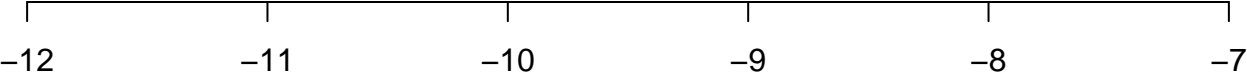

Unidentified Metabolite 31

B224:26 – B224:18

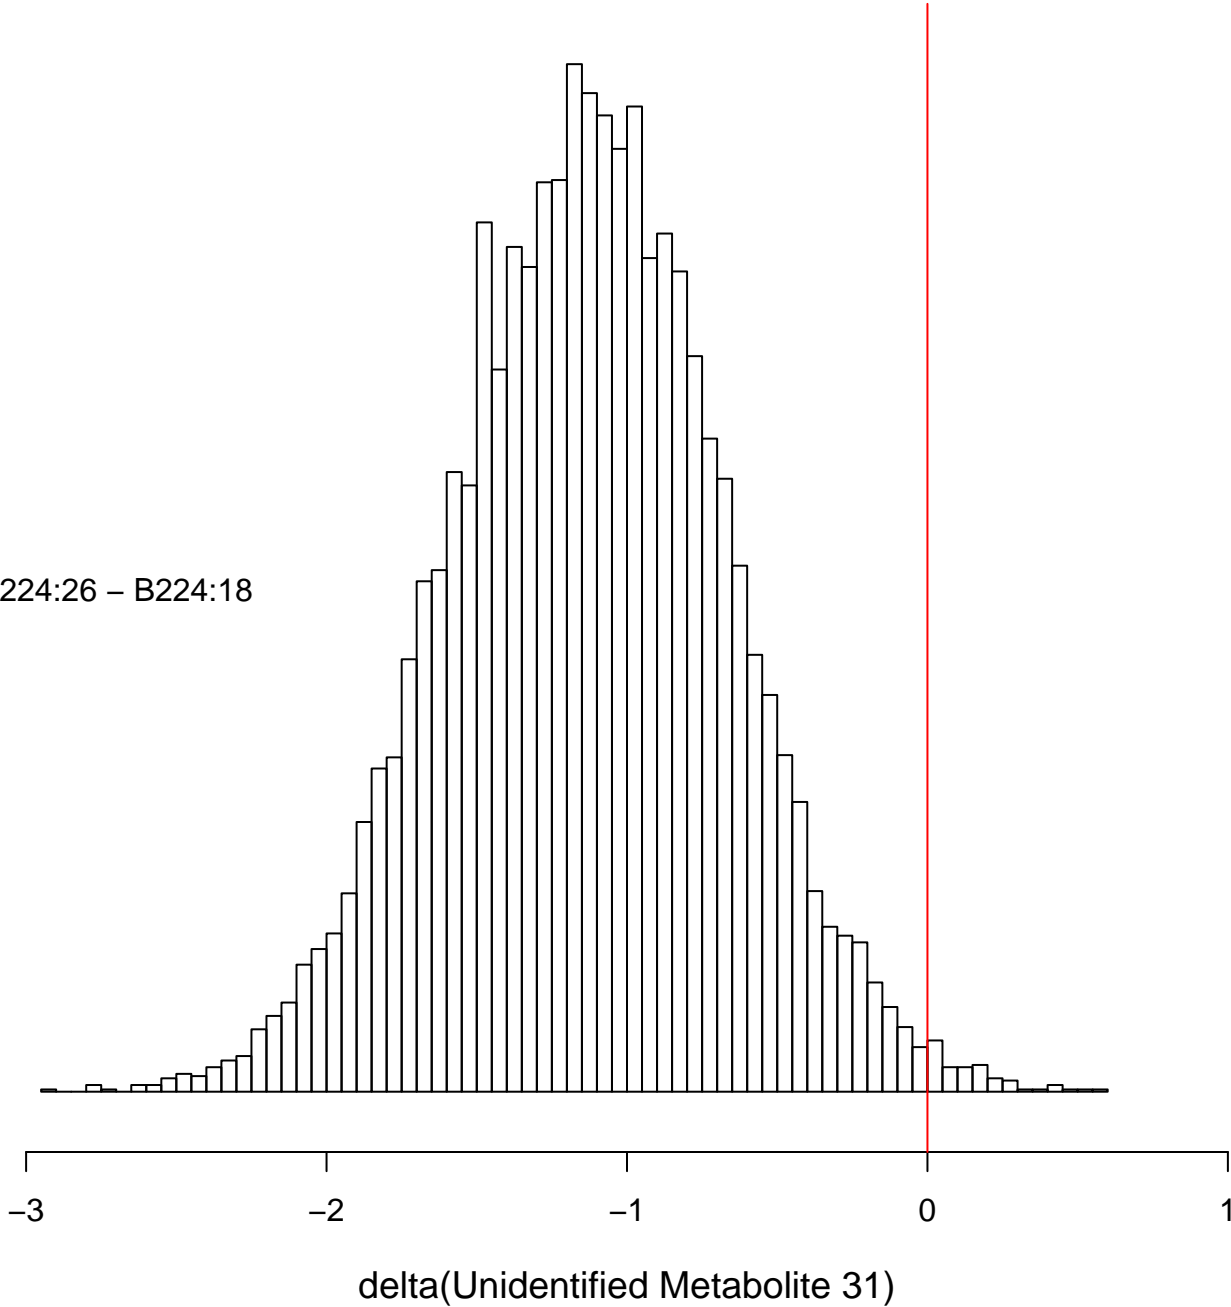

B224:26

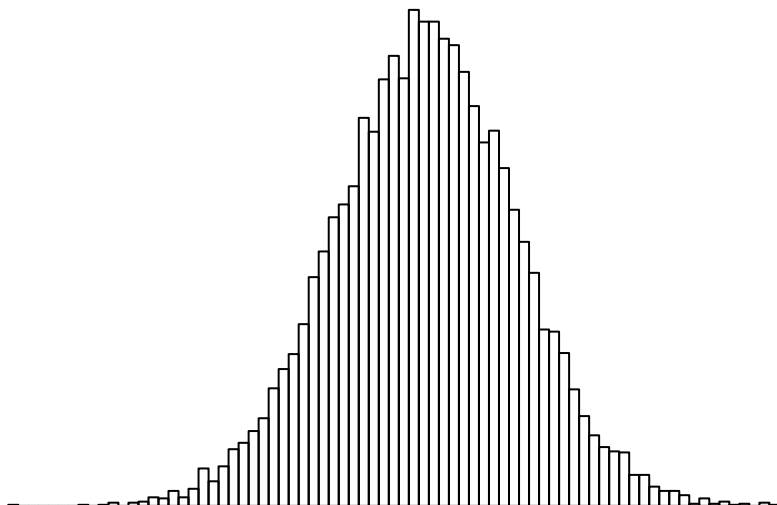

B224:18

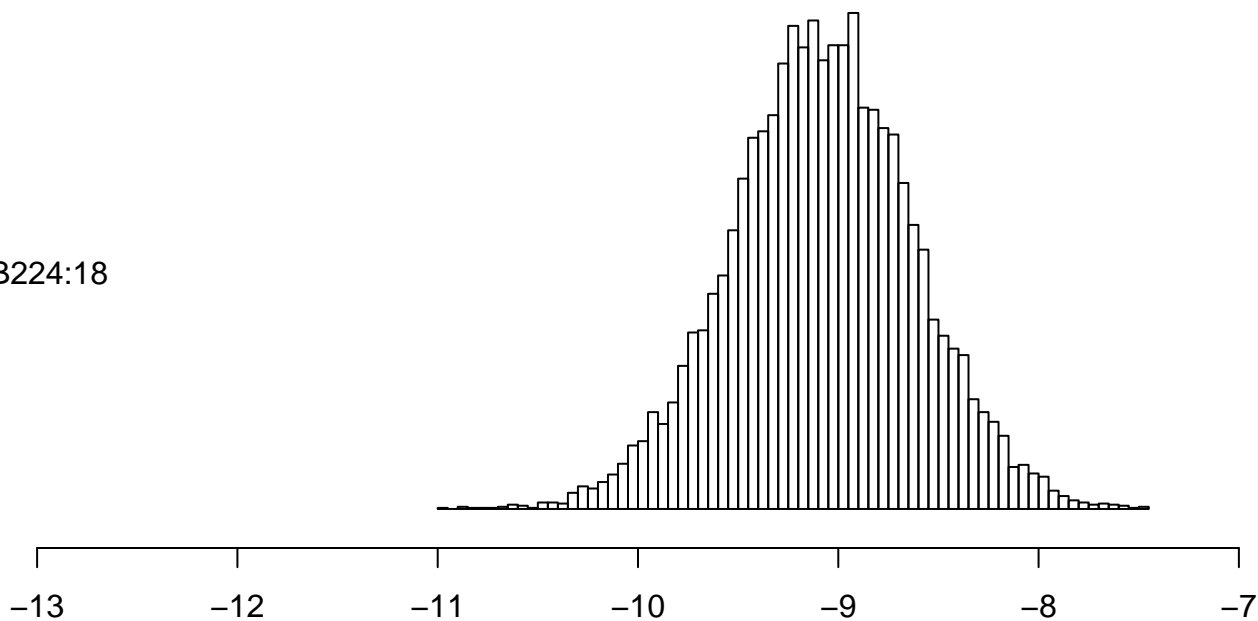

Unidentified Metabolite 32

B224:26 – B224:18

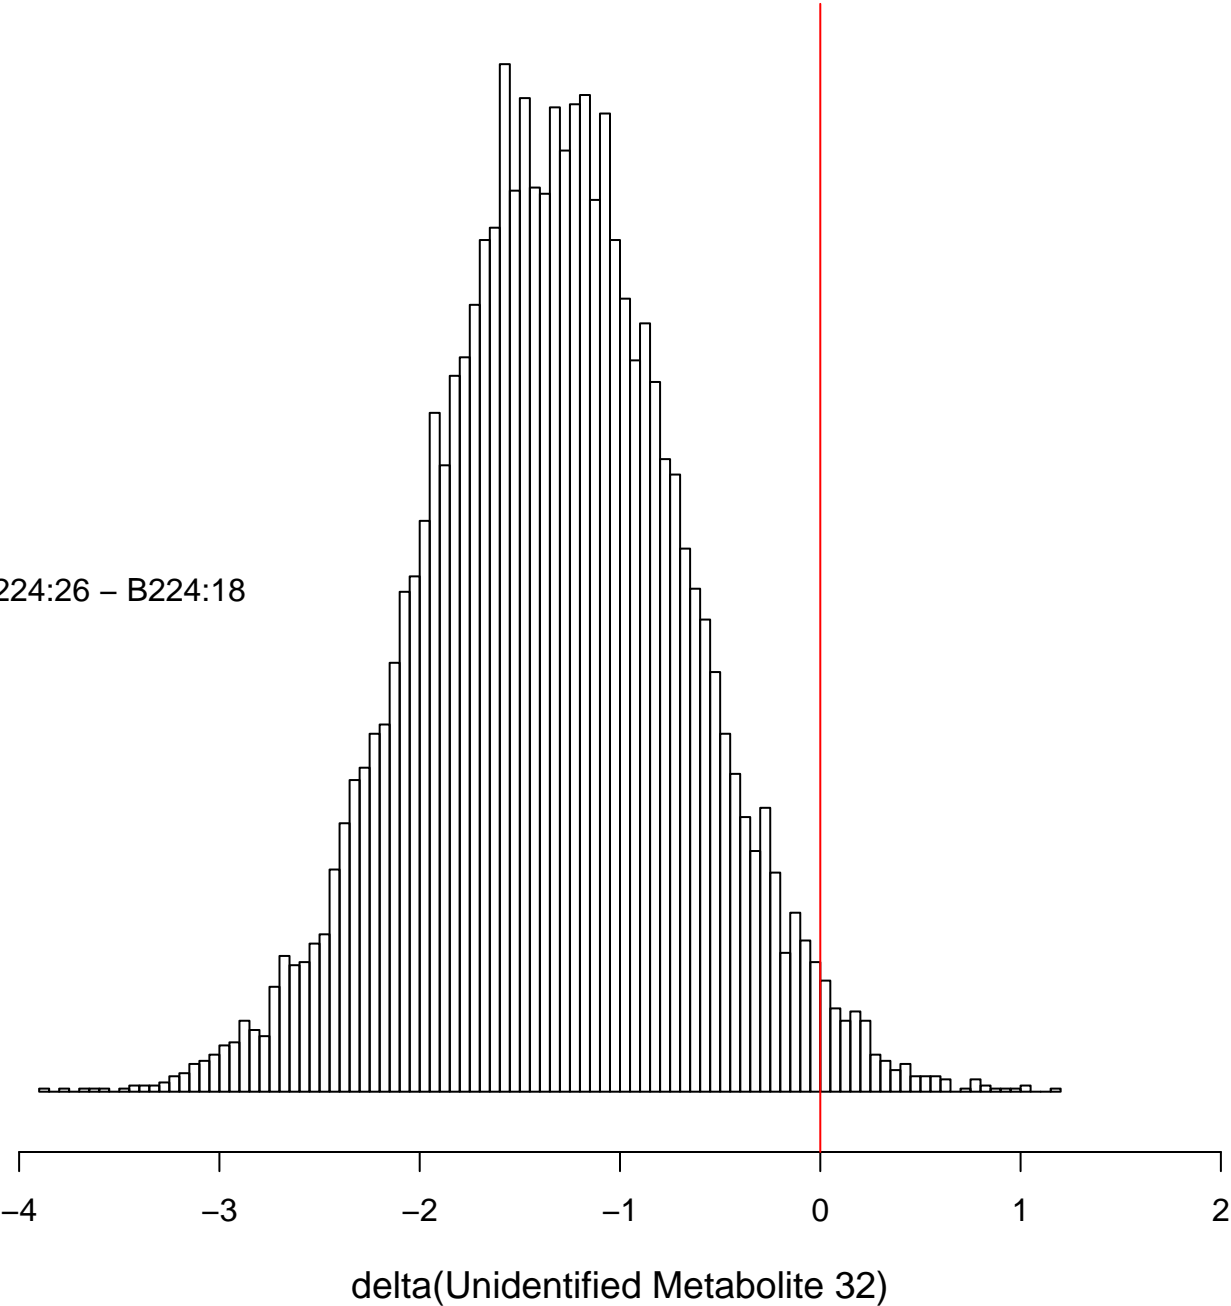

B224:26

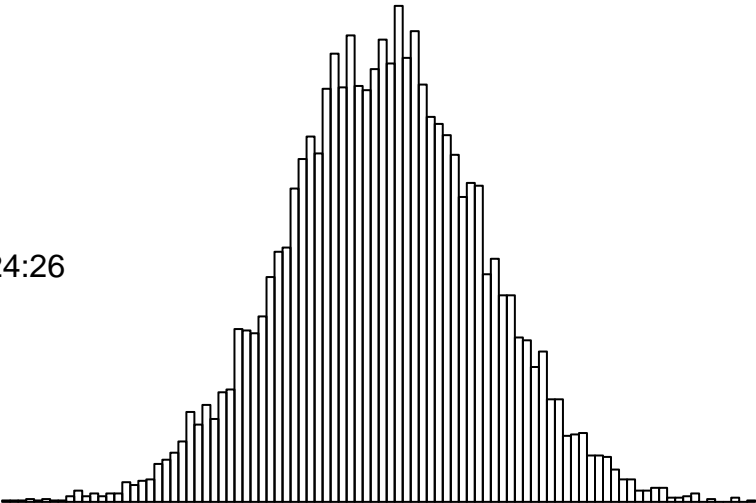

B224:18

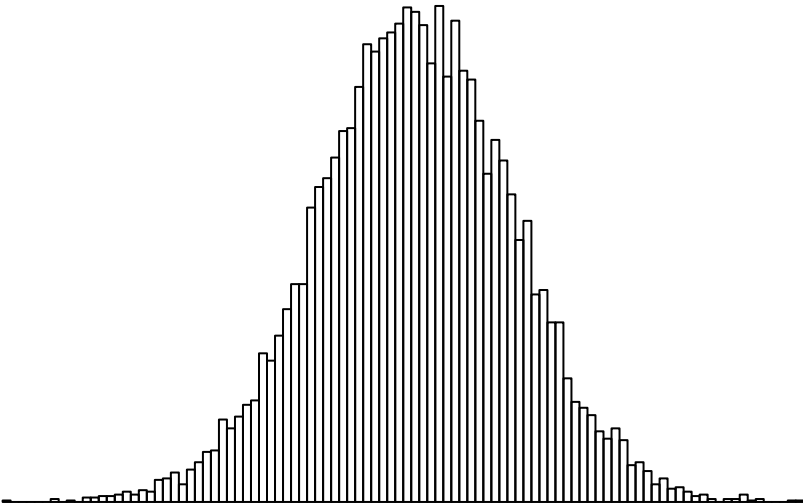

Unidentified Metabolite 33

B224:26 – B224:18

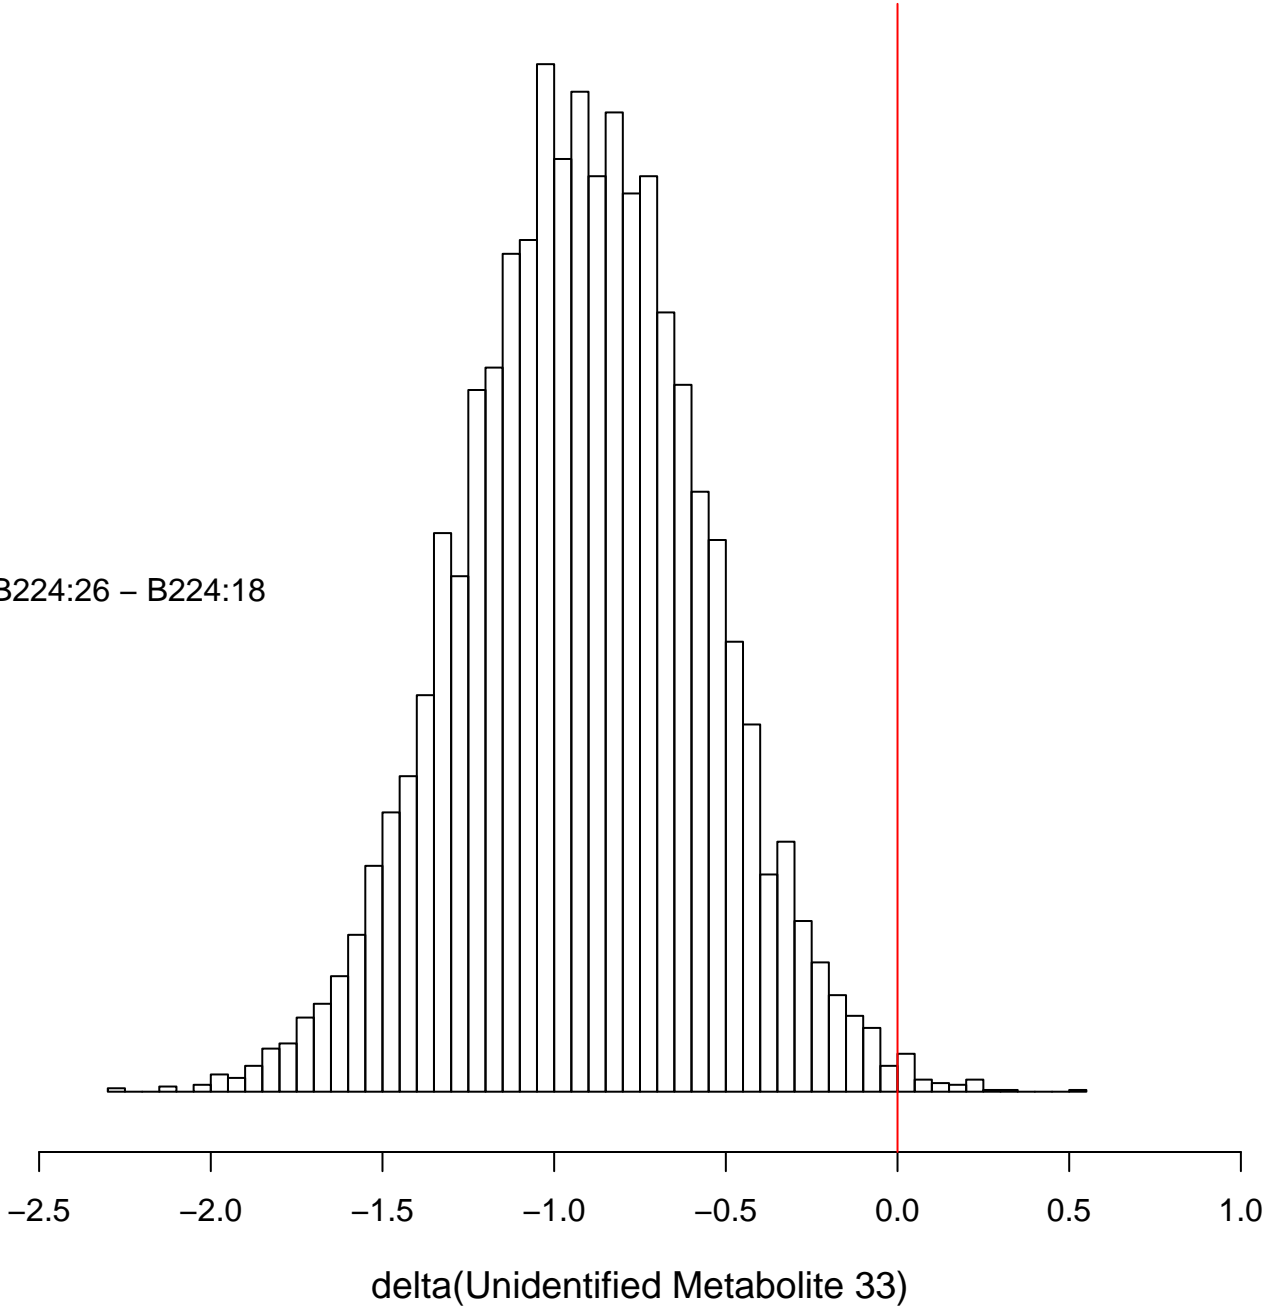

B224:26

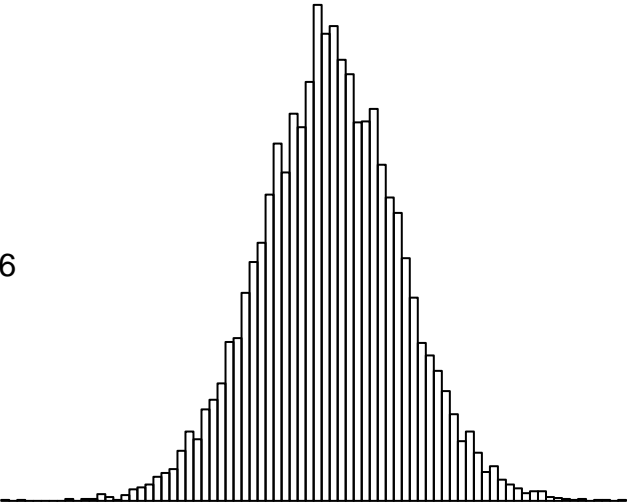

B224:18

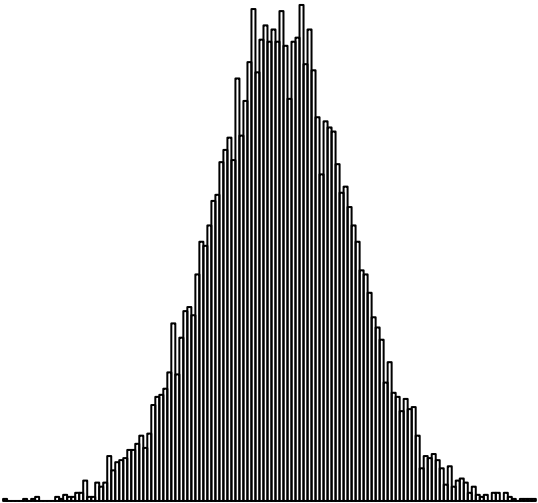

-10.5      -10.0      -9.5      -9.0      -8.5      -8.0      -7.5

Unidentified Metabolite 34

B224:26 – B224:18

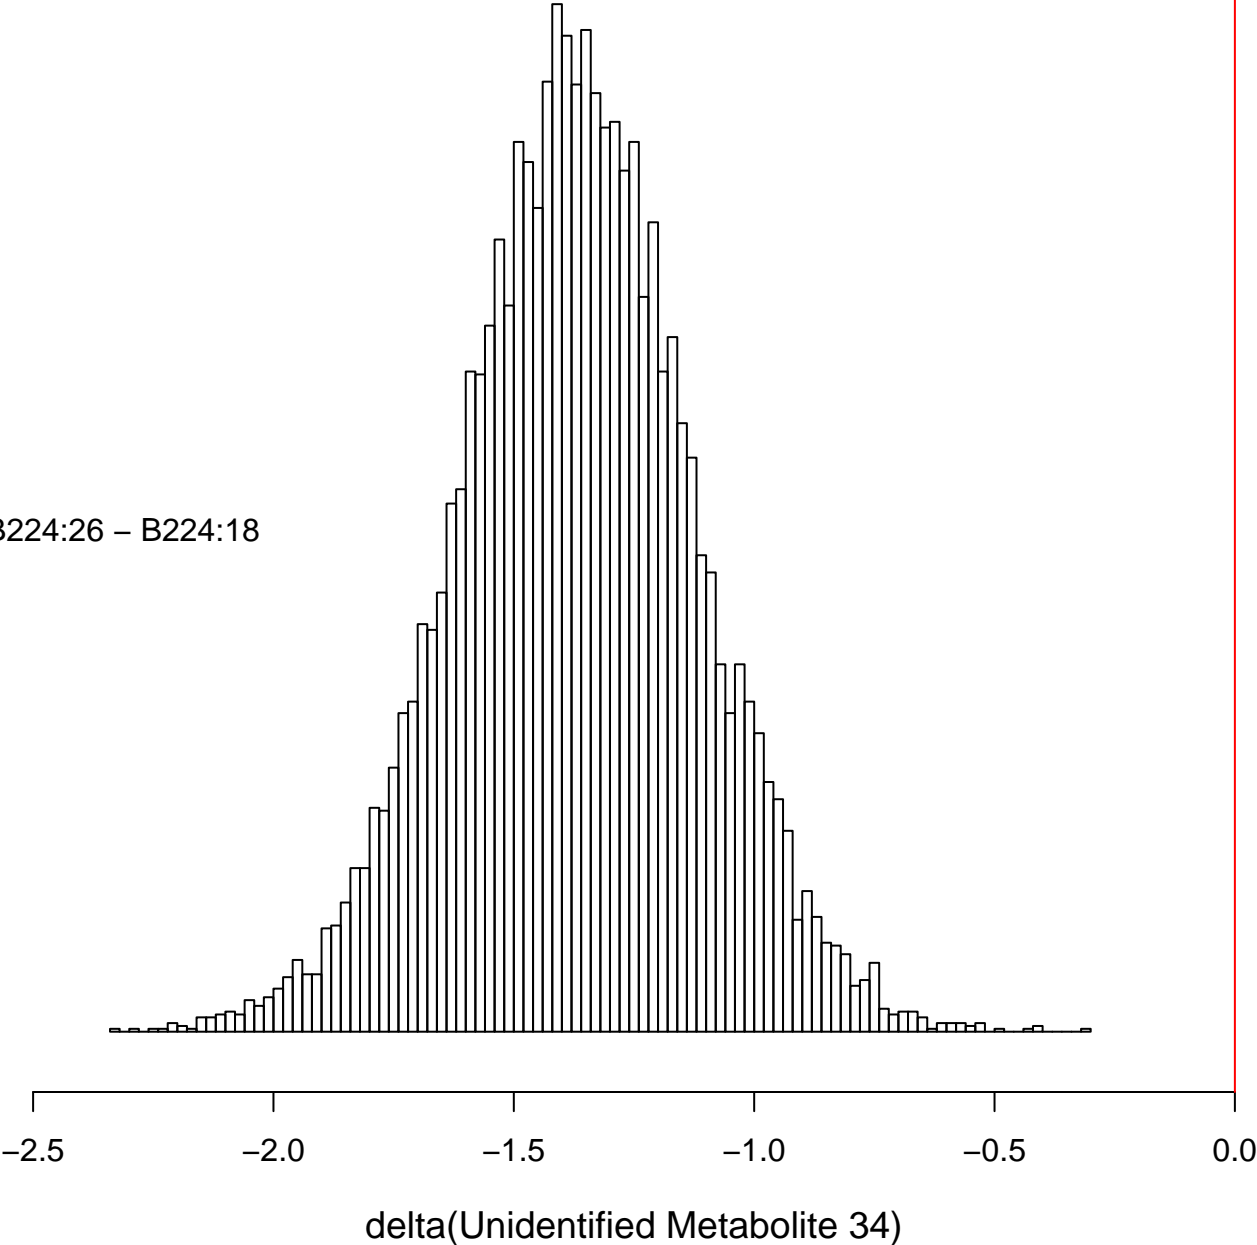



B224:26

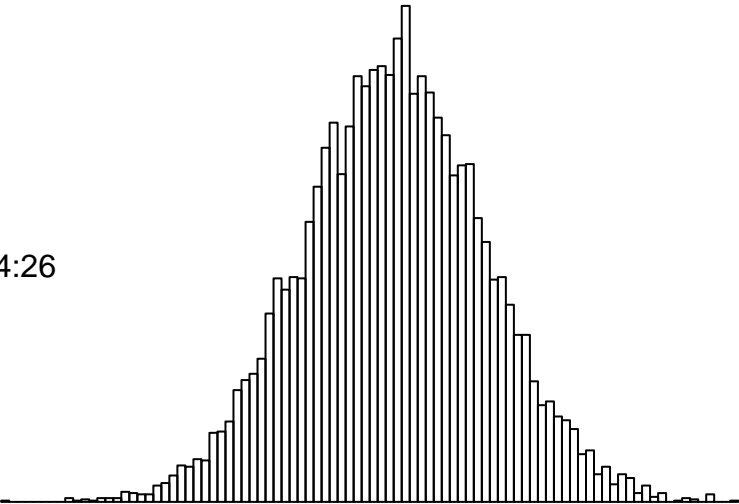

B224:18

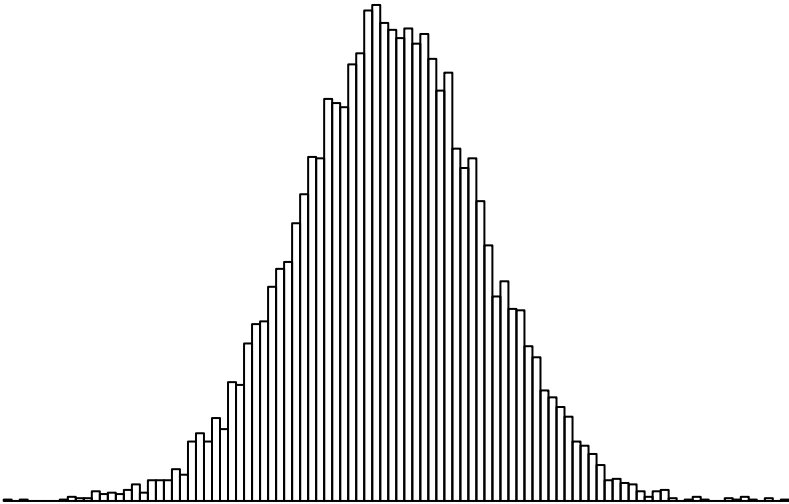

-8.5      -8.0      -7.5      -7.0      -6.5      -6.0      -5.5

Unidentified Metabolite 35

B224:26 – B224:18

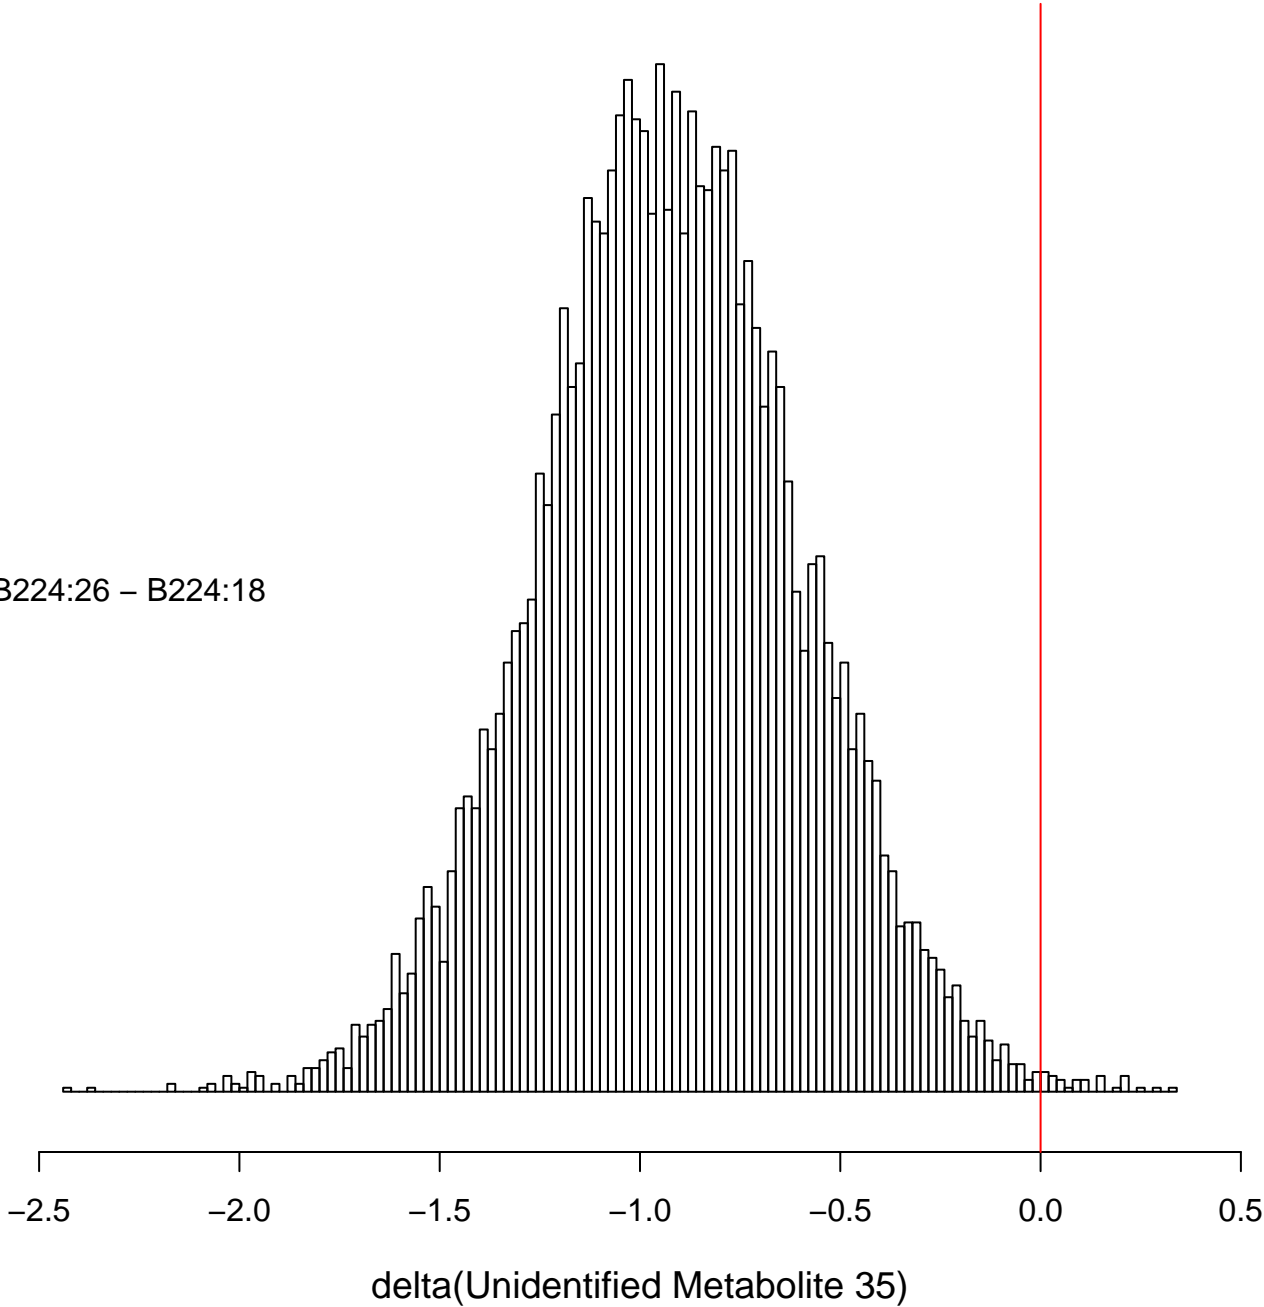

B224:26

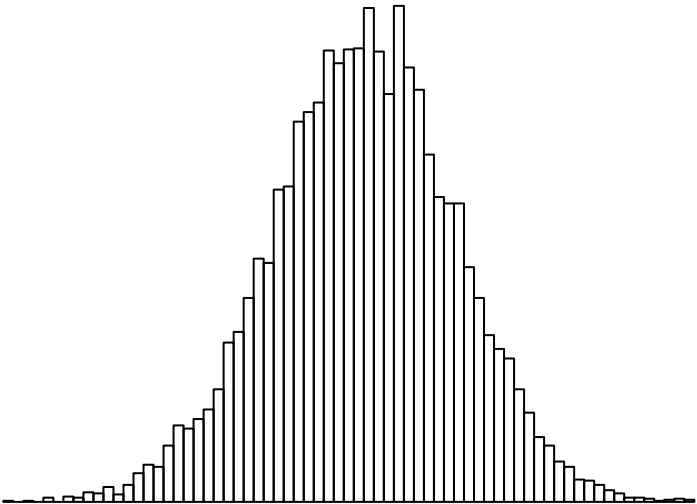

B224:18

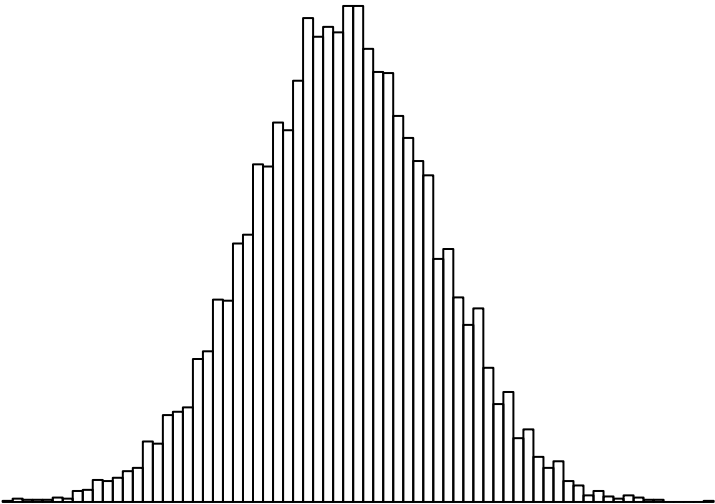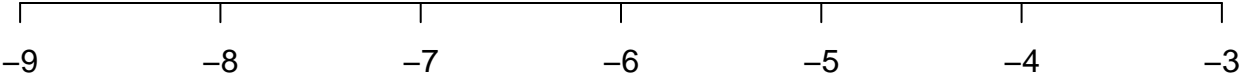

Unidentified Metabolite 36

B224:26 – B224:18

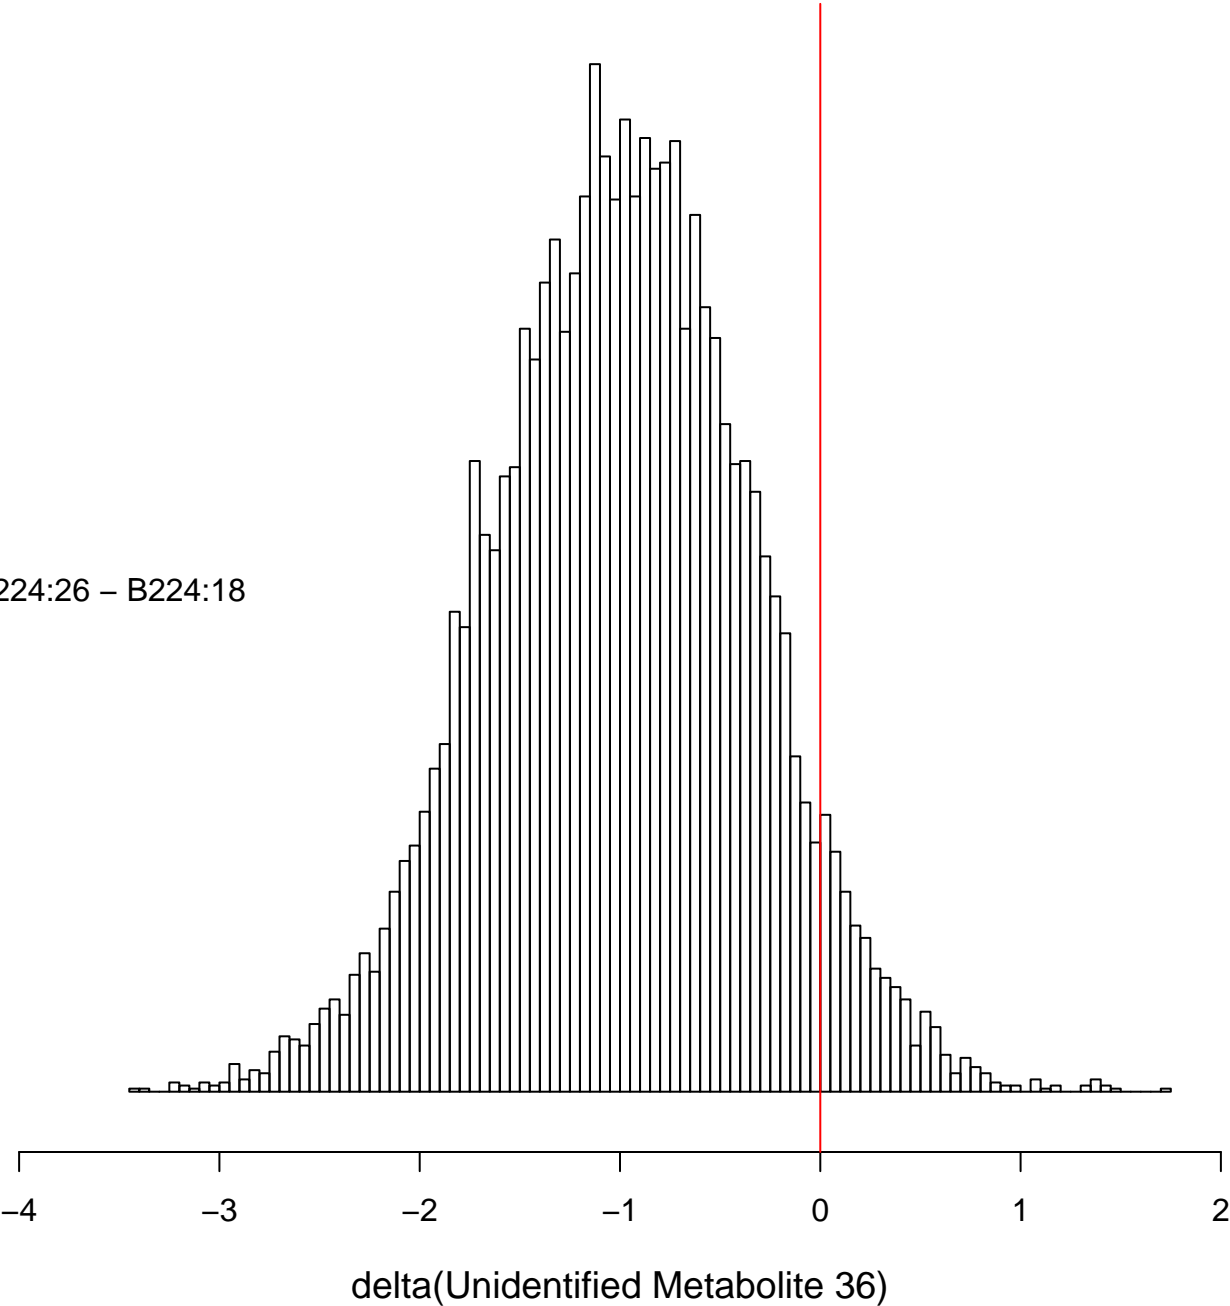

B224:26

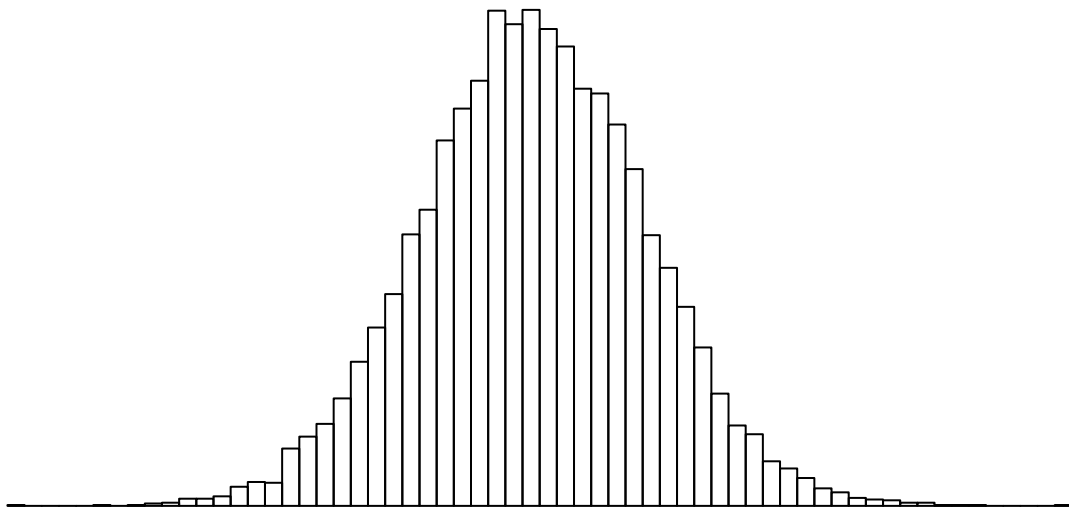

B224:18

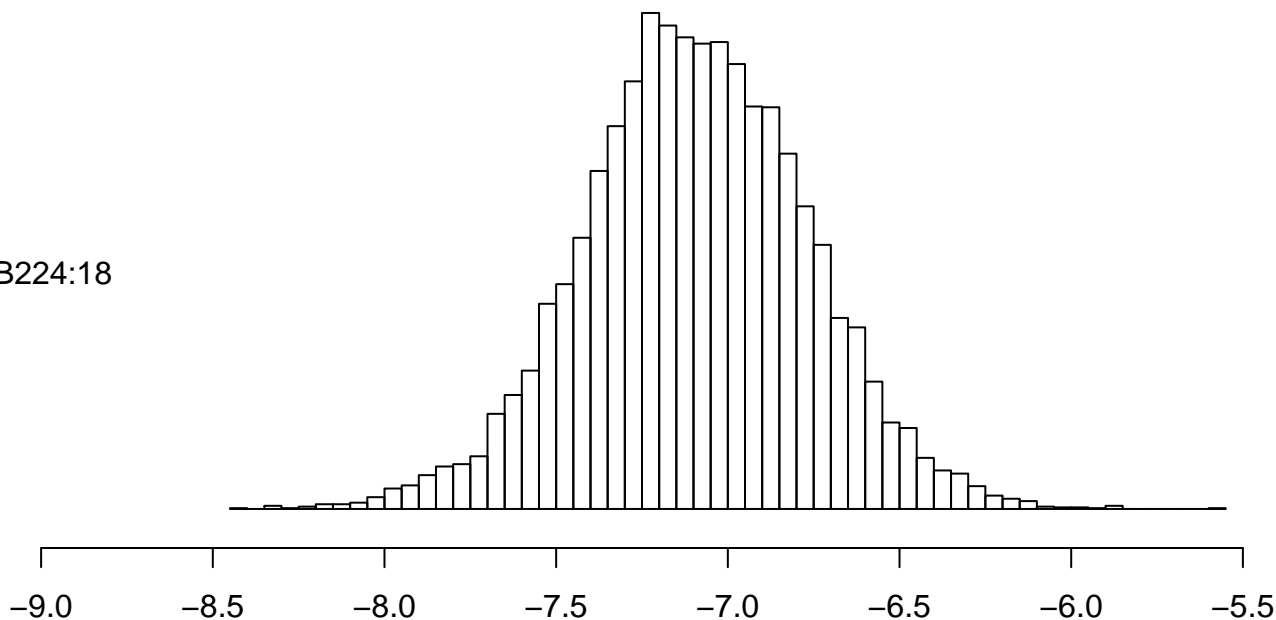

Unidentified Metabolite 38

B224:26 – B224:18

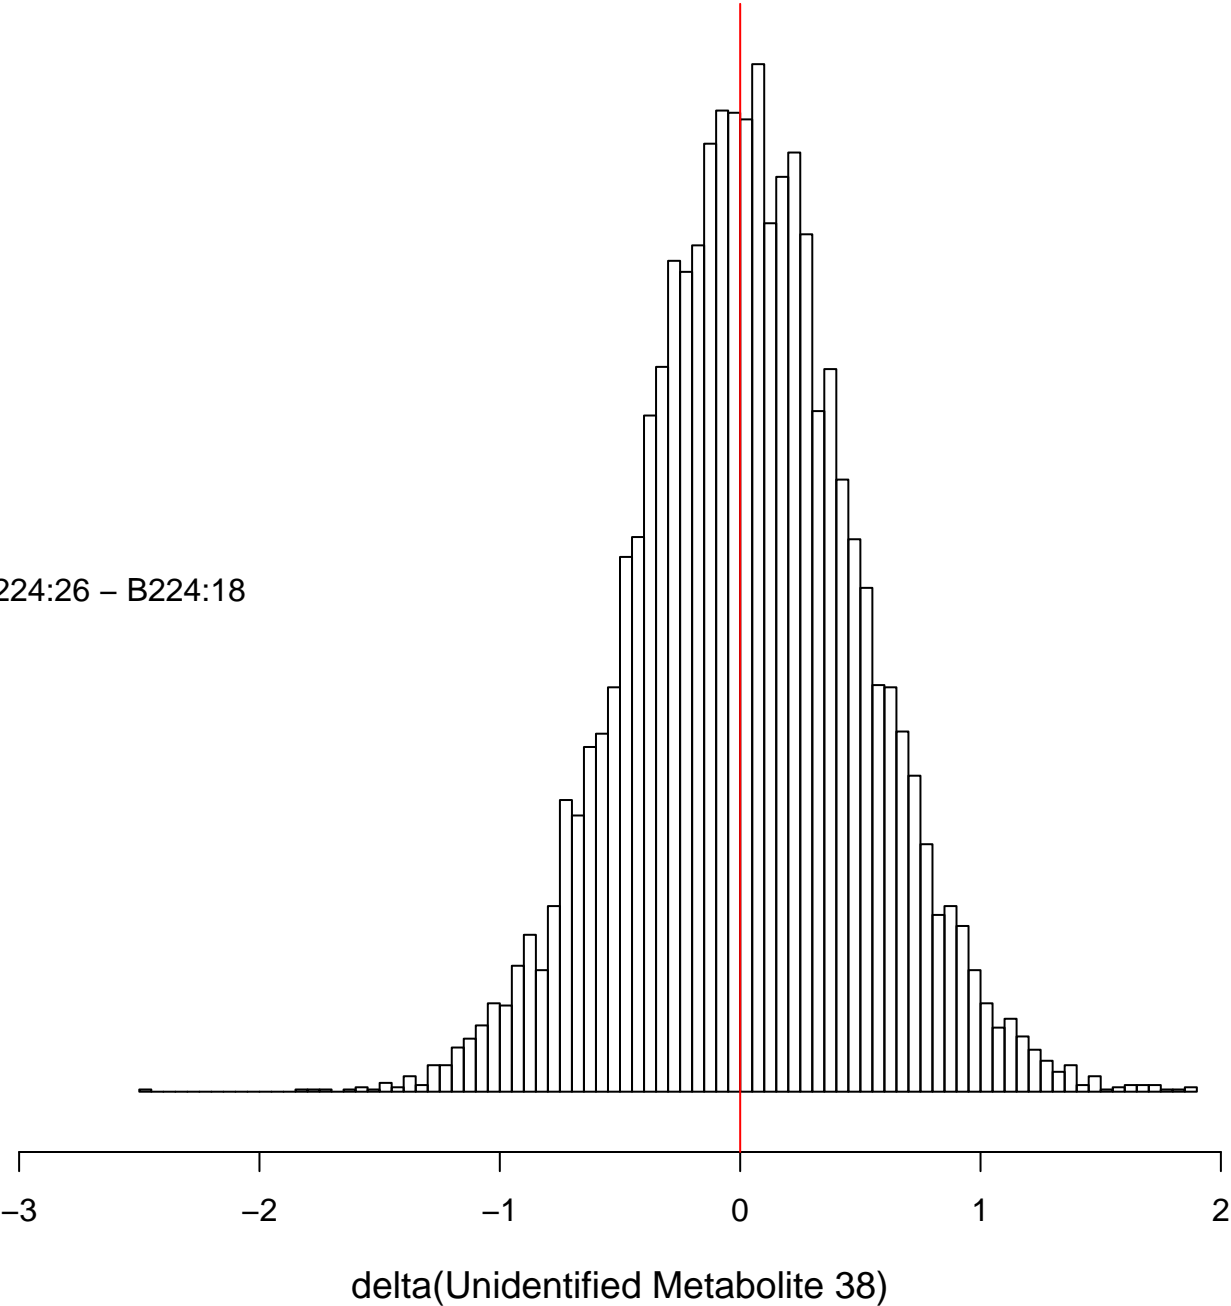

B224:26

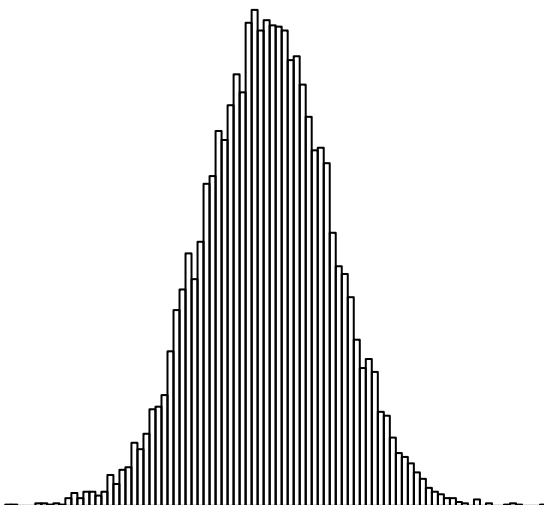

B224:18

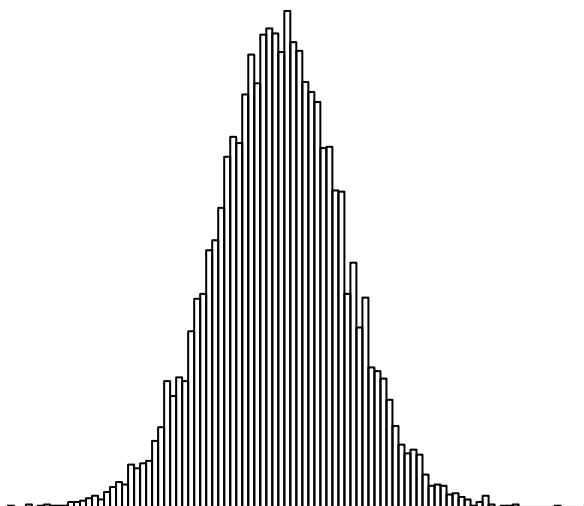

-10

-9

-8

-7

-6

Unidentified Metabolite 39

B224:26 – B224:18

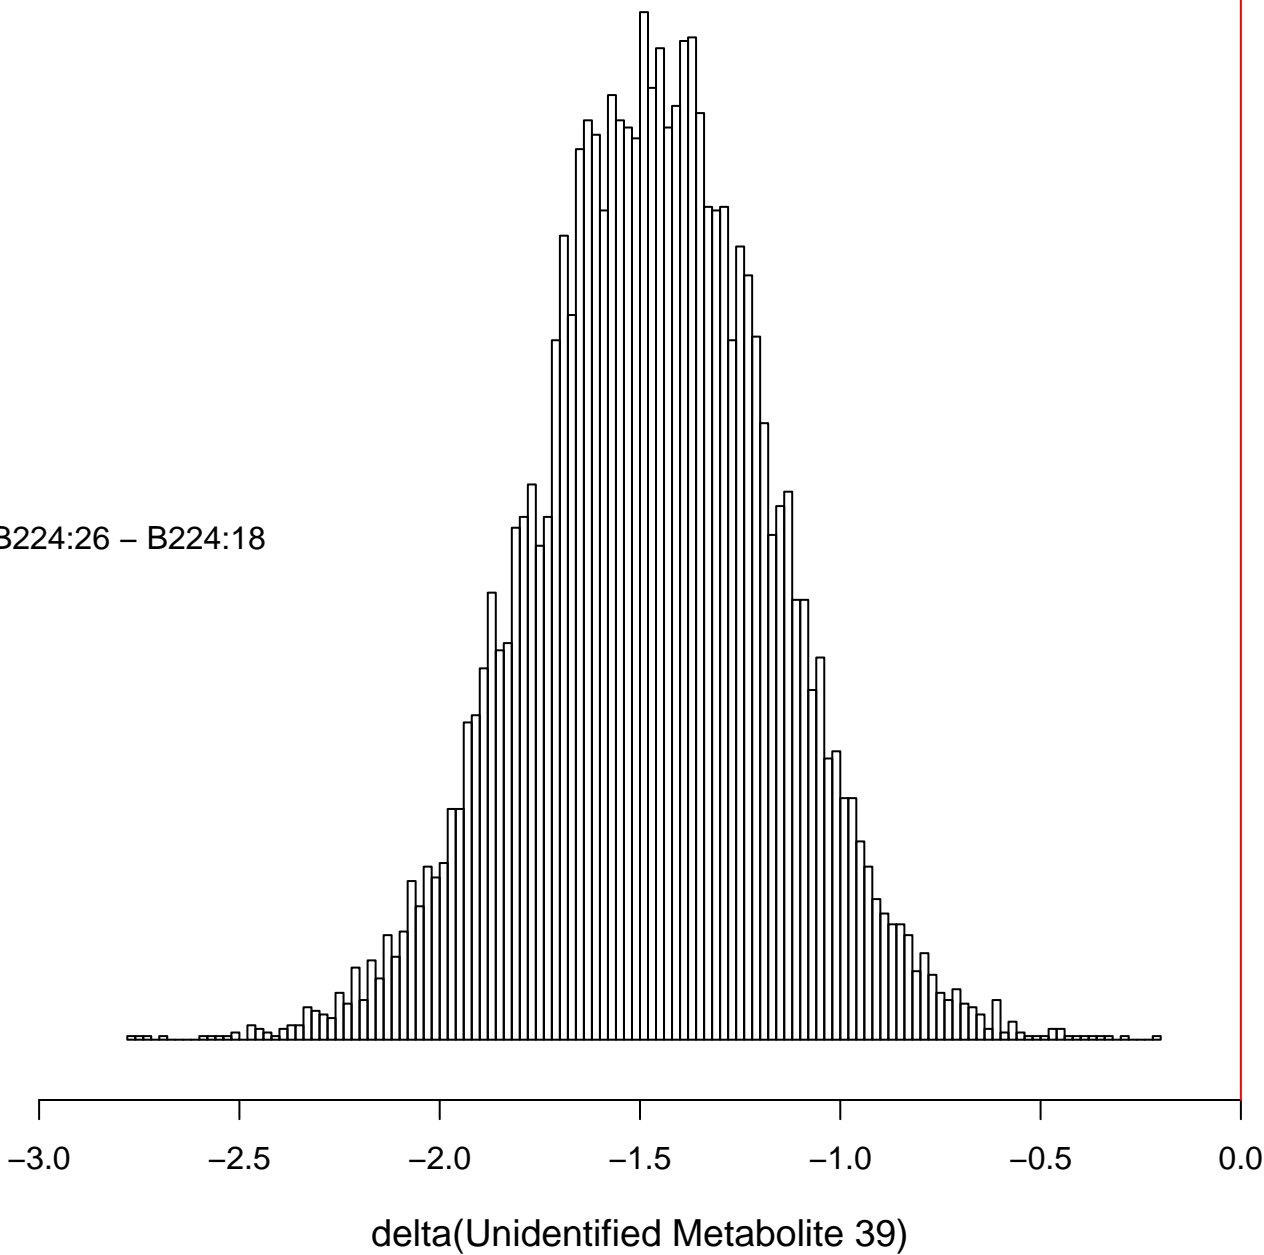



B224:26

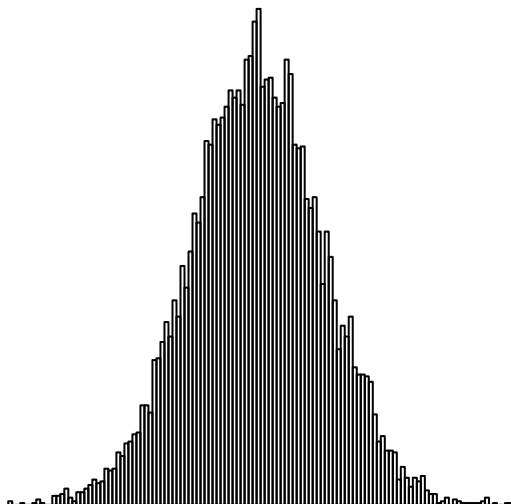

B224:18

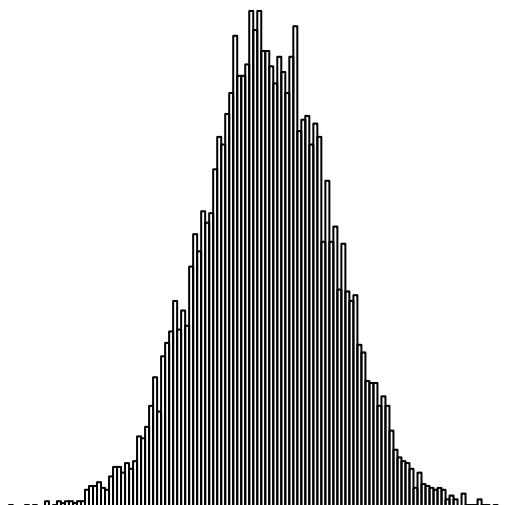

-10      -9      -8      -7      -6      -5      -4

Unidentified Metabolite 42

B224:26 – B224:18

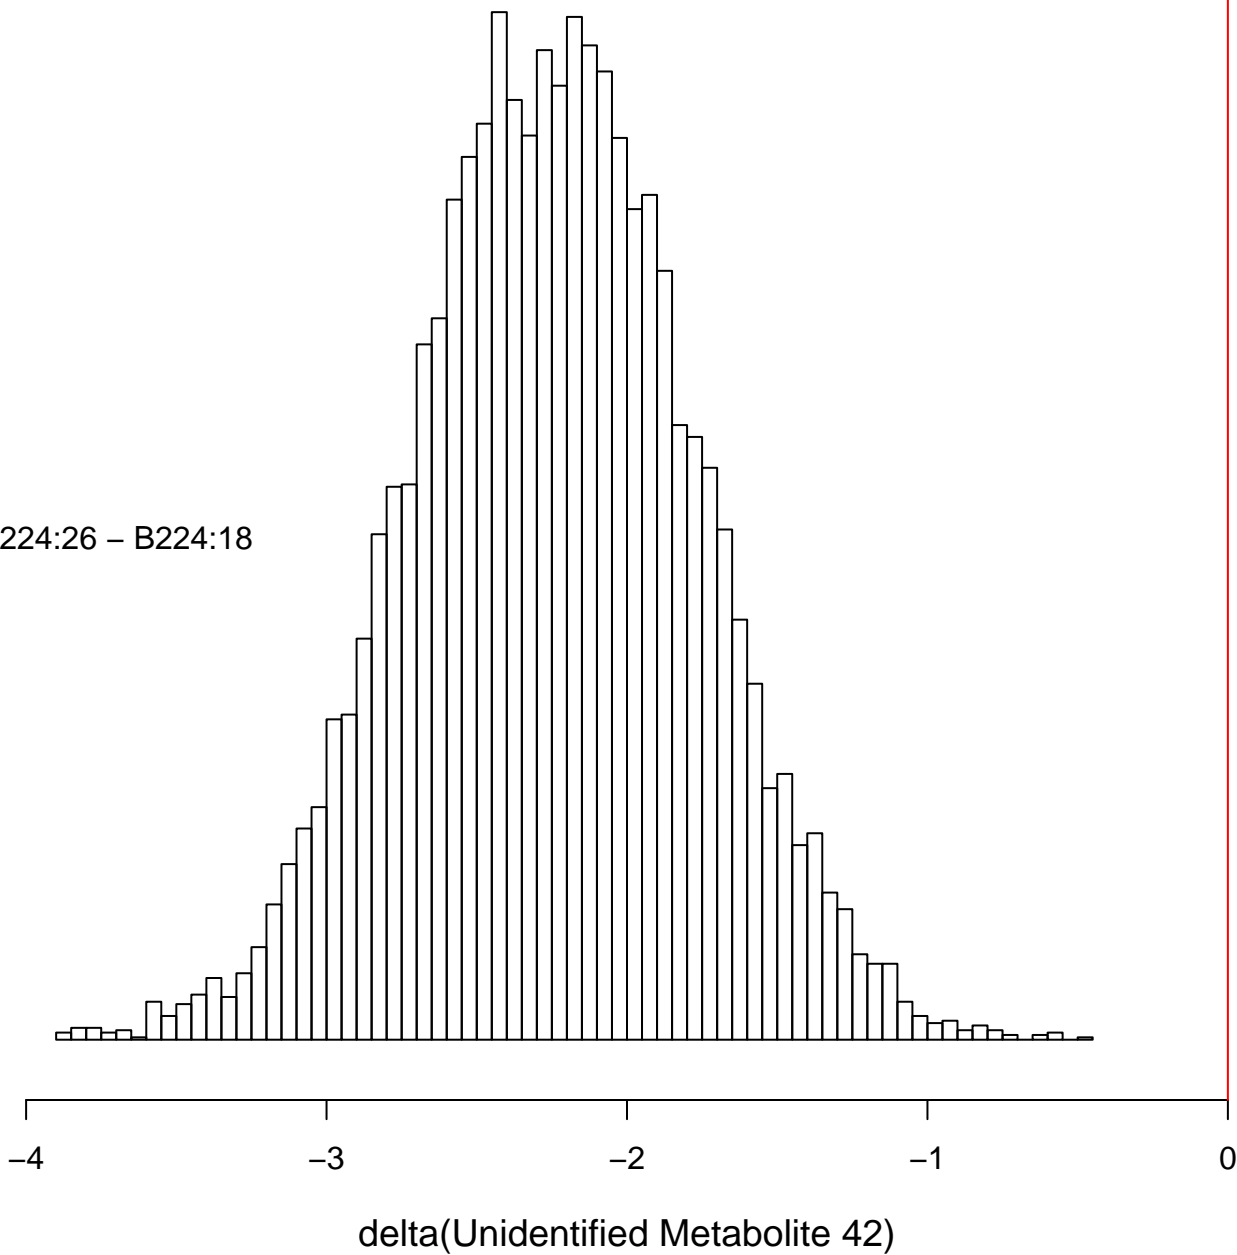

B224:26

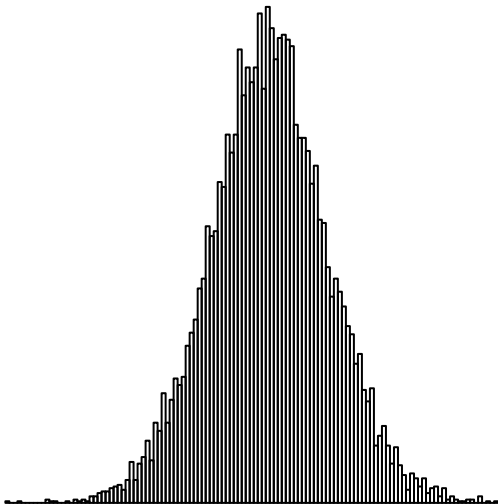

B224:18

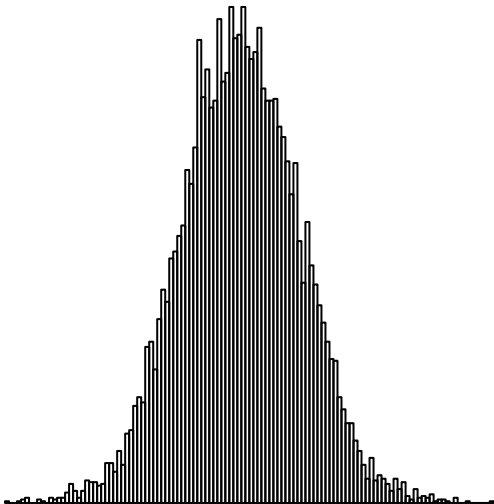

-10.0      -9.5      -9.0      -8.5      -8.0      -7.5      -7.0

Unidentified Metabolite 43

B224:26 – B224:18

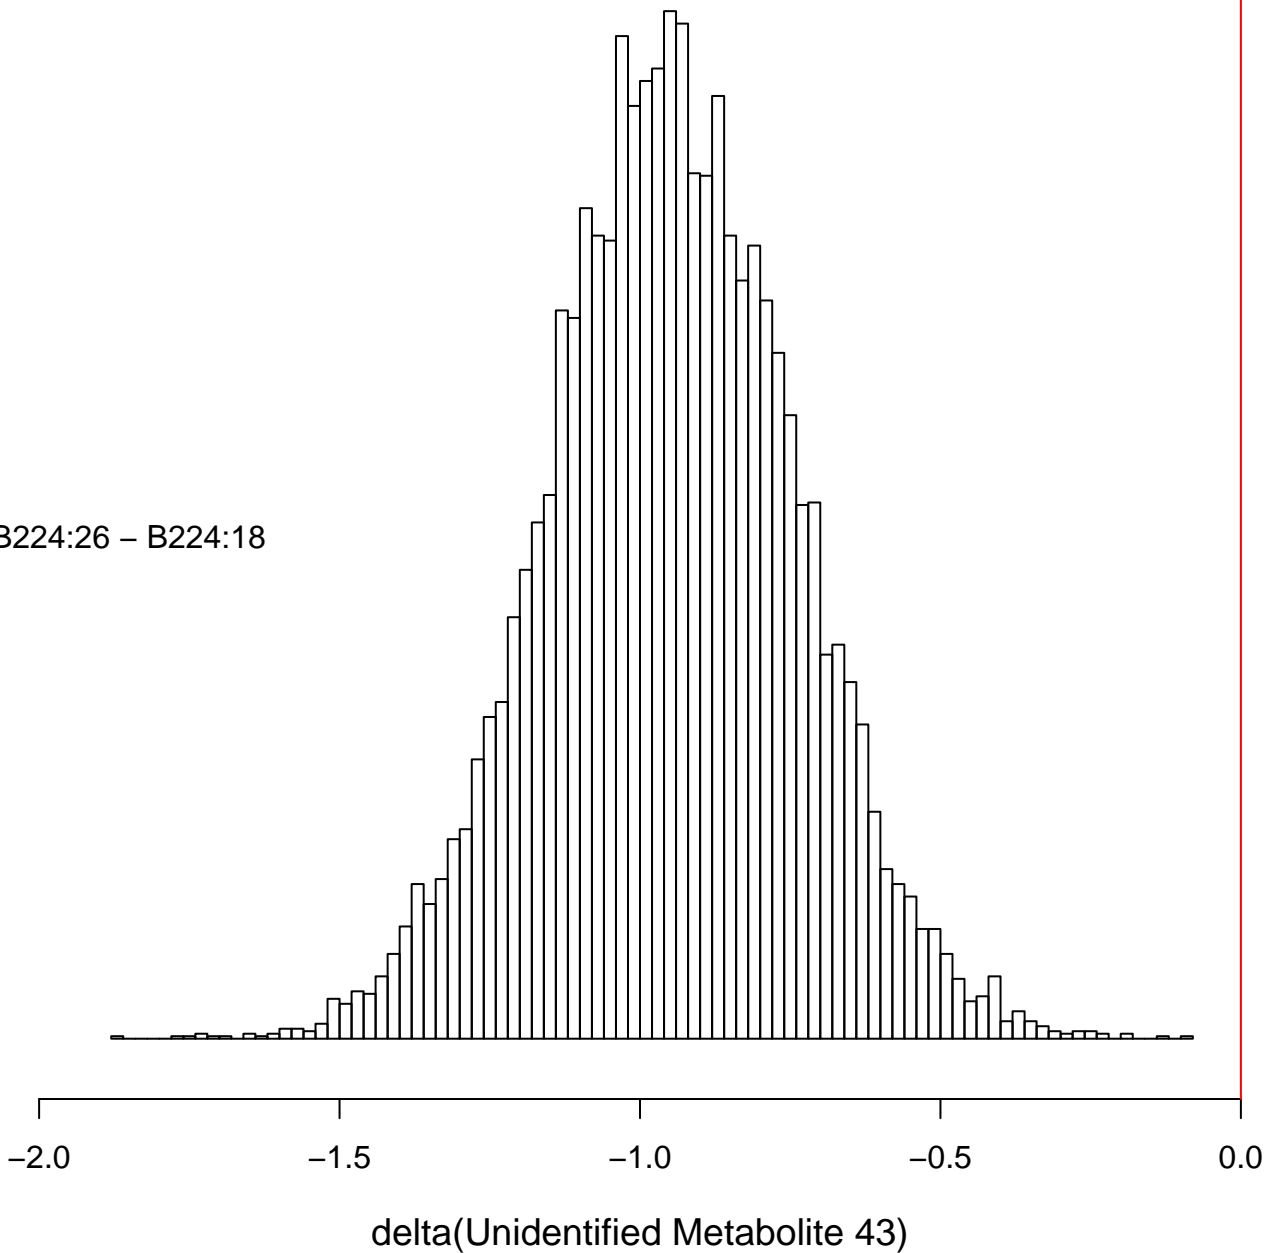

B224:26

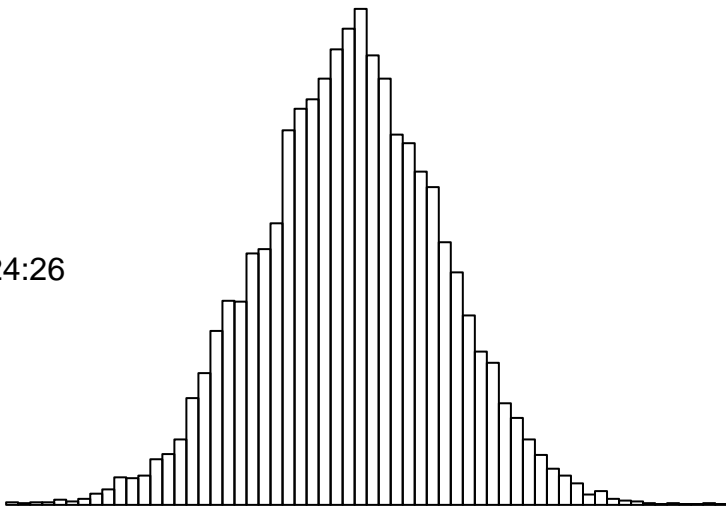

B224:18

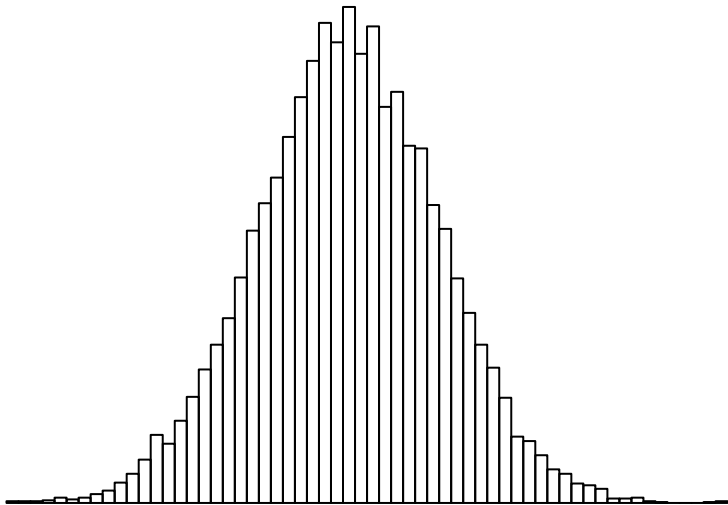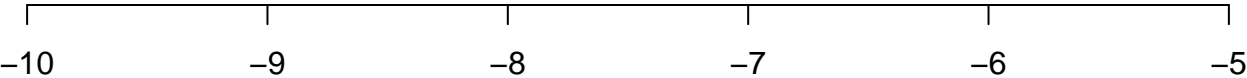

Unidentified Metabolite 45

B224:26 – B224:18

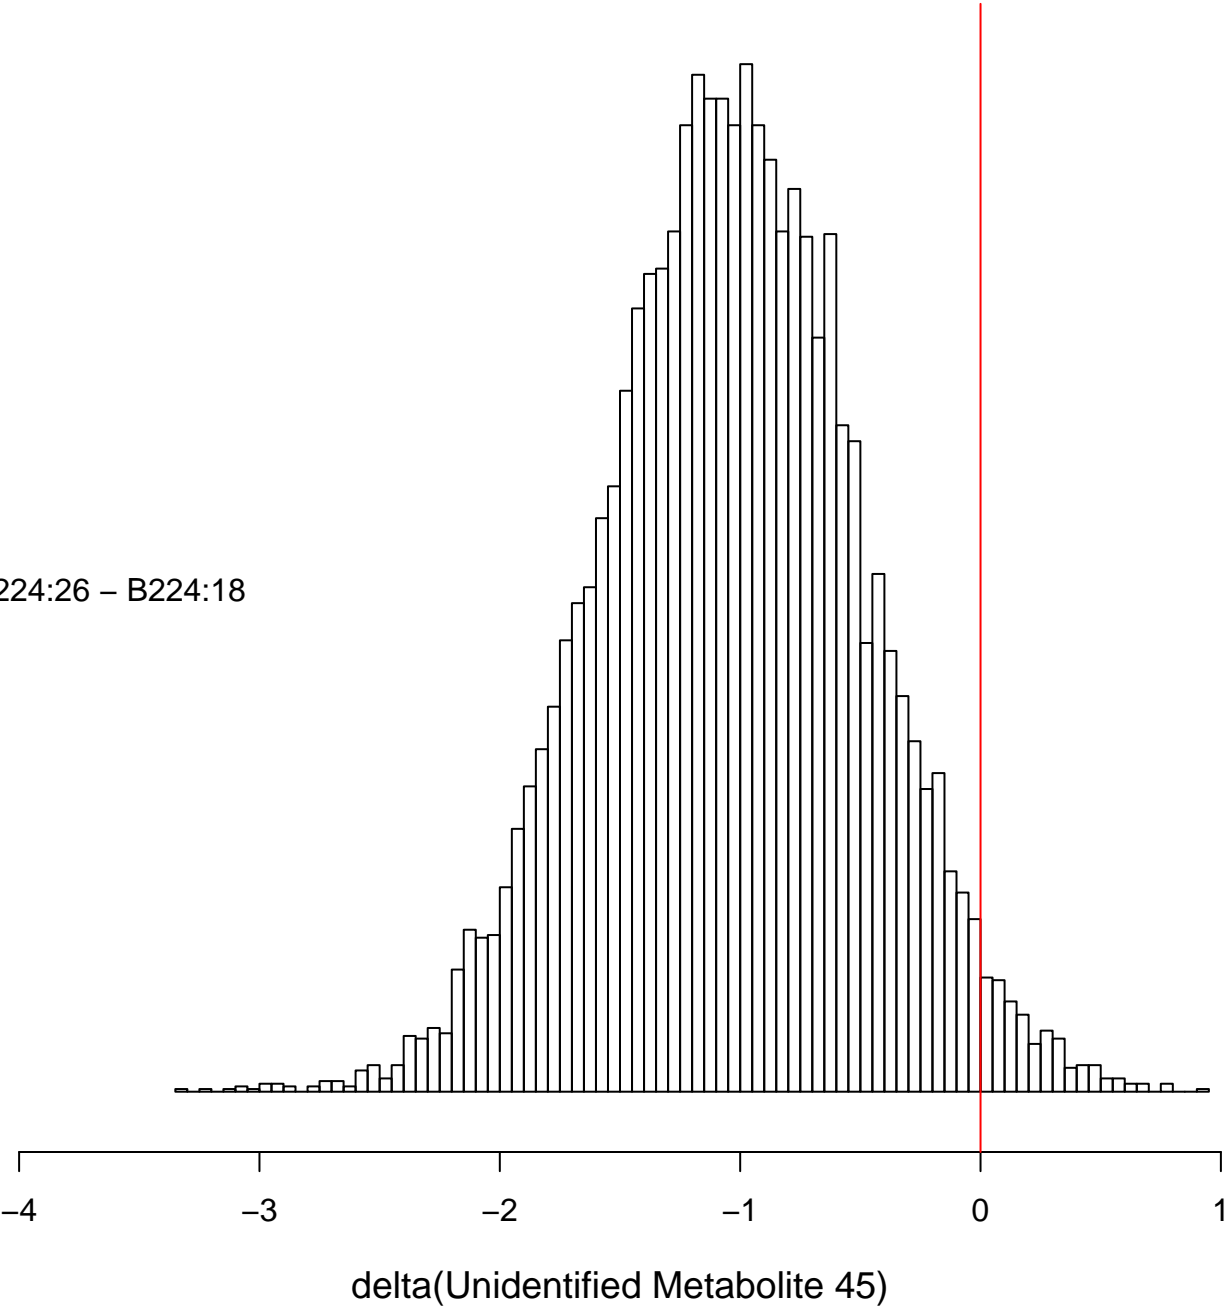

B224:26

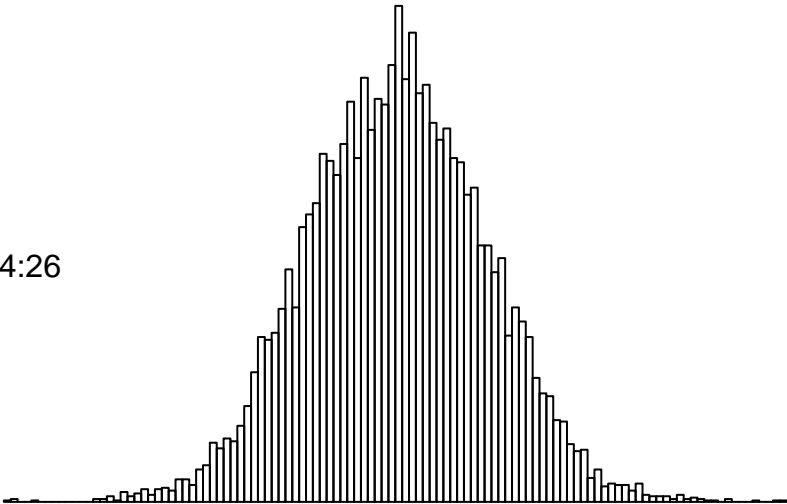

B224:18

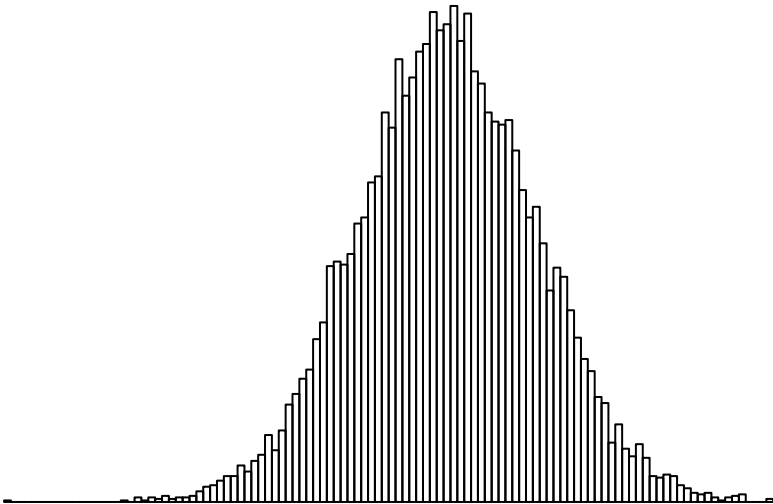

-9.5      -9.0      -8.5      -8.0      -7.5      -7.0      -6.5      -6.0

Unidentified Metabolite 47

B224:26 – B224:18

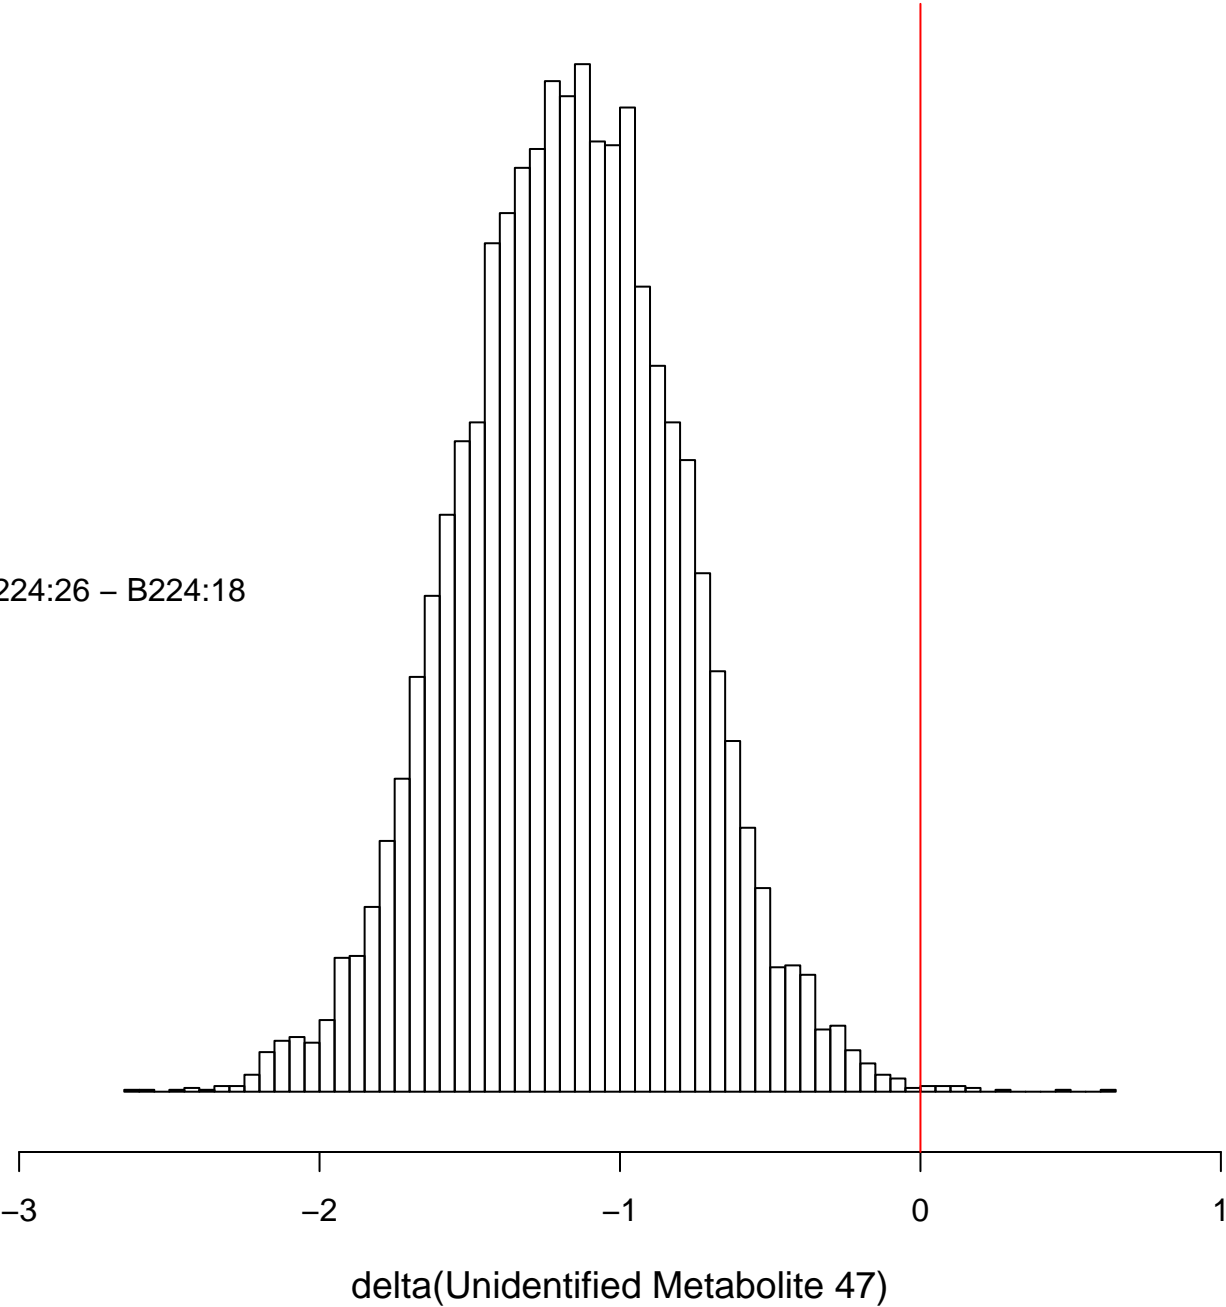



B224:26

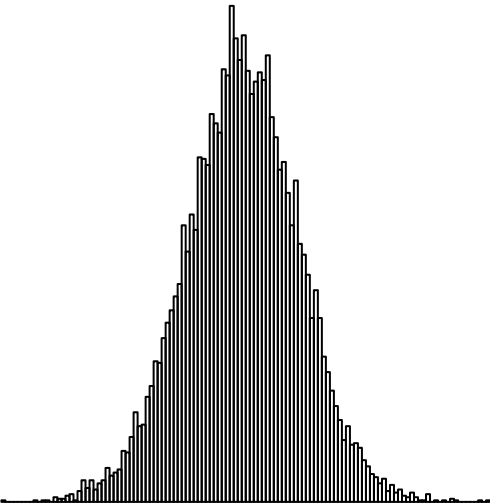

B224:18

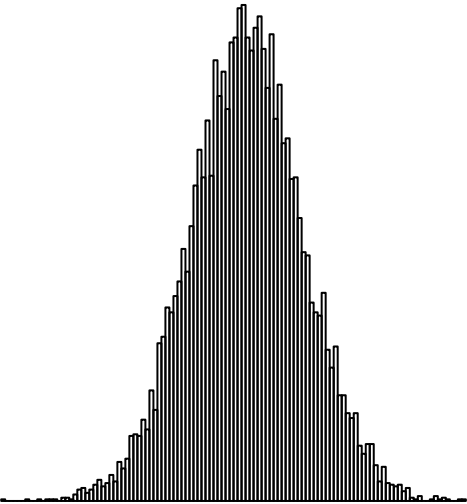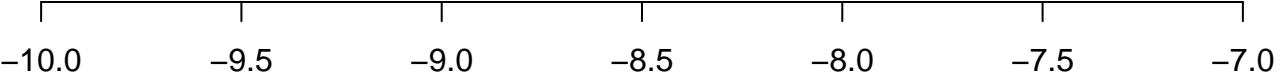

Unidentified Metabolite 48

B224:26 – B224:18

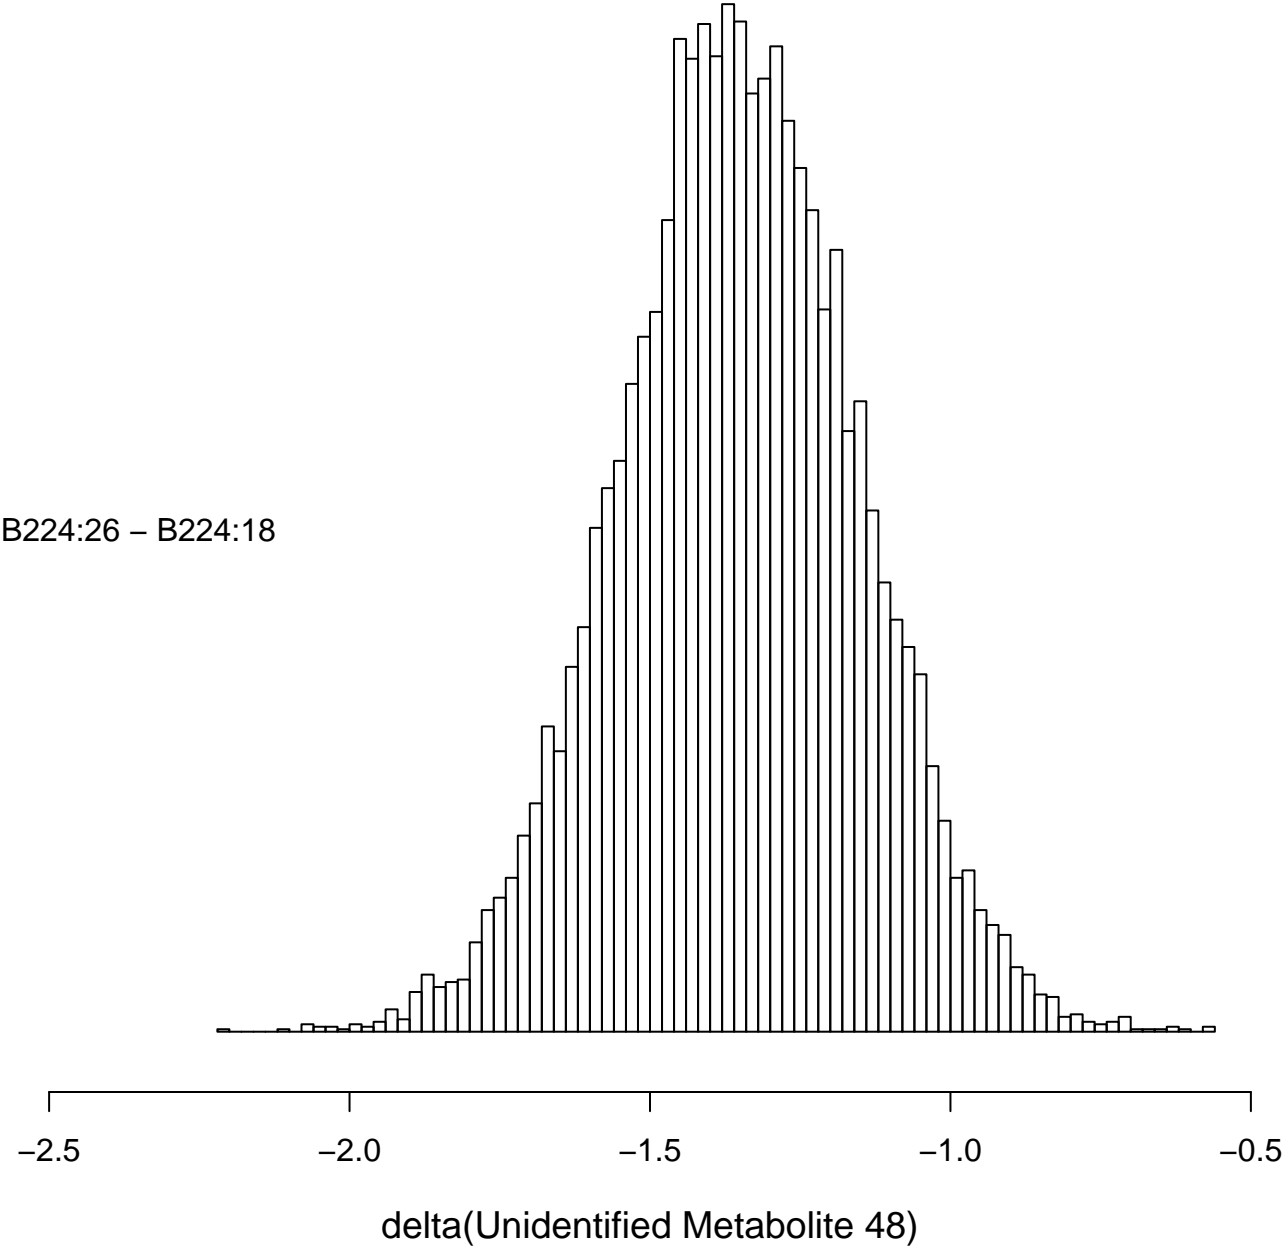

B224:26

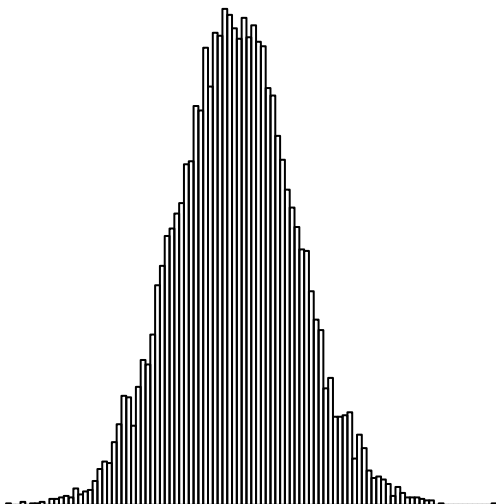

B224:18

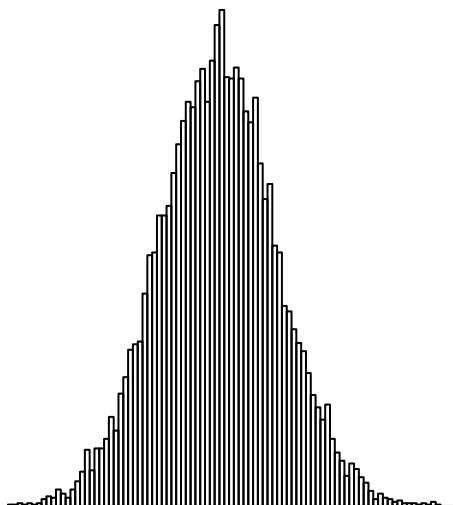

-11      -10      -9      -8      -7      -6

Unidentified Metabolite 49

B224:26 – B224:18

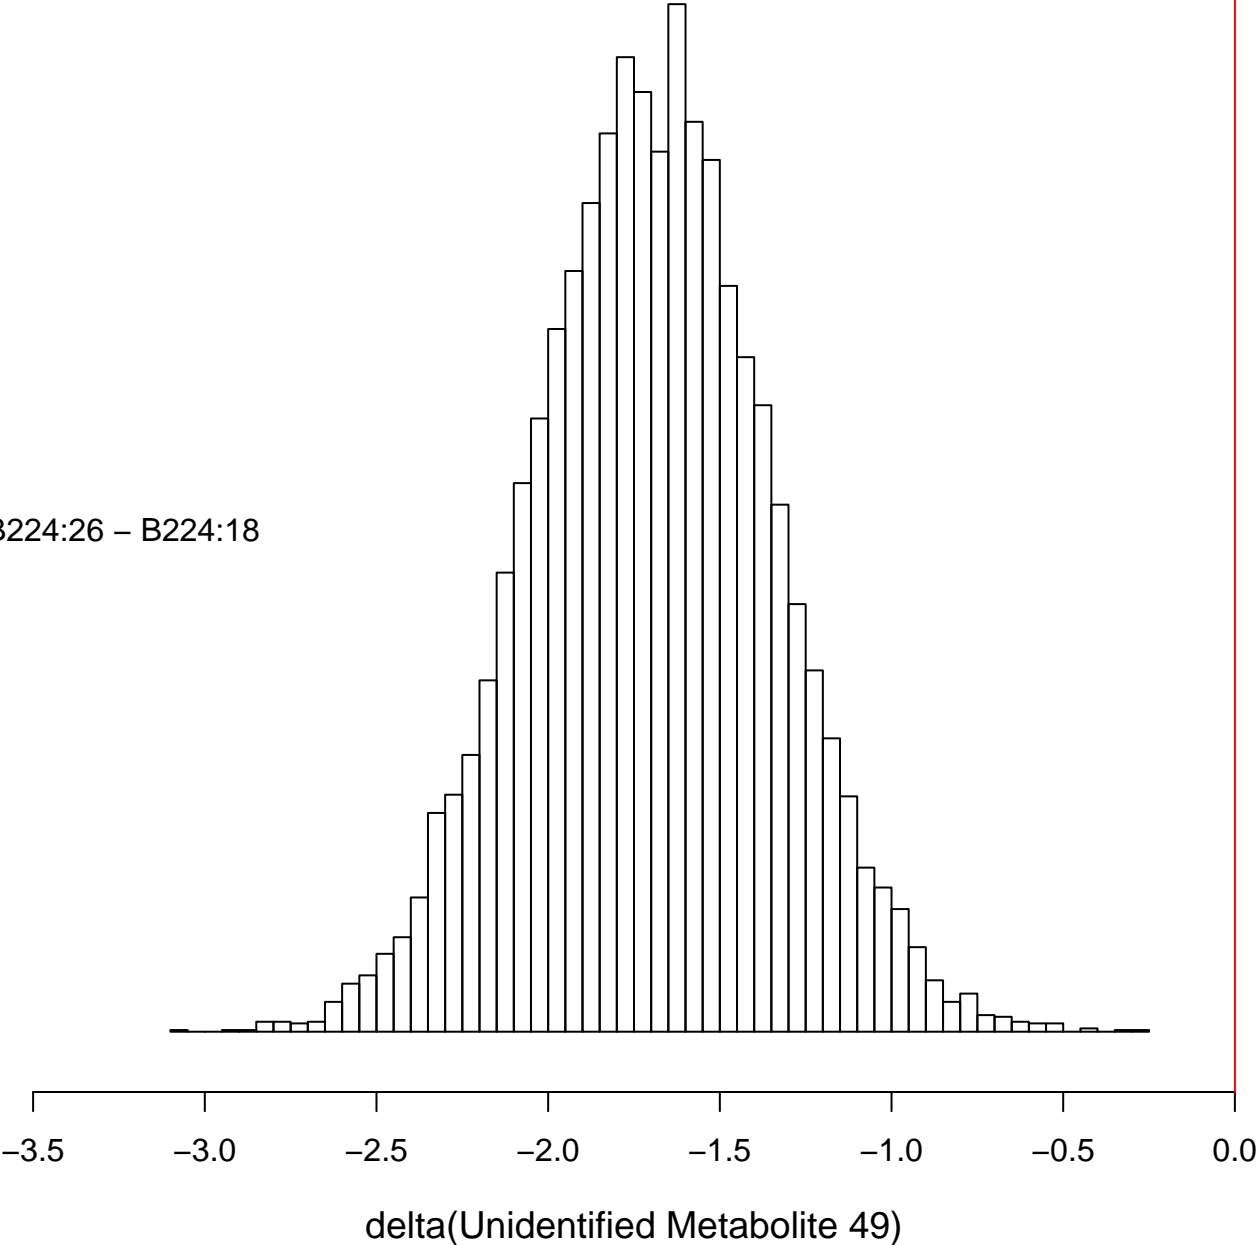

B224:26

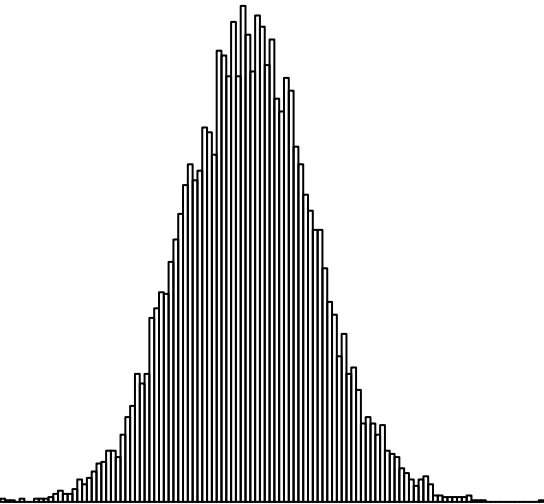

B224:18

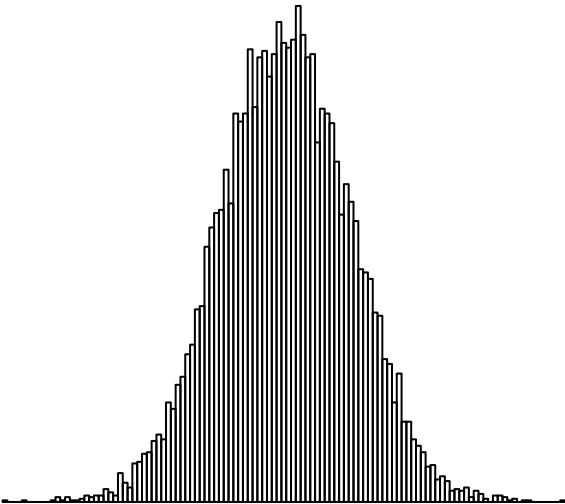

Unidentified Metabolite 50

B224:26 – B224:18

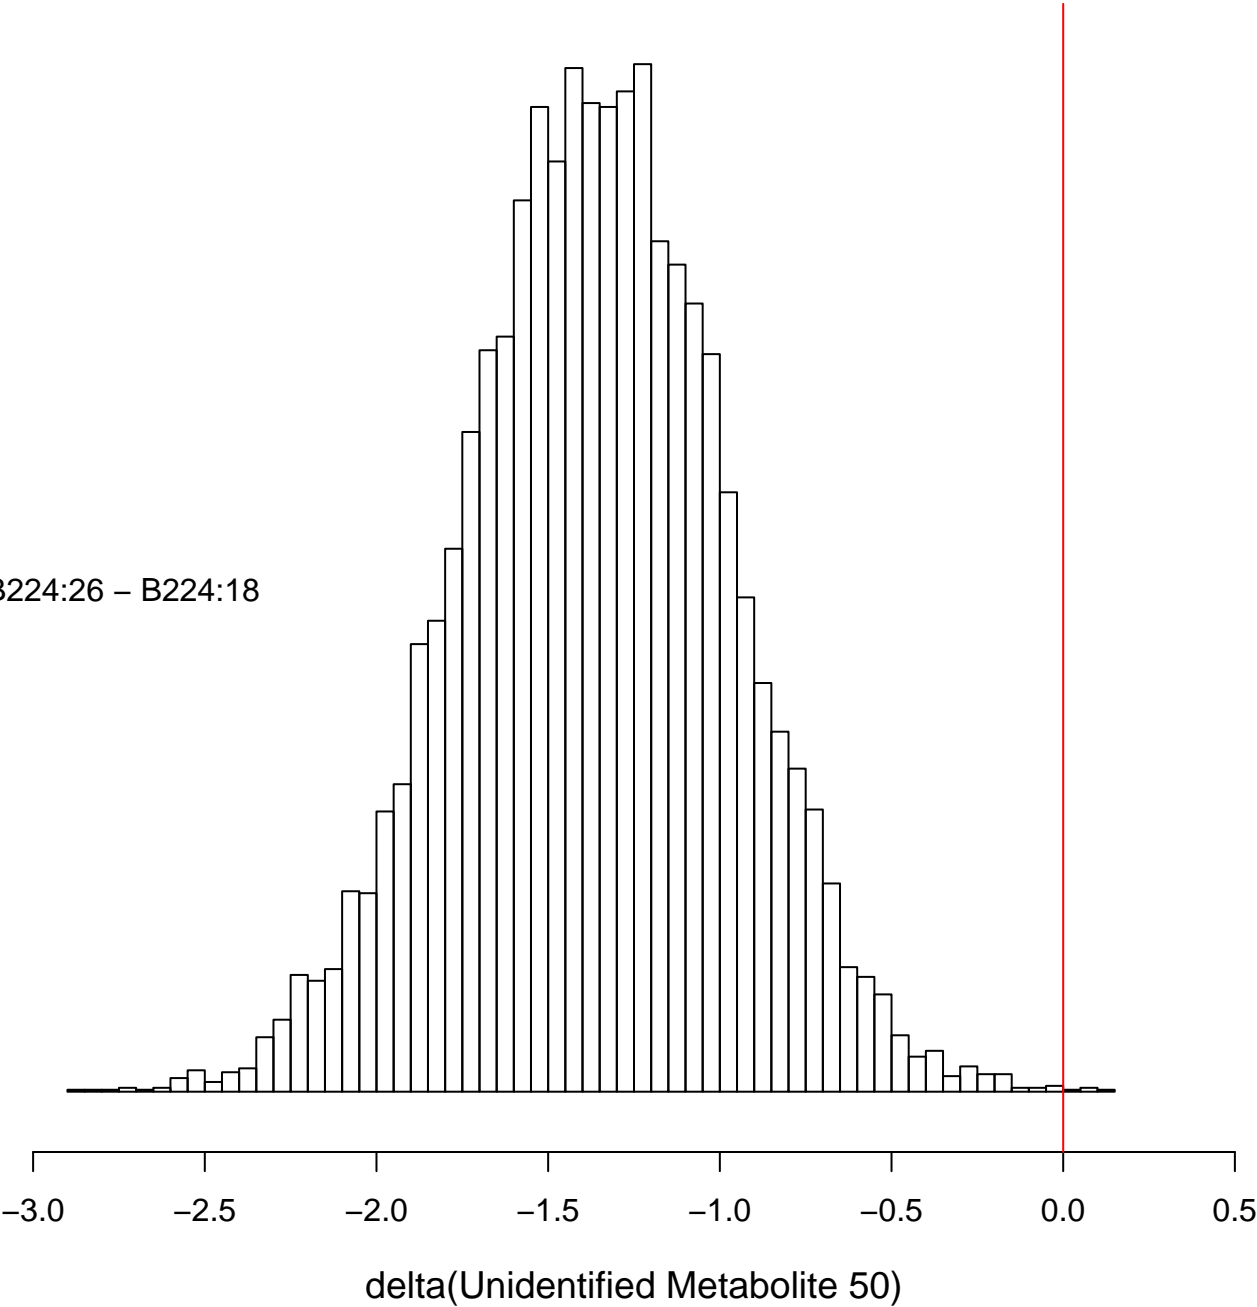

B224:26

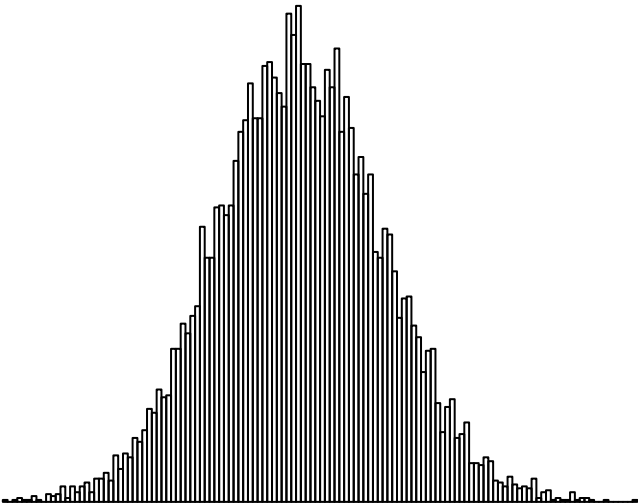

B224:18

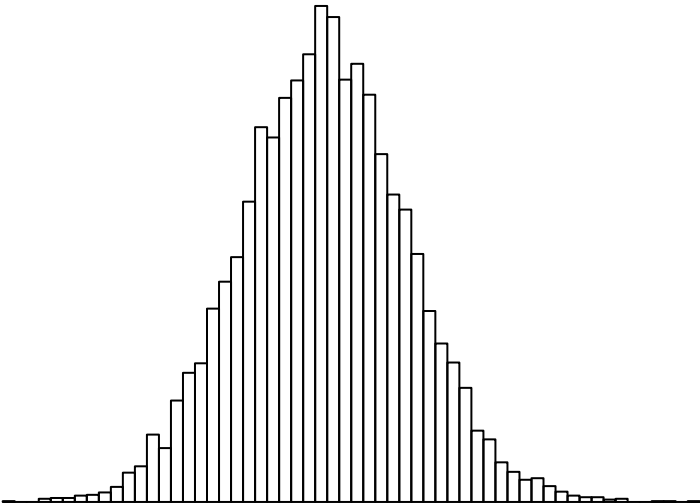

Unidentified Metabolite 51

B224:26 – B224:18

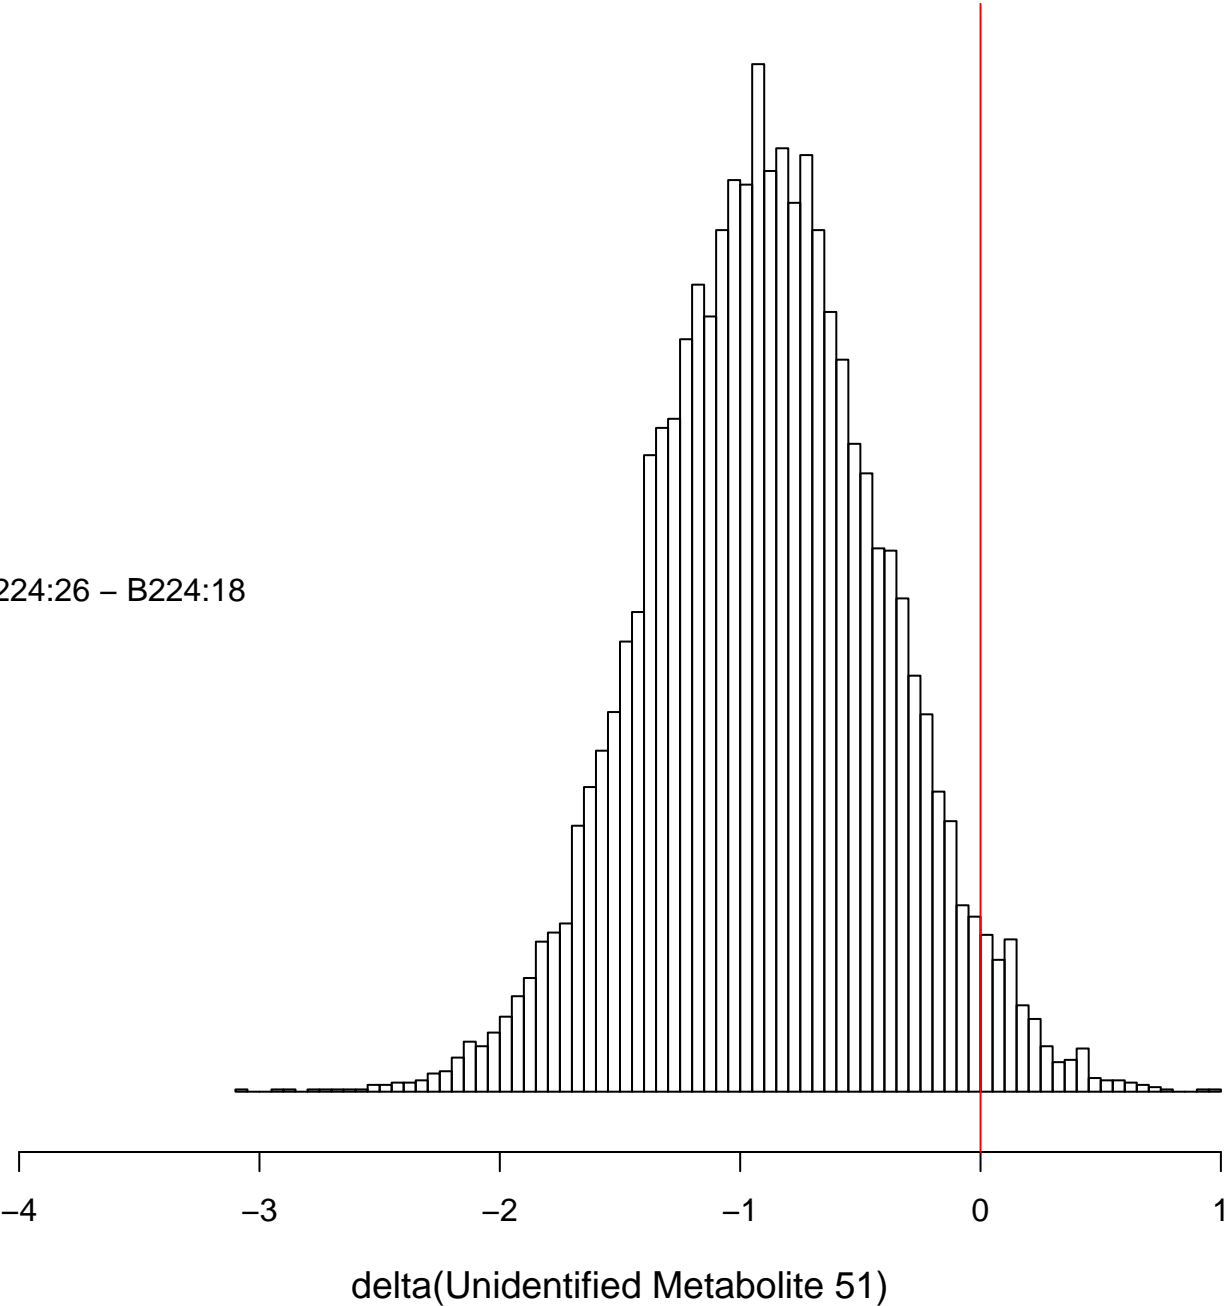



B224:26

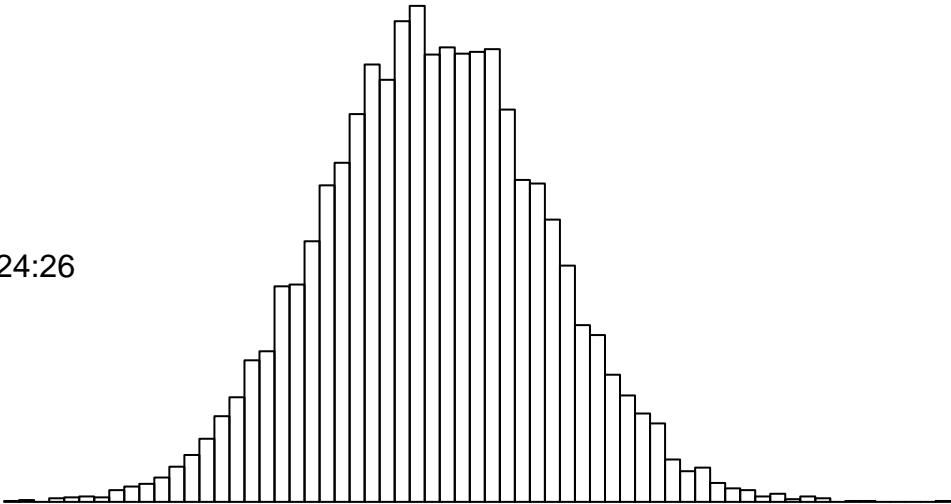

B224:18

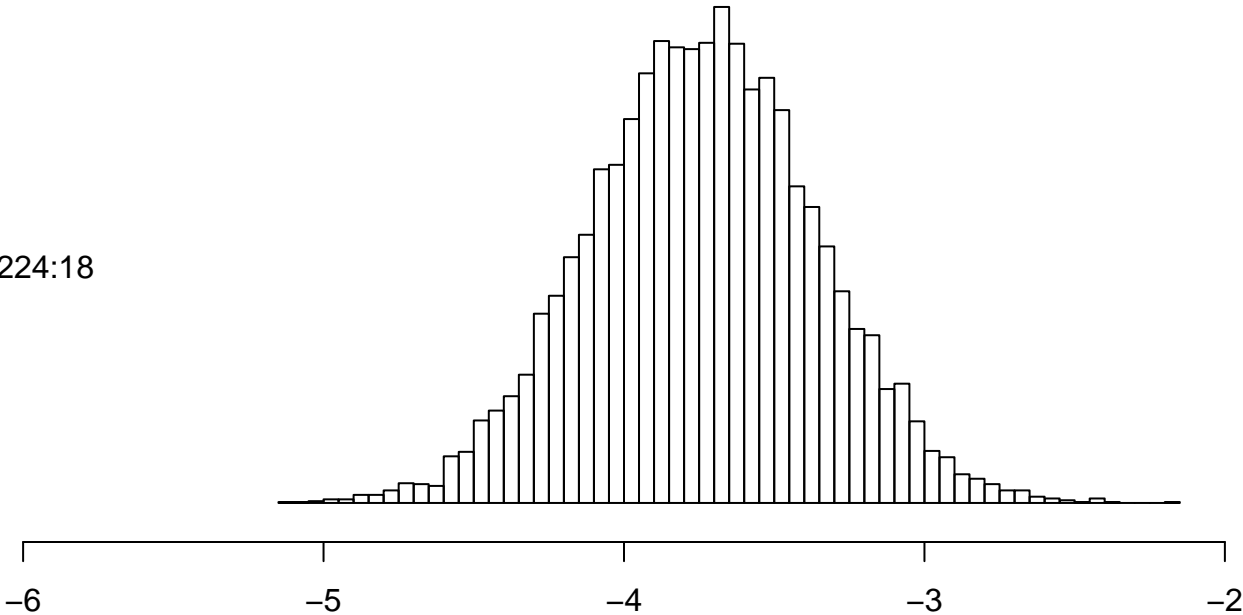

Unidentified Metabolite 55

B224:26 – B224:18

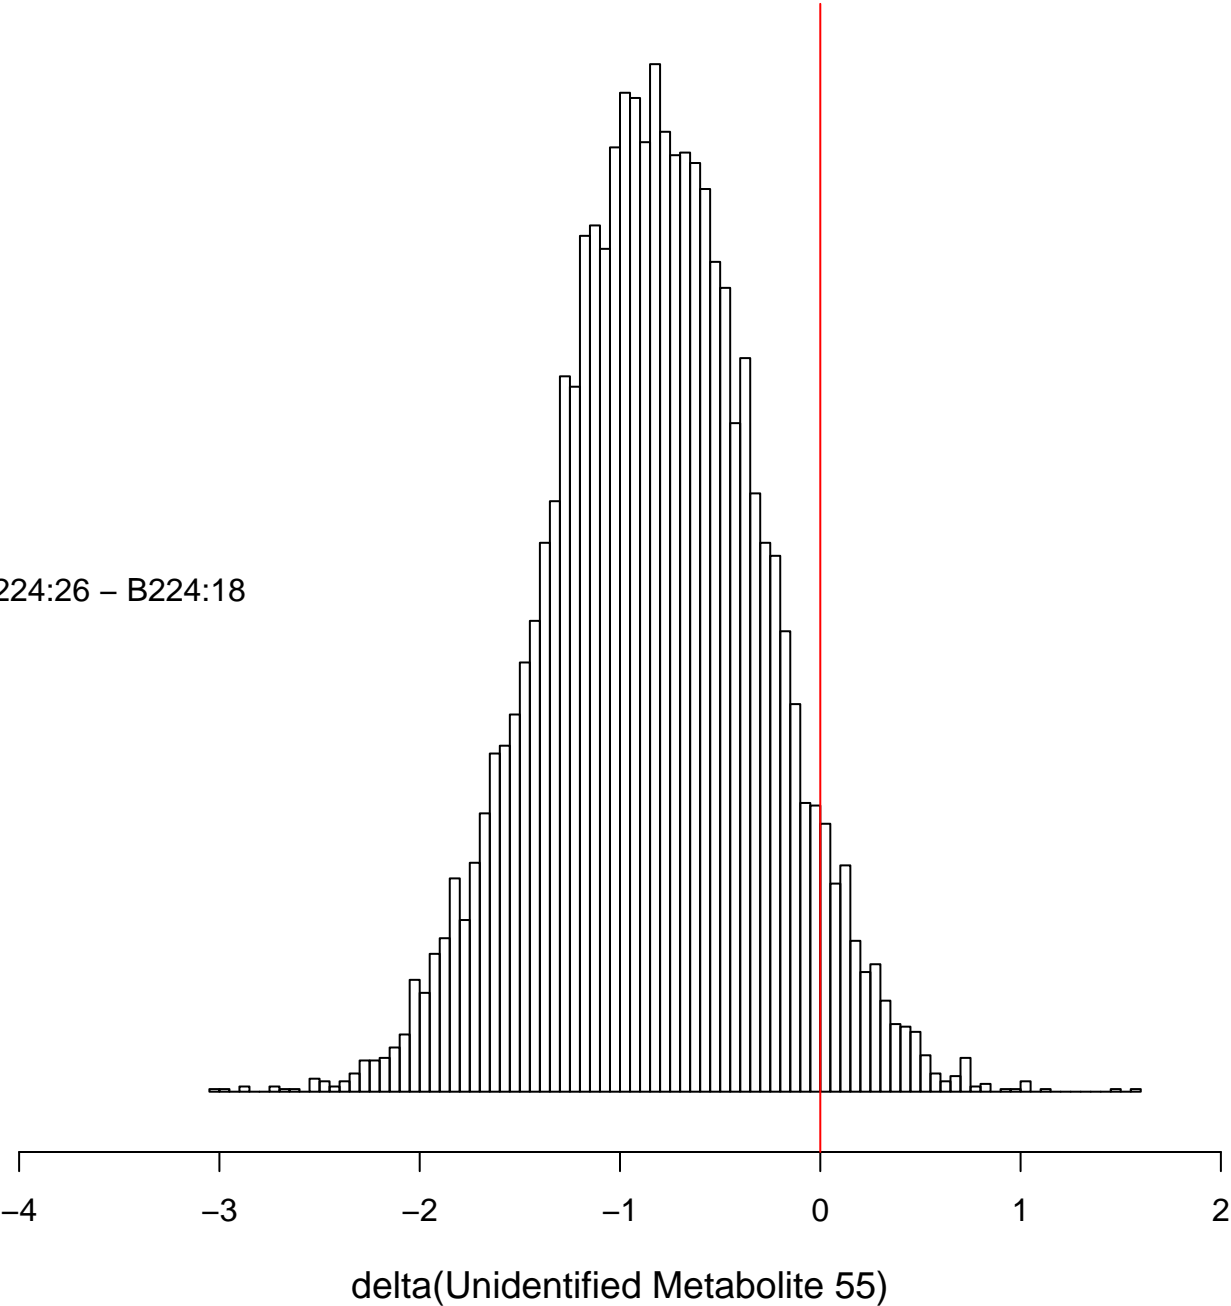

B224:26

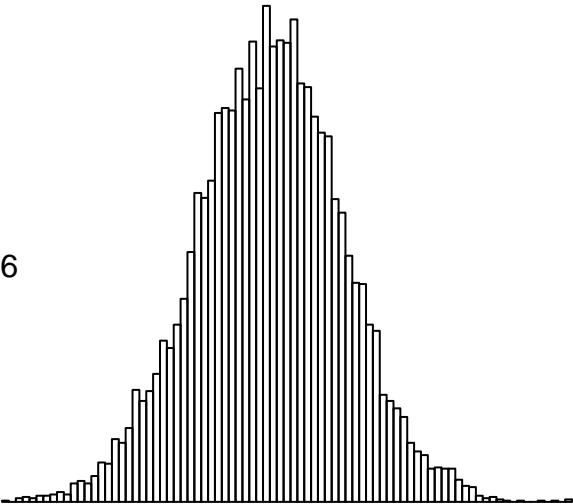

B224:18

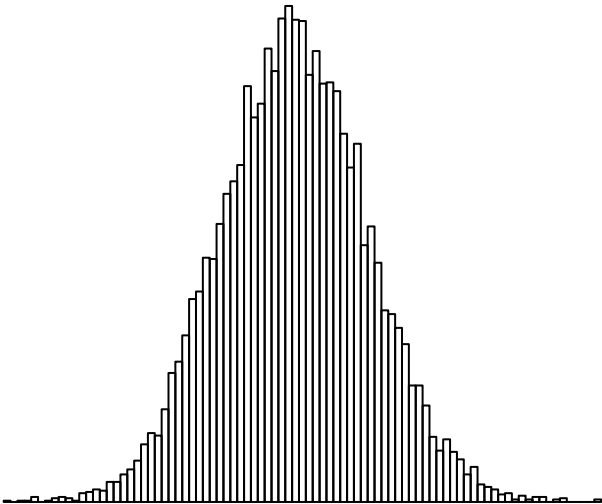

-10.0      -9.5      -9.0      -8.5      -8.0      -7.5      -7.0      -6.5

Unidentified Metabolite 56

B224:26 – B224:18

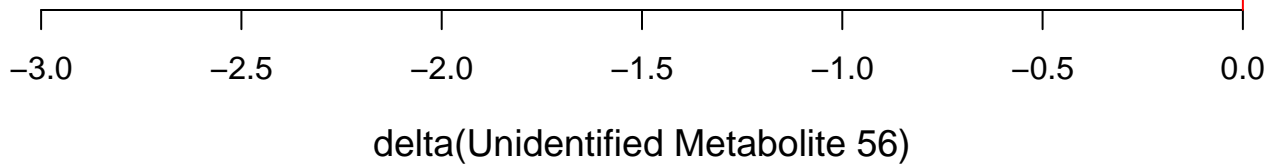

B224:26

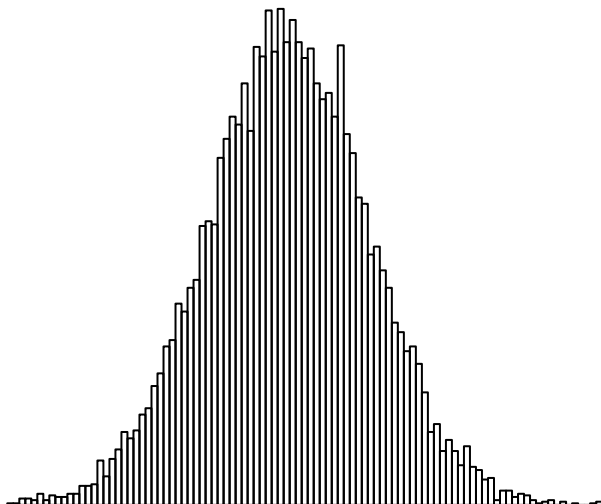

B224:18

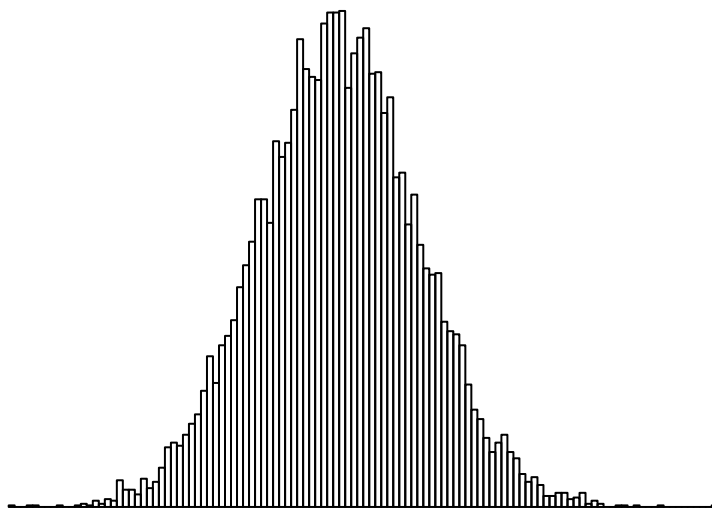

-9

-8

-7

-6

-5

Unidentified Metabolite 58

B224:26 – B224:18

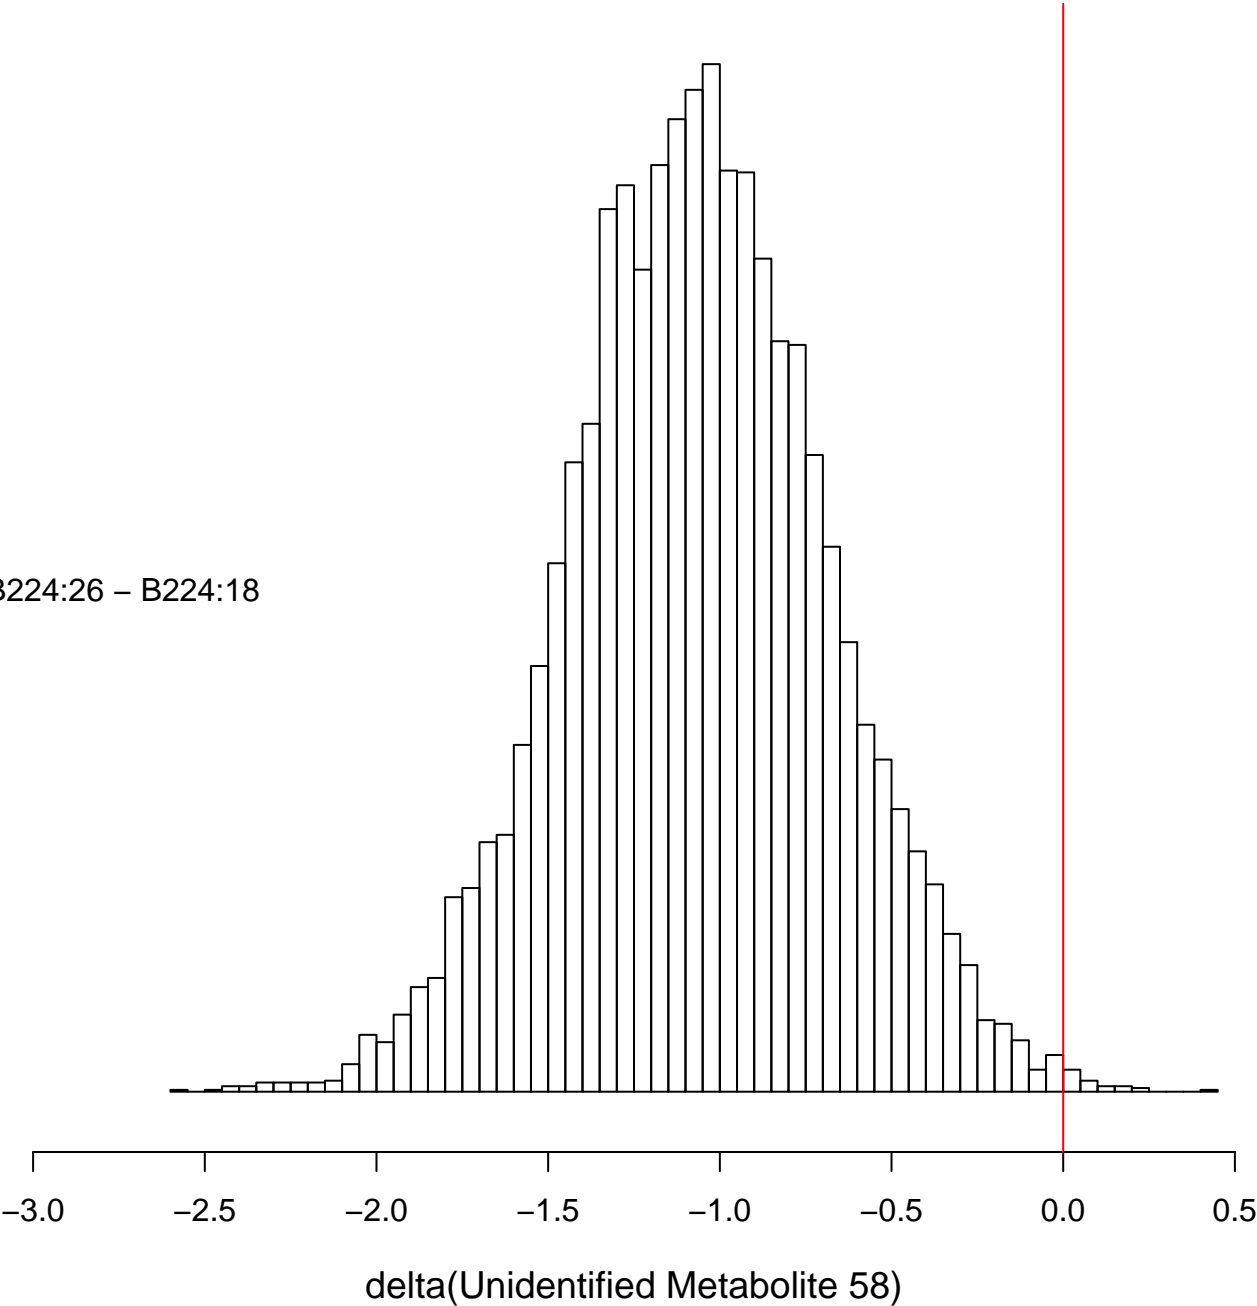

B224:26

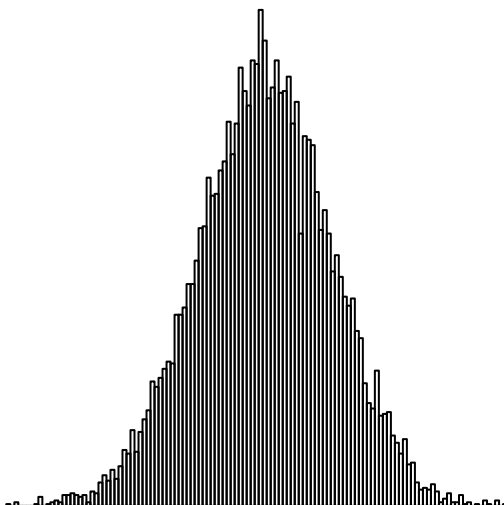

B224:18

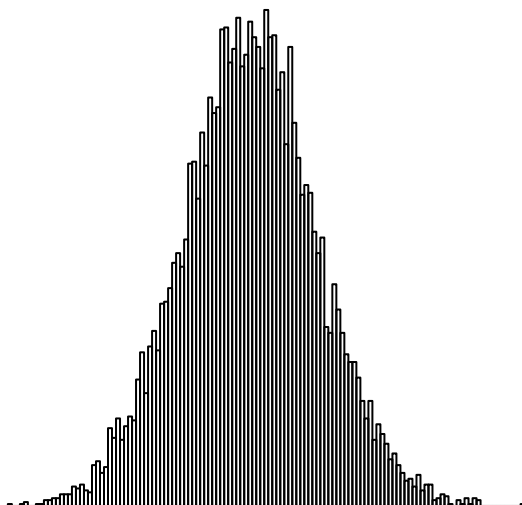

-9      -8      -7      -6      -5      -4      -3

Unidentified Metabolite 59

B224:26 – B224:18

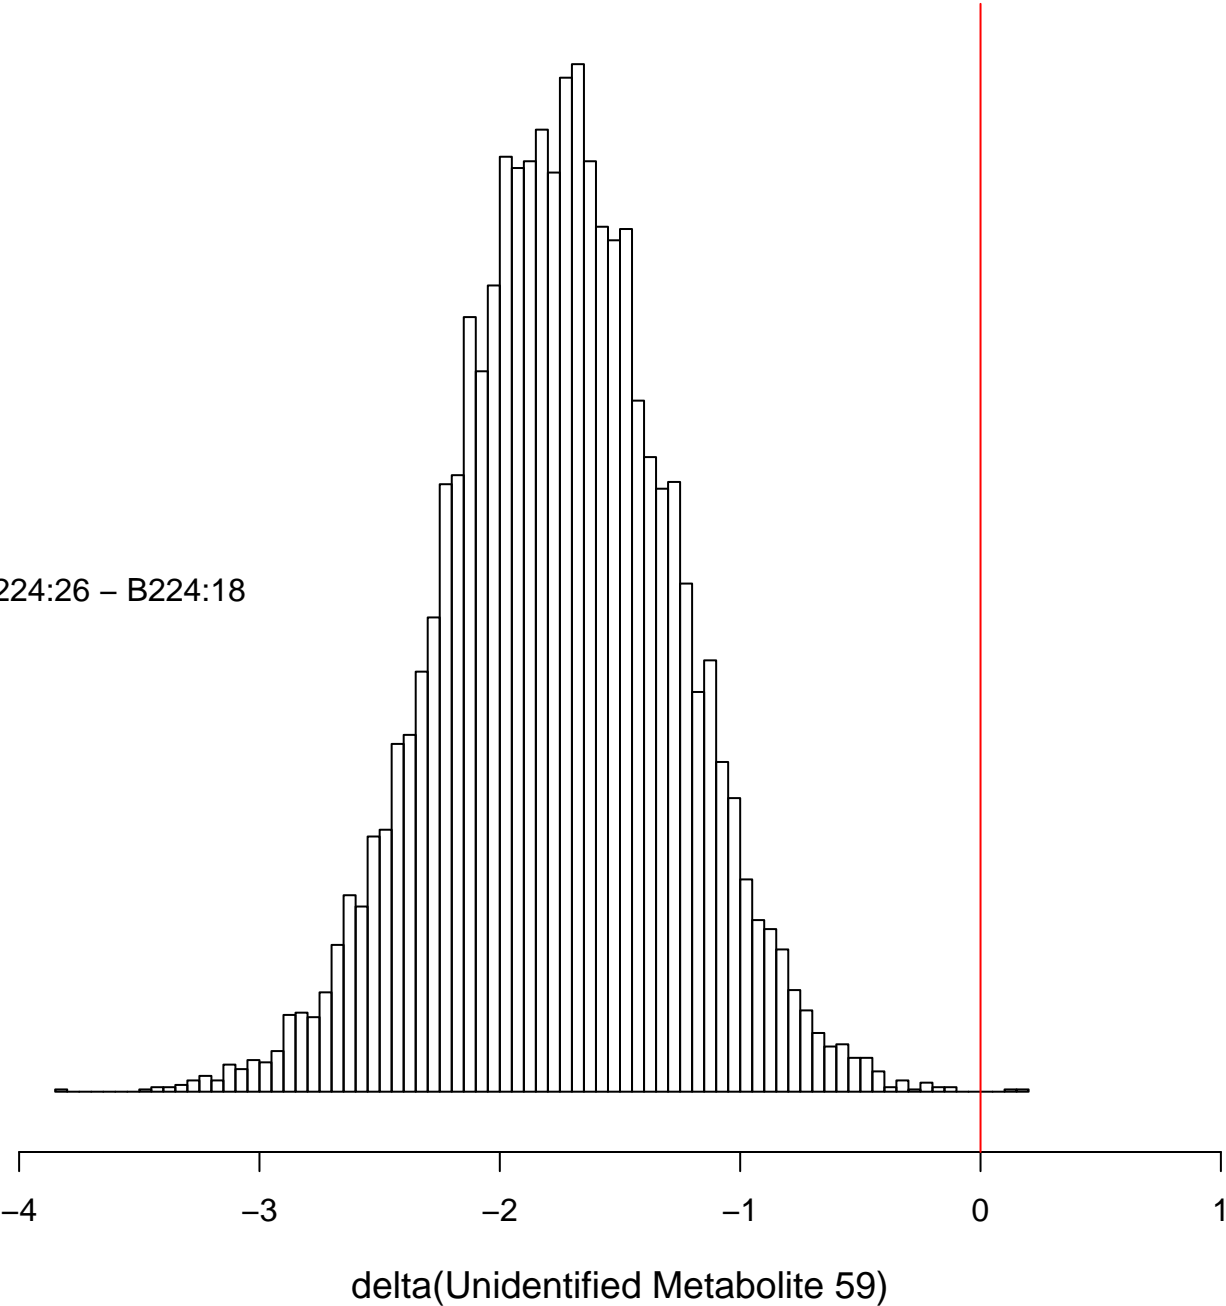



B224:26

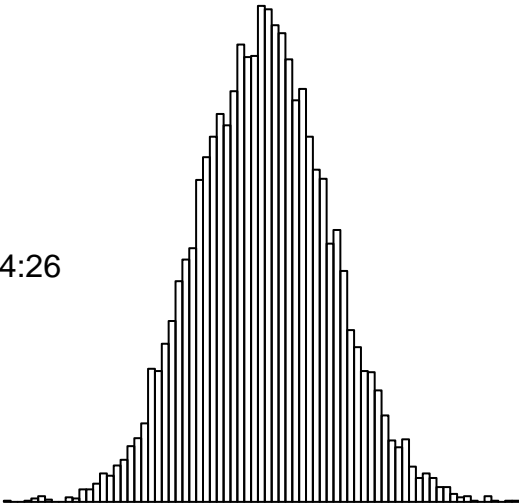

B224:18

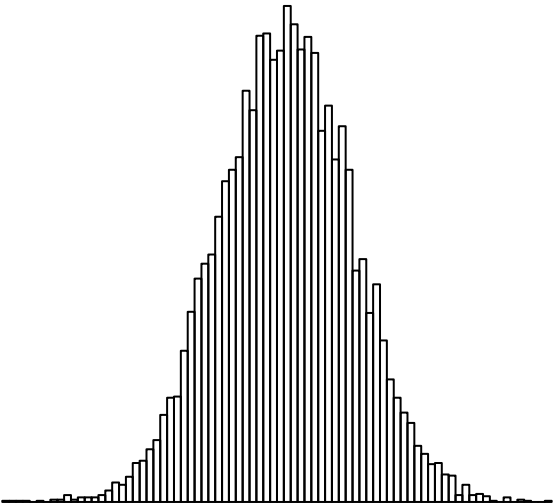

-10.0      -9.5      -9.0      -8.5      -8.0      -7.5      -7.0      -6.5

Unidentified Metabolite 60

B224:26 – B224:18

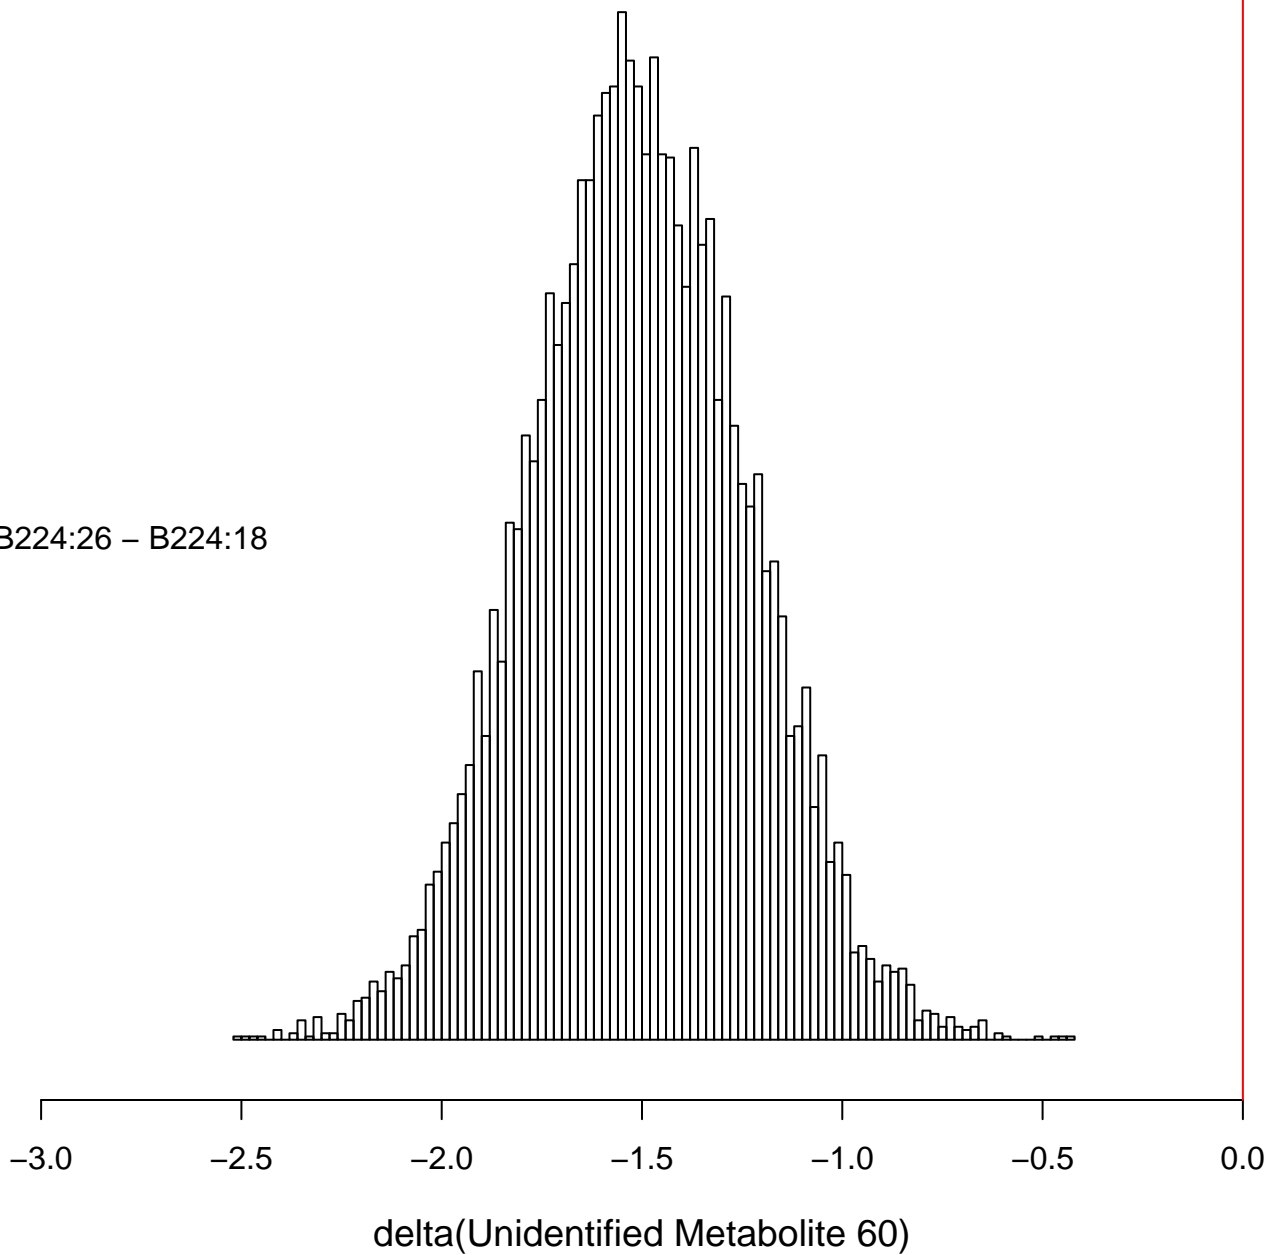

B224:26

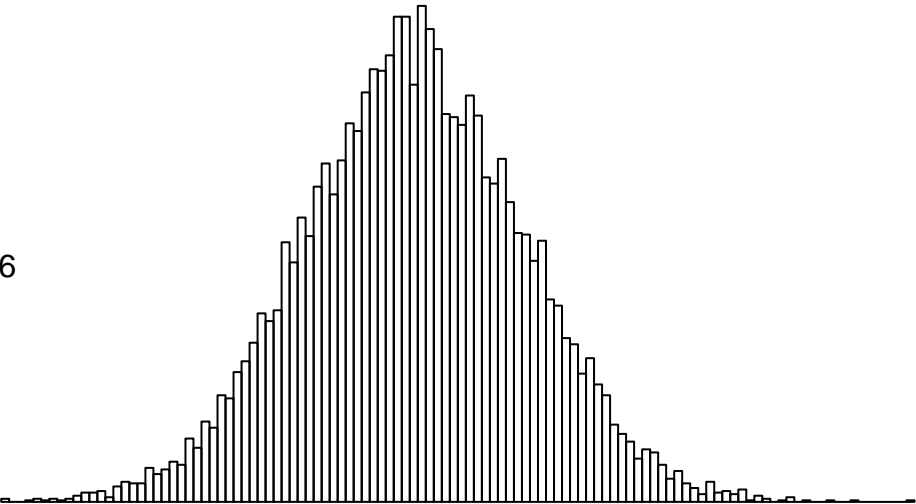

B224:18

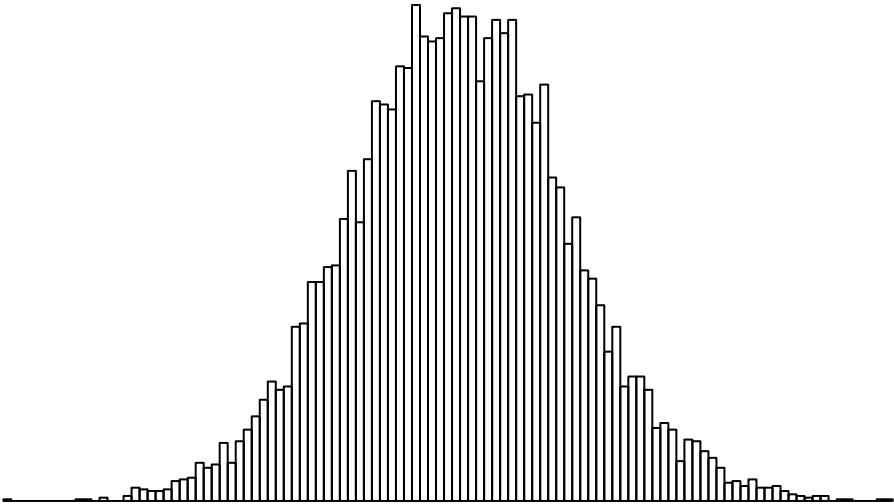

Unidentified Metabolite 61

B224:26 – B224:18

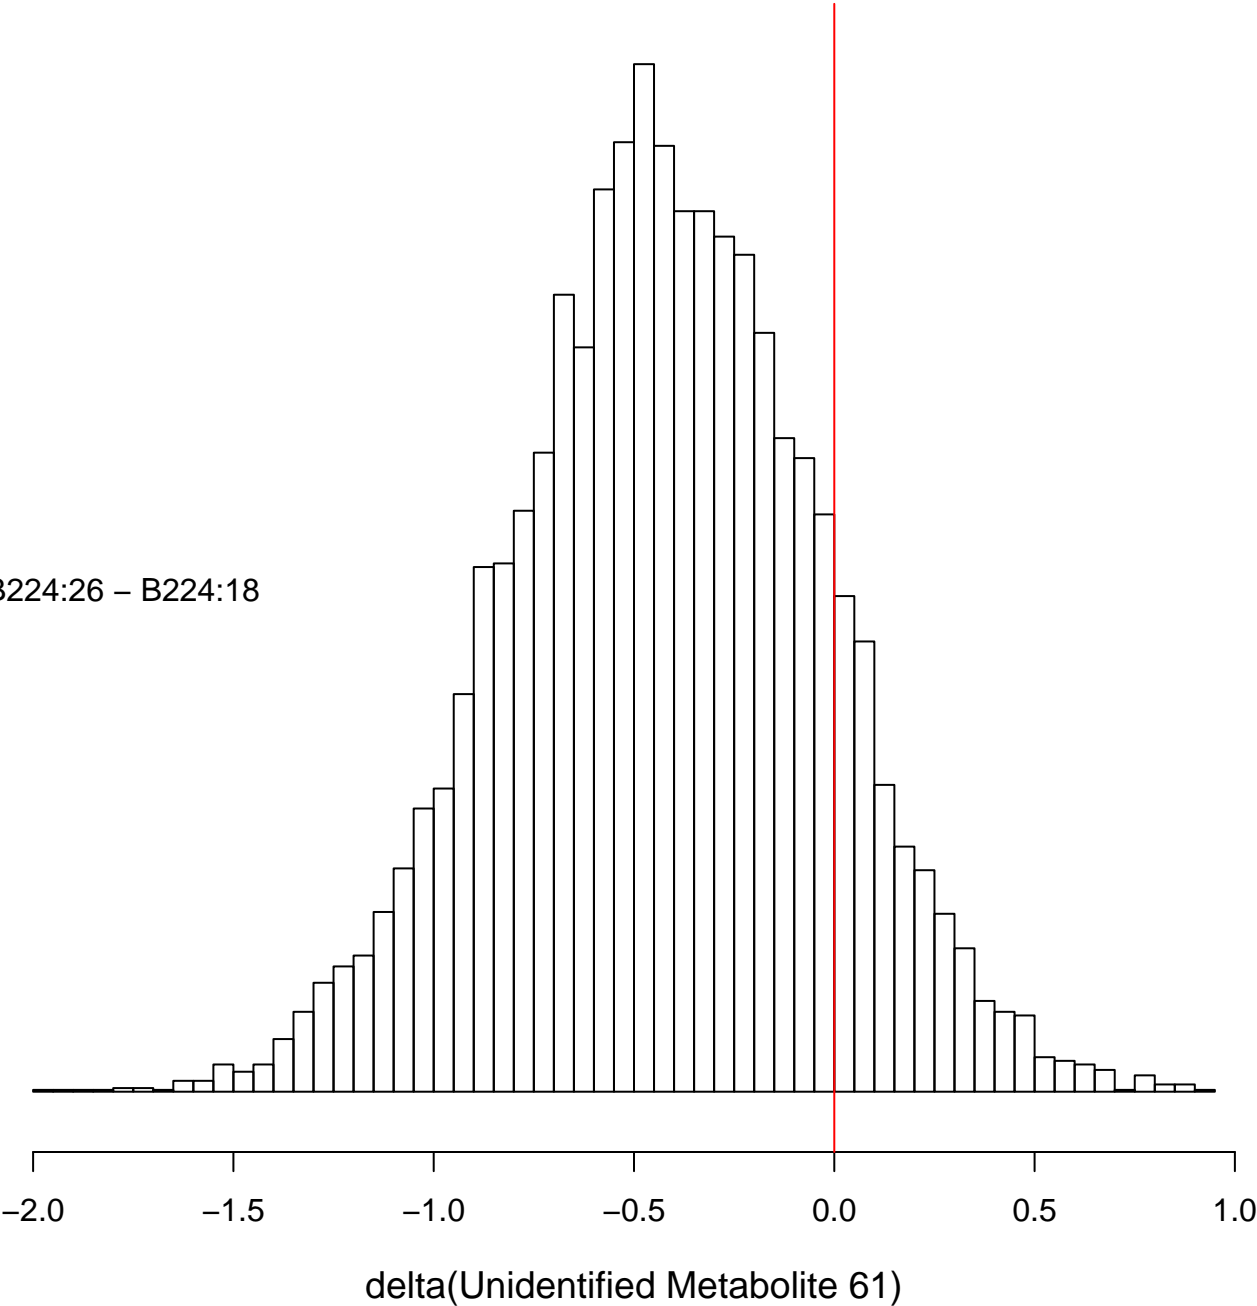

B224:26

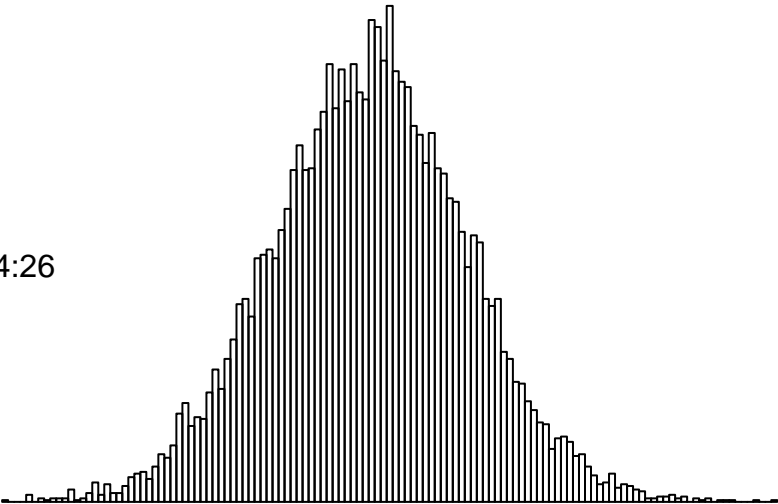

B224:18

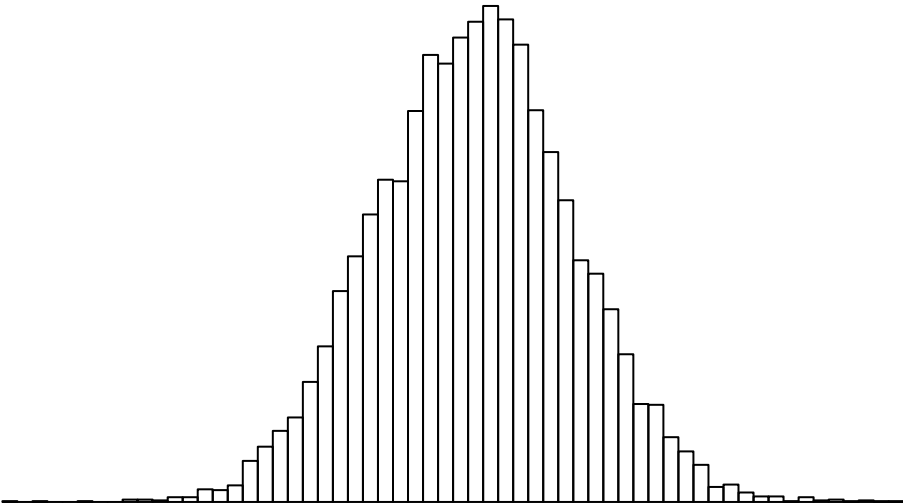

-10                      -9                      -8                      -7                      -6

Unidentified Metabolite 62

B224:26 – B224:18

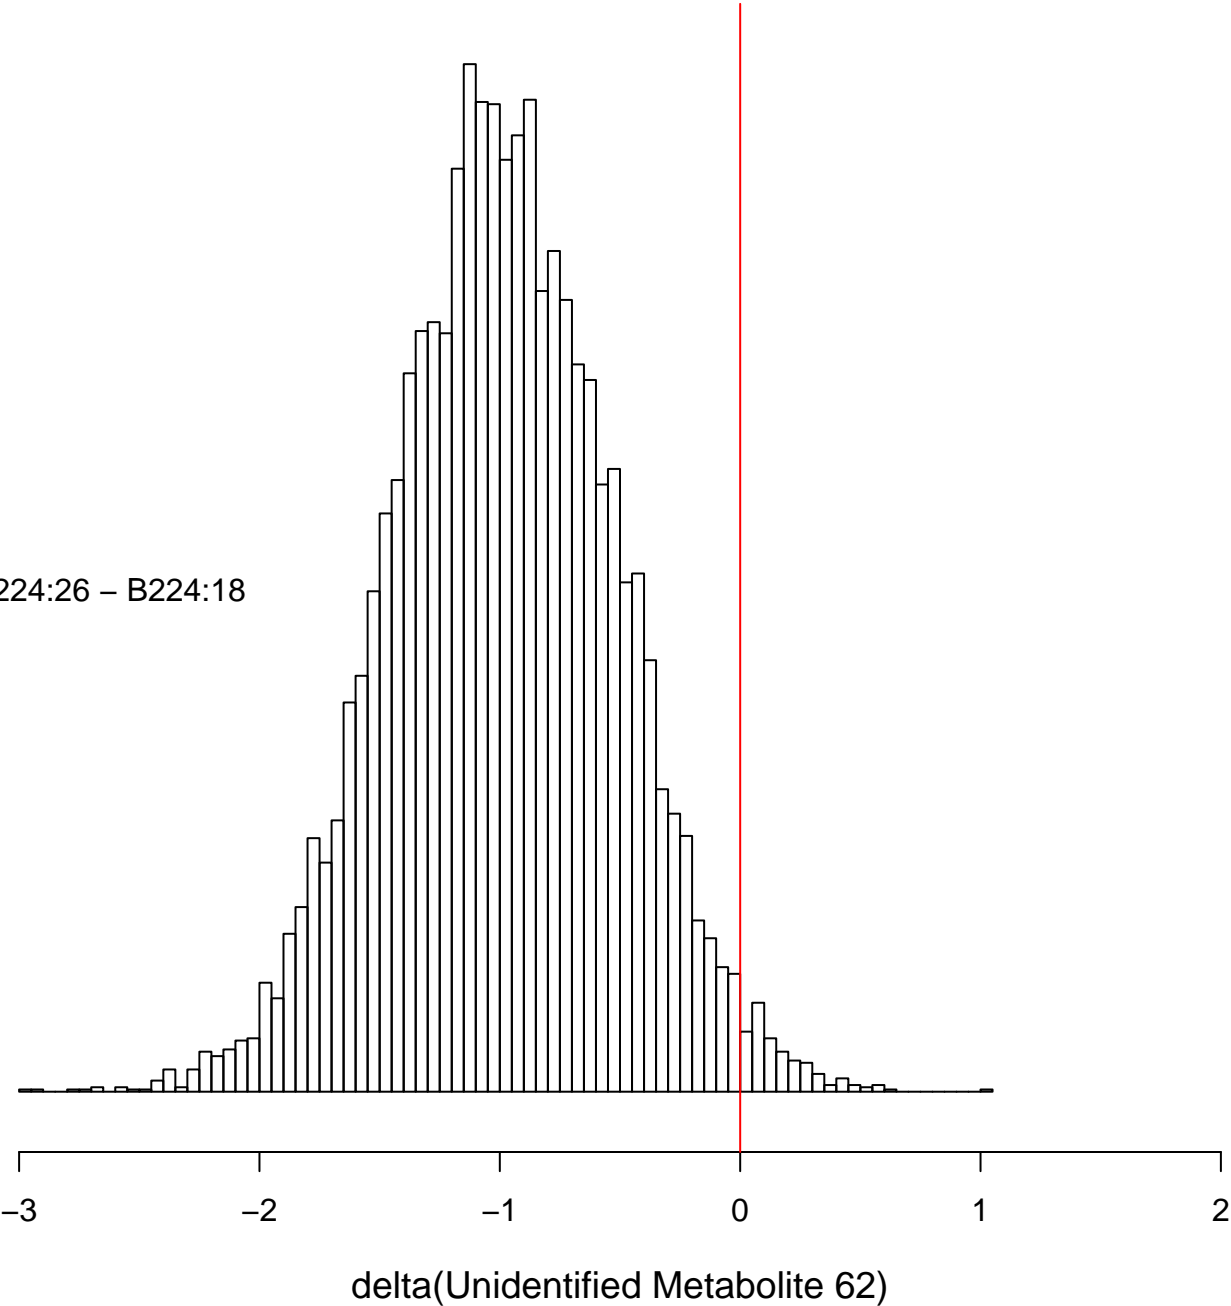

B224:26

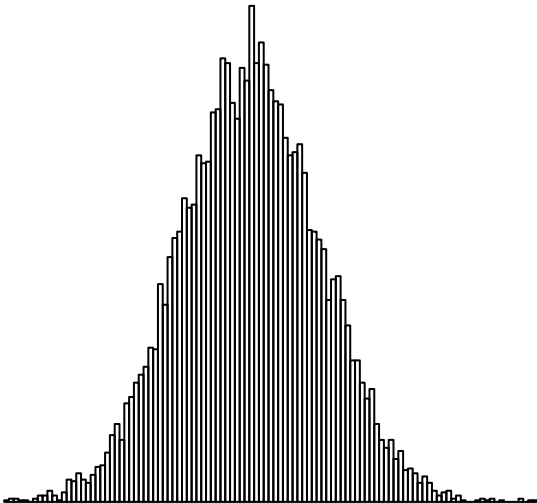

B224:18

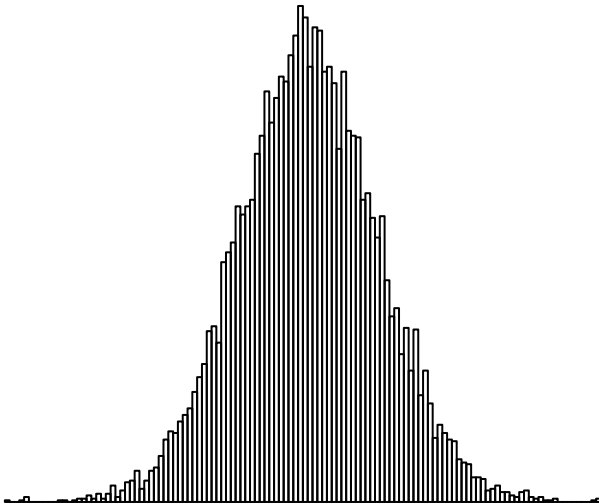

Unidentified Metabolite 63

B224:26 – B224:18

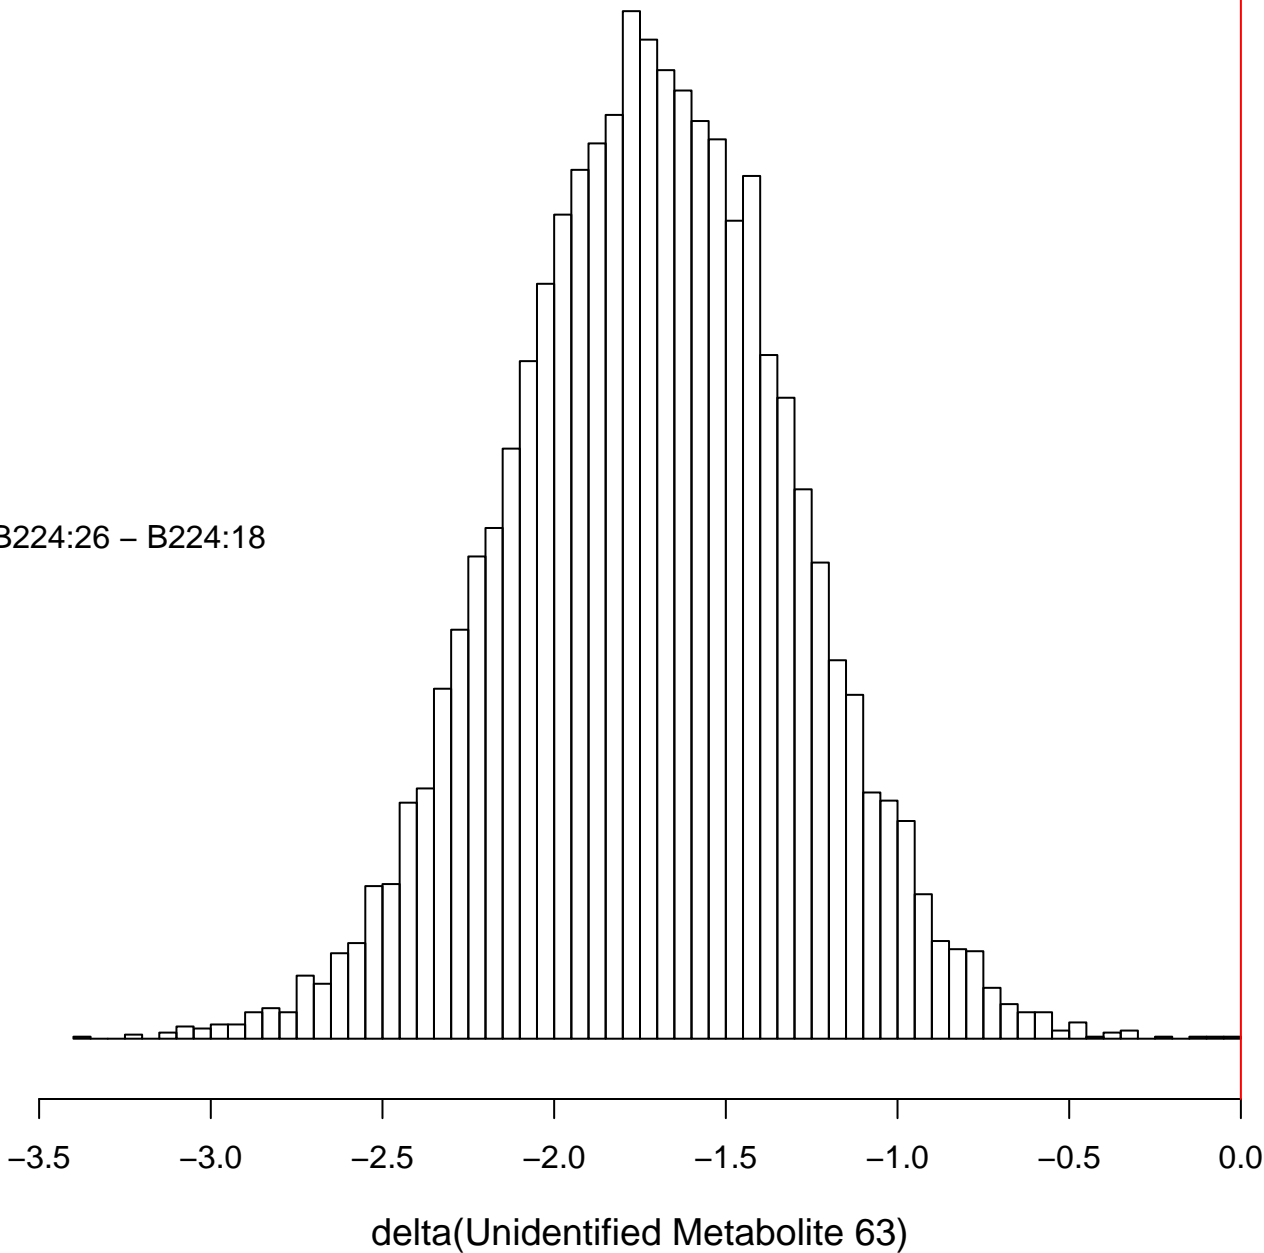



B224:26

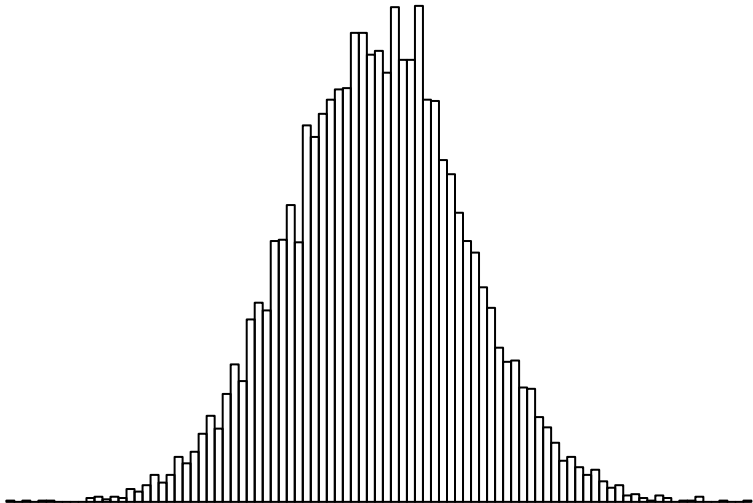

B224:18

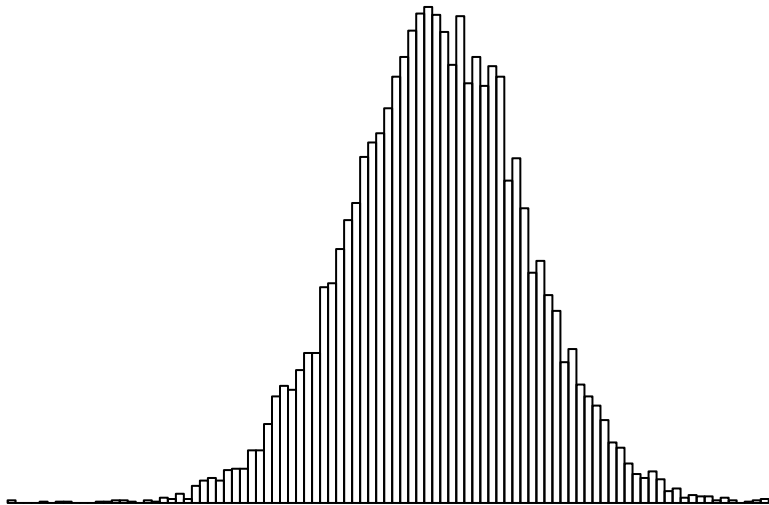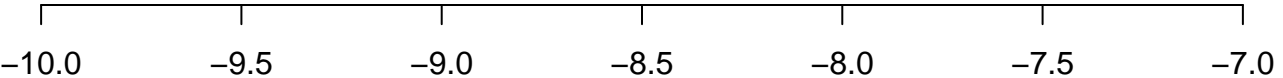

Unidentified Metabolite 65

B224:26 – B224:18

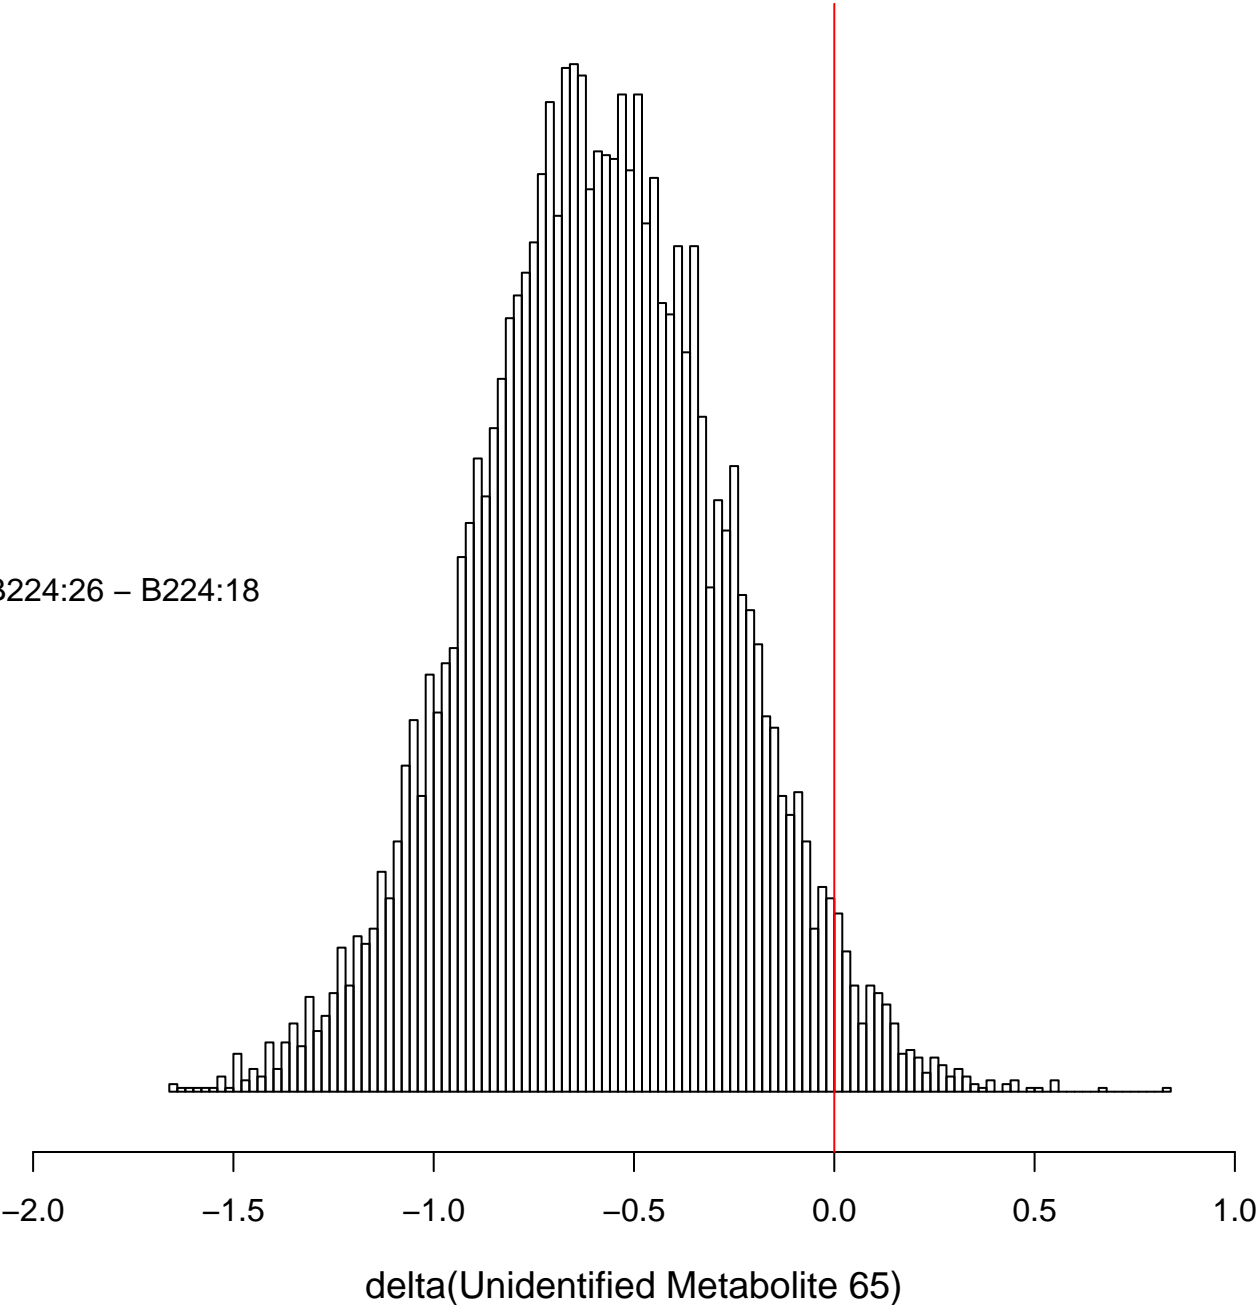

B224:26

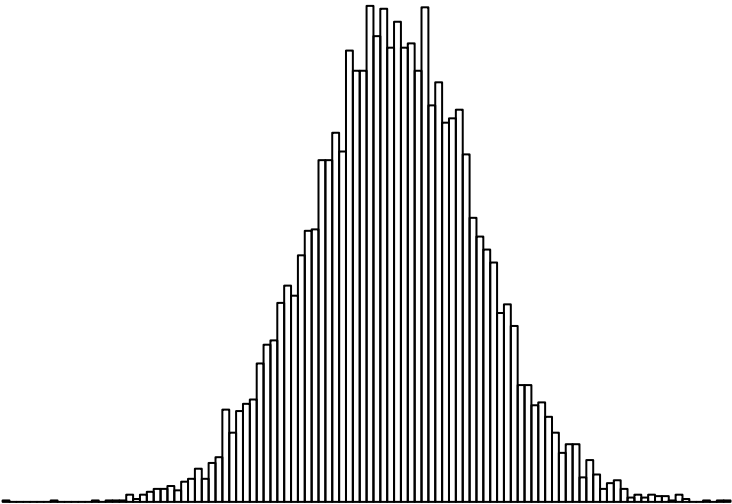

B224:18

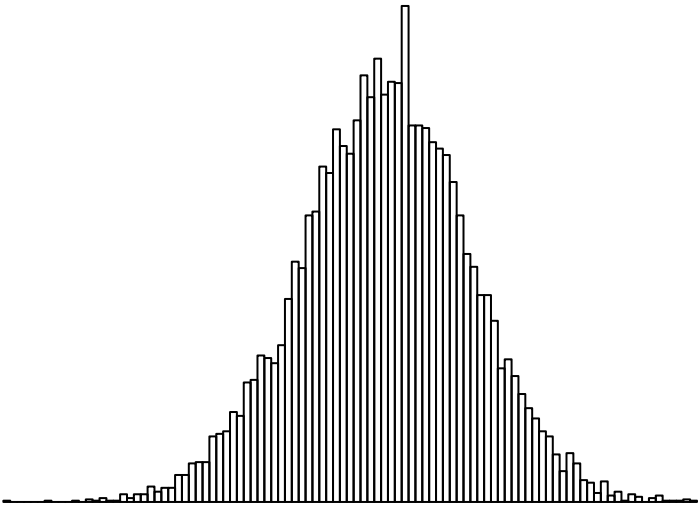

-9.0      -8.5      -8.0      -7.5      -7.0      -6.5      -6.0      -5.5

Unidentified Metabolite 68

B224:26 – B224:18

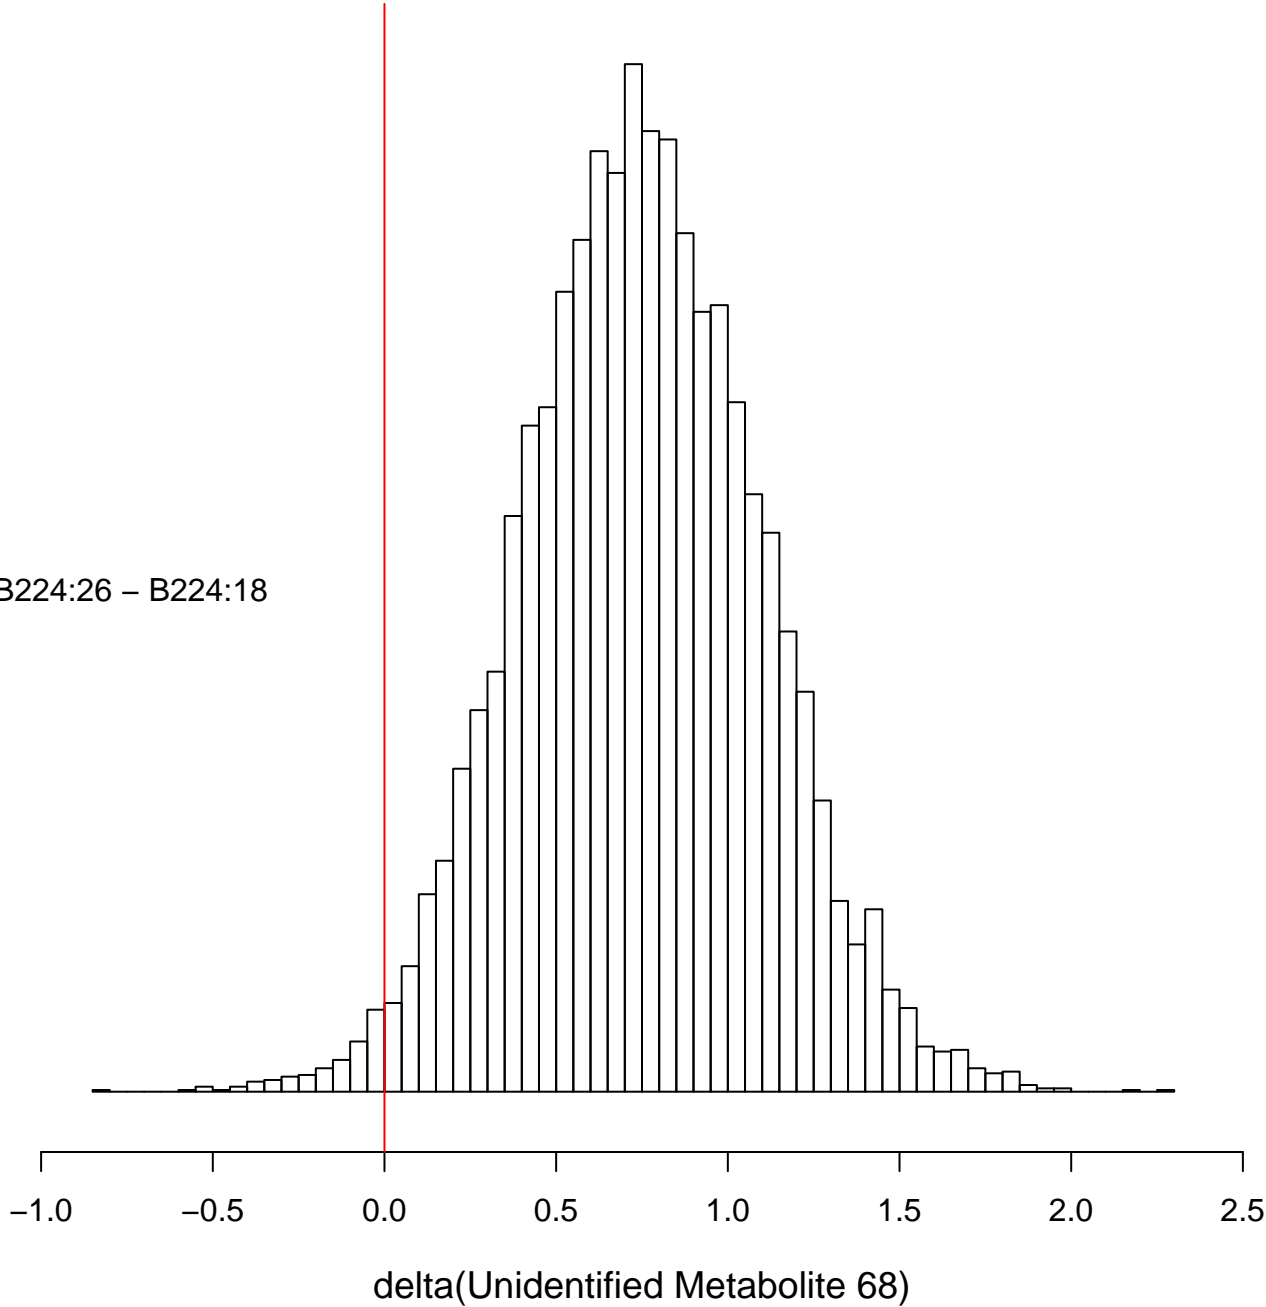

B224:26

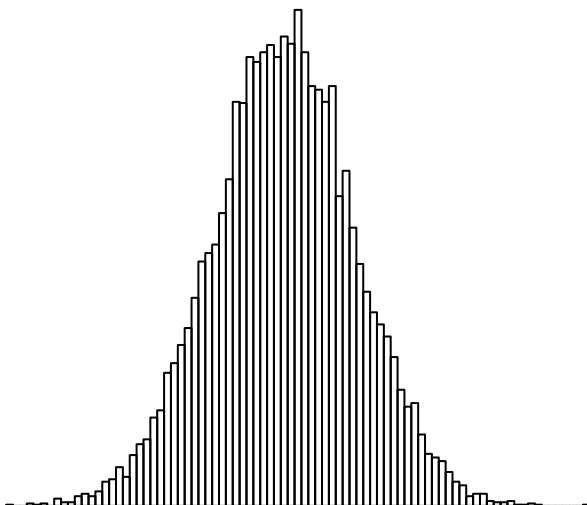

B224:18

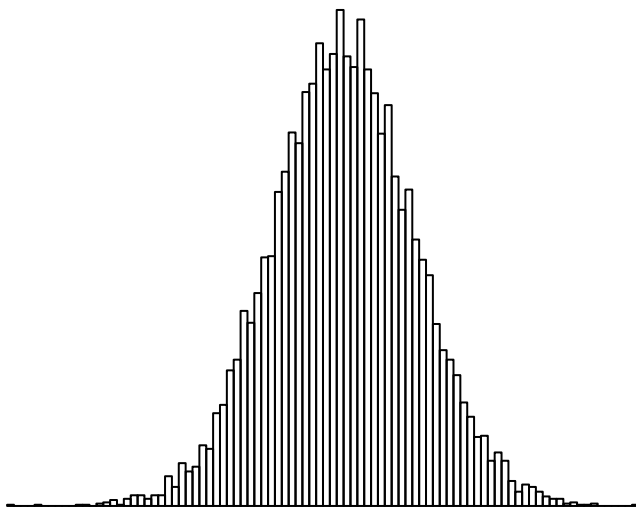

-8.5      -8.0      -7.5      -7.0      -6.5      -6.0      -5.5      -5.0

Unidentified Metabolite 69

B224:26 – B224:18

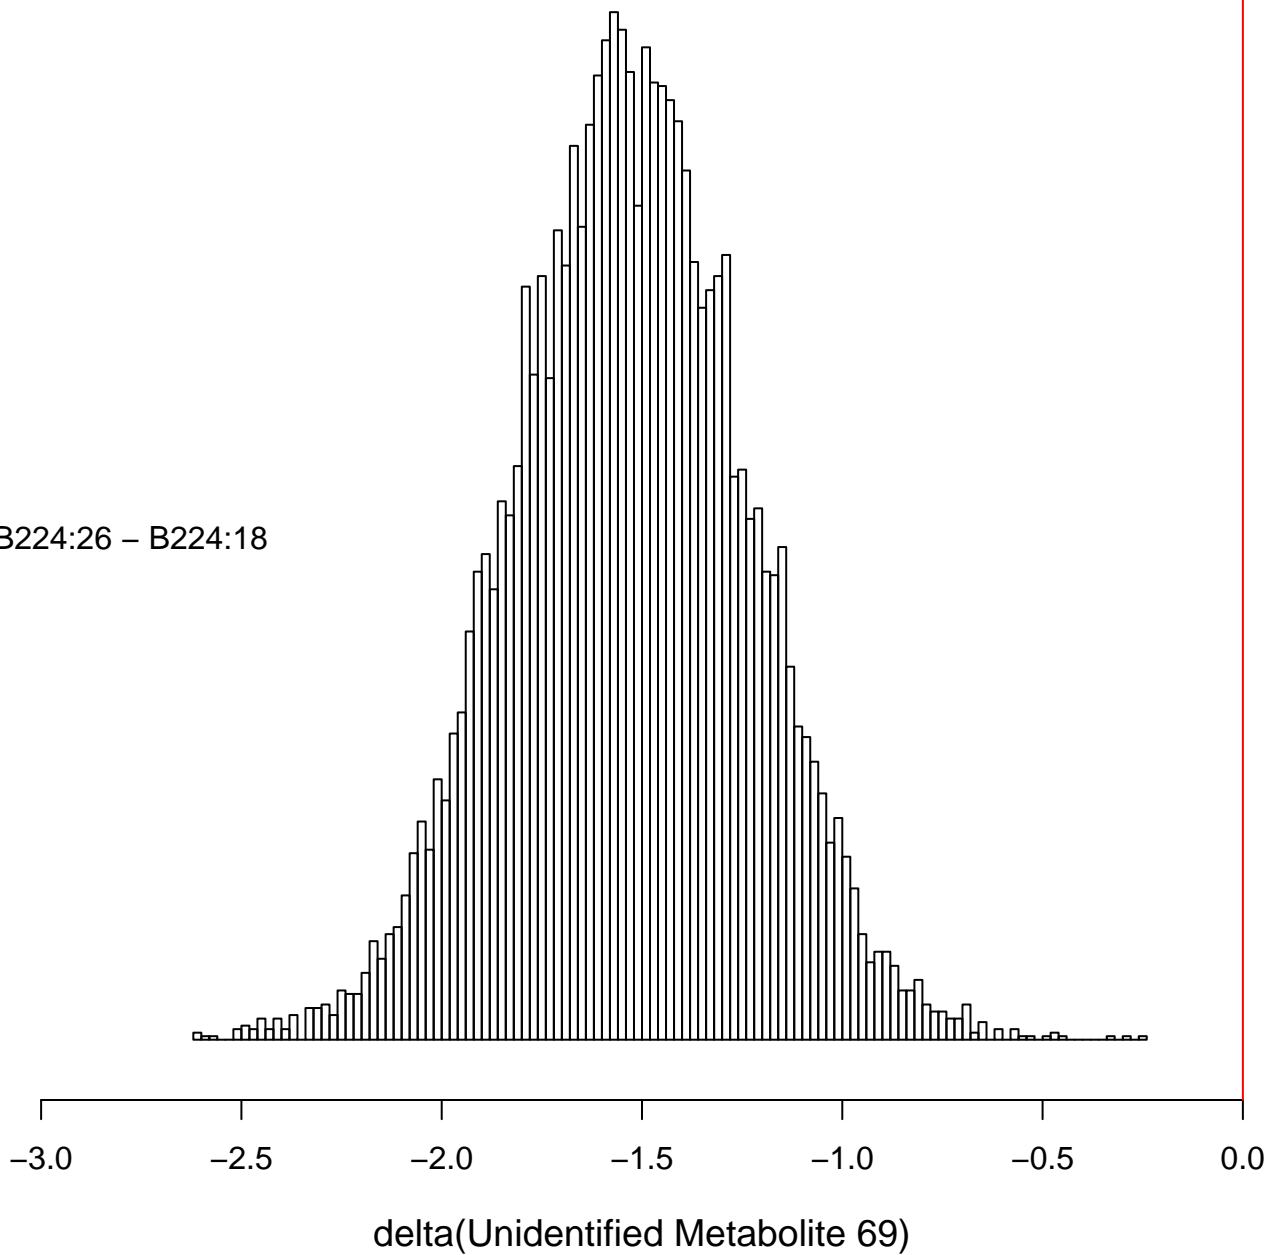

B224:26

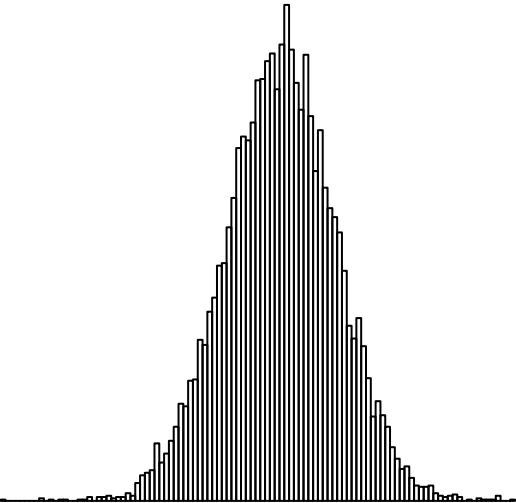

B224:18

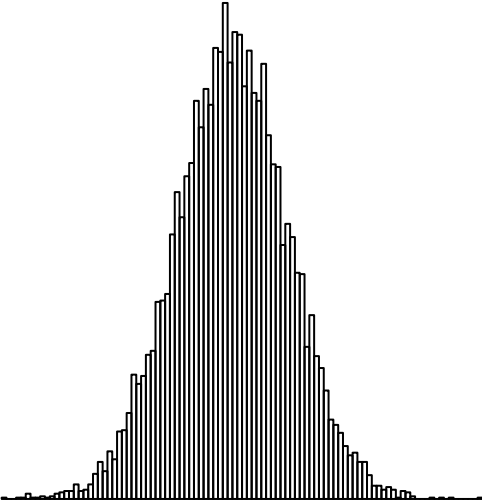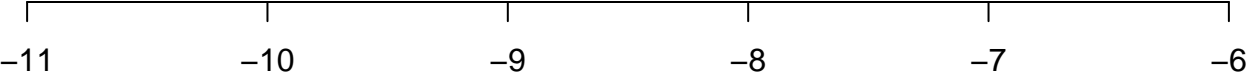

Unidentified Metabolite 70

B224:26 – B224:18

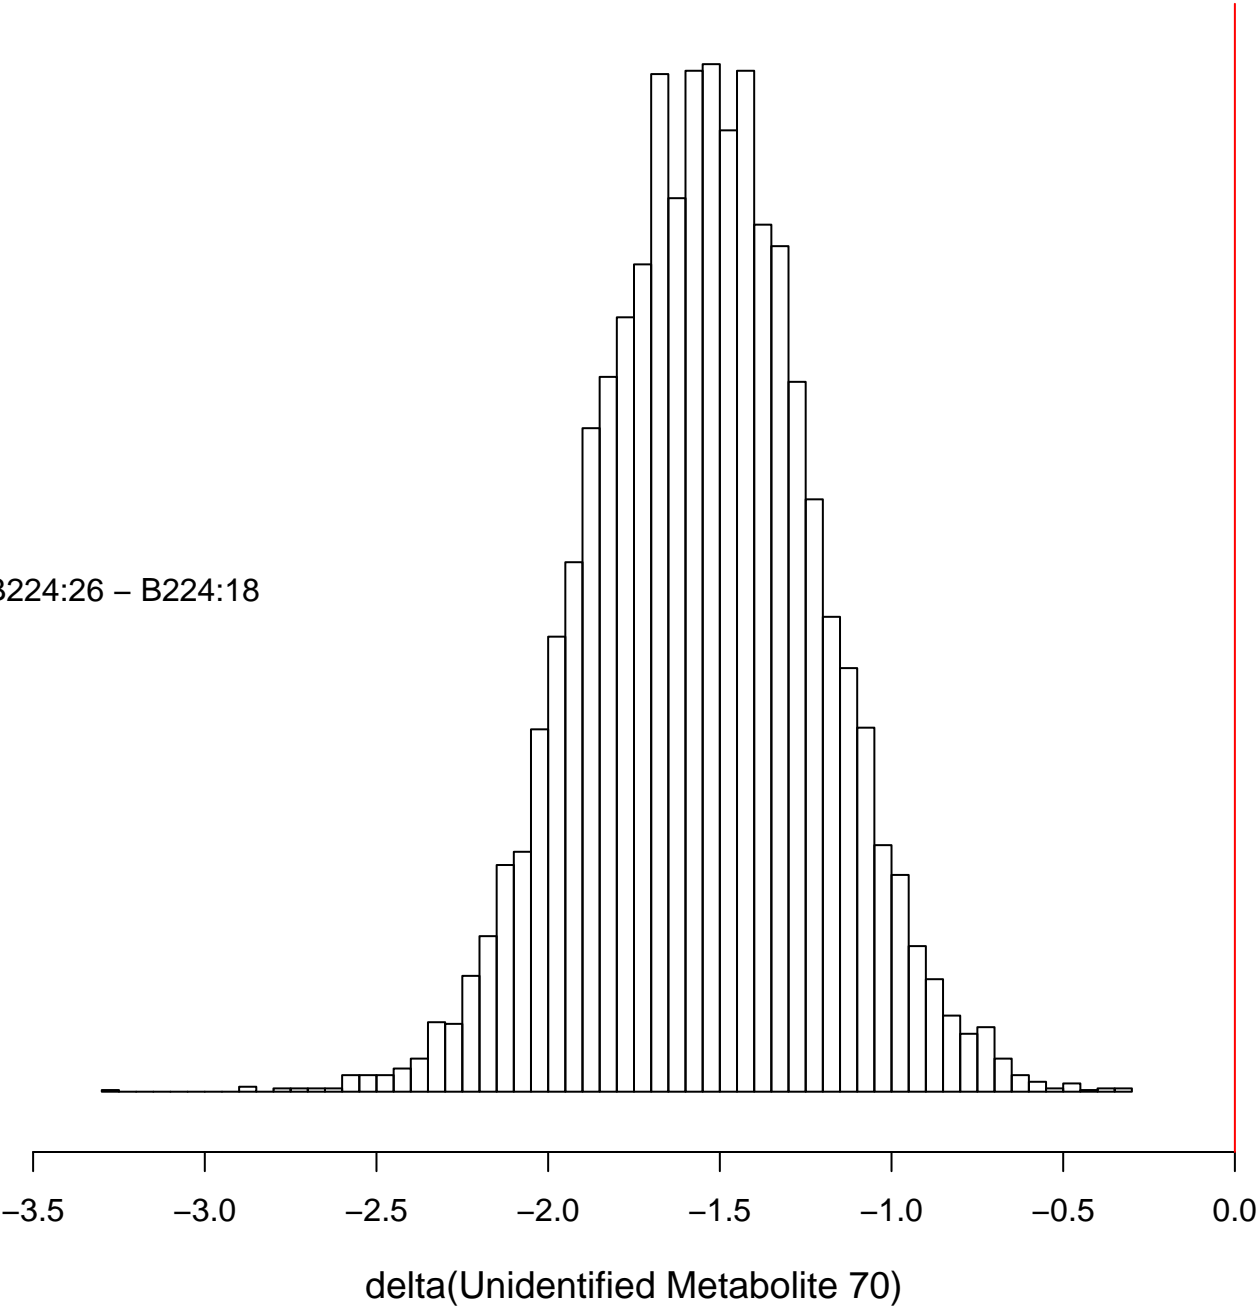



B224:26

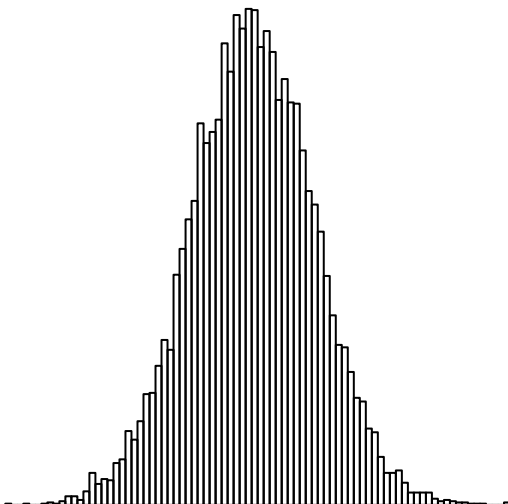

B224:18

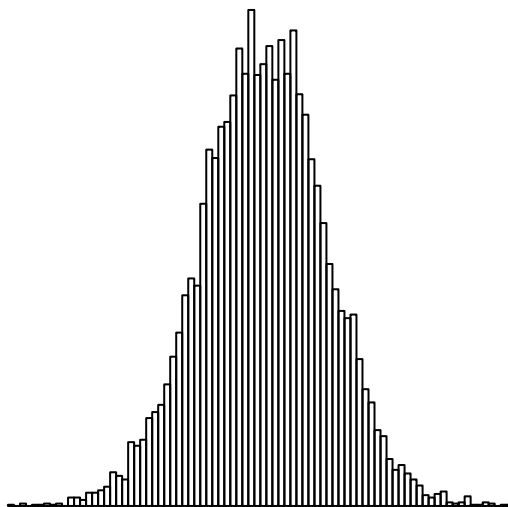

-11

-10

-9

-8

-7

Unidentified Metabolite 71

B224:26 – B224:18

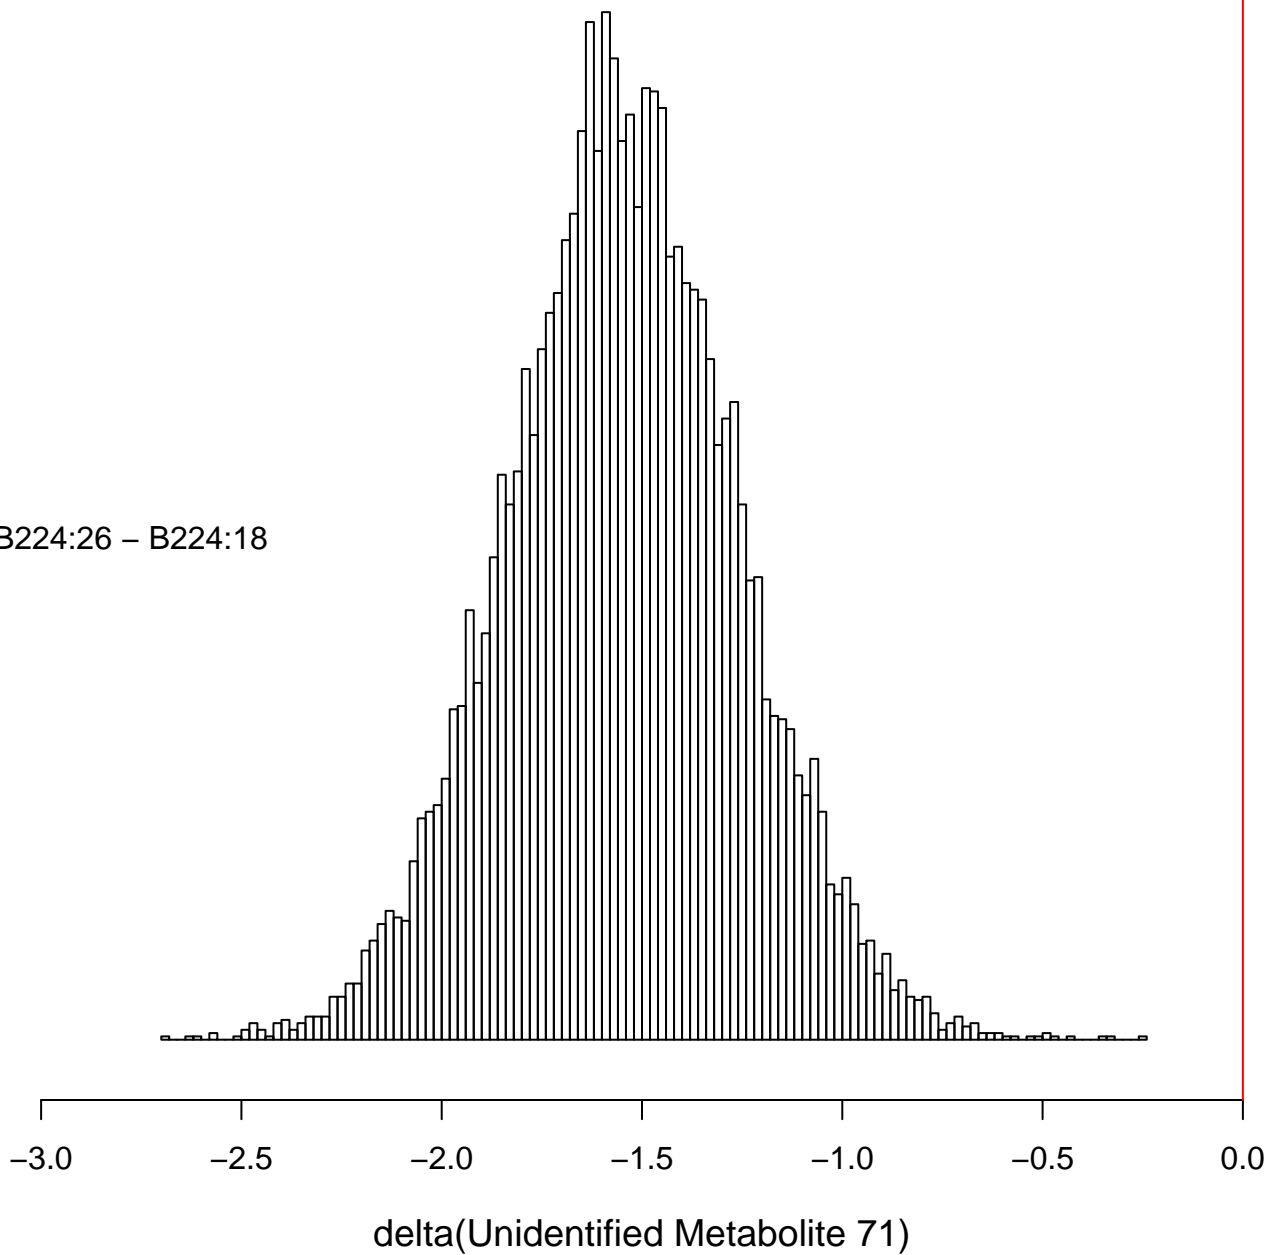

B224:26

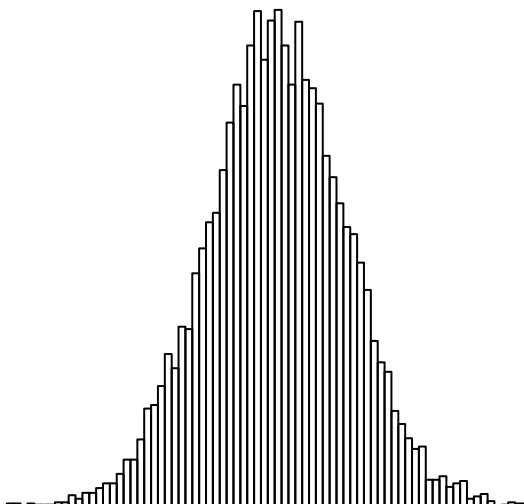

B224:18

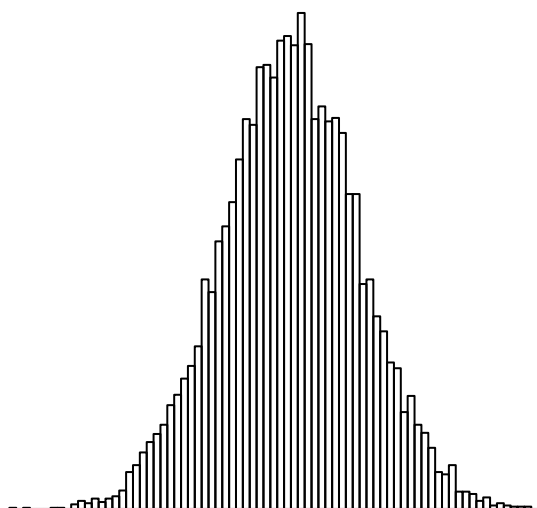

-8.5      -8.0      -7.5      -7.0      -6.5      -6.0      -5.5      -5.0

Unidentified Metabolite 72

B224:26 – B224:18

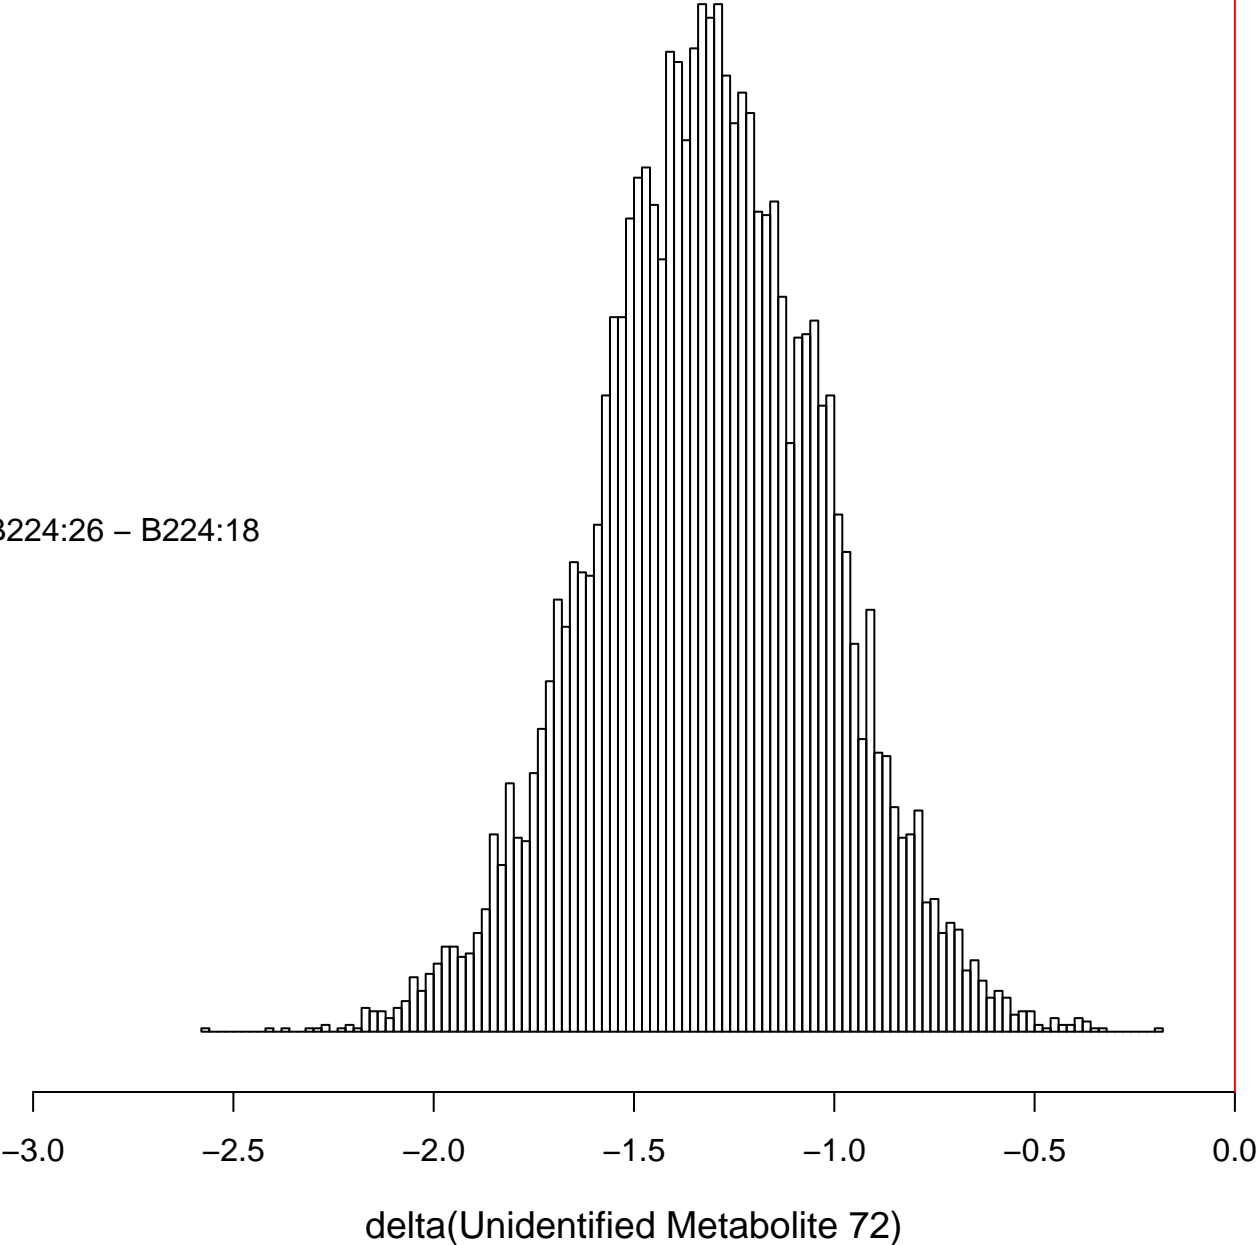

B224:26

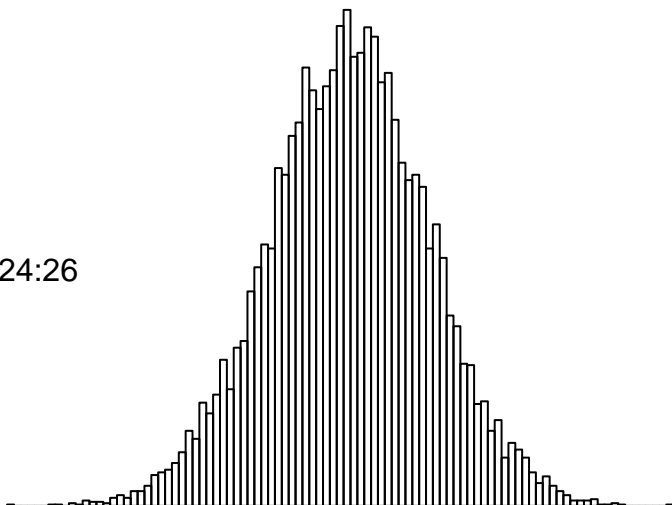

B224:18

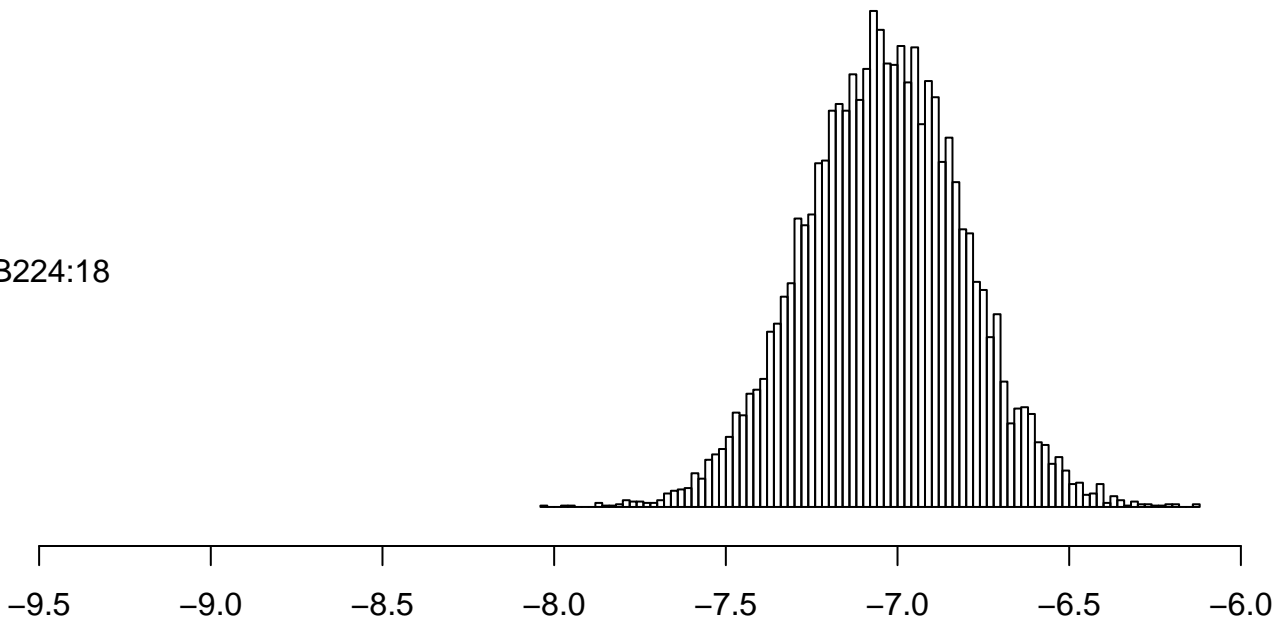

Unidentified Metabolite 73

B224:26 – B224:18

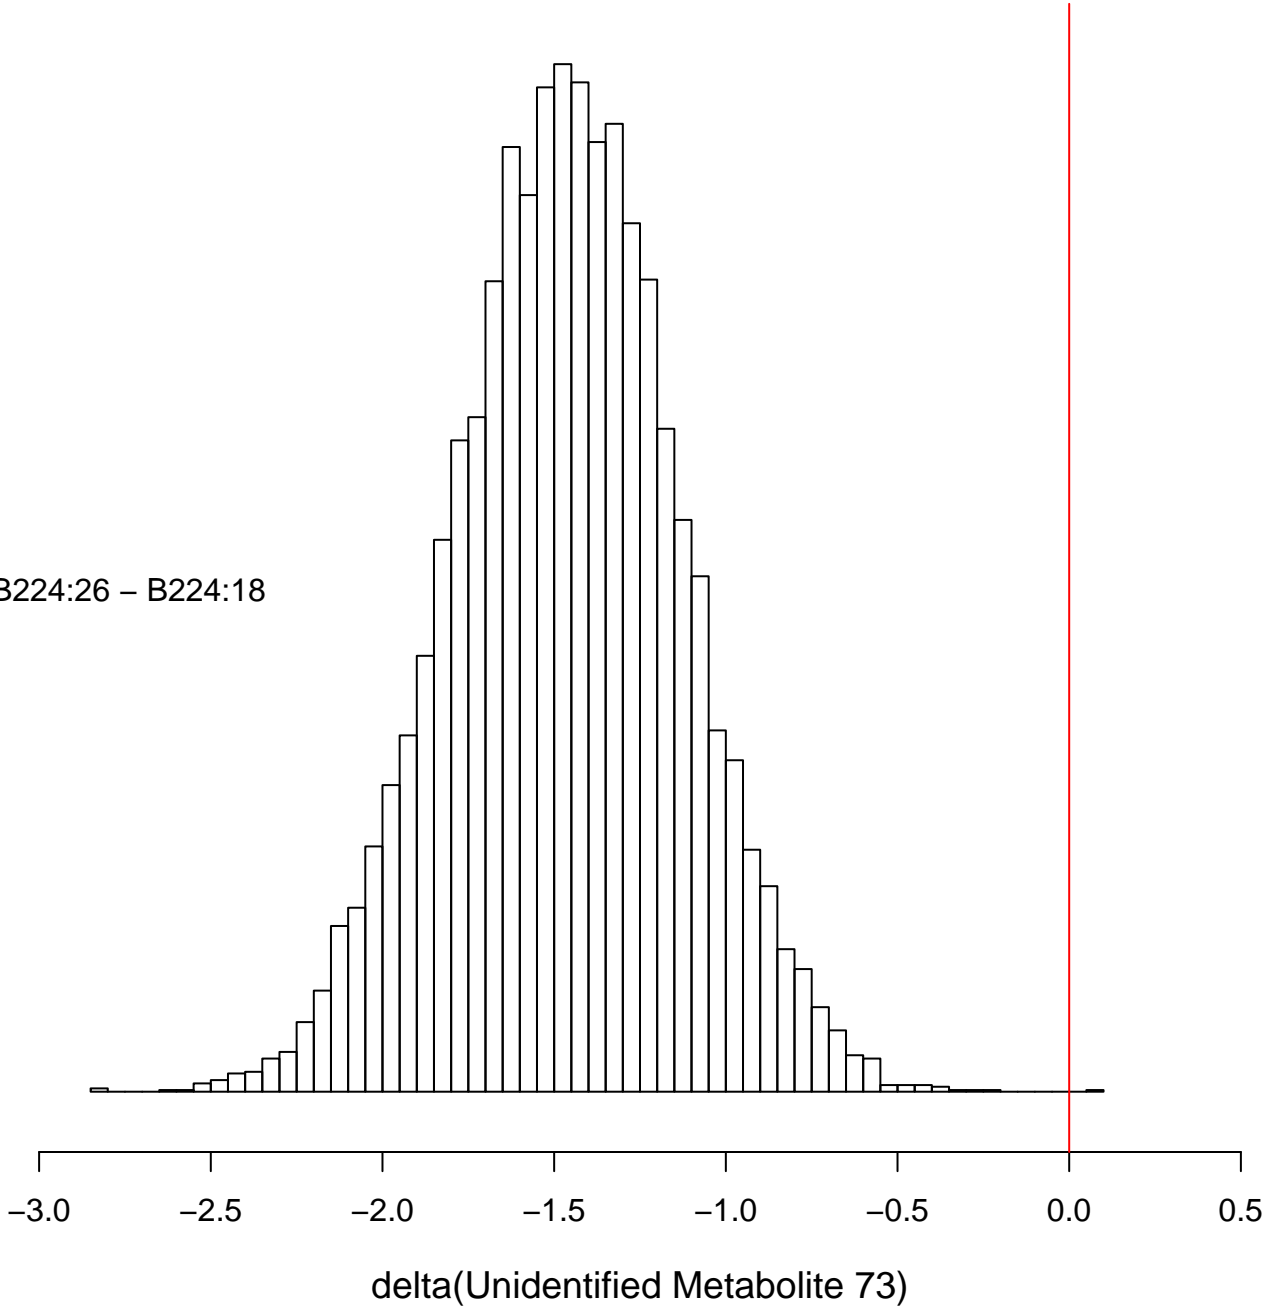

B224:26

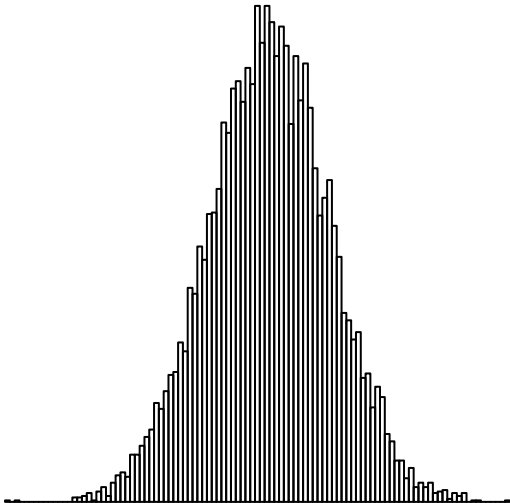

B224:18

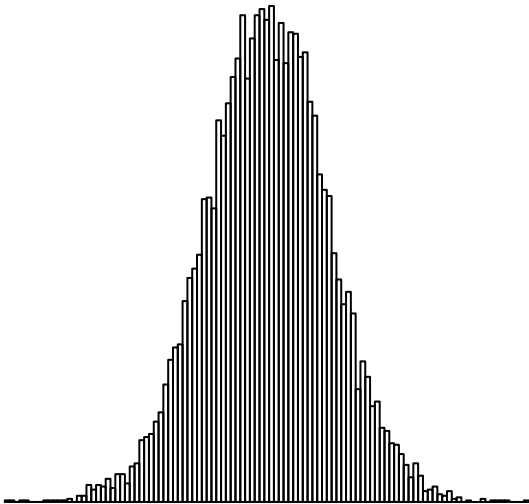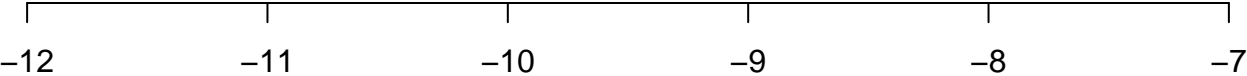

Unidentified Metabolite 74

B224:26 – B224:18

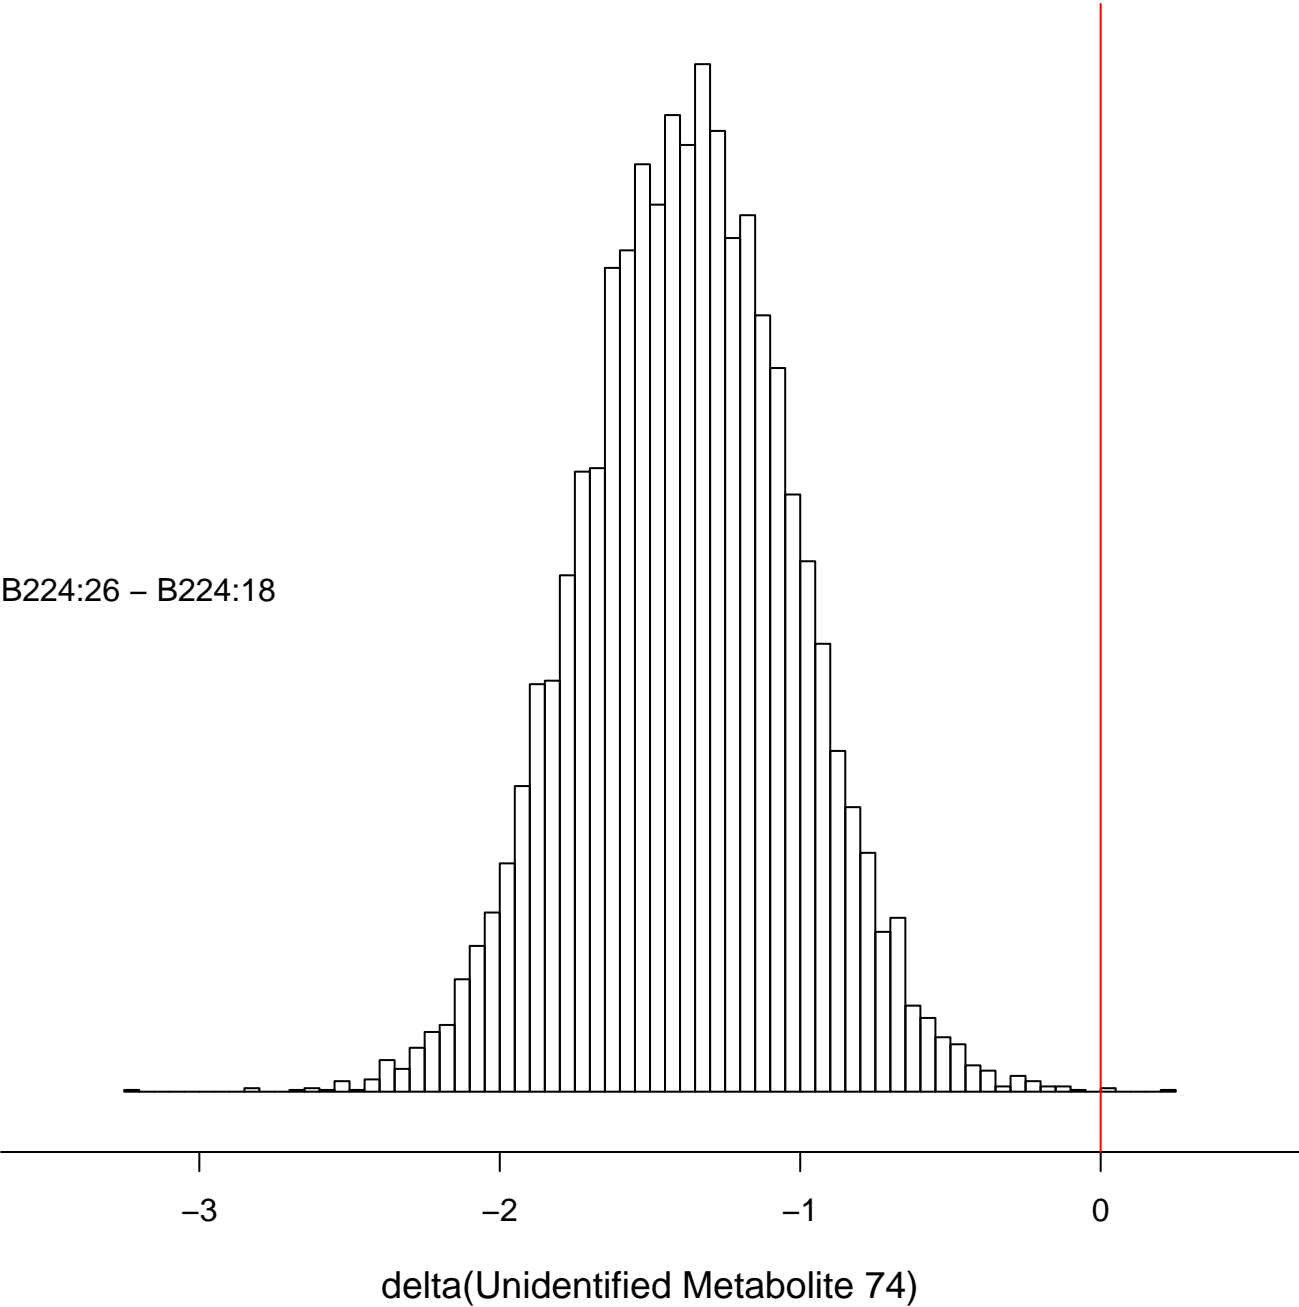



B224:26

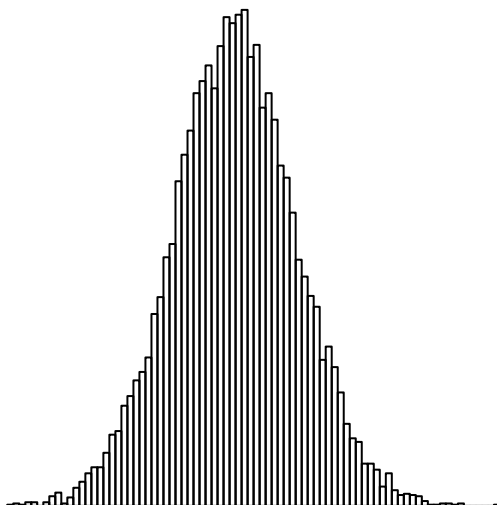

B224:18

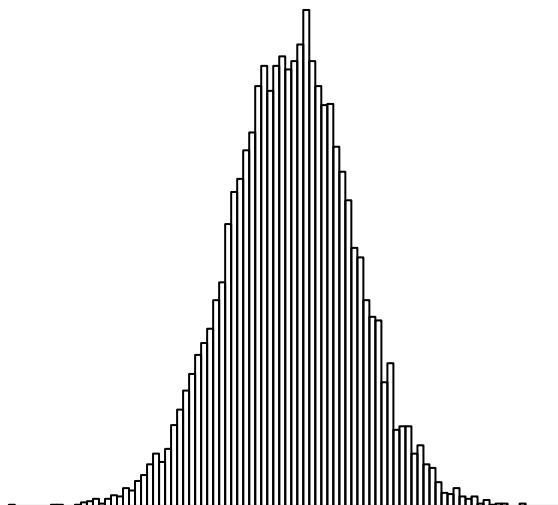

-12

-11

-10

-9

-8

Unidentified Metabolite 75

B224:26 – B224:18

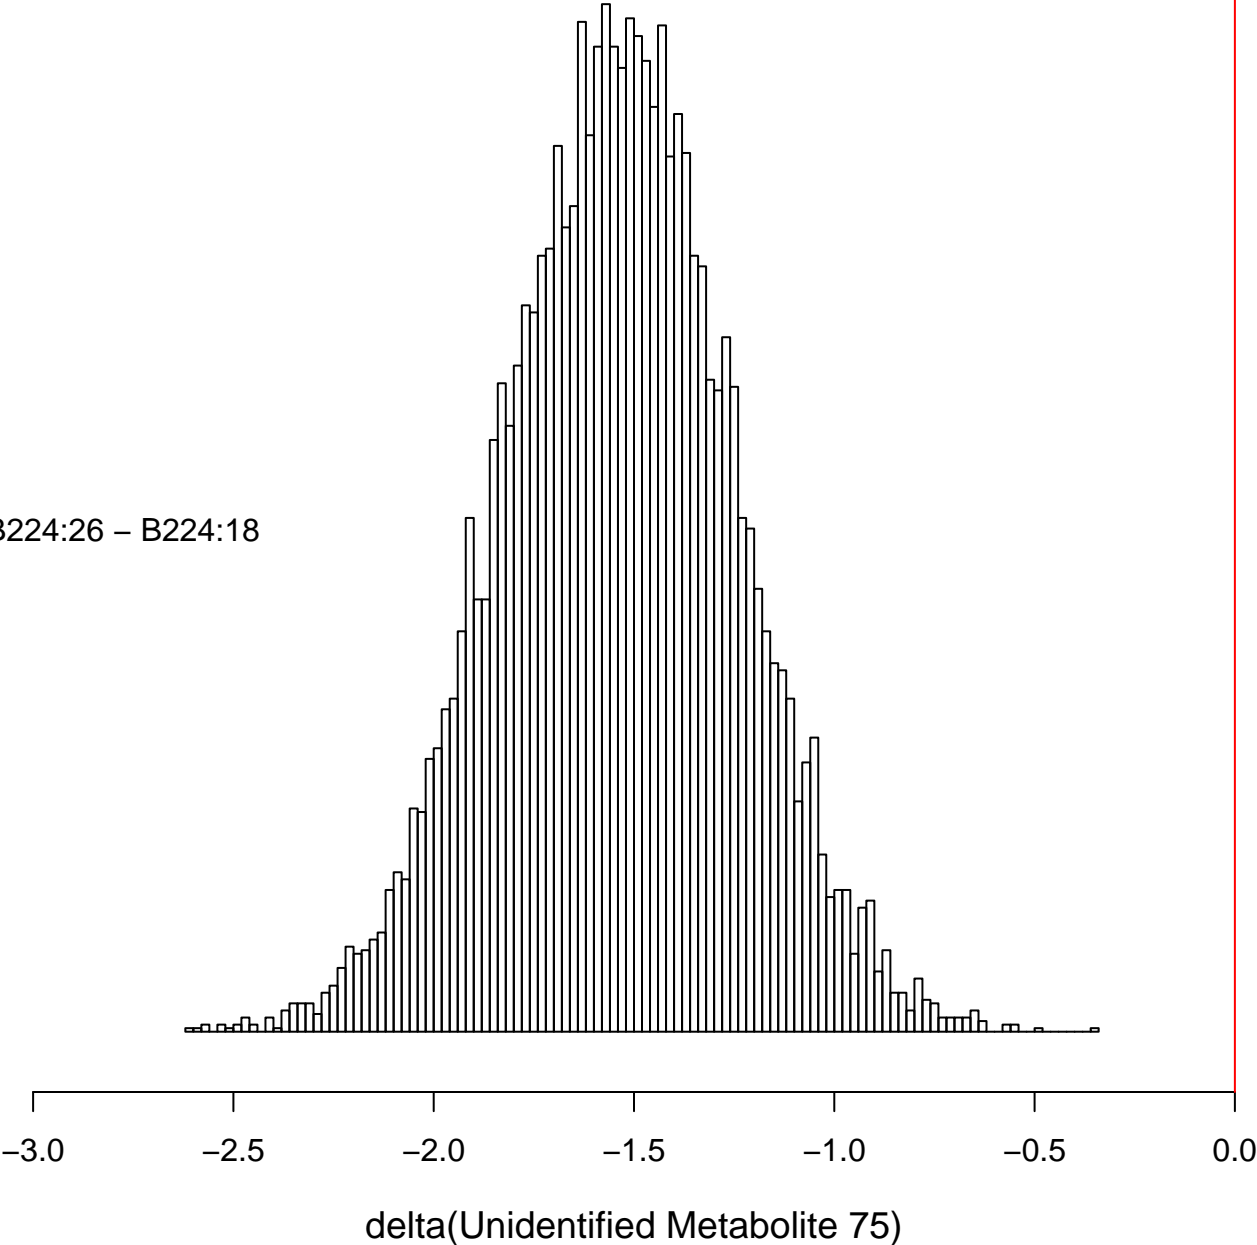

B224:26

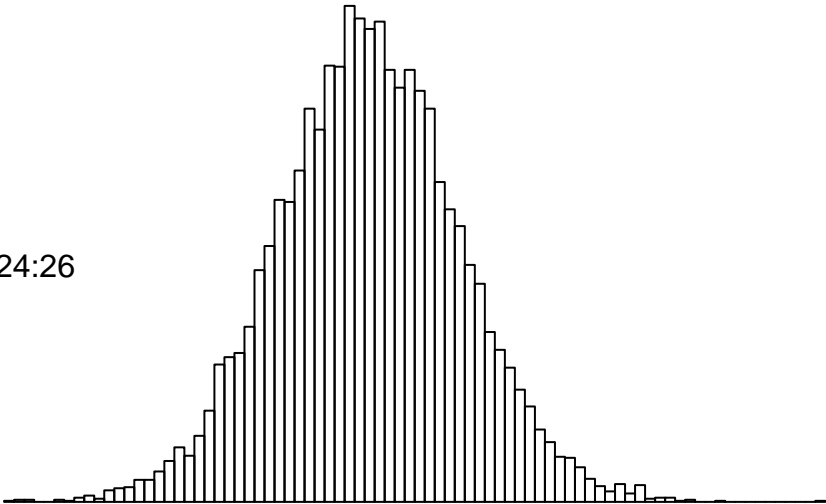

B224:18

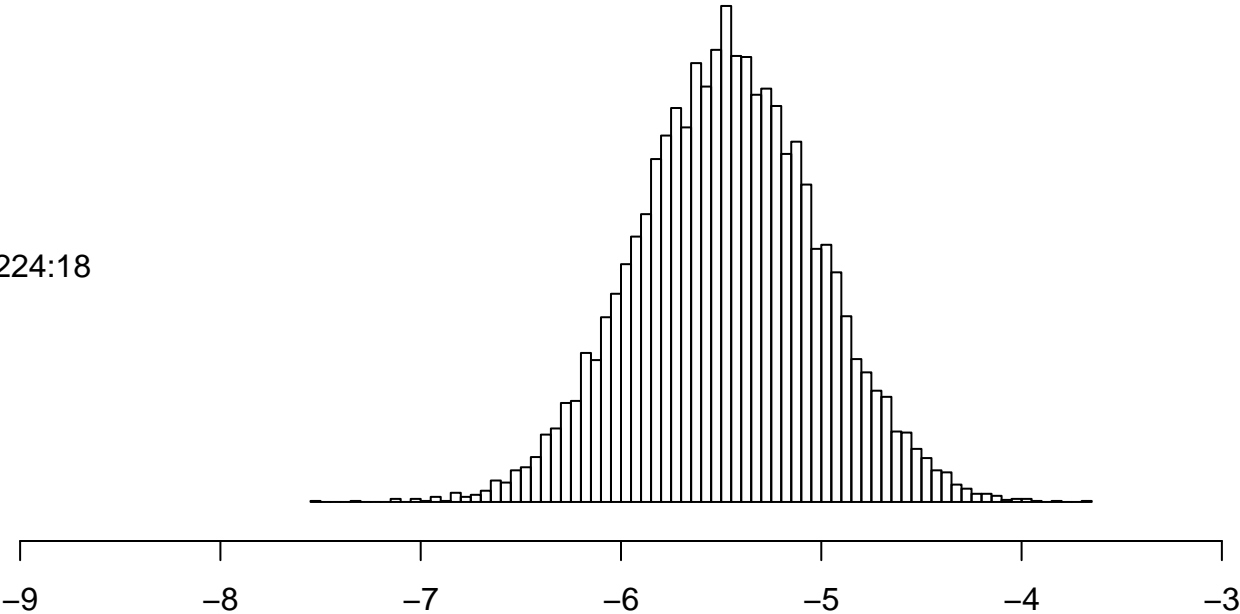

Unidentified Metabolite 76

B224:26 – B224:18

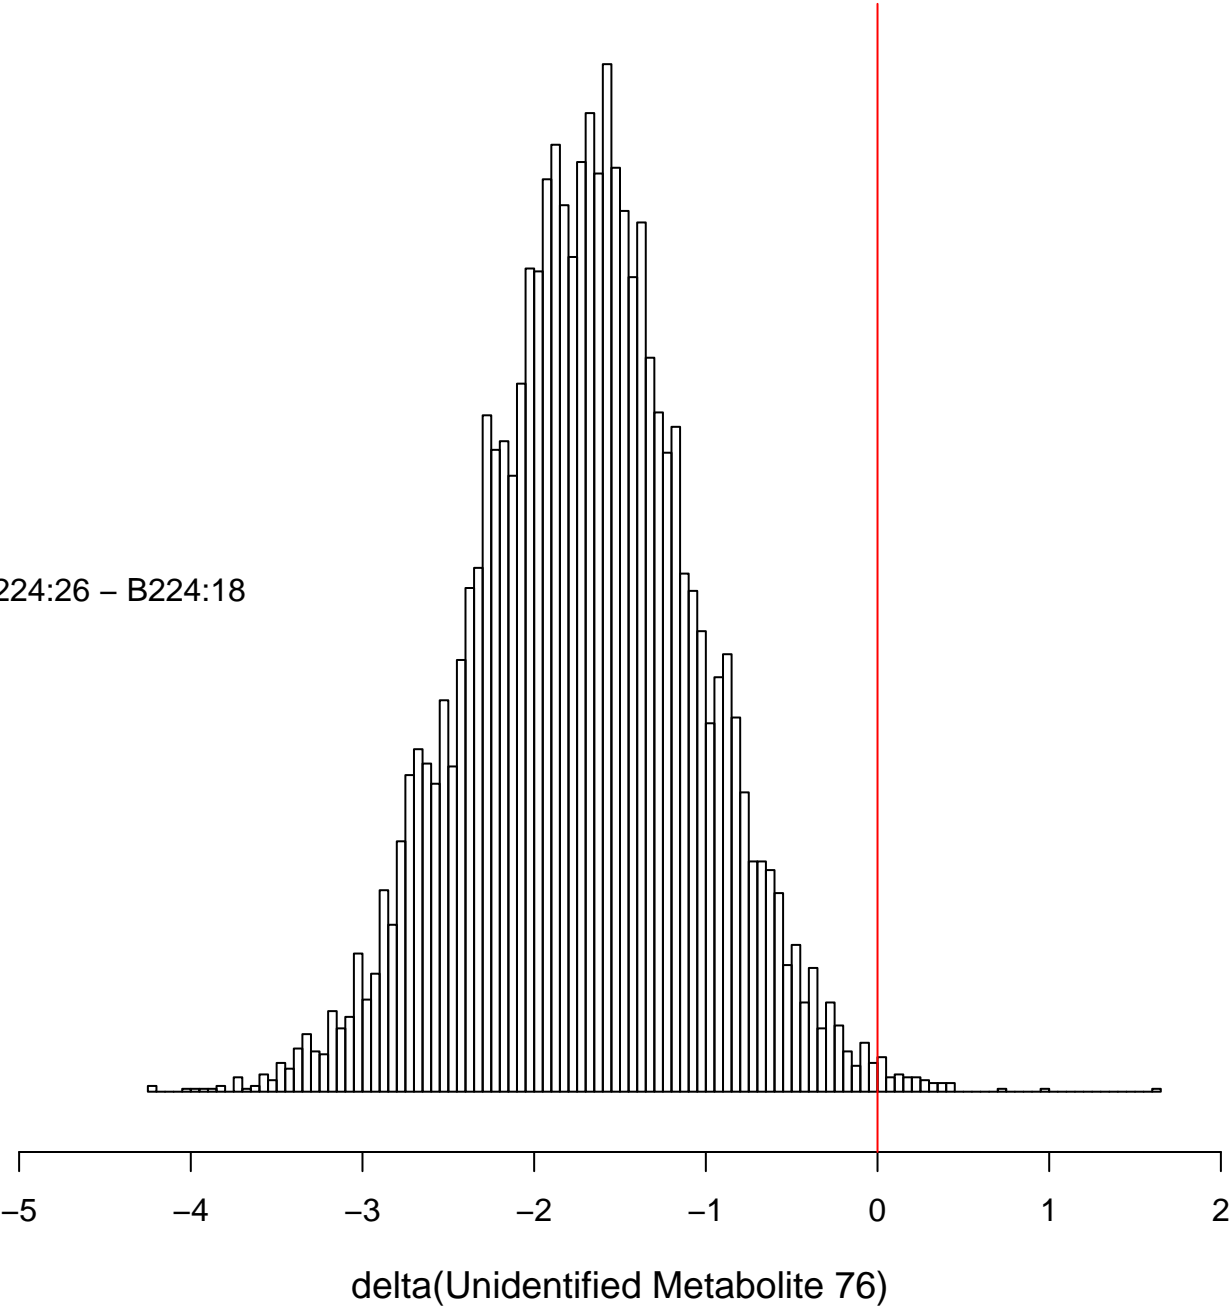

B224:26

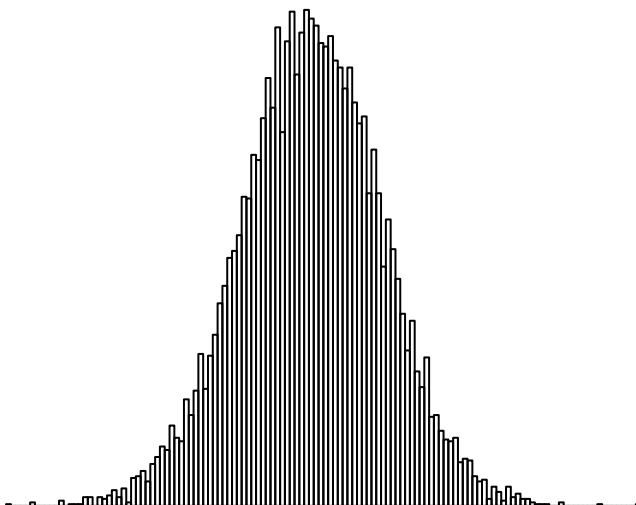

B224:18

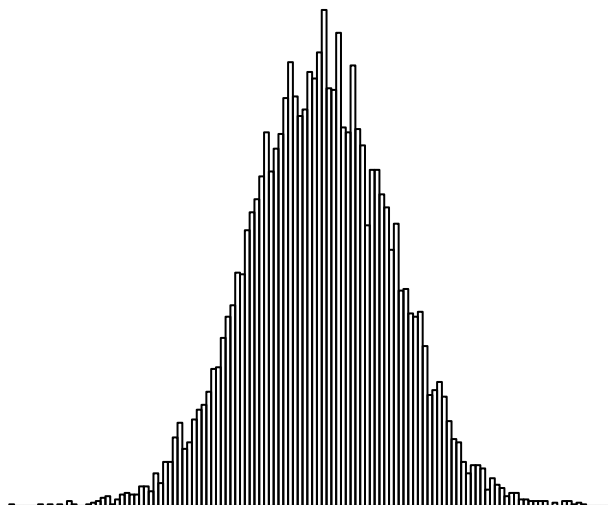

-10      -9      -8      -7      -6      -5

Unidentified Metabolite 77

B224:26 – B224:18

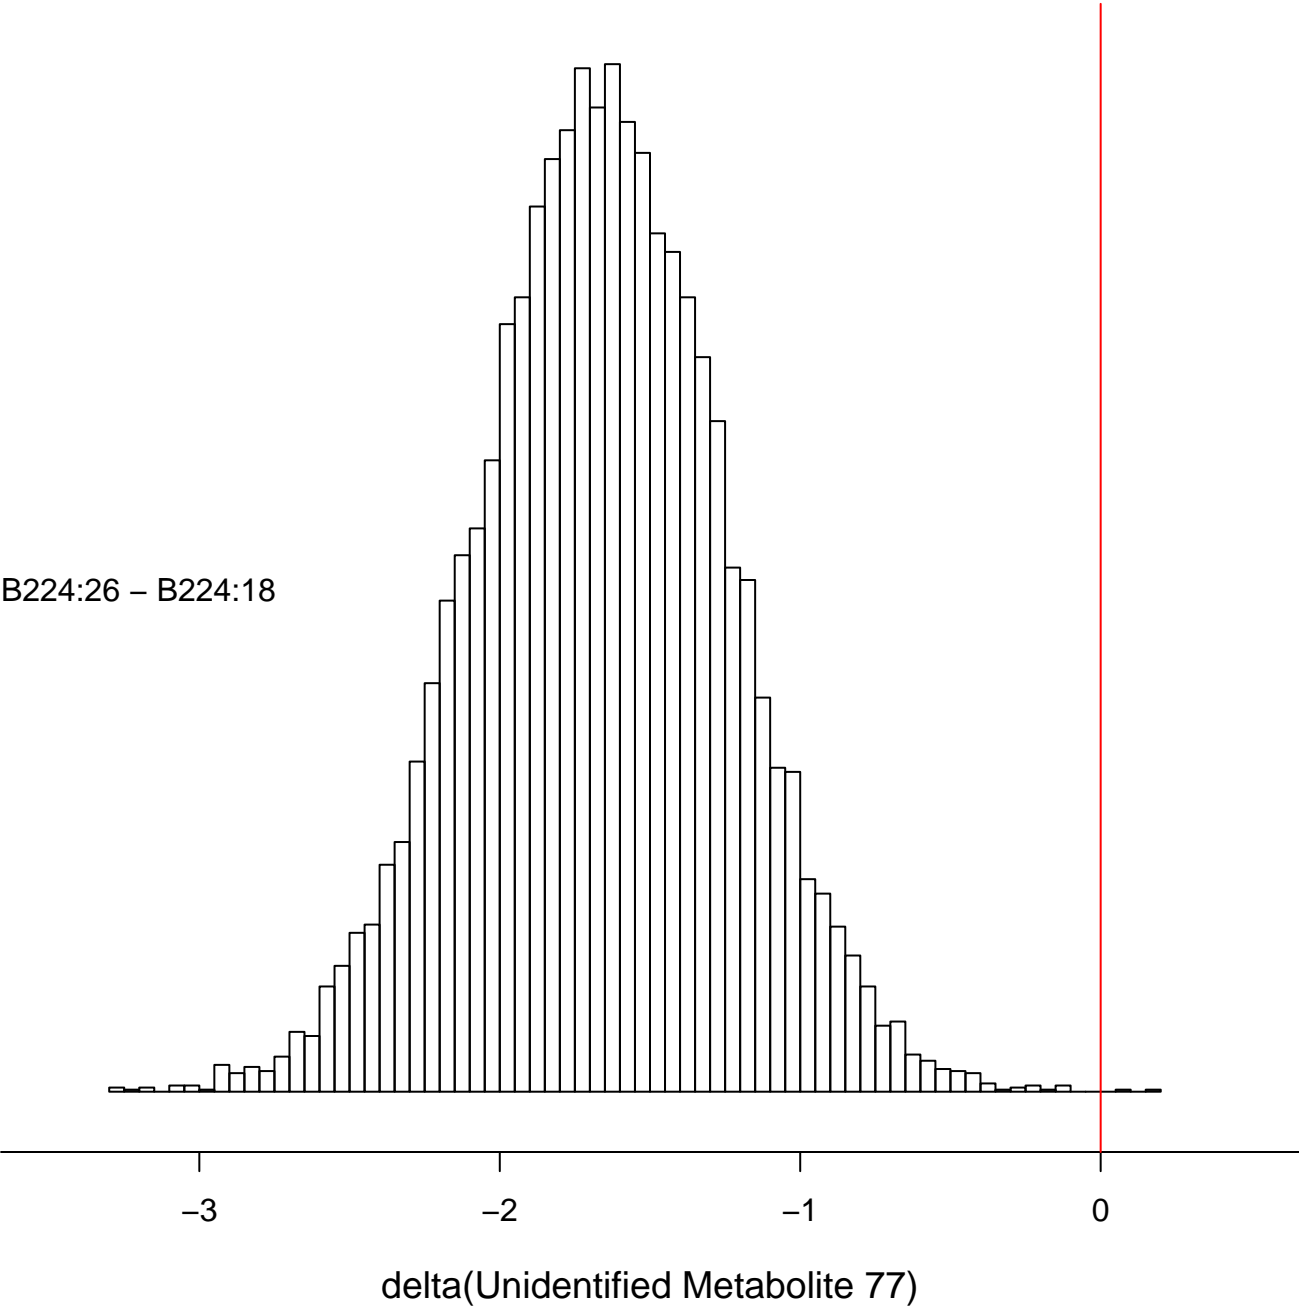

B224:26

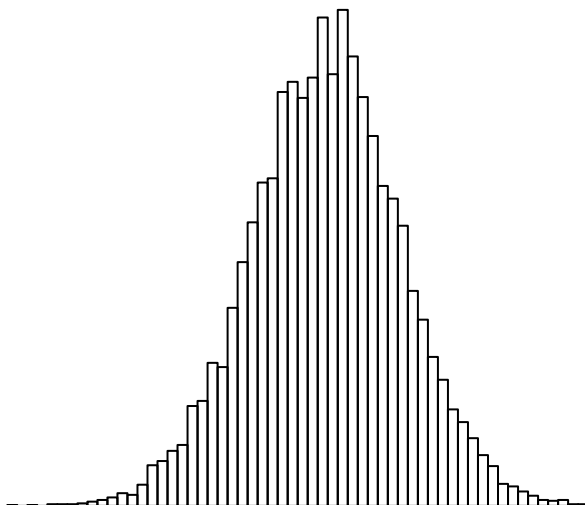

B224:18

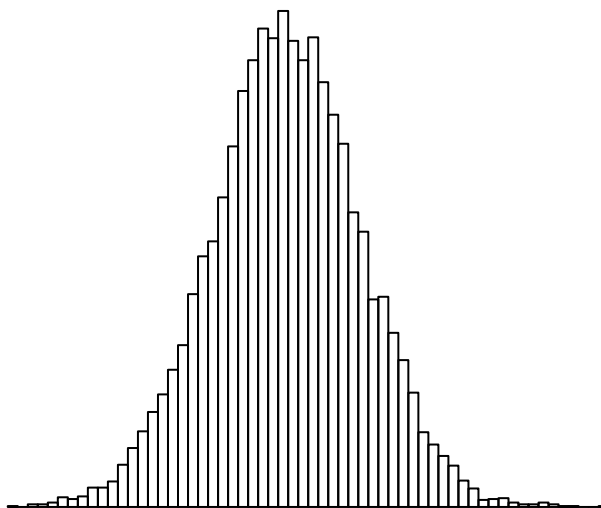

-10

-9

-8

-7

-6

-5

-4

Unidentified Metabolite 78

B224:26 – B224:18

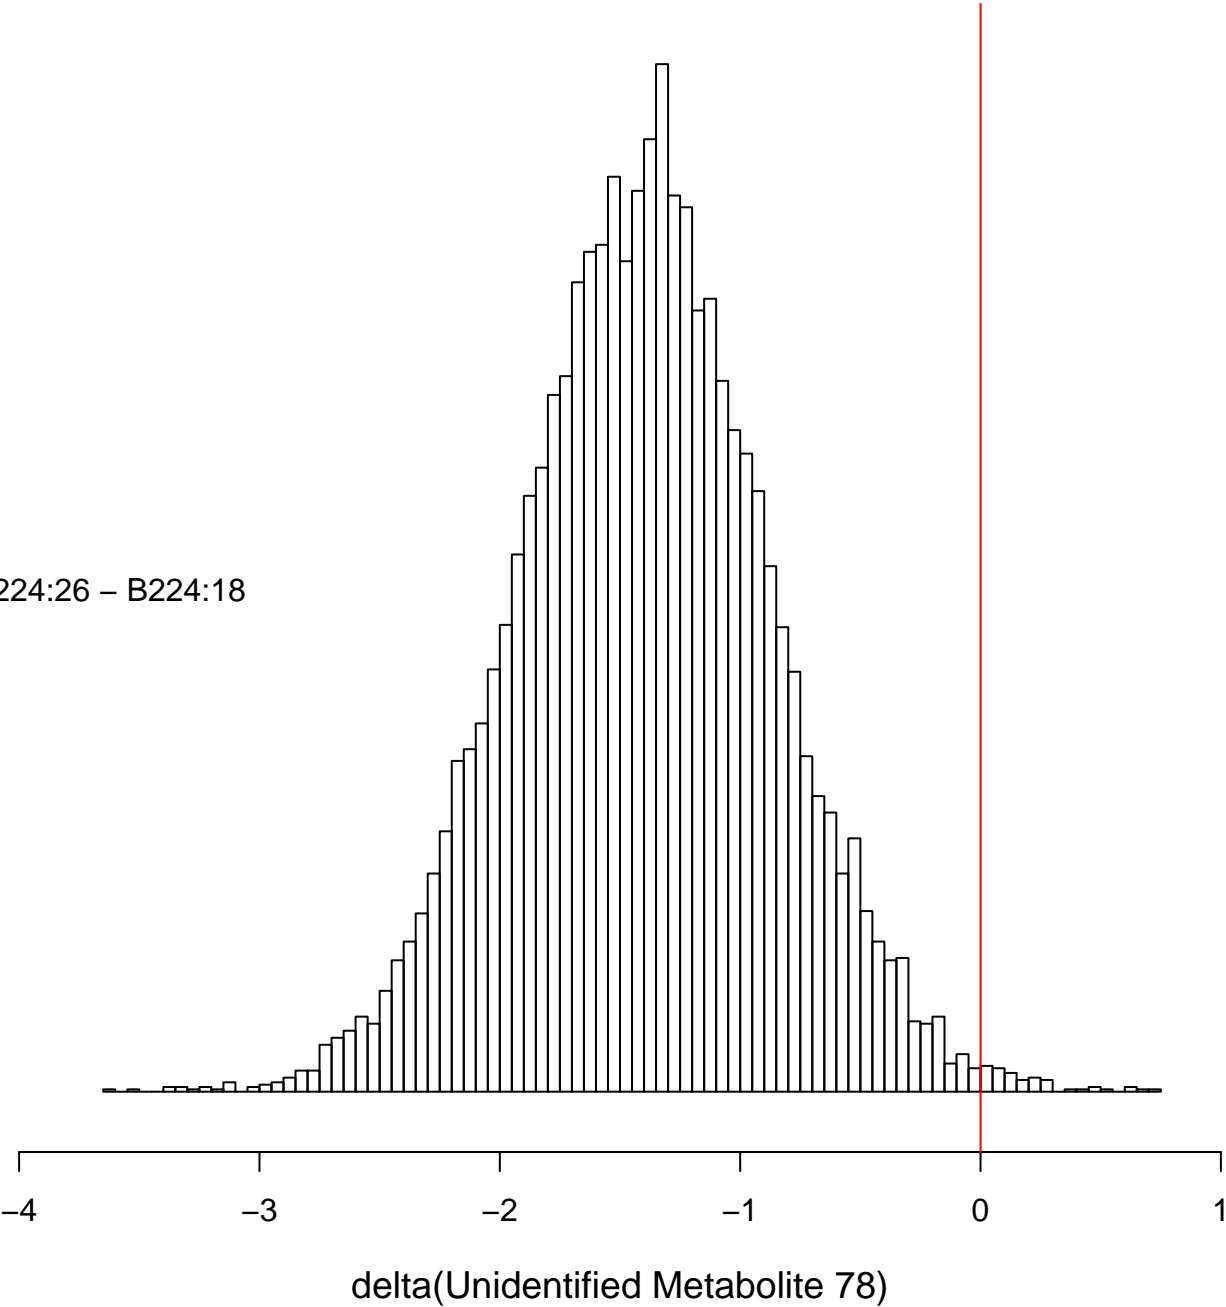



B224:26

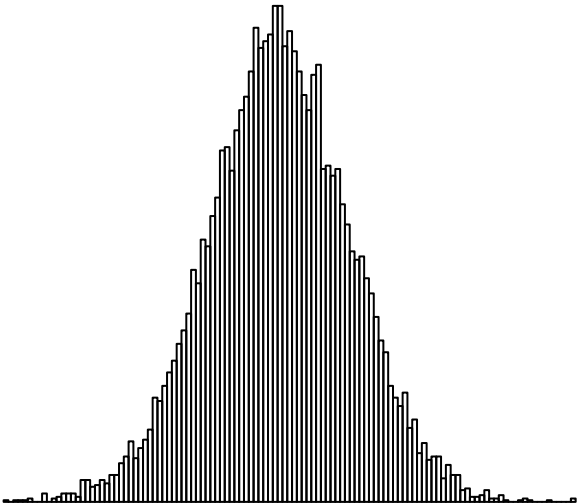

B224:18

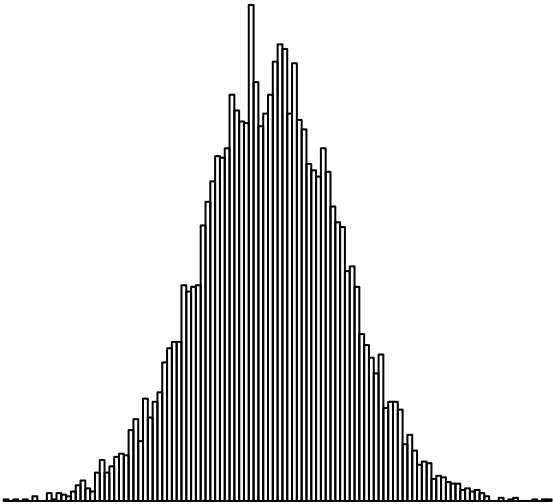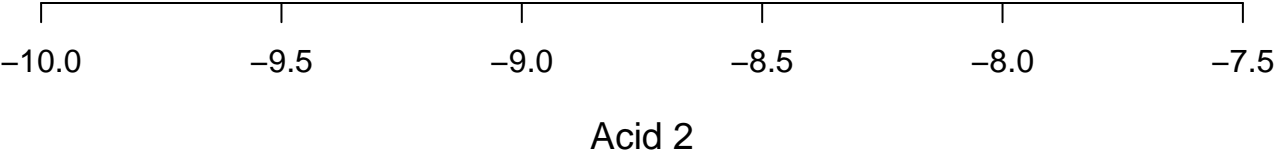

B224:26 – B224:18

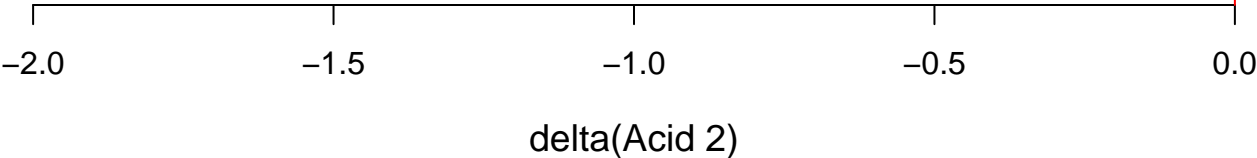

B224:26

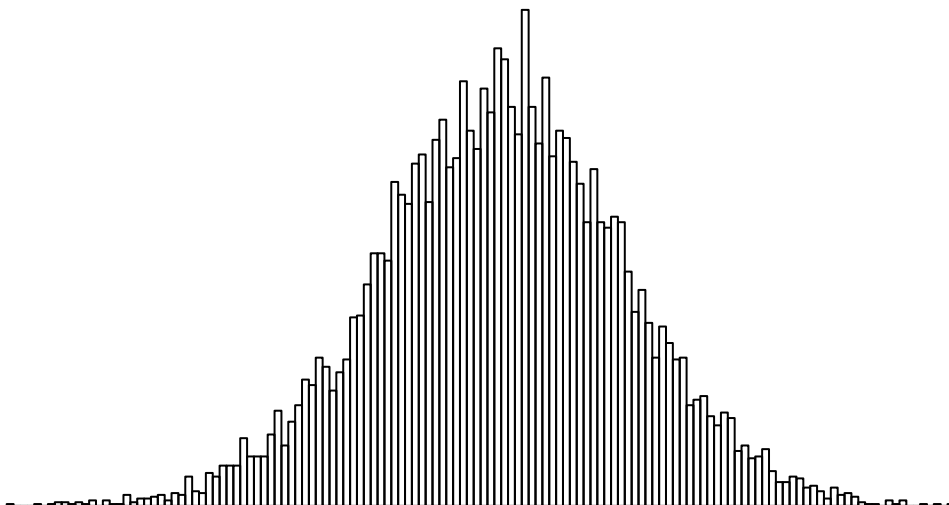

B224:18

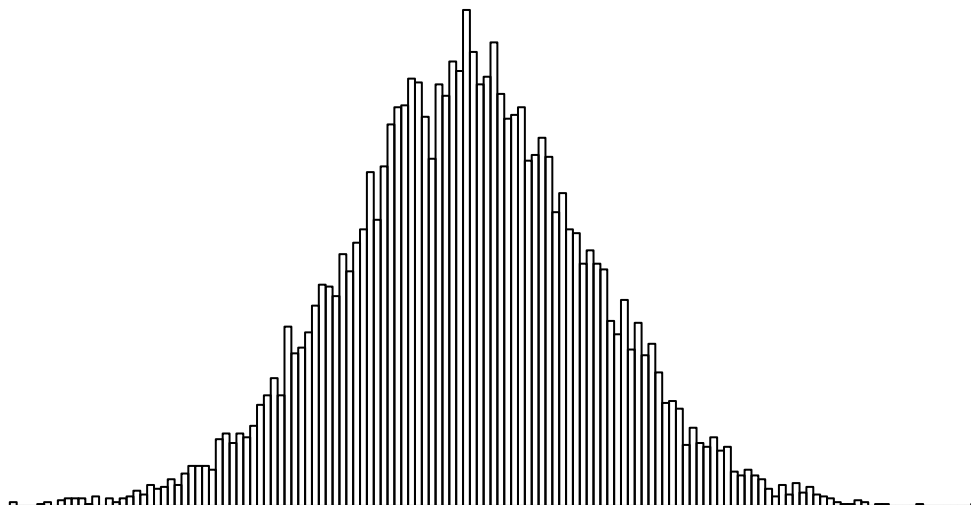

-8.5      -8.0      -7.5      -7.0      -6.5      -6.0      -5.5      -5.0

Acid 3

B224:26 – B224:18

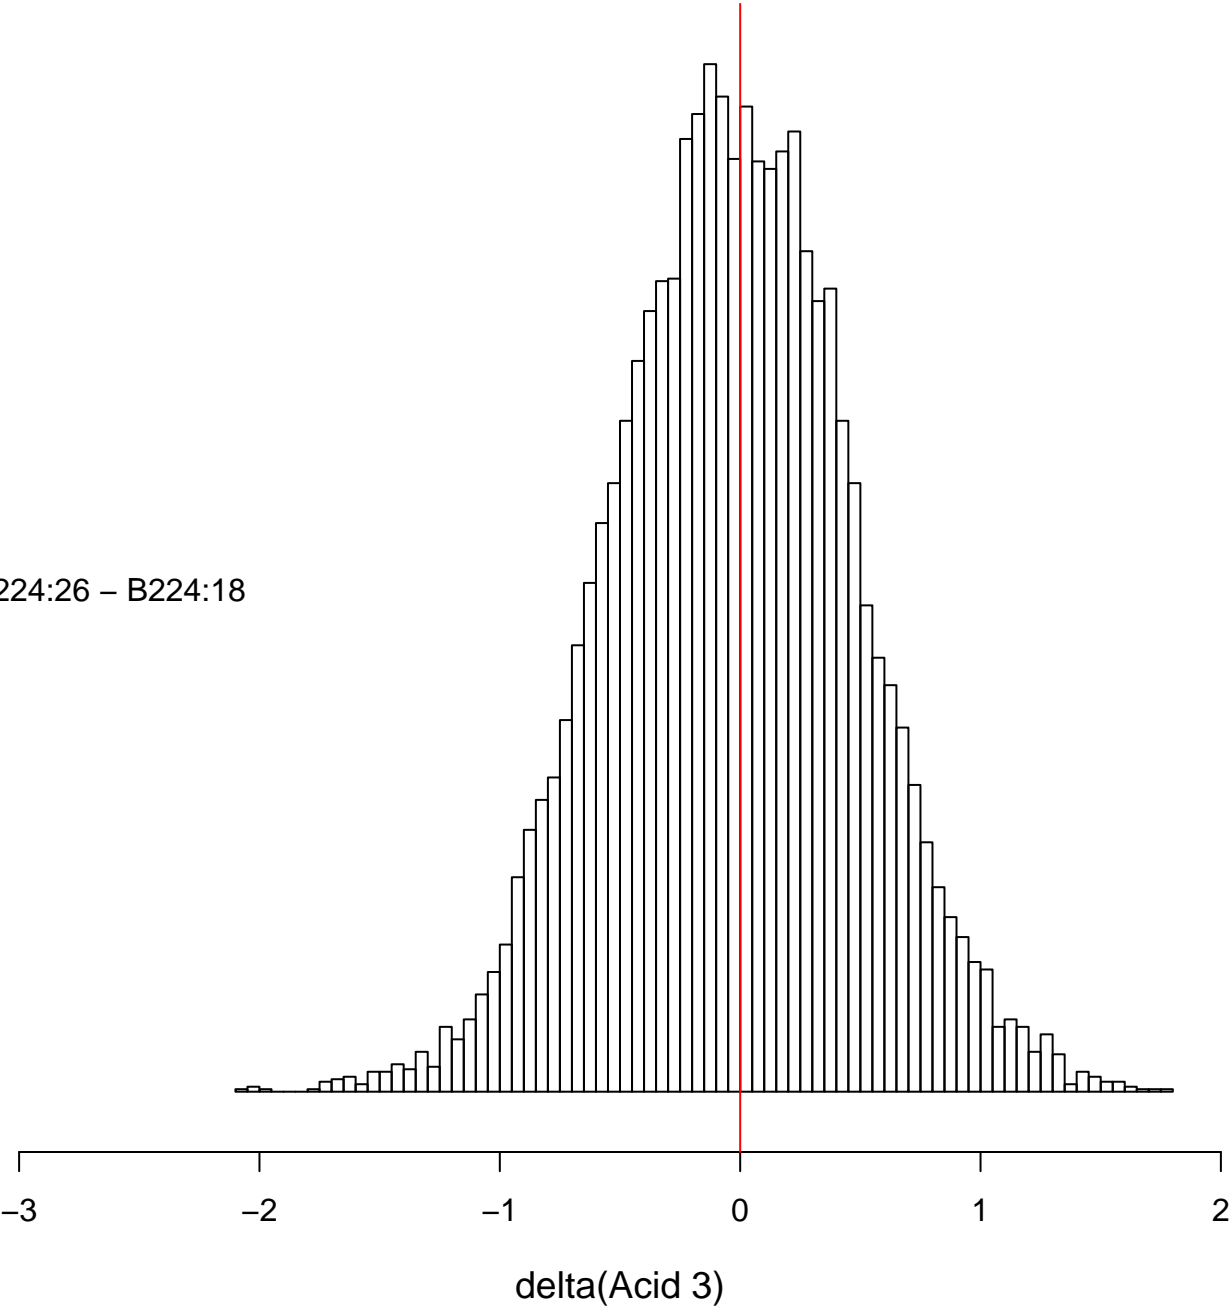

B224:26

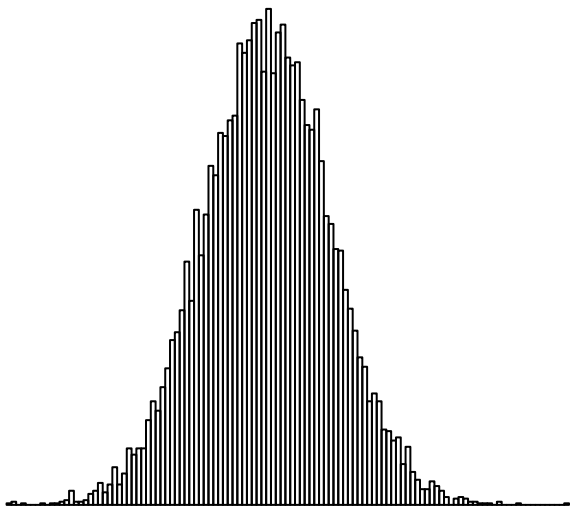

B224:18

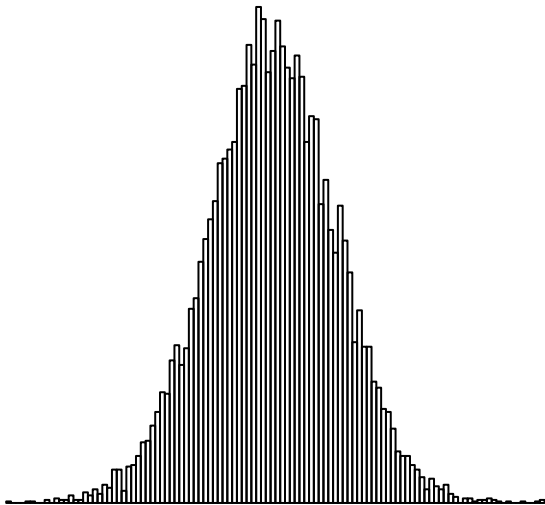

Acid 6

B224:26 – B224:18

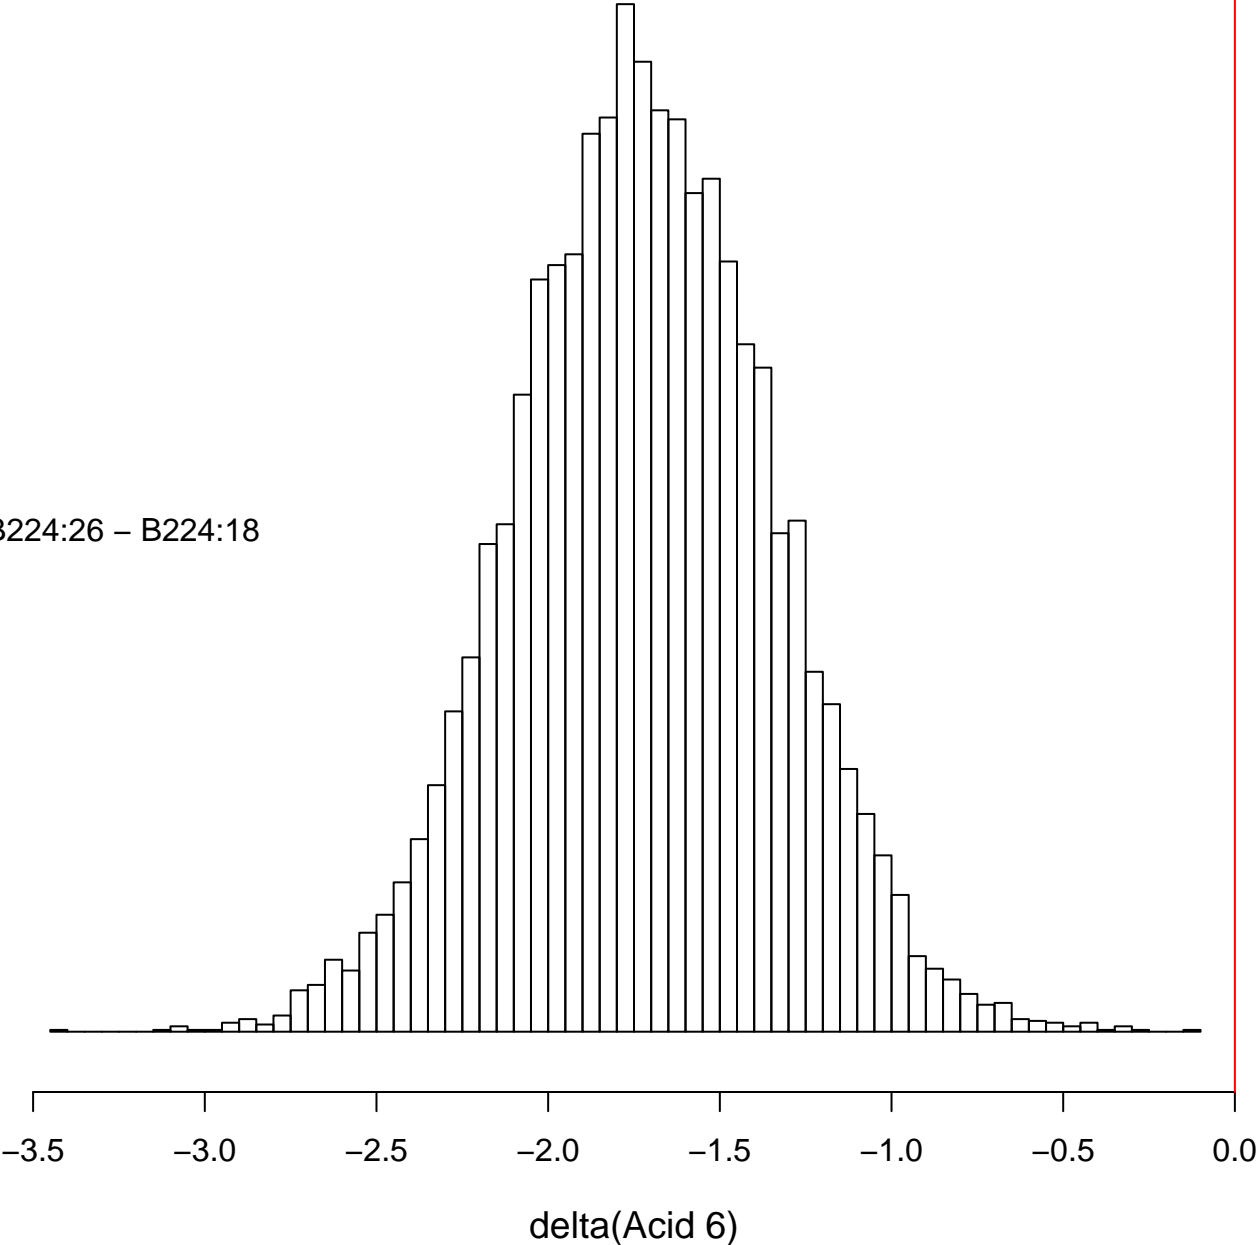

B224:26

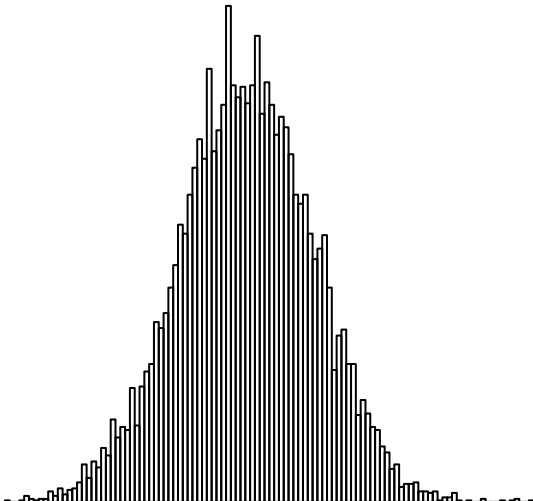

B224:18

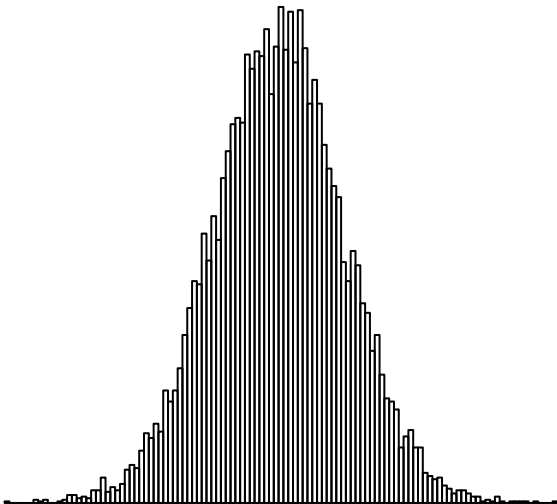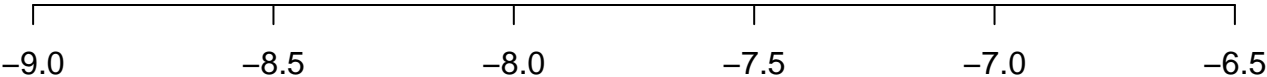

Acid 7

B224:26 – B224:18

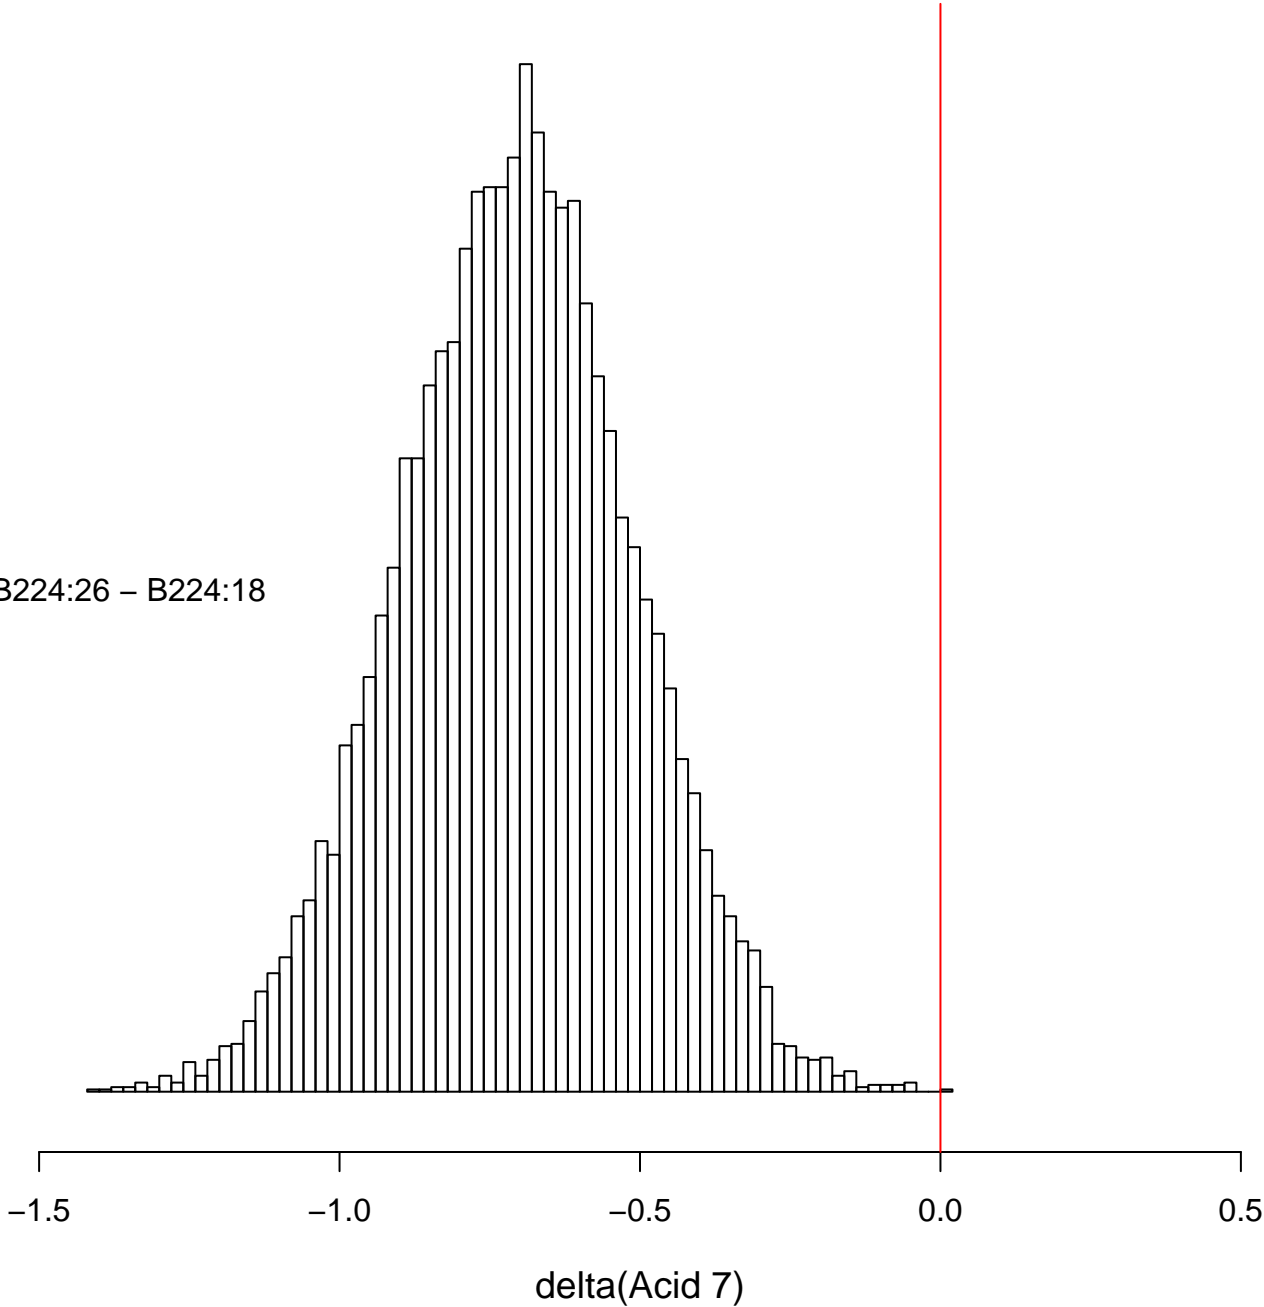



[illegible]

-2

A horizontal number line with tick marks at intervals of 1. The labels below the tick marks are -6, -5, -4, -3, and -2.

B224:26 – B224:18

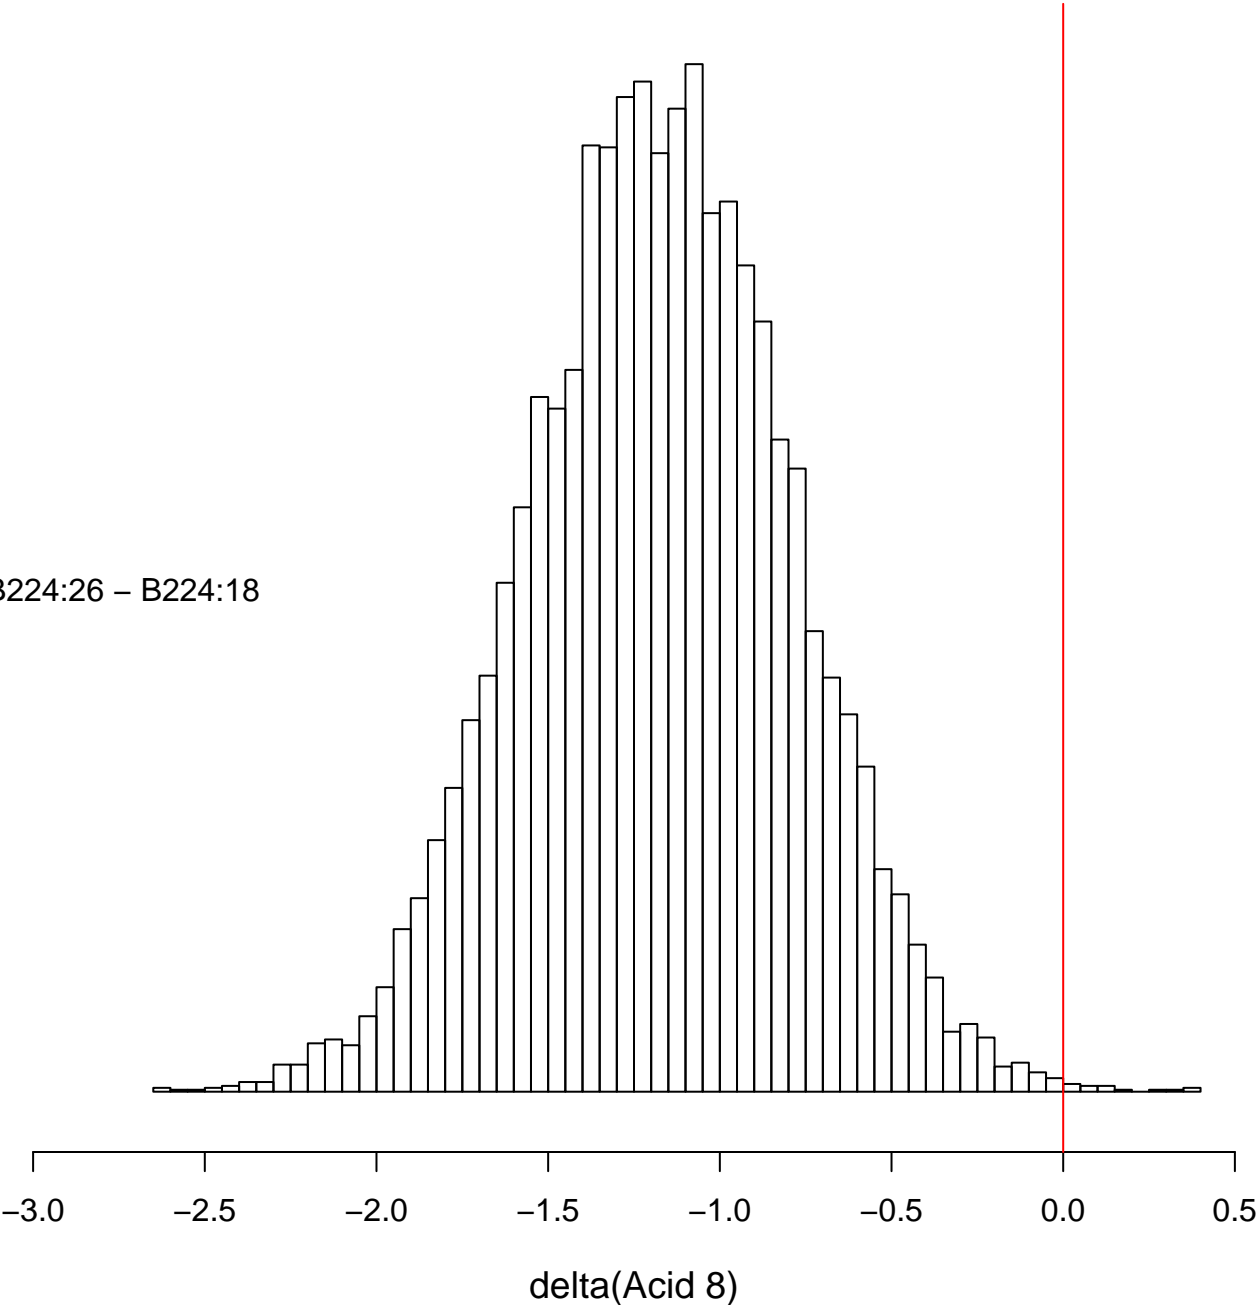

B224:26

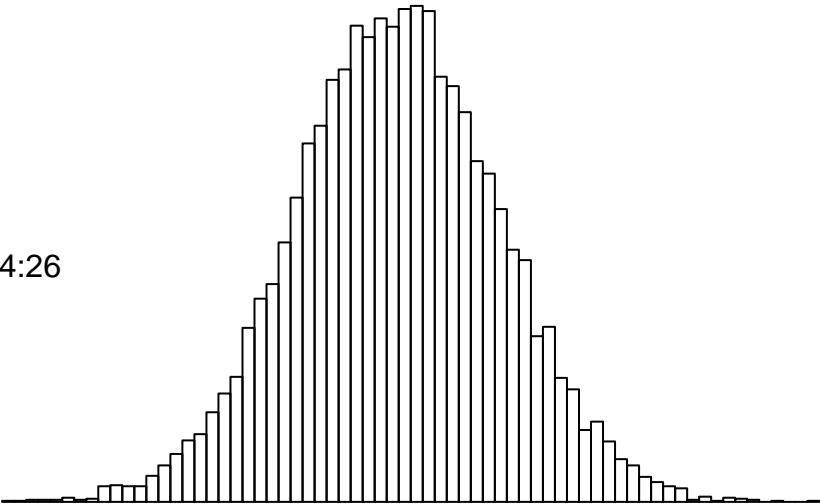

B224:18

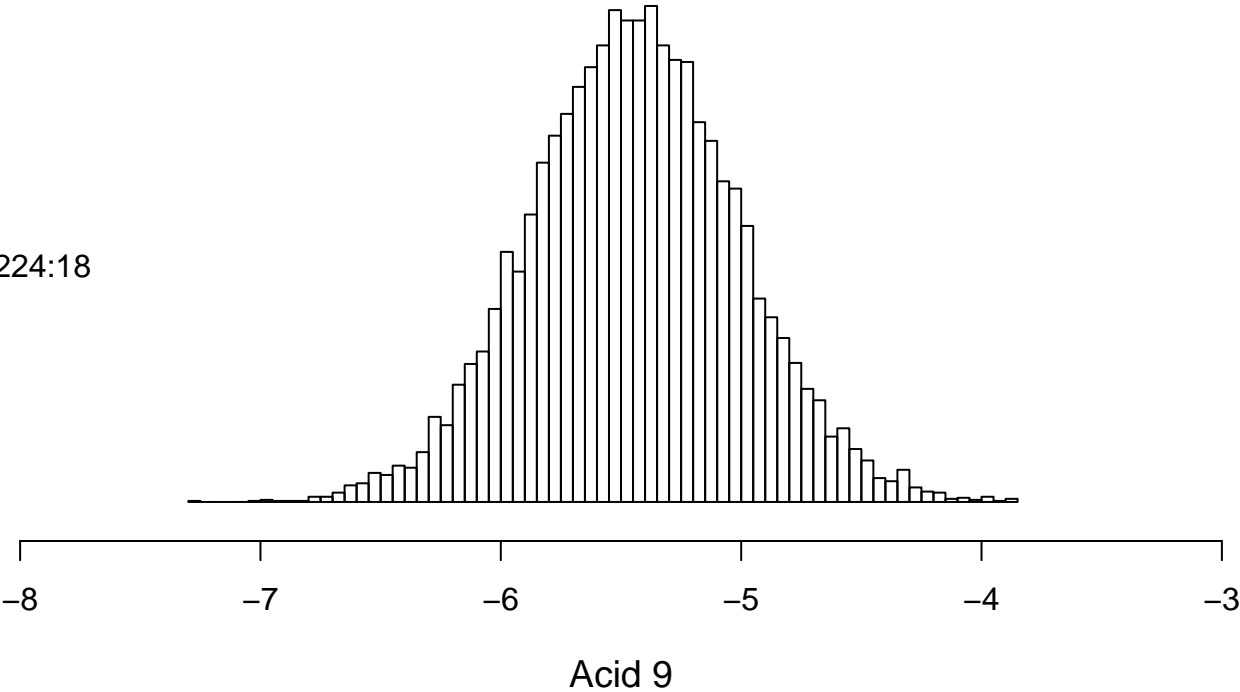

B224:26 – B224:18

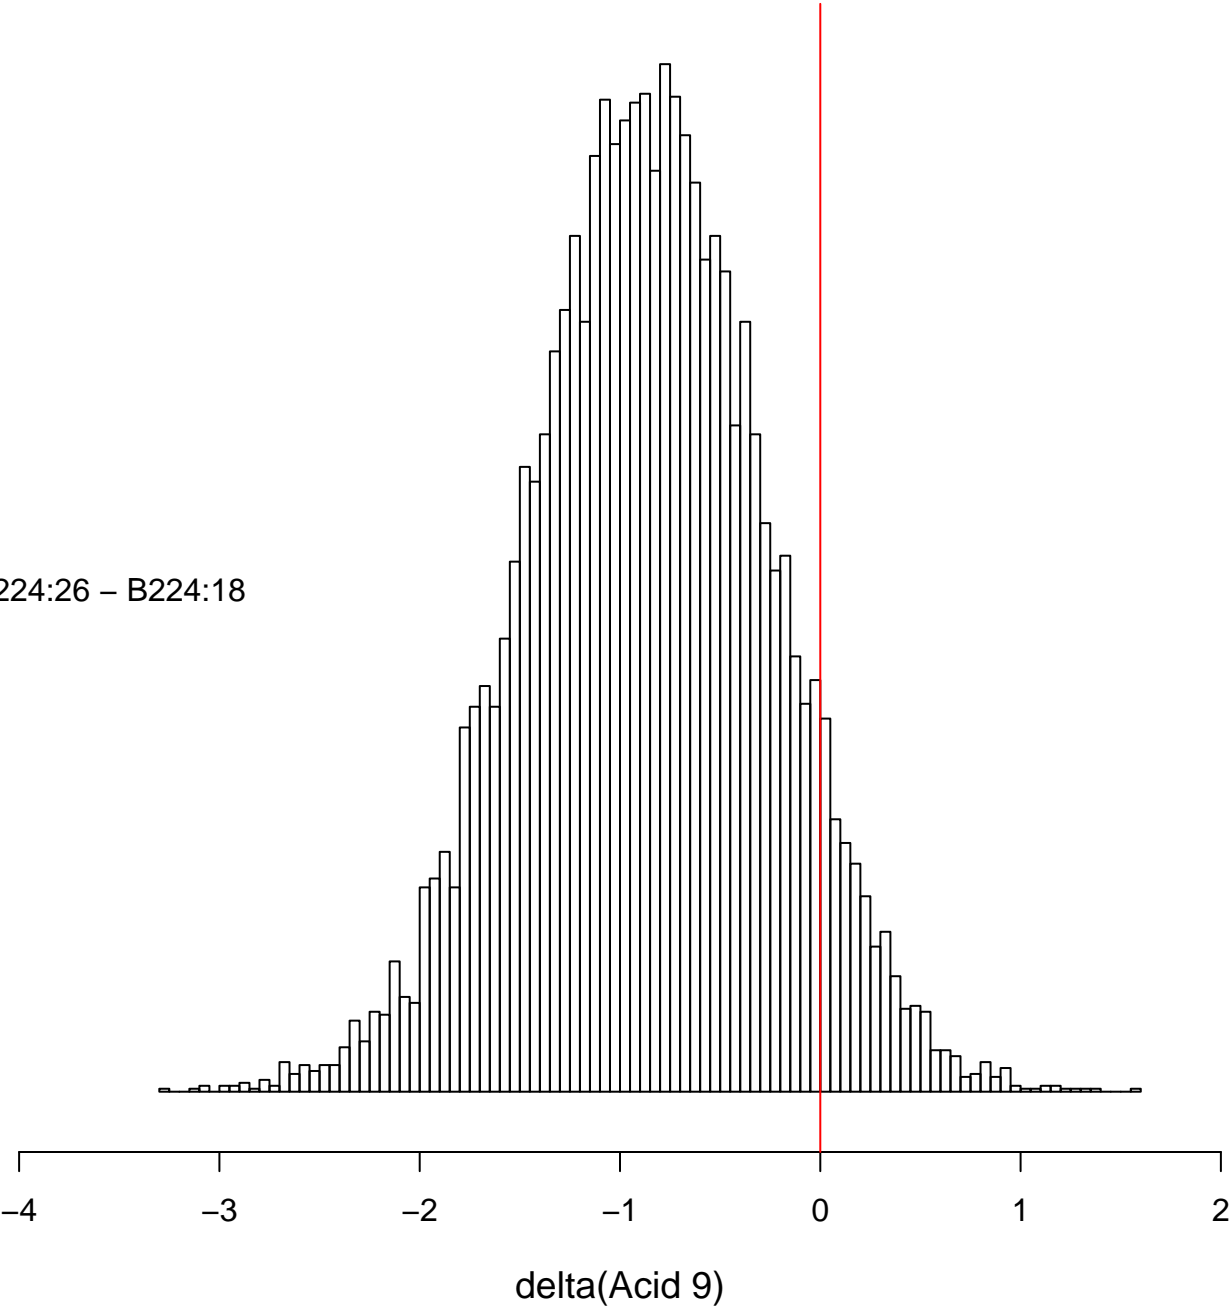

B224:26

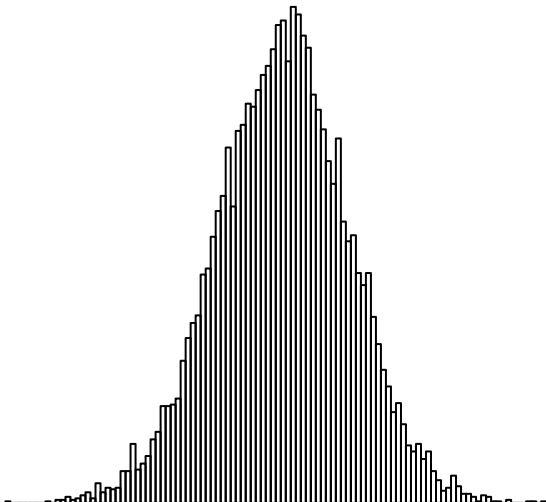

B224:18

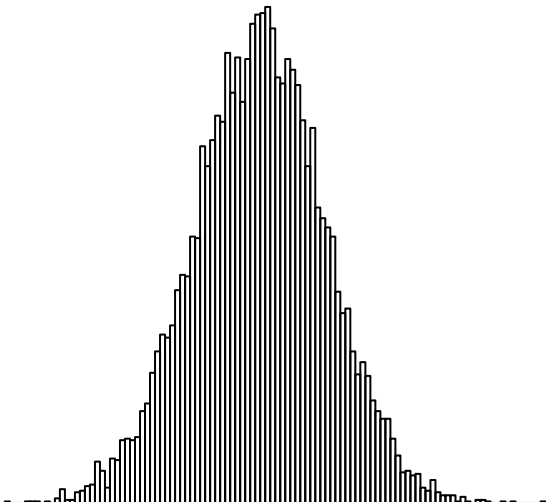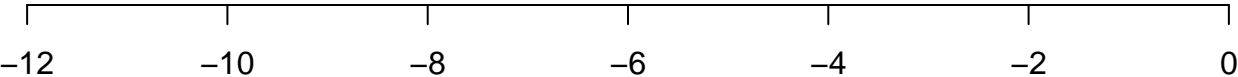

Acid 10

B224:26 – B224:18

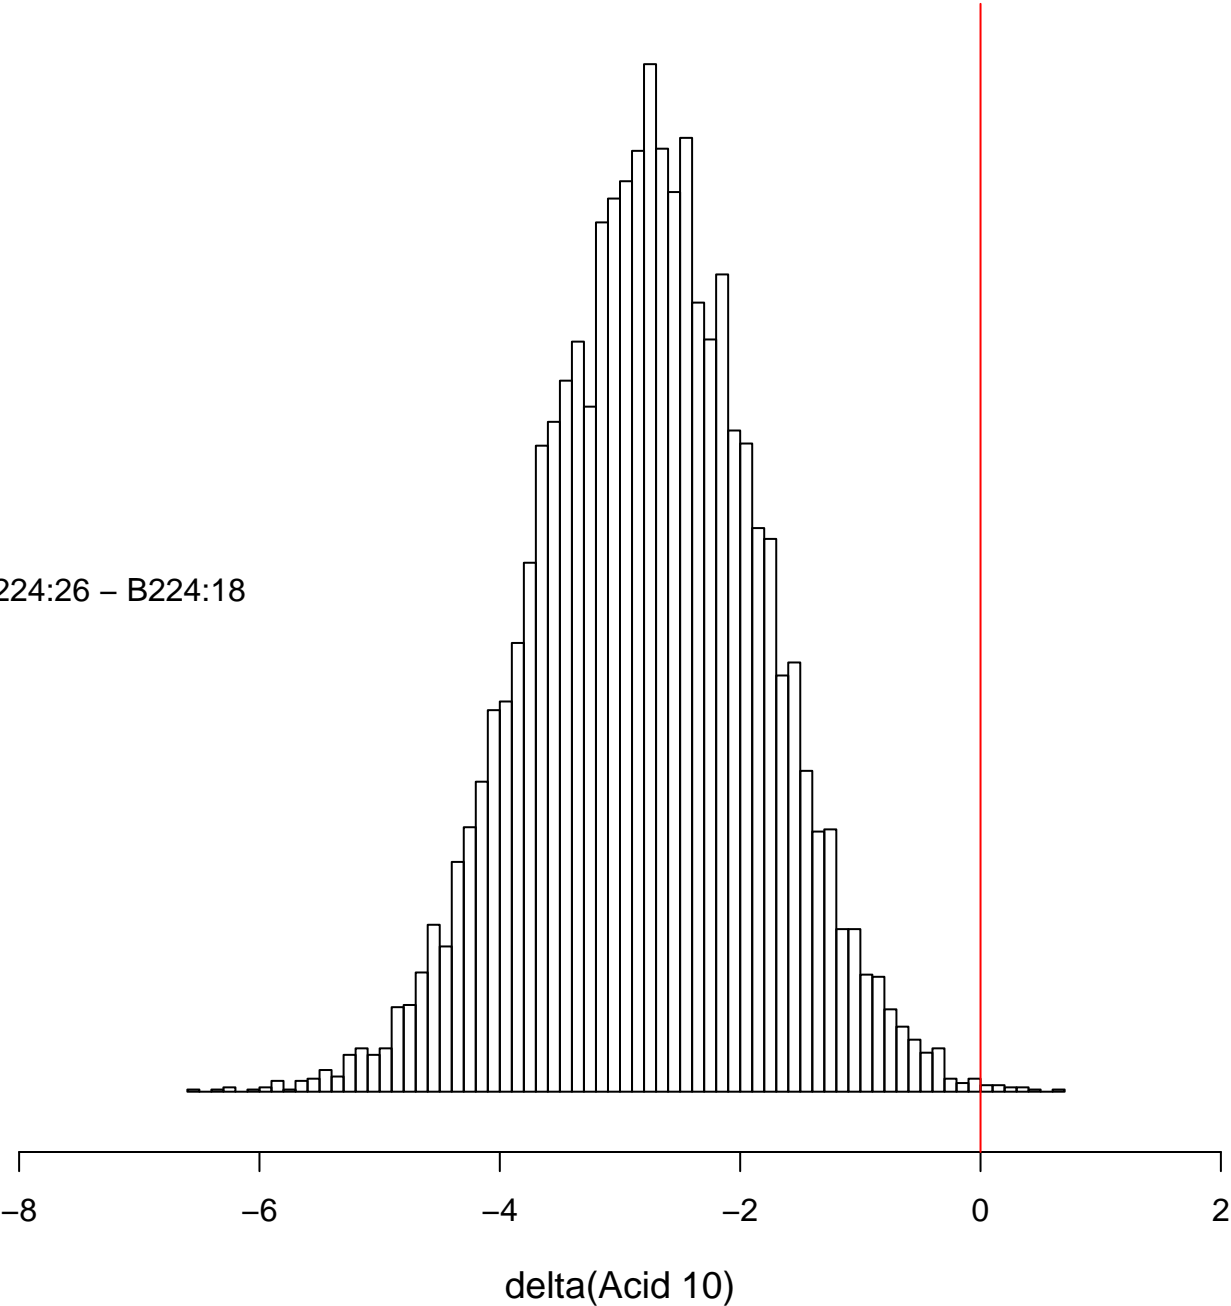

B224:26

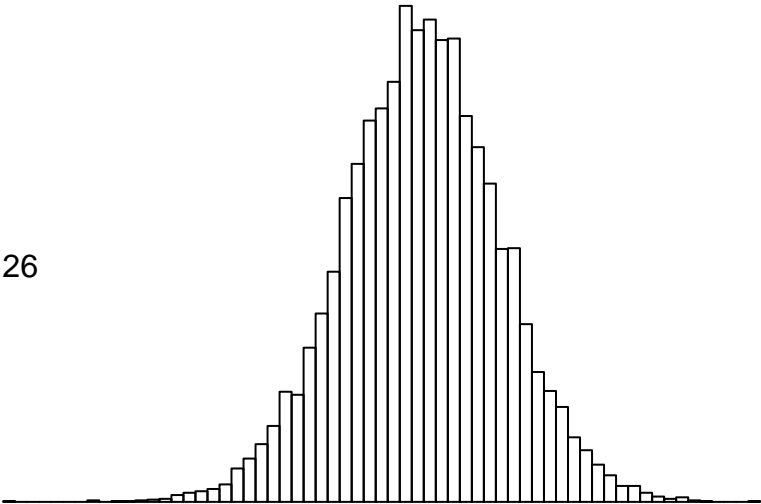

B224:18

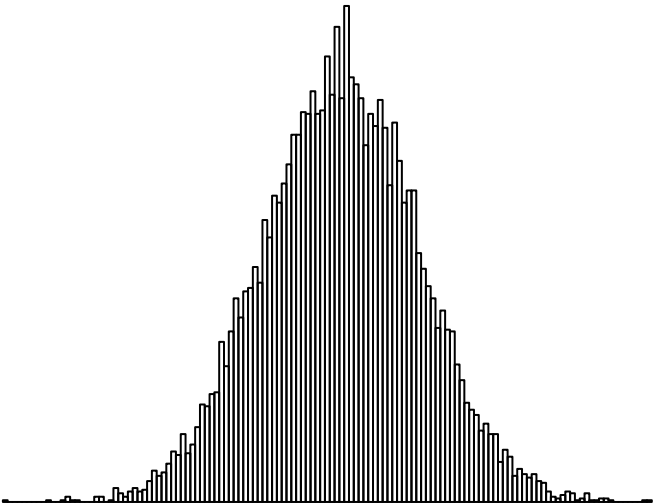

-10      -9      -8      -7      -6      -5

Acid 11

B224:26 – B224:18

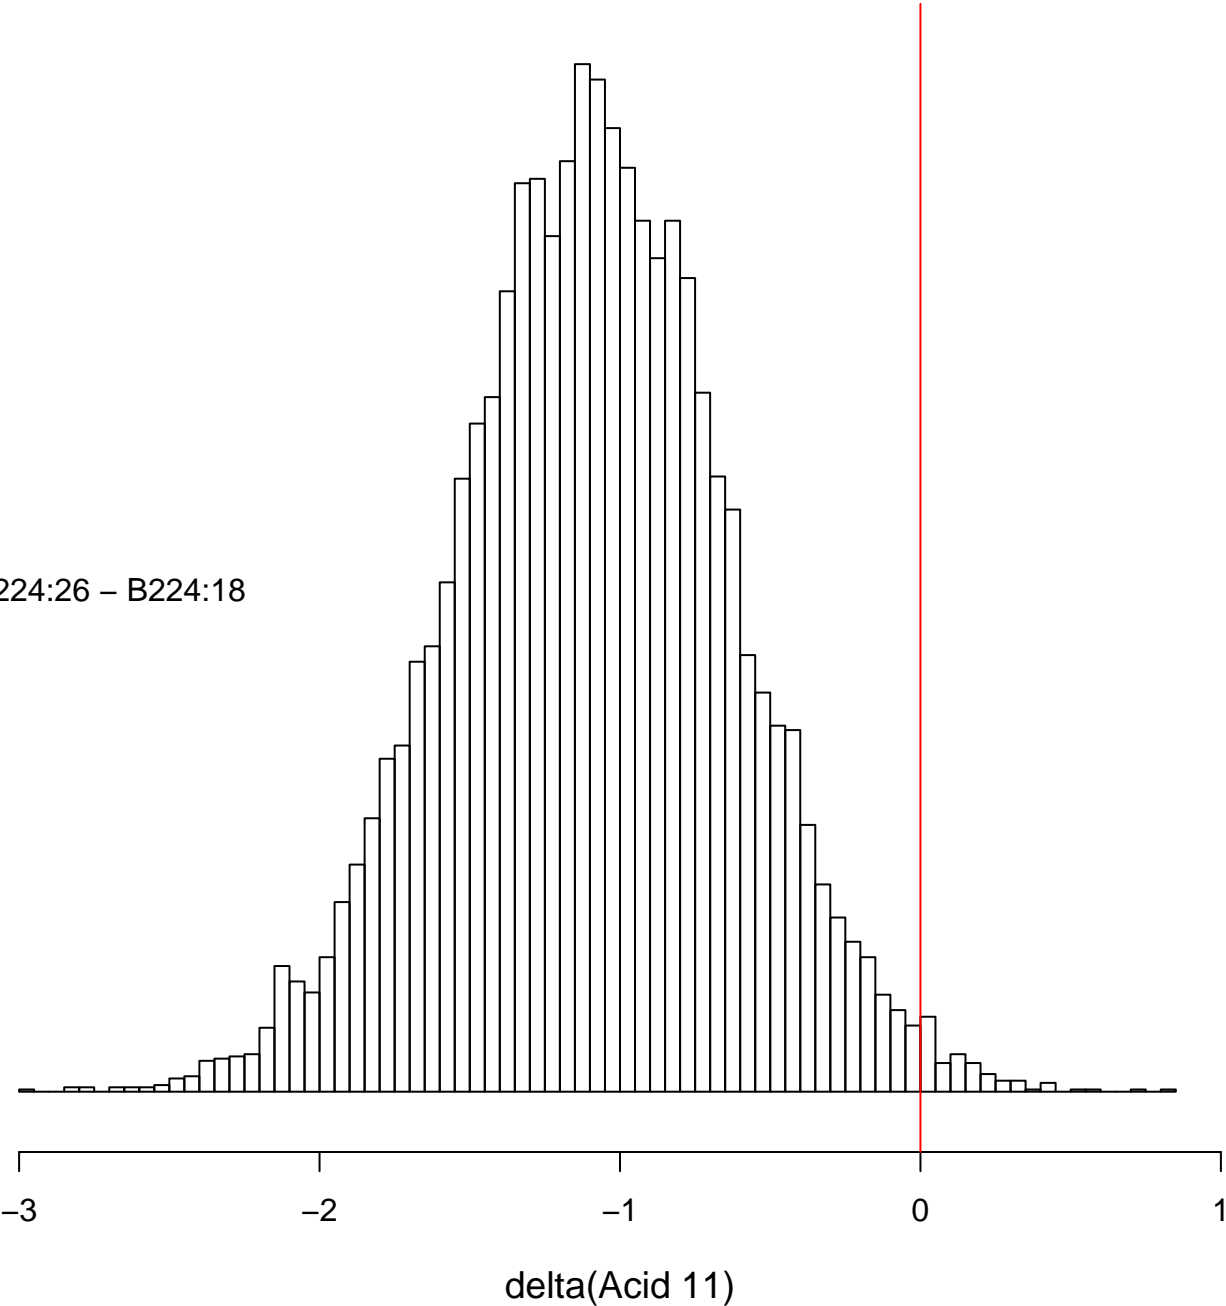



B224:26

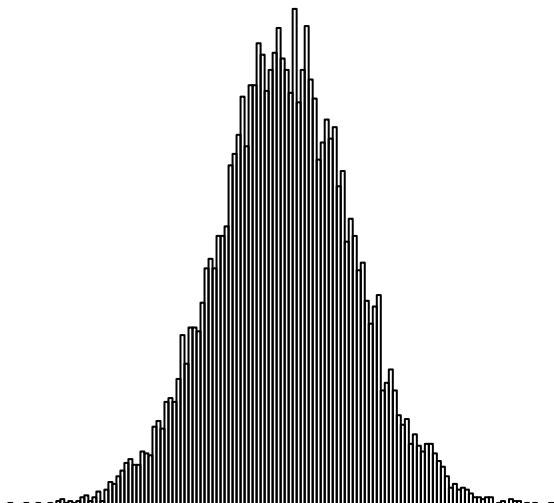

B224:18

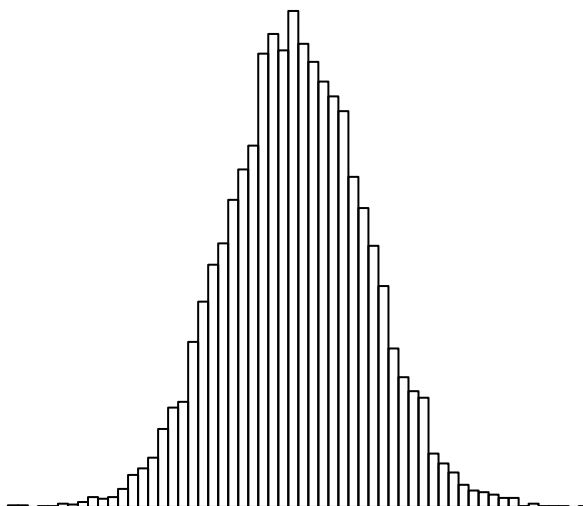

-10

-9

-8

-7

-6

-5

-4

Acid 12

B224:26 – B224:18

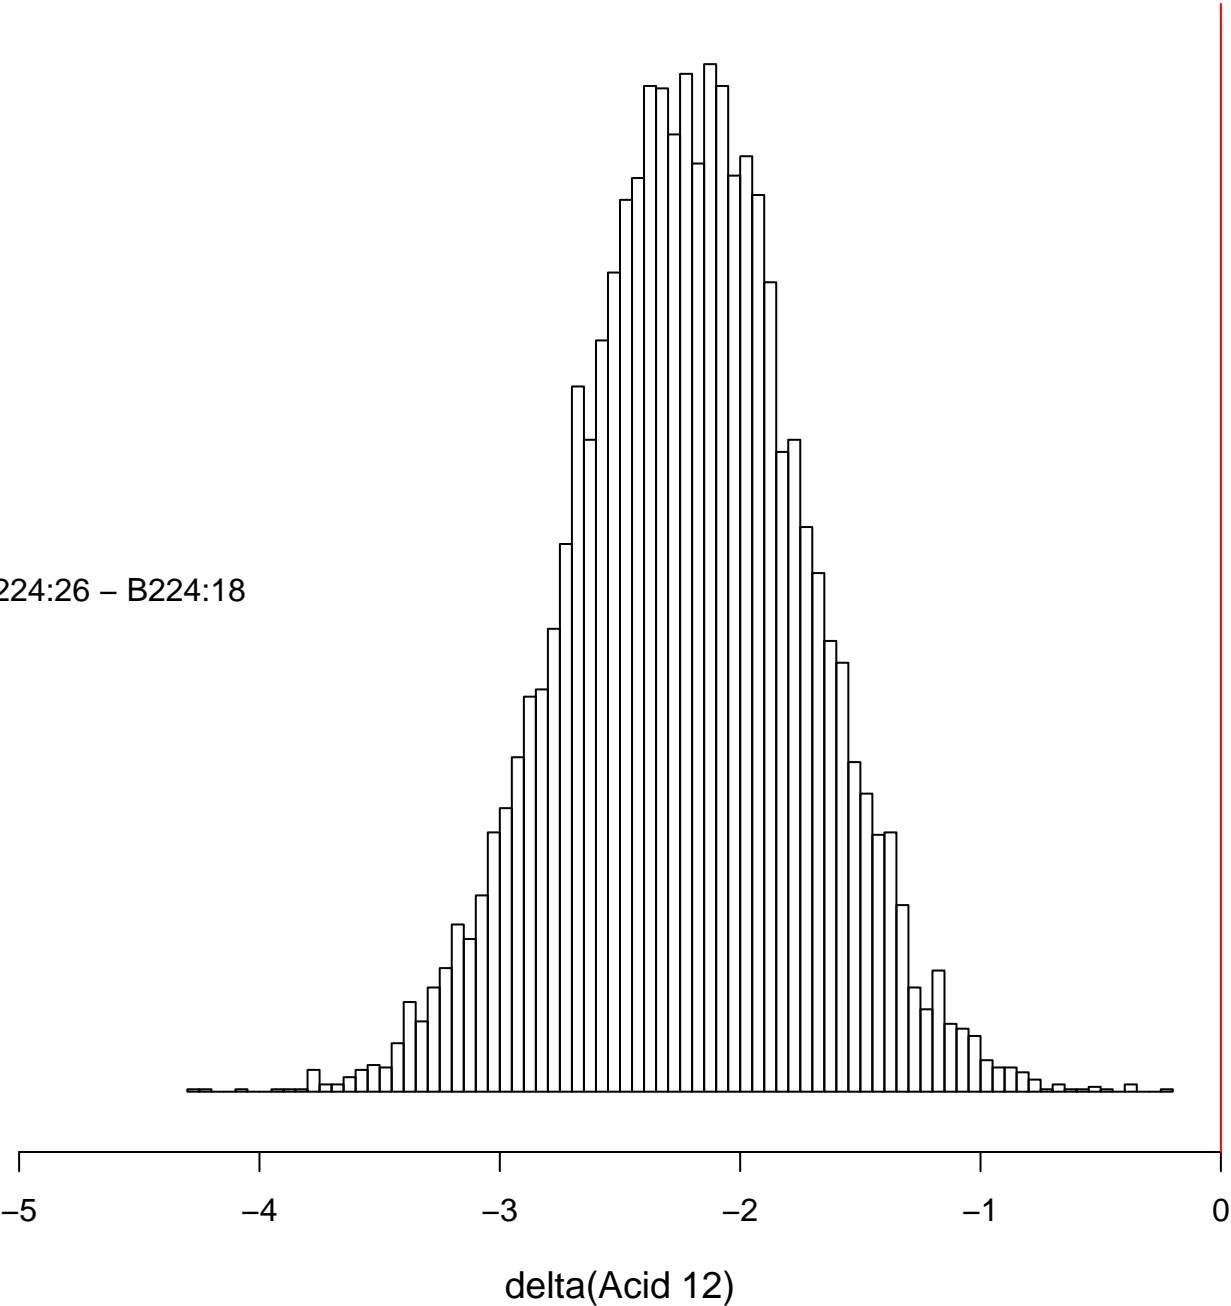

B224:26

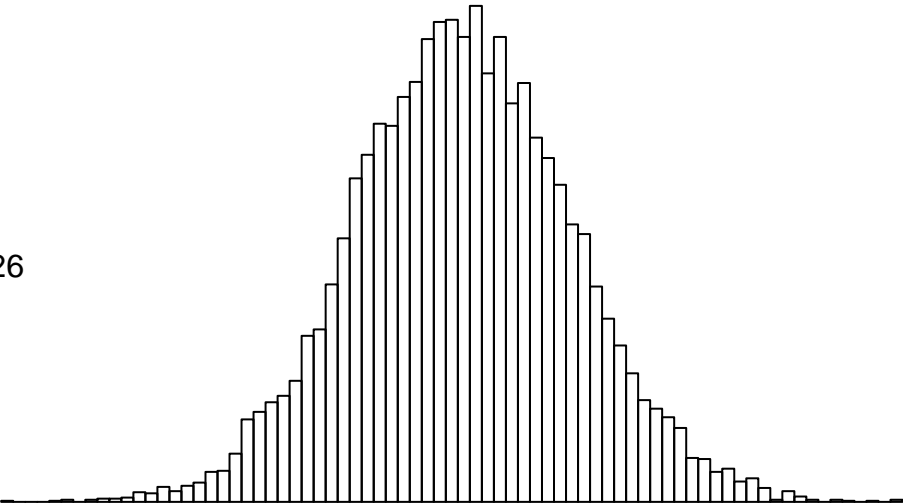

B224:18

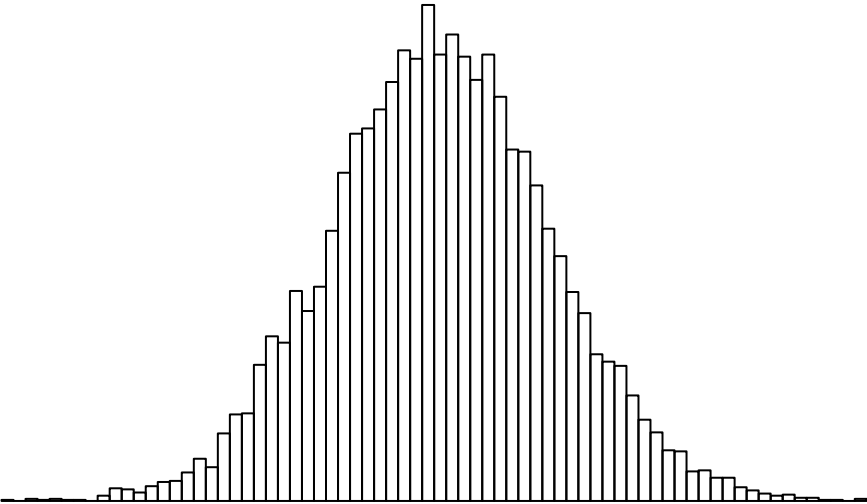

Acid 13

B224:26 – B224:18

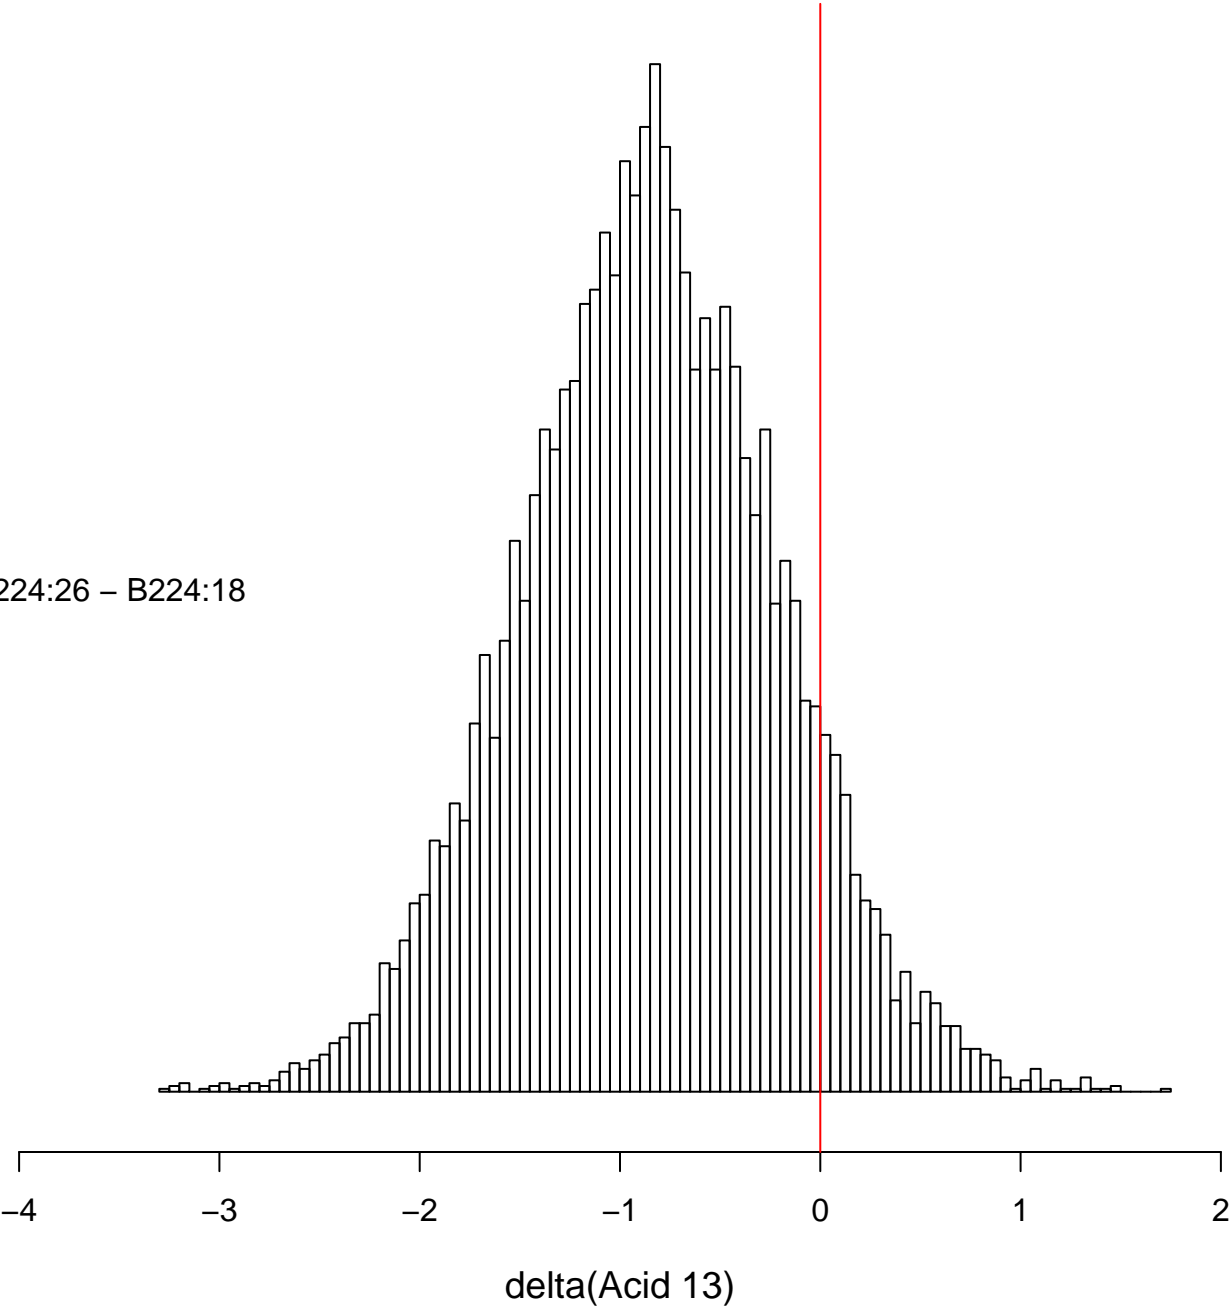

B224:26

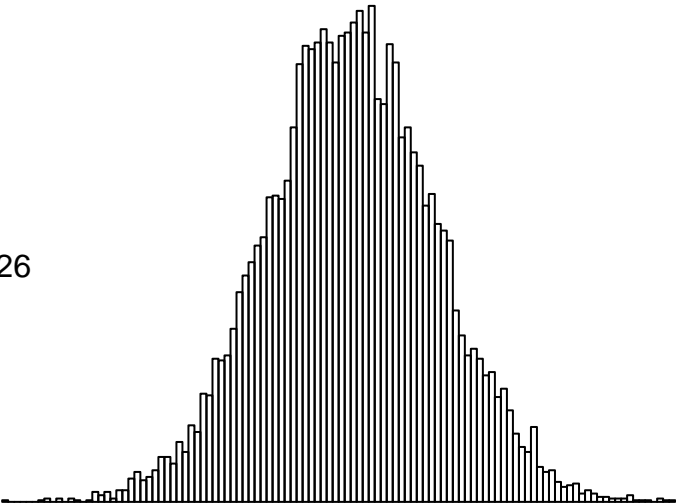

B224:18

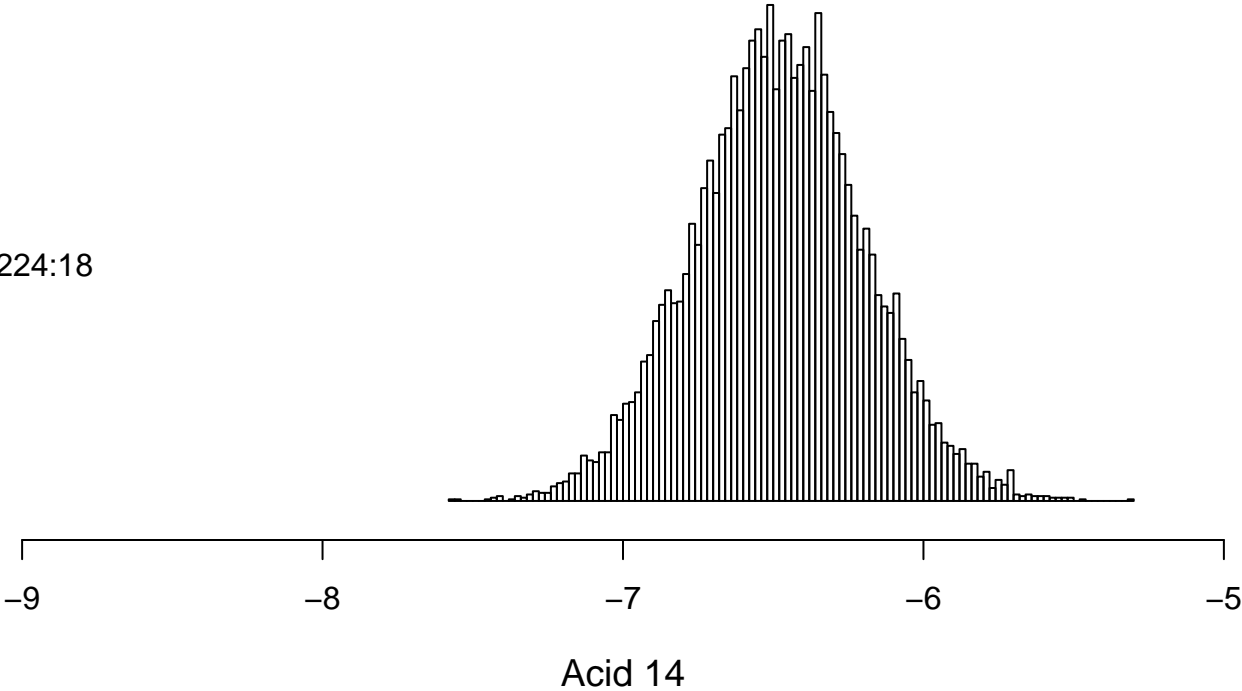

B224:26 – B224:18

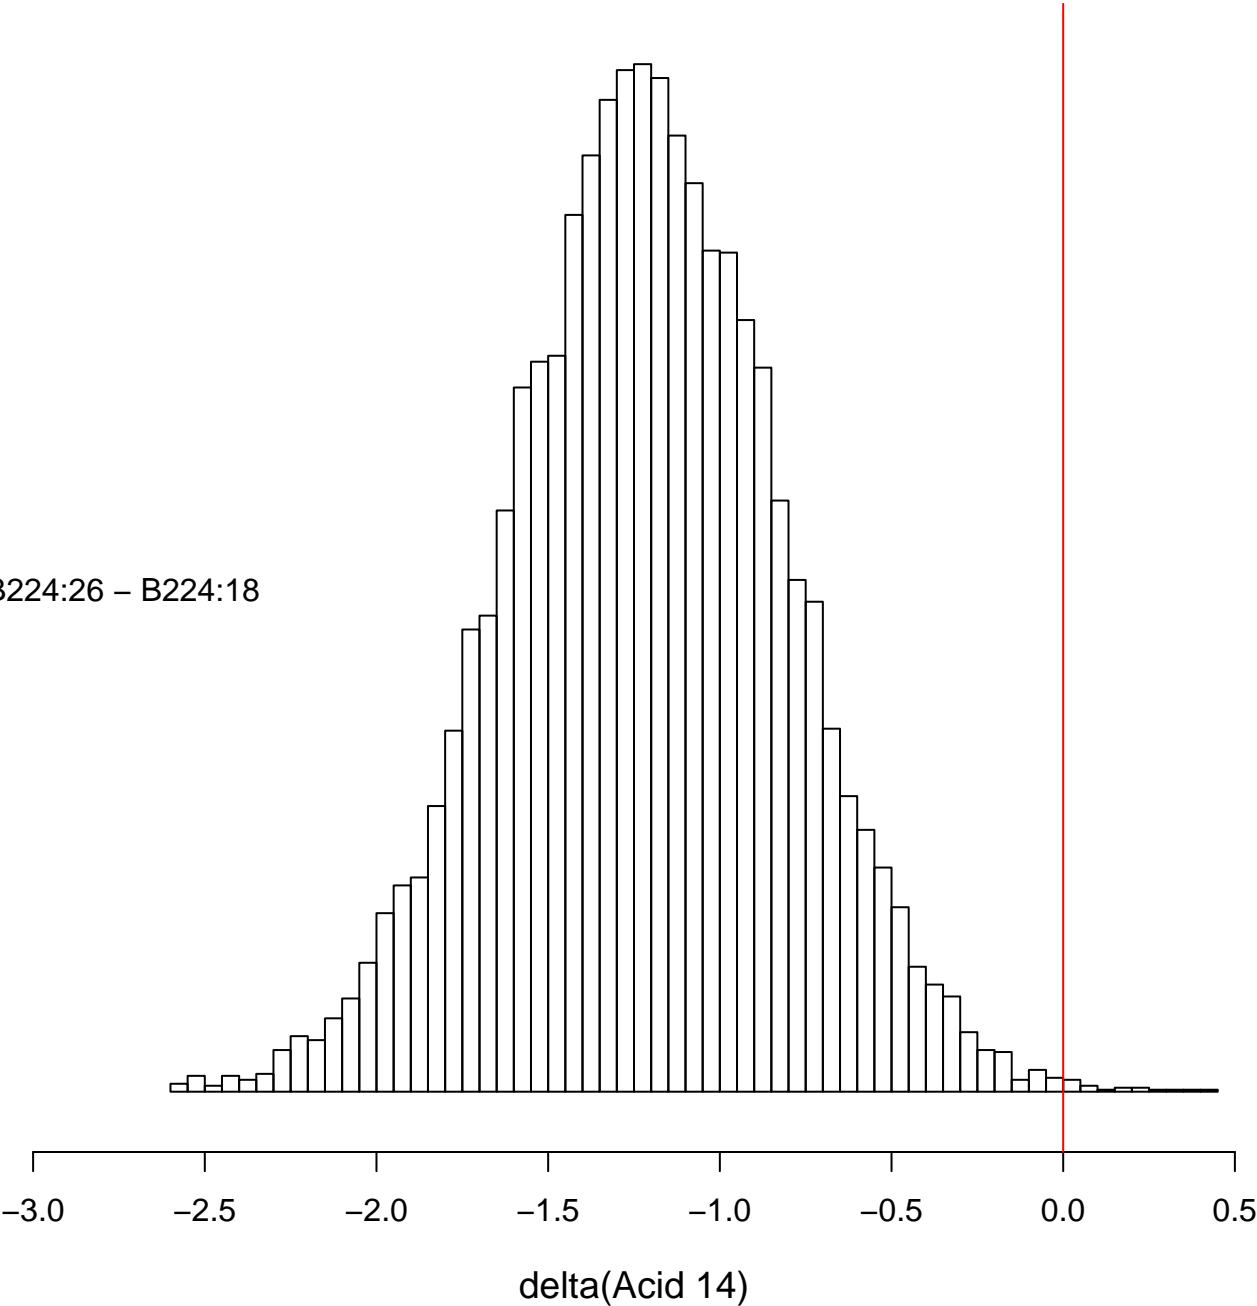

Supplement: s1 [file s1]
