# Supplementary material for: Taxonomic and Environmental Variation of Metabolite Profiles in Marine Dinoflagellates of the Genus Symbiodinium
Source: MDPI journal article supplement (doi:10.3390/metabo5010074), 2015-02-16

D206:26

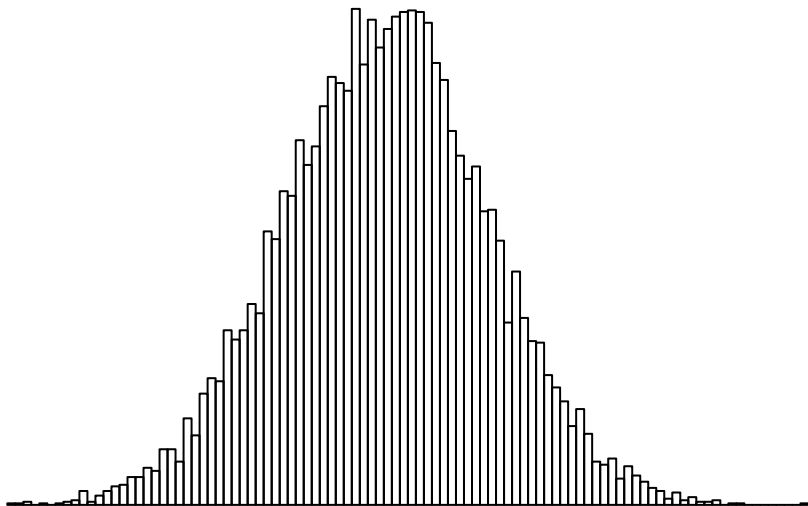

D206:18

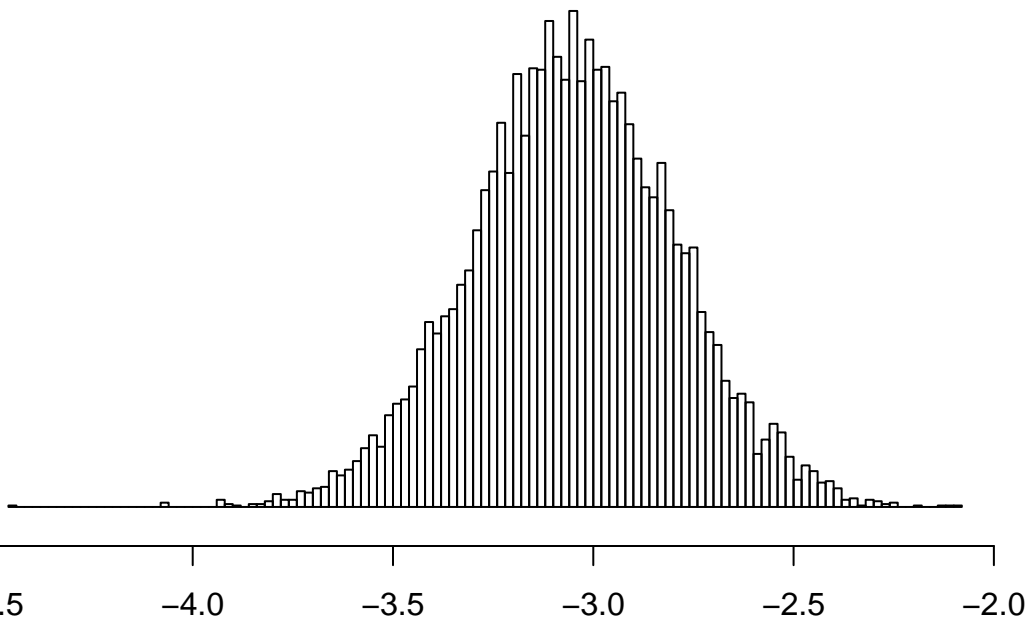

-5.0

-4.5

-4.0

-3.5

-3.0

-2.5

-2.0

Amino Acid 2

D206:26 – D206:18

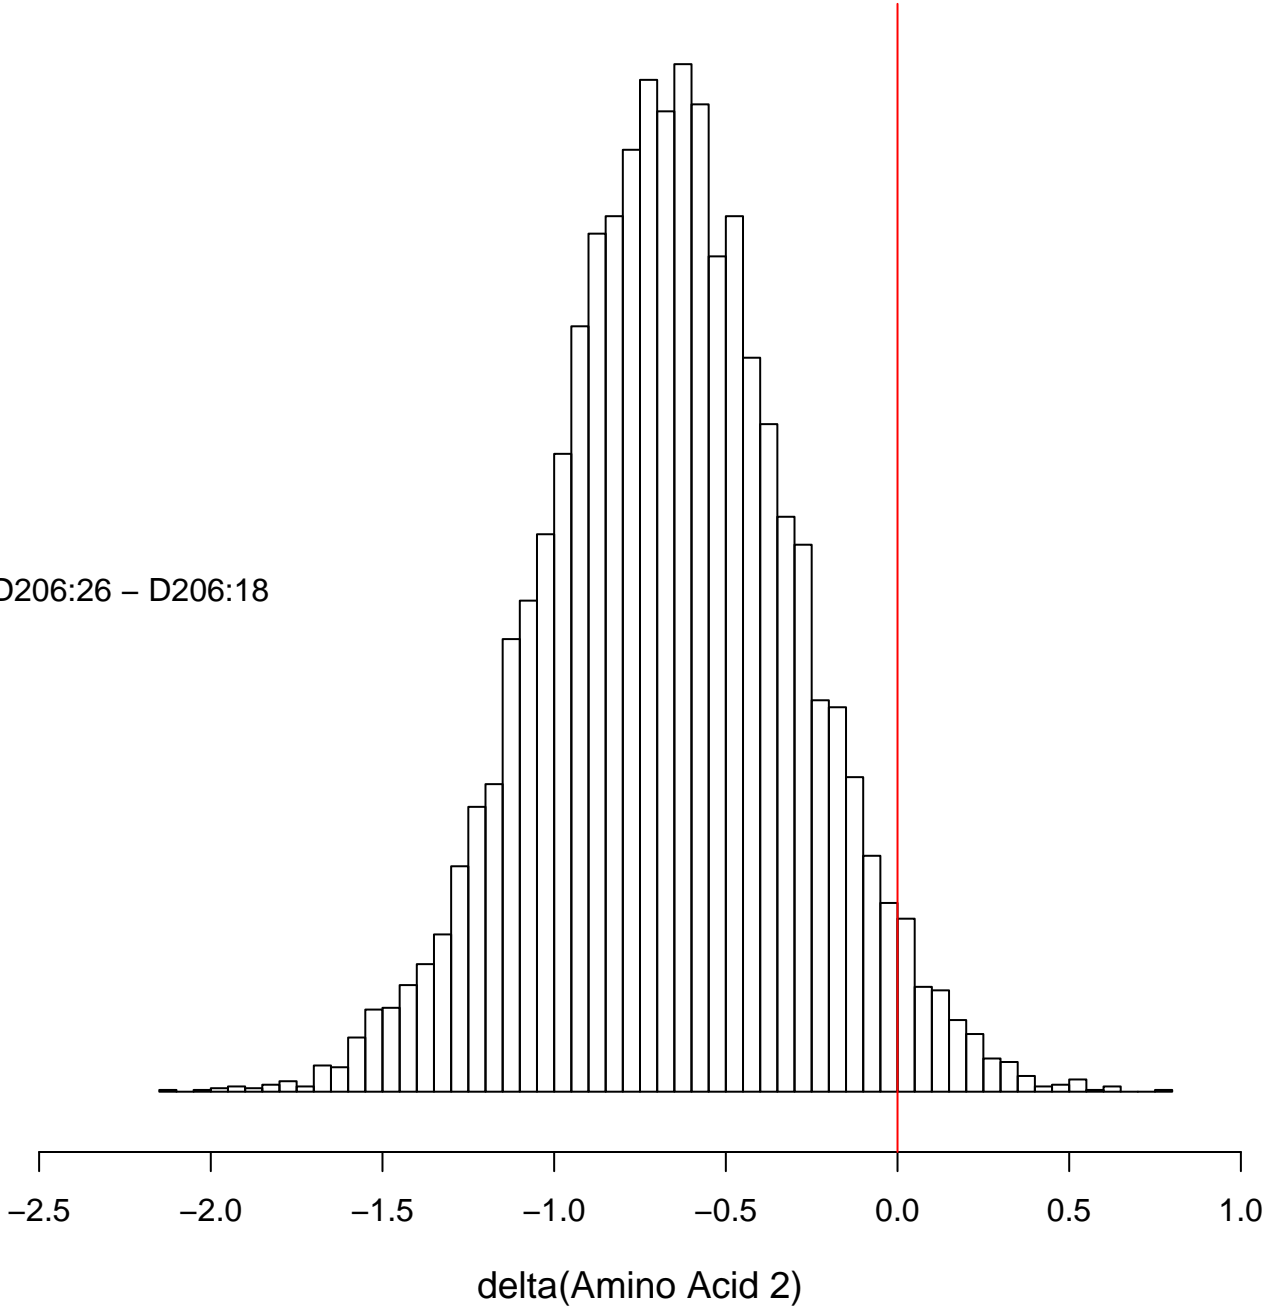

D206:26

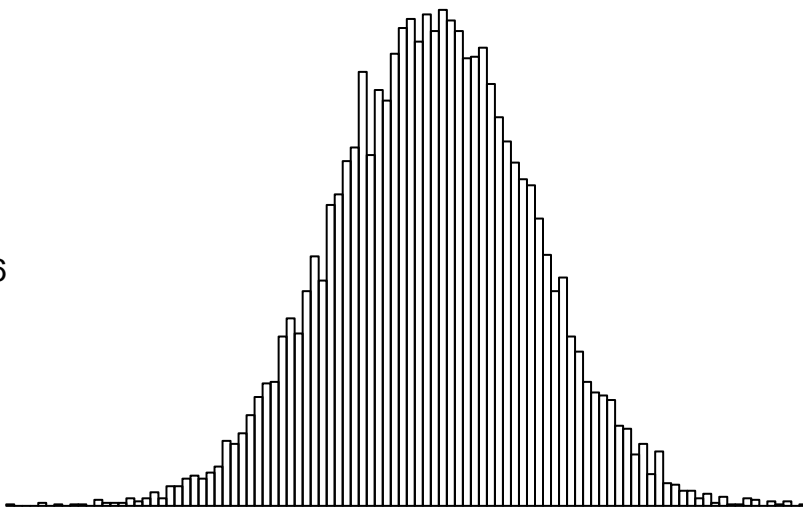

D206:18

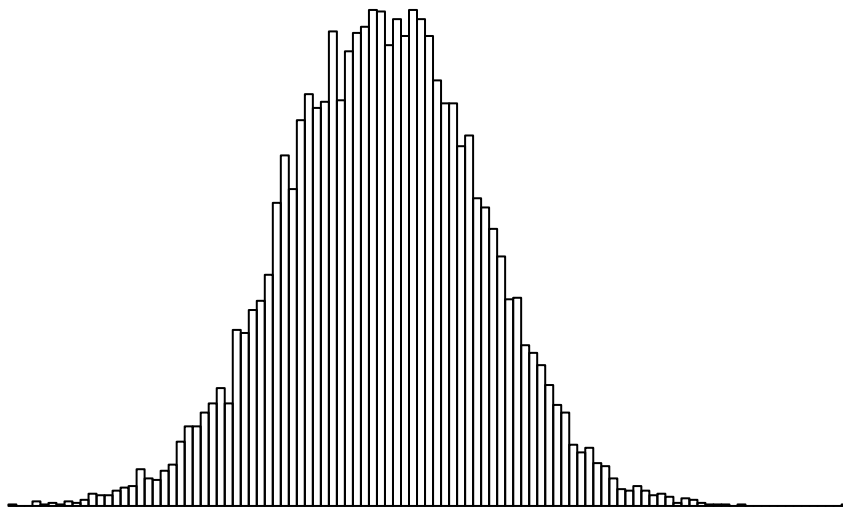

-7.0      -6.5      -6.0      -5.5      -5.0      -4.5      -4.0

Amino Acid 3

D206:26 – D206:18

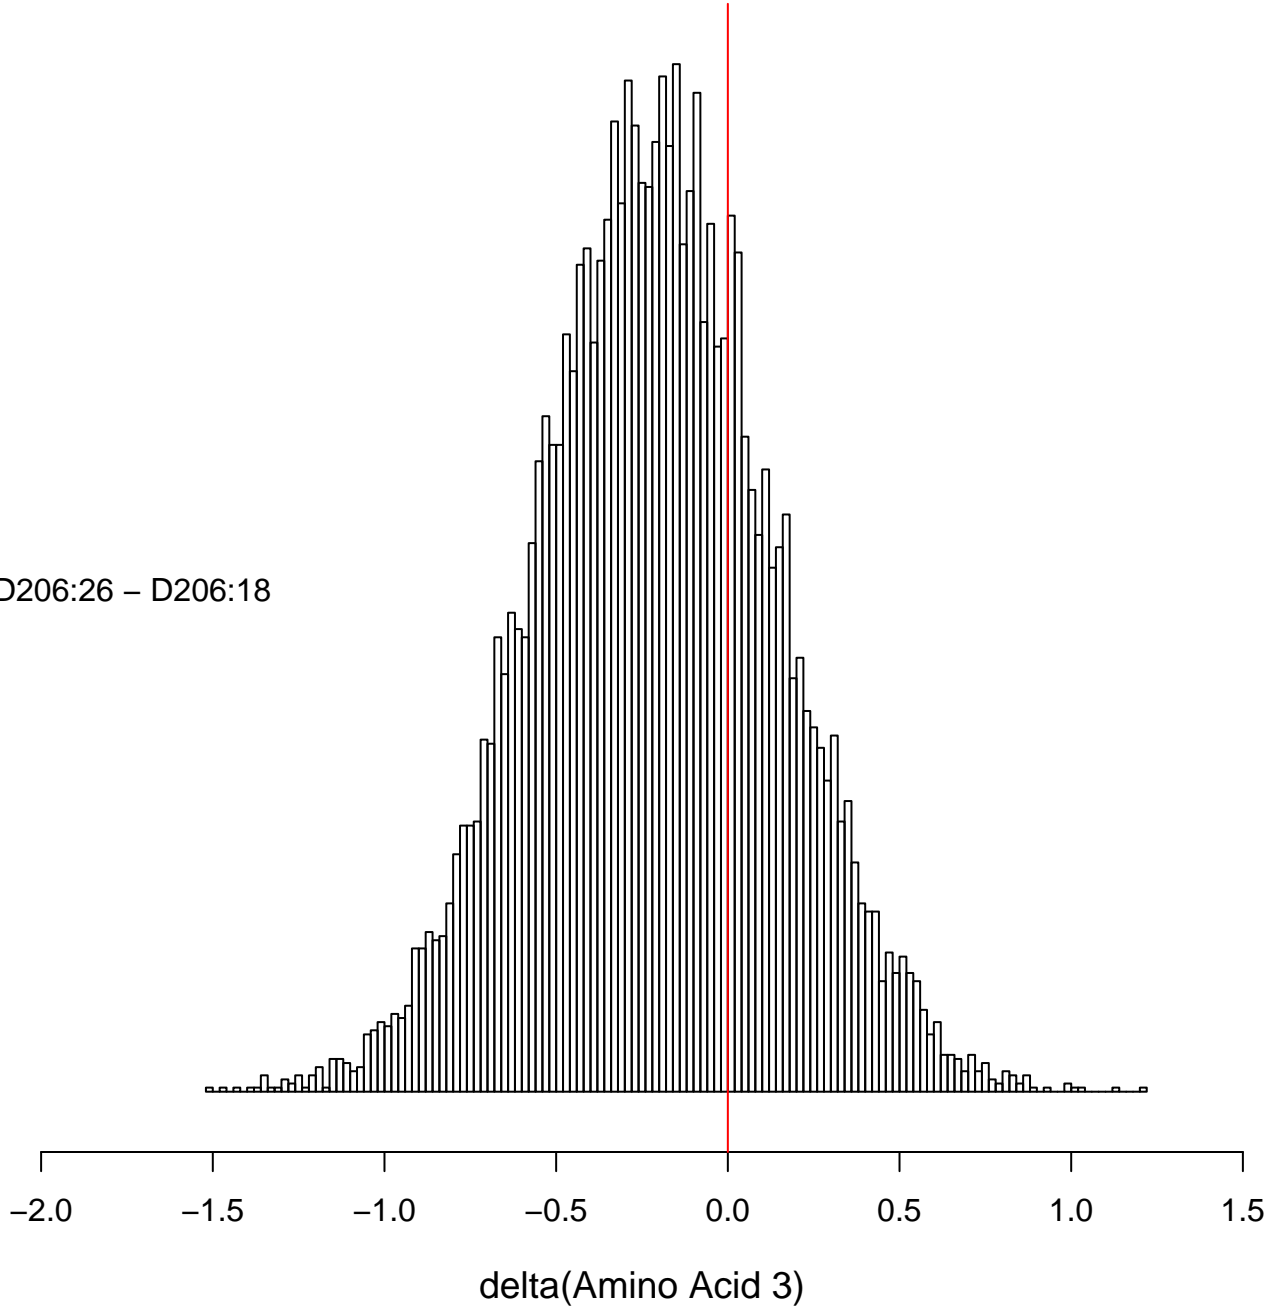

D206:26

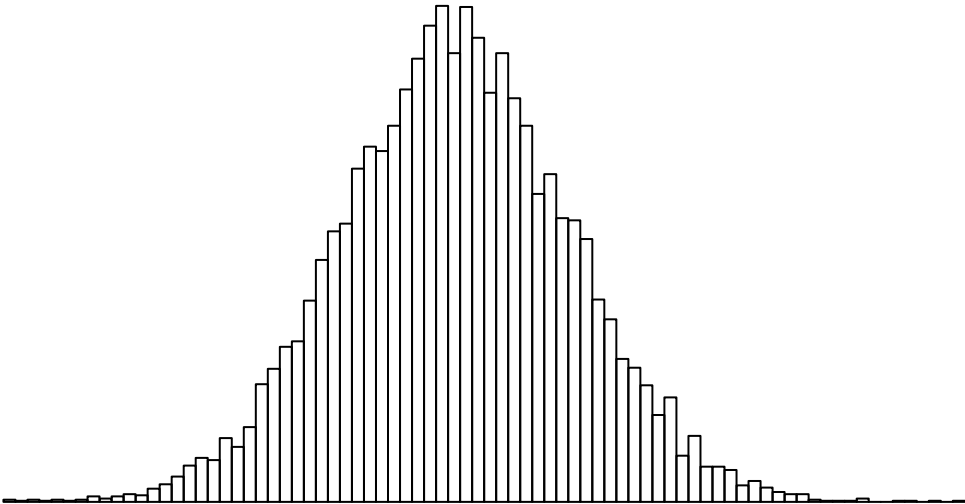

D206:18

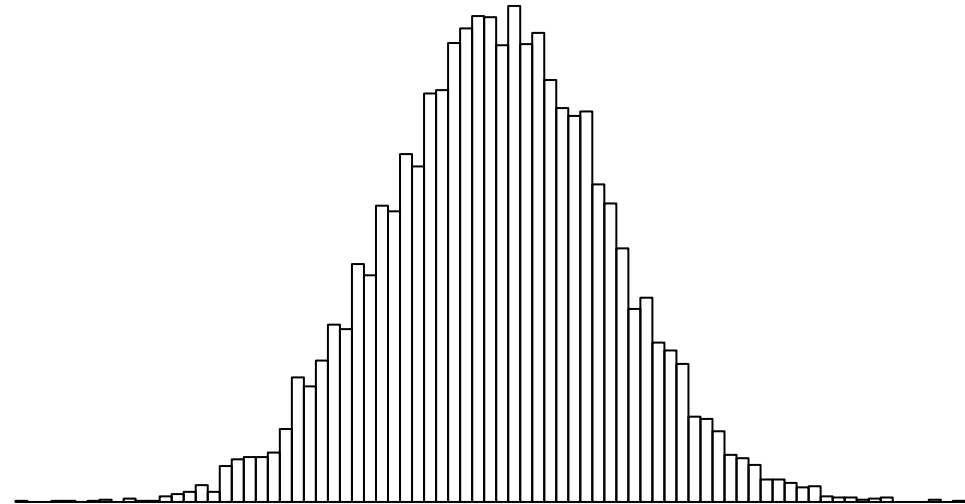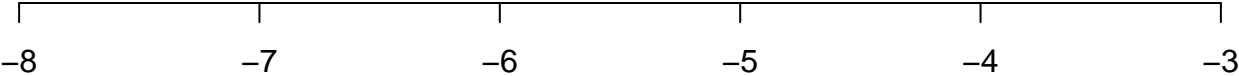

Alanine

D206:26 – D206:18

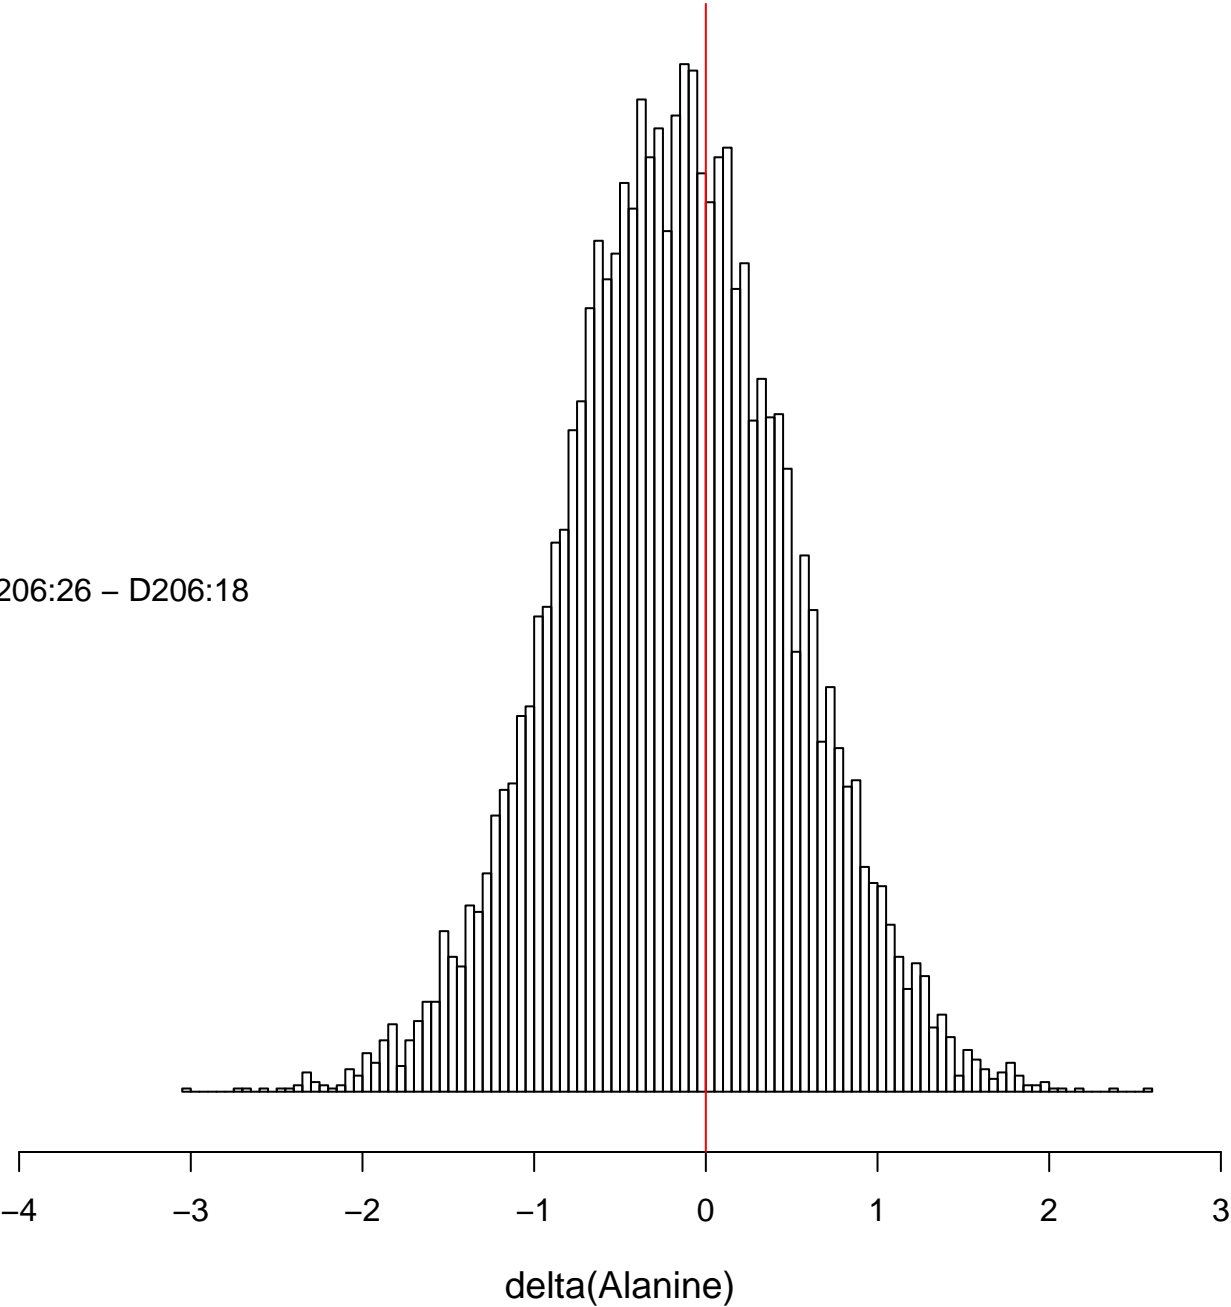

D206:26

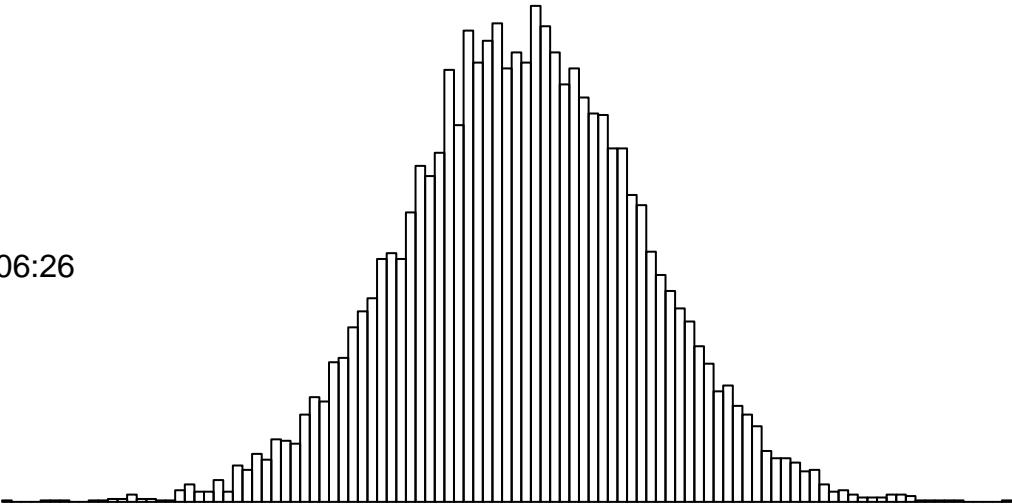

D206:18

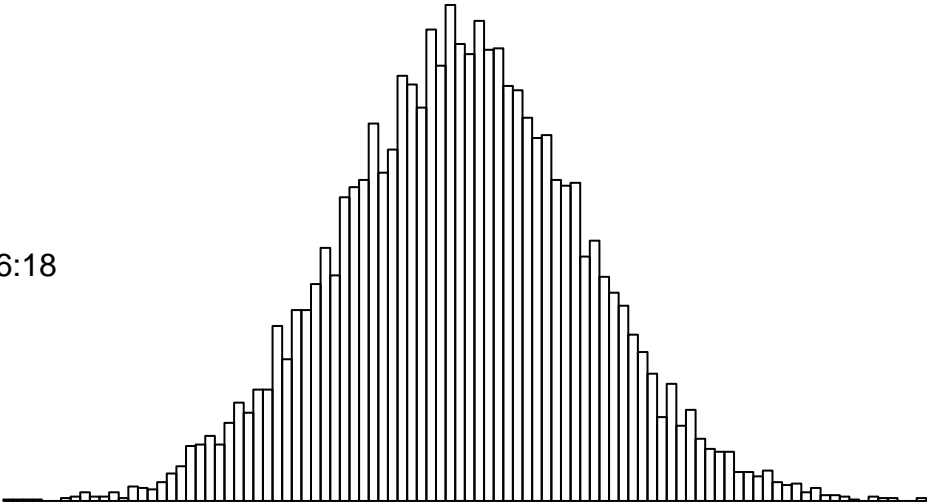

-7.5                      -7.0                      -6.5                      -6.0                      -5.5                      -5.0

Amino Acid 4

D206:26 – D206:18

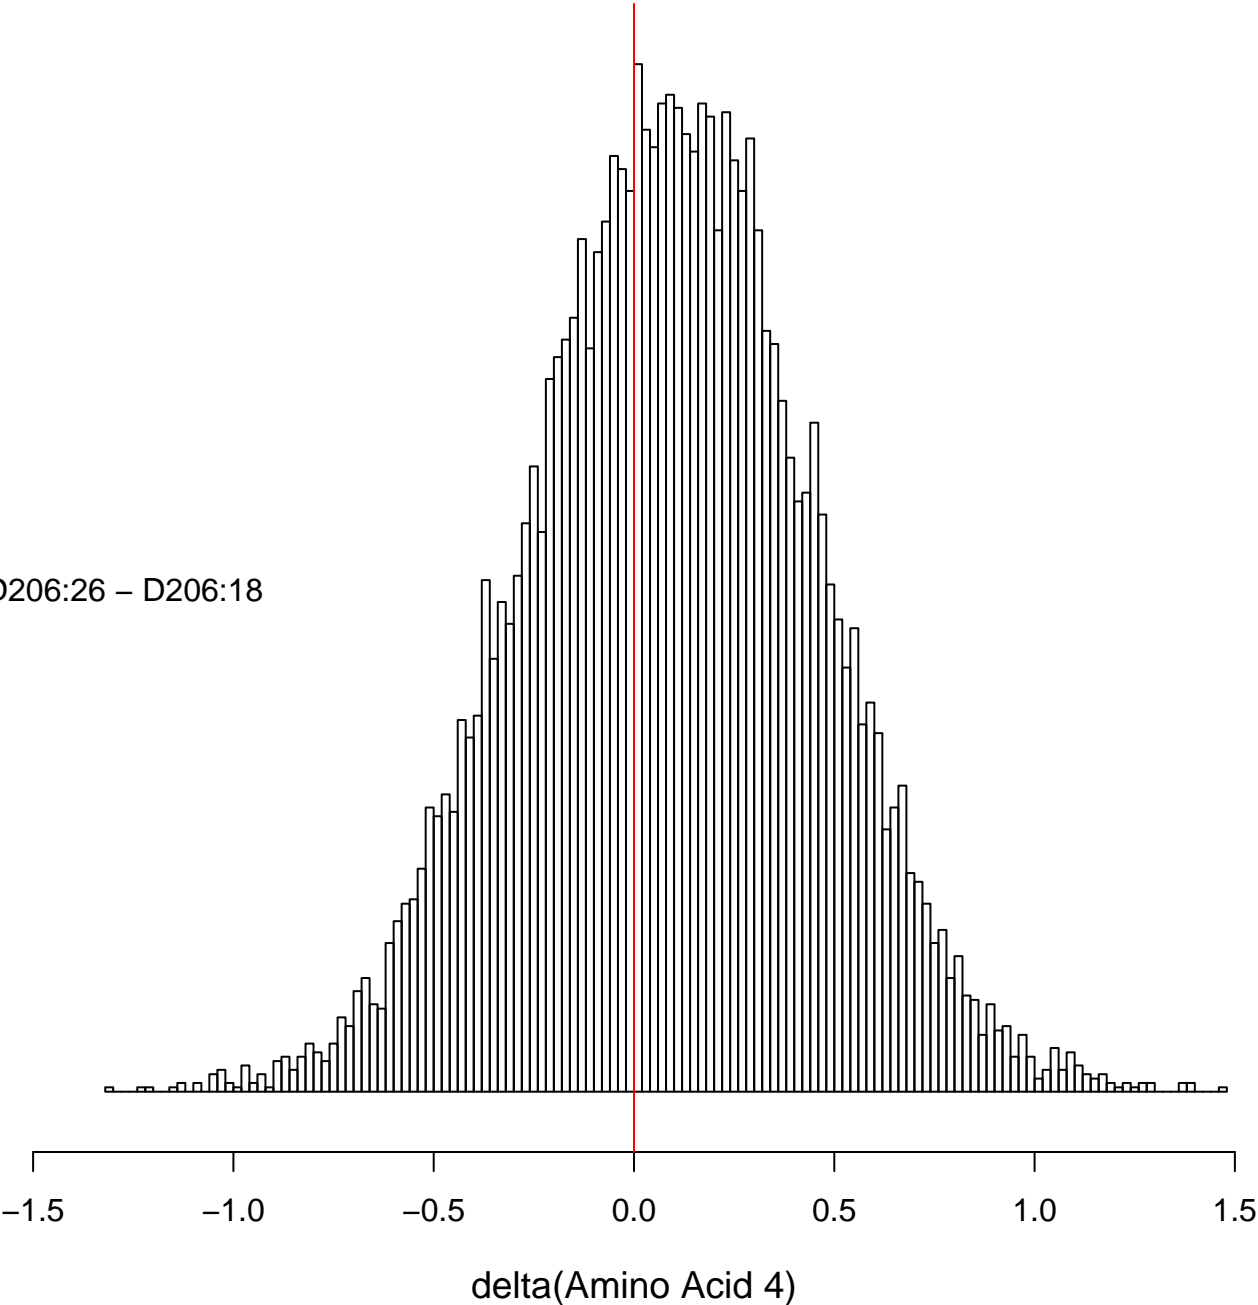



D206:26

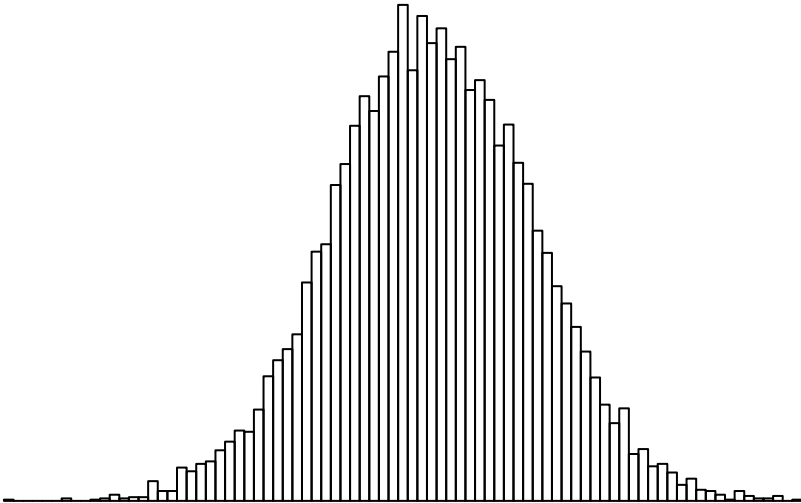

D206:18

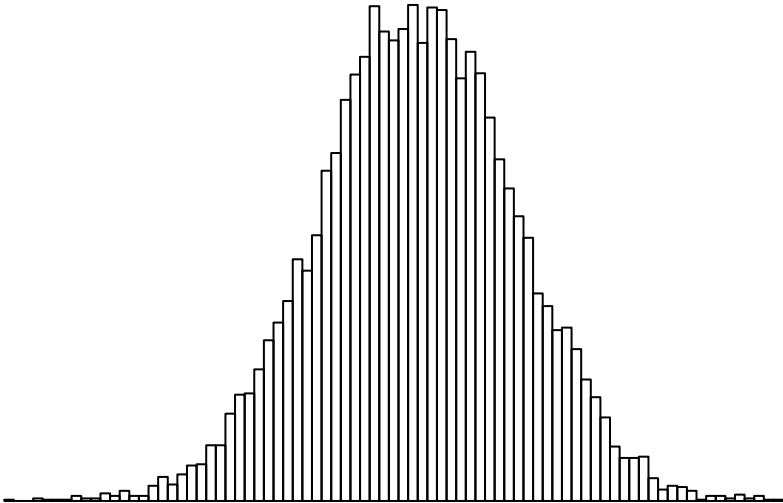

-8.0      -7.5      -7.0      -6.5      -6.0      -5.5

Amino Acid 6

D206:26 – D206:18

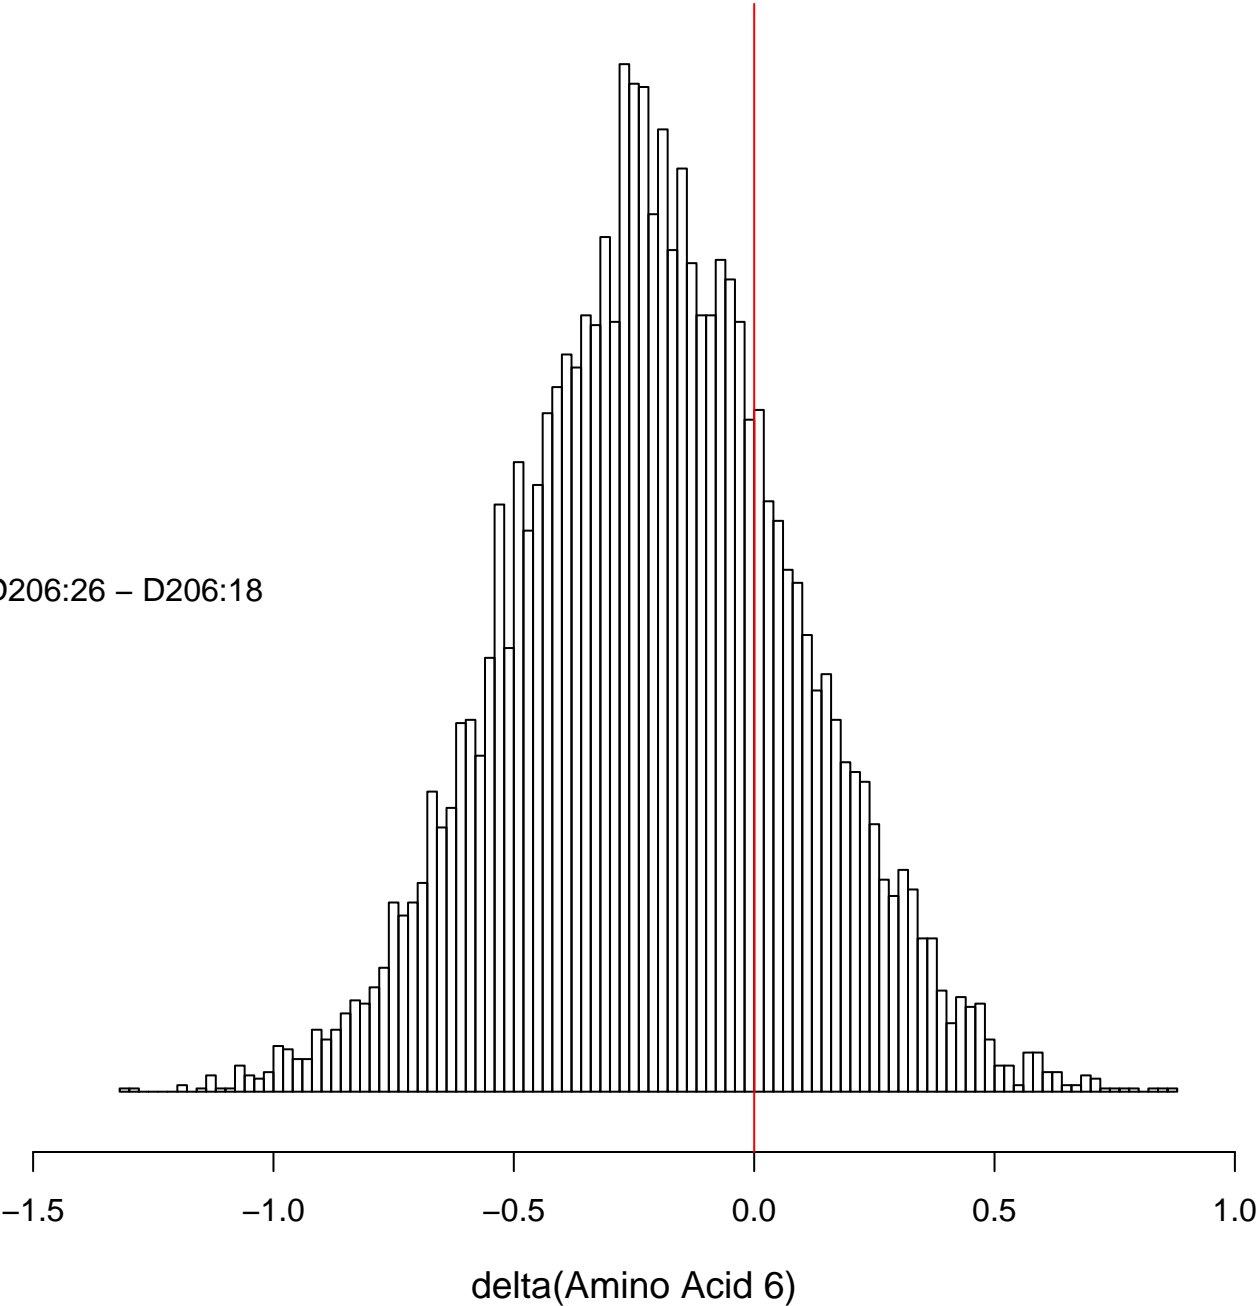

D206:26

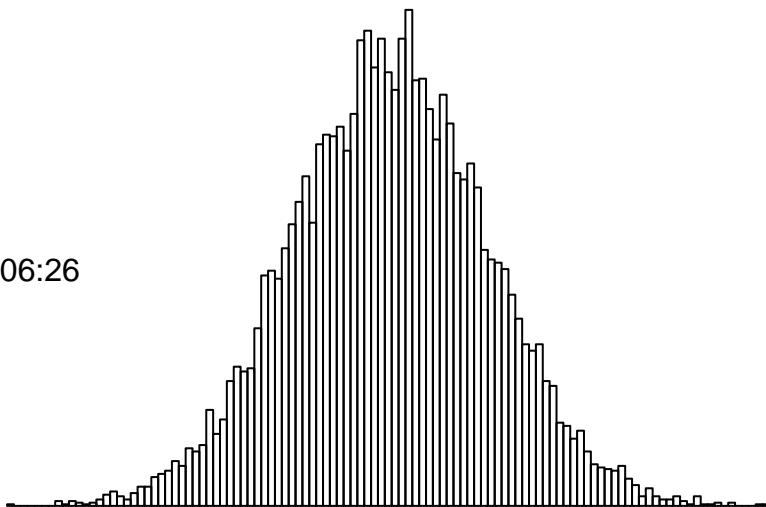

D206:18

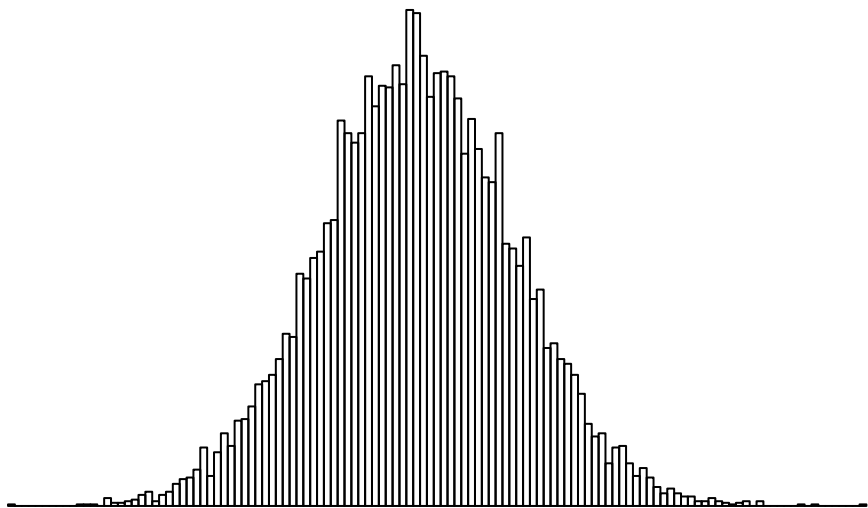

-9.0 -8.5 -8.0 -7.5 -7.0 -6.5 -6.0 -5.5

Valine

D206:26 – D206:18

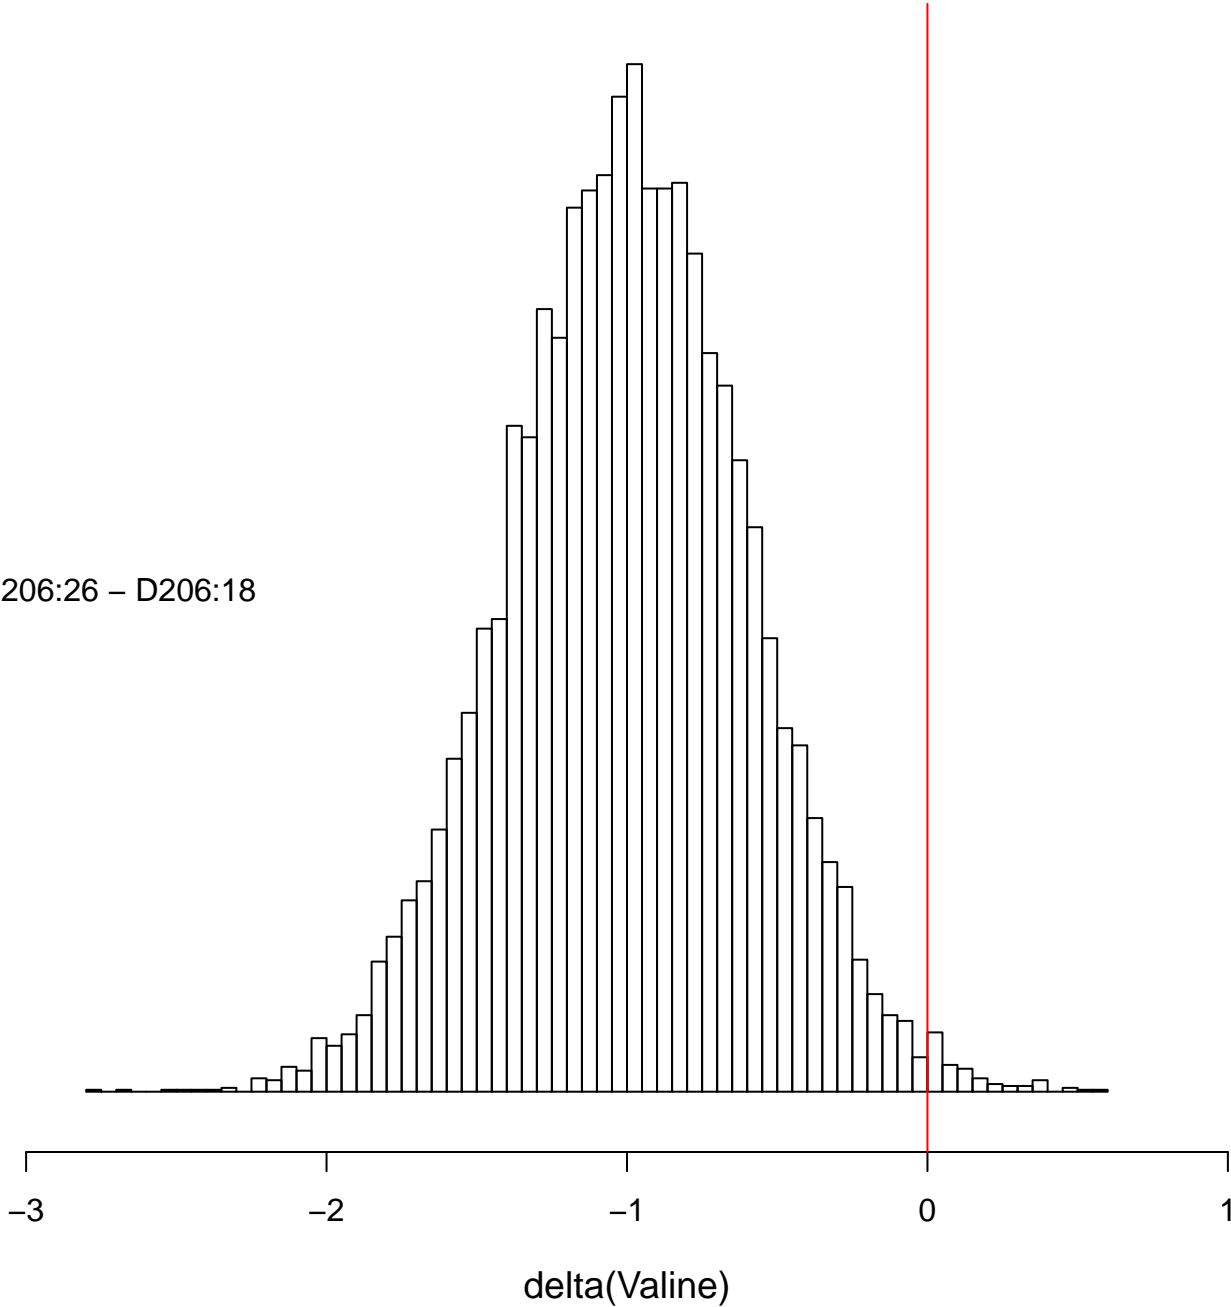

D206:26

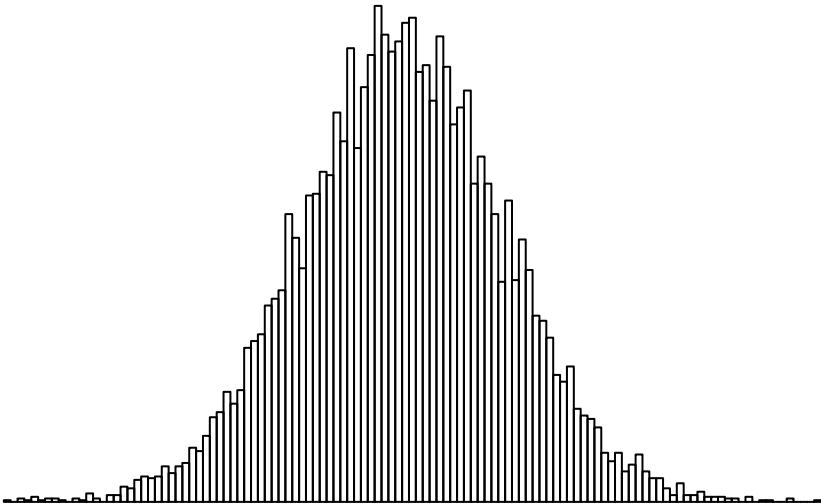

D206:18

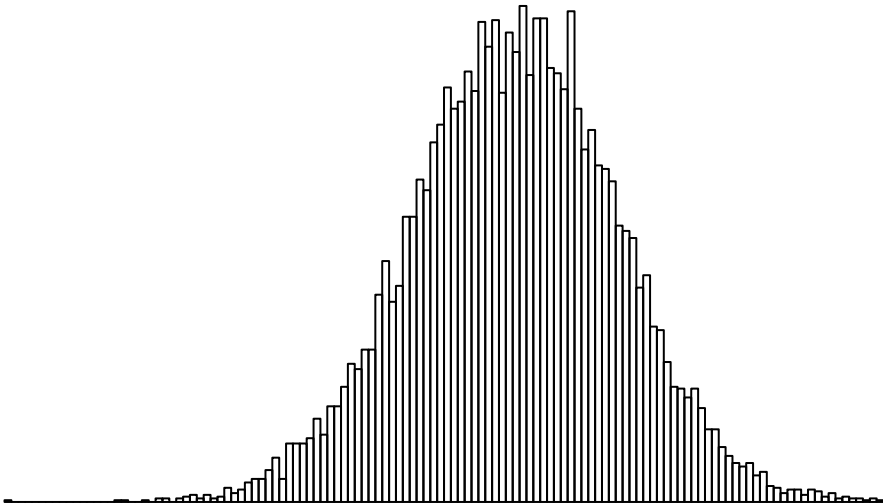

-7.5      -7.0      -6.5      -6.0      -5.5      -5.0      -4.5      -4.0

Amino Acid 7

D206:26 – D206:18

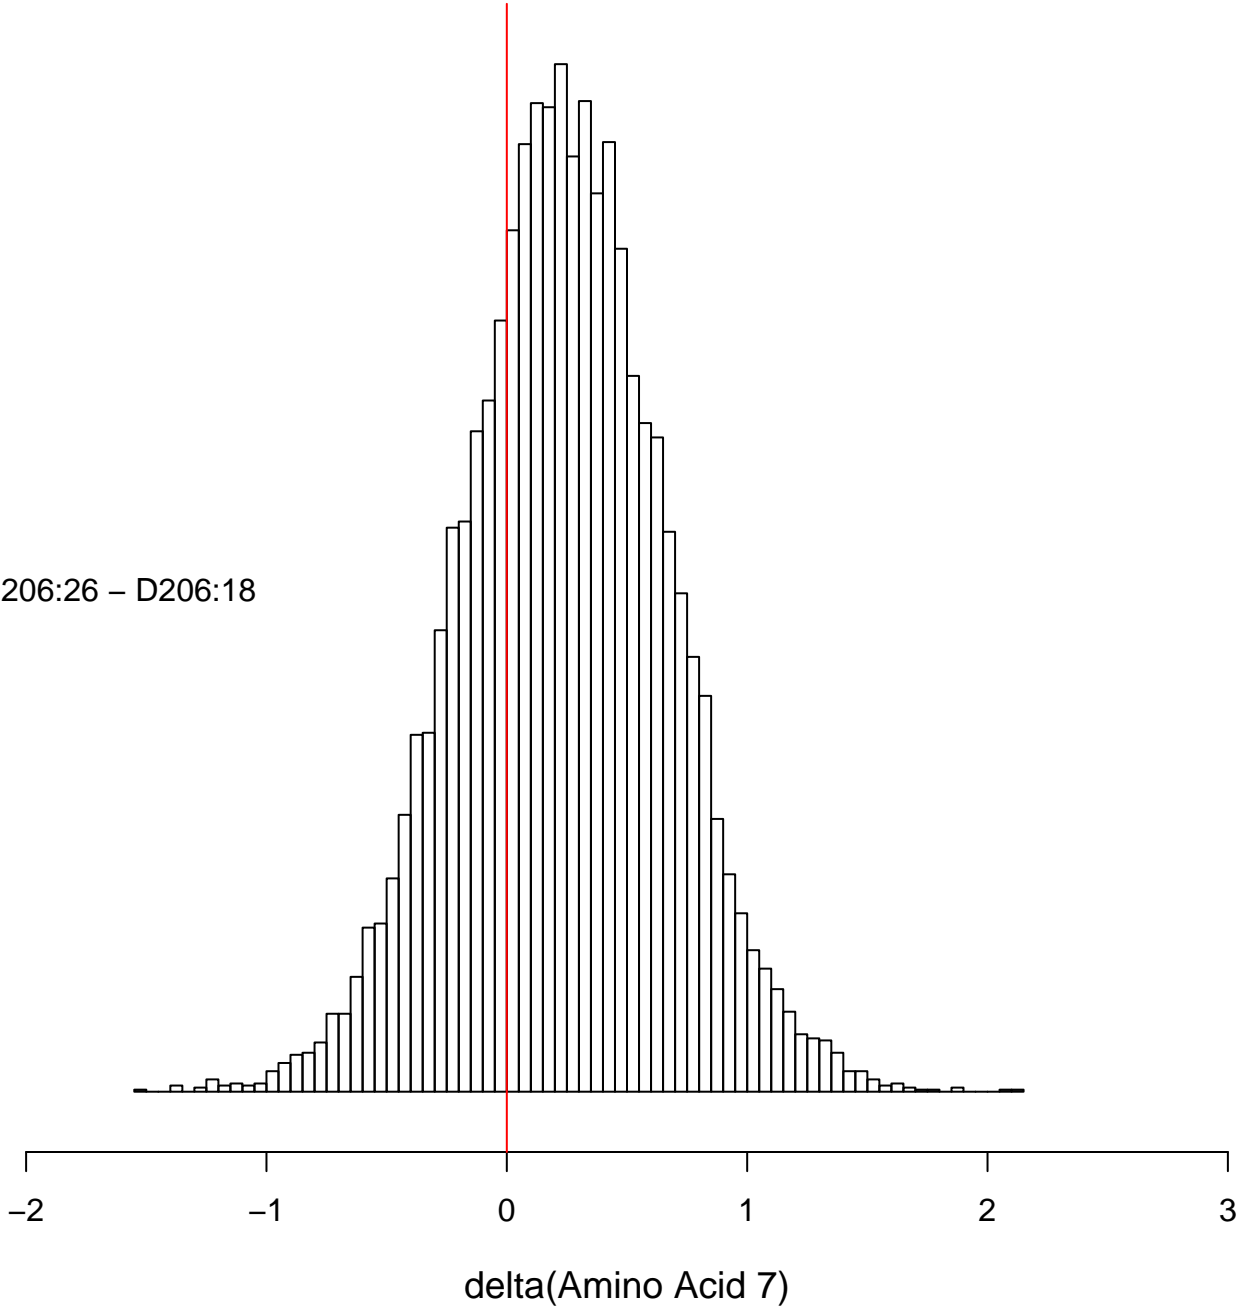

D206:26

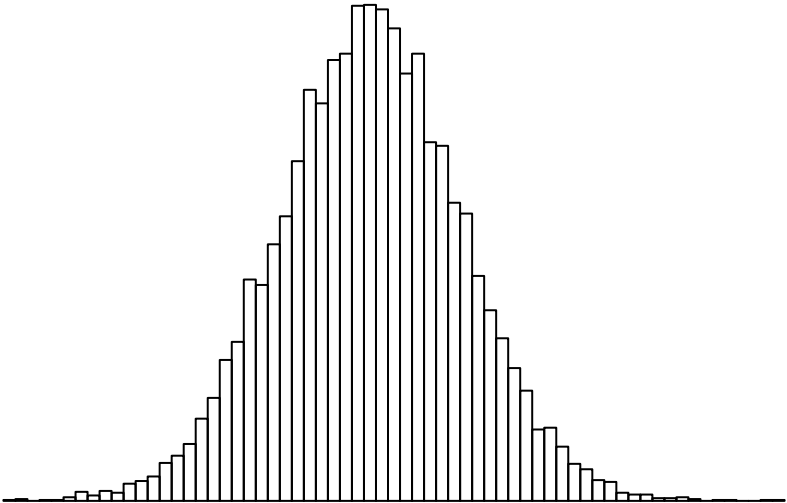

D206:18

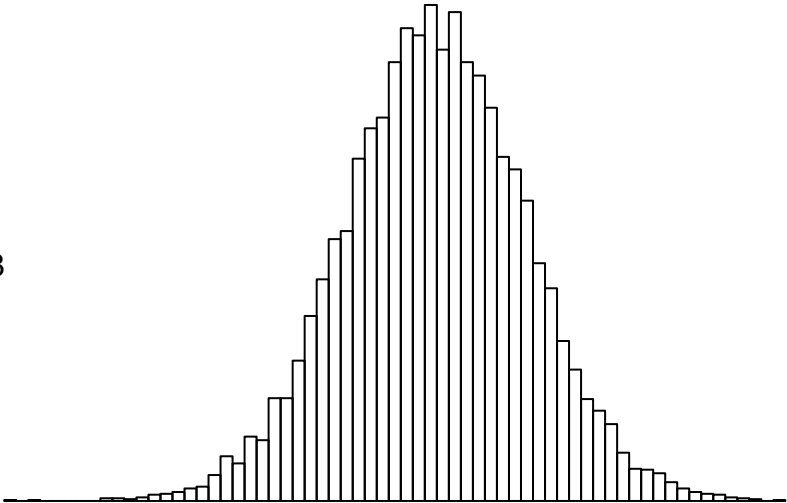

-9      -8      -7      -6      -5      -4

Glycine

D206:26 – D206:18

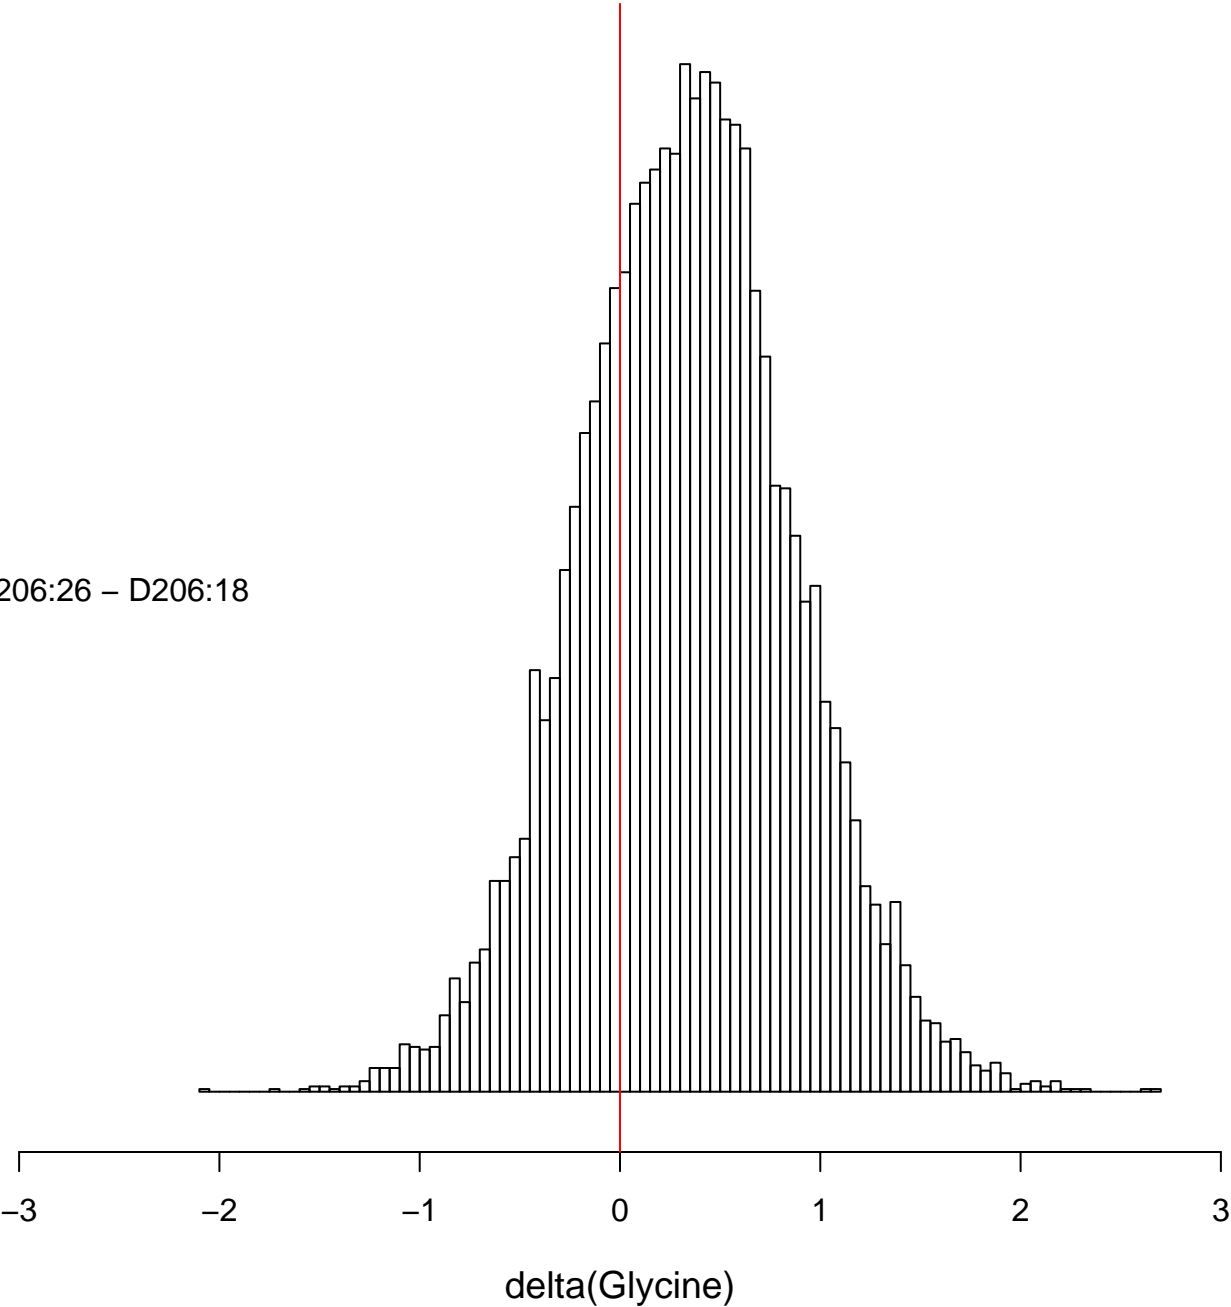



D206:26

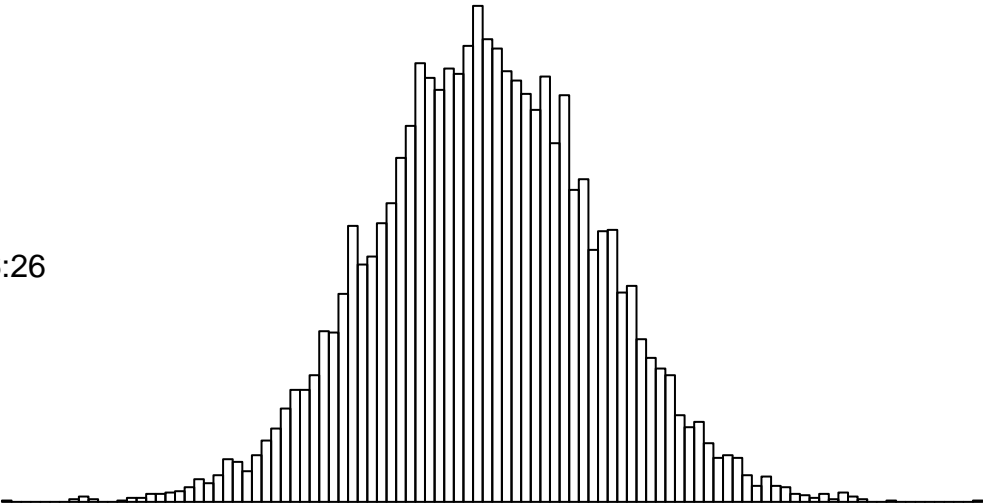

D206:18

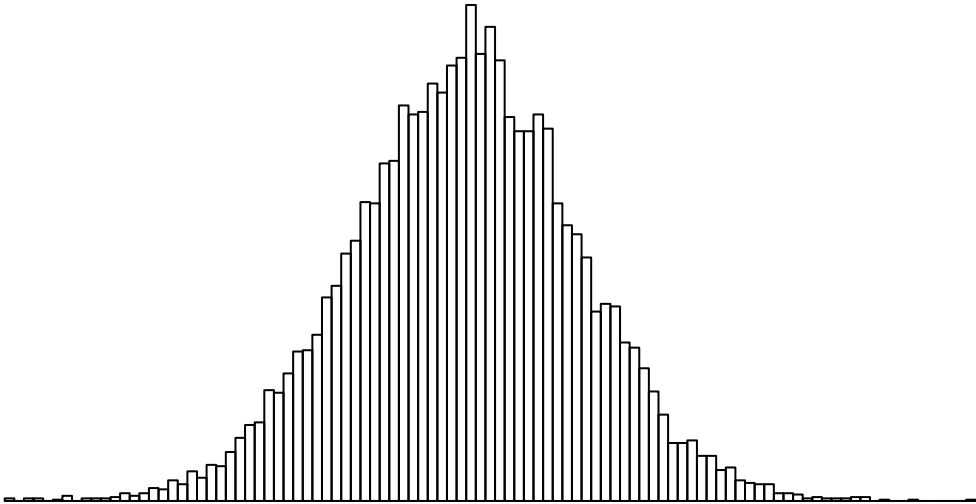

-8.5      -8.0      -7.5      -7.0      -6.5      -6.0

Amino Acid 8

D206:26 – D206:18

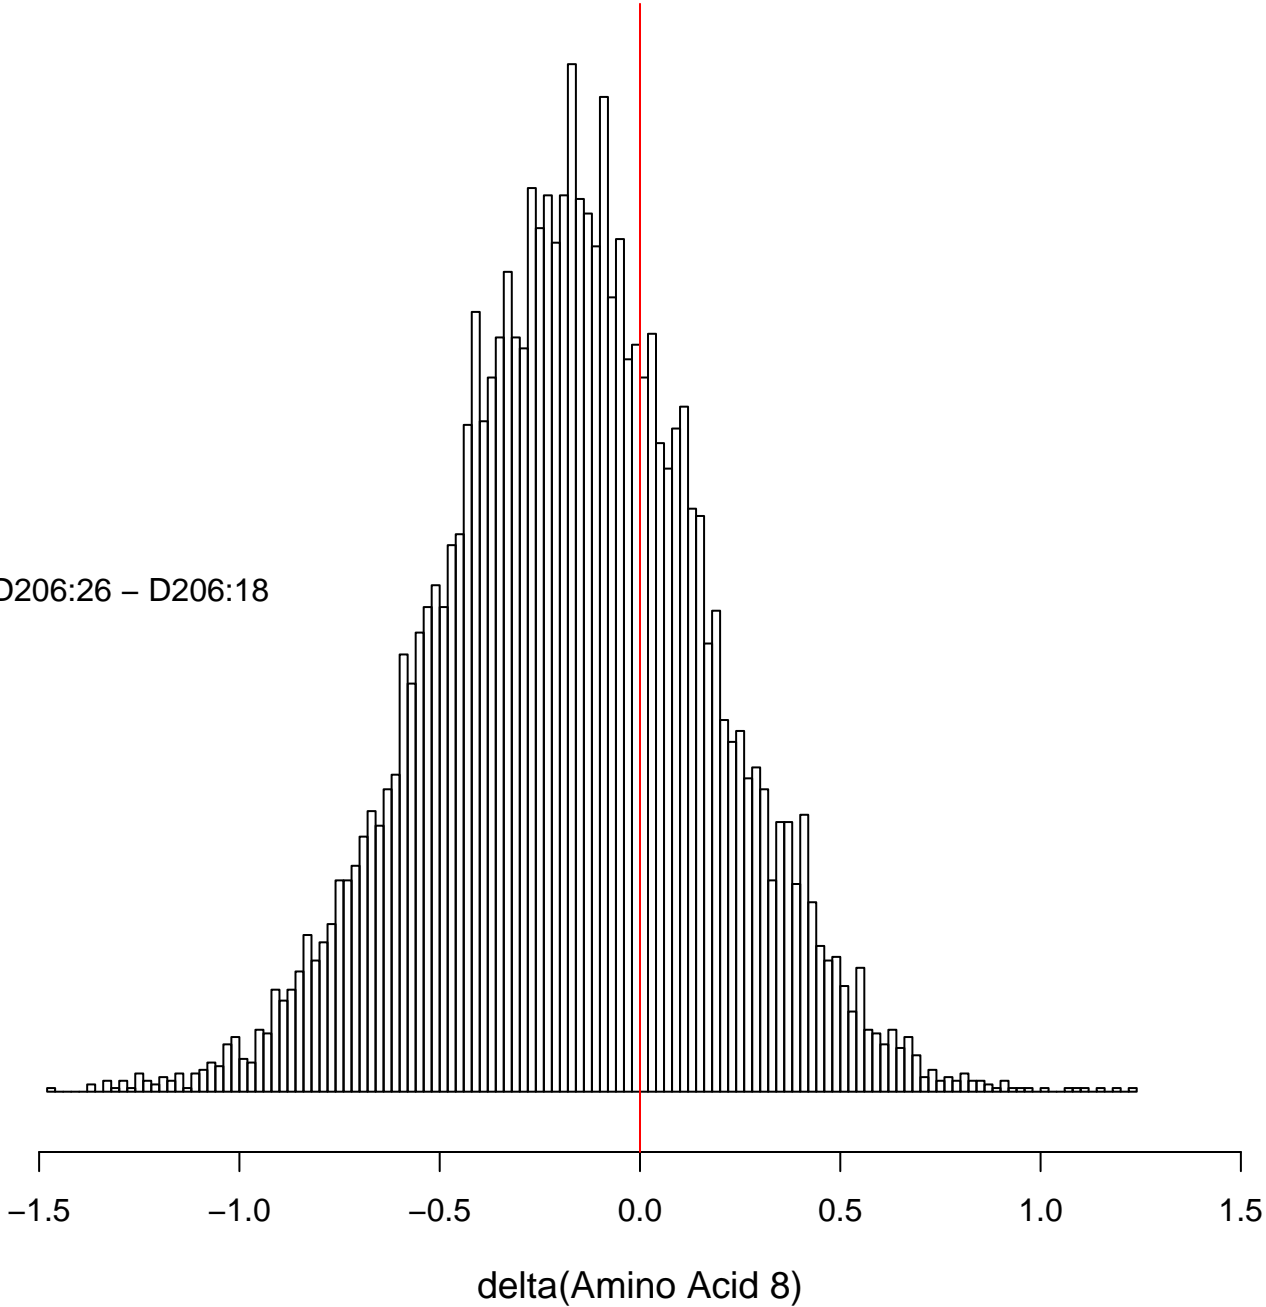

D206:26

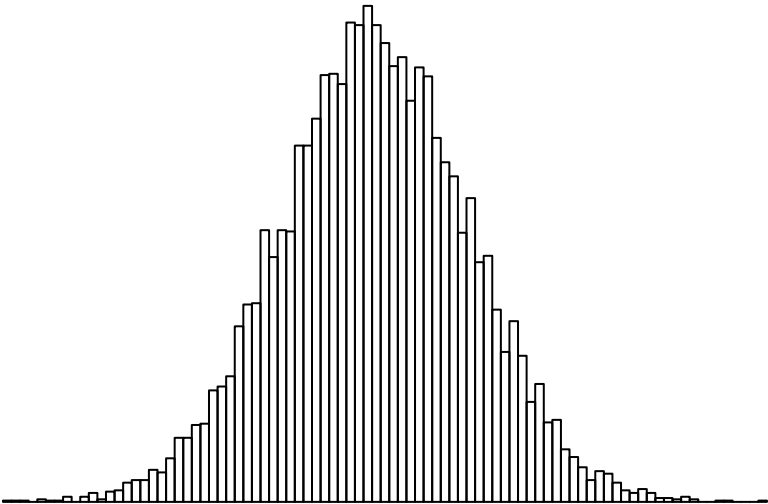

D206:18

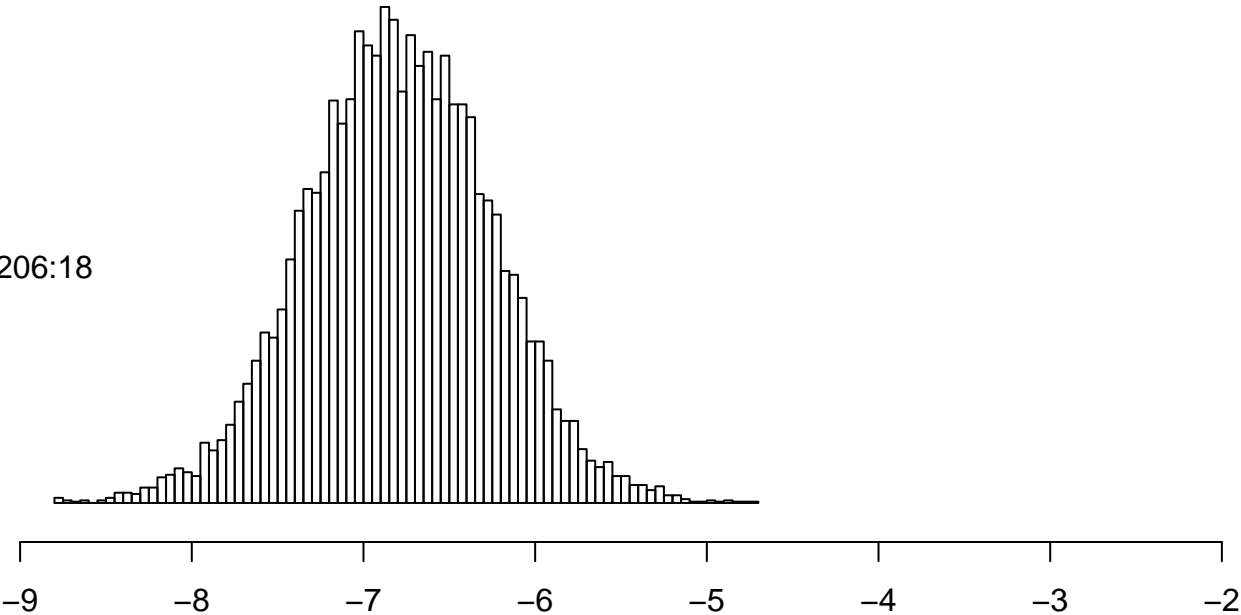

Amino Acid 10

D206:26 – D206:18

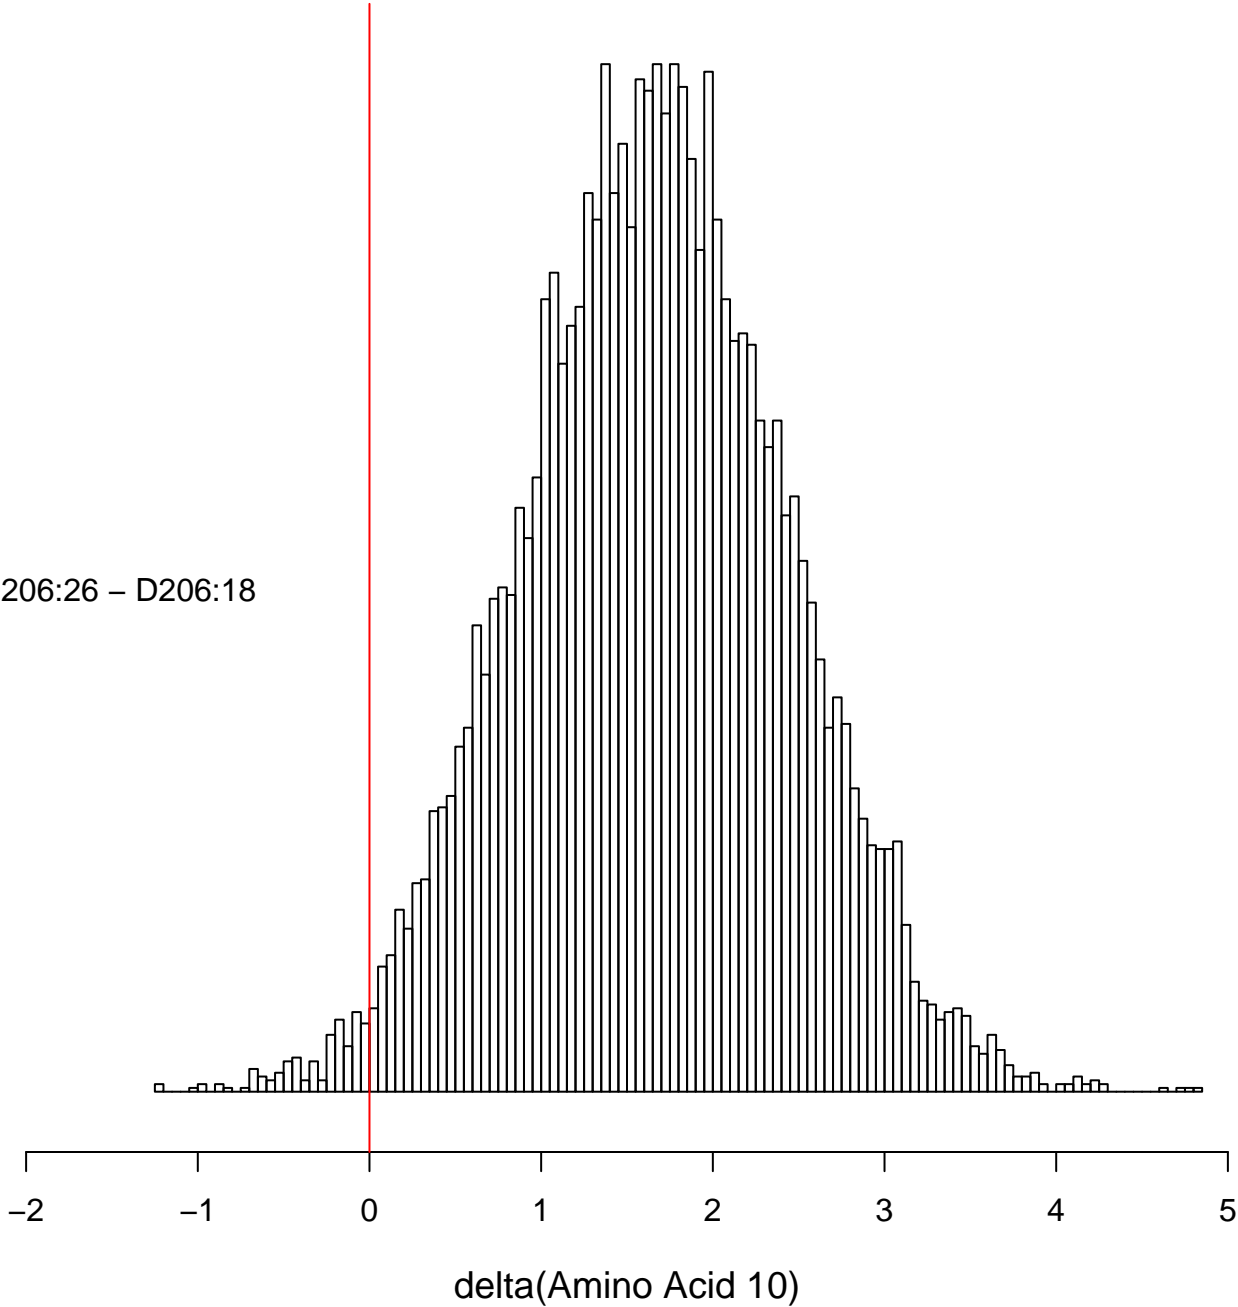

D206:26

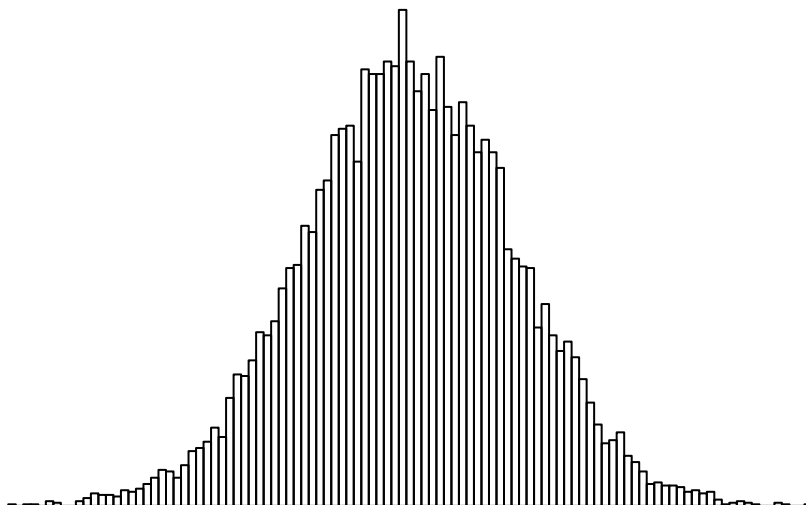

D206:18

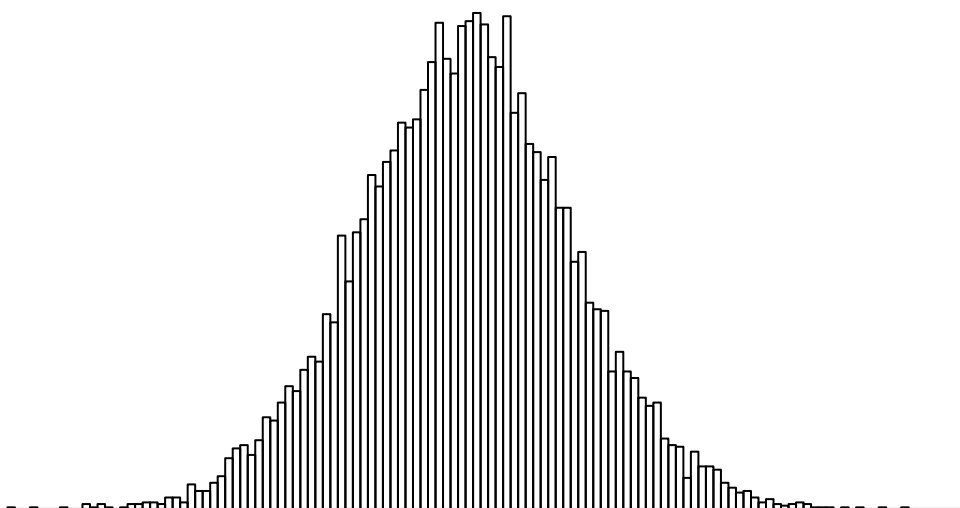

-6.5

-6.0

-5.5

-5.0

Disaccharide 2

D206:26 – D206:18

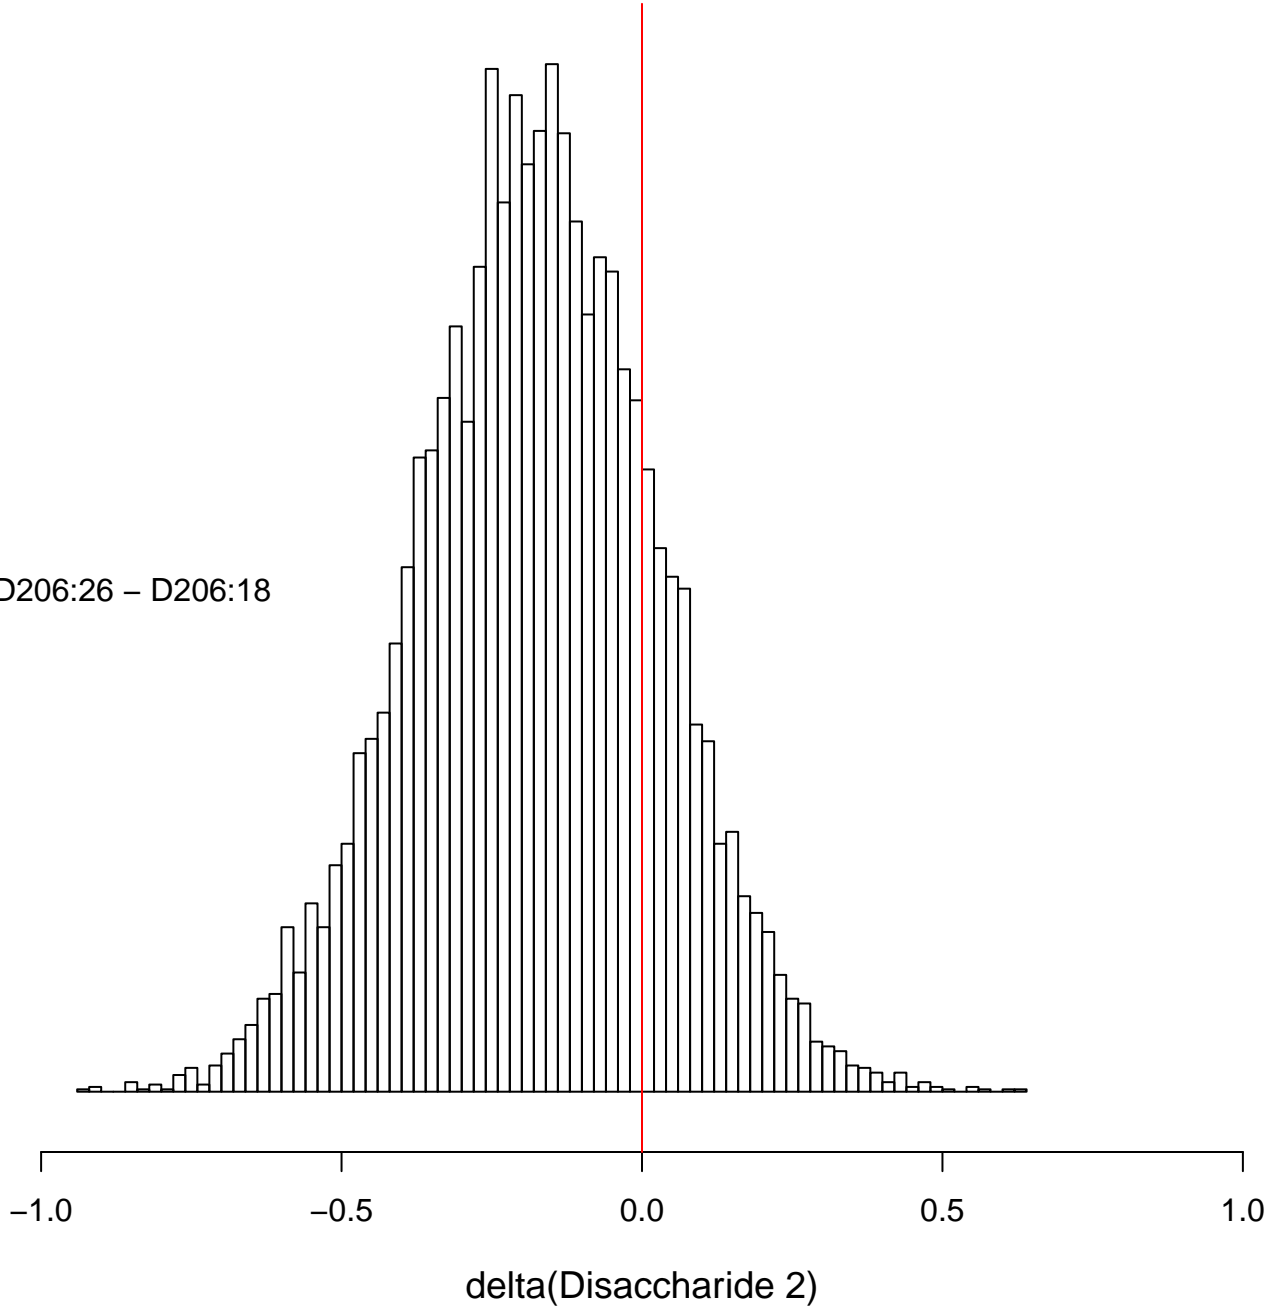

D206:26

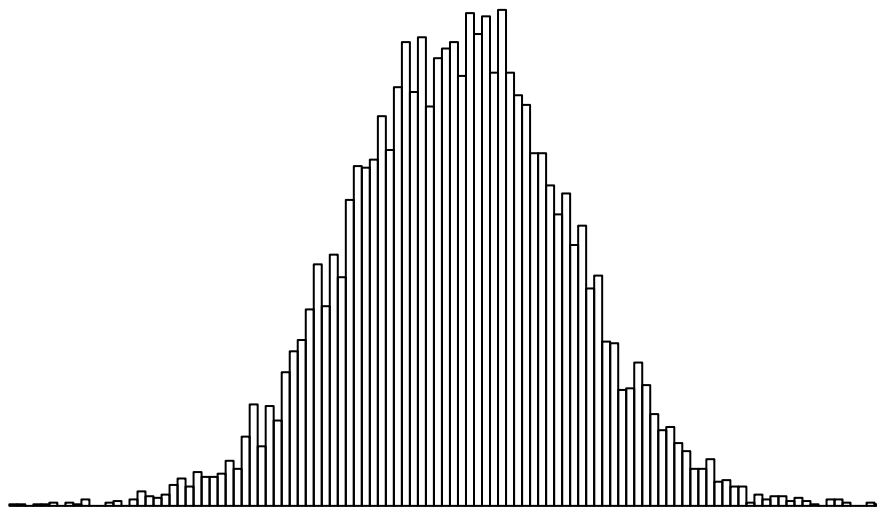

D206:18

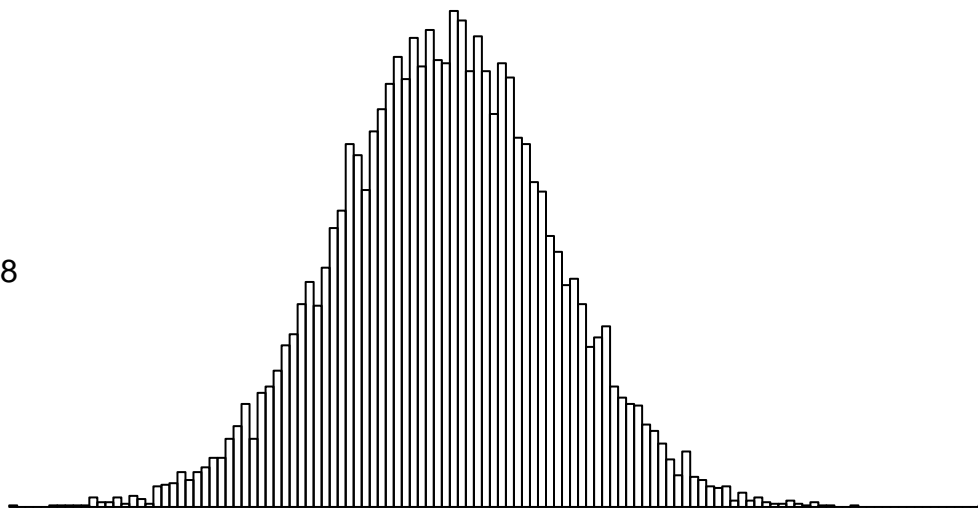

-8.0      -7.5      -7.0      -6.5      -6.0      -5.5      -5.0

Disaccharide 3

D206:26 – D206:18

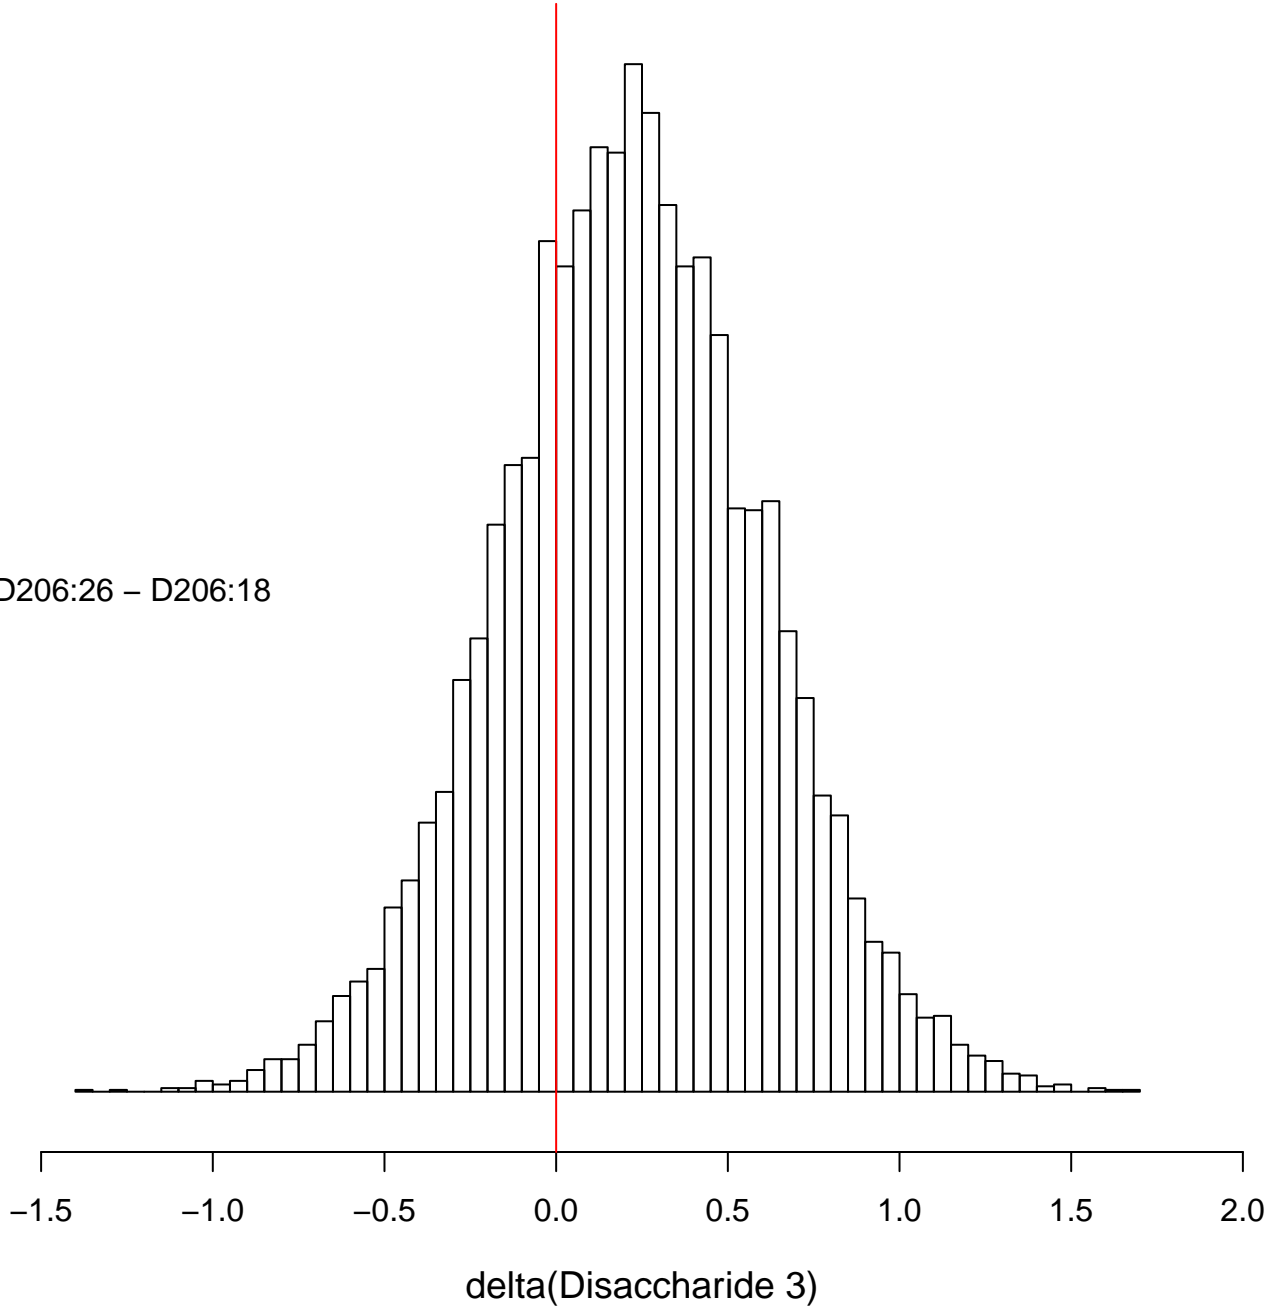



D206:26

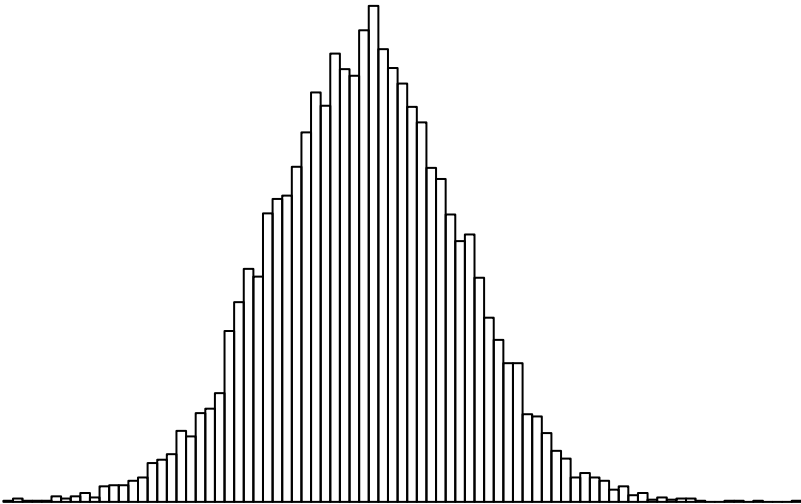

D206:18

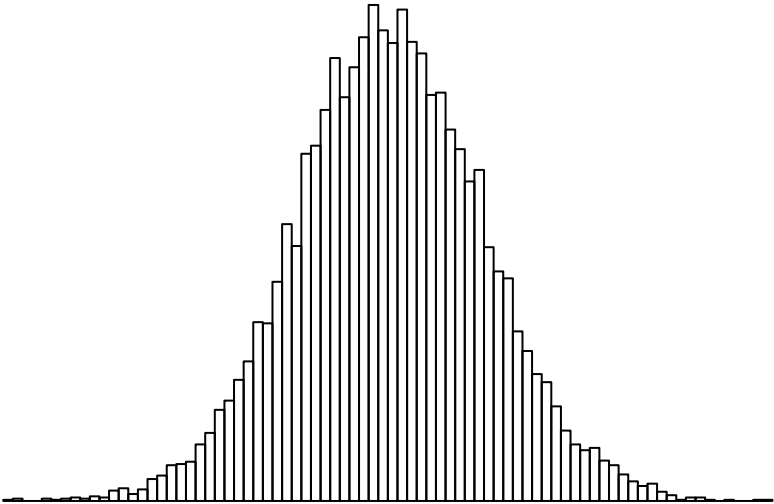

-7.5                      -7.0                      -6.5                      -6.0                      -5.5                      -5.0

Disaccharide 4

D206:26 – D206:18

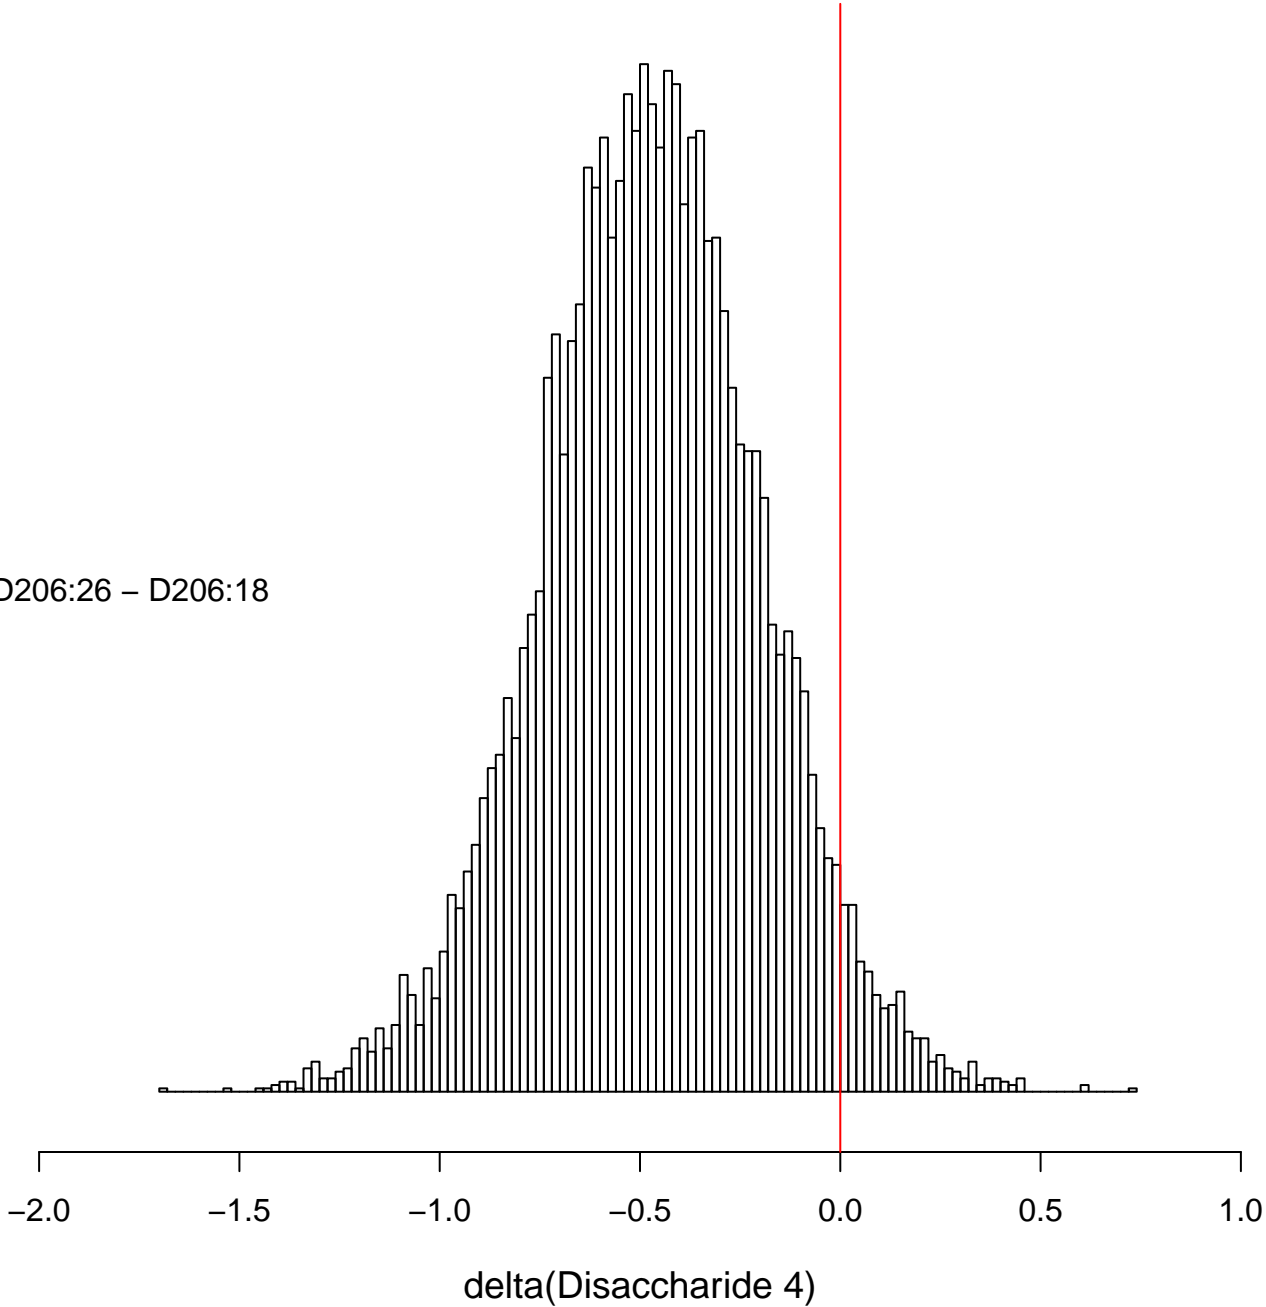

D206:26

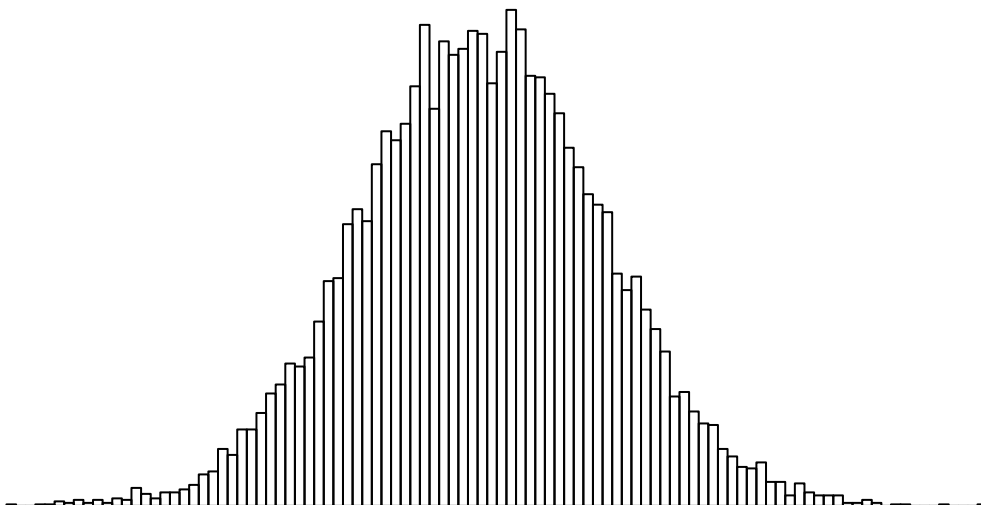

D206:18

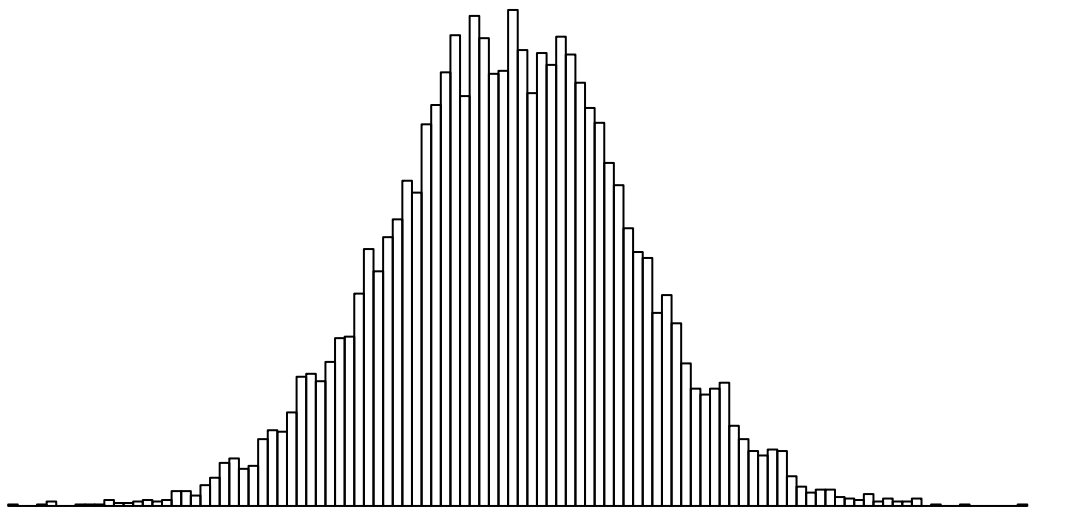

-7.0

-6.5

-6.0

-5.5

-5.0

-4.5

Disaccharide 5

D206:26 – D206:18

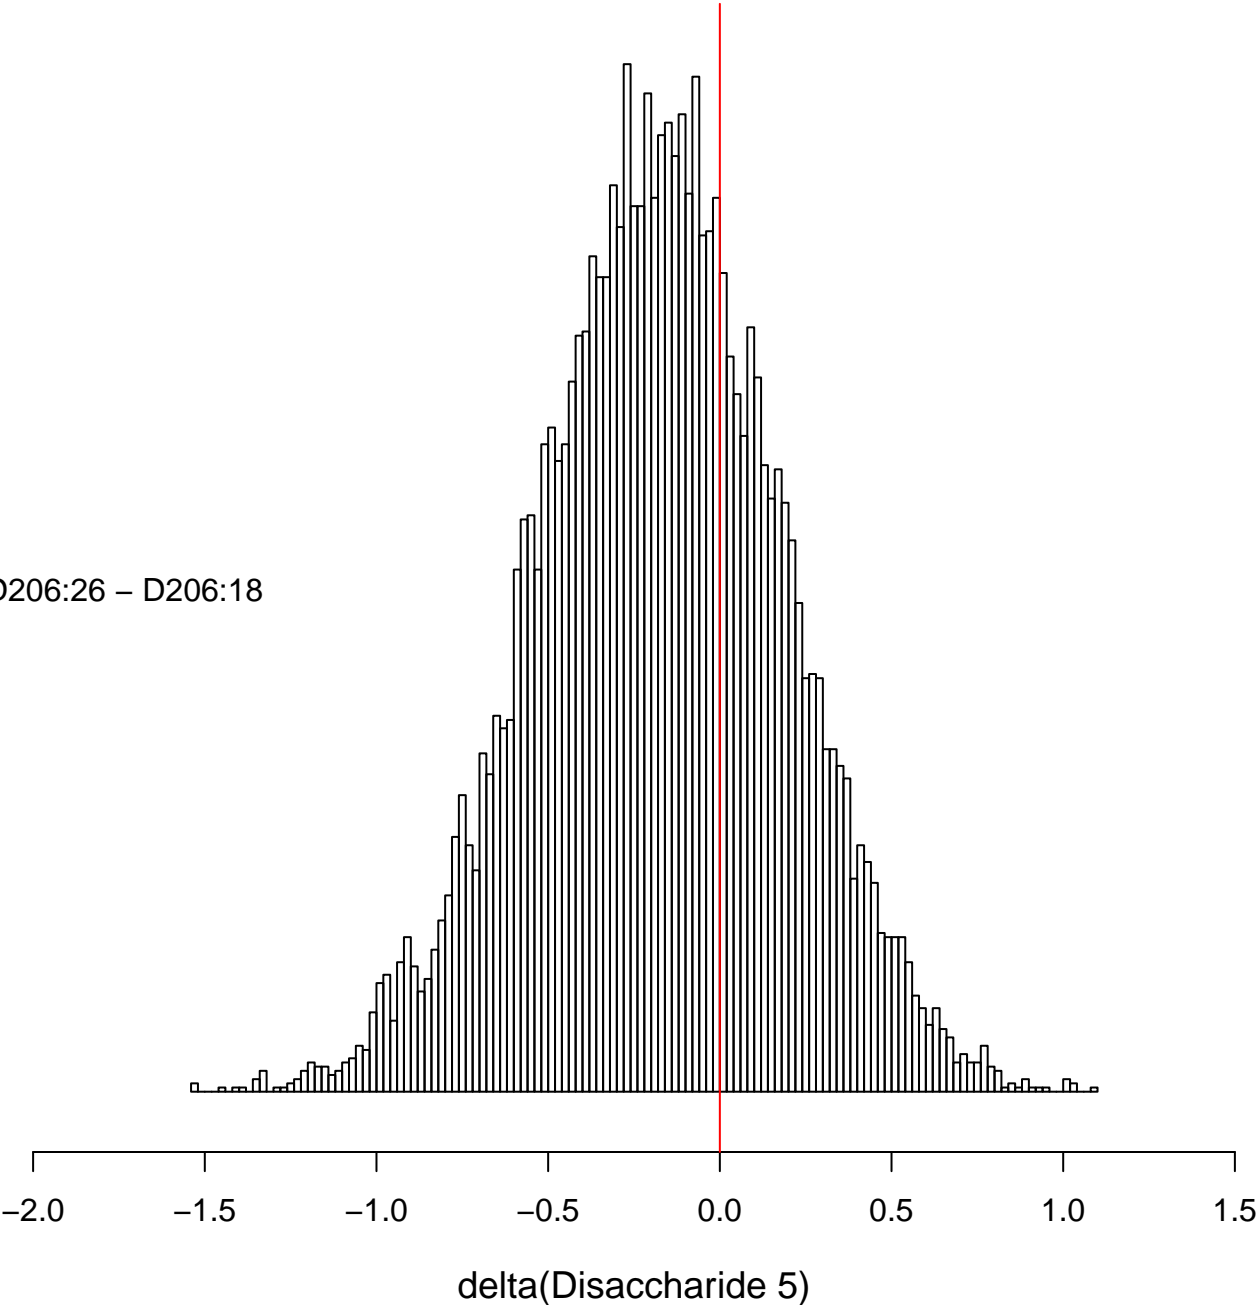

D206:26

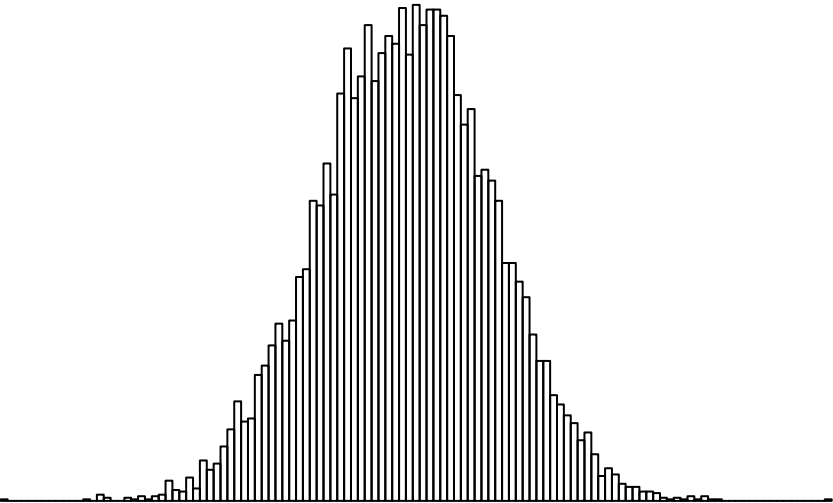

D206:18

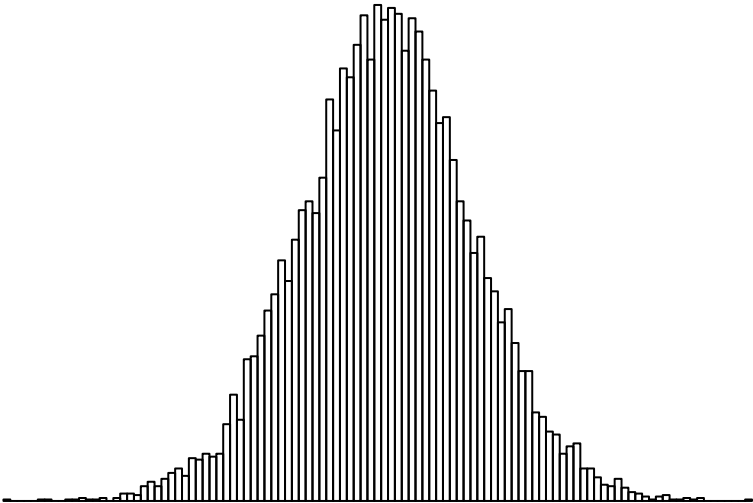

-9.5      -9.0      -8.5      -8.0      -7.5      -7.0      -6.5      -6.0

Disaccharide 6

D206:26 – D206:18

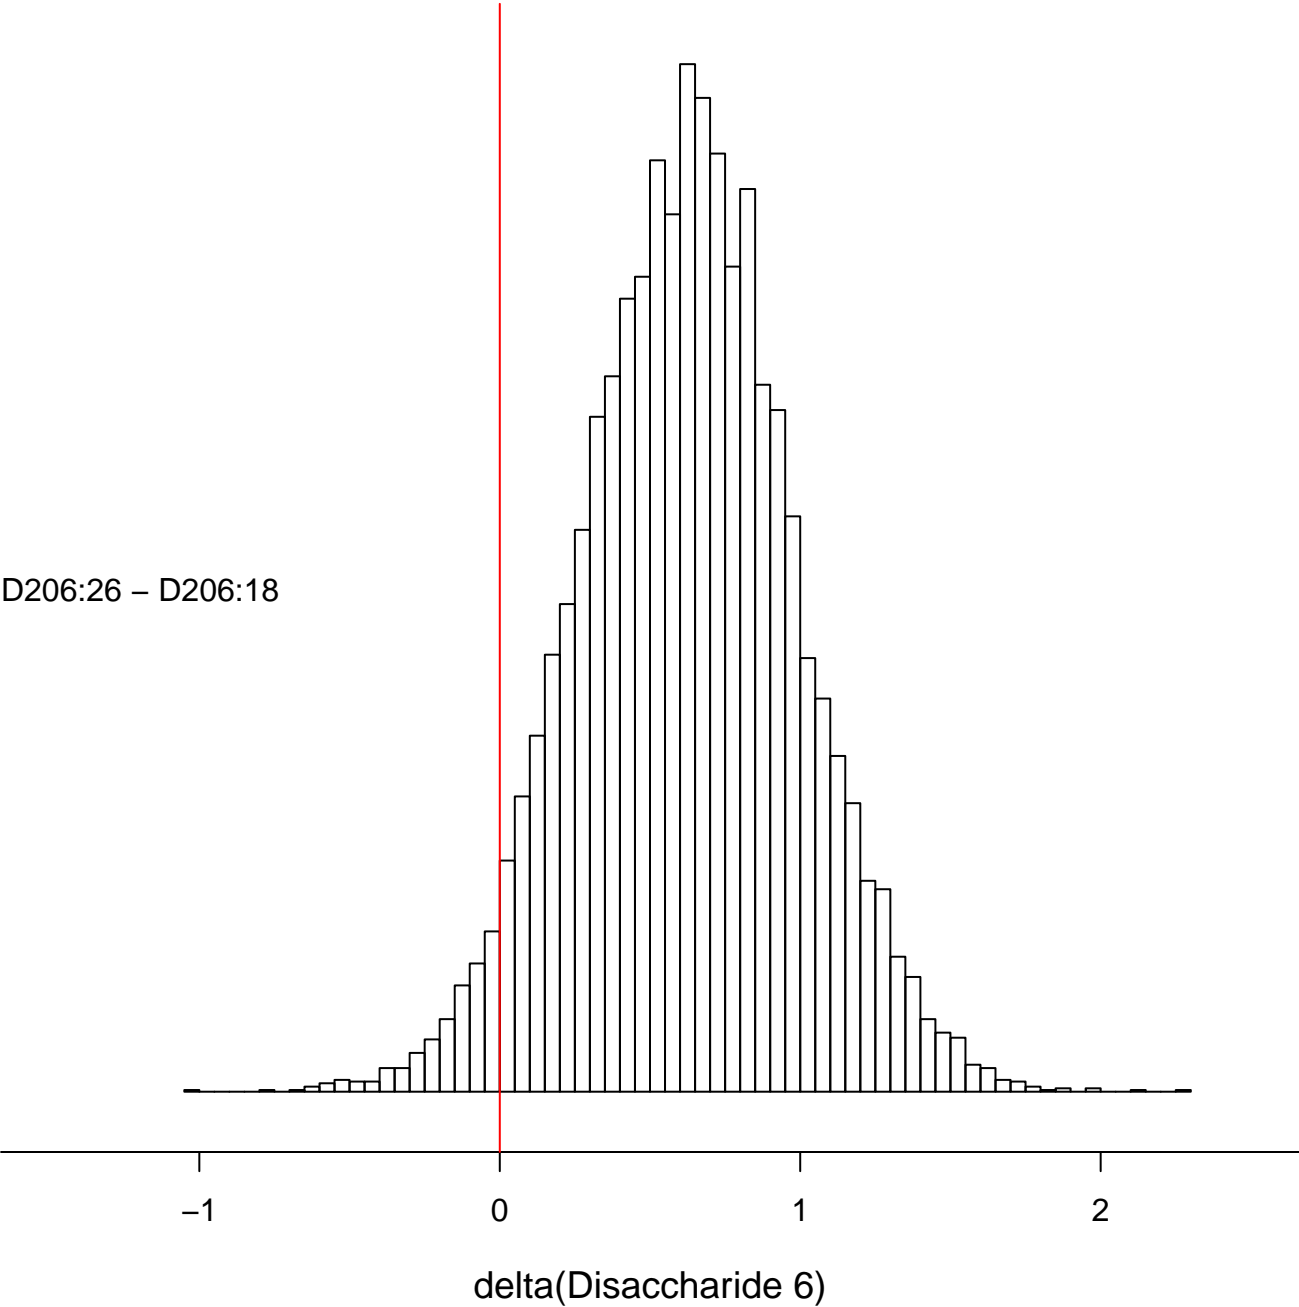

D206:26

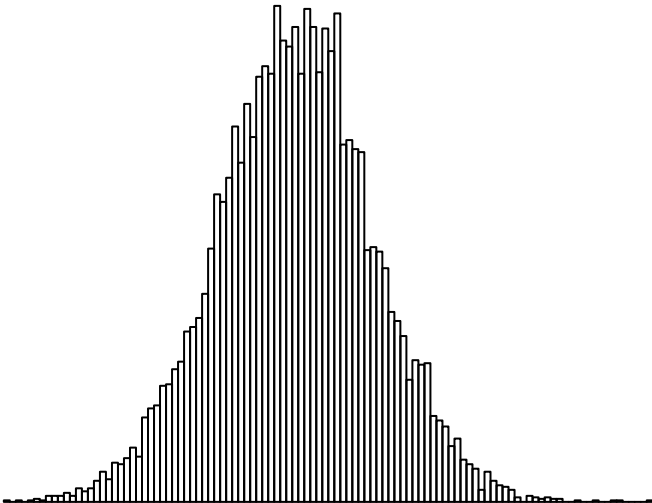

D206:18

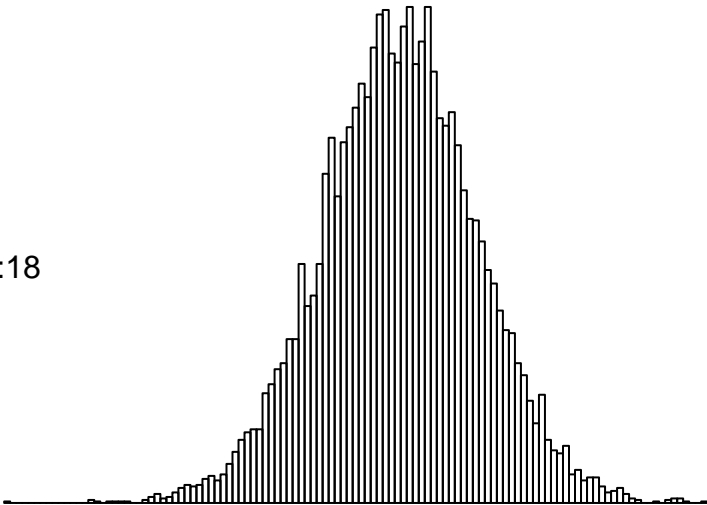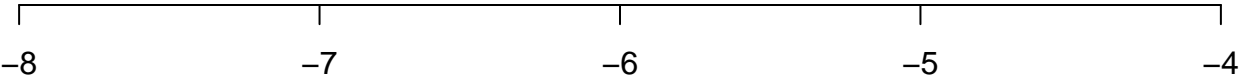

Disaccharide 7

D206:26 – D206:18

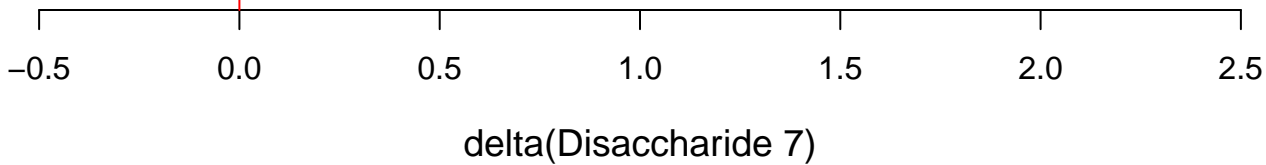



D206:26

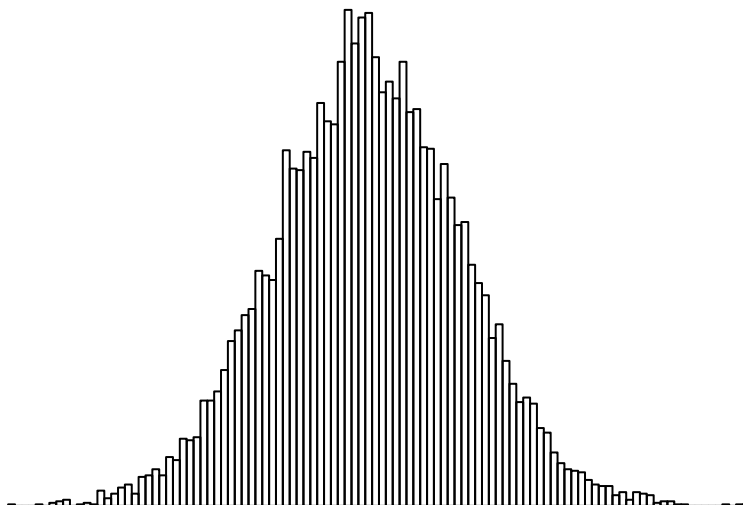

D206:18

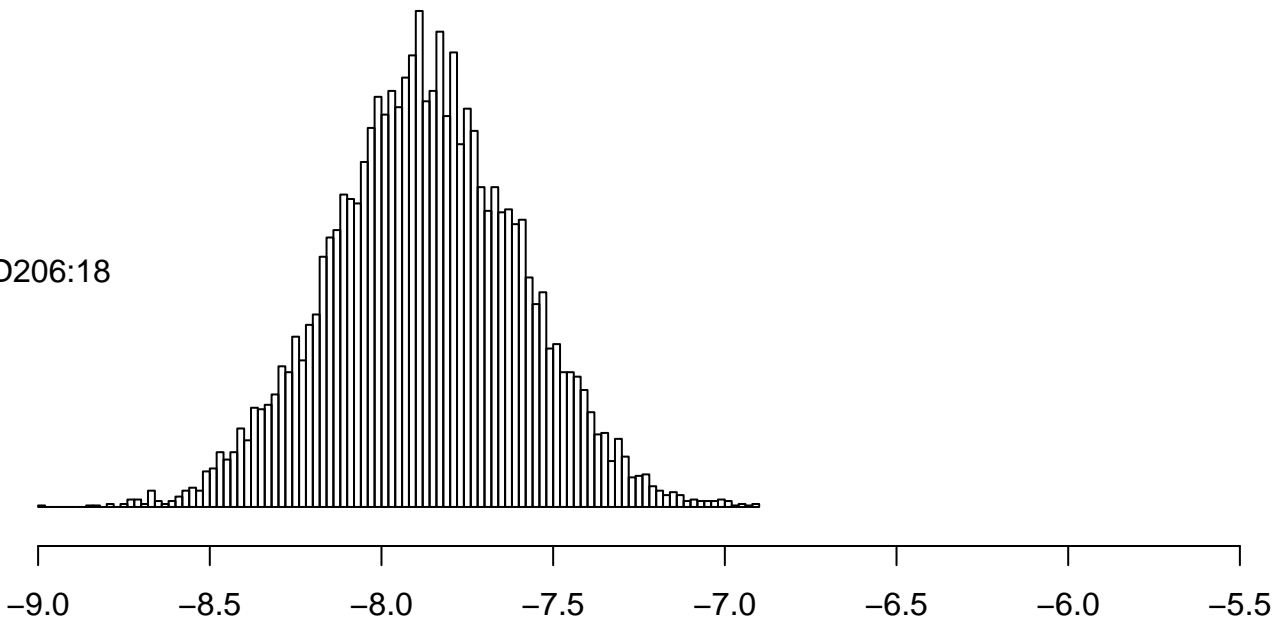

Disaccharide 8

D206:26 – D206:18

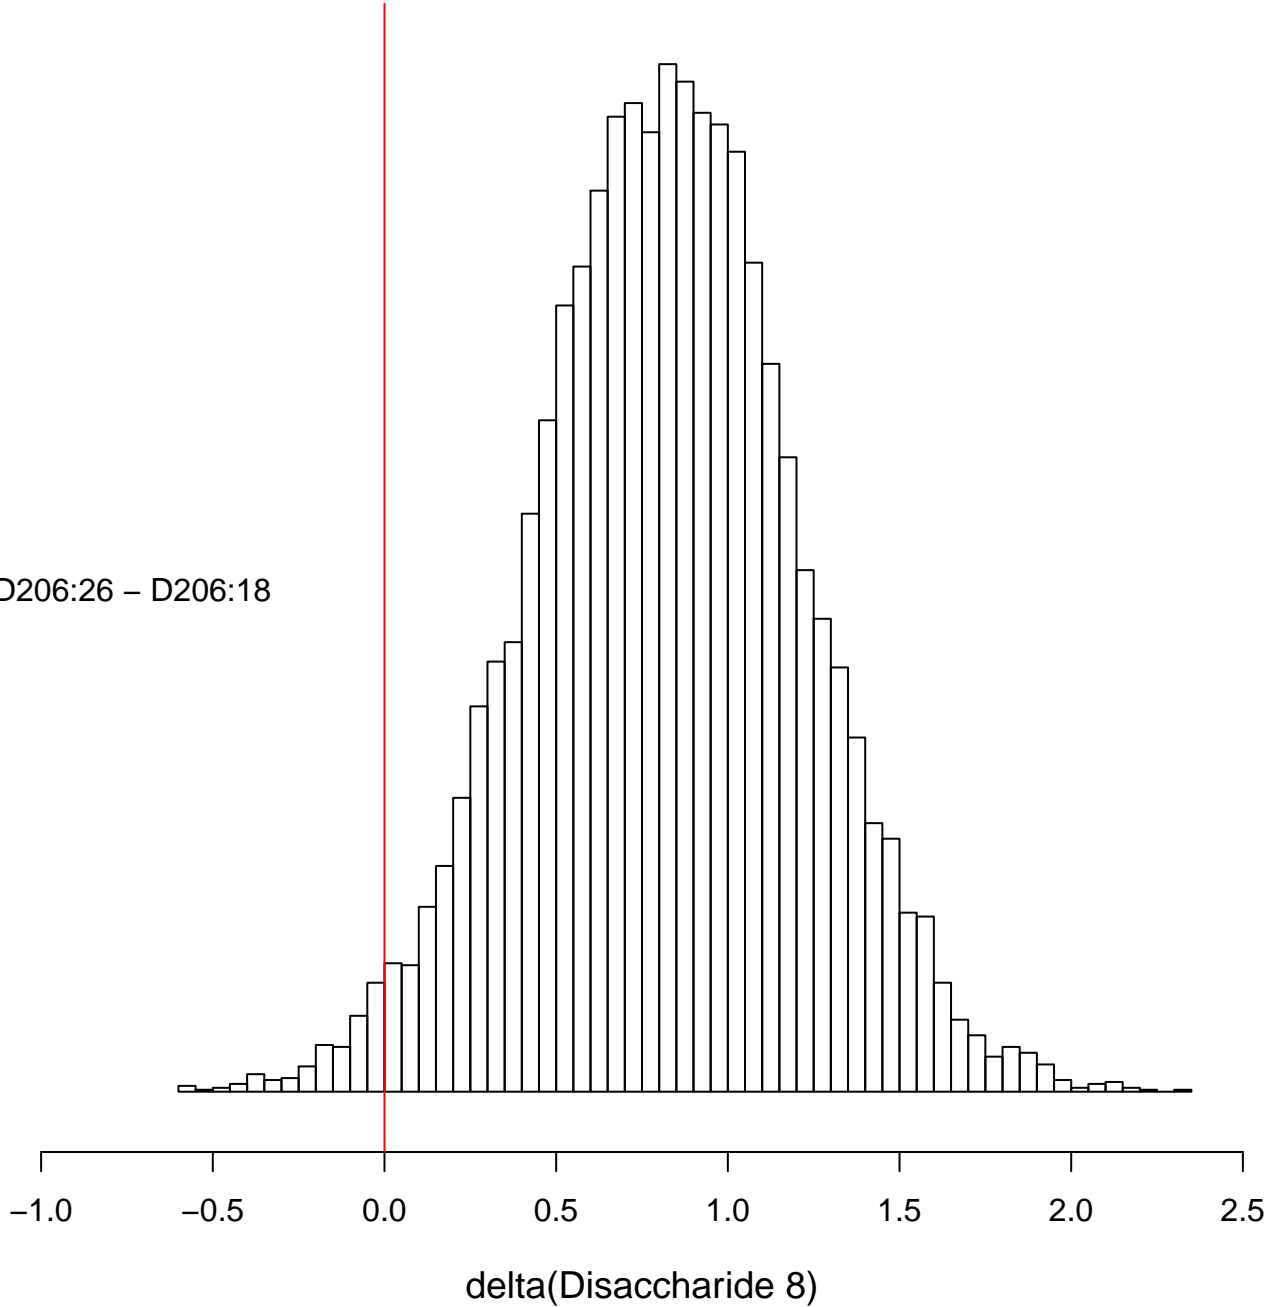

D206:26

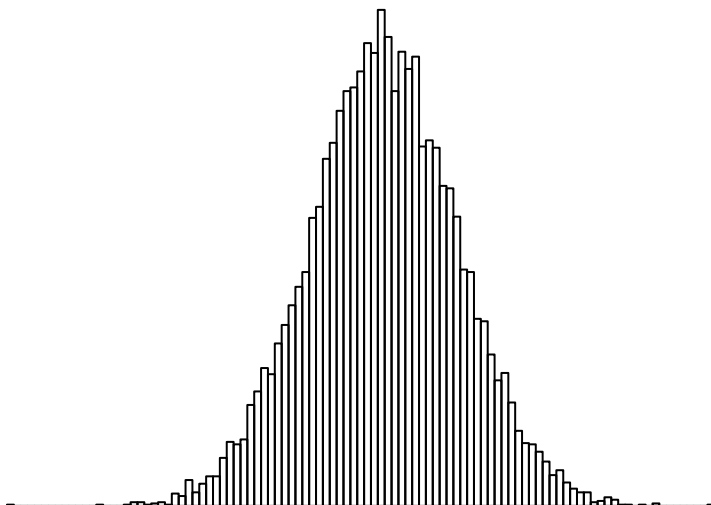

D206:18

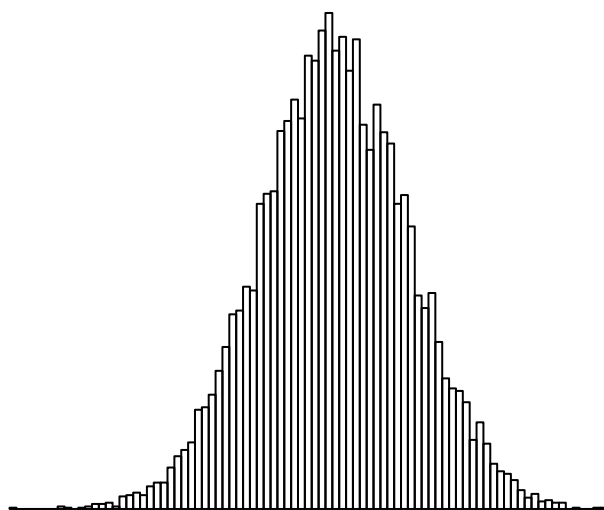

-9.5      -9.0      -8.5      -8.0      -7.5      -7.0      -6.5      -6.0

Disaccharide 9

D206:26 – D206:18

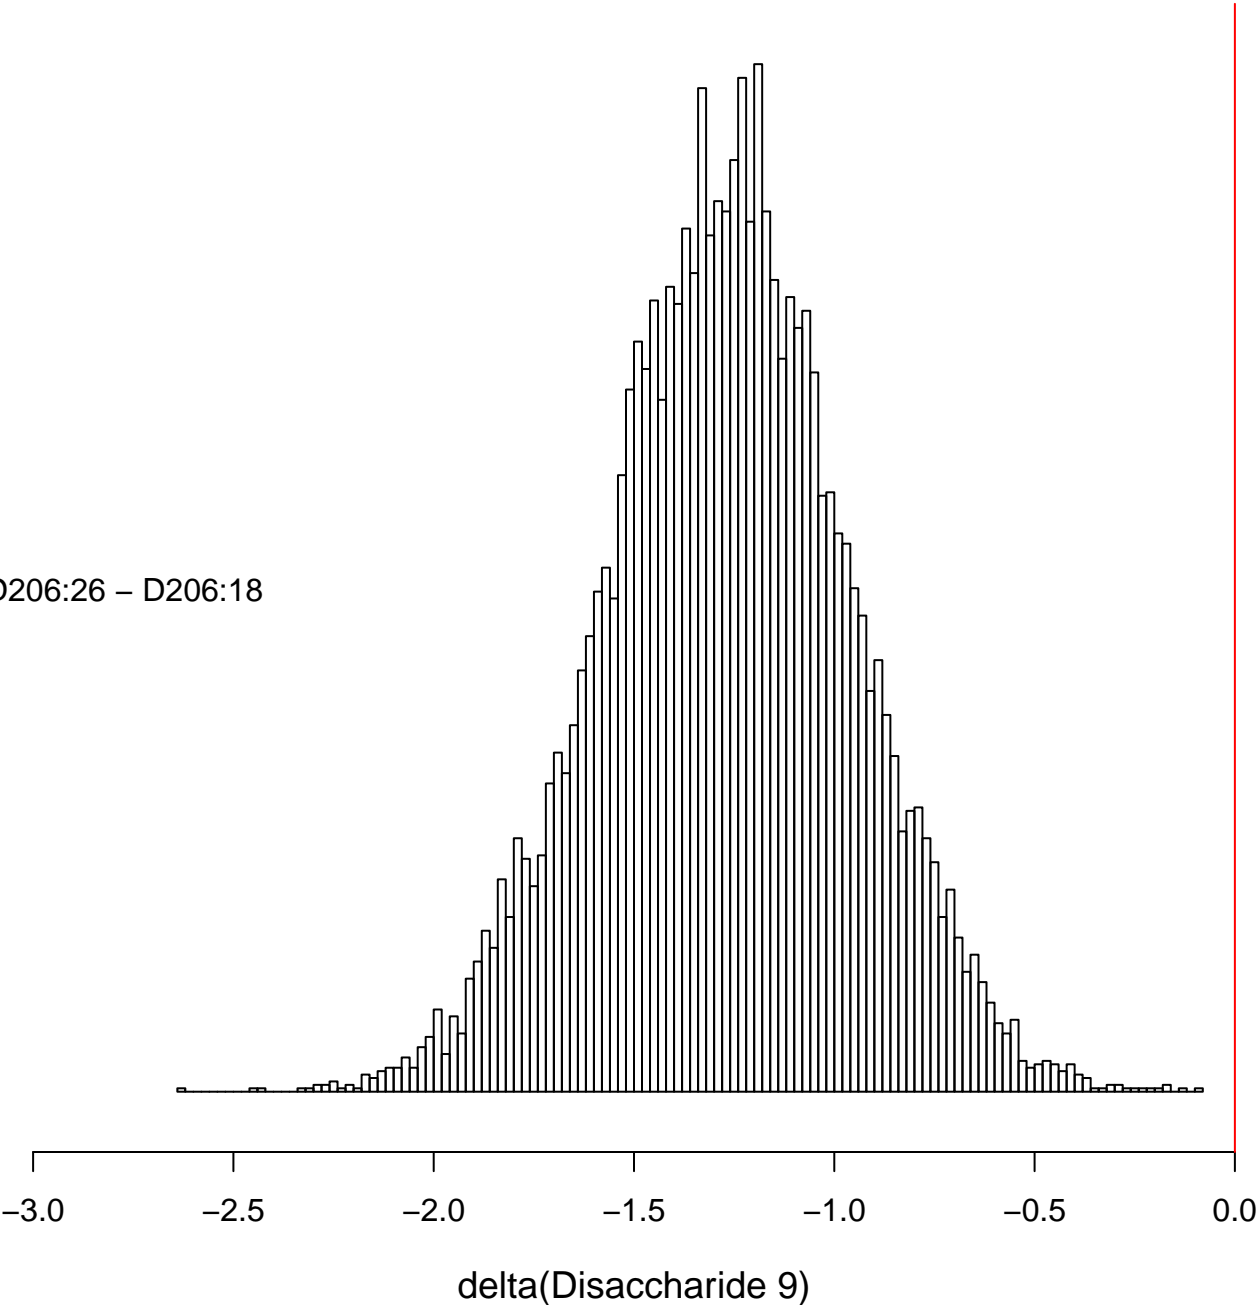

D206:26

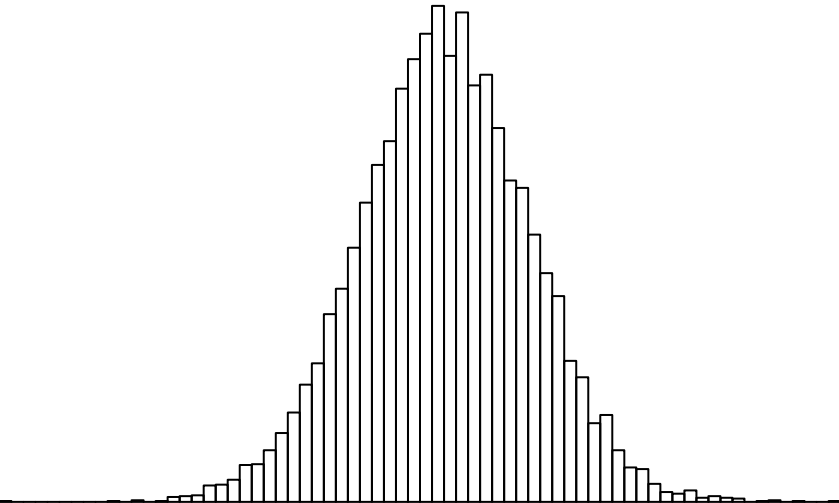

D206:18

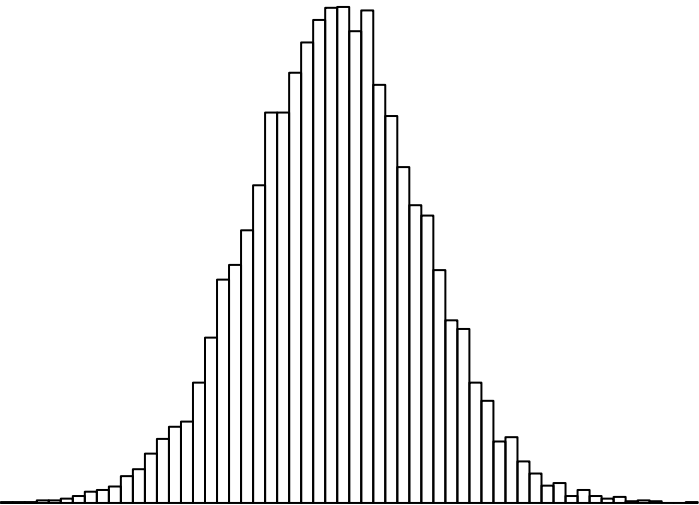

-9      -8      -7      -6      -5      -4

C12:0 Fatty Acid

D206:26 – D206:18

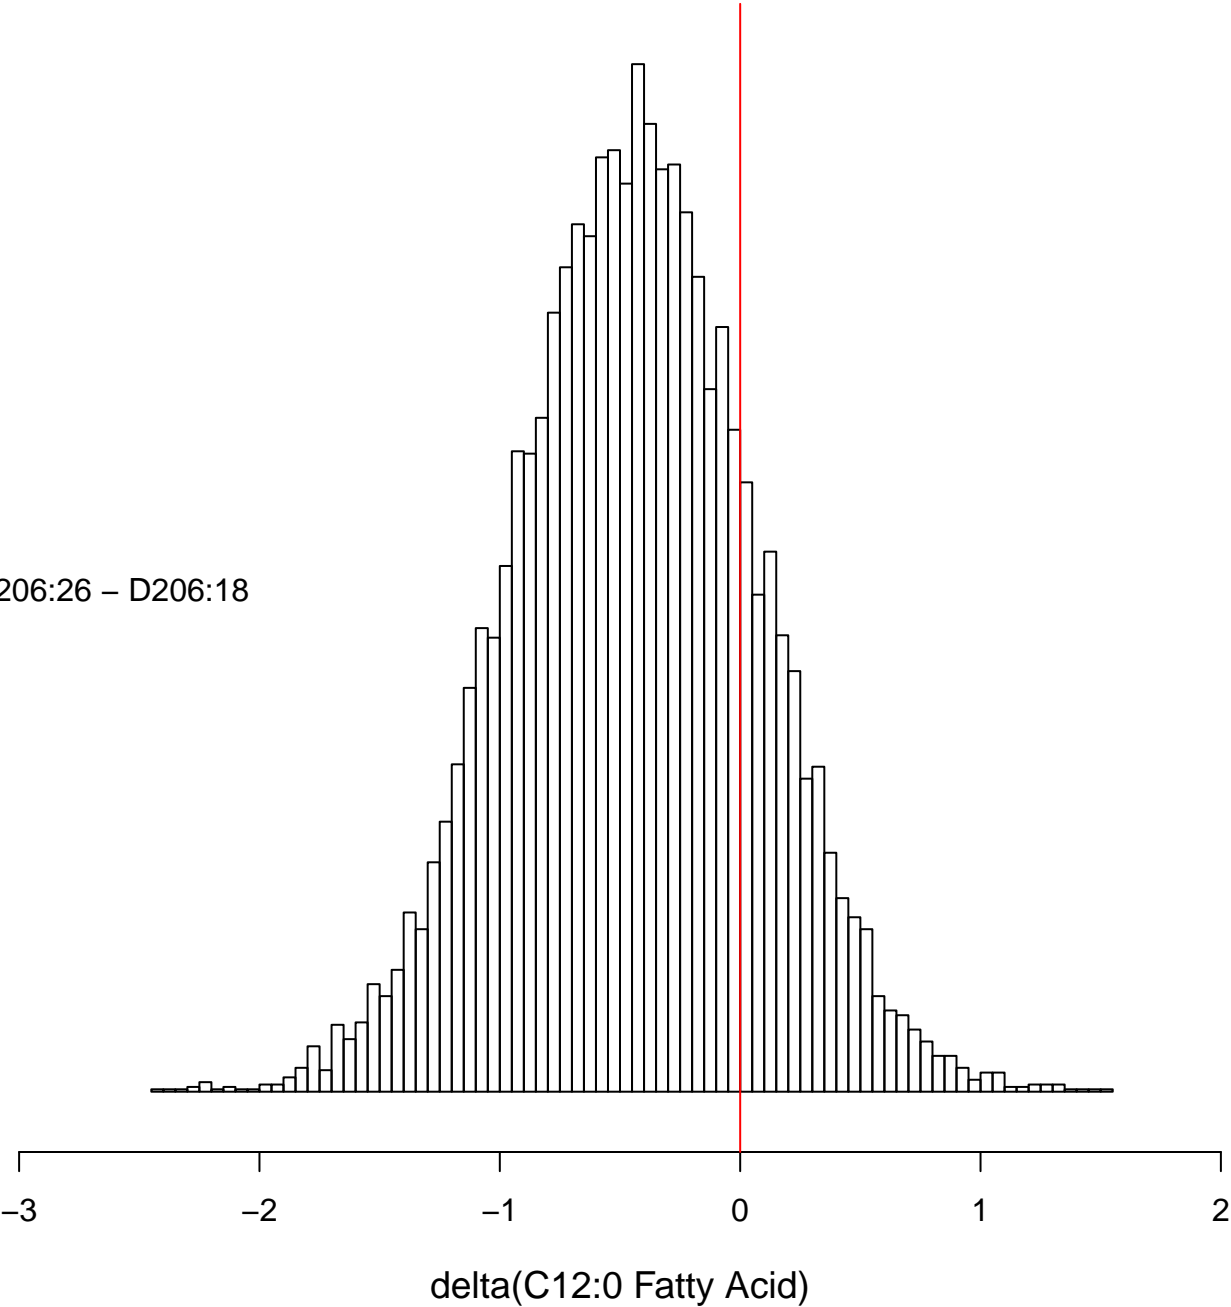

D206:26

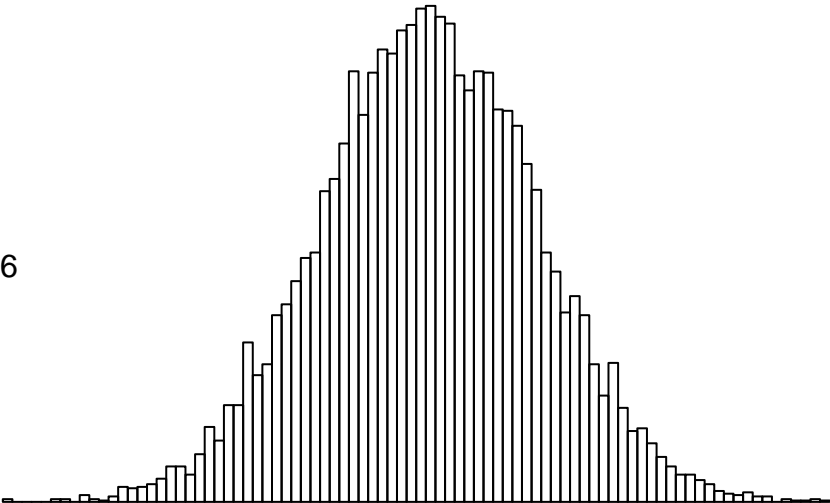

D206:18

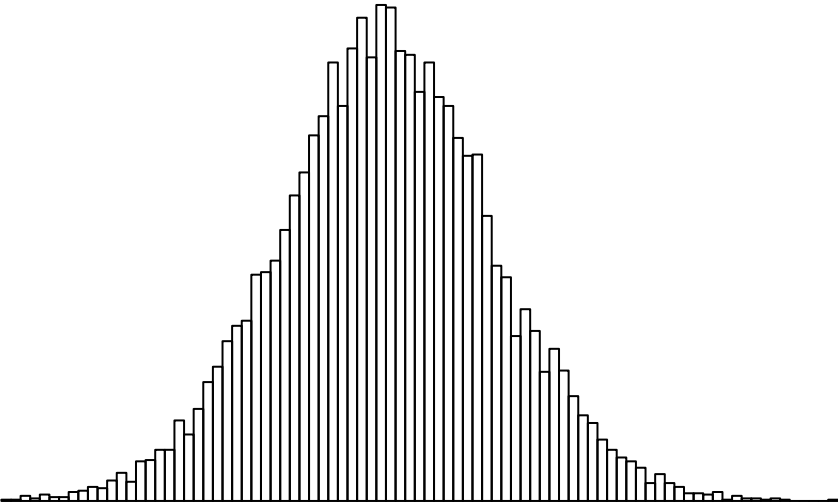

-8.0                      -7.5                      -7.0                      -6.5                      -6.0                      -5.5

C14:1 Fatty Acid

D206:26 – D206:18

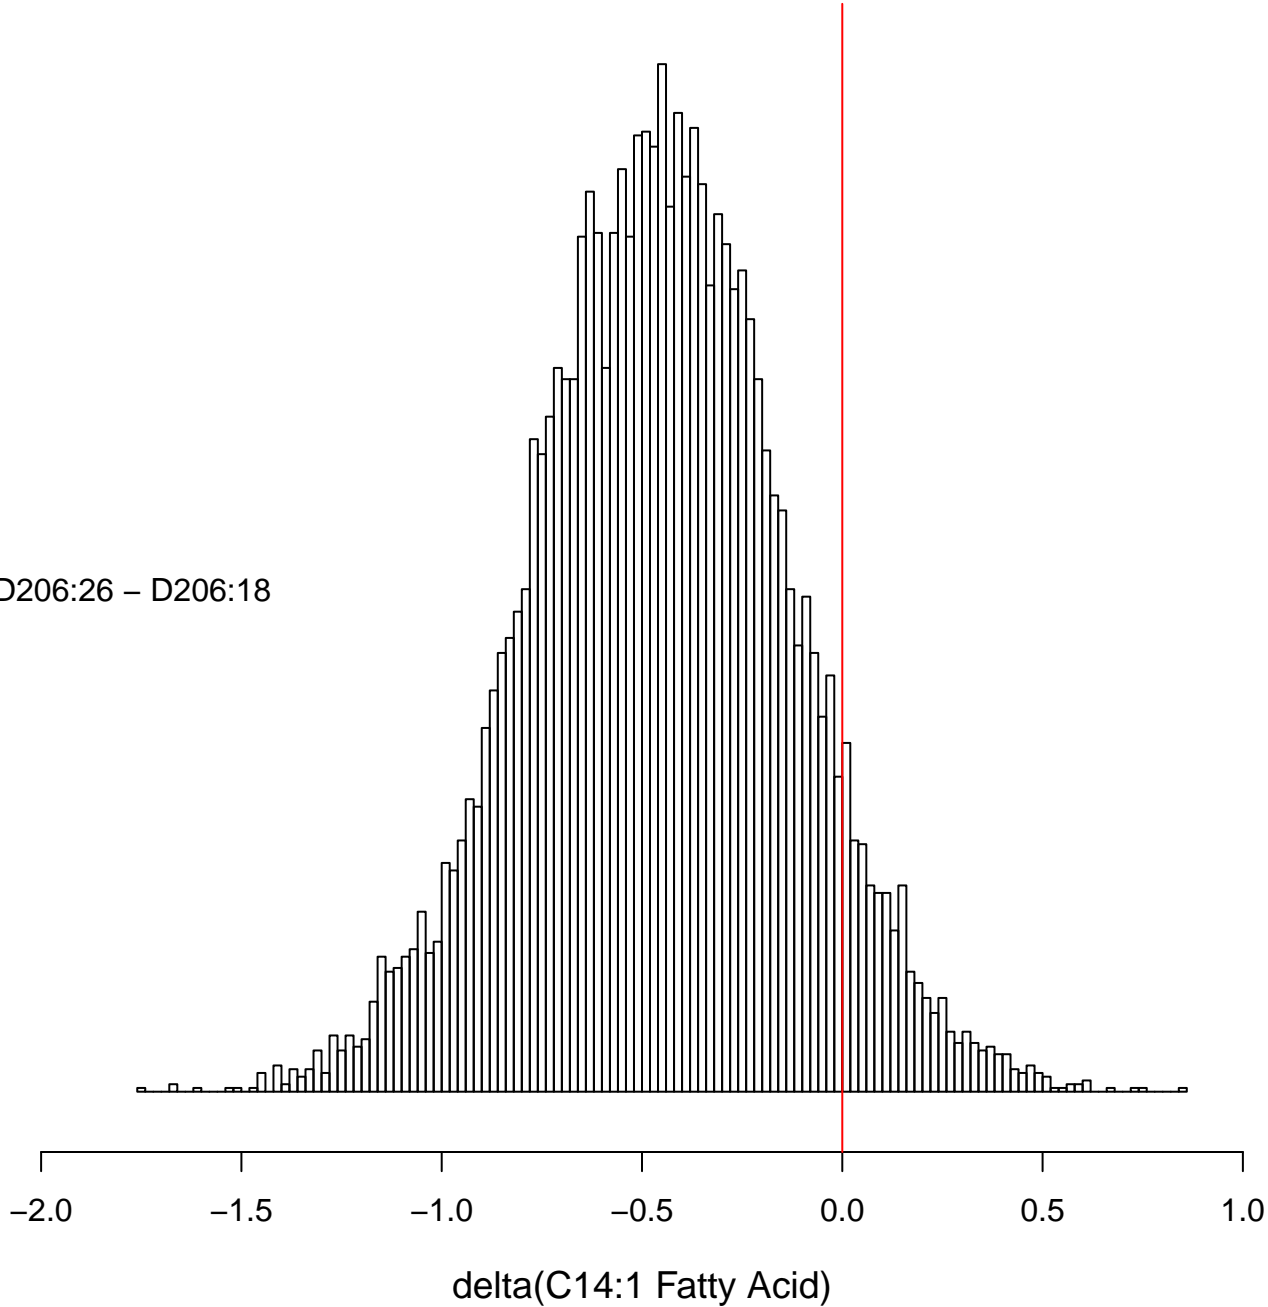



D206:26

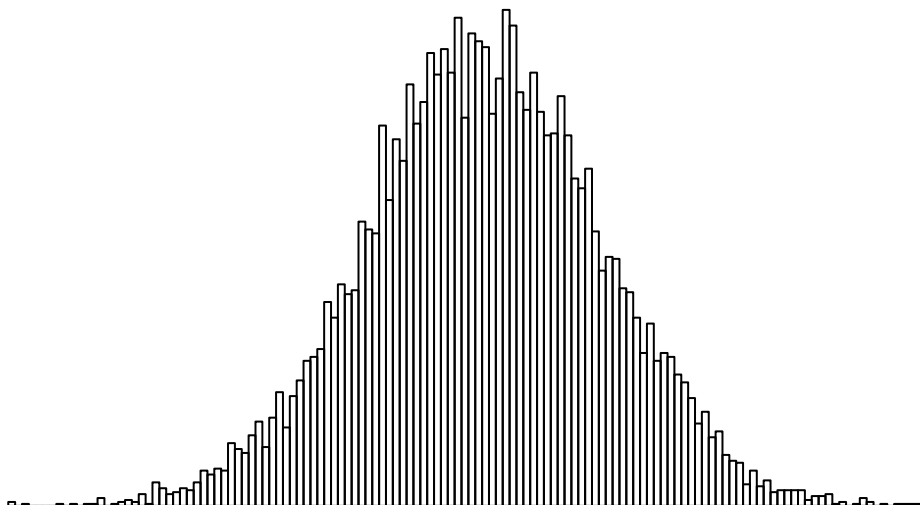

D206:18

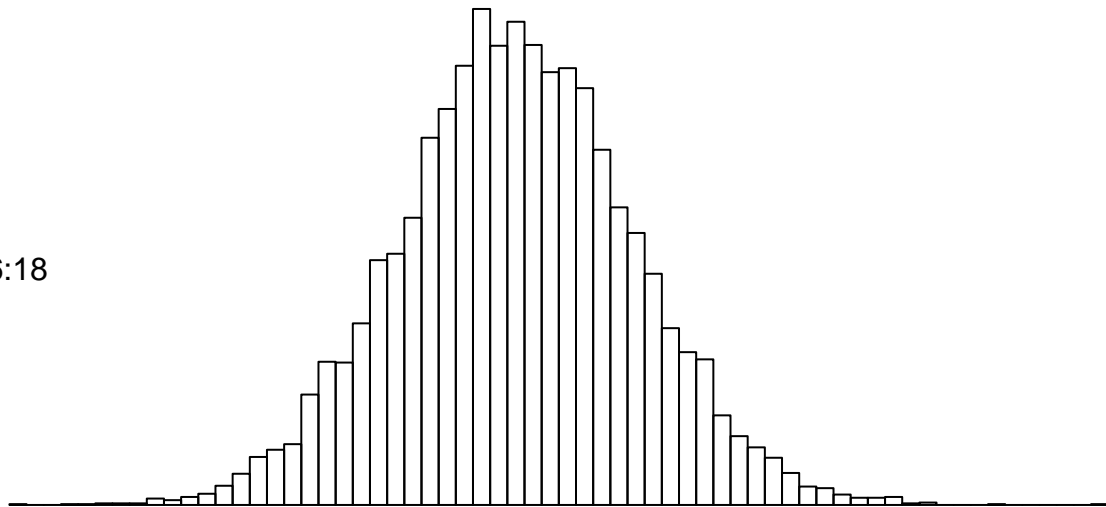

-7.0      -6.5      -6.0      -5.5      -5.0      -4.5      -4.0      -3.5

C14:0 Fatty Acid

D206:26 – D206:18

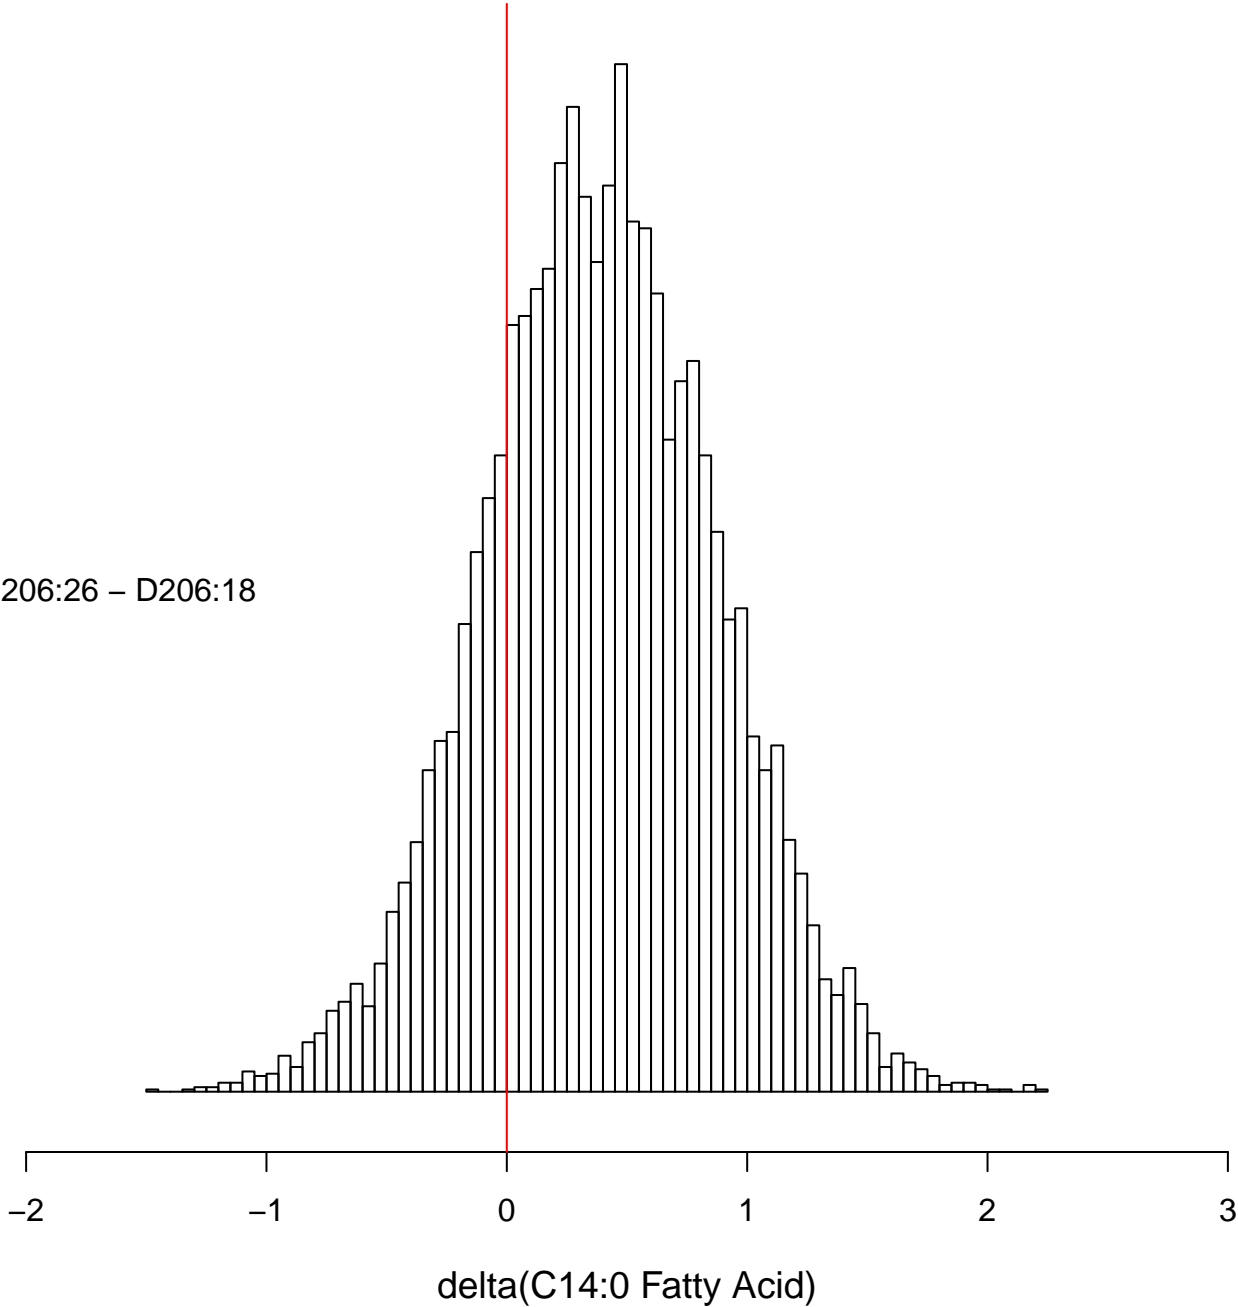

D206:26

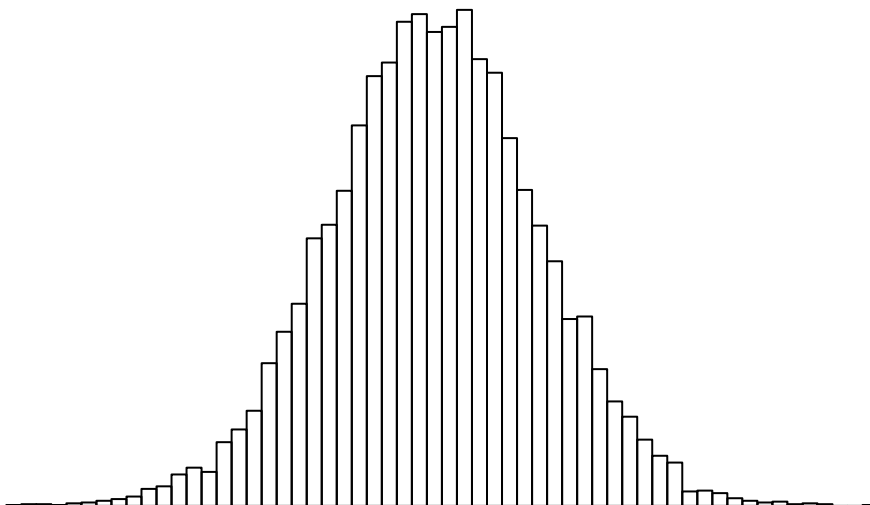

D206:18

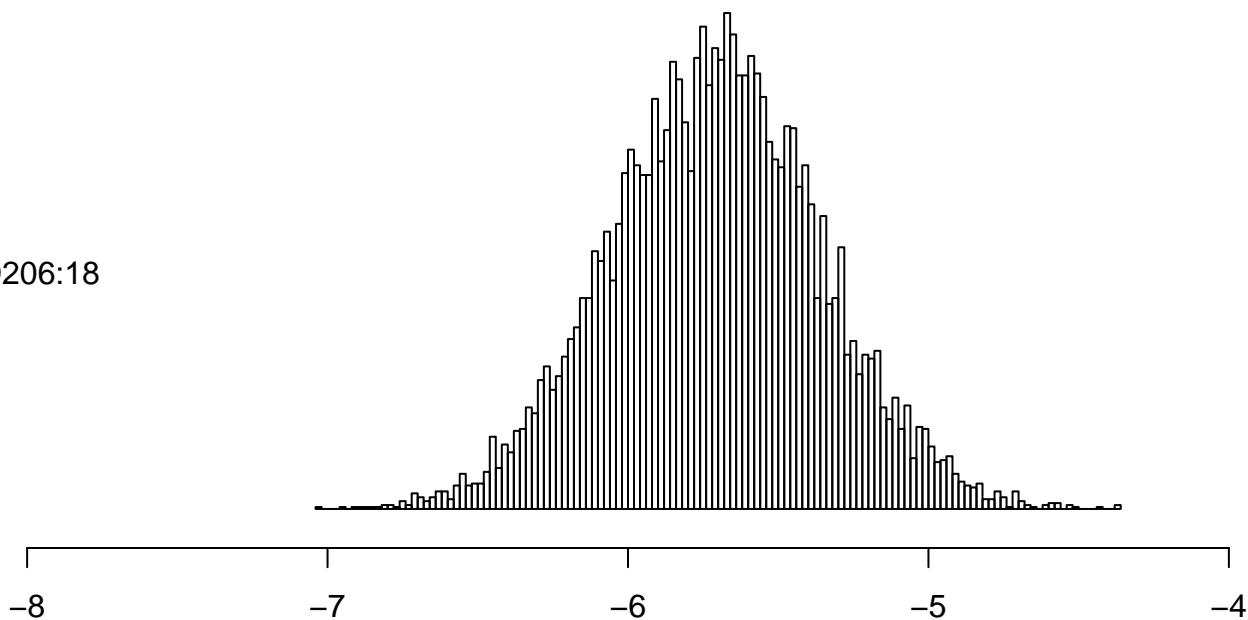

C16:1 Fatty Acid

D206:26 – D206:18

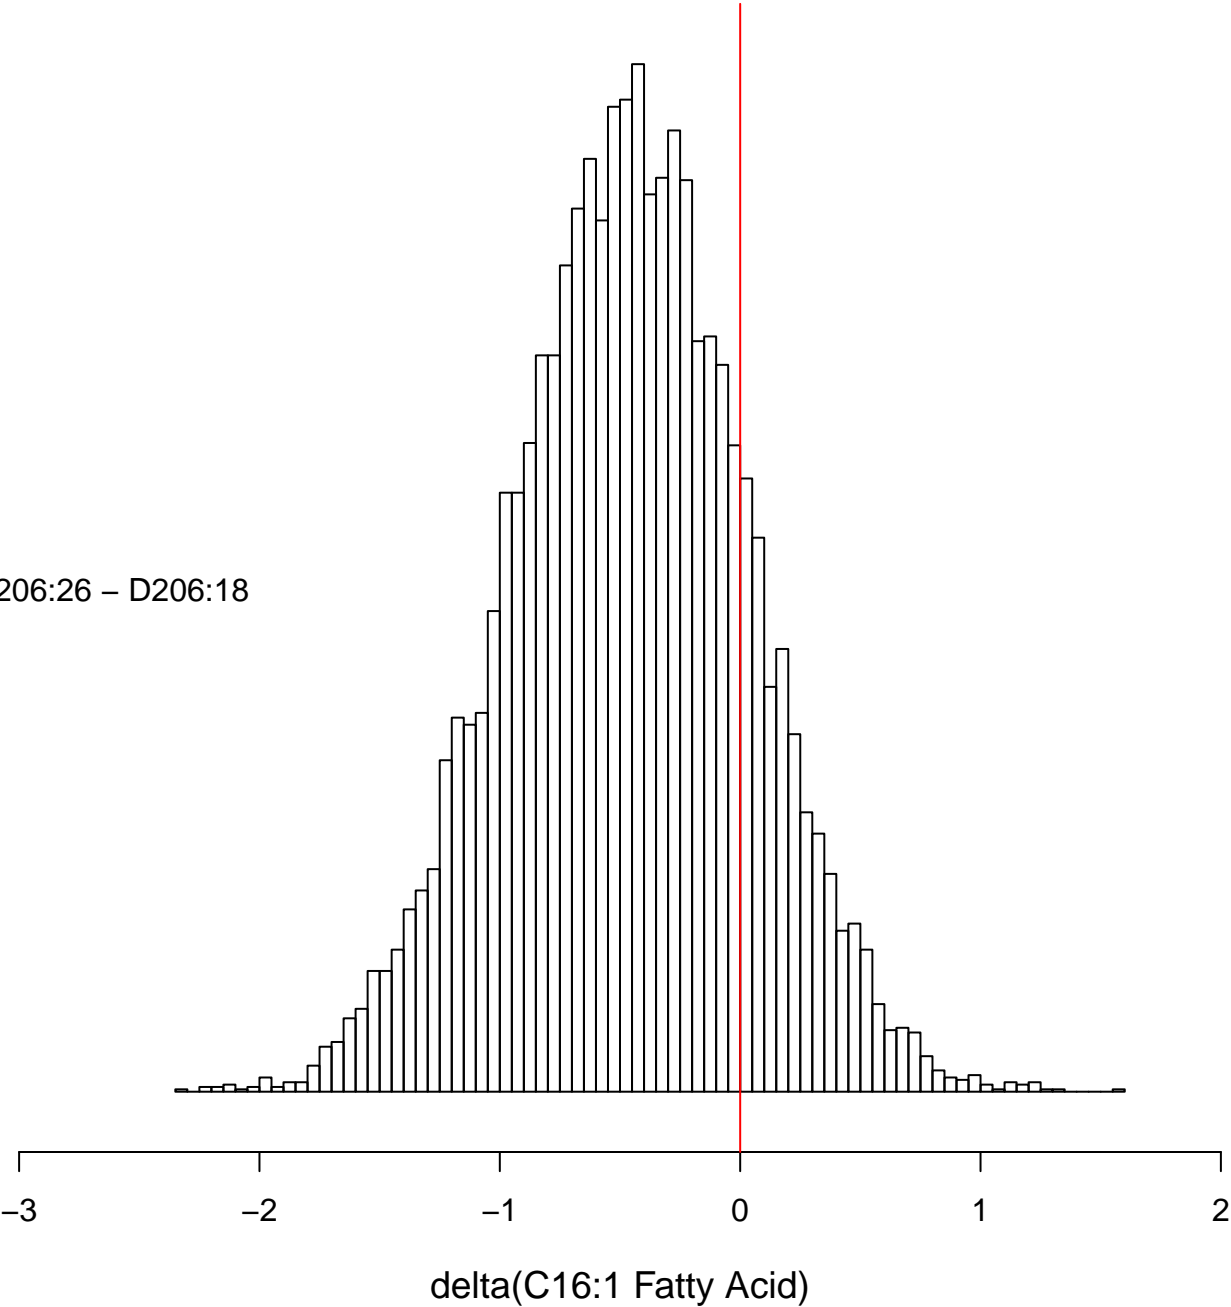

D206:26

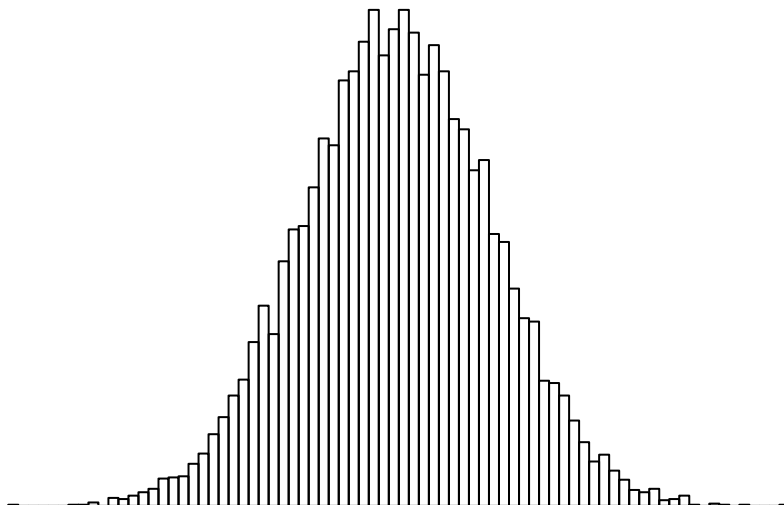

D206:18

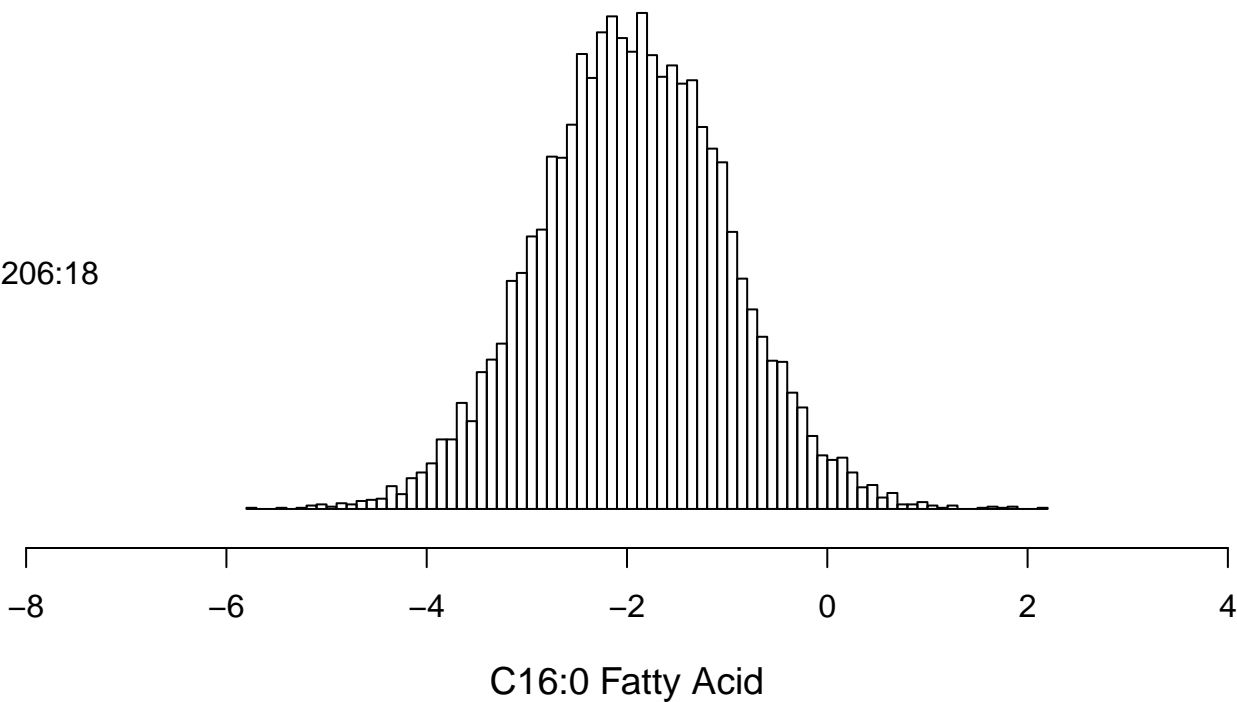

D206:26 – D206:18

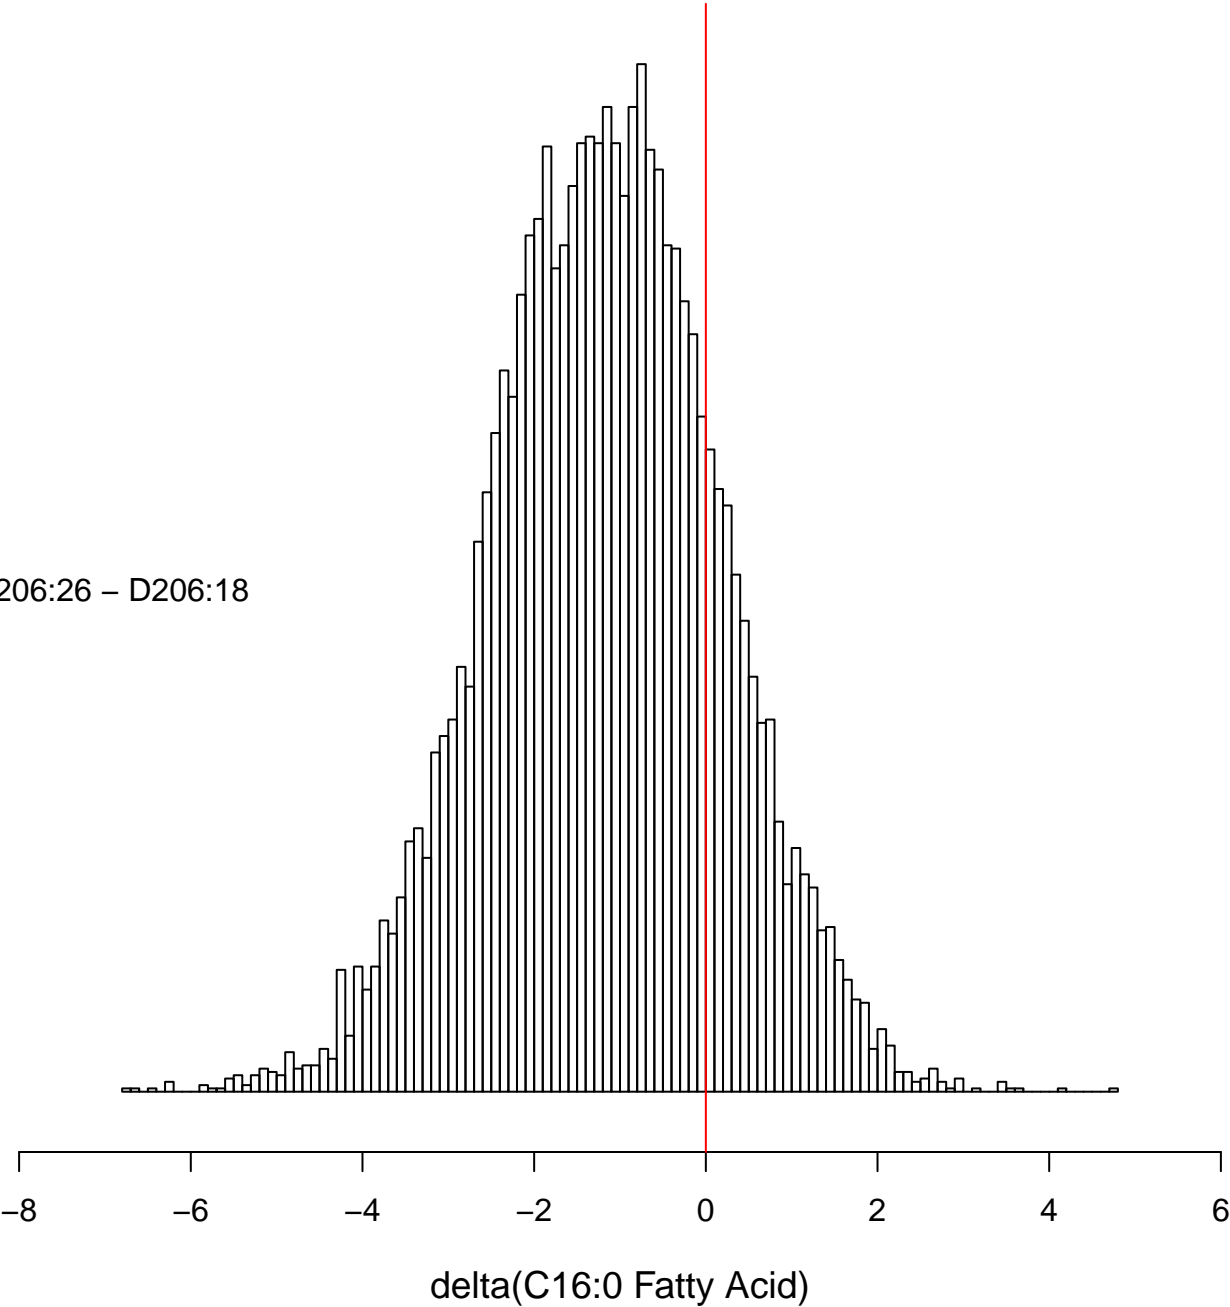

D206:26

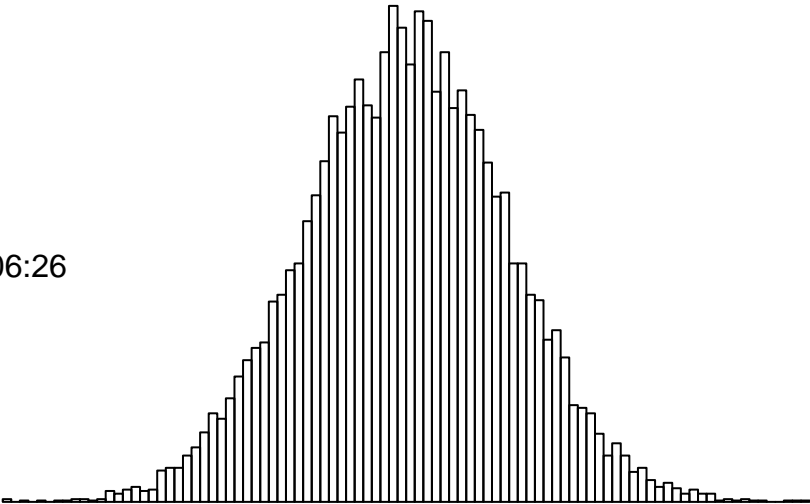

D206:18

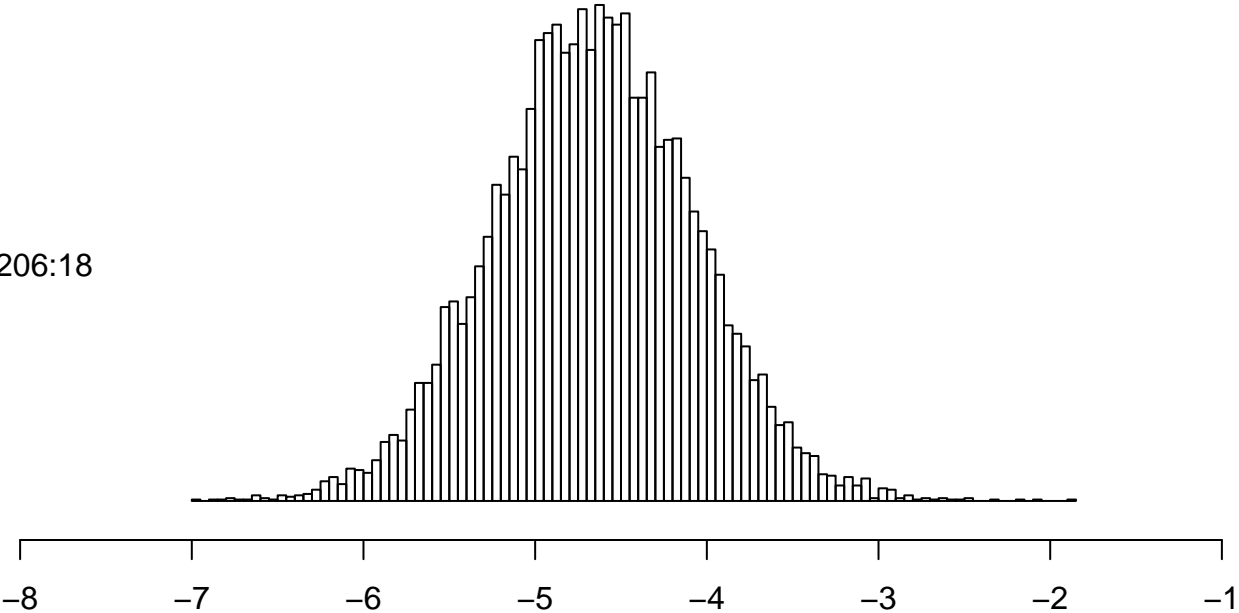

Polyunsaturated Fatty Acids 1

D206:26 – D206:18

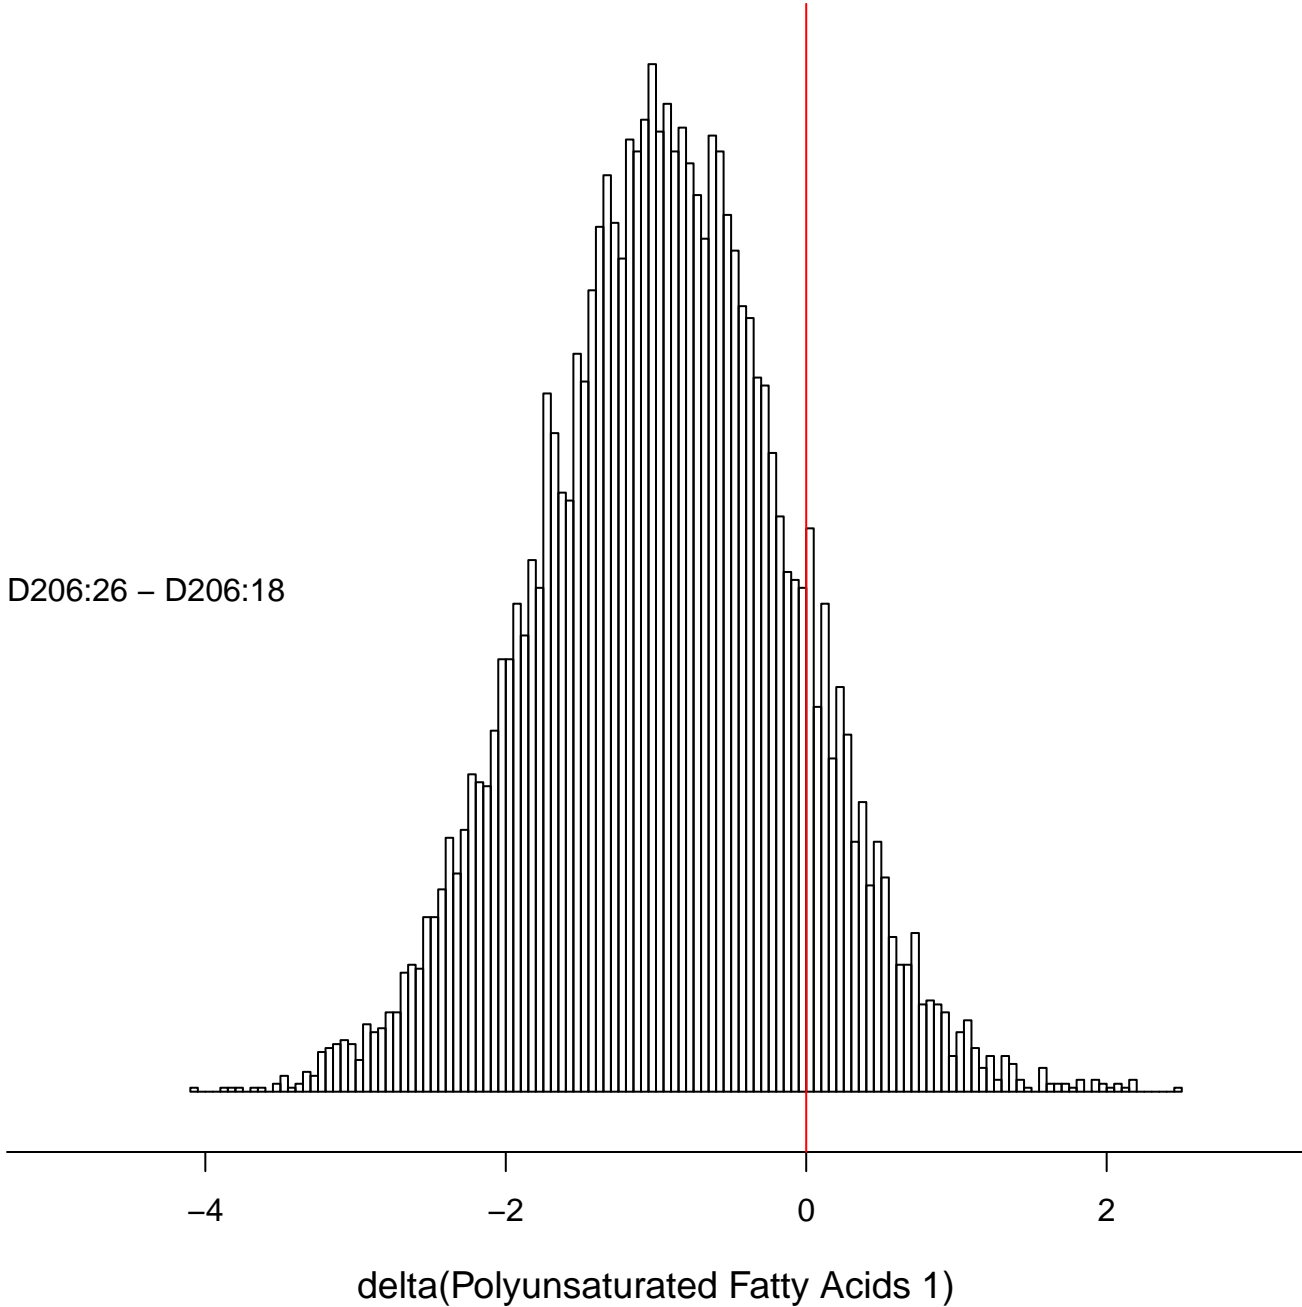



D206:26

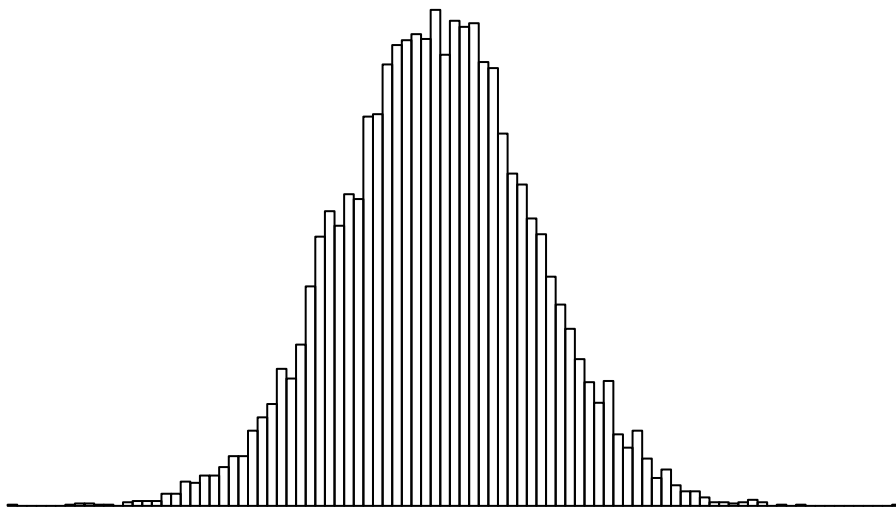

D206:18

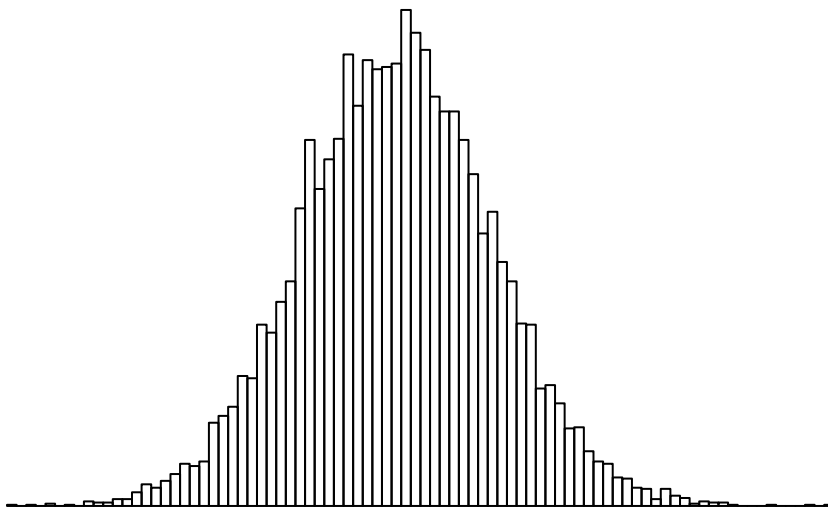

-9.0 -8.5 -8.0 -7.5 -7.0 -6.5

Polyunsaturated Fatty Acids 3

D206:26 – D206:18

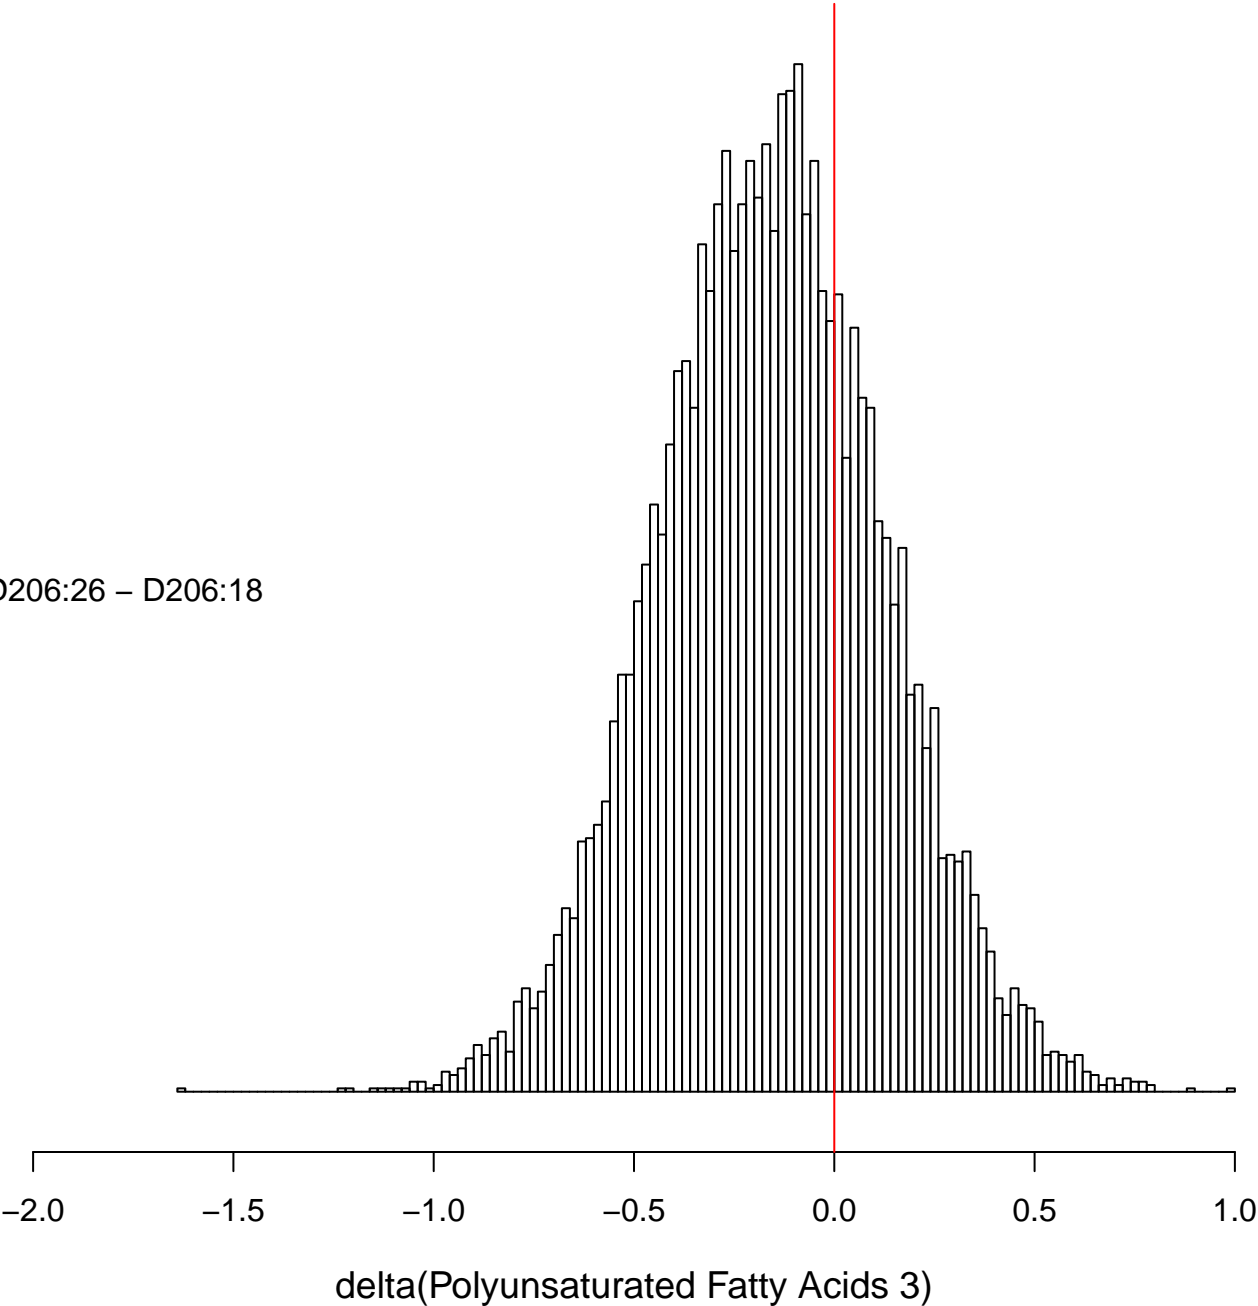

D206:26

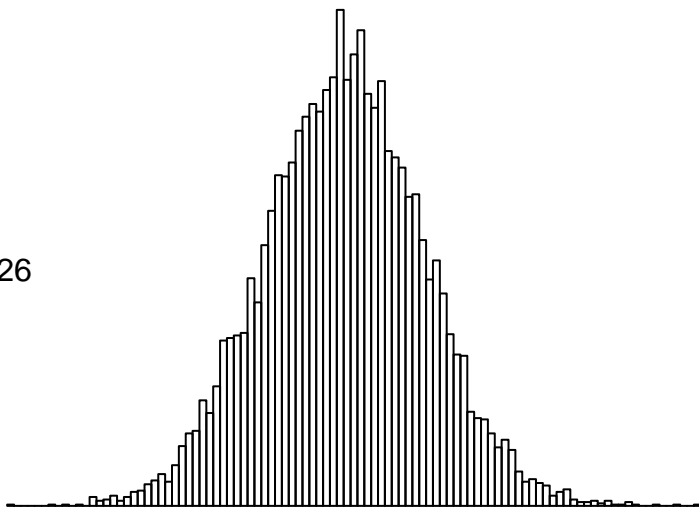

D206:18

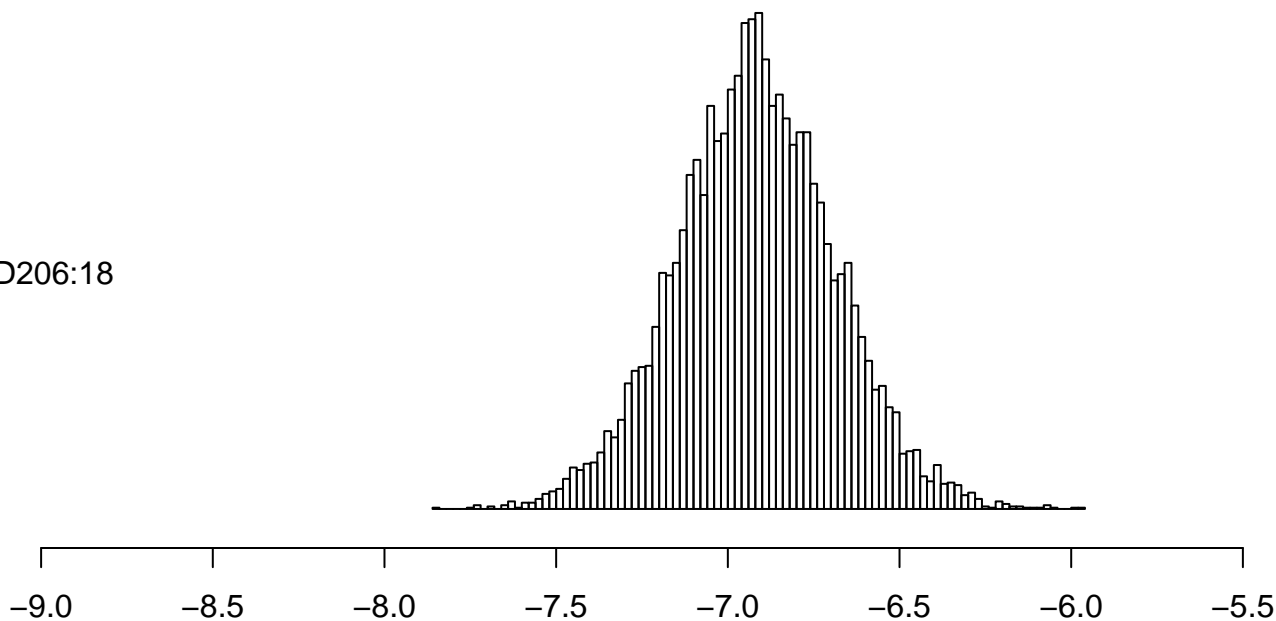

C18:2 Fatty Acid

D206:26 – D206:18

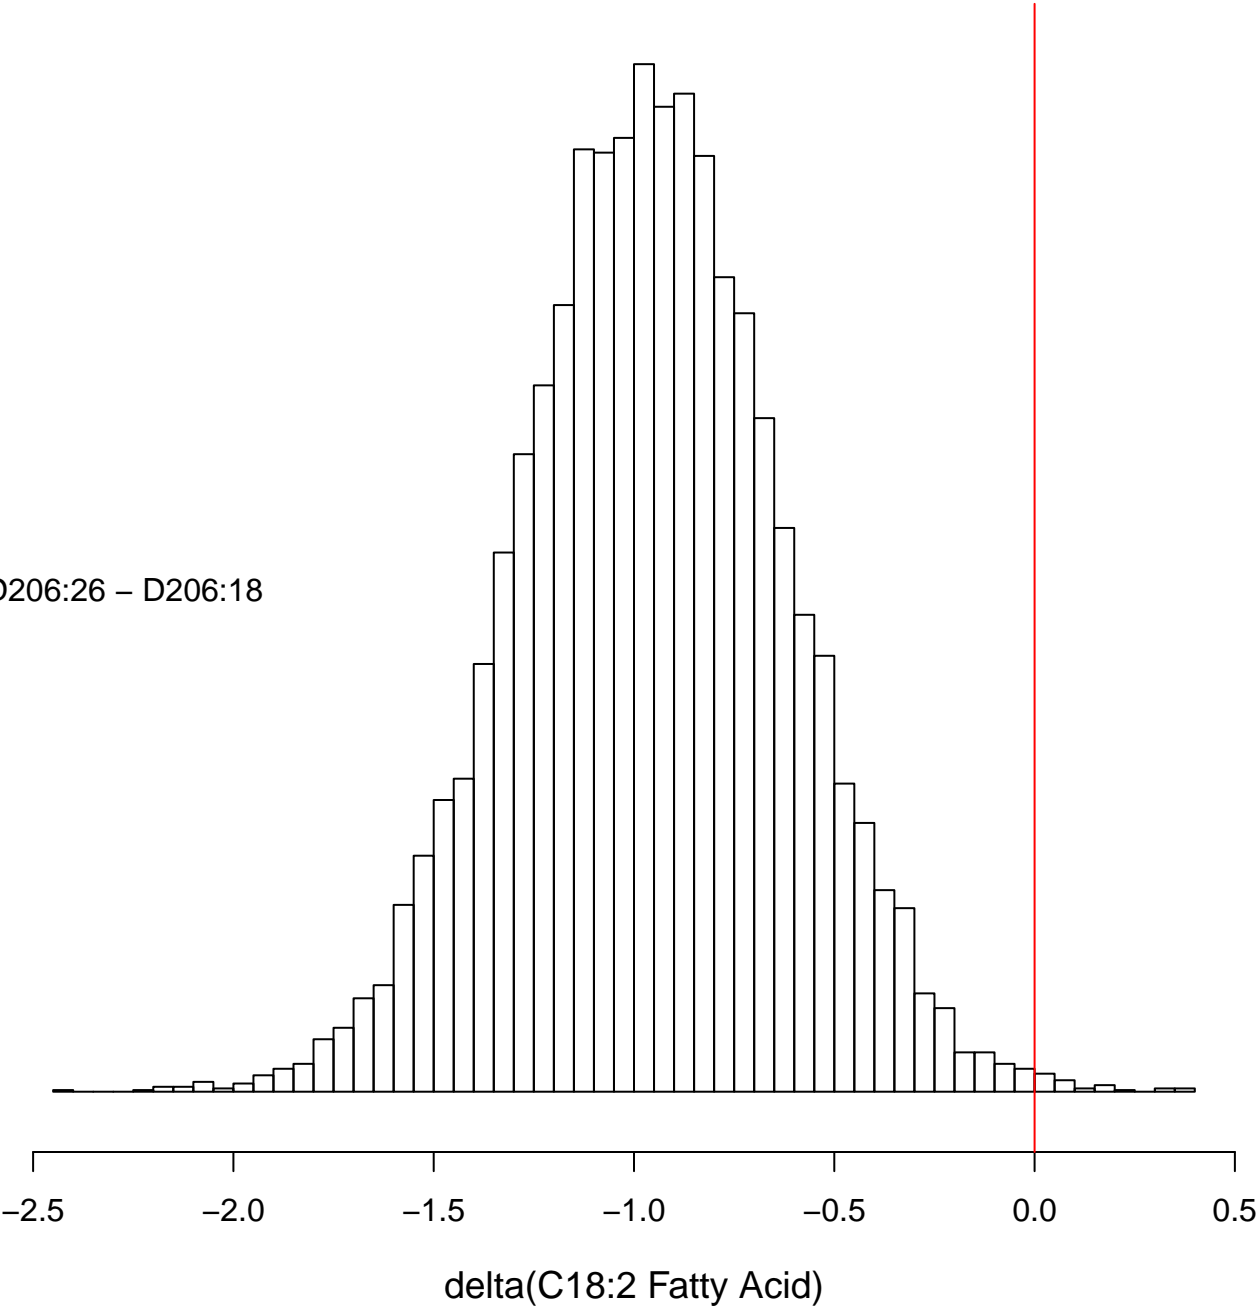

D206:26

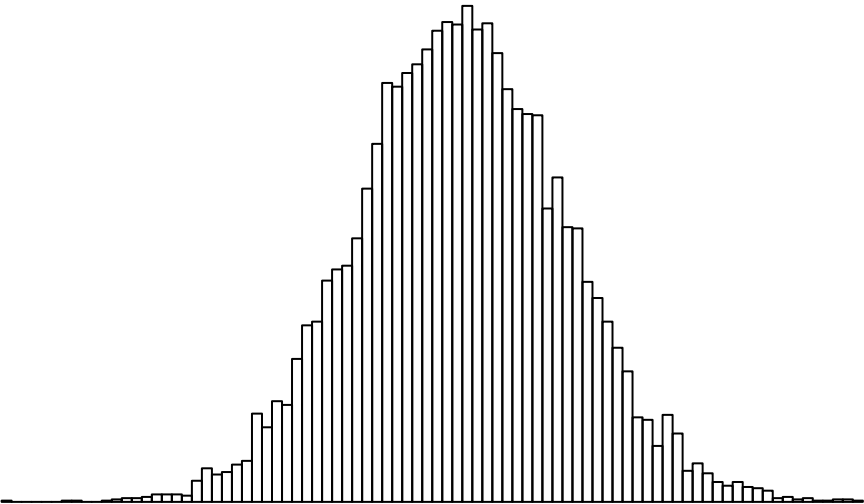

D206:18

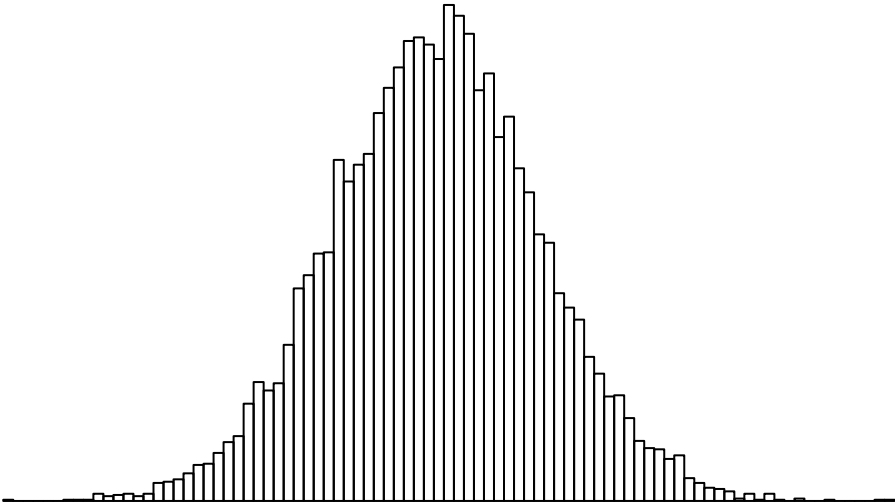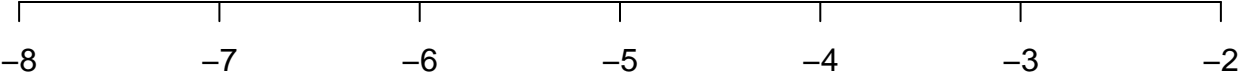

C18:0 Fatty Acid

D206:26 – D206:18

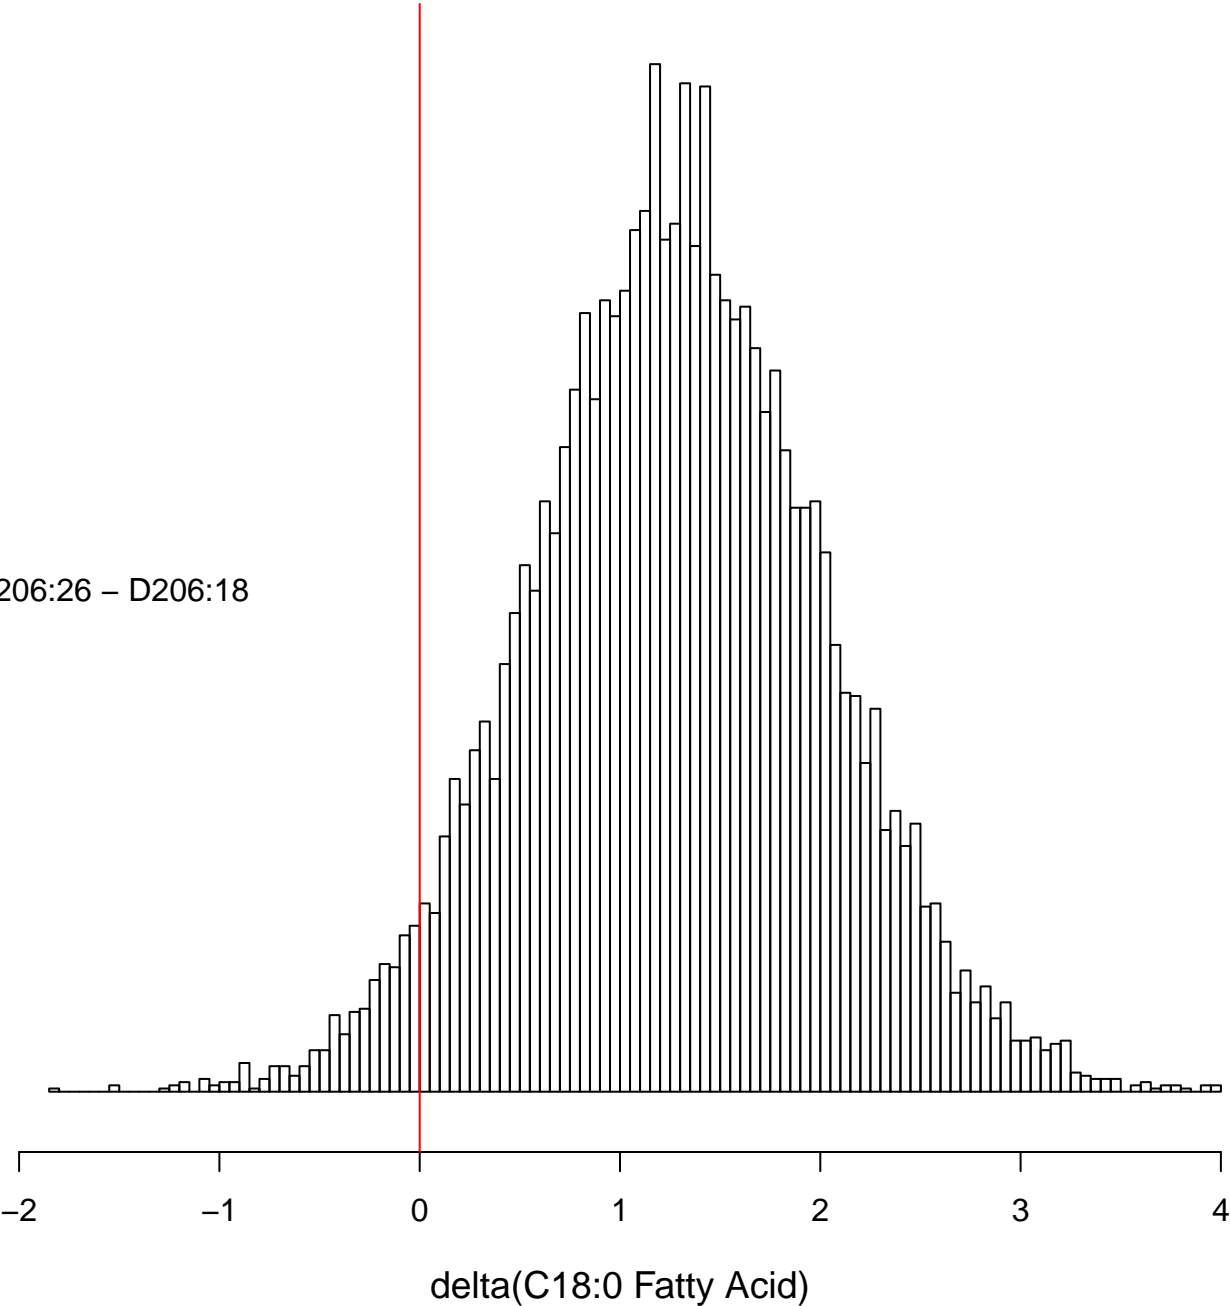

D206:26

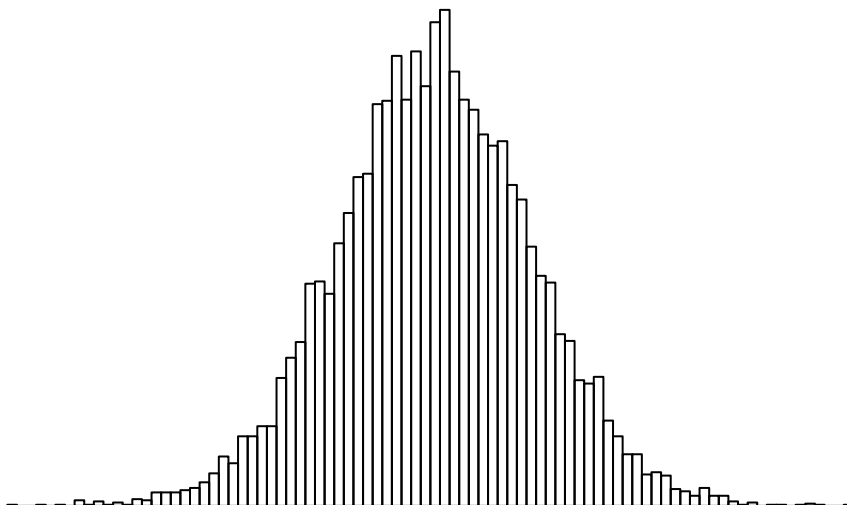

D206:18

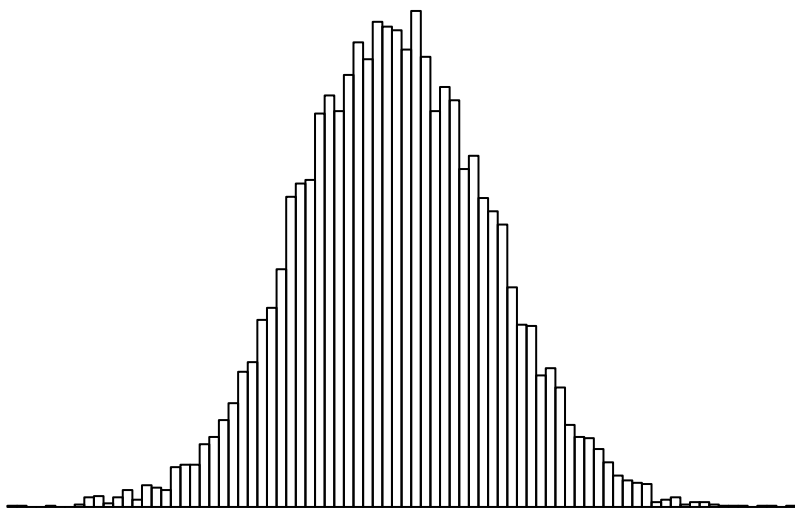

-8.5 -8.0 -7.5 -7.0 -6.5 -6.0

Unidentified Fatty Acid 2

D206:26 – D206:18

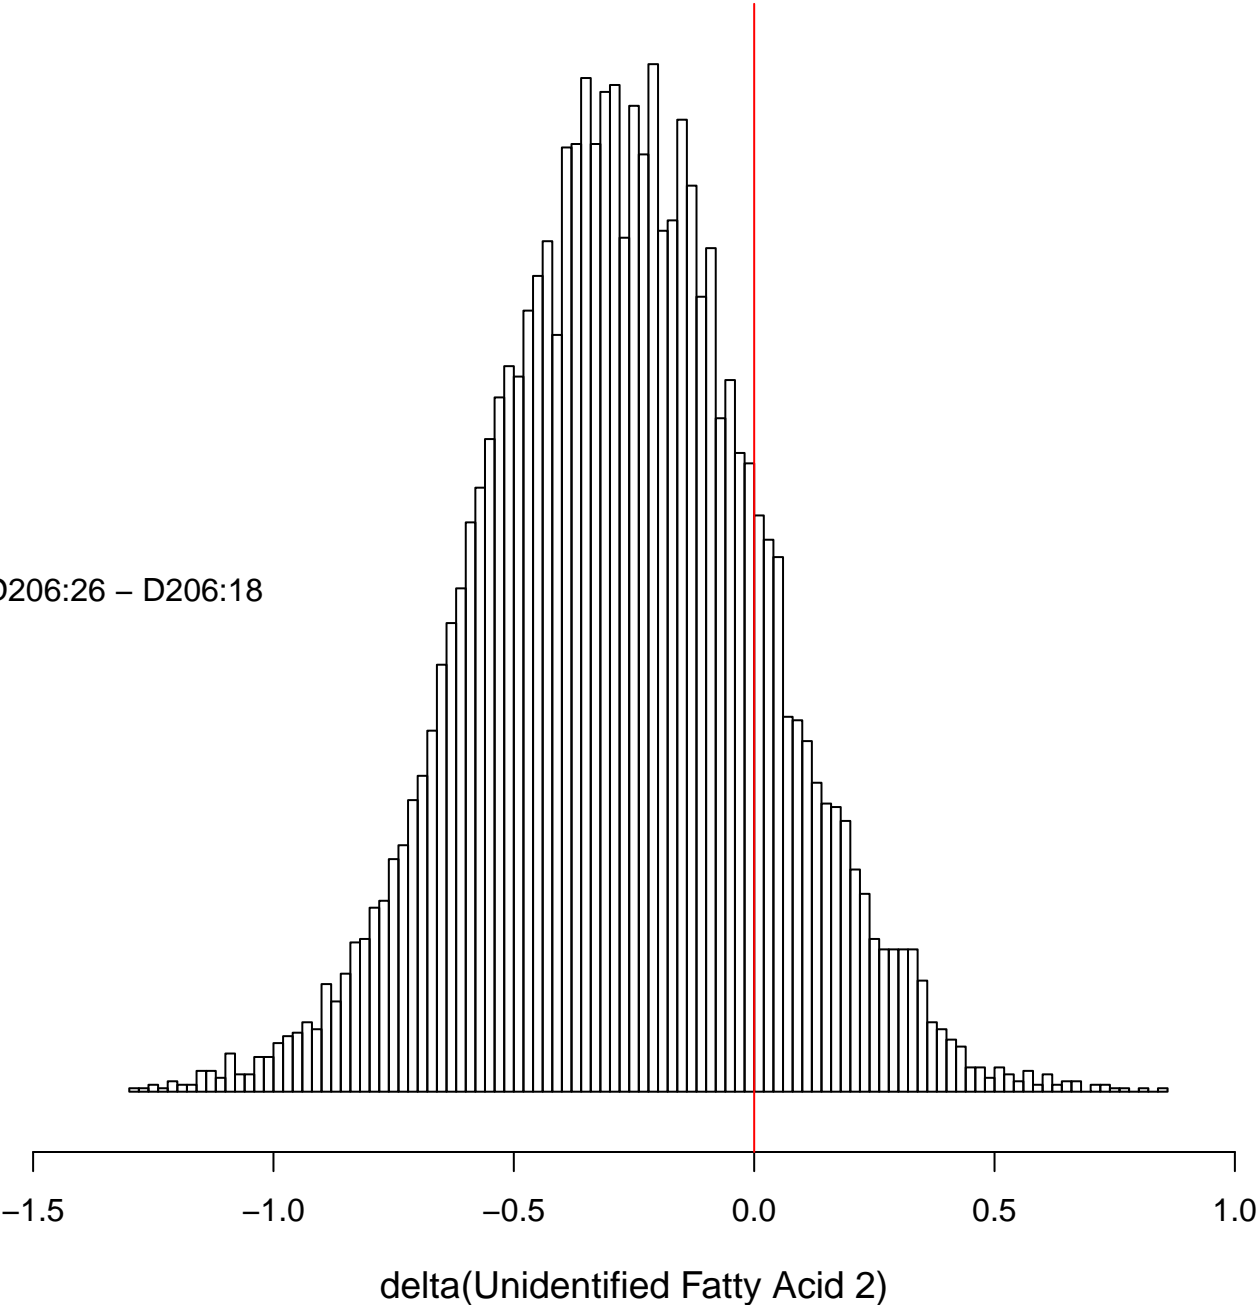



D206:26

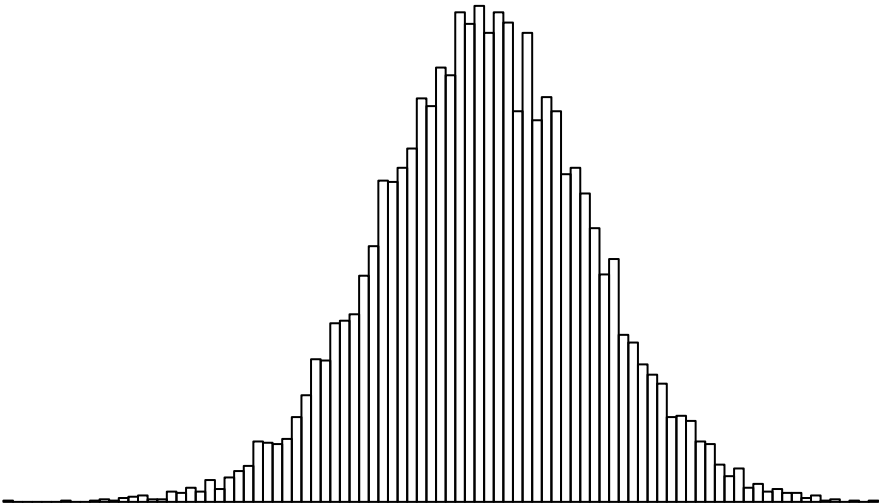

D206:18

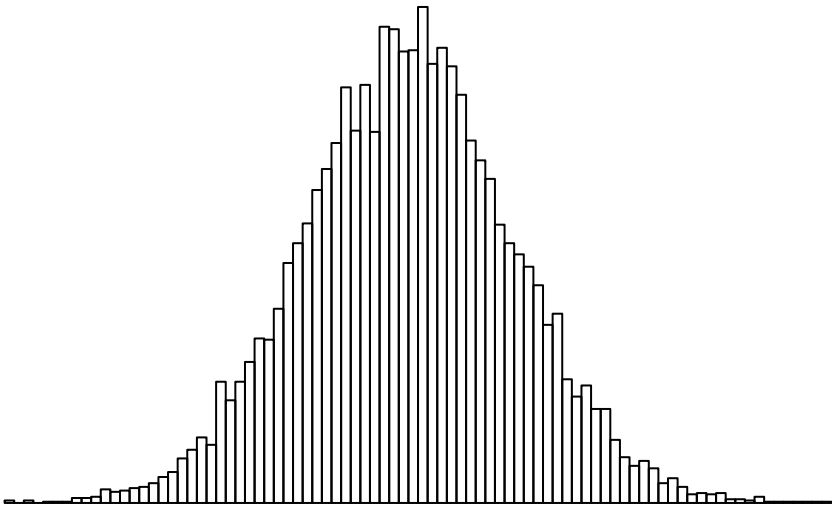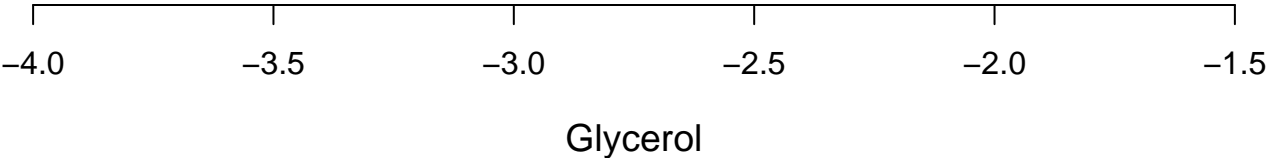

D206:26 – D206:18

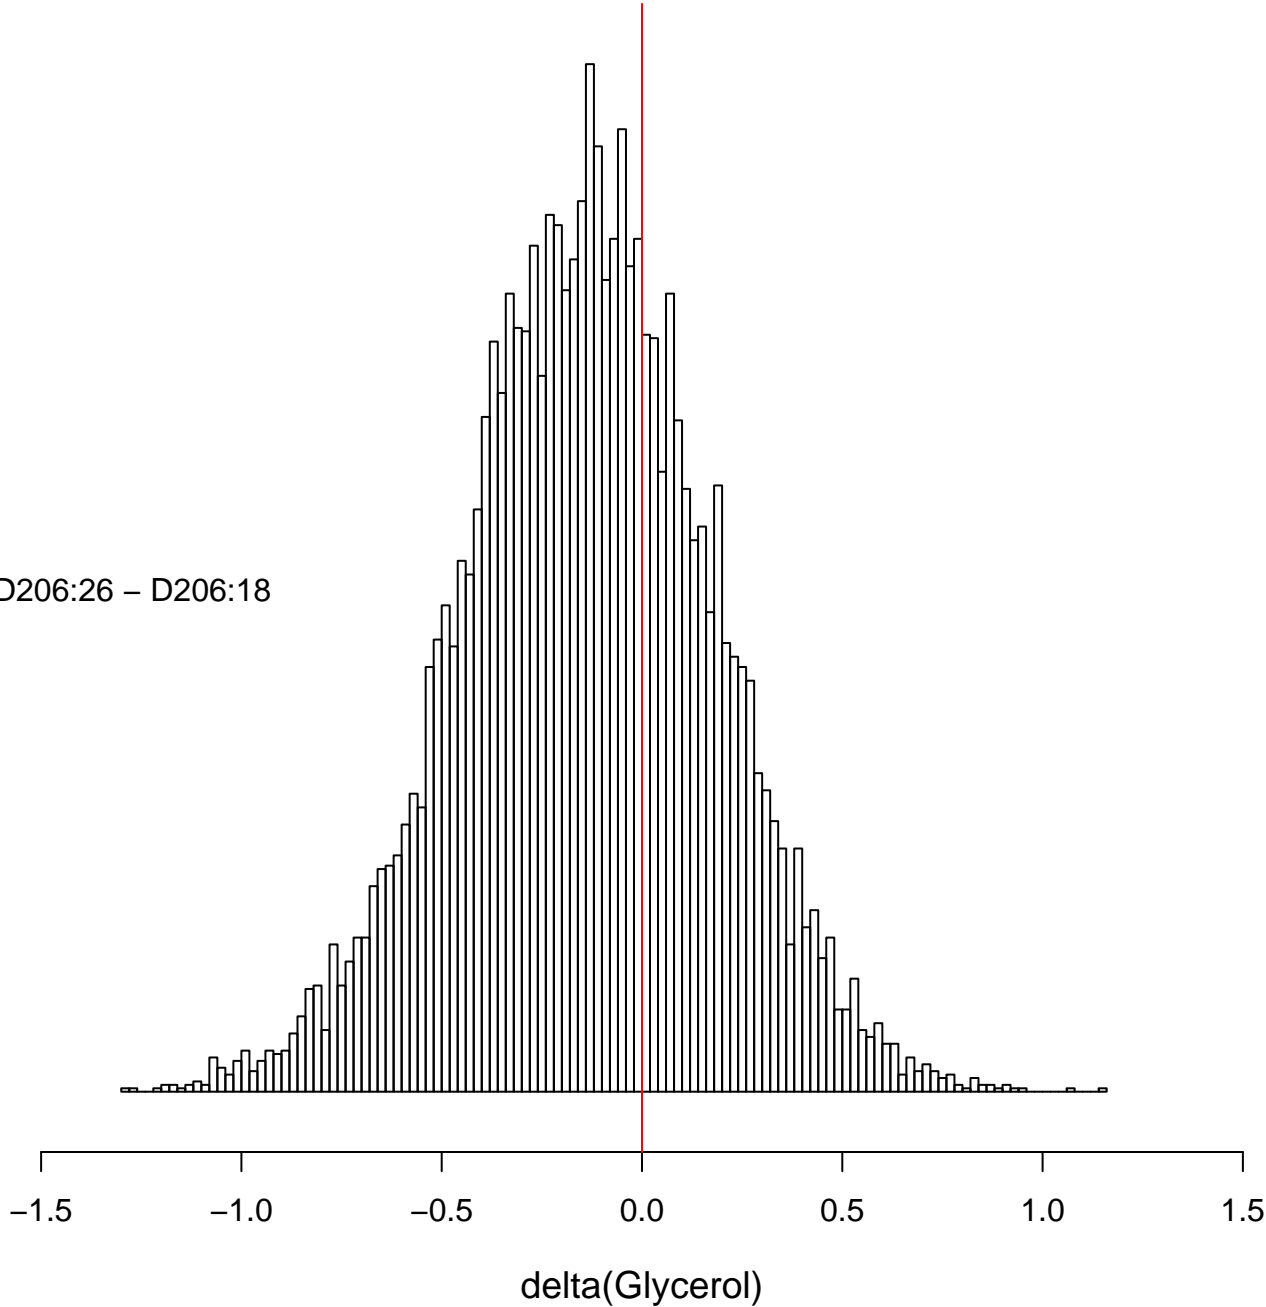

D206:26

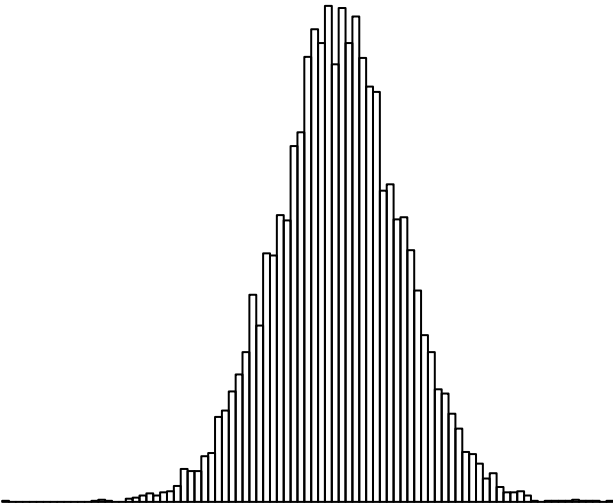

D206:18

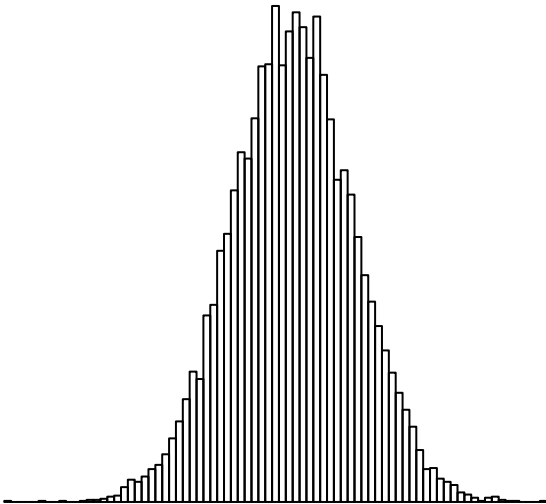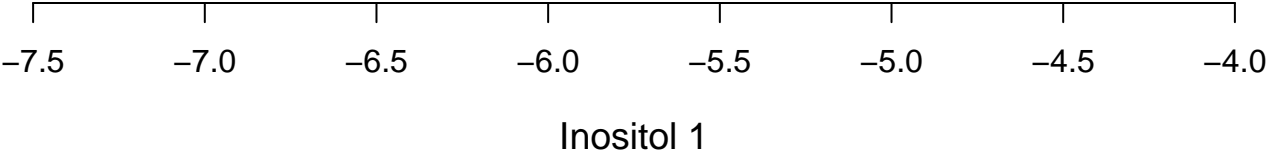

D206:26 – D206:18

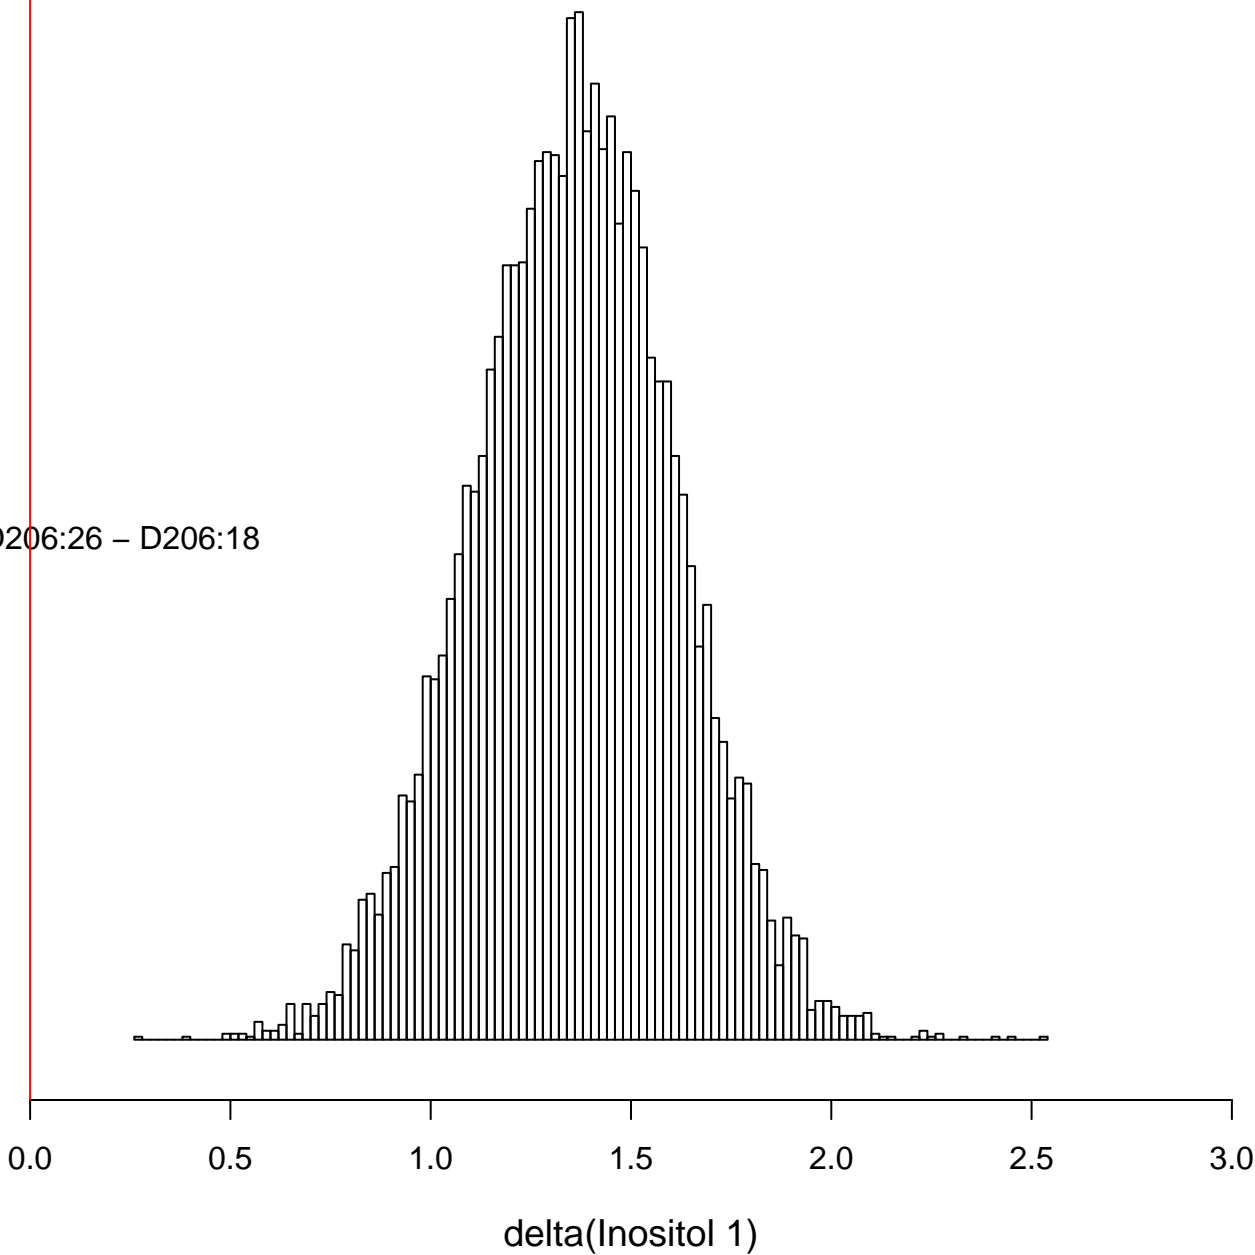

D206:26

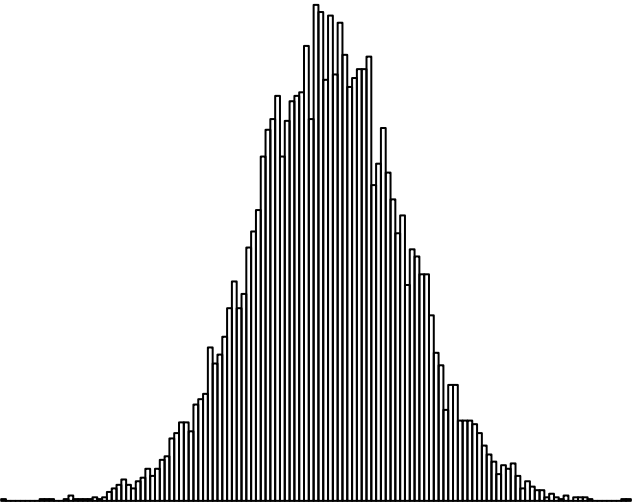

D206:18

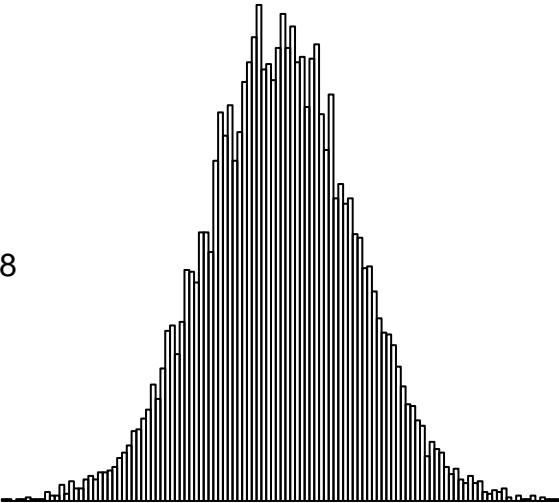

-7.5                      -7.0                      -6.5                      -6.0                      -5.5                      -5.0

Inositol 2

D206:26 – D206:18

0.0

0.5

1.0

1.5

2.0

2.5

delta(Inositol 2)

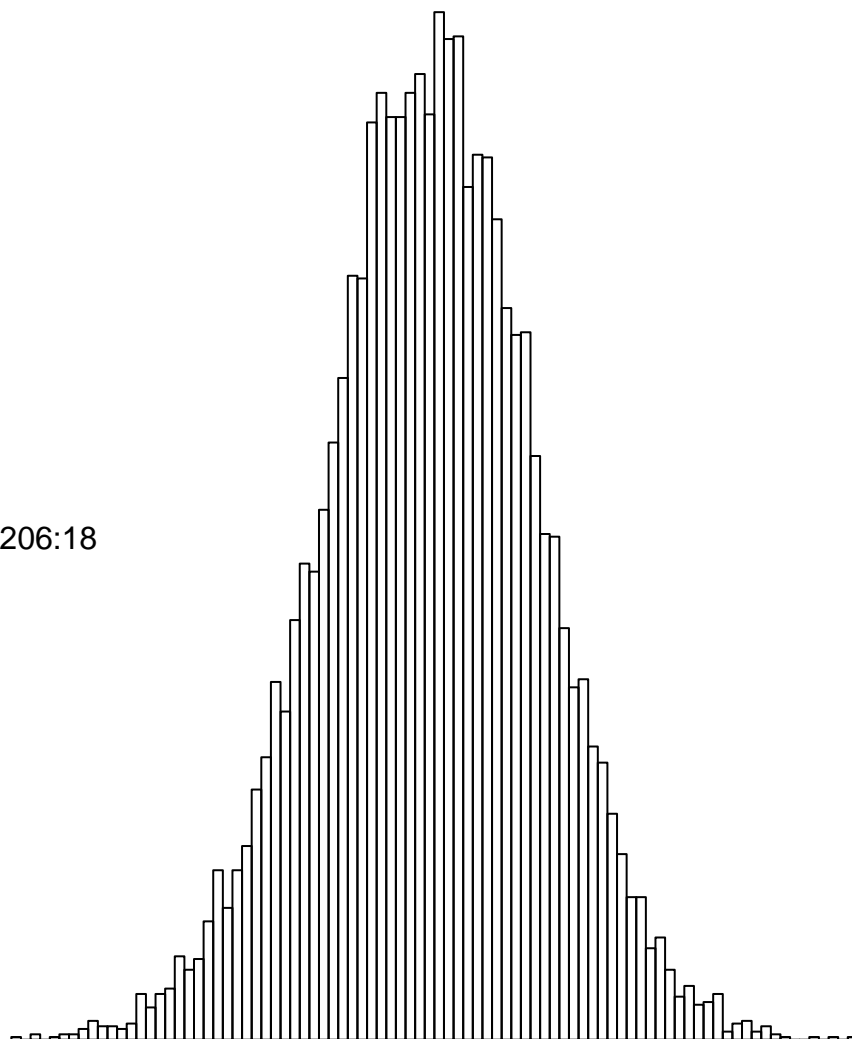

D206:26

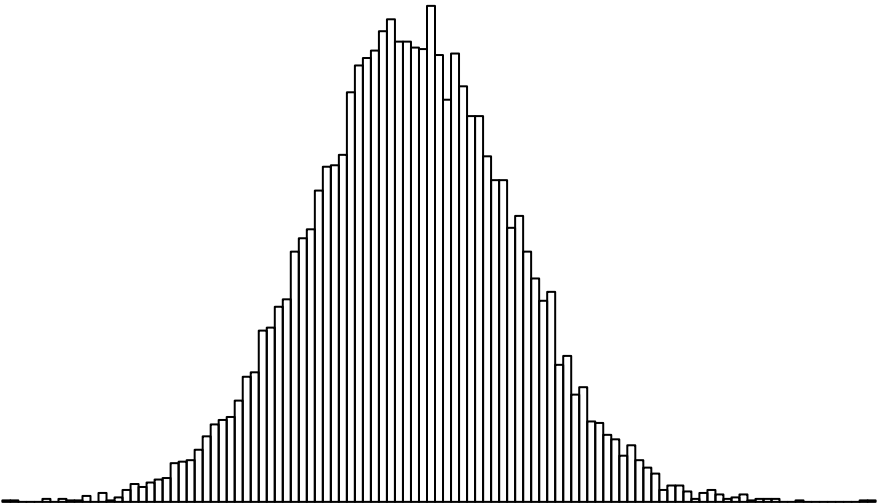

D206:18

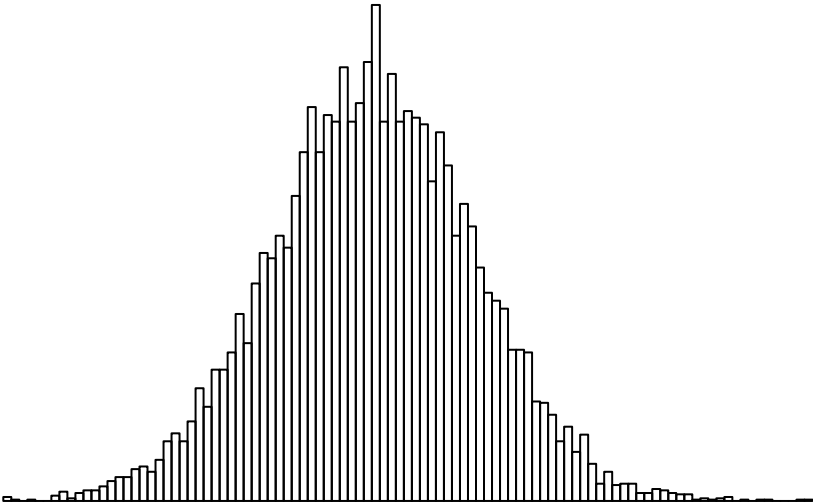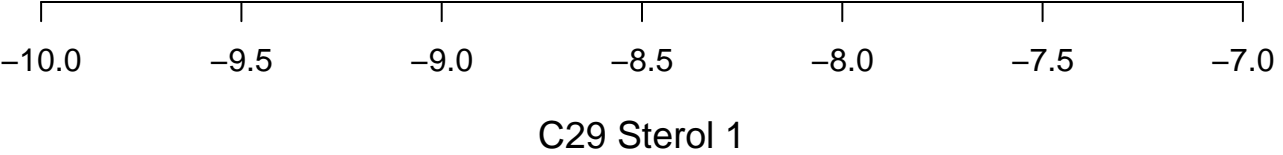

D206:26 – D206:18

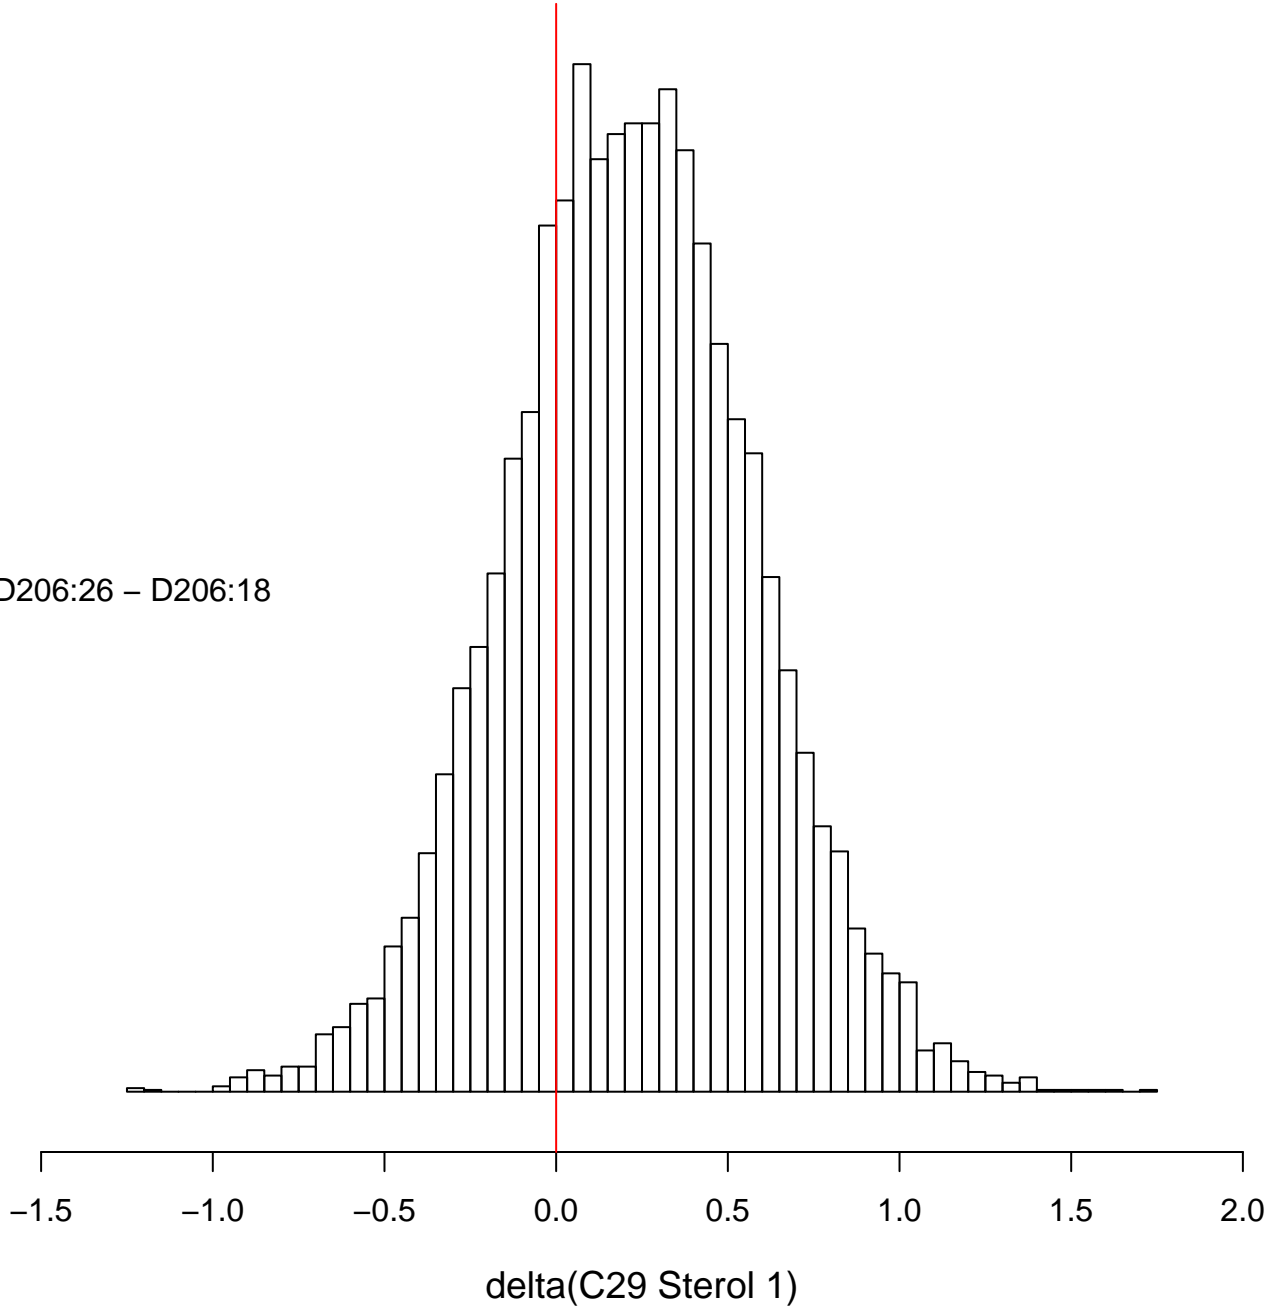



D206:26

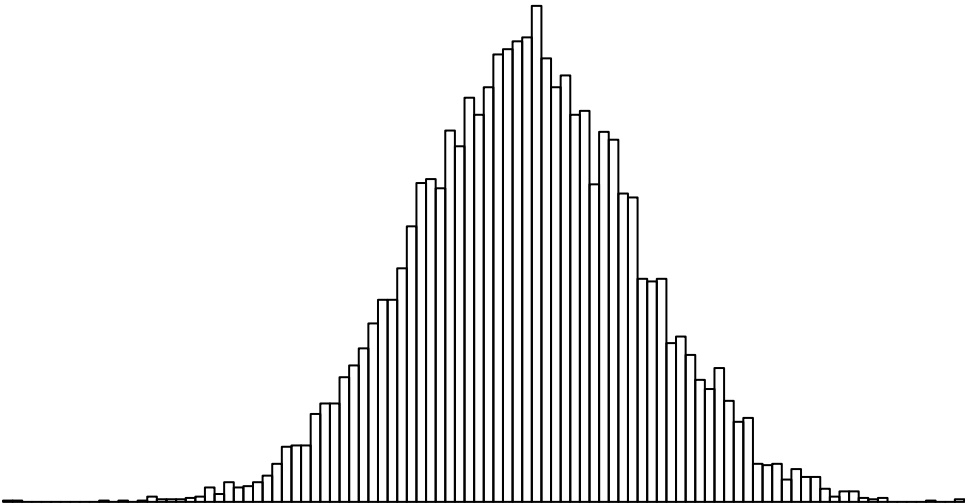

D206:18

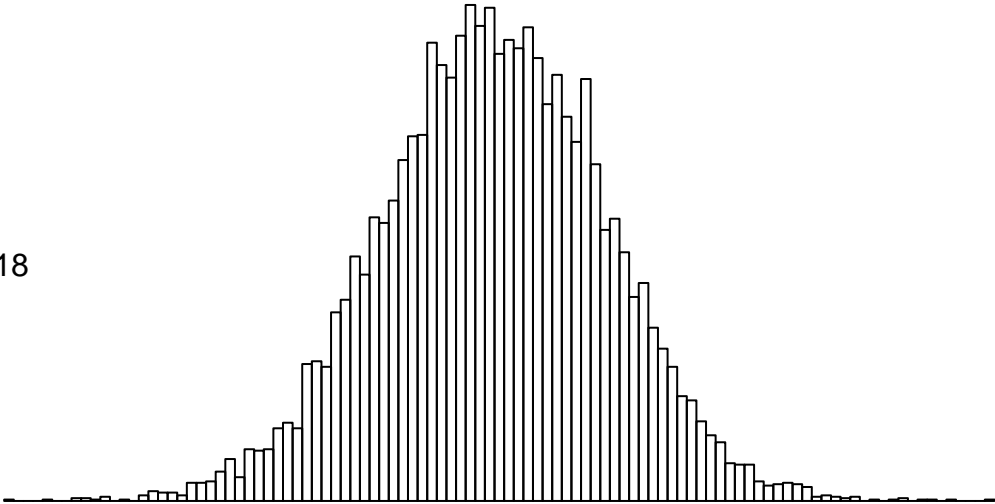

-9.5                      -9.0                      -8.5                      -8.0                      -7.5                      -7.0

C29 Stanol 1

D206:26 – D206:18

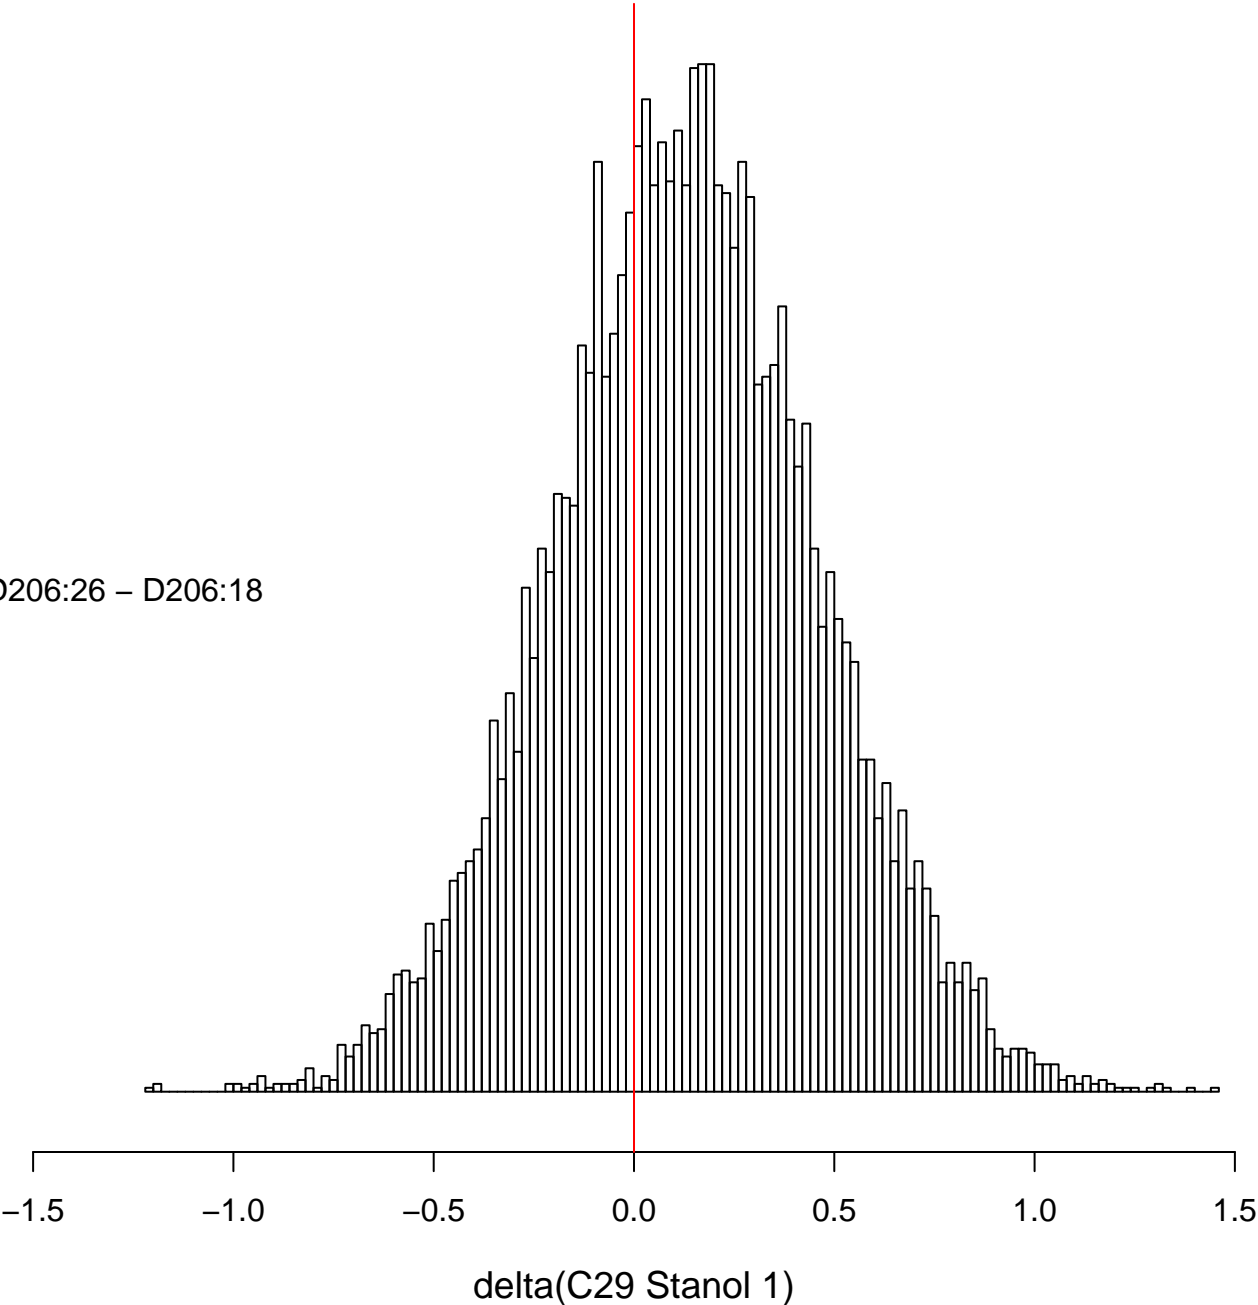

D206:26

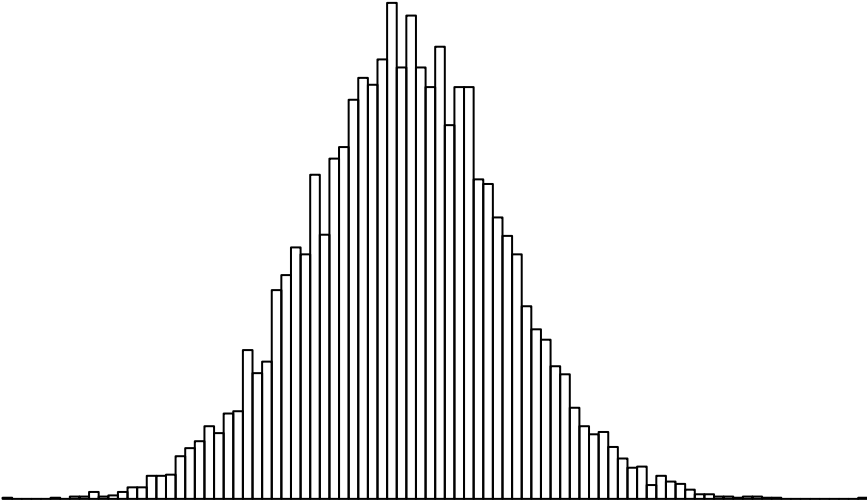

D206:18

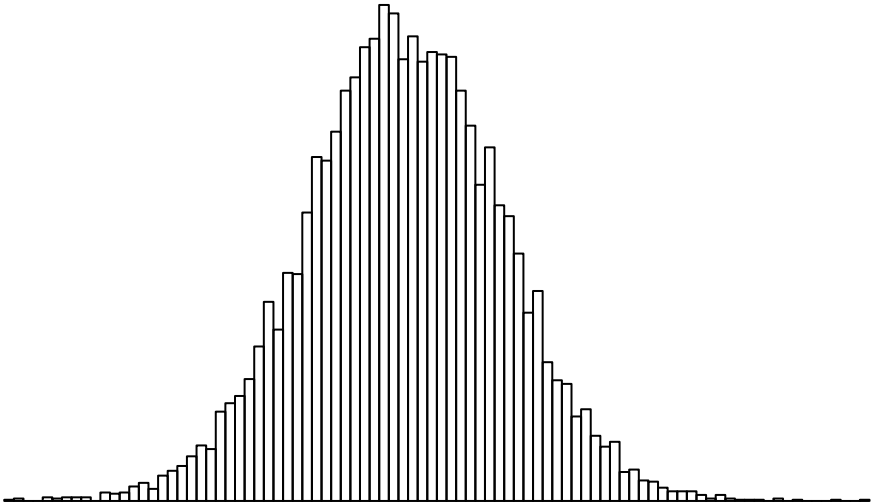

-9.0      -8.5      -8.0      -7.5      -7.0      -6.5

C27<sup>5,22</sup> Sterol

D206:26 – D206:18

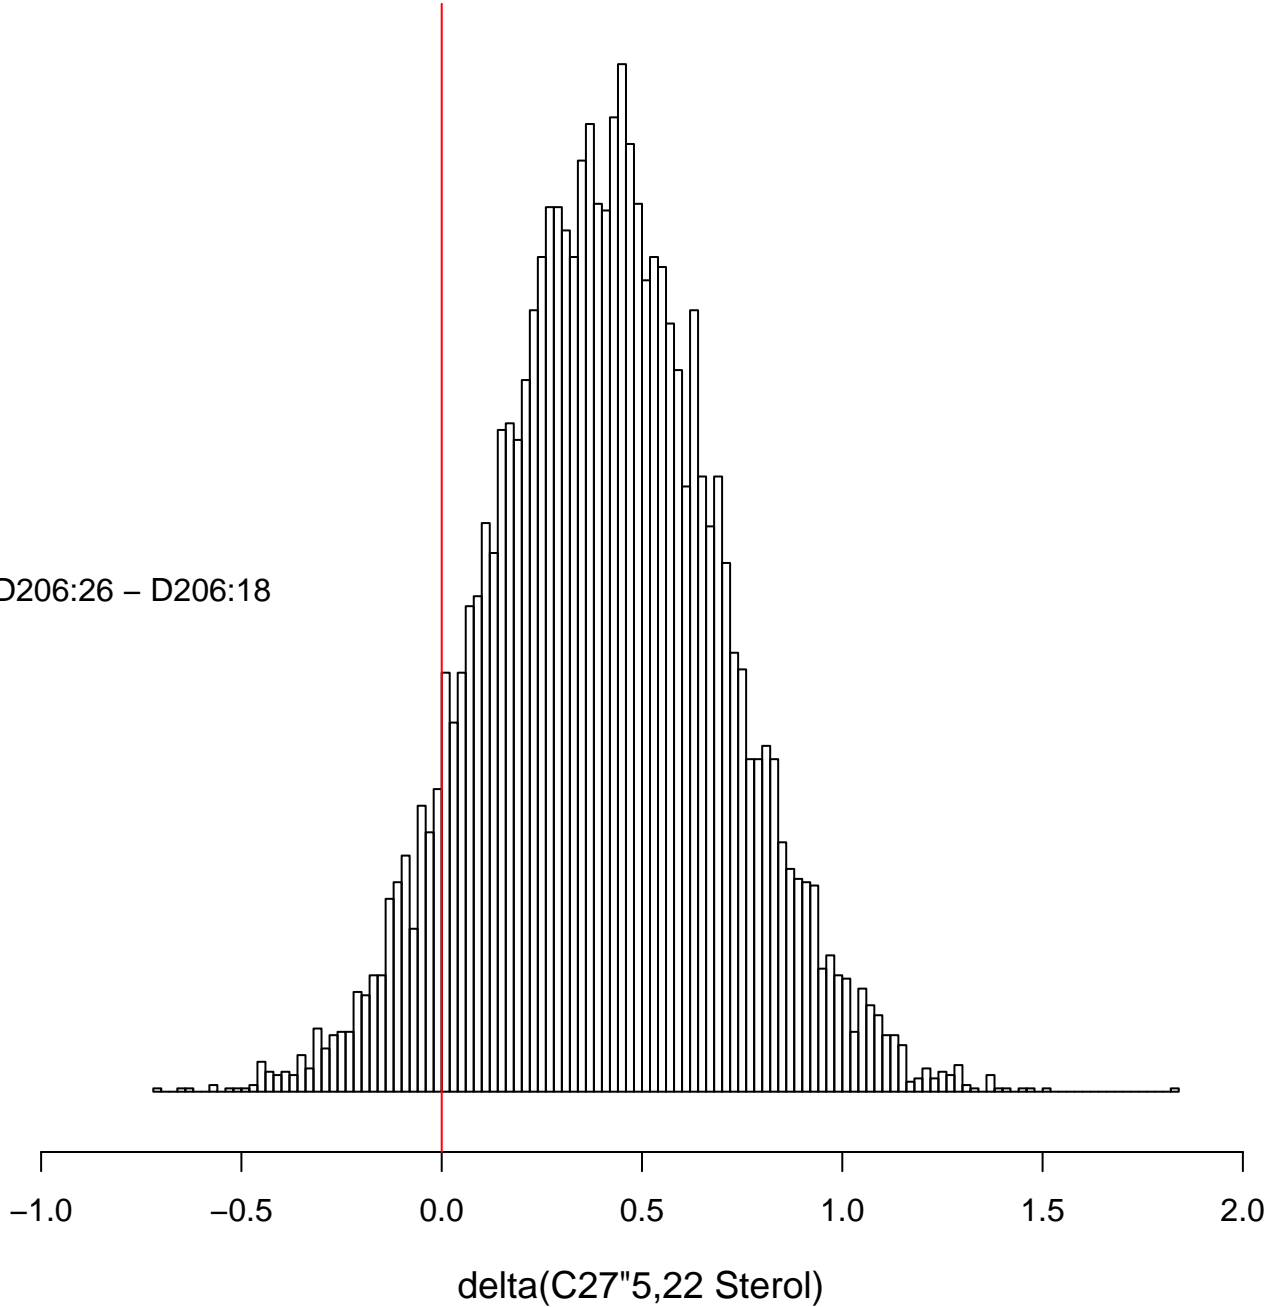

D206:26

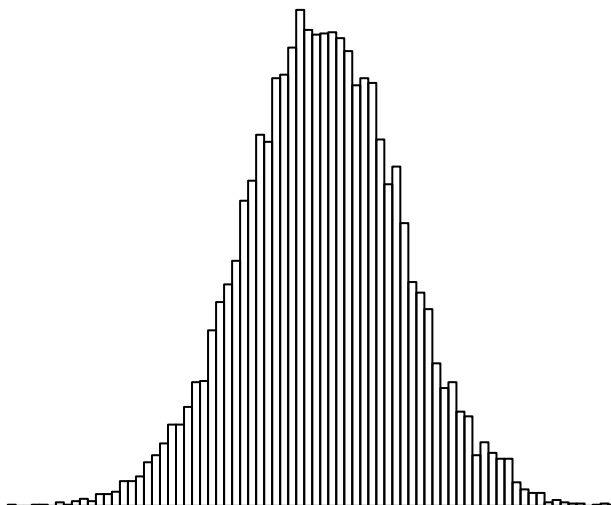

D206:18

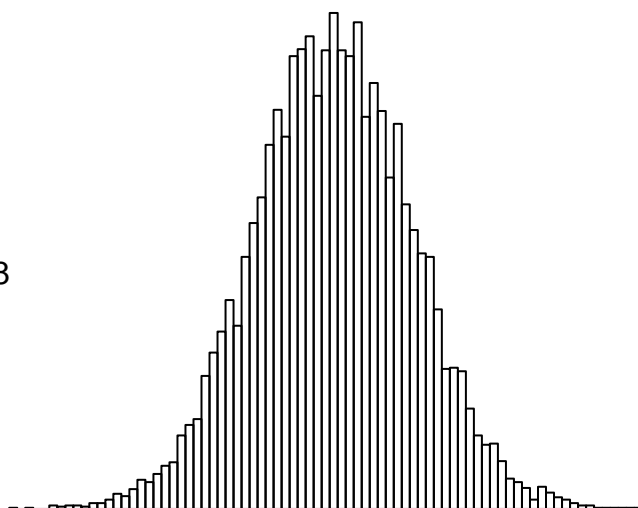

-9.0      -8.5      -8.0      -7.5      -7.0      -6.5      -6.0

C27"5 Sterol

D206:26 – D206:18

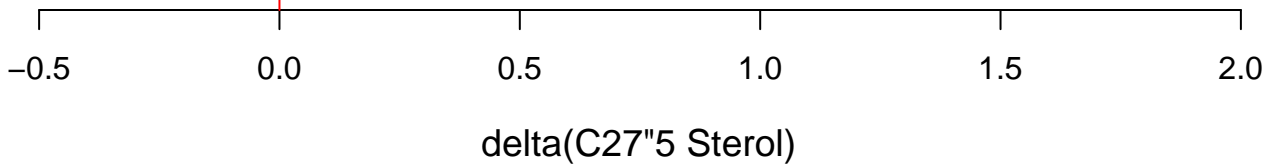

D206:26

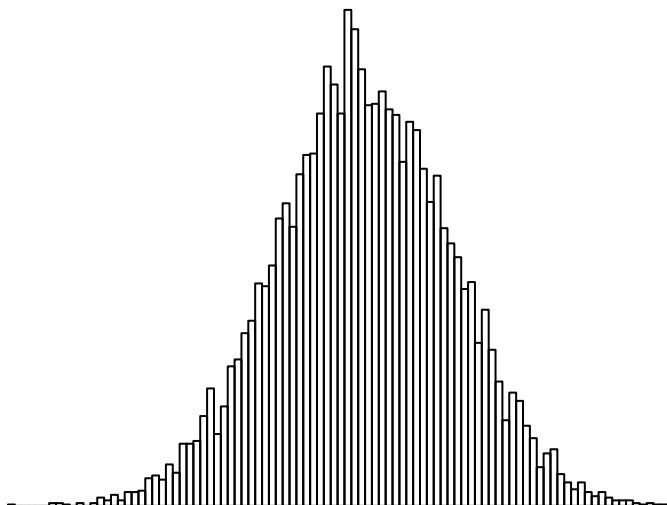

D206:18

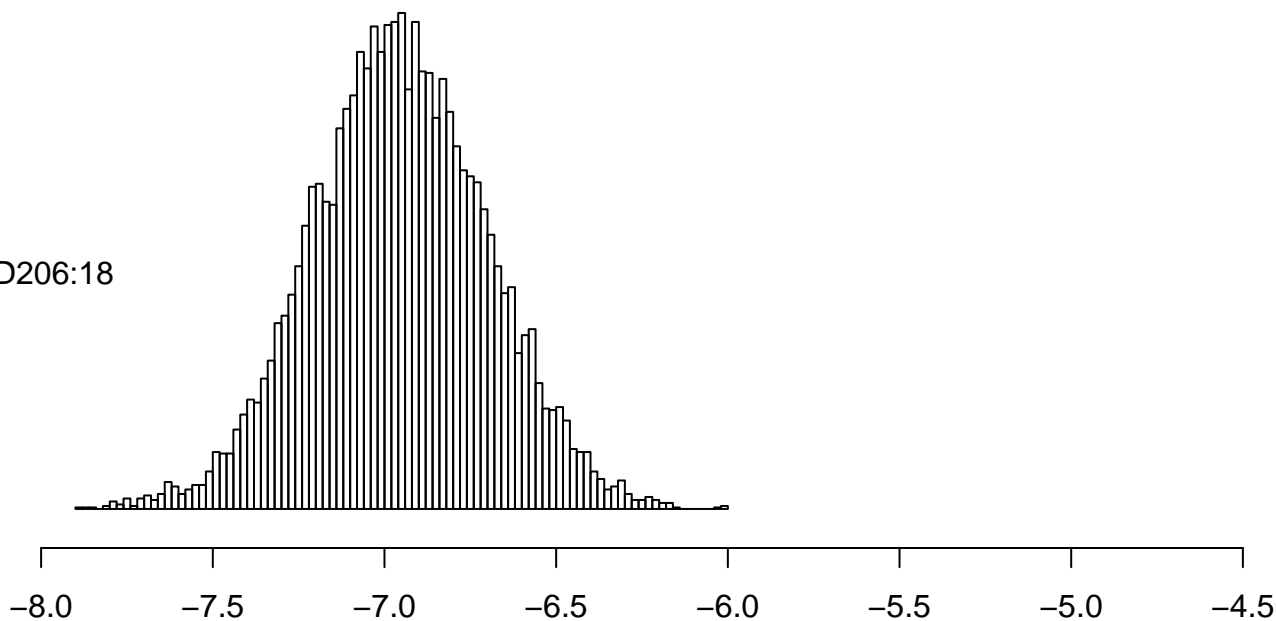

C28<sup>5,22</sup> Sterol

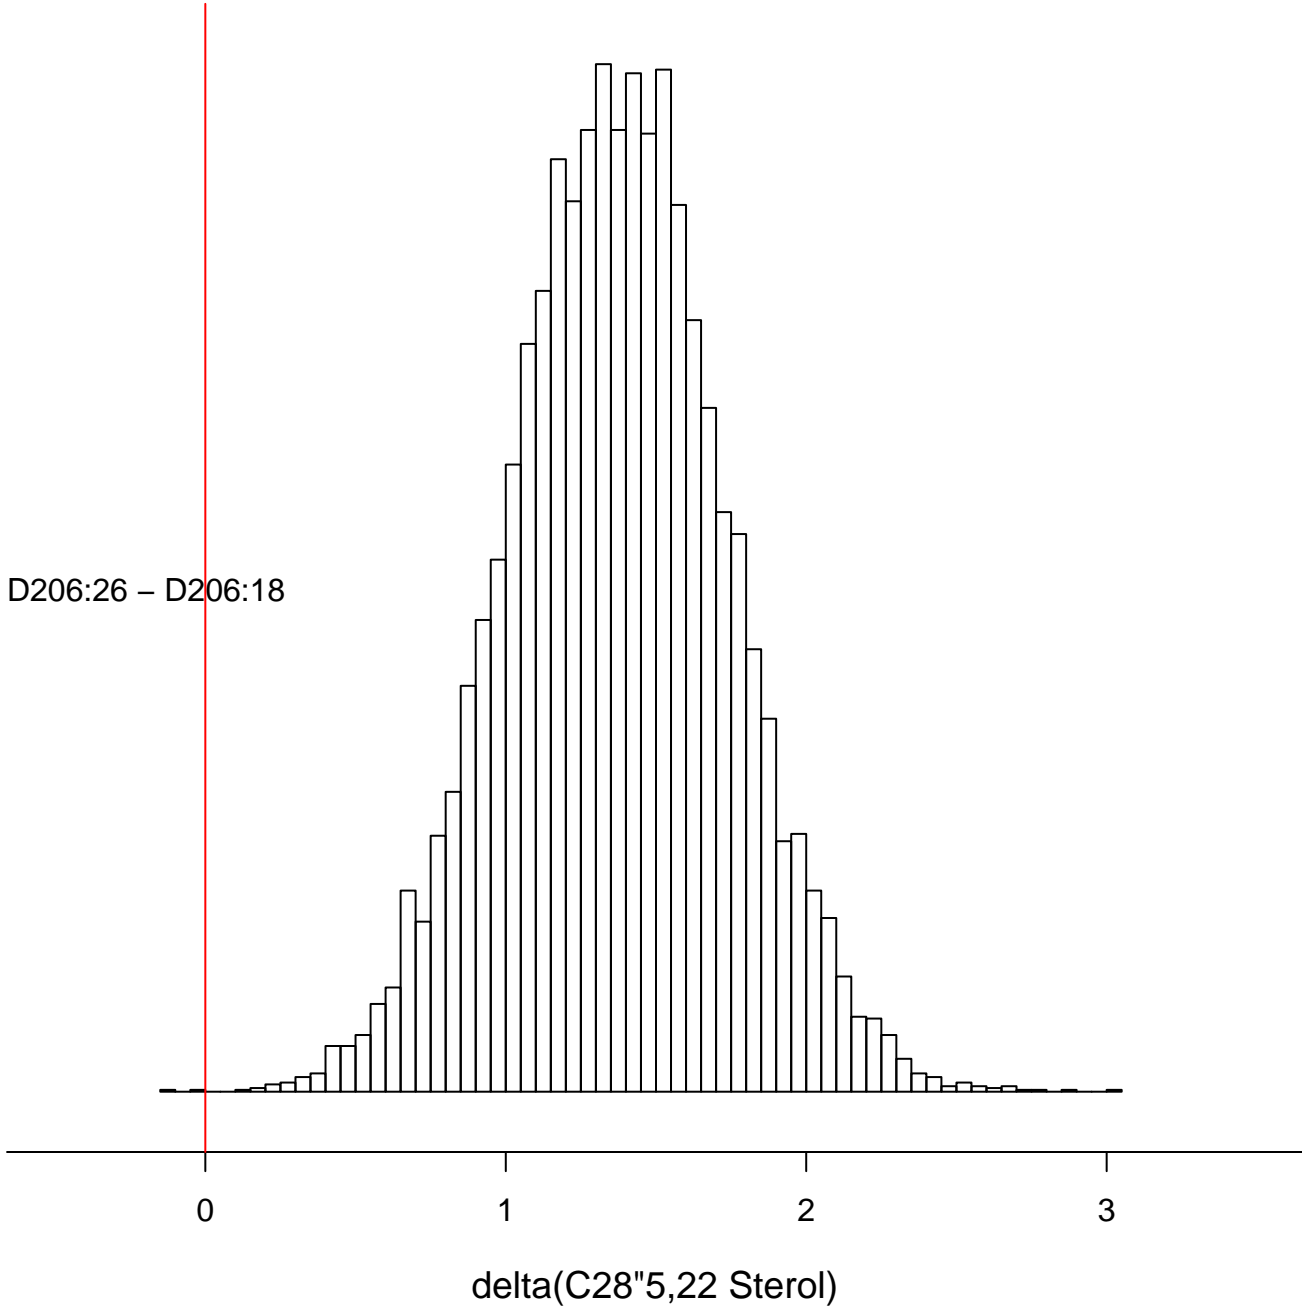



D206:26

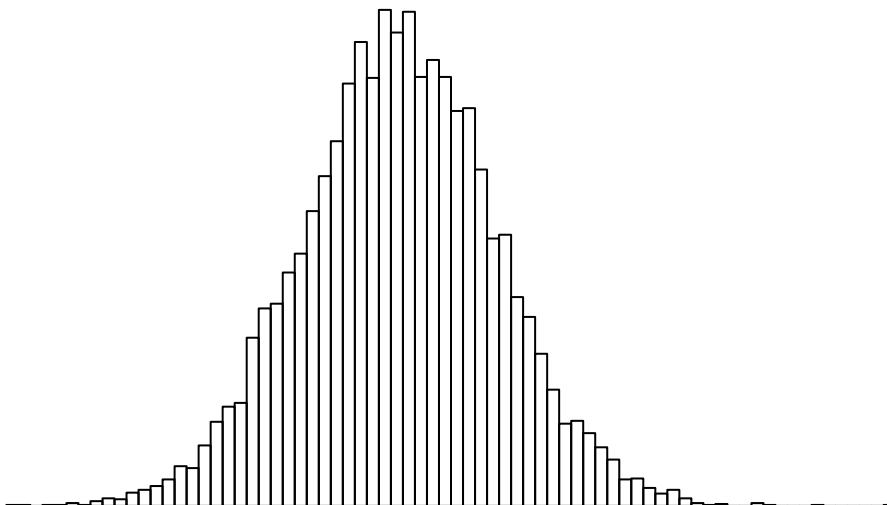

D206:18

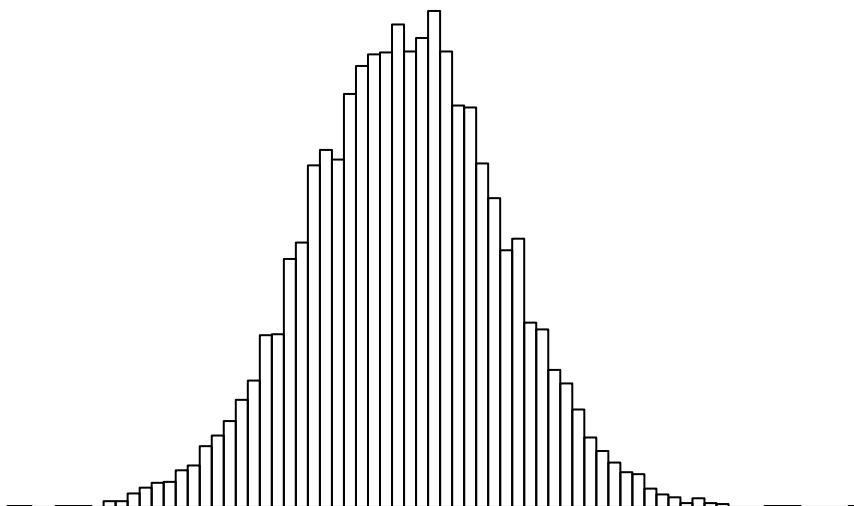

-10

-9

-8

-7

-6

-5

C28<sup>5</sup> Sterol

D206:26 – D206:18

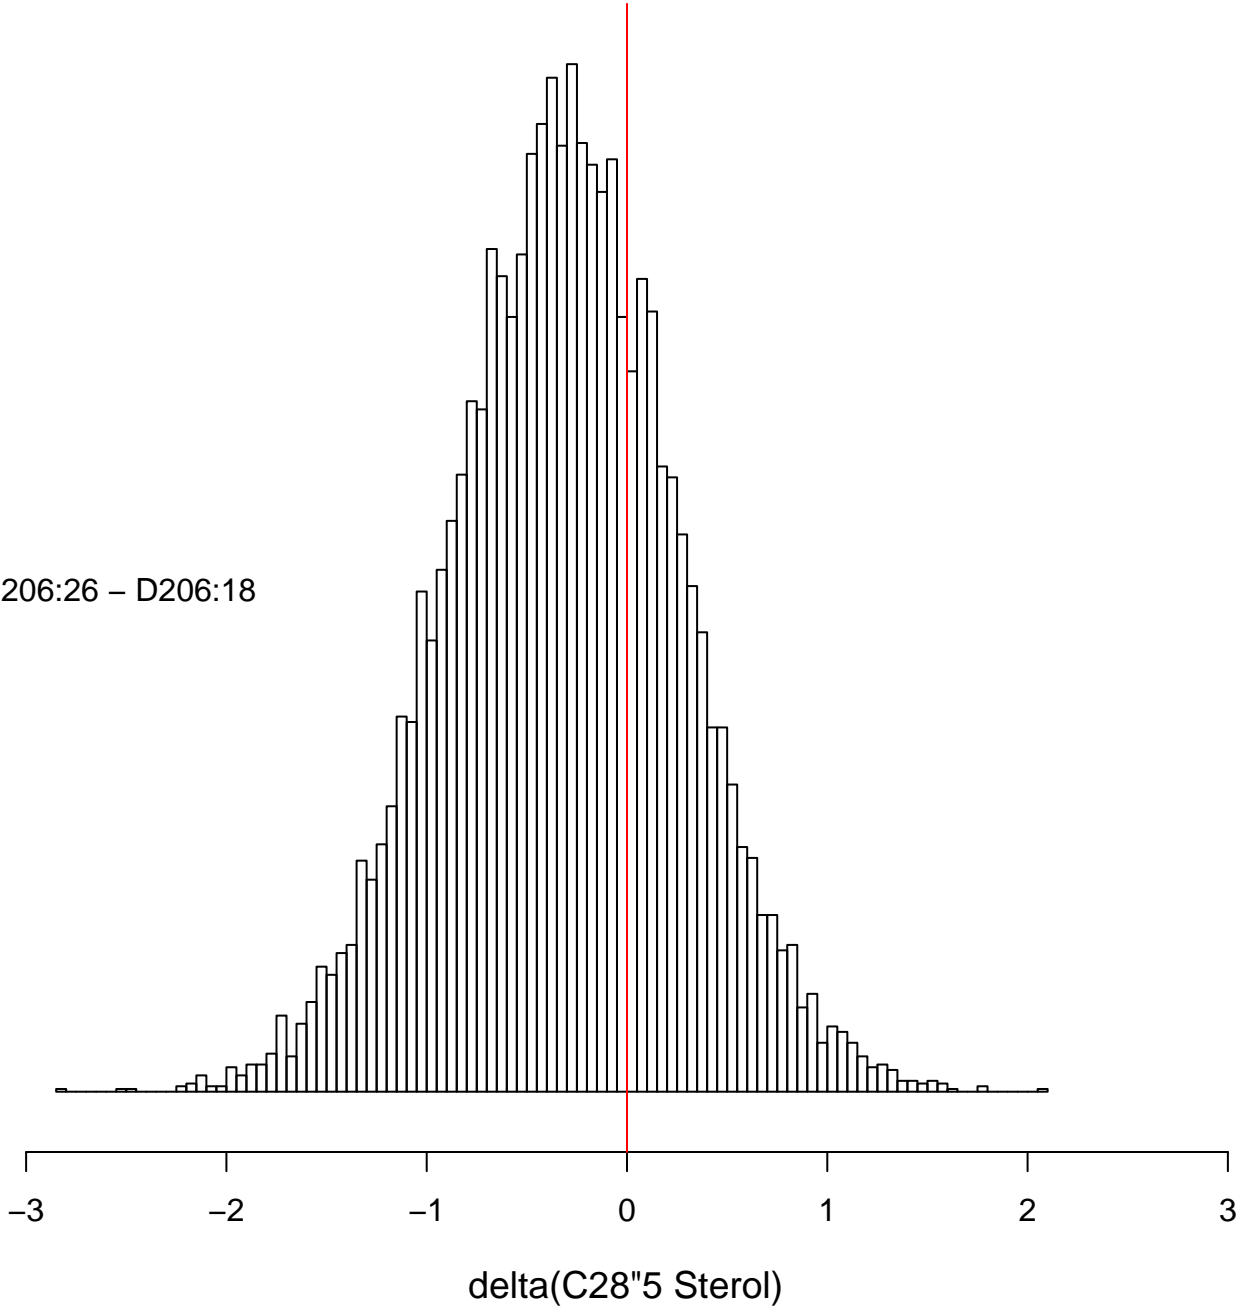

D206:26

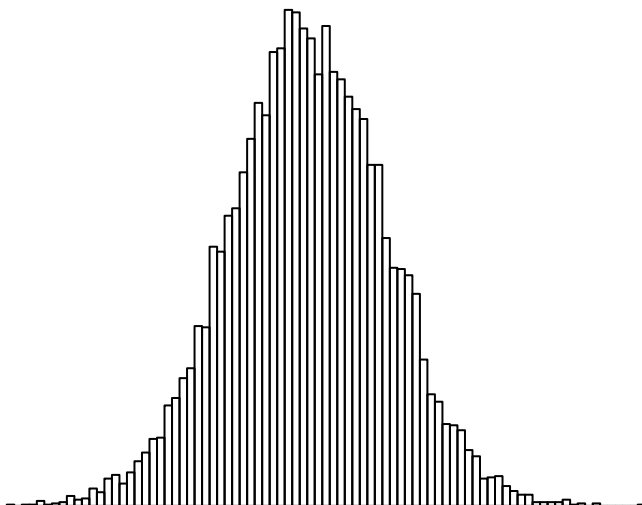

D206:18

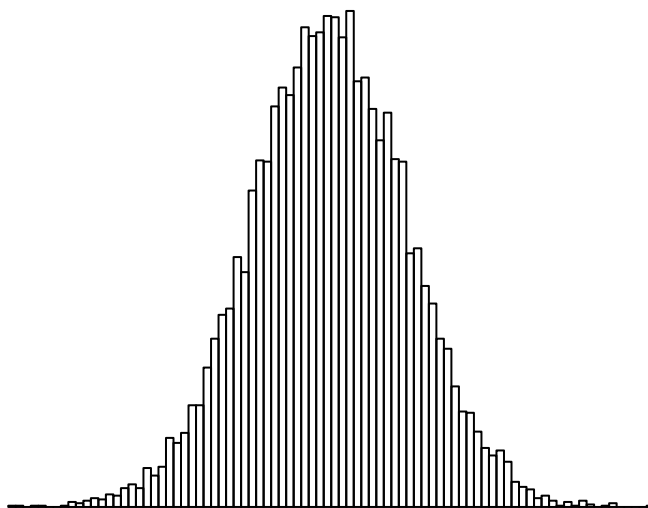

-10

-8

-6

-4

C29"5,22 Sterol

D206:26 – D206:18

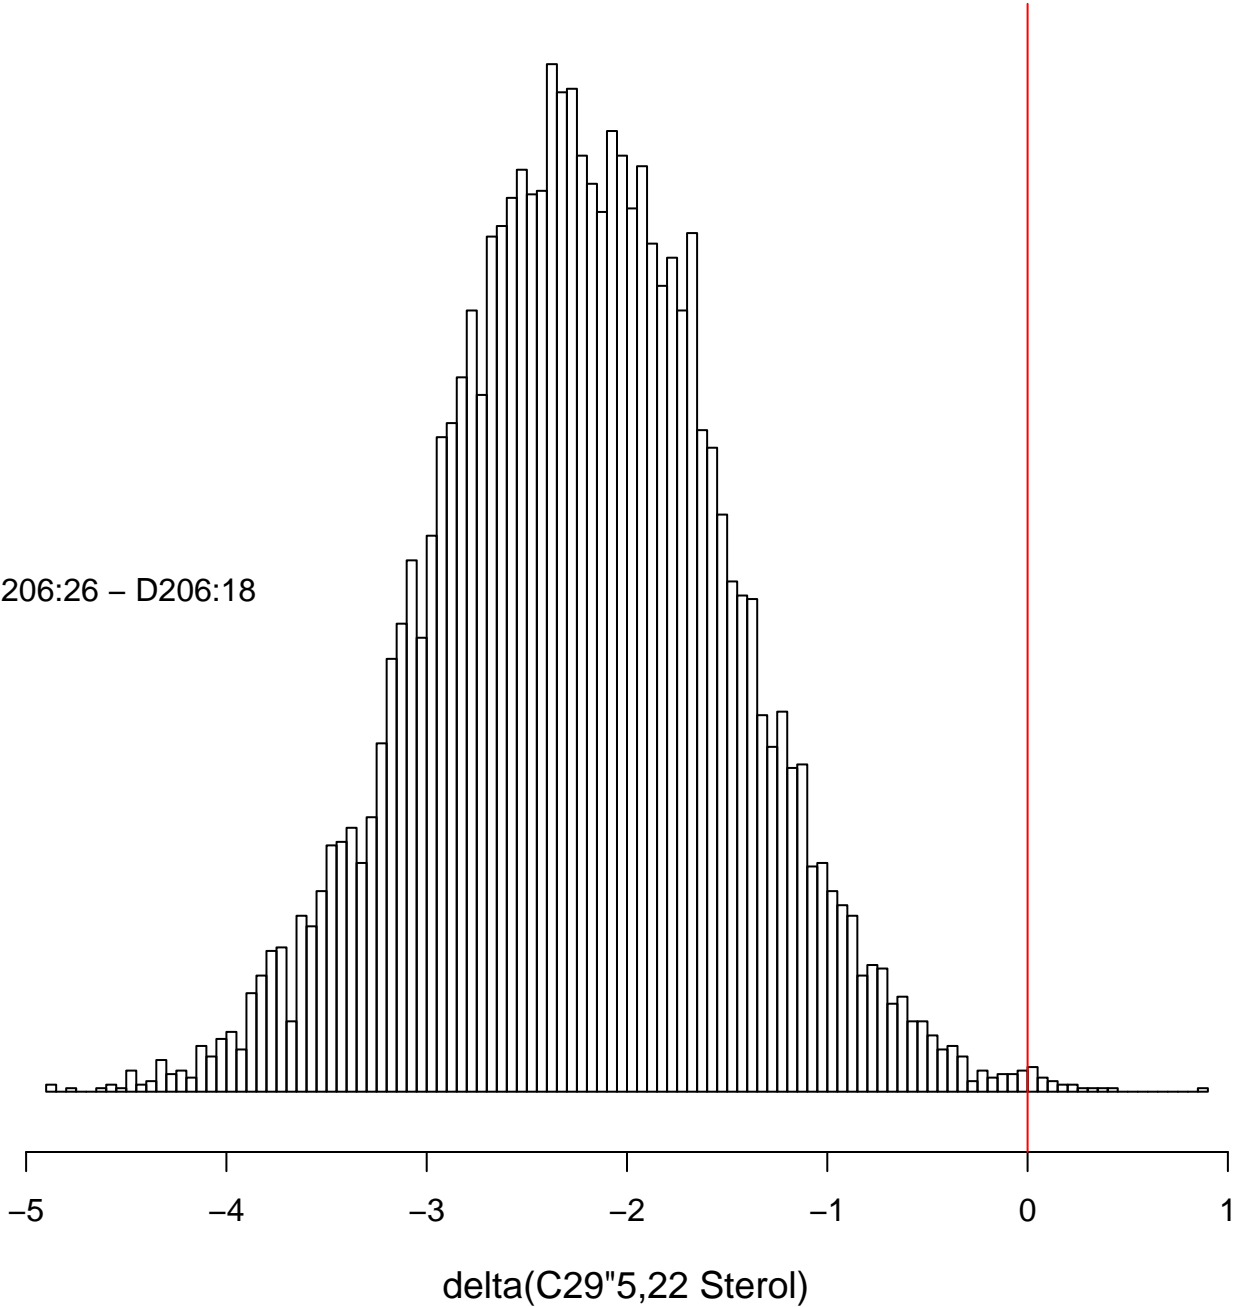

D206:26

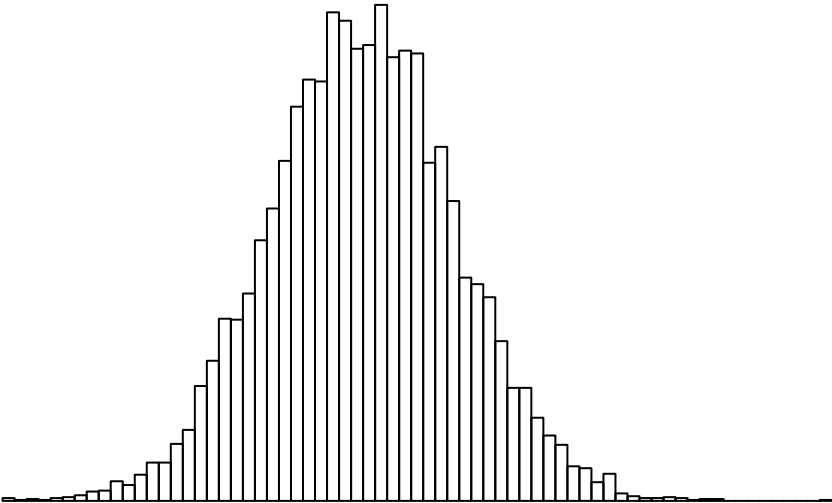

D206:18

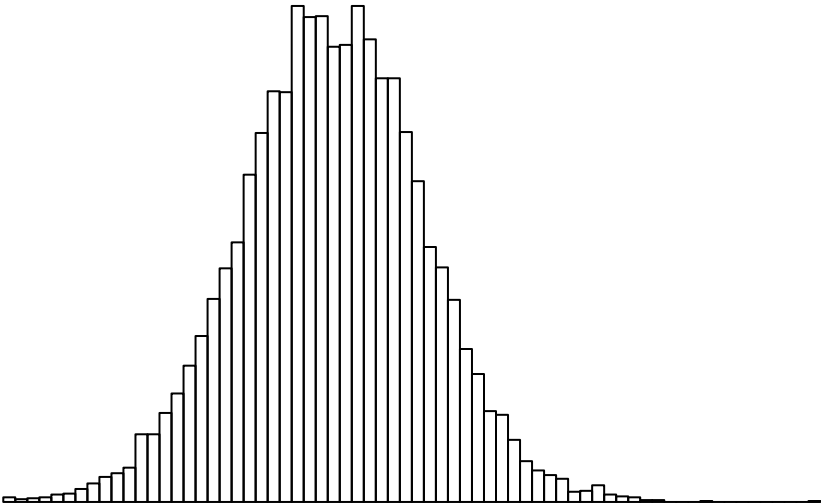

C29 Sterol 2

D206:26 – D206:18

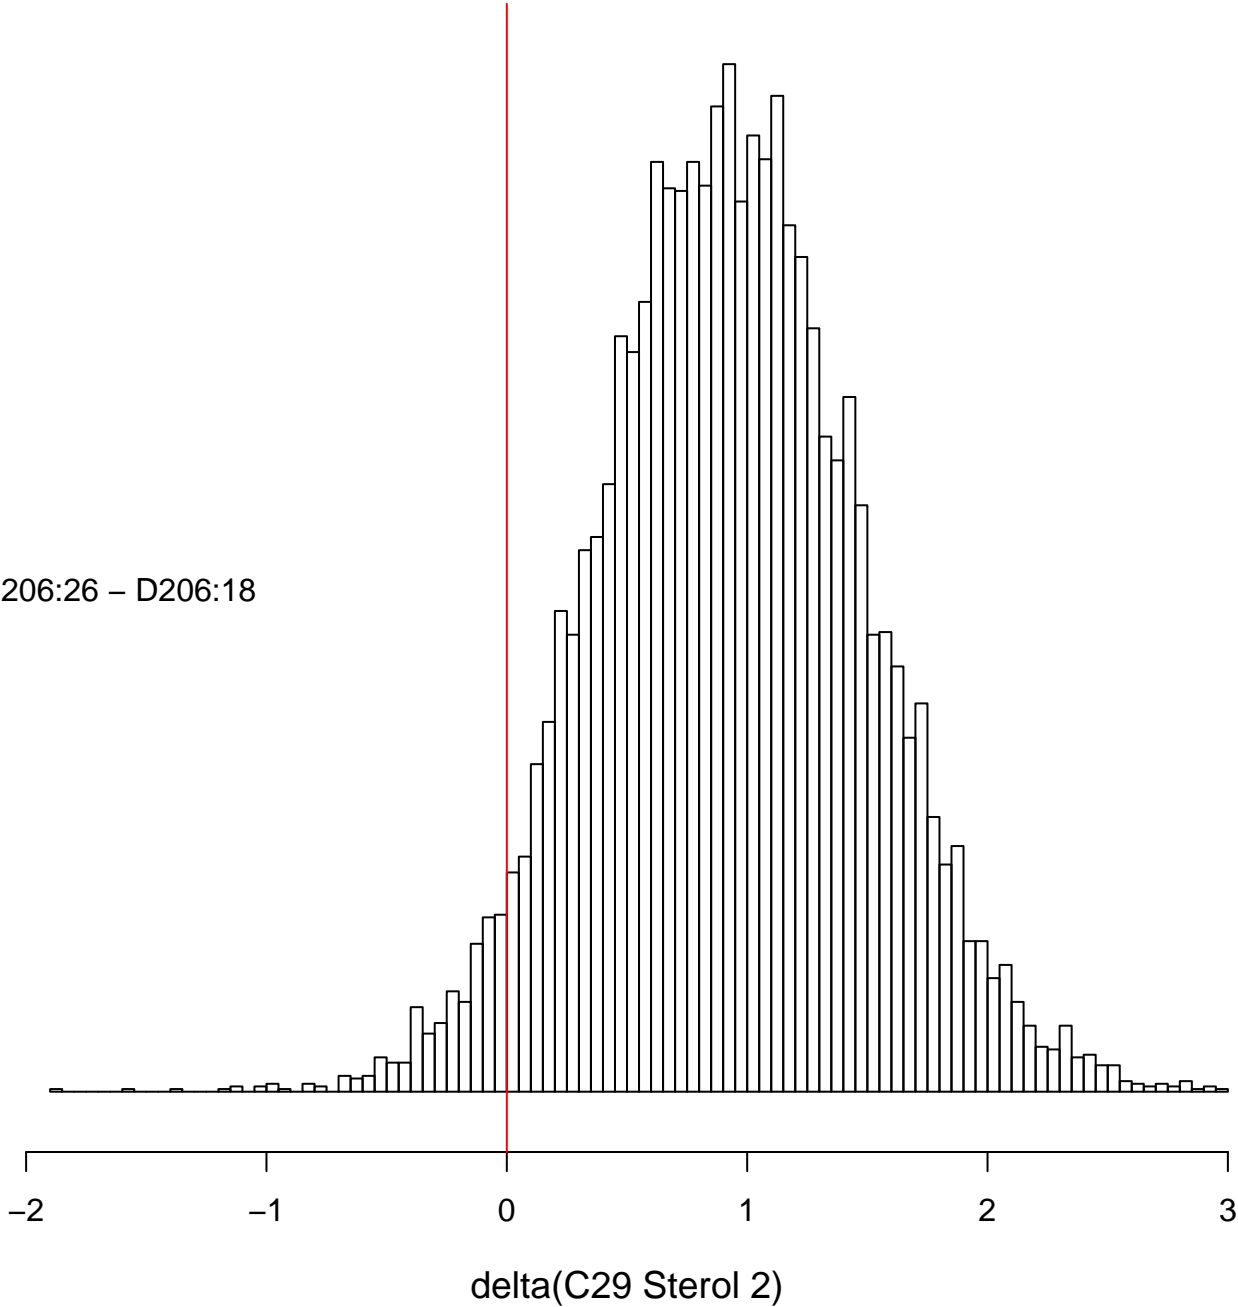

D206:26

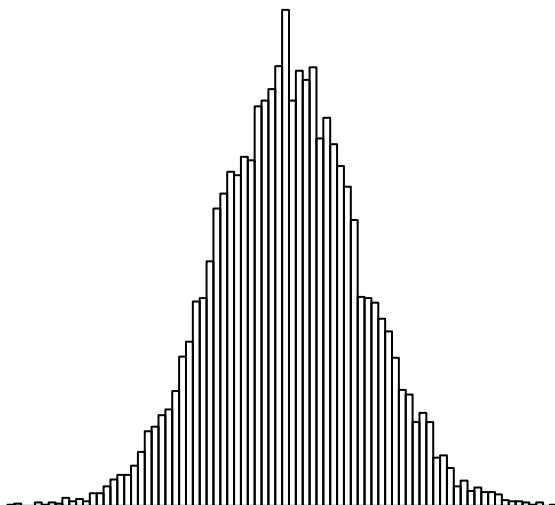

D206:18

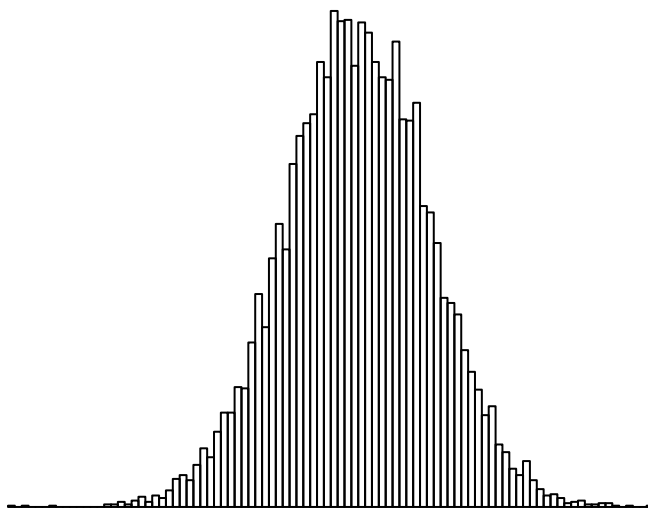

-8.5      -8.0      -7.5      -7.0      -6.5      -6.0      -5.5      -5.0

C29 Stanol 2

D206:26 – D206:18

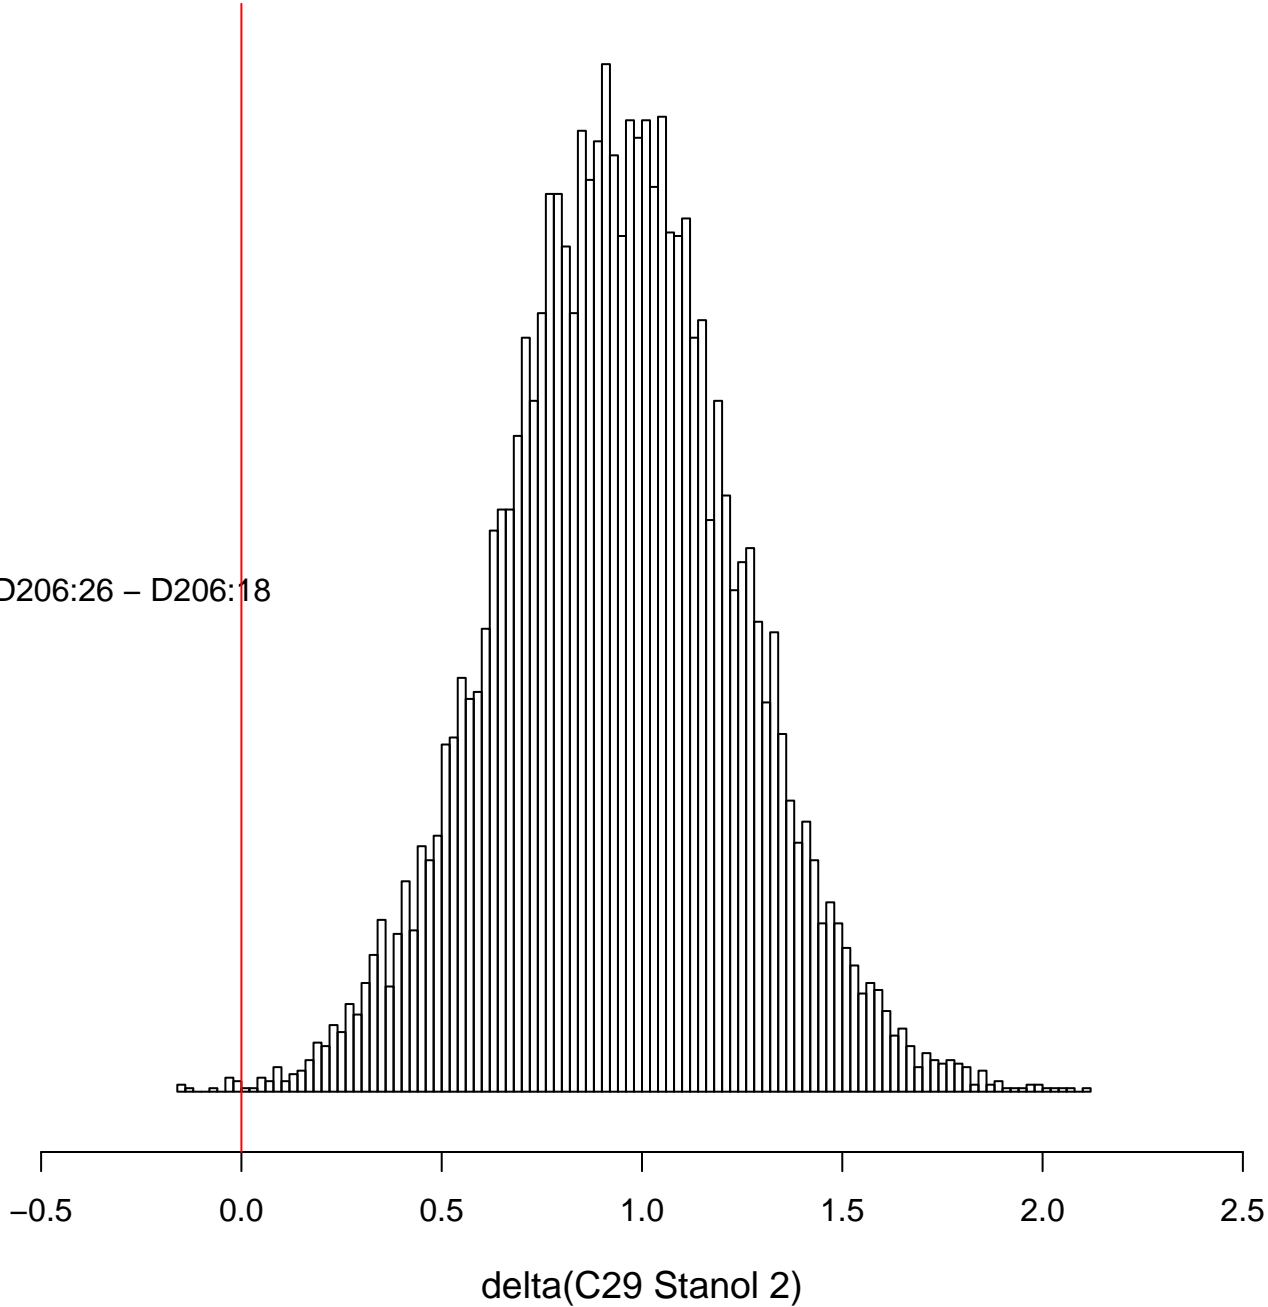



D206:26

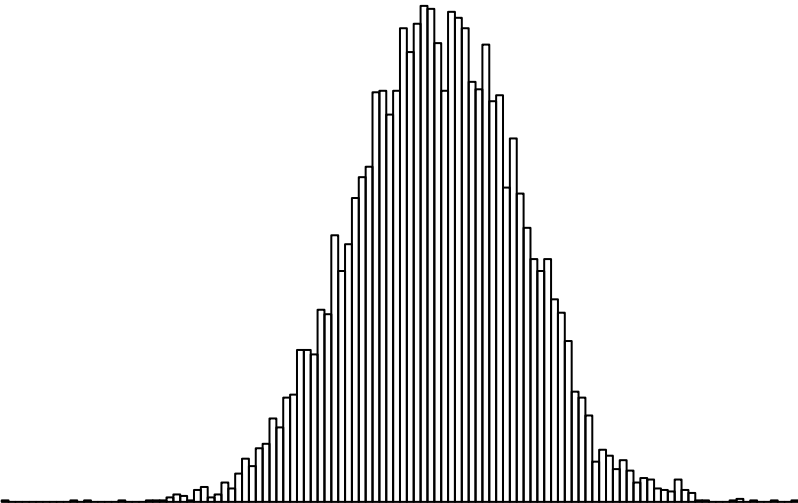

D206:18

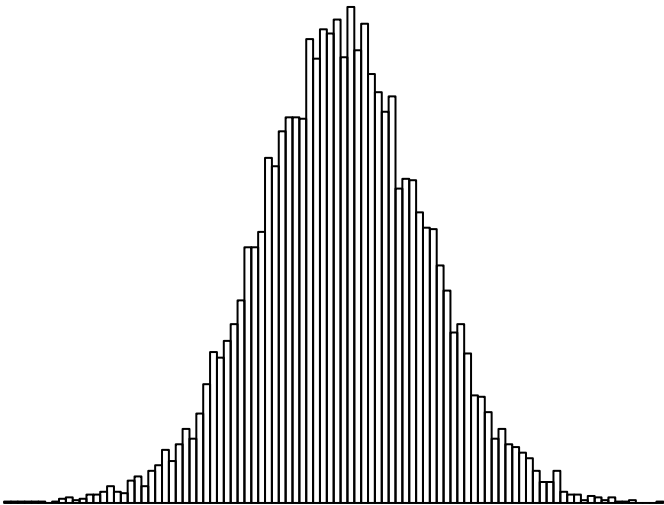

-8.0      -7.5      -7.0      -6.5      -6.0      -5.5      -5.0      -4.5

C29 Sterol 3

D206:26 – D206:18

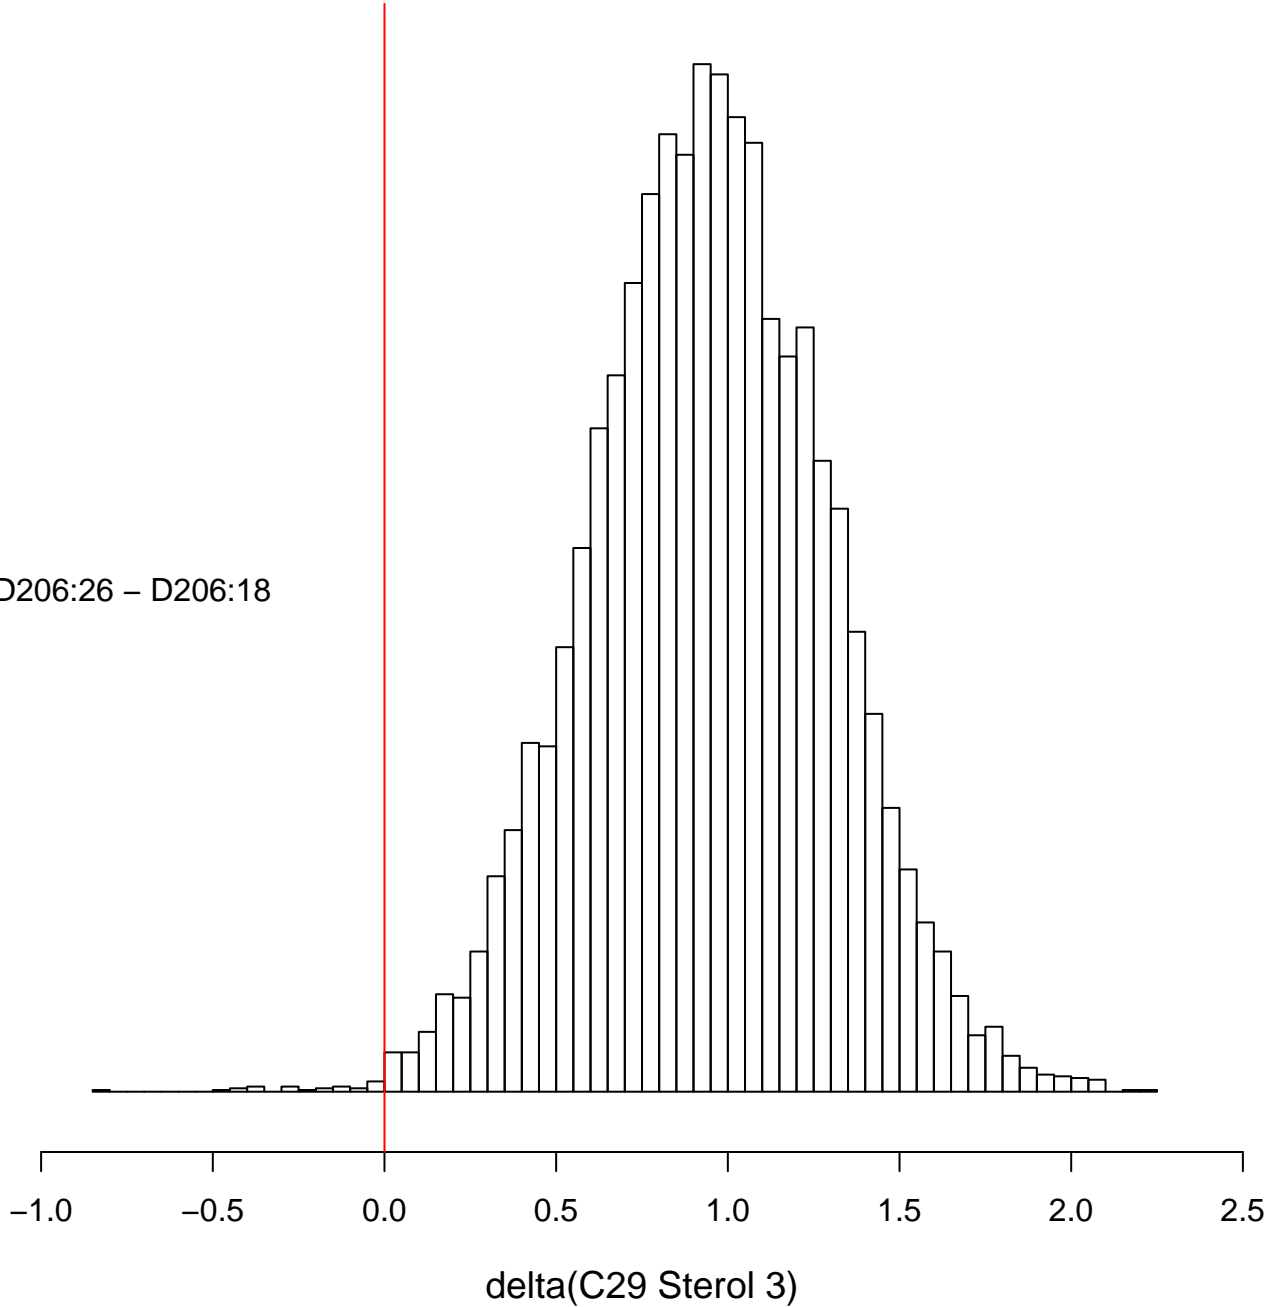

D206:26

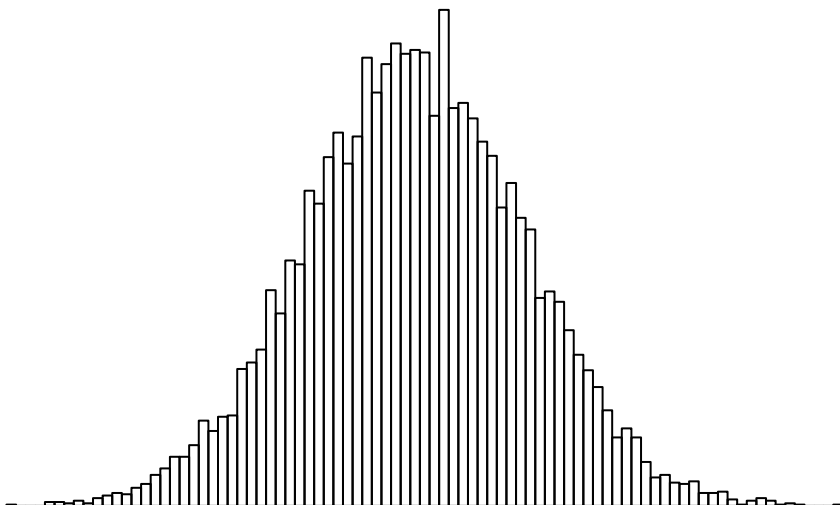

D206:18

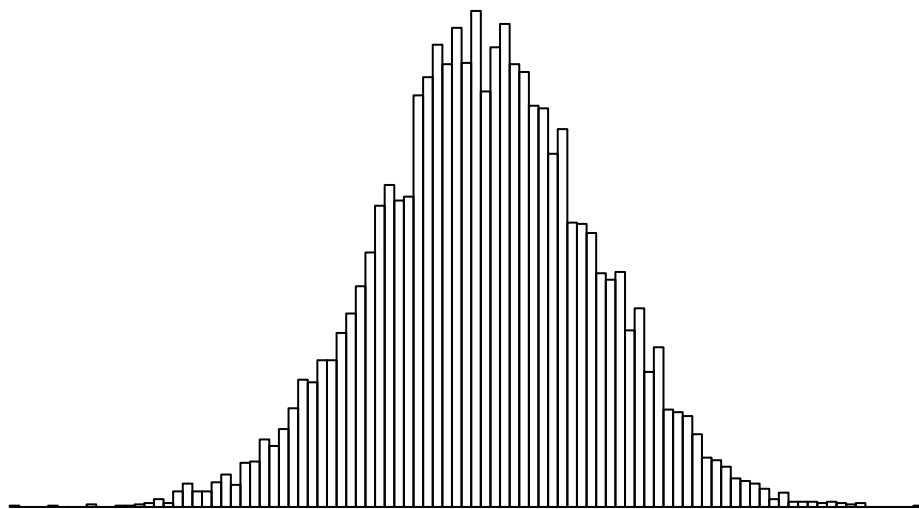

-9.5

-9.0

-8.5

-8.0

-7.5

-7.0

C30 Sterol

D206:26 – D206:18

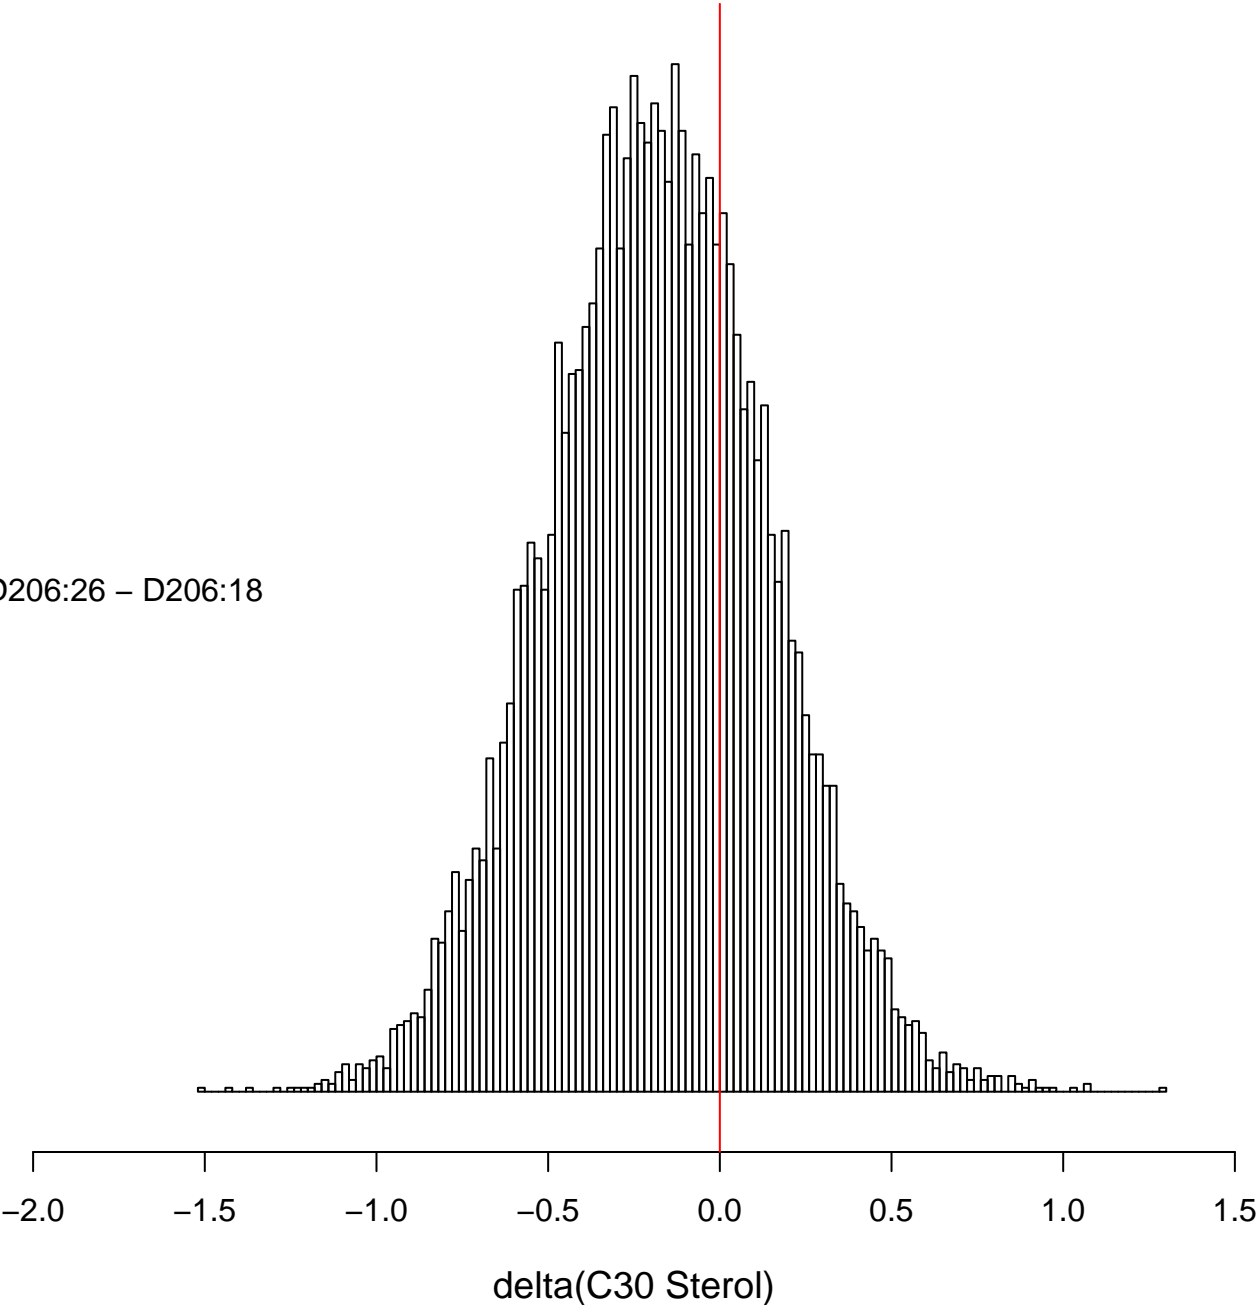

D206:26

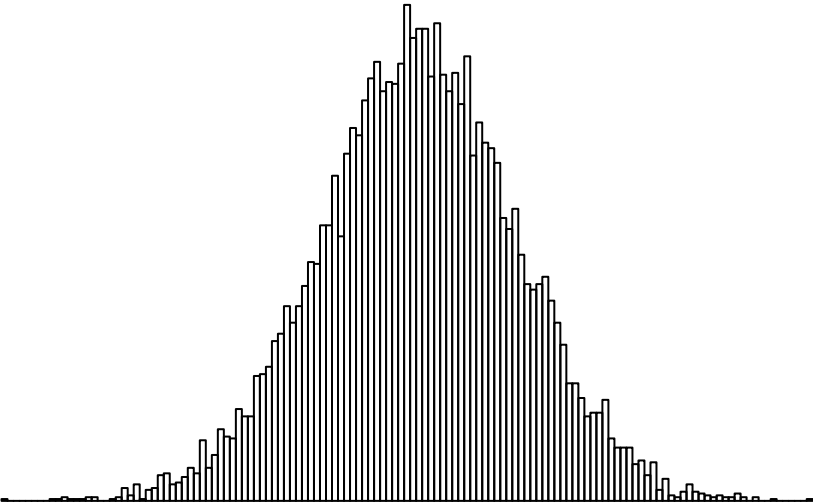

D206:18

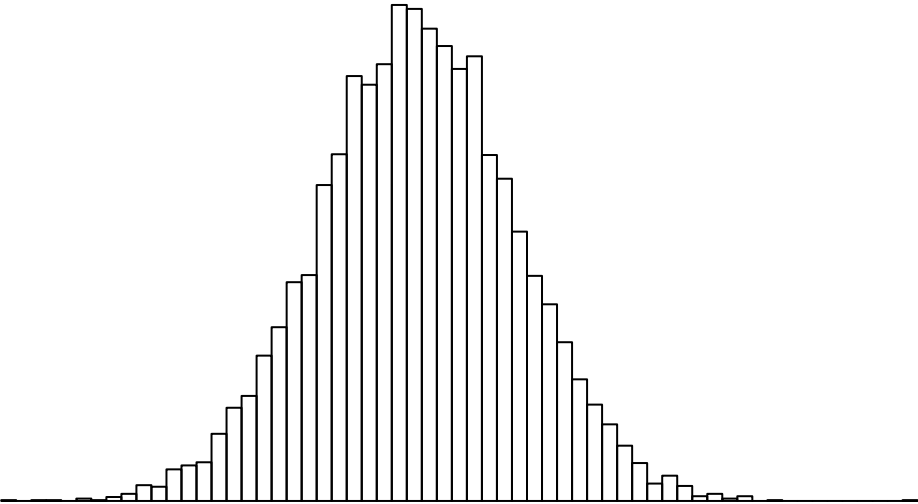

-10

-9

-8

-7

C30'5 Sterol

D206:26 – D206:18

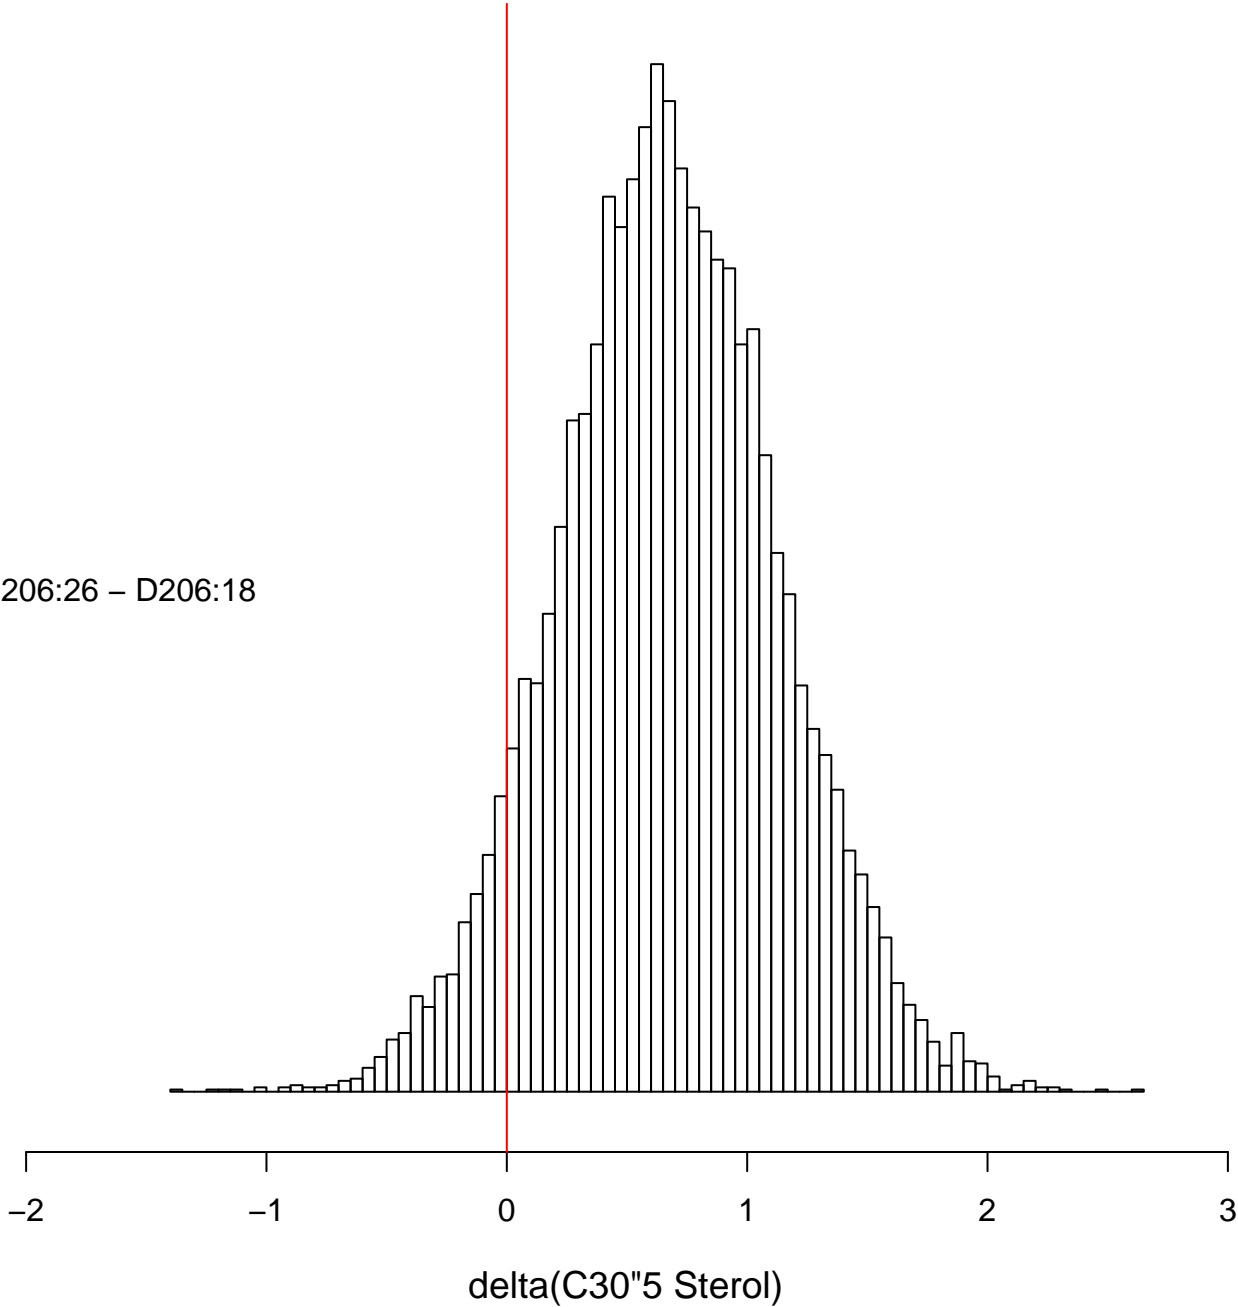

D206:26

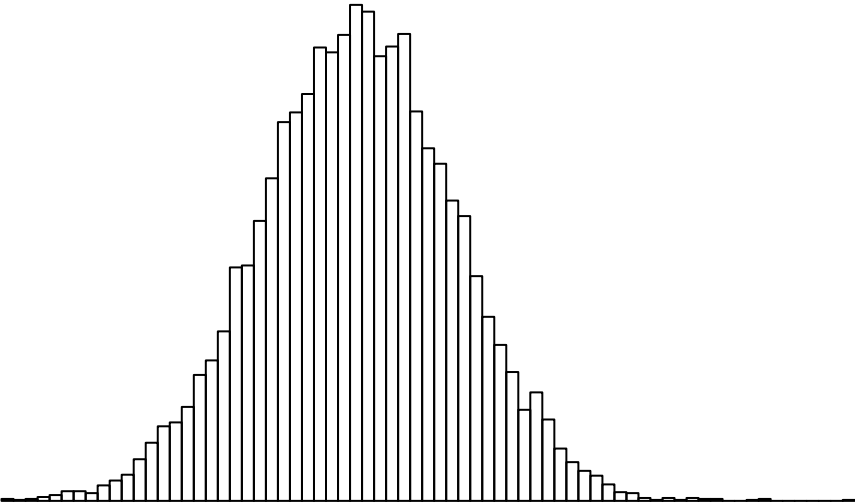

D206:18

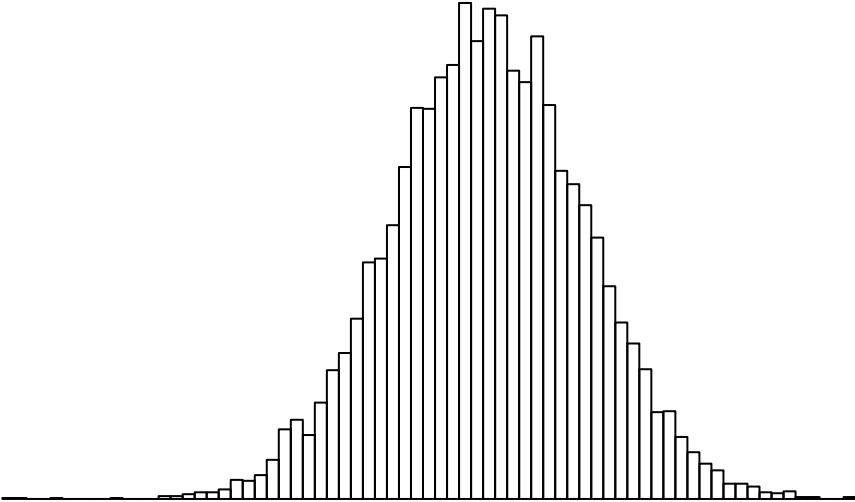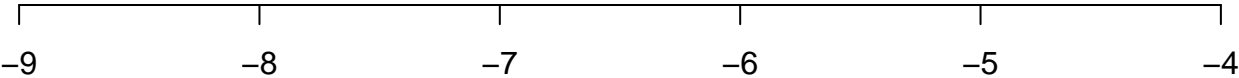

Open Hexose 1

D206:26 – D206:18

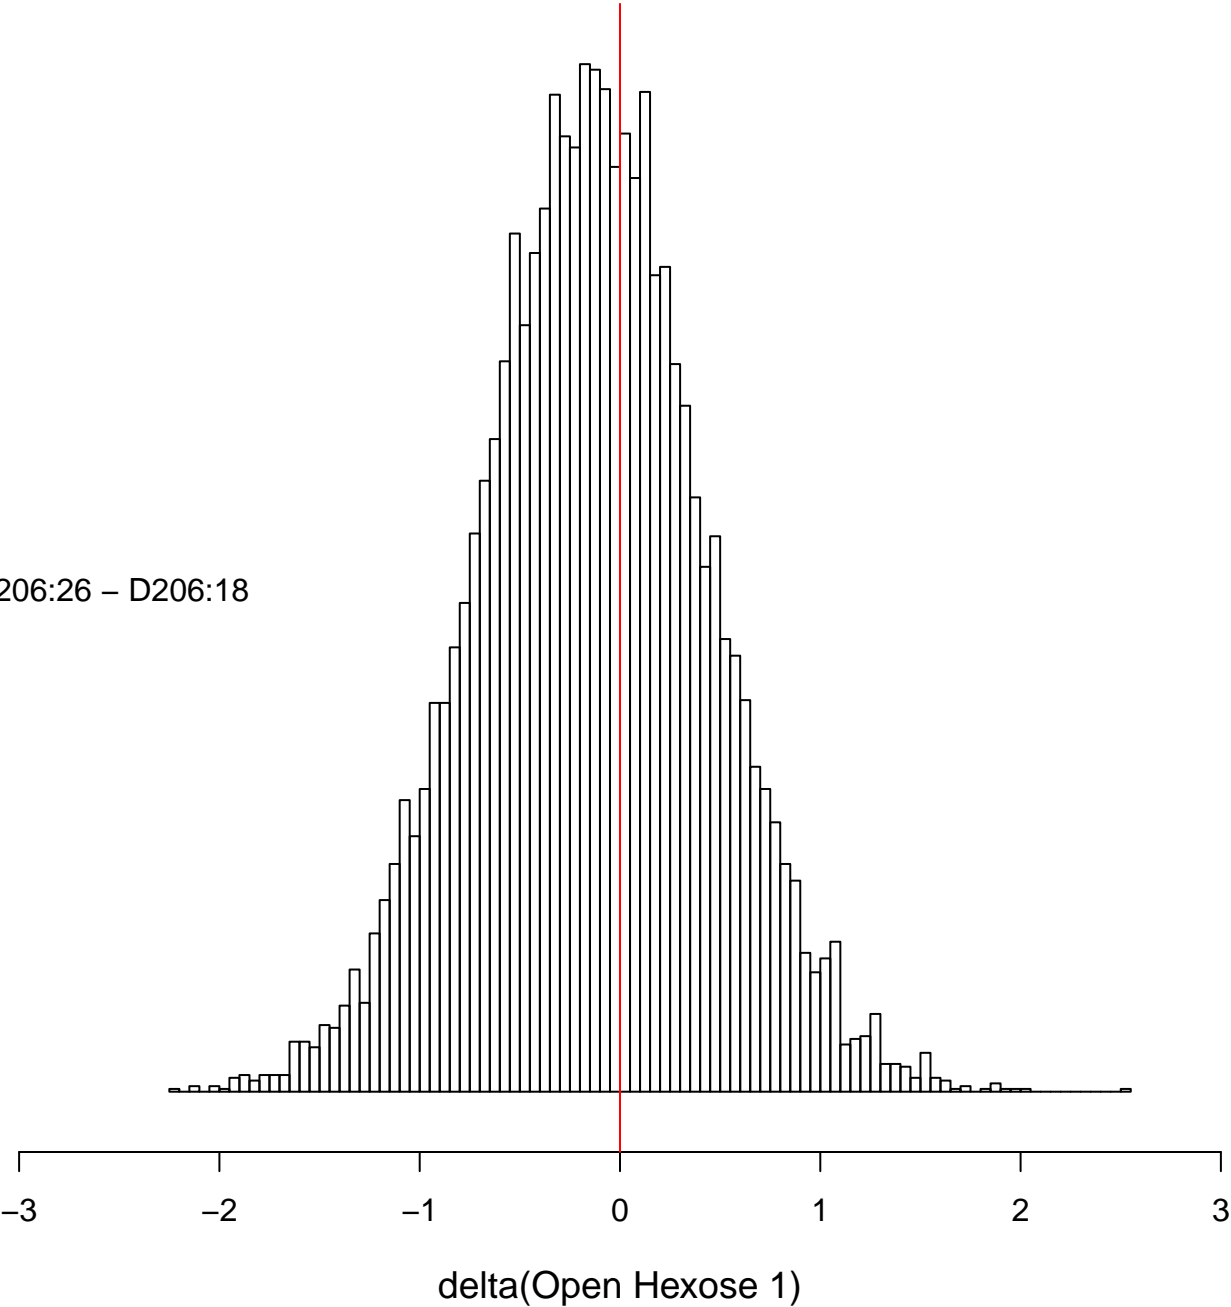



D206:26

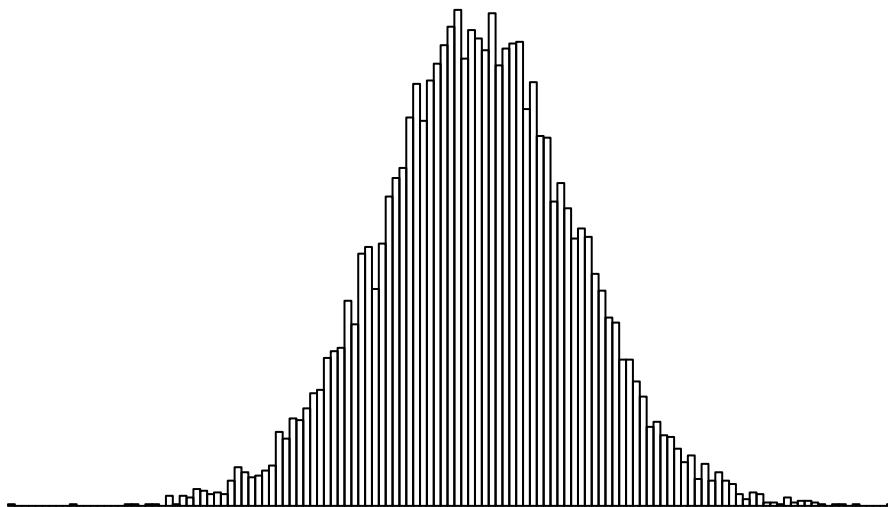

D206:18

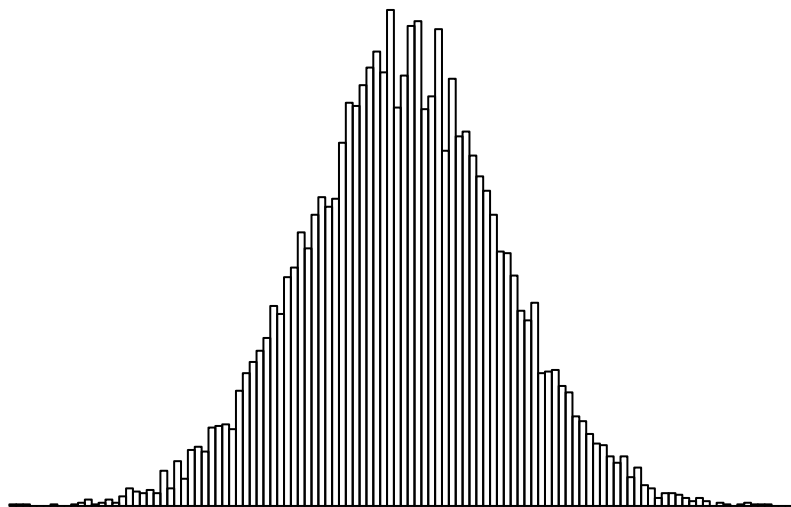

-8.5      -8.0      -7.5      -7.0      -6.5      -6.0      -5.5      -5.0

Closed Hexose 1

D206:26 – D206:18

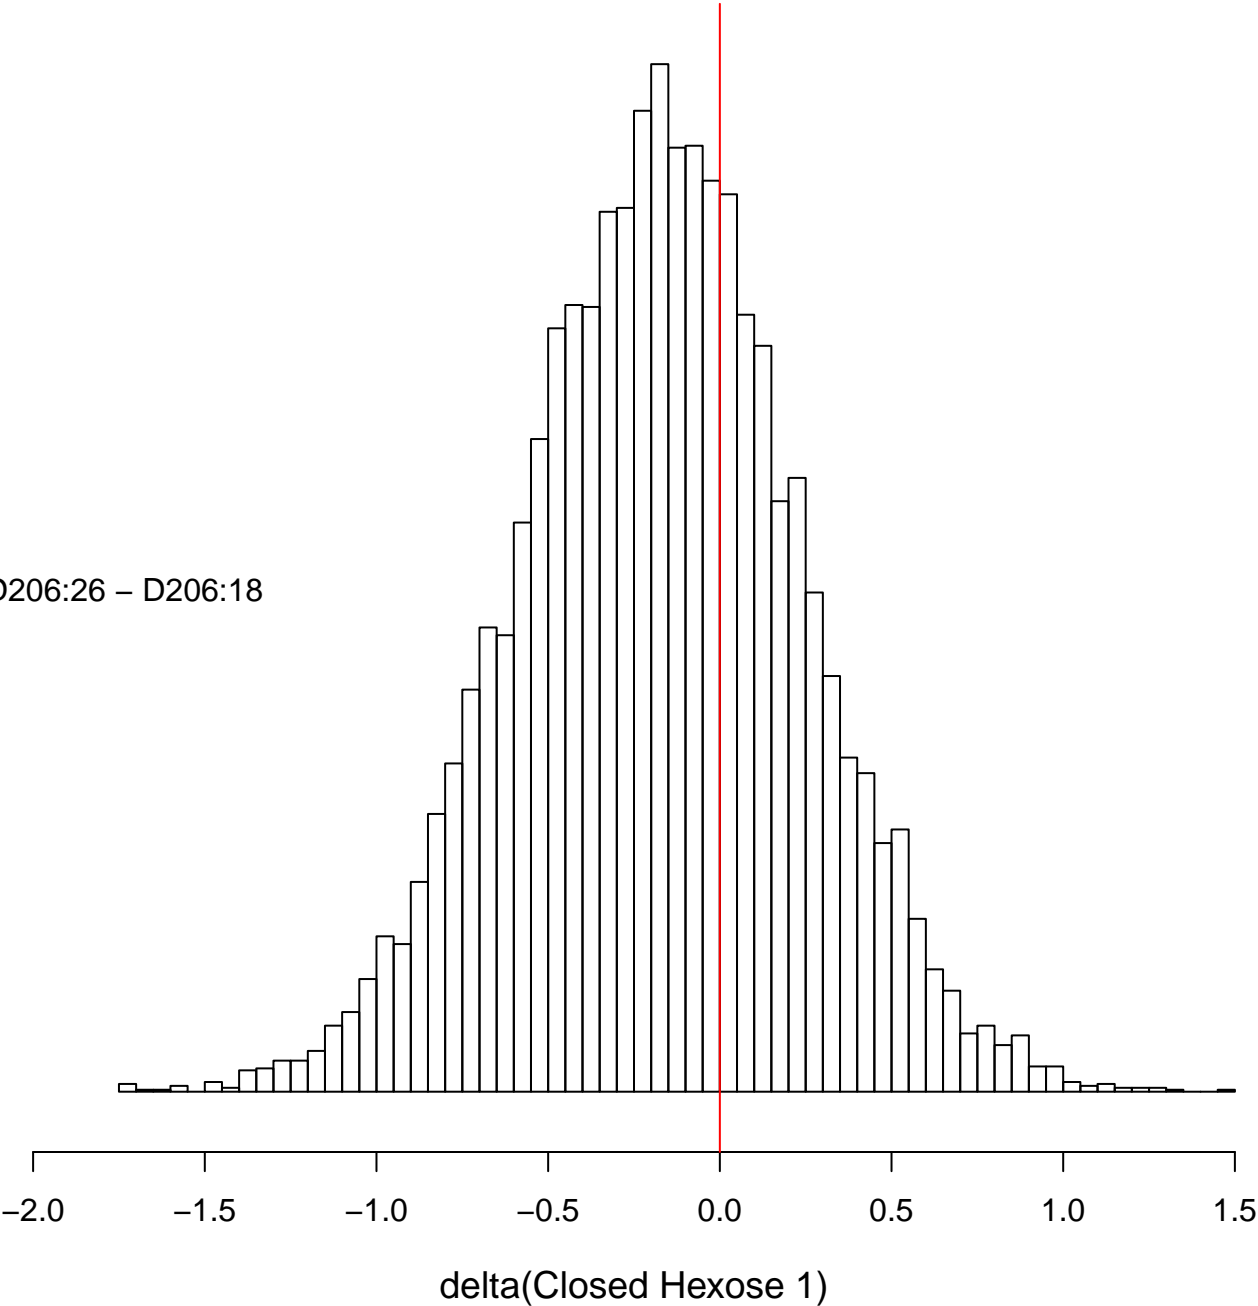

D206:26

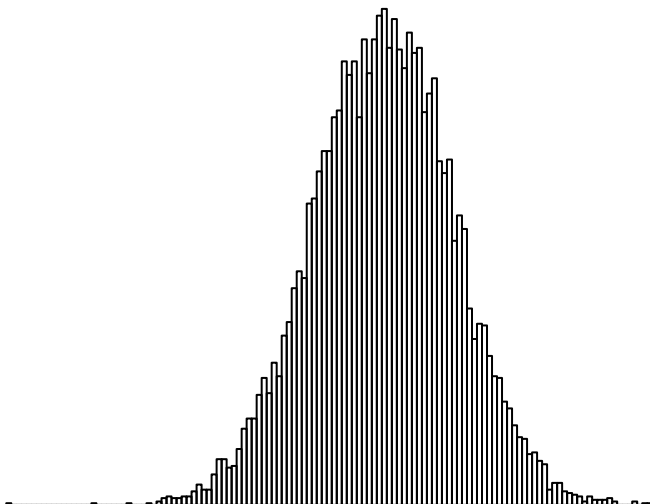

D206:18

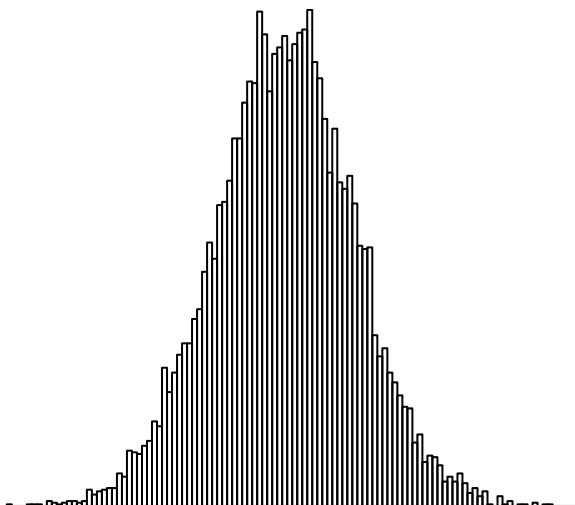

-10      -8      -6      -4      -2      0      2

Closed Hexose 2

D206:26 – D206:18

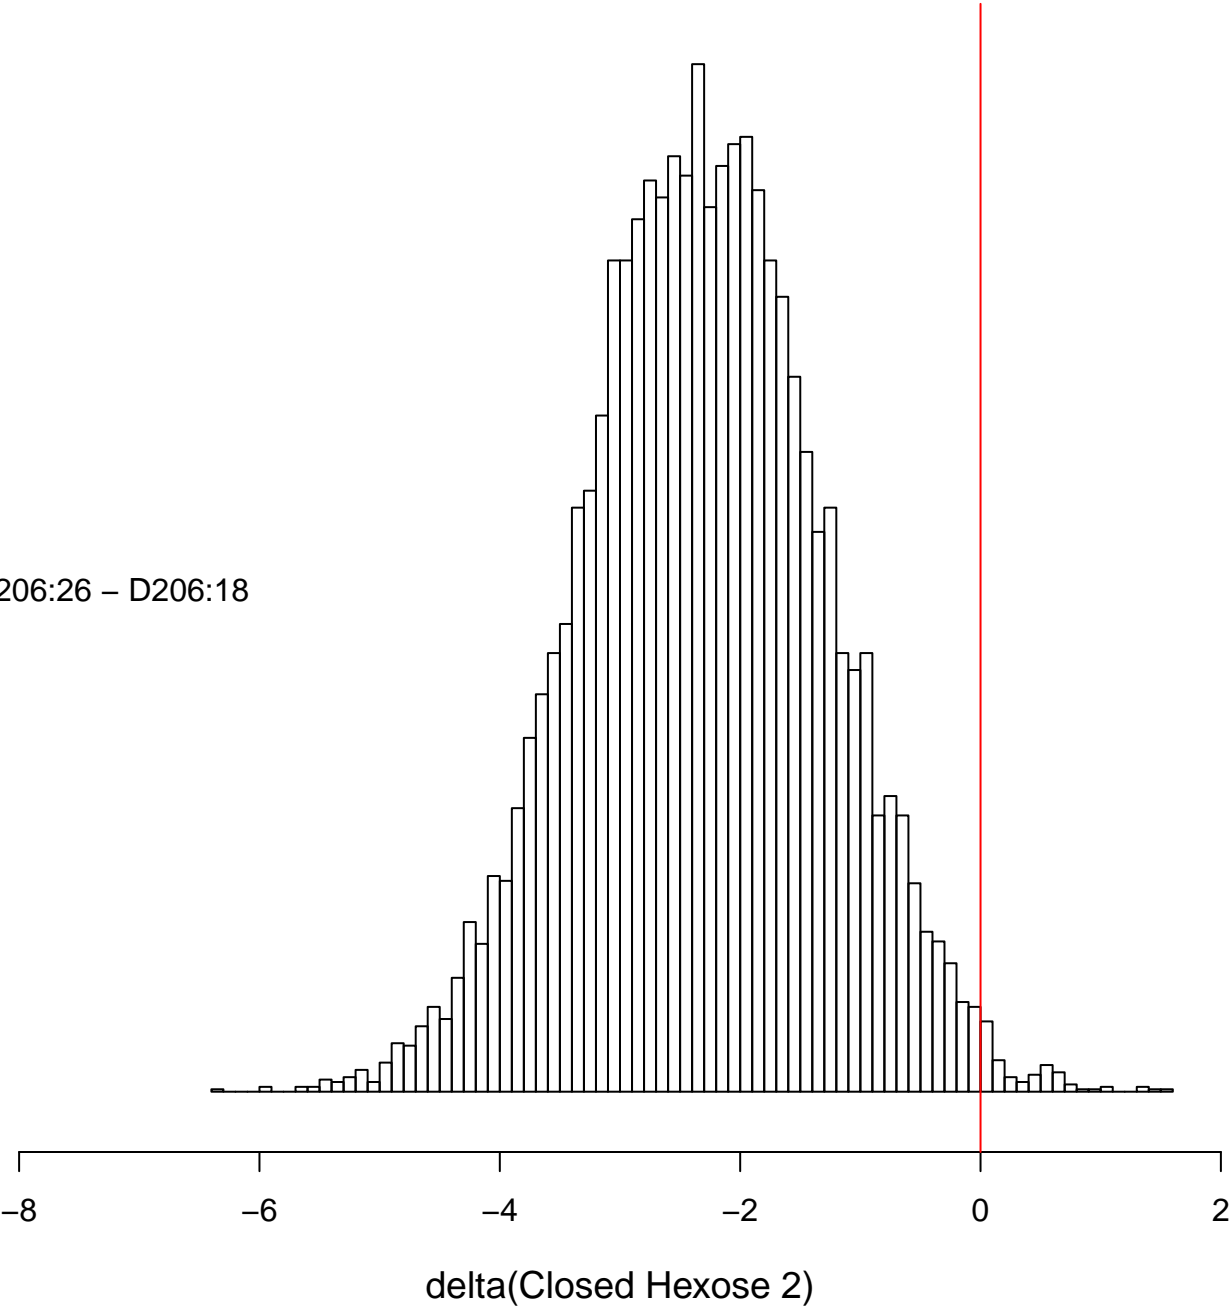

D206:26

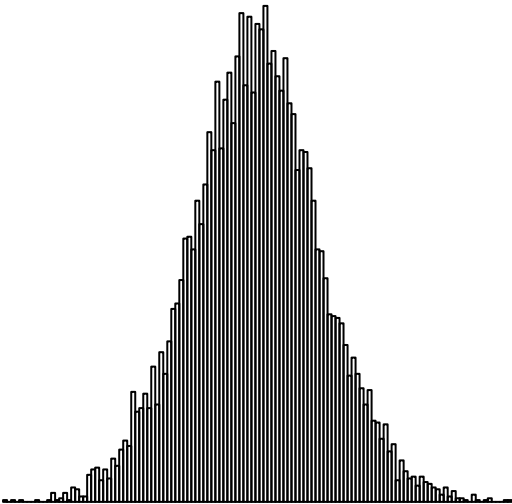

D206:18

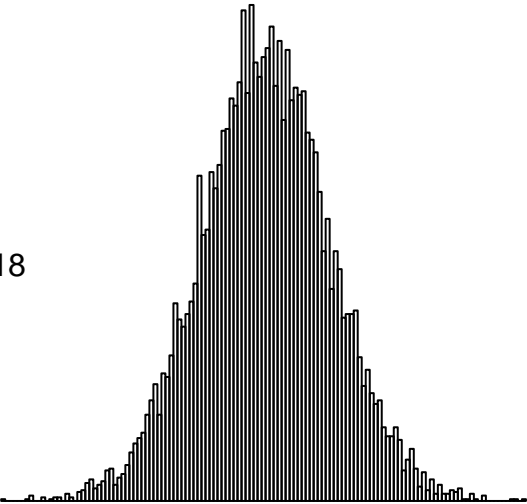

-6      -5      -4      -3      -2      -1      0

Open Hexose 2

D206:26 – D206:18

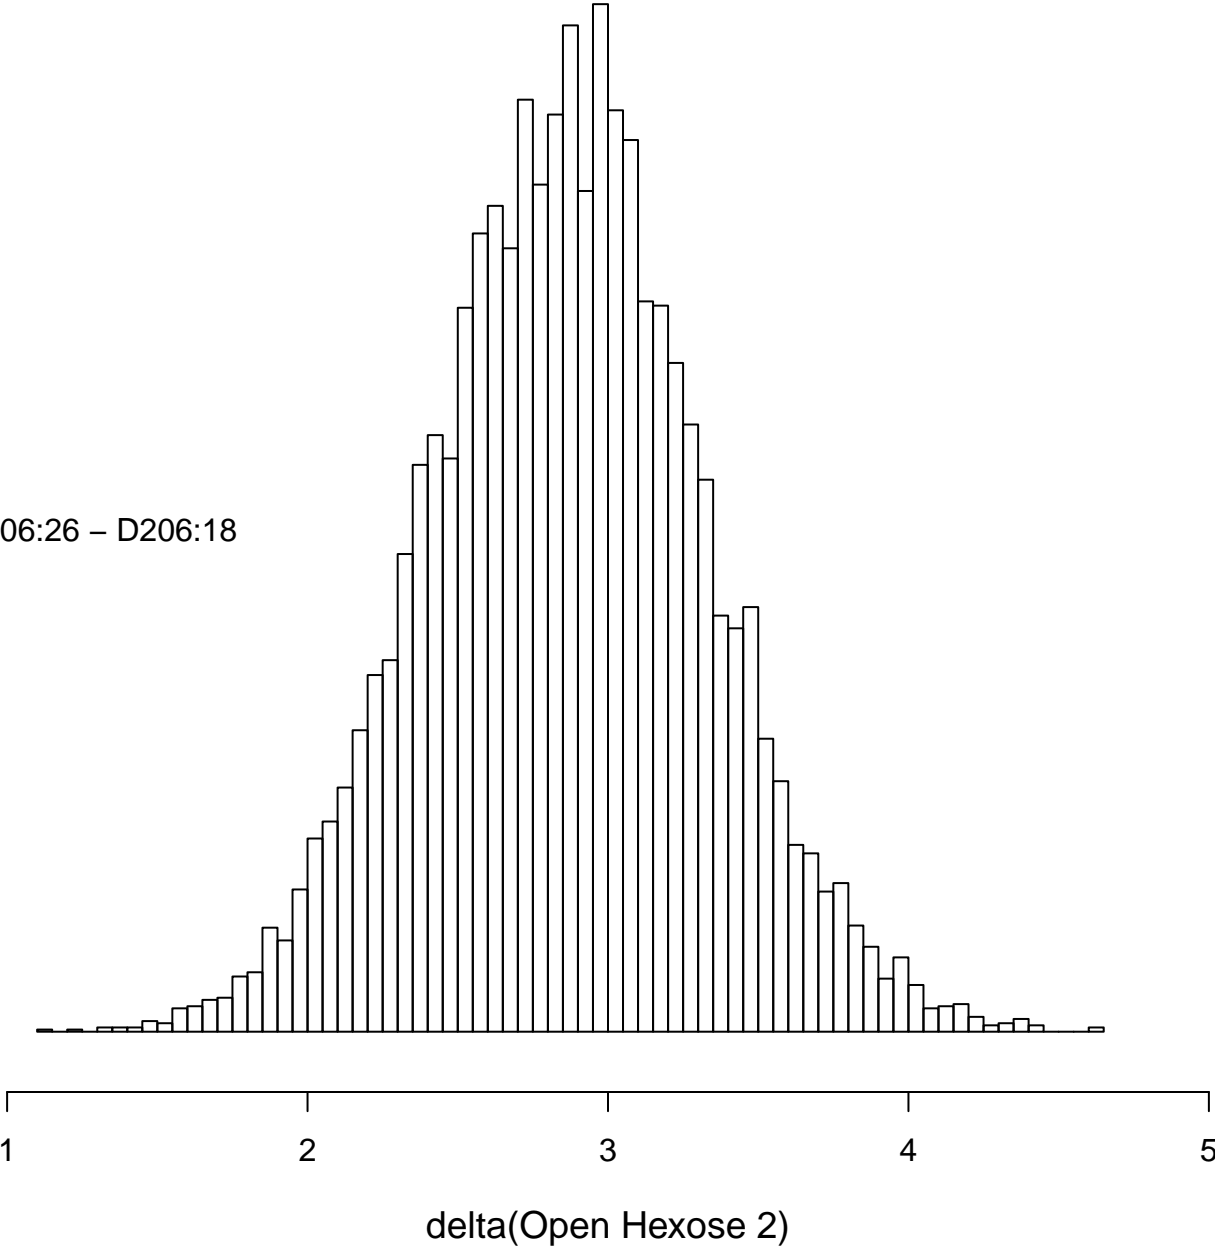

D206:26

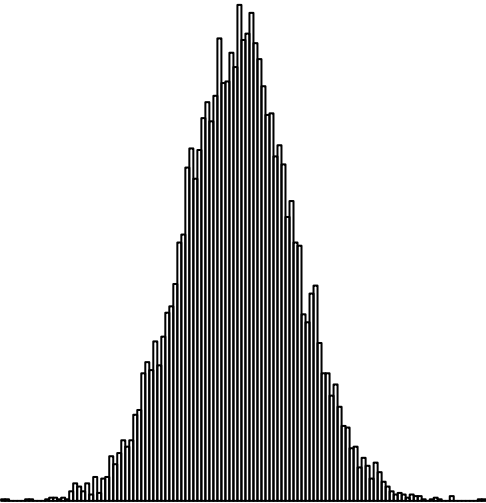

D206:18

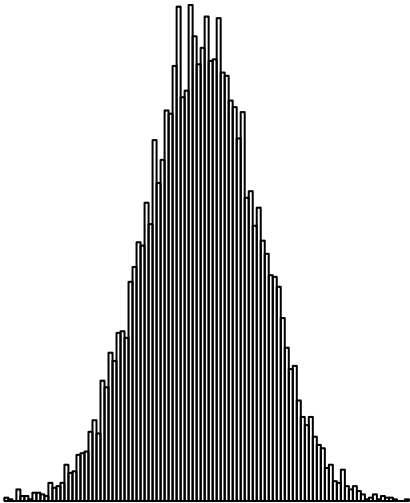

-8      -7      -6      -5      -4      -3      -2

Open Hexose 3

D206:26 – D206:18

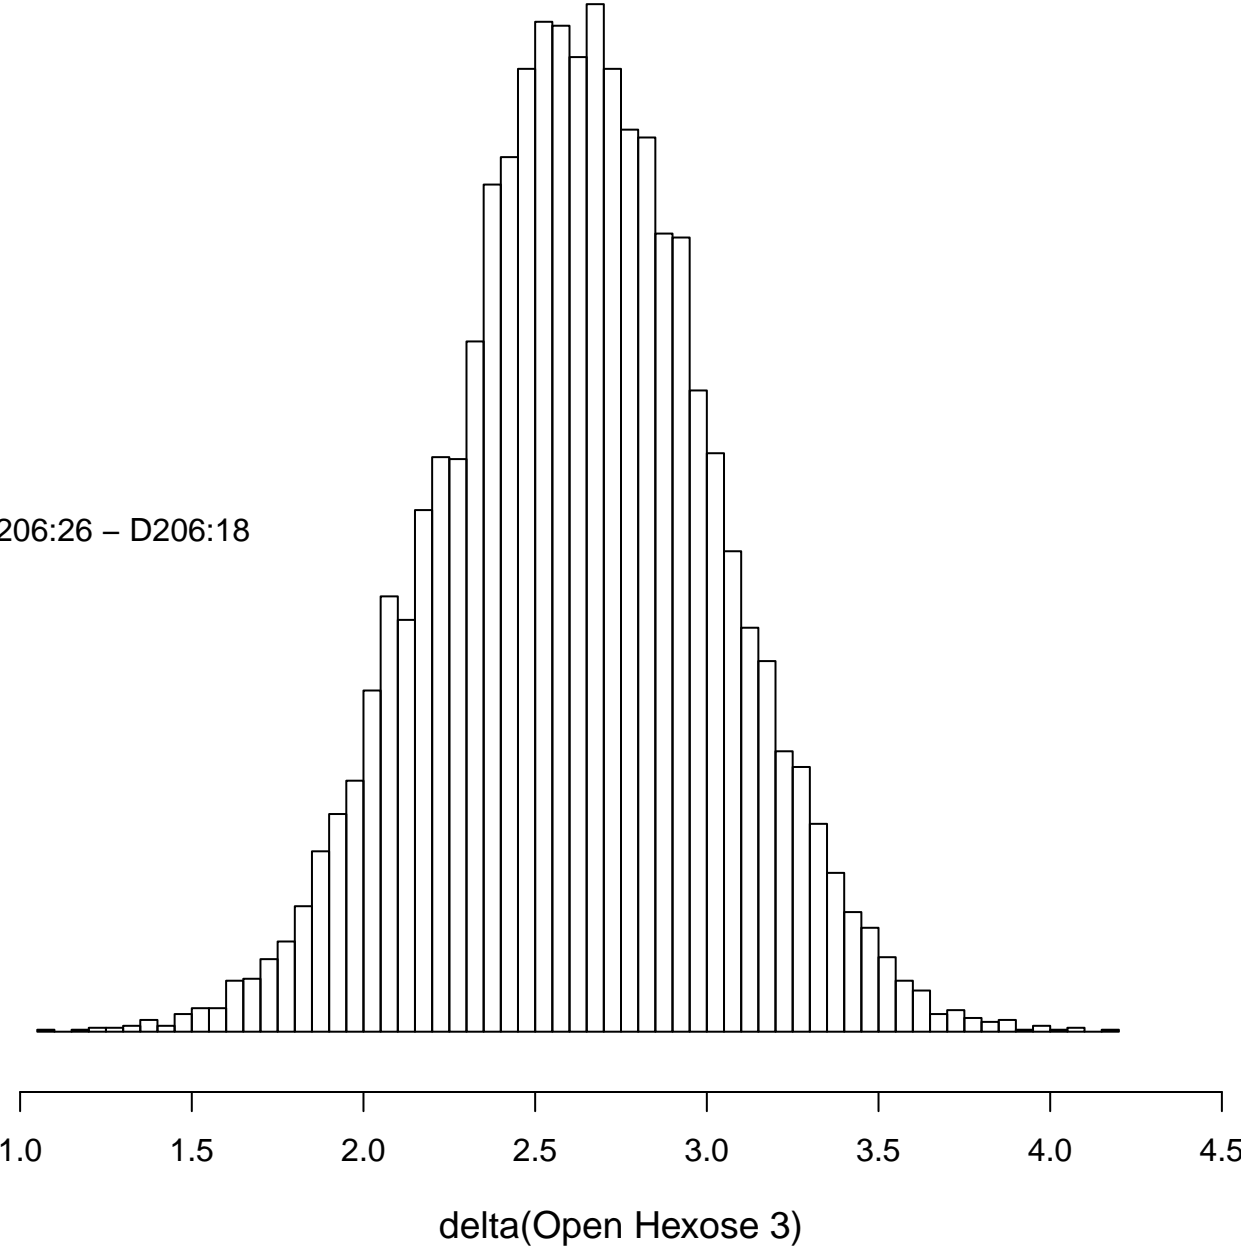



D206:26

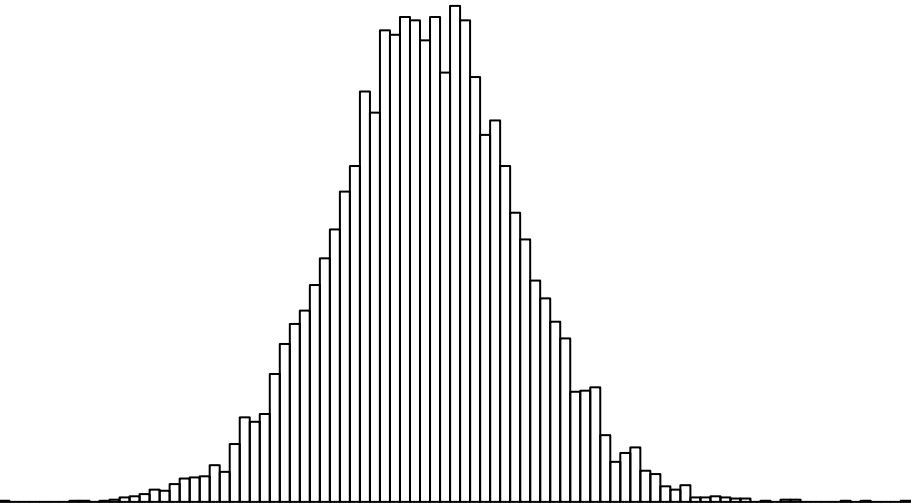

D206:18

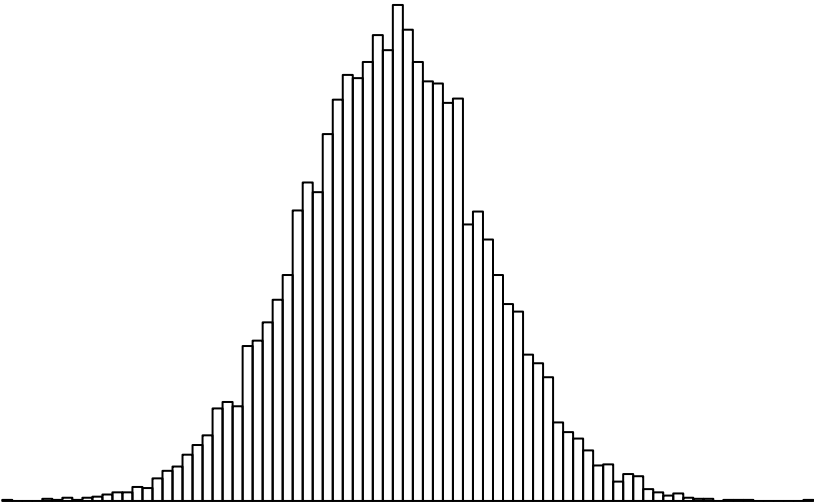

Closed Hexose 3

D206:26 – D206:18

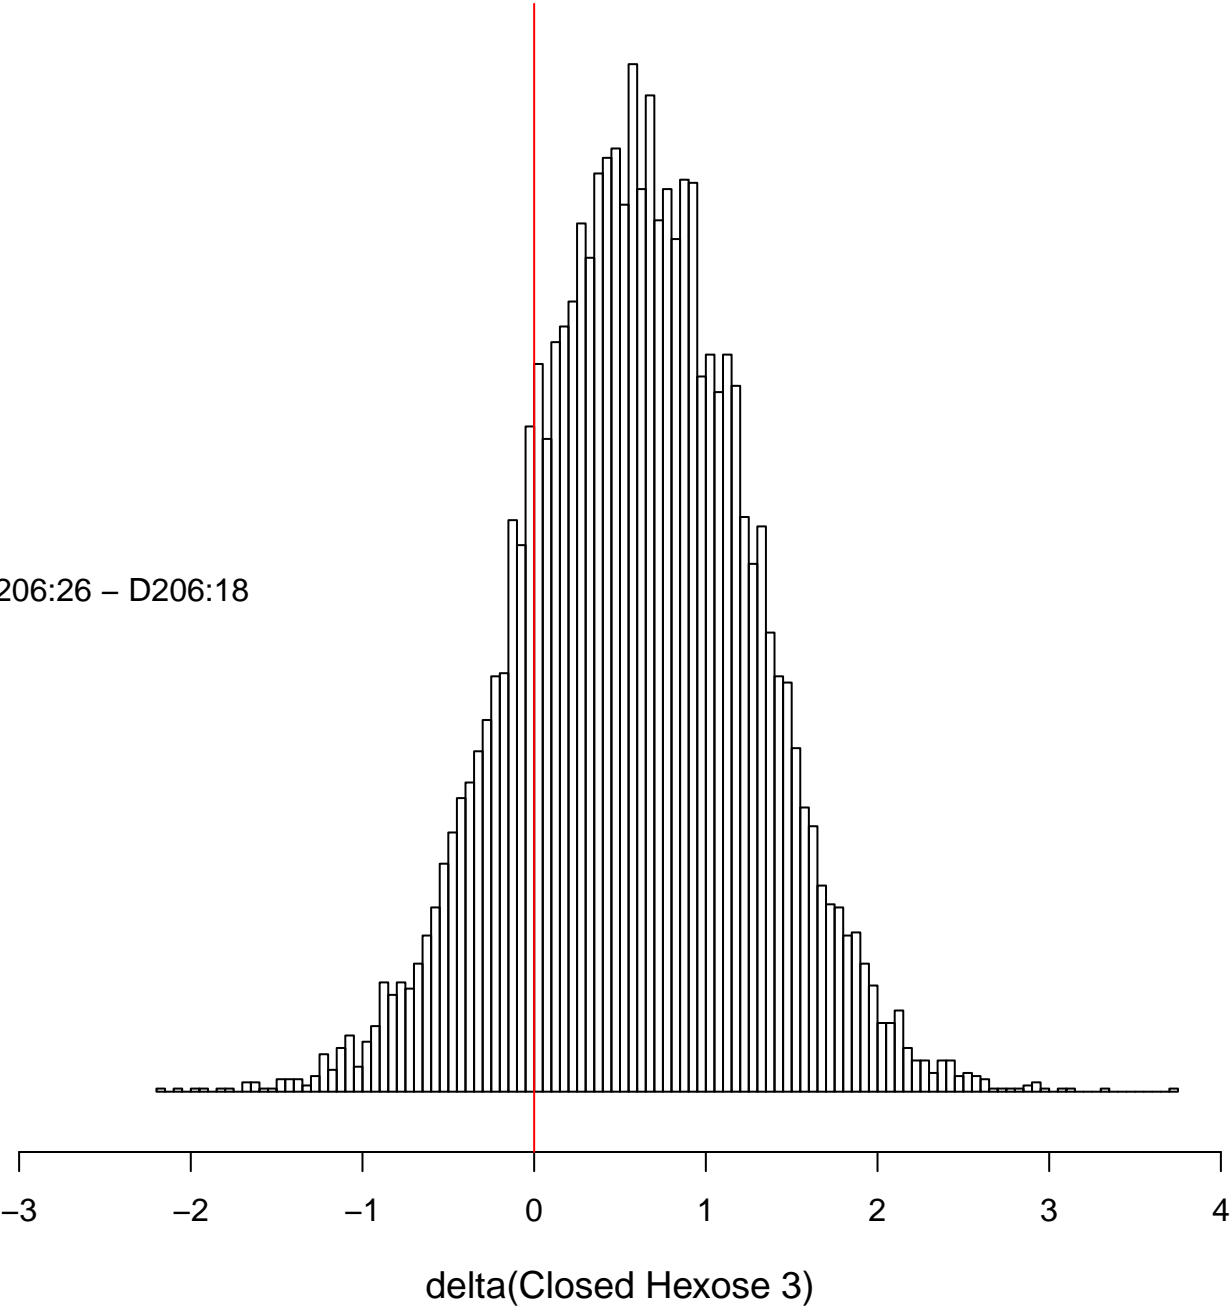

D206:26

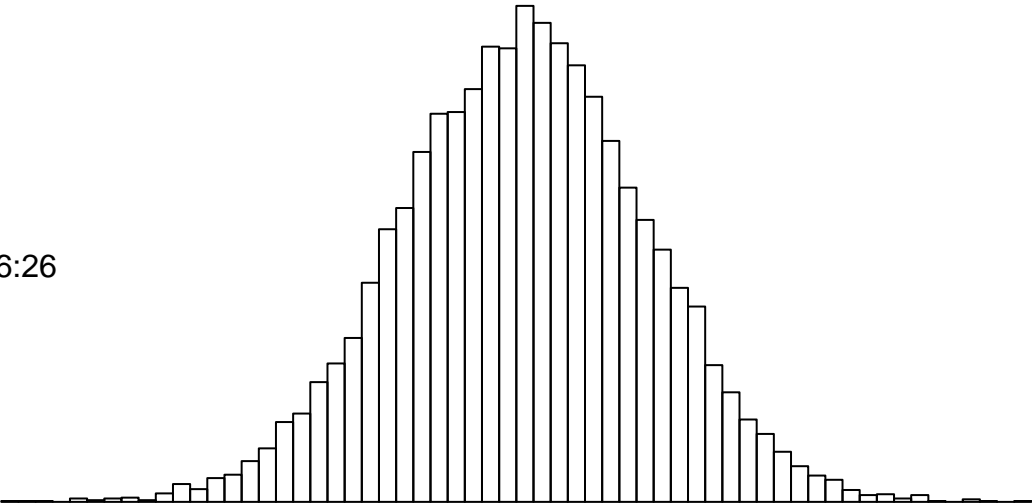

D206:18

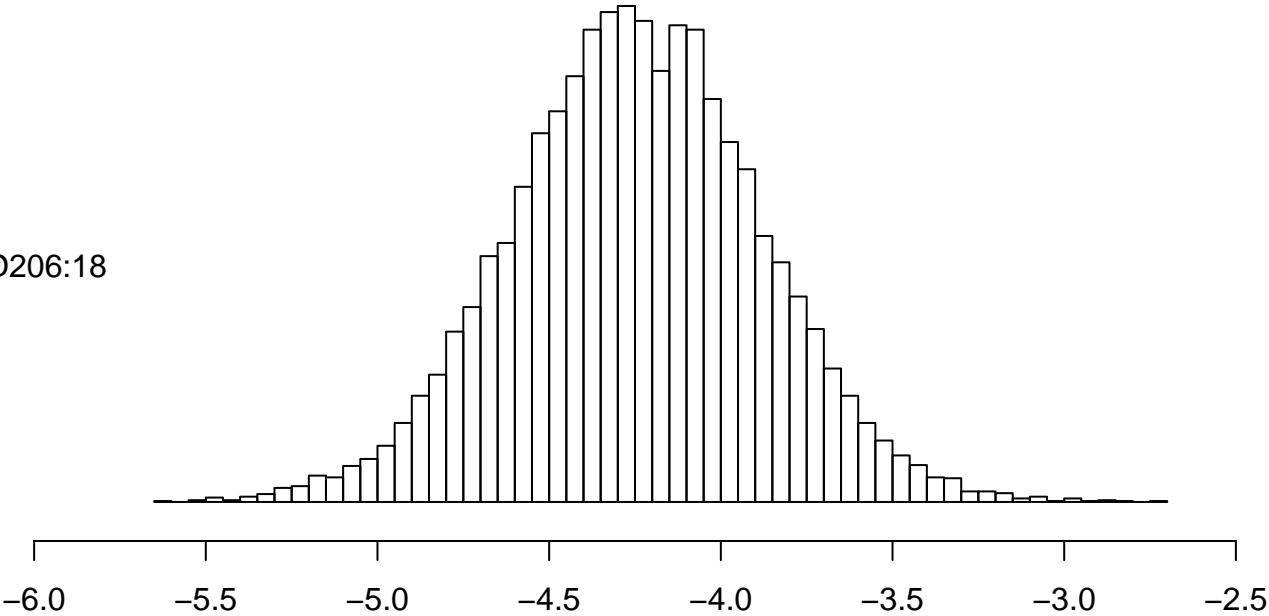

Closed Hexose 4

D206:26 – D206:18

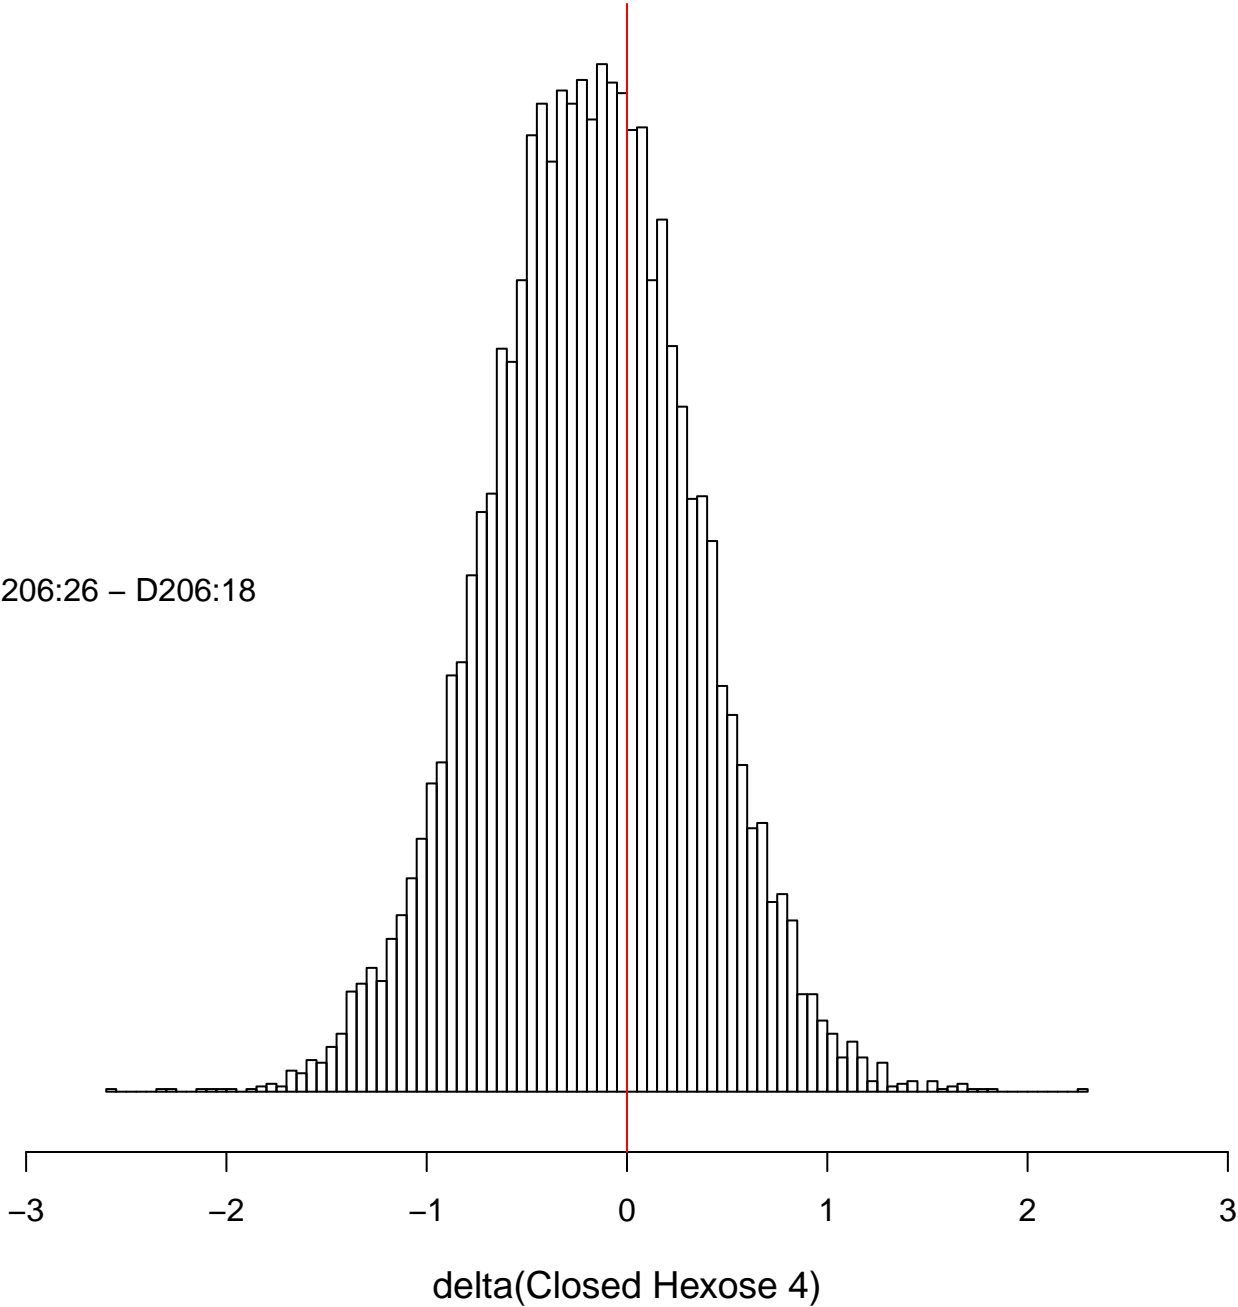

D206:26

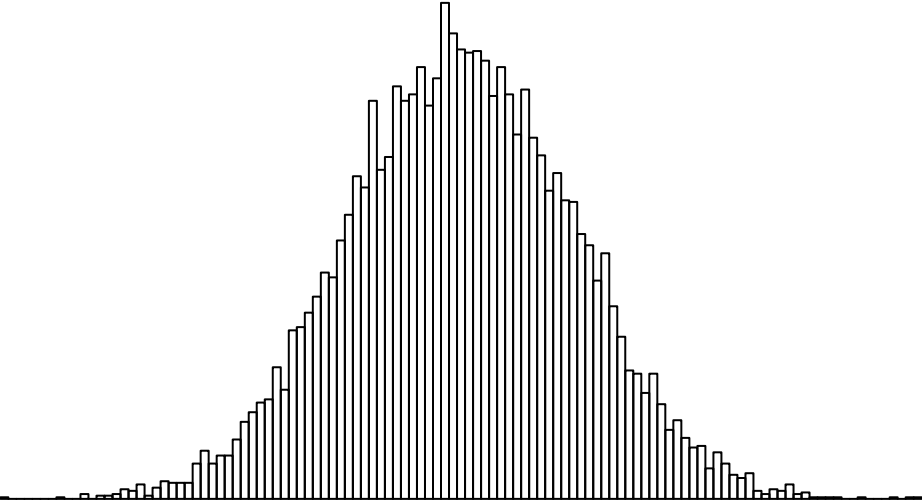

D206:18

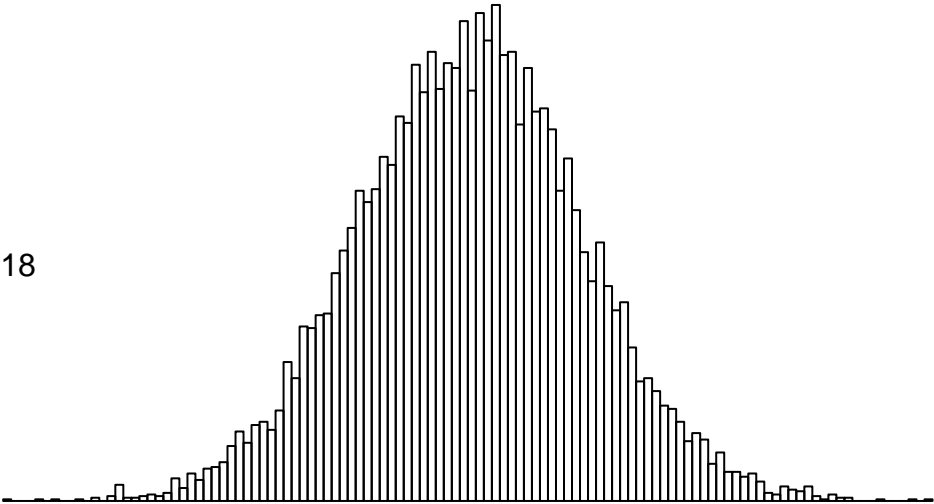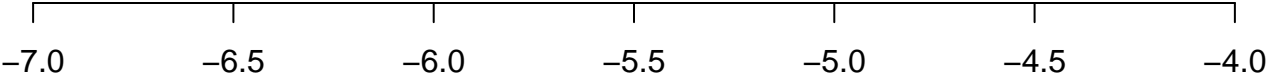

Hexose 1

D206:26 – D206:18

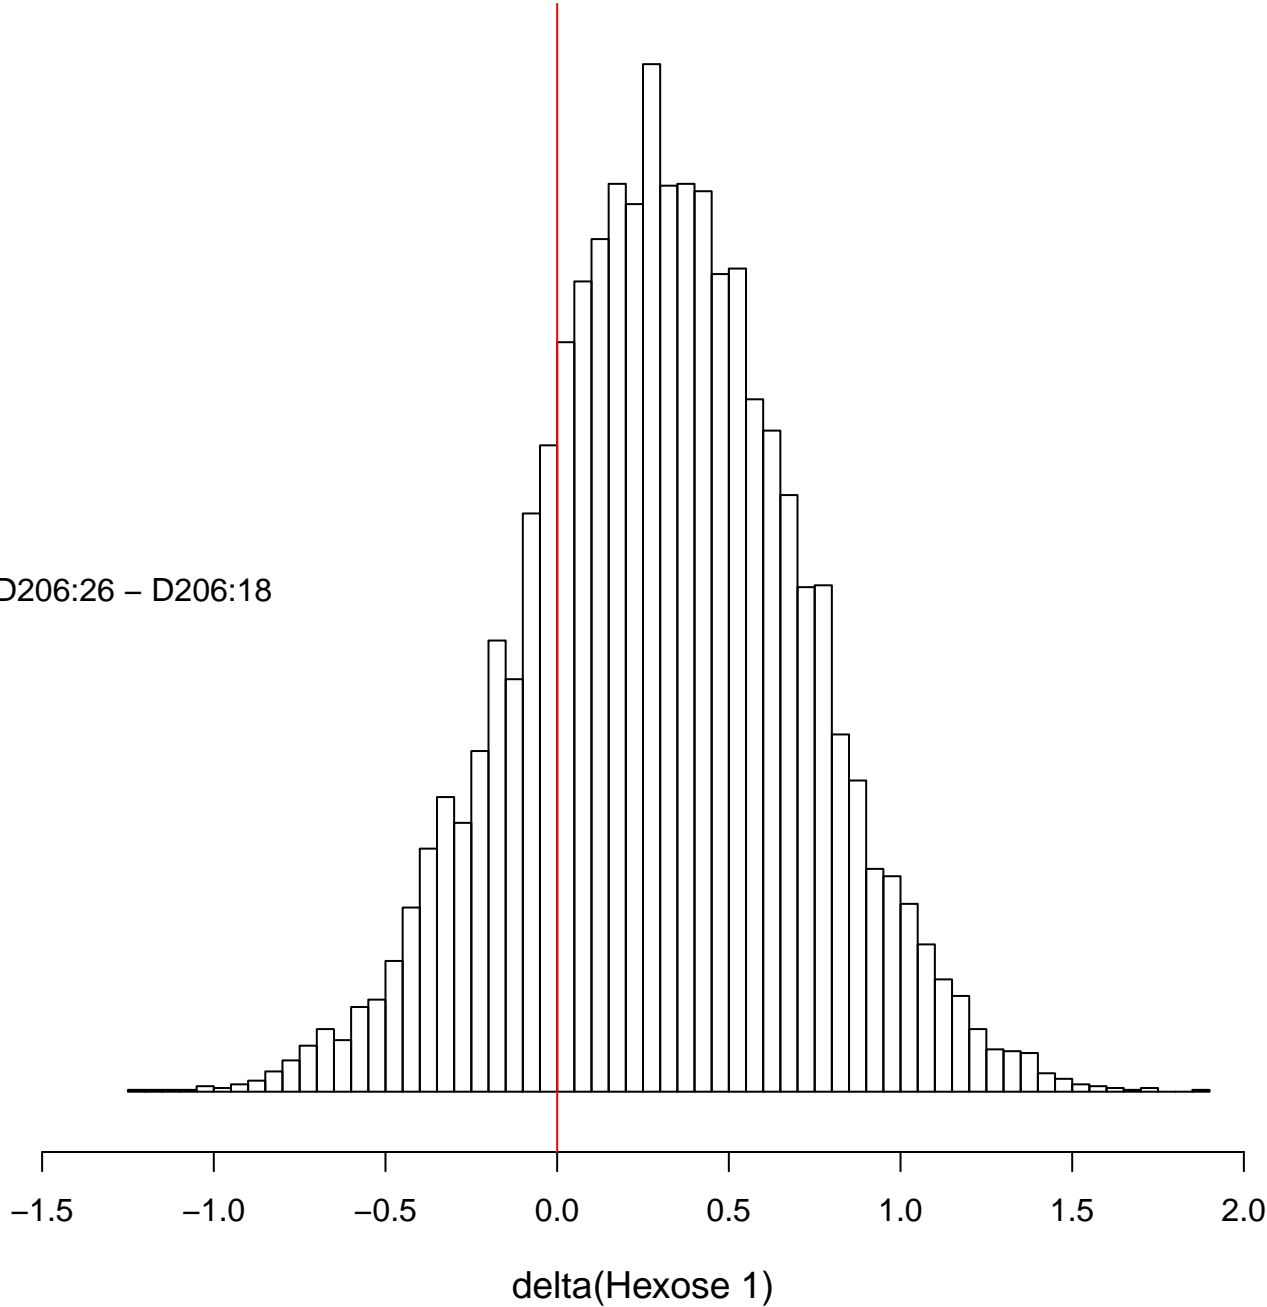

D206:26

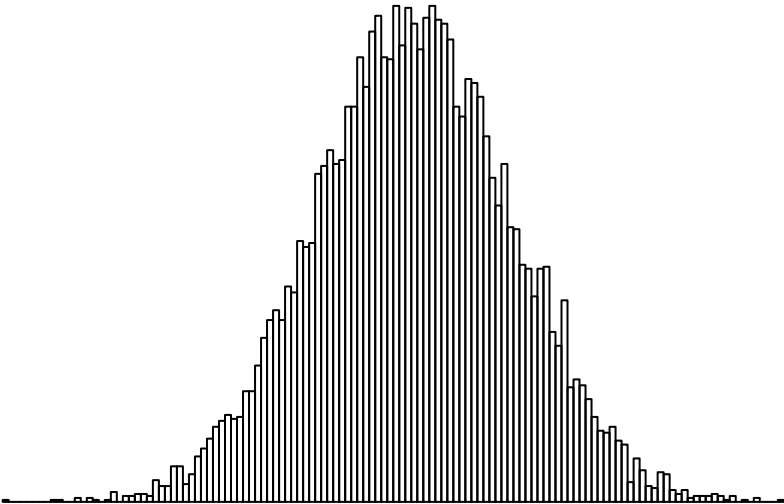

D206:18

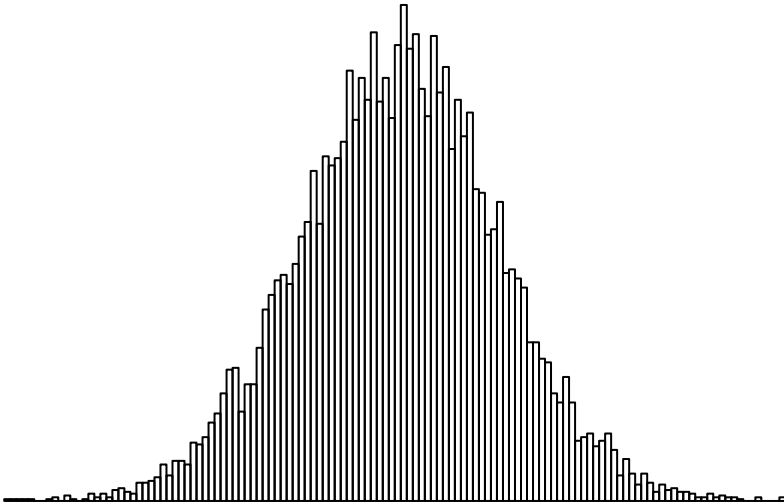

Closed Hexose 5

D206:26 – D206:18

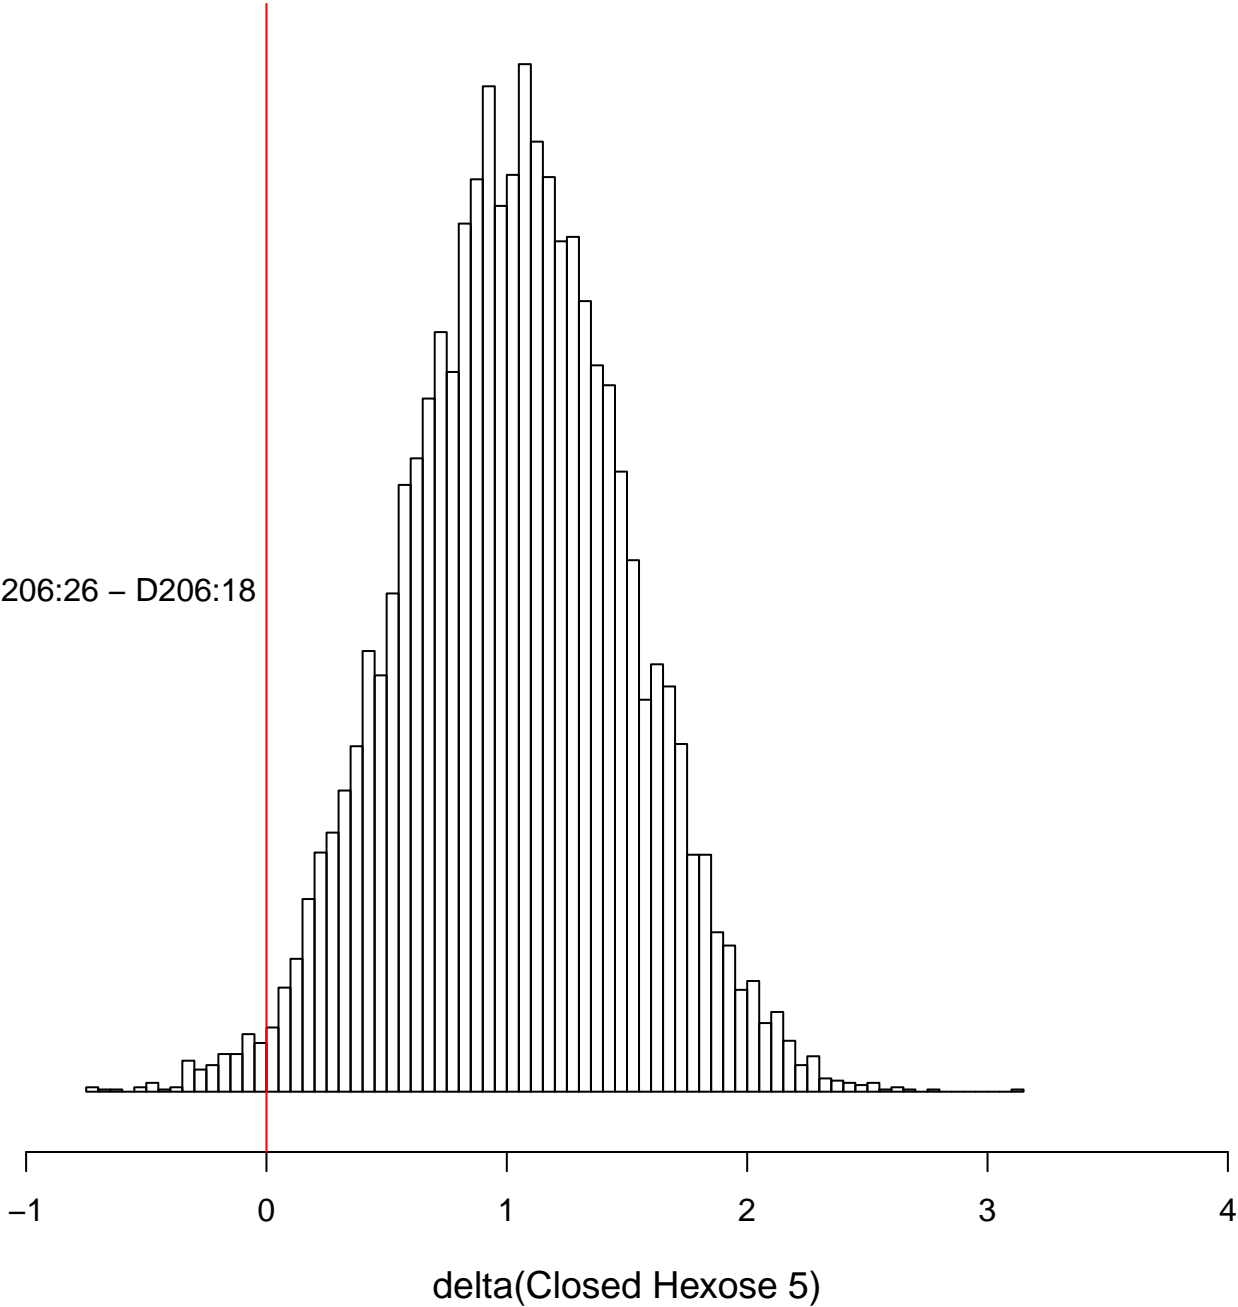



D206:26

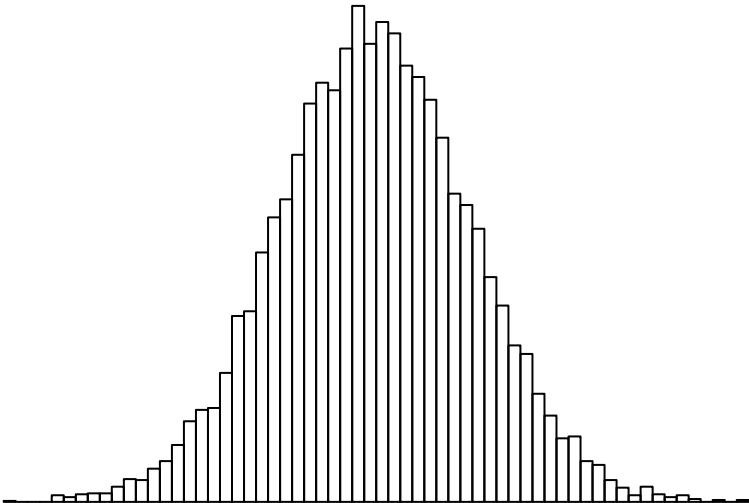

D206:18

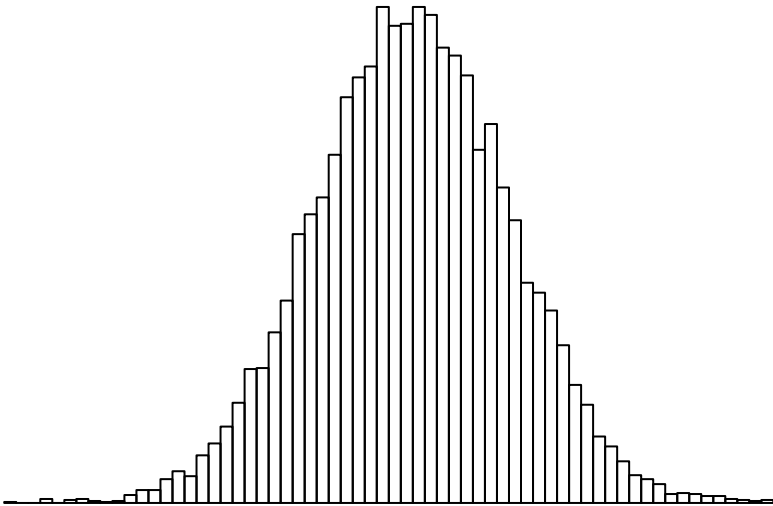

-10      -9      -8      -7      -6      -5

Open Pentose 1

D206:26 – D206:18

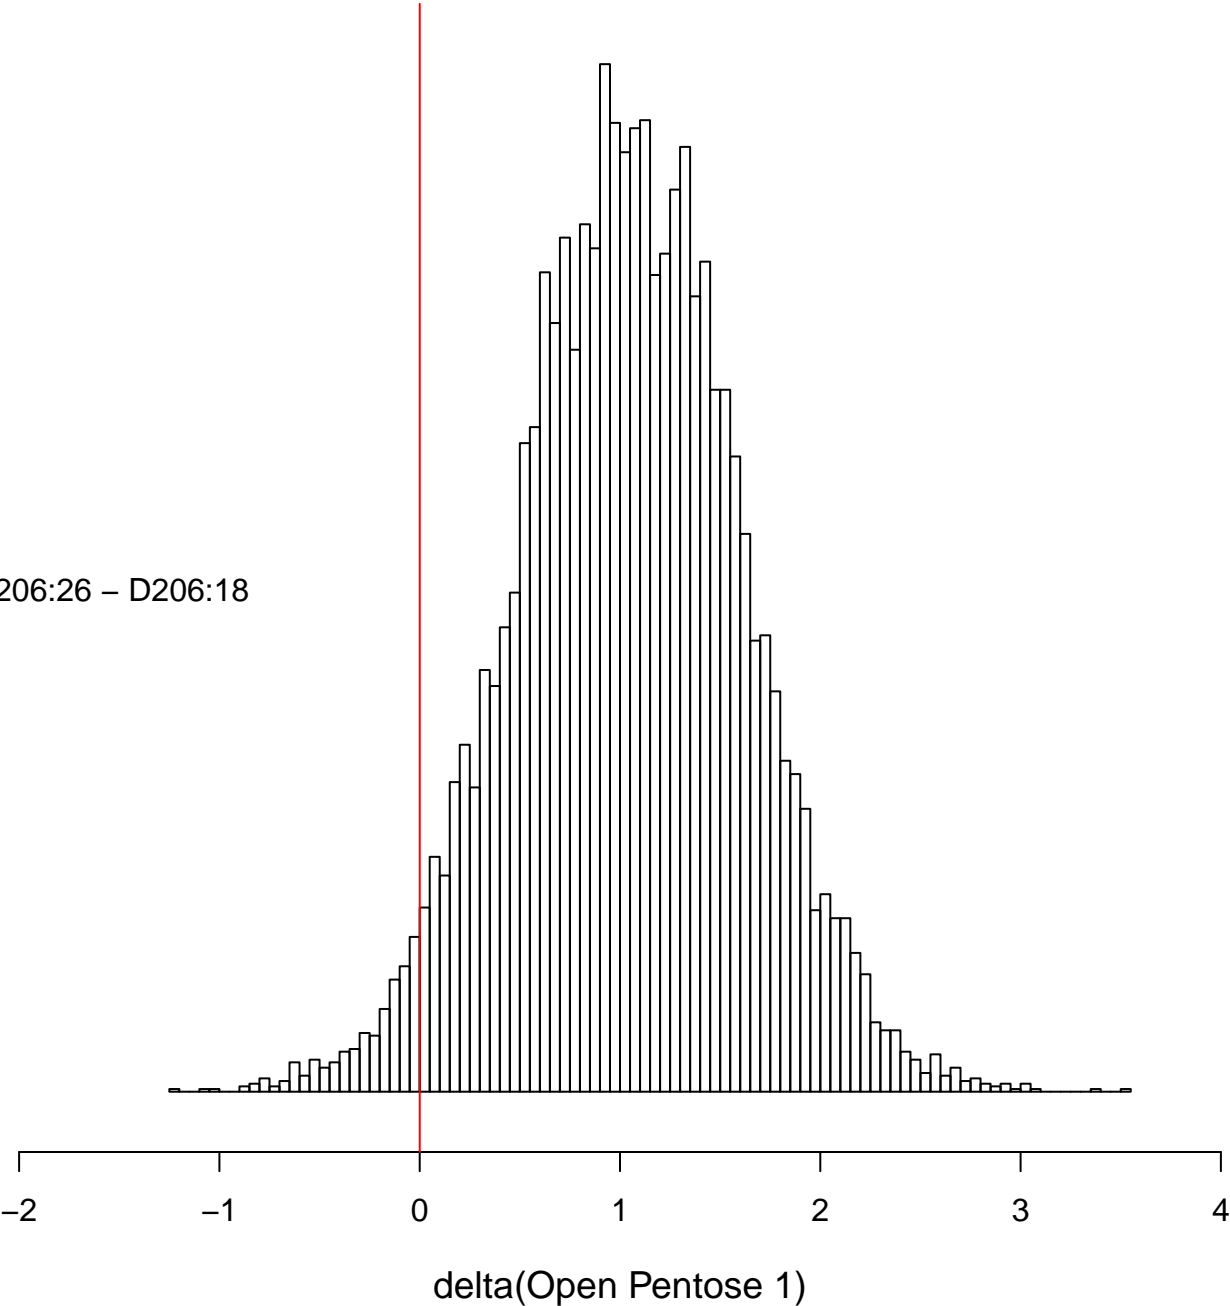

D206:26

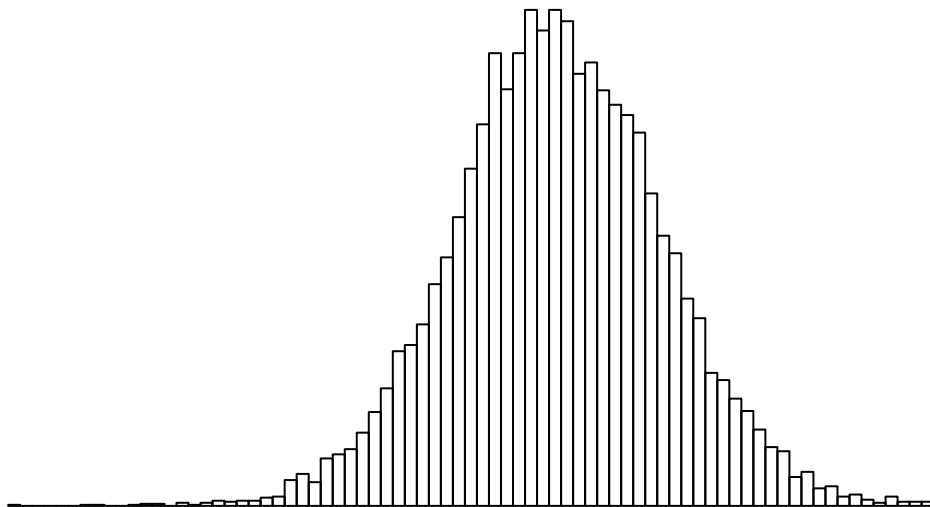

D206:18

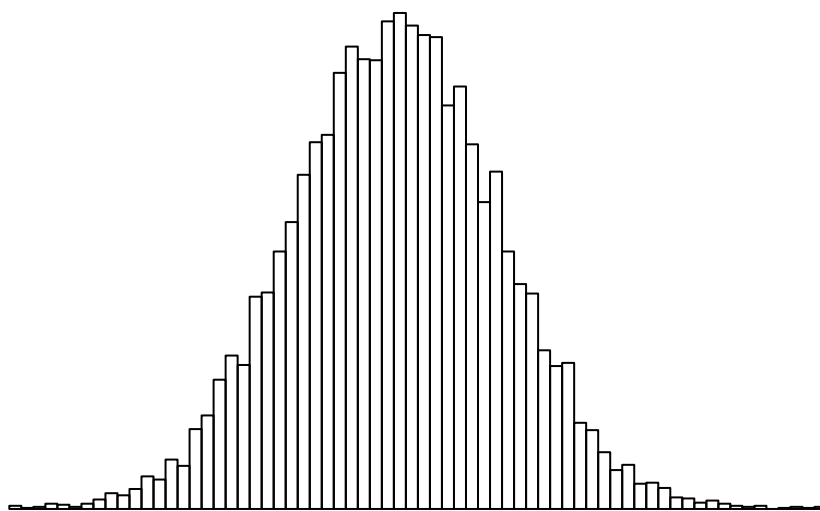

-8

-7

-6

-5

-4

-3

Open Pentose 2

D206:26 – D206:18

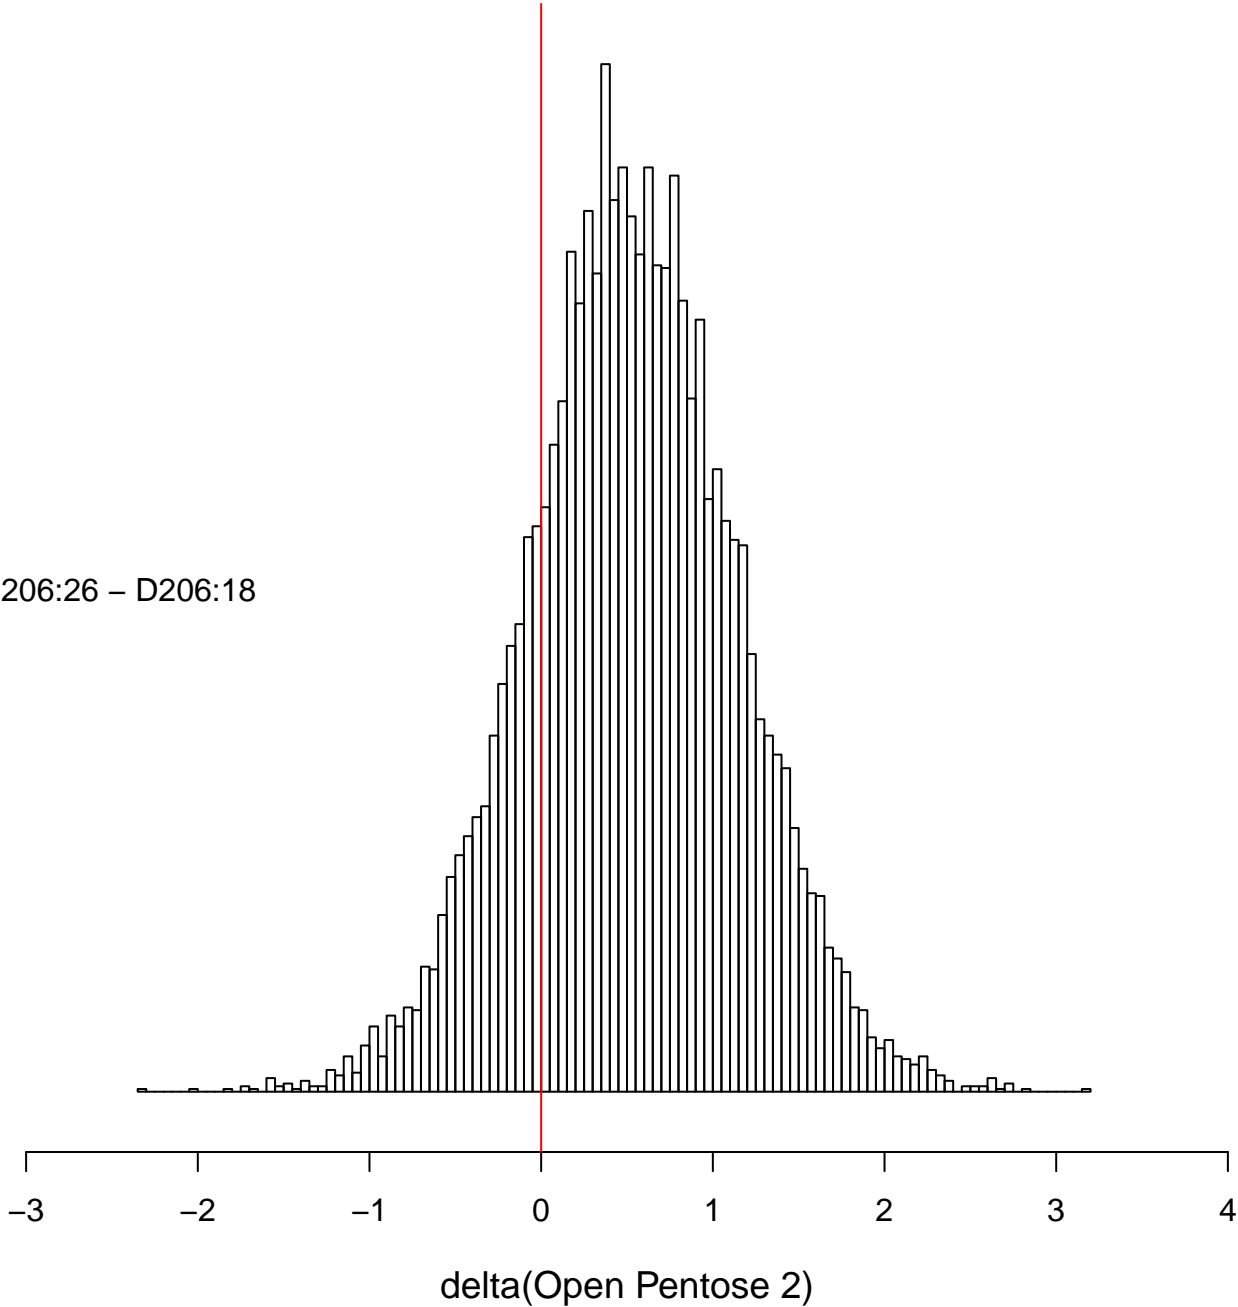

D206:26

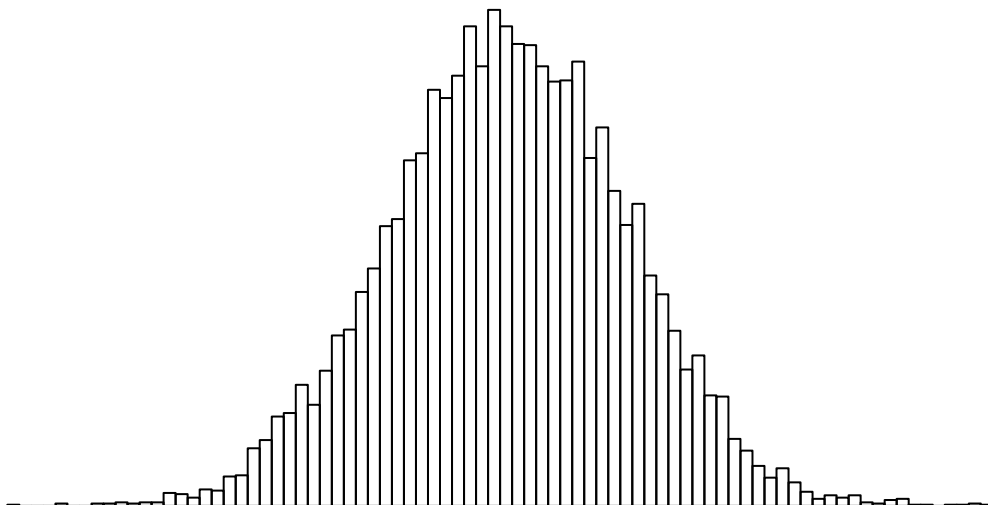

D206:18

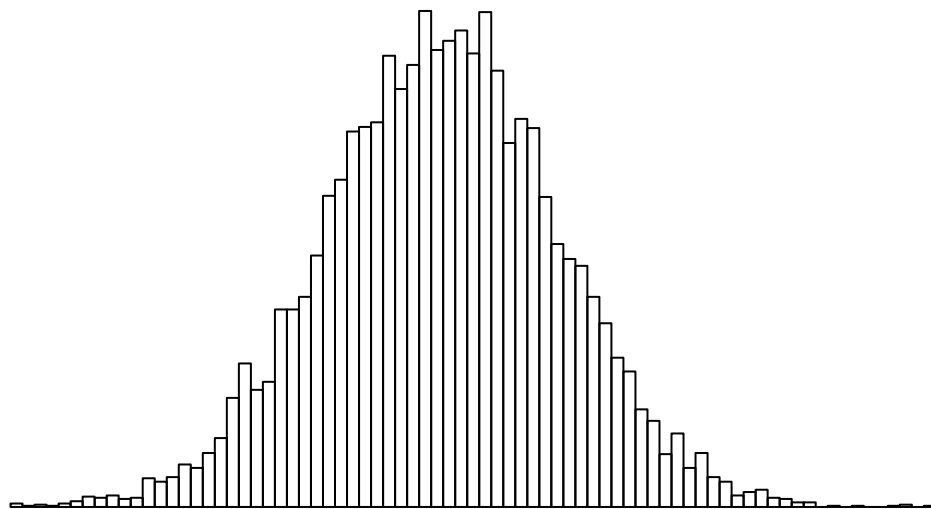

-8

-7

-6

-5

-4

-3

Closed Pentose 1

D206:26 – D206:18

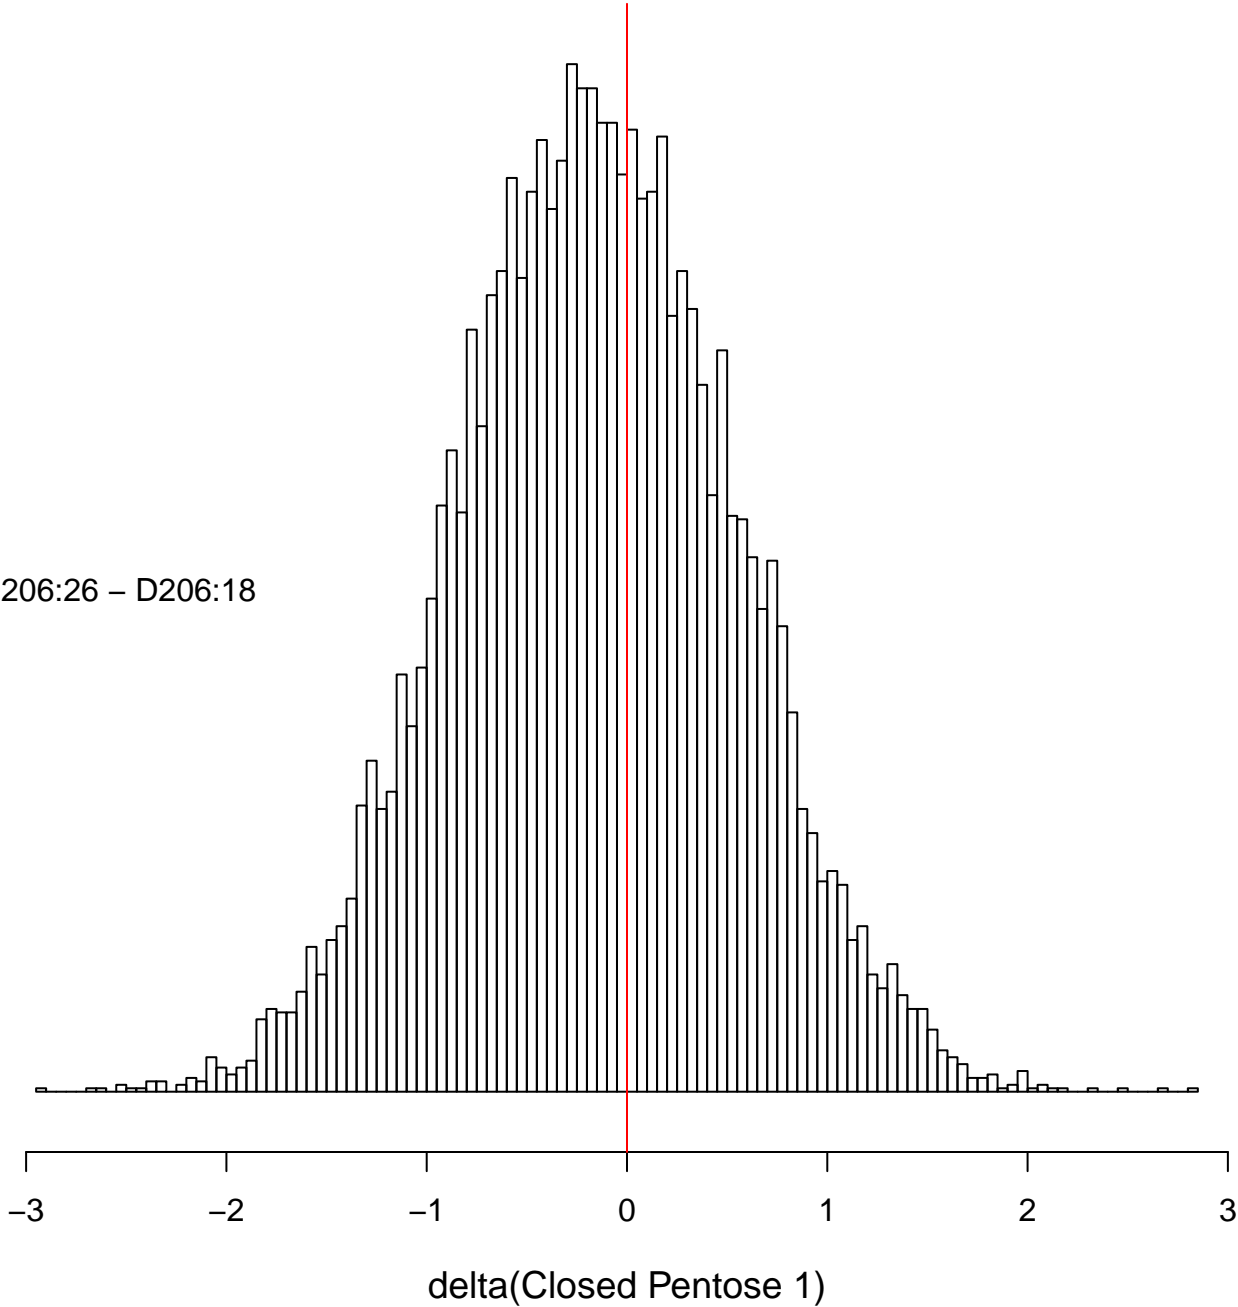

D206:26

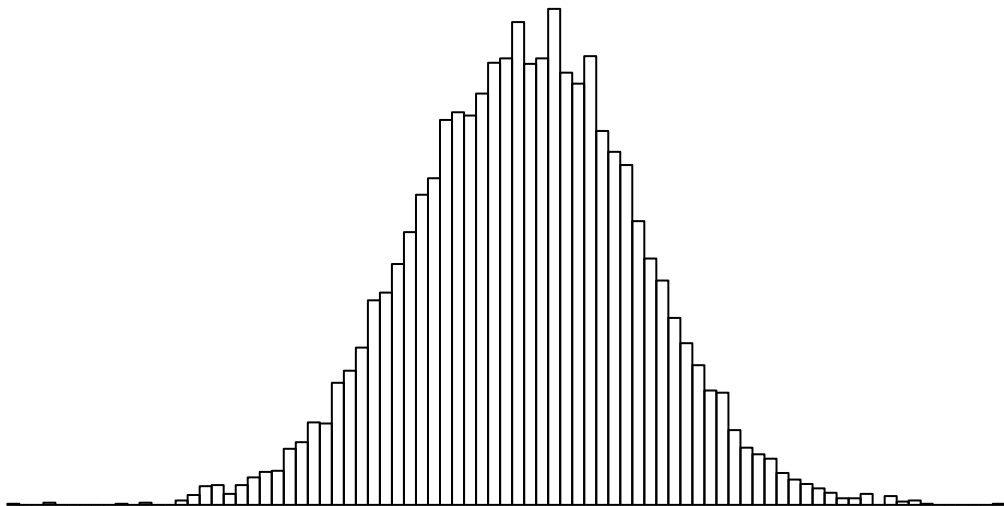

D206:18

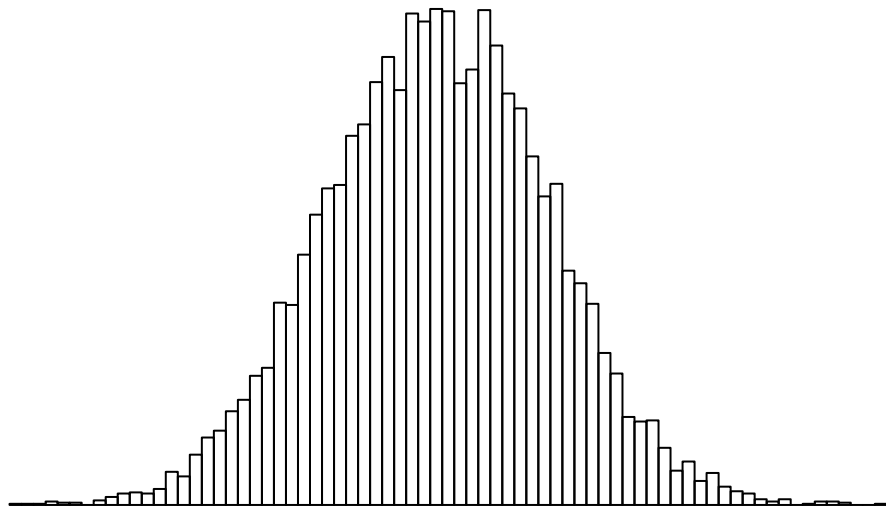

-8      -7      -6      -5      -4      -3

Closed Pentose 2

D206:26 – D206:18

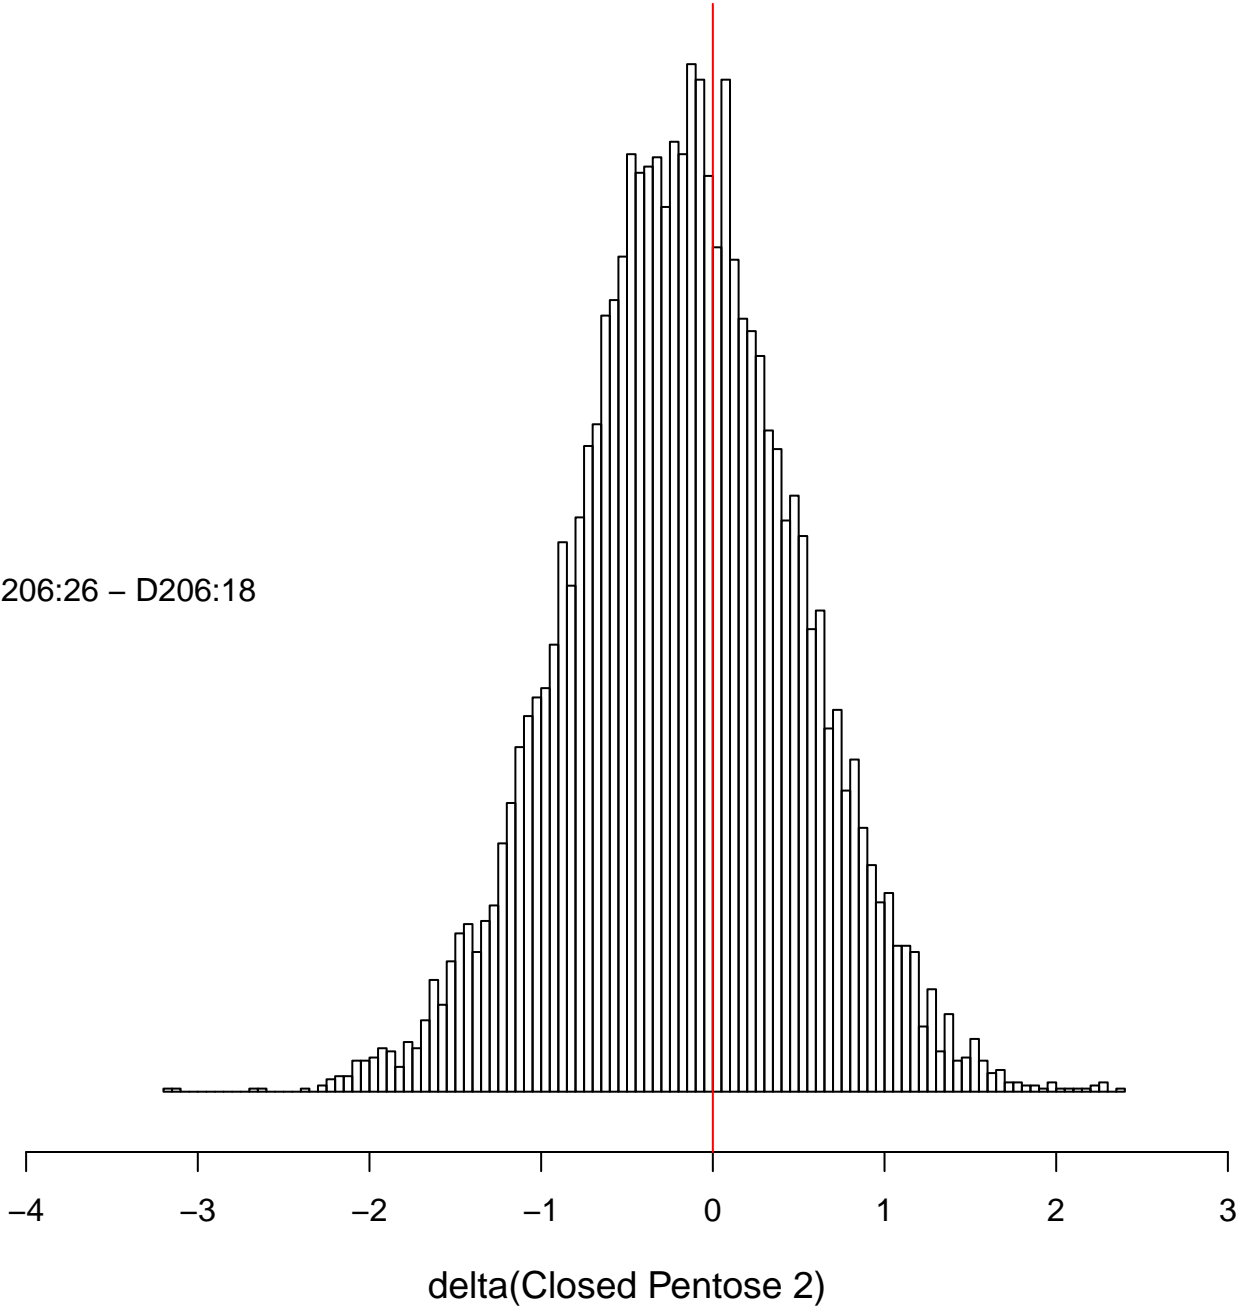



D206:26

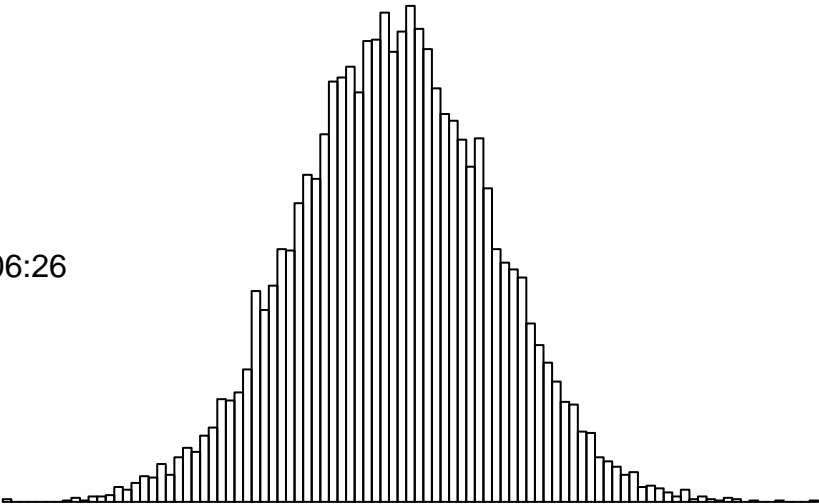

D206:18

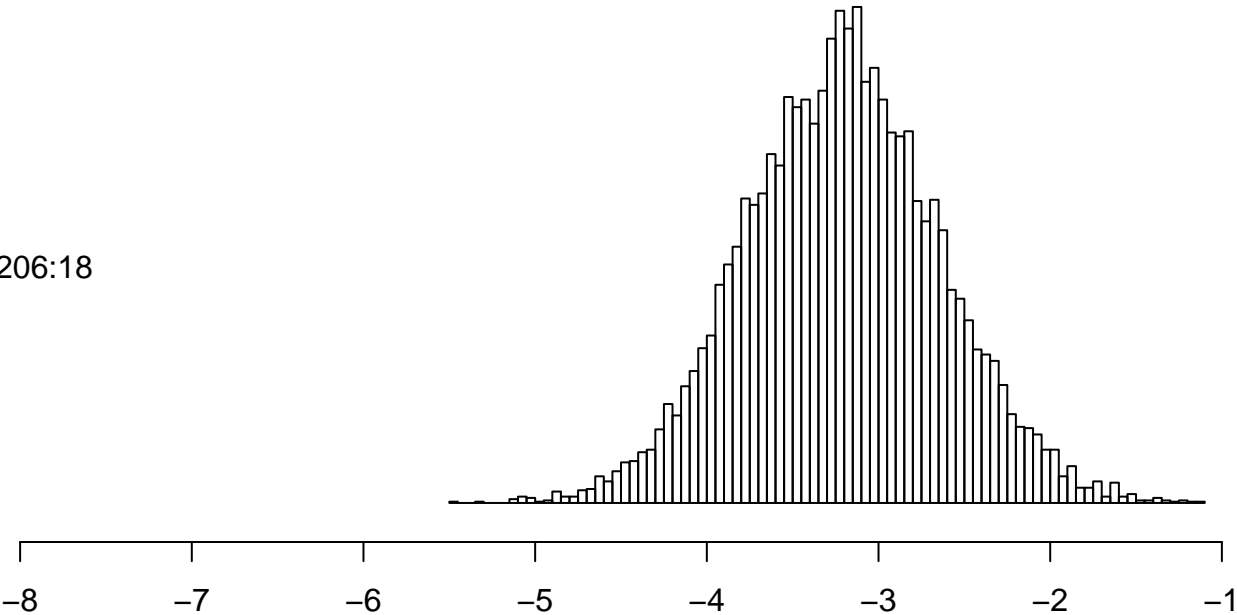

Pentose 1

D206:26 – D206:18

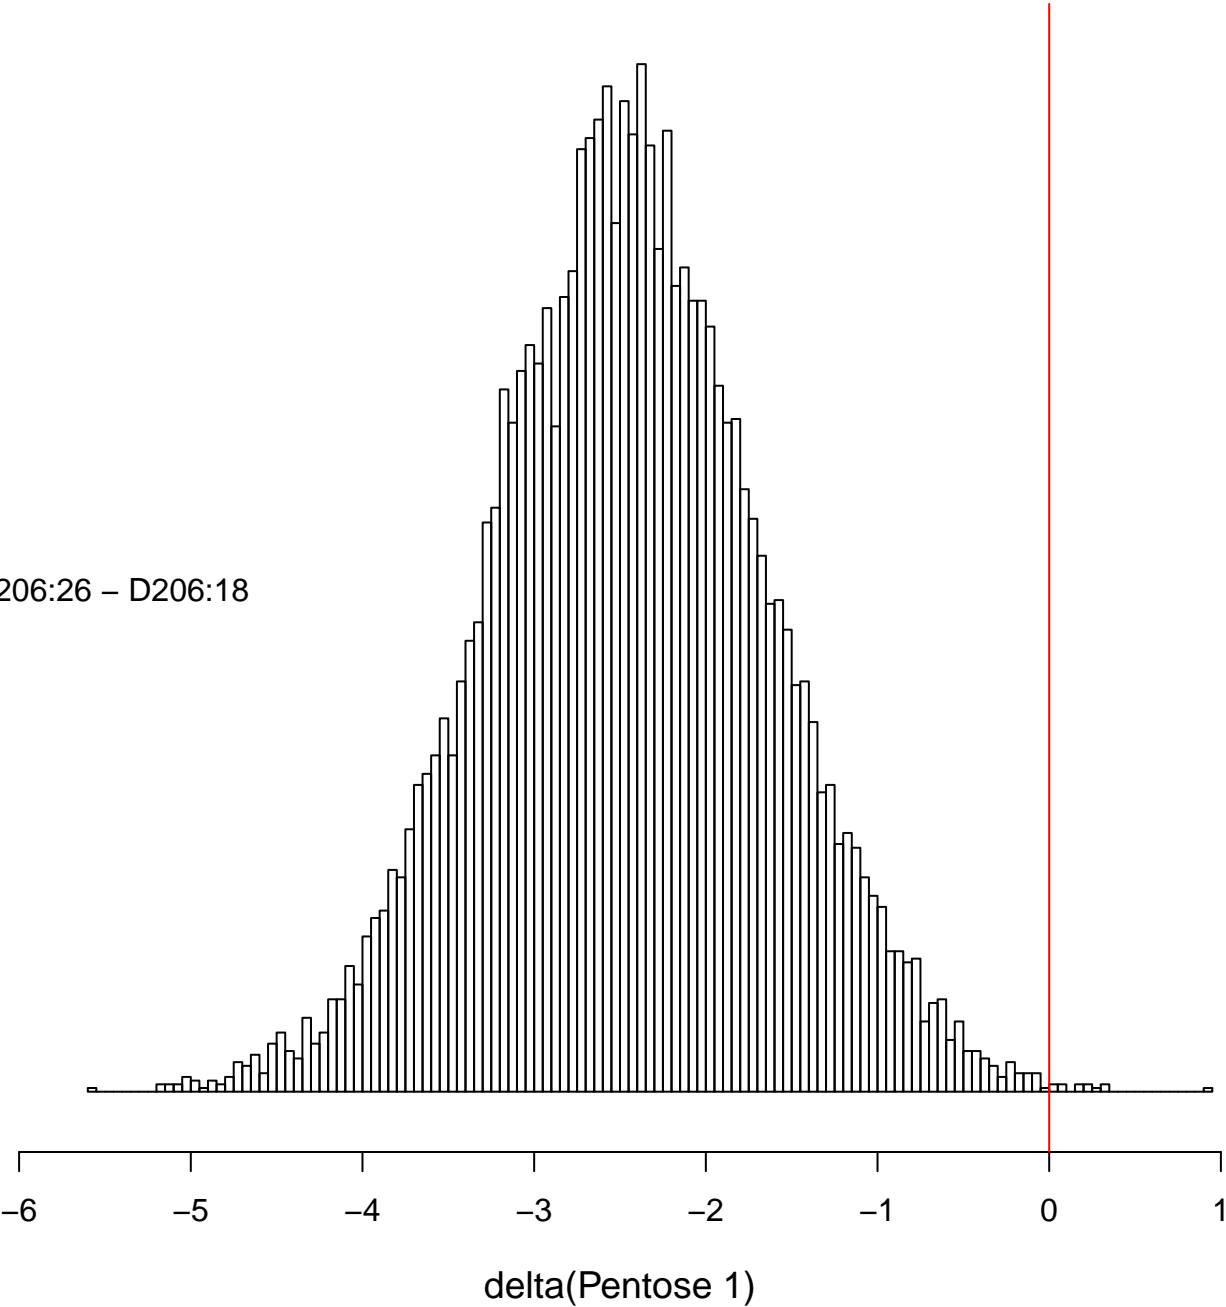

D206:26

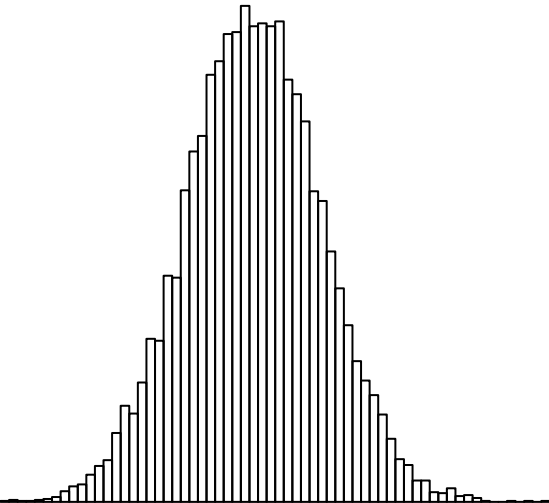

D206:18

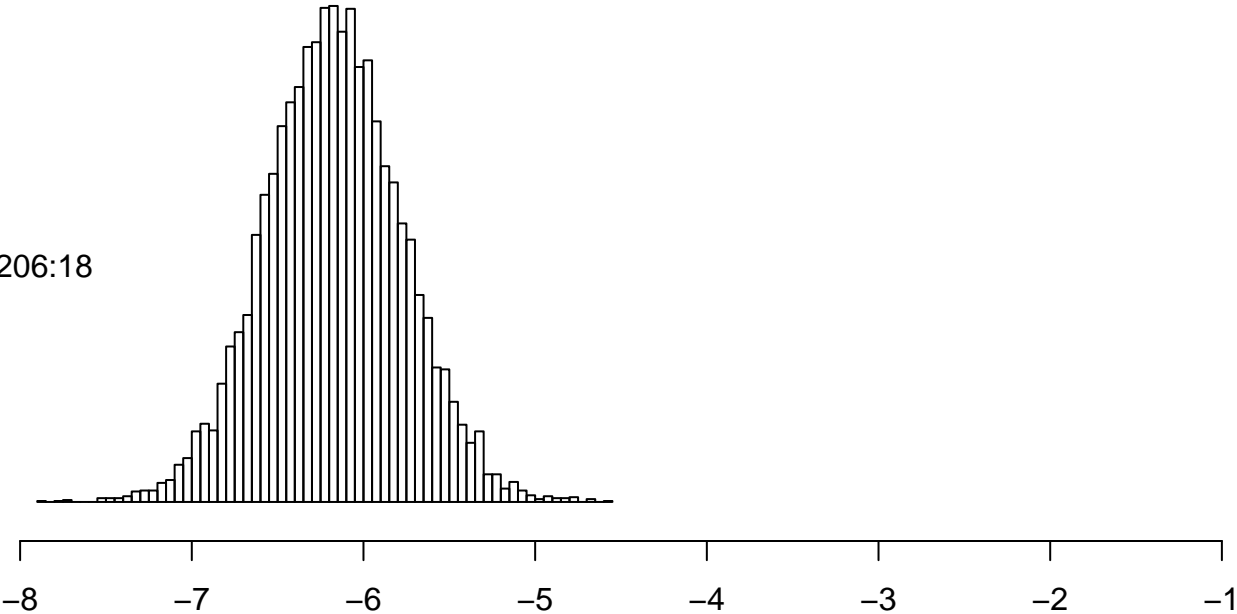

Open Pentose 3

D206:26 – D206:18

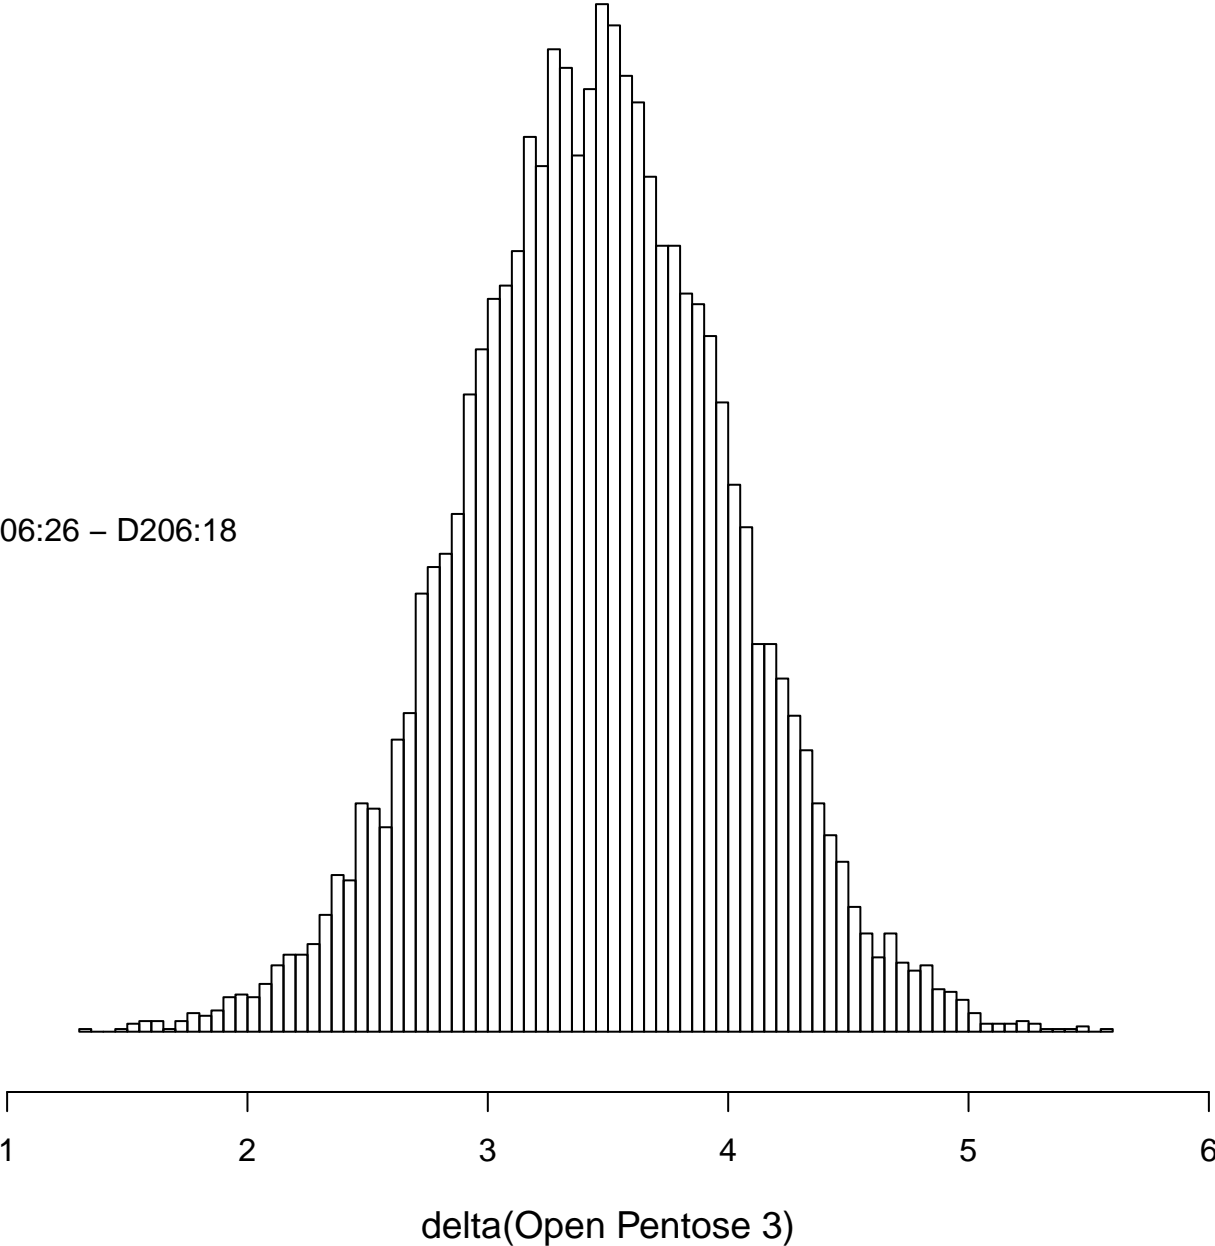

D206:26

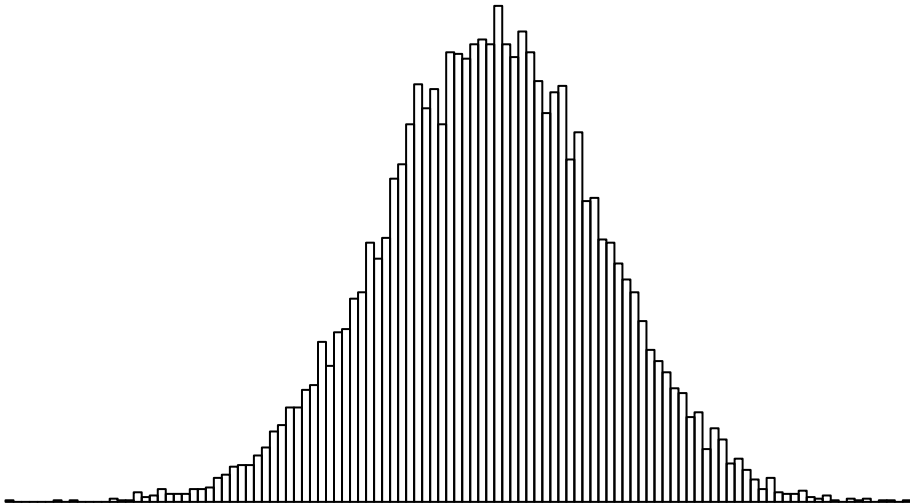

D206:18

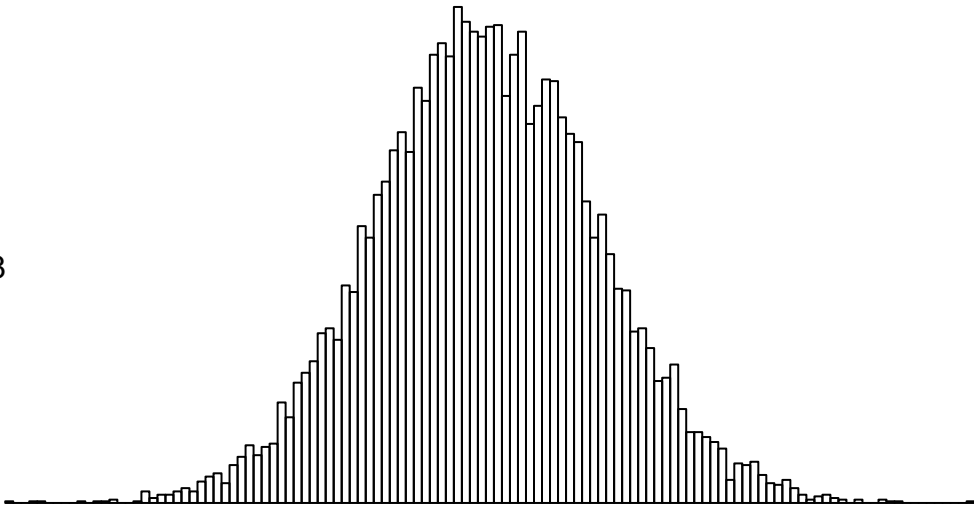

-8.5      -8.0      -7.5      -7.0      -6.5      -6.0      -5.5

Sugar 1

D206:26 – D206:18

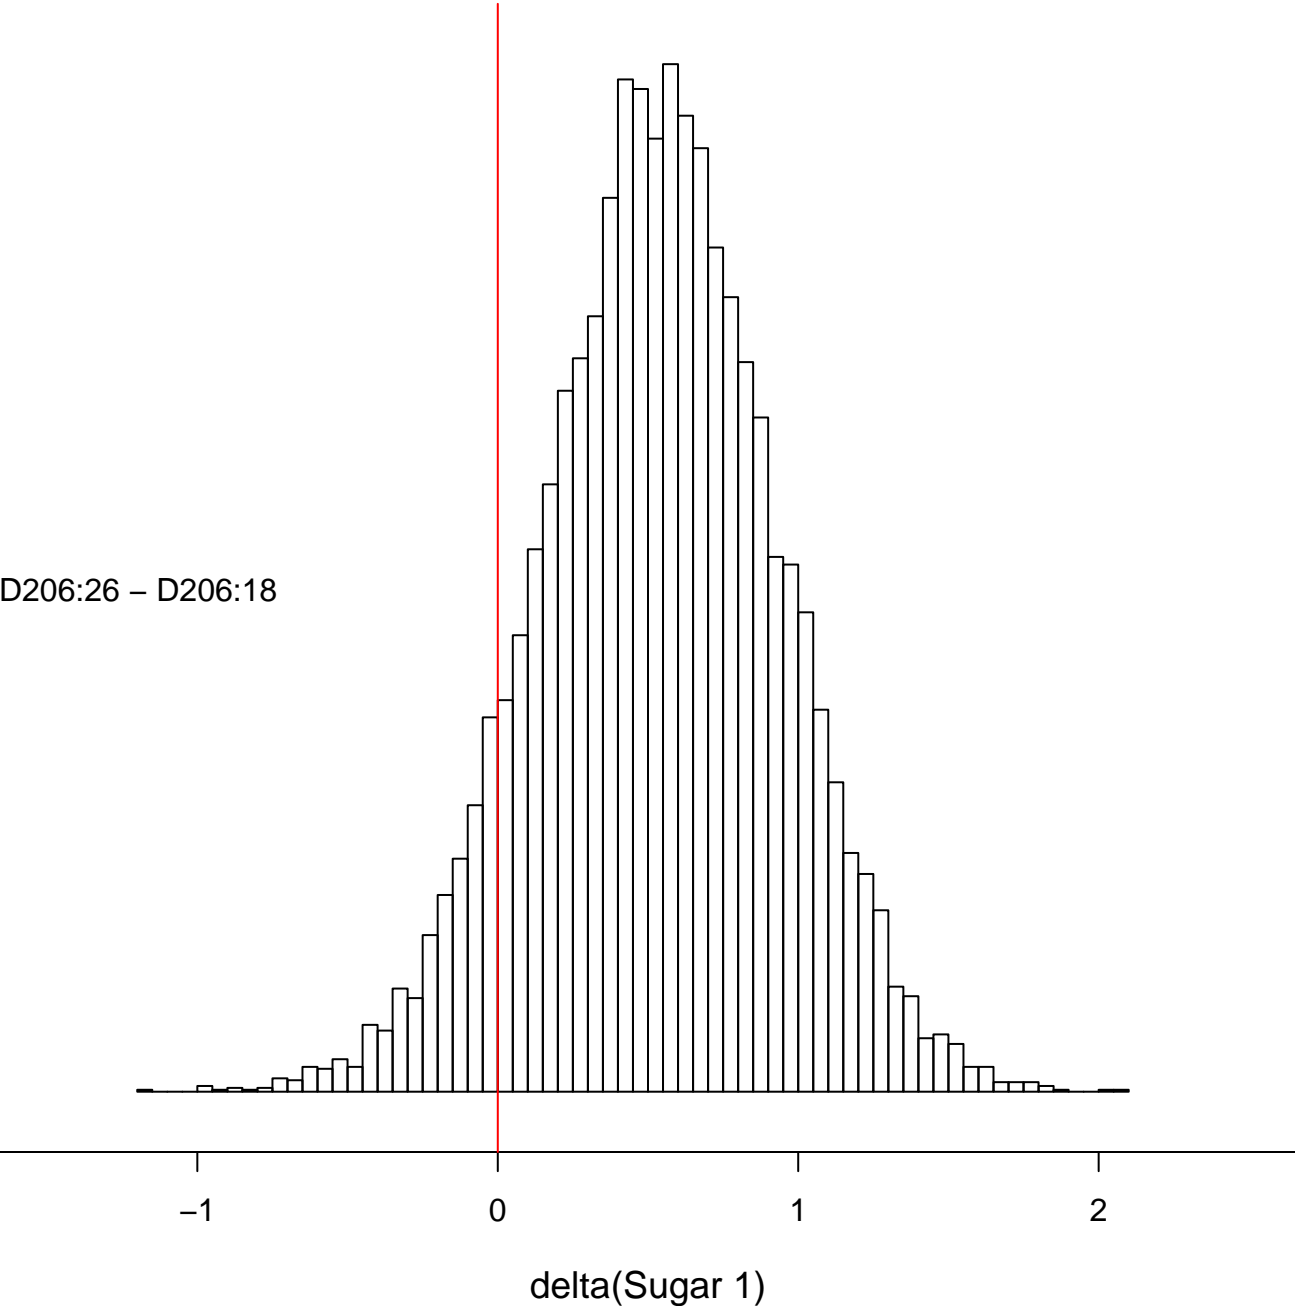

D206:26

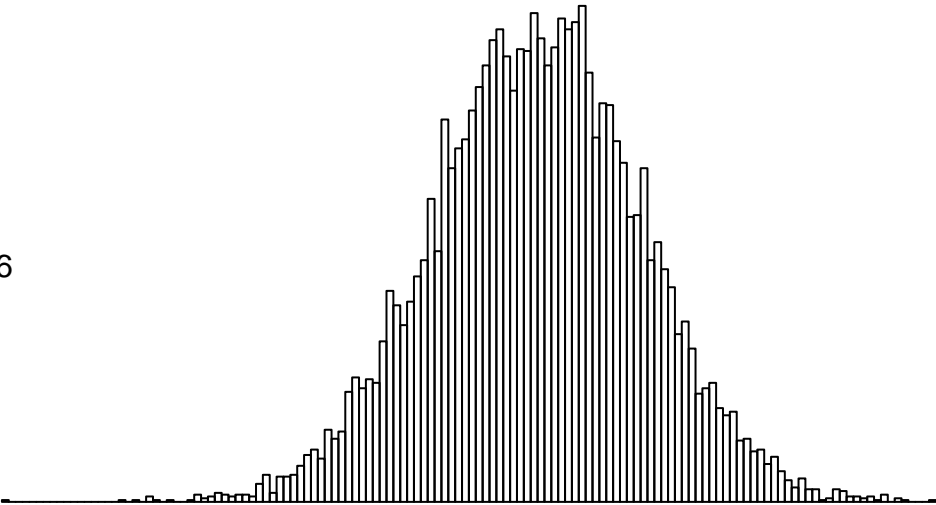

D206:18

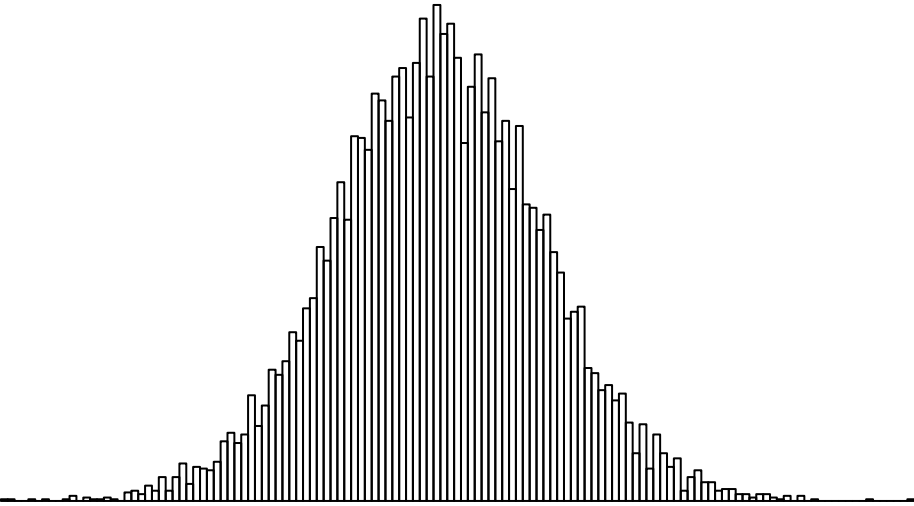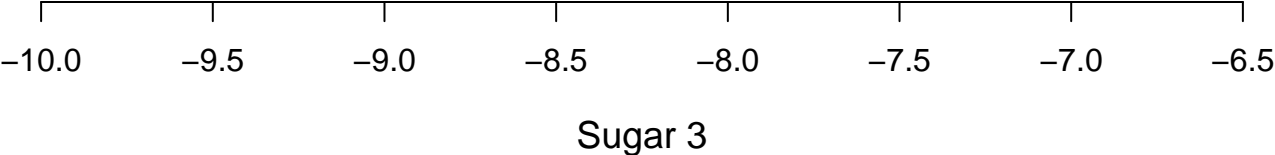

D206:26 – D206:18

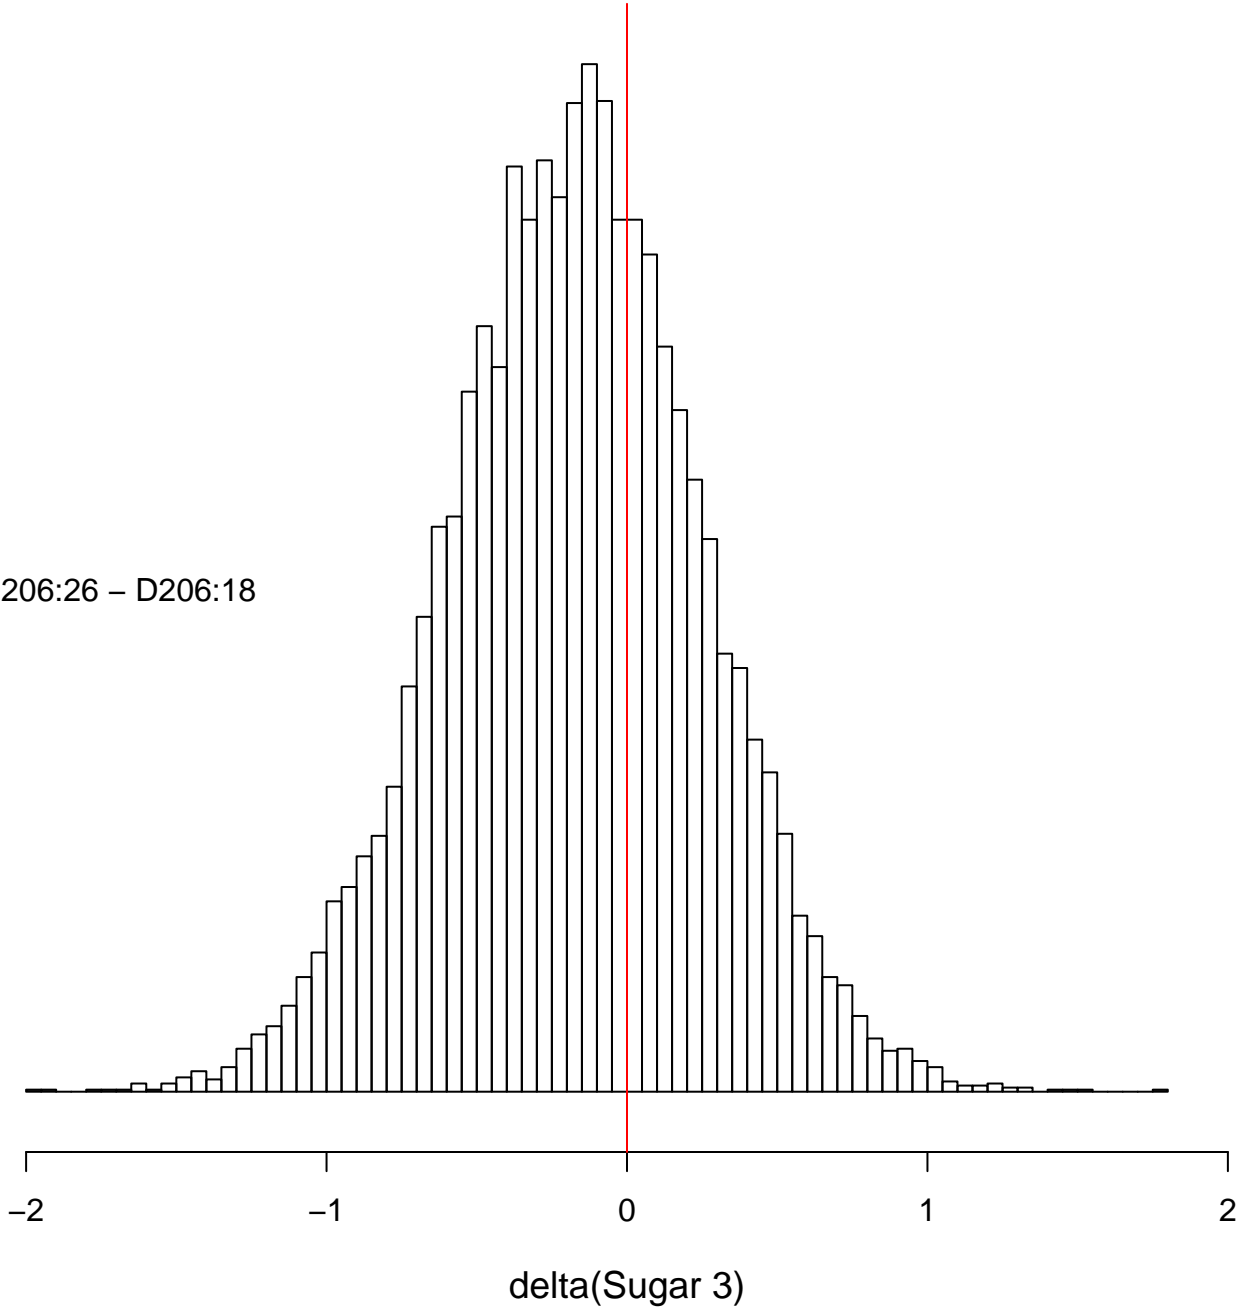



D206:26

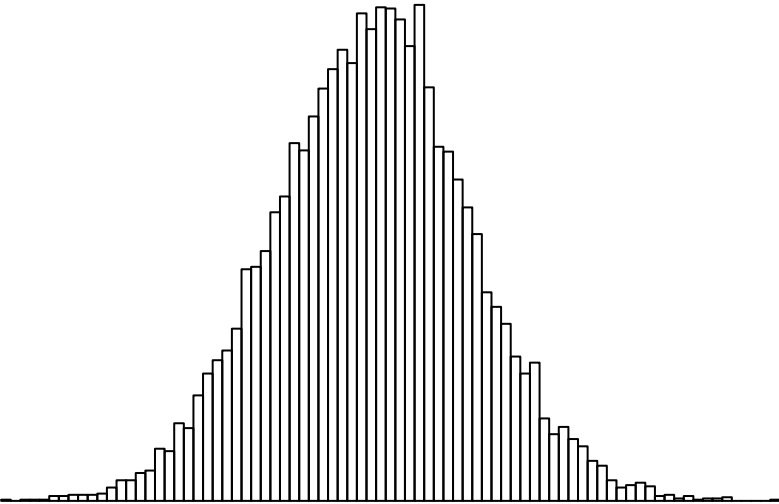

D206:18

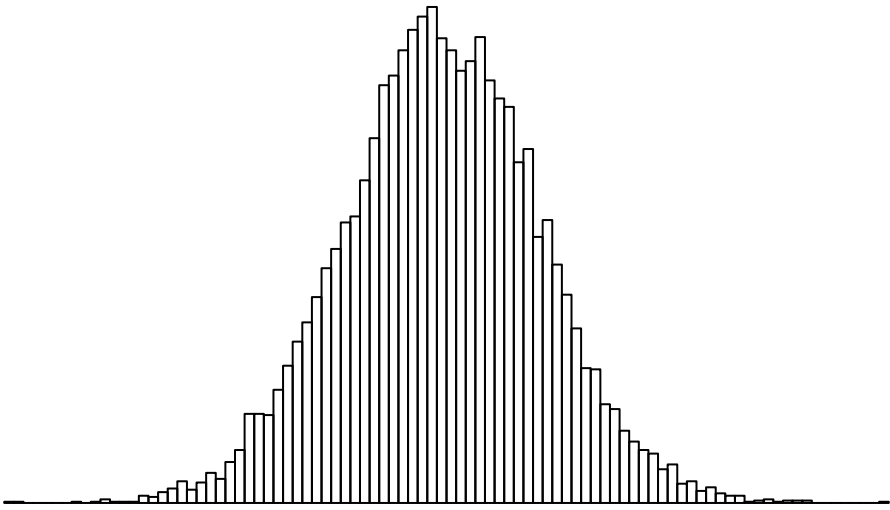

-8.5                      -8.0                      -7.5                      -7.0                      -6.5                      -6.0

Sugar 4

D206:26 – D206:18

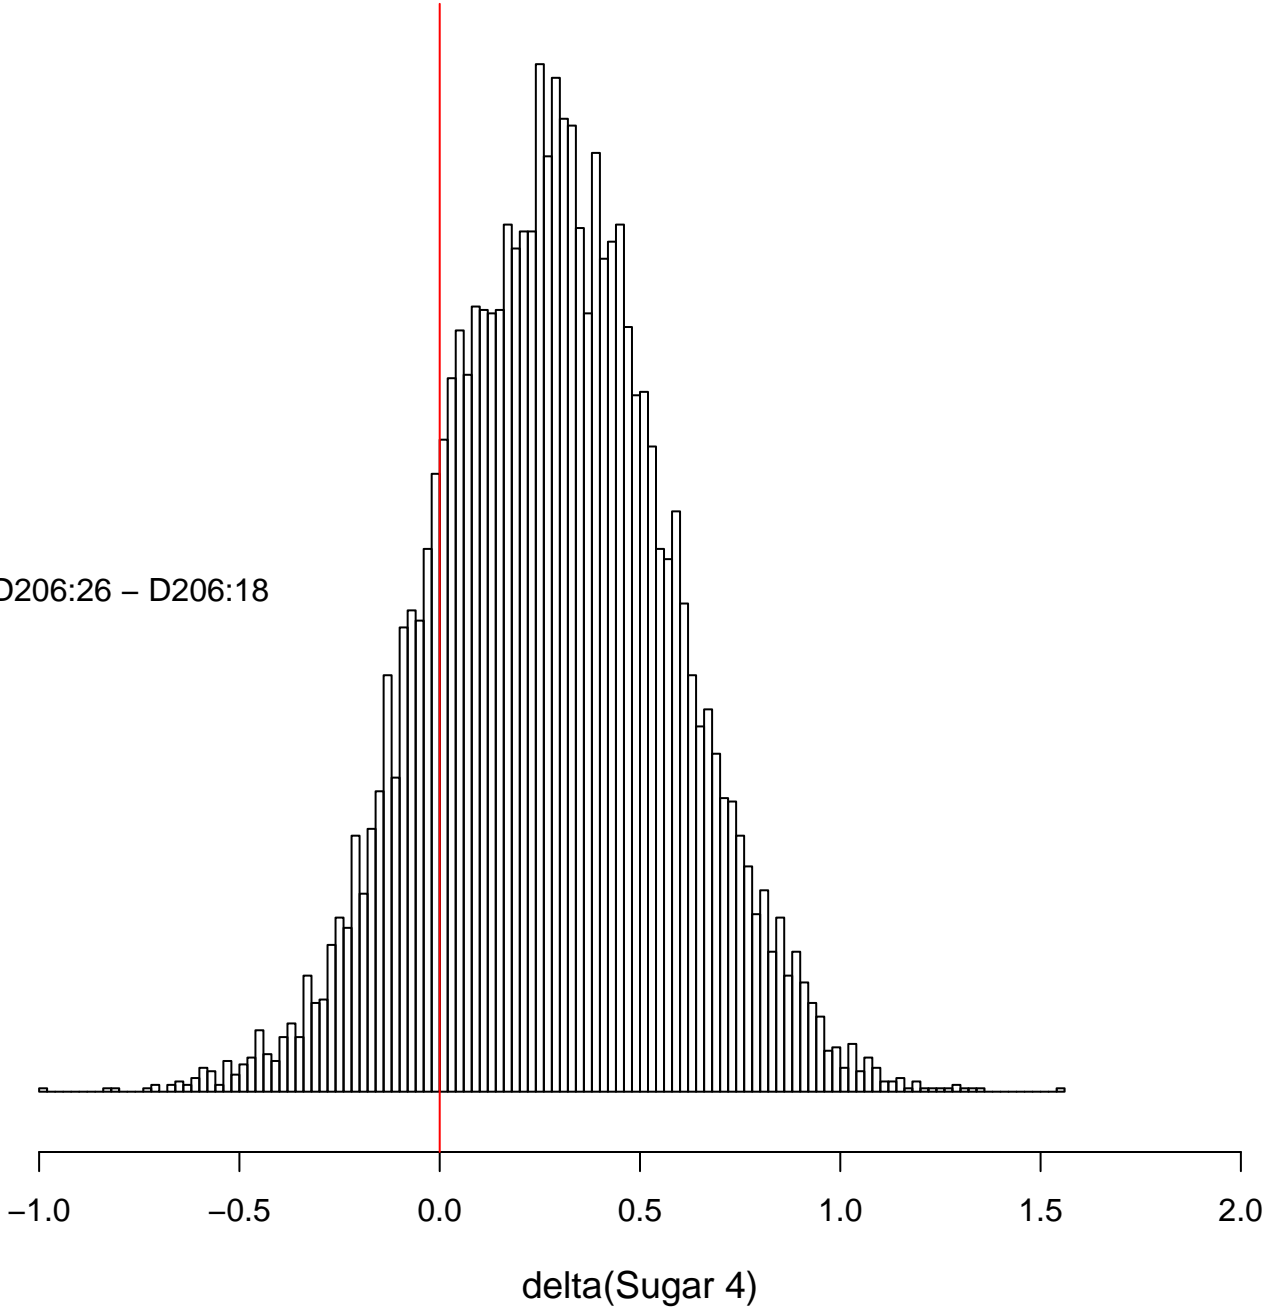

D206:26

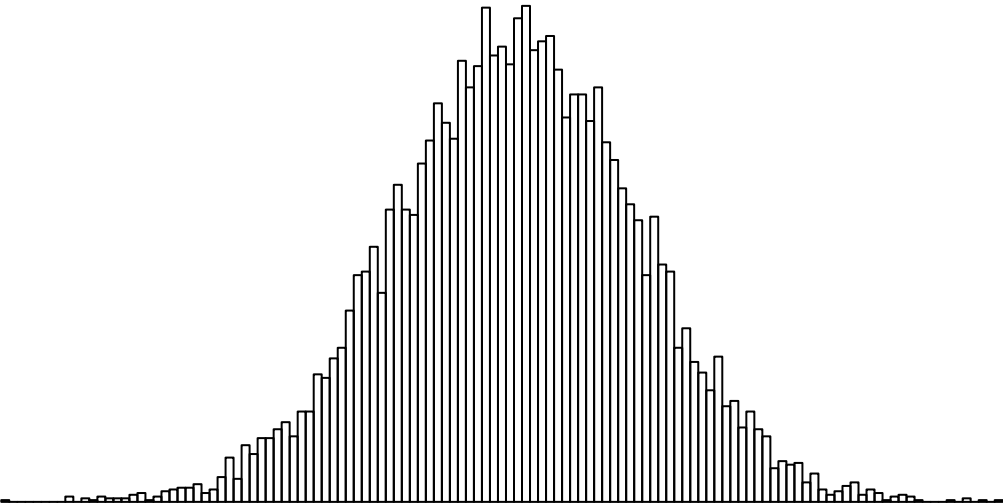

D206:18

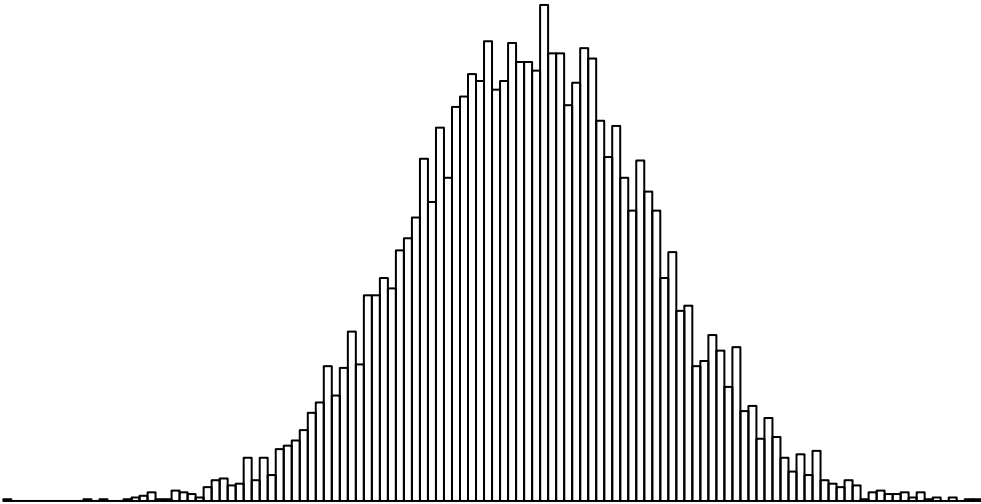

-8.0      -7.5      -7.0      -6.5      -6.0      -5.5      -5.0

Sugar 5

D206:26 – D206:18

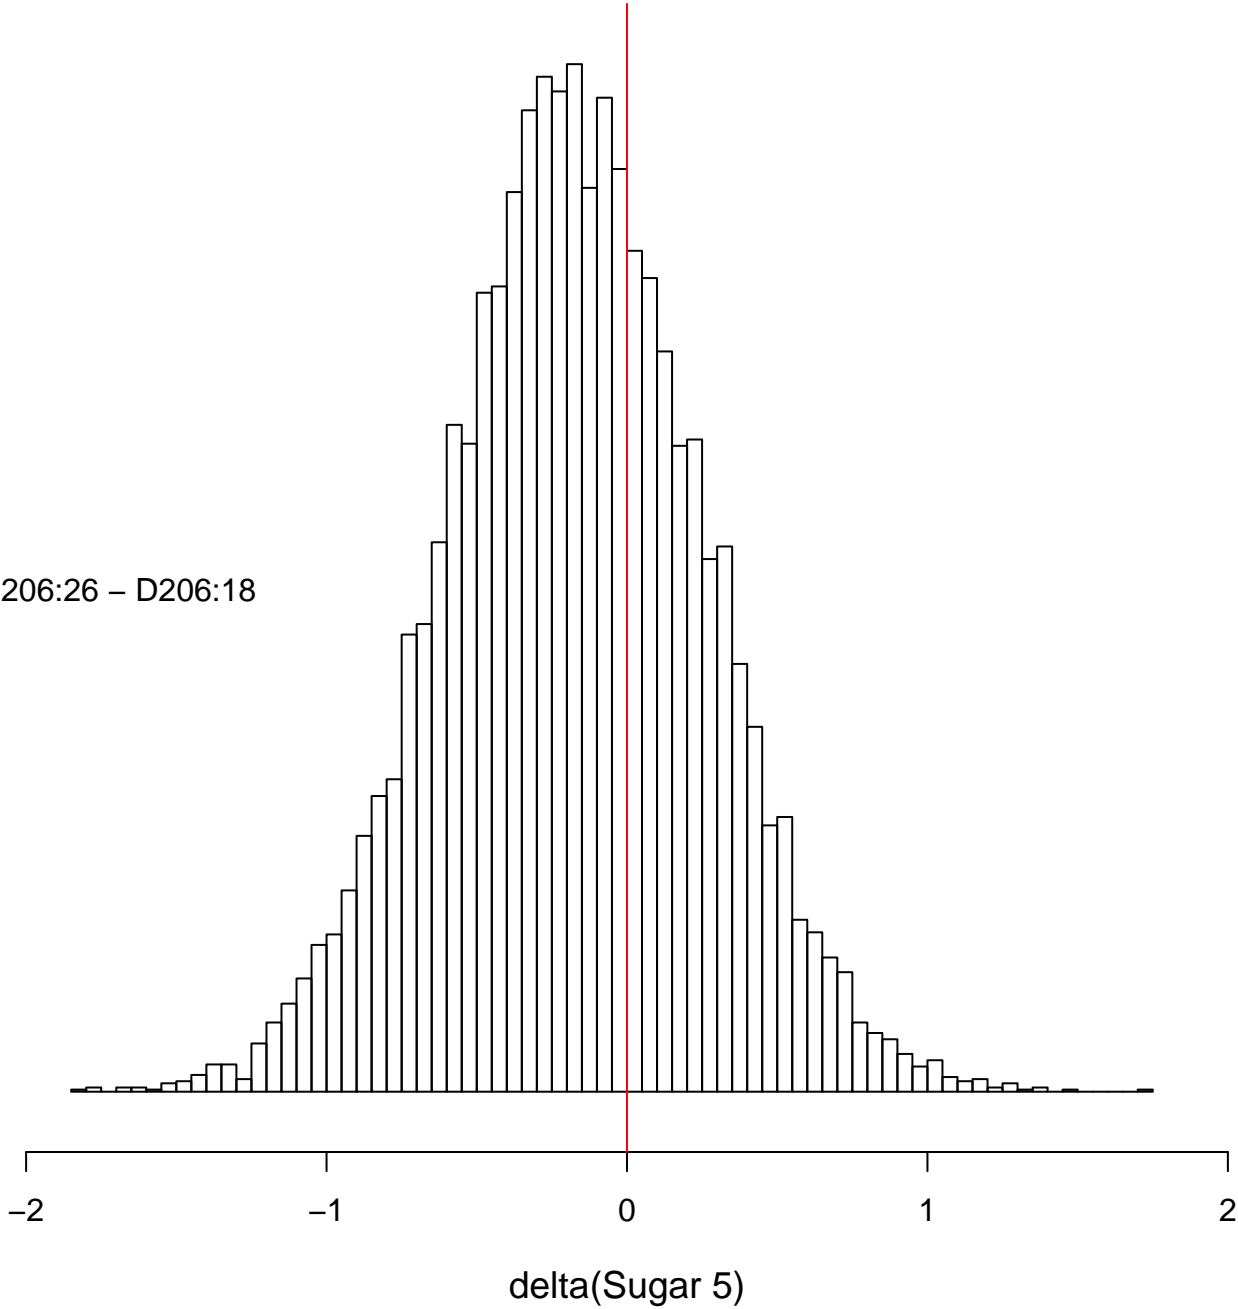

D206:26

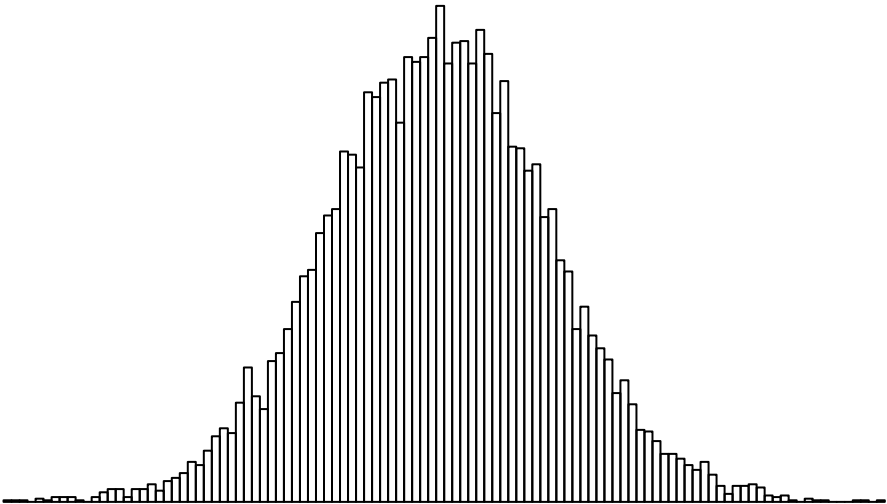

D206:18

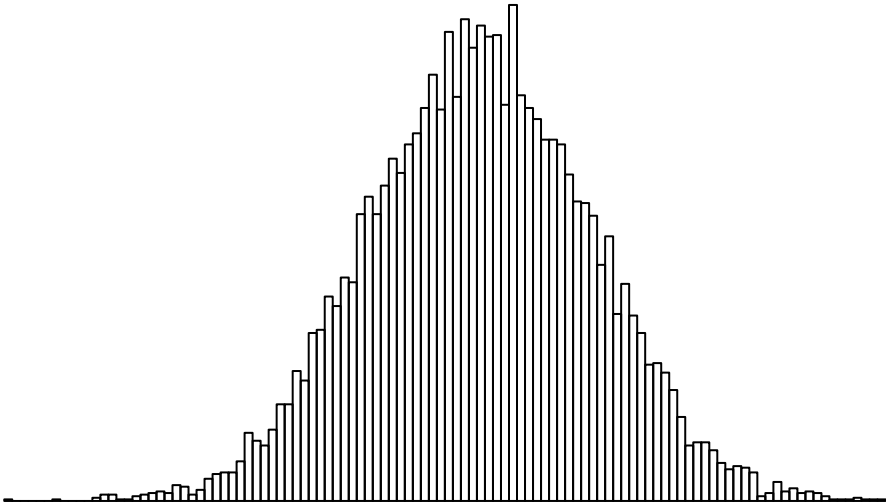

-9.0      -8.5      -8.0      -7.5      -7.0      -6.5      -6.0

Sugar 6

D206:26 – D206:18

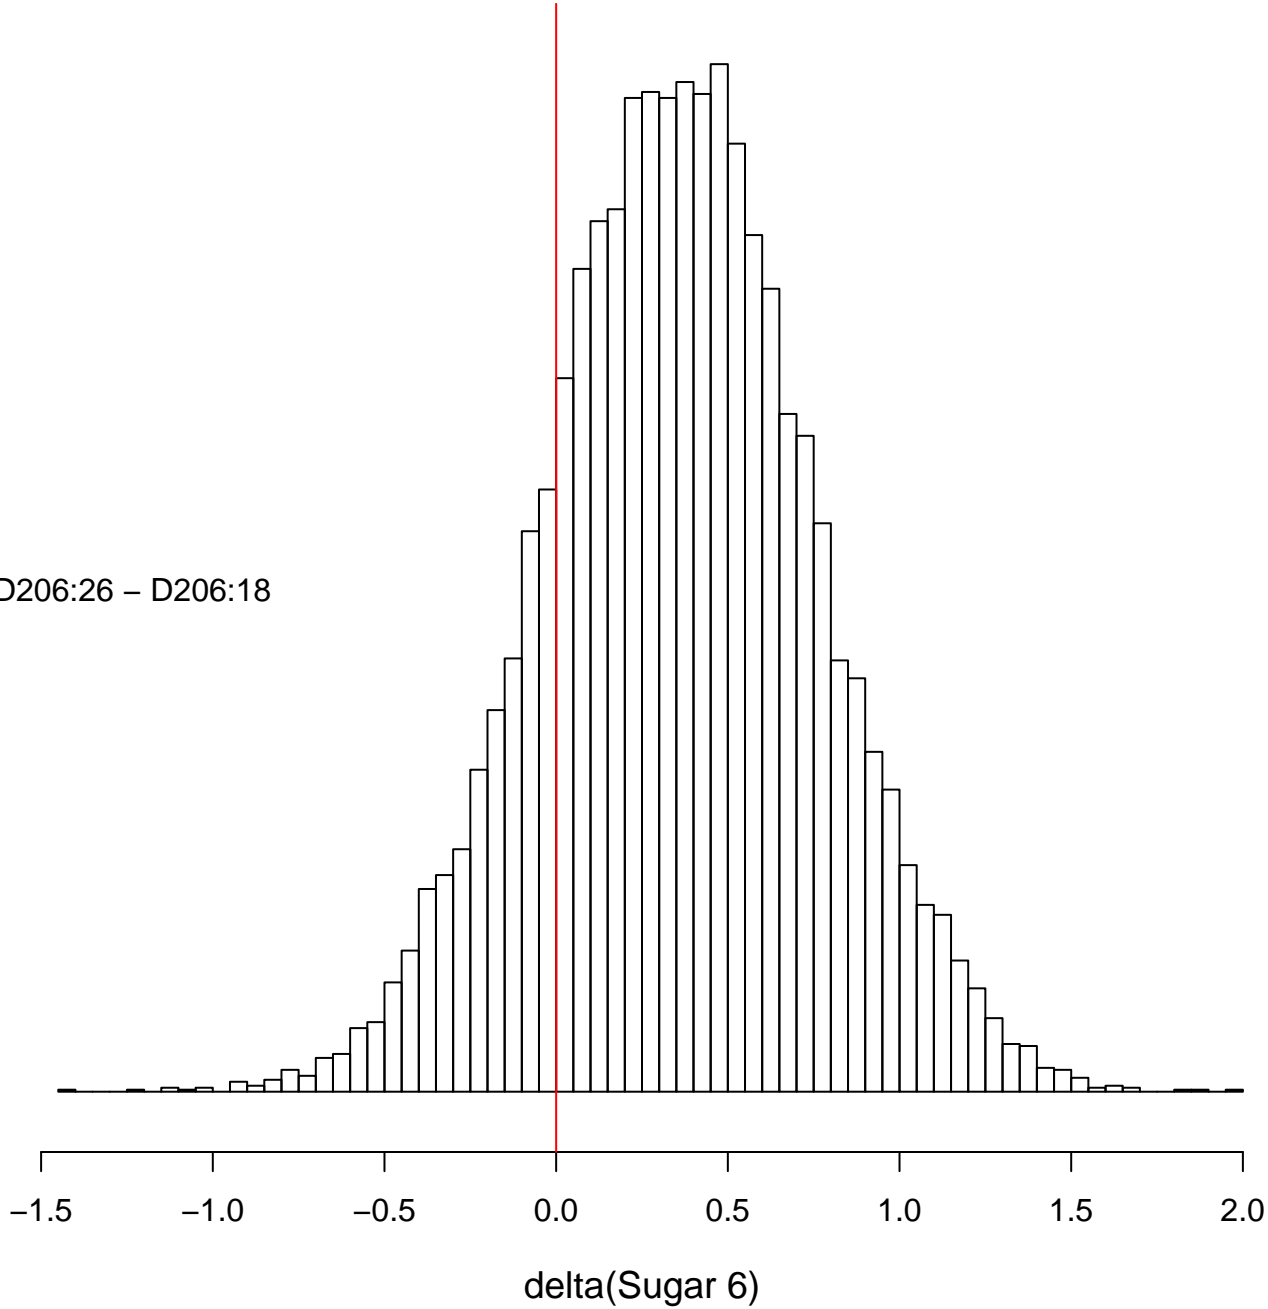

D206:26

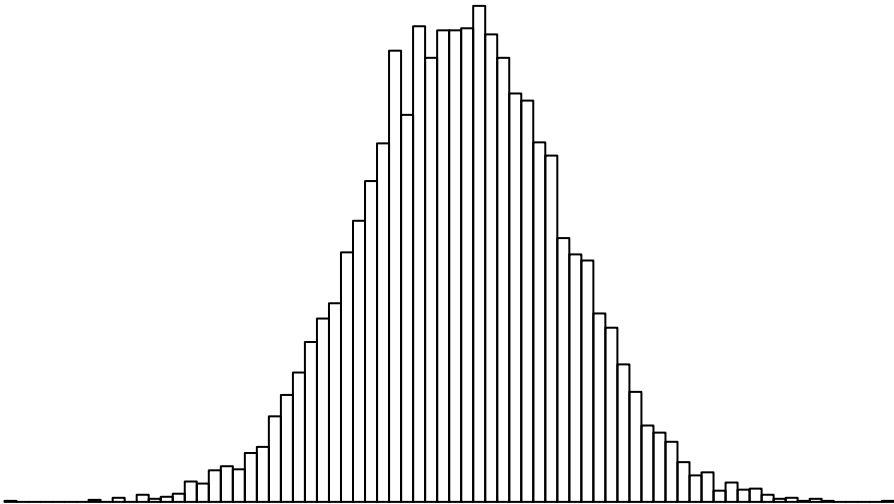

D206:18

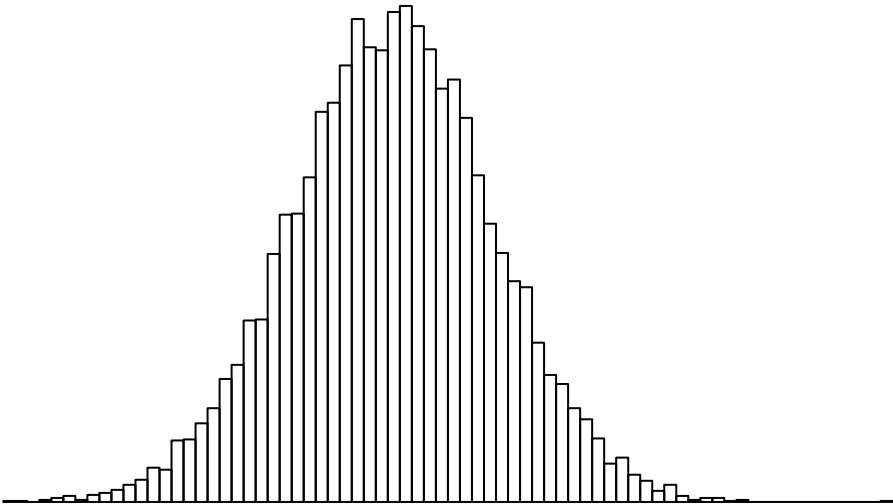

-8                      -7                      -6                      -5                      -4                      -3

Sugar 7

D206:26 – D206:18

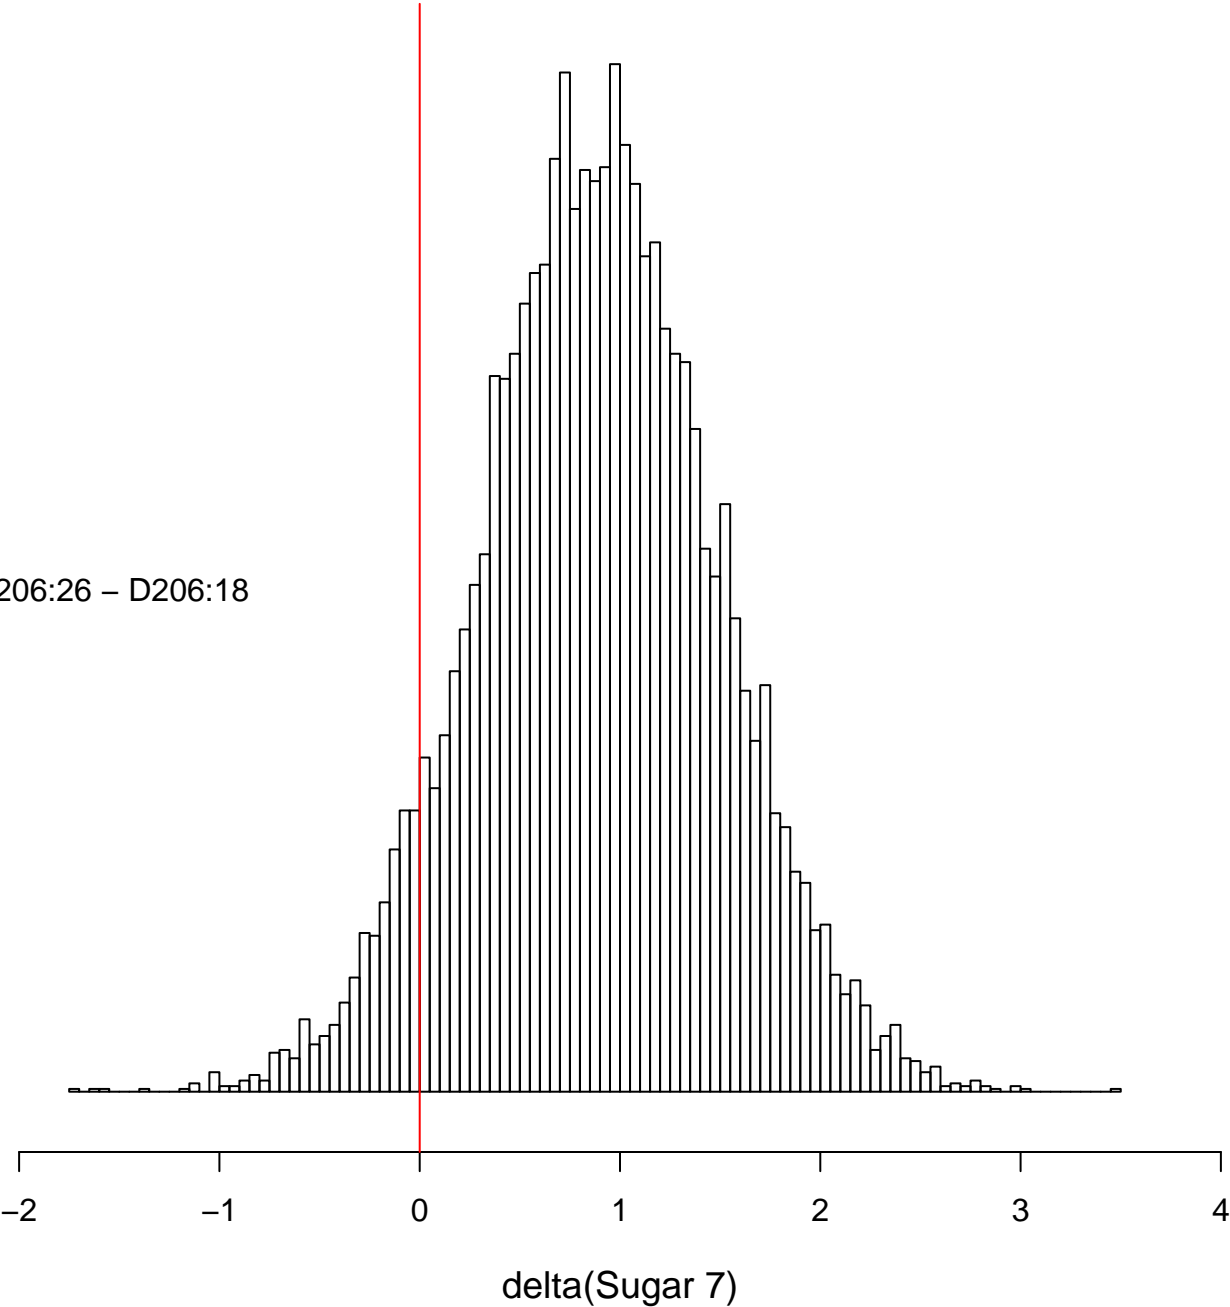



D206:26

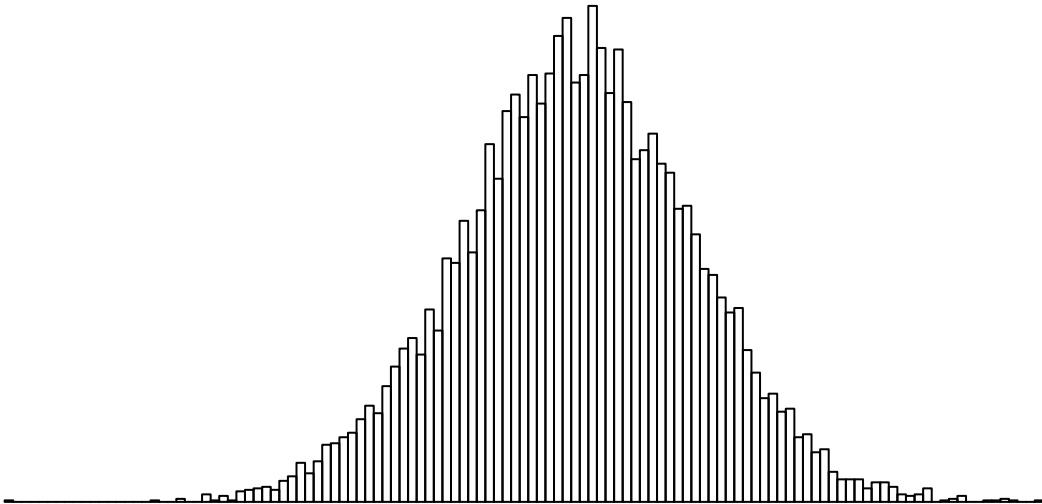

D206:18

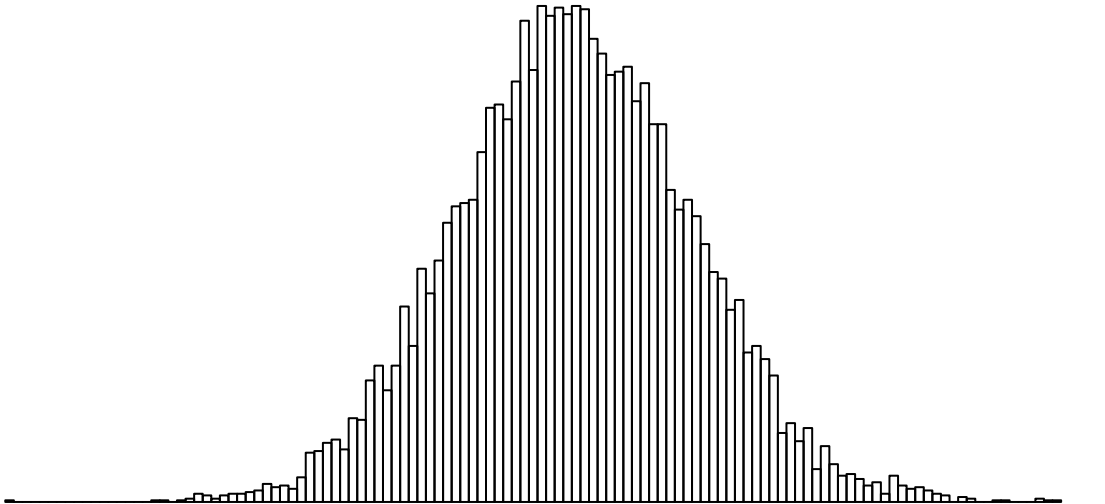

-9      -8      -7      -6      -5      -4      -3      -2

Sugar 8

D206:26 – D206:18

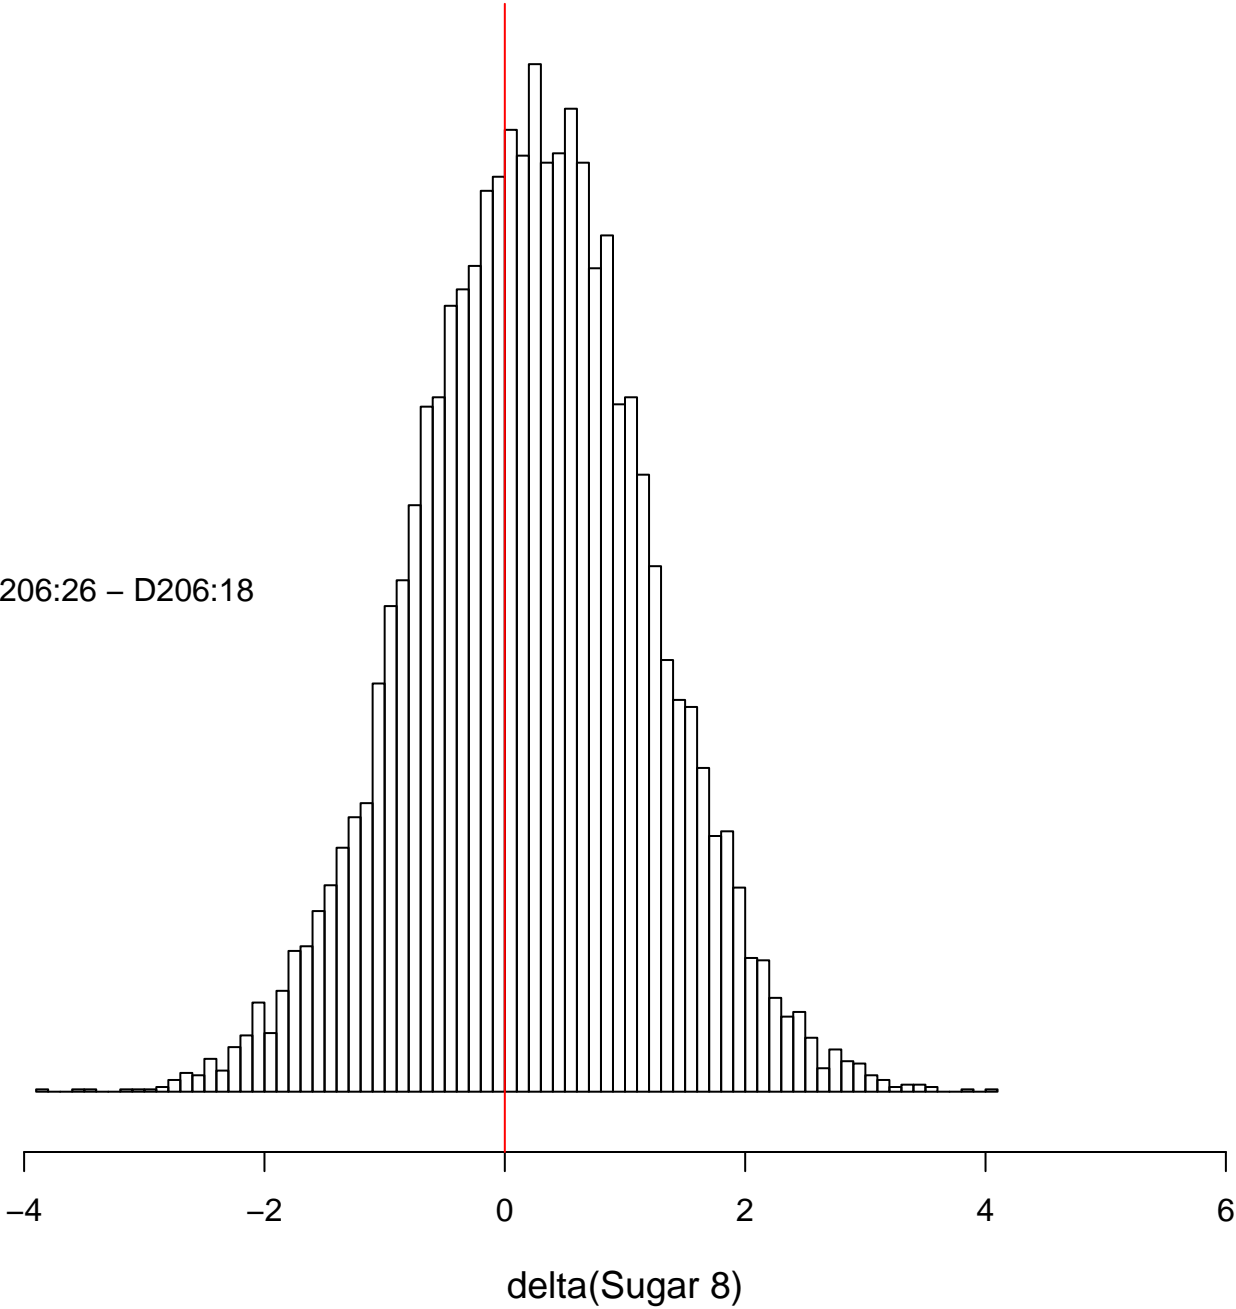

D206:26

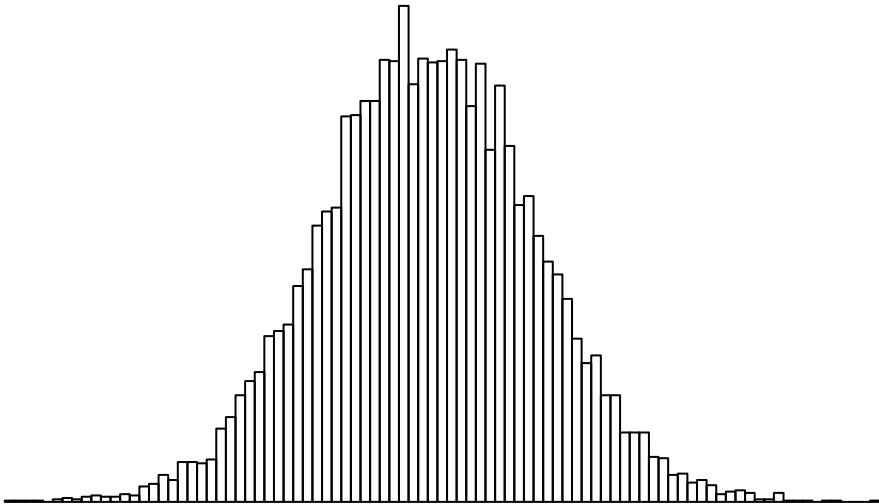

D206:18

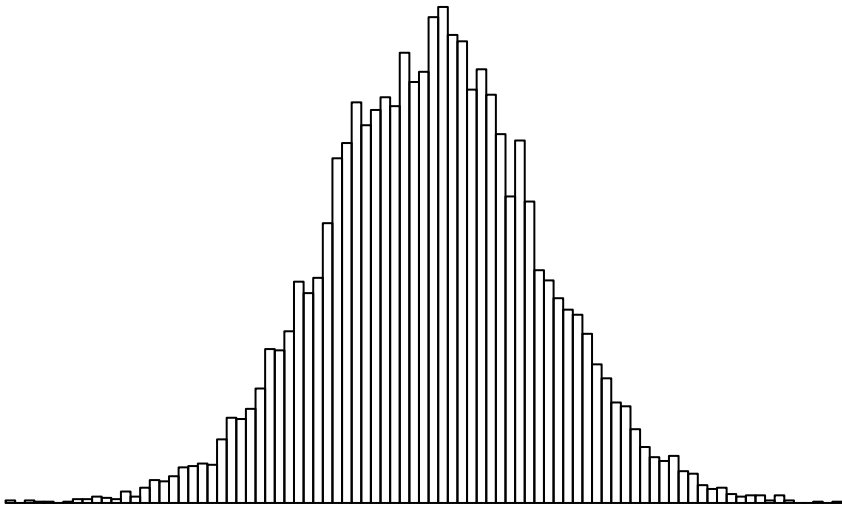

-9.0      -8.5      -8.0      -7.5      -7.0      -6.5

Sugar 9

D206:26 – D206:18

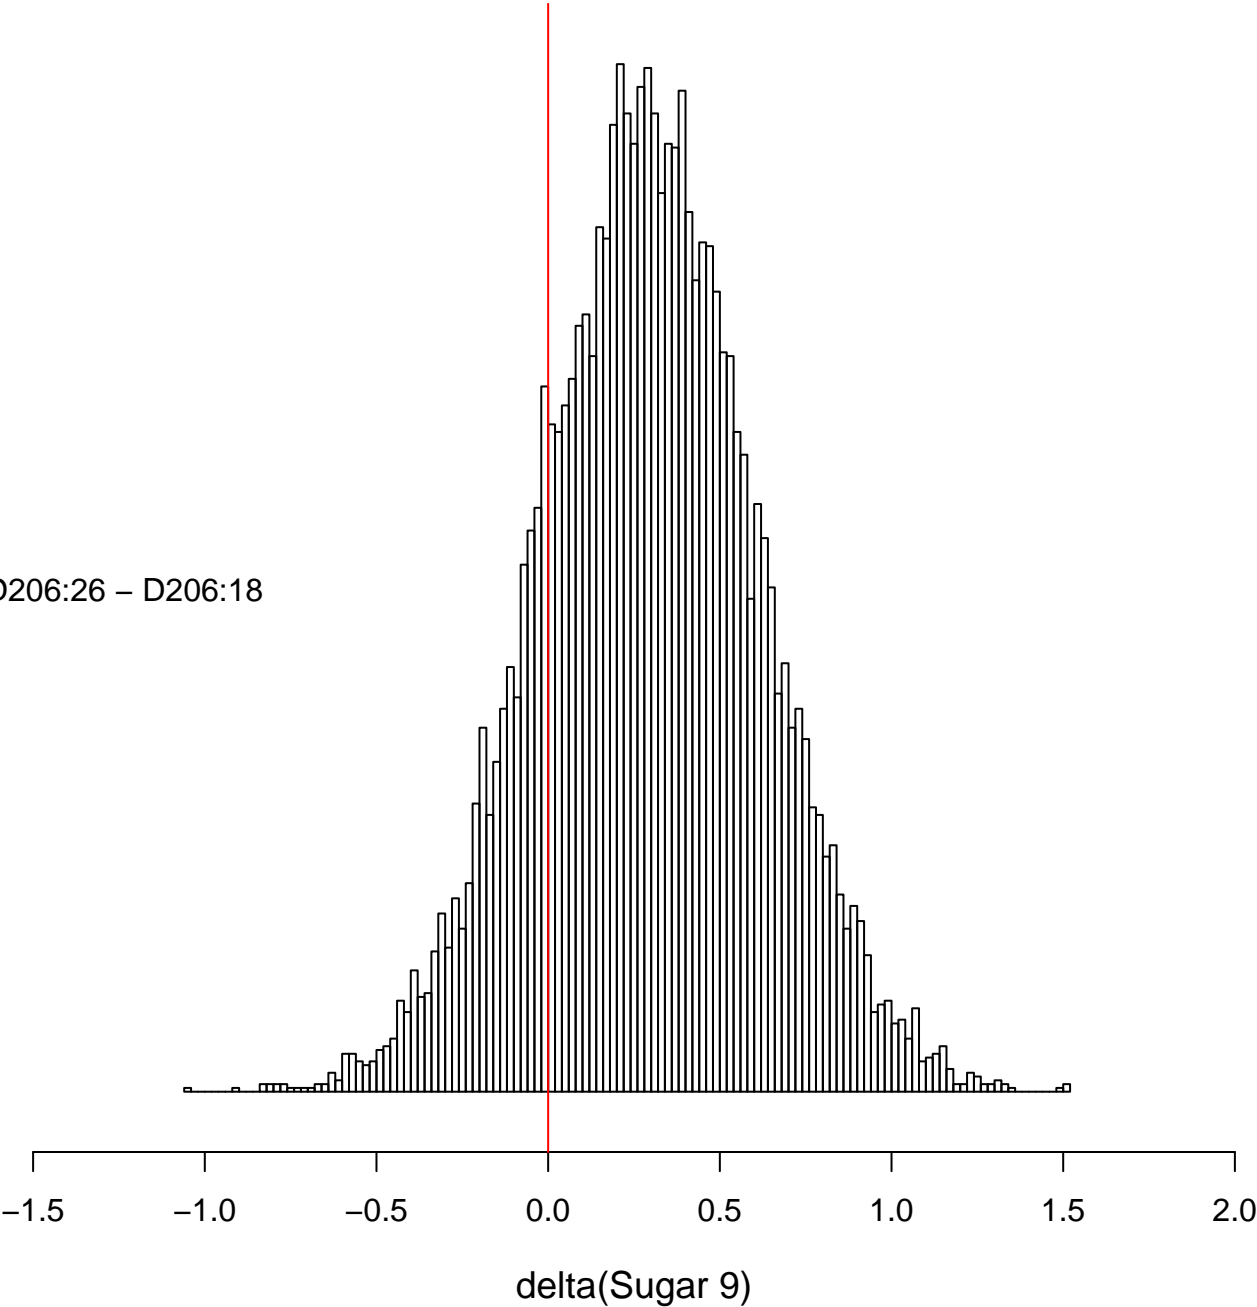

D206:26

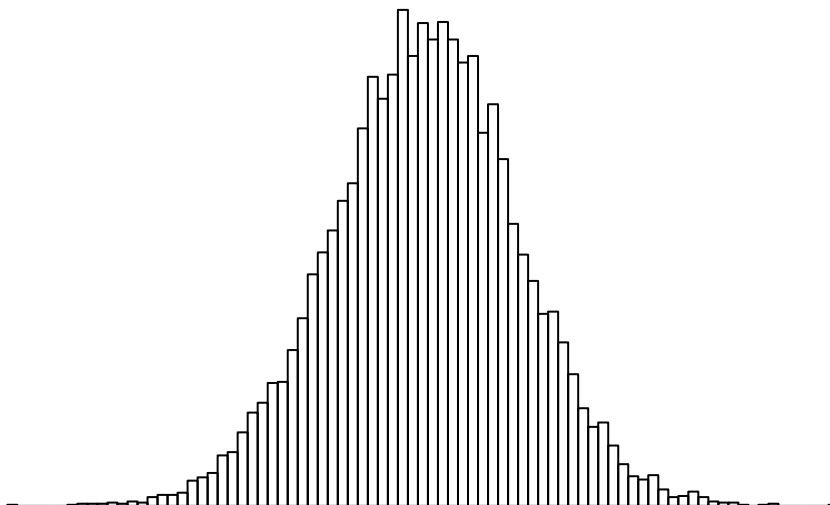

D206:18

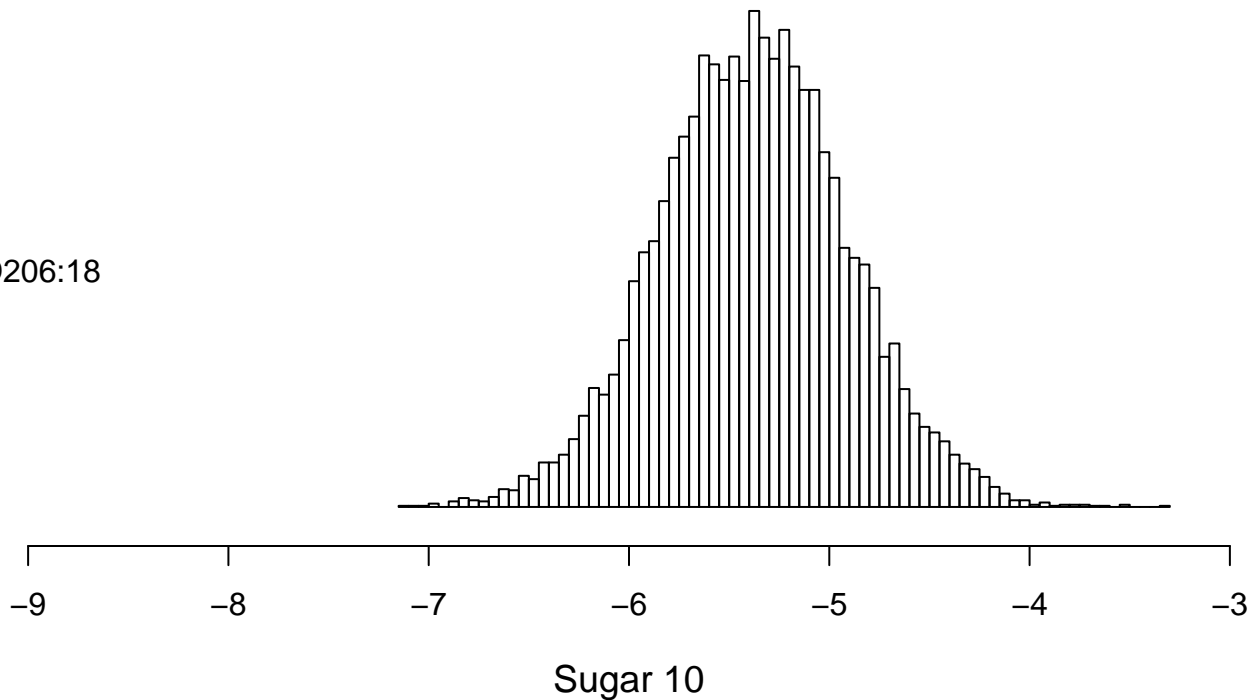

D206:26 – D206:18

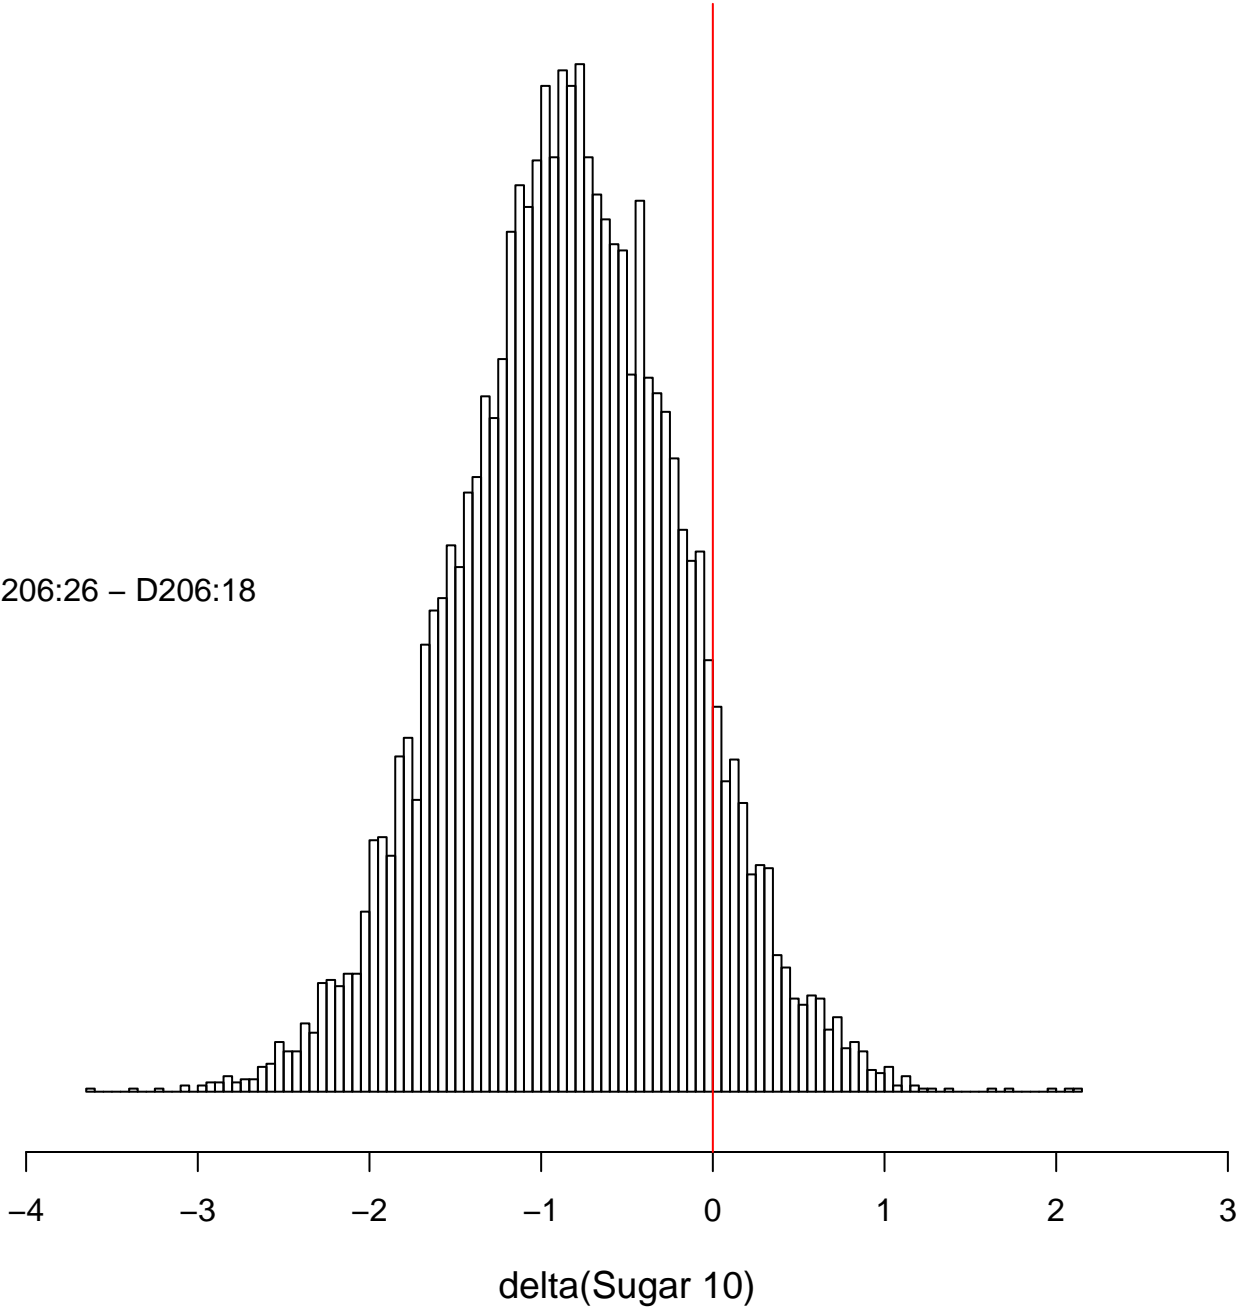

D206:26

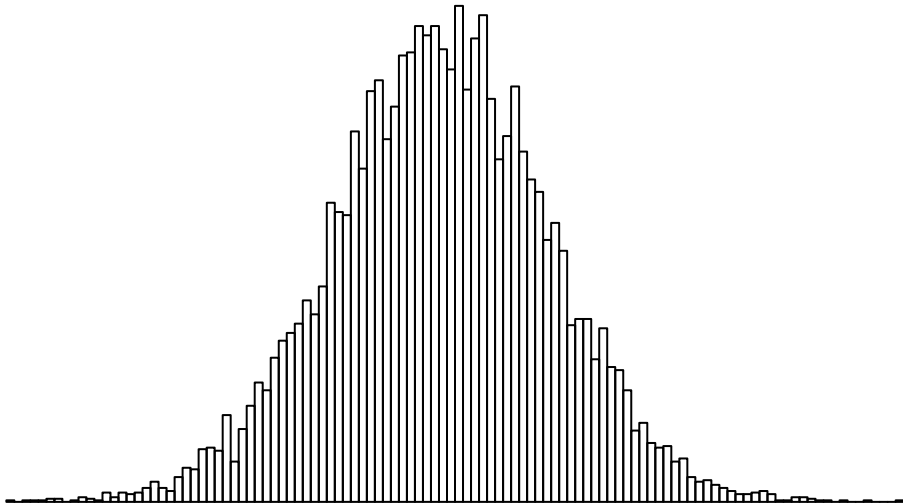

D206:18

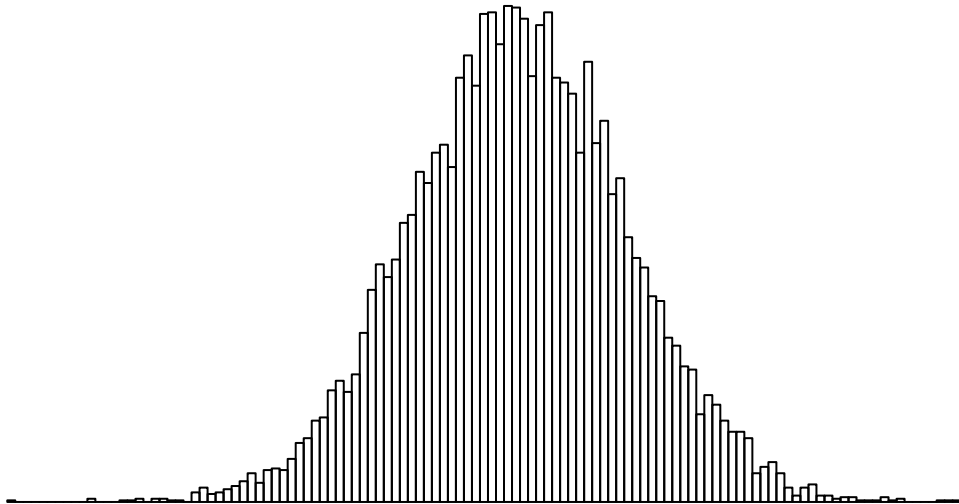

-8.5      -8.0      -7.5      -7.0      -6.5      -6.0      -5.5

Sugar 11

D206:26 – D206:18

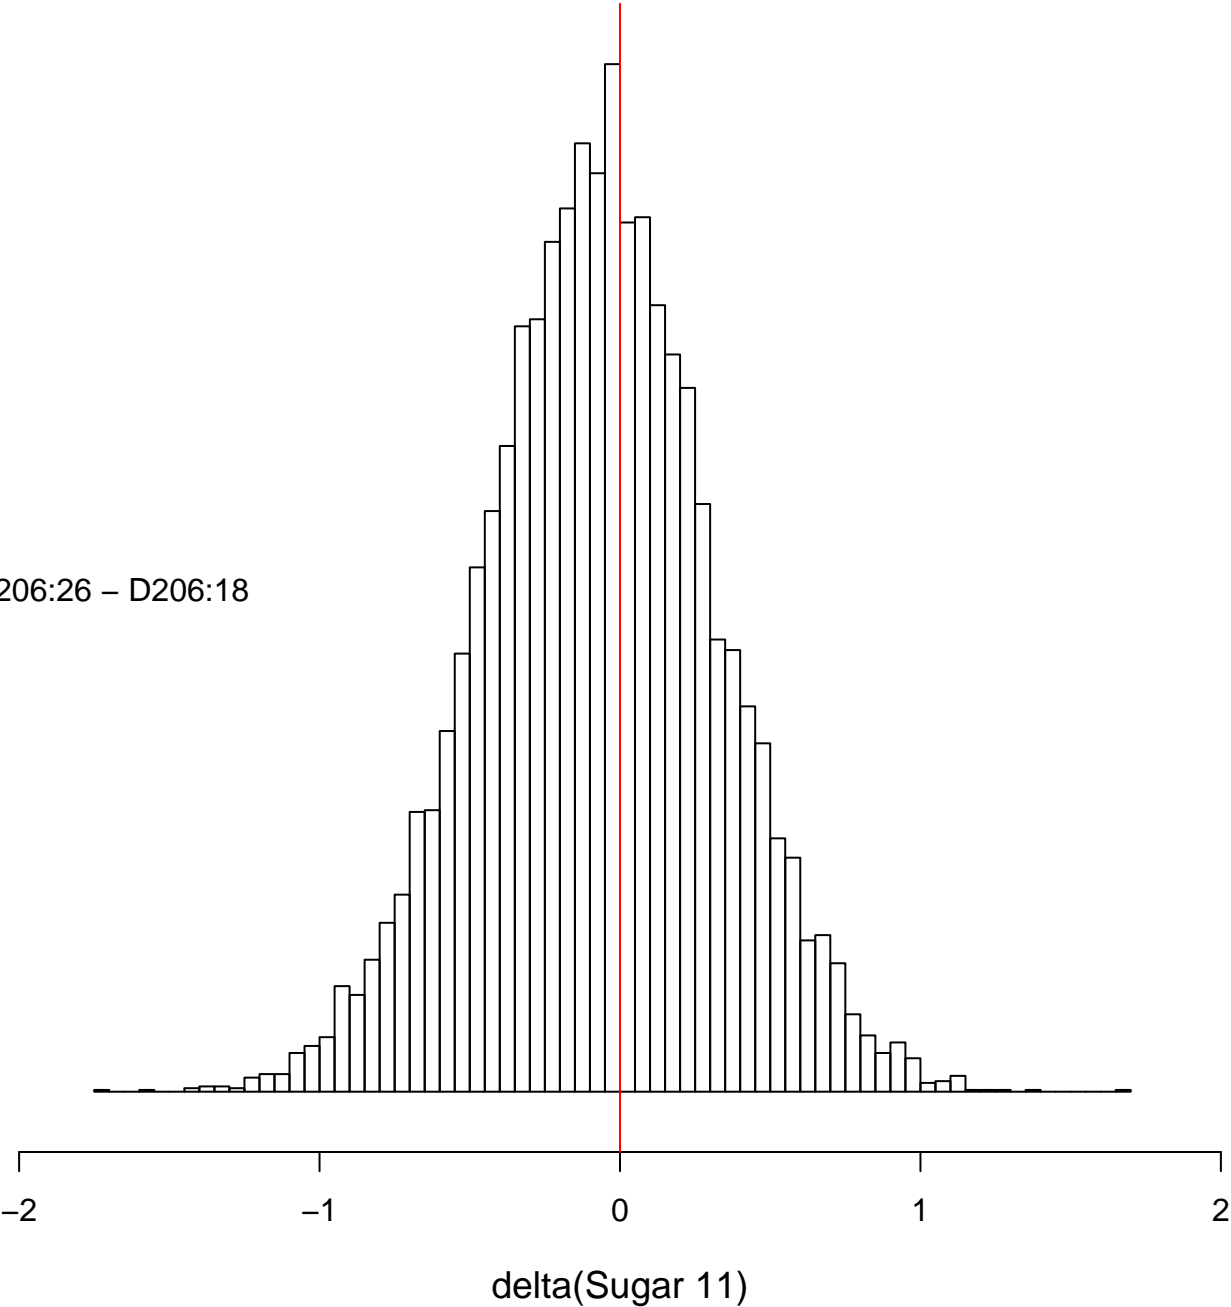



D206:26

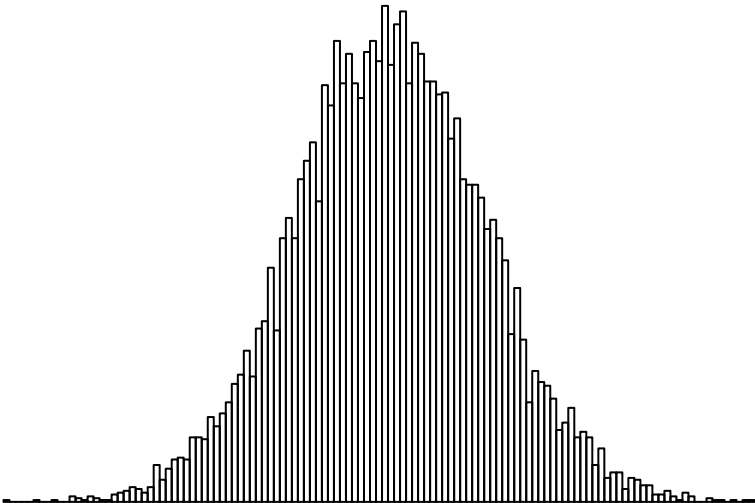

D206:18

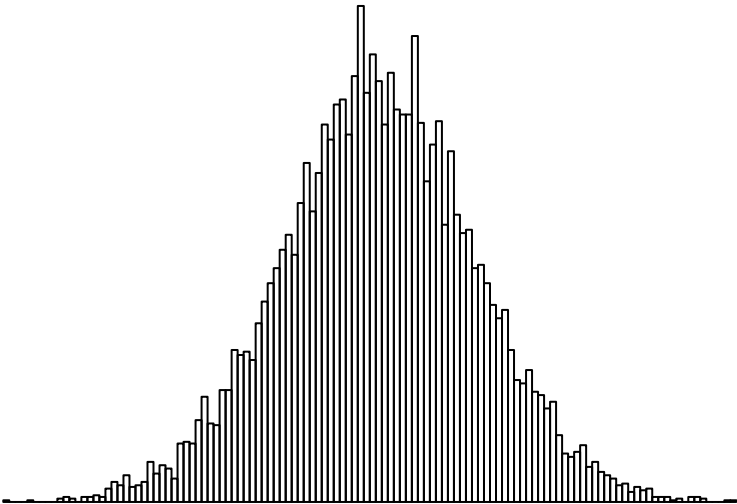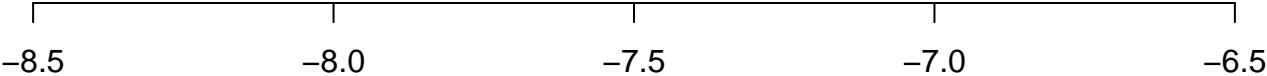

Sugar 12

D206:26 – D206:18

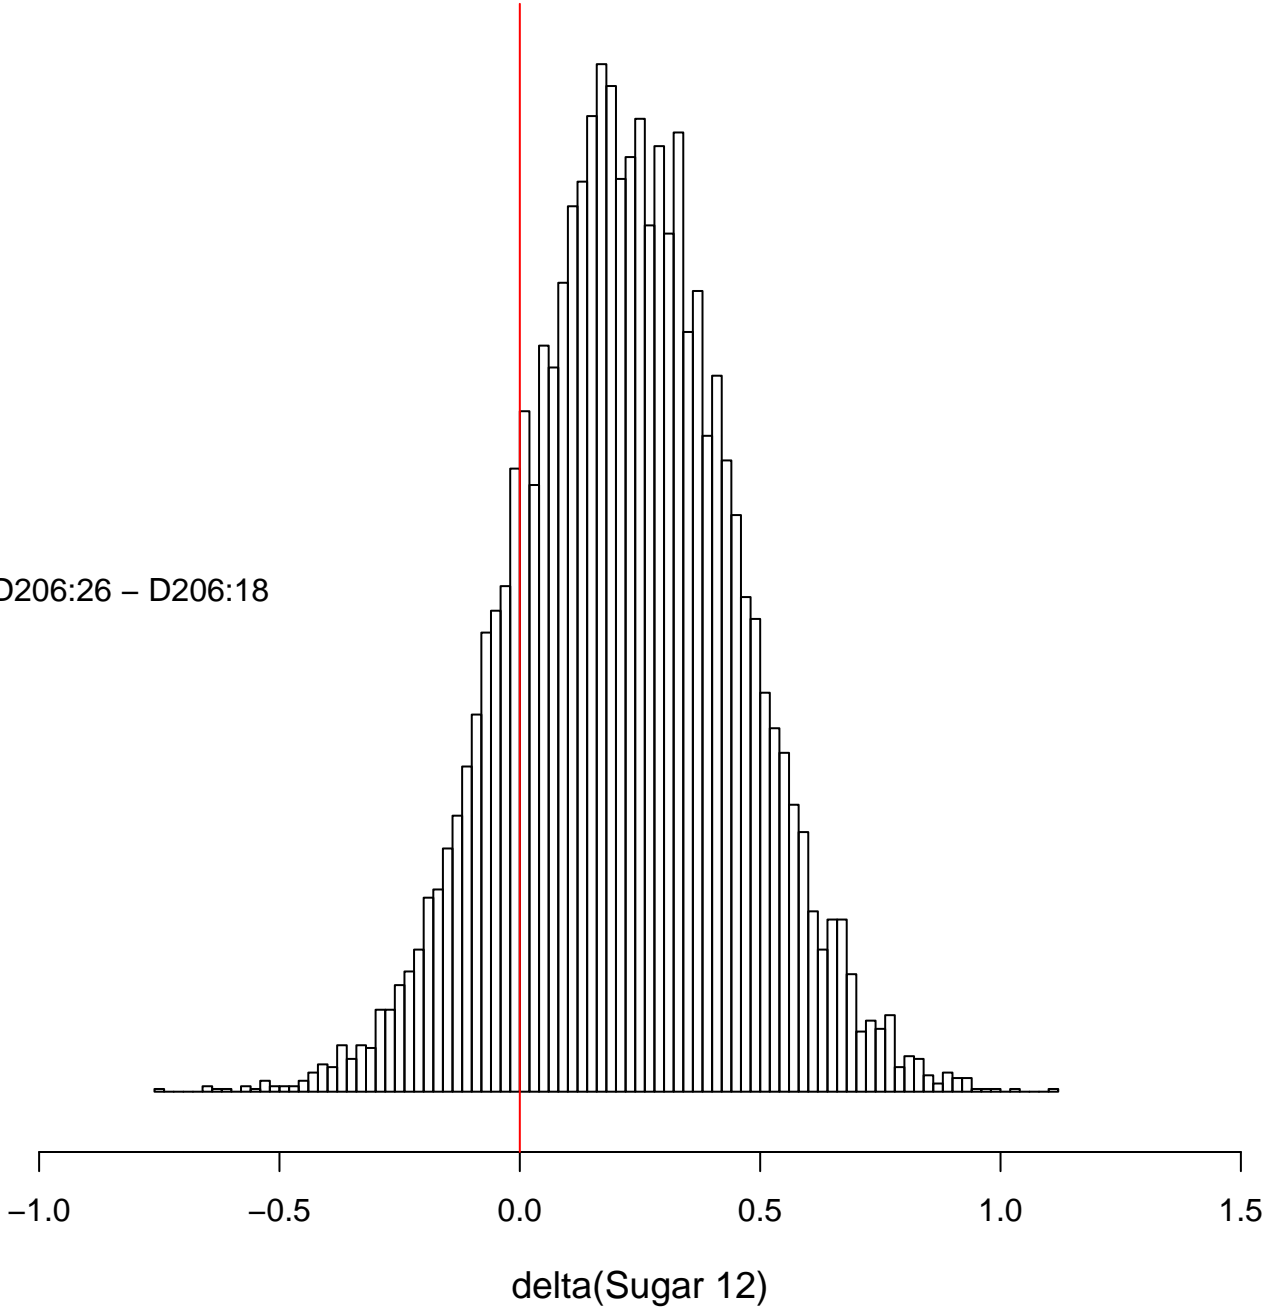

D206:26

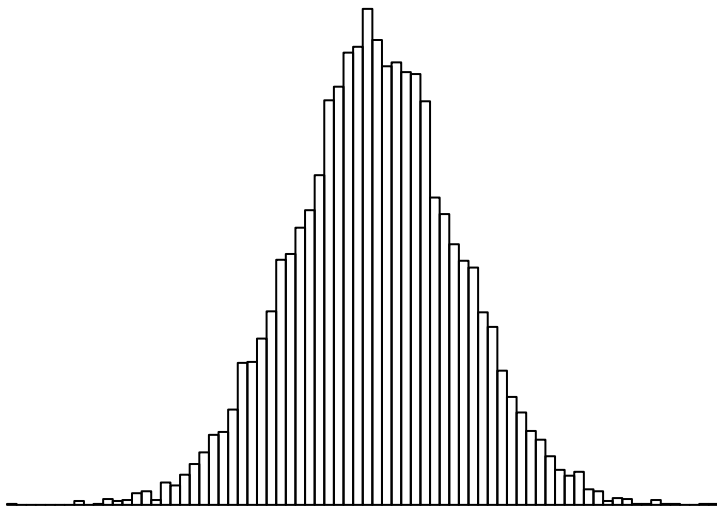

D206:18

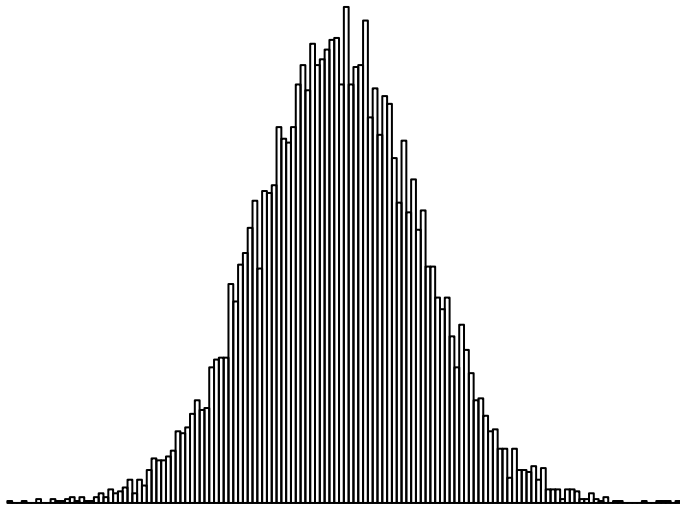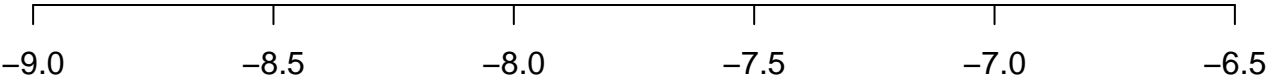

Sugar 14

D206:26 – D206:18

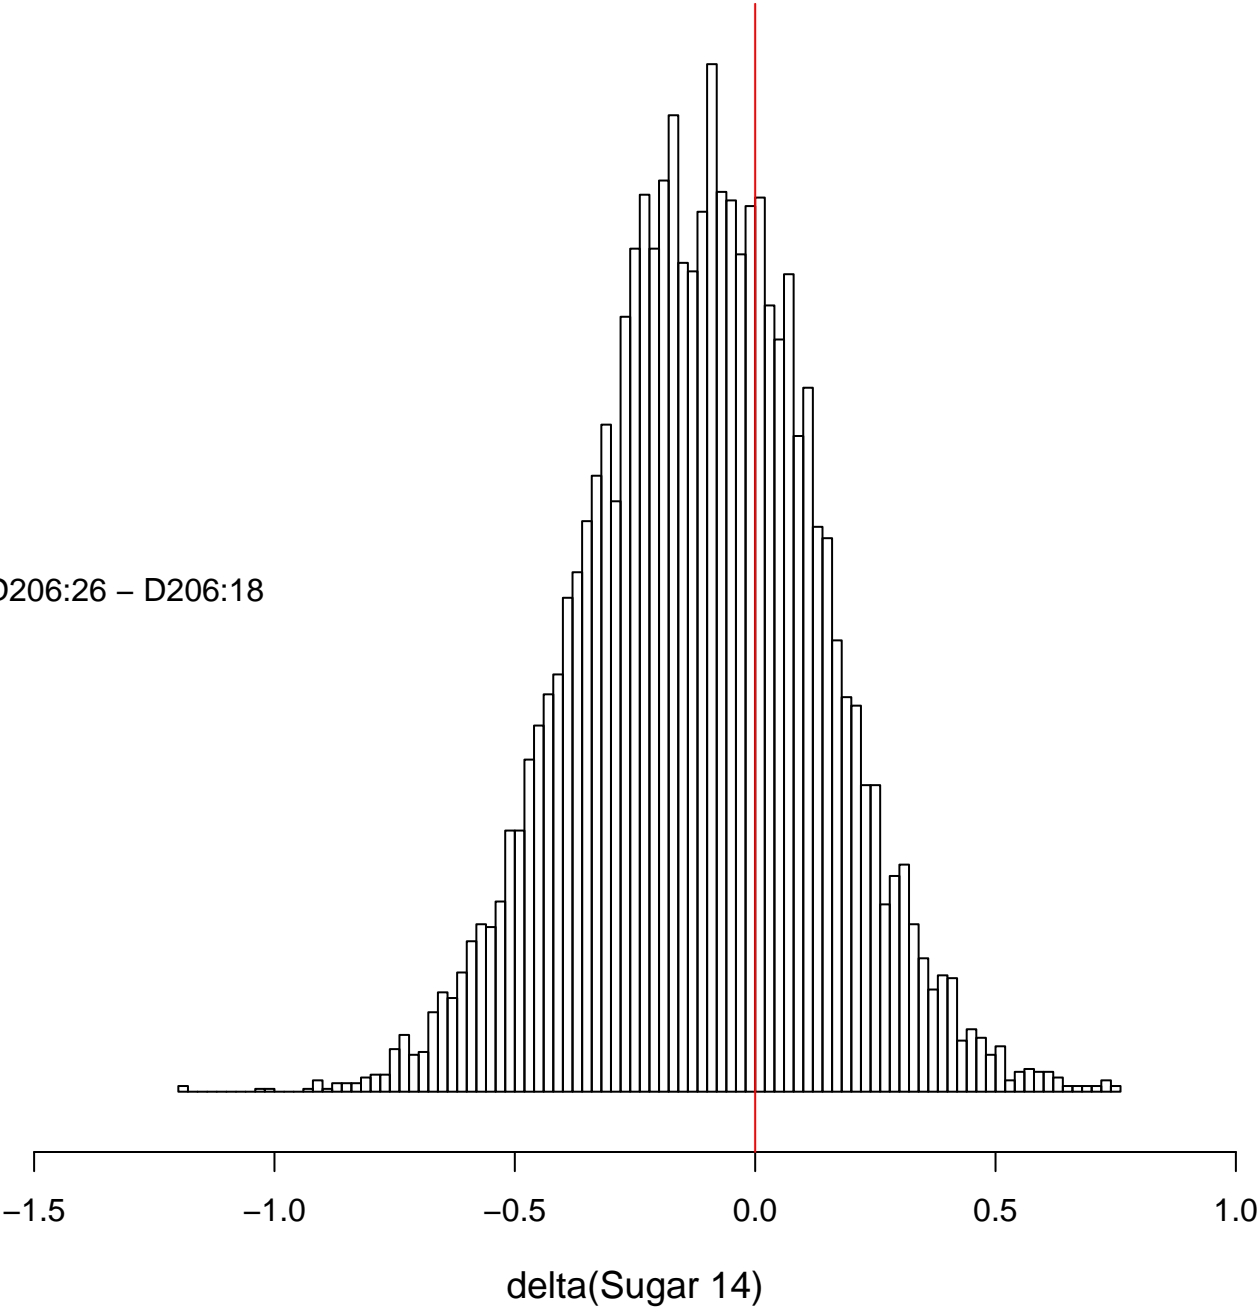

D206:26

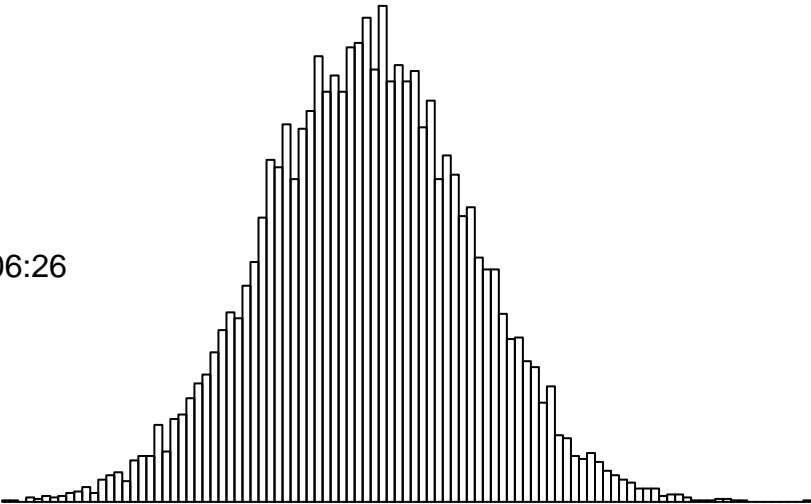

D206:18

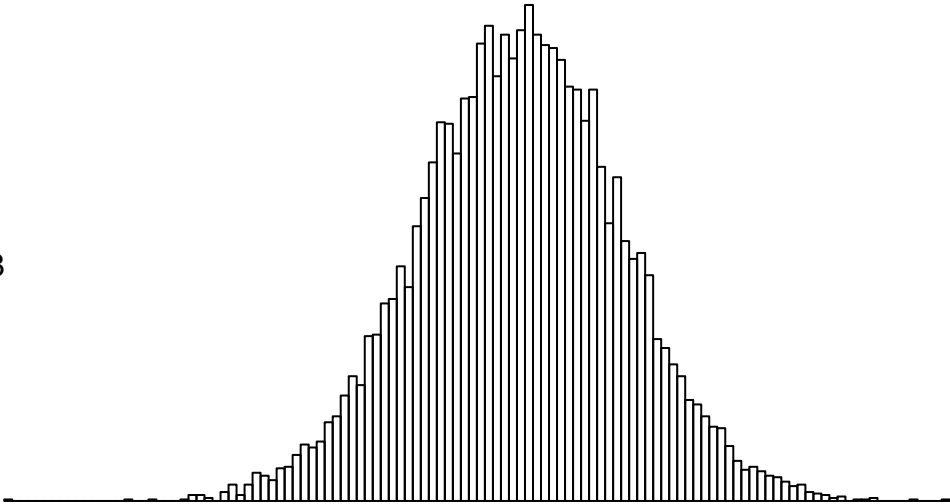

-9.0      -8.5      -8.0      -7.5      -7.0      -6.5      -6.0

Sugar 16

D206:26 – D206:18

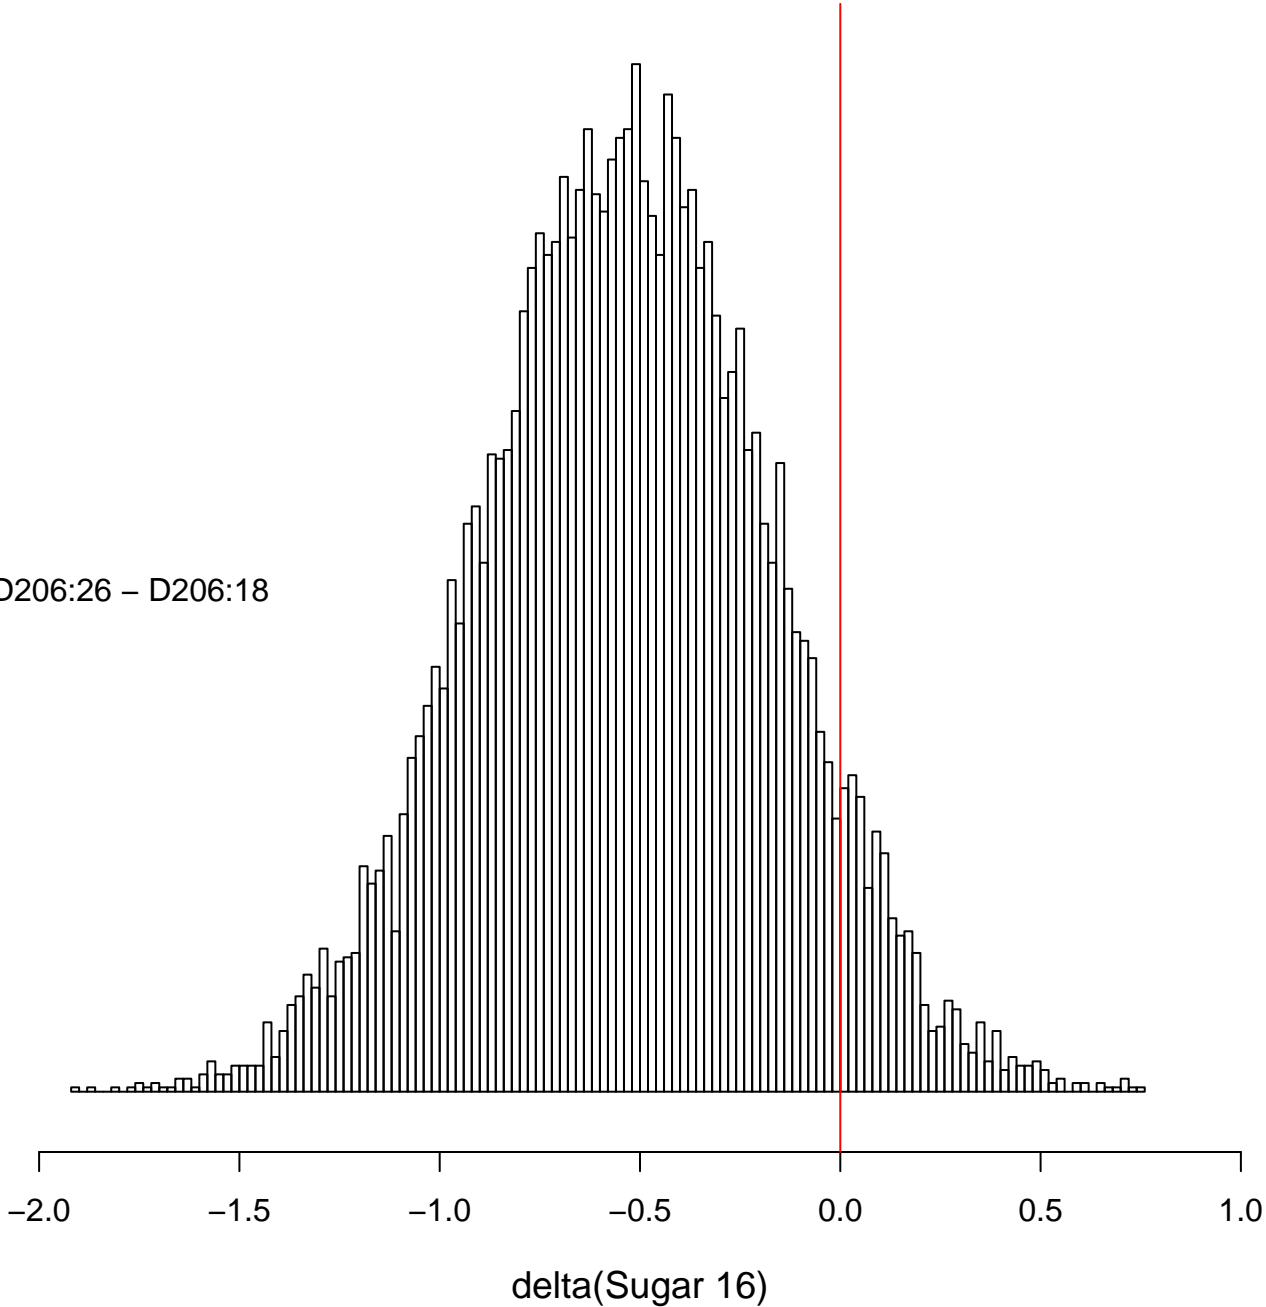

D206:26

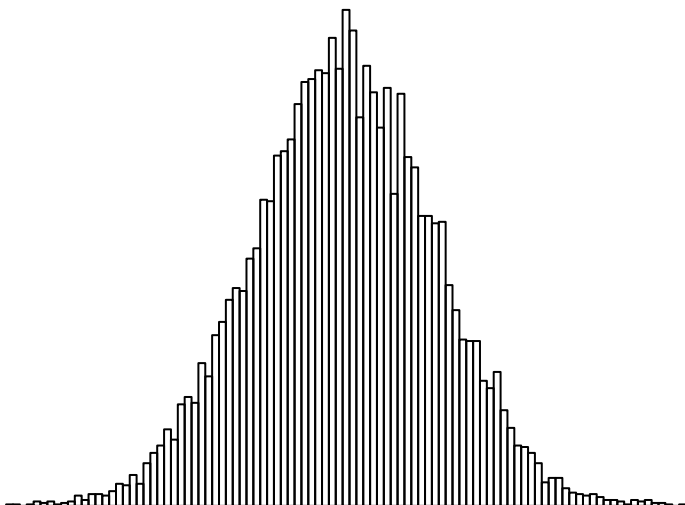

D206:18

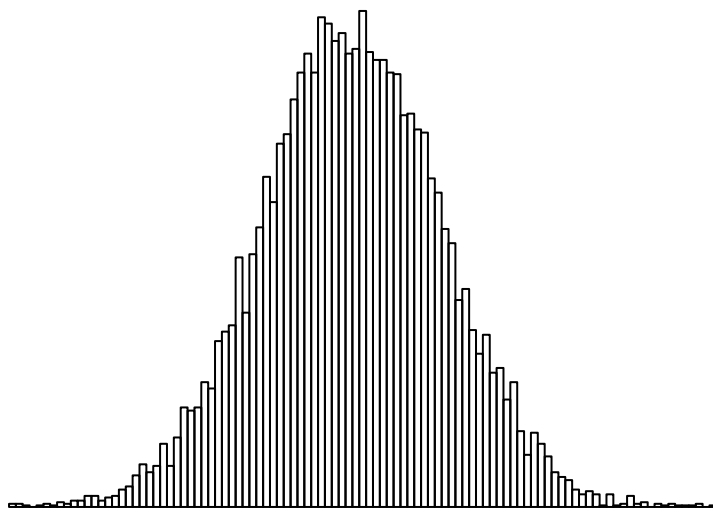

-8.0      -7.5      -7.0      -6.5      -6.0      -5.5      -5.0      -4.5

Sugar 17

D206:26 – D206:18

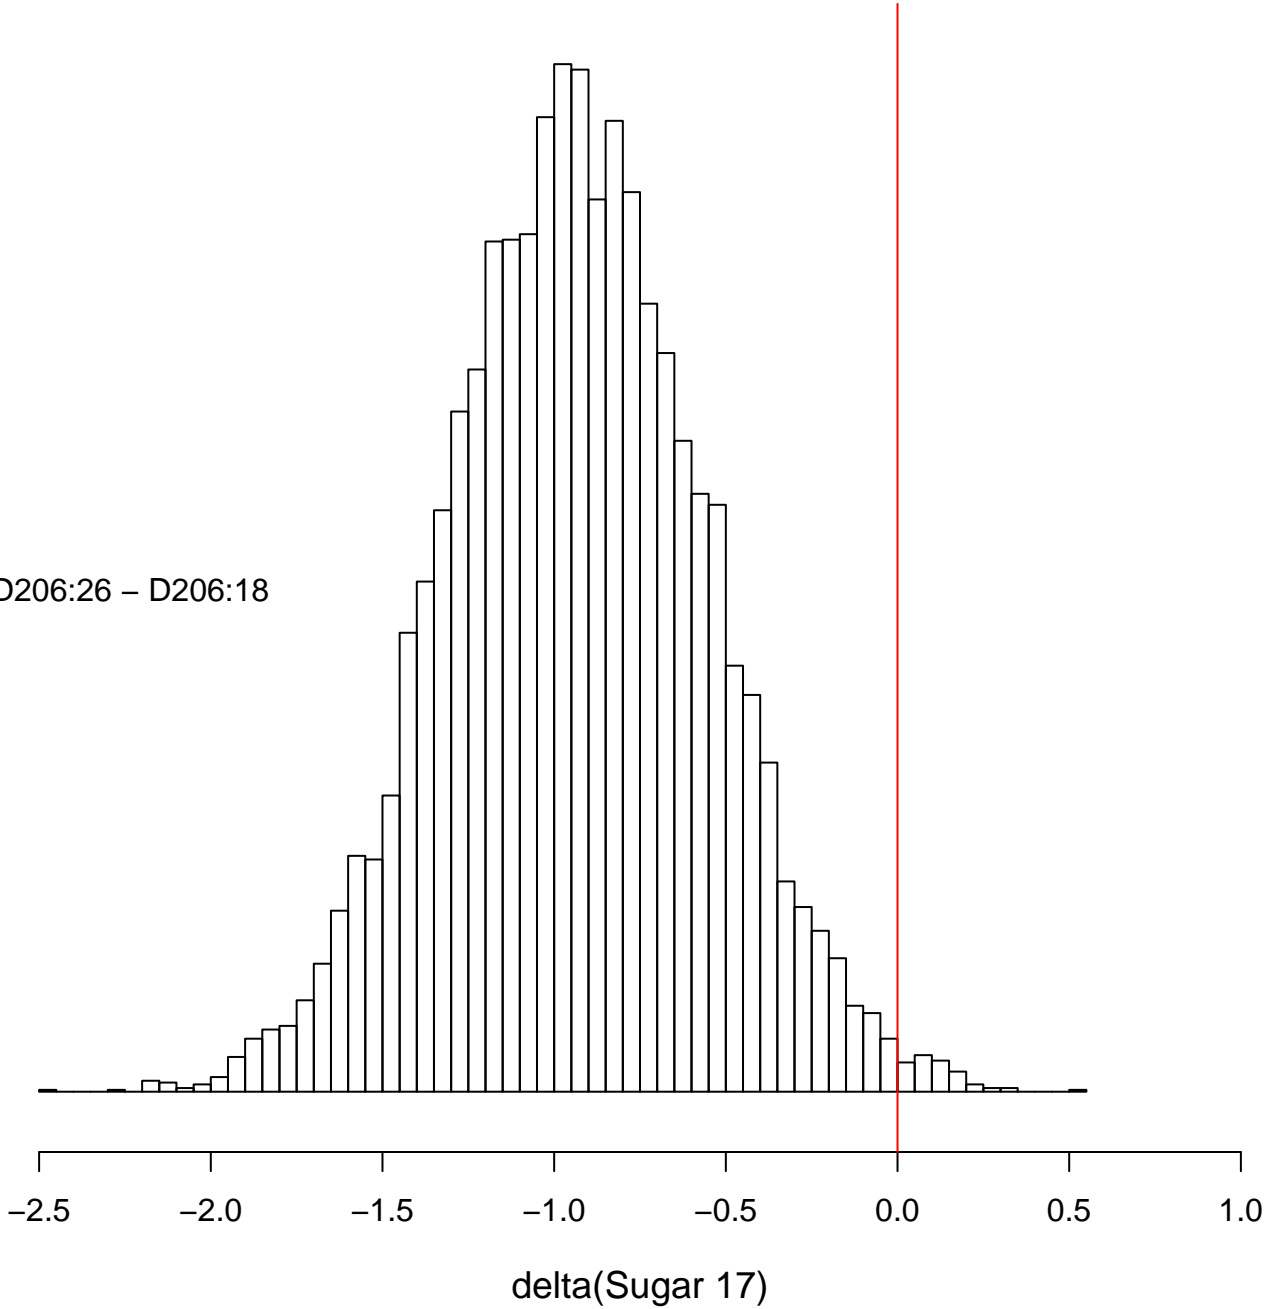



D206:26

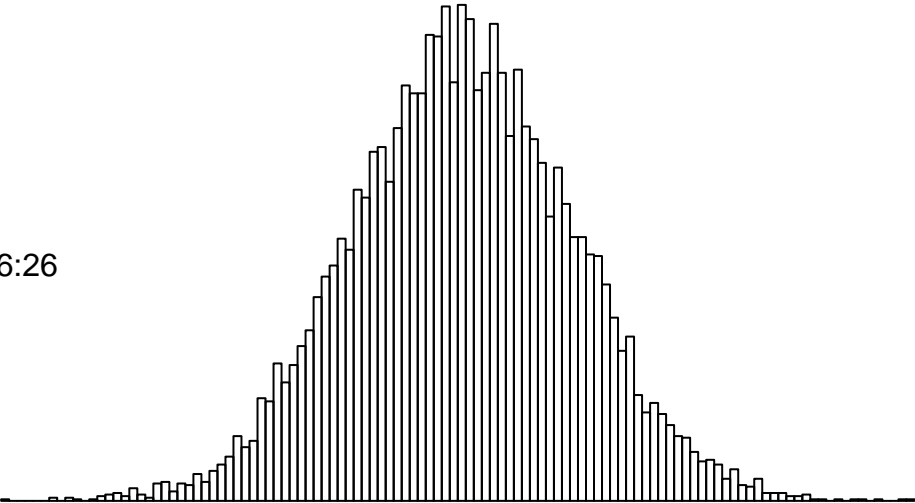

D206:18

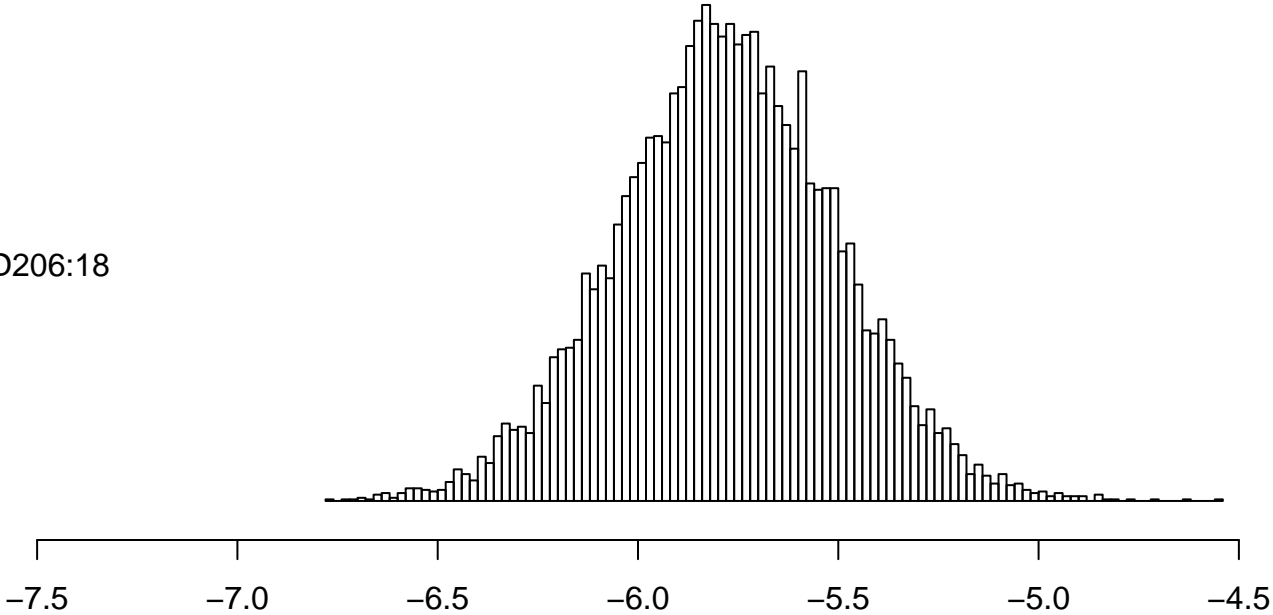

Sugar 18

D206:26 – D206:18

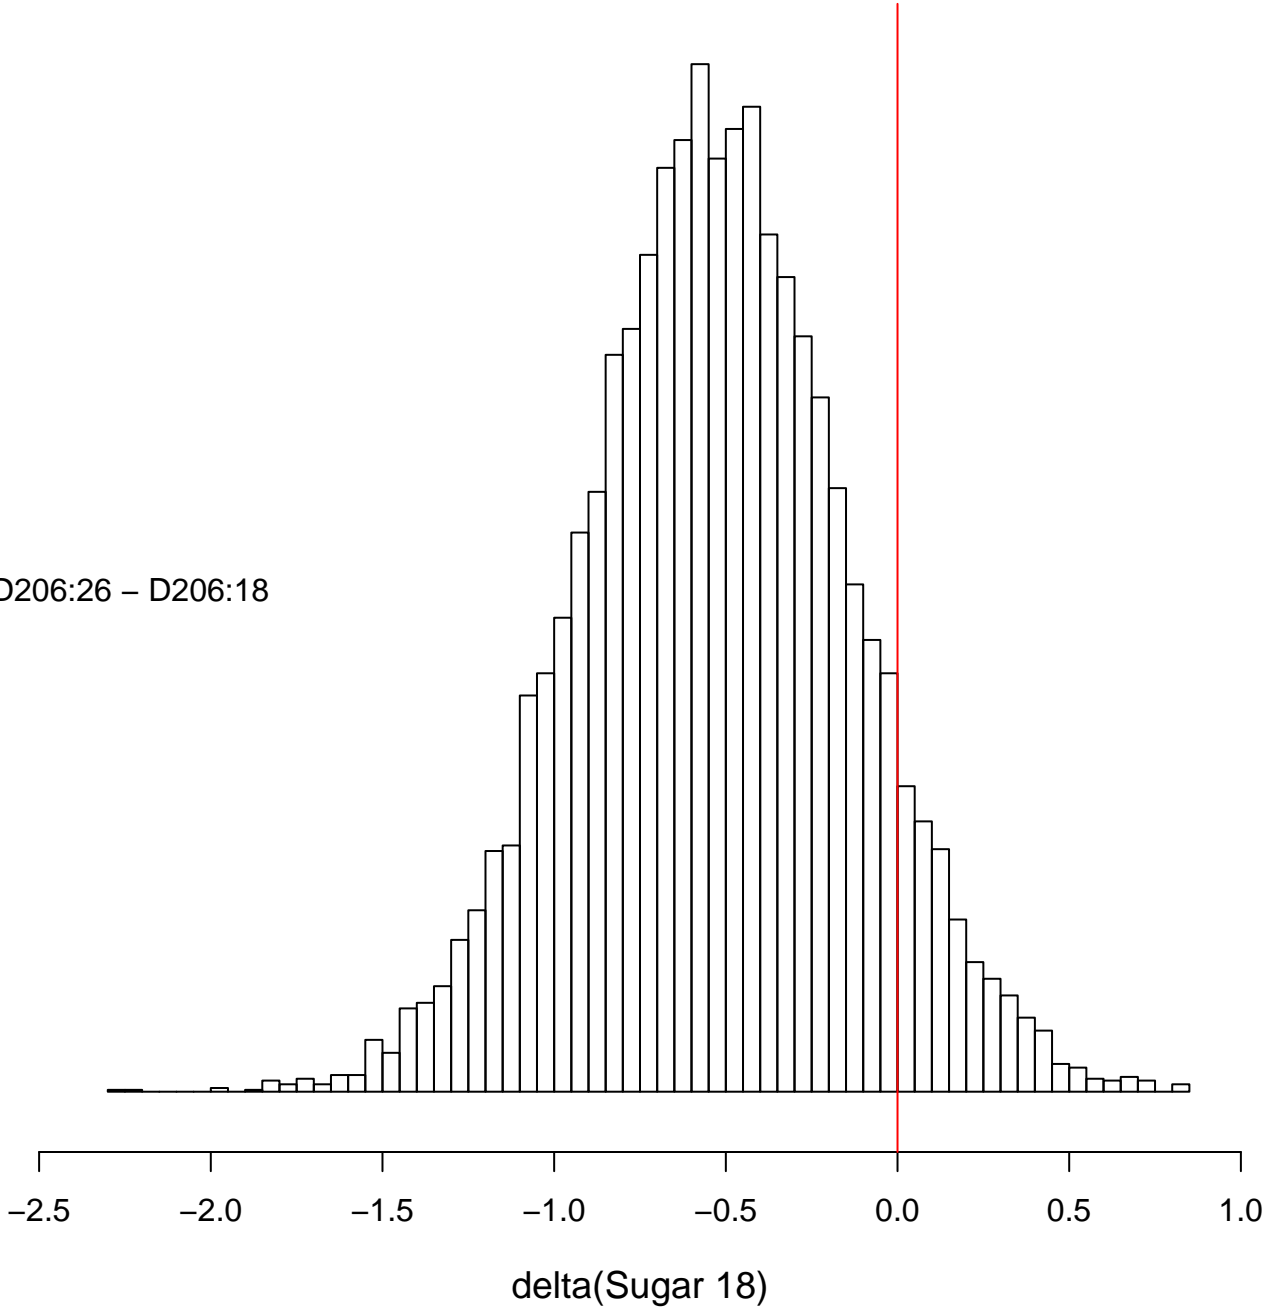

D206:26

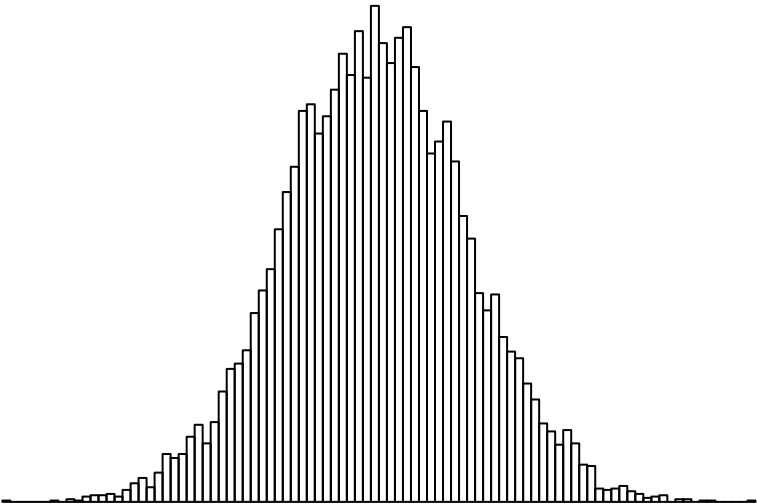

D206:18

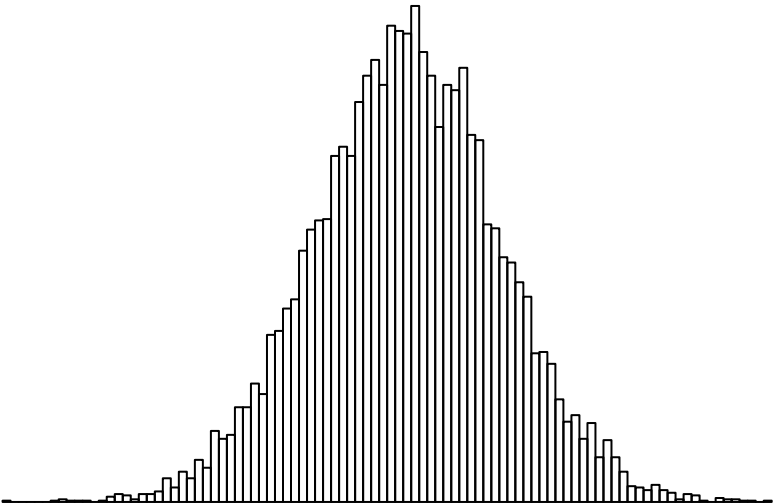

-9.0      -8.5      -8.0      -7.5      -7.0      -6.5      -6.0

Sugar 20

D206:26 – D206:18

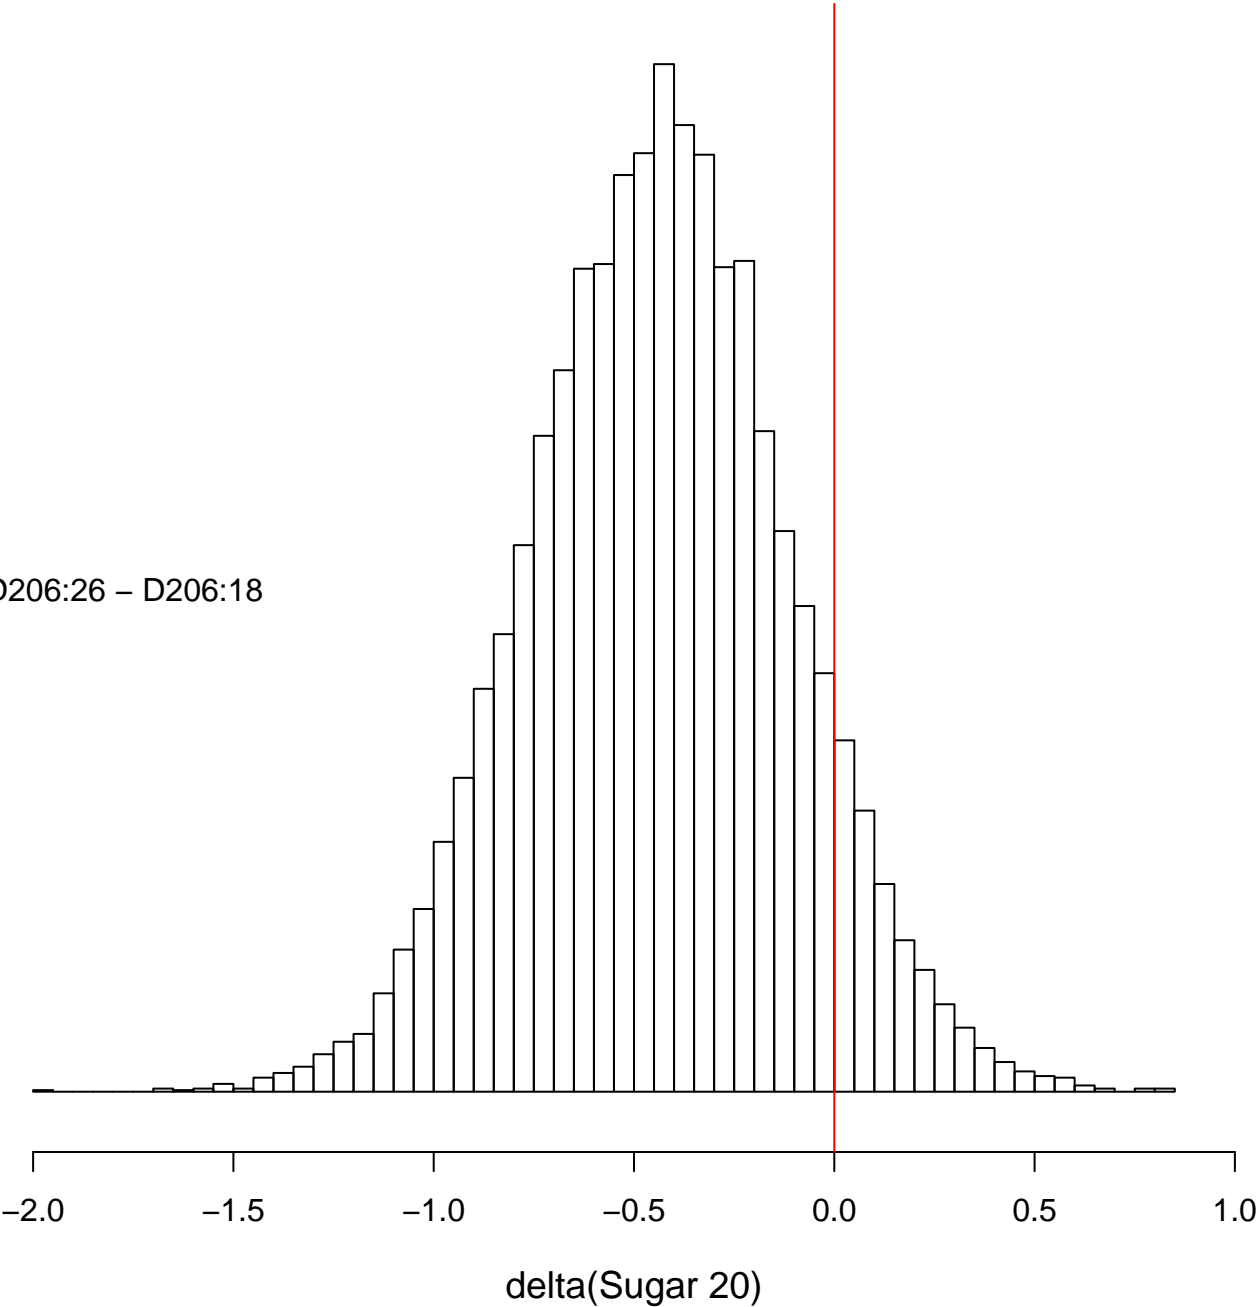

D206:26

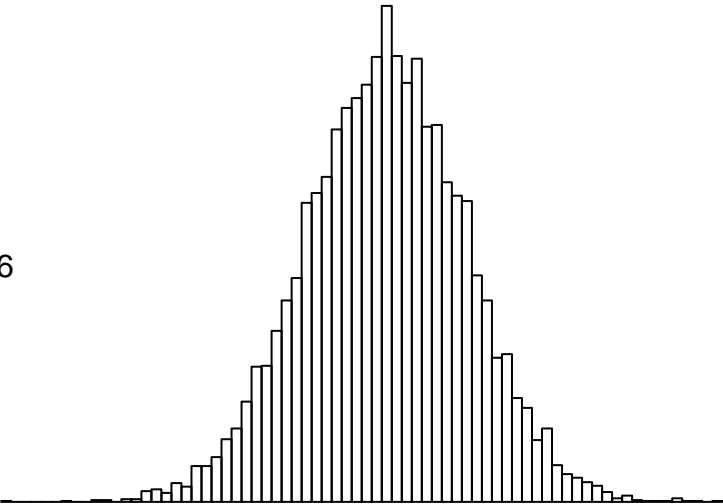

D206:18

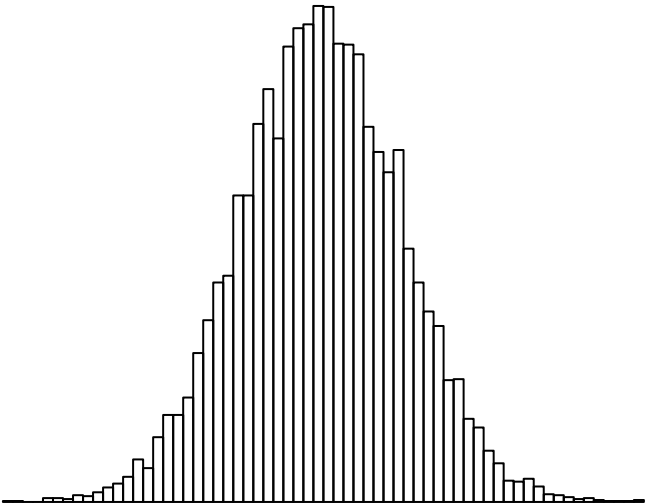

-10      -9      -8      -7      -6      -5      -4

Sugar 21

D206:26 – D206:18

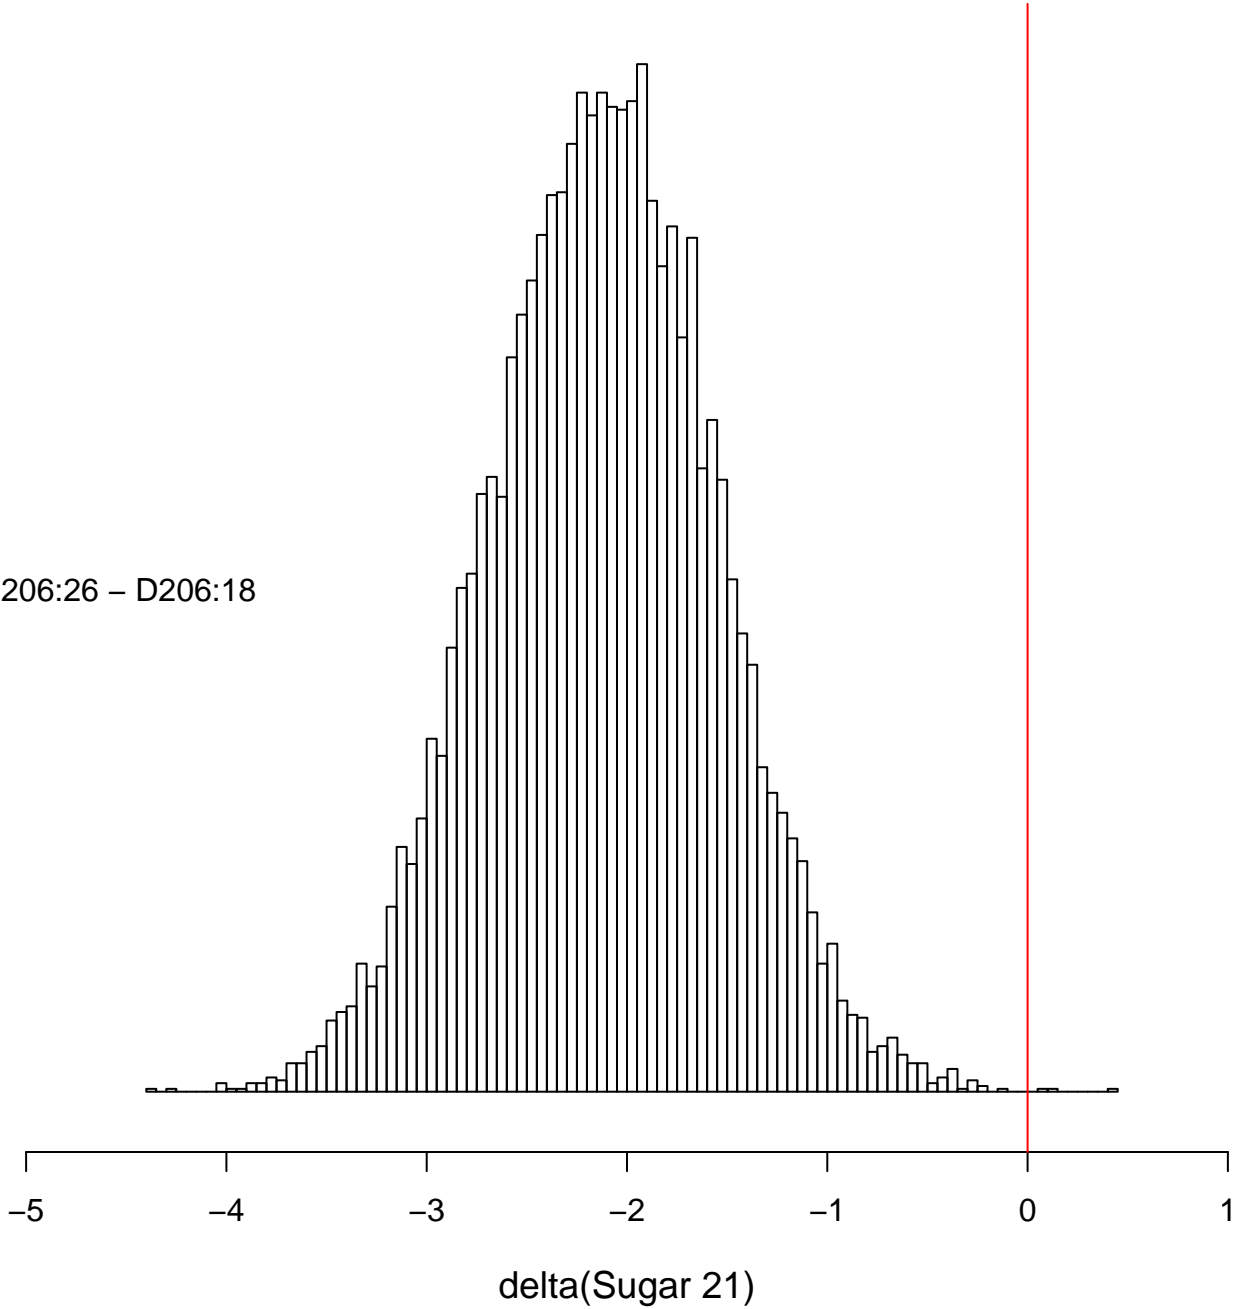

D206:26

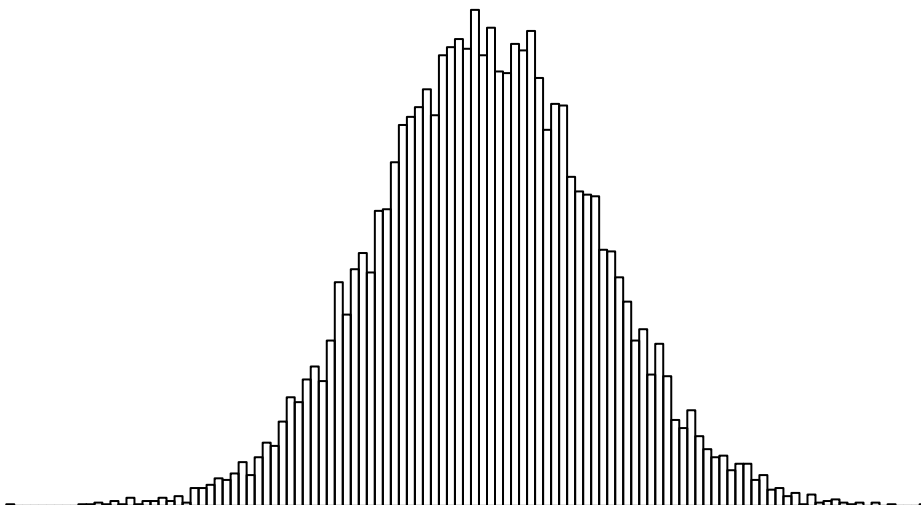

D206:18

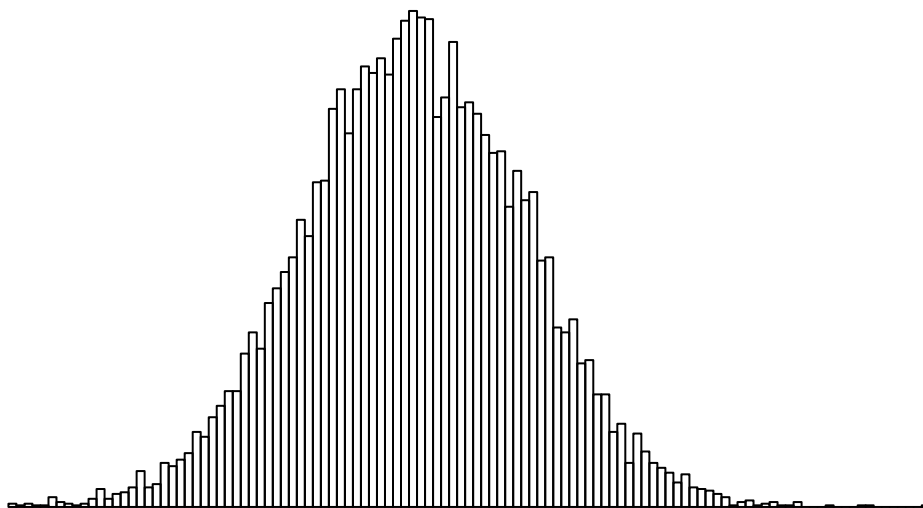

-6.5      -6.0      -5.5      -5.0      -4.5      -4.0      -3.5

Sugar 22

D206:26 – D206:18

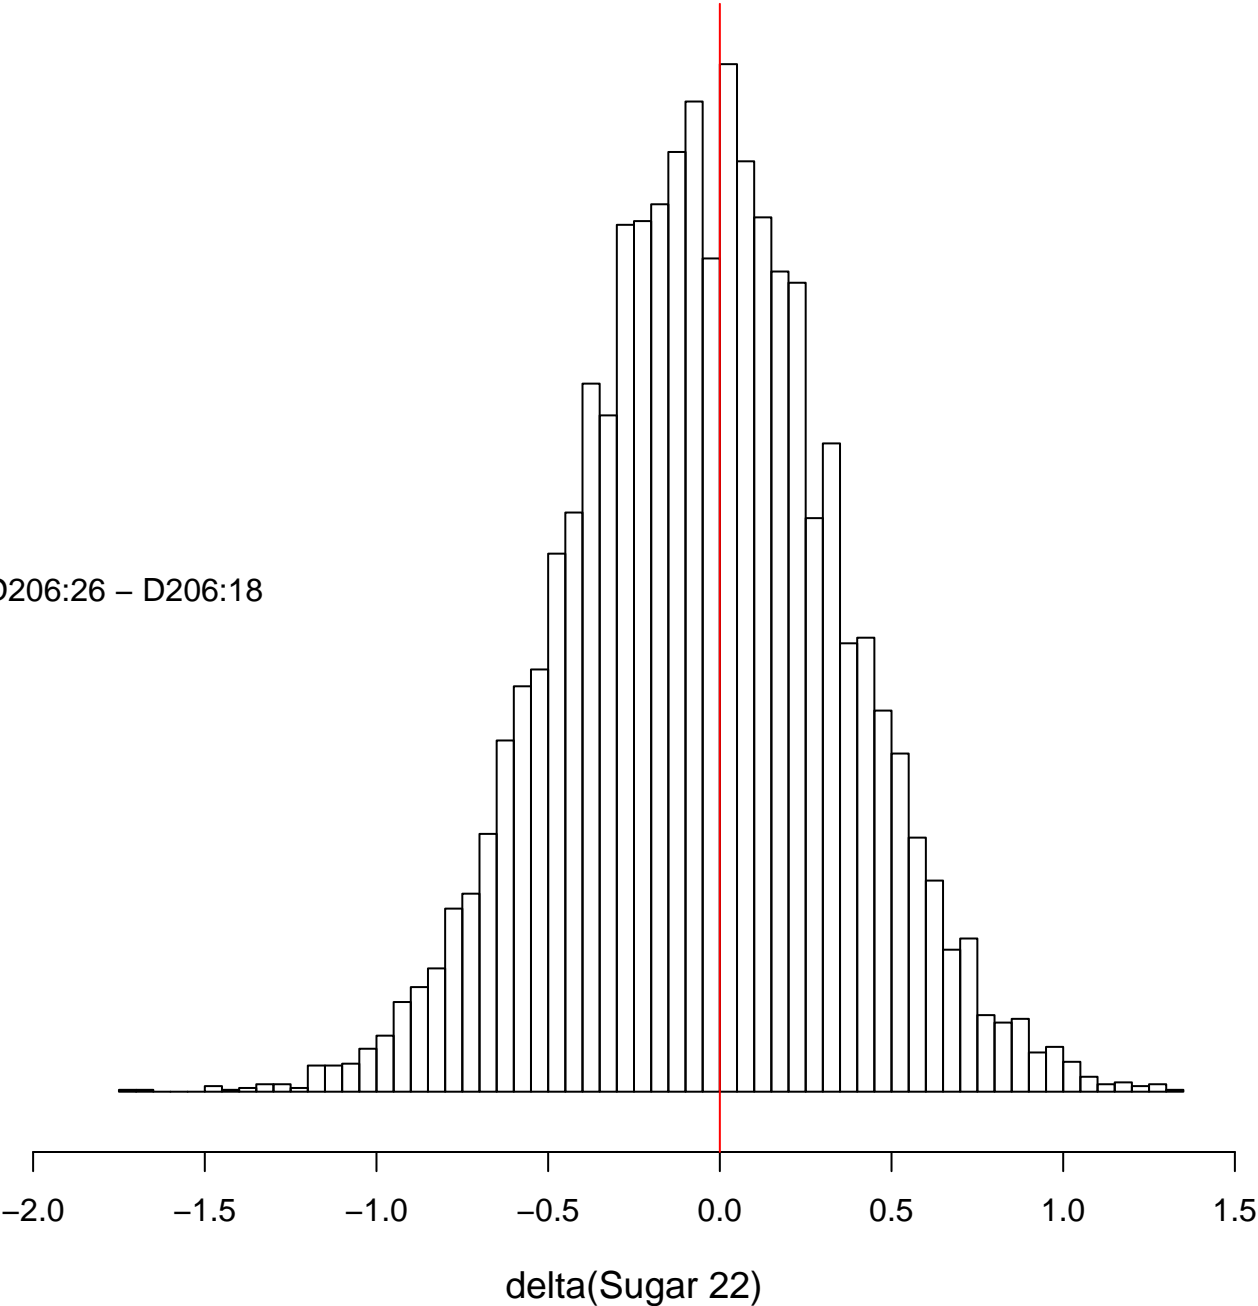



D206:26

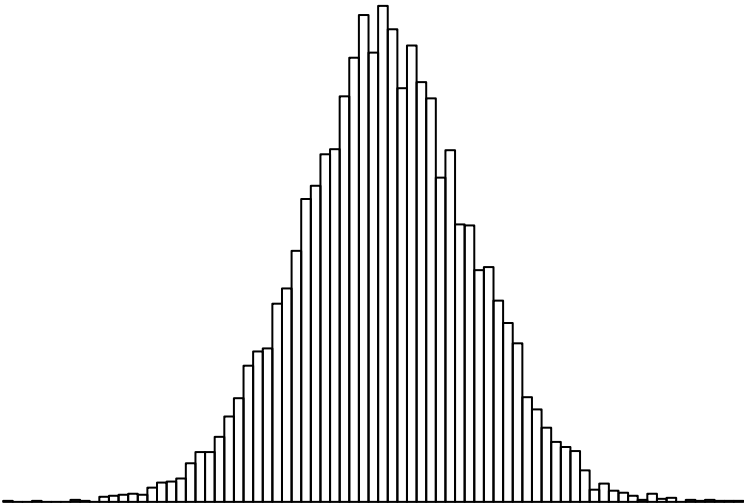

D206:18

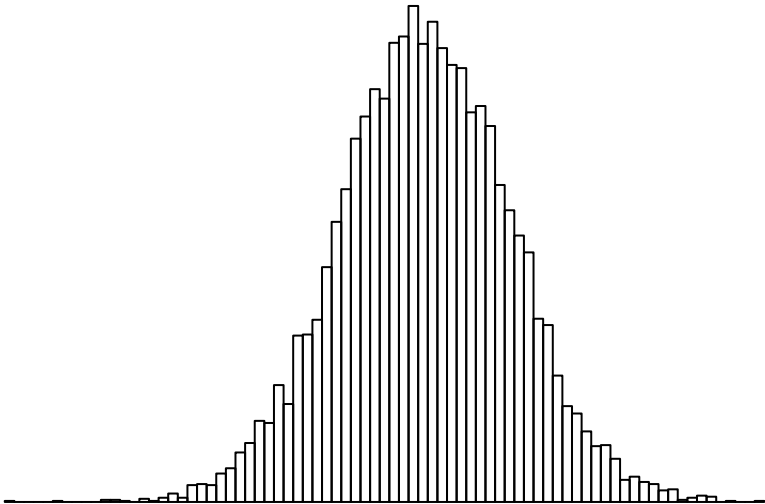

-8.0      -7.5      -7.0      -6.5      -6.0      -5.5

Sugar 23

D206:26 – D206:18

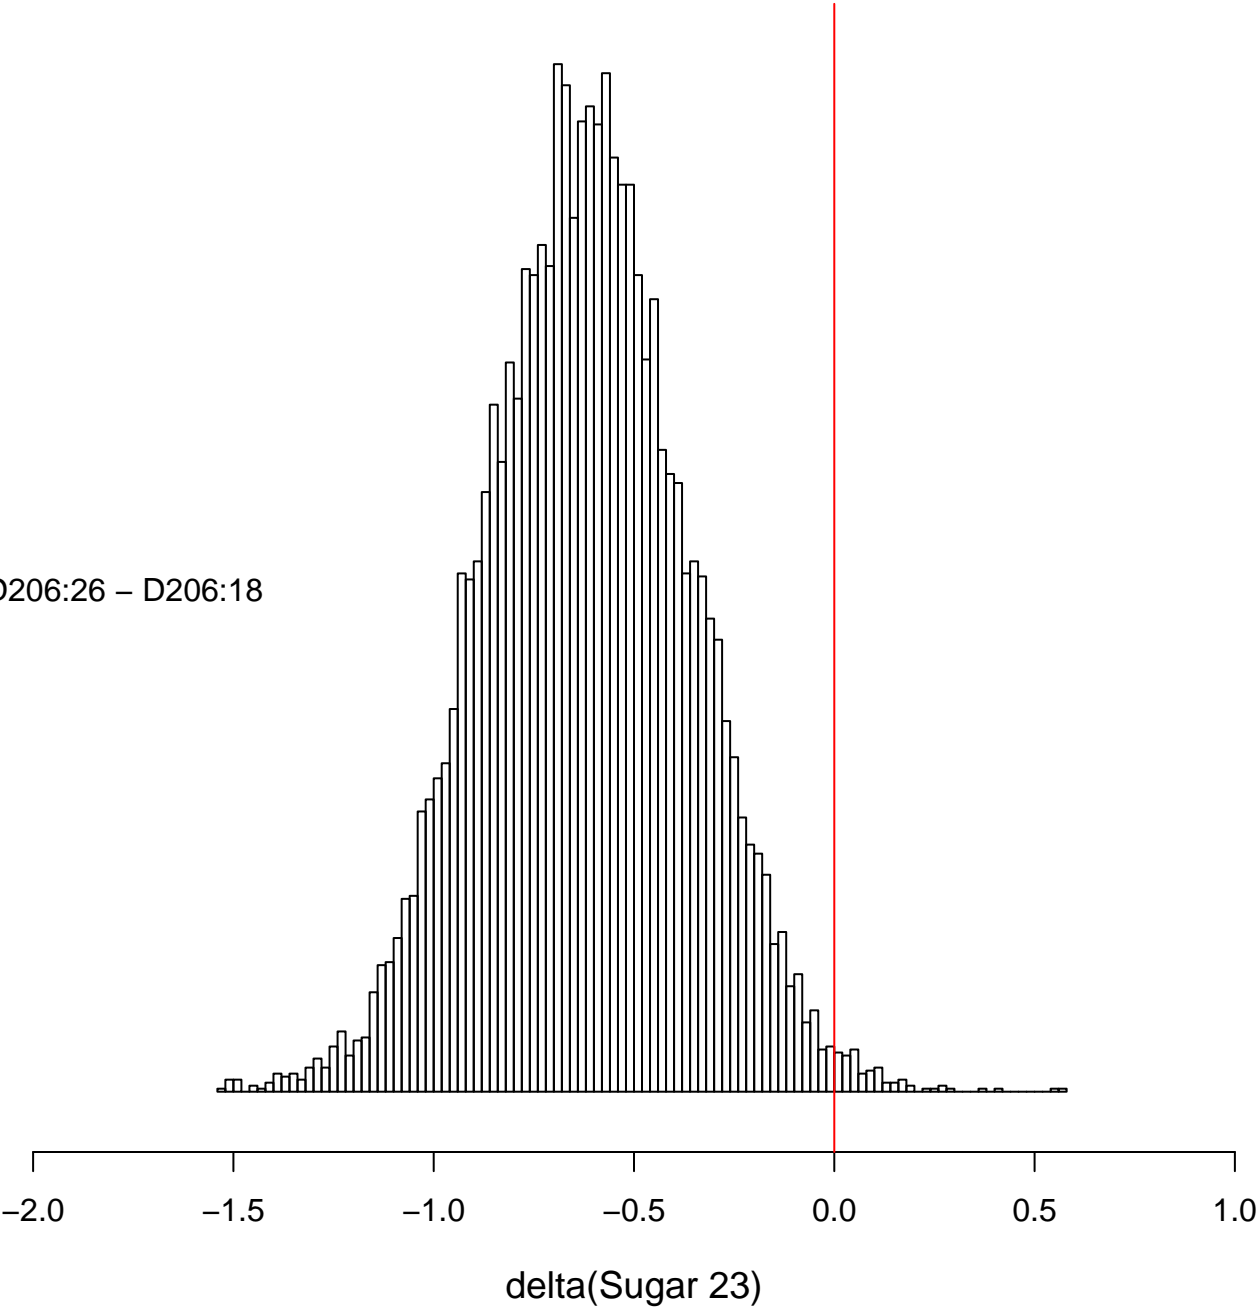

D206:26

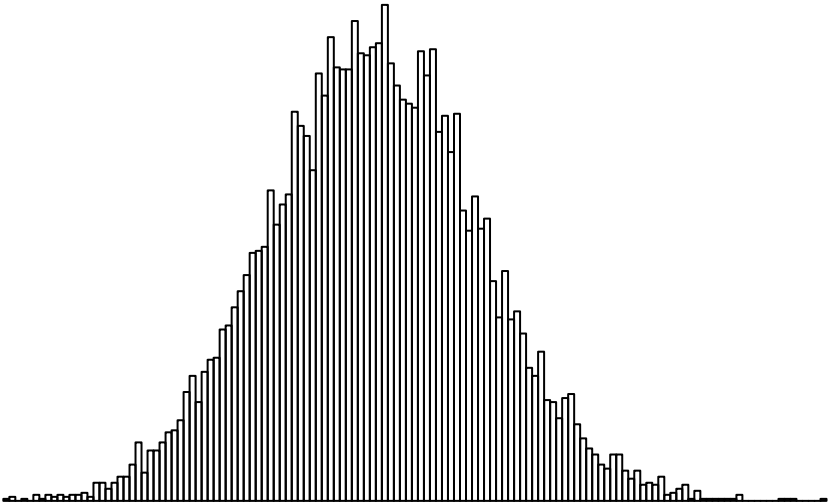

D206:18

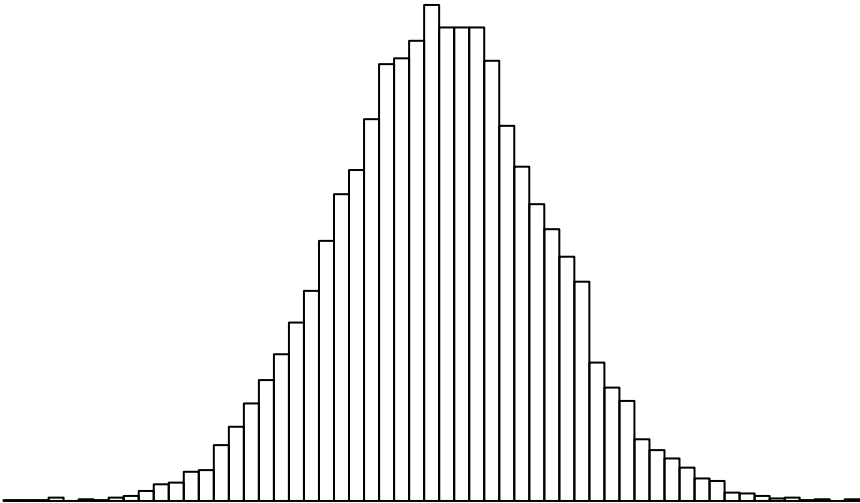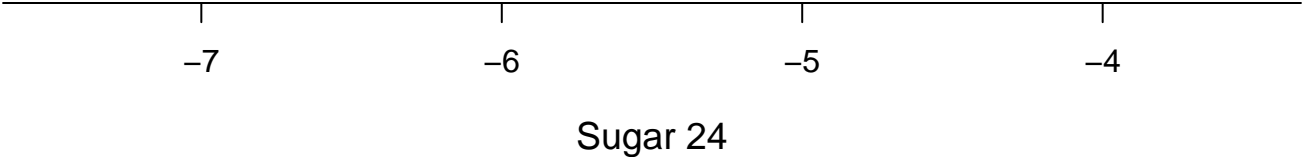

D206:26 – D206:18

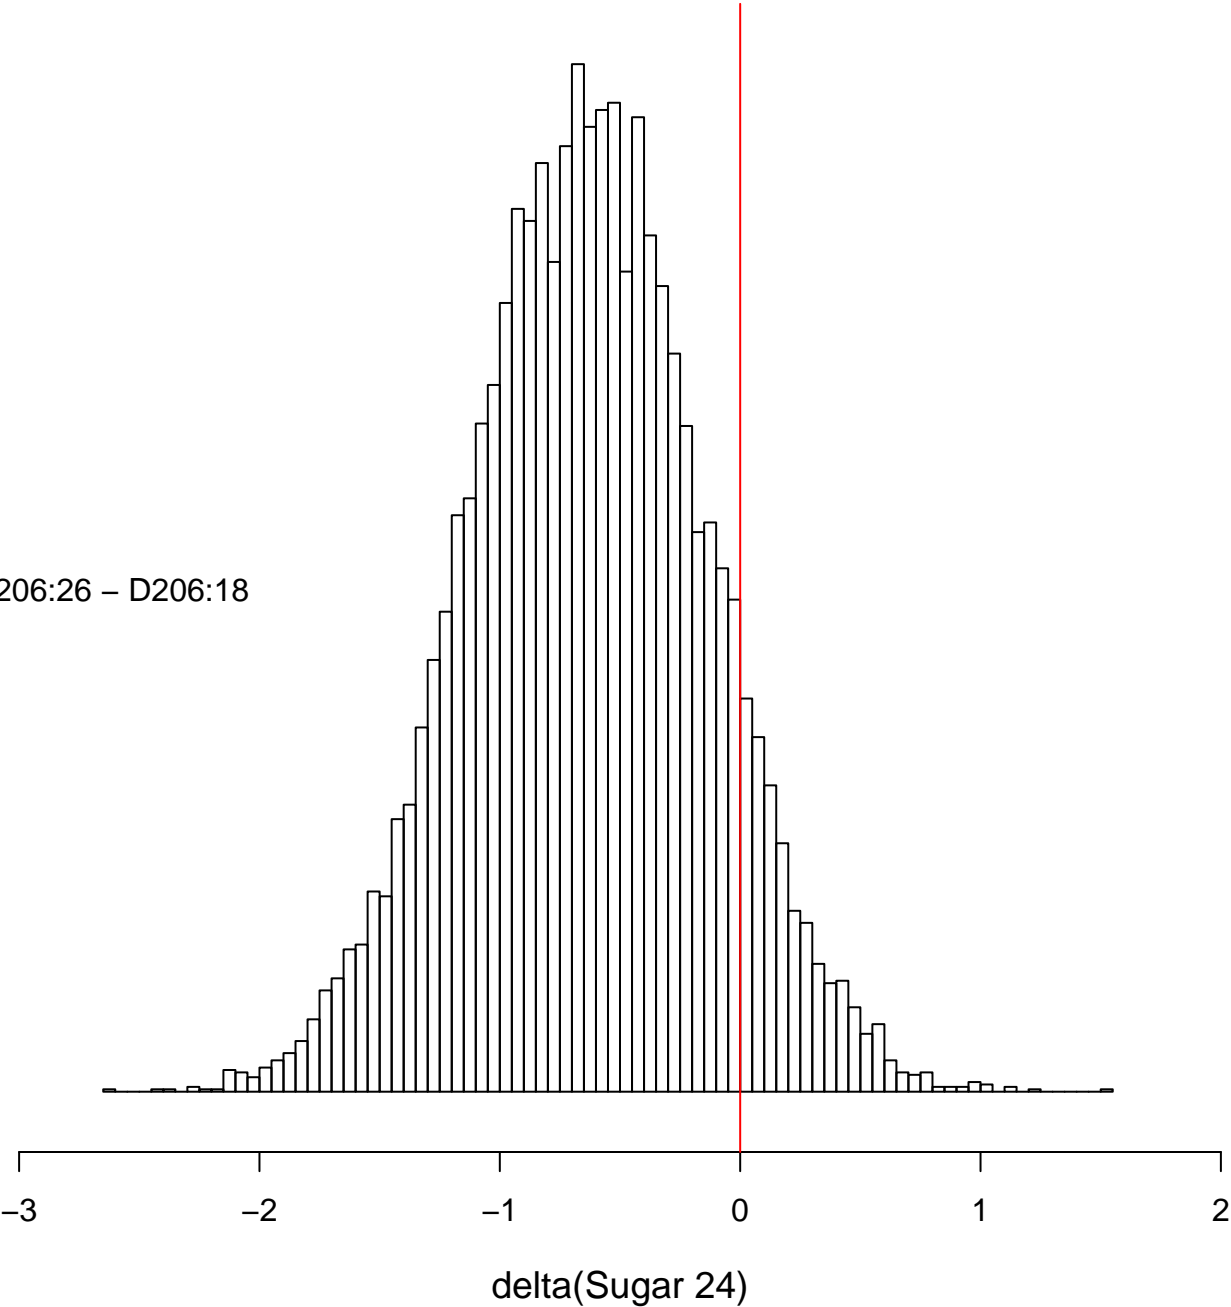

D206:26

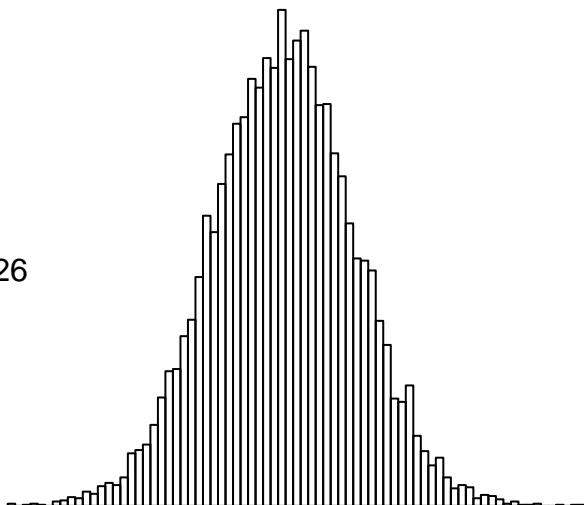

D206:18

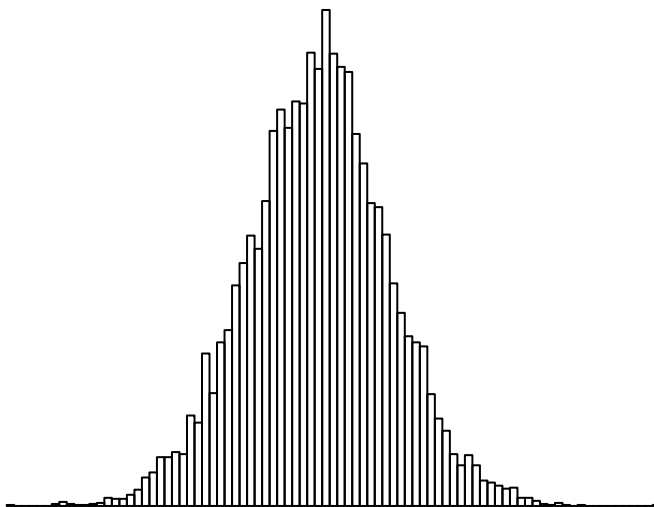

-8

-6

-4

-2

Alcohol 1

D206:26 – D206:18

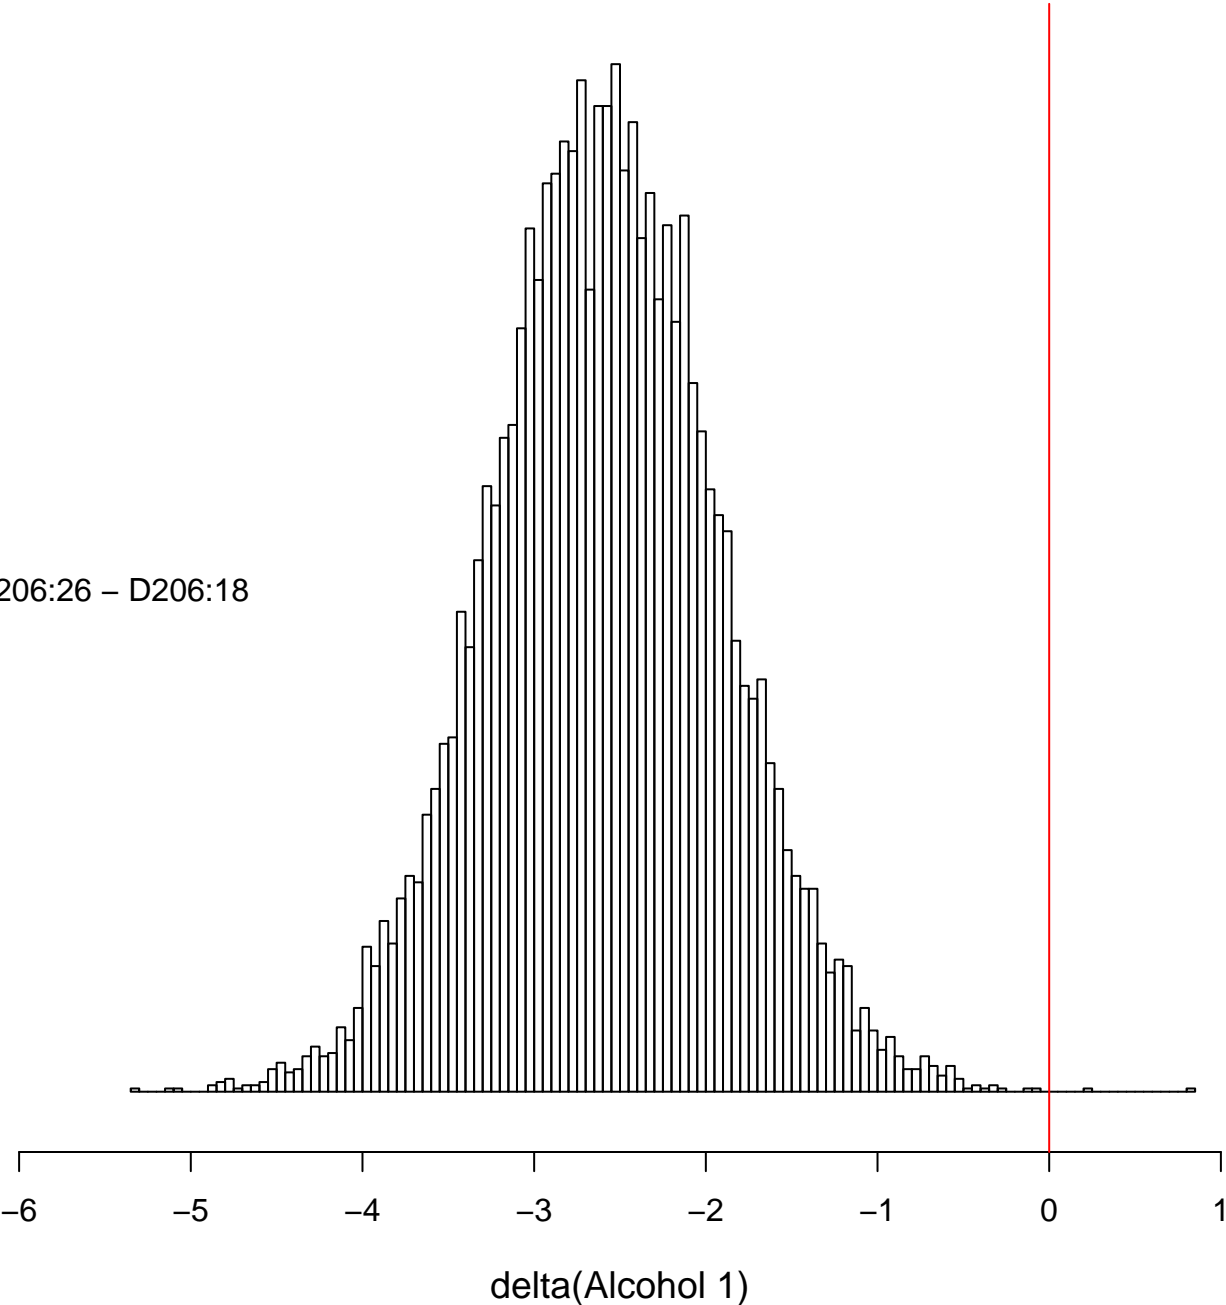

D206:26

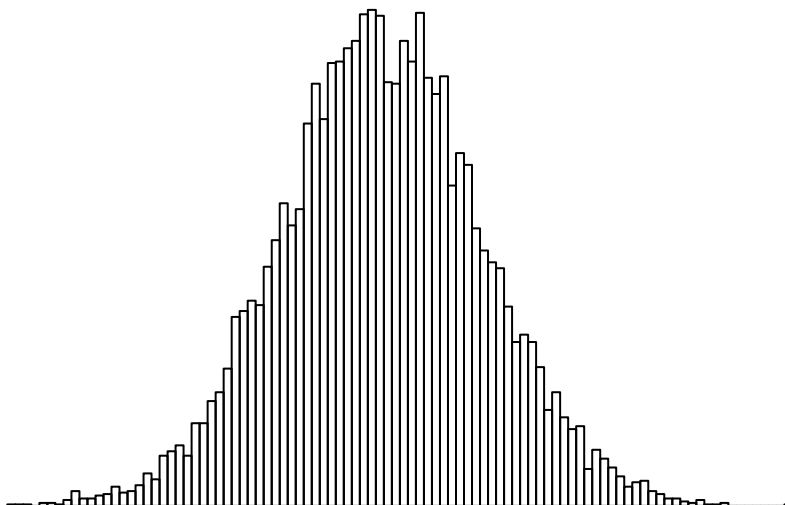

D206:18

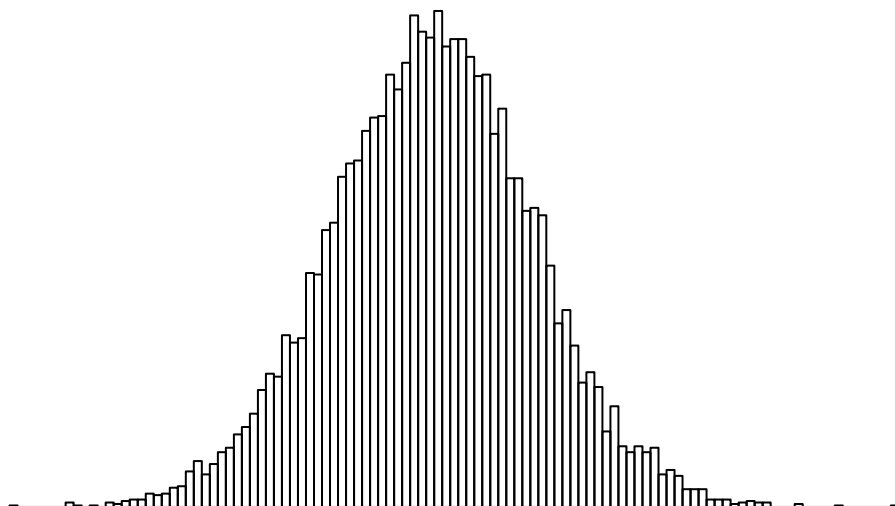

-8.0

-7.5

-7.0

-6.5

-6.0

-5.5

-5.0

Hydrocarbon 1

D206:26 – D206:18

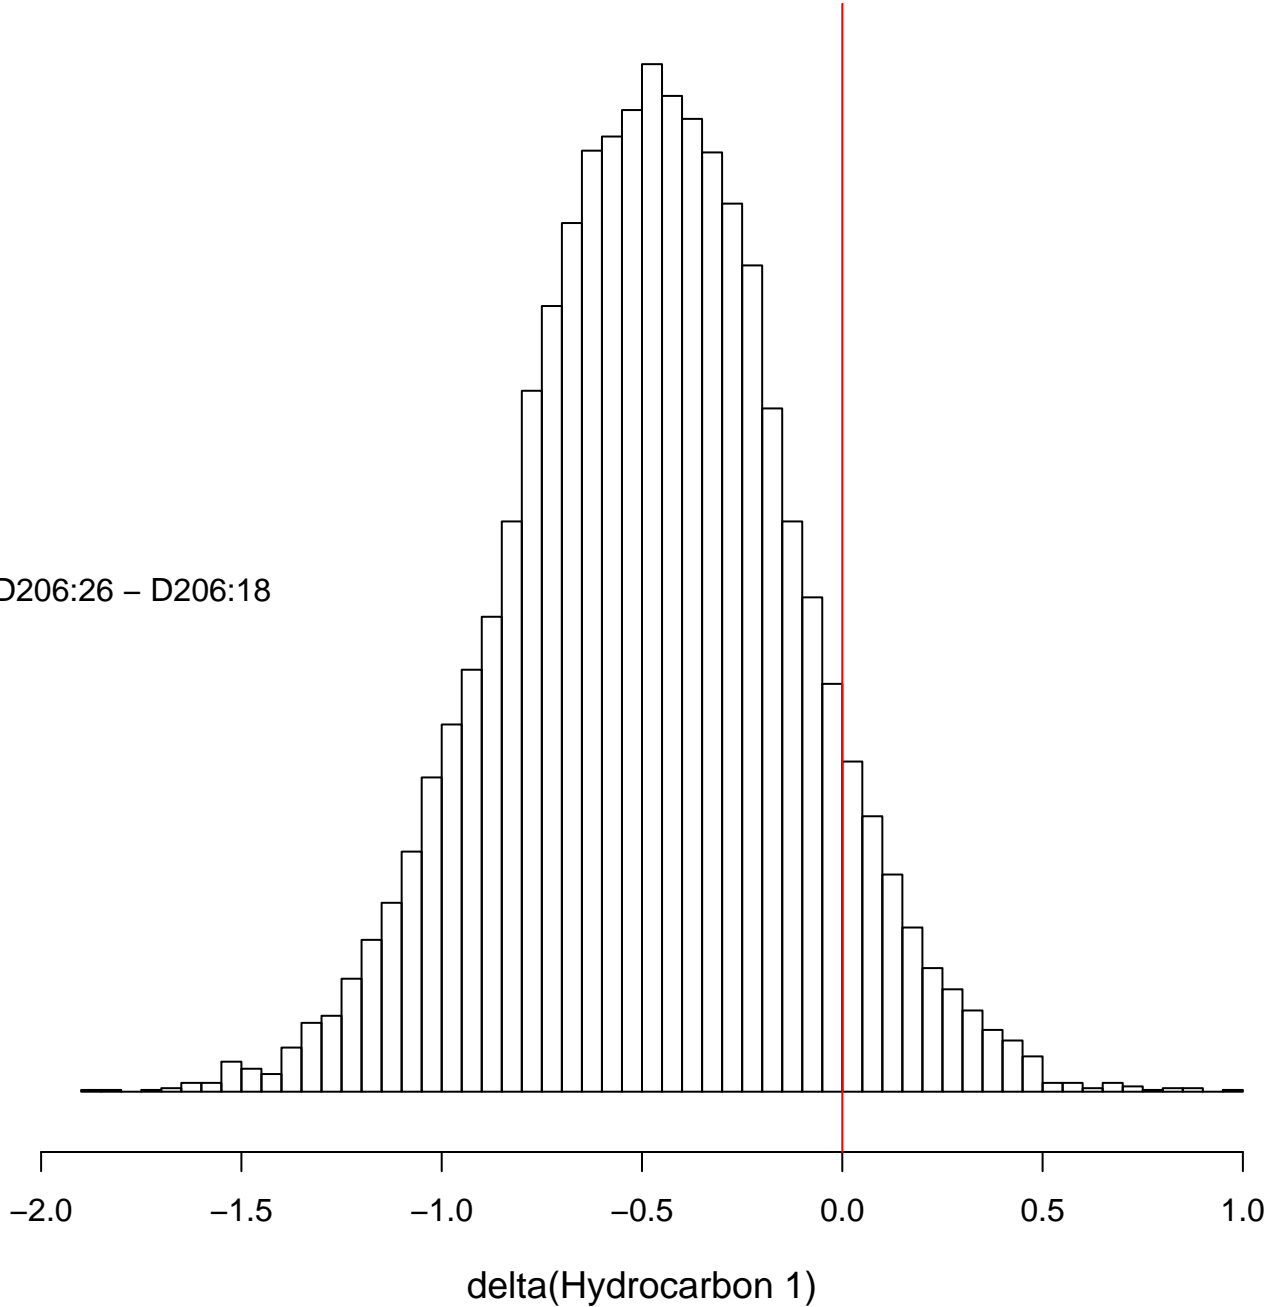



D206:26

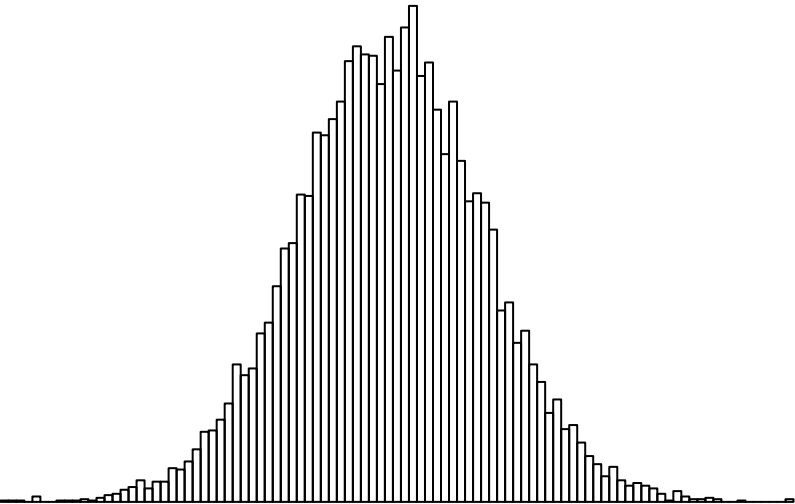

D206:18

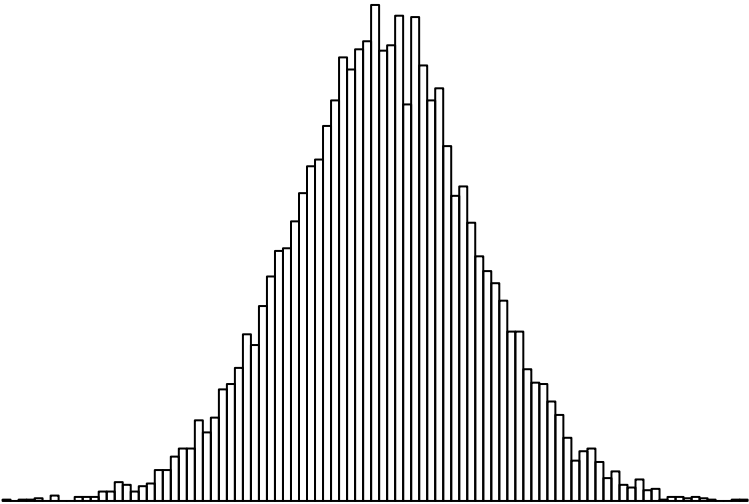

-7.5      -7.0      -6.5      -6.0      -5.5      -5.0      -4.5

Hydrocarbon 2

D206:26 – D206:18

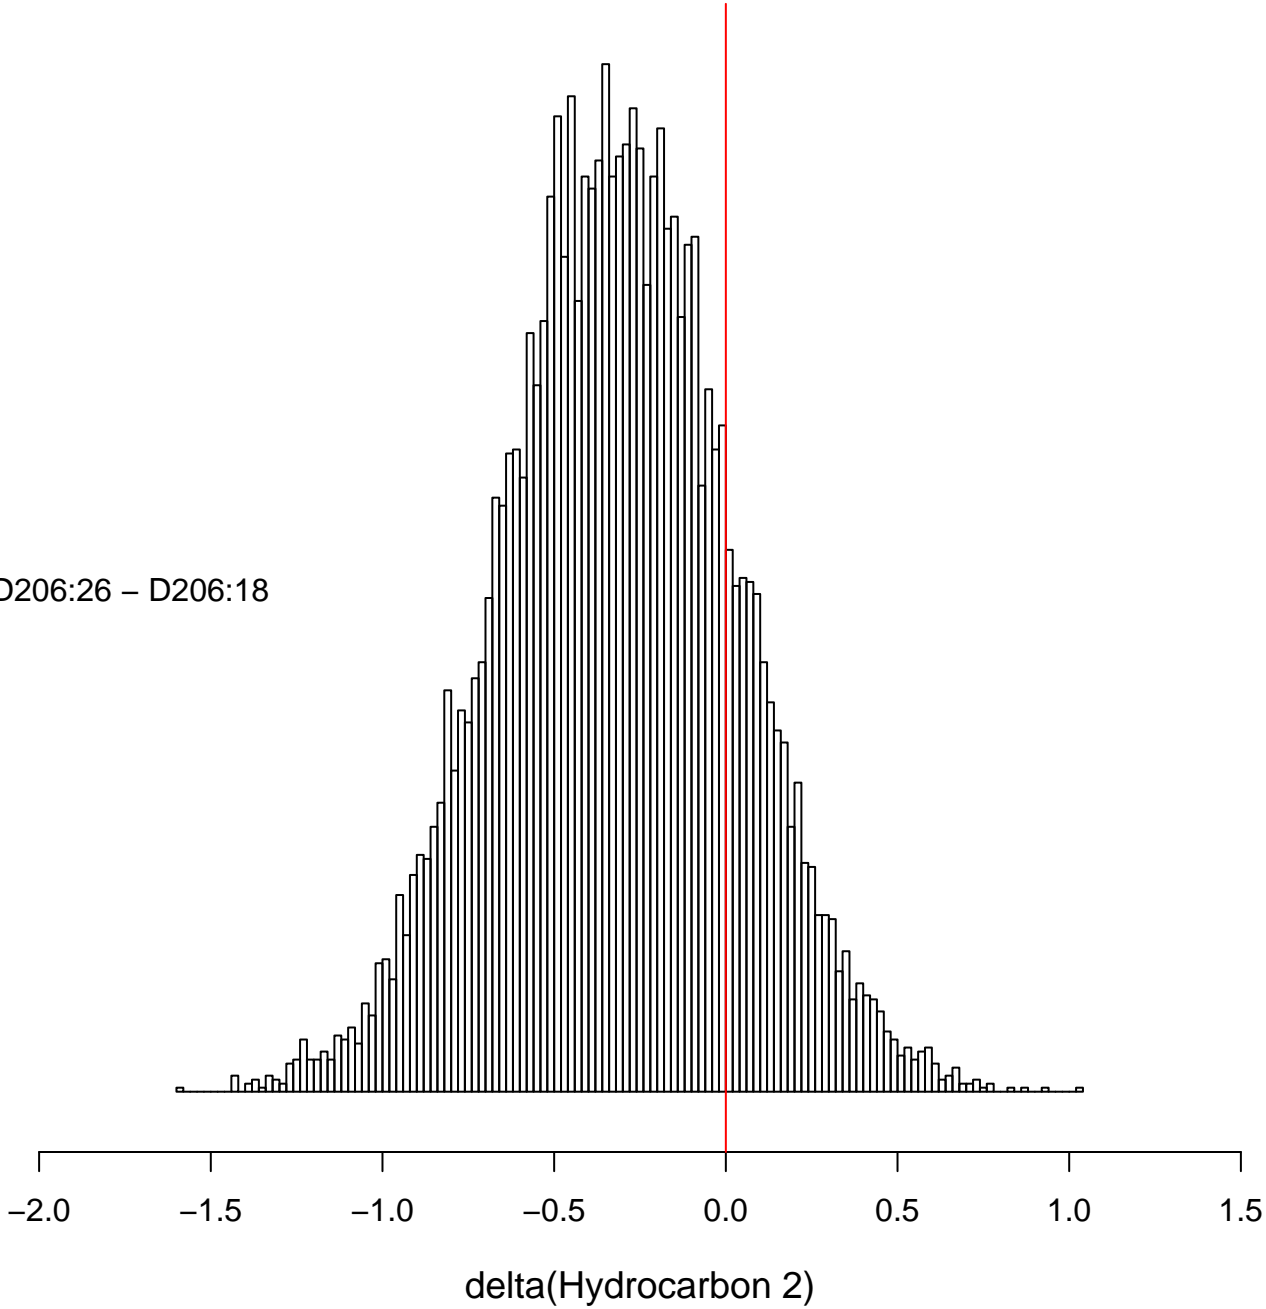

D206:26

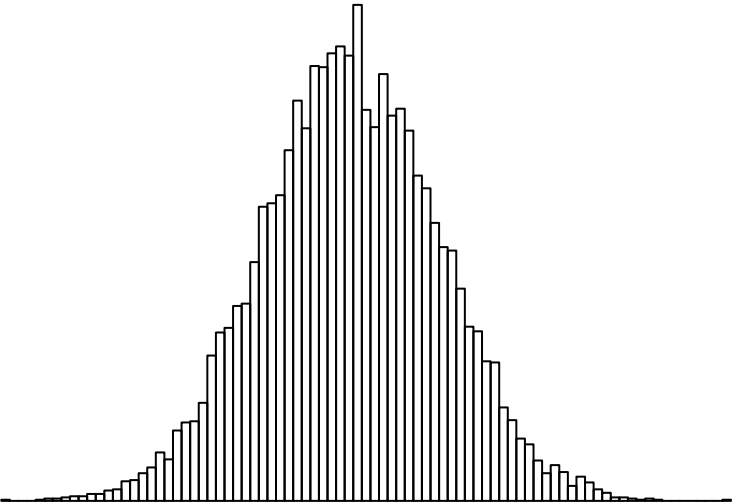

D206:18

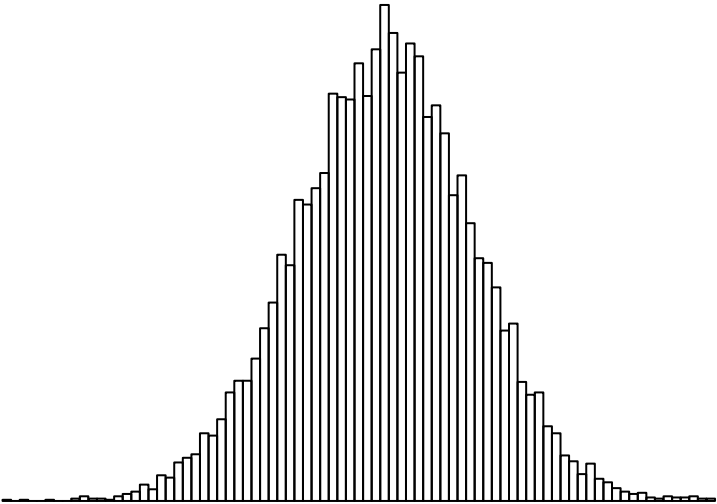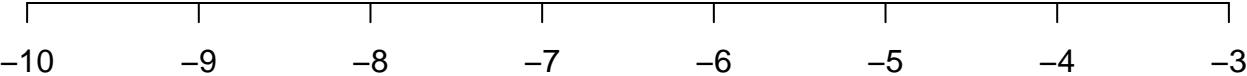

Hydrocarbon 3

D206:26 – D206:18

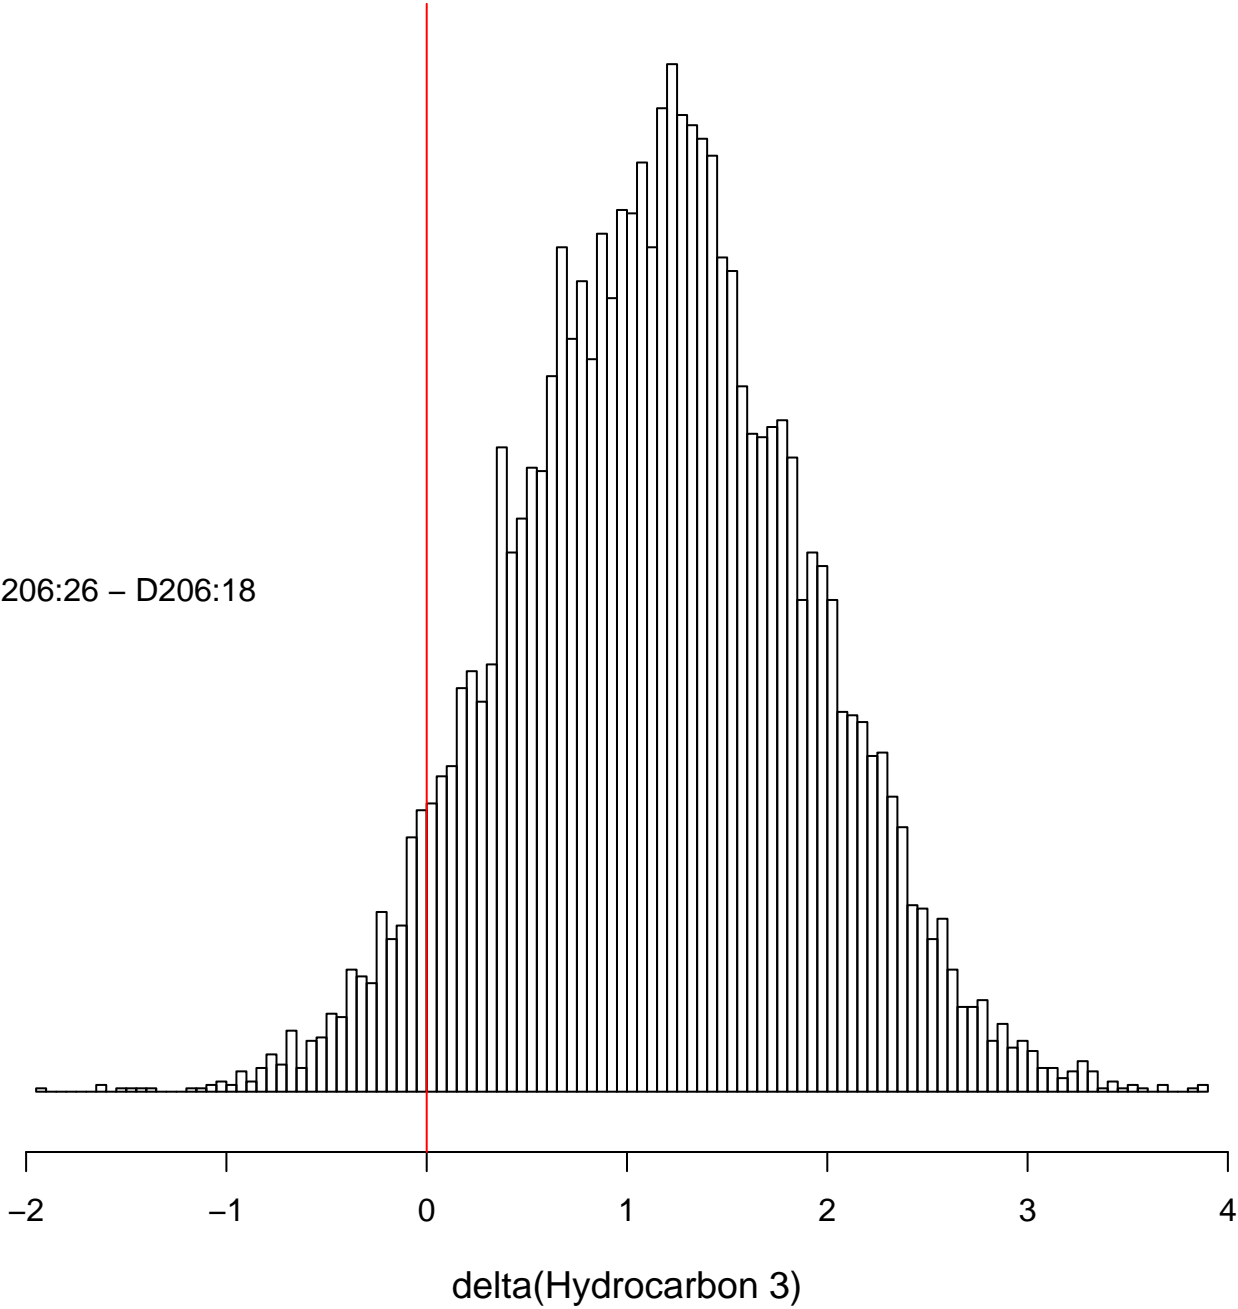

D206:26

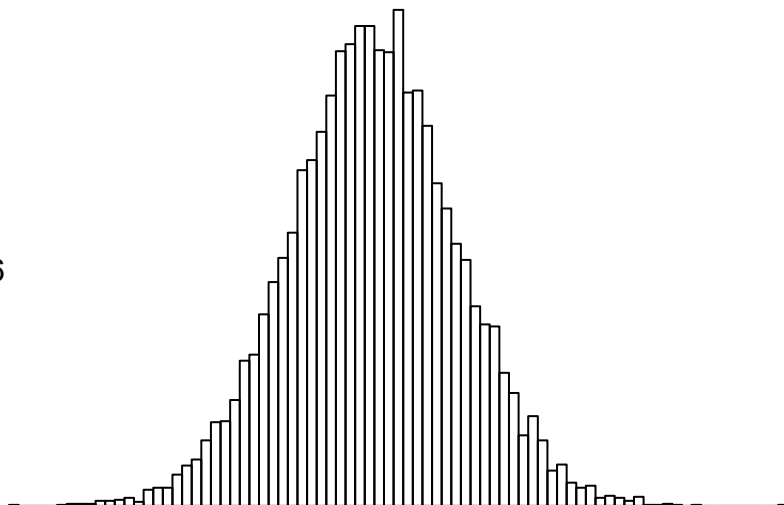

D206:18

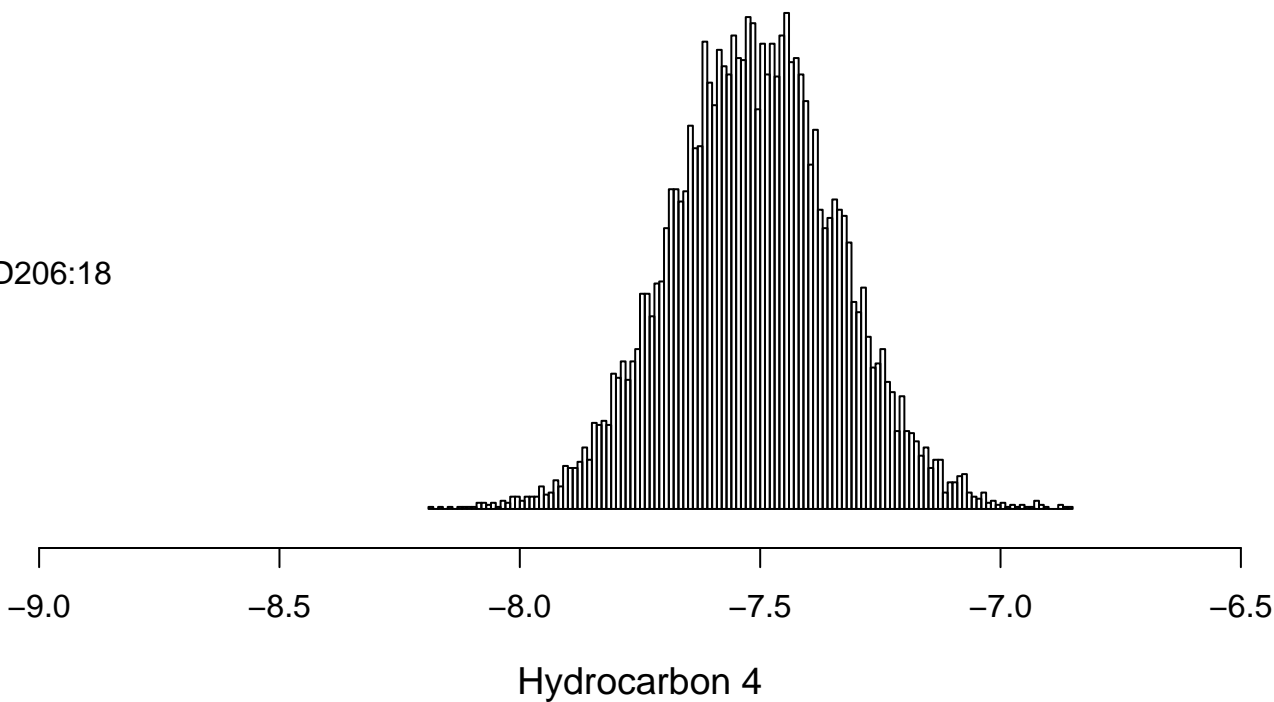

D206:26 – D206:18

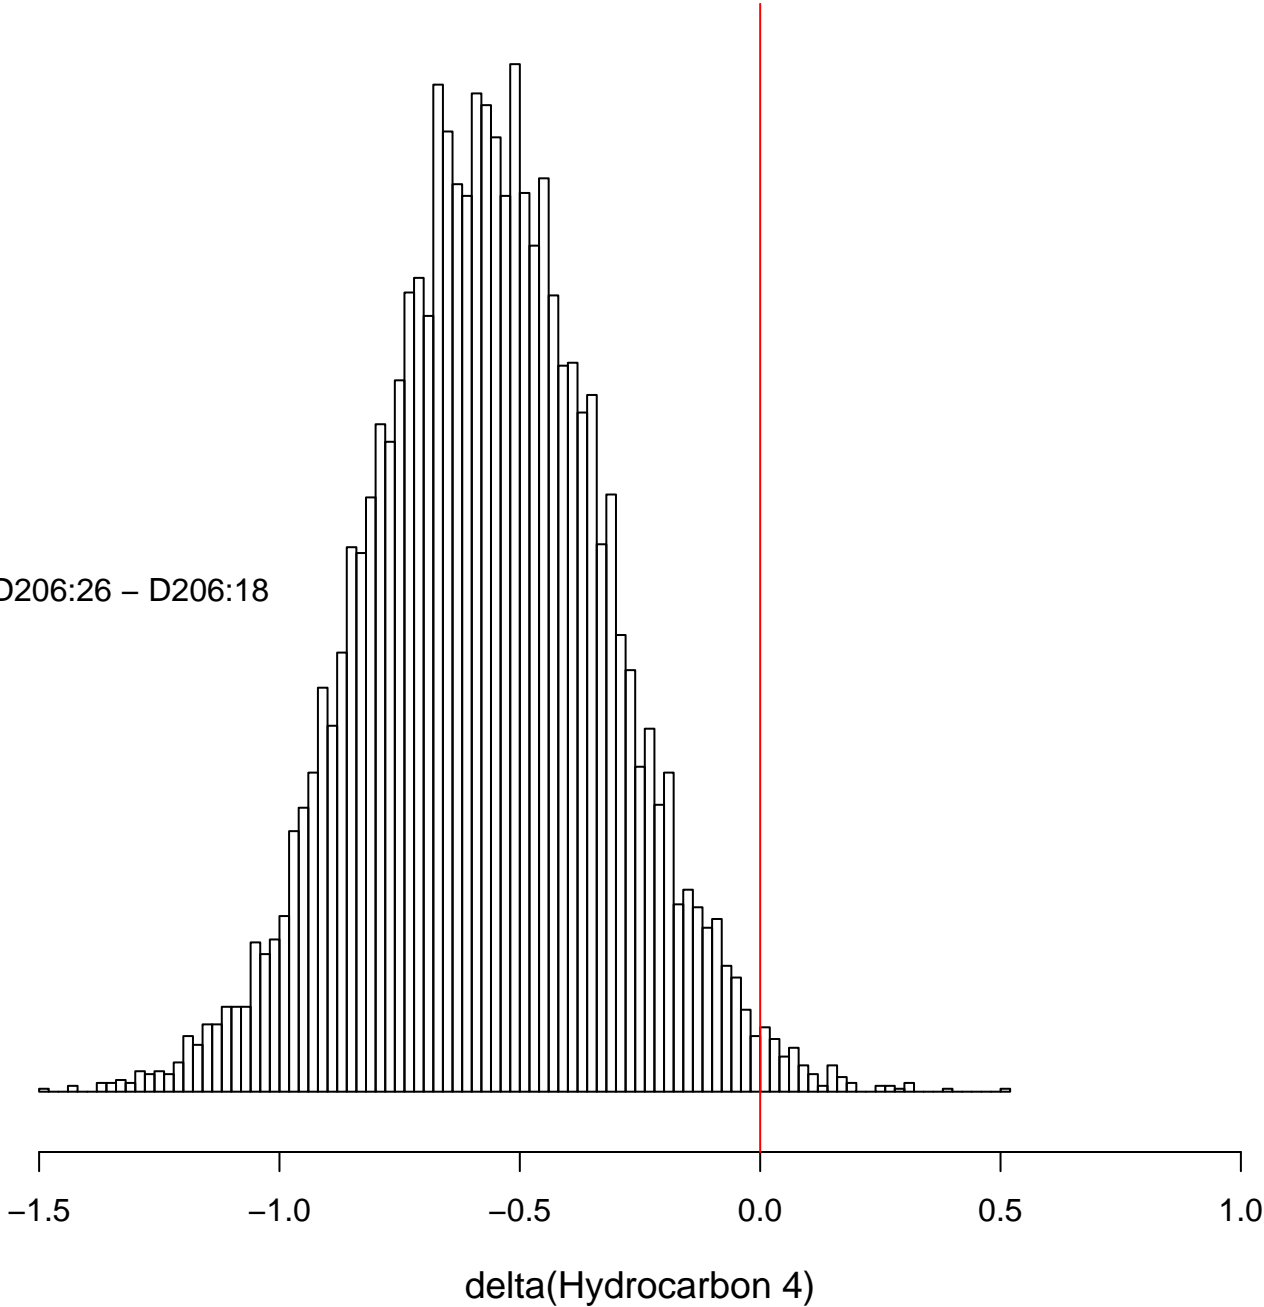

D206:26

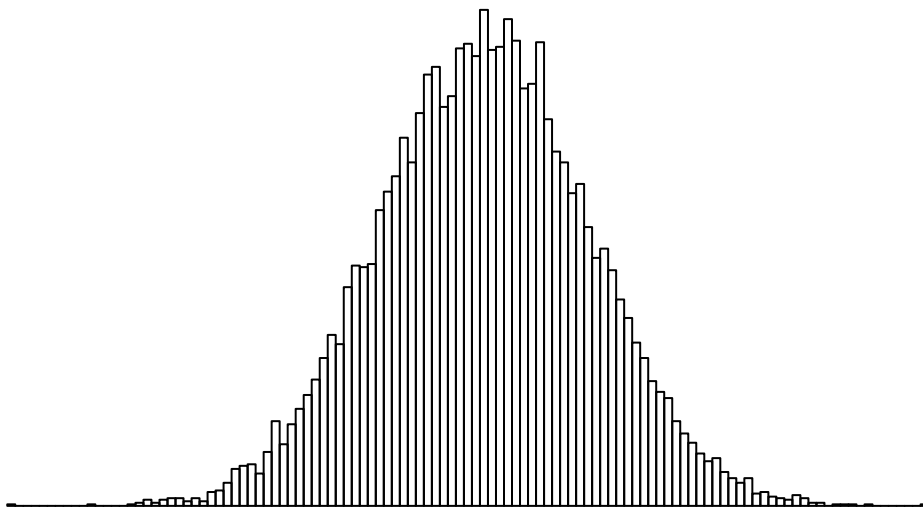

D206:18

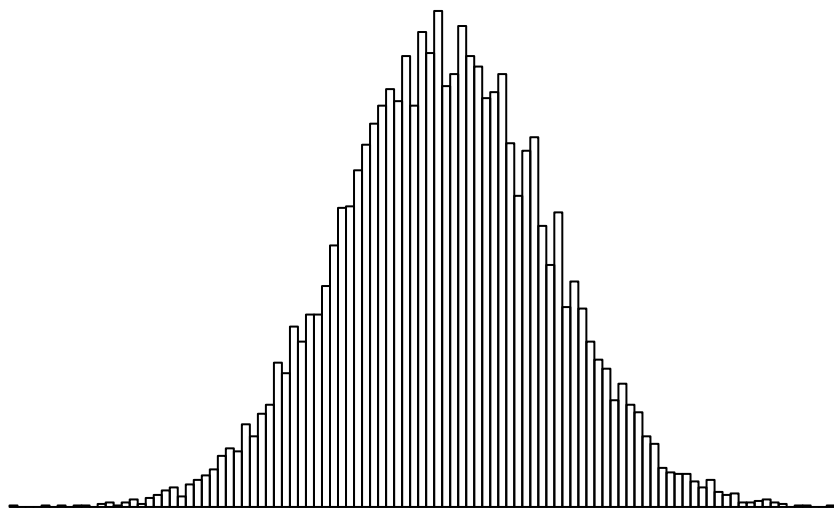

-9.0

-8.5

-8.0

-7.5

-7.0

-6.5

-6.0

Unidentified Metabolite 1

D206:26 – D206:18

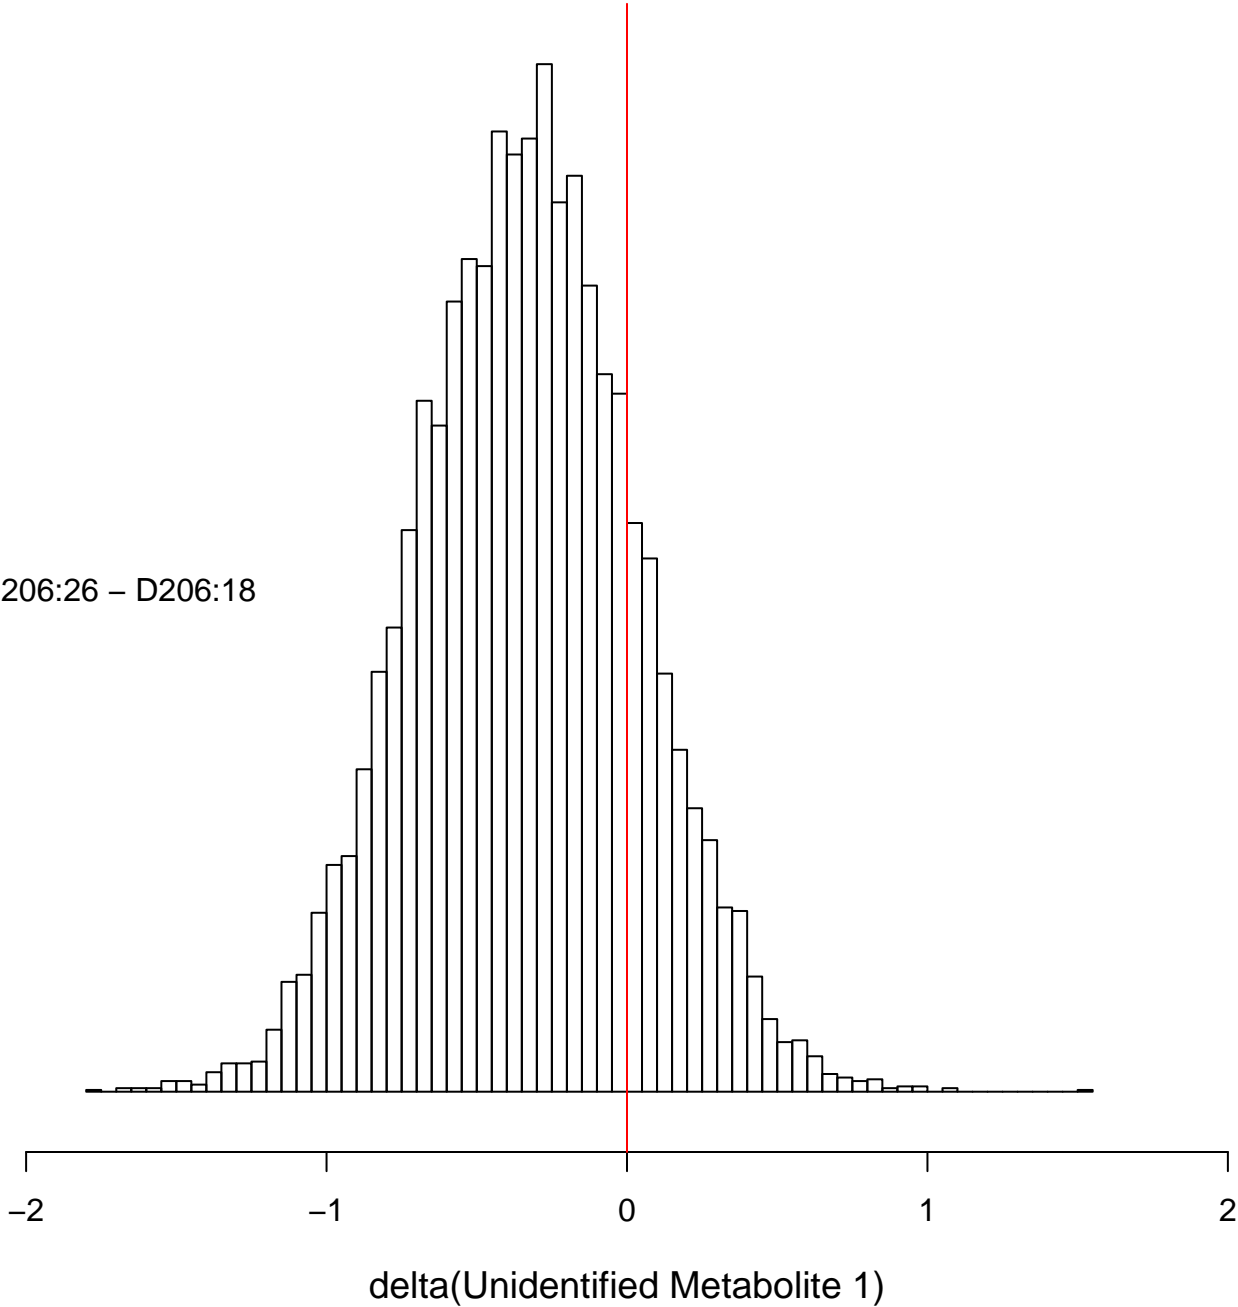



D206:26

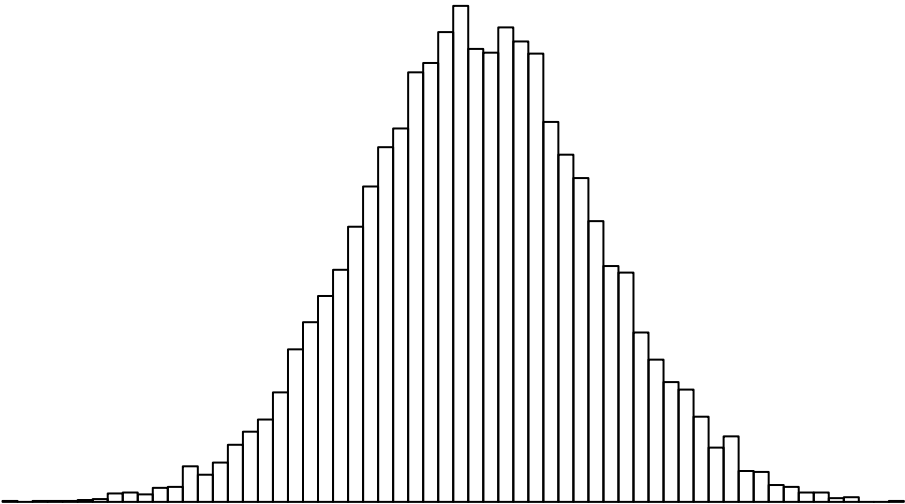

D206:18

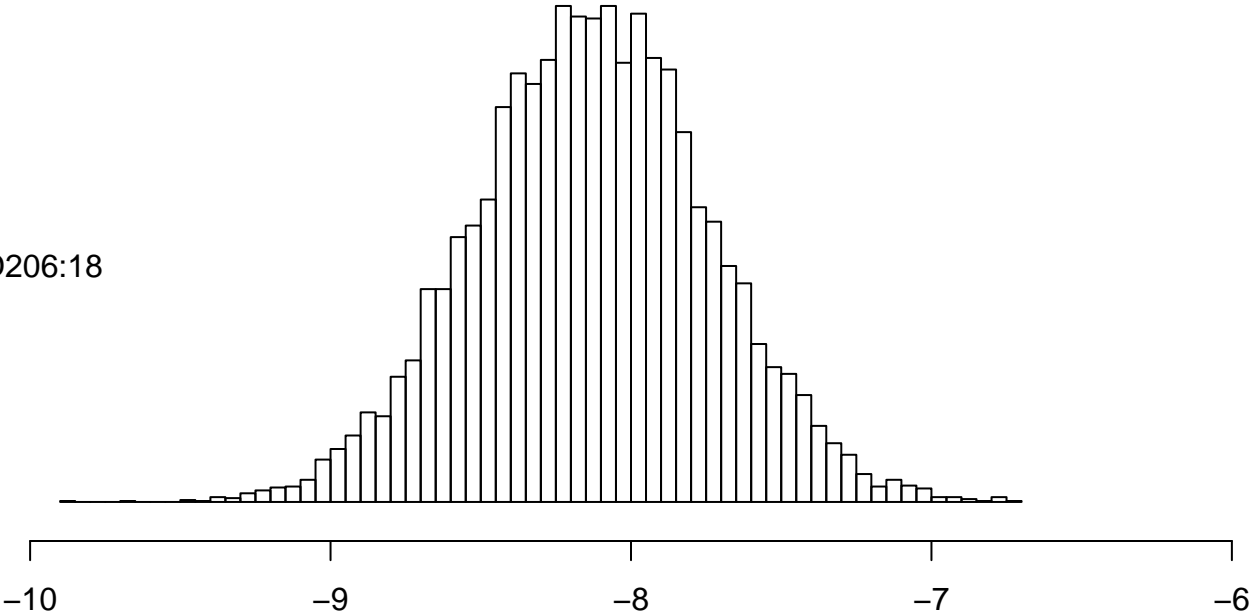

Unidentified Metabolite 2

D206:26 – D206:18

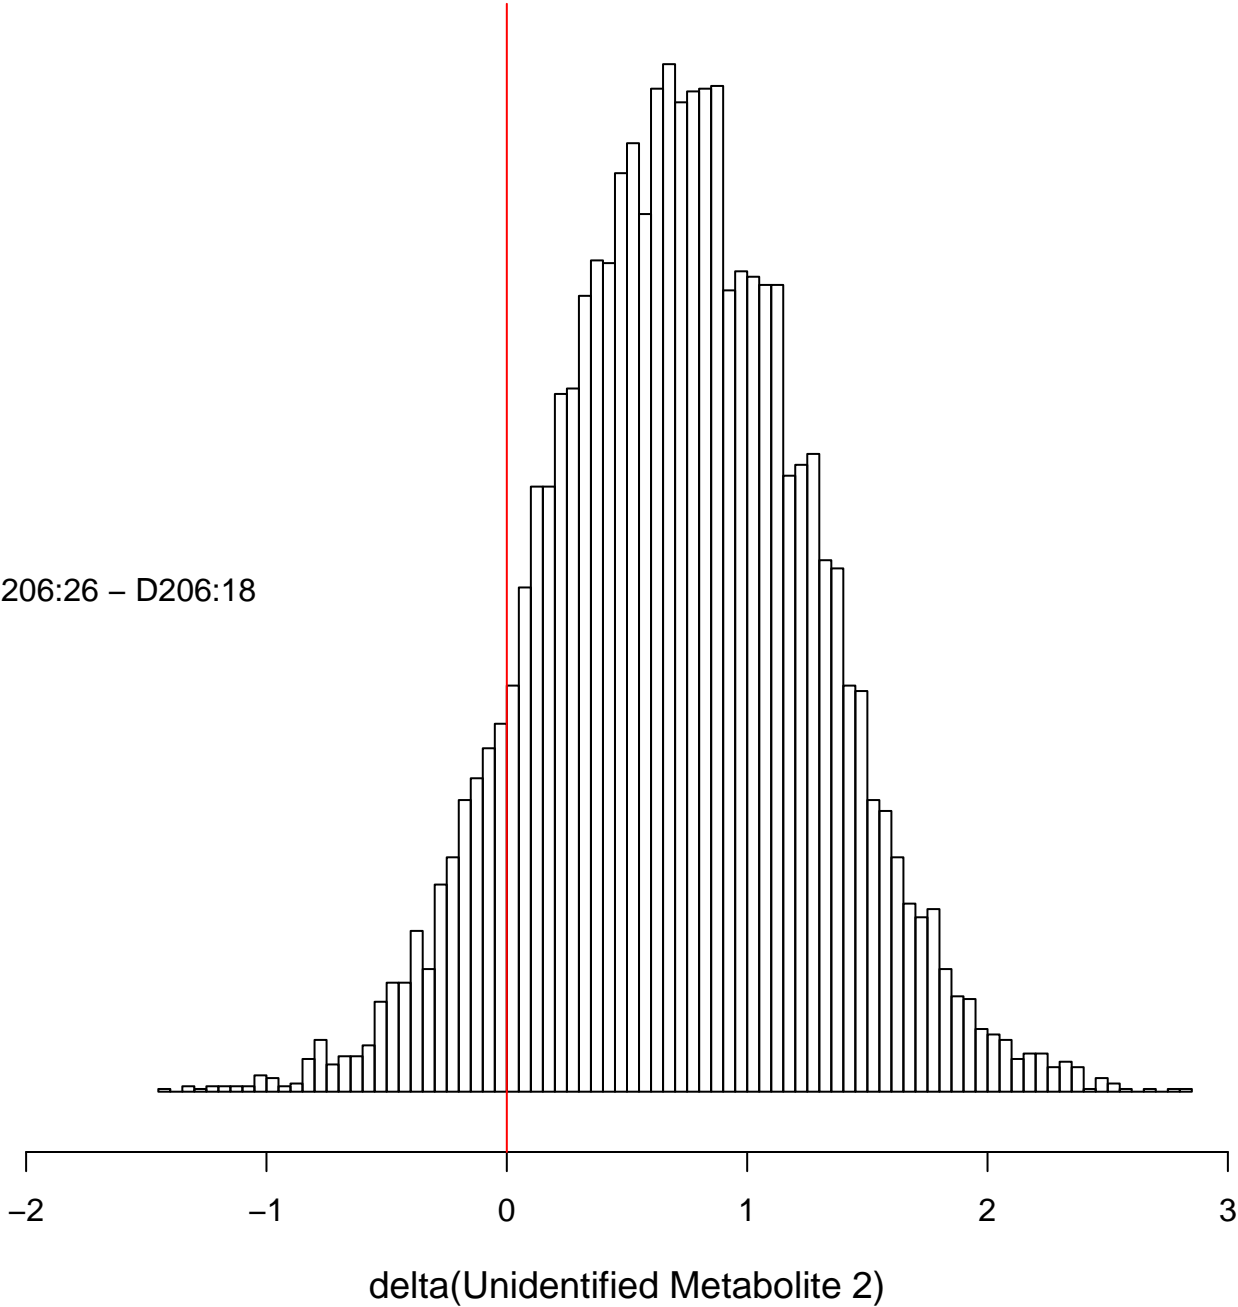

D206:26

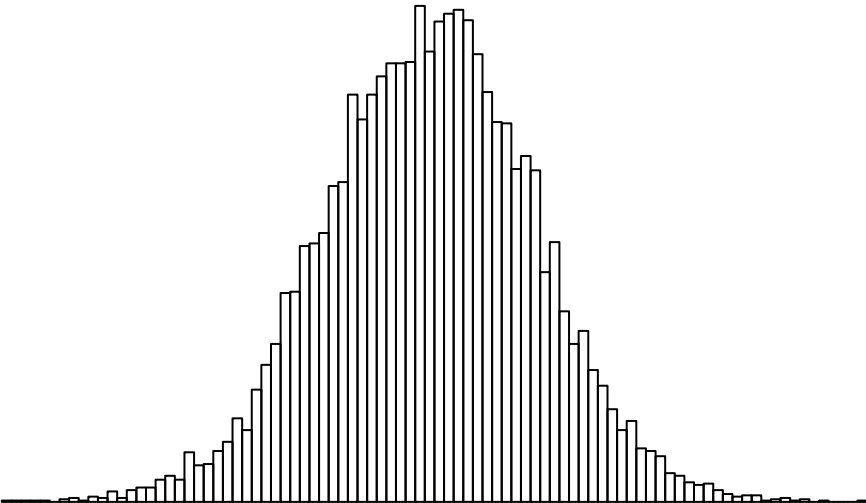

D206:18

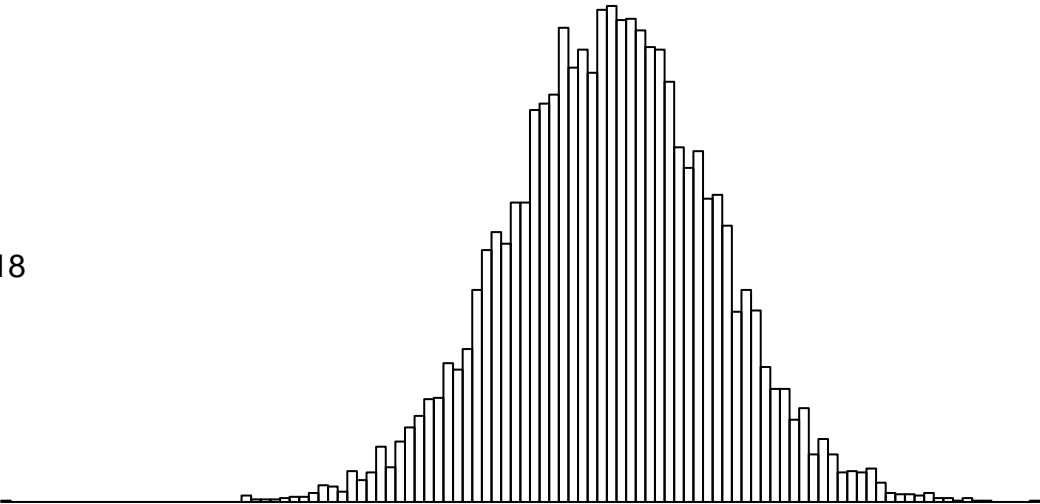

-10.0      -9.5      -9.0      -8.5      -8.0      -7.5

Unidentified Metabolite 3

D206:26 – D206:18

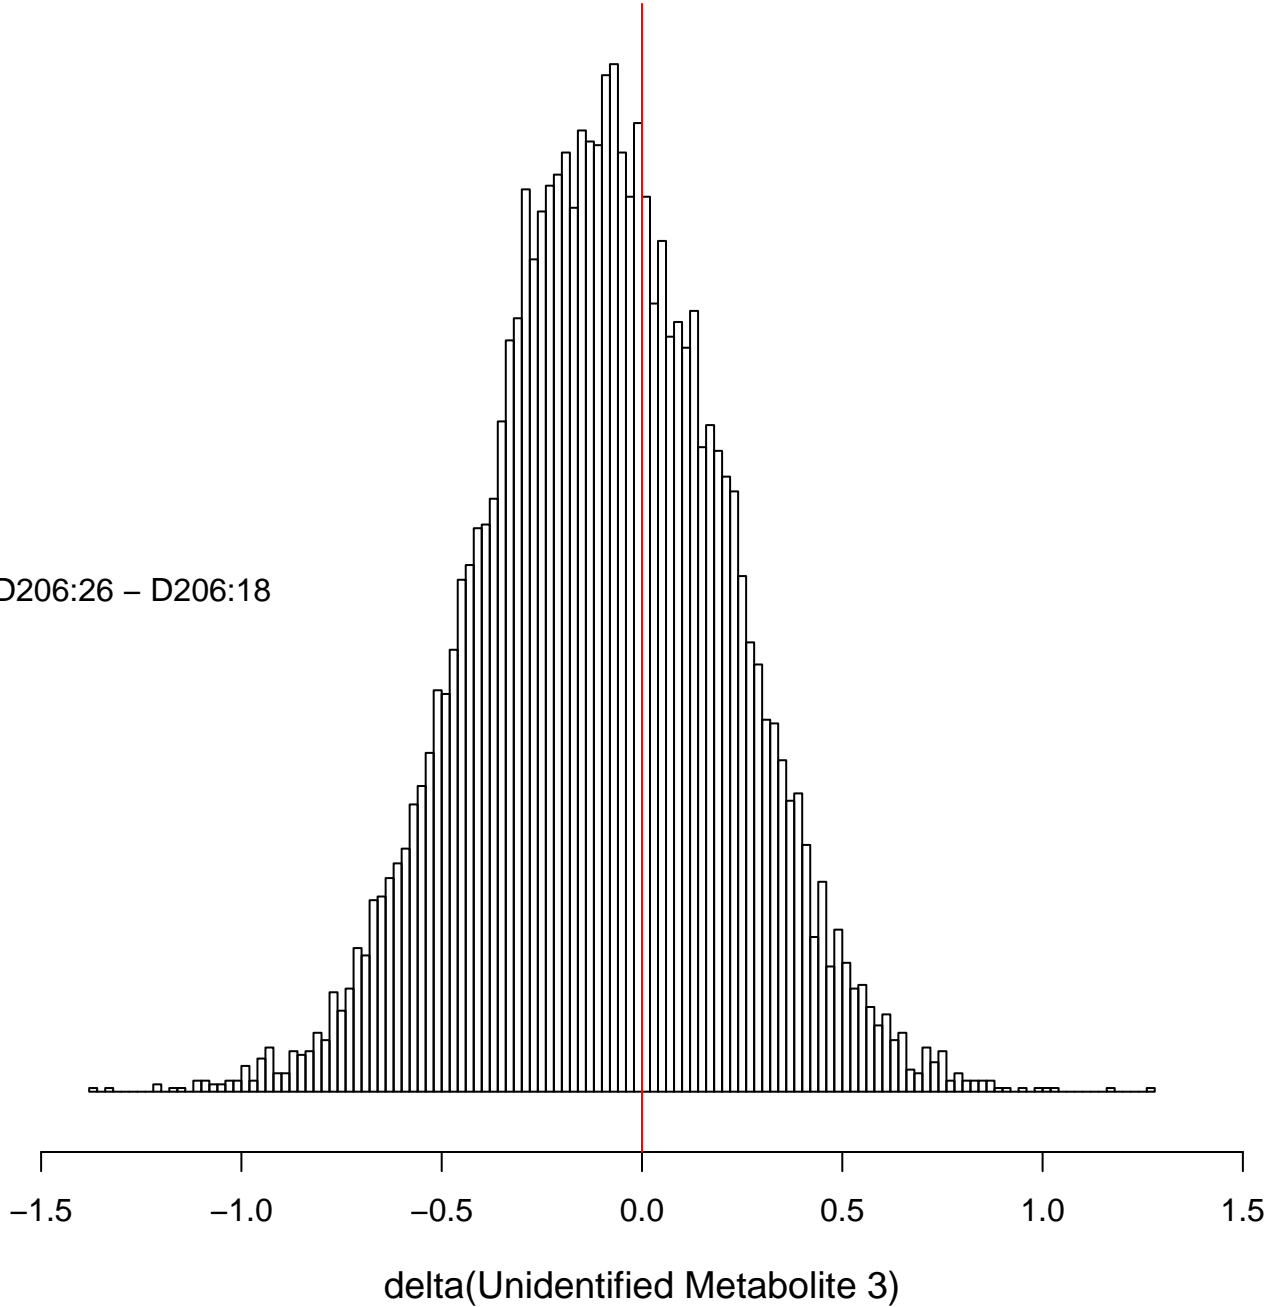

D206:26

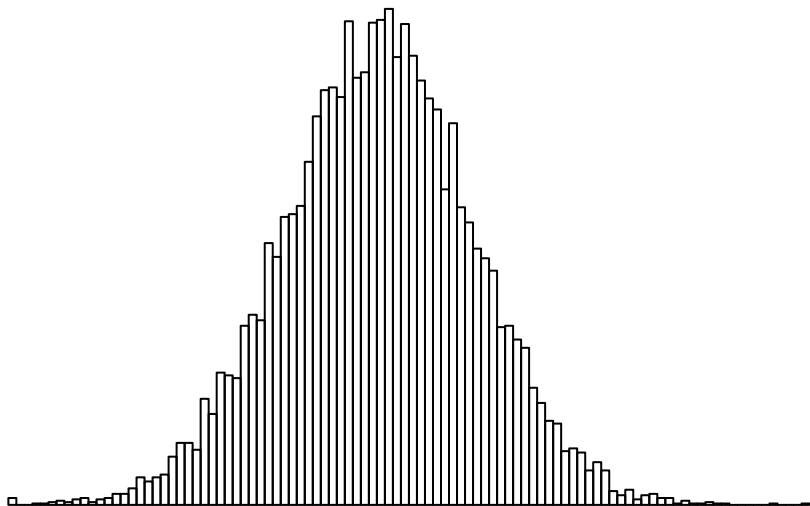

D206:18

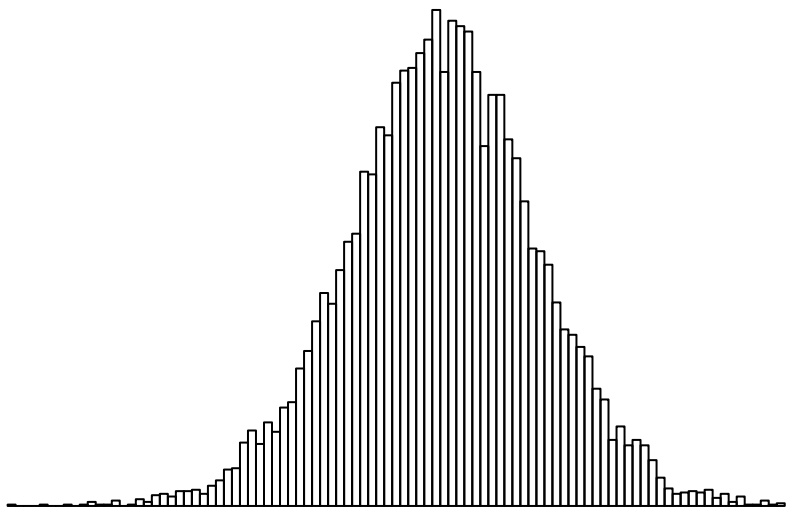

-9.0      -8.5      -8.0      -7.5      -7.0      -6.5      -6.0

Unidentified Metabolite 4

D206:26 – D206:18

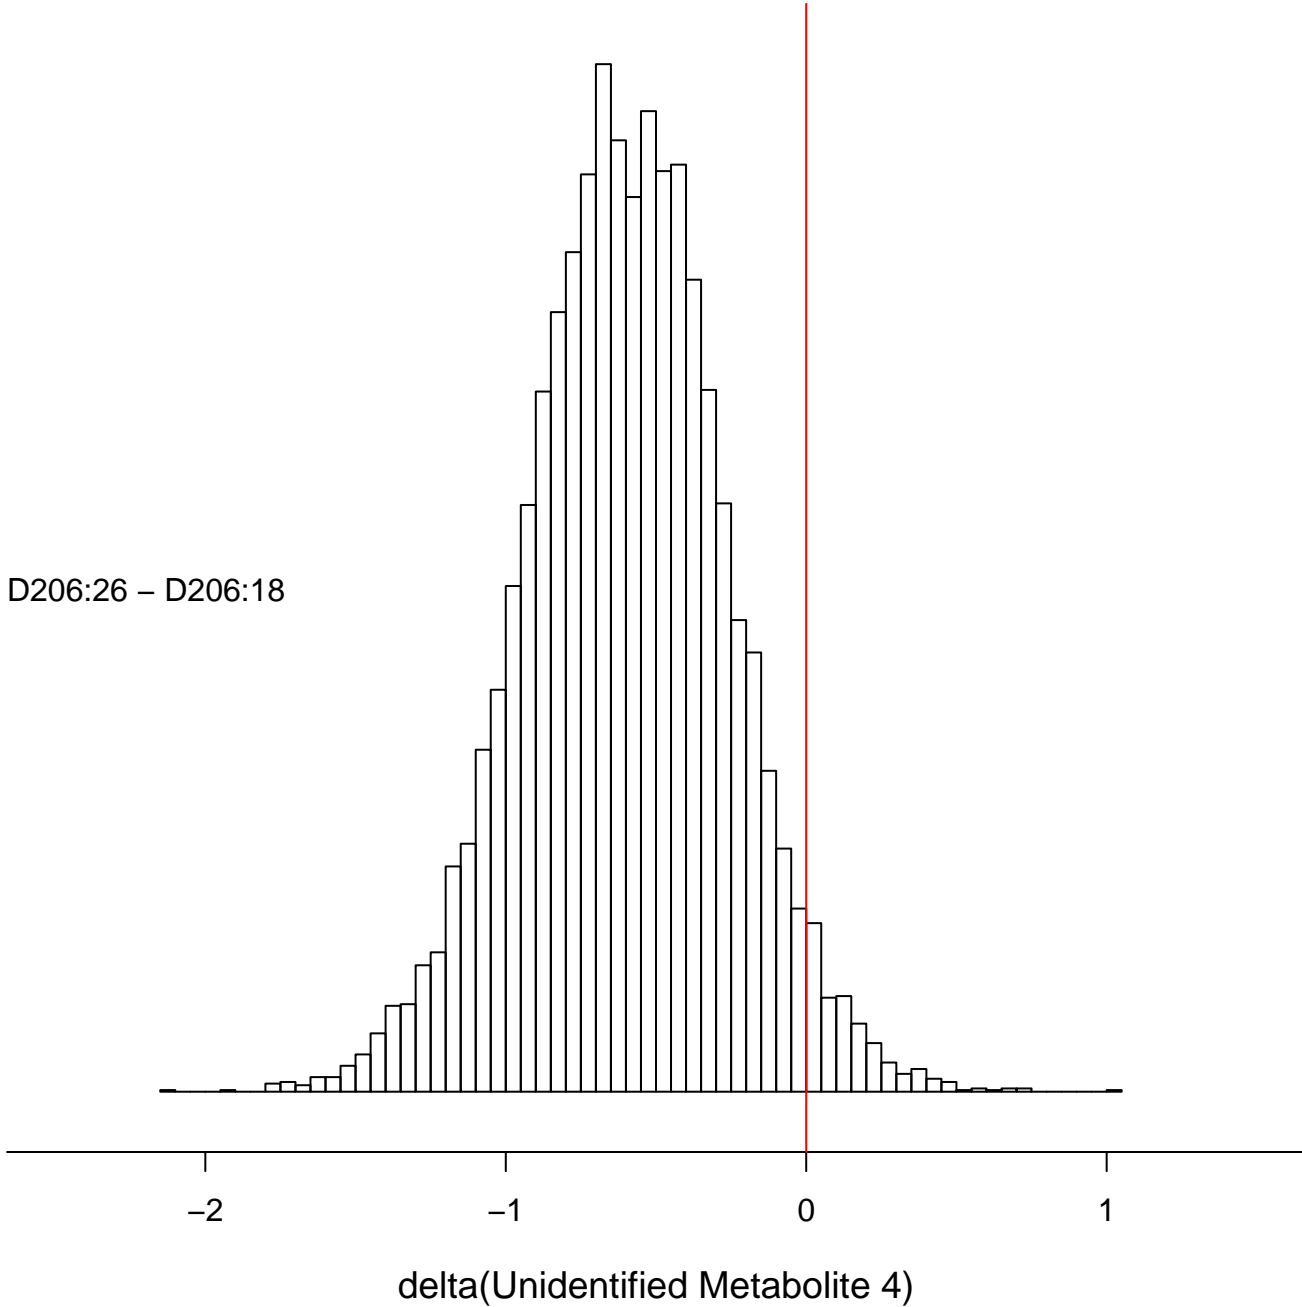

D206:26

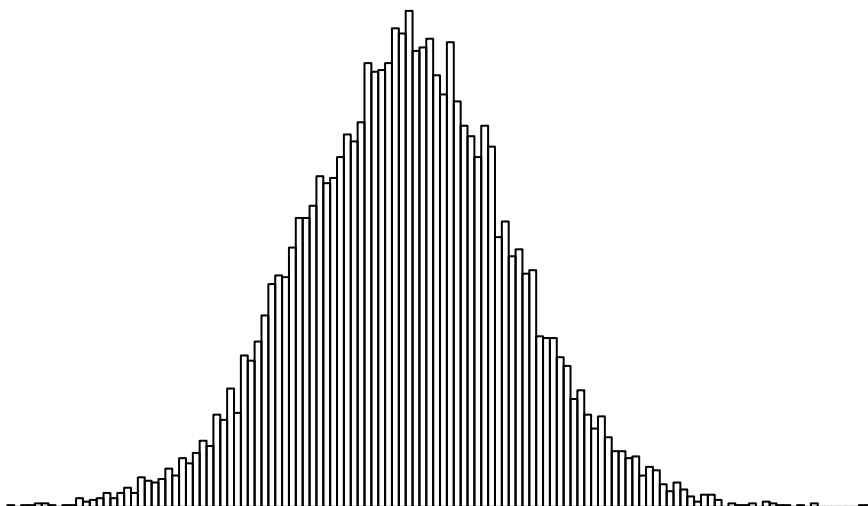

D206:18

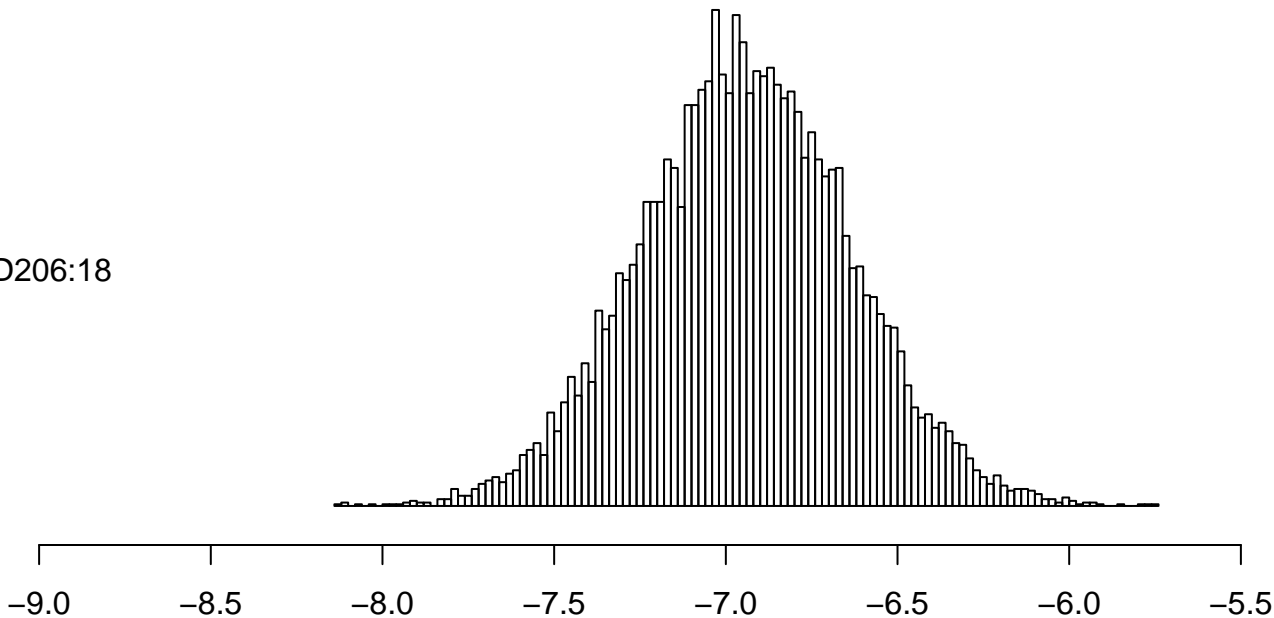

Unidentified Metabolite 5

D206:26 – D206:18

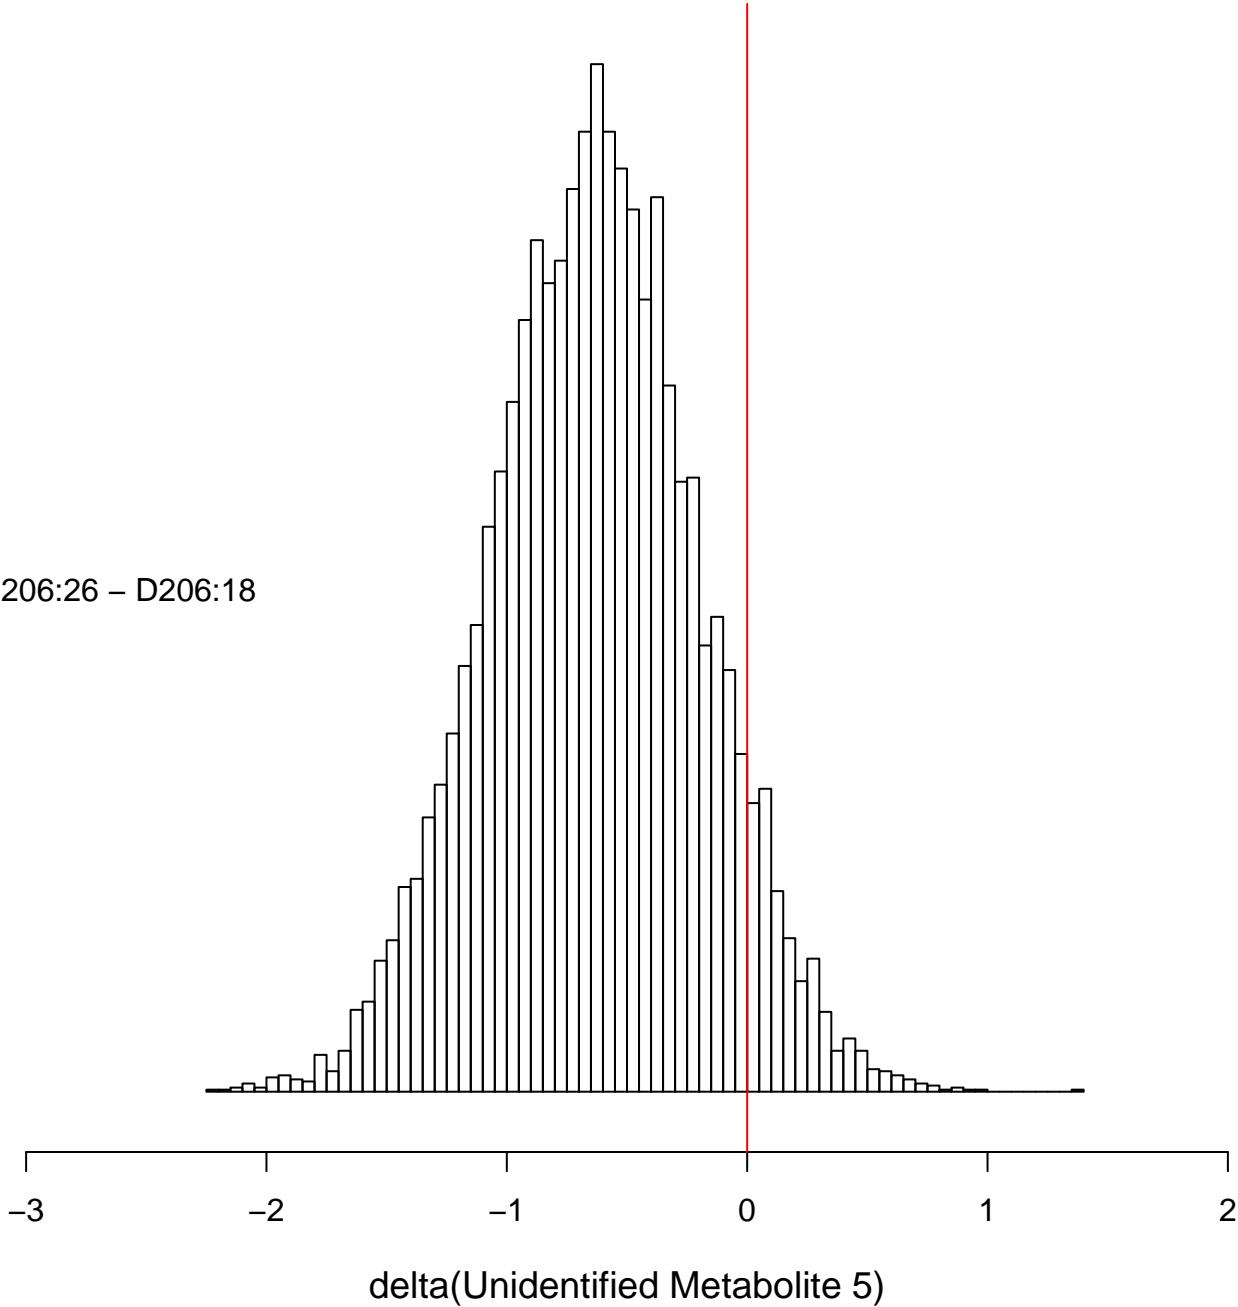



D206:26

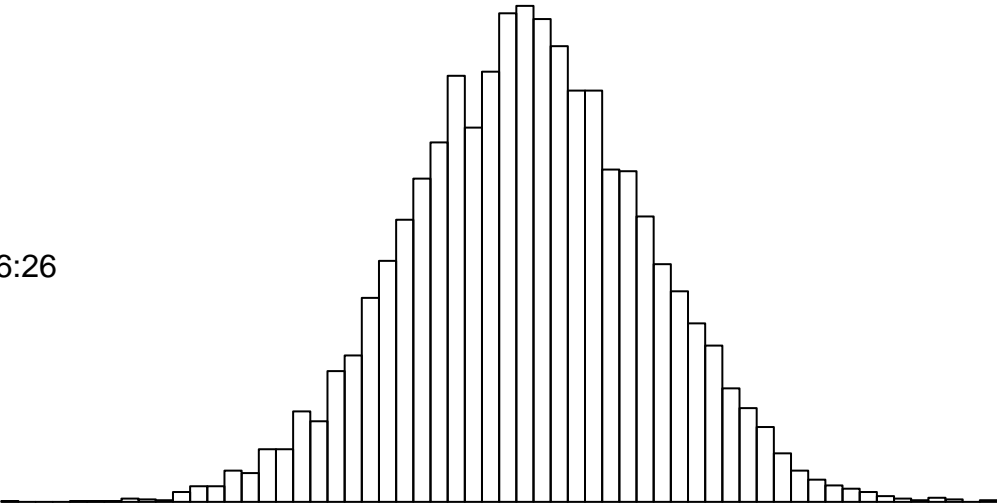

D206:18

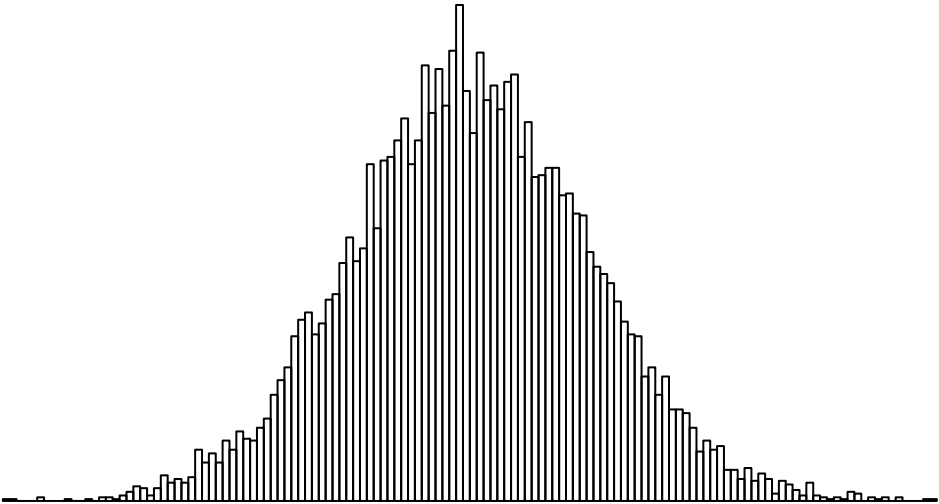

-7.0      -6.5      -6.0      -5.5      -5.0      -4.5      -4.0      -3.5

Unidentified Metabolite 6

D206:26 – D206:18

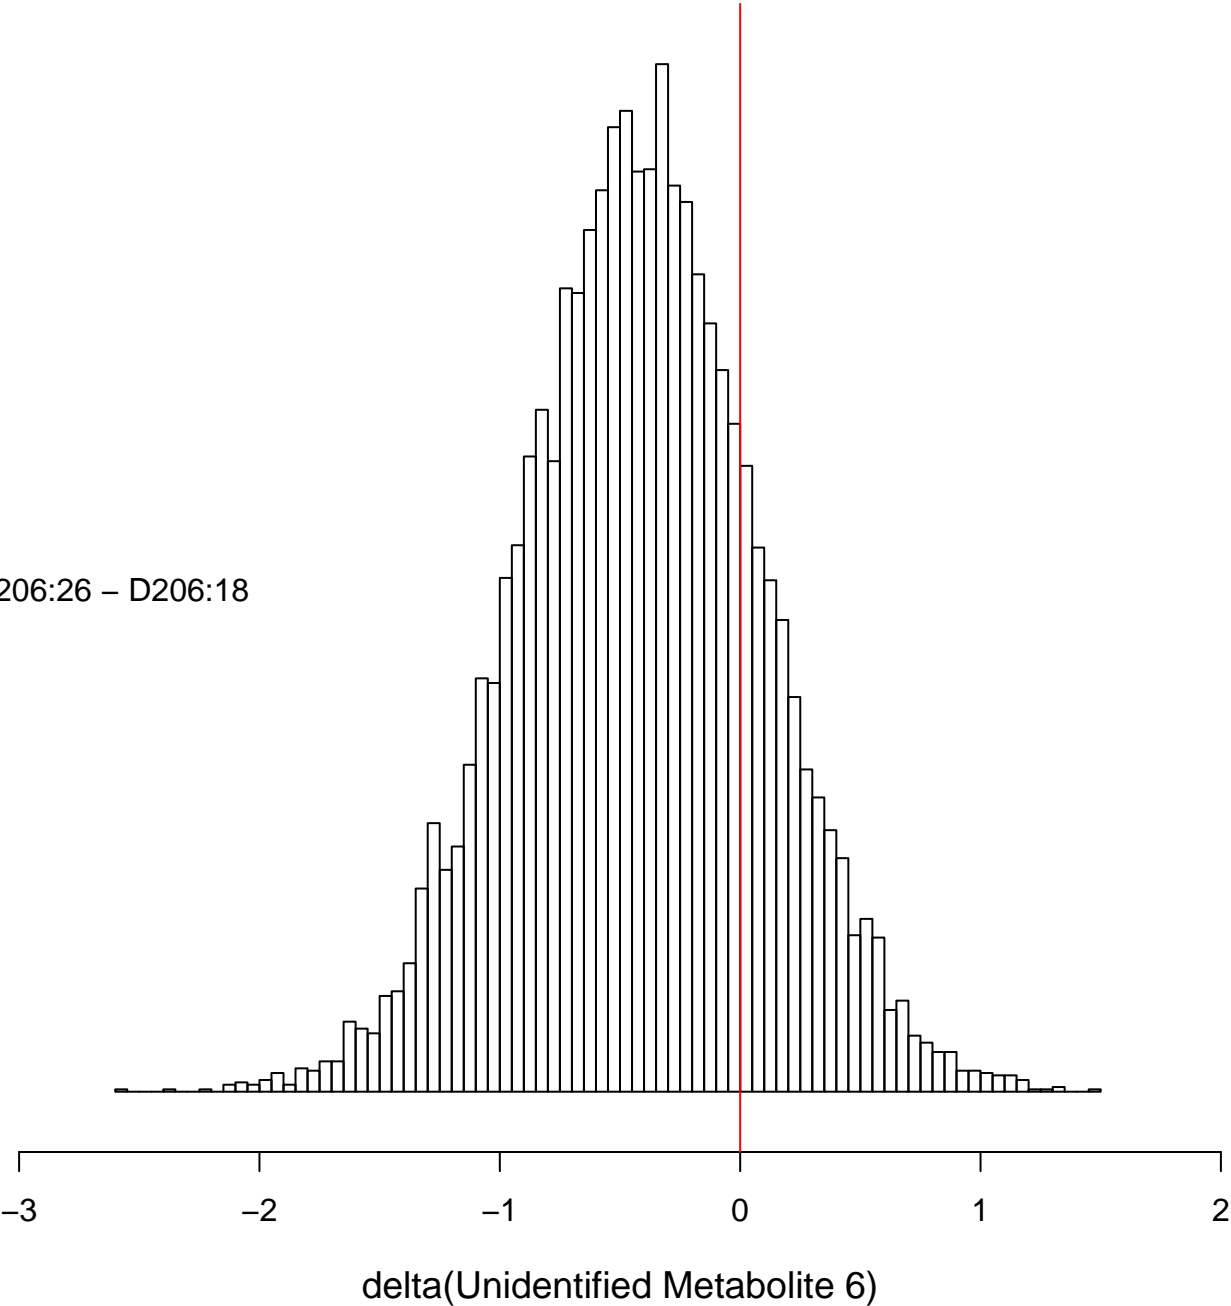

D206:26

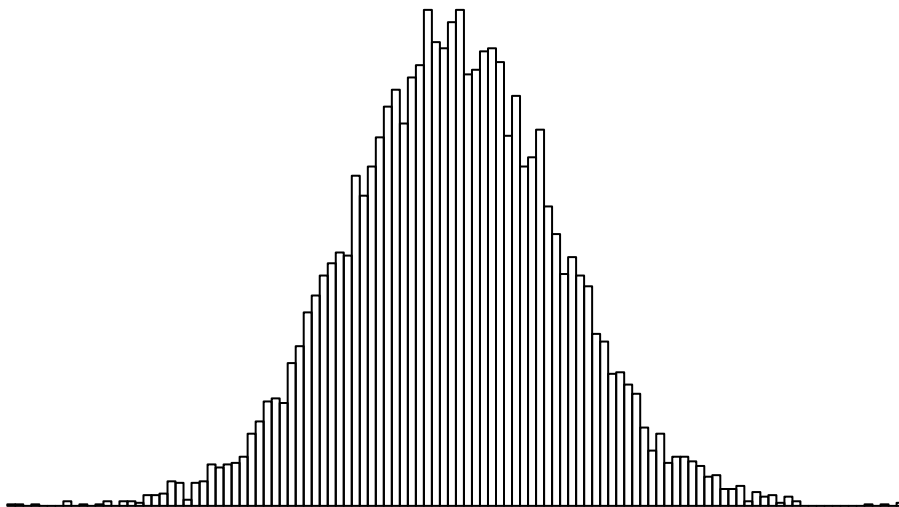

D206:18

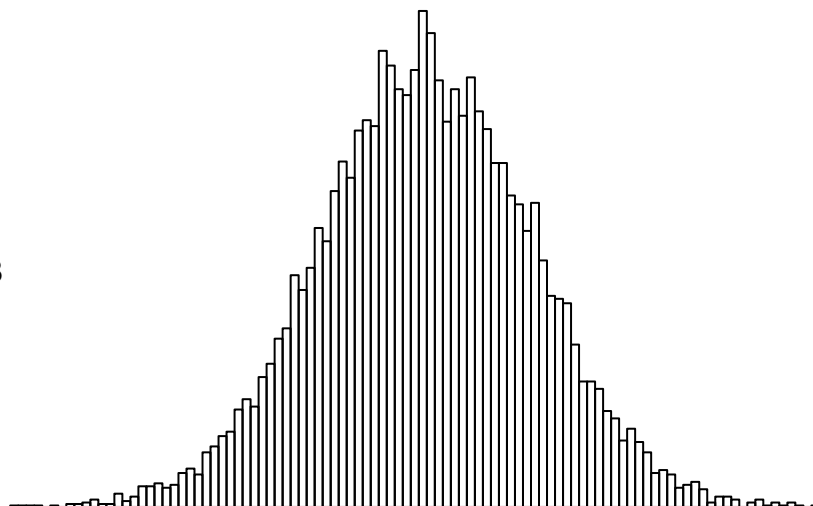

-7.5      -7.0      -6.5      -6.0      -5.5      -5.0      -4.5

Unidentified Metabolite 7

D206:26 – D206:18

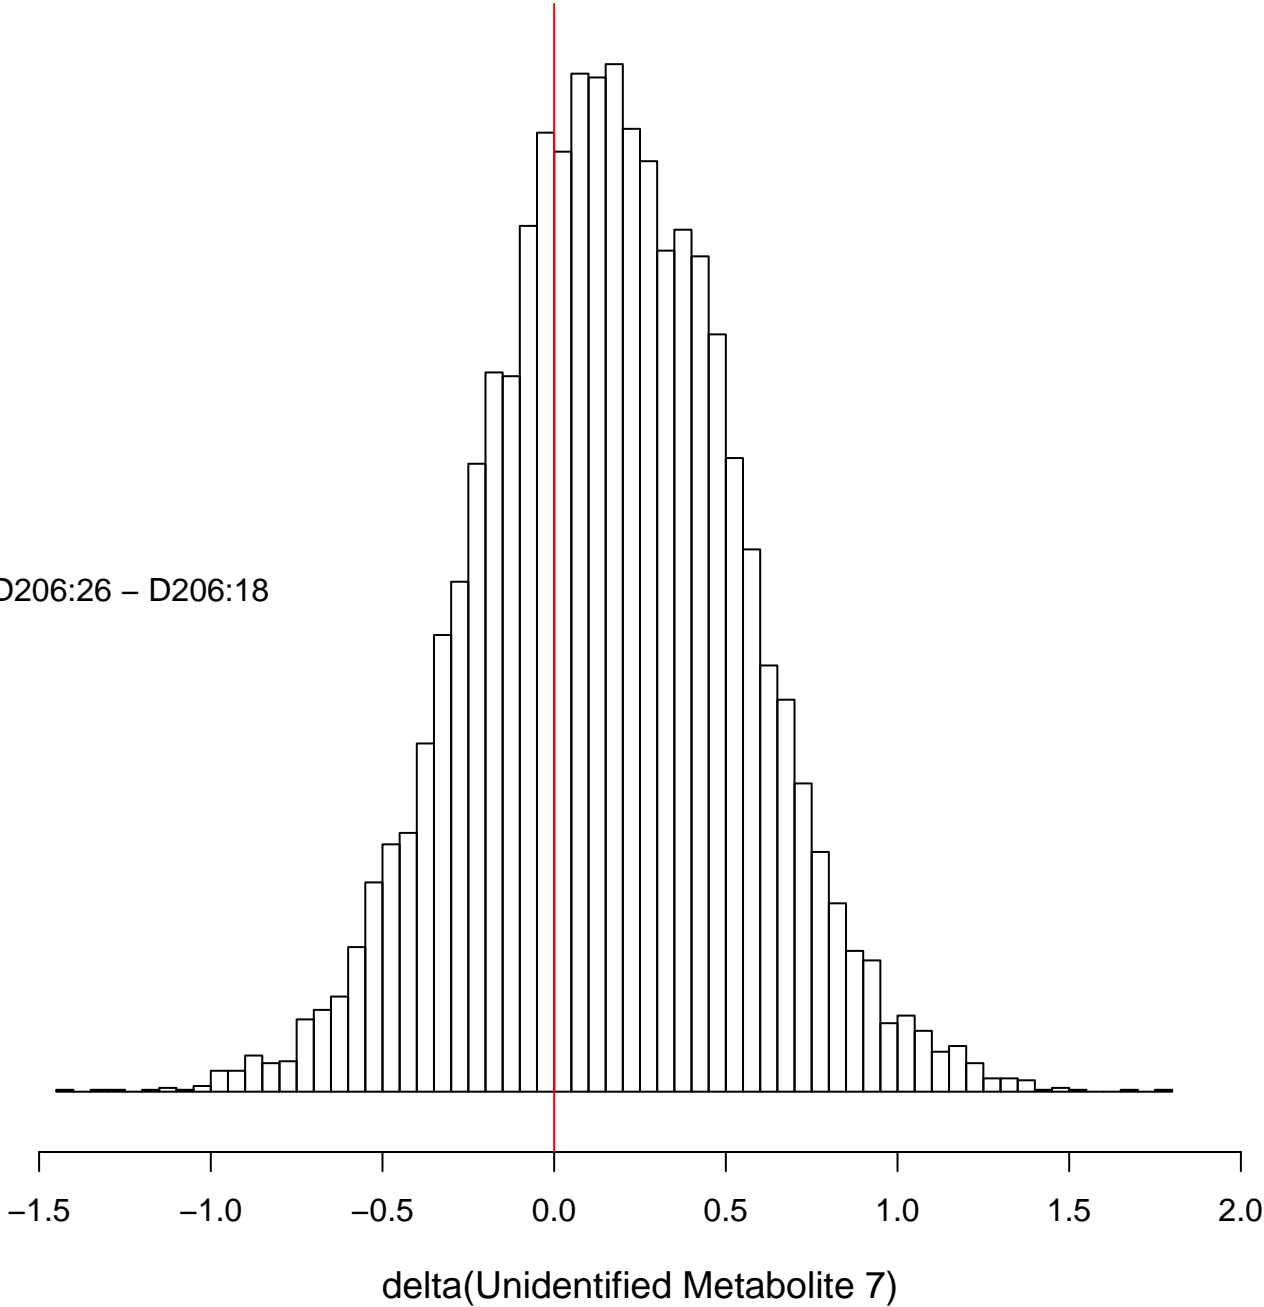

D206:26

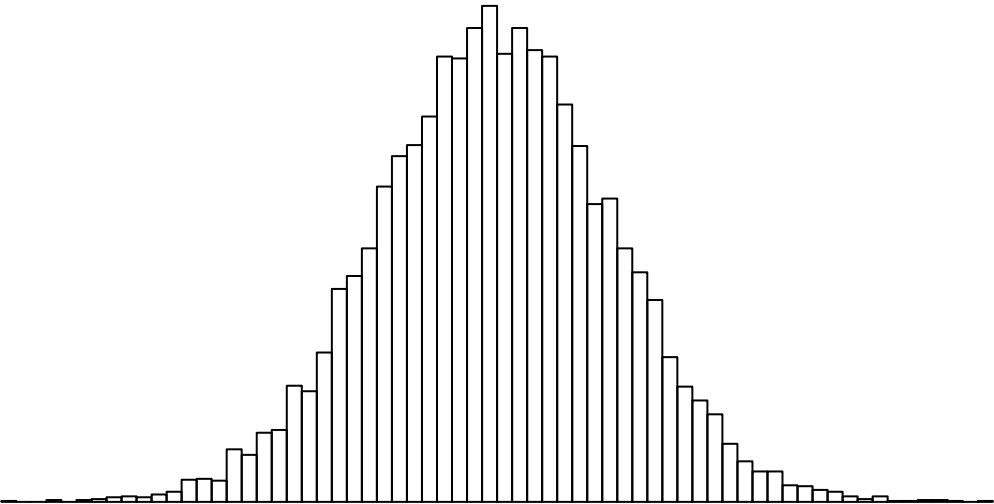

D206:18

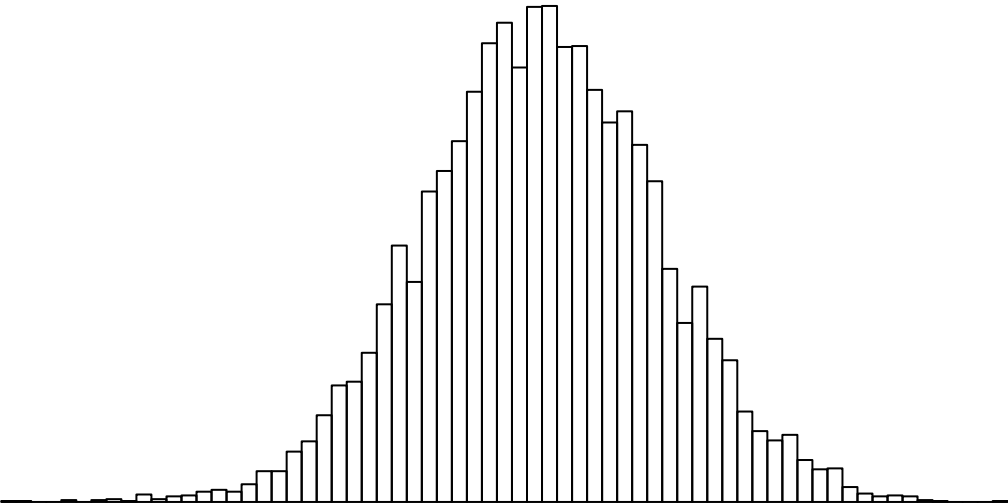

-9

-8

-7

-6

-5

Unidentified Metabolite 8

D206:26 – D206:18

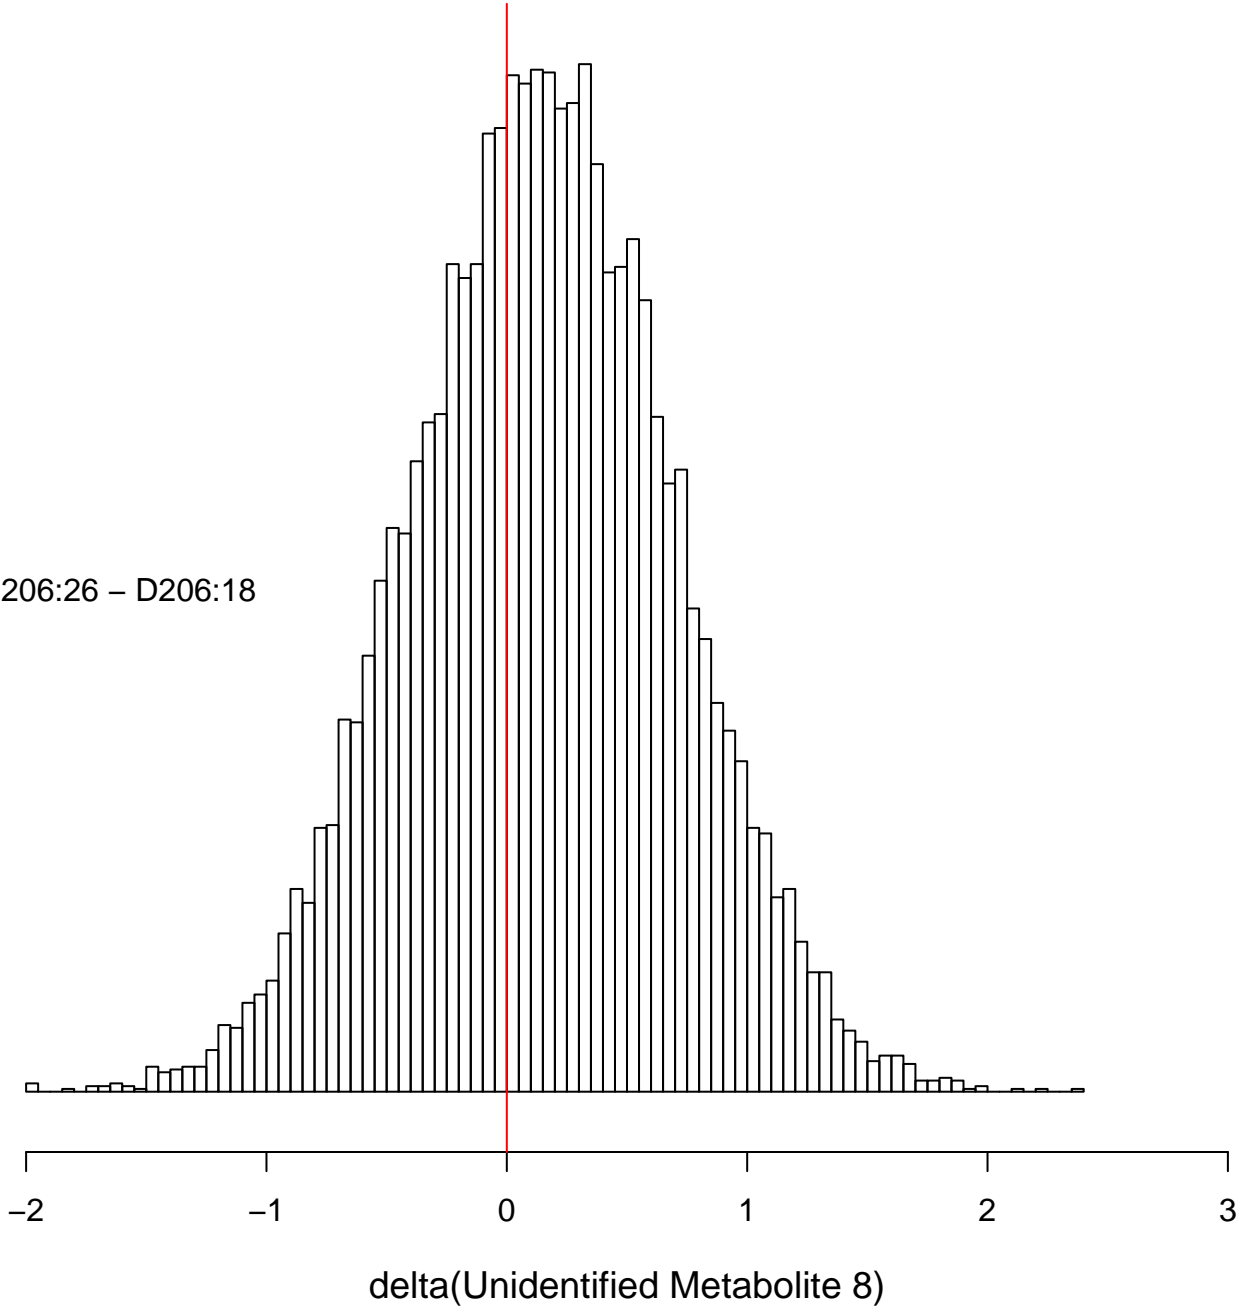

D206:26

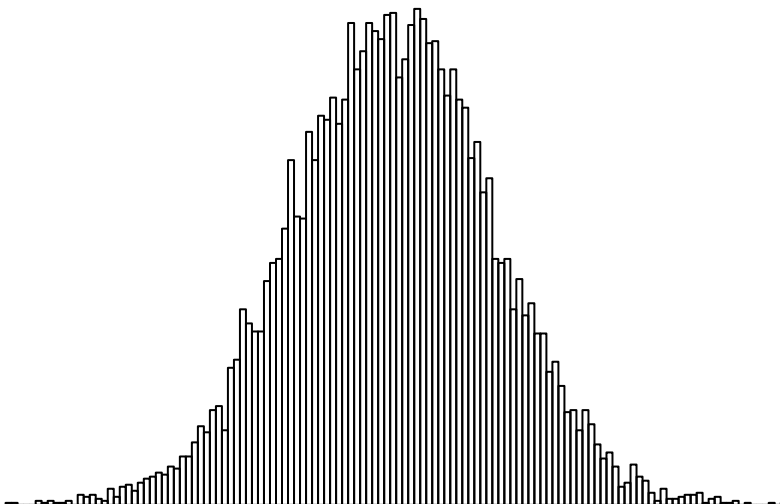

D206:18

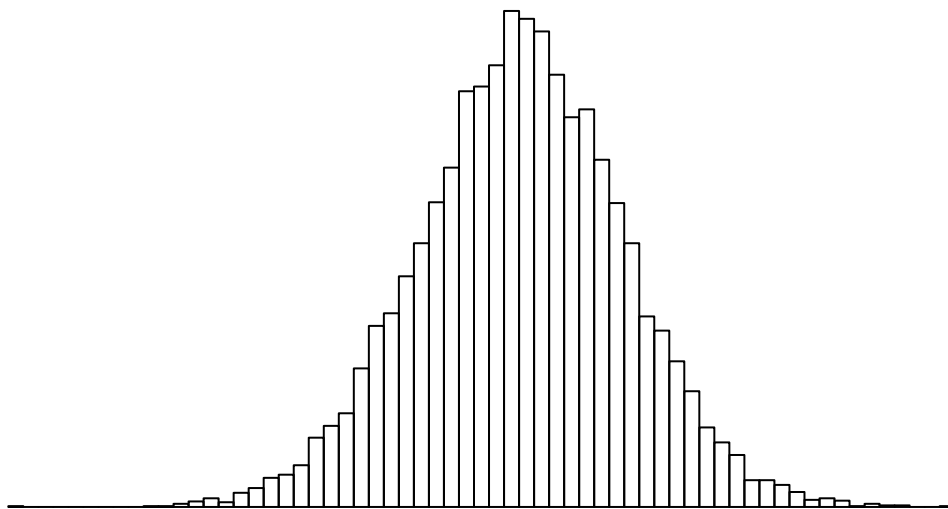

-8

-7

-6

-5

Unidentified Metabolite 9

D206:26 – D206:18

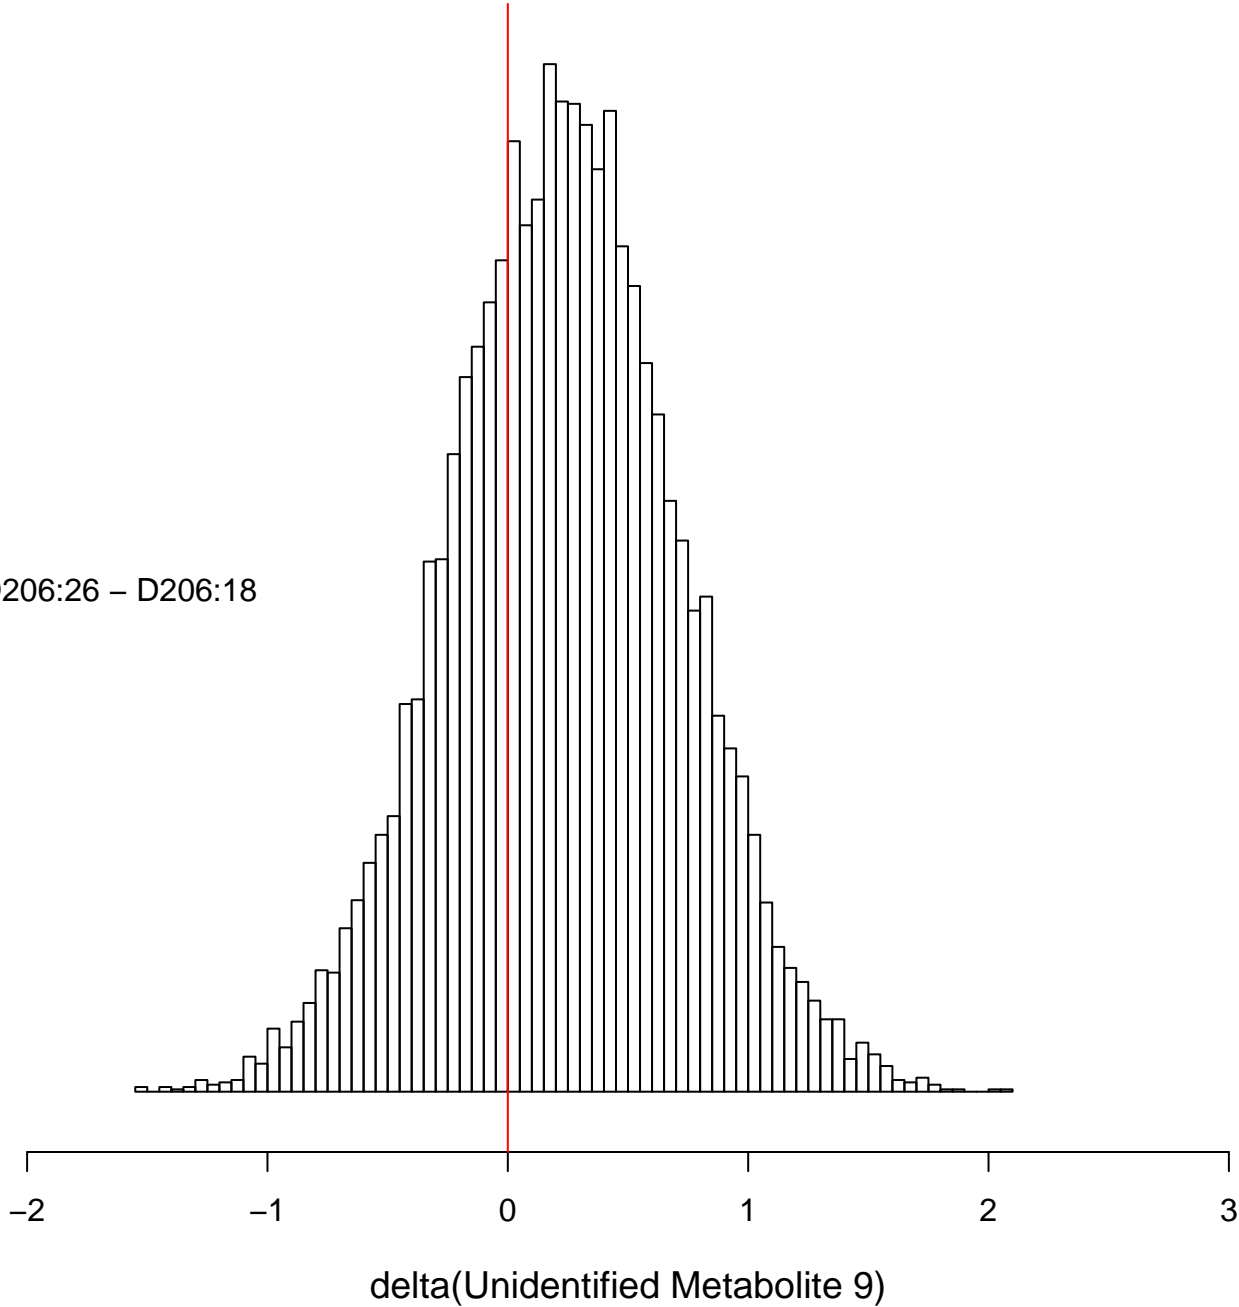



D206:26

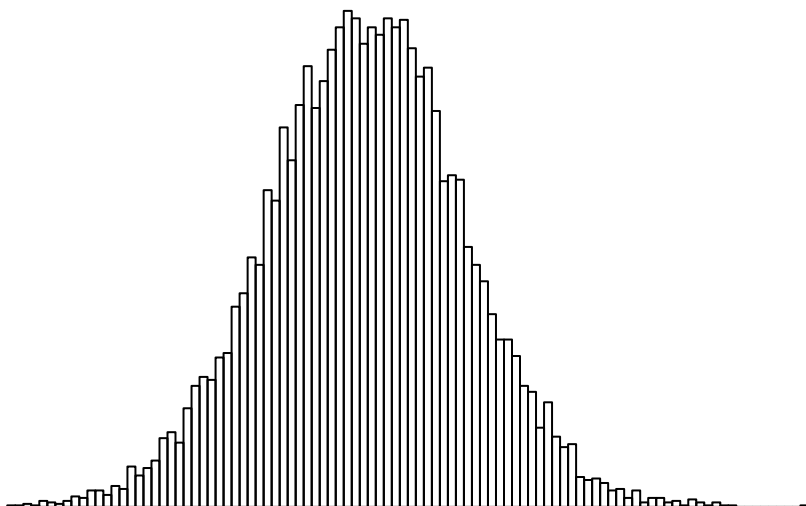

D206:18

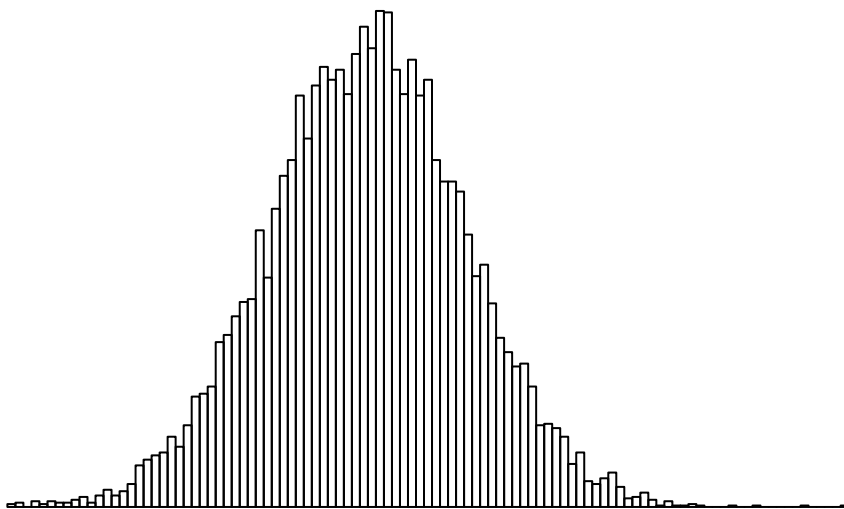

-8.0

-7.5

-7.0

-6.5

-6.0

-5.5

-5.0

Unidentified Metabolite 10

D206:26 – D206:18

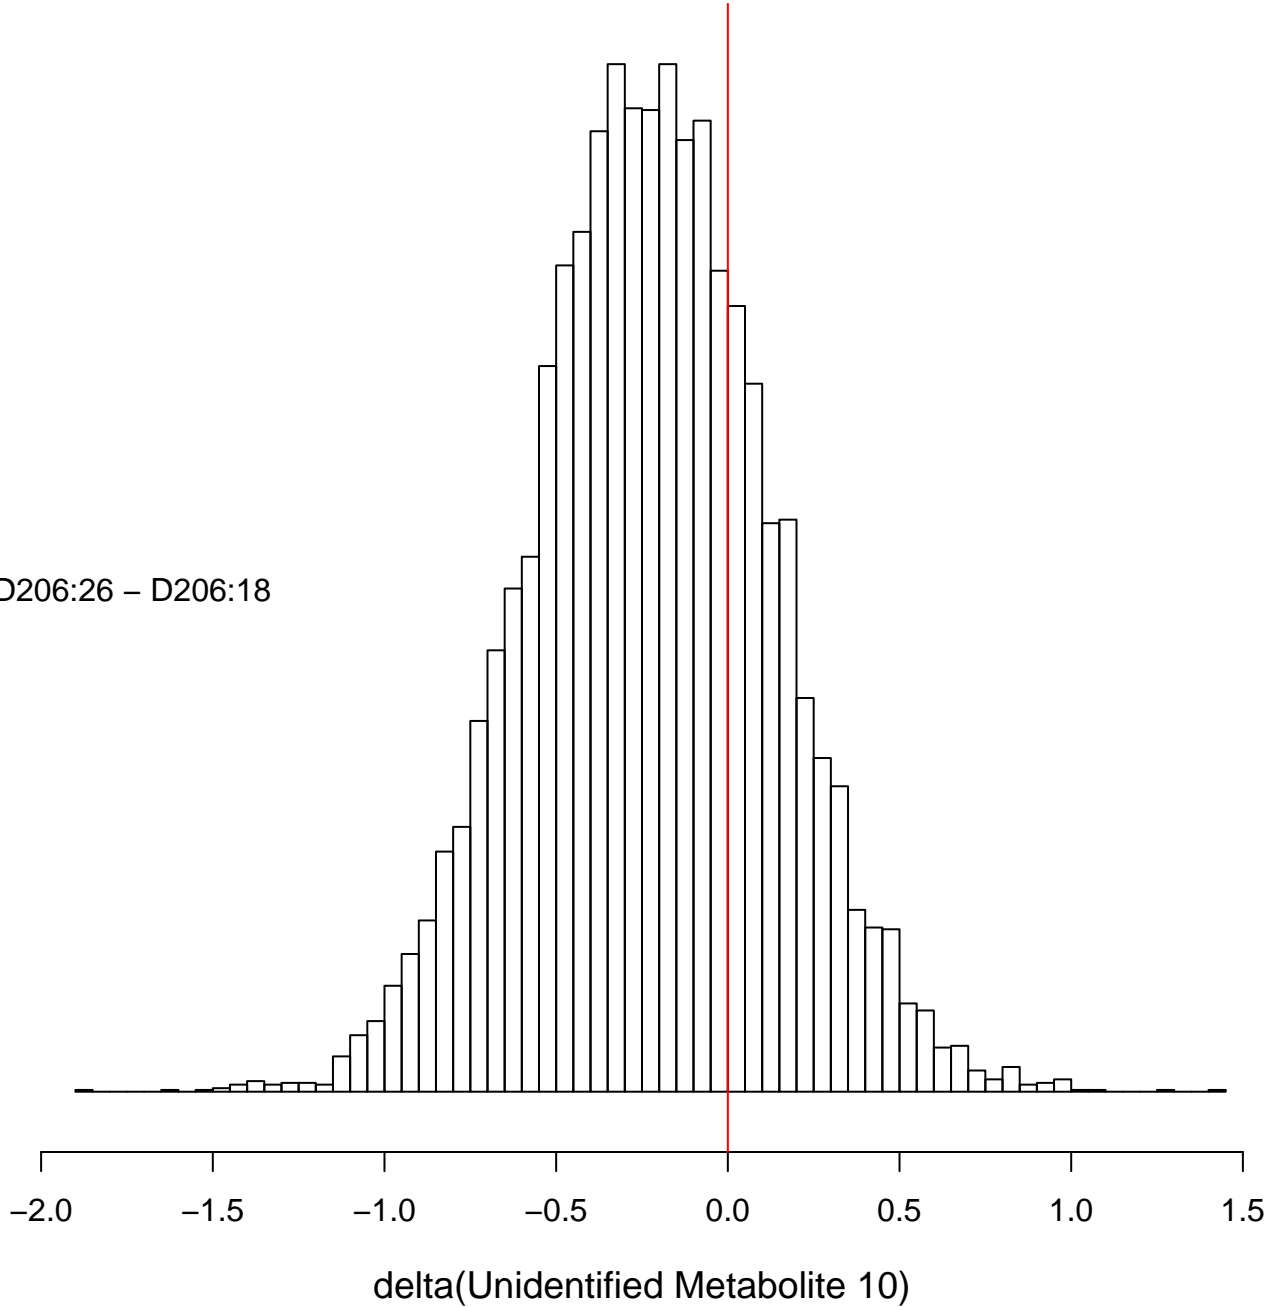

D206:26

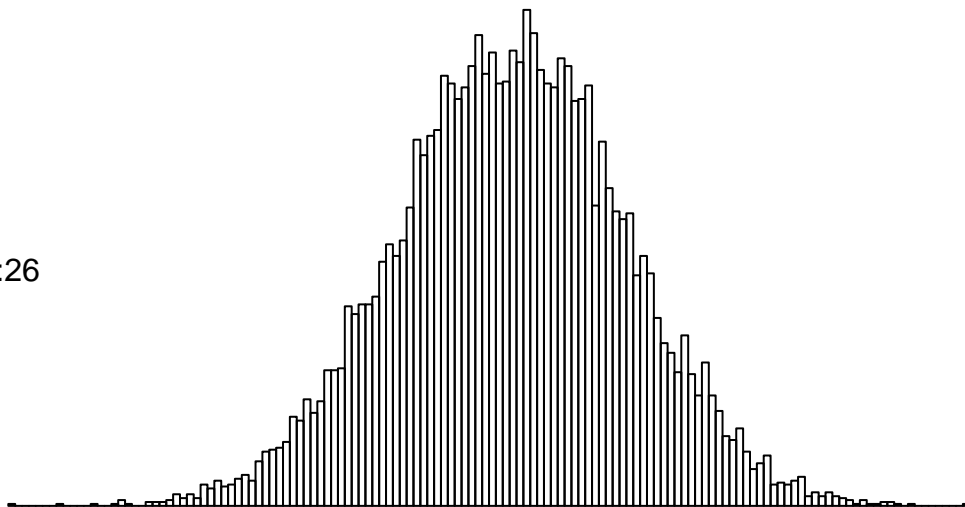

D206:18

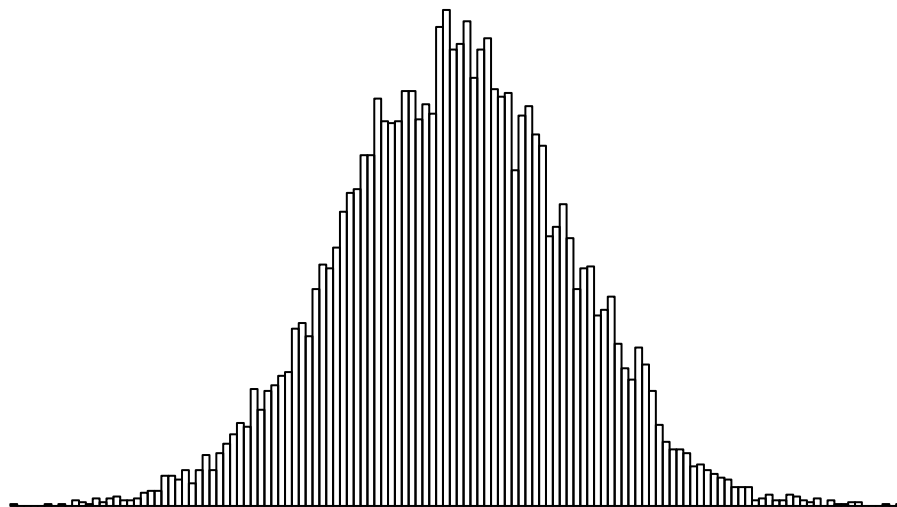

-6.5      -6.0      -5.5      -5.0      -4.5      -4.0      -3.5      -3.0

Unidentified Metabolite 11

D206:26 – D206:18

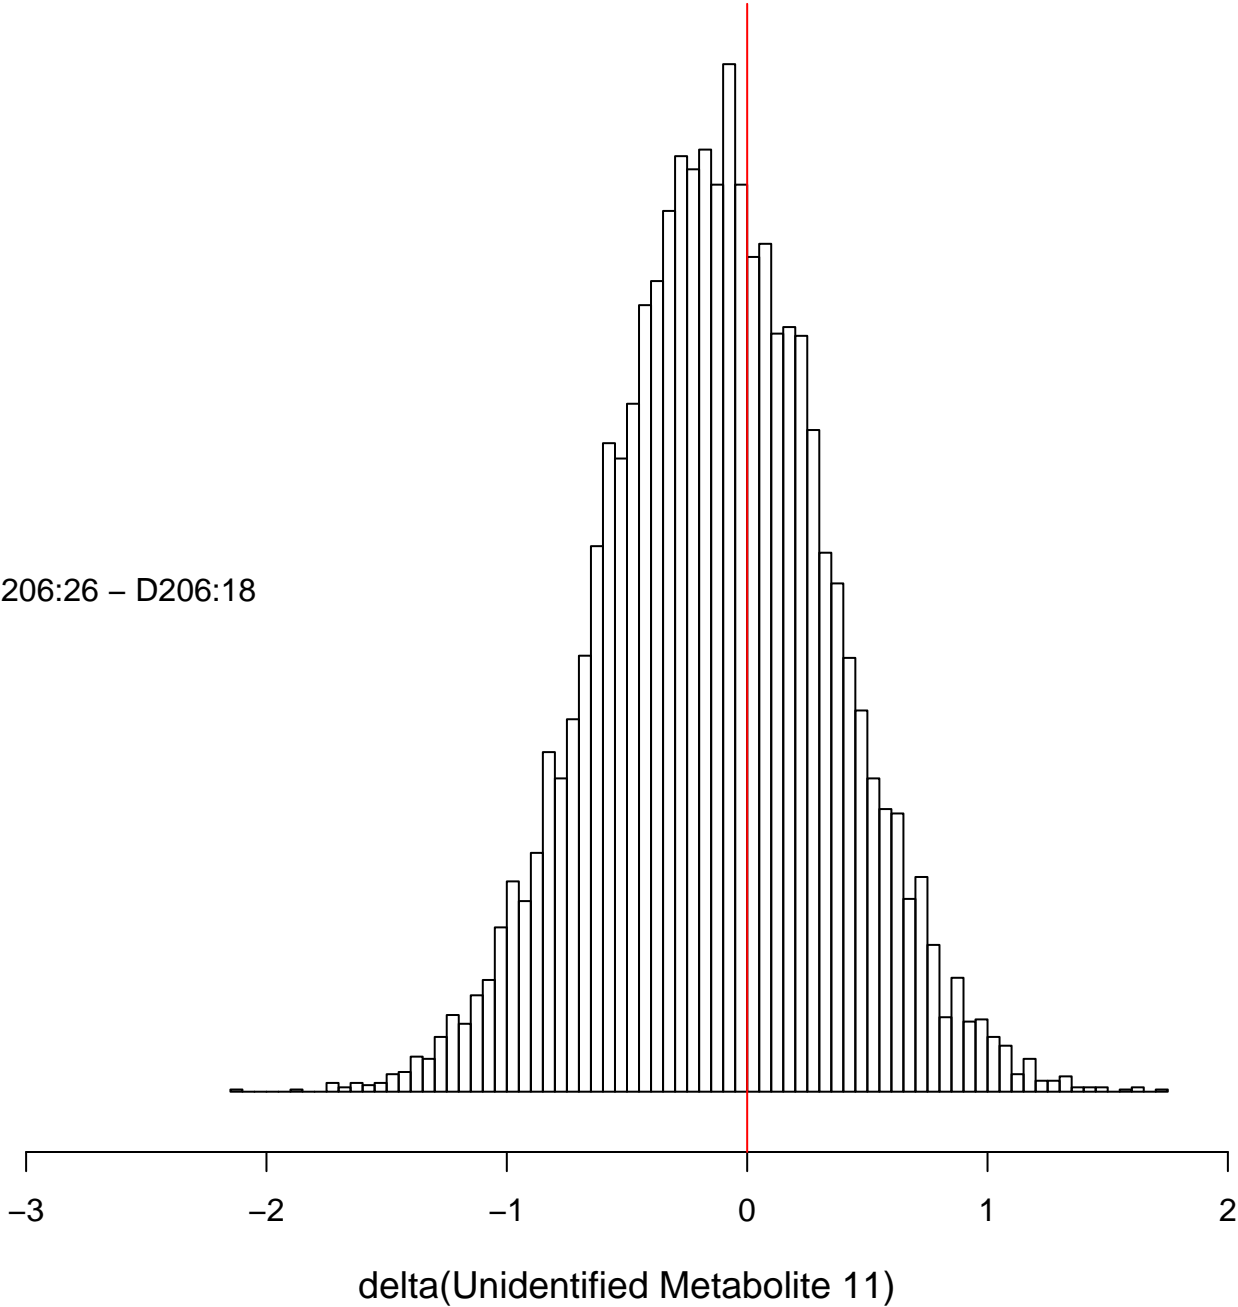

D206:26

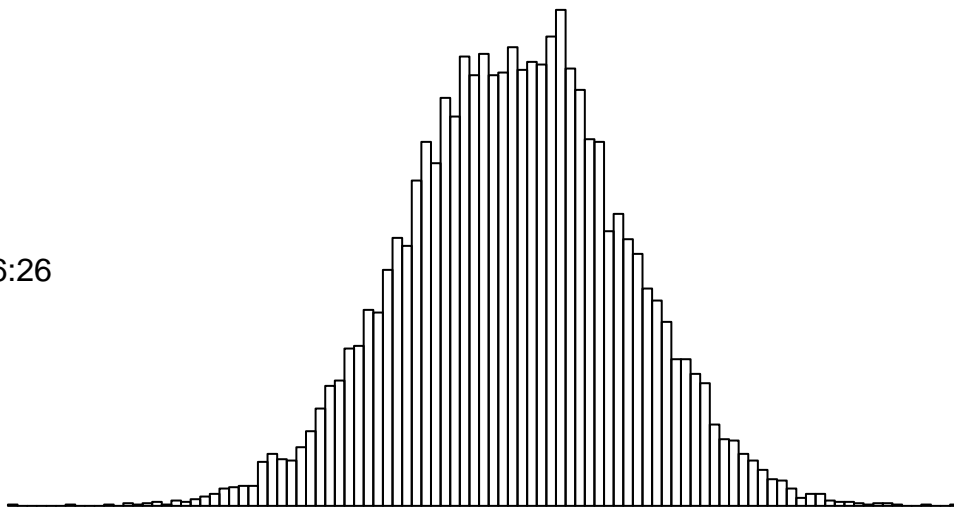

D206:18

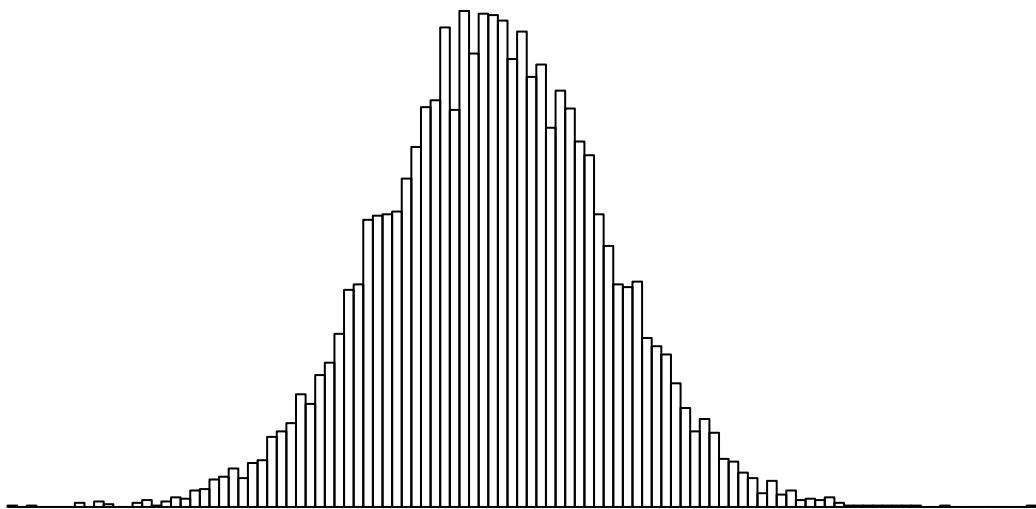

-9.0      -8.5      -8.0      -7.5      -7.0      -6.5

Unidentified Metabolite 12

D206:26 – D206:18

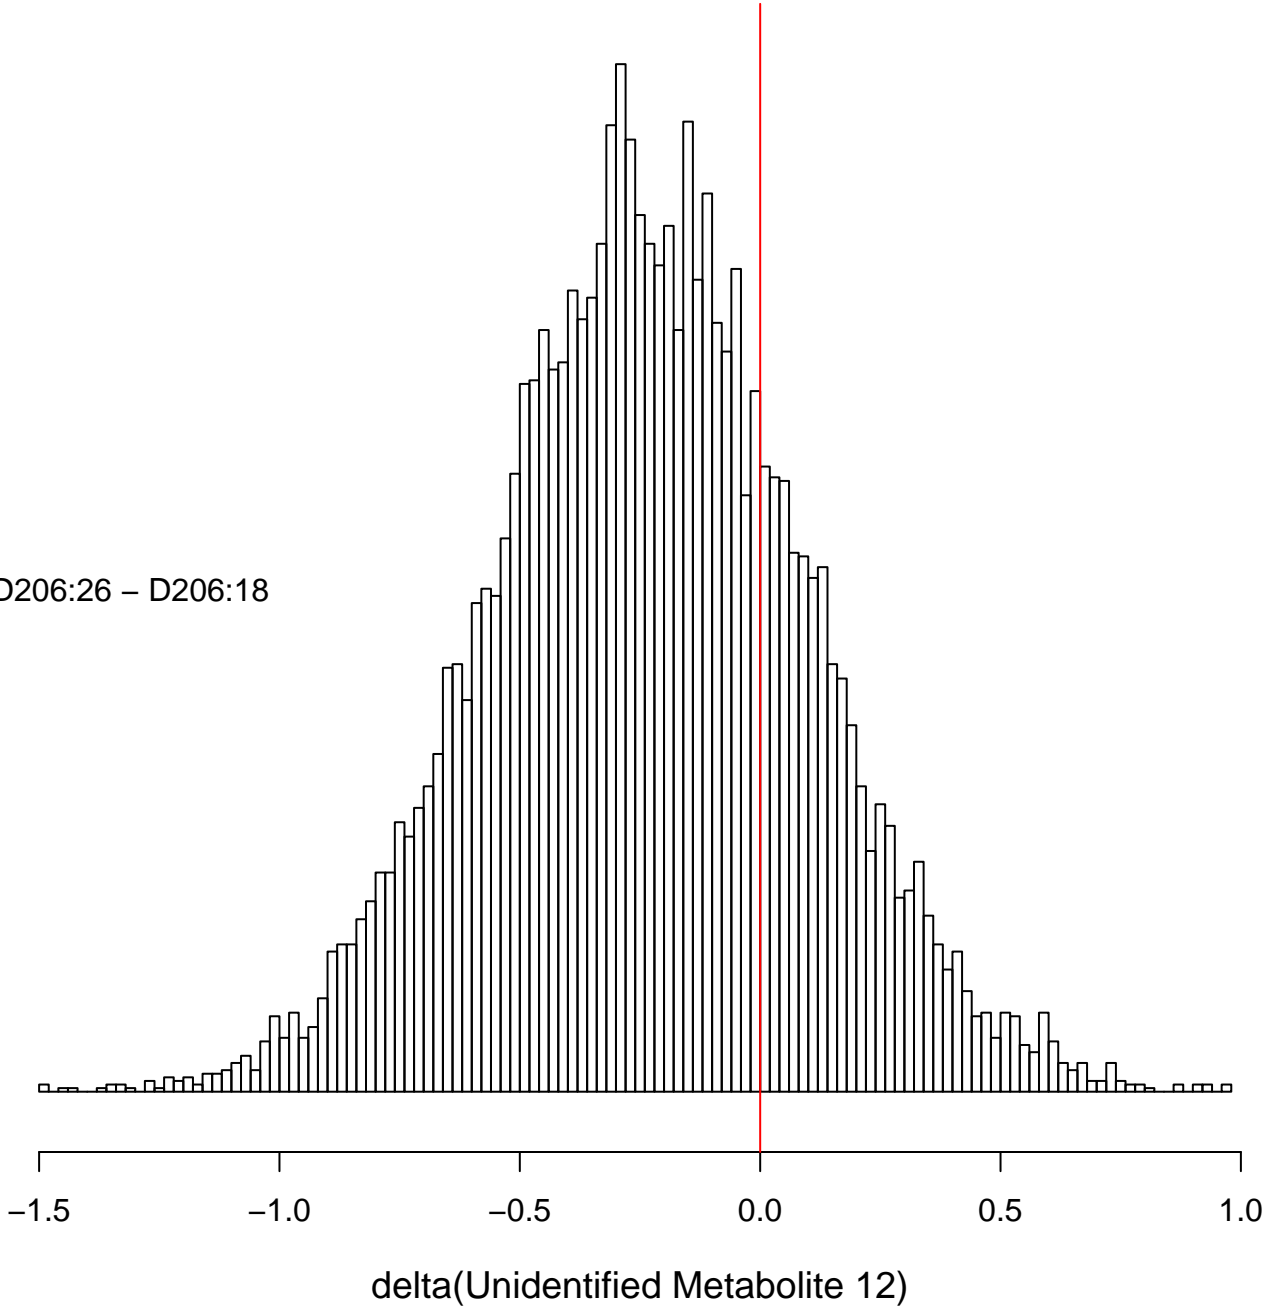

D206:26

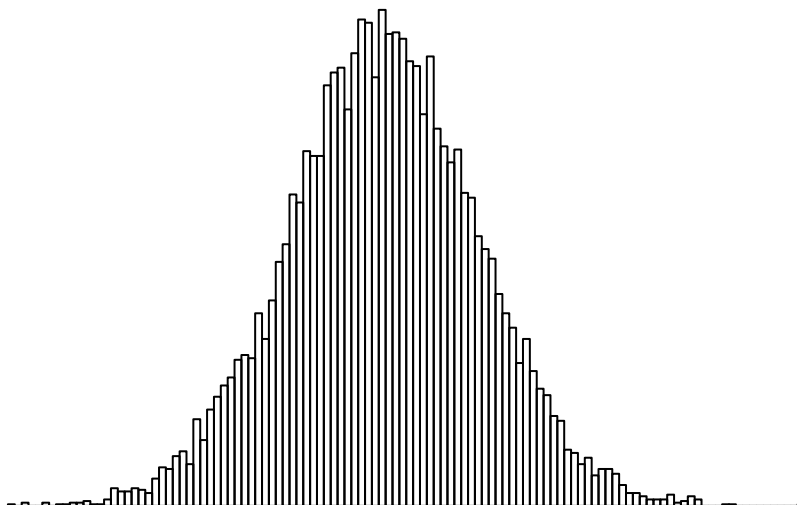

D206:18

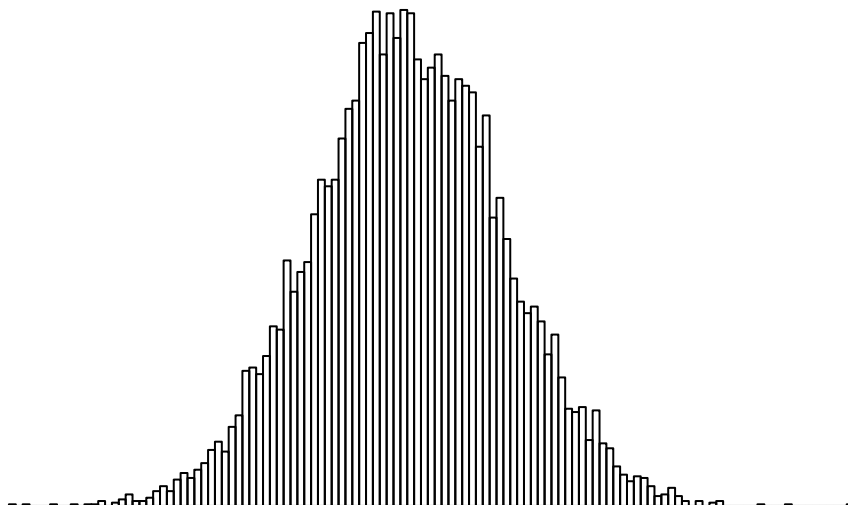

-8.5      -8.0      -7.5      -7.0      -6.5      -6.0      -5.5      -5.0

Unidentified Metabolite 14

D206:26 – D206:18

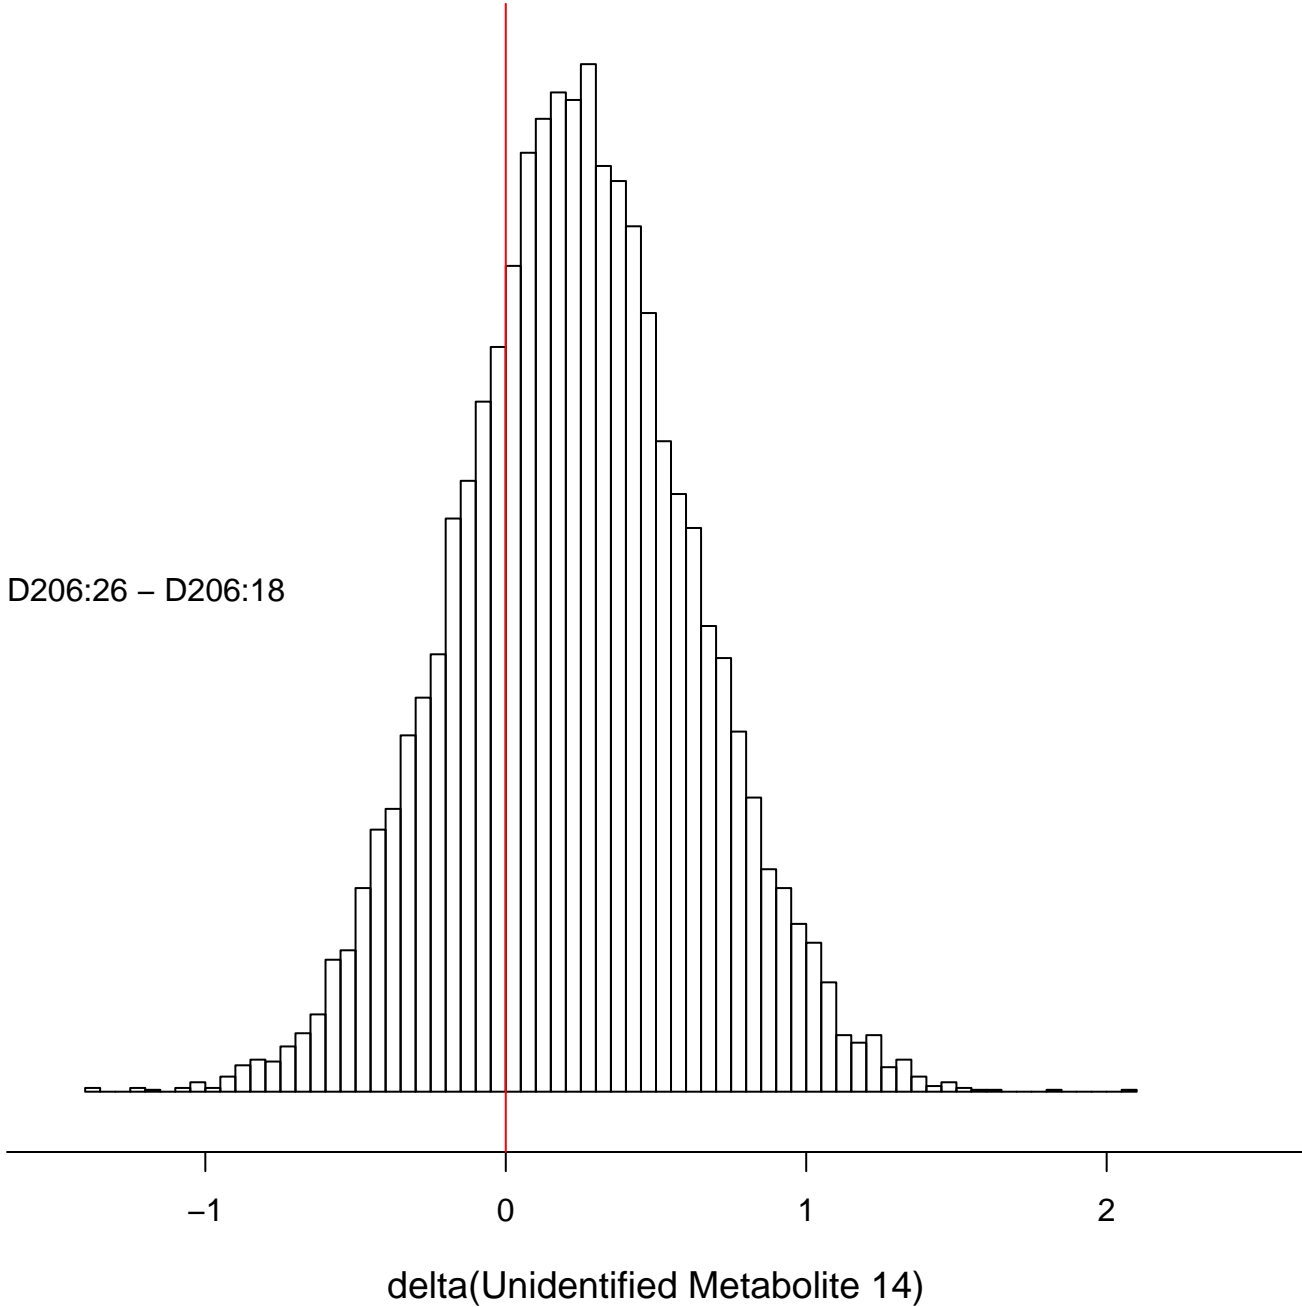



D206:26

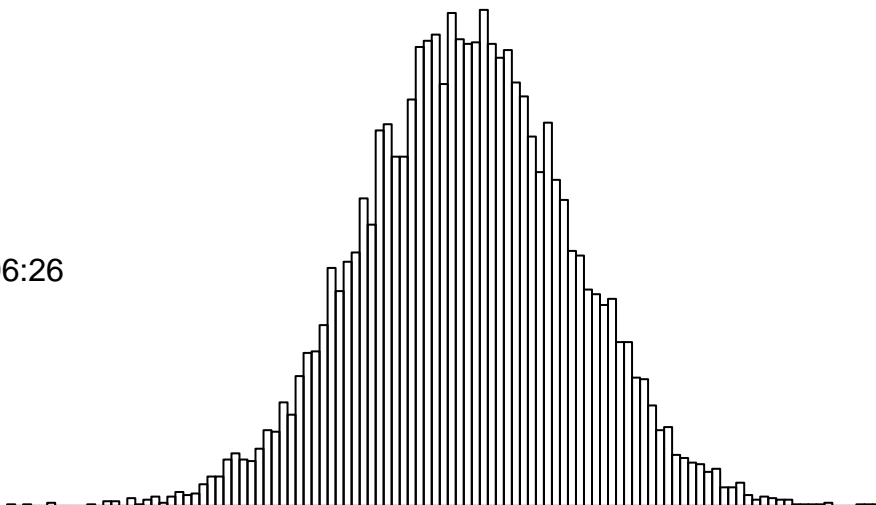

D206:18

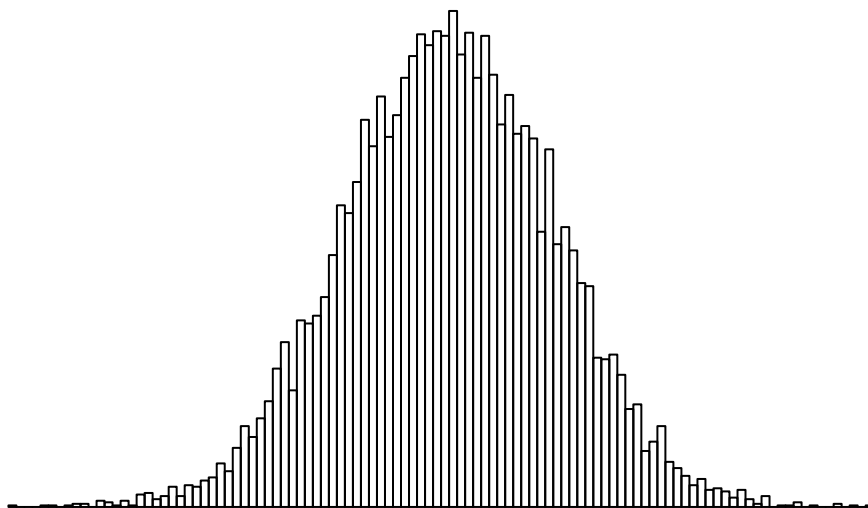

-8.0 -7.5 -7.0 -6.5 -6.0 -5.5 -5.0

Unidentified Metabolite 16

D206:26 – D206:18

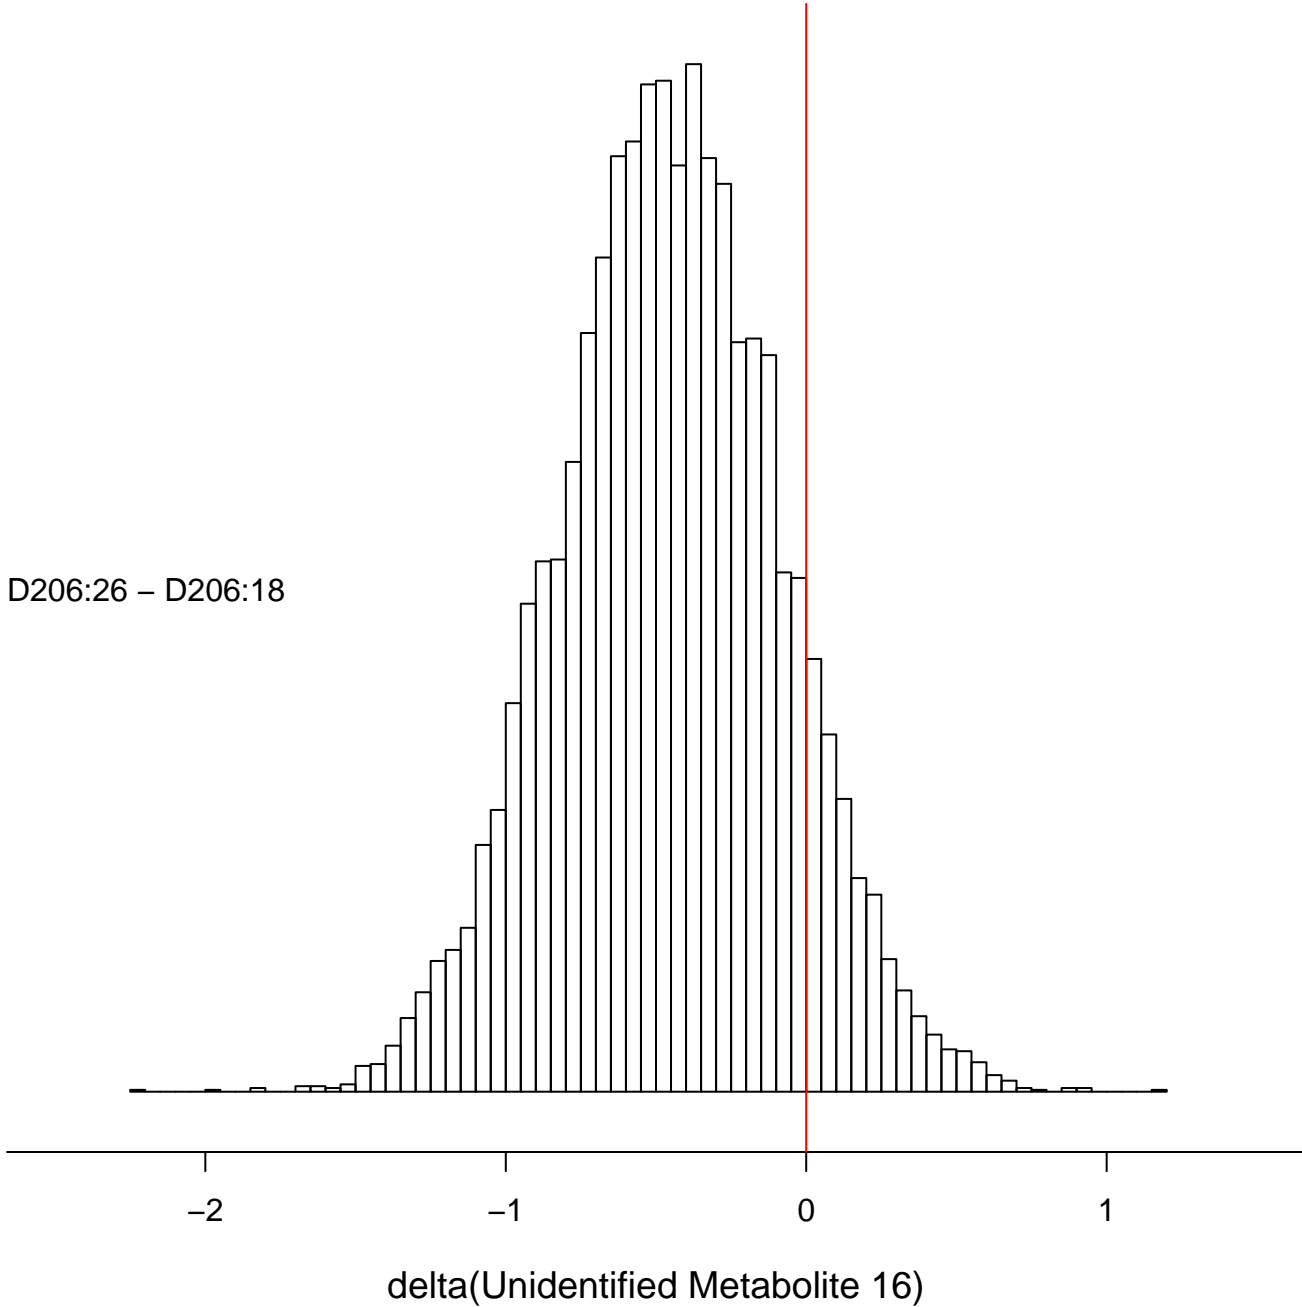

D206:26

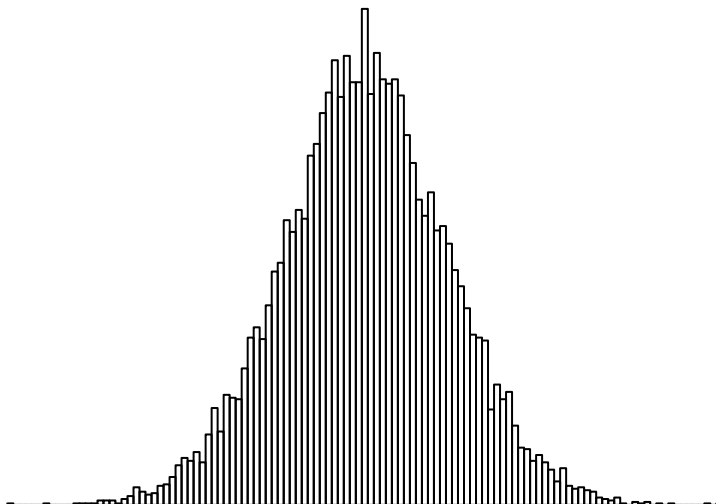

D206:18

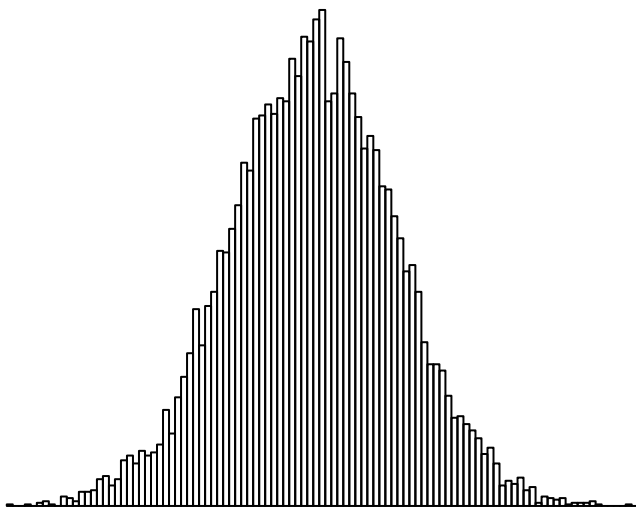

-8

-7

-6

-5

Unidentified Metabolite 17

D206:26 – D206:18

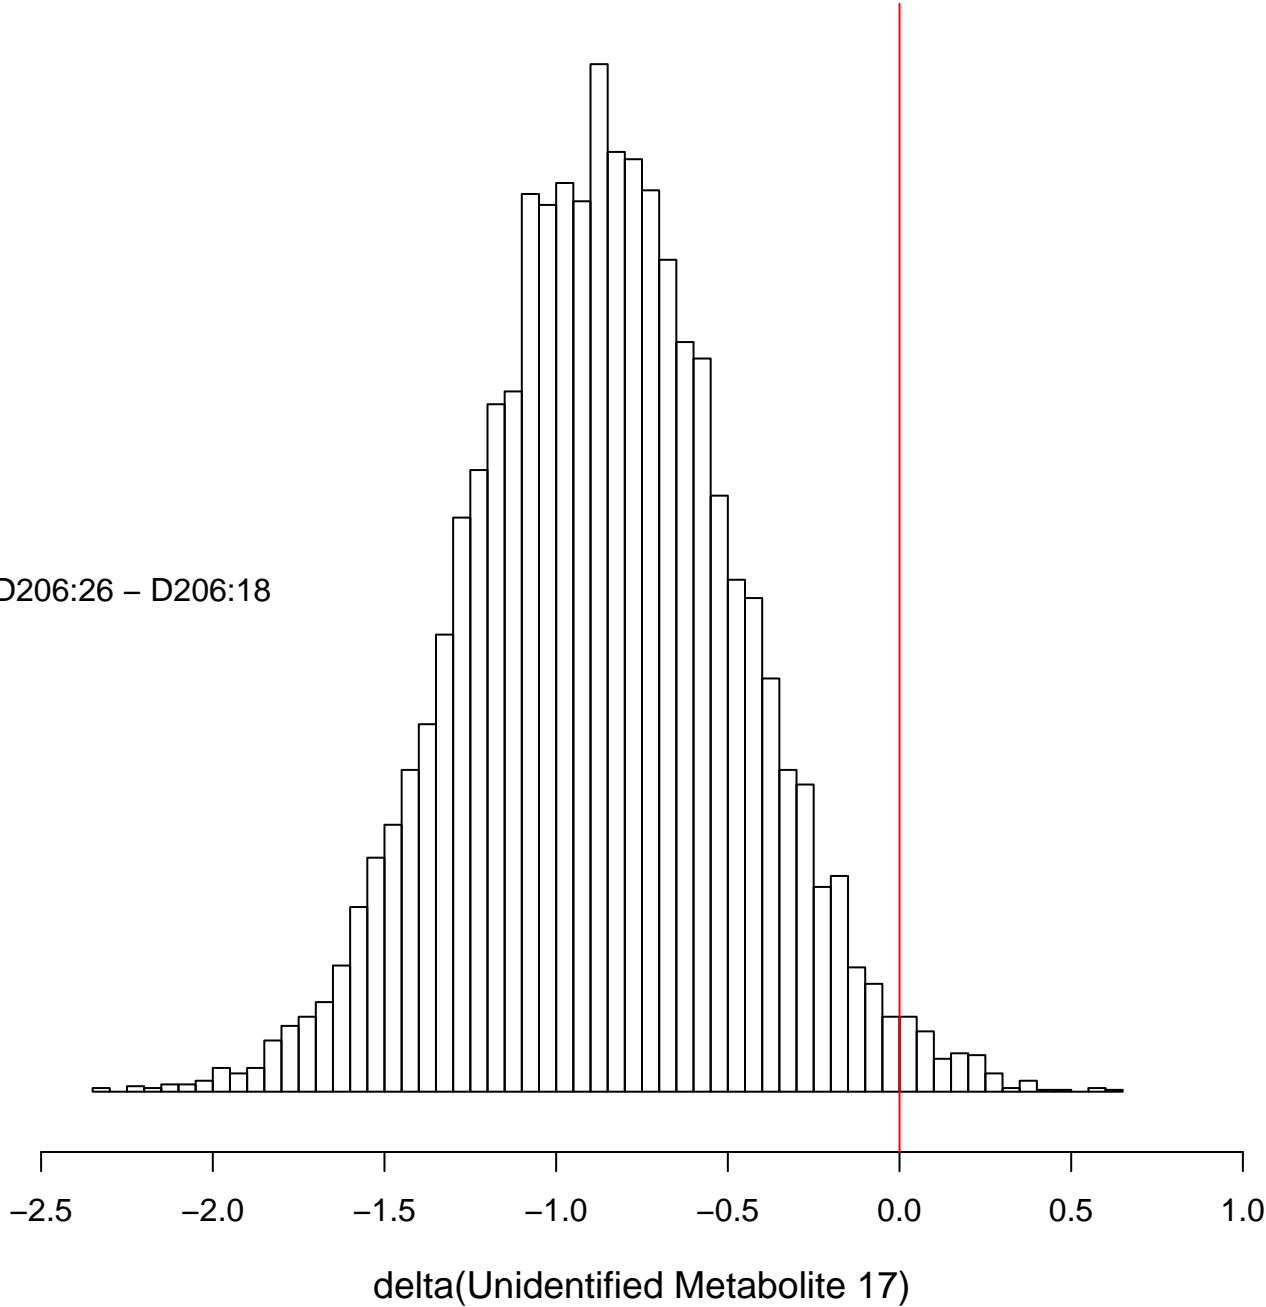

D206:26

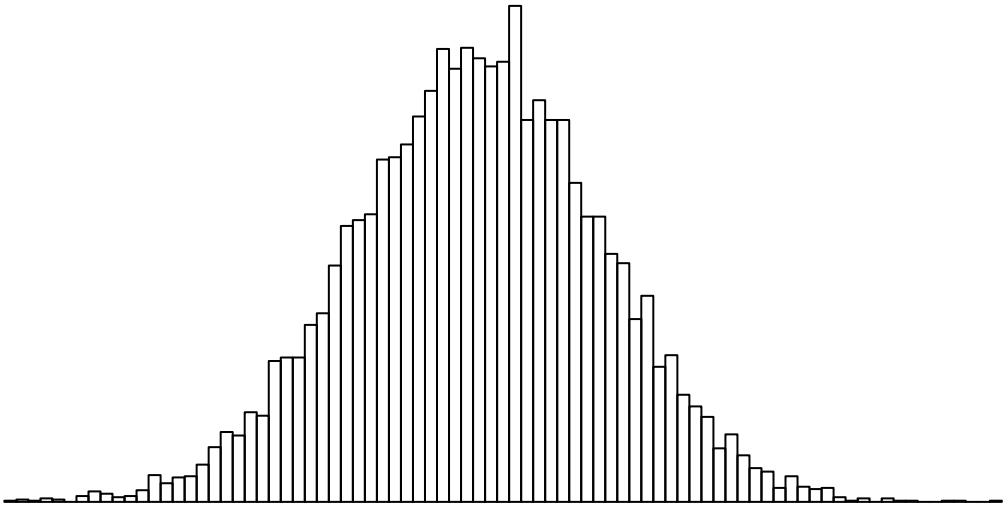

D206:18

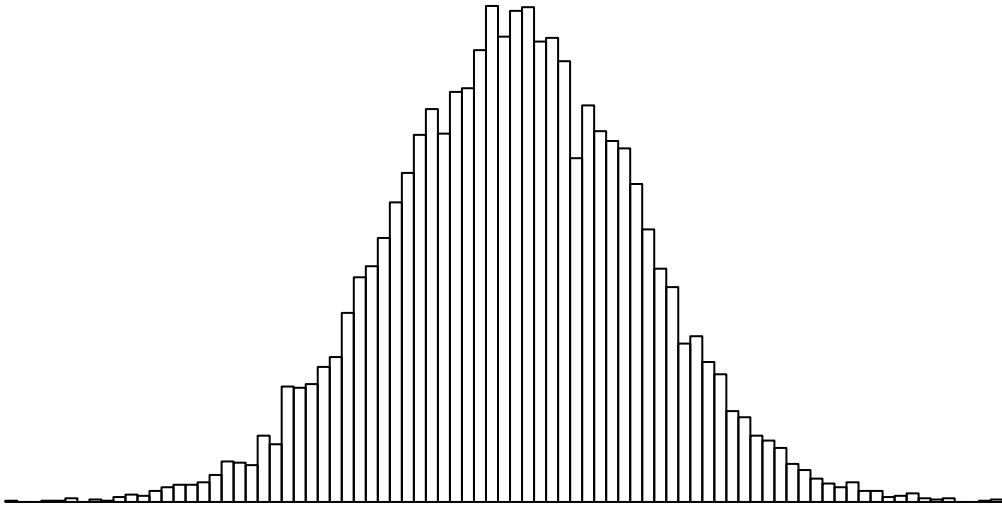

-7.5                      -7.0                      -6.5                      -6.0                      -5.5

Unidentified Metabolite 18

D206:26 – D206:18

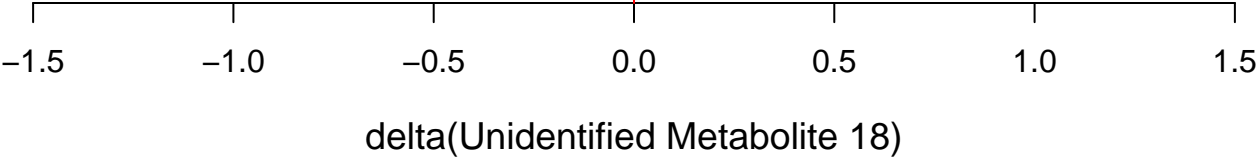

D206:26

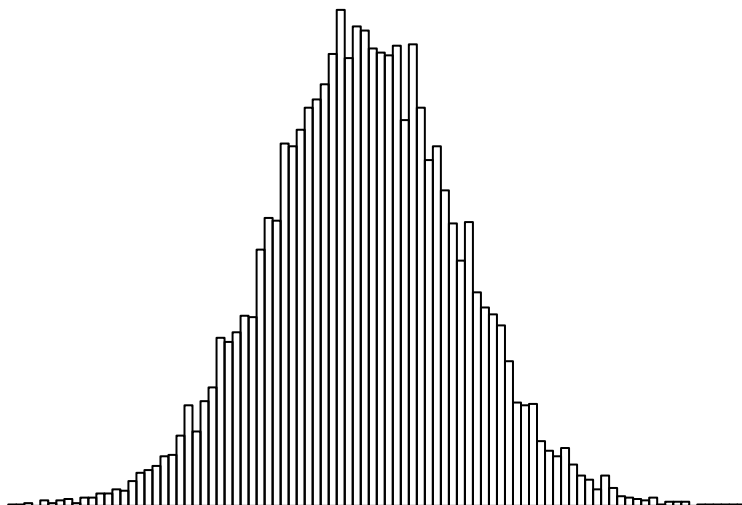

D206:18

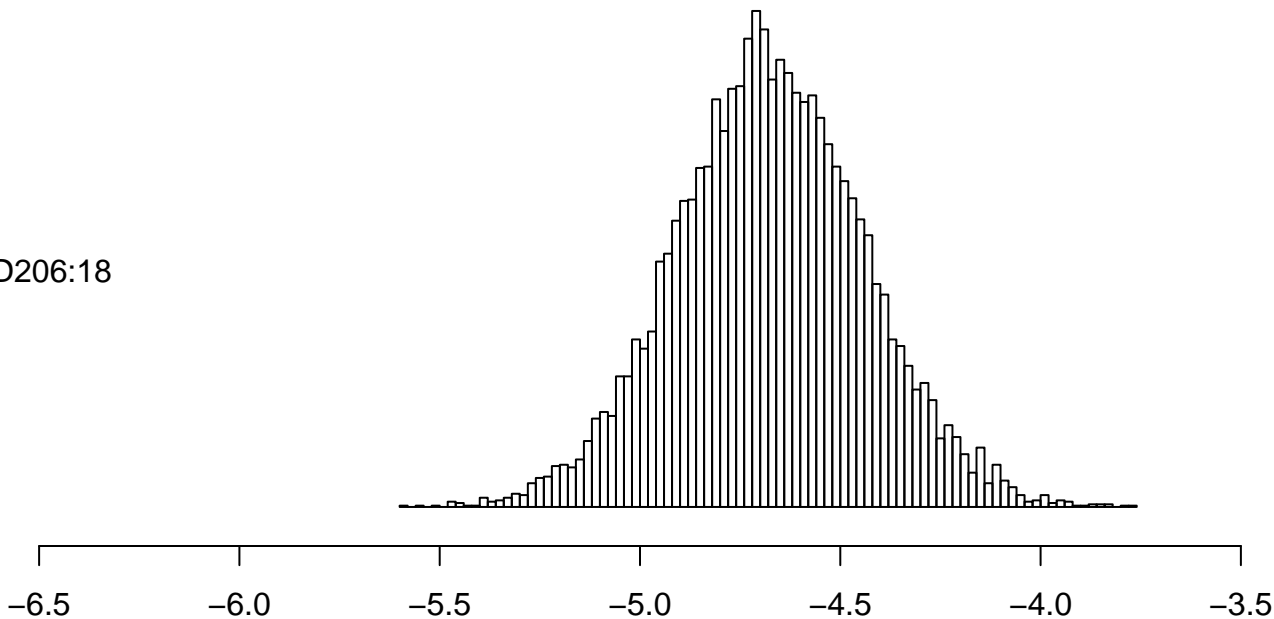

Unidentified Metabolite 20

D206:26 – D206:18

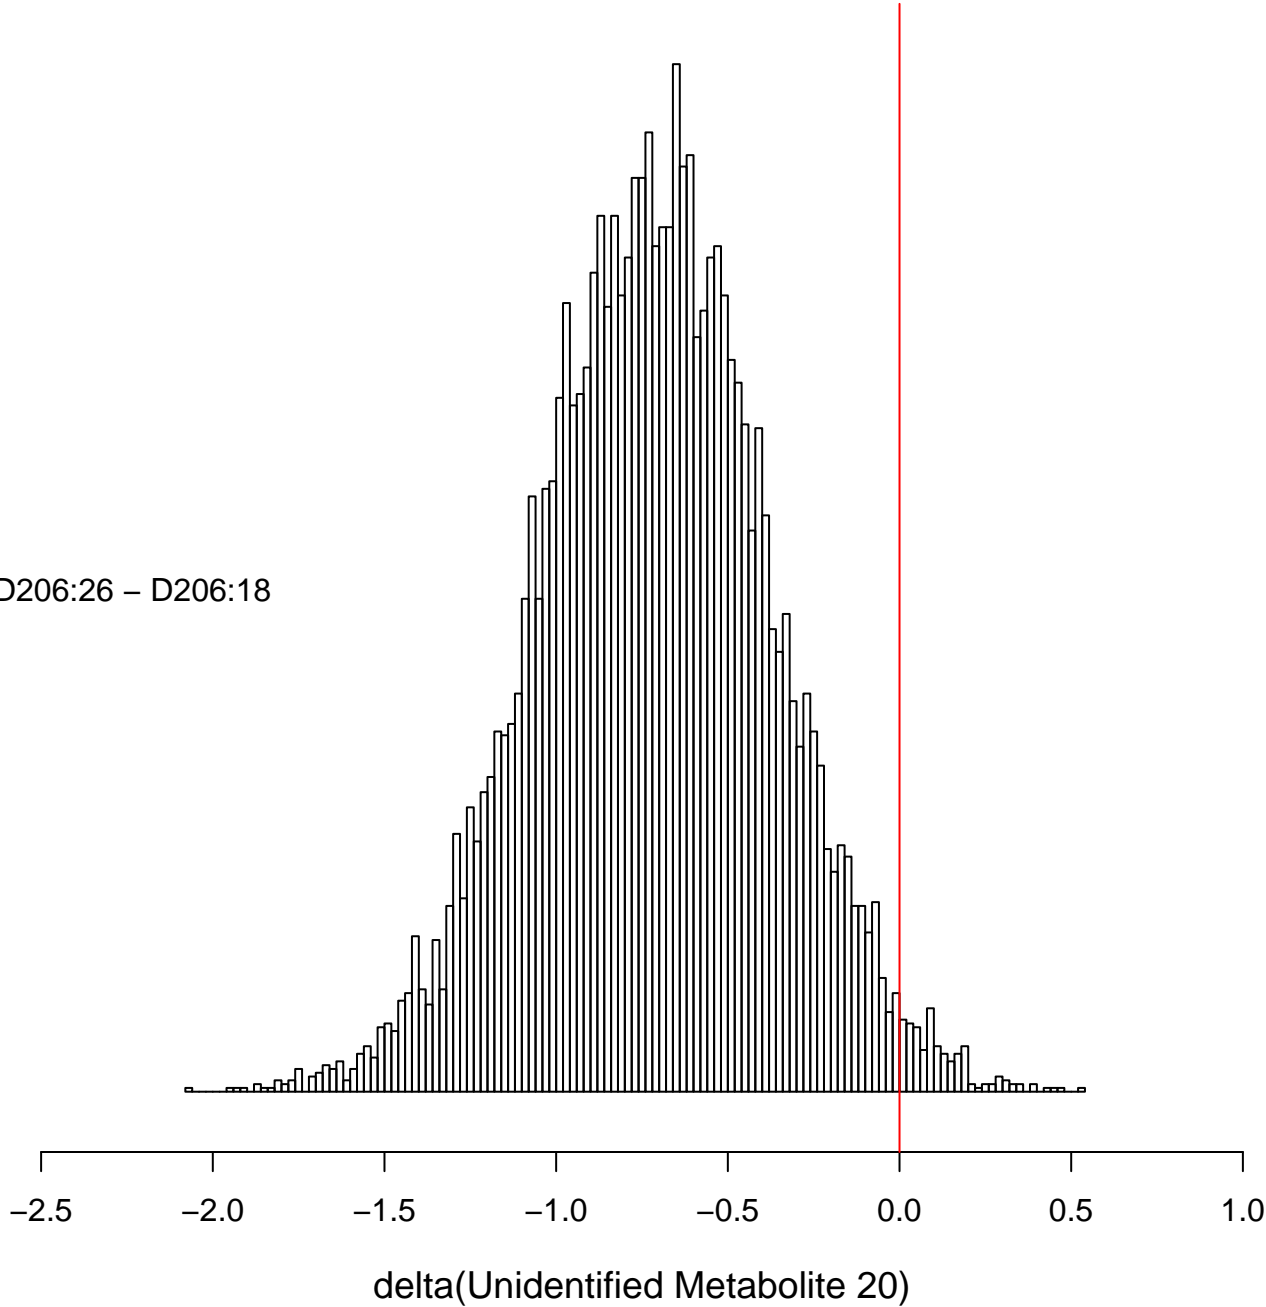



D206:26

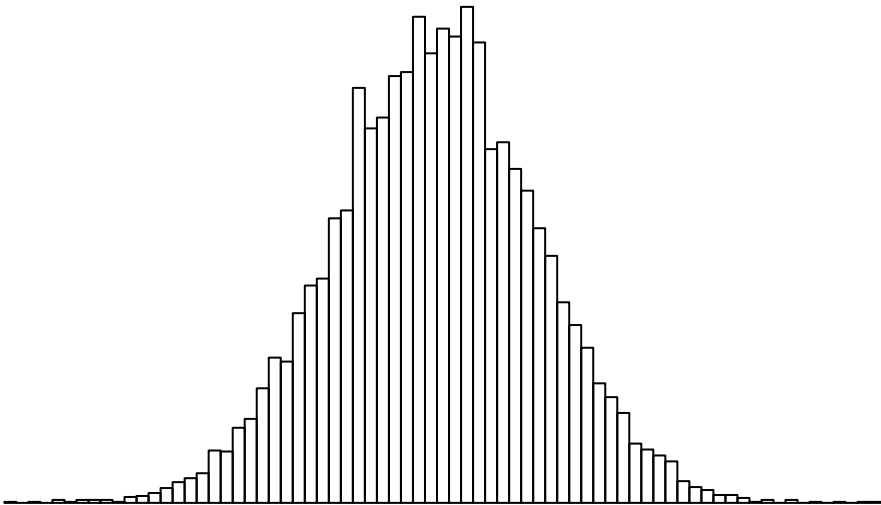

D206:18

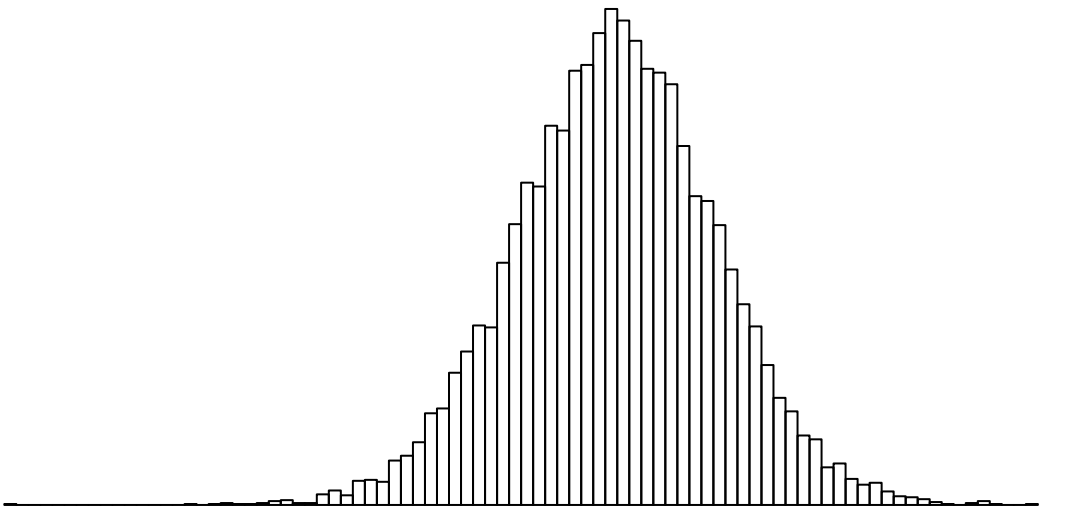

Unidentified Metabolite 22

D206:26 – D206:18

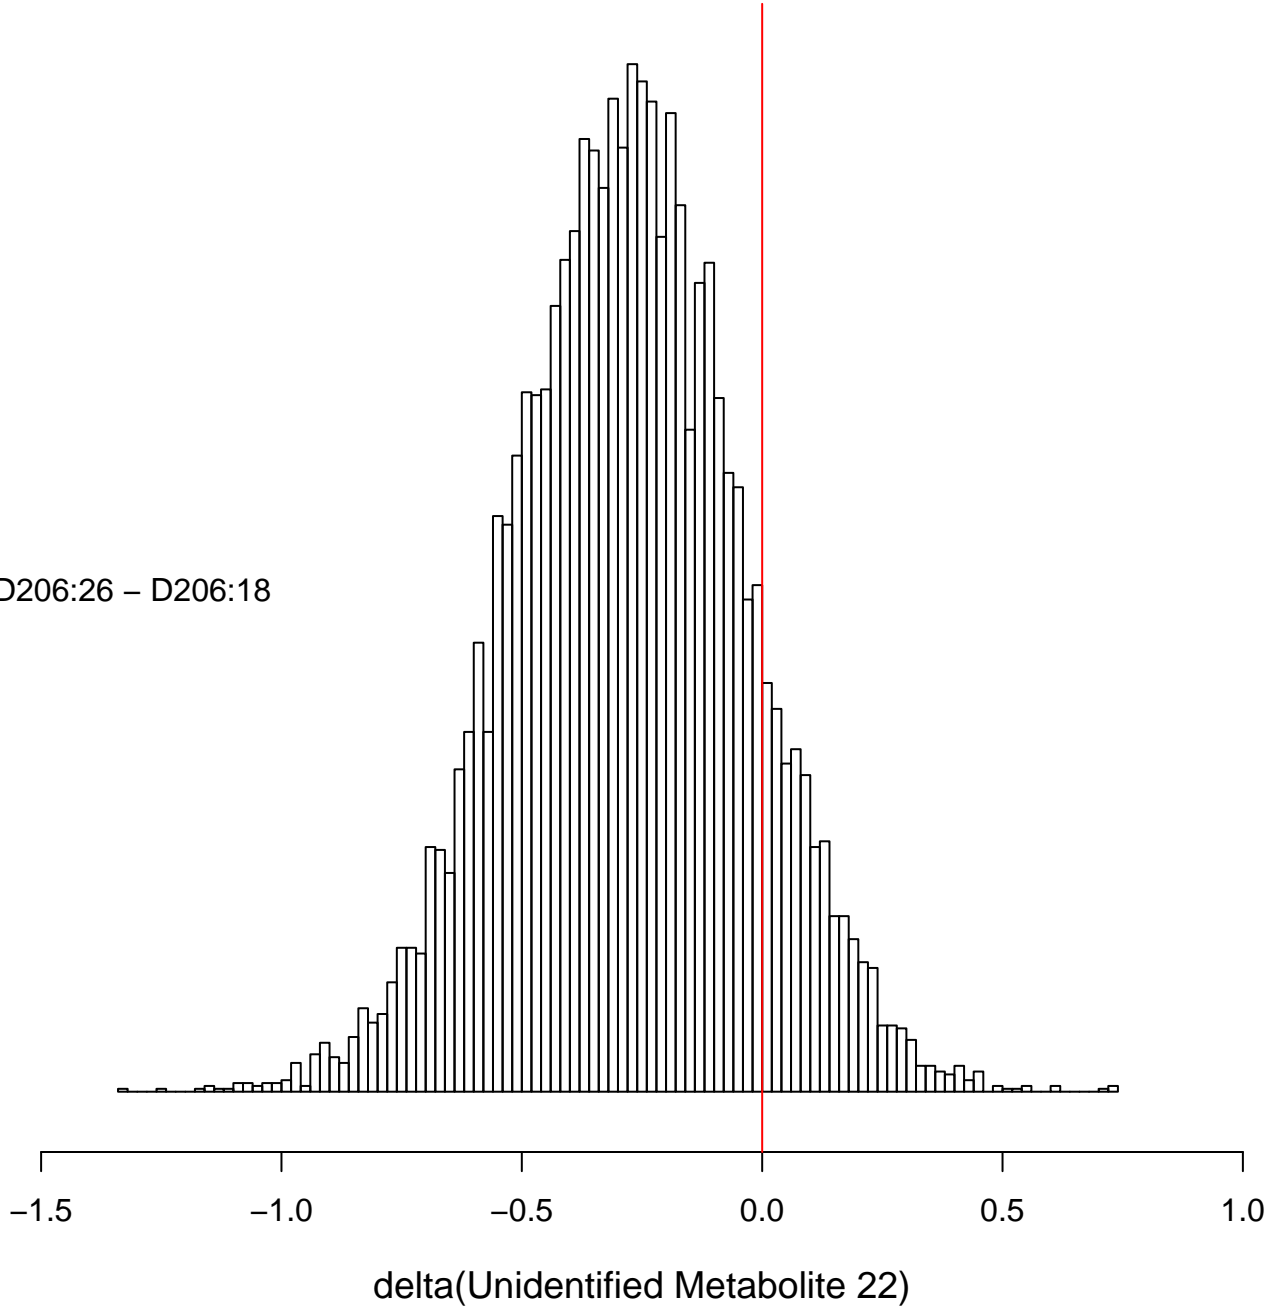

D206:26

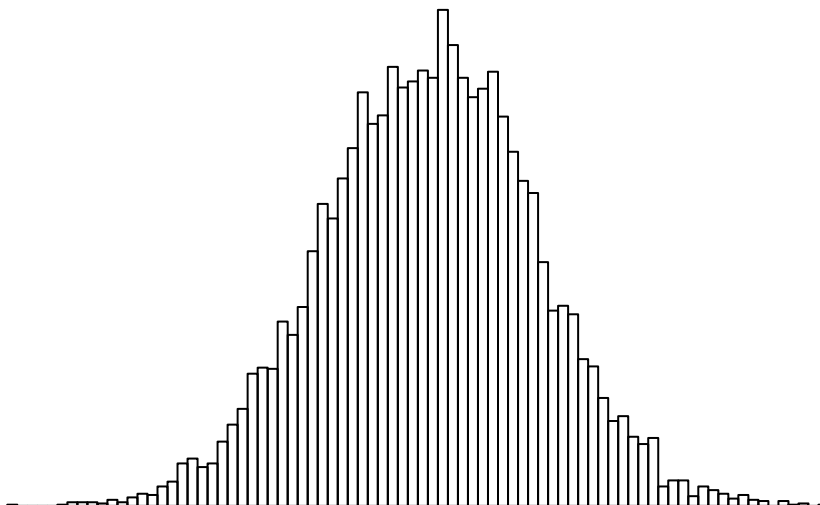

D206:18

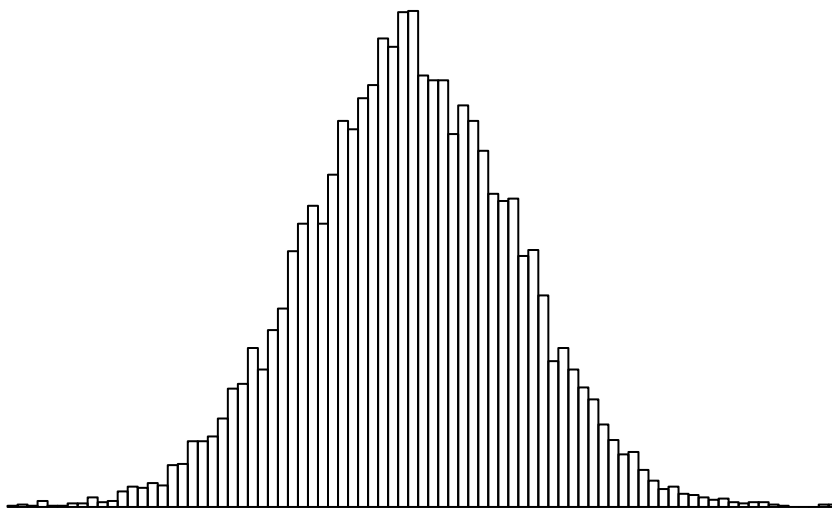

-9

-8

-7

-6

-5

-4

-3

Unidentified Metabolite 23

D206:26 – D206:18

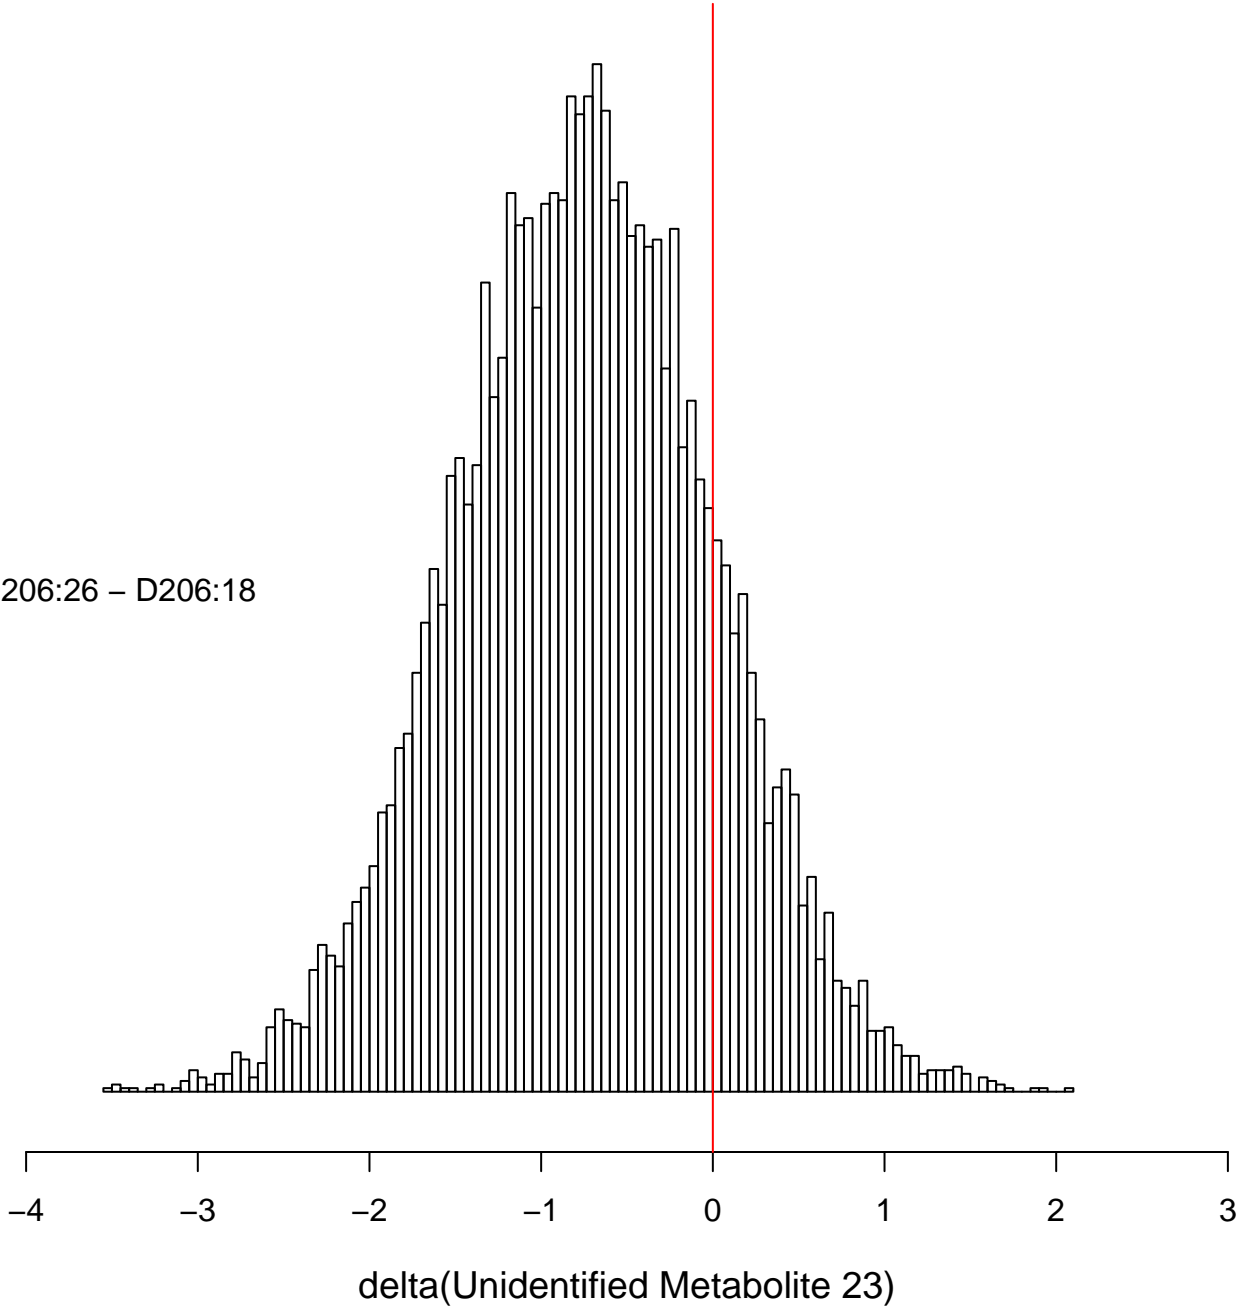

D206:26

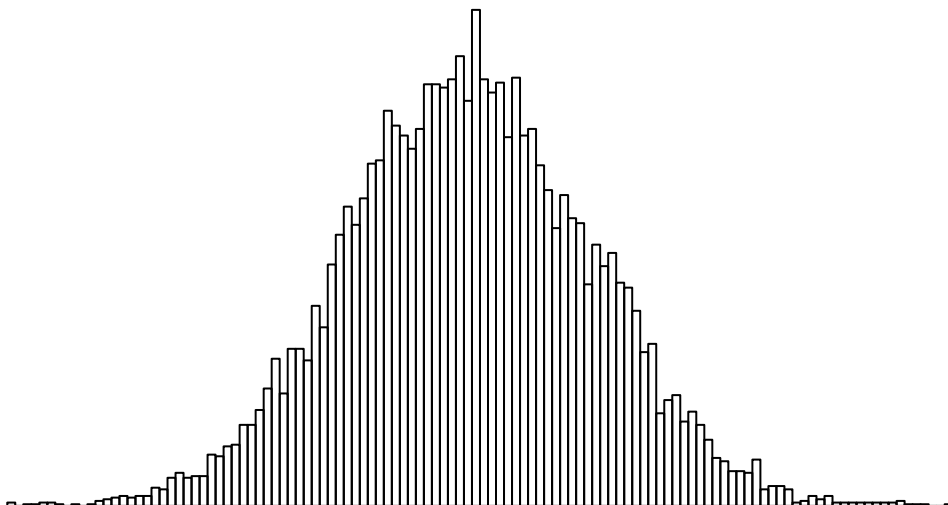

D206:18

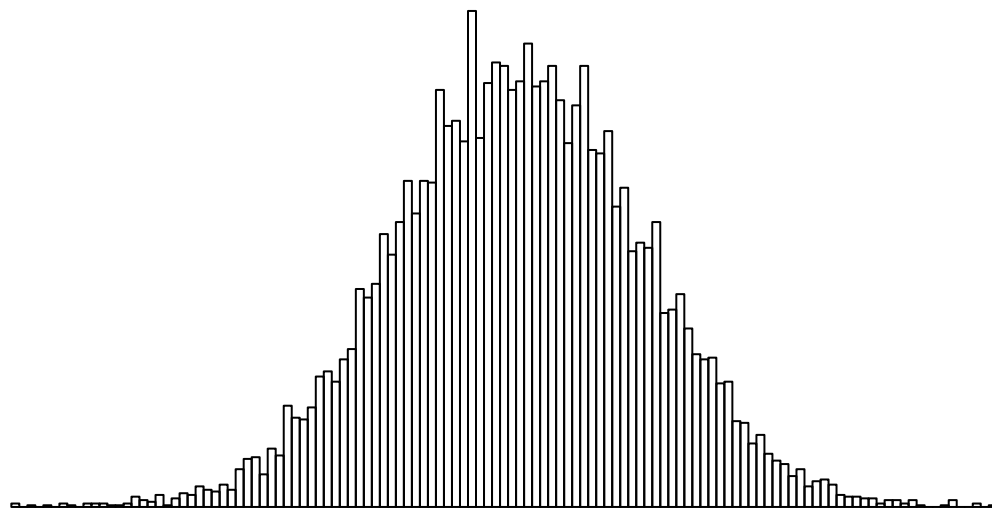

-6.5      -6.0      -5.5      -5.0      -4.5      -4.0      -3.5

Unidentified Metabolite 24

D206:26 – D206:18

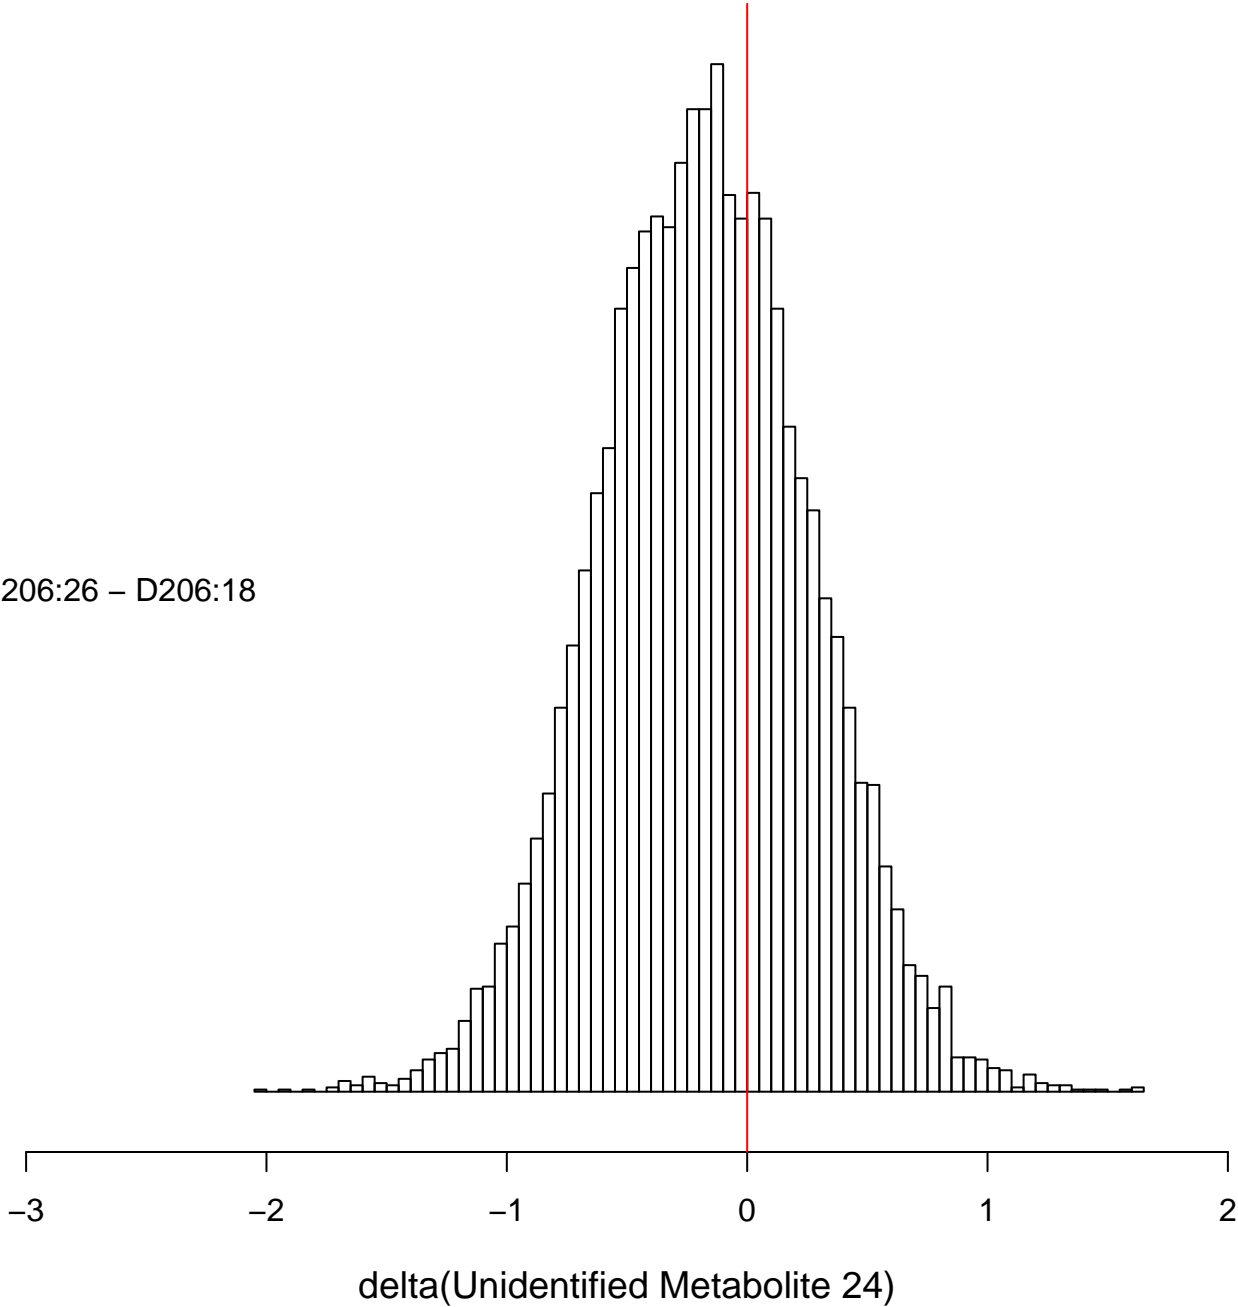

D206:26

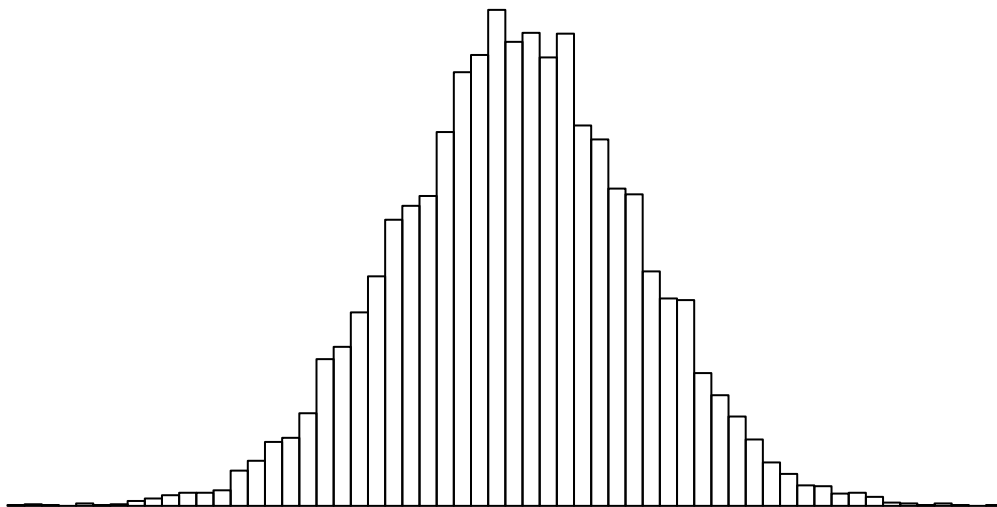

D206:18

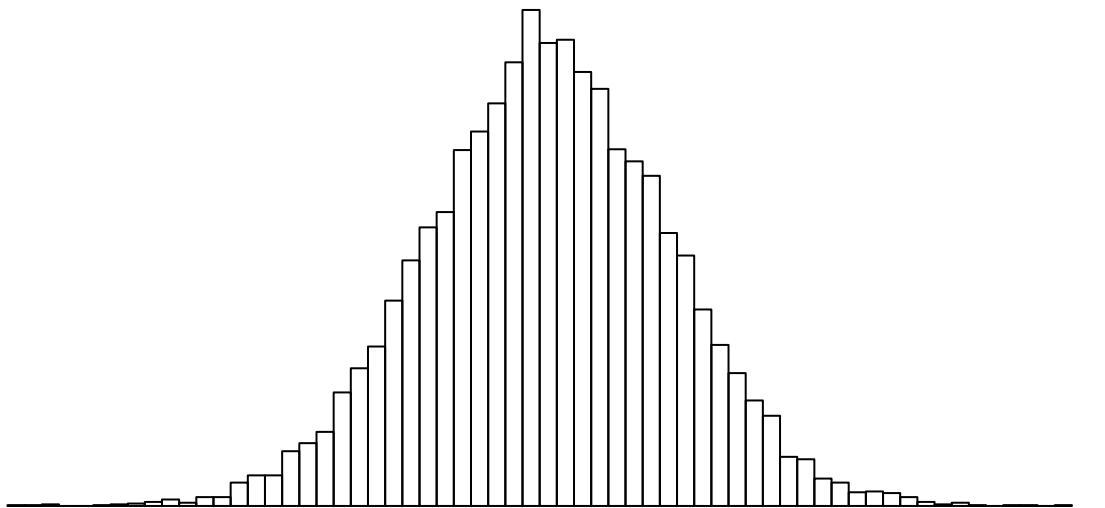

-8.5      -8.0      -7.5      -7.0      -6.5      -6.0      -5.5      -5.0

Unidentified Metabolite 25

D206:26 – D206:18

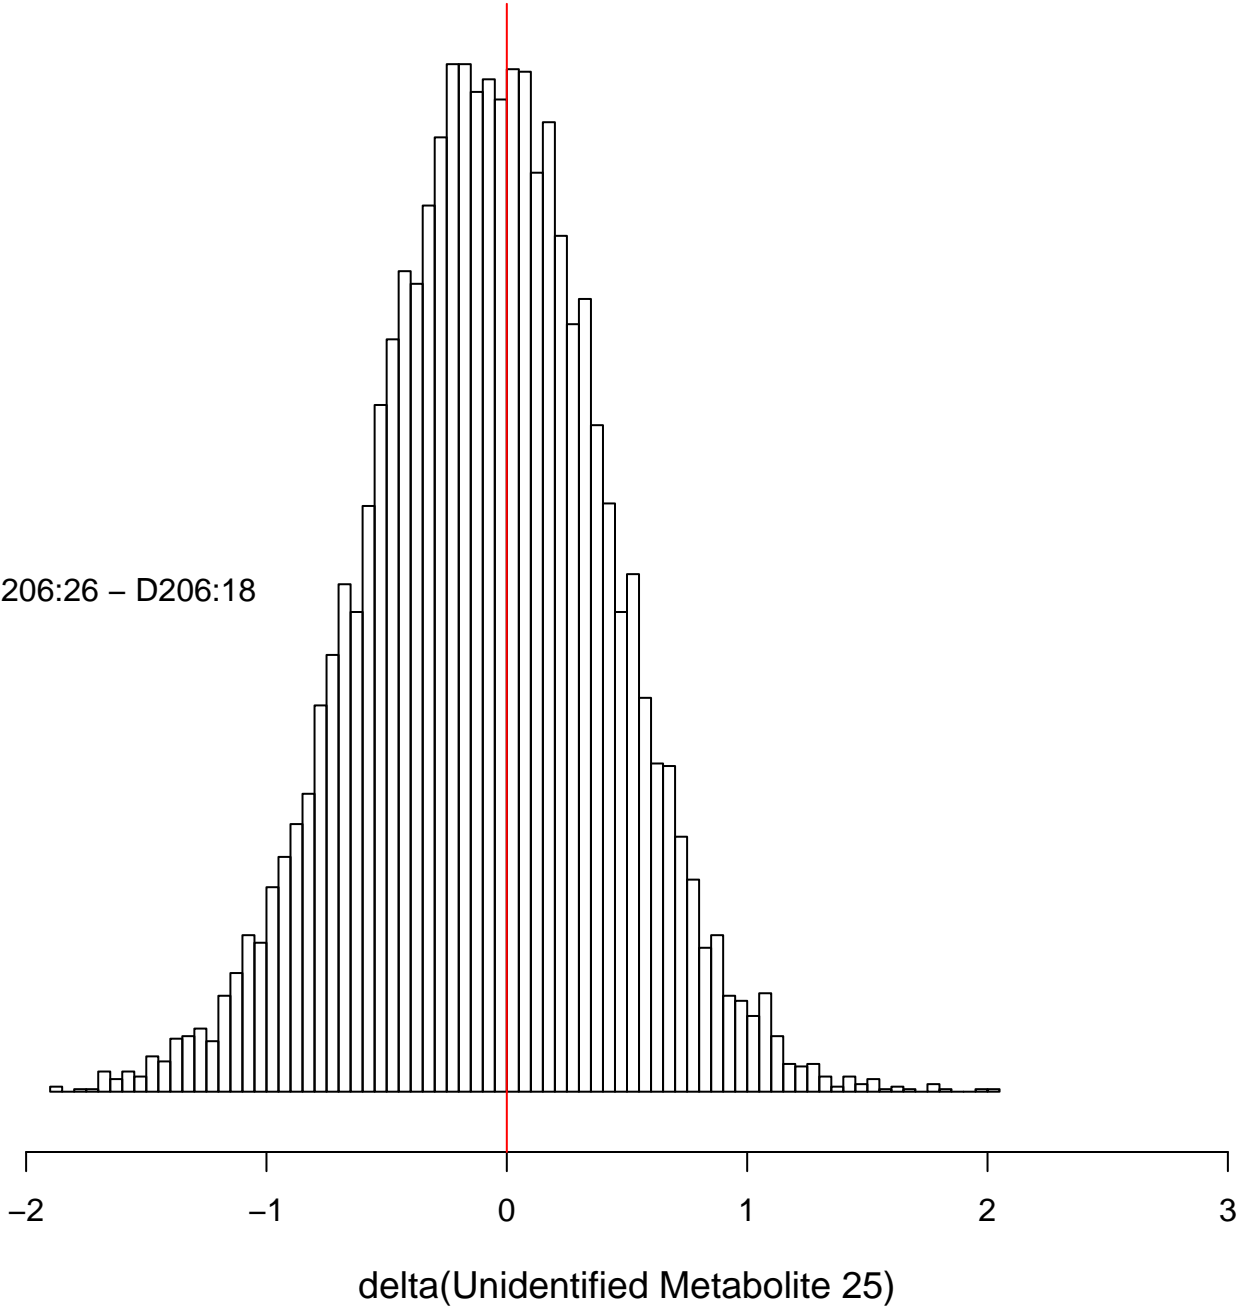



D206:26

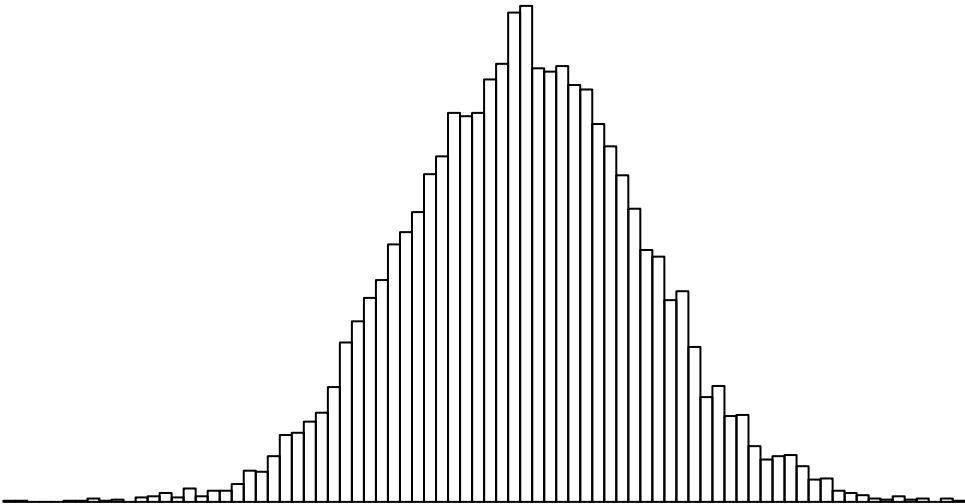

D206:18

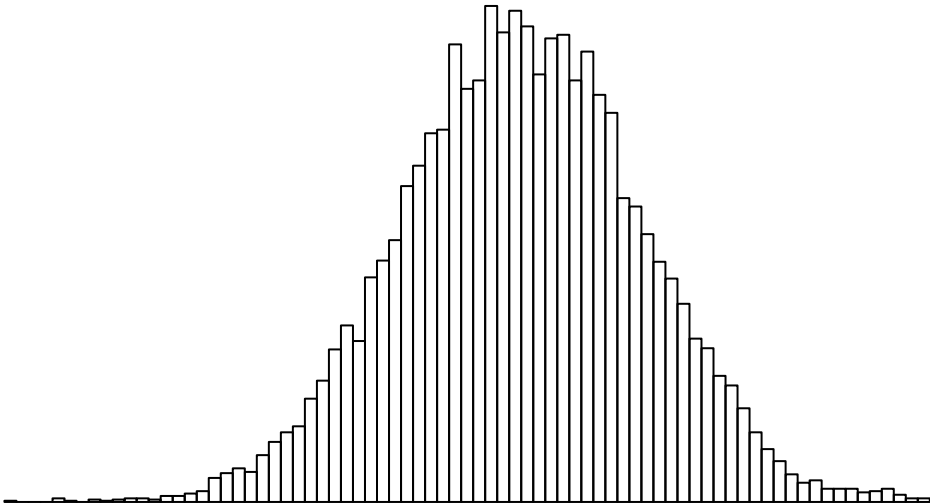

-10      -9      -8      -7      -6      -5

Unidentified Metabolite 26

D206:26 – D206:18

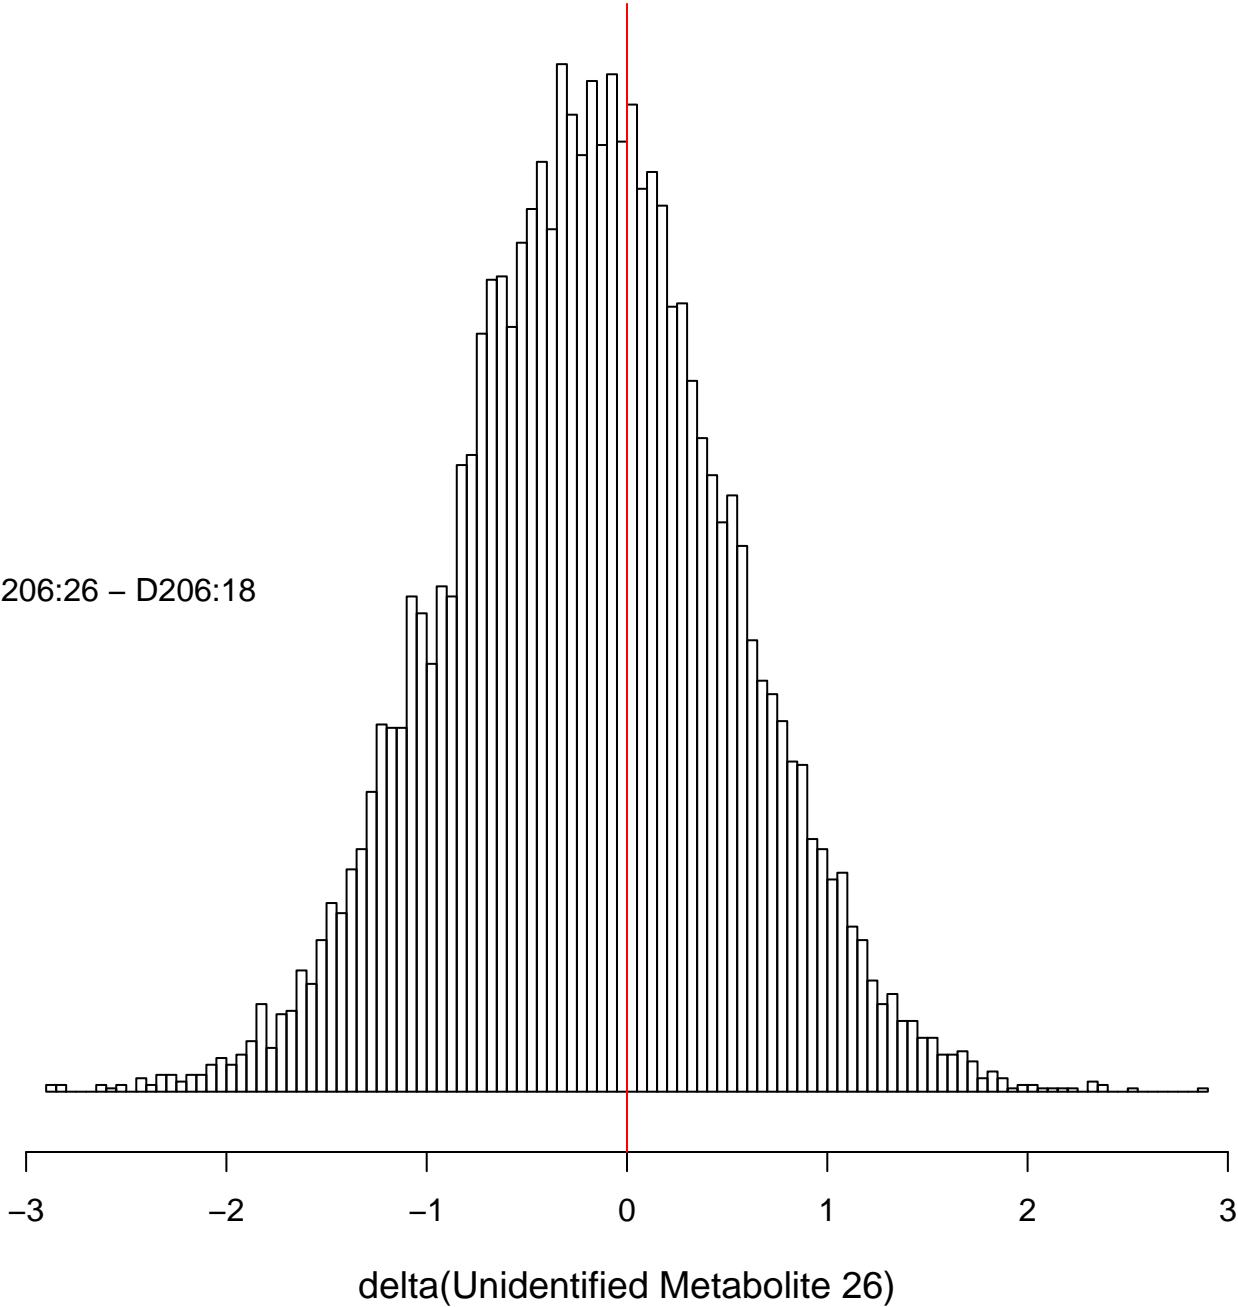

D206:26

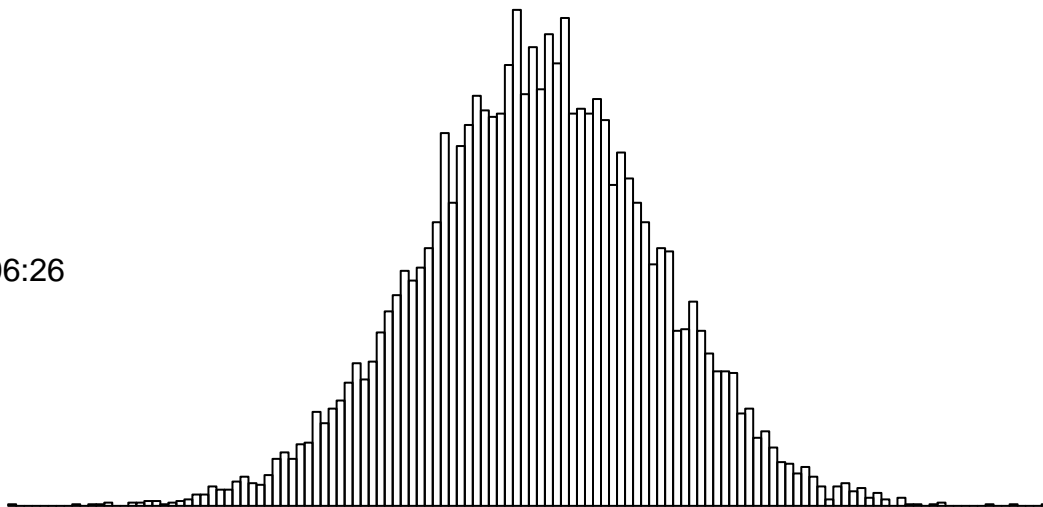

D206:18

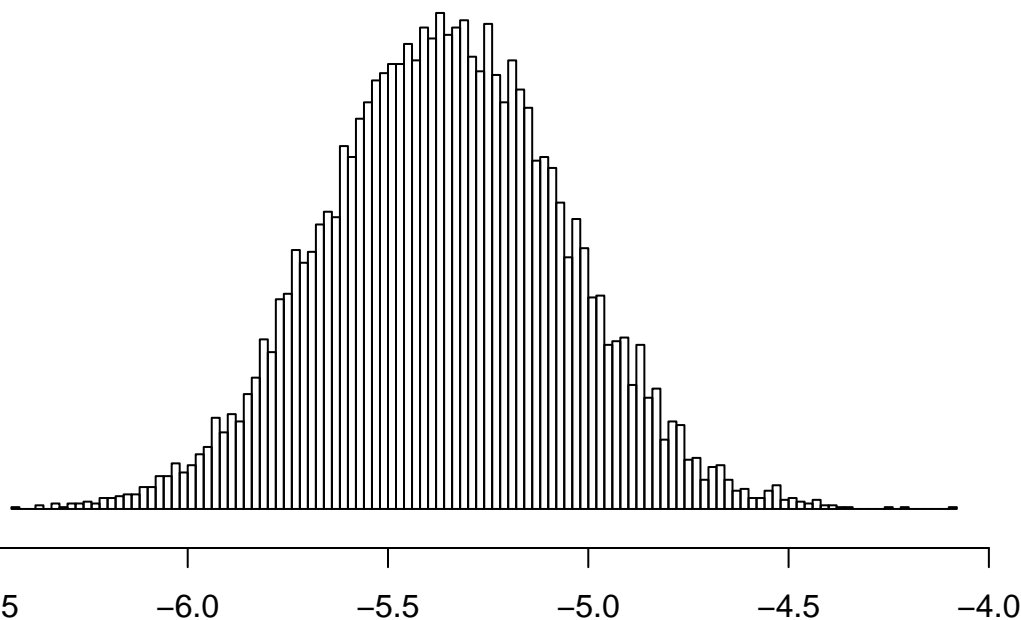

-7.0

-6.5

-6.0

-5.5

-5.0

-4.5

-4.0

Unidentified Metabolite 27

D206:26 – D206:18

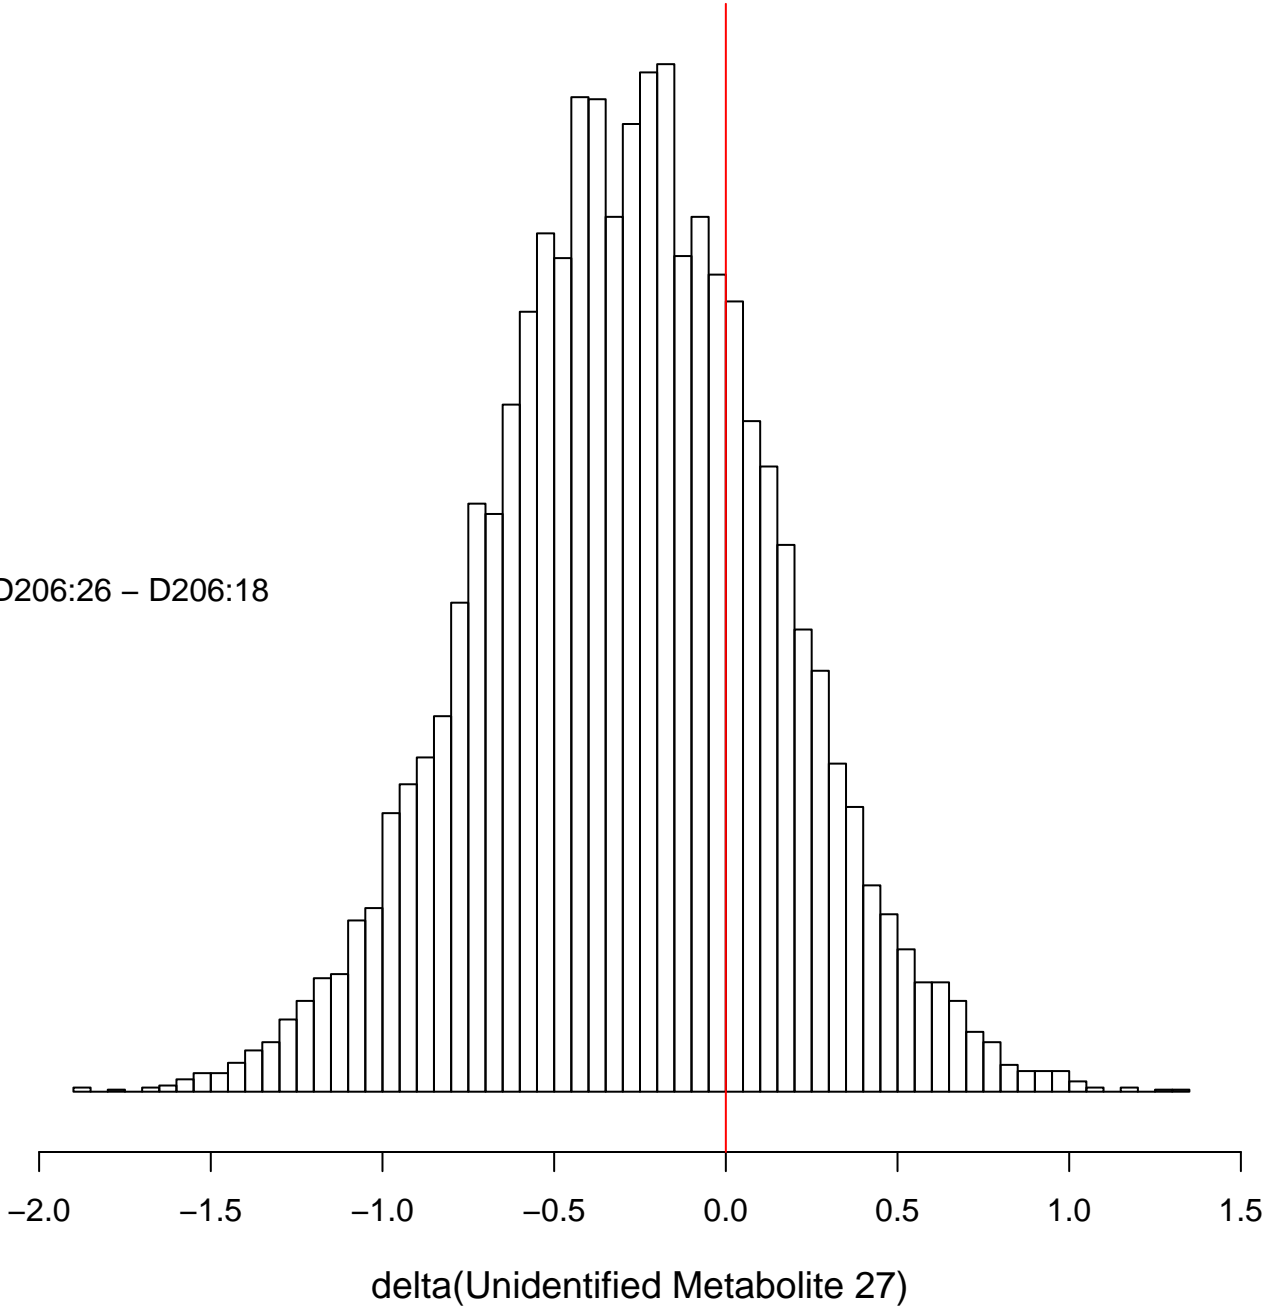

D206:26

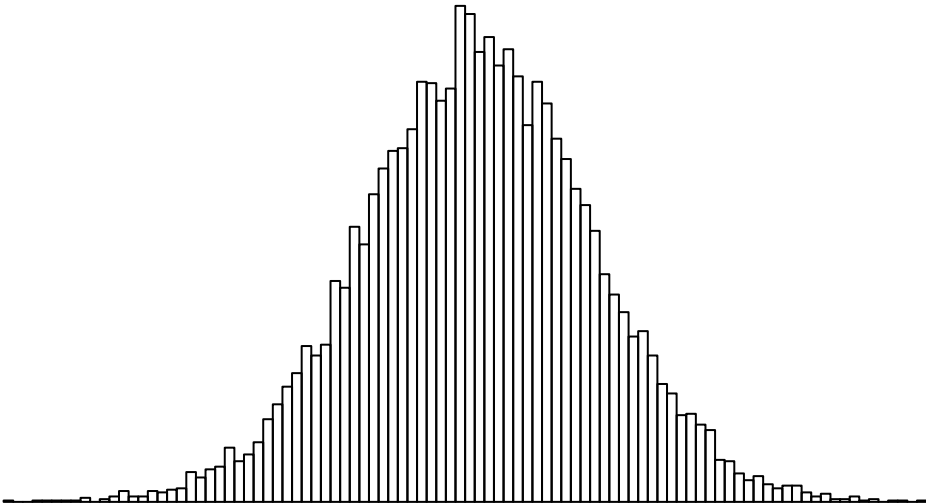

D206:18

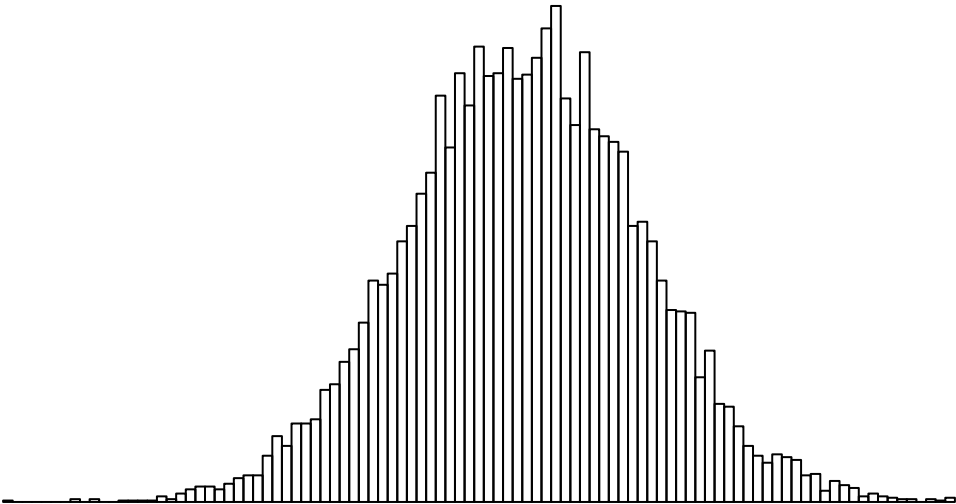

-8.5      -8.0      -7.5      -7.0      -6.5      -6.0

Unidentified Metabolite 29

D206:26 – D206:18

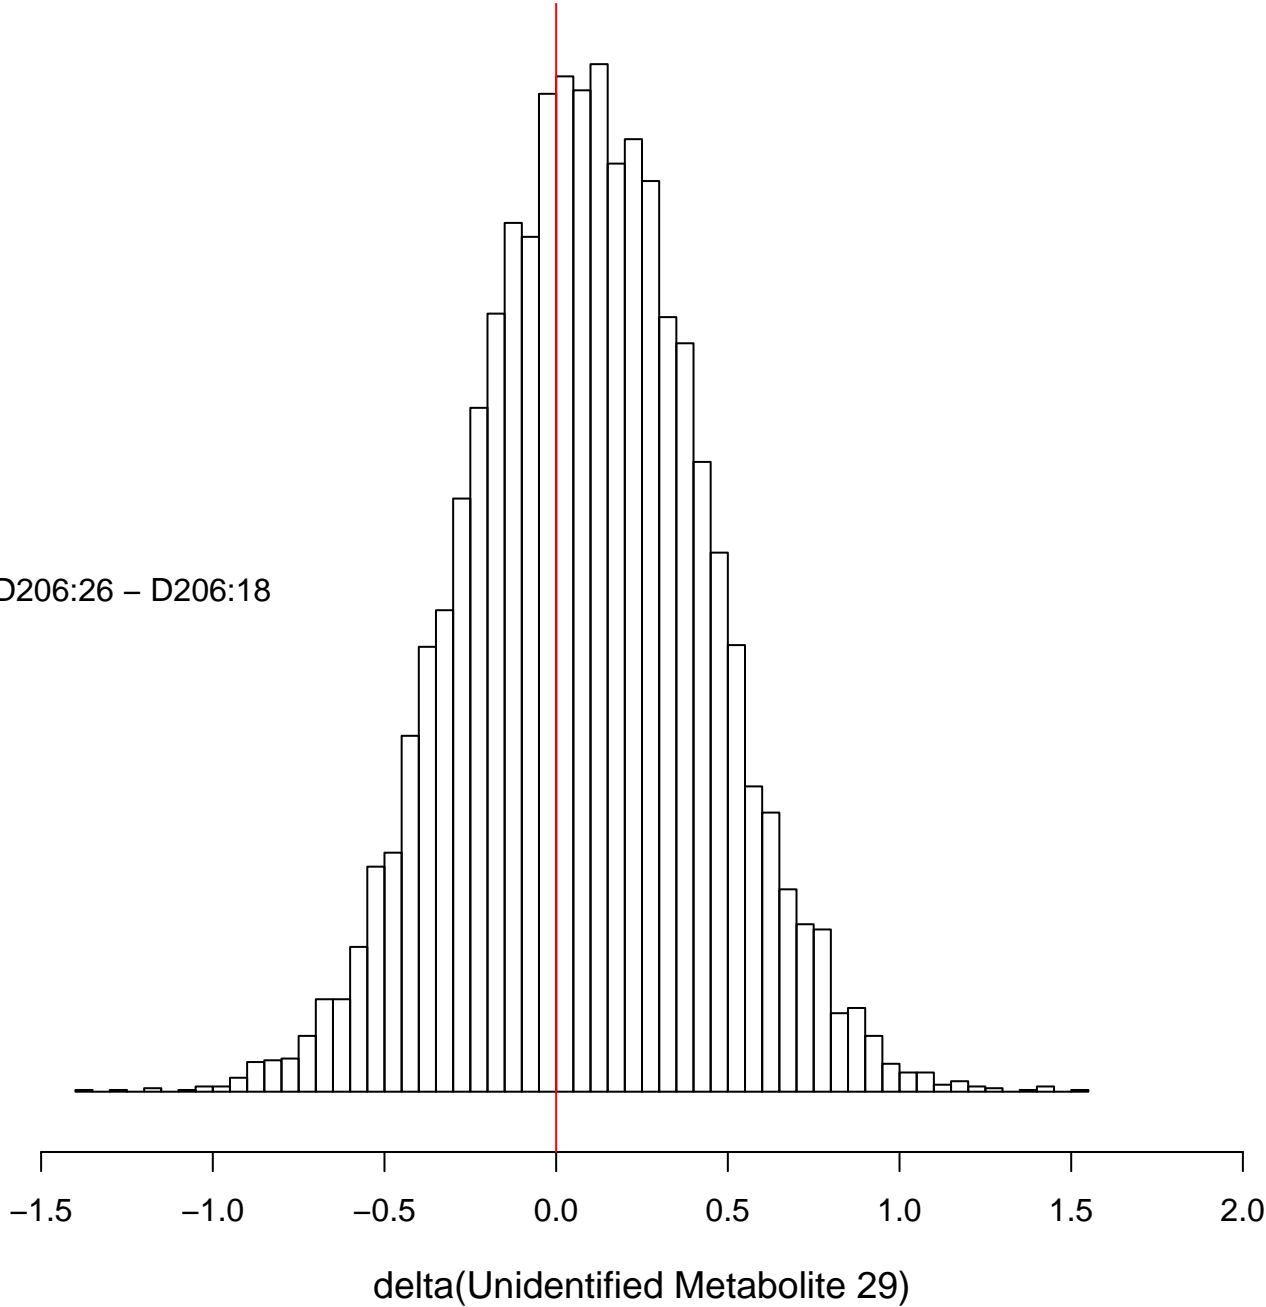

D206:26

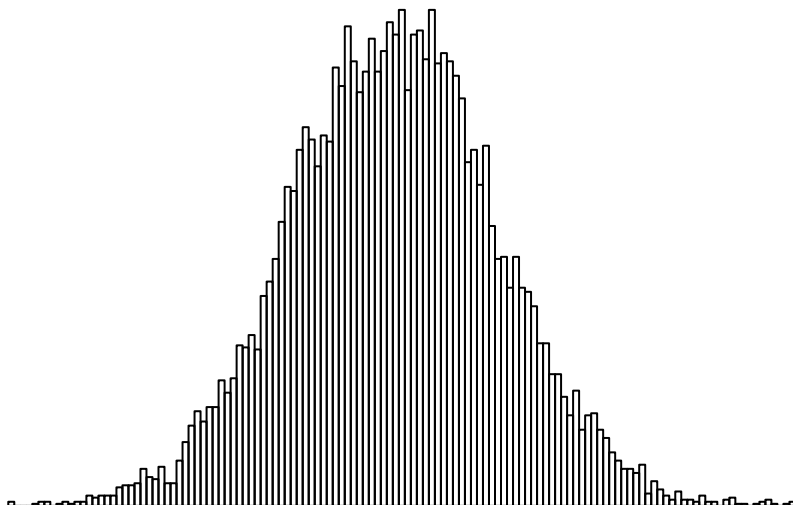

D206:18

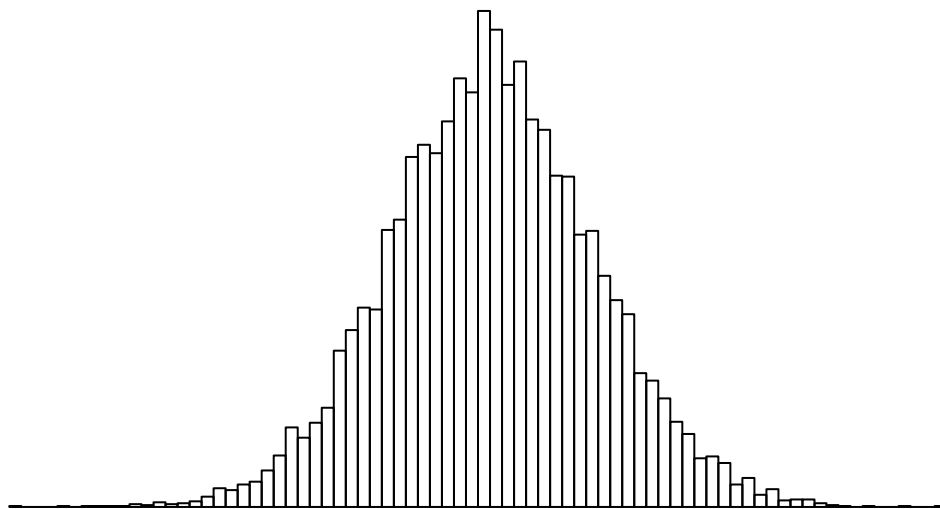

-9.0

-8.5

-8.0

-7.5

-7.0

Unidentified Metabolite 30

D206:26 – D206:18

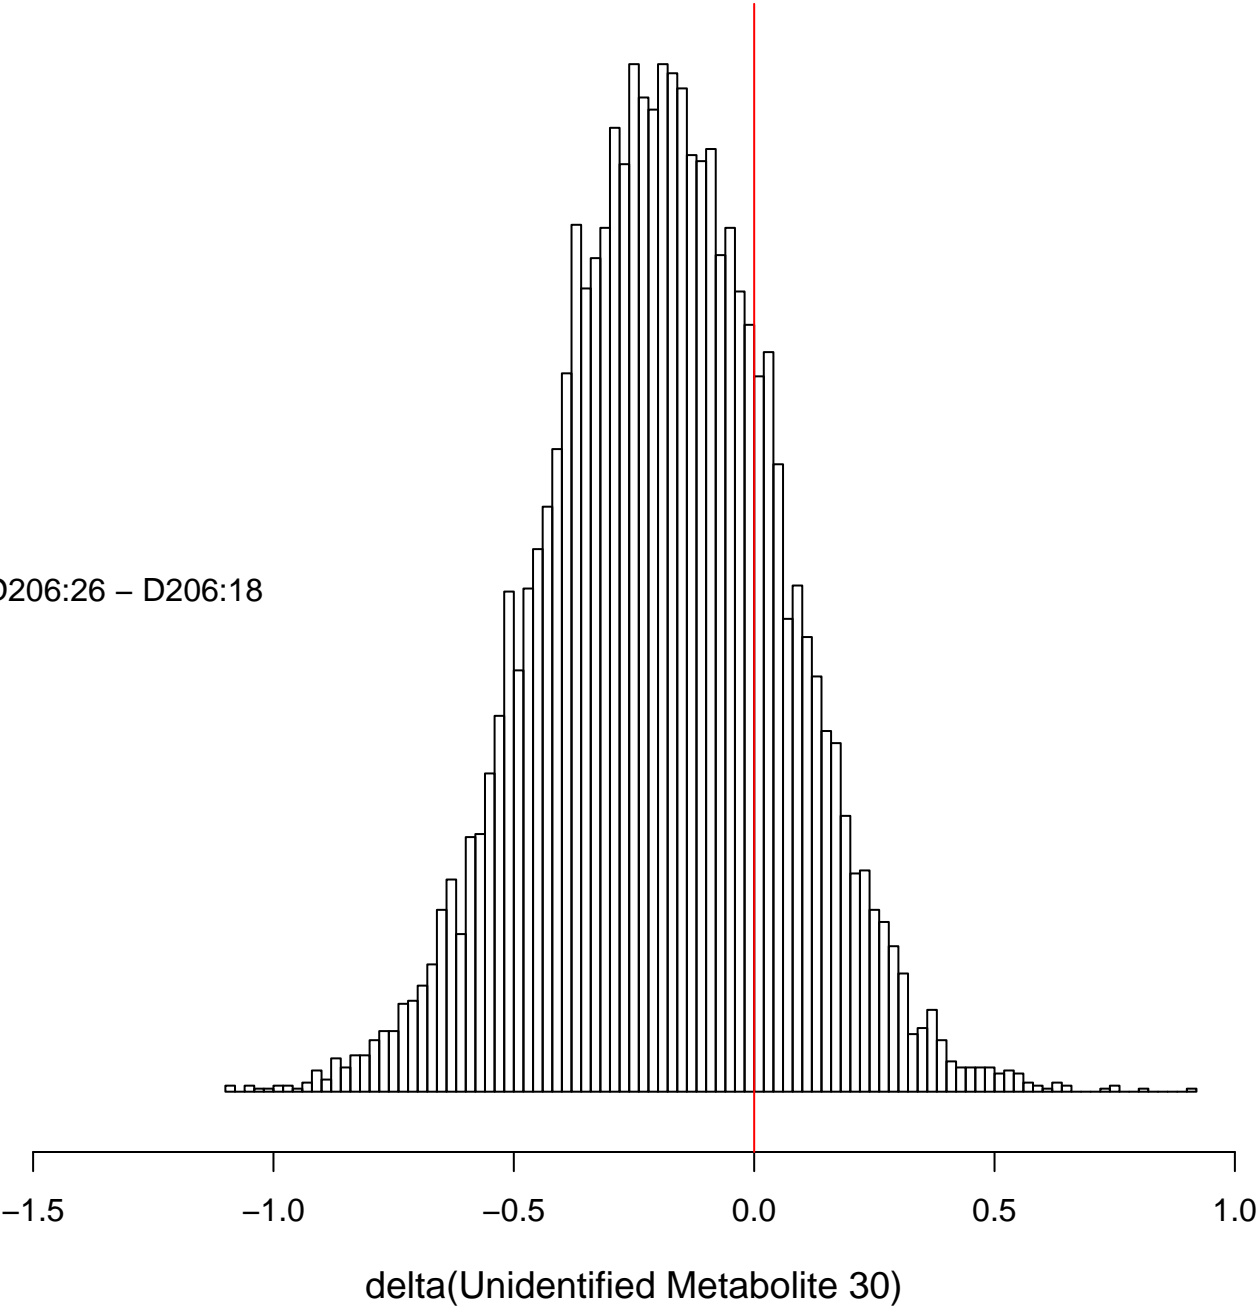



D206:26

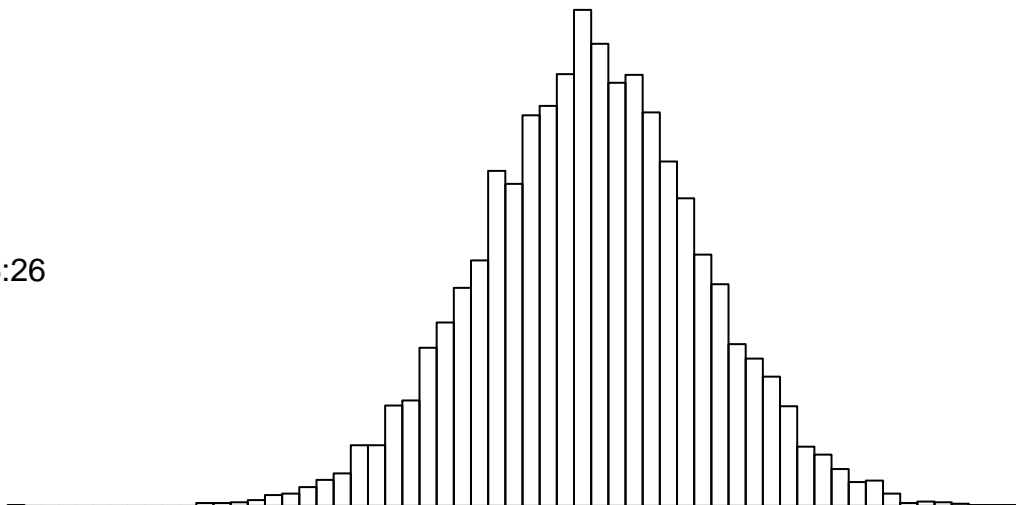

D206:18

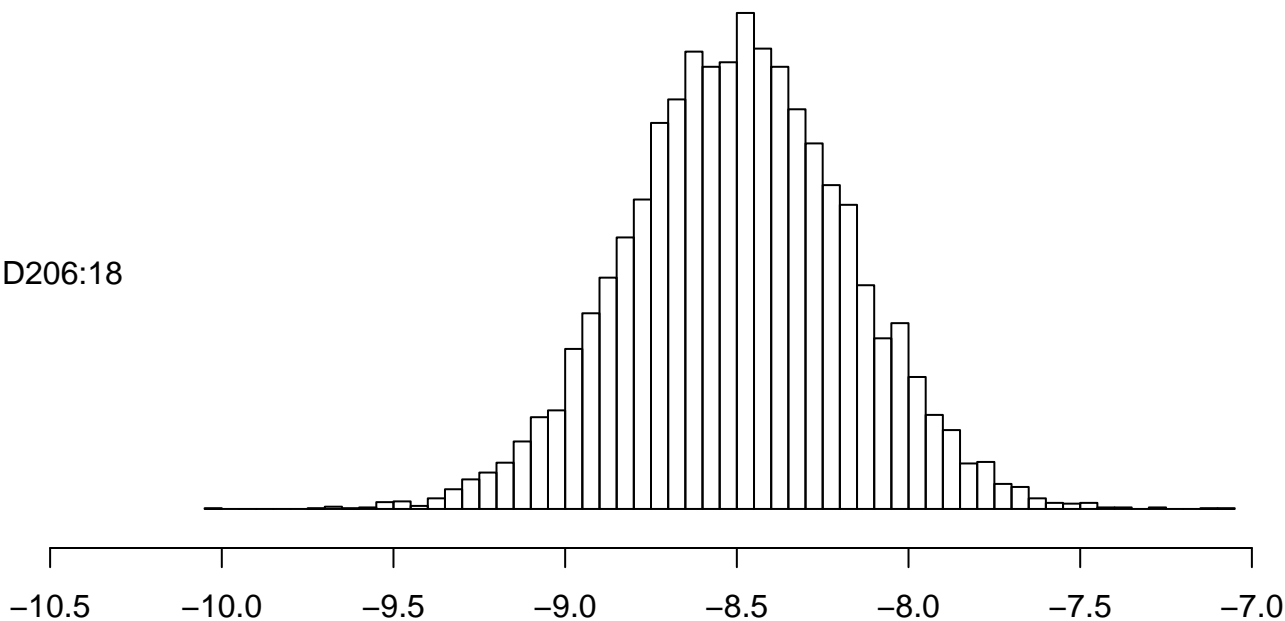

Unidentified Metabolite 31

D206:26 – D206:18

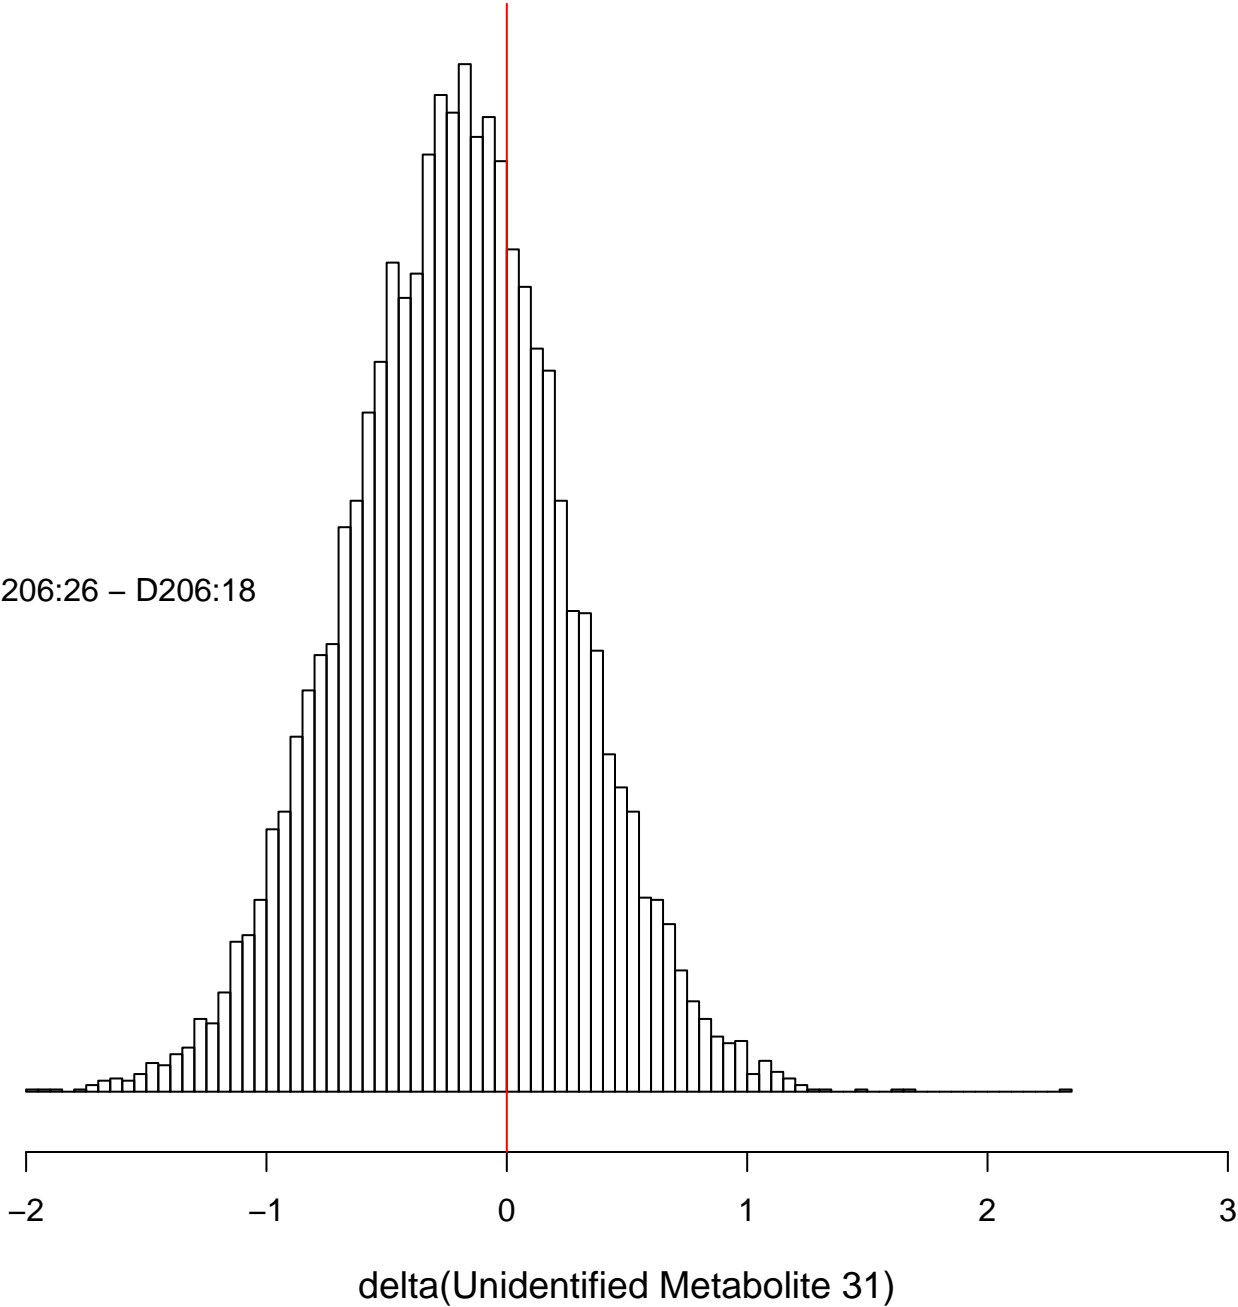

D206:26

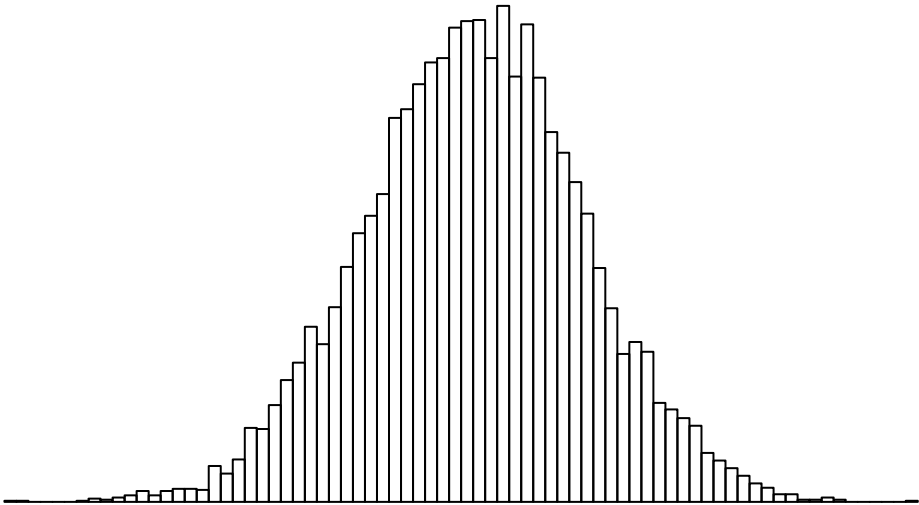

D206:18

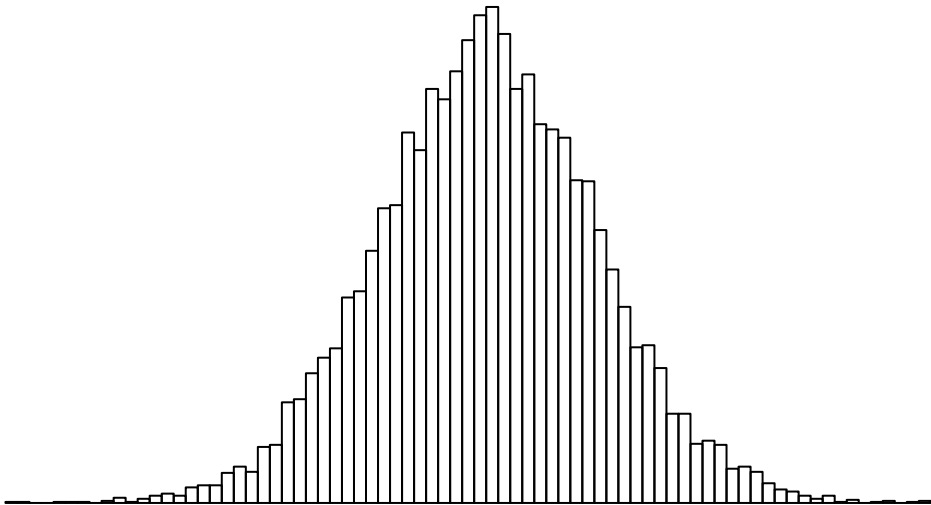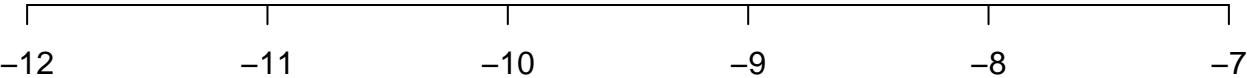

Unidentified Metabolite 32

D206:26 – D206:18

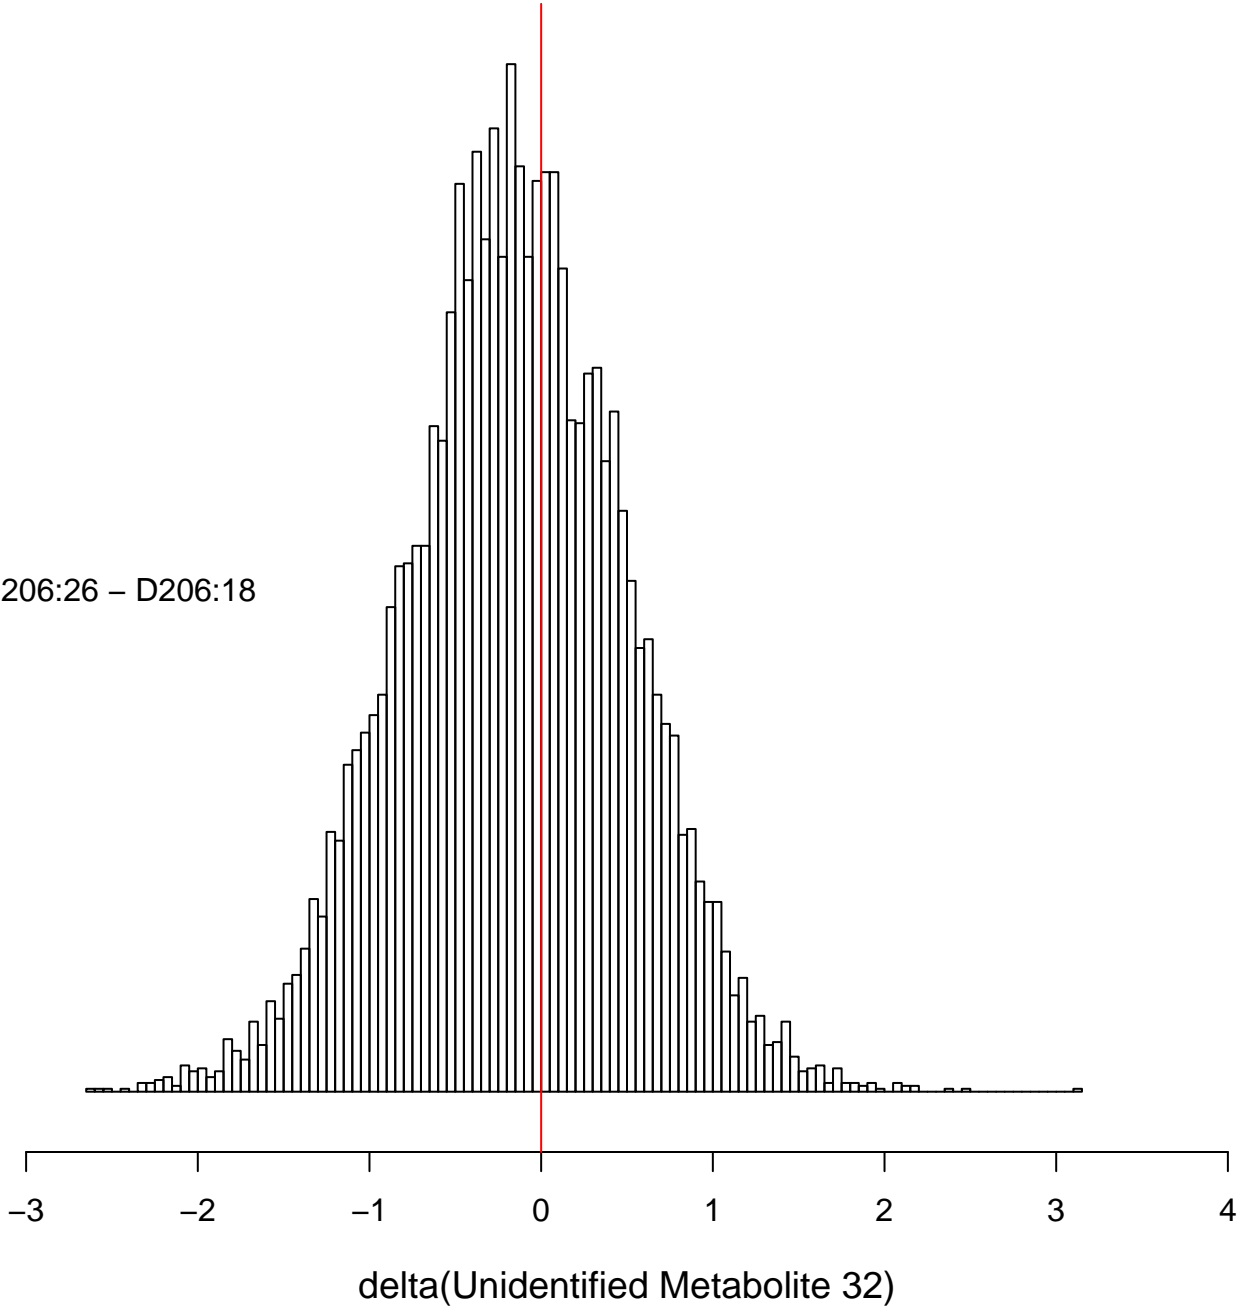

D206:26

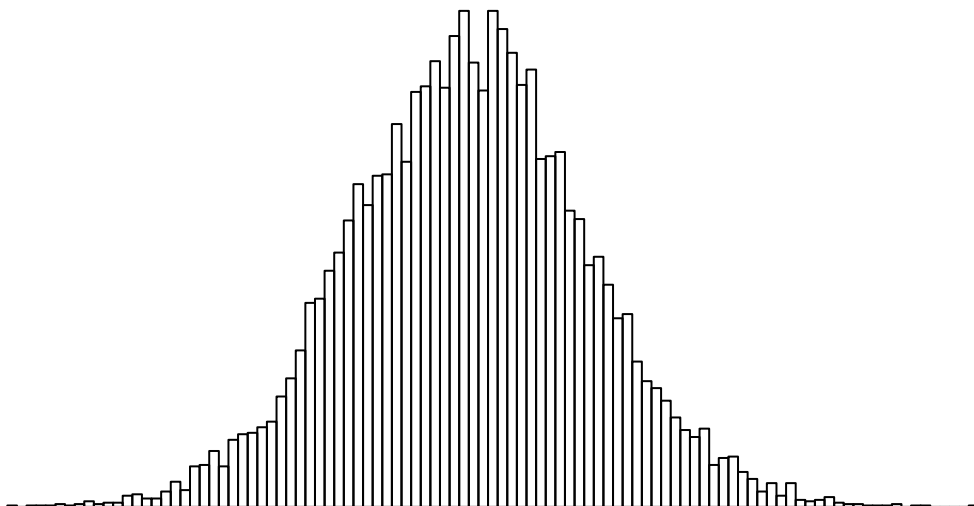

D206:18

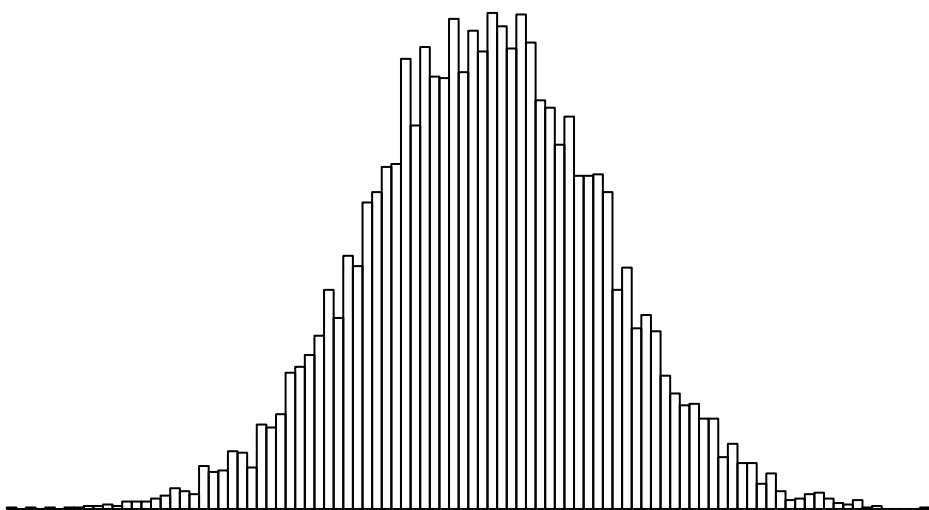

-9.0

-8.5

-8.0

-7.5

-7.0

-6.5

Unidentified Metabolite 33

D206:26 – D206:18

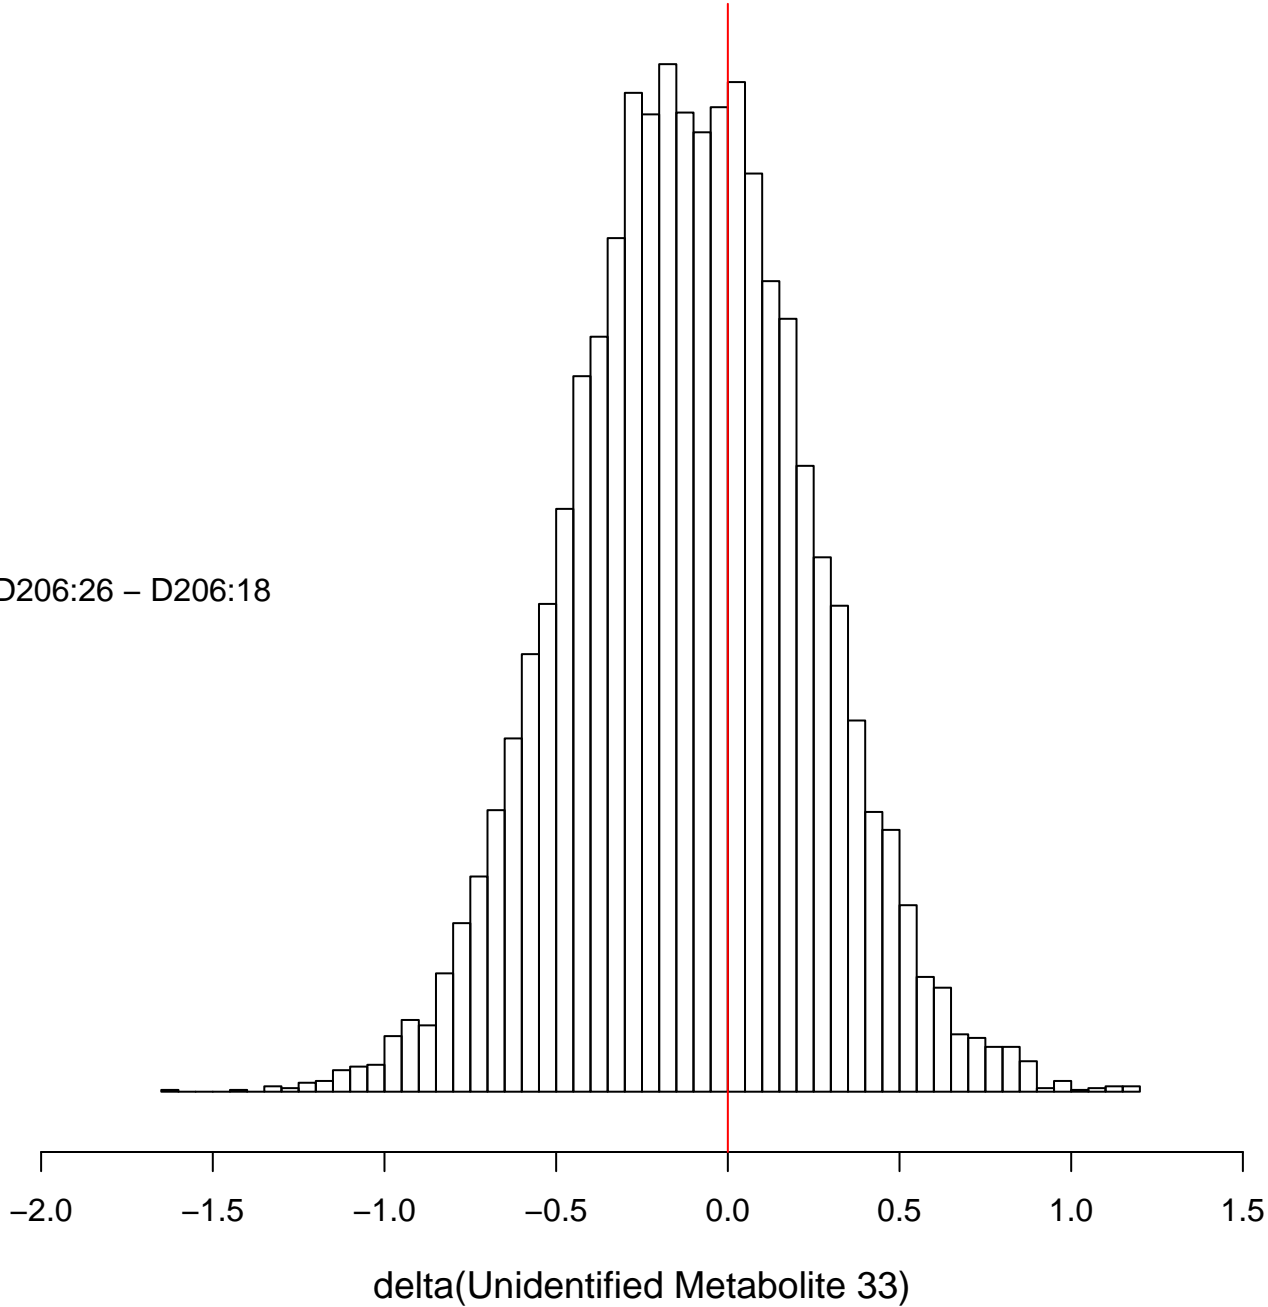

D206:26

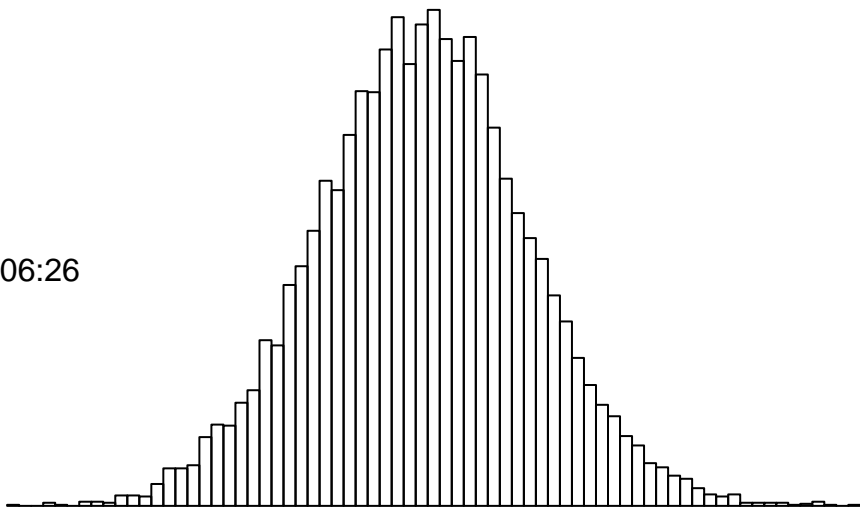

D206:18

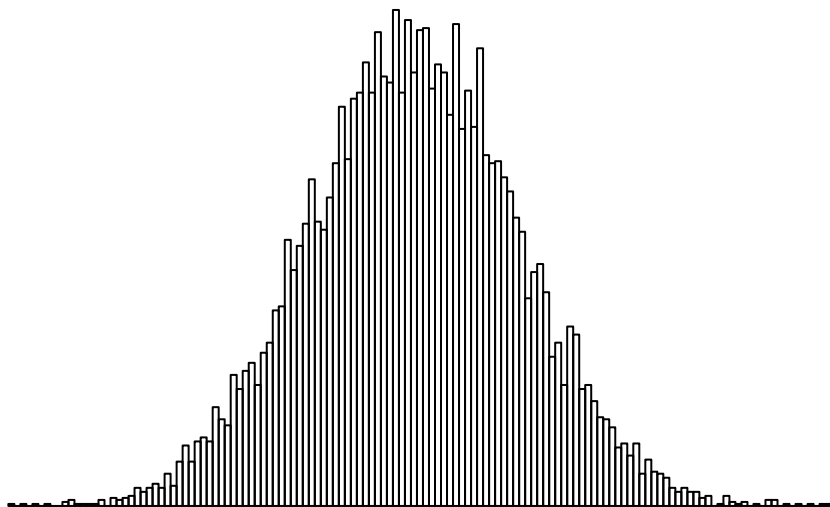

-9.0

-8.5

-8.0

-7.5

-7.0

Unidentified Metabolite 34

D206:26 – D206:18

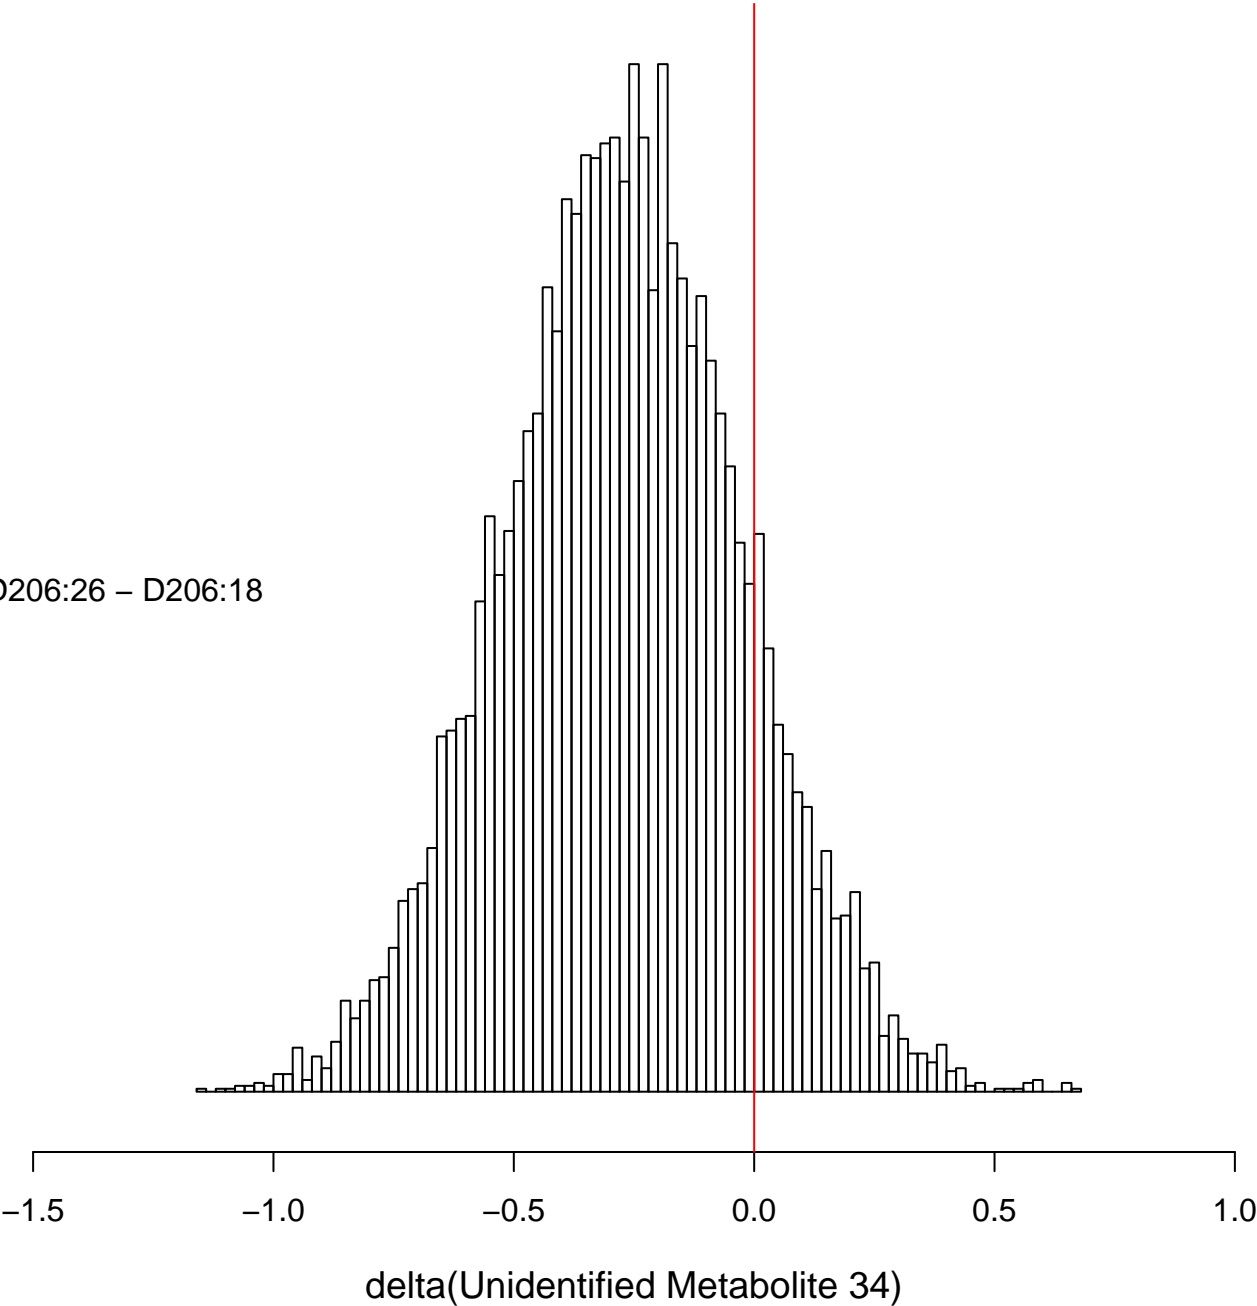



D206:26

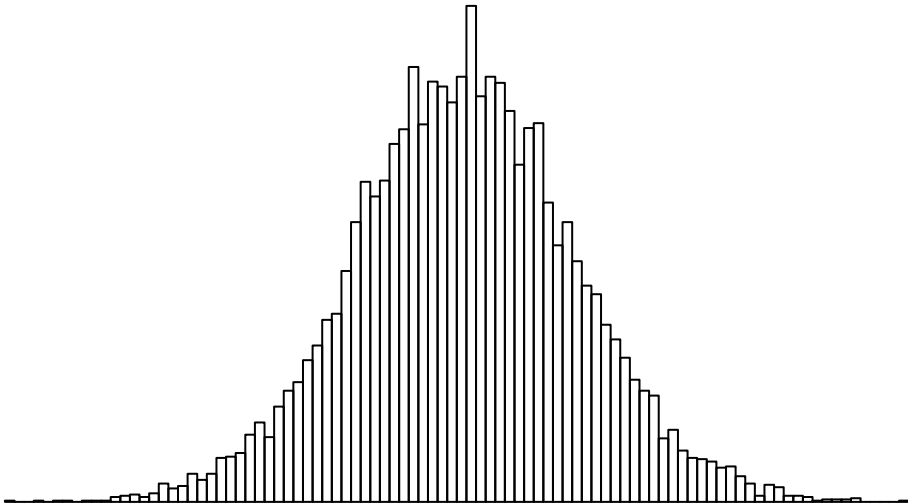

D206:18

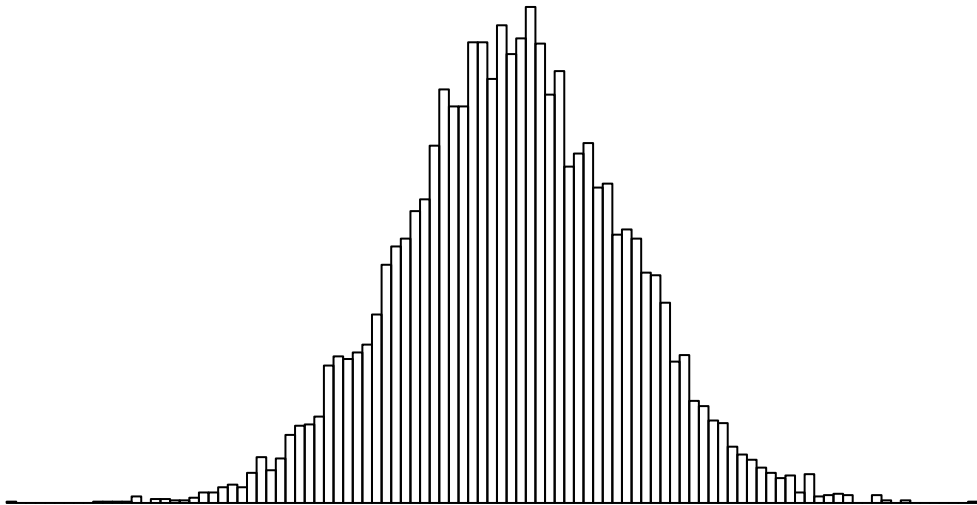

-7.5      -7.0      -6.5      -6.0      -5.5      -5.0

Unidentified Metabolite 35

D206:26 – D206:18

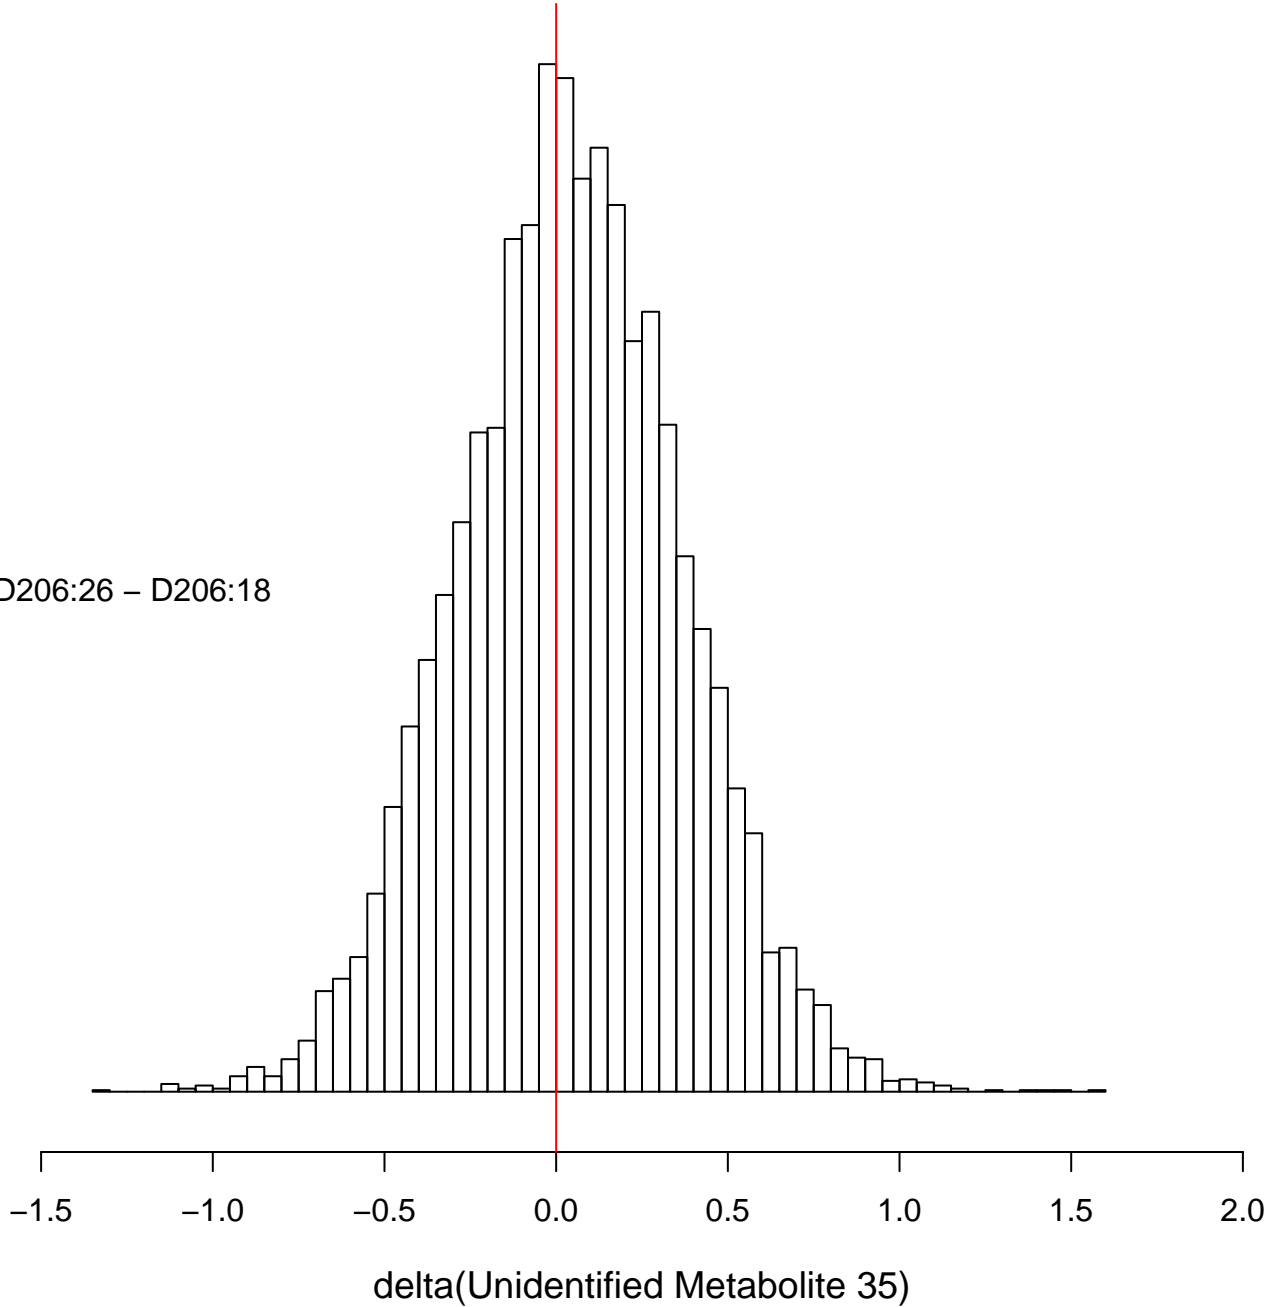

D206:26

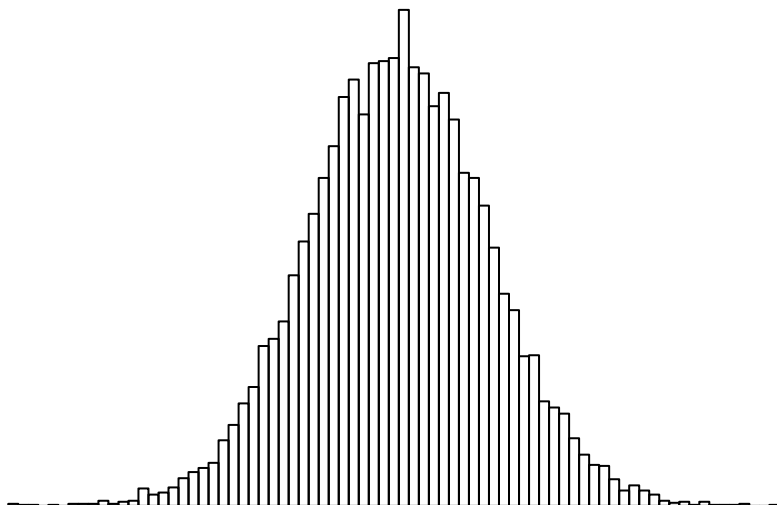

D206:18

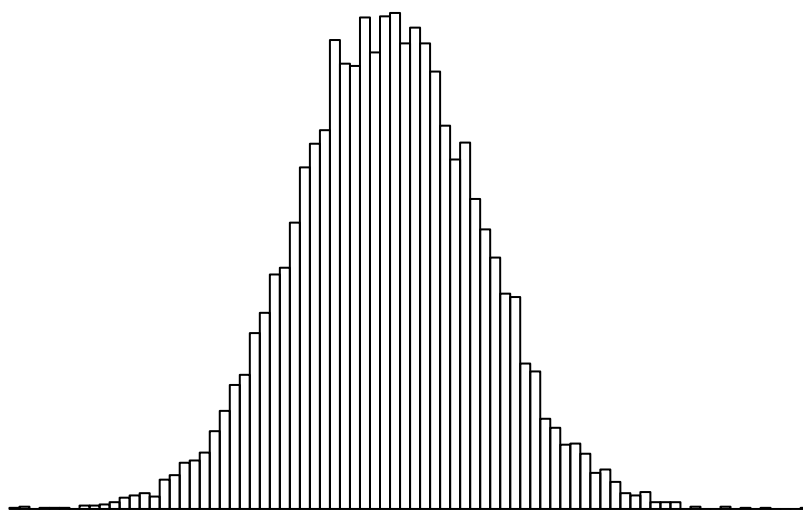

-9

-8

-7

-6

-5

-4

-3

Unidentified Metabolite 36

D206:26 – D206:18

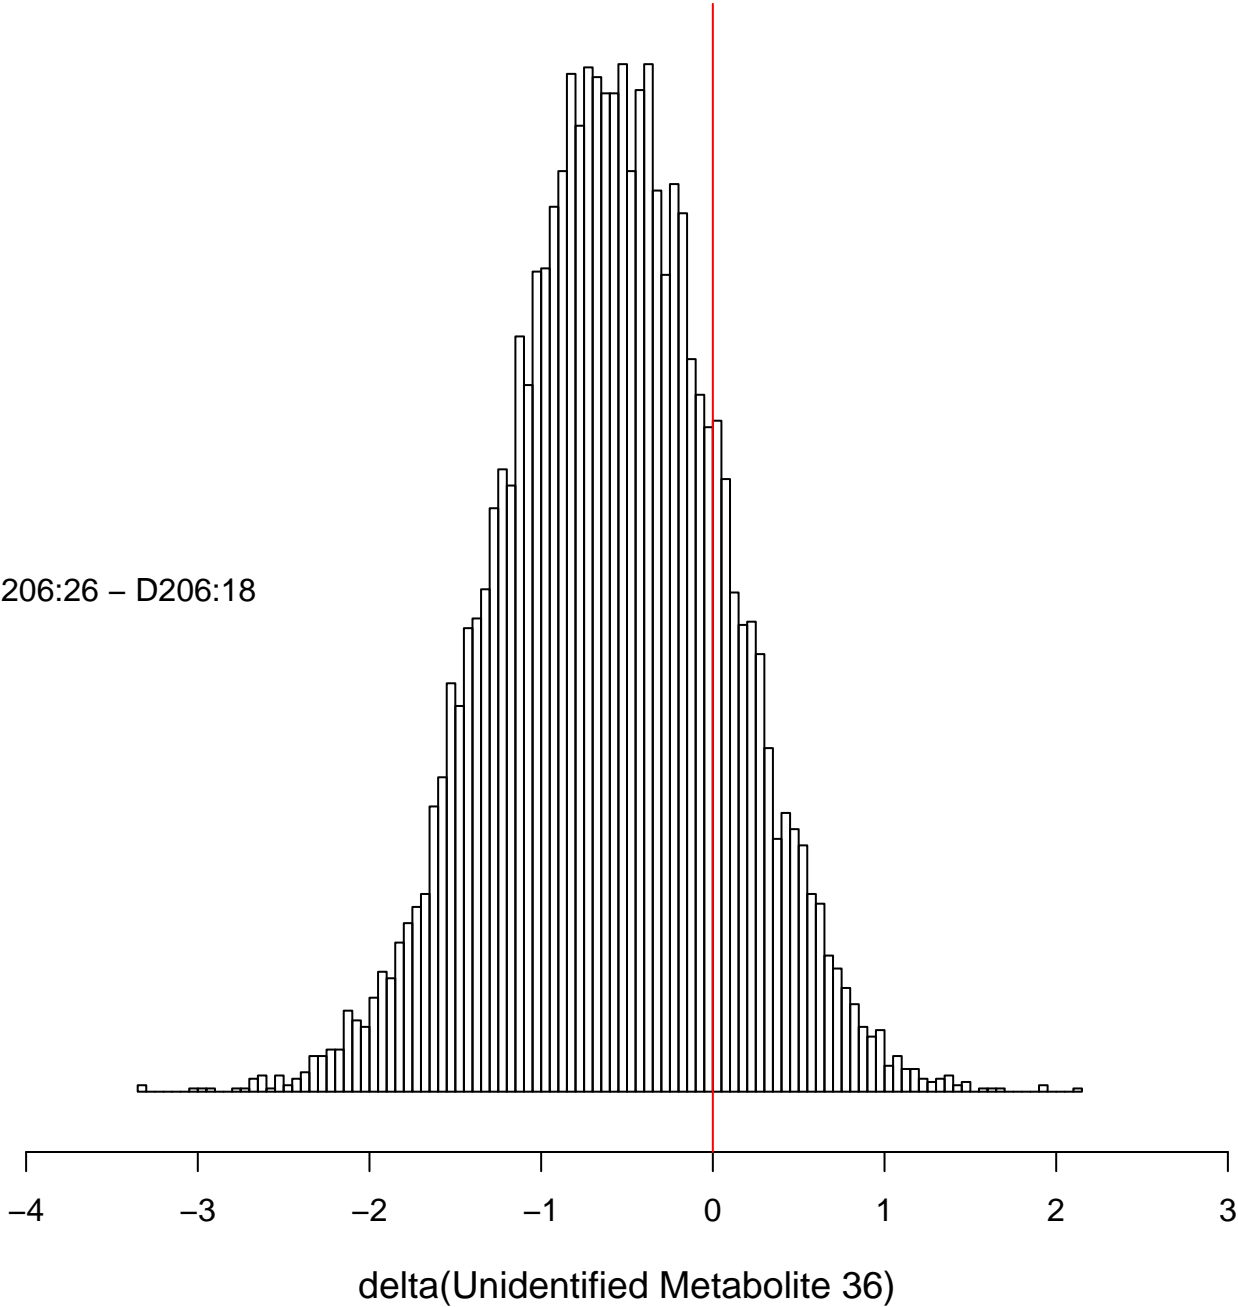

D206:26

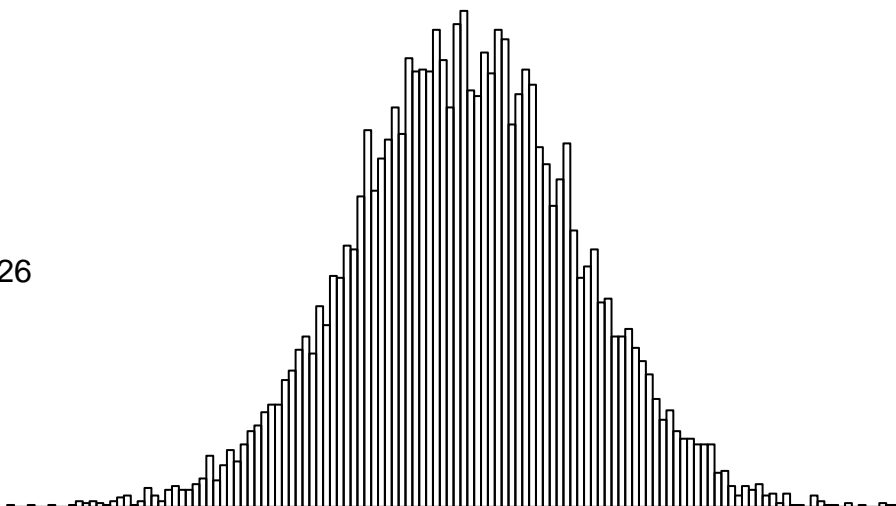

D206:18

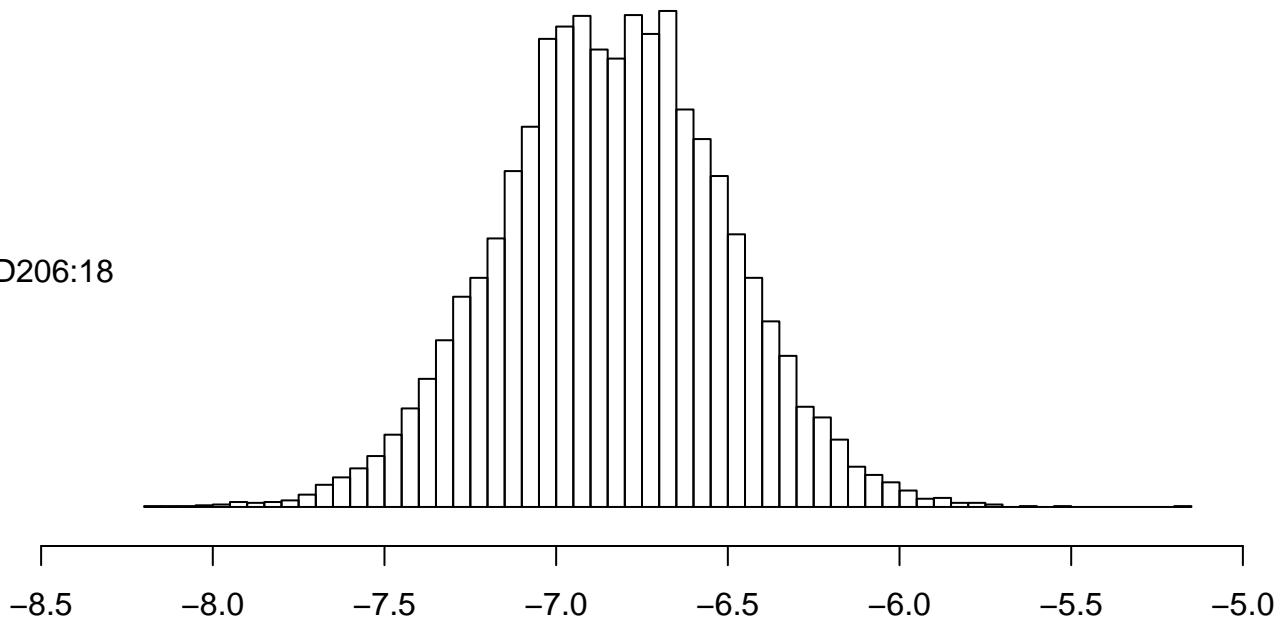

Unidentified Metabolite 38

D206:26 – D206:18

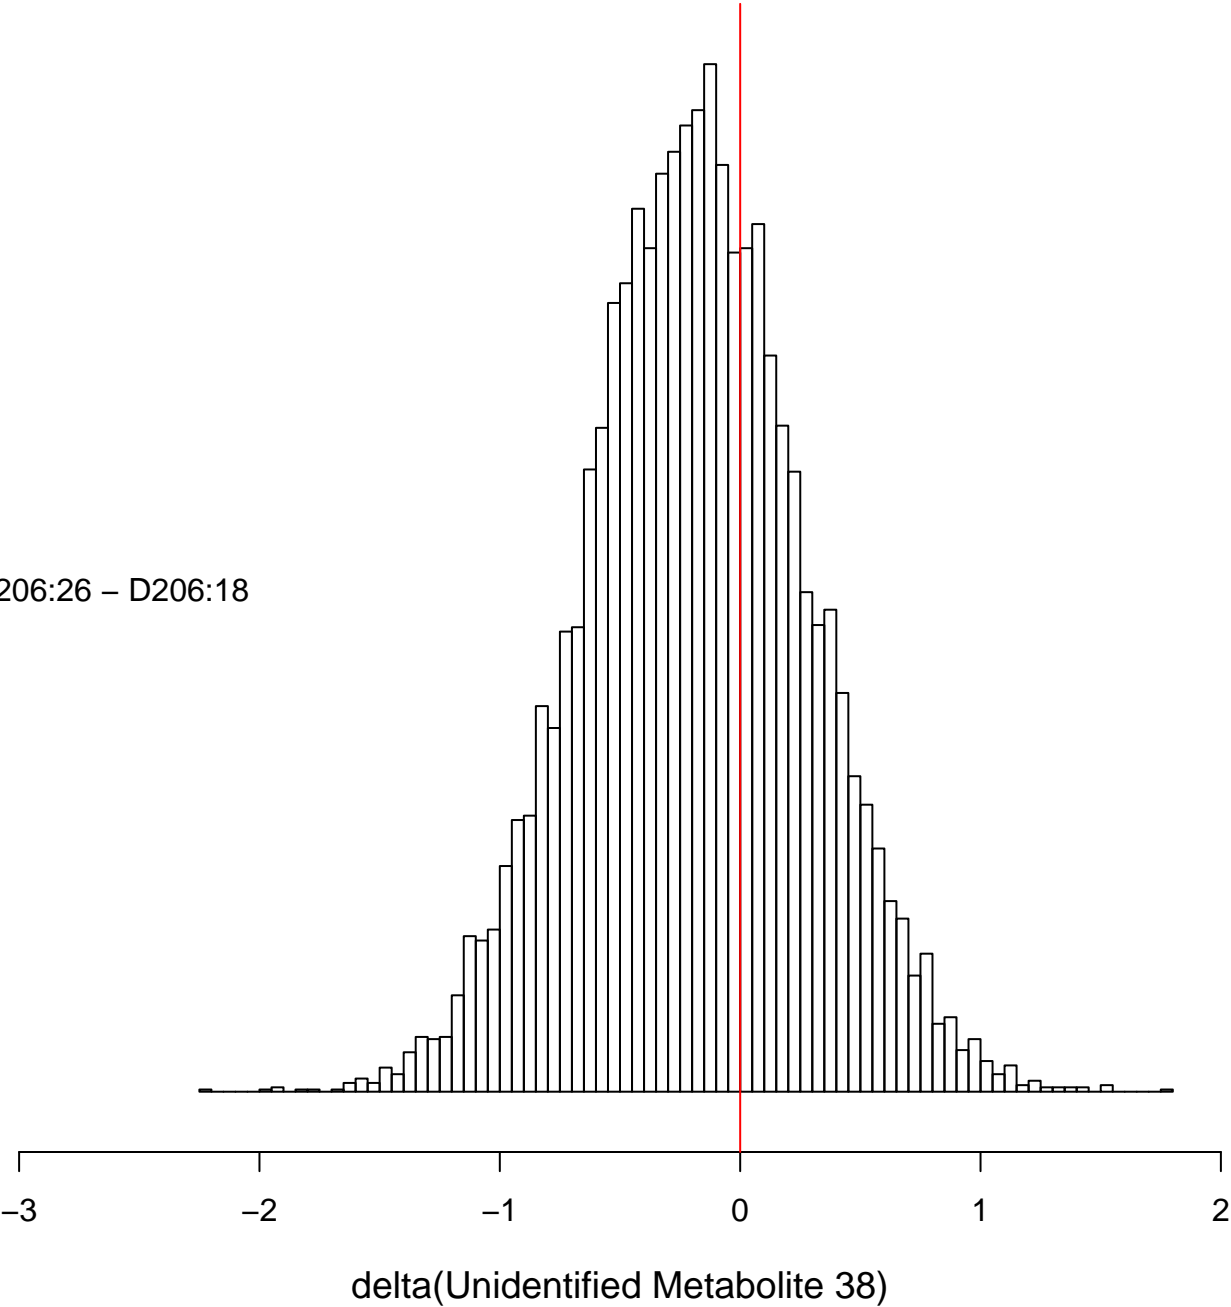

D206:26

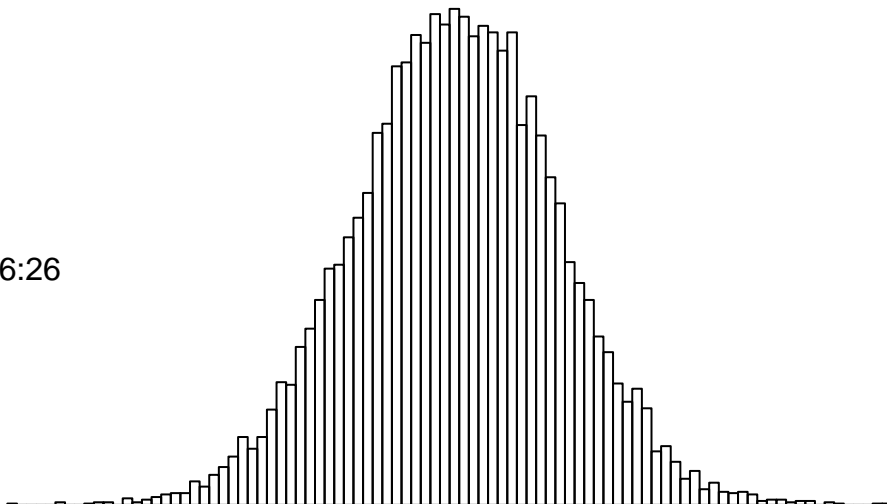

D206:18

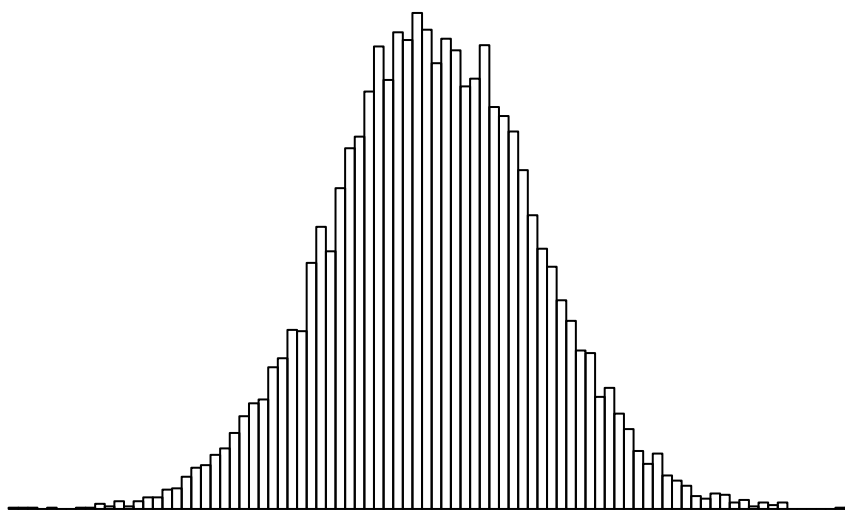

-8.5

-8.0

-7.5

-7.0

-6.5

-6.0

Unidentified Metabolite 39

D206:26 – D206:18

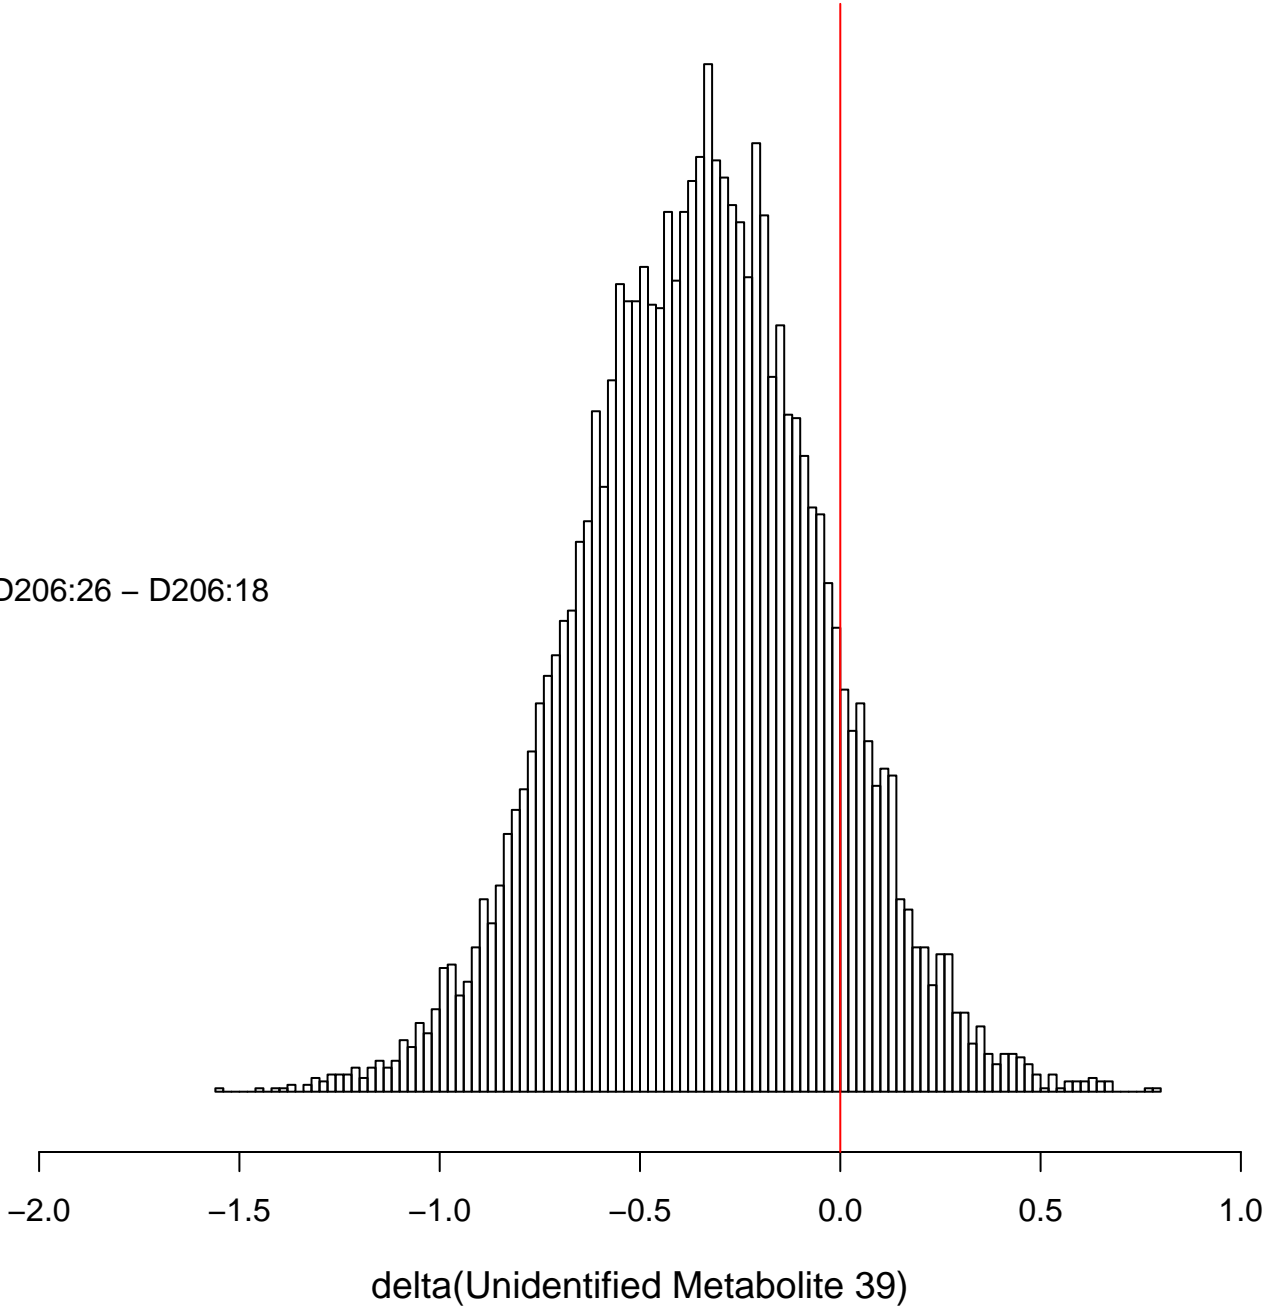



D206:26

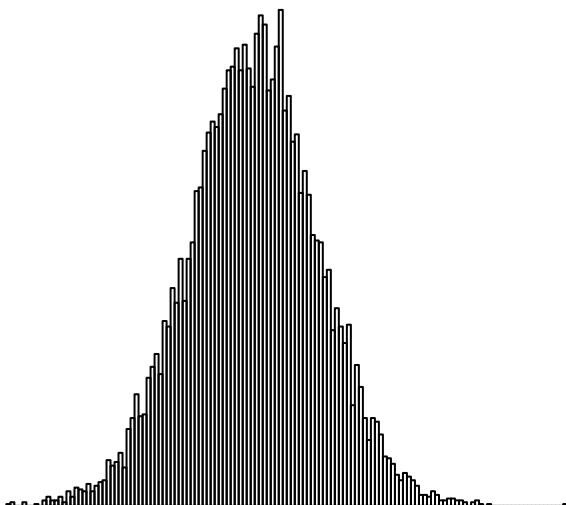

D206:18

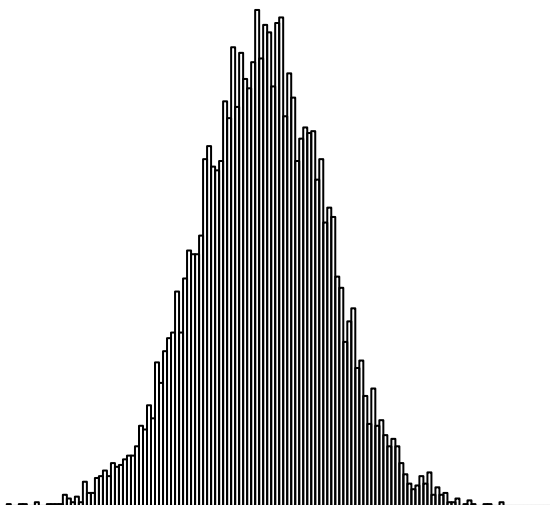

-9      -8      -7      -6      -5      -4      -3

Unidentified Metabolite 42

D206:26 – D206:18

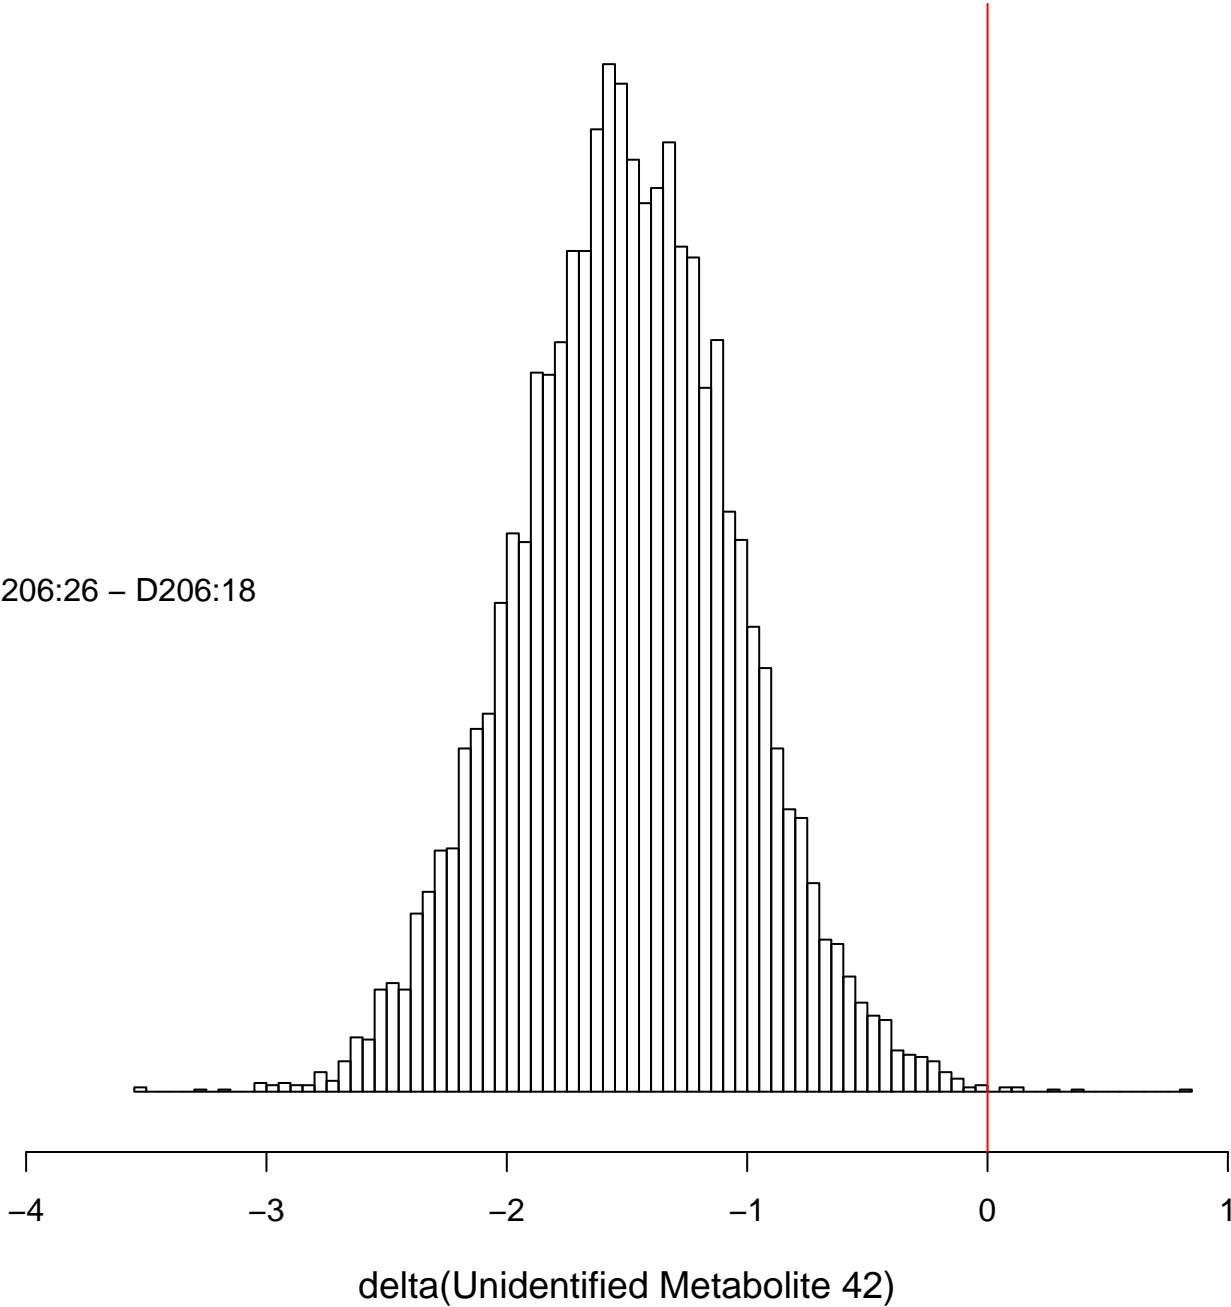

D206:26

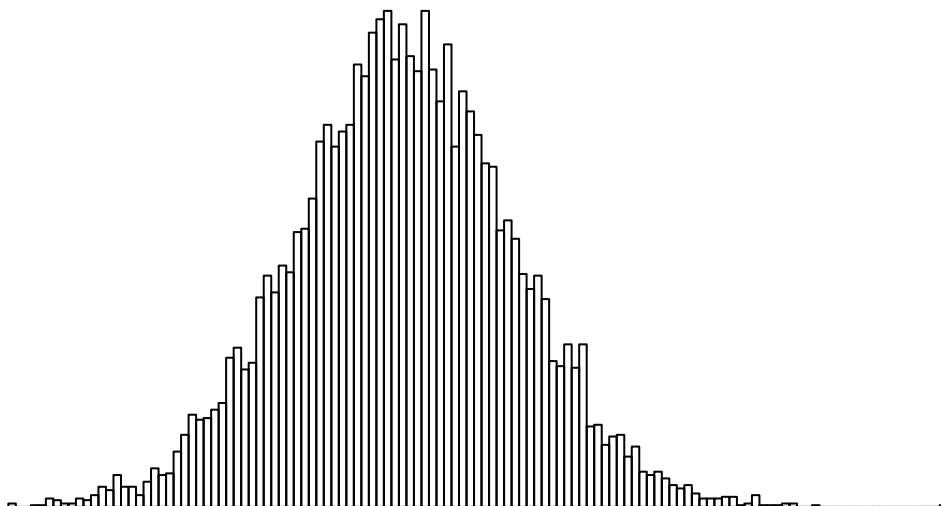

D206:18

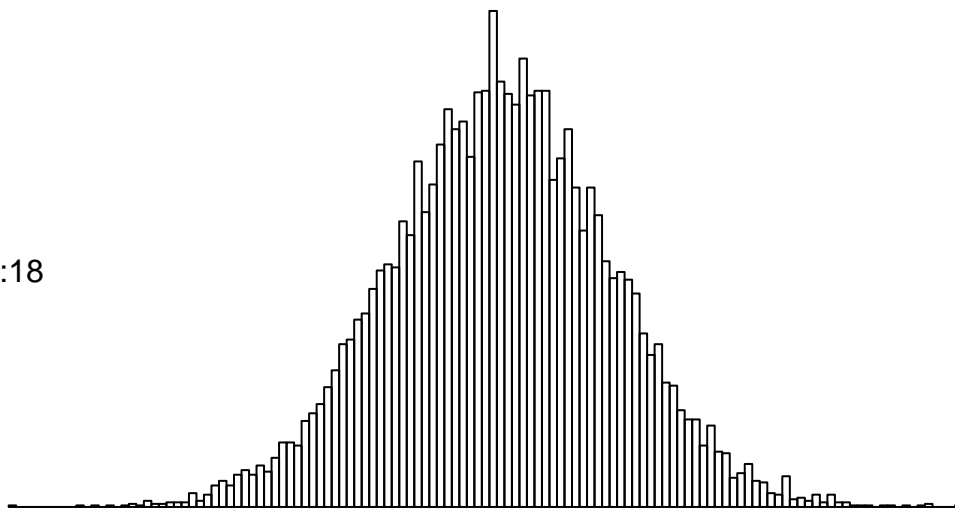

-8.5

-8.0

-7.5

-7.0

Unidentified Metabolite 43

D206:26 – D206:18

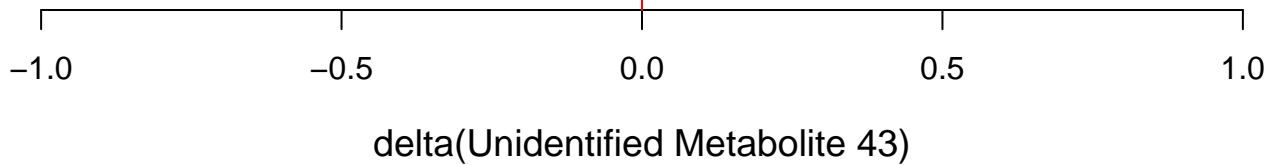

D206:26

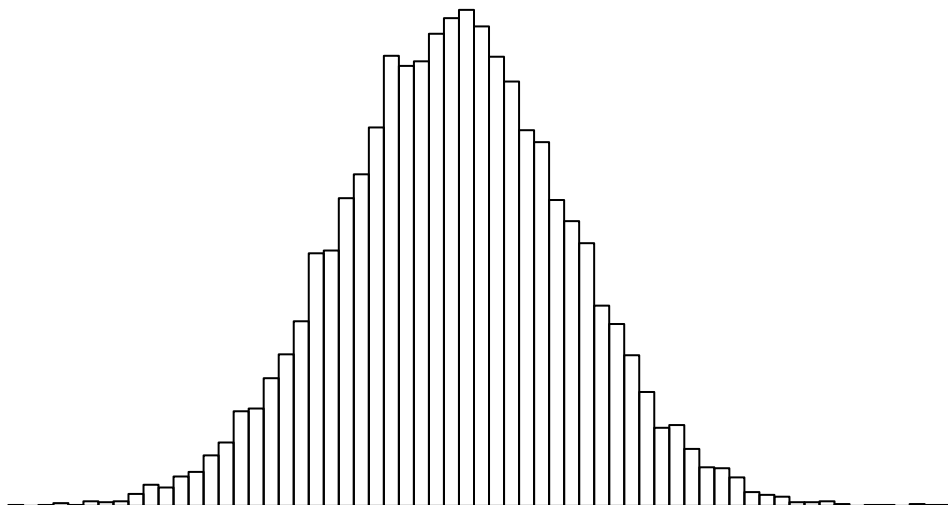

D206:18

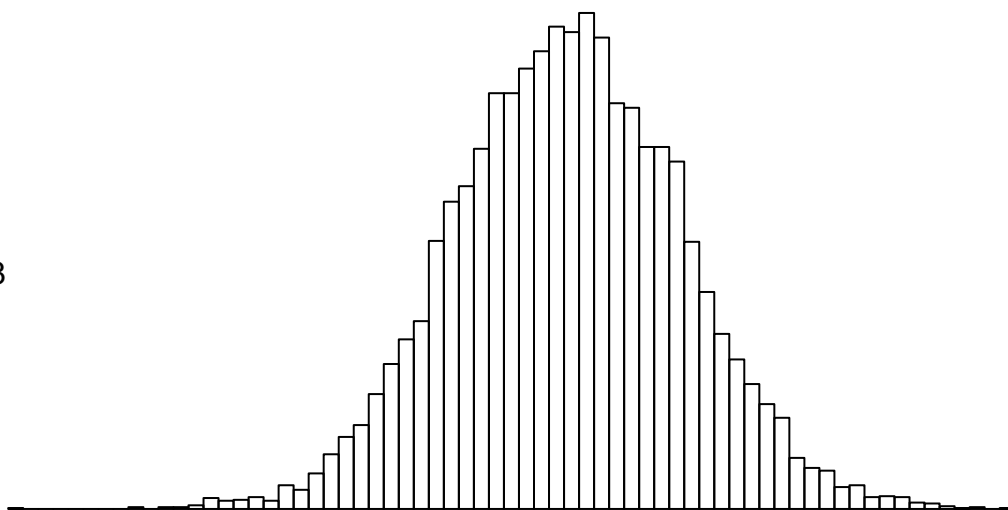

-9

-8

-7

-6

-5

Unidentified Metabolite 45

D206:26 – D206:18

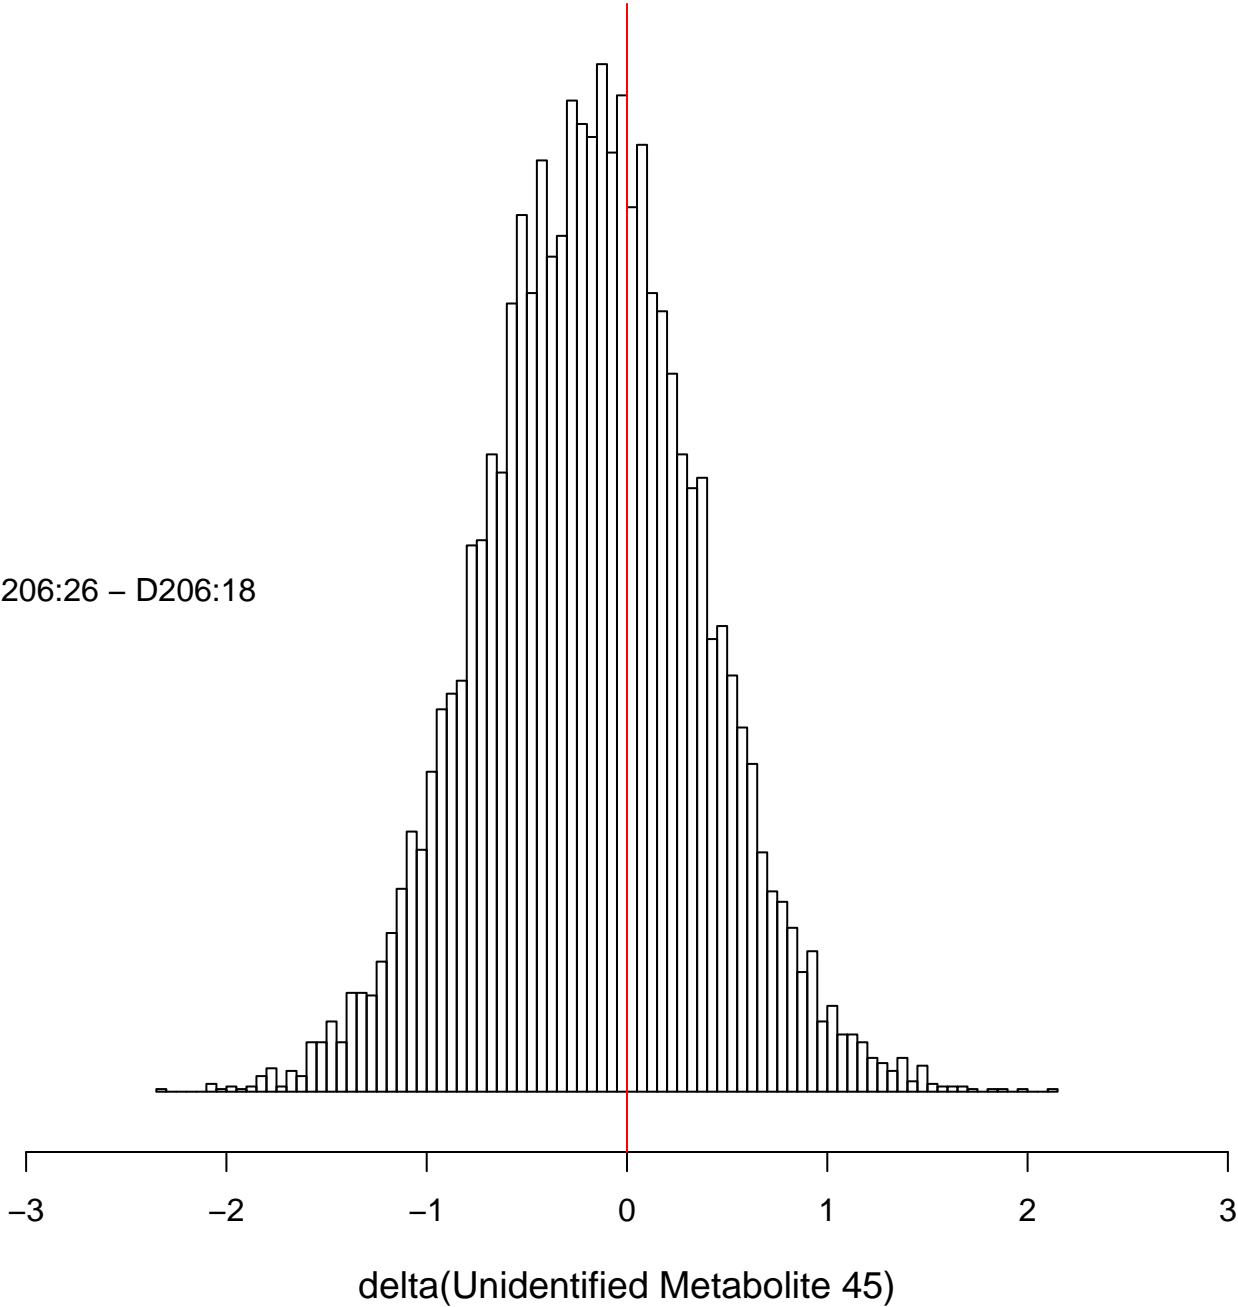

D206:26

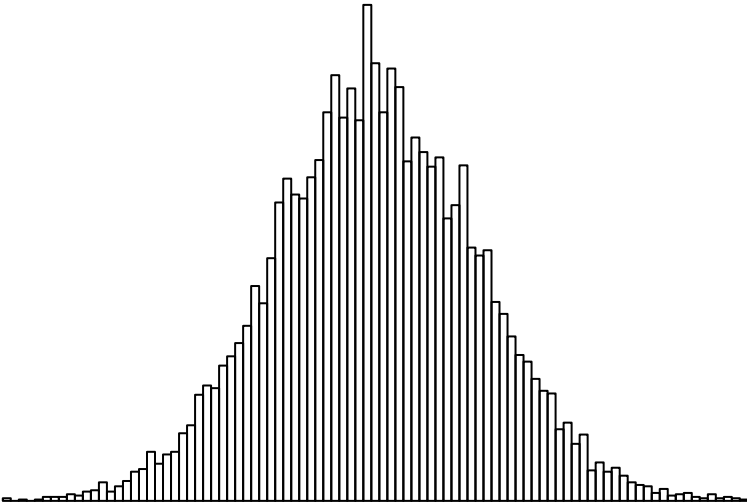

D206:18

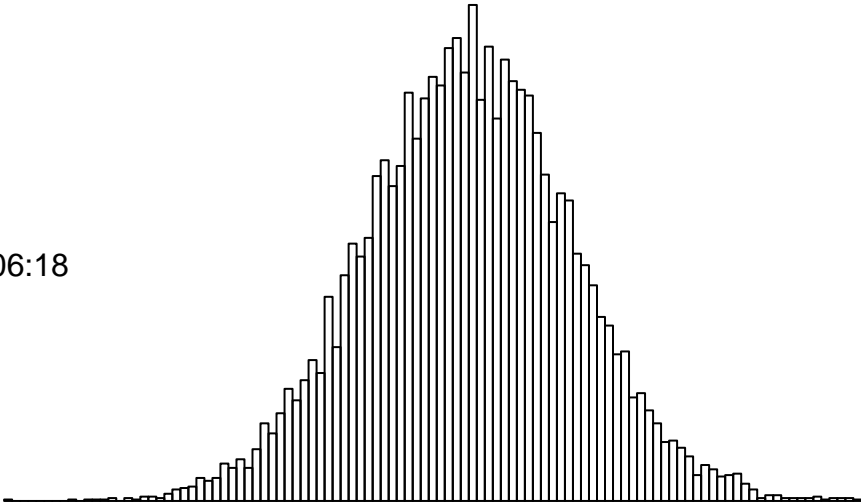

Unidentified Metabolite 47

D206:26 – D206:18

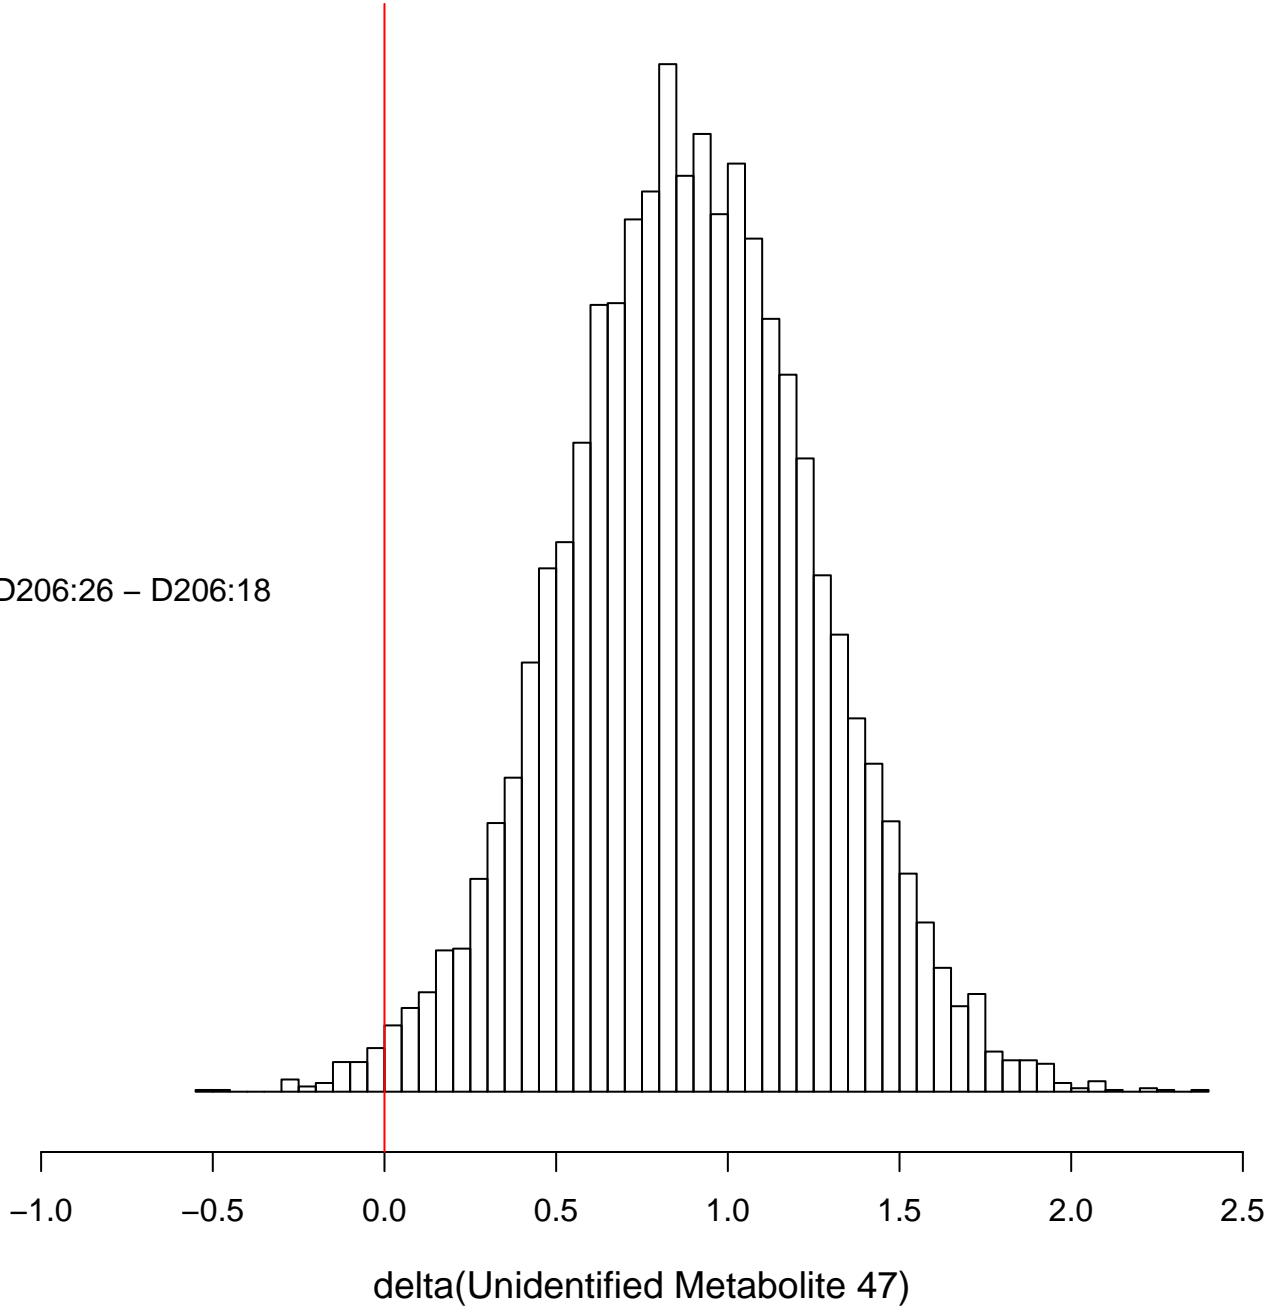



D206:26

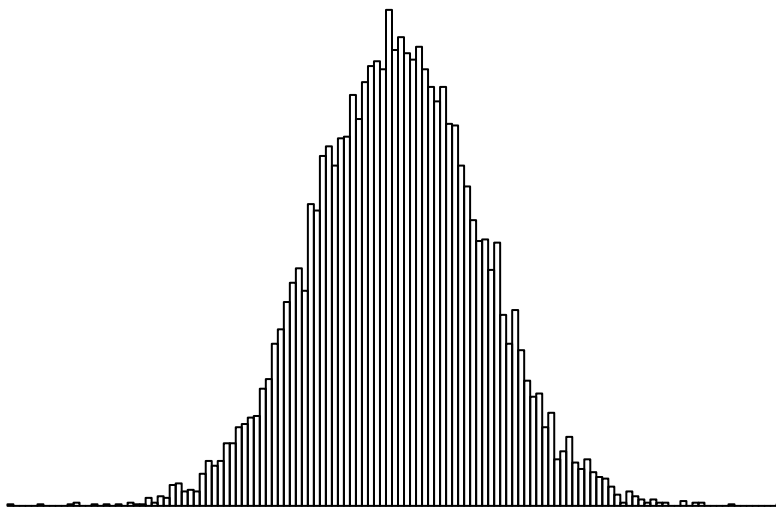

D206:18

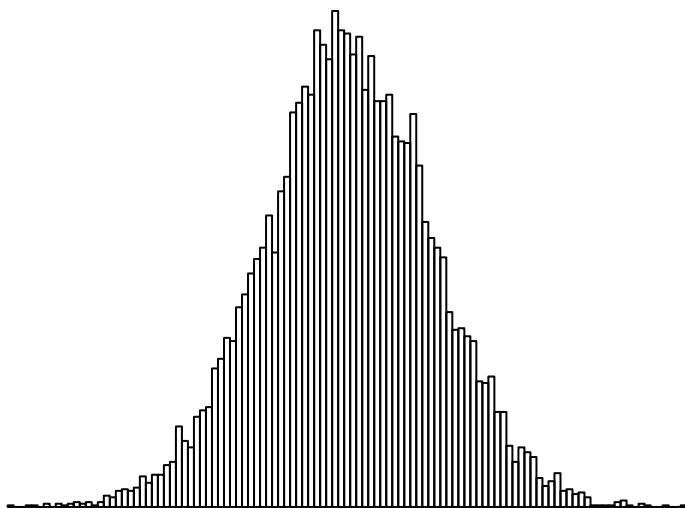

-8.5

-8.0

-7.5

-7.0

-6.5

Unidentified Metabolite 48

D206:26 – D206:18

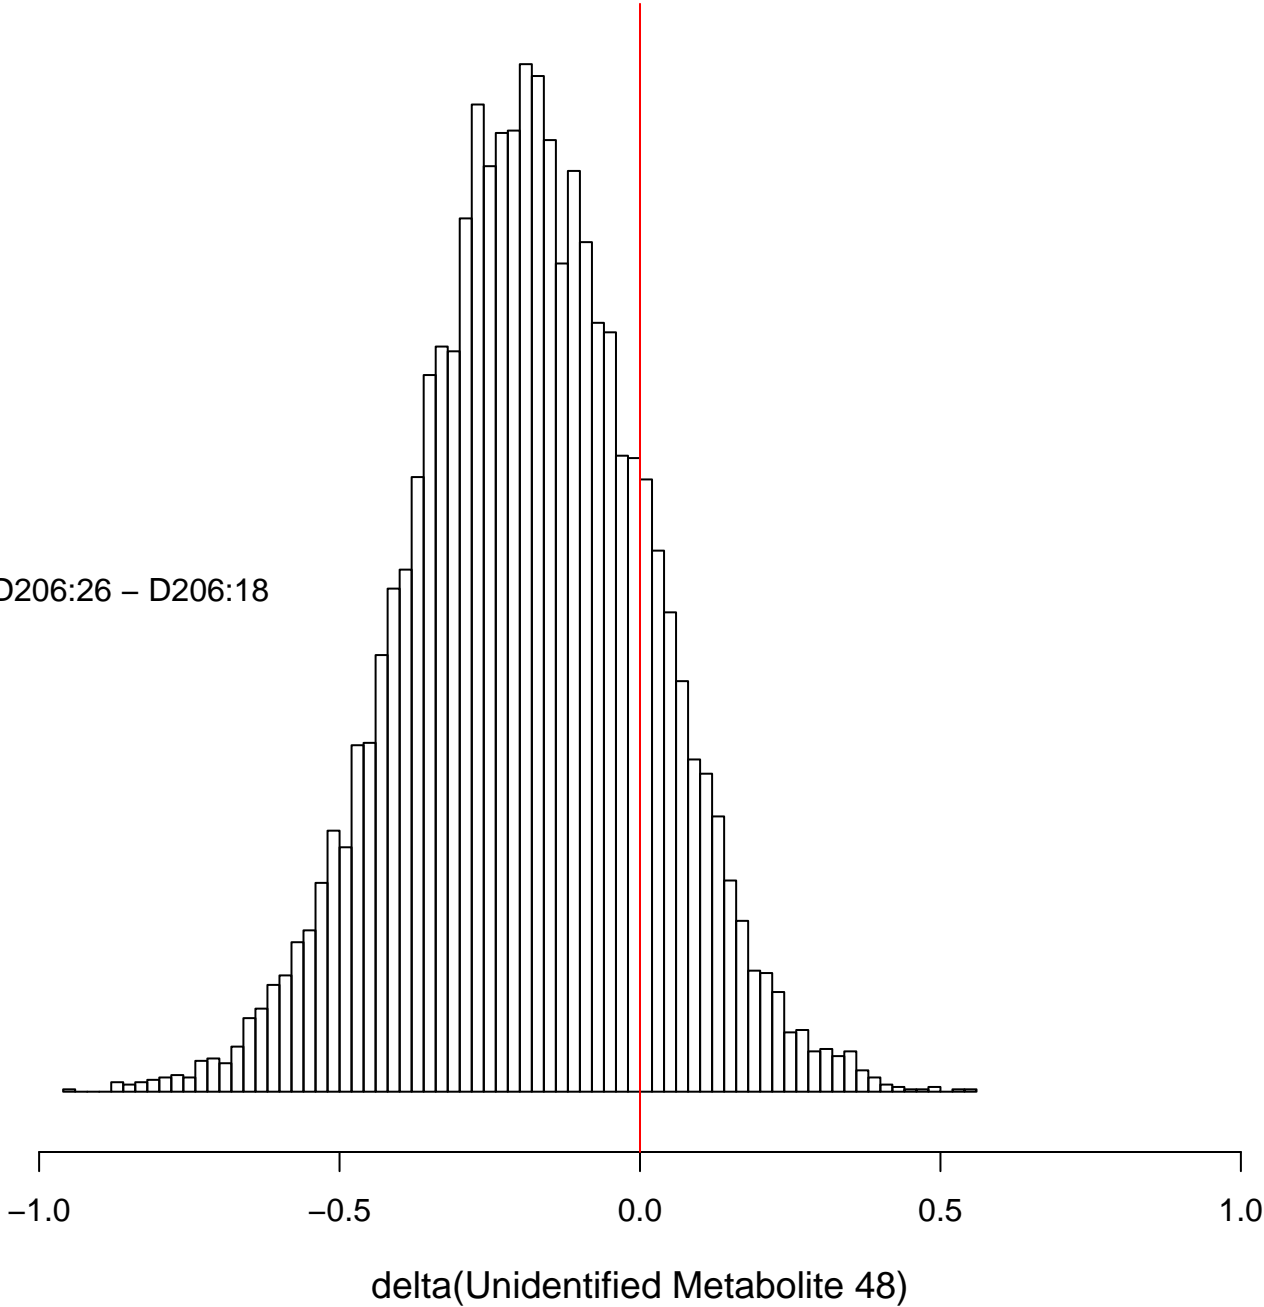

D206:26

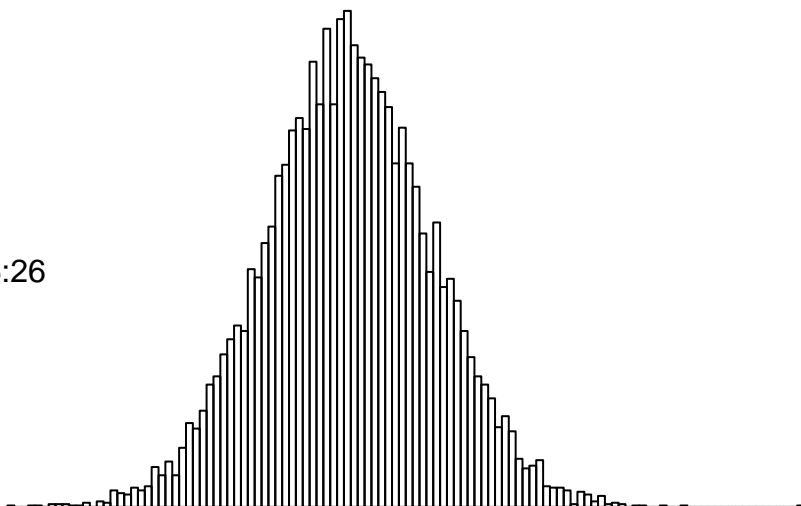

D206:18

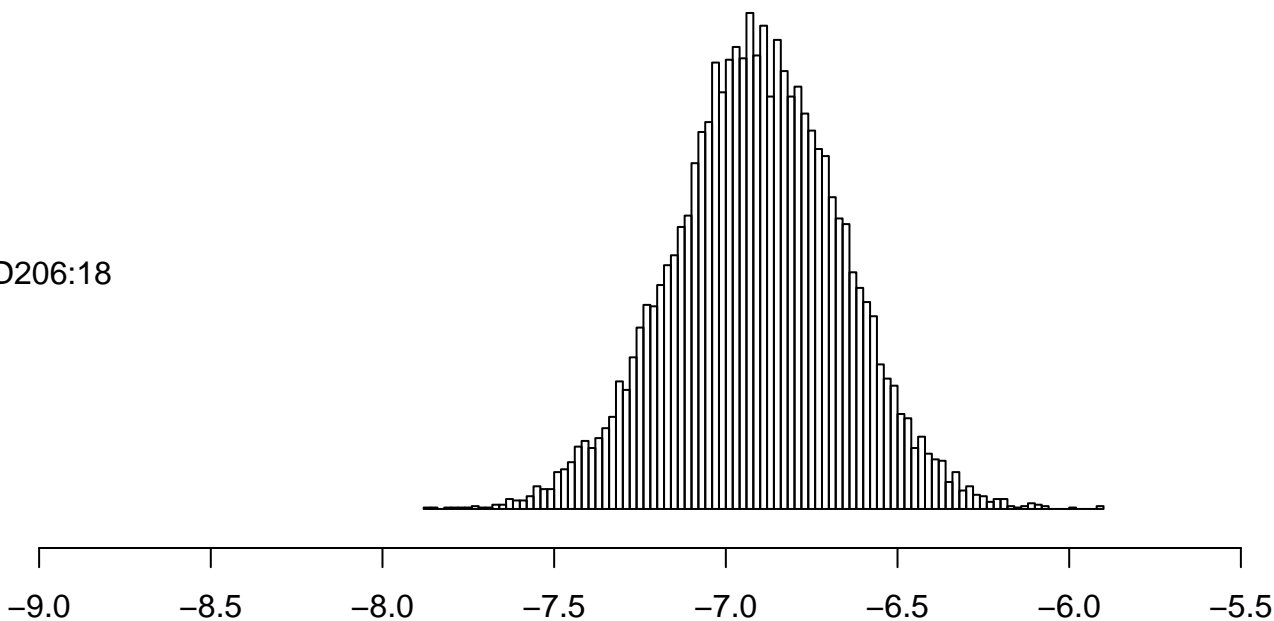

Unidentified Metabolite 49

D206:26 – D206:18

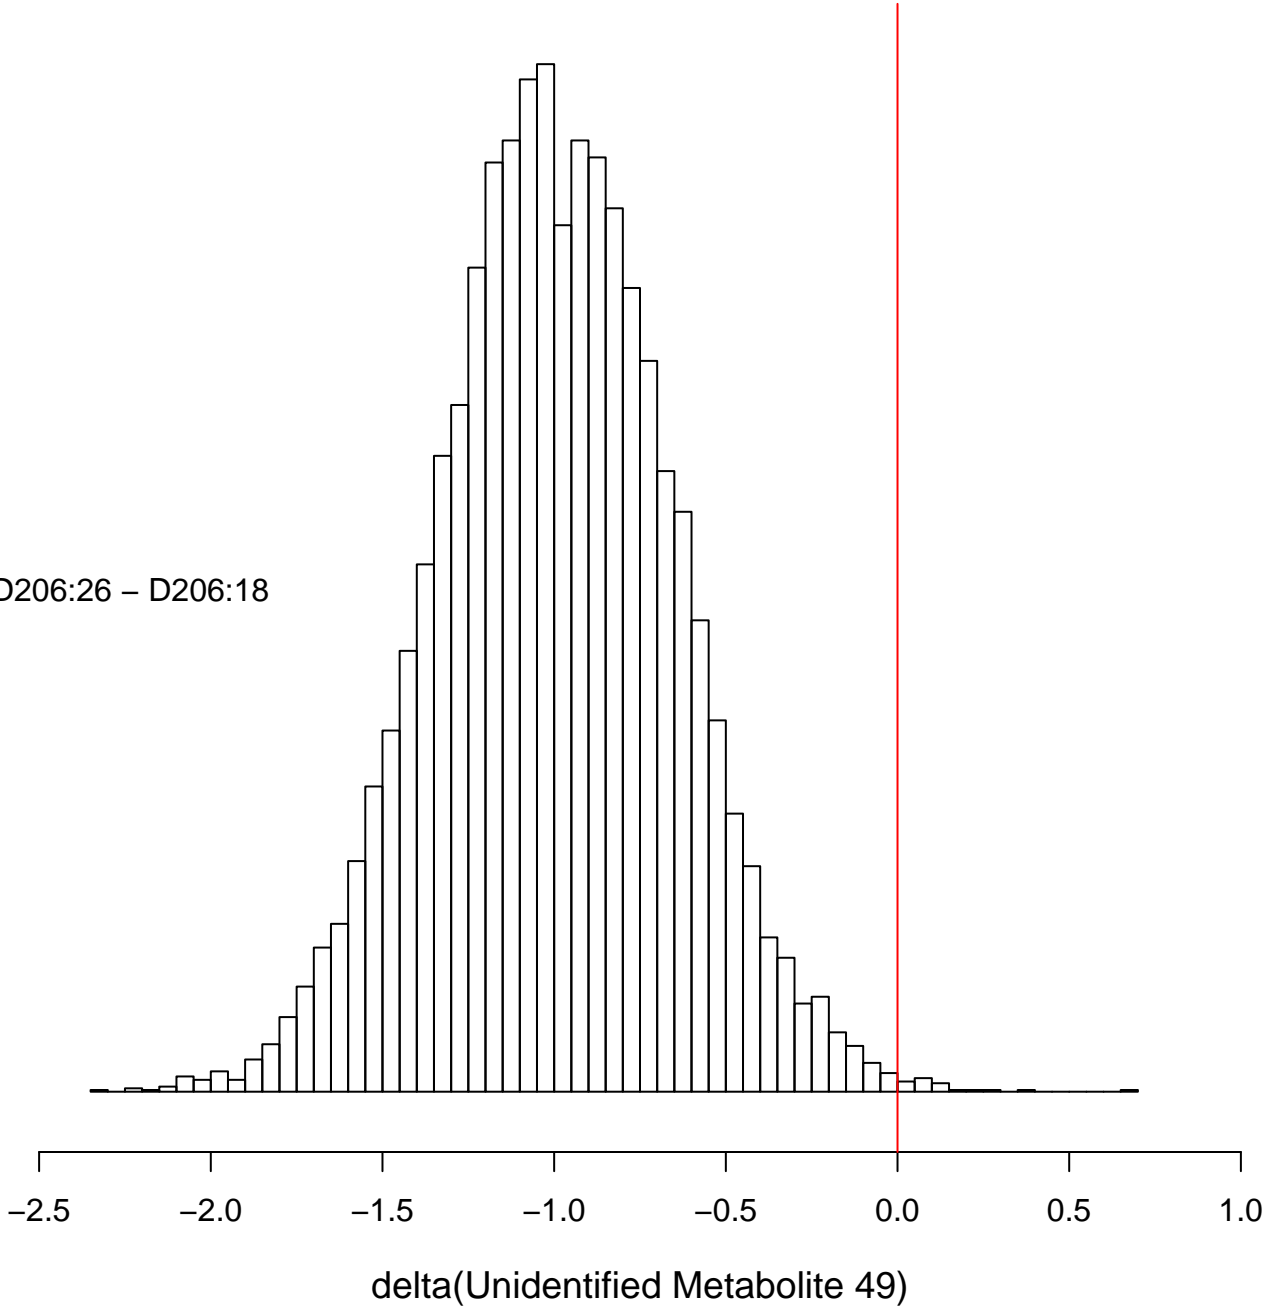

D206:26

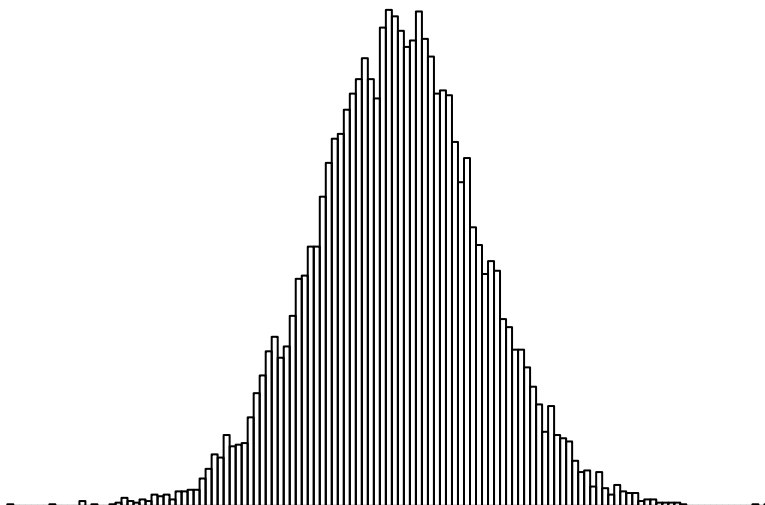

D206:18

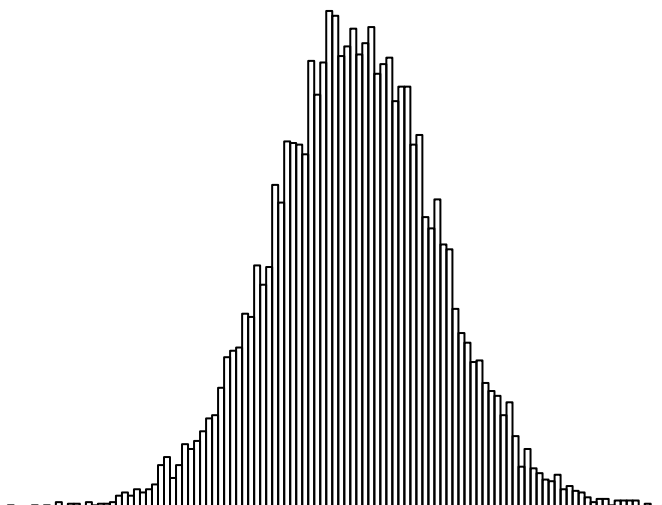

-9

-8

-7

-6

-5

Unidentified Metabolite 50

D206:26 – D206:18

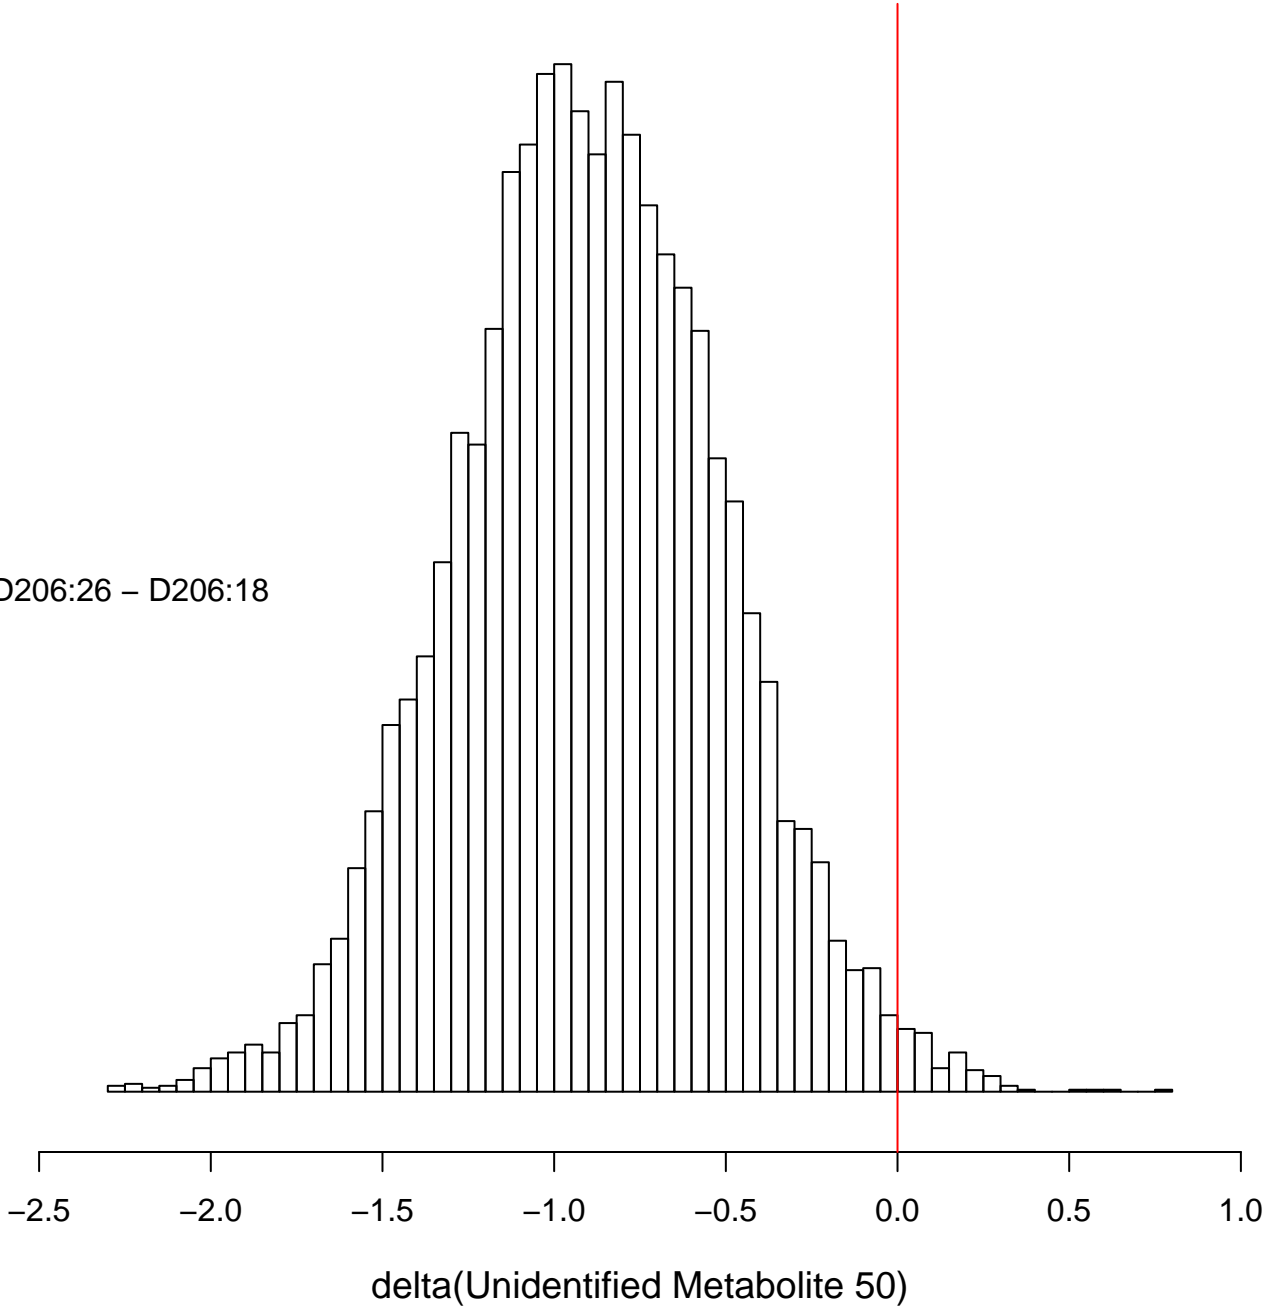

D206:26

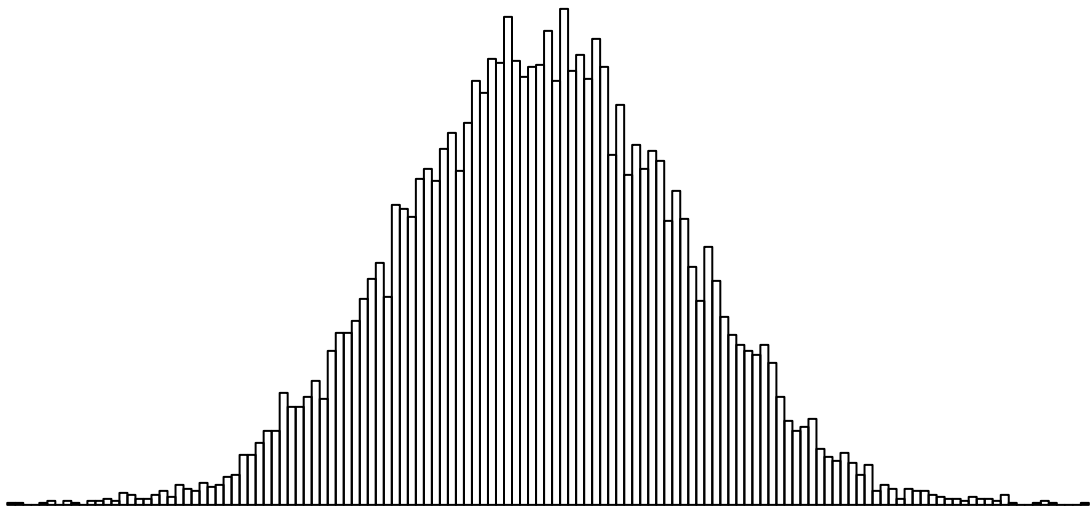

D206:18

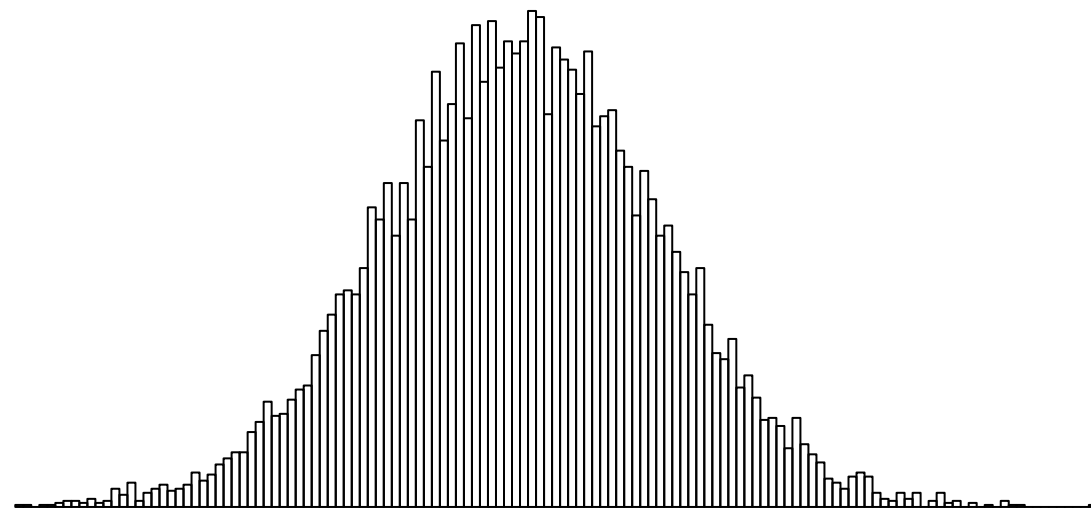

-8.0

-7.5

-7.0

-6.5

-6.0

-5.5

-5.0

Unidentified Metabolite 51

D206:26 – D206:18

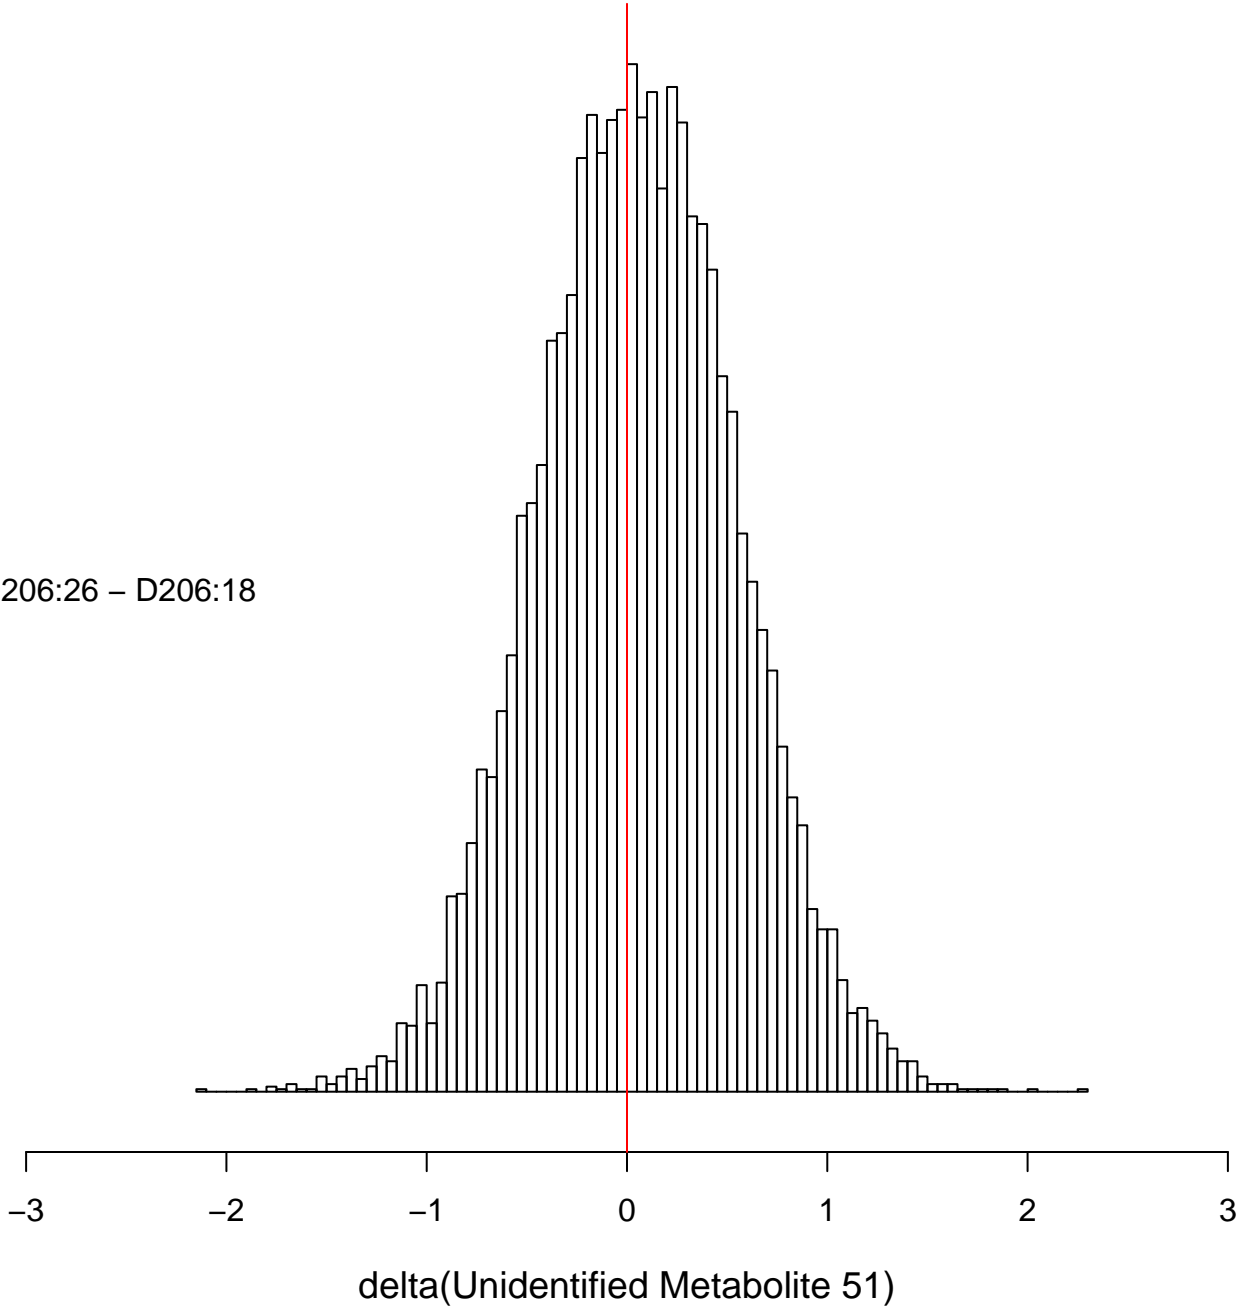



D206:26

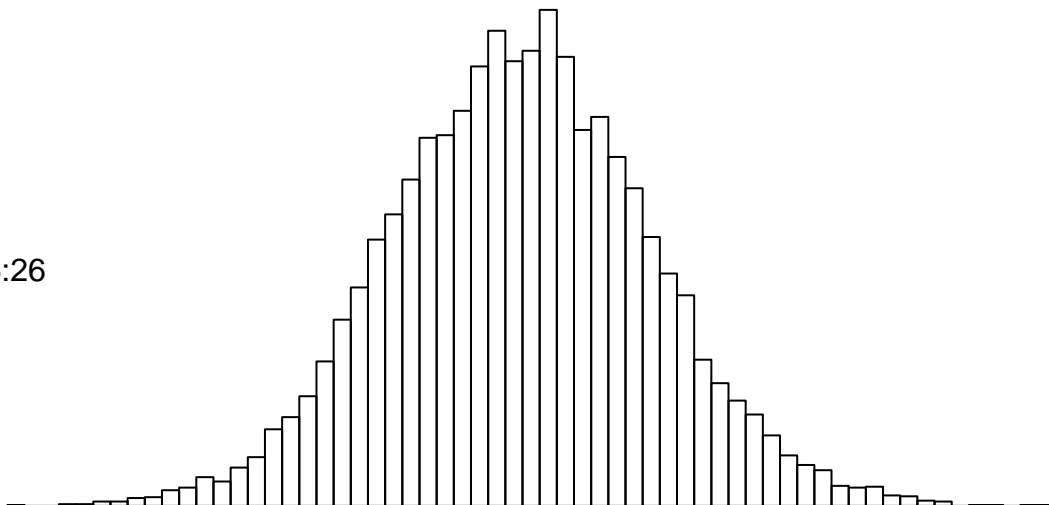

D206:18

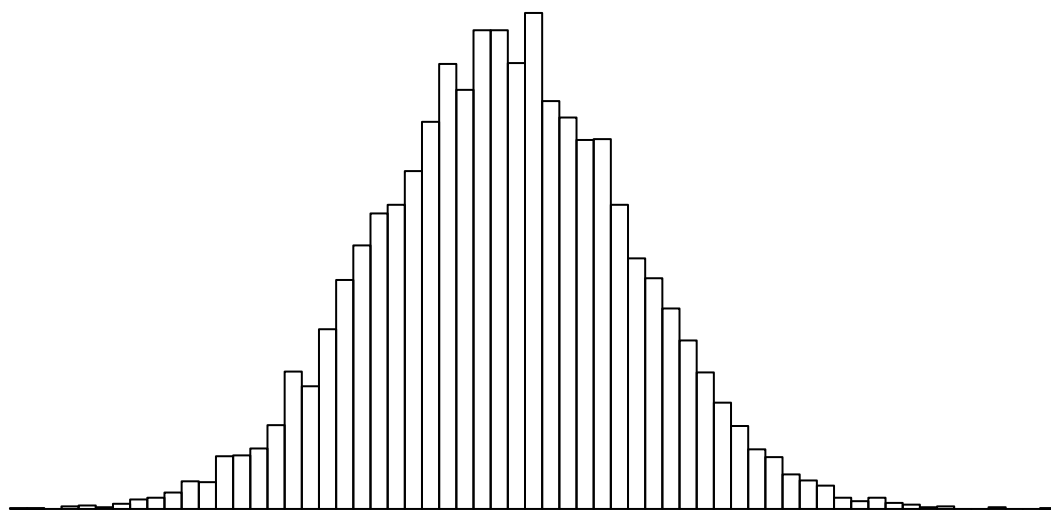

-5.5      -5.0      -4.5      -4.0      -3.5      -3.0      -2.5      -2.0

Unidentified Metabolite 55

D206:26 – D206:18

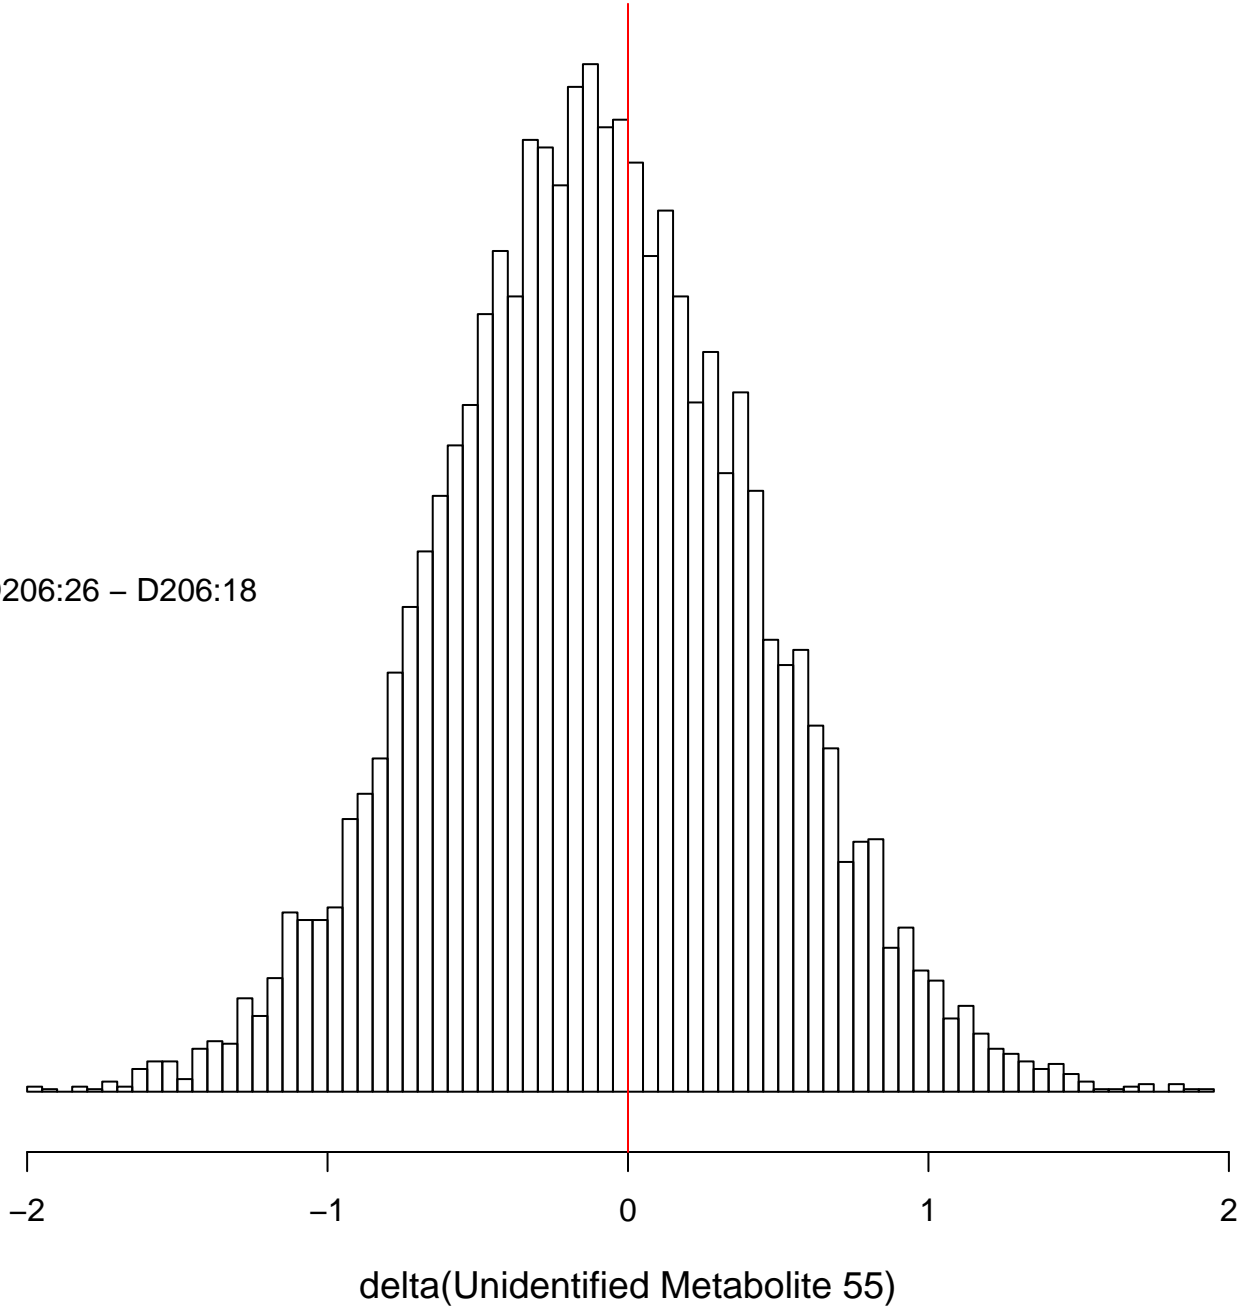

D206:26

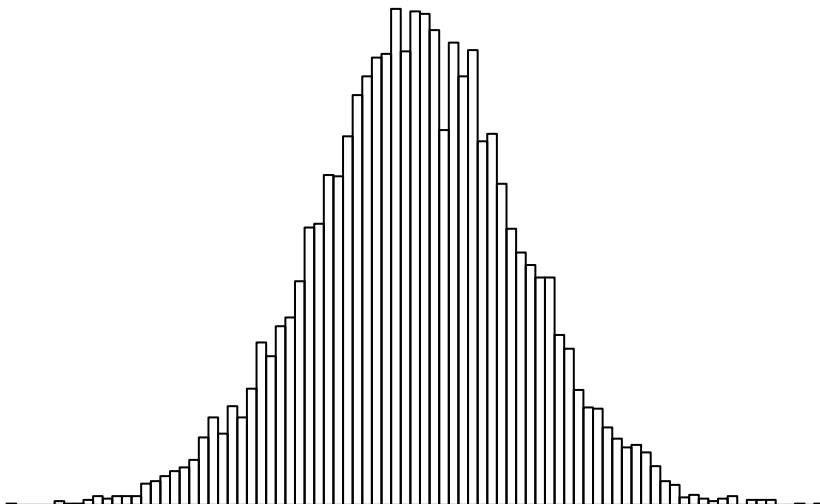

D206:18

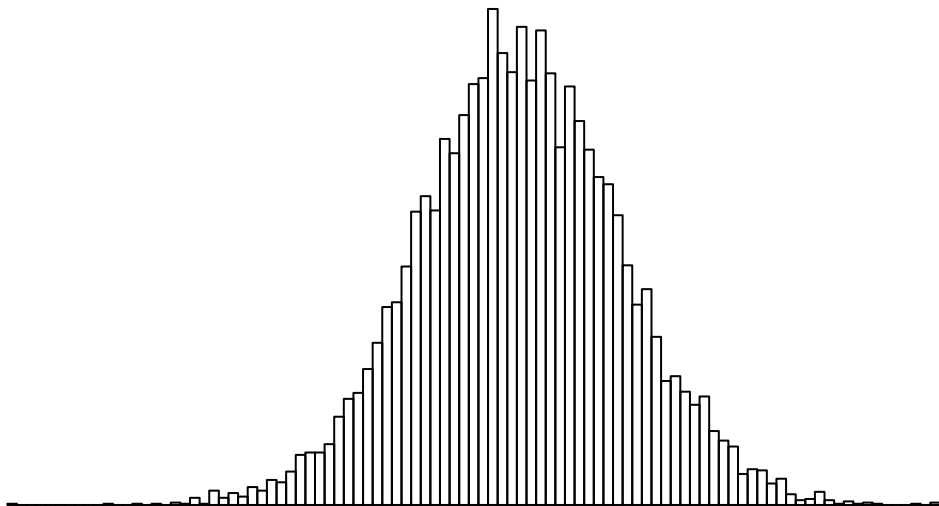

-9.0 -8.5 -8.0 -7.5 -7.0 -6.5

Unidentified Metabolite 56

D206:26 – D206:18

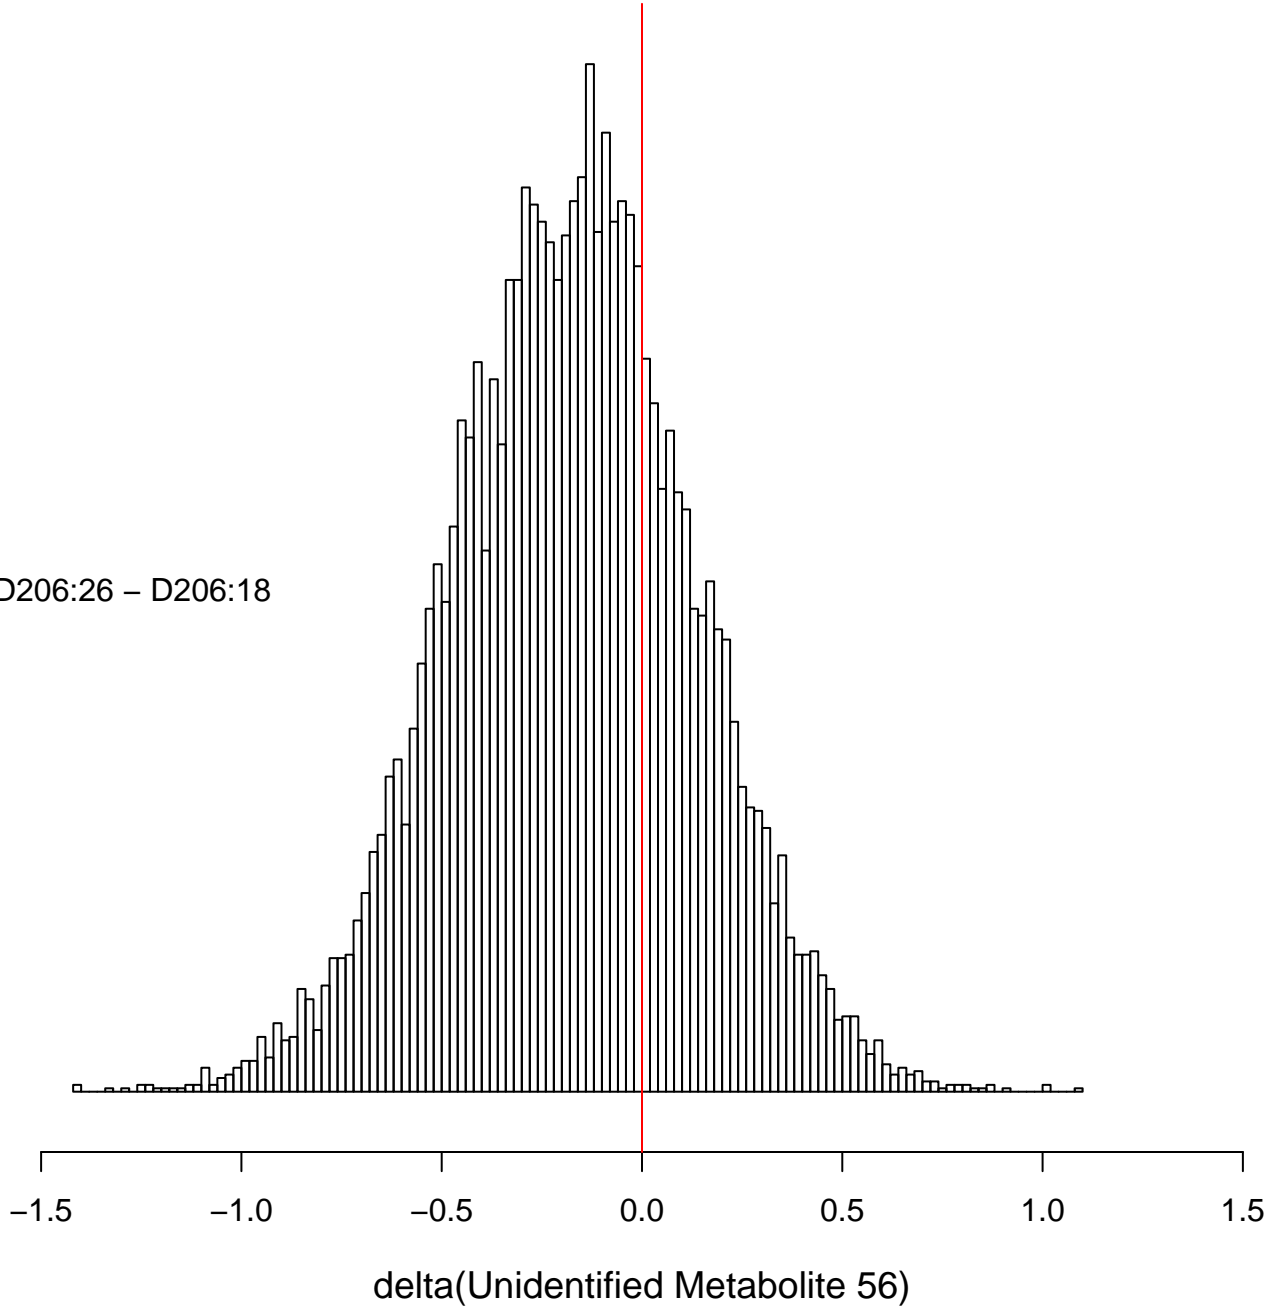

D206:26

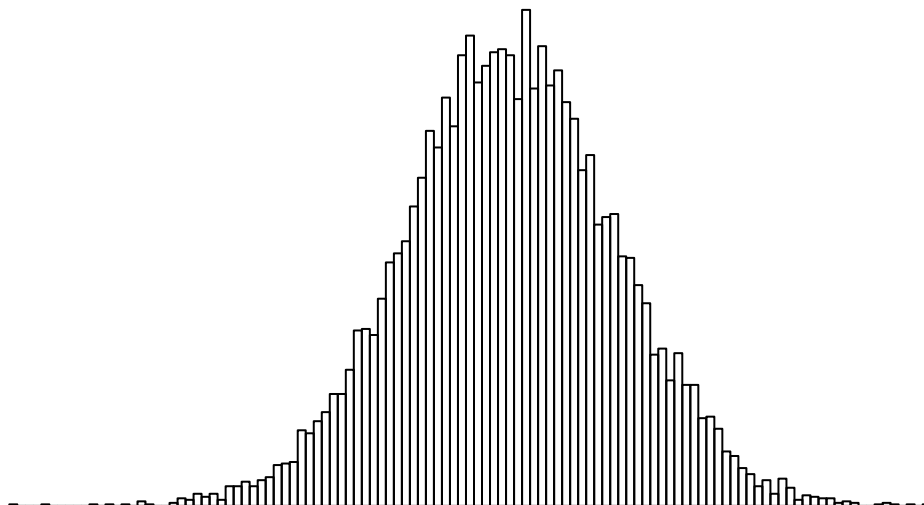

D206:18

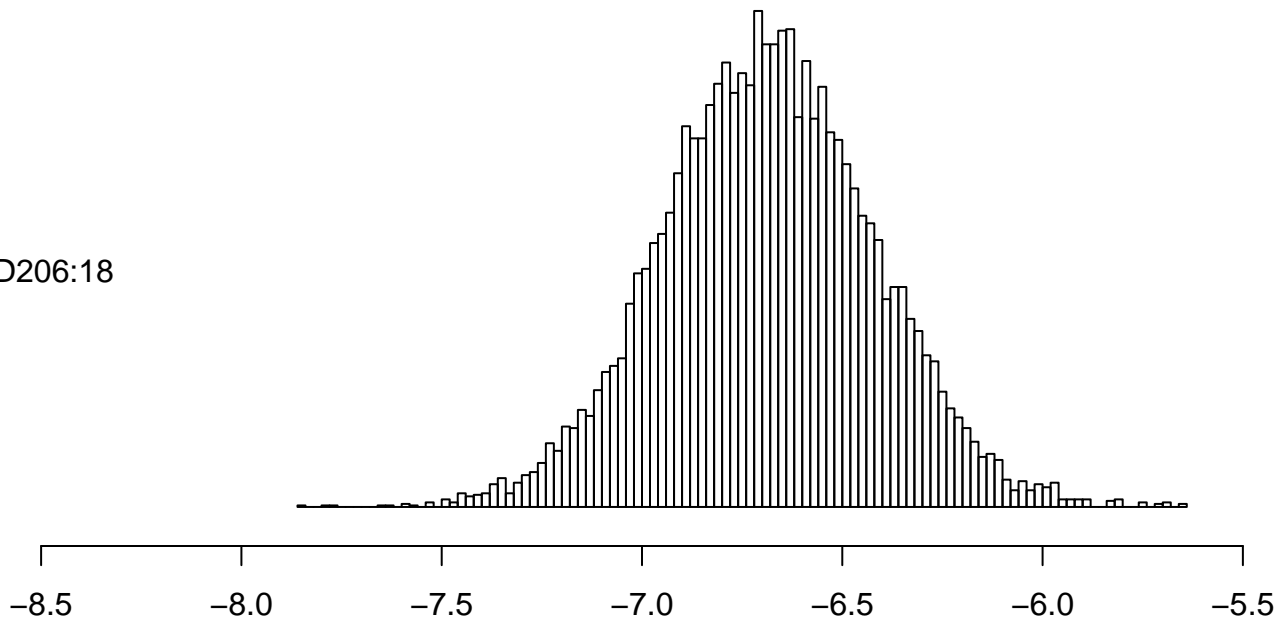

Unidentified Metabolite 58

D206:26 – D206:18

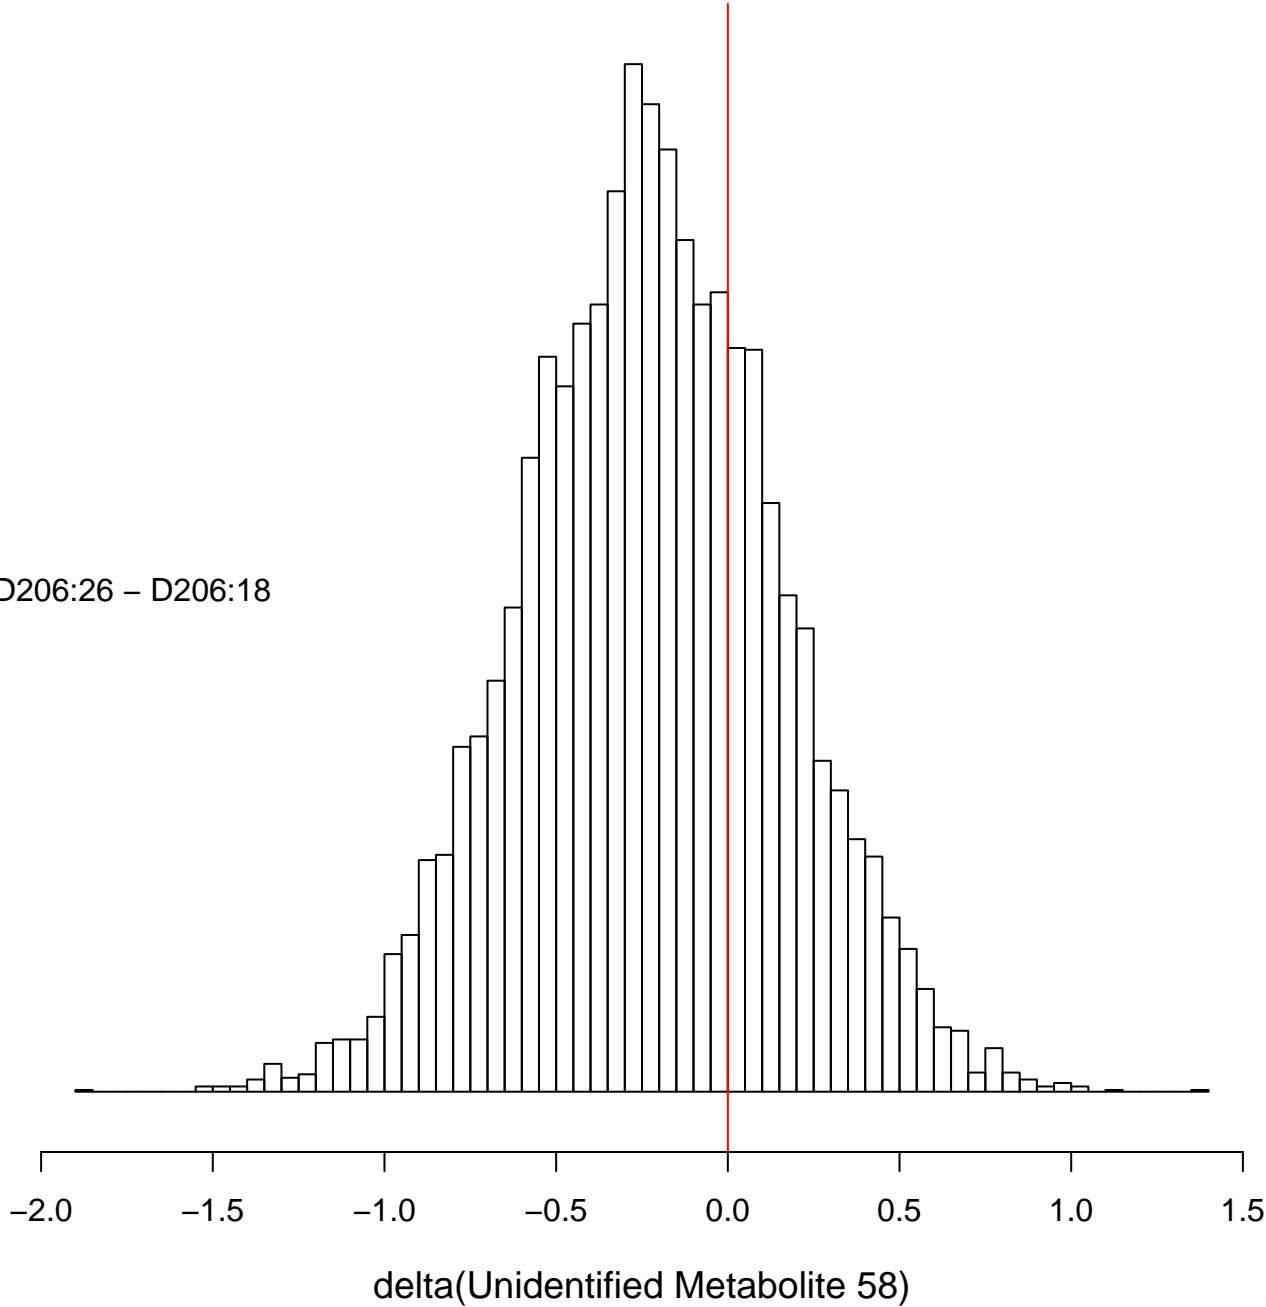

D206:26

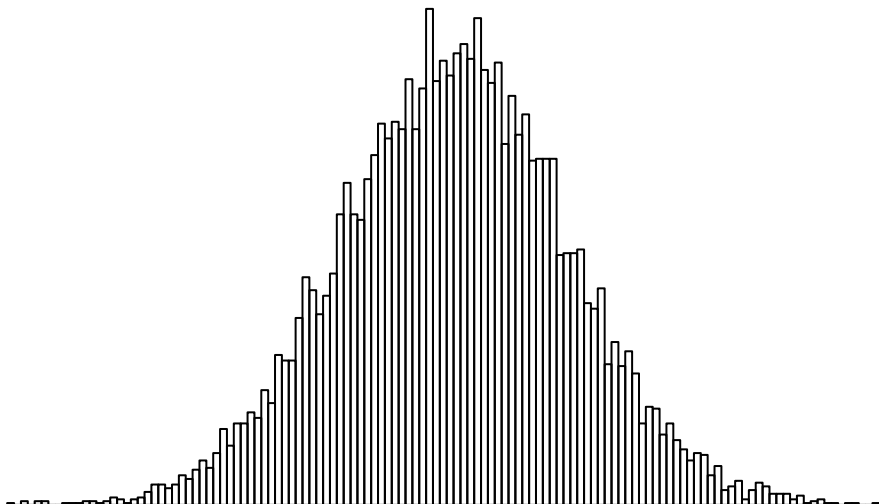

D206:18

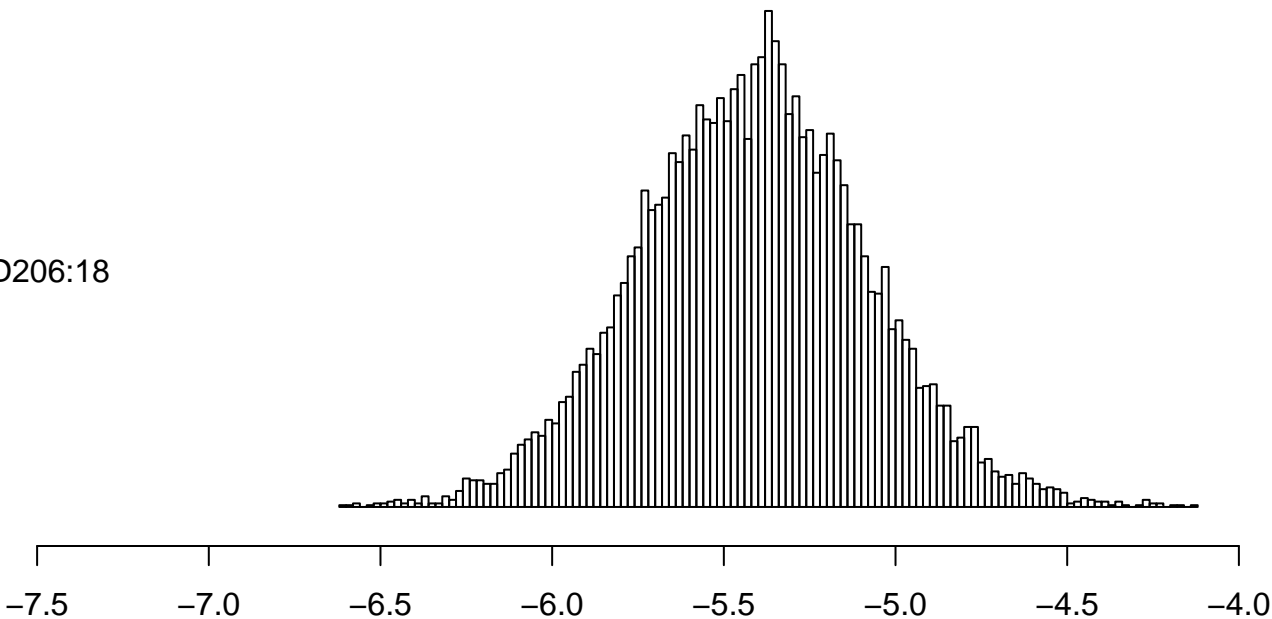

Unidentified Metabolite 59

D206:26 – D206:18

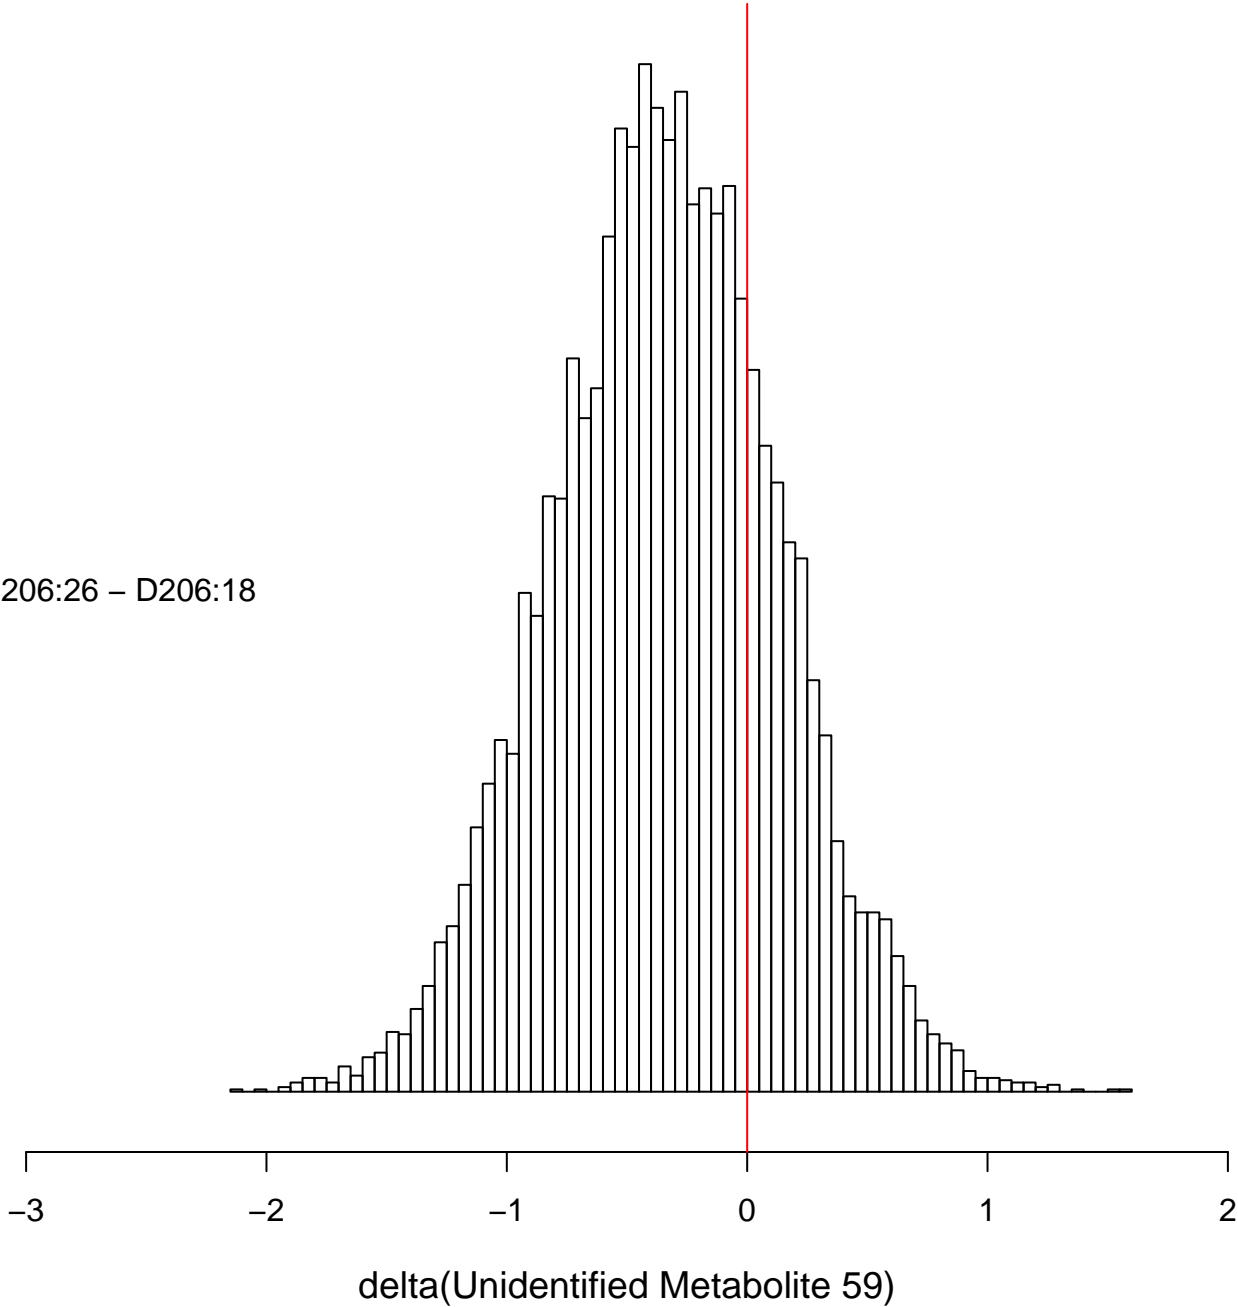



D206:26

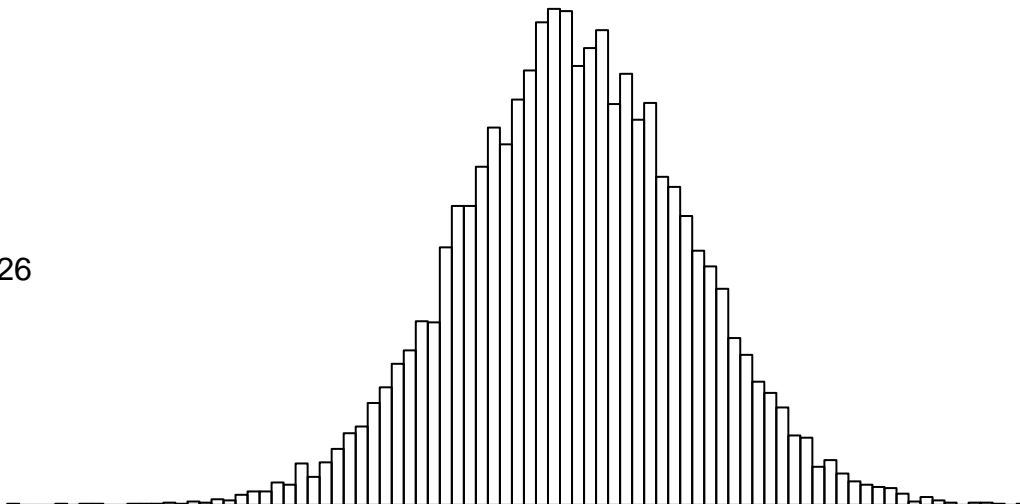

D206:18

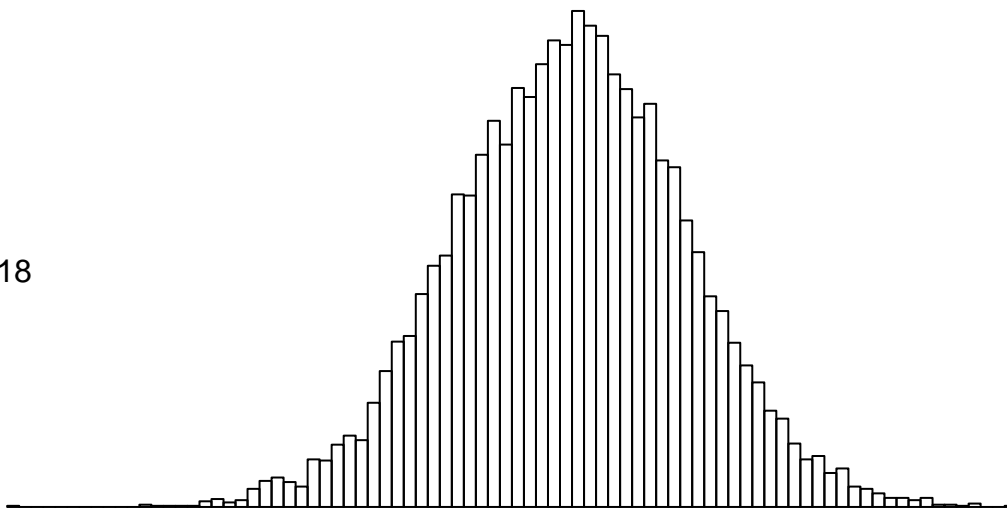

-8.5

-8.0

-7.5

-7.0

-6.5

Unidentified Metabolite 60

D206:26 – D206:18

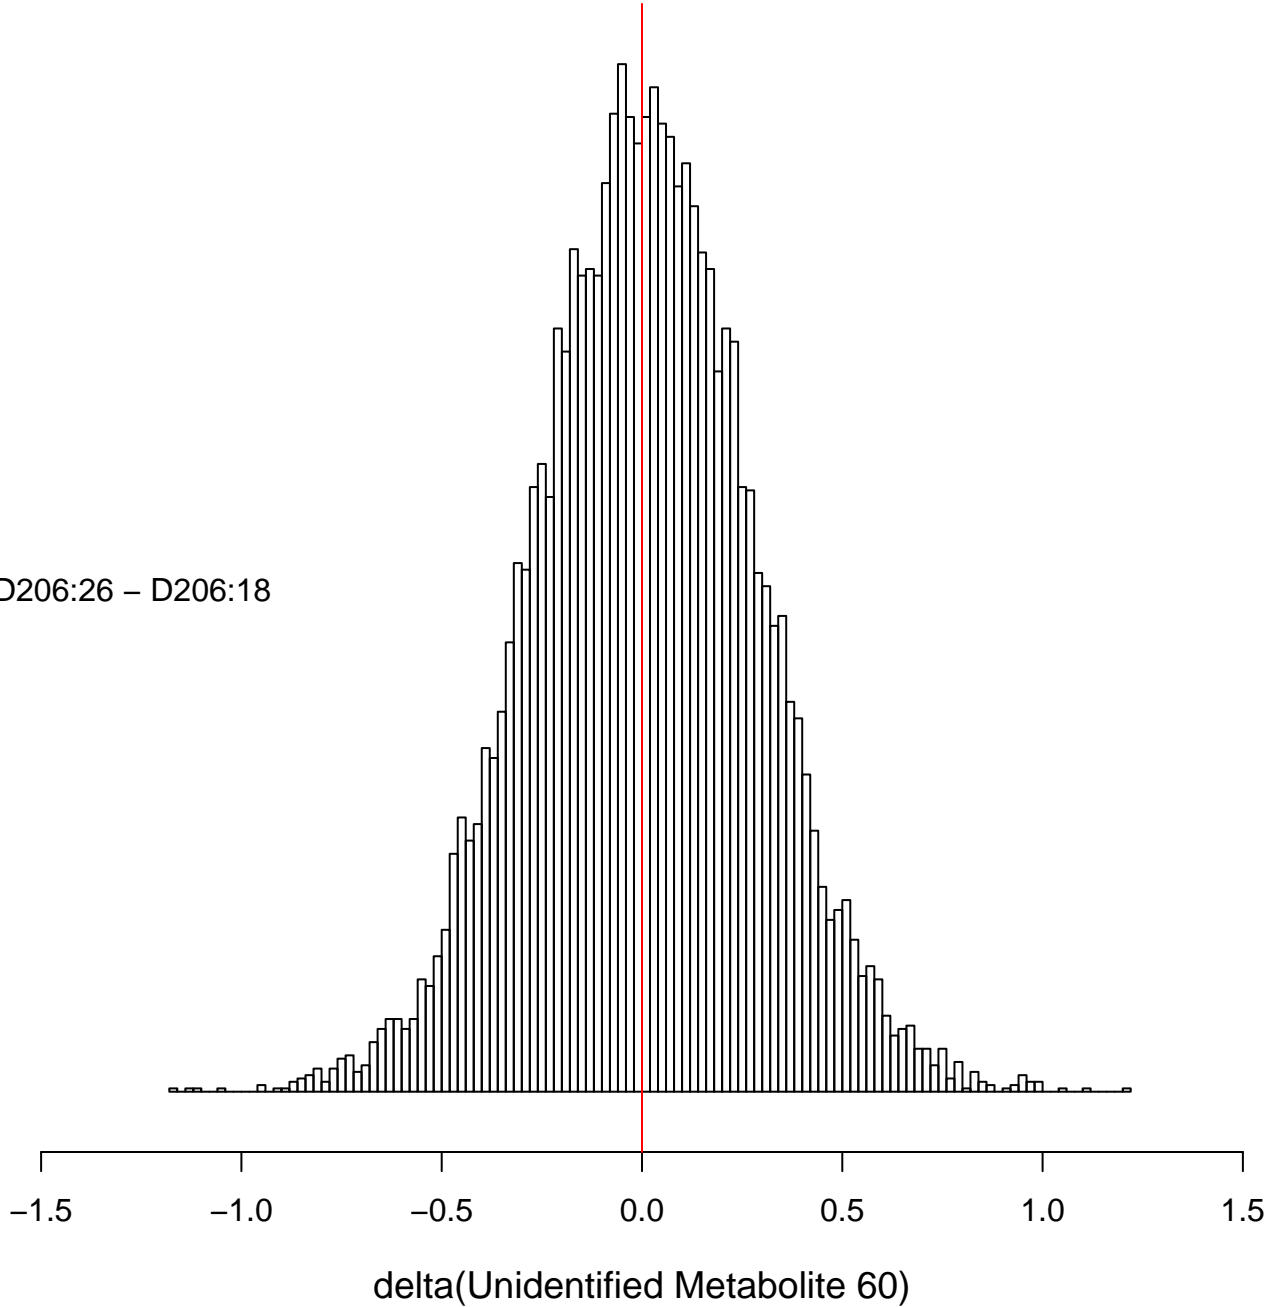

D206:26

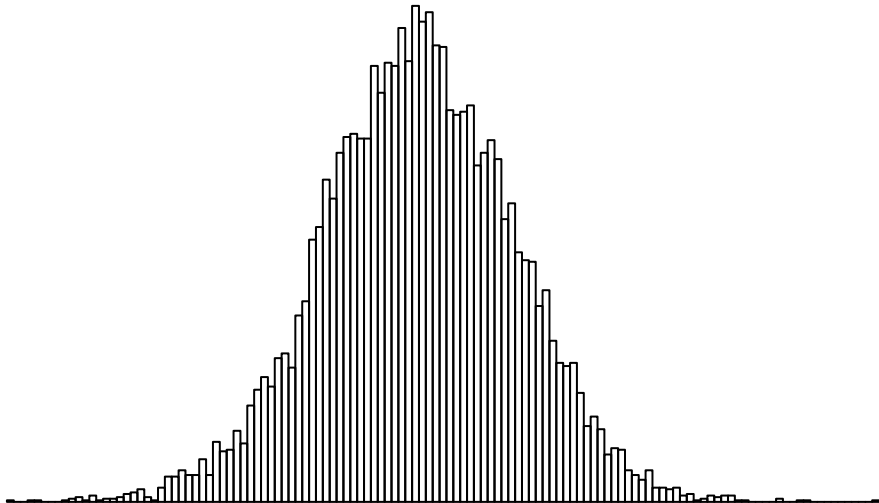

D206:18

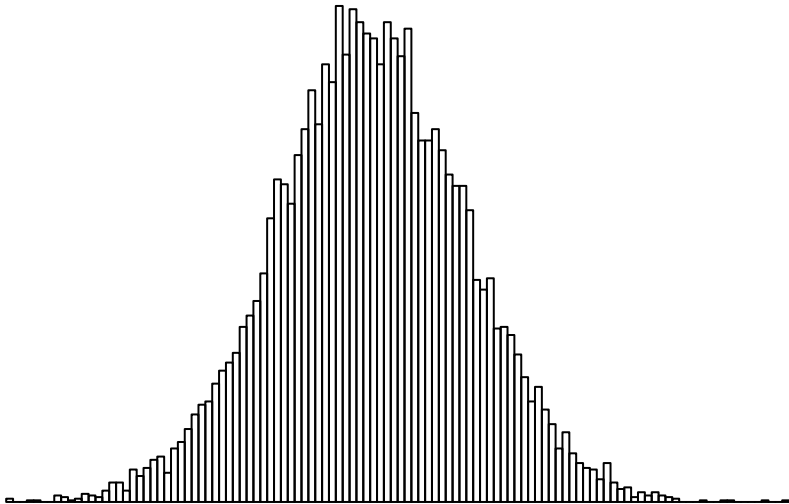

-9.0      -8.5      -8.0      -7.5      -7.0      -6.5      -6.0      -5.5

Unidentified Metabolite 61

D206:26 – D206:18

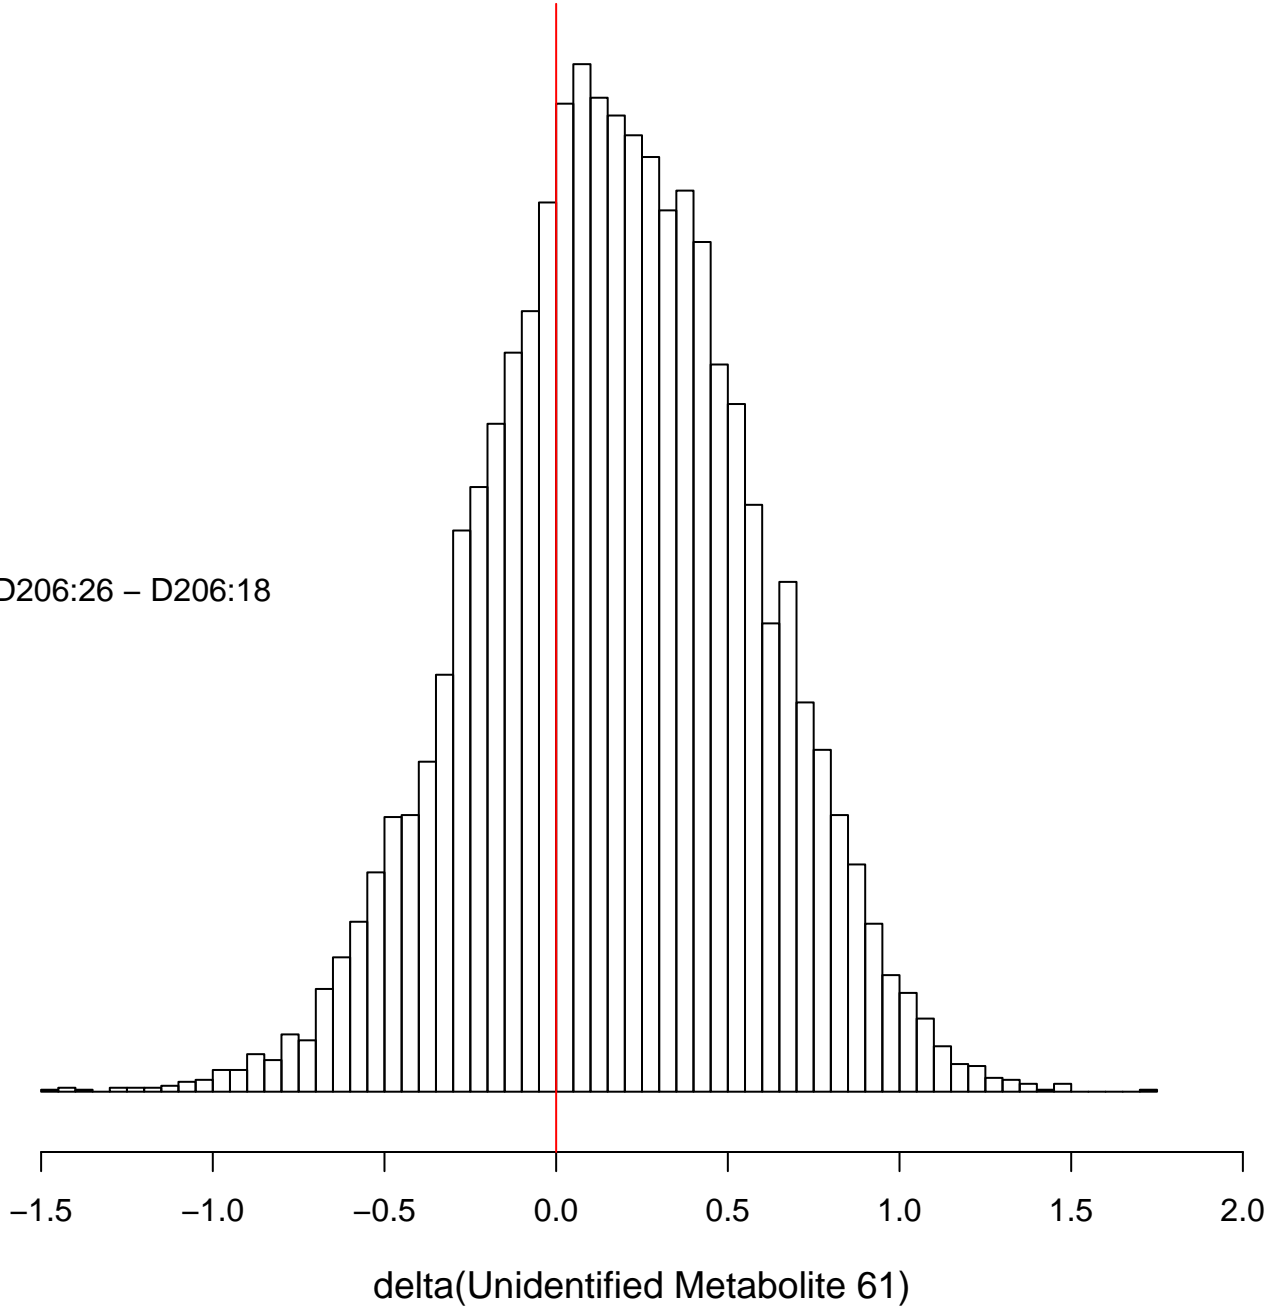

D206:26

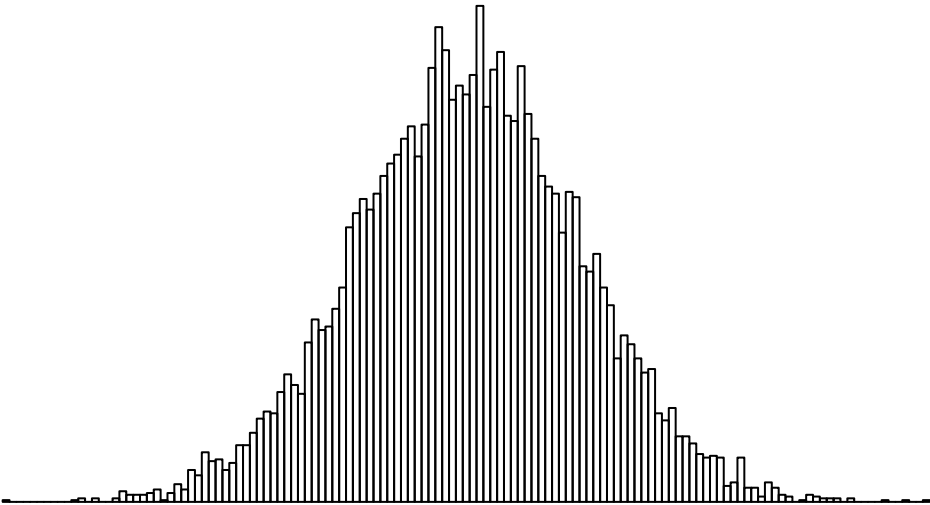

D206:18

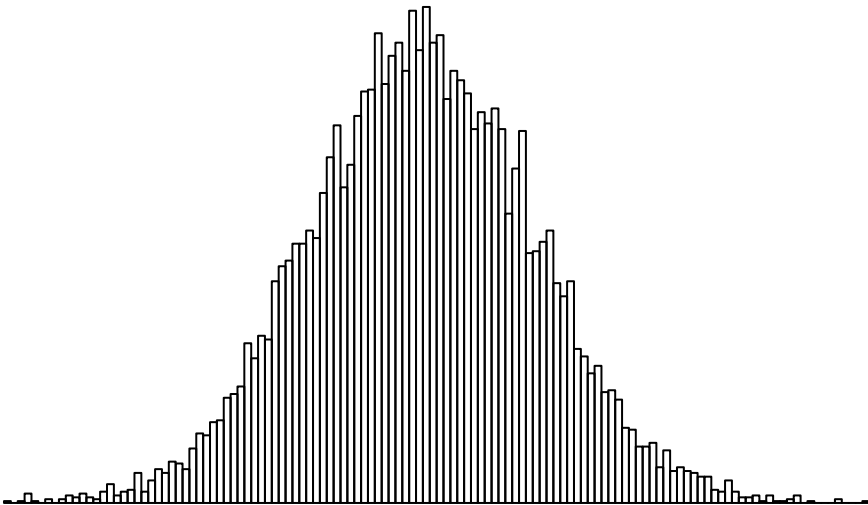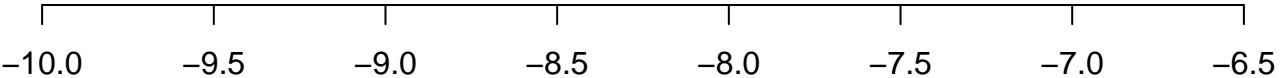

Unidentified Metabolite 62

D206:26 – D206:18

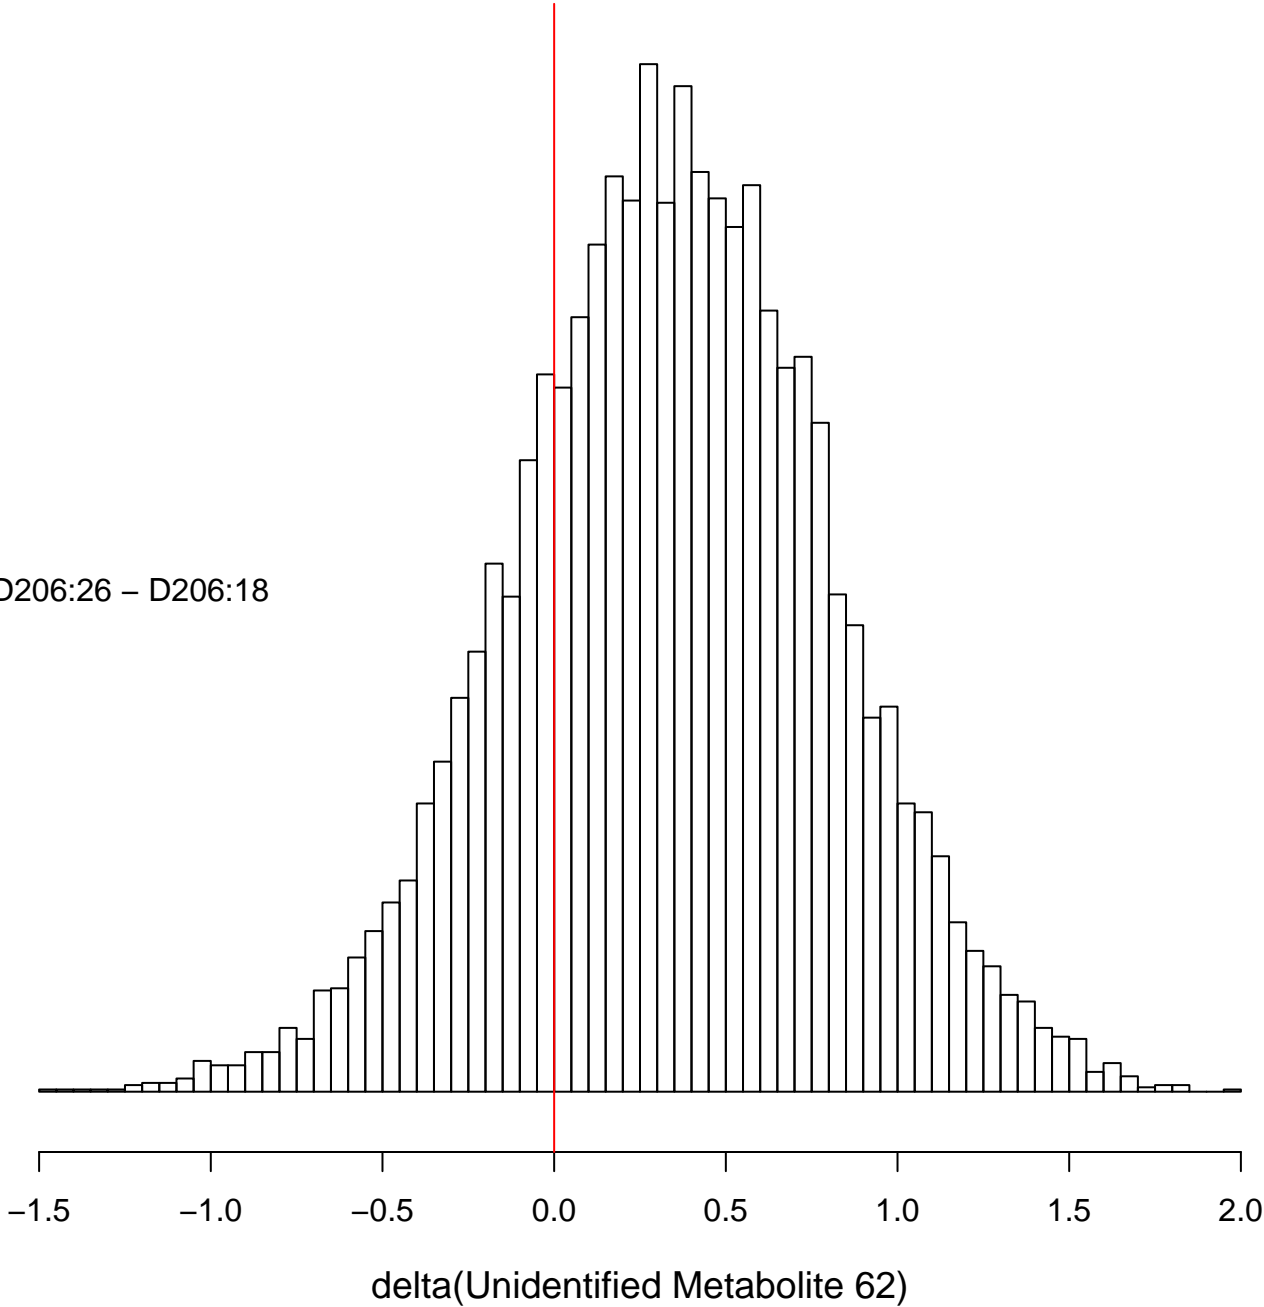

D206:26

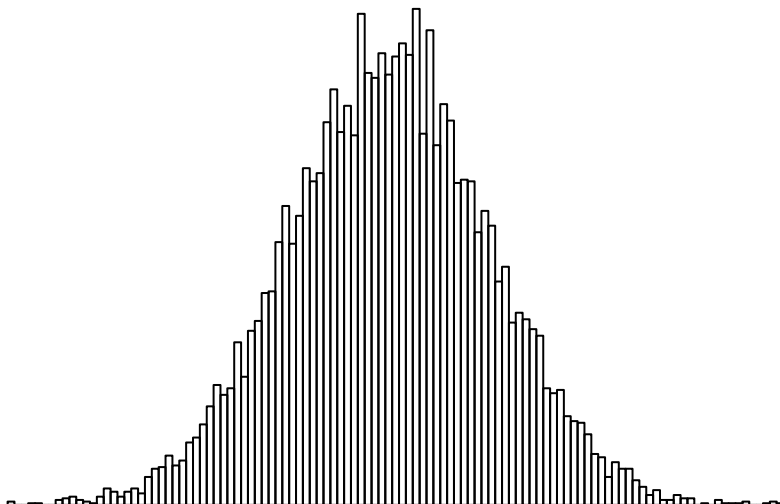

D206:18

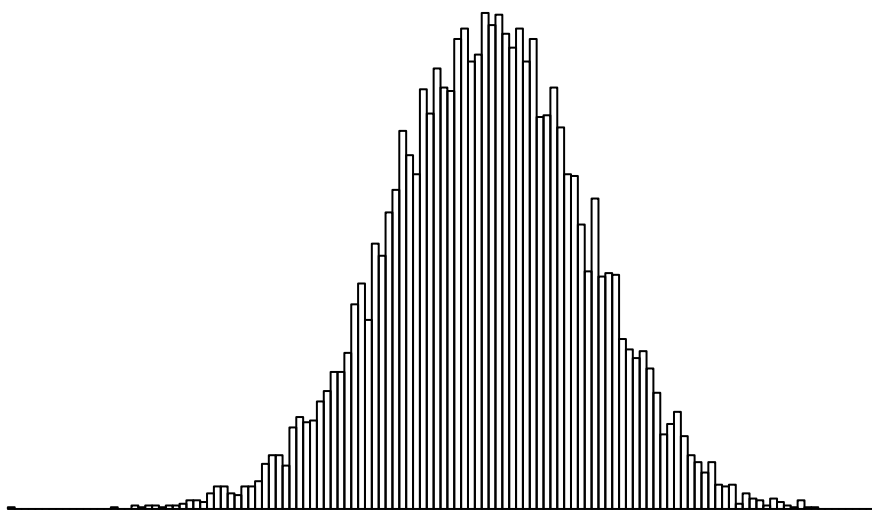

-7.5      -7.0      -6.5      -6.0      -5.5      -5.0      -4.5      -4.0

Unidentified Metabolite 63

D206:26 – D206:18

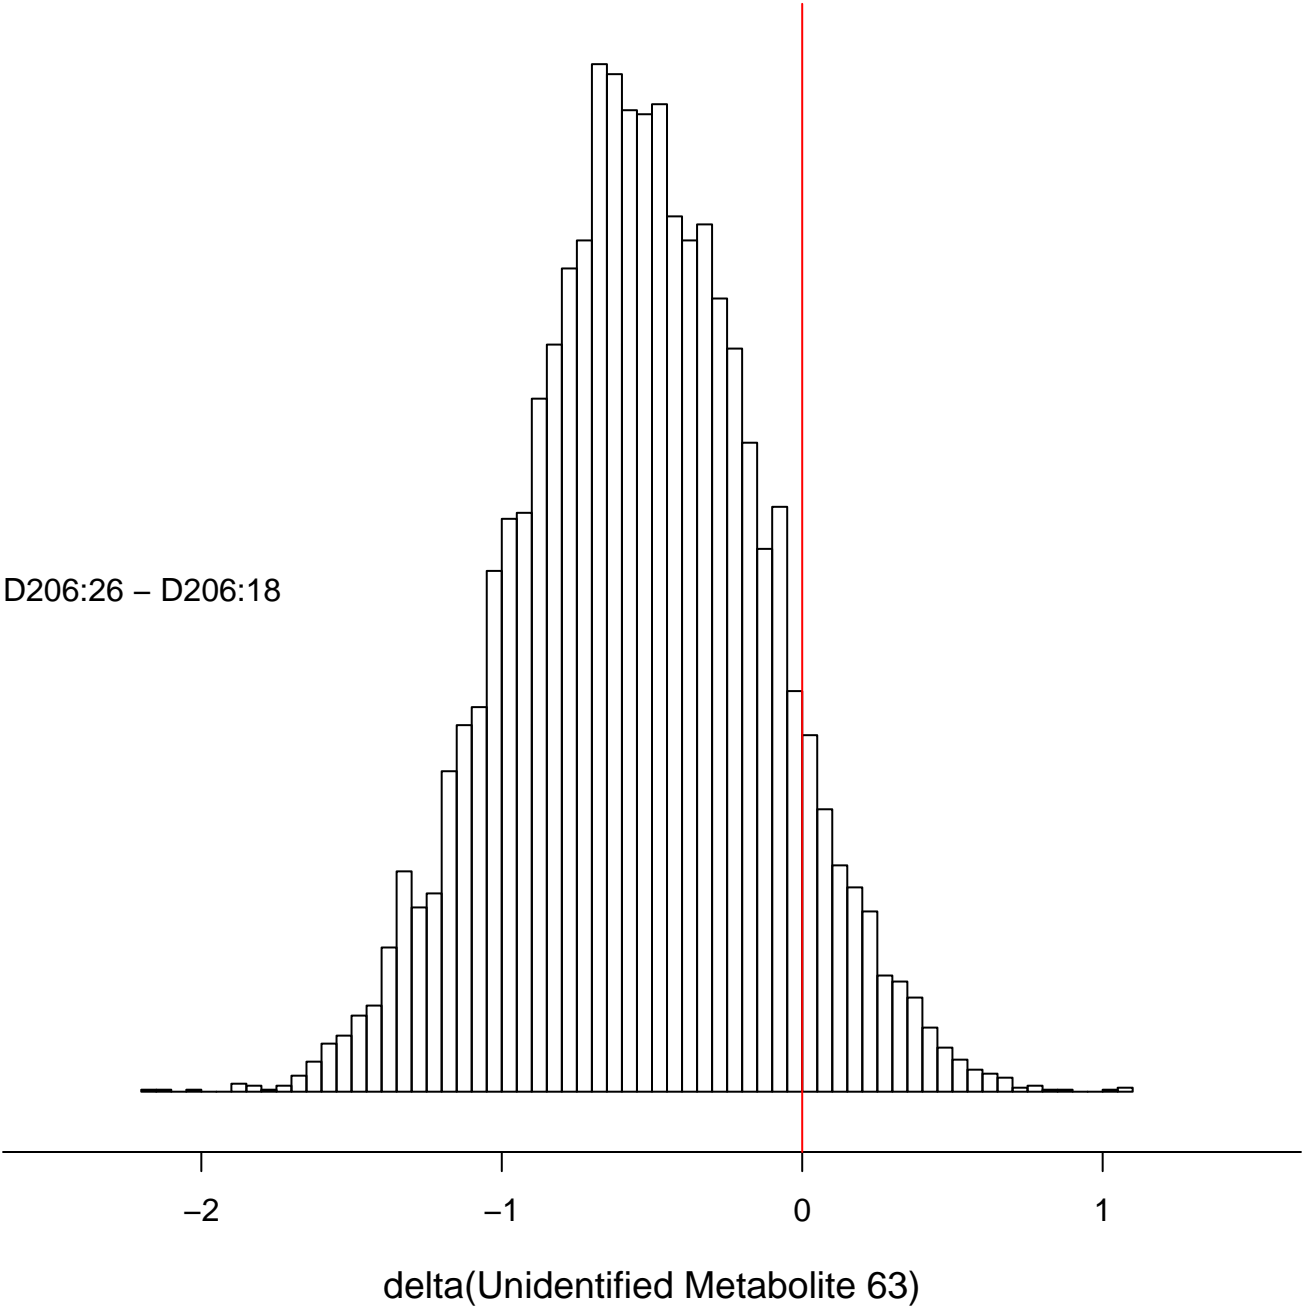



D206:26

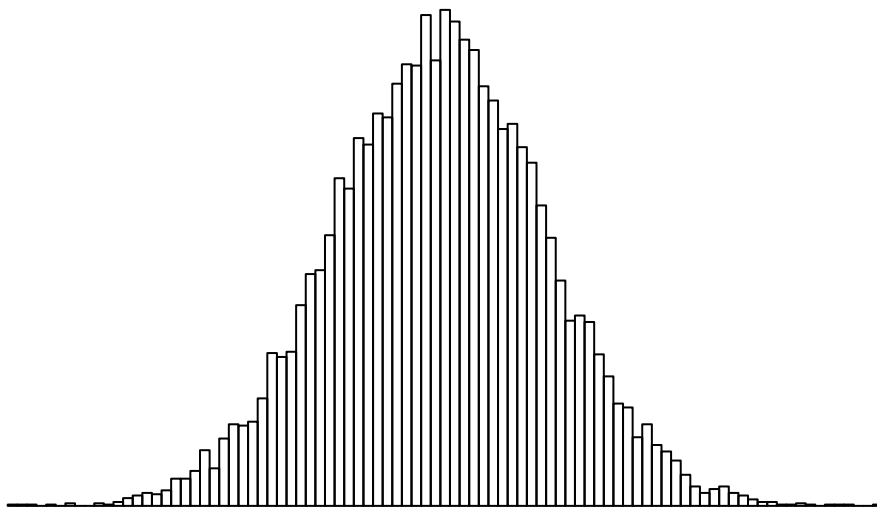

D206:18

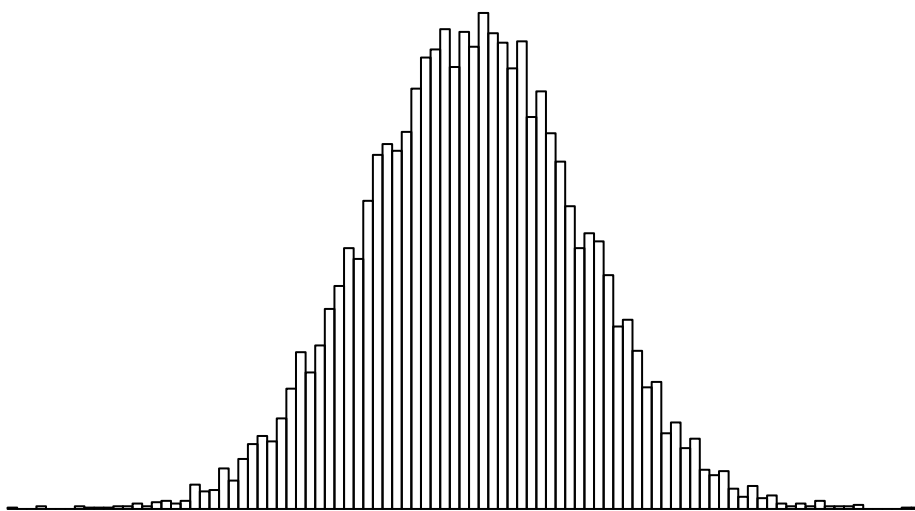

-9.0

-8.5

-8.0

-7.5

-7.0

-6.5

Unidentified Metabolite 65

D206:26 – D206:18

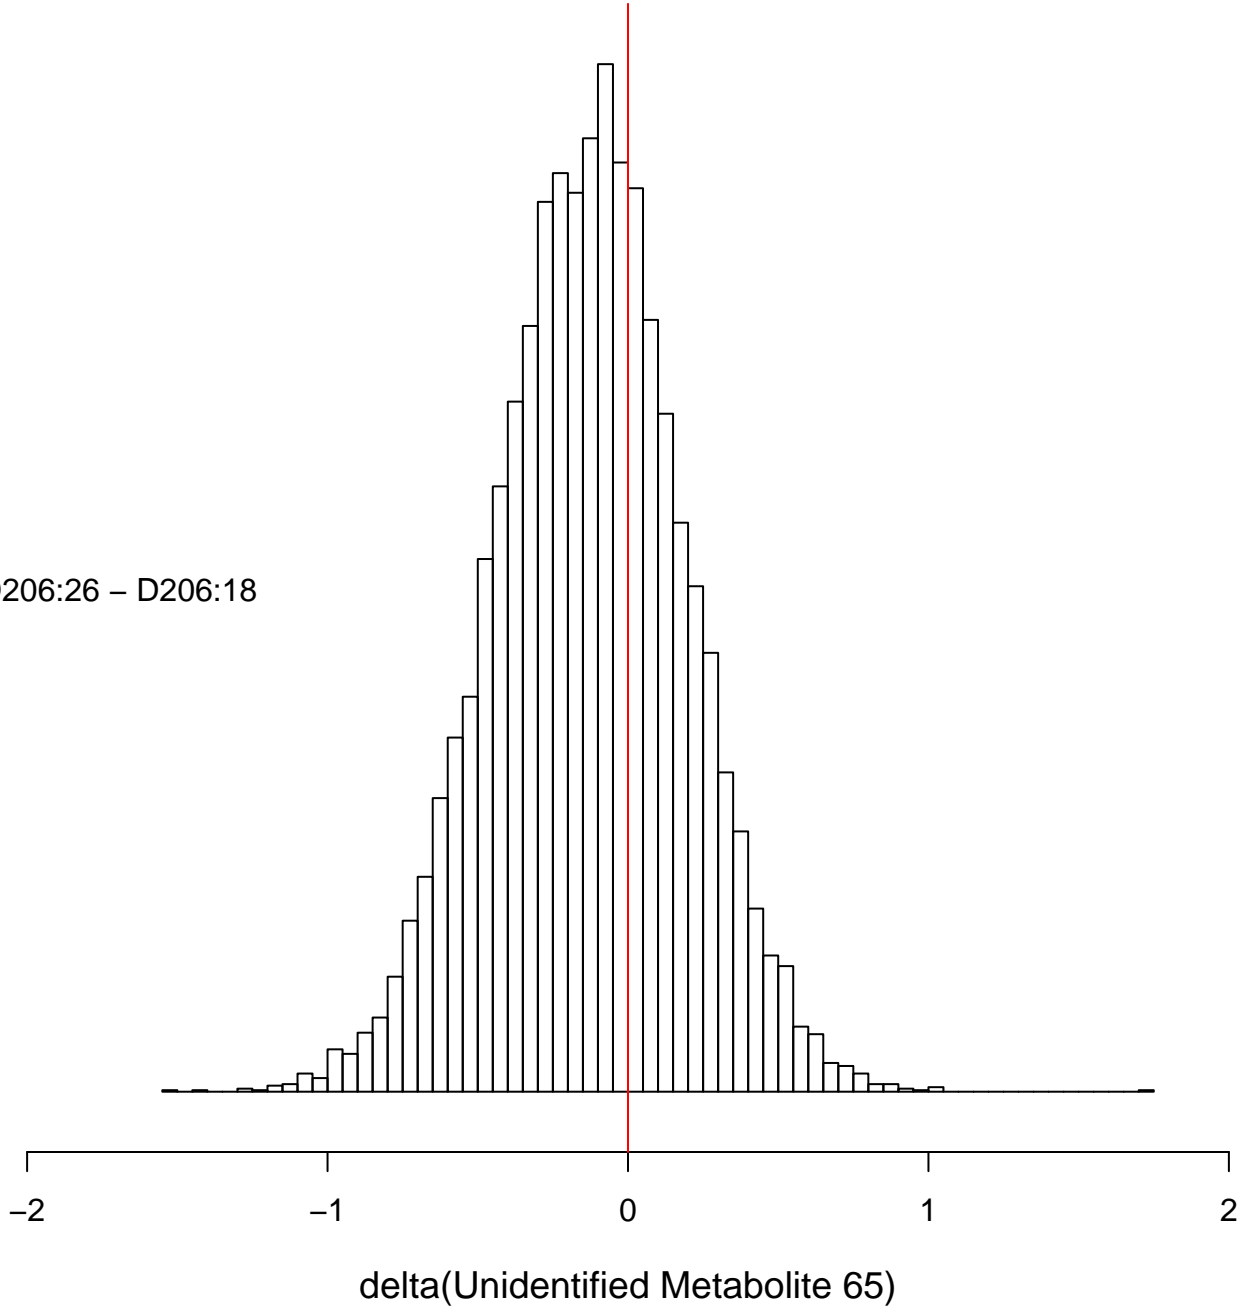

D206:26

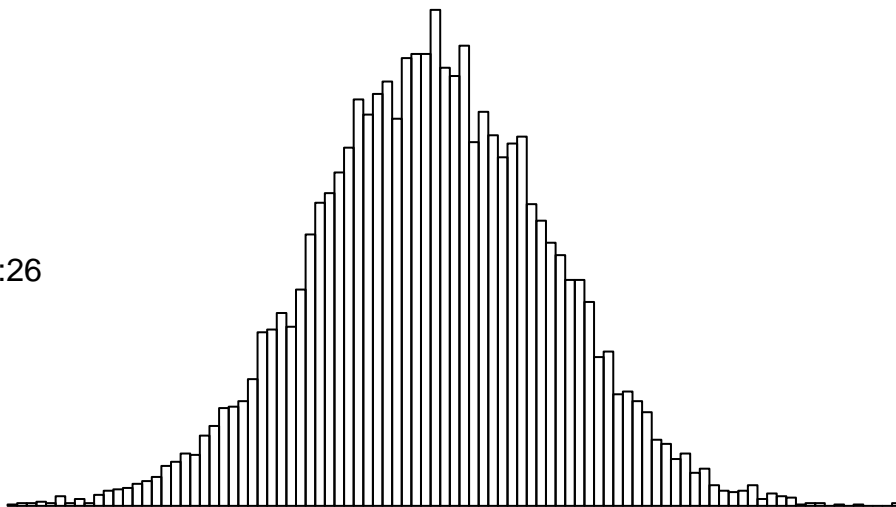

D206:18

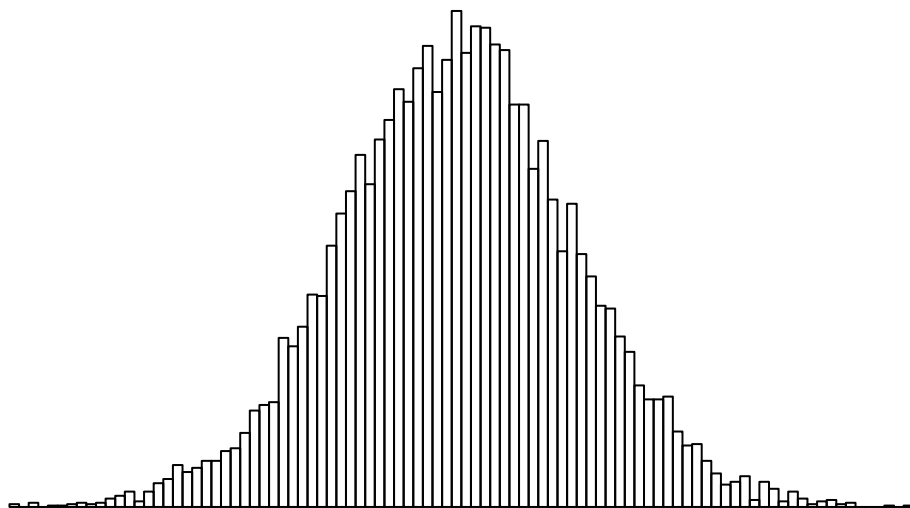

-9.0      -8.5      -8.0      -7.5      -7.0      -6.5

Unidentified Metabolite 68

D206:26 – D206:18

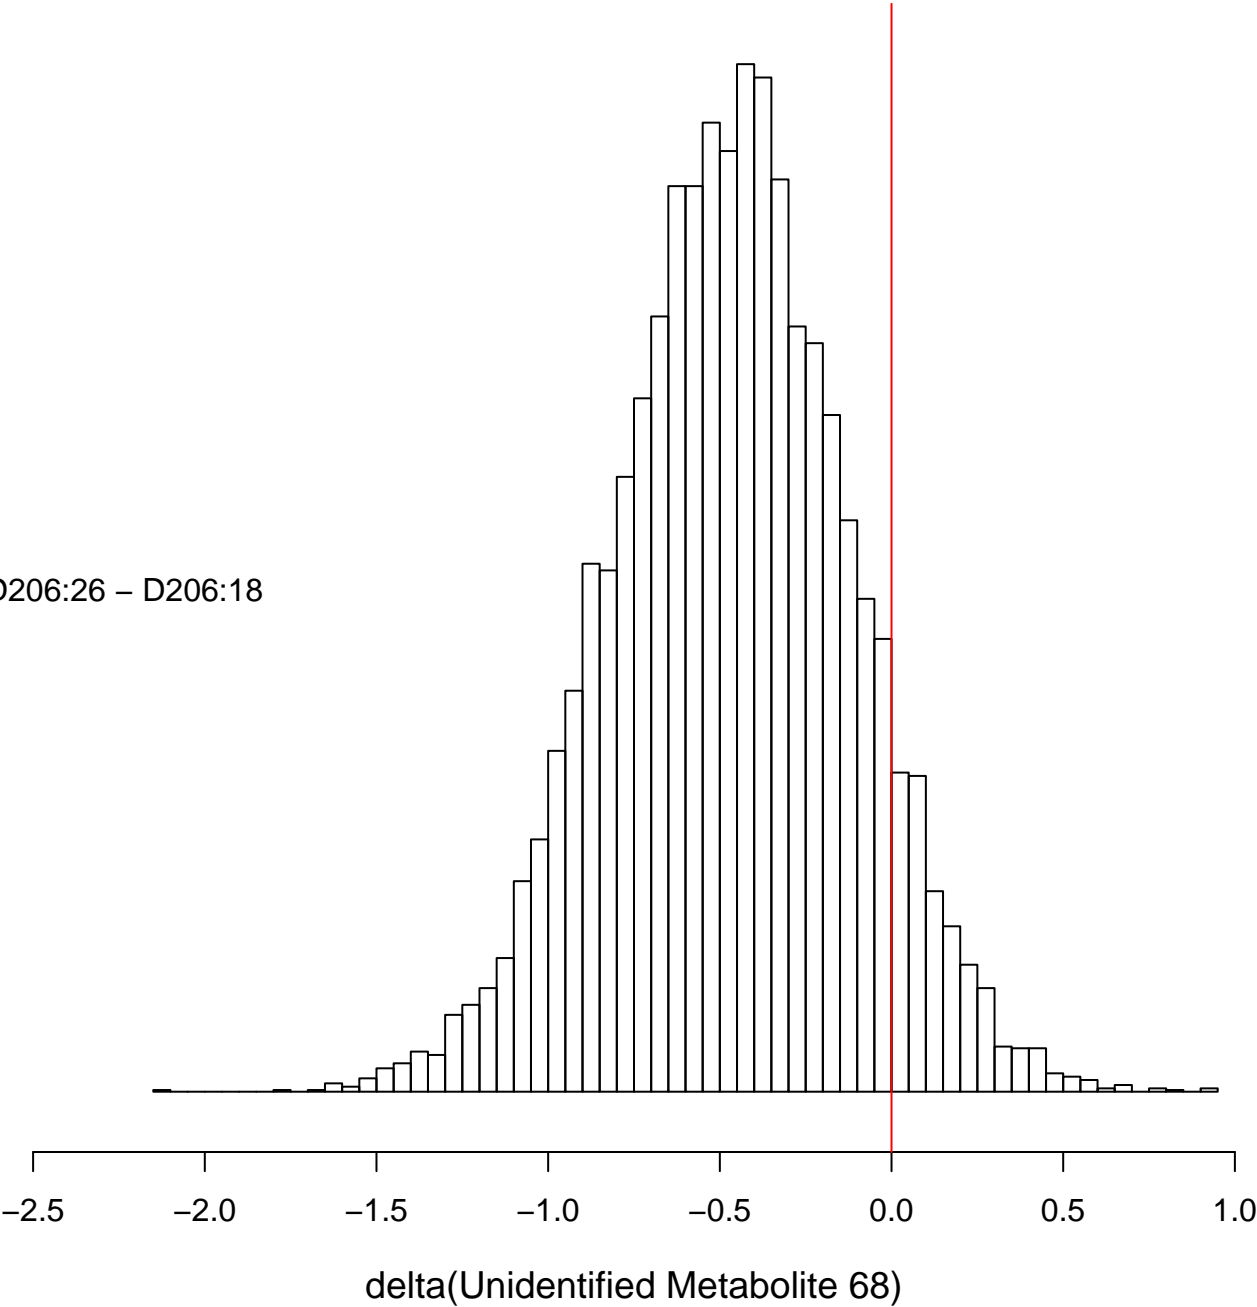

D206:26

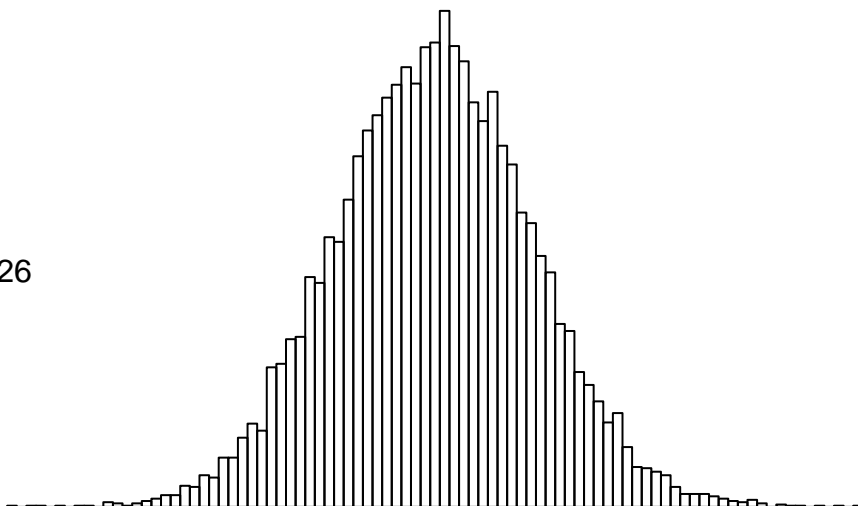

D206:18

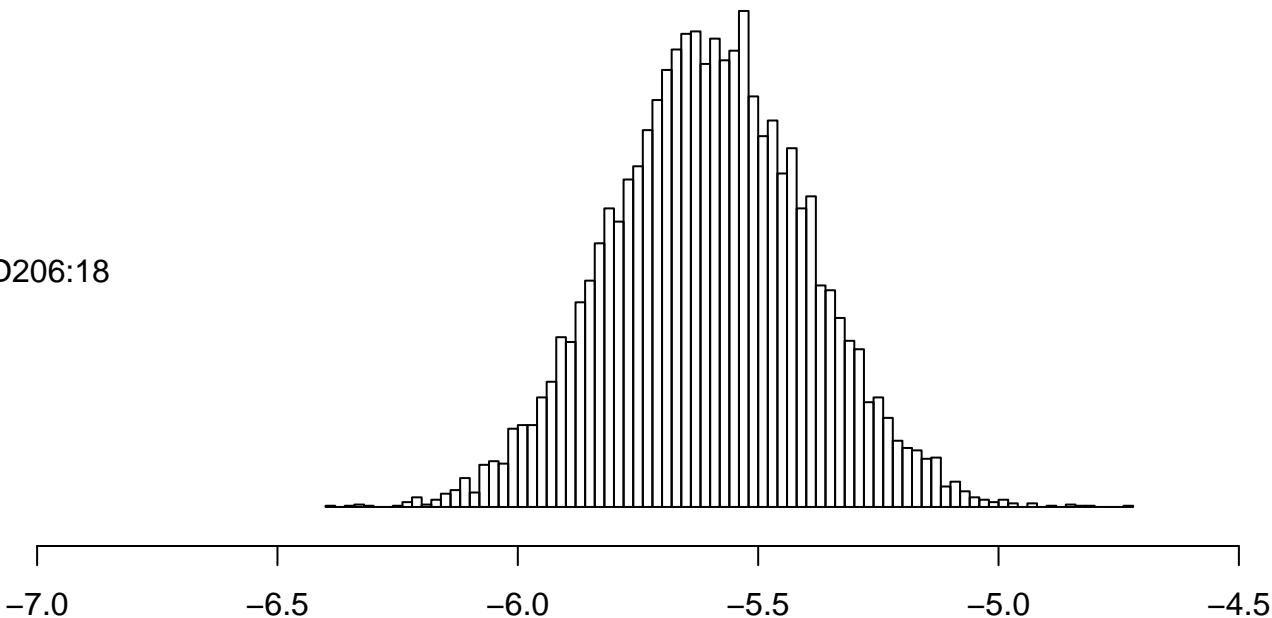

Unidentified Metabolite 69

D206:26 – D206:18

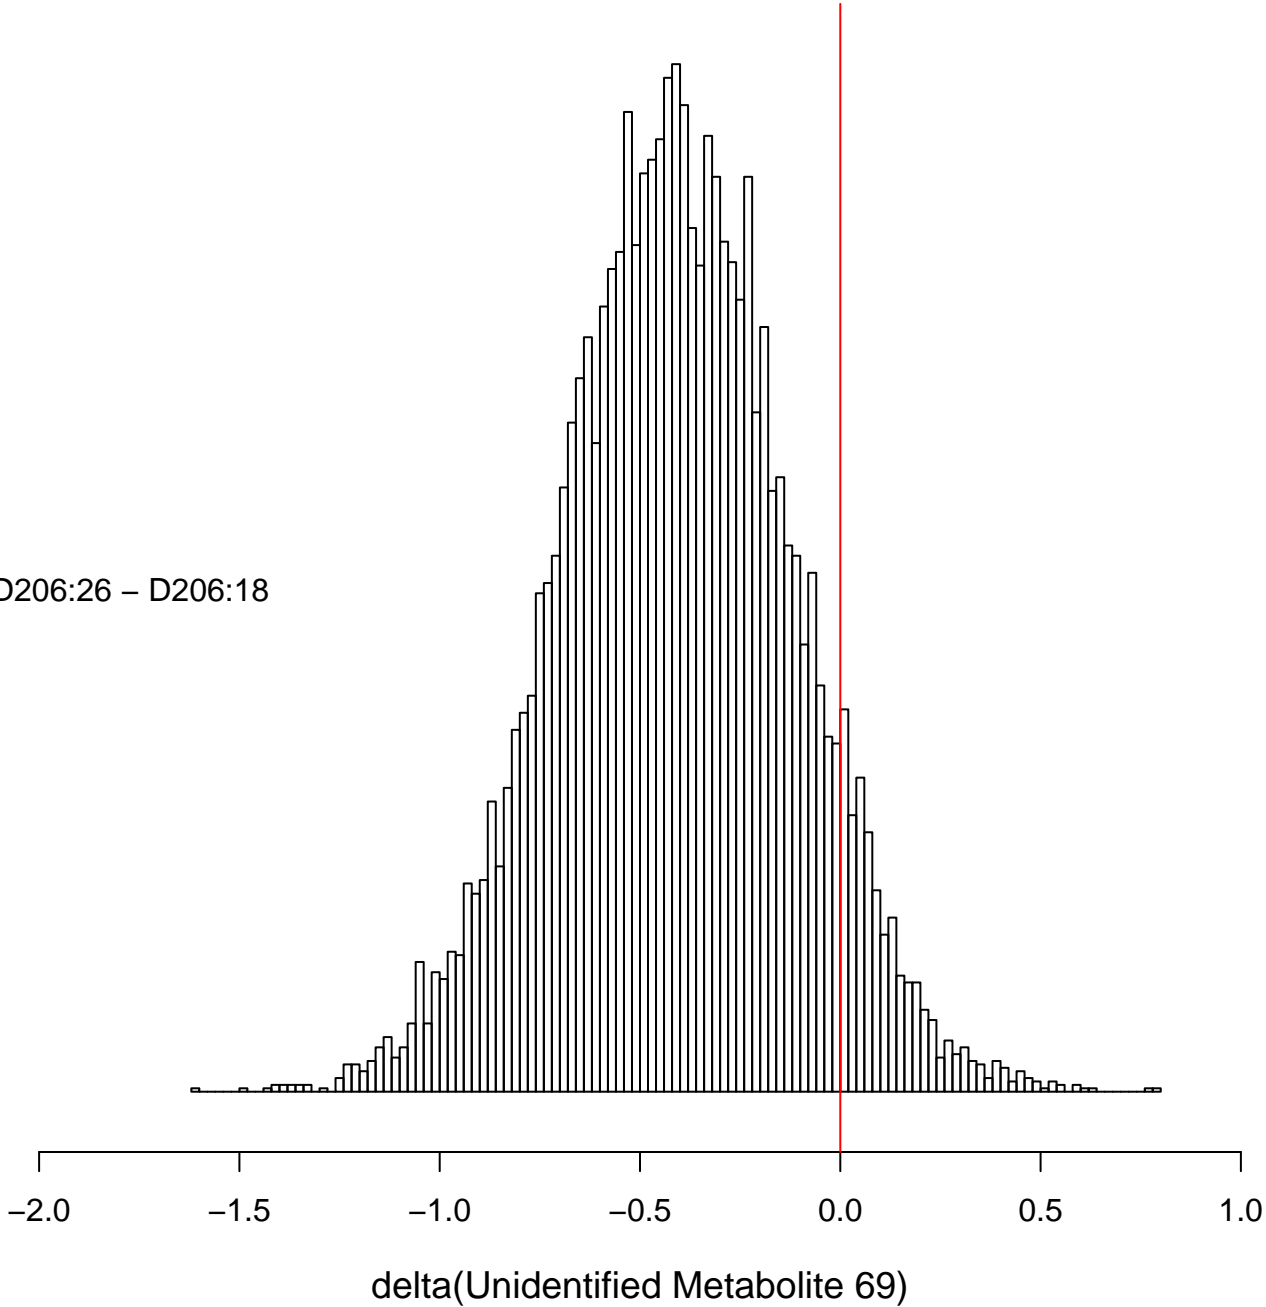

D206:26

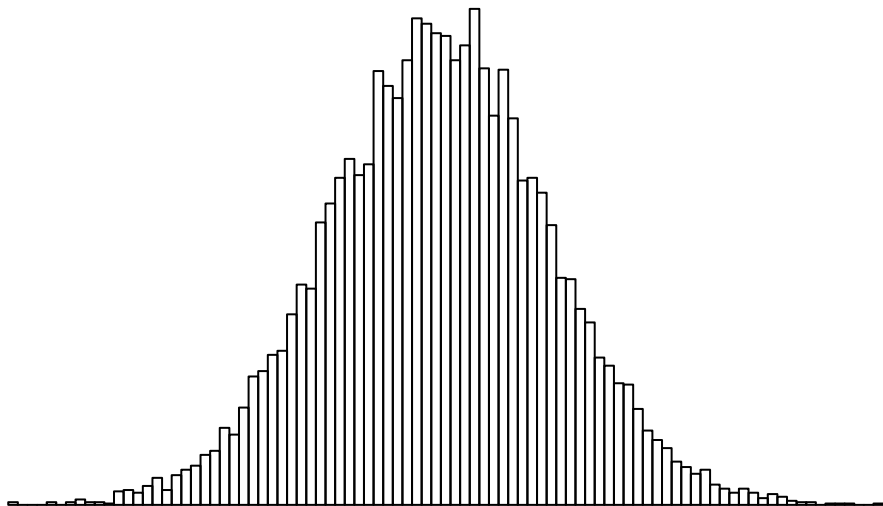

D206:18

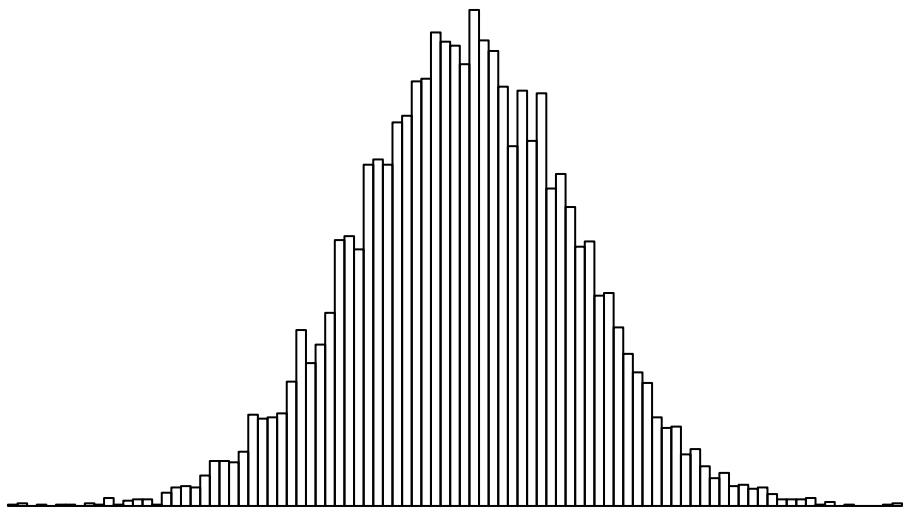

-8.5      -8.0      -7.5      -7.0      -6.5      -6.0

Unidentified Metabolite 70

D206:26 – D206:18

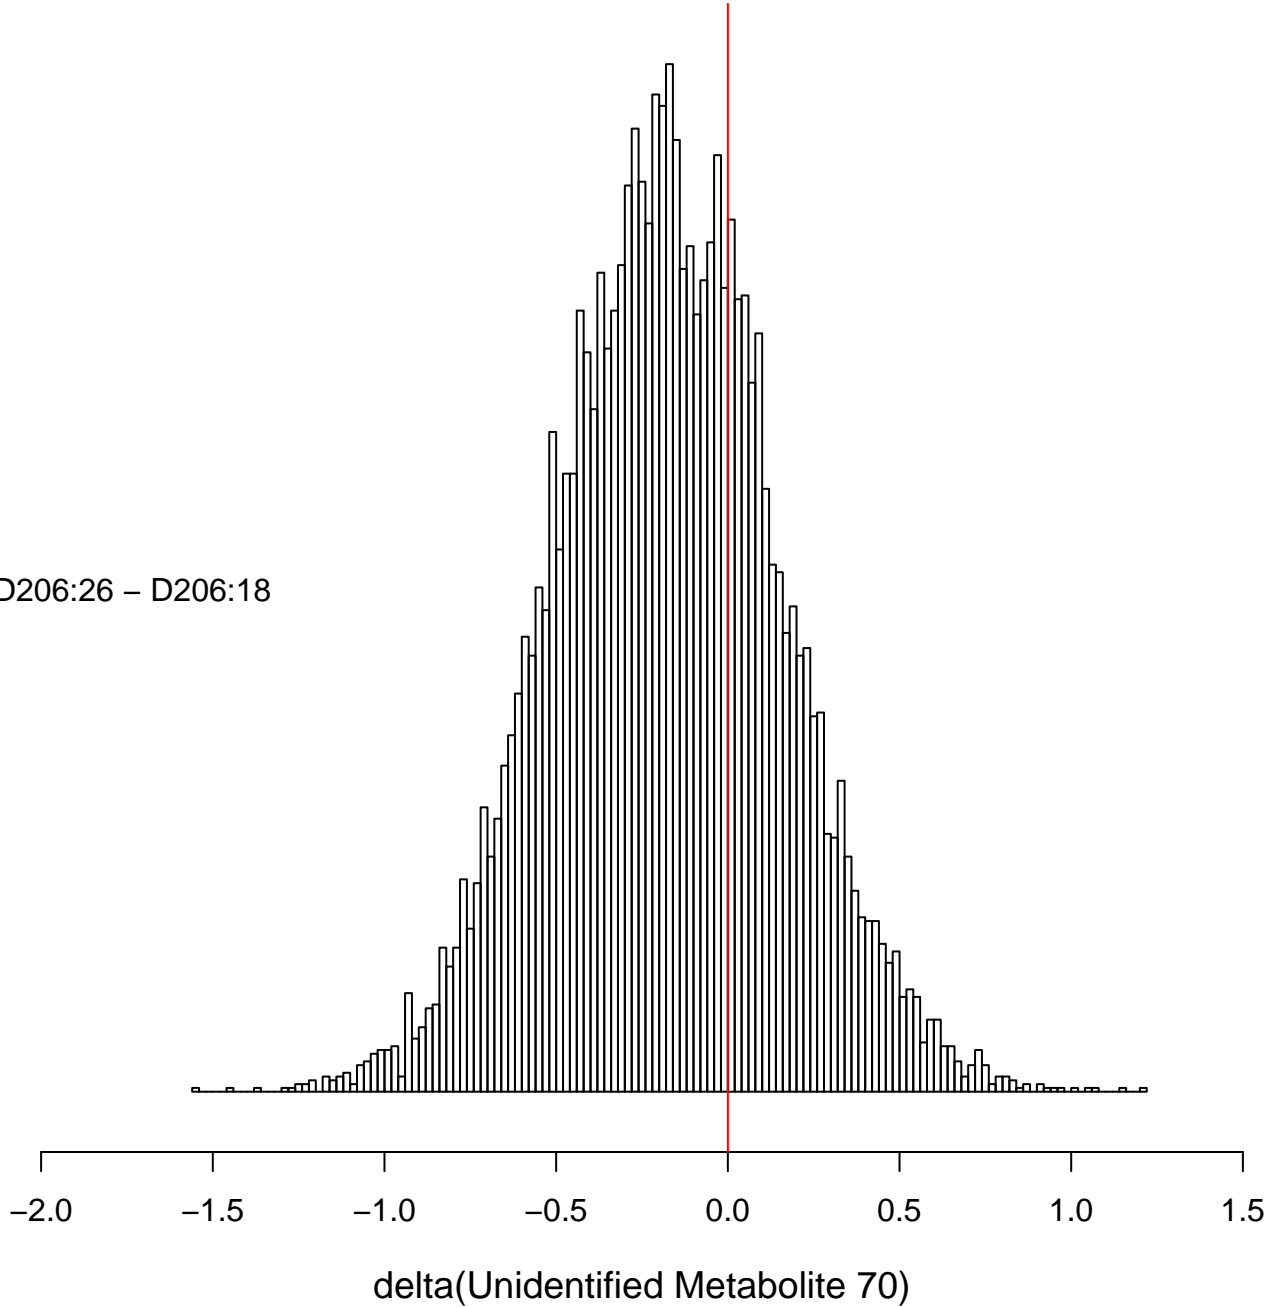



D206:26

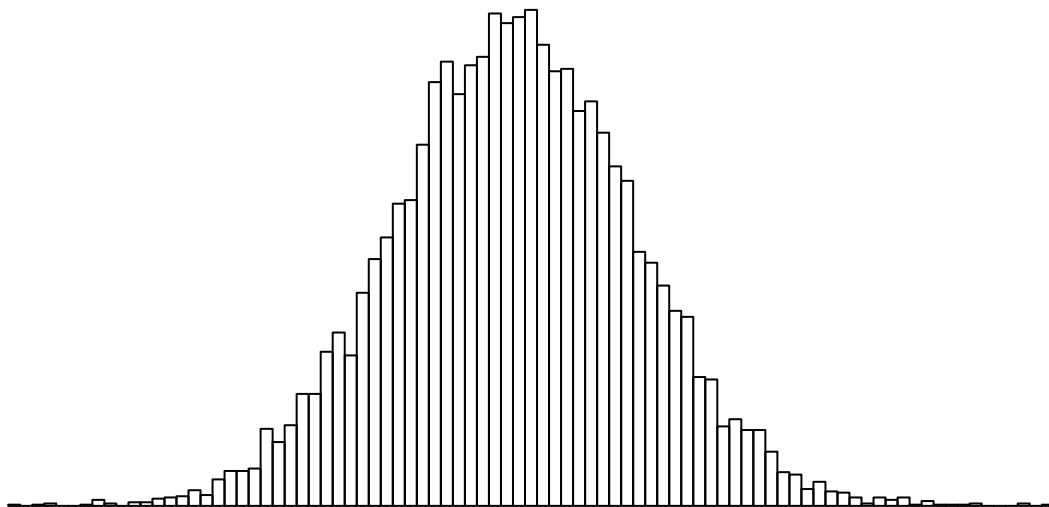

D206:18

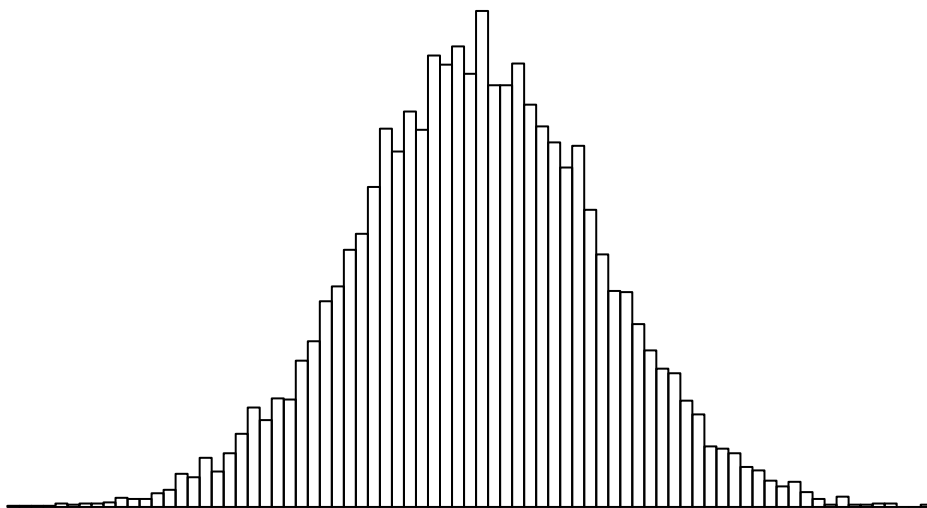

-9.5

-9.0

-8.5

-8.0

-7.5

Unidentified Metabolite 71

D206:26 – D206:18

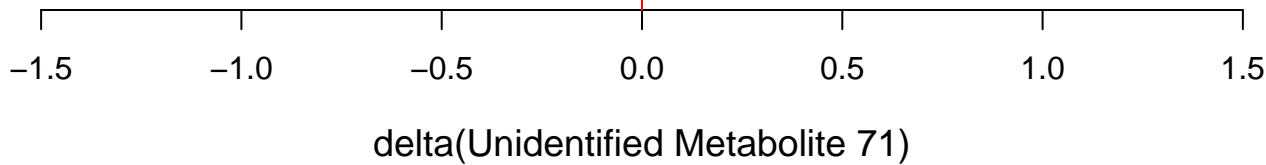

D206:26

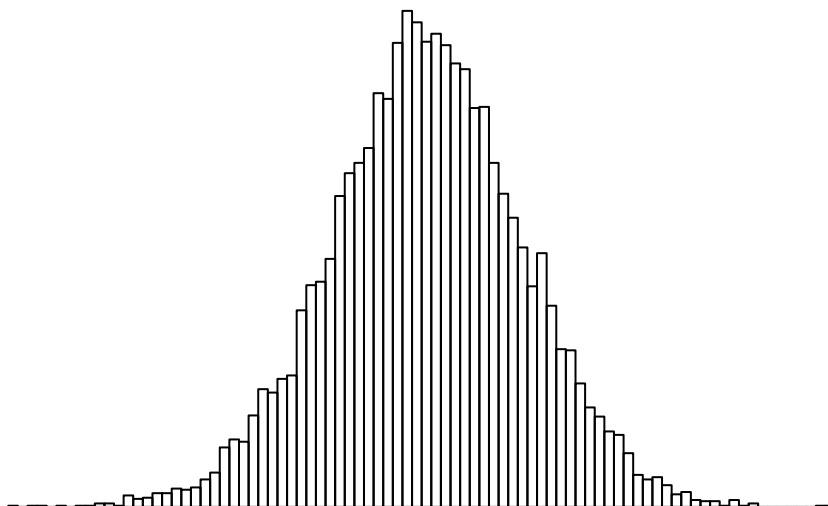

D206:18

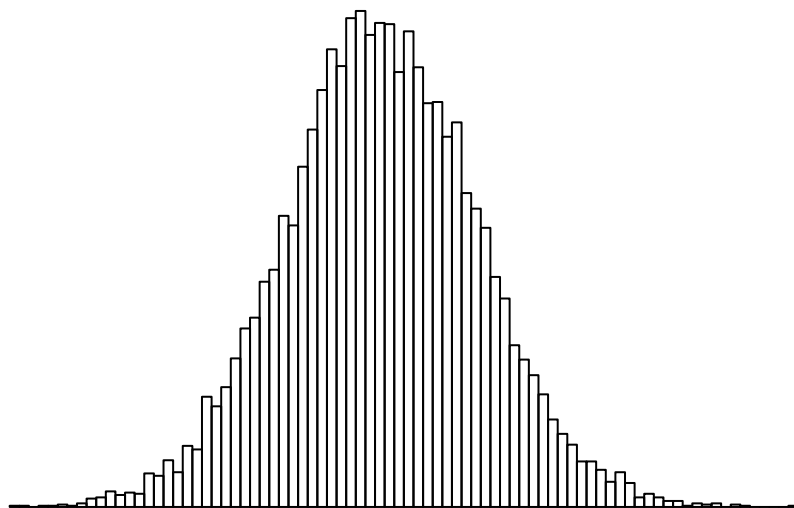

-7.0

-6.5

-6.0

-5.5

-5.0

-4.5

Unidentified Metabolite 72

D206:26 – D206:18

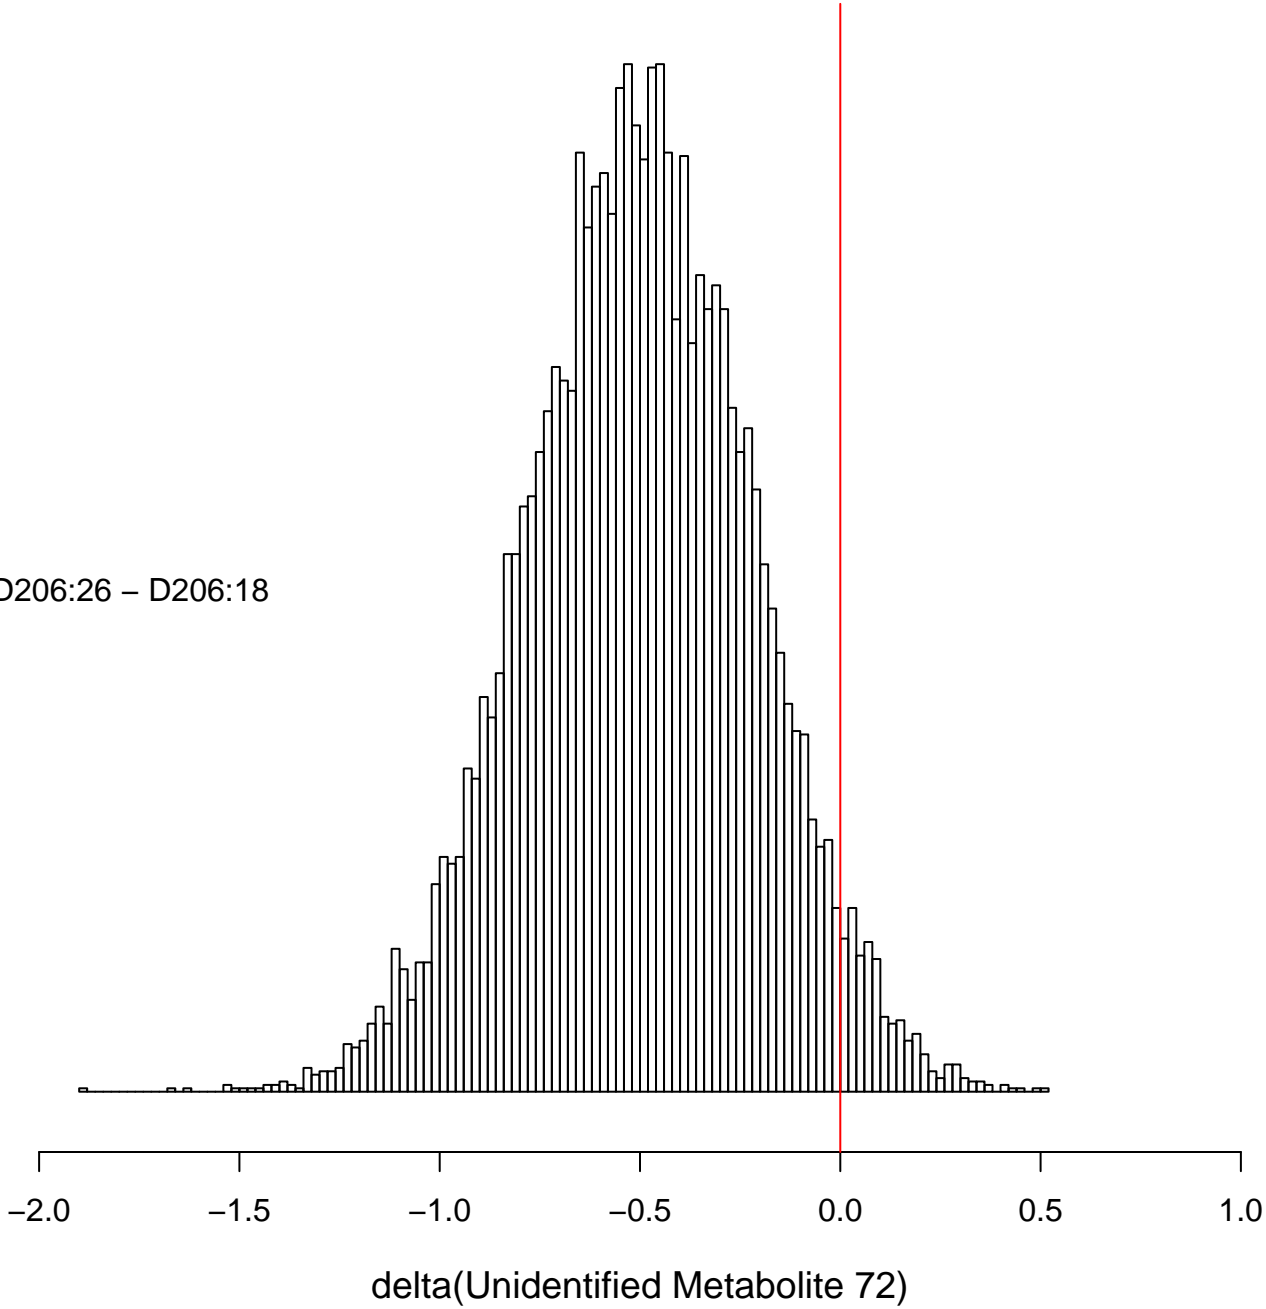

D206:26

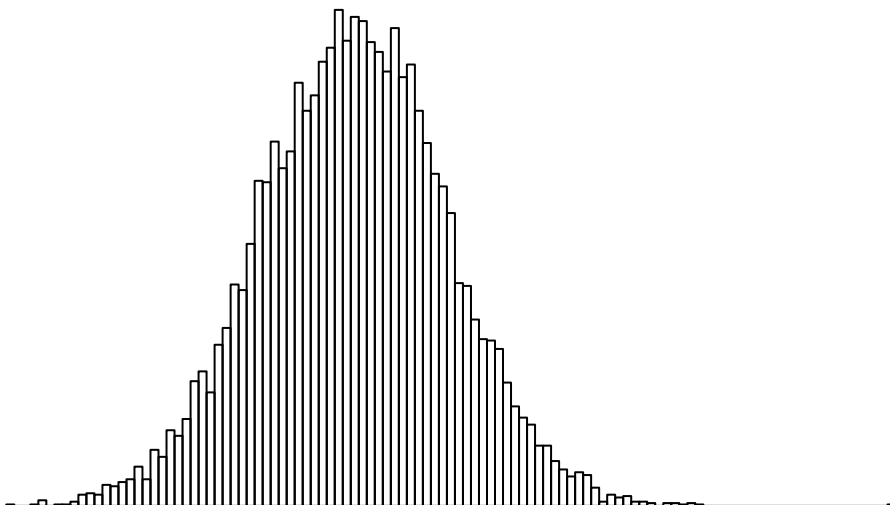

D206:18

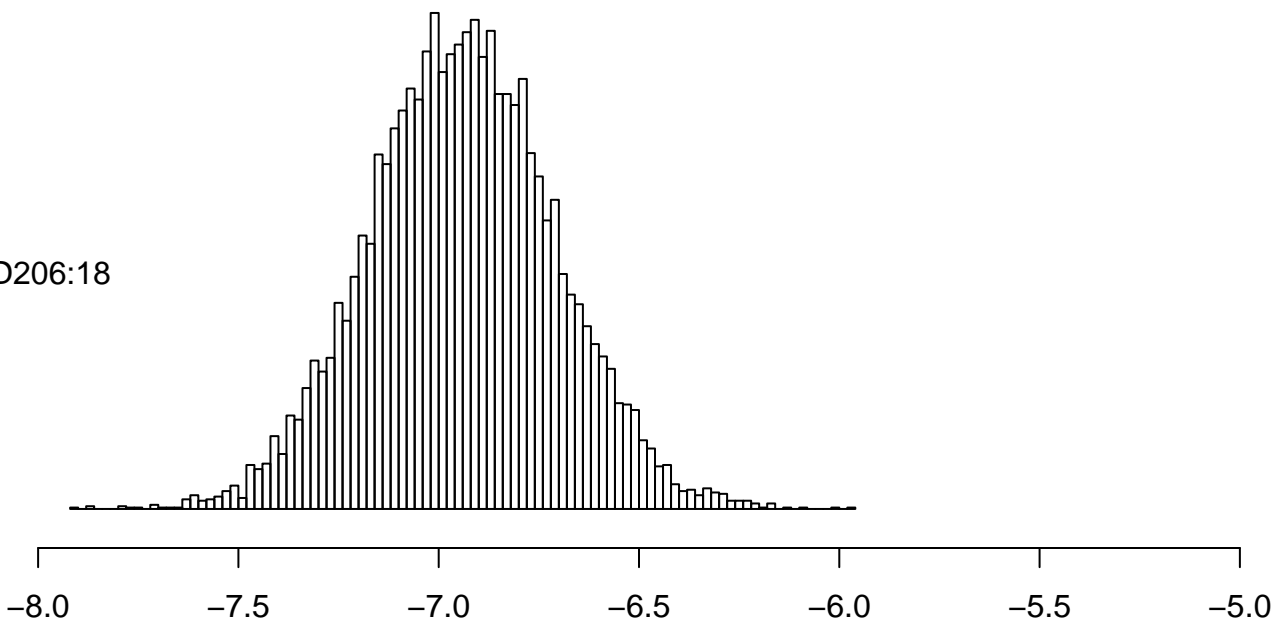

Unidentified Metabolite 73

D206:26 – D206:18

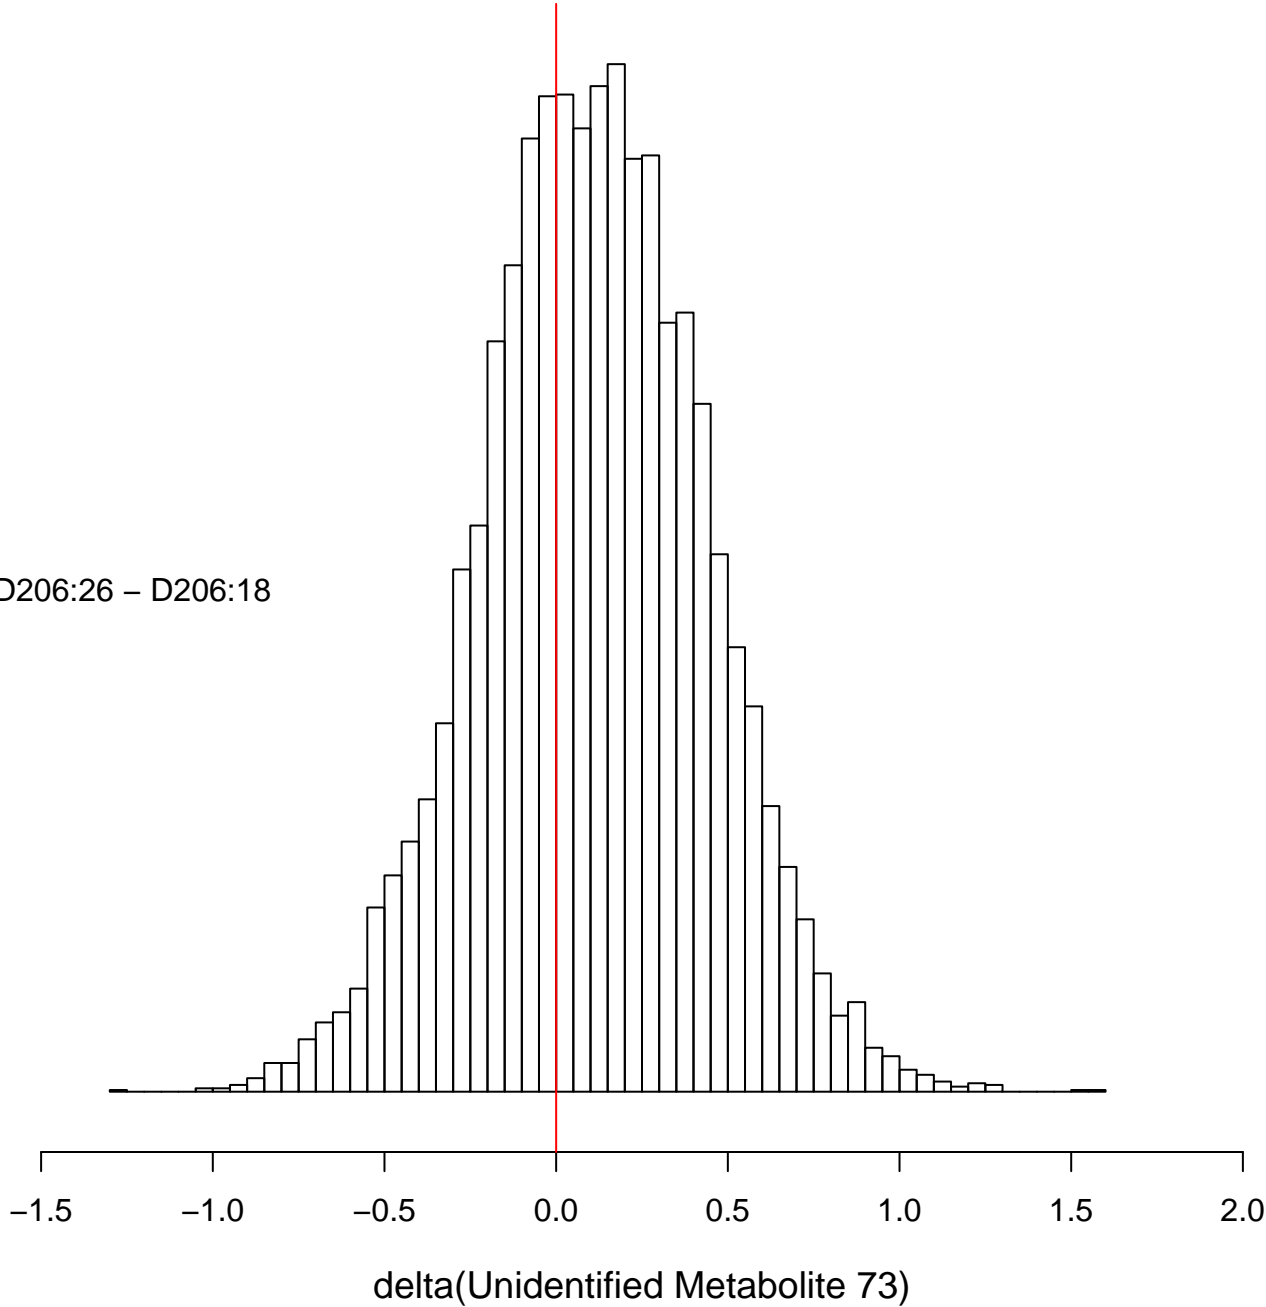

D206:26

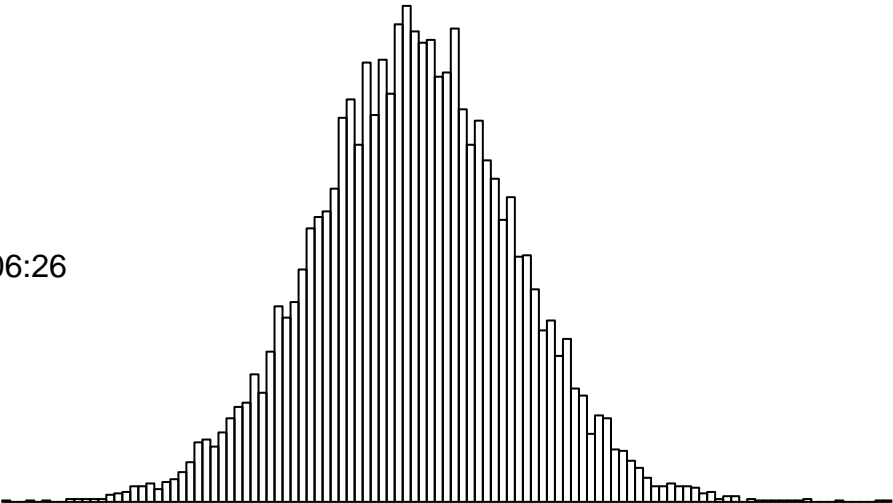

D206:18

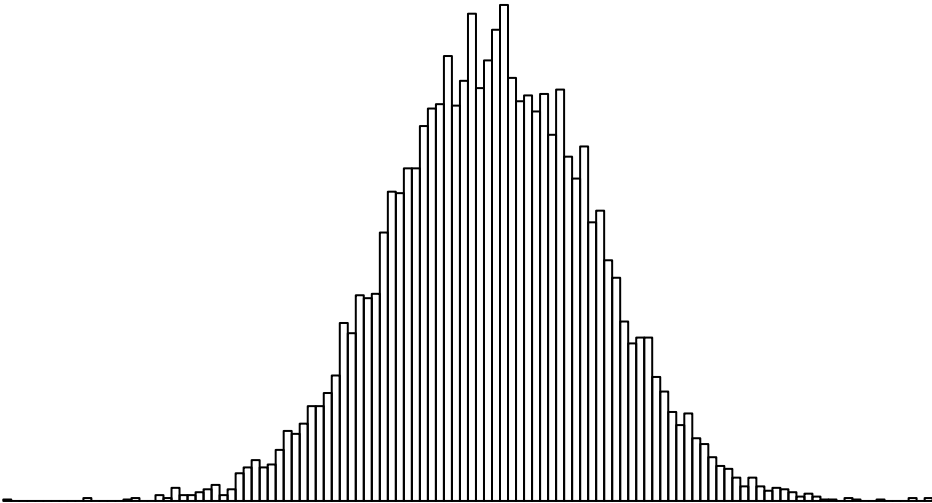

-9.5      -9.0      -8.5      -8.0      -7.5      -7.0      -6.5

Unidentified Metabolite 74

D206:26 – D206:18

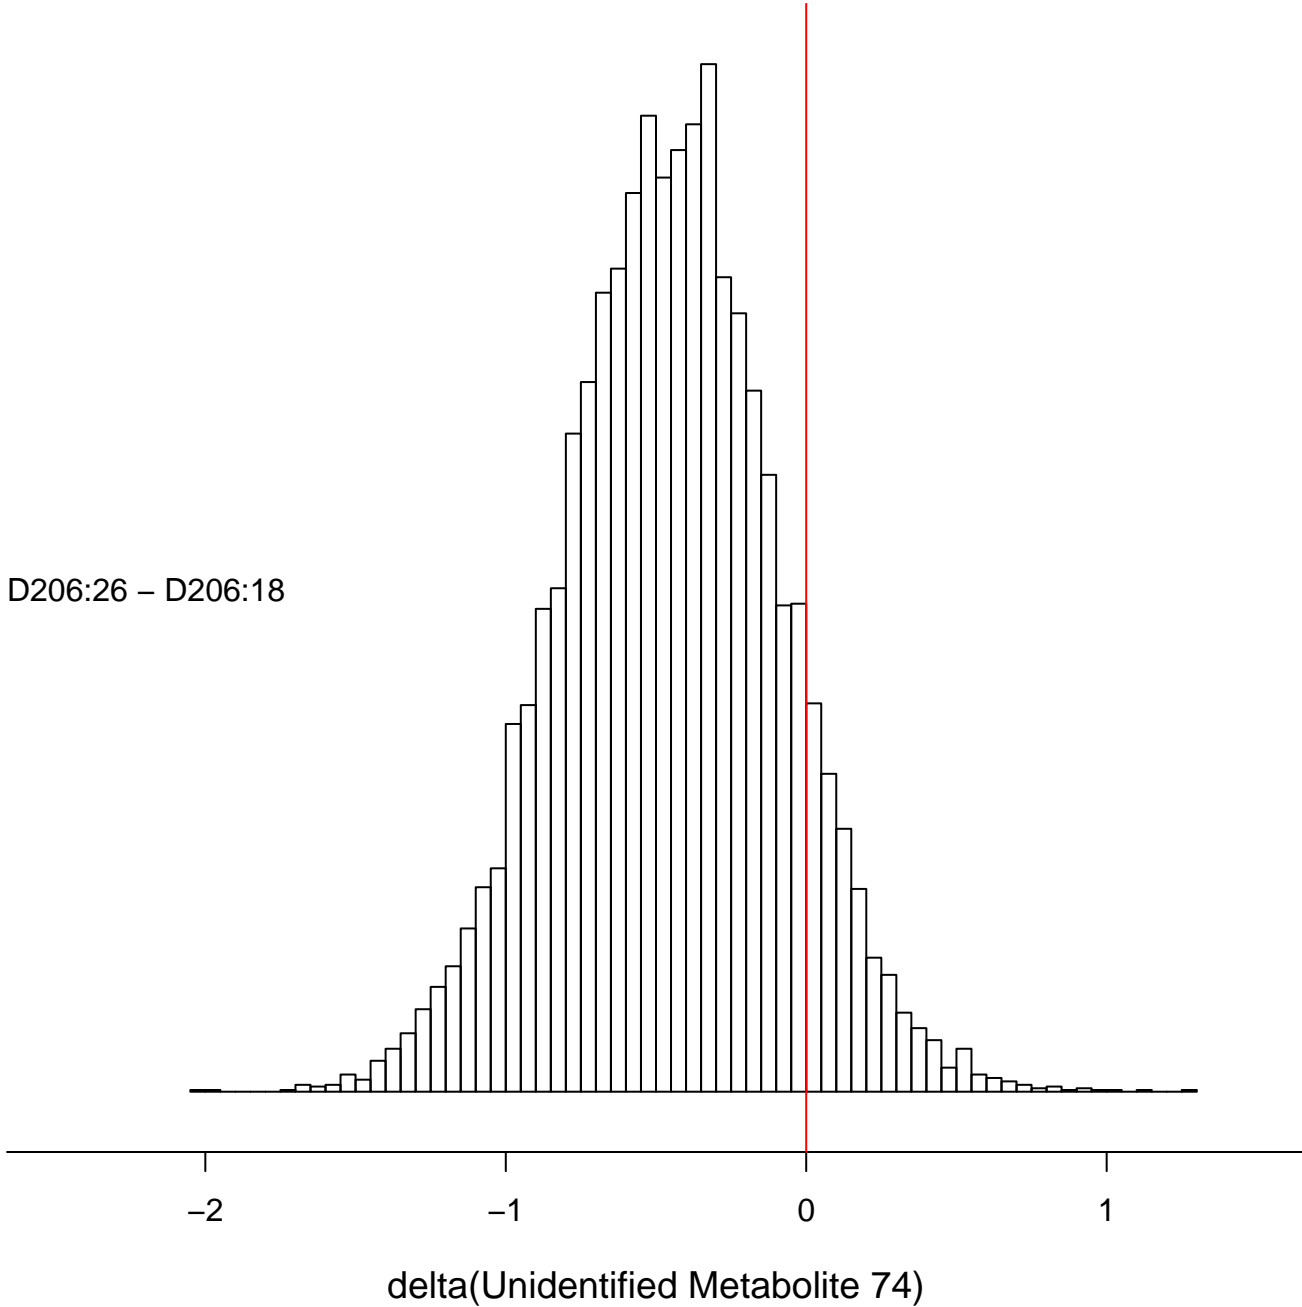



D206:26

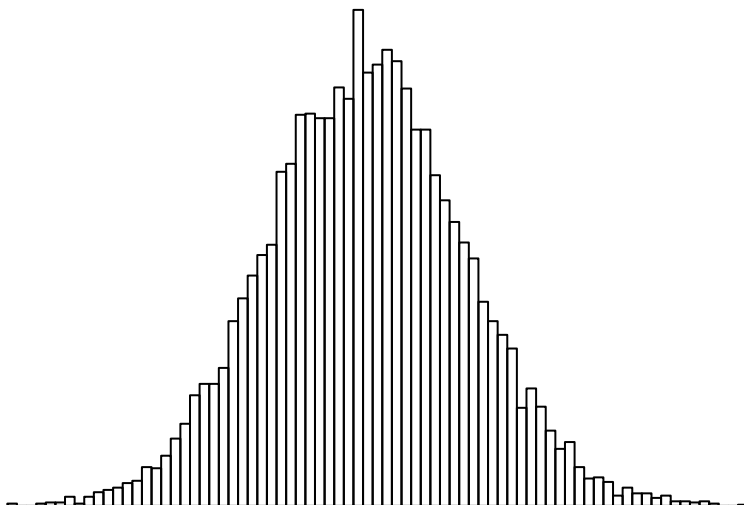

D206:18

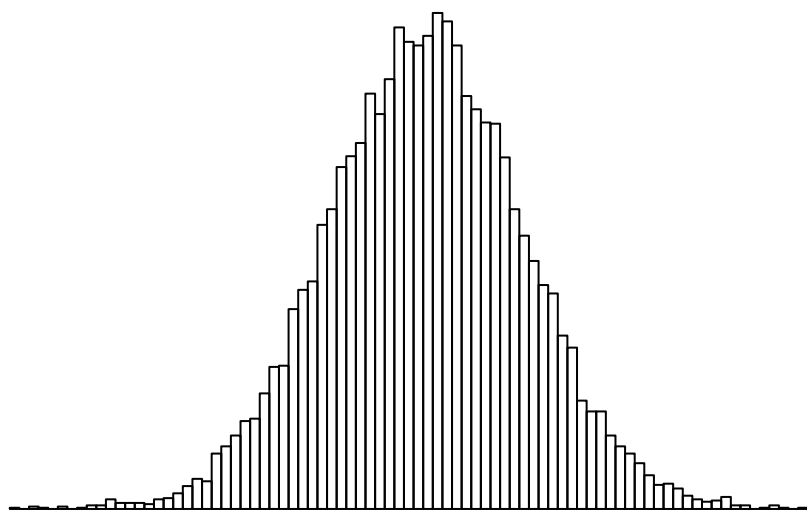

-10.5

-10.0

-9.5

-9.0

-8.5

-8.0

Unidentified Metabolite 75

D206:26 – D206:18

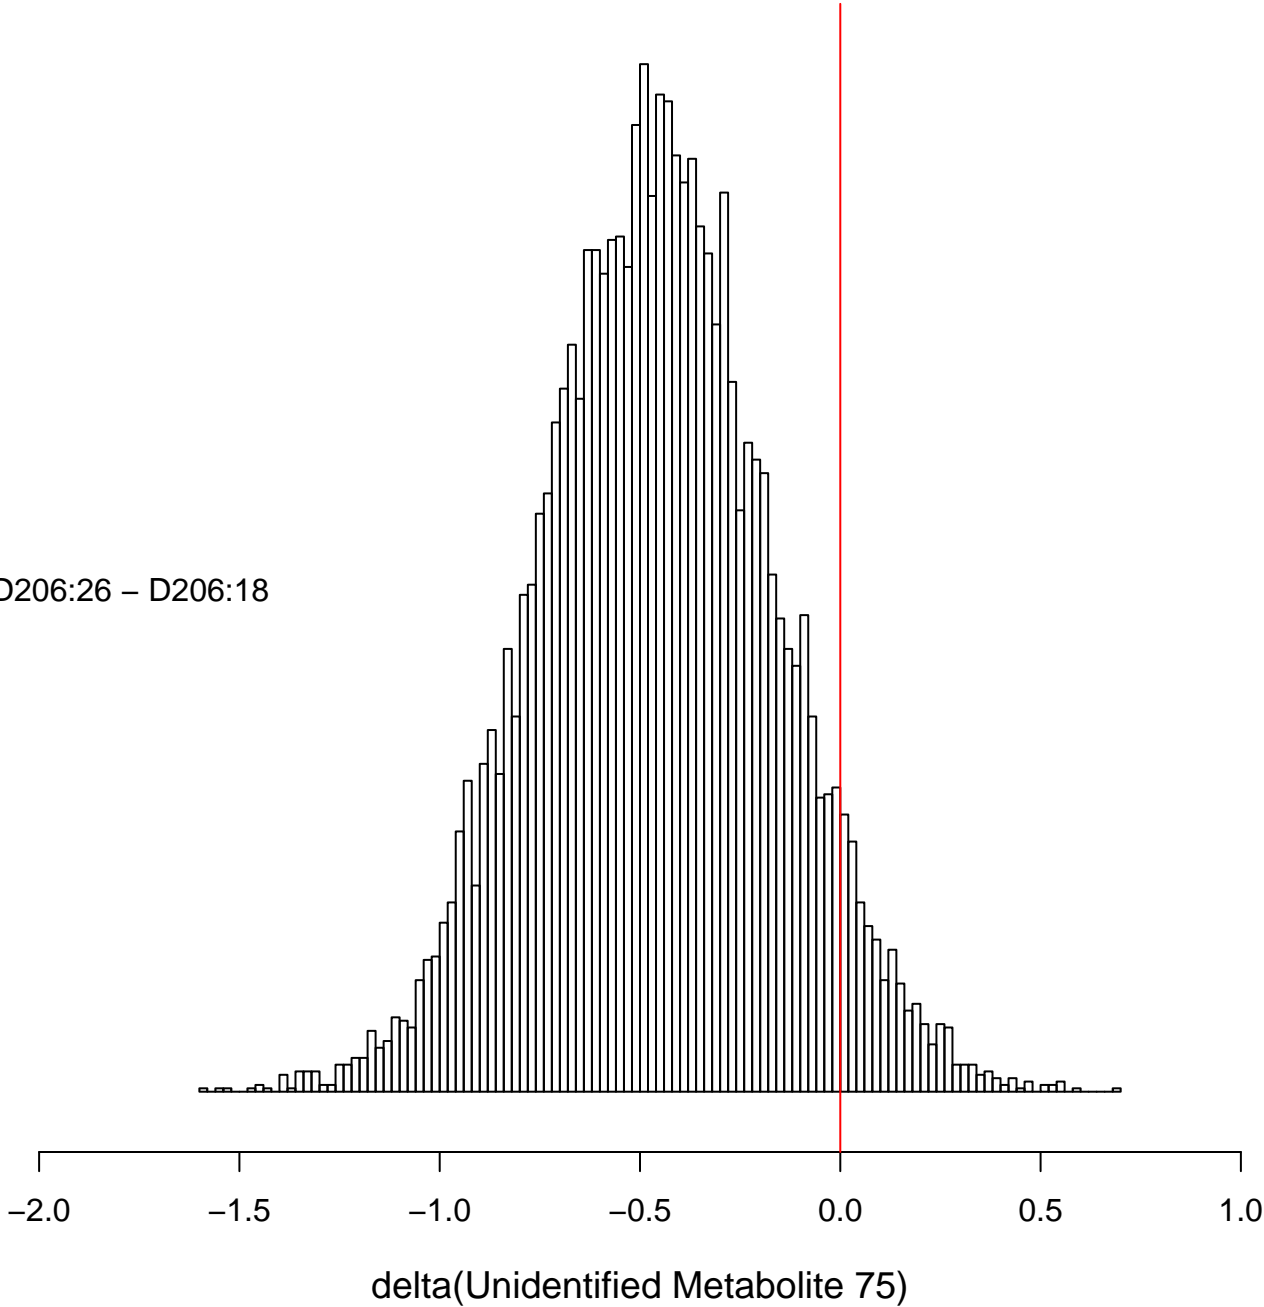

D206:26

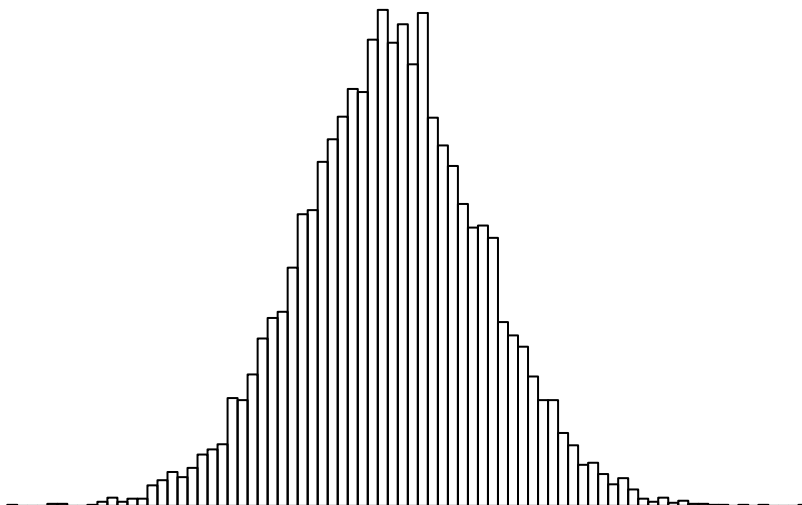

D206:18

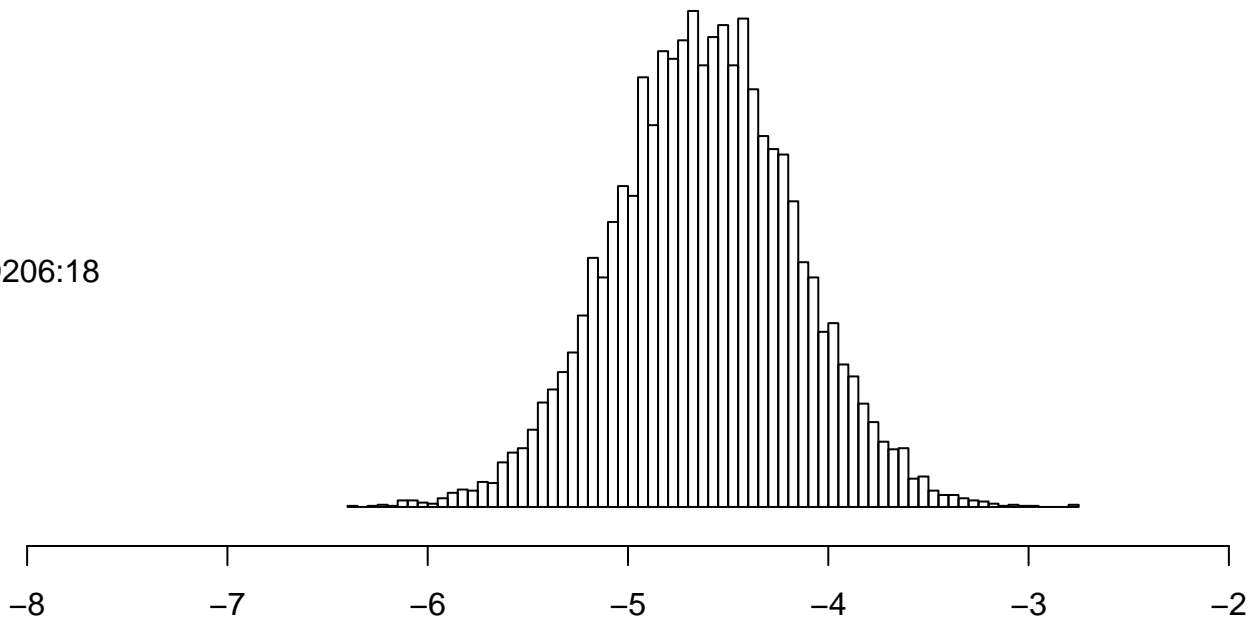

Unidentified Metabolite 76

D206:26 – D206:18

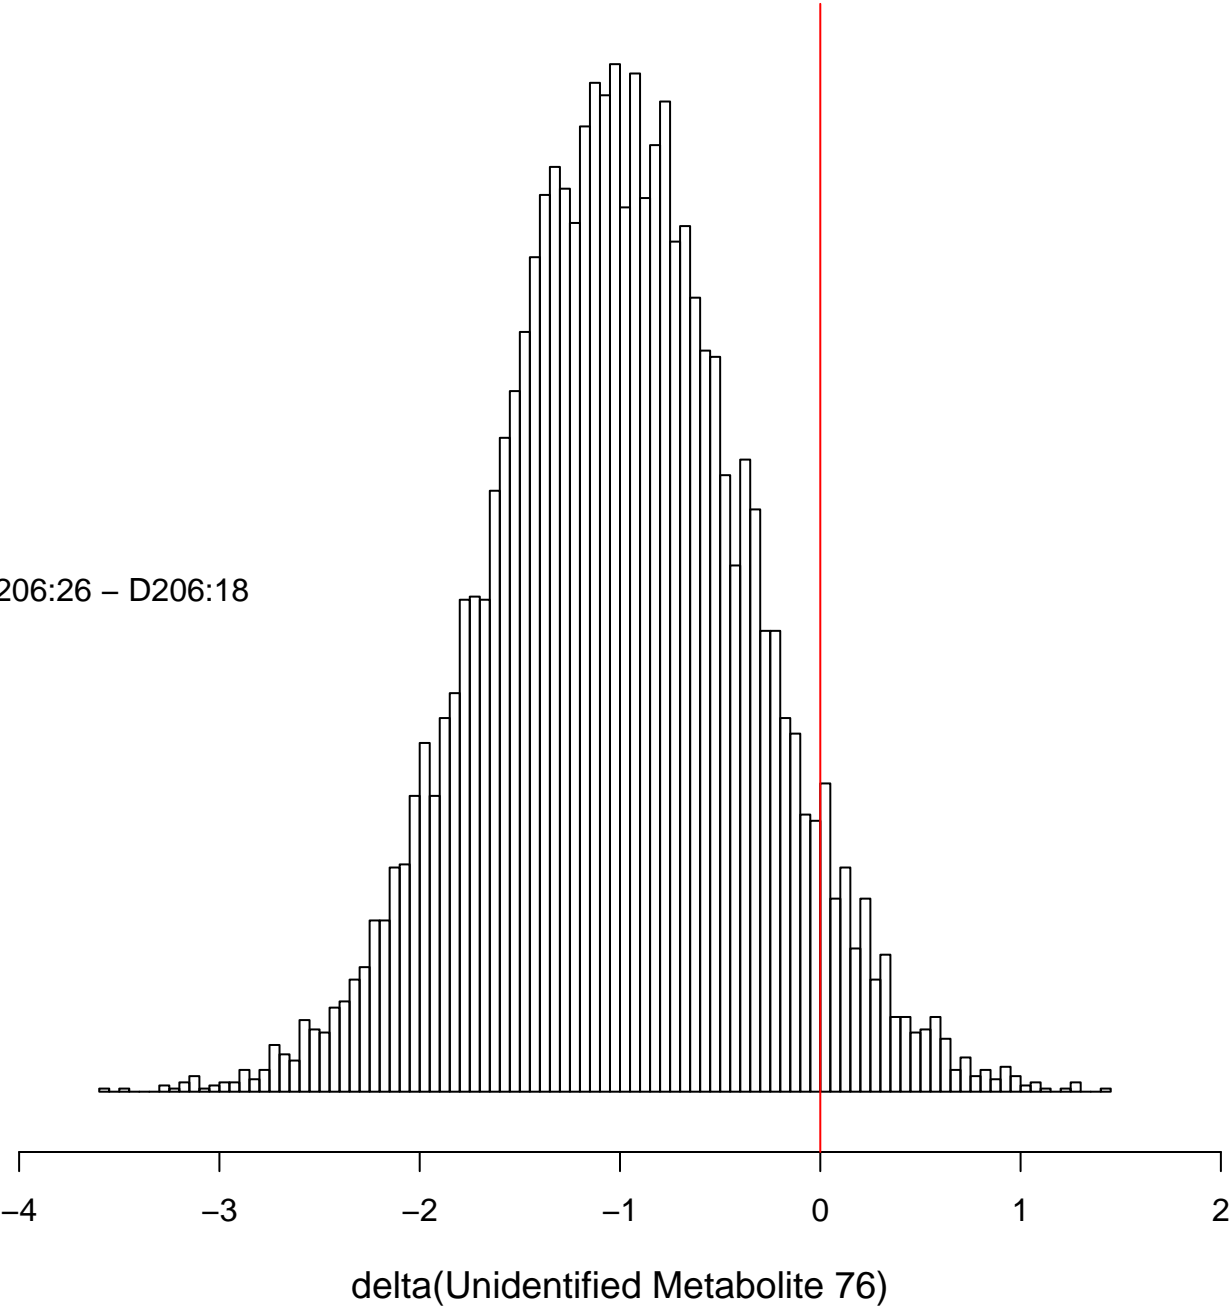

D206:26

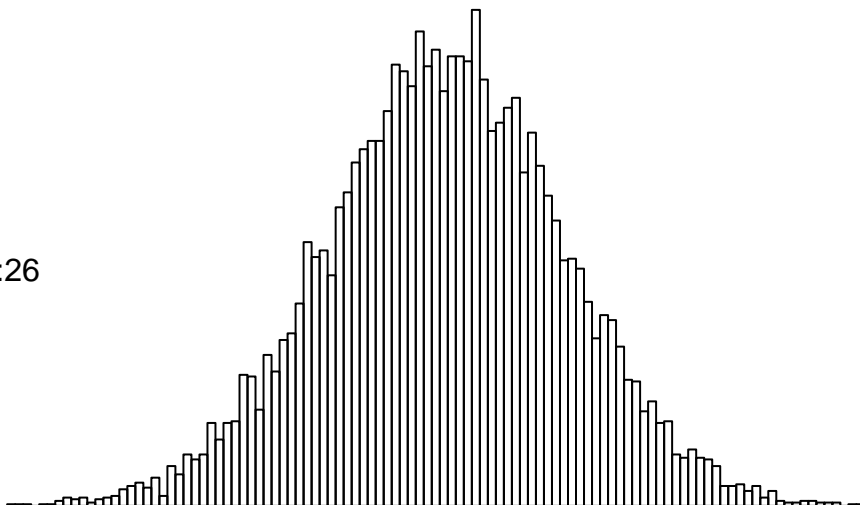

D206:18

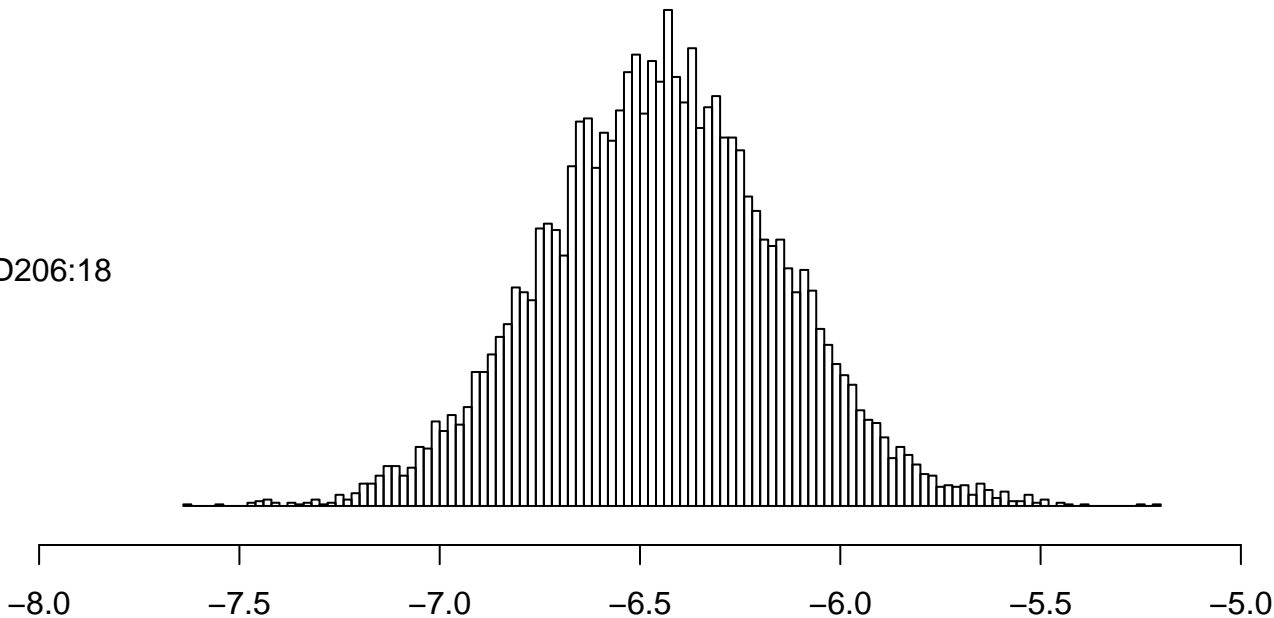

Unidentified Metabolite 77

D206:26 – D206:18

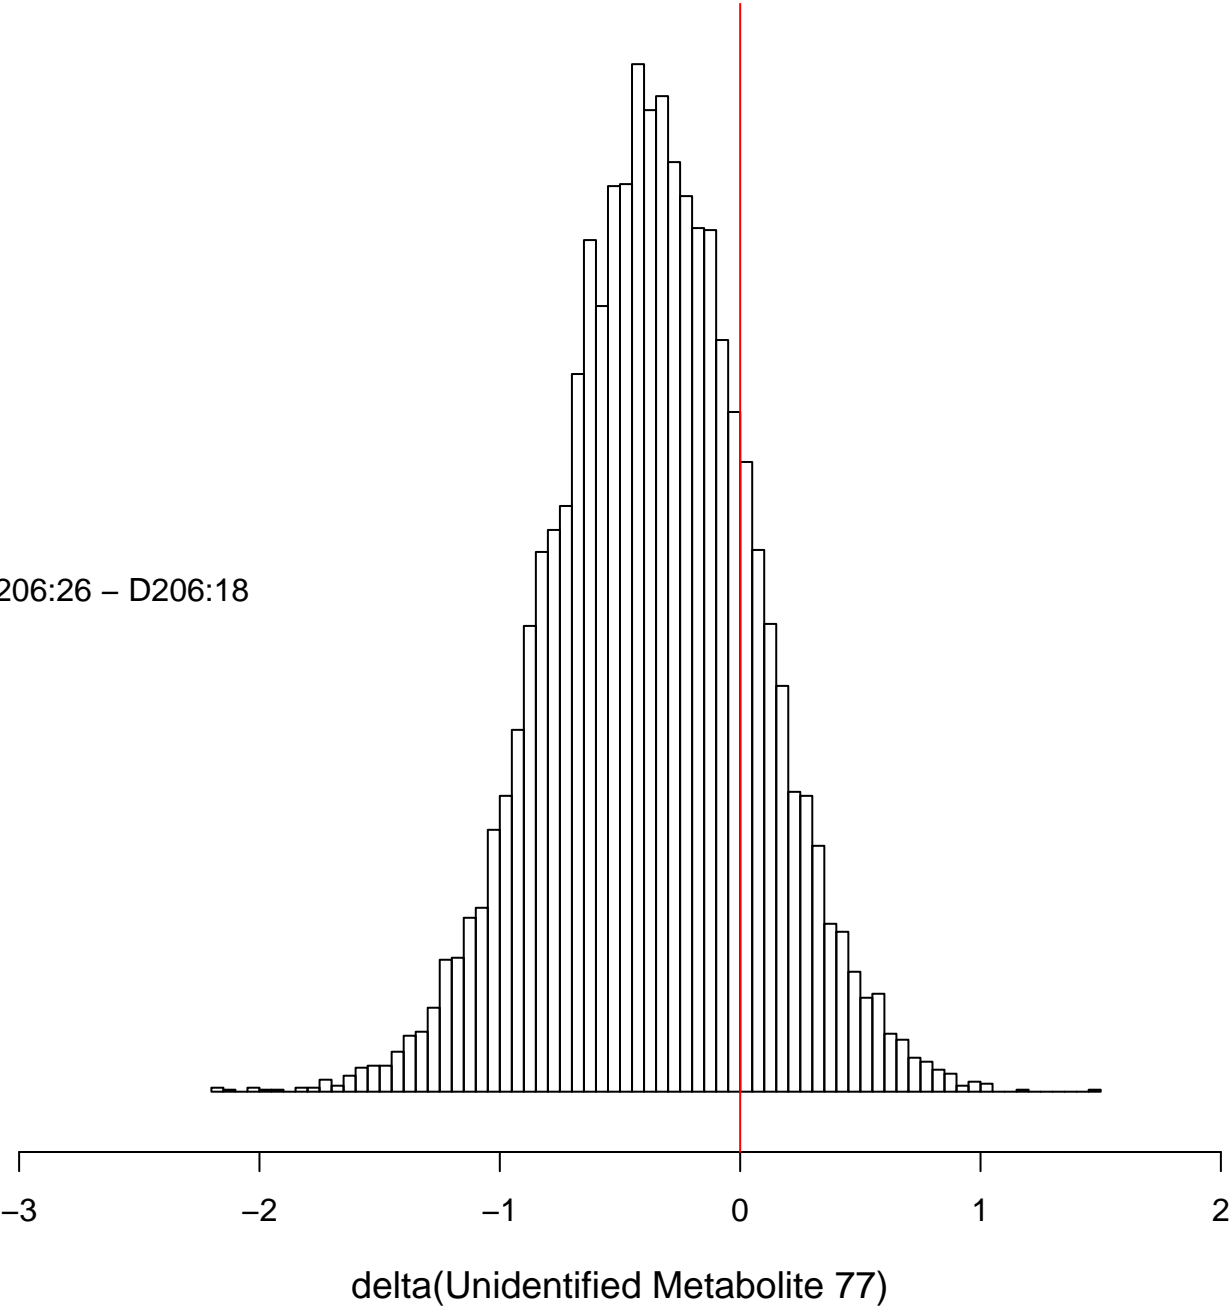

D206:26

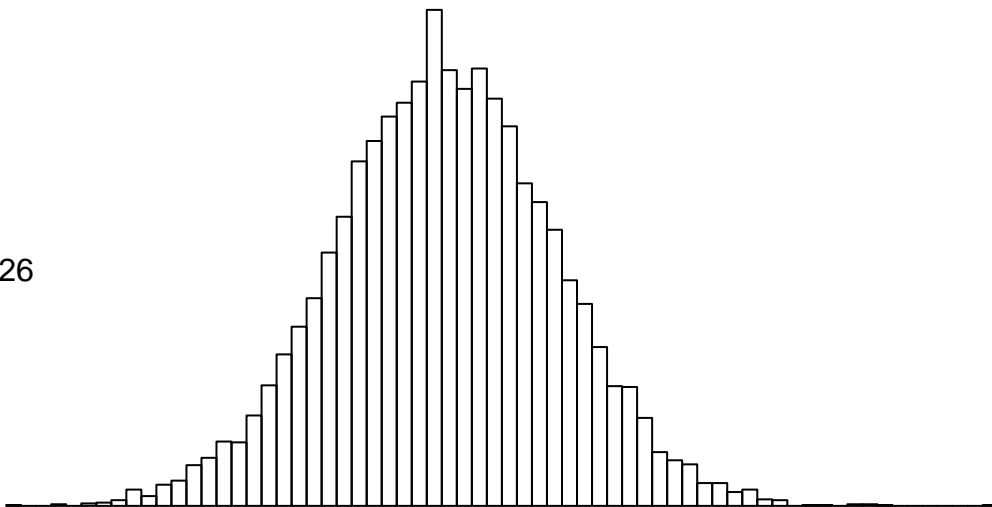

D206:18

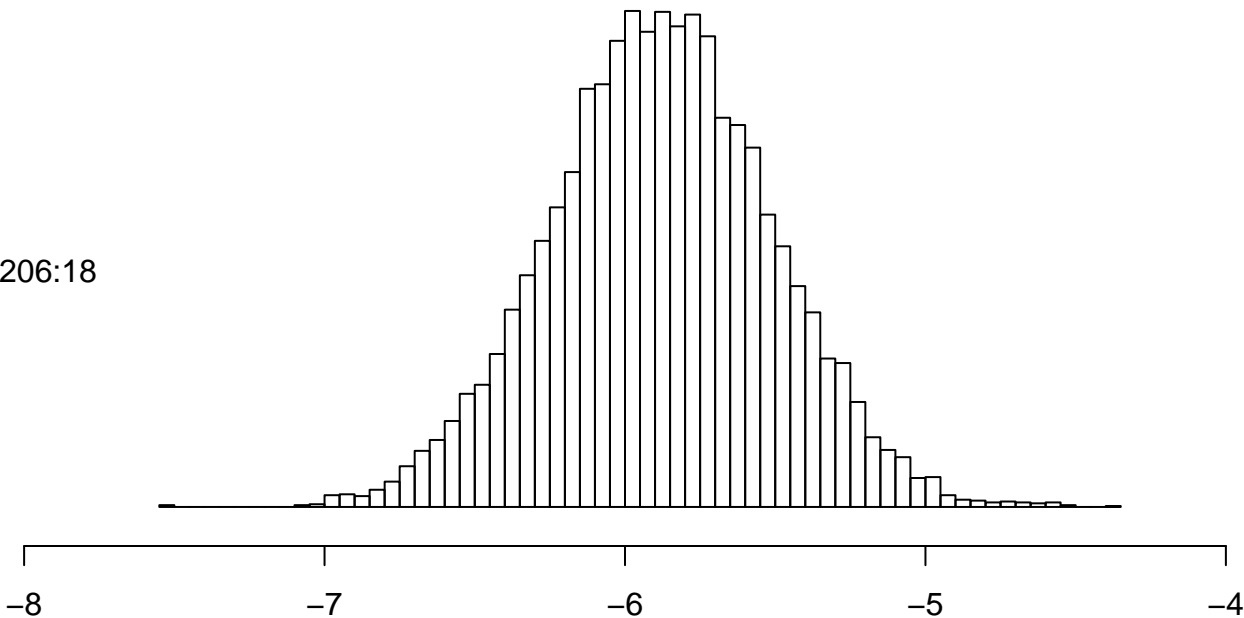

Unidentified Metabolite 78

D206:26 – D206:18

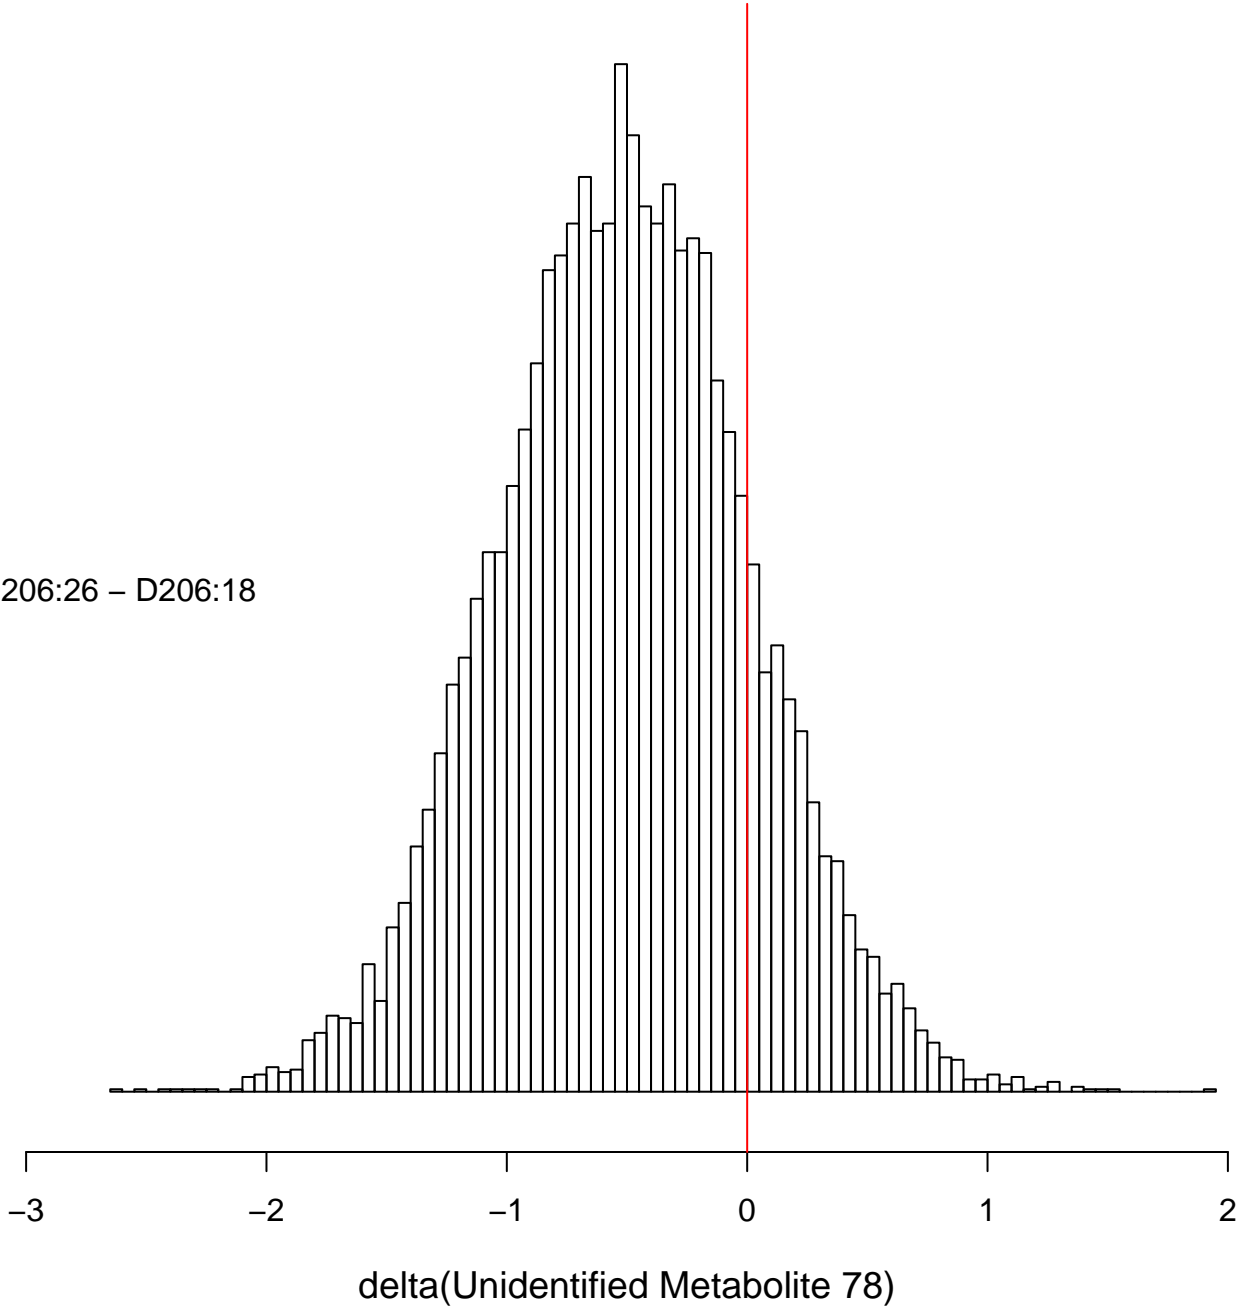



D206:26

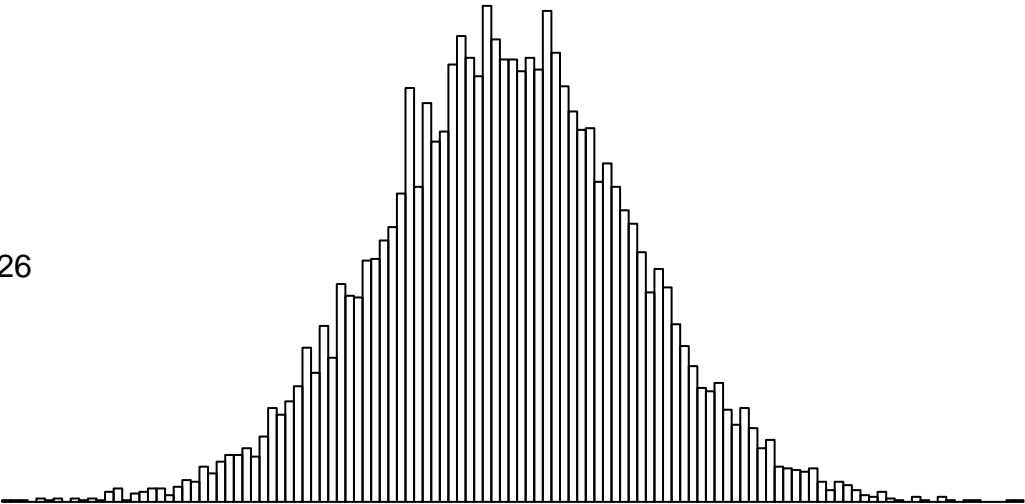

D206:18

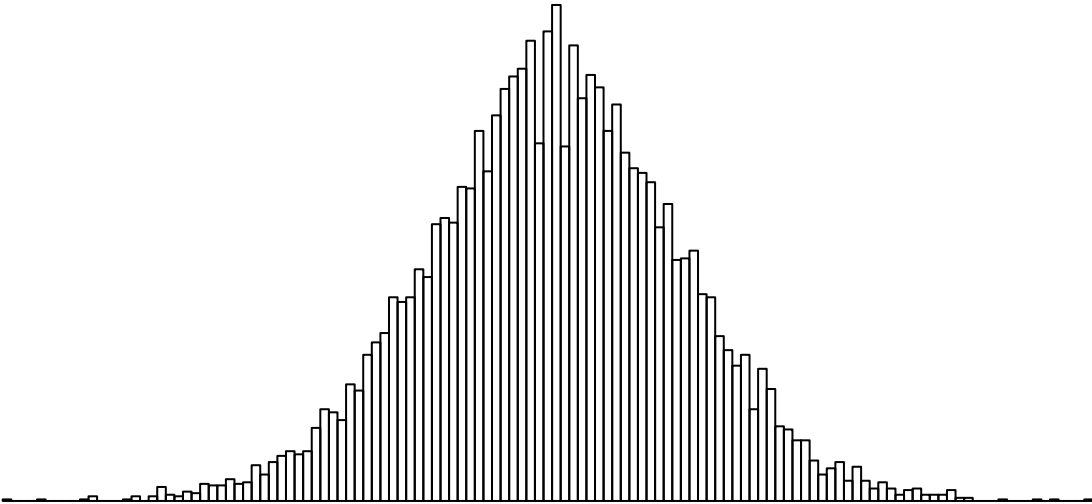

-8.5

-8.0

-7.5

Acid 2

D206:26 – D206:18

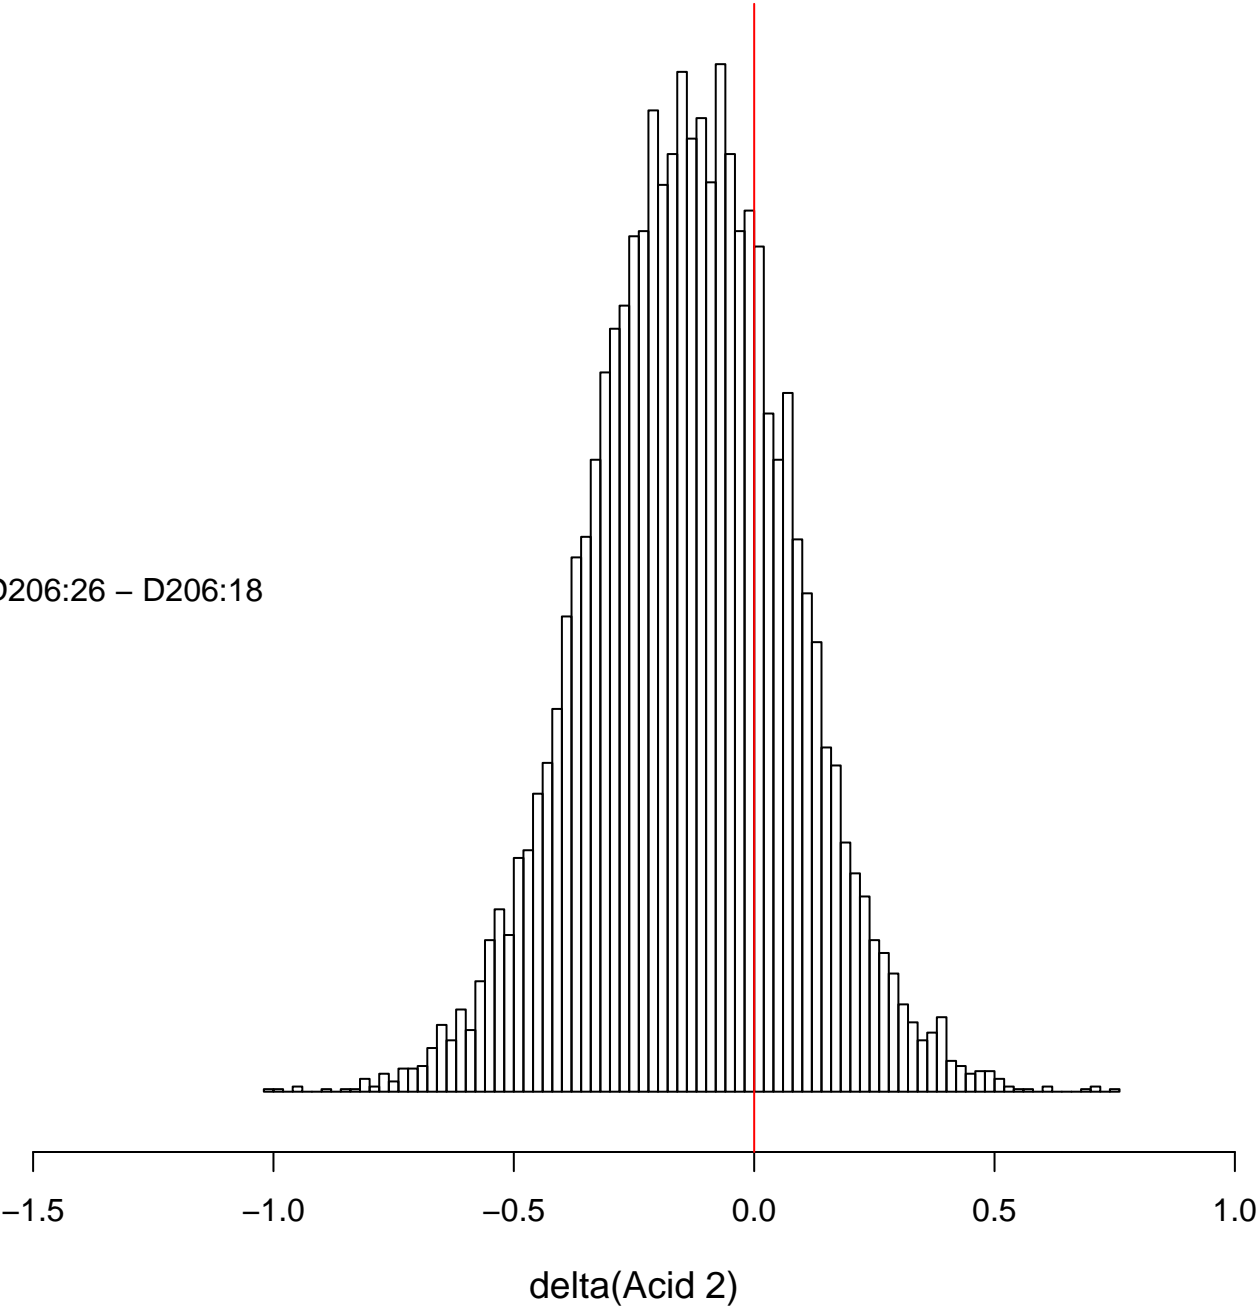

D206:26

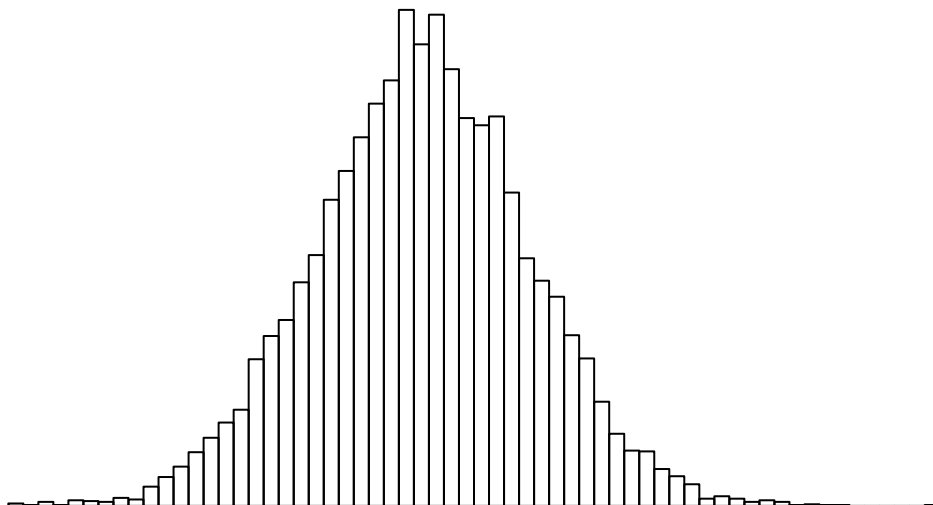

D206:18

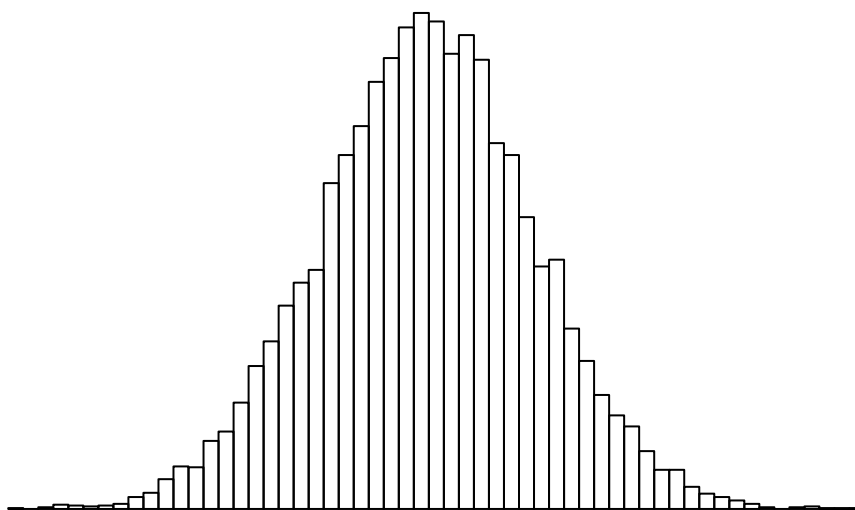

-8

-7

-6

-5

-4

Acid 3

D206:26 – D206:18

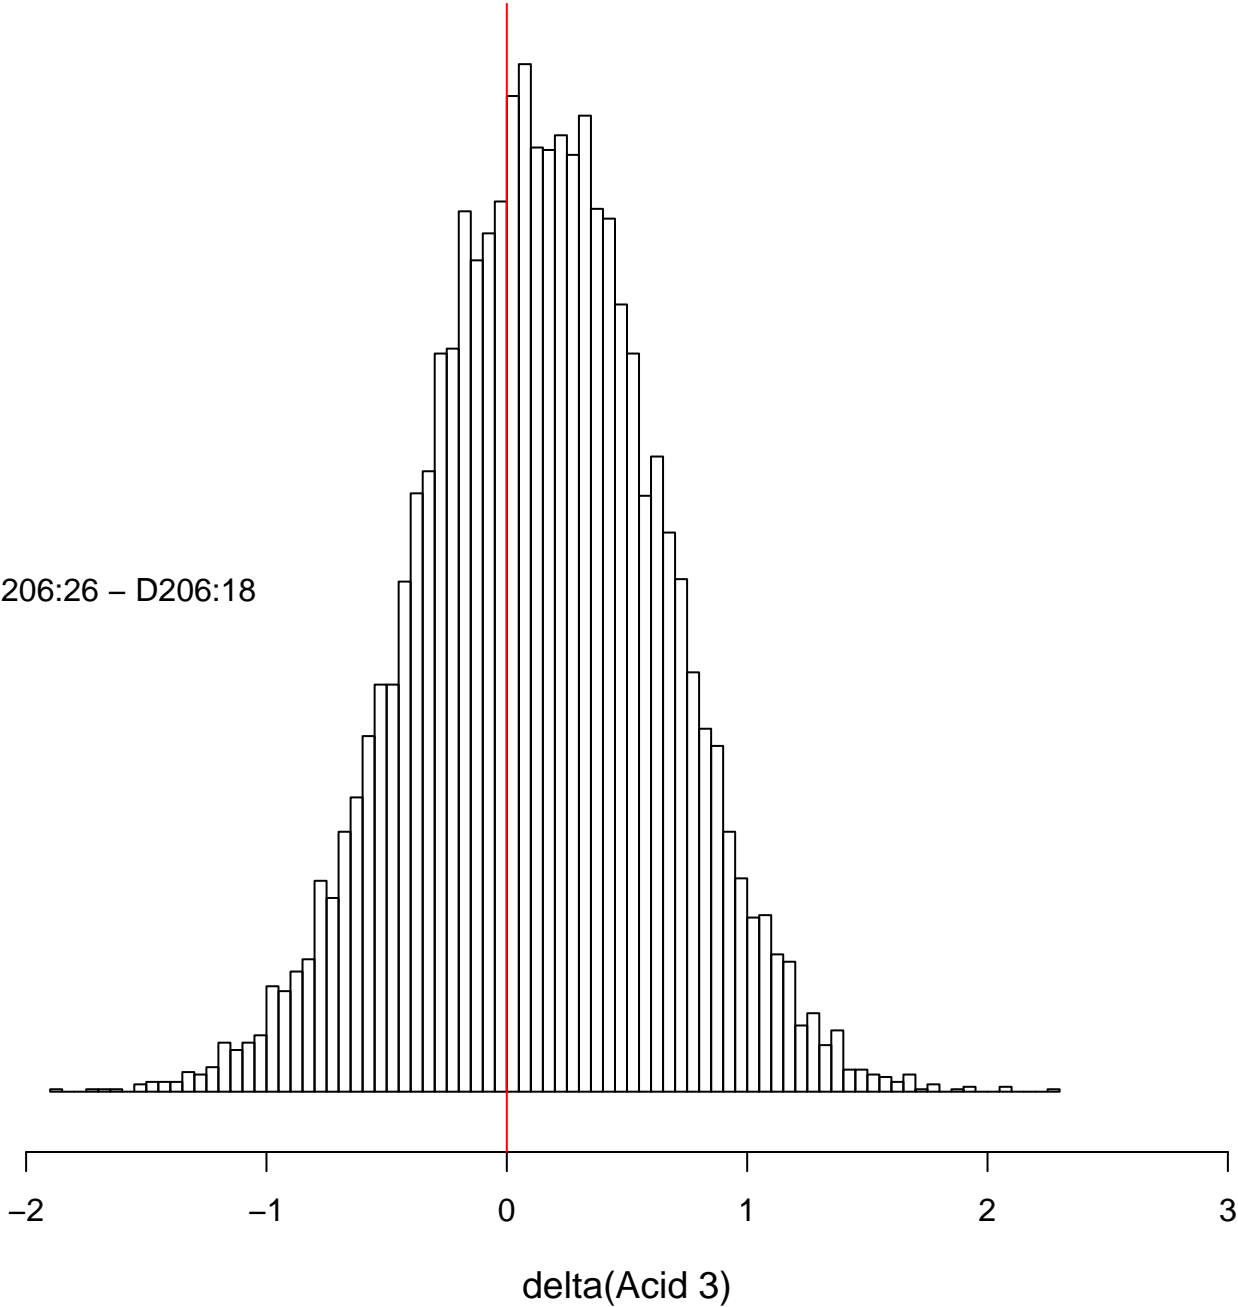

D206:26

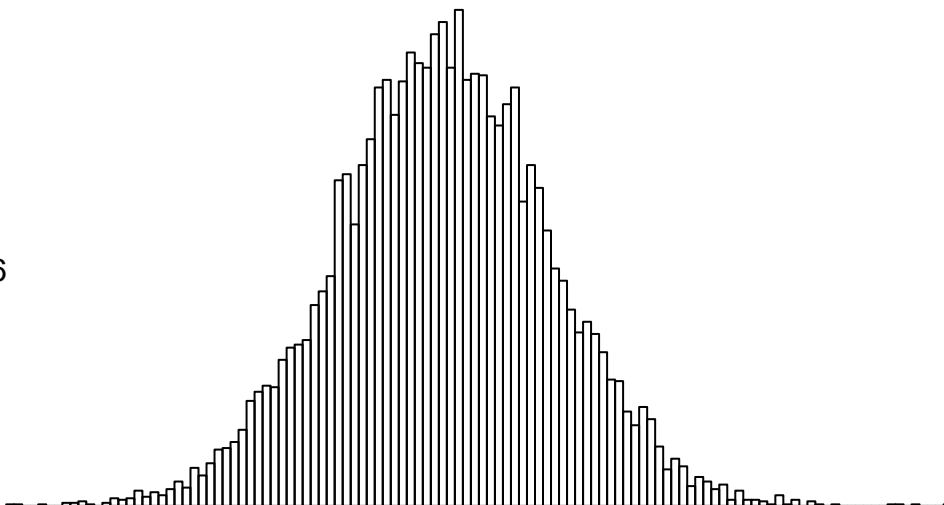

D206:18

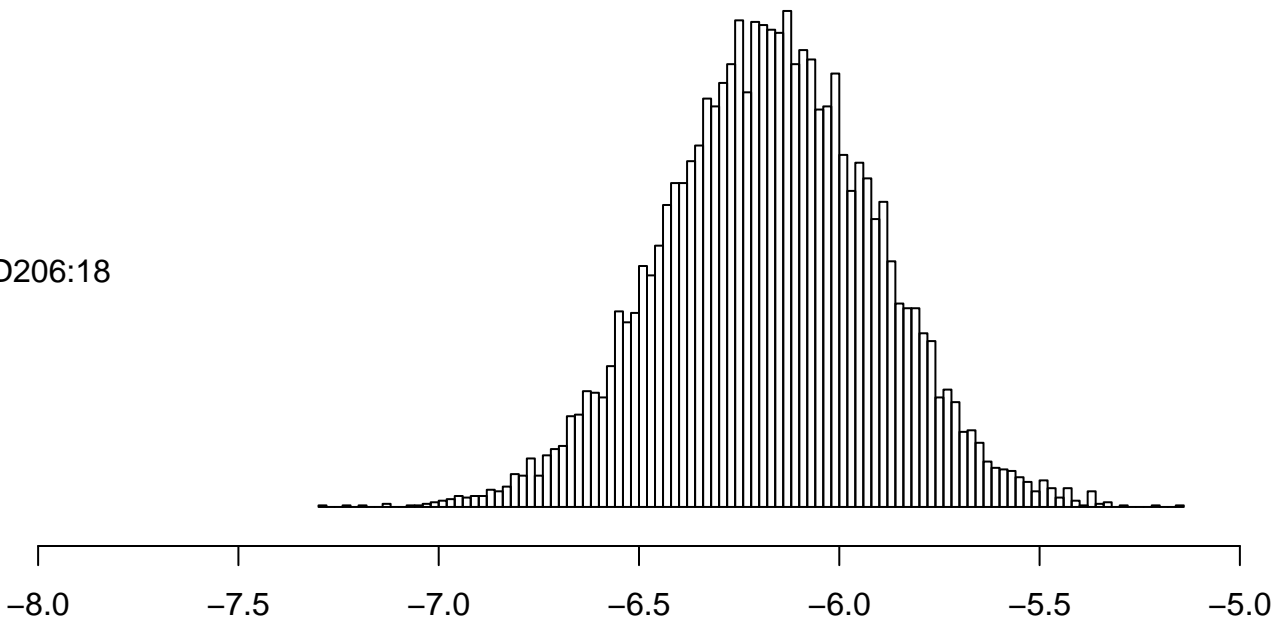

Acid 6

D206:26 – D206:18

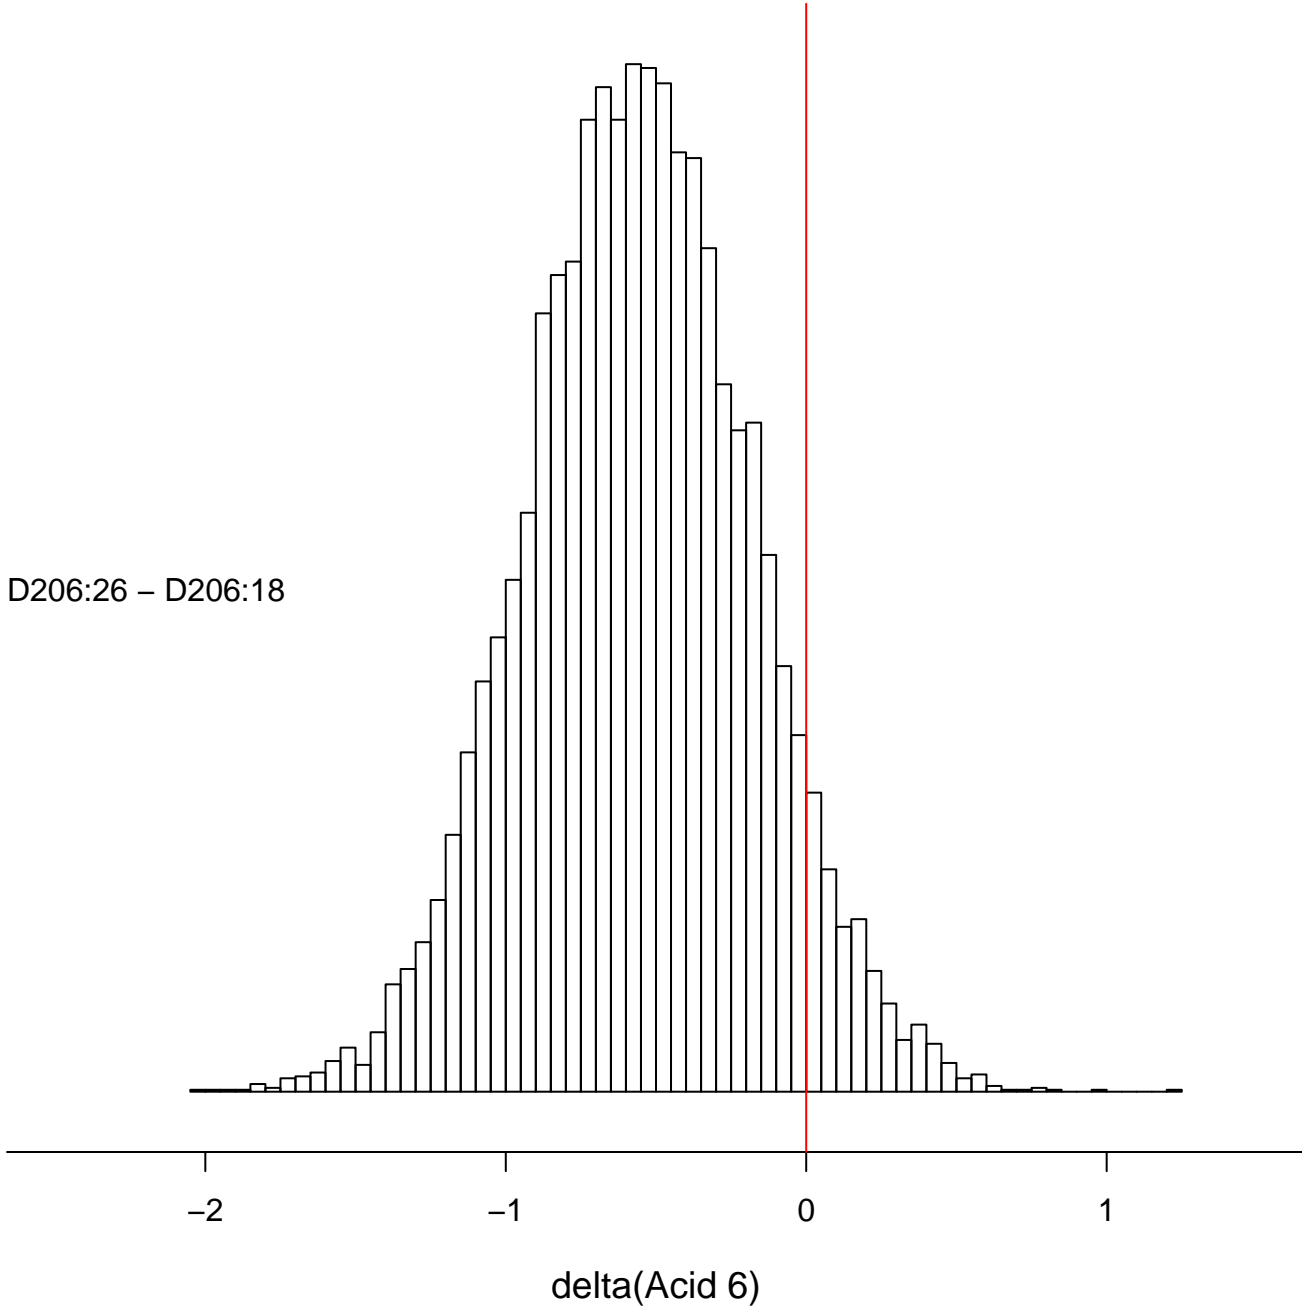

D206:26

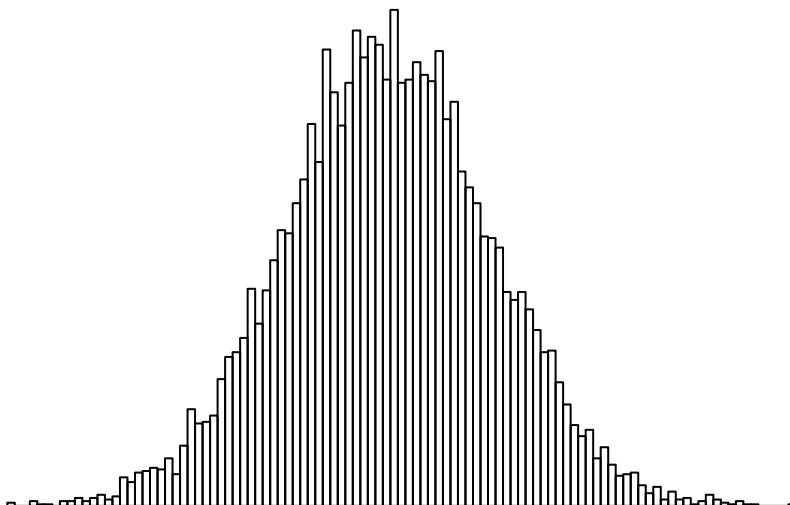

D206:18

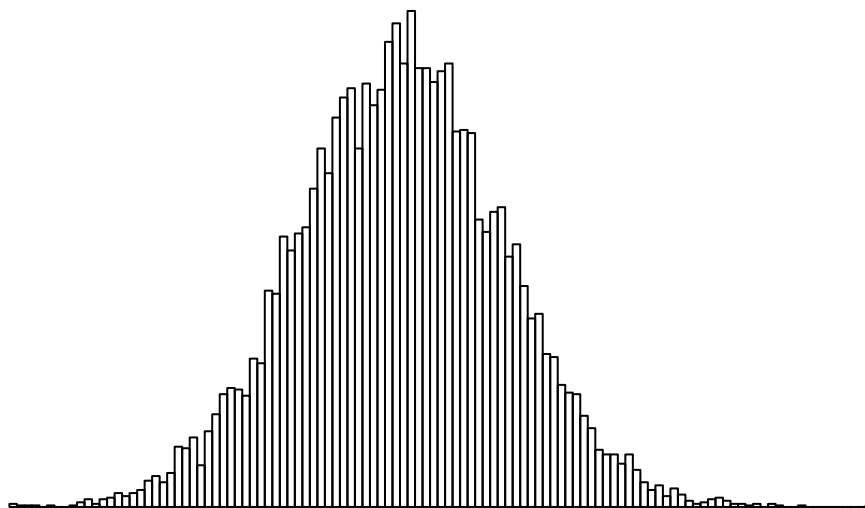

-8.0

-7.5

-7.0

-6.5

Acid 7

D206:26 – D206:18

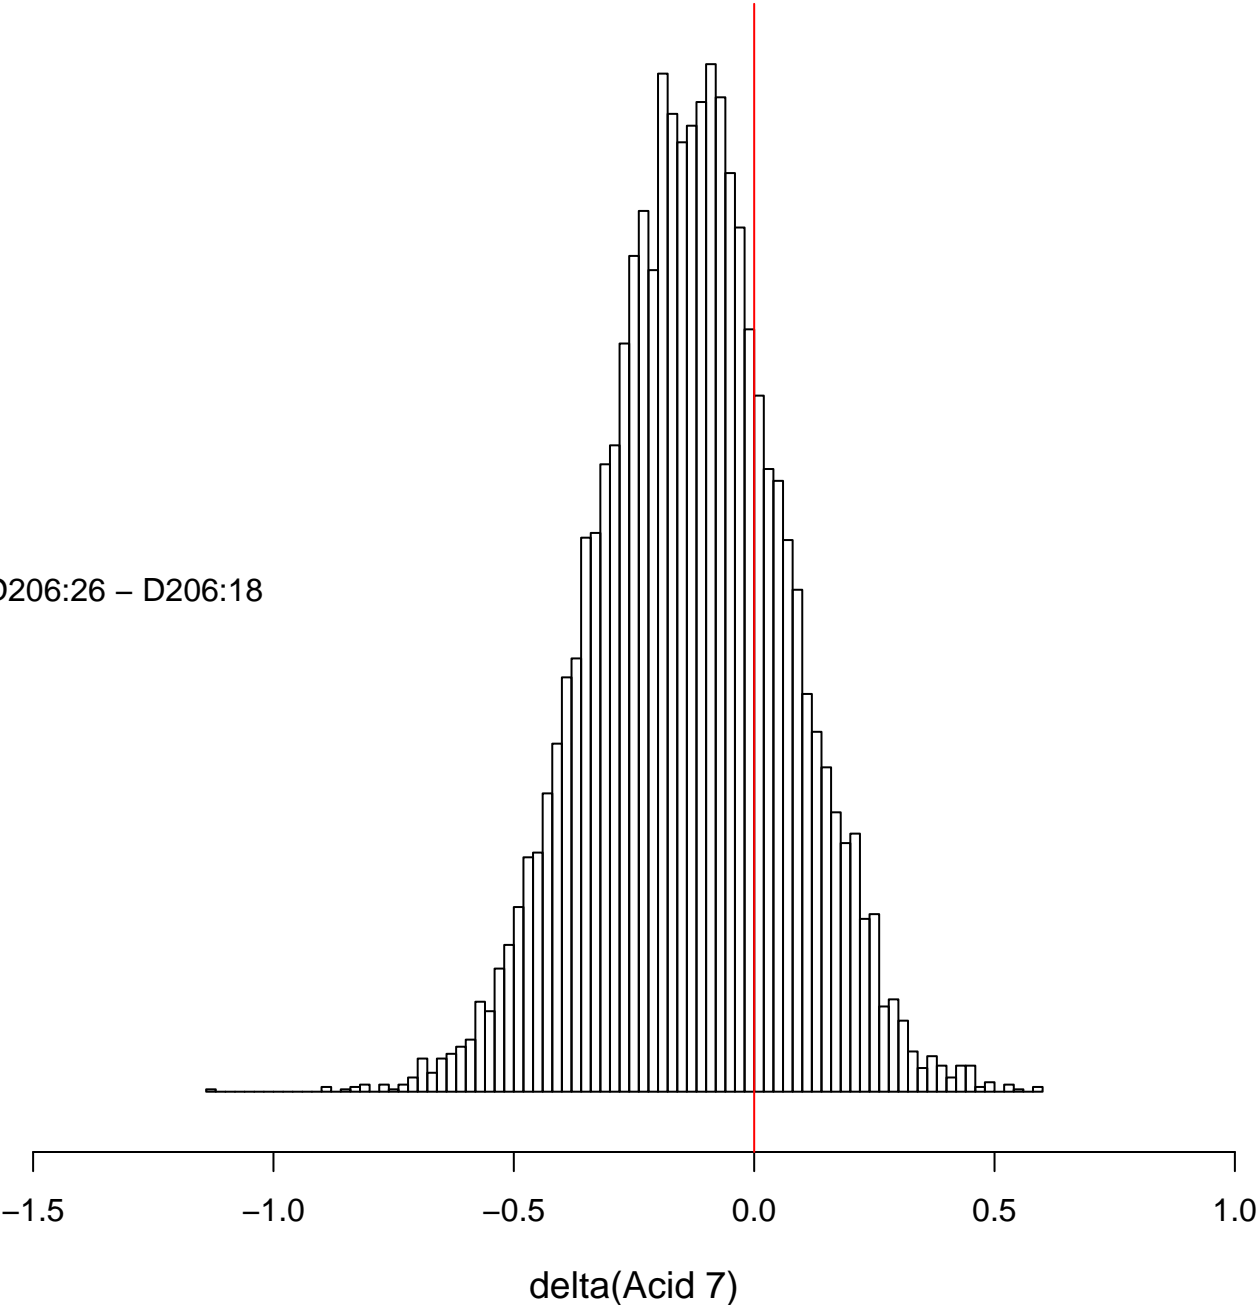



D206:26

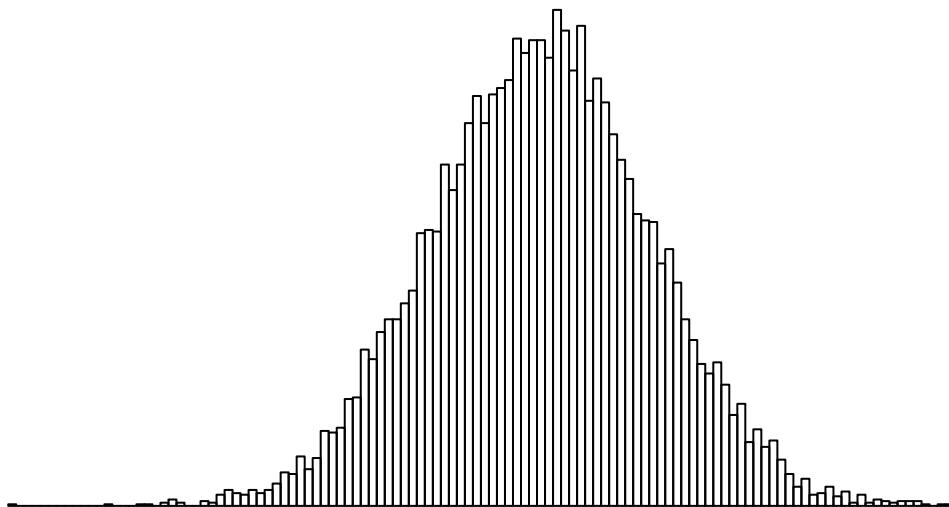

D206:18

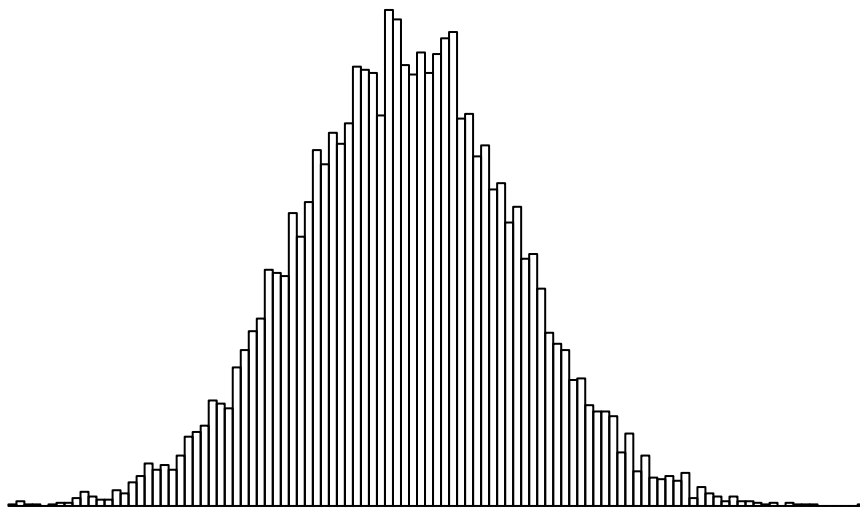

-5.0

-4.5

-4.0

-3.5

-3.0

-2.5

-2.0

Acid 8

D206:26 – D206:18

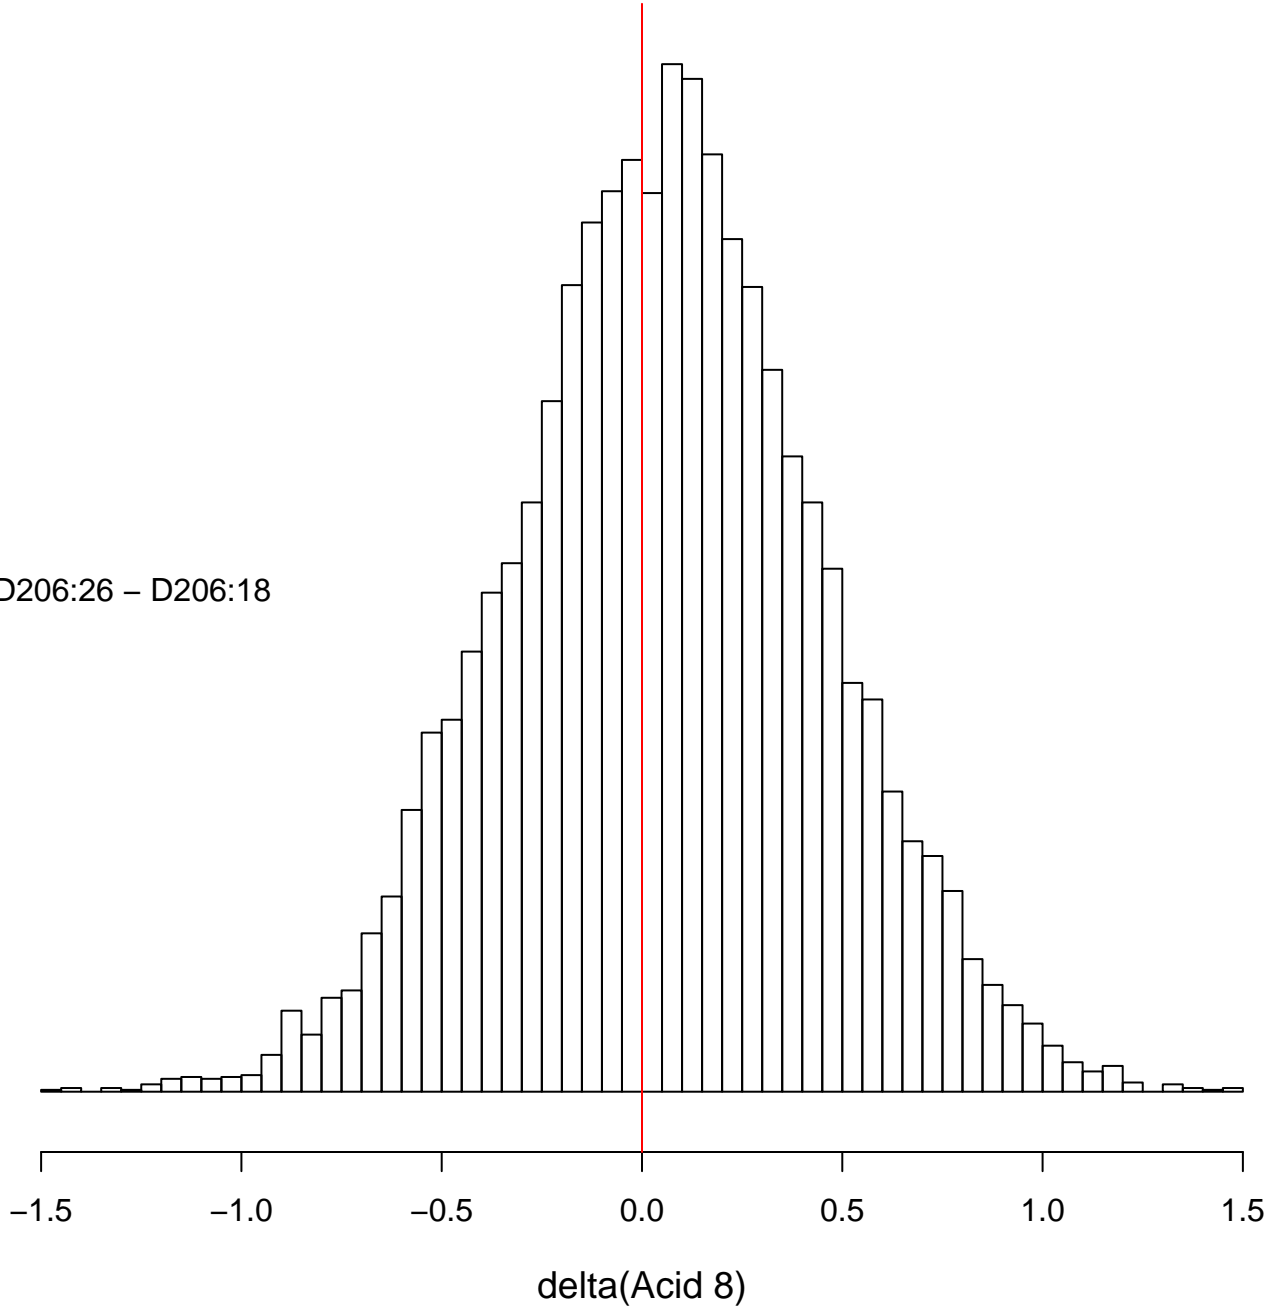

D206:26

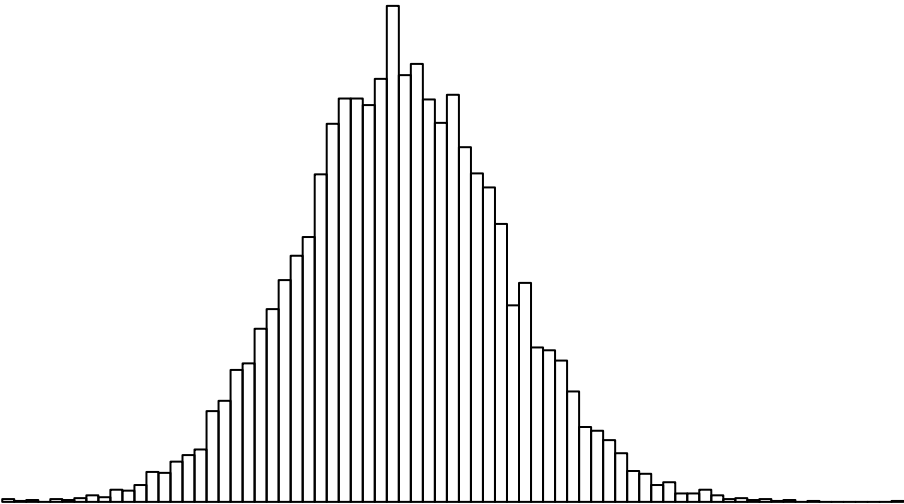

D206:18

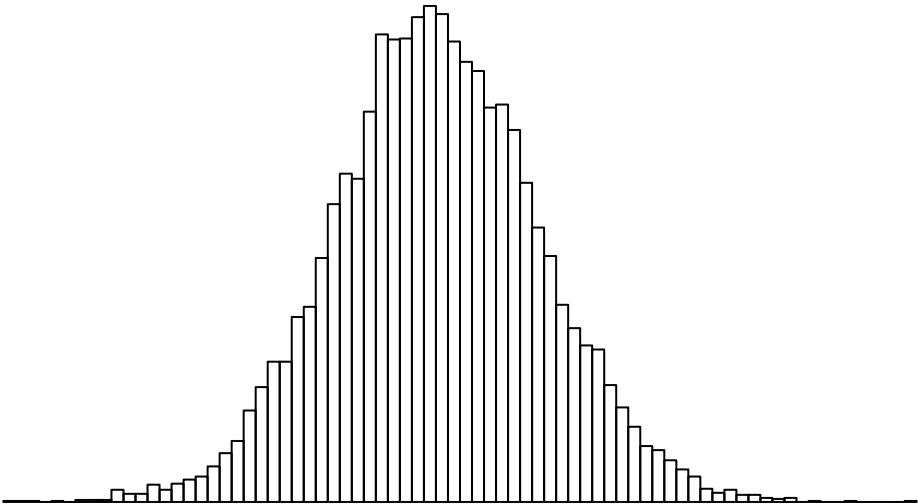

Acid 9

D206:26 – D206:18

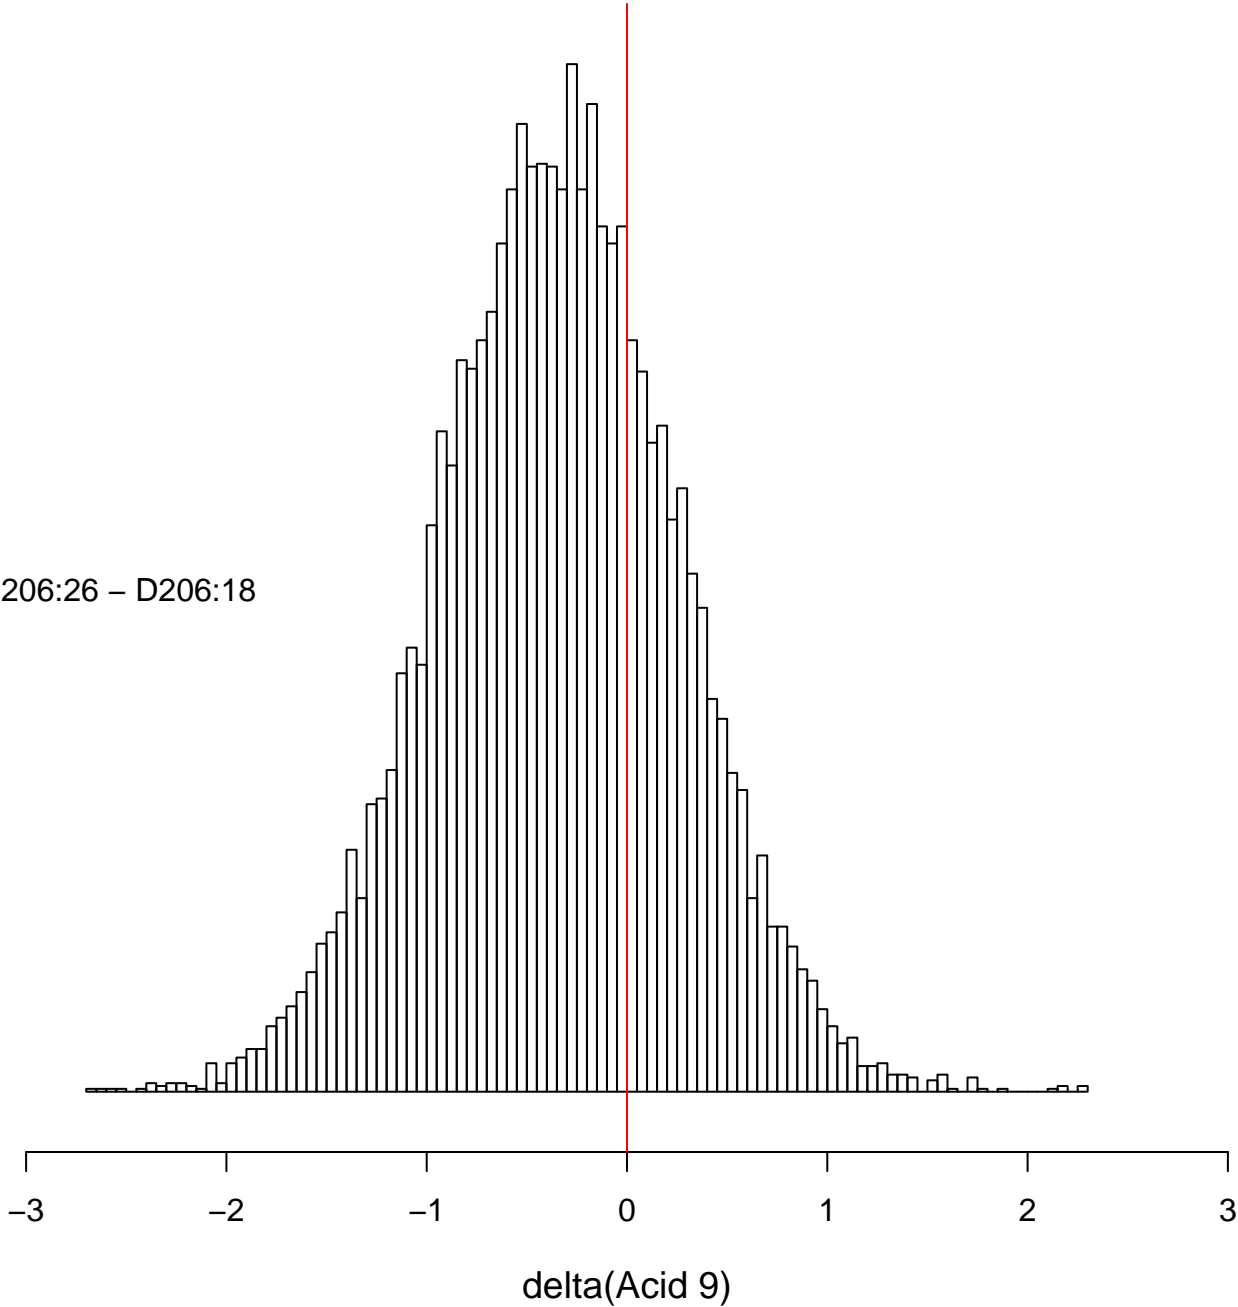

D206:26

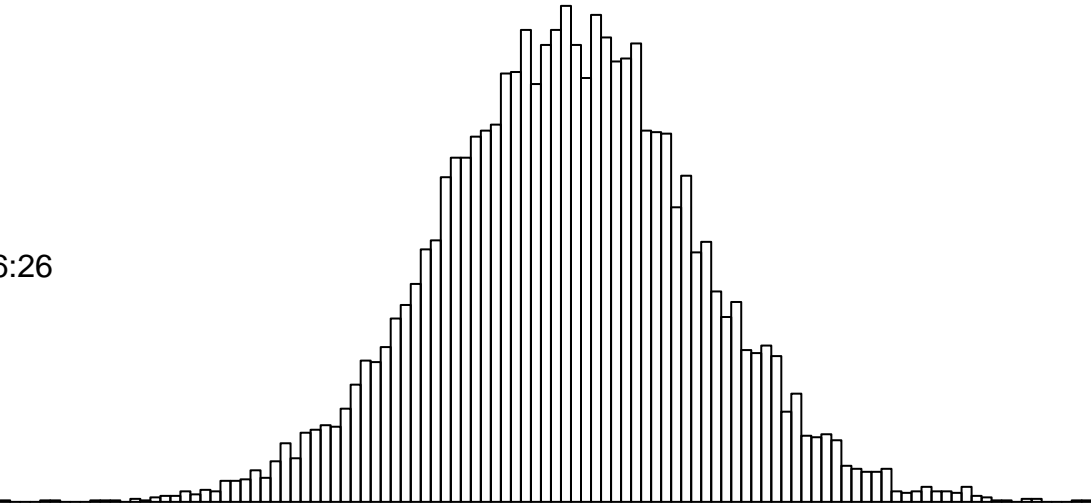

D206:18

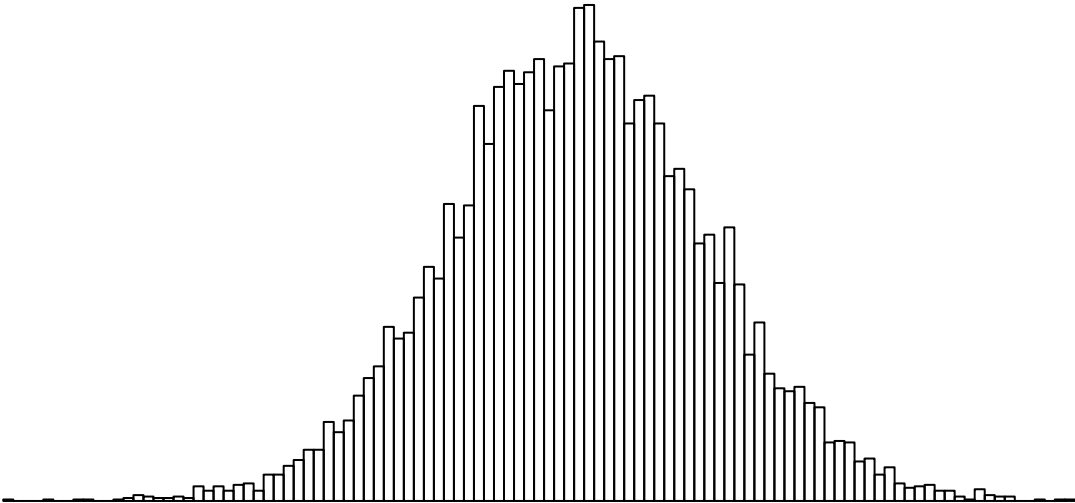

-11      -10      -9      -8      -7      -6      -5

Acid 10

D206:26 – D206:18

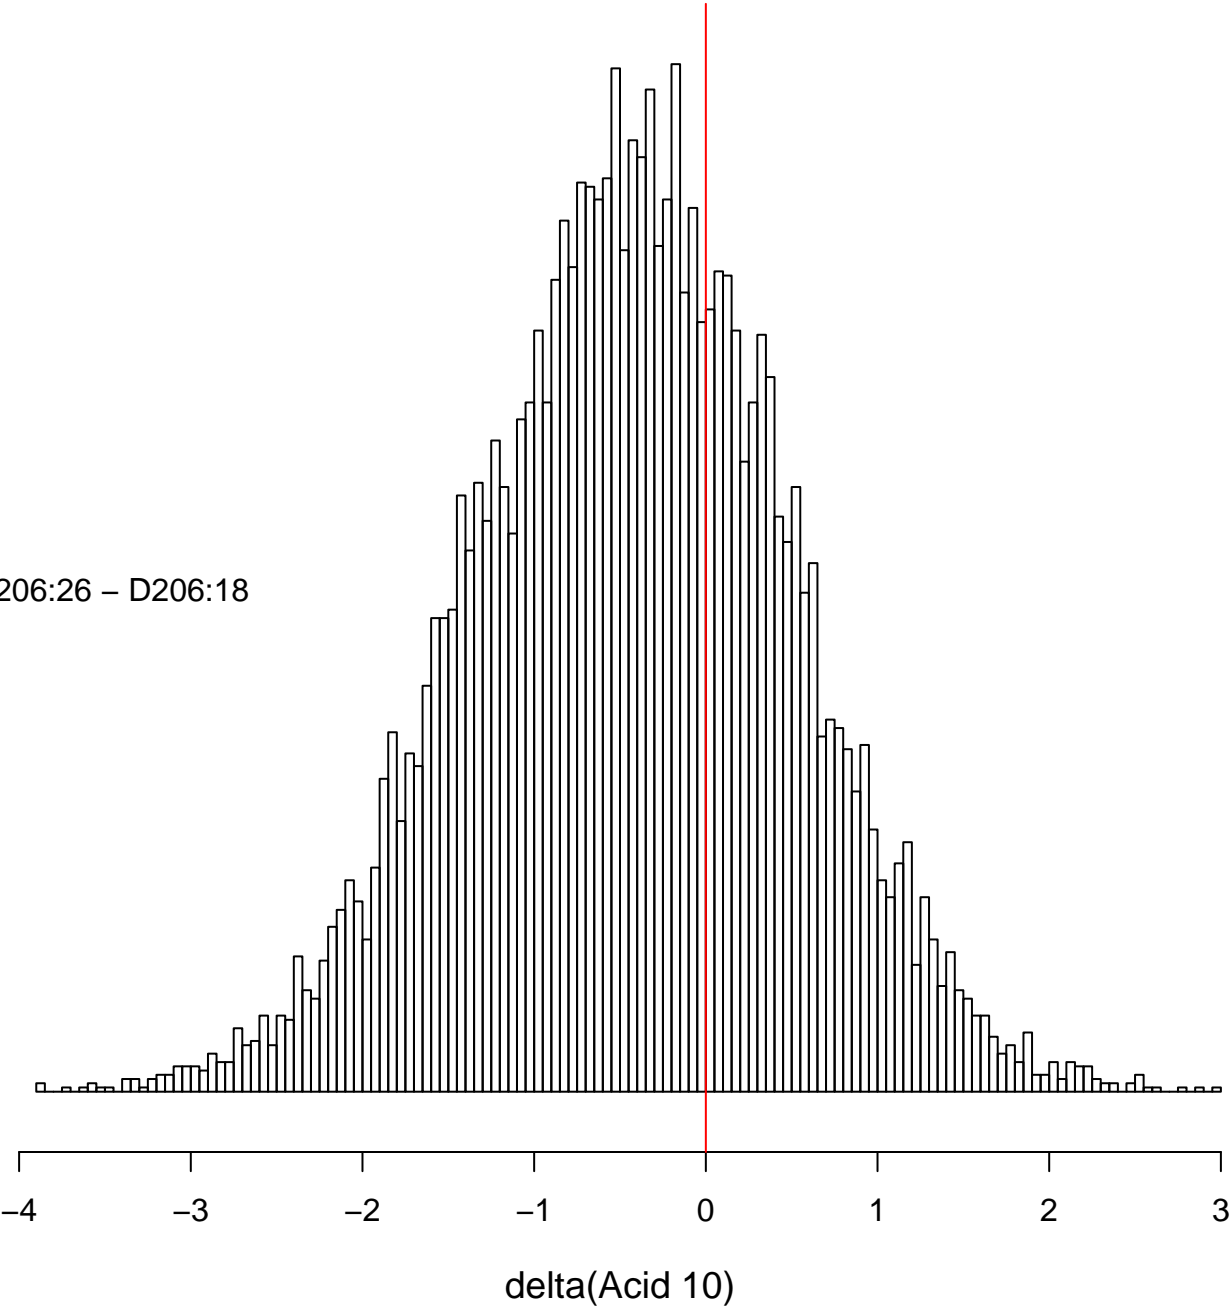

D206:26

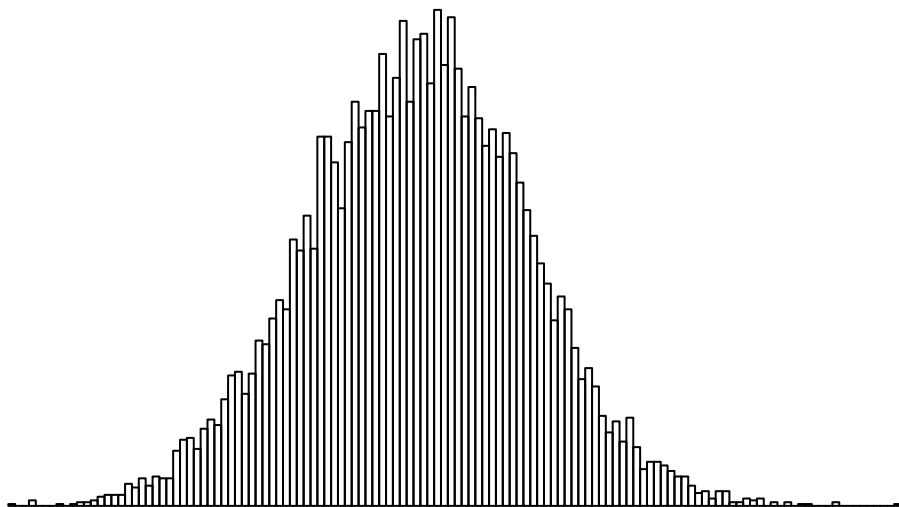

D206:18

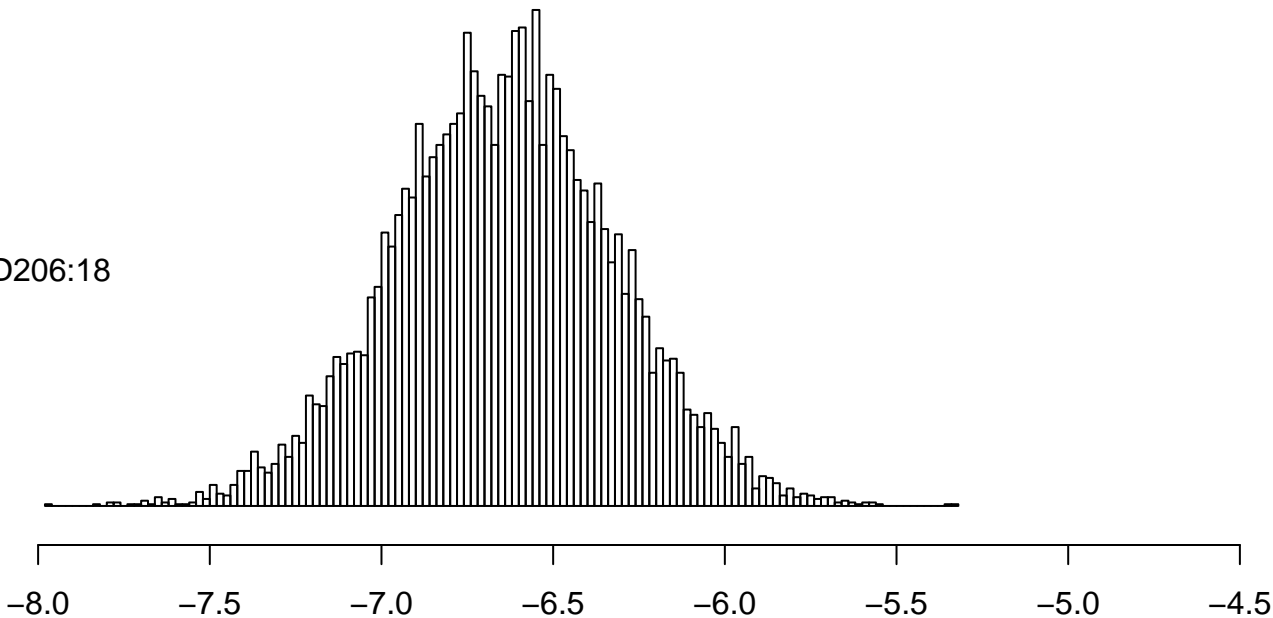

Acid 11

D206:26 – D206:18

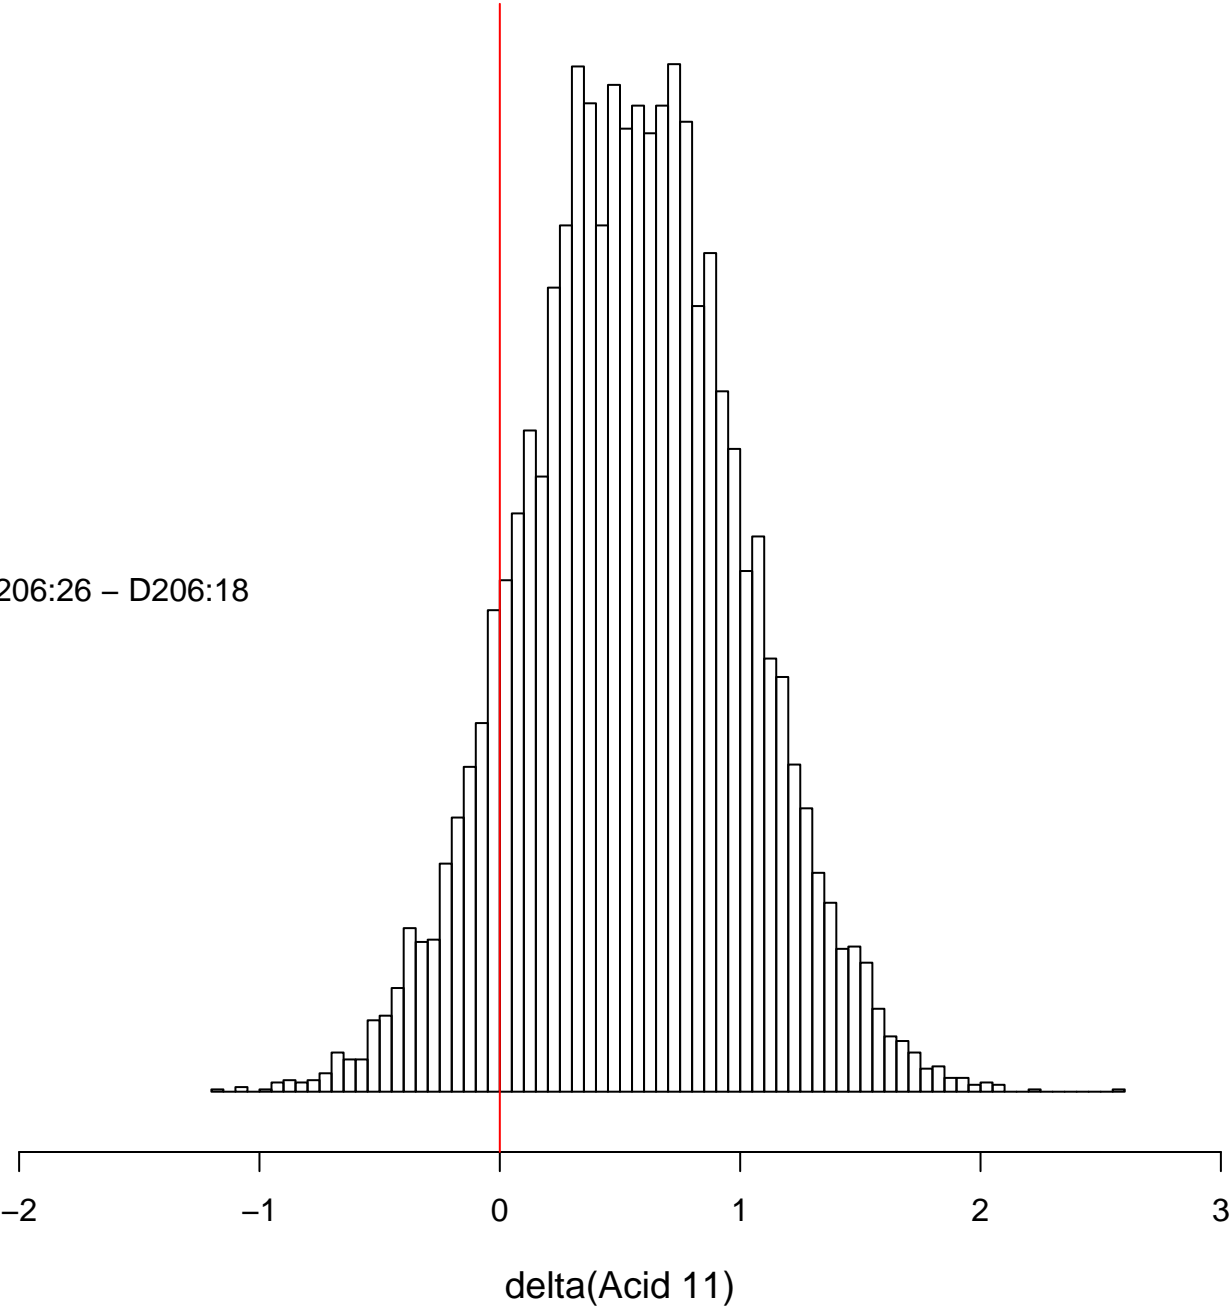



D206:26

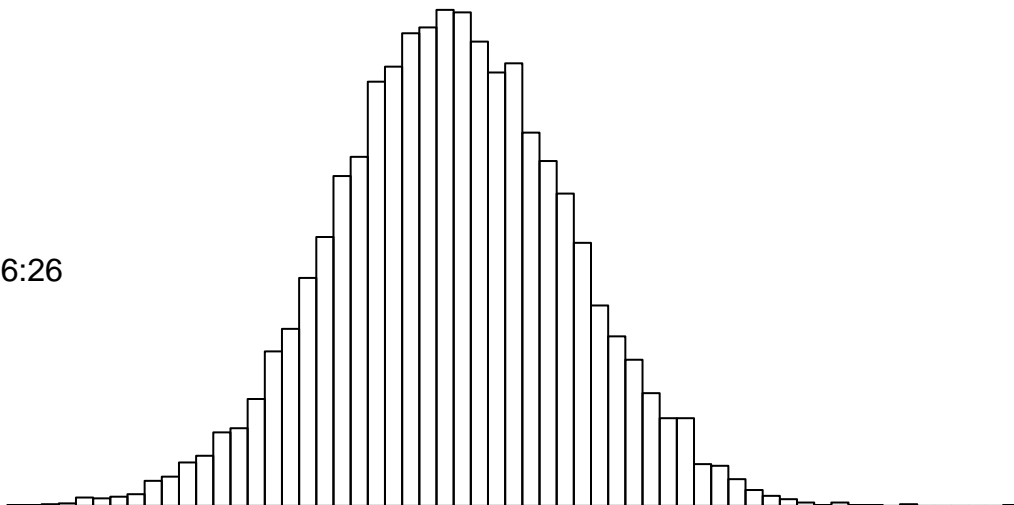

D206:18

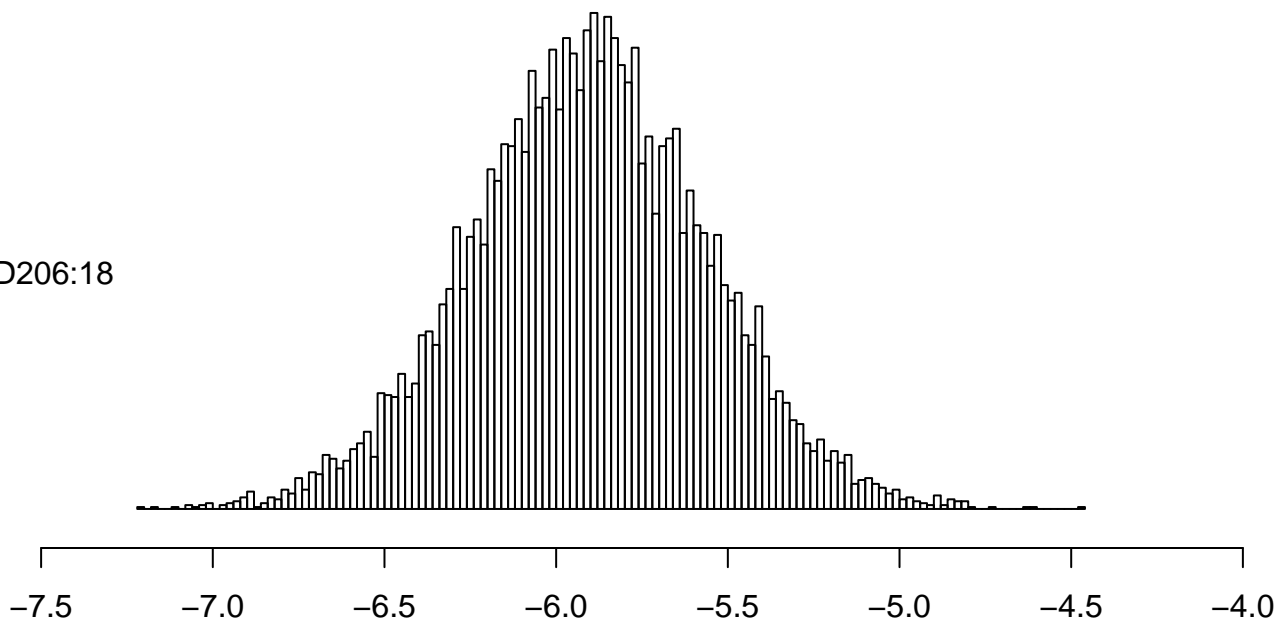

Acid 12

D206:26 – D206:18

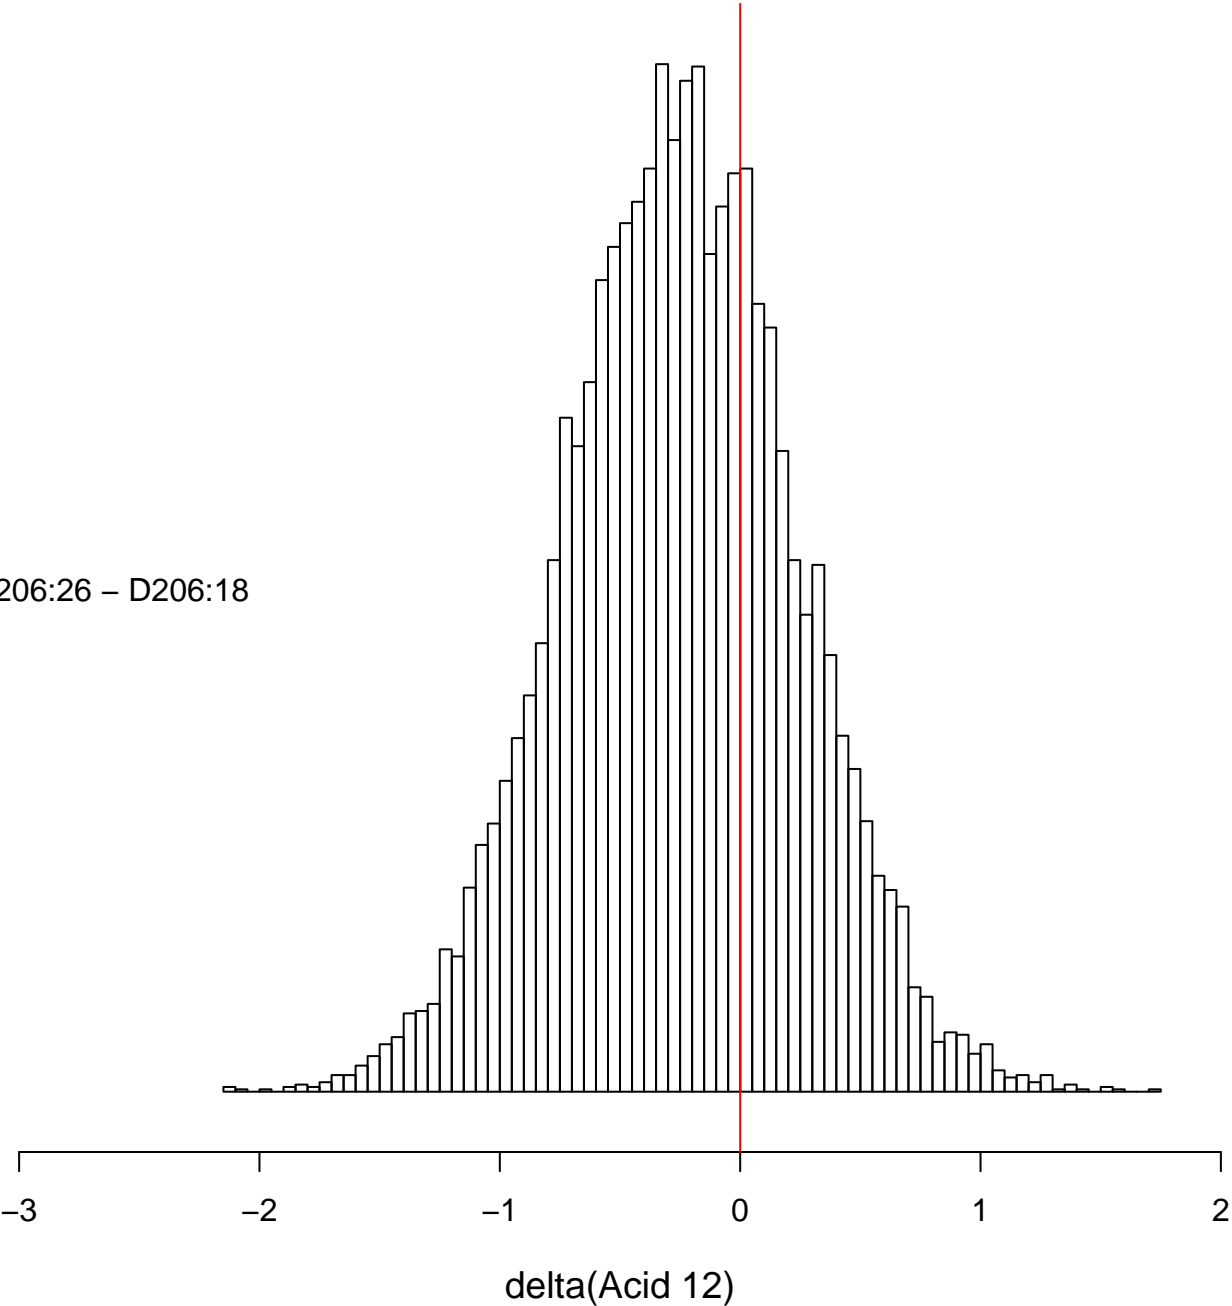

D206:26

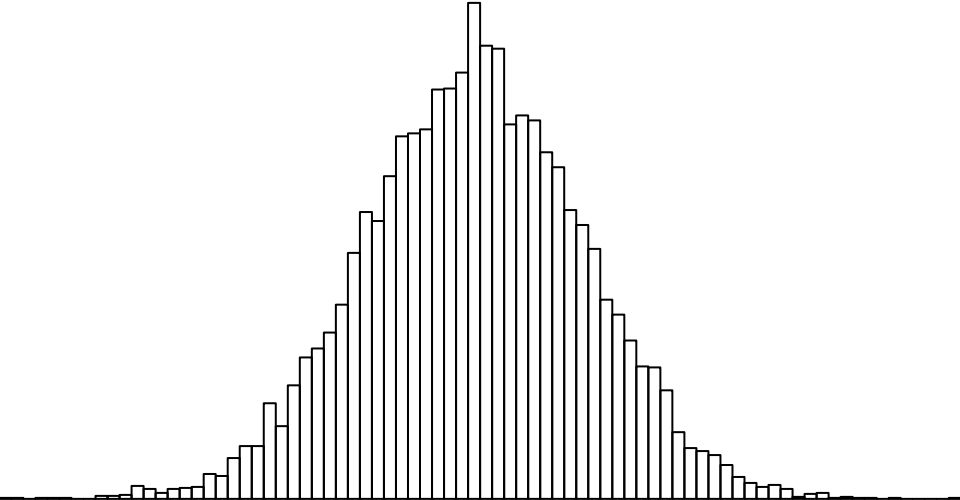

D206:18

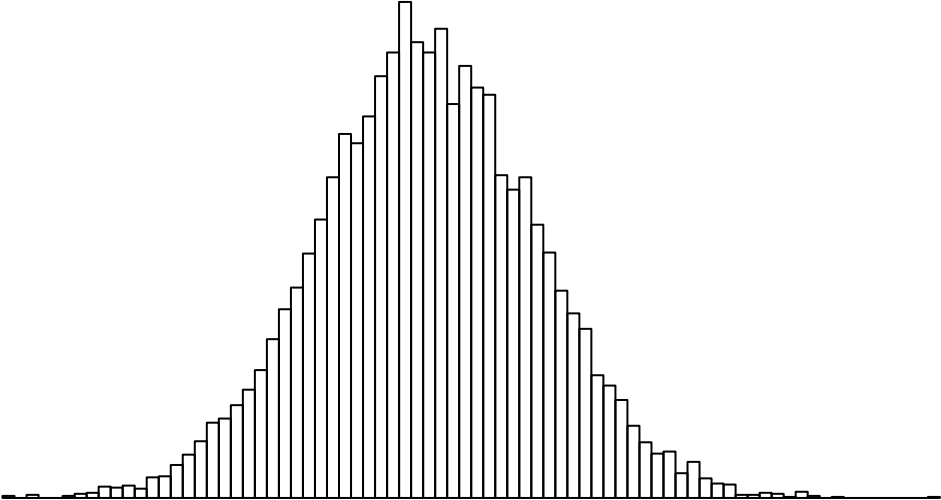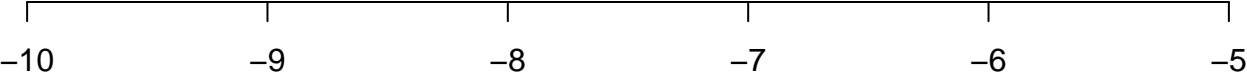

Acid 13

D206:26 – D206:18

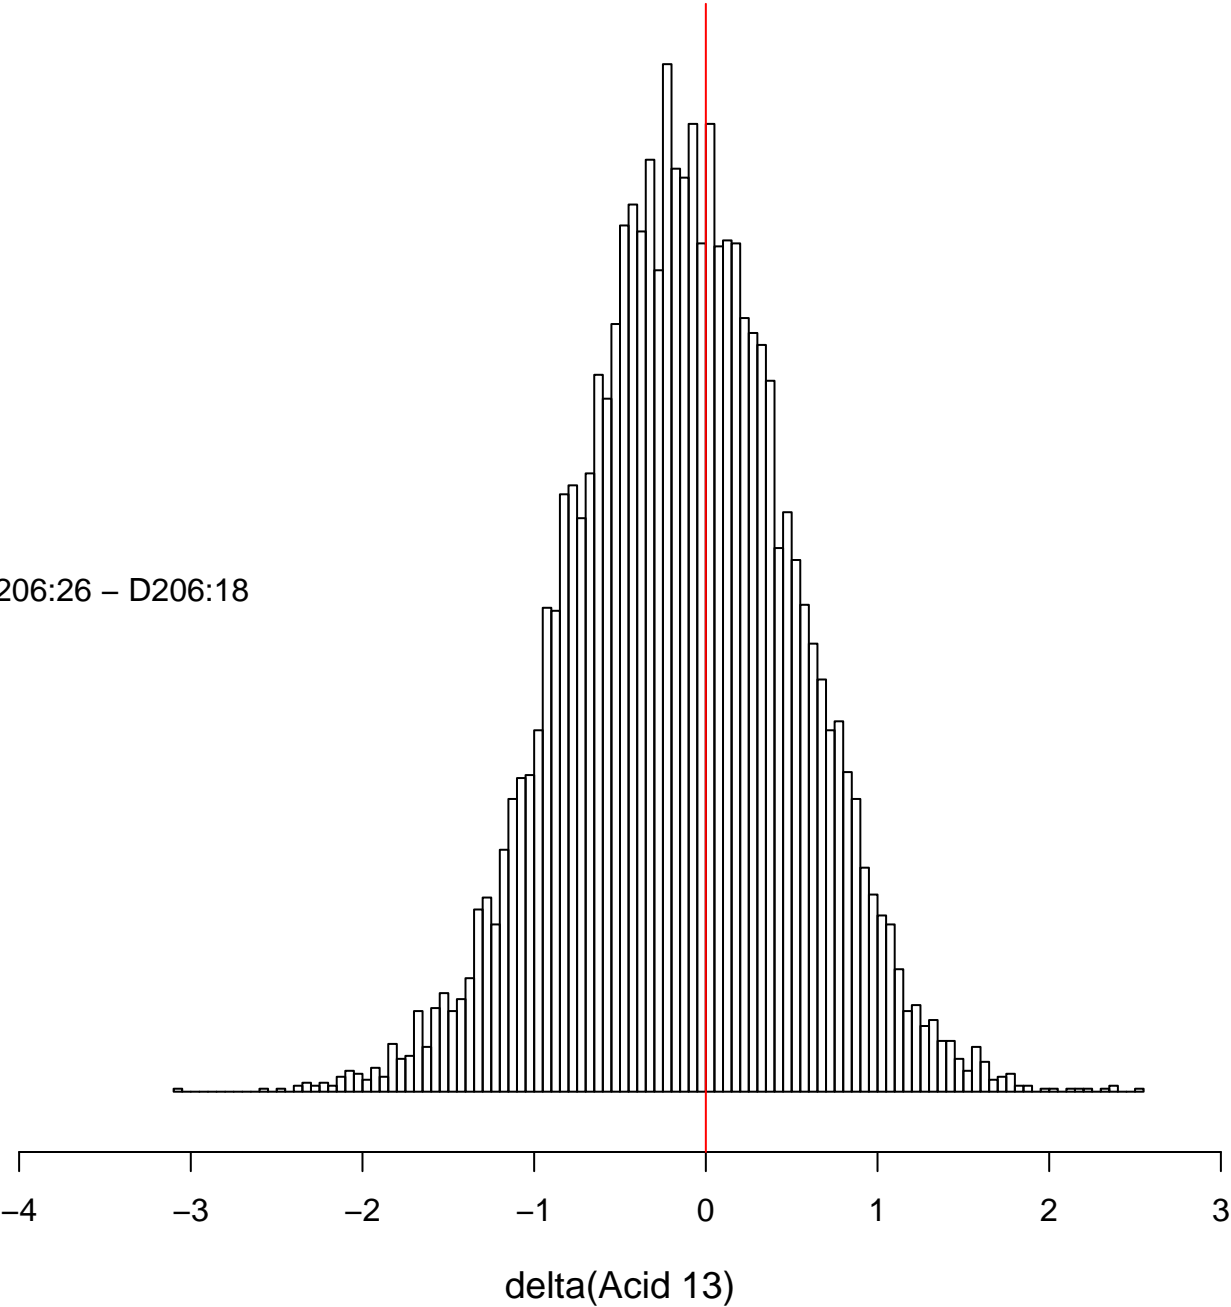

D206:26

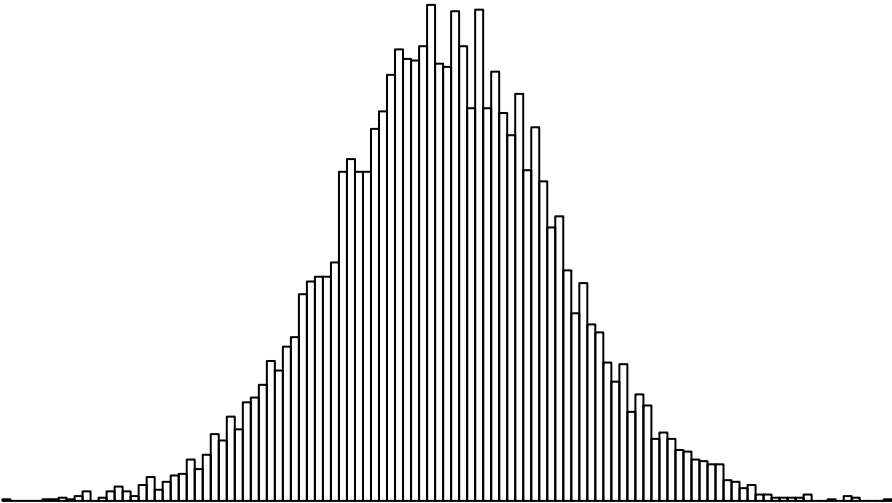

D206:18

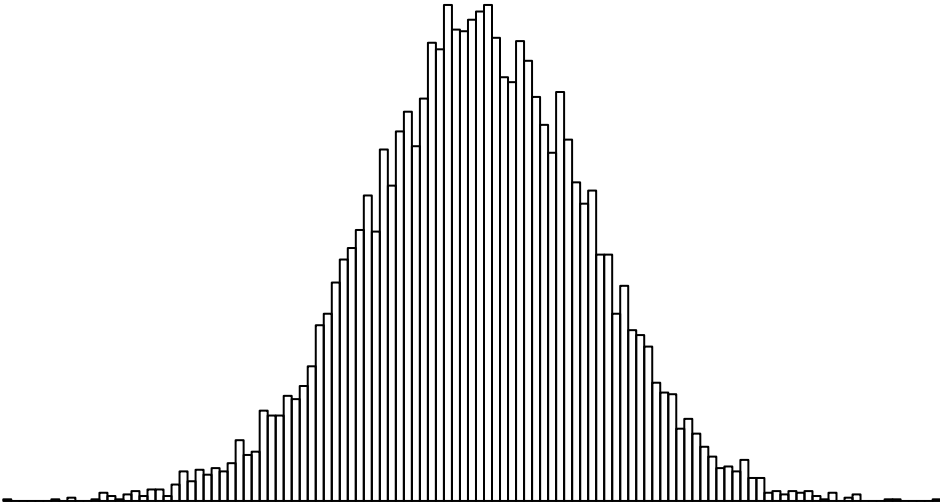

-8.0      -7.5      -7.0      -6.5      -6.0      -5.5      -5.0

Acid 14

D206:26 – D206:18

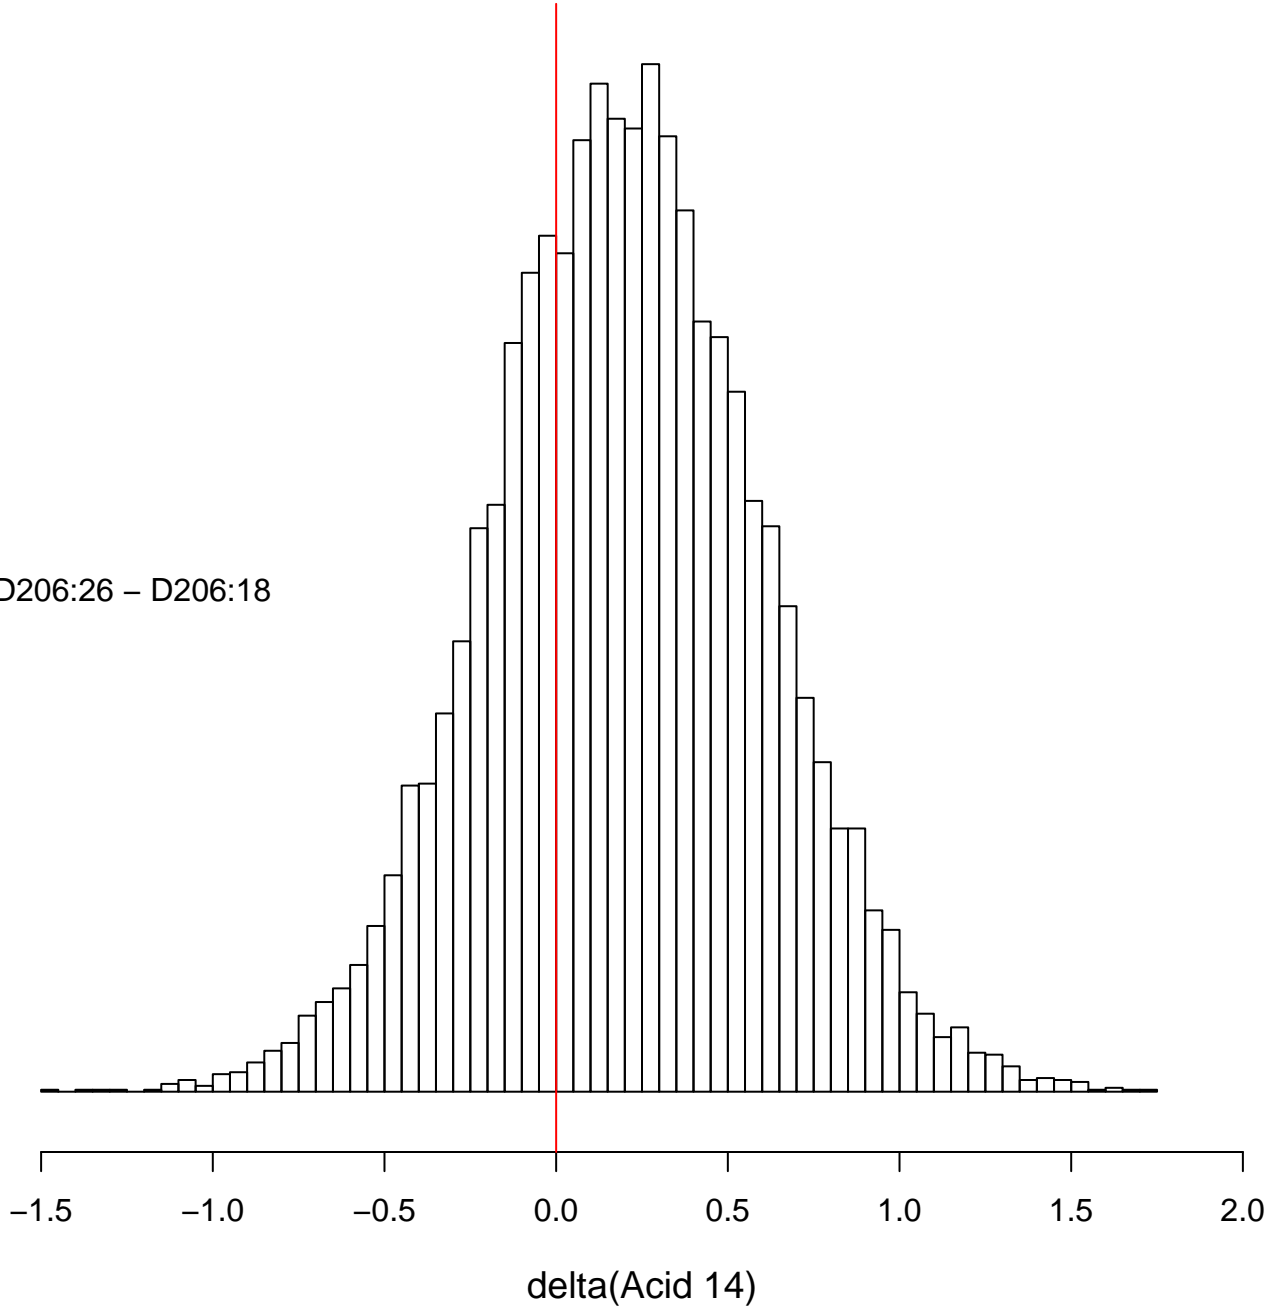

Supplement: s1 [file s1]
