# Supplementary material for: Taxonomic and Environmental Variation of Metabolite Profiles in Marine Dinoflagellates of the Genus Symbiodinium
Source: MDPI journal article supplement (doi:10.3390/metabo5010074), 2015-02-16

A194:26

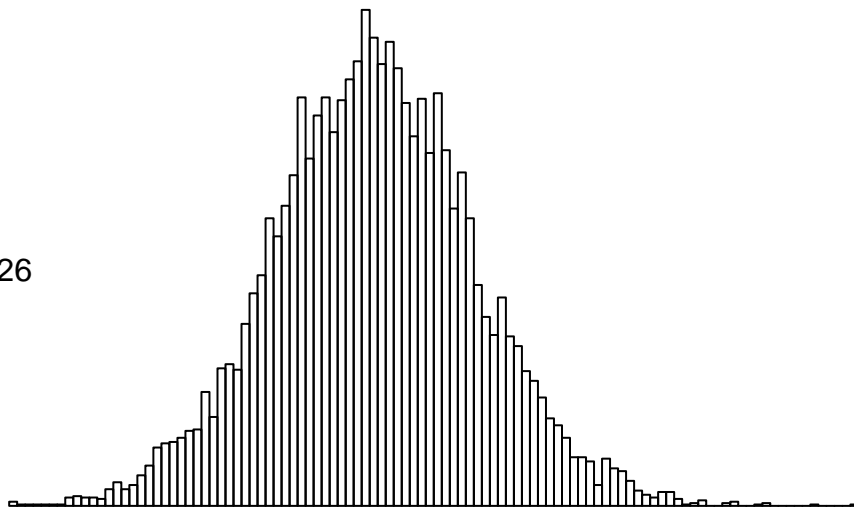

A194:18

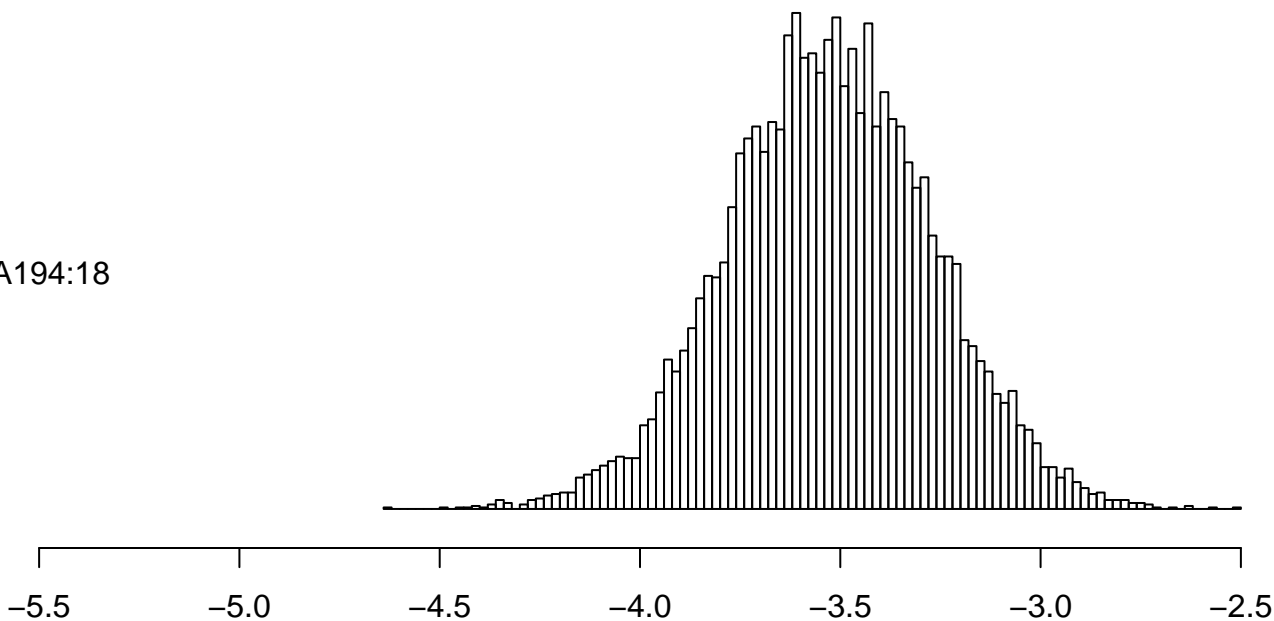

Amino Acid 2

A194:26 – A194:18

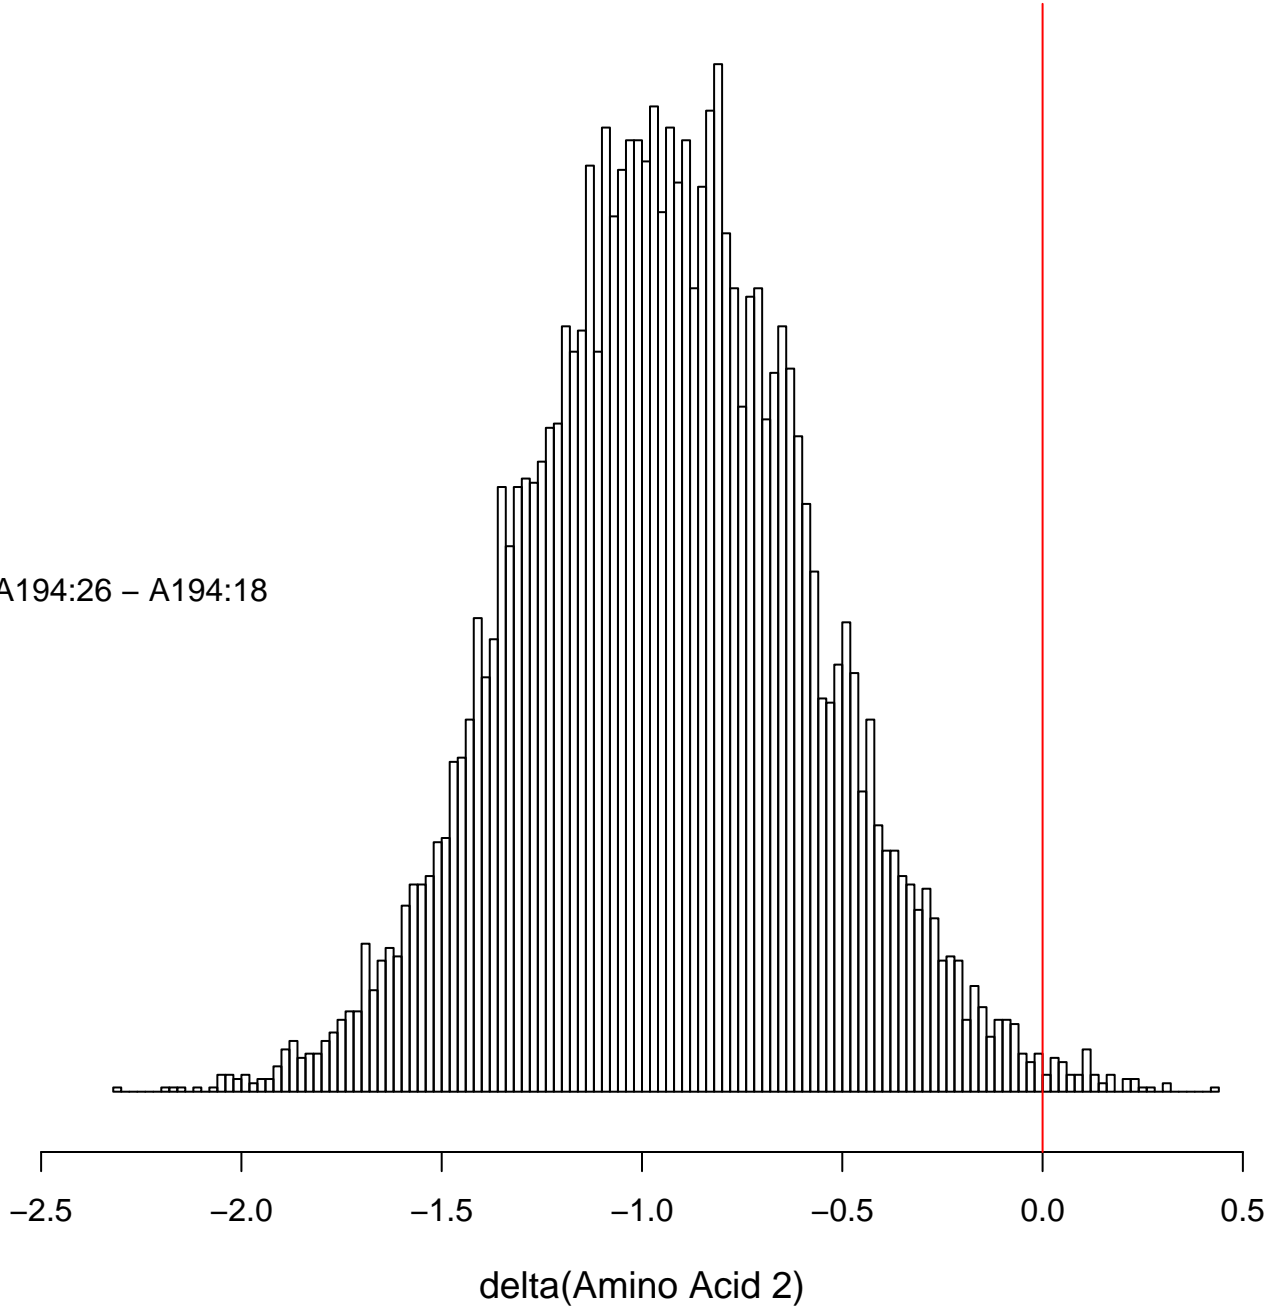

A194:26

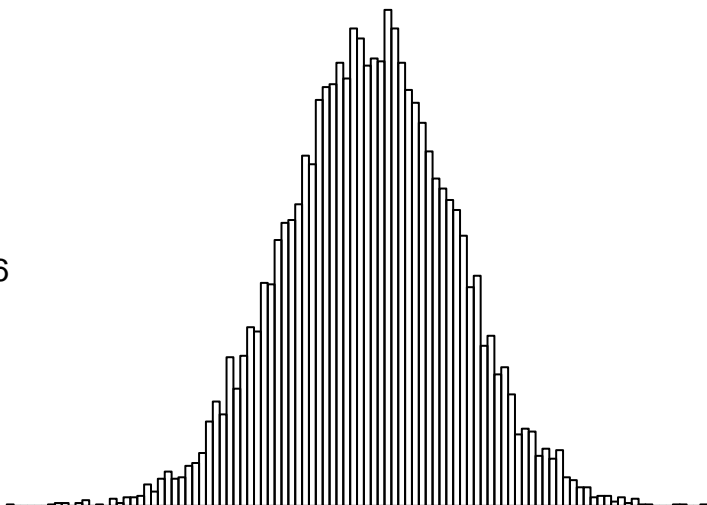

A194:18

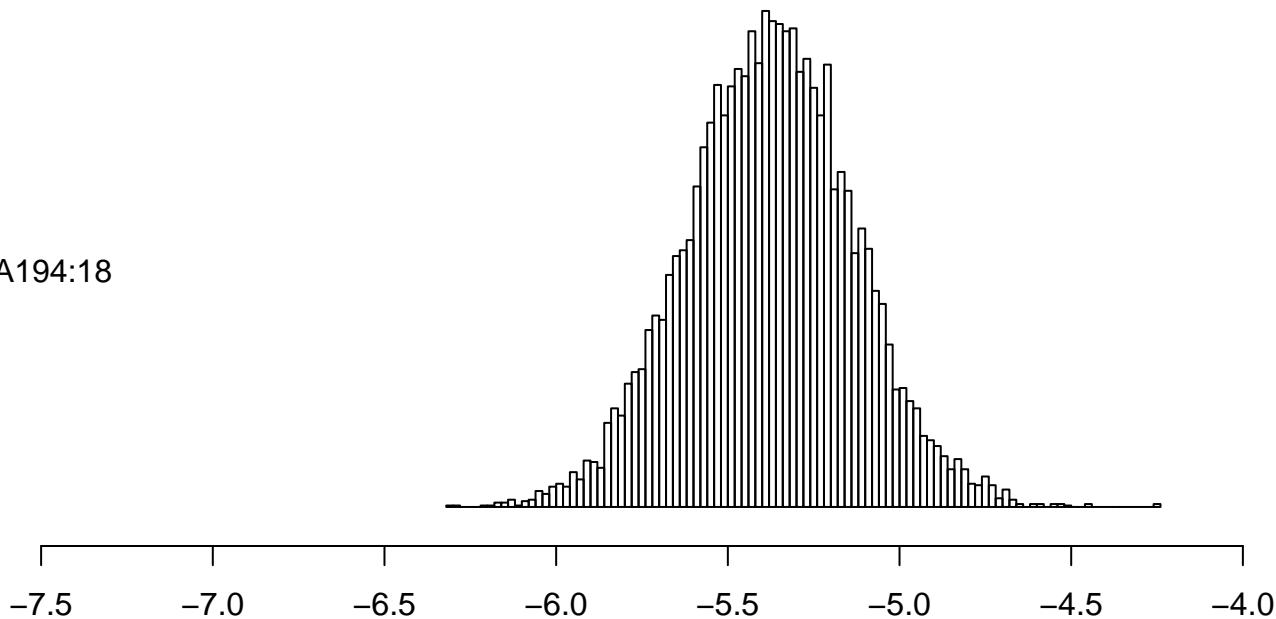

Amino Acid 3

A194:26 – A194:18

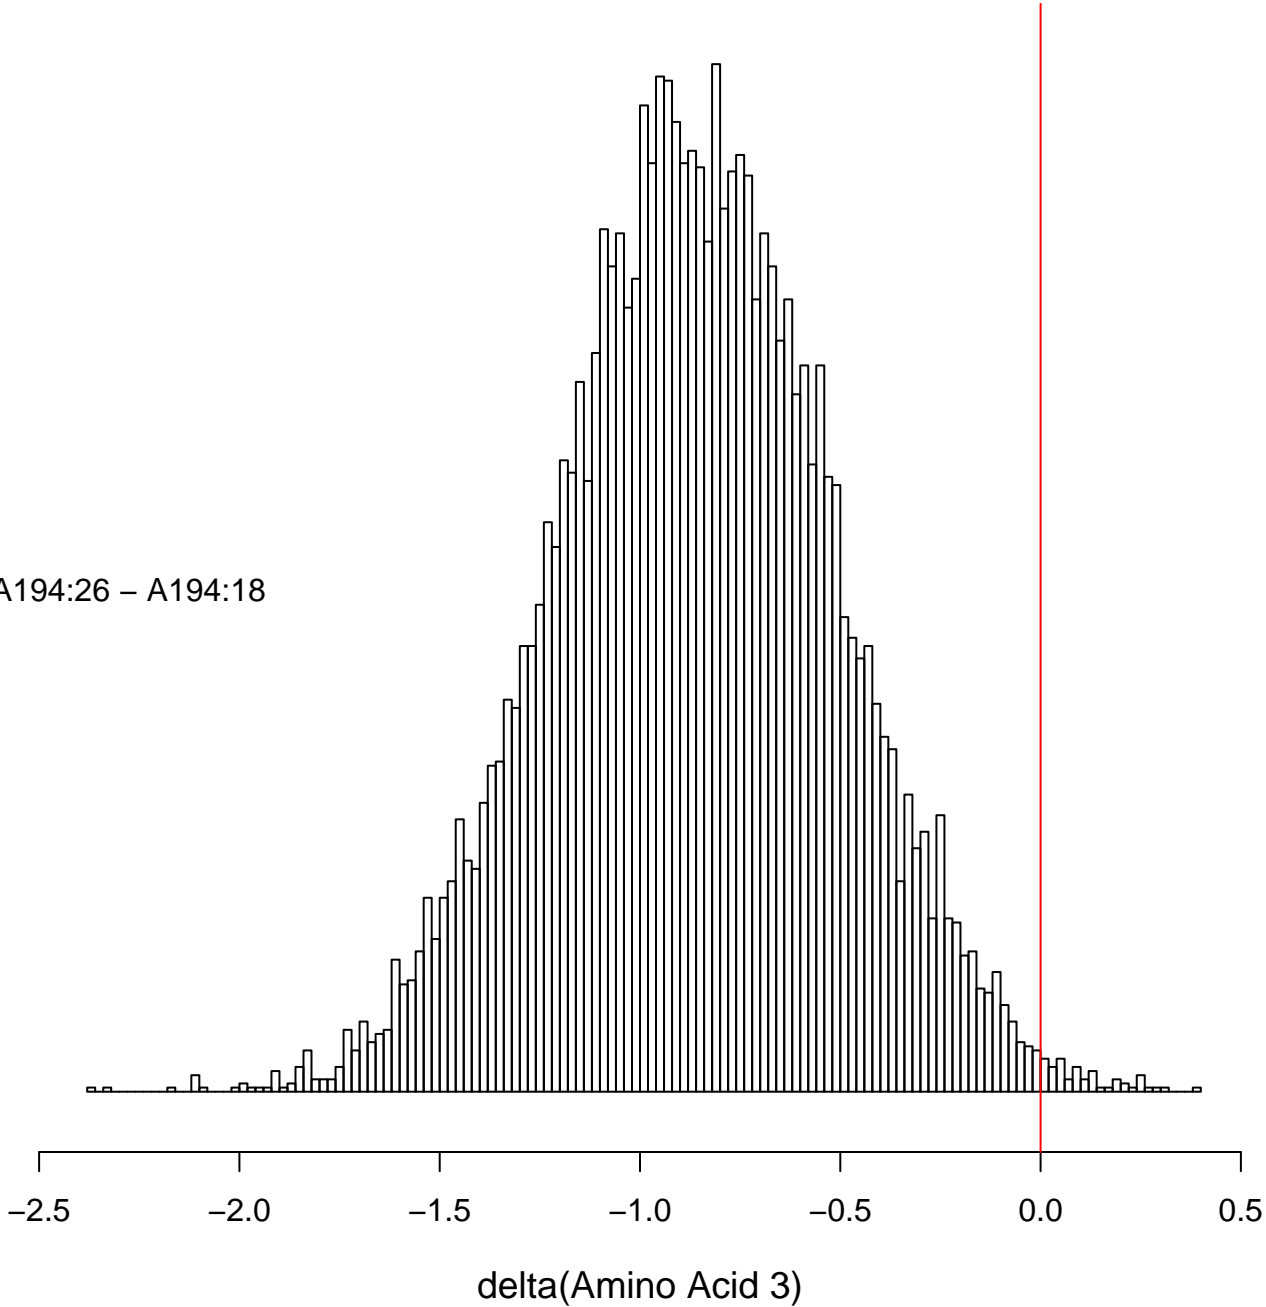

A194:26

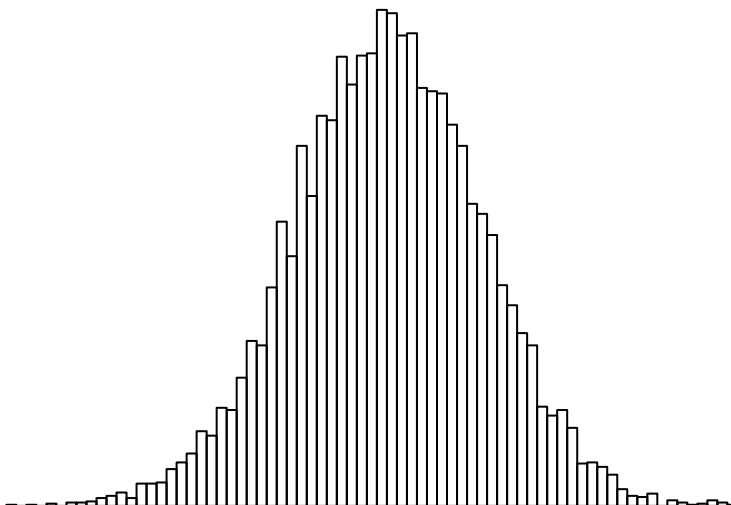

A194:18

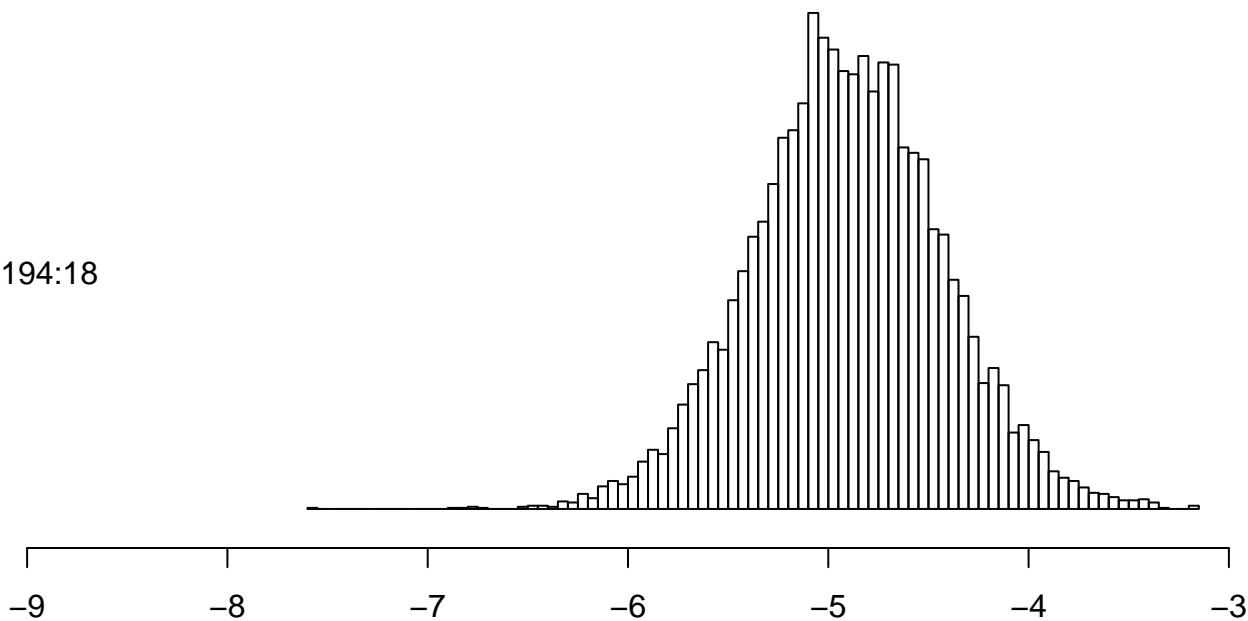

Alanine

A194:26 – A194:18

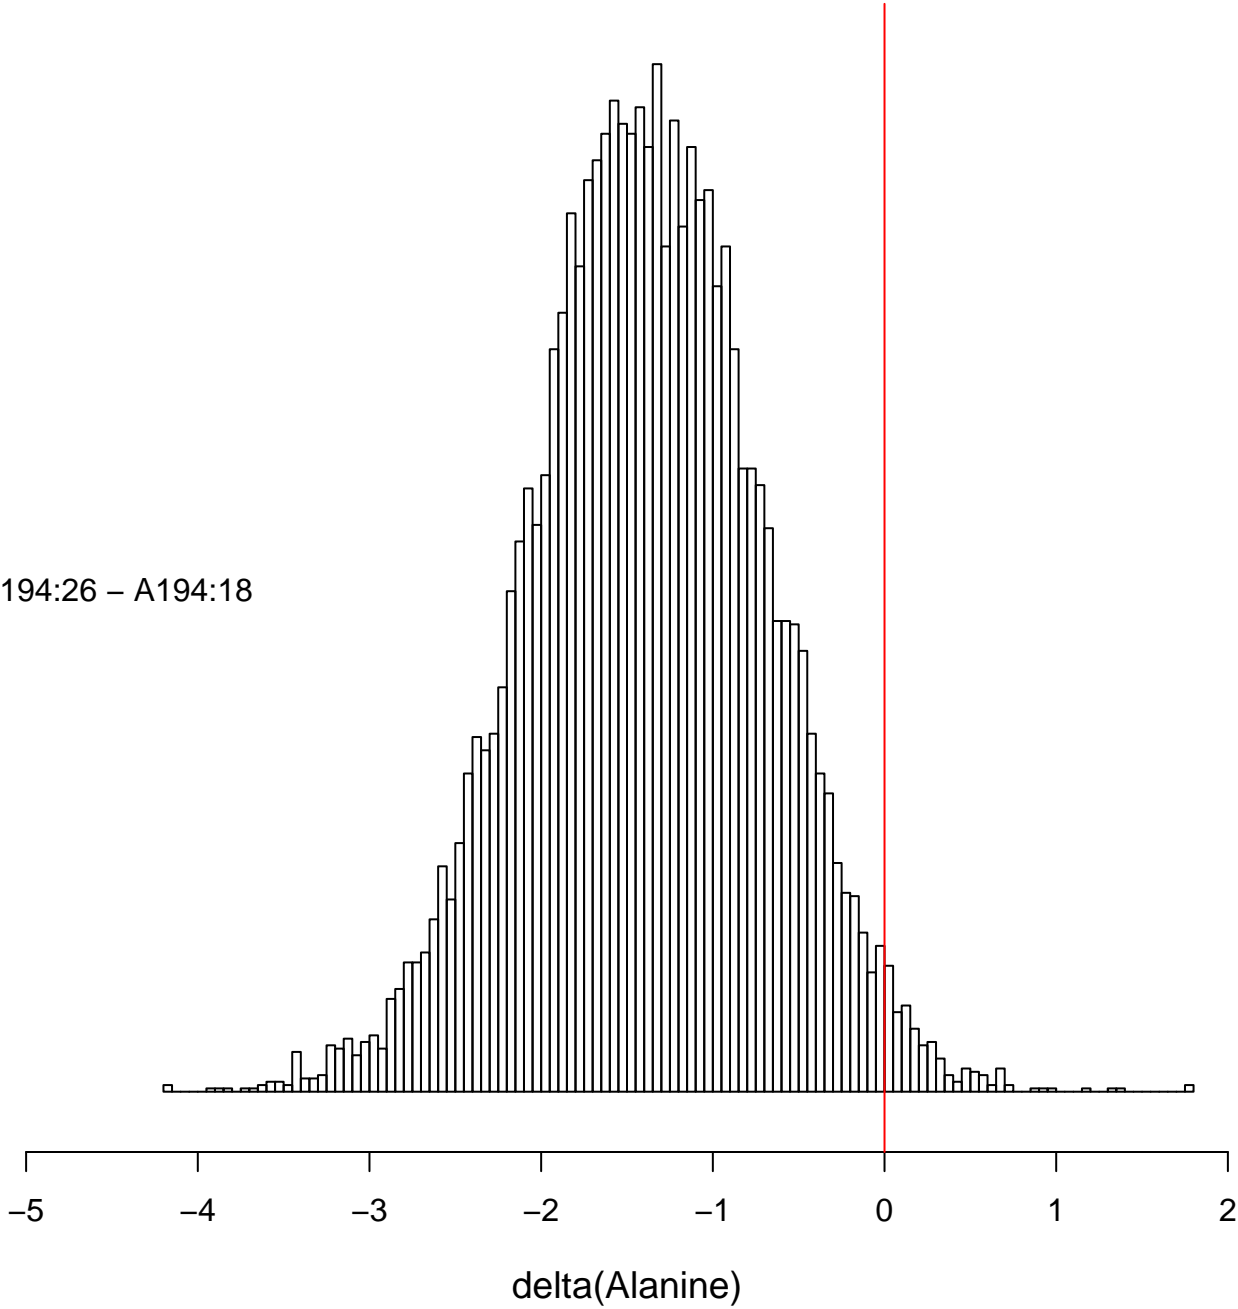

A194:26

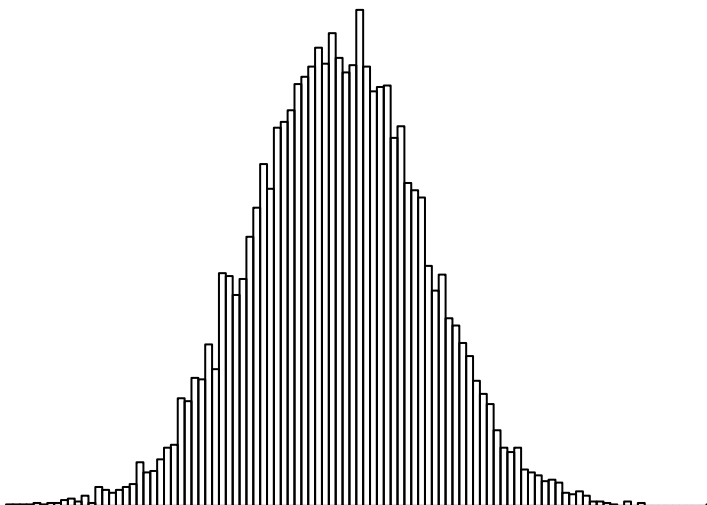

A194:18

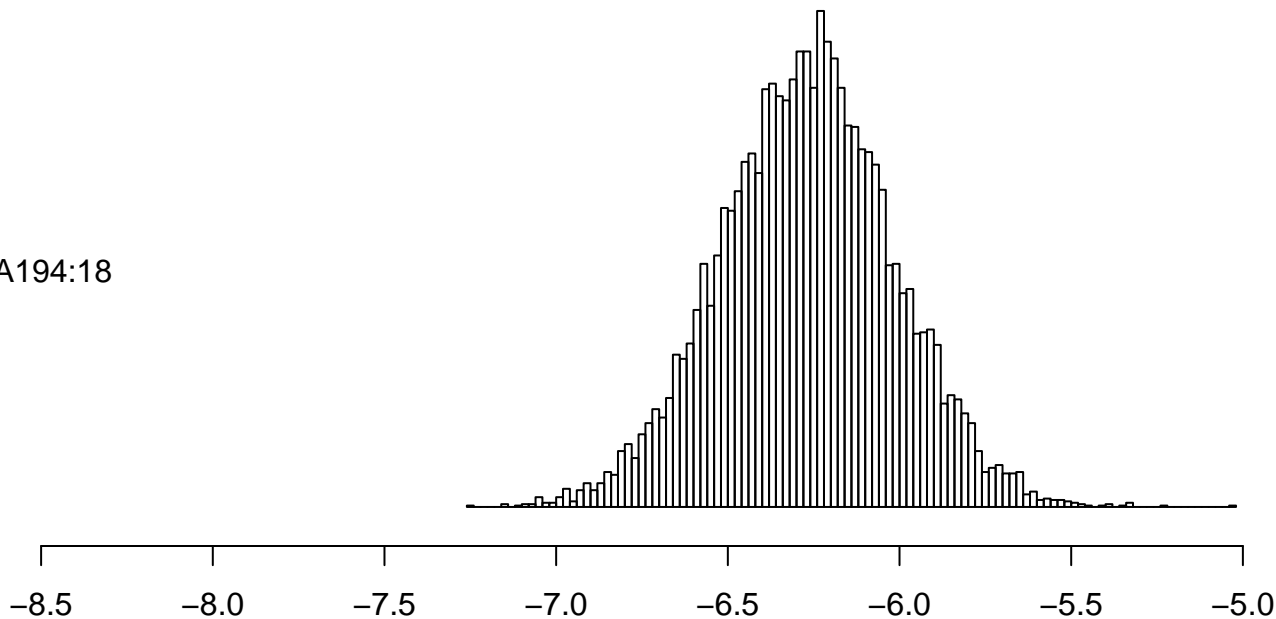

Amino Acid 4

A194:26 – A194:18

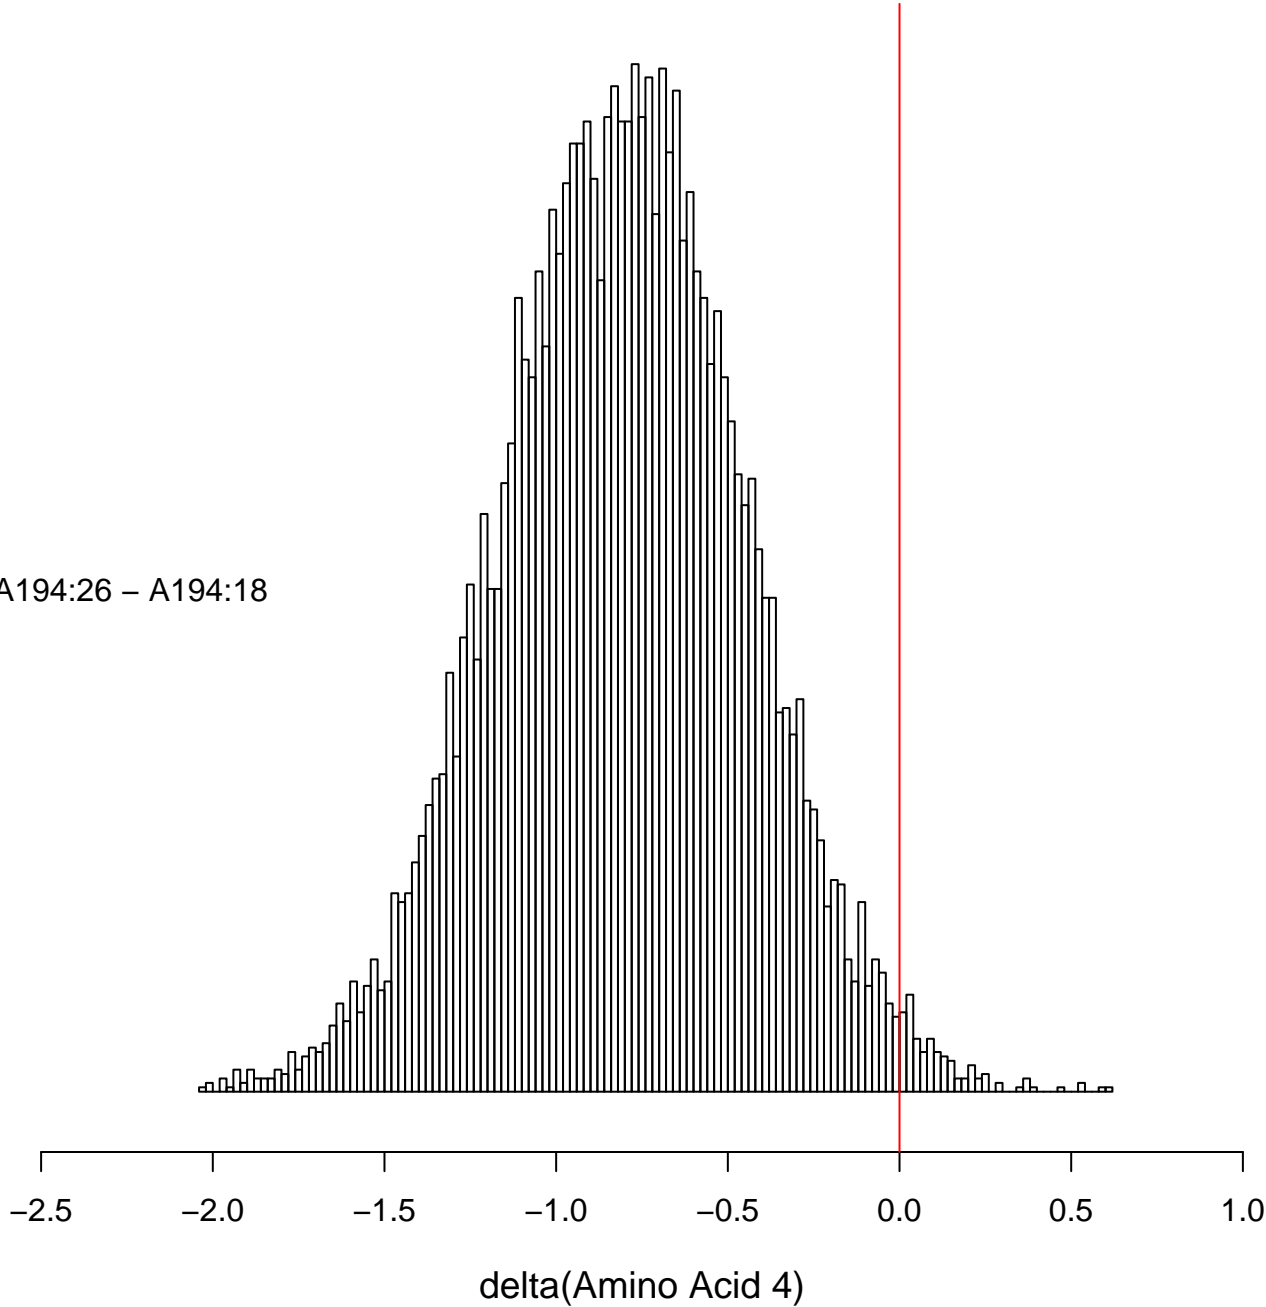



A194:26

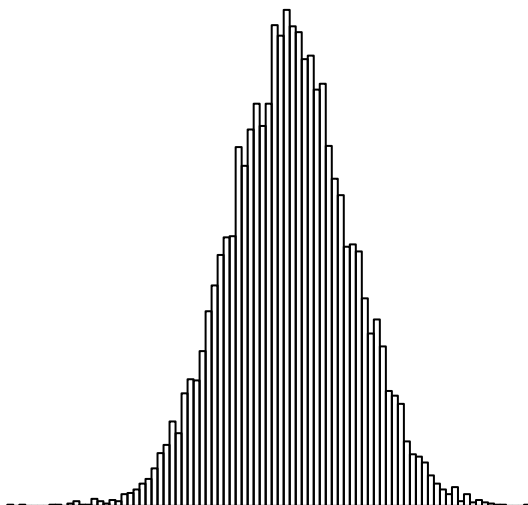

A194:18

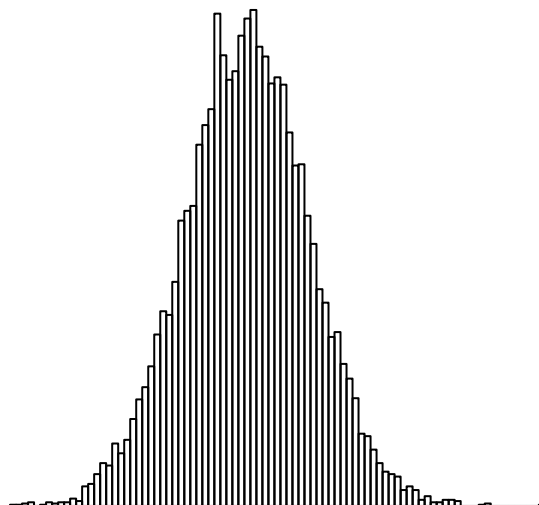

-9

-8

-7

-6

-5

Amino Acid 6

A194:26 – A194:18

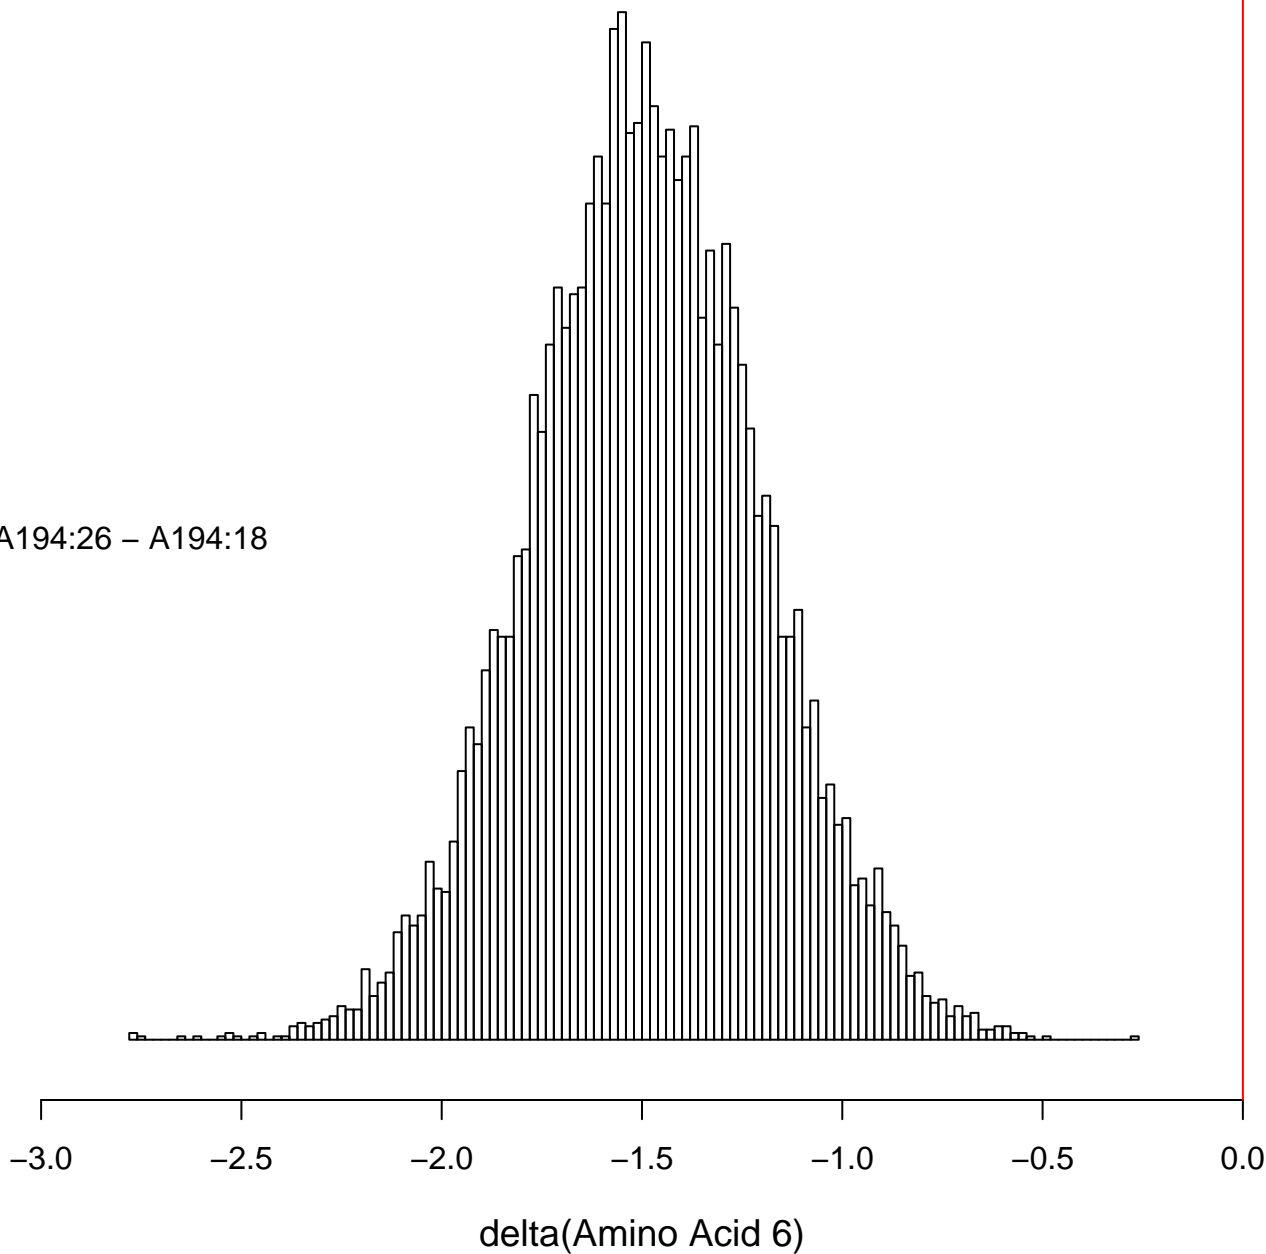

A194:26

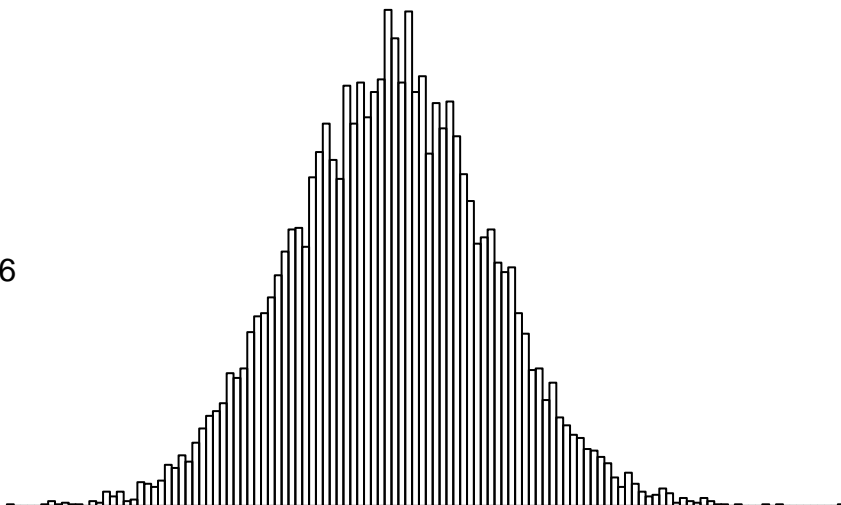

A194:18

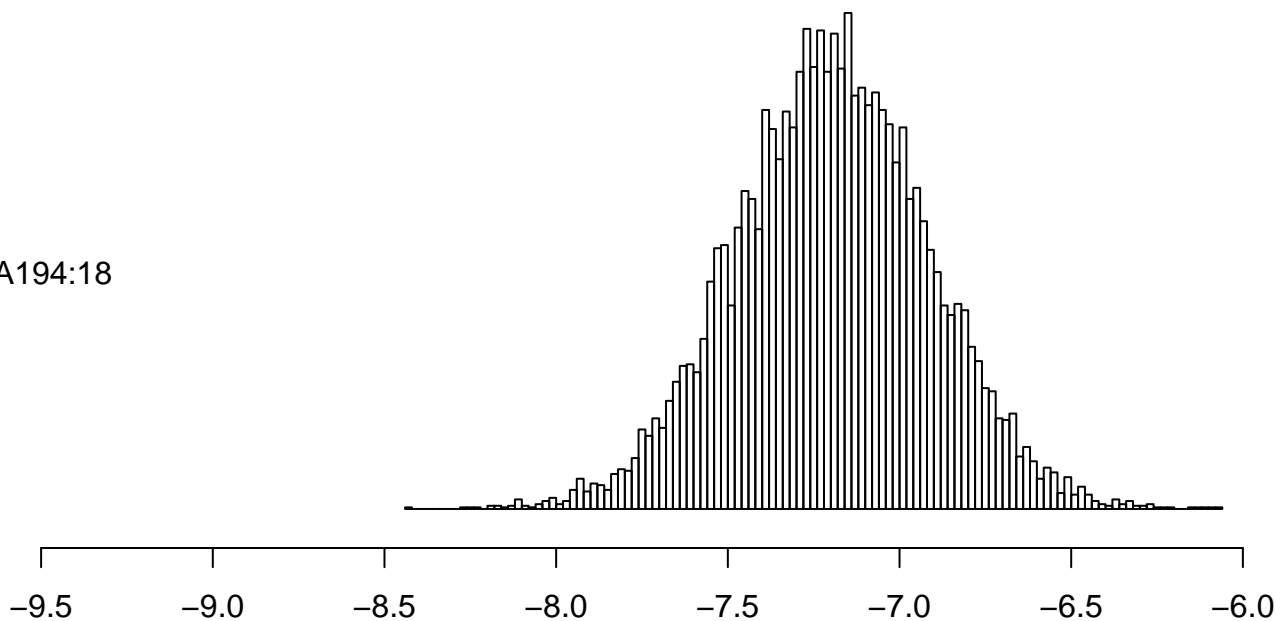

Valine

A194:26 – A194:18

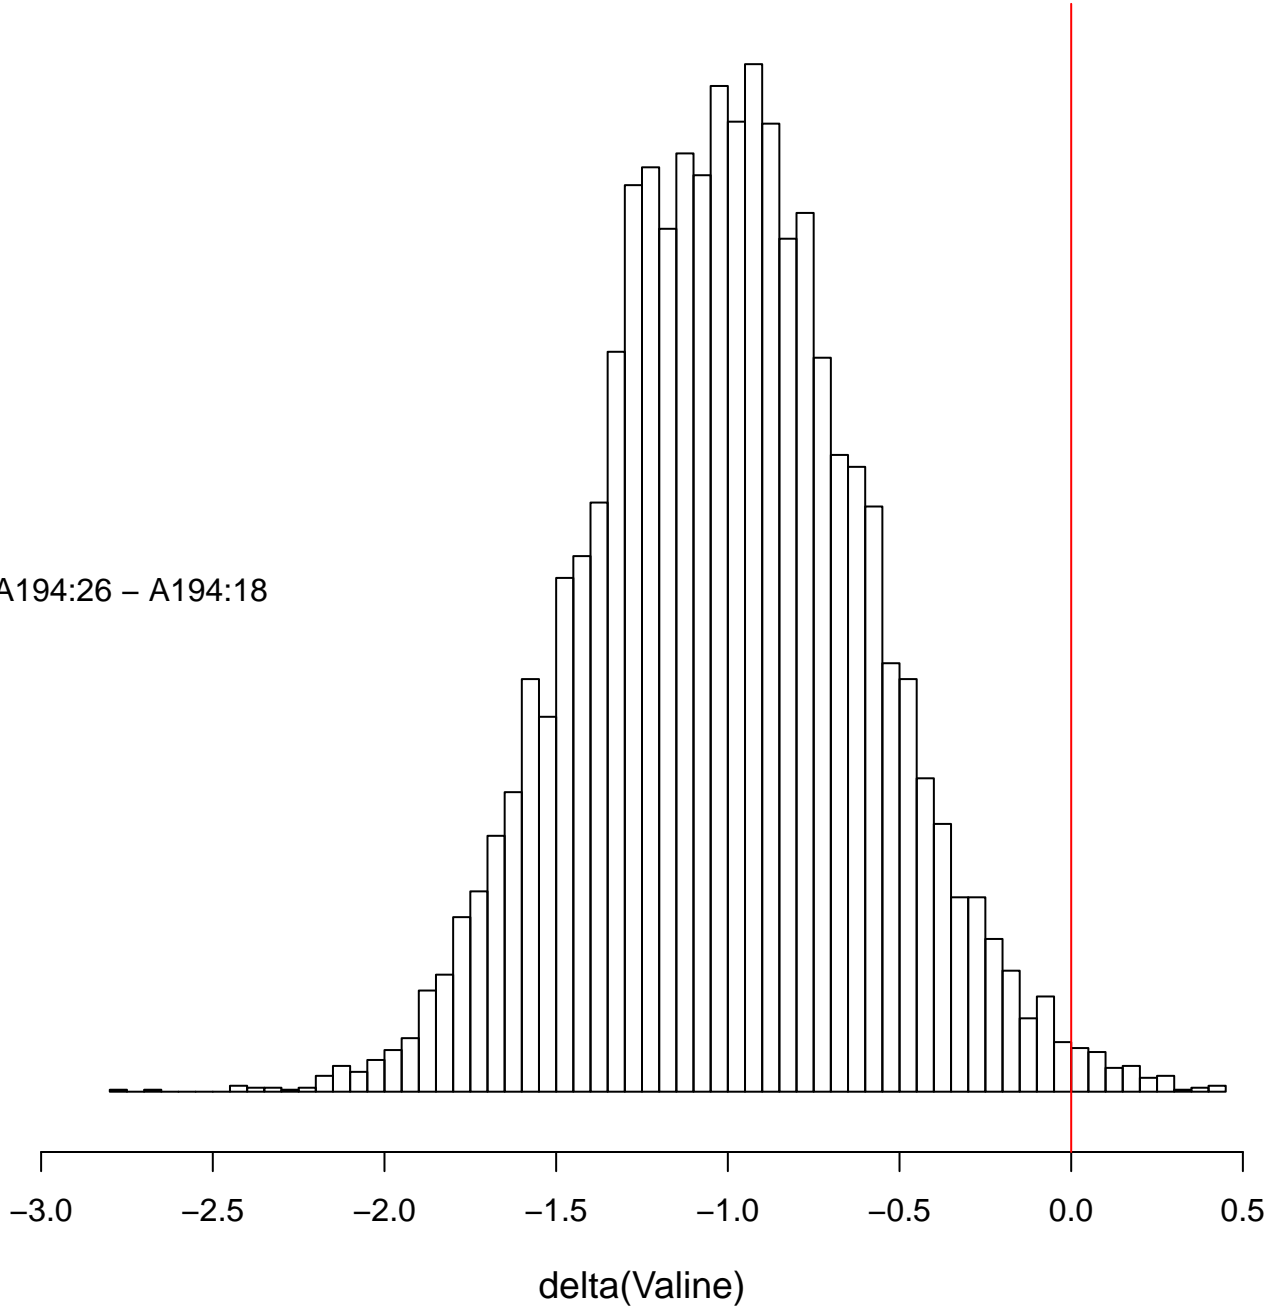

A194:26

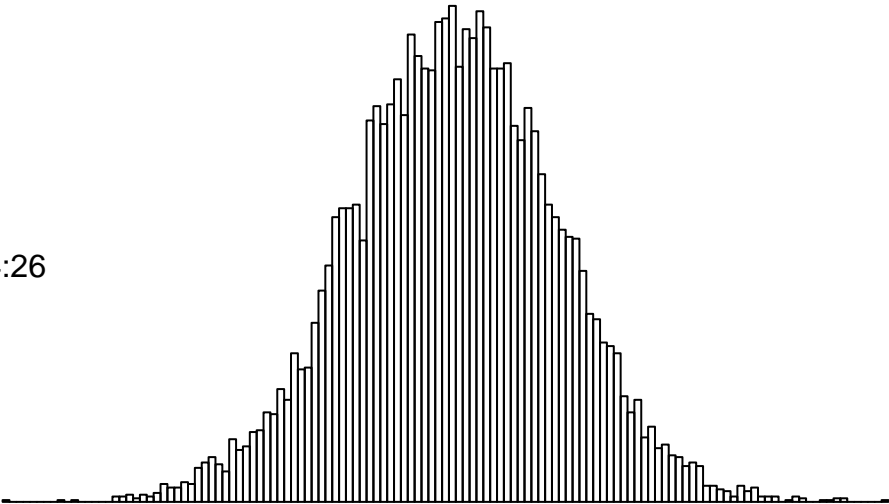

A194:18

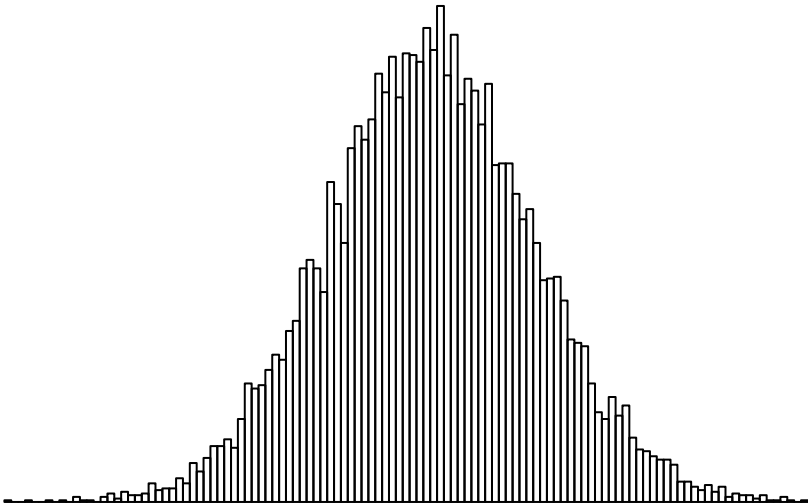

-8.0      -7.5      -7.0      -6.5      -6.0      -5.5      -5.0      -4.5

Amino Acid 7

A194:26 – A194:18

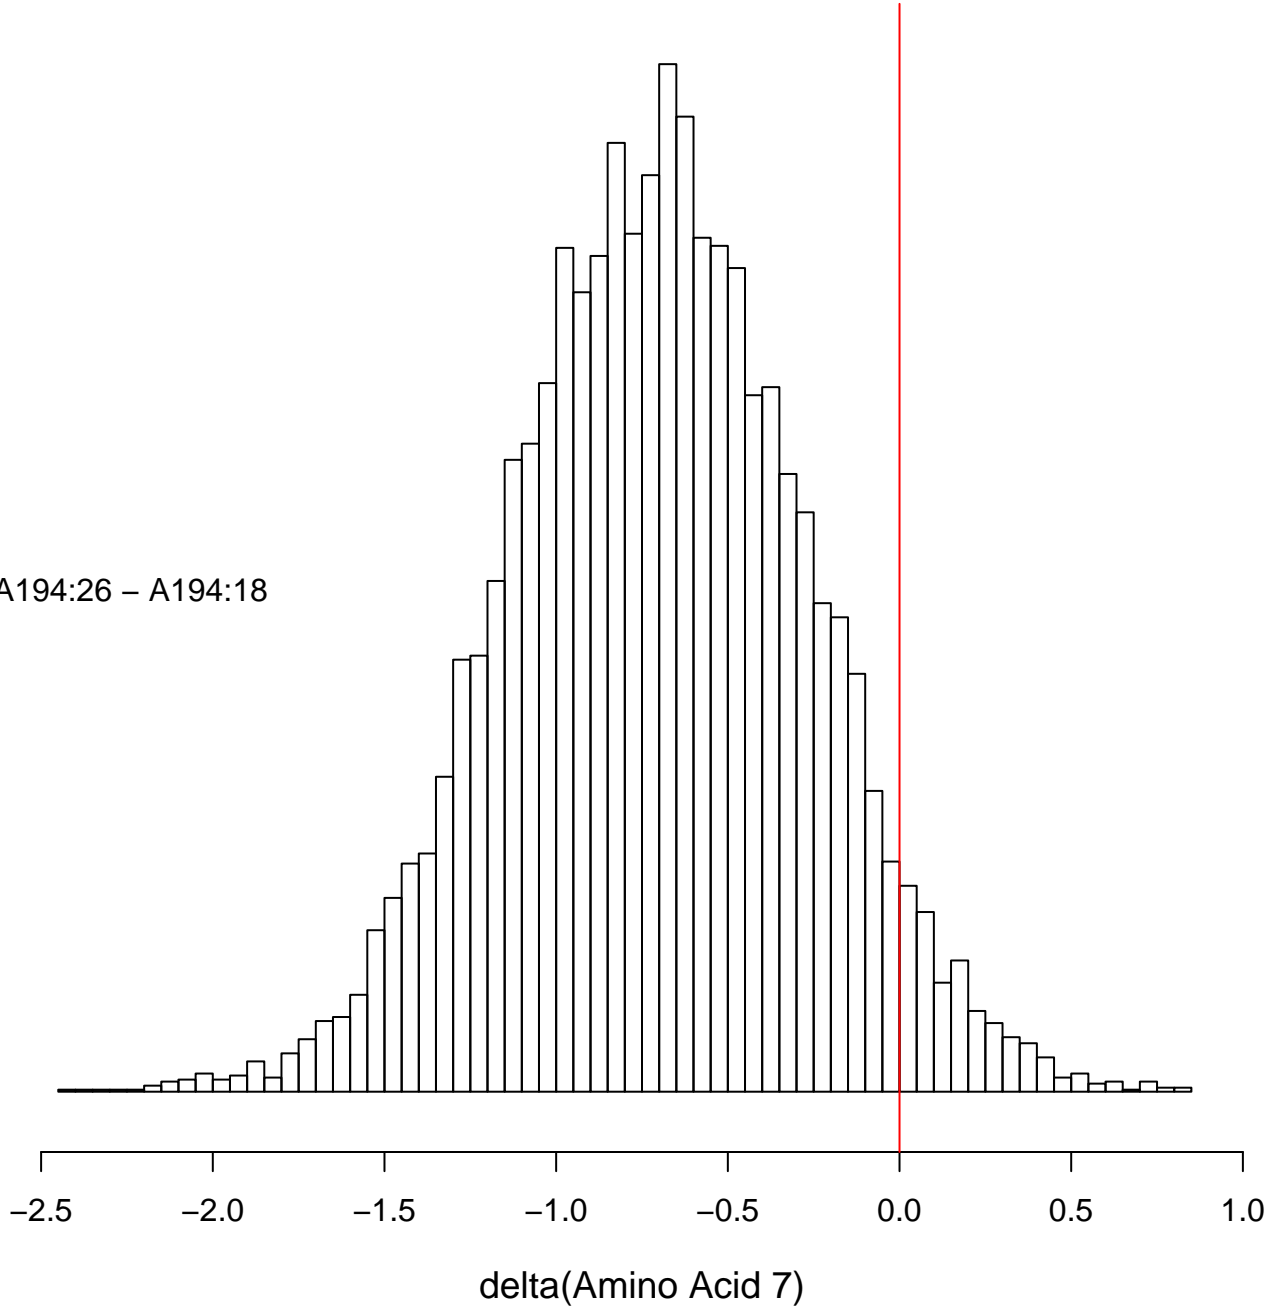

A194:26

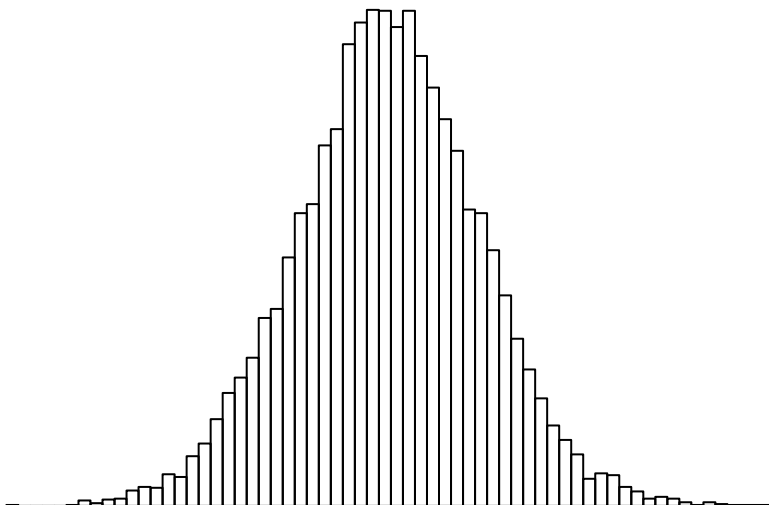

A194:18

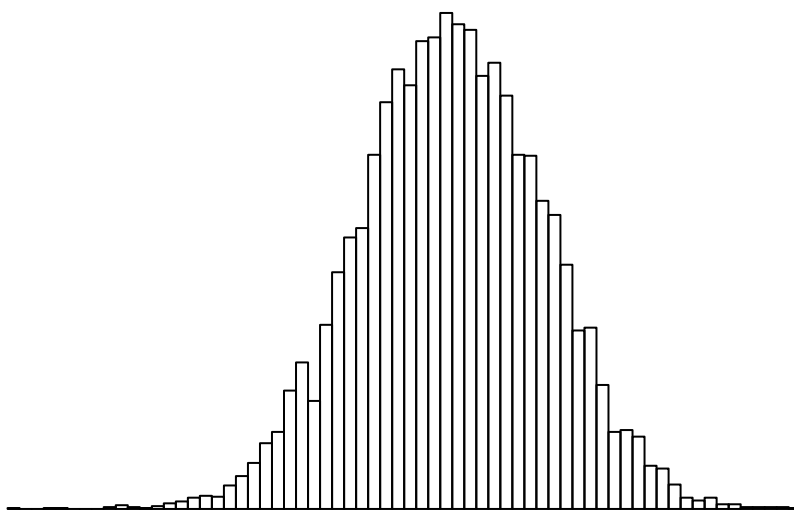

-9

-8

-7

-6

-5

-4

Glycine

A194:26 – A194:18

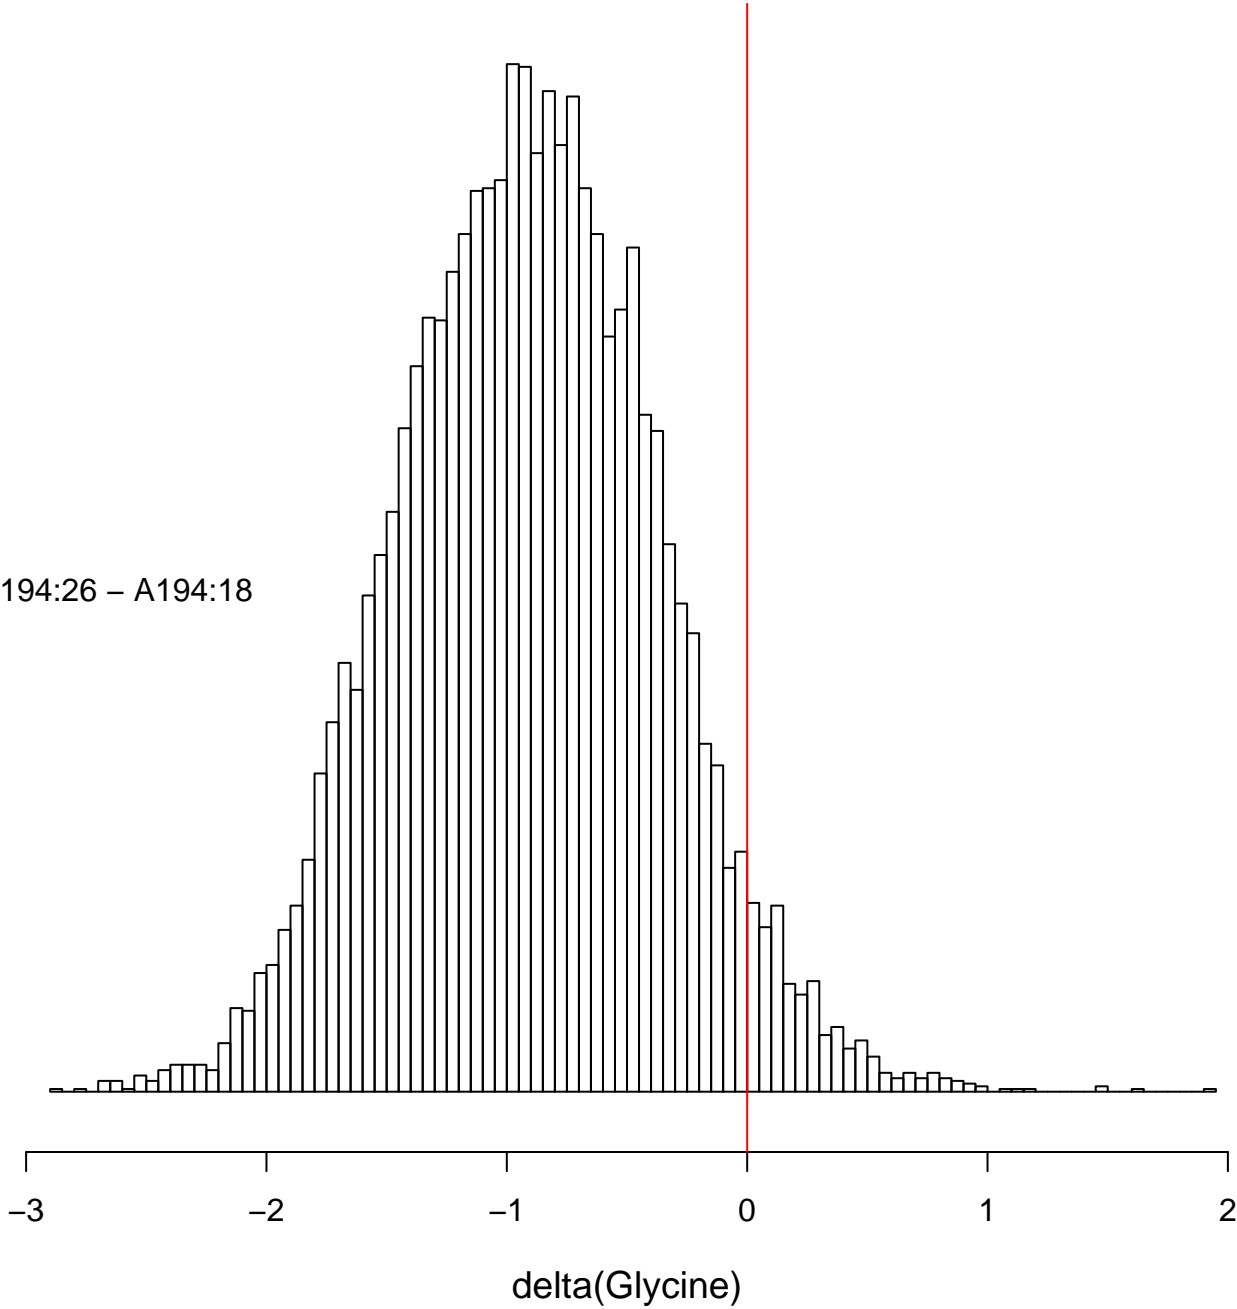



A194:26

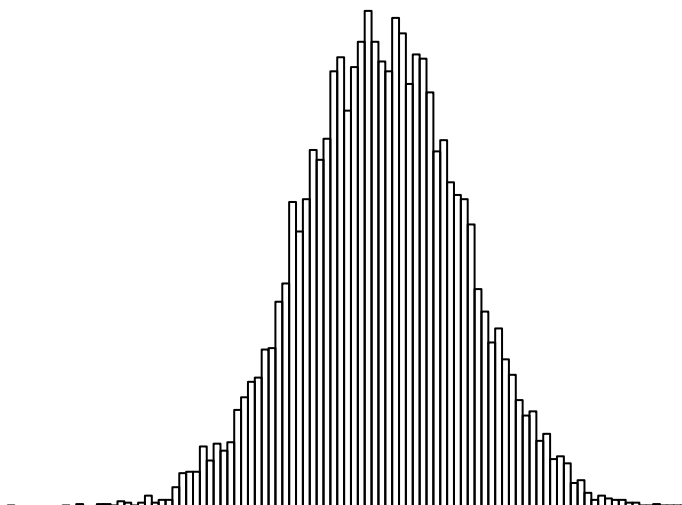

A194:18

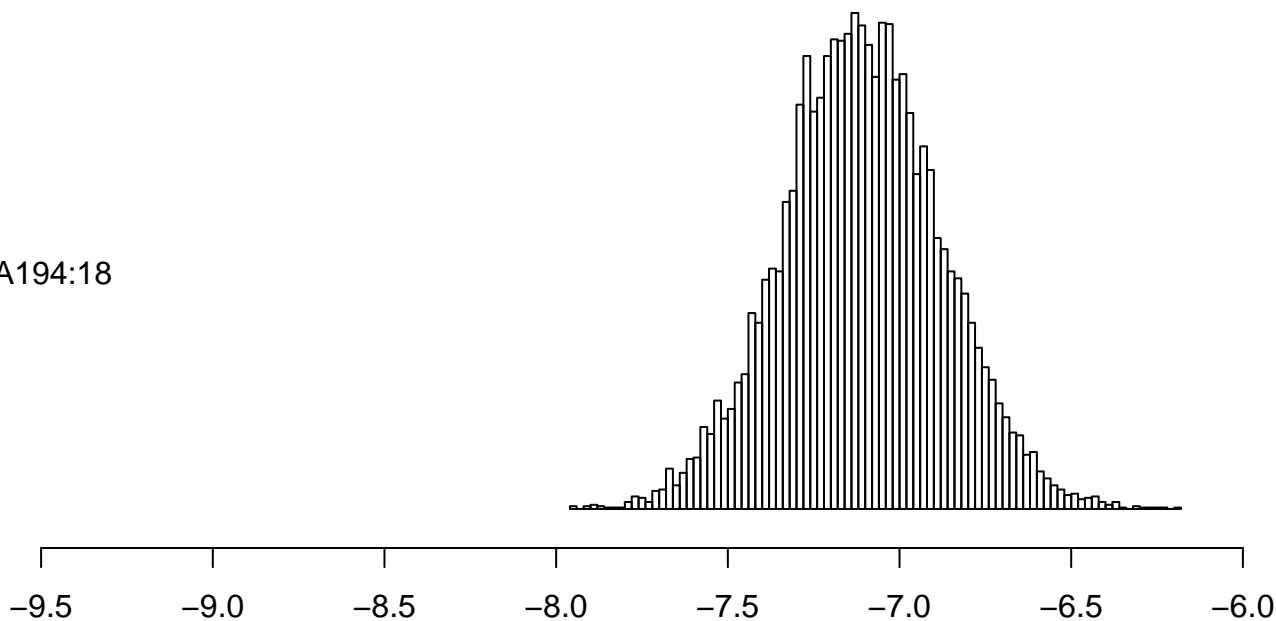

Amino Acid 8

A194:26 – A194:18

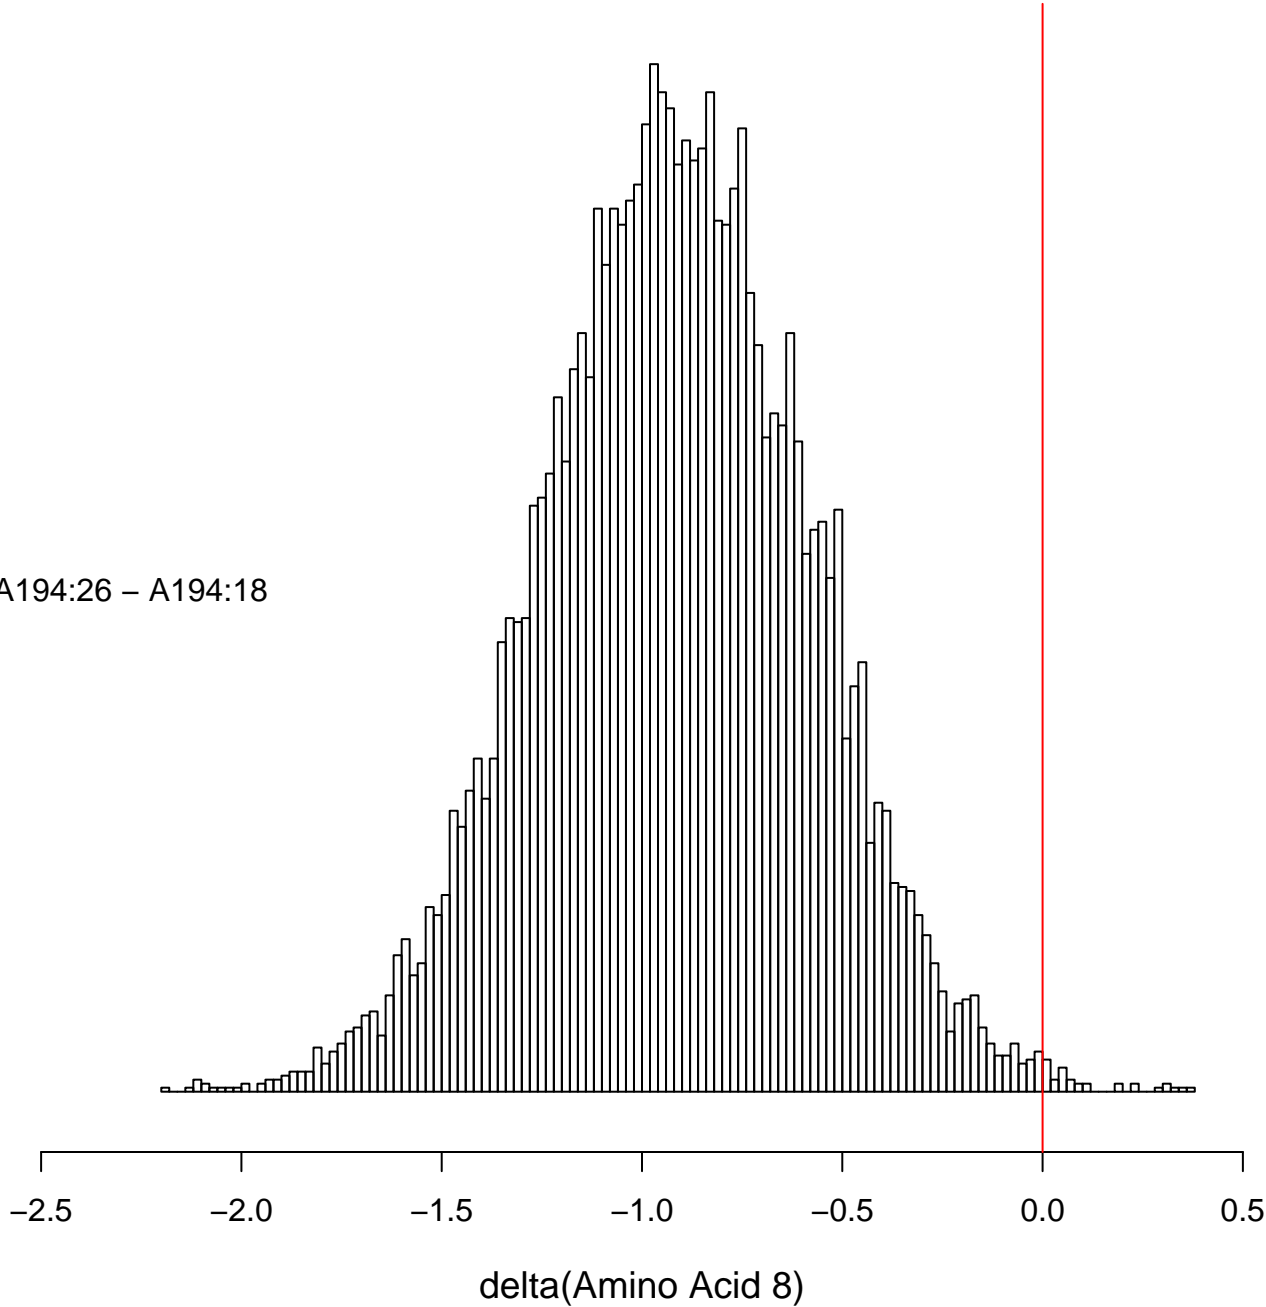

A194:26

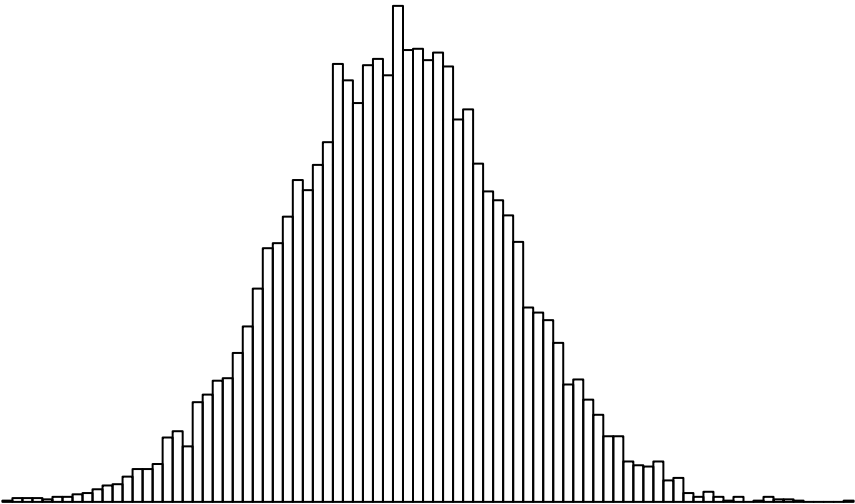

A194:18

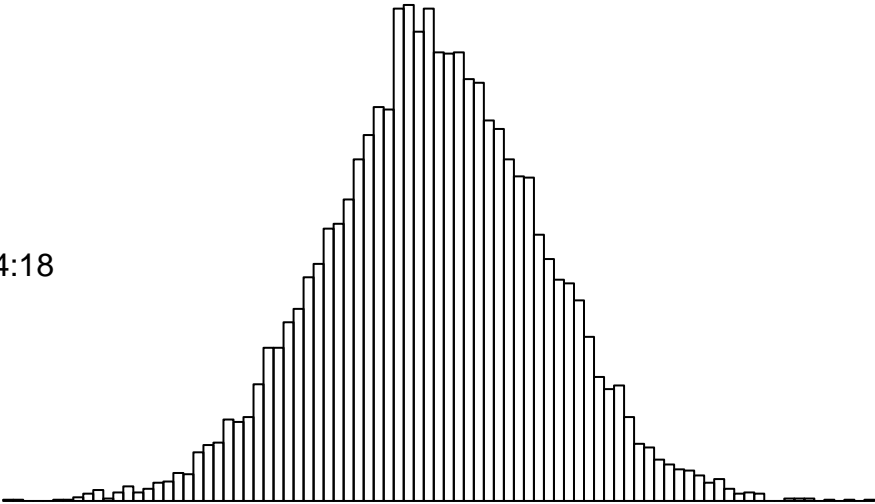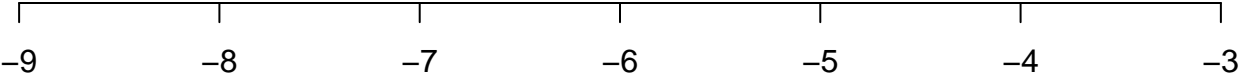

Amino Acid 10

A194:26 – A194:18

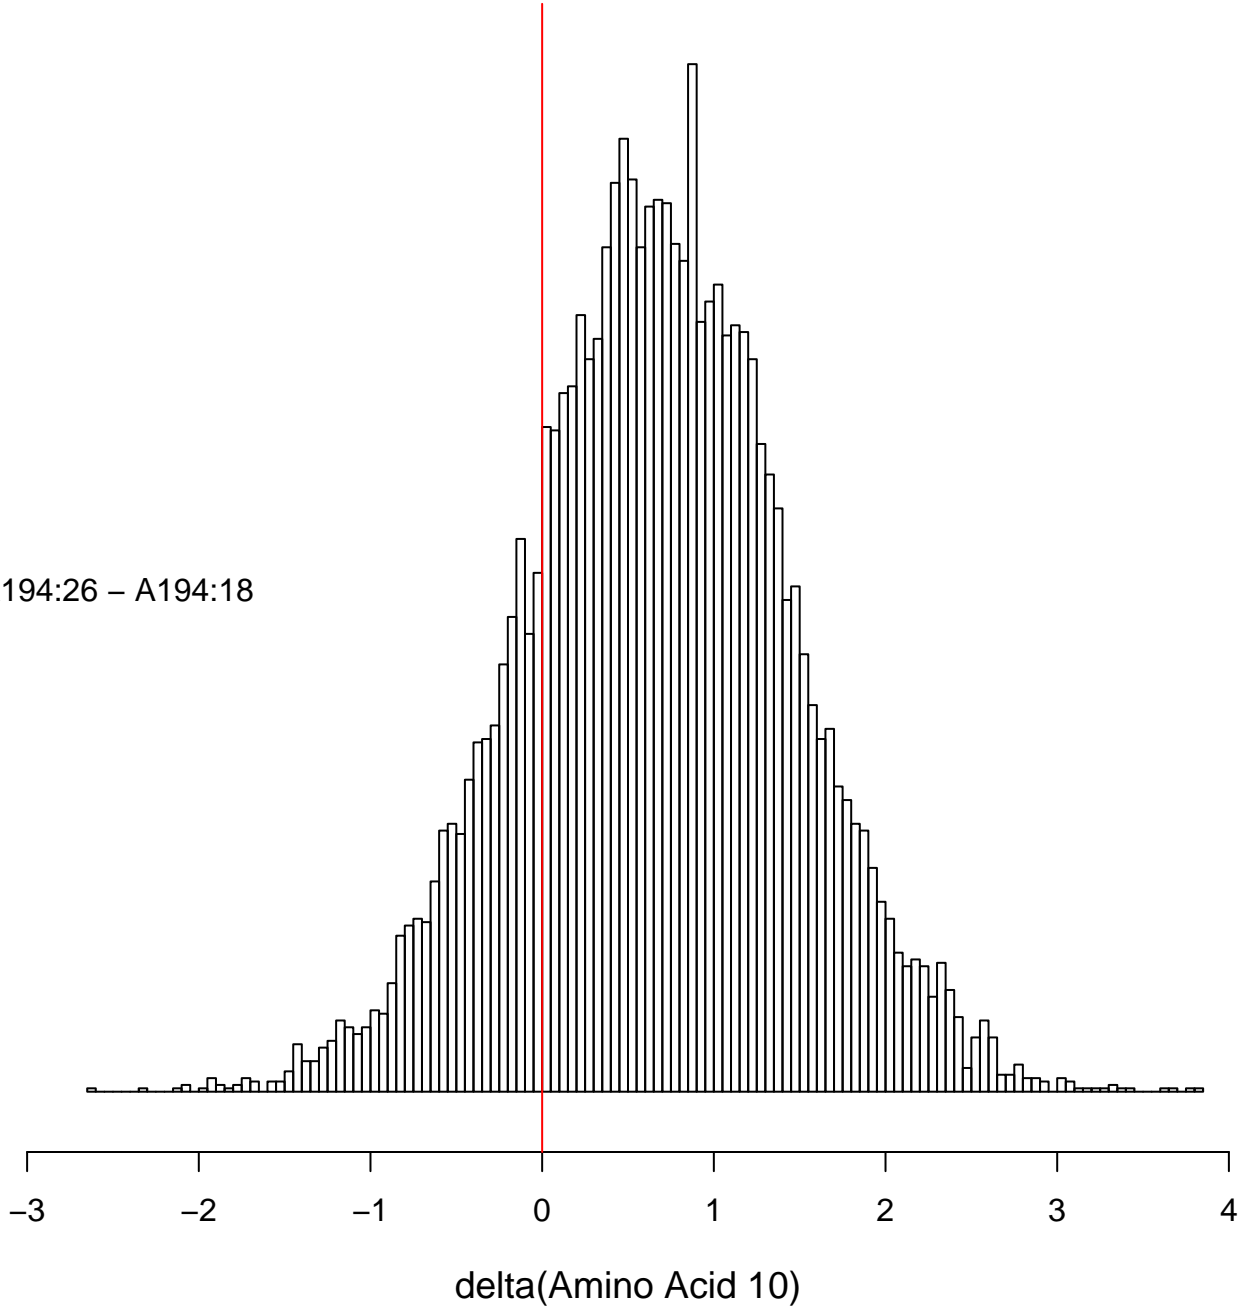

A194:26

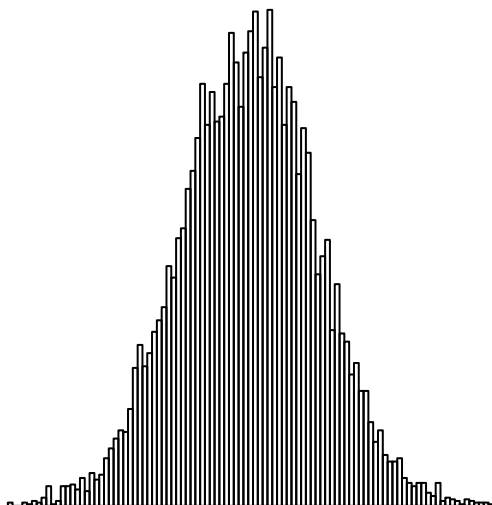

A194:18

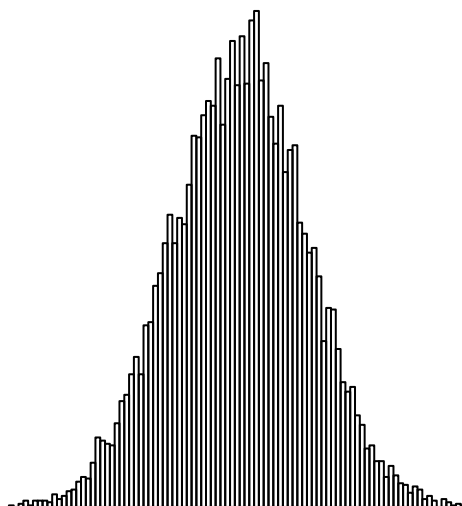

-7.5      -7.0      -6.5      -6.0      -5.5      -5.0

Disaccharide 2

A194:26 – A194:18

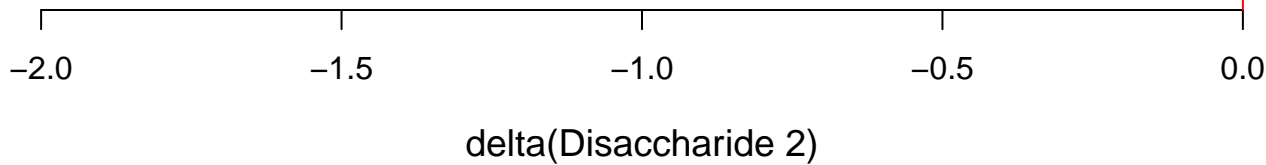

A194:26

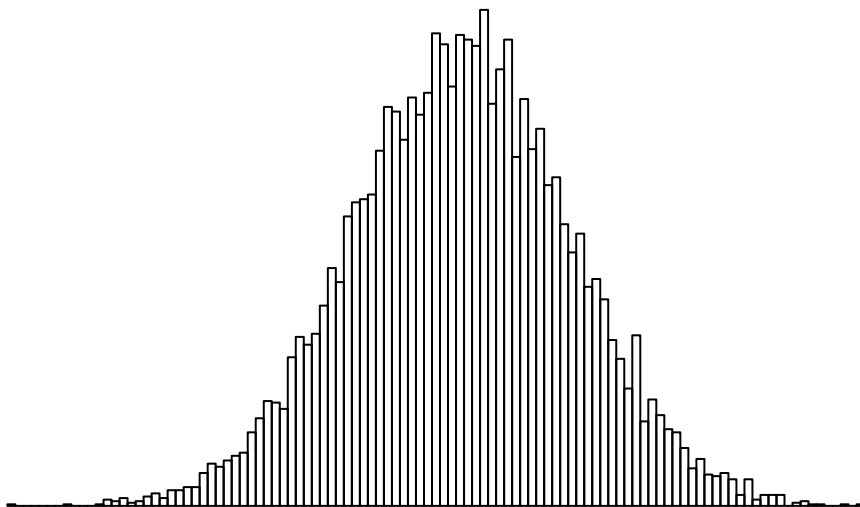

A194:18

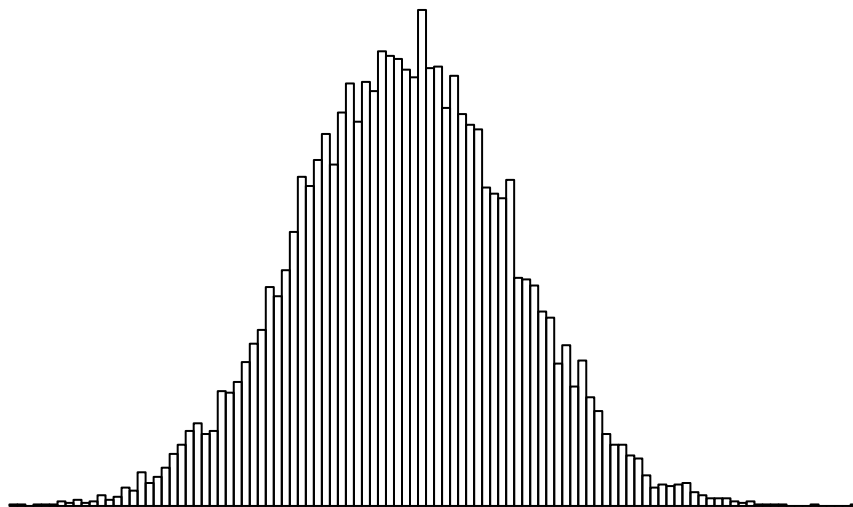

-8.5      -8.0      -7.5      -7.0      -6.5      -6.0      -5.5

Disaccharide 3

A194:26 – A194:18

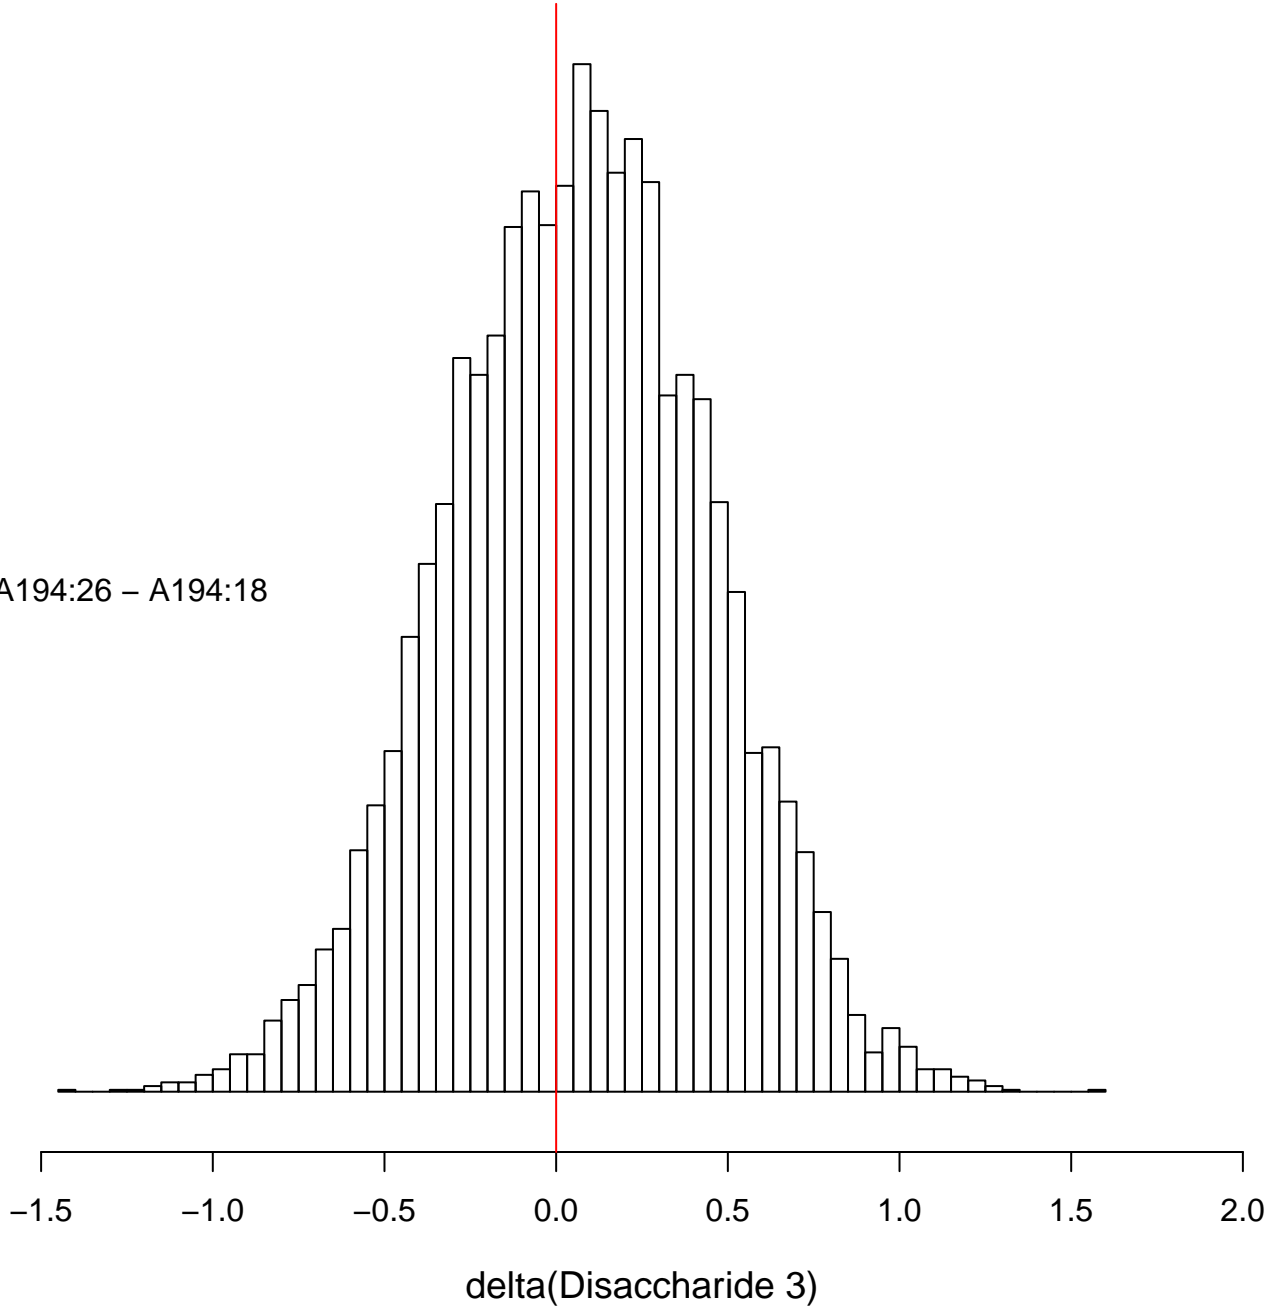



A194:26

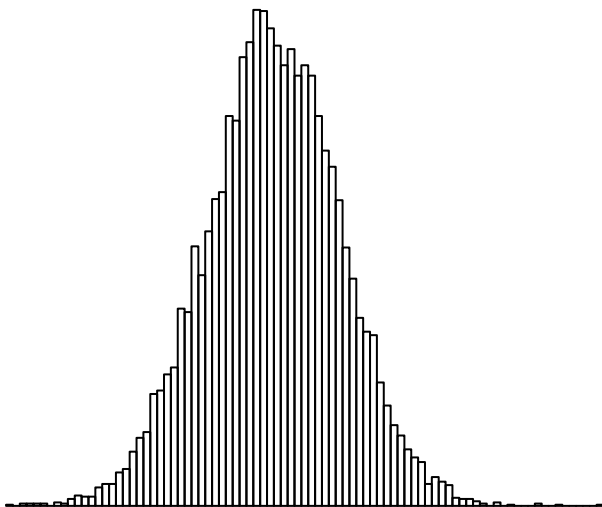

A194:18

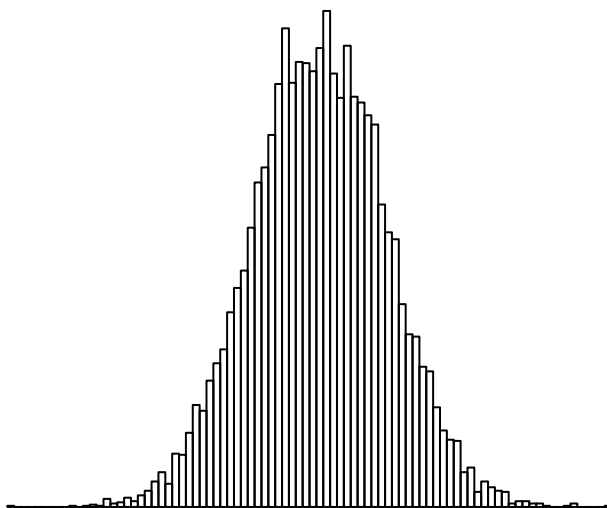

-8.0      -7.5      -7.0      -6.5      -6.0      -5.5      -5.0      -4.5

Disaccharide 4

A194:26 – A194:18

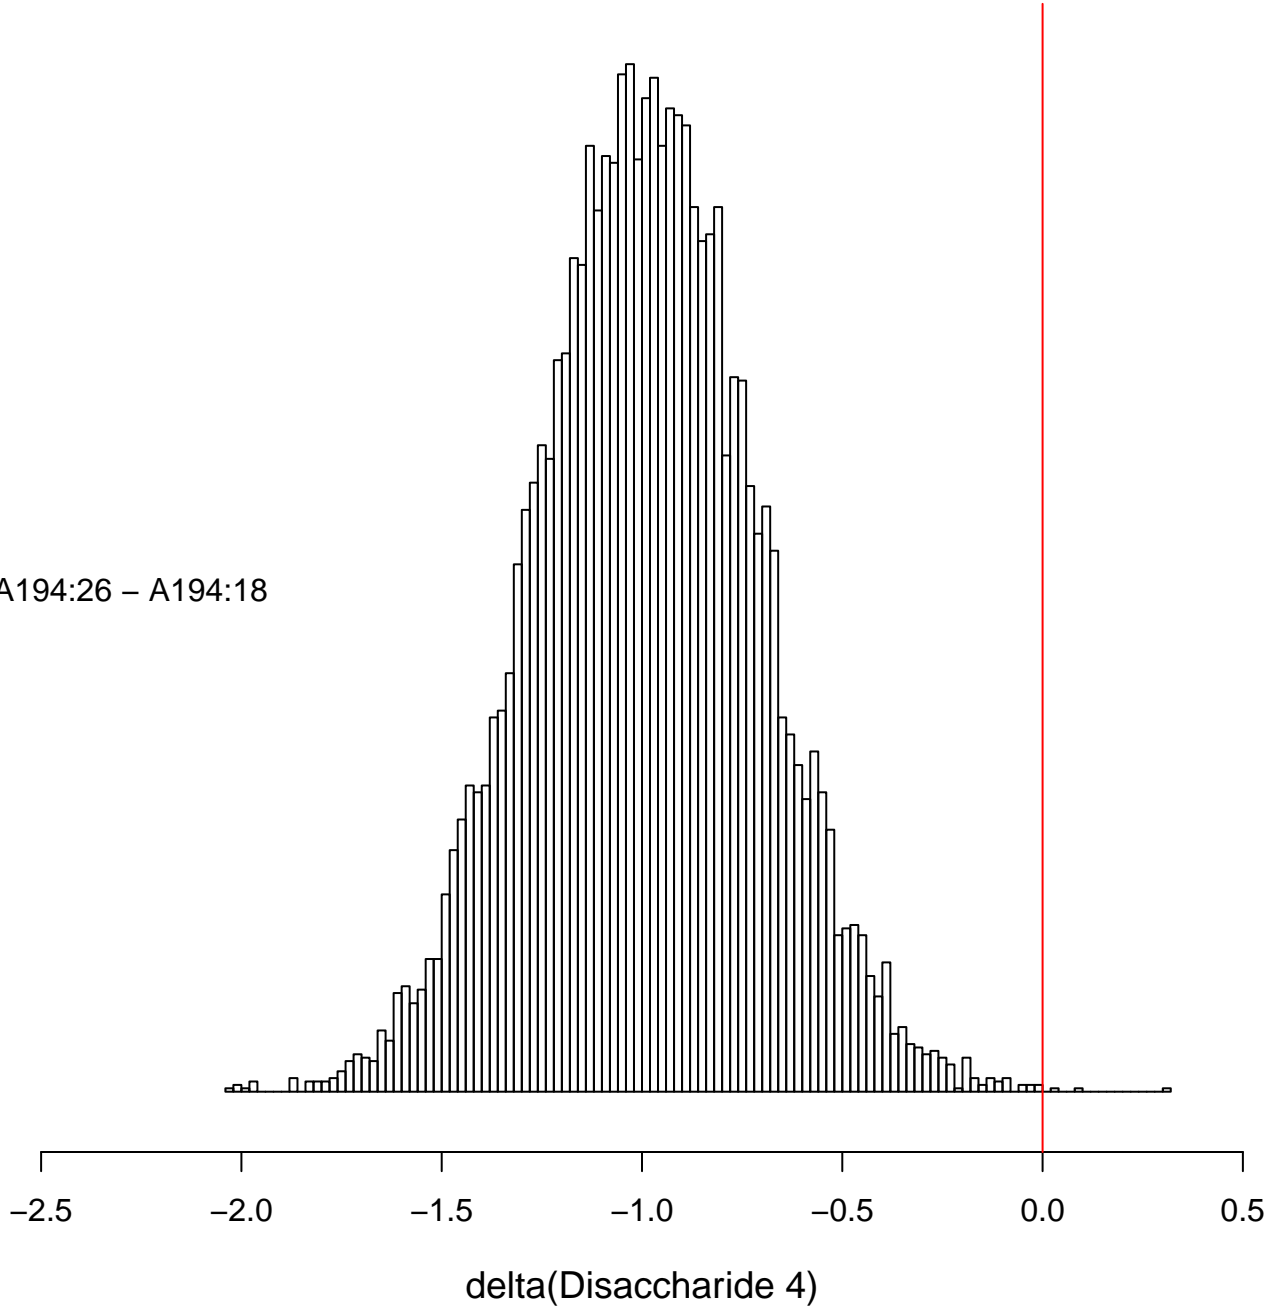

A194:26

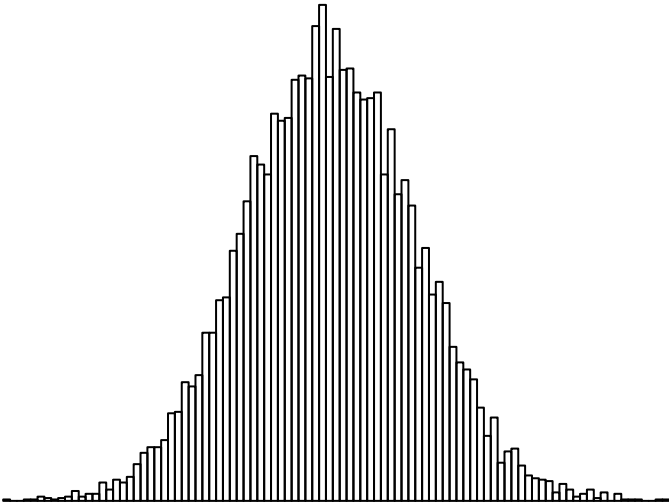

A194:18

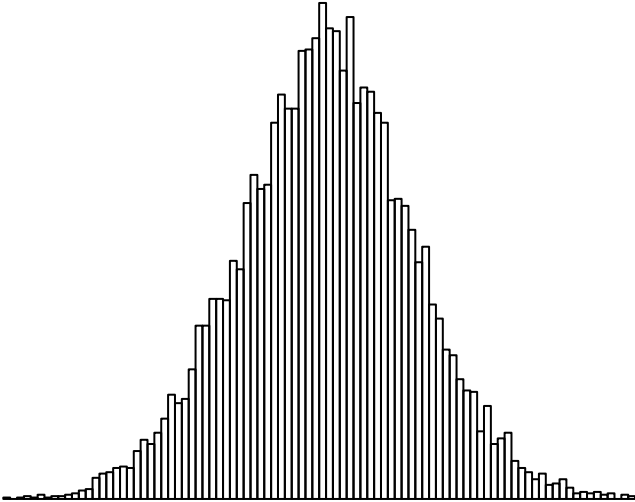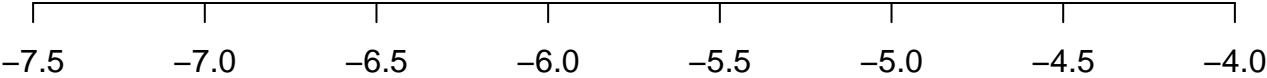

Disaccharide 5

A194:26 – A194:18

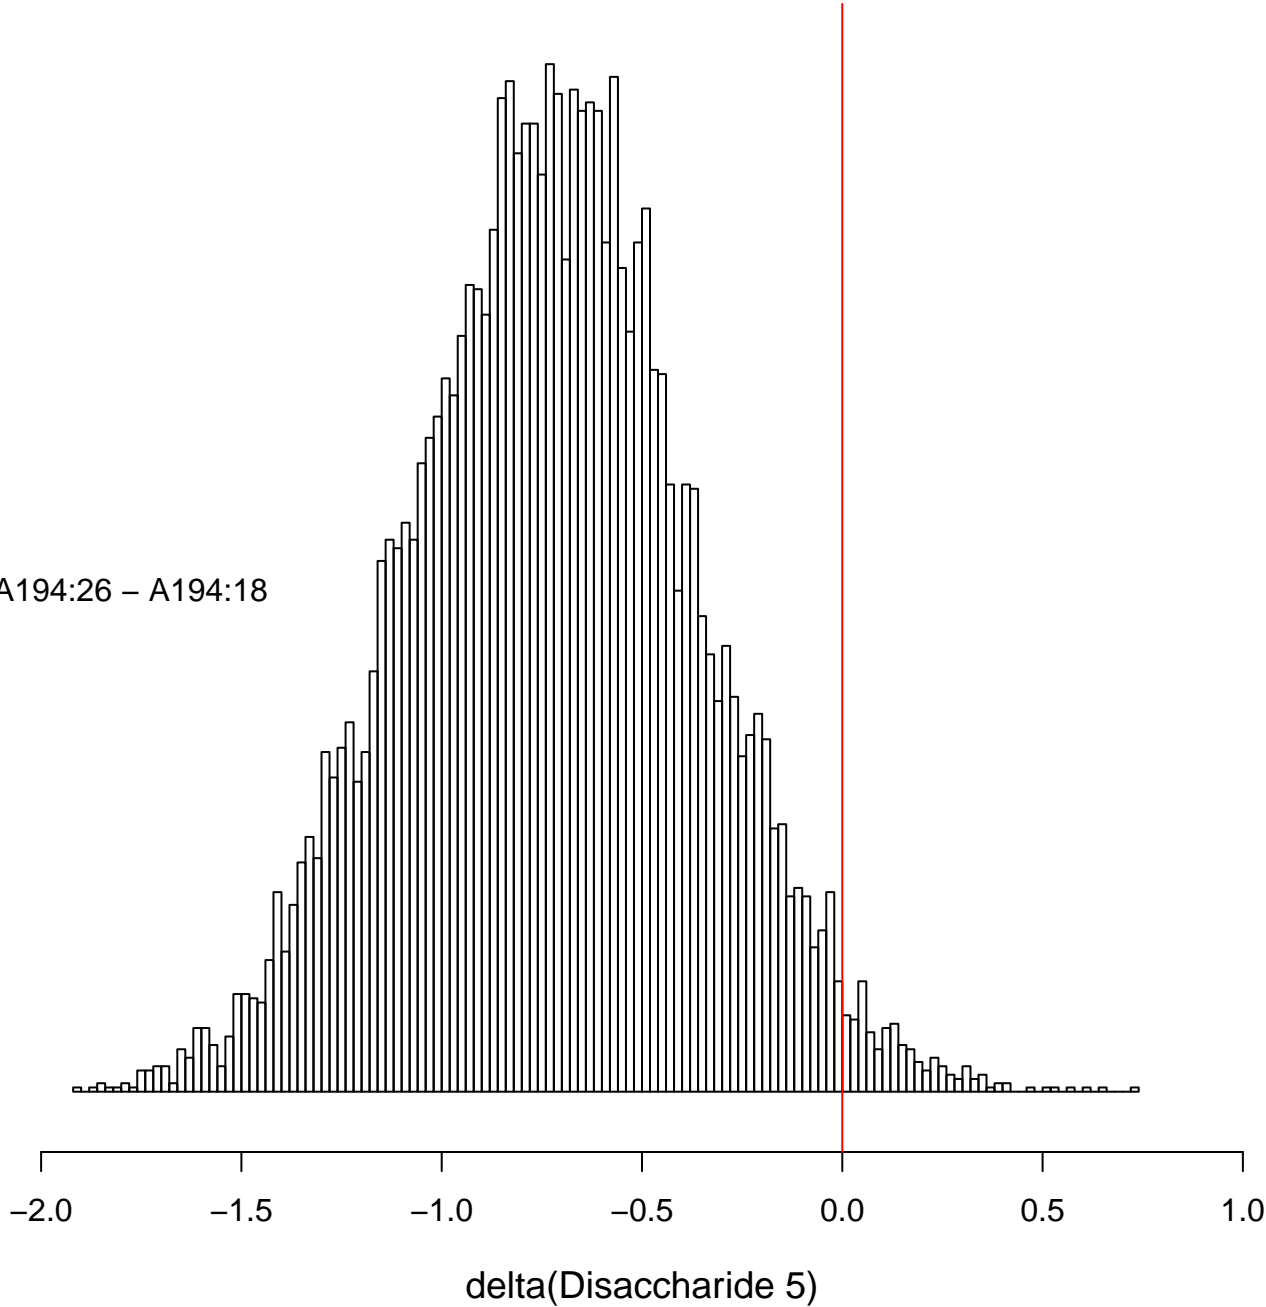

A194:26

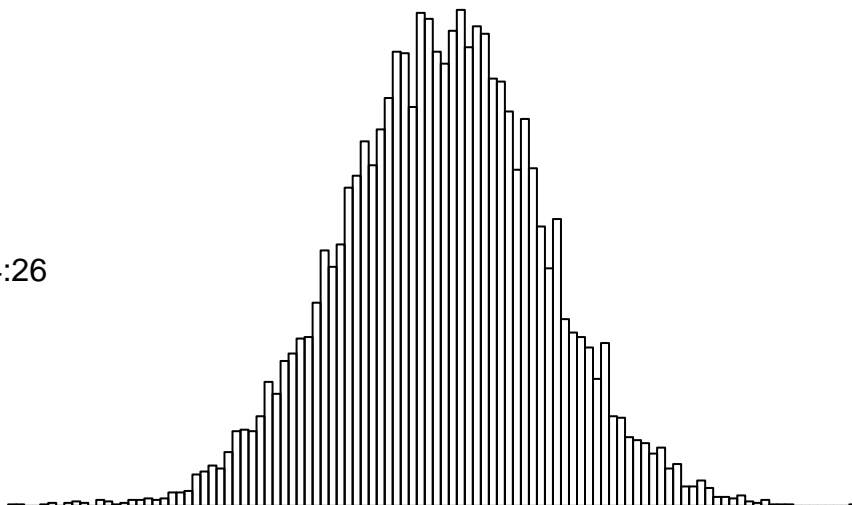

A194:18

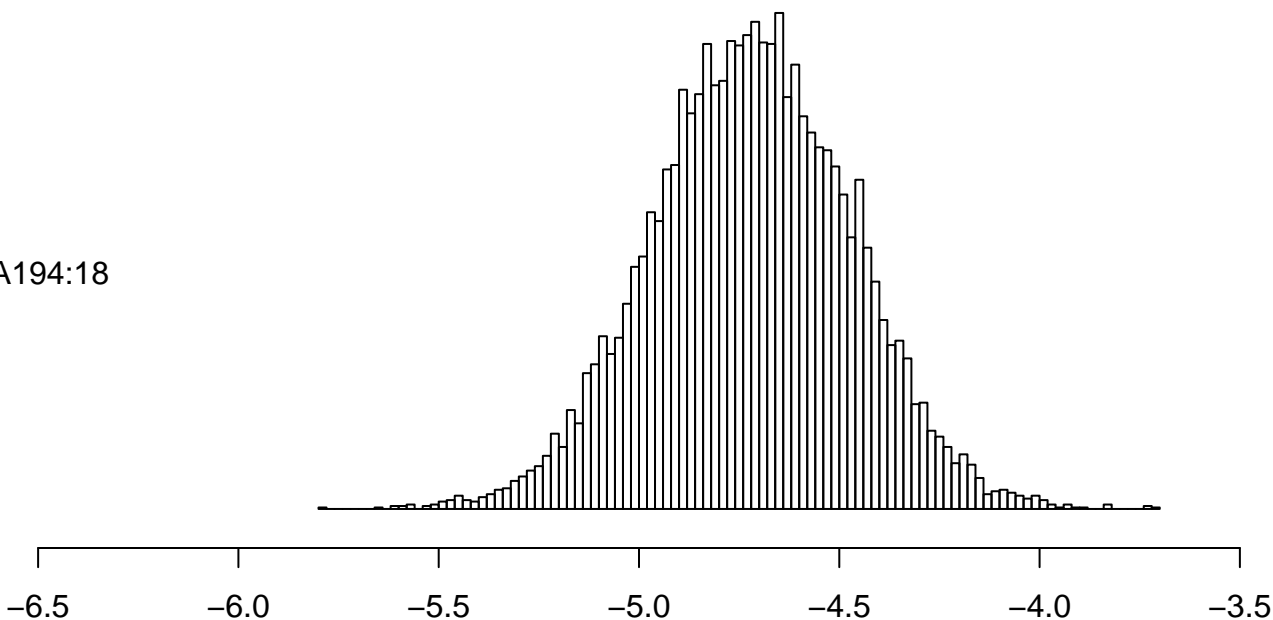

Disaccharide 6

A194:26 – A194:18

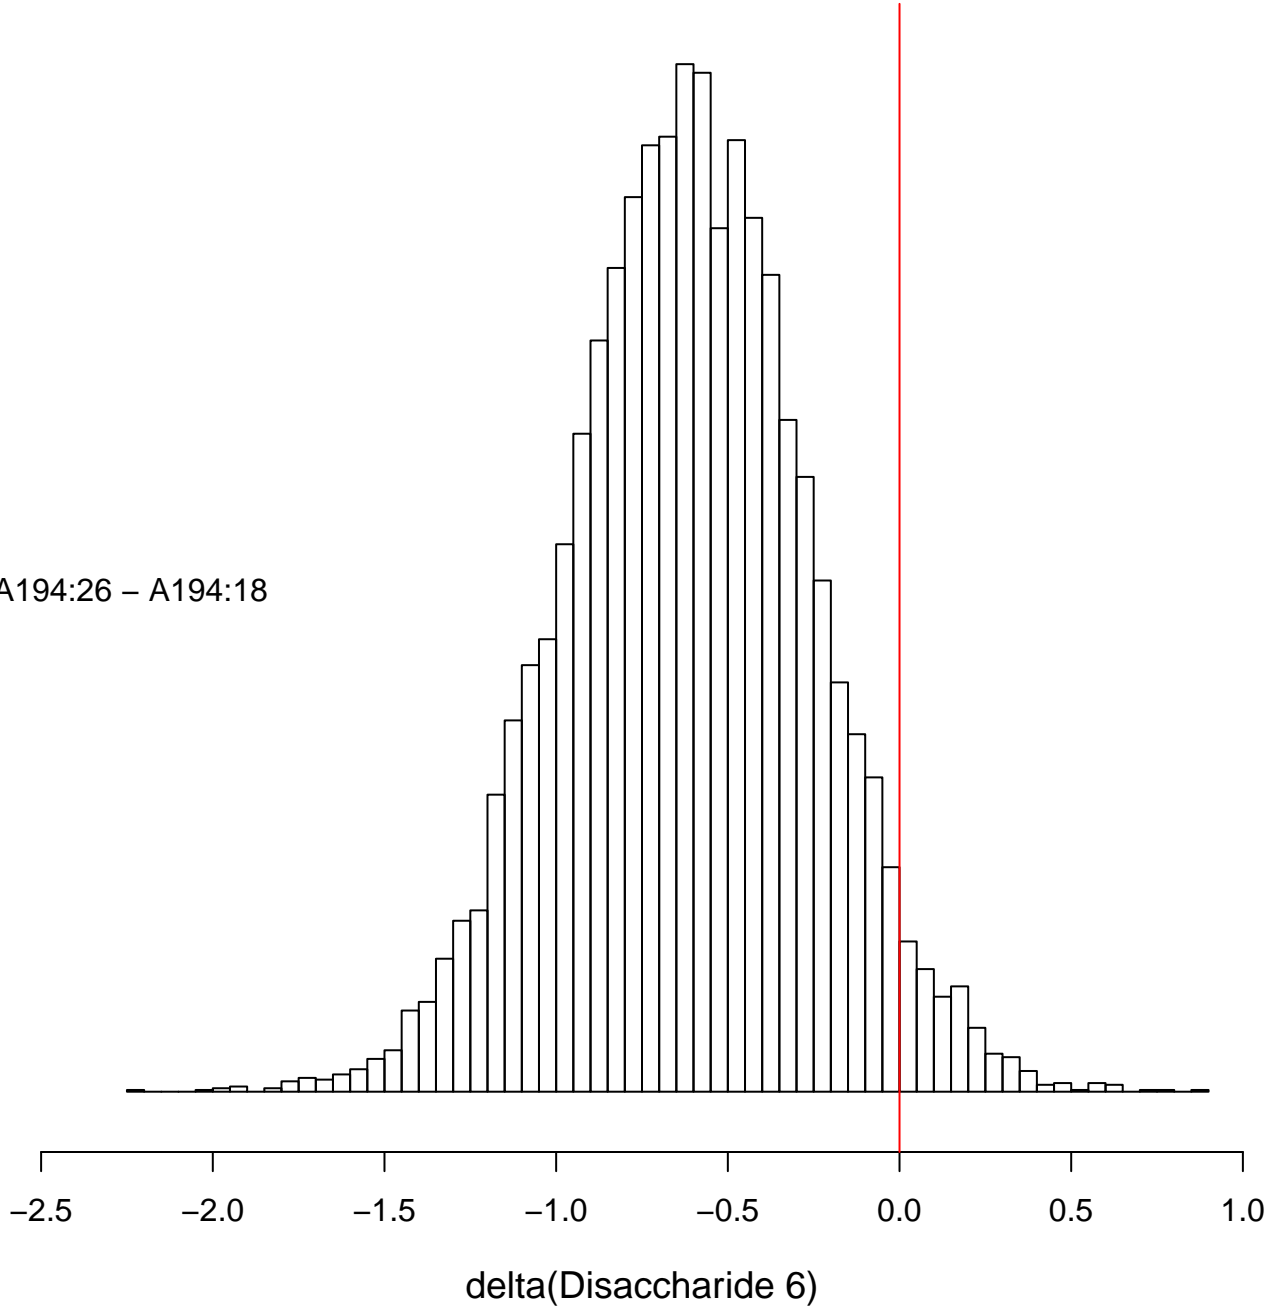

A194:26

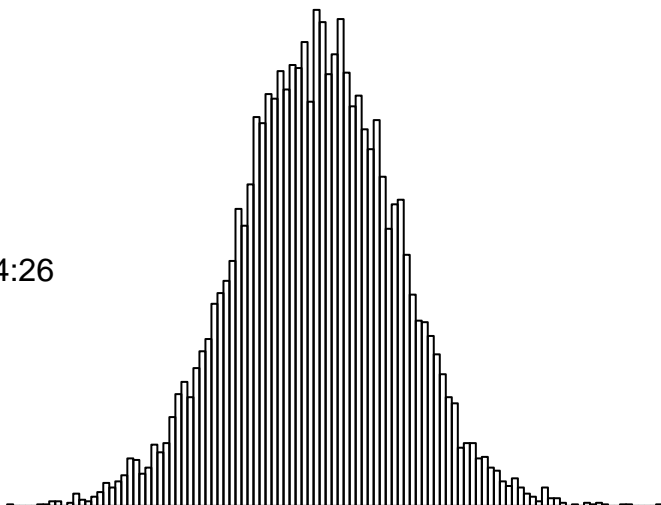

A194:18

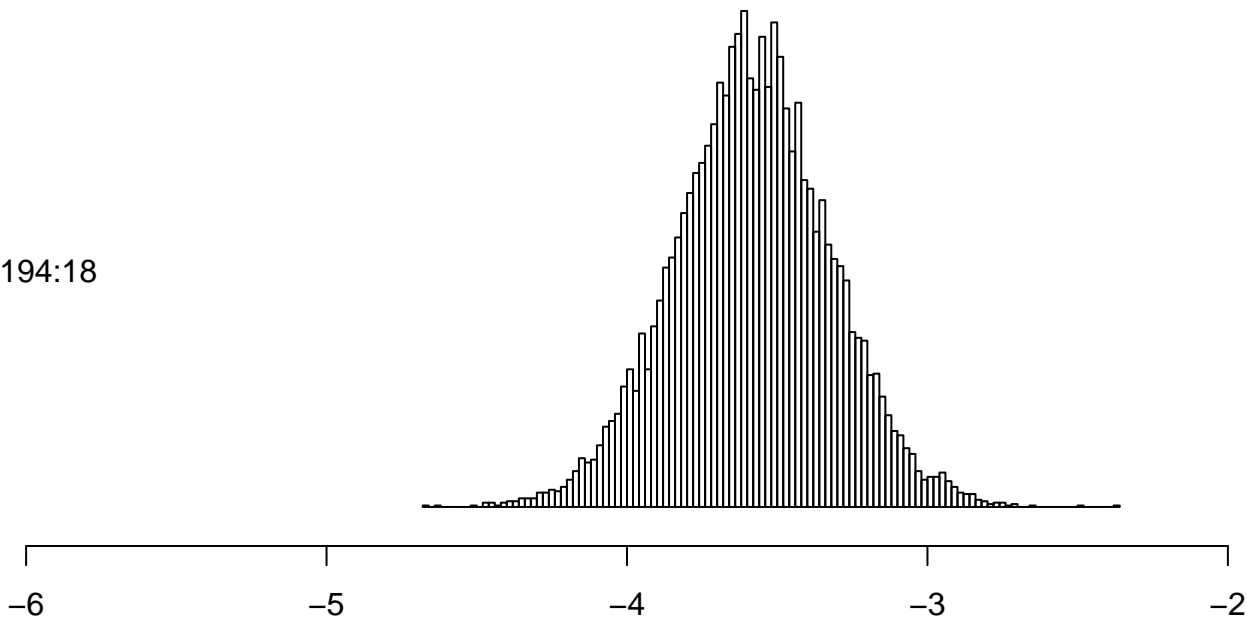

Disaccharide 7

A194:26 – A194:18

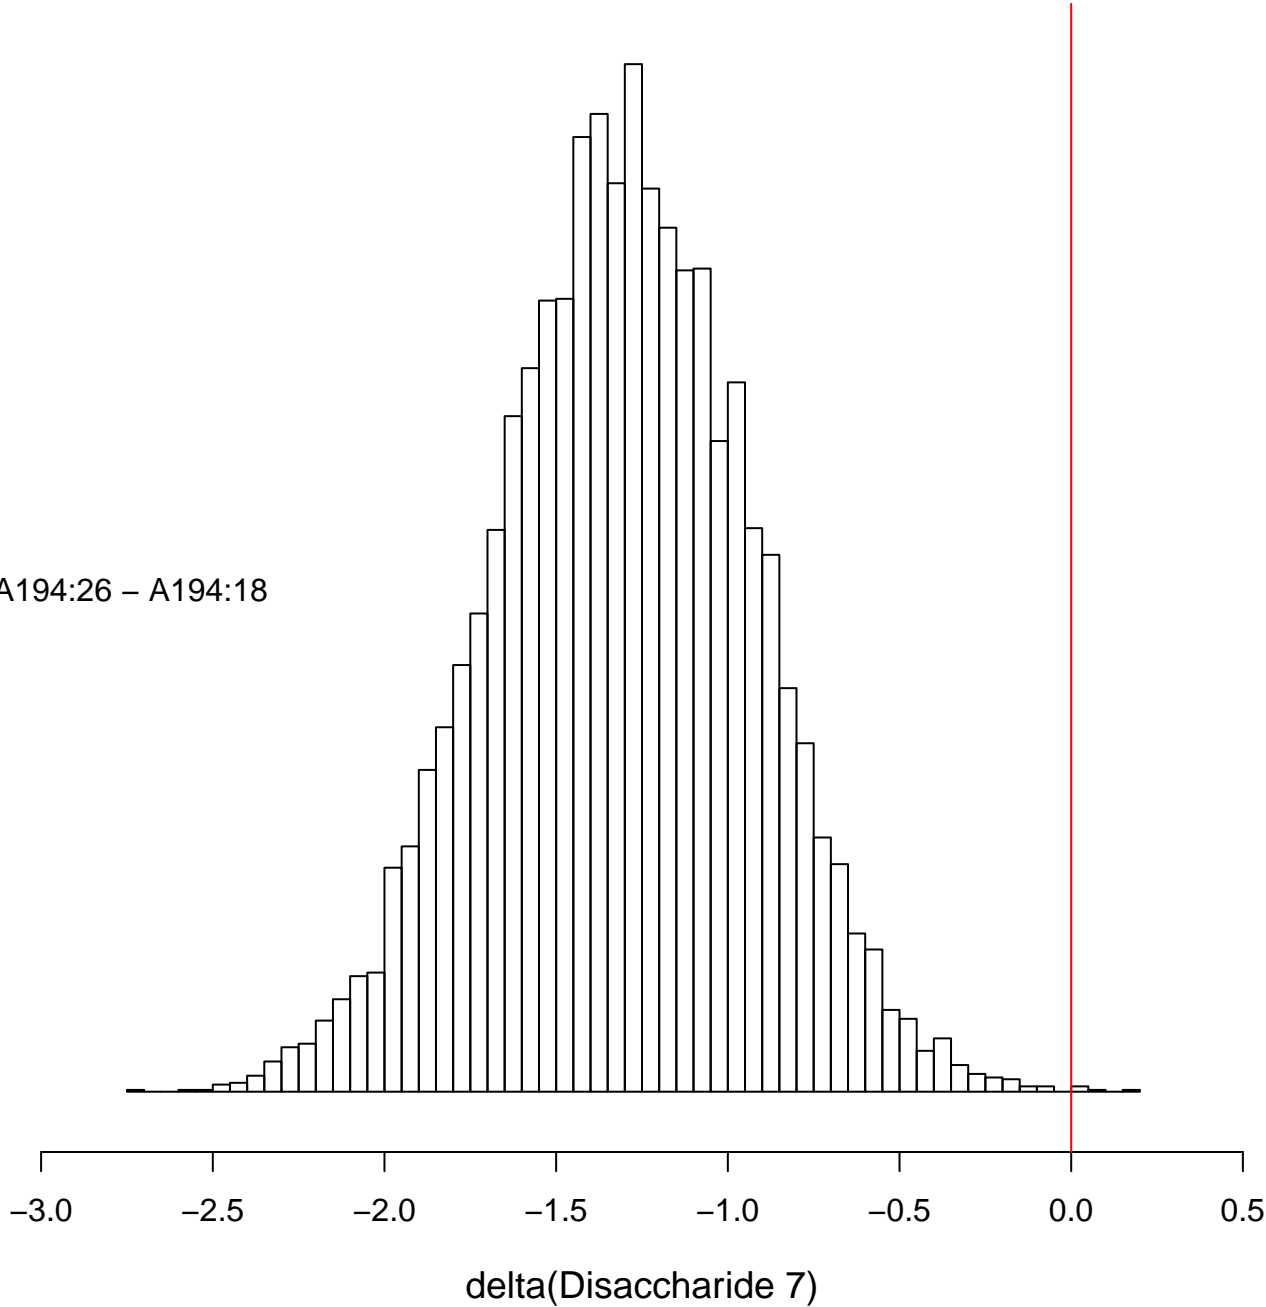



A194:26

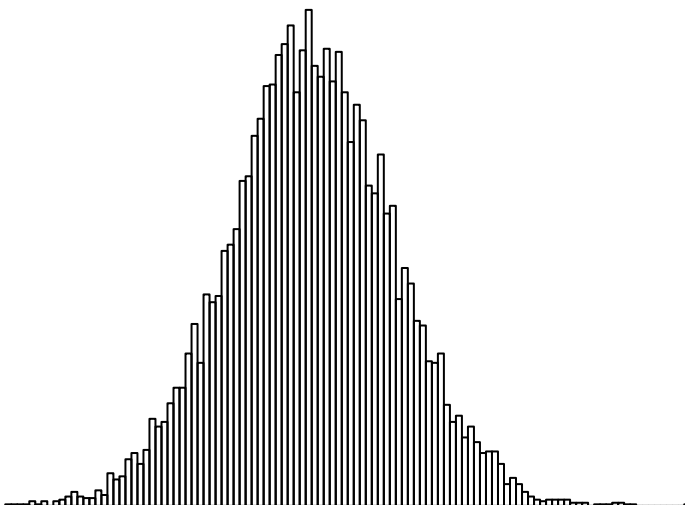

A194:18

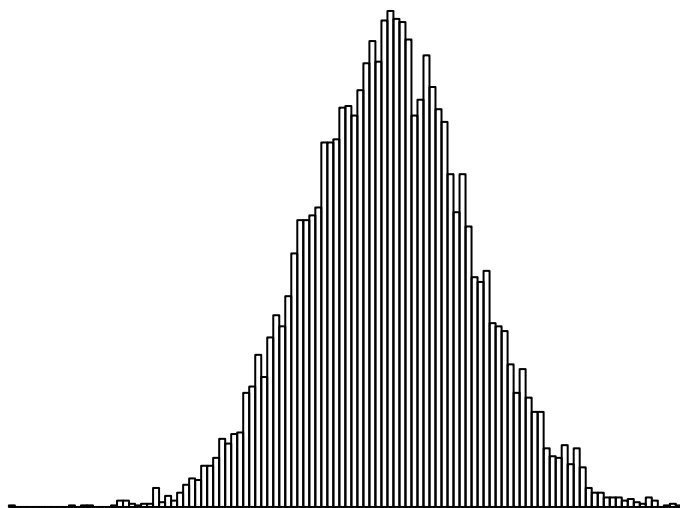

-8

-7

-6

-5

-4

Disaccharide 8

A194:26 – A194:18

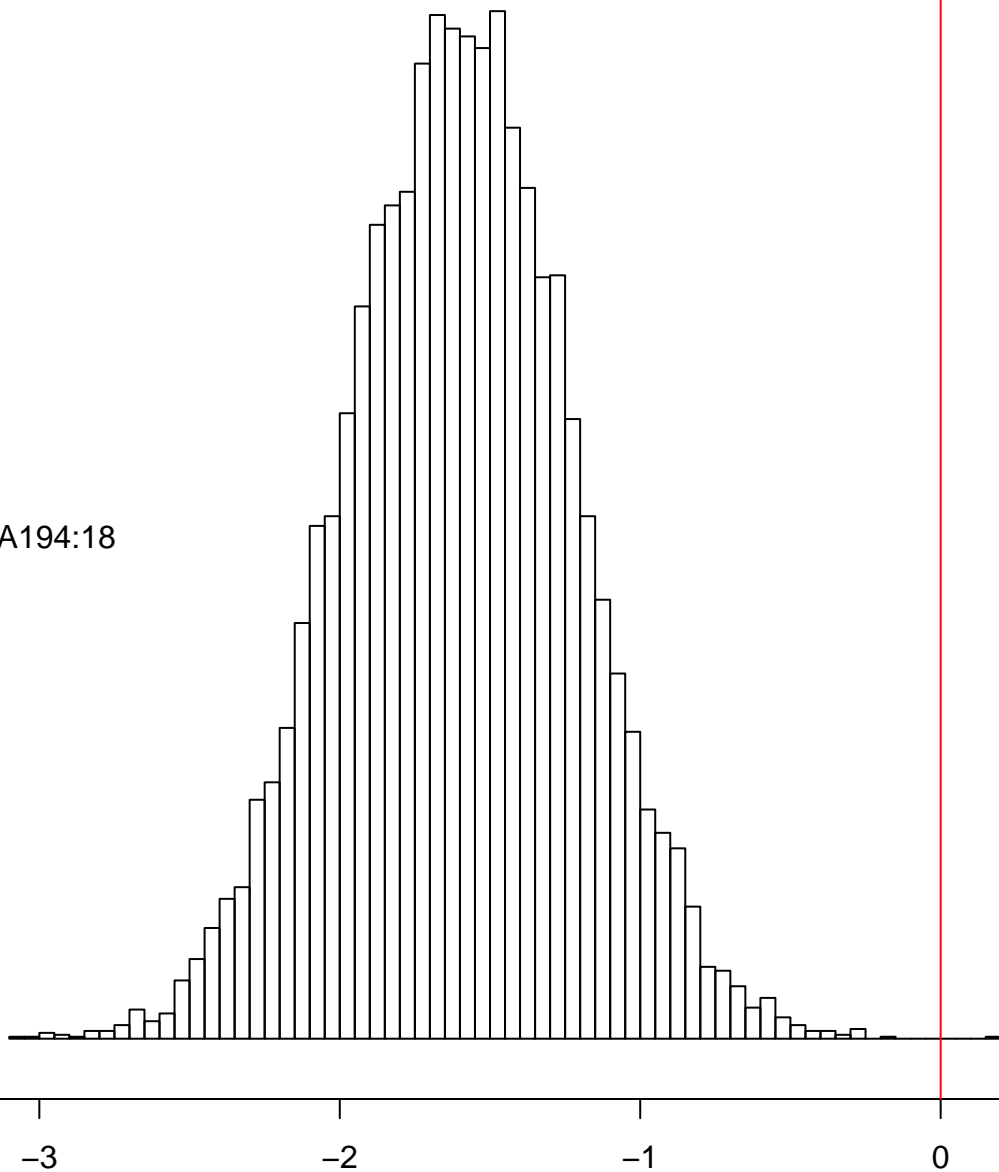

delta(Disaccharide 8)

A194:26

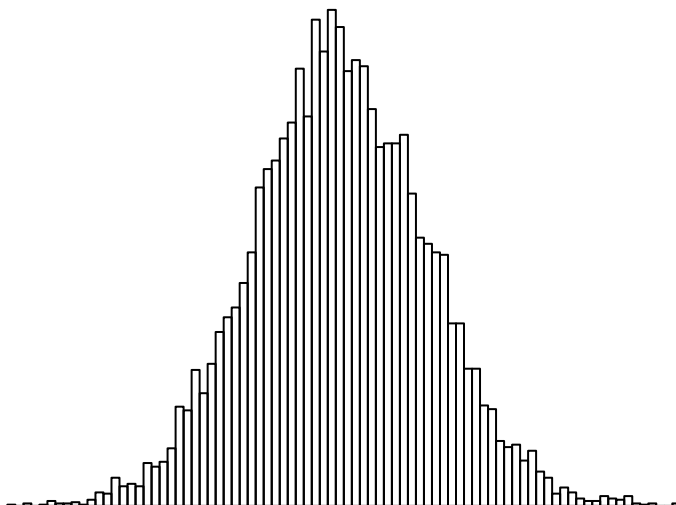

A194:18

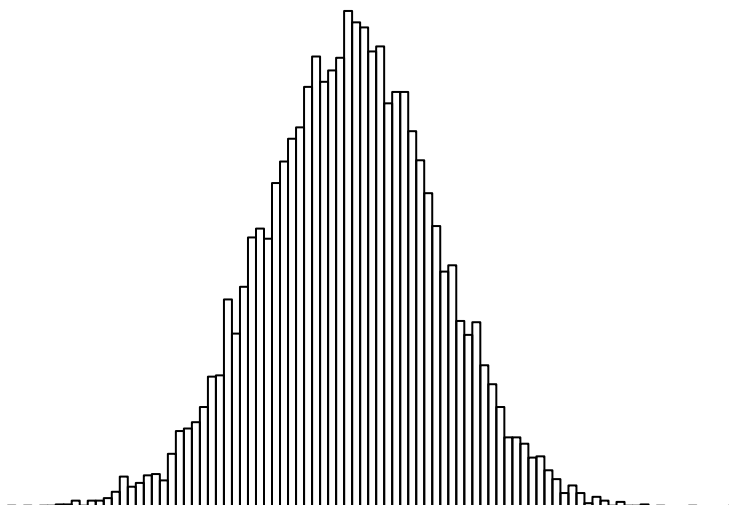

-9.0

-8.5

-8.0

-7.5

-7.0

-6.5

-6.0

Disaccharide 9

A194:26 – A194:18

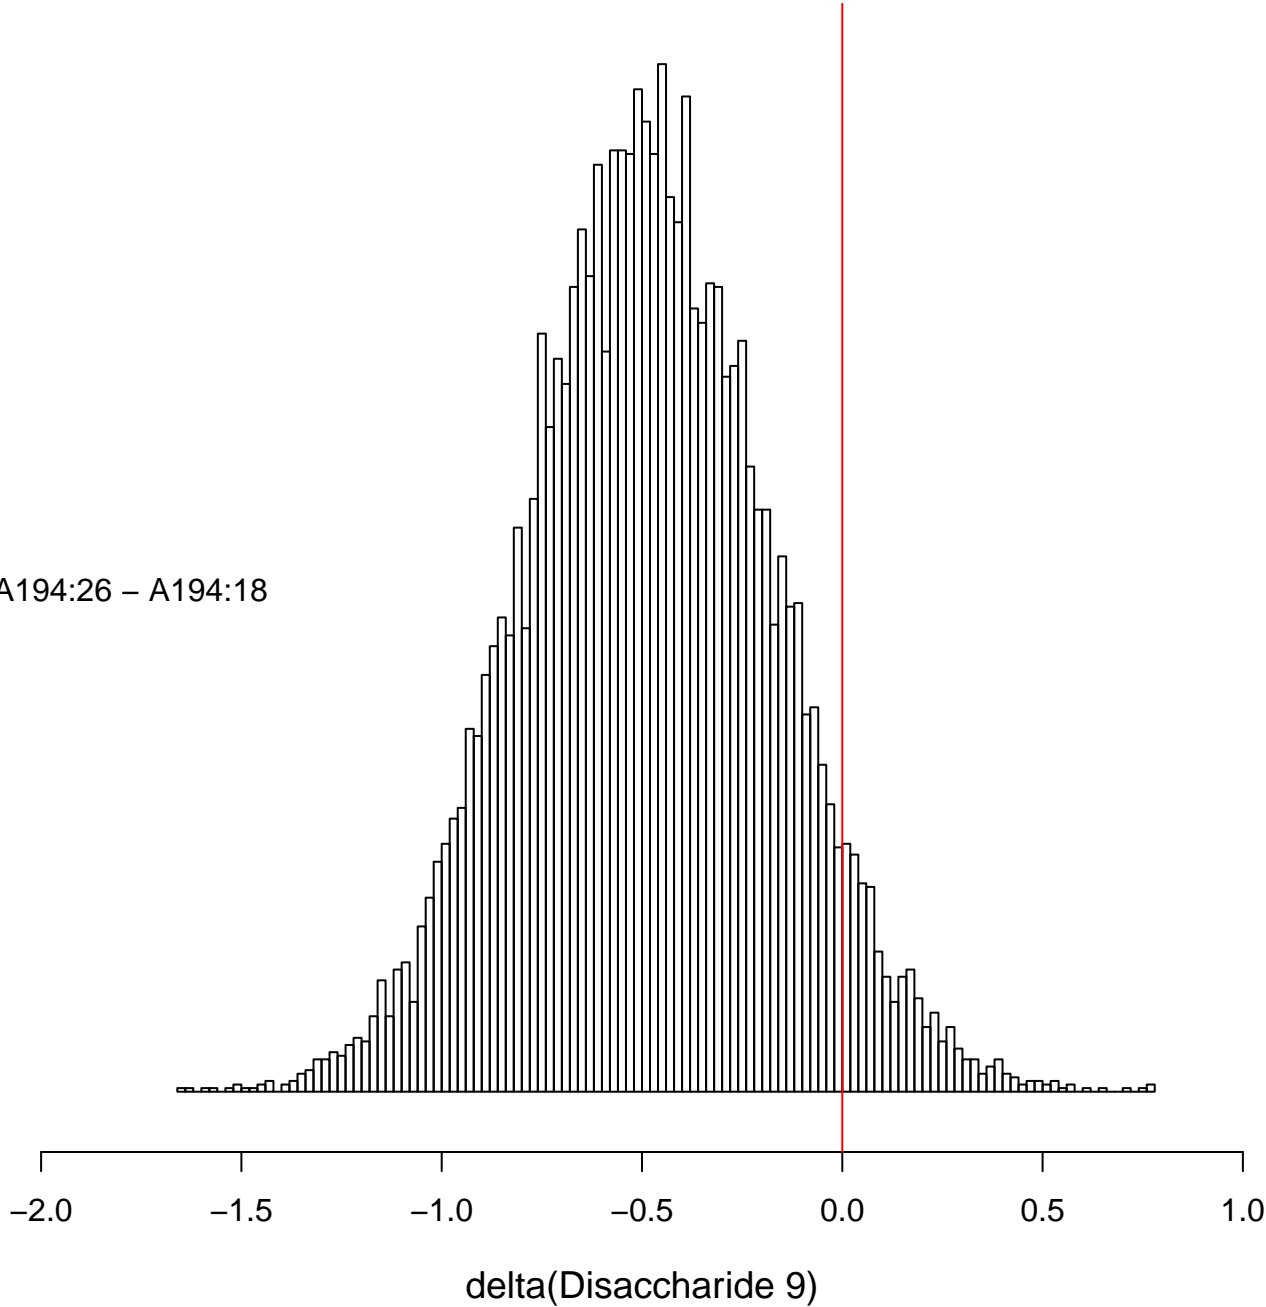

A194:26

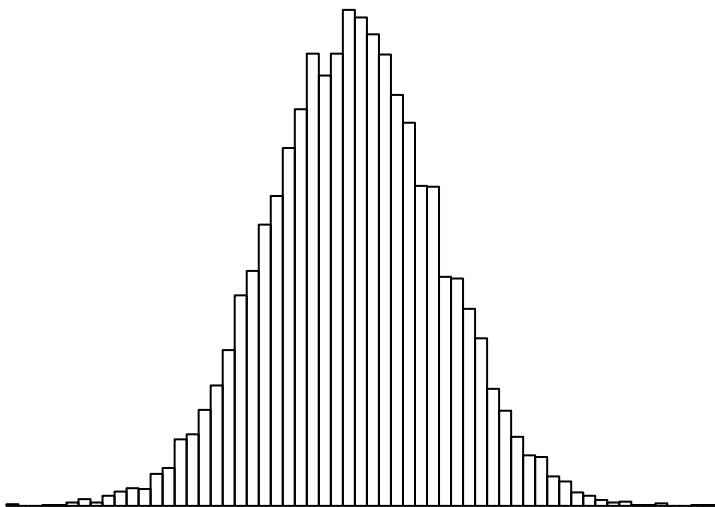

A194:18

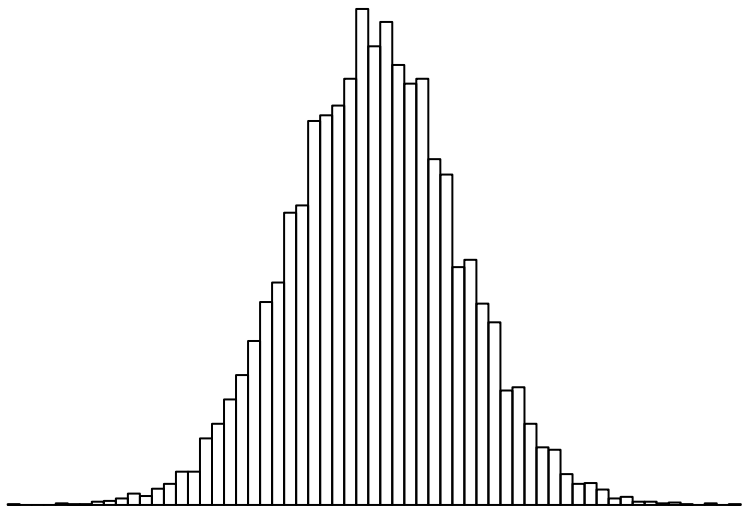

-9 -8 -7 -6 -5 -4

C12:0 Fatty Acid

A194:26 – A194:18

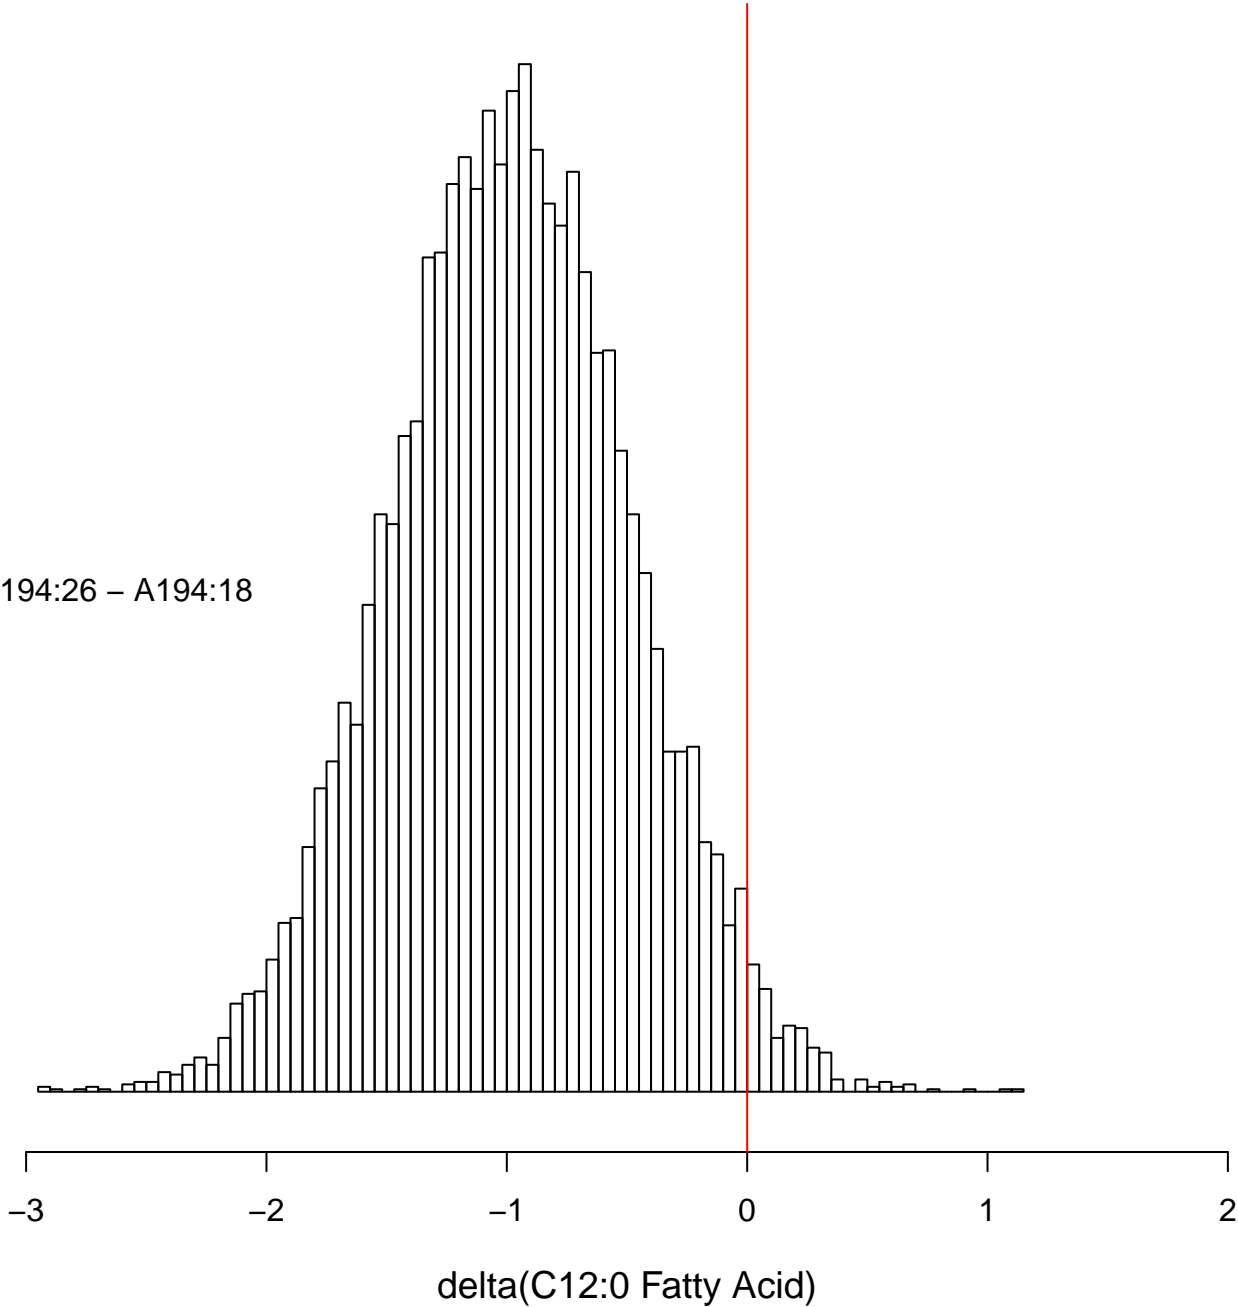

A194:26

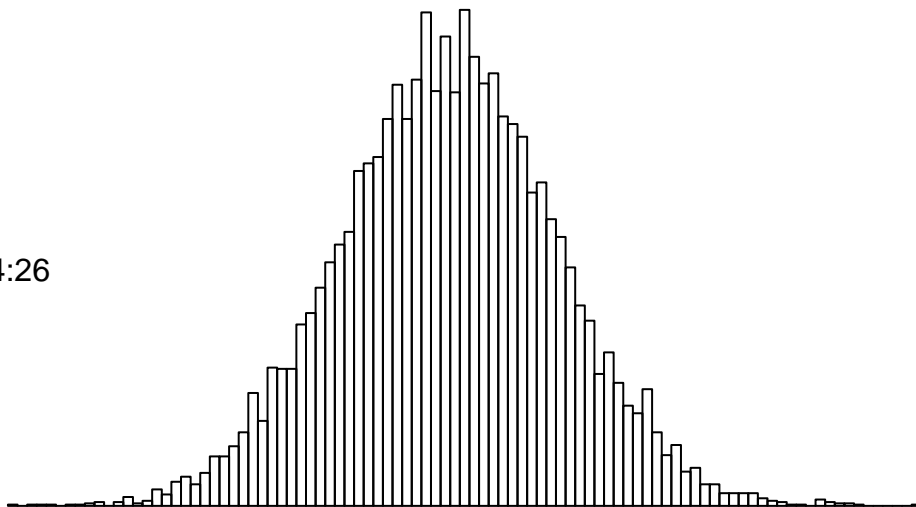

A194:18

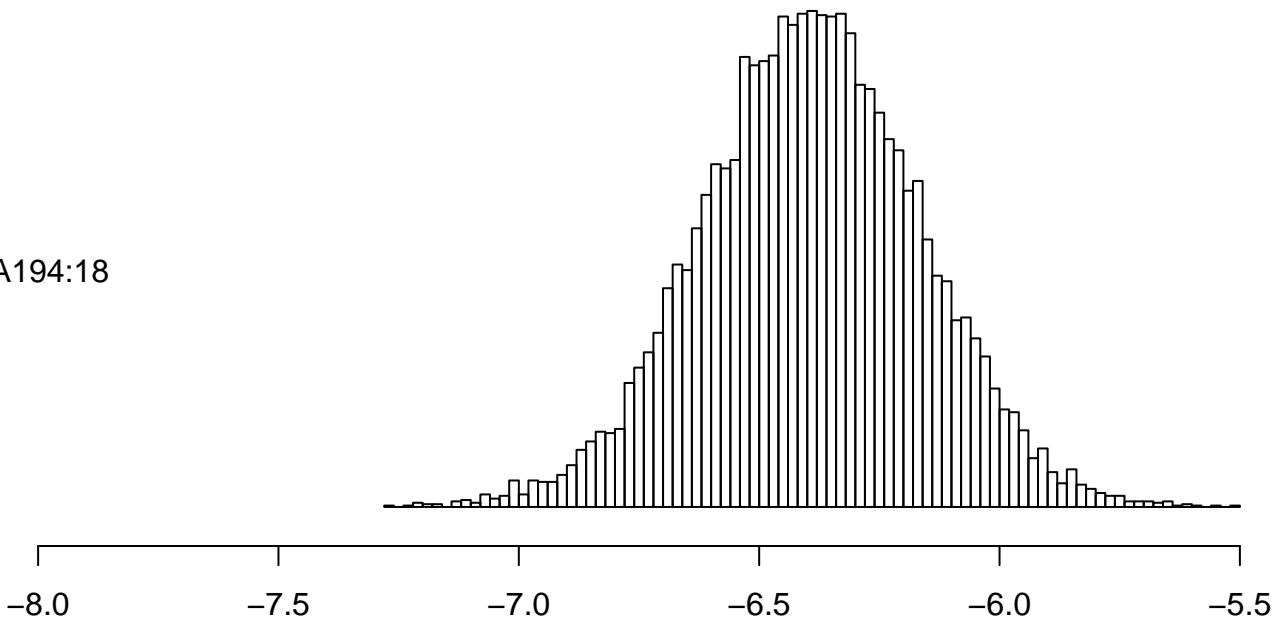

C14:1 Fatty Acid

A194:26 – A194:18

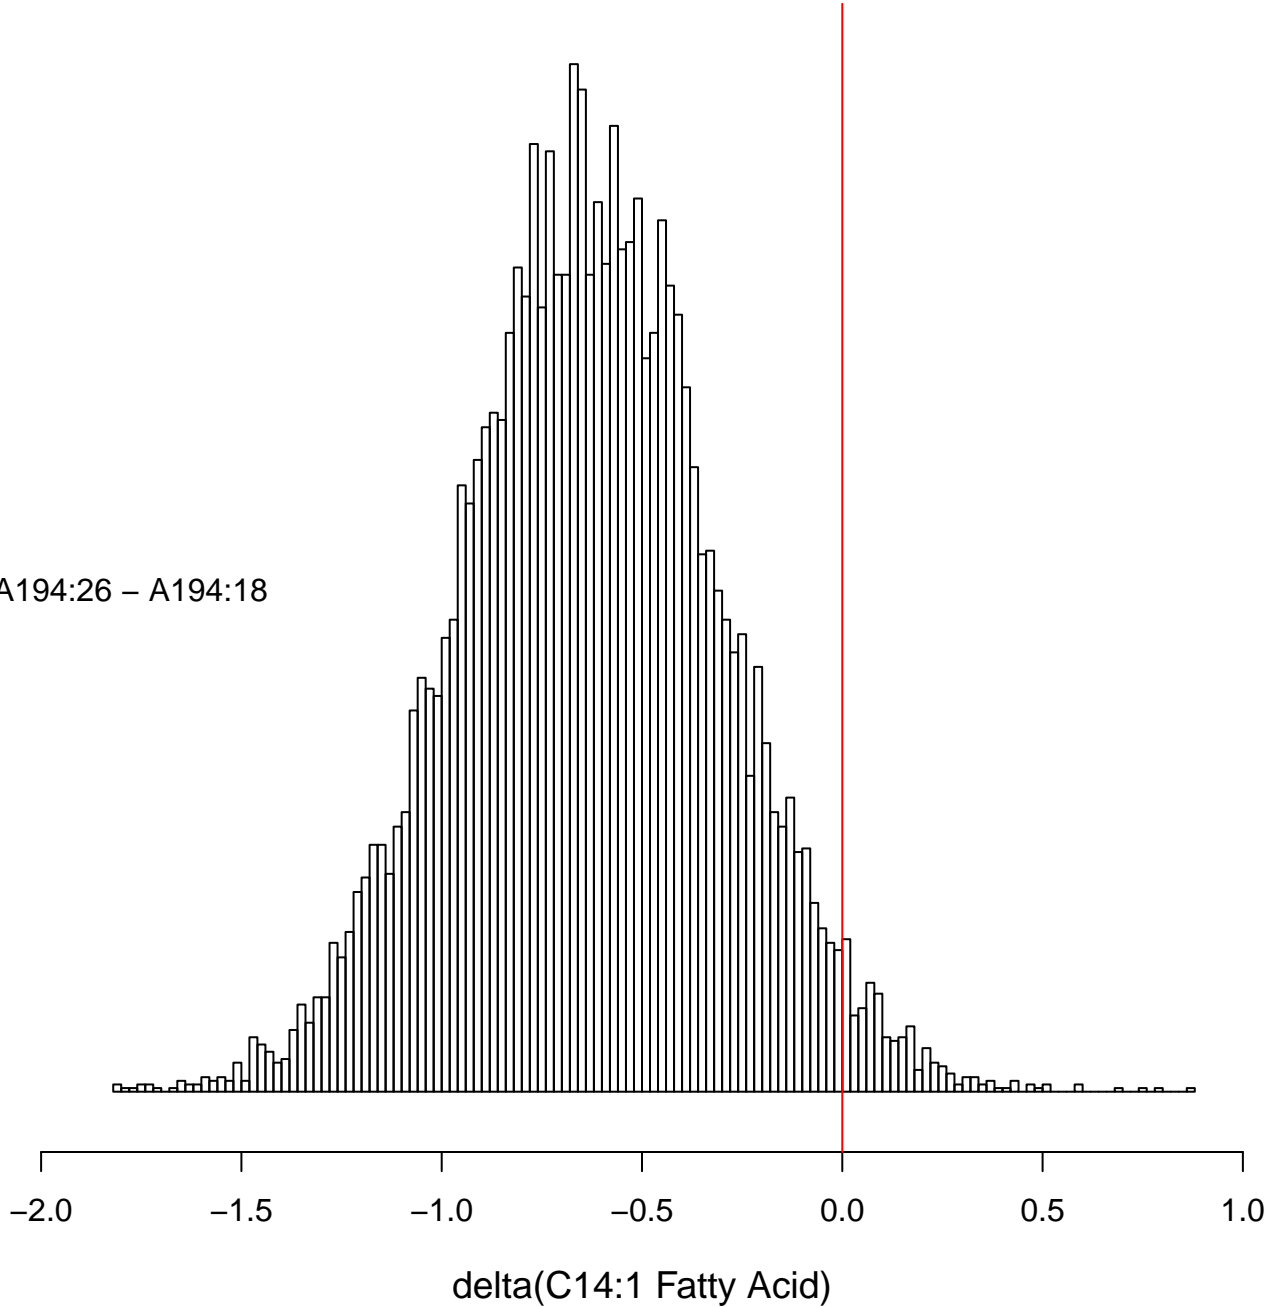



A194:26

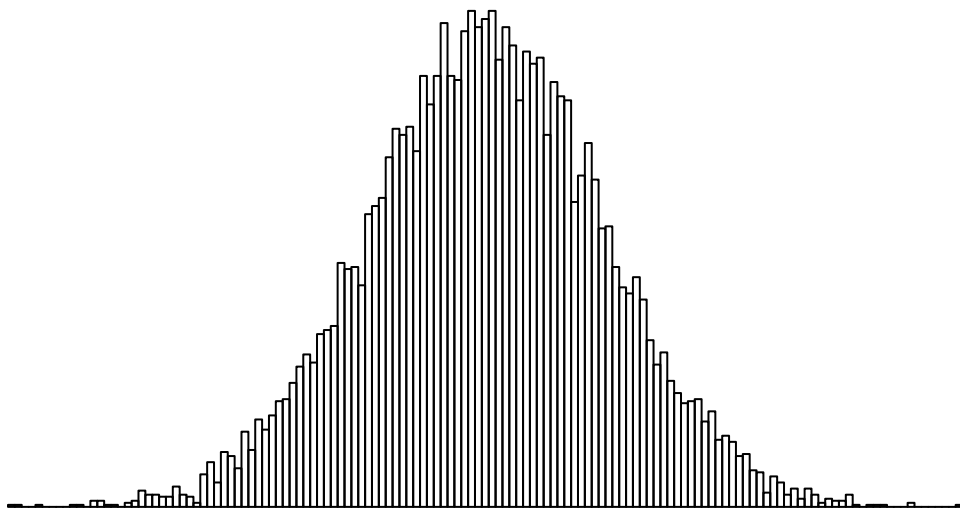

A194:18

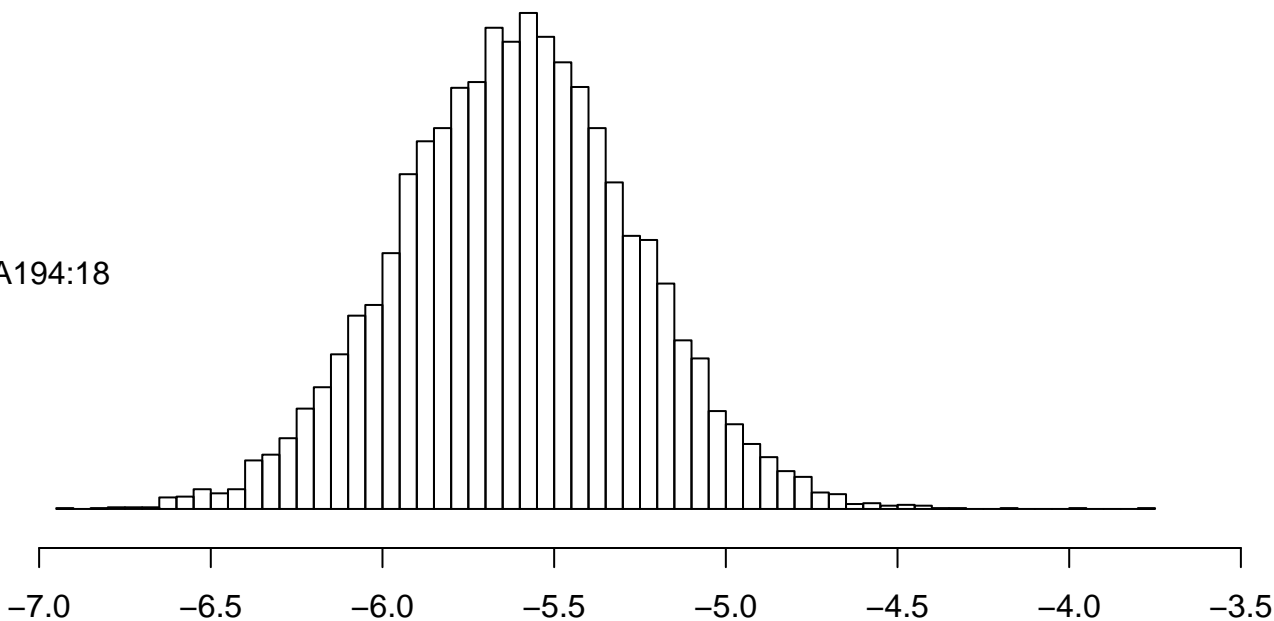

C14:0 Fatty Acid

A194:26 – A194:18

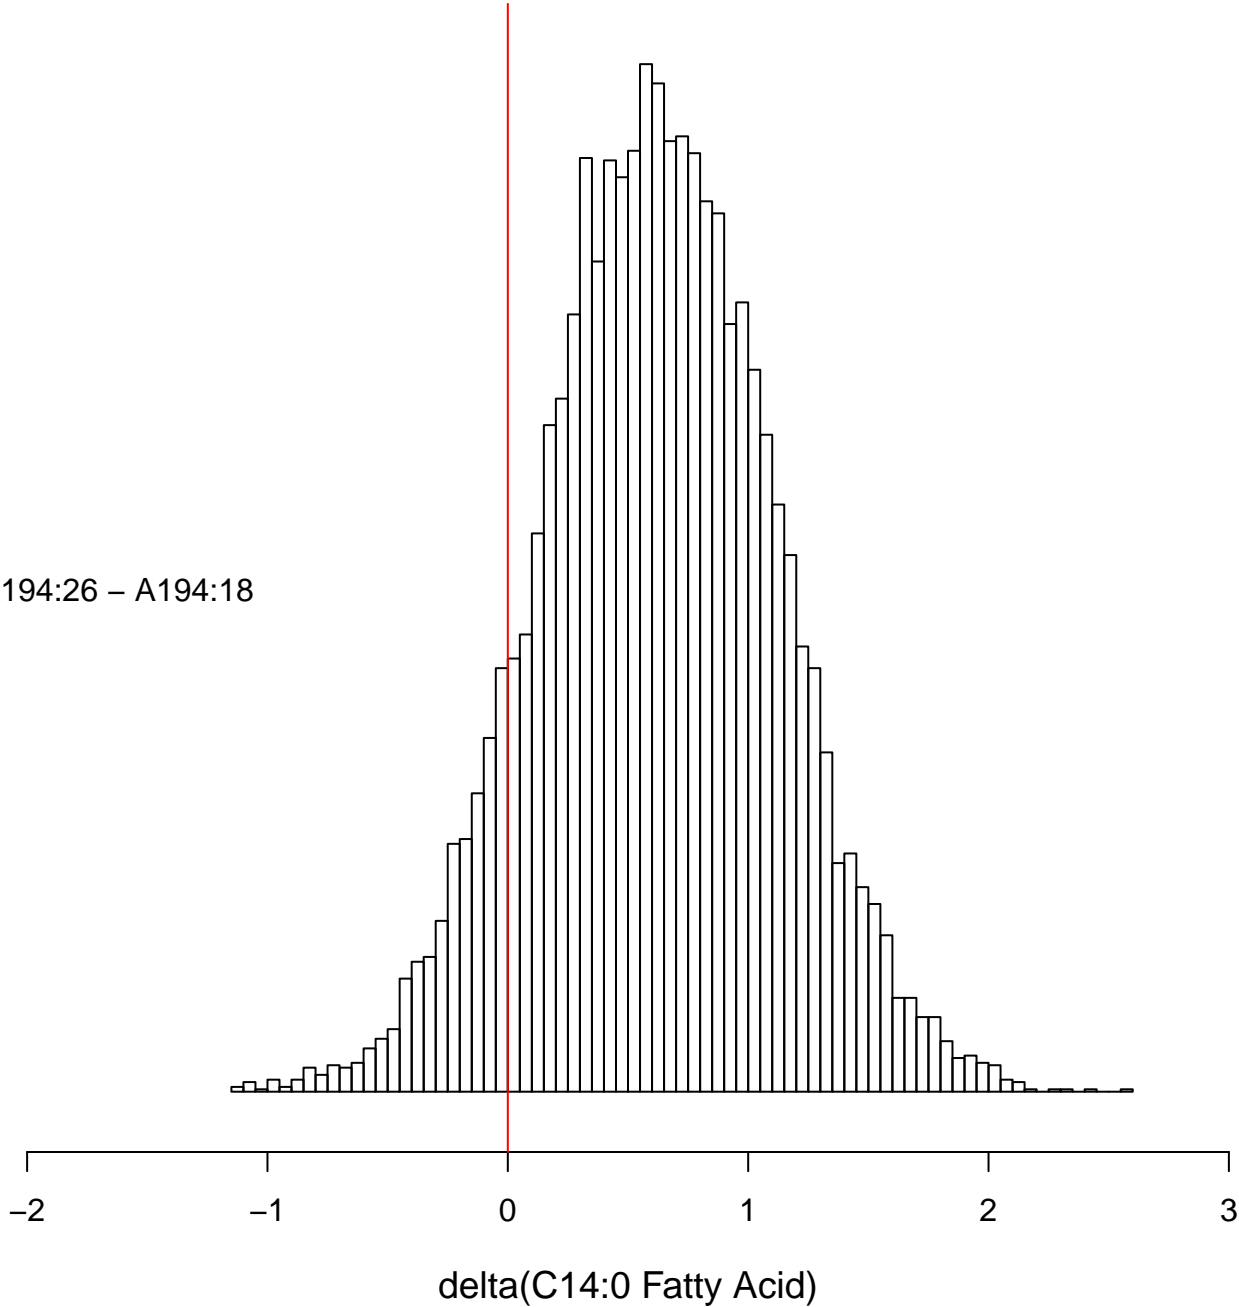

A194:26

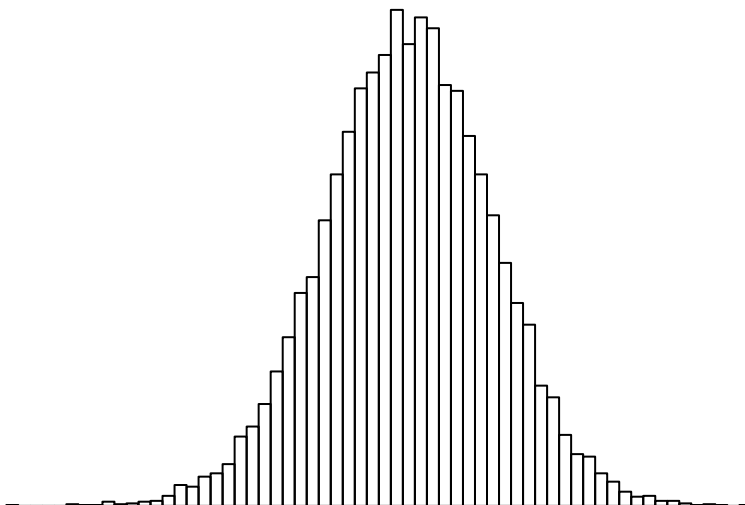

A194:18

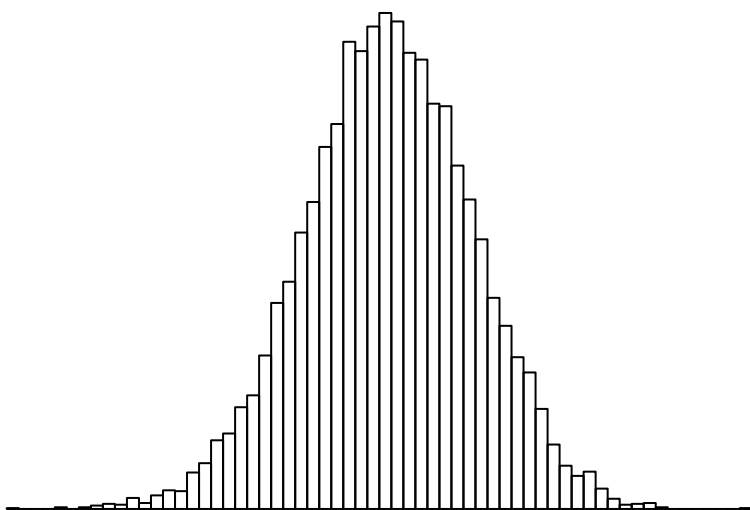

-9 -8 -7 -6 -5 -4

C16:1 Fatty Acid

A194:26 – A194:18

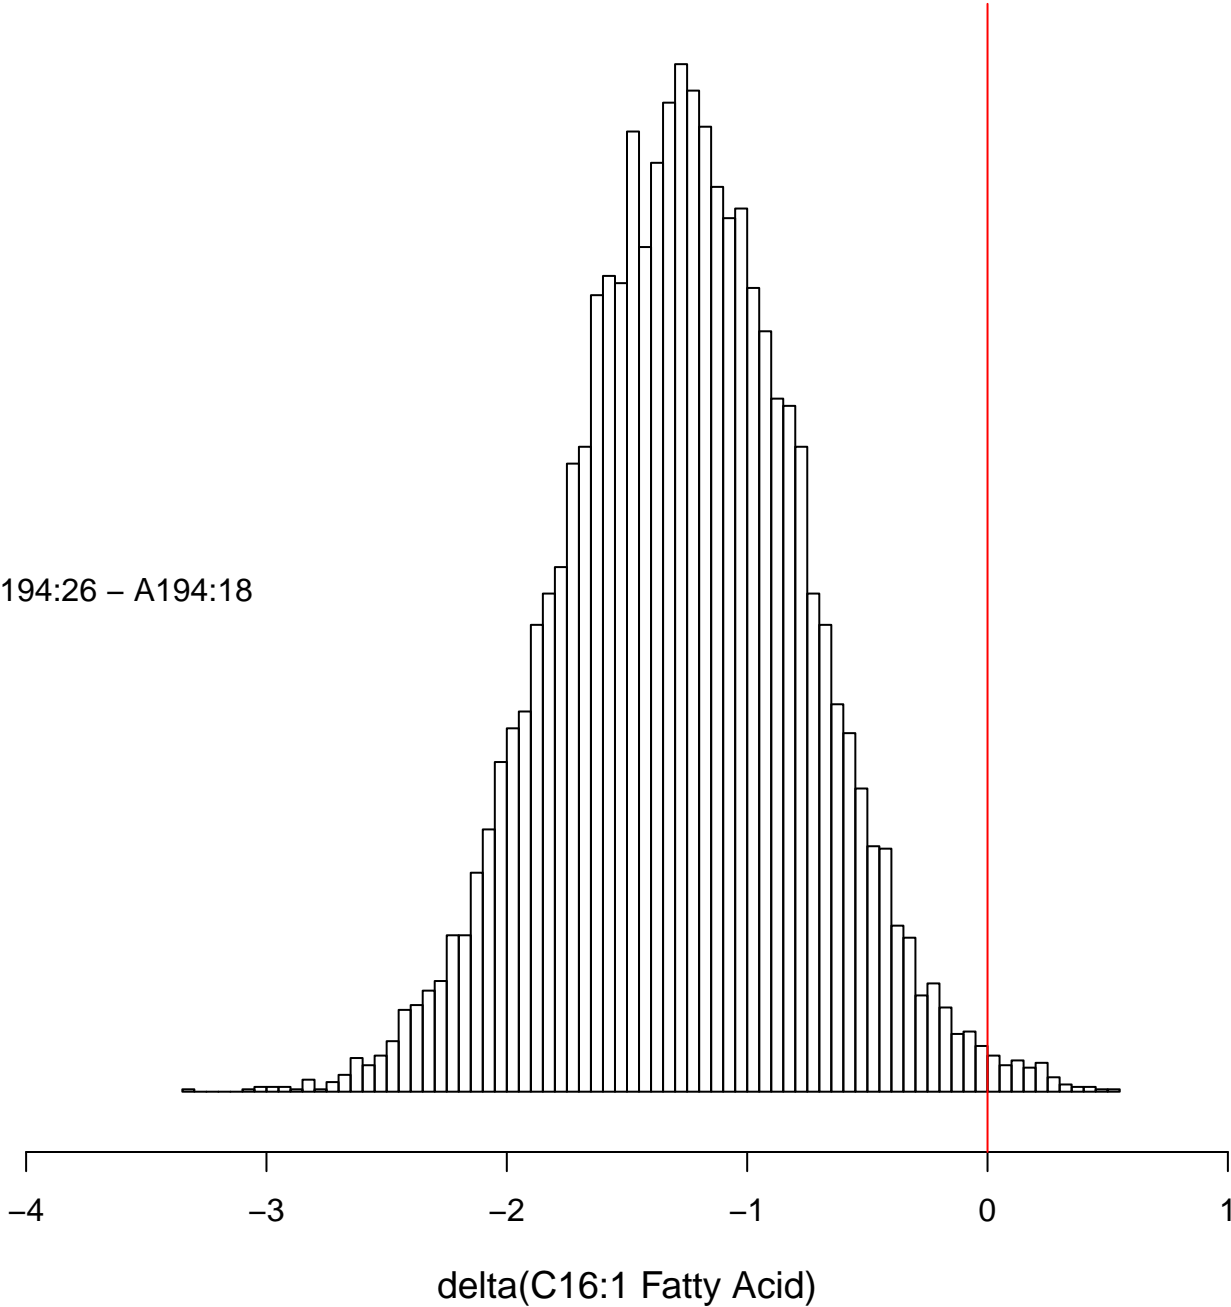

A194:26

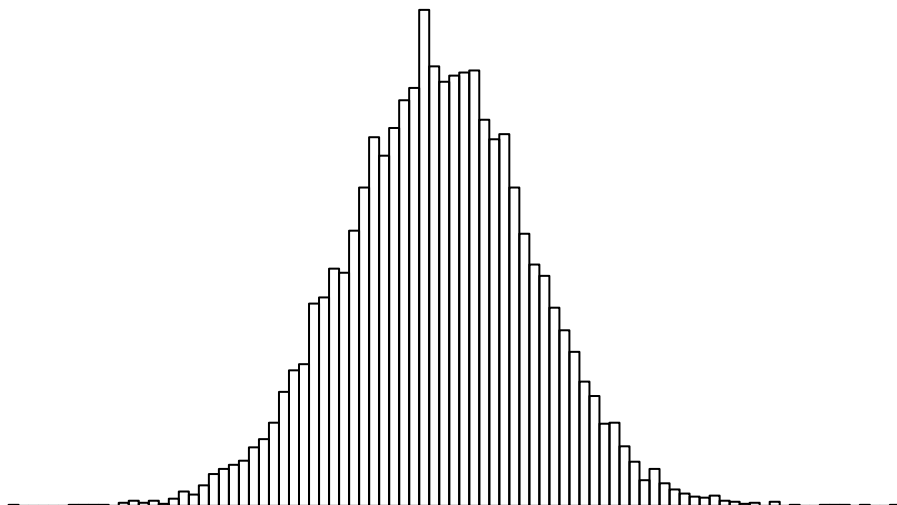

A194:18

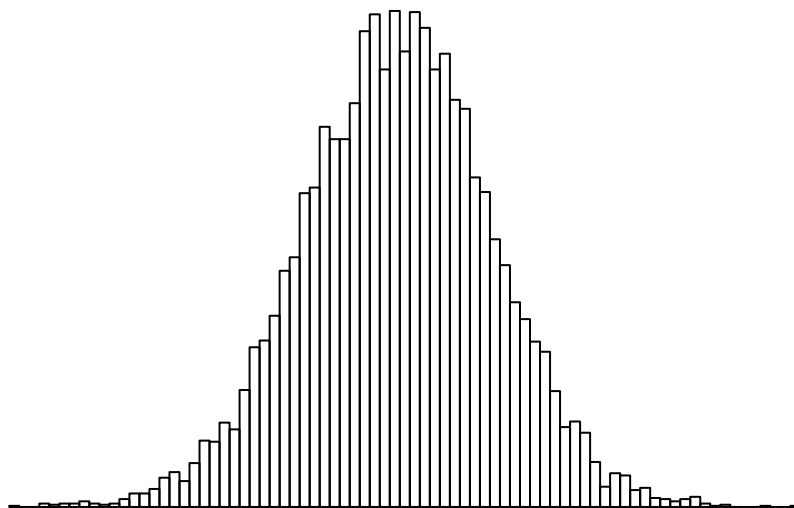

-10

-8

-6

-4

-2

0

2

C16:0 Fatty Acid

A194:26 – A194:18

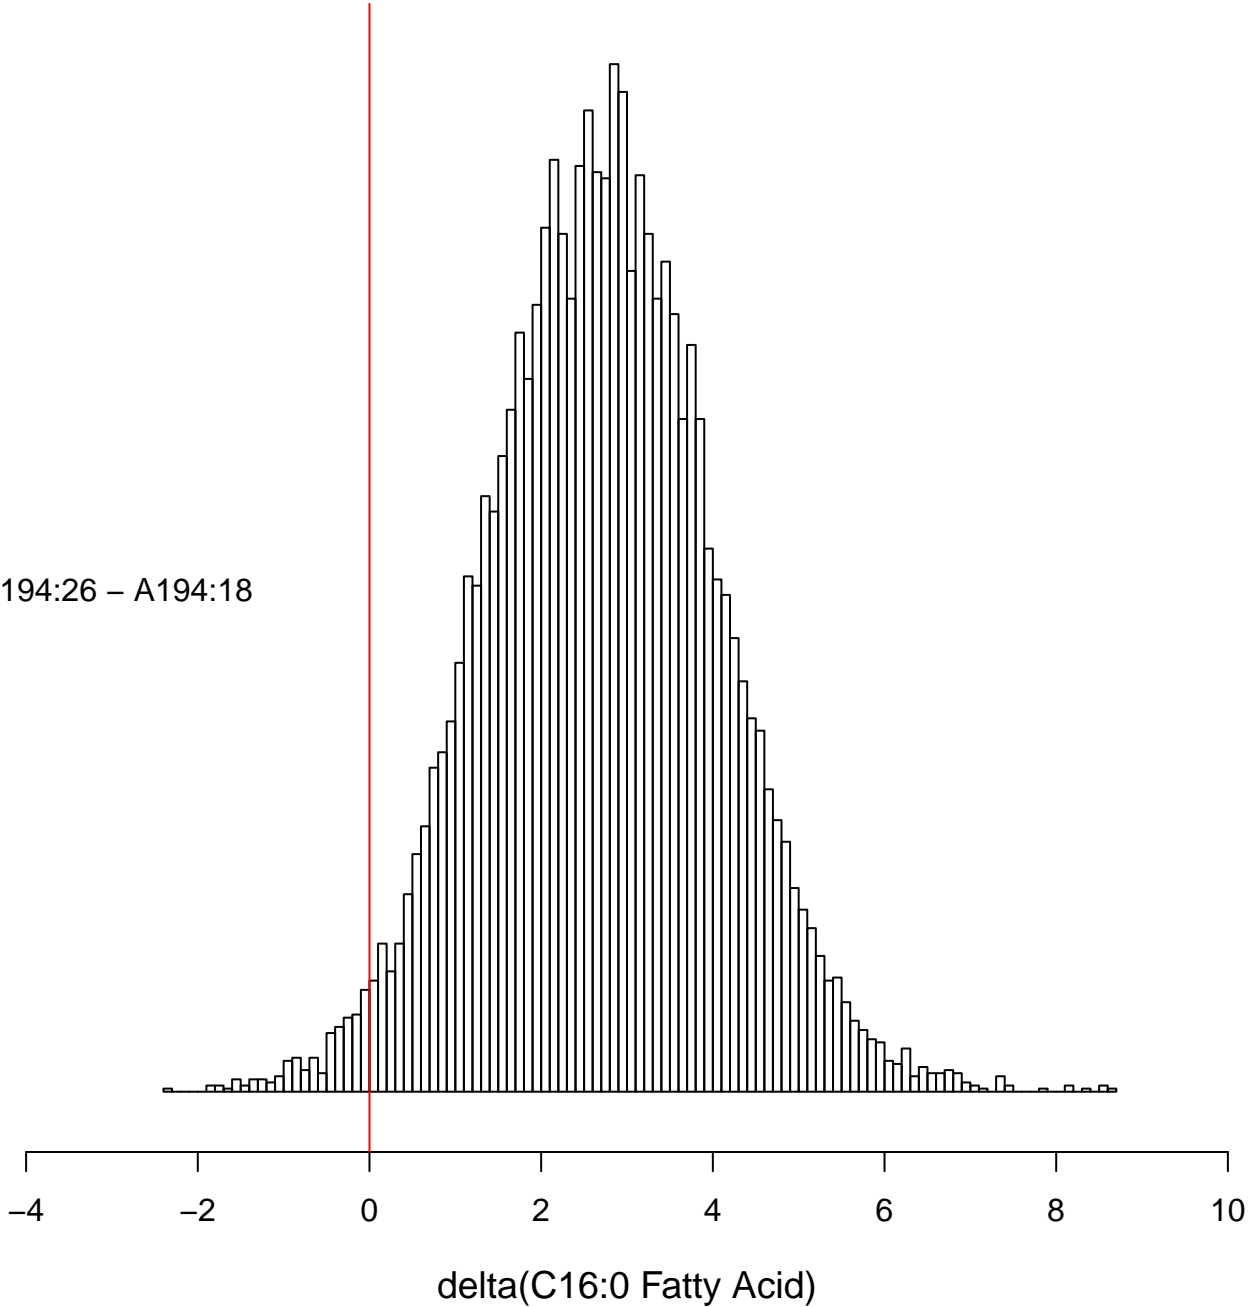

A194:26

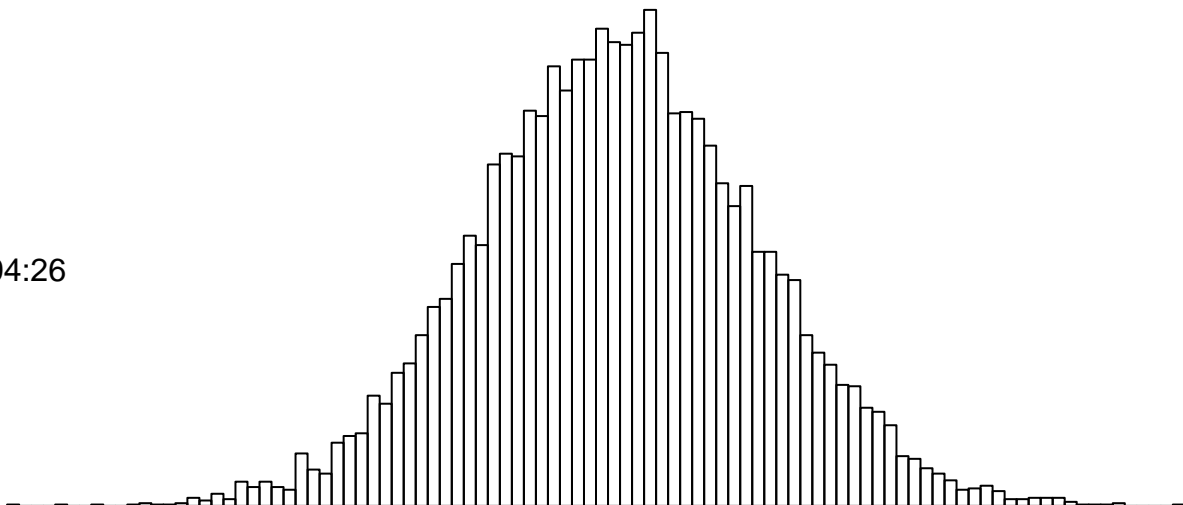

A194:18

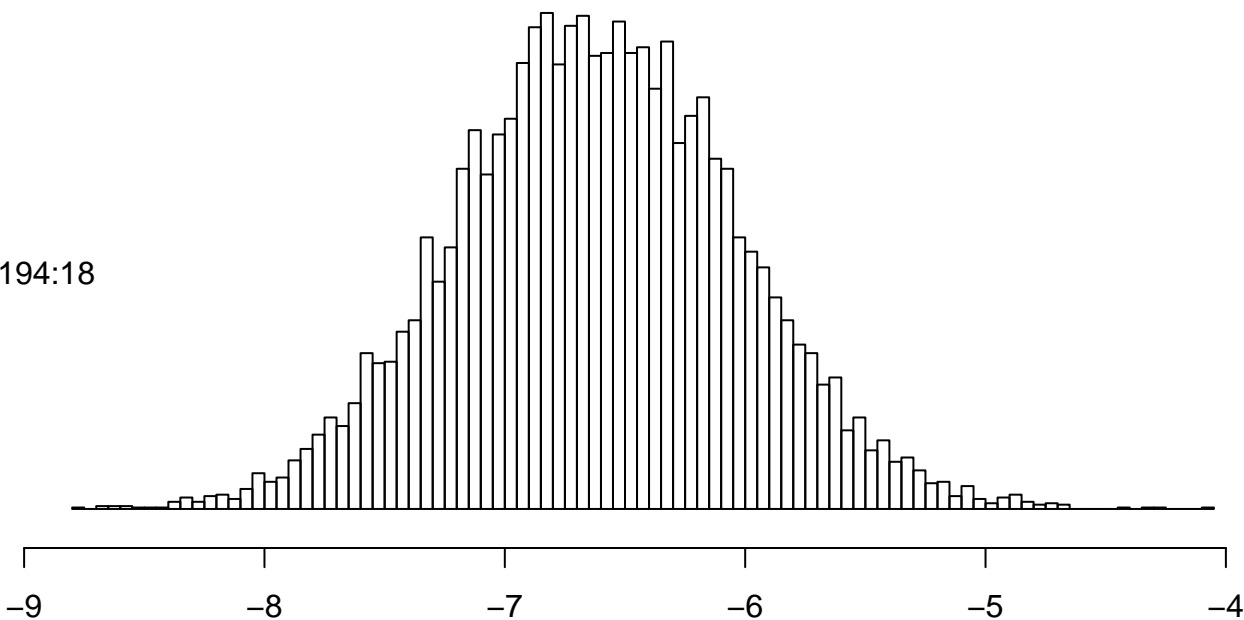

Polyunsaturated Fatty Acids 1

A194:26 – A194:18

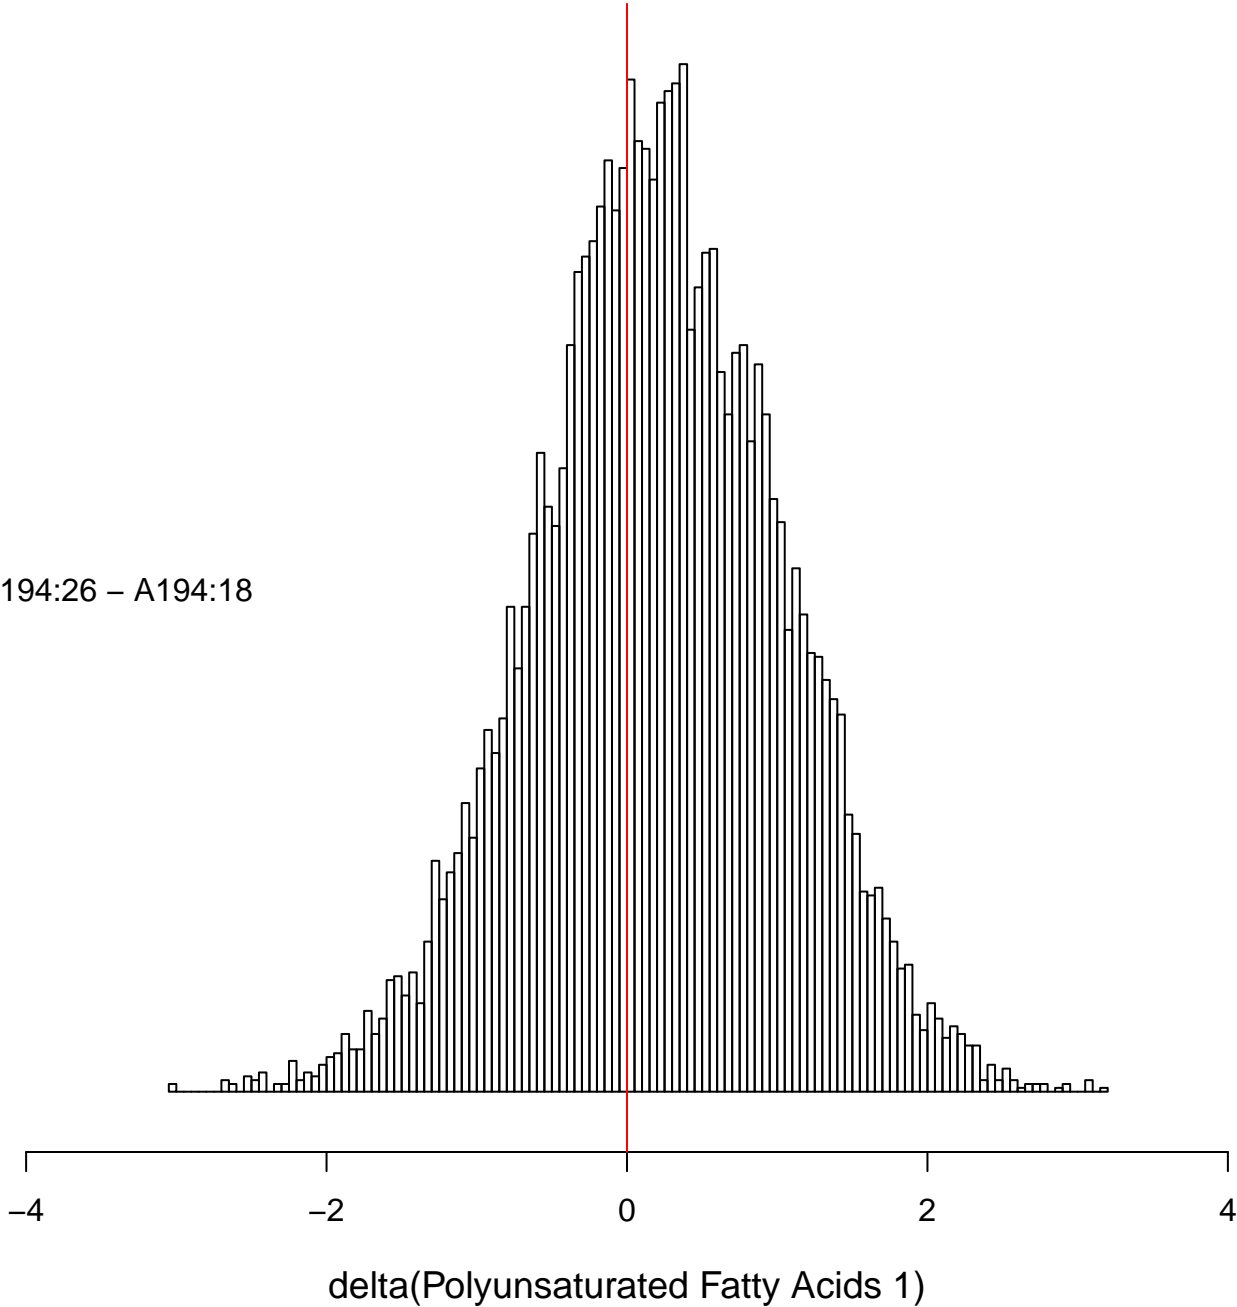



A194:26

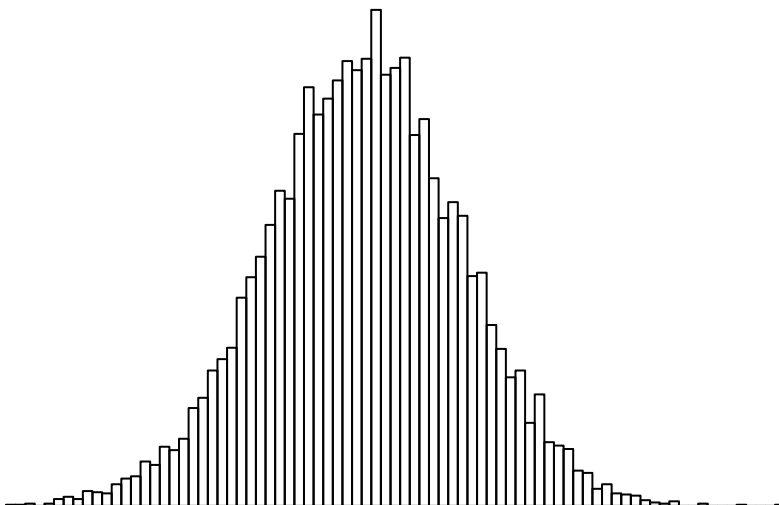

A194:18

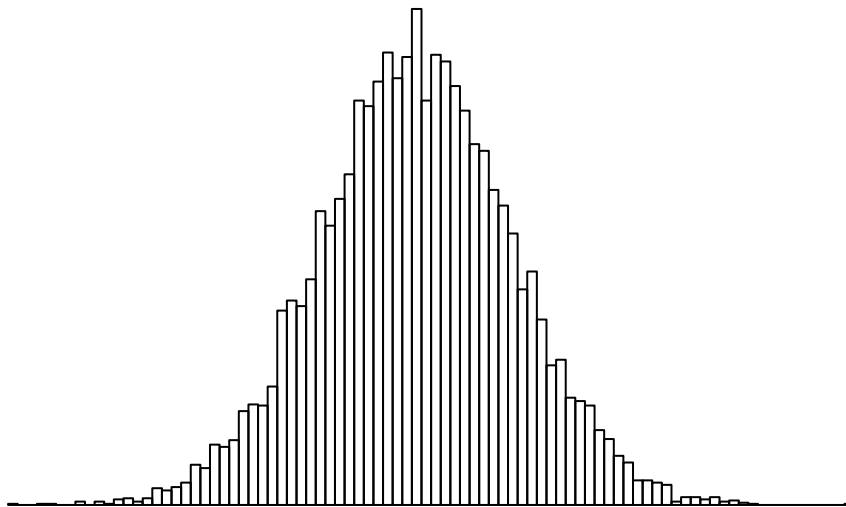

-9.0      -8.5      -8.0      -7.5      -7.0      -6.5

Polyunsaturated Fatty Acids 3

A194:26 – A194:18

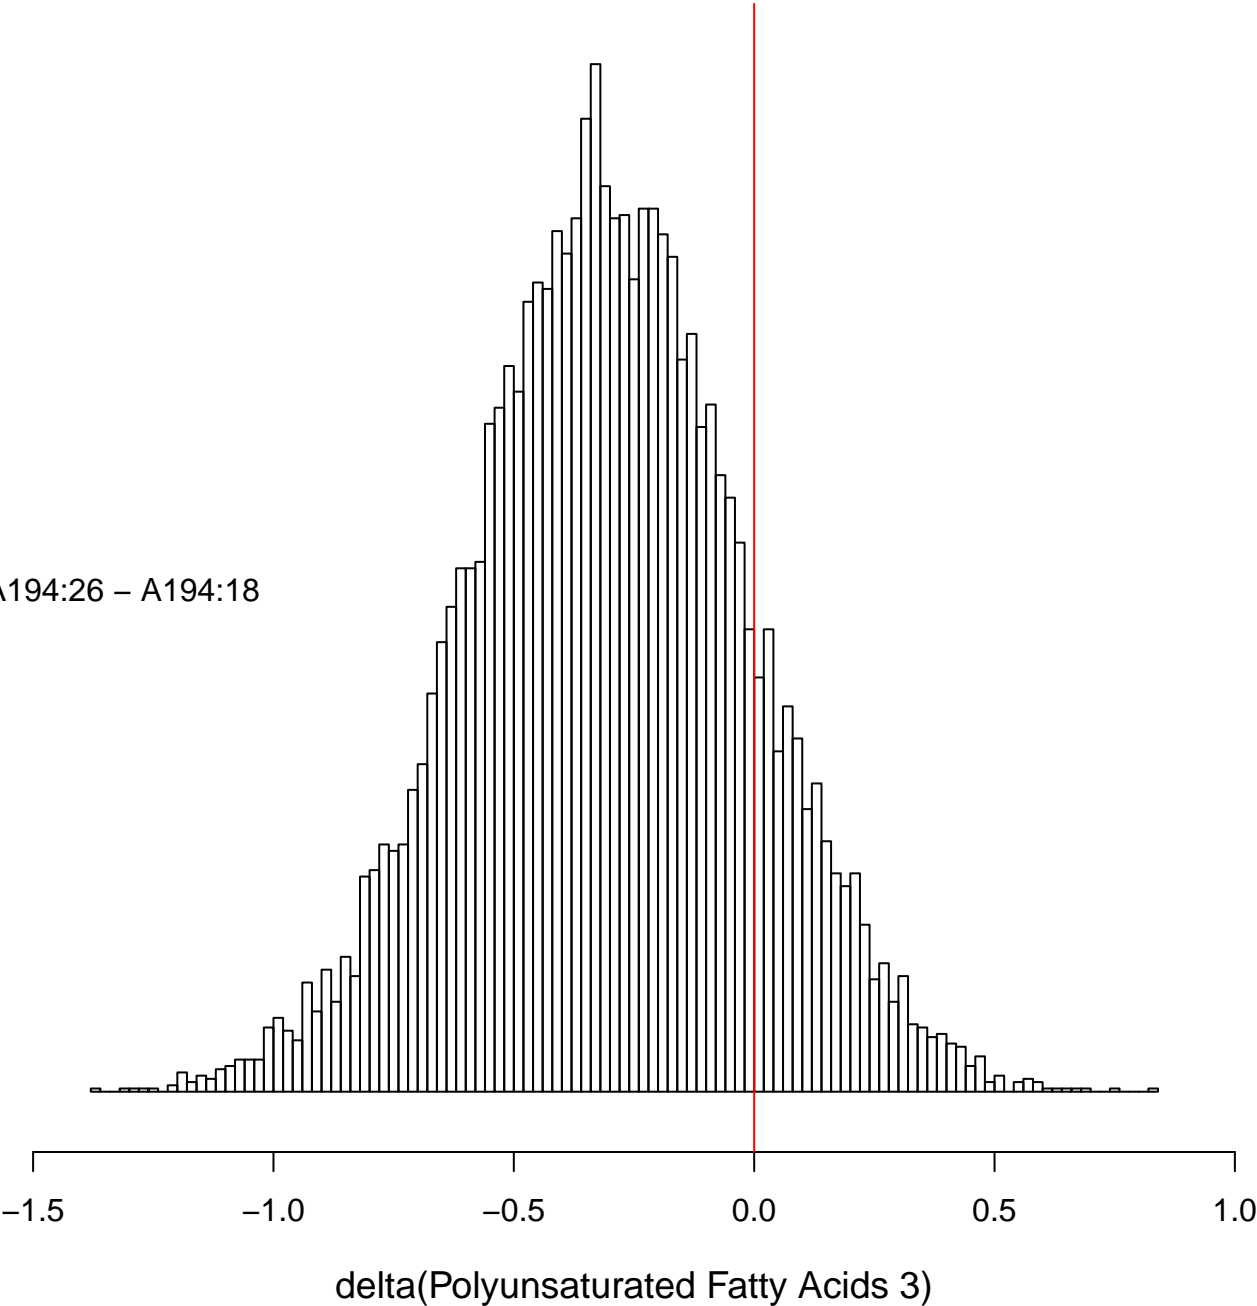

A194:26

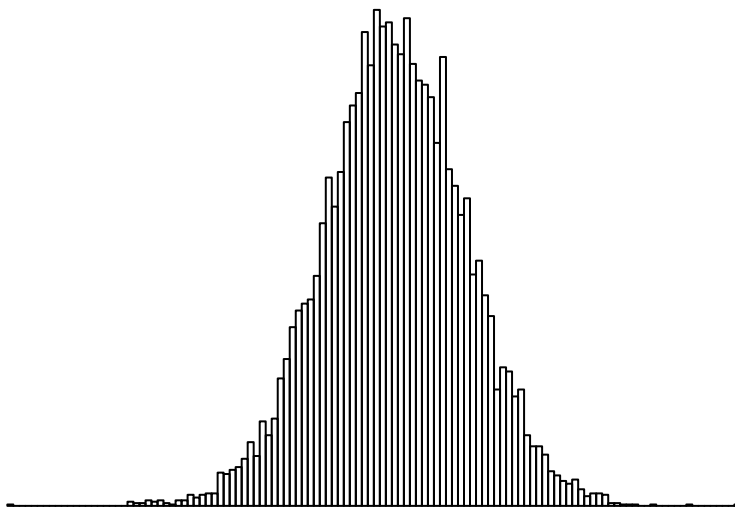

A194:18

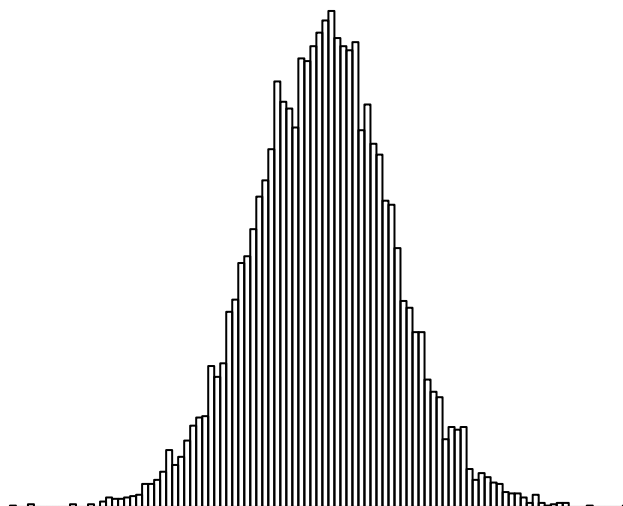

-10

-9

-8

-7

-6

C18:2 Fatty Acid

A194:26 – A194:18

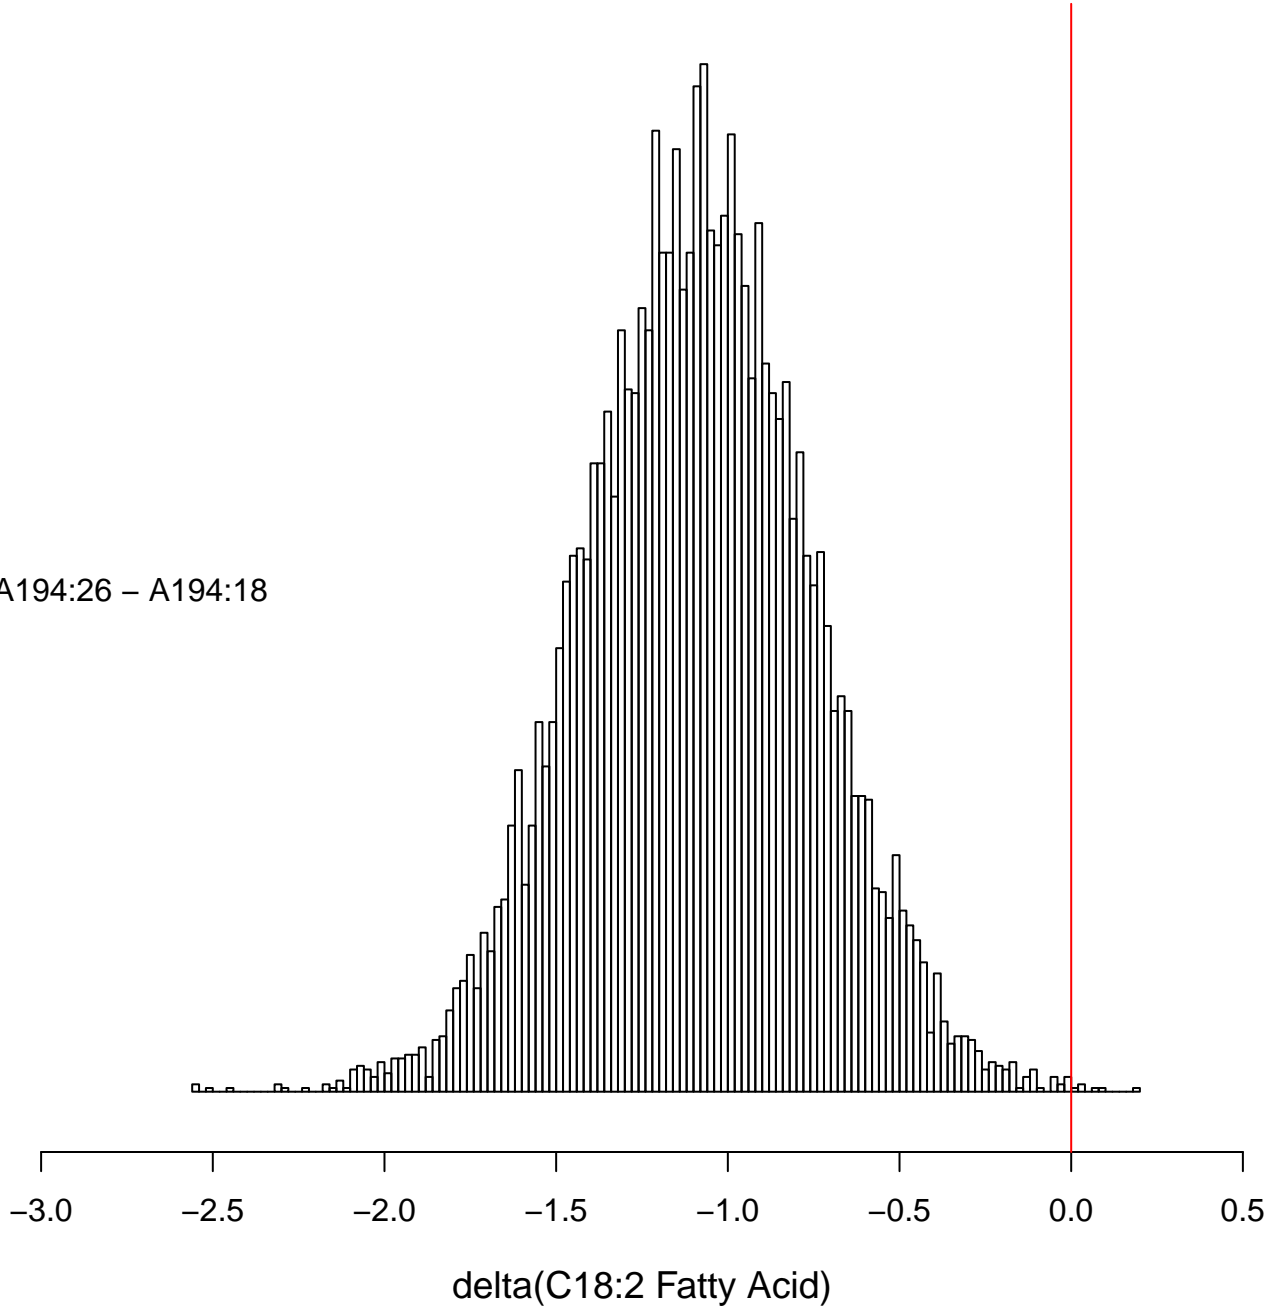

A194:26

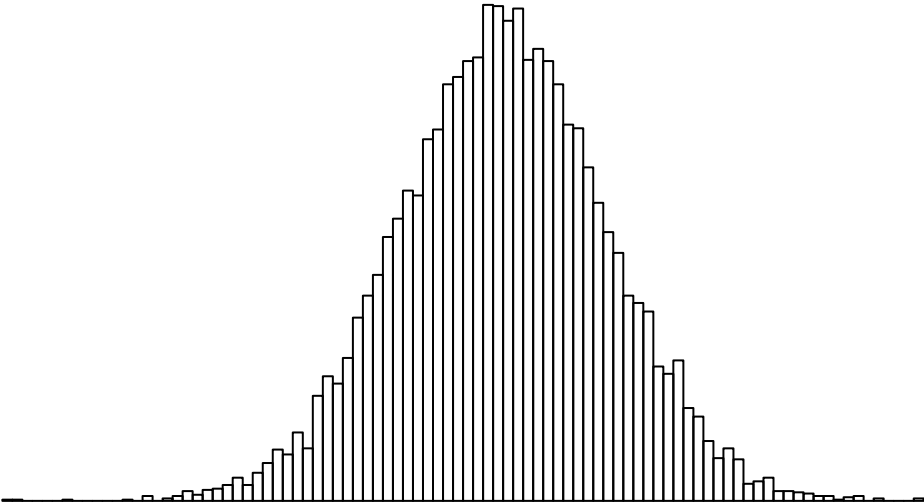

A194:18

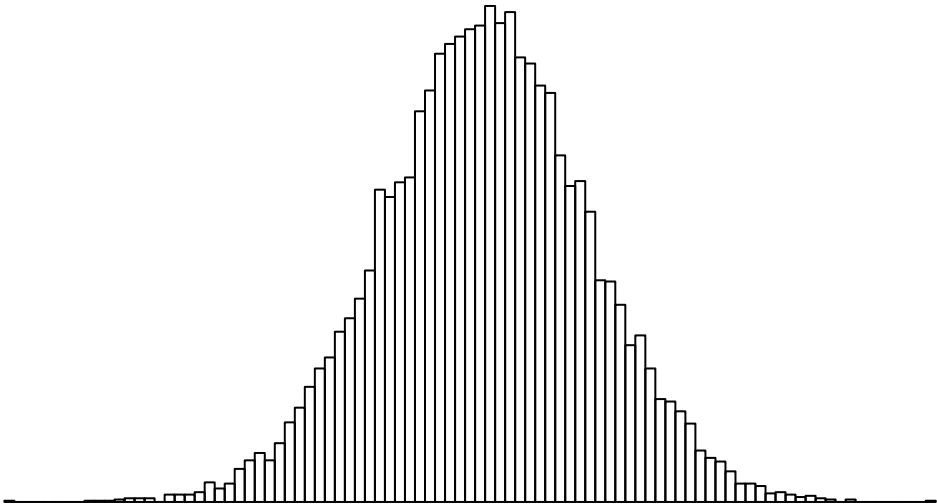

-8 -7 -6 -5 -4 -3 -2

C18:0 Fatty Acid

A194:26 – A194:18

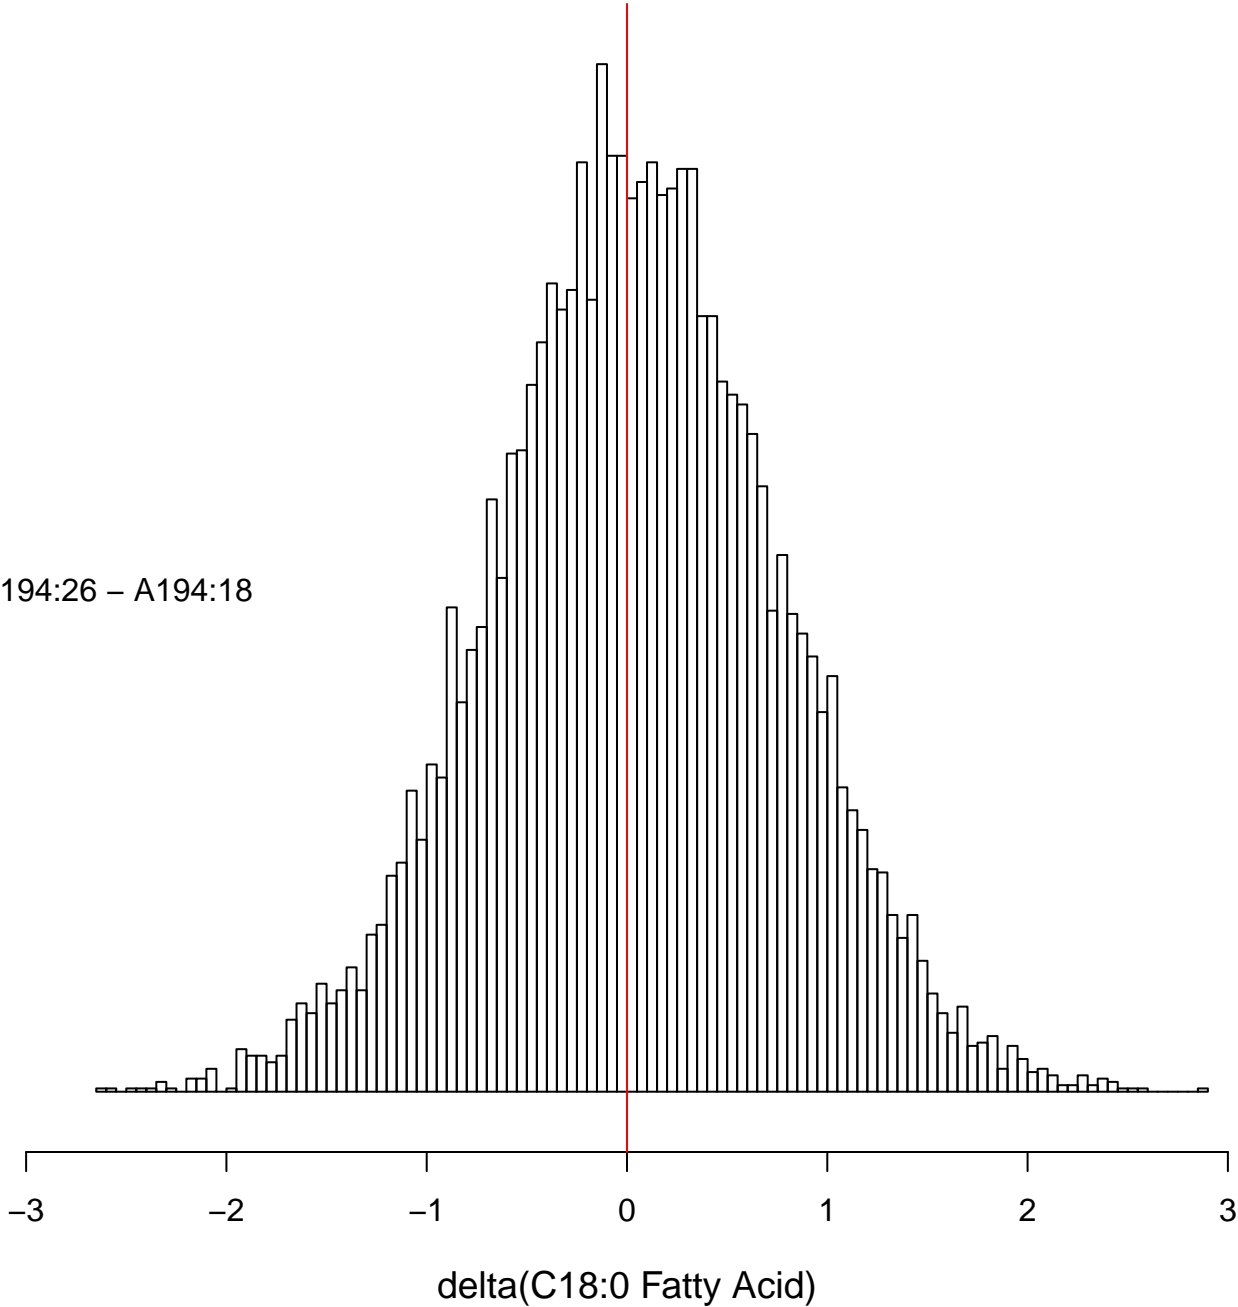

A194:26

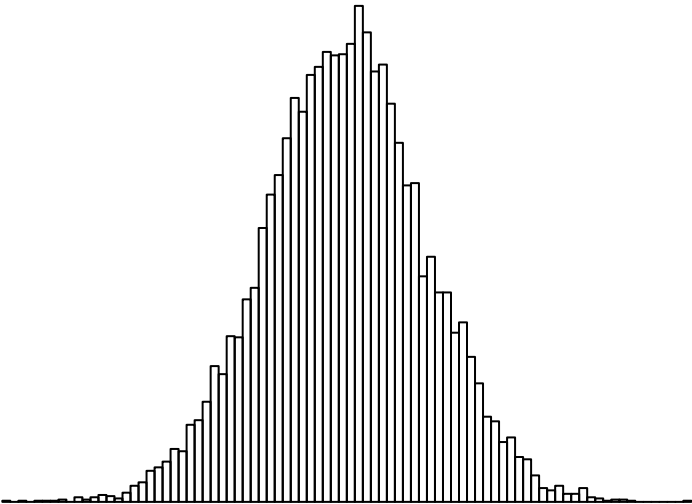

A194:18

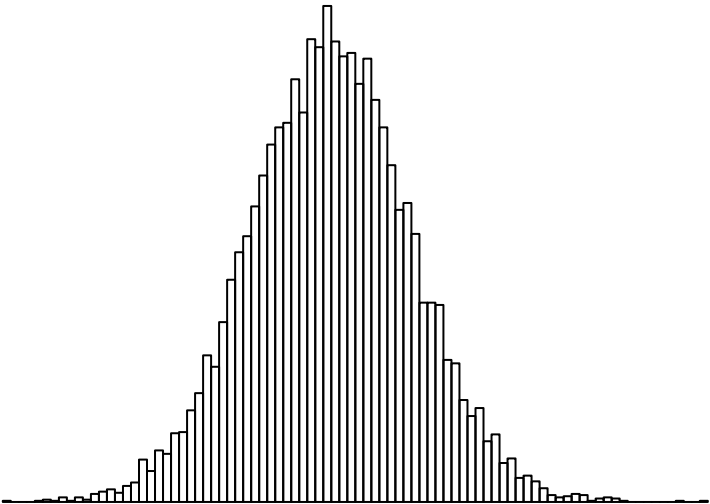

-9.0      -8.5      -8.0      -7.5      -7.0      -6.5      -6.0

Unidentified Fatty Acid 2

A194:26 – A194:18

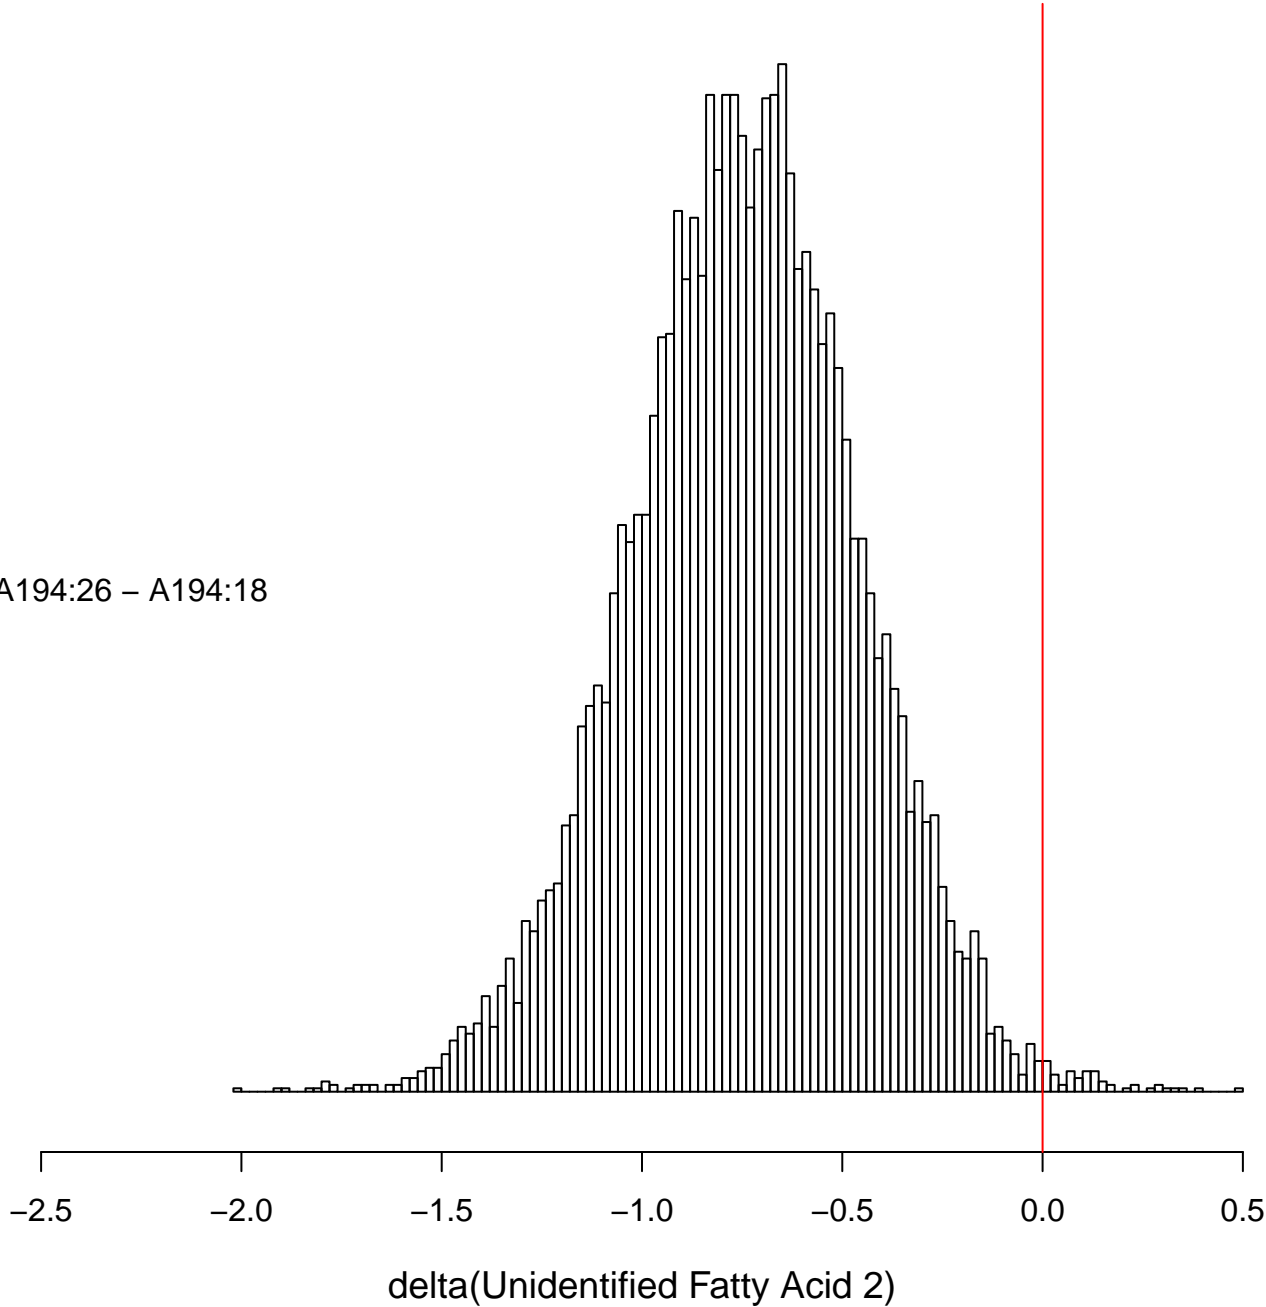



A194:26

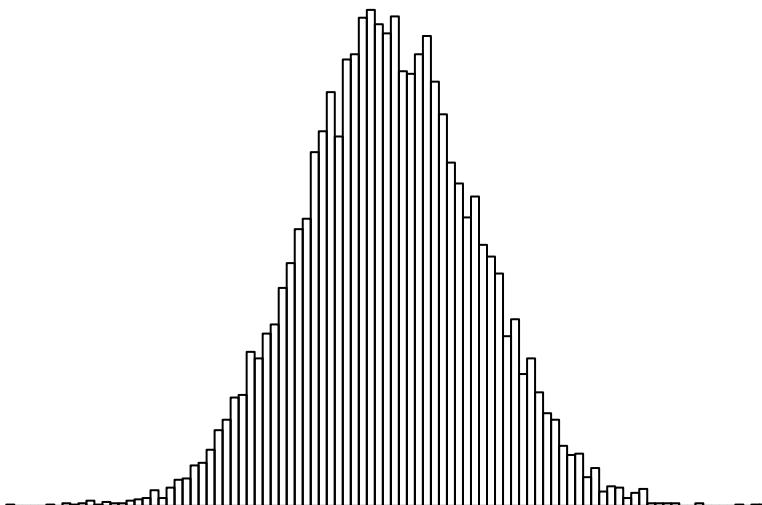

A194:18

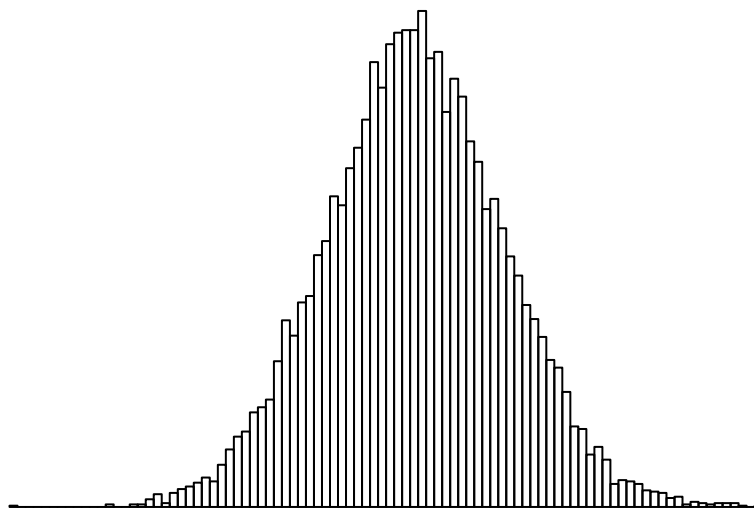

-4.5      -4.0      -3.5      -3.0      -2.5      -2.0      -1.5

Glycerol

A194:26 – A194:18

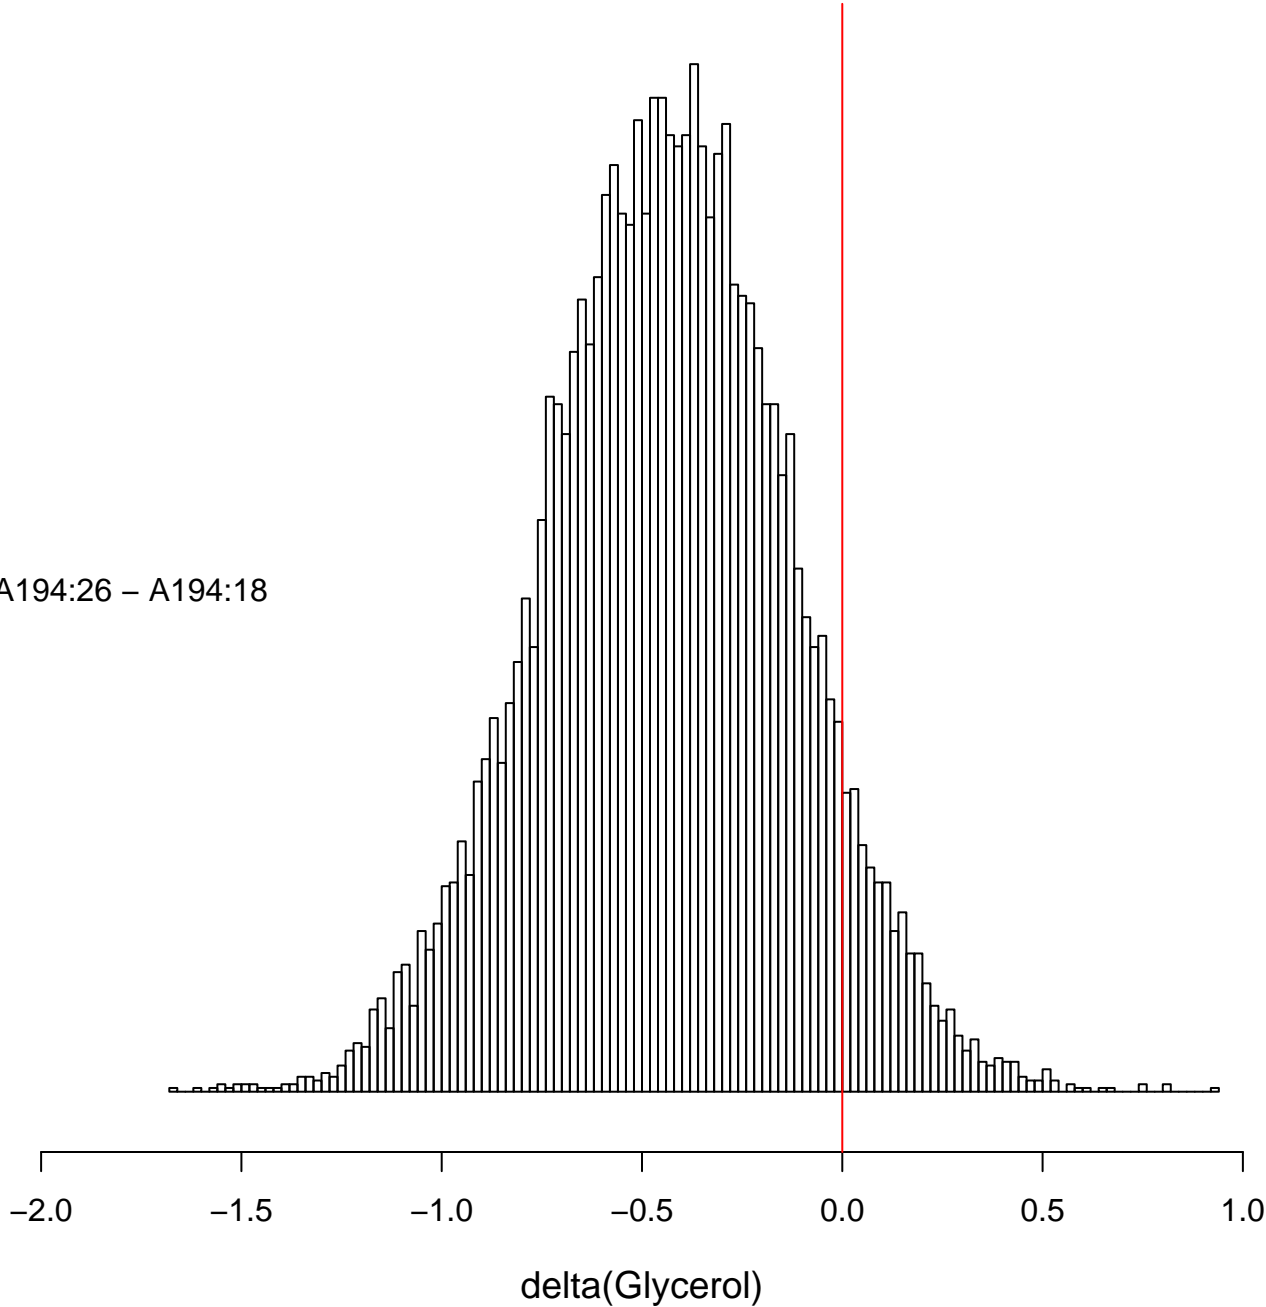

A194:26

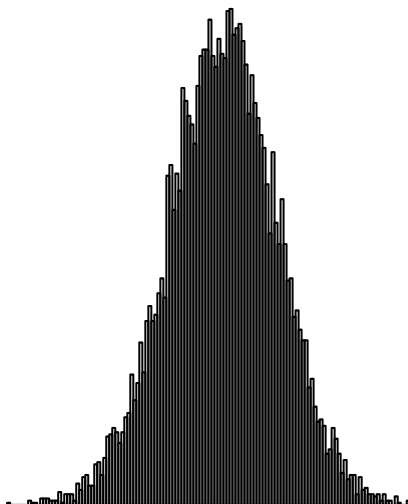

A194:18

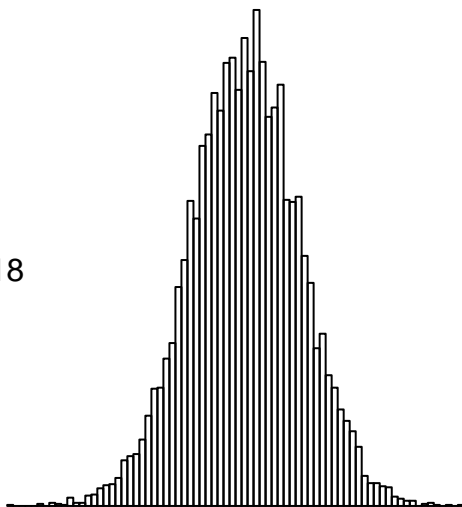

-7

-6

-5

-4

Inositol 1

A194:26 – A194:18

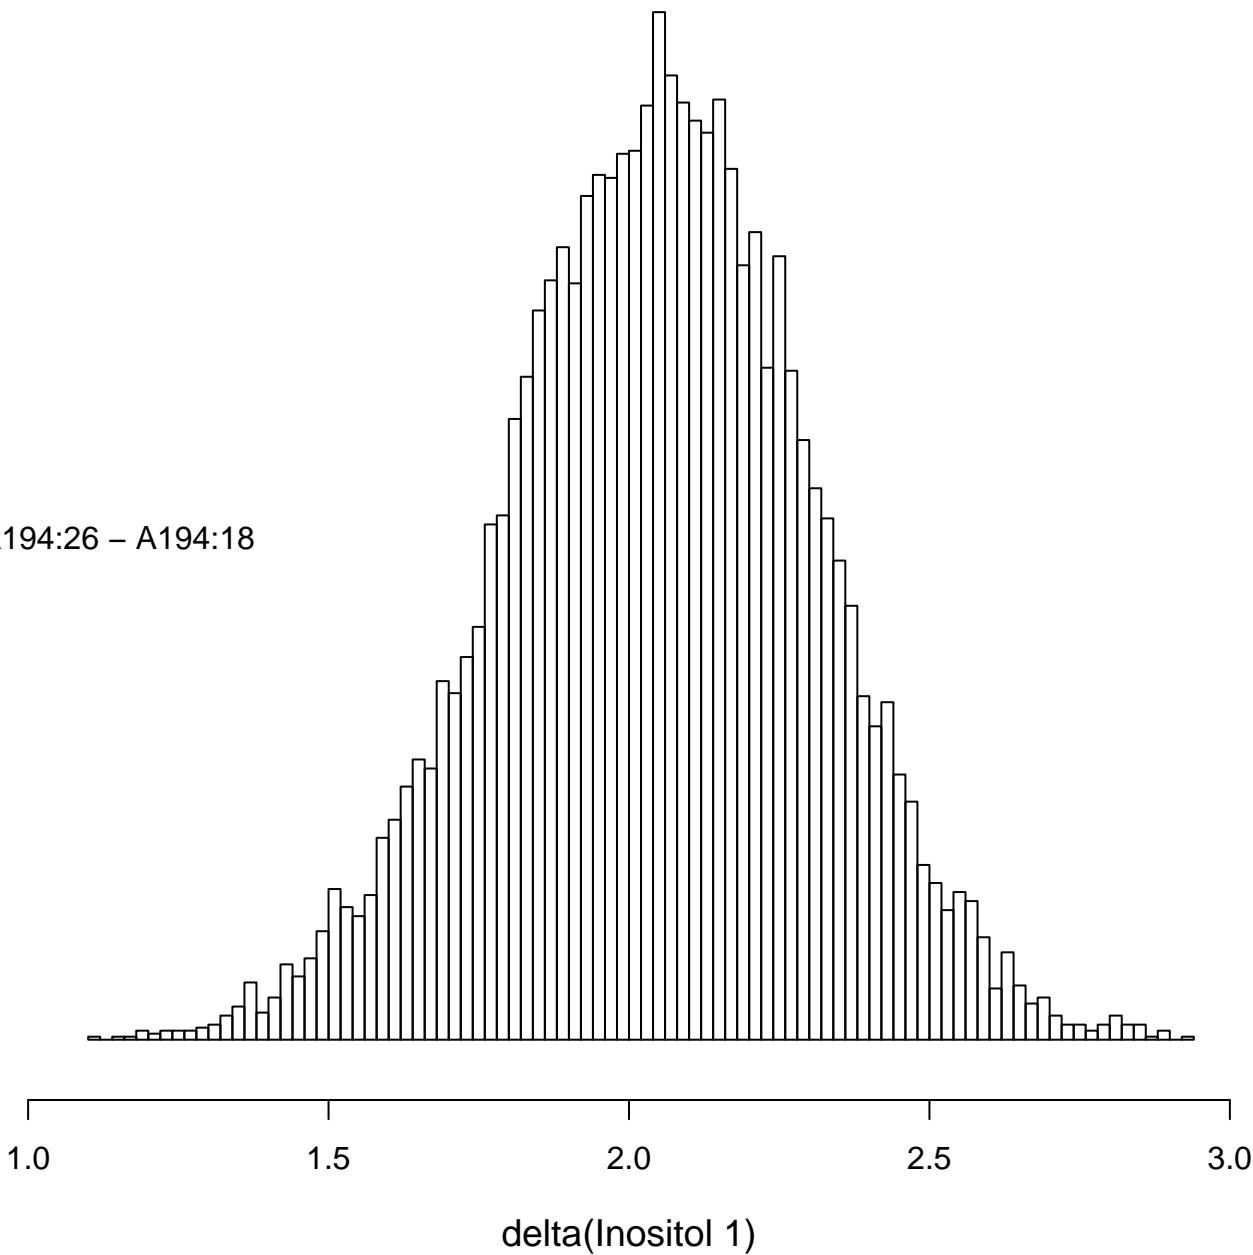

A194:26

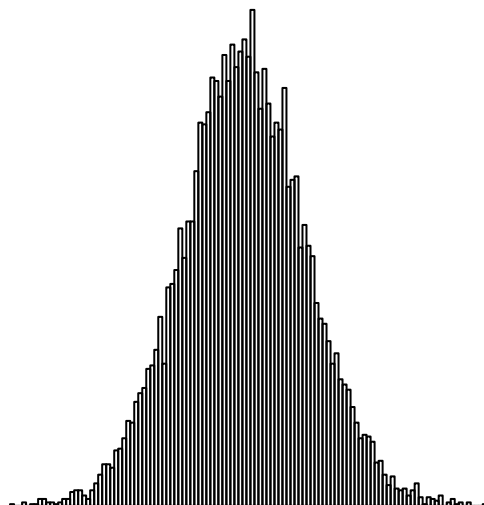

A194:18

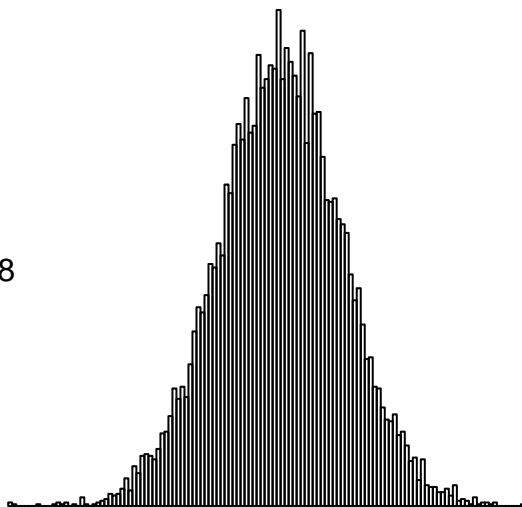

-8.0      -7.5      -7.0      -6.5      -6.0      -5.5      -5.0

Inositol 2

A194:26 – A194:18

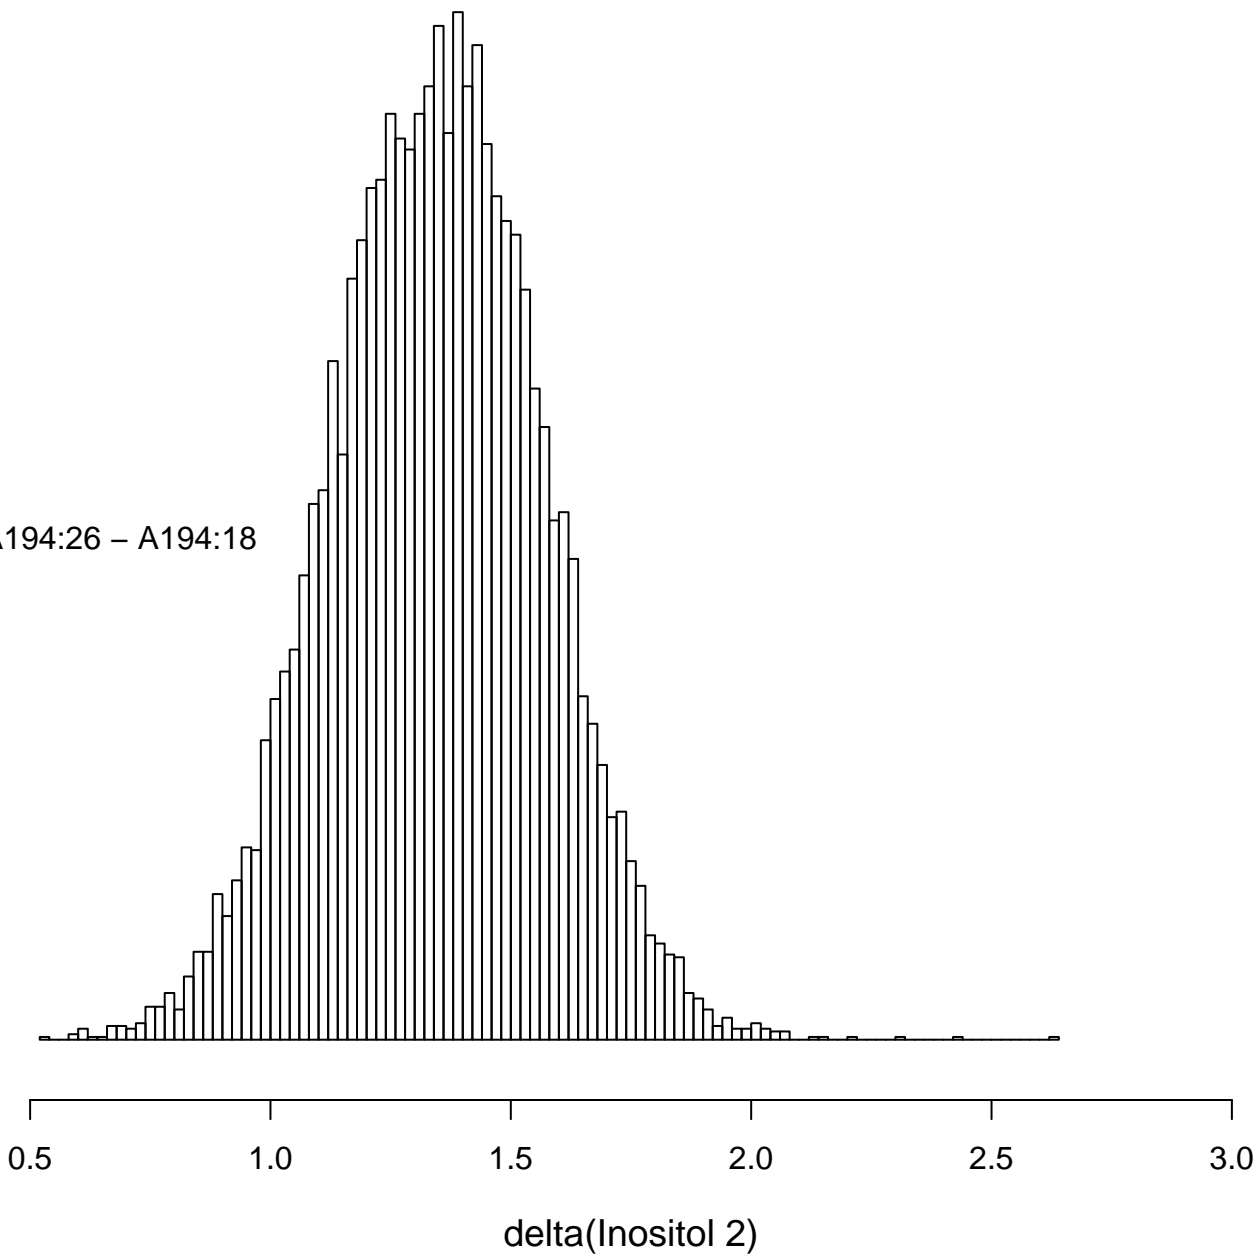

A194:26

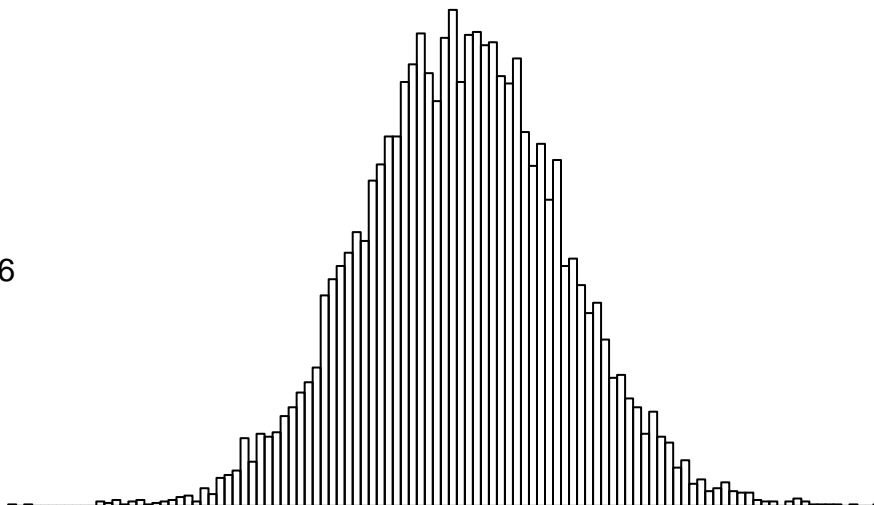

A194:18

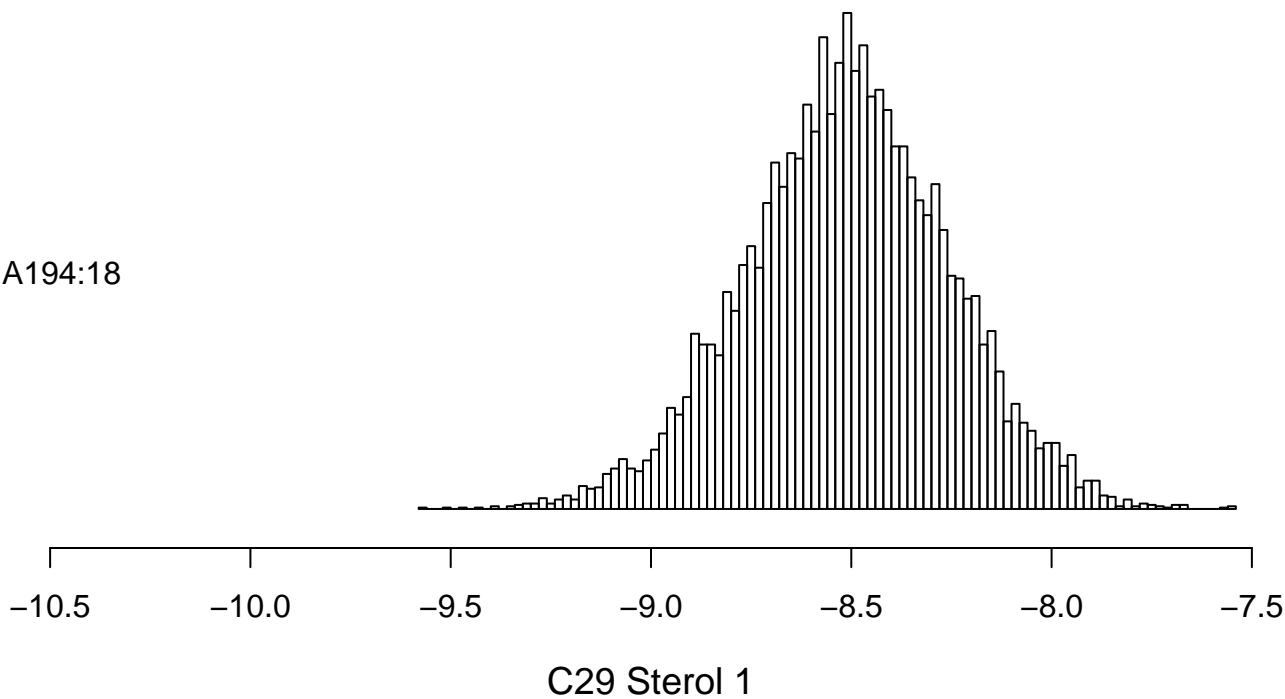

A194:26 – A194:18

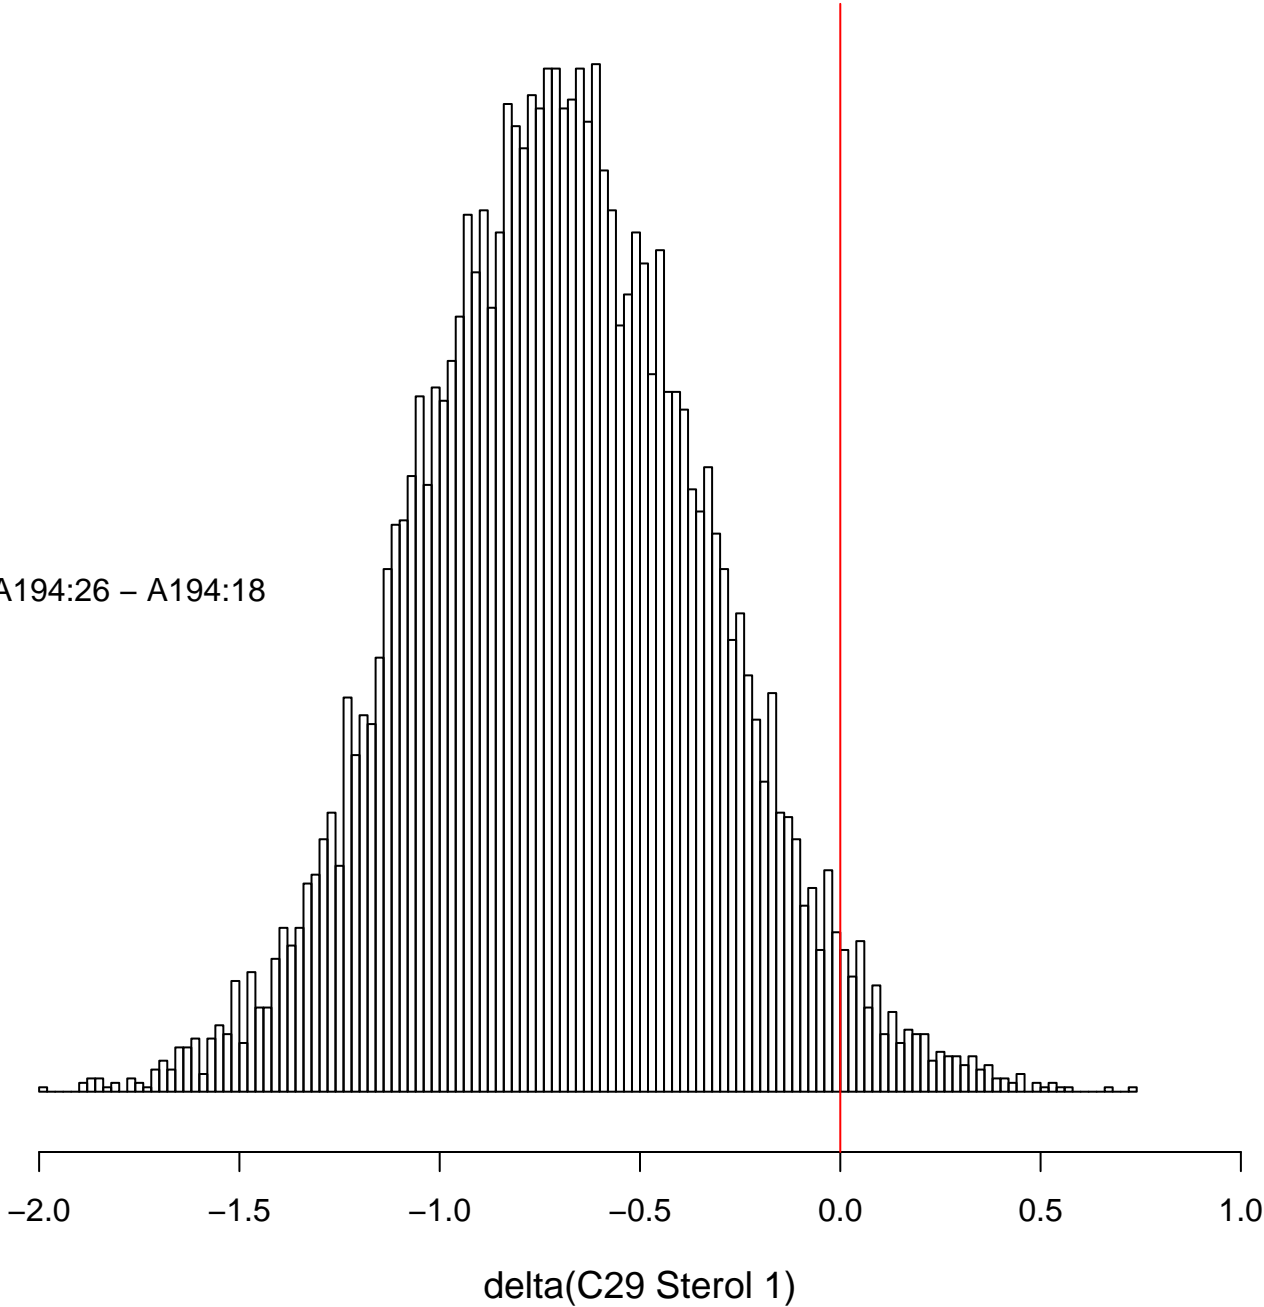



A194:26

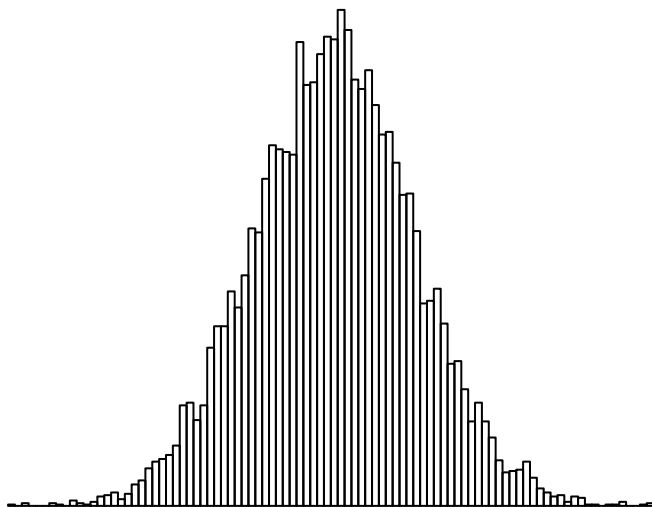

A194:18

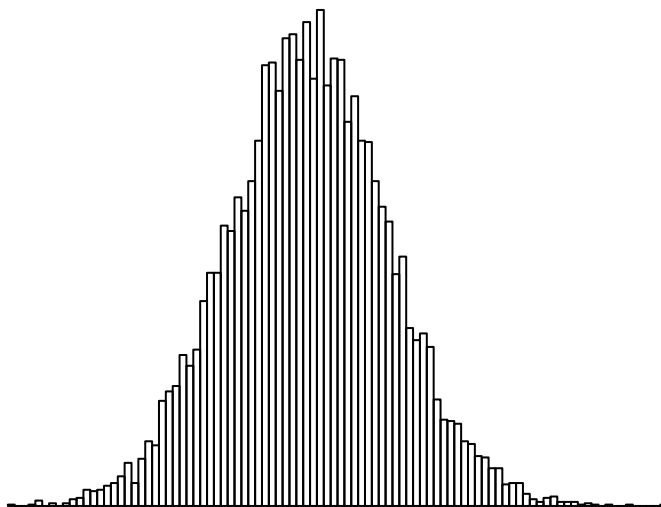

-10.0      -9.5      -9.0      -8.5      -8.0      -7.5      -7.0      -6.5

C29 Stanol 1

A194:26 – A194:18

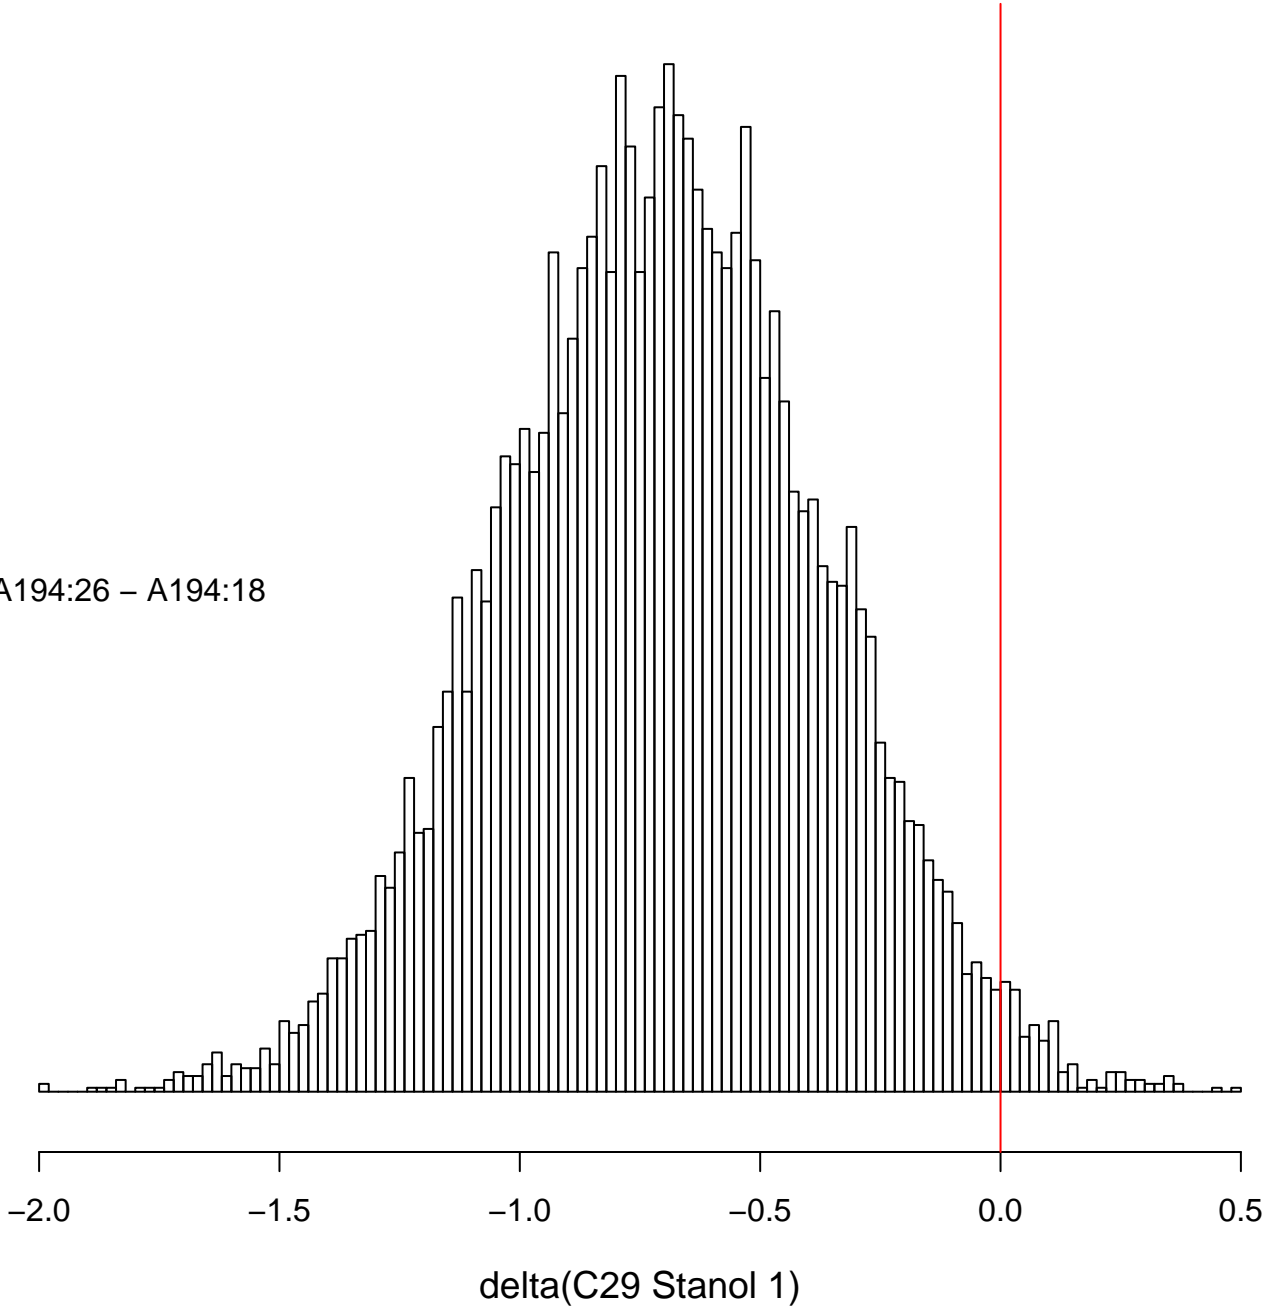

A194:26

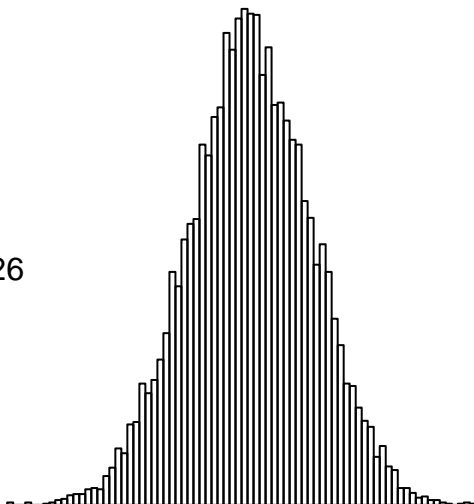

A194:18

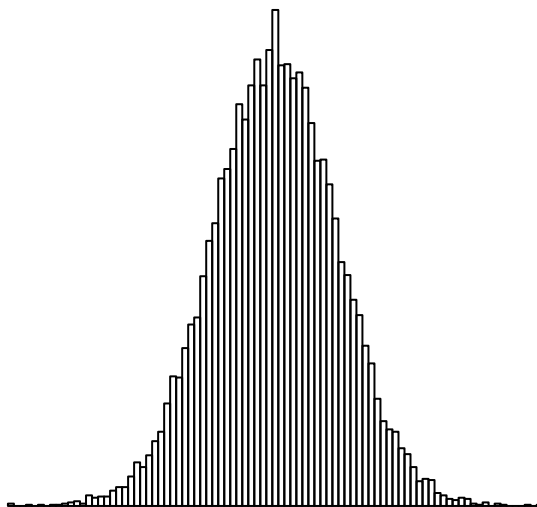

-10

-9

-8

-7

C27"5,22 Sterol

A194:26 – A194:18

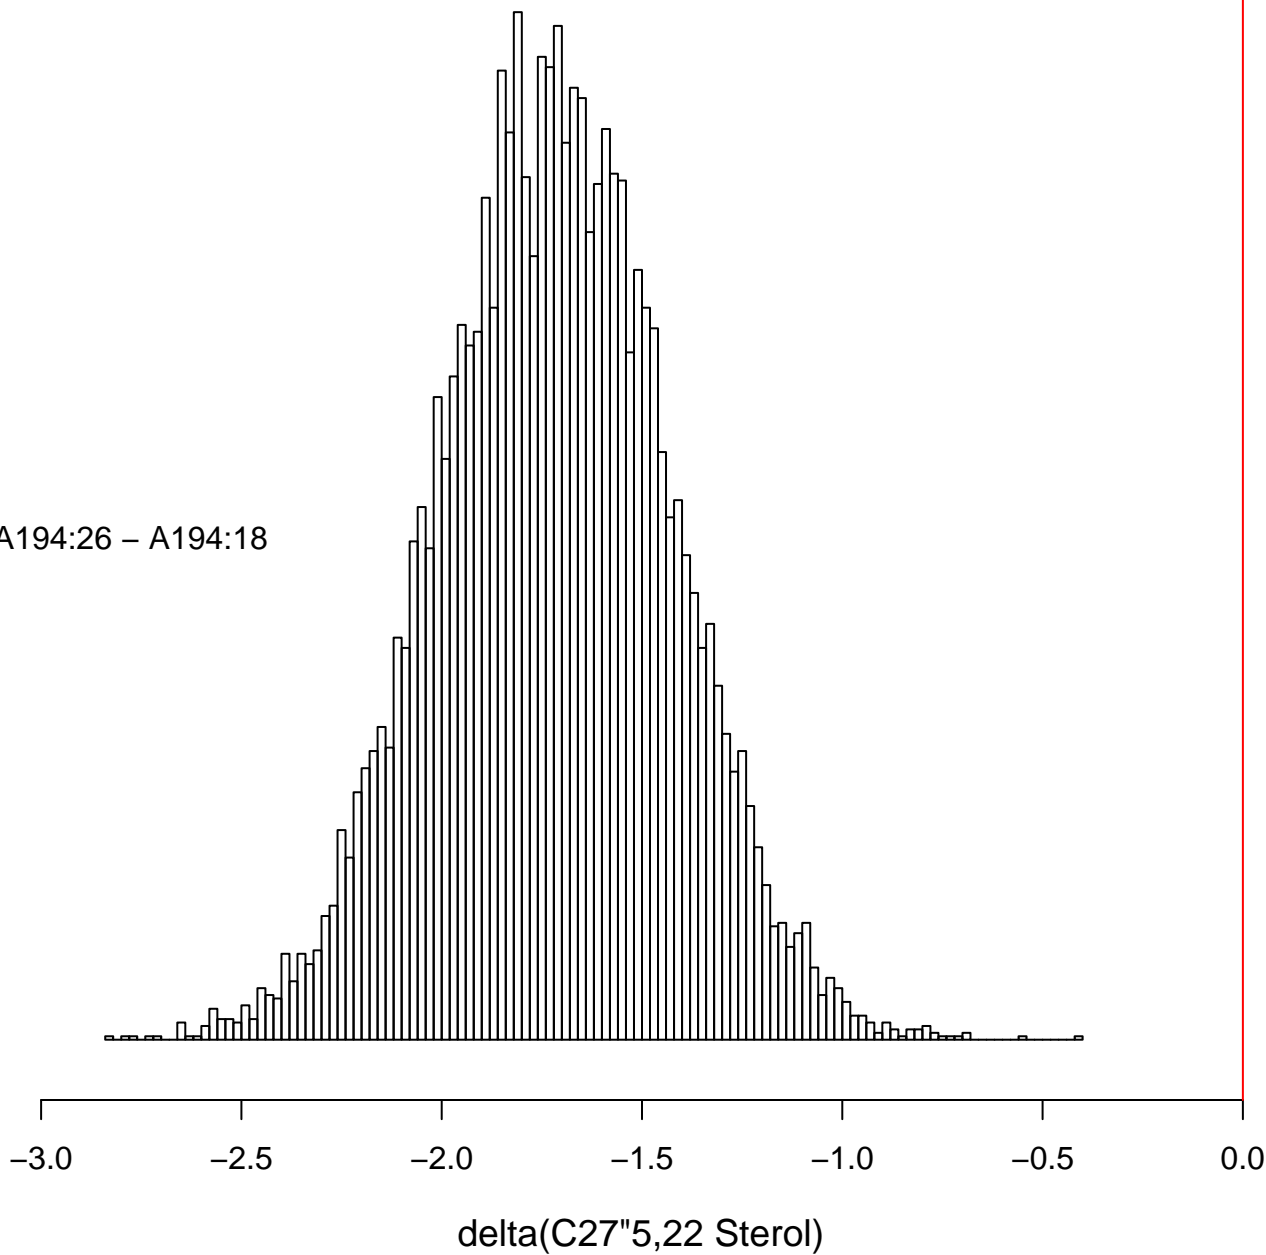

A194:26

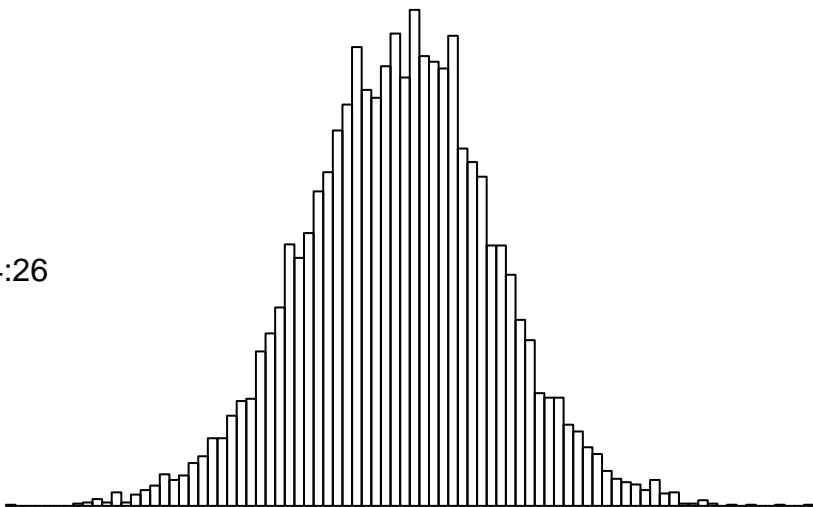

A194:18

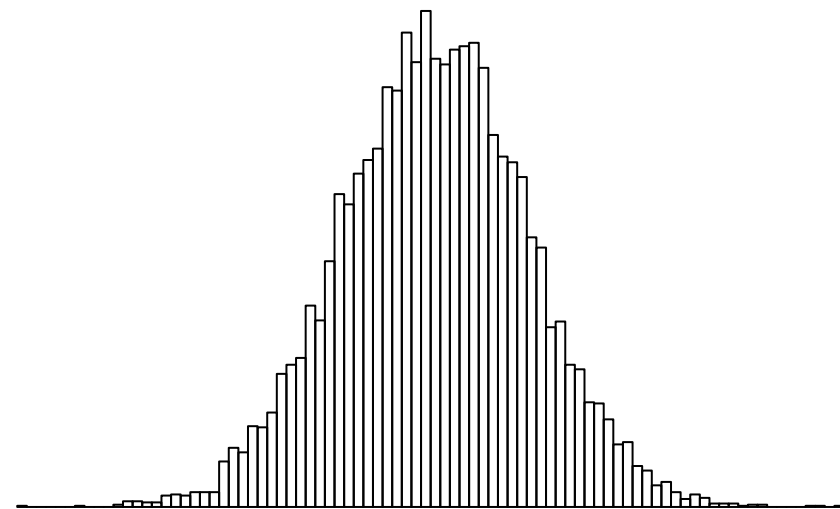

-7.0      -6.5      -6.0      -5.5      -5.0      -4.5

C27:5 Sterol

A194:26 – A194:18

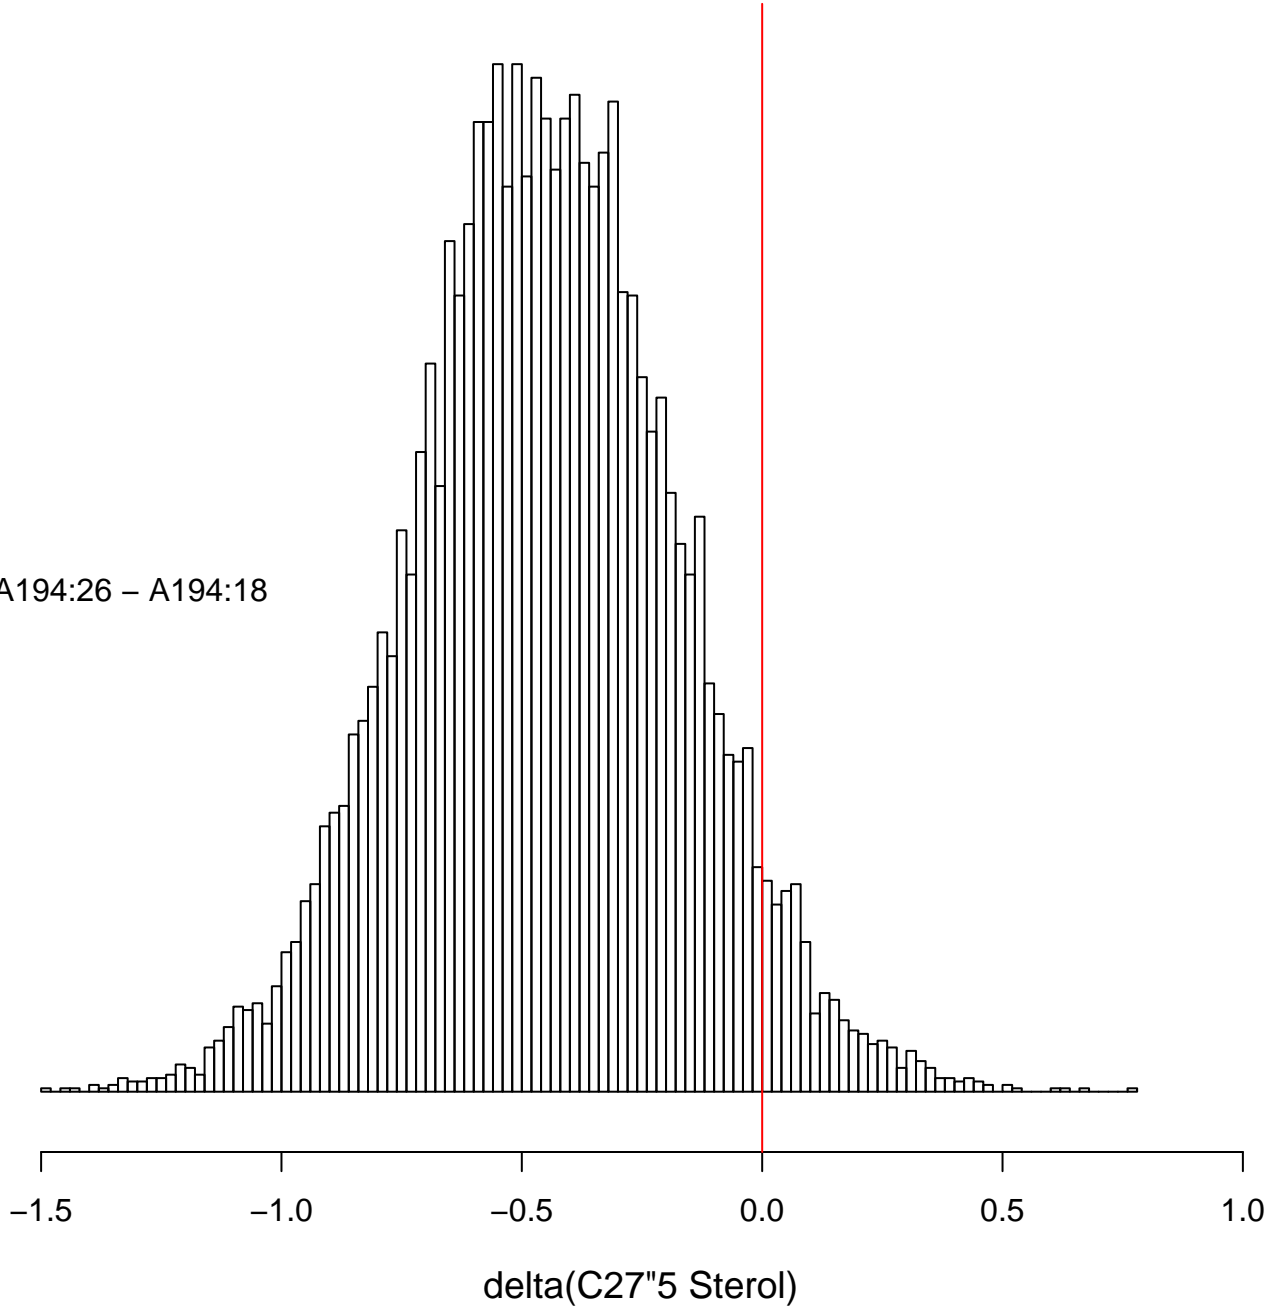

A194:26

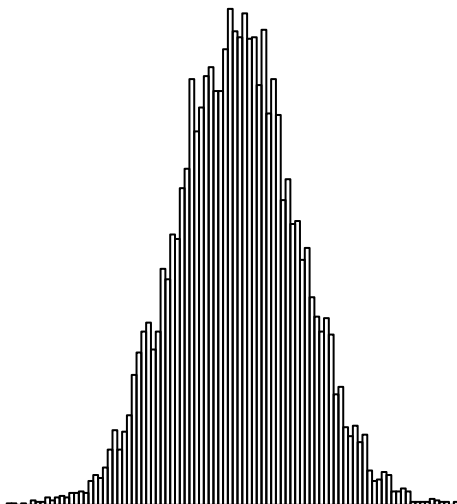

A194:18

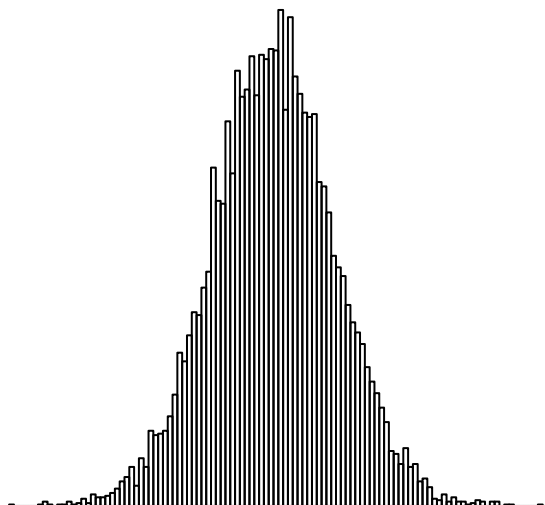

-9 -8 -7 -6 -5 -4

C28<sup>5,22</sup> Sterol

A194:26 – A194:18

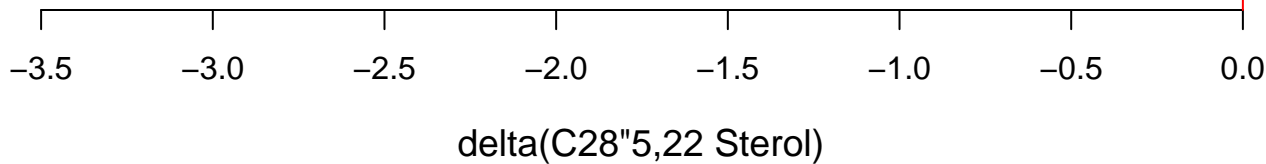



A194:26

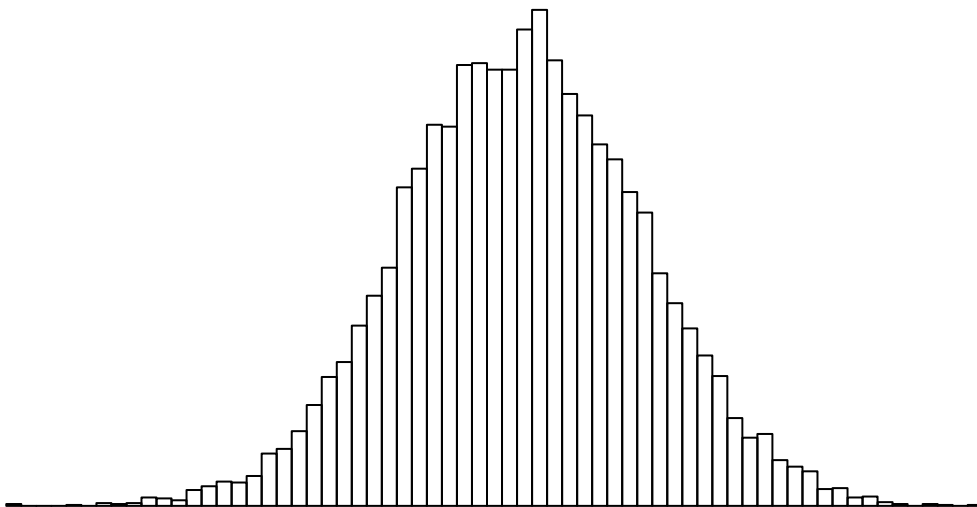

A194:18

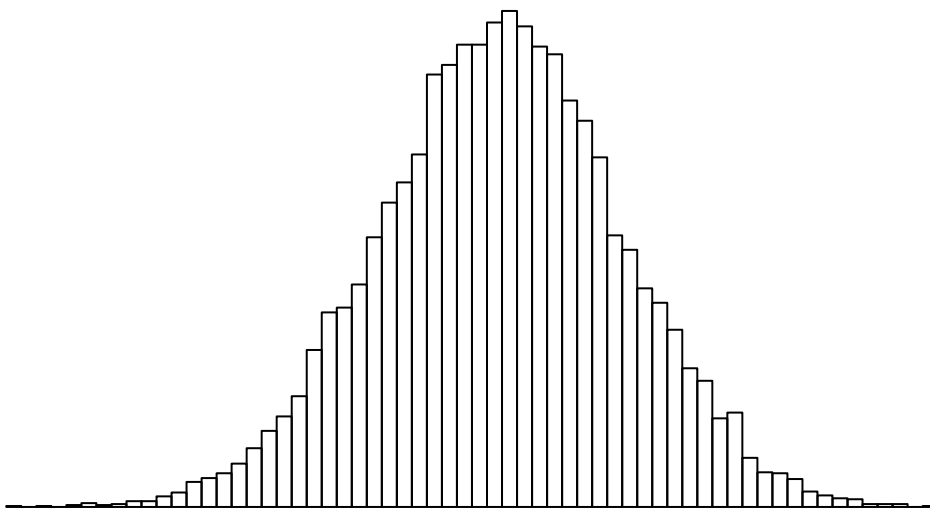

-7

-6

-5

-4

C28"5 Sterol

A194:26 – A194:18

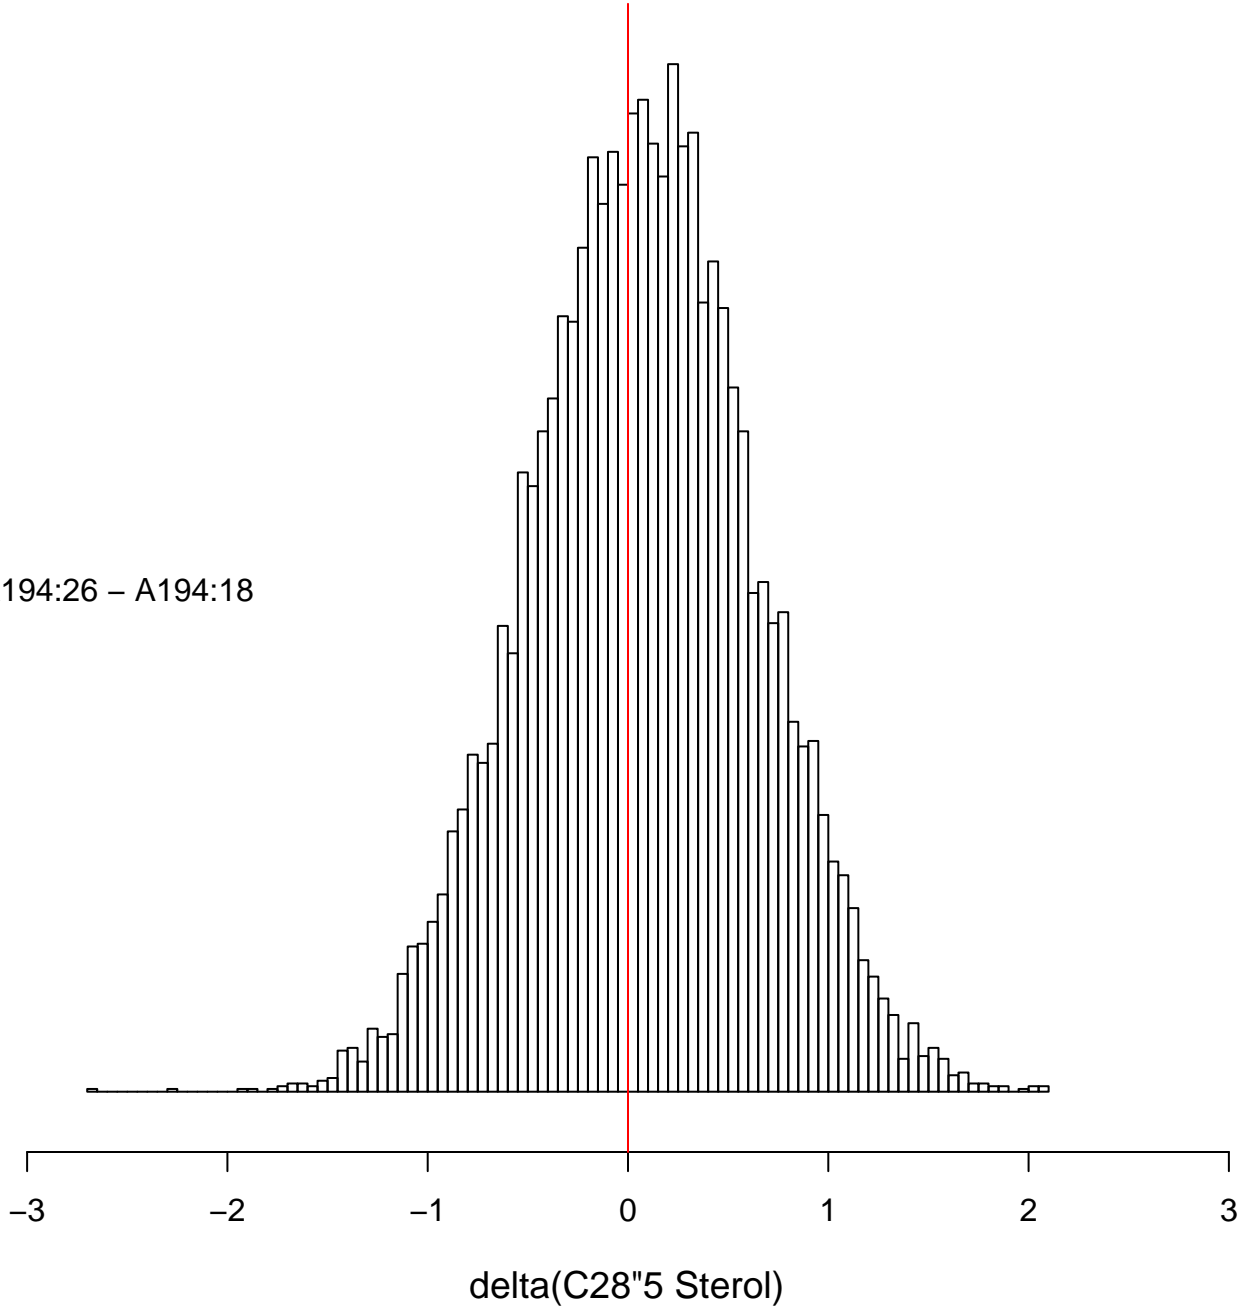

A194:26

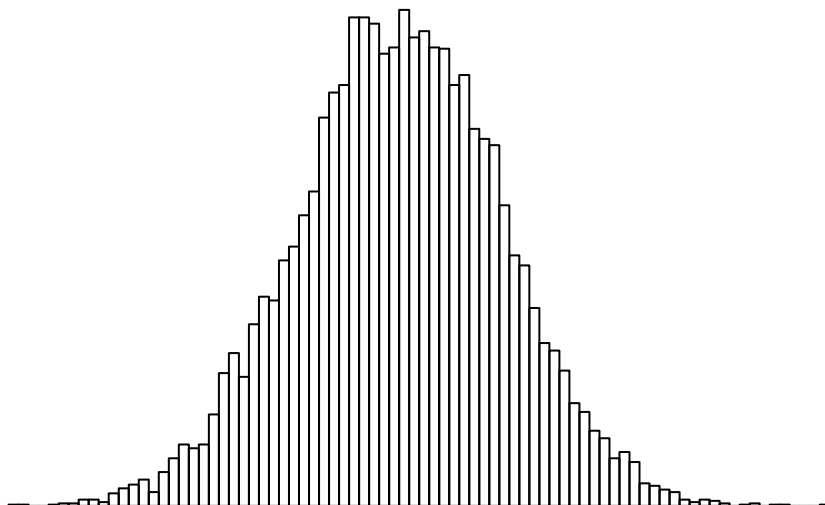

A194:18

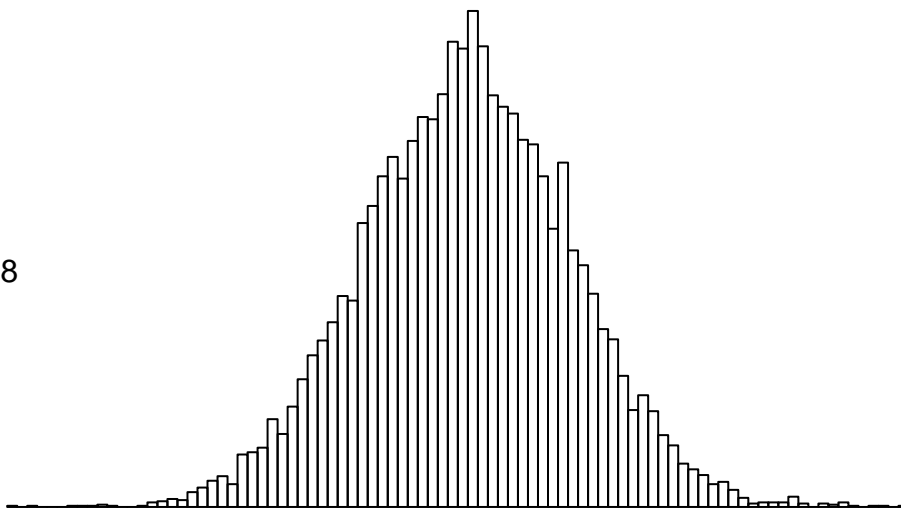

-10

-9

-8

-7

-6

-5

-4

C29<sup>5,22</sup> Sterol

A194:26 – A194:18

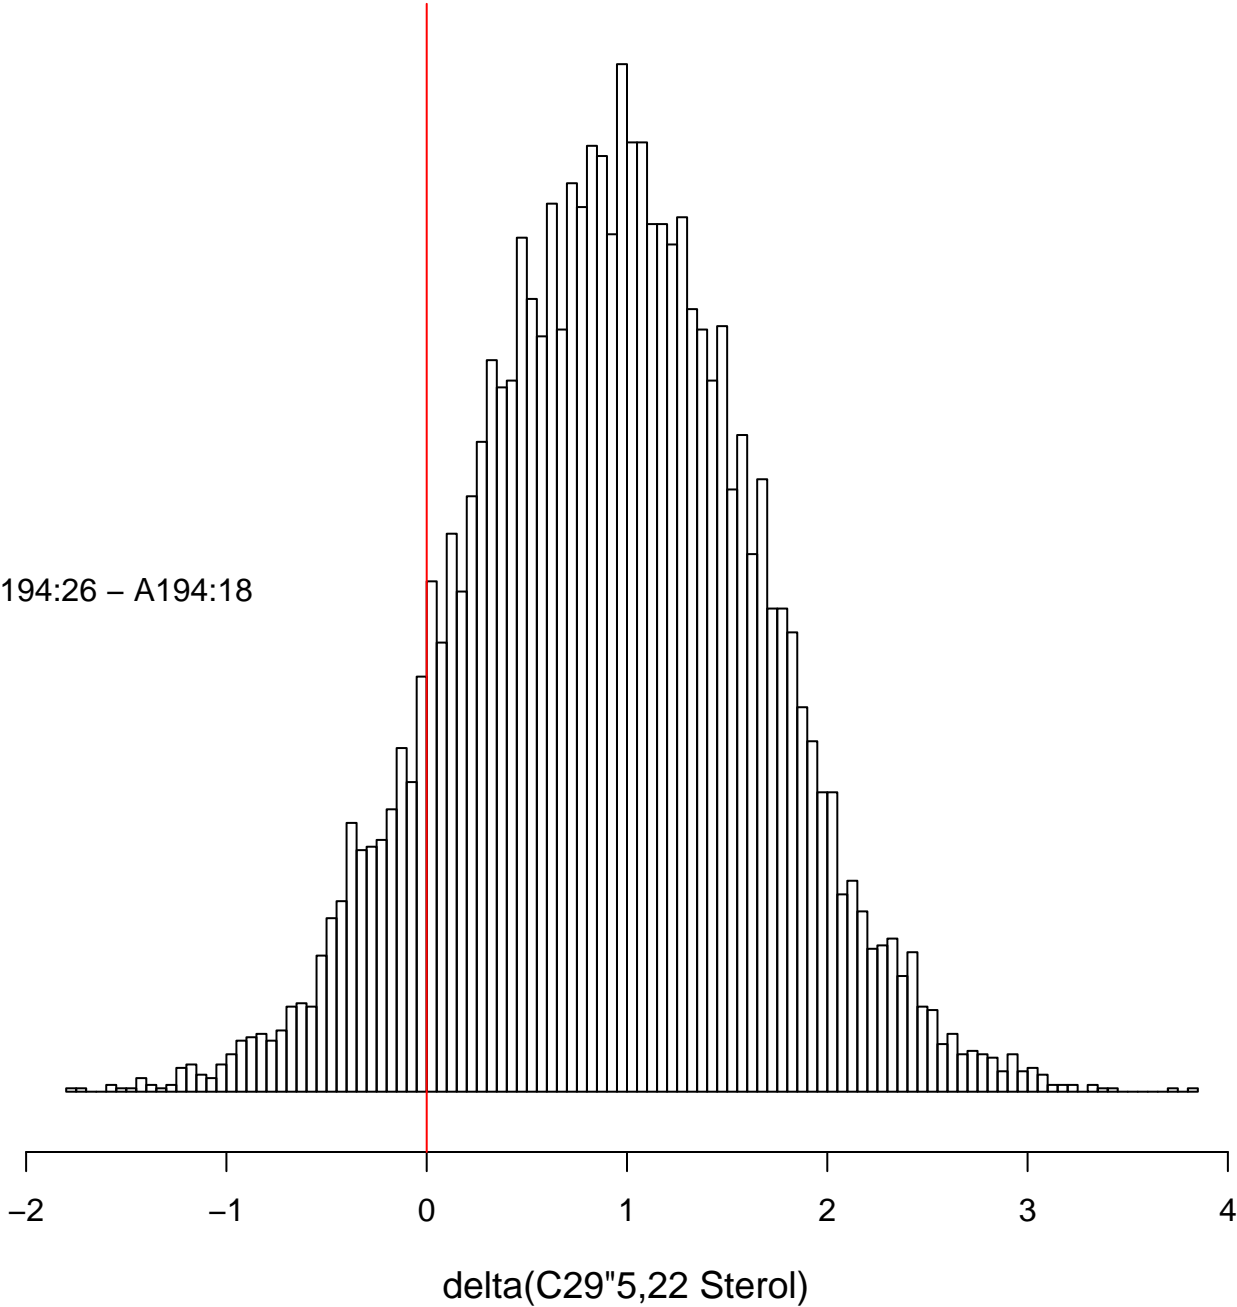

A194:26

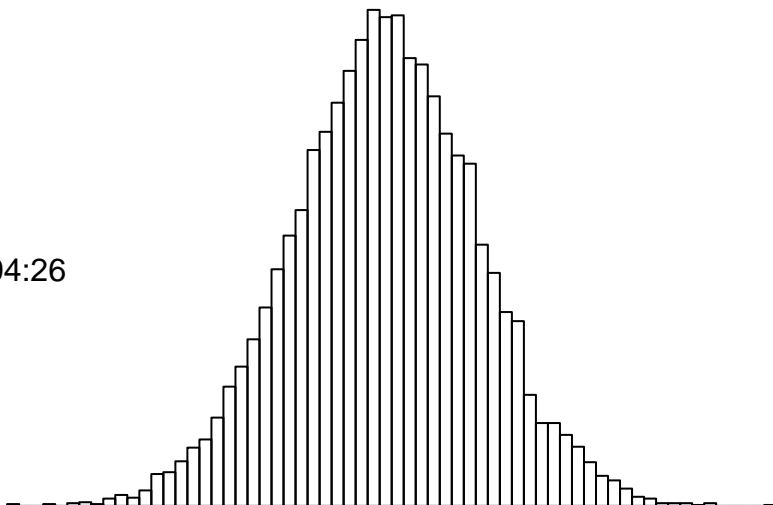

A194:18

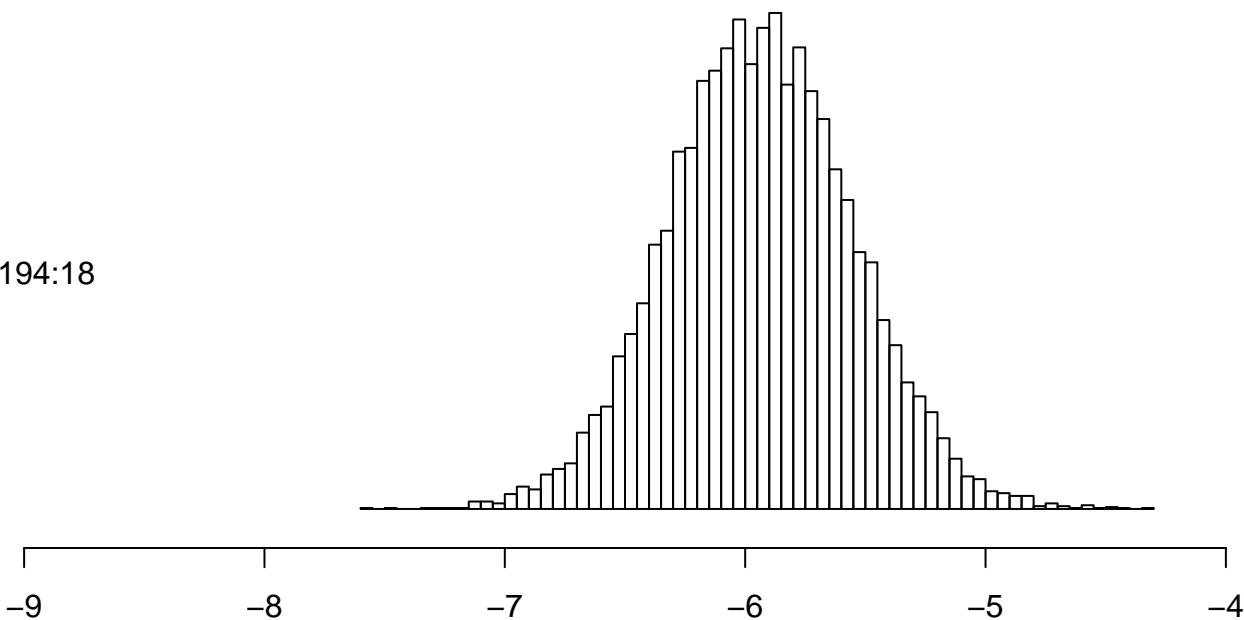

C29 Sterol 2

A194:26 – A194:18

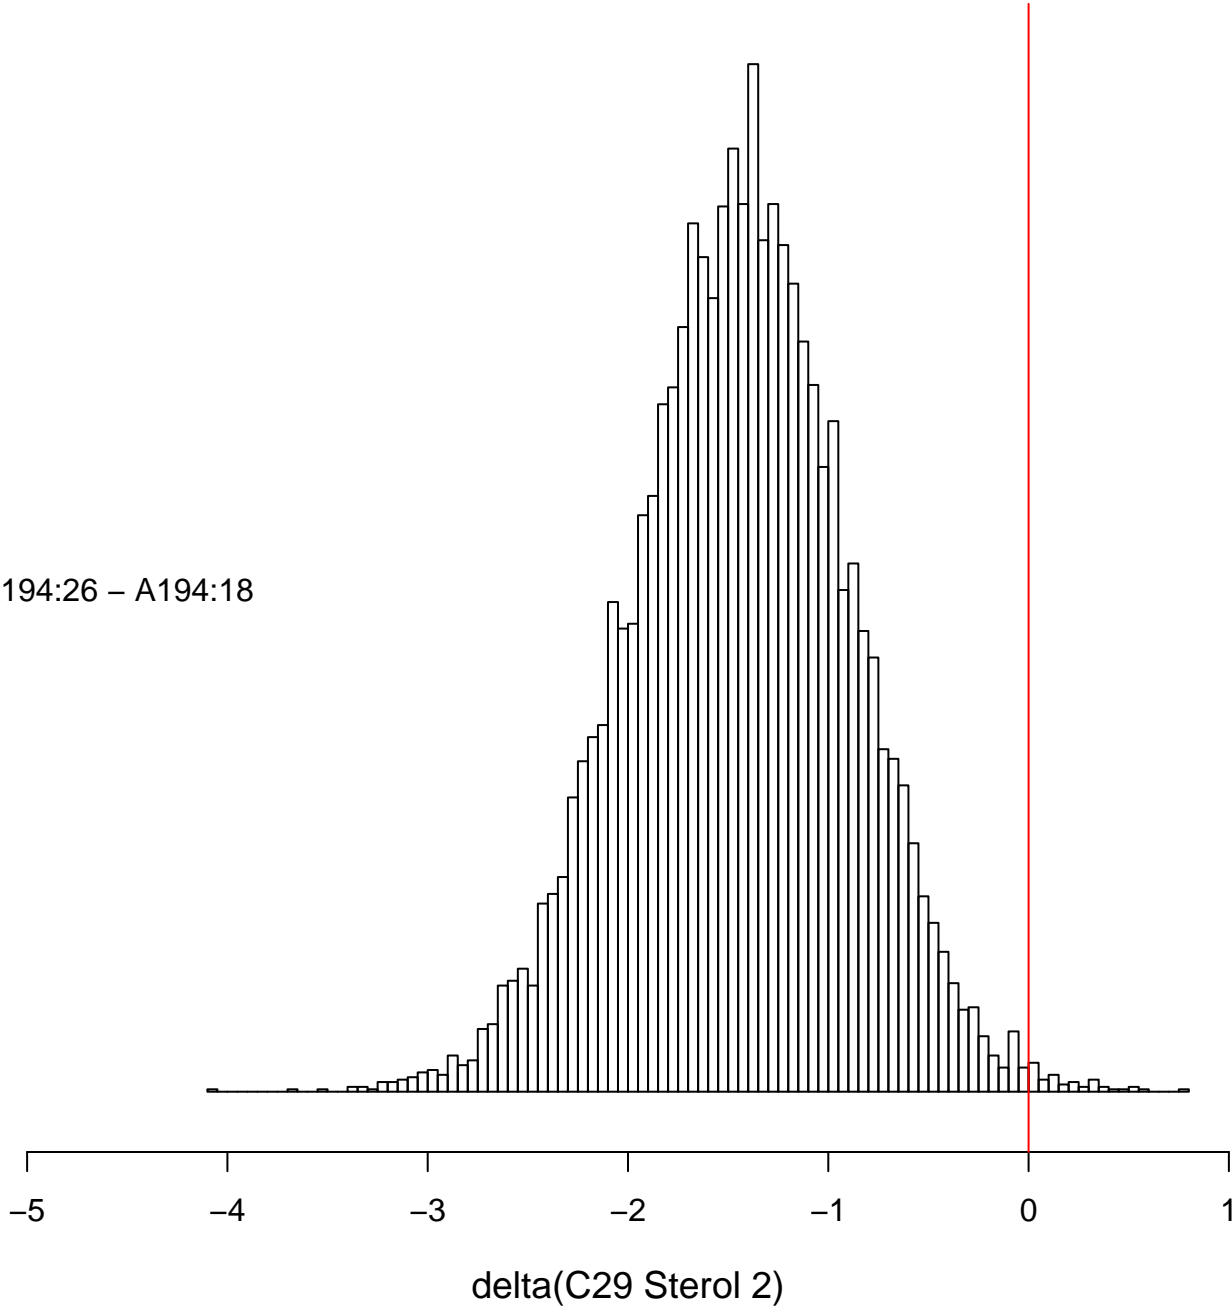

A194:26

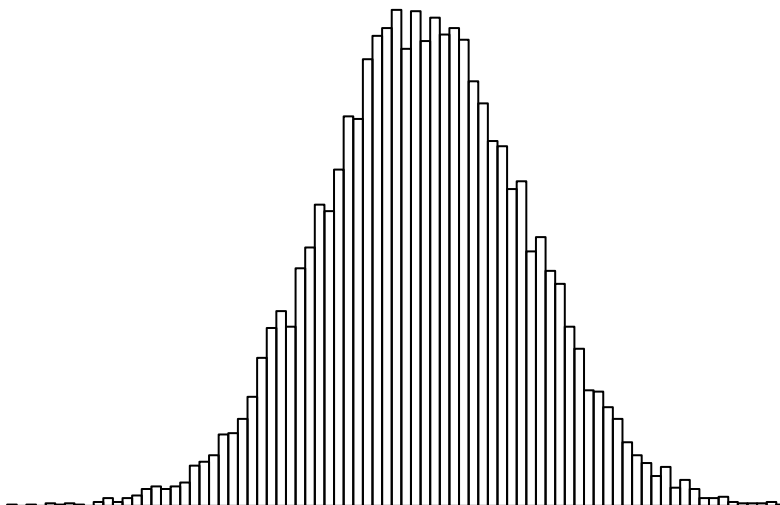

A194:18

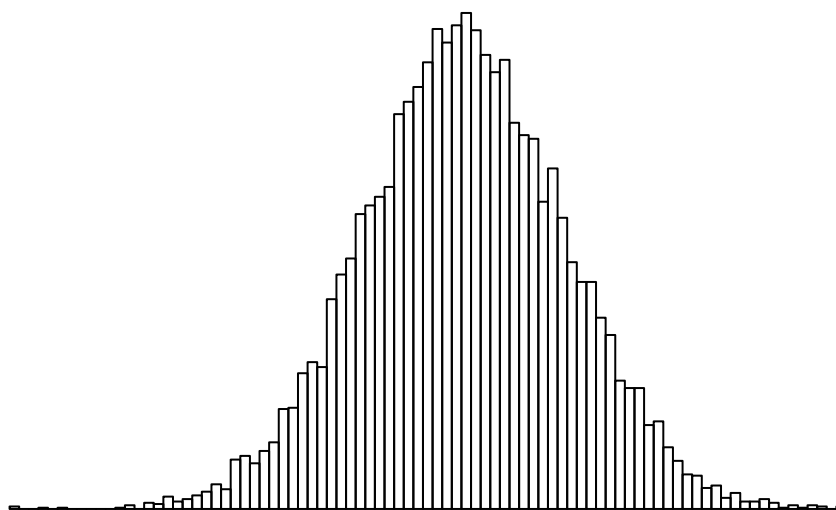

-5.5 -5.0 -4.5 -4.0 -3.5 -3.0

C29 Stanol 2

A194:26 – A194:18

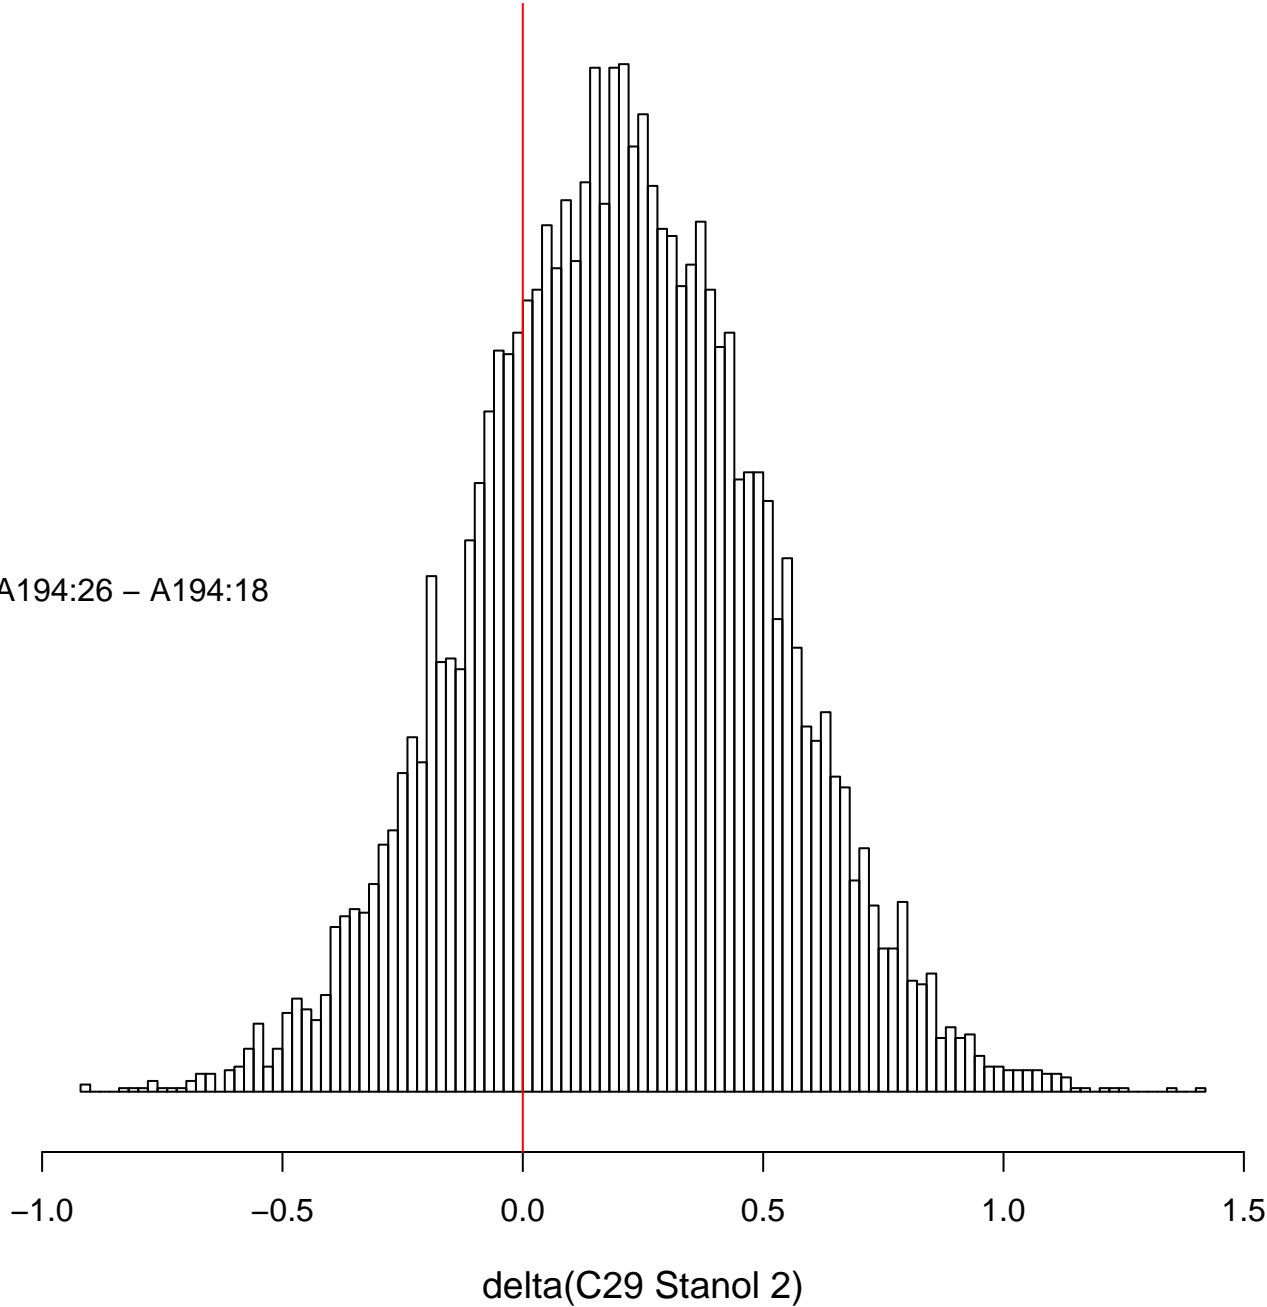



A194:26

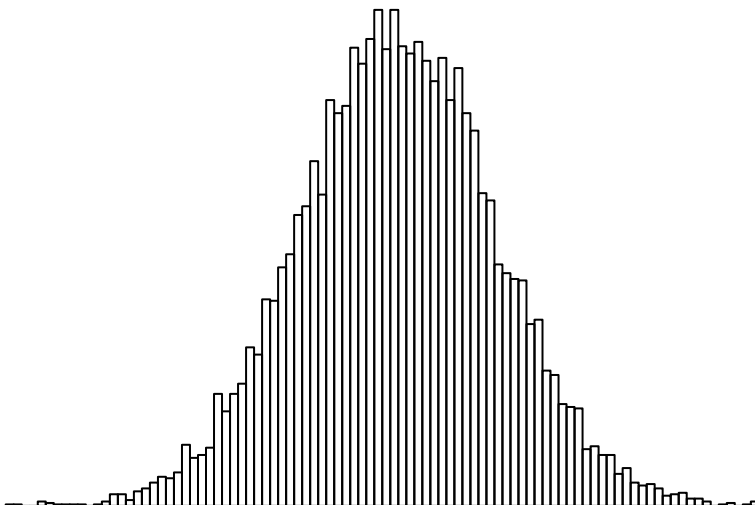

A194:18

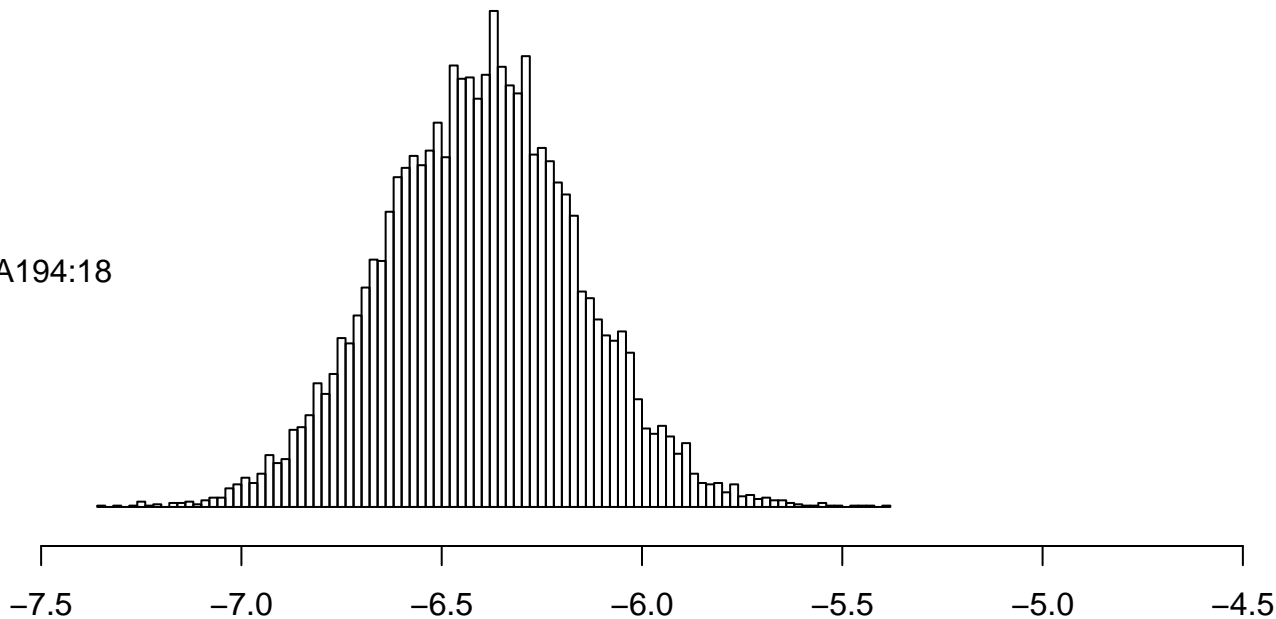

C29 Sterol 3

A194:26 – A194:18

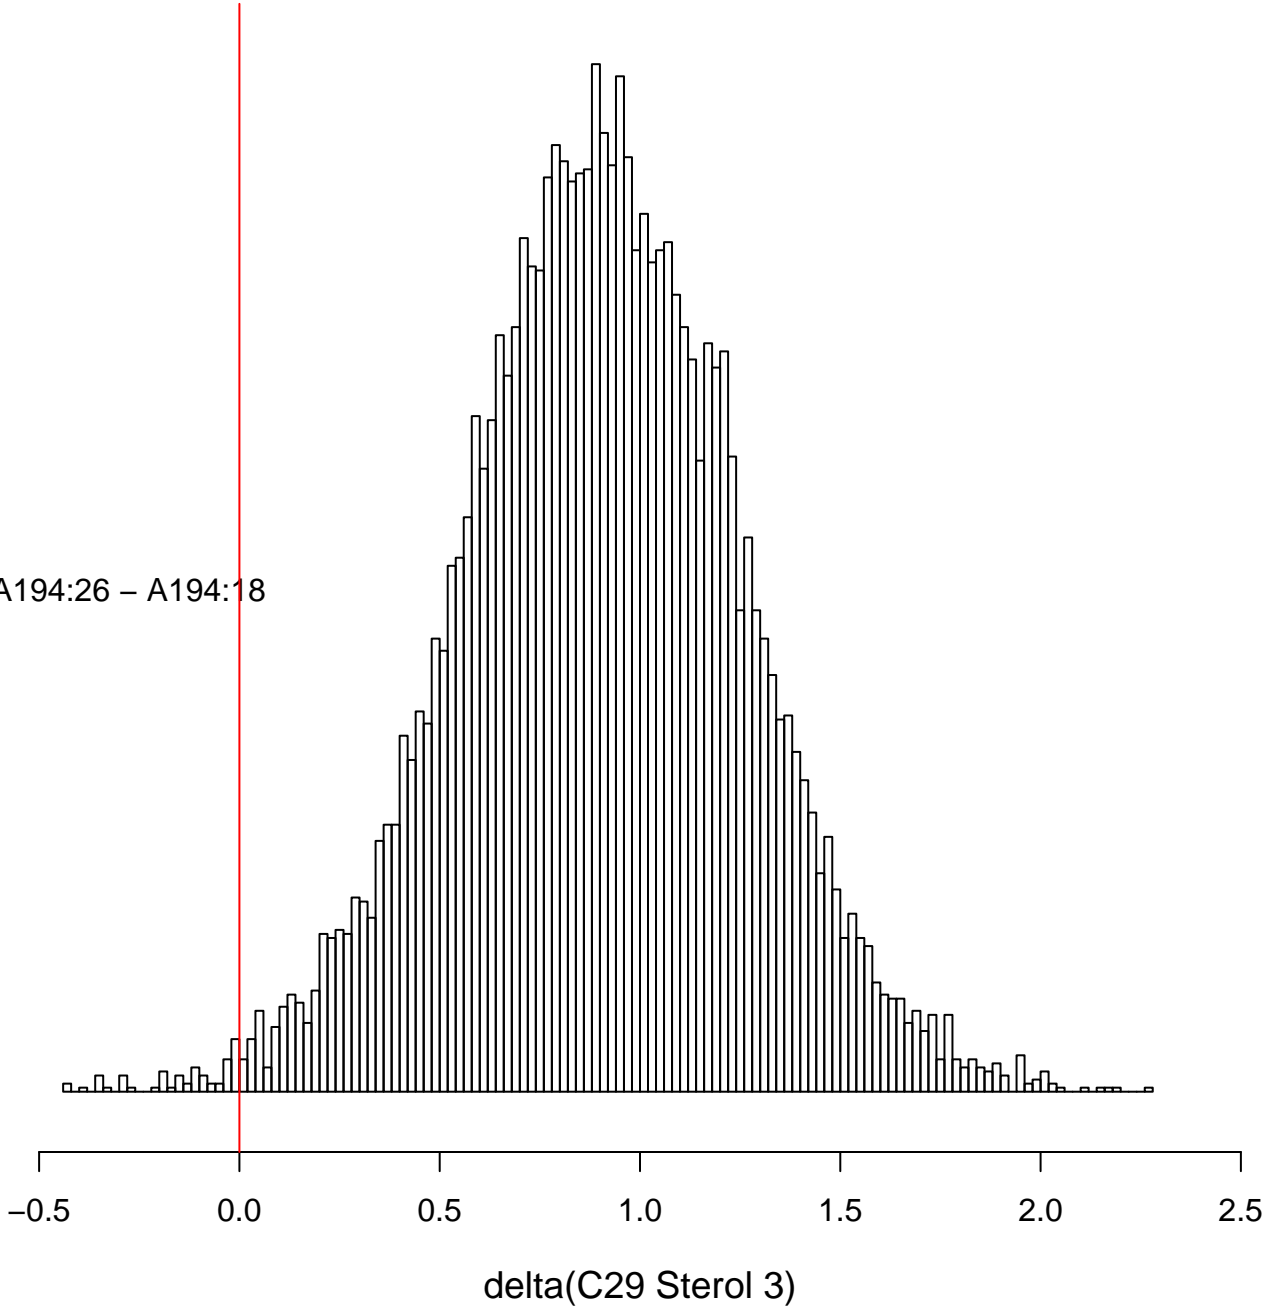

A194:26

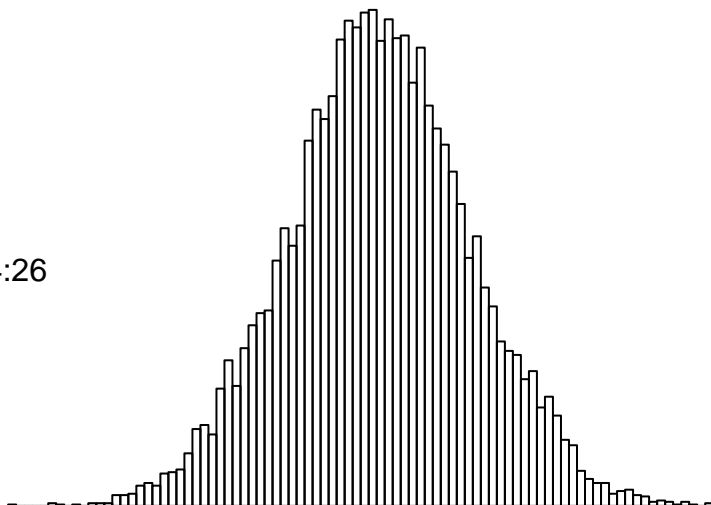

A194:18

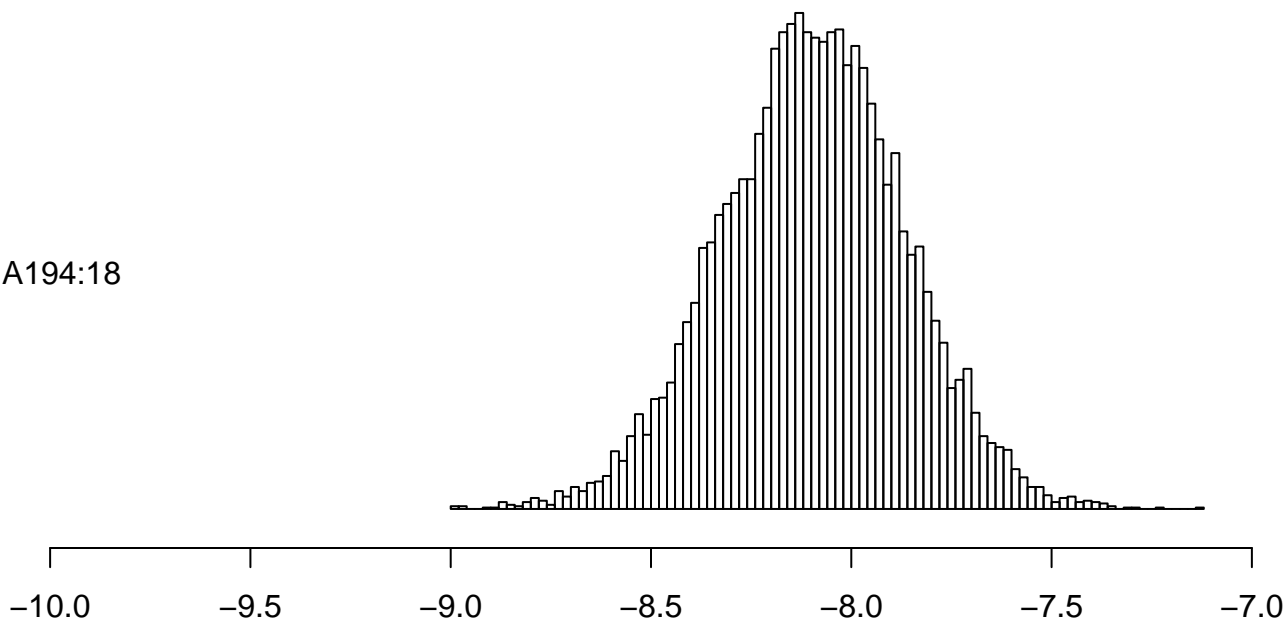

C30 Sterol

A194:26 – A194:18

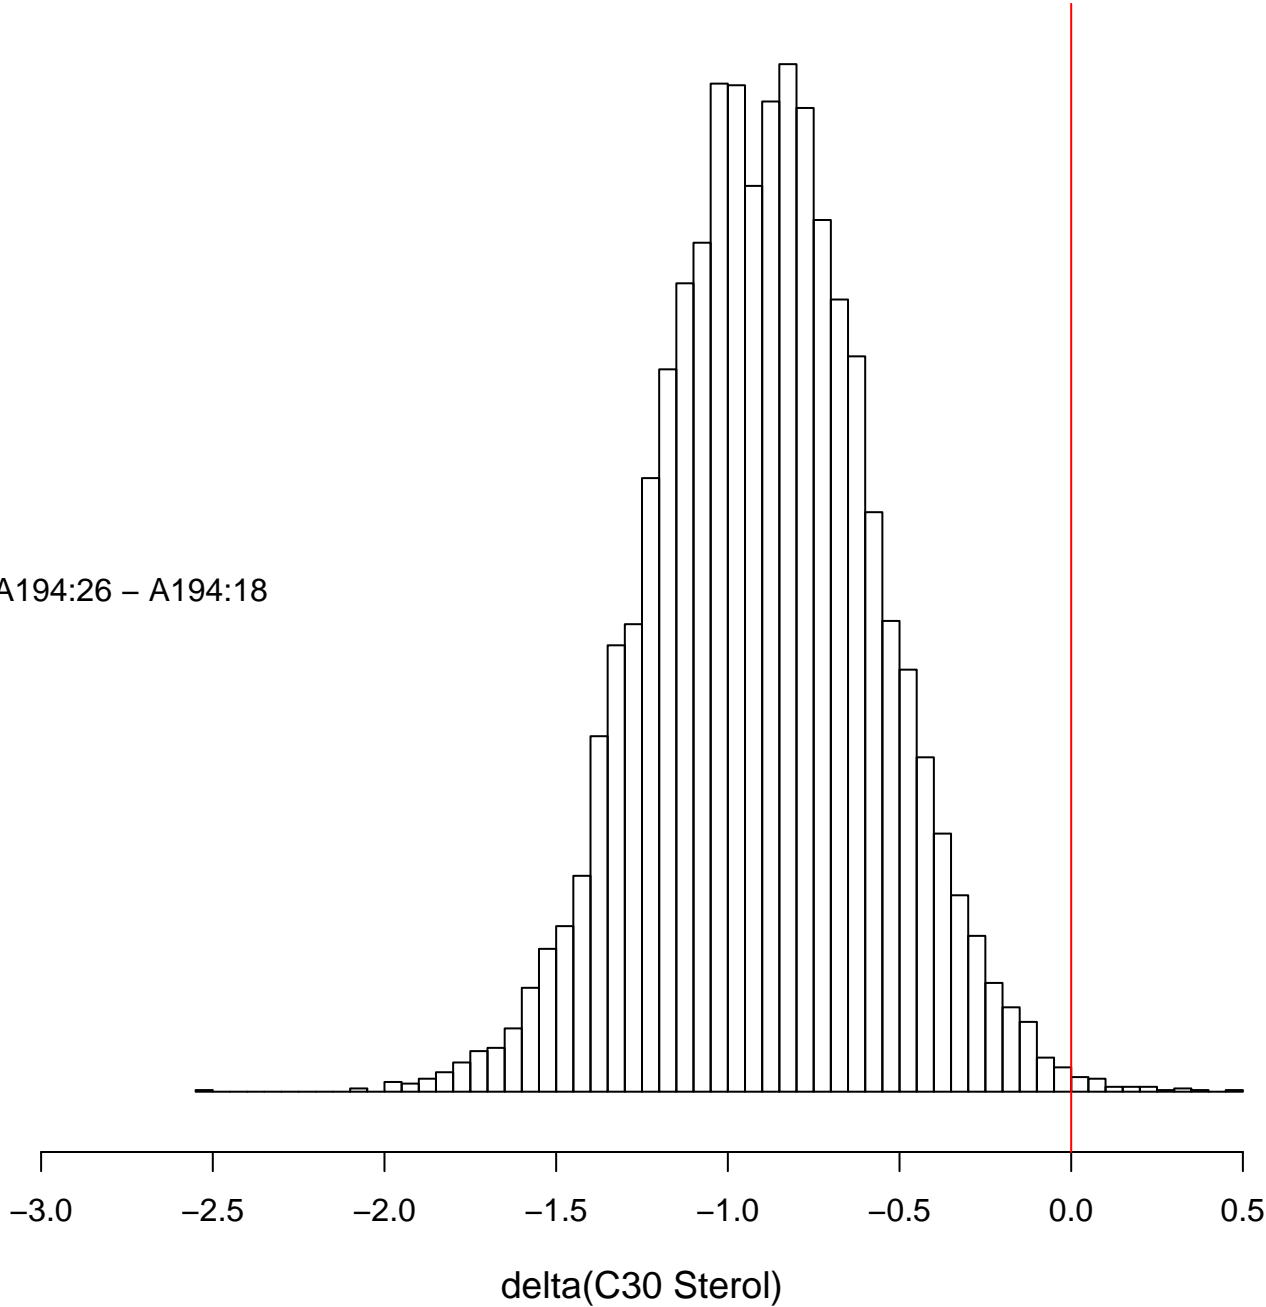

A194:26

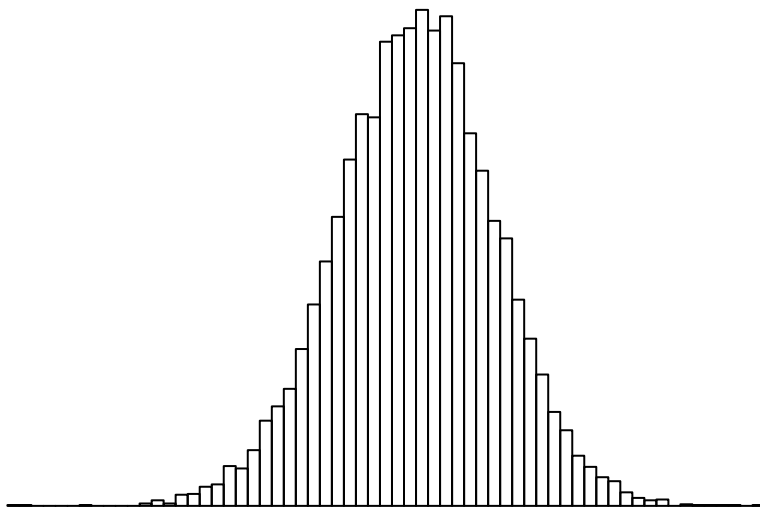

A194:18

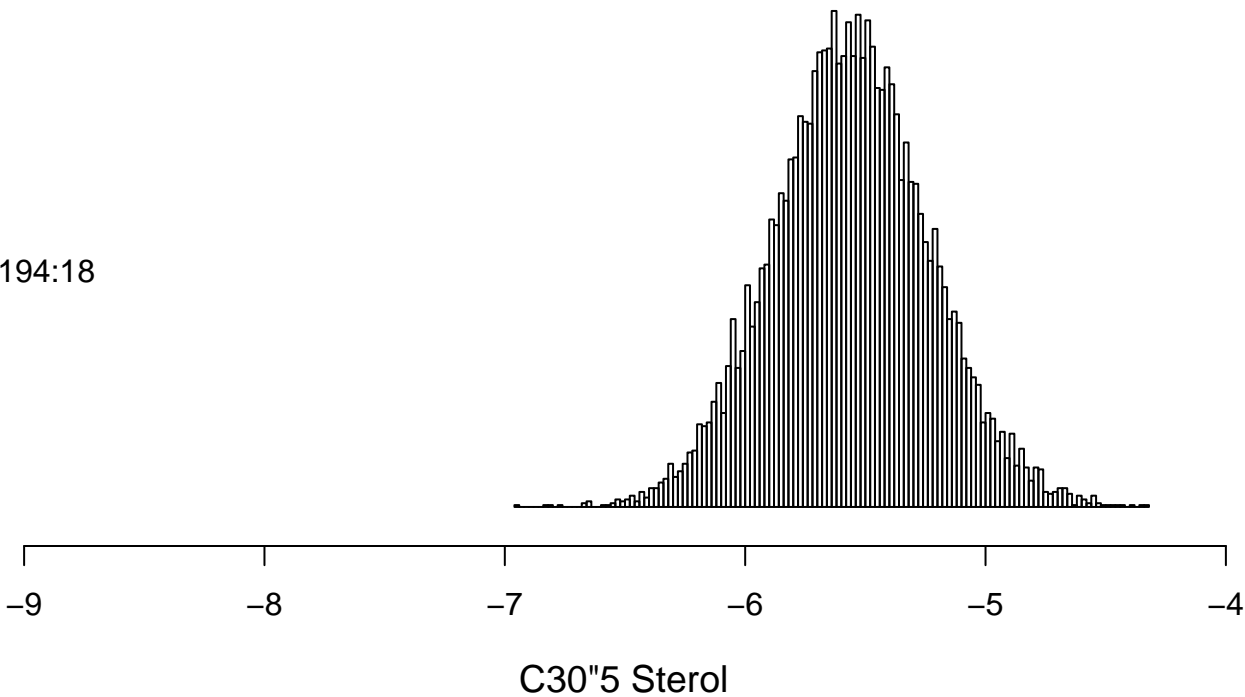

A194:26 – A194:18

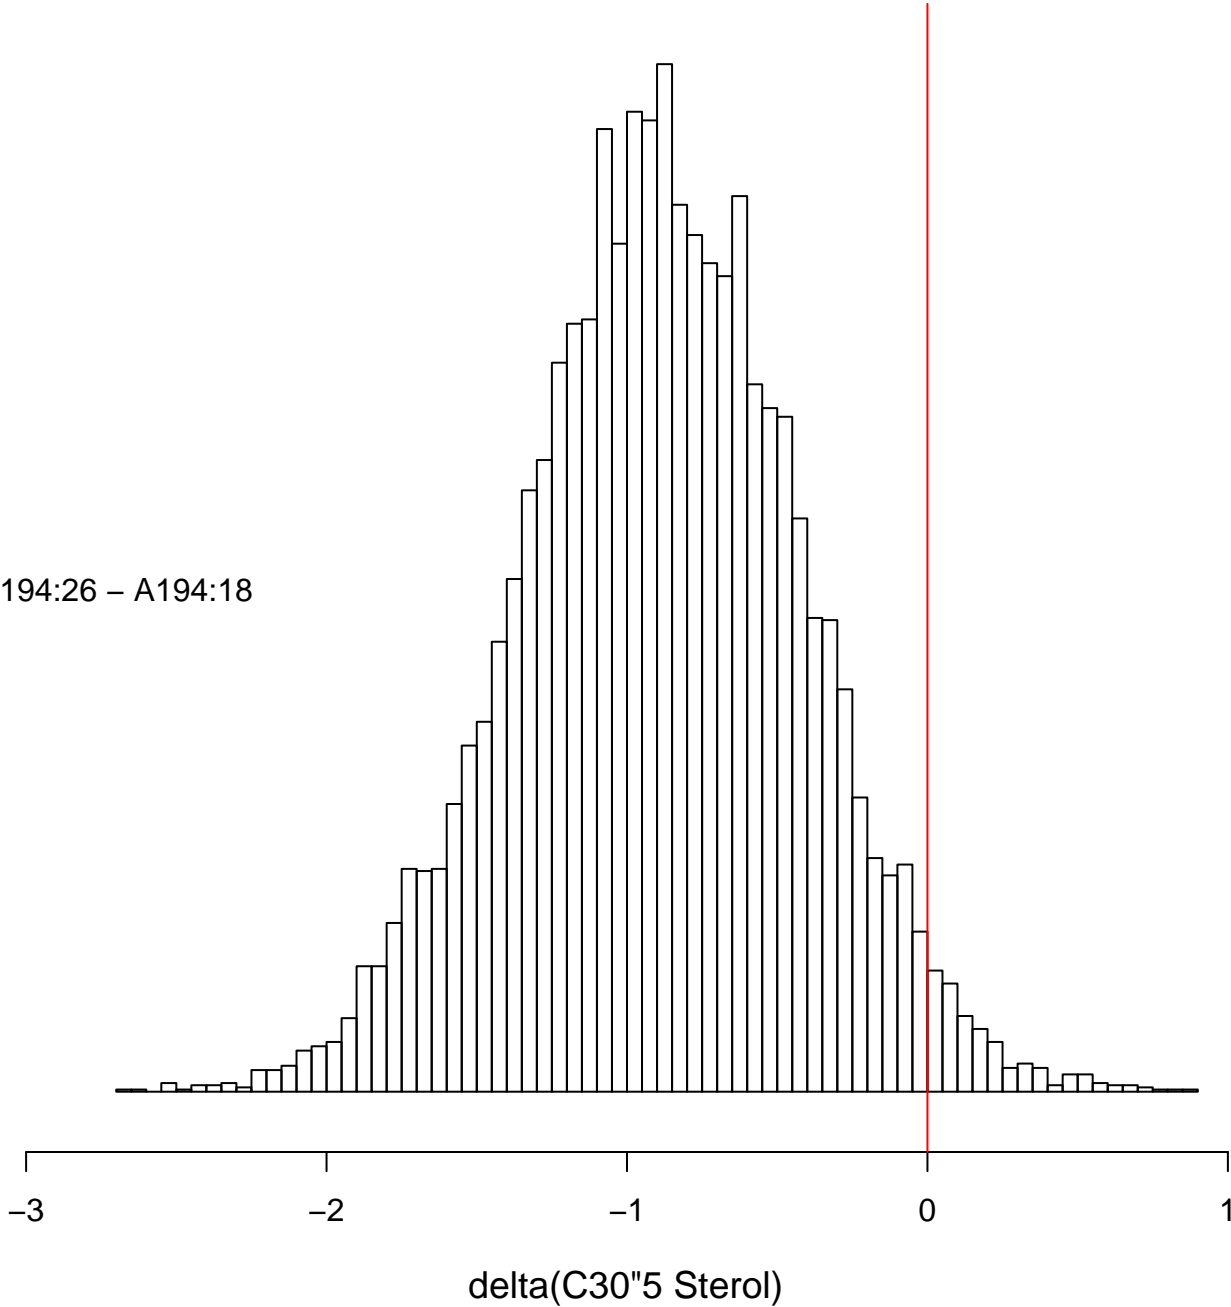

A194:26

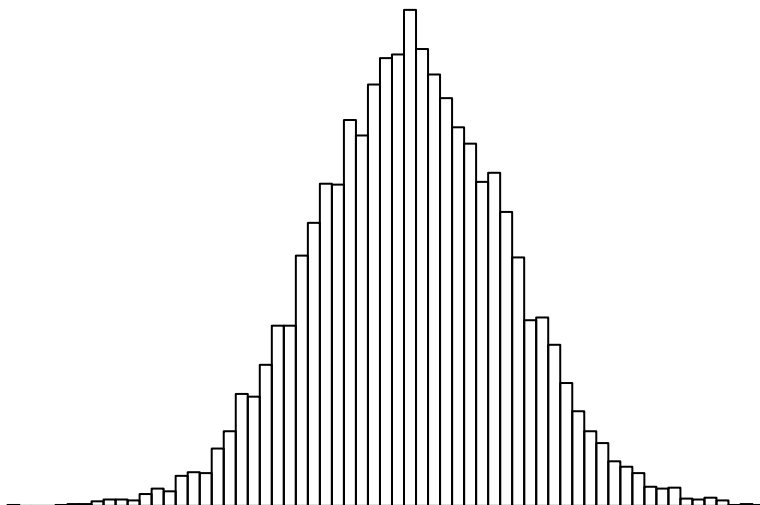

A194:18

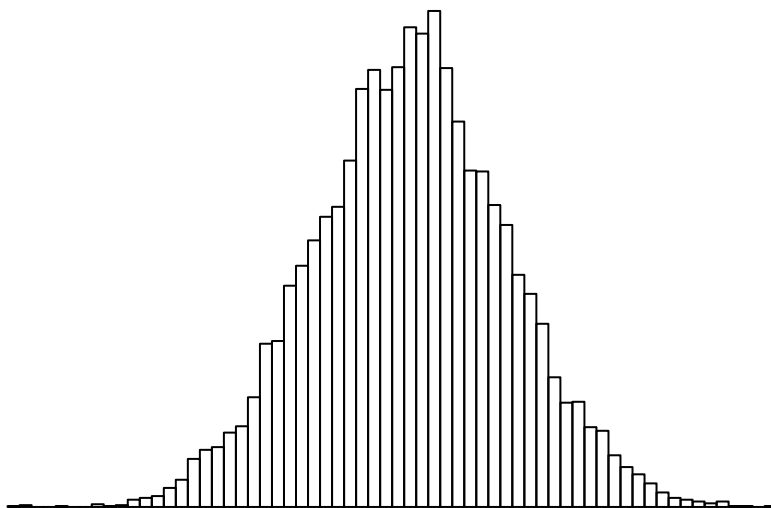

-9 -8 -7 -6 -5 -4

Open Hexose 1

A194:26 – A194:18

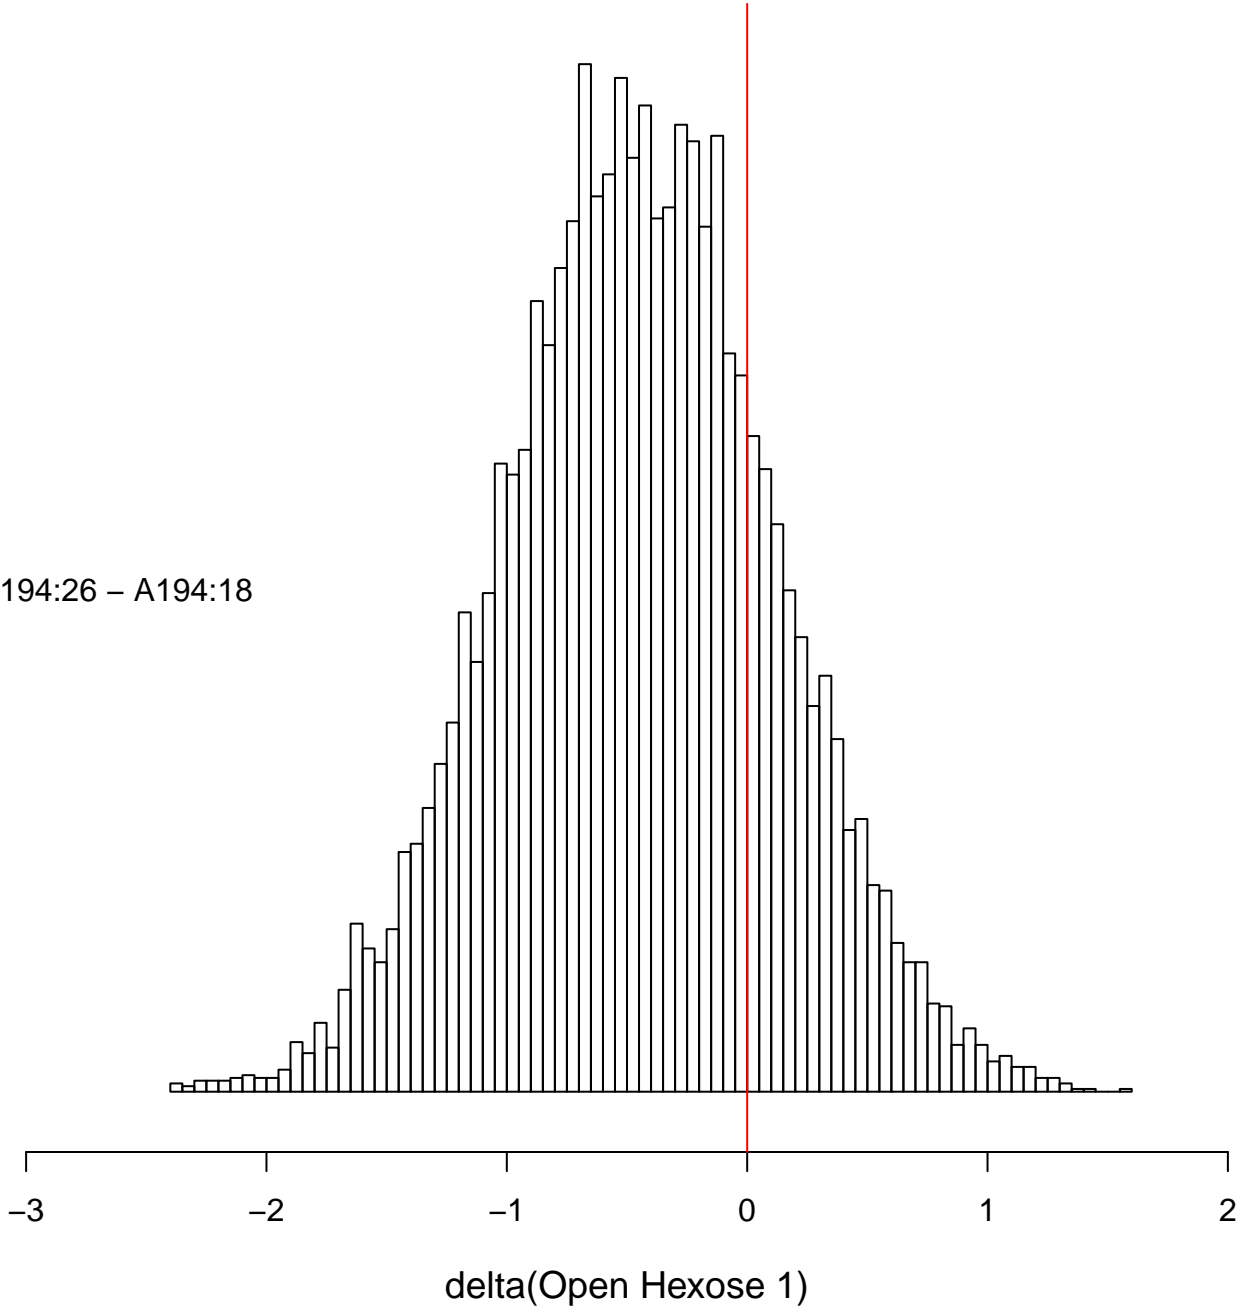



A194:26

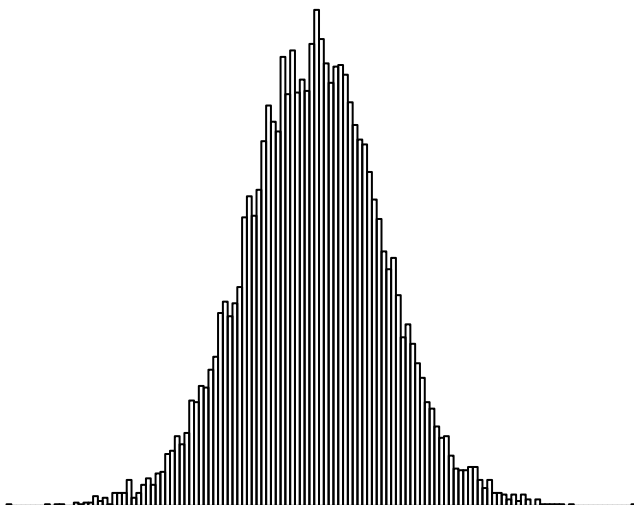

A194:18

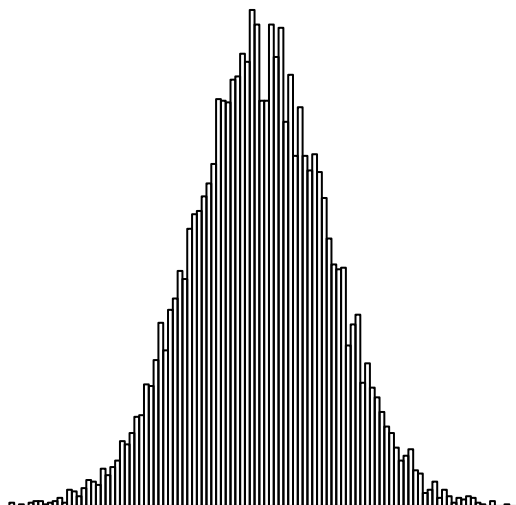

-10      -9      -8      -7      -6      -5

Closed Hexose 1

A194:26 – A194:18

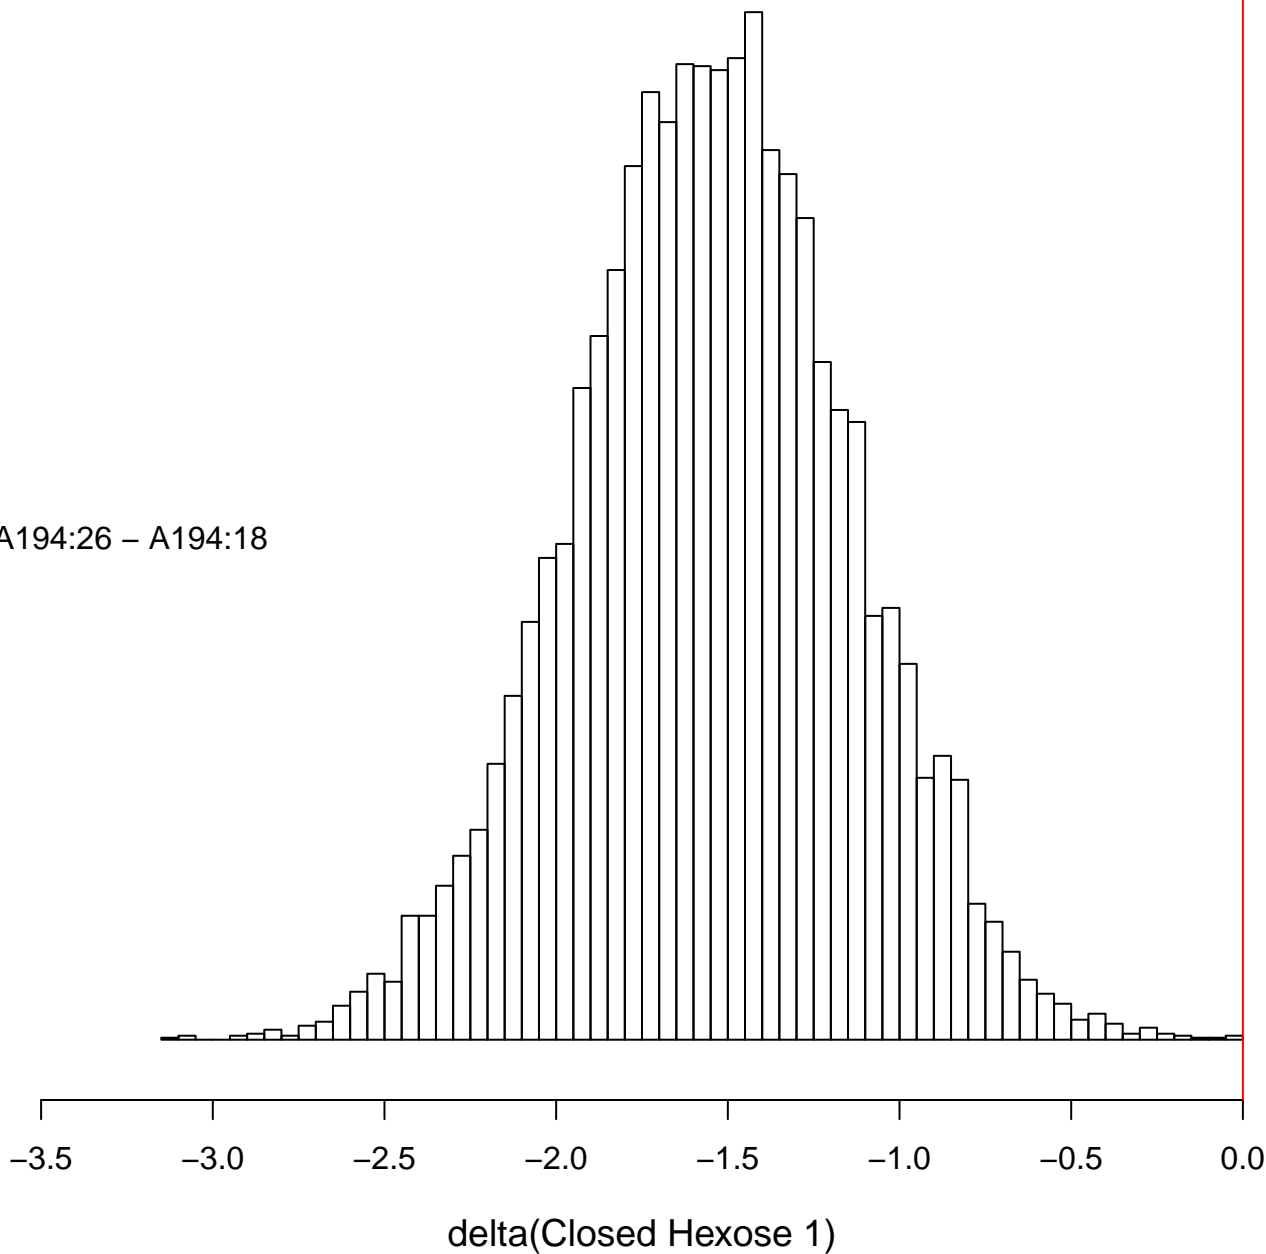

A194:26

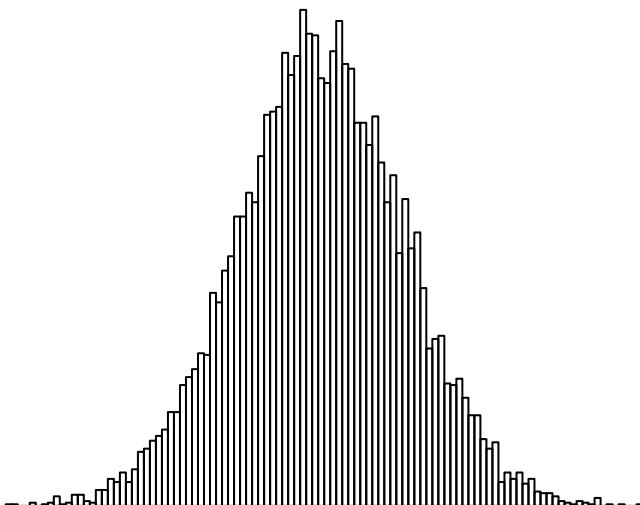

A194:18

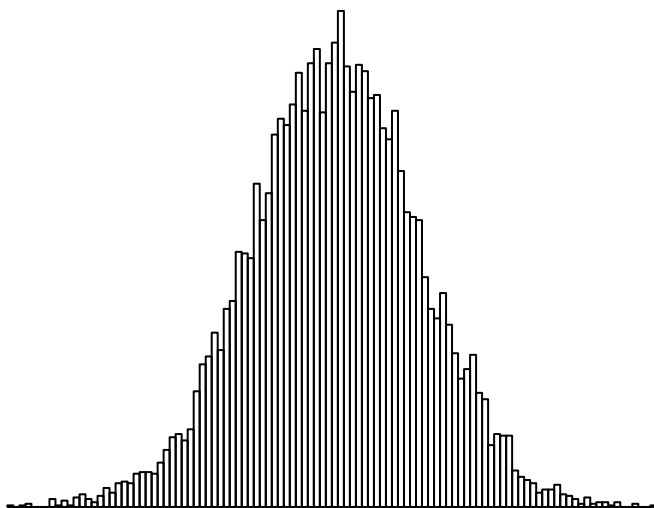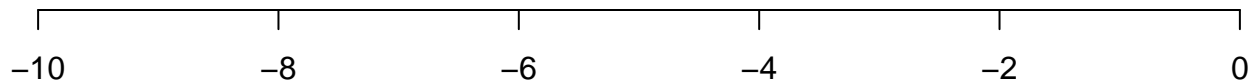

Closed Hexose 2

A194:26 – A194:18

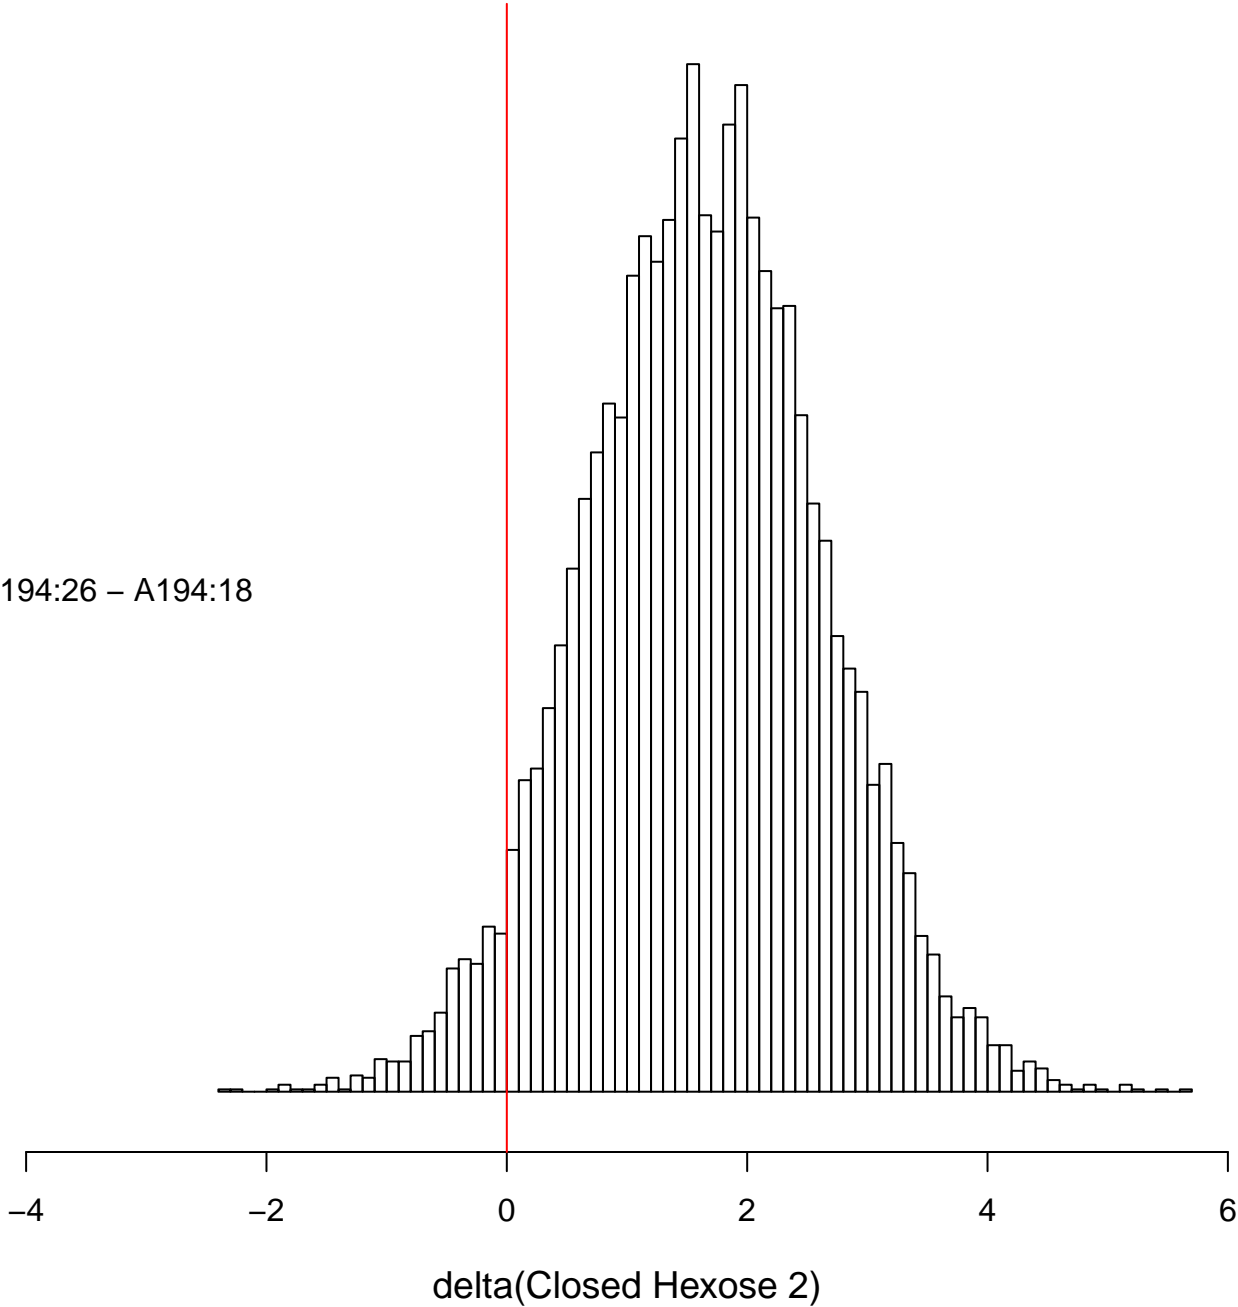

A194:26

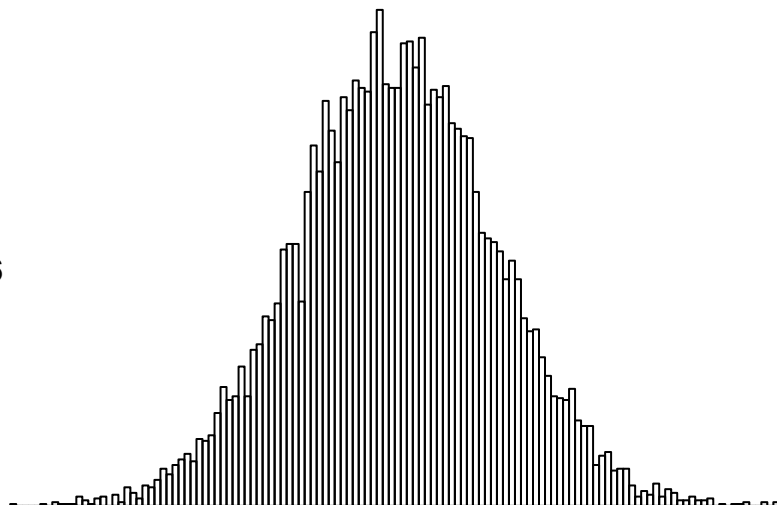

A194:18

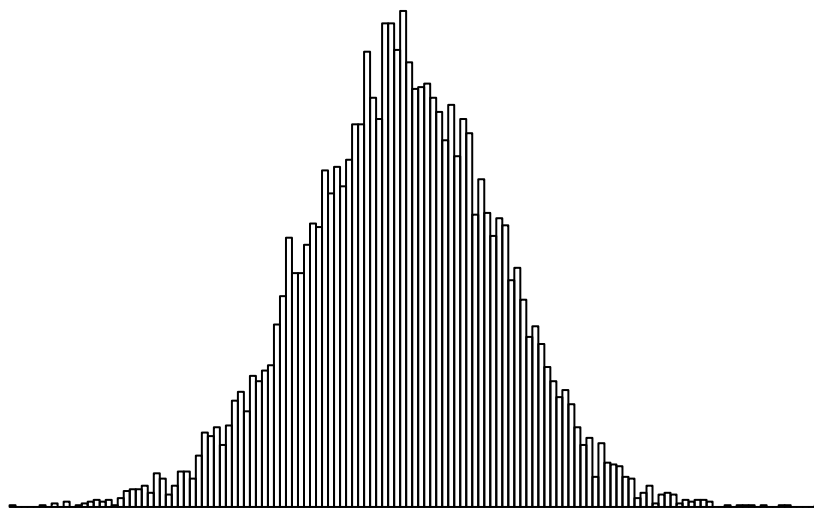

-4

-3

-2

-1

0

Open Hexose 2

A194:26 – A194:18

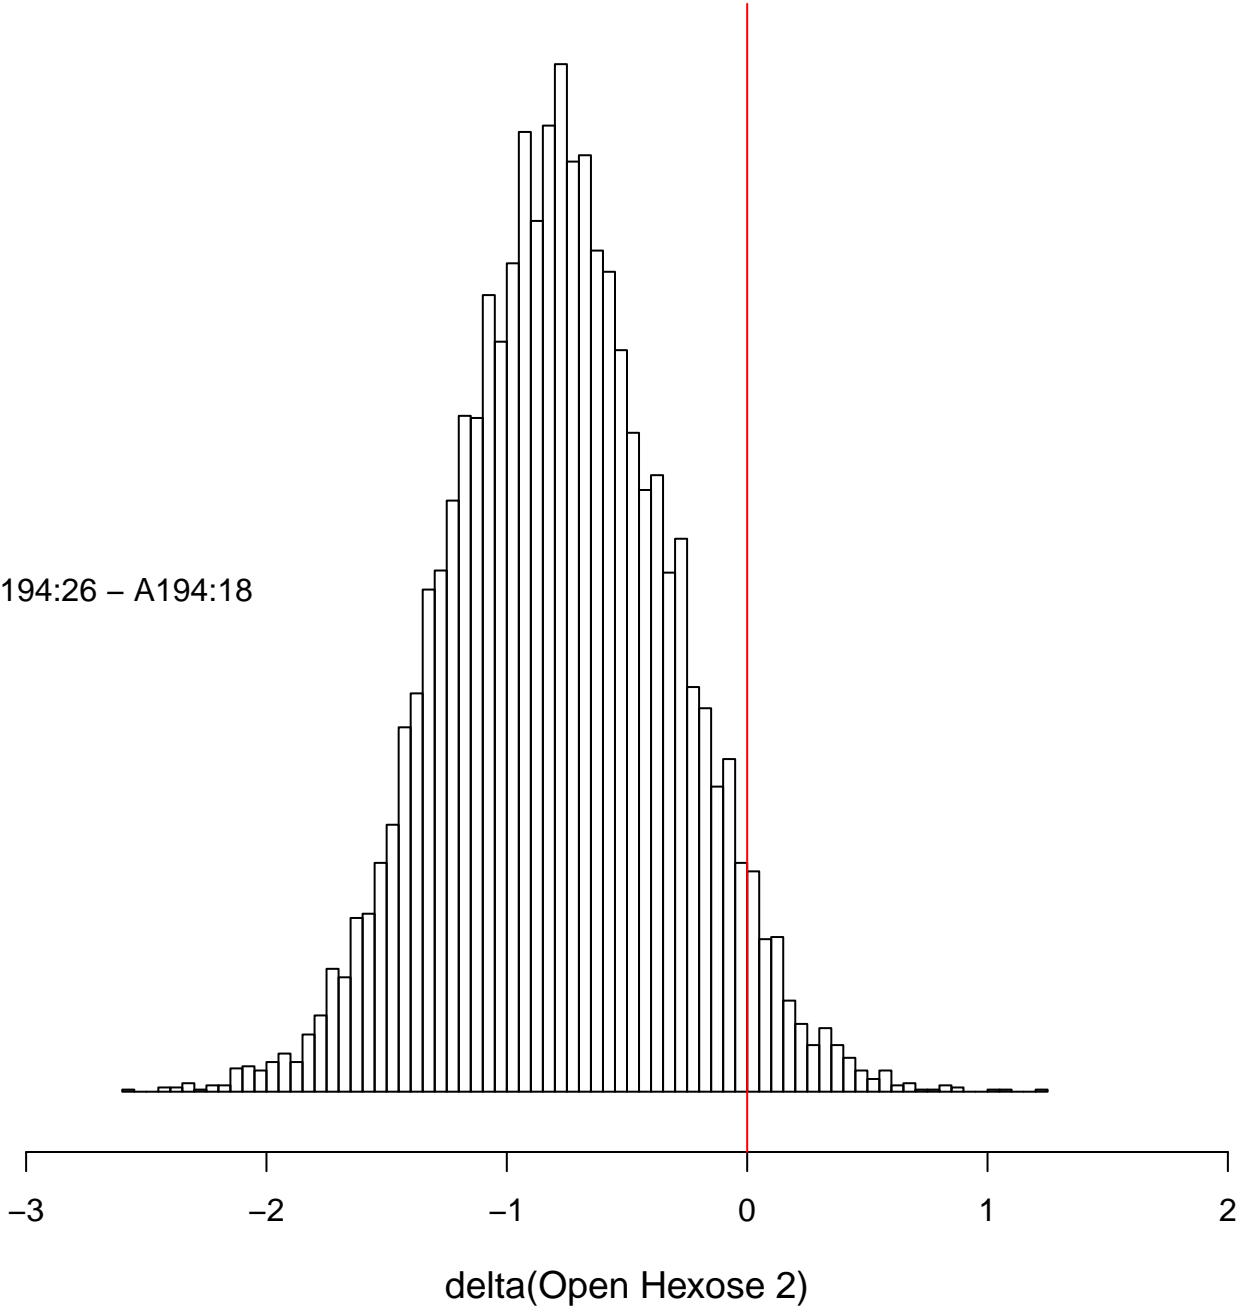

A194:26

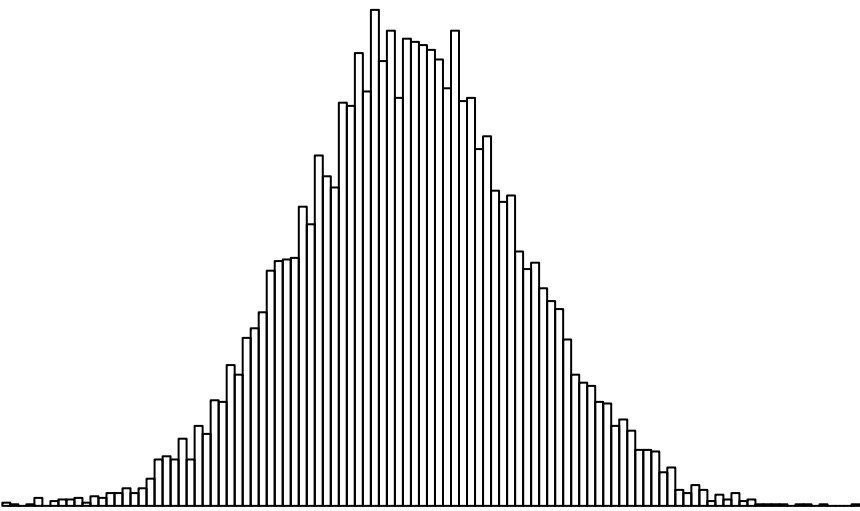

A194:18

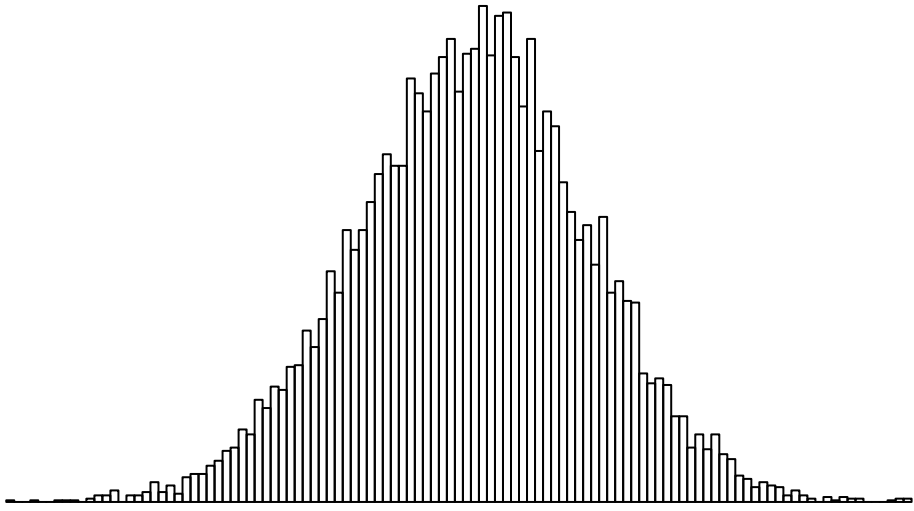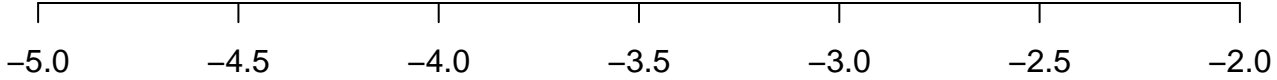

Open Hexose 3

A194:26 – A194:18

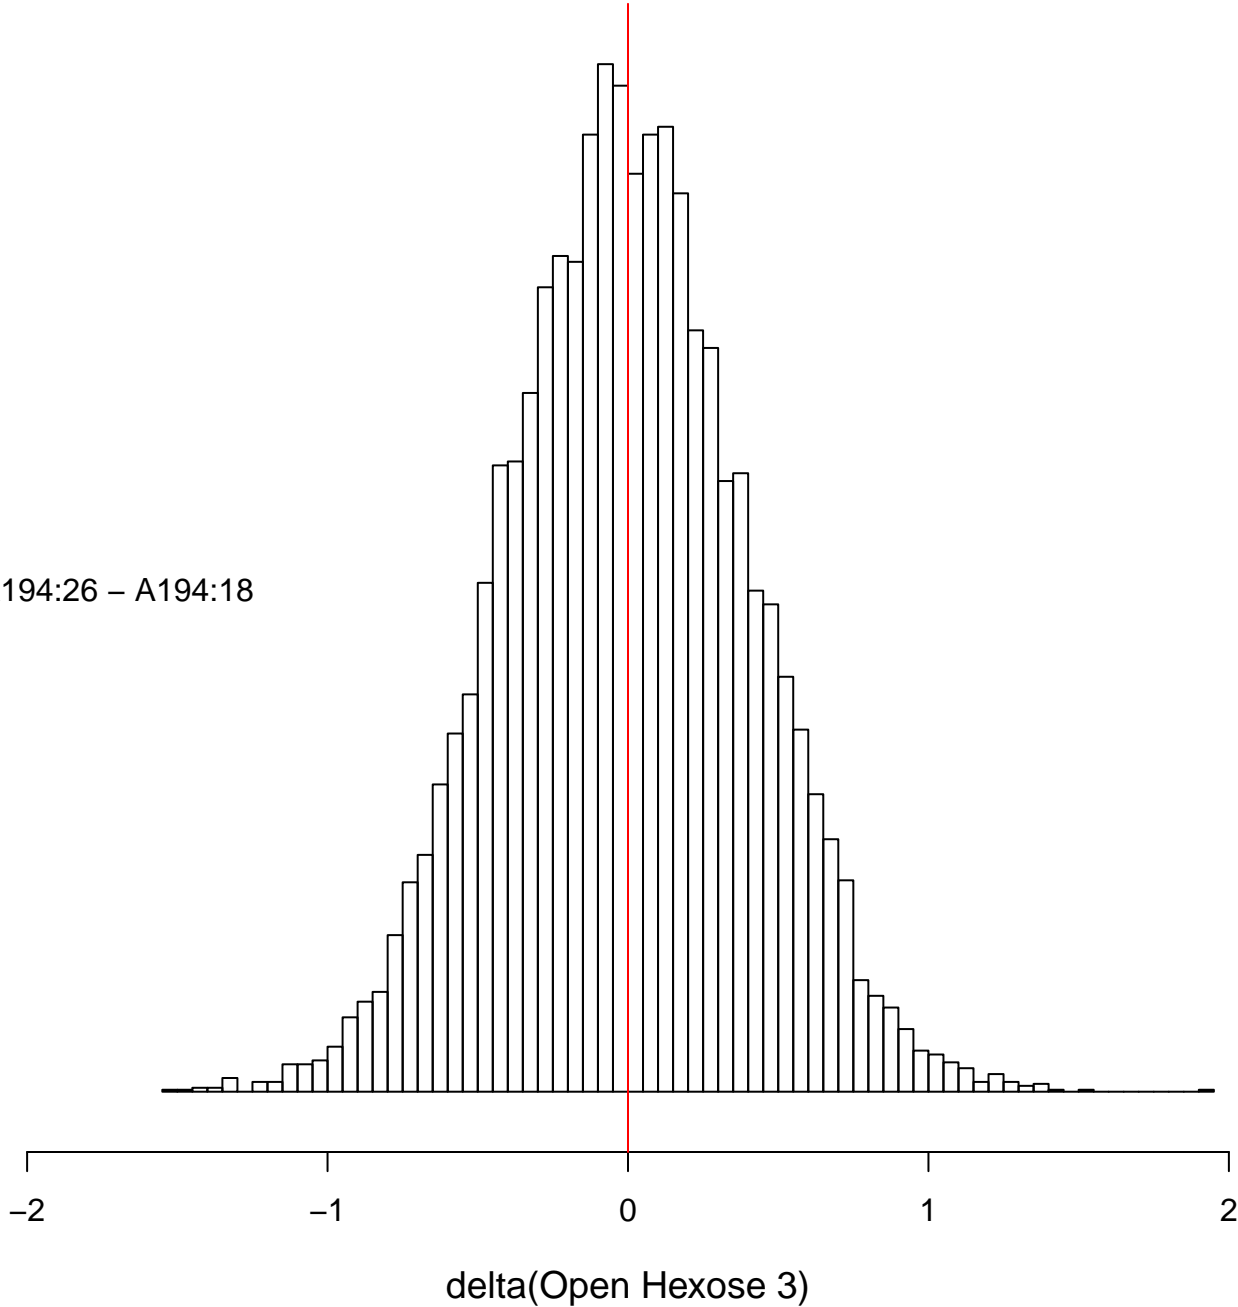



A194:26

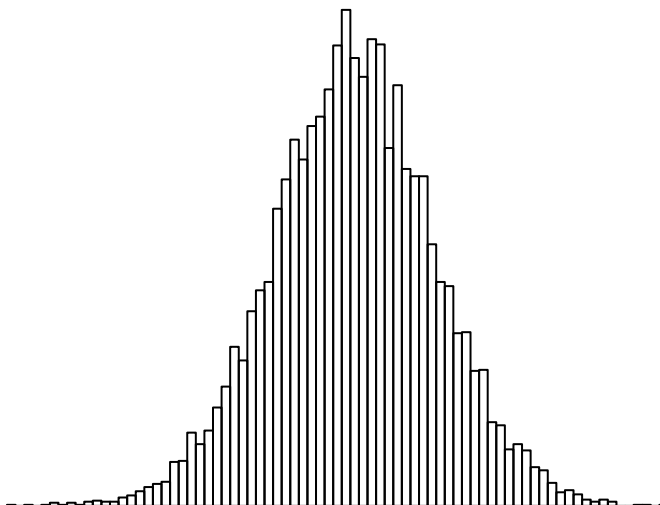

A194:18

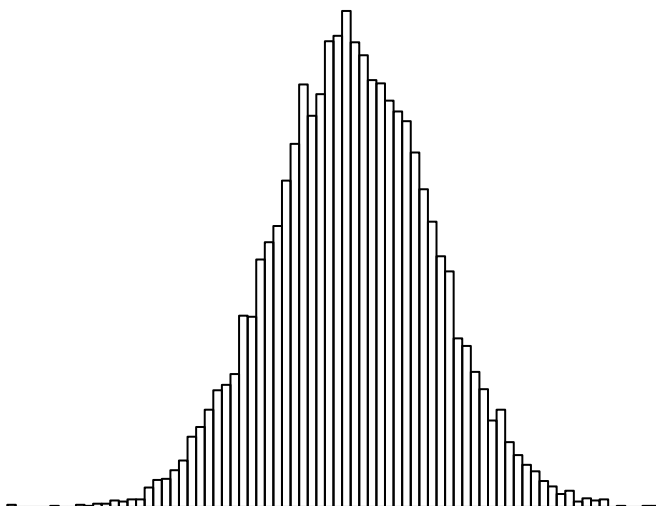

-7      -6      -5      -4      -3      -2      -1      0

Closed Hexose 3

A194:26 – A194:18

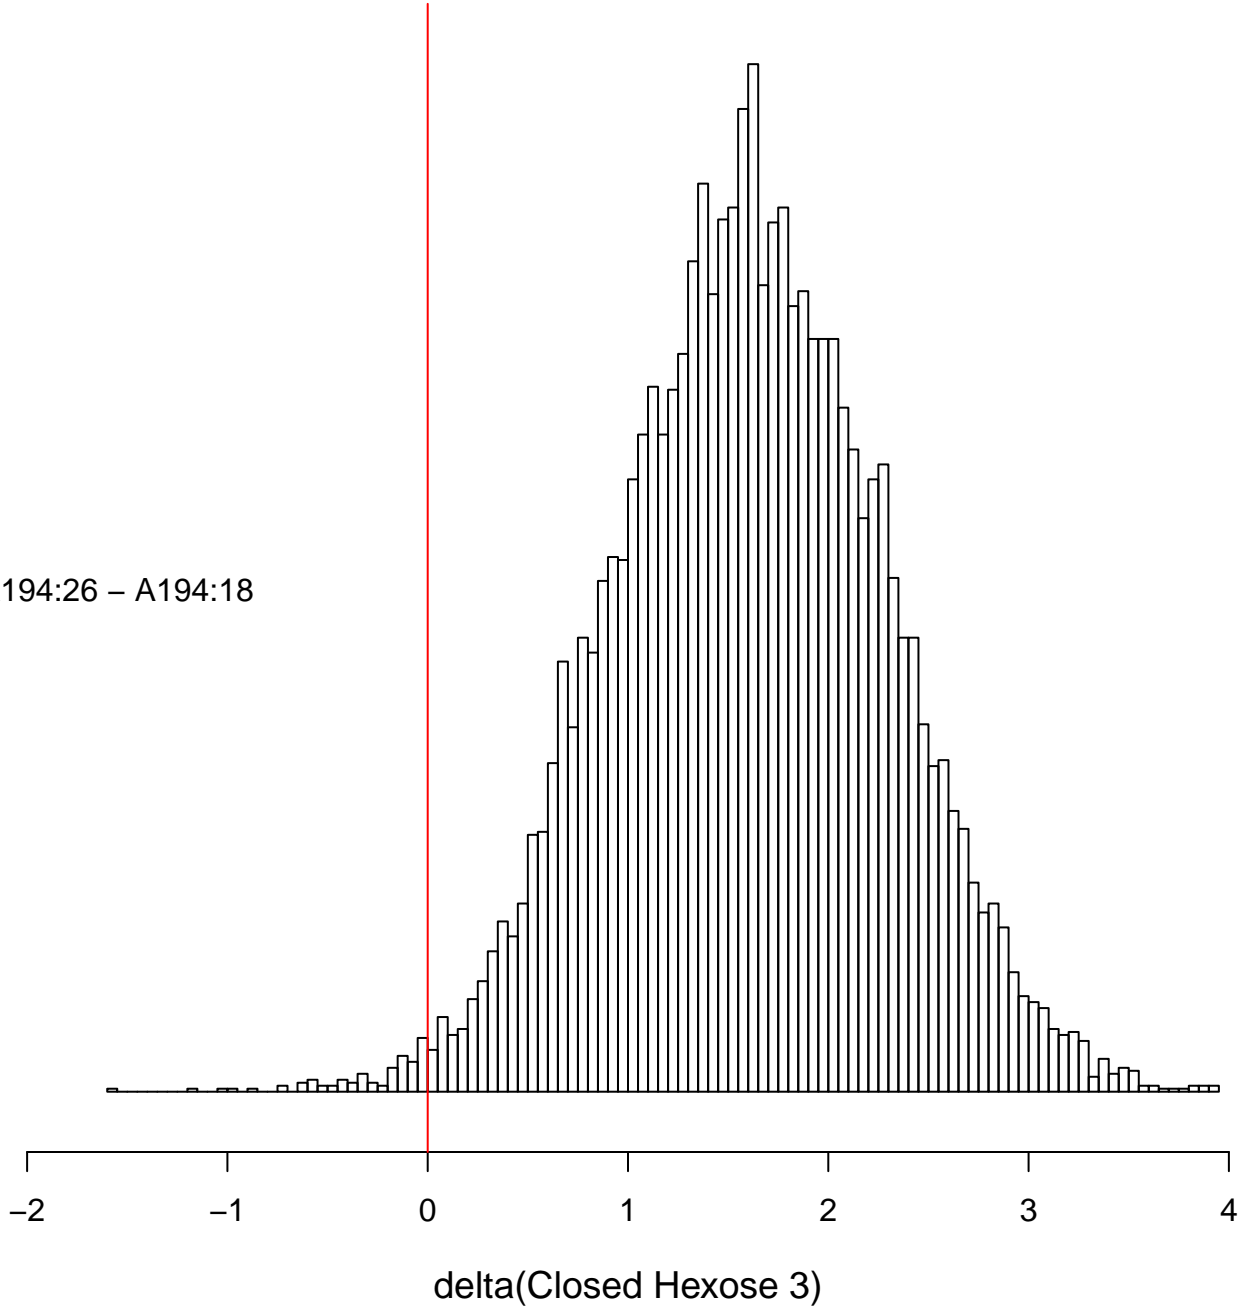

A194:26

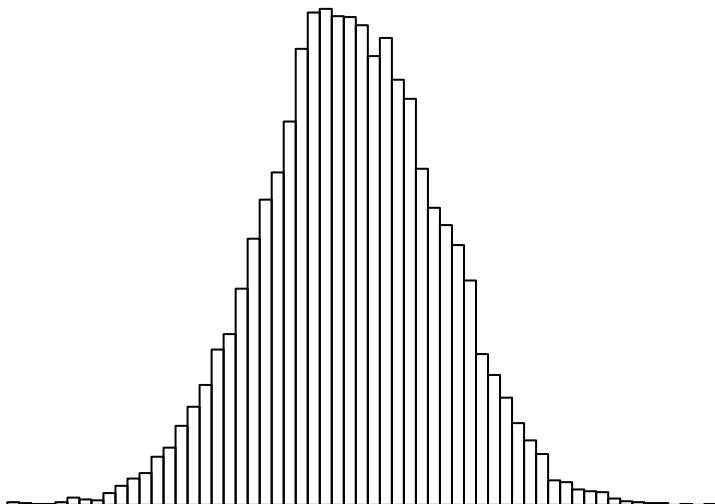

A194:18

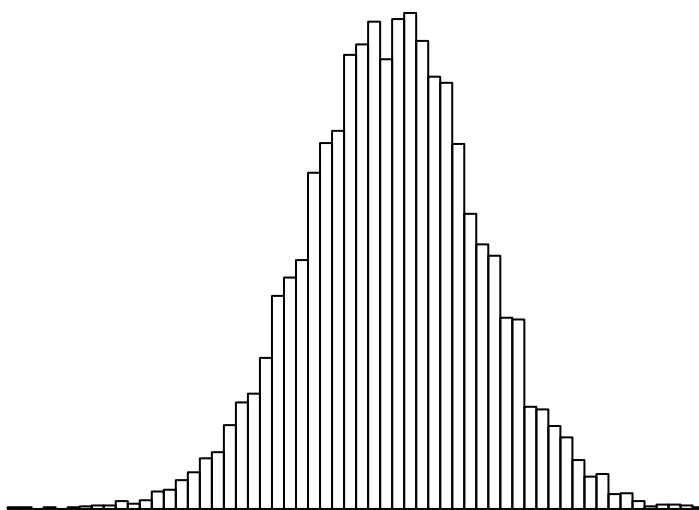

-7      -6      -5      -4      -3      -2

Closed Hexose 4

A194:26 – A194:18

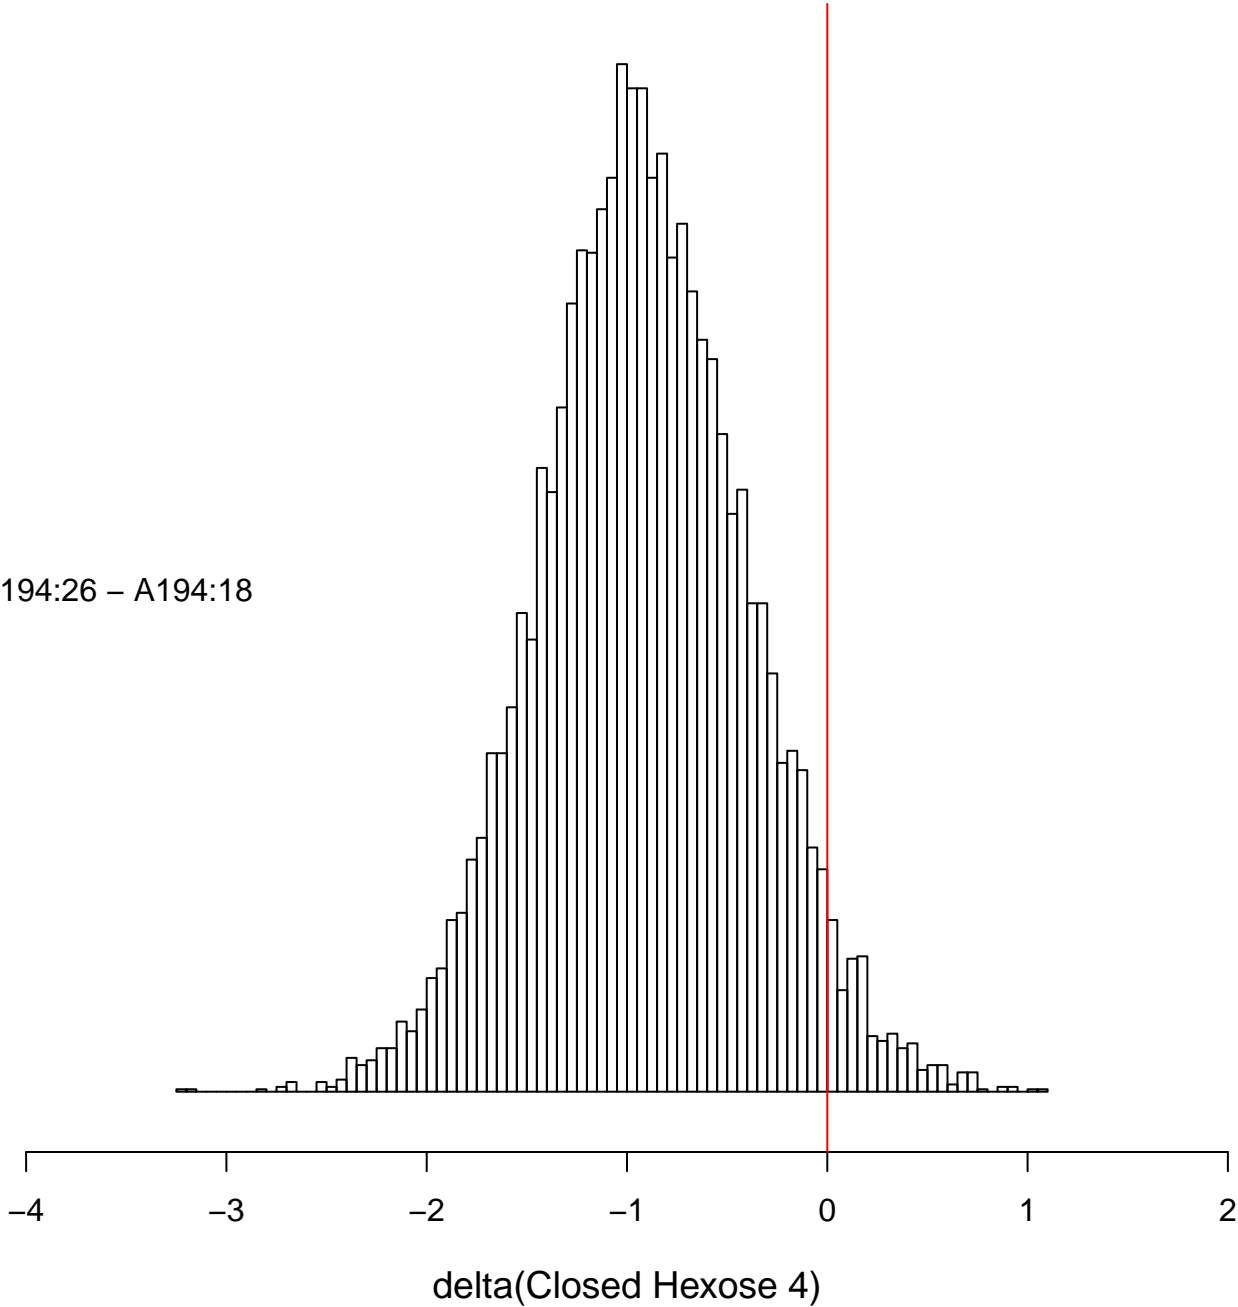

A194:26

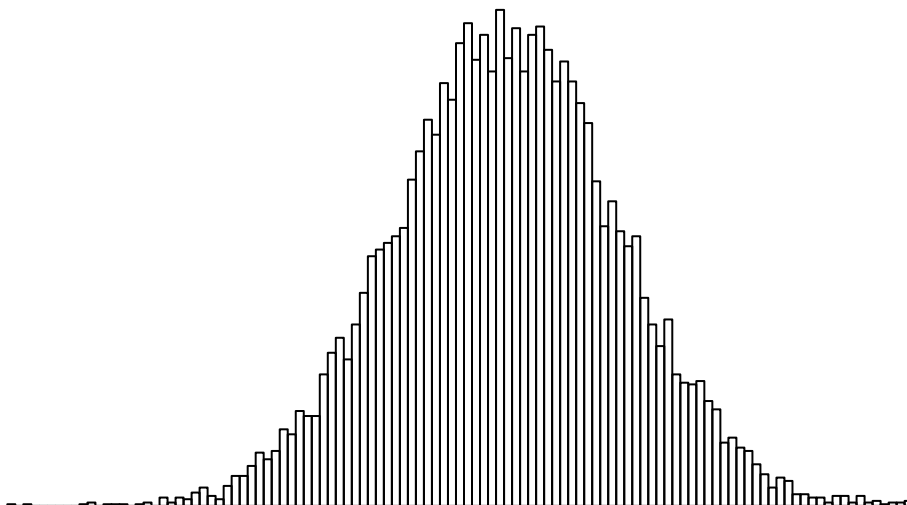

A194:18

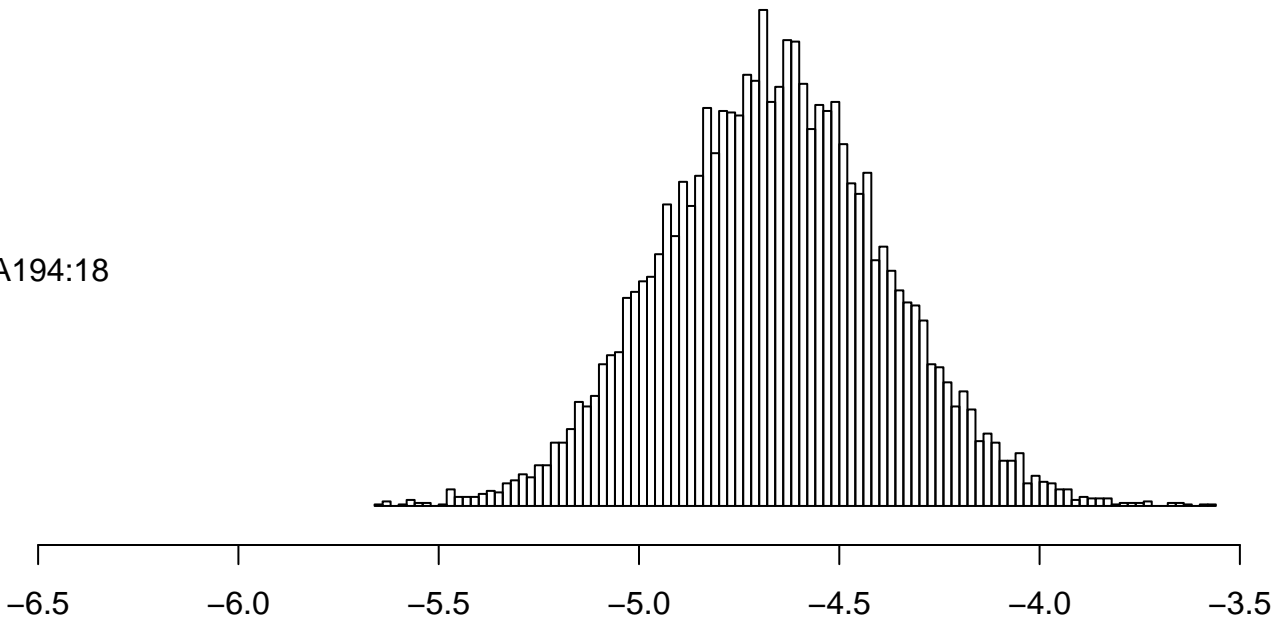

Hexose 1

A194:26 – A194:18

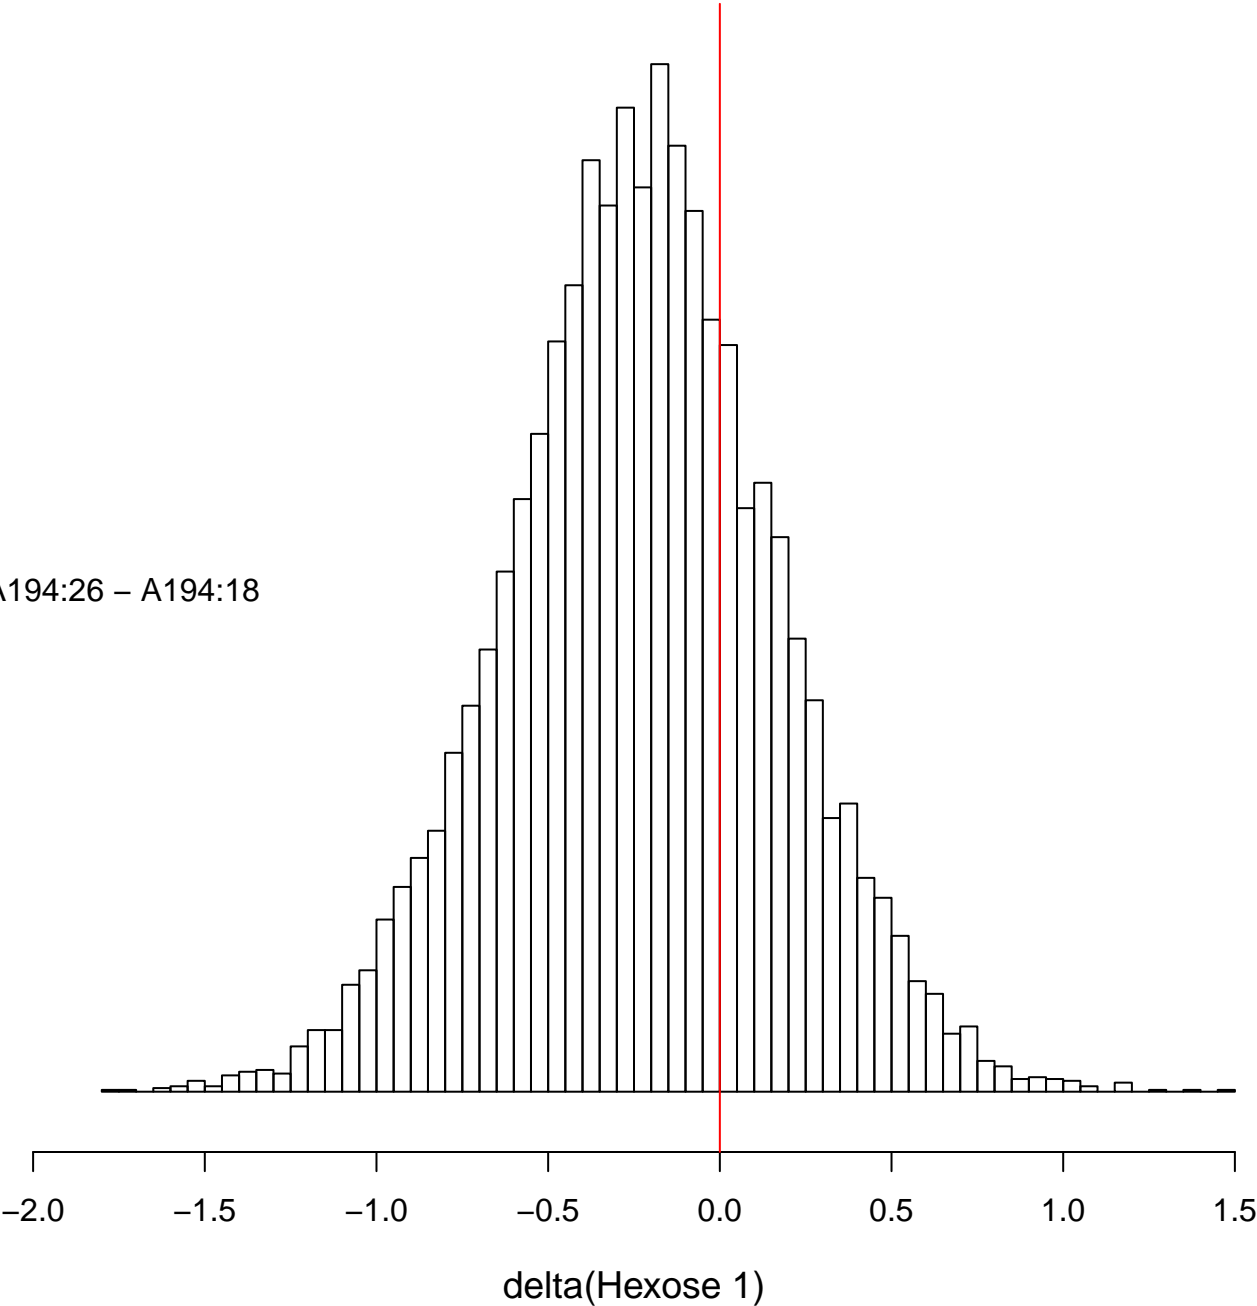

A194:26

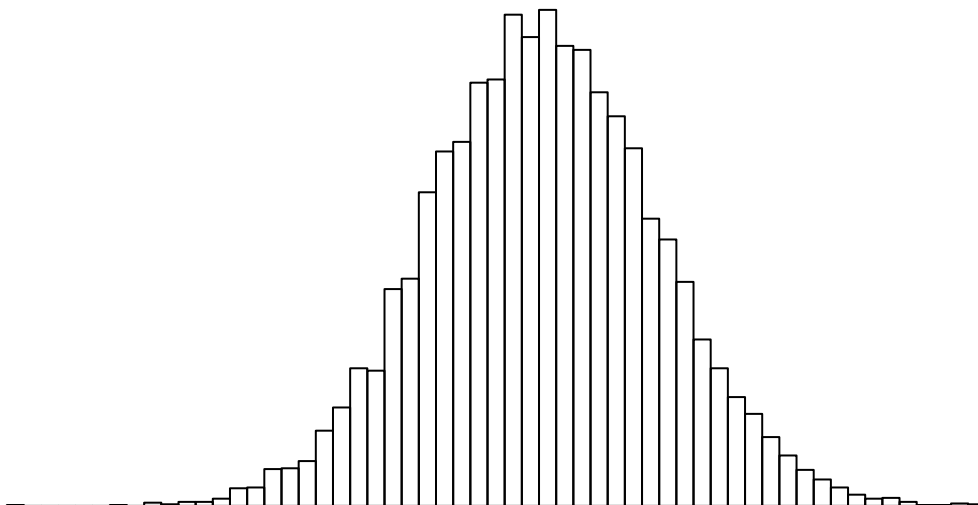

A194:18

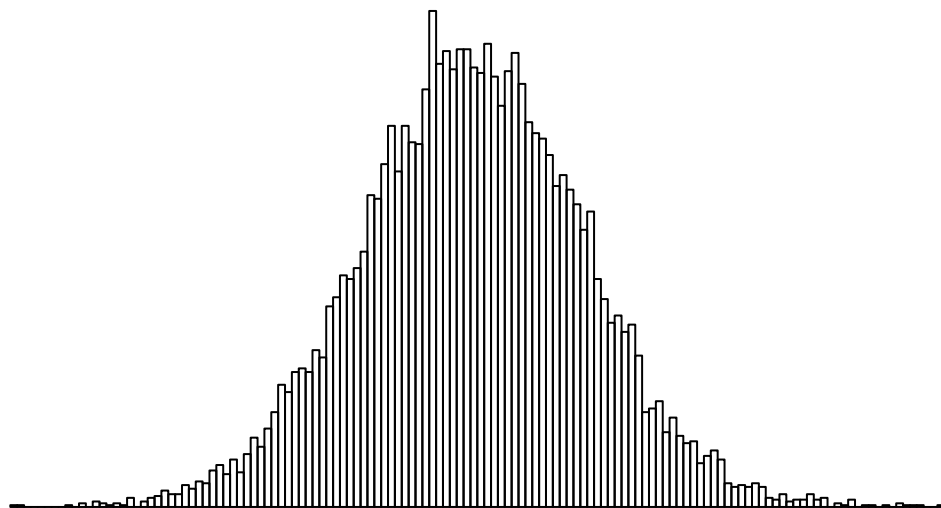

-6.0      -5.5      -5.0      -4.5      -4.0      -3.5      -3.0      -2.5

Closed Hexose 5

A194:26 – A194:18

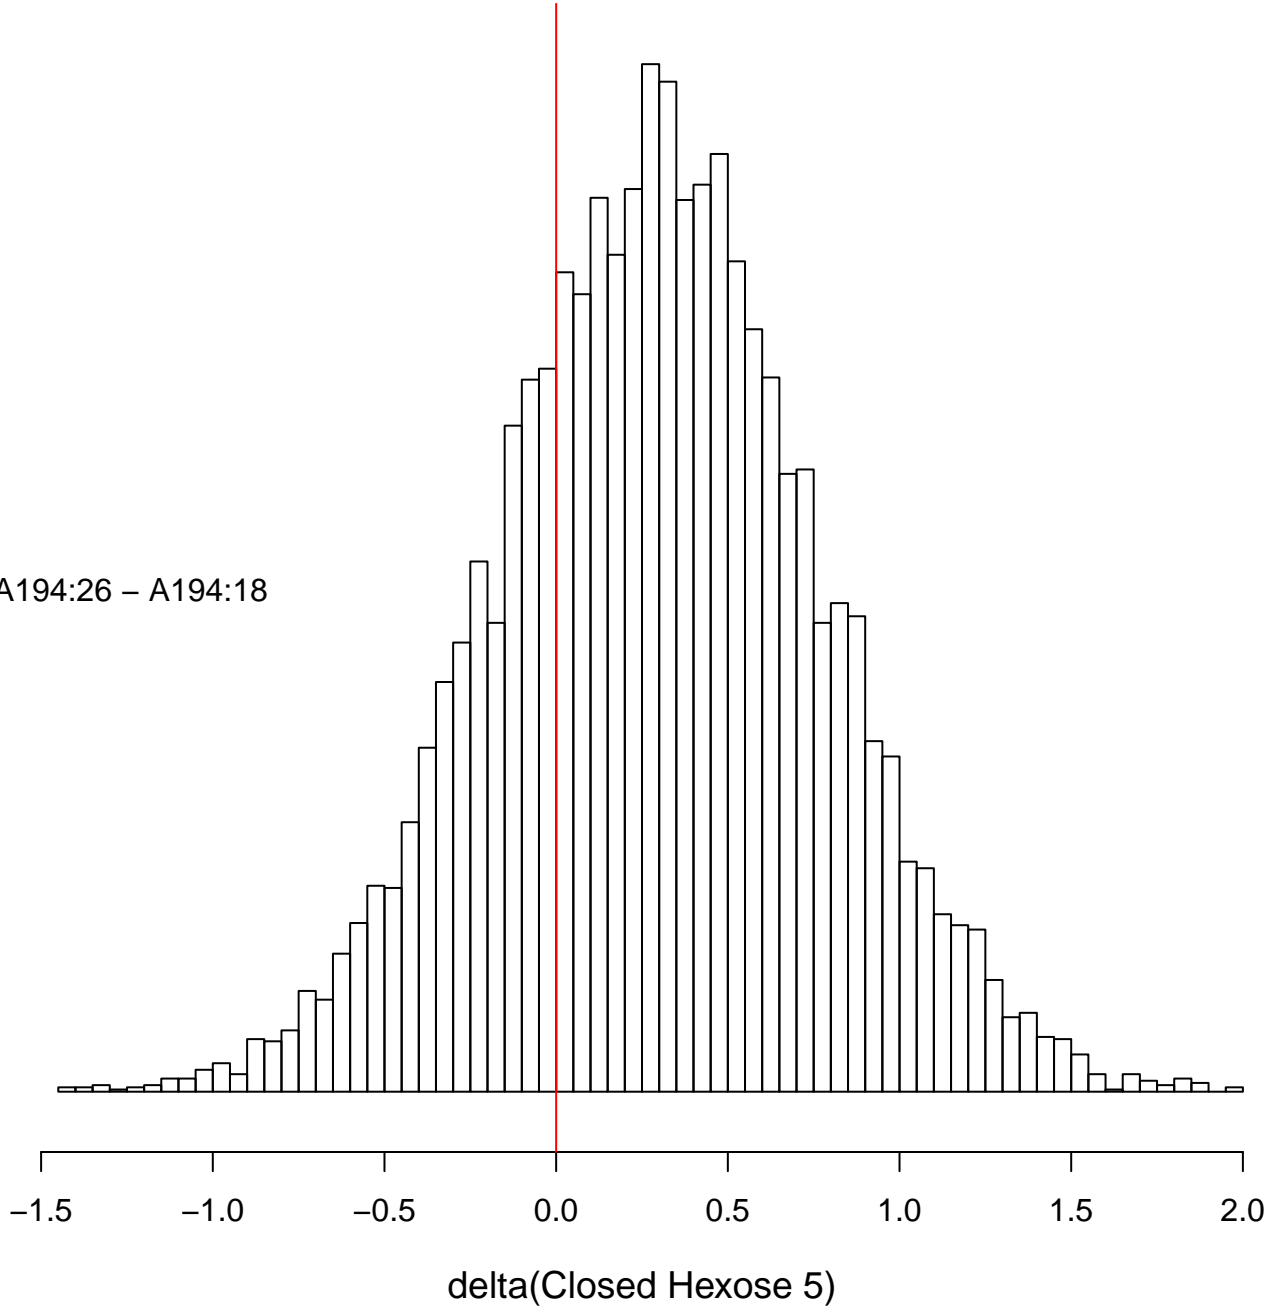



A194:26

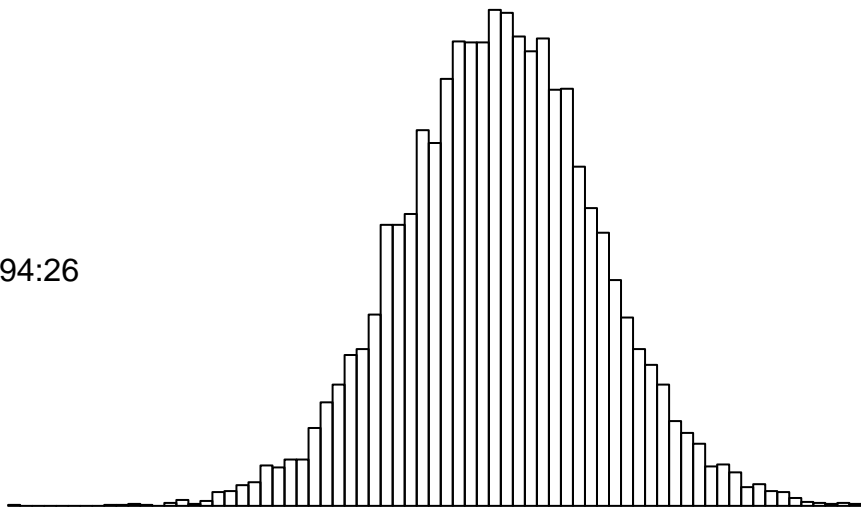

A194:18

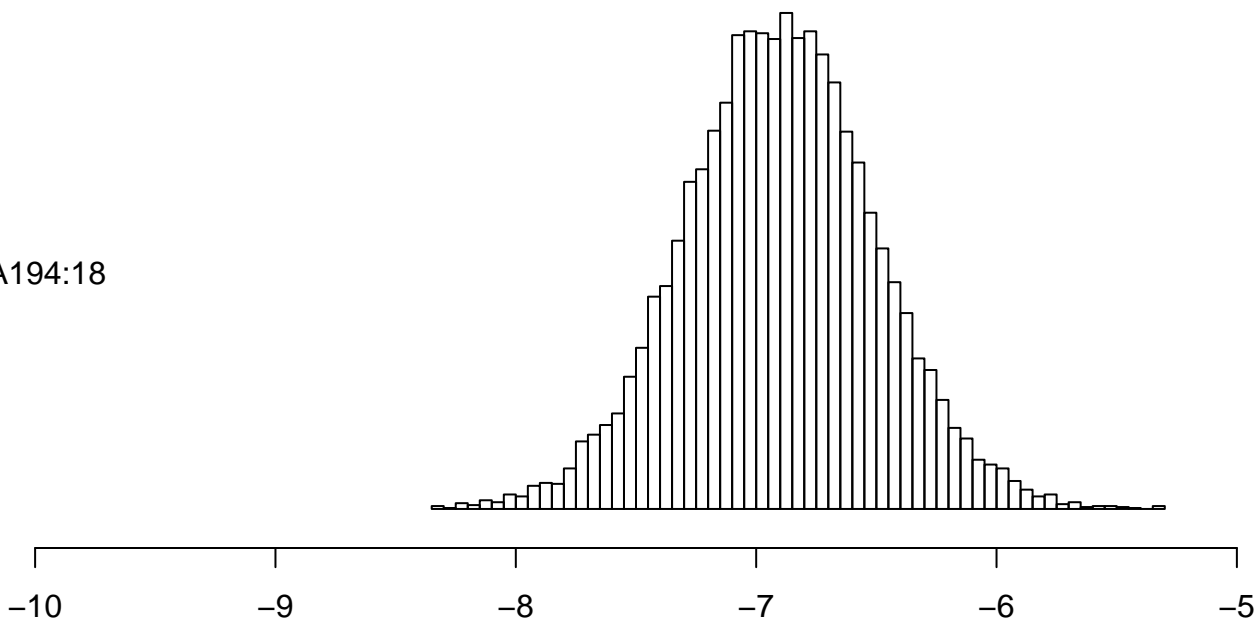

Open Pentose 1

A194:26 – A194:18

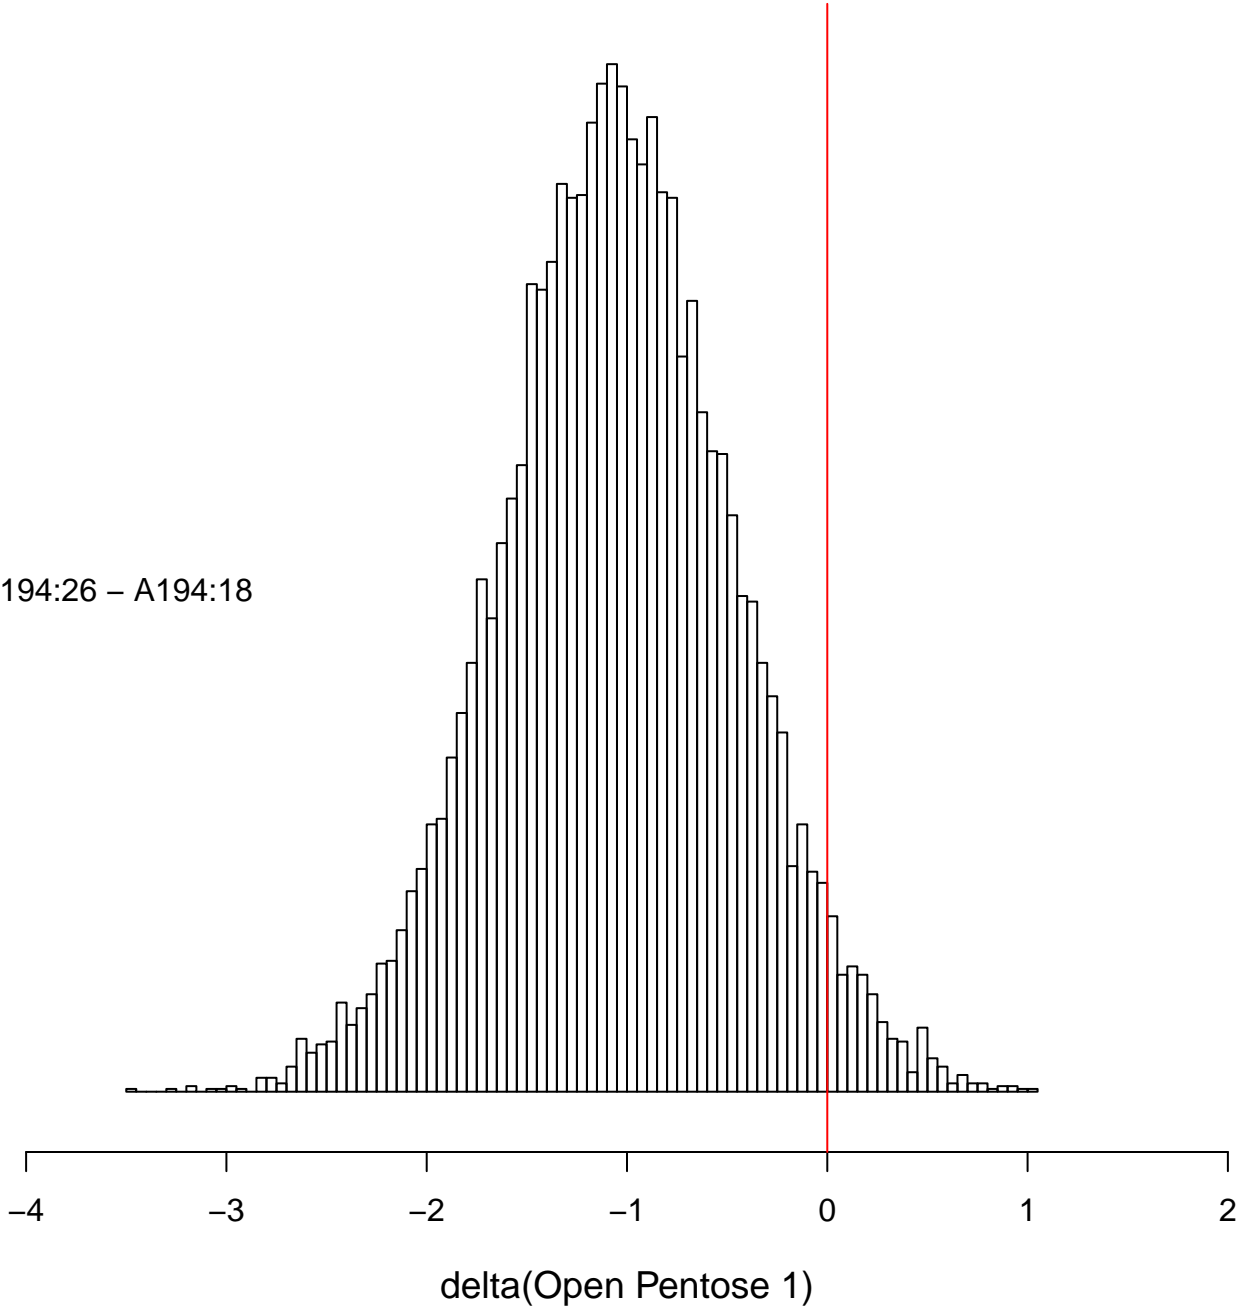

A194:26

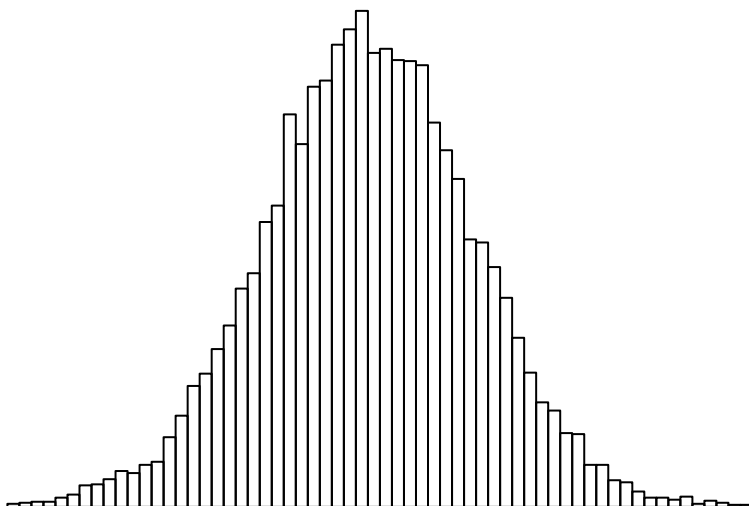

A194:18

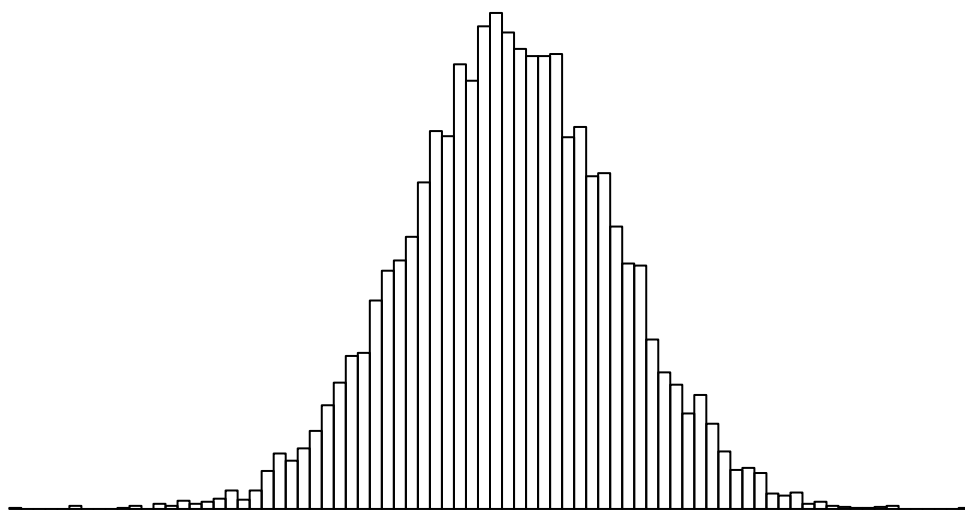

-8

-7

-6

-5

-4

-3

Open Pentose 2

A194:26 – A194:18

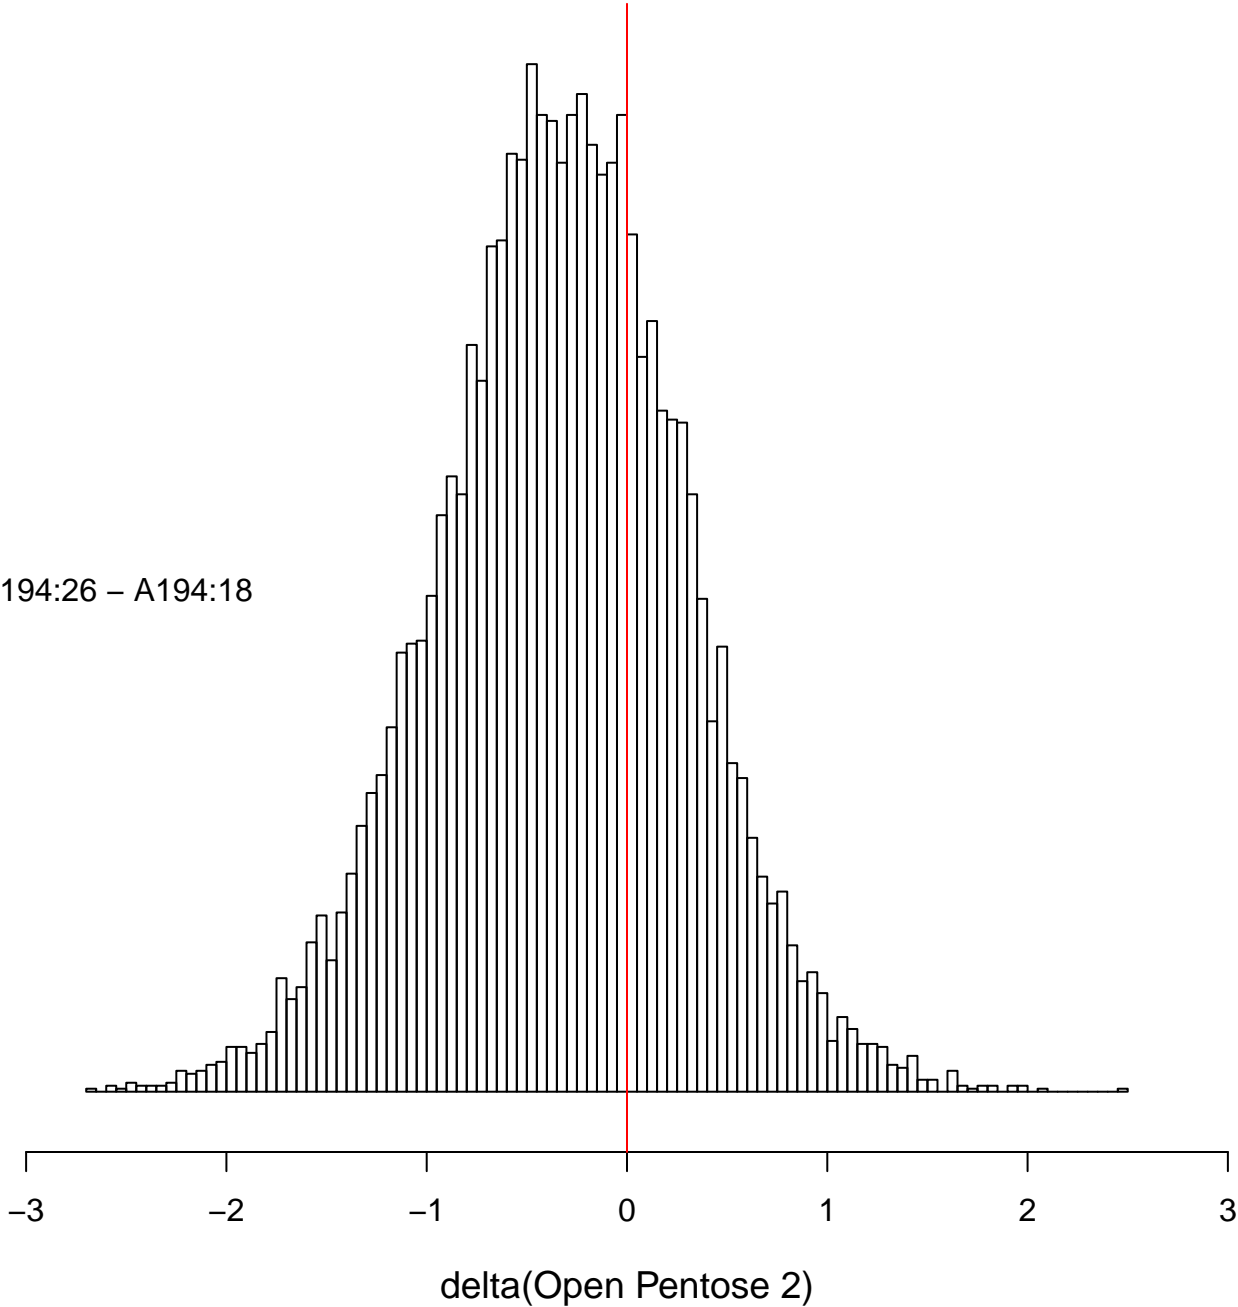

A194:26

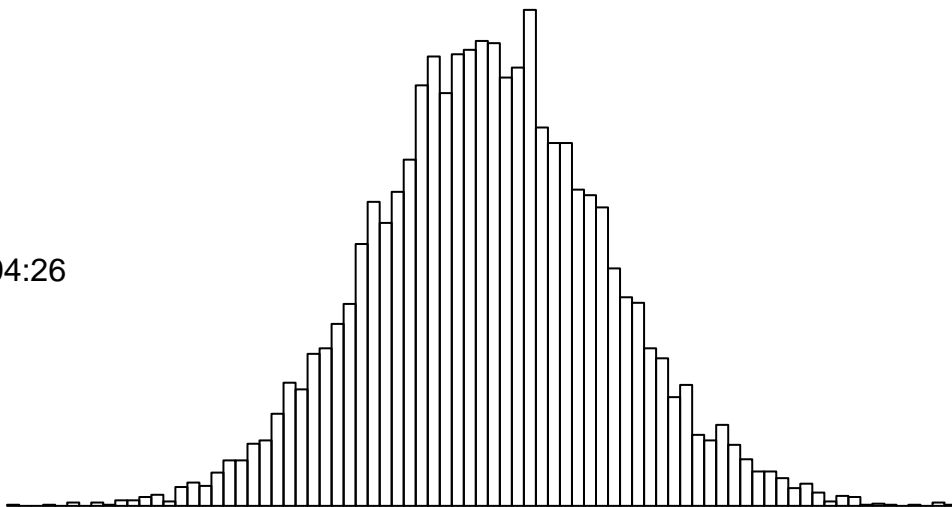

A194:18

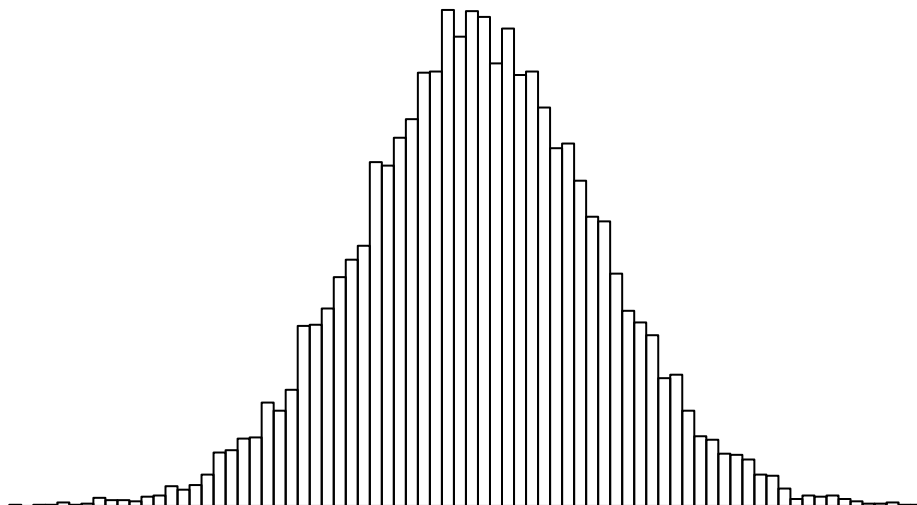

-8

-7

-6

-5

-4

-3

Closed Pentose 1

A194:26 – A194:18

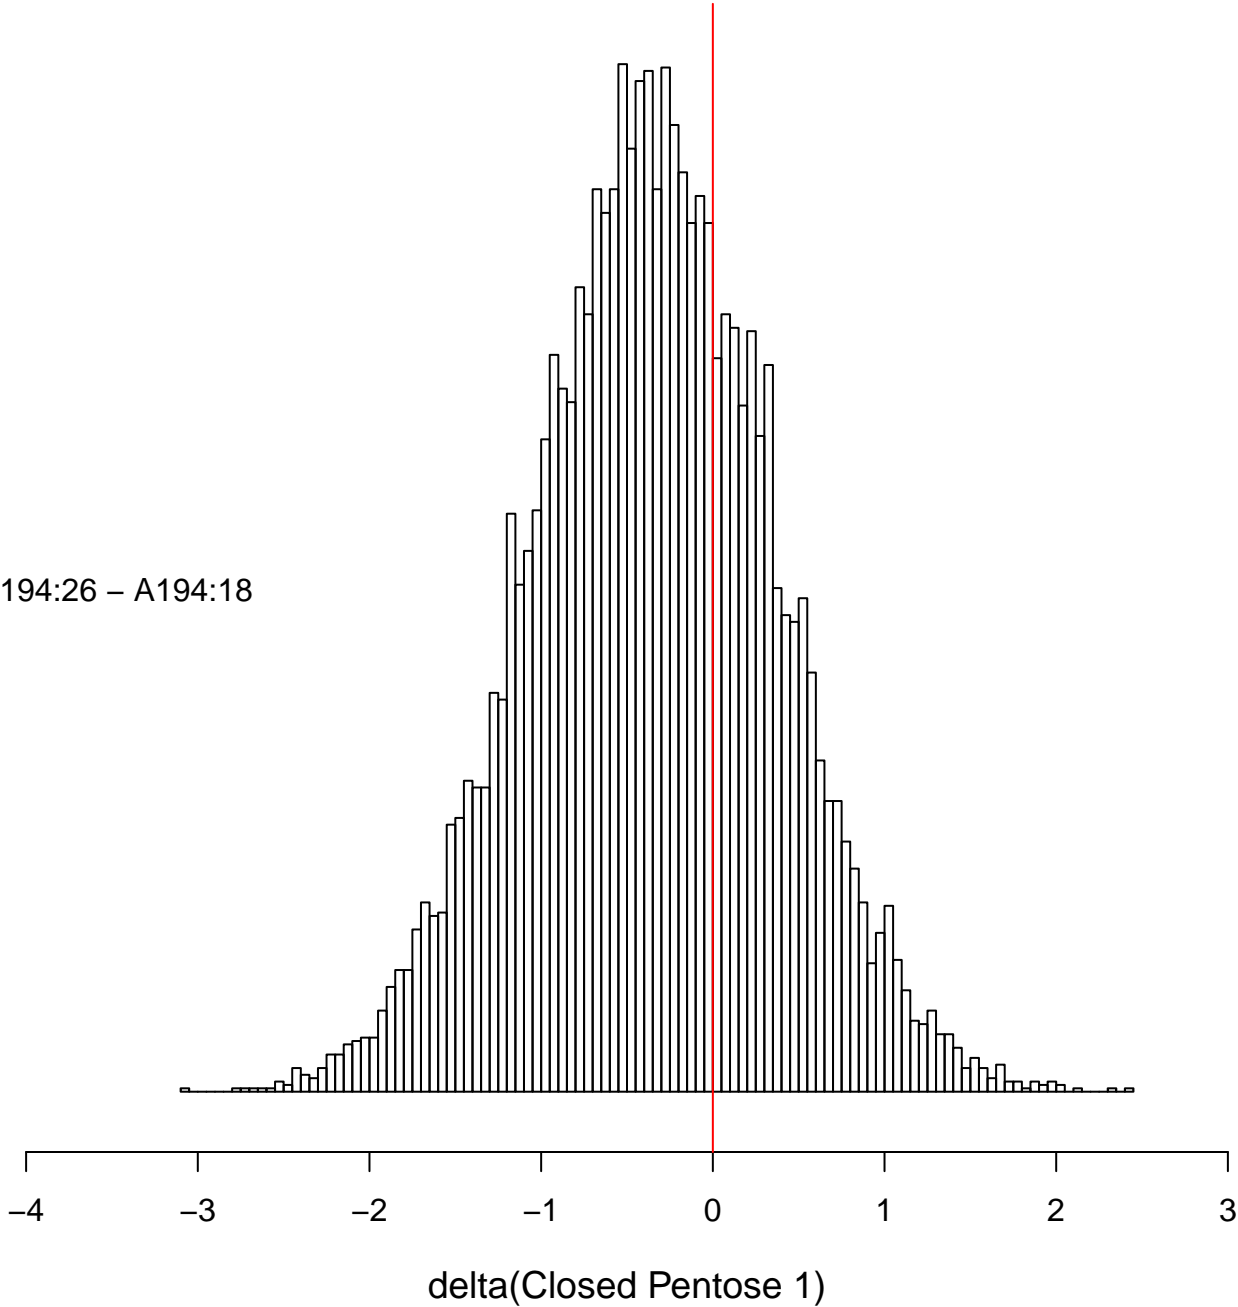

A194:26

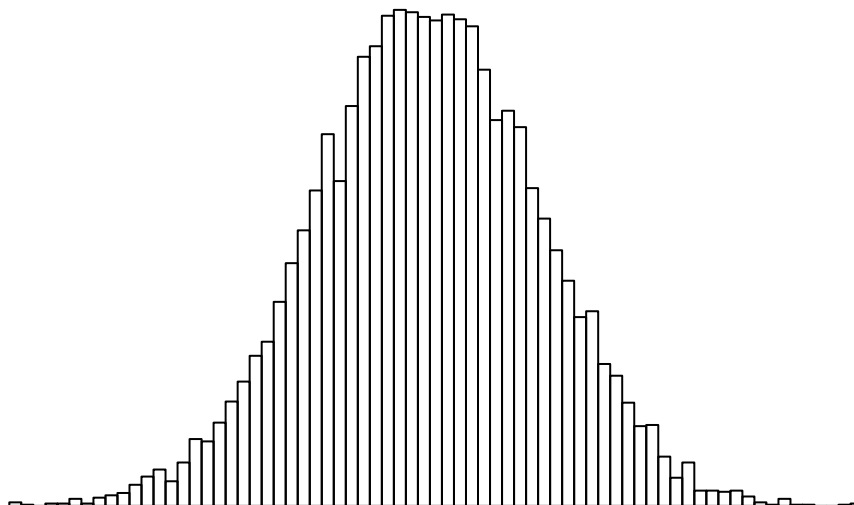

A194:18

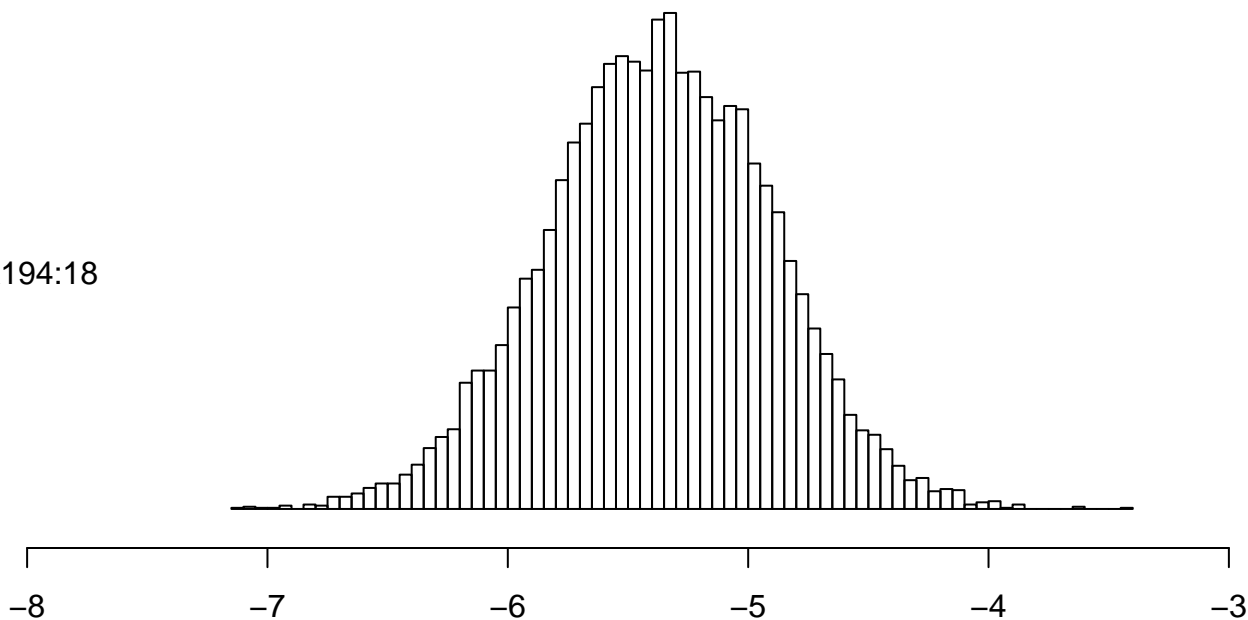

Closed Pentose 2

A194:26 – A194:18

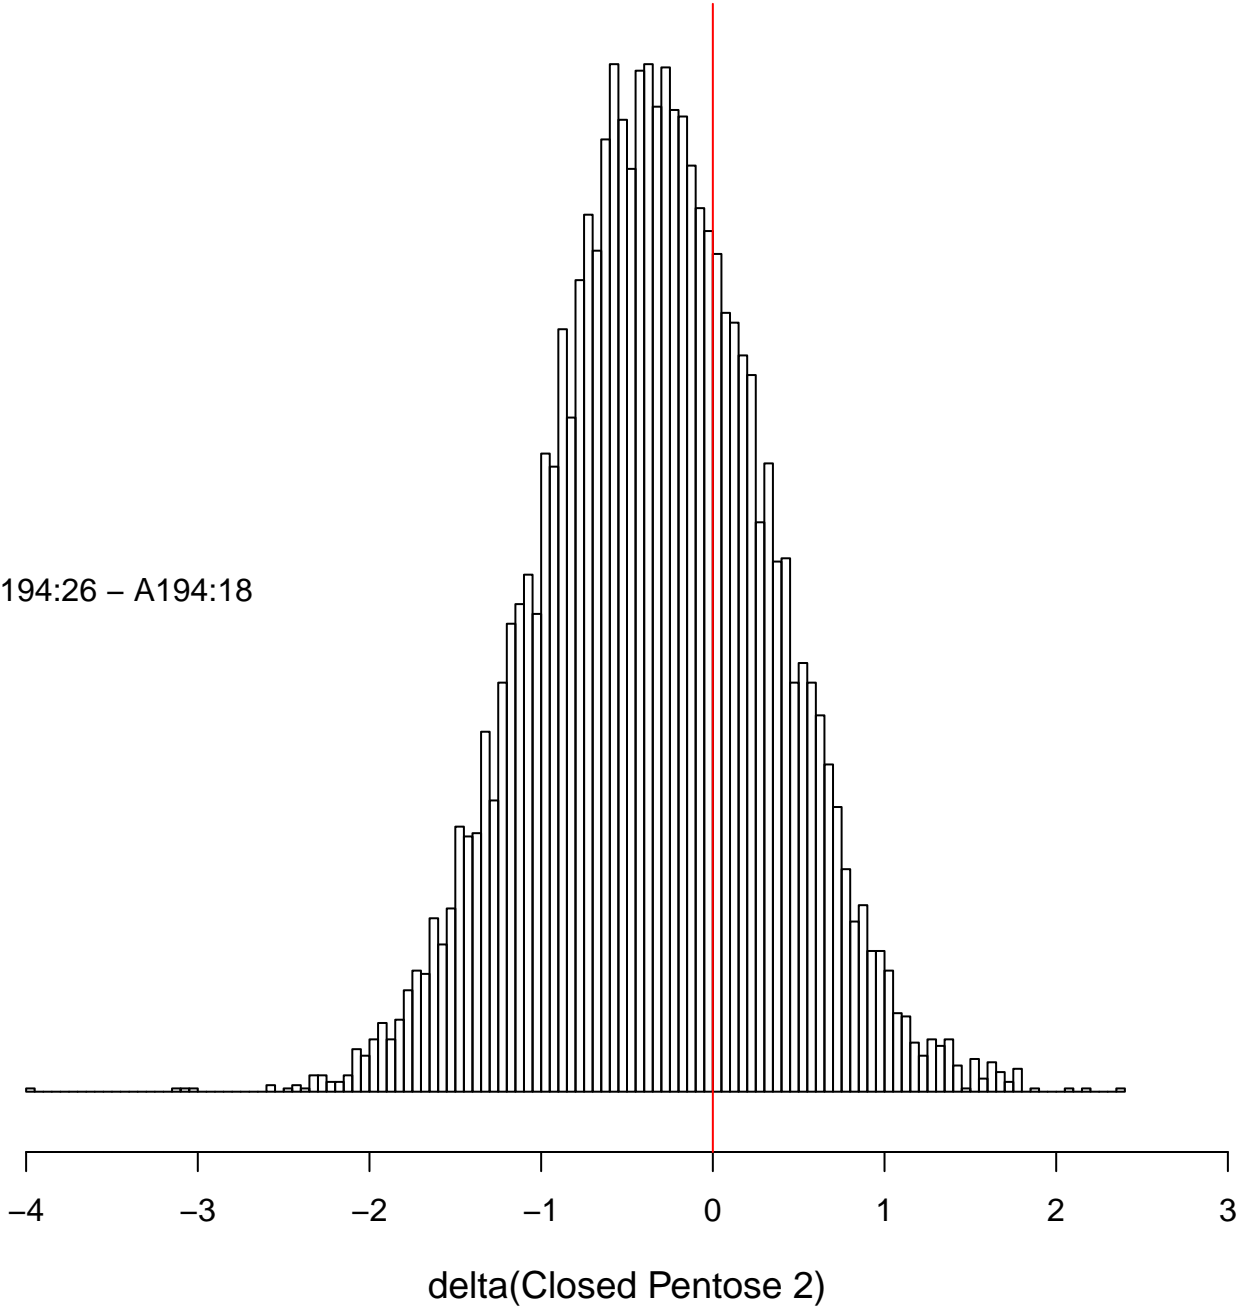



A194:26

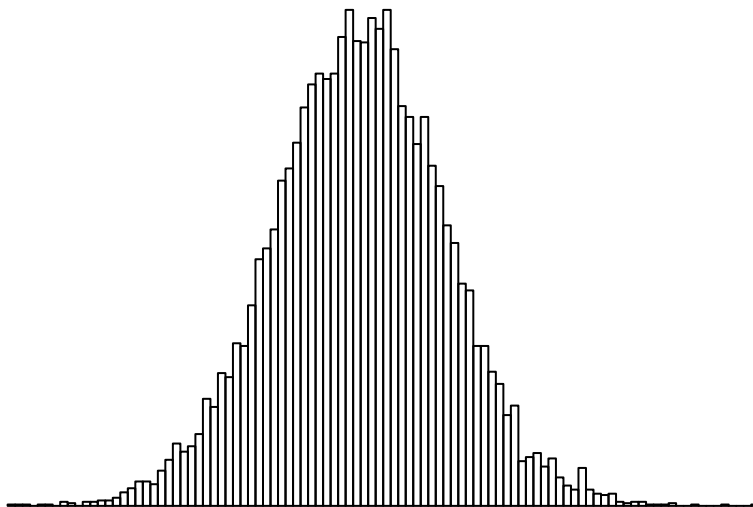

A194:18

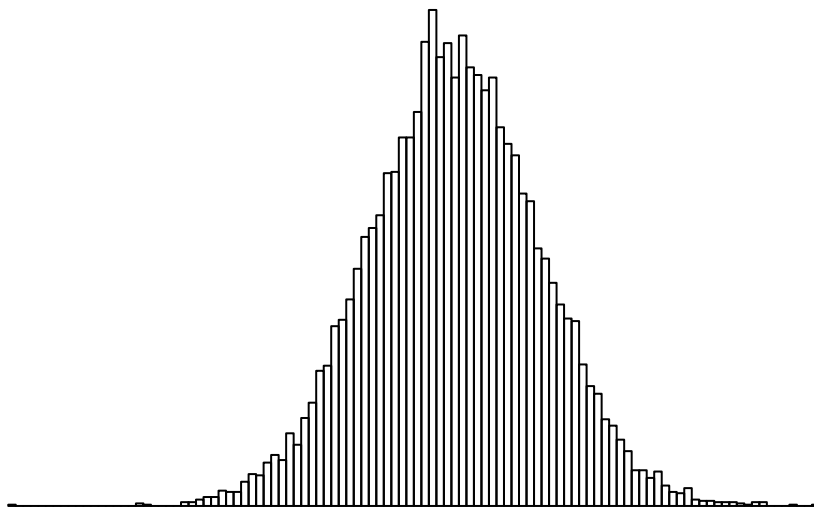

-8

-6

-4

-2

Pentose 1

A194:26 – A194:18

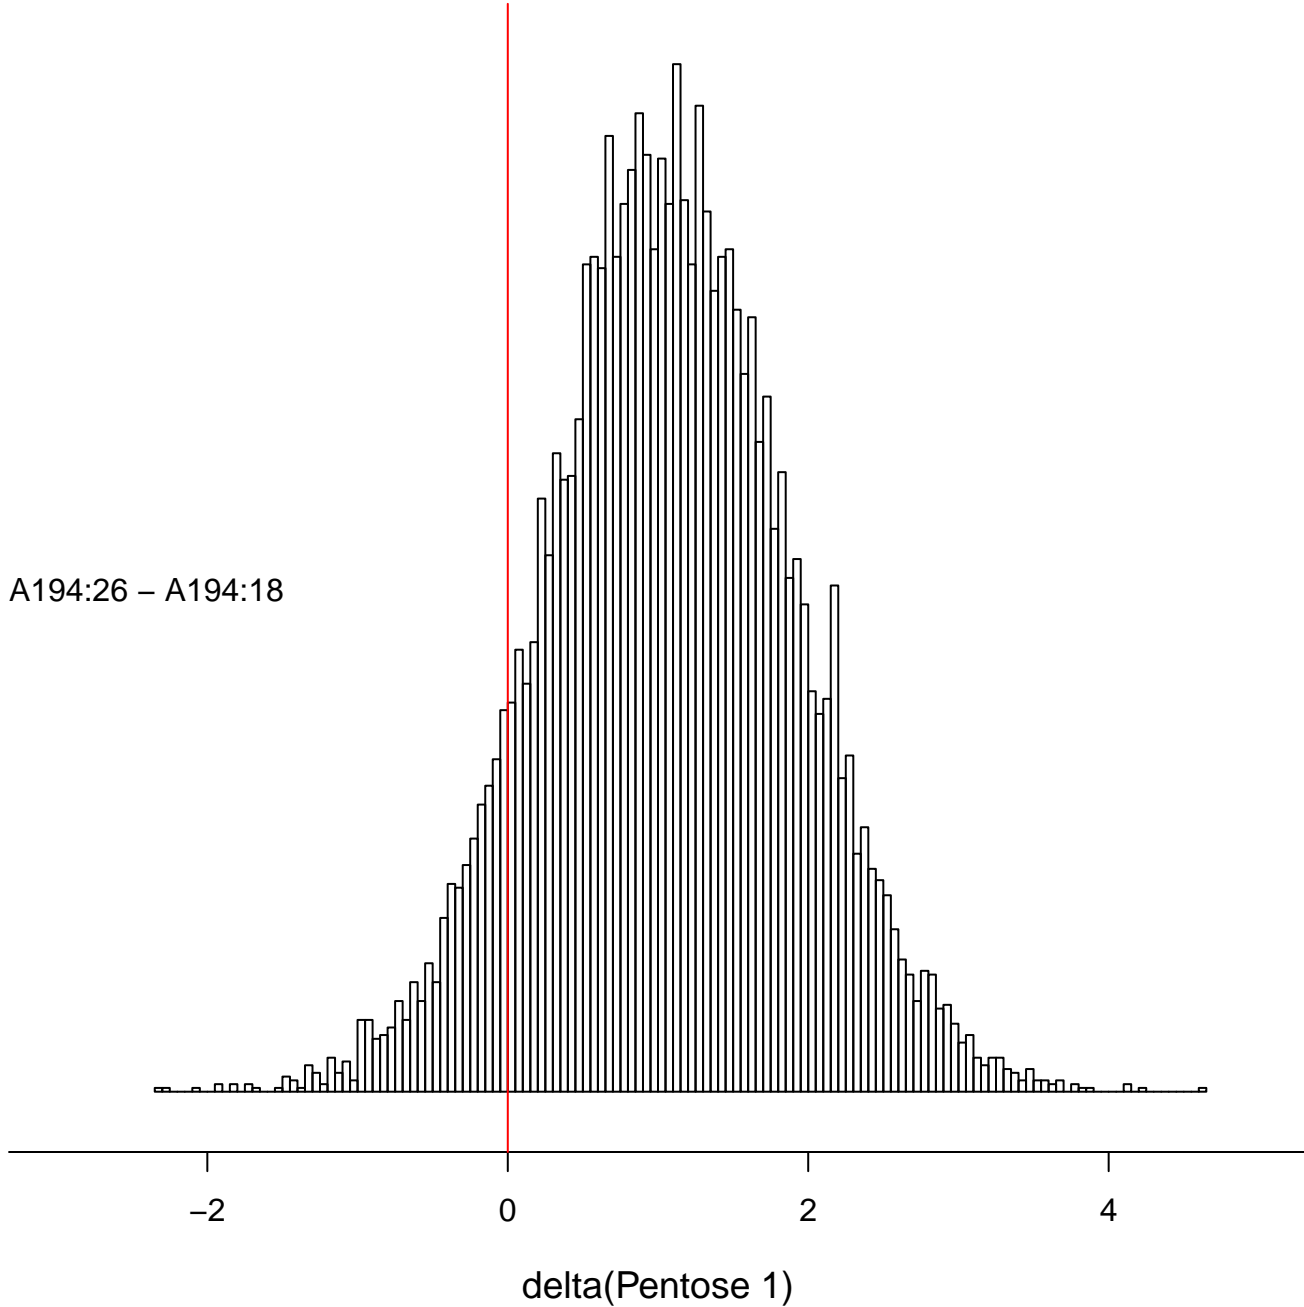

A194:26

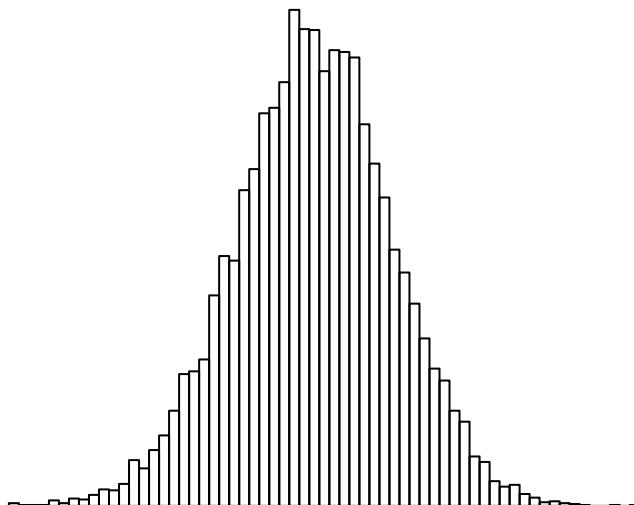

A194:18

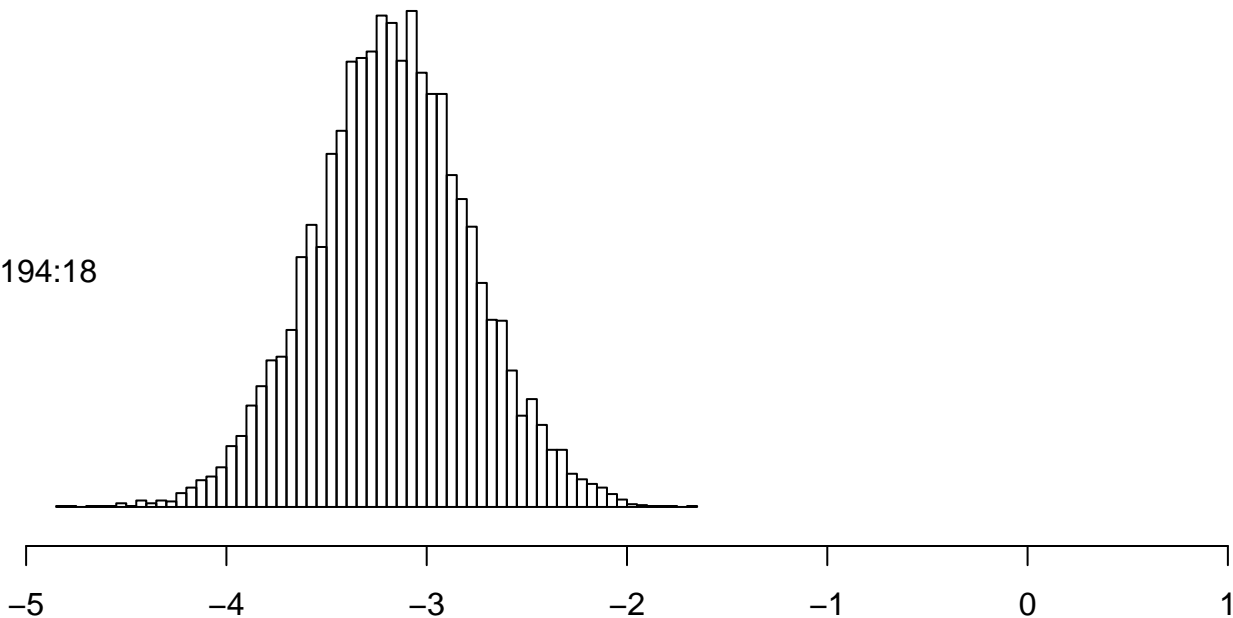

Open Pentose 3

A194:26 – A194:18

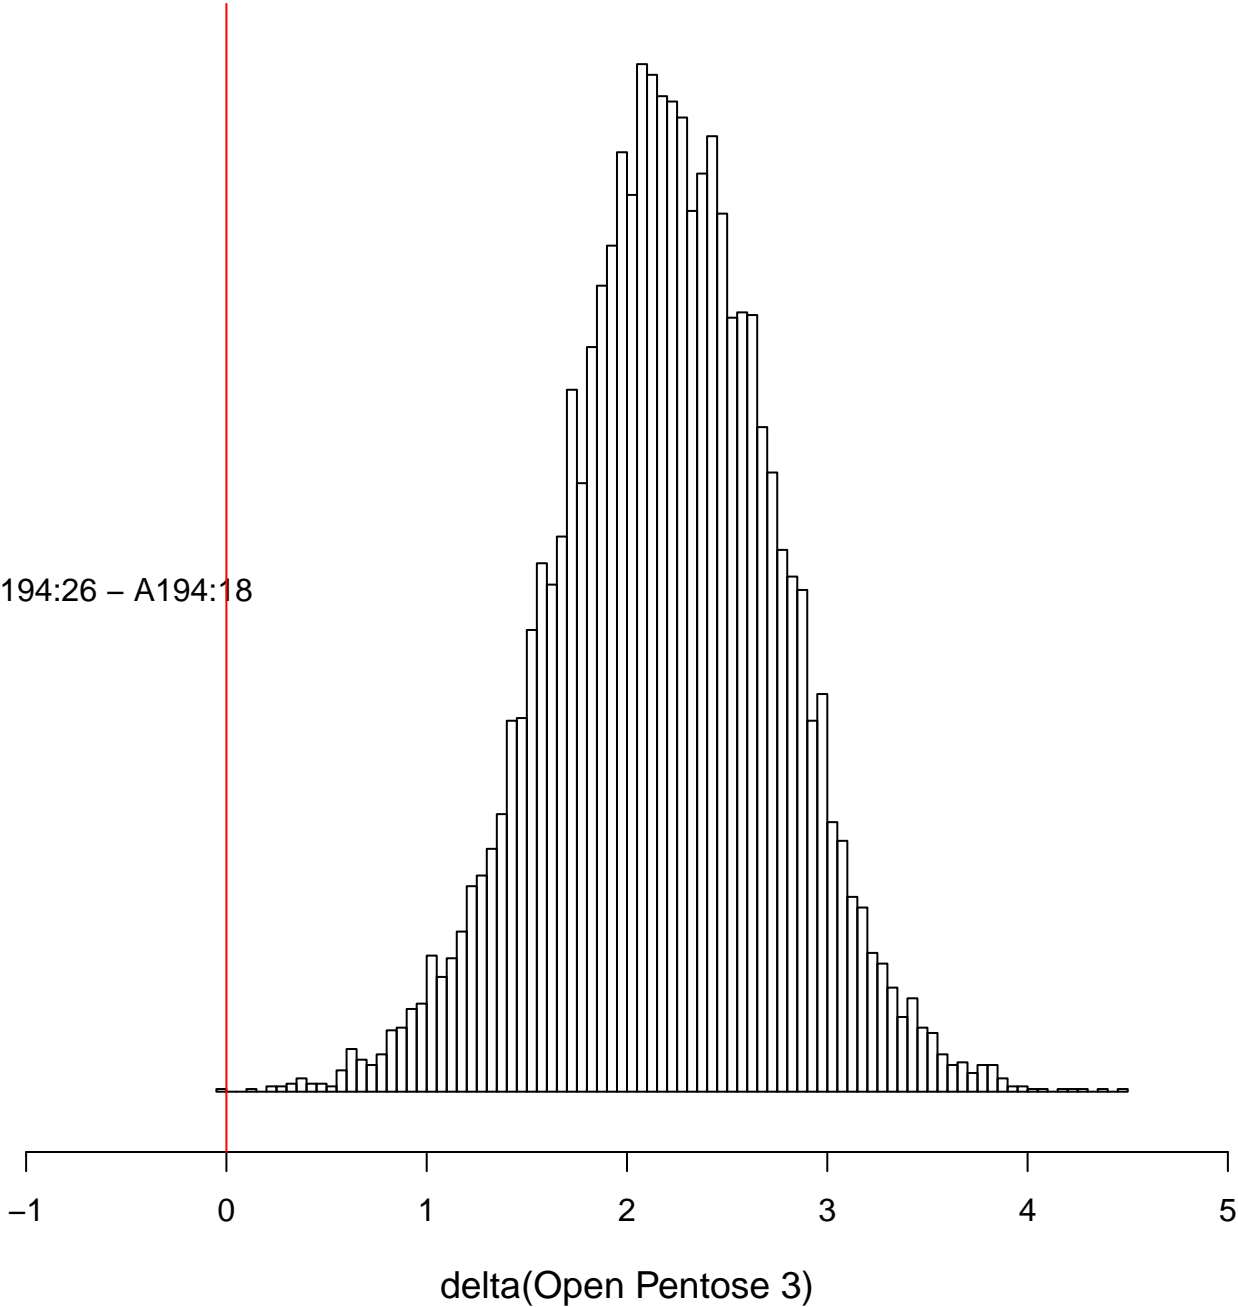

A194:26

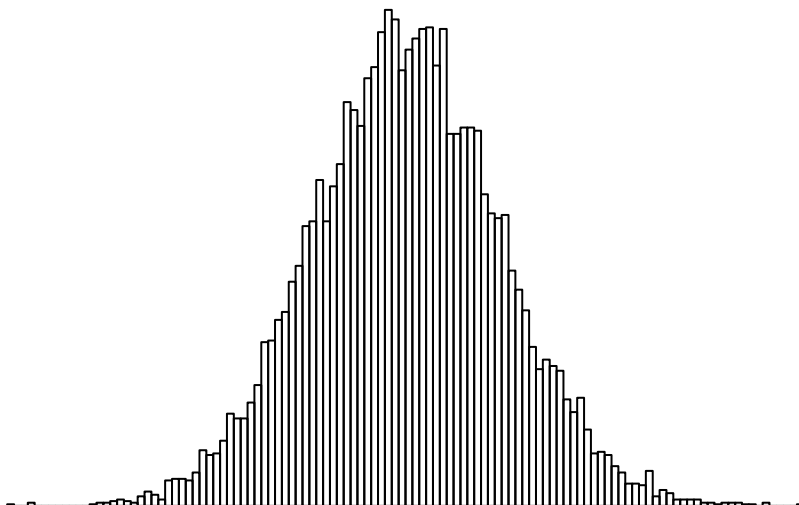

A194:18

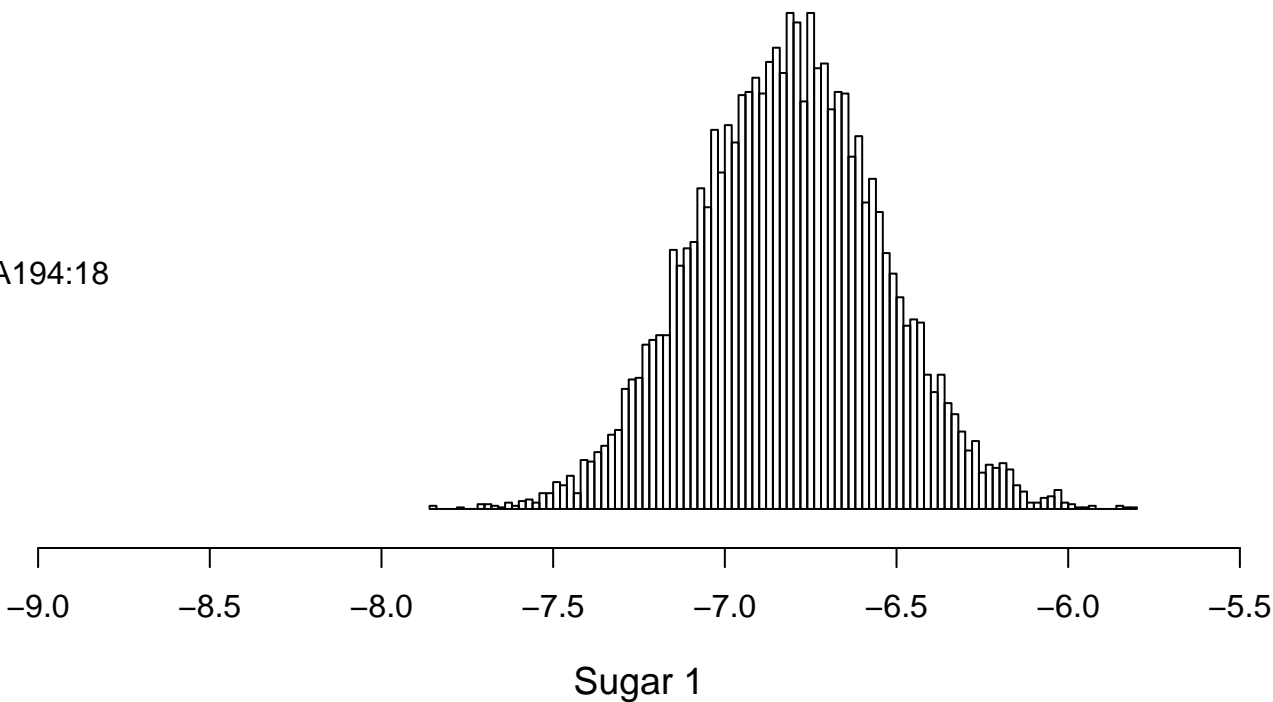

A194:26 – A194:18

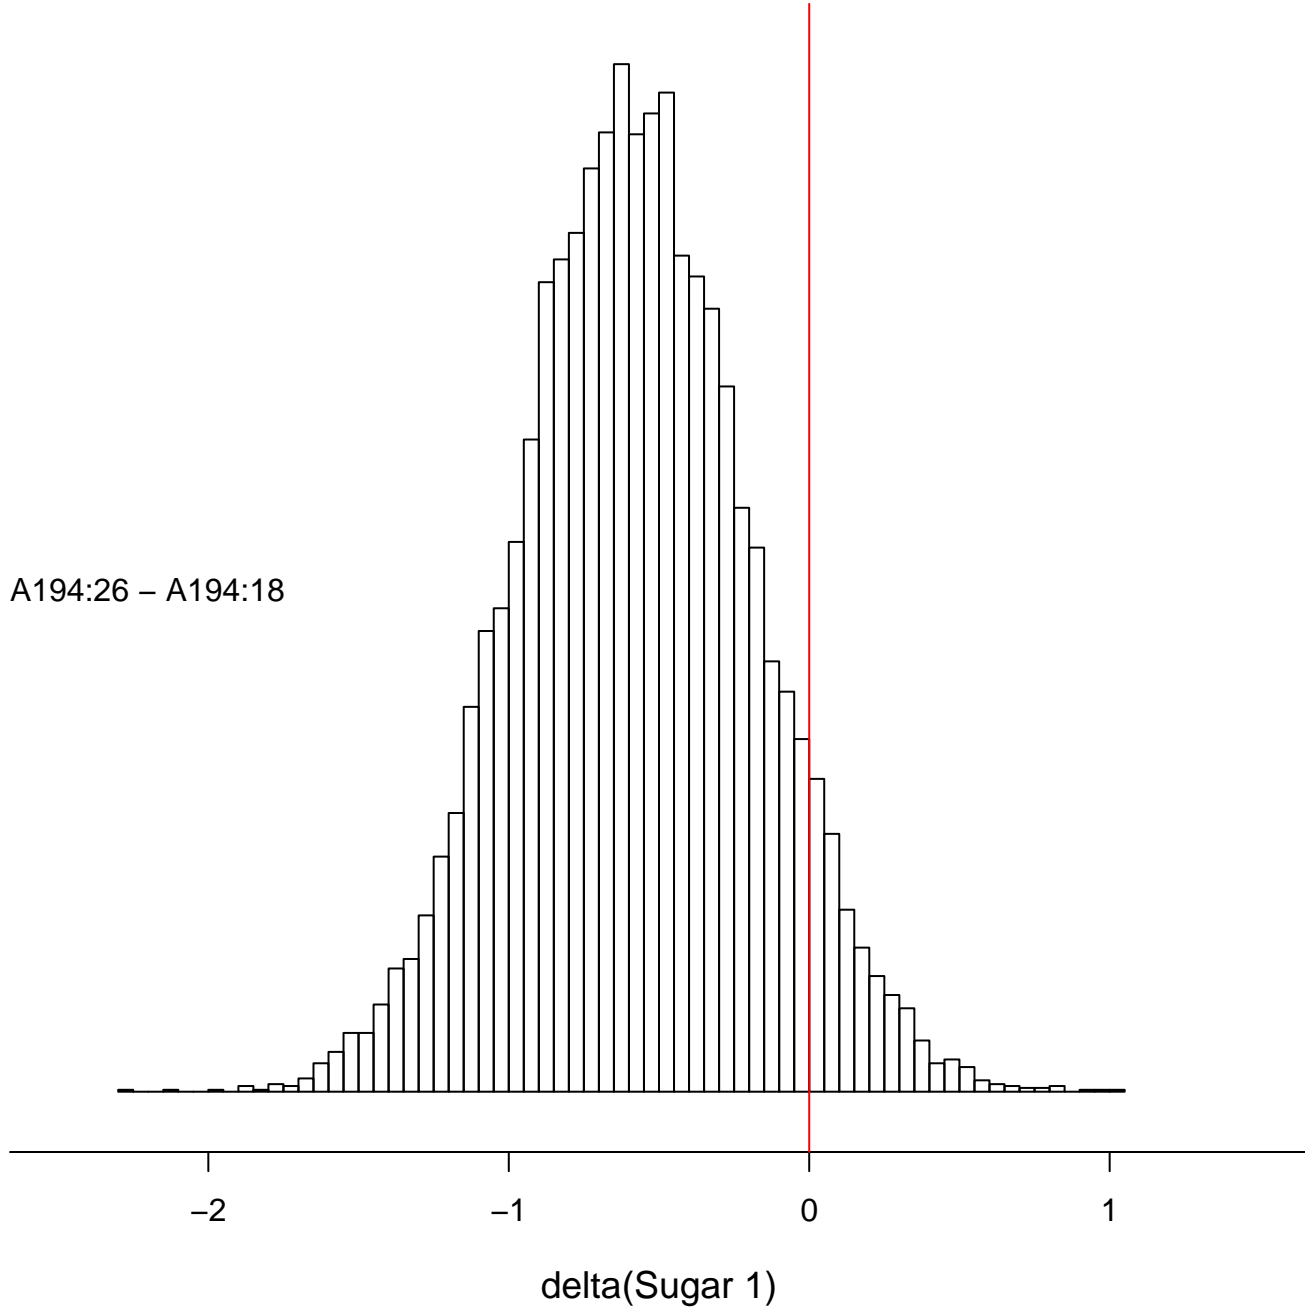

A194:26

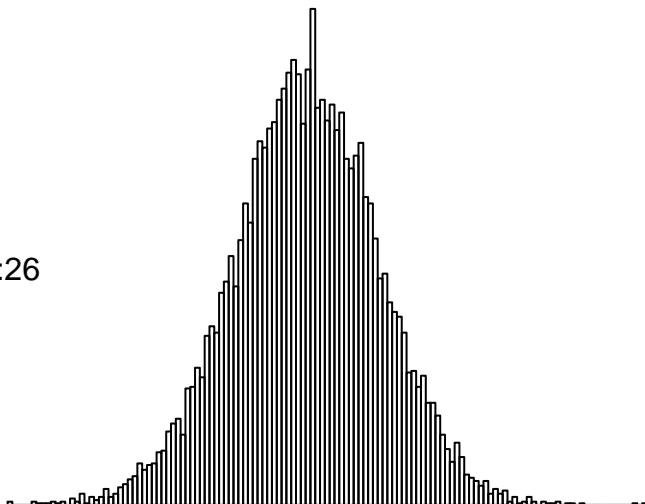

A194:18

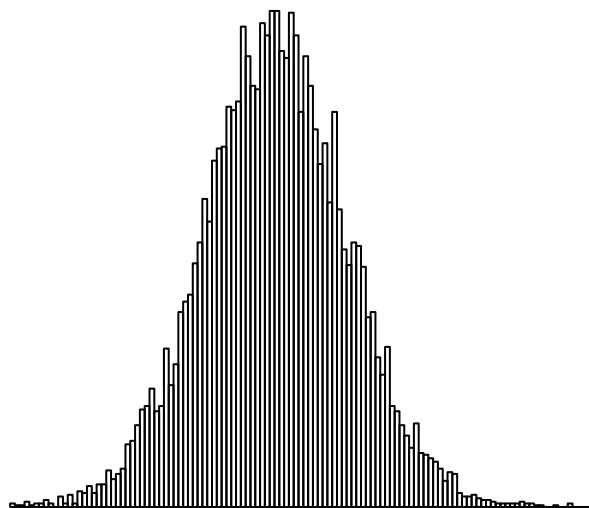

-10

-9

-8

-7

-6

-5

Sugar 3

A194:26 – A194:18

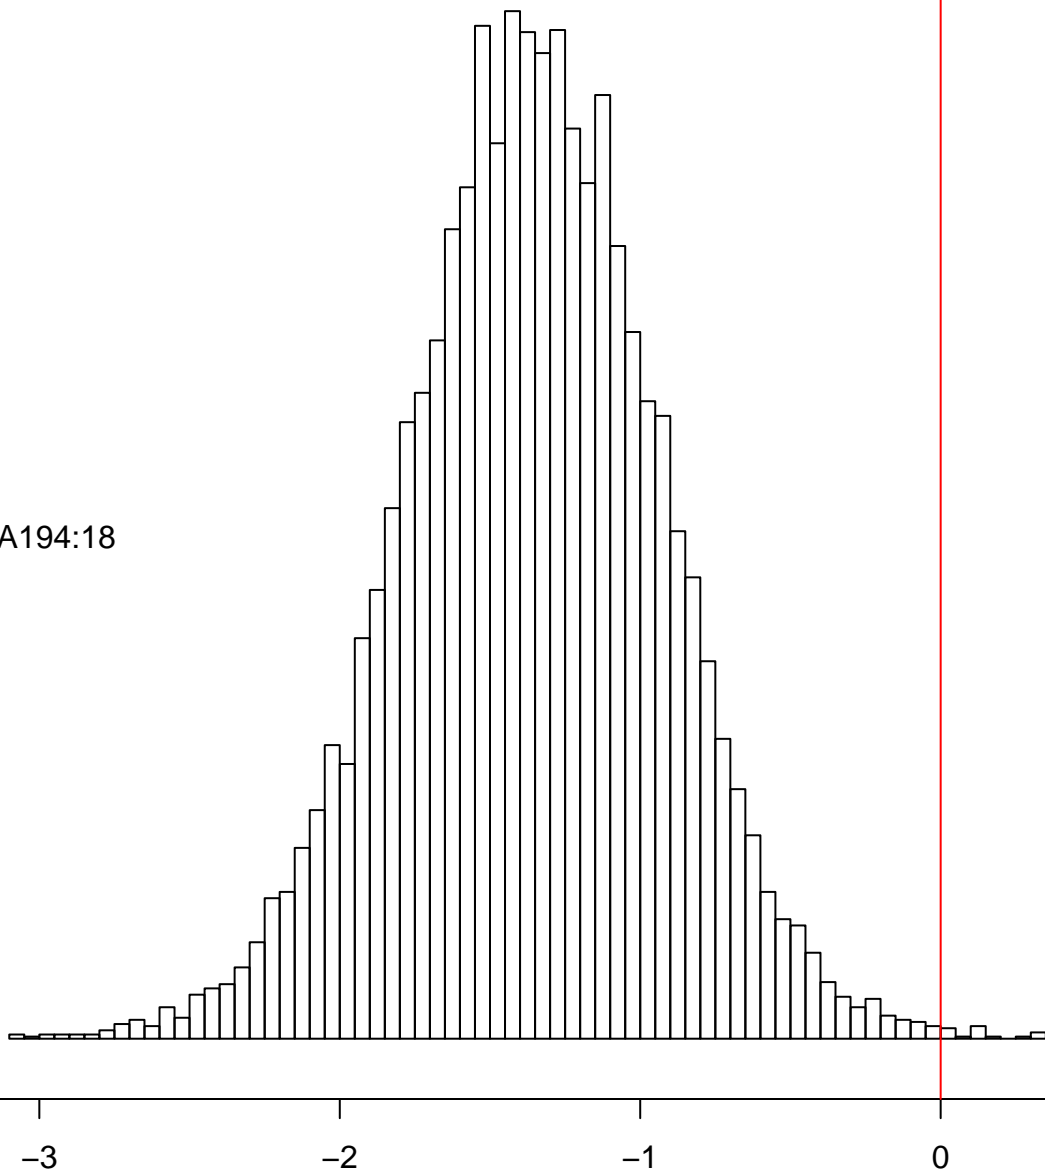

$\text{delta}(\text{Sugar } 3)$



A194:26

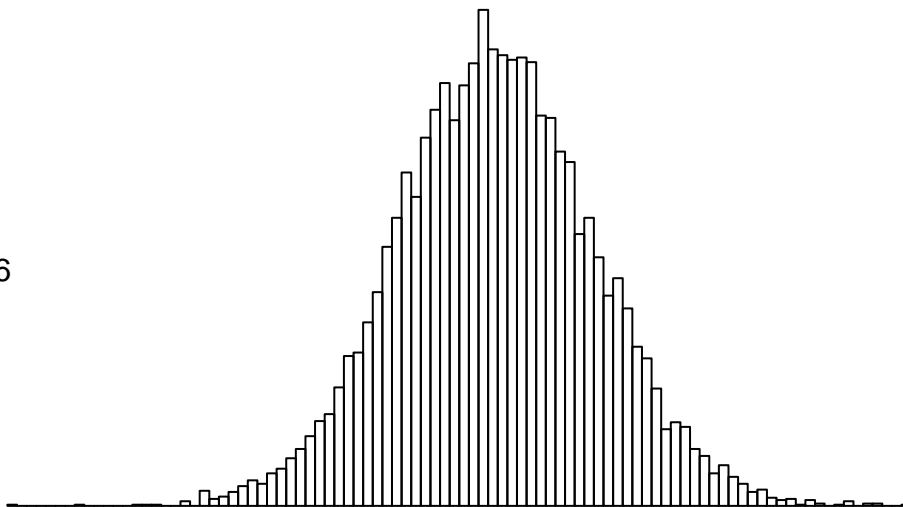

A194:18

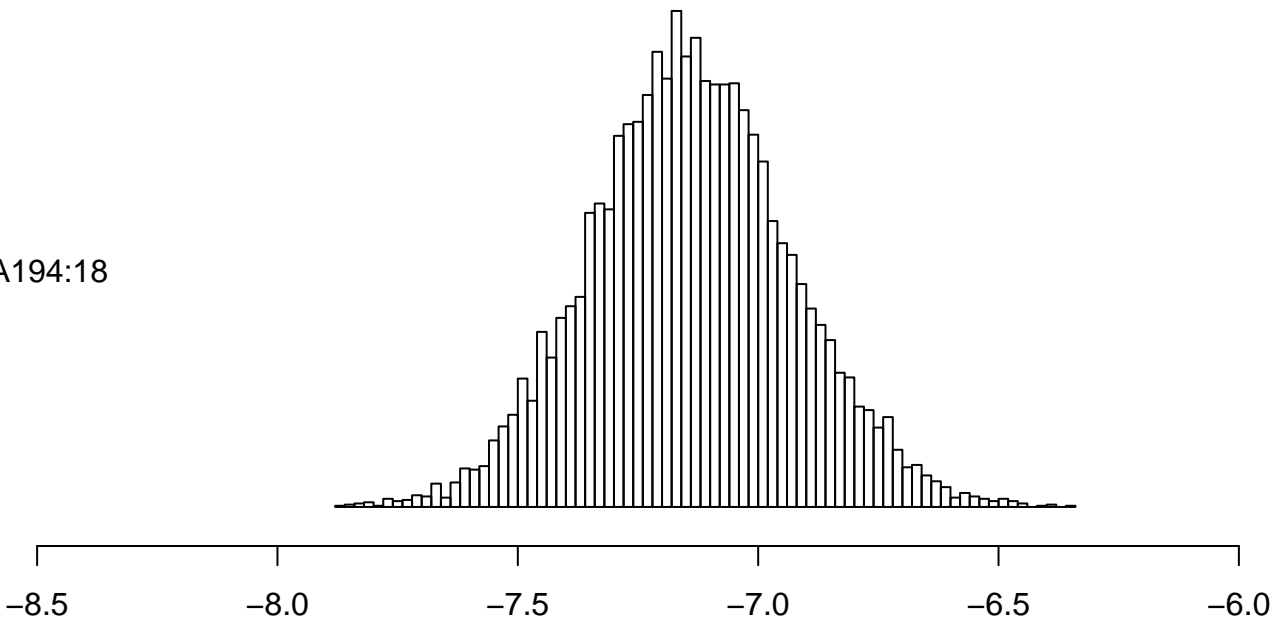

Sugar 4

A194:26 – A194:18

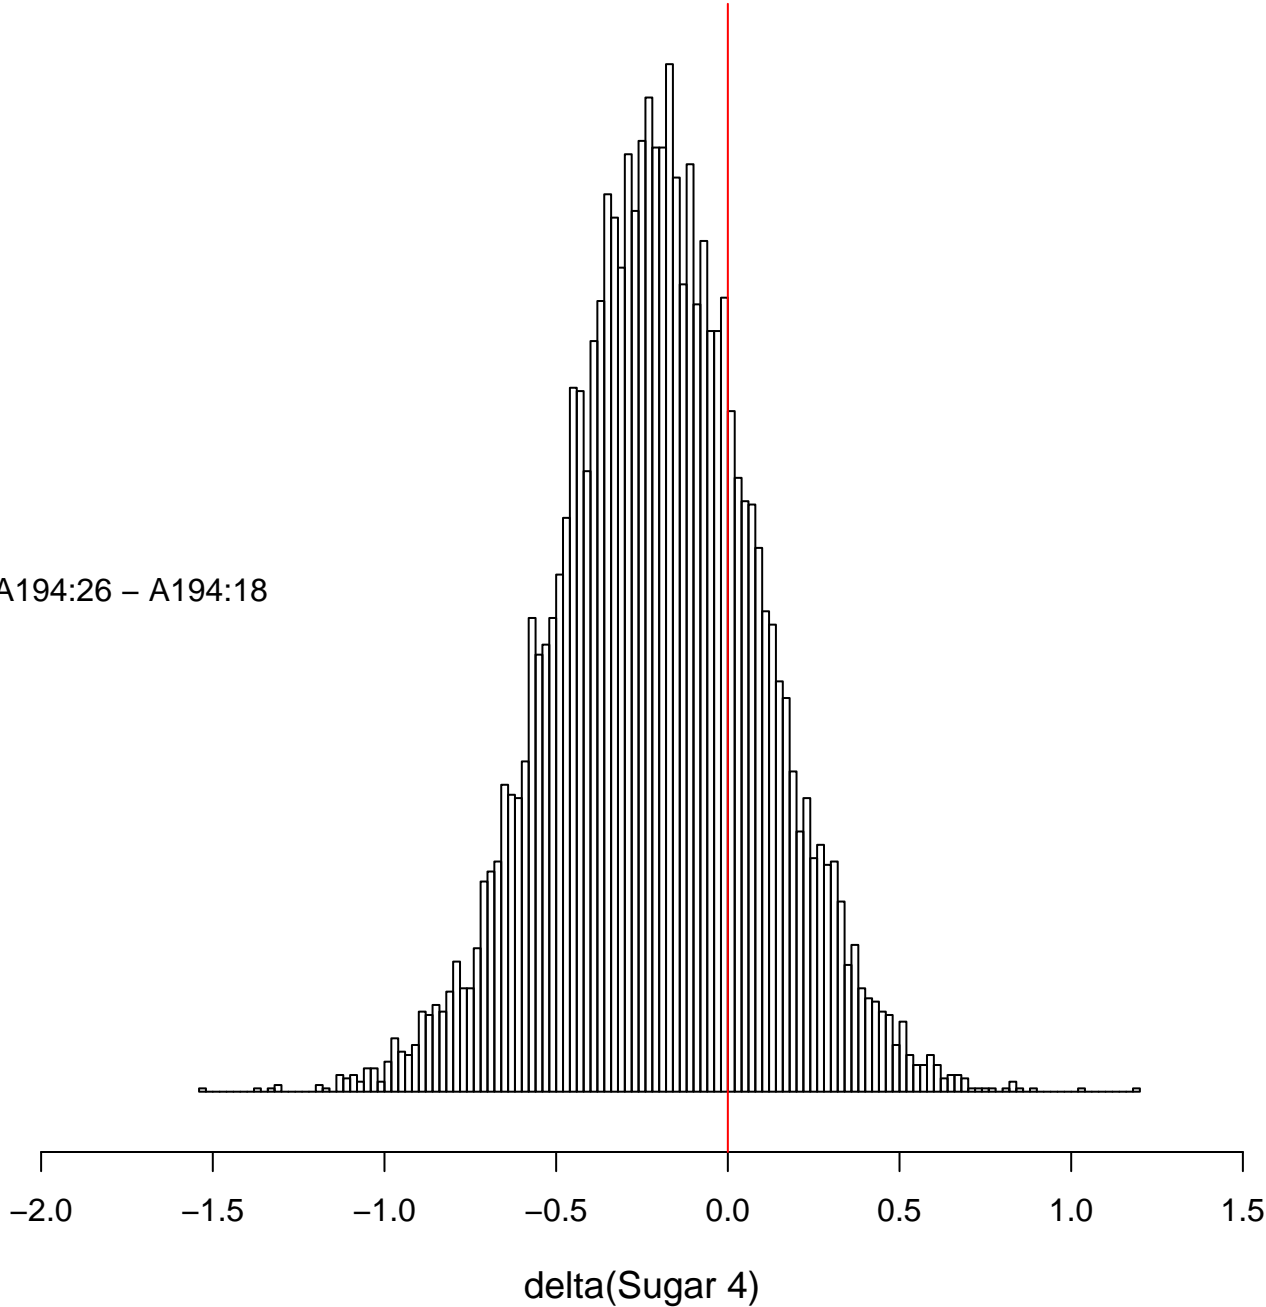

A194:26

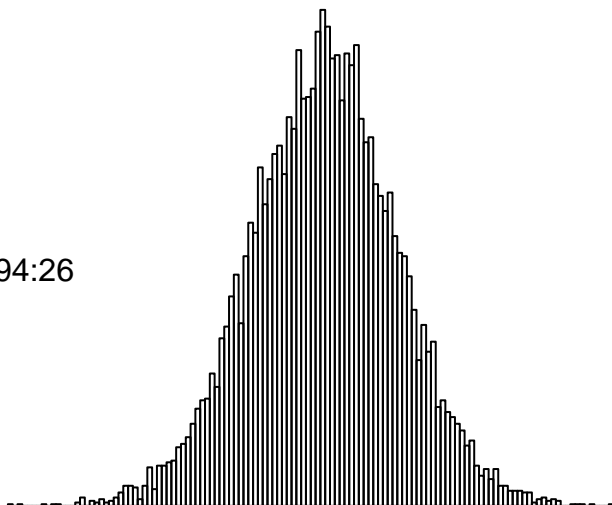

A194:18

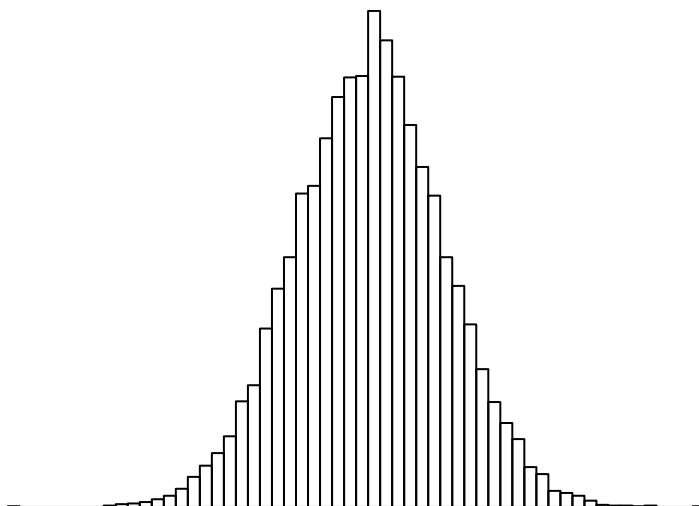

-9 -8 -7 -6 -5 -4

Sugar 5

A194:26 – A194:18

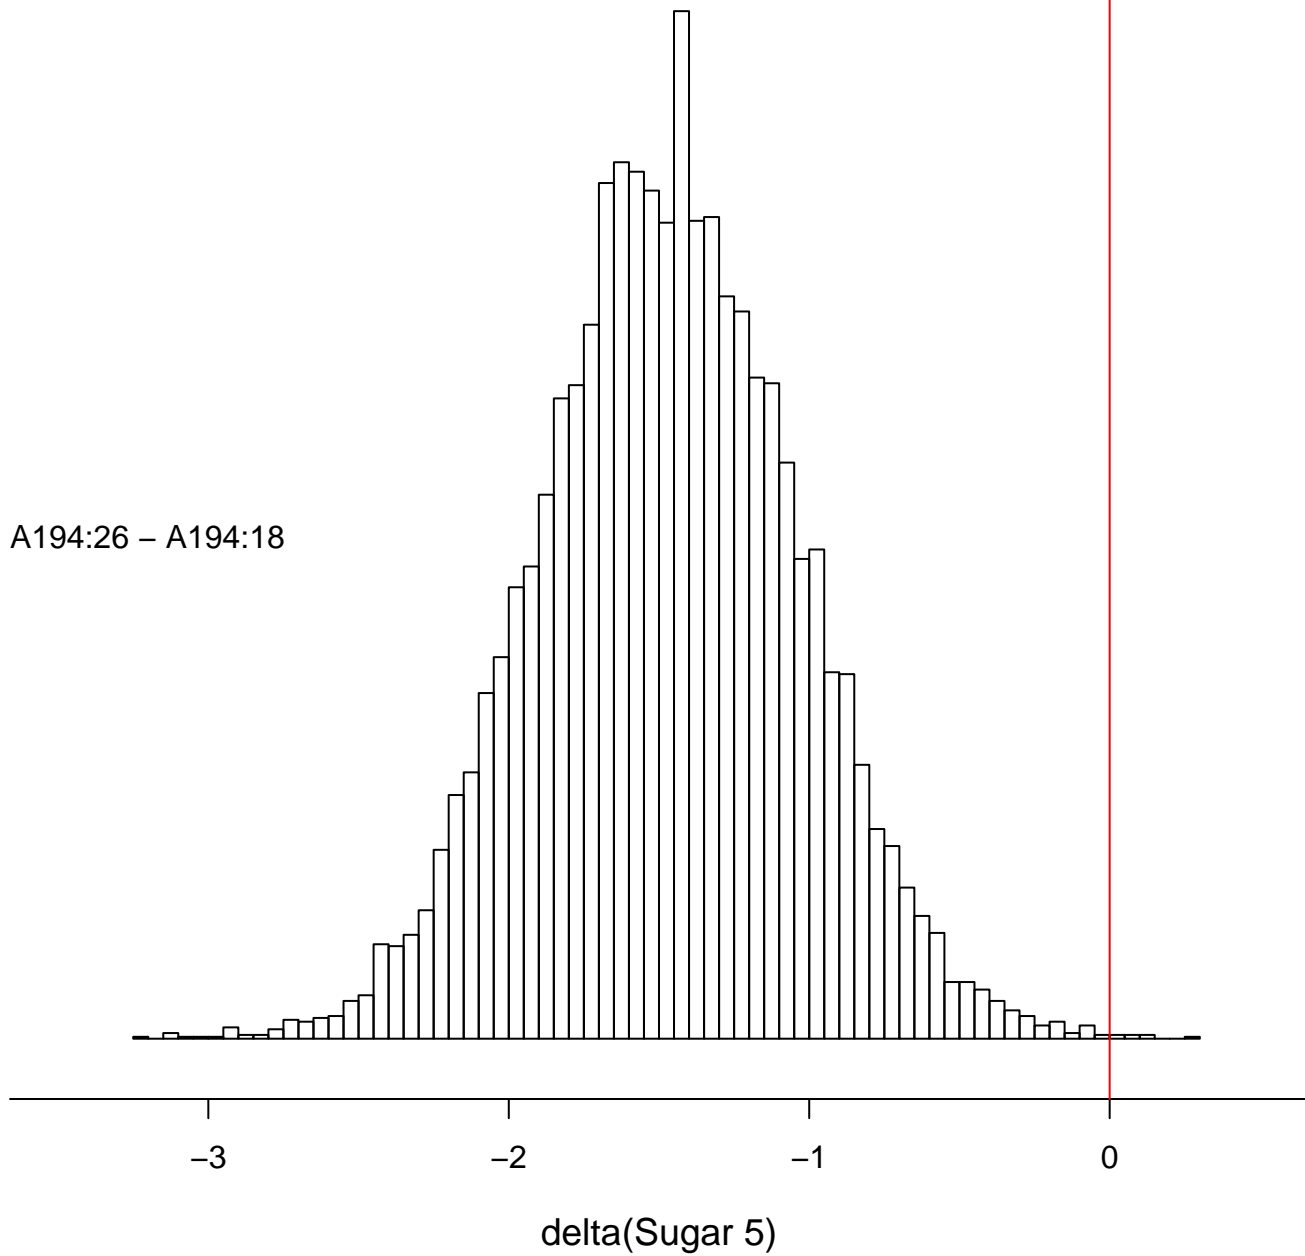

A194:26

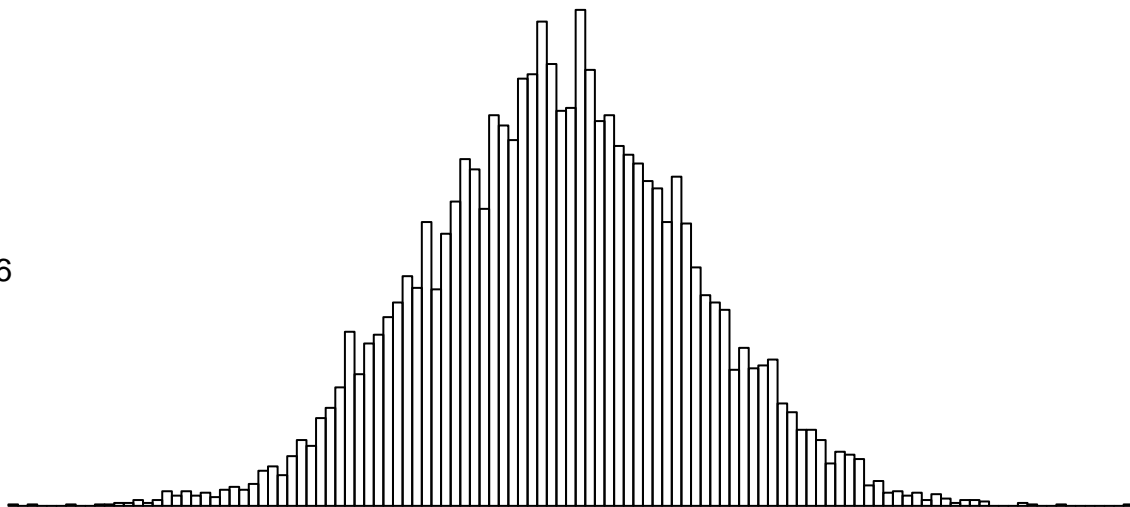

A194:18

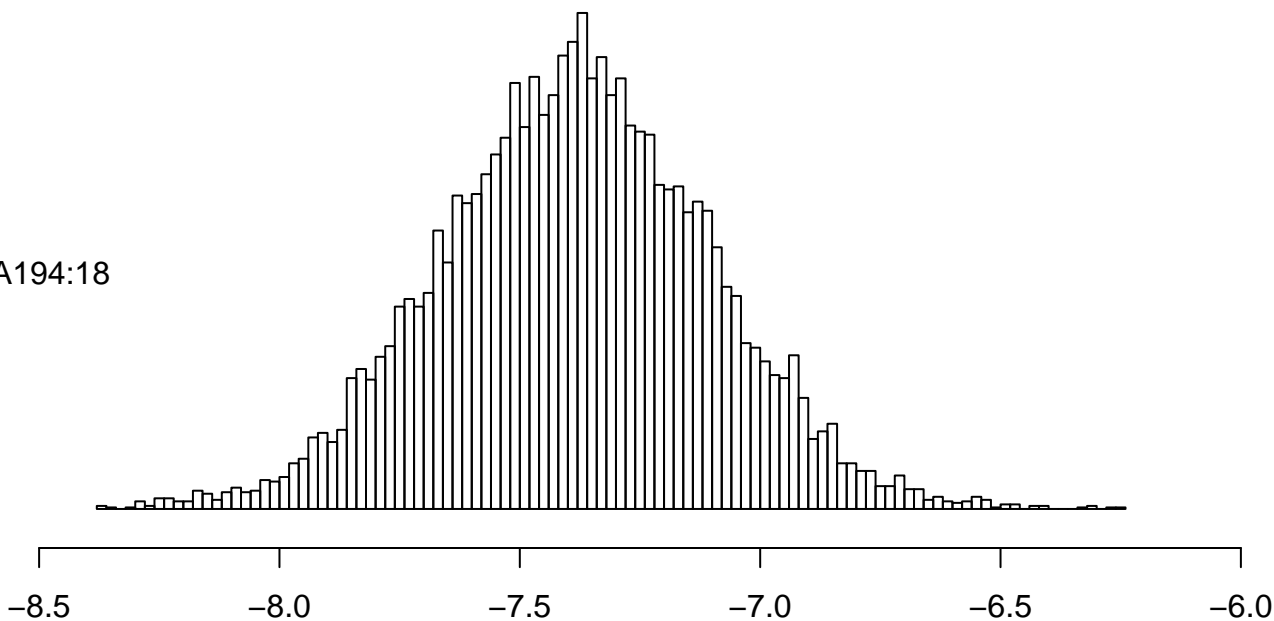

Sugar 6

A194:26 – A194:18

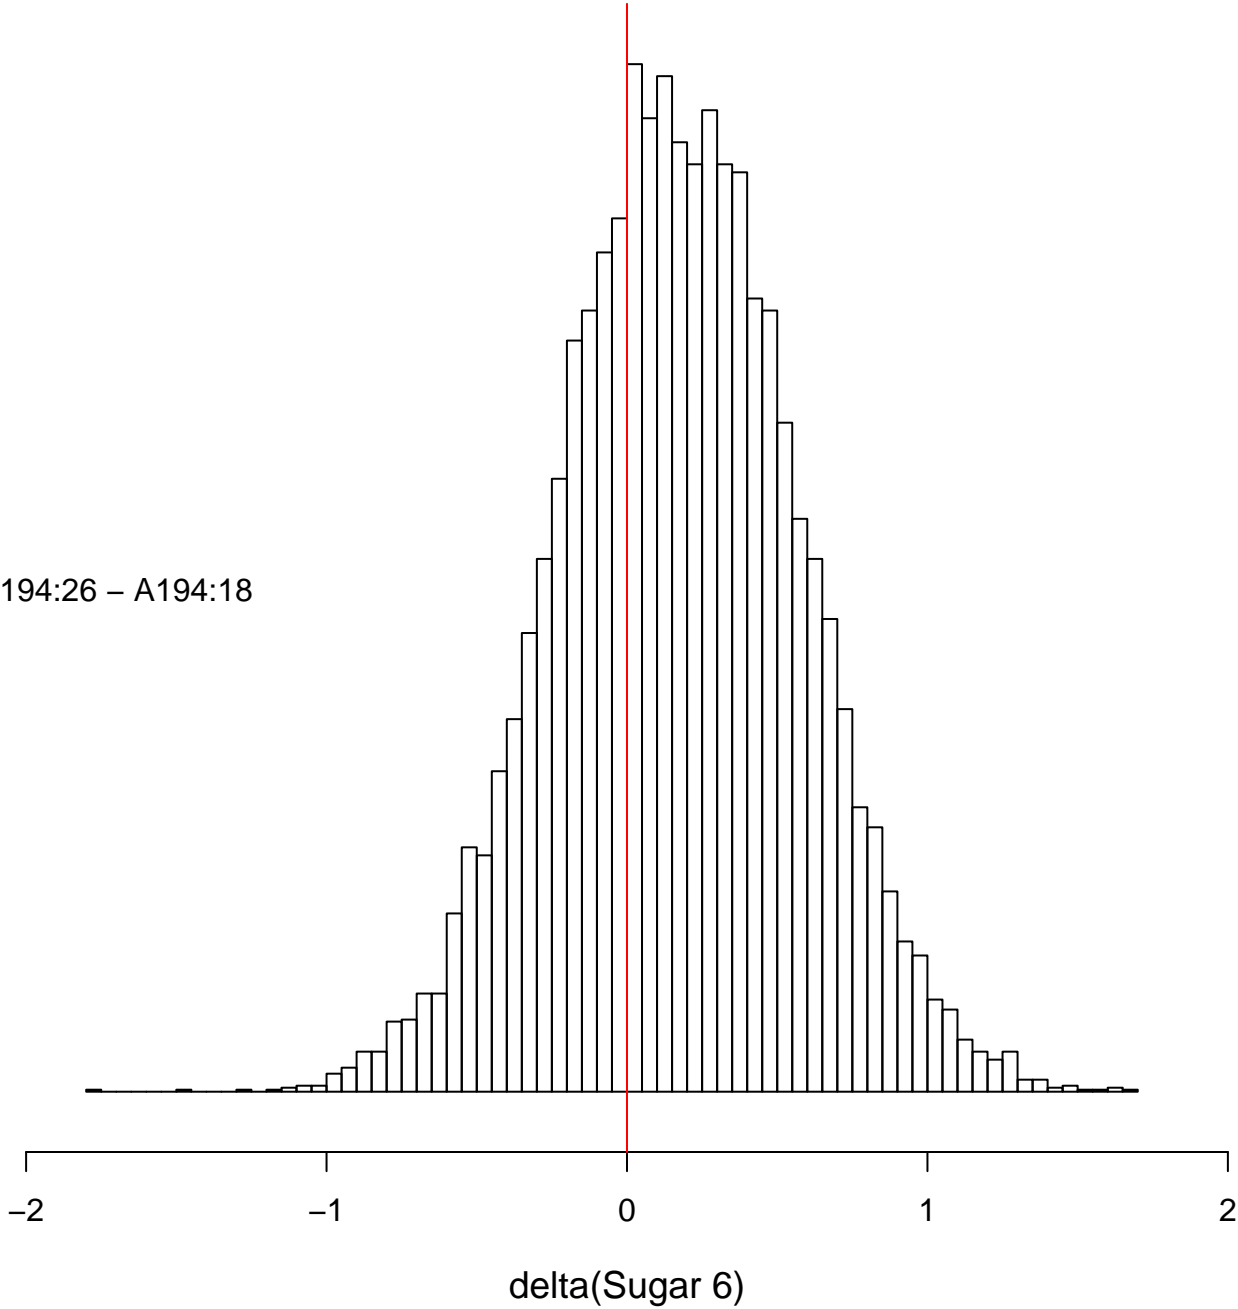

A194:26

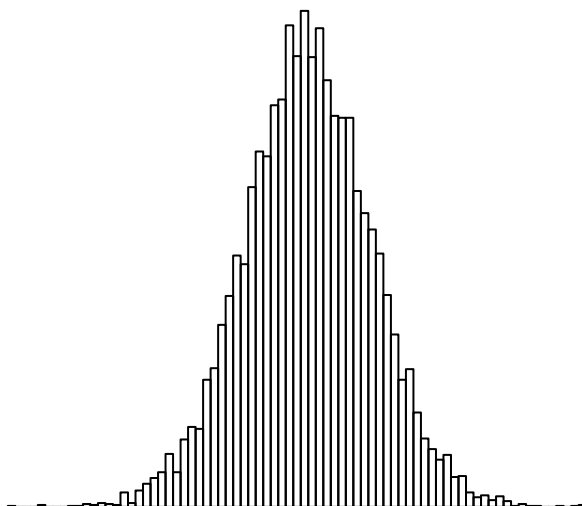

A194:18

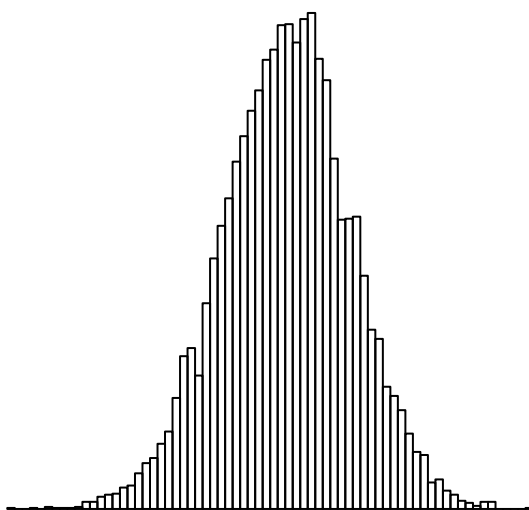

-8

-6

-4

-2

Sugar 7

A194:26 – A194:18

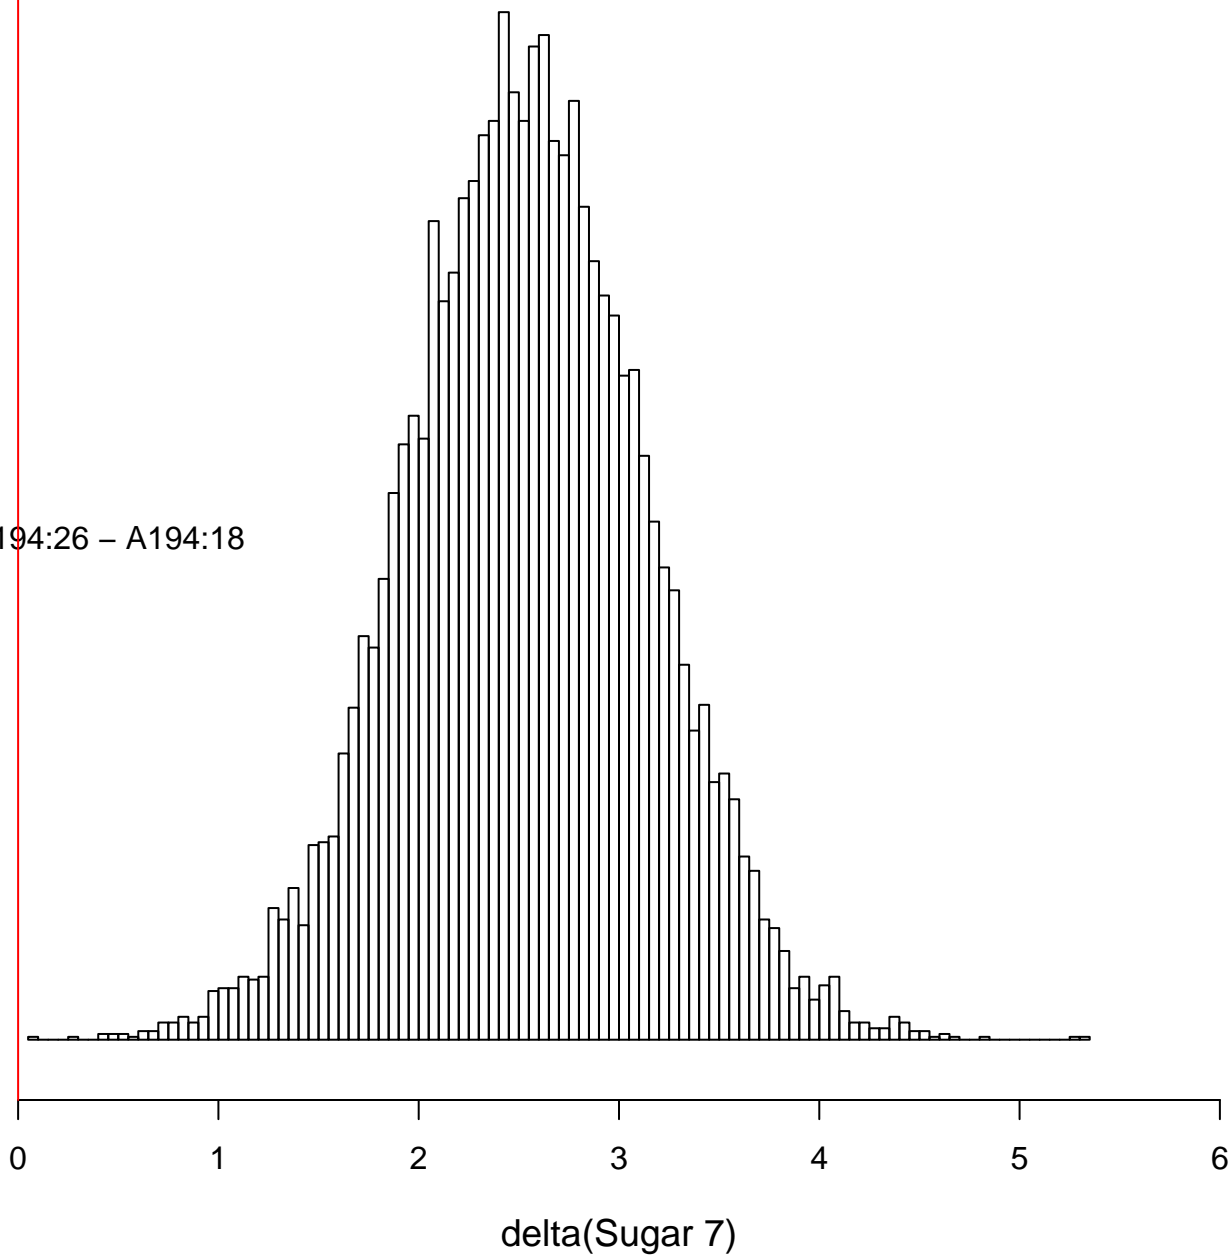



A194:26

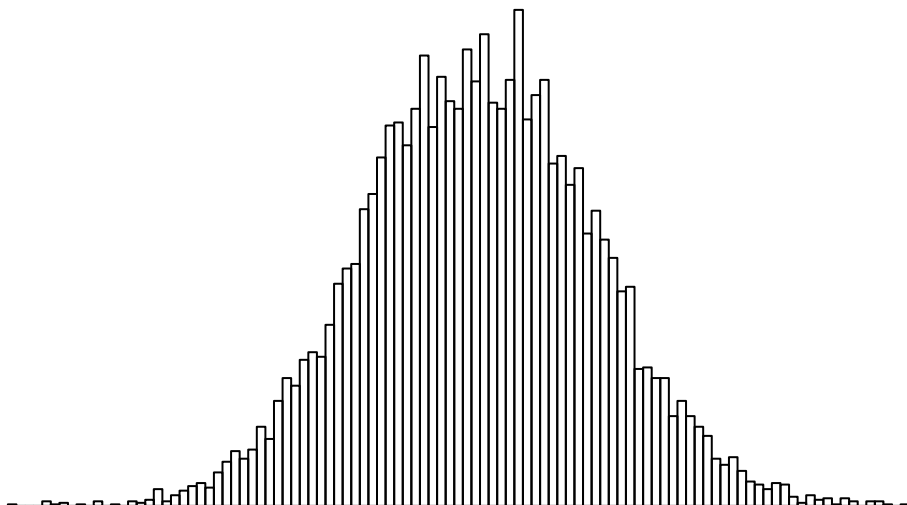

A194:18

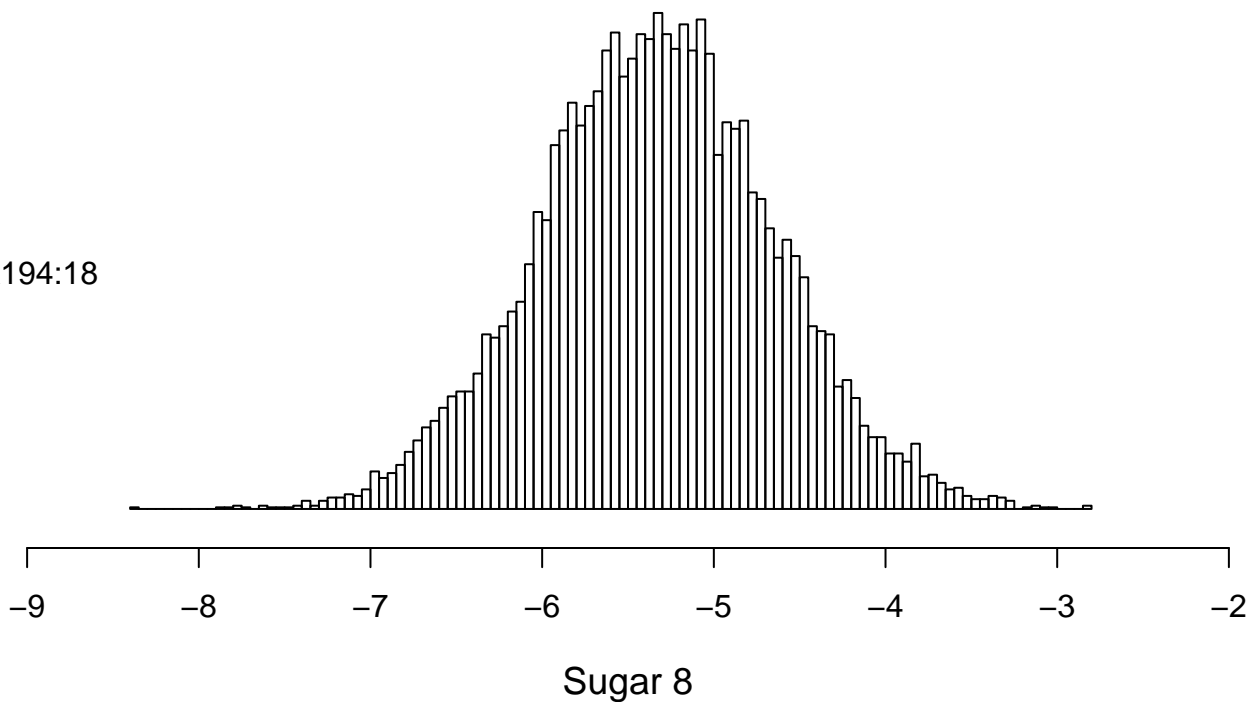

A194:26 – A194:18

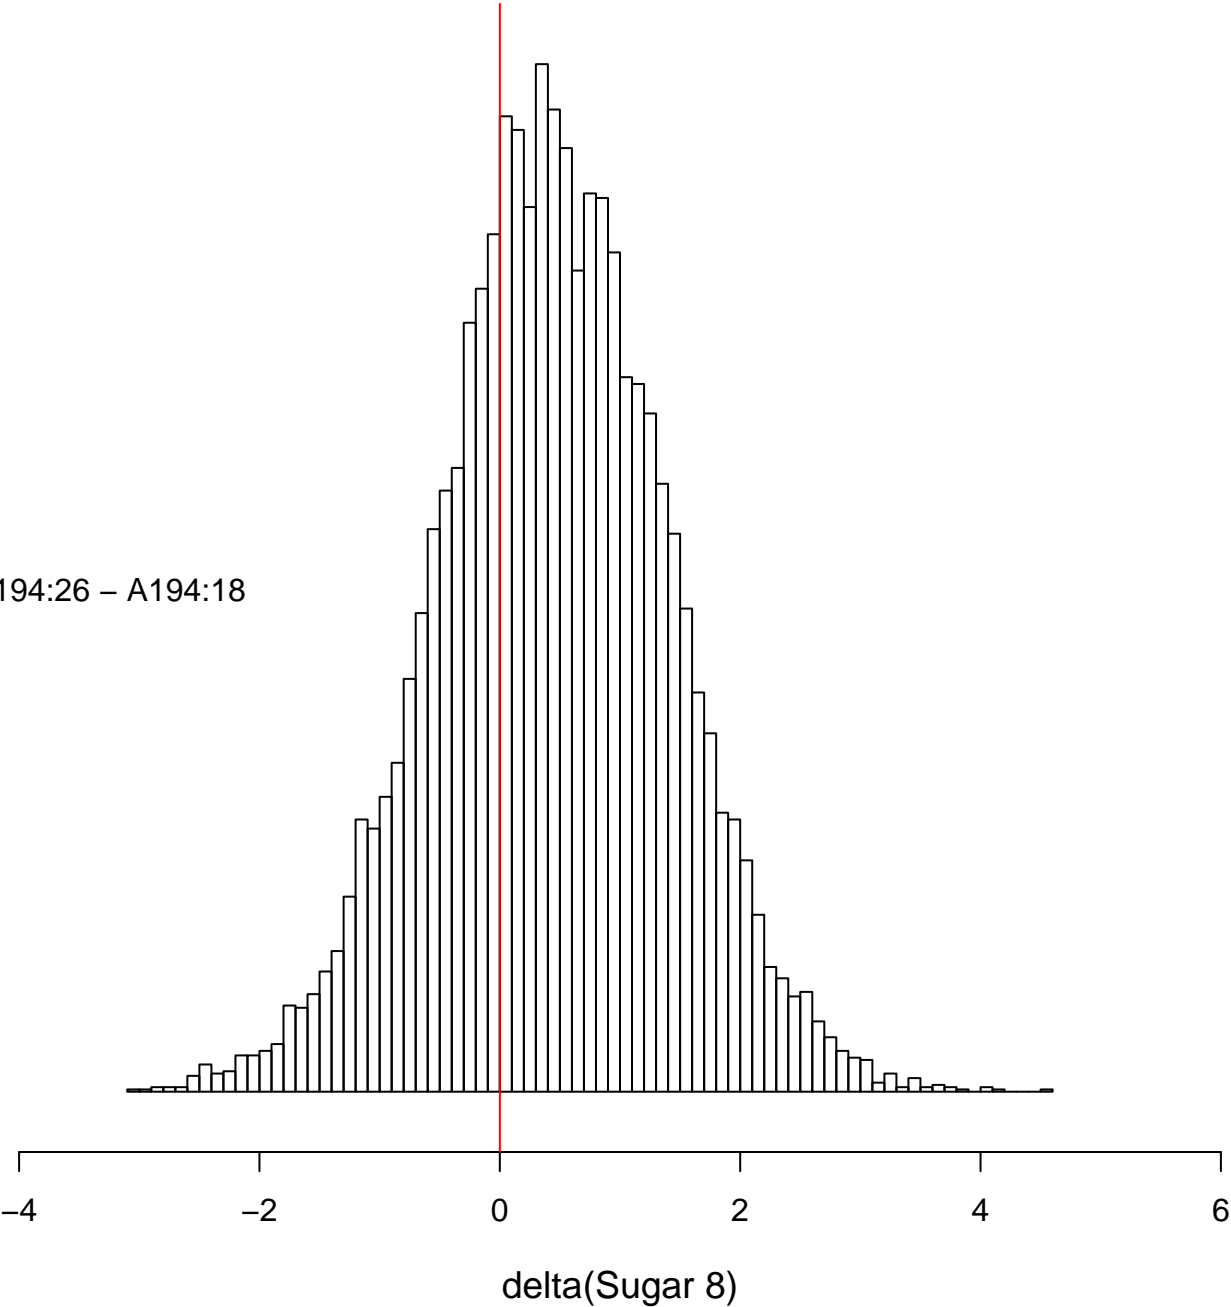

A194:26

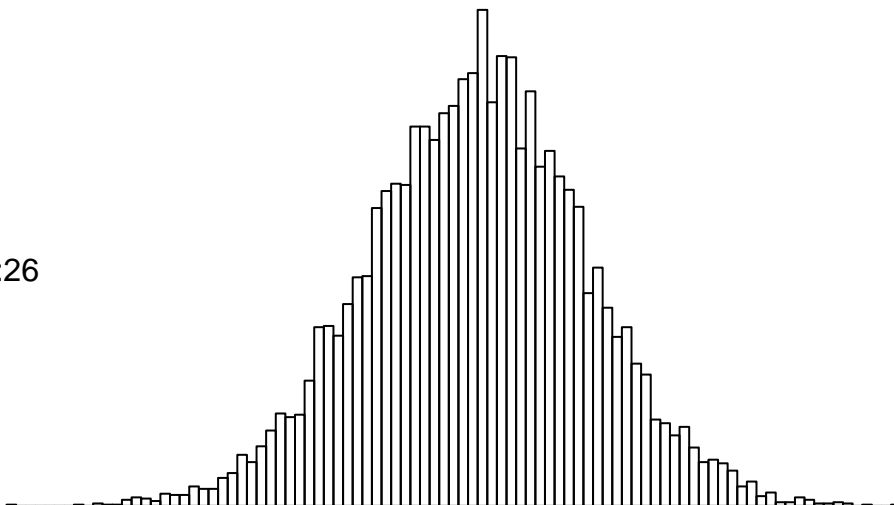

A194:18

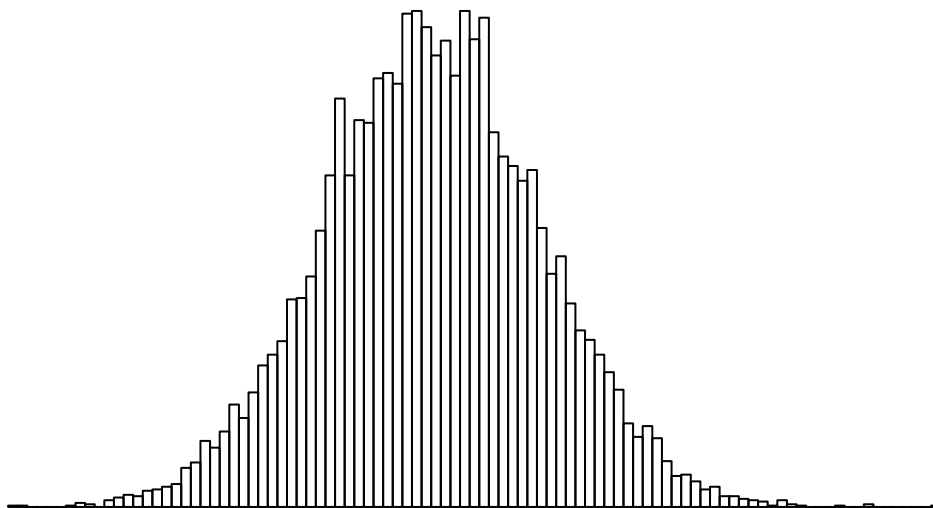

-9.0

-8.5

-8.0

-7.5

-7.0

-6.5

Sugar 9

A194:26 – A194:18

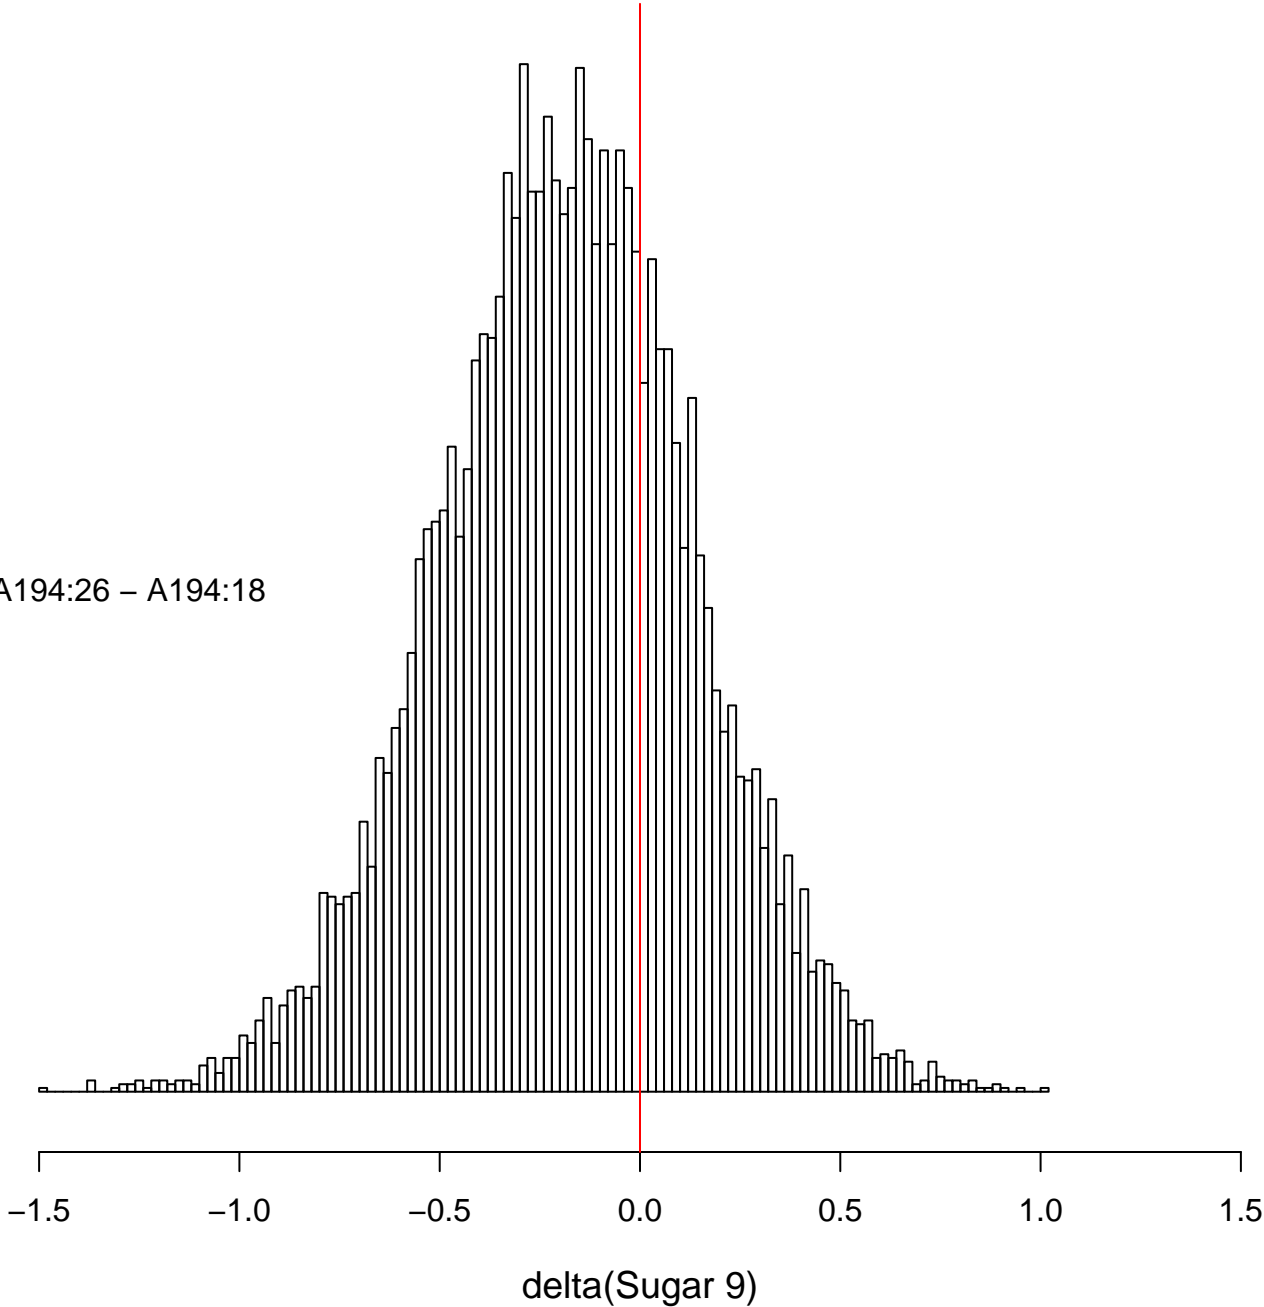

A194:26

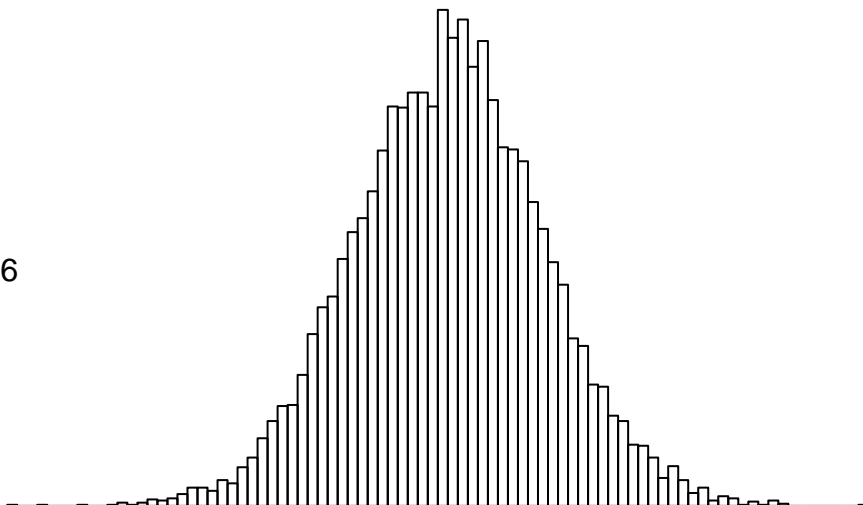

A194:18

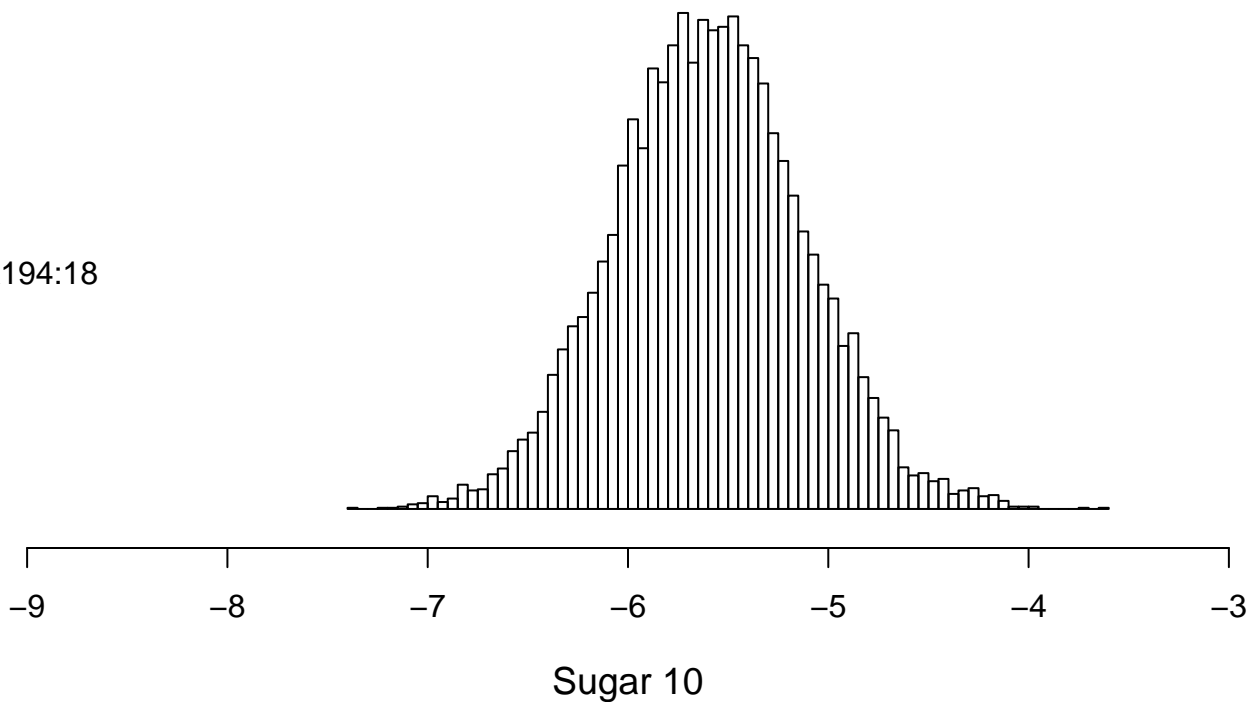

A194:26 – A194:18

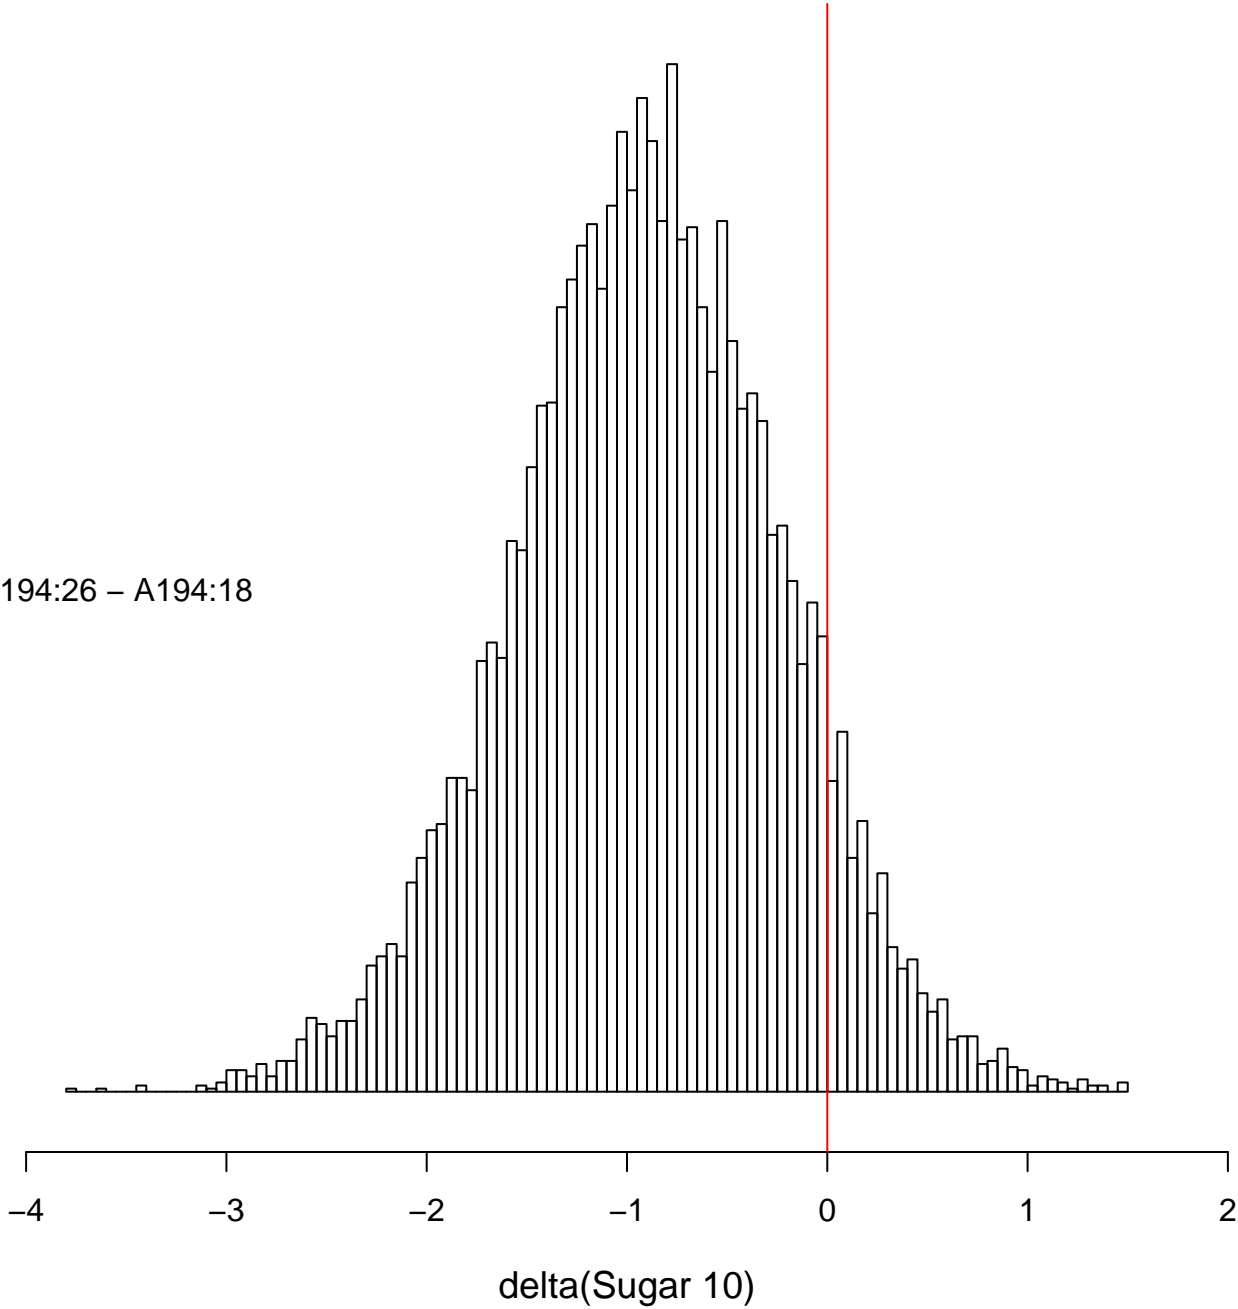

A194:26

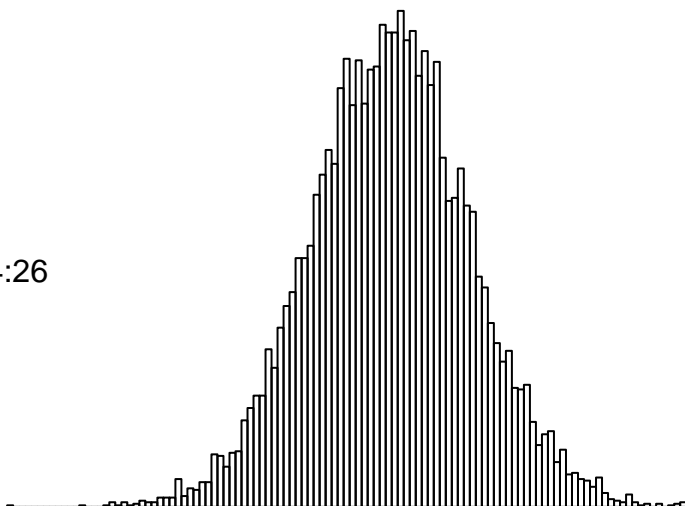

A194:18

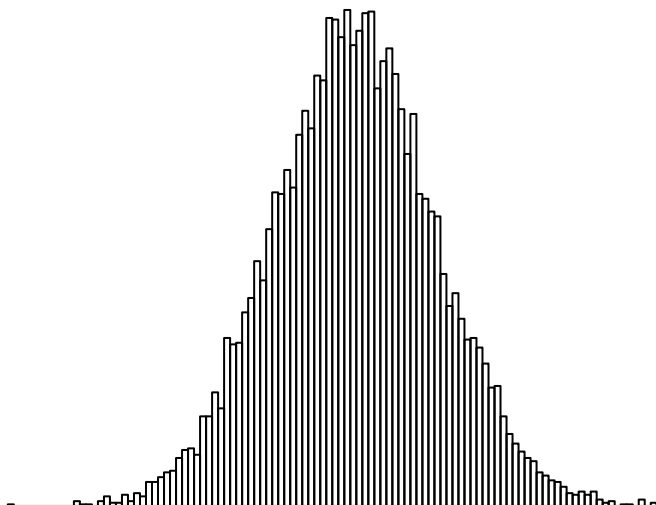

-9

-8

-7

-6

-5

Sugar 11

A194:26 – A194:18

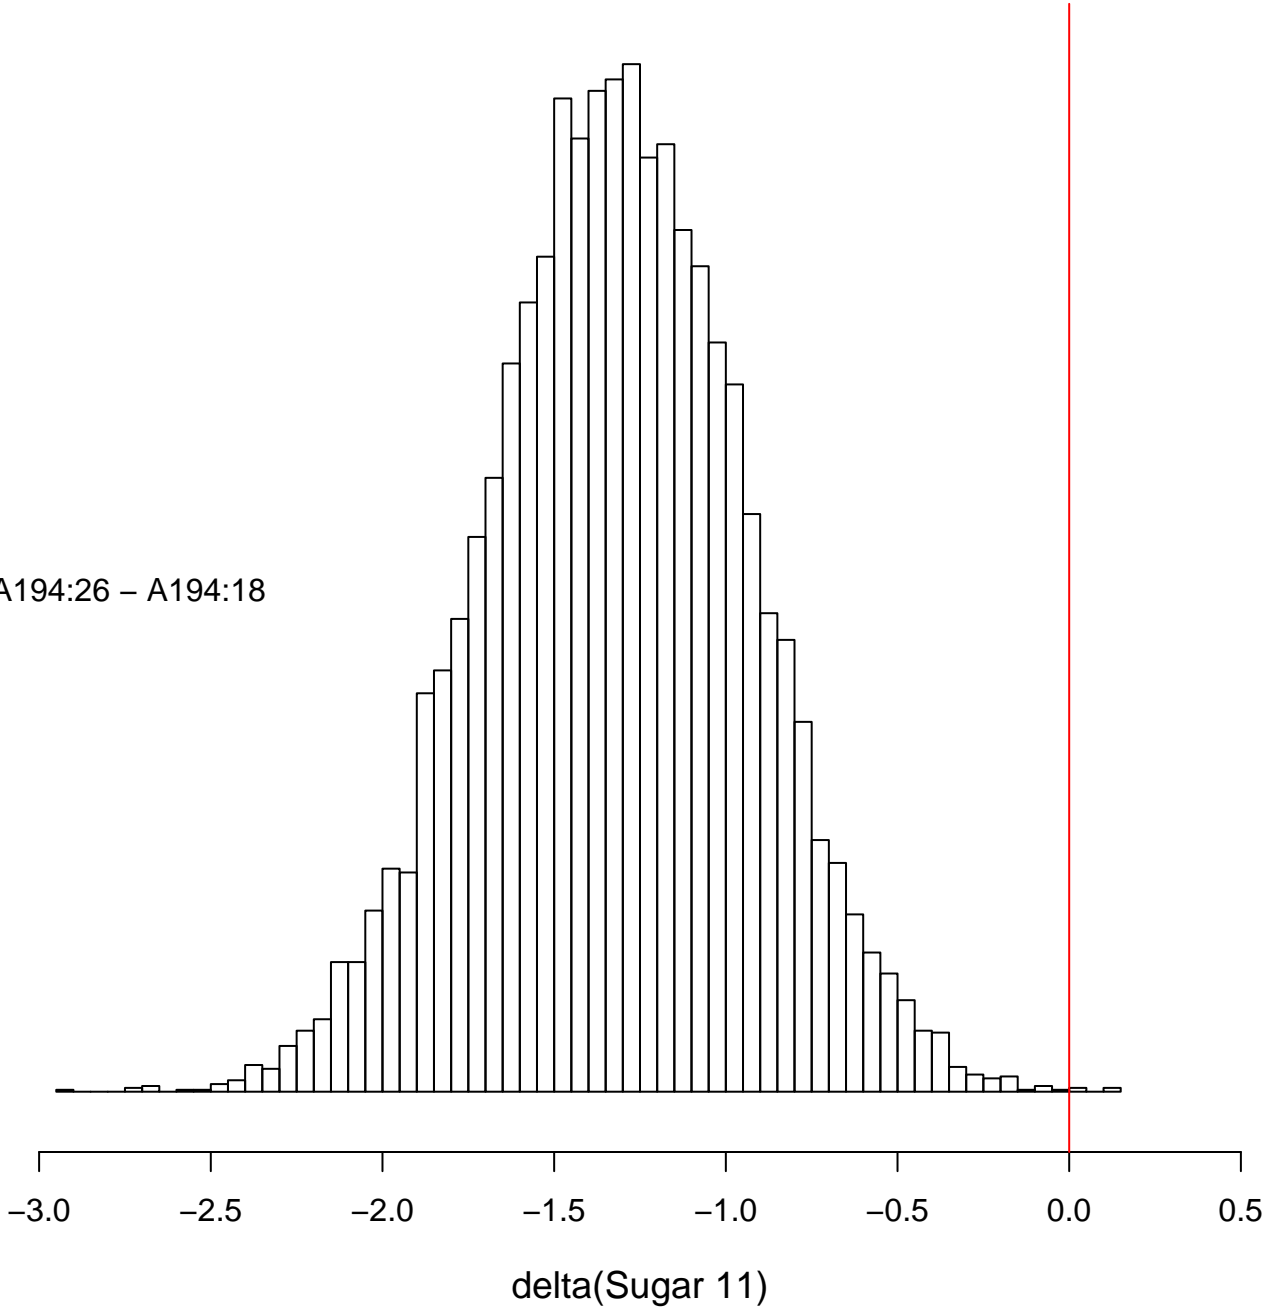



A194:26

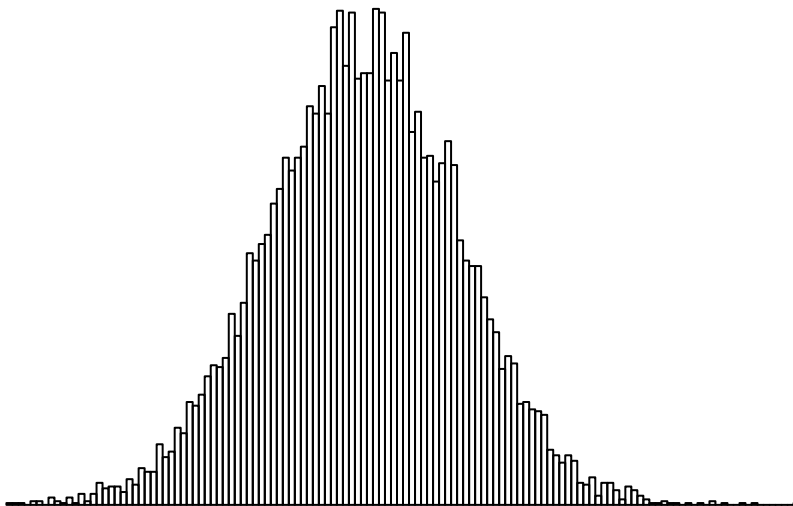

A194:18

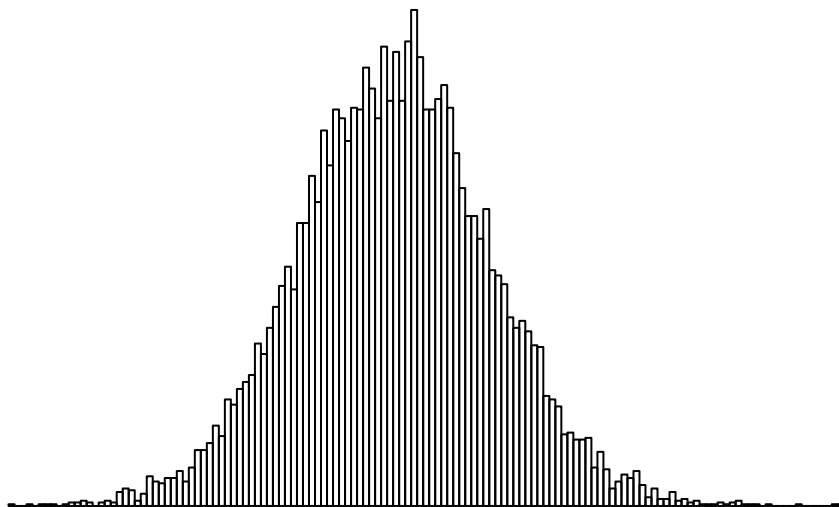

-9.0

-8.5

-8.0

-7.5

-7.0

Sugar 12

A194:26 – A194:18

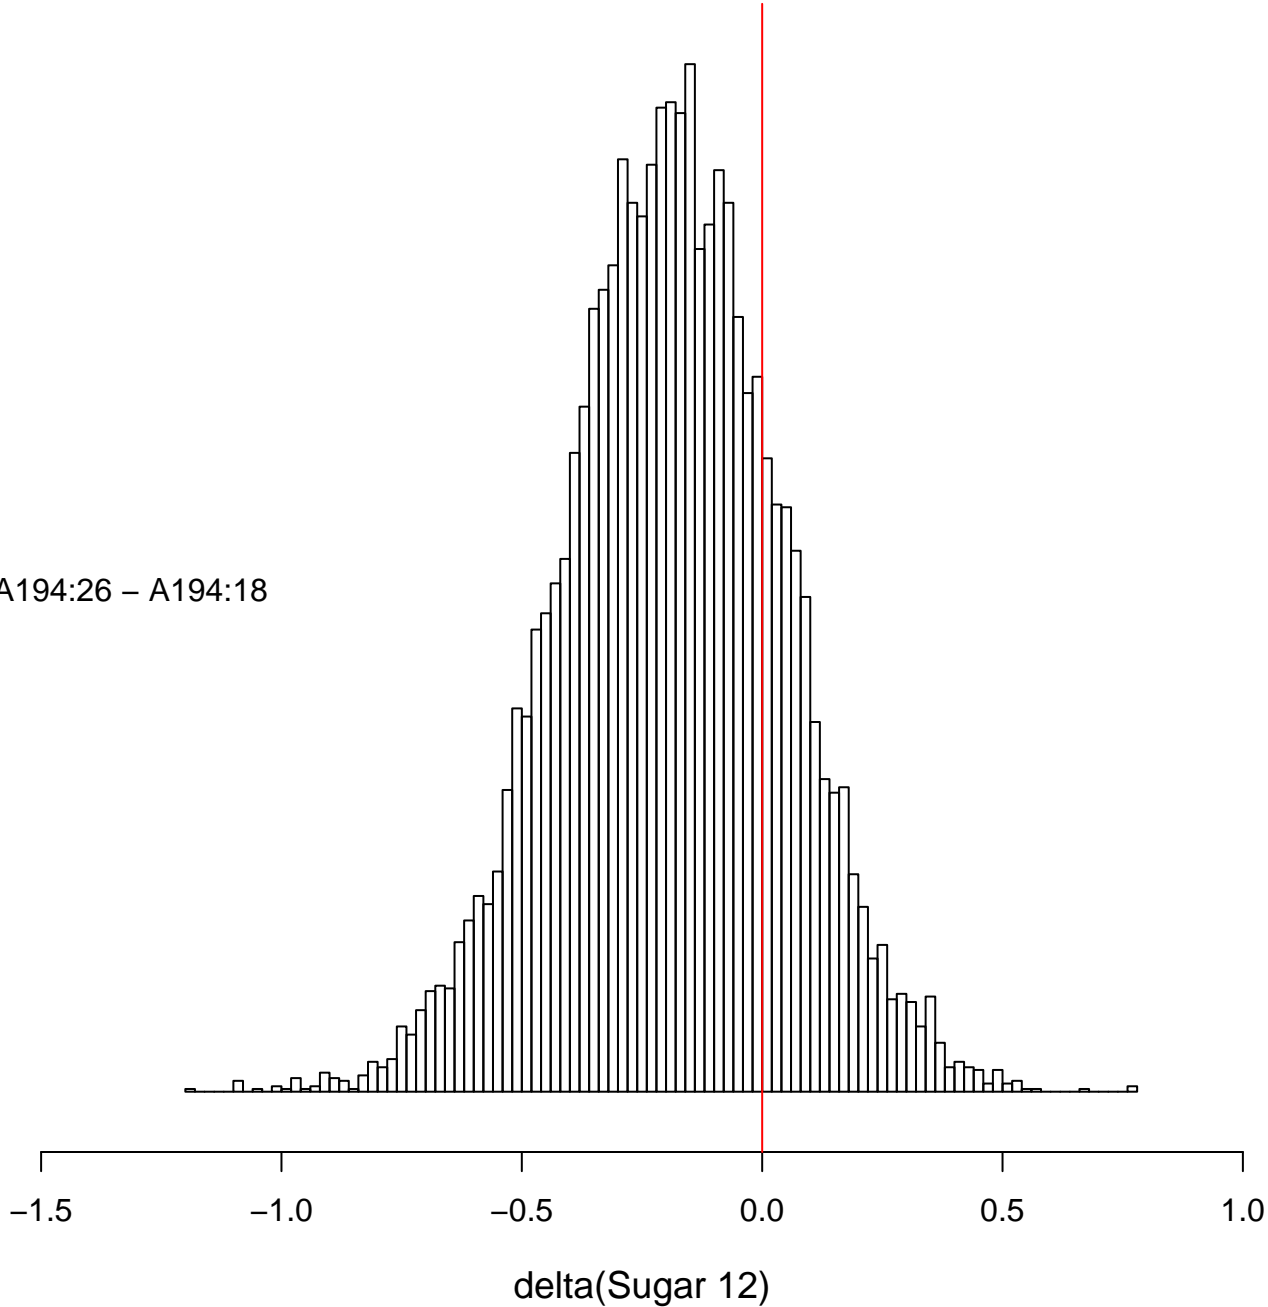

A194:26

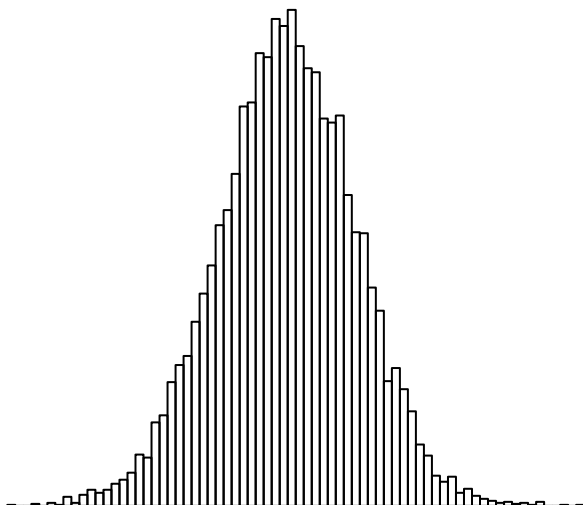

A194:18

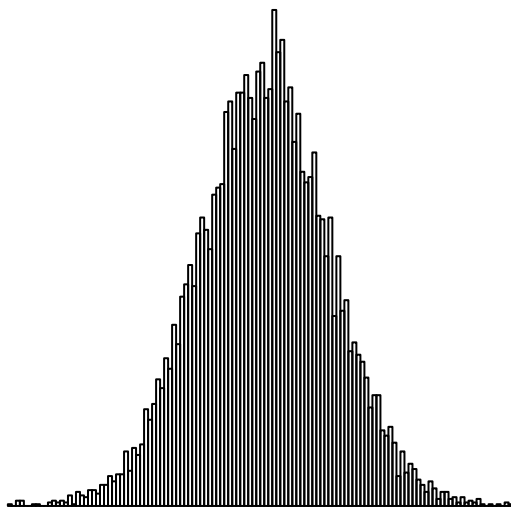

-9.5      -9.0      -8.5      -8.0      -7.5      -7.0      -6.5

Sugar 14

A194:26 – A194:18

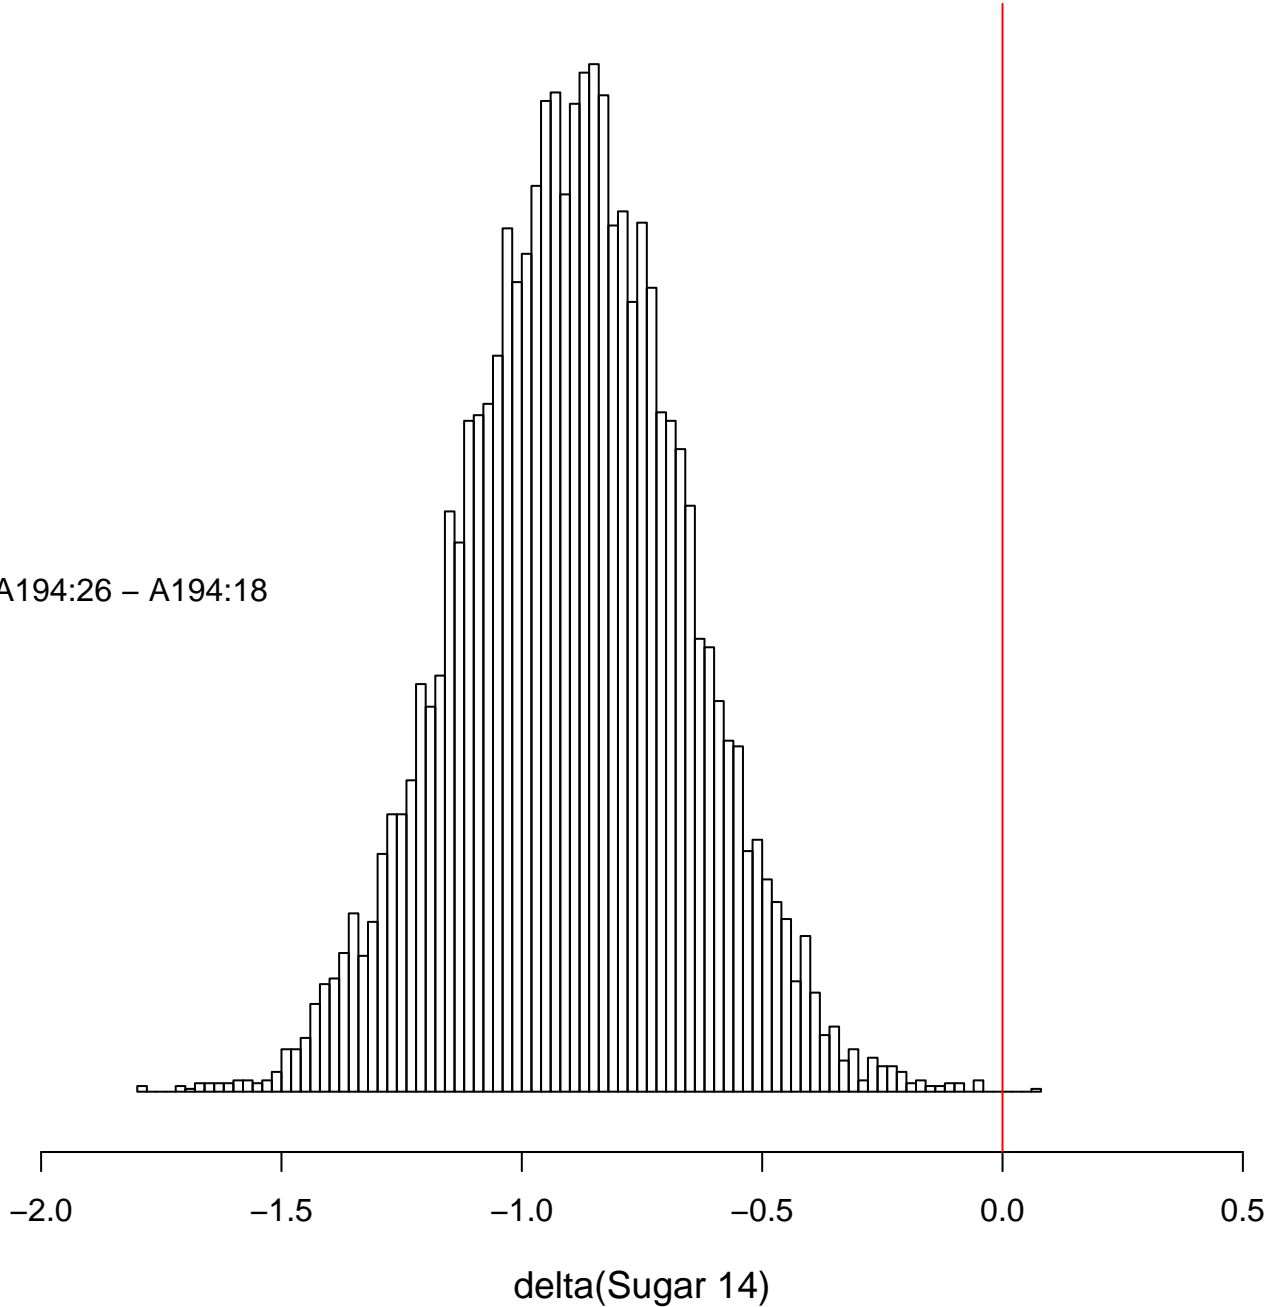

A194:26

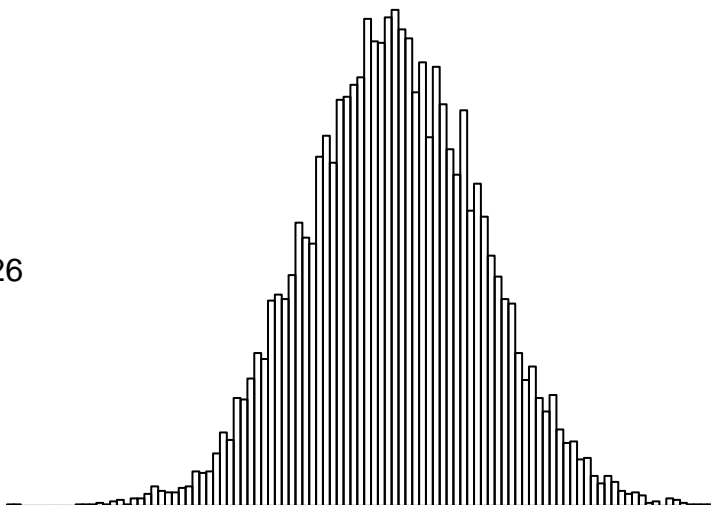

A194:18

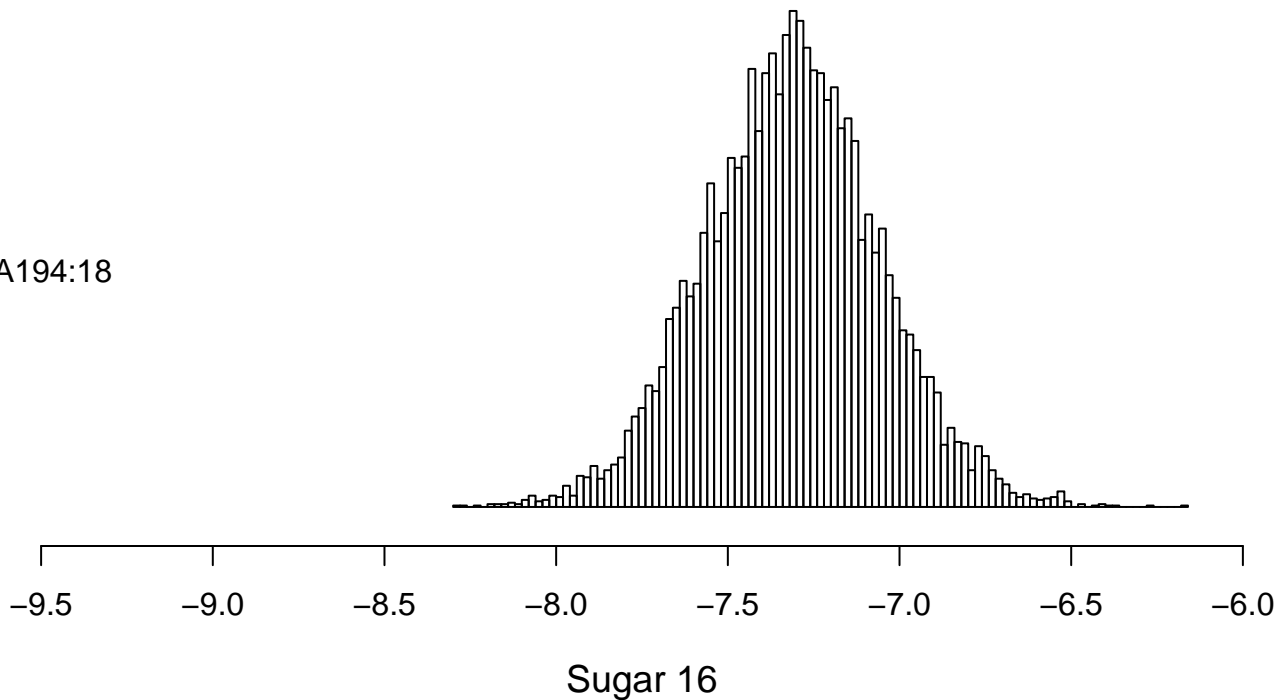

A194:26 – A194:18

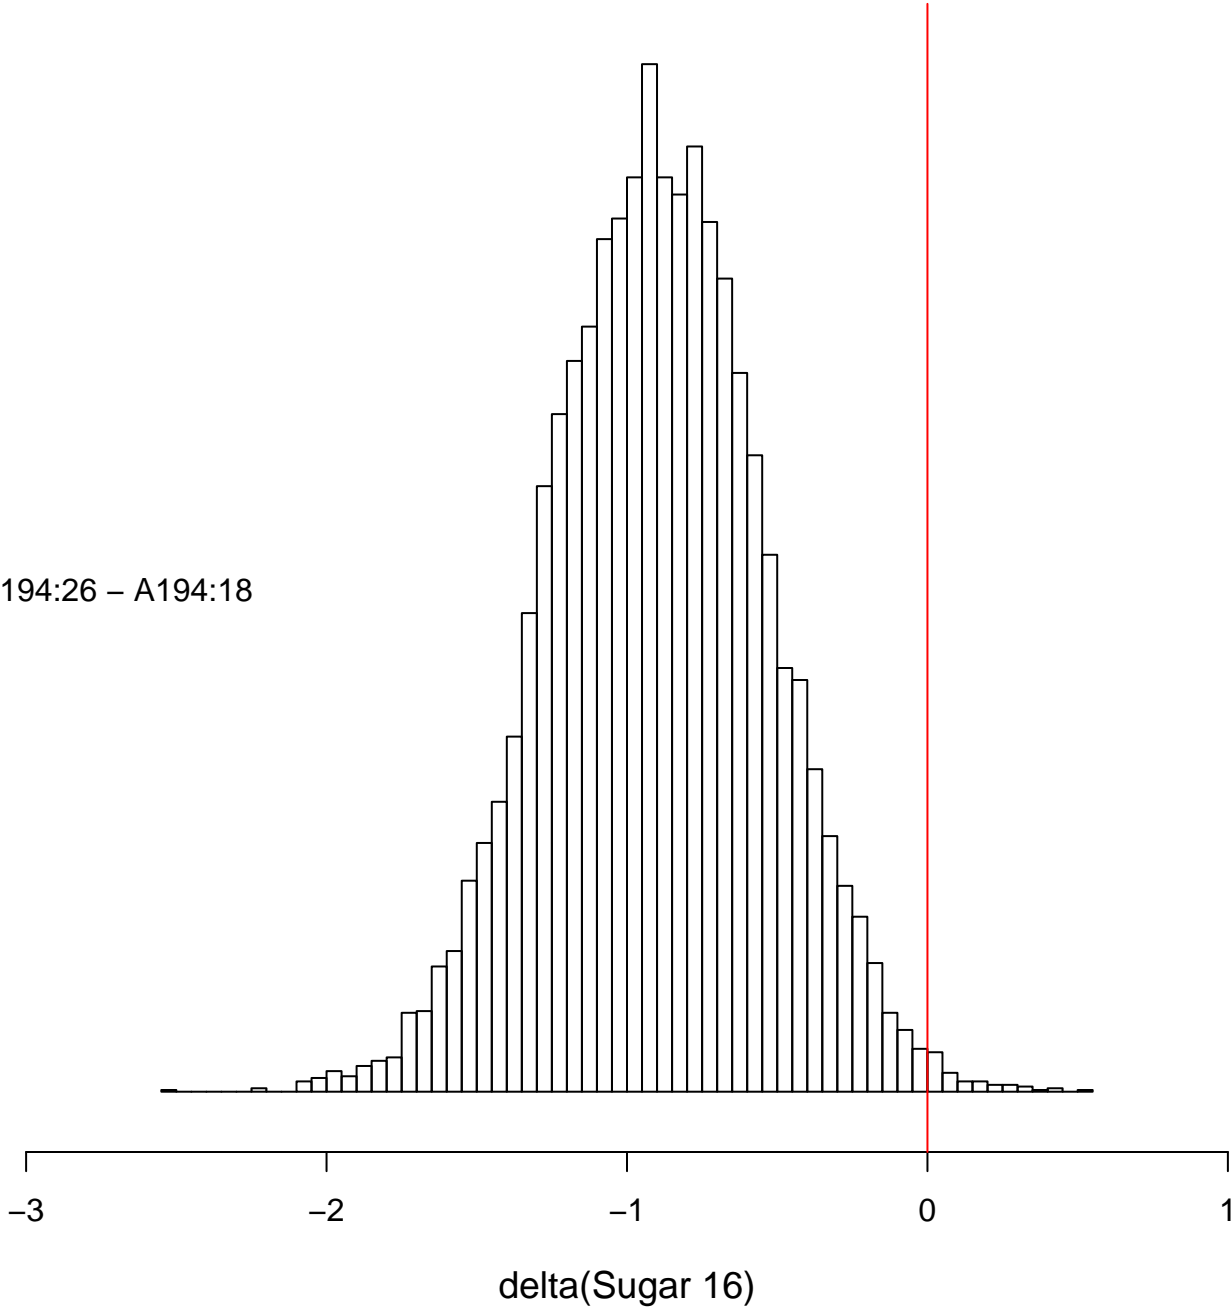

A194:26

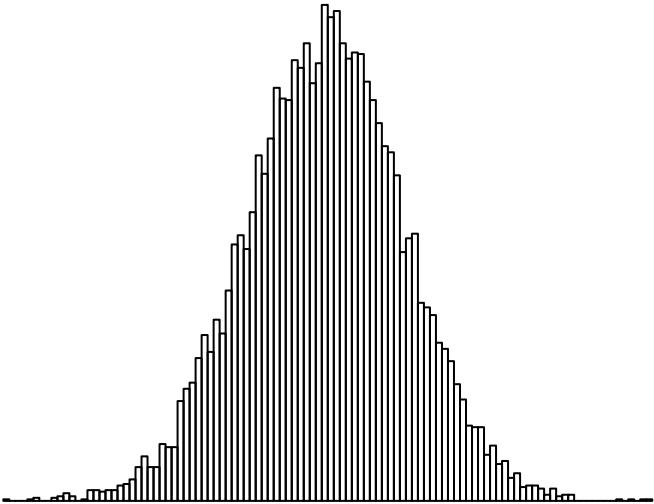

A194:18

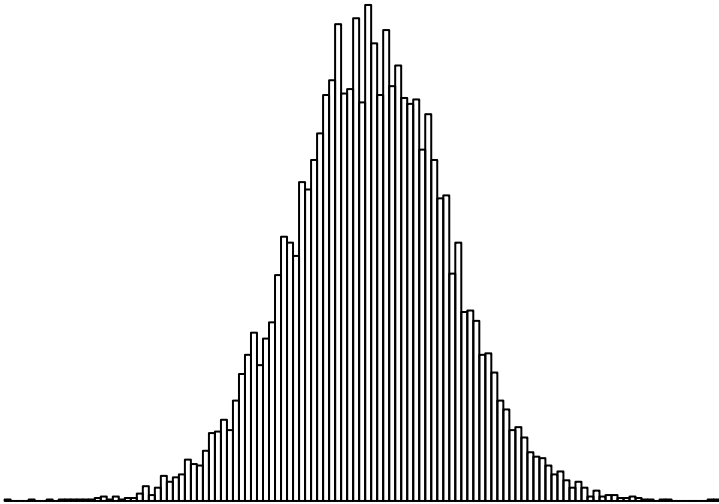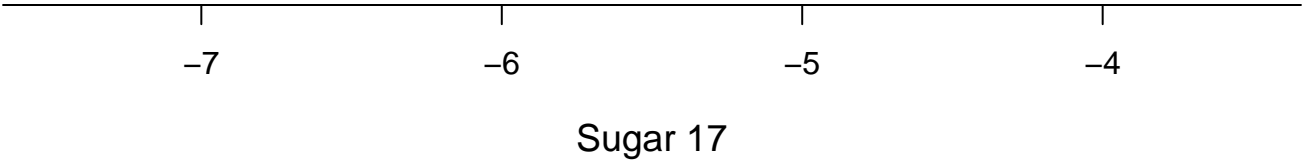

A194:26 – A194:18

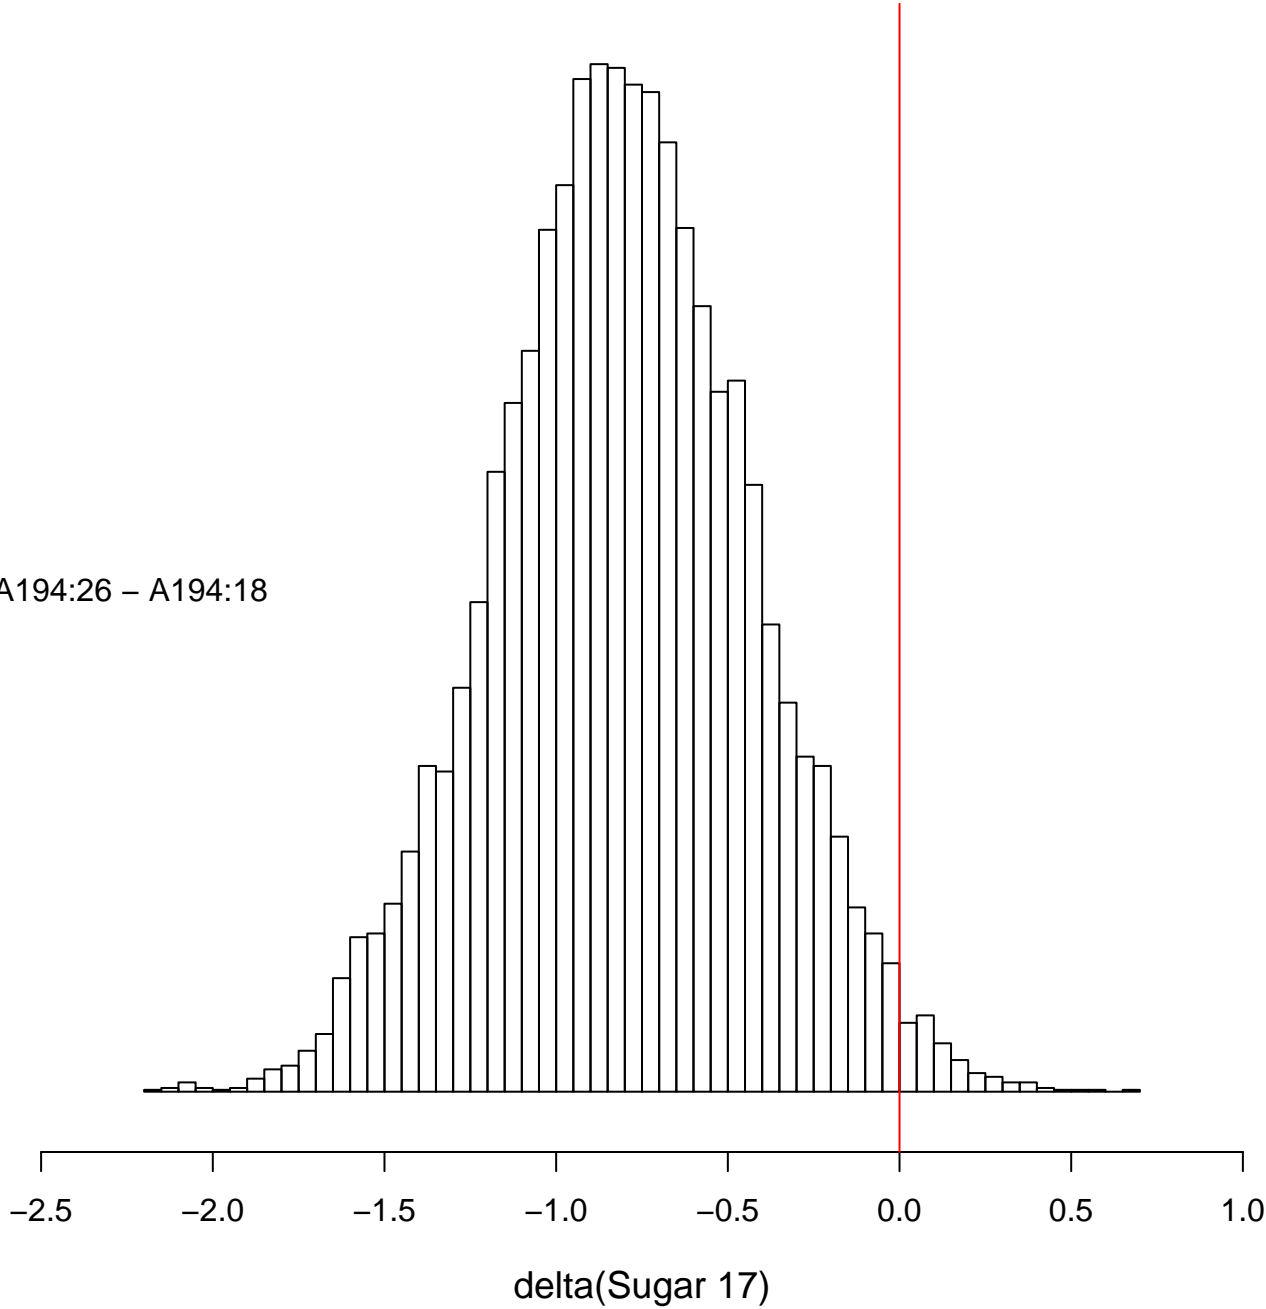



A194:26

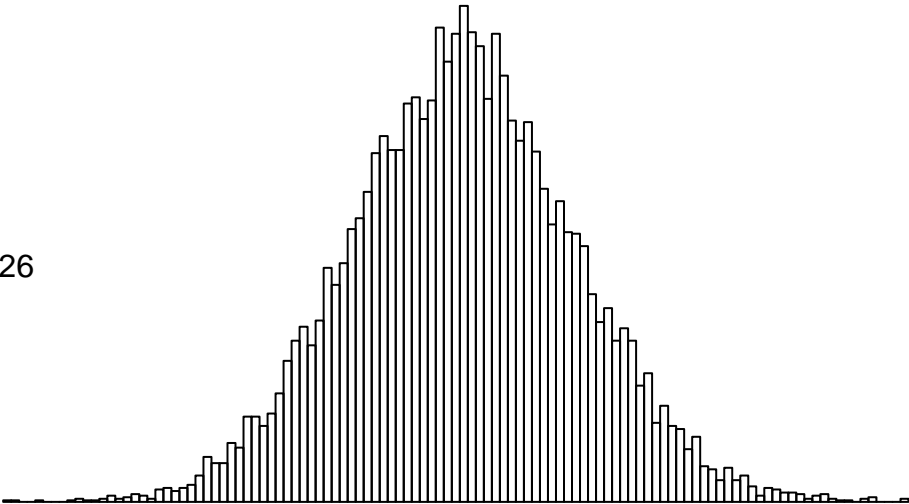

A194:18

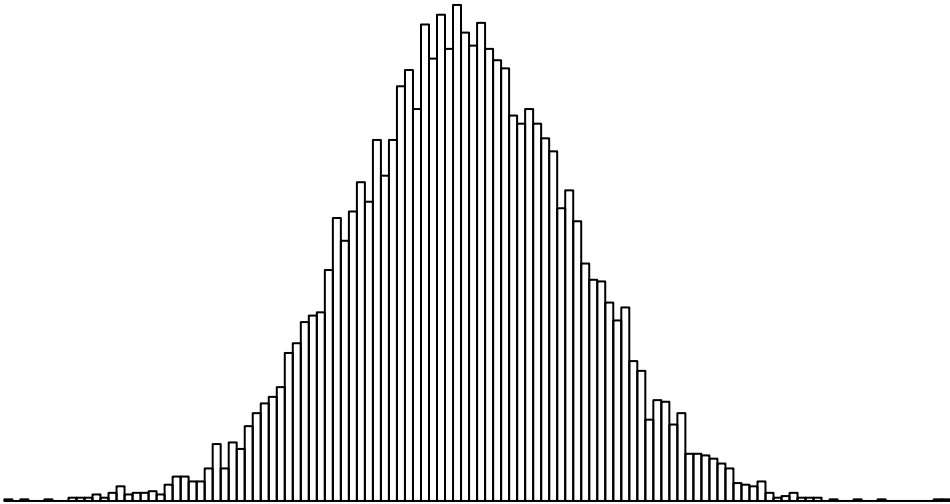

-7.0      -6.5      -6.0      -5.5      -5.0      -4.5      -4.0

Sugar 18

A194:26 – A194:18

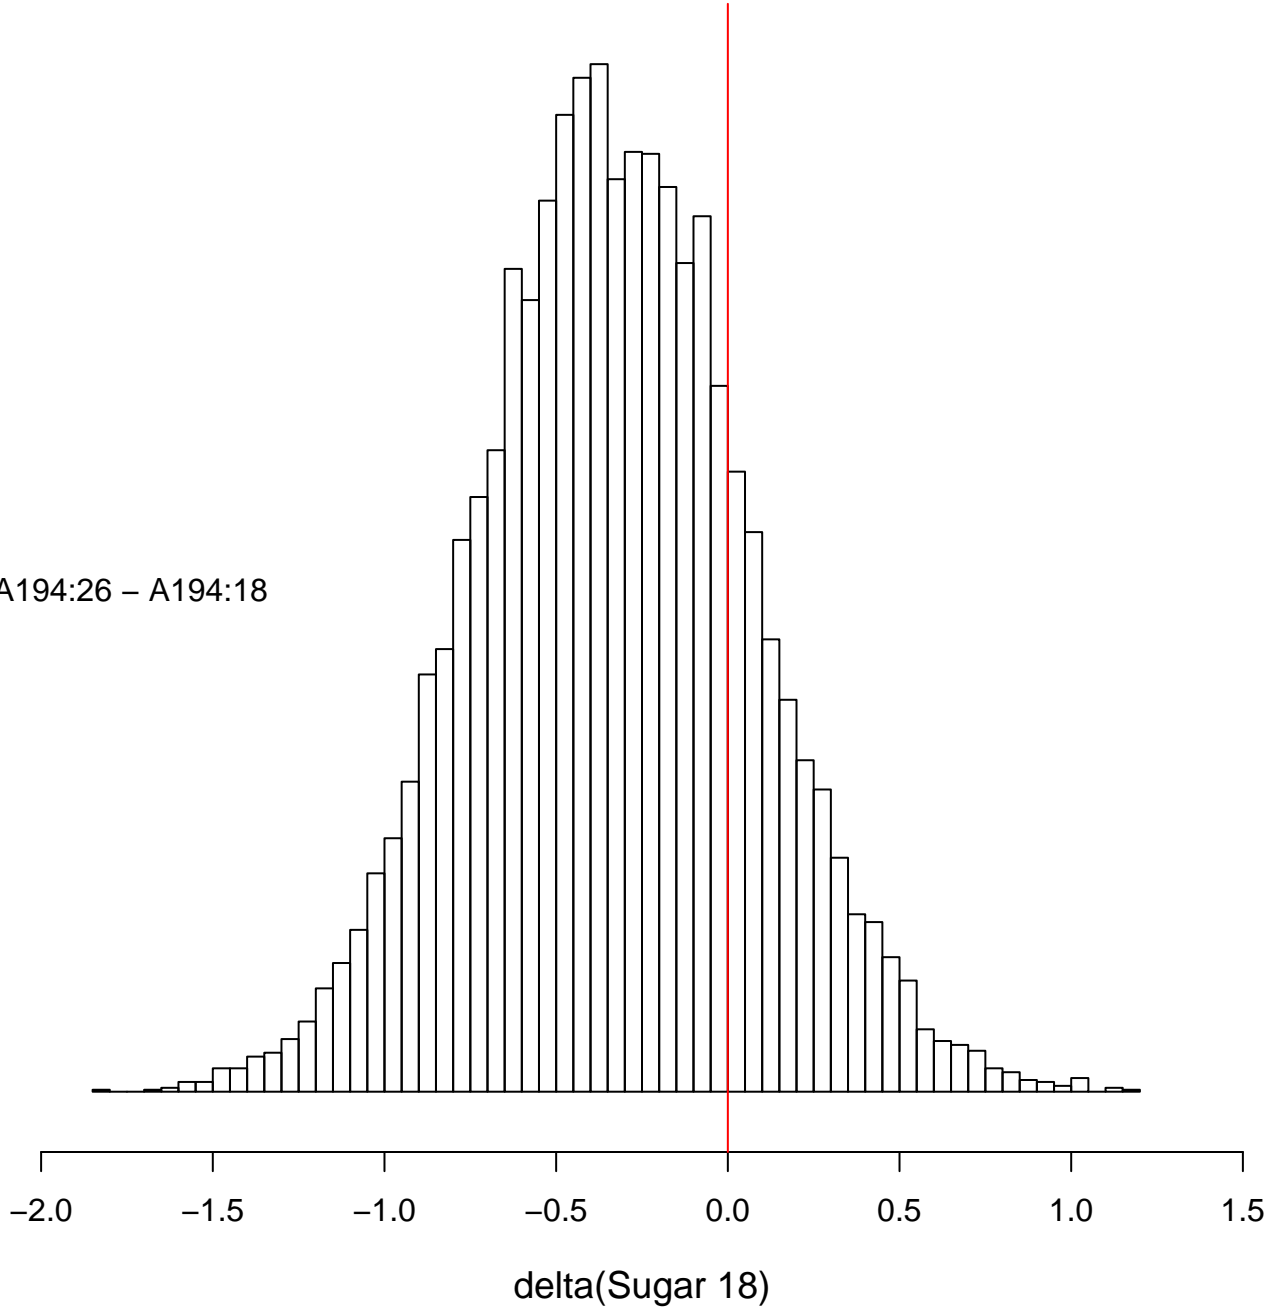

A194:26

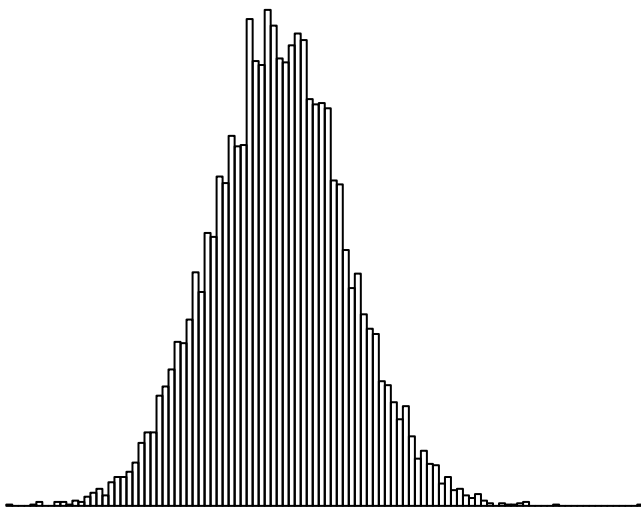

A194:18

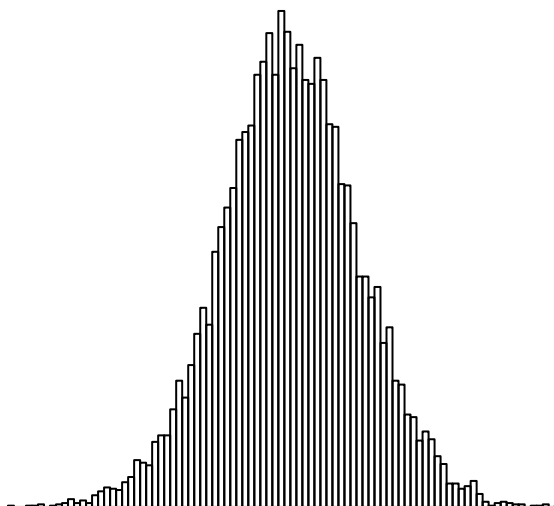

-9

-8

-7

-6

Sugar 20

A194:26 – A194:18

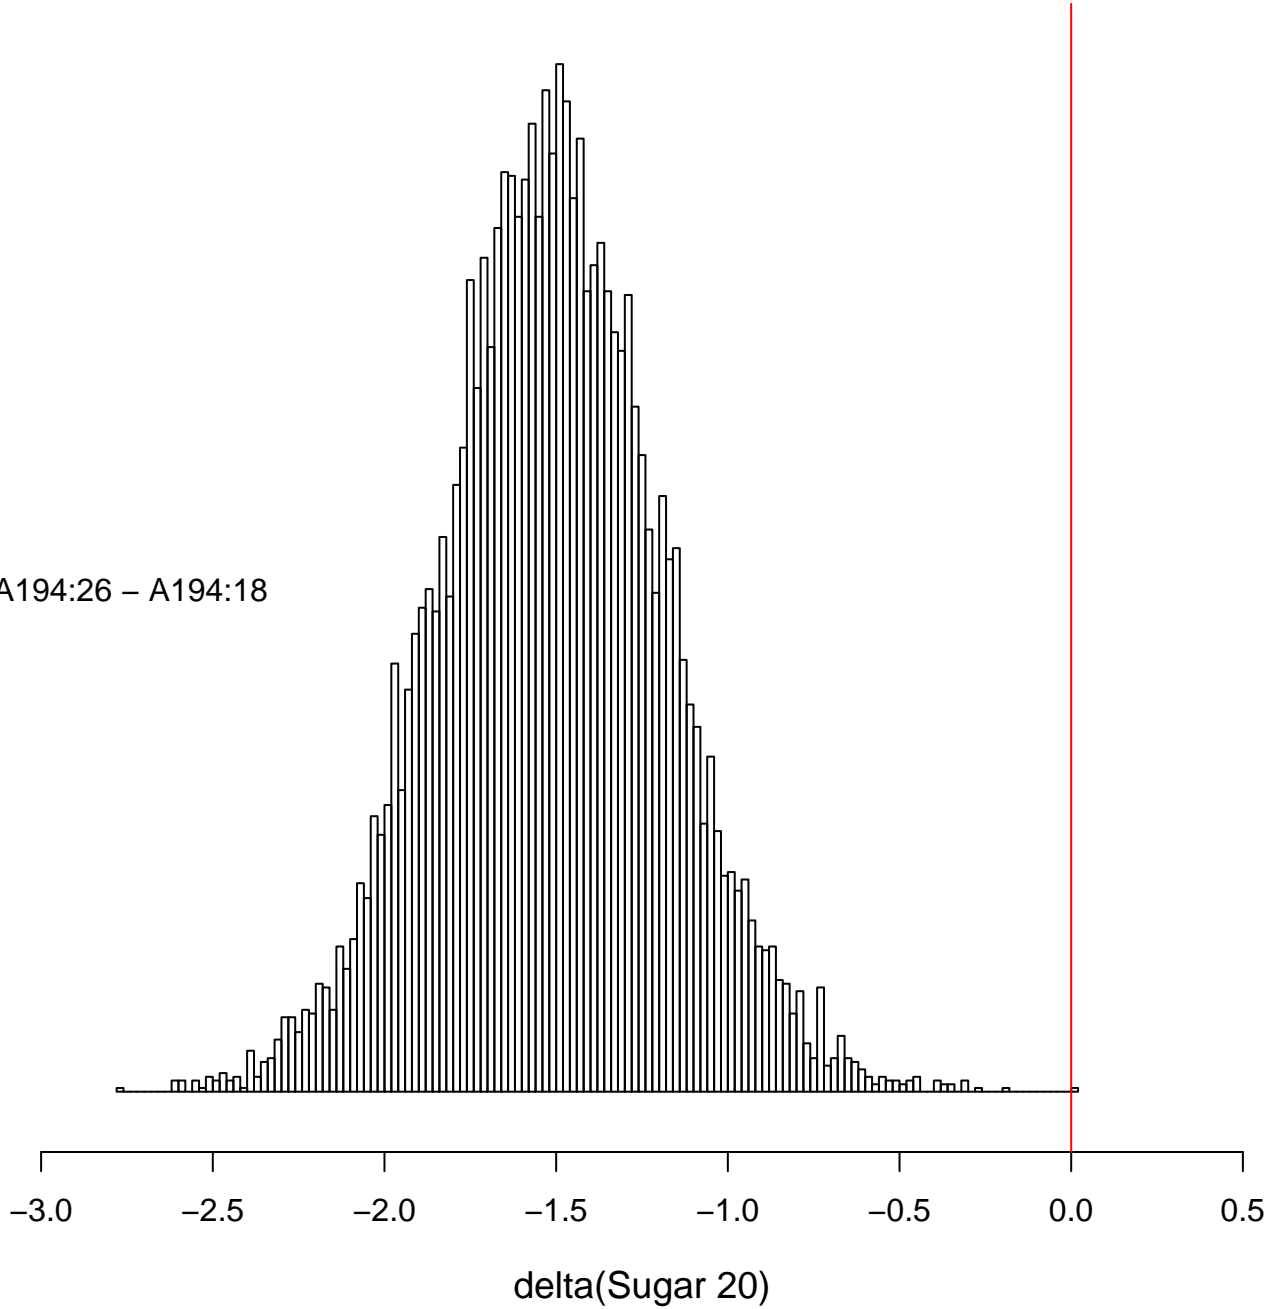

A194:26

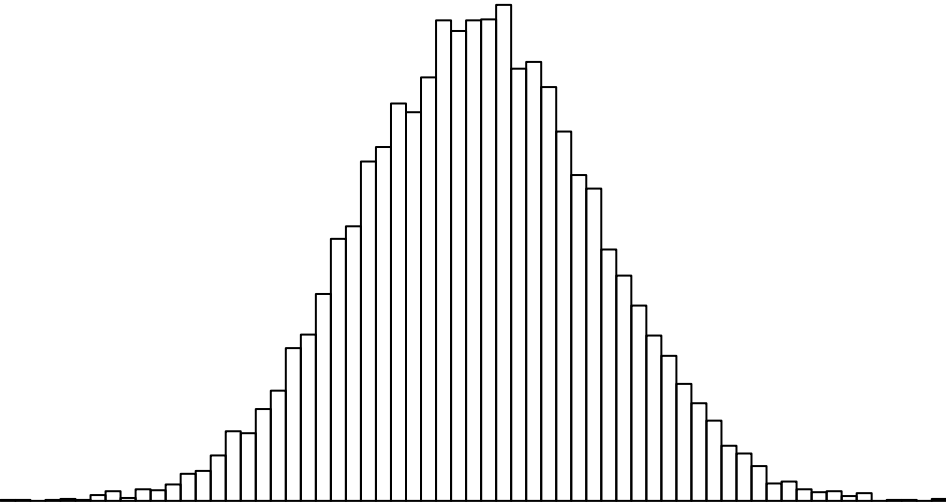

A194:18

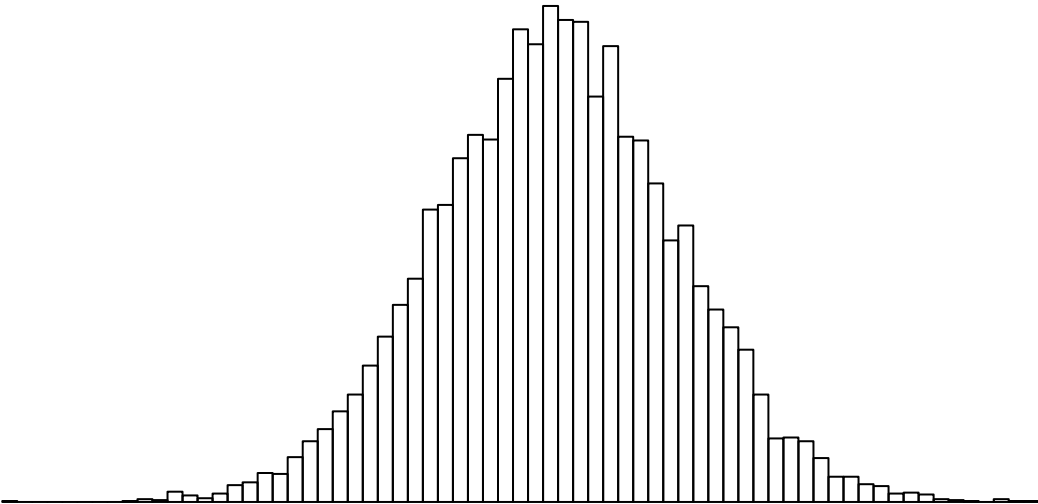

-9                      -8                      -7                      -6                      -5

Sugar 21

A194:26 – A194:18

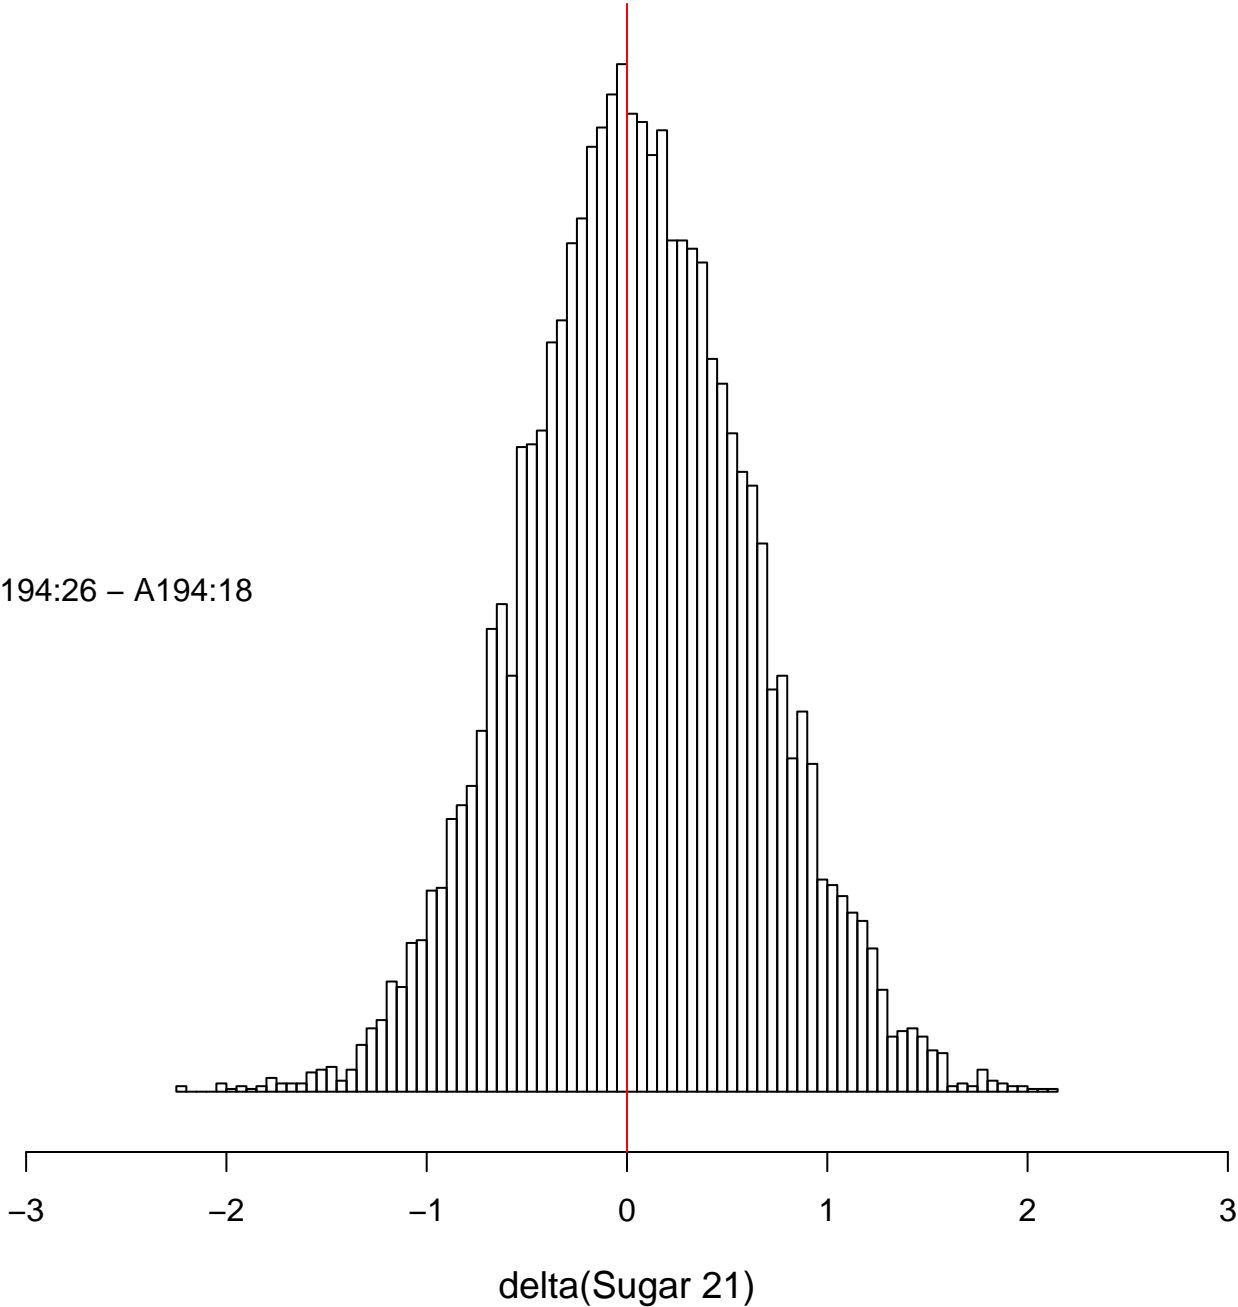

A194:26

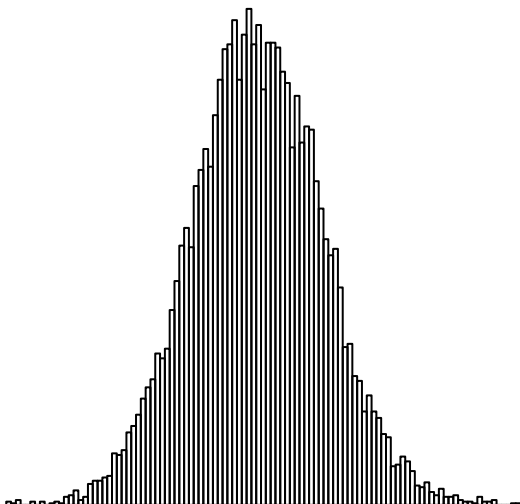

A194:18

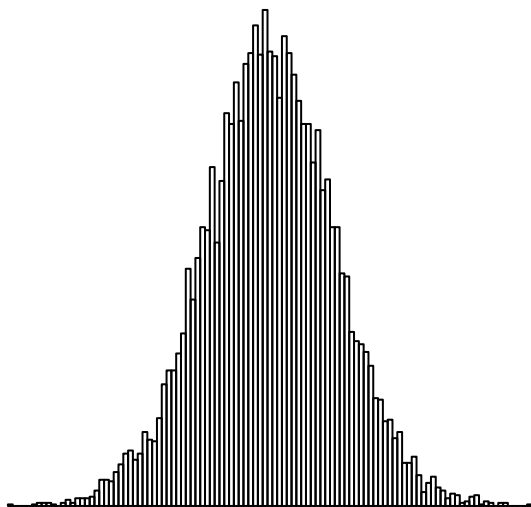

-8      -7      -6      -5      -4      -3

Sugar 22

A194:26 – A194:18

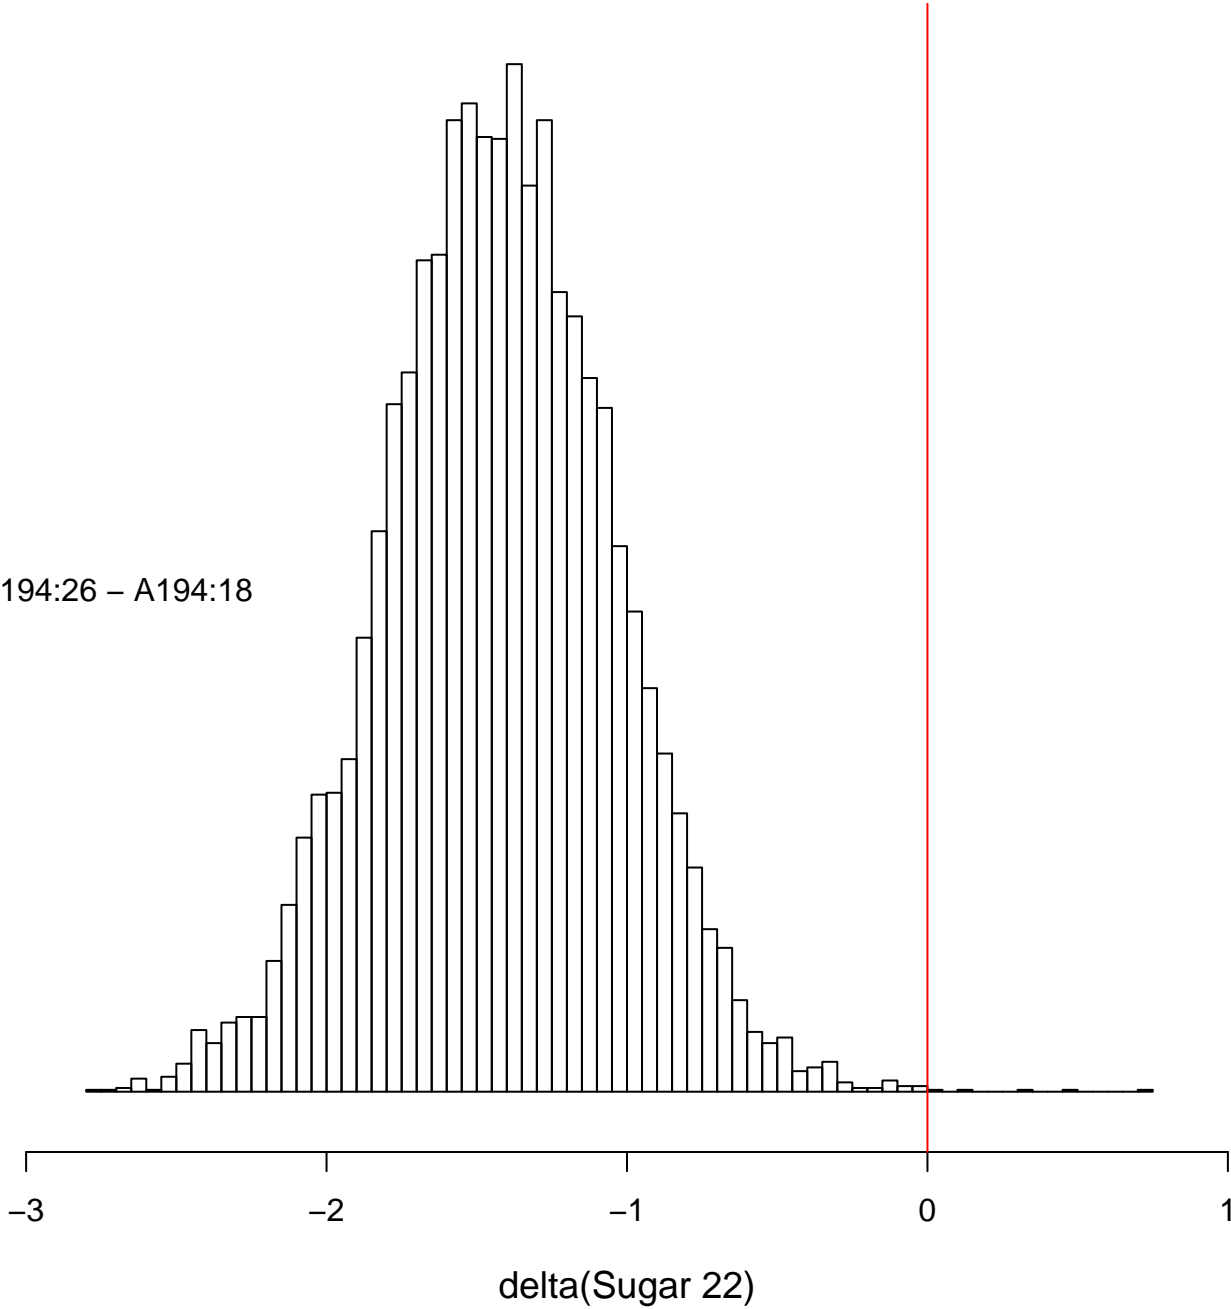



A194:26

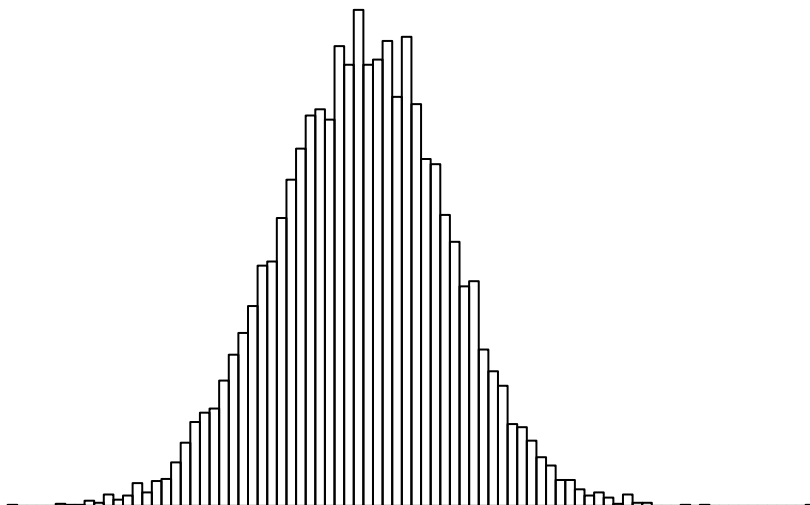

A194:18

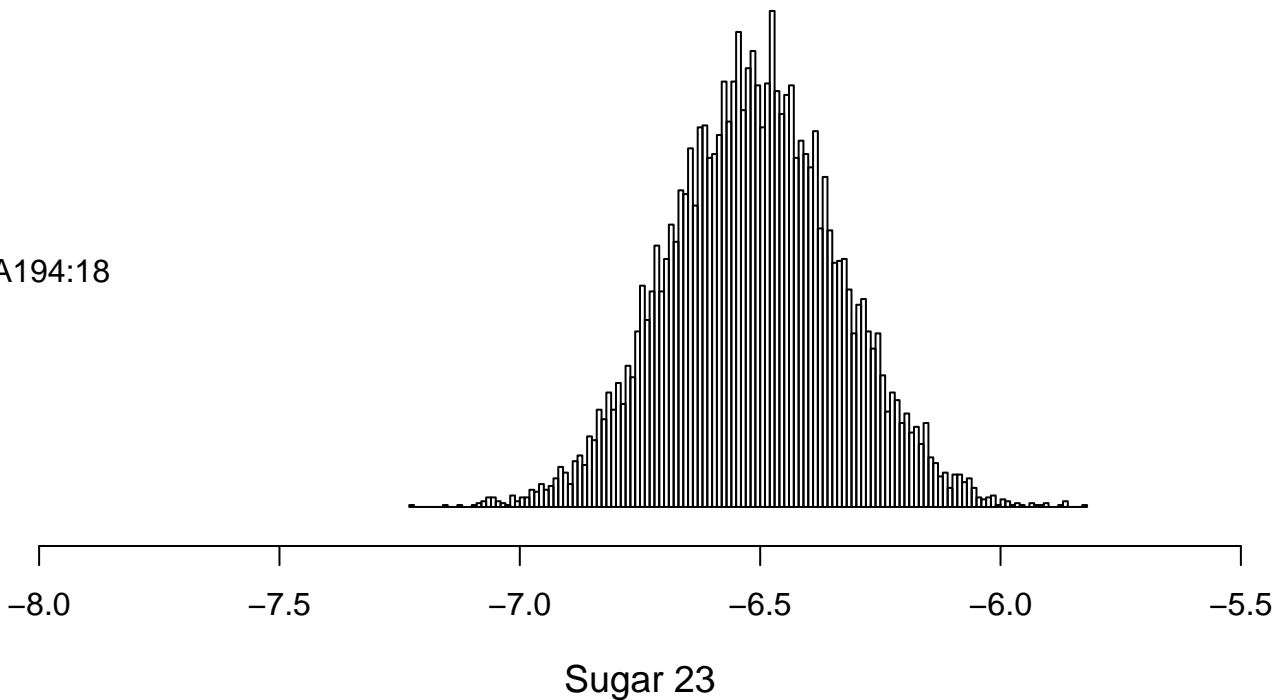

A194:26 – A194:18

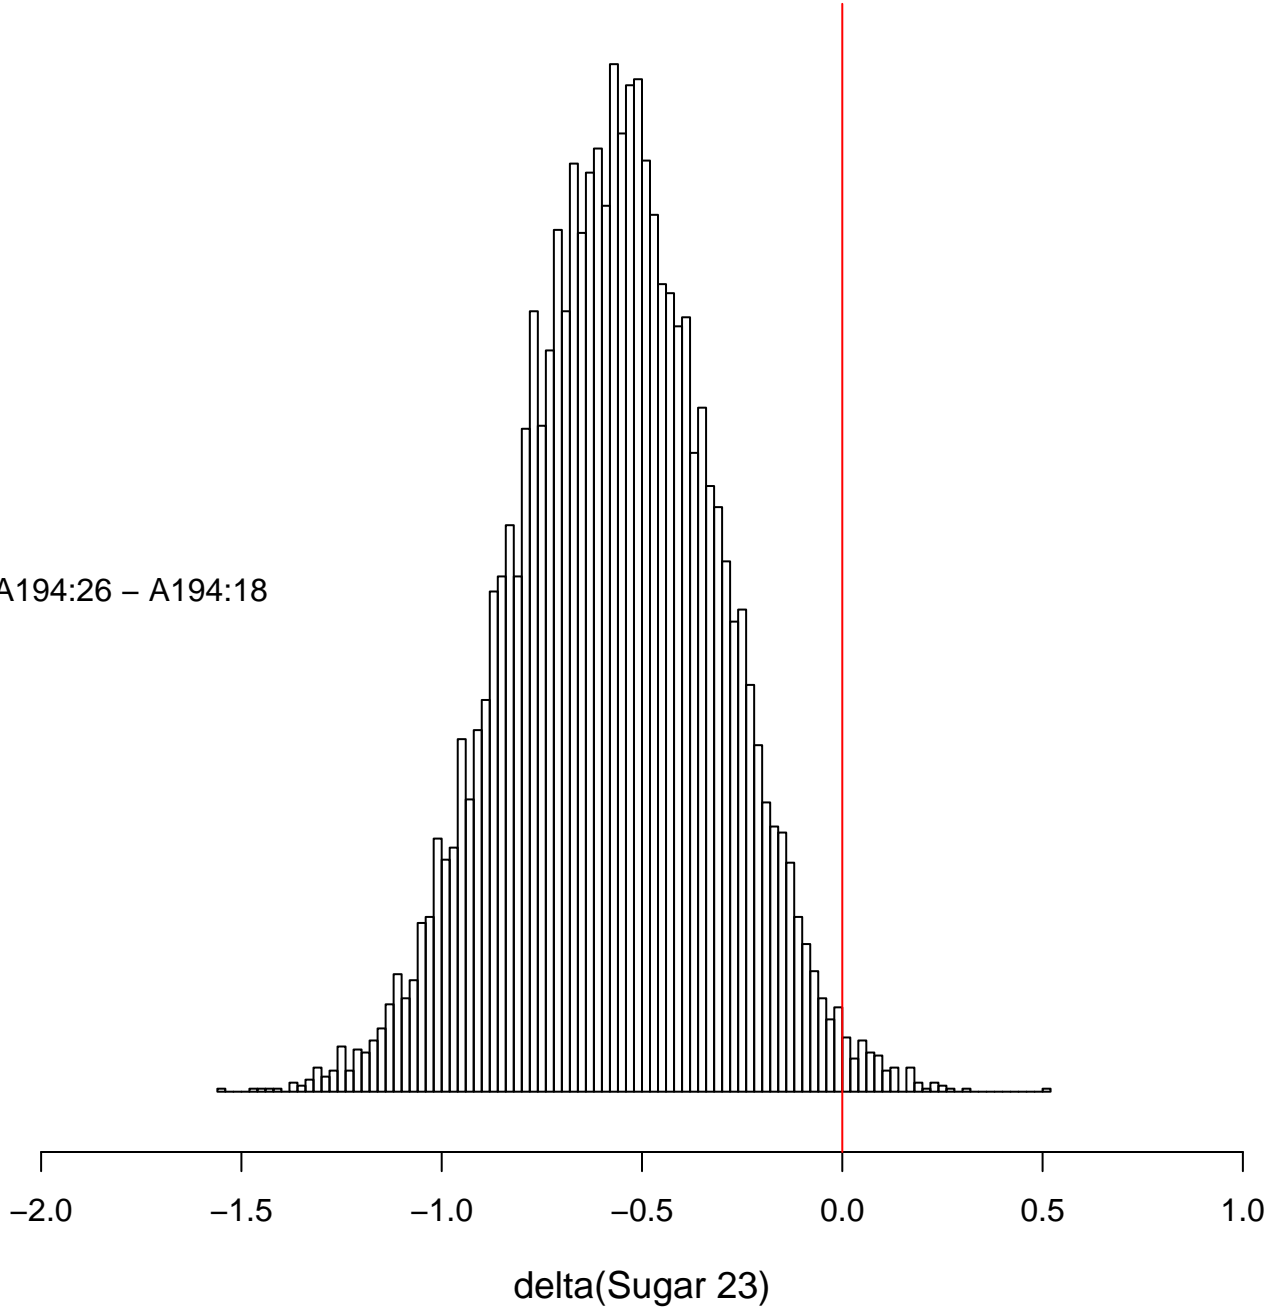

A194:26

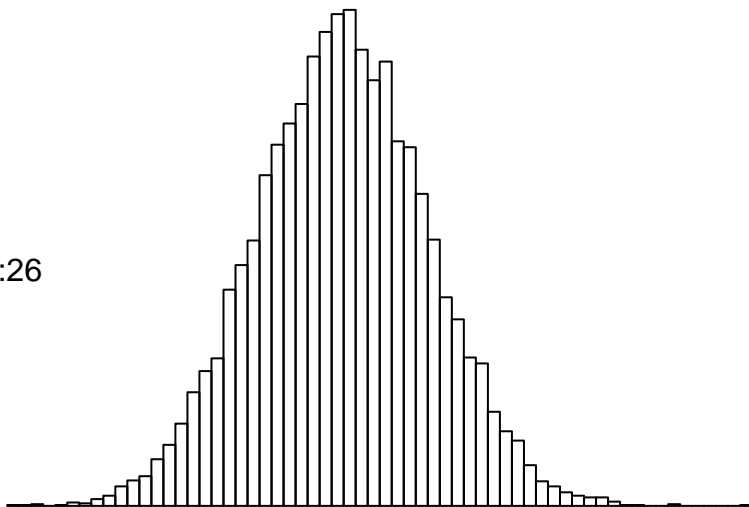

A194:18

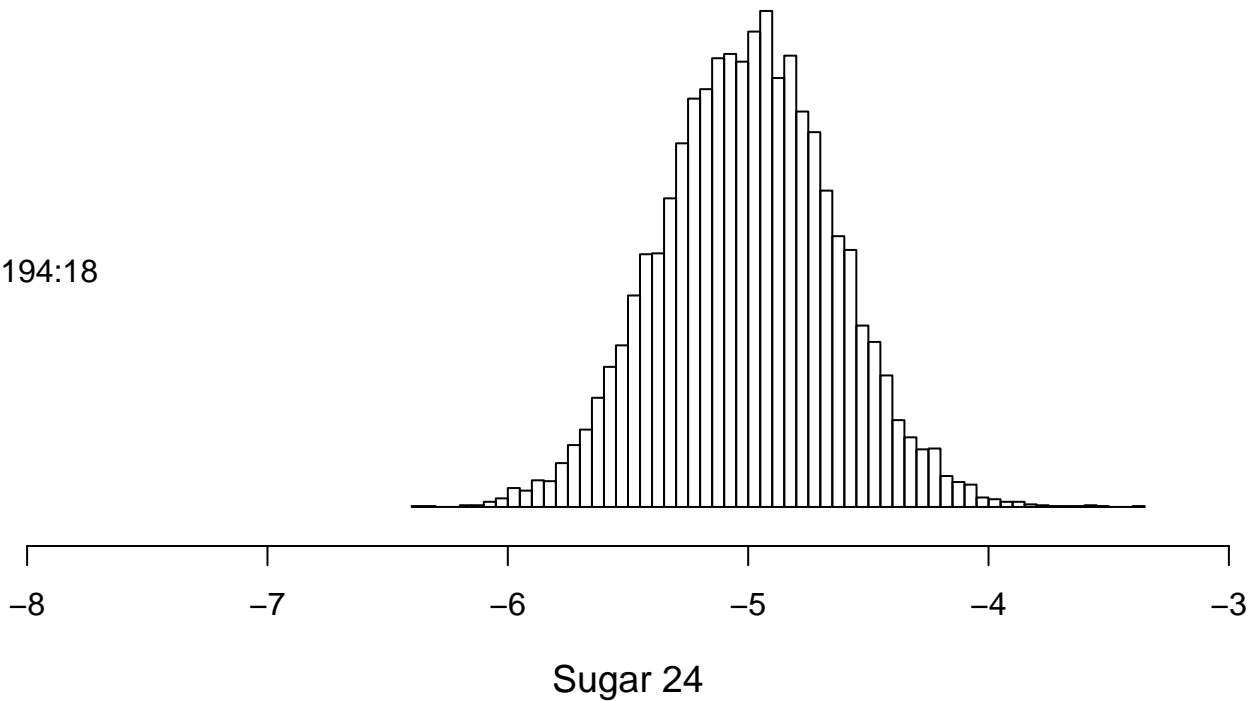

A194:26 – A194:18

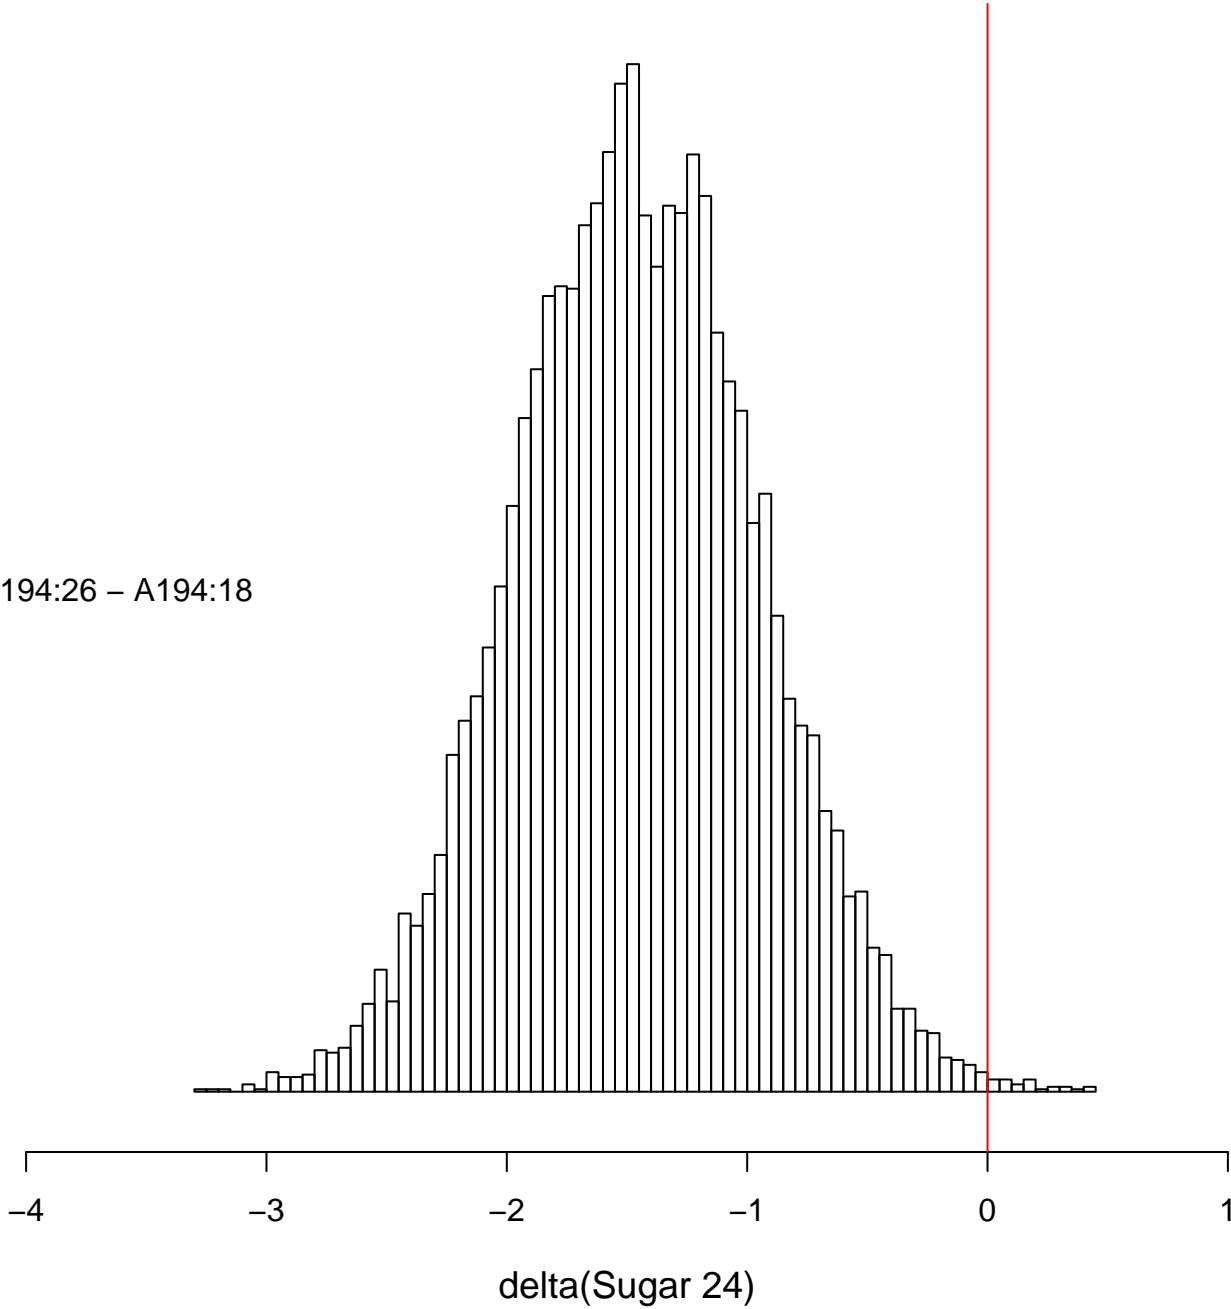

A194:26

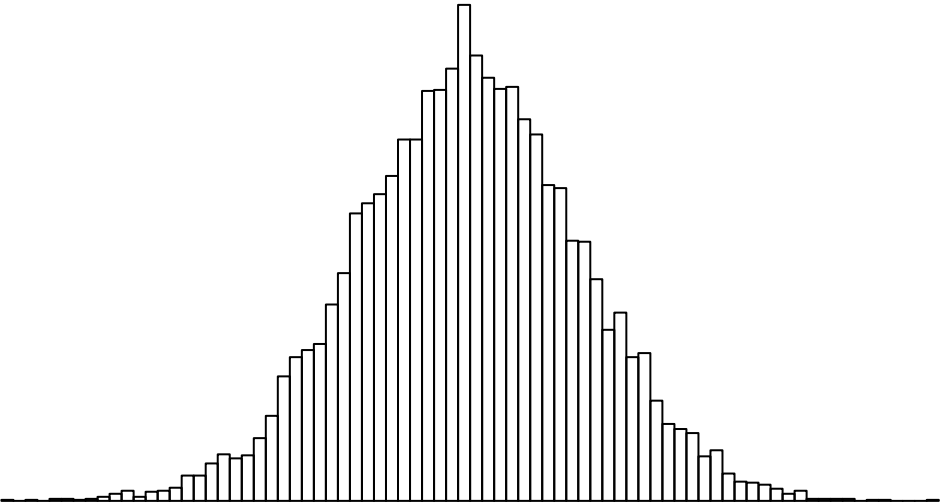

A194:18

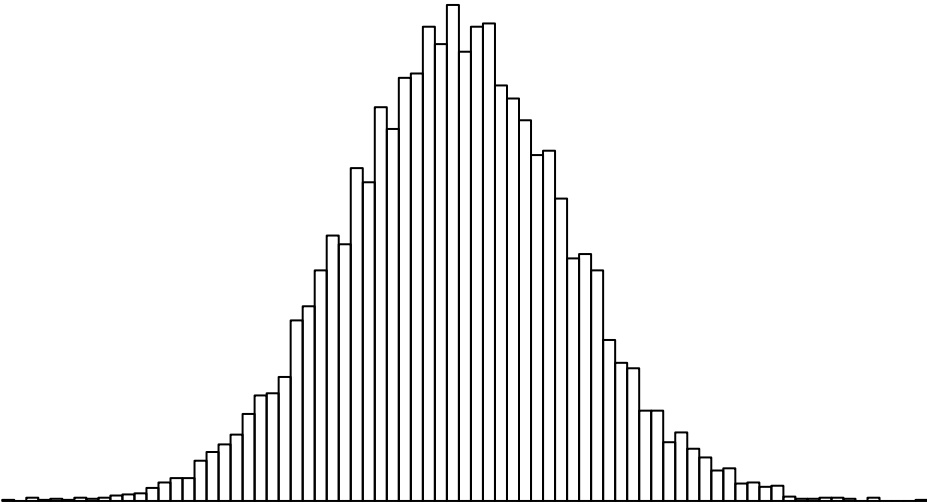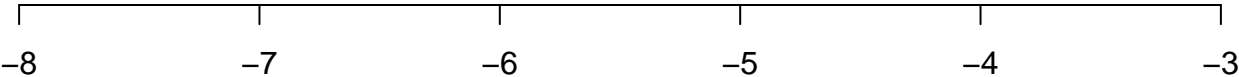

Alcohol 1

A194:26 – A194:18

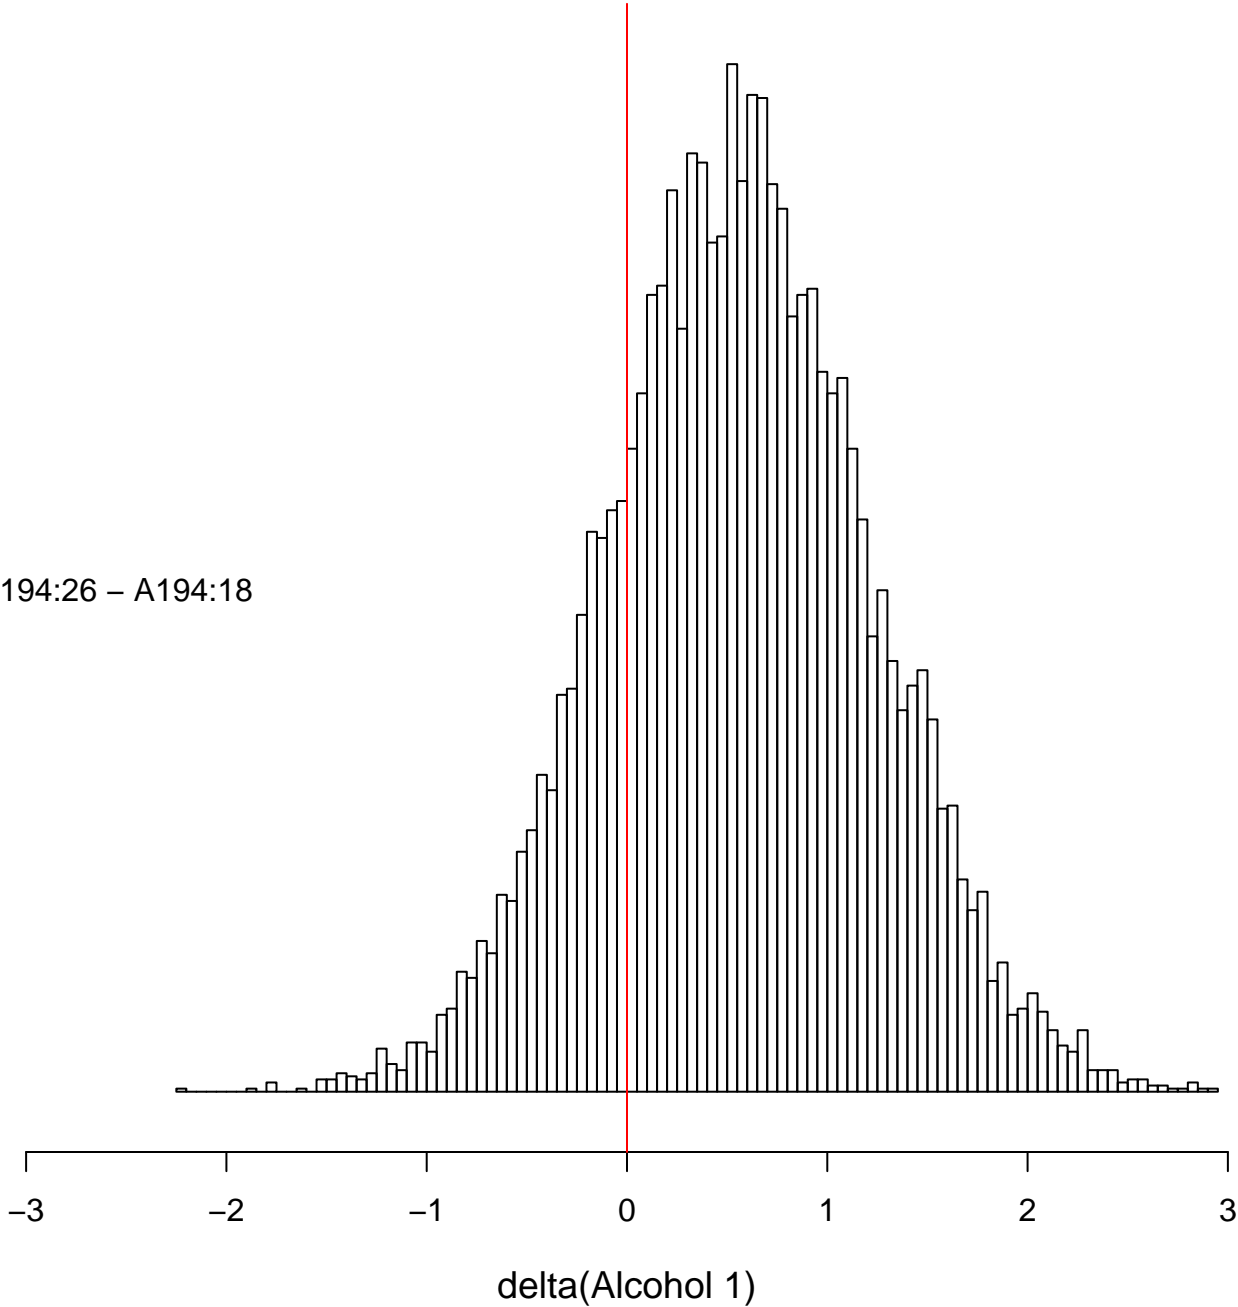

A194:26

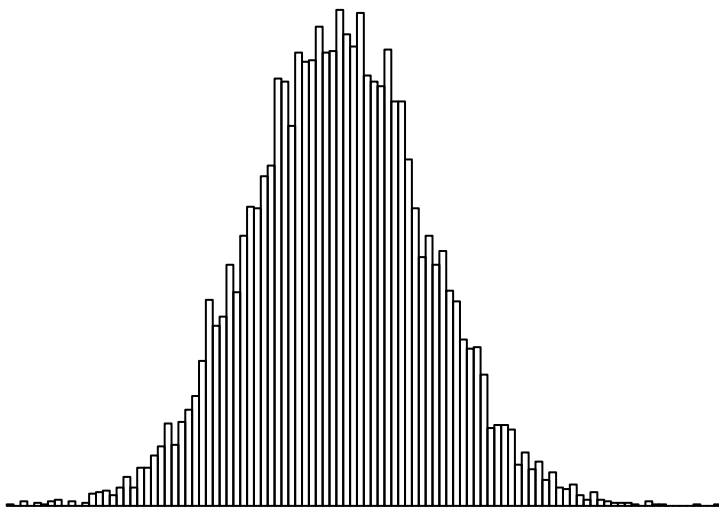

A194:18

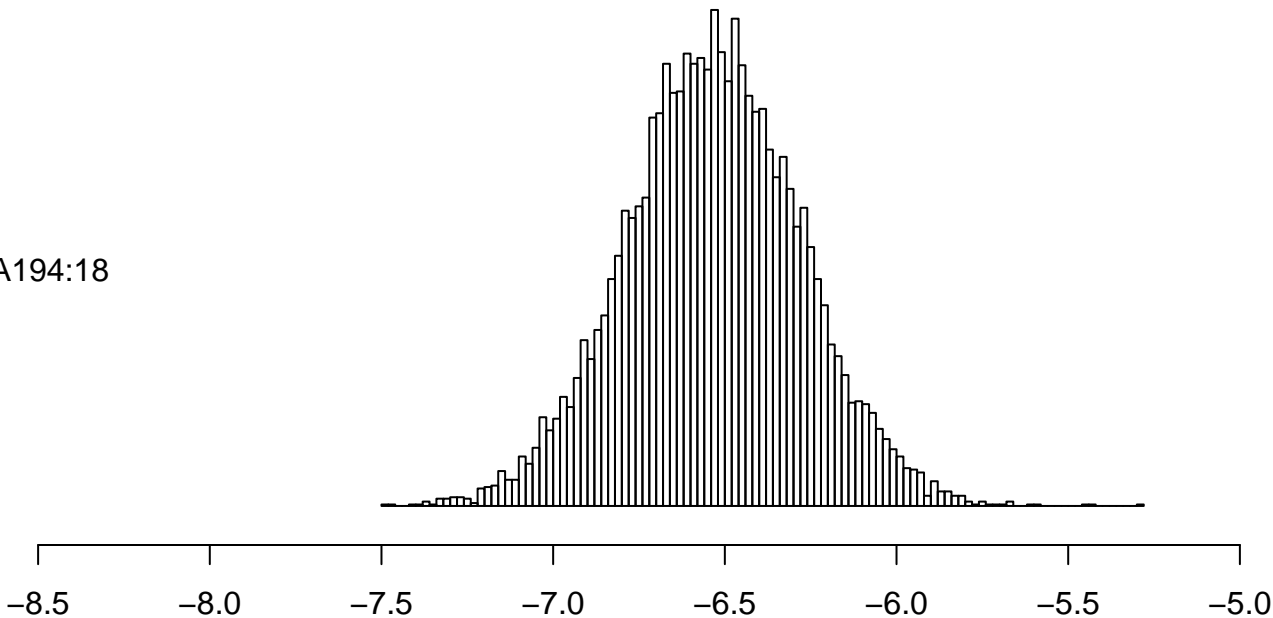

Hydrocarbon 1

A194:26 – A194:18

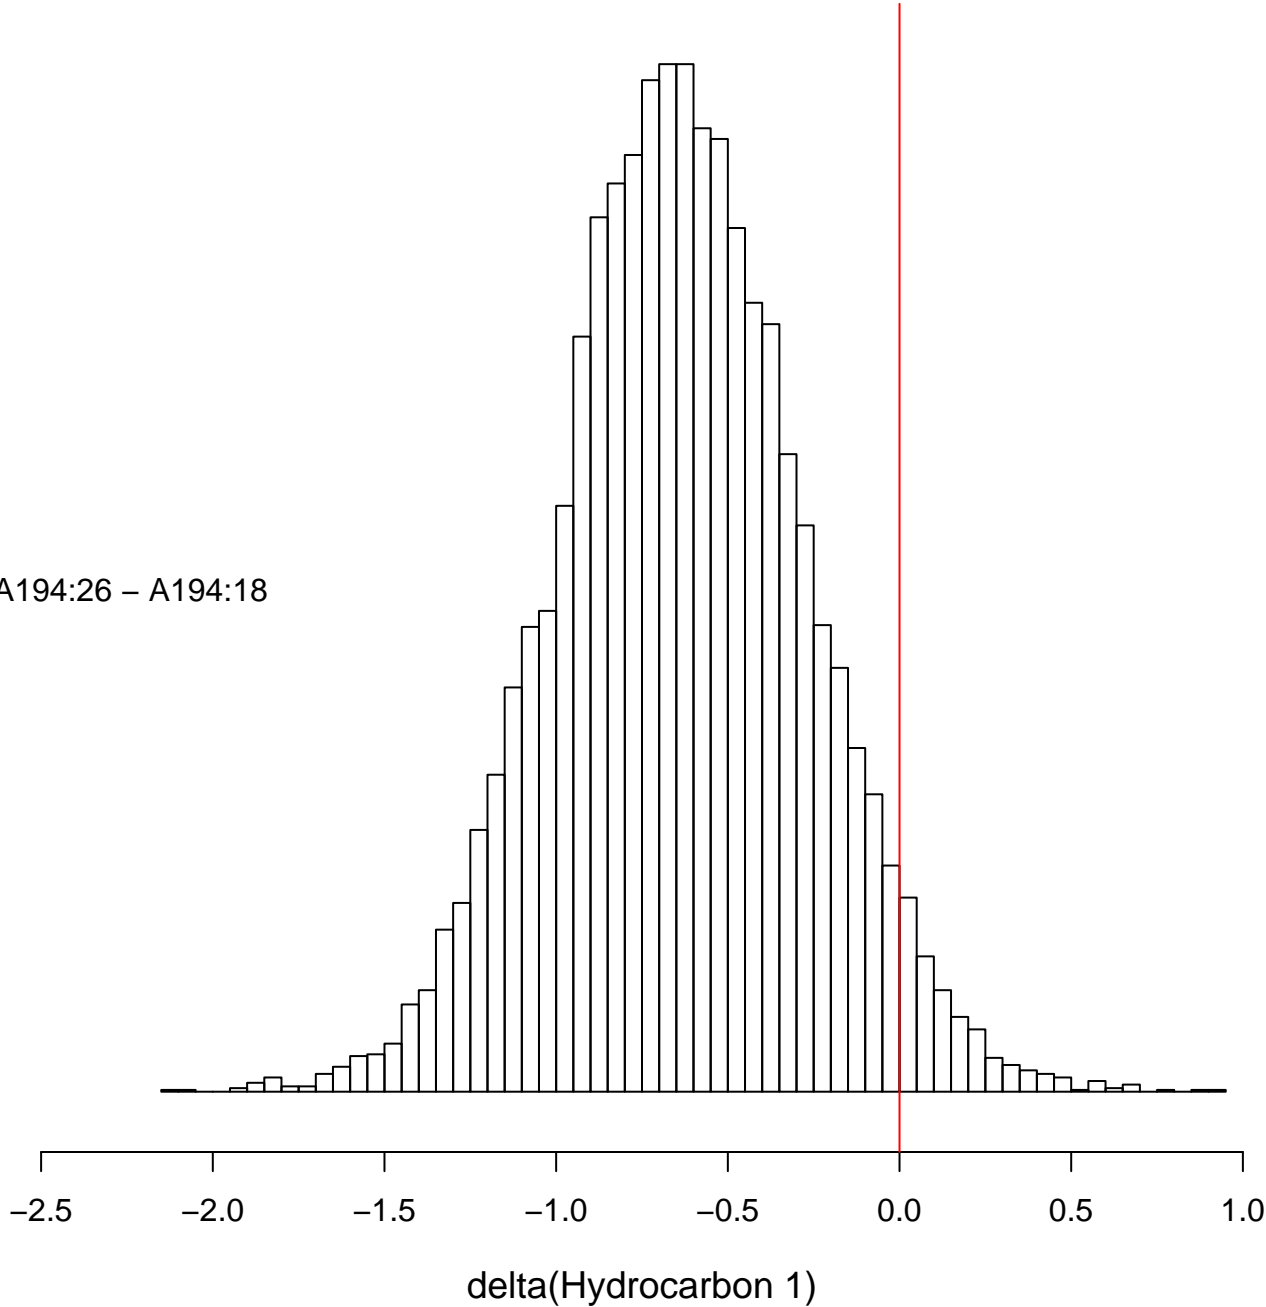



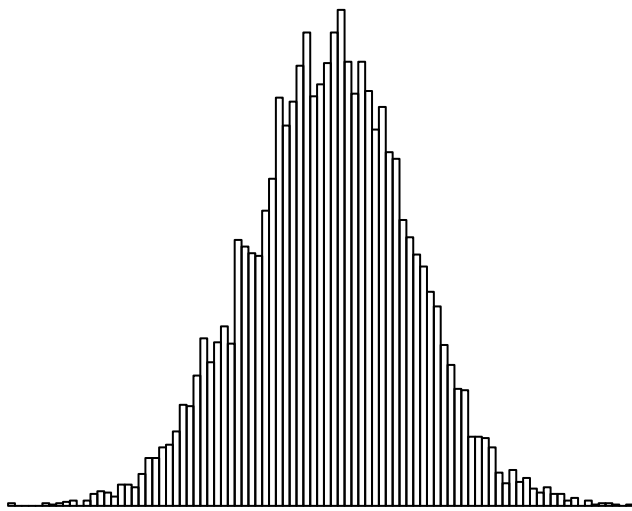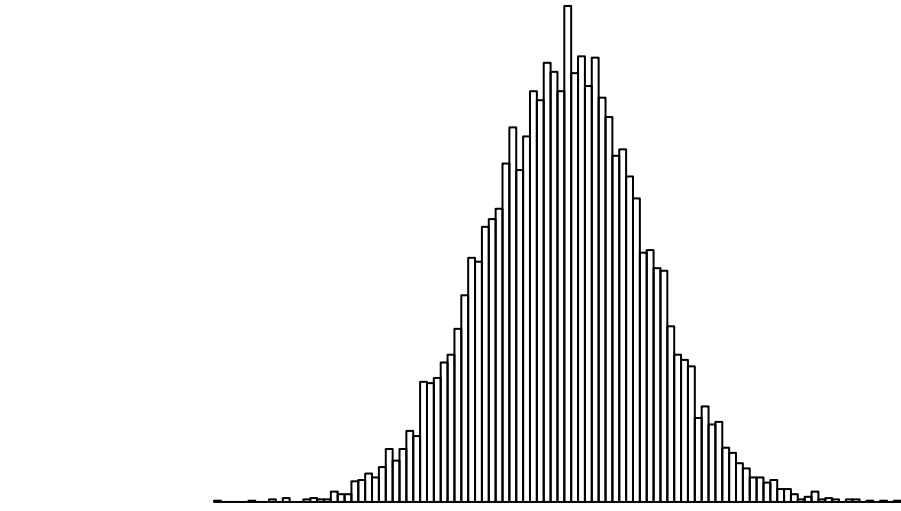

-8.0      -7.5      -7.0      -6.5      -6.0      -5.5      -5.0      -4.5

Hydrocarbon 2

A194:26 – A194:18

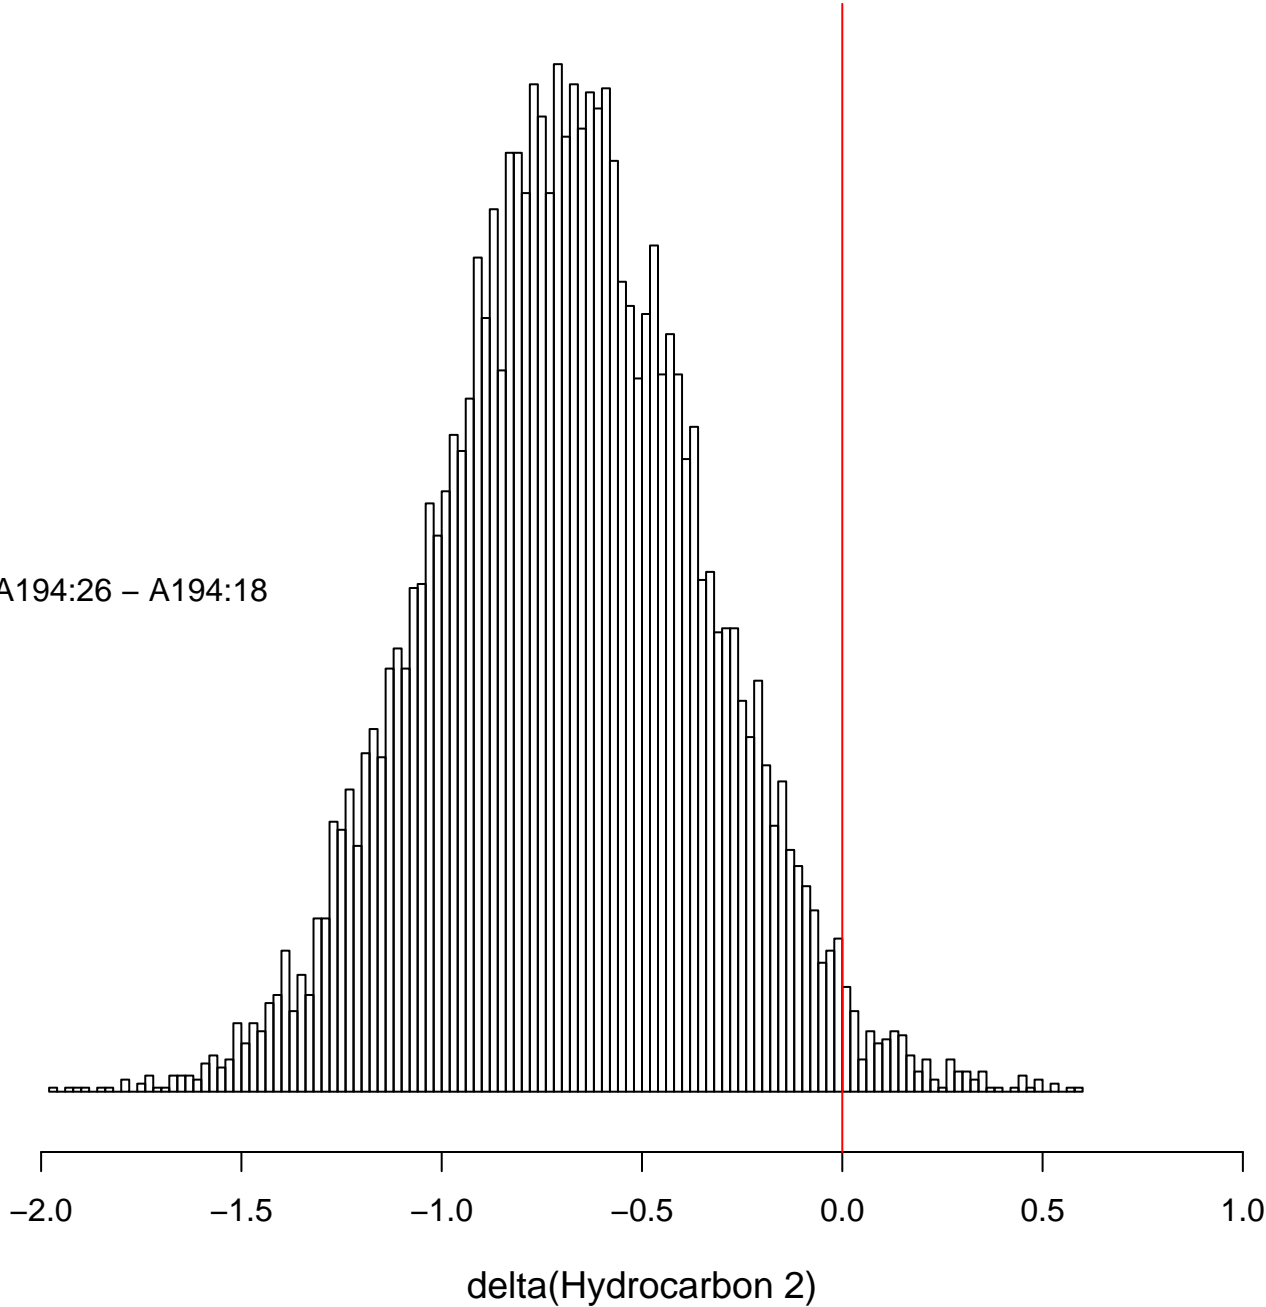

A194:26

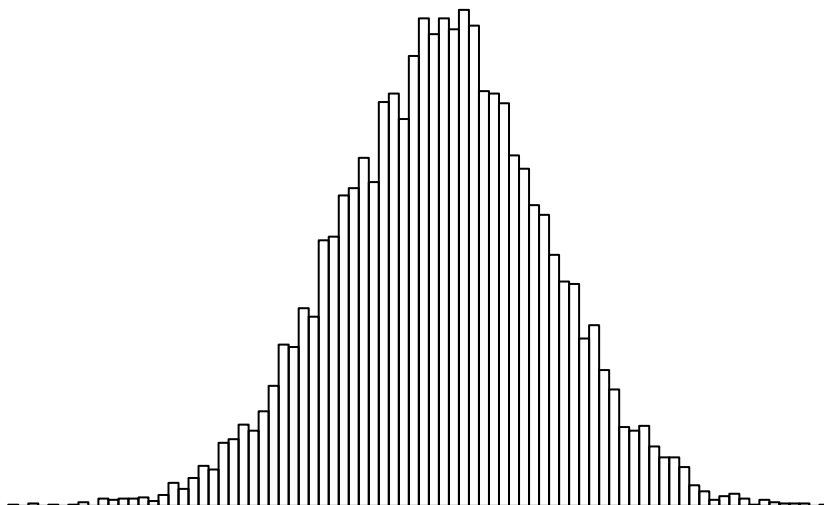

A194:18

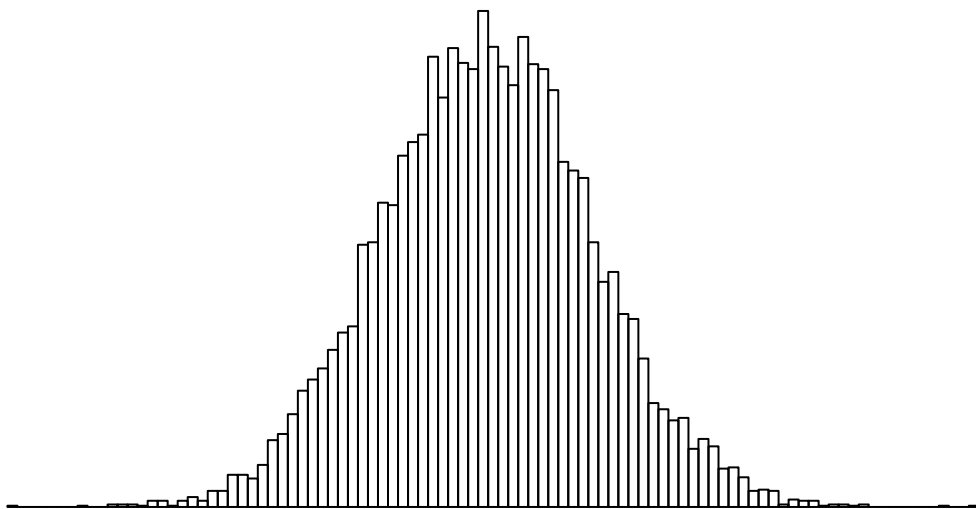

-10

-9

-8

-7

-6

-5

-4

Hydrocarbon 3

A194:26 – A194:18

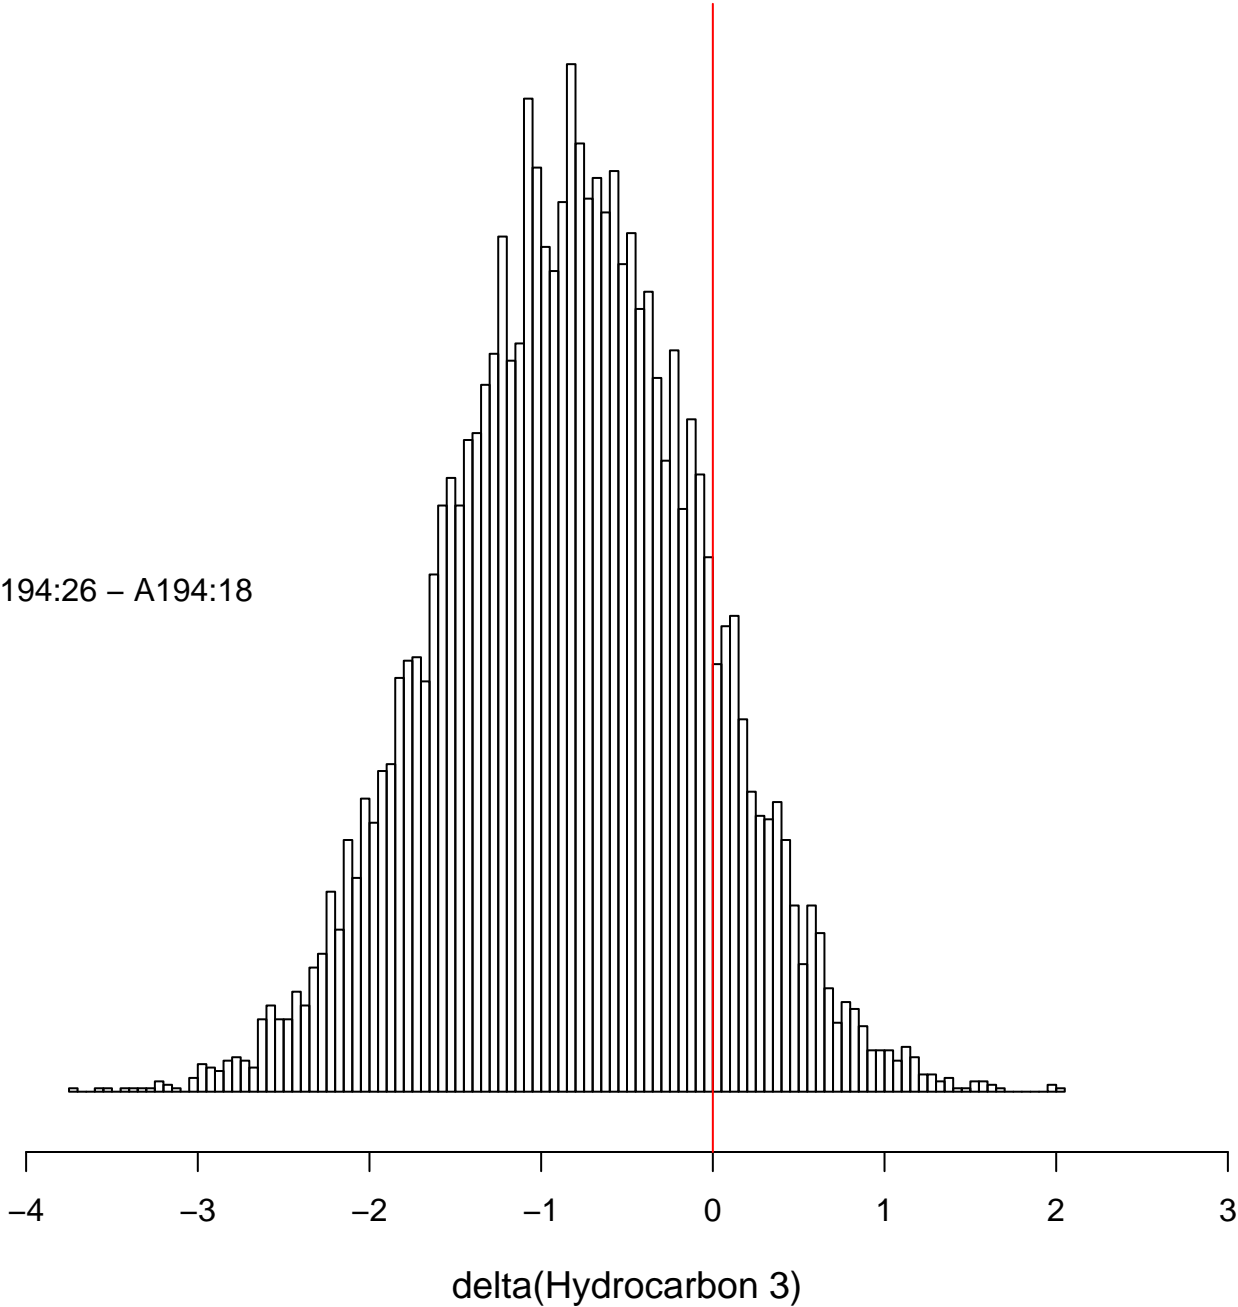

A194:26

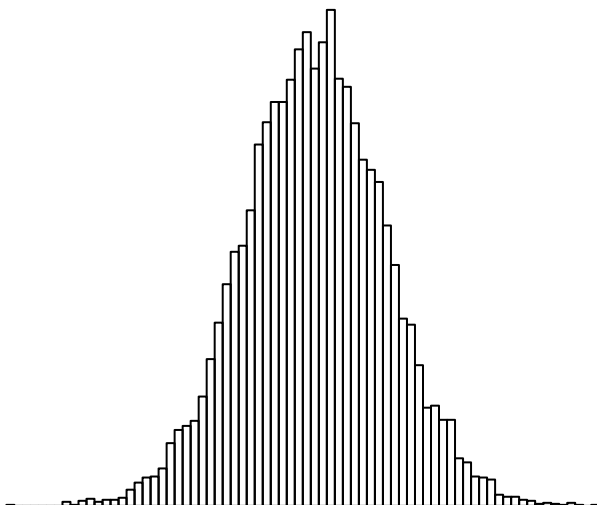

A194:18

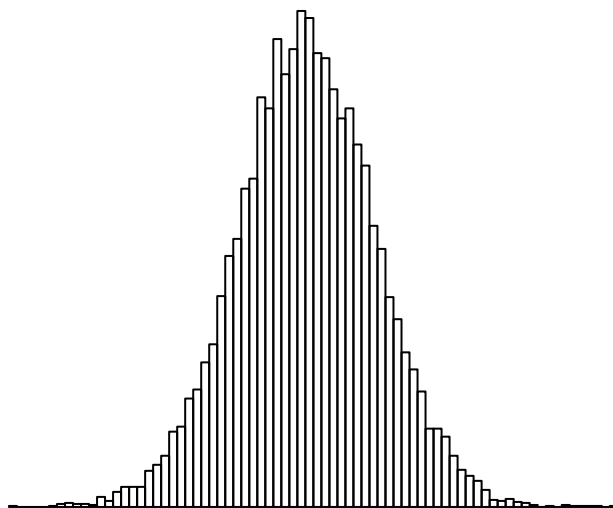

-9.5      -9.0      -8.5      -8.0      -7.5      -7.0      -6.5

Hydrocarbon 4

A194:26 – A194:18

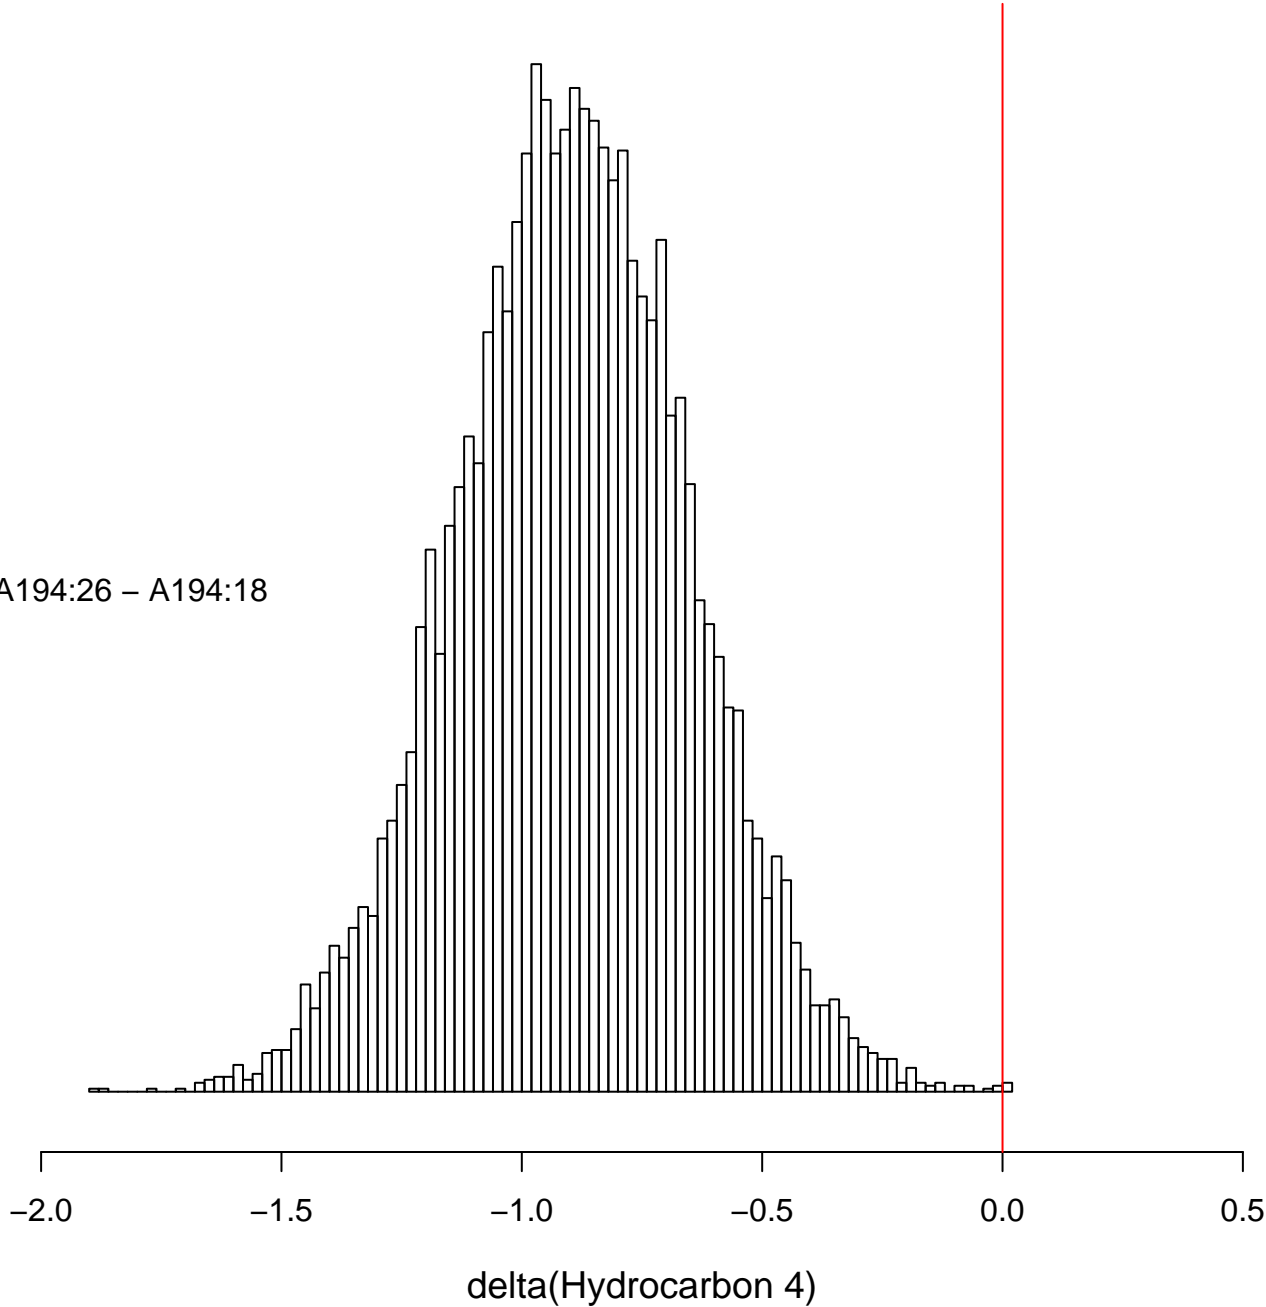

A194:26

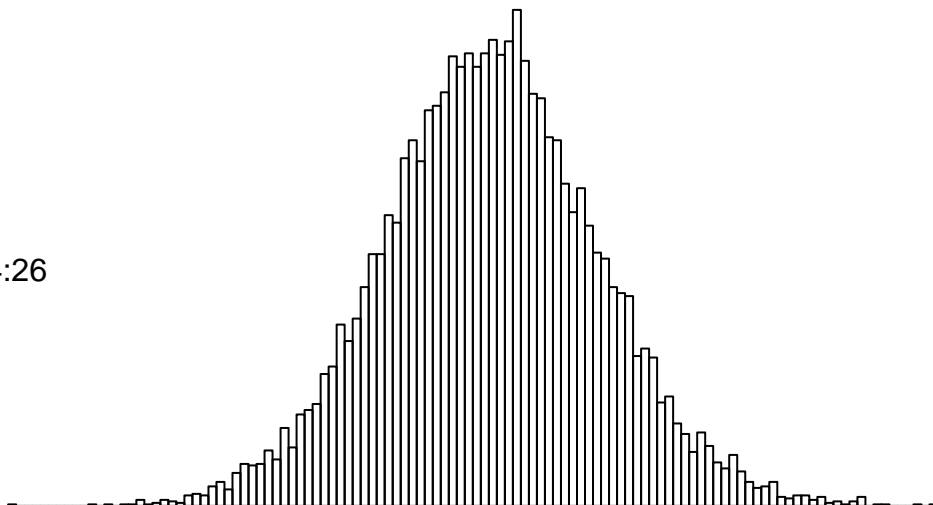

A194:18

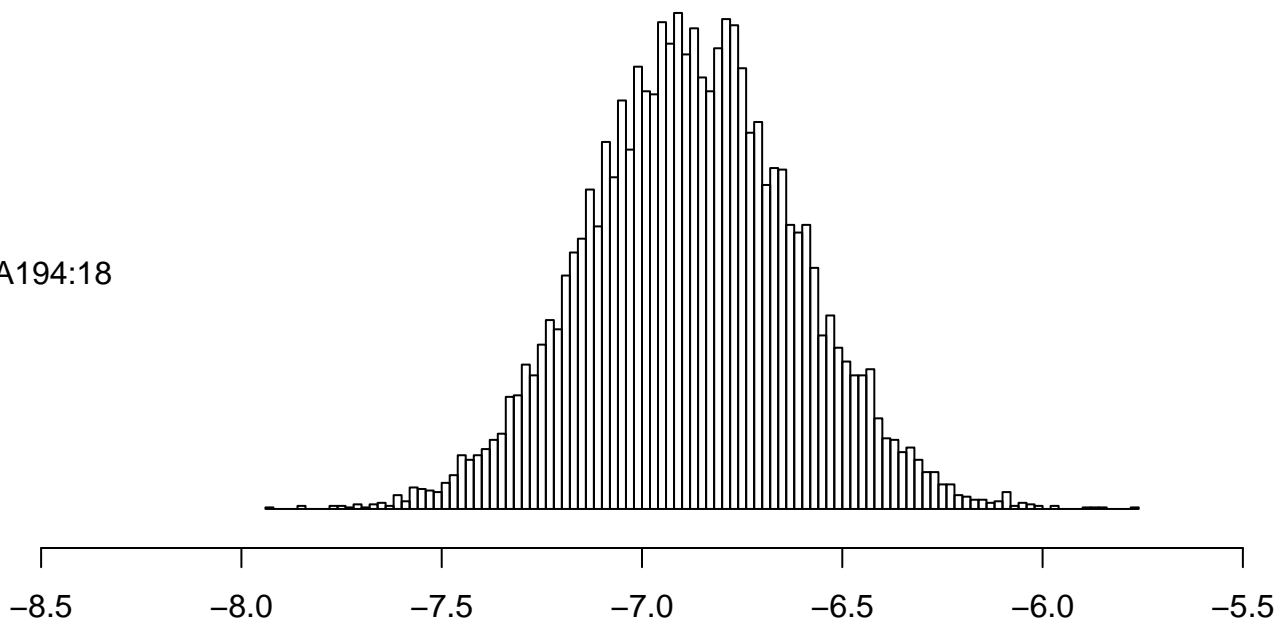

Unidentified Metabolite 1

A194:26 – A194:18

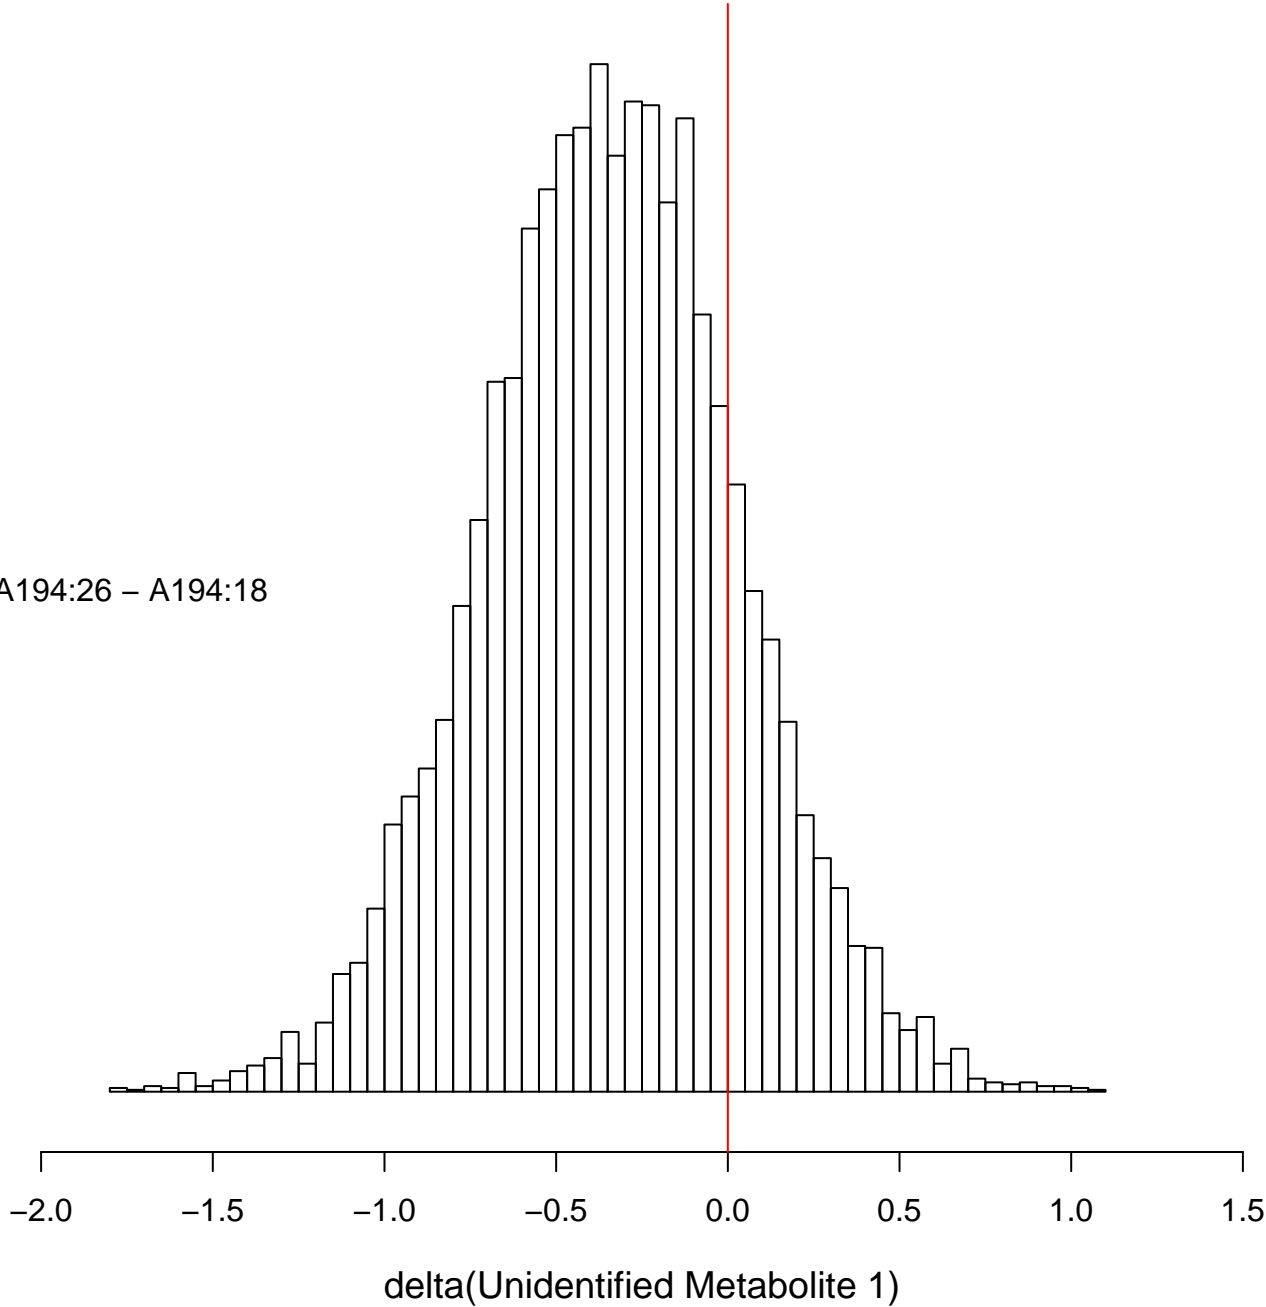



A194:26

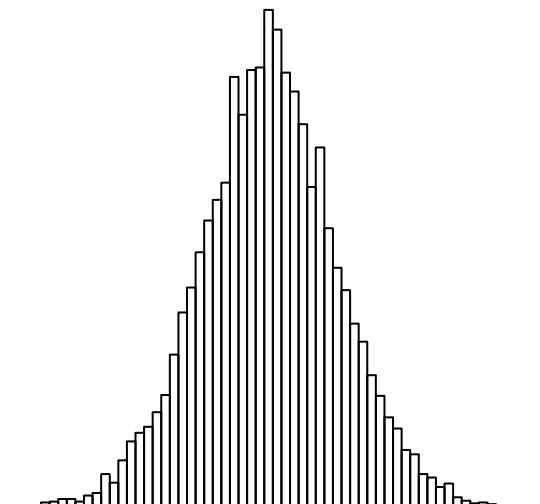

A194:18

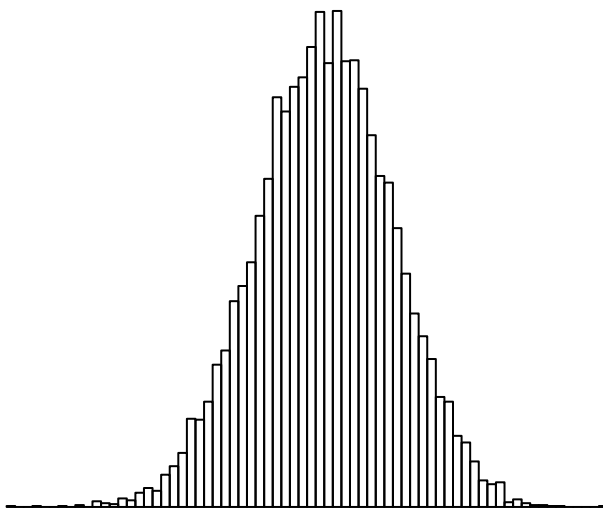

-11      -10      -9      -8      -7      -6      -5      -4

Unidentified Metabolite 2

A194:26 – A194:18

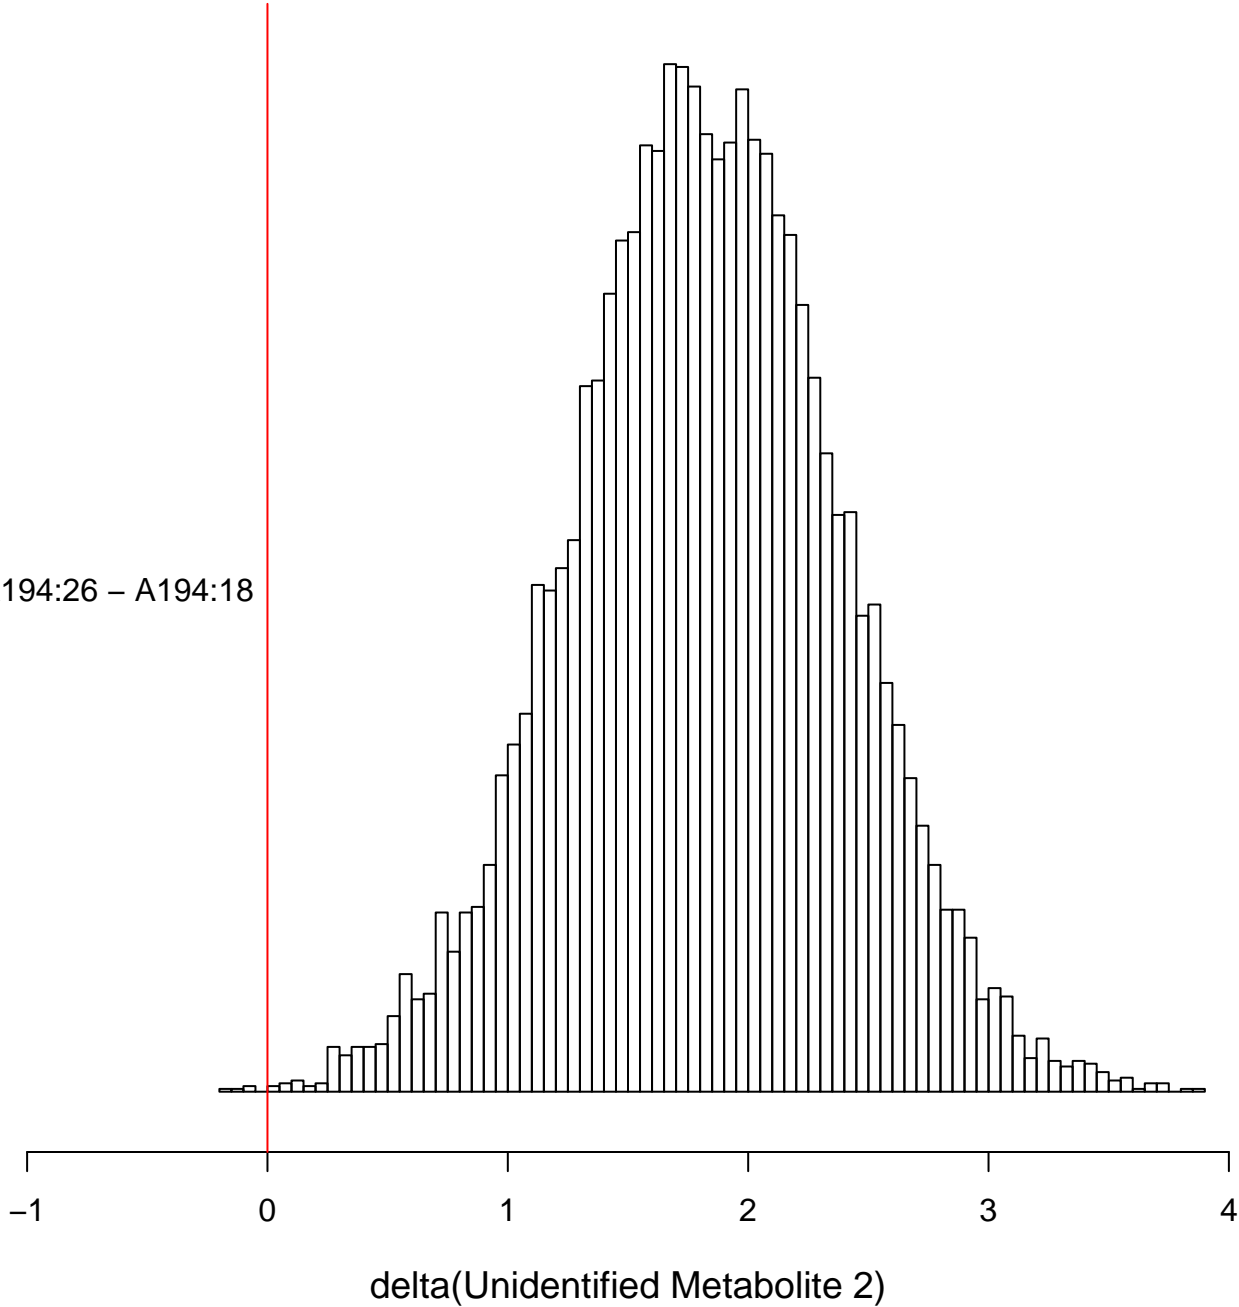

A194:26

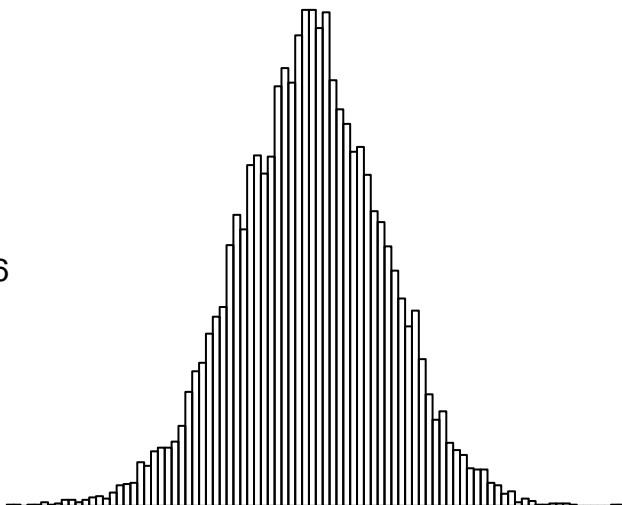

A194:18

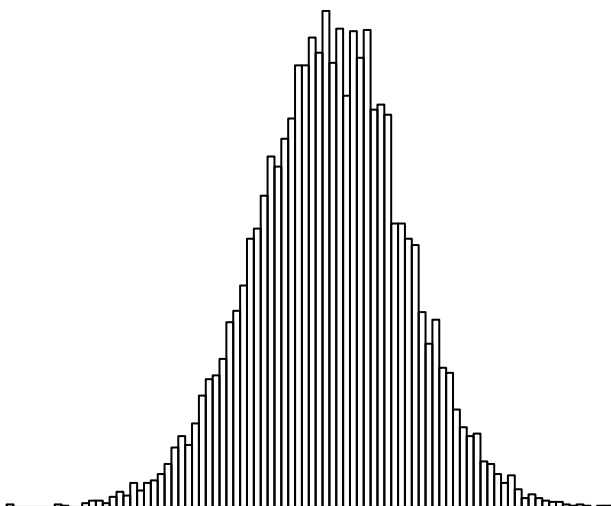

-10.5      -10.0      -9.5      -9.0      -8.5      -8.0      -7.5      -7.0

Unidentified Metabolite 3

A194:26 – A194:18

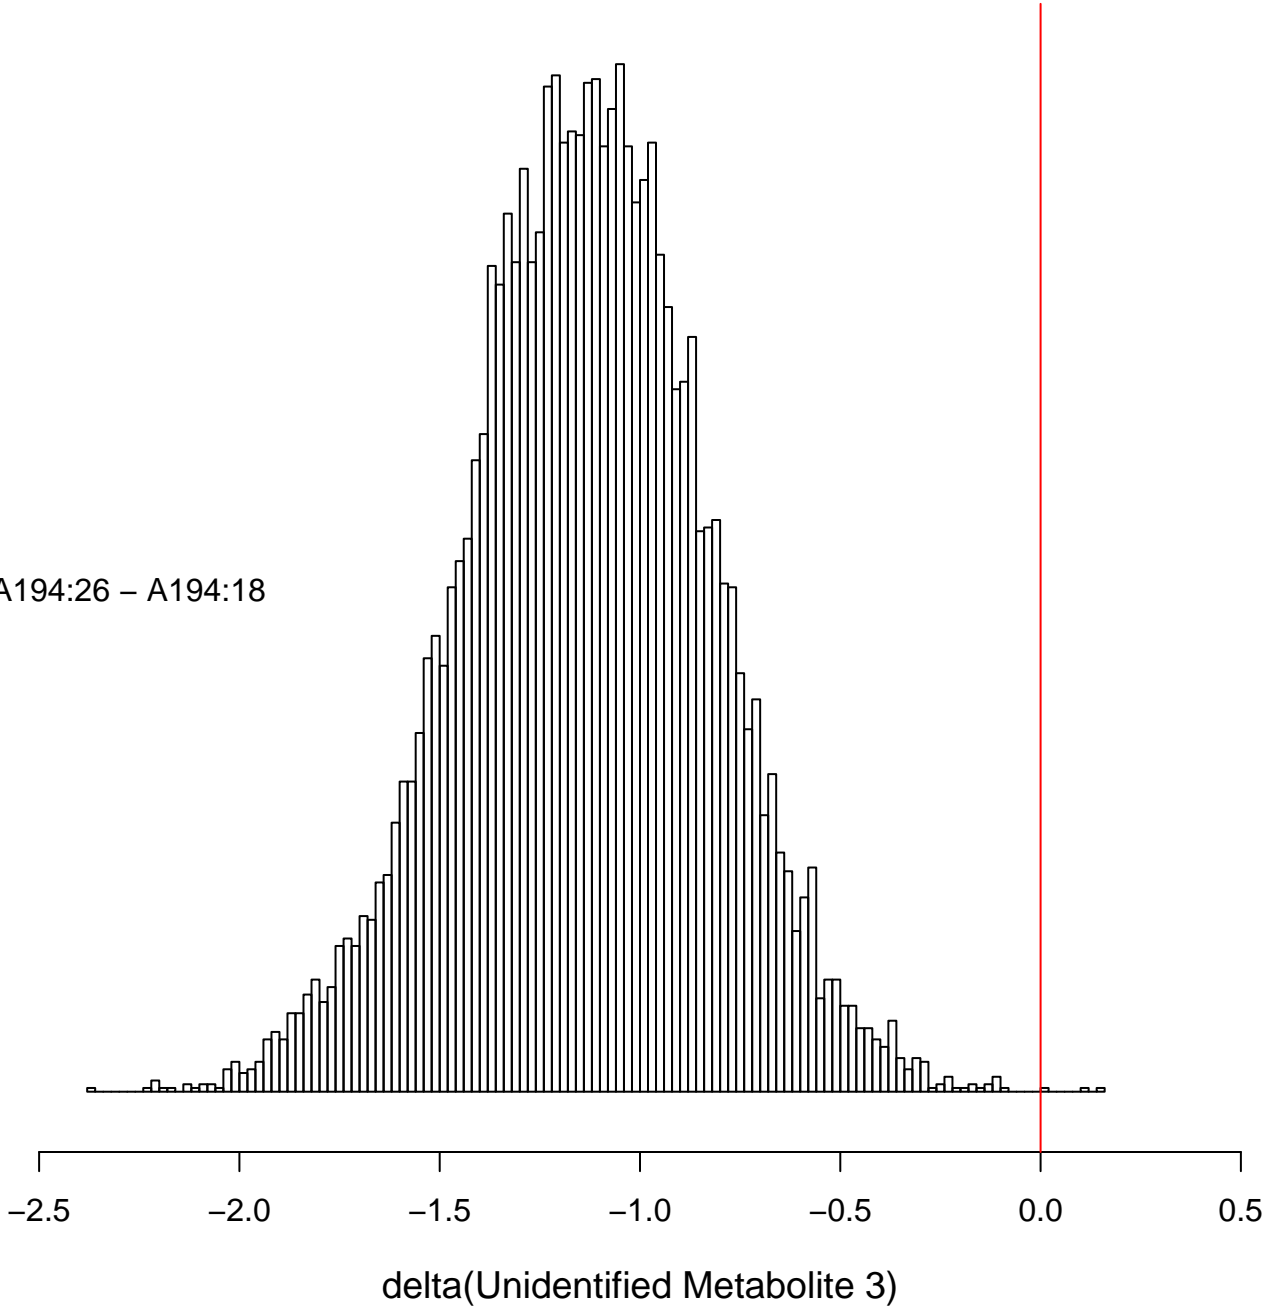

A194:26

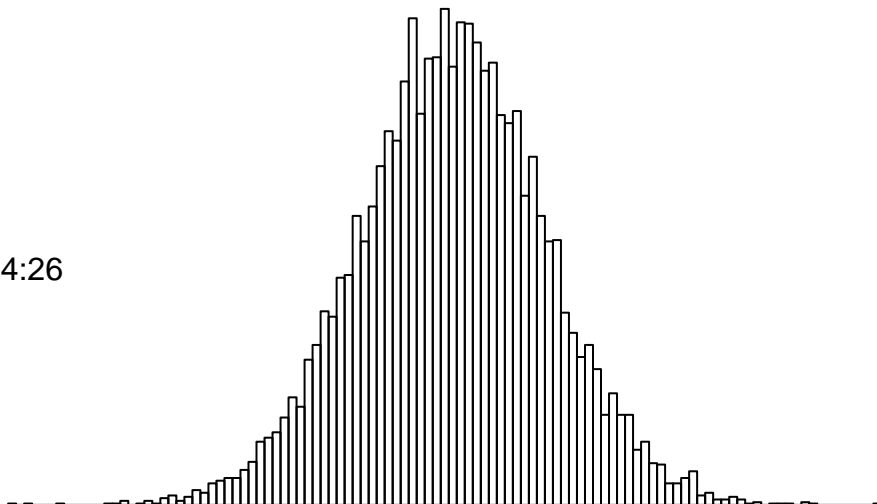

A194:18

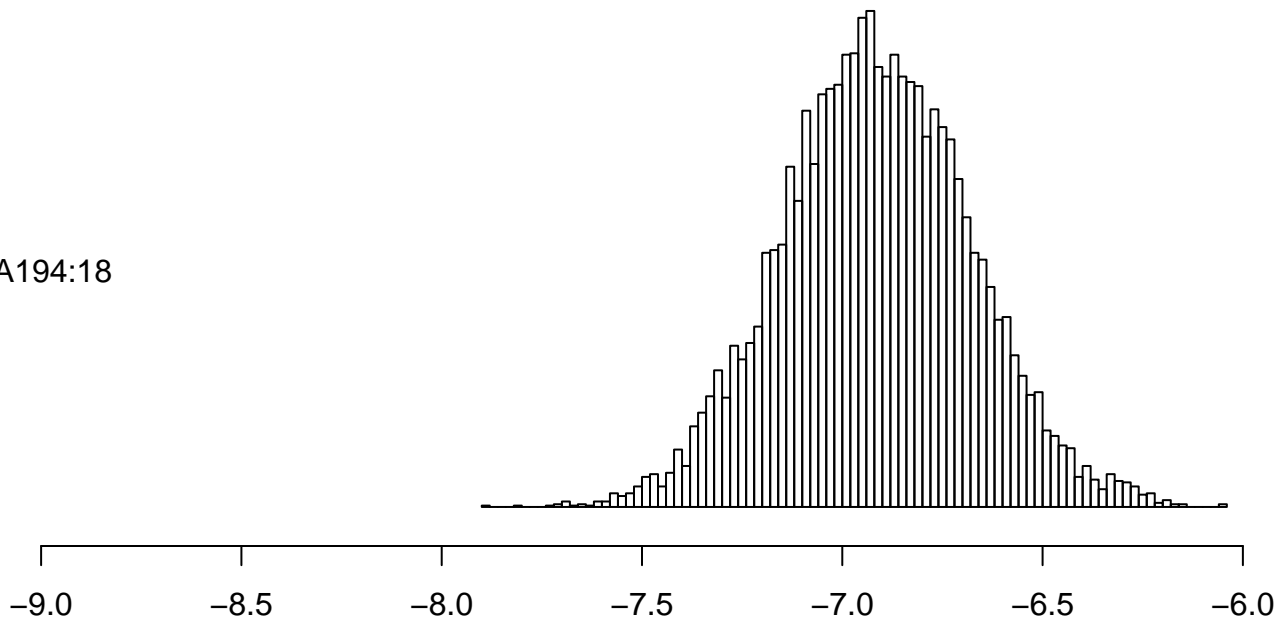

Unidentified Metabolite 4

A194:26 – A194:18

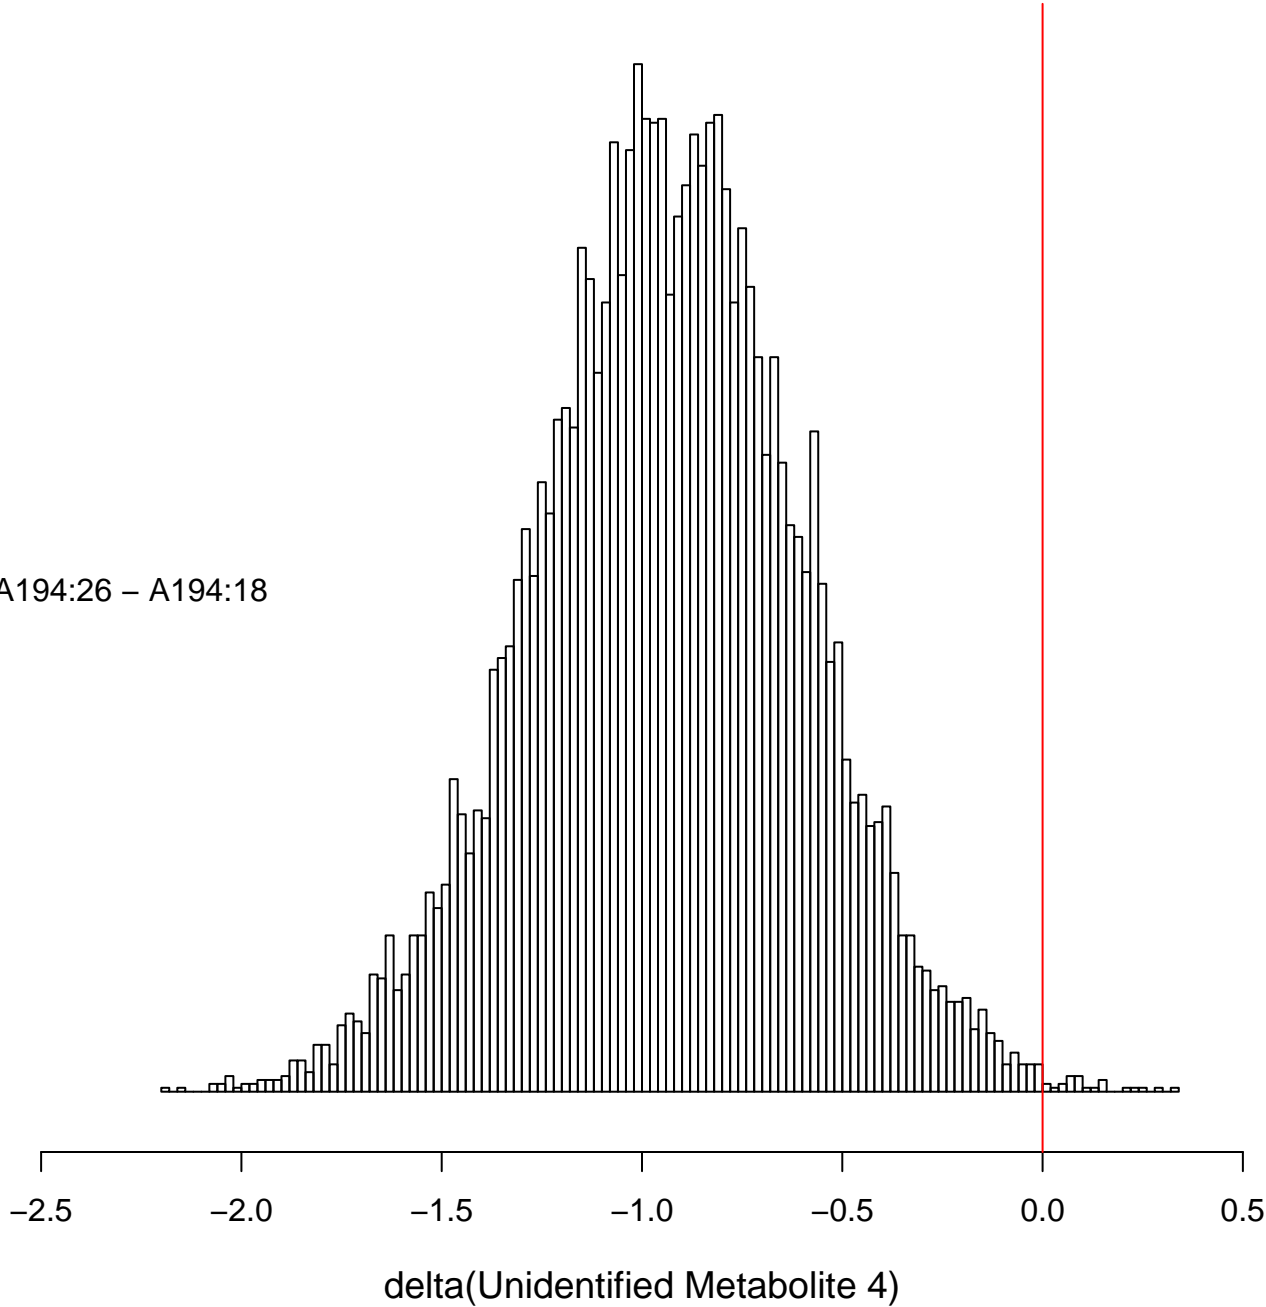

A194:26

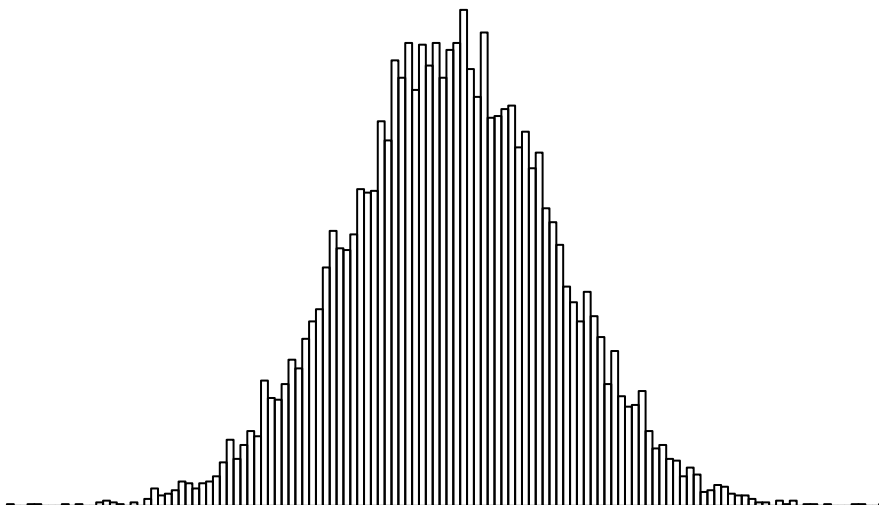

A194:18

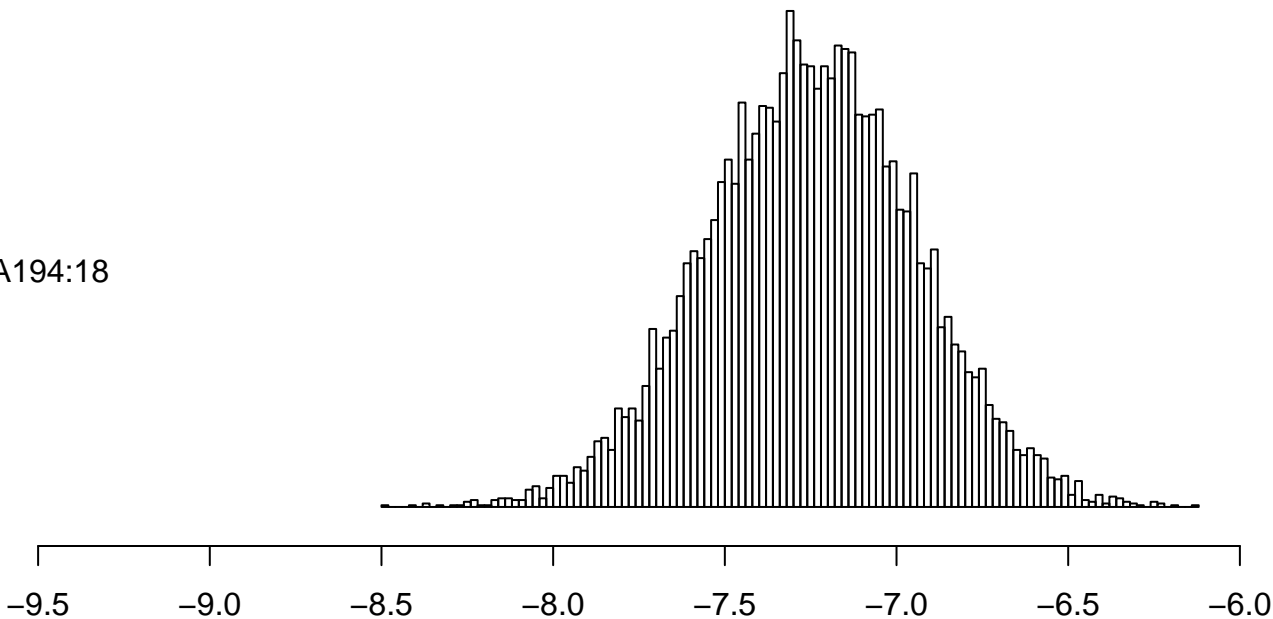

Unidentified Metabolite 5

A194:26 – A194:18

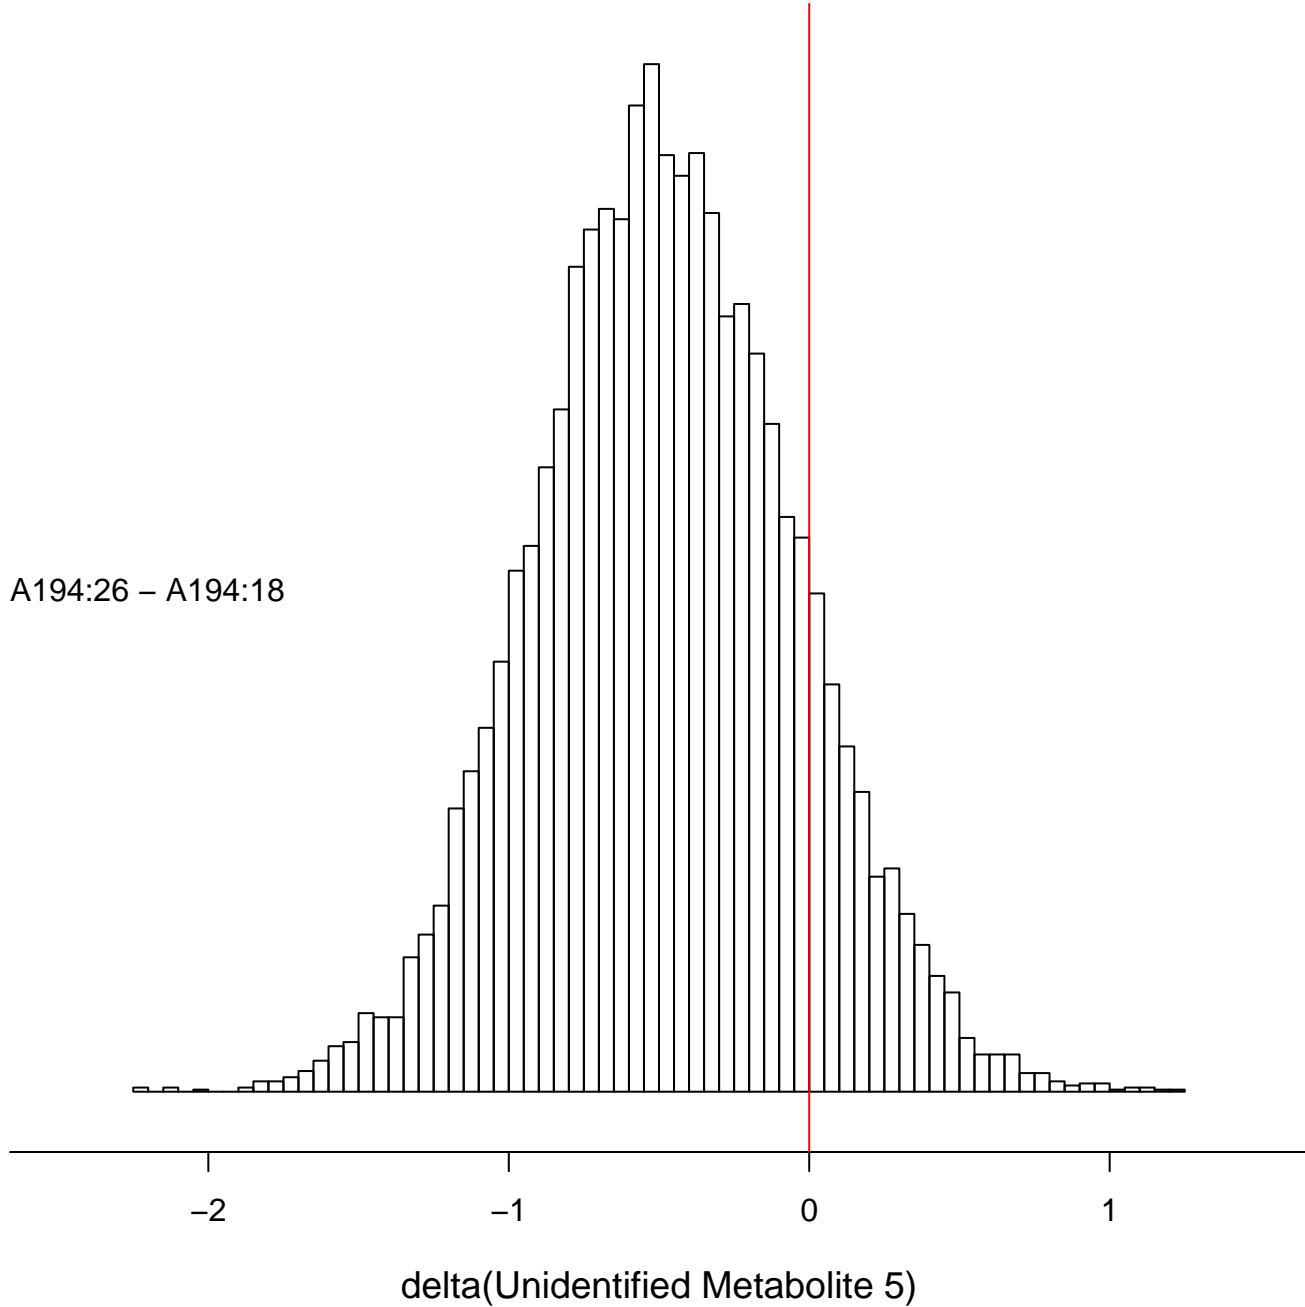



A194:26

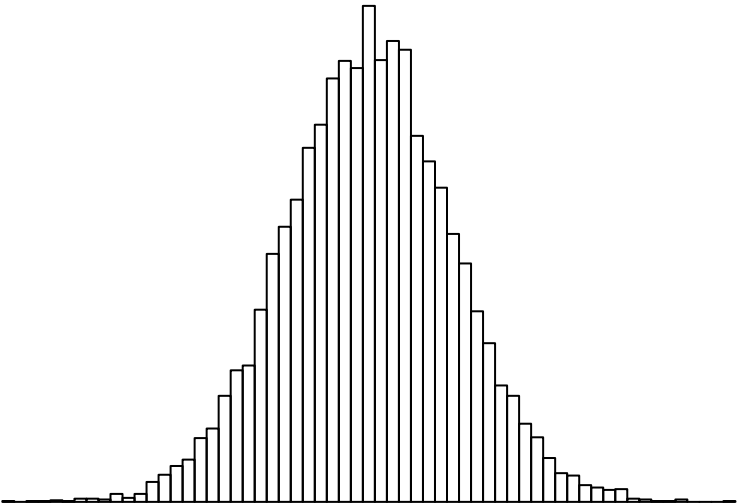

A194:18

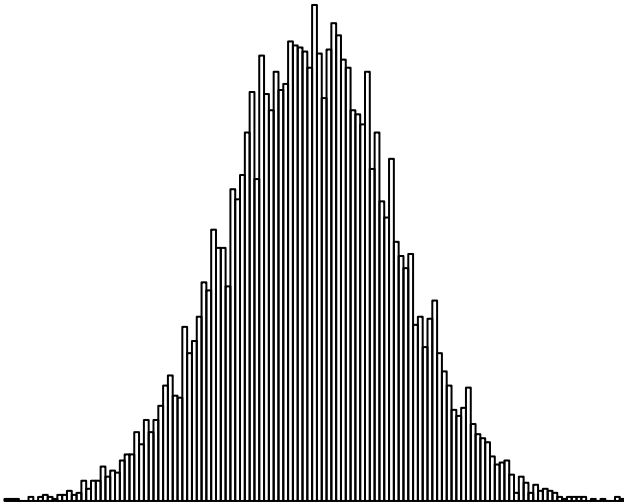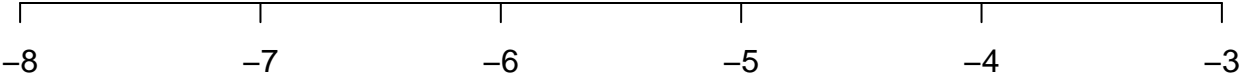

Unidentified Metabolite 6

A194:26 – A194:18

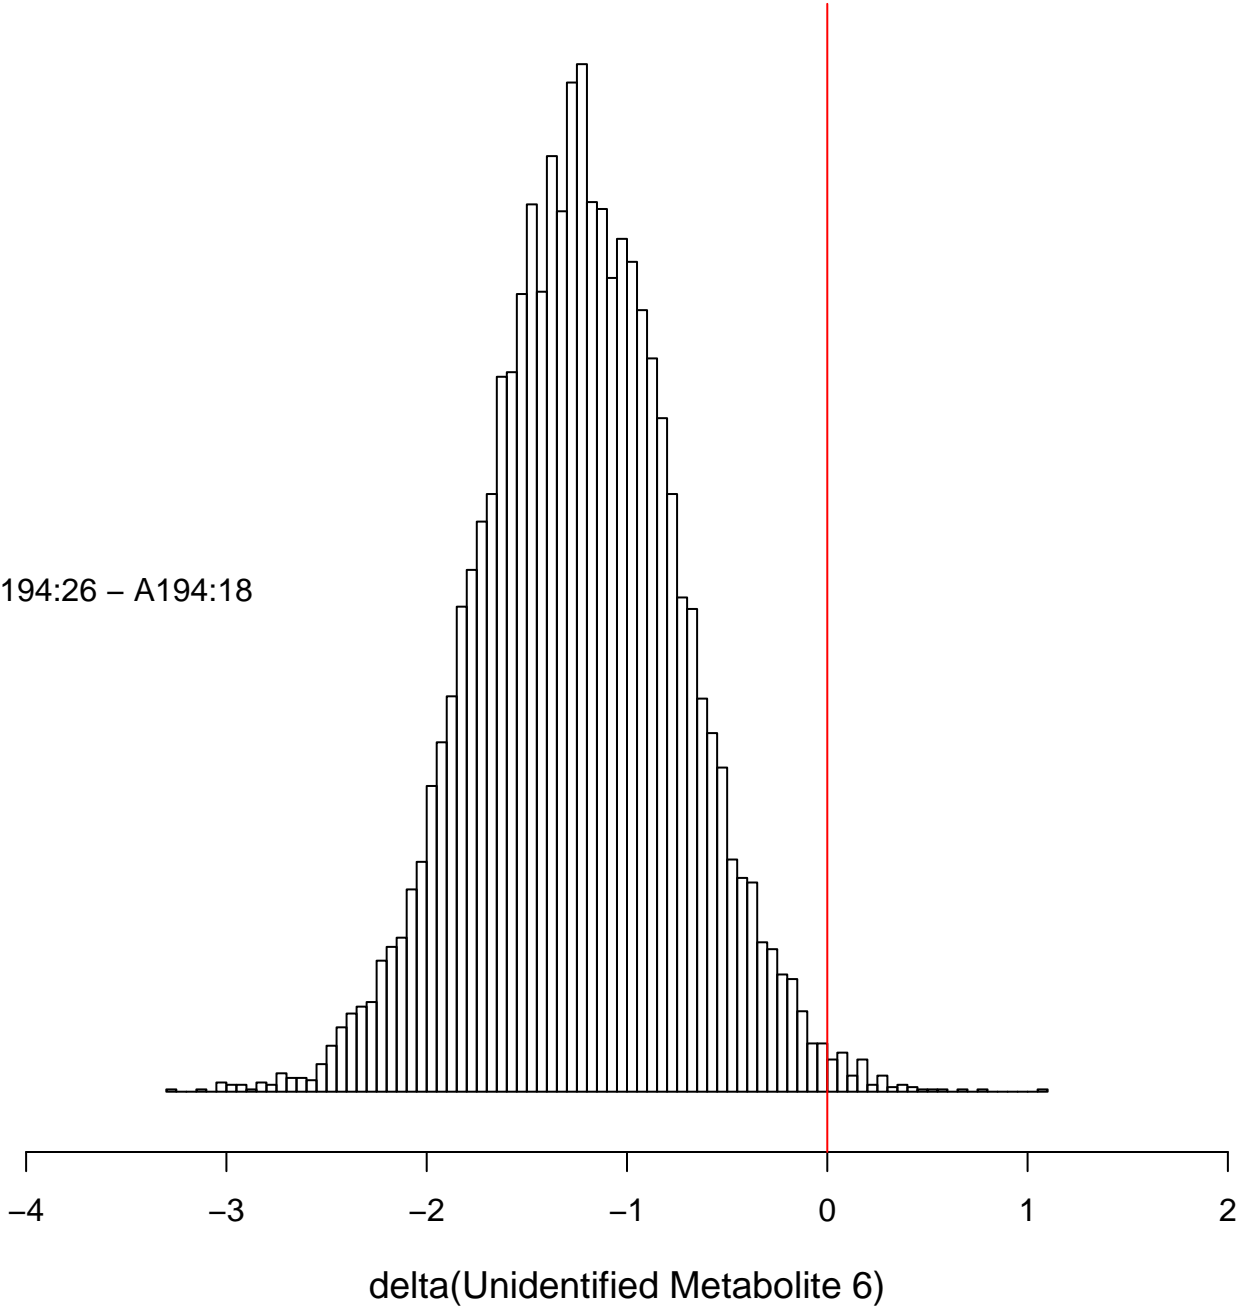

A194:26

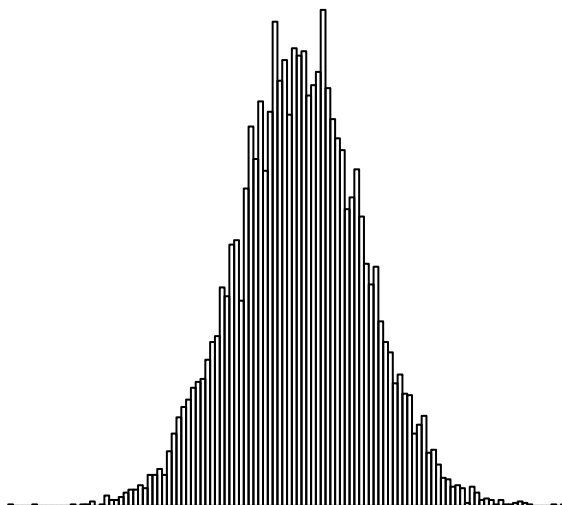

A194:18

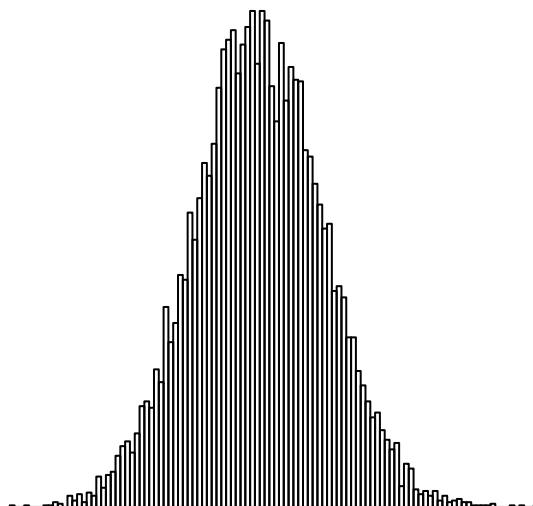

-9 -8 -7 -6 -5 -4

Unidentified Metabolite 7

A194:26 – A194:18

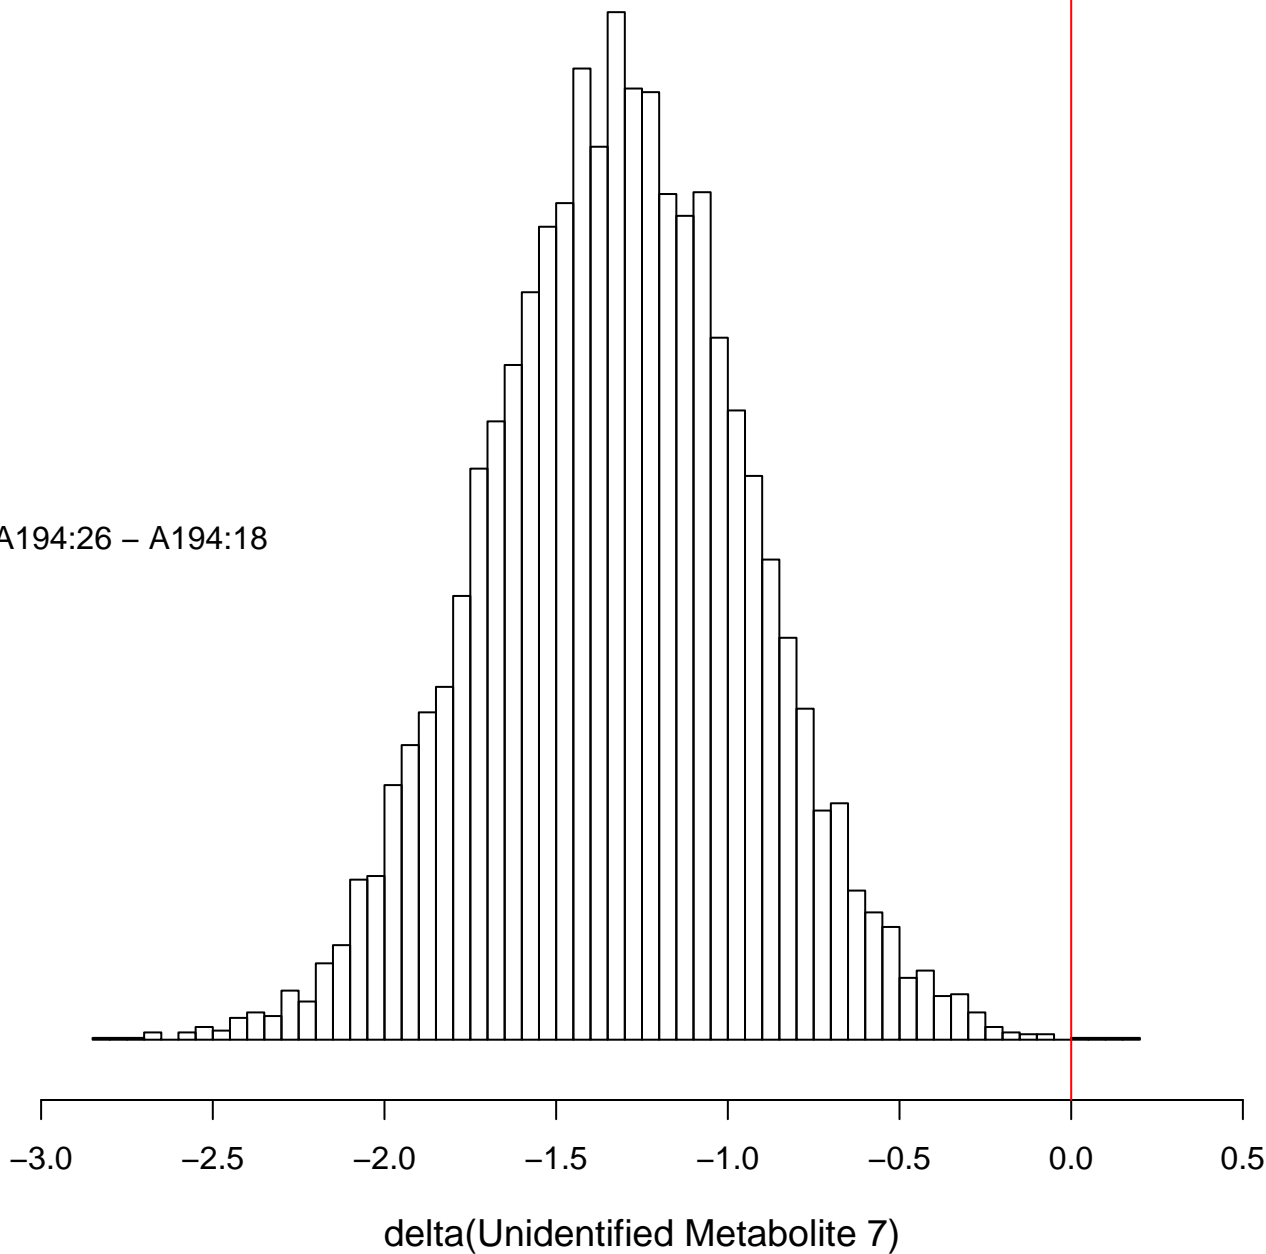

A194:26

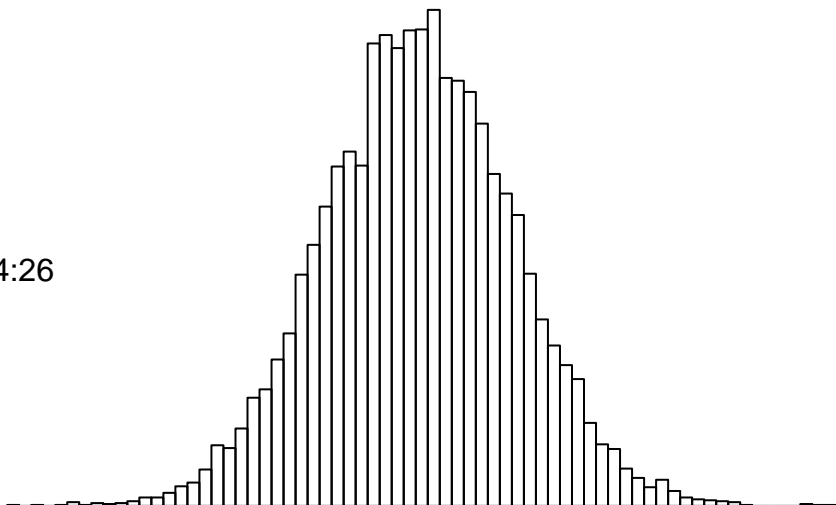

A194:18

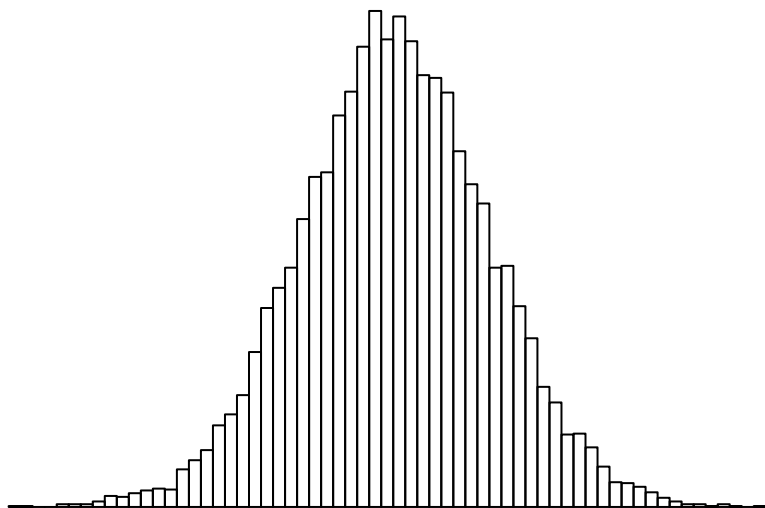

-8

-7

-6

-5

-4

-3

Unidentified Metabolite 8

A194:26 – A194:18

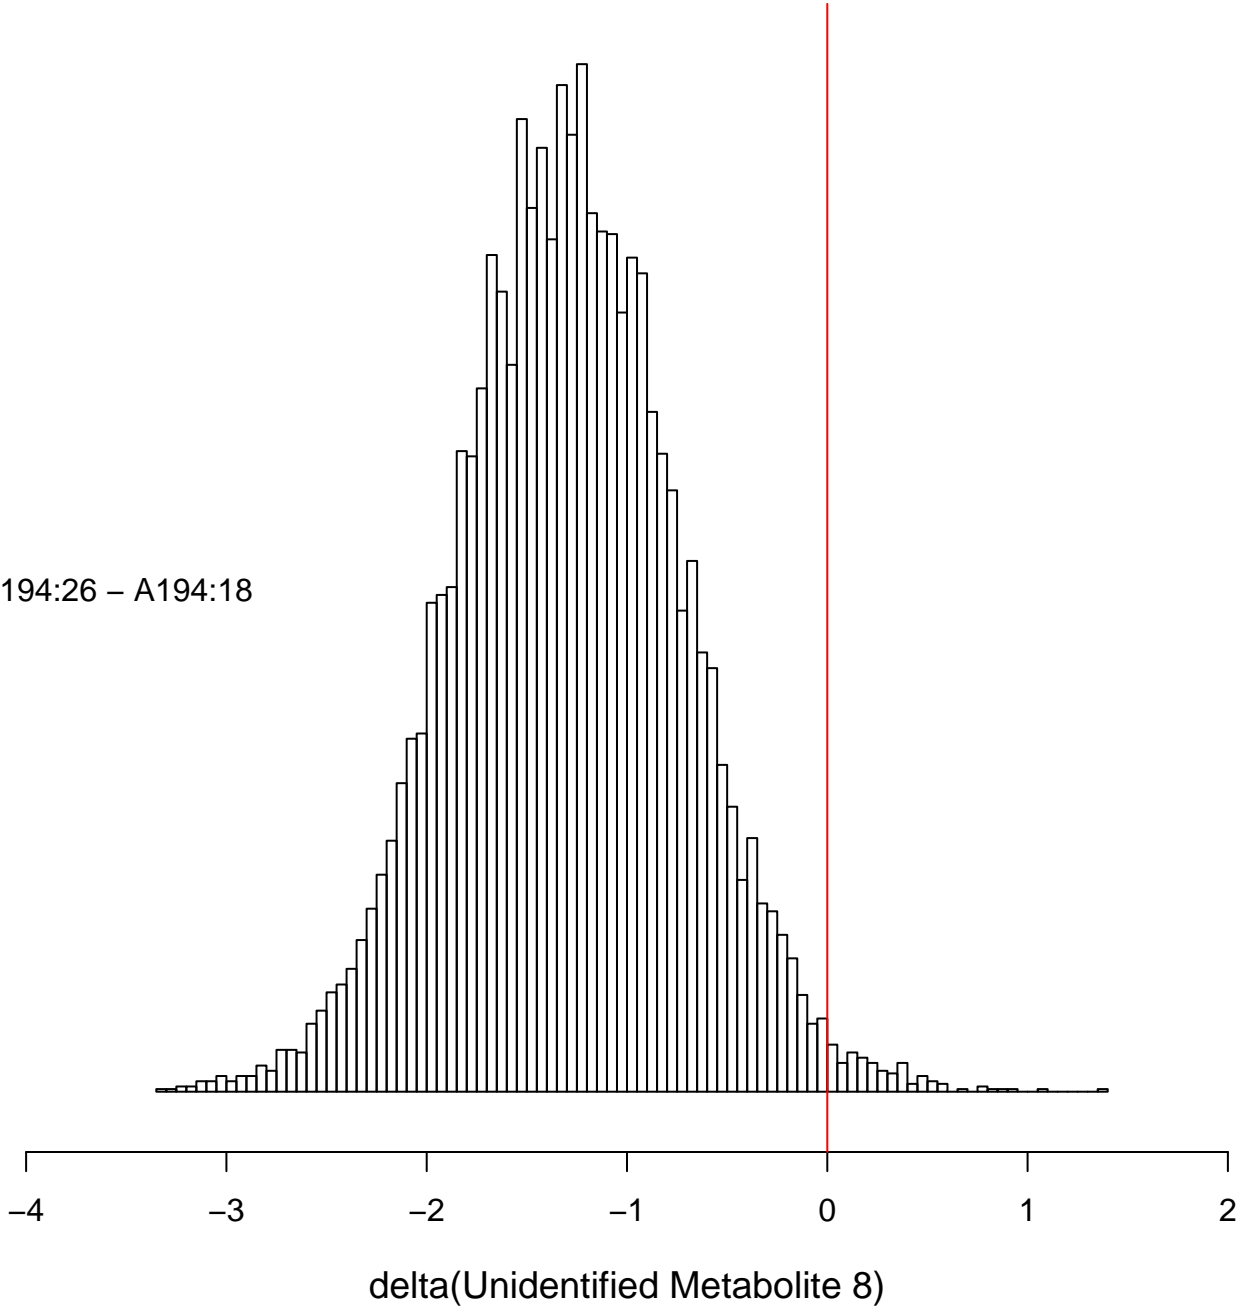

A194:26

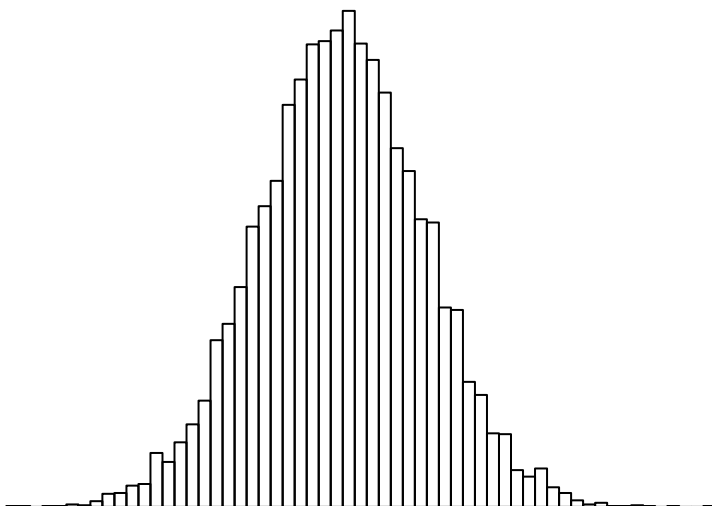

A194:18

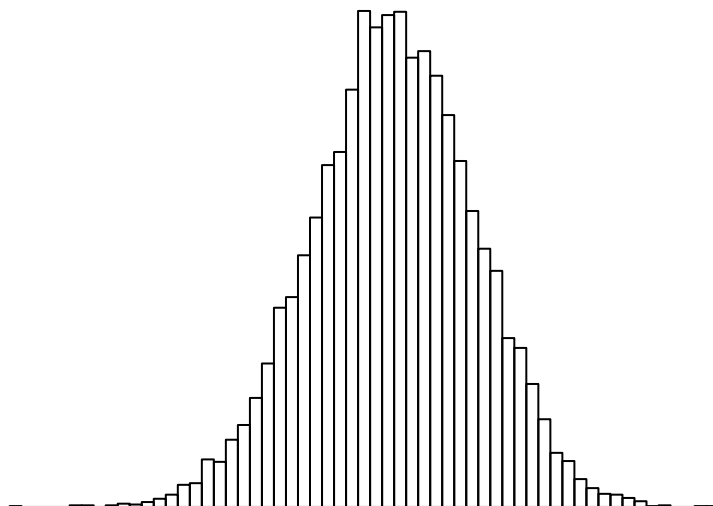

-9 -8 -7 -6 -5 -4

Unidentified Metabolite 9

A194:26 – A194:18

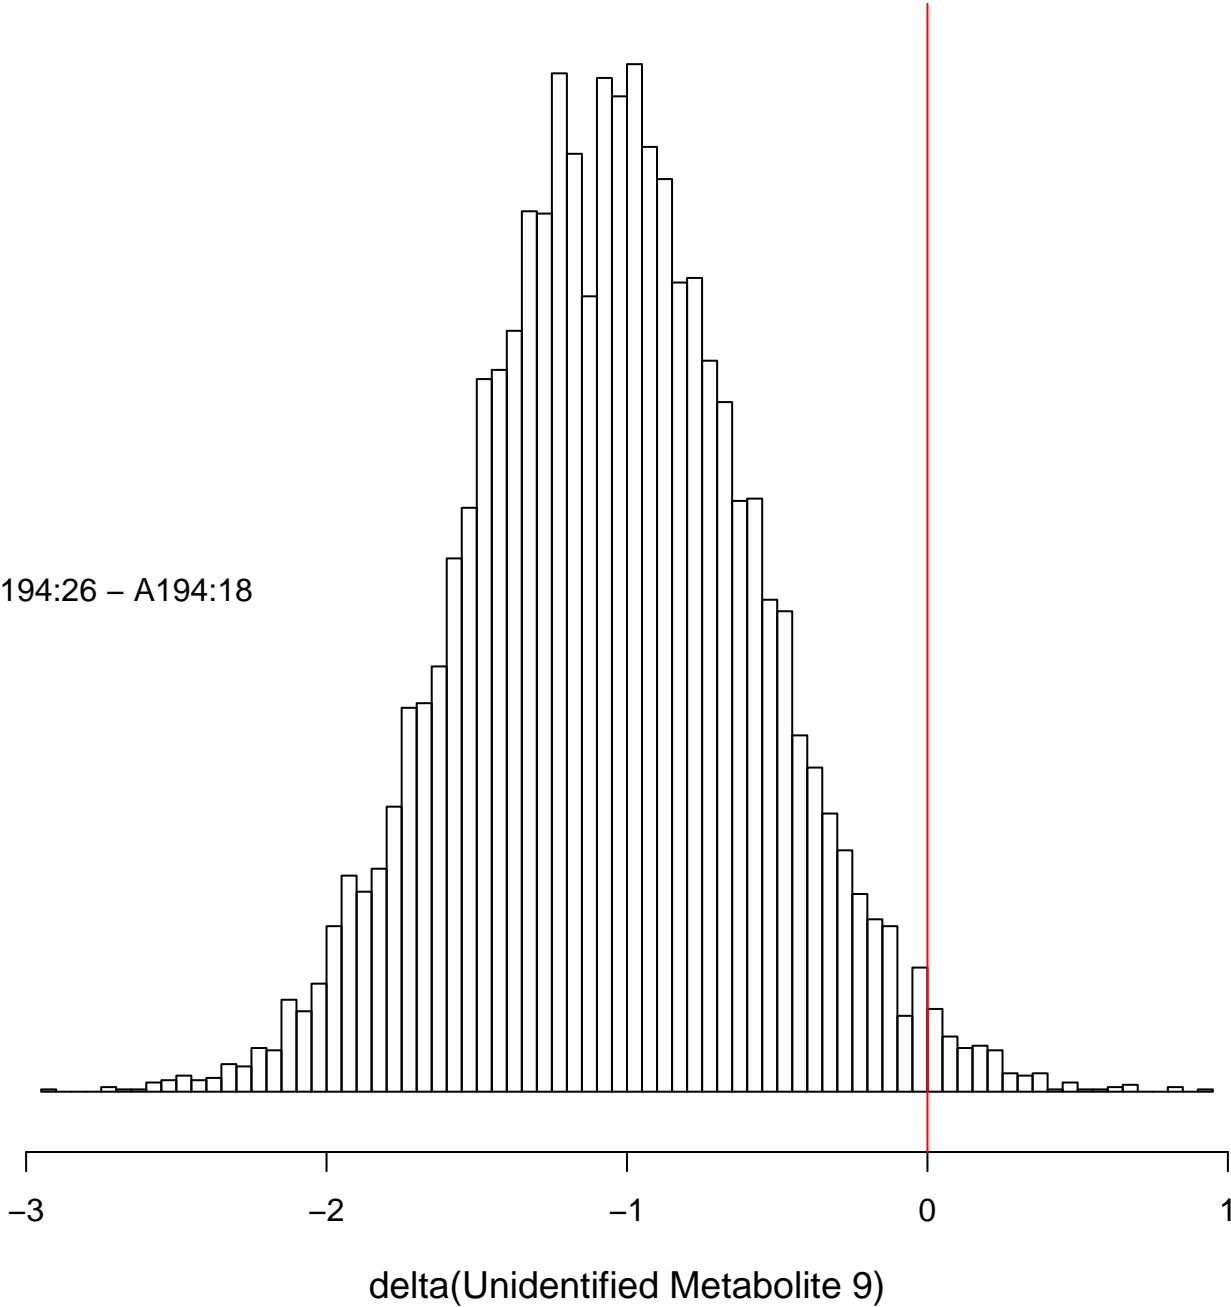



A194:26

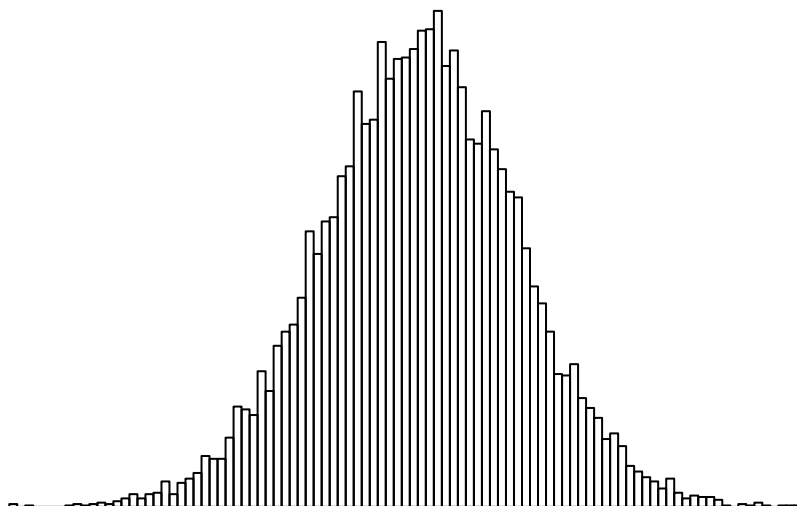

A194:18

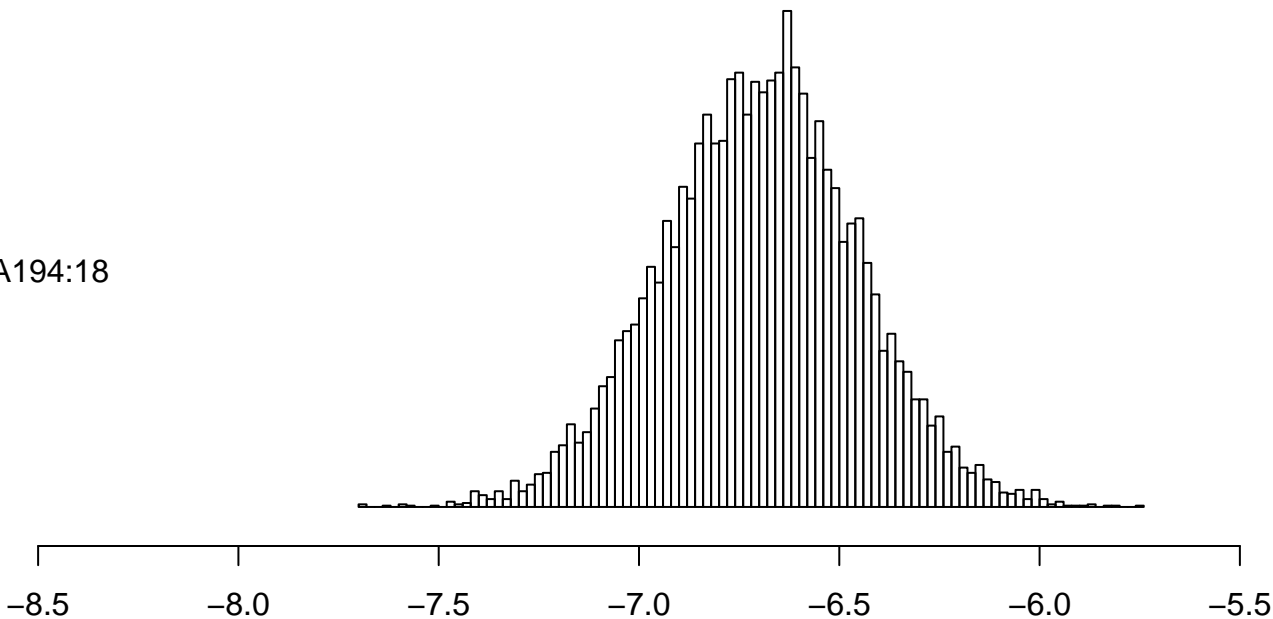

Unidentified Metabolite 10

A194:26 – A194:18

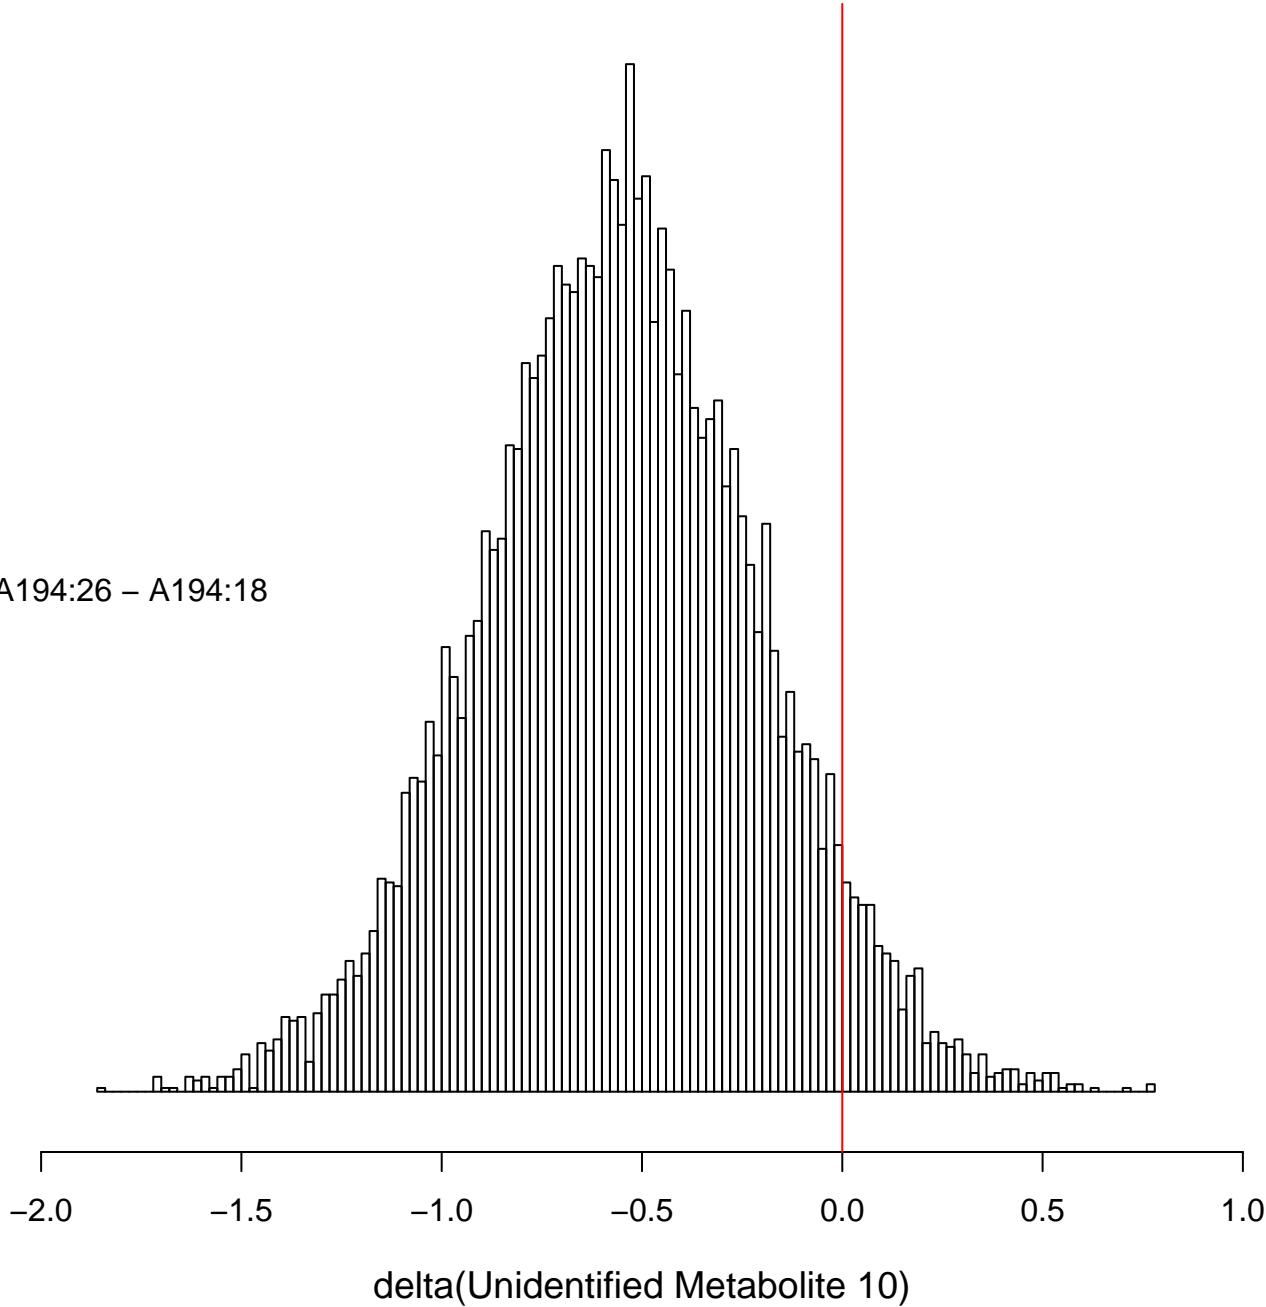

A194:26

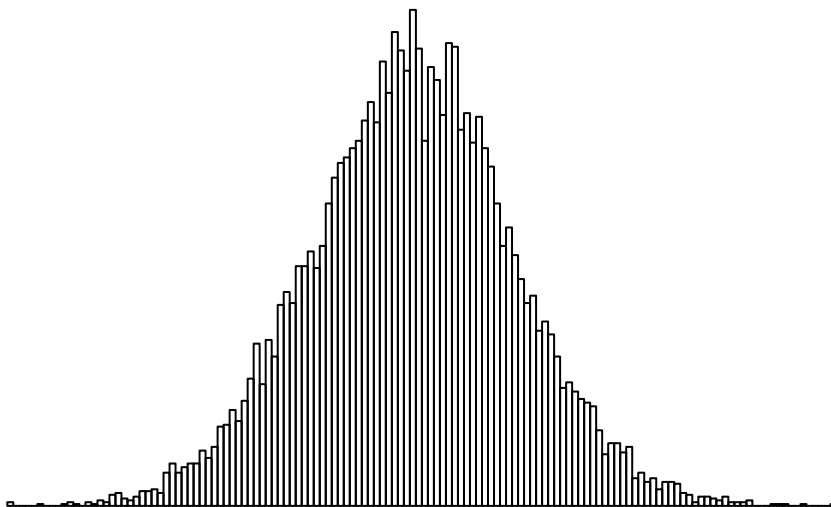

A194:18

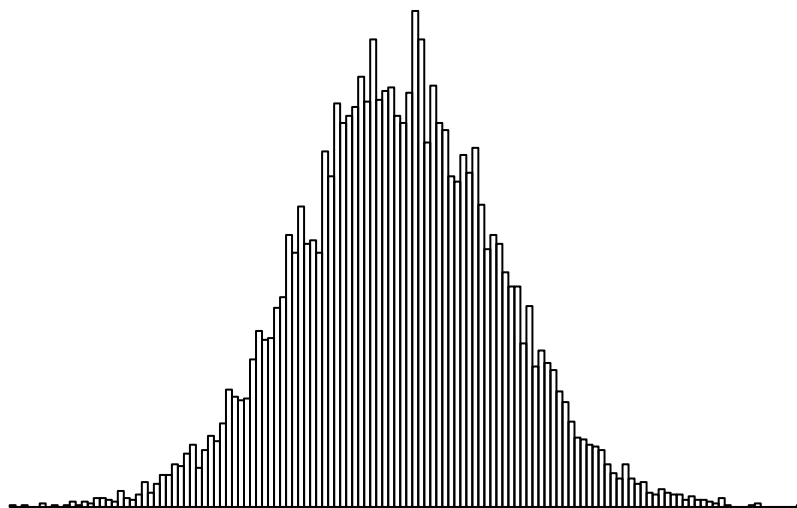

-7

-6

-5

-4

-3

Unidentified Metabolite 11

A194:26 – A194:18

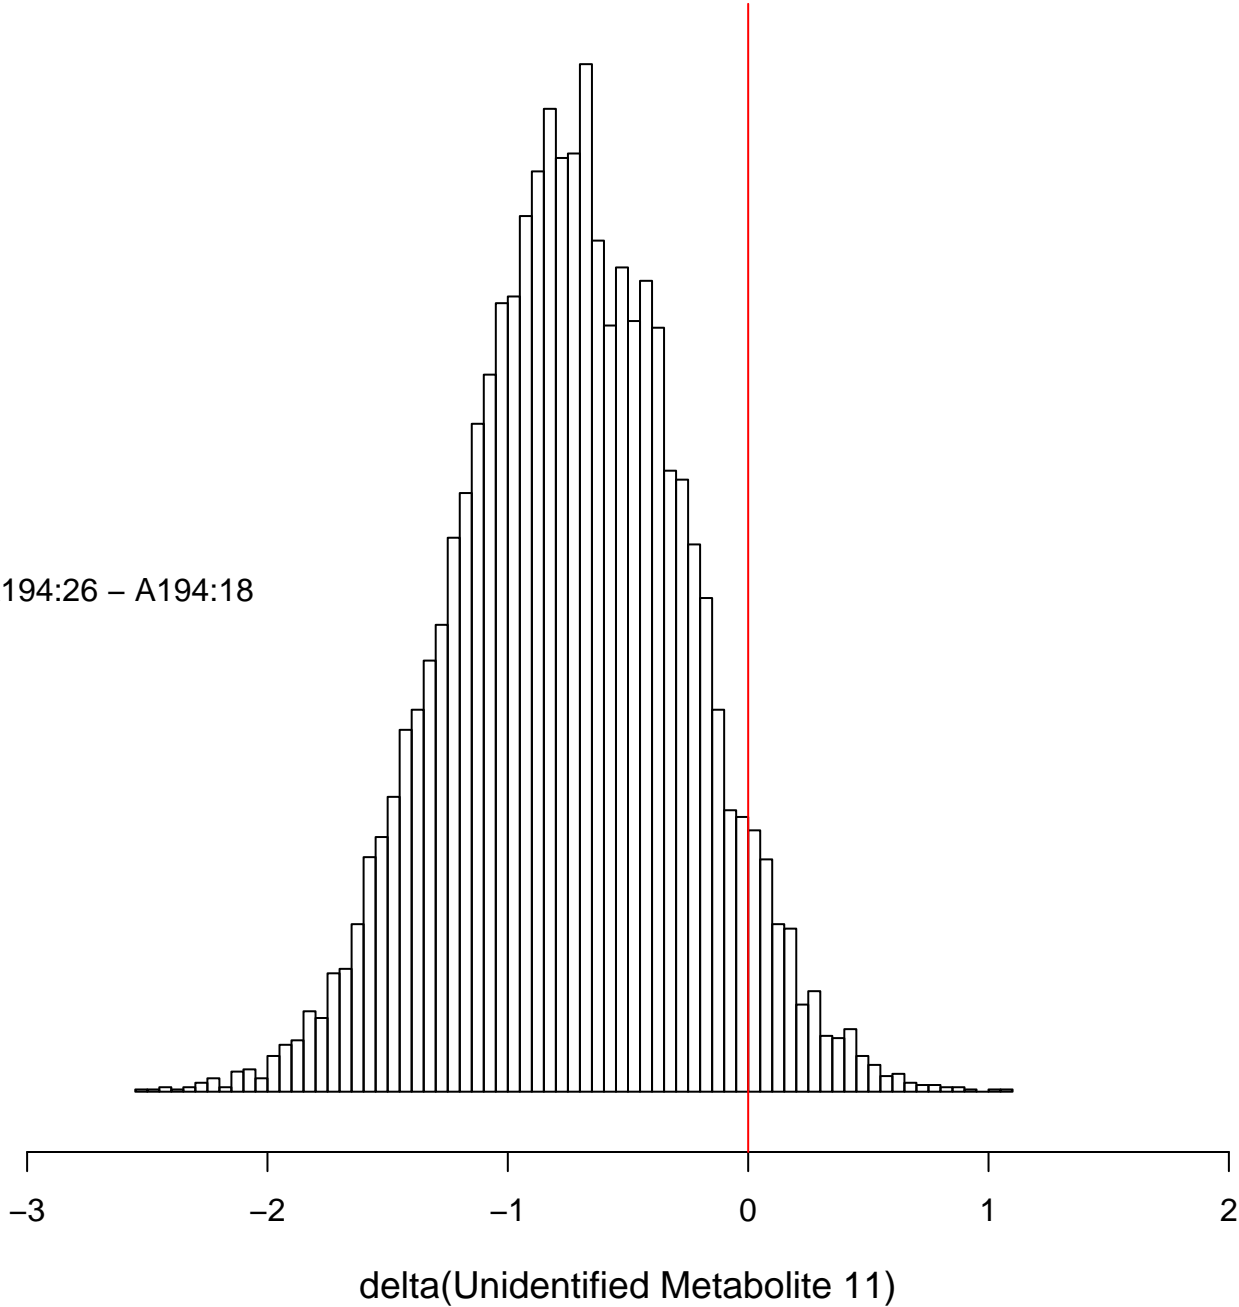

A194:26

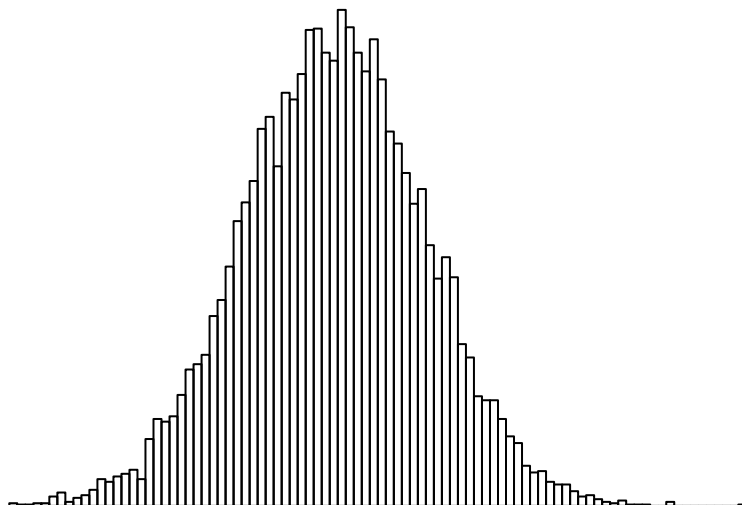

A194:18

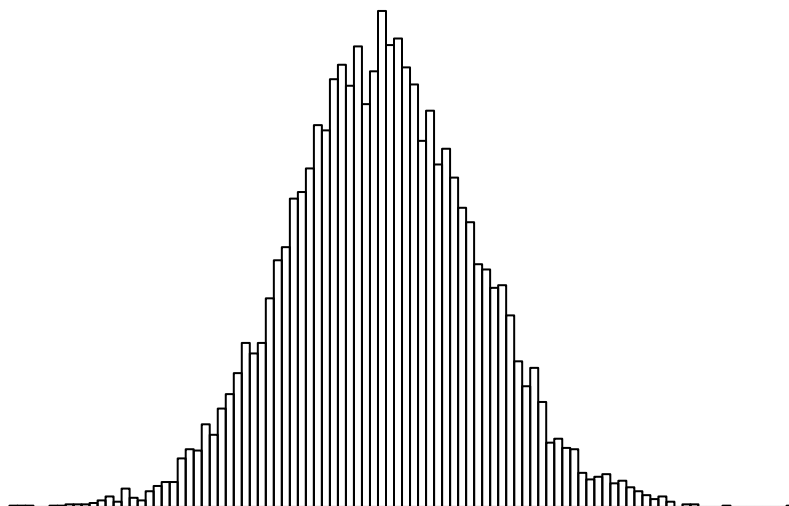

-9.0      -8.5      -8.0      -7.5      -7.0      -6.5      -6.0

Unidentified Metabolite 12

A194:26 – A194:18

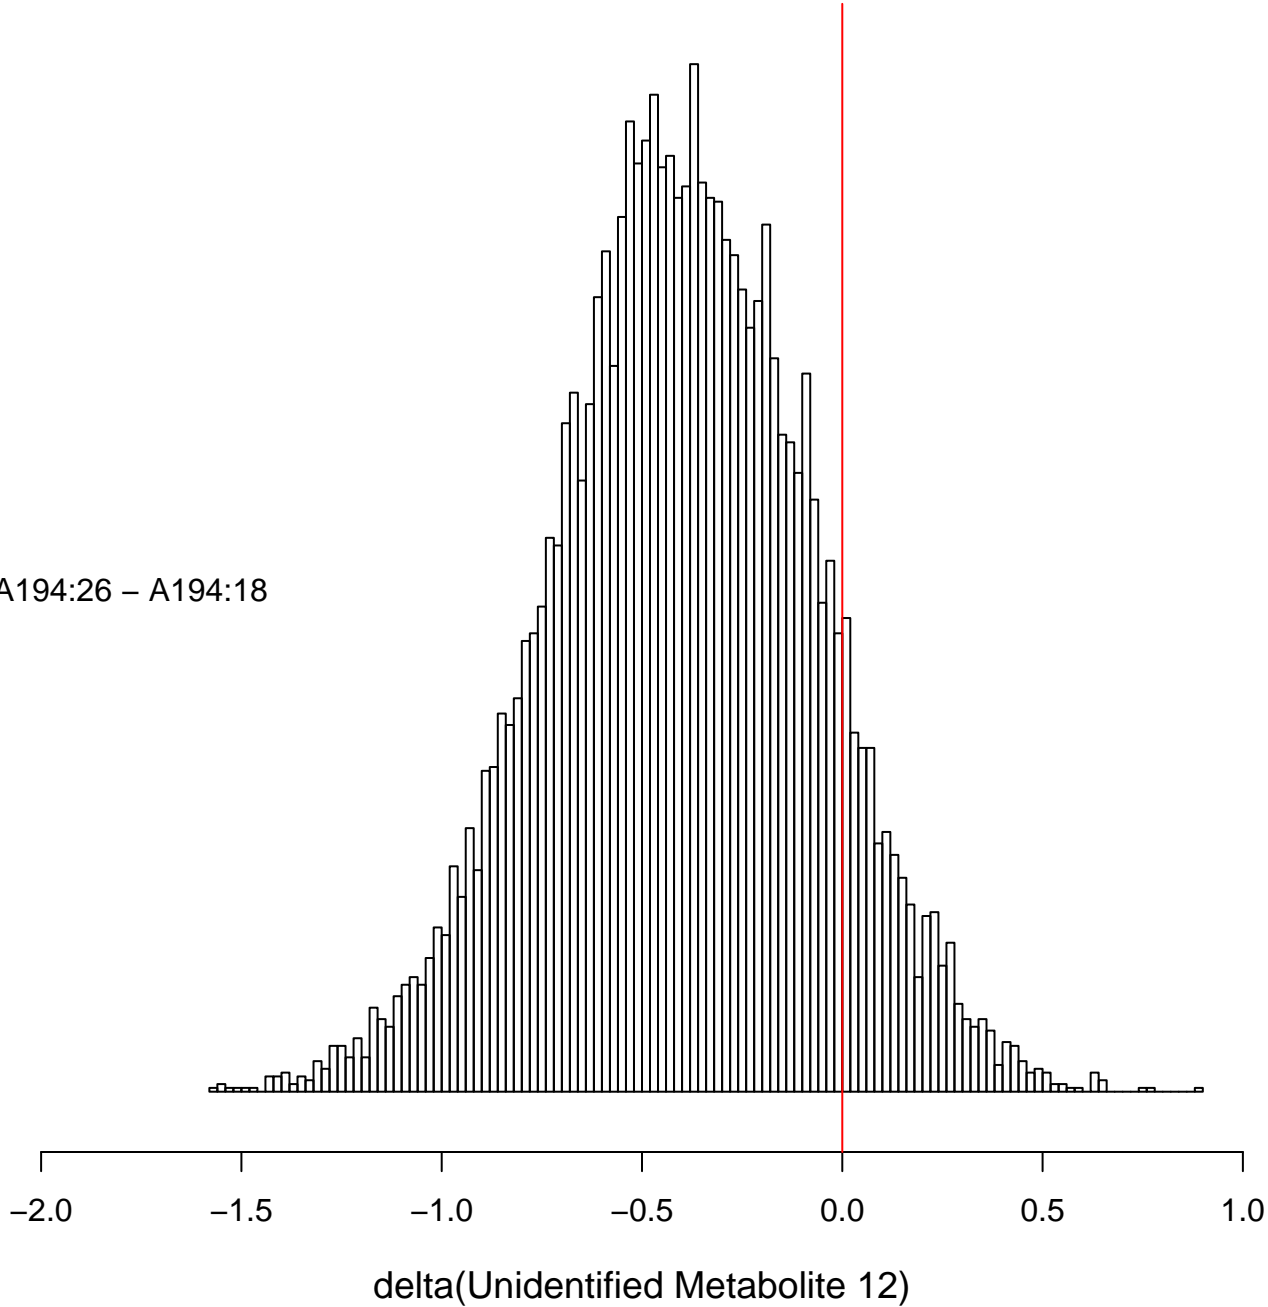

A194:26

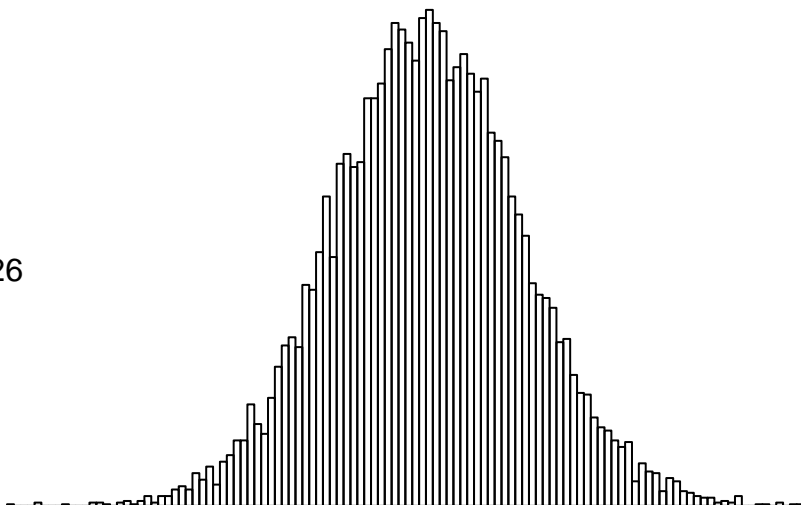

A194:18

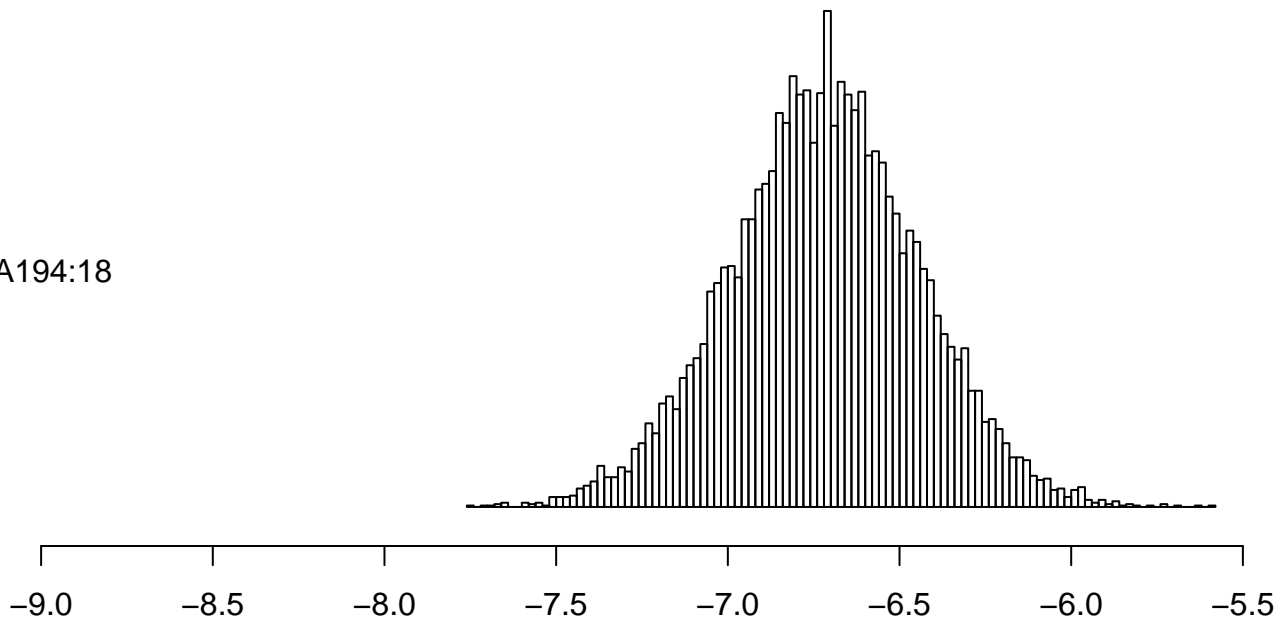

Unidentified Metabolite 14

A194:26 – A194:18

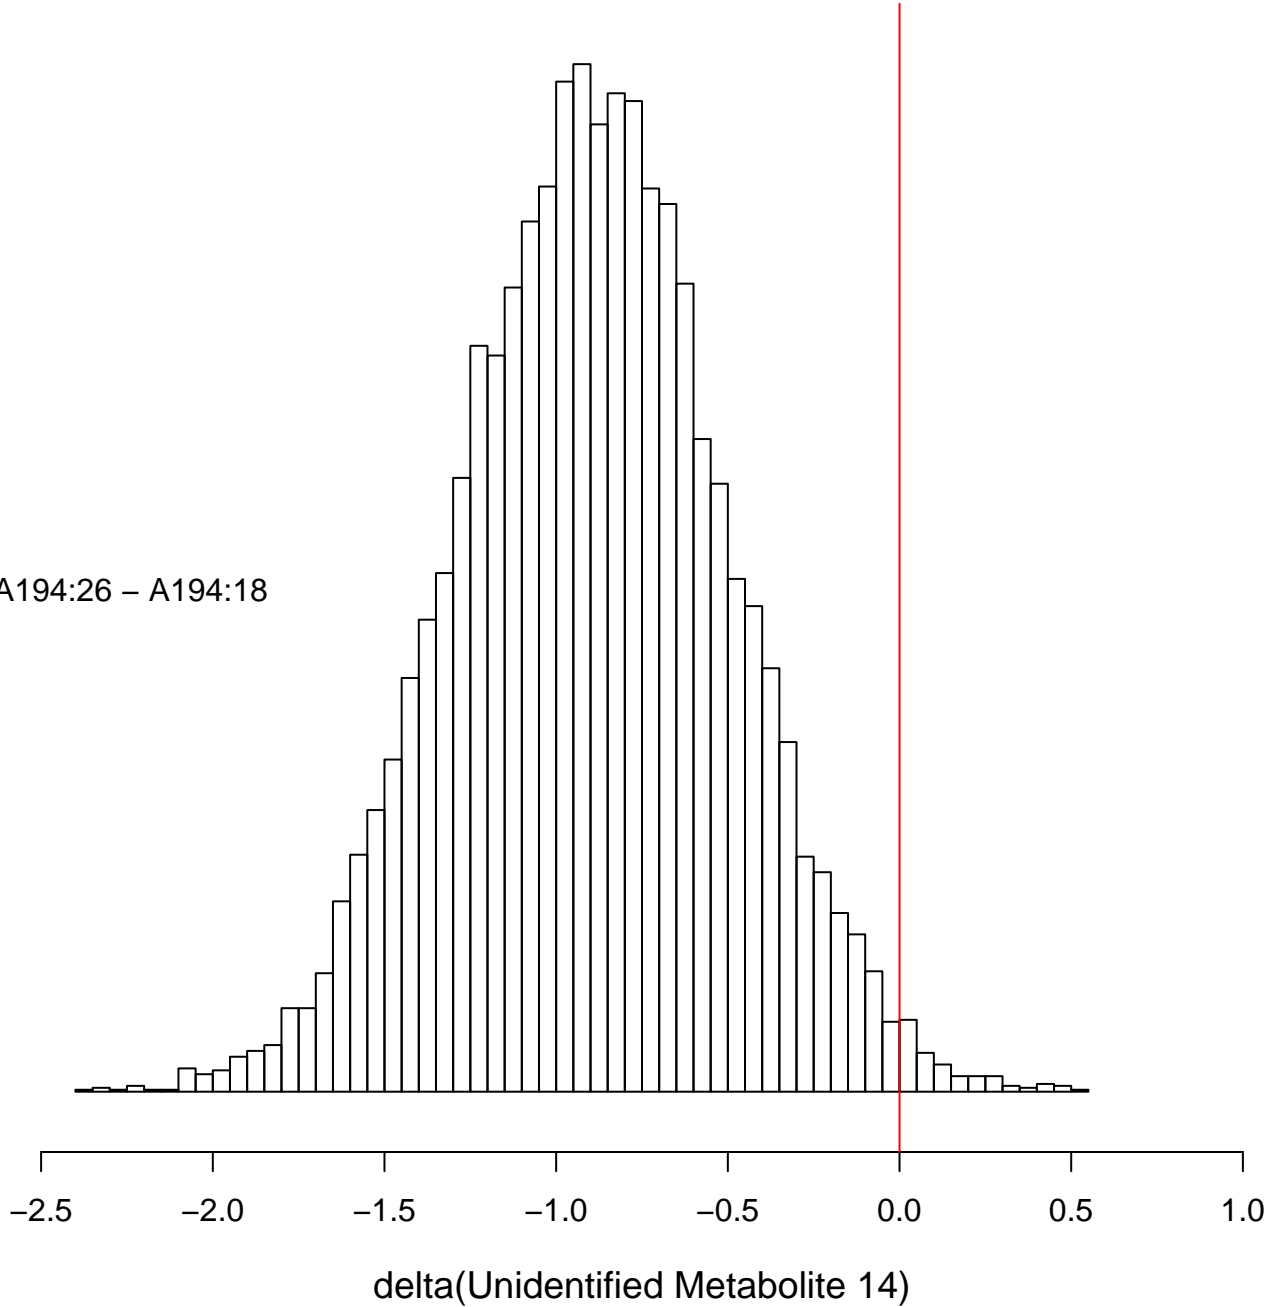



A194:26

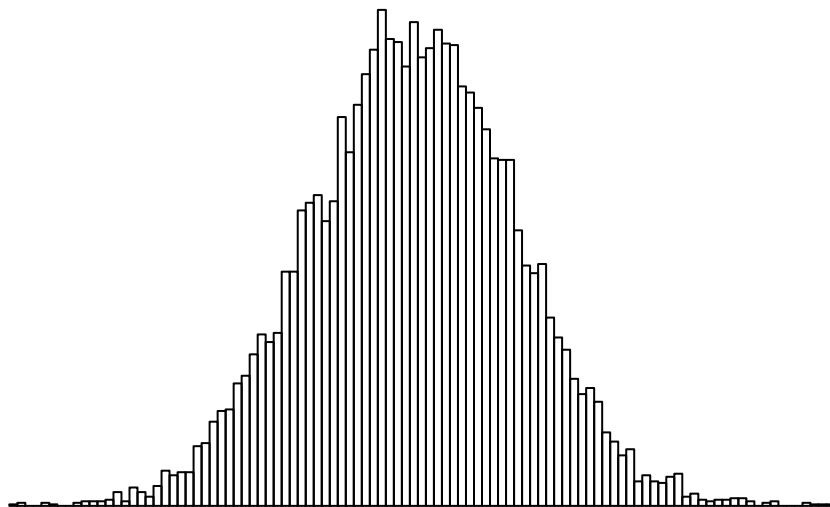

A194:18

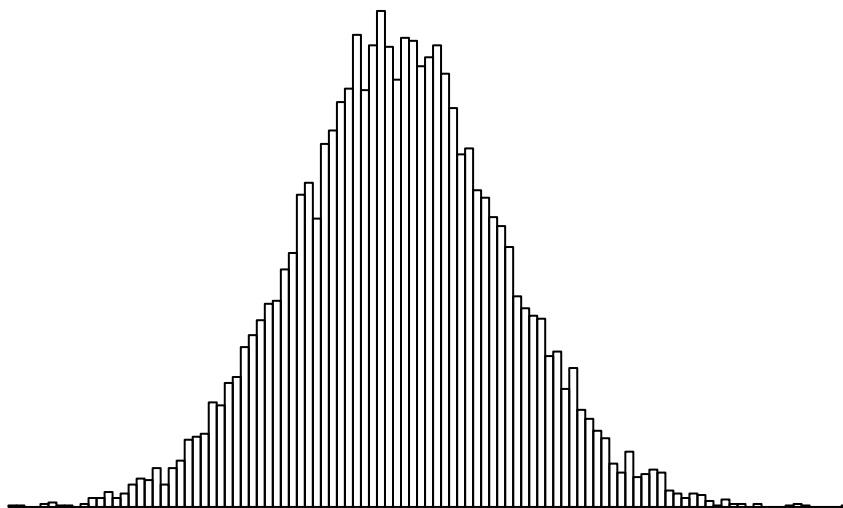

-8.0 -7.5 -7.0 -6.5 -6.0 -5.5 -5.0

Unidentified Metabolite 16

A194:26 – A194:18

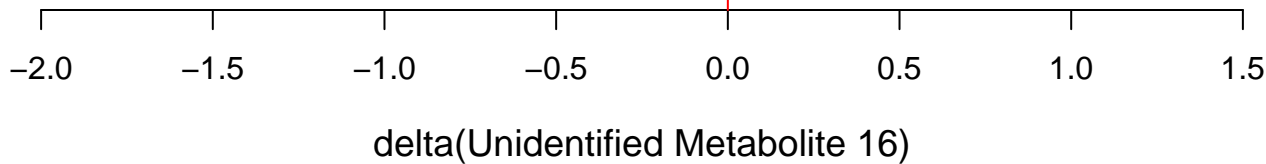

A194:26

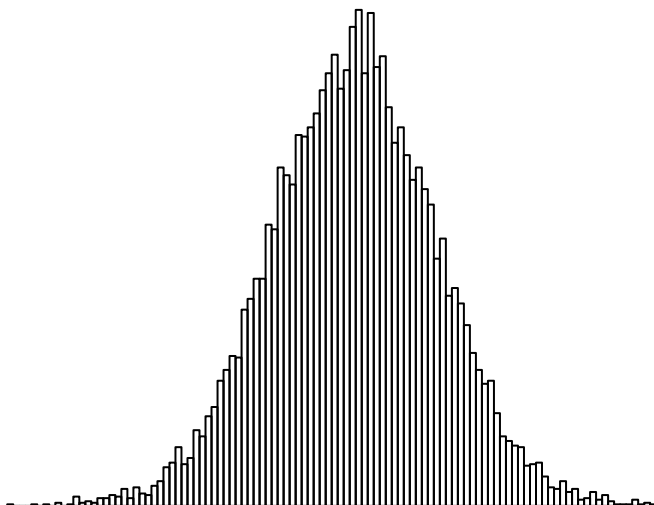

A194:18

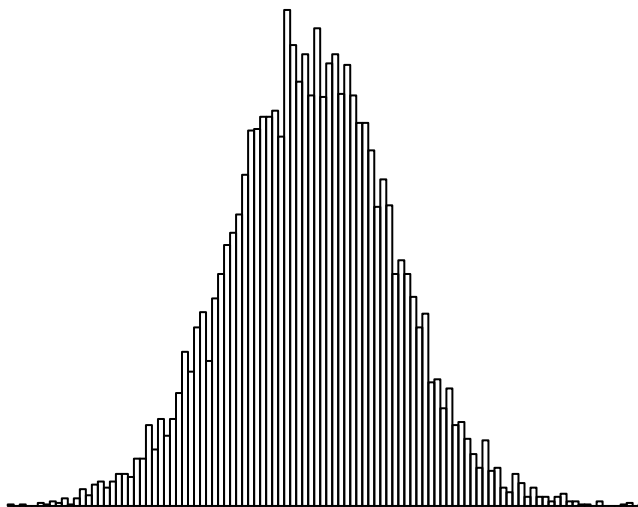

-9

-8

-7

-6

-5

Unidentified Metabolite 17

A194:26 – A194:18

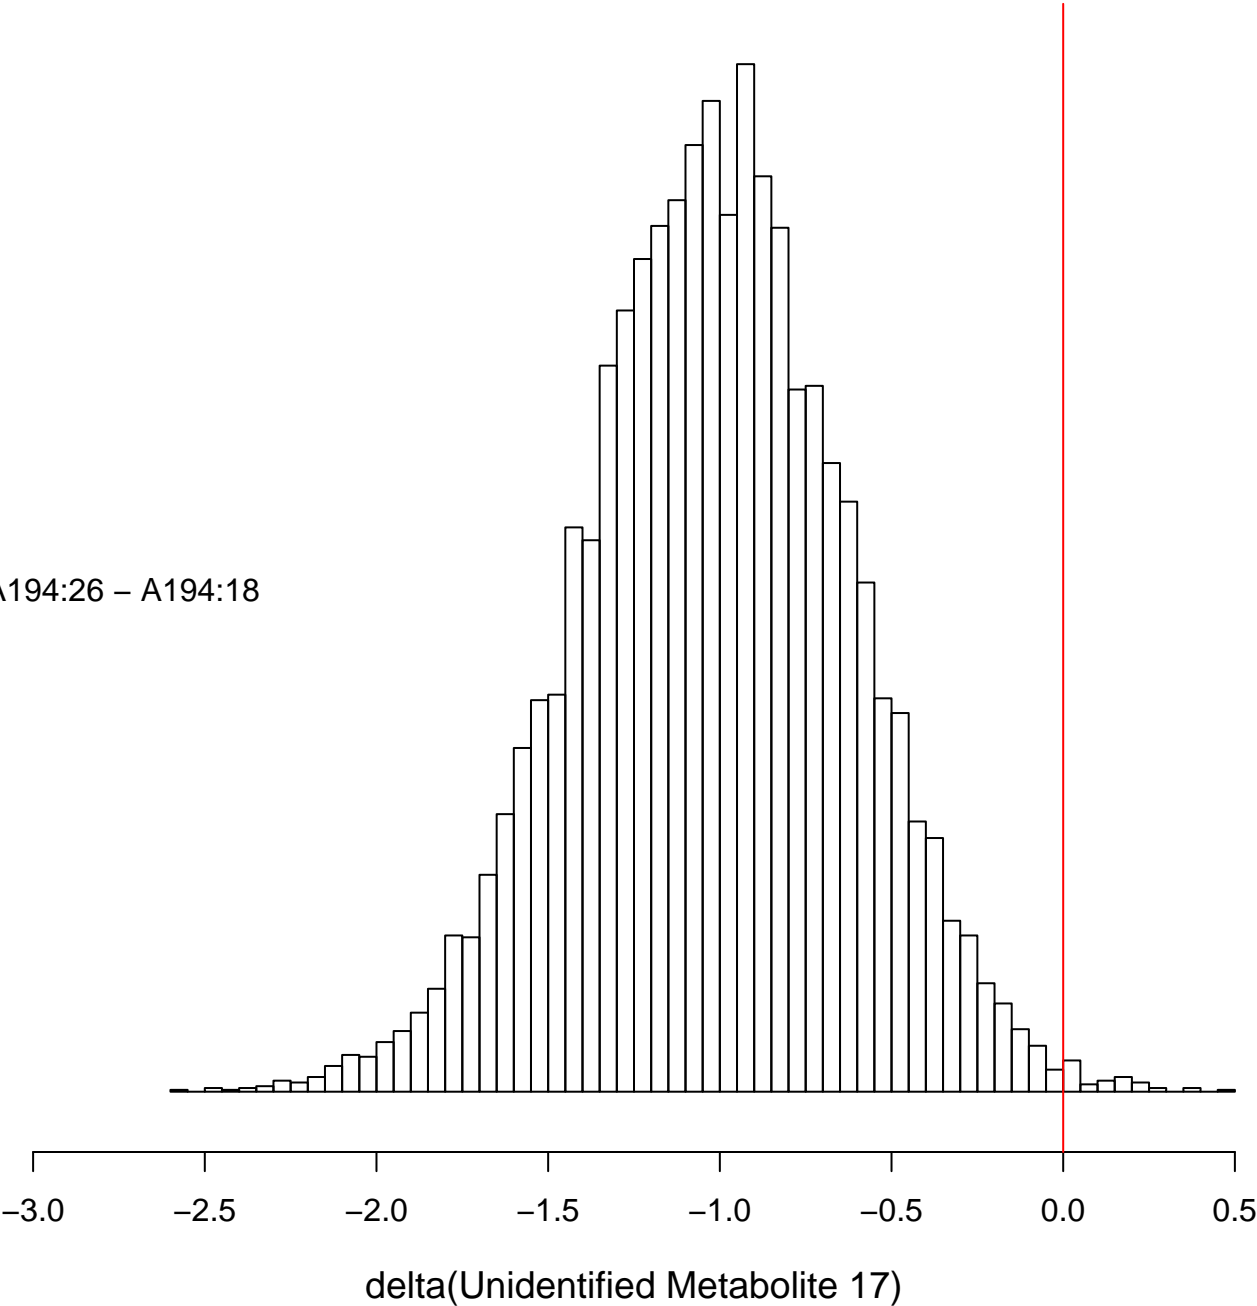

A194:26

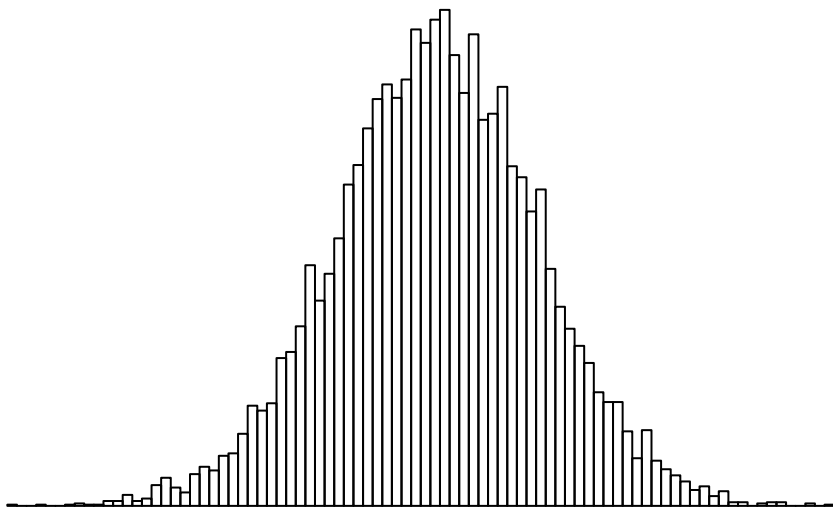

A194:18

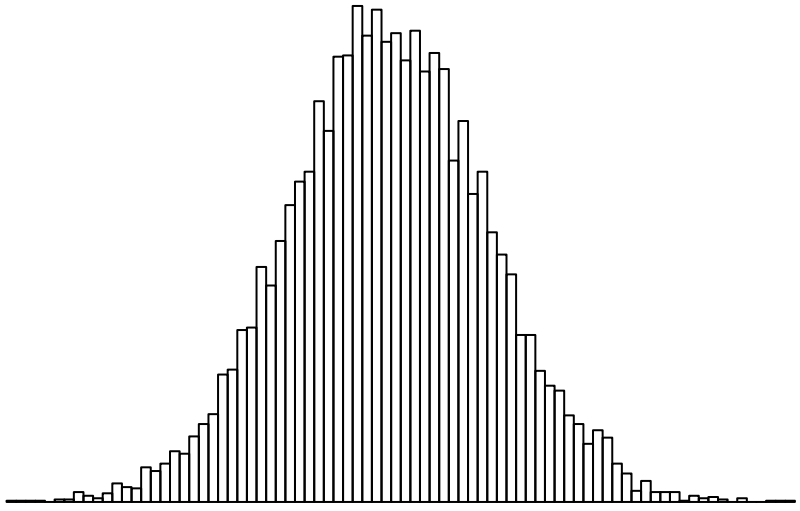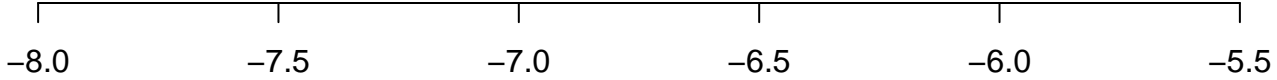

Unidentified Metabolite 18

A194:26 – A194:18

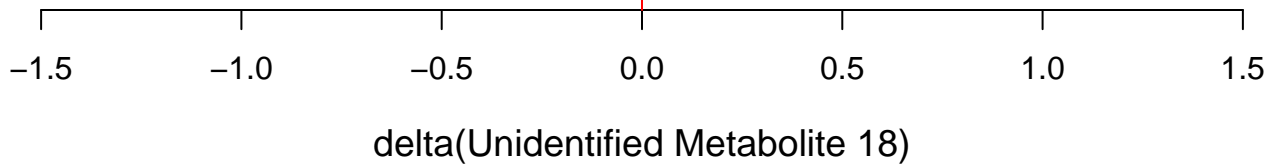

A194:26

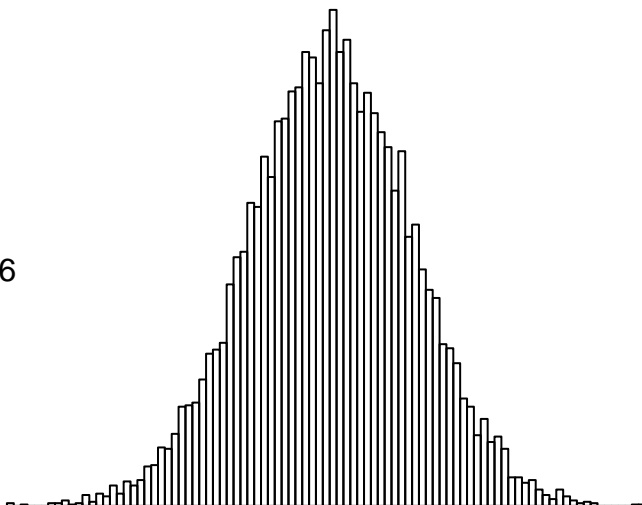

A194:18

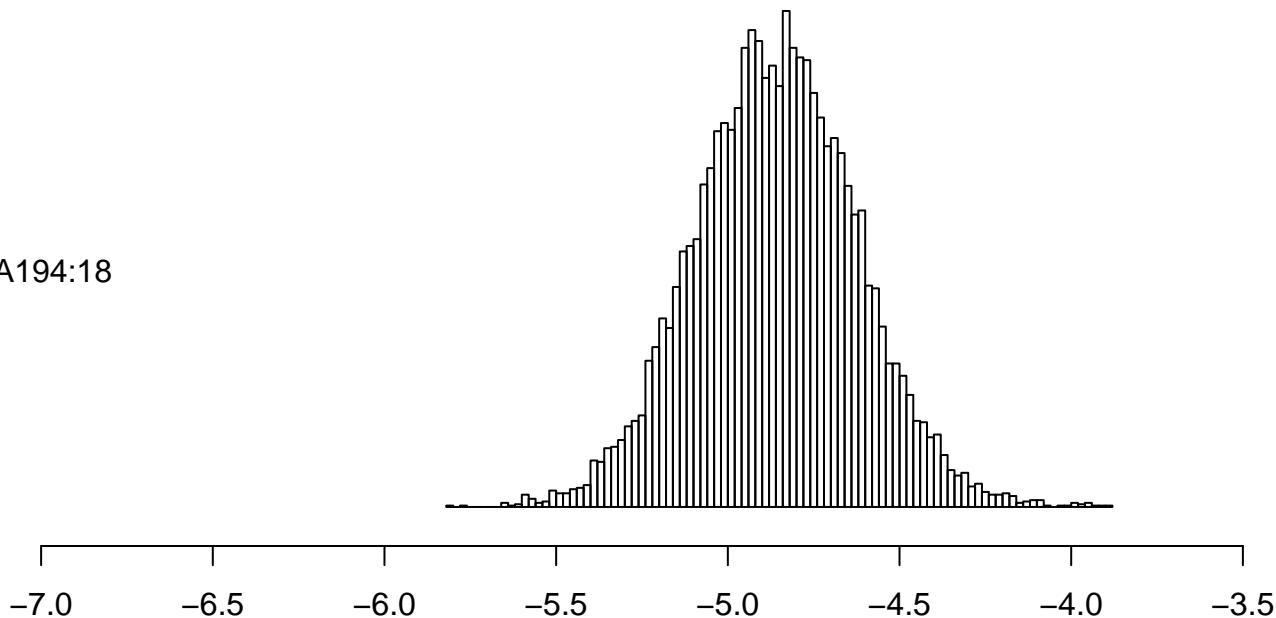

Unidentified Metabolite 20

A194:26 – A194:18

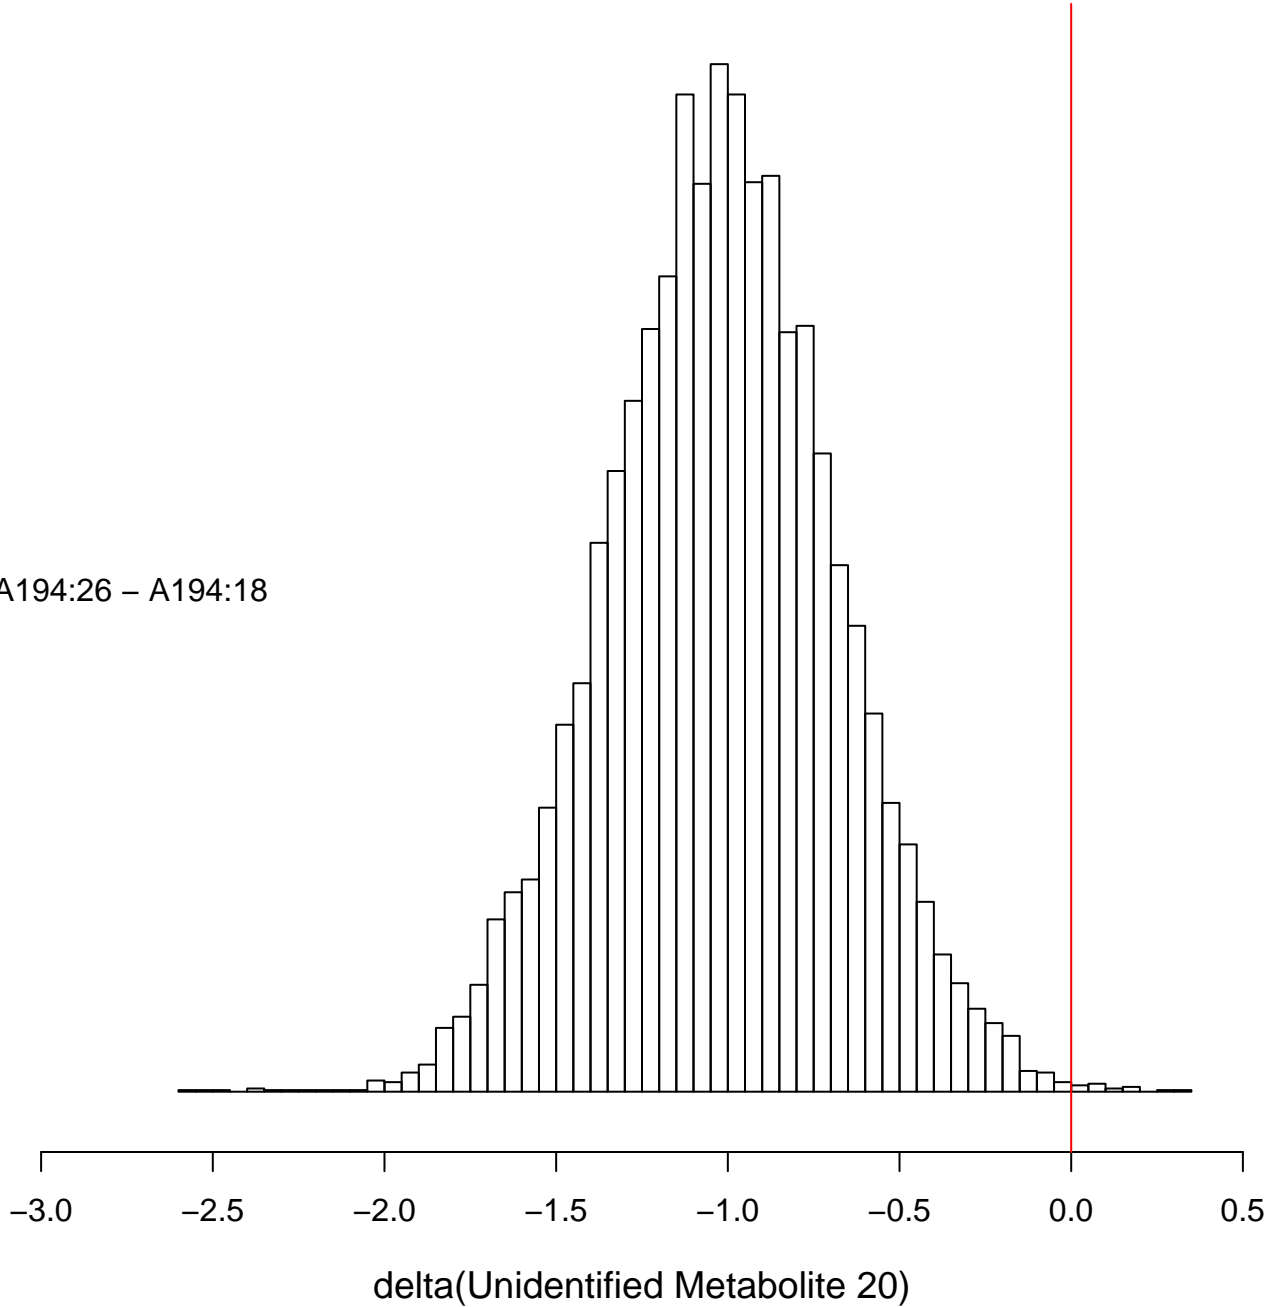



A194:26

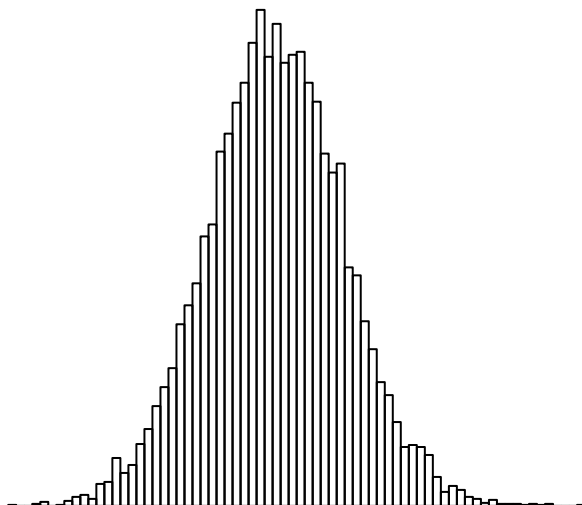

A194:18

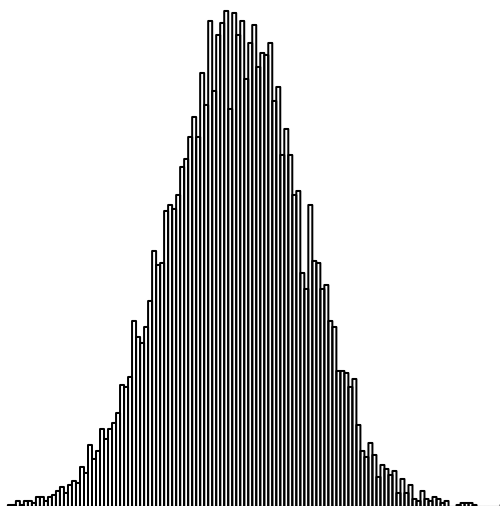

-9.0      -8.5      -8.0      -7.5      -7.0      -6.5      -6.0

Unidentified Metabolite 22

A194:26 – A194:18

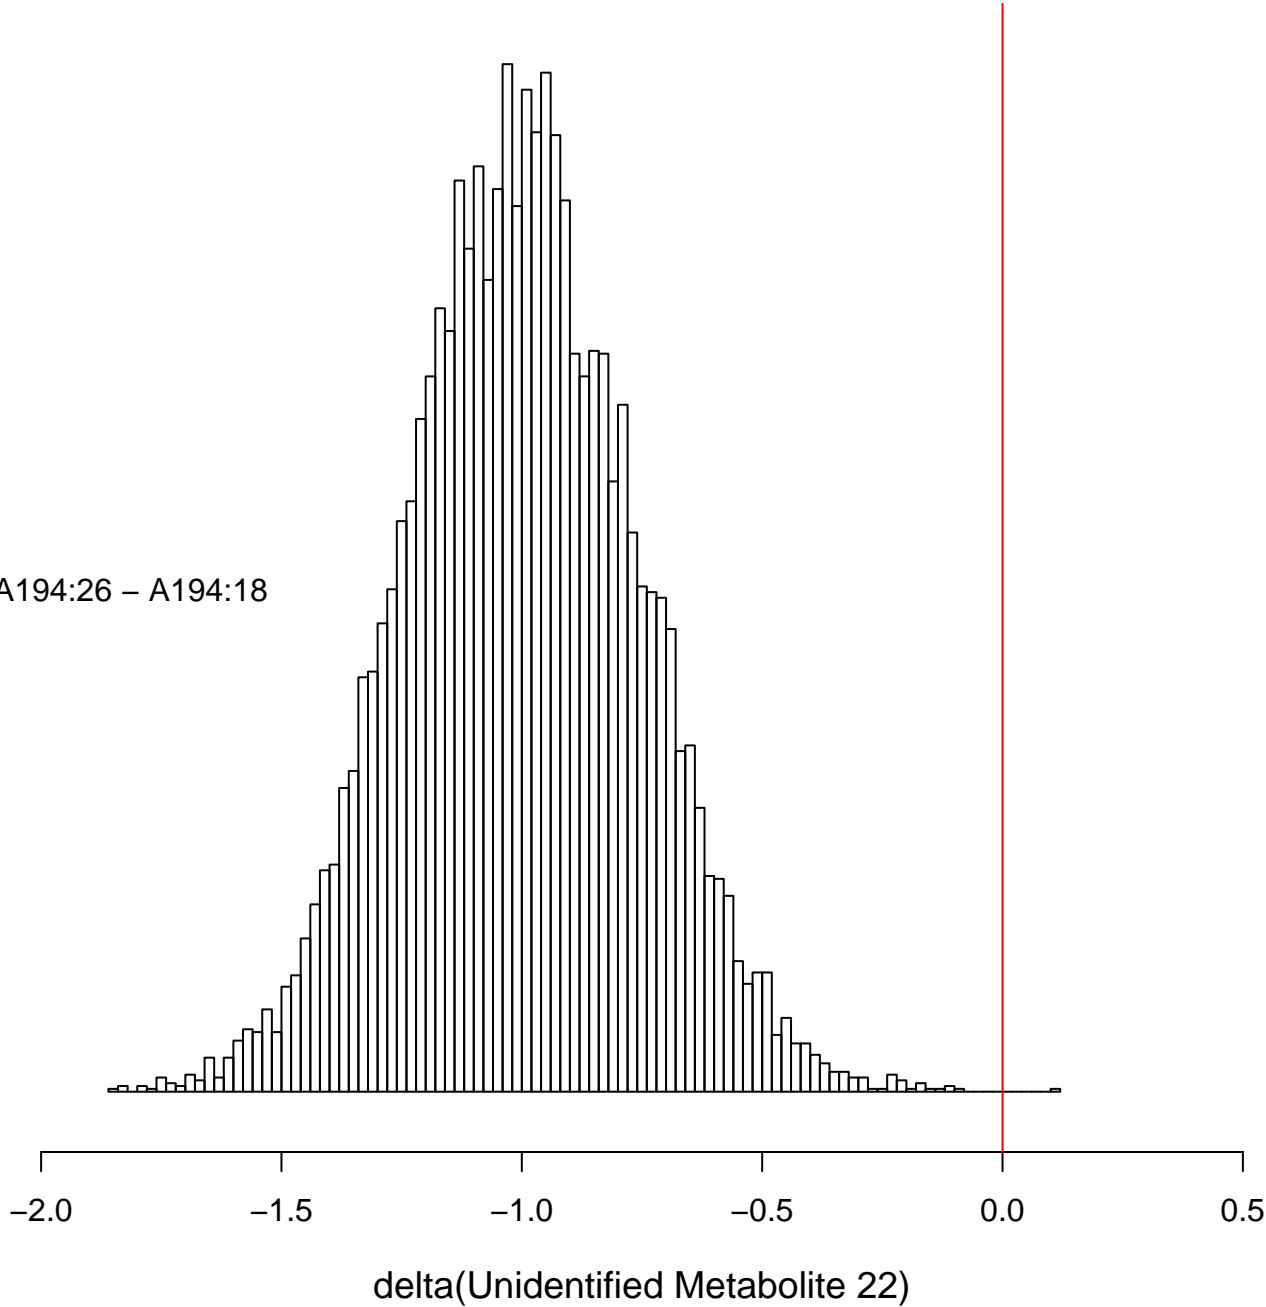

A194:26

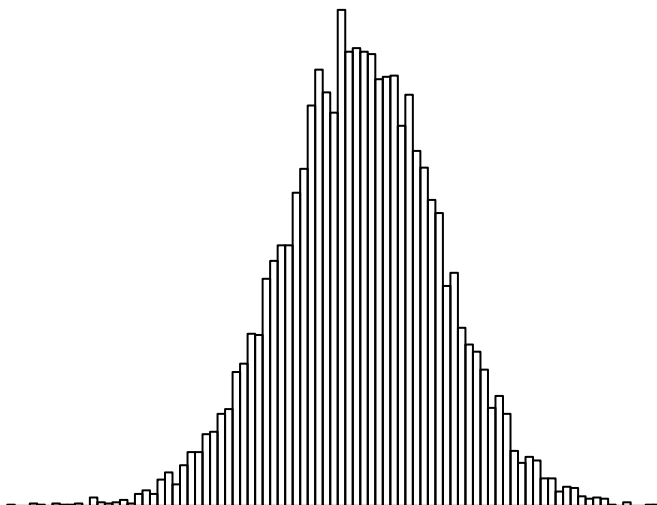

A194:18

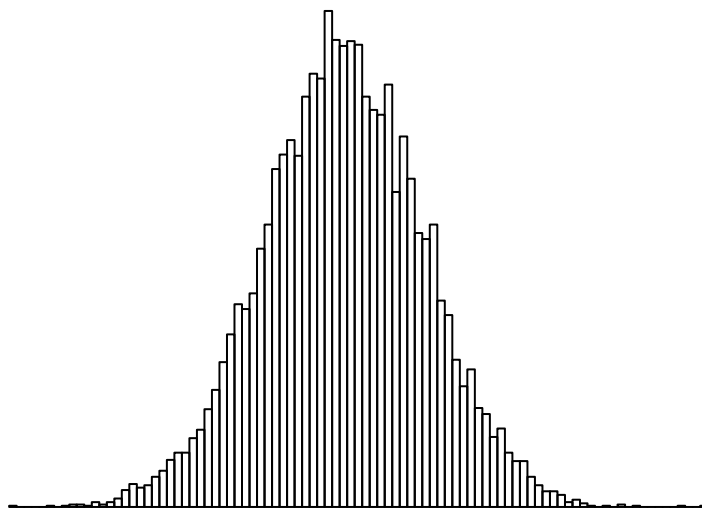

-10

-8

-6

-4

-2

Unidentified Metabolite 23

A194:26 – A194:18

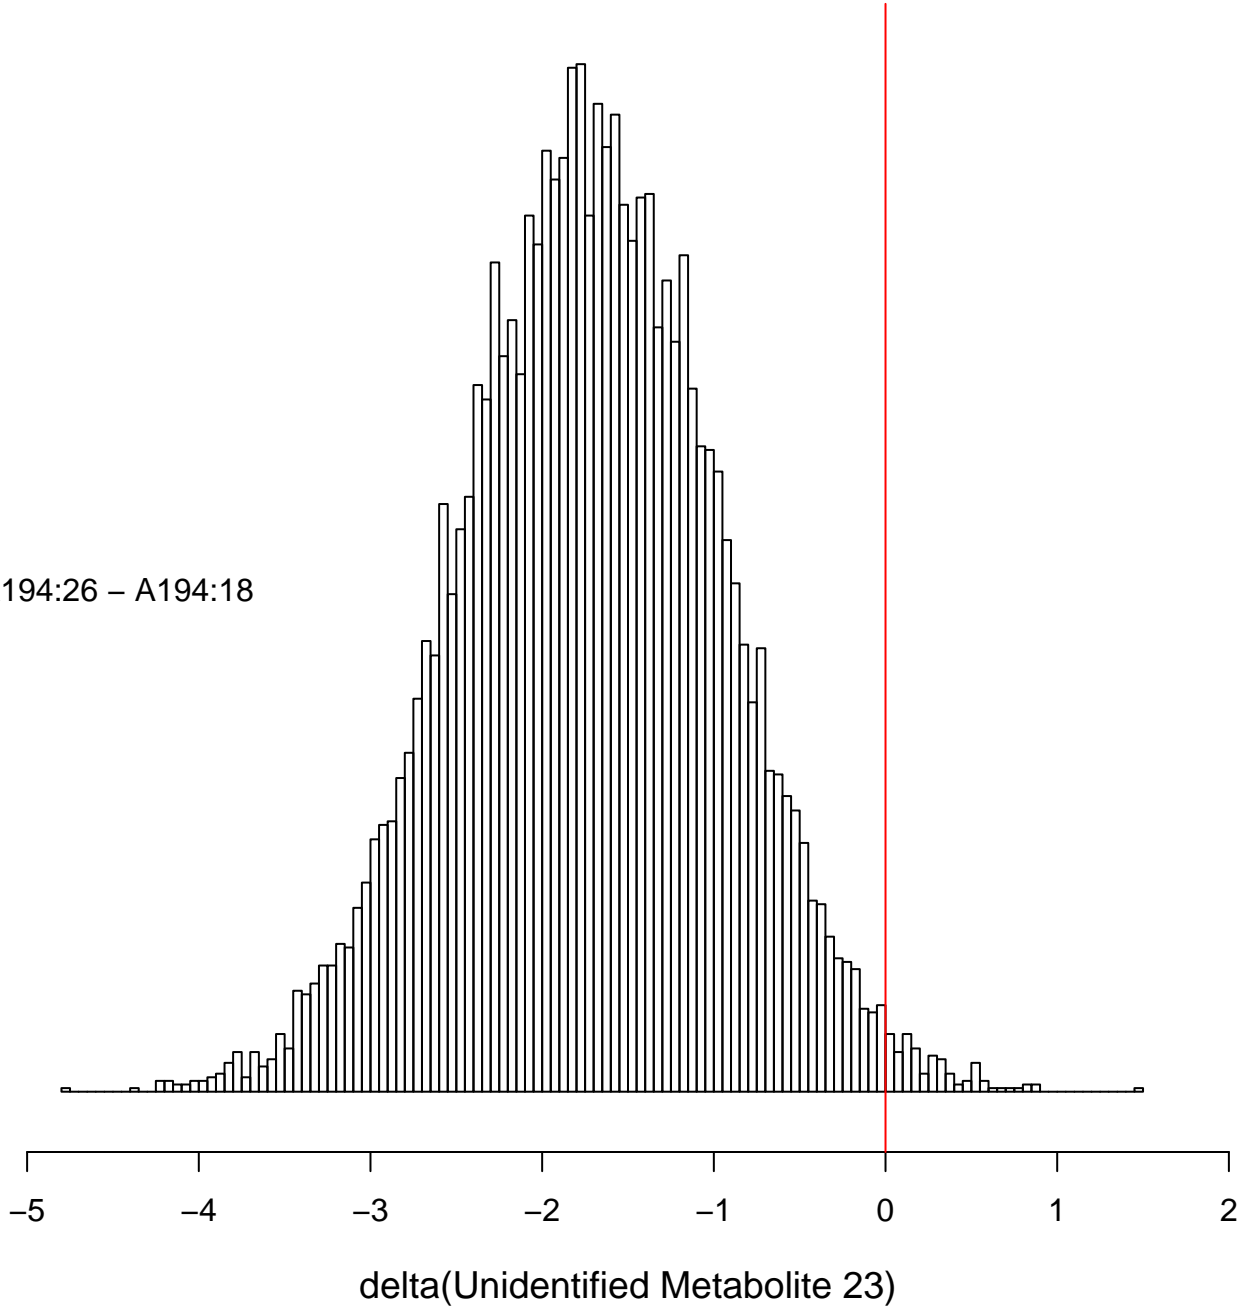

A194:26

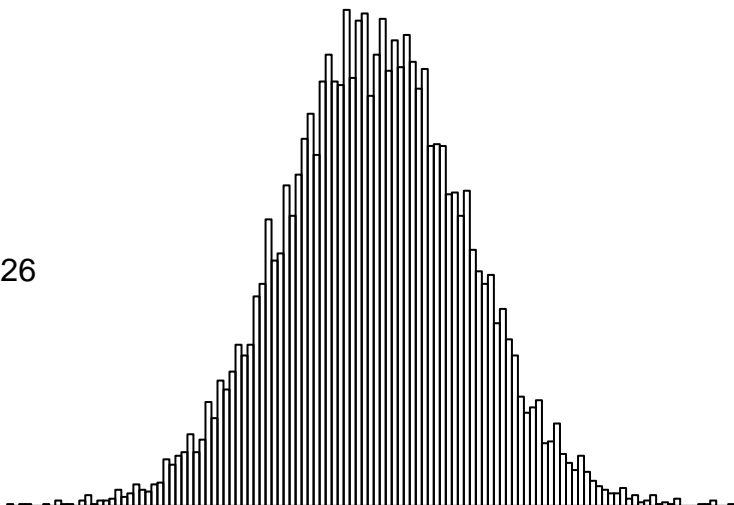

A194:18

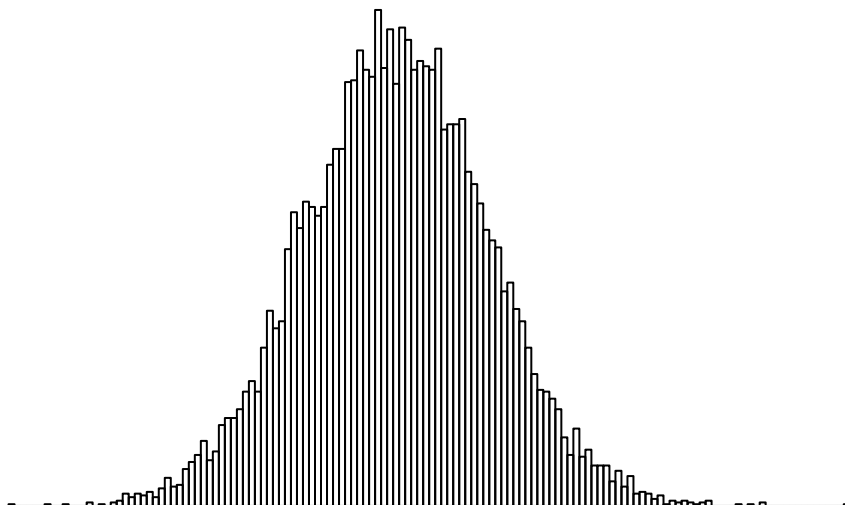

-7                      -6                      -5                      -4                      -3

Unidentified Metabolite 24

A194:26 – A194:18

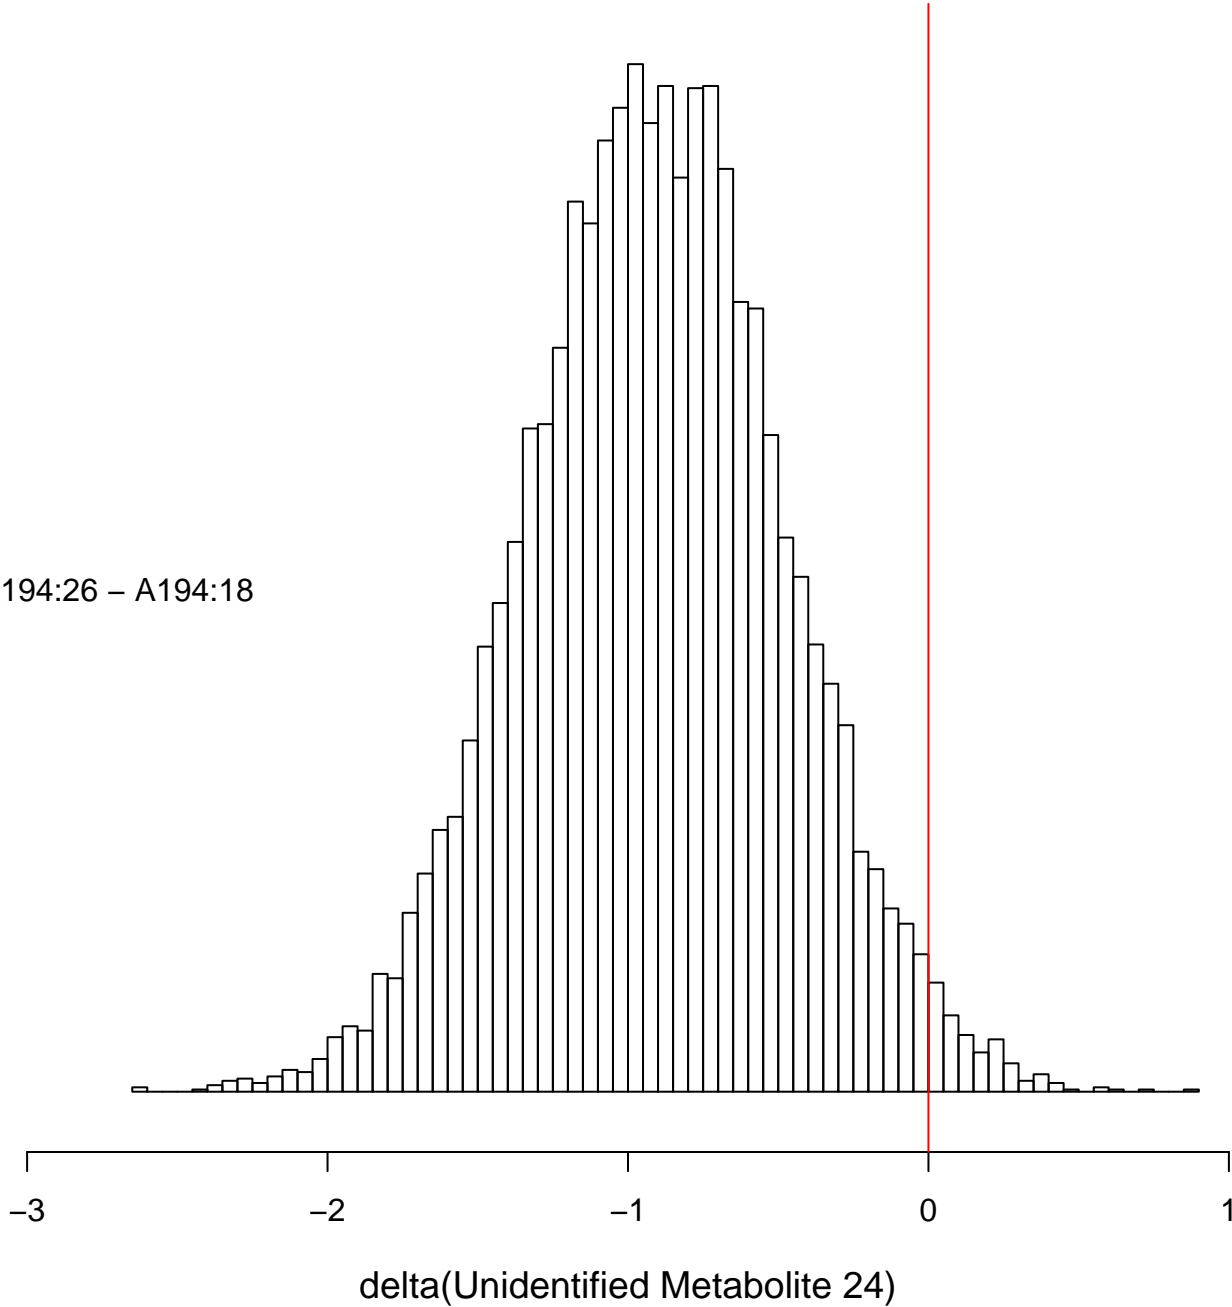

A194:26

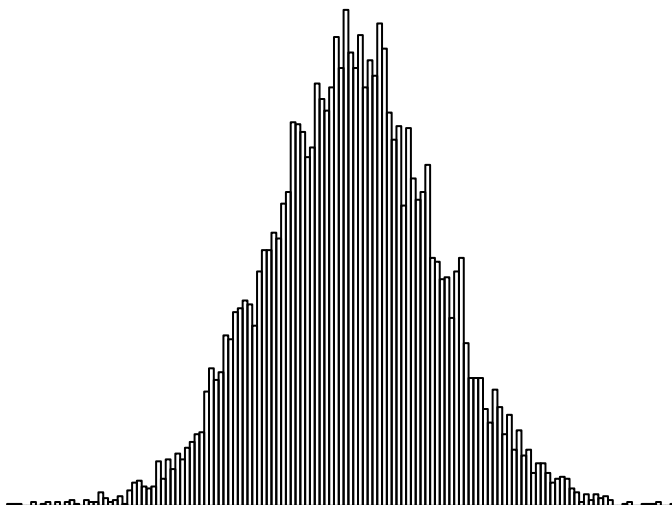

A194:18

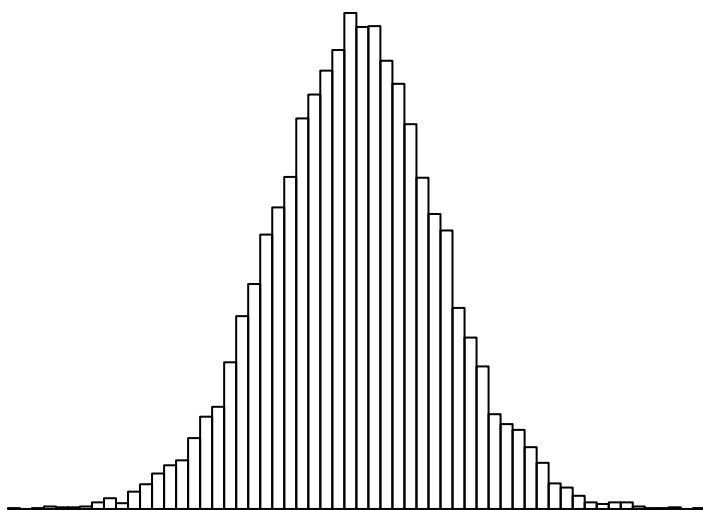

-10 -9 -8 -7 -6 -5

Unidentified Metabolite 25

A194:26 – A194:18

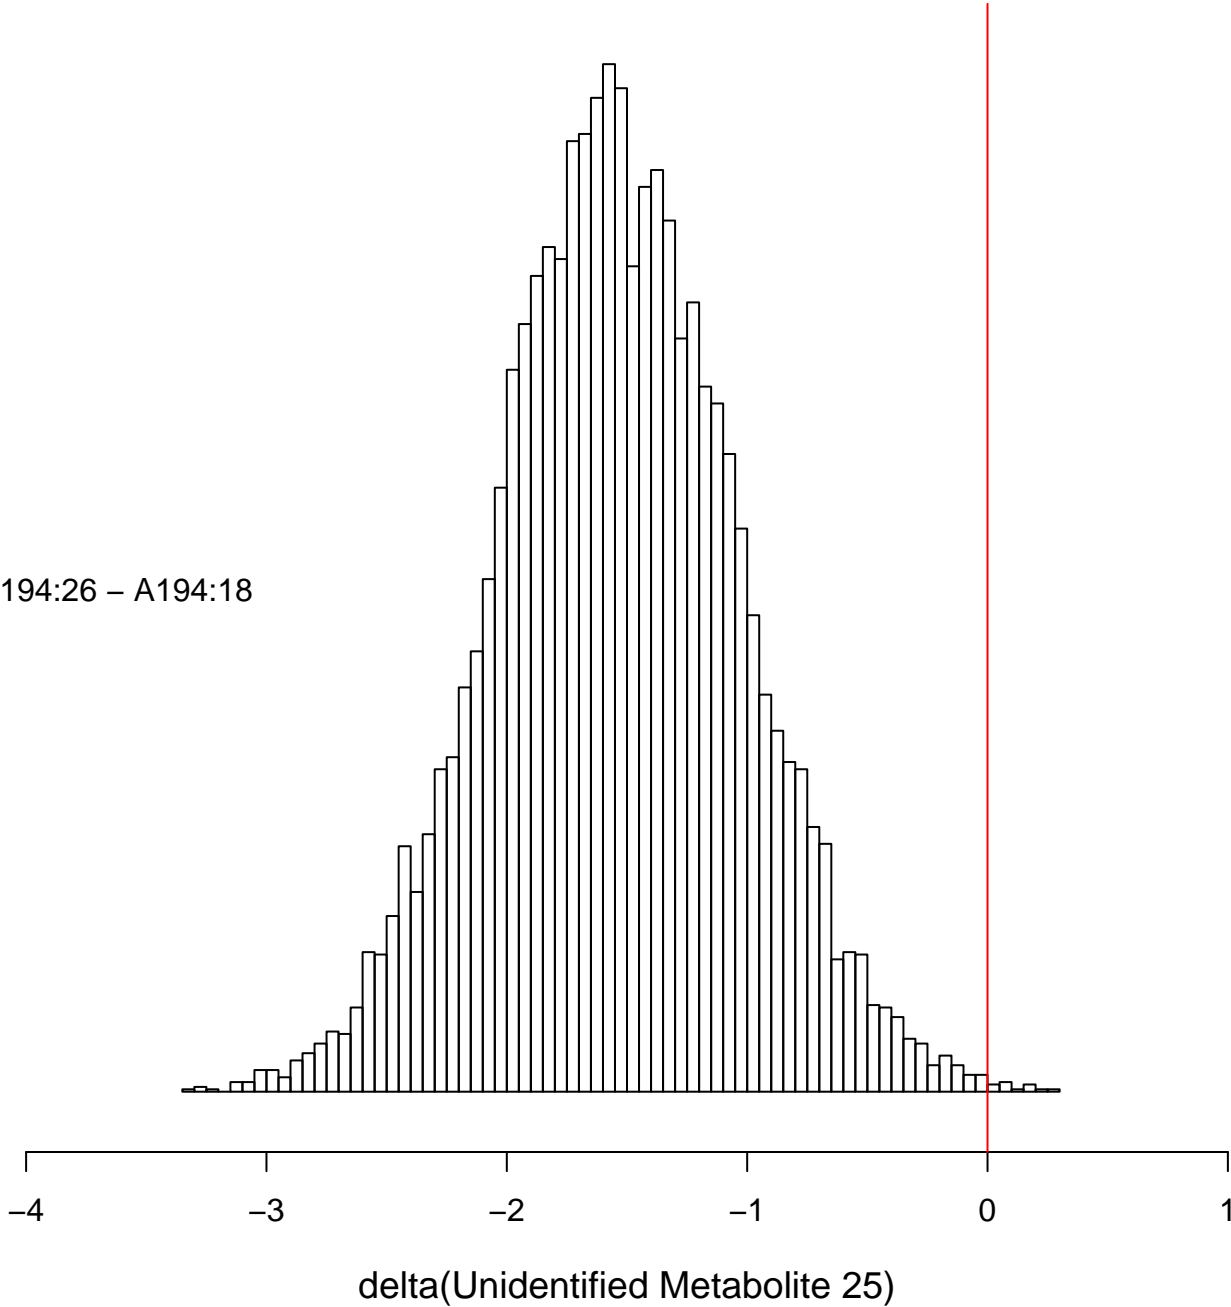



A194:26

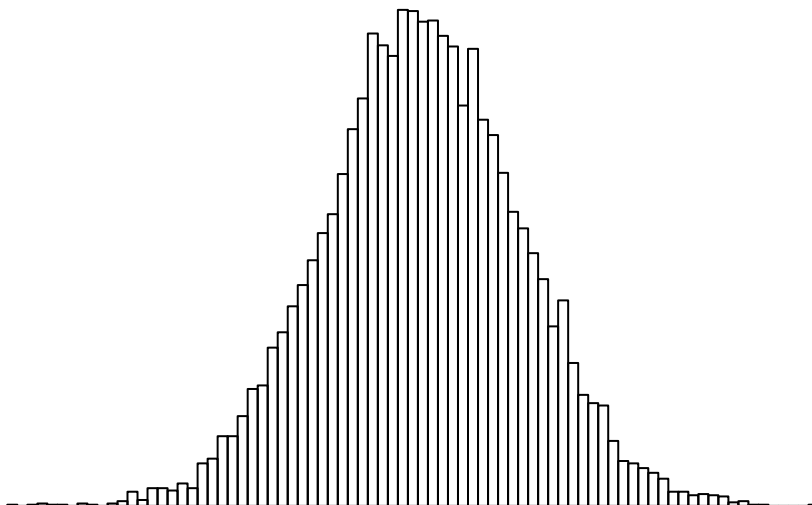

A194:18

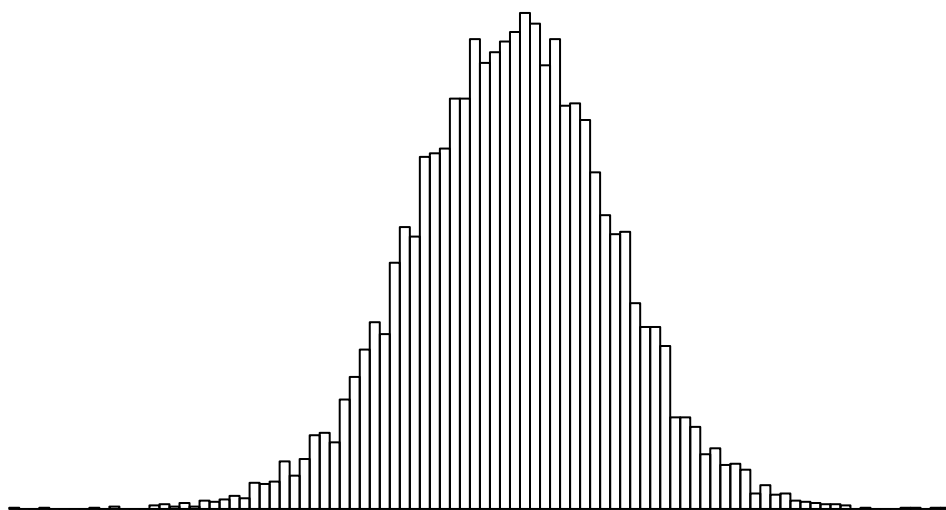

-10

-9

-8

-7

-6

-5

-4

Unidentified Metabolite 26

A194:26 – A194:18

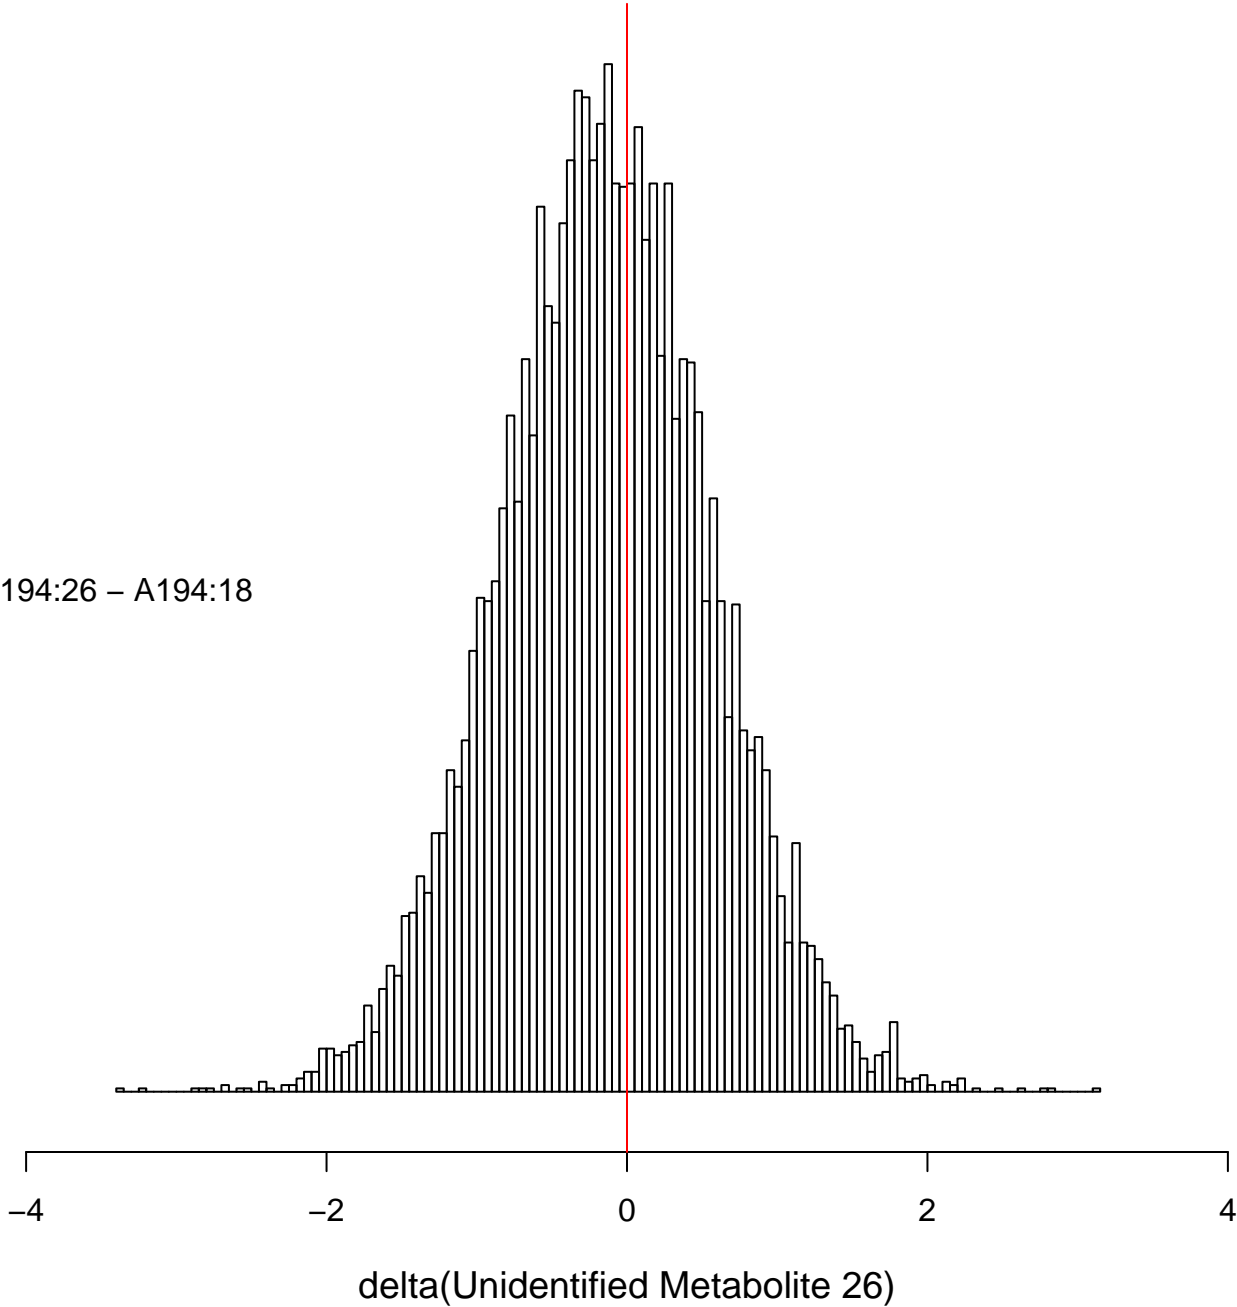

A194:26

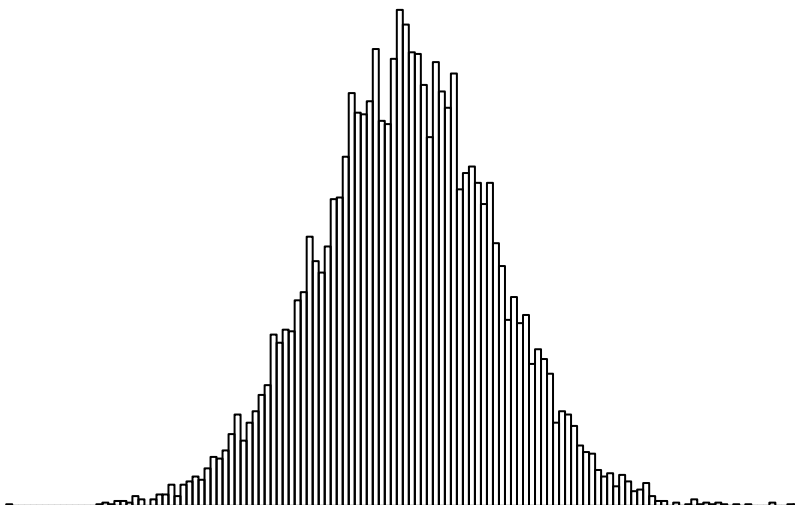

A194:18

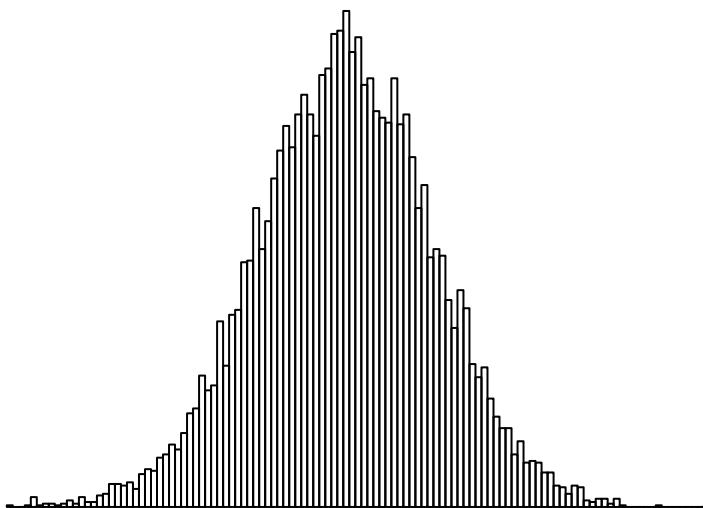

-8

-7

-6

-5

-4

Unidentified Metabolite 27

A194:26 – A194:18

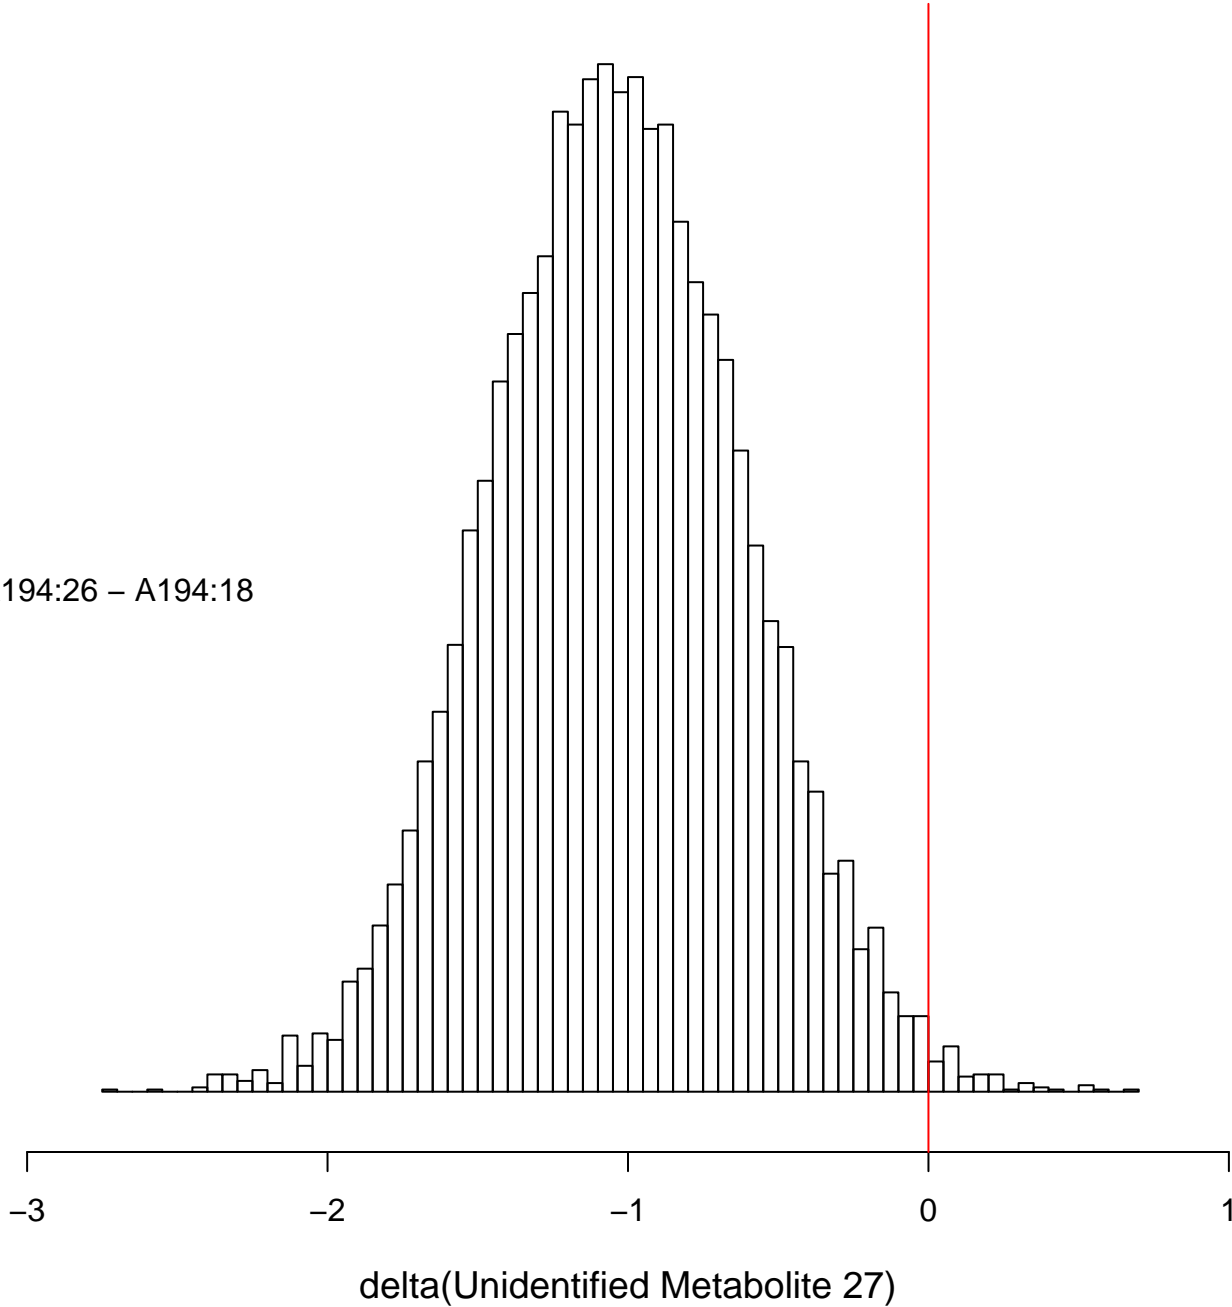

A194:26

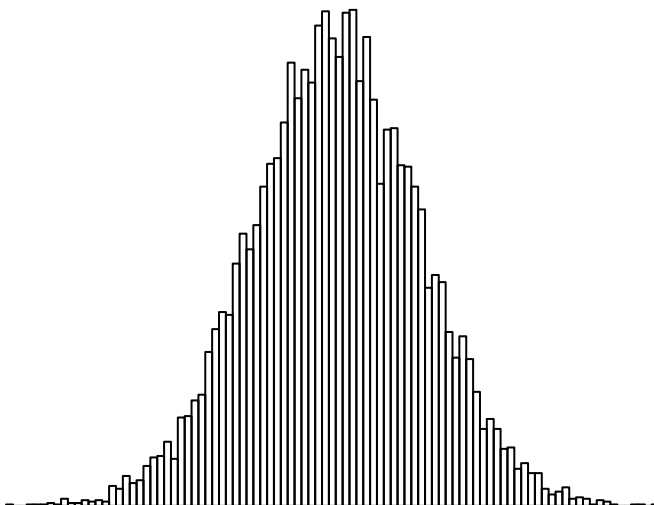

A194:18

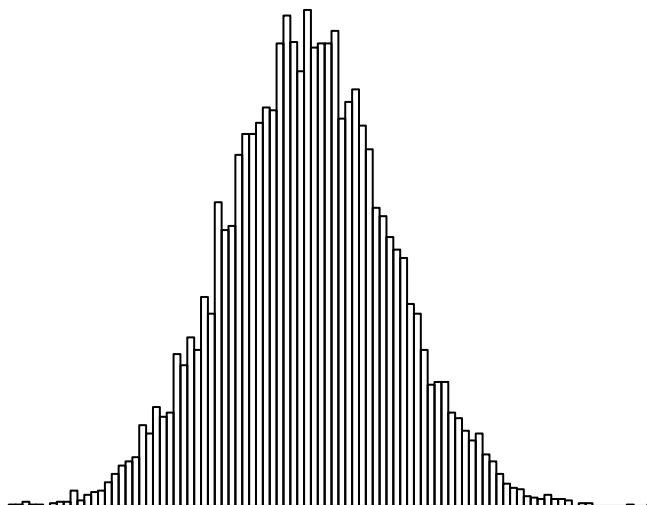

-9.0      -8.5      -8.0      -7.5      -7.0      -6.5      -6.0      -5.5

Unidentified Metabolite 29

A194:26 – A194:18

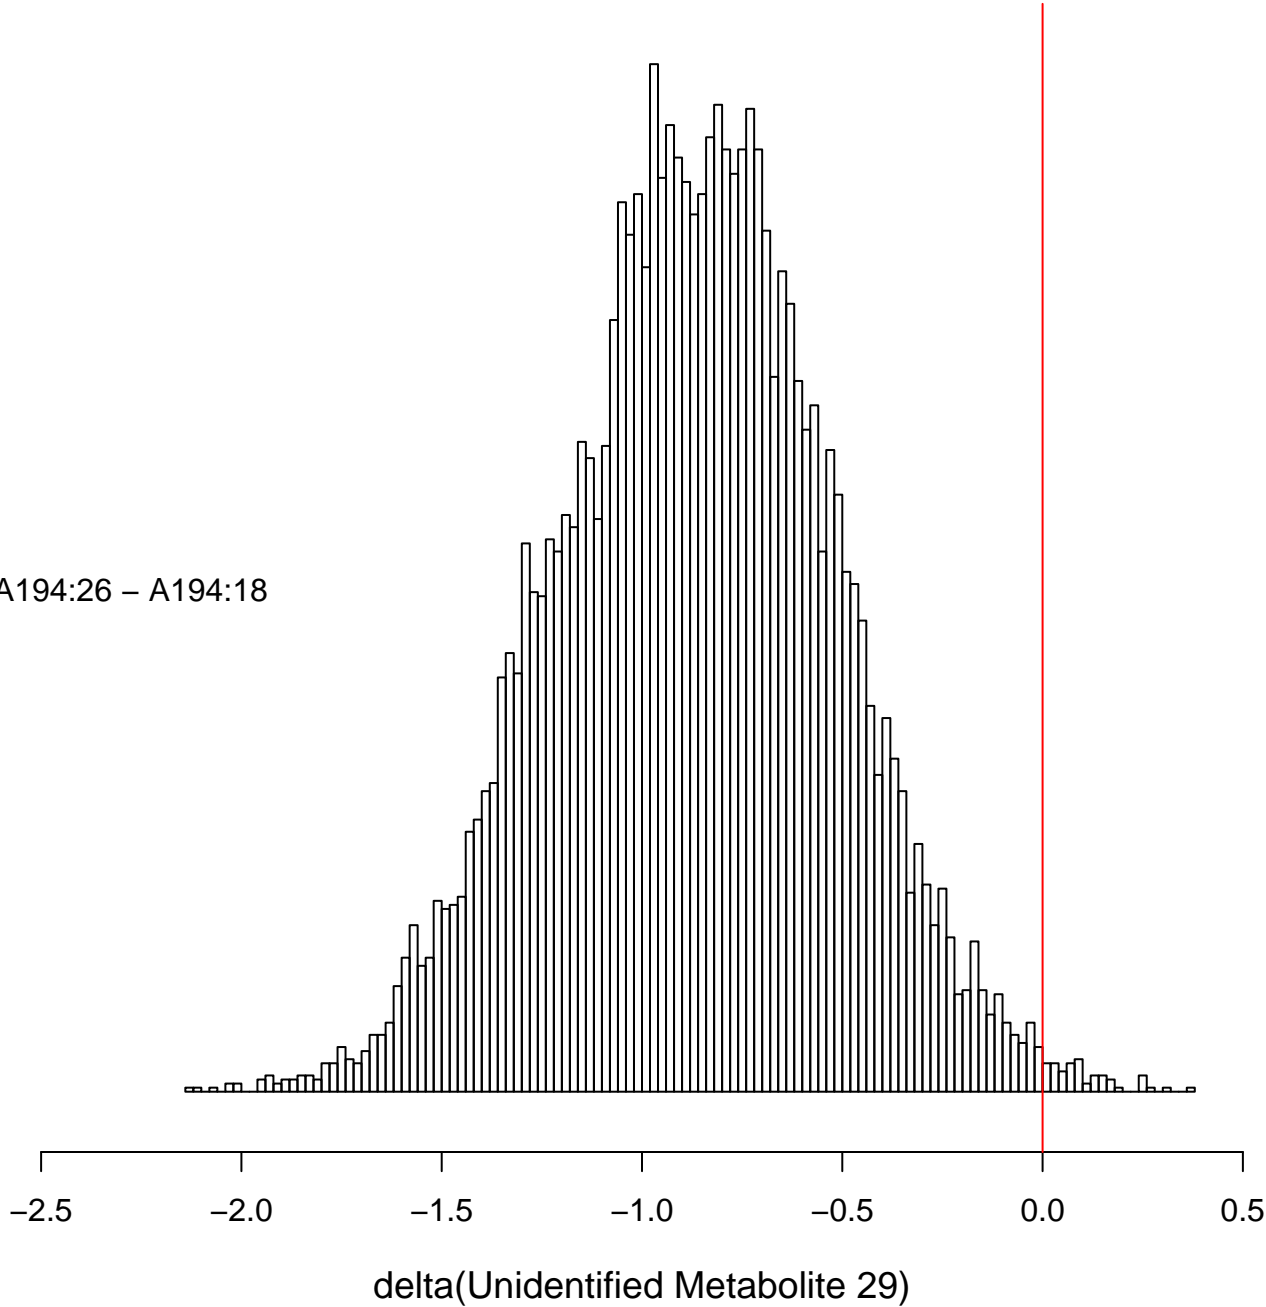

A194:26

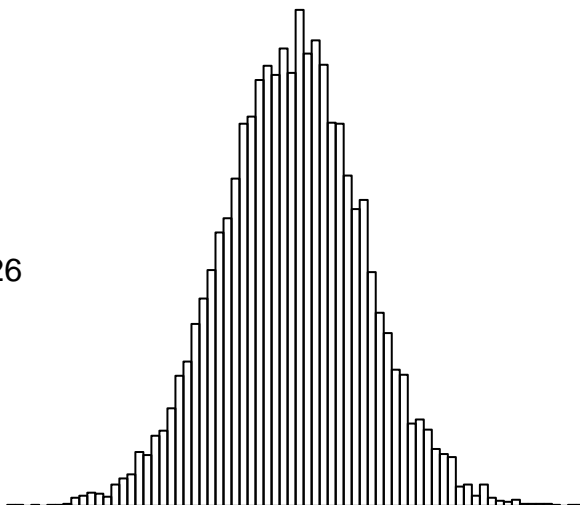

A194:18

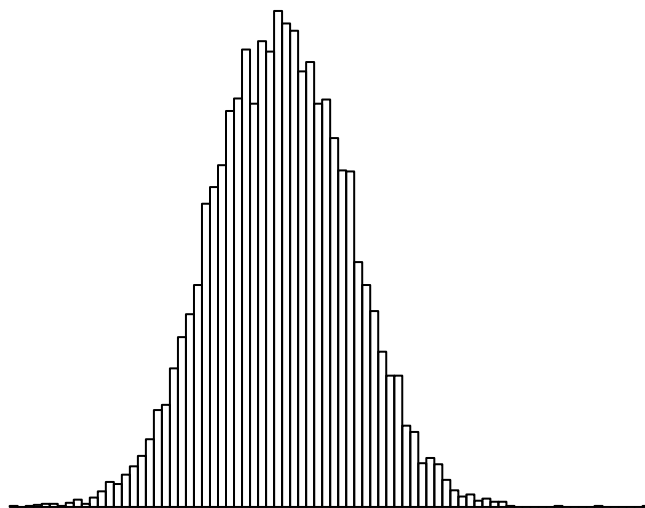

-9.5      -9.0      -8.5      -8.0      -7.5      -7.0      -6.5

Unidentified Metabolite 30

A194:26 – A194:18

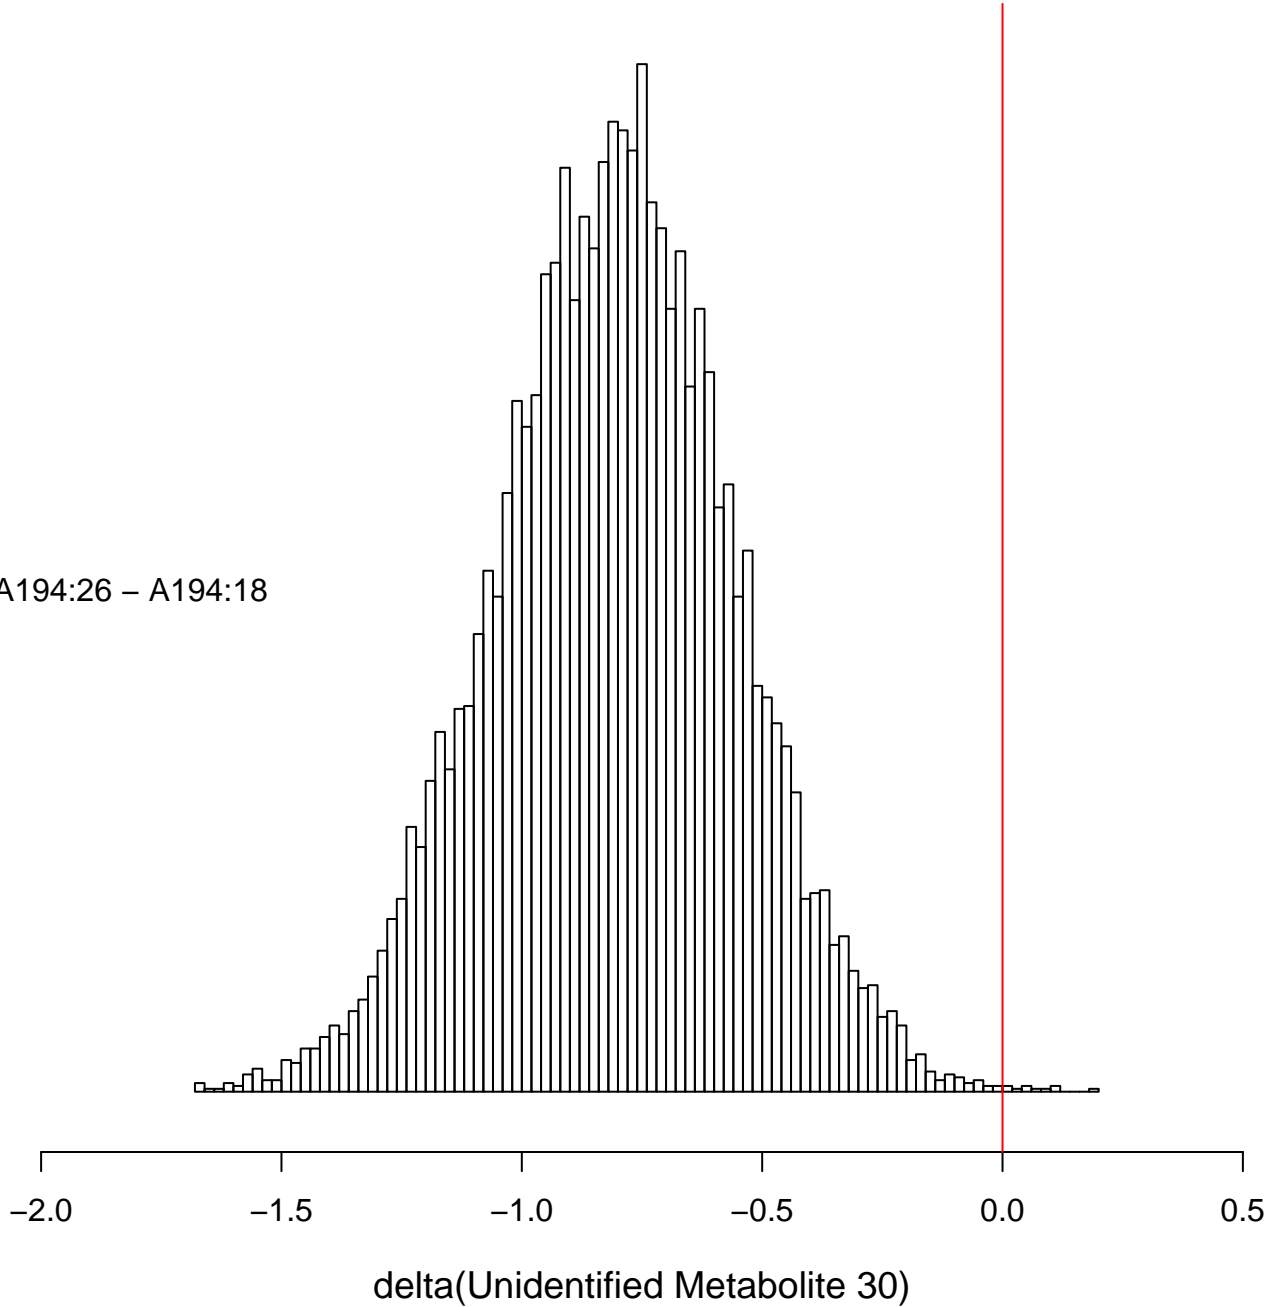



A194:26

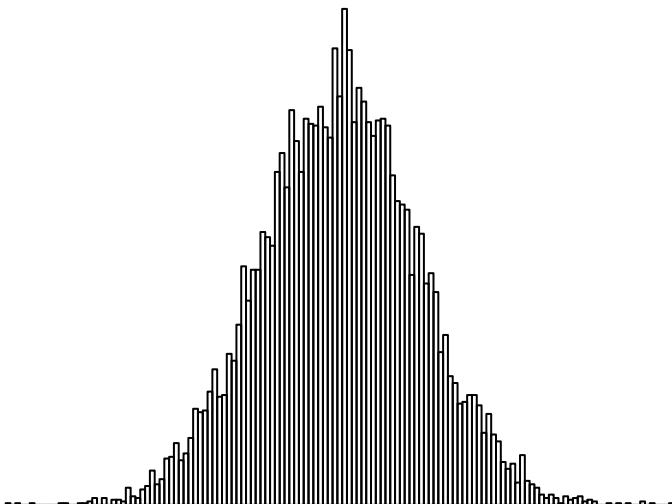

A194:18

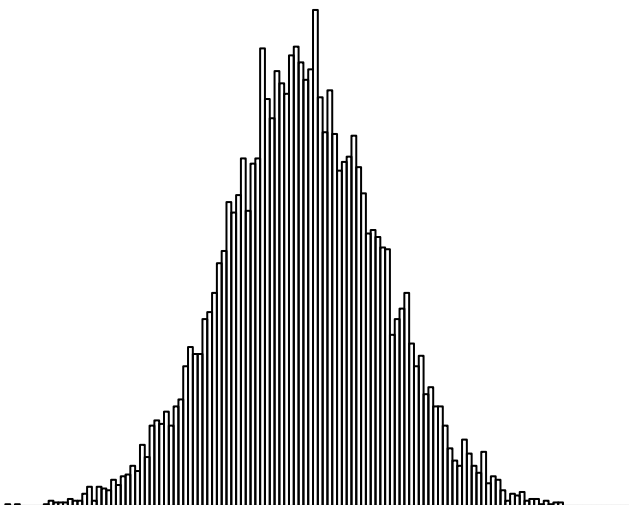

-11      -10      -9      -8      -7      -6

Unidentified Metabolite 31

A194:26 – A194:18

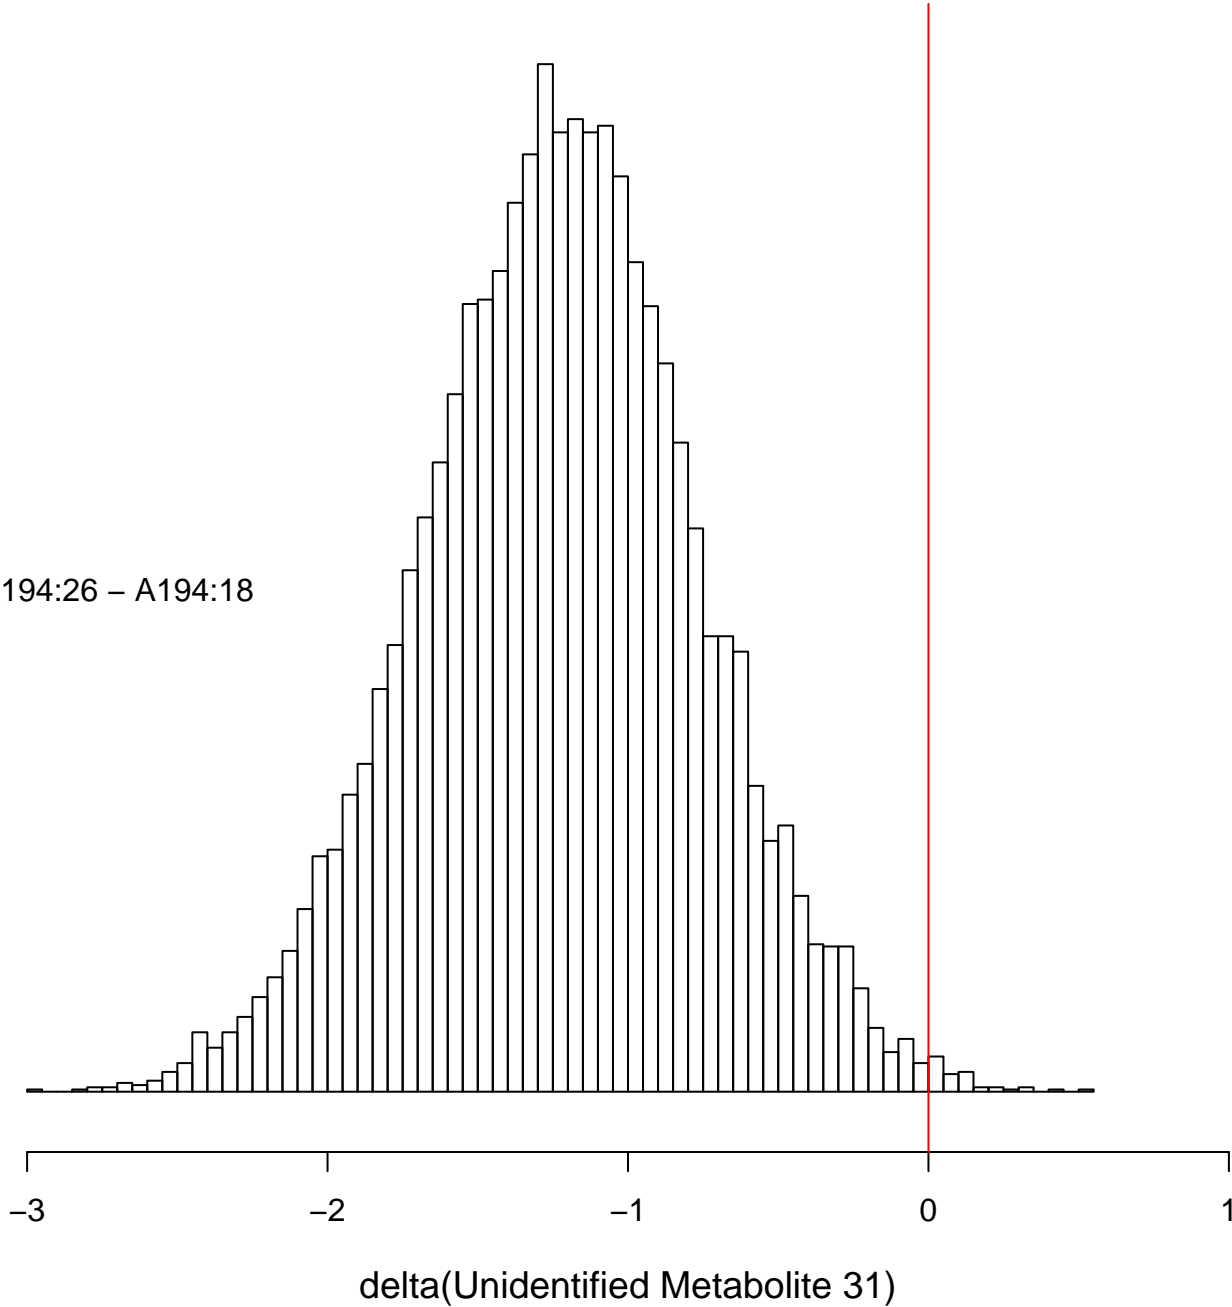

A194:26

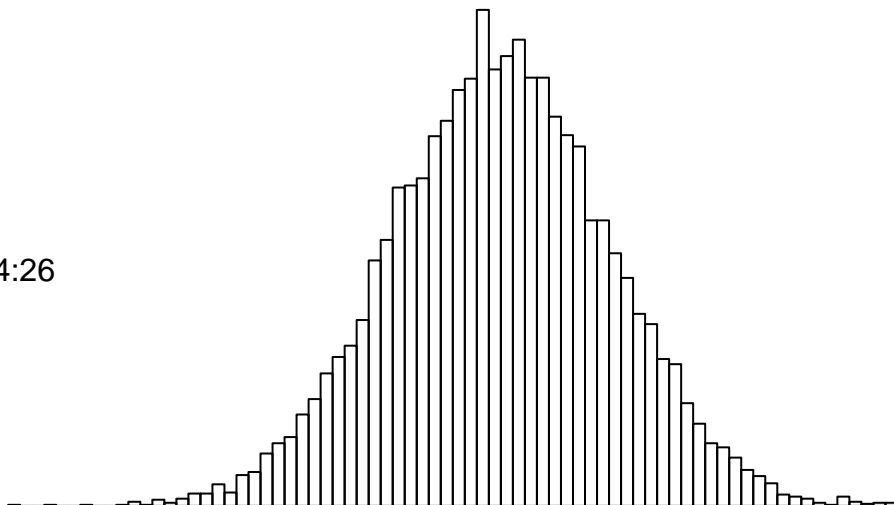

A194:18

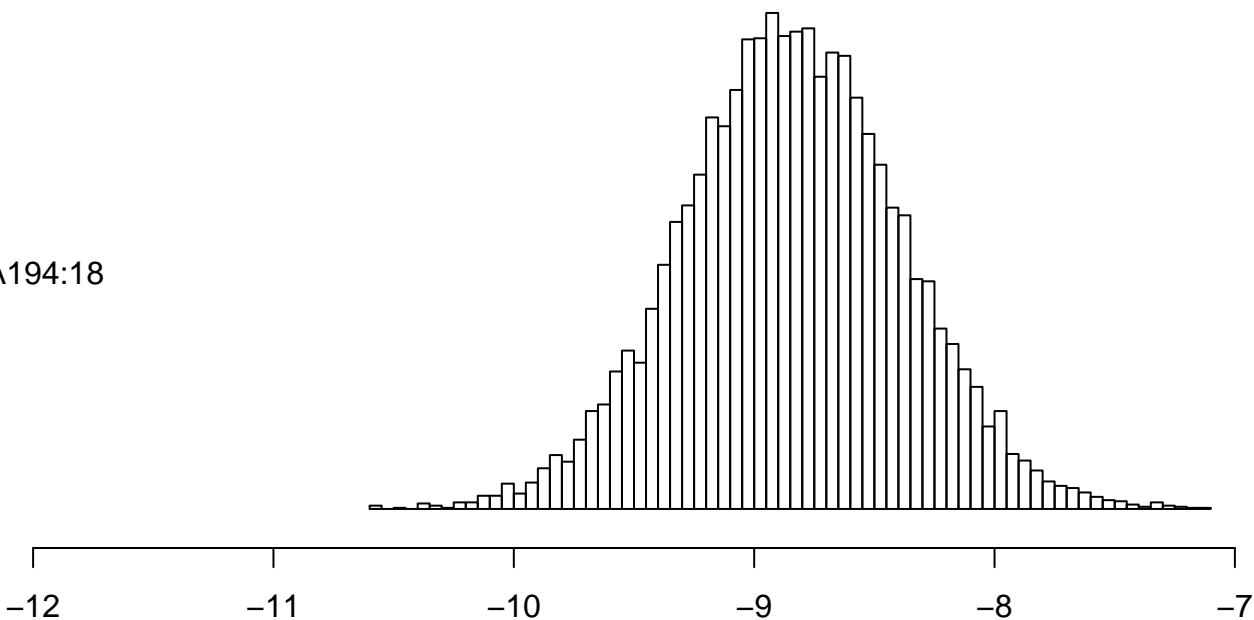

Unidentified Metabolite 32

A194:26 – A194:18

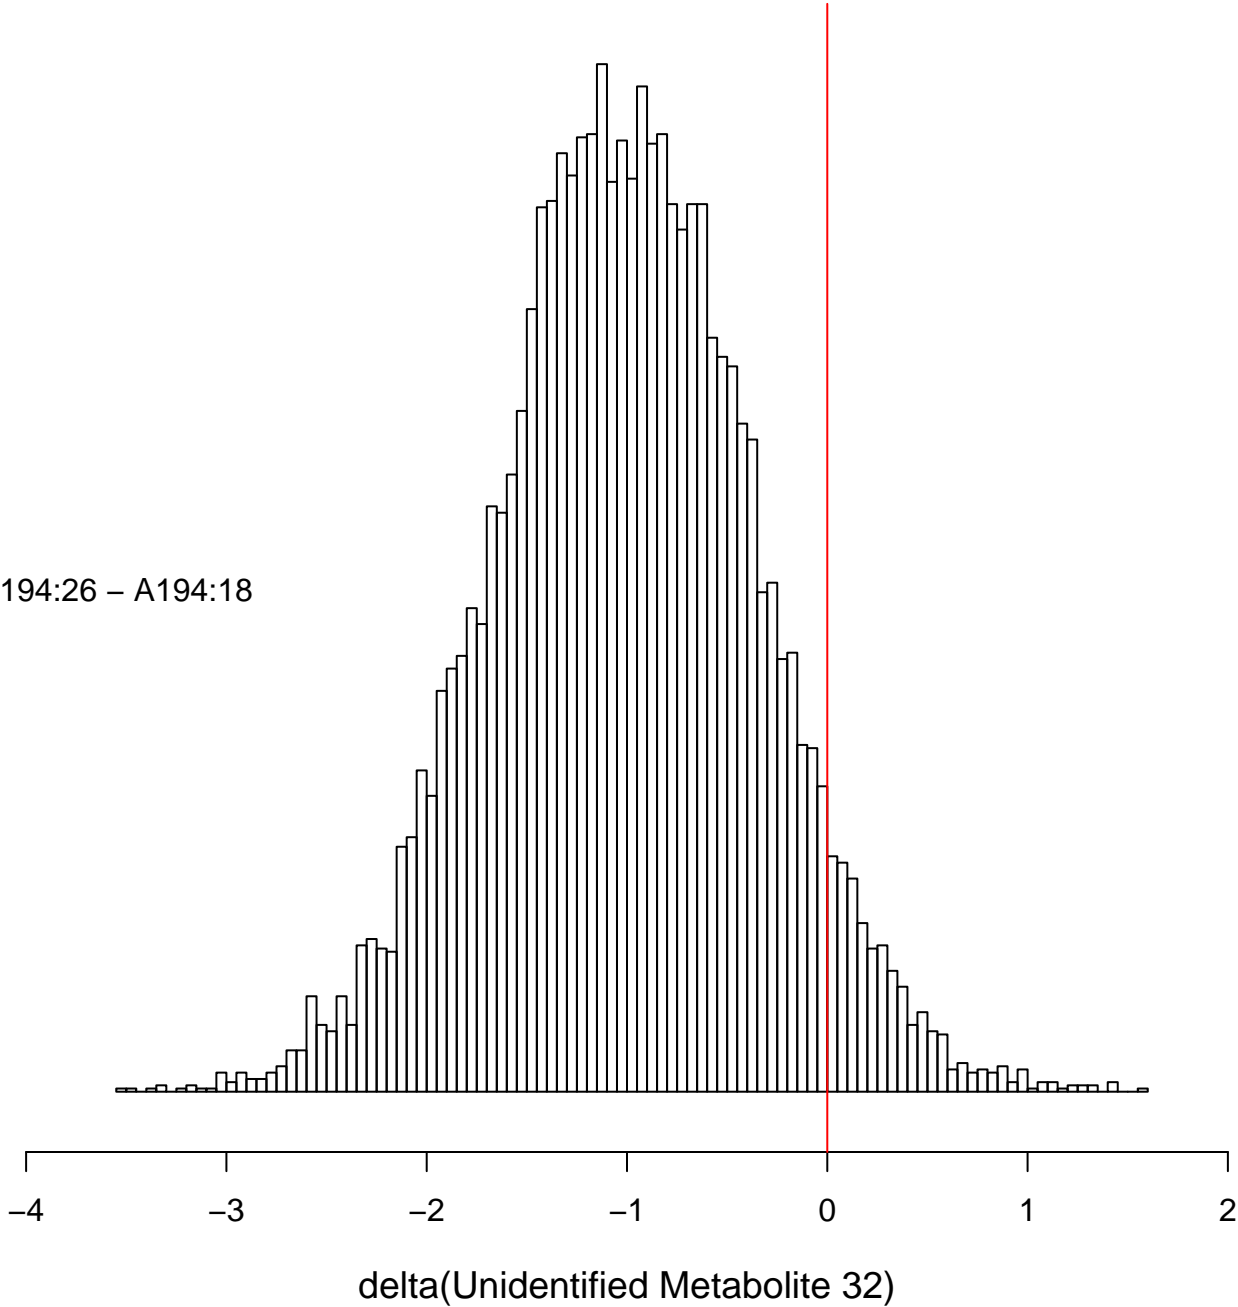

A194:26

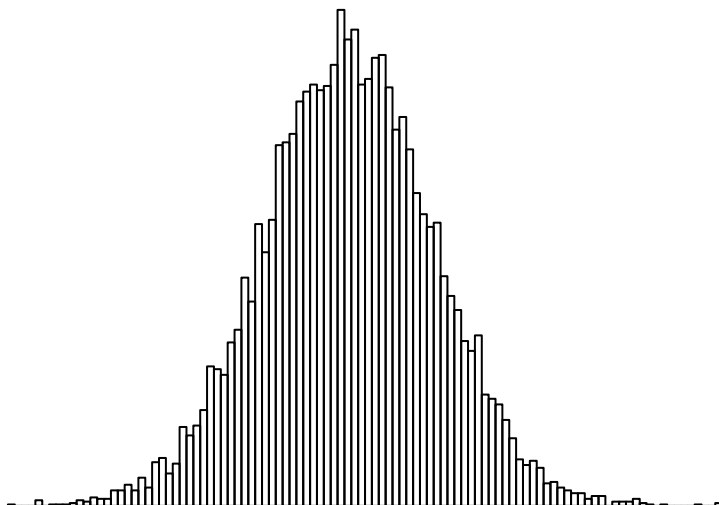

A194:18

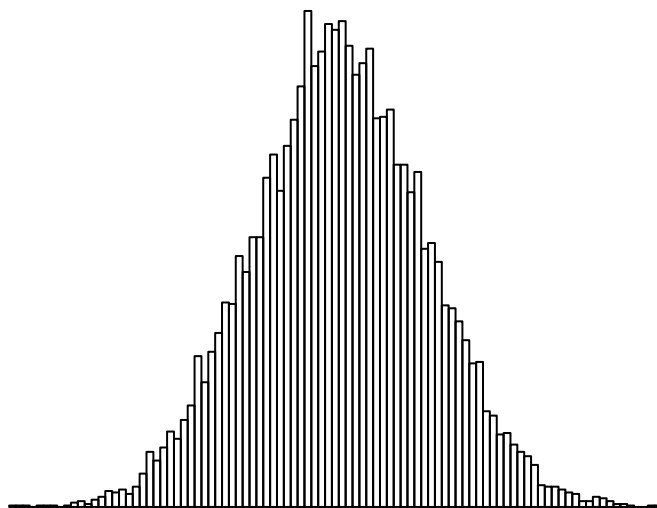

-9.5      -9.0      -8.5      -8.0      -7.5      -7.0      -6.5      -6.0

Unidentified Metabolite 33

A194:26 – A194:18

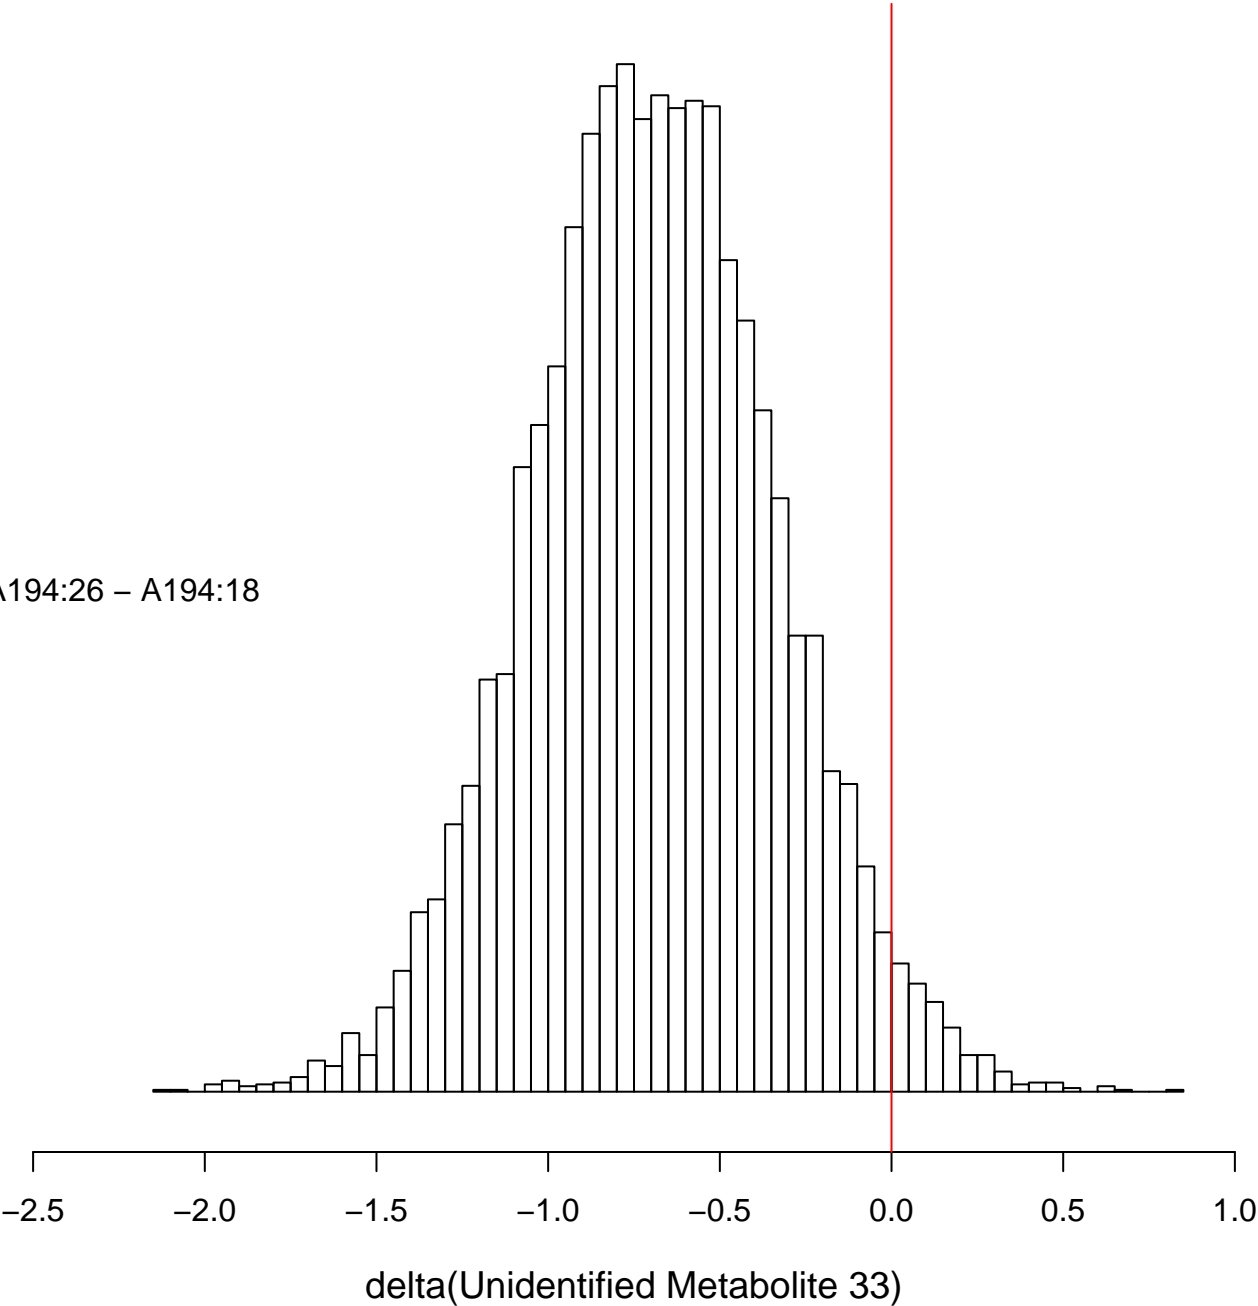

A194:26

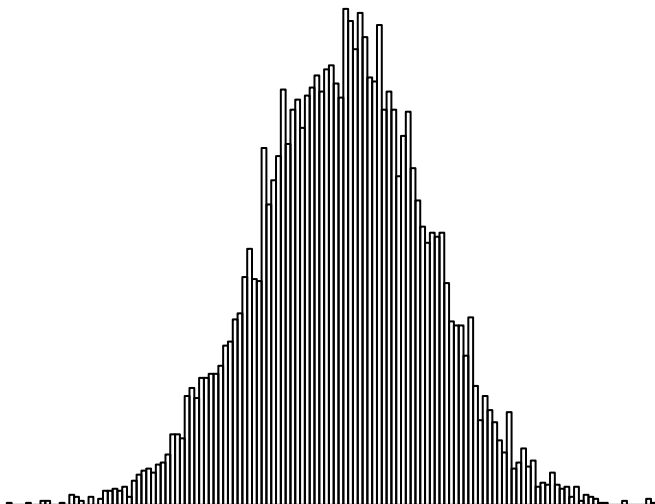

A194:18

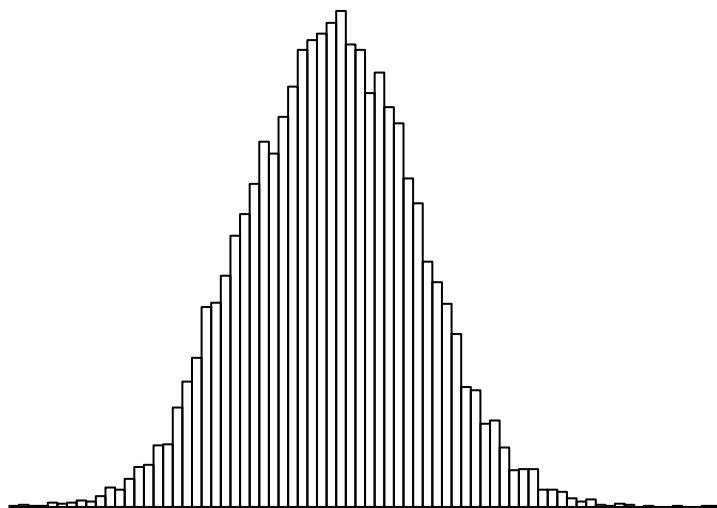

-9.0

-8.5

-8.0

-7.5

-7.0

-6.5

Unidentified Metabolite 34

A194:26 – A194:18

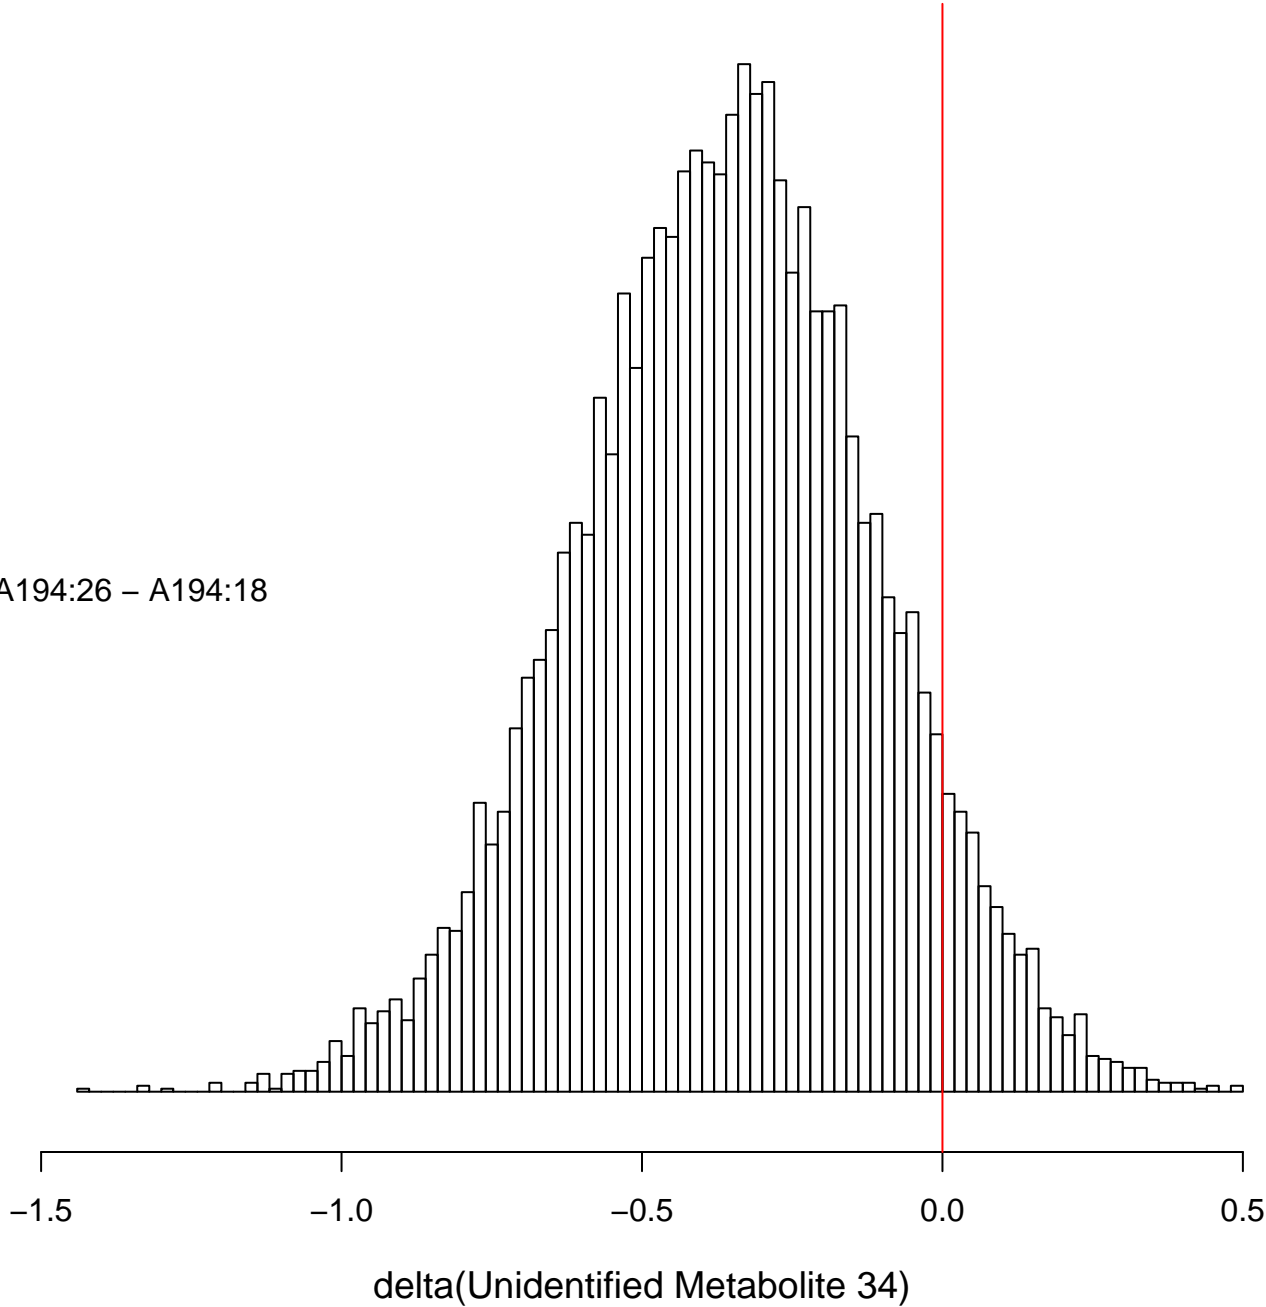



A194:26

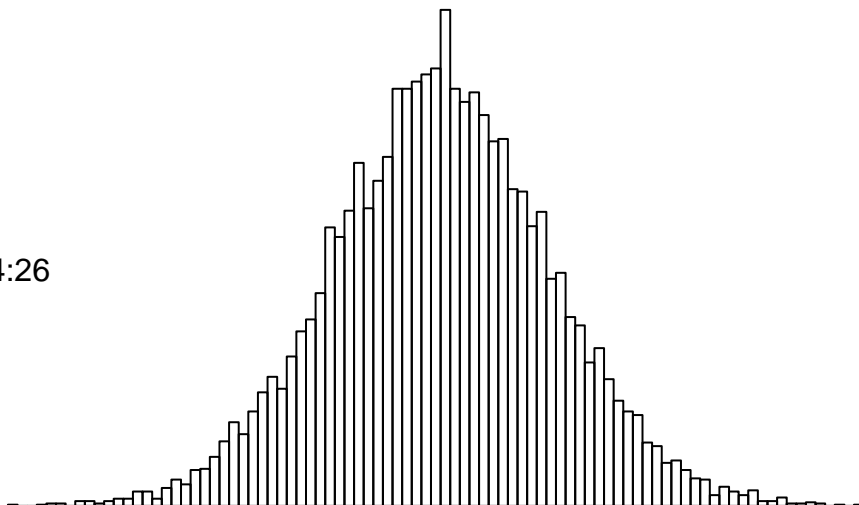

A194:18

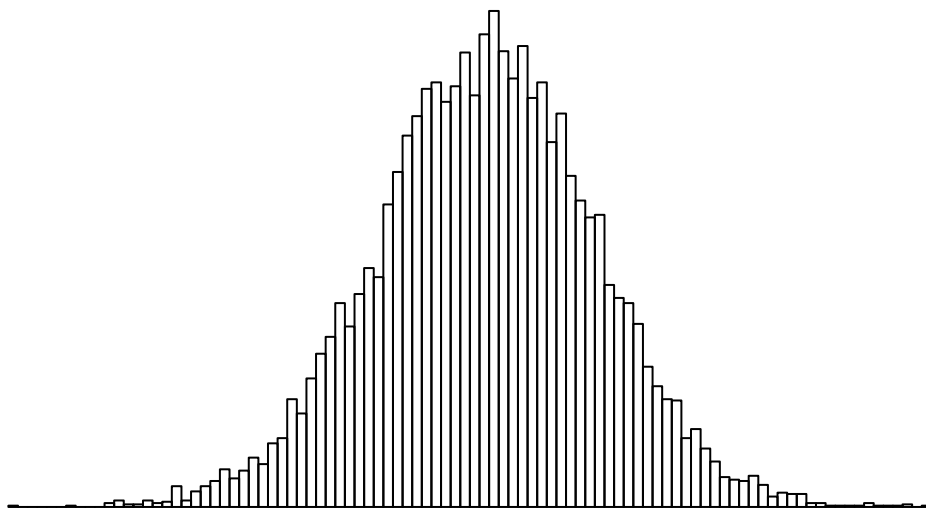

-8.0

-7.5

-7.0

-6.5

-6.0

-5.5

Unidentified Metabolite 35

A194:26 – A194:18

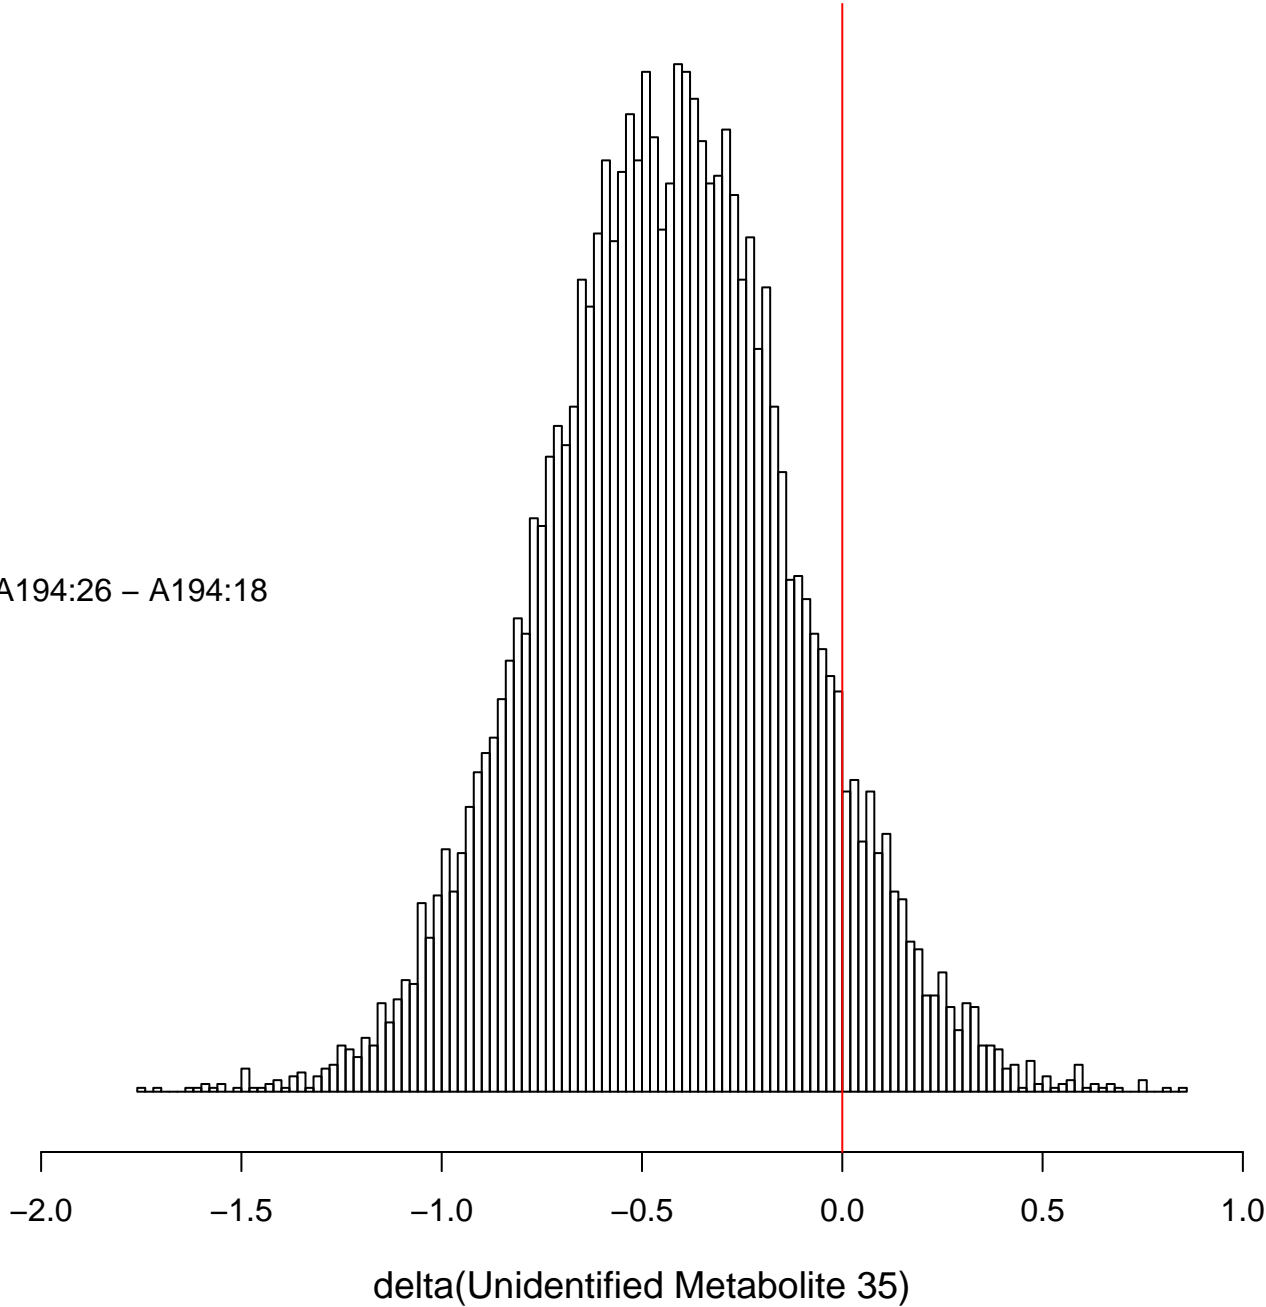

A194:26

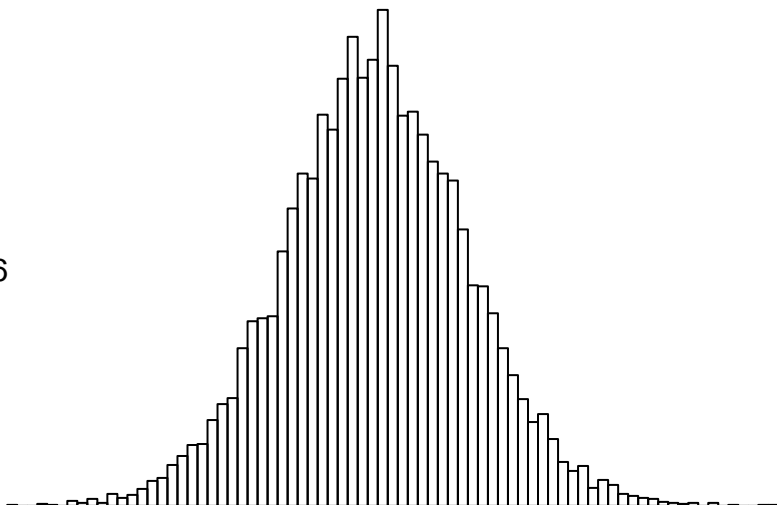

A194:18

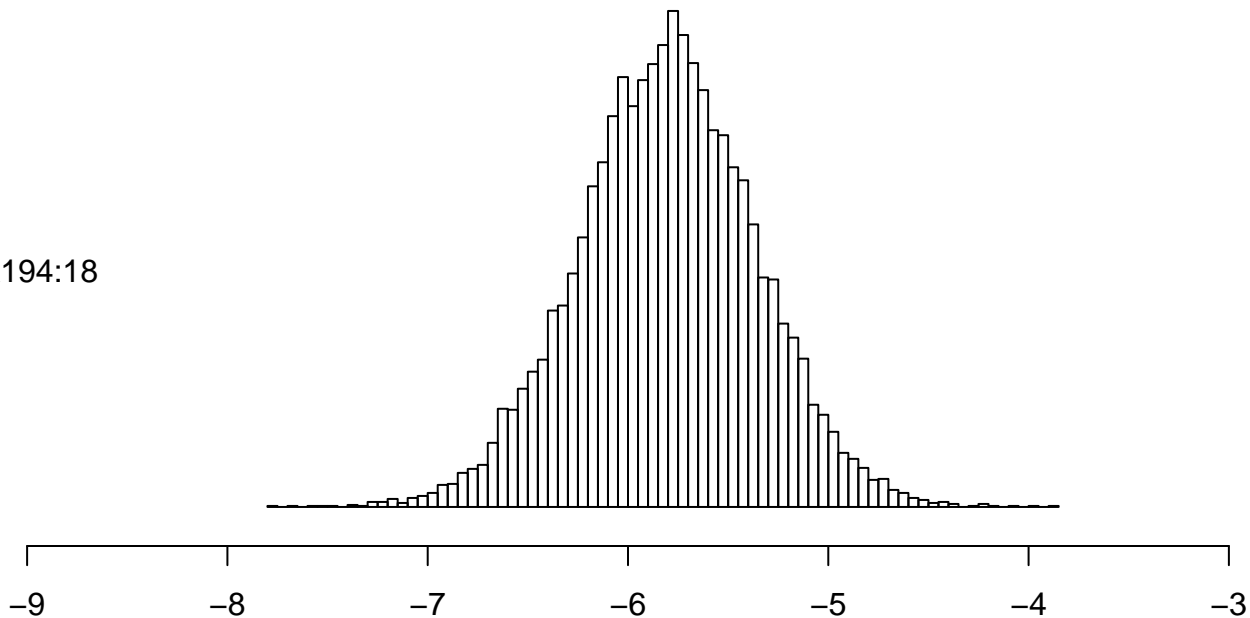

Unidentified Metabolite 36

A194:26 – A194:18

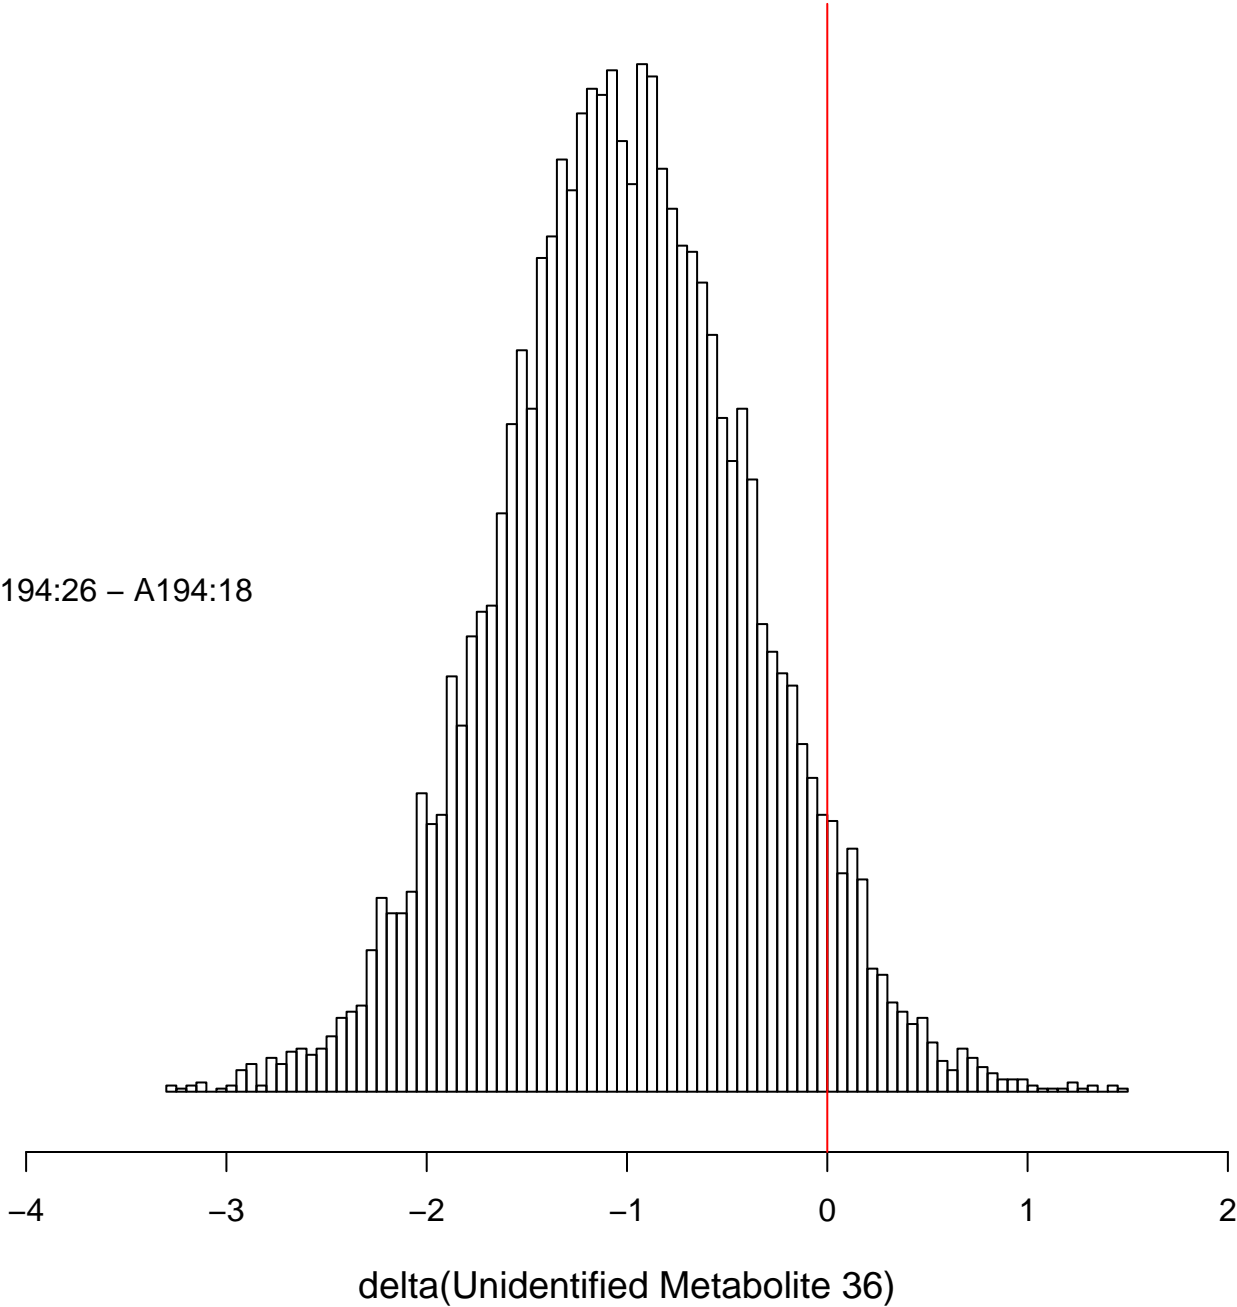

A194:26

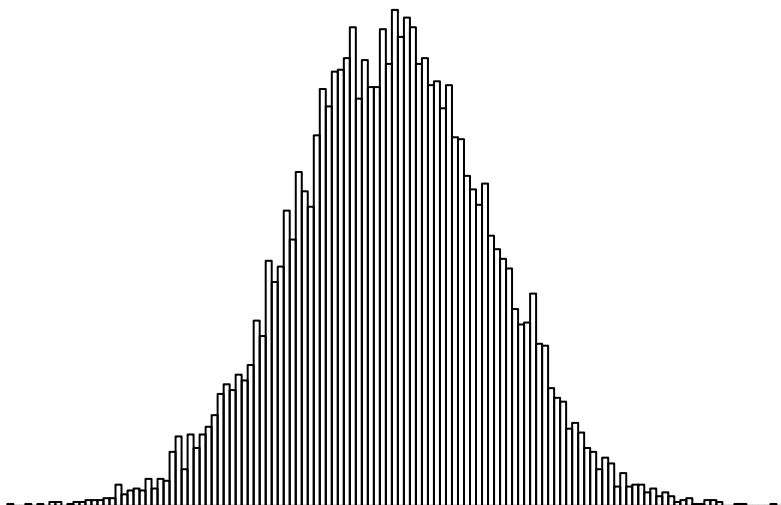

A194:18

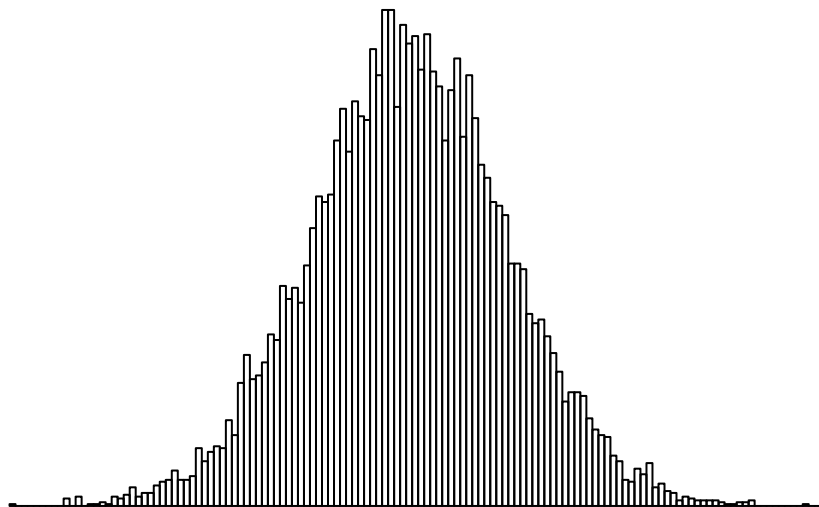

-9

-8

-7

-6

-5

Unidentified Metabolite 38

A194:26 – A194:18

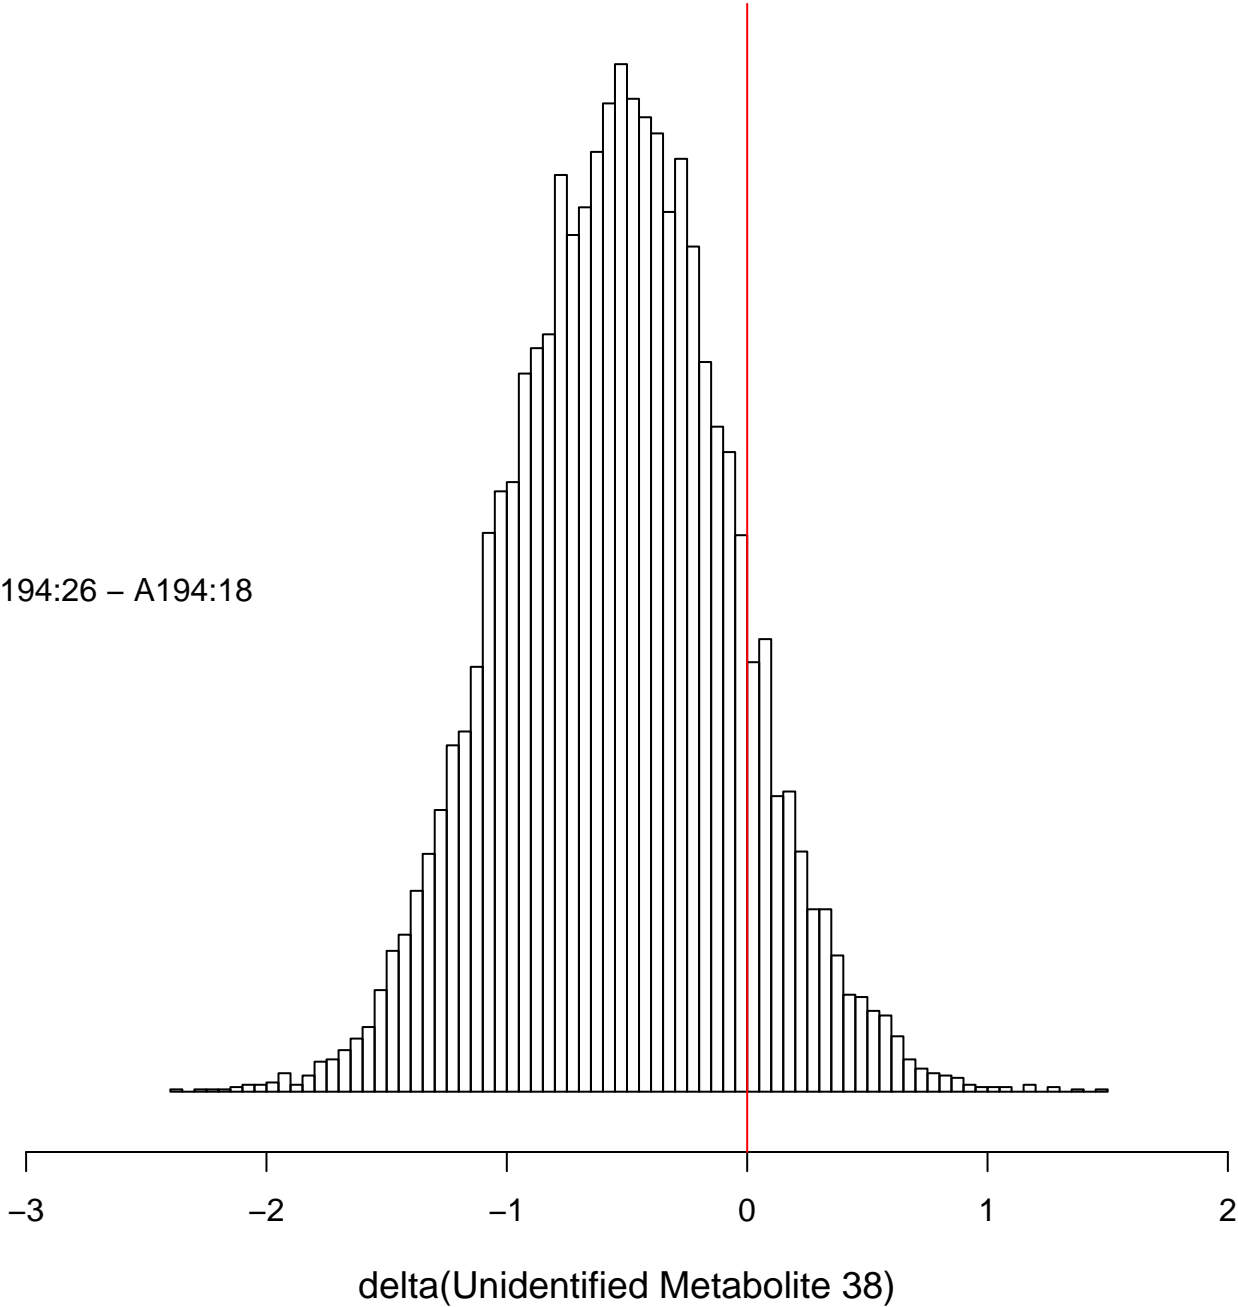

A194:26

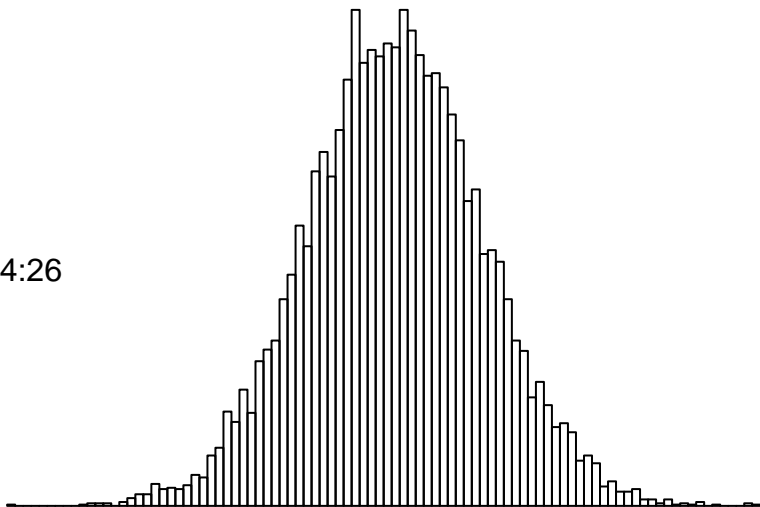

A194:18

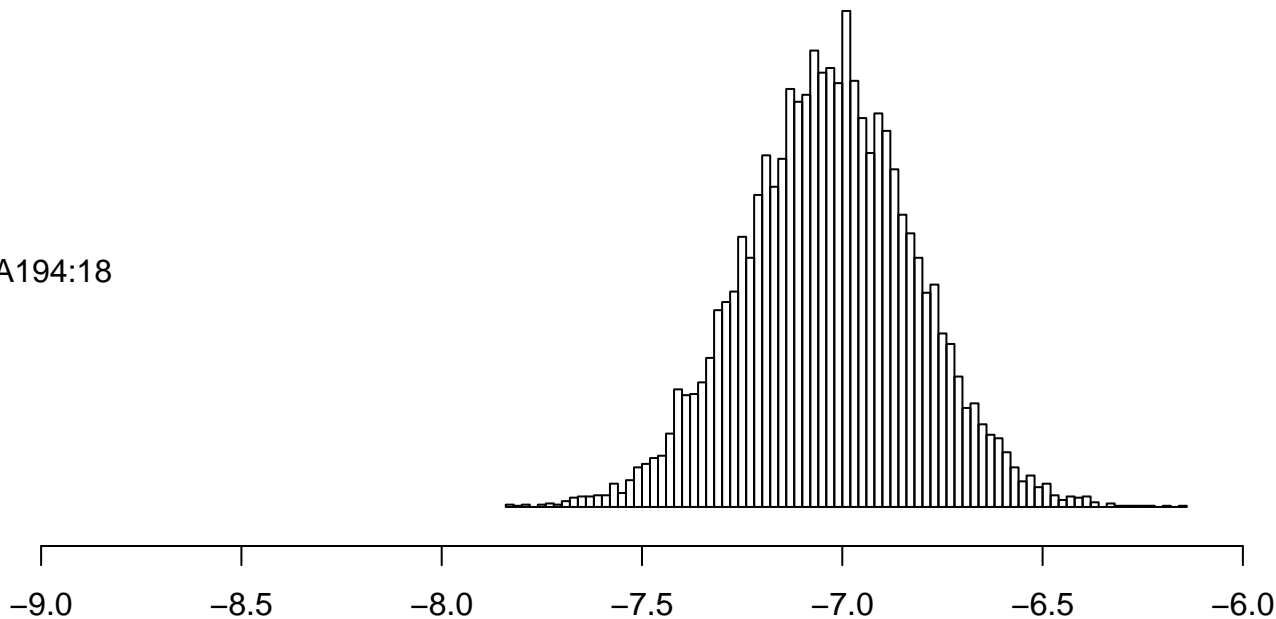

Unidentified Metabolite 39

A194:26 – A194:18

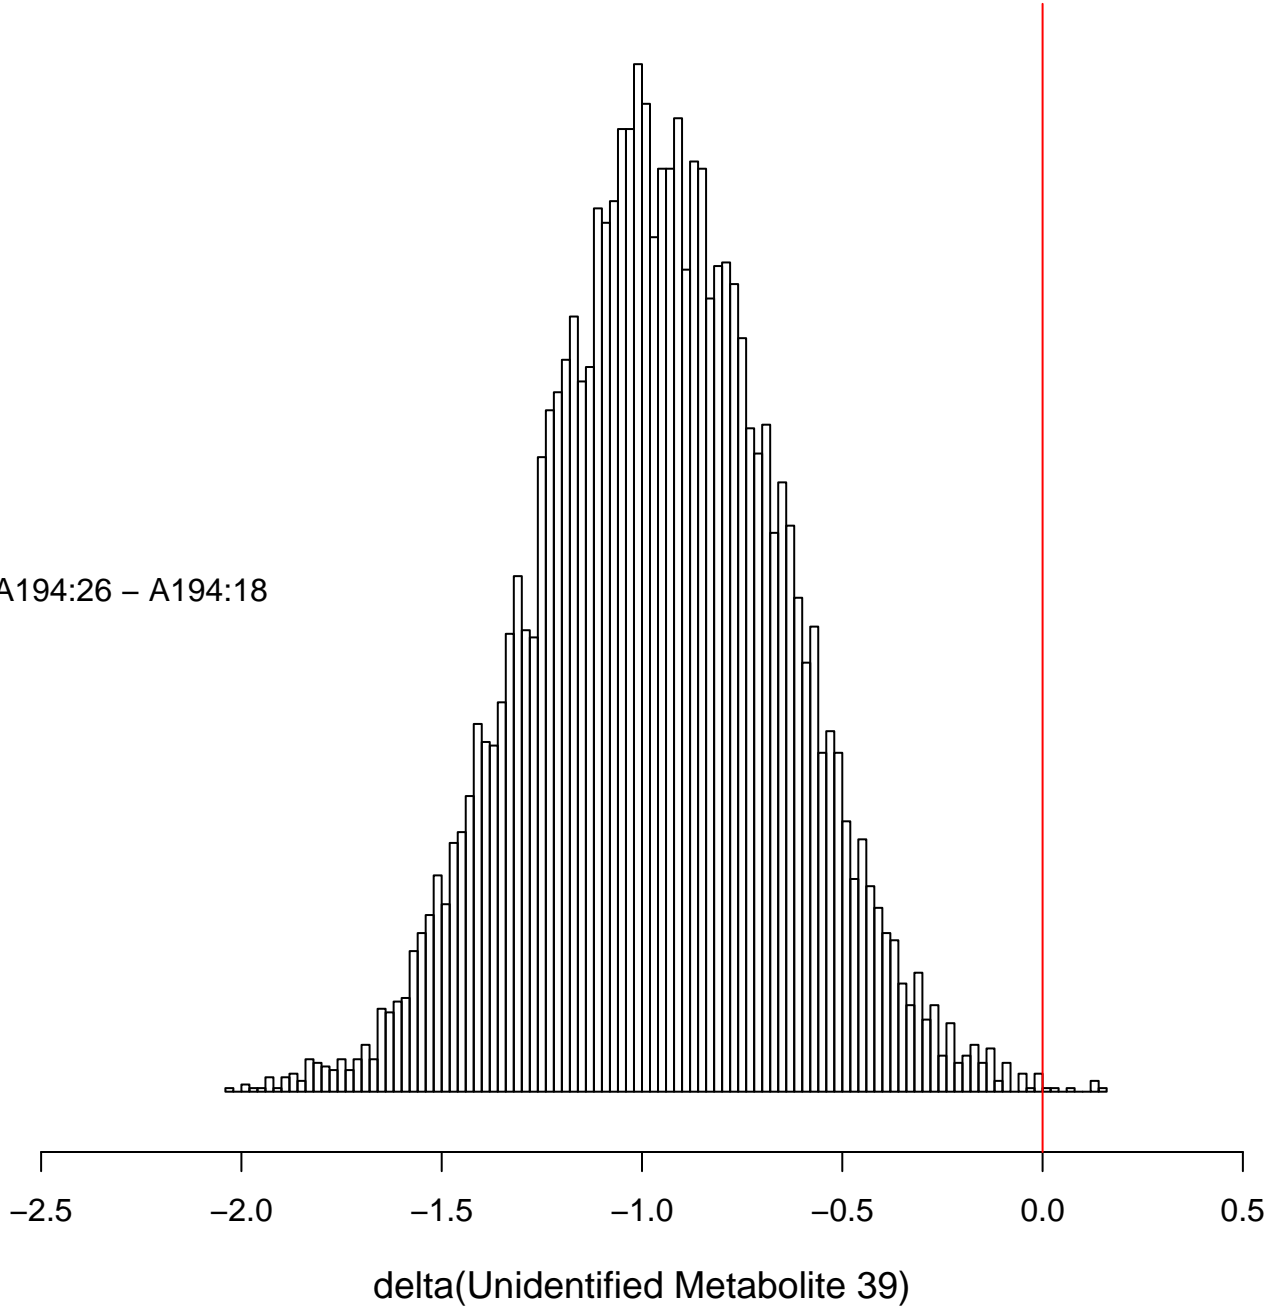



A194:26

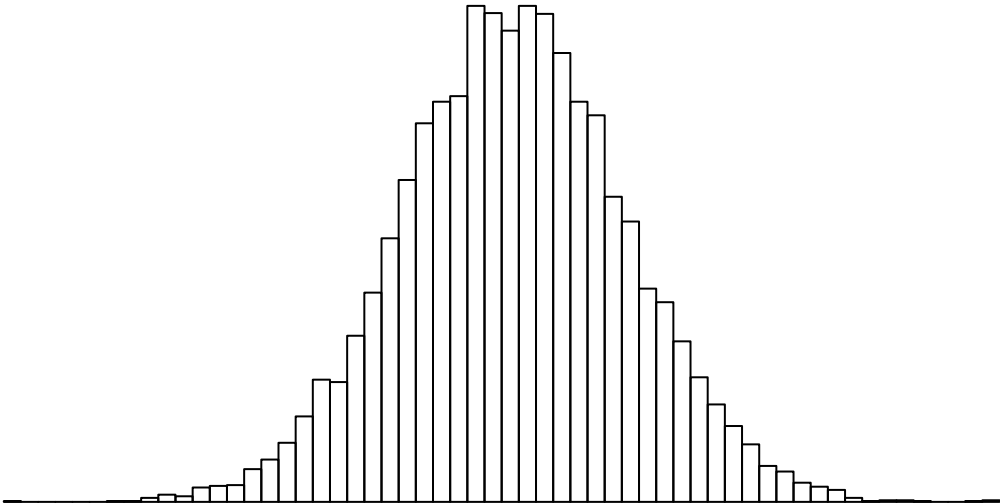

A194:18

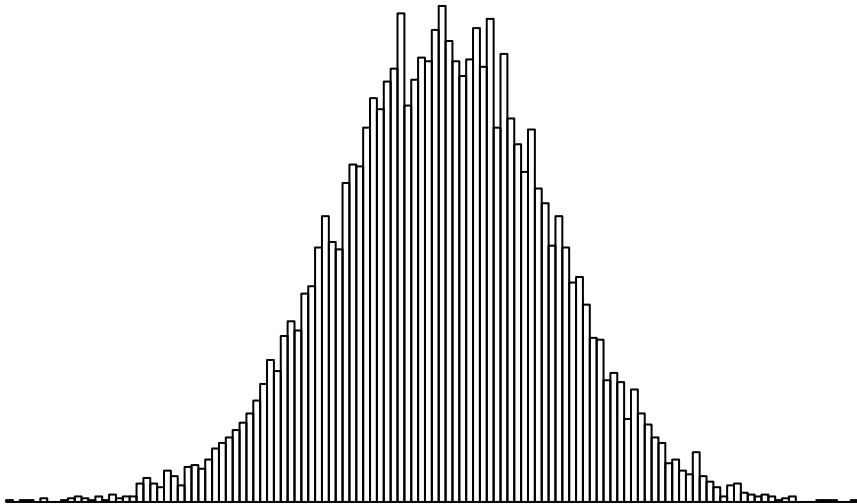

-8.5      -8.0      -7.5      -7.0      -6.5      -6.0      -5.5      -5.0

Unidentified Metabolite 42

A194:26 – A194:18

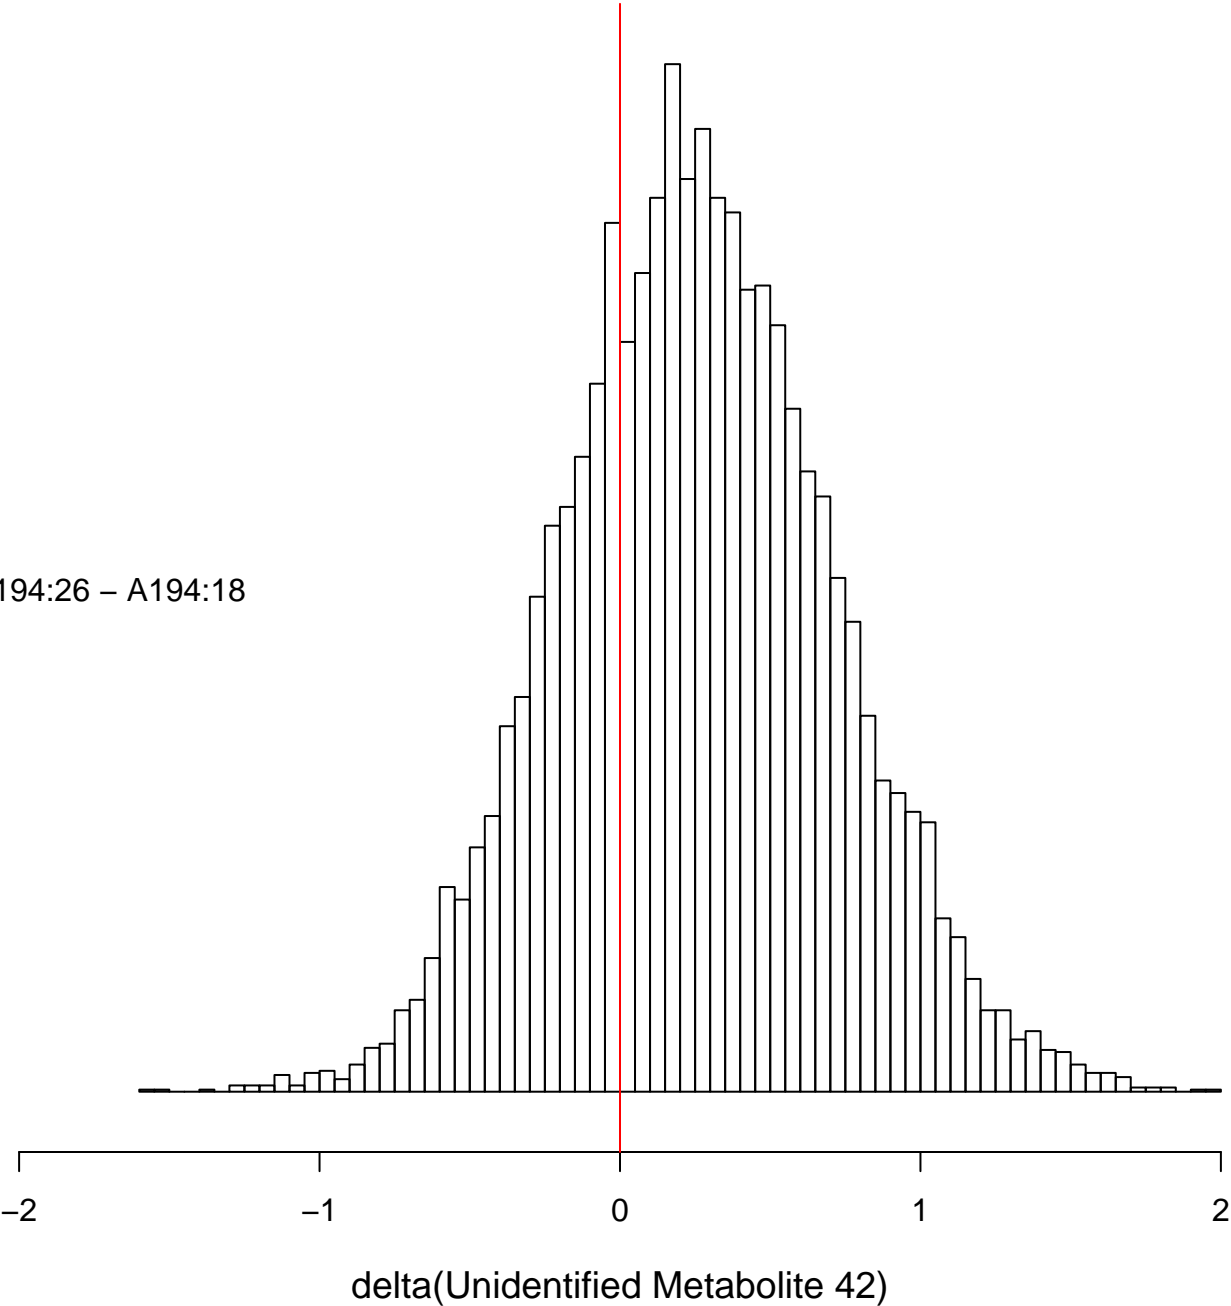

A194:26

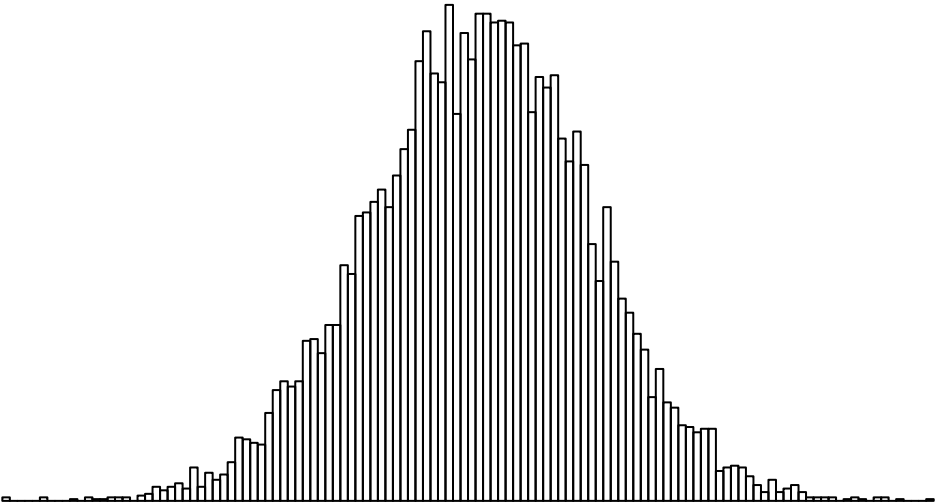

A194:18

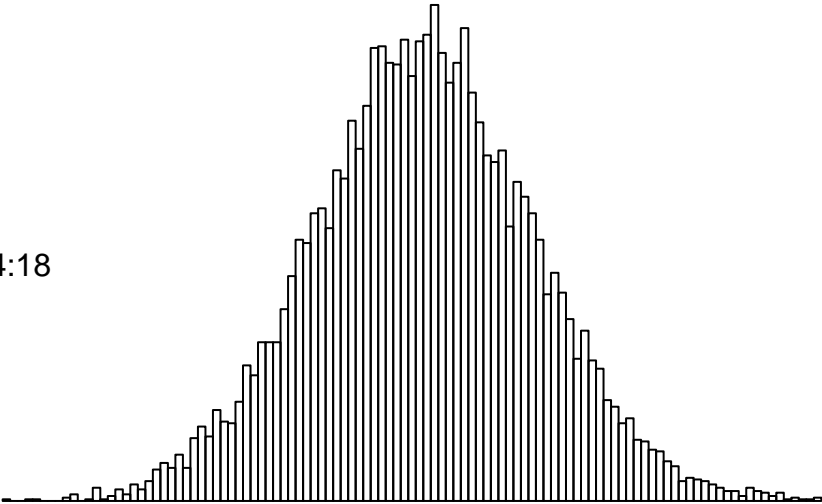

-8.0

-7.5

-7.0

Unidentified Metabolite 43

A194:26 – A194:18

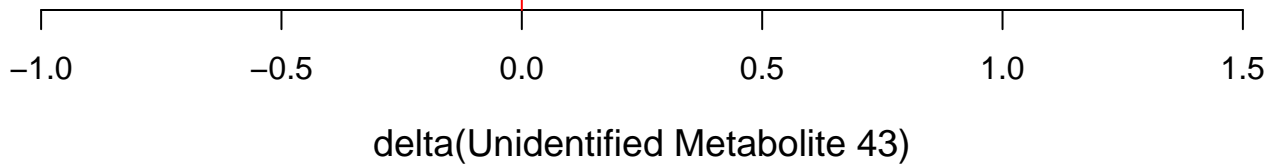

A194:26

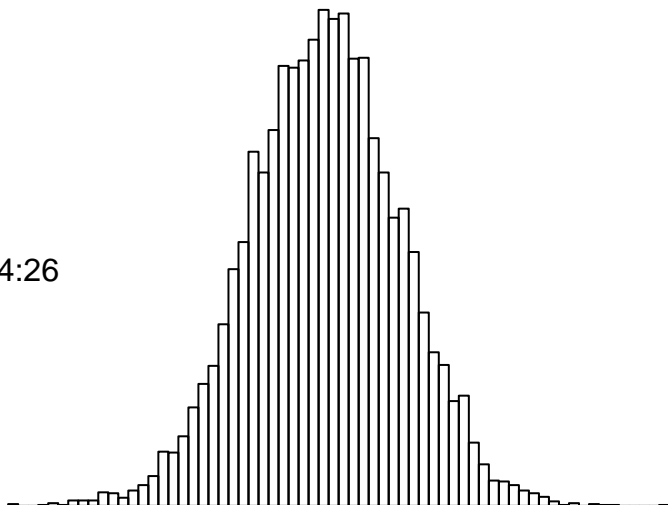

A194:18

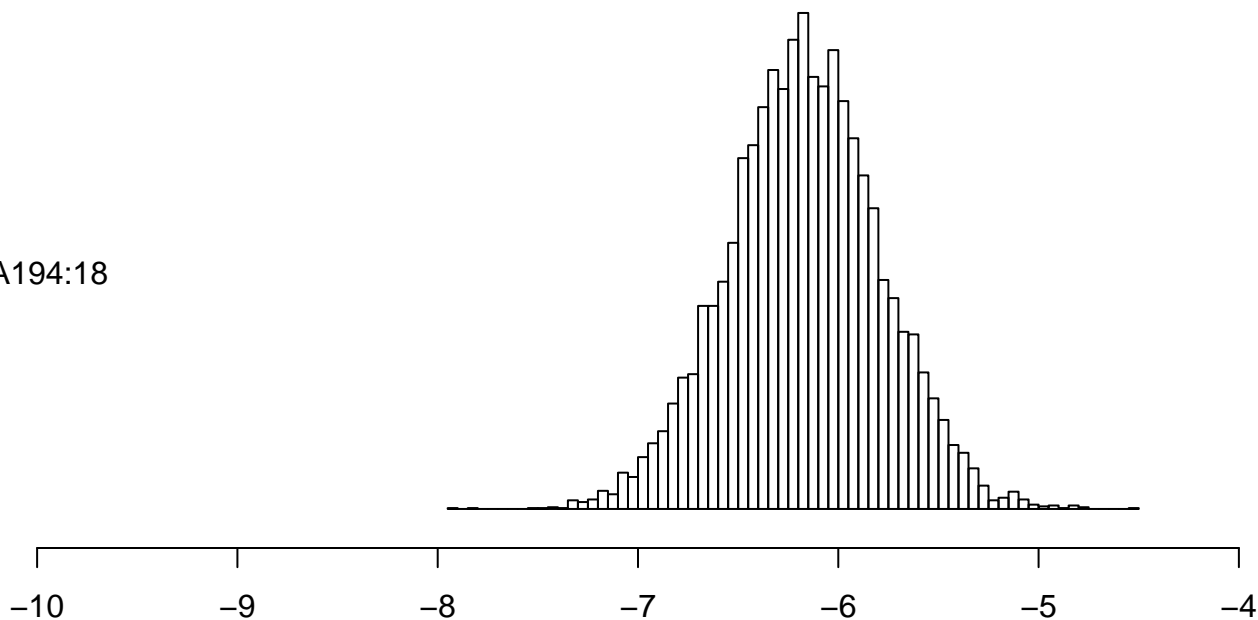

Unidentified Metabolite 45

A194:26 – A194:18

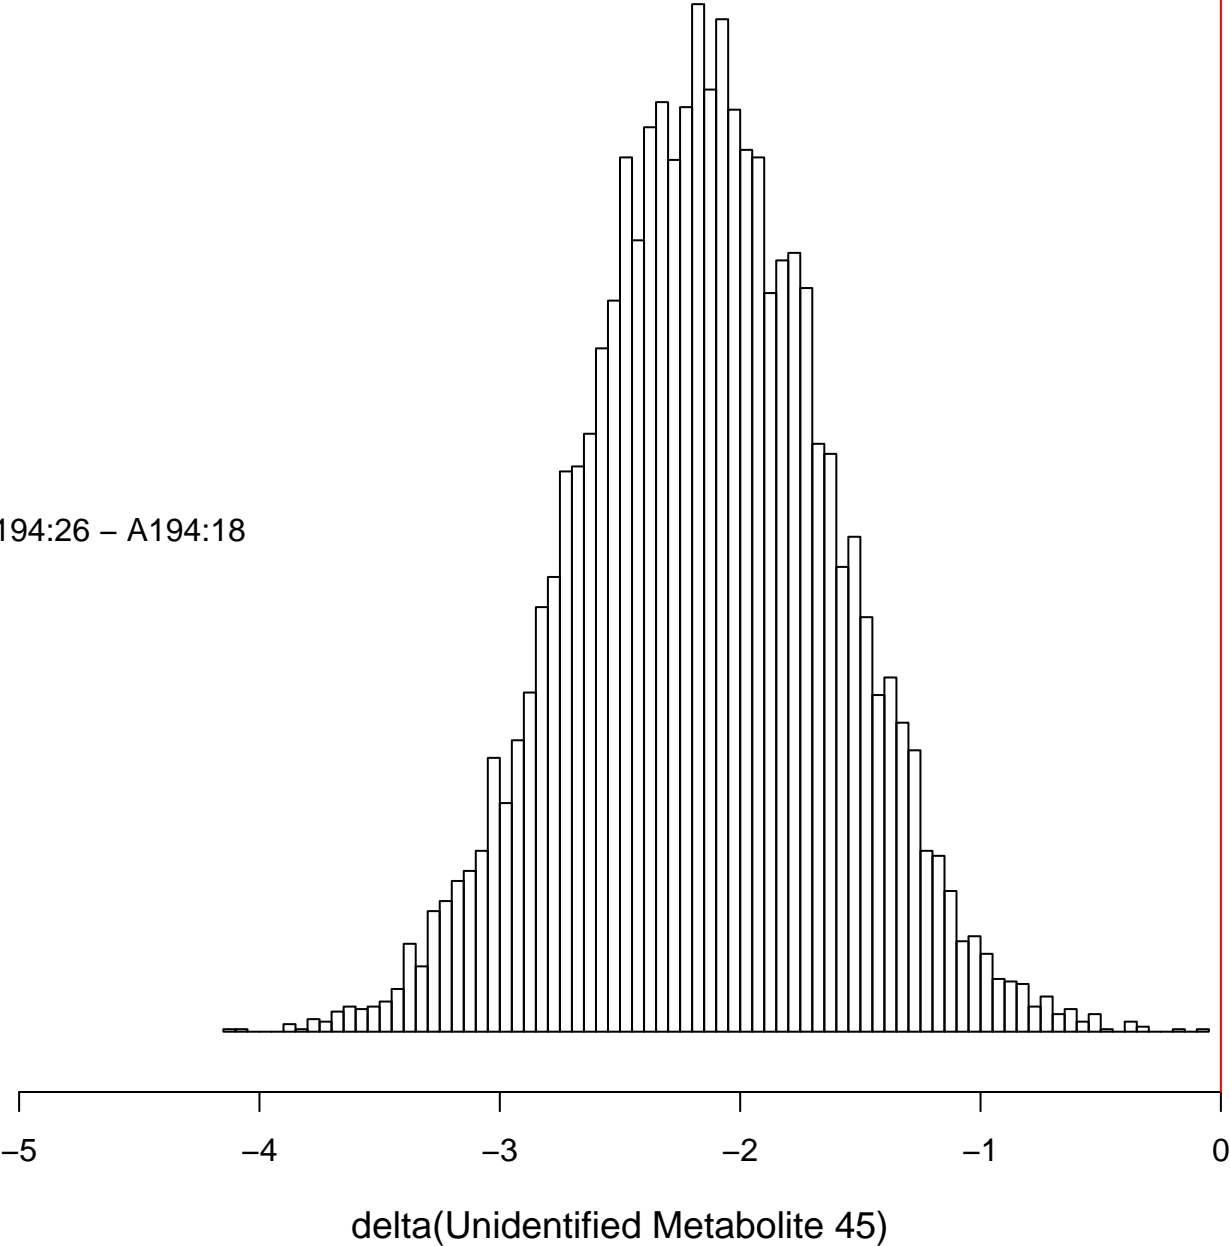

A194:26

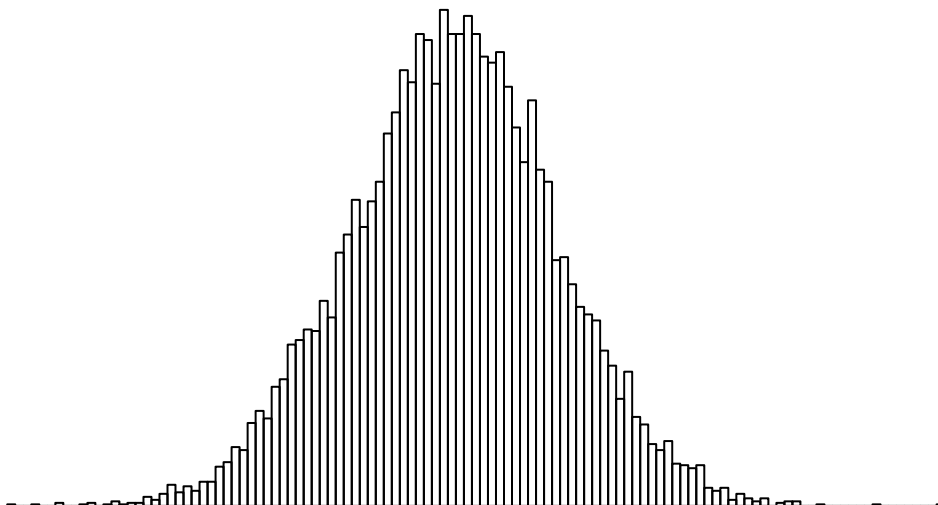

A194:18

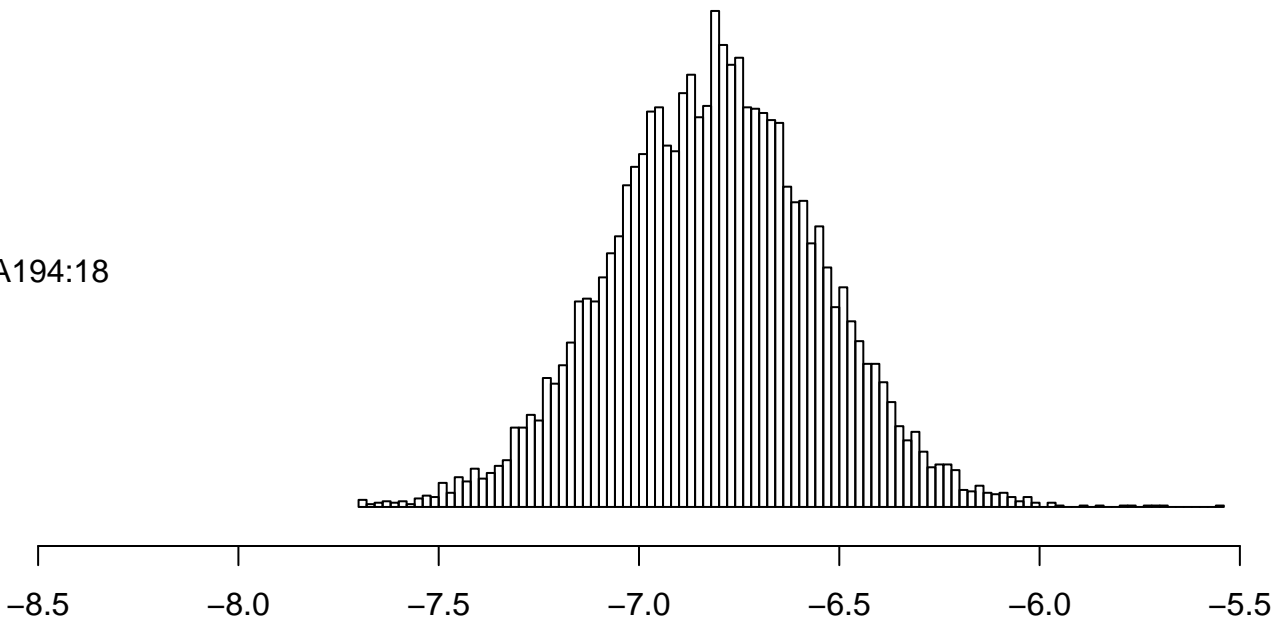

Unidentified Metabolite 47

A194:26 – A194:18

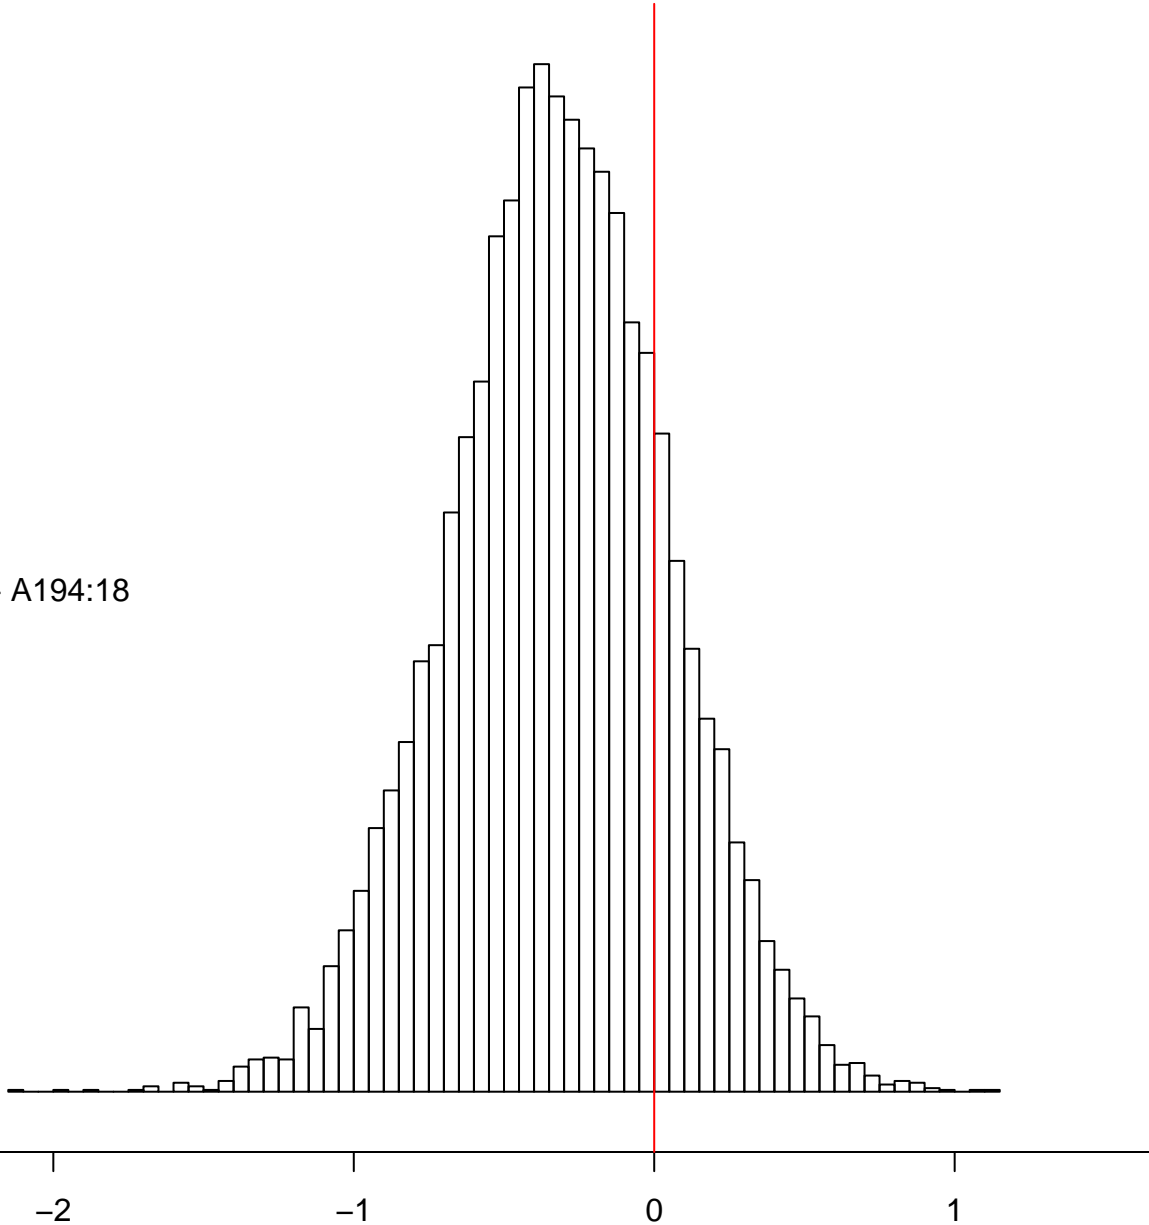

delta(Unidentified Metabolite 47)



A194:26

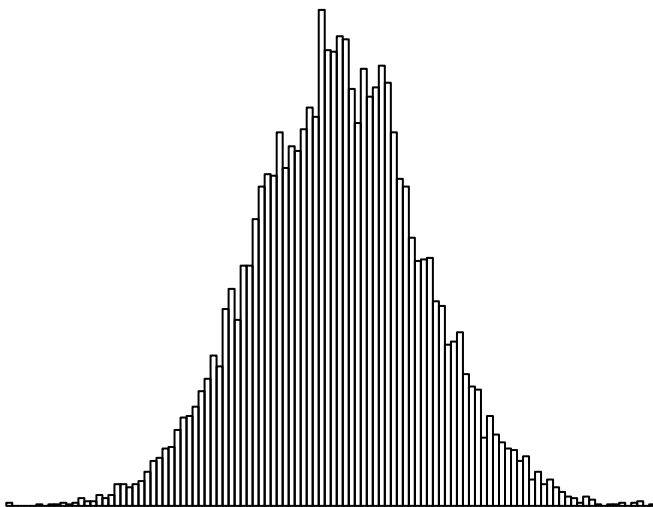

A194:18

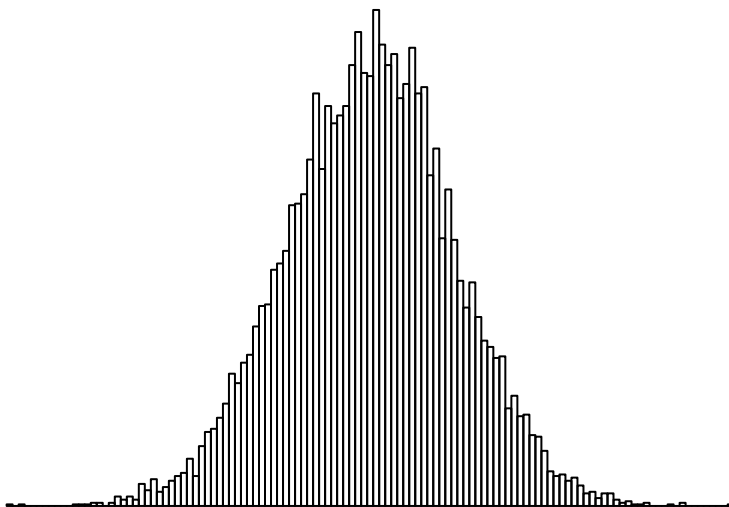

-8.5

-8.0

-7.5

-7.0

-6.5

Unidentified Metabolite 48

A194:26 – A194:18

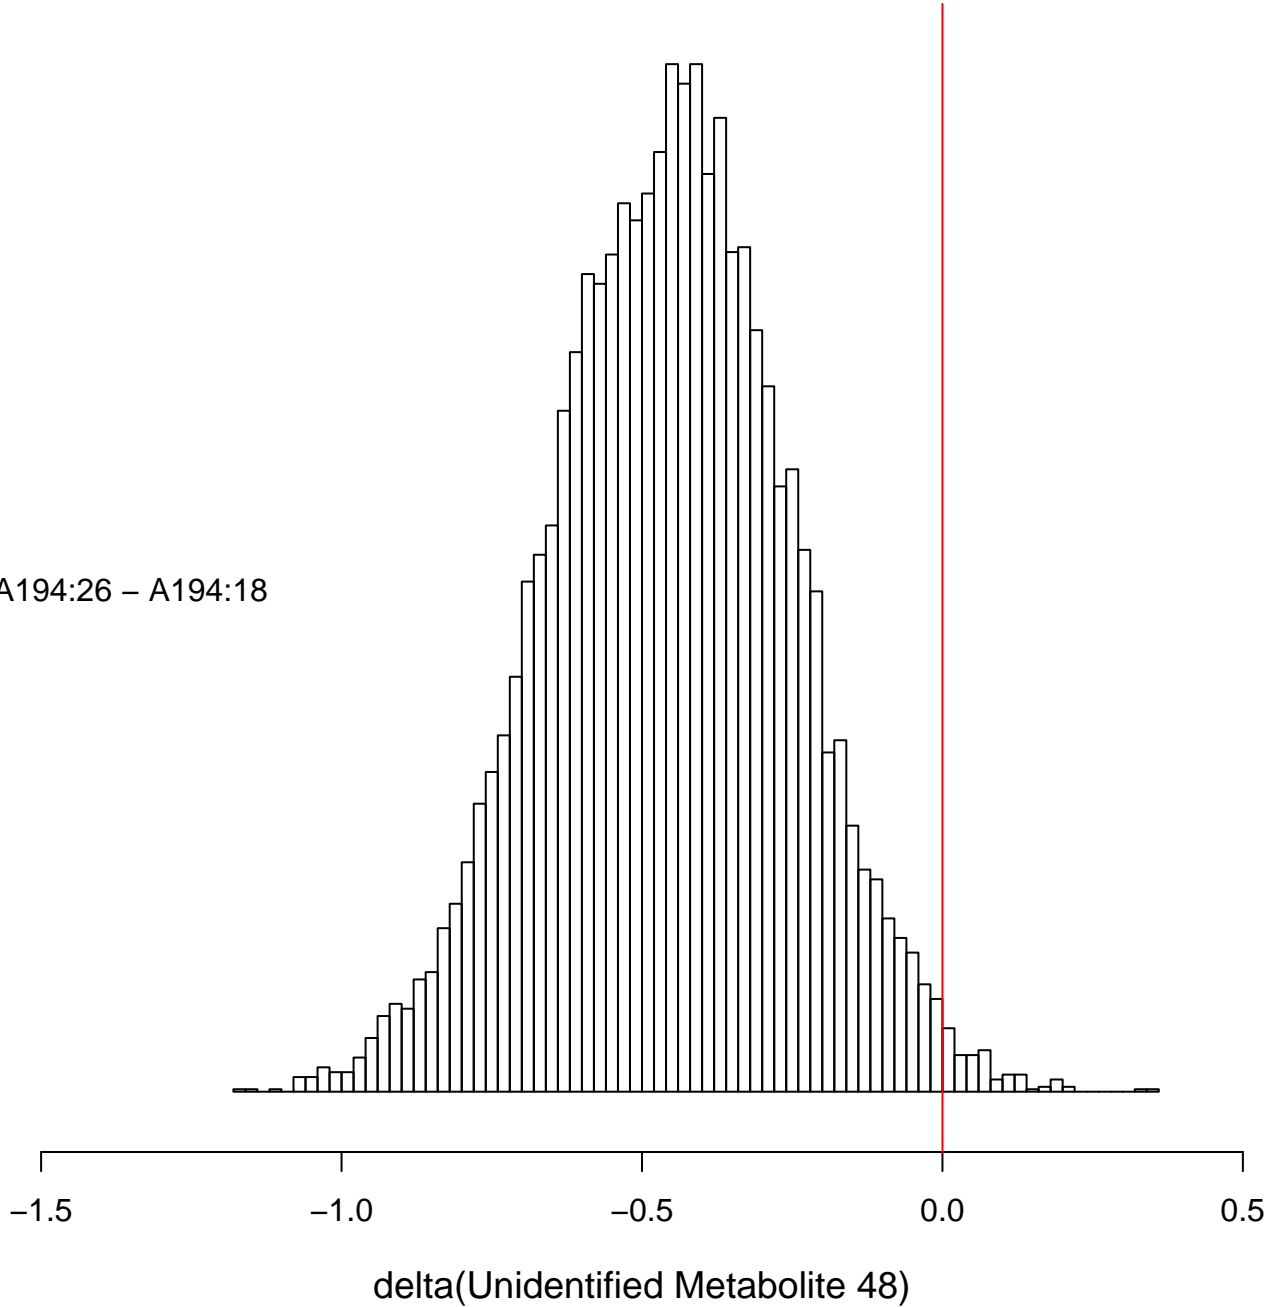

A194:26

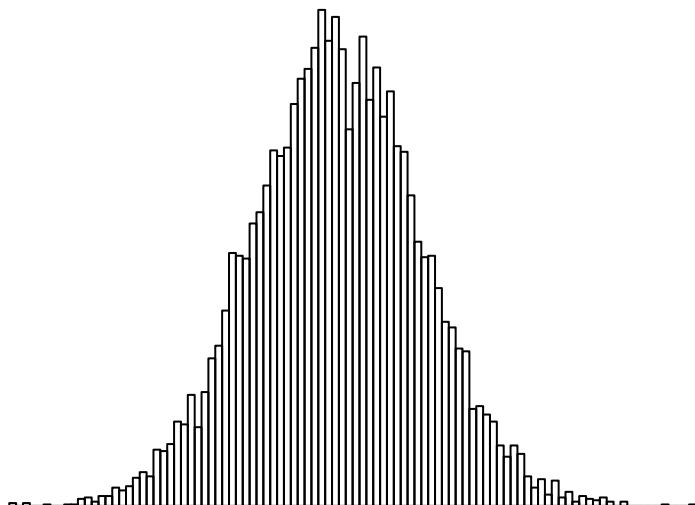

A194:18

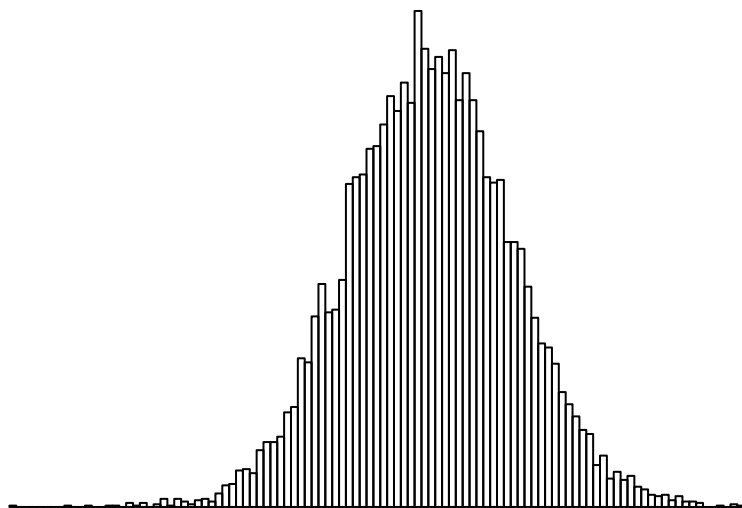

-10.0      -9.5      -9.0      -8.5      -8.0      -7.5      -7.0      -6.5

Unidentified Metabolite 49

A194:26 – A194:18

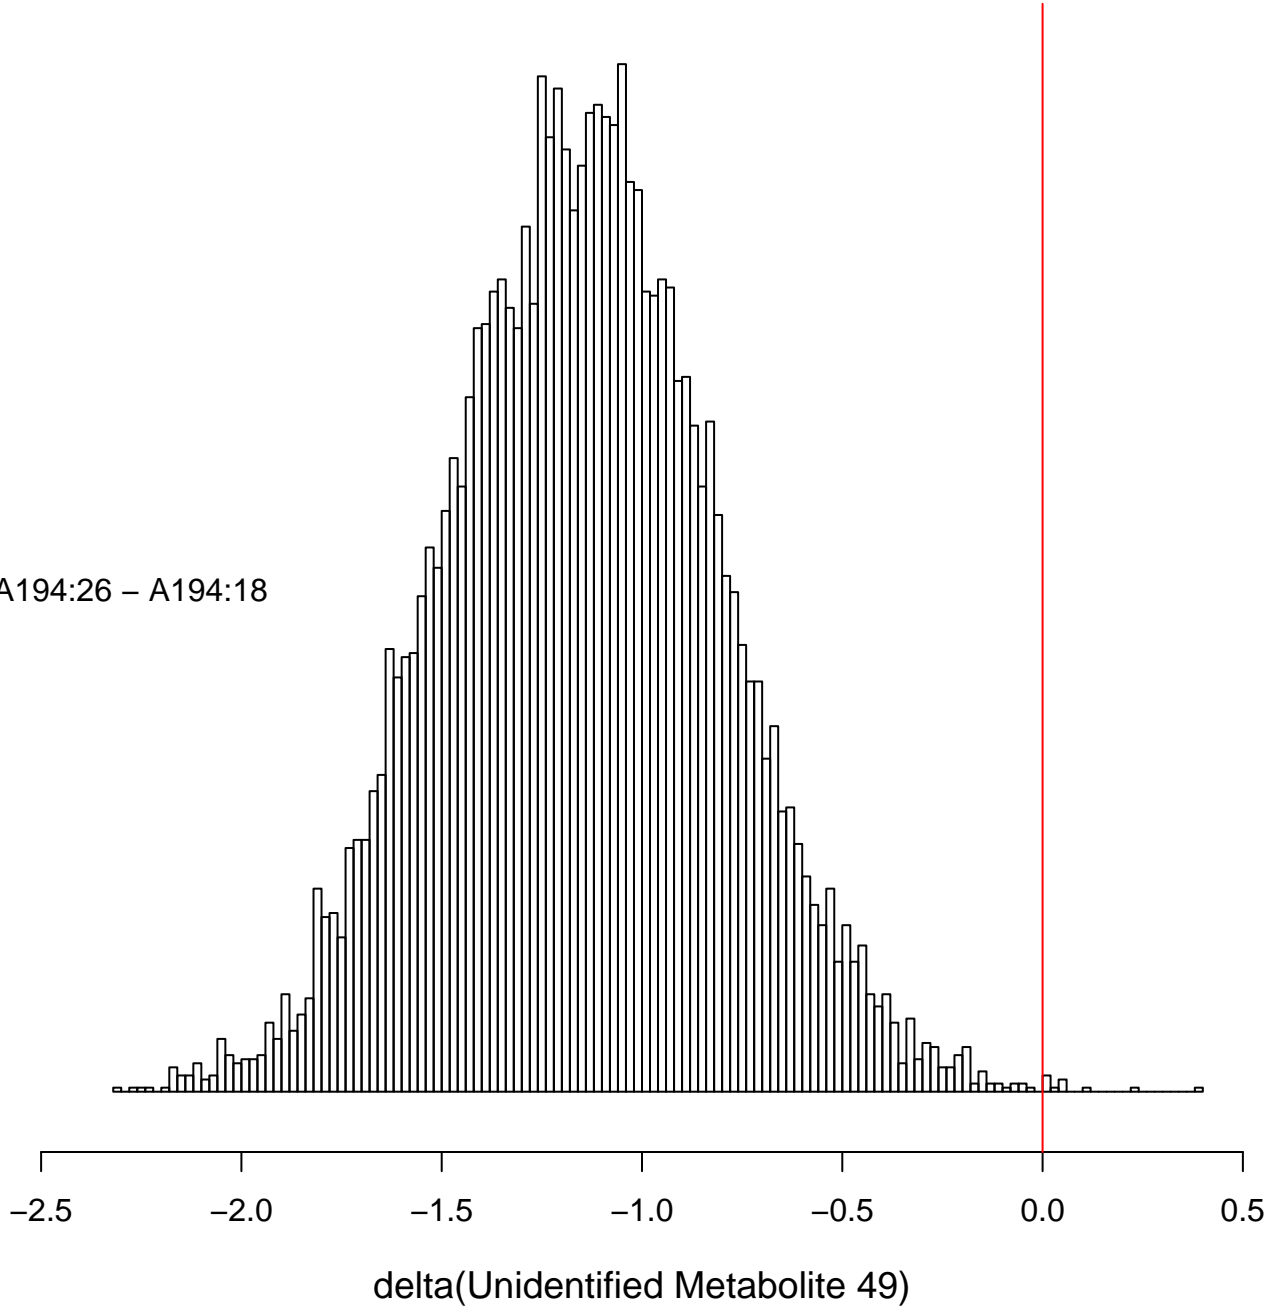

A194:26

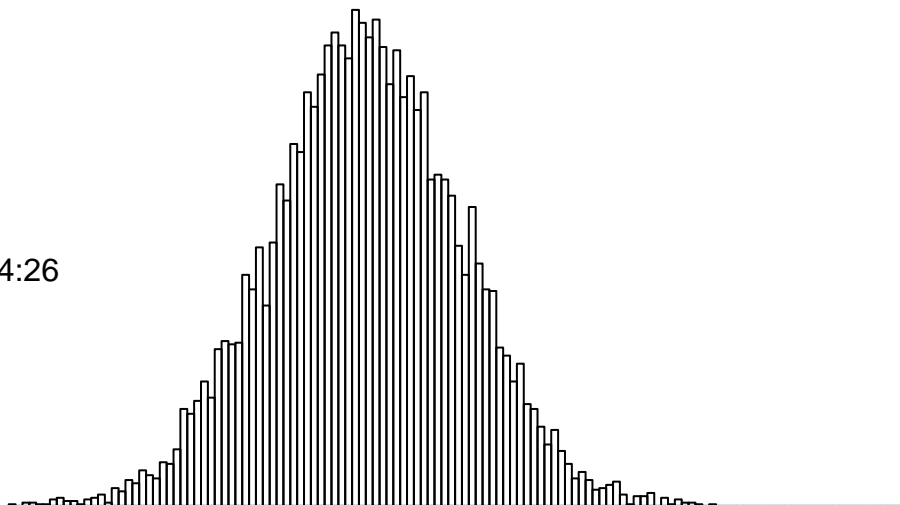

A194:18

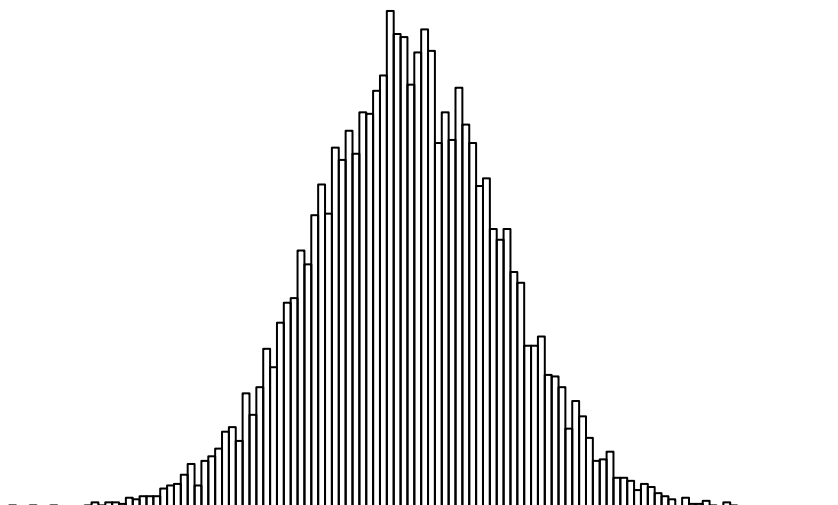

-8.5      -8.0      -7.5      -7.0      -6.5      -6.0      -5.5      -5.0

Unidentified Metabolite 50

A194:26 – A194:18

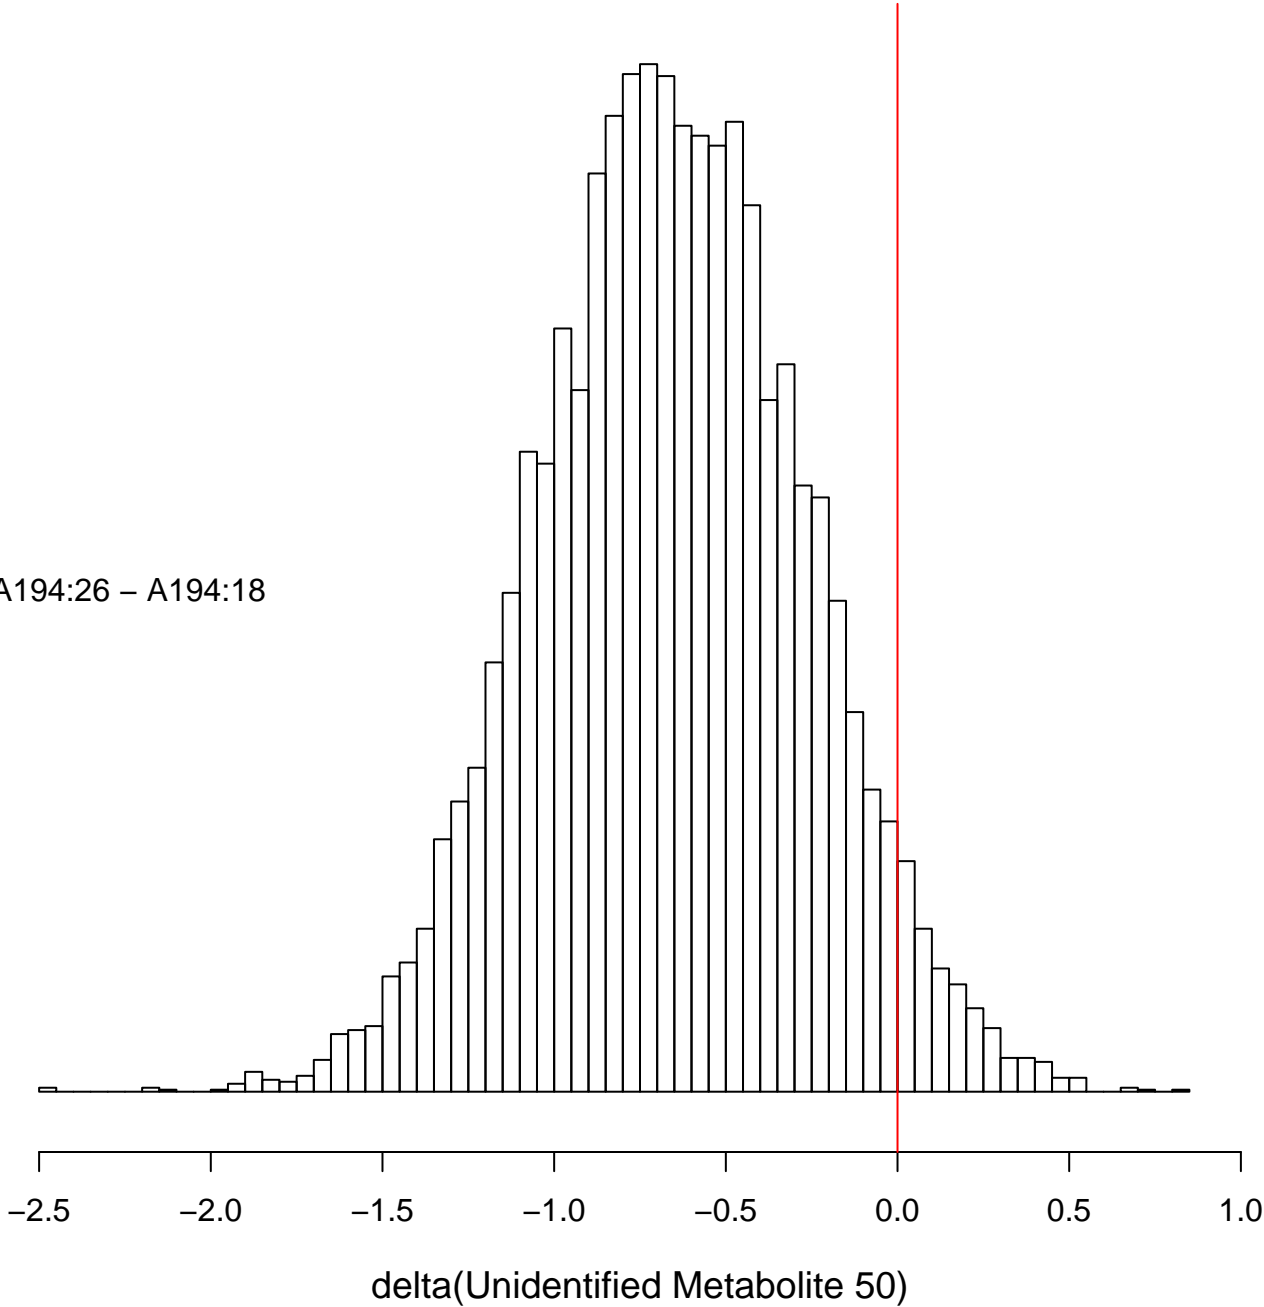

A194:26

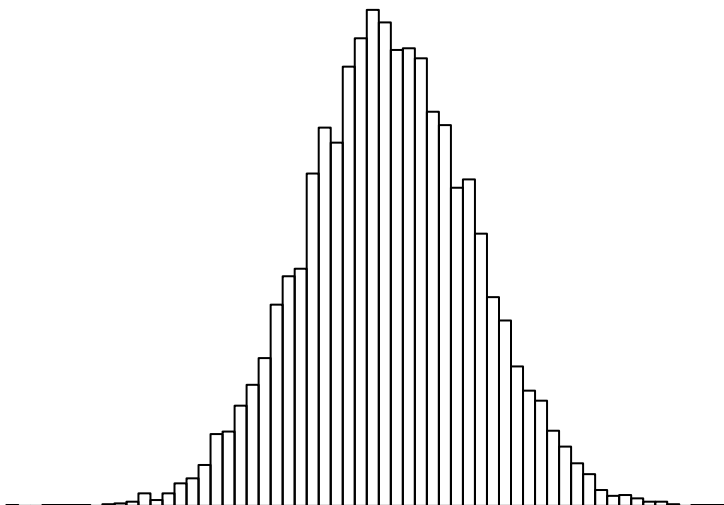

A194:18

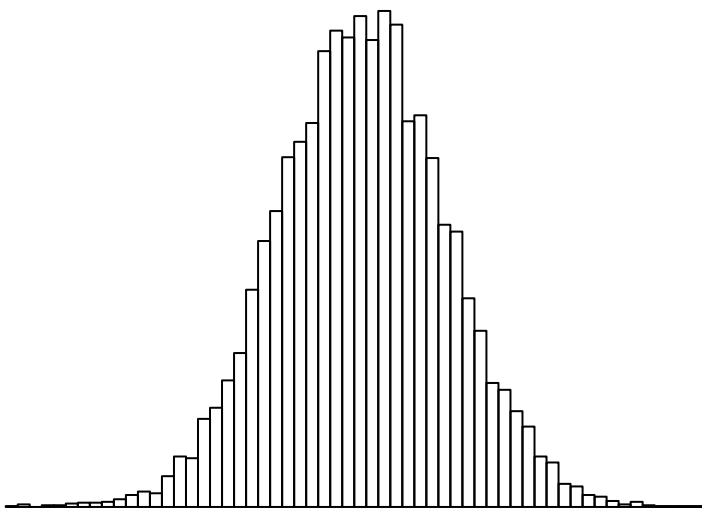

-9

-8

-7

-6

-5

-4

Unidentified Metabolite 51

A194:26 – A194:18

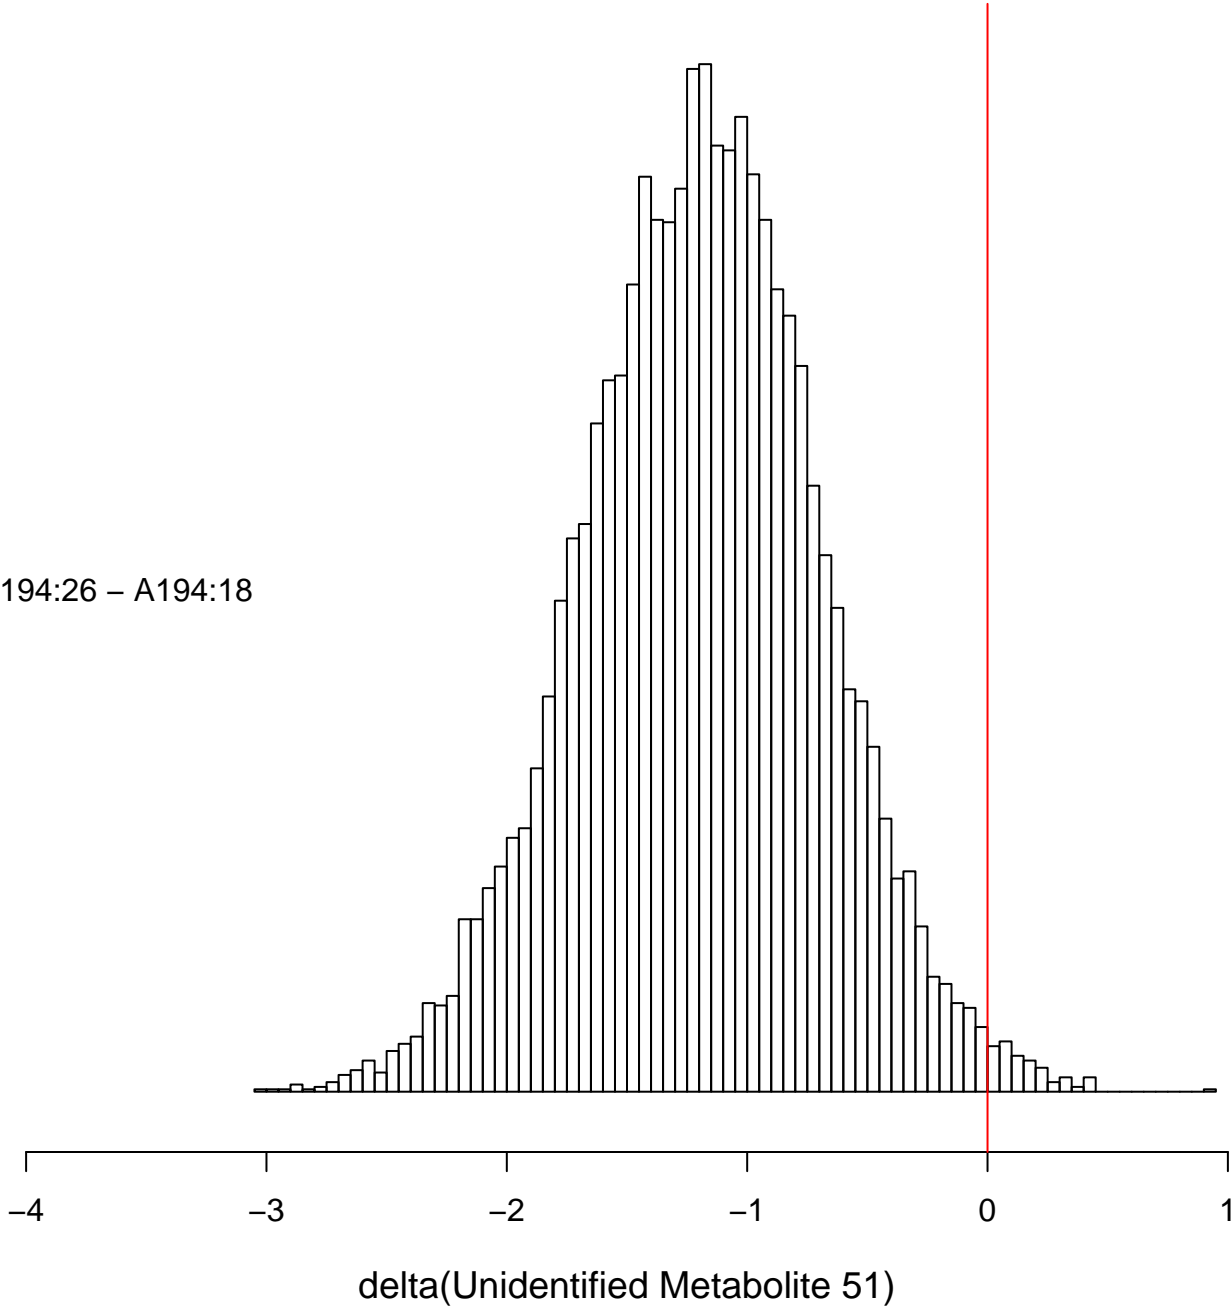



A194:26

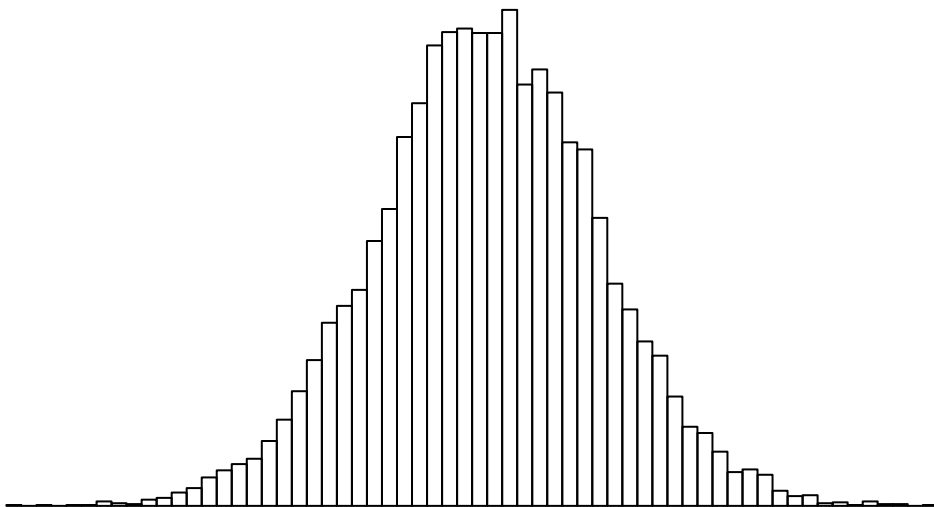

A194:18

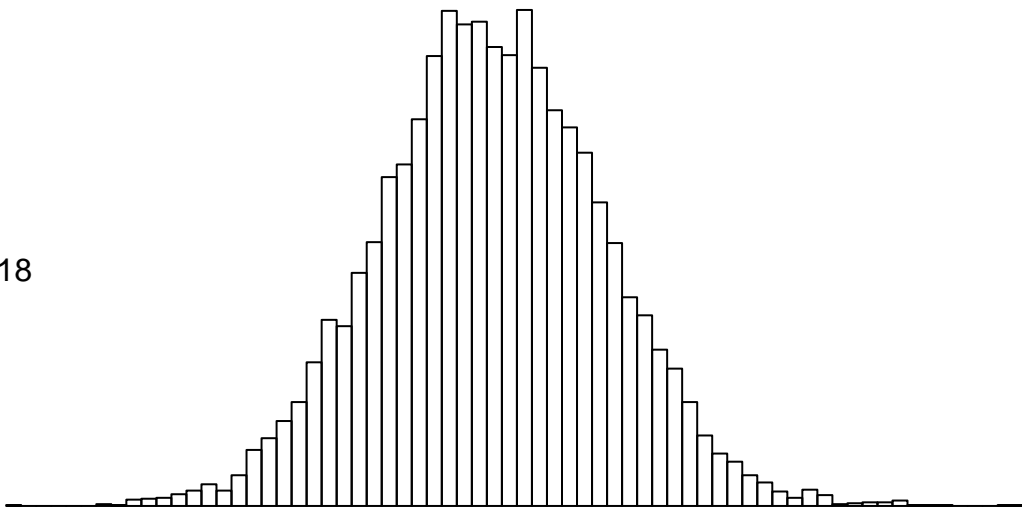

-6

-5

-4

-3

-2

Unidentified Metabolite 55

A194:26 – A194:18

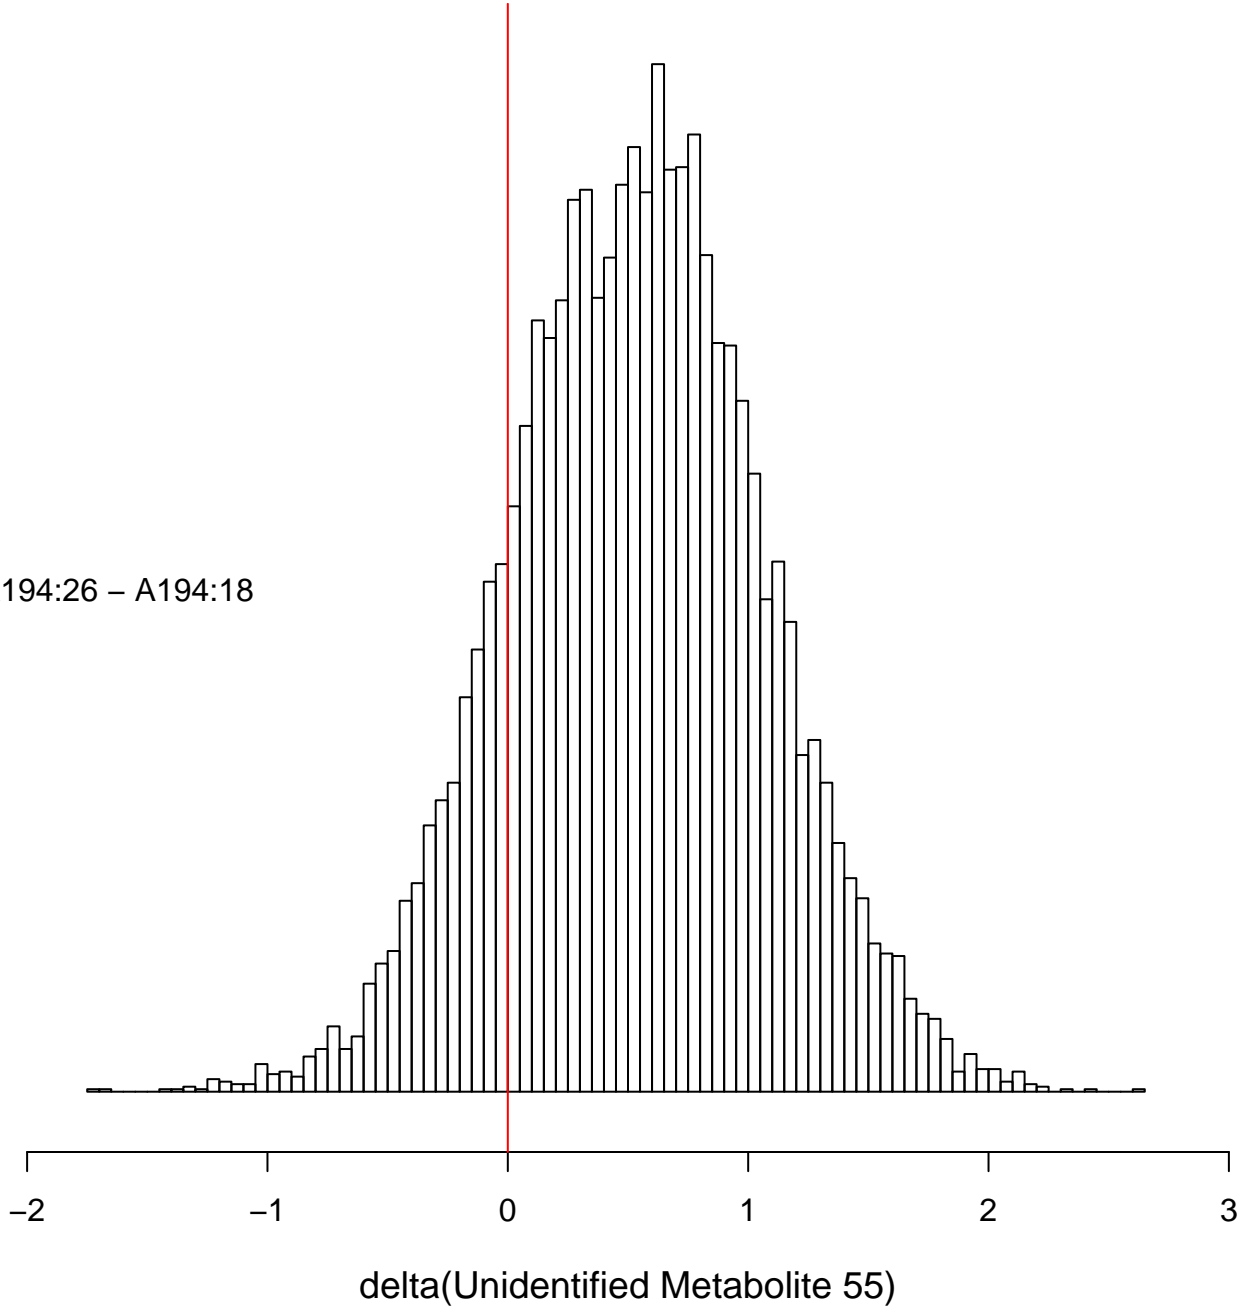

A194:26

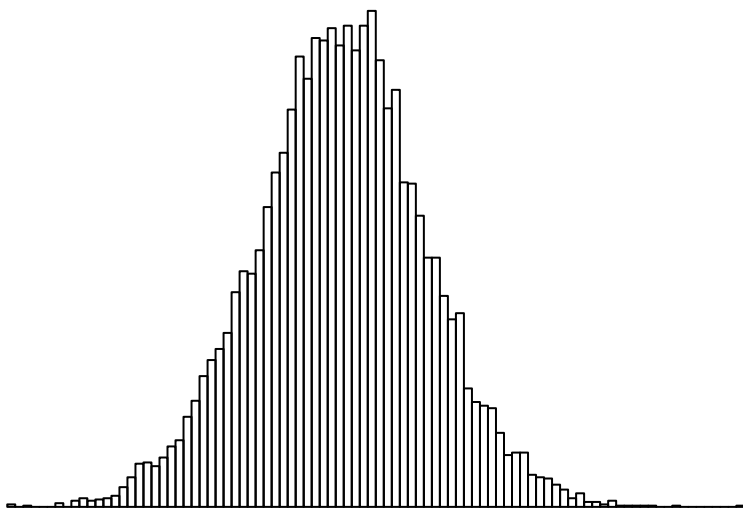

A194:18

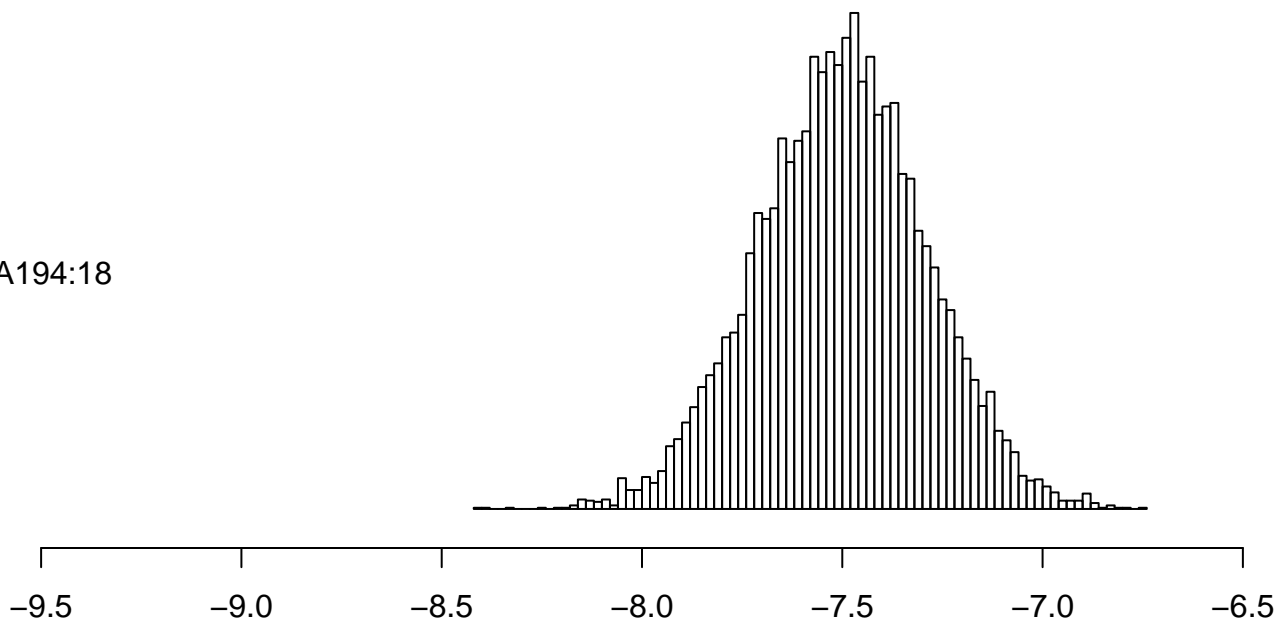

Unidentified Metabolite 56

A194:26 – A194:18

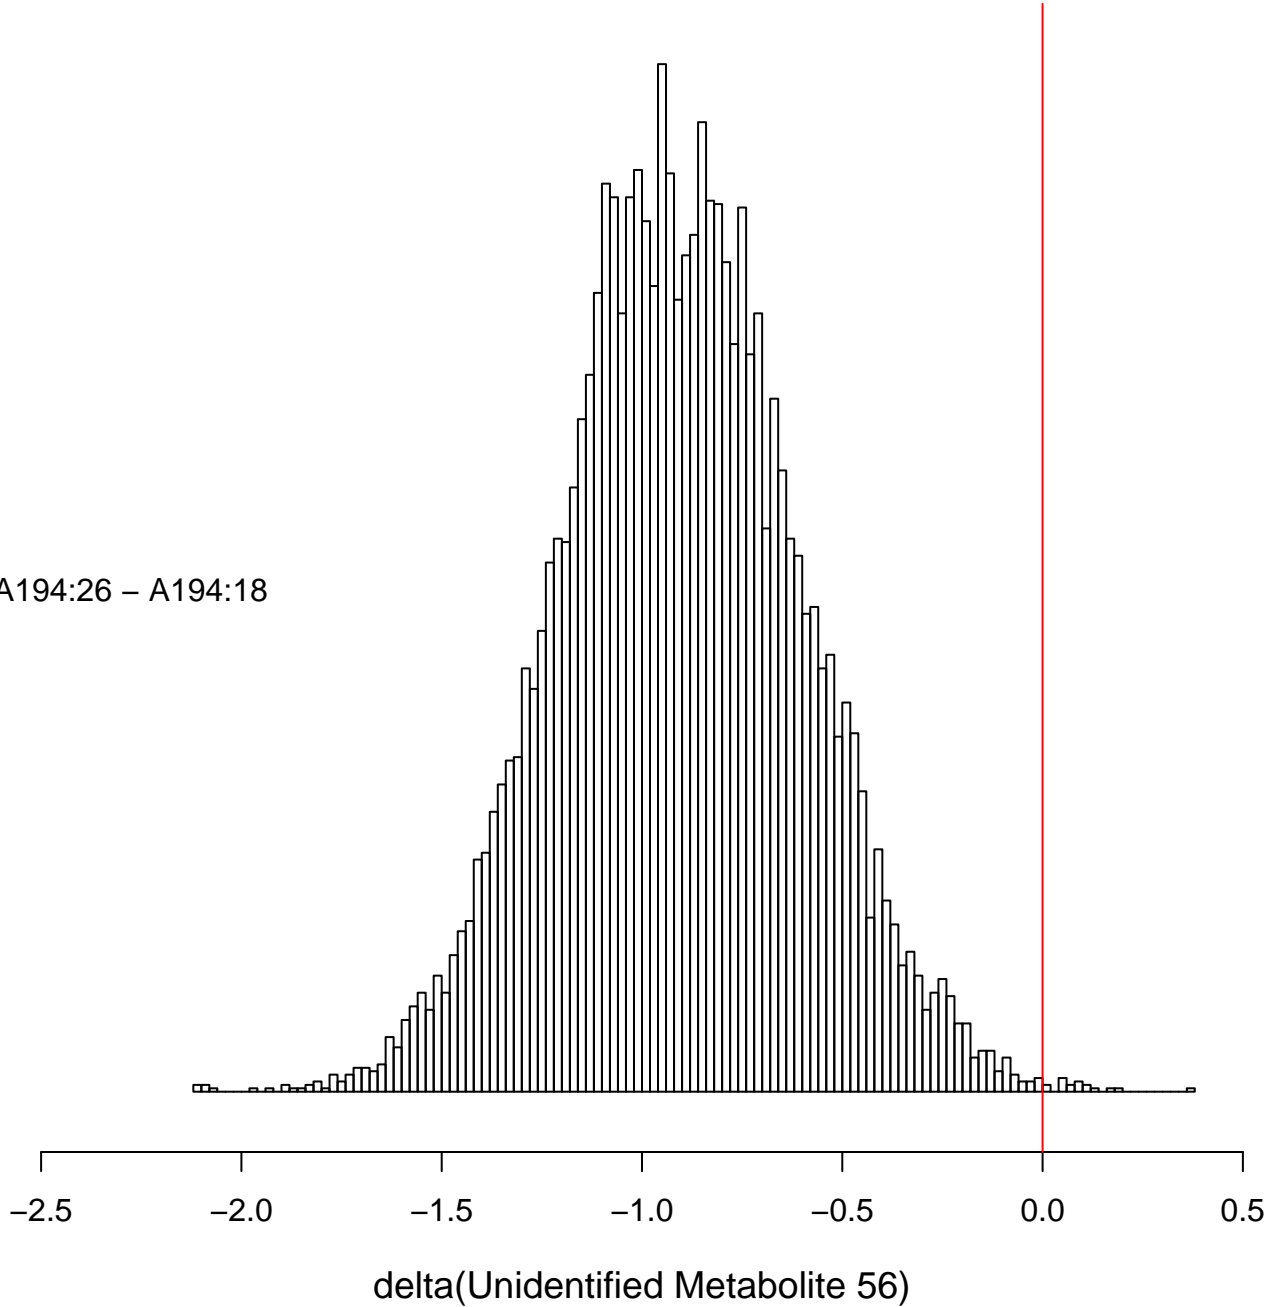

A194:26

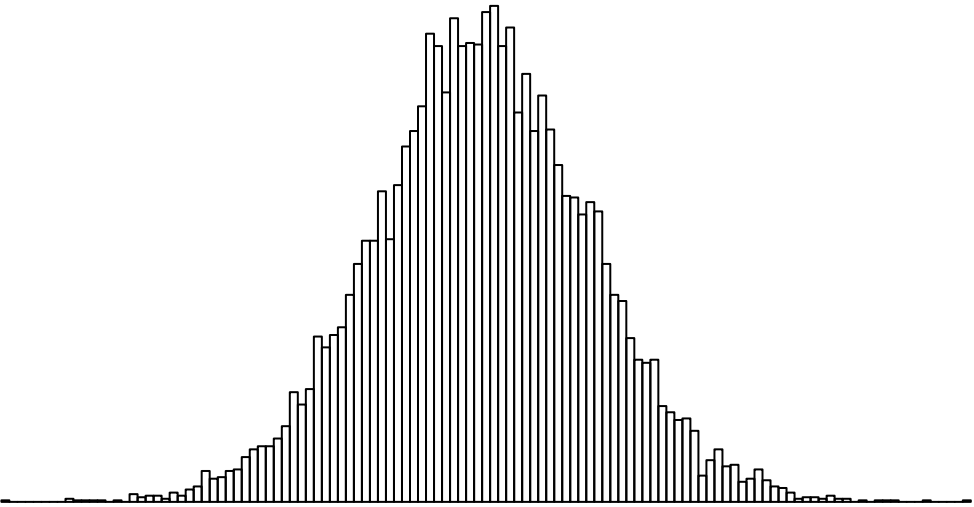

A194:18

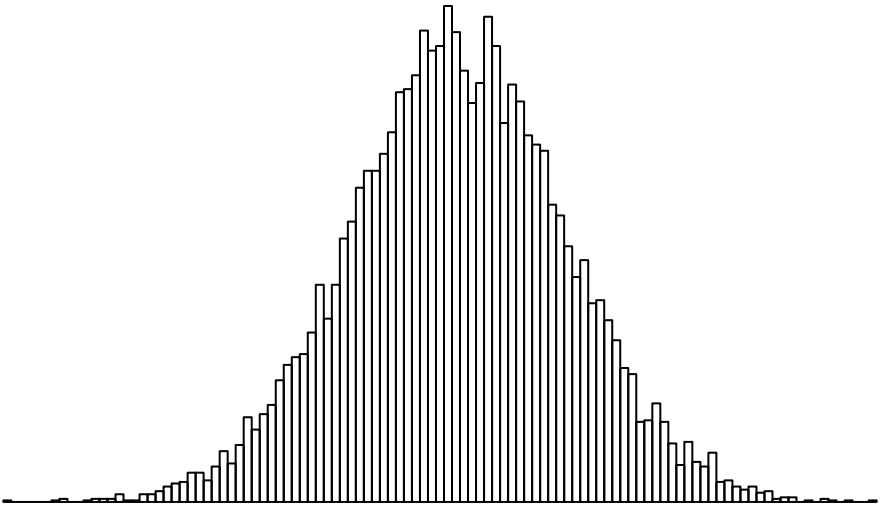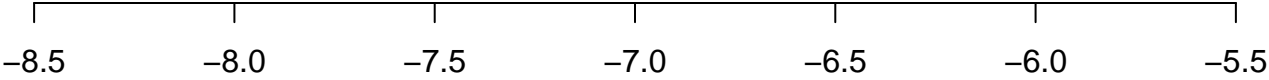

Unidentified Metabolite 58

A194:26 – A194:18

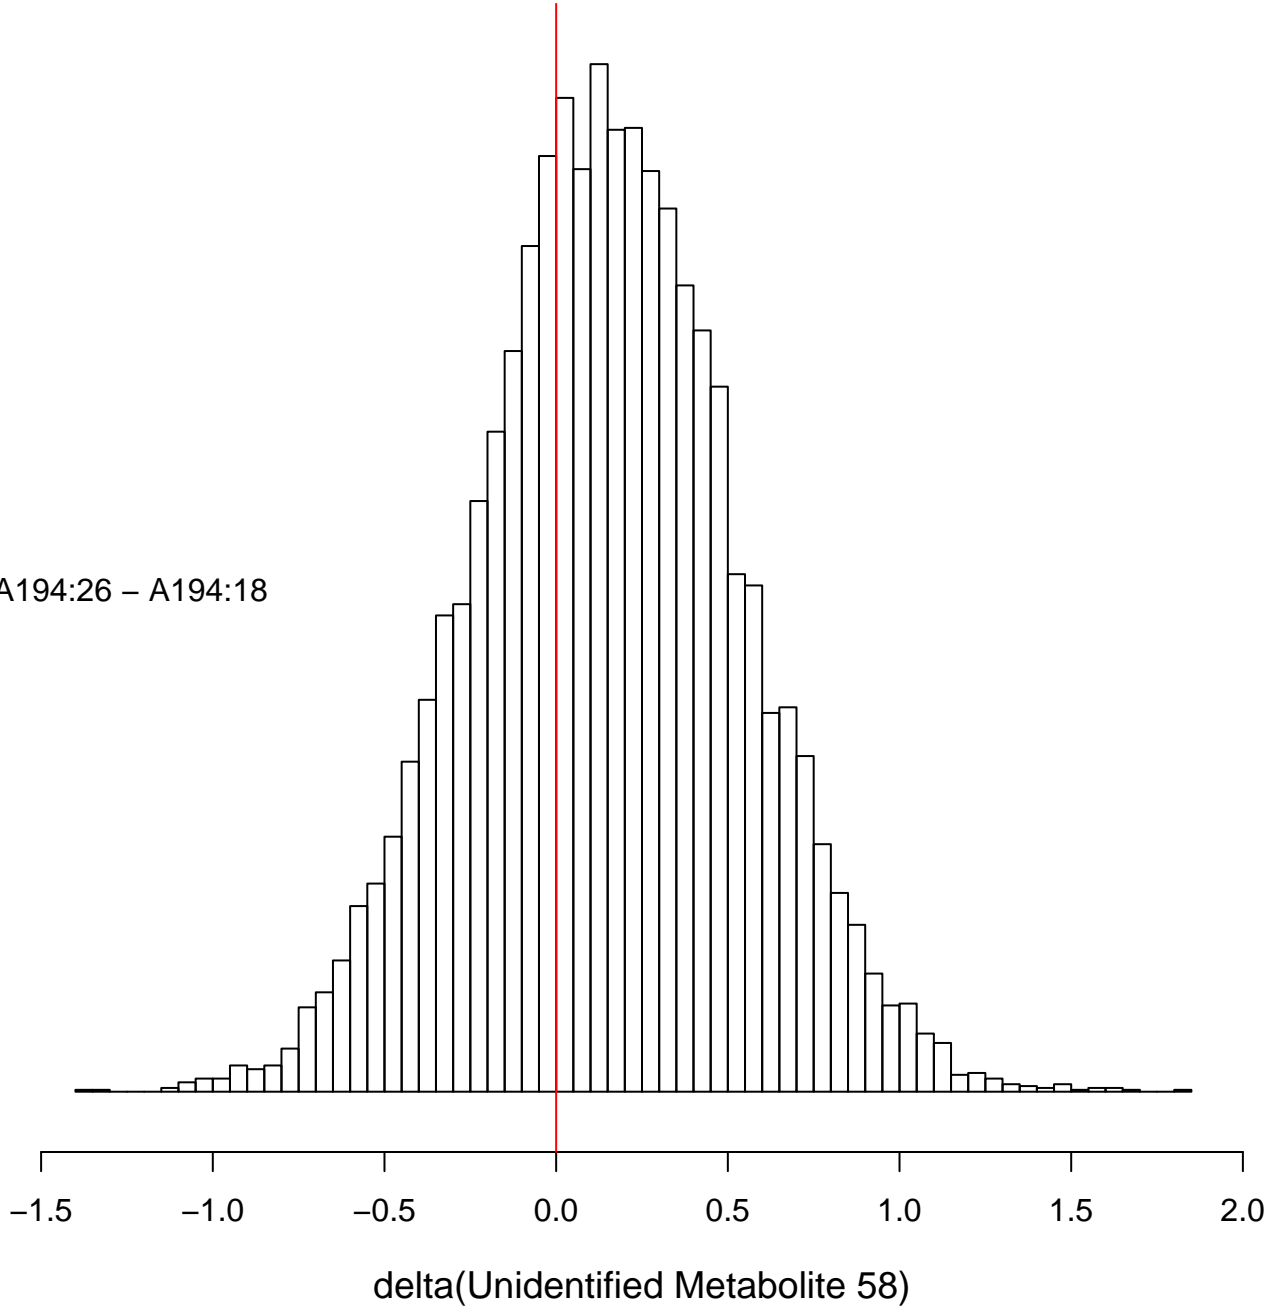

A194:26

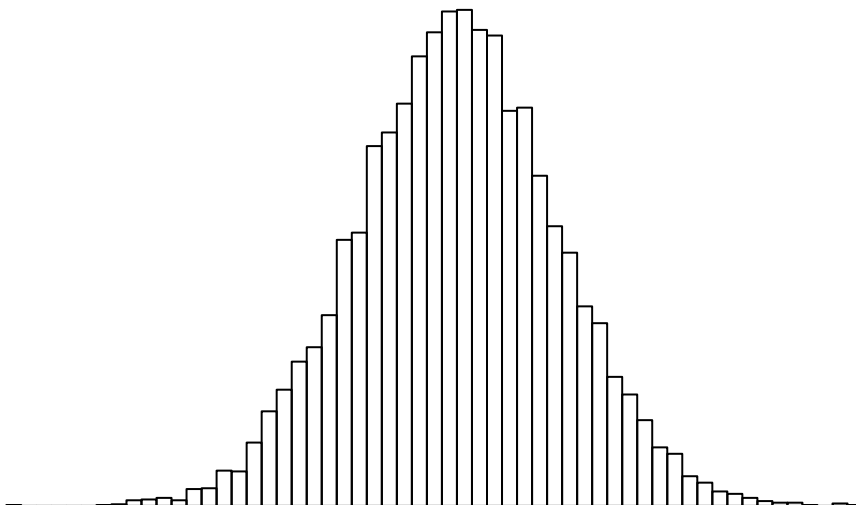

A194:18

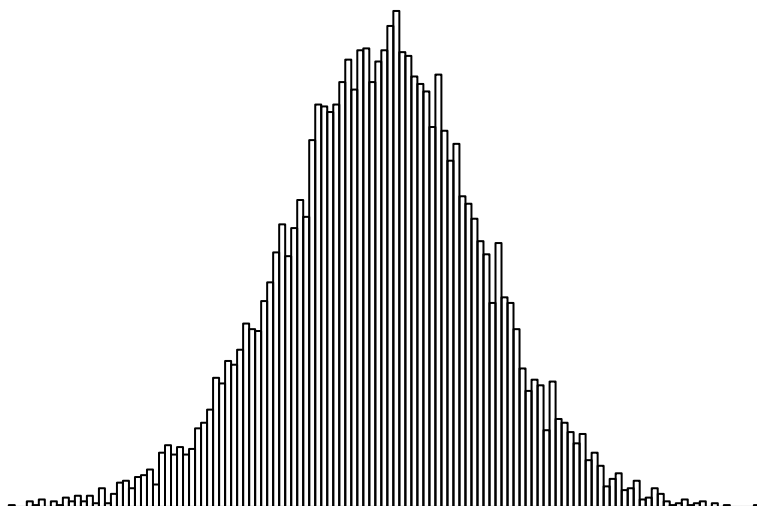

-8

-7

-6

-5

-4

Unidentified Metabolite 59

A194:26 – A194:18

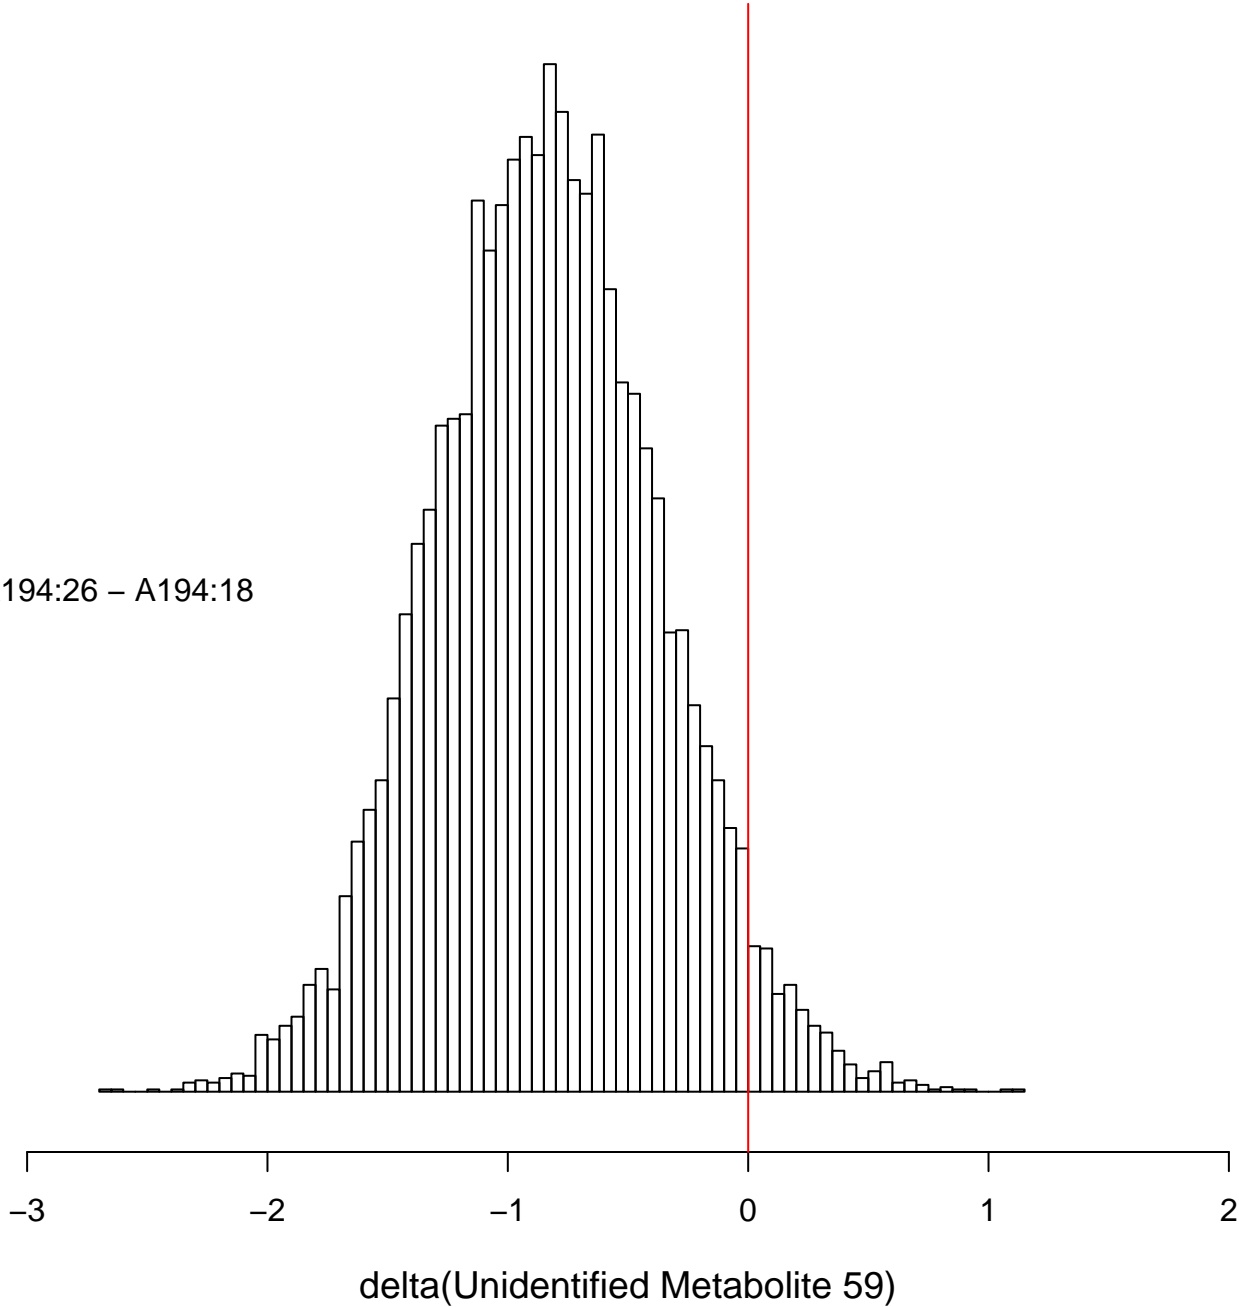



A194:26

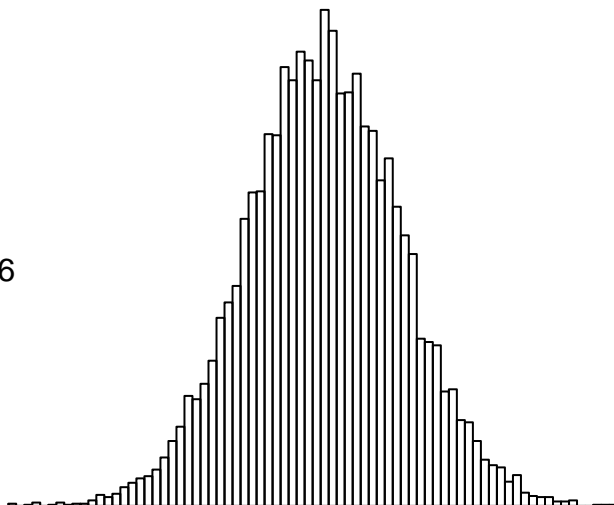

A194:18

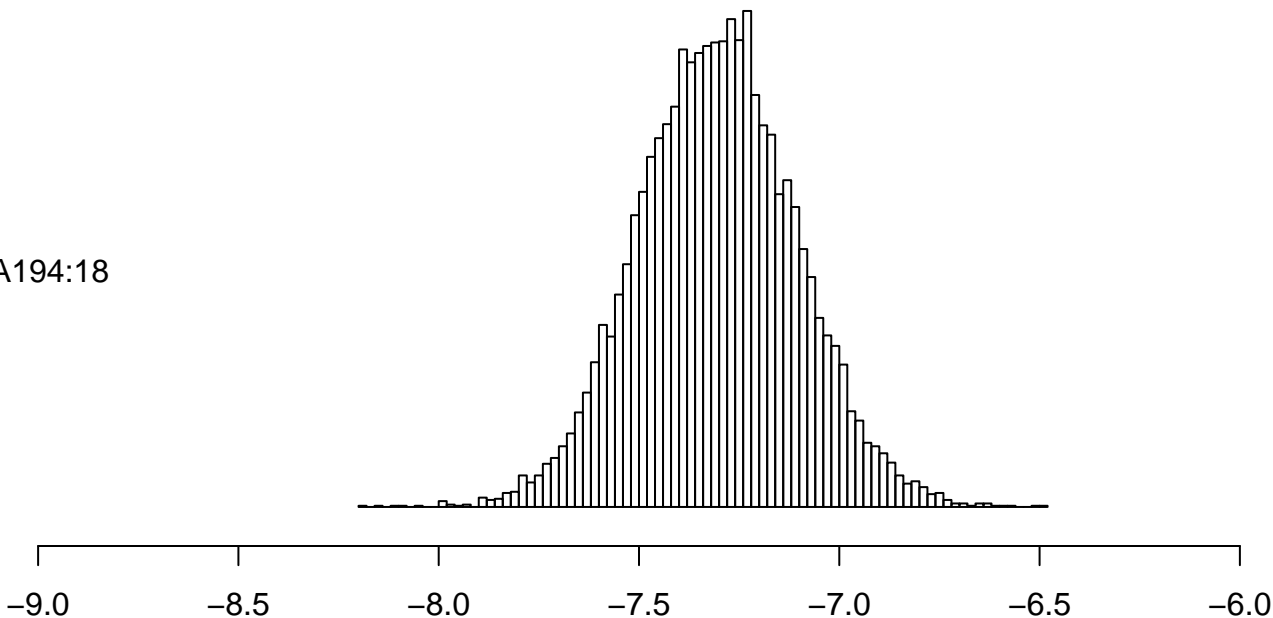

Unidentified Metabolite 60

A194:26 – A194:18

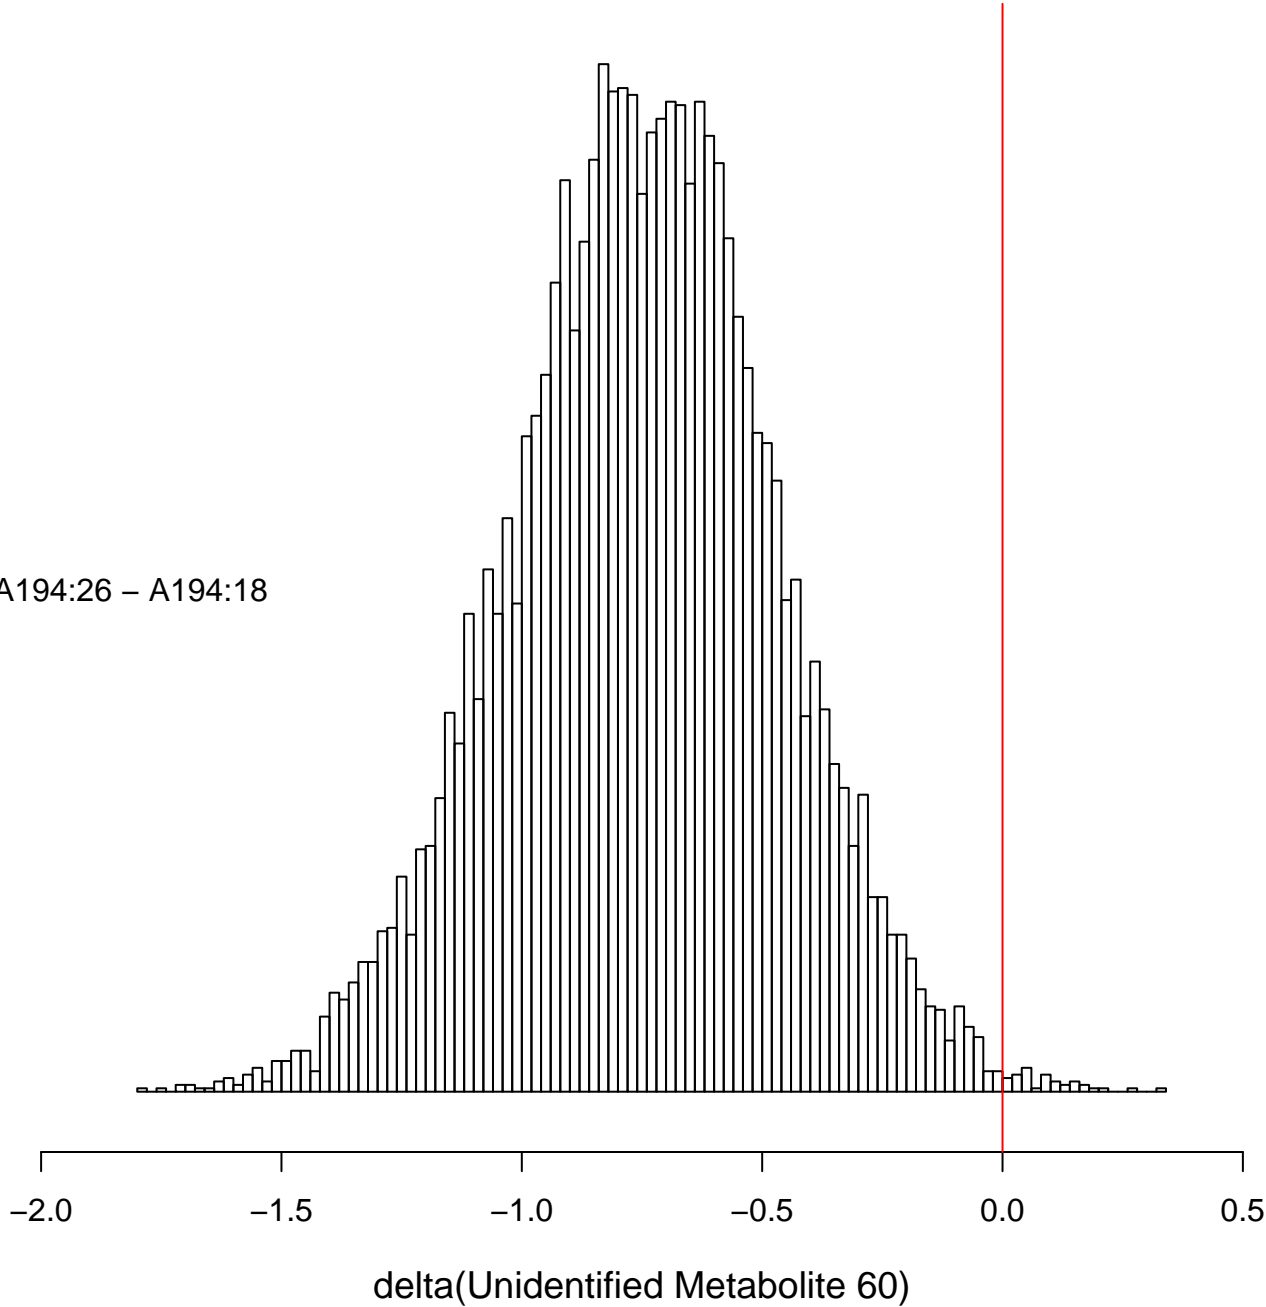

A194:26

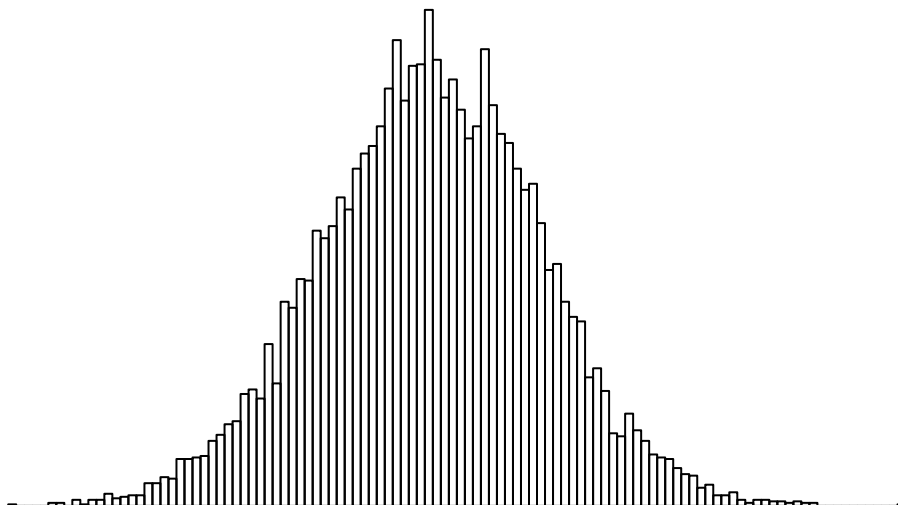

A194:18

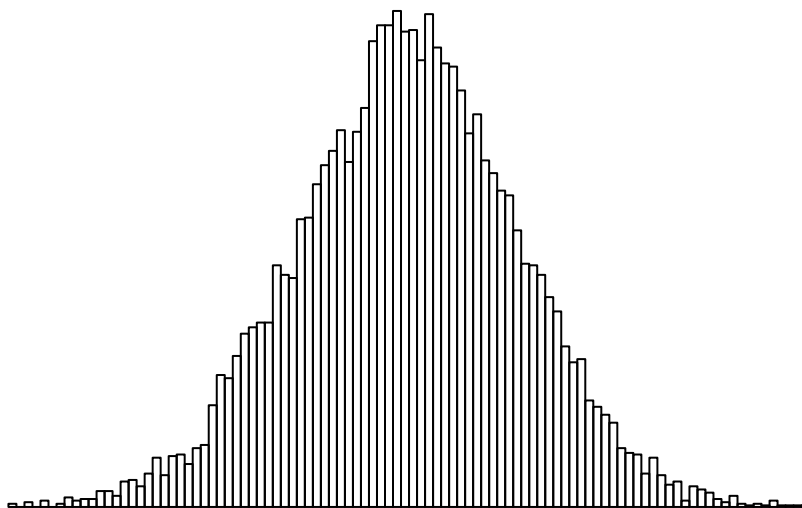

-8.5 -8.0 -7.5 -7.0 -6.5 -6.0 -5.5

Unidentified Metabolite 61

A194:26 – A194:18

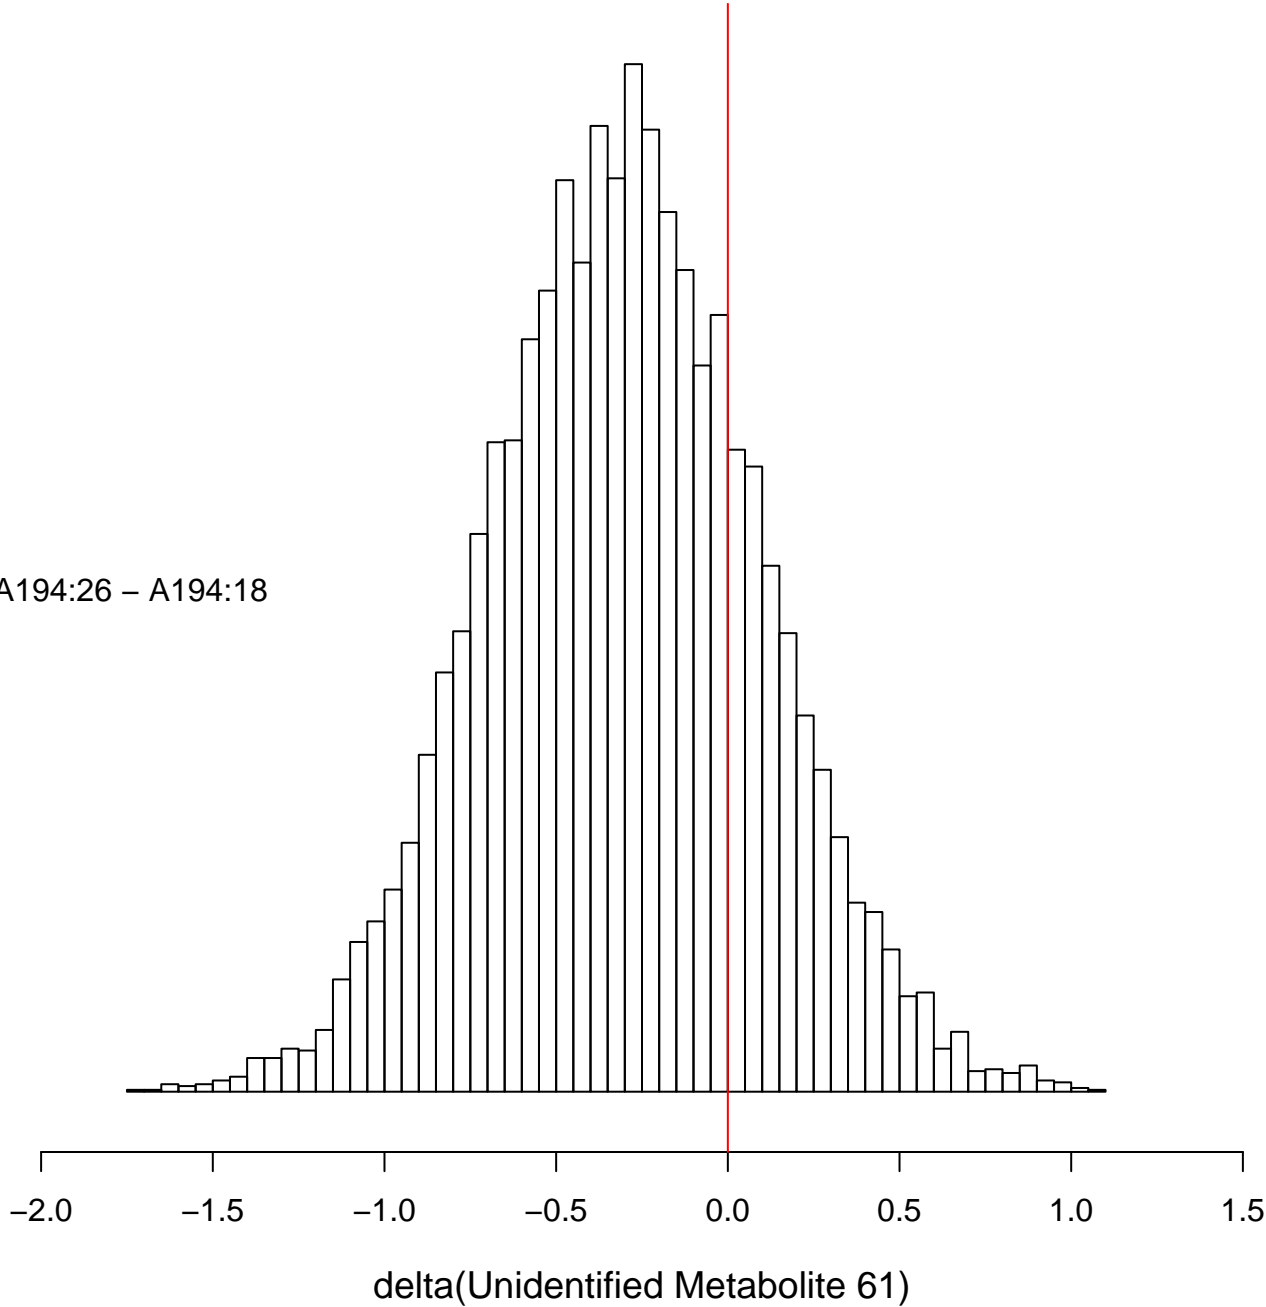

A194:26

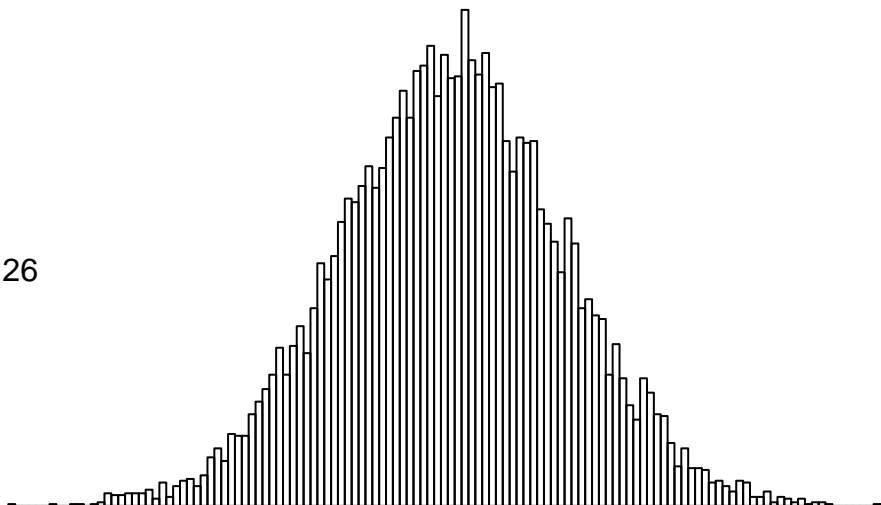

A194:18

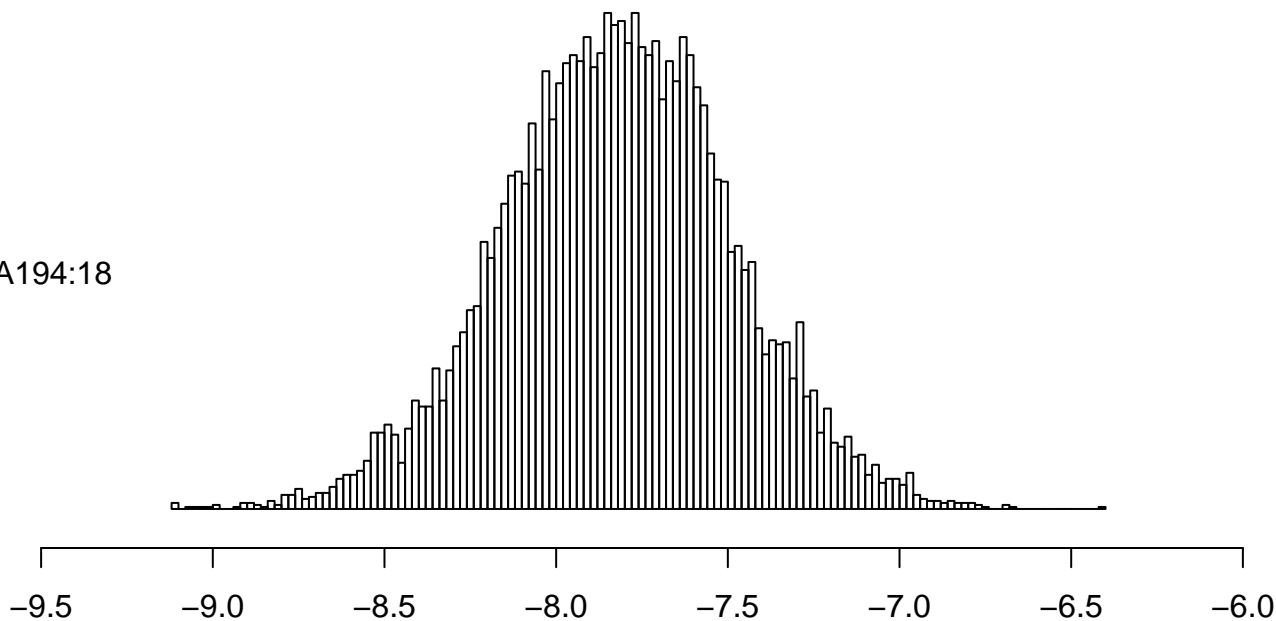

Unidentified Metabolite 62

A194:26 – A194:18

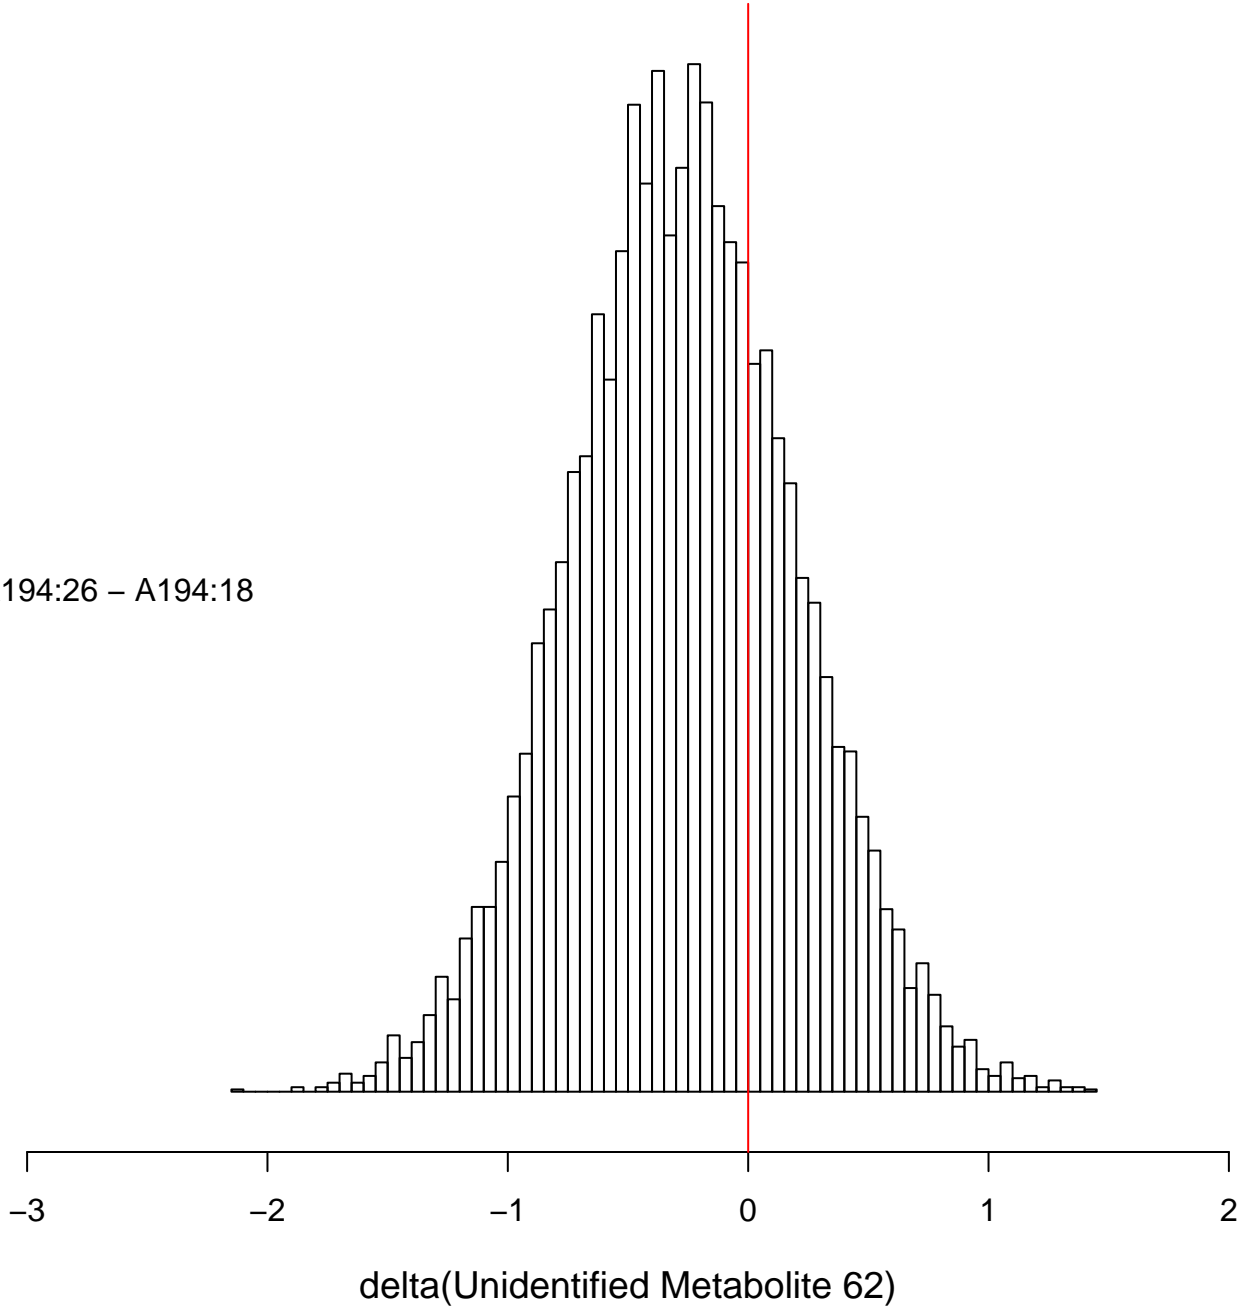

A194:26

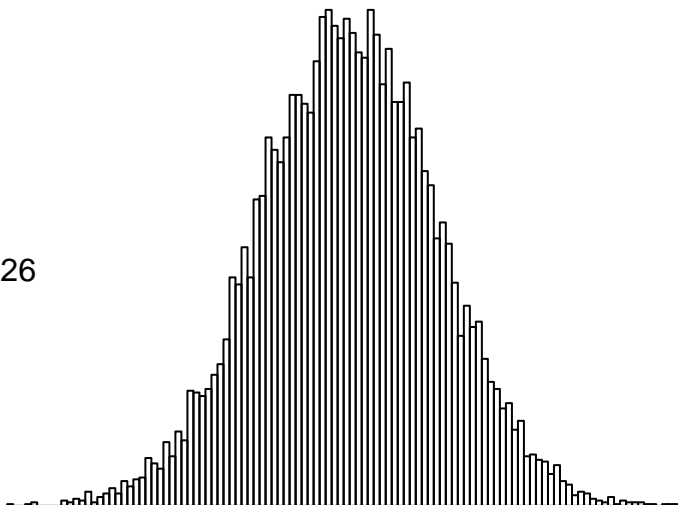

A194:18

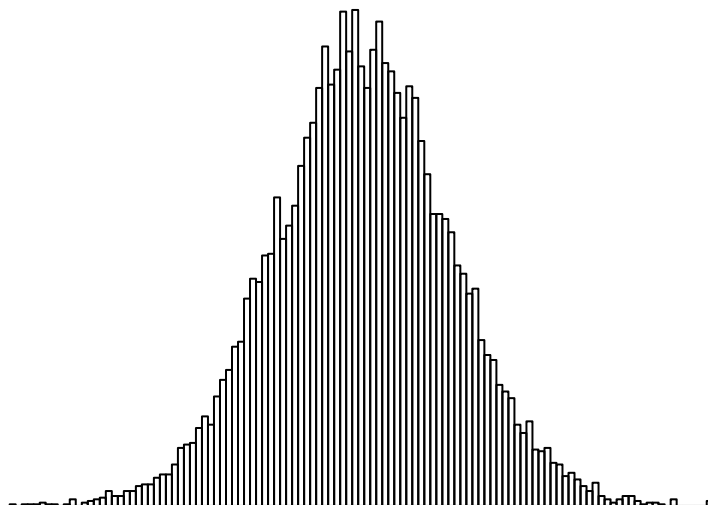

-8

-7

-6

-5

-4

Unidentified Metabolite 63

A194:26 – A194:18

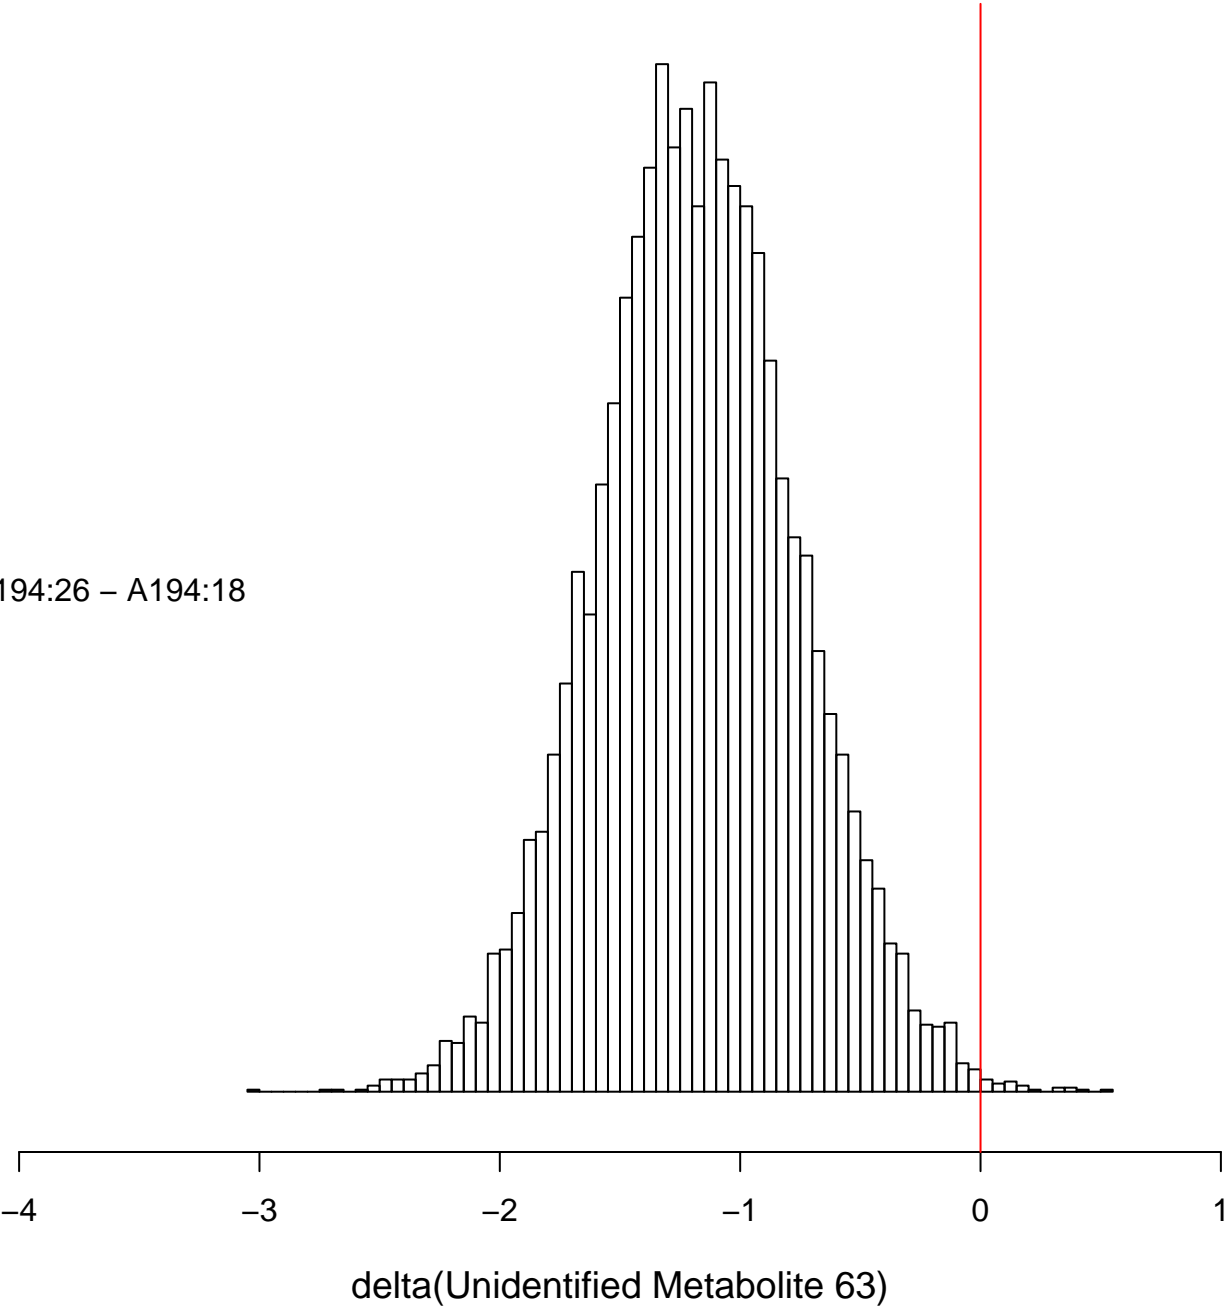



A194:26

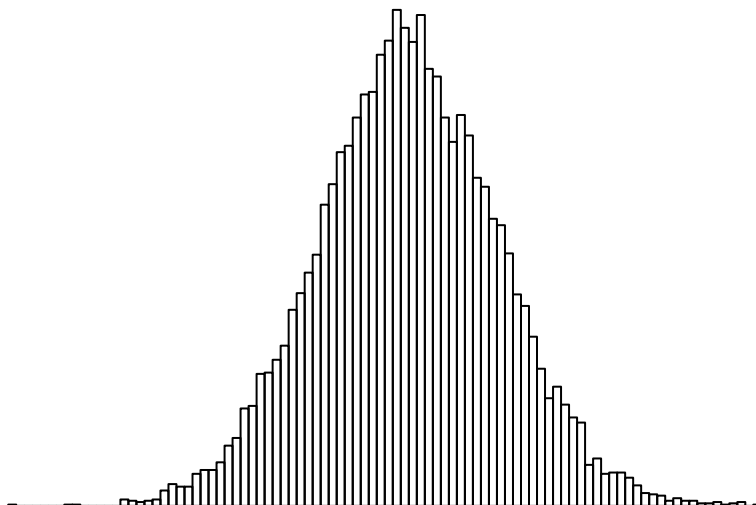

A194:18

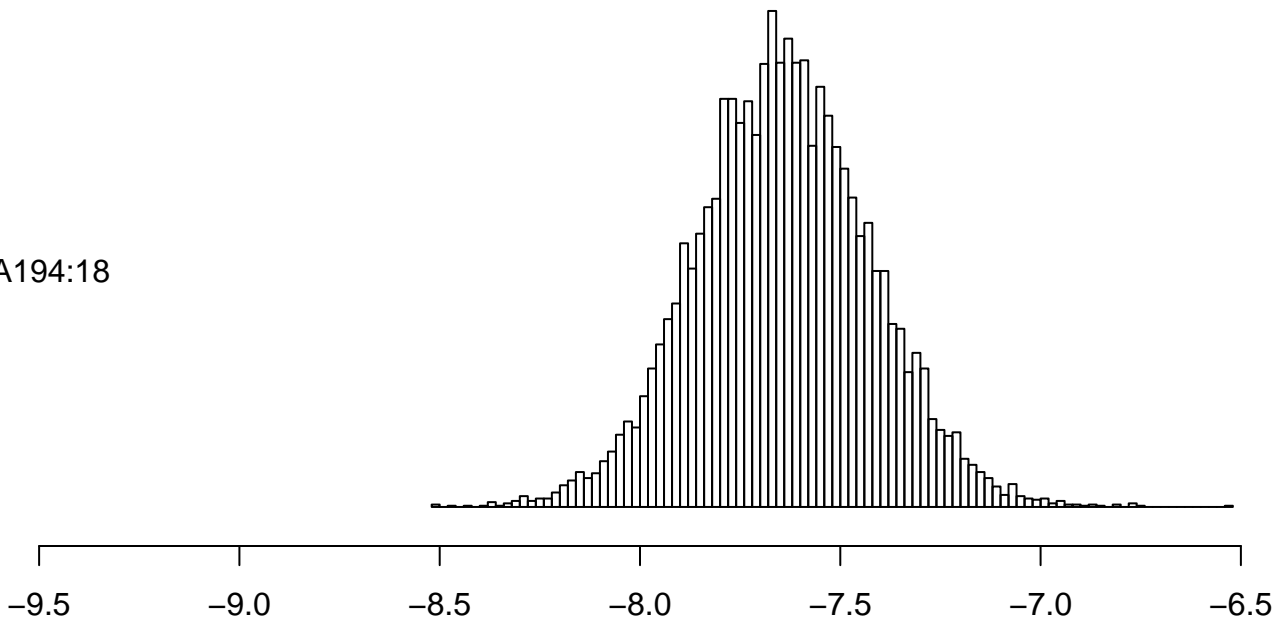

Unidentified Metabolite 65

A194:26 – A194:18

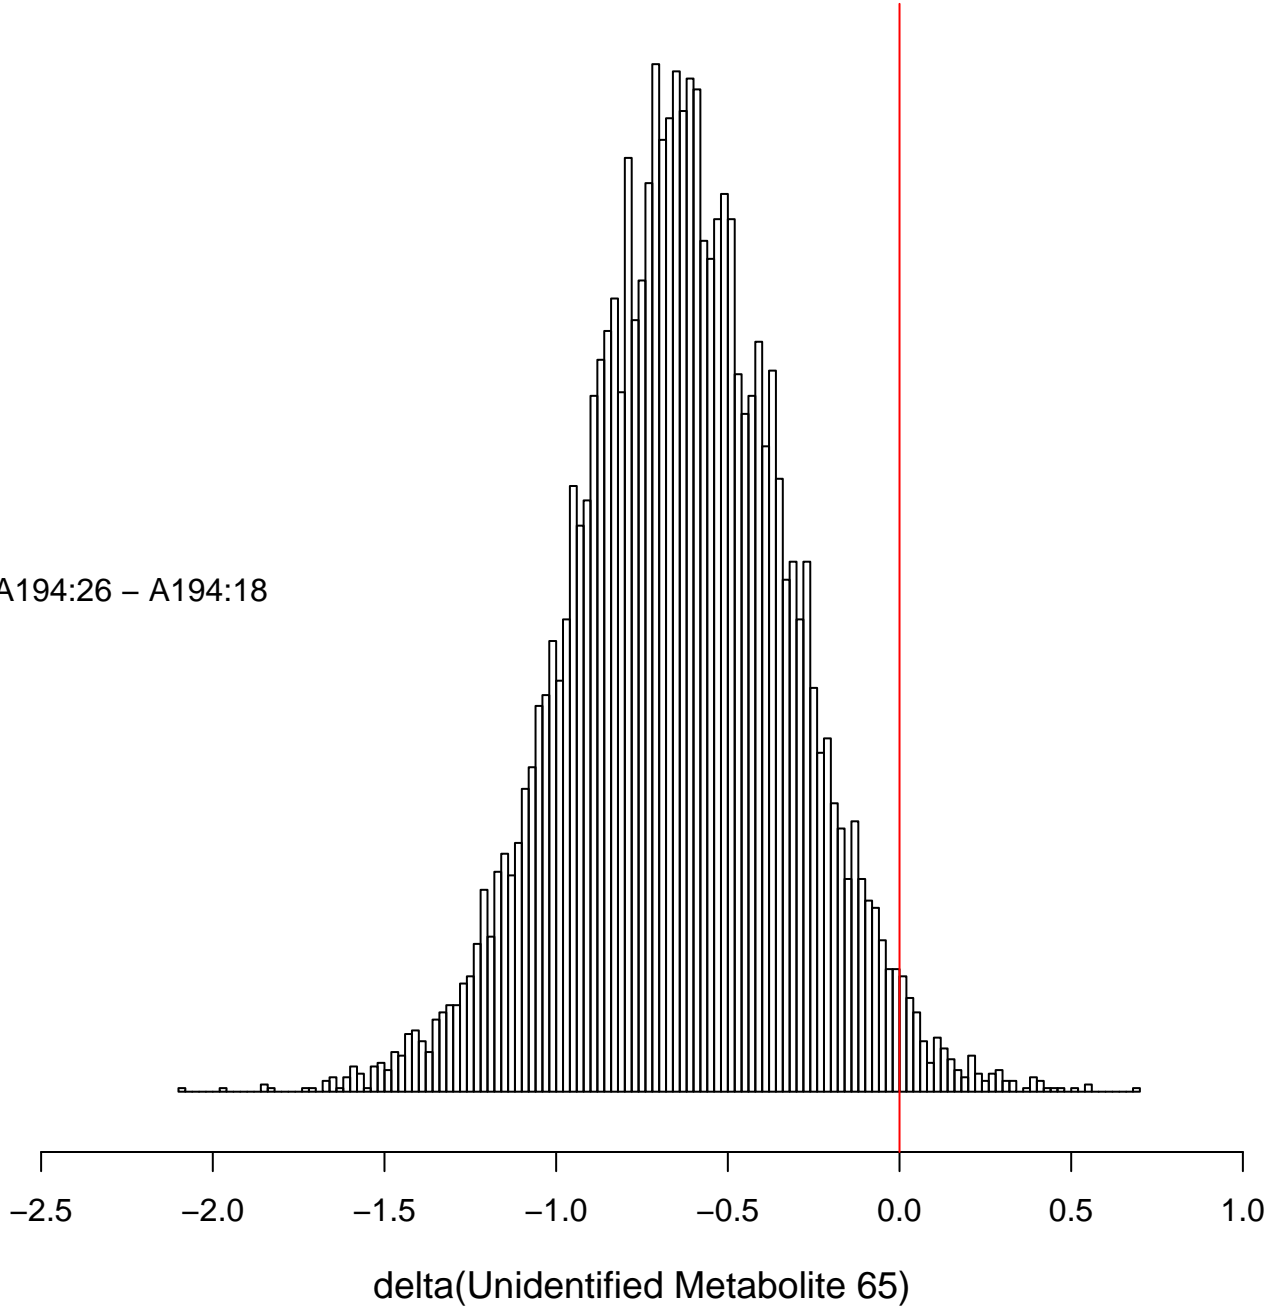

A194:26

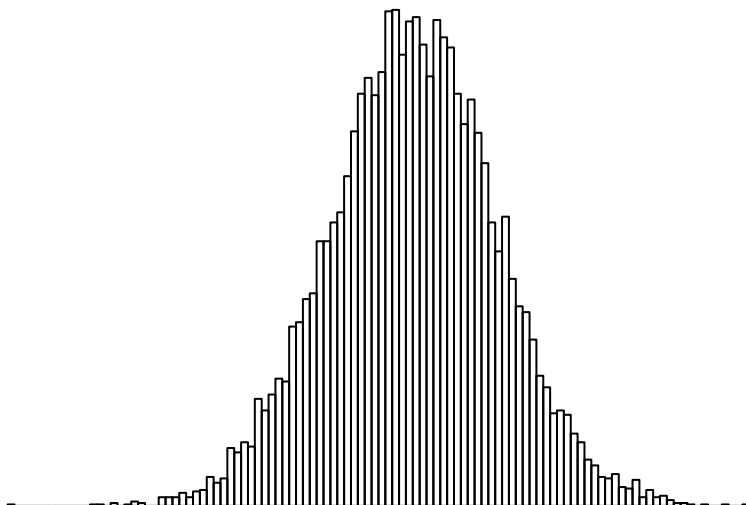

A194:18

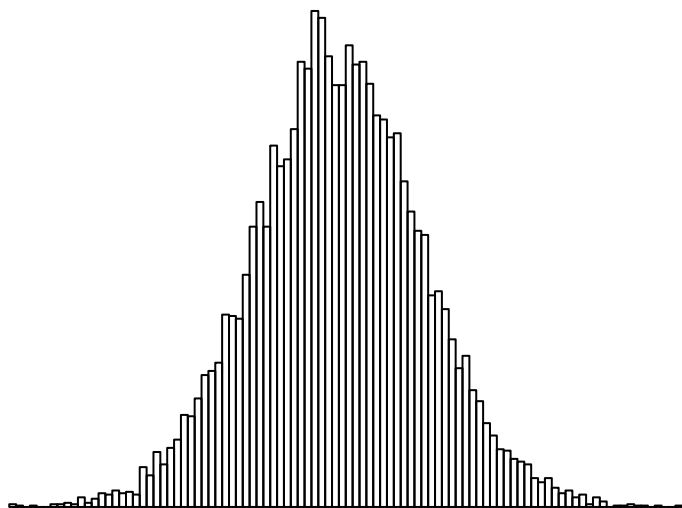

-9.0 -8.5 -8.0 -7.5 -7.0 -6.5 -6.0 -5.5

Unidentified Metabolite 68

A194:26 – A194:18

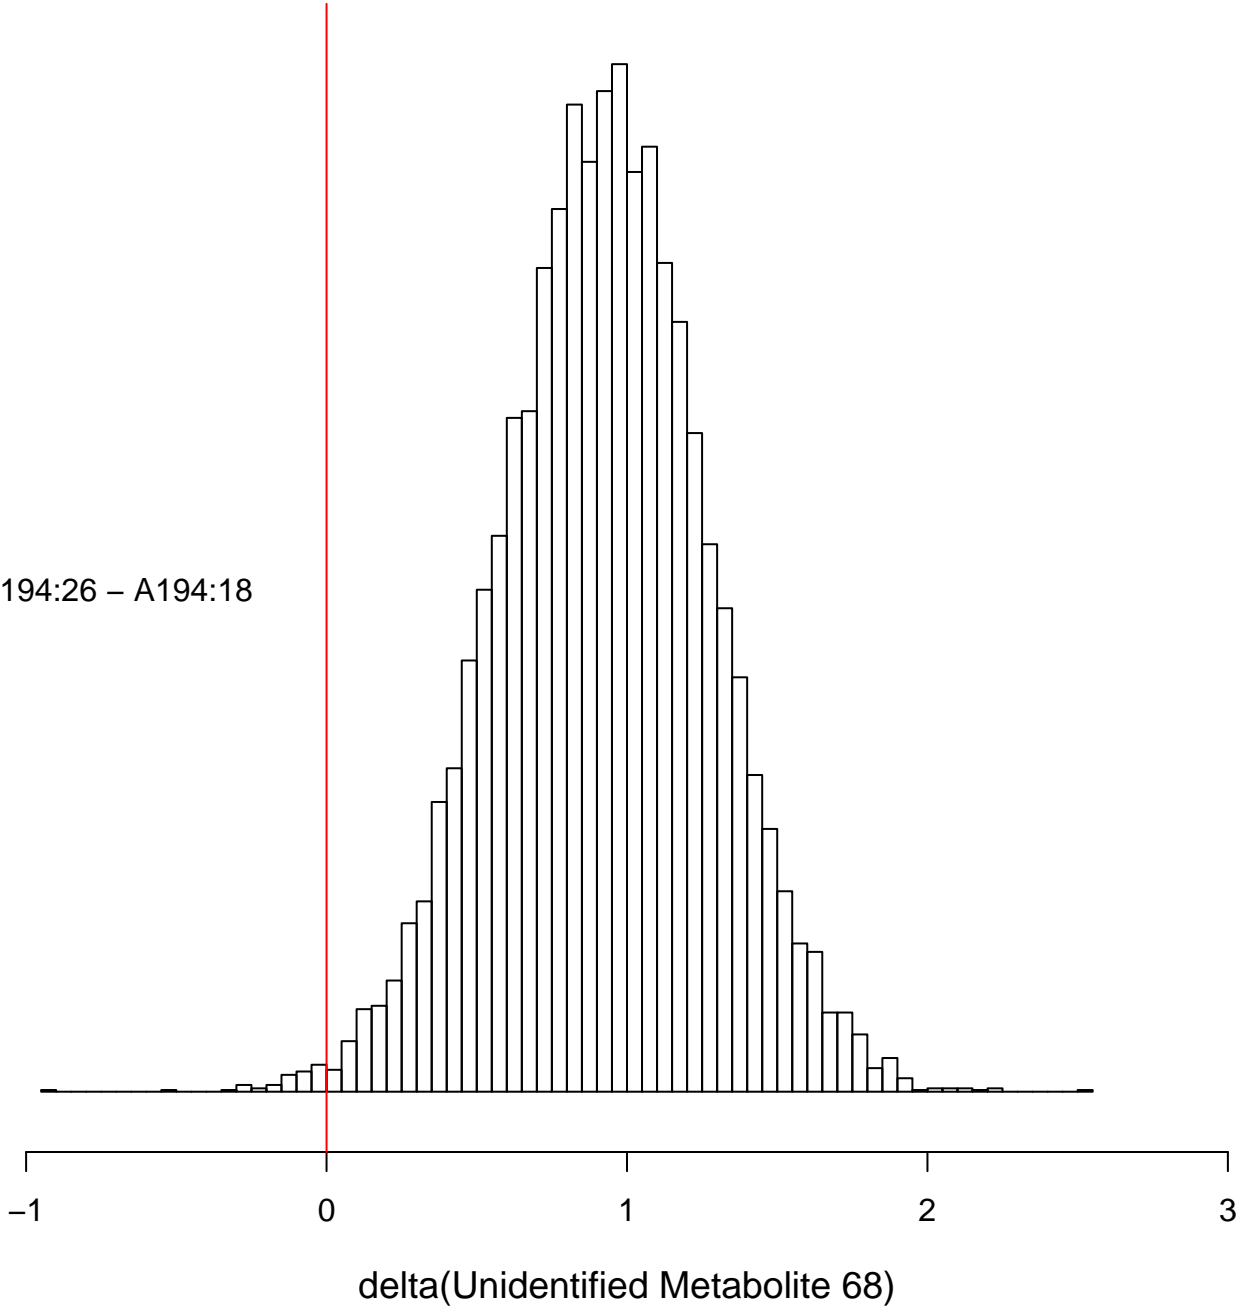

A194:26

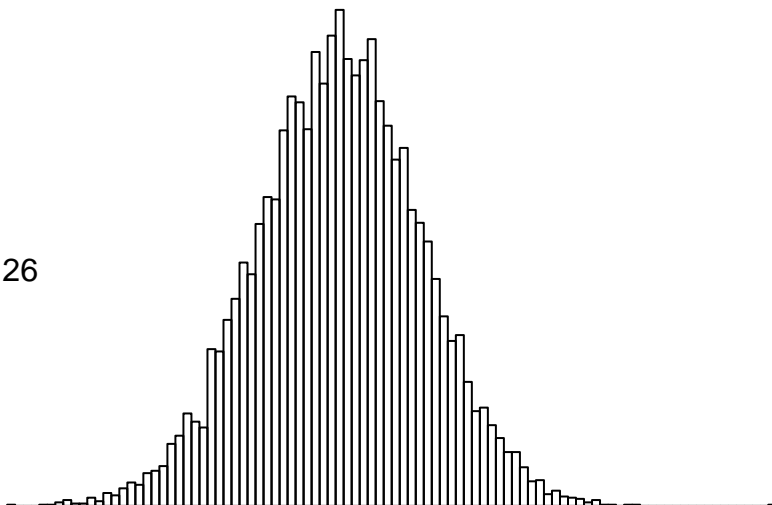

A194:18

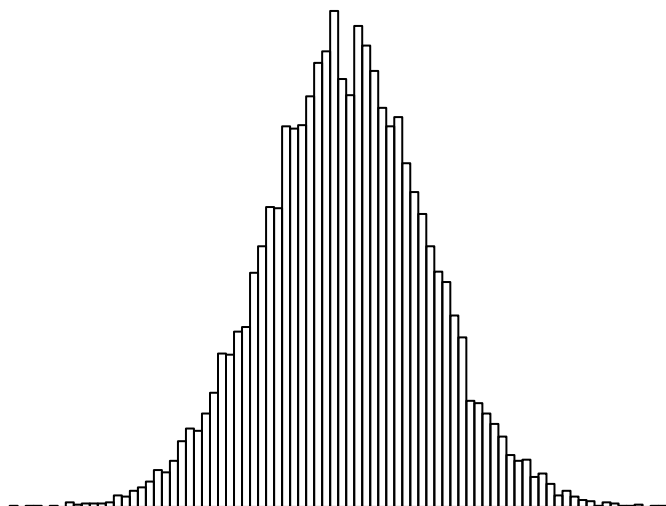

-7.5      -7.0      -6.5      -6.0      -5.5      -5.0      -4.5

Unidentified Metabolite 69

A194:26 – A194:18

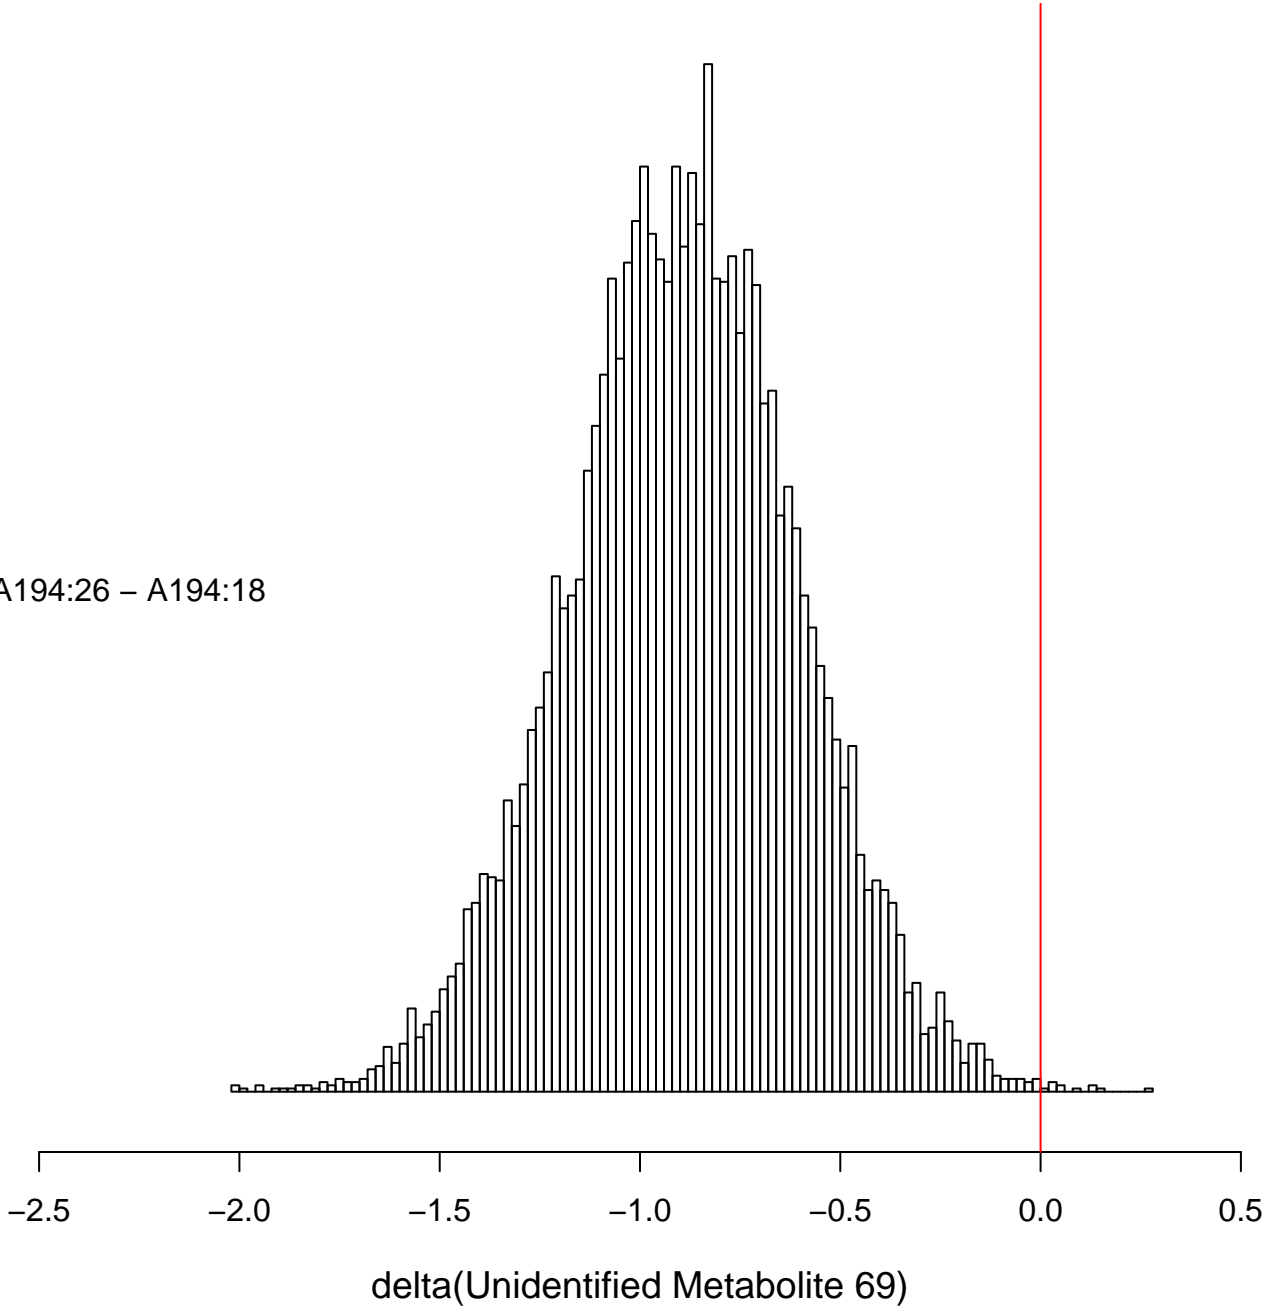

A194:26

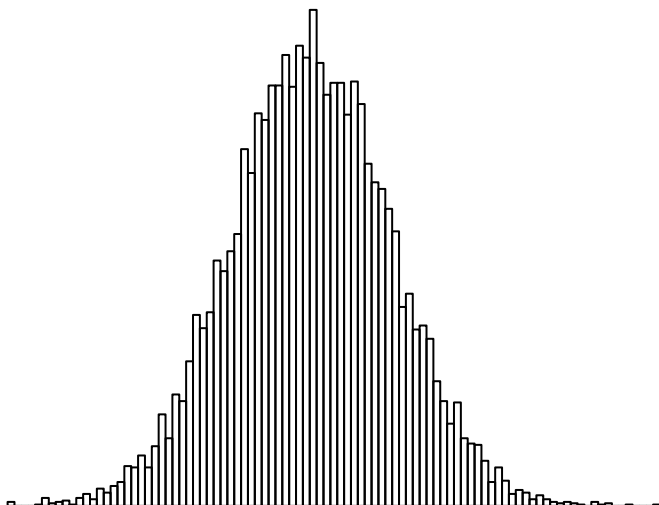

A194:18

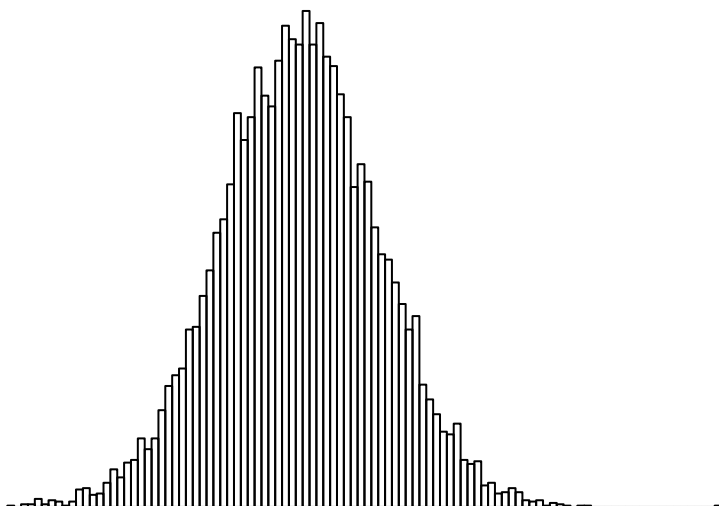

-9.0      -8.5      -8.0      -7.5      -7.0      -6.5      -6.0      -5.5

Unidentified Metabolite 70

A194:26 – A194:18

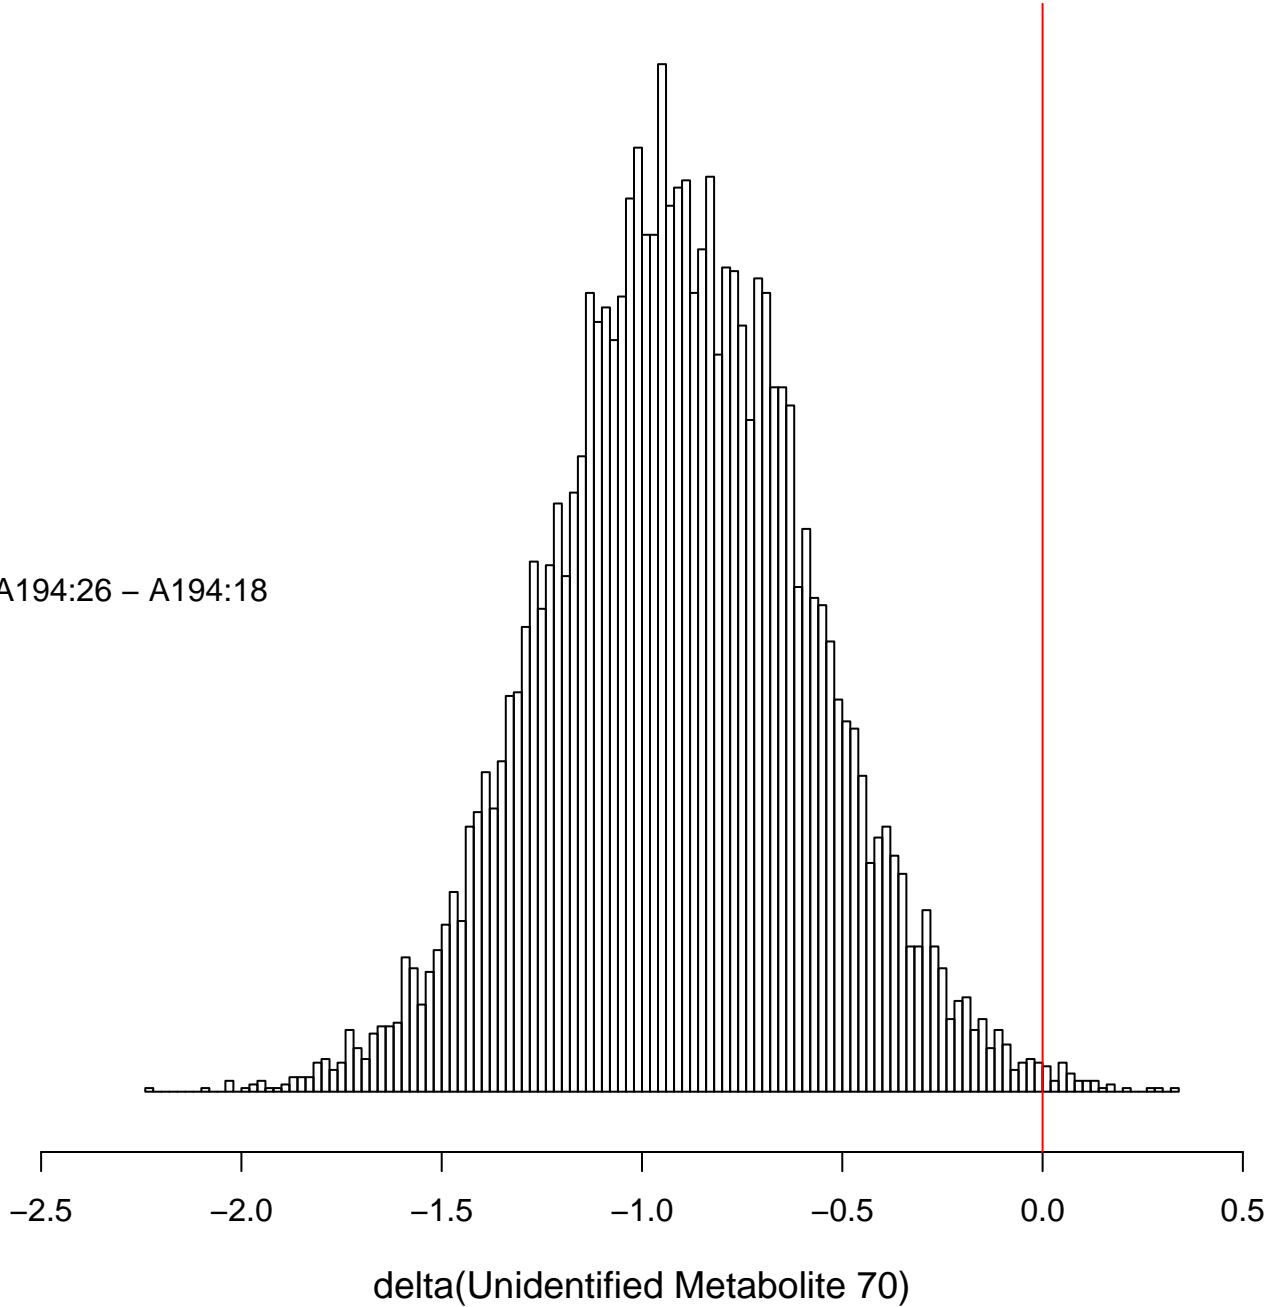



A194:26

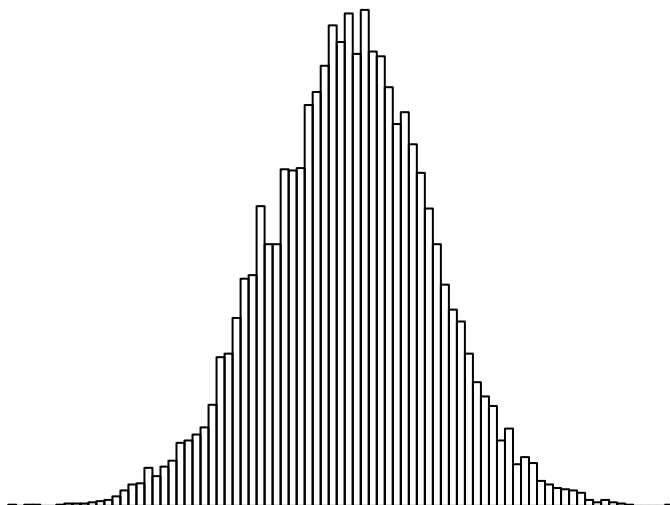

A194:18

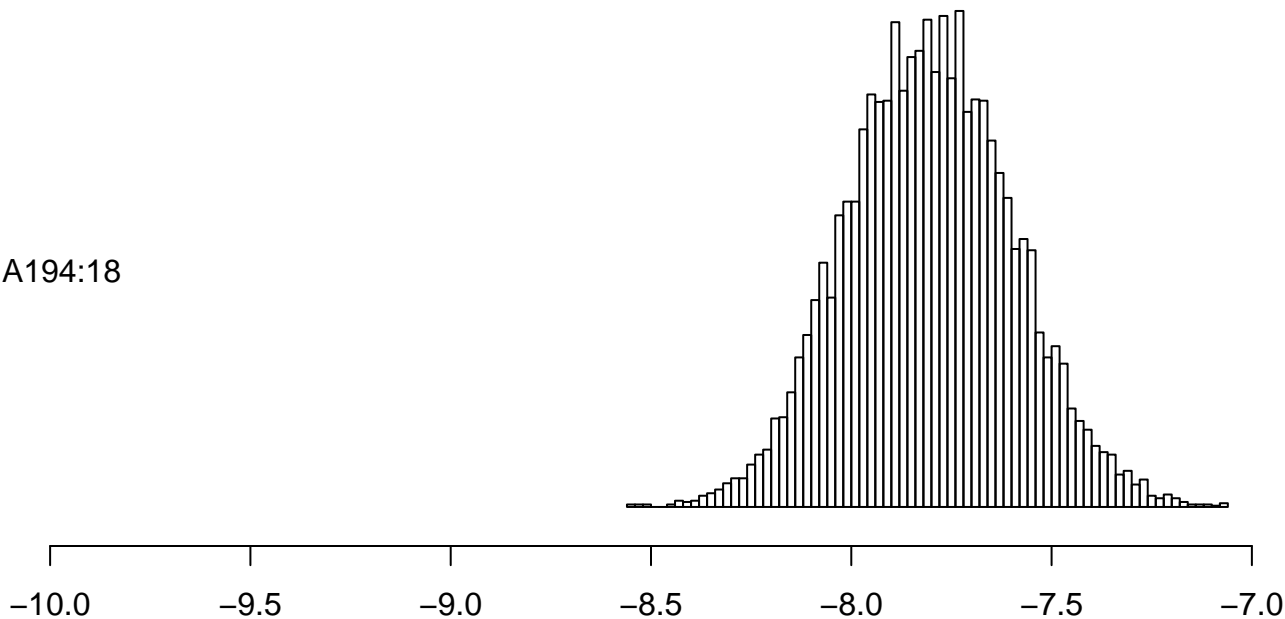

Unidentified Metabolite 71

A194:26 – A194:18

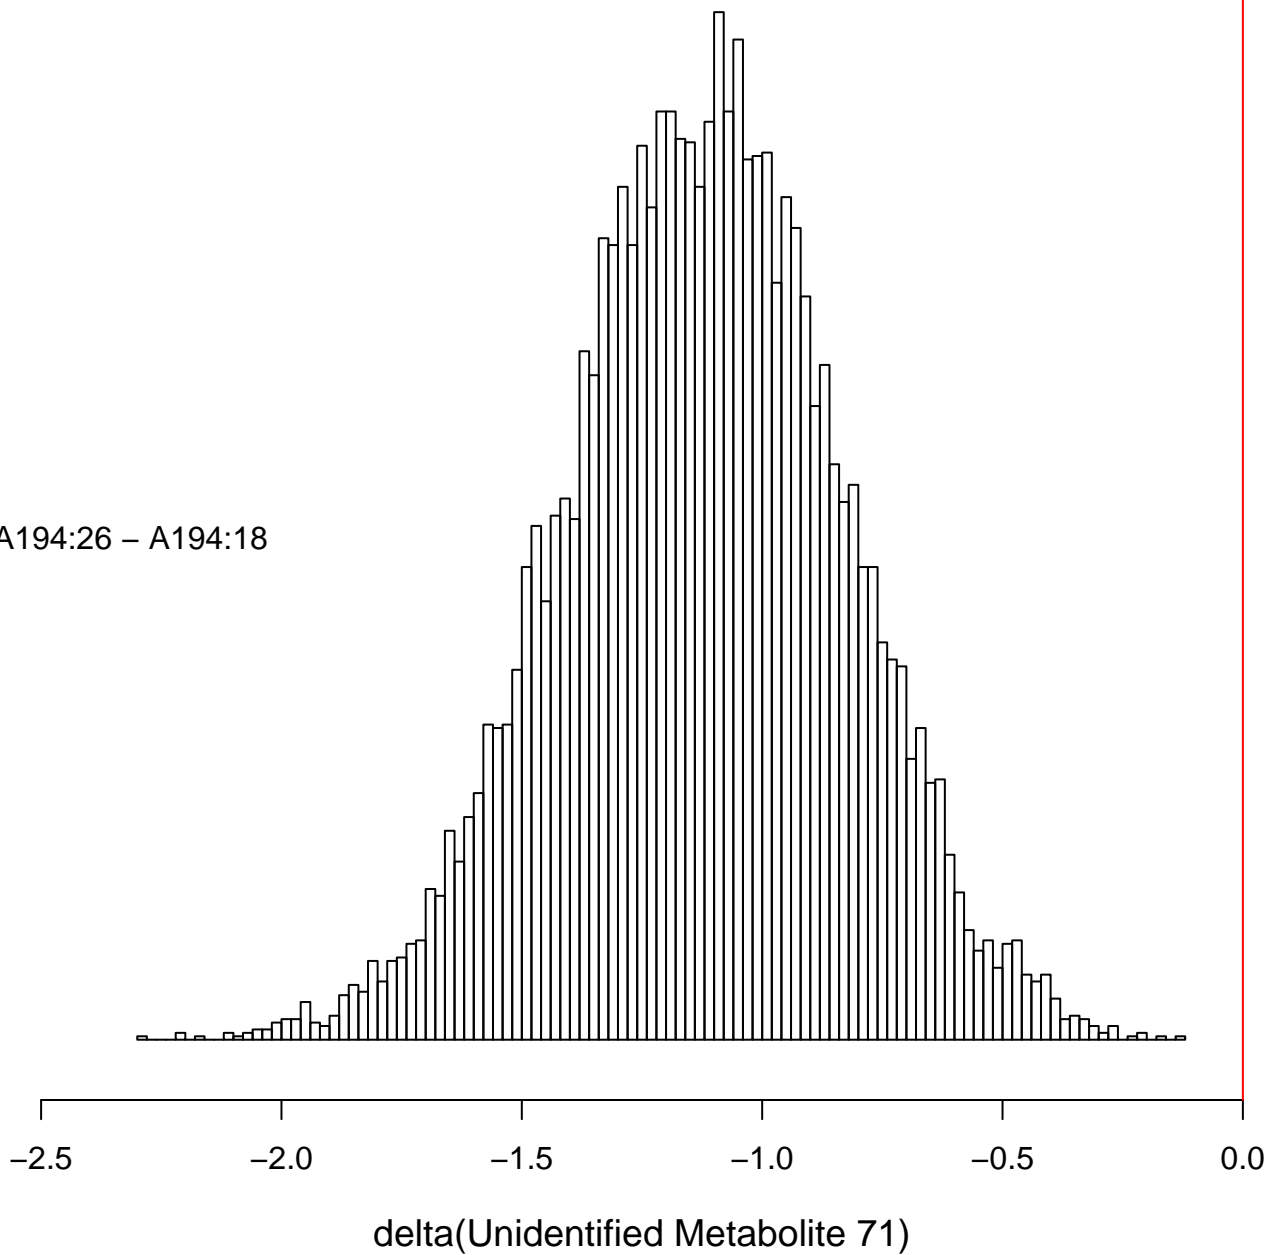

A194:26

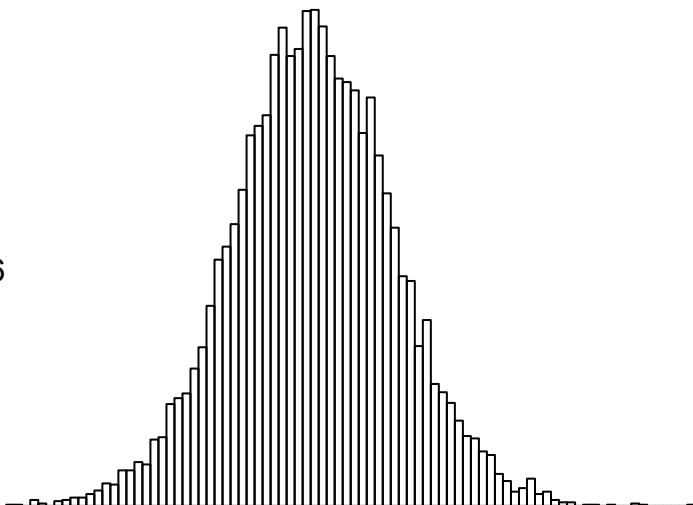

A194:18

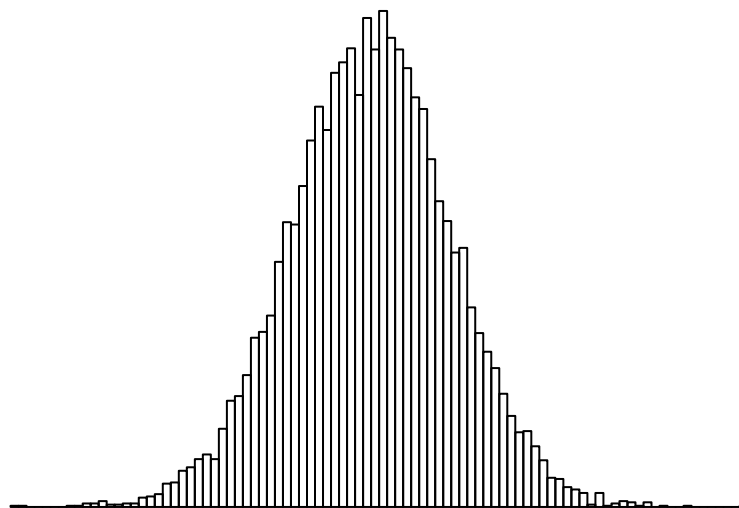

-7.5      -7.0      -6.5      -6.0      -5.5      -5.0      -4.5

Unidentified Metabolite 72

A194:26 – A194:18

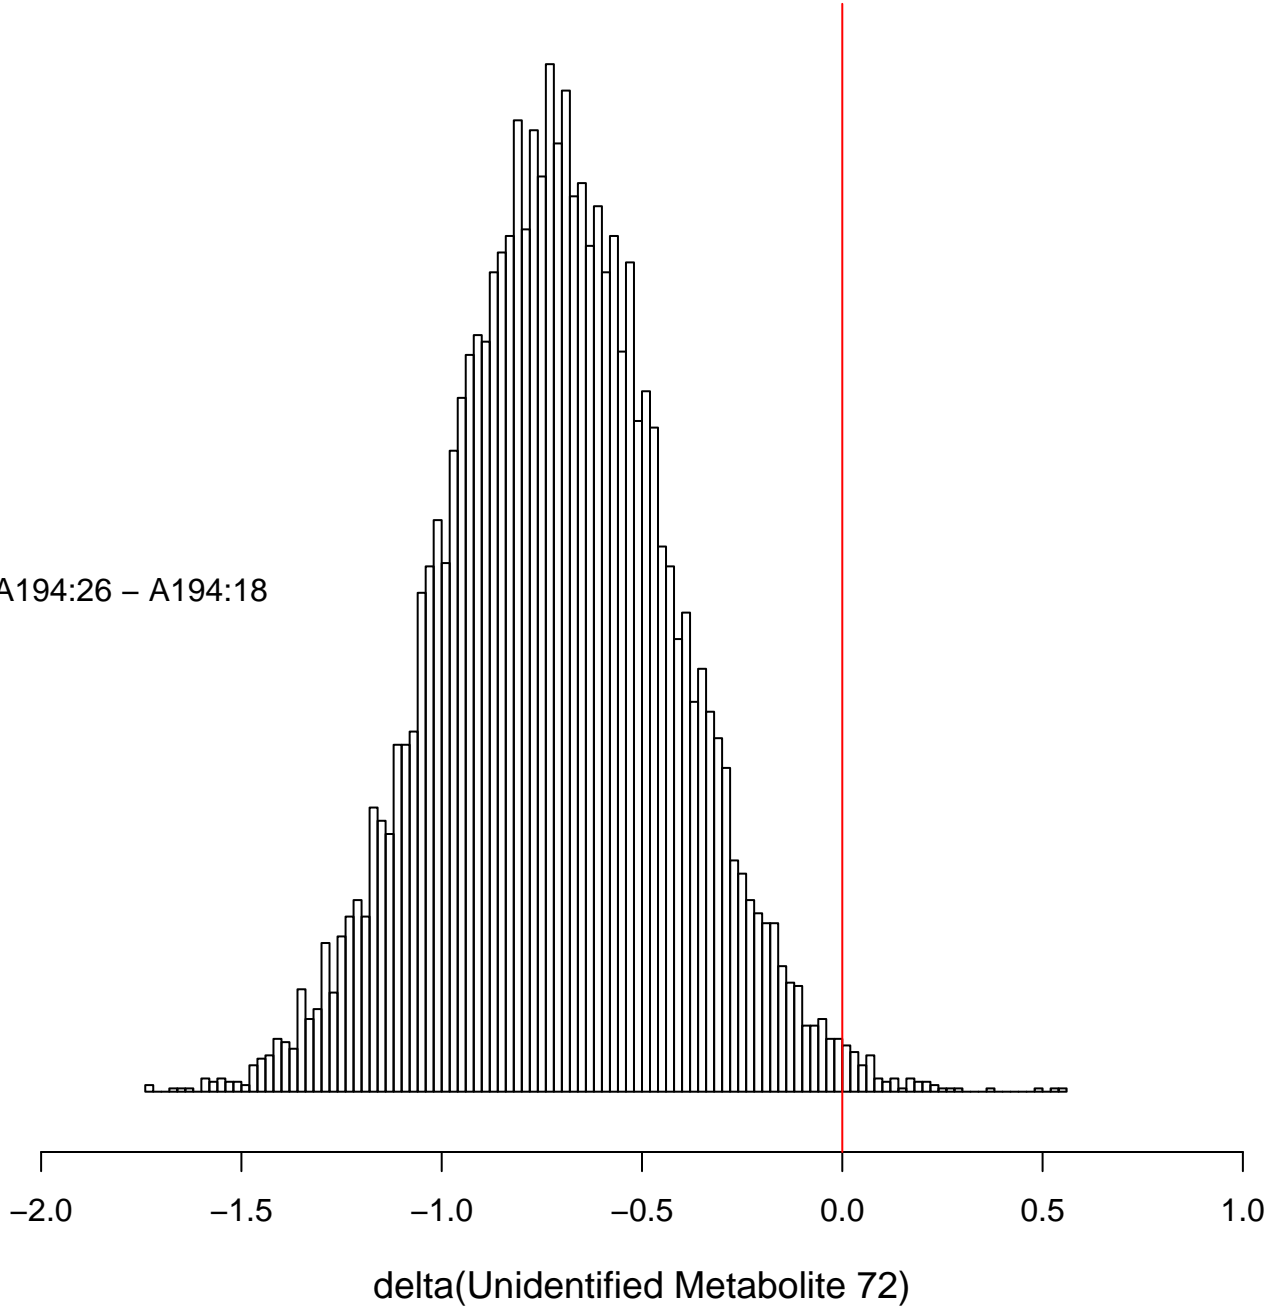

A194:26

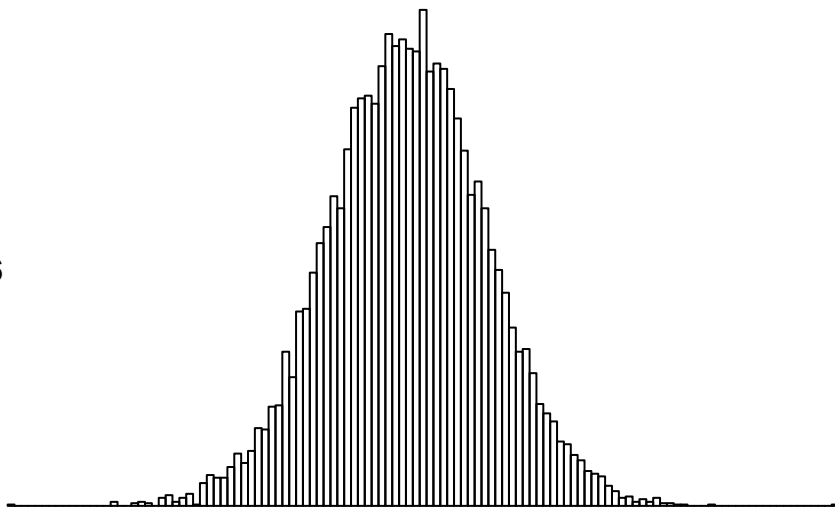

A194:18

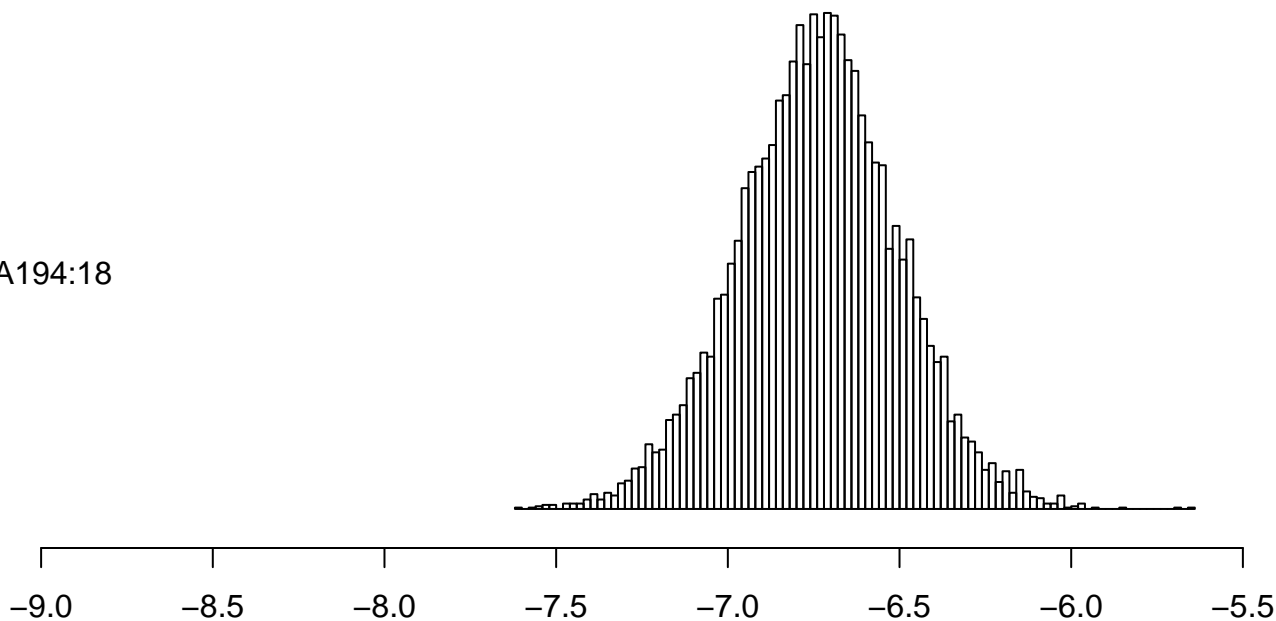

Unidentified Metabolite 73

A194:26 – A194:18

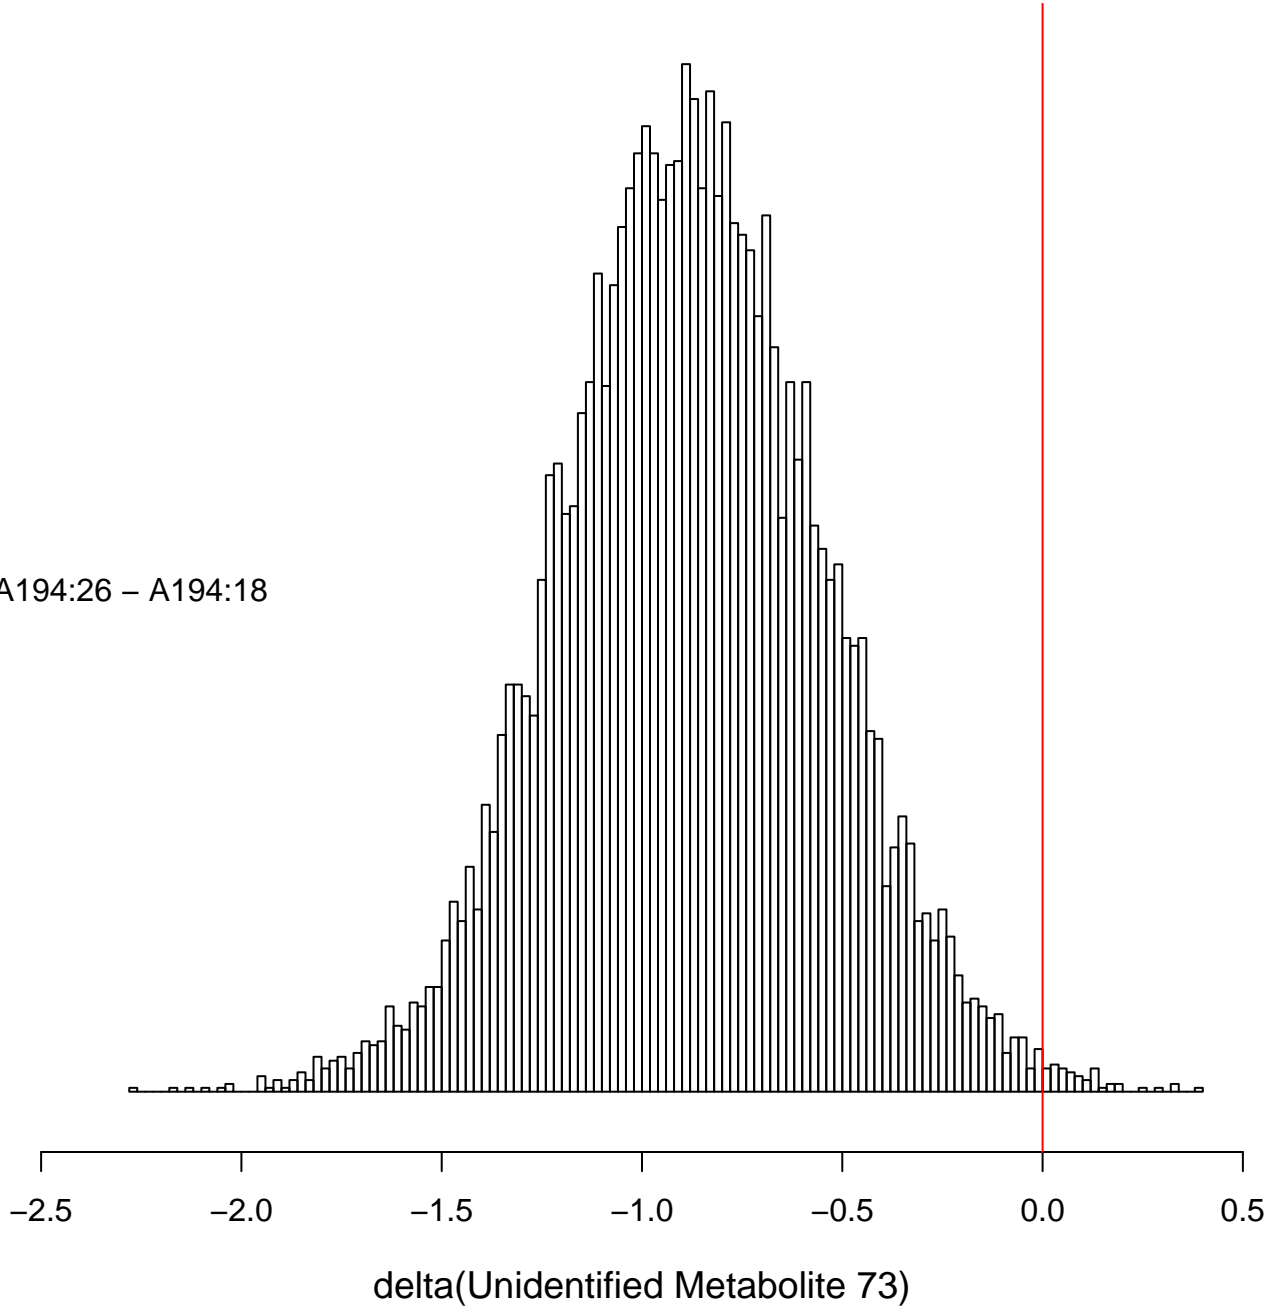

A194:26

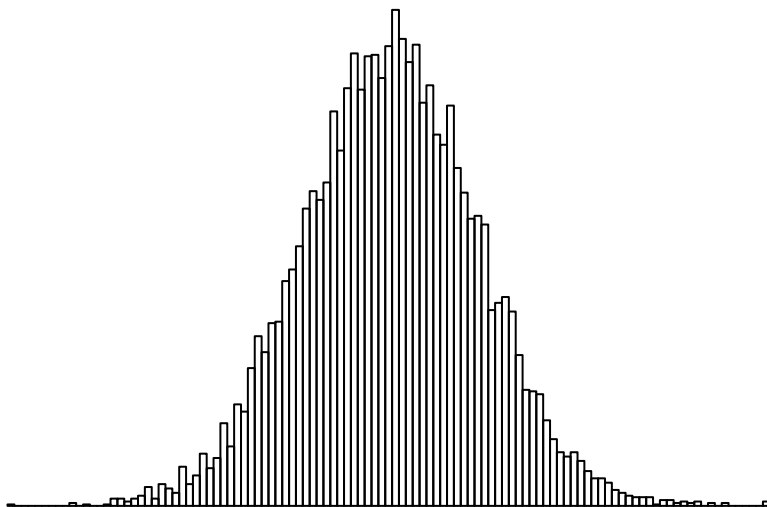

A194:18

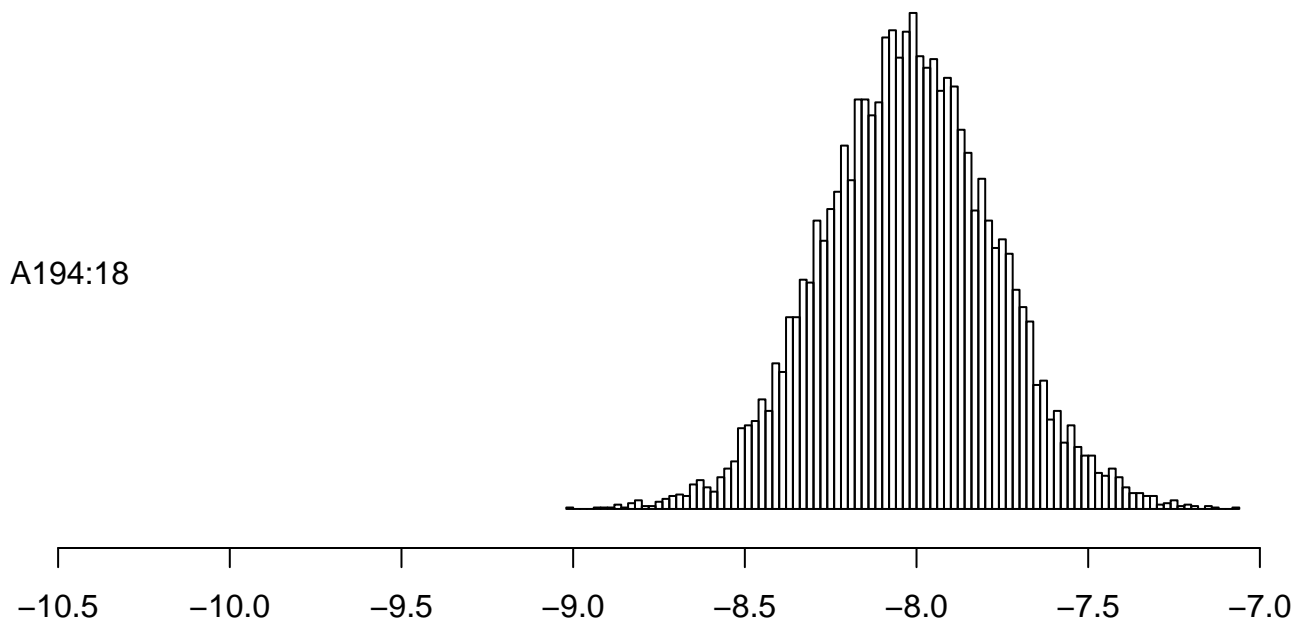

Unidentified Metabolite 74

A194:26 – A194:18

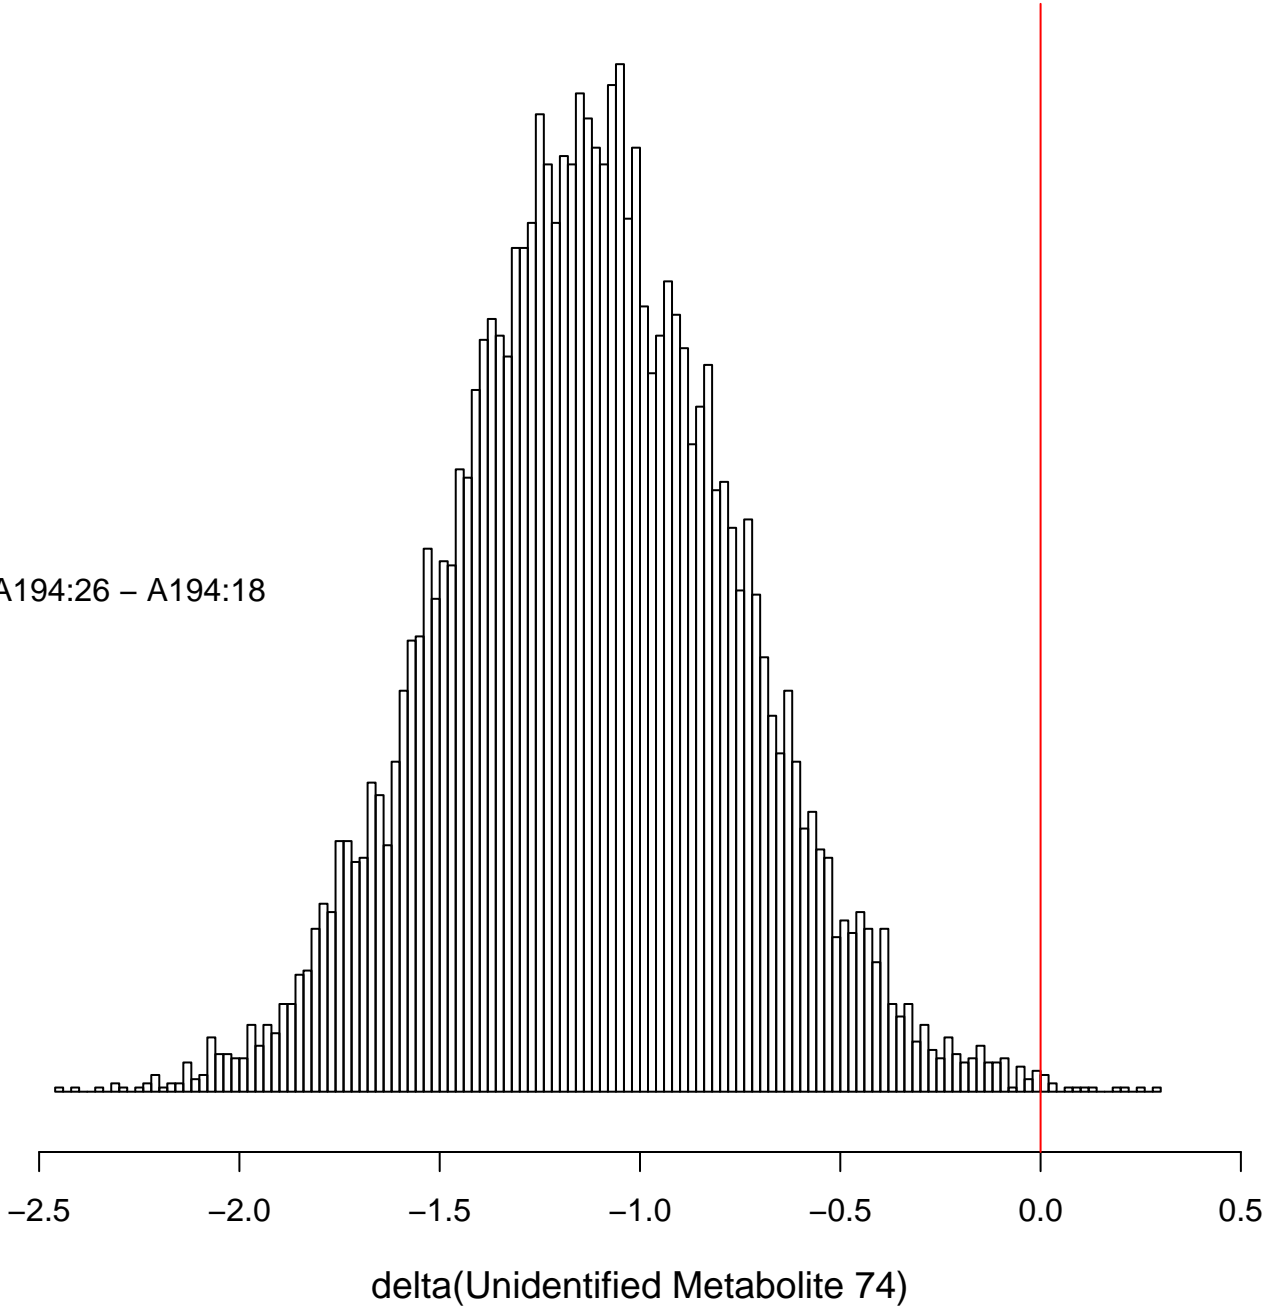



A194:26

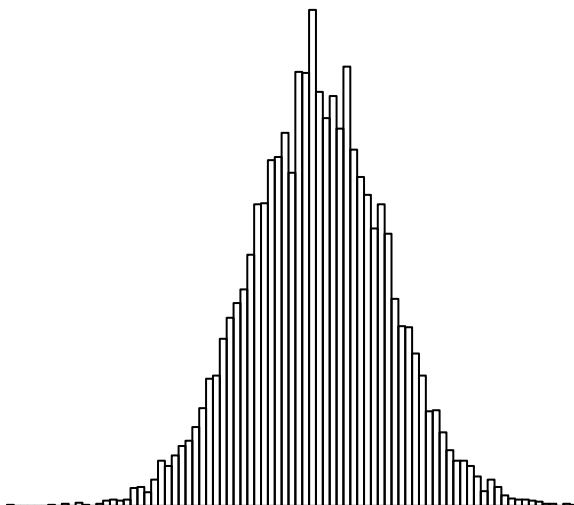

A194:18

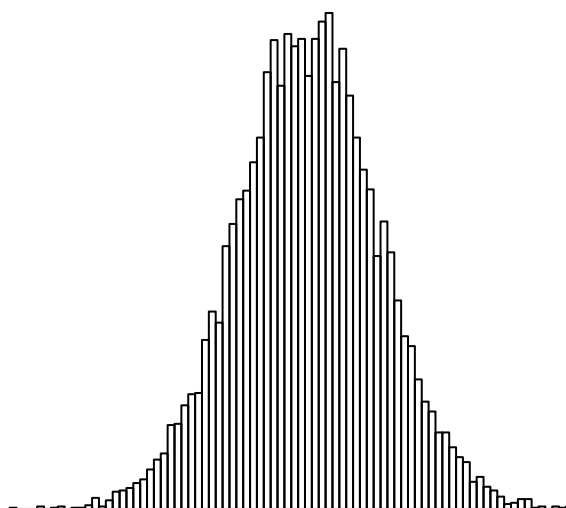

-11.5      -11.0      -10.5      -10.0      -9.5      -9.0      -8.5      -8.0

Unidentified Metabolite 75

A194:26 – A194:18

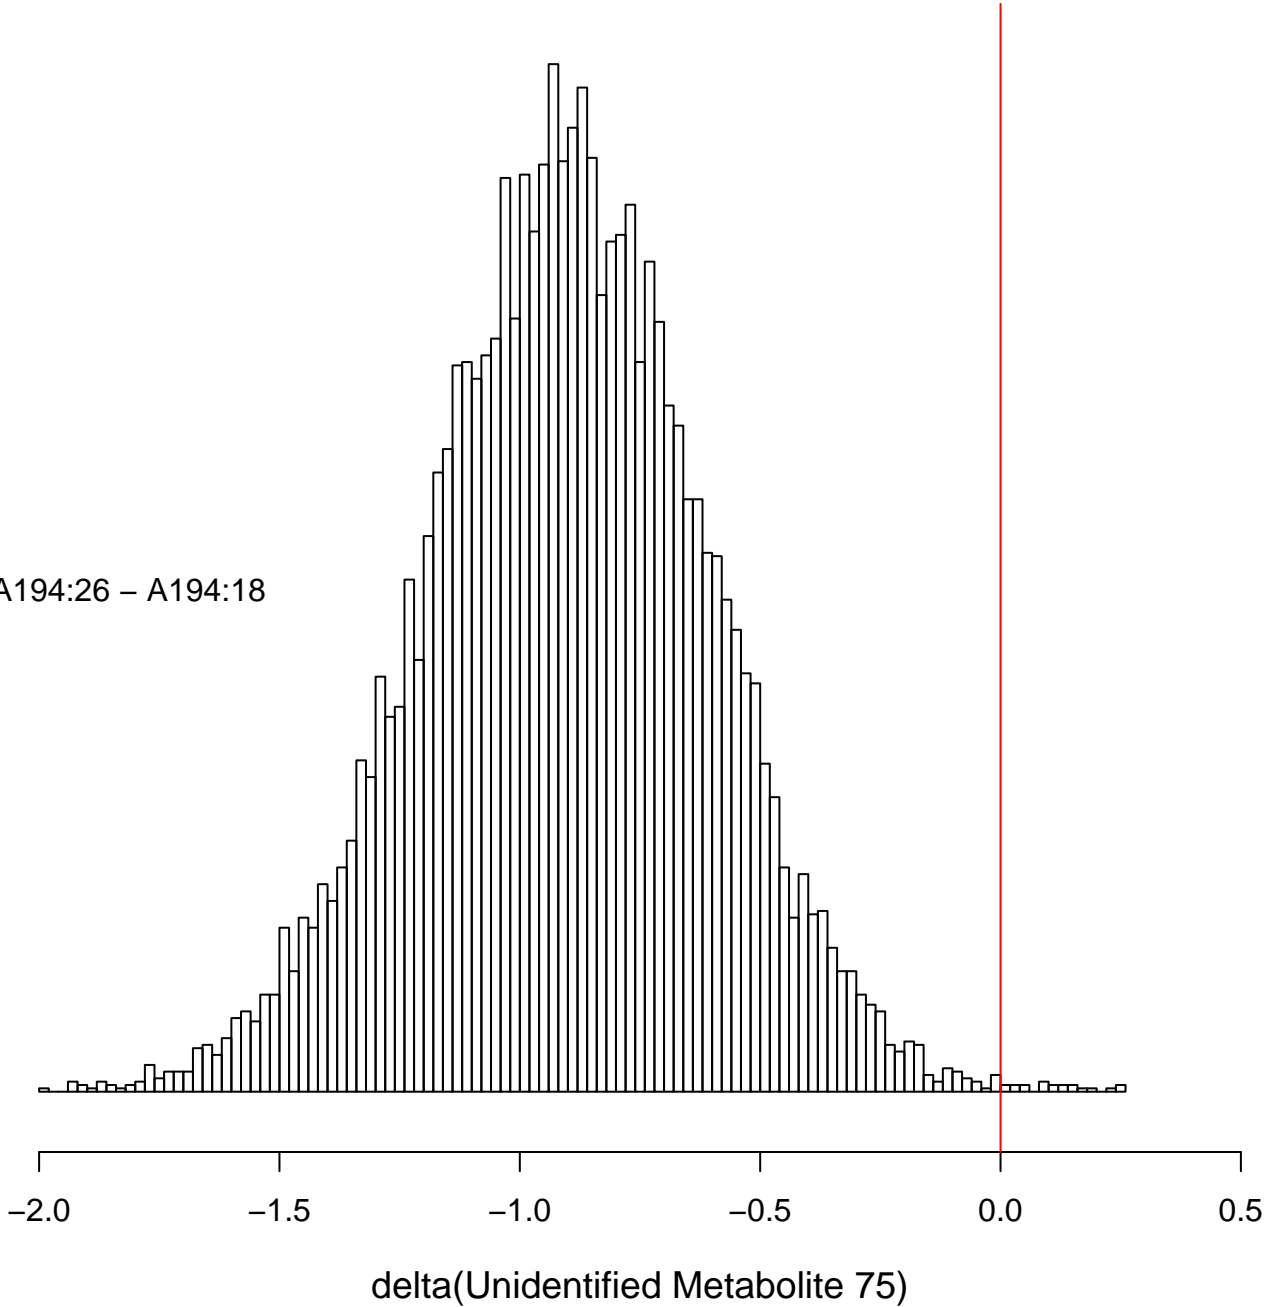

A194:26

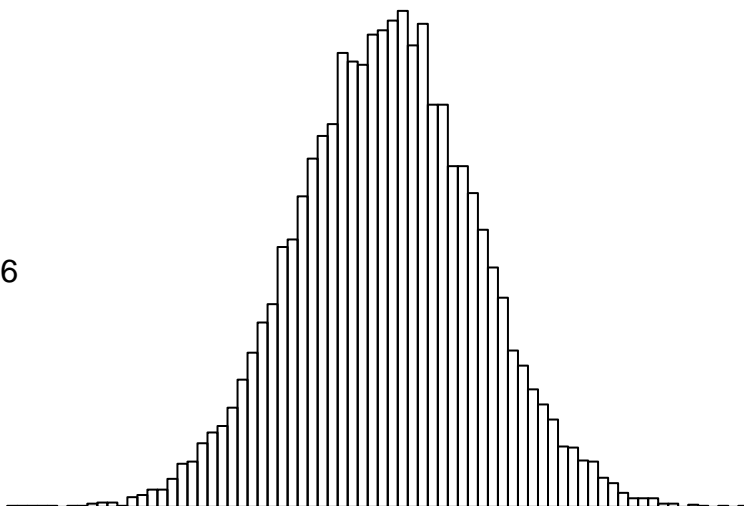

A194:18

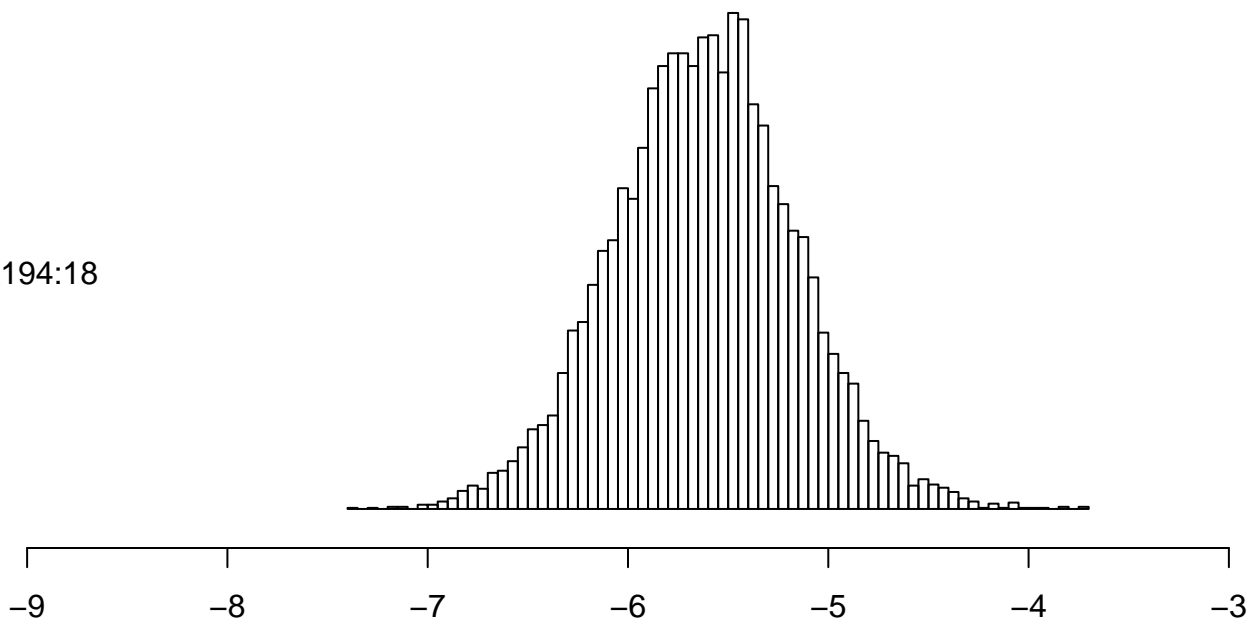

Unidentified Metabolite 76

A194:26 – A194:18

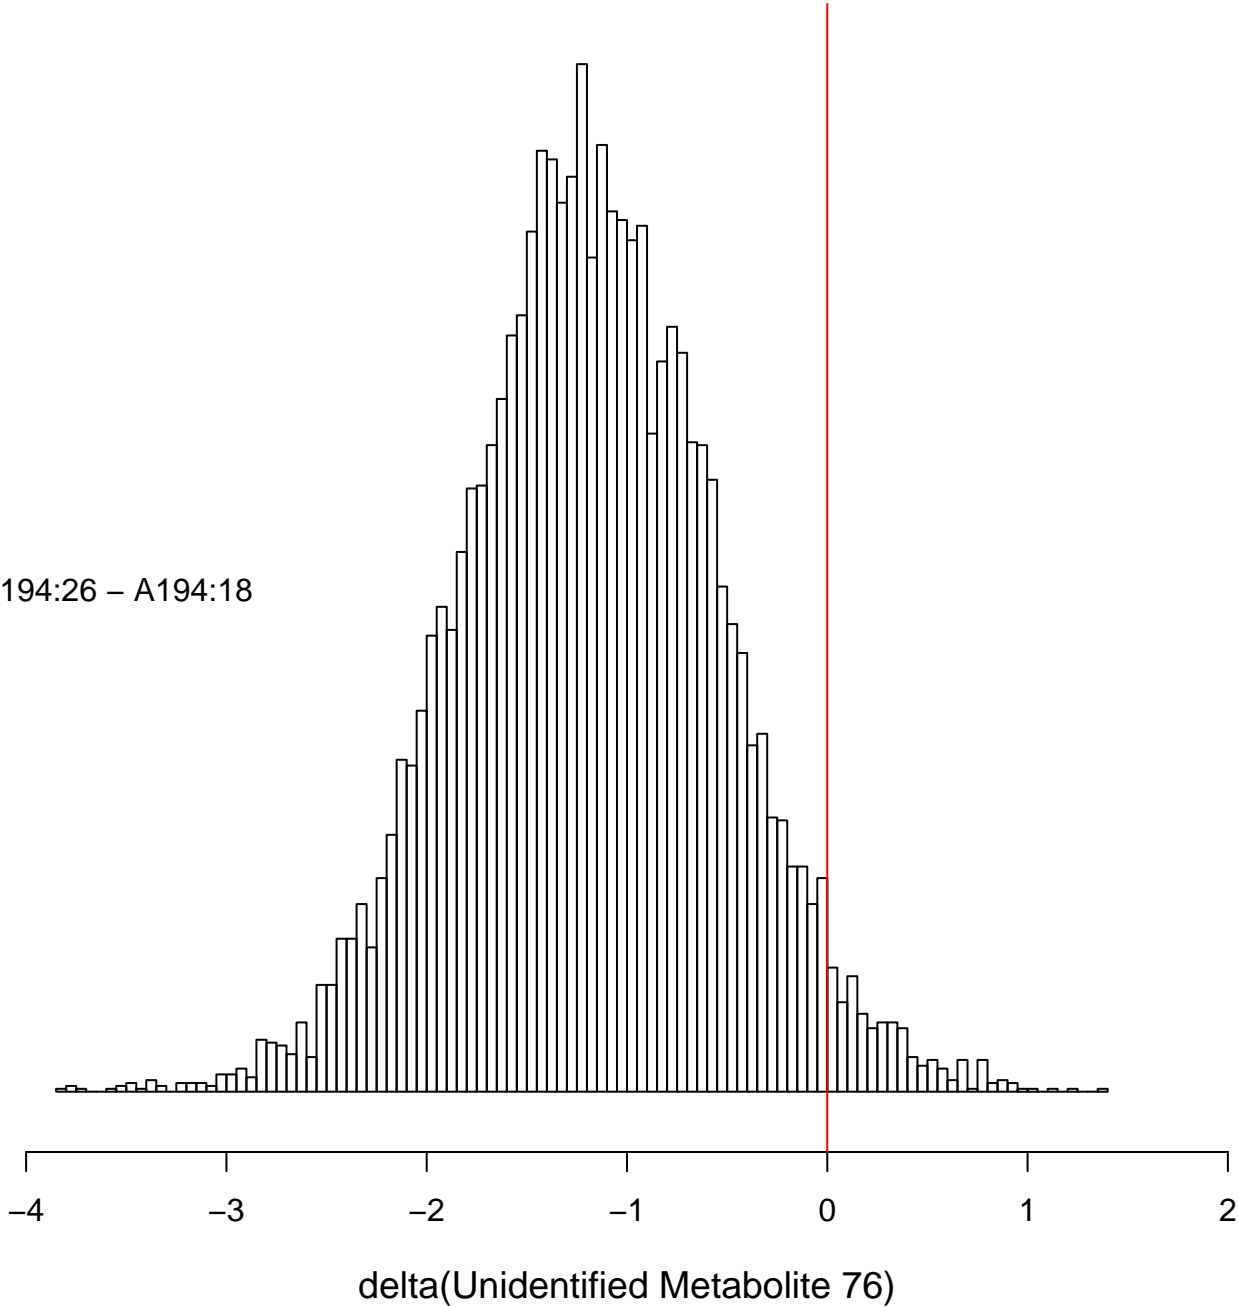

A194:26

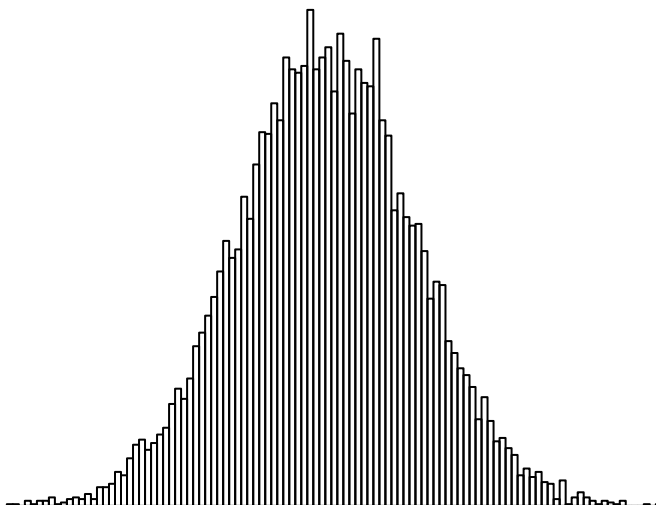

A194:18

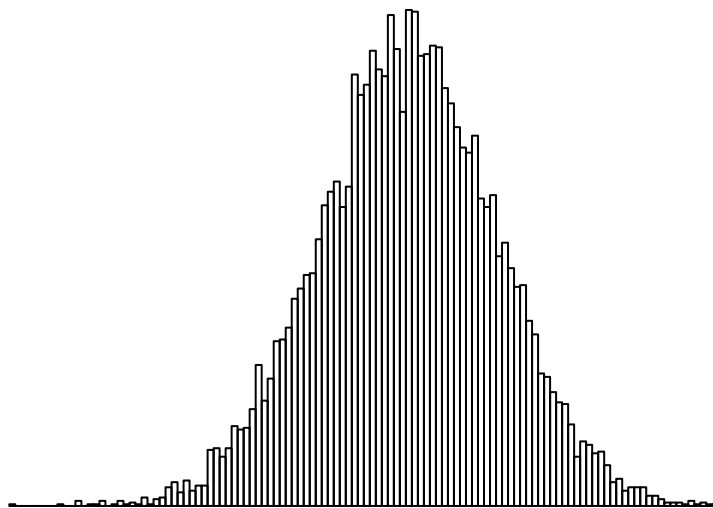

-8

-7

-6

-5

Unidentified Metabolite 77

A194:26 – A194:18

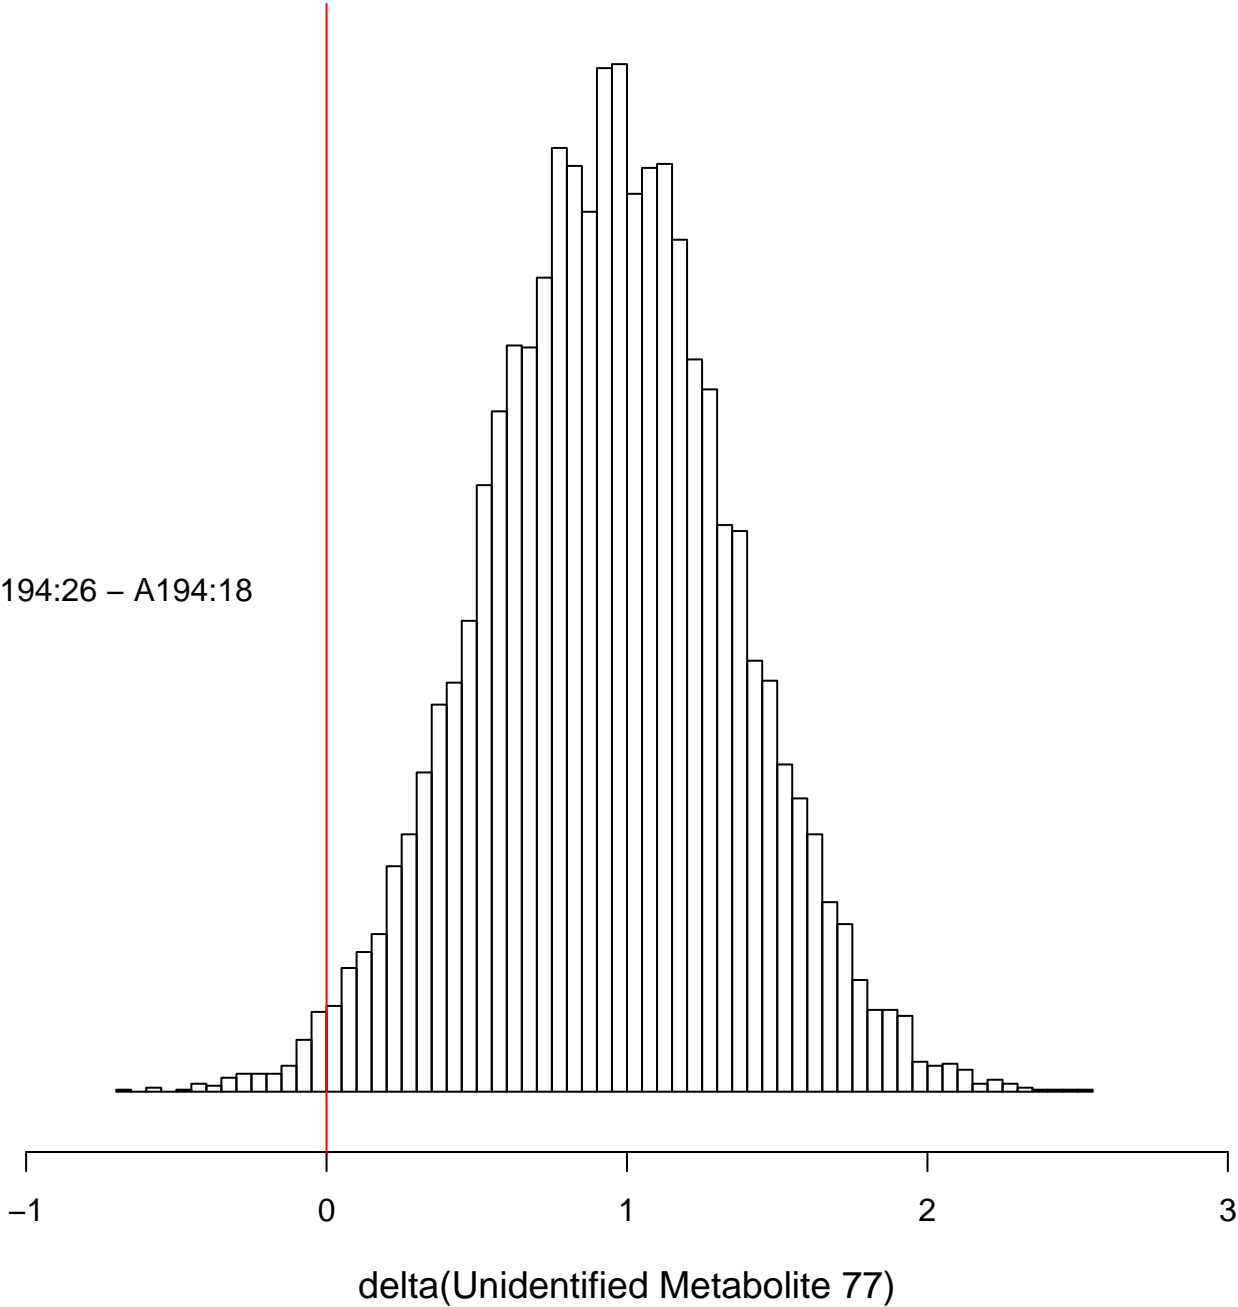

A194:26

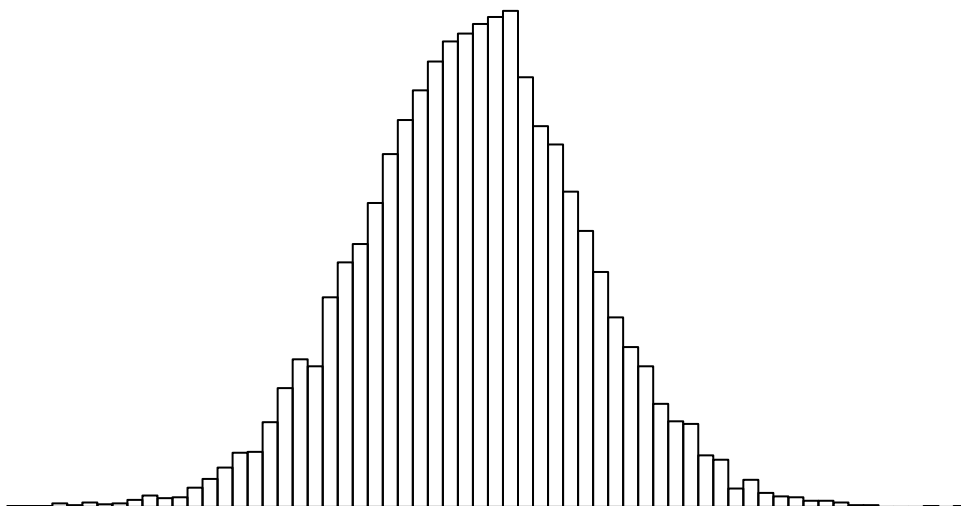

A194:18

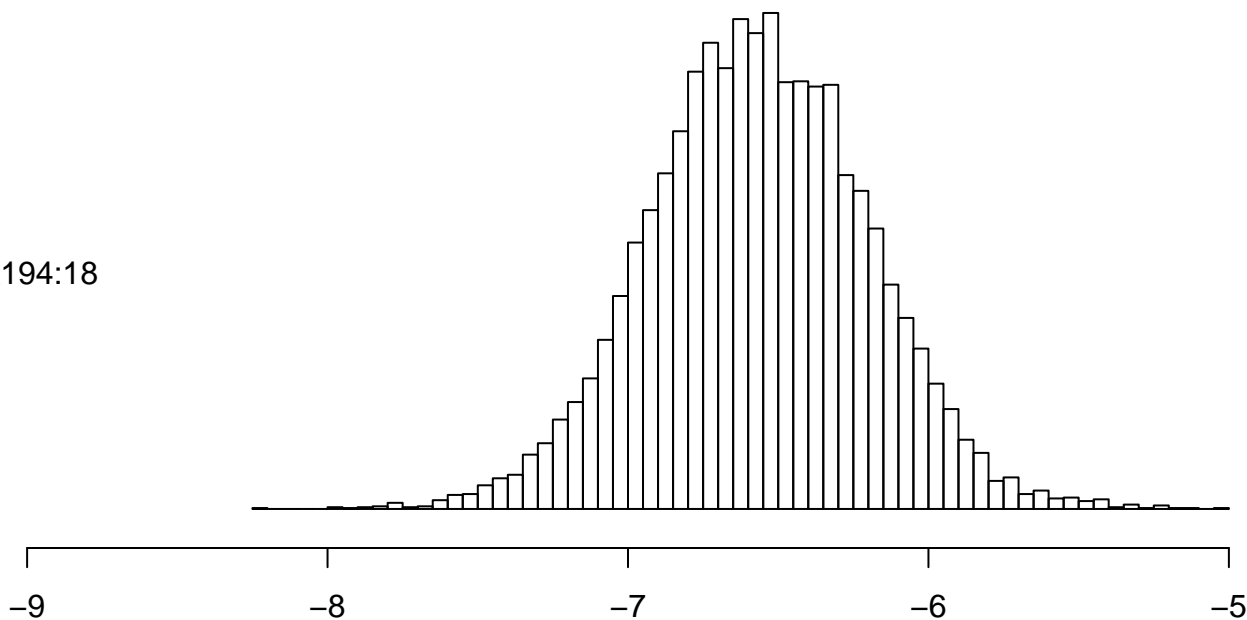

Unidentified Metabolite 78

A194:26 – A194:18

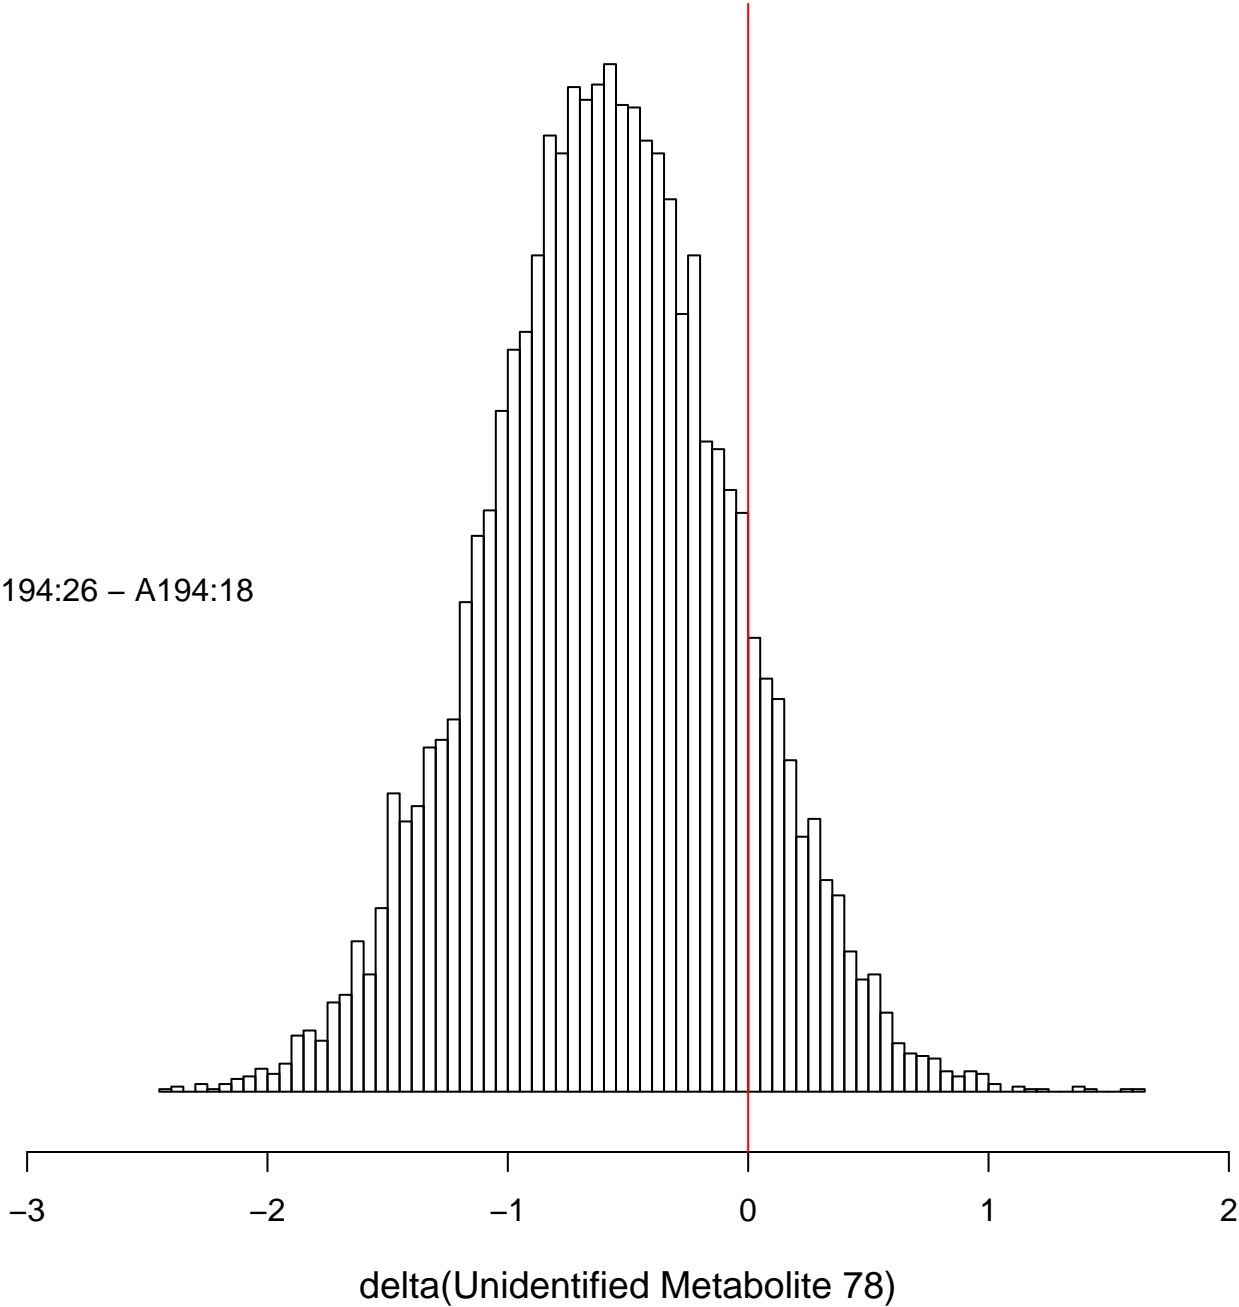



A194:26

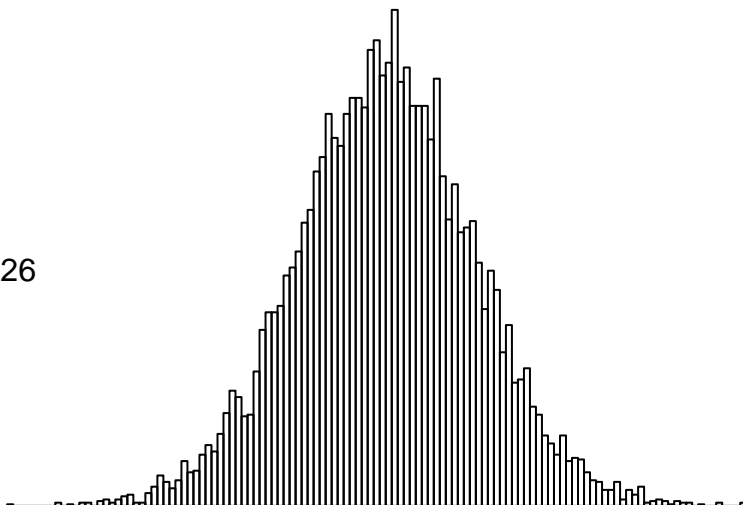

A194:18

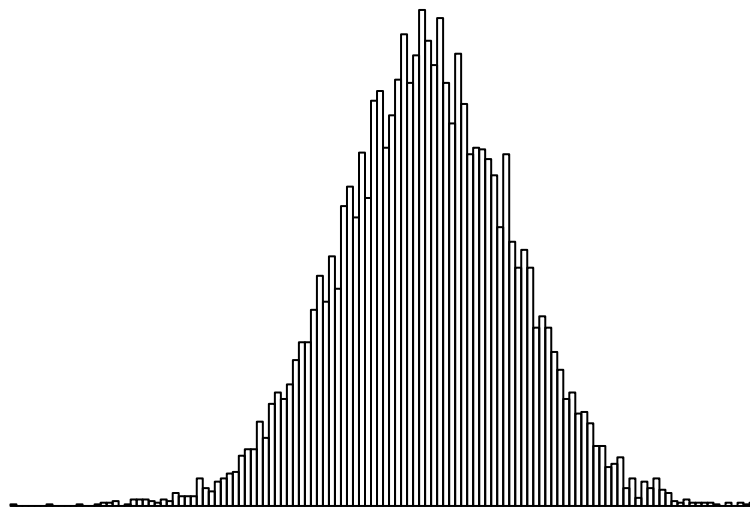

-9.0

-8.5

-8.0

-7.5

-7.0

Acid 2

A194:26 – A194:18

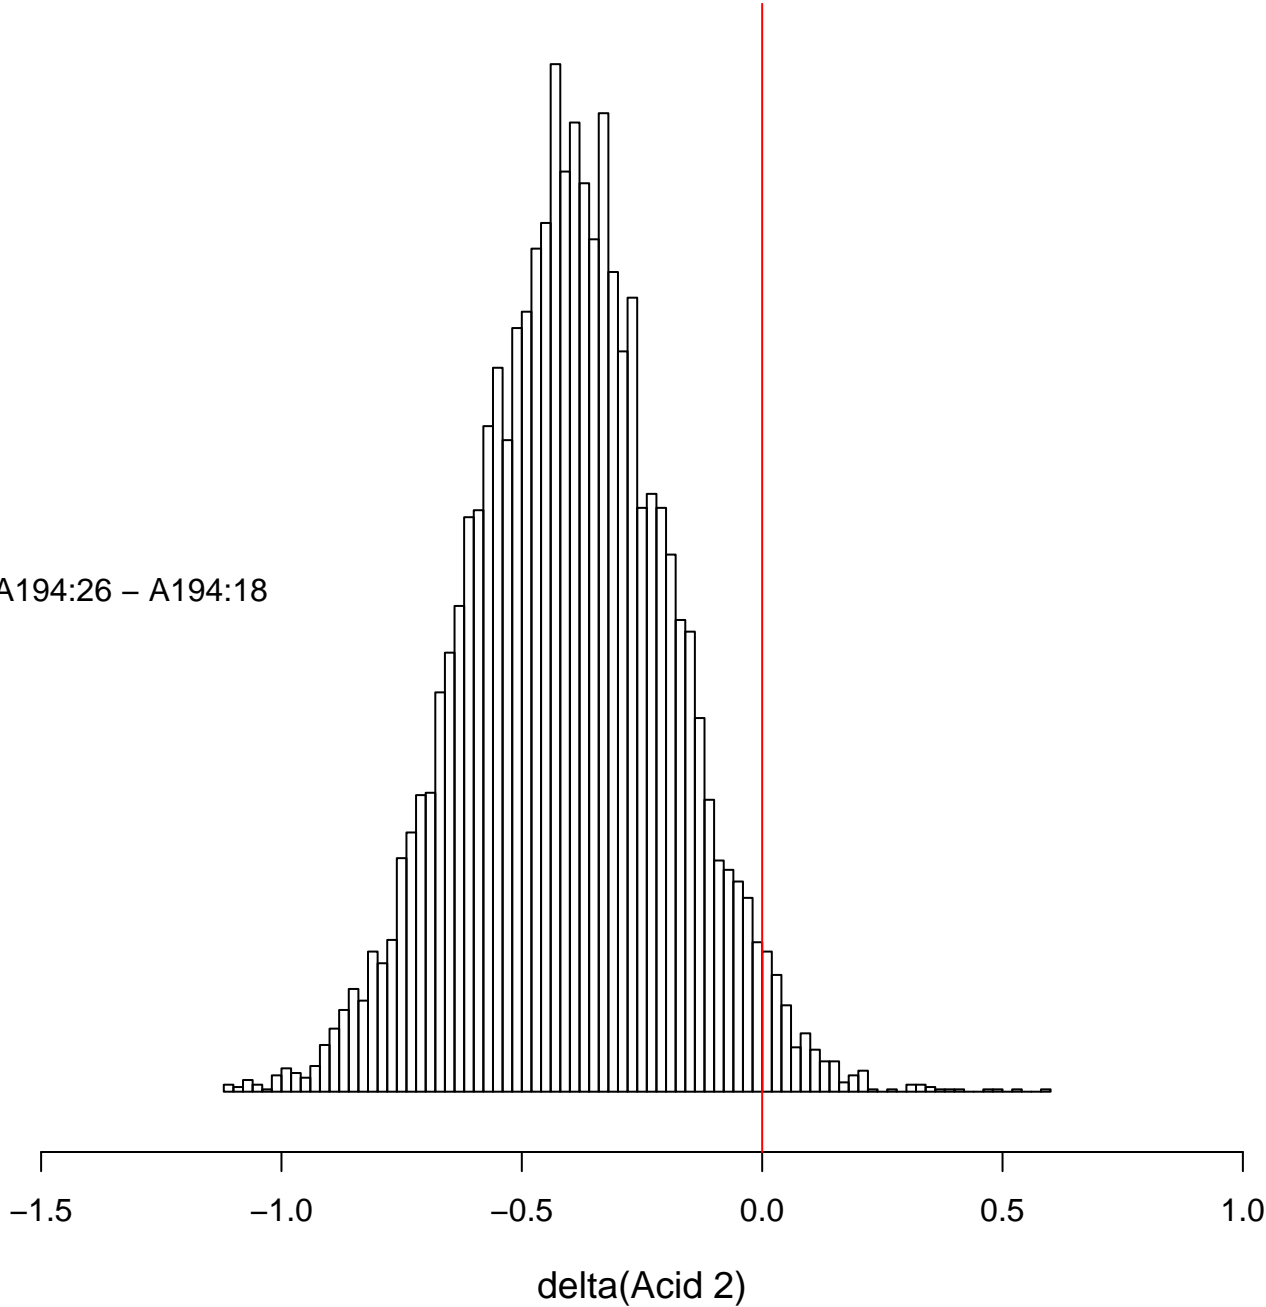

A194:26

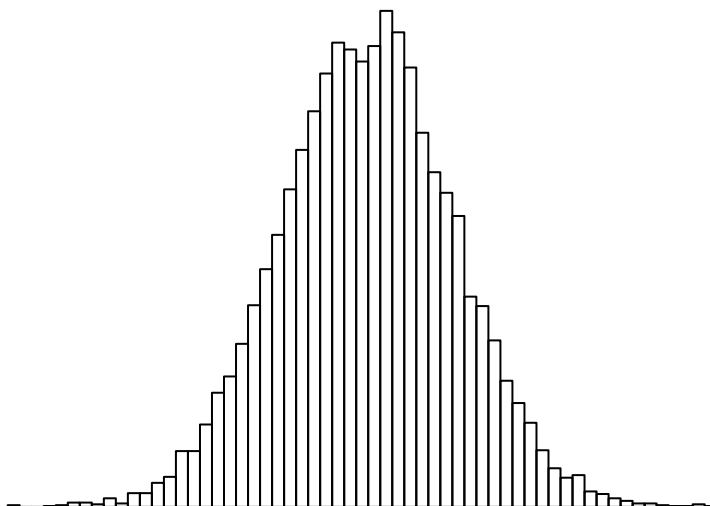

A194:18

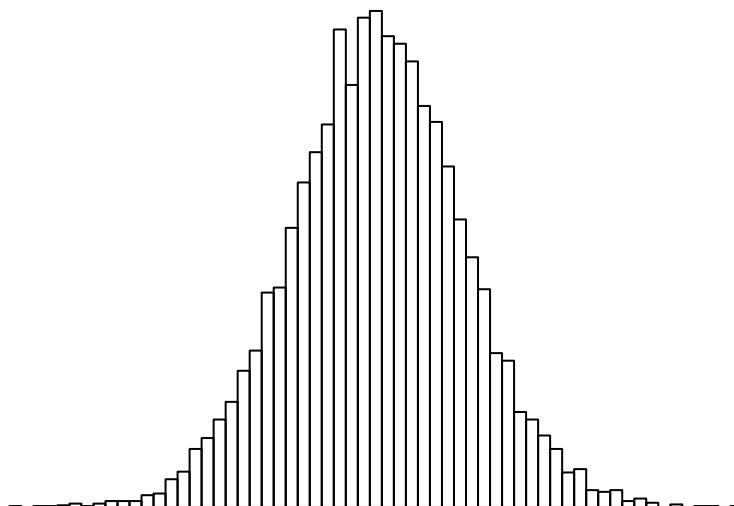

-9

-8

-7

-6

-5

-4

Acid 3

A194:26 – A194:18

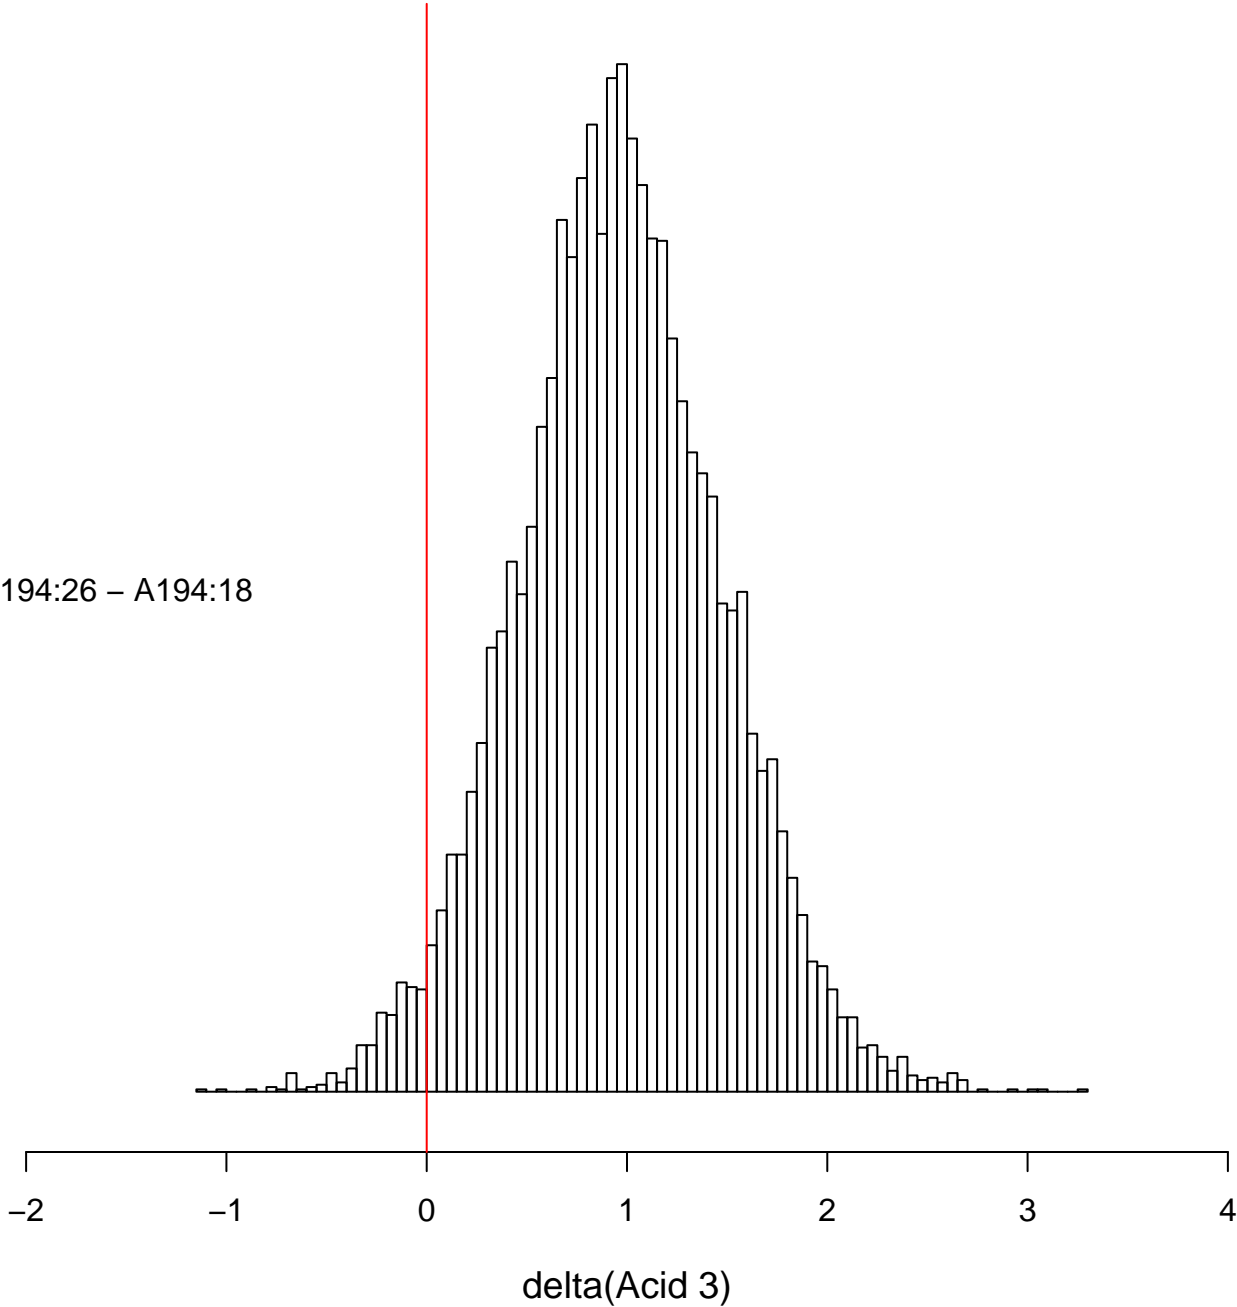

A194:26

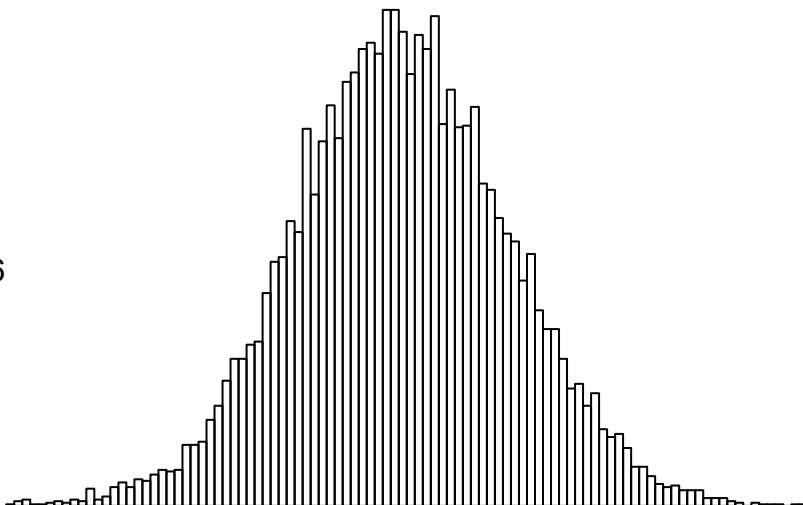

A194:18

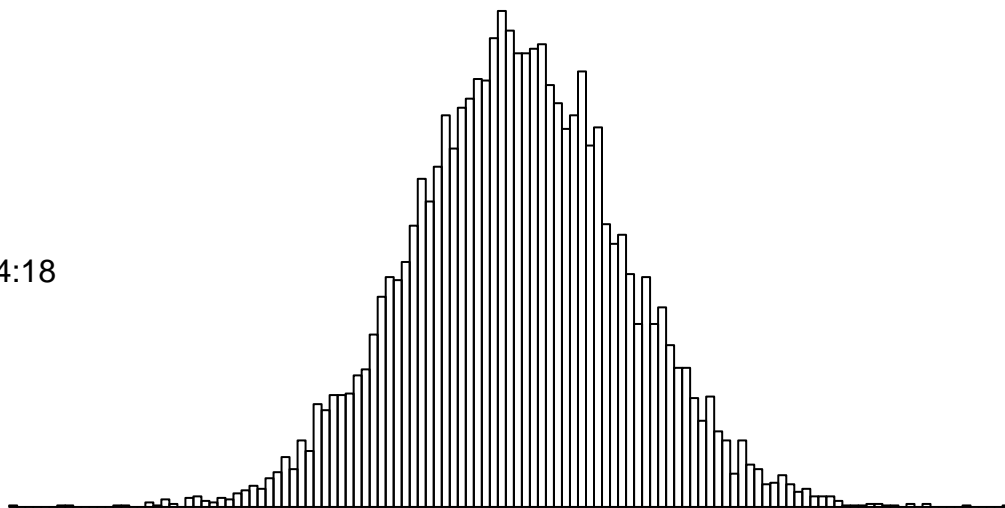

-7.5      -7.0      -6.5      -6.0      -5.5      -5.0      -4.5

Acid 6

A194:26 – A194:18

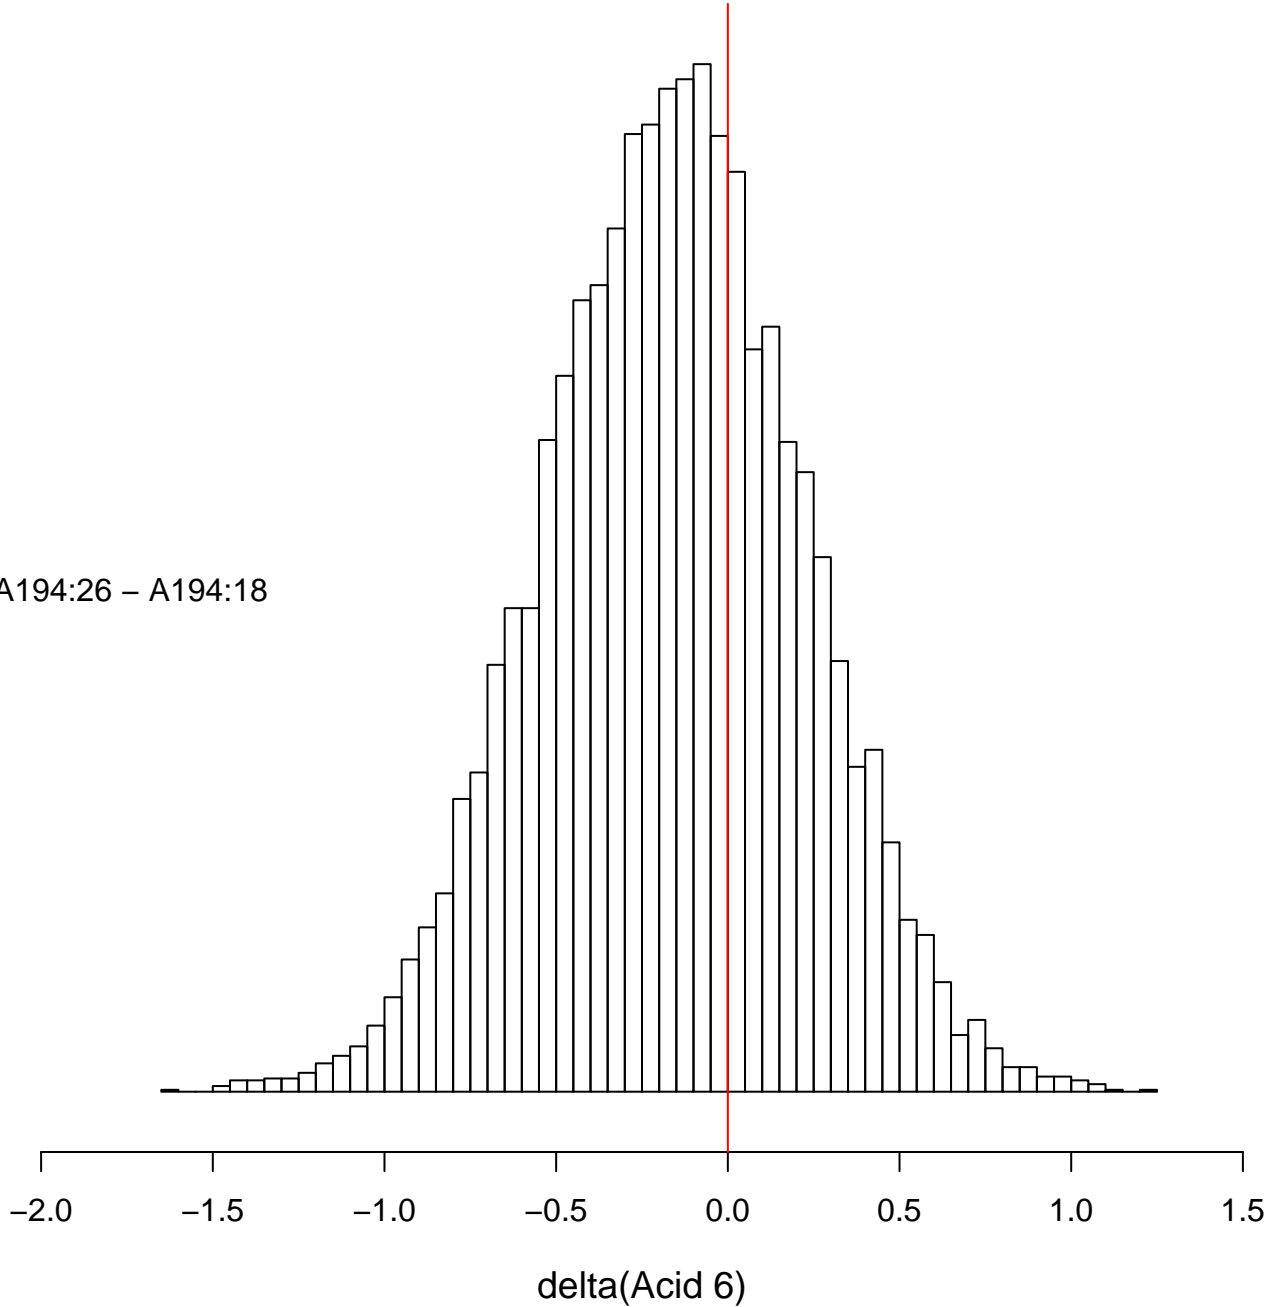

A194:26

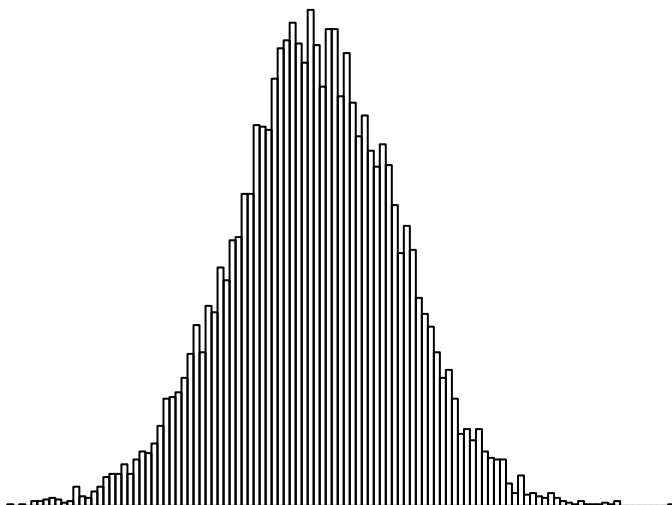

A194:18

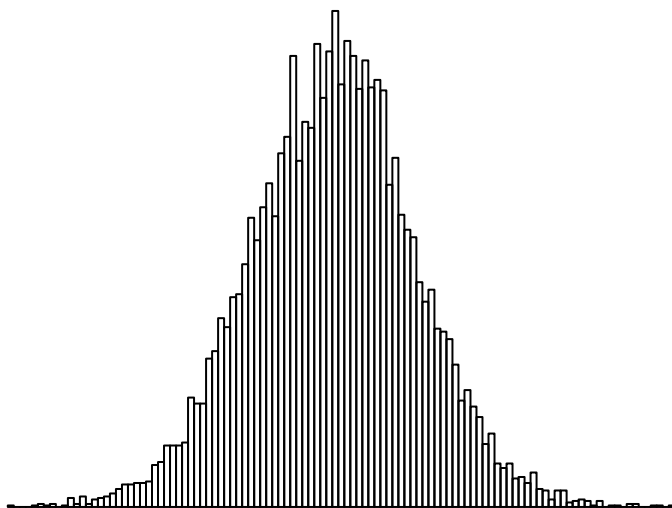

-8.5

-8.0

-7.5

-7.0

-6.5

Acid 7

A194:26 – A194:18

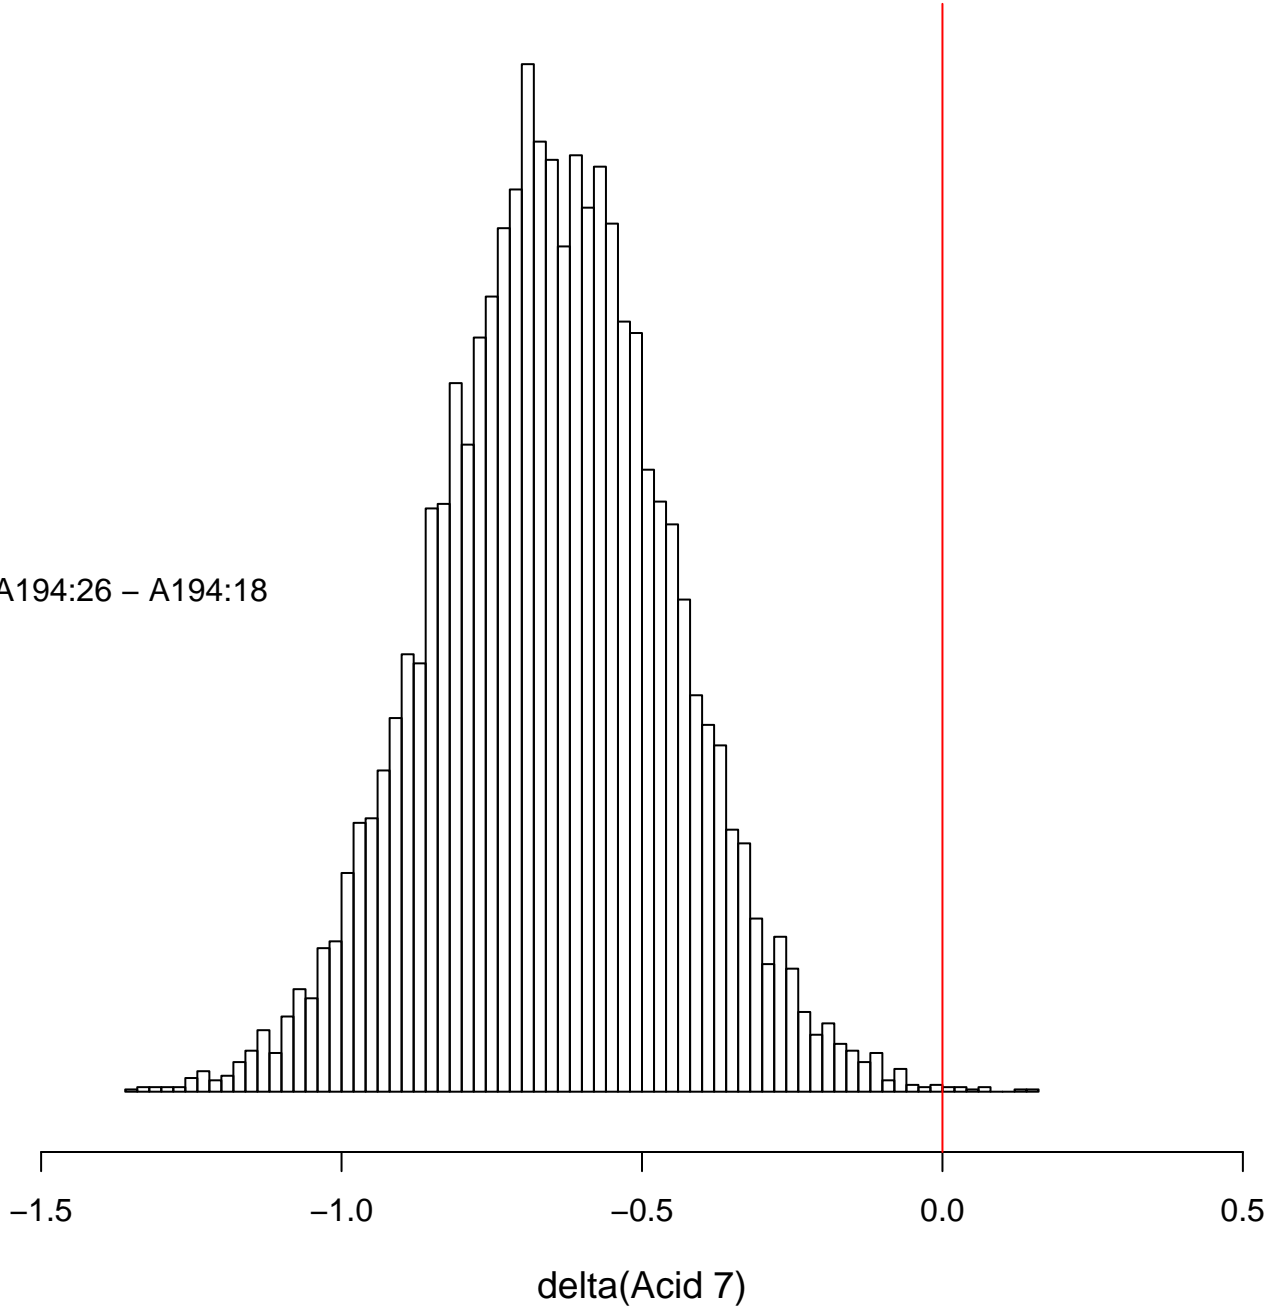



A194:26

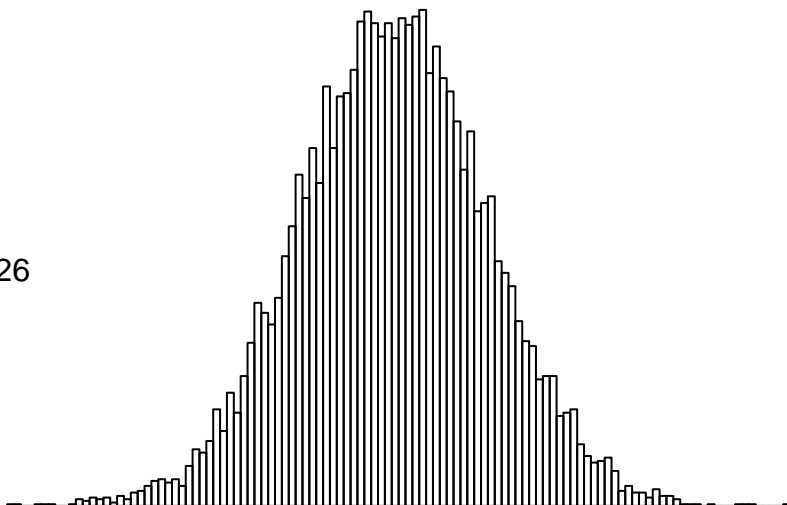

A194:18

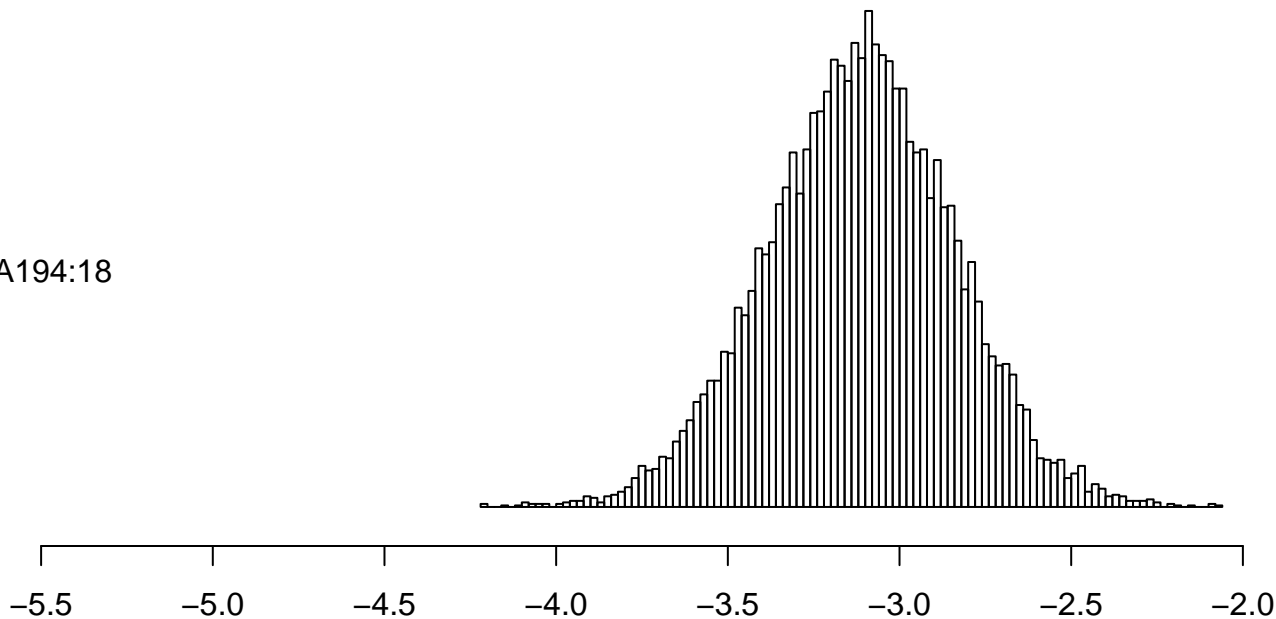

Acid 8

A194:26 – A194:18

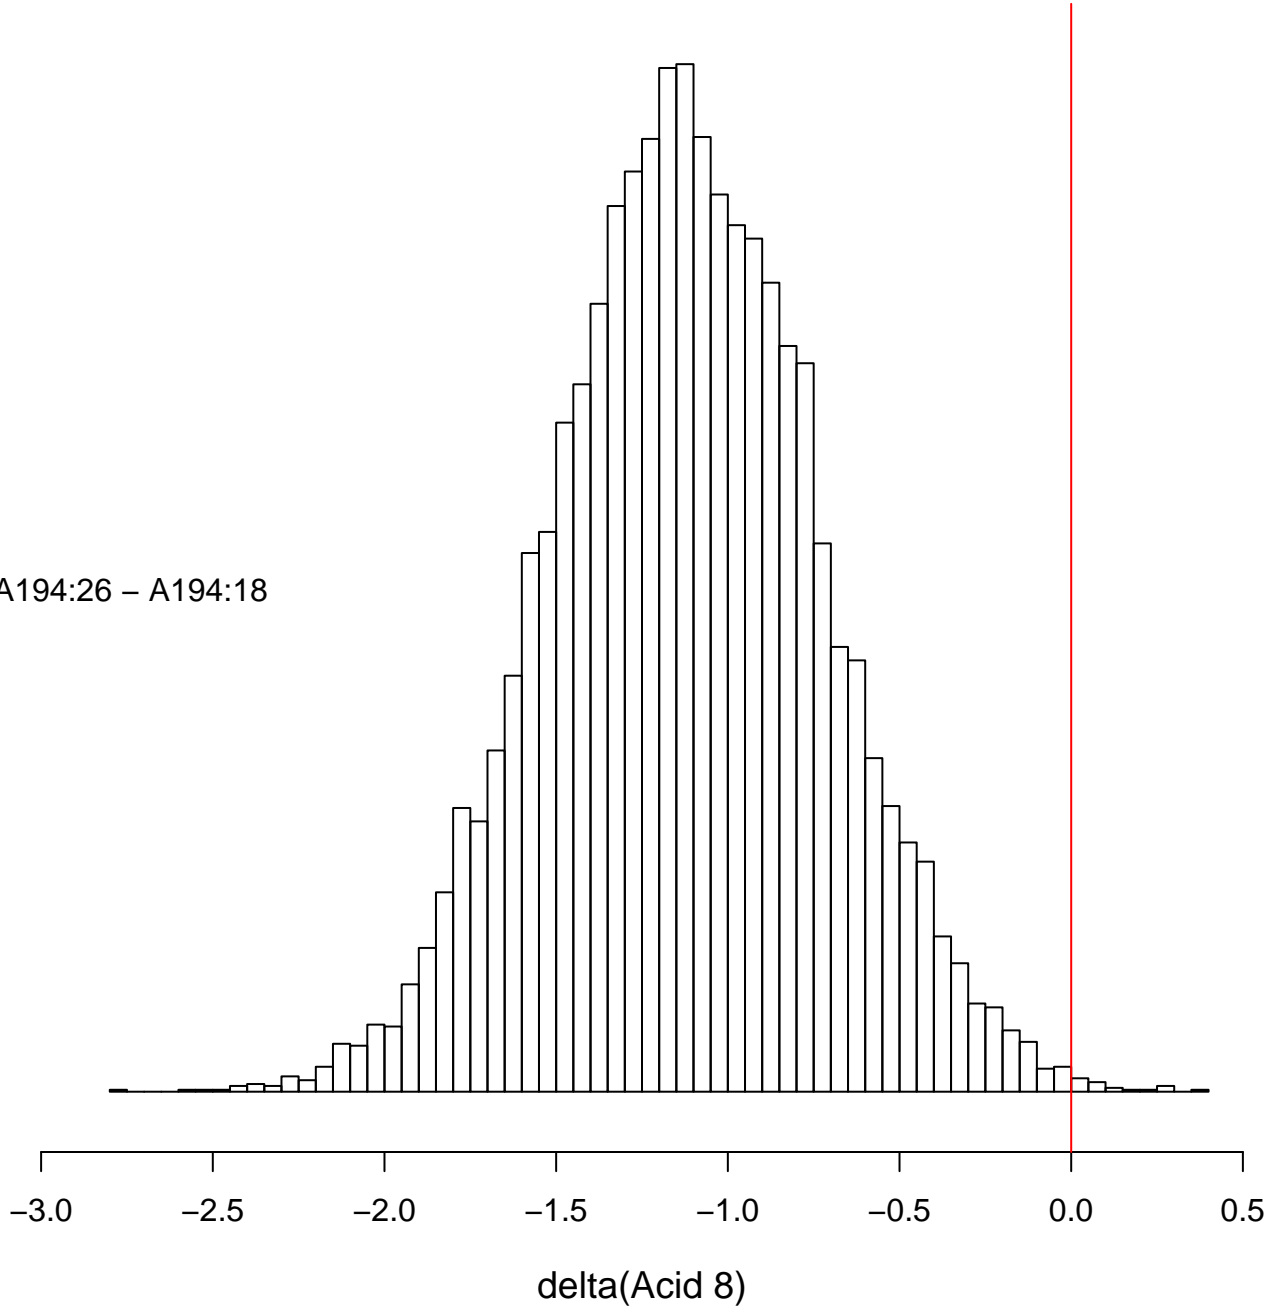

A194:26

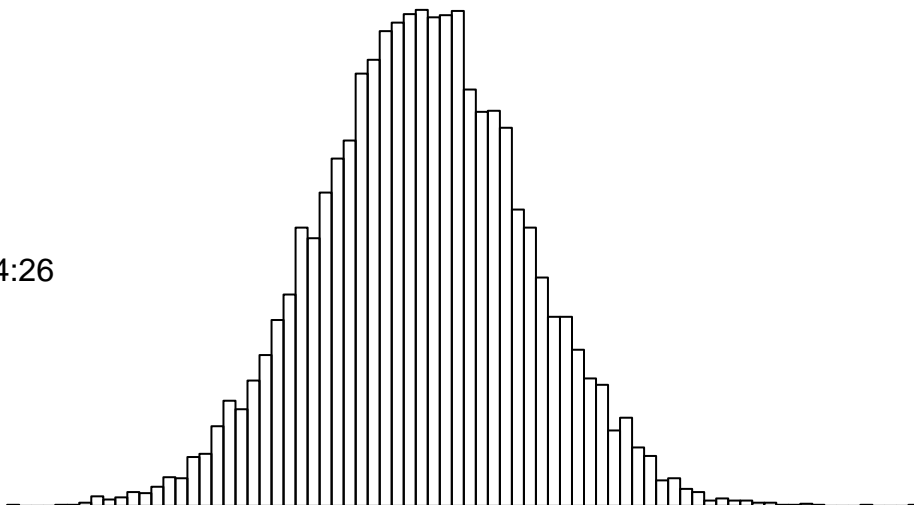

A194:18

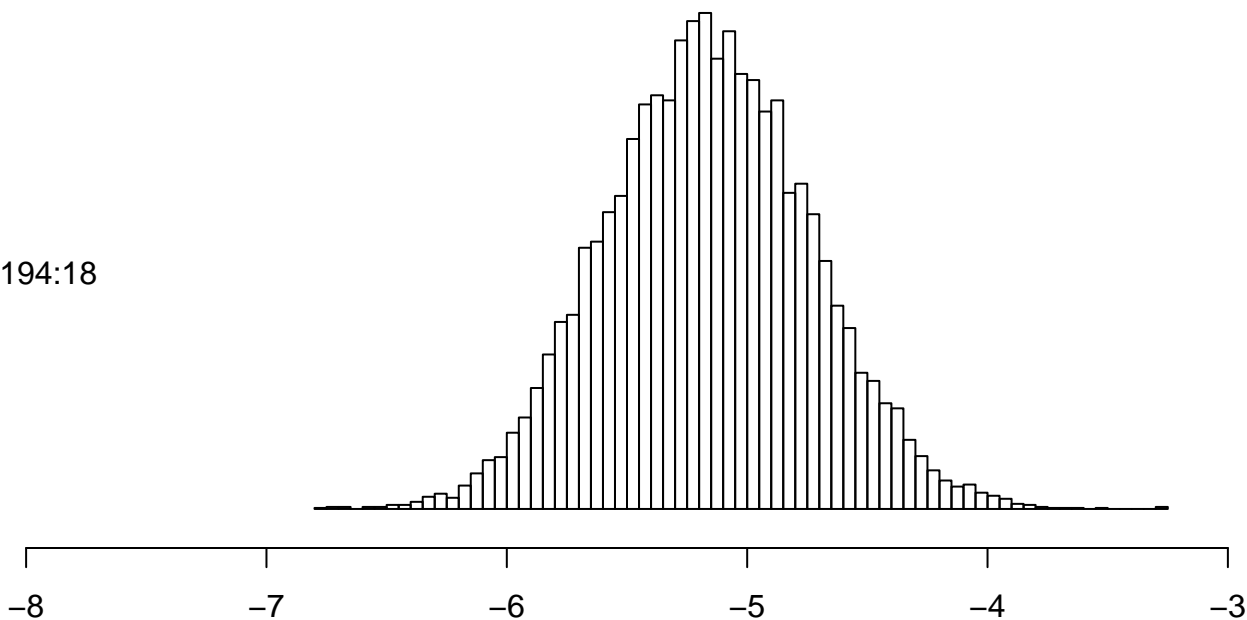

Acid 9

A194:26 – A194:18

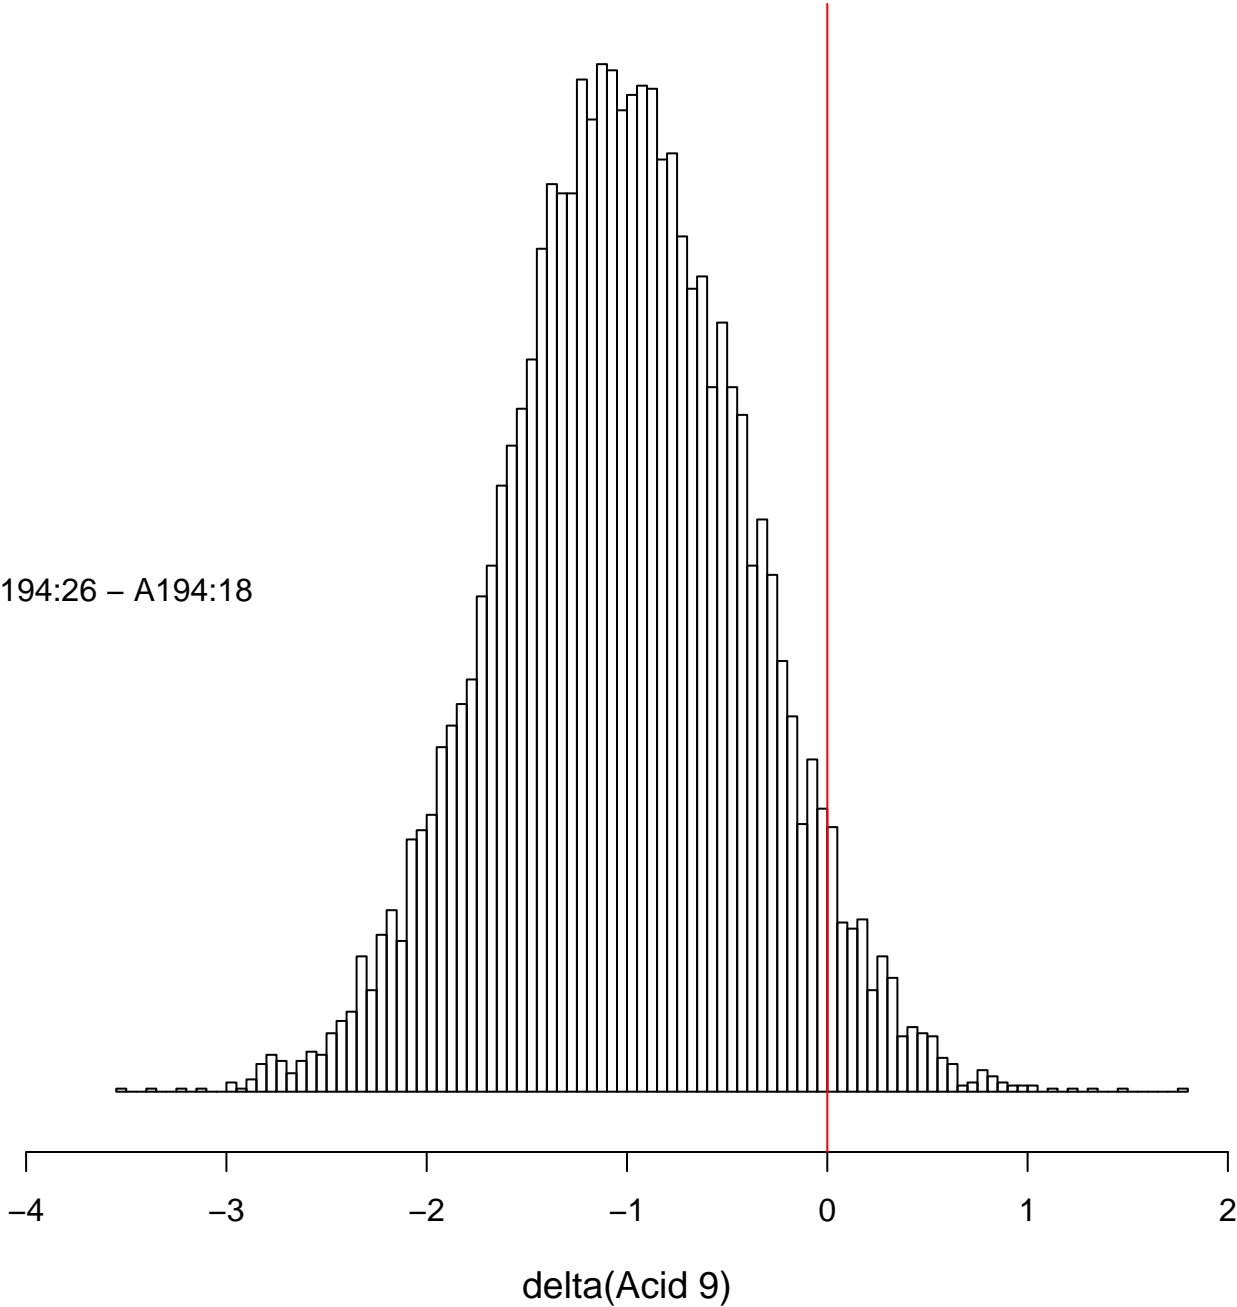

A194:26

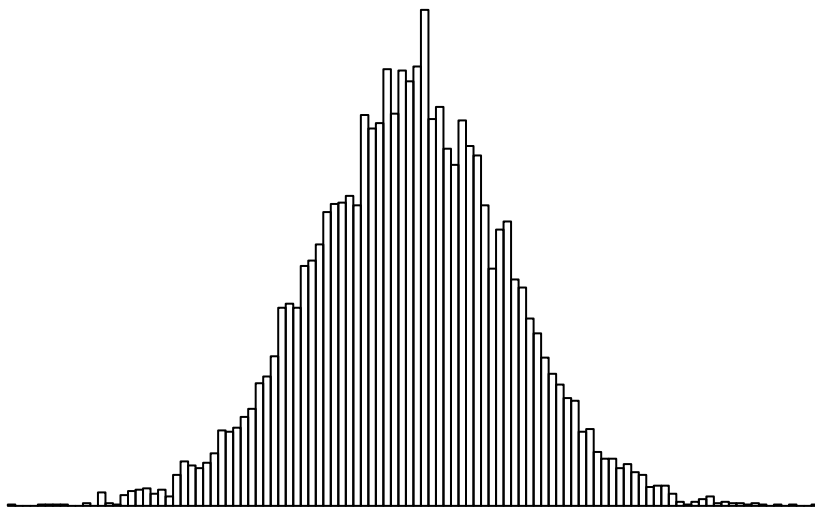

A194:18

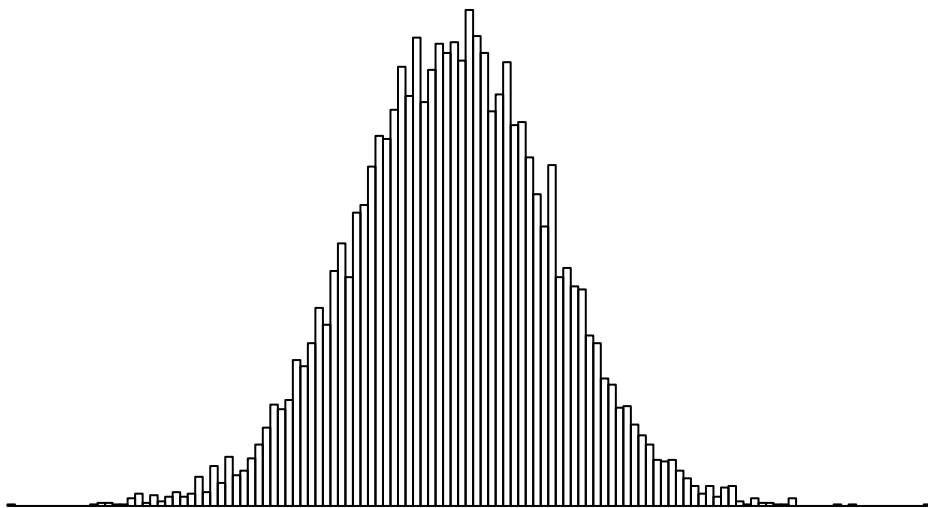

-10

-8

-6

-4

Acid 10

A194:26 – A194:18

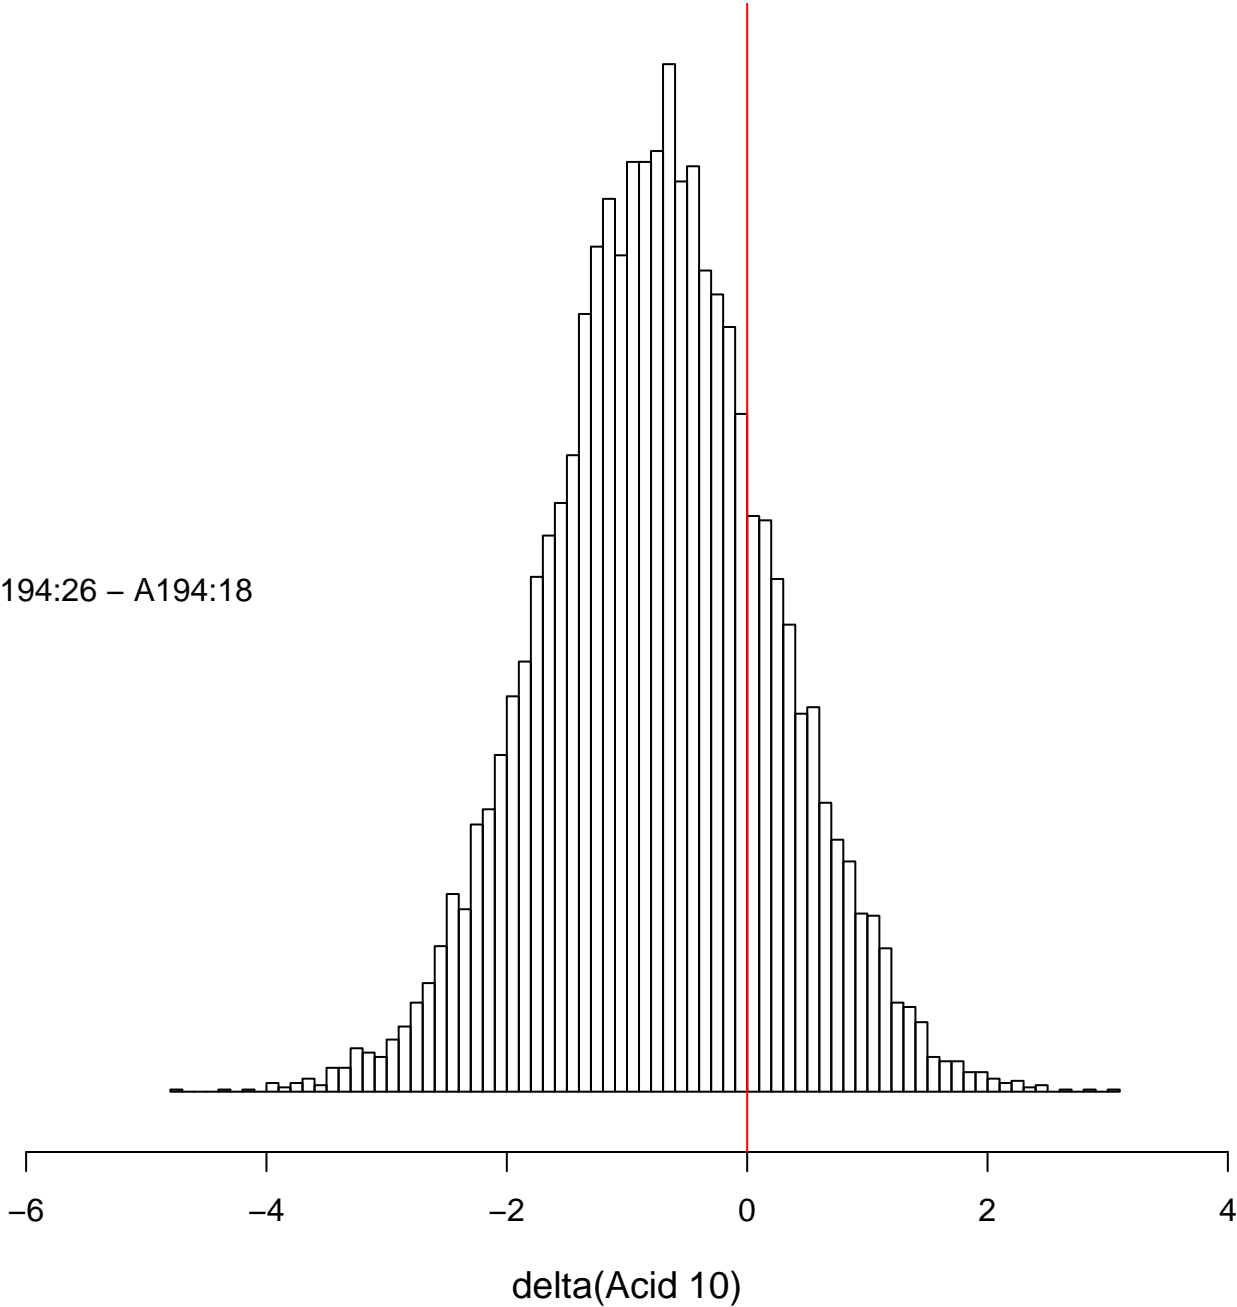

A194:26

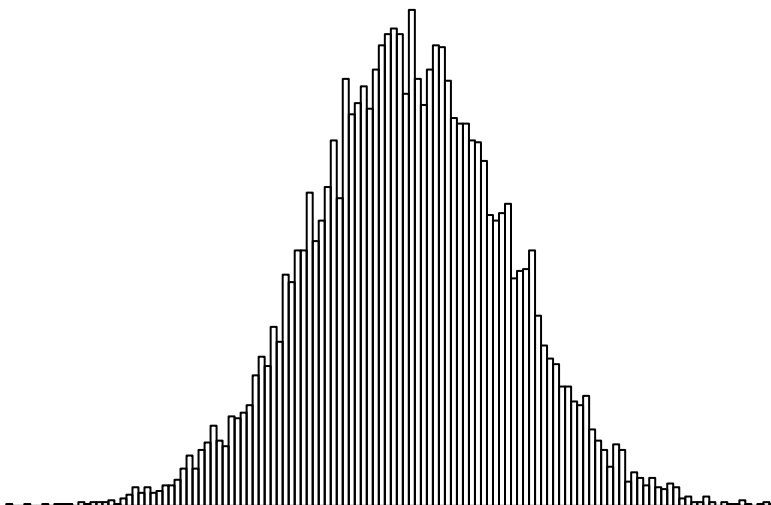

A194:18

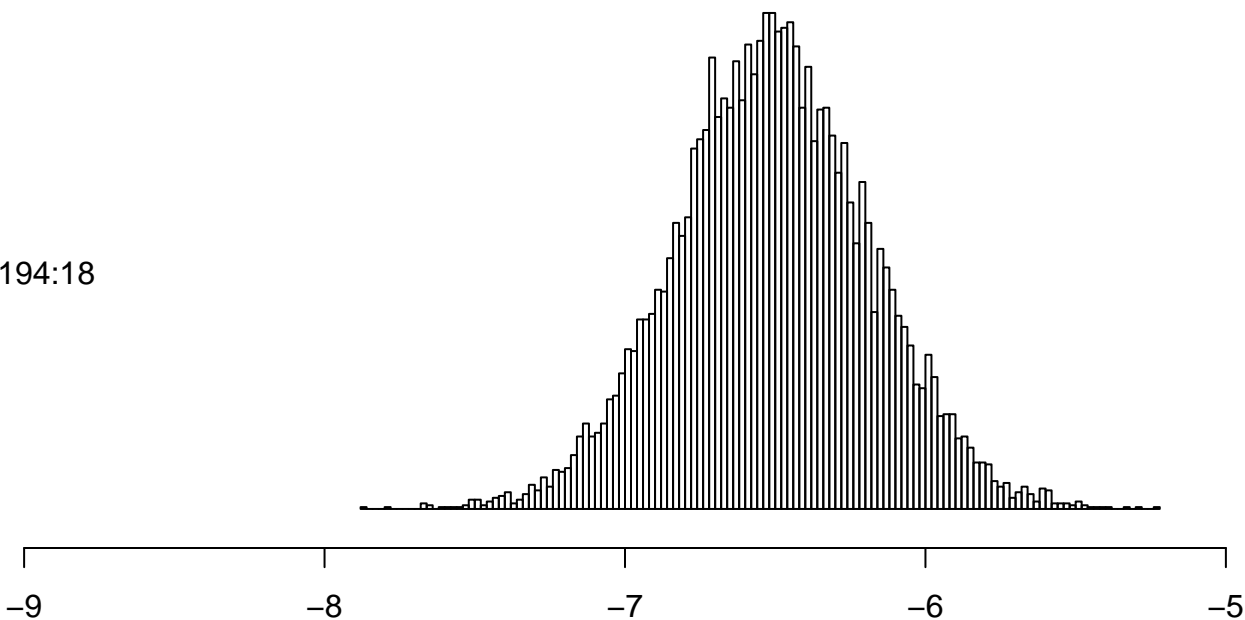

Acid 11

A194:26 – A194:18

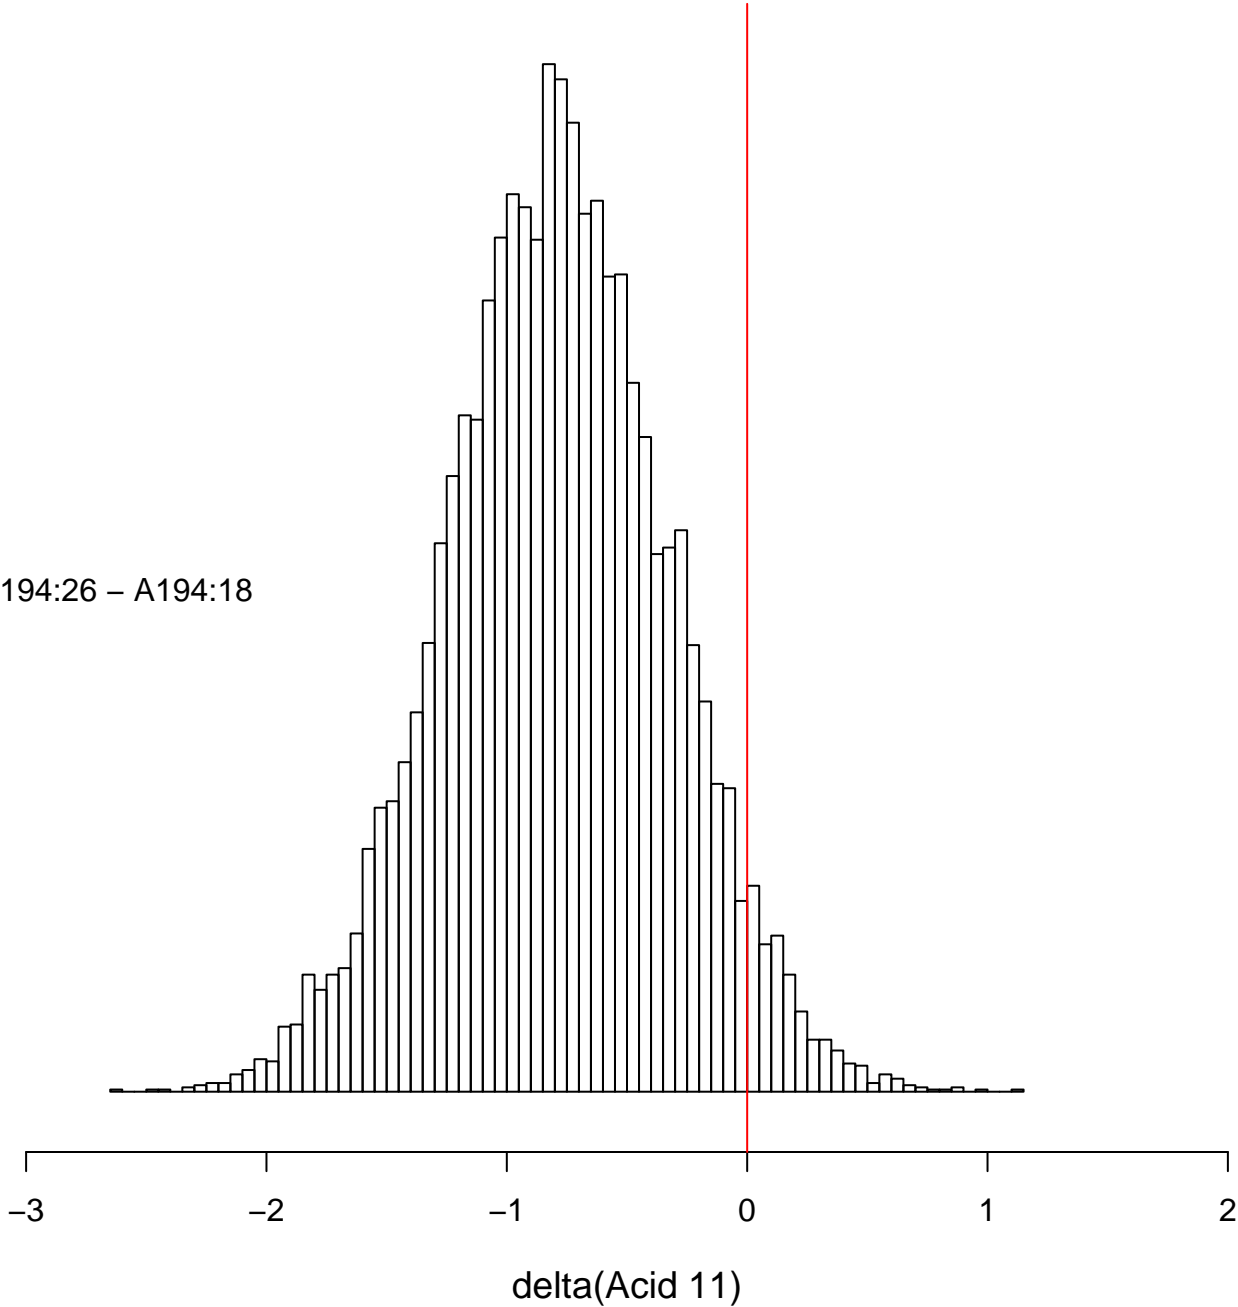



A194:26

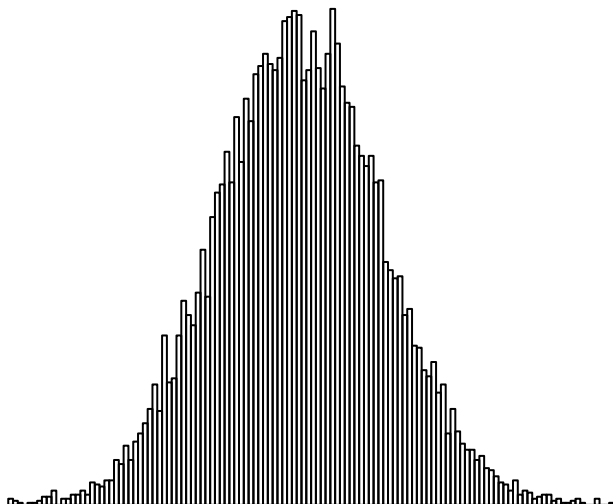

A194:18

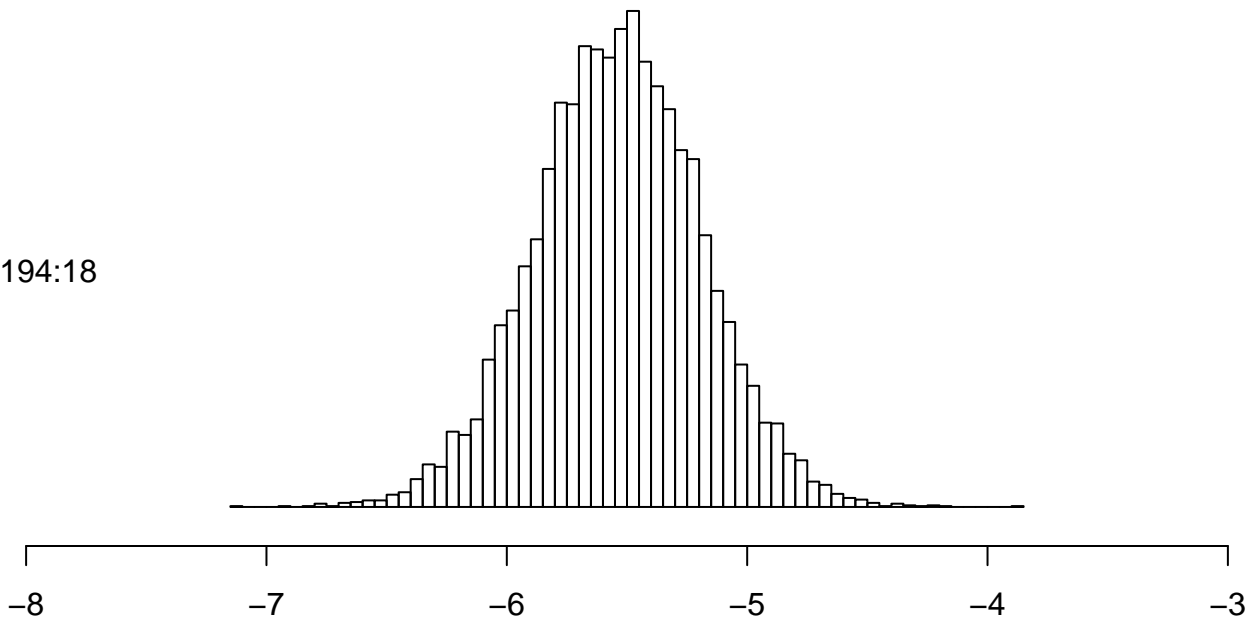

Acid 12

A194:26 – A194:18

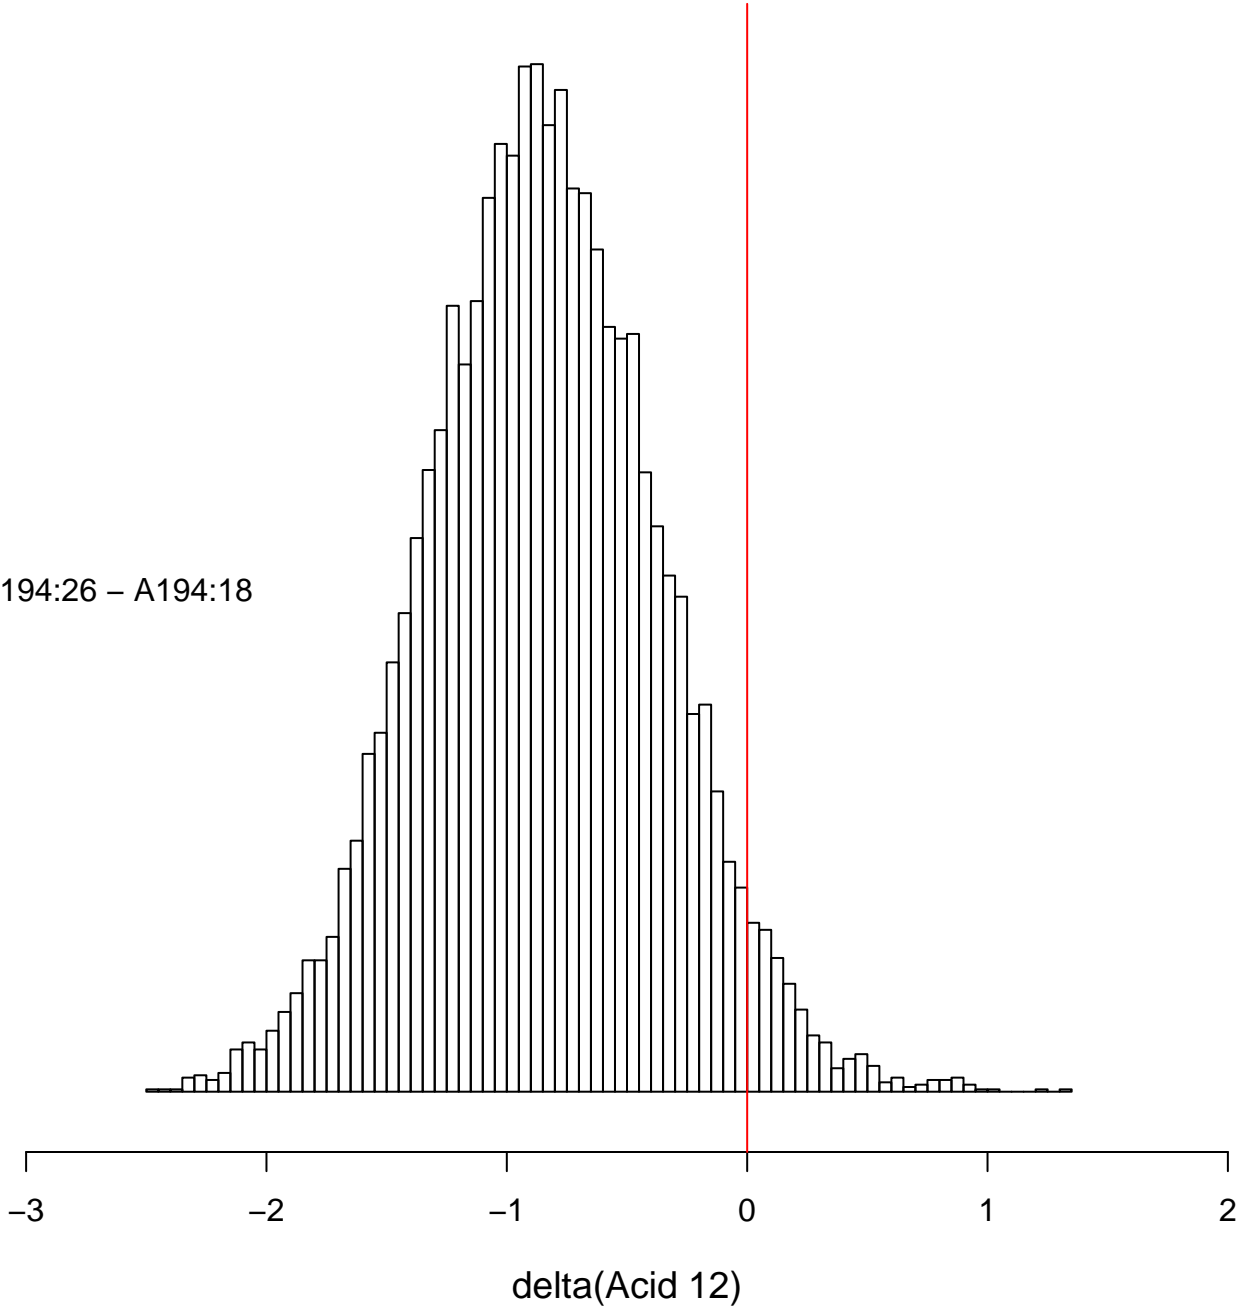

A194:26

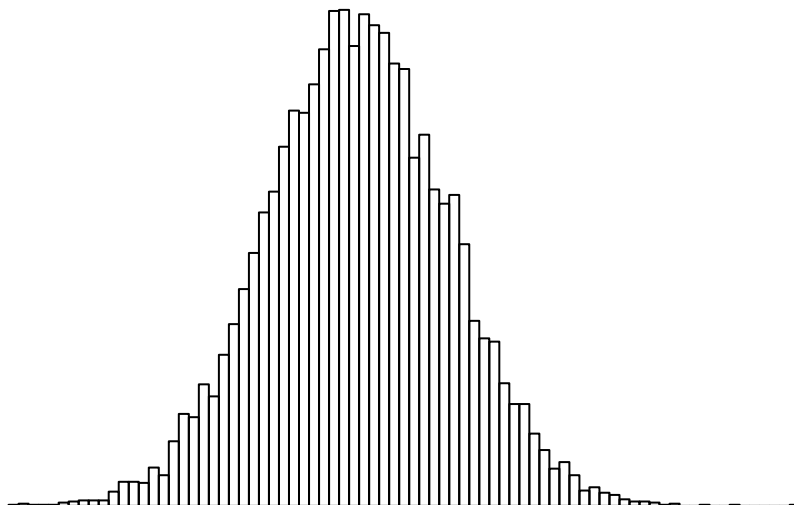

A194:18

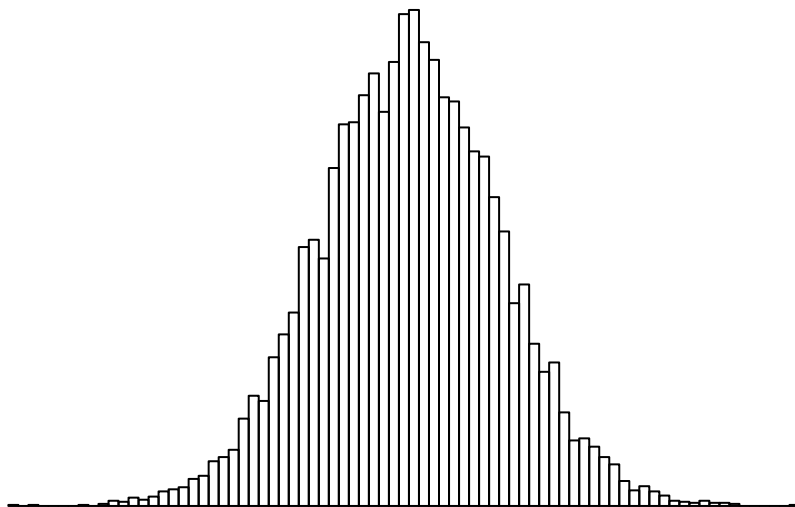

-10

-9

-8

-7

-6

-5

-4

Acid 13

A194:26 – A194:18

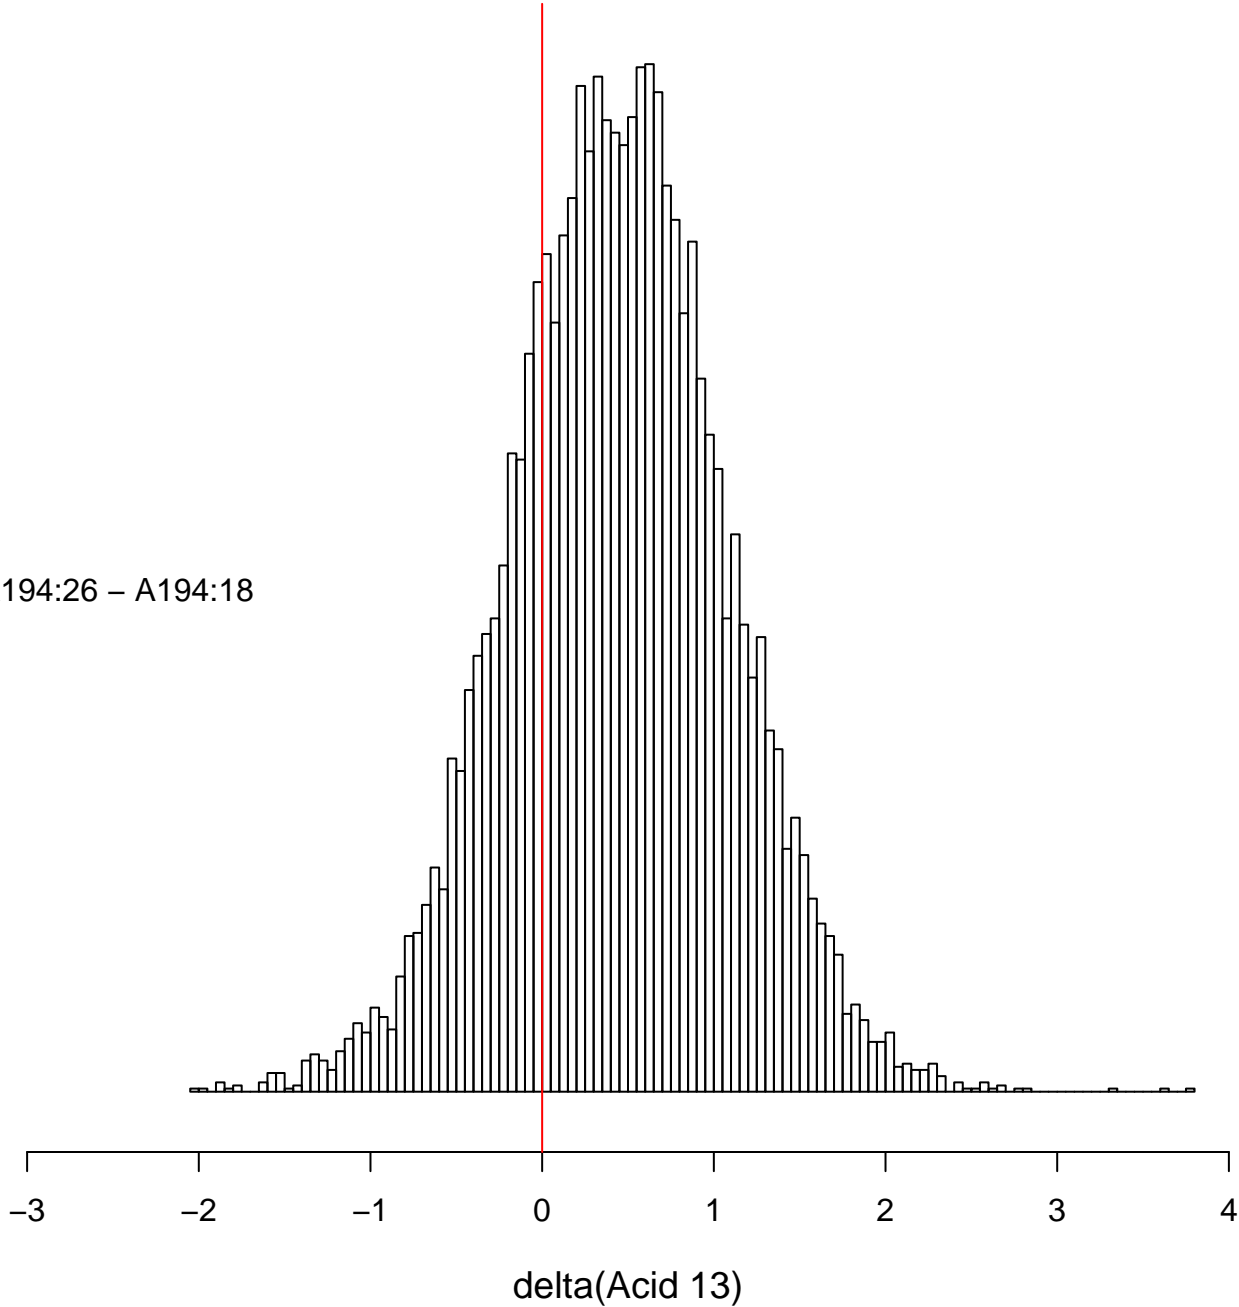

A194:26

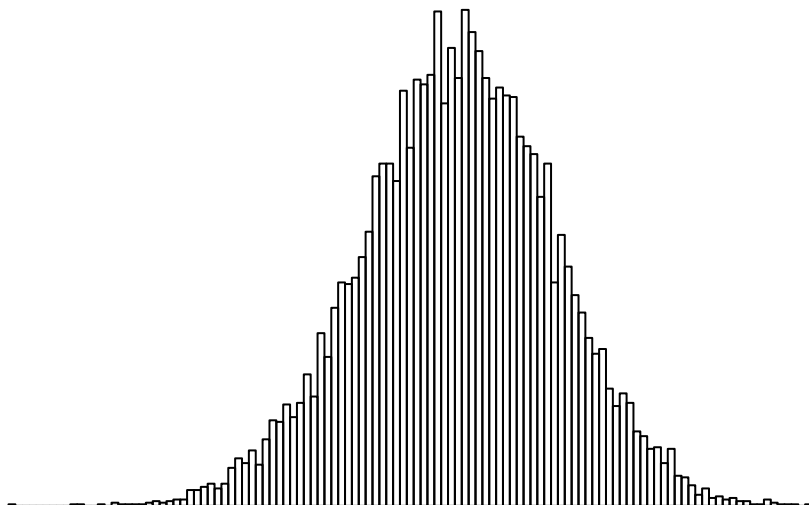

A194:18

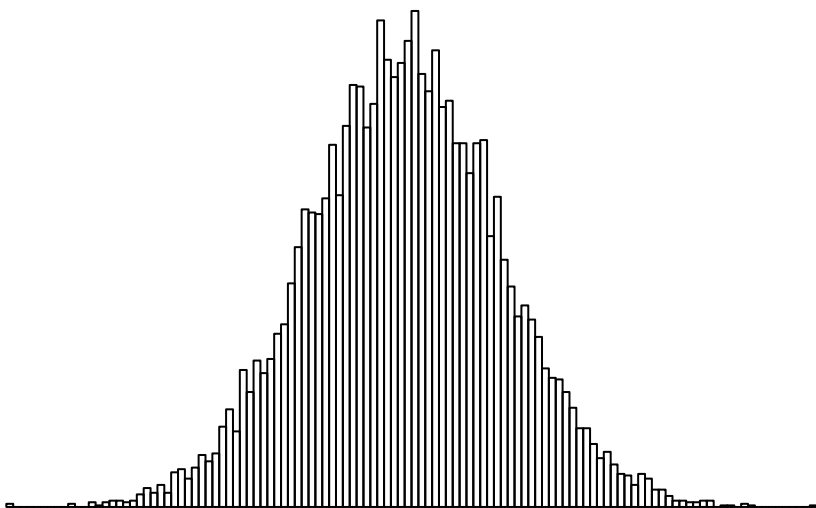

-9.0      -8.5      -8.0      -7.5      -7.0      -6.5      -6.0      -5.5

Acid 14

A194:26 – A194:18

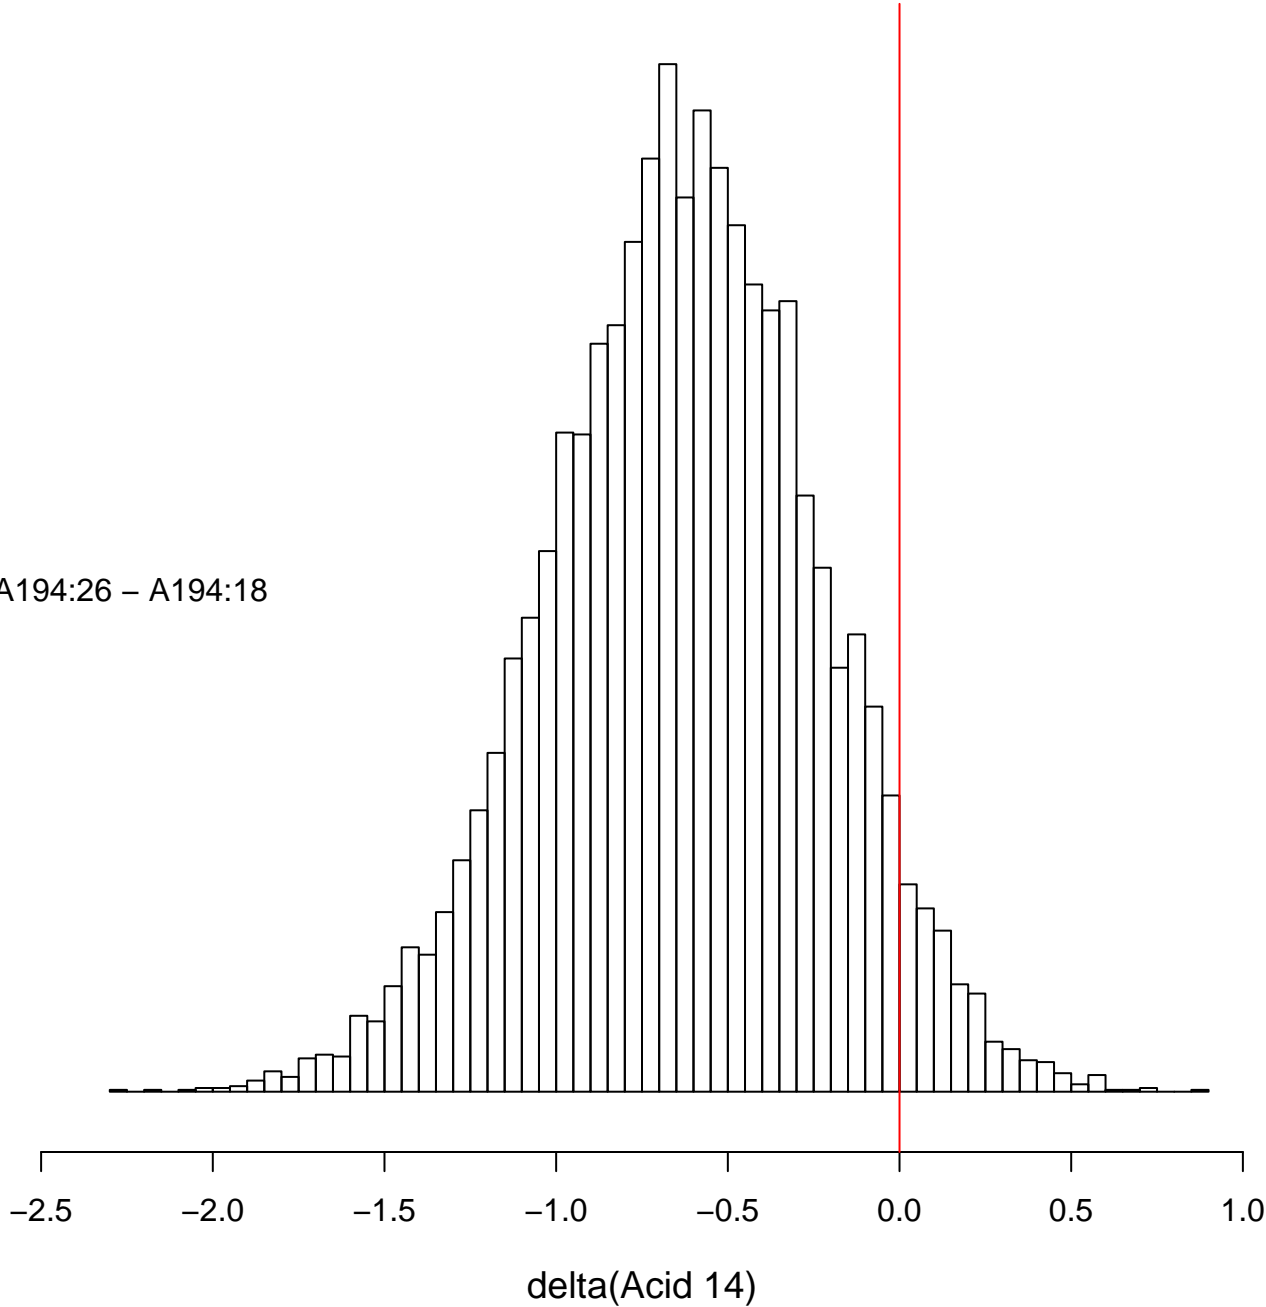

Supplement: s1 [file s1]
