# Supplementary material for: Taxonomic and Environmental Variation of Metabolite Profiles in Marine Dinoflagellates of the Genus Symbiodinium
Source: MDPI journal article supplement (doi:10.3390/metabo5010074), 2015-02-16

A194:18

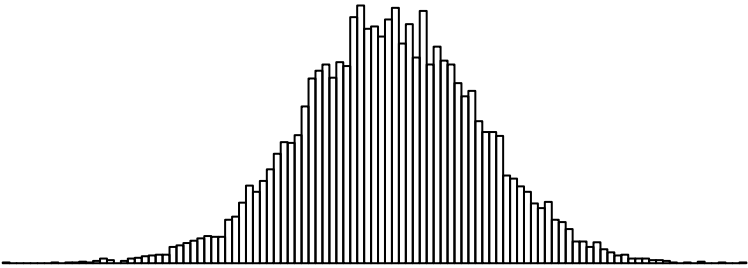

B184:18

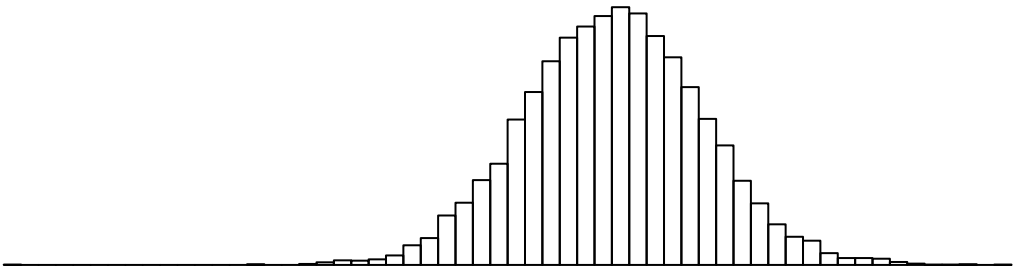

B224:18

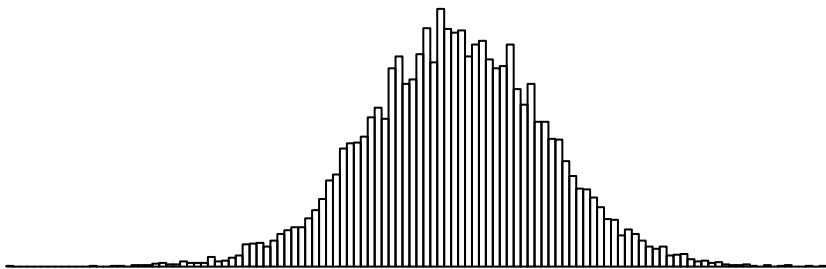

D206:18

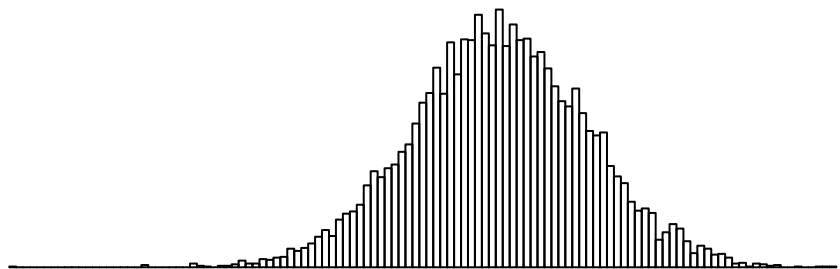

-5.5      -5.0      -4.5      -4.0      -3.5      -3.0      -2.5      -2.0

Amino Acid 2

A194:18 – B184:18

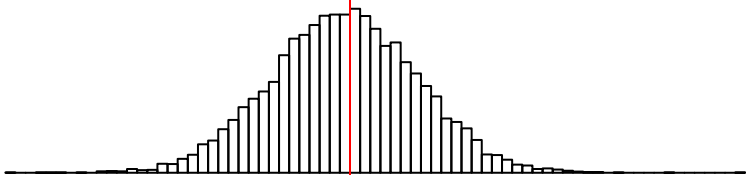

A194:18 – B224:18

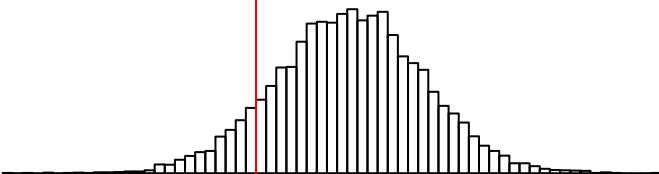

A194:18 – D206:18

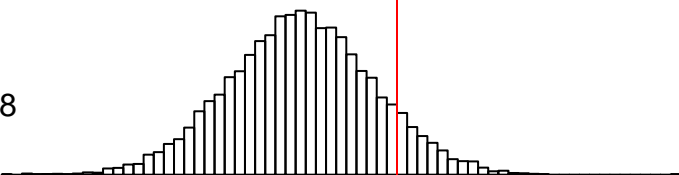

B184:18 – B224:18

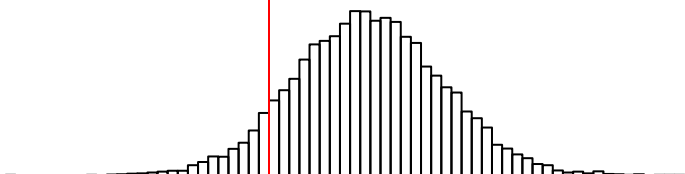

B184:18 – D206:18

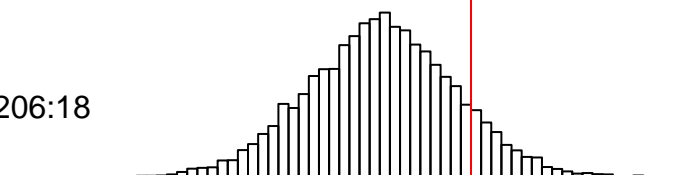

B224:18 – D206:18

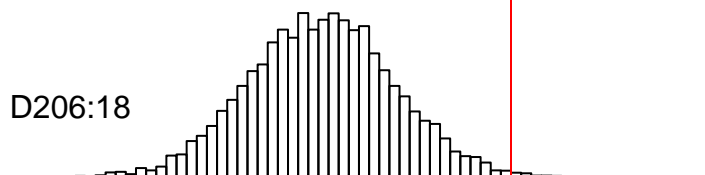

delta(Amino Acid 2)

A194:18

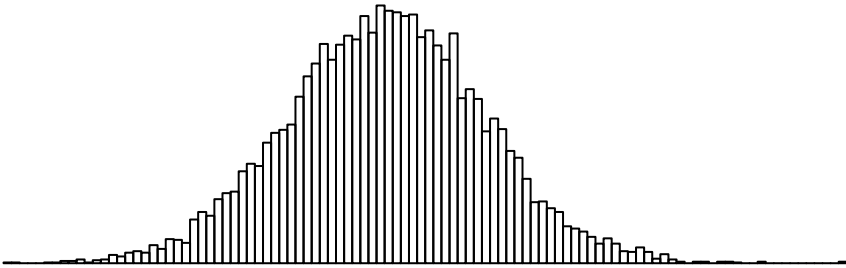

B184:18

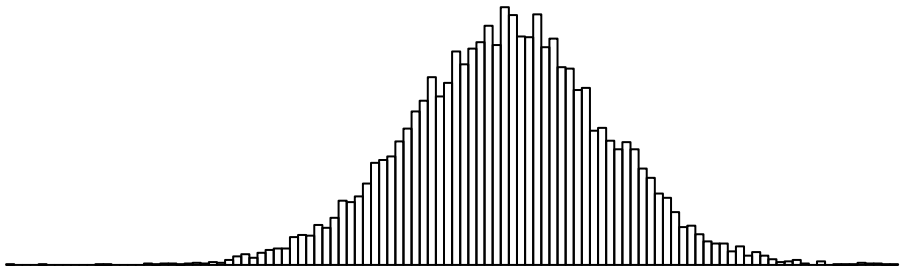

B224:18

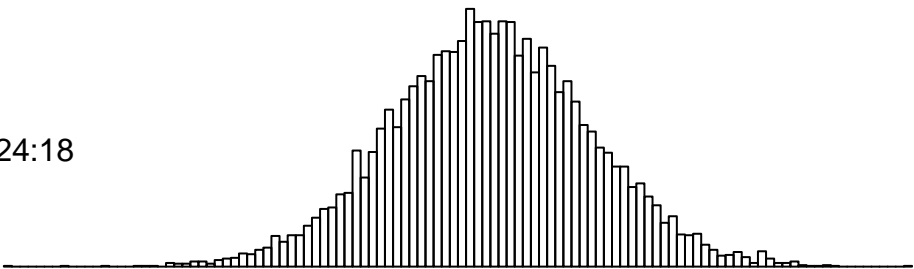

D206:18

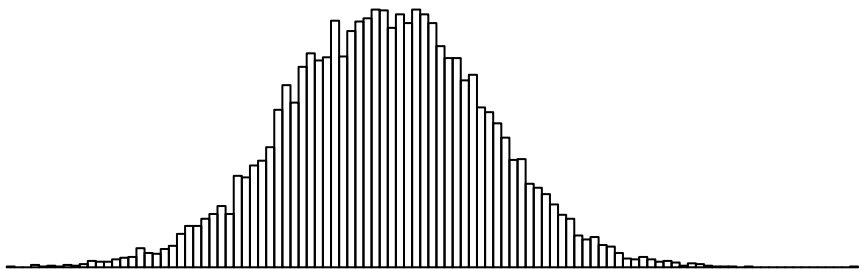

-7.0 -6.5 -6.0 -5.5 -5.0 -4.5 -4.0

Amino Acid 3

A194:18 – B184:18

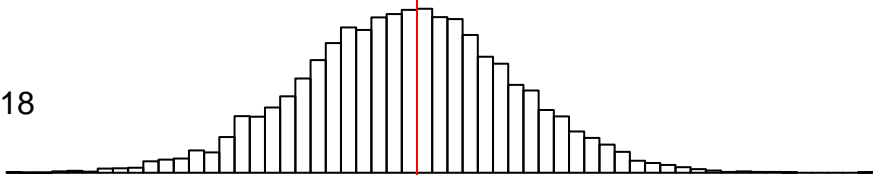

A194:18 – B224:18

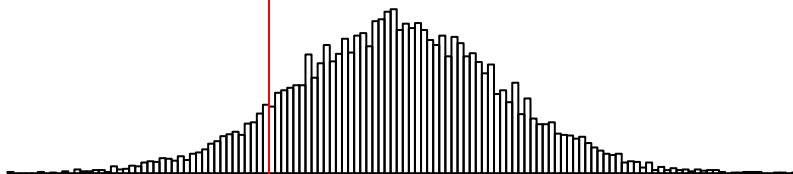

A194:18 – D206:18

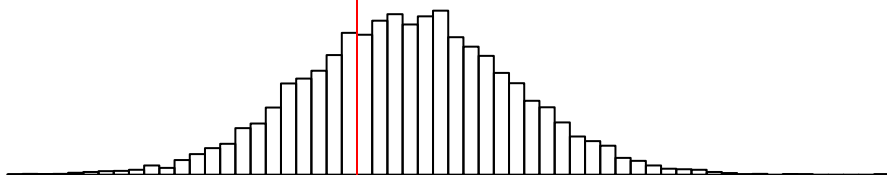

B184:18 – B224:18

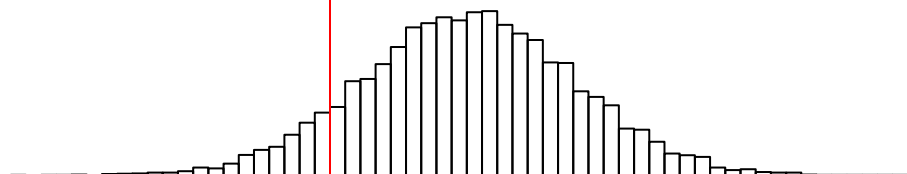

B184:18 – D206:18

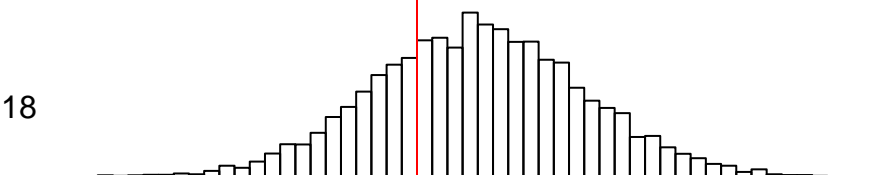

B224:18 – D206:18

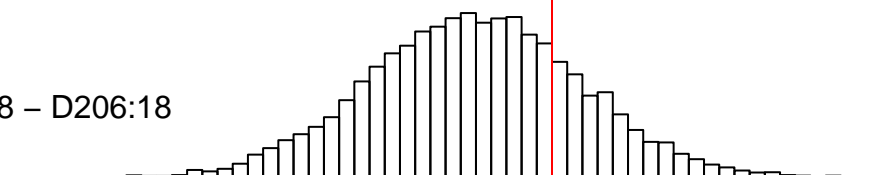

-2 -1 0 1 2

delta(Amino Acid 3)

A194:18

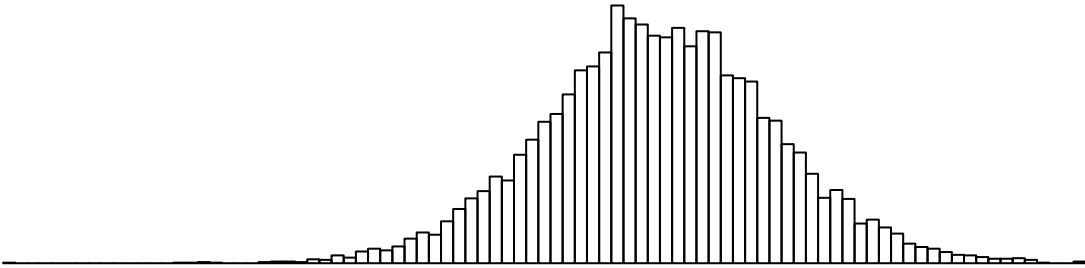

B184:18

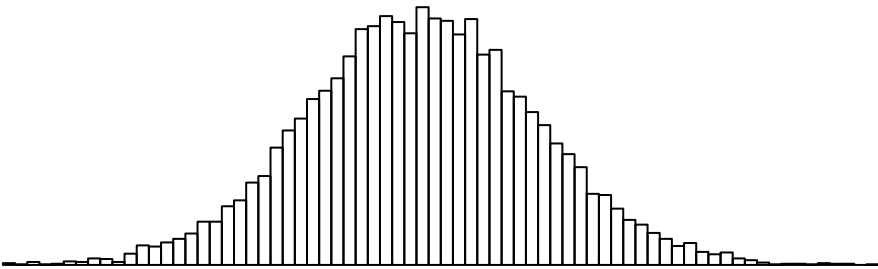

B224:18

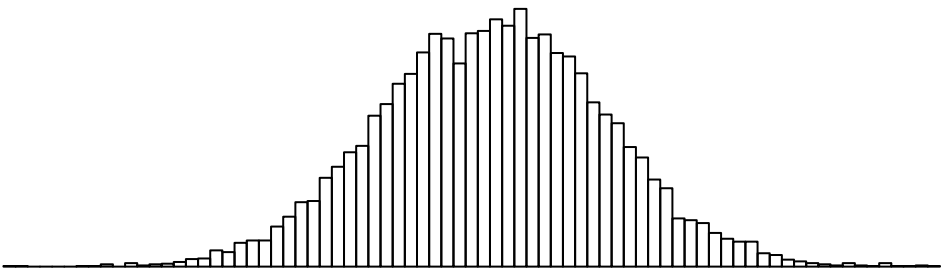

D206:18

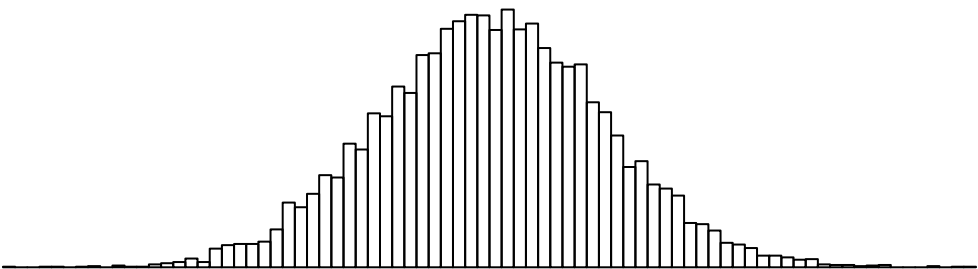

-8      -7      -6      -5      -4      -3

Alanine

A194:18 – B184:18

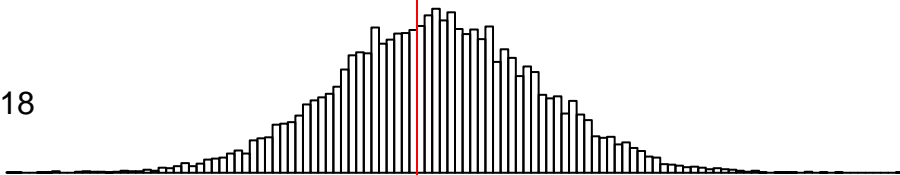

A194:18 – B224:18

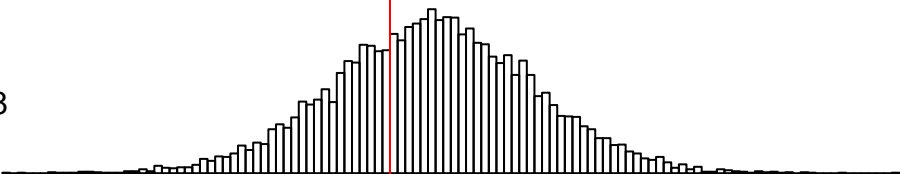

A194:18 – D206:18

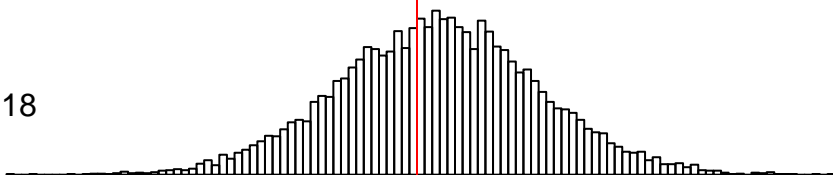

B184:18 – B224:18

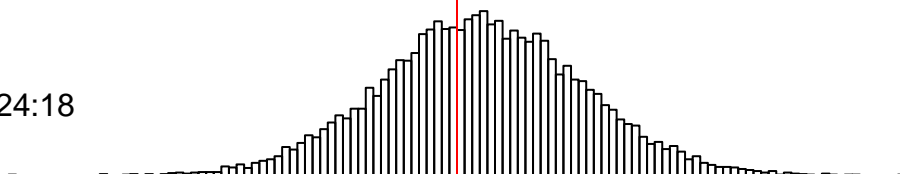

B184:18 – D206:18

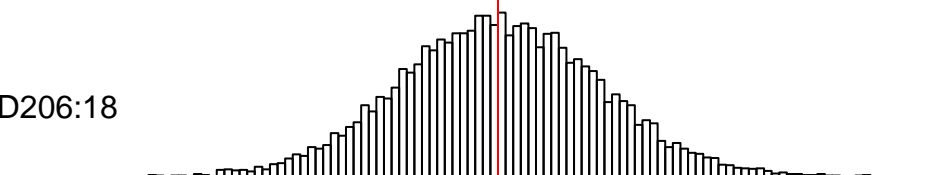

B224:18 – D206:18

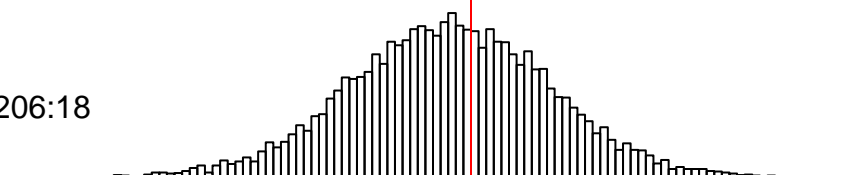

-4 -2 0 2 4

delta(Alanine)

A194:18

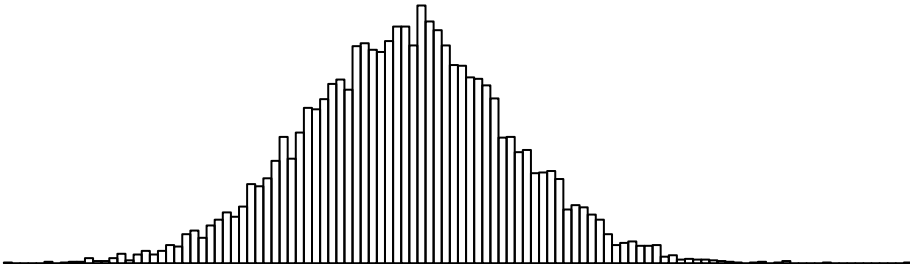

B184:18

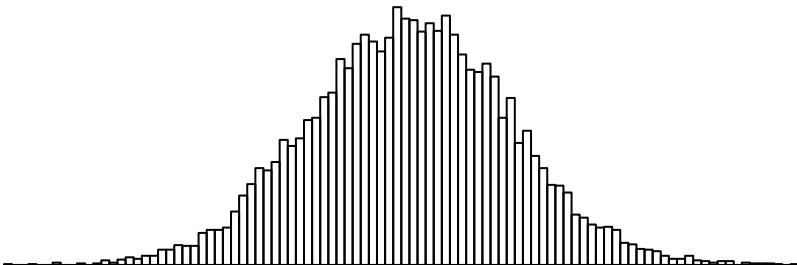

B224:18

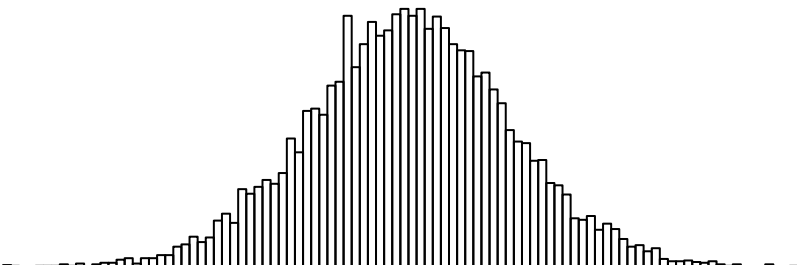

D206:18

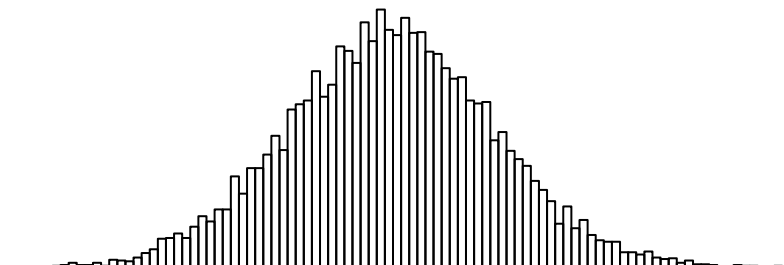

-8.0      -7.5      -7.0      -6.5      -6.0      -5.5      -5.0

Amino Acid 4

A194:18 – B184:18

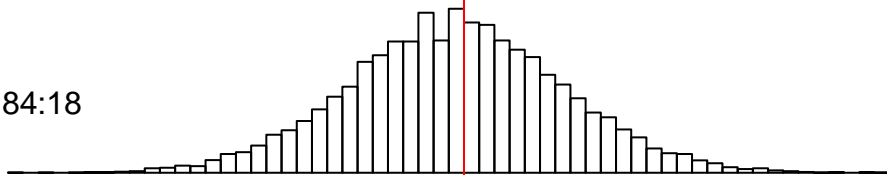

A194:18 – B224:18

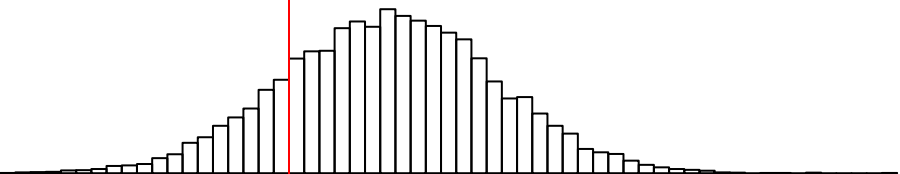

A194:18 – D206:18

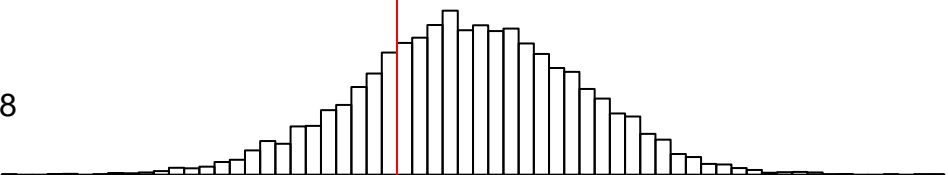

B184:18 – B224:18

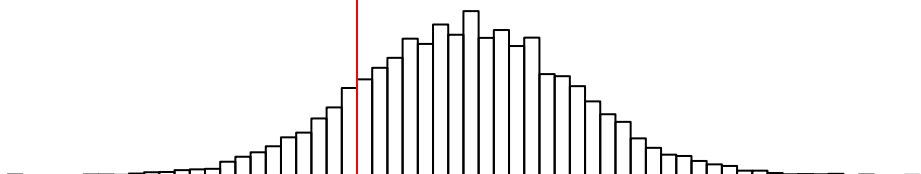

B184:18 – D206:18

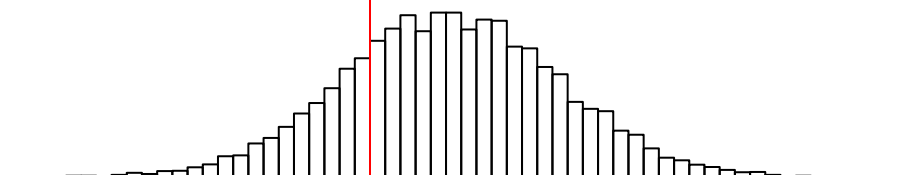

B224:18 – D206:18

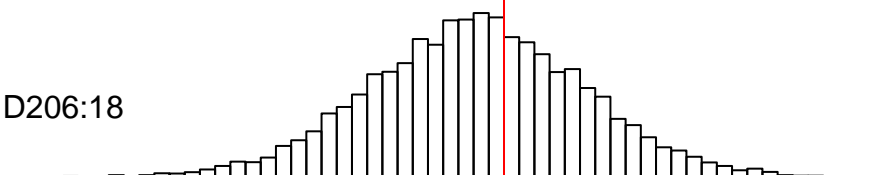

-2 -1 0 1 2

delta(Amino Acid 4)



A194:18

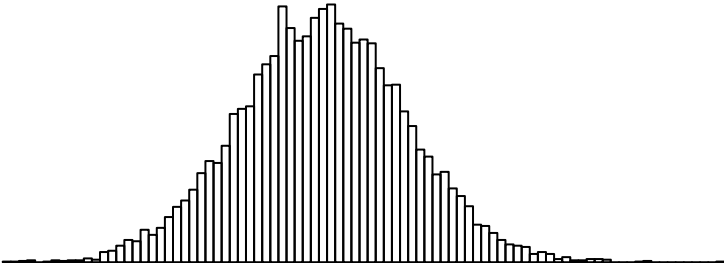

B184:18

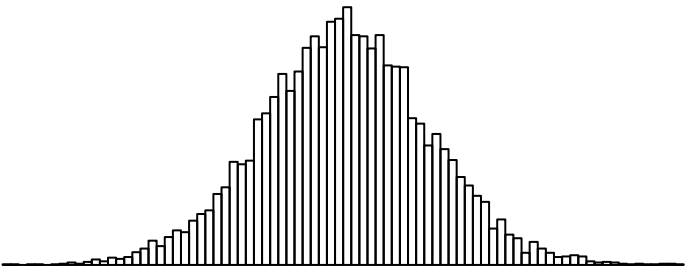

B224:18

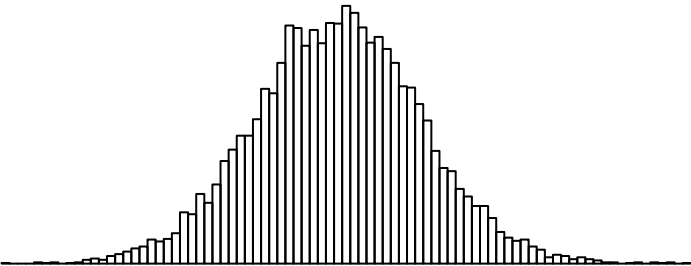

D206:18

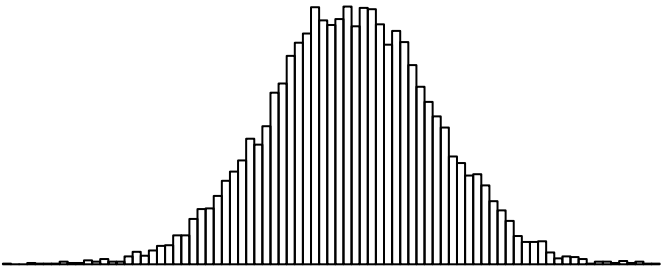

-8.0 -7.5 -7.0 -6.5 -6.0 -5.5 -5.0

Amino Acid 6

A194:18 – B184:18

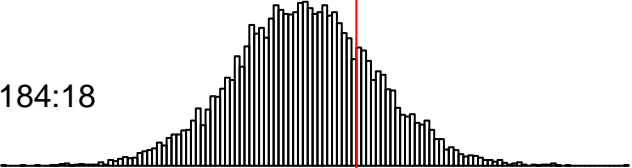

A194:18 – B224:18

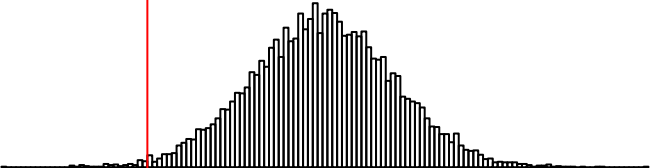

A194:18 – D206:18

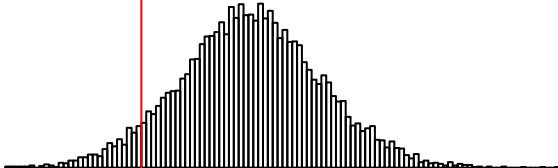

B184:18 – B224:18

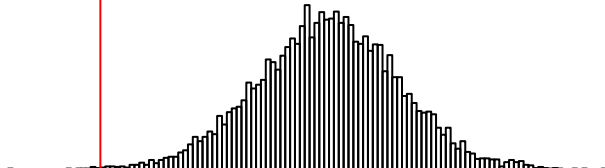

B184:18 – D206:18

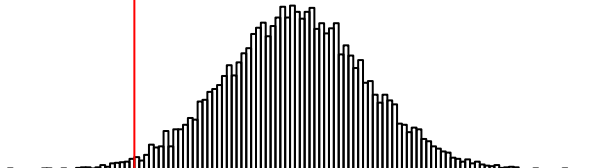

B224:18 – D206:18

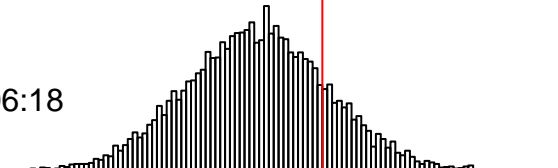

-2 -1 0 1 2 3

delta(Amino Acid 6)

A194:18

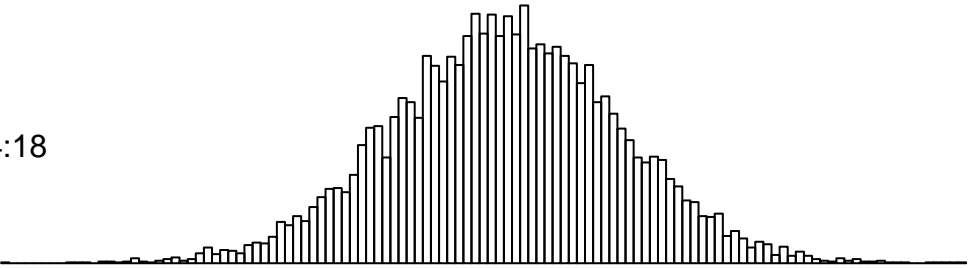

B184:18

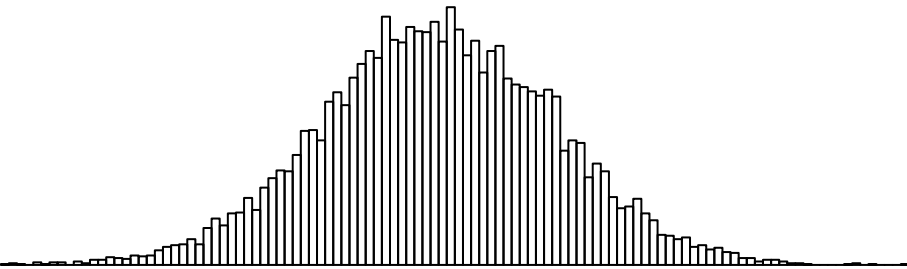

B224:18

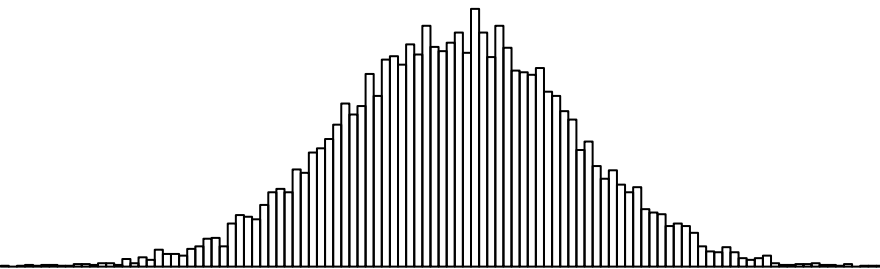

D206:18

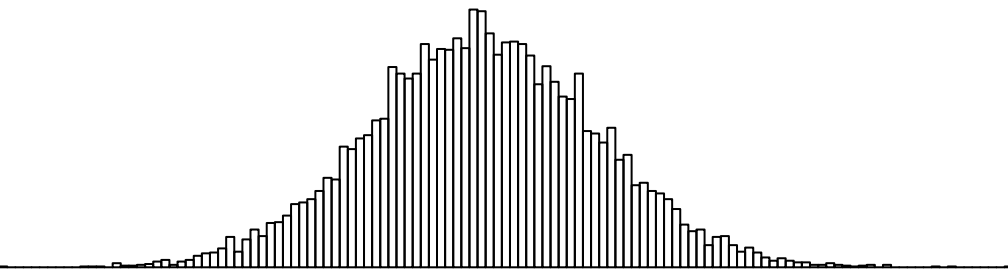

-8.5      -8.0      -7.5      -7.0      -6.5      -6.0      -5.5

Valine

A194:18 – B184:18

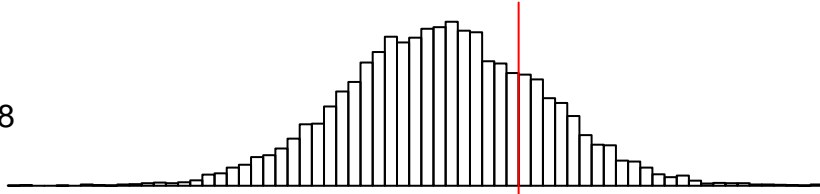

A194:18 – B224:18

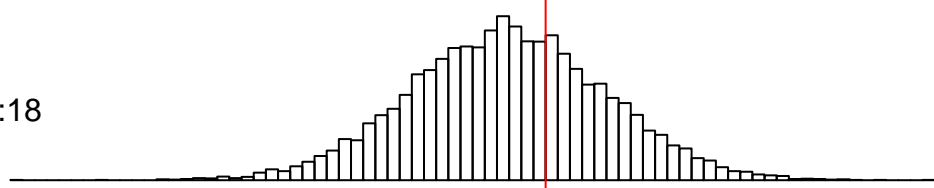

A194:18 – D206:18

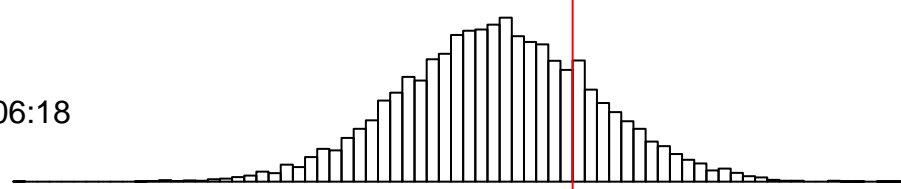

B184:18 – B224:18

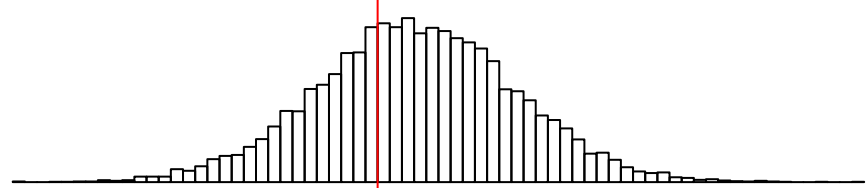

B184:18 – D206:18

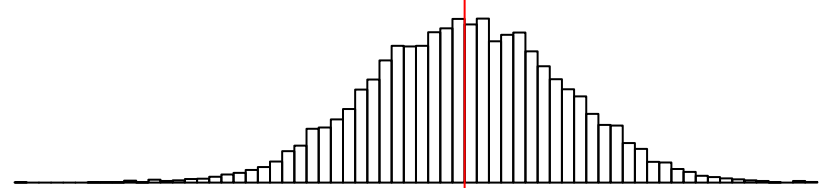

B224:18 – D206:18

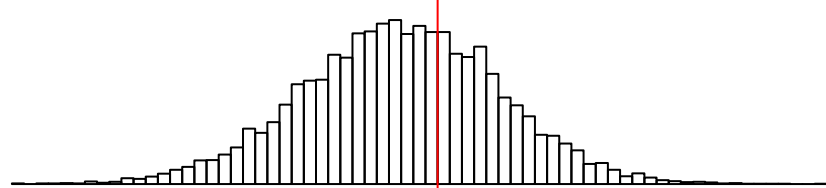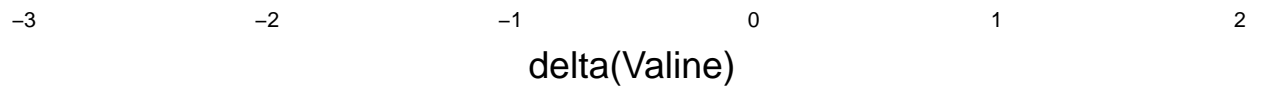

A194:18

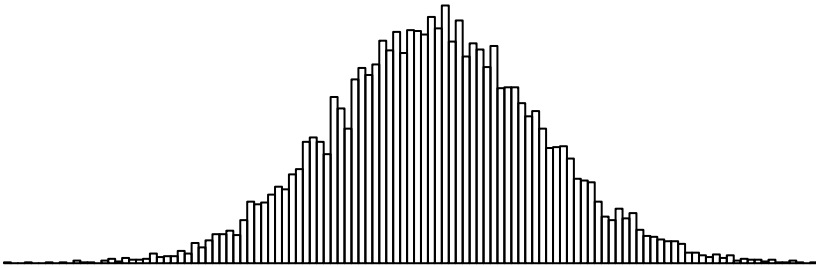

B184:18

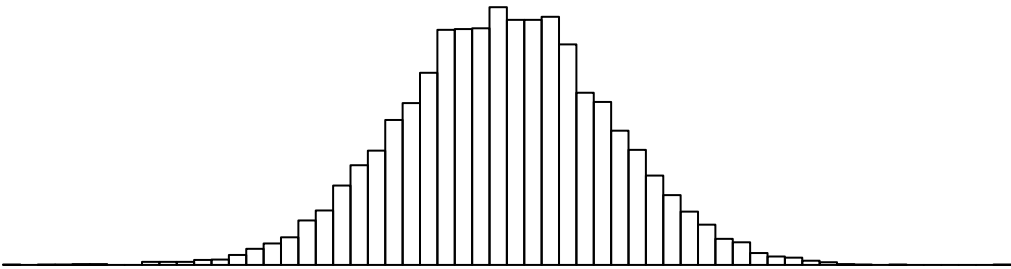

B224:18

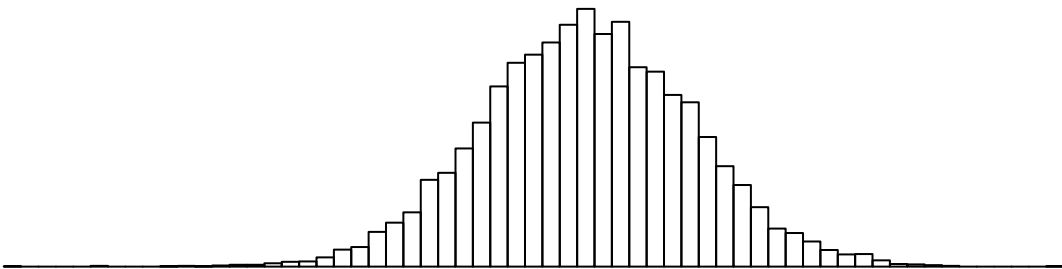

D206:18

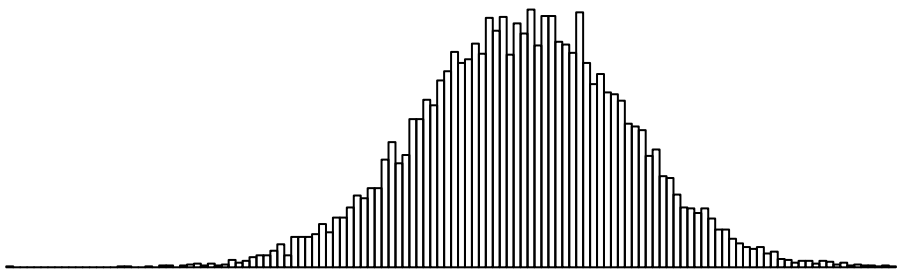

-7.5      -7.0      -6.5      -6.0      -5.5      -5.0      -4.5      -4.0

Amino Acid 7

A194:18 – B184:18

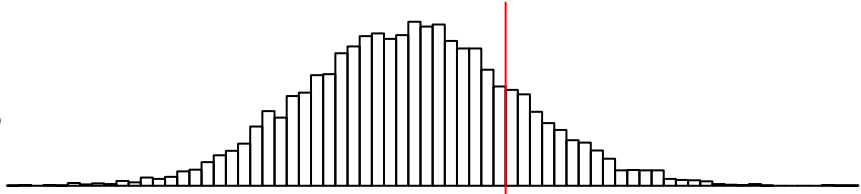

A194:18 – B224:18

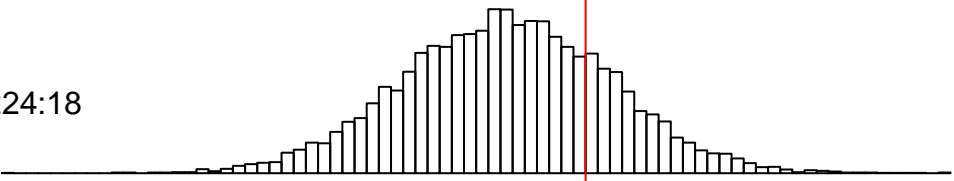

A194:18 – D206:18

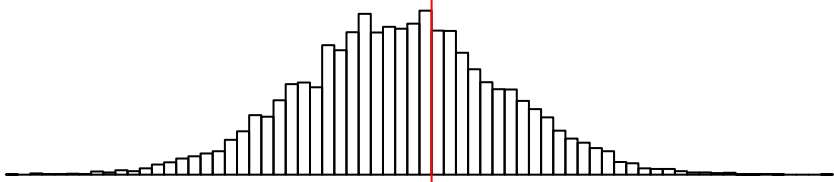

B184:18 – B224:18

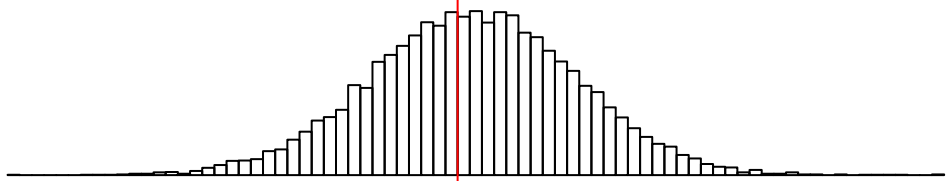

B184:18 – D206:18

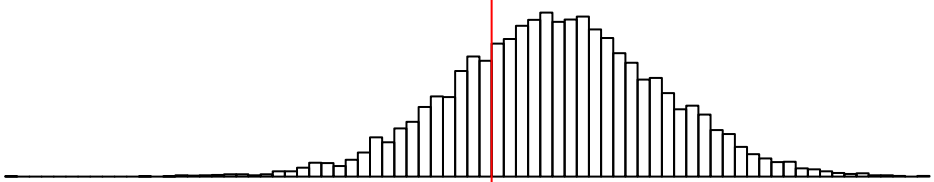

B224:18 – D206:18

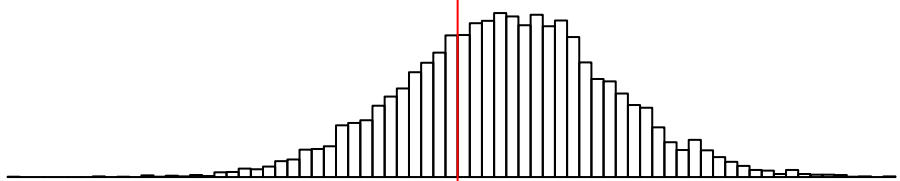

-3 -2 -1 0 1 2

delta(Amino Acid 7)

A194:18

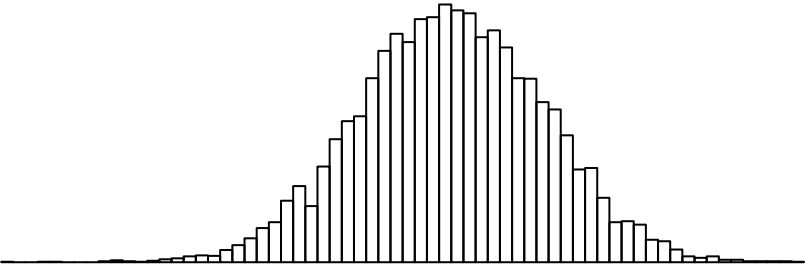

B184:18

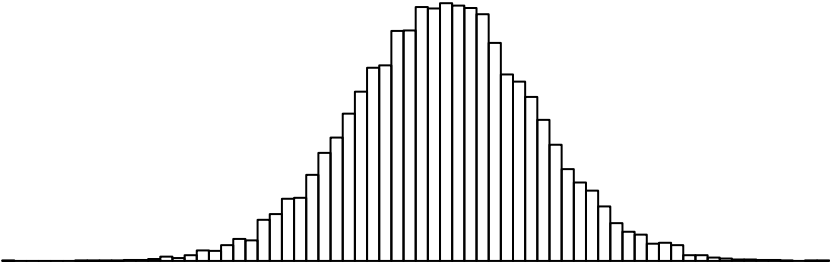

B224:18

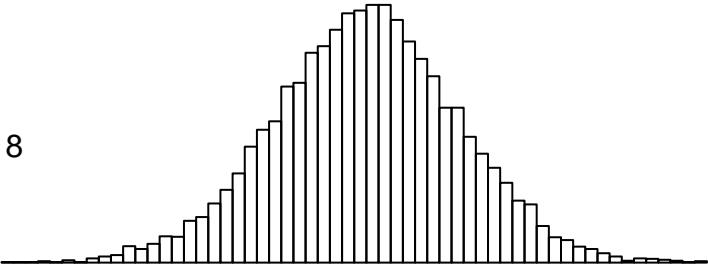

D206:18

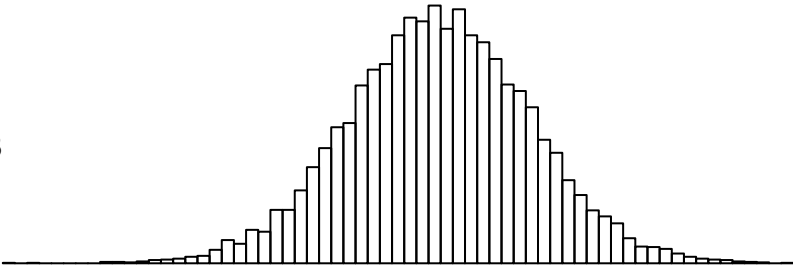

Glycine

A194:18 – B184:18

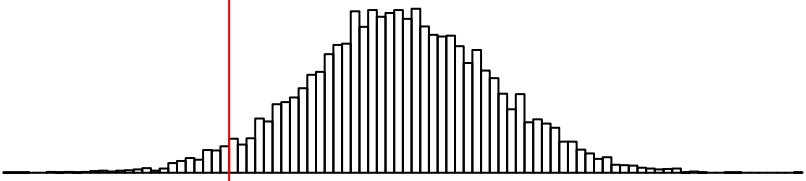

A194:18 – B224:18

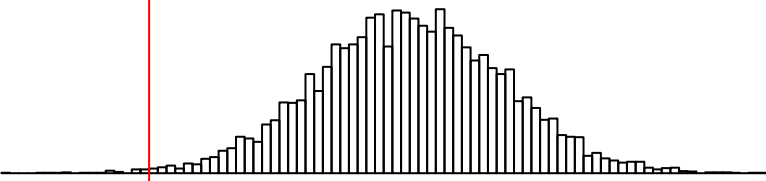

A194:18 – D206:18

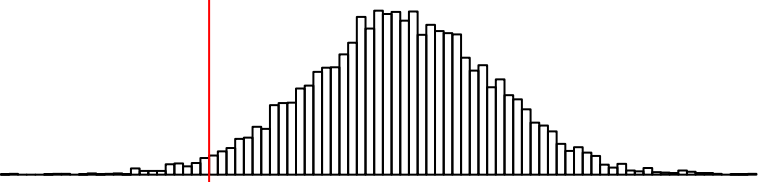

B184:18 – B224:18

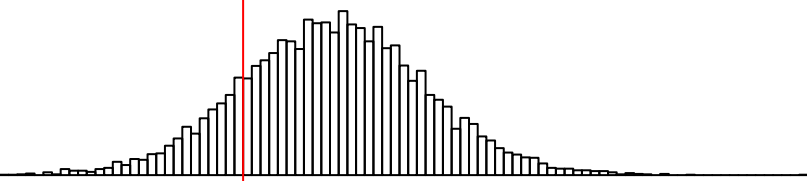

B184:18 – D206:18

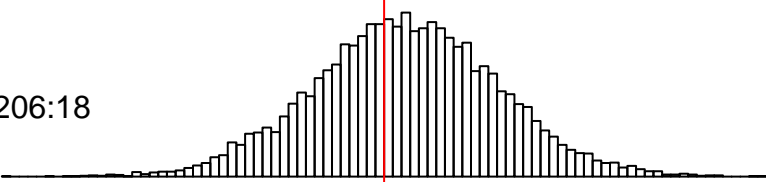

B224:18 – D206:18

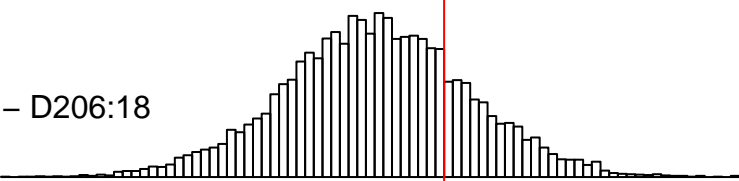

-3      -2      -1      0      1      2      3      4

delta(Glycine)



A194:18

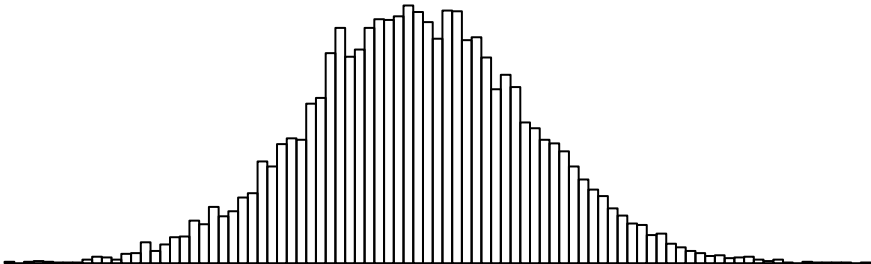

B184:18

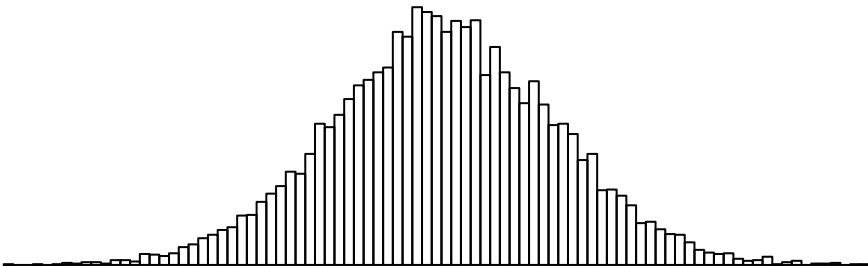

B224:18

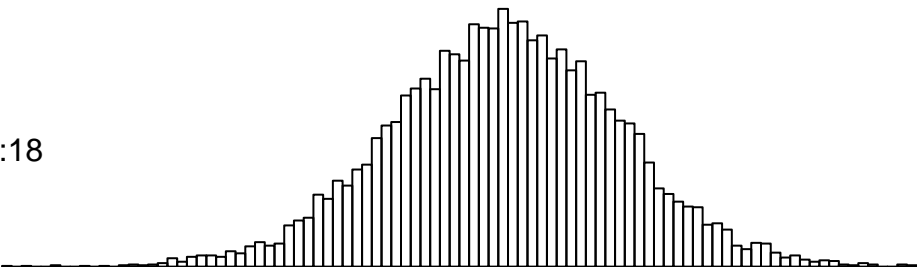

D206:18

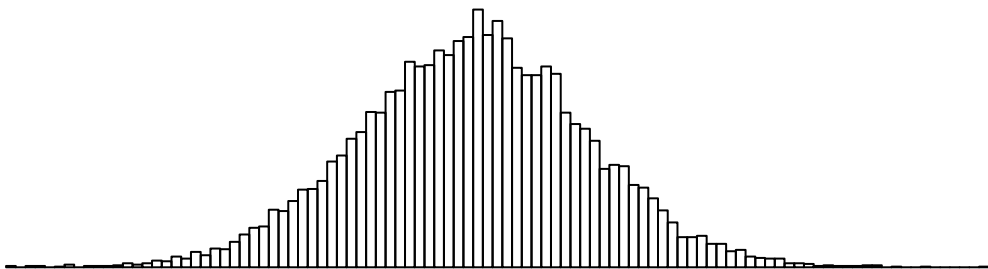

-8.5      -8.0      -7.5      -7.0      -6.5      -6.0

Amino Acid 8

A194:18 – B184:18

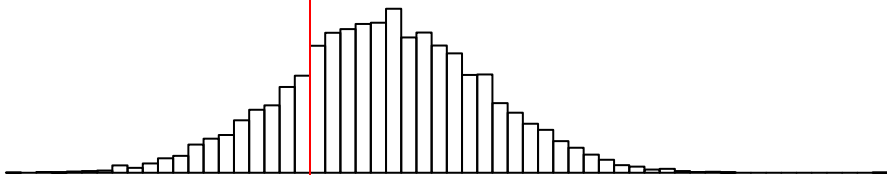

A194:18 – B224:18

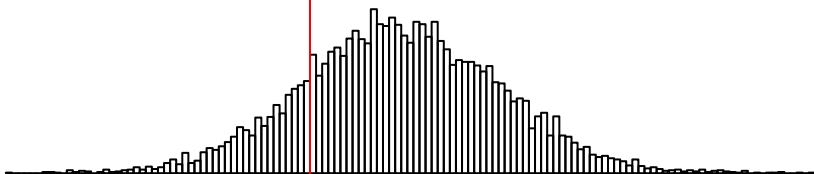

A194:18 – D206:18

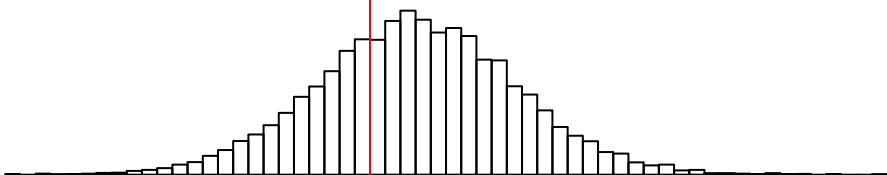

B184:18 – B224:18

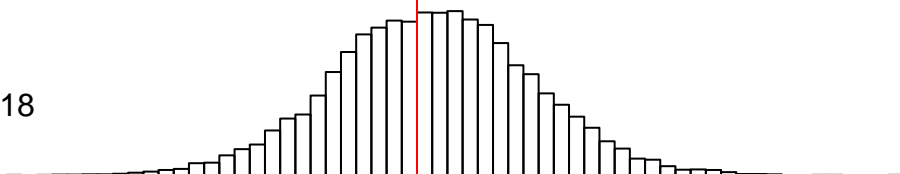

B184:18 – D206:18

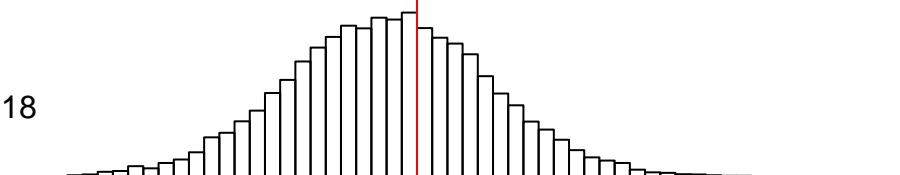

B224:18 – D206:18

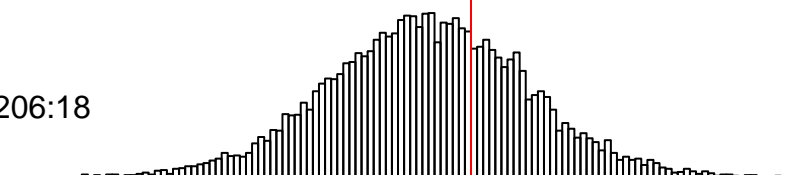

-2 -1 0 1 2

delta(Amino Acid 8)

A194:18

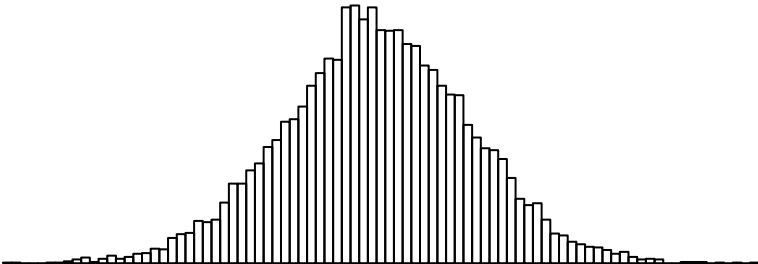

B184:18

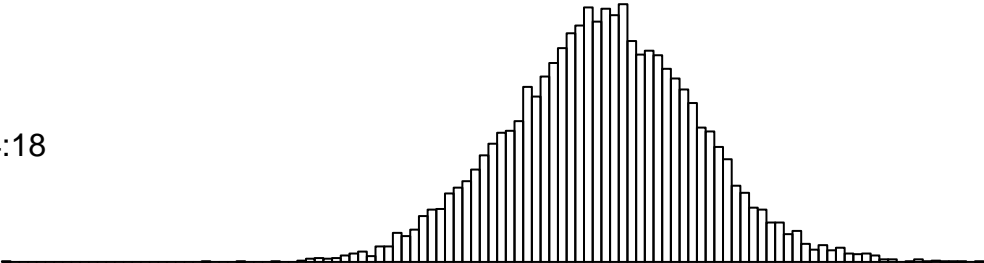

B224:18

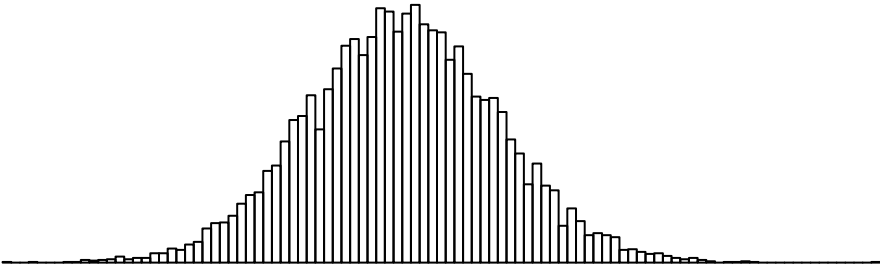

D206:18

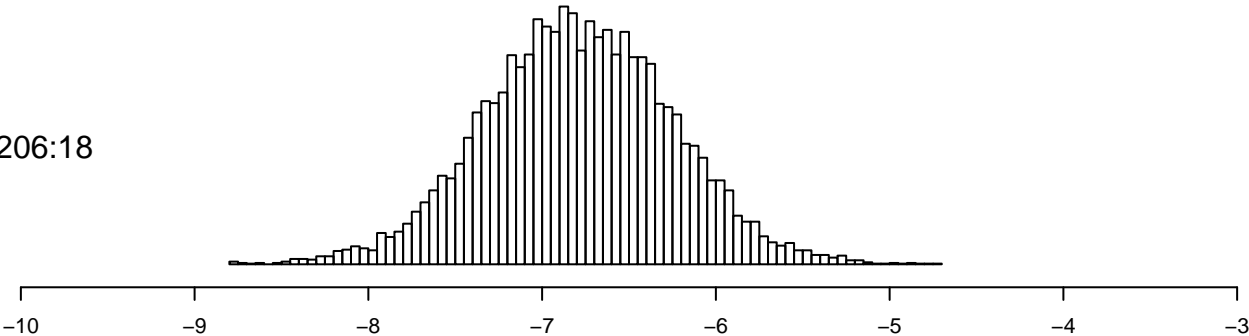

Amino Acid 10

A194:18 – B184:18

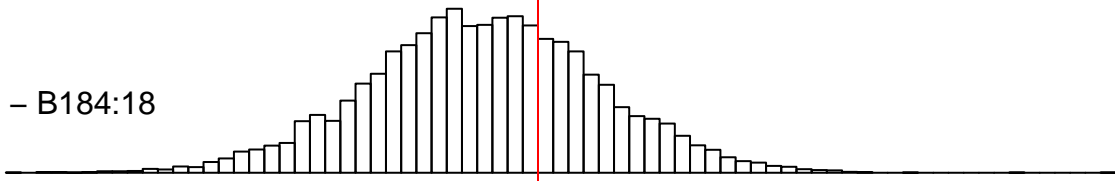

A194:18 – B224:18

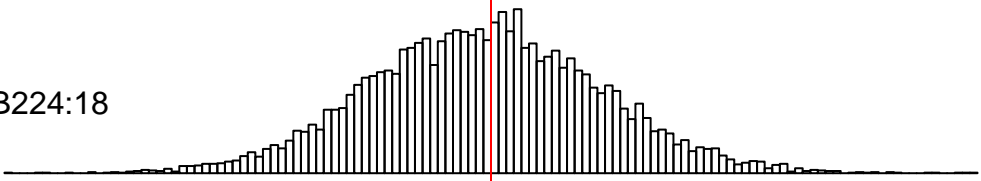

A194:18 – D206:18

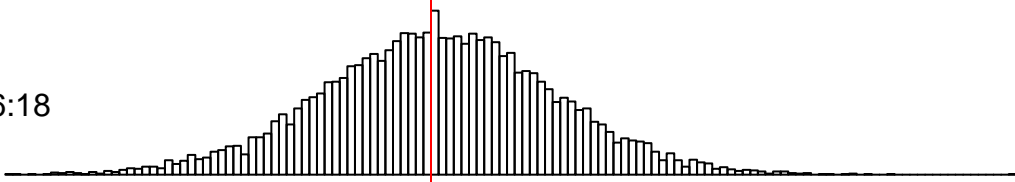

B184:18 – B224:18

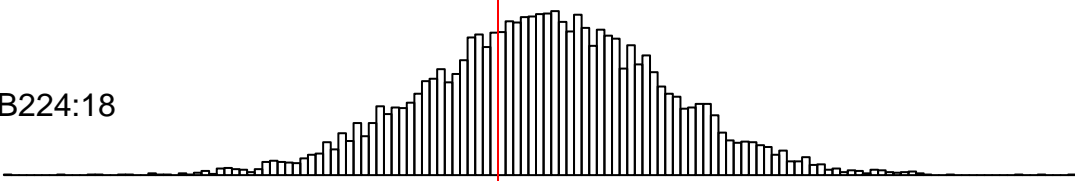

B184:18 – D206:18

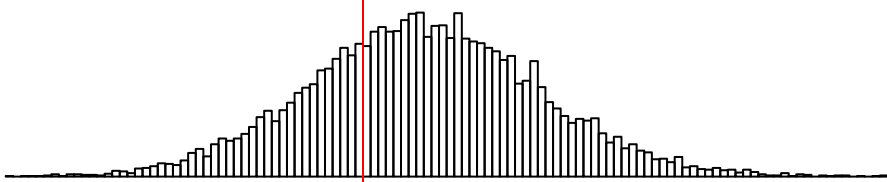

B224:18 – D206:18

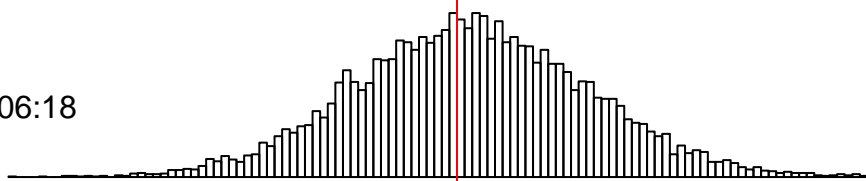

-4 -2 0 2 4

delta(Amino Acid 10)

A194:18

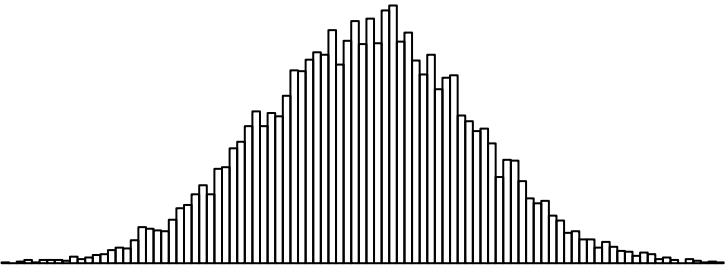

B184:18

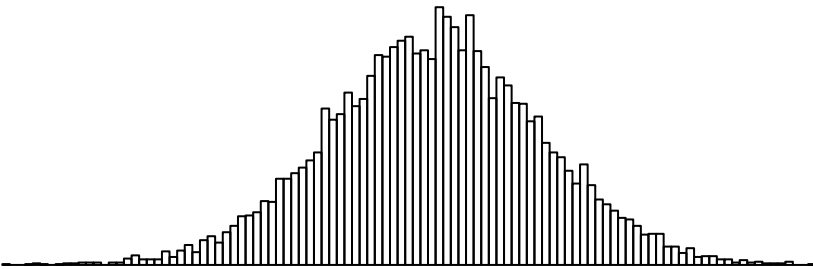

B224:18

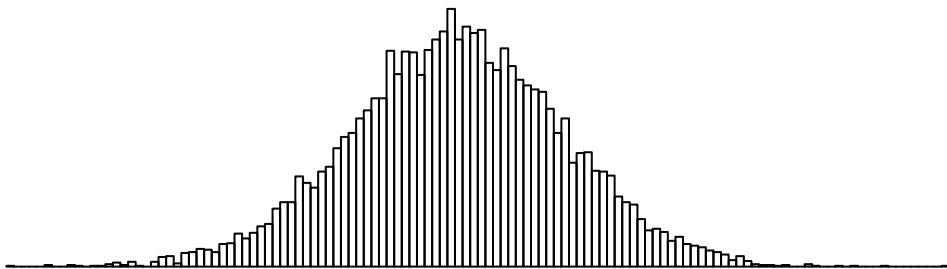

D206:18

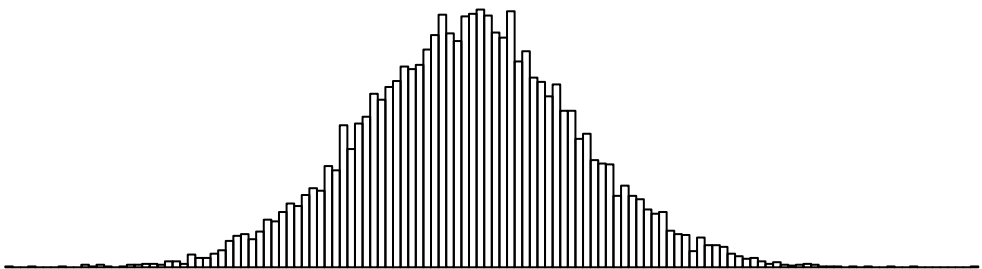

-6.5

-6.0

-5.5

-5.0

Disaccharide 2

A194:18 – B184:18

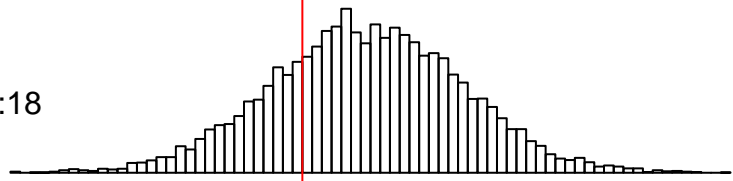

A194:18 – B224:18

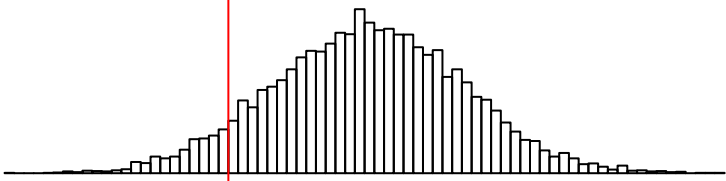

A194:18 – D206:18

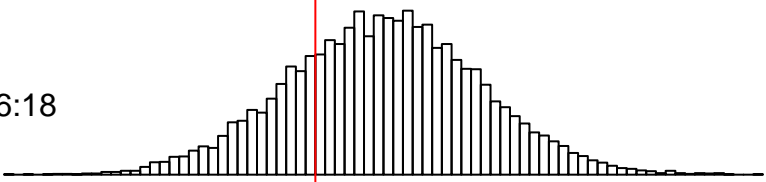

B184:18 – B224:18

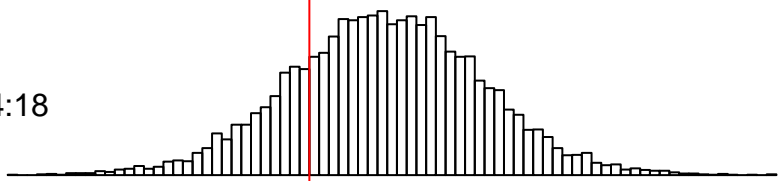

B184:18 – D206:18

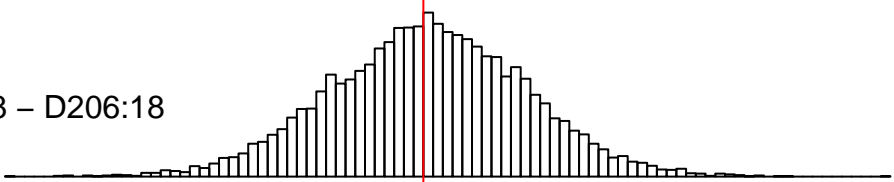

B224:18 – D206:18

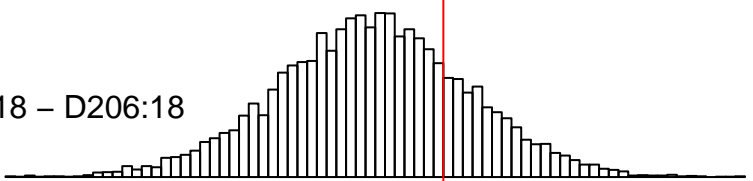

-1.0      -0.5      0.0      0.5      1.0      1.5

delta(Disaccharide 2)

A194:18

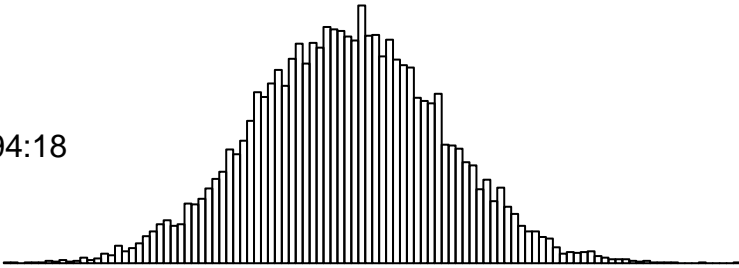

B184:18

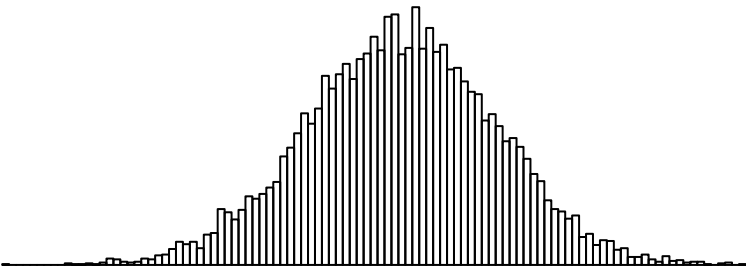

B224:18

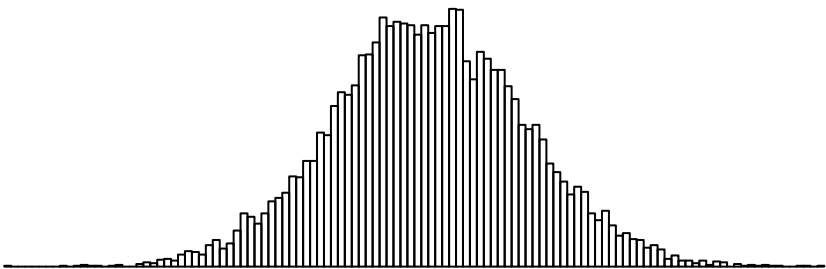

D206:18

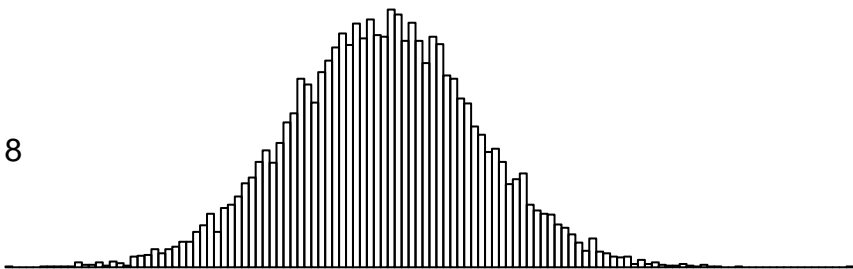

-8.0 -7.5 -7.0 -6.5 -6.0 -5.5 -5.0 -4.5

Disaccharide 3

A194:18 – B184:18

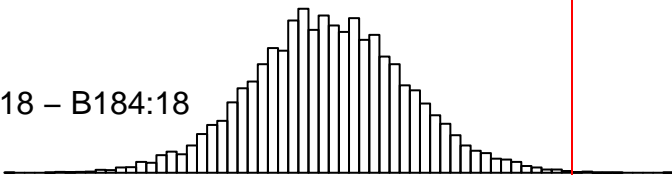

A194:18 – B224:18

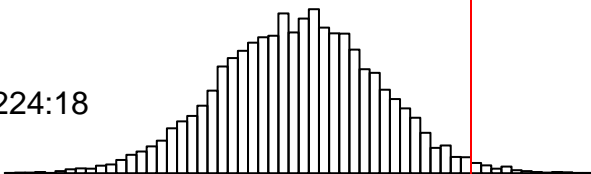

A194:18 – D206:18

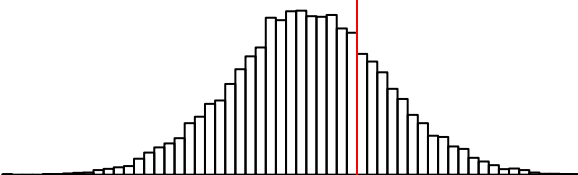

B184:18 – B224:18

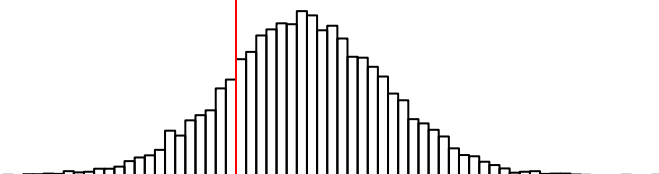

B184:18 – D206:18

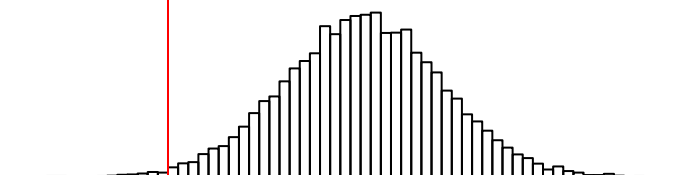

B224:18 – D206:18

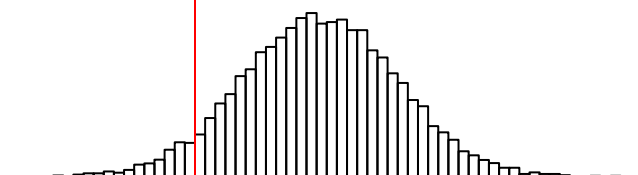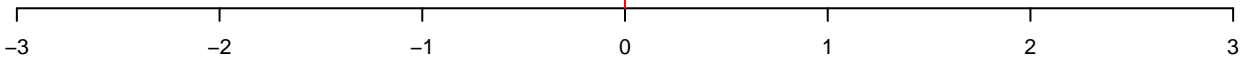

delta(Disaccharide 3)



A194:18

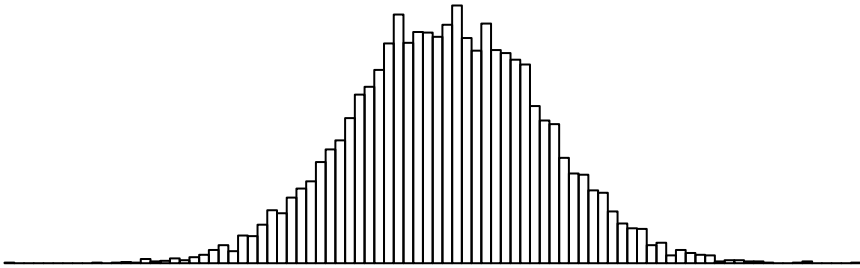

B184:18

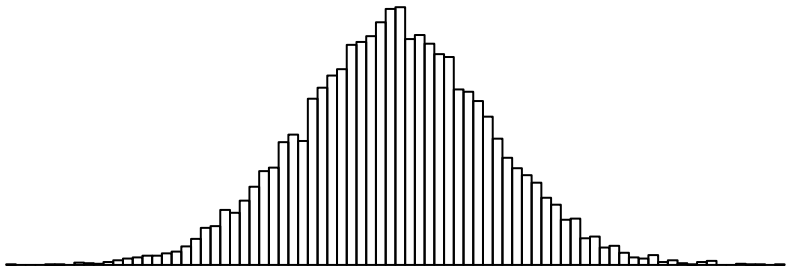

B224:18

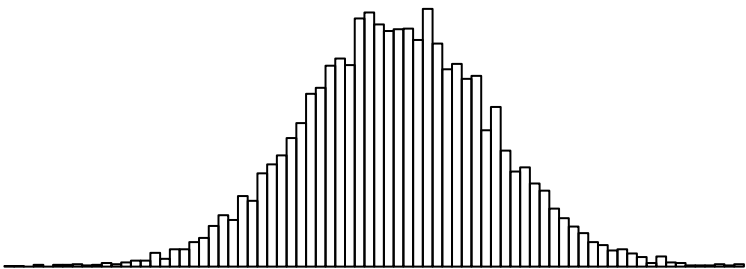

D206:18

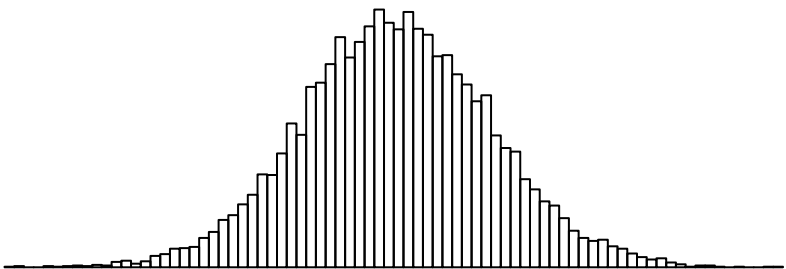

-7.0      -6.5      -6.0      -5.5      -5.0      -4.5

Disaccharide 4

A194:18 – B184:18

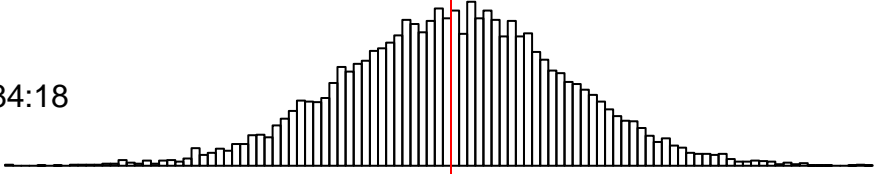

A194:18 – B224:18

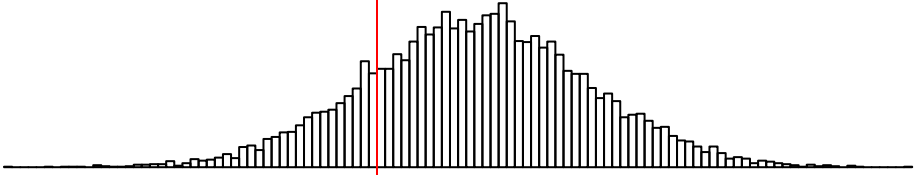

A194:18 – D206:18

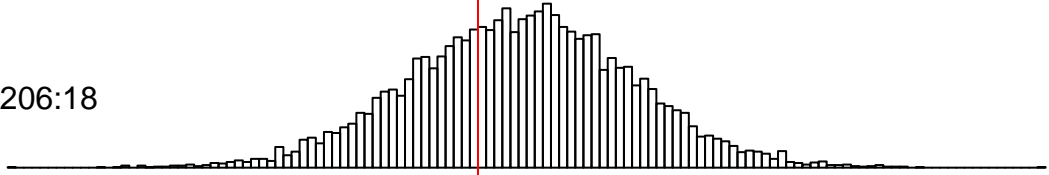

B184:18 – B224:18

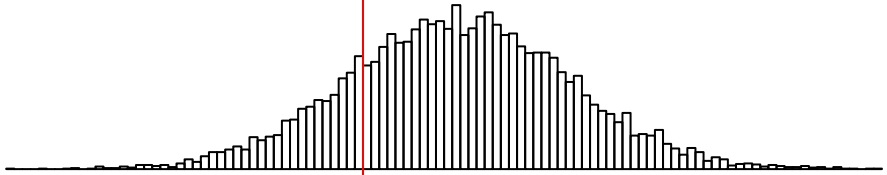

B184:18 – D206:18

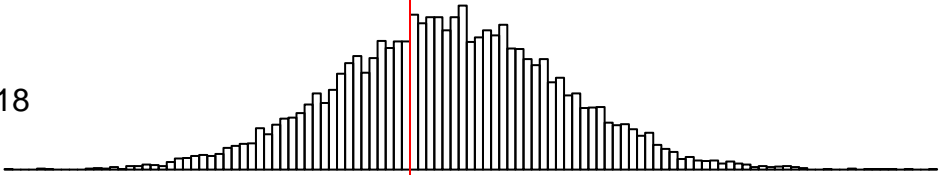

B224:18 – D206:18

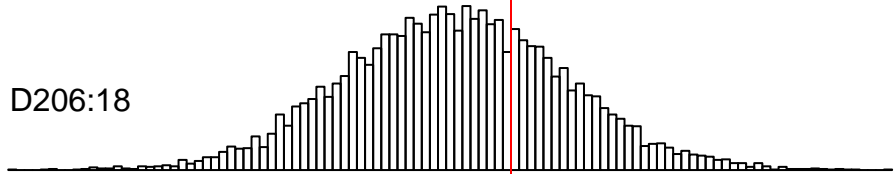

-1.5      -1.0      -0.5      0.0      0.5      1.0      1.5

delta(Disaccharide 4)

A194:18

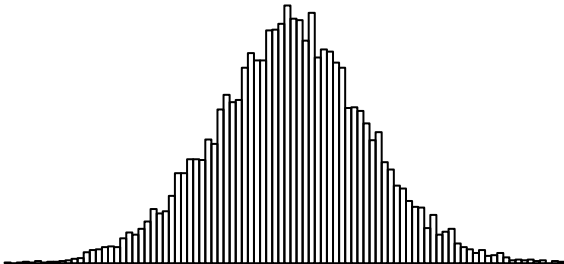

B184:18

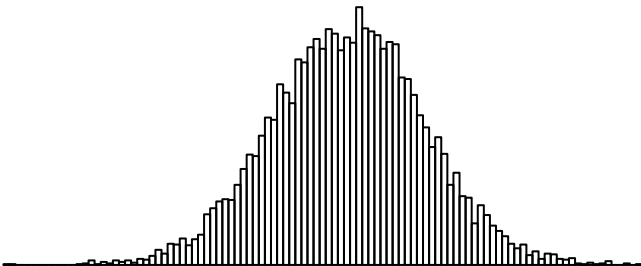

B224:18

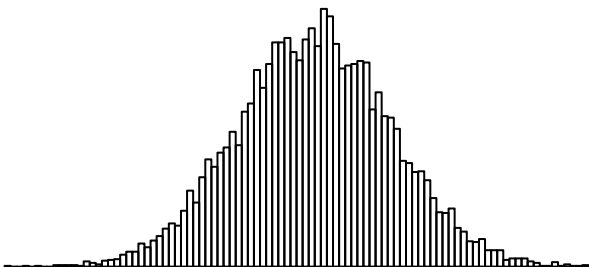

D206:18

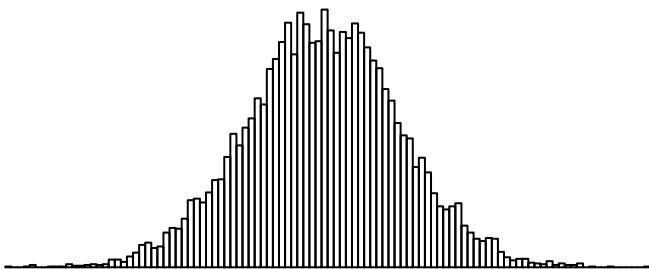

-7 -6 -5 -4 -3

Disaccharide 5

A194:18 – B184:18

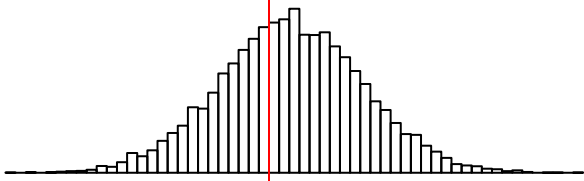

A194:18 – B224:18

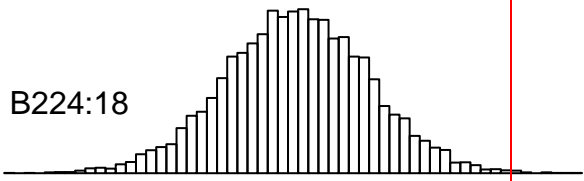

A194:18 – D206:18

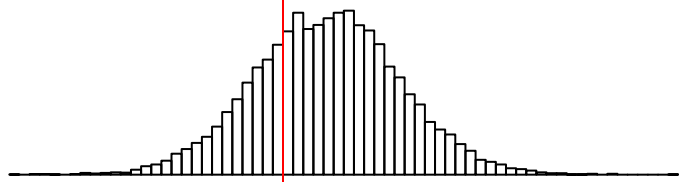

B184:18 – B224:18

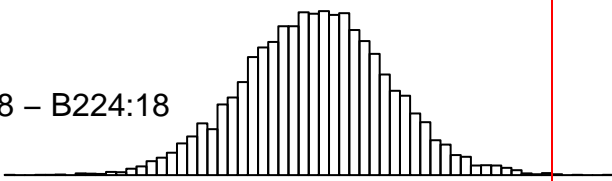

B184:18 – D206:18

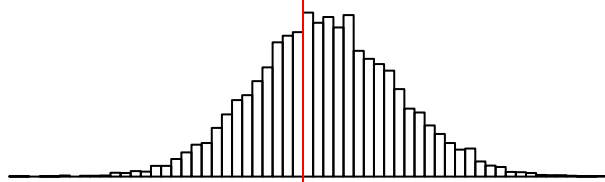

B224:18 – D206:18

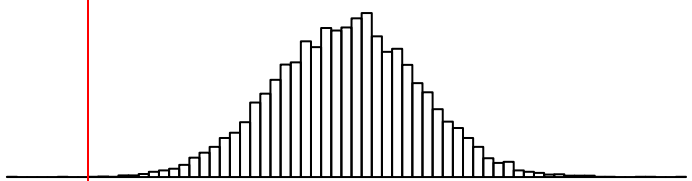

-3 -2 -1 0 1 2 3

delta(Disaccharide 5)

A194:18

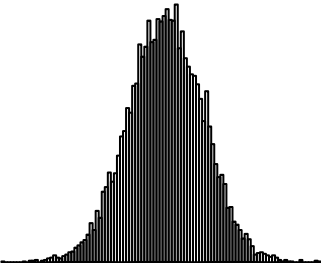

B184:18

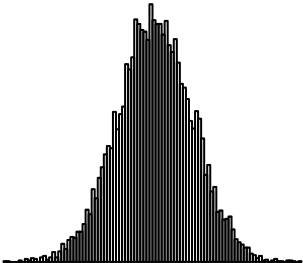

B224:18

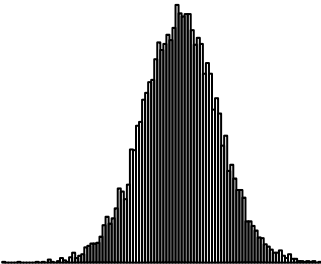

D206:18

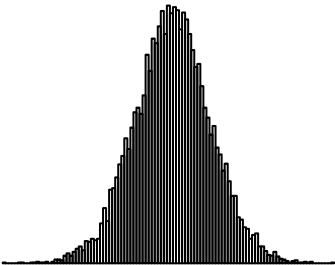

-10 -8 -6 -4 -2

Disaccharide 6

A194:18 – B184:18

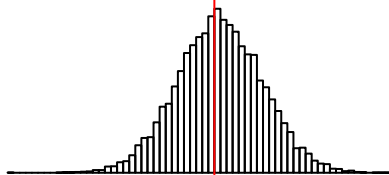

A194:18 – B224:18

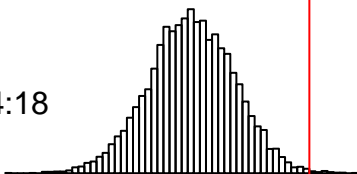

A194:18 – D206:18

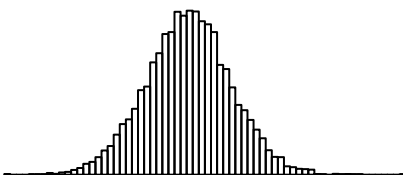

B184:18 – B224:18

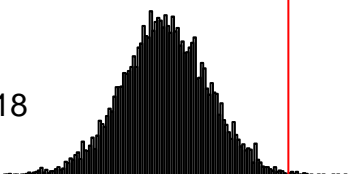

B184:18 – D206:18

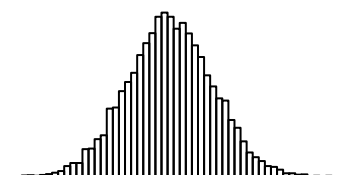

B224:18 – D206:18

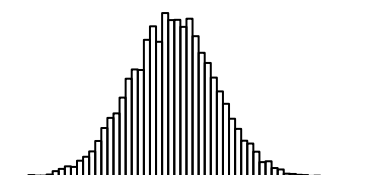

-4 -2 0 2 4 6

delta(Disaccharide 6)

A194:18

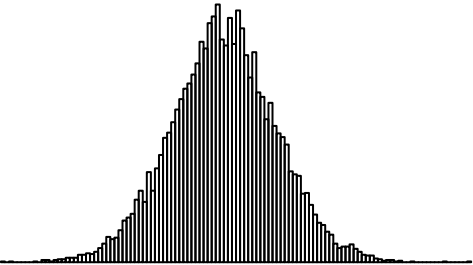

B184:18

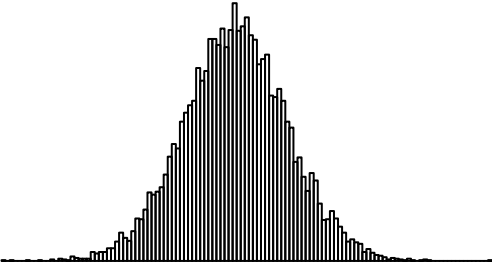

B224:18

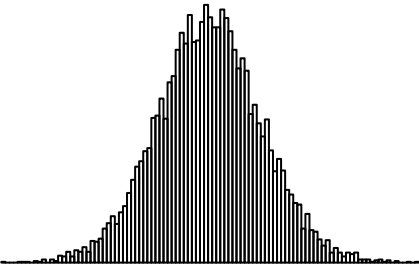

D206:18

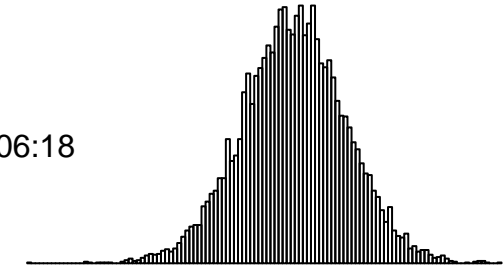

Disaccharide 7

A194:18 – B184:18

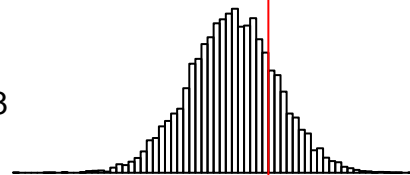

A194:18 – B224:18

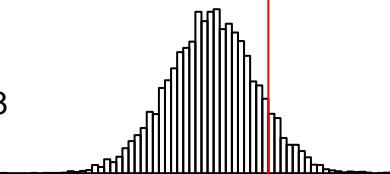

A194:18 – D206:18

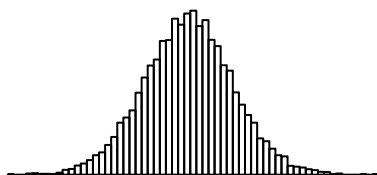

B184:18 – B224:18

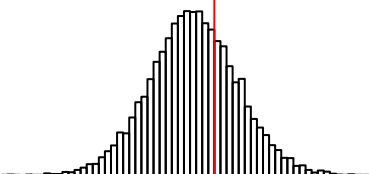

B184:18 – D206:18

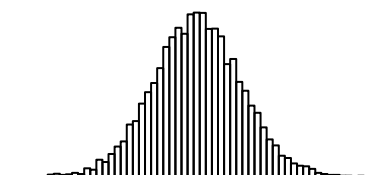

B224:18 – D206:18

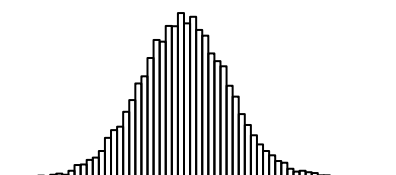

-4 -2 0 2 4 6

delta(Disaccharide 7)



A194:18

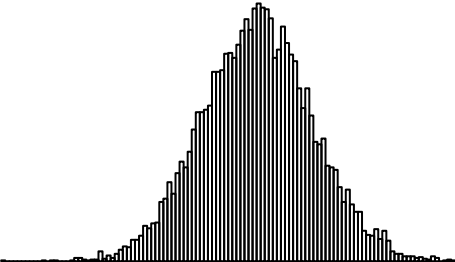

B184:18

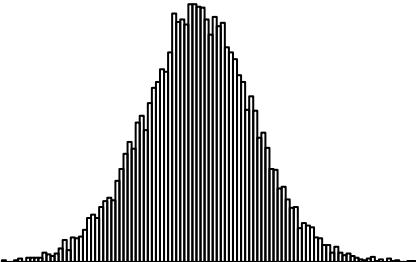

B224:18

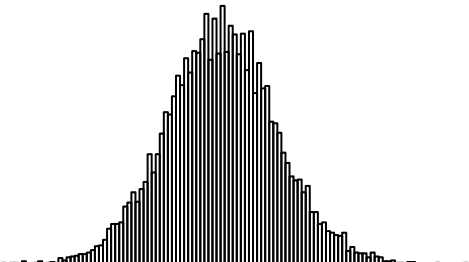

D206:18

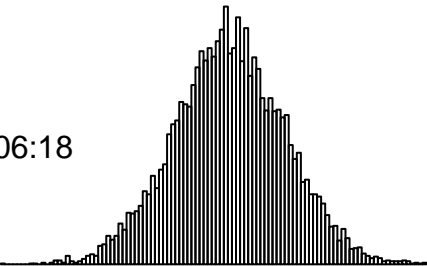

Disaccharide 8

A194:18 – B184:18

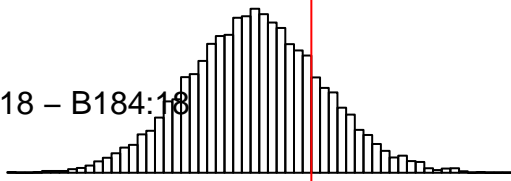

A194:18 – B224:18

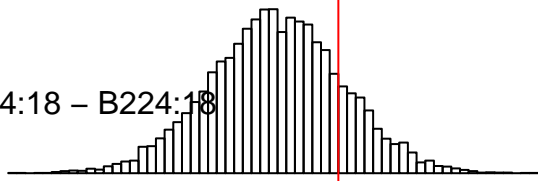

A194:18 – D206:18

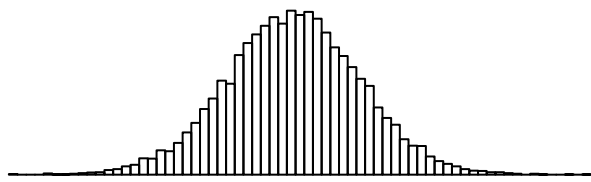

B184:18 – B224:18

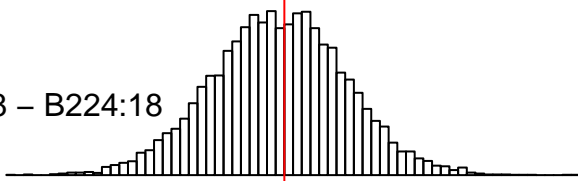

B184:18 – D206:18

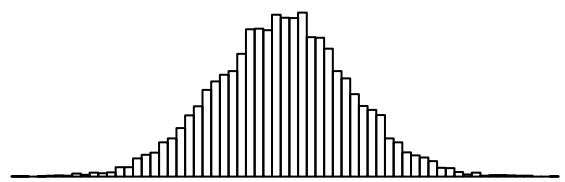

B224:18 – D206:18

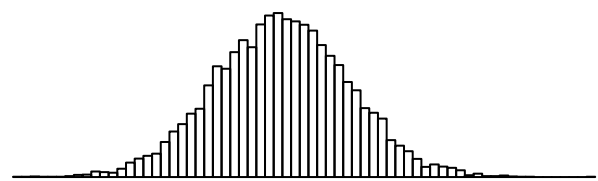

-2 -1 0 1 2 3 4 5

delta(Disaccharide 8)

A194:18

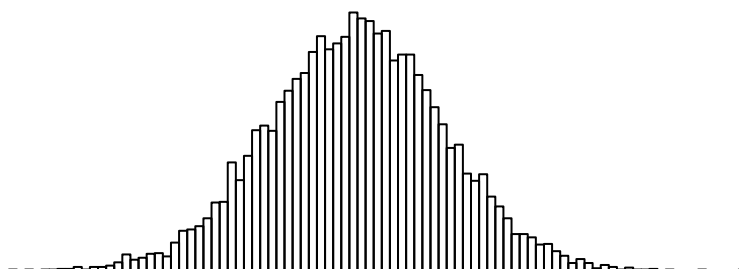

B184:18

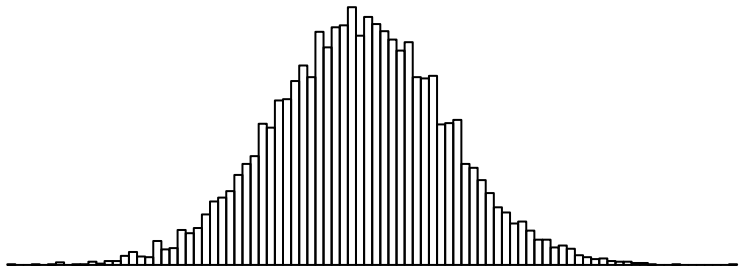

B224:18

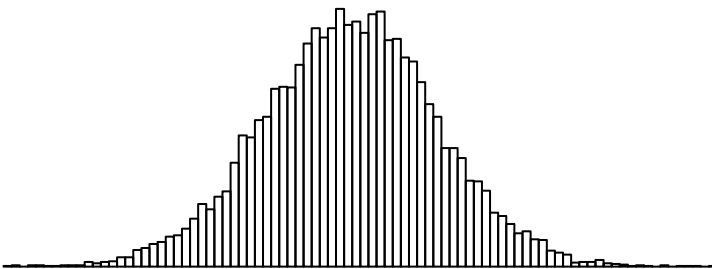

D206:18

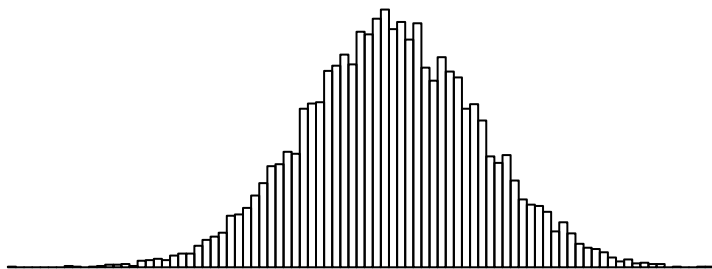

-8.5      -8.0      -7.5      -7.0      -6.5      -6.0      -5.5

Disaccharide 9

A194:18 – B184:18

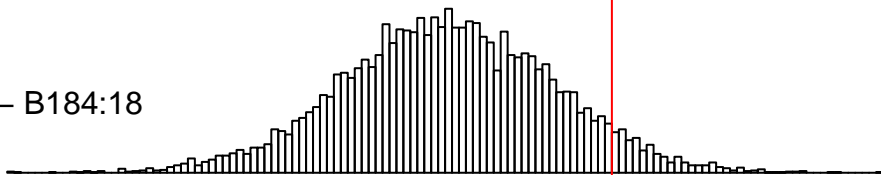

A194:18 – B224:18

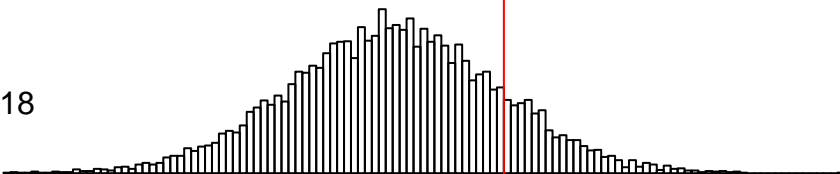

A194:18 – D206:18

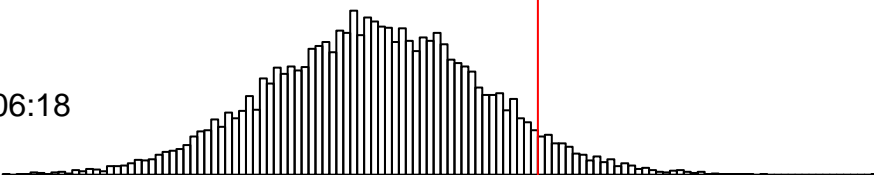

B184:18 – B224:18

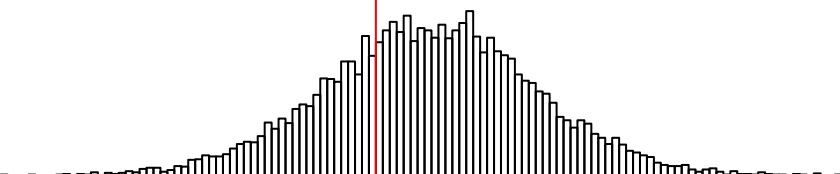

B184:18 – D206:18

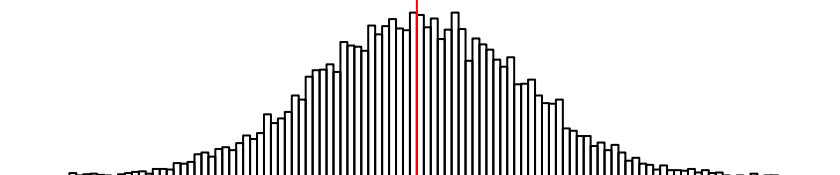

B224:18 – D206:18

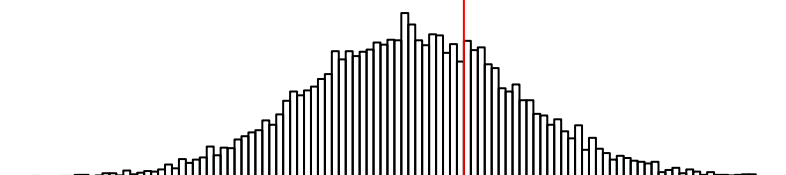

-2.0 -1.5 -1.0 -0.5 0.0 0.5 1.0 1.5

delta(Disaccharide 9)

A194:18

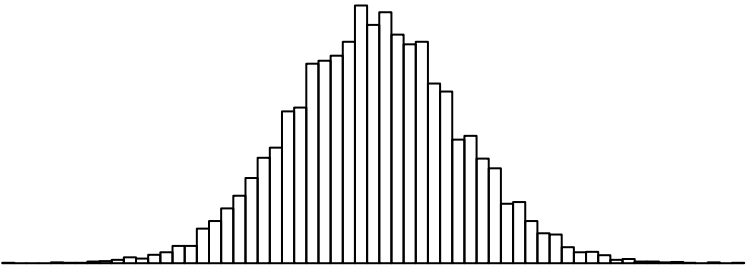

B184:18

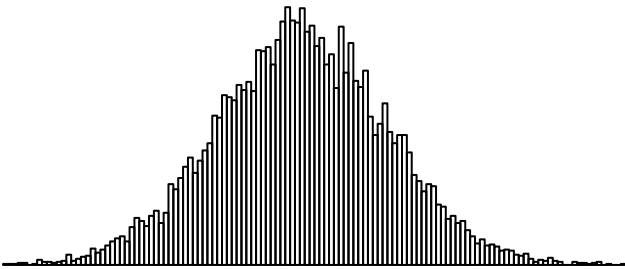

B224:18

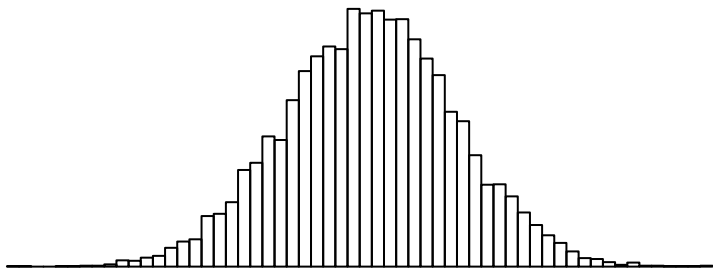

D206:18

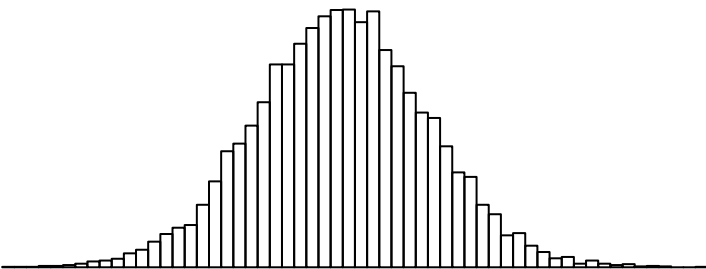

C12:0 Fatty Acid

A194:18 – B184:18

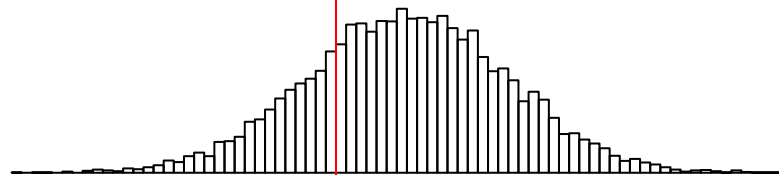

A194:18 – B224:18

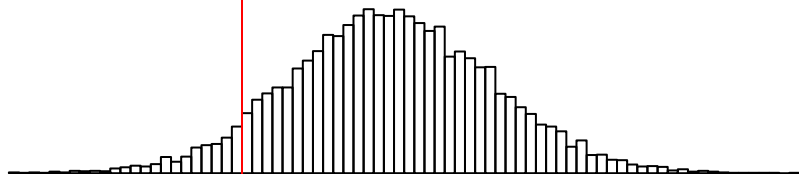

A194:18 – D206:18

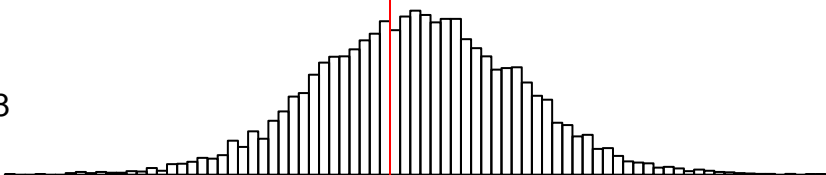

B184:18 – B224:18

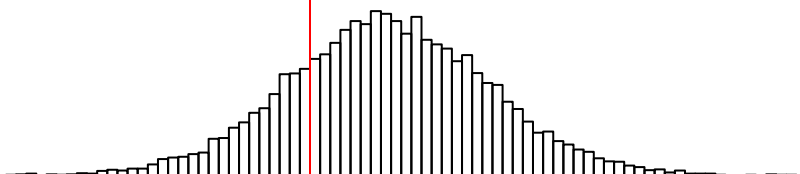

B184:18 – D206:18

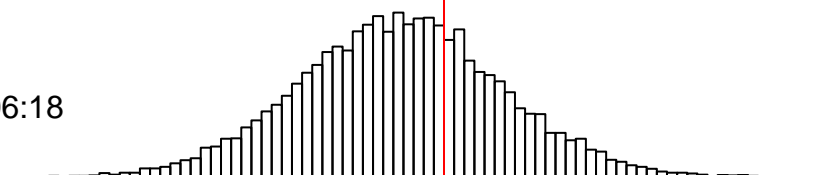

B224:18 – D206:18

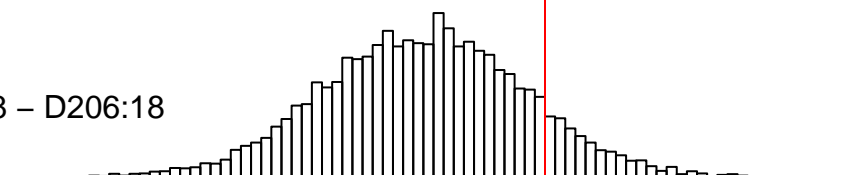

-3 -2 -1 0 1 2 3

delta(C12:0 Fatty Acid)

A194:18

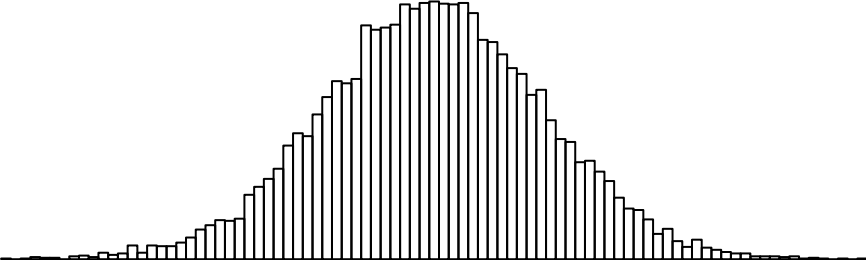

B184:18

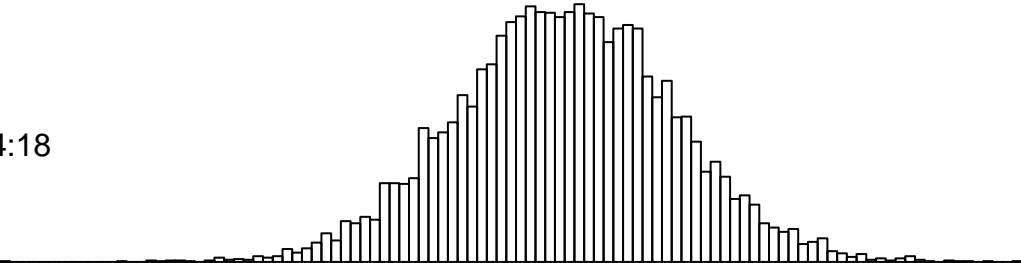

B224:18

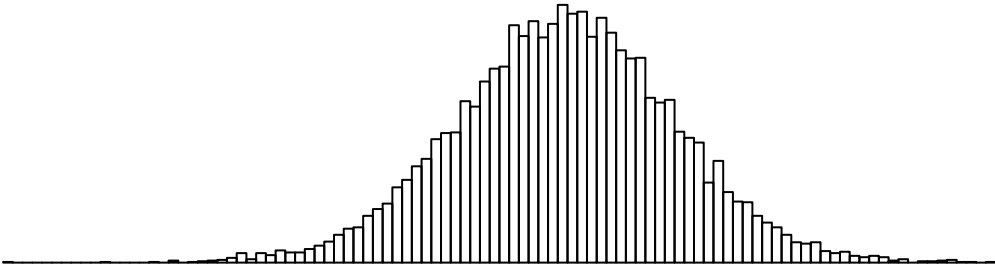

D206:18

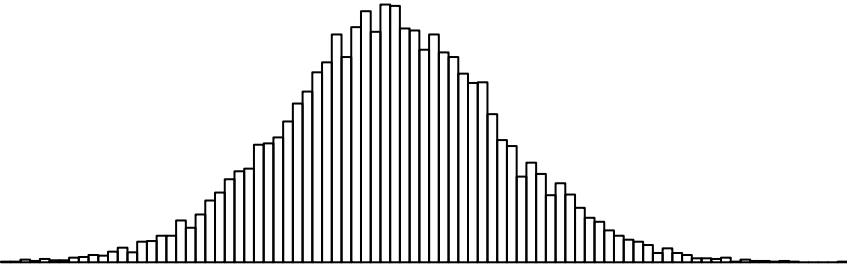

-8.0 -7.5 -7.0 -6.5 -6.0 -5.5

C14:1 Fatty Acid

A194:18 – B184:18

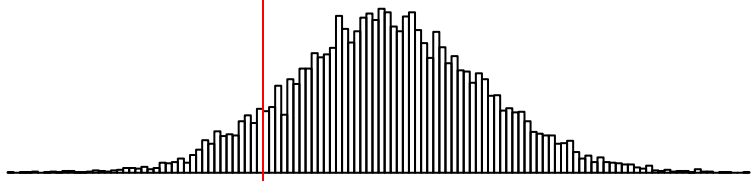

A194:18 – B224:18

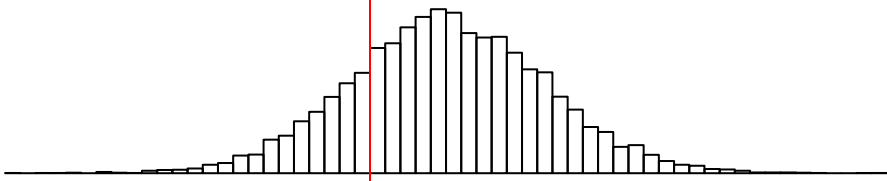

A194:18 – D206:18

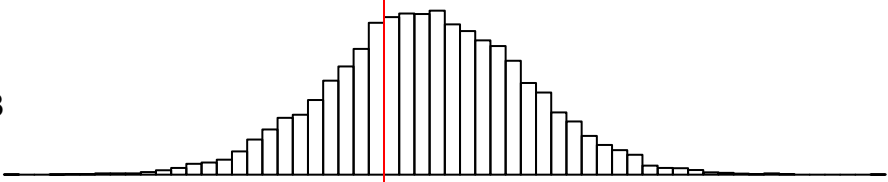

B184:18 – B224:18

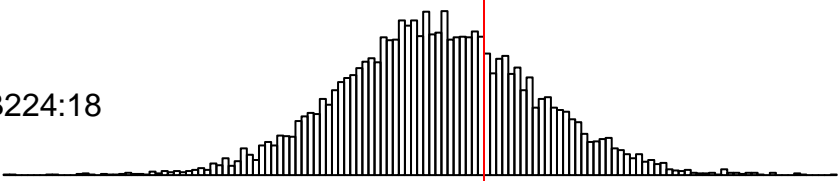

B184:18 – D206:18

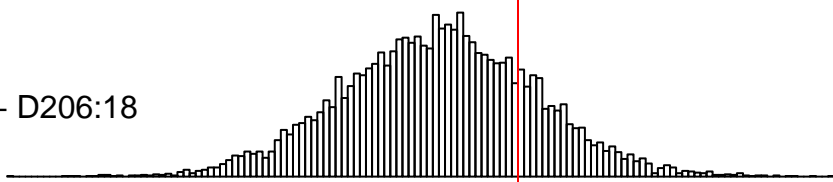

B224:18 – D206:18

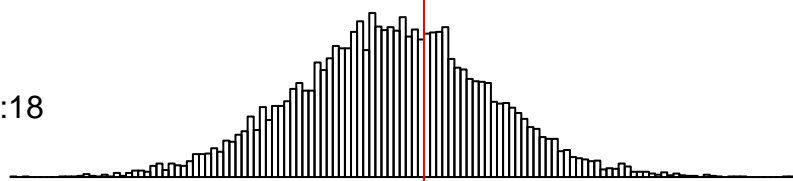

-2                      -1                      0                      1                      2

delta(C14:1 Fatty Acid)



A194:18

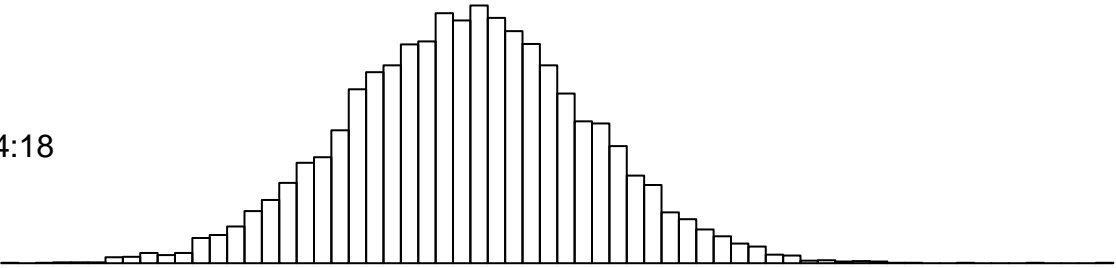

B184:18

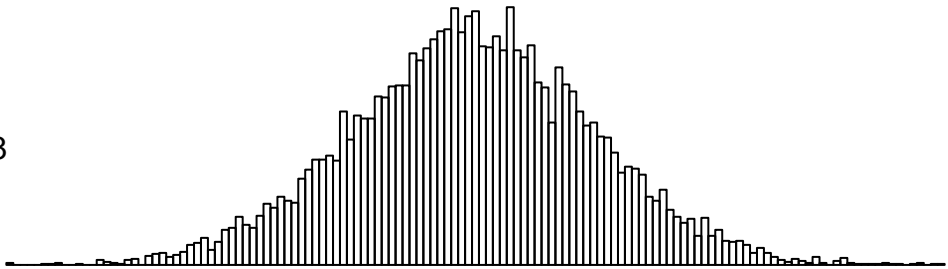

B224:18

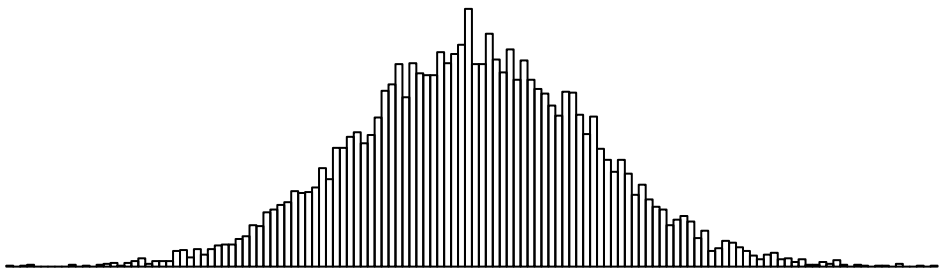

D206:18

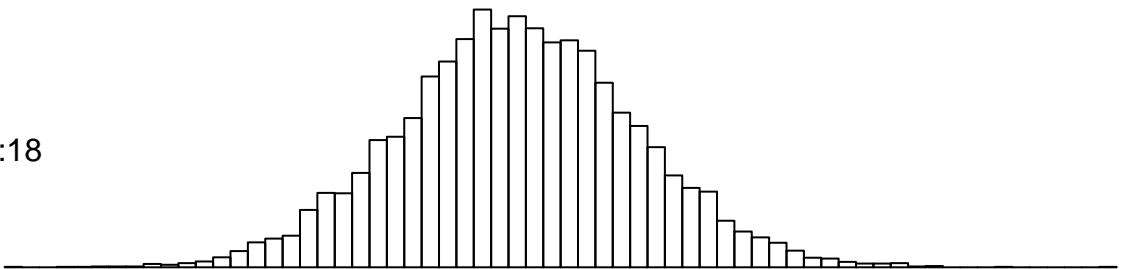

-7.0 -6.5 -6.0 -5.5 -5.0 -4.5 -4.0 -3.5

C14:0 Fatty Acid

A194:18 – B184:18

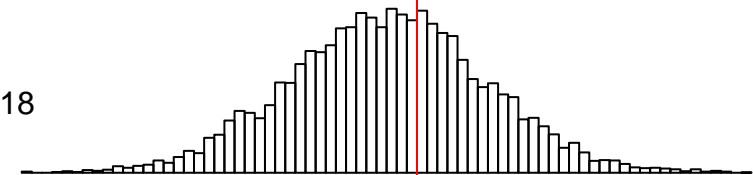

A194:18 – B224:18

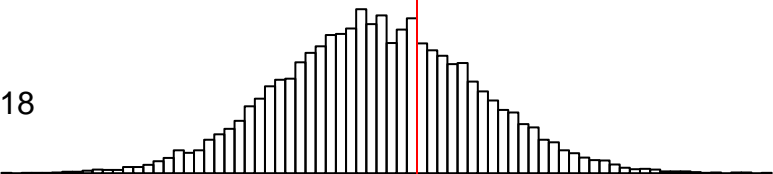

A194:18 – D206:18

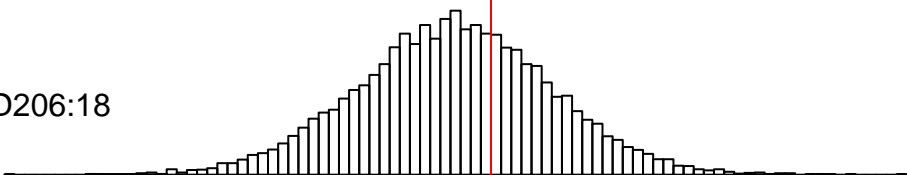

B184:18 – B224:18

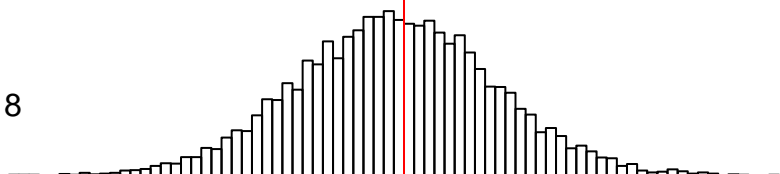

B184:18 – D206:18

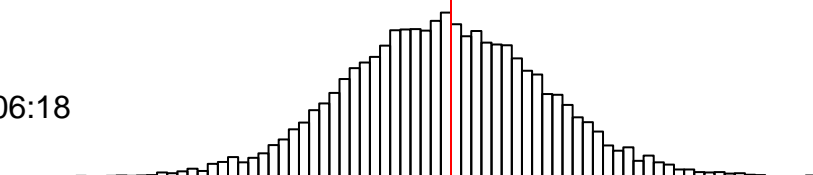

B224:18 – D206:18

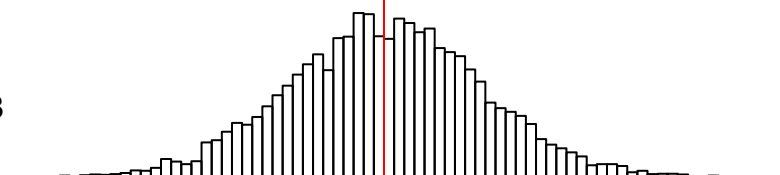

delta(C14:0 Fatty Acid)

A194:18

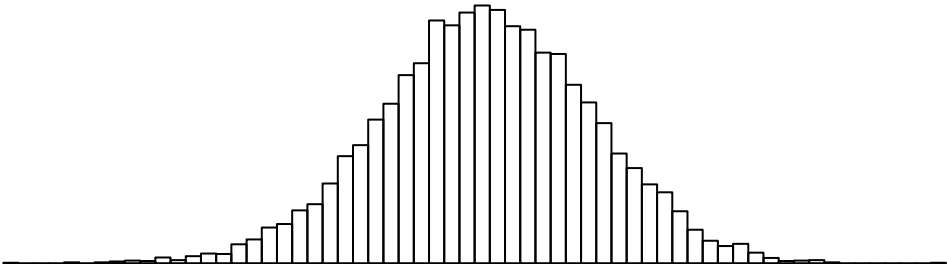

B184:18

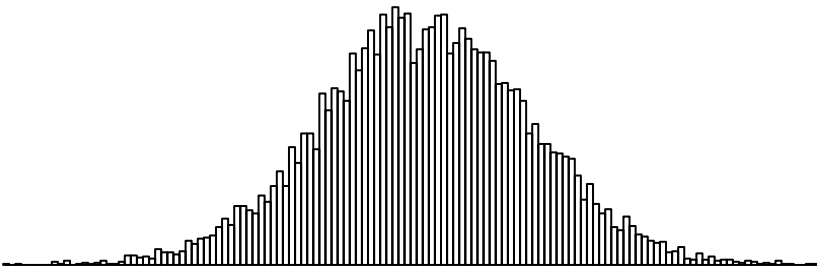

B224:18

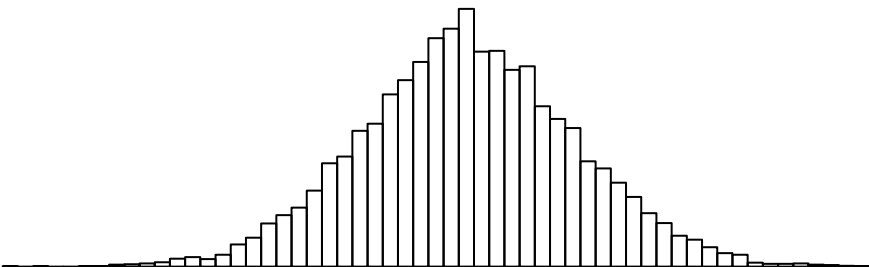

D206:18

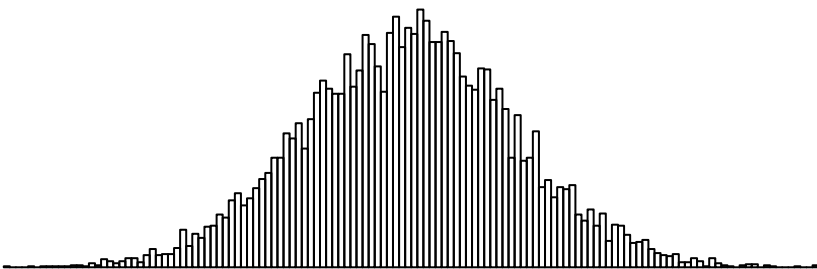

C16:1 Fatty Acid

-8 -7 -6 -5 -4

A194:18 – B184:18

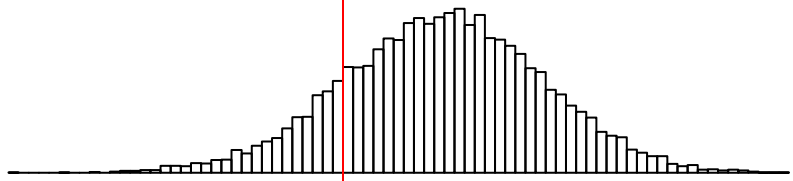

A194:18 – B224:18

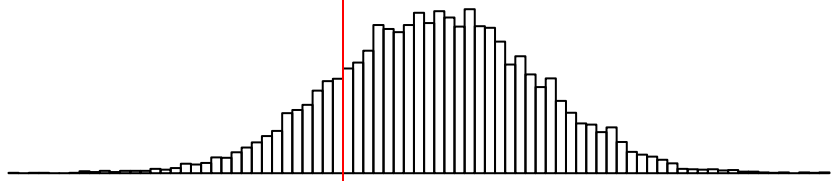

A194:18 – D206:18

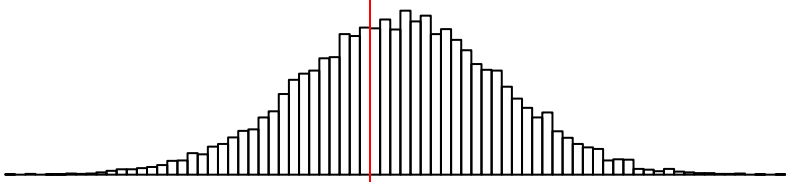

B184:18 – B224:18

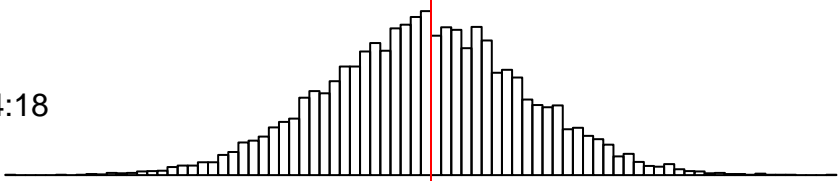

B184:18 – D206:18

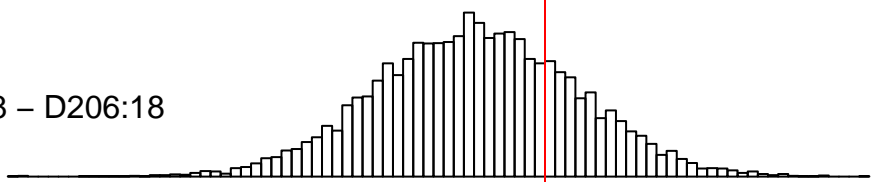

B224:18 – D206:18

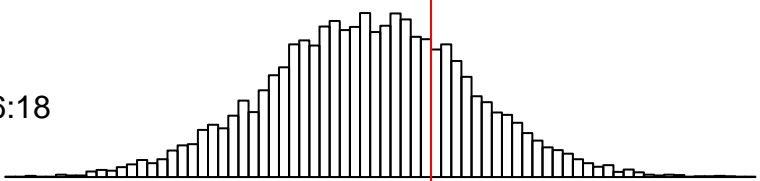

-3      -2      -1      0      1      2      3

delta(C16:1 Fatty Acid)

A194:18

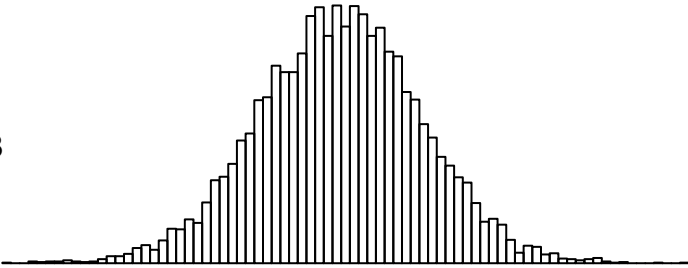

B184:18

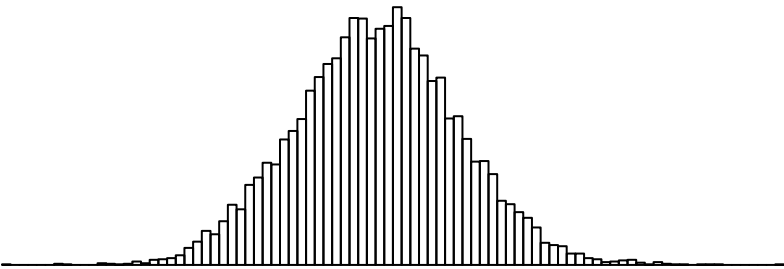

B224:18

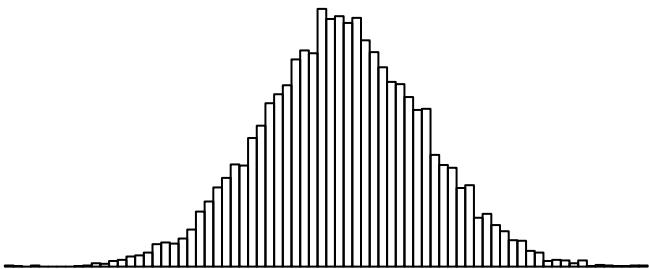

D206:18

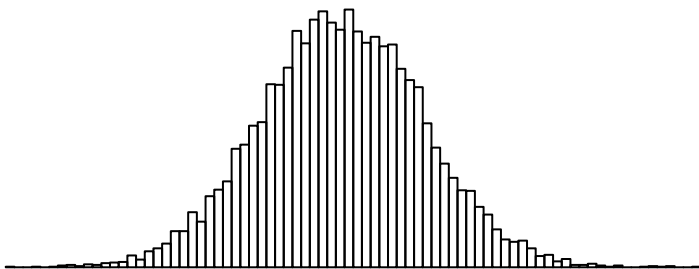

C16:0 Fatty Acid

A194:18 – B184:18

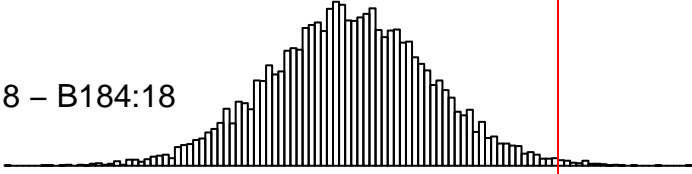

A194:18 – B224:18

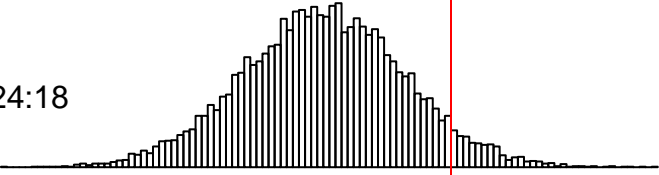

A194:18 – D206:18

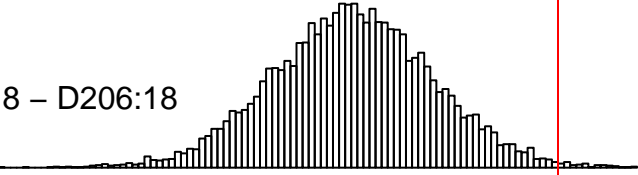

B184:18 – B224:18

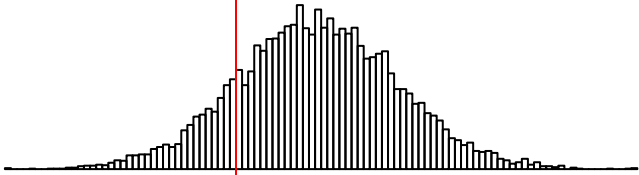

B184:18 – D206:18

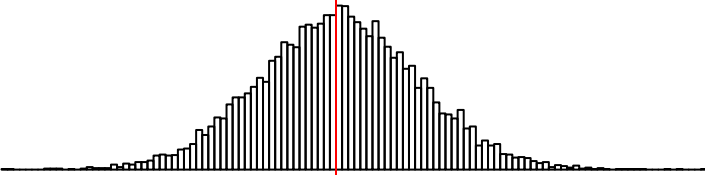

B224:18 – D206:18

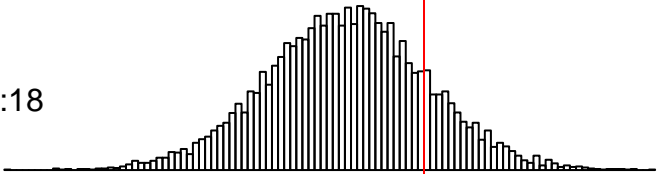

-10                      -5                      0                      5                      10

delta(C16:0 Fatty Acid)

A194:18

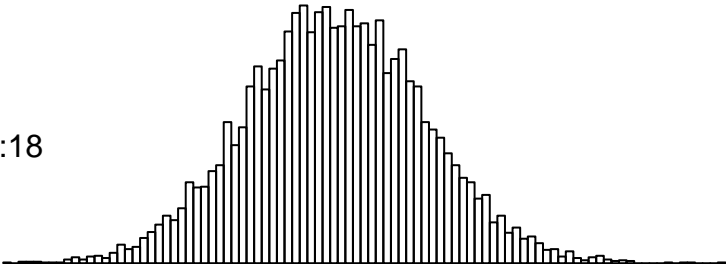

B184:18

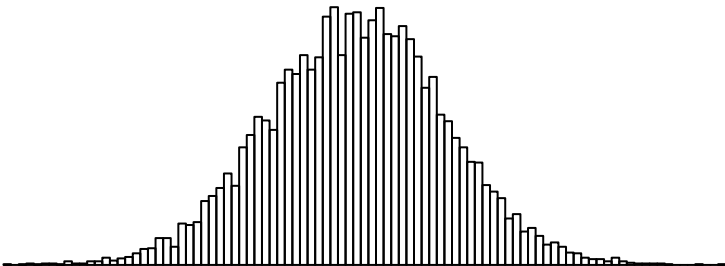

B224:18

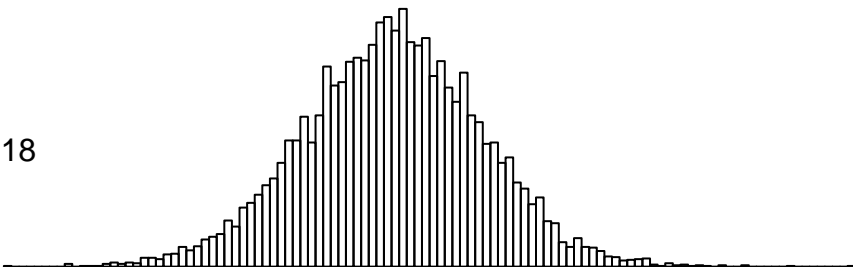

D206:18

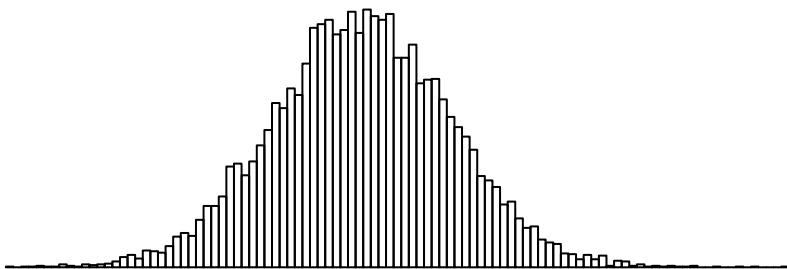

-8

-6

-4

-2

Polyunsaturated Fatty Acids 1

A194:18 – B184:18

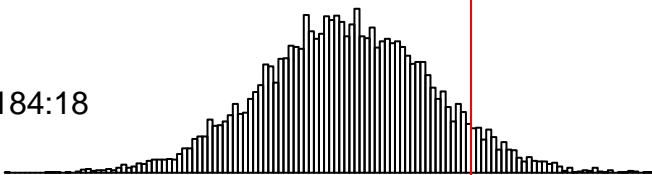

A194:18 – B224:18

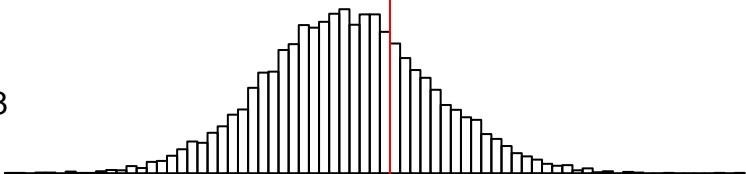

A194:18 – D206:18

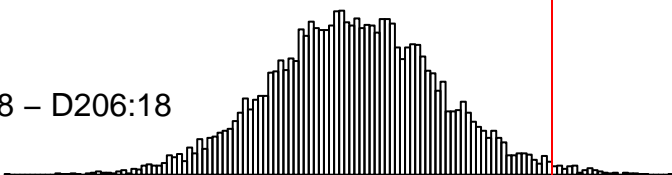

B184:18 – B224:18

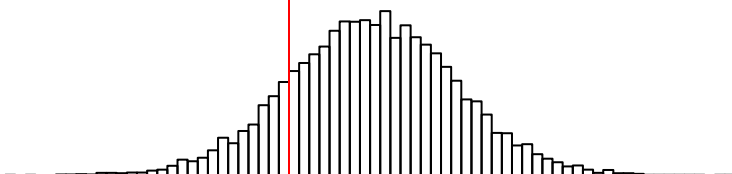

B184:18 – D206:18

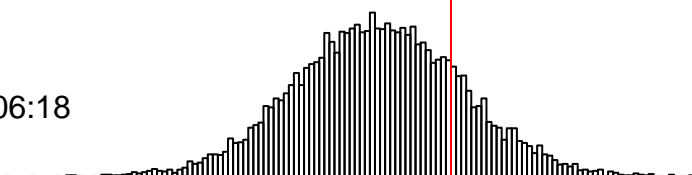

B224:18 – D206:18

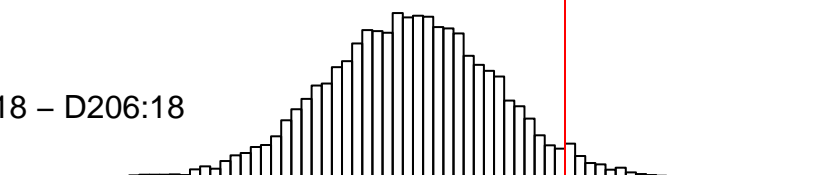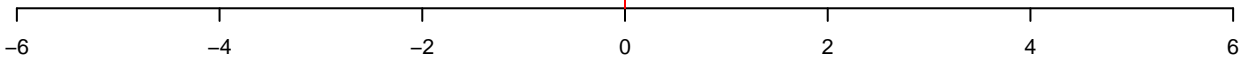

delta(Polyunsaturated Fatty Acids 1)



A194:18

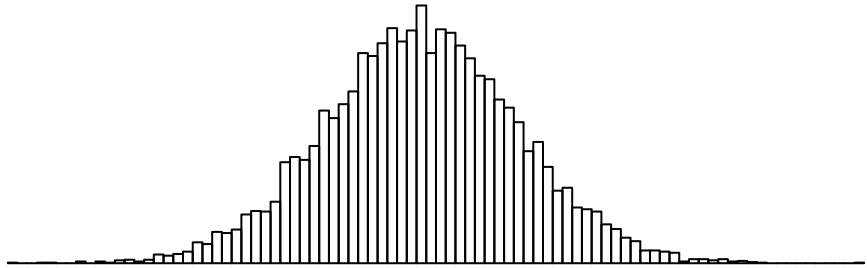

B184:18

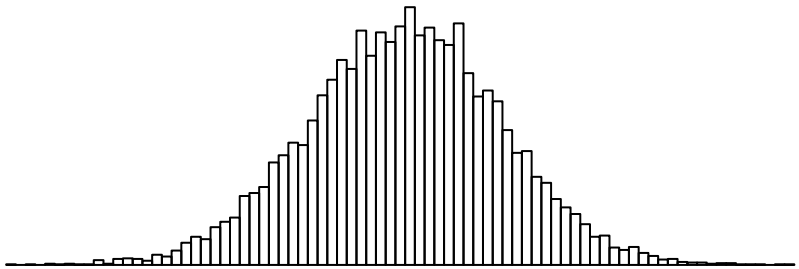

B224:18

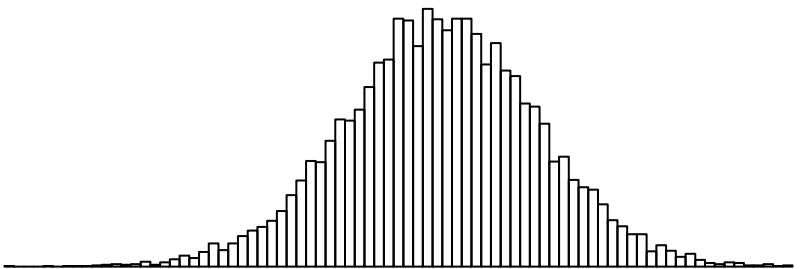

D206:18

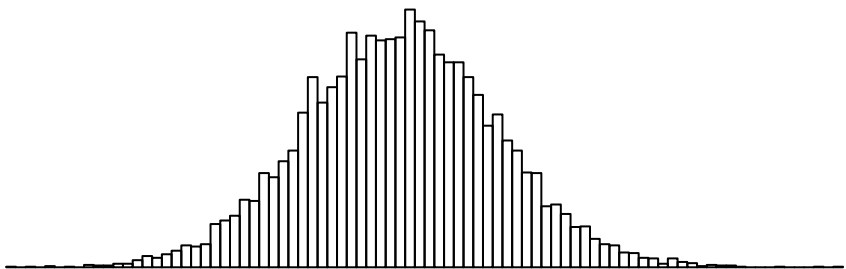

-9.0      -8.5      -8.0      -7.5      -7.0      -6.5

Polyunsaturated Fatty Acids 3

A194:18 – B184:18

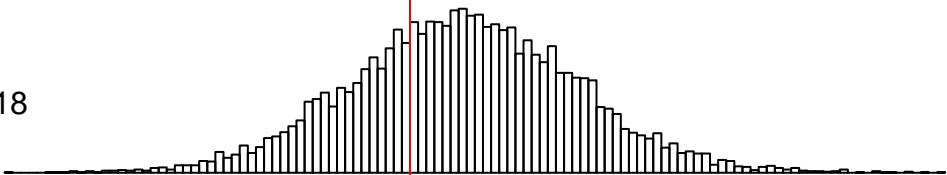

A194:18 – B224:18

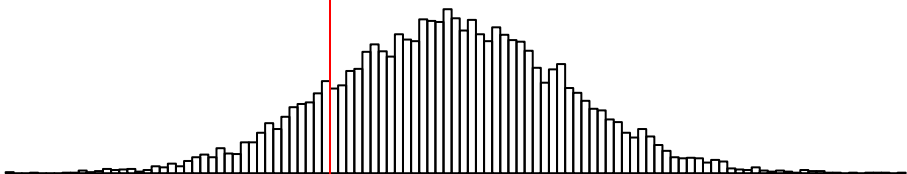

A194:18 – D206:18

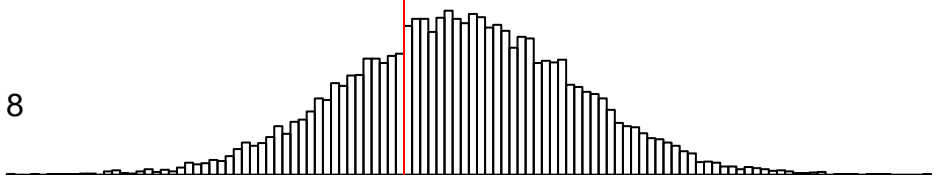

B184:18 – B224:18

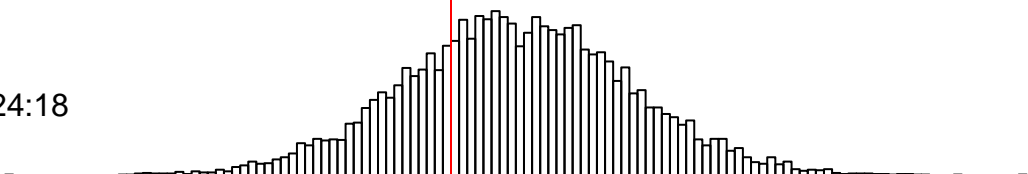

B184:18 – D206:18

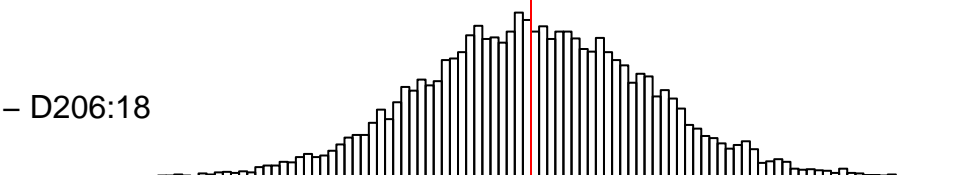

B224:18 – D206:18

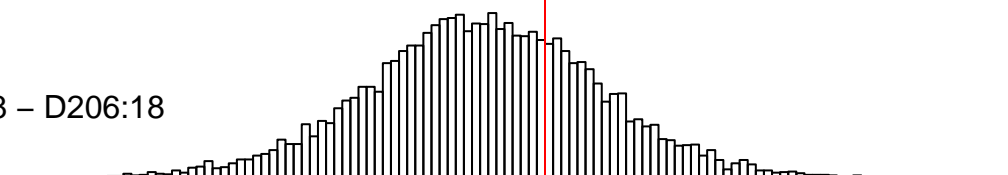

-1.5      -1.0      -0.5      0.0      0.5      1.0      1.5

delta(Polyunsaturated Fatty Acids 3)

A194:18

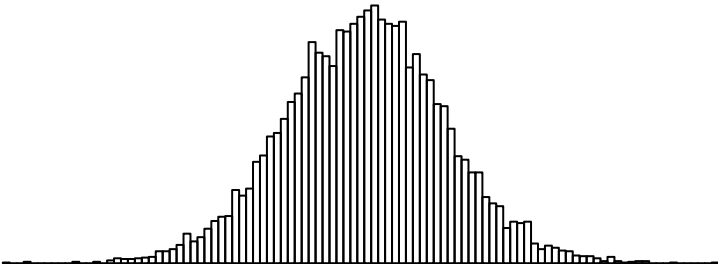

B184:18

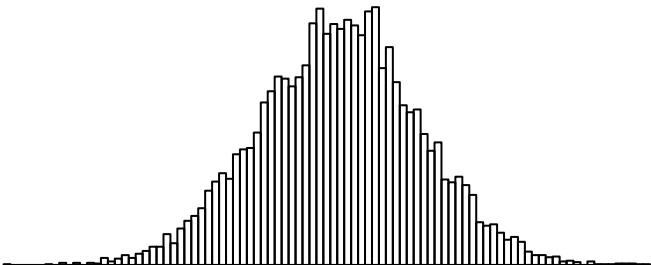

B224:18

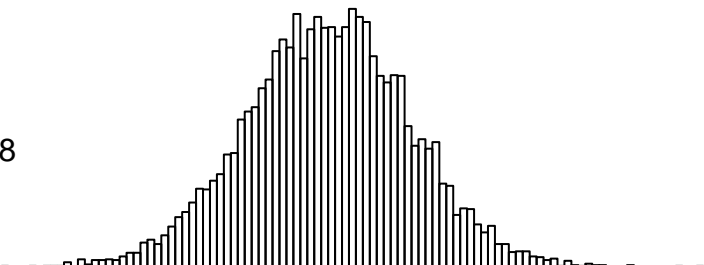

D206:18

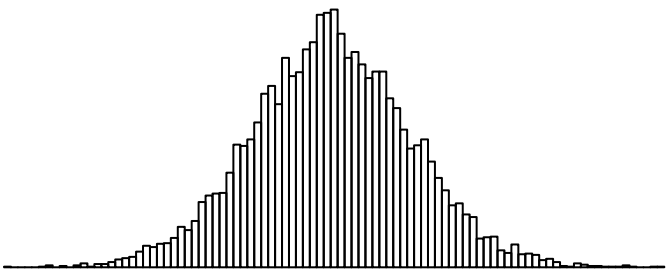

C18:2 Fatty Acid

A194:18 – B184:18

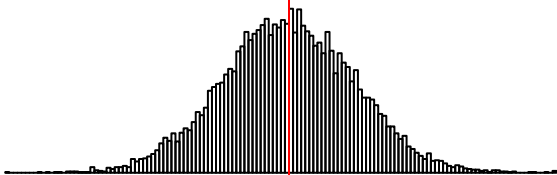

A194:18 – B224:18

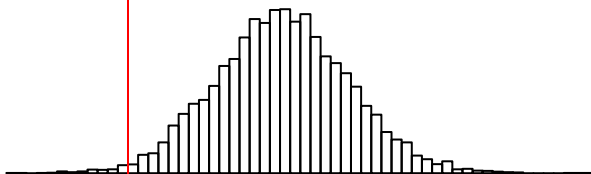

A194:18 – D206:18

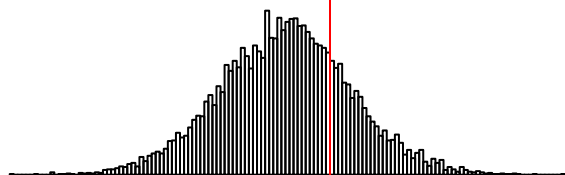

B184:18 – B224:18

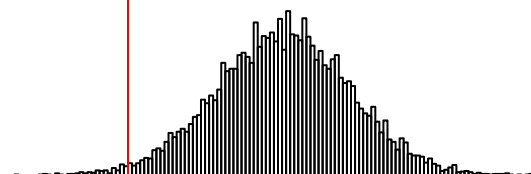

B184:18 – D206:18

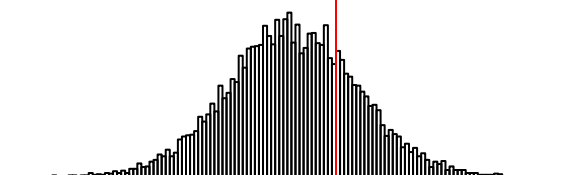

B224:18 – D206:18

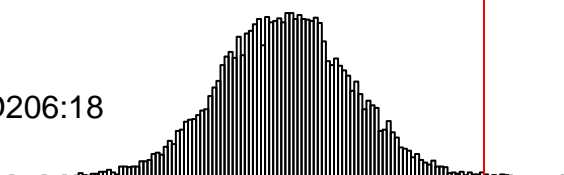

delta(C18:2 Fatty Acid)

A194:18

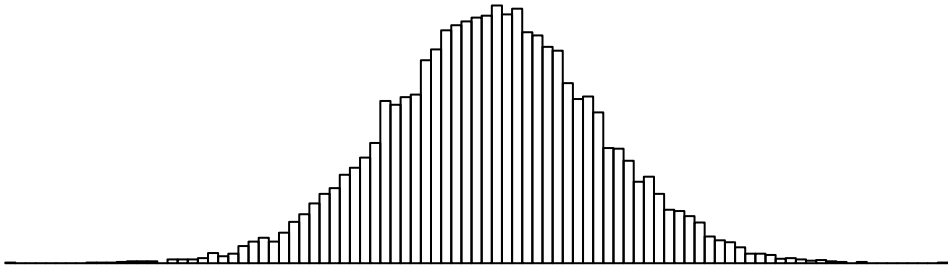

B184:18

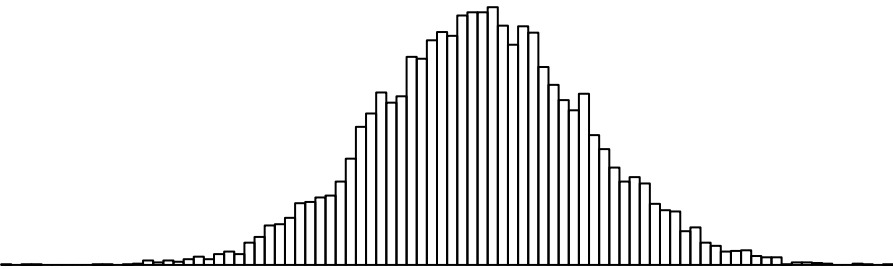

B224:18

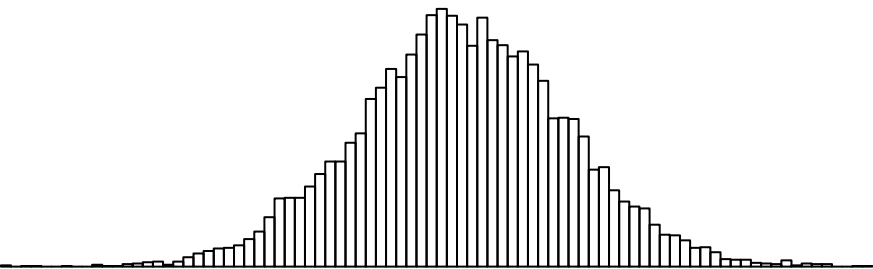

D206:18

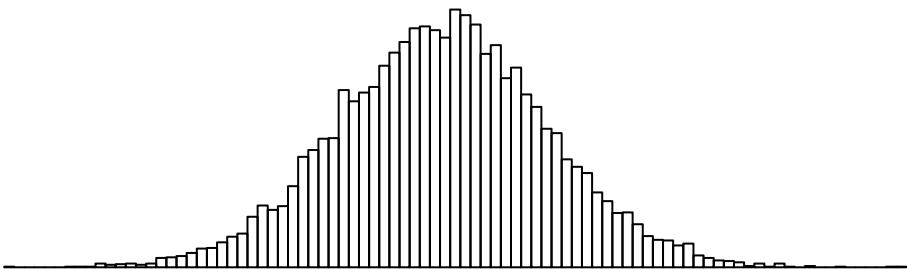

C18:0 Fatty Acid

A194:18 – B184:18

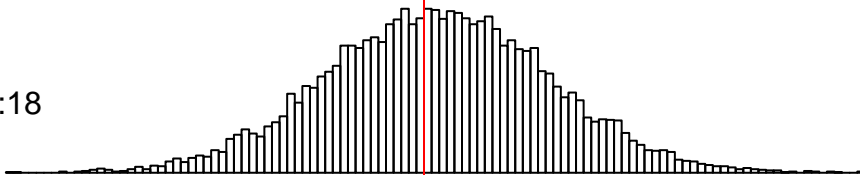

A194:18 – B224:18

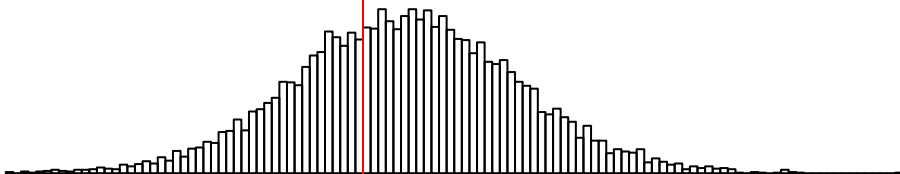

A194:18 – D206:18

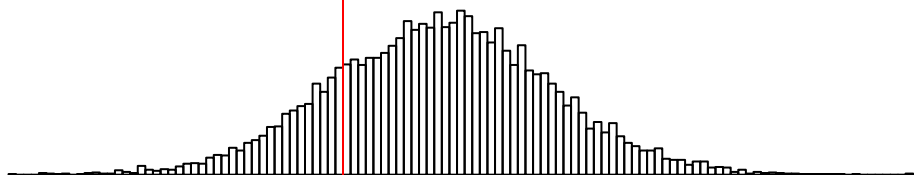

B184:18 – B224:18

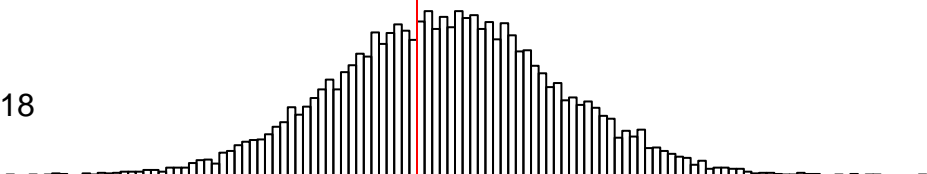

B184:18 – D206:18

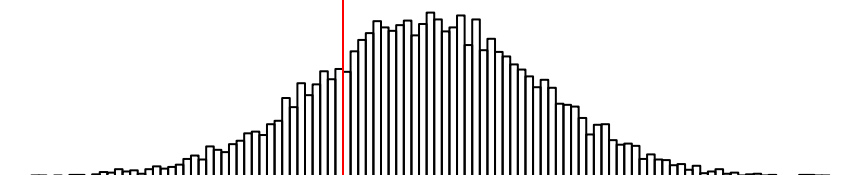

B224:18 – D206:18

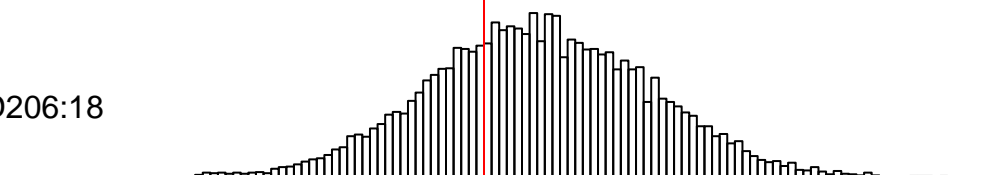

-4 -2 0 2 4

delta(C18:0 Fatty Acid)

A194:18

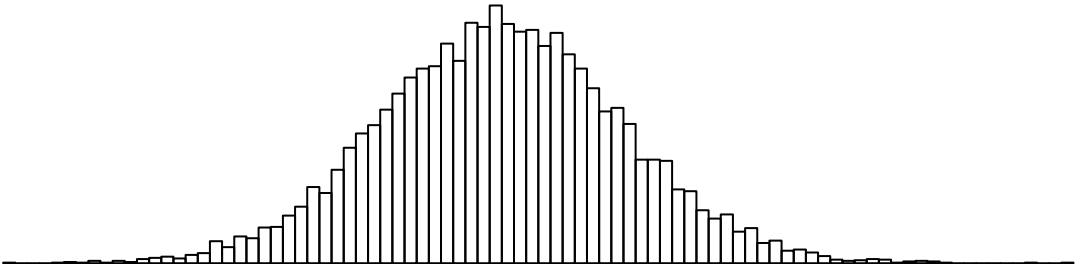

B184:18

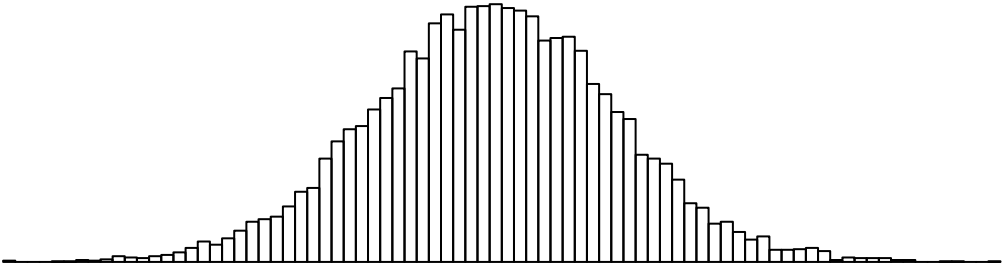

B224:18

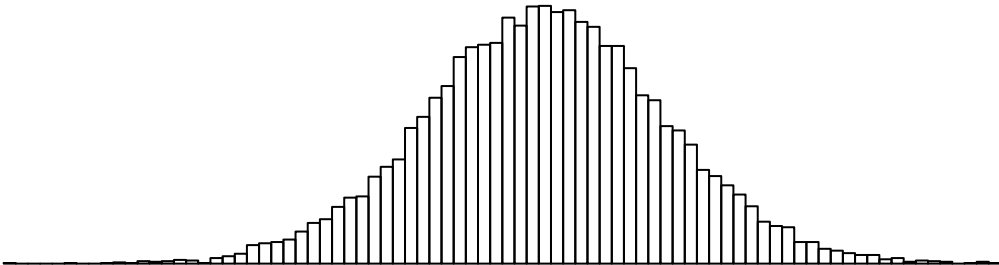

D206:18

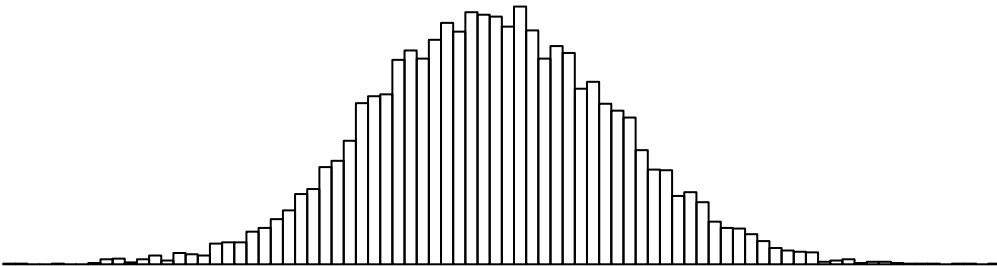

-8.0 -7.5 -7.0 -6.5 -6.0

Unidentified Fatty Acid 2

A194:18 – B184:18

A194:18 – B224:18

A194:18 – D206:18

B184:18 – B224:18

B184:18 – D206:18

B224:18 – D206:18

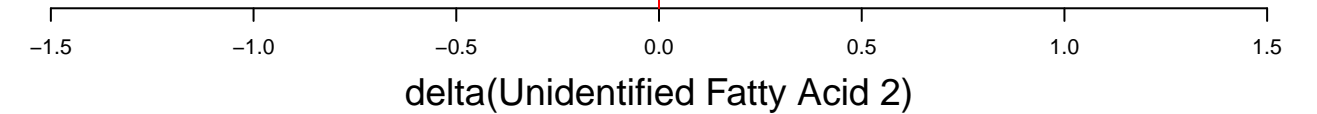



A194:18

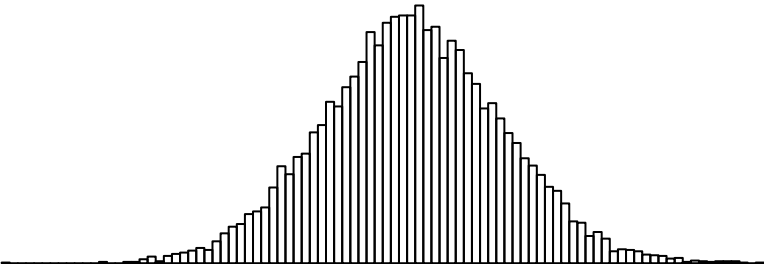

B184:18

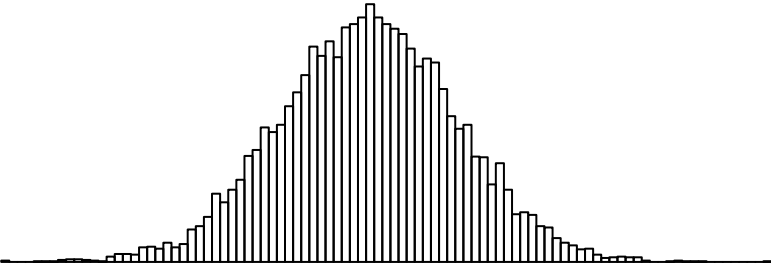

B224:18

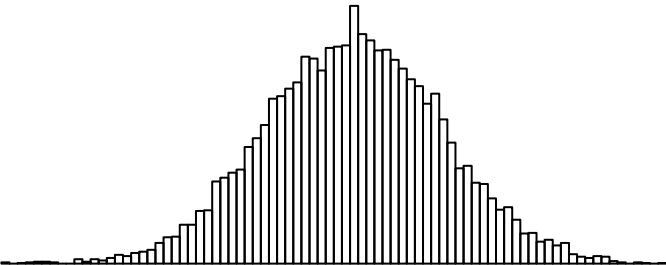

D206:18

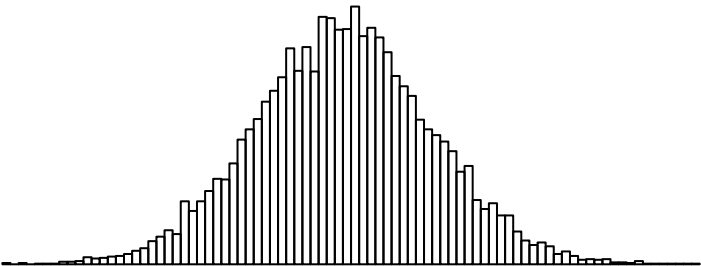

-4.5      -4.0      -3.5      -3.0      -2.5      -2.0      -1.5

Glycerol

A194:18 – B184:18

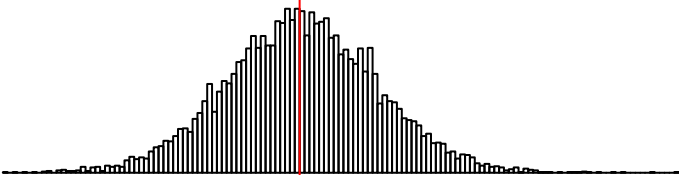

A194:18 – B224:18

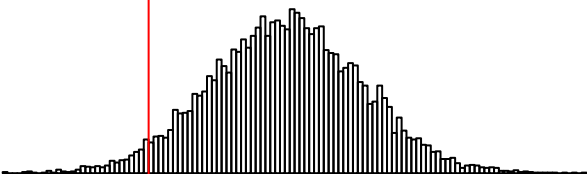

A194:18 – D206:18

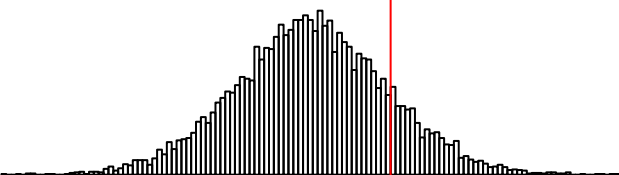

B184:18 – B224:18

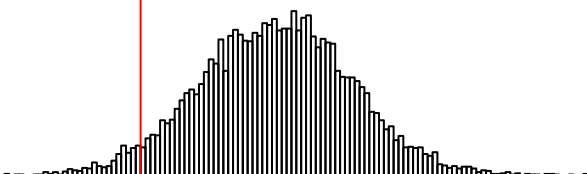

B184:18 – D206:18

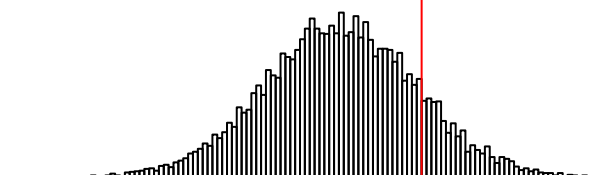

B224:18 – D206:18

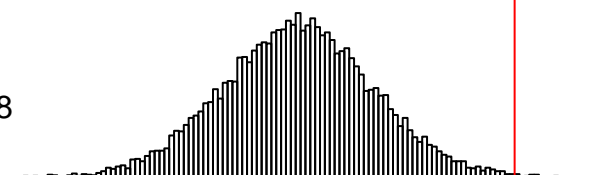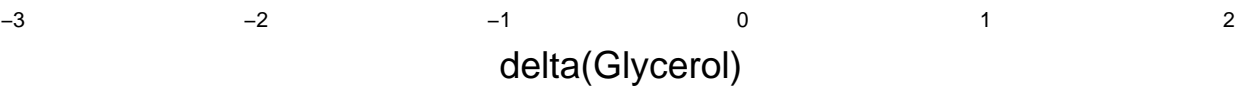

A194:18

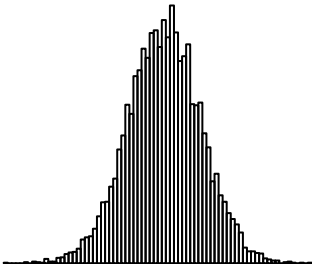

B184:18

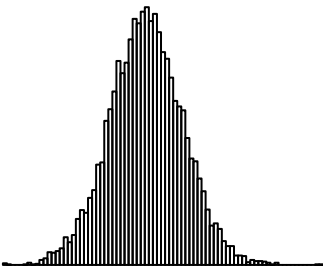

B224:18

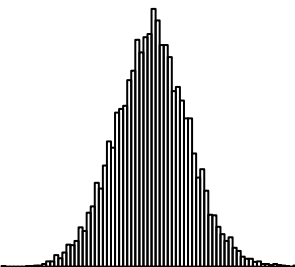

D206:18

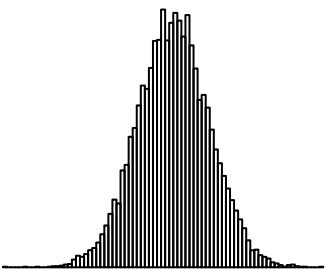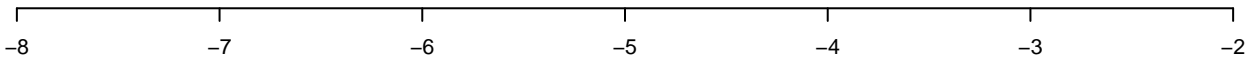

Inositol 1

A194:18 – B184:18

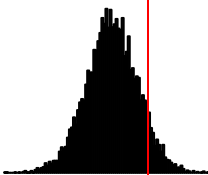

A194:18 – B224:18

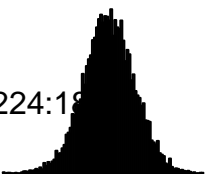

A194:18 – D206:18

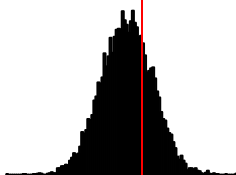

B184:18 – B224:18

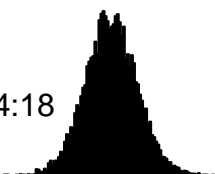

B184:18 – D206:18

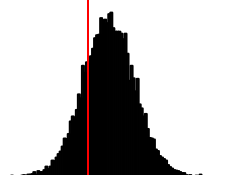

B224:18 – D206:18

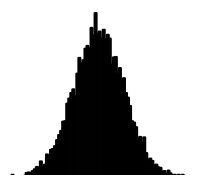

delta(Inositol 1)

A194:18

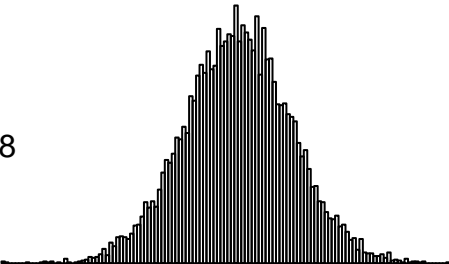

B184:18

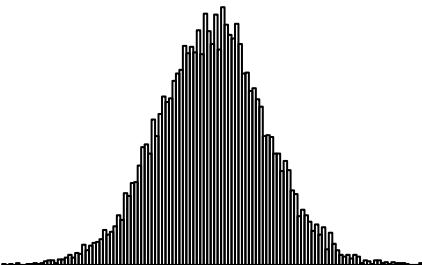

B224:18

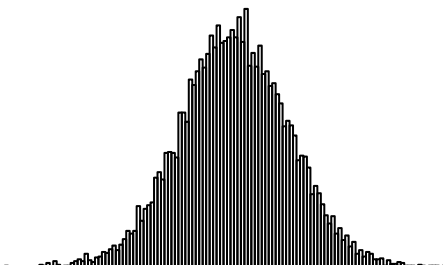

D206:18

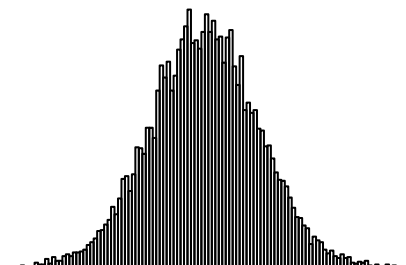

-8.0 -7.5 -7.0 -6.5 -6.0 -5.5 -5.0 -4.5

Inositol 2

A194:18 – B184:18

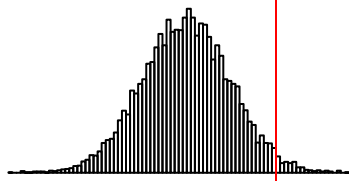

A194:18 – B224:18

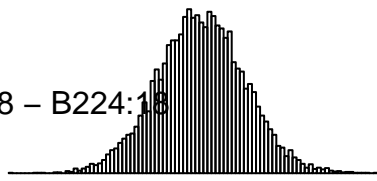

A194:18 – D206:18

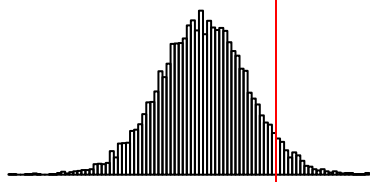

B184:18 – B224:18

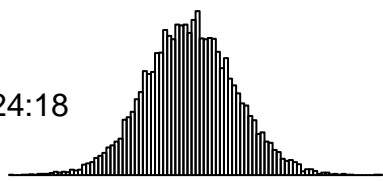

B184:18 – D206:18

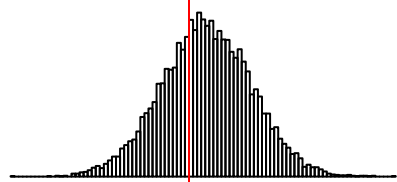

B224:18 – D206:18

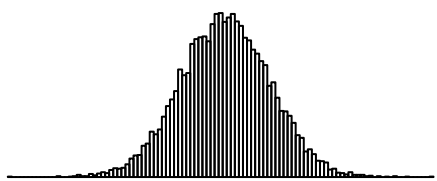

-3 -2 -1 0 1 2 3

delta(Inositol 2)

A194:18

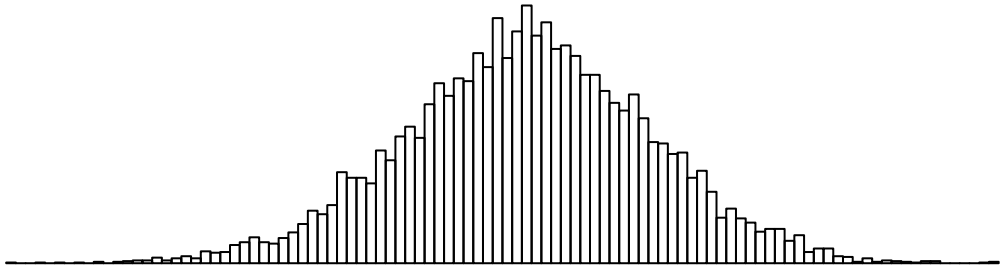

B184:18

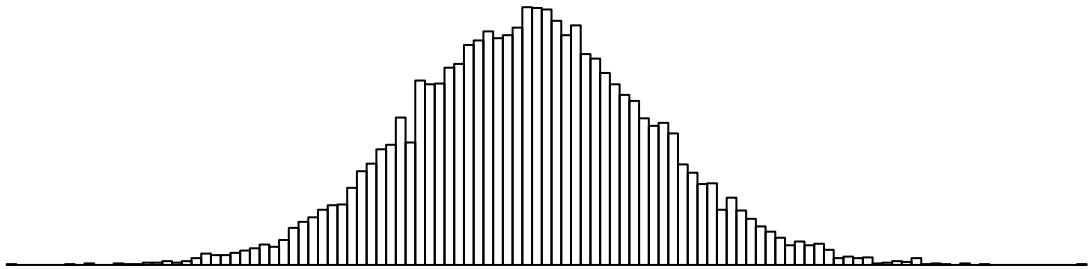

B224:18

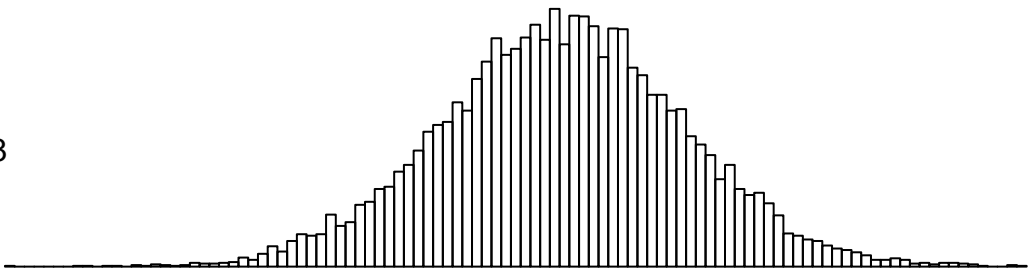

D206:18

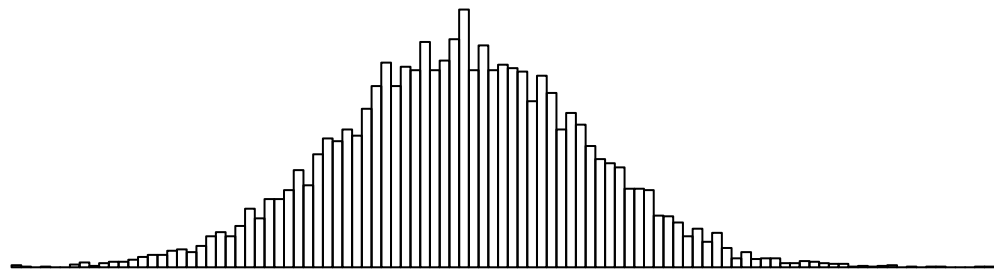

-10.0      -9.5      -9.0      -8.5      -8.0      -7.5

C29 Sterol 1

A194:18 – B184:18

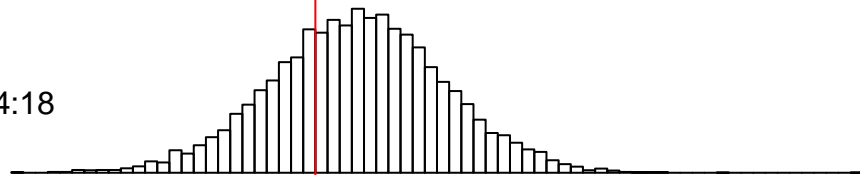

A194:18 – B224:18

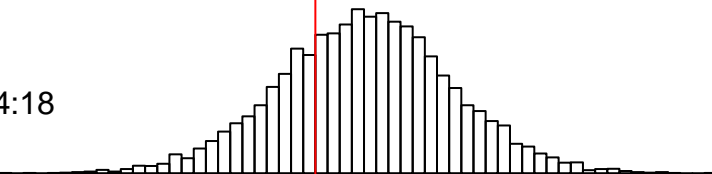

A194:18 – D206:18

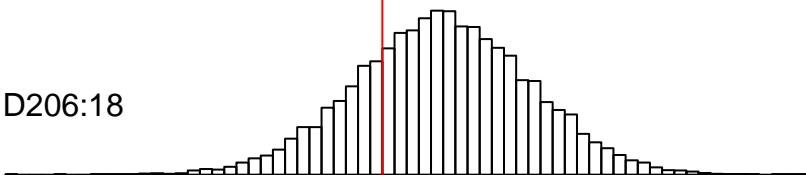

B184:18 – B224:18

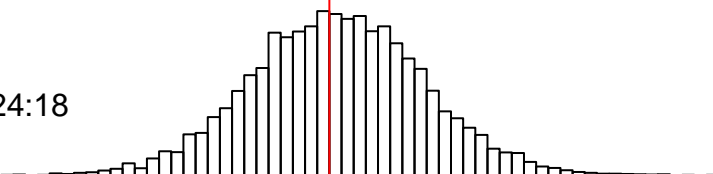

B184:18 – D206:18

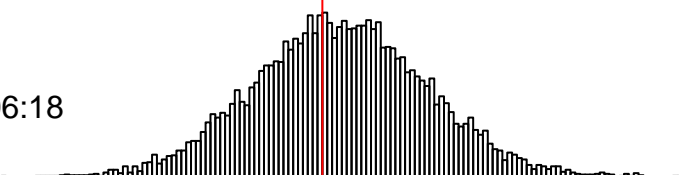

B224:18 – D206:18

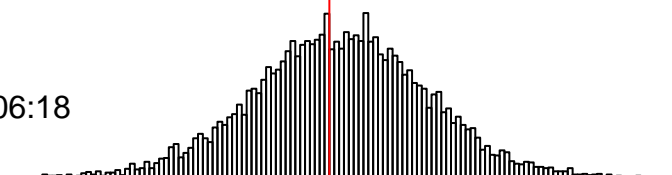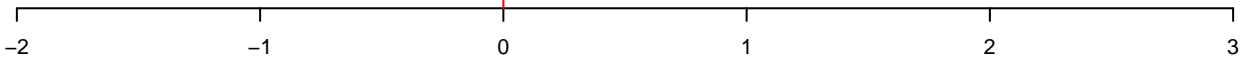

delta(C29 Sterol 1)



A194:18

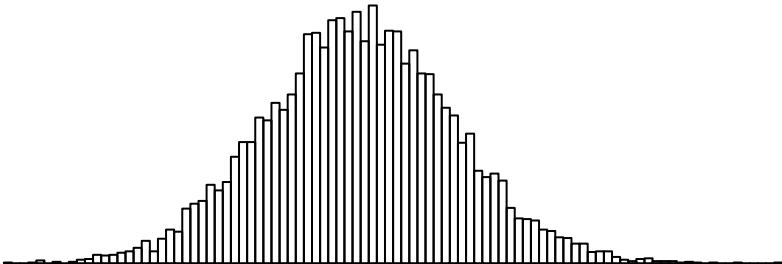

B184:18

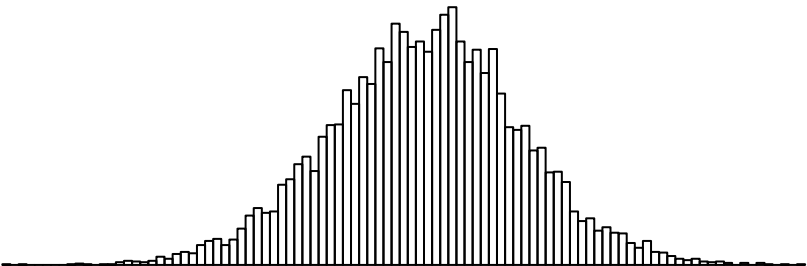

B224:18

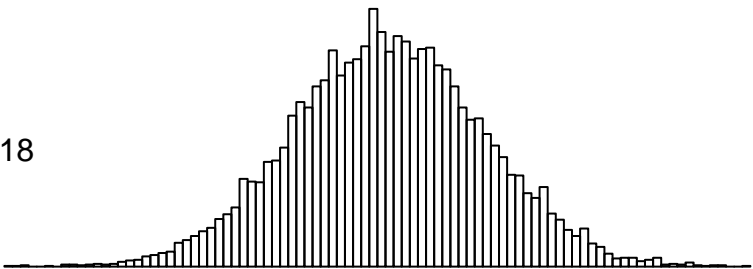

D206:18

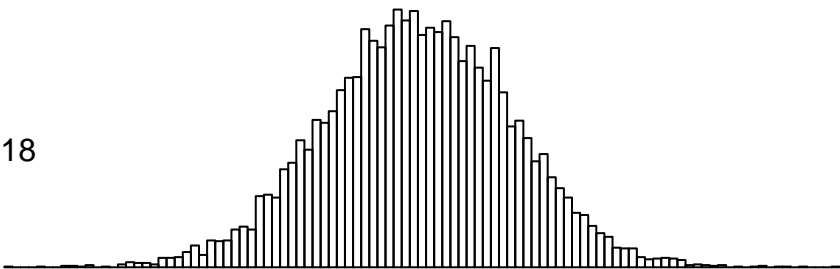

-9.5      -9.0      -8.5      -8.0      -7.5      -7.0      -6.5

C29 Stanol 1

A194:18 – B184:18

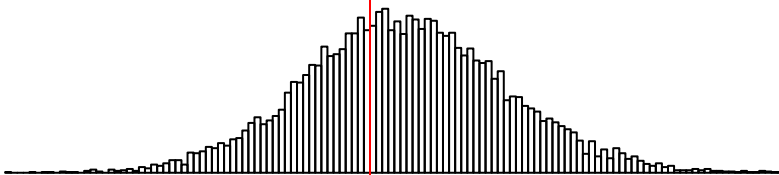

A194:18 – B224:18

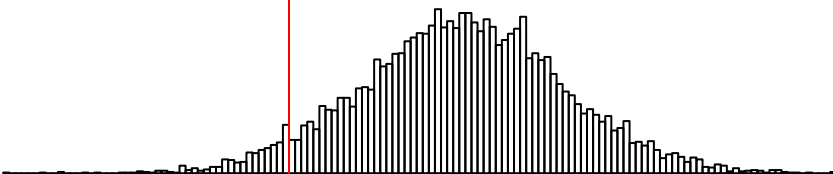

A194:18 – D206:18

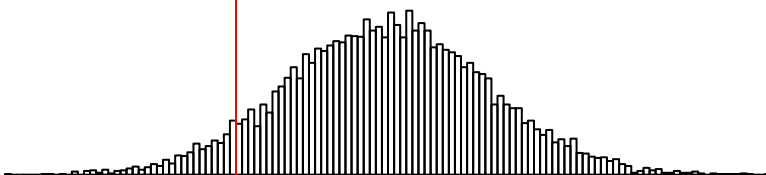

B184:18 – B224:18

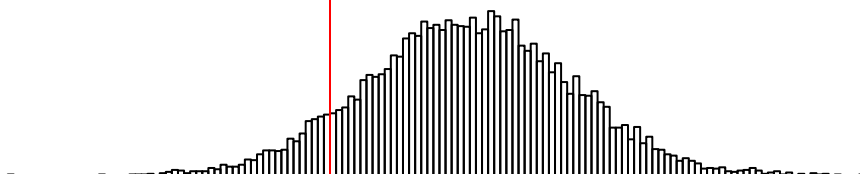

B184:18 – D206:18

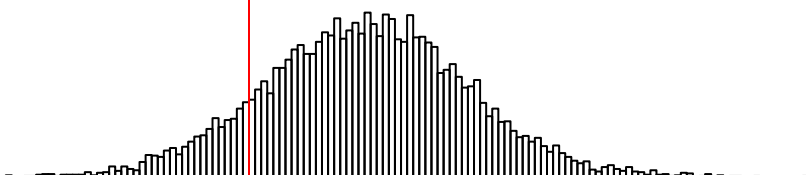

B224:18 – D206:18

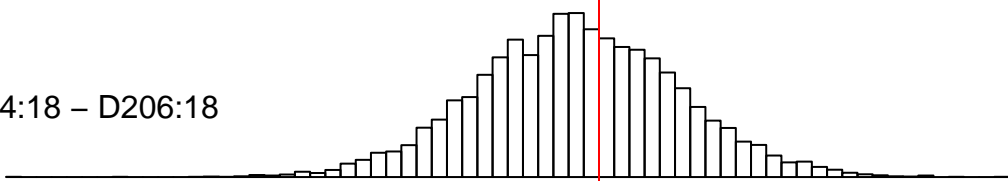

-2 -1 0 1 2

delta(C29 Stanol 1)

A194:18

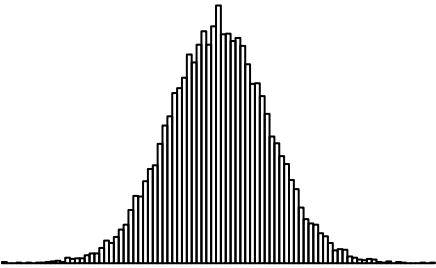

B184:18

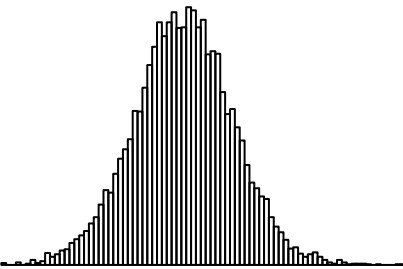

B224:18

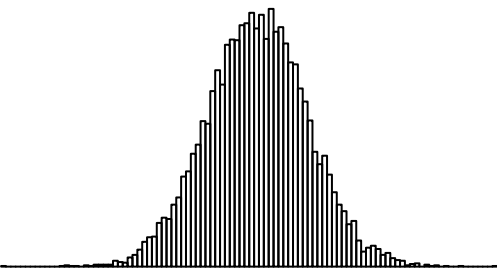

D206:18

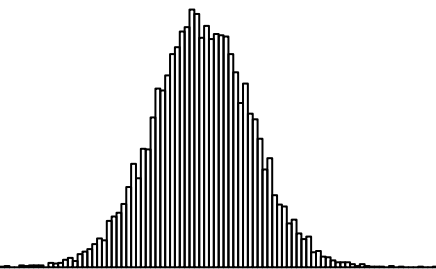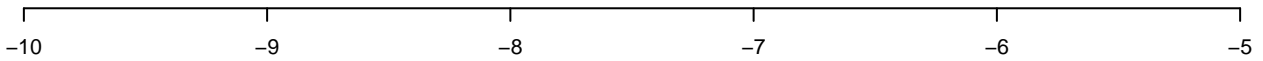

C27<sup>5,22</sup> Sterol

A194:18 – B184:18

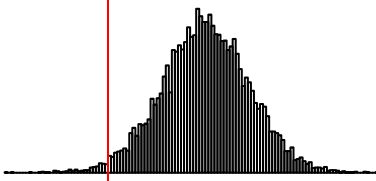

A194:18 – B224:18

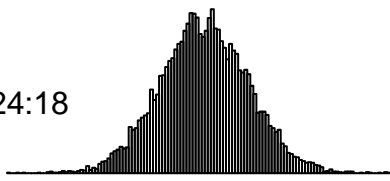

A194:18 – D206:18

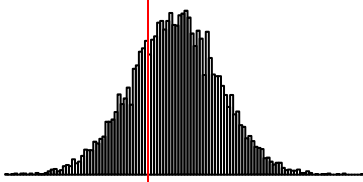

B184:18 – B224:18

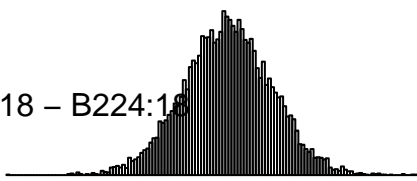

B184:18 – D206:18

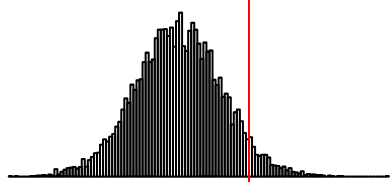

B224:18 – D206:18

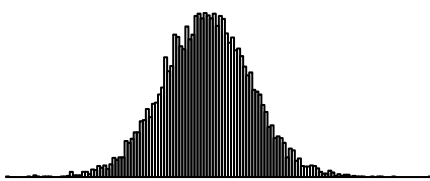

-4 -2 0 2 4

delta(C27"5,22 Sterol)

A194:18

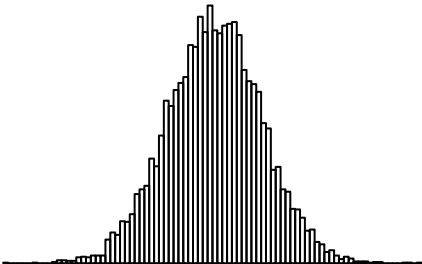

B184:18

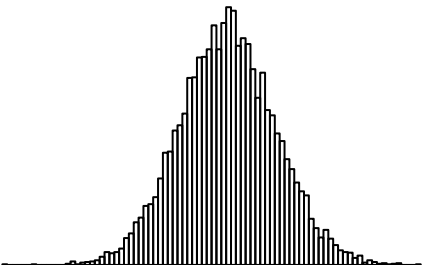

B224:18

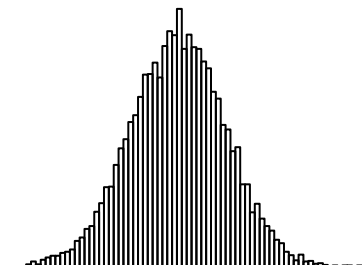

D206:18

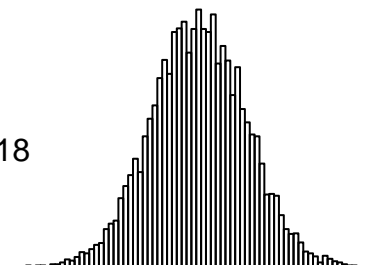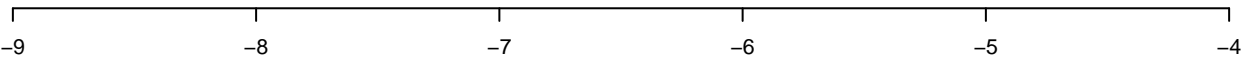

C27<sup>5</sup> Sterol

A194:18 – B184:18

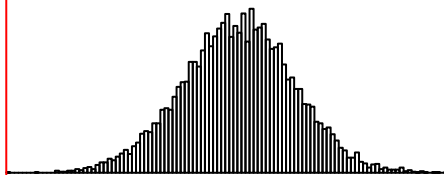

A194:18 – B224:18

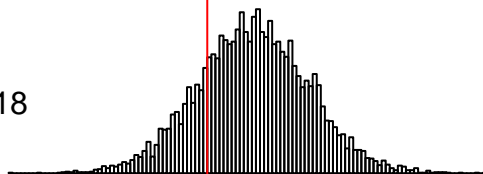

A194:18 – D206:18

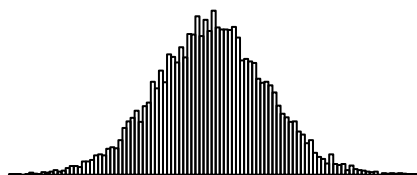

B184:18 – B224:18

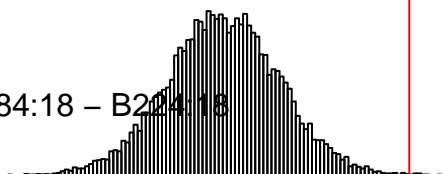

B184:18 – D206:18

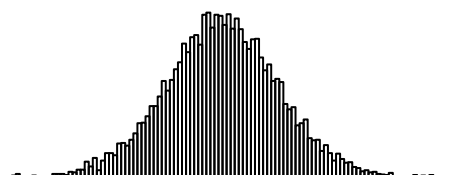

B224:18 – D206:18

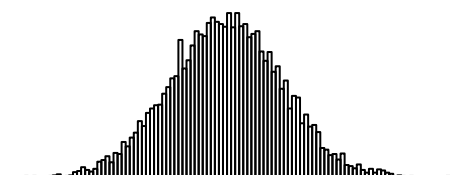

-2 -1 0 1 2 3 4

delta(C27"5 Sterol)

A194:18

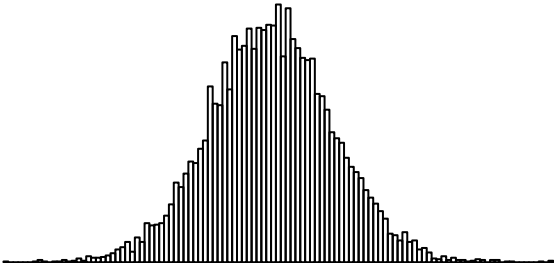

B184:18

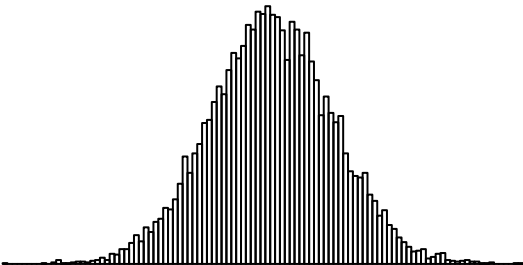

B224:18

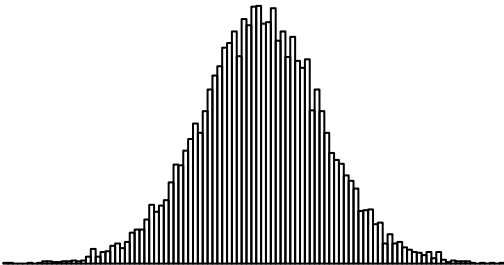

D206:18

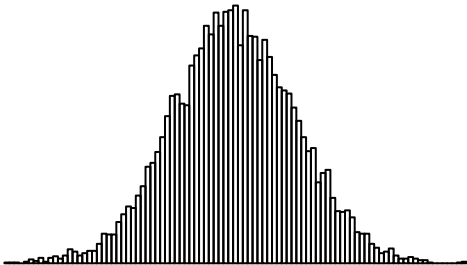

-9                      -8                      -7                      -6                      -5                      -4

C28<sup>5,22</sup> Sterol

A194:18 – B184:18

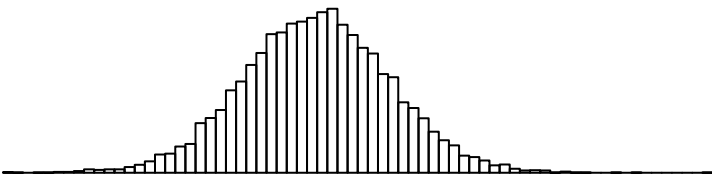

A194:18 – B224:18

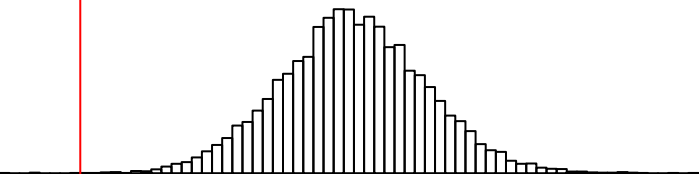

A194:18 – D206:18

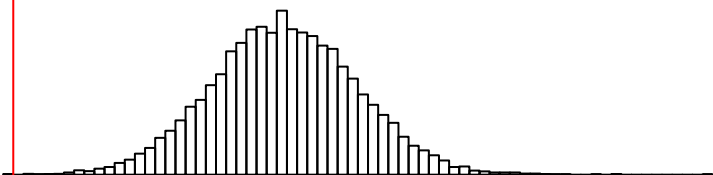

B184:18 – B224:18

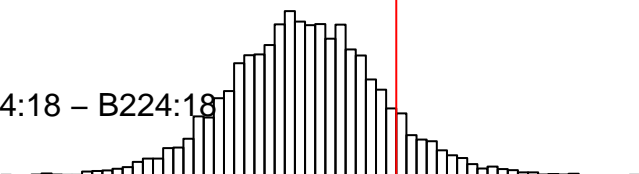

B184:18 – D206:18

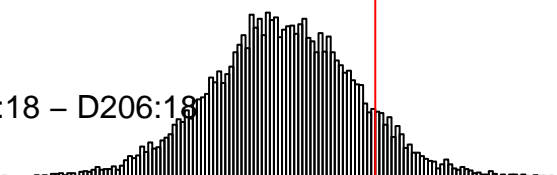

B224:18 – D206:18

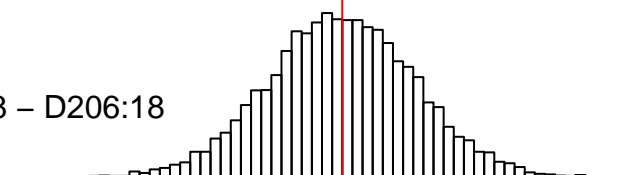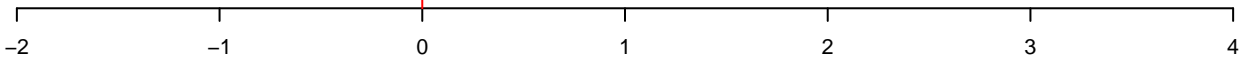

delta(C28"5,22 Sterol)



A194:18

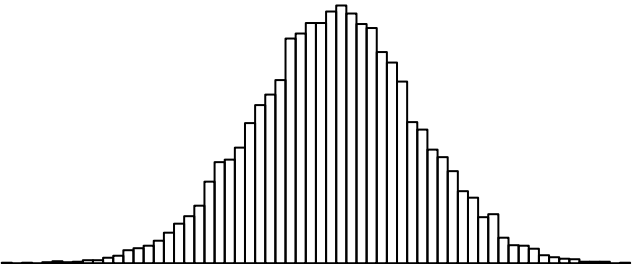

B184:18

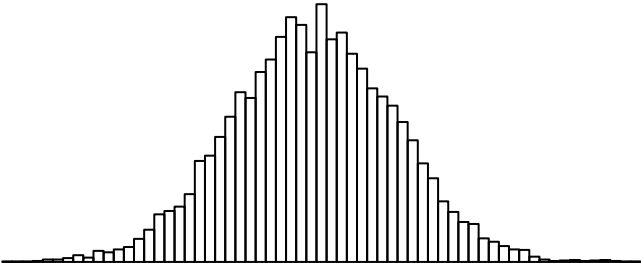

B224:18

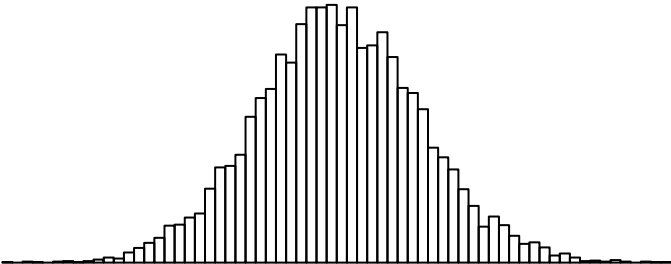

D206:18

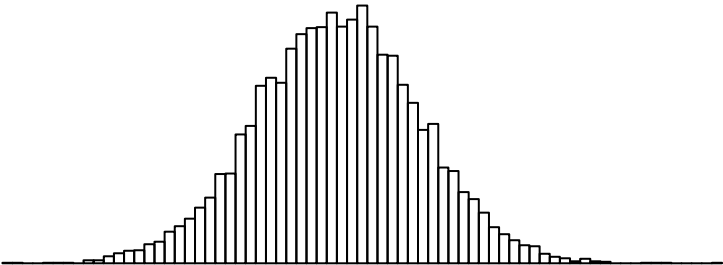

-10      -9      -8      -7      -6      -5      -4

C28"5 Sterol

A194:18 – B184:18

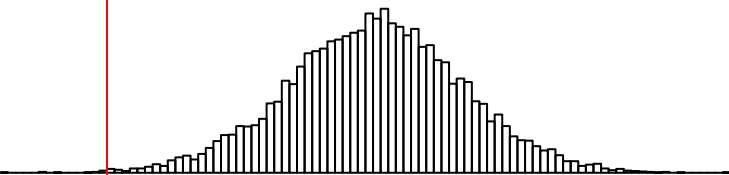

A194:18 – B224:18

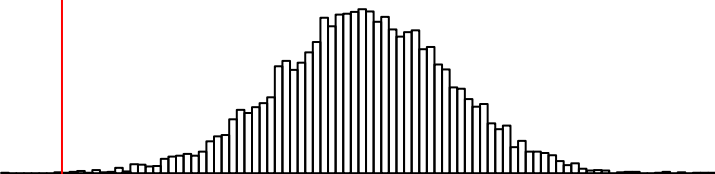

A194:18 – D206:18

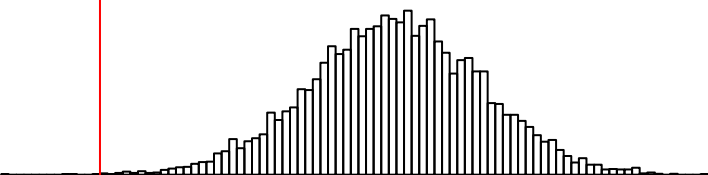

B184:18 – B224:18

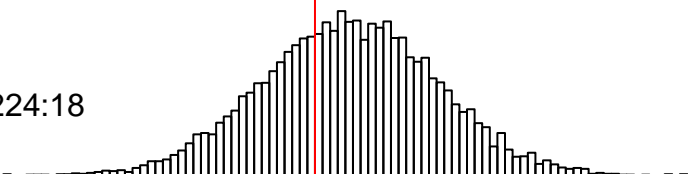

B184:18 – D206:18

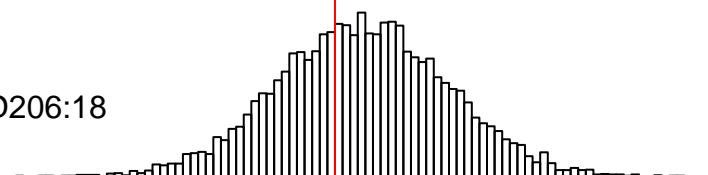

B224:18 – D206:18

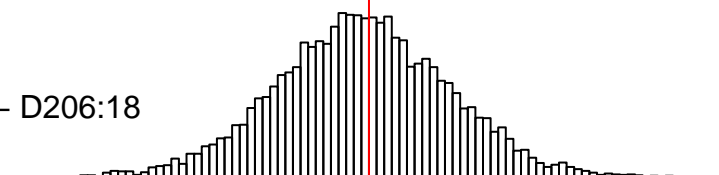

-2 0 2 4

delta(C28"5 Sterol)

A194:18

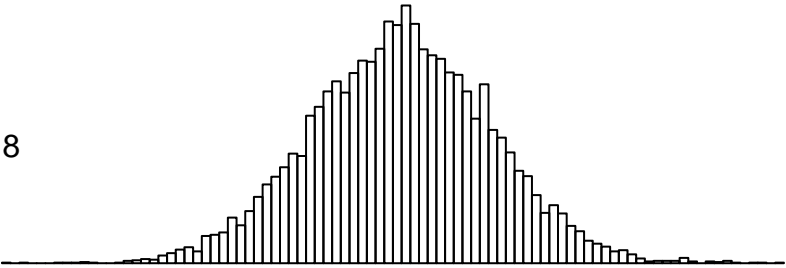

B184:18

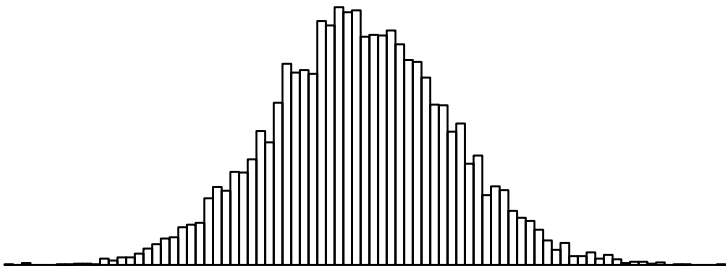

B224:18

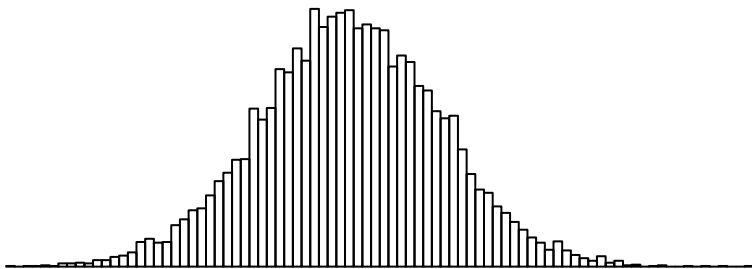

D206:18

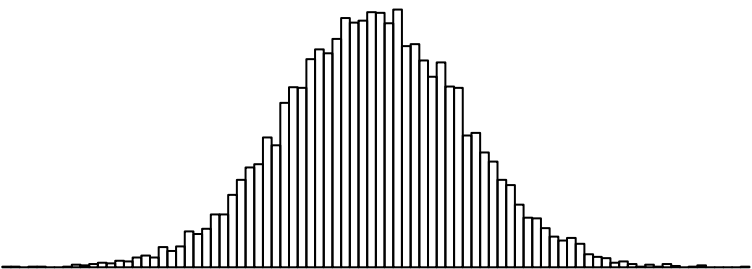

-10      -9      -8      -7      -6      -5      -4      -3

C29<sup>5,22</sup> Sterol

A194:18 – B184:18

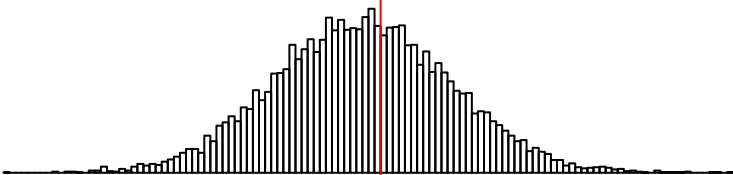

A194:18 – B224:18

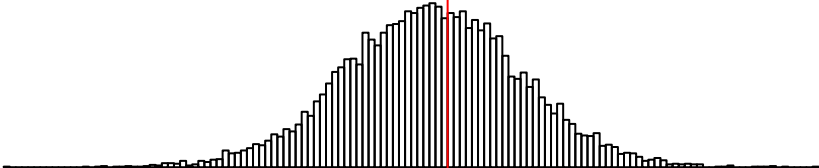

A194:18 – D206:18

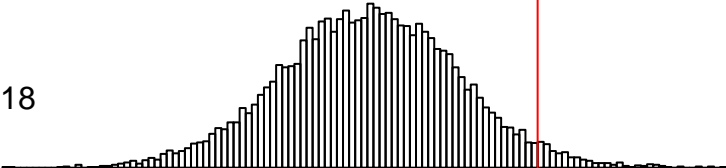

B184:18 – B224:18

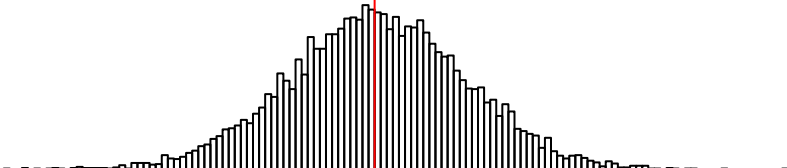

B184:18 – D206:18

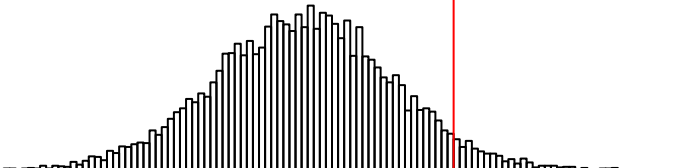

B224:18 – D206:18

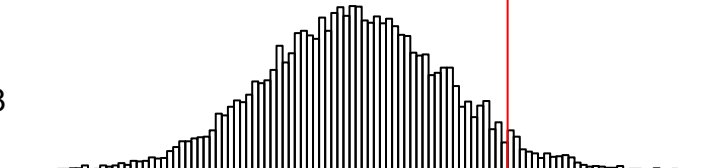

-6 -4 -2 0 2 4

delta(C29"5,22 Sterol)

A194:18

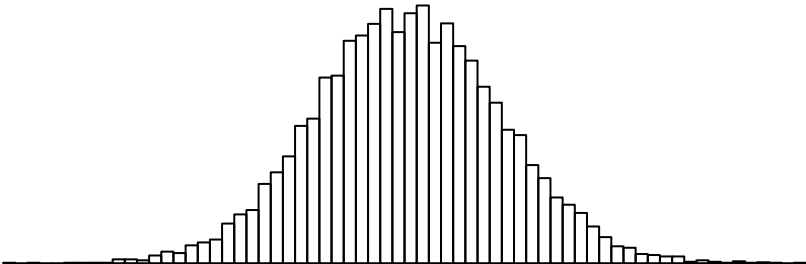

B184:18

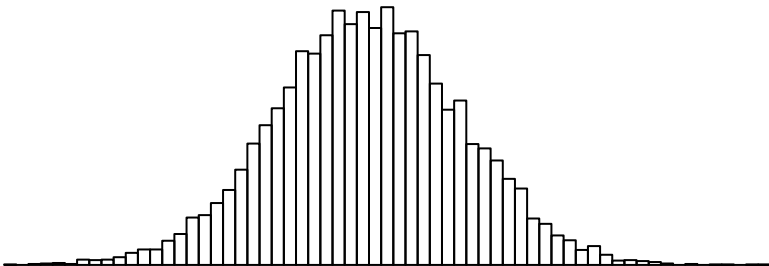

B224:18

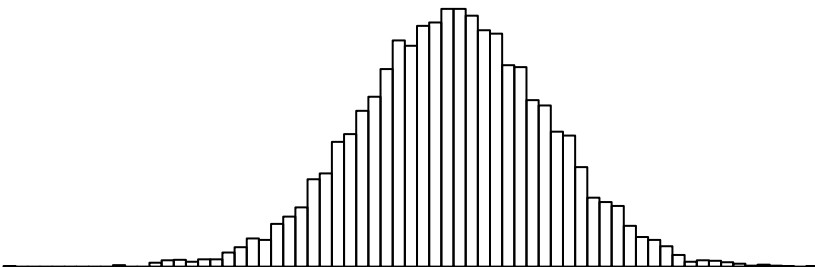

D206:18

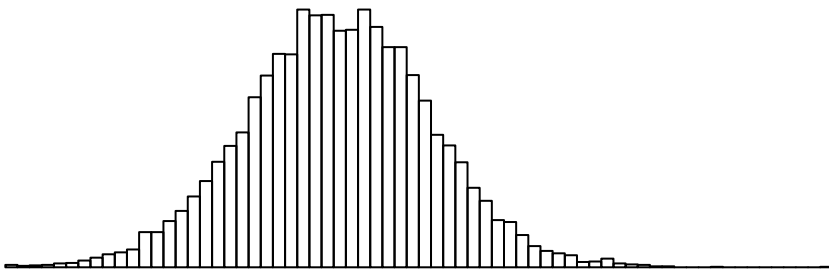

C29 Sterol 2

A194:18 – B184:18

A194:18 – B224:18

A194:18 – D206:18

B184:18 – B224:18

B184:18 – D206:18

B224:18 – D206:18

-3 -2 -1 0 1 2 3

delta(C29 Sterol 2)

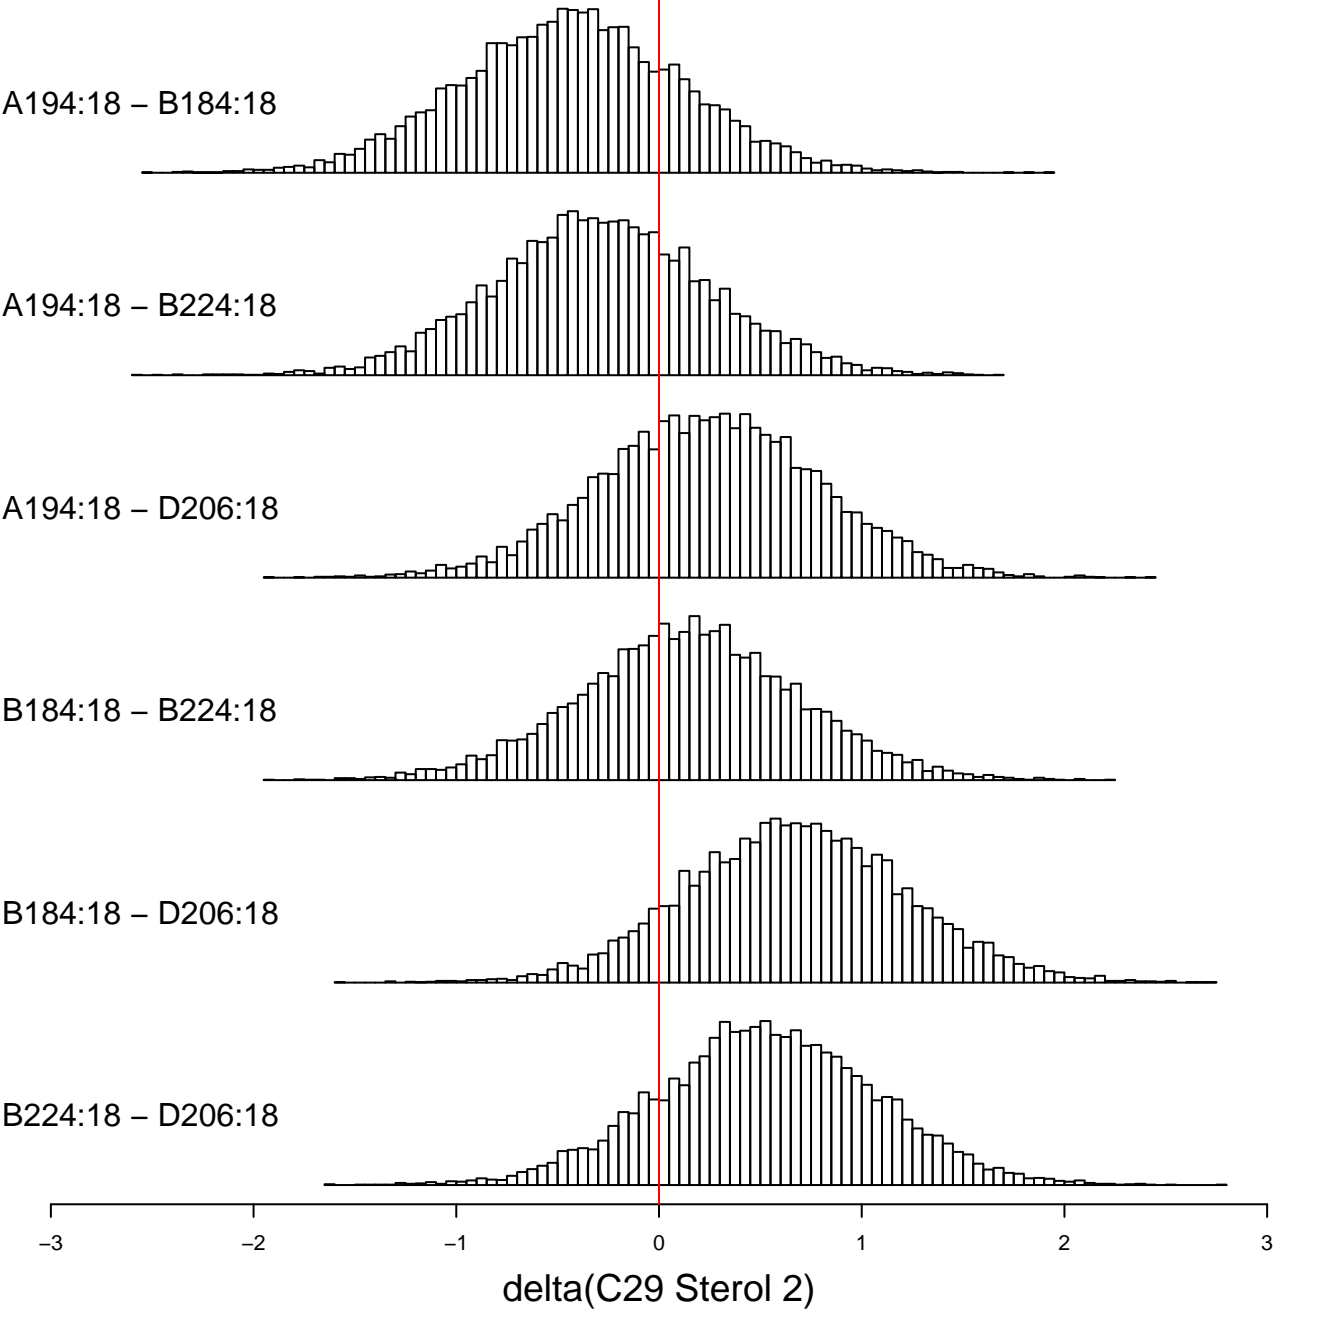

A194:18

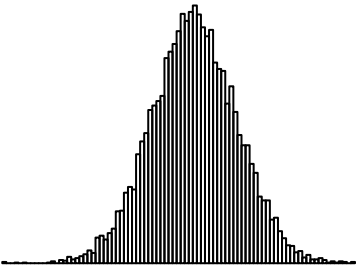

B184:18

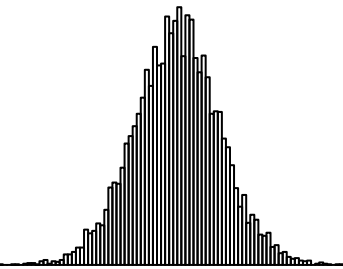

B224:18

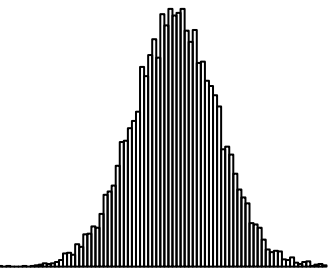

D206:18

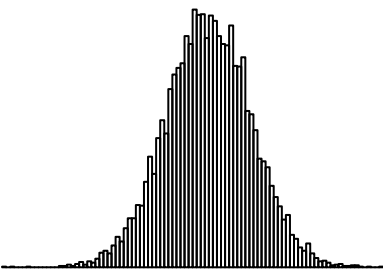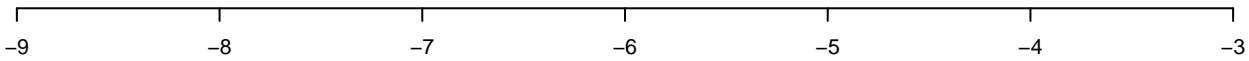

C29 Stanol 2

A194:18 – B184:18

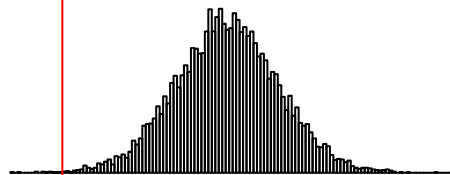

A194:18 – B224:18

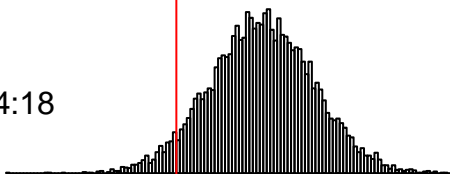

A194:18 – D206:18

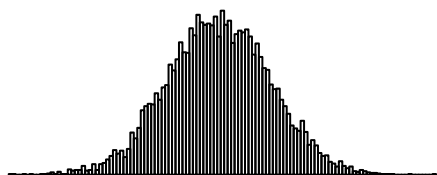

B184:18 – B224:18

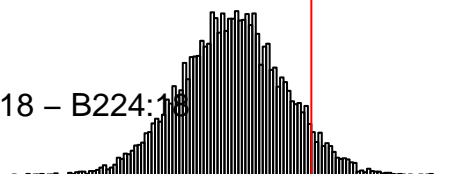

B184:18 – D206:18

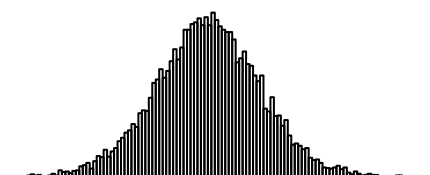

B224:18 – D206:18

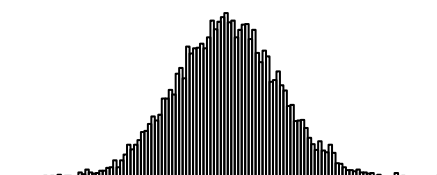

-2      -1      0      1      2      3      4      5

delta(C29 Stanol 2)



A194:18

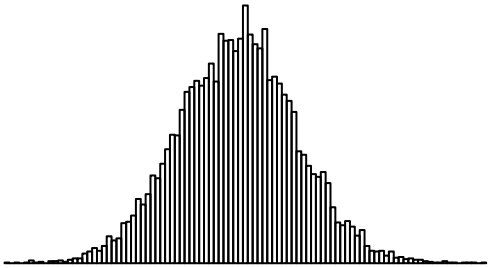

B184:18

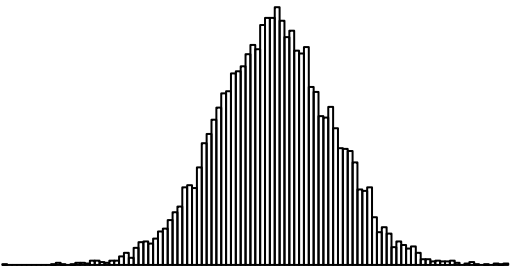

B224:18

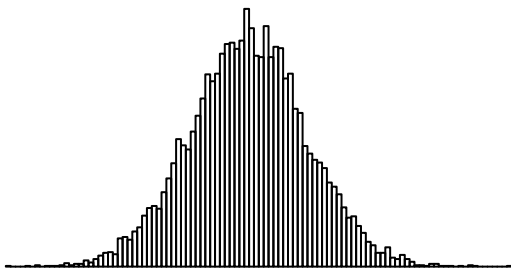

D206:18

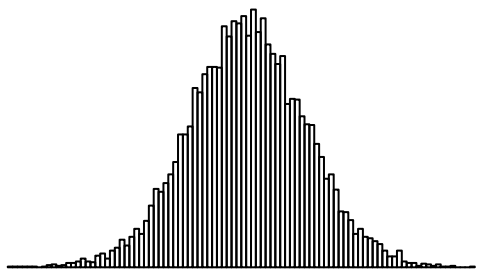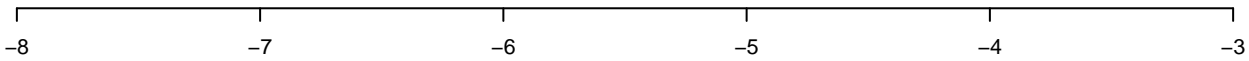

C29 Sterol 3

A194:18 – B184:18

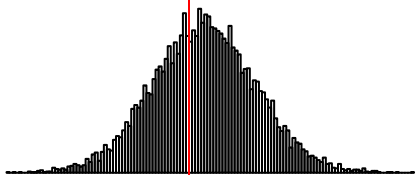

A194:18 – B224:18

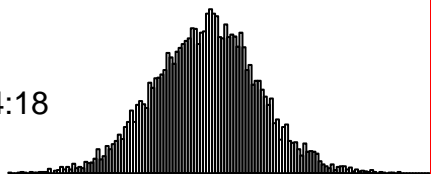

A194:18 – D206:18

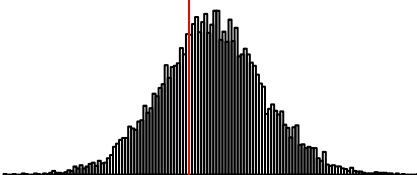

B184:18 – B224:18

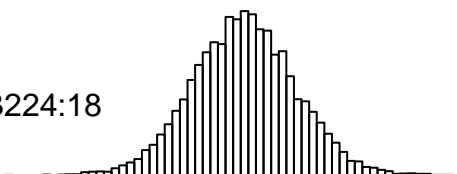

B184:18 – D206:18

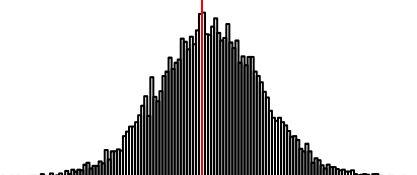

B224:18 – D206:18

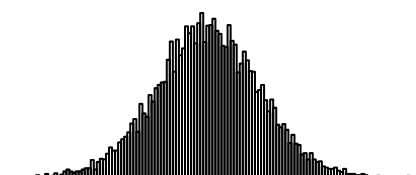

-4                      -2                      0                      2                      4

delta(C29 Sterol 3)

A194:18

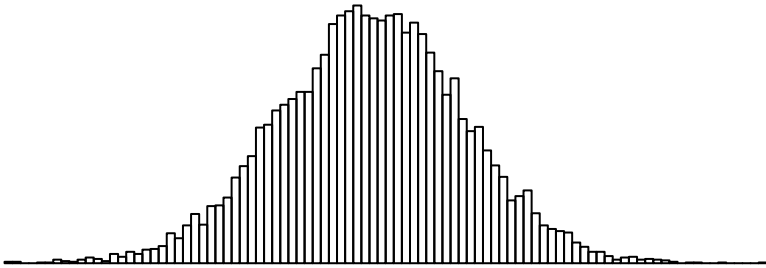

B184:18

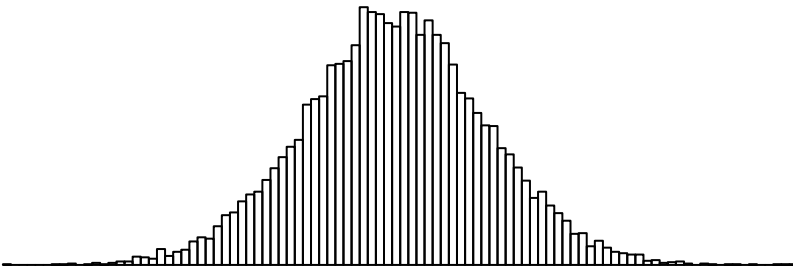

B224:18

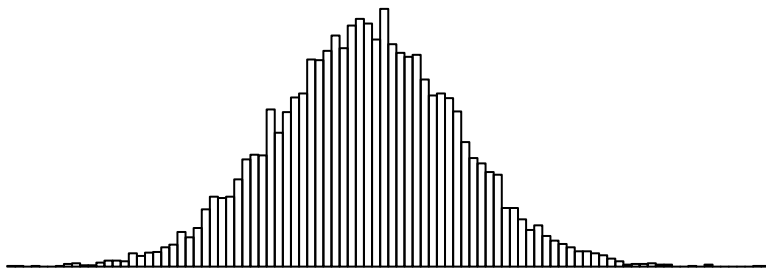

D206:18

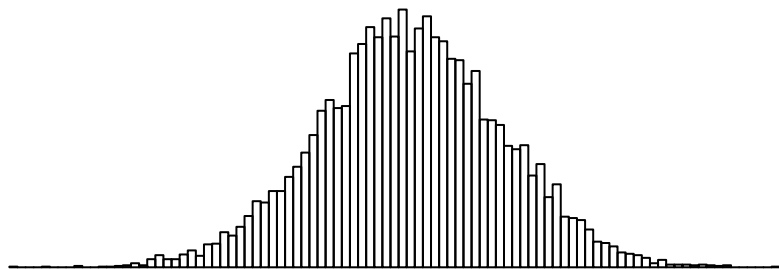

-9.5      -9.0      -8.5      -8.0      -7.5      -7.0      -6.5

C30 Sterol

A194:18 – B184:18

A194:18 – B224:18

A194:18 – D206:18

B184:18 – B224:18

B184:18 – D206:18

B224:18 – D206:18

-1.5      -1.0      -0.5      0.0      0.5      1.0      1.5      2.0

delta(C30 Sterol)

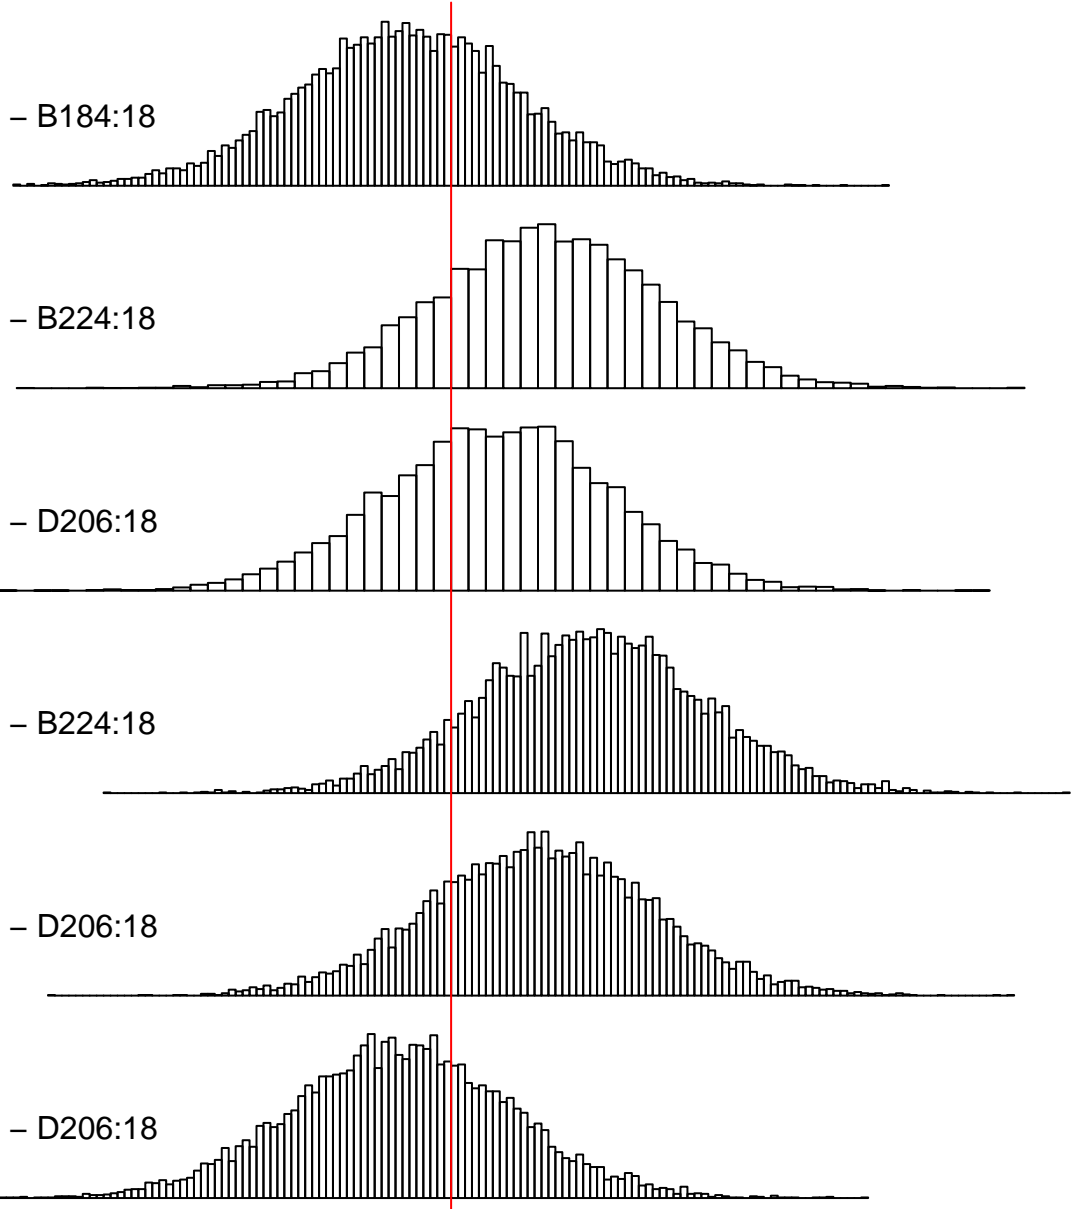

A194:18

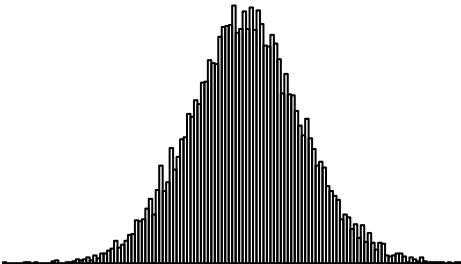

B184:18

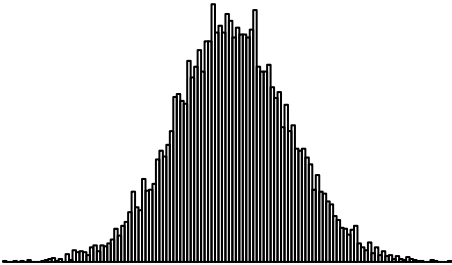

B224:18

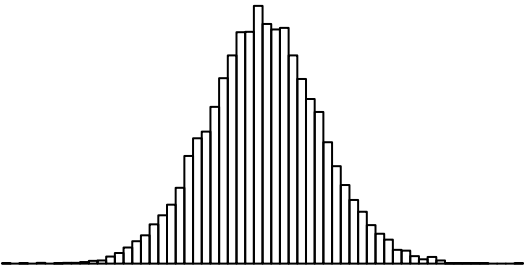

D206:18

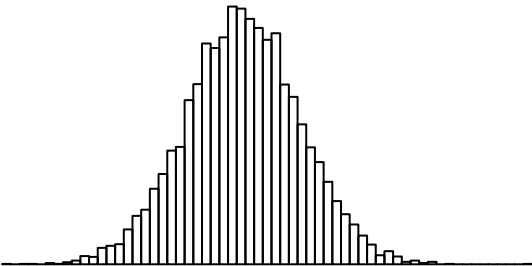

-11      -10      -9      -8      -7      -6      -5      -4

C30<sup>5</sup> Sterol

A194:18 – B184:18

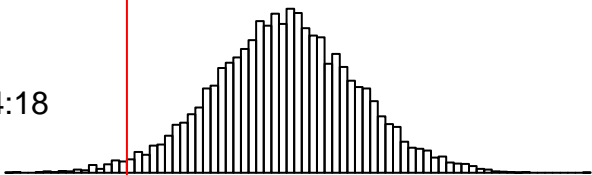

A194:18 – B224:18

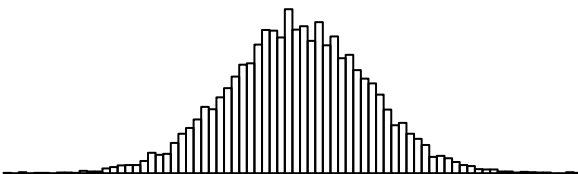

A194:18 – D206:18

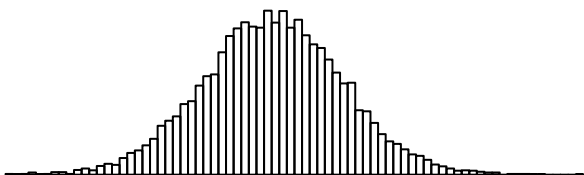

B184:18 – B224:18

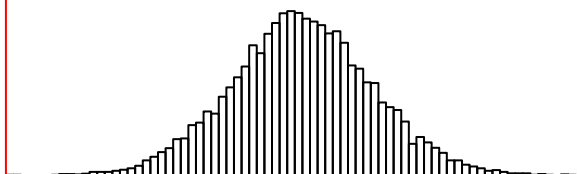

B184:18 – D206:18

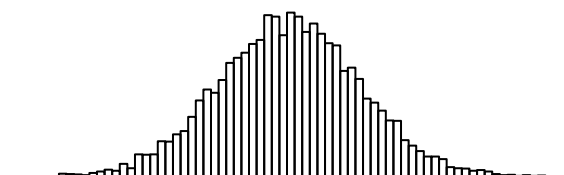

B224:18 – D206:18

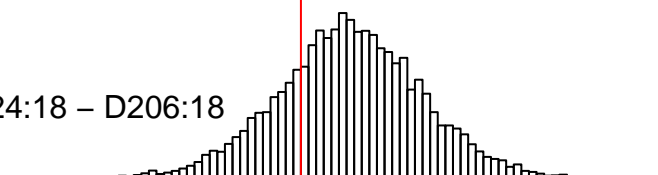

-2 0 2 4 6

delta(C30"5 Sterol)

A194:18

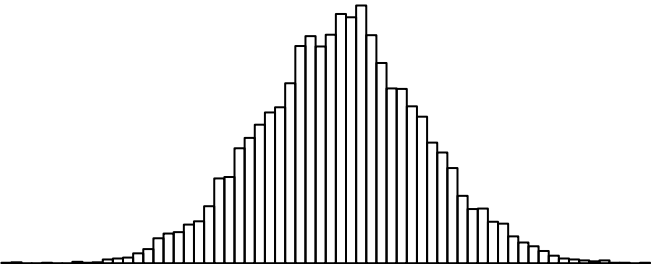

B184:18

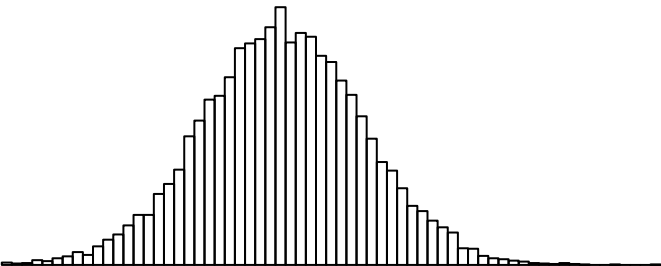

B224:18

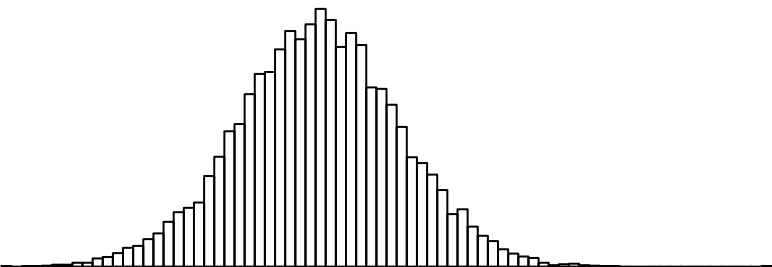

D206:18

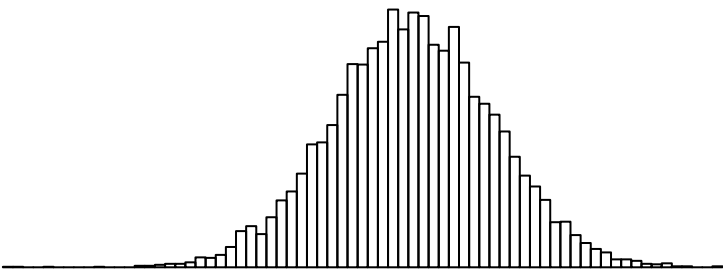

Open Hexose 1

A194:18 – B184:18

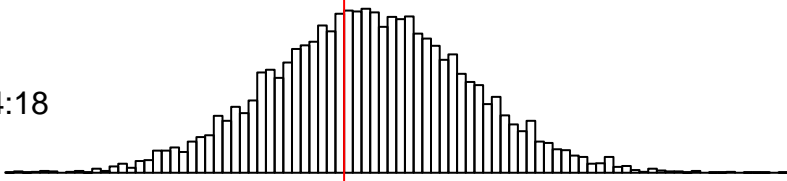

A194:18 – B224:18

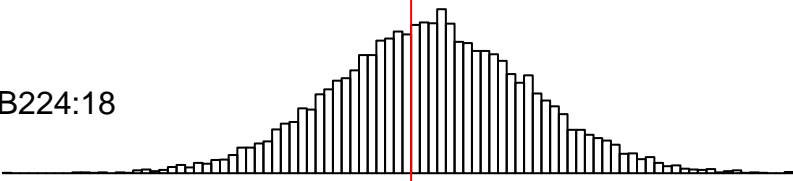

A194:18 – D206:18

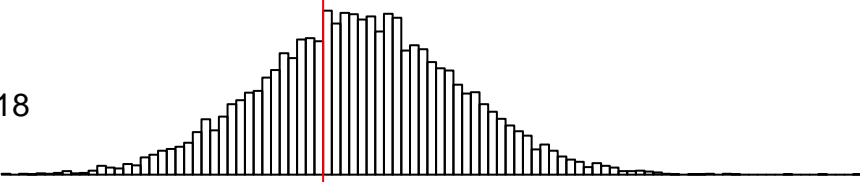

B184:18 – B224:18

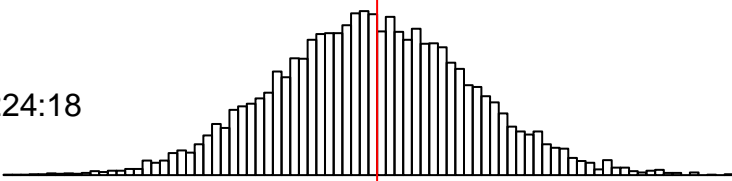

B184:18 – D206:18

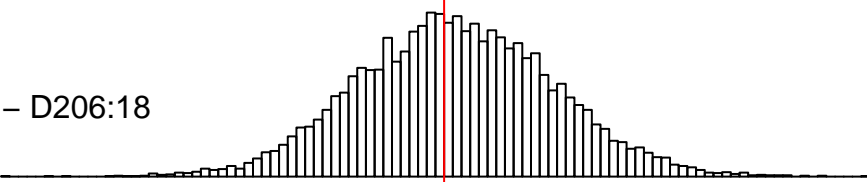

B224:18 – D206:18

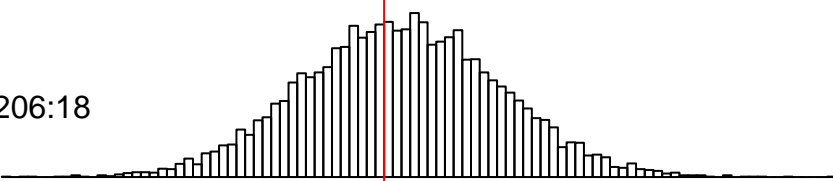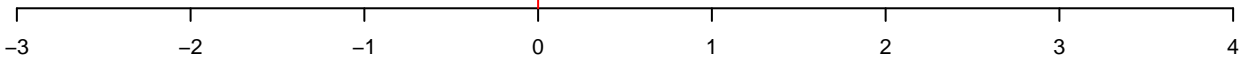

delta(Open Hexose 1)



A194:18

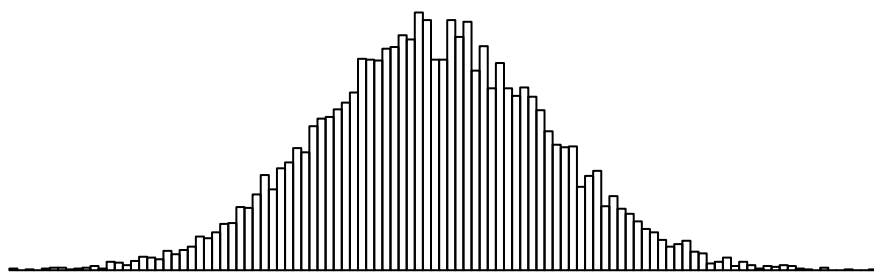

B184:18

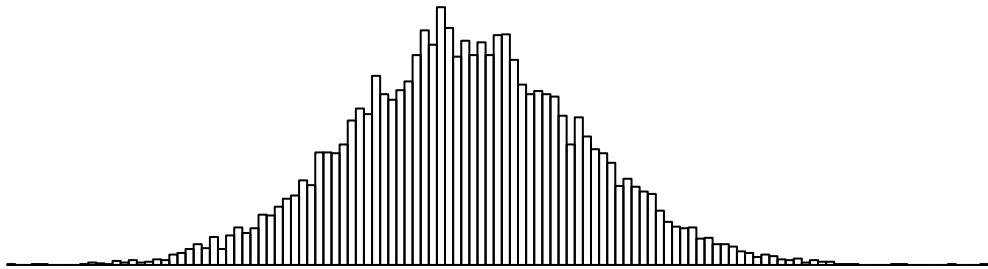

B224:18

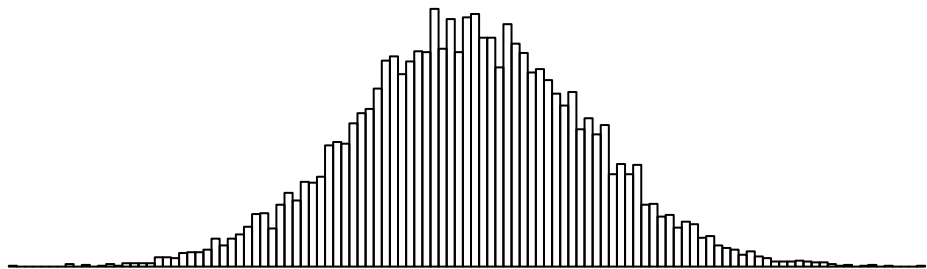

D206:18

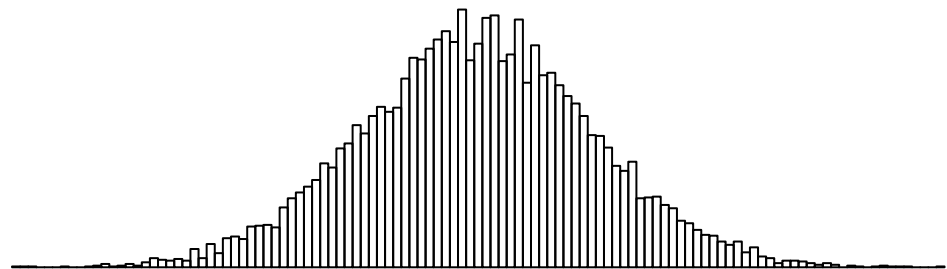

-8.0 -7.5 -7.0 -6.5 -6.0 -5.5 -5.0

Closed Hexose 1

A194:18 – B184:18

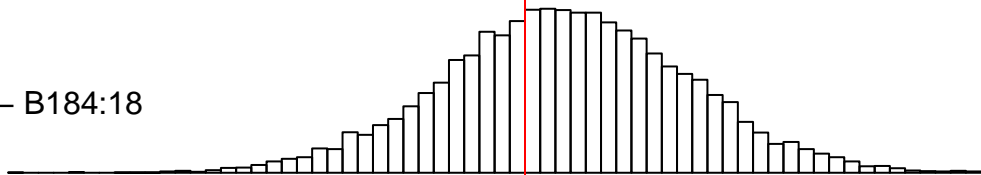

A194:18 – B224:18

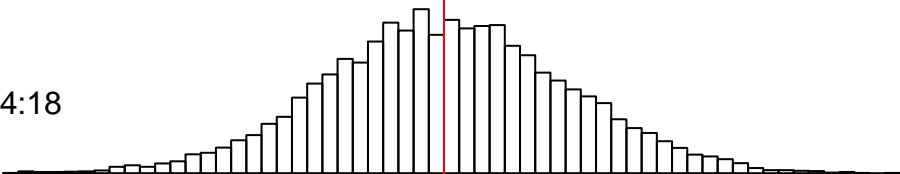

A194:18 – D206:18

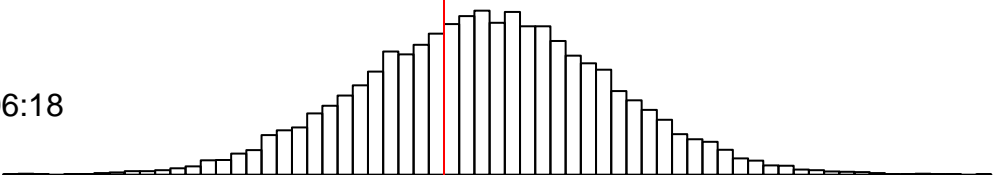

B184:18 – B224:18

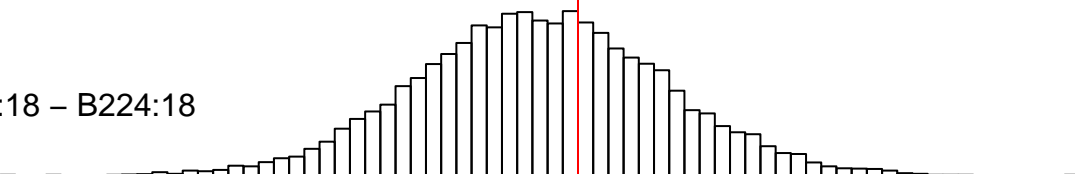

B184:18 – D206:18

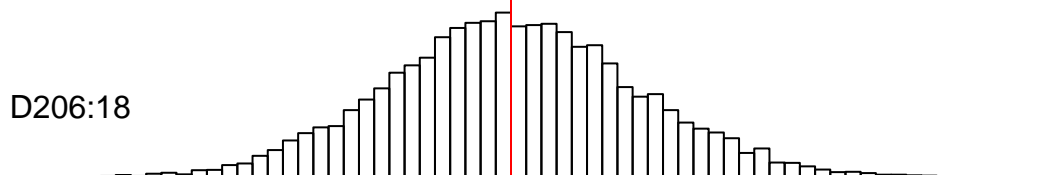

B224:18 – D206:18

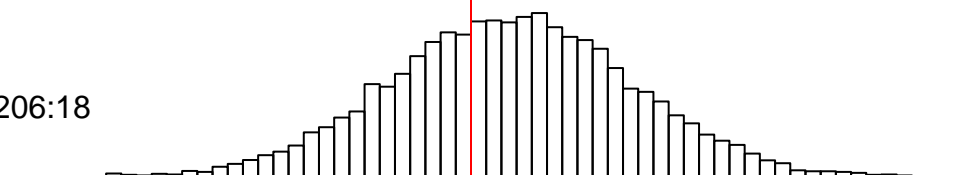

-2                      -1                      0                      1                      2

delta(Closed Hexose 1)

A194:18

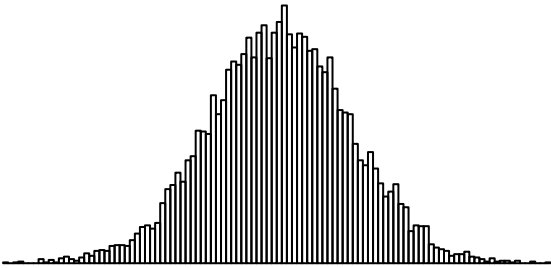

B184:18

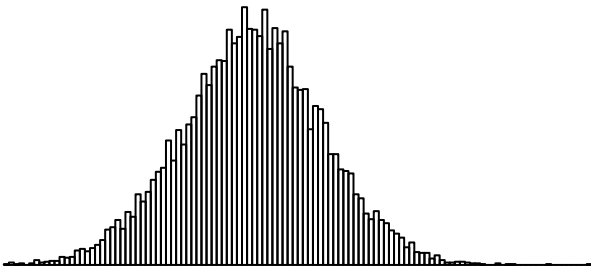

B224:18

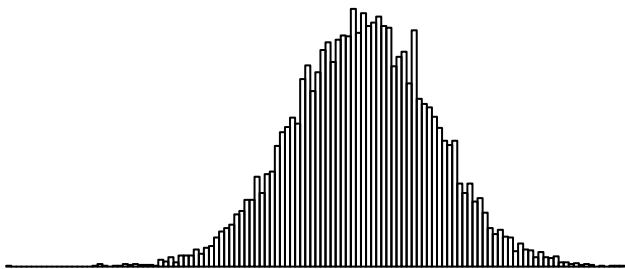

D206:18

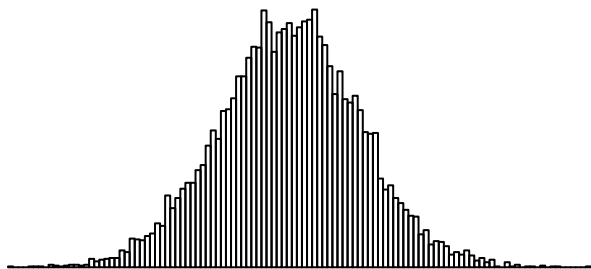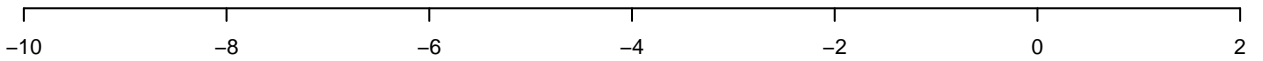

Closed Hexose 2

A194:18 – B184:18

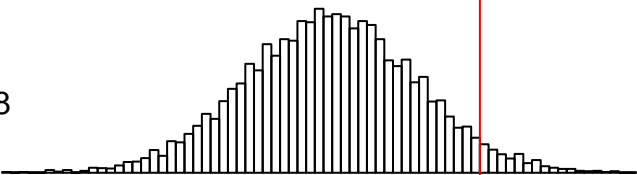

A194:18 – B224:18

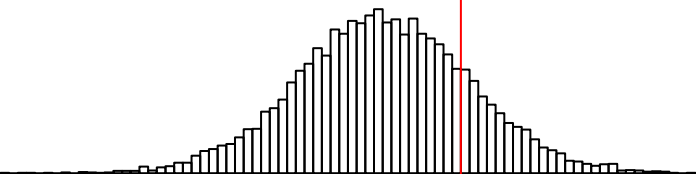

A194:18 – D206:18

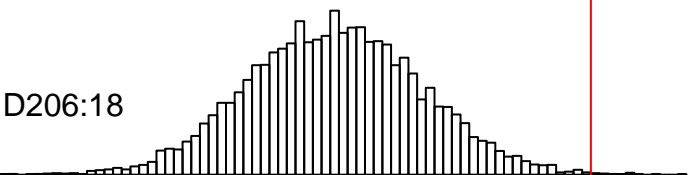

B184:18 – B224:18

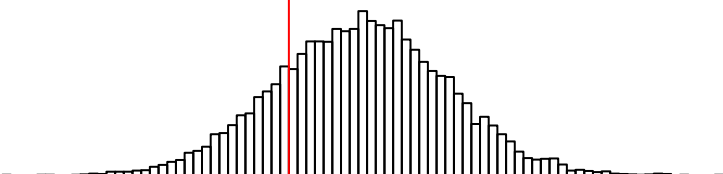

B184:18 – D206:18

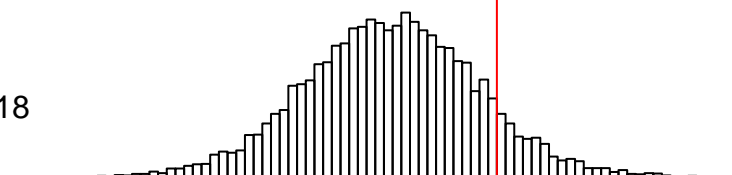

B224:18 – D206:18

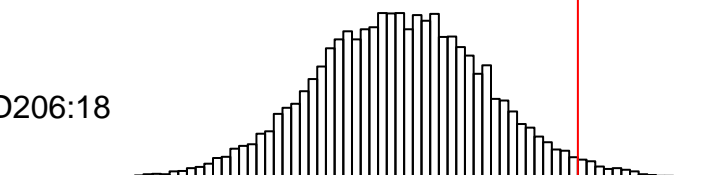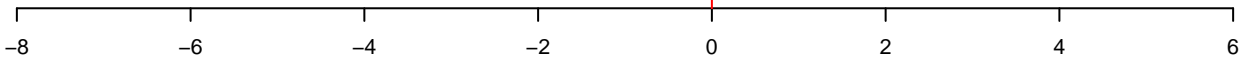

delta(Closed Hexose 2)

A194:18

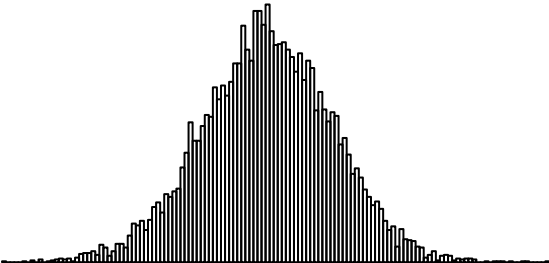

B184:18

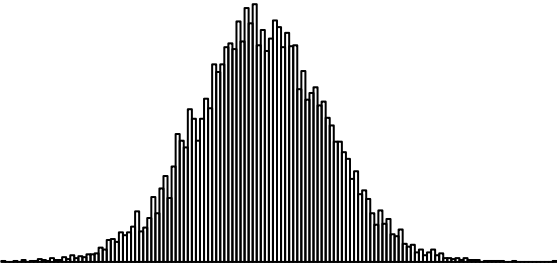

B224:18

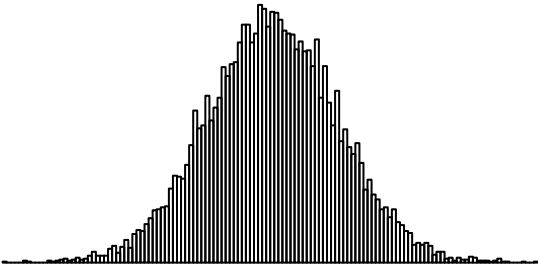

D206:18

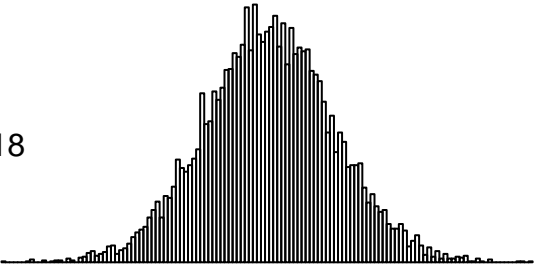

-6 -5 -4 -3 -2 -1 0

Open Hexose 2

A194:18 – B184:18

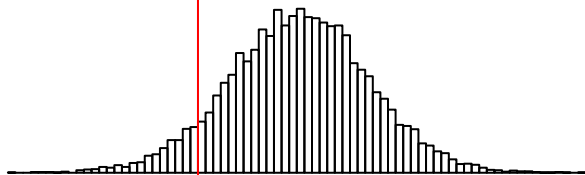

A194:18 – B224:18

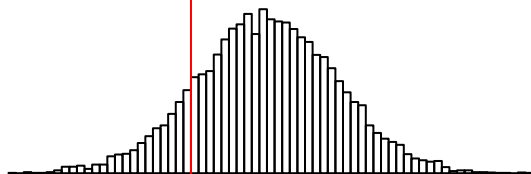

A194:18 – D206:18

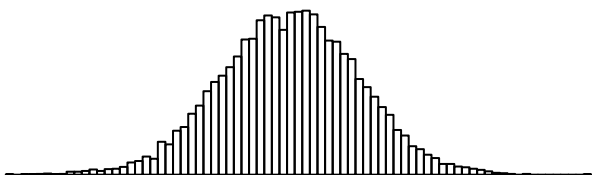

B184:18 – B224:18

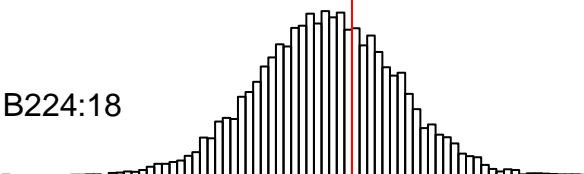

B184:18 – D206:18

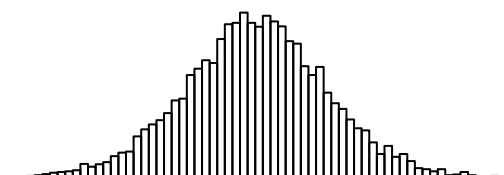

B224:18 – D206:18

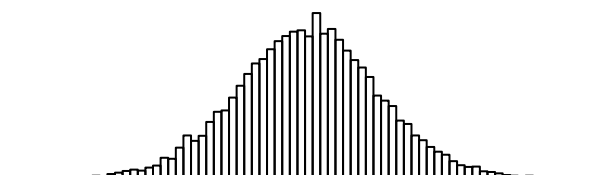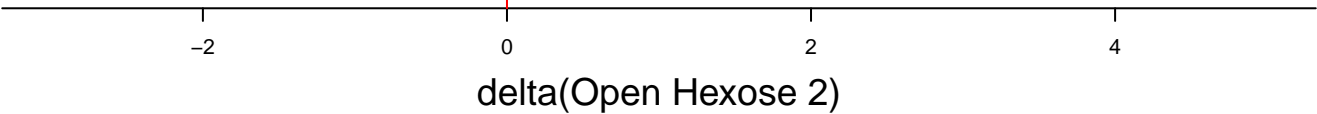

A194:18

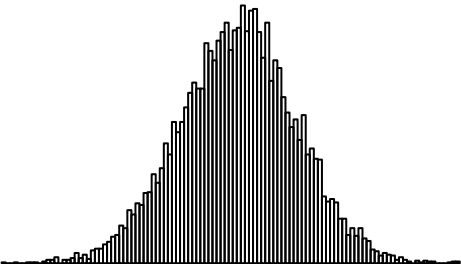

B184:18

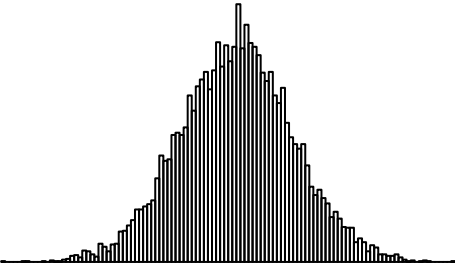

B224:18

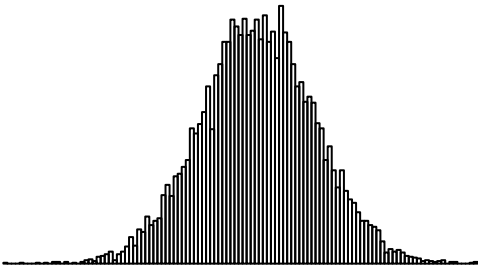

D206:18

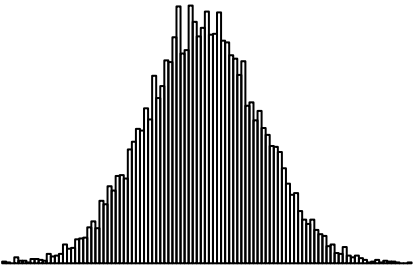

-8 -7 -6 -5 -4 -3 -2

Open Hexose 3

A194:18 – B184:18

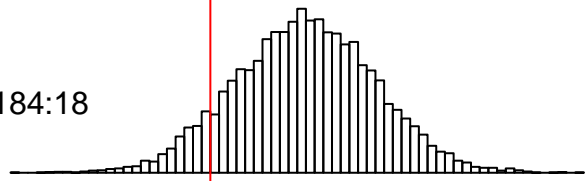

A194:18 – B224:18

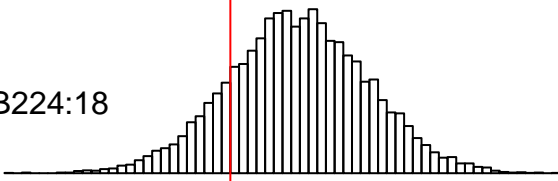

A194:18 – D206:18

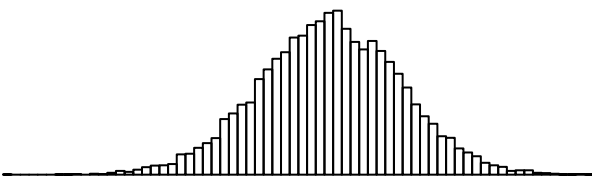

B184:18 – B224:18

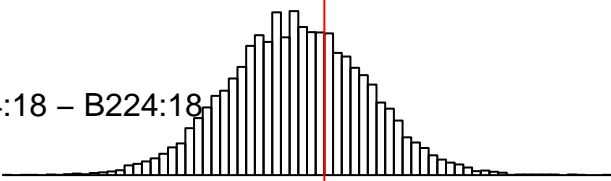

B184:18 – D206:18

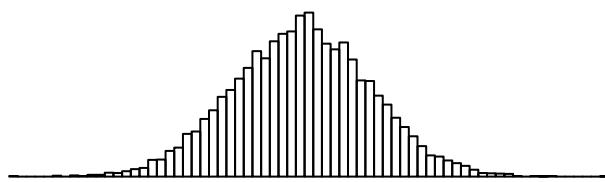

B224:18 – D206:18

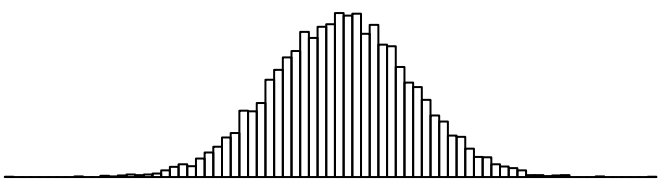

-2 -1 0 1 2 3 4 5

delta(Open Hexose 3)



A194:18

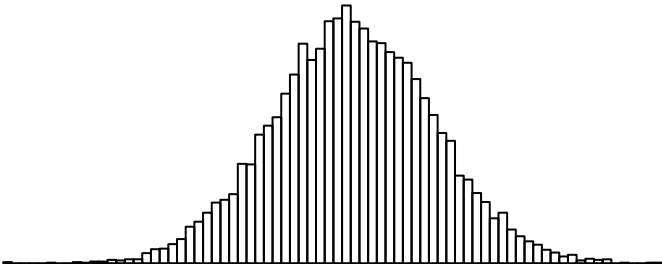

B184:18

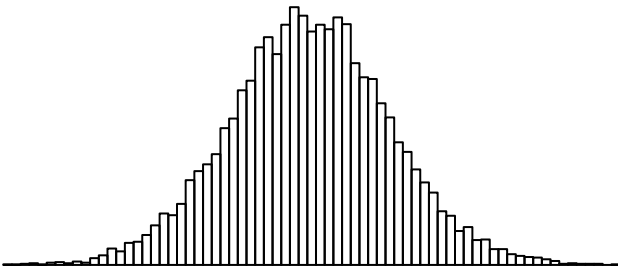

B224:18

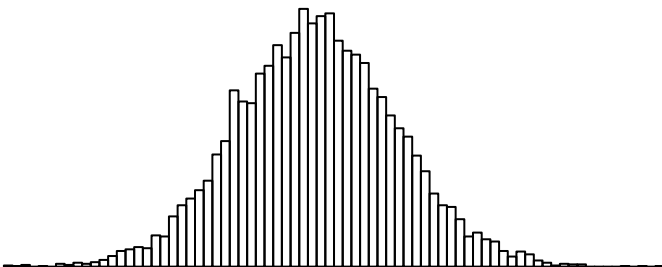

D206:18

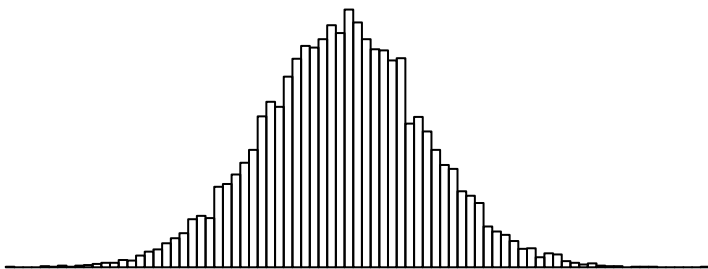

Closed Hexose 3

A194:18 – B184:18

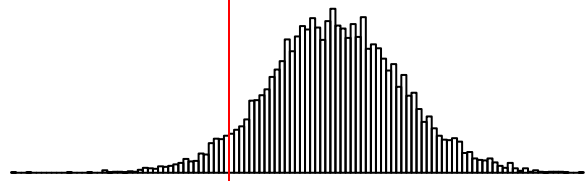

A194:18 – B224:18

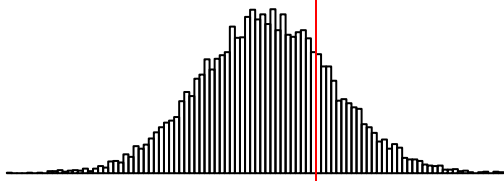

A194:18 – D206:18

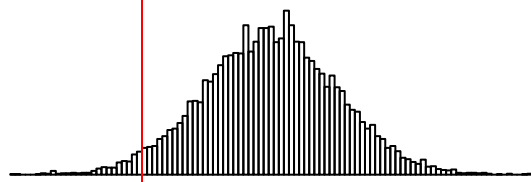

B184:18 – B224:18

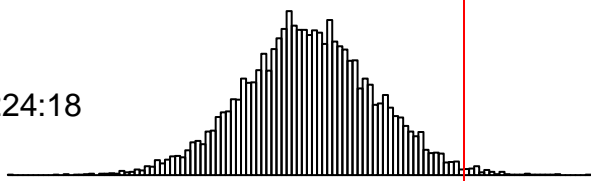

B184:18 – D206:18

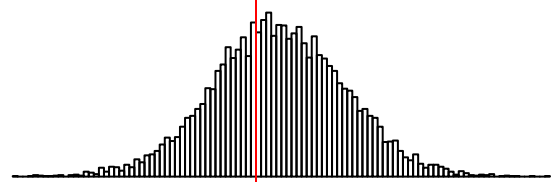

B224:18 – D206:18

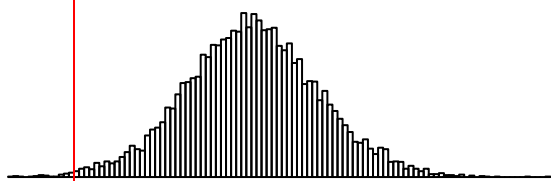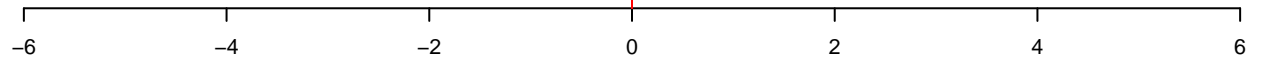

delta(Closed Hexose 3)

A194:18

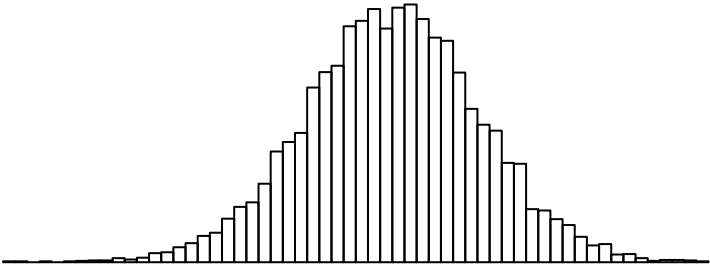

B184:18

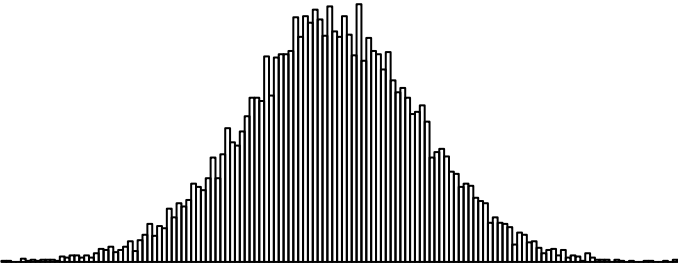

B224:18

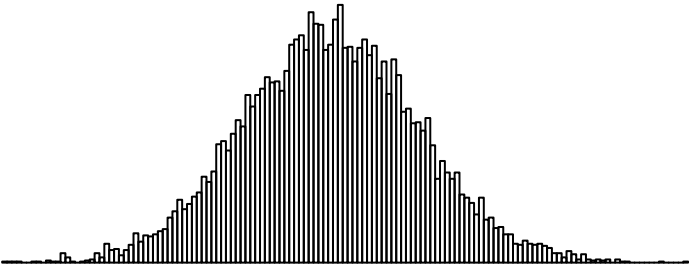

D206:18

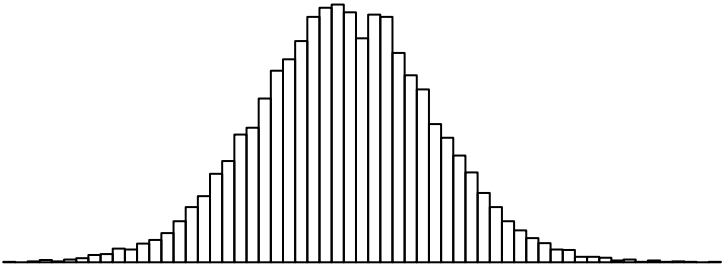

-7 -6 -5 -4 -3 -2

Closed Hexose 4

A194:18 – B184:18

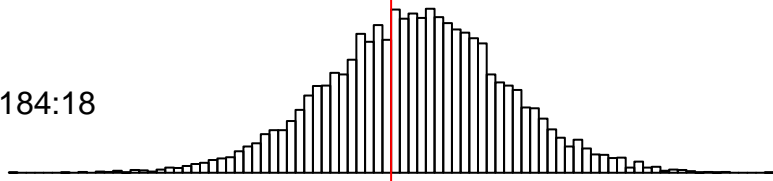

A194:18 – B224:18

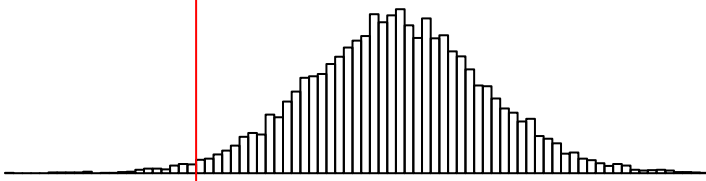

A194:18 – D206:18

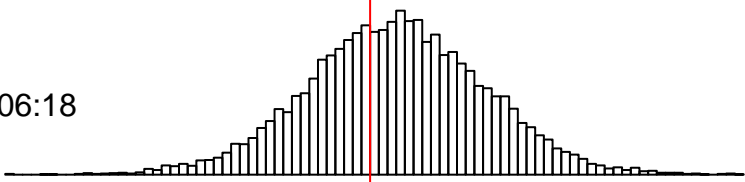

B184:18 – B224:18

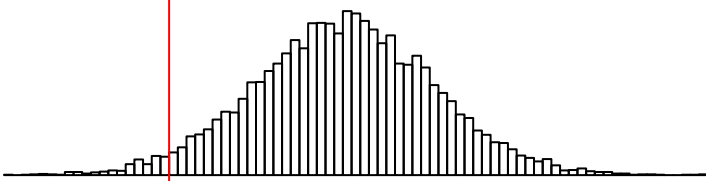

B184:18 – D206:18

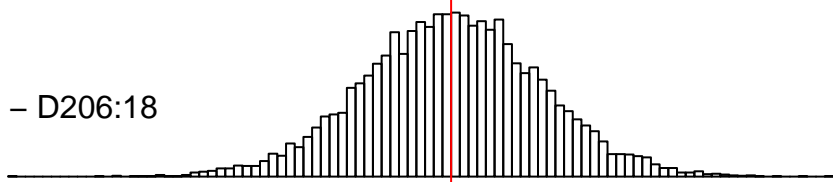

B224:18 – D206:18

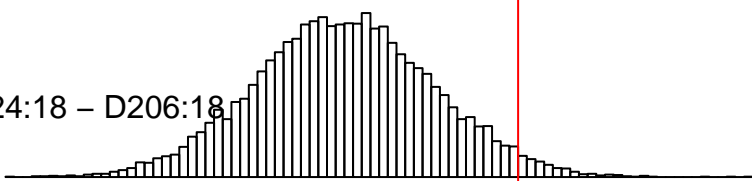

delta(Closed Hexose 4)

A194:18

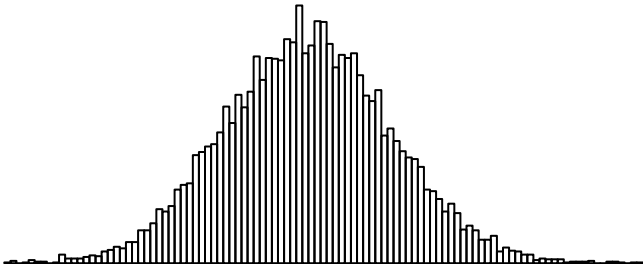

B184:18

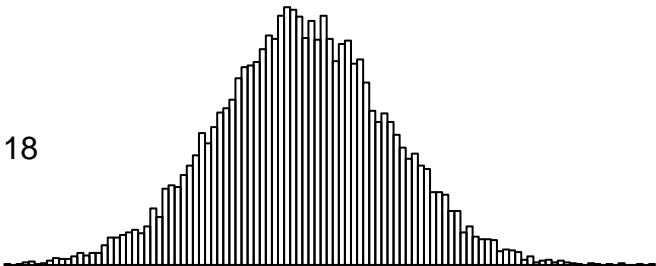

B224:18

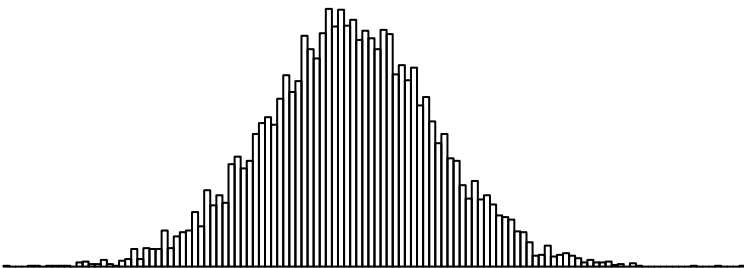

D206:18

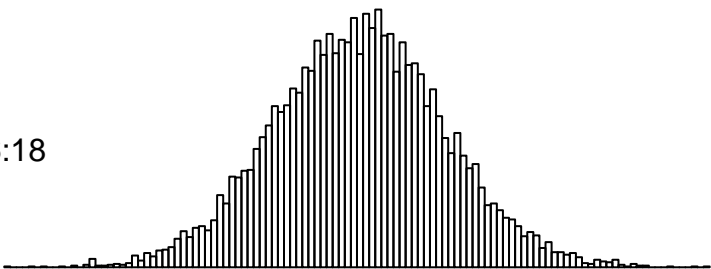

-7 -6 -5 -4 -3

Hexose 1

A194:18 – B184:18

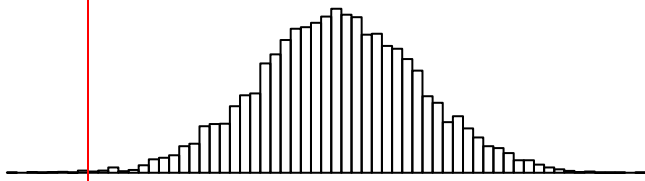

A194:18 – B224:18

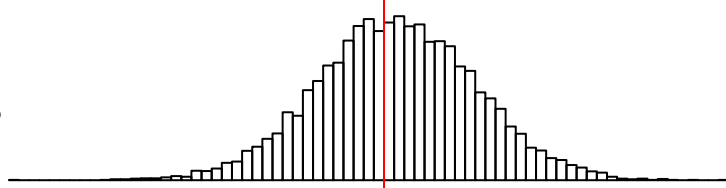

A194:18 – D206:18

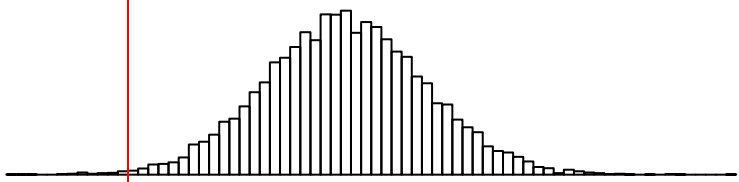

B184:18 – B224:18

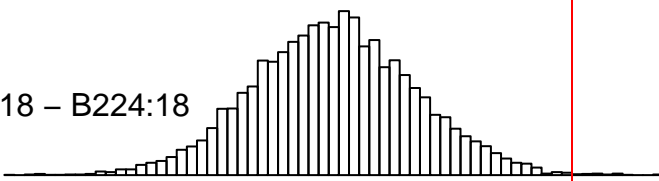

B184:18 – D206:18

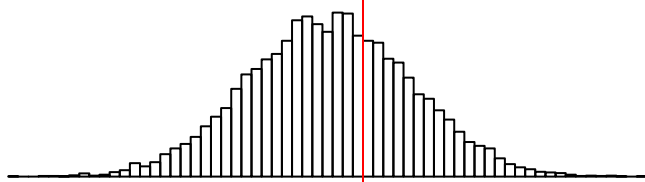

B224:18 – D206:18

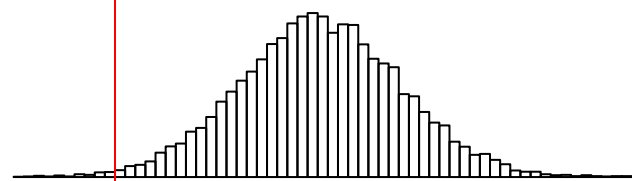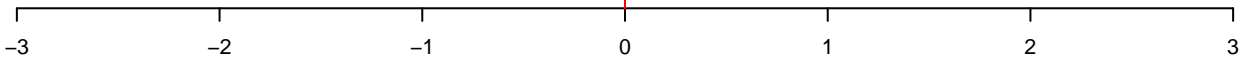

delta(Hexose 1)

A194:18

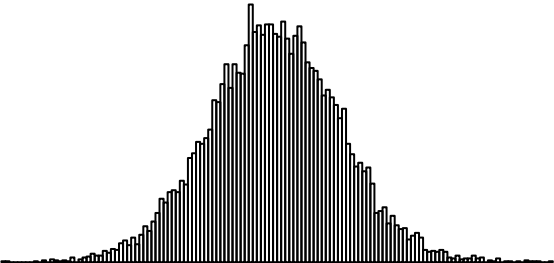

B184:18

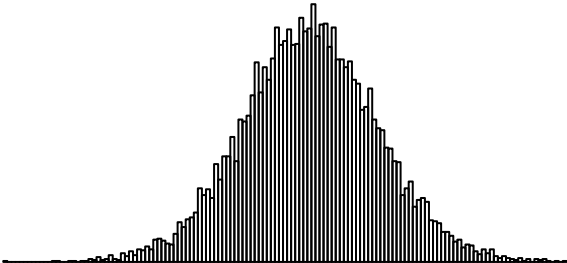

B224:18

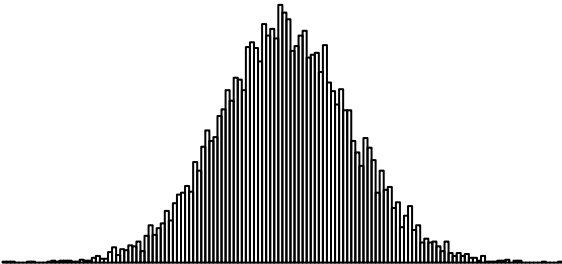

D206:18

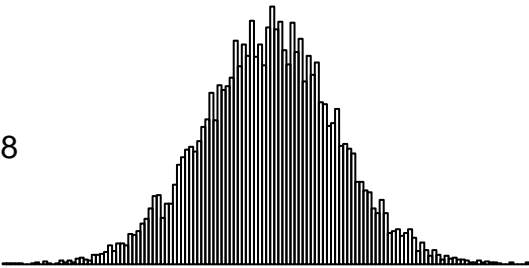

Closed Hexose 5

A194:18 – B184:18

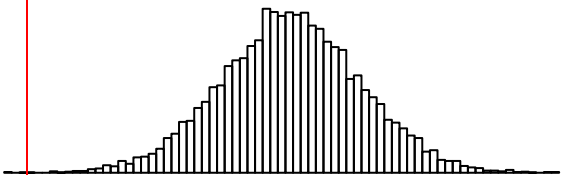

A194:18 – B224:18

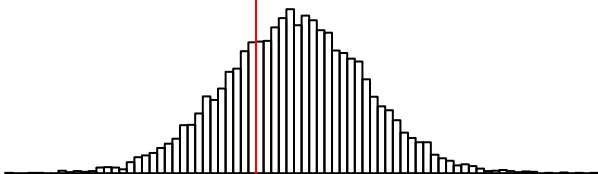

A194:18 – D206:18

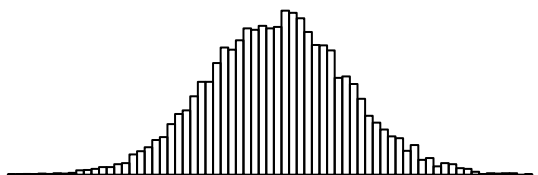

B184:18 – B224:18

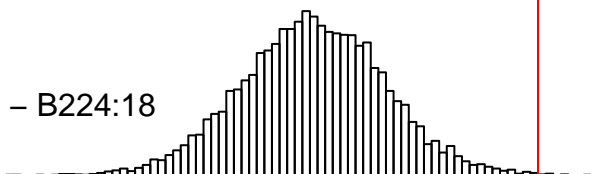

B184:18 – D206:18

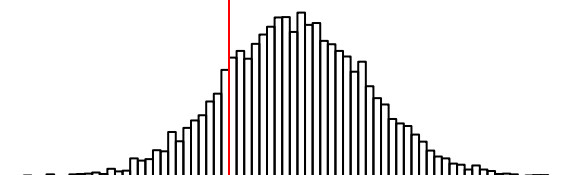

B224:18 – D206:18

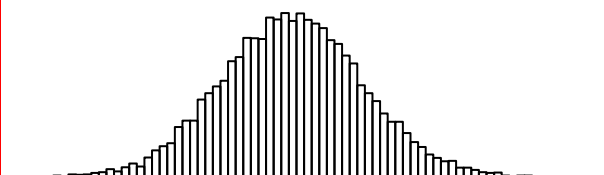

-4 -2 0 2 4

delta(Closed Hexose 5)



A194:18

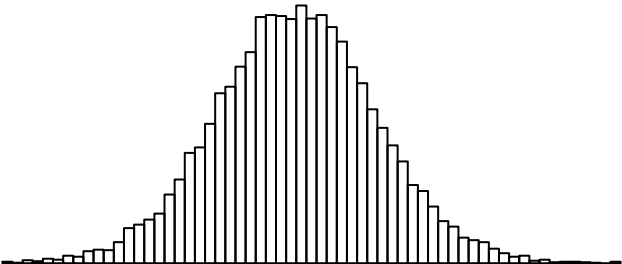

B184:18

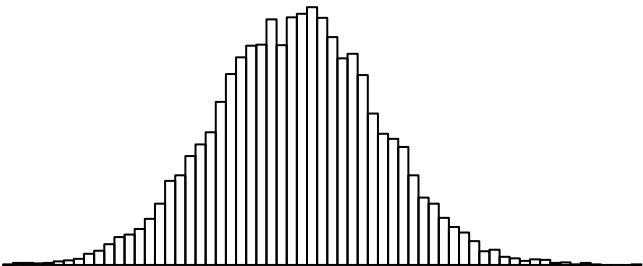

B224:18

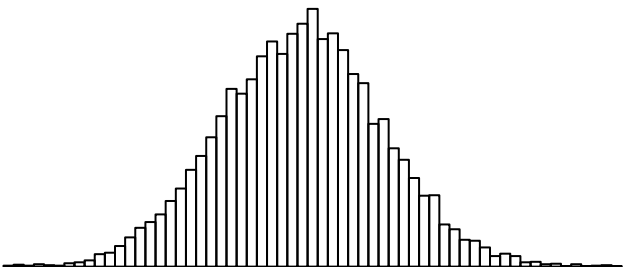

D206:18

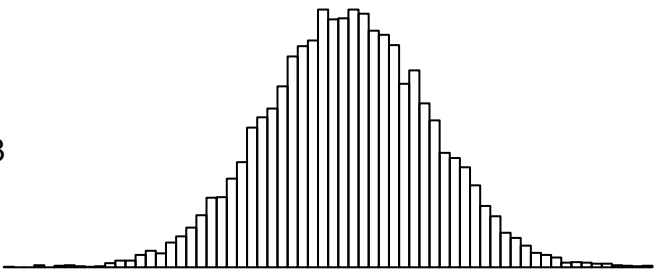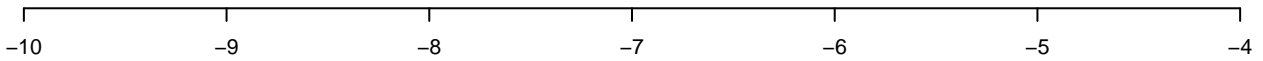

Open Pentose 1

A194:18 – B184:18

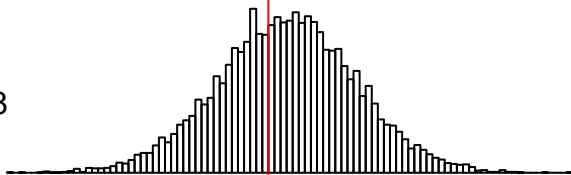

A194:18 – B224:18

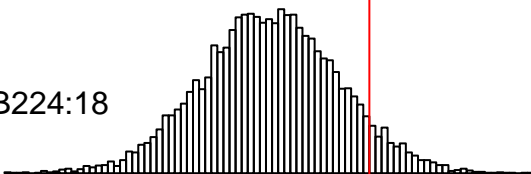

A194:18 – D206:18

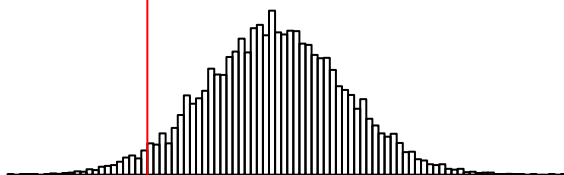

B184:18 – B224:18

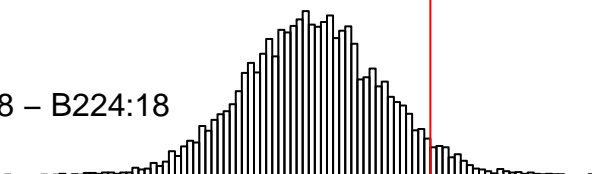

B184:18 – D206:18

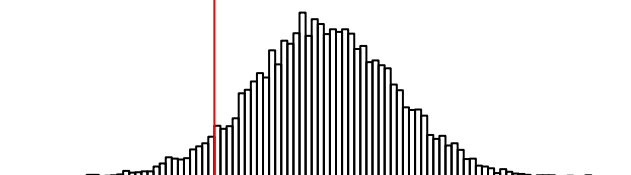

B224:18 – D206:18

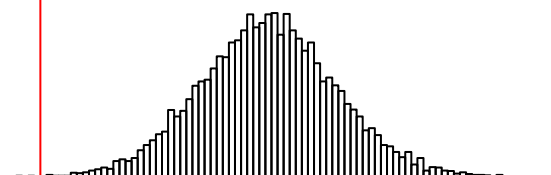

-4                      -2                      0                      2                      4                      6

delta(Open Pentose 1)

A194:18

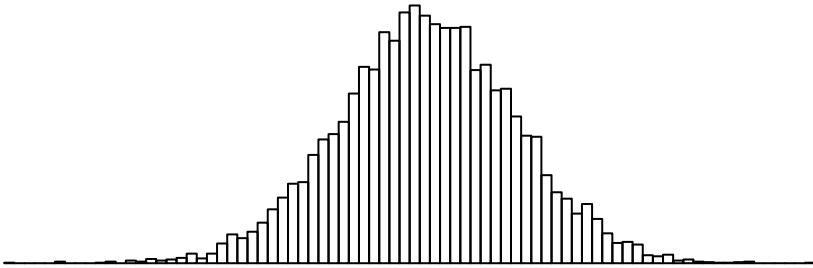

B184:18

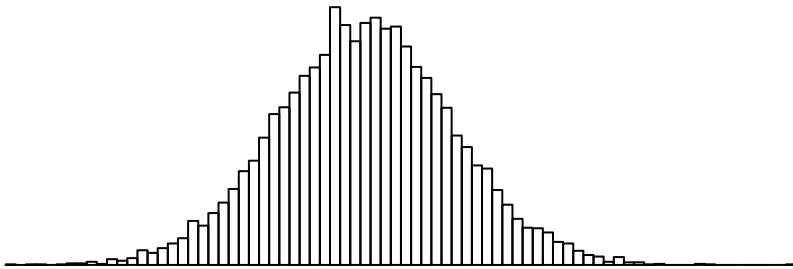

B224:18

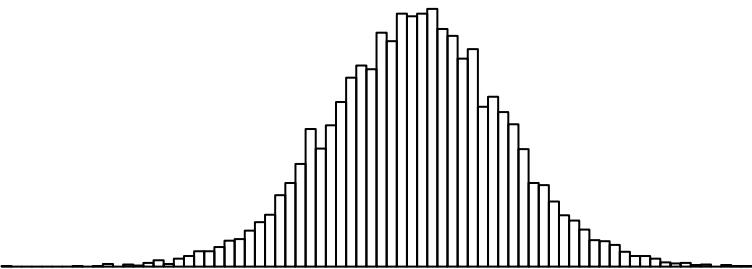

D206:18

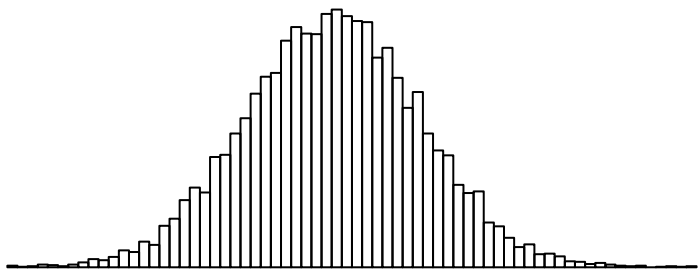

-8      -7      -6      -5      -4      -3      -2

Open Pentose 2

A194:18 – B184:18

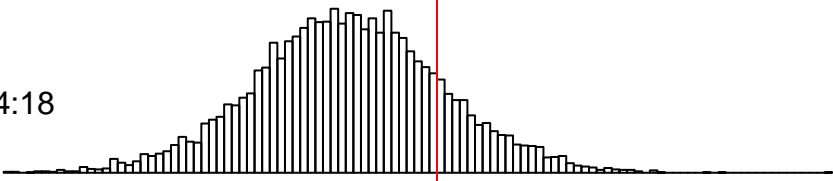

A194:18 – B224:18

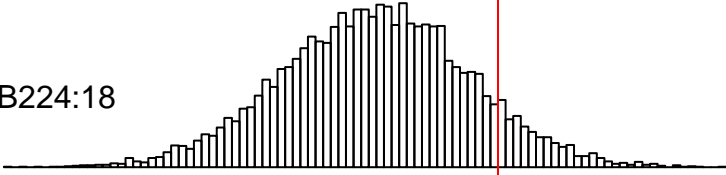

A194:18 – D206:18

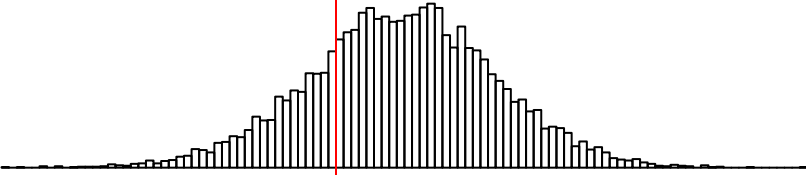

B184:18 – B224:18

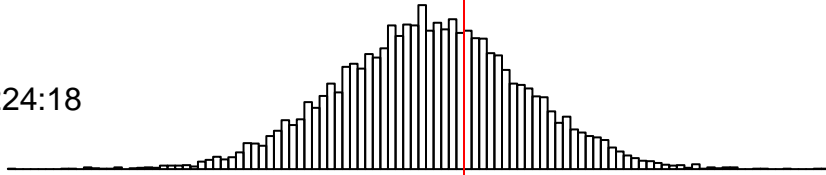

B184:18 – D206:18

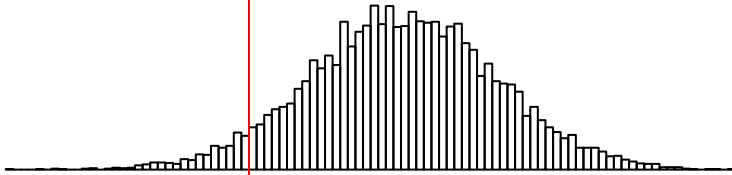

B224:18 – D206:18

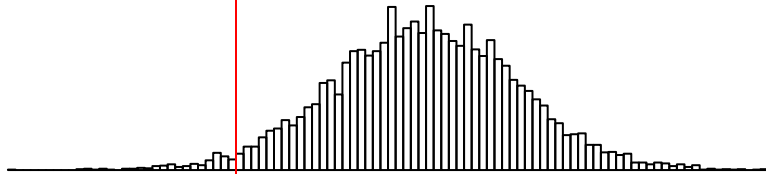

-4 -2 0 2 4

delta(Open Pentose 2)

A194:18

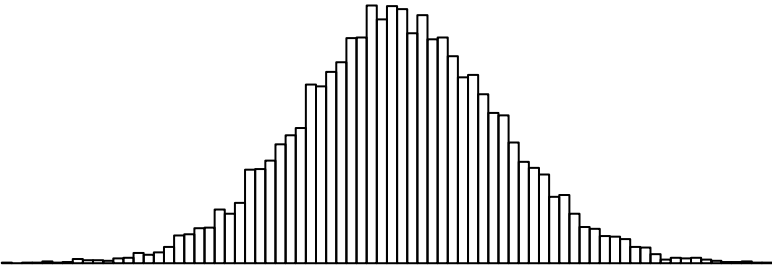

B184:18

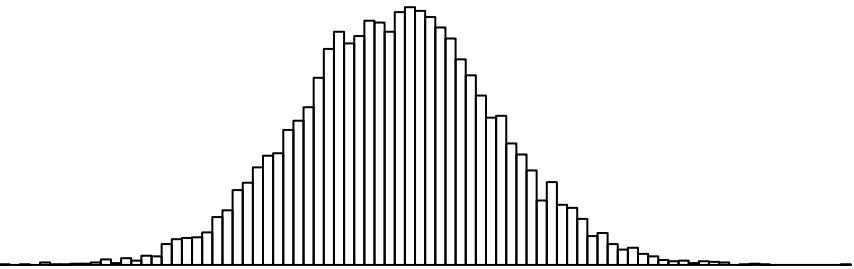

B224:18

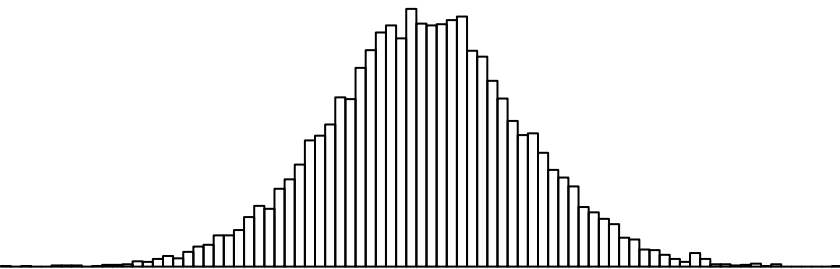

D206:18

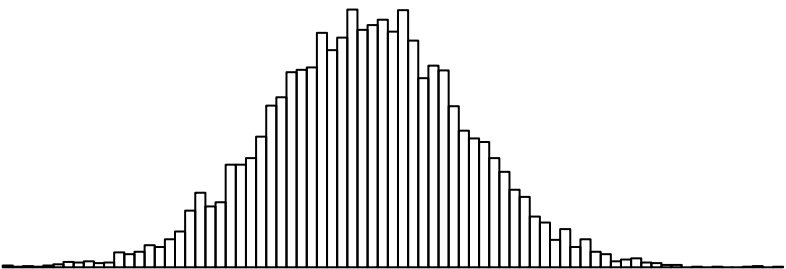

Closed Pentose 1

A194:18 – B184:18

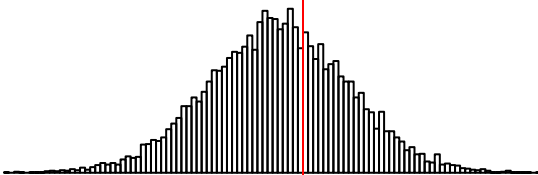

A194:18 – B224:18

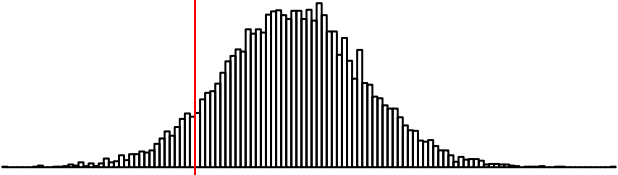

A194:18 – D206:18

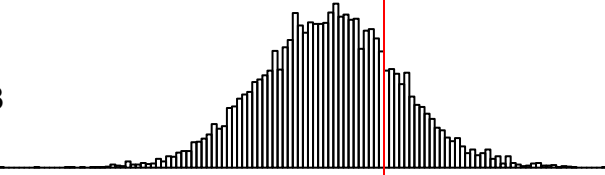

B184:18 – B224:18

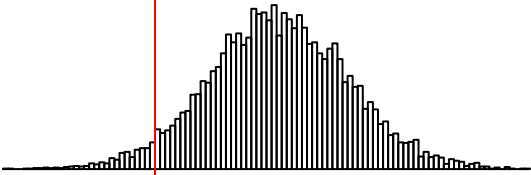

B184:18 – D206:18

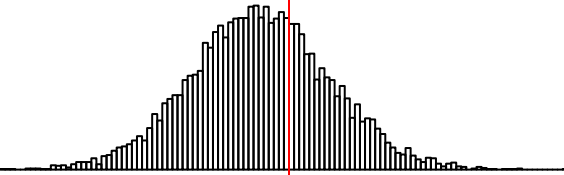

B224:18 – D206:18

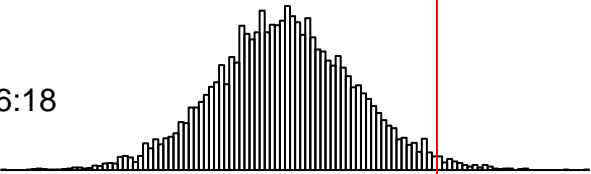

-6 -4 -2 0 2 4 6

delta(Closed Pentose 1)

A194:18

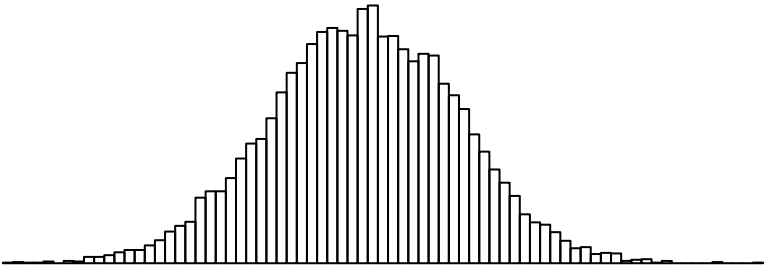

B184:18

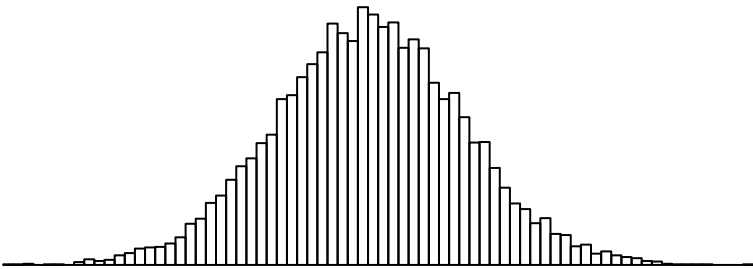

B224:18

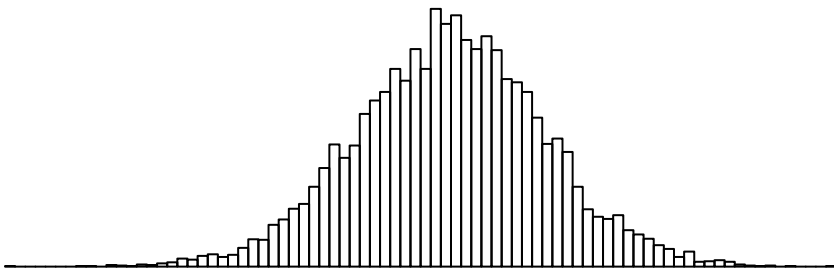

D206:18

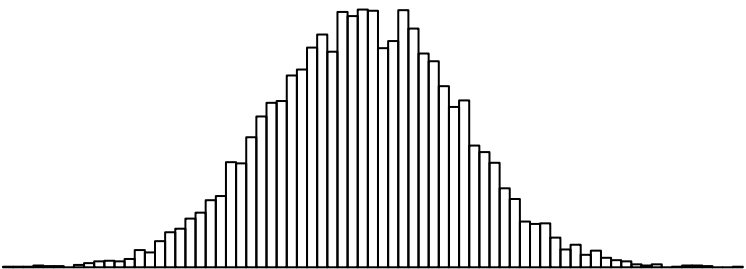

Closed Pentose 2

A194:18 – B184:18

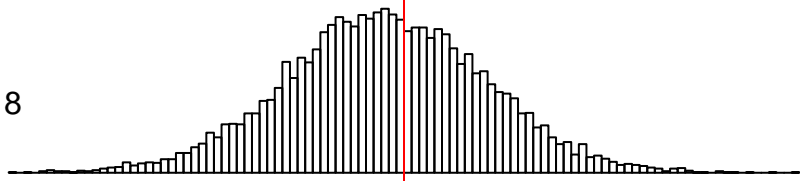

A194:18 – B224:18

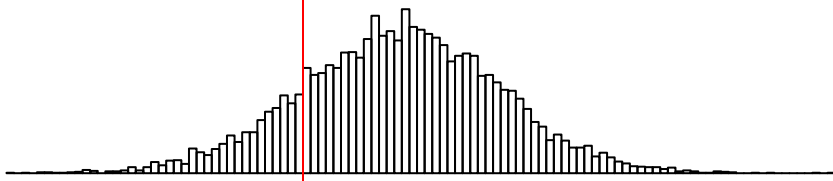

A194:18 – D206:18

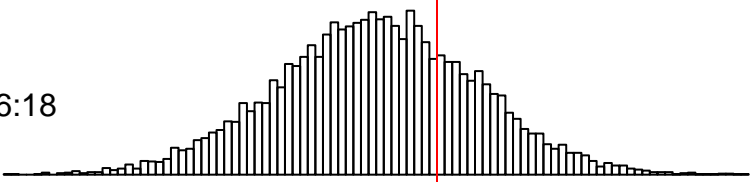

B184:18 – B224:18

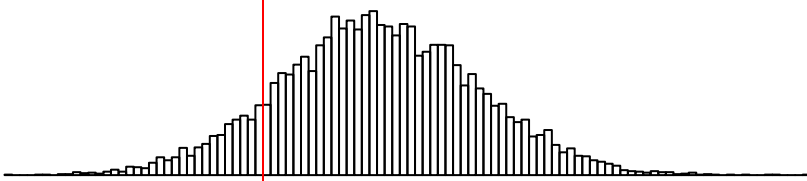

B184:18 – D206:18

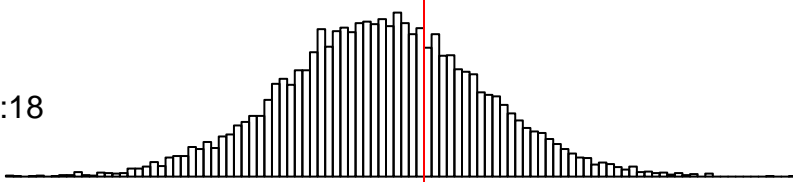

B224:18 – D206:18

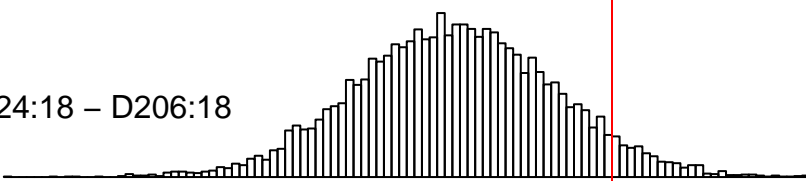

-4 -2 0 2 4

delta(Closed Pentose 2)



A194:18

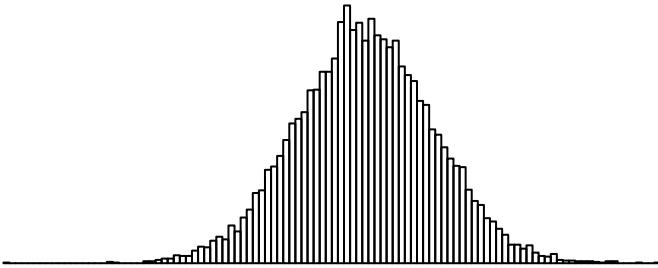

B184:18

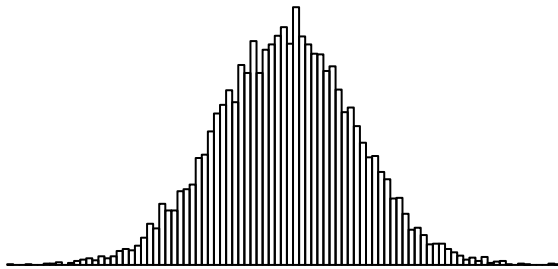

B224:18

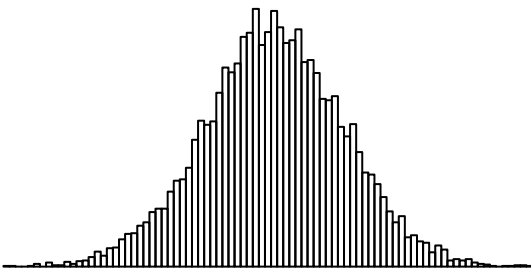

D206:18

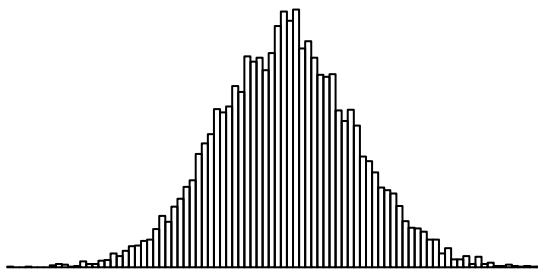

-10      -8      -6      -4      -2      0

Pentose 1

A194:18 – B184:18

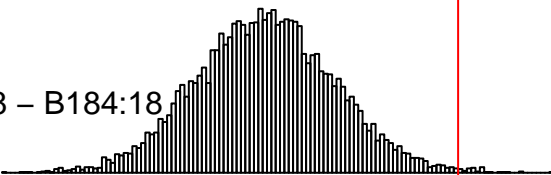

A194:18 – B224:18

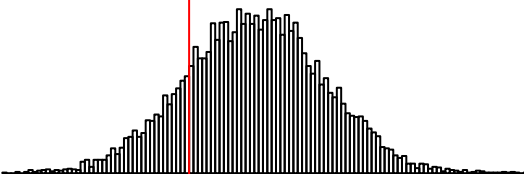

A194:18 – D206:18

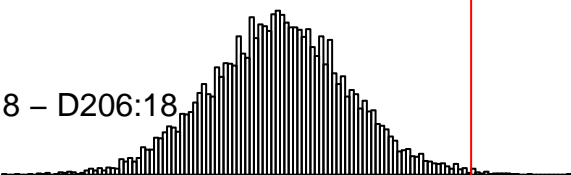

B184:18 – B224:18

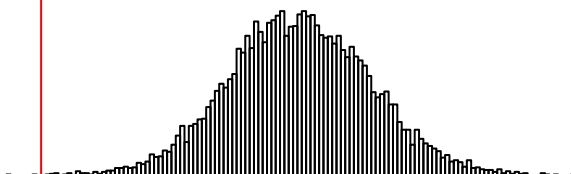

B184:18 – D206:18

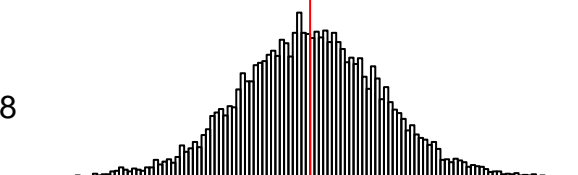

B224:18 – D206:18

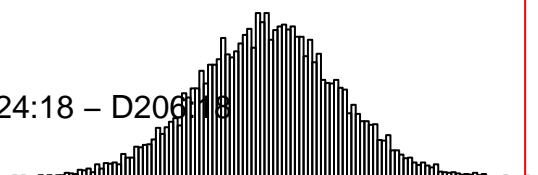

delta(Pentose 1)

A194:18

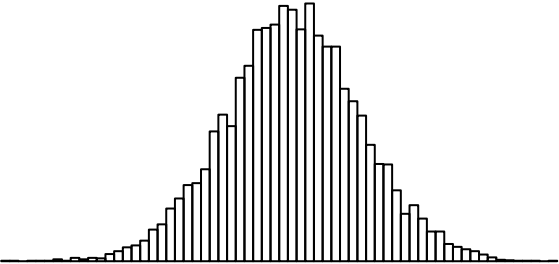

B184:18

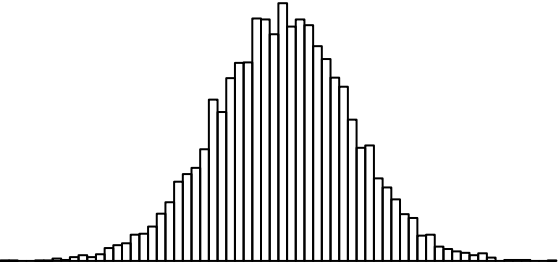

B224:18

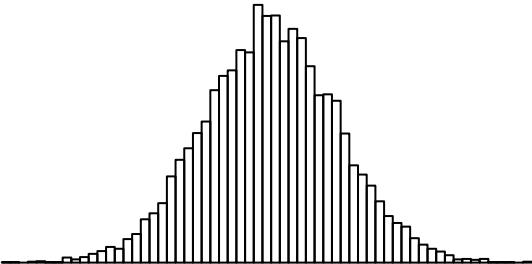

D206:18

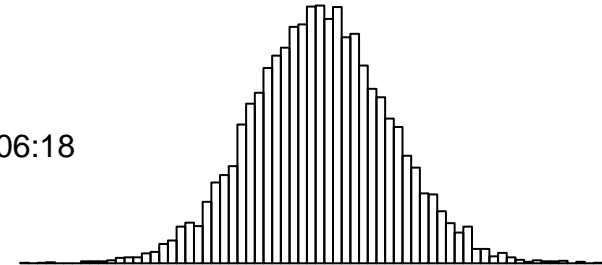

-8 -7 -6 -5 -4 -3 -2 -1

Open Pentose 3

A194:18 – B184:18

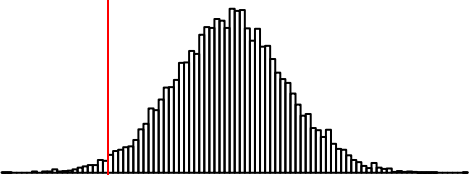

A194:18 – B224:18

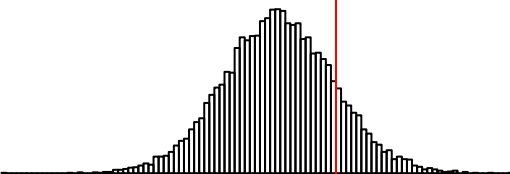

A194:18 – D206:18

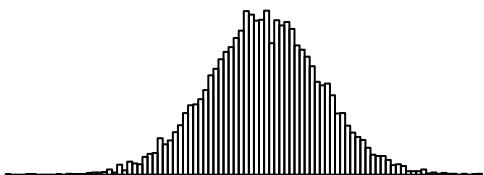

B184:18 – B224:18

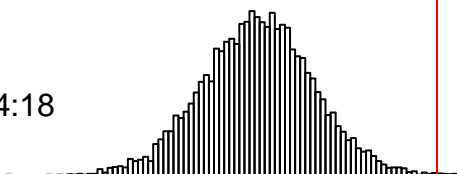

B184:18 – D206:18

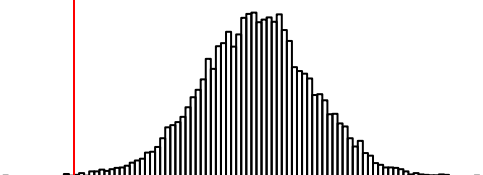

B224:18 – D206:18

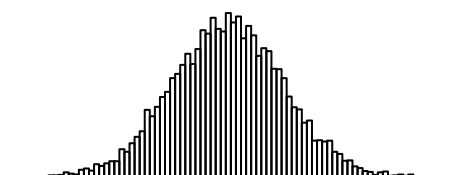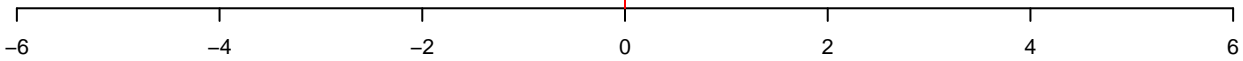

delta(Open Pentose 3)

A194:18

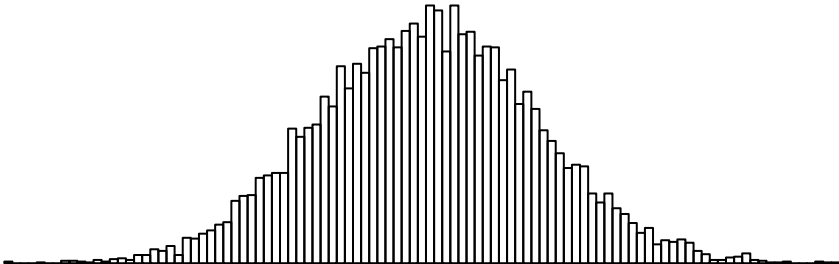

B184:18

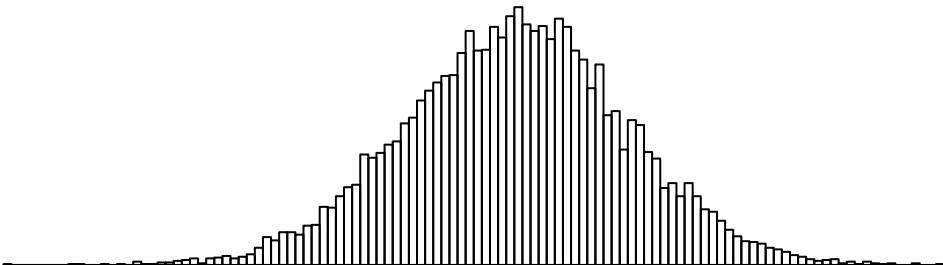

B224:18

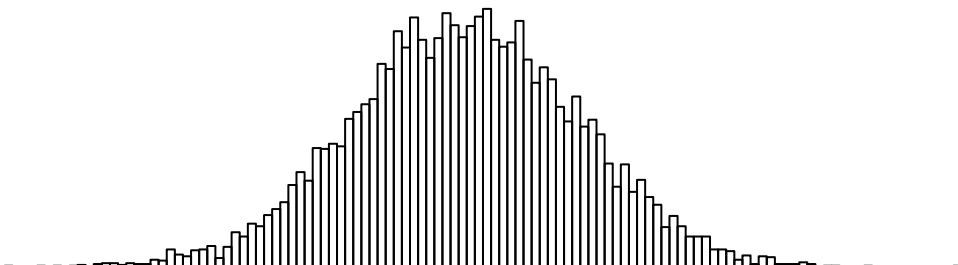

D206:18

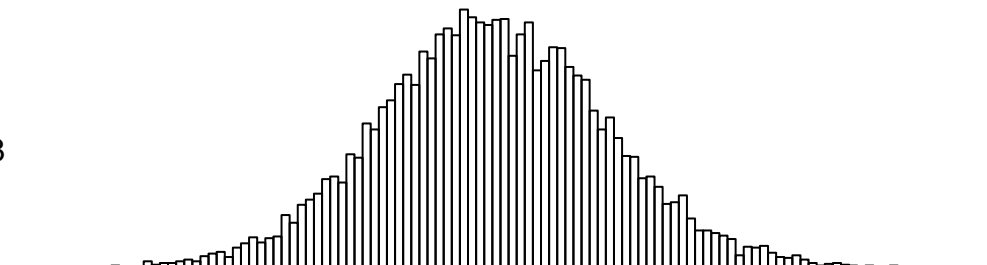

-8.5      -8.0      -7.5      -7.0      -6.5      -6.0      -5.5

Sugar 1

A194:18 – B184:18

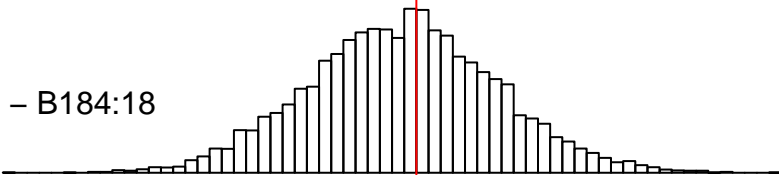

A194:18 – B224:18

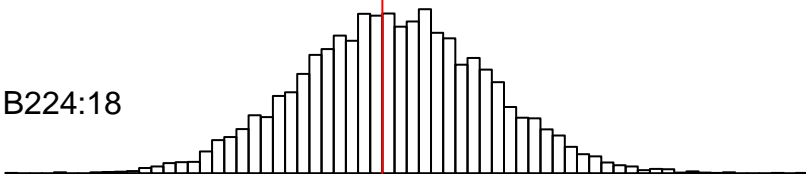

A194:18 – D206:18

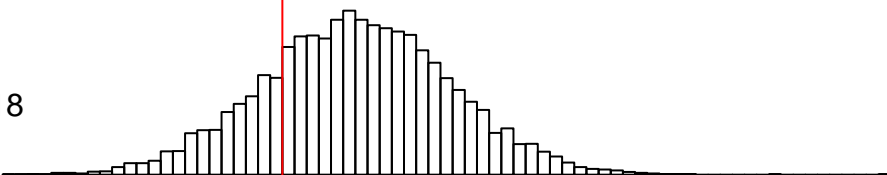

B184:18 – B224:18

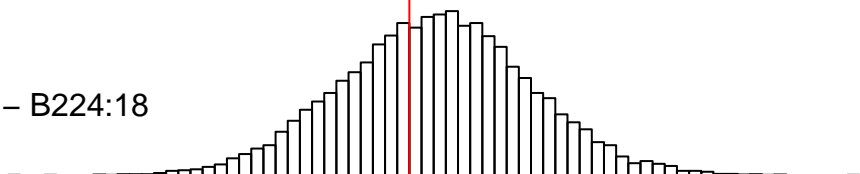

B184:18 – D206:18

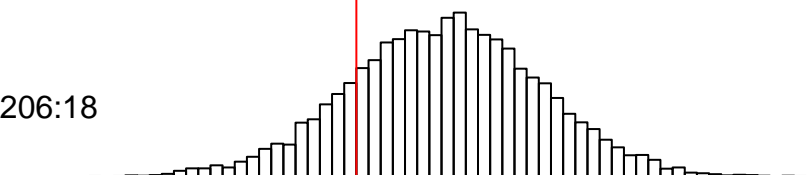

B224:18 – D206:18

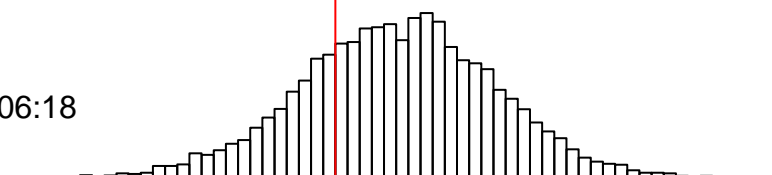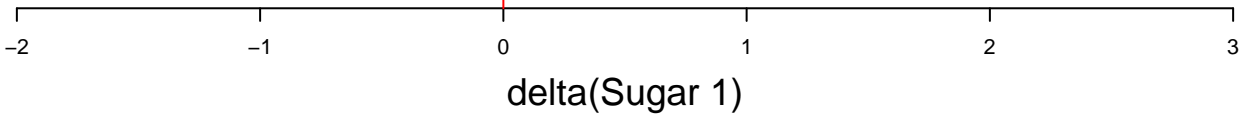

A194:18

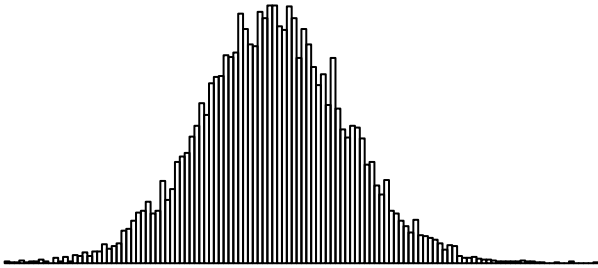

B184:18

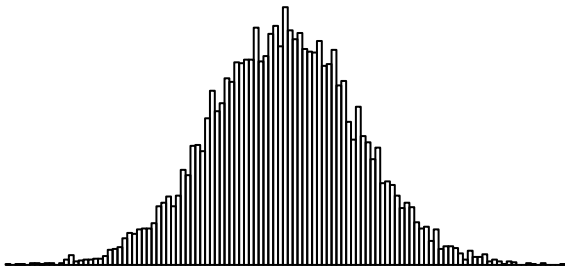

B224:18

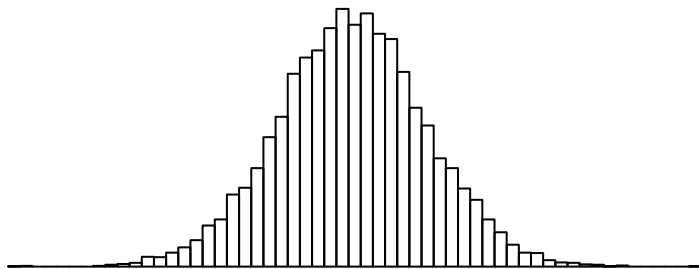

D206:18

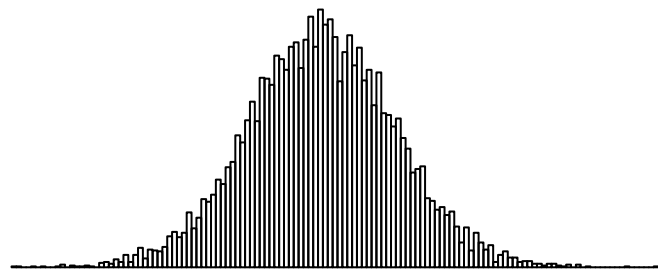

Sugar 3

A194:18 – B184:18

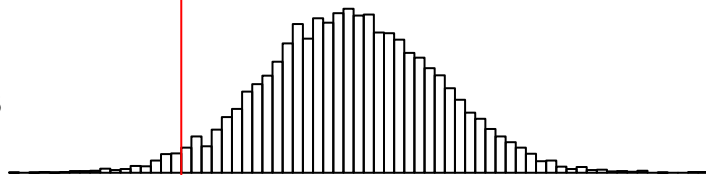

A194:18 – B224:18

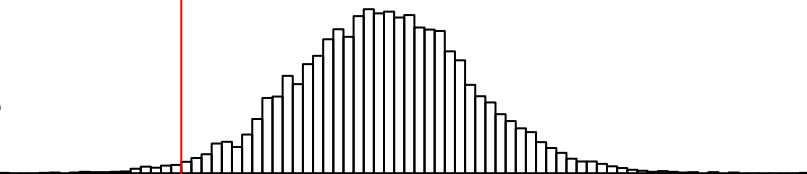

A194:18 – D206:18

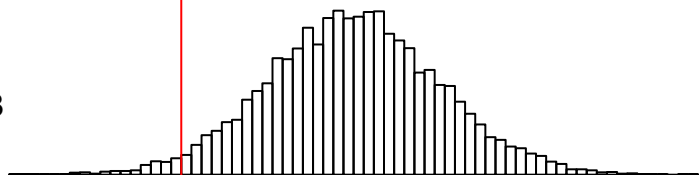

B184:18 – B224:18

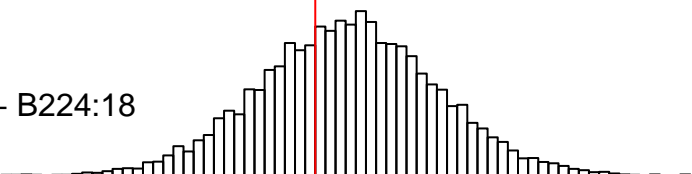

B184:18 – D206:18

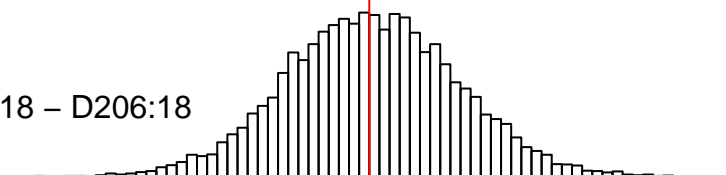

B224:18 – D206:18

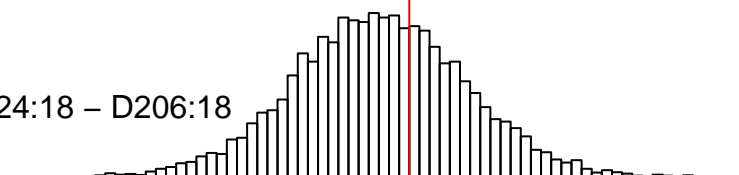

-2                      -1                      0                      1                      2                      3                      4

delta(Sugar 3)



A194:18

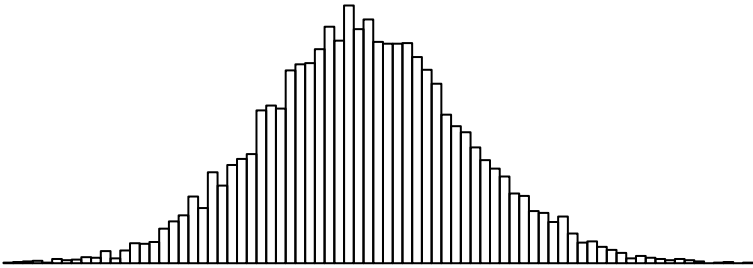

B184:18

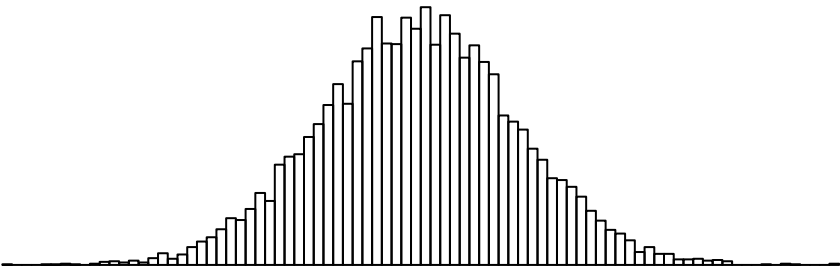

B224:18

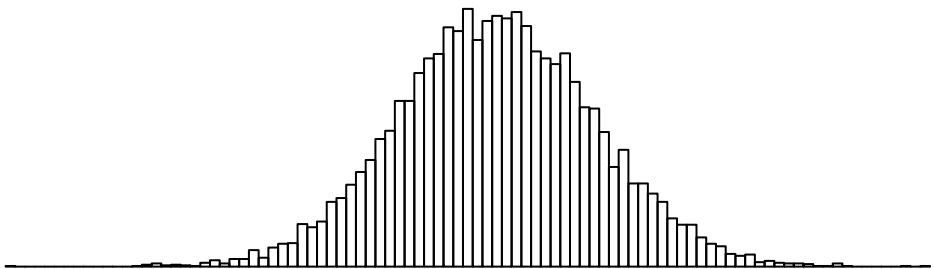

D206:18

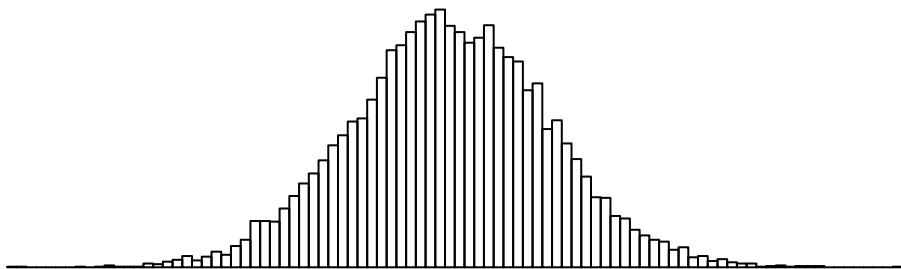

-8.5      -8.0      -7.5      -7.0      -6.5      -6.0

Sugar 4

A194:18 – B184:18

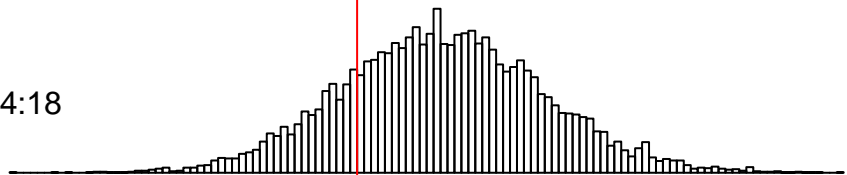

A194:18 – B224:18

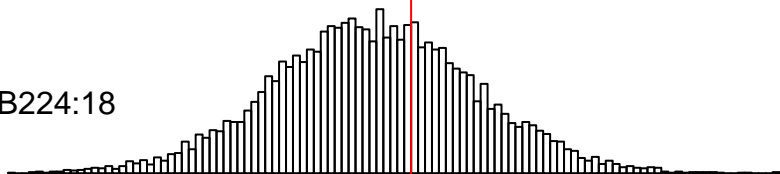

A194:18 – D206:18

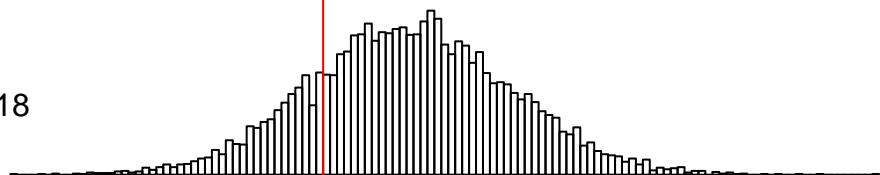

B184:18 – B224:18

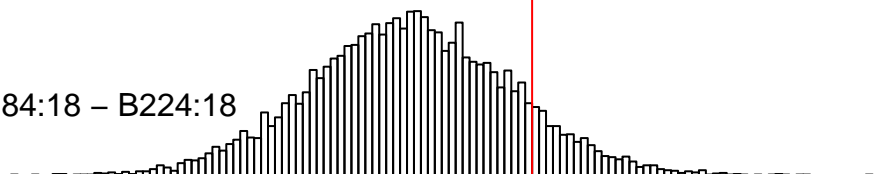

B184:18 – D206:18

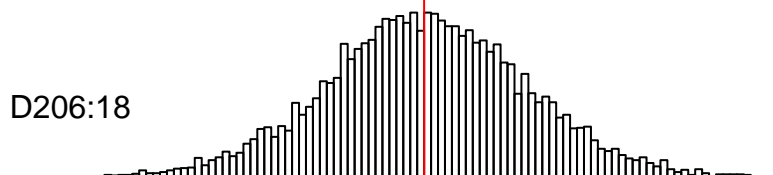

B224:18 – D206:18

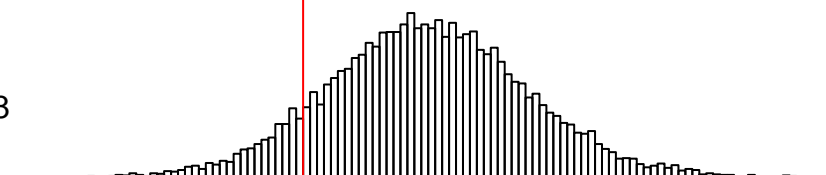

-1.5      -1.0      -0.5      0.0      0.5      1.0      1.5      2.0

delta(Sugar 4)

A194:18

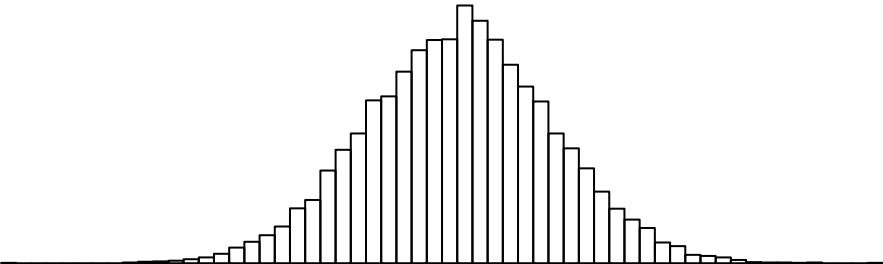

B184:18

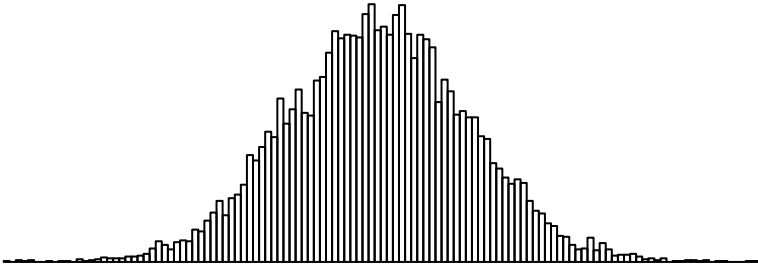

B224:18

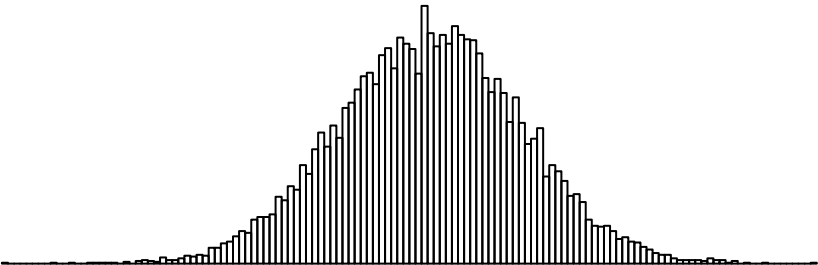

D206:18

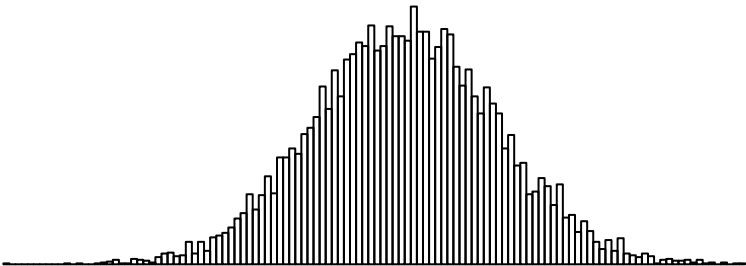

-8

-7

-6

-5

Sugar 5

A194:18 – B184:18

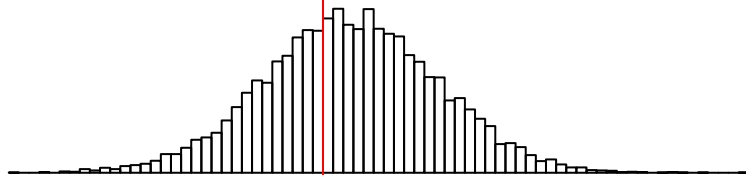

A194:18 – B224:18

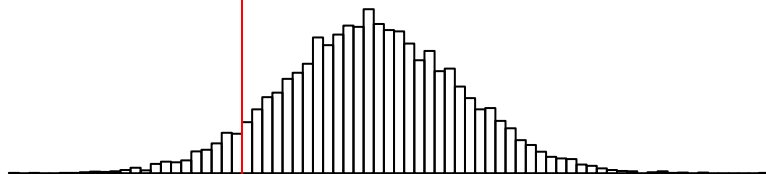

A194:18 – D206:18

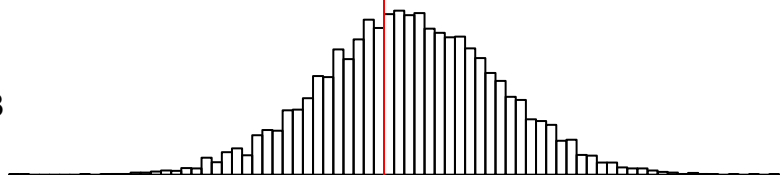

B184:18 – B224:18

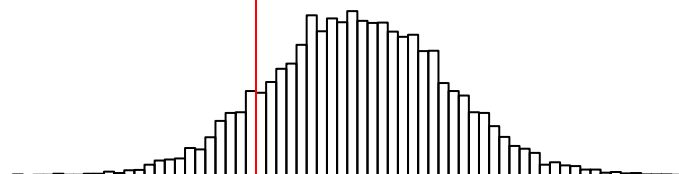

B184:18 – D206:18

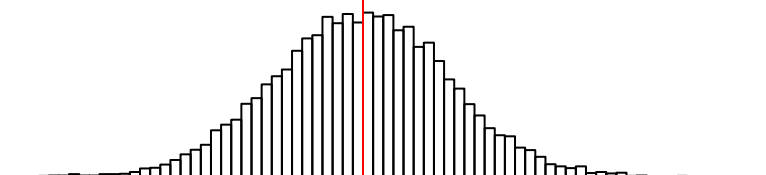

B224:18 – D206:18

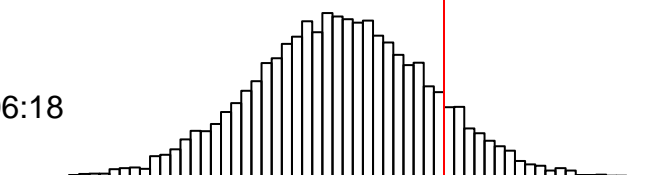

-3 -2 -1 0 1 2 3

delta(Sugar 5)

A194:18

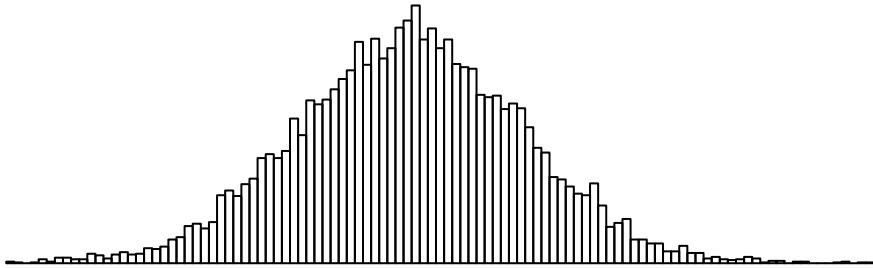

B184:18

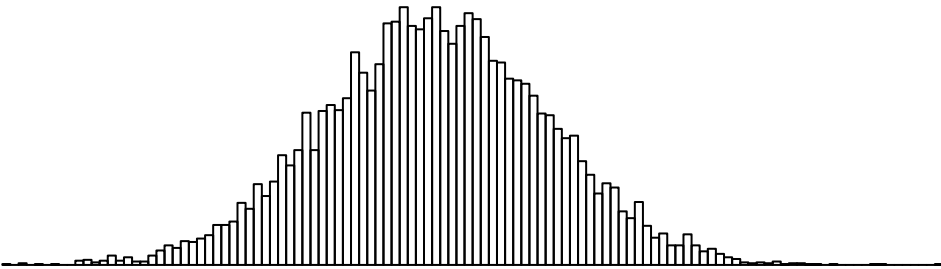

B224:18

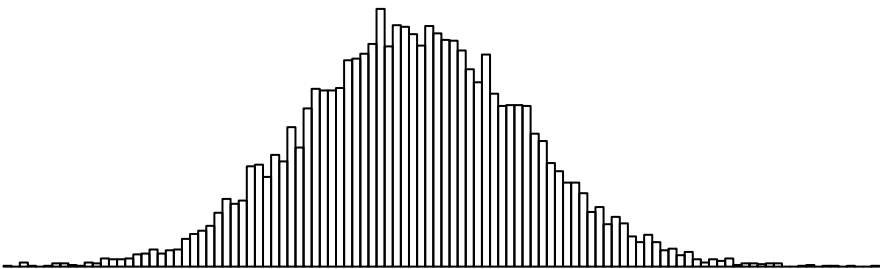

D206:18

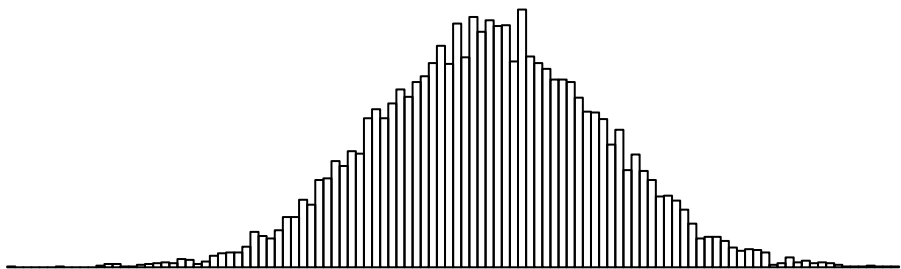

-9.0 -8.5 -8.0 -7.5 -7.0 -6.5 -6.0

Sugar 6

A194:18 – B184:18

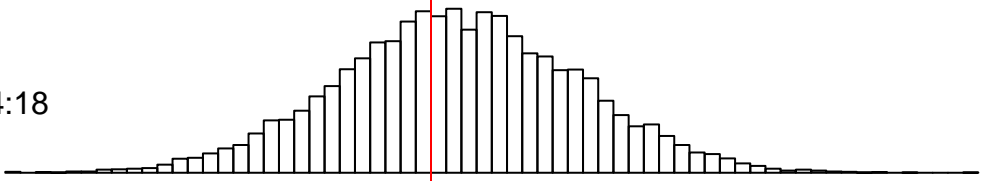

A194:18 – B224:18

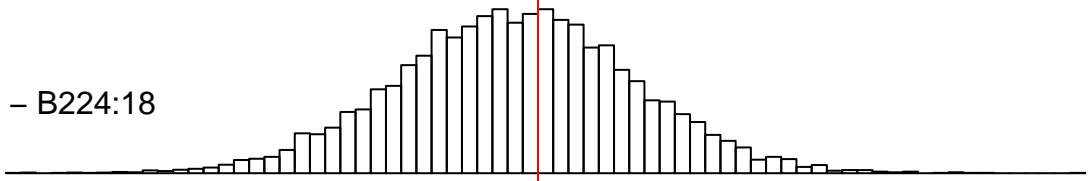

A194:18 – D206:18

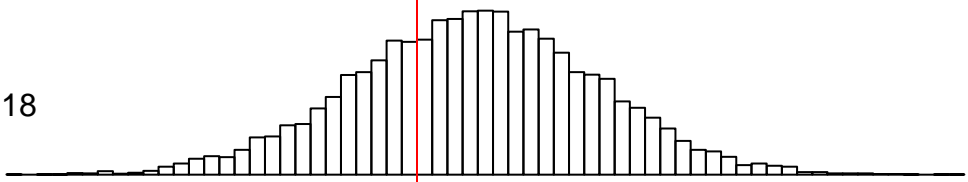

B184:18 – B224:18

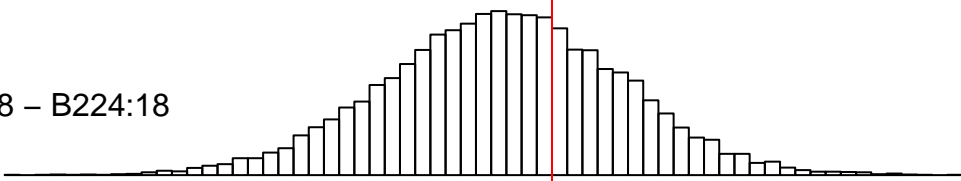

B184:18 – D206:18

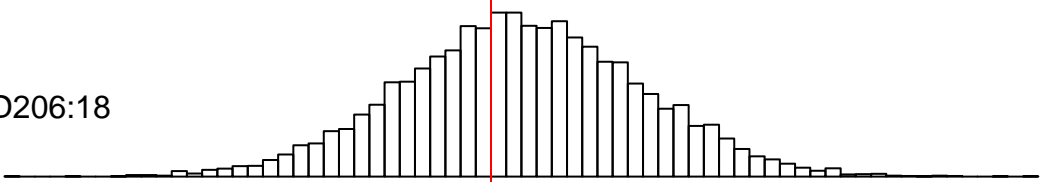

B224:18 – D206:18

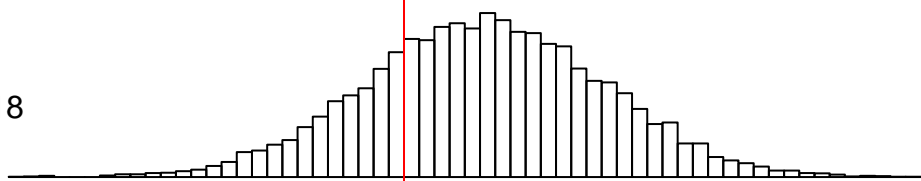

-2 -1 0 1 2

delta(Sugar 6)

A194:18

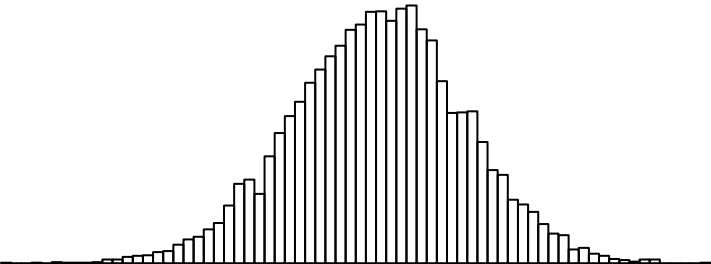

B184:18

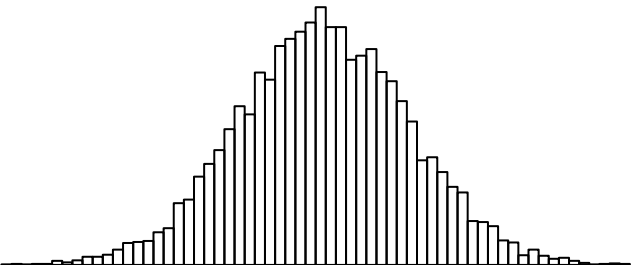

B224:18

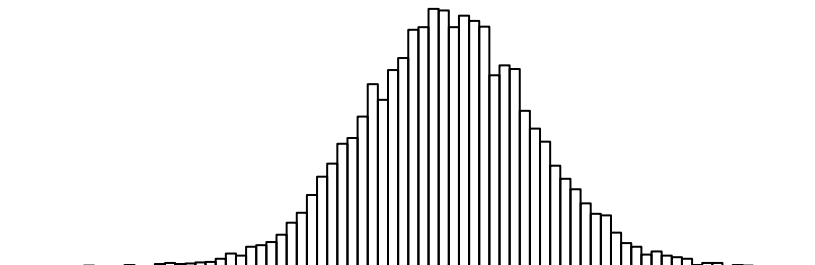

D206:18

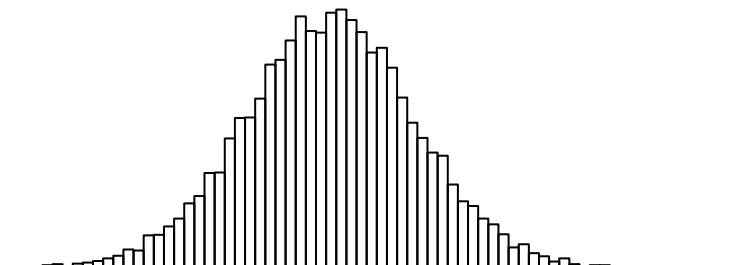

-9      -8      -7      -6      -5      -4      -3

Sugar 7

A194:18 – B184:18

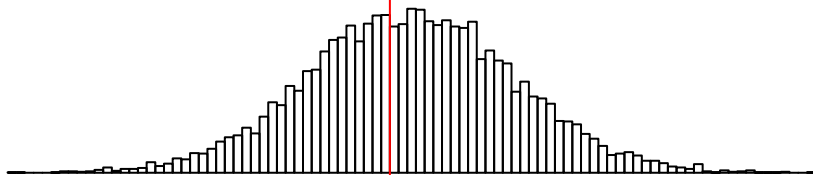

A194:18 – B224:18

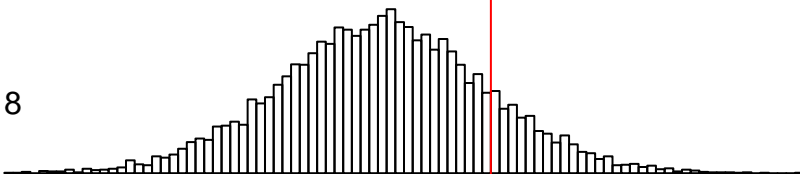

A194:18 – D206:18

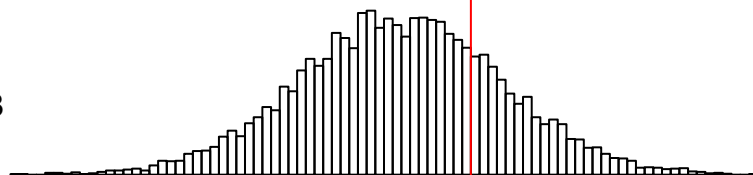

B184:18 – B224:18

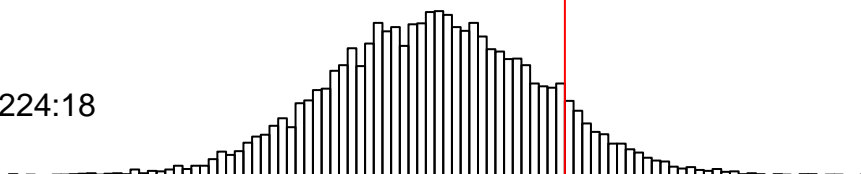

B184:18 – D206:18

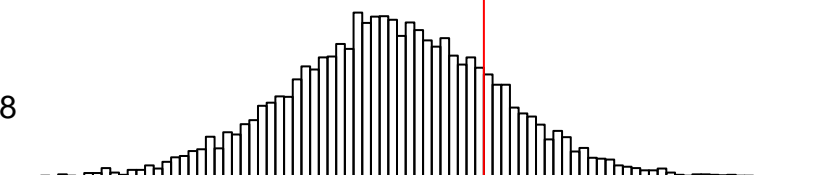

B224:18 – D206:18

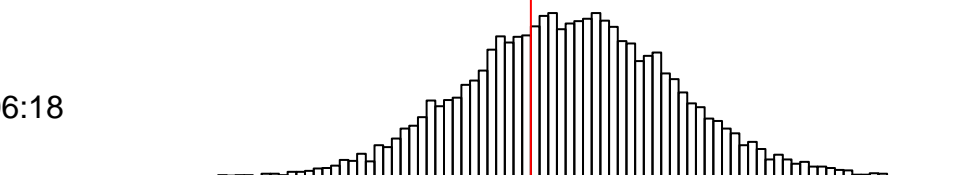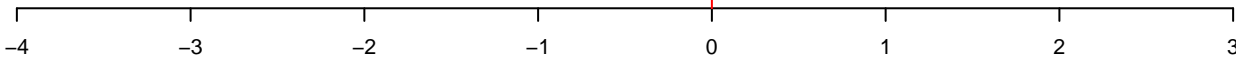

delta(Sugar 7)



A194:18

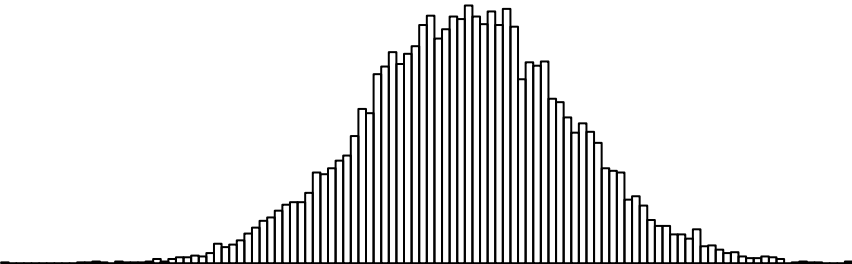

B184:18

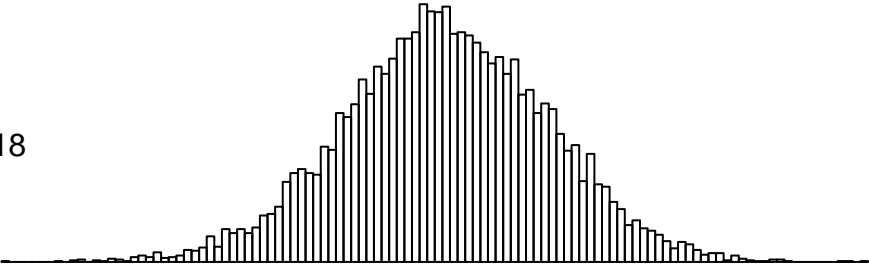

B224:18

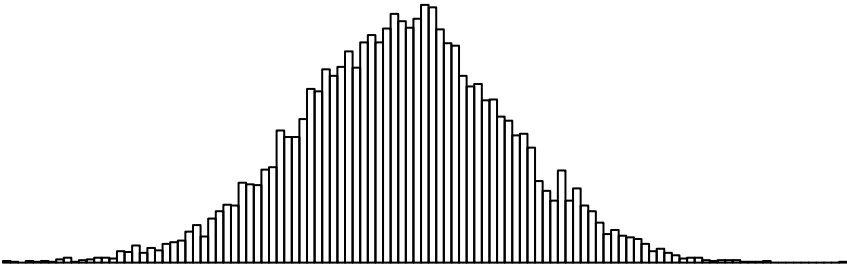

D206:18

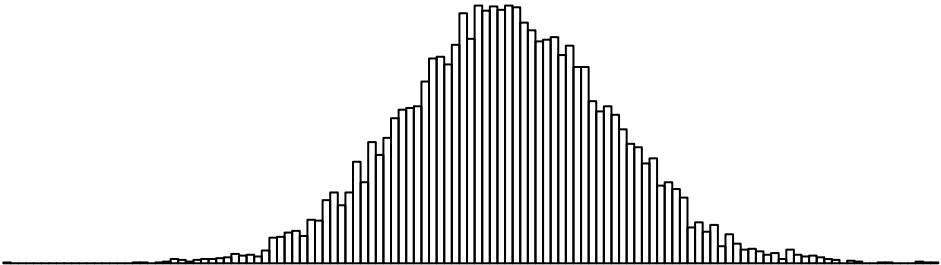

-10                      -8                      -6                      -4                      -2

Sugar 8

A194:18 – B184:18

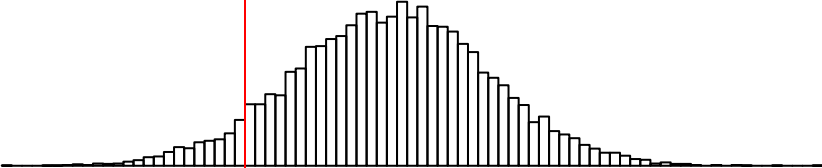

A194:18 – B224:18

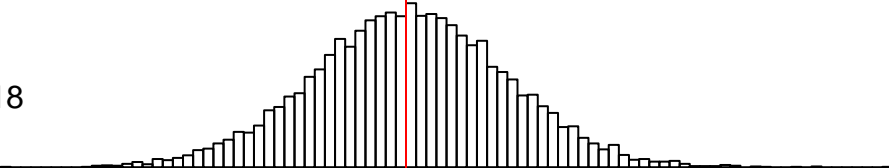

A194:18 – D206:18

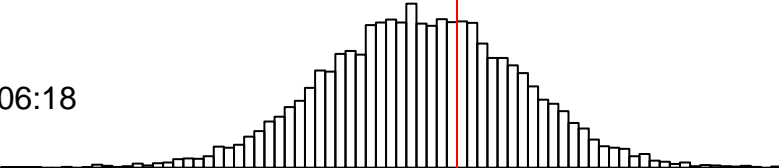

B184:18 – B224:18

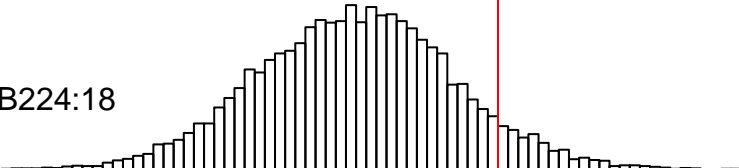

B184:18 – D206:18

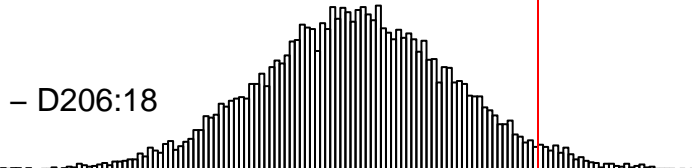

B224:18 – D206:18

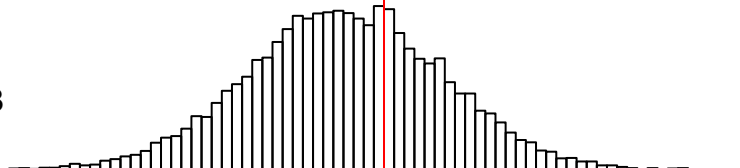

-6 -4 -2 0 2 4 6

delta(Sugar 8)

A194:18

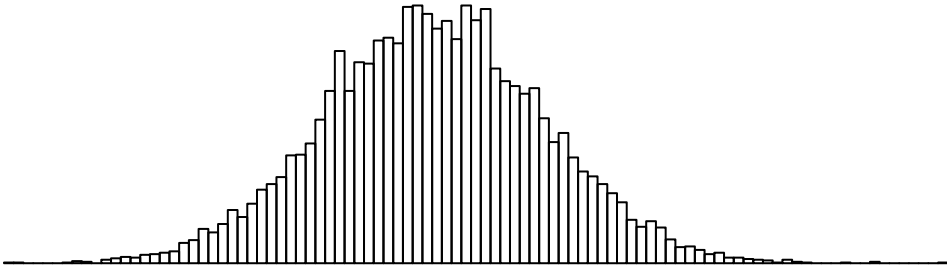

B184:18

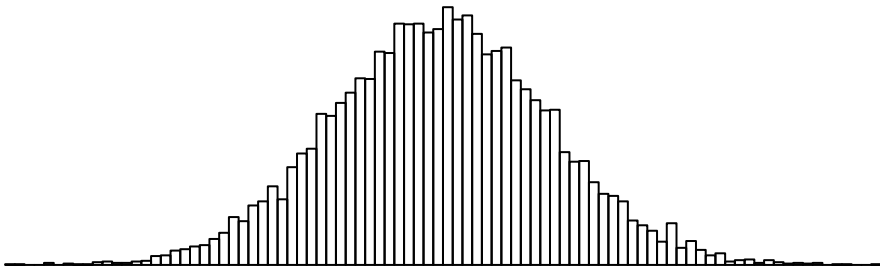

B224:18

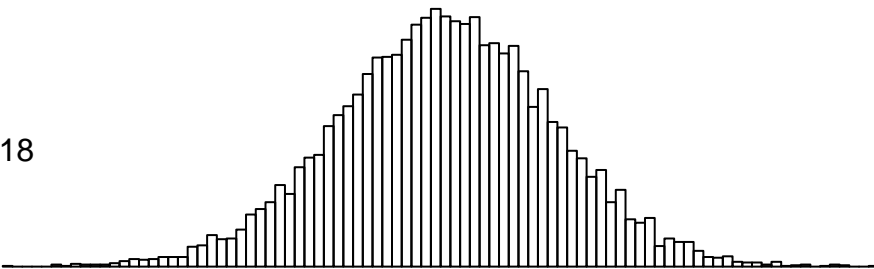

D206:18

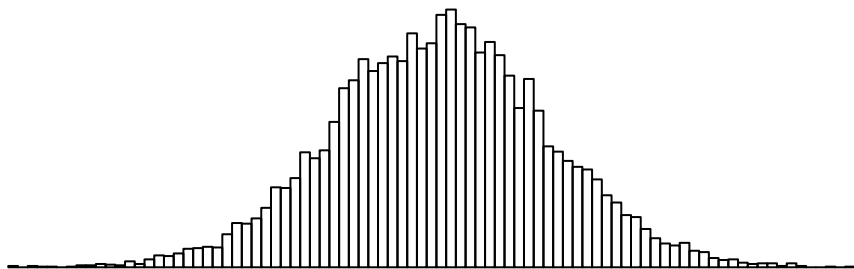

-9.0      -8.5      -8.0      -7.5      -7.0      -6.5

Sugar 9

A194:18 – B184:18

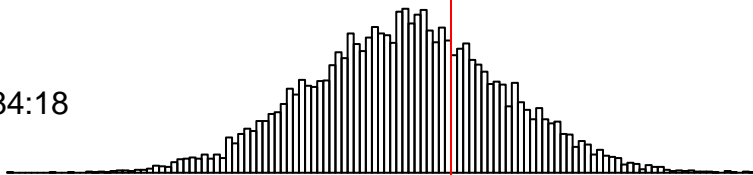

A194:18 – B224:18

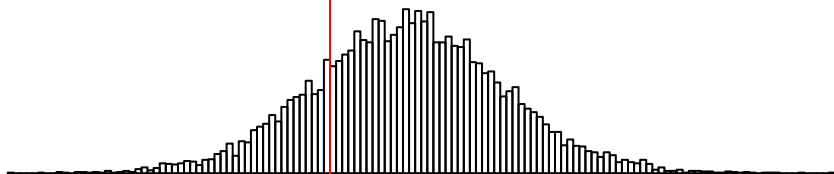

A194:18 – D206:18

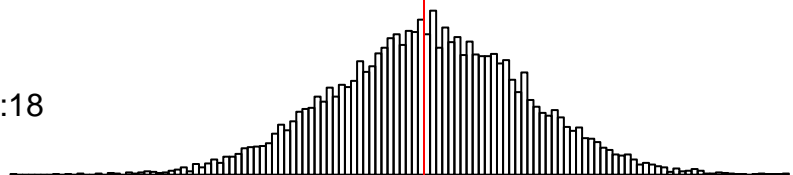

B184:18 – B224:18

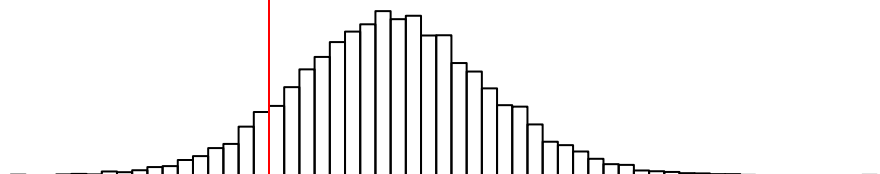

B184:18 – D206:18

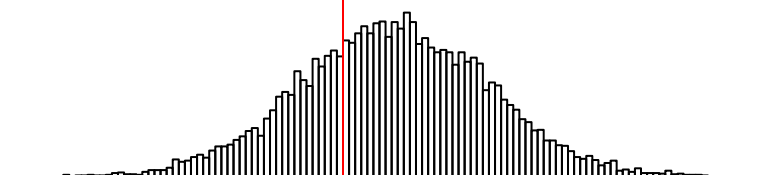

B224:18 – D206:18

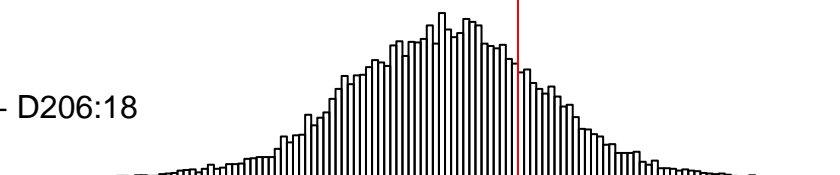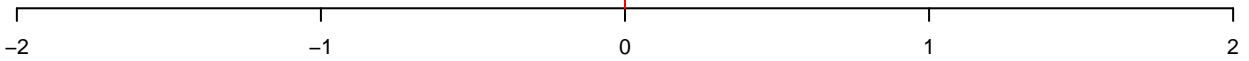

delta(Sugar 9)

A194:18

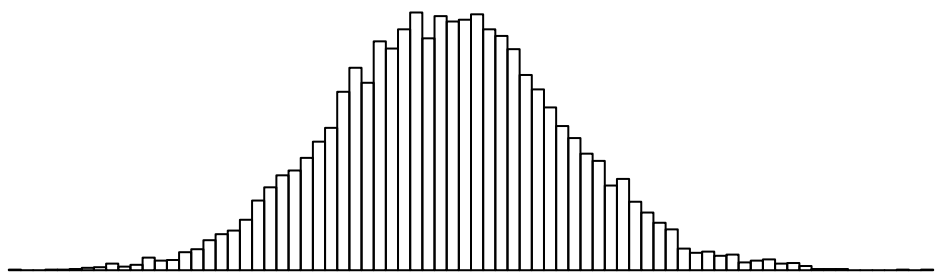

B184:18

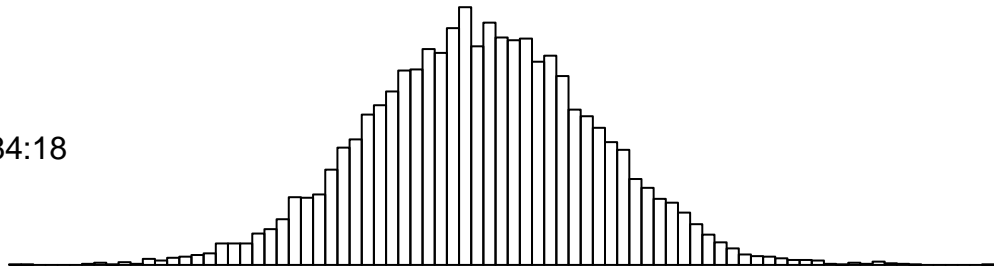

B224:18

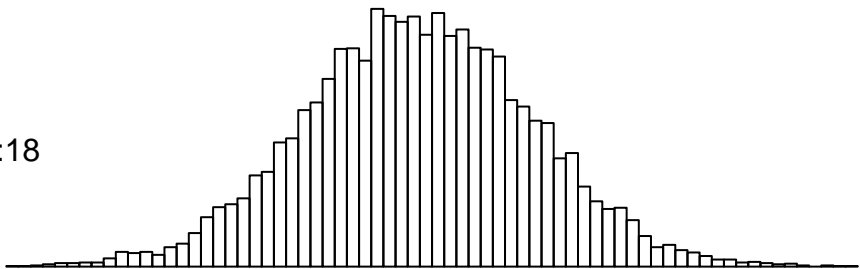

D206:18

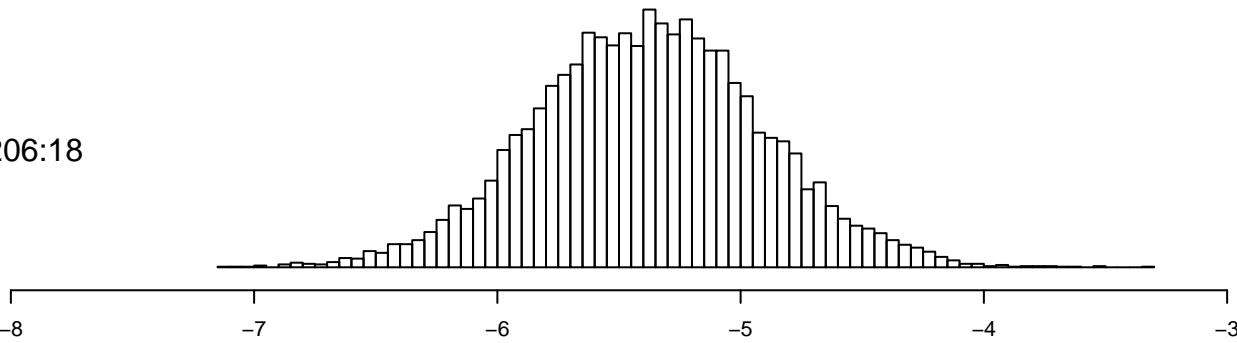

Sugar 10

A194:18 – B184:18

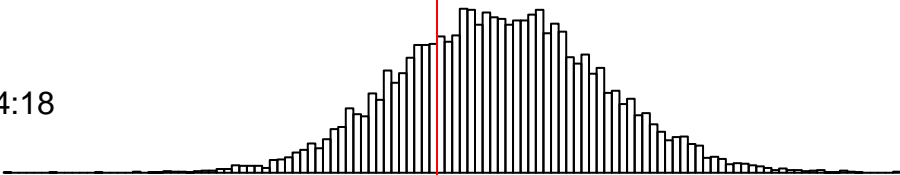

A194:18 – B224:18

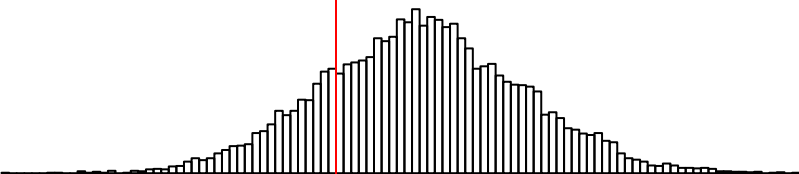

A194:18 – D206:18

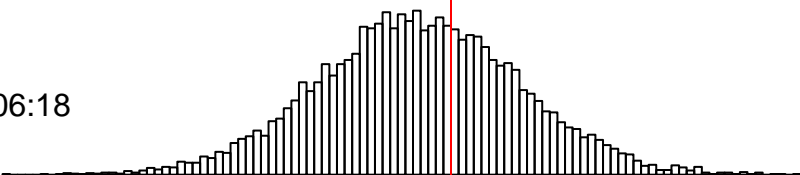

B184:18 – B224:18

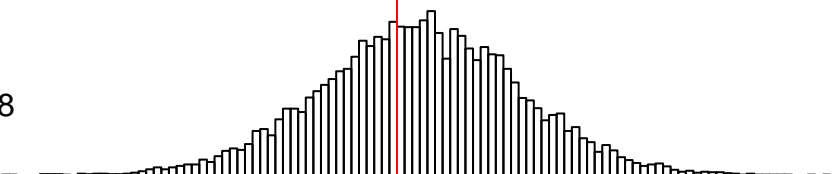

B184:18 – D206:18

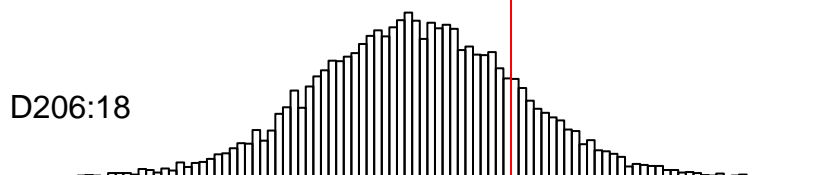

B224:18 – D206:18

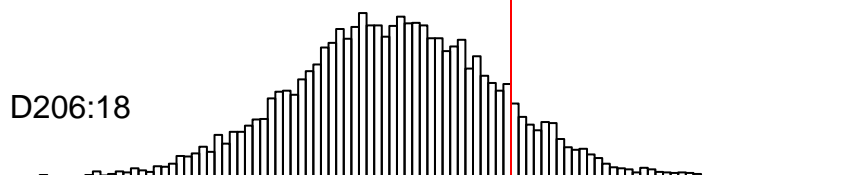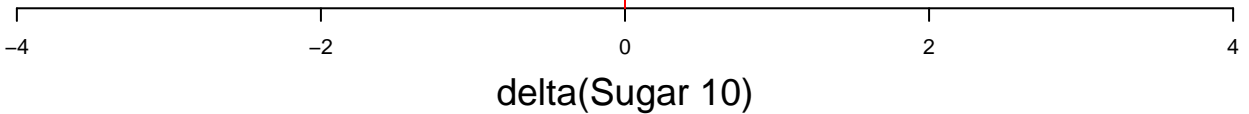

A194:18

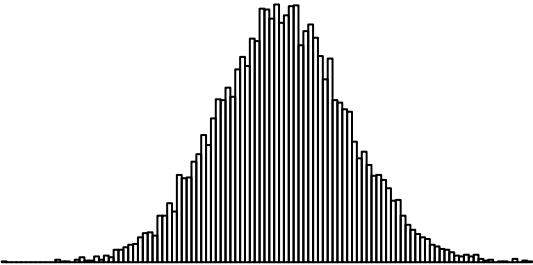

B184:18

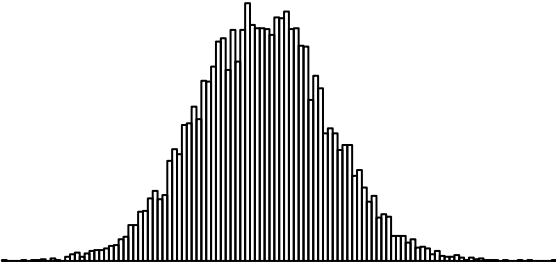

B224:18

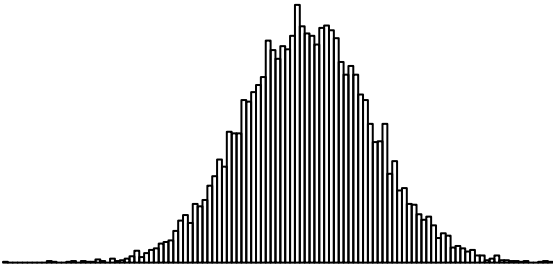

D206:18

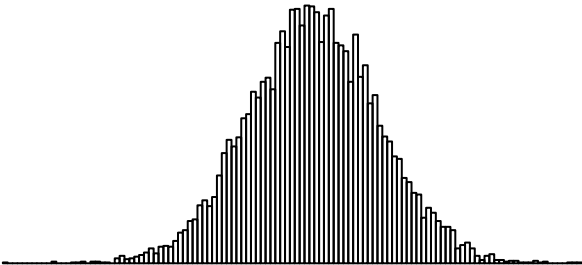

-10      -9      -8      -7      -6      -5

Sugar 11

A194:18 – B184:18

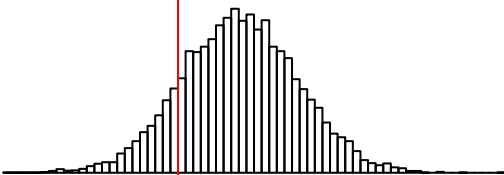

A194:18 – B224:18

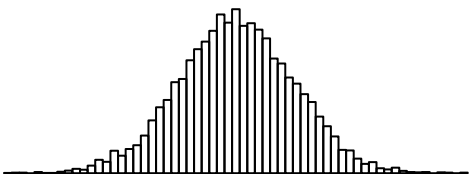

A194:18 – D206:18

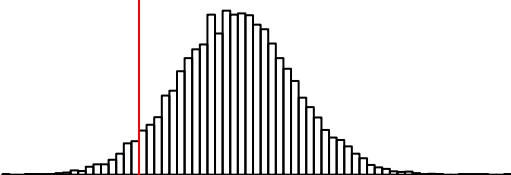

B184:18 – B224:18

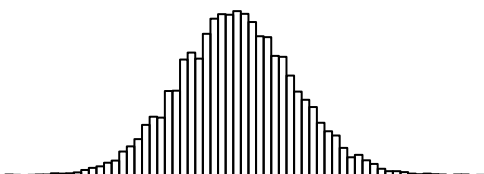

B184:18 – D206:18

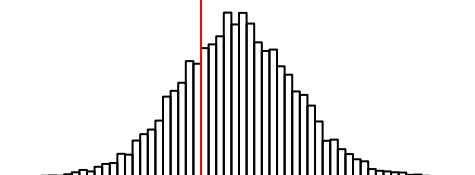

B224:18 – D206:18

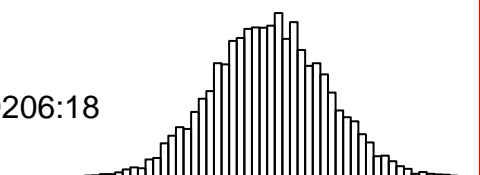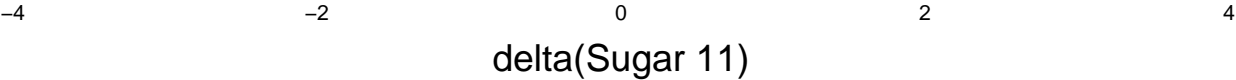



A194:18

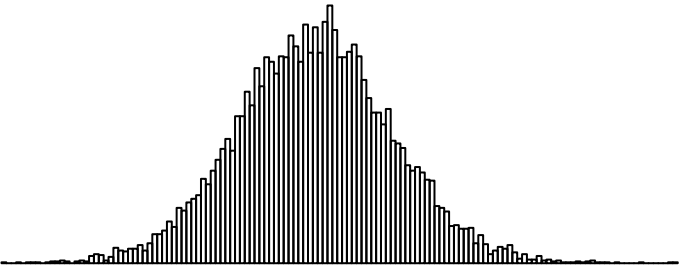

B184:18

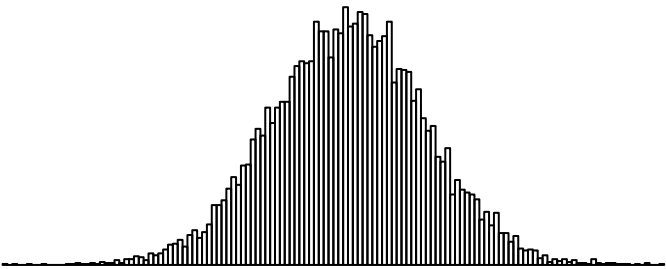

B224:18

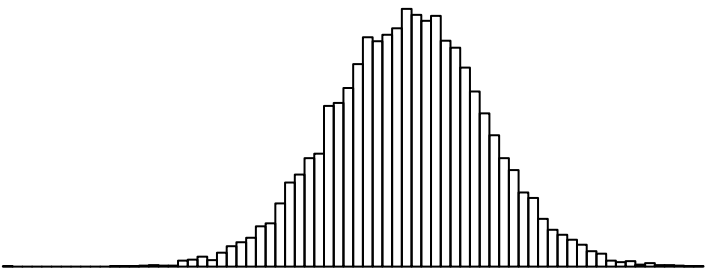

D206:18

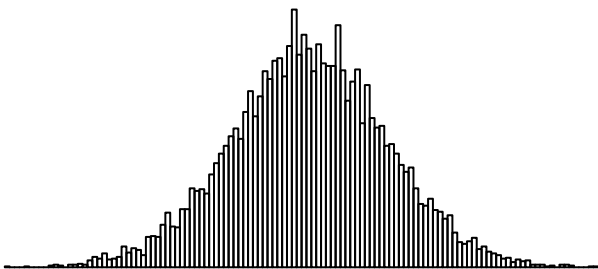

-9.5                      -9.0                      -8.5                      -8.0                      -7.5                      -7.0

Sugar 12

A194:18 – B184:18

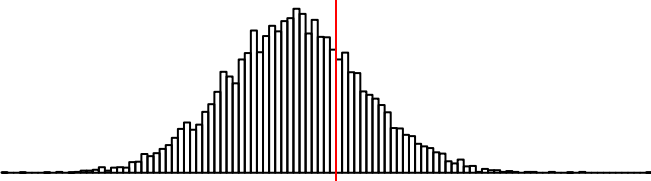

A194:18 – B224:18

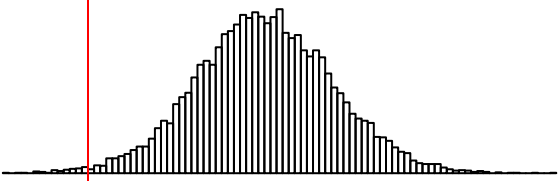

A194:18 – D206:18

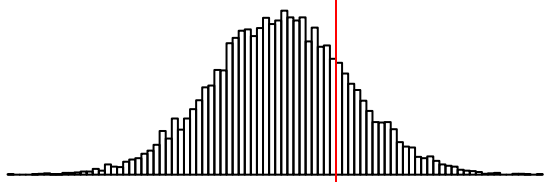

B184:18 – B224:18

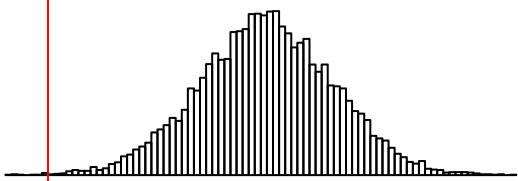

B184:18 – D206:18

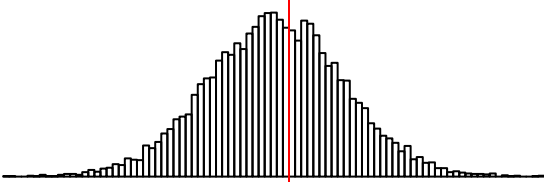

B224:18 – D206:18

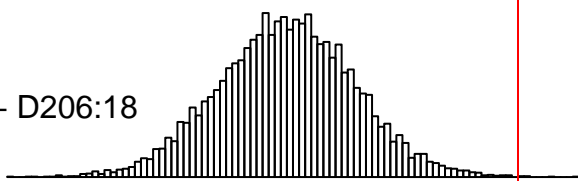

delta(Sugar 12)

A194:18

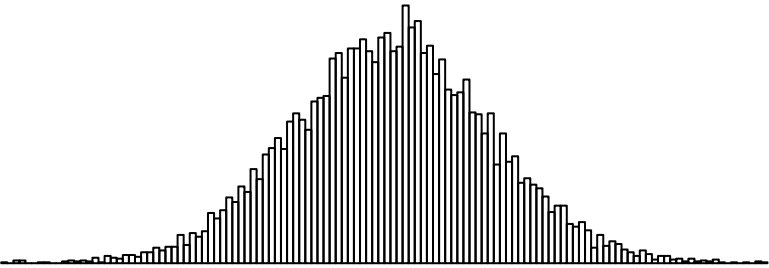

B184:18

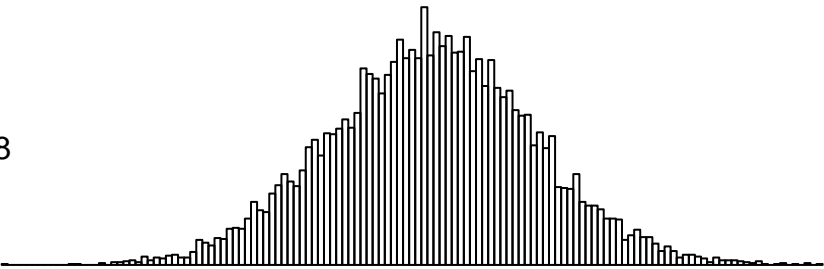

B224:18

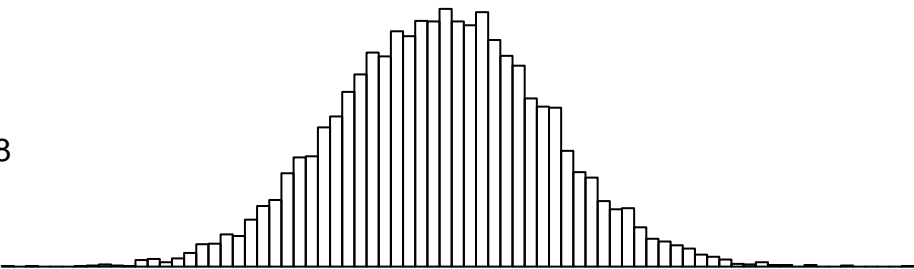

D206:18

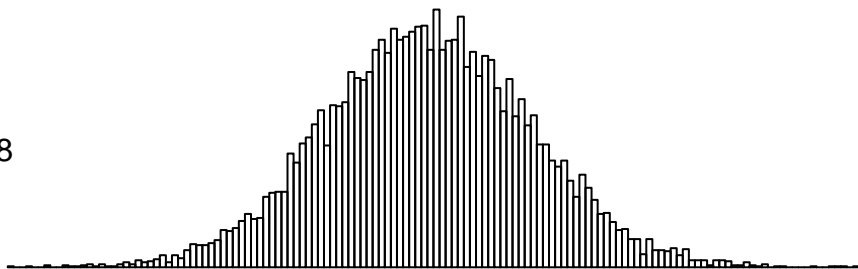

-8.5                      -8.0                      -7.5                      -7.0                      -6.5

Sugar 14

A194:18 – B184:18

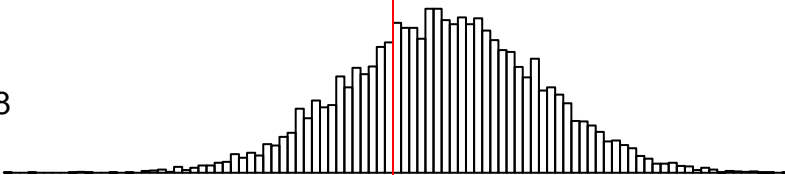

A194:18 – B224:18

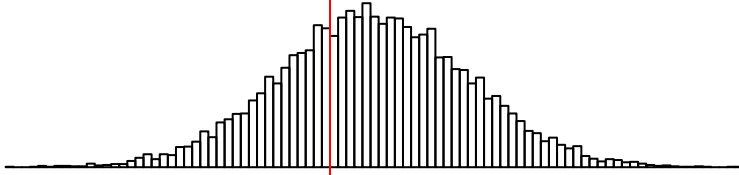

A194:18 – D206:18

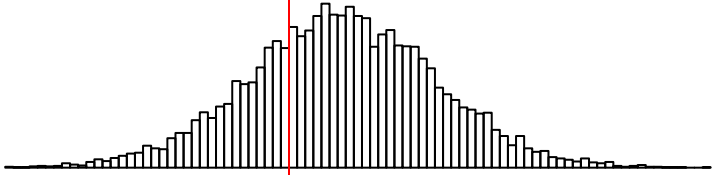

B184:18 – B224:18

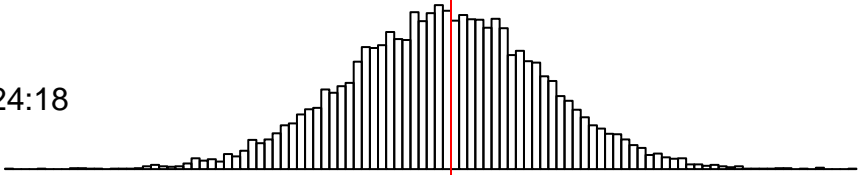

B184:18 – D206:18

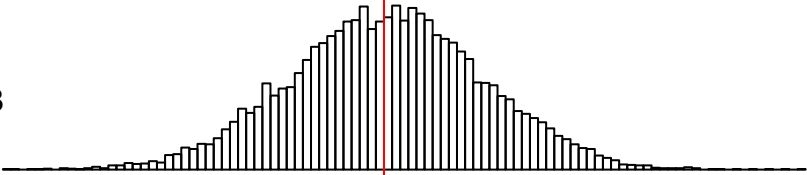

B224:18 – D206:18

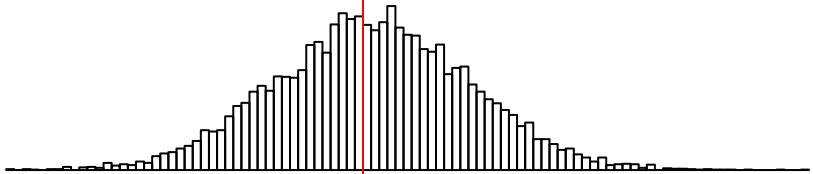

-1.5      -1.0      -0.5      0.0      0.5      1.0      1.5

delta(Sugar 14)

A194:18

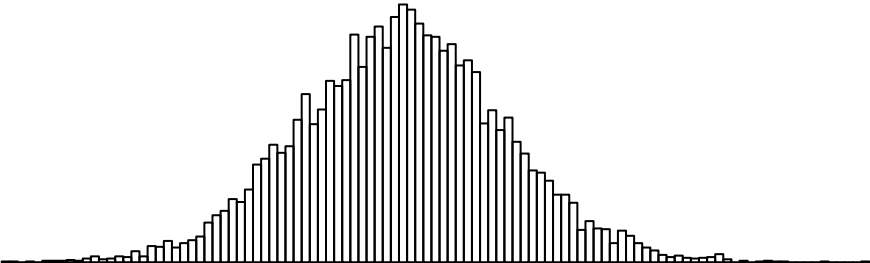

B184:18

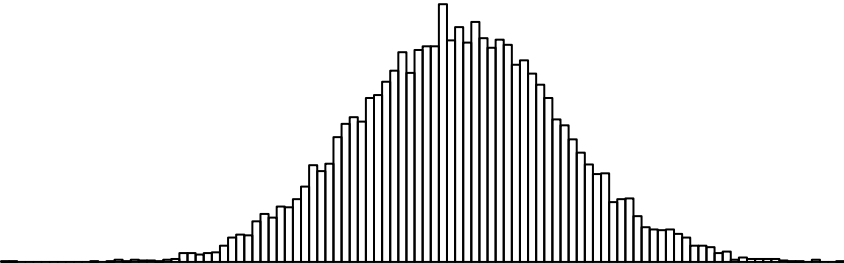

B224:18

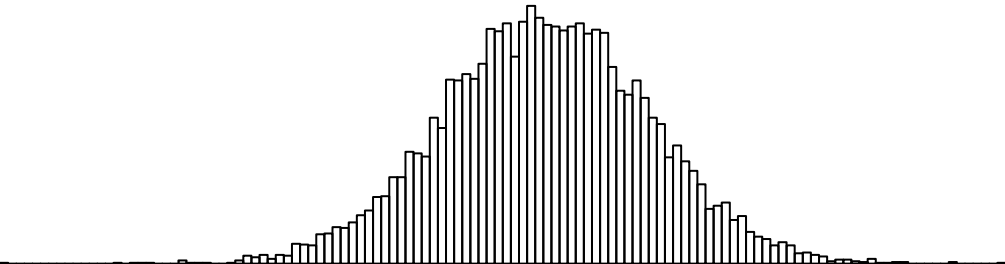

D206:18

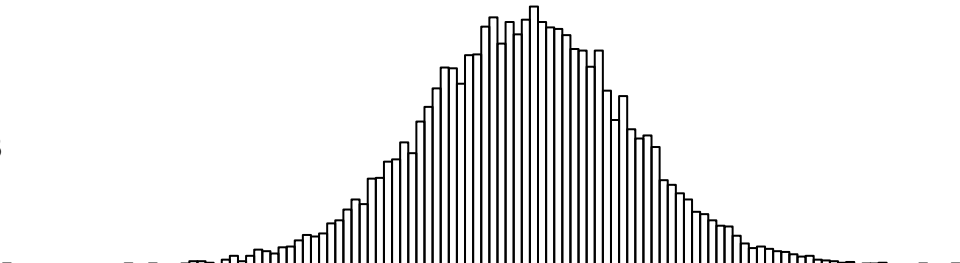

-9.0      -8.5      -8.0      -7.5      -7.0      -6.5      -6.0

Sugar 16

A194:18 – B184:18

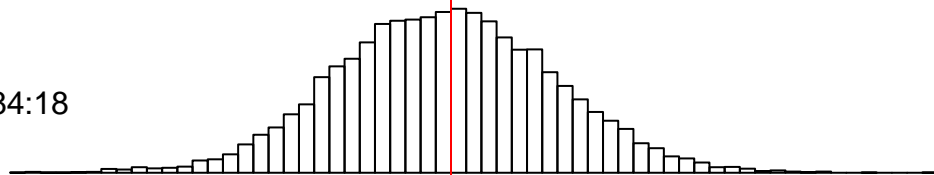

A194:18 – B224:18

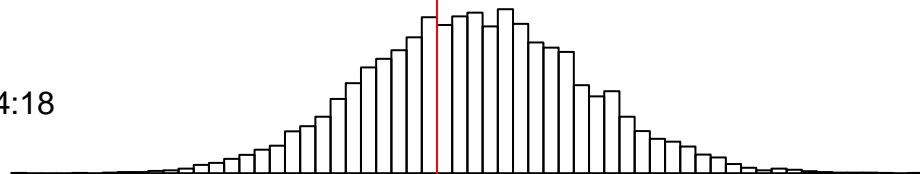

A194:18 – D206:18

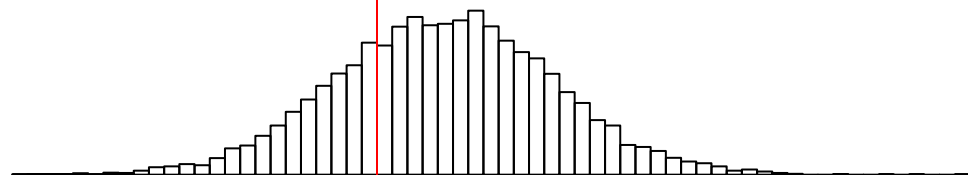

B184:18 – B224:18

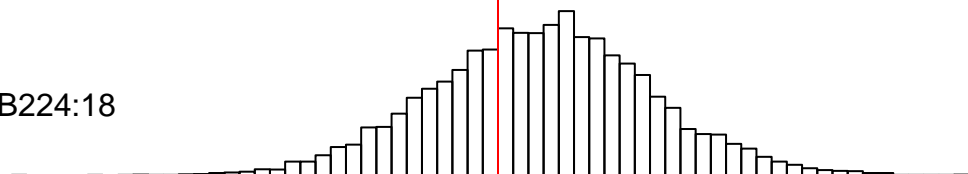

B184:18 – D206:18

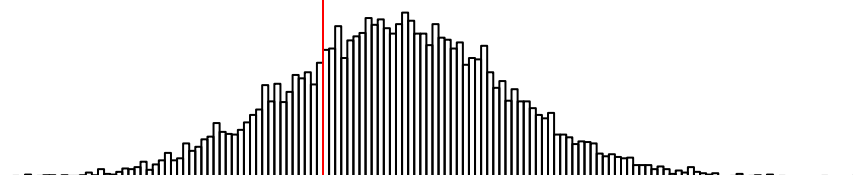

B224:18 – D206:18

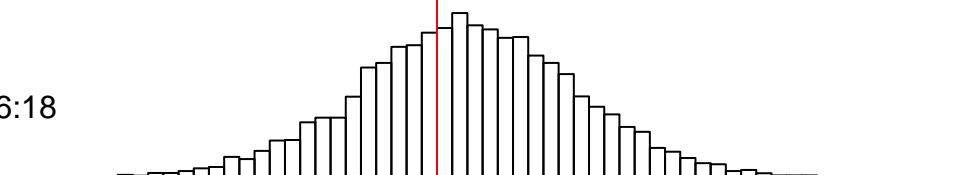

-2                      -1                      0                      1                      2

delta(Sugar 16)

A194:18

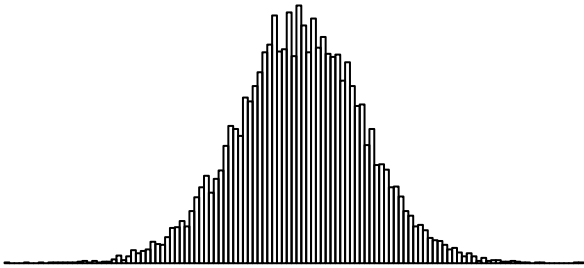

B184:18

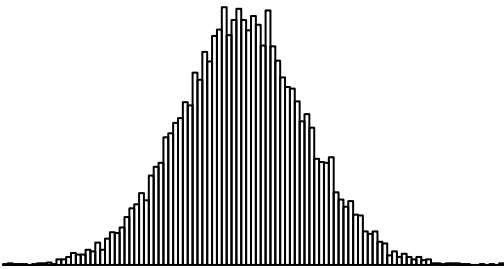

B224:18

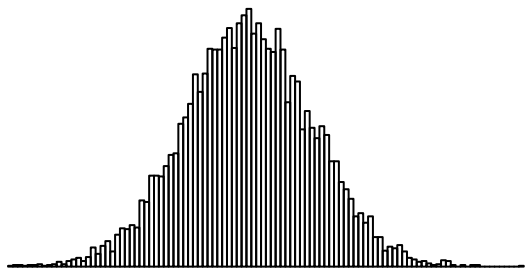

D206:18

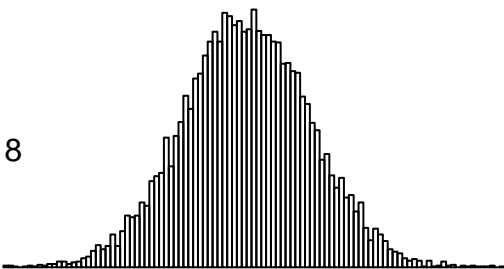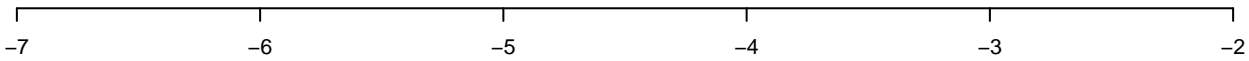

Sugar 17

A194:18 – B184:18

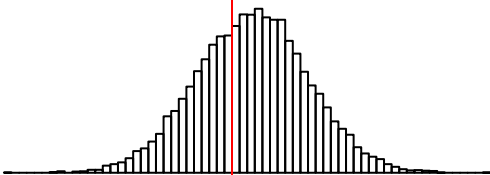

A194:18 – B224:18

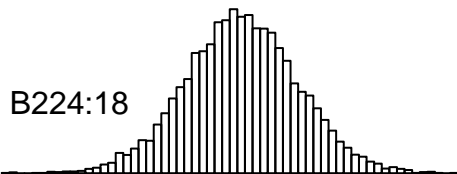

A194:18 – D206:18

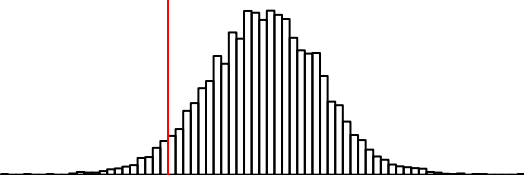

B184:18 – B224:18

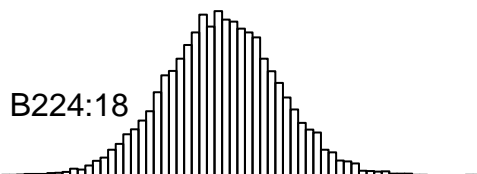

B184:18 – D206:18

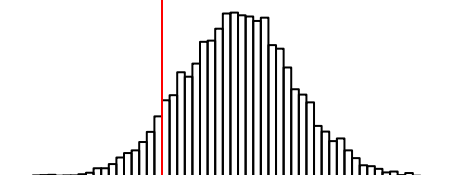

B224:18 – D206:18

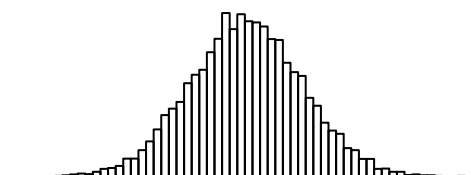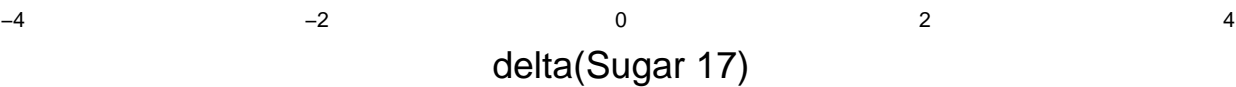



A194:18

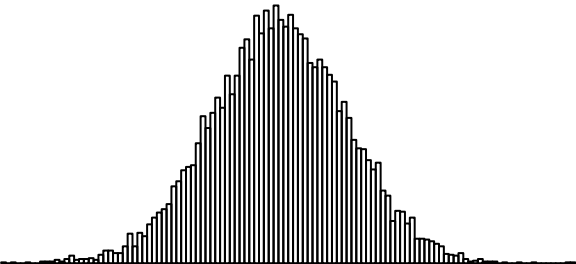

B184:18

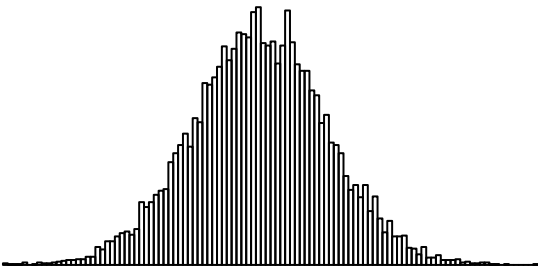

B224:18

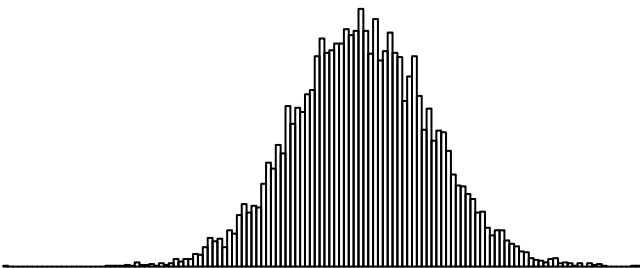

D206:18

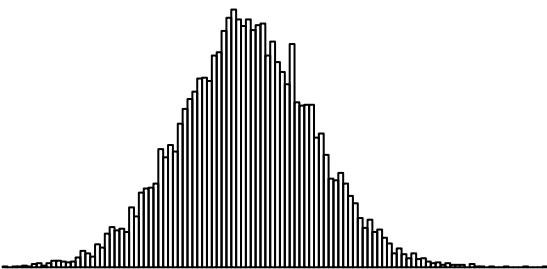

-8                      -7                      -6                      -5                      -4                      -3

Sugar 18

A194:18 – B184:18

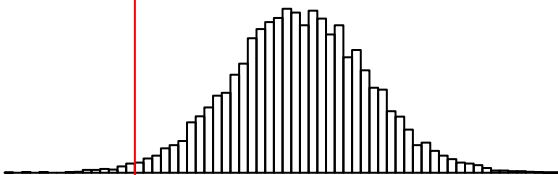

A194:18 – B224:18

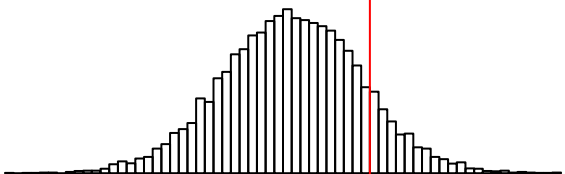

A194:18 – D206:18

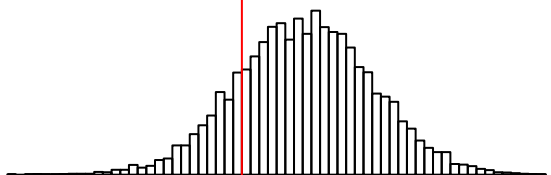

B184:18 – B224:18

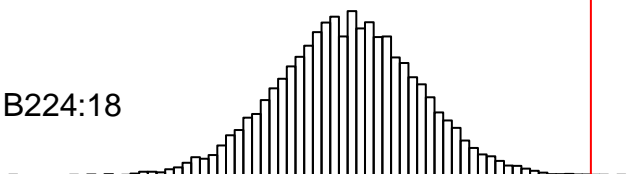

B184:18 – D206:18

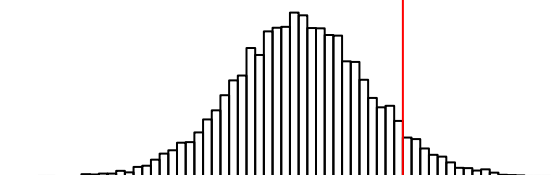

B224:18 – D206:18

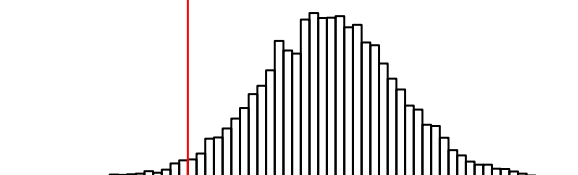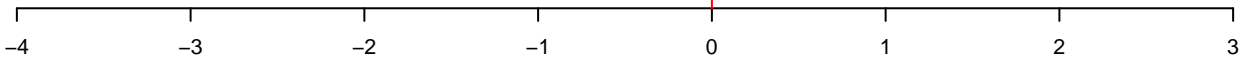

delta(Sugar 18)

A194:18

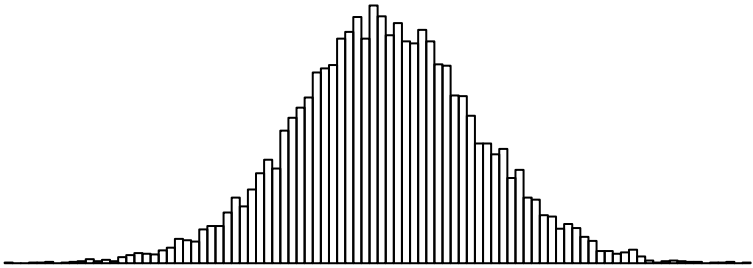

B184:18

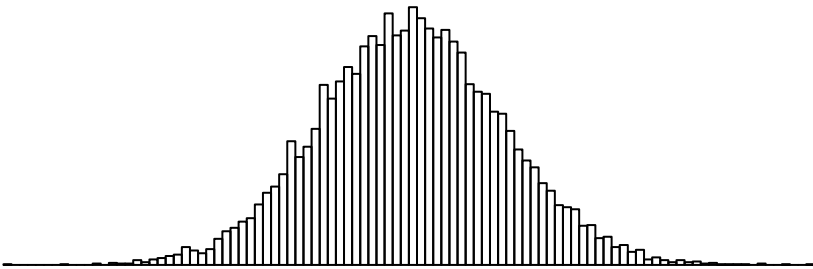

B224:18

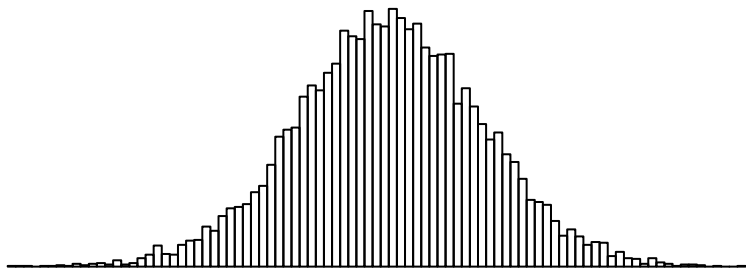

D206:18

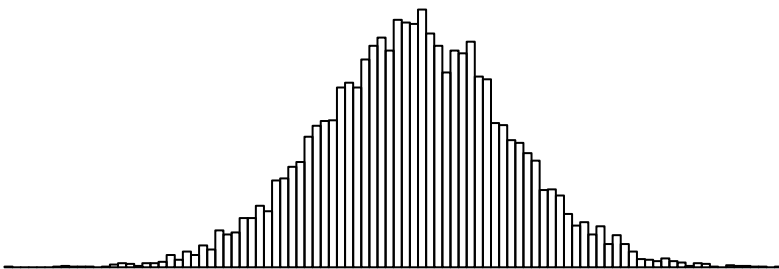

-8.5      -8.0      -7.5      -7.0      -6.5      -6.0      -5.5

Sugar 20

A194:18 – B184:18

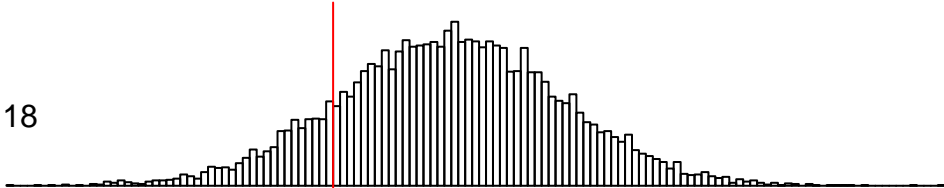

A194:18 – B224:18

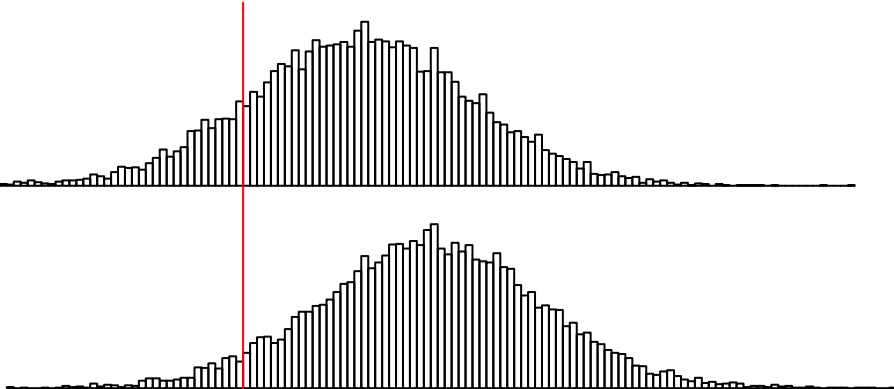

A194:18 – D206:18

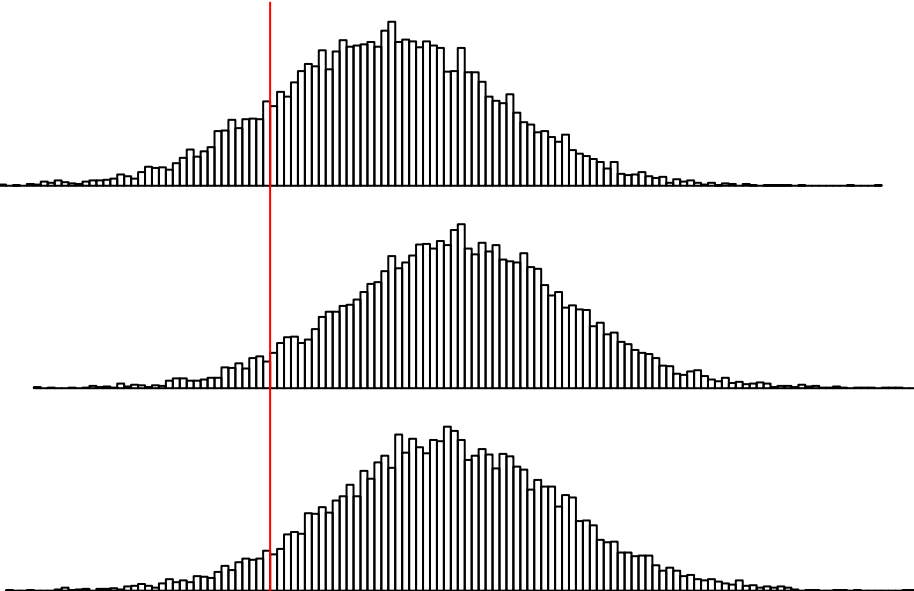

B184:18 – B224:18

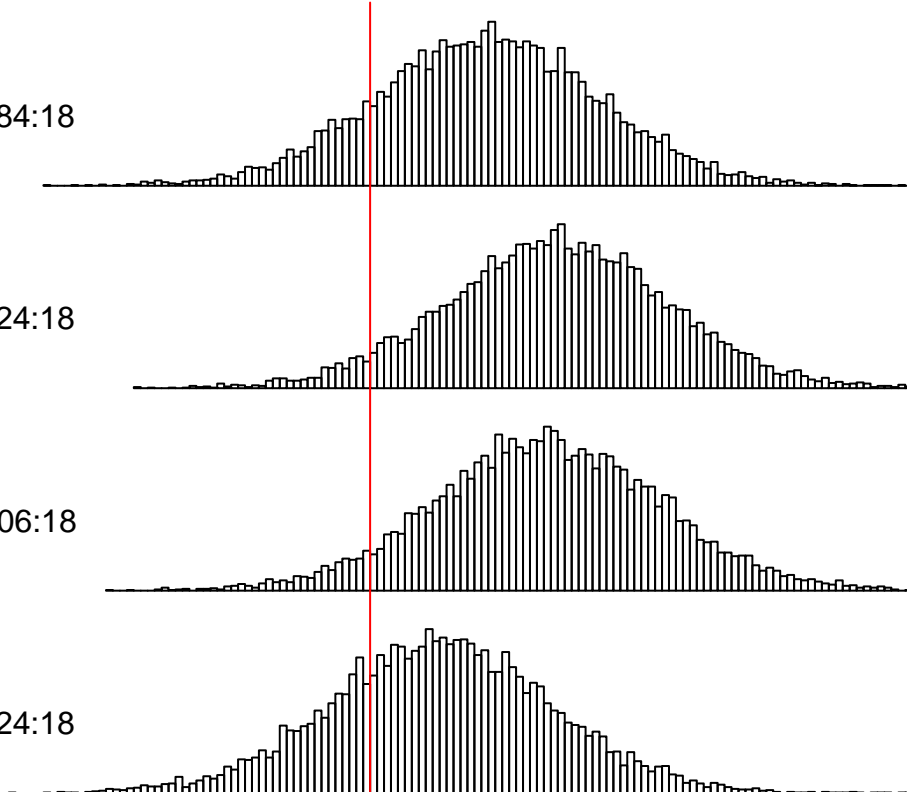

B184:18 – D206:18

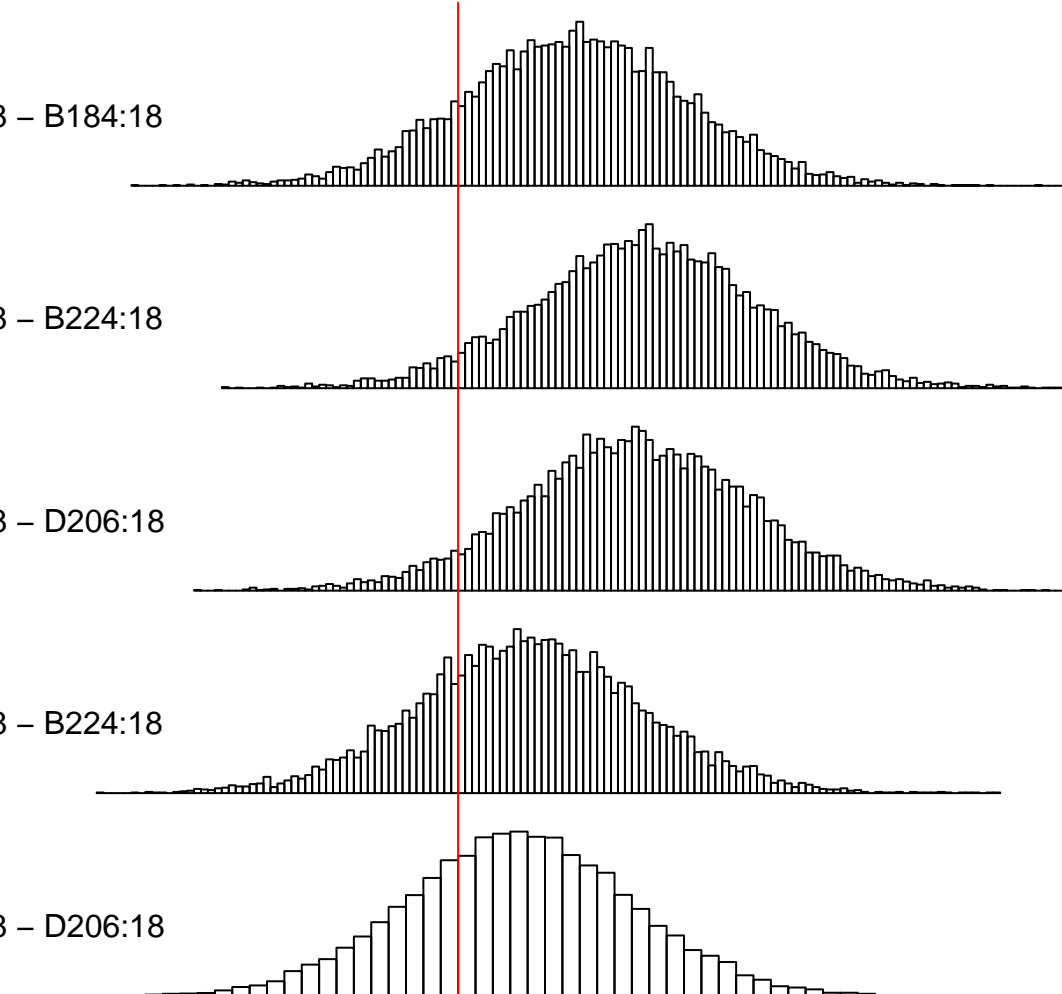

B224:18 – D206:18

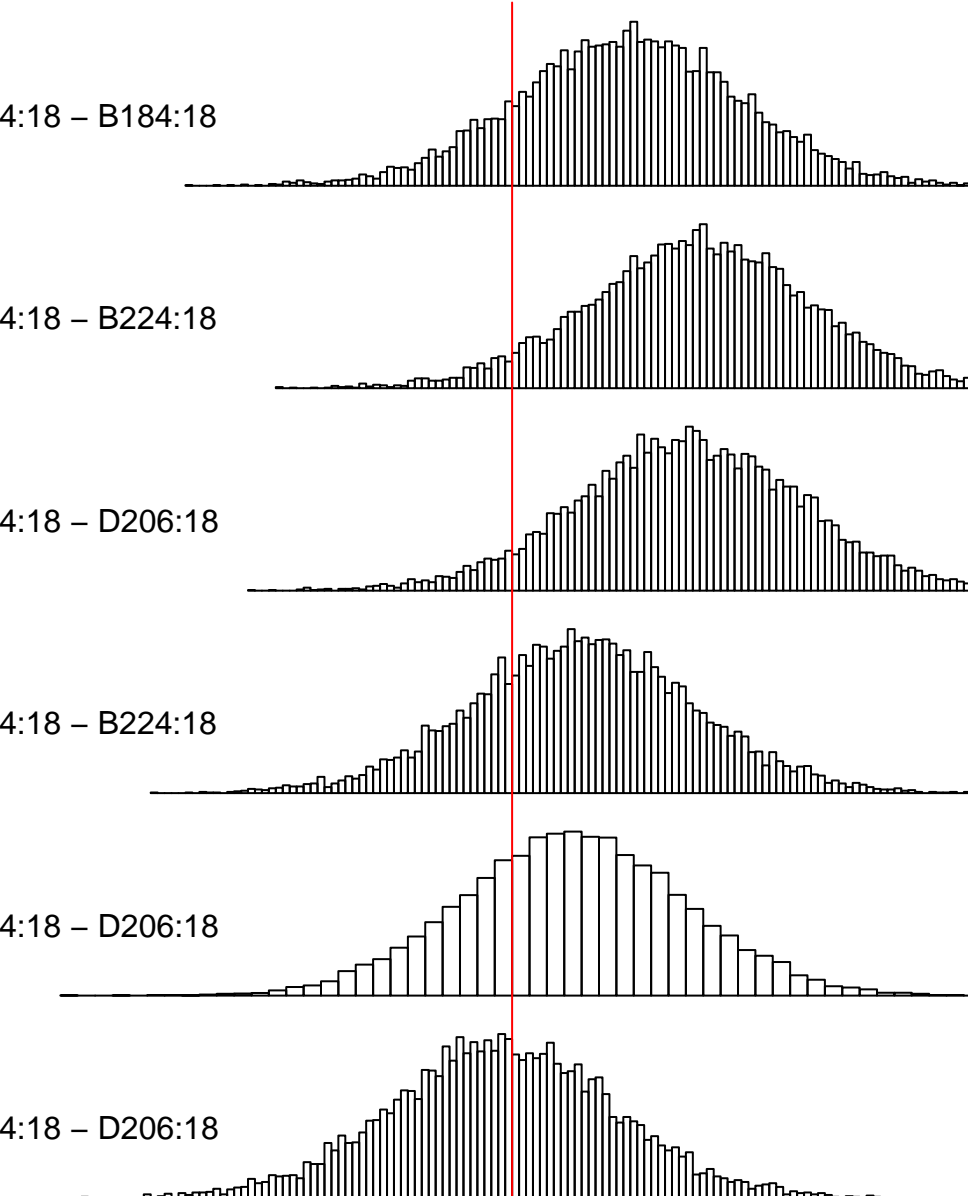

-1.5      -1.0      -0.5      0.0      0.5      1.0      1.5      2.0

delta(Sugar 20)

A194:18

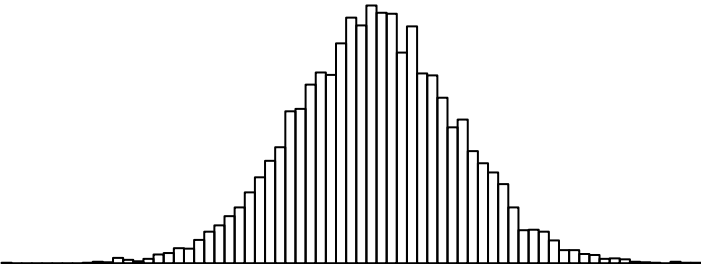

B184:18

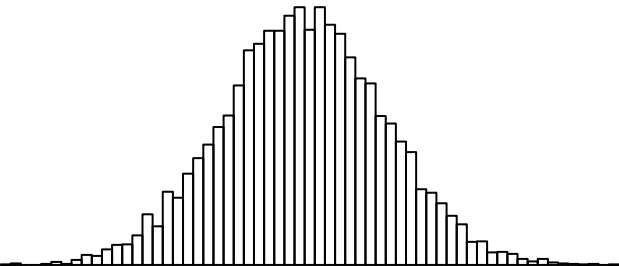

B224:18

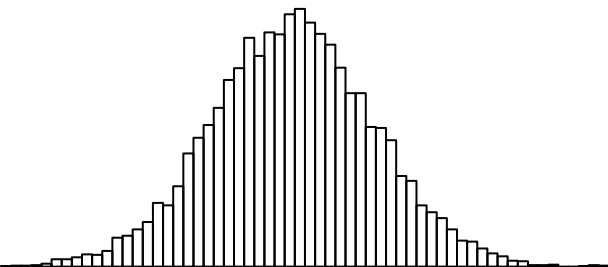

D206:18

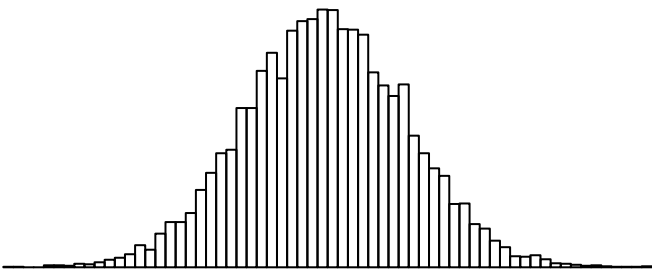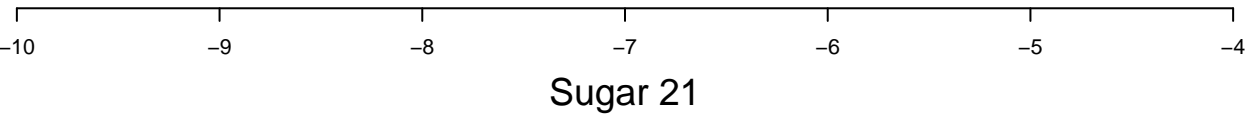

A194:18 – B184:18

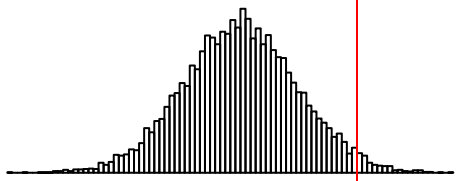

A194:18 – B224:18

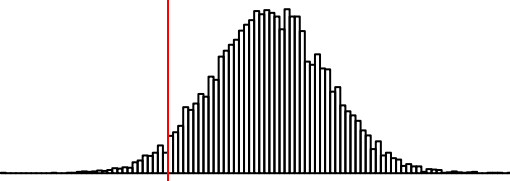

A194:18 – D206:18

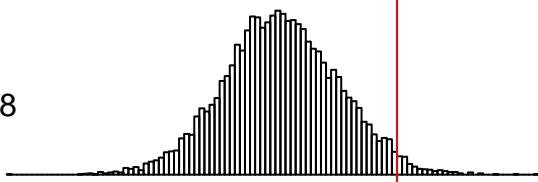

B184:18 – B224:18

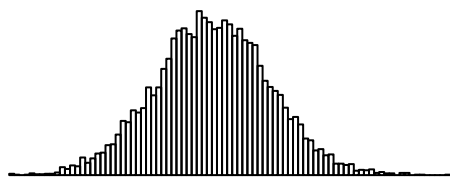

B184:18 – D206:18

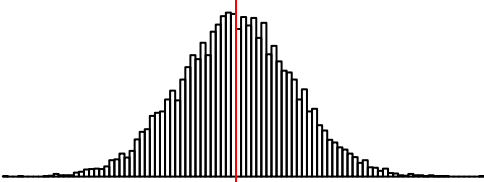

B224:18 – D206:18

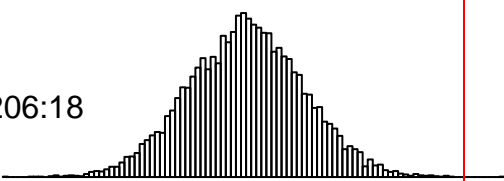

-6 -4 -2 0 2 4 6

delta(Sugar 21)

A194:18

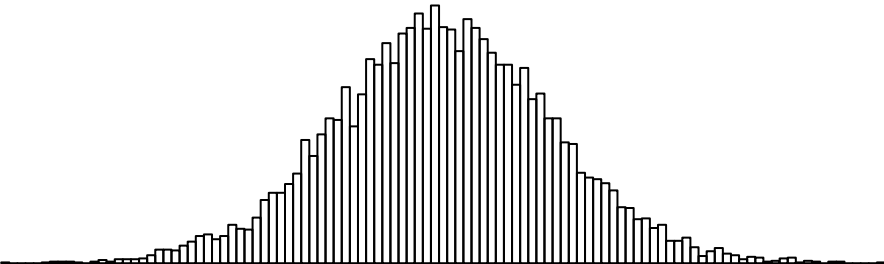

B184:18

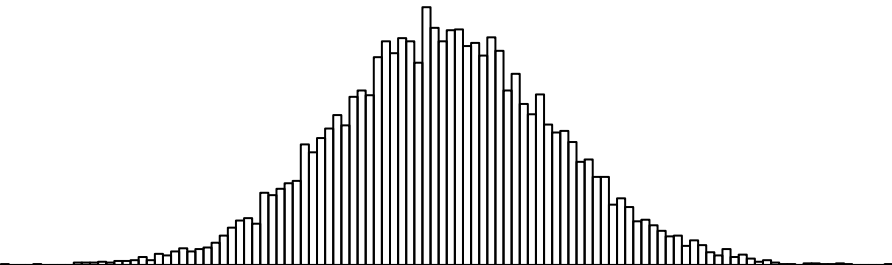

B224:18

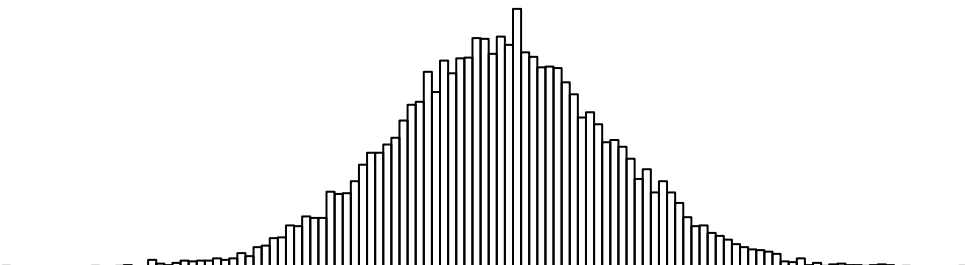

D206:18

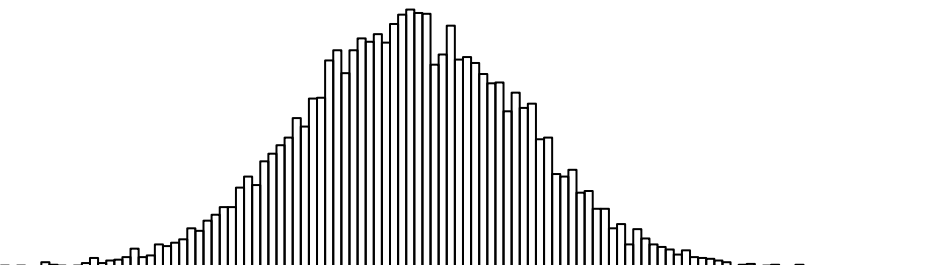

-6.5      -6.0      -5.5      -5.0      -4.5      -4.0      -3.5

Sugar 22

A194:18 – B184:18

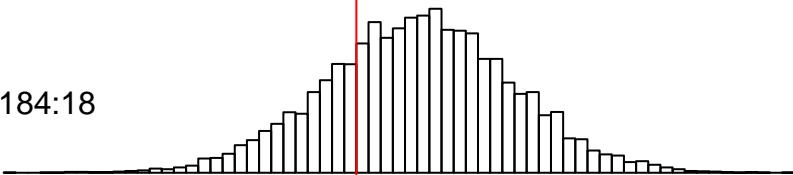

A194:18 – B224:18

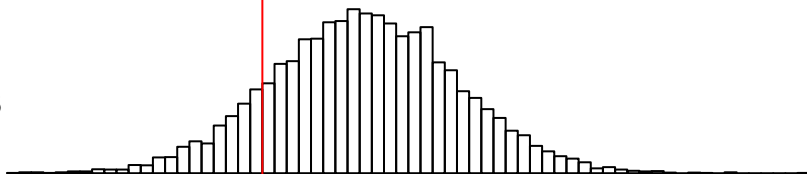

A194:18 – D206:18

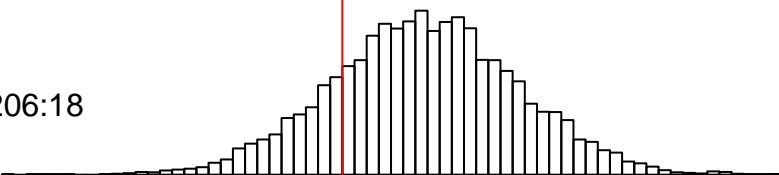

B184:18 – B224:18

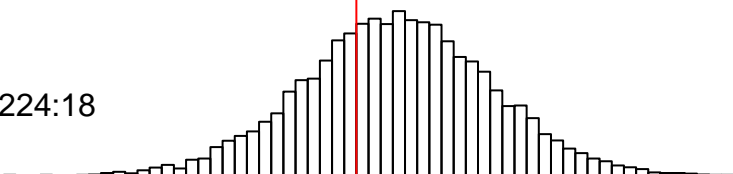

B184:18 – D206:18

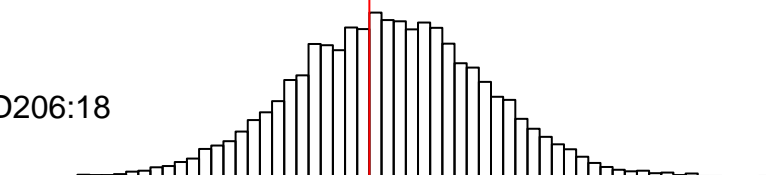

B224:18 – D206:18

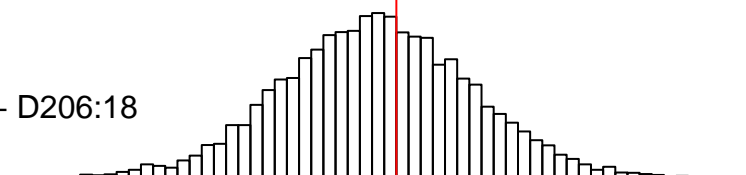

-2                      -1                      0                      1                      2                      3

delta(Sugar 22)



A194:18

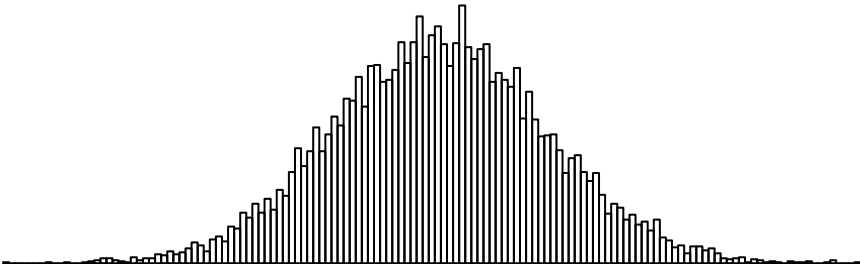

B184:18

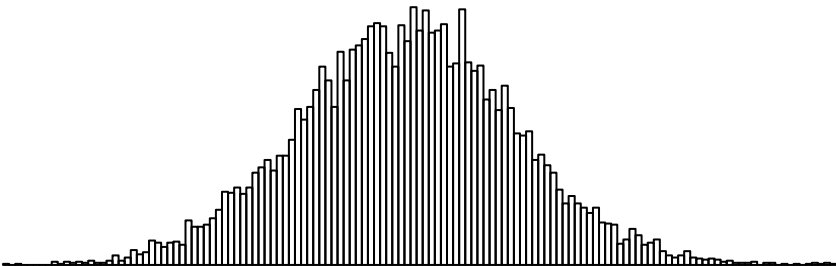

B224:18

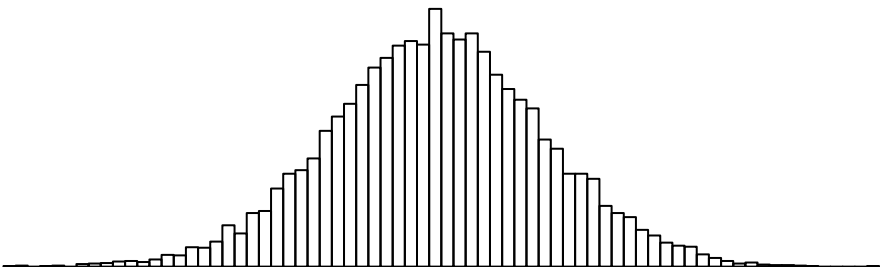

D206:18

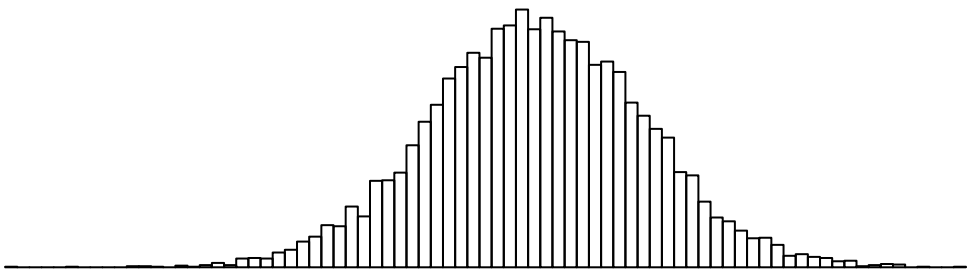

-7.5                      -7.0                      -6.5                      -6.0                      -5.5

Sugar 23

A194:18 – B184:18

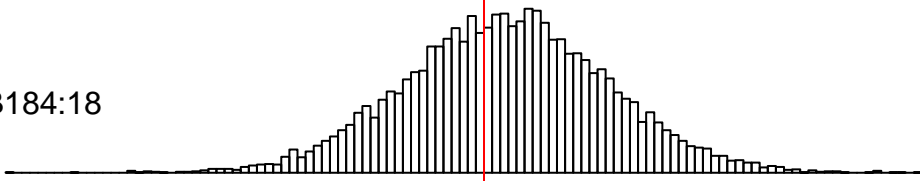

A194:18 – B224:18

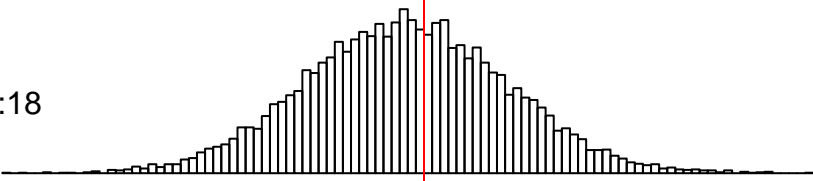

A194:18 – D206:18

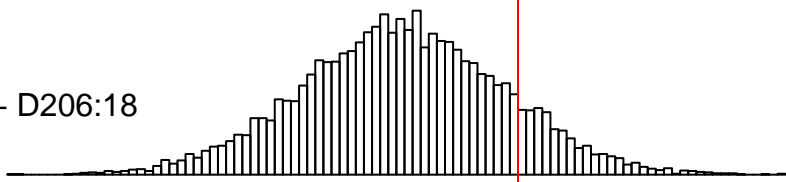

B184:18 – B224:18

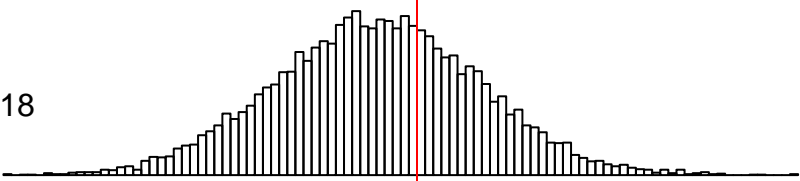

B184:18 – D206:18

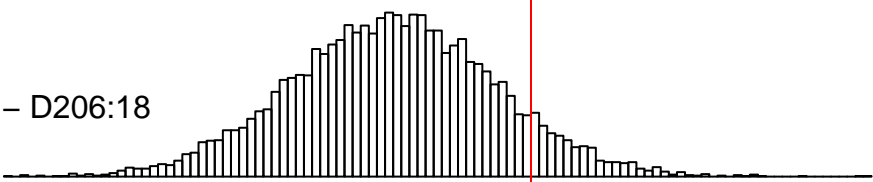

B224:18 – D206:18

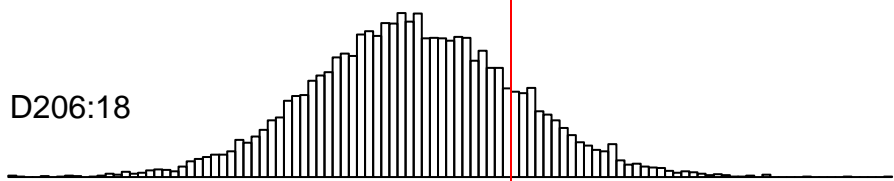

-1.5      -1.0      -0.5      0.0      0.5      1.0      1.5

delta(Sugar 23)

A194:18

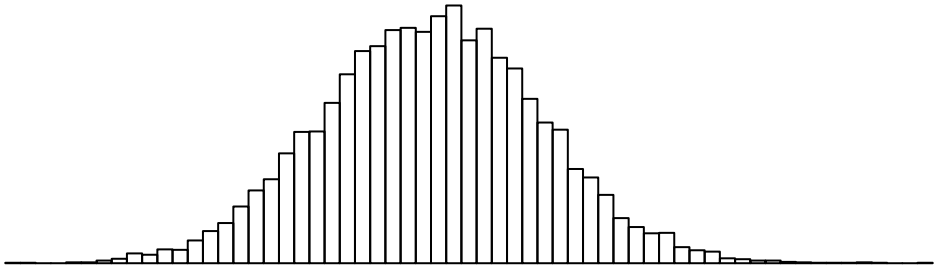

B184:18

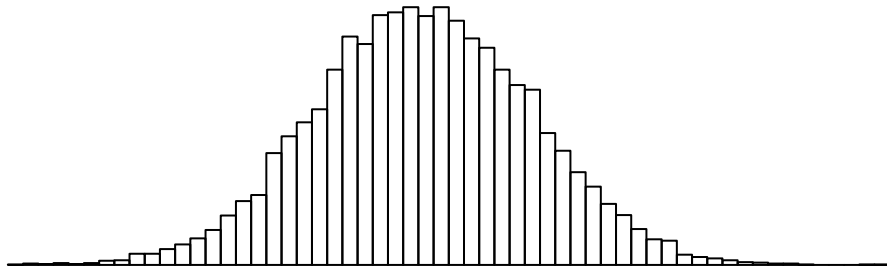

B224:18

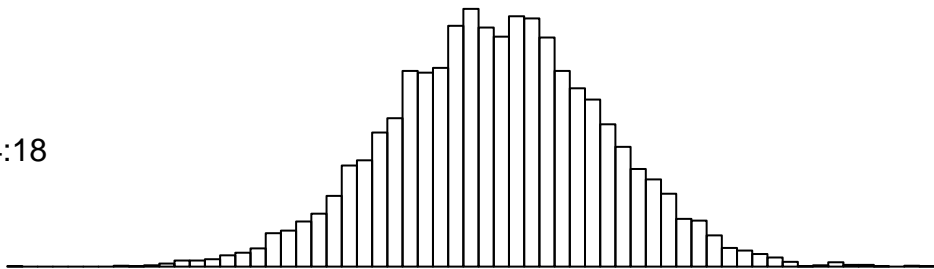

D206:18

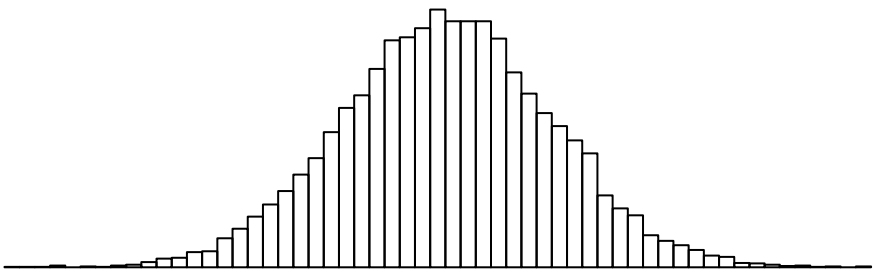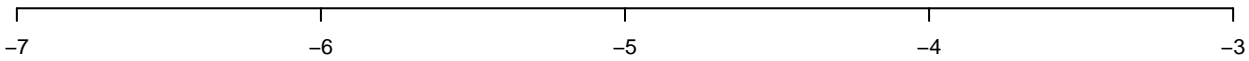

Sugar 24

A194:18 – B184:18

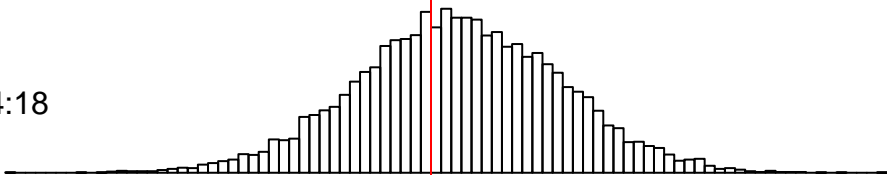

A194:18 – B224:18

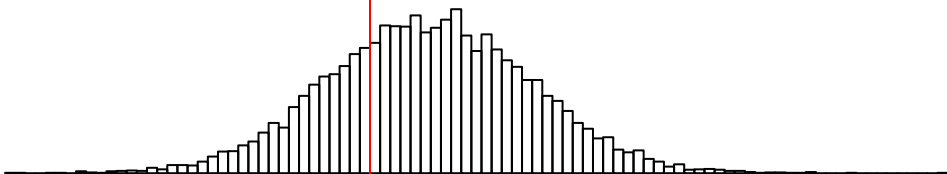

A194:18 – D206:18

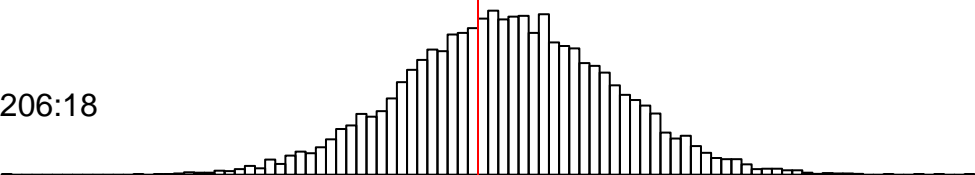

B184:18 – B224:18

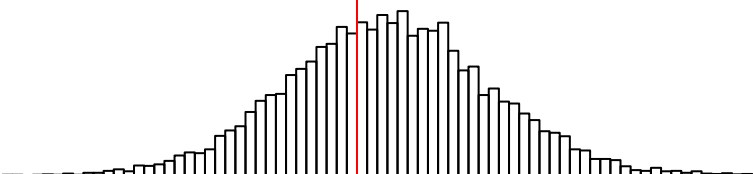

B184:18 – D206:18

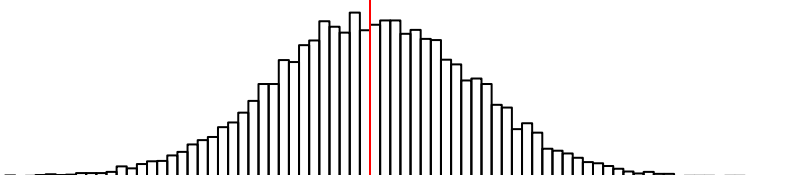

B224:18 – D206:18

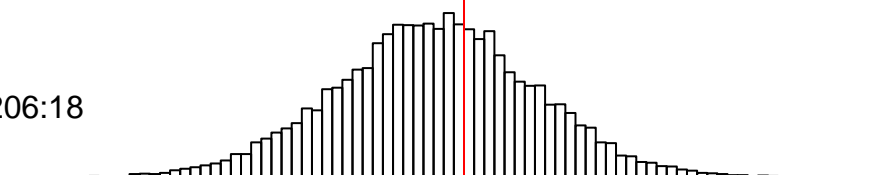

-3 -2 -1 0 1 2 3

delta(Sugar 24)

A194:18

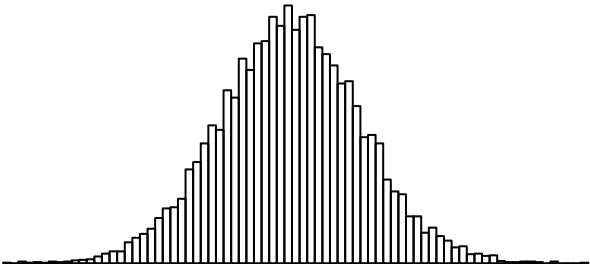

B184:18

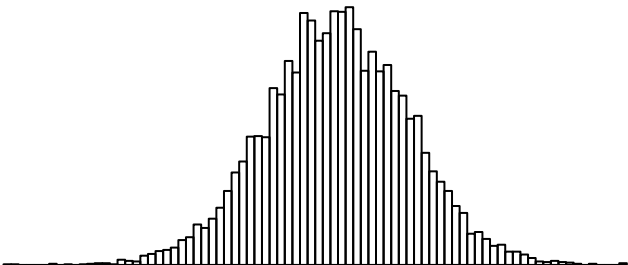

B224:18

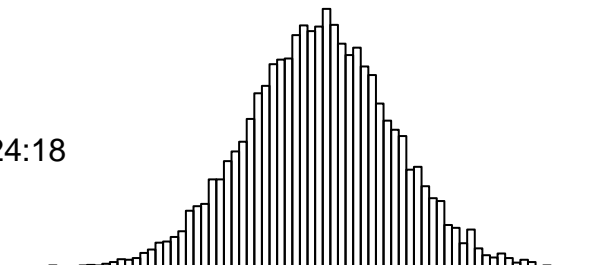

D206:18

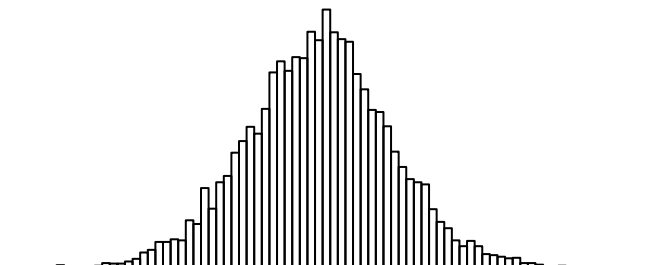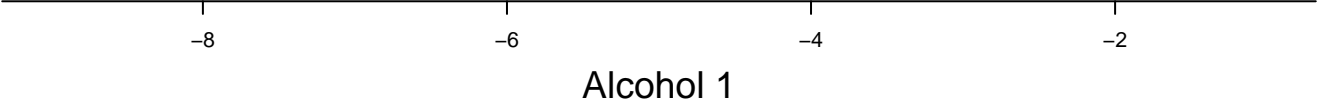

A194:18 – B184:18

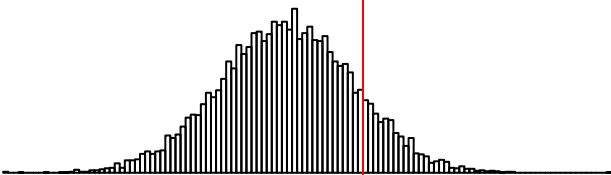

A194:18 – B224:18

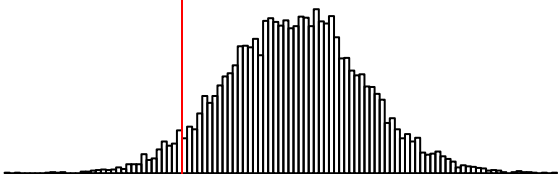

A194:18 – D206:18

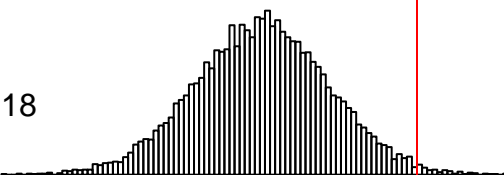

B184:18 – B224:18

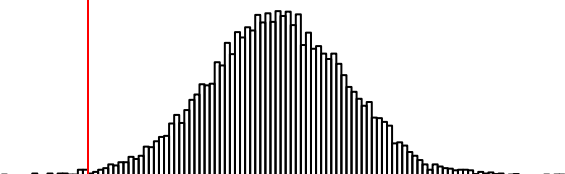

B184:18 – D206:18

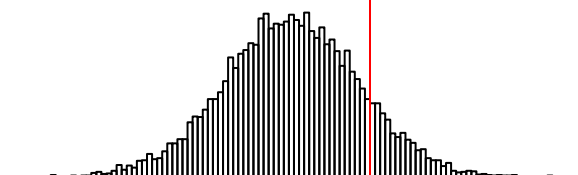

B224:18 – D206:18

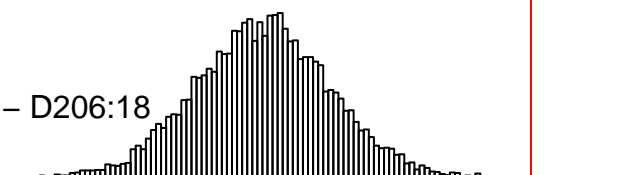

delta(Alcohol 1)

A194:18

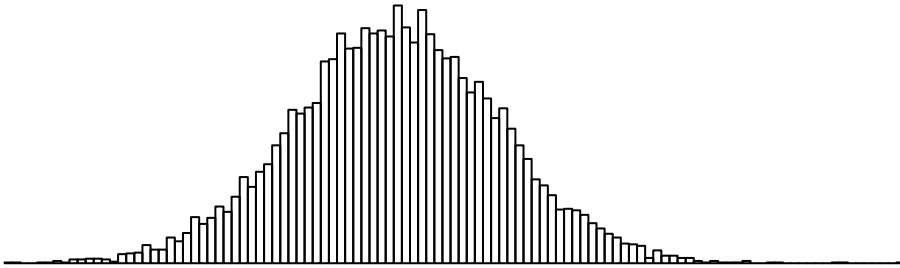

B184:18

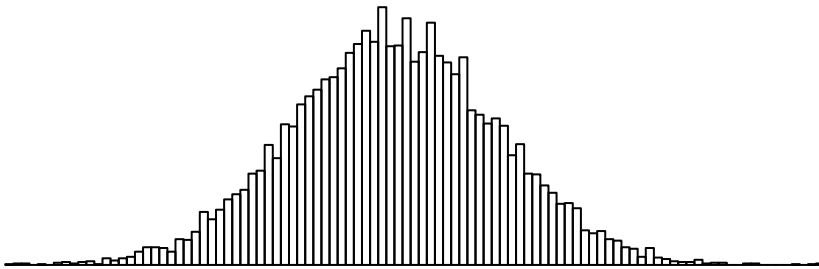

B224:18

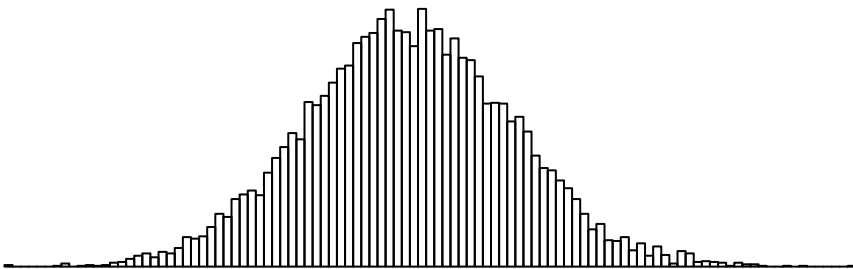

D206:18

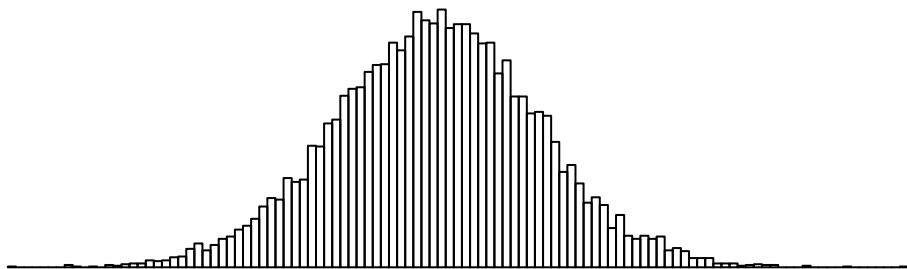

-8.0 -7.5 -7.0 -6.5 -6.0 -5.5 -5.0

Hydrocarbon 1

A194:18 – B184:18

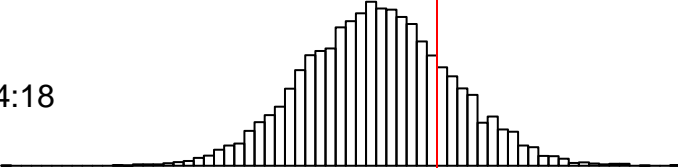

A194:18 – B224:18

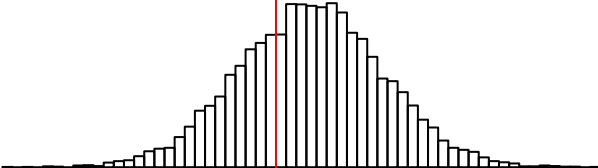

A194:18 – D206:18

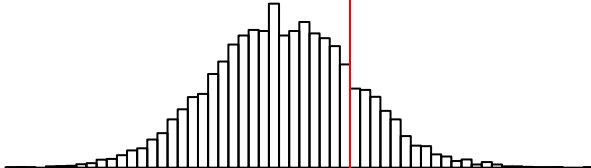

B184:18 – B224:18

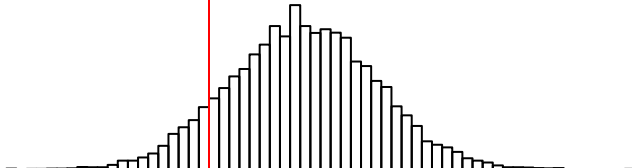

B184:18 – D206:18

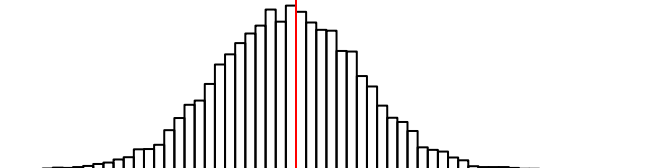

B224:18 – D206:18

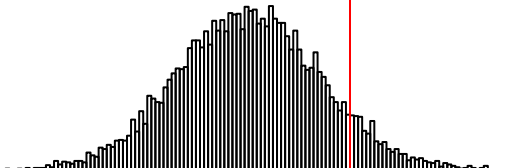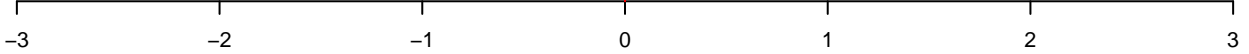

delta(Hydrocarbon 1)



A194:18

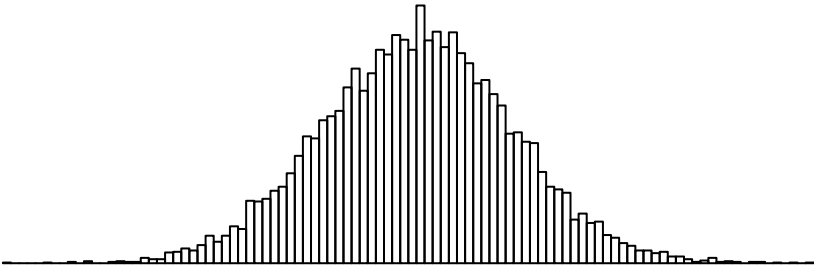

B184:18

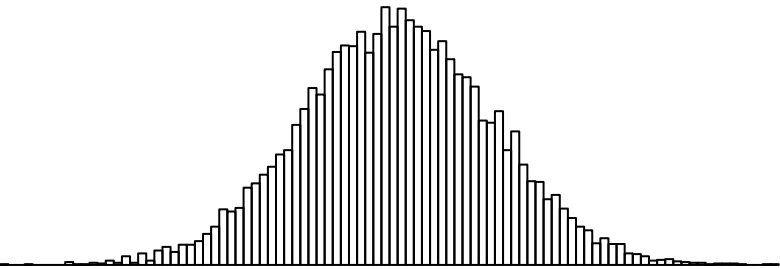

B224:18

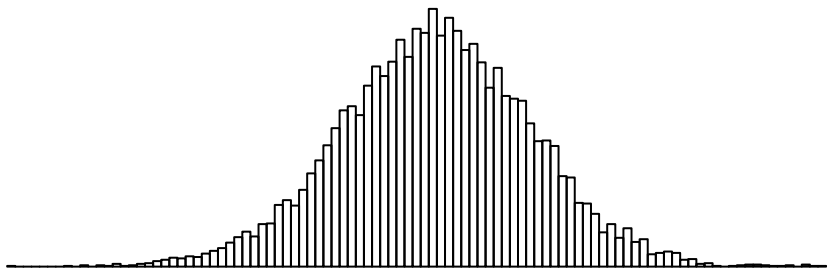

D206:18

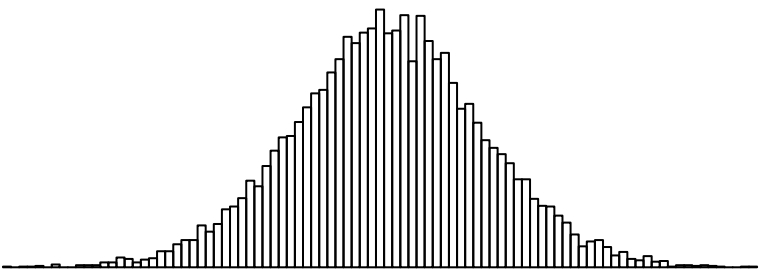

-7.5      -7.0      -6.5      -6.0      -5.5      -5.0      -4.5

Hydrocarbon 2

A194:18 – B184:18

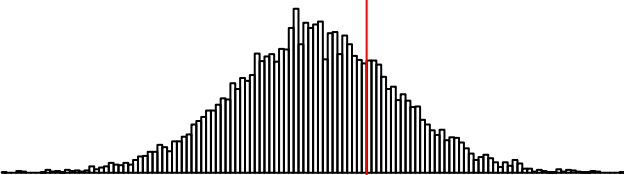

A194:18 – B224:18

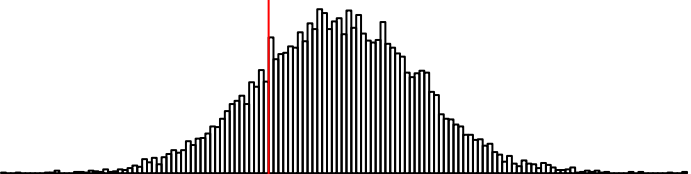

A194:18 – D206:18

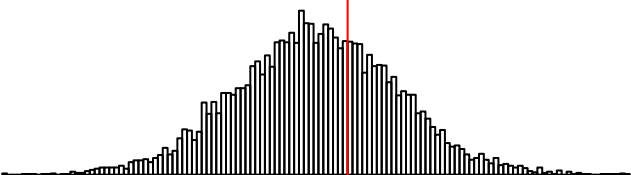

B184:18 – B224:18

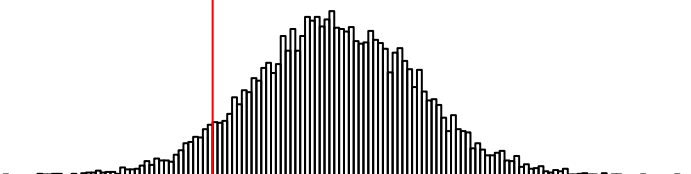

B184:18 – D206:18

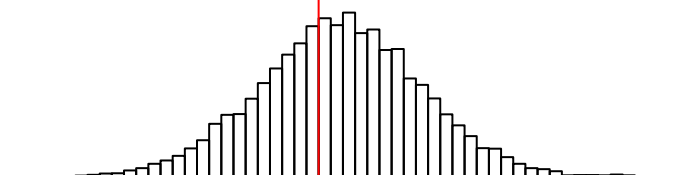

B224:18 – D206:18

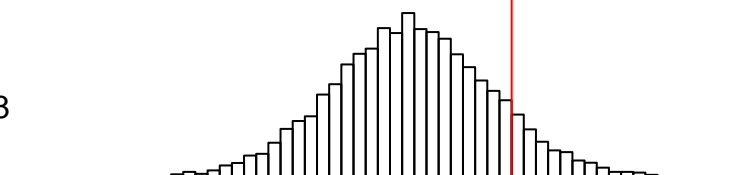

-3 -2 -1 0 1 2

delta(Hydrocarbon 2)

A194:18

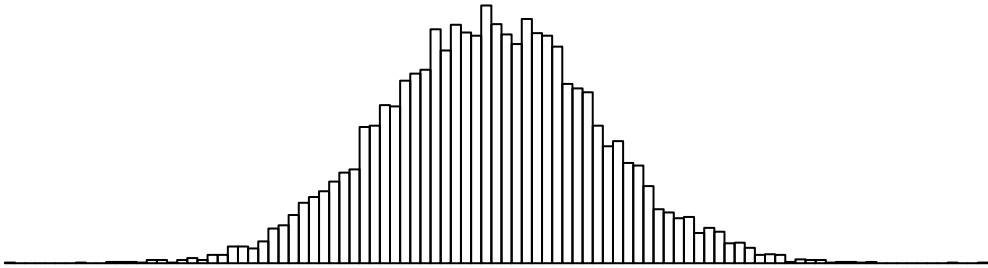

B184:18

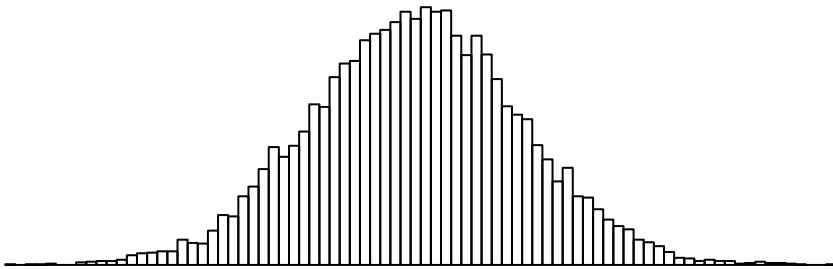

B224:18

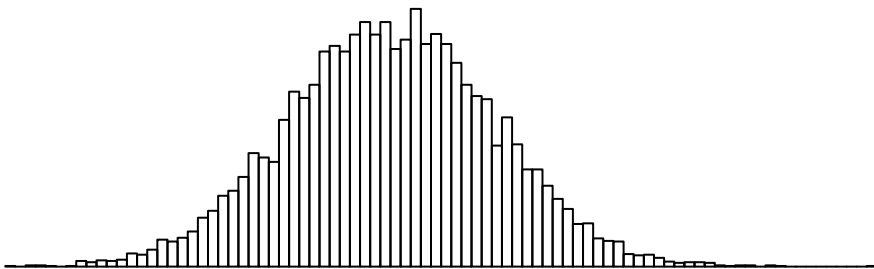

D206:18

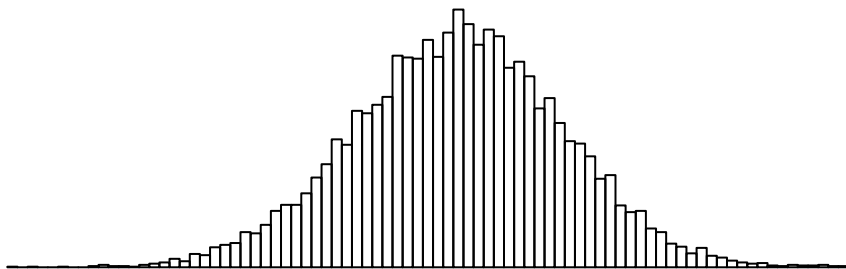

Hydrocarbon 3

A194:18 – B184:18

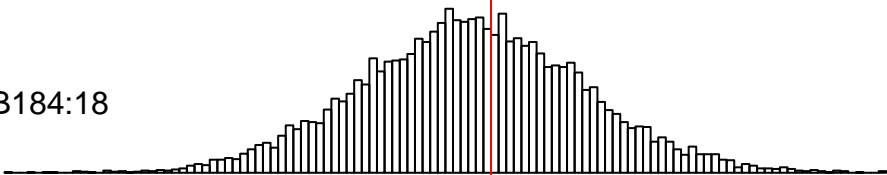

A194:18 – B224:18

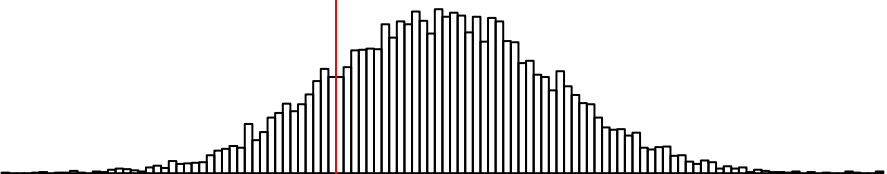

A194:18 – D206:18

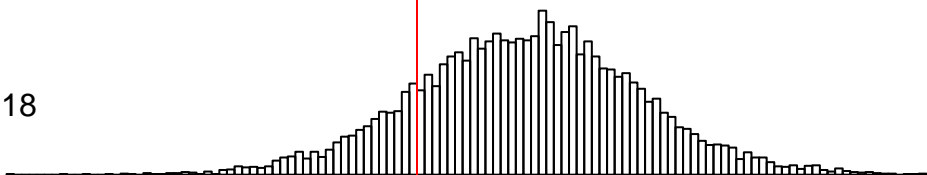

B184:18 – B224:18

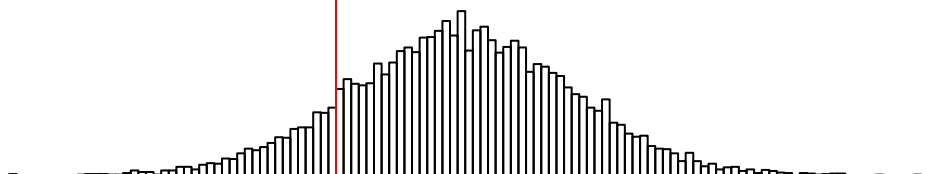

B184:18 – D206:18

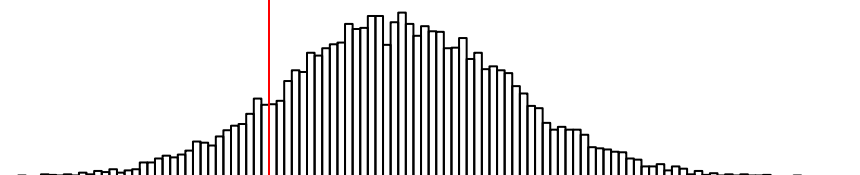

B224:18 – D206:18

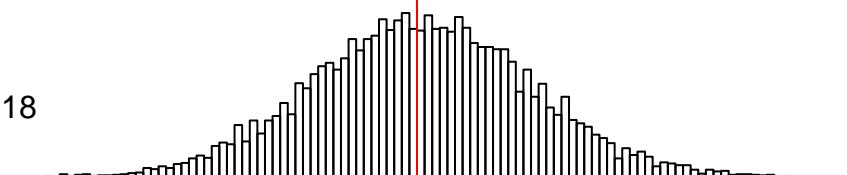

-4 -2 0 2 4

delta(Hydrocarbon 3)

A194:18

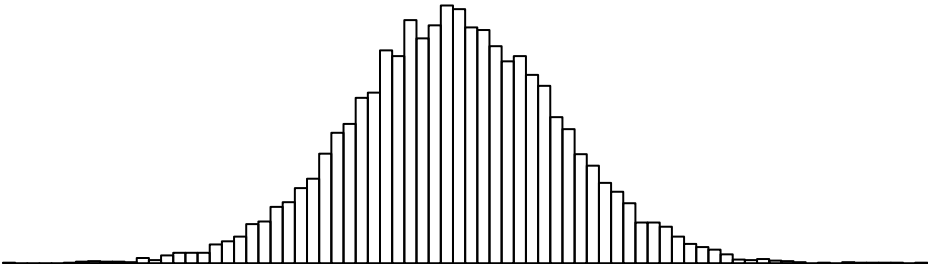

B184:18

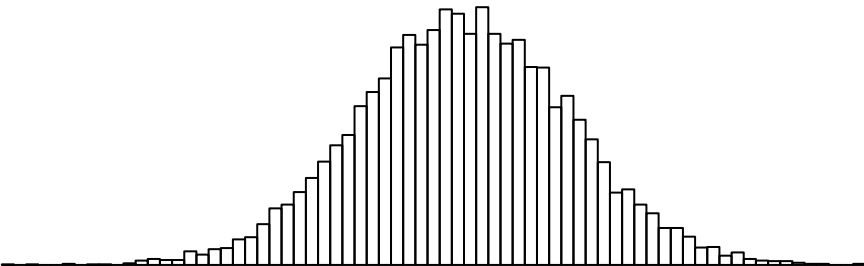

B224:18

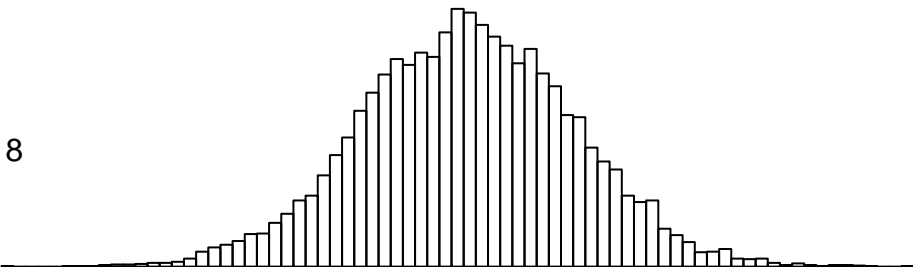

D206:18

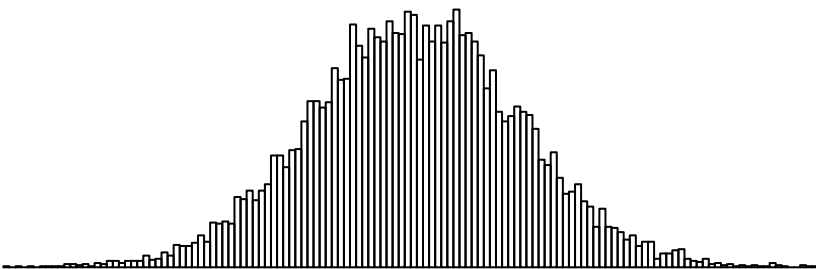

-8.5                      -8.0                      -7.5                      -7.0                      -6.5

Hydrocarbon 4

A194:18 – B184:18

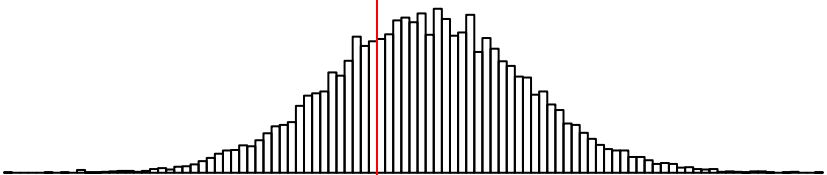

A194:18 – B224:18

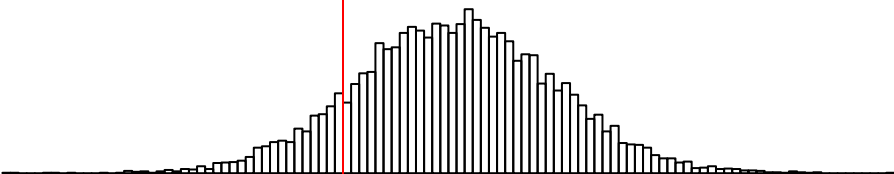

A194:18 – D206:18

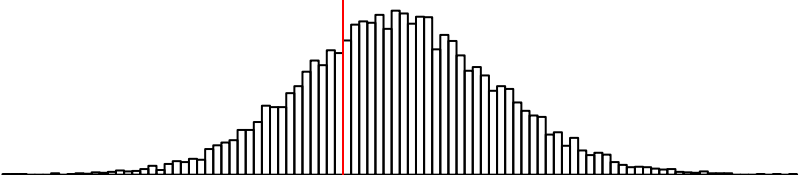

B184:18 – B224:18

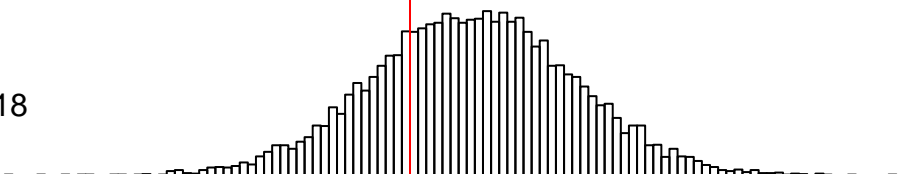

B184:18 – D206:18

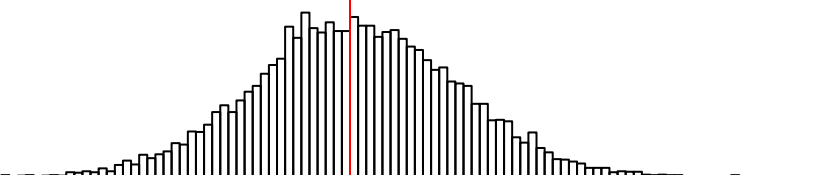

B224:18 – D206:18

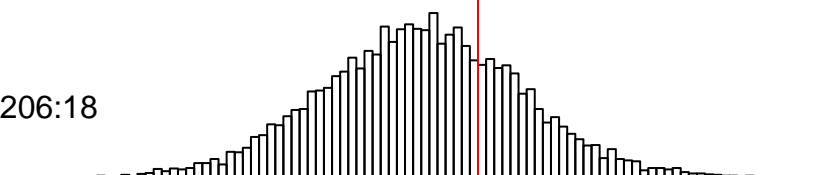

-1.5      -1.0      -0.5      0.0      0.5      1.0      1.5

delta(Hydrocarbon 4)

A194:18

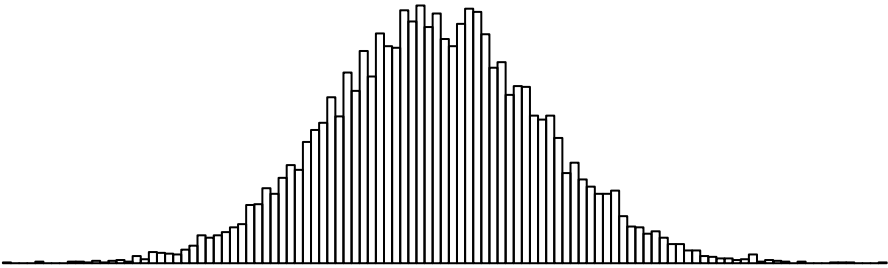

B184:18

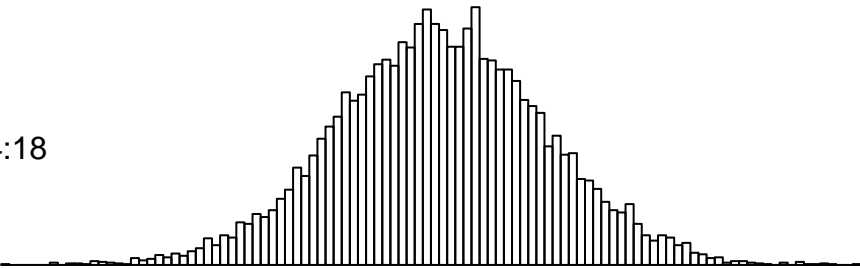

B224:18

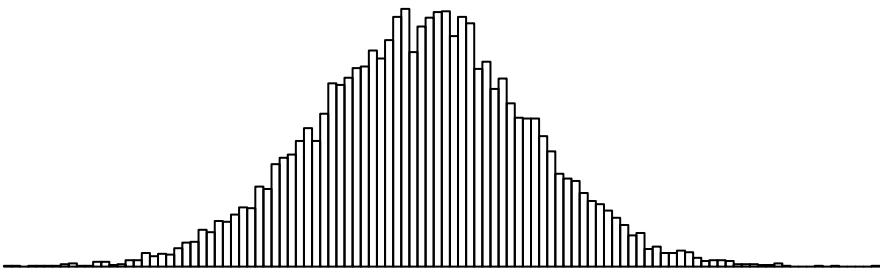

D206:18

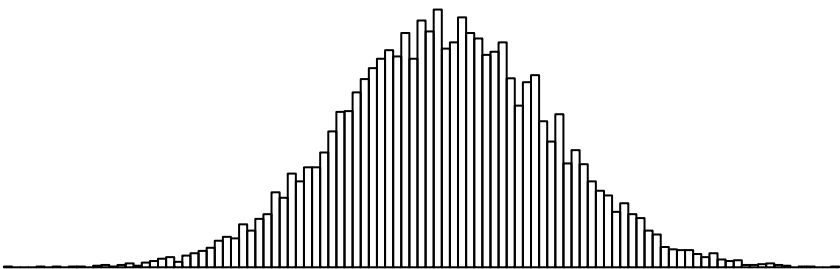

Unidentified Metabolite 1

A194:18 – B184:18

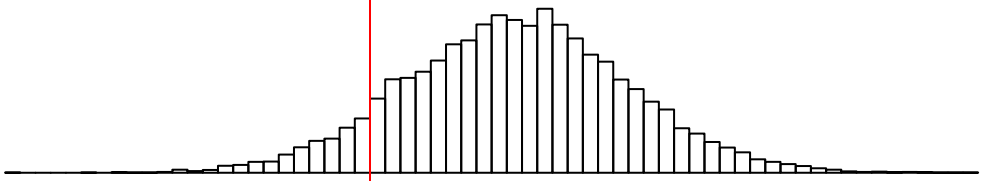

A194:18 – B224:18

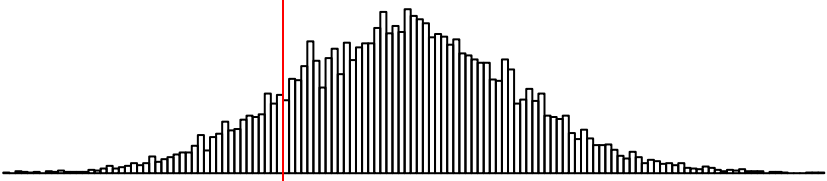

A194:18 – D206:18

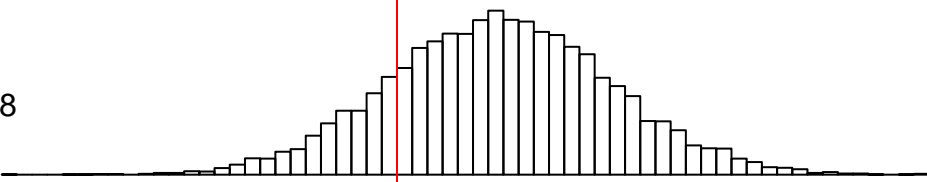

B184:18 – B224:18

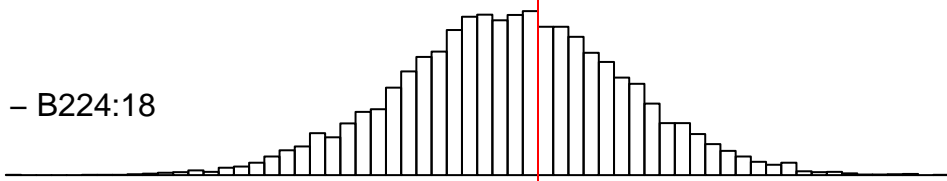

B184:18 – D206:18

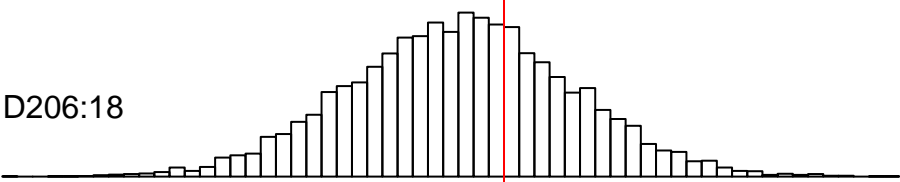

B224:18 – D206:18

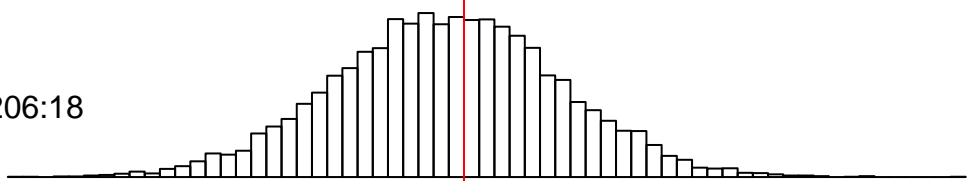

delta(Unidentified Metabolite 1)



A194:18

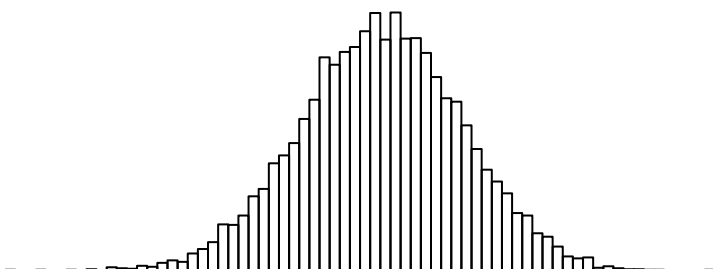

B184:18

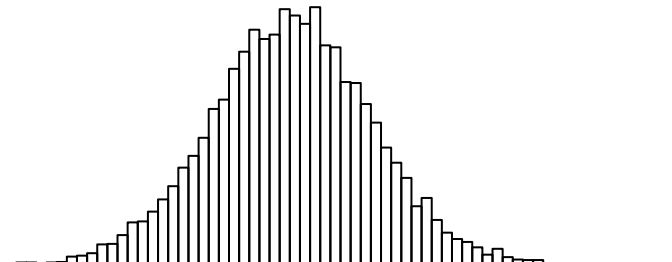

B224:18

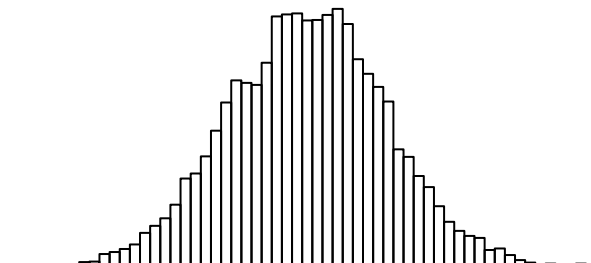

D206:18

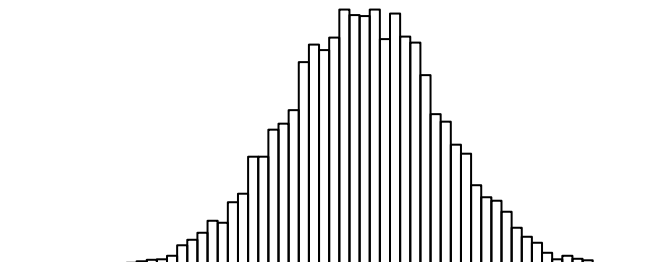

-11      -10      -9      -8      -7      -6      -5

Unidentified Metabolite 2

A194:18 – B184:18

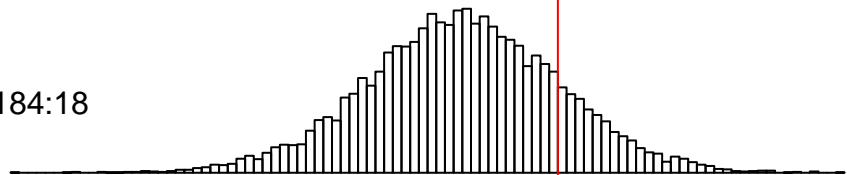

A194:18 – B224:18

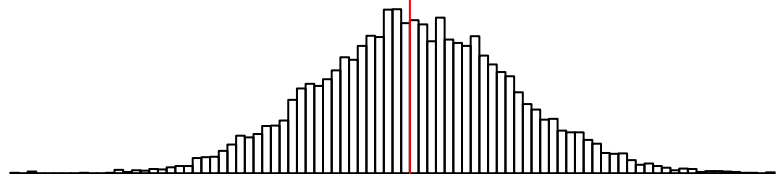

A194:18 – D206:18

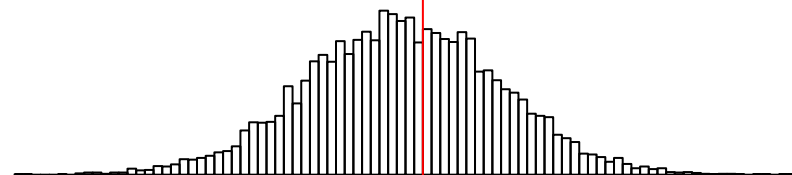

B184:18 – B224:18

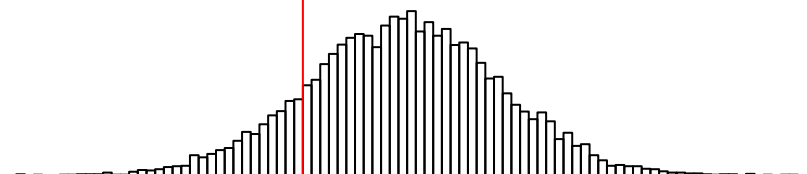

B184:18 – D206:18

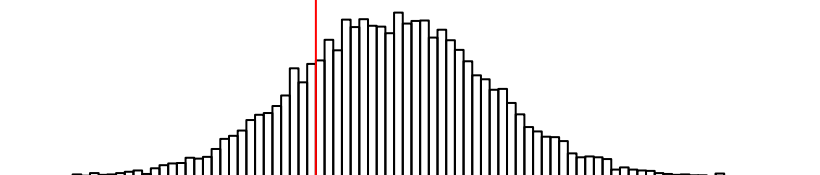

B224:18 – D206:18

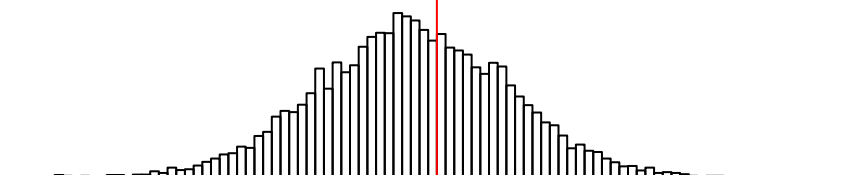

-4 -3 -2 -1 0 1 2 3

delta(Unidentified Metabolite 2)

A194:18

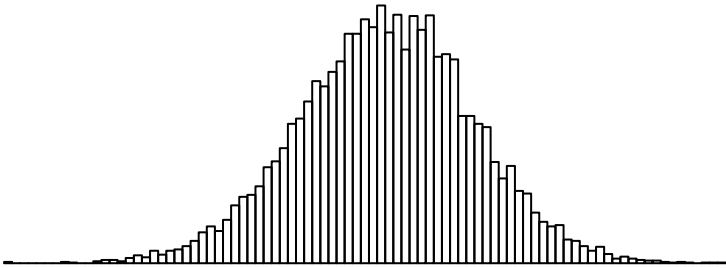

B184:18

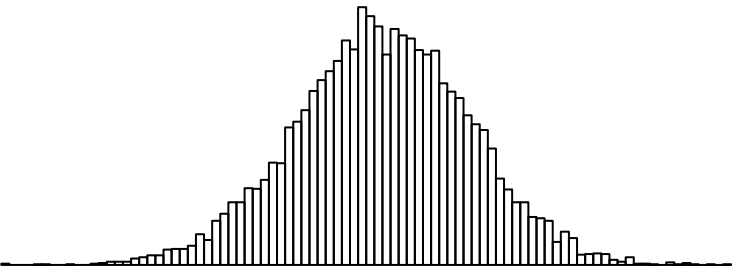

B224:18

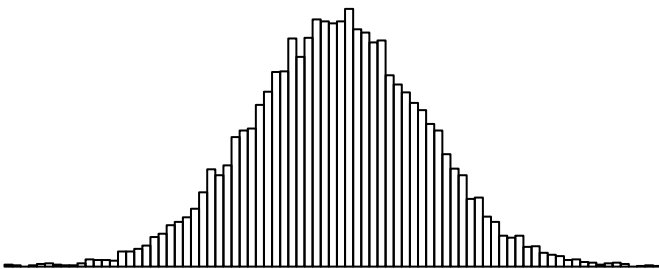

D206:18

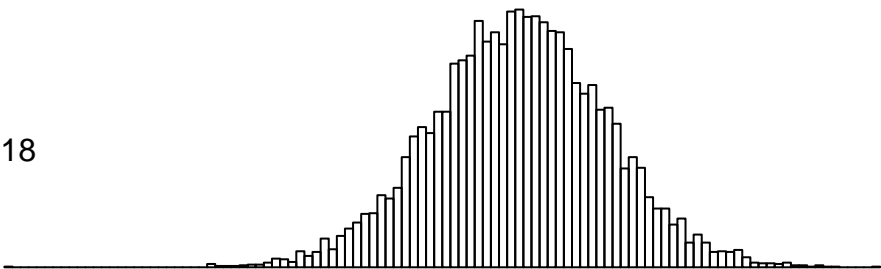

-10.0      -9.5      -9.0      -8.5      -8.0      -7.5      -7.0

Unidentified Metabolite 3

A194:18 – B184:18

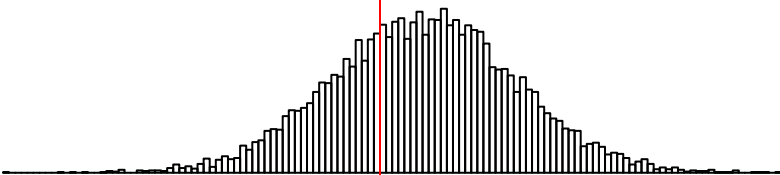

A194:18 – B224:18

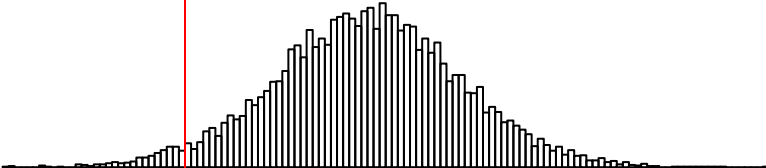

A194:18 – D206:18

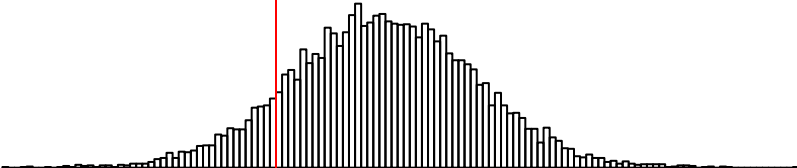

B184:18 – B224:18

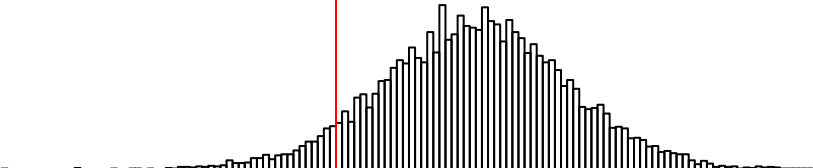

B184:18 – D206:18

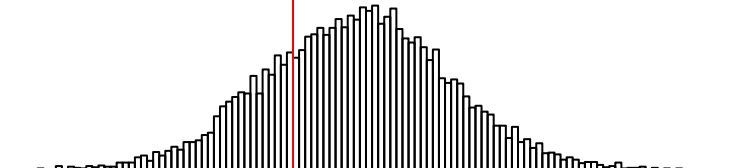

B224:18 – D206:18

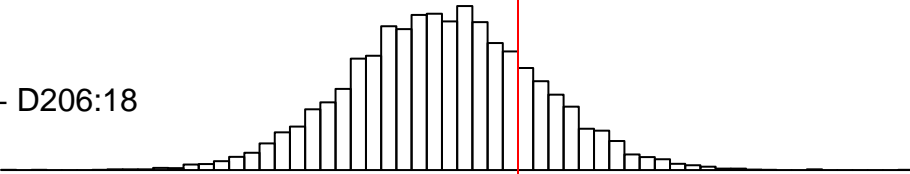

delta(Unidentified Metabolite 3)

A194:18

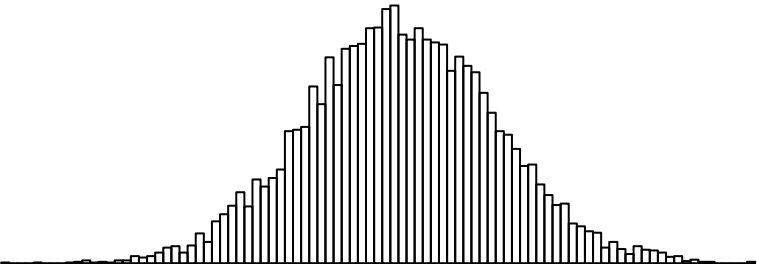

B184:18

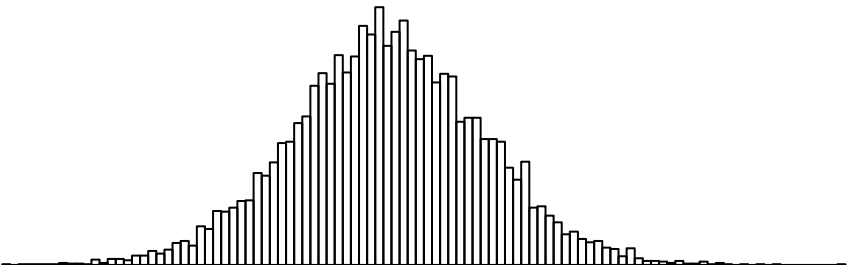

B224:18

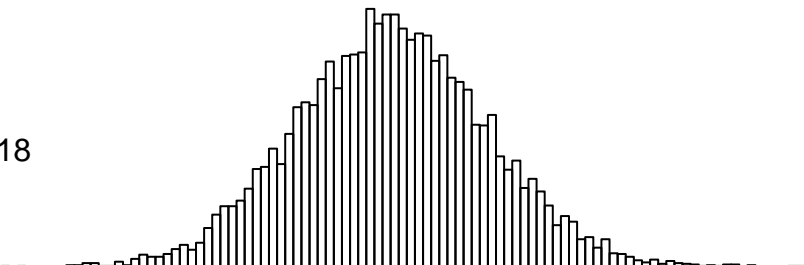

D206:18

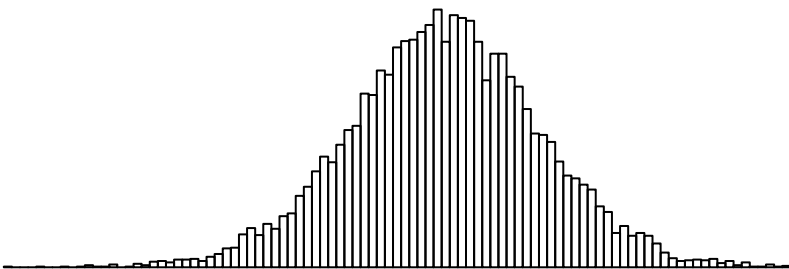

Unidentified Metabolite 4

A194:18 – B184:18

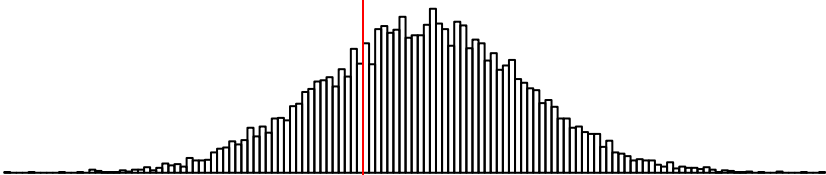

A194:18 – B224:18

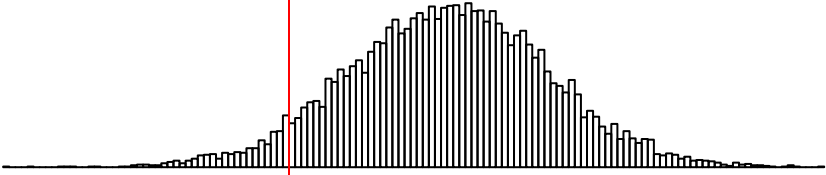

A194:18 – D206:18

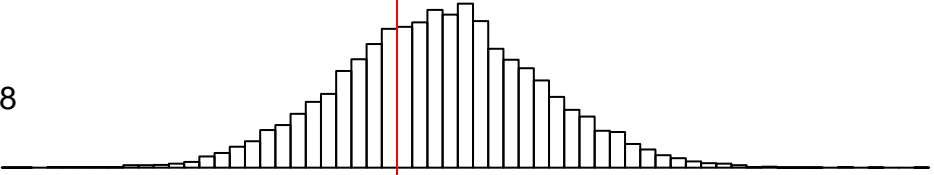

B184:18 – B224:18

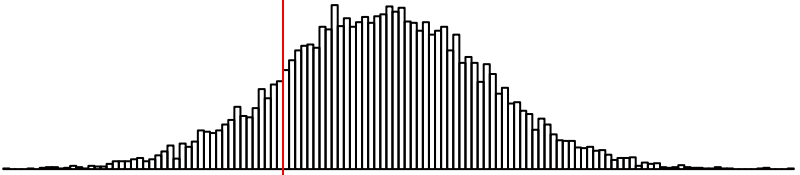

B184:18 – D206:18

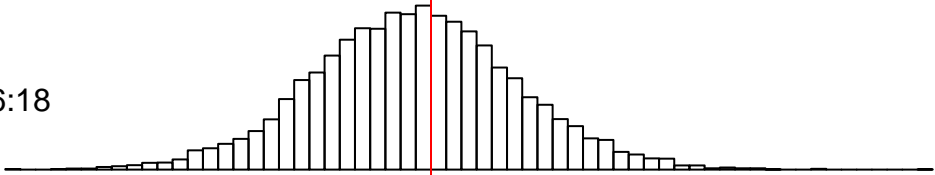

B224:18 – D206:18

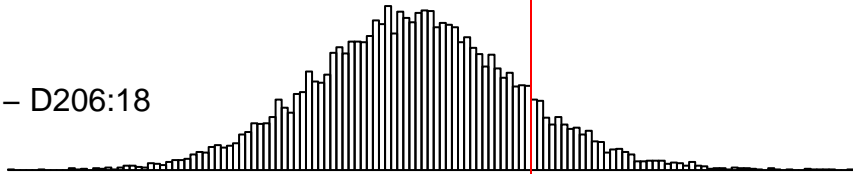

delta(Unidentified Metabolite 4)

A194:18

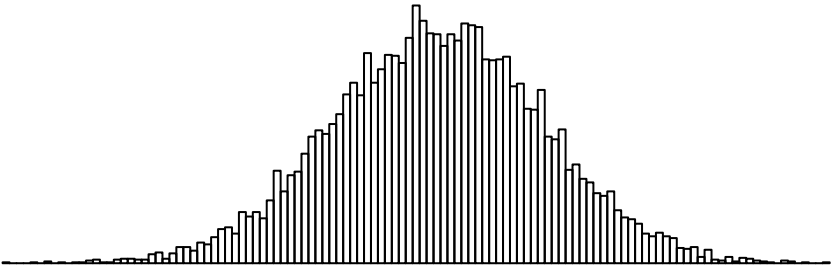

B184:18

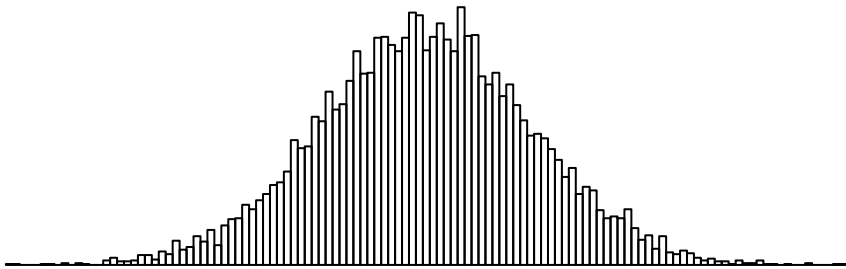

B224:18

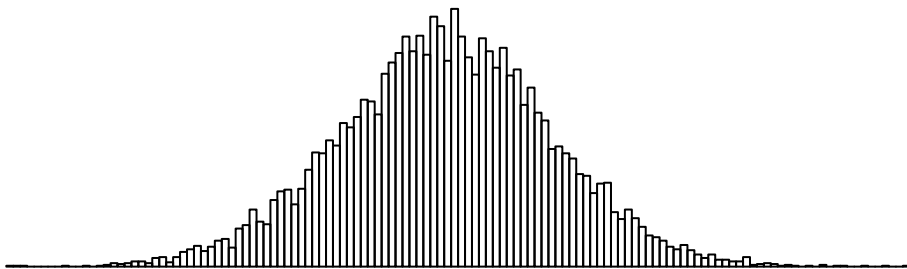

D206:18

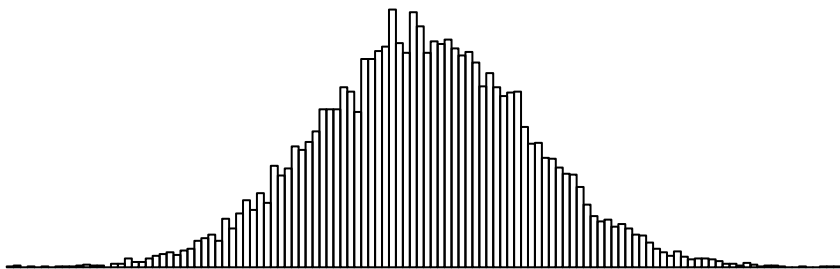

-9.0      -8.5      -8.0      -7.5      -7.0      -6.5      -6.0      -5.5

Unidentified Metabolite 5

A194:18 – B184:18

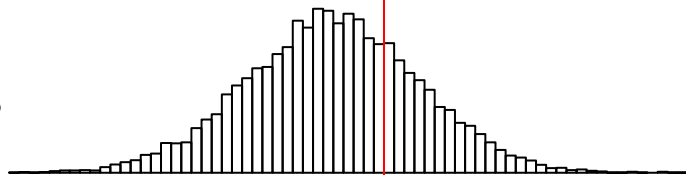

A194:18 – B224:18

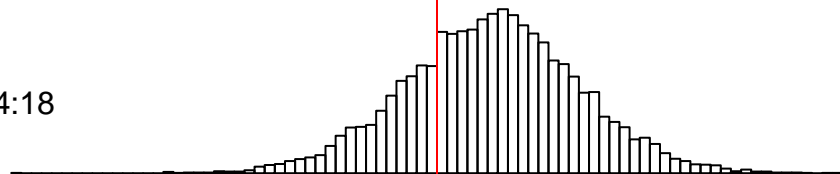

A194:18 – D206:18

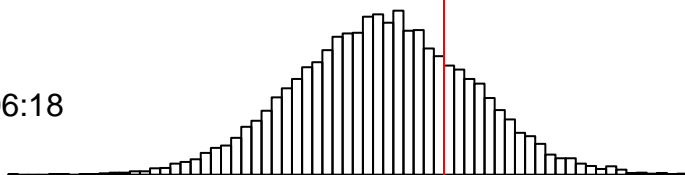

B184:18 – B224:18

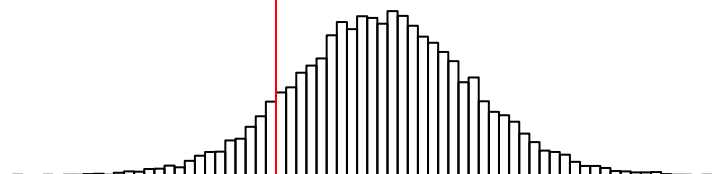

B184:18 – D206:18

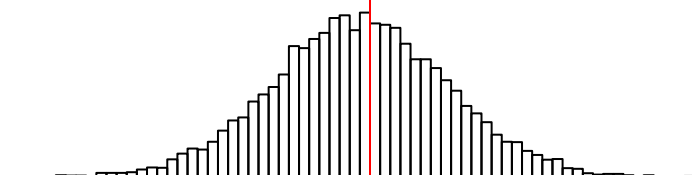

B224:18 – D206:18

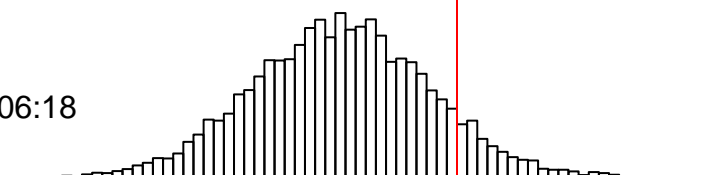

delta(Unidentified Metabolite 5)



A194:18

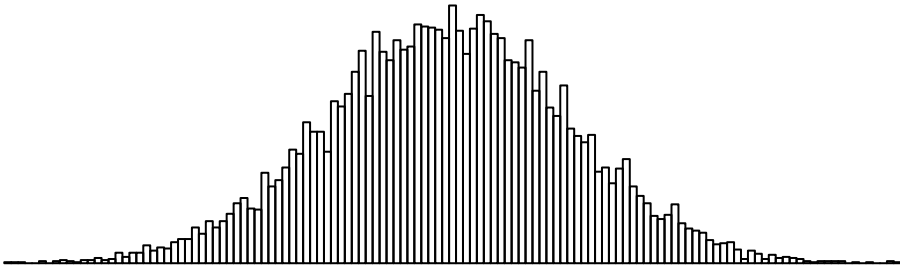

B184:18

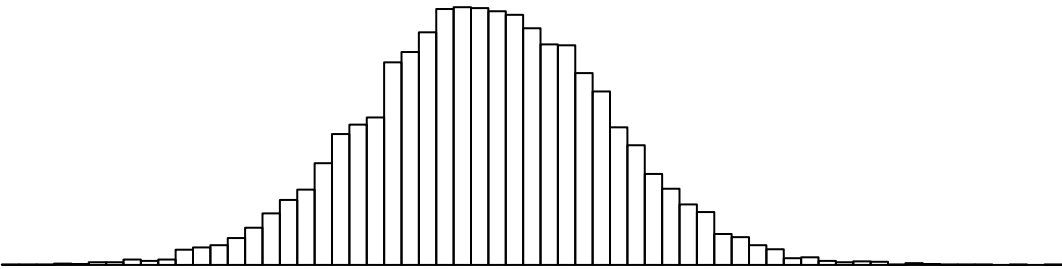

B224:18

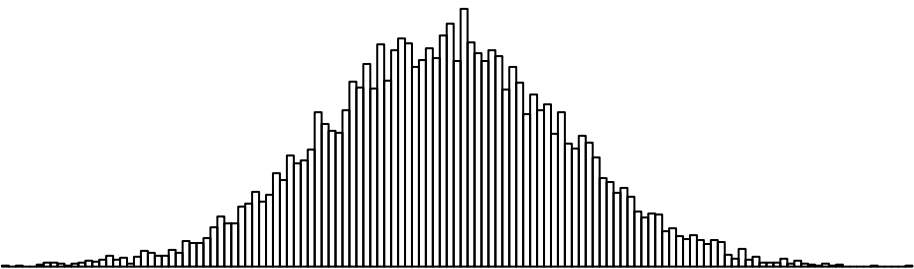

D206:18

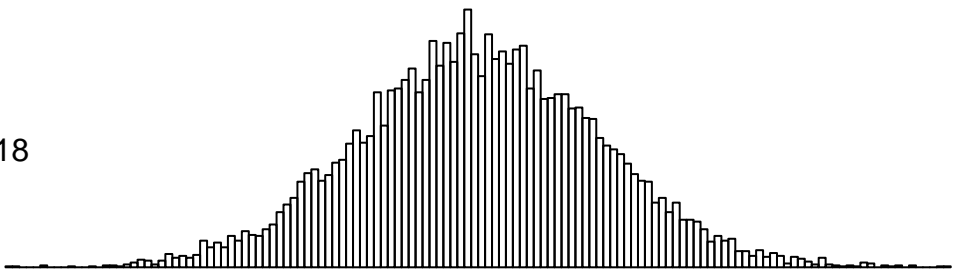

-6.5 -6.0 -5.5 -5.0 -4.5 -4.0 -3.5 -3.0

Unidentified Metabolite 6

A194:18 – B184:18

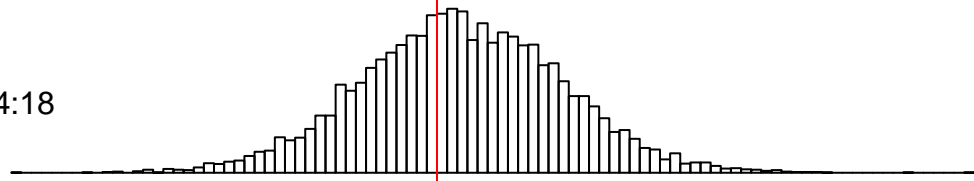

A194:18 – B224:18

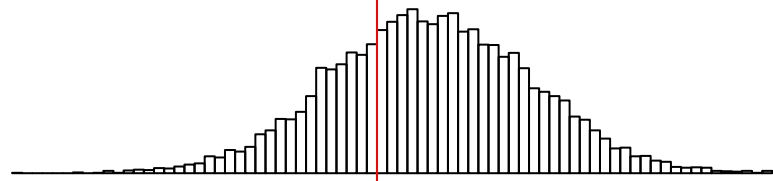

A194:18 – D206:18

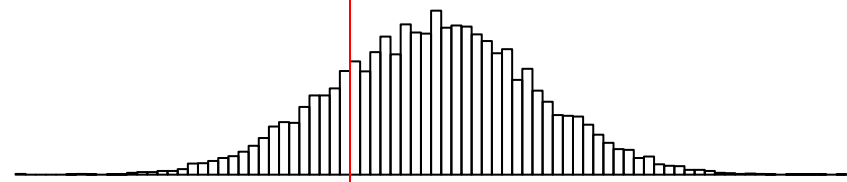

B184:18 – B224:18

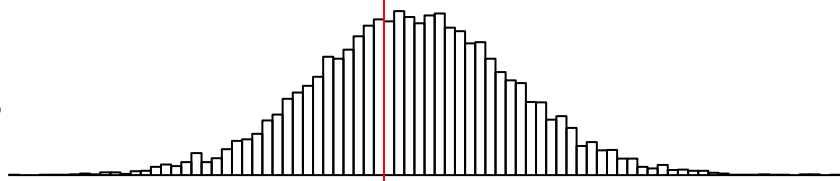

B184:18 – D206:18

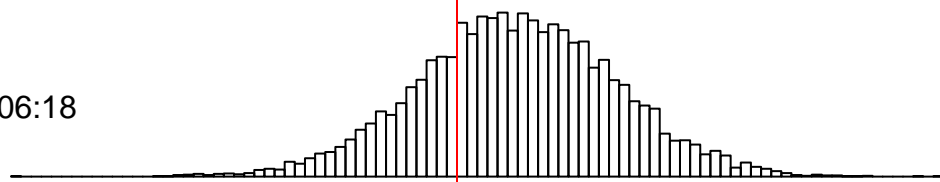

B224:18 – D206:18

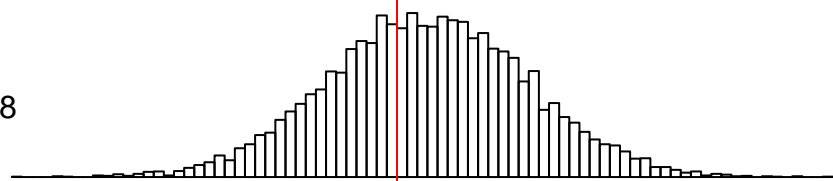

delta(Unidentified Metabolite 6)

A194:18

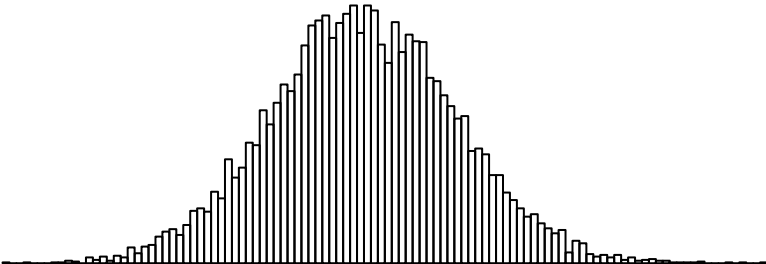

B184:18

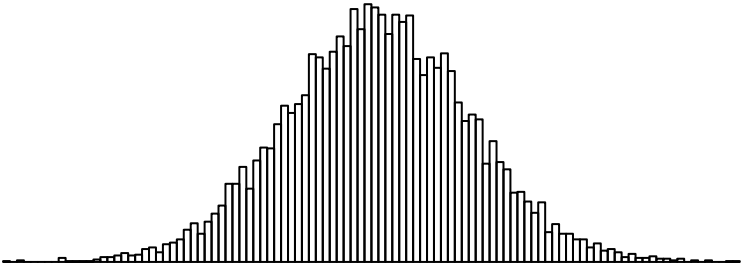

B224:18

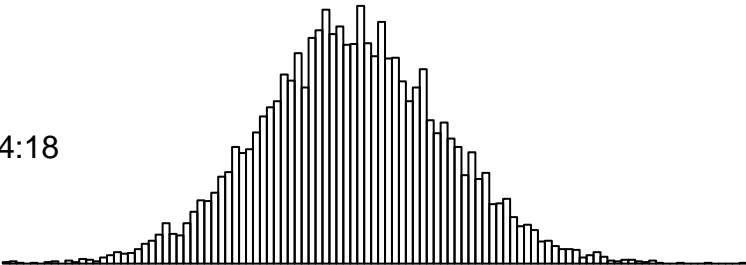

D206:18

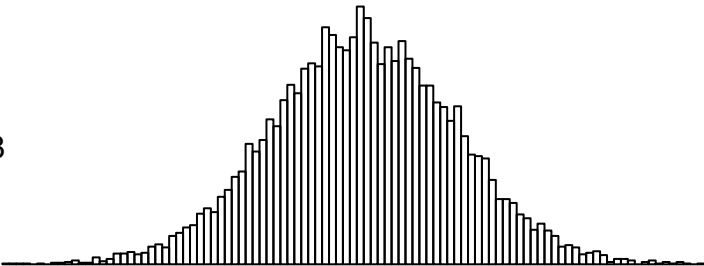

Unidentified Metabolite 7

A194:18 – B184:18

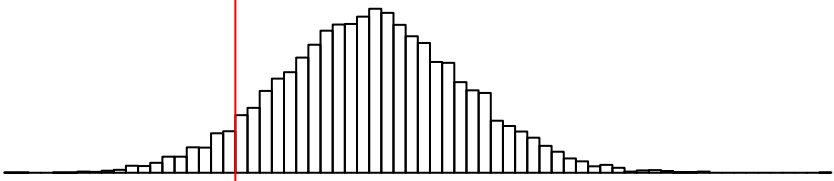

A194:18 – B224:18

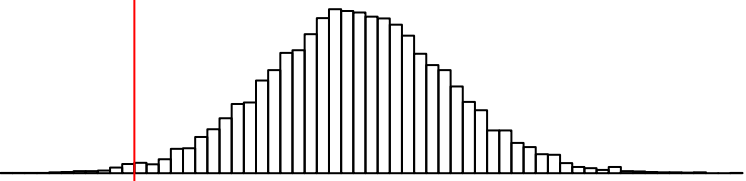

A194:18 – D206:18

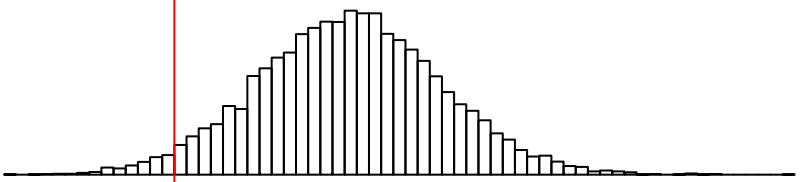

B184:18 – B224:18

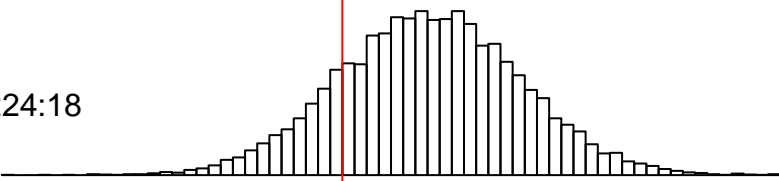

B184:18 – D206:18

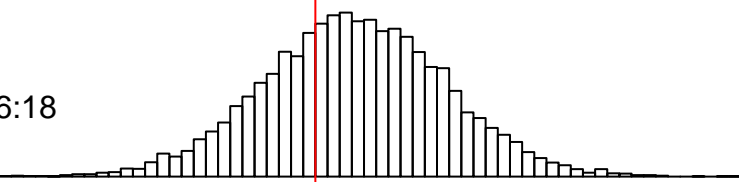

B224:18 – D206:18

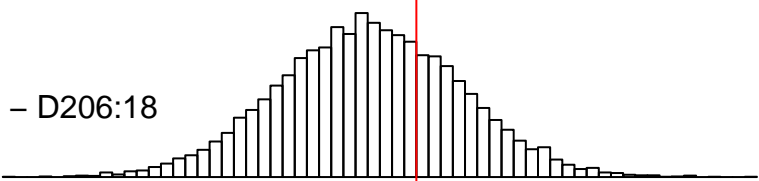

delta(Unidentified Metabolite 7)

A194:18

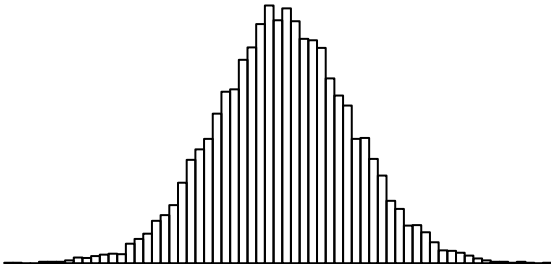

B184:18

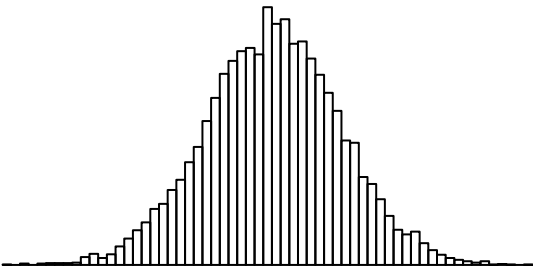

B224:18

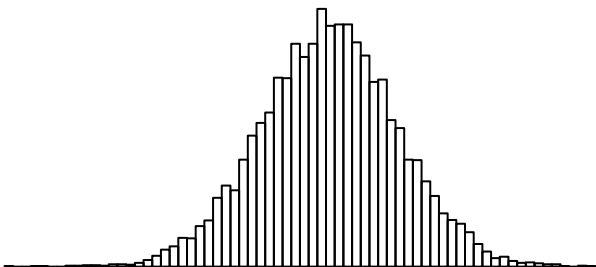

D206:18

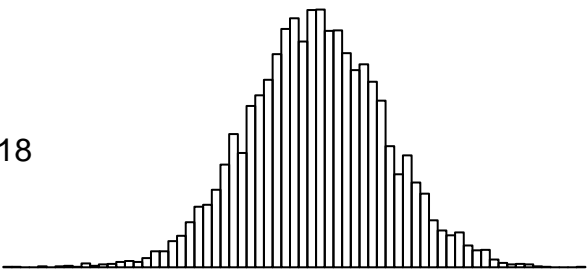

-9      -8      -7      -6      -5      -4      -3      -2

Unidentified Metabolite 8

A194:18 – B184:18

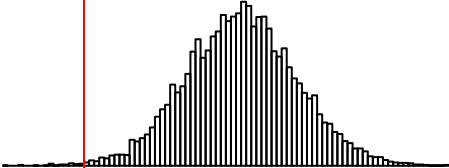

A194:18 – B224:18

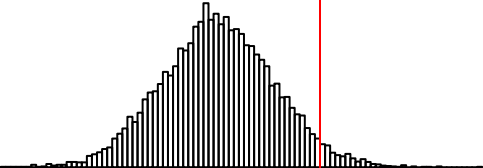

A194:18 – D206:18

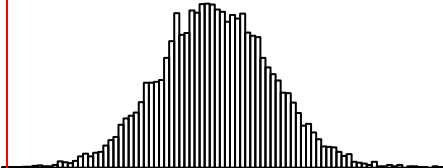

B184:18 – B224:18

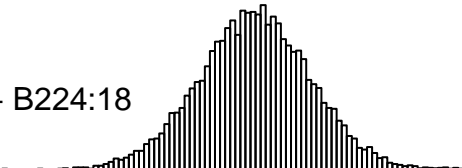

B184:18 – D206:18

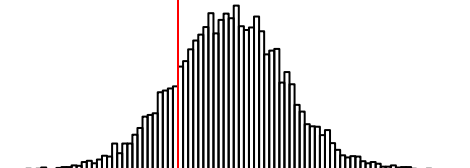

B224:18 – D206:18

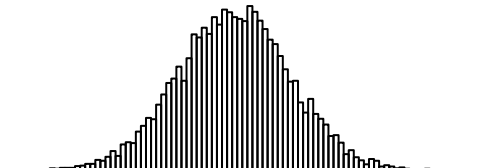

delta(Unidentified Metabolite 8)

A194:18

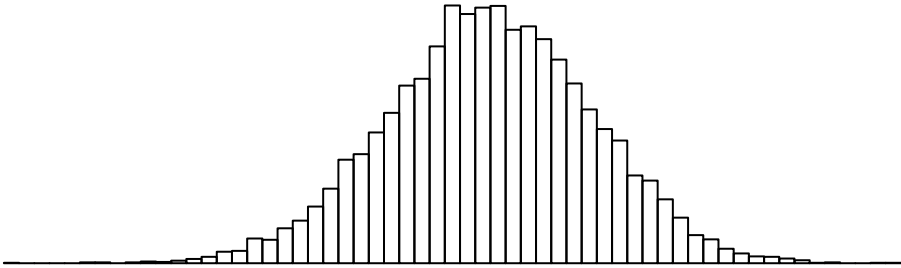

B184:18

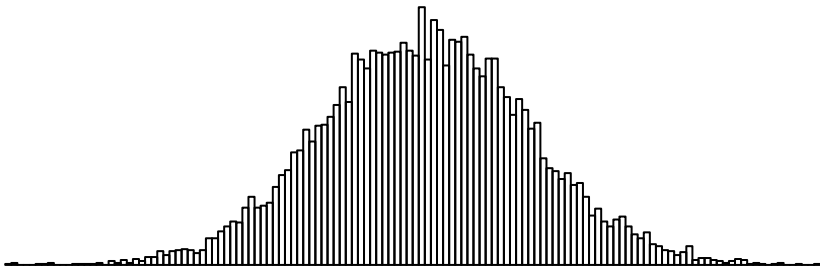

B224:18

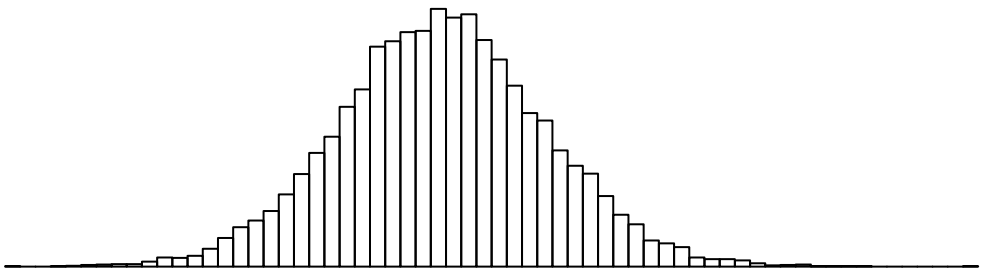

D206:18

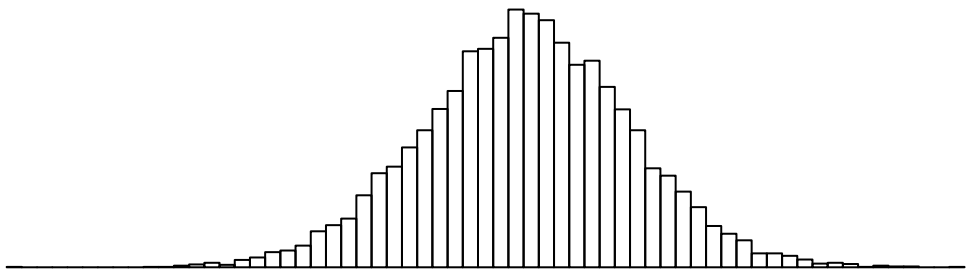

-8

-7

-6

-5

Unidentified Metabolite 9

A194:18 – B184:18

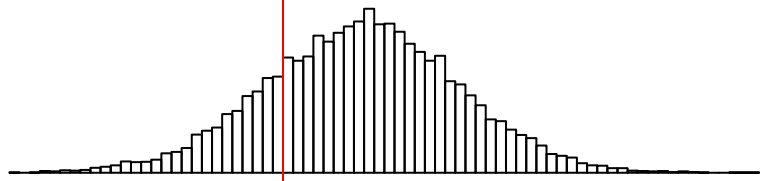

A194:18 – B224:18

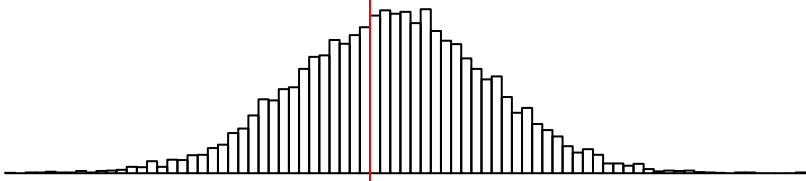

A194:18 – D206:18

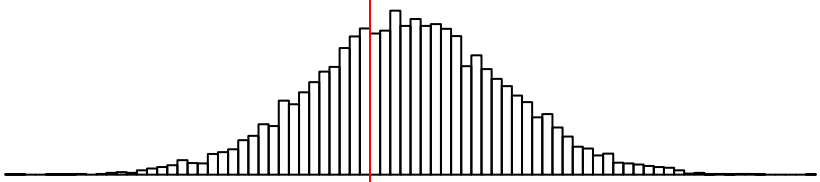

B184:18 – B224:18

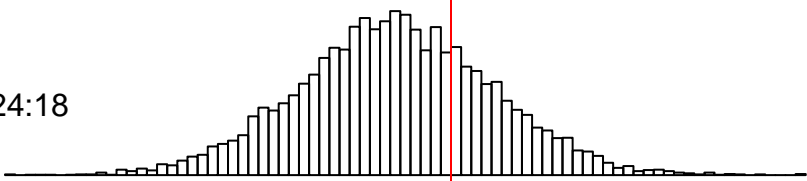

B184:18 – D206:18

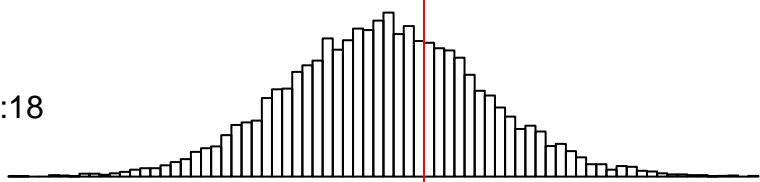

B224:18 – D206:18

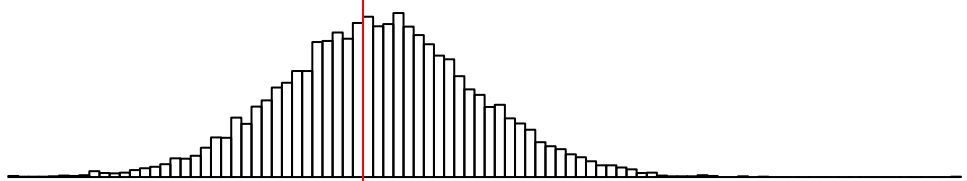

delta(Unidentified Metabolite 9)



A194:18

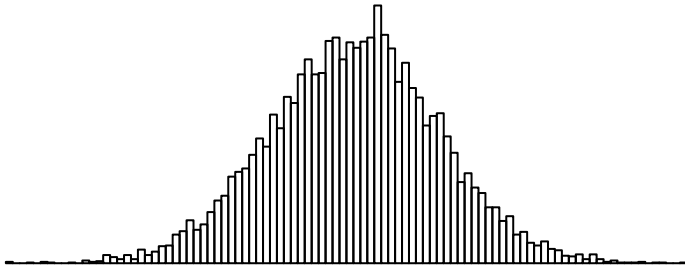

B184:18

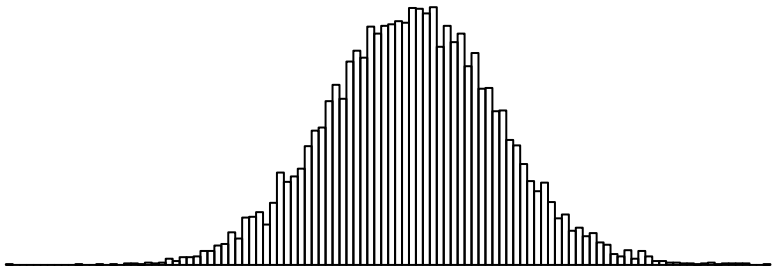

B224:18

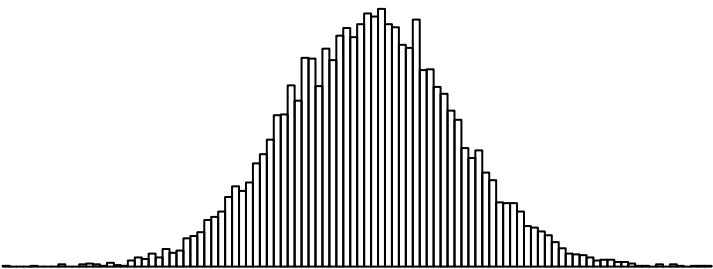

D206:18

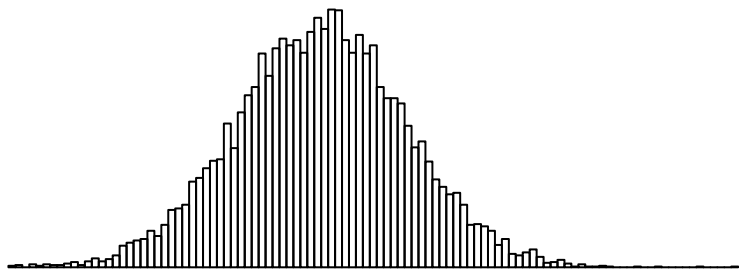

-8.5      -8.0      -7.5      -7.0      -6.5      -6.0      -5.5      -5.0

Unidentified Metabolite 10

A194:18 – B184:18

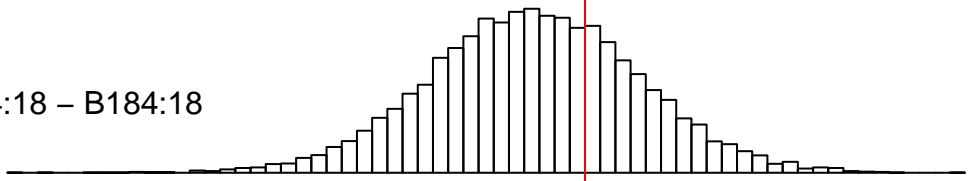

A194:18 – B224:18

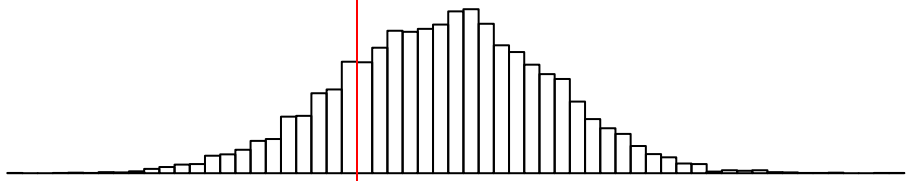

A194:18 – D206:18

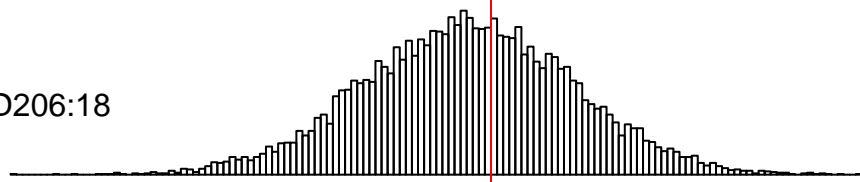

B184:18 – B224:18

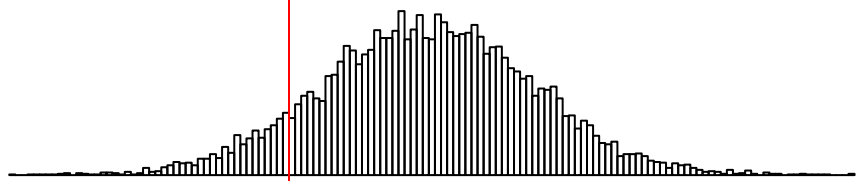

B184:18 – D206:18

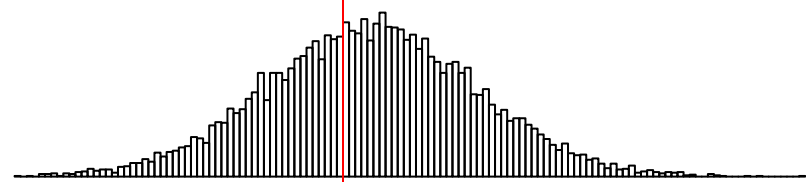

B224:18 – D206:18

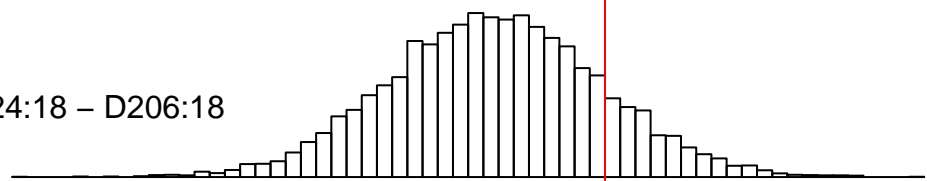

-2 -1 0 1 2

delta(Unidentified Metabolite 10)

A194:18

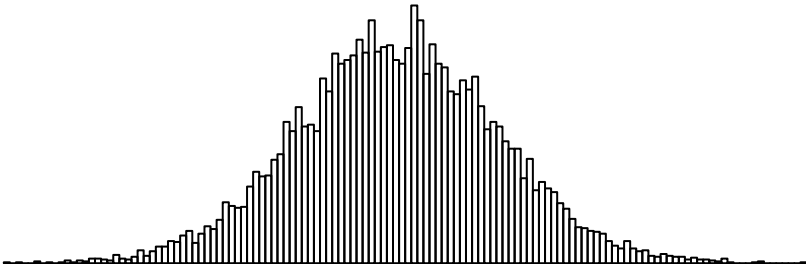

B184:18

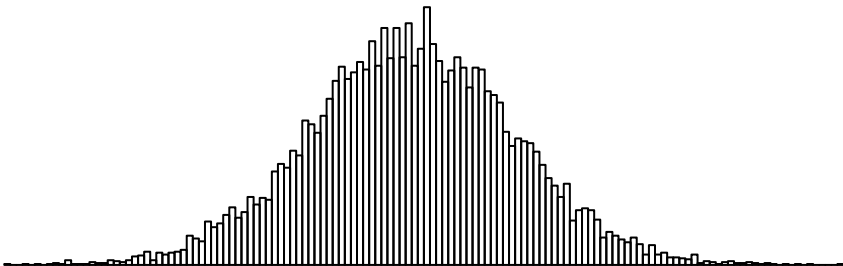

B224:18

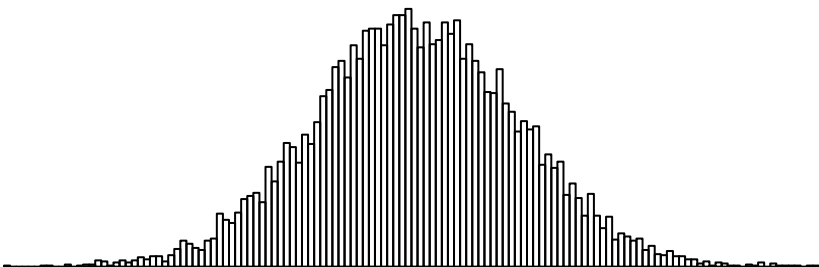

D206:18

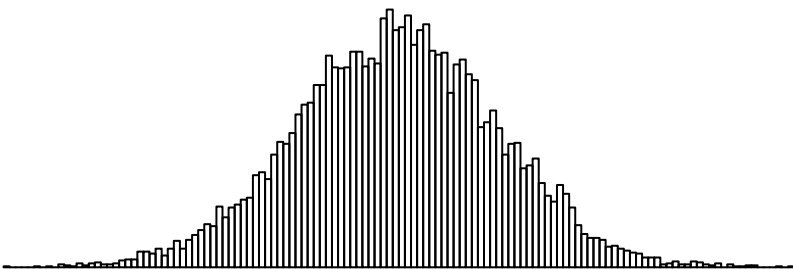

Unidentified Metabolite 11

A194:18 – B184:18

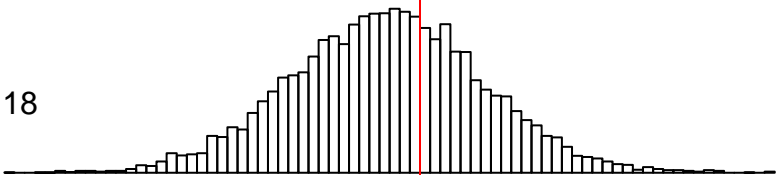

A194:18 – B224:18

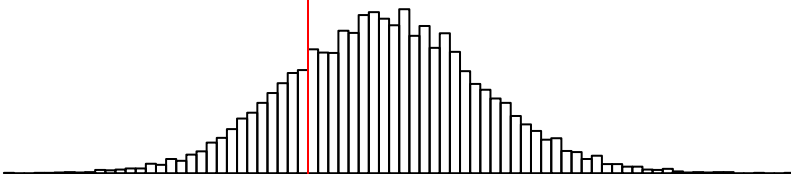

A194:18 – D206:18

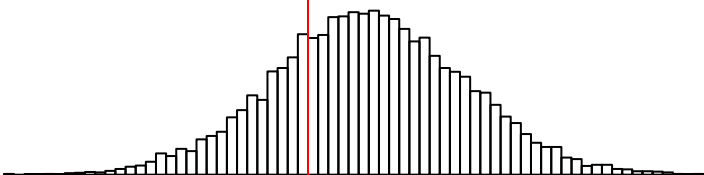

B184:18 – B224:18

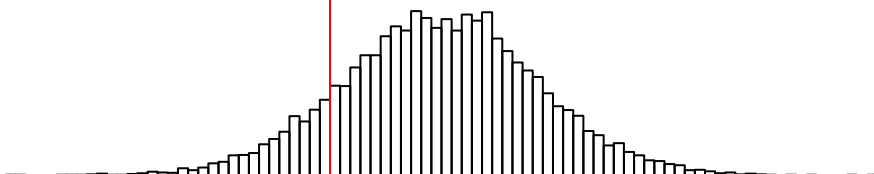

B184:18 – D206:18

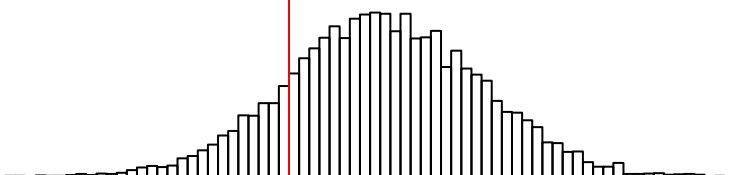

B224:18 – D206:18

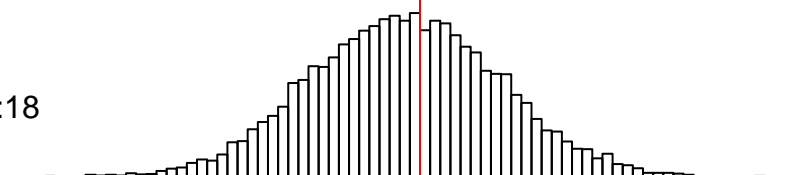

-3 -2 -1 0 1 2 3

delta(Unidentified Metabolite 11)

A194:18

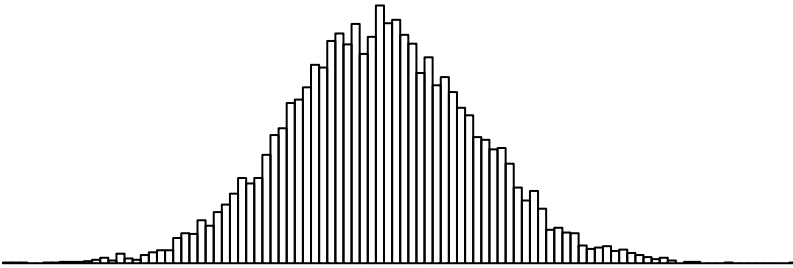

B184:18

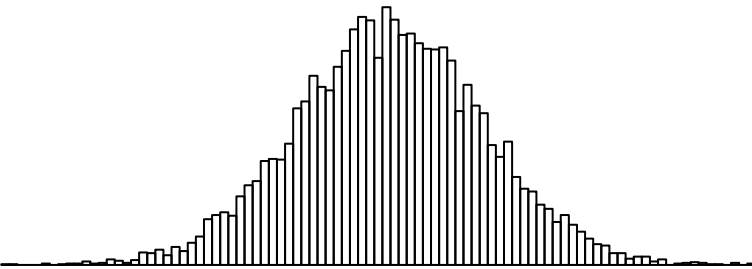

B224:18

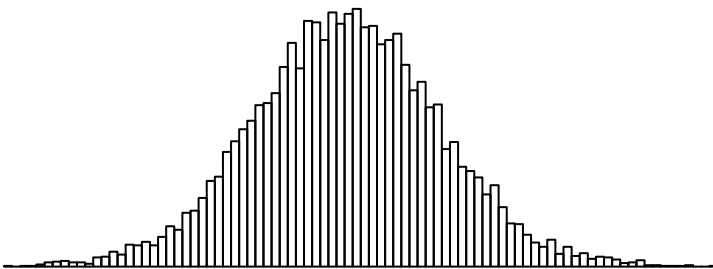

D206:18

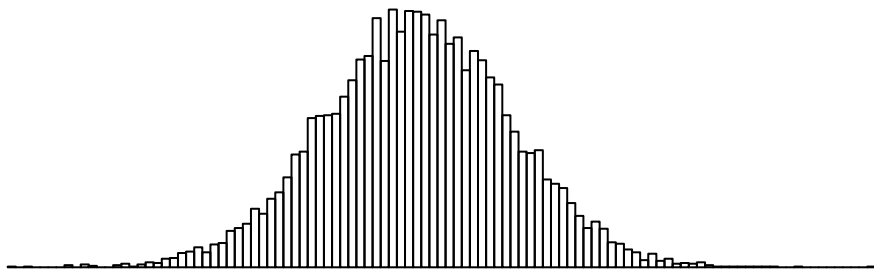

-9.0 -8.5 -8.0 -7.5 -7.0 -6.5 -6.0

Unidentified Metabolite 12

A194:18 – B184:18

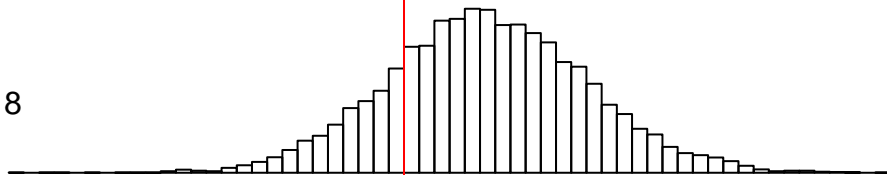

A194:18 – B224:18

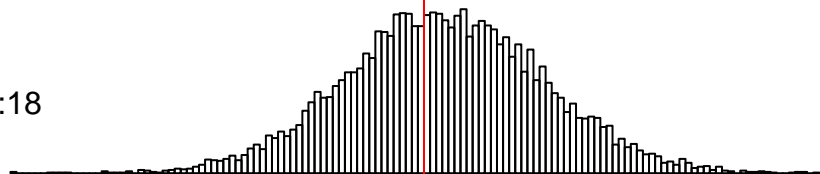

A194:18 – D206:18

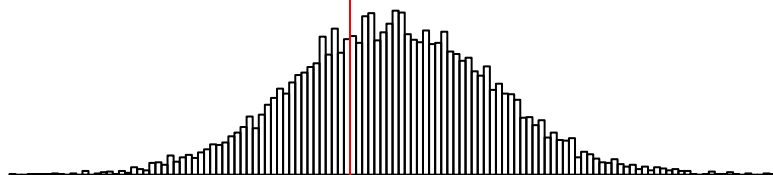

B184:18 – B224:18

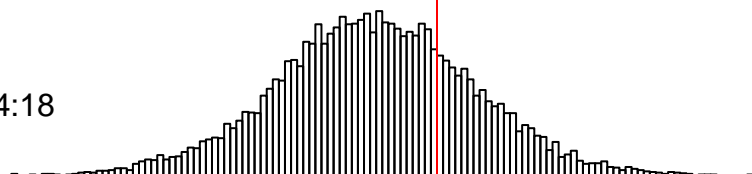

B184:18 – D206:18

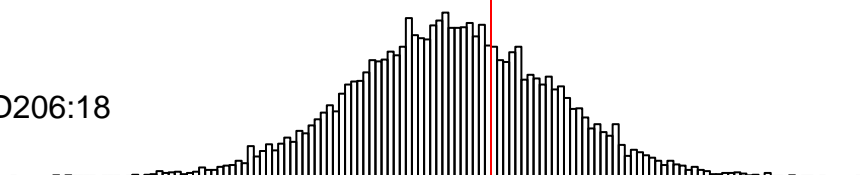

B224:18 – D206:18

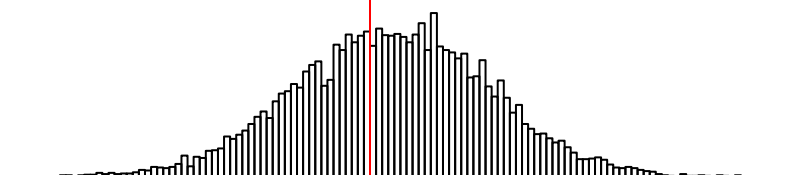

-2 -1 0 1 2

delta(Unidentified Metabolite 12)

A194:18

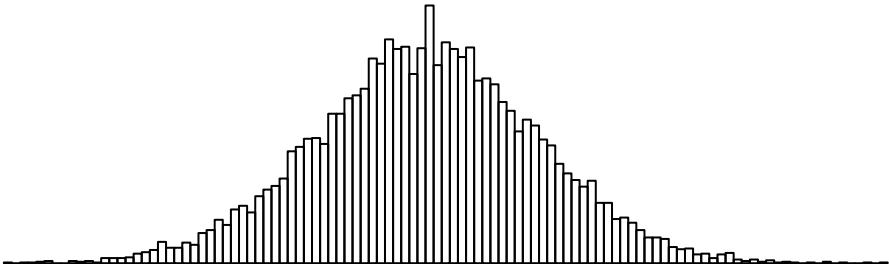

B184:18

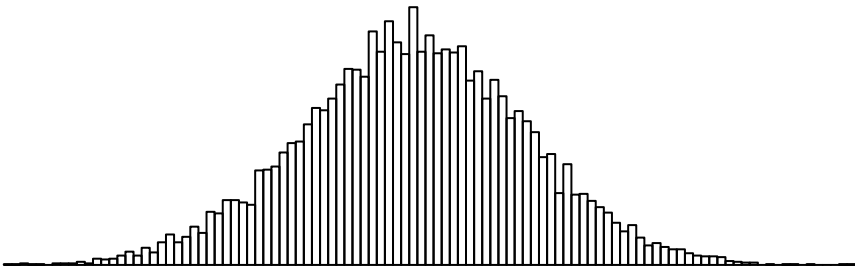

B224:18

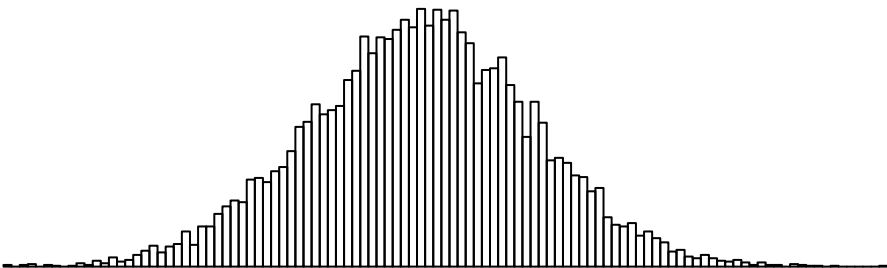

D206:18

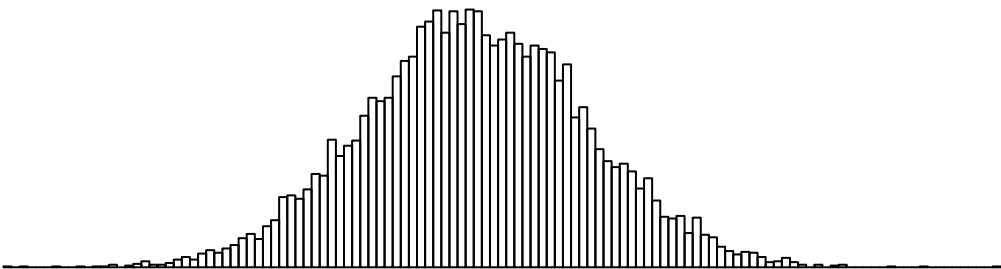

-8.5      -8.0      -7.5      -7.0      -6.5      -6.0      -5.5

Unidentified Metabolite 14

A194:18 – B184:18

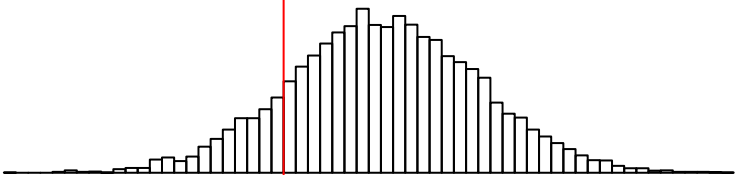

A194:18 – B224:18

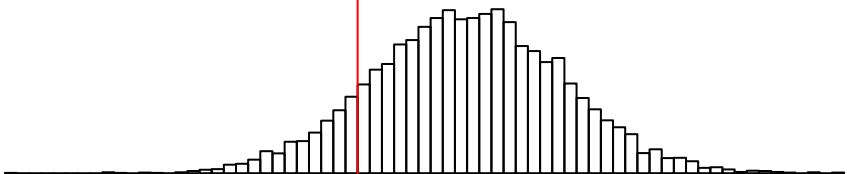

A194:18 – D206:18

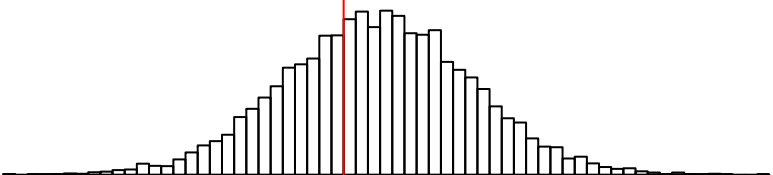

B184:18 – B224:18

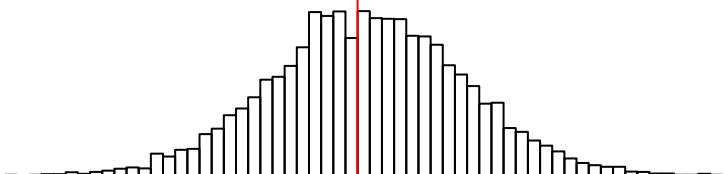

B184:18 – D206:18

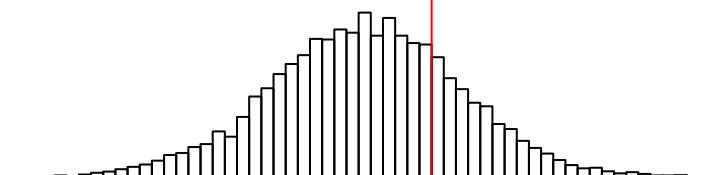

B224:18 – D206:18

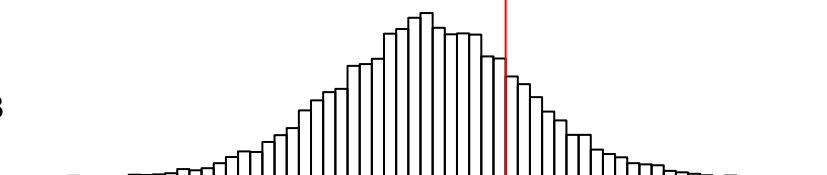

-3                      -2                      -1                      0                      1                      2

delta(Unidentified Metabolite 14)



A194:18

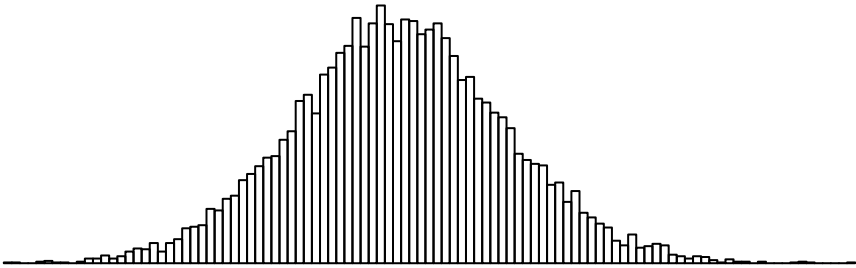

B184:18

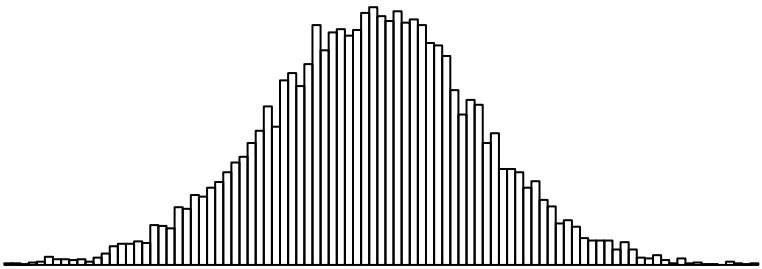

B224:18

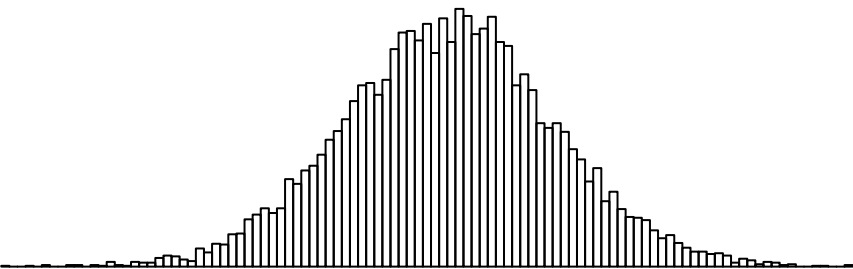

D206:18

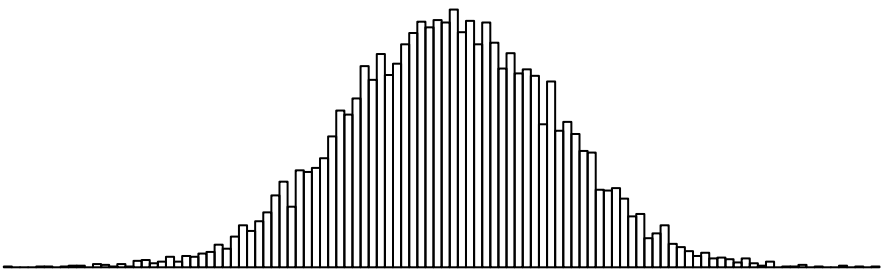

-8.0      -7.5      -7.0      -6.5      -6.0      -5.5      -5.0

Unidentified Metabolite 16

A194:18 – B184:18

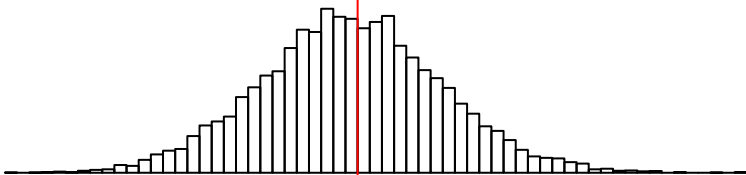

A194:18 – B224:18

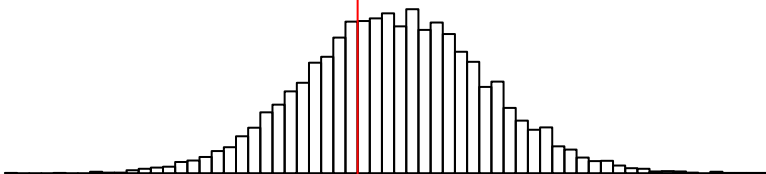

A194:18 – D206:18

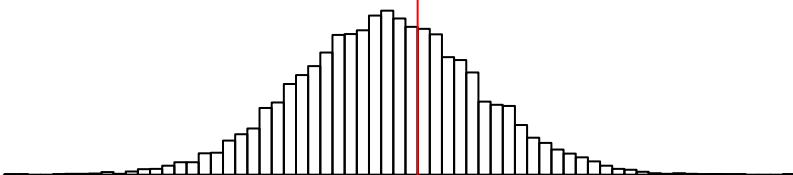

B184:18 – B224:18

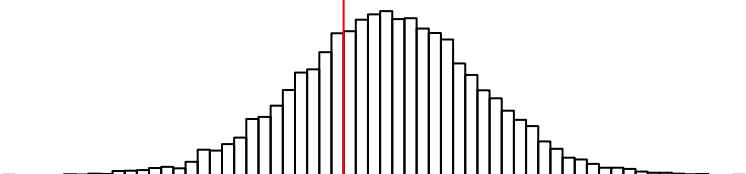

B184:18 – D206:18

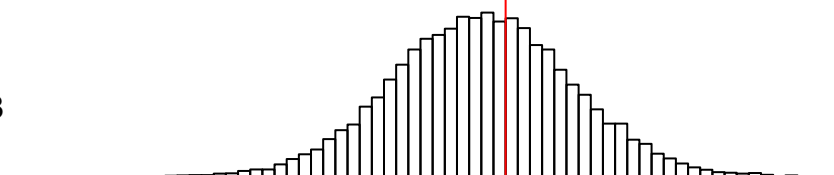

B224:18 – D206:18

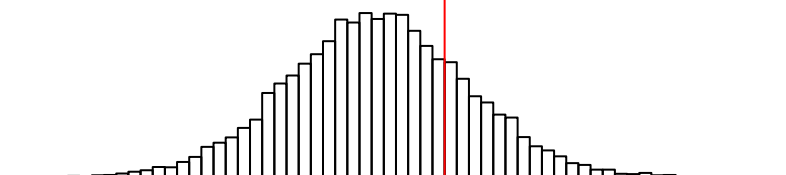

-3      -2      -1      0      1      2

delta(Unidentified Metabolite 16)

A194:18

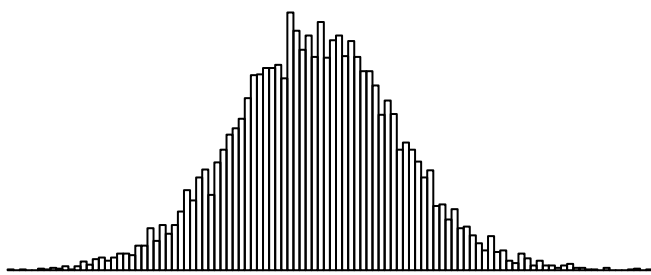

B184:18

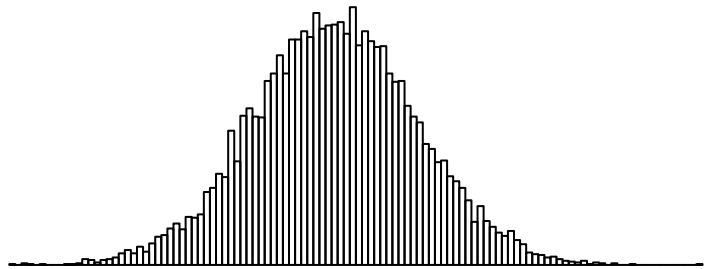

B224:18

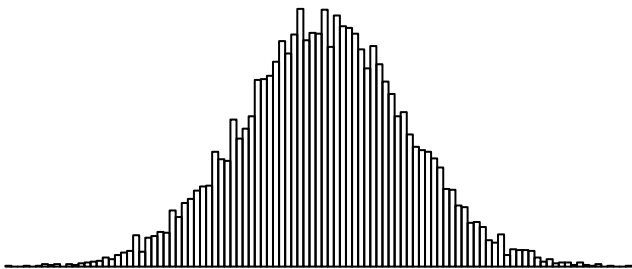

D206:18

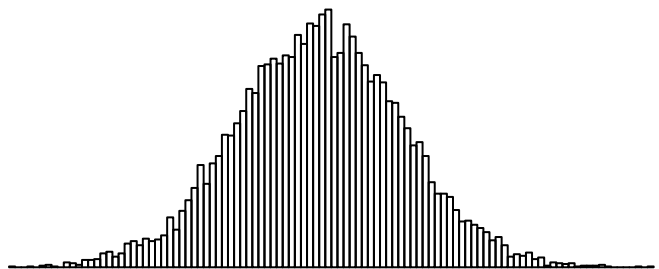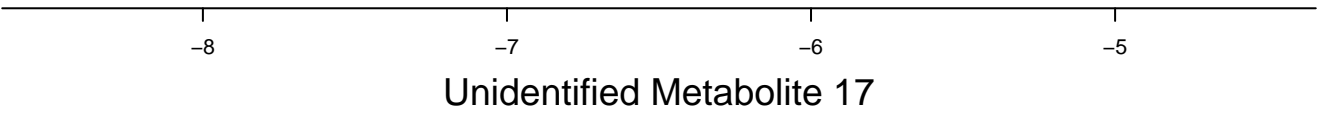

A194:18 – B184:18

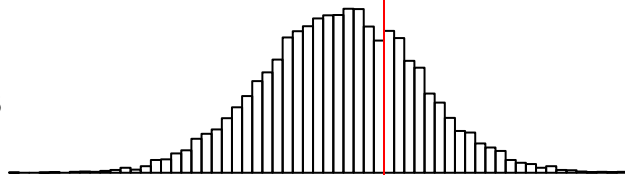

A194:18 – B224:18

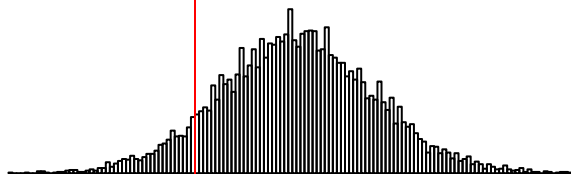

A194:18 – D206:18

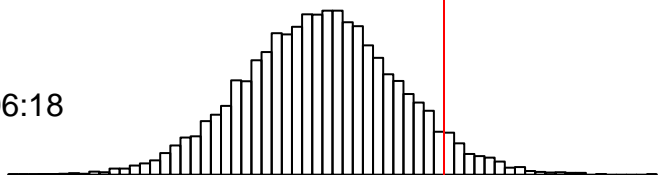

B184:18 – B224:18

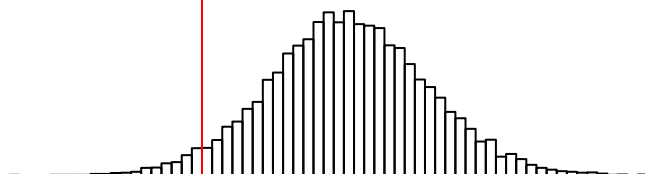

B184:18 – D206:18

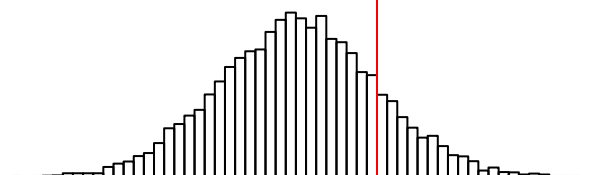

B224:18 – D206:18

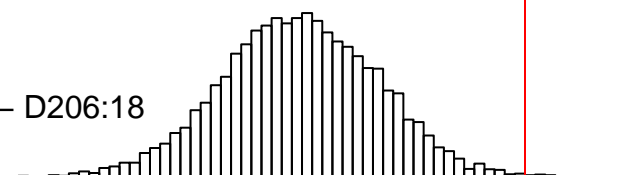

-3 -2 -1 0 1 2 3

delta(Unidentified Metabolite 17)

A194:18

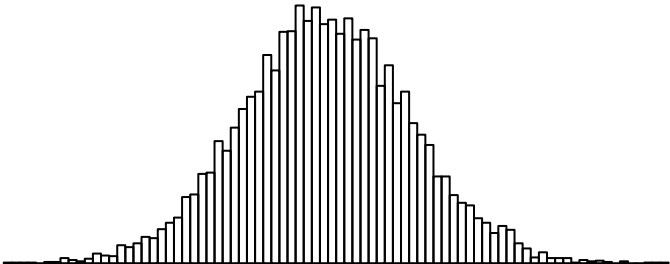

B184:18

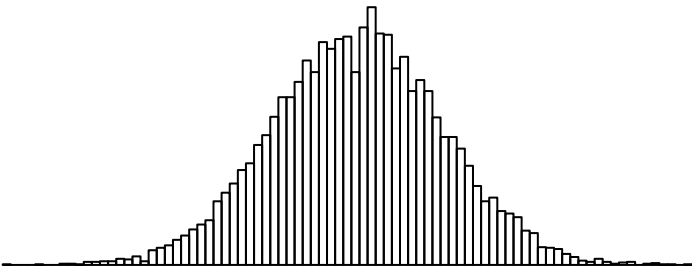

B224:18

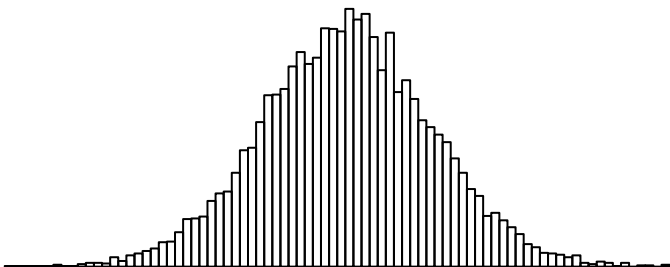

D206:18

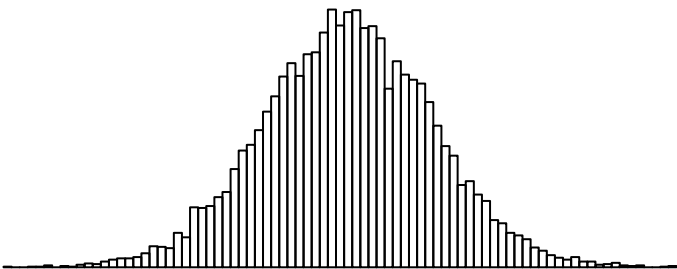

-8.0      -7.5      -7.0      -6.5      -6.0      -5.5      -5.0

Unidentified Metabolite 18

A194:18 – B184:18

A194:18 – B224:18

A194:18 – D206:18

B184:18 – B224:18

B184:18 – D206:18

B224:18 – D206:18

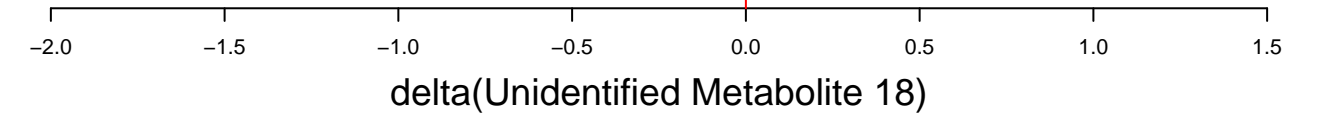

A194:18

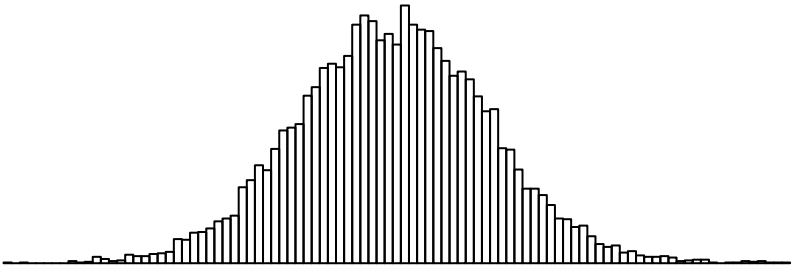

B184:18

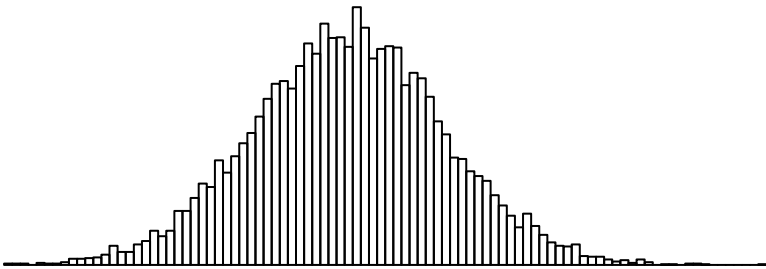

B224:18

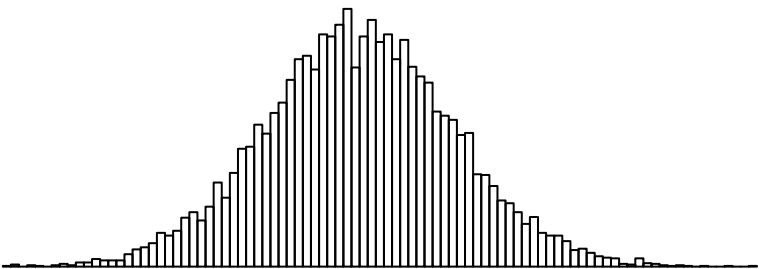

D206:18

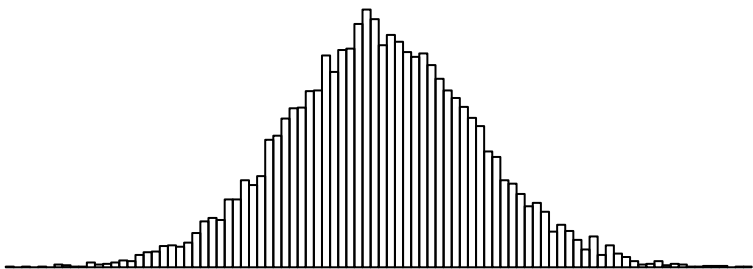

-6.5      -6.0      -5.5      -5.0      -4.5      -4.0      -3.5

Unidentified Metabolite 20

A194:18 – B184:18

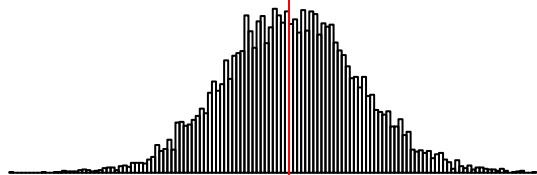

A194:18 – B224:18

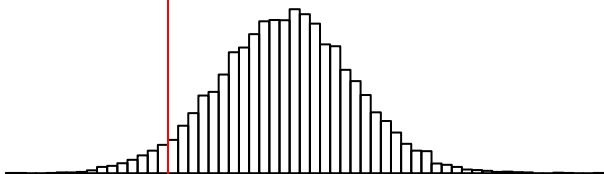

A194:18 – D206:18

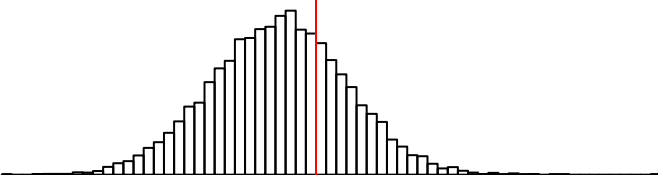

B184:18 – B224:18

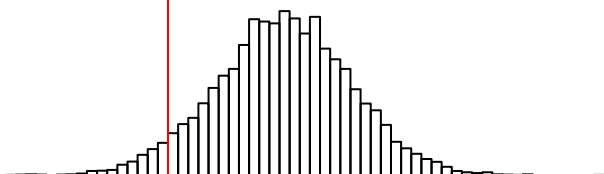

B184:18 – D206:18

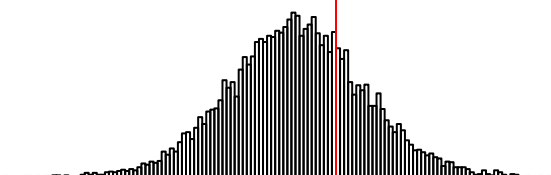

B224:18 – D206:18

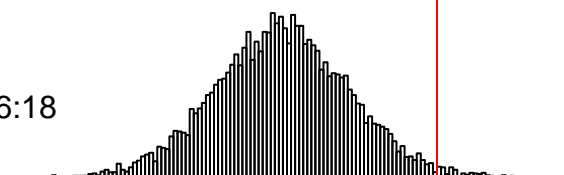

-3 -2 -1 0 1 2 3

delta(Unidentified Metabolite 20)



A194:18

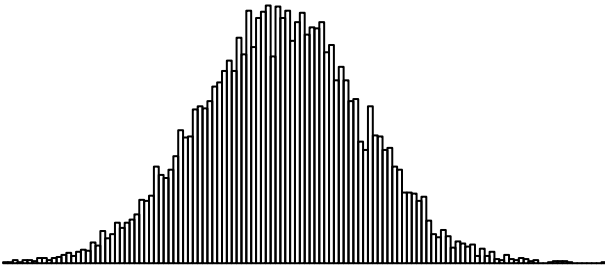

B184:18

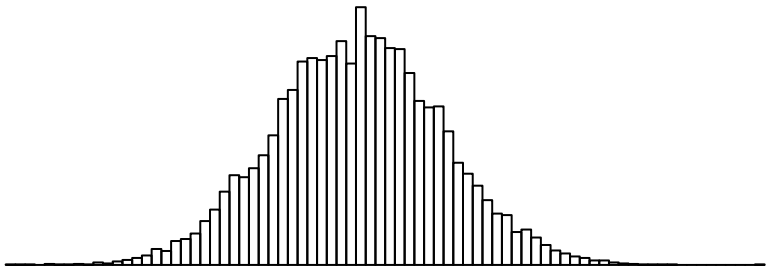

B224:18

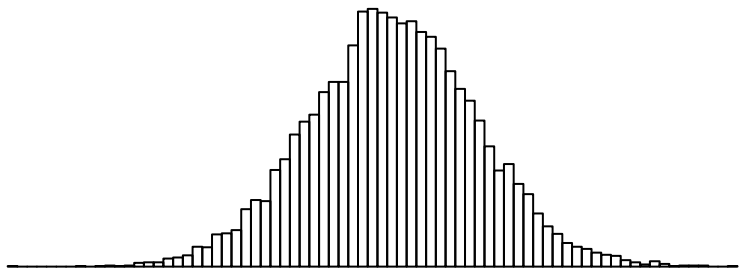

D206:18

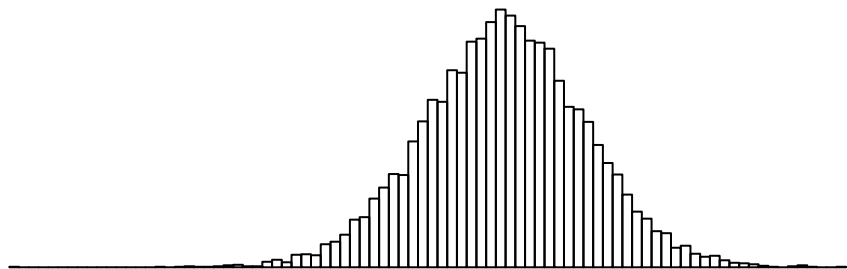

-8.5                      -8.0                      -7.5                      -7.0                      -6.5                      -6.0

Unidentified Metabolite 22

A194:18 – B184:18

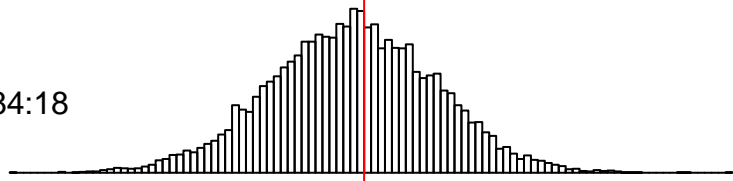

A194:18 – B224:18

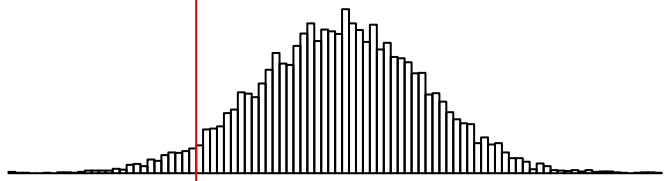

A194:18 – D206:18

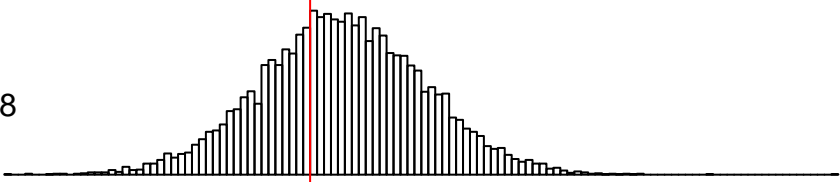

B184:18 – B224:18

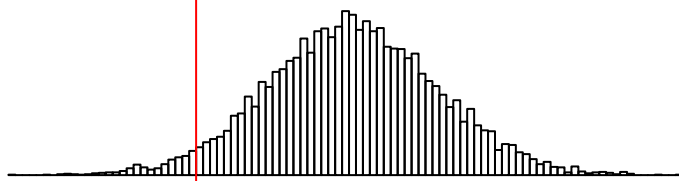

B184:18 – D206:18

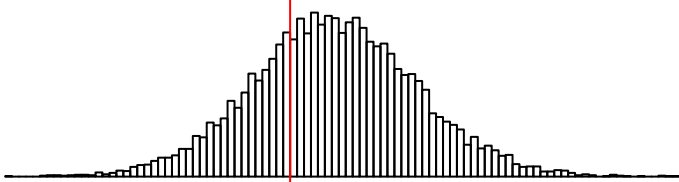

B224:18 – D206:18

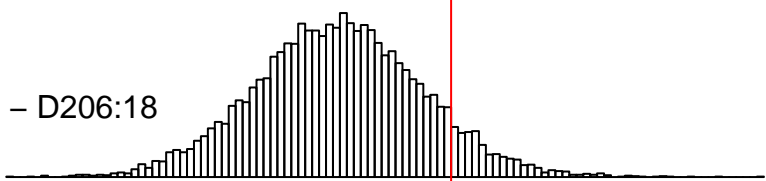

-1.5      -1.0      -0.5      0.0      0.5      1.0      1.5      2.0

delta(Unidentified Metabolite 22)

A194:18

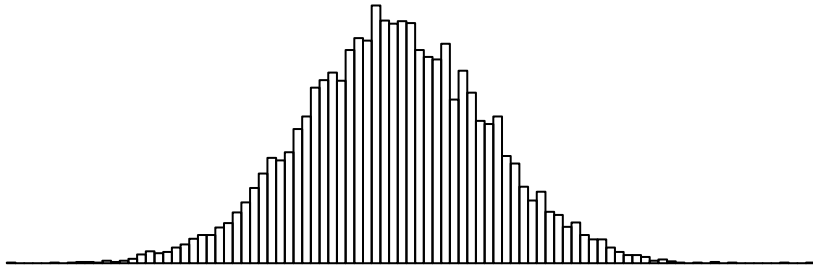

B184:18

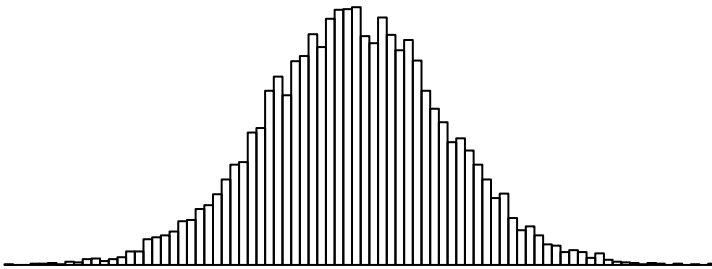

B224:18

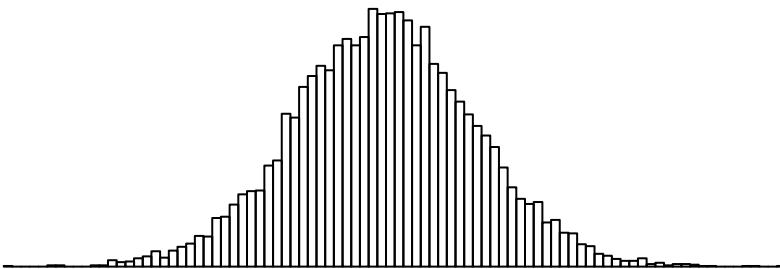

D206:18

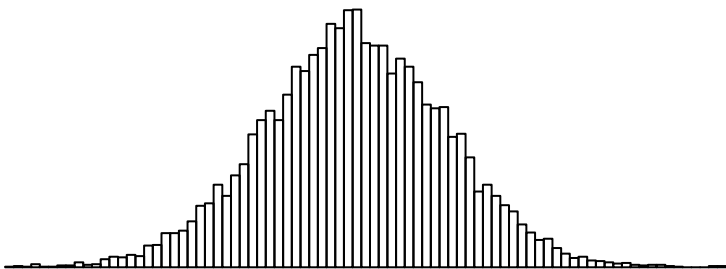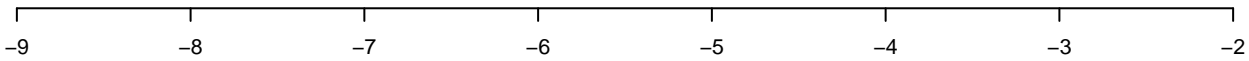

Unidentified Metabolite 23

A194:18 – B184:18

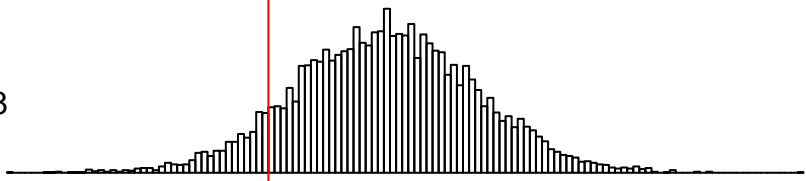

A194:18 – B224:18

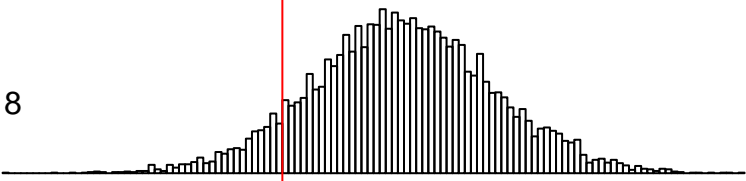

A194:18 – D206:18

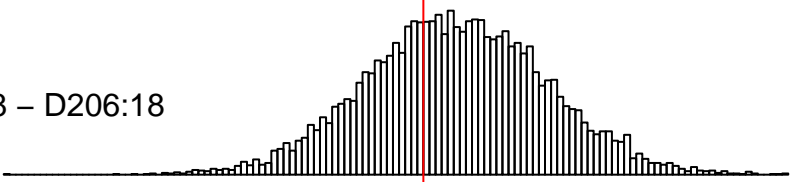

B184:18 – B224:18

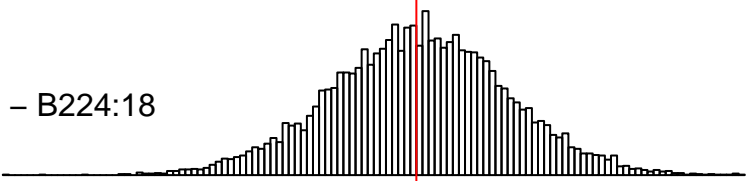

B184:18 – D206:18

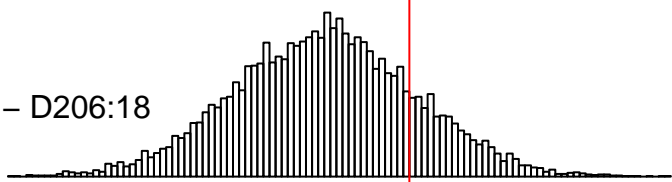

B224:18 – D206:18

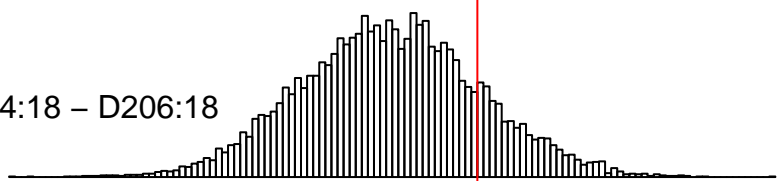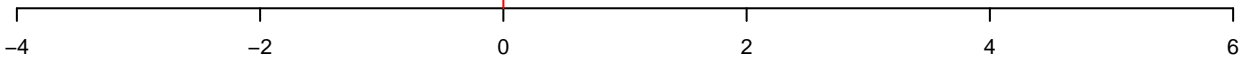

delta(Unidentified Metabolite 23)

A194:18

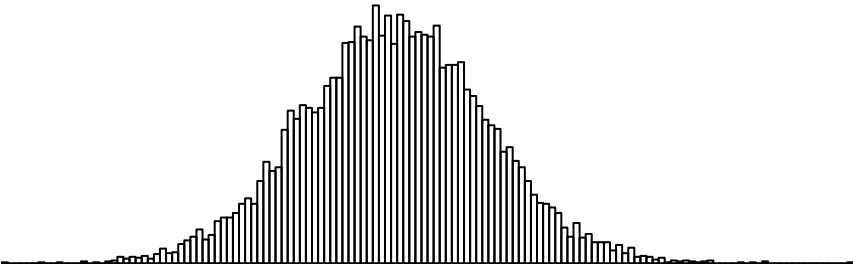

B184:18

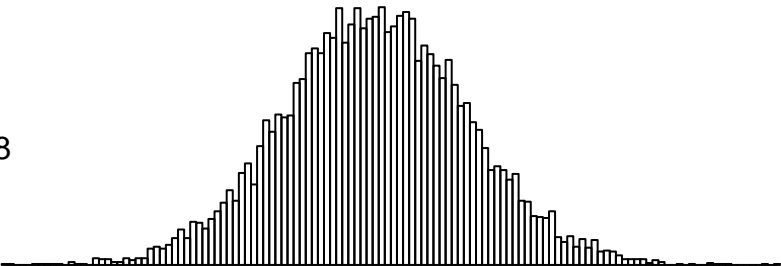

B224:18

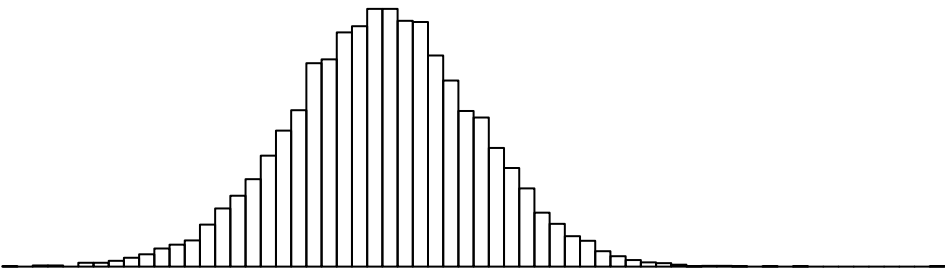

D206:18

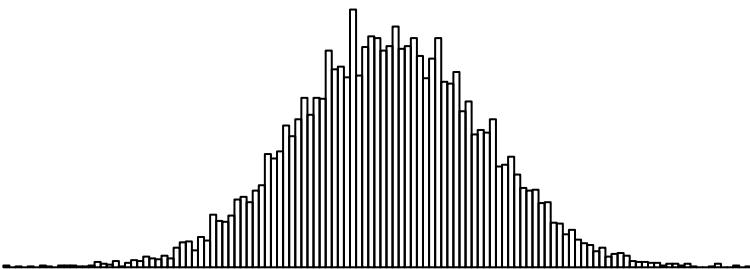

-7 -6 -5 -4 -3

Unidentified Metabolite 24

A194:18 – B184:18

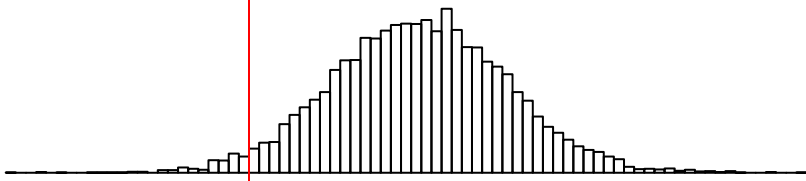

A194:18 – B224:18

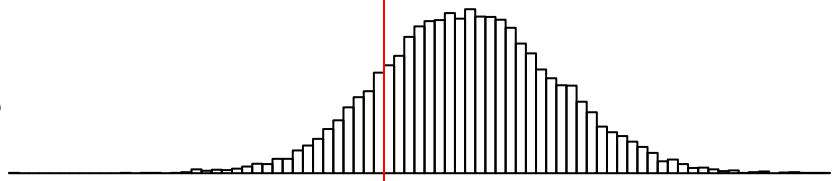

A194:18 – D206:18

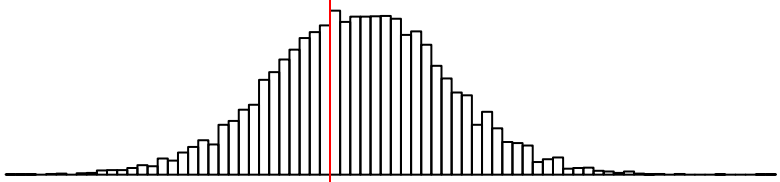

B184:18 – B224:18

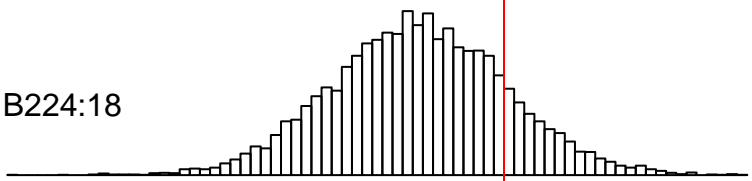

B184:18 – D206:18

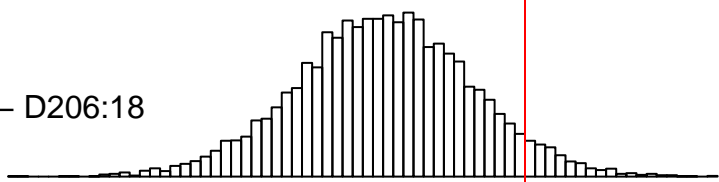

B224:18 – D206:18

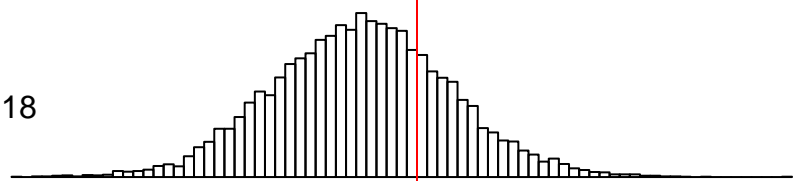

-3 -2 -1 0 1 2 3

delta(Unidentified Metabolite 24)

A194:18

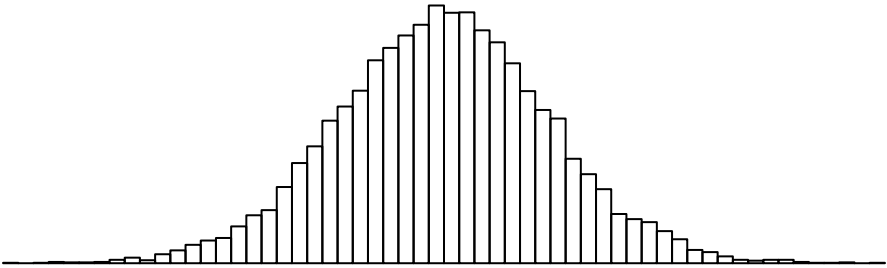

B184:18

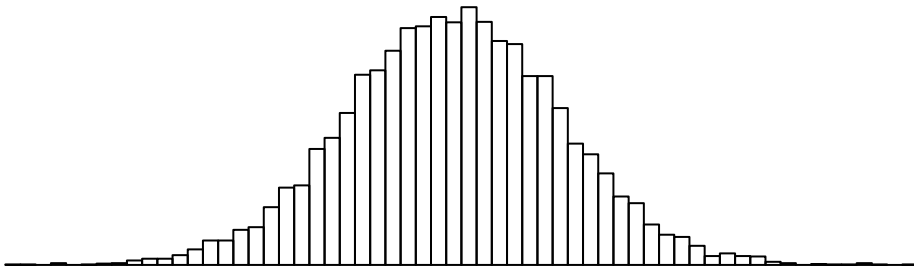

B224:18

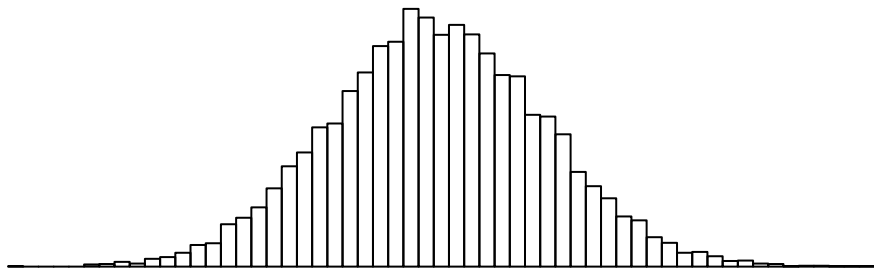

D206:18

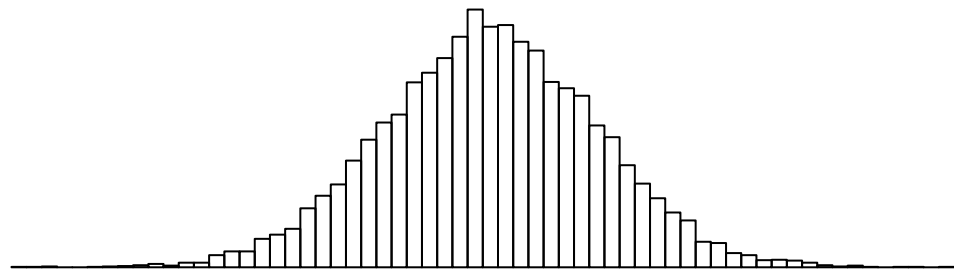

-8

-7

-6

-5

Unidentified Metabolite 25

A194:18 – B184:18

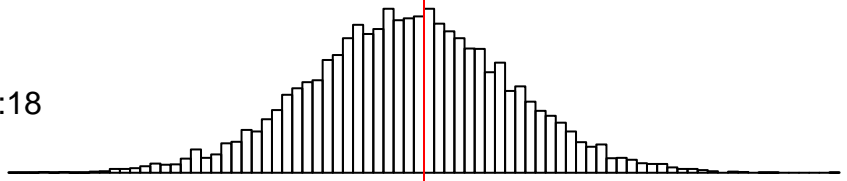

A194:18 – B224:18

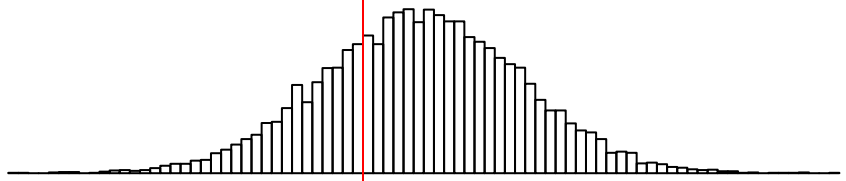

A194:18 – D206:18

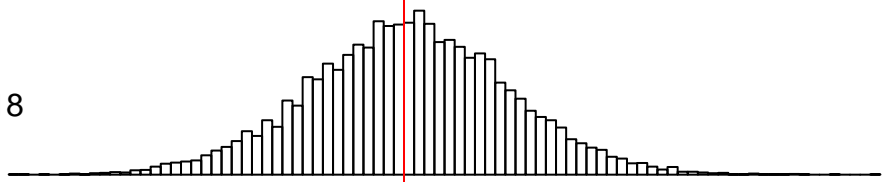

B184:18 – B224:18

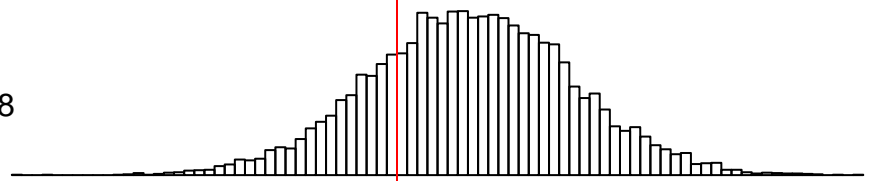

B184:18 – D206:18

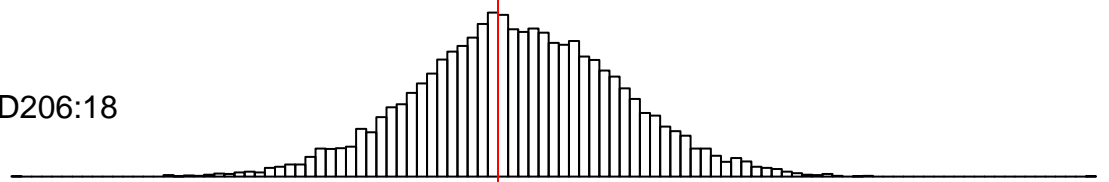

B224:18 – D206:18

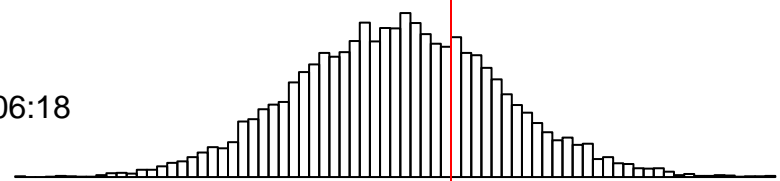

-3 -2 -1 0 1 2 3

delta(Unidentified Metabolite 25)



A194:18

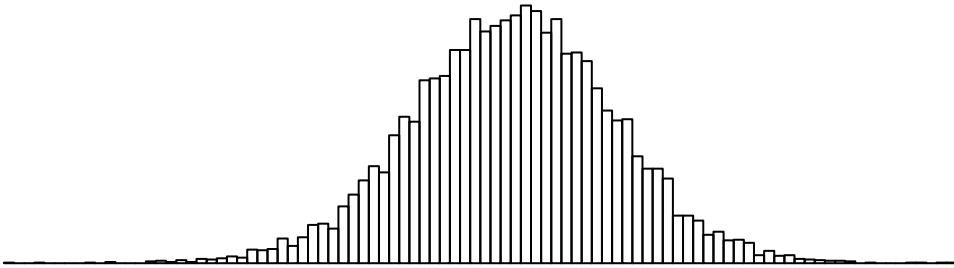

B184:18

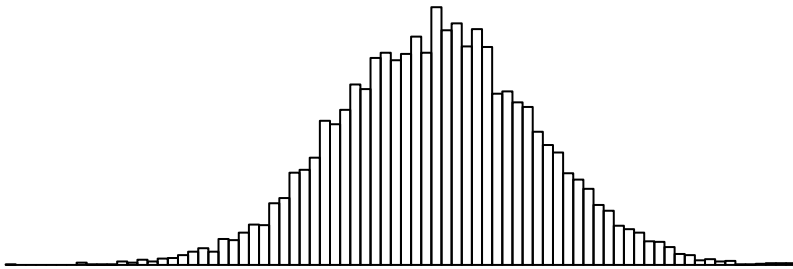

B224:18

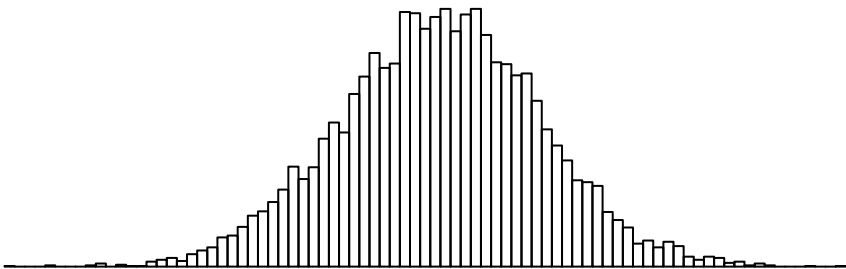

D206:18

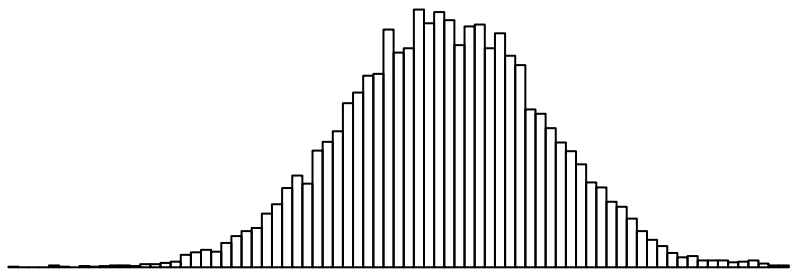

-10 -9 -8 -7 -6 -5 -4

Unidentified Metabolite 26

A194:18 – B184:18

A194:18 – B224:18

A194:18 – D206:18

B184:18 – B224:18

B184:18 – D206:18

B224:18 – D206:18

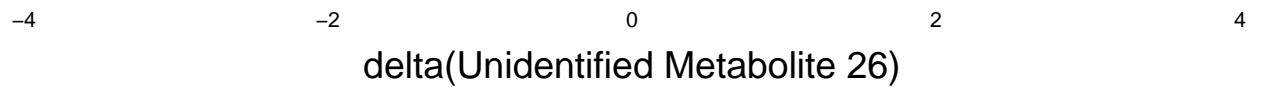

A194:18

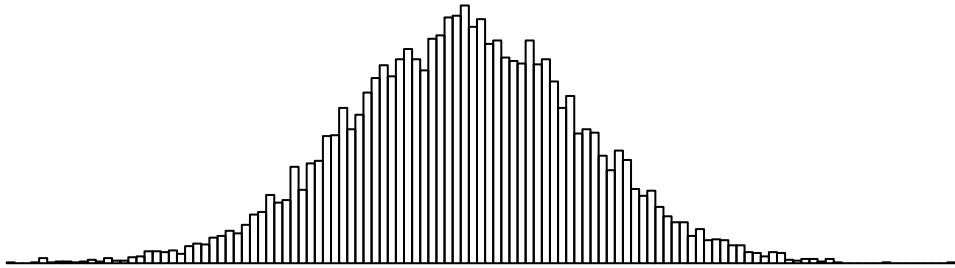

B184:18

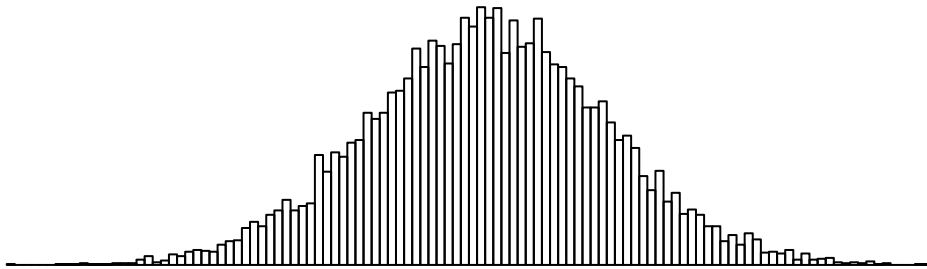

B224:18

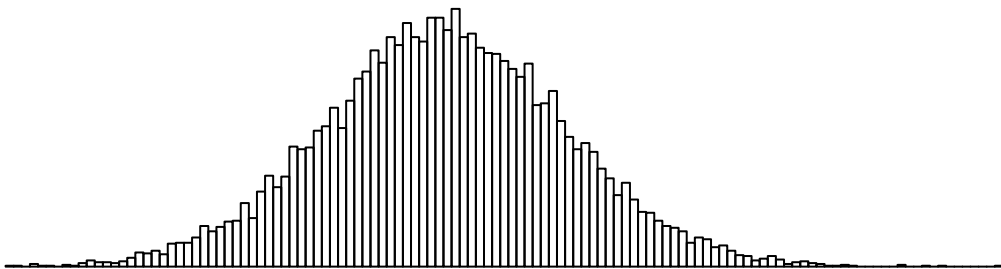

D206:18

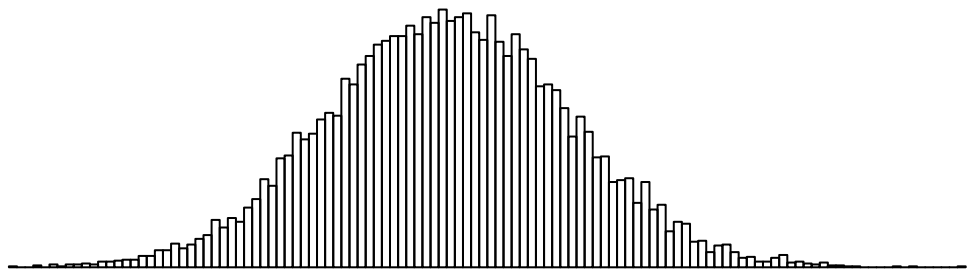

-7.0      -6.5      -6.0      -5.5      -5.0      -4.5      -4.0

Unidentified Metabolite 27

A194:18 – B184:18

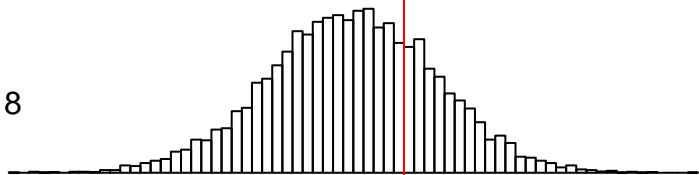

A194:18 – B224:18

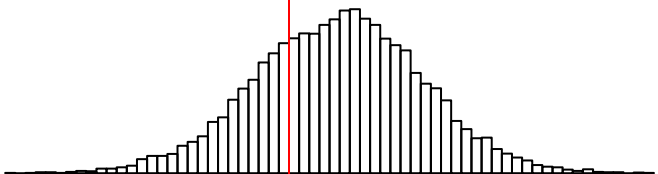

A194:18 – D206:18

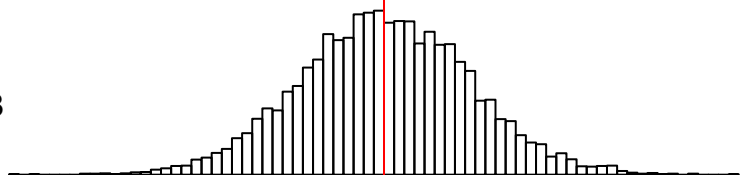

B184:18 – B224:18

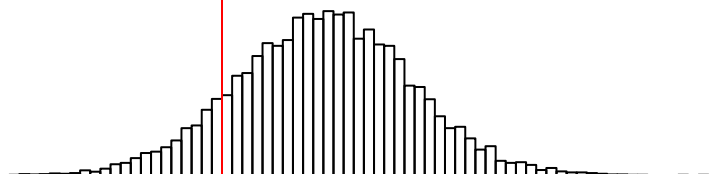

B184:18 – D206:18

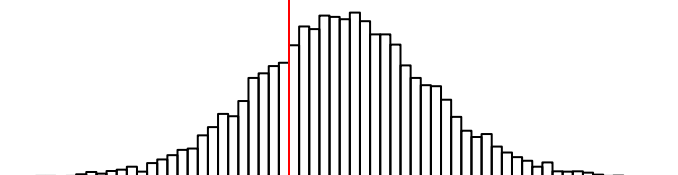

B224:18 – D206:18

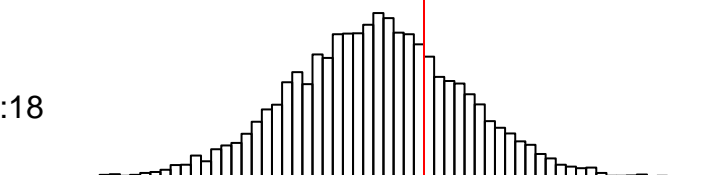

-3 -2 -1 0 1 2 3

delta(Unidentified Metabolite 27)

A194:18

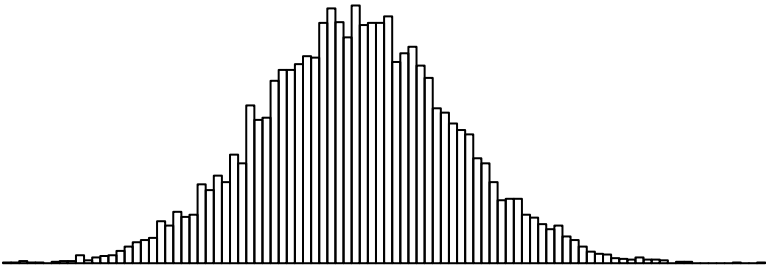

B184:18

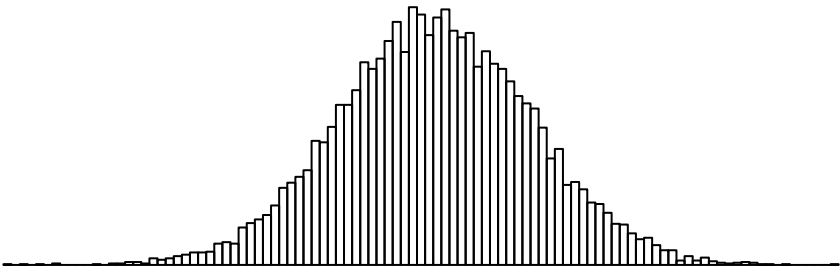

B224:18

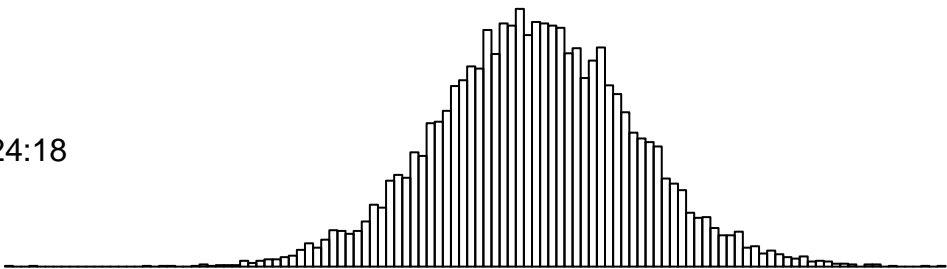

D206:18

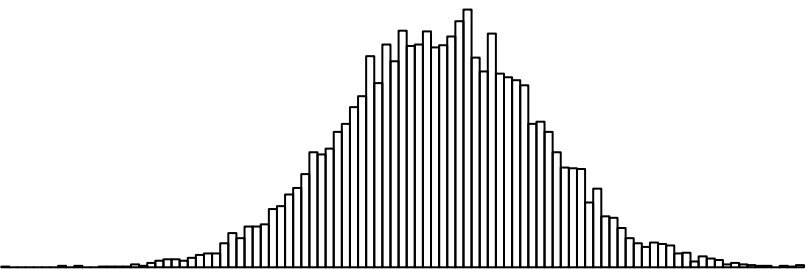

-8.5      -8.0      -7.5      -7.0      -6.5      -6.0      -5.5

Unidentified Metabolite 29

A194:18 – B184:18

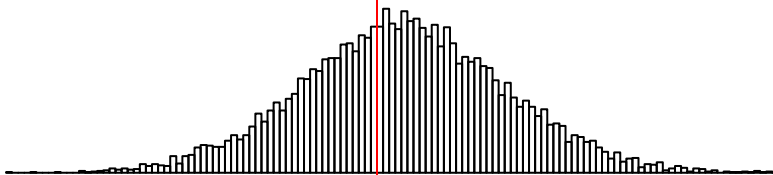

A194:18 – B224:18

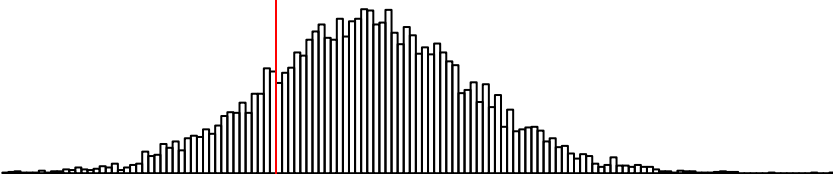

A194:18 – D206:18

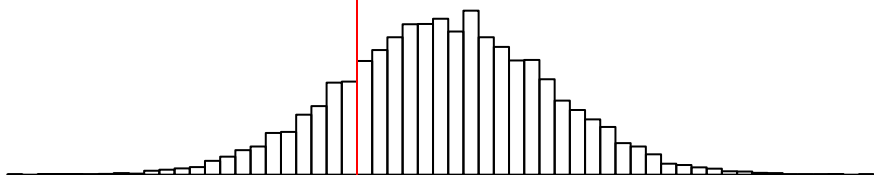

B184:18 – B224:18

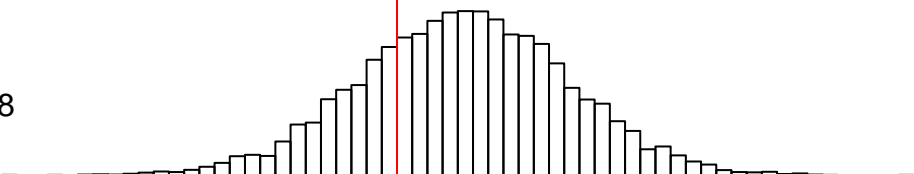

B184:18 – D206:18

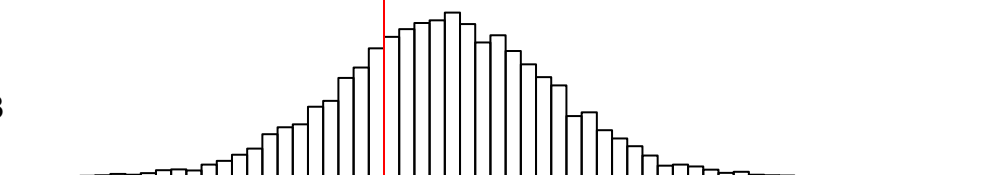

B224:18 – D206:18

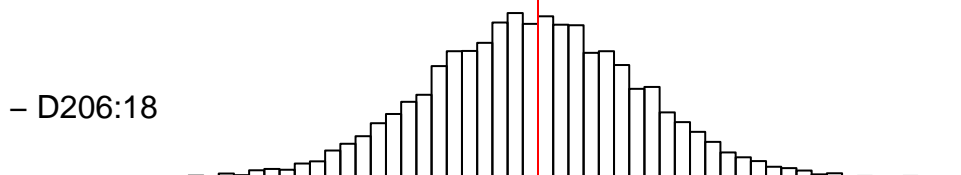

-2 -1 0 1 2

delta(Unidentified Metabolite 29)

A194:18

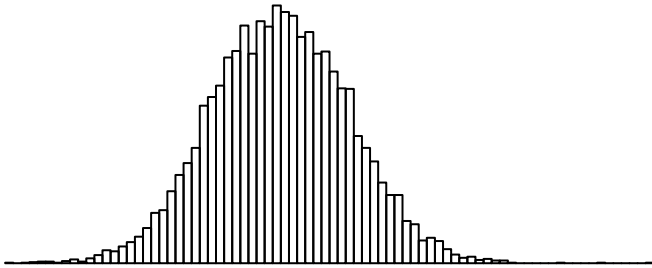

B184:18

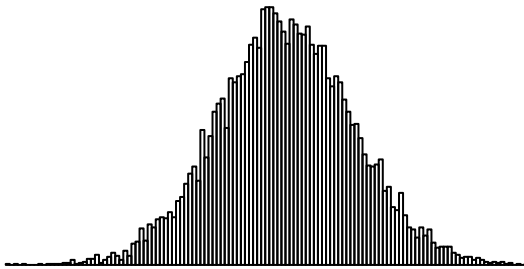

B224:18

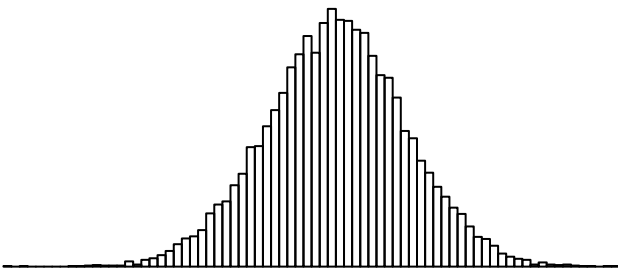

D206:18

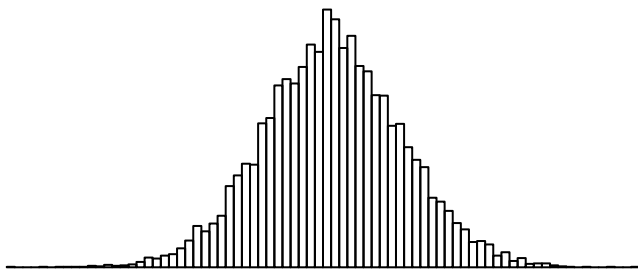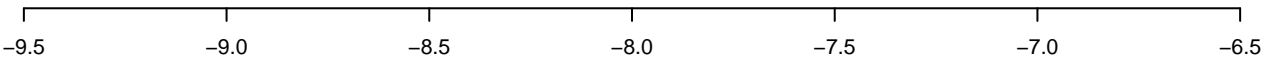

Unidentified Metabolite 30

A194:18 – B184:18

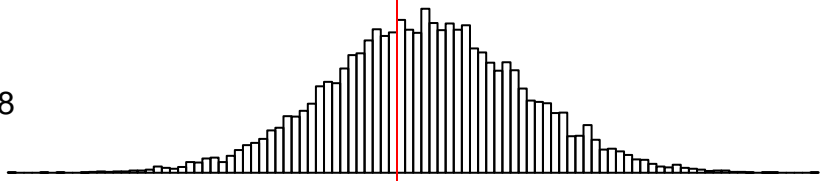

A194:18 – B224:18

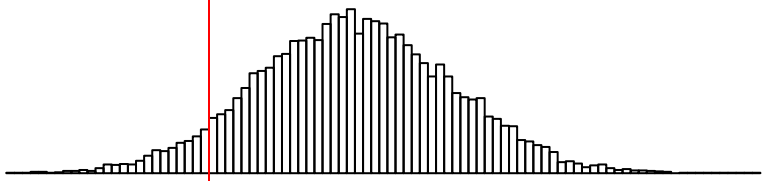

A194:18 – D206:18

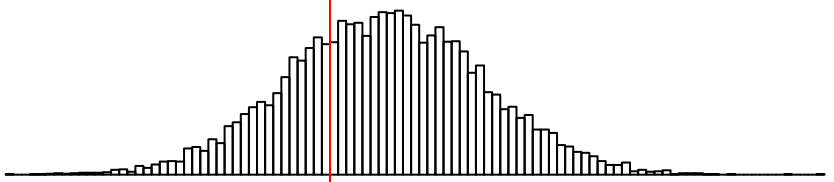

B184:18 – B224:18

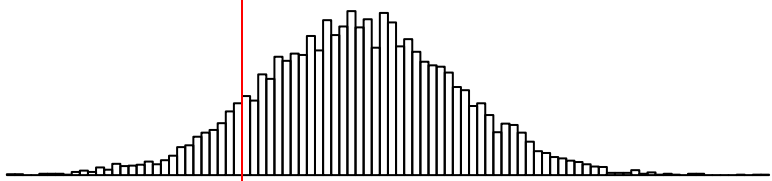

B184:18 – D206:18

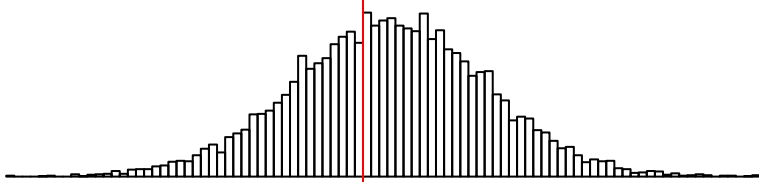

B224:18 – D206:18

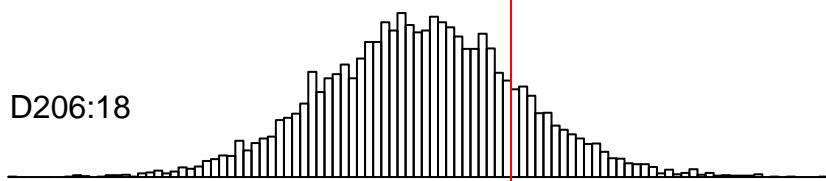

-1.5      -1.0      -0.5      0.0      0.5      1.0      1.5

delta(Unidentified Metabolite 30)



A194:18

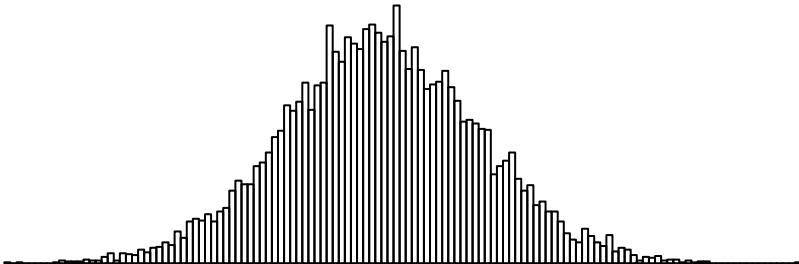

B184:18

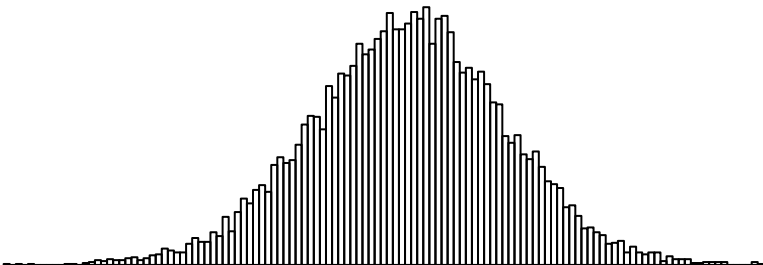

B224:18

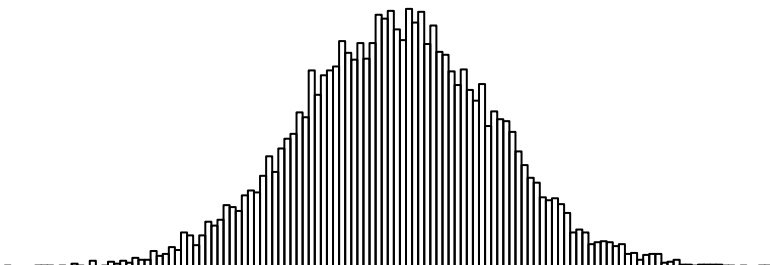

D206:18

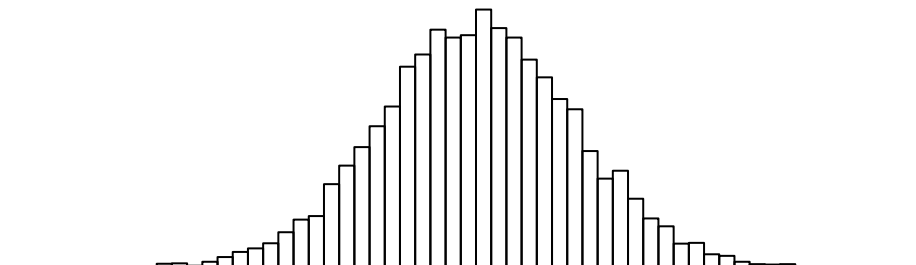

-10 -9 -8 -7

Unidentified Metabolite 31

A194:18 – B184:18

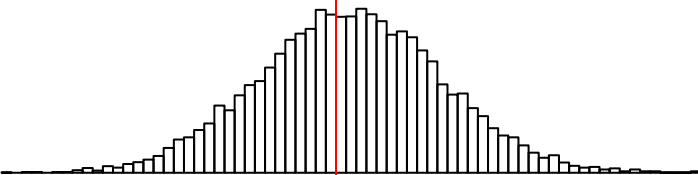

A194:18 – B224:18

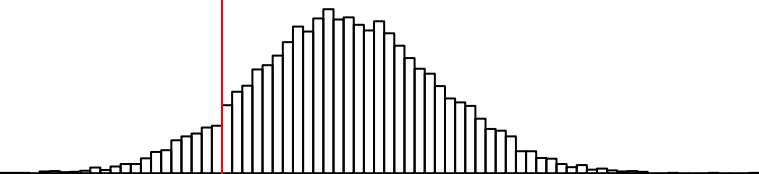

A194:18 – D206:18

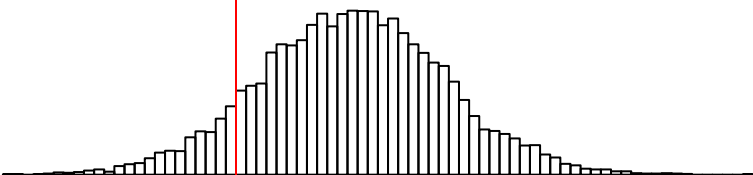

B184:18 – B224:18

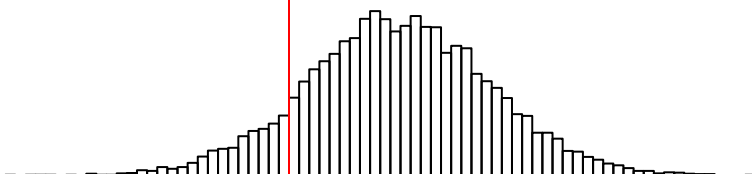

B184:18 – D206:18

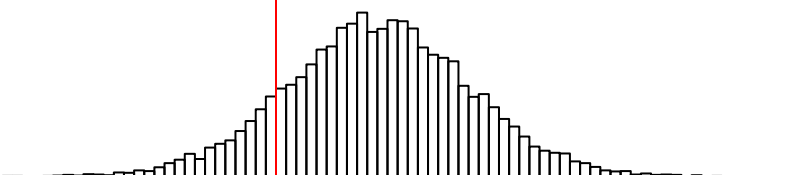

B224:18 – D206:18

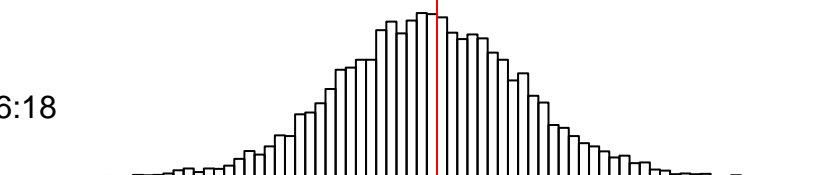

-3      -2      -1      0      1      2      3

delta(Unidentified Metabolite 31)

A194:18

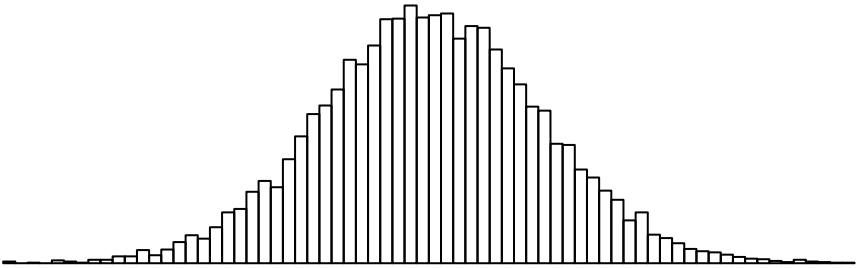

B184:18

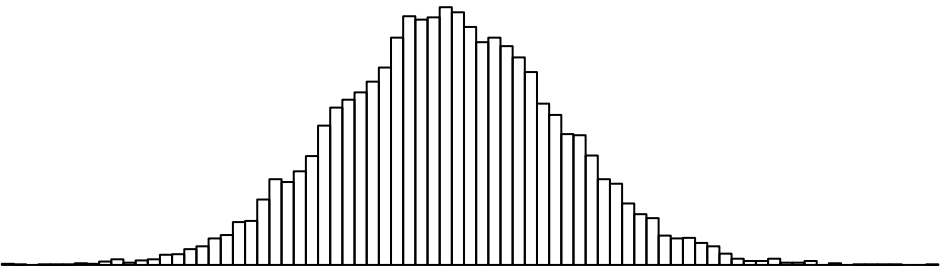

B224:18

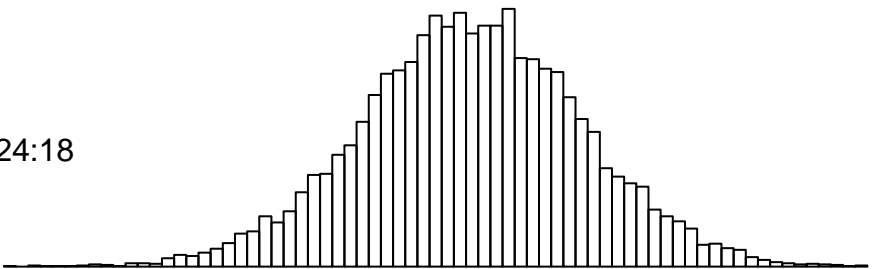

D206:18

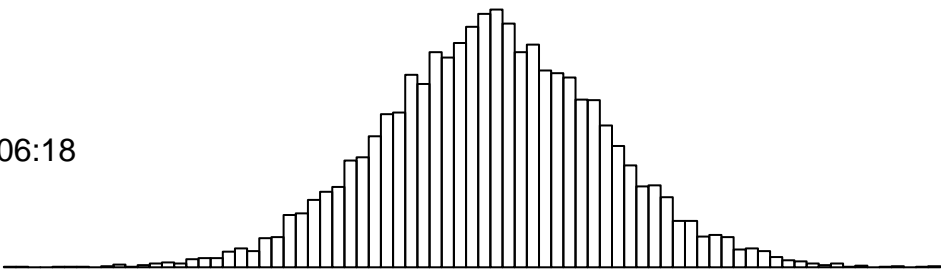

Unidentified Metabolite 32

A194:18 – B184:18

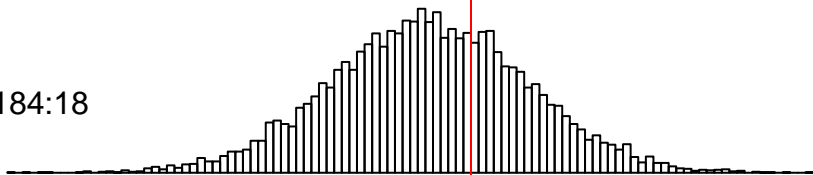

A194:18 – B224:18

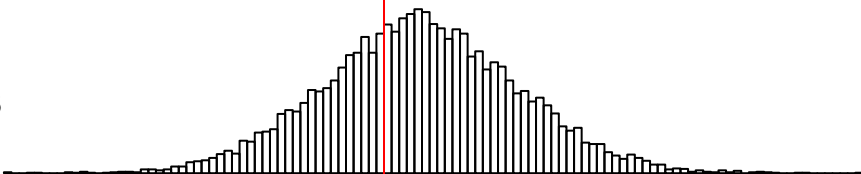

A194:18 – D206:18

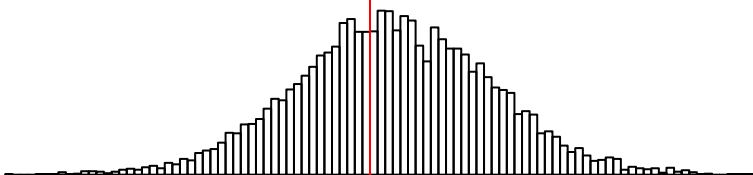

B184:18 – B224:18

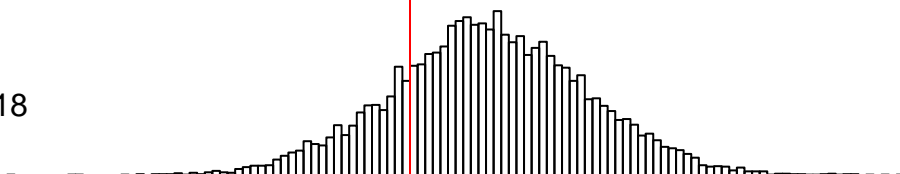

B184:18 – D206:18

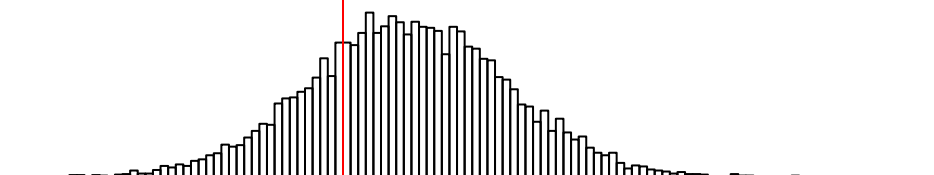

B224:18 – D206:18

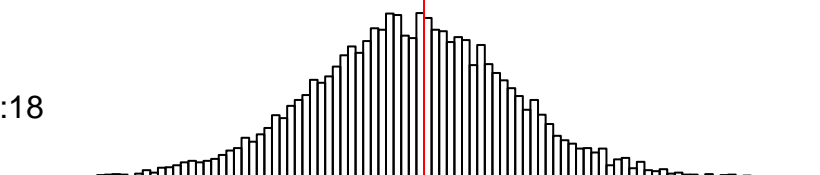

-4 -2 0 2 4

delta(Unidentified Metabolite 32)

A194:18

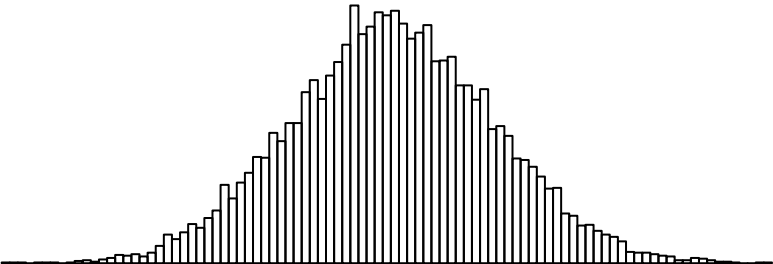

B184:18

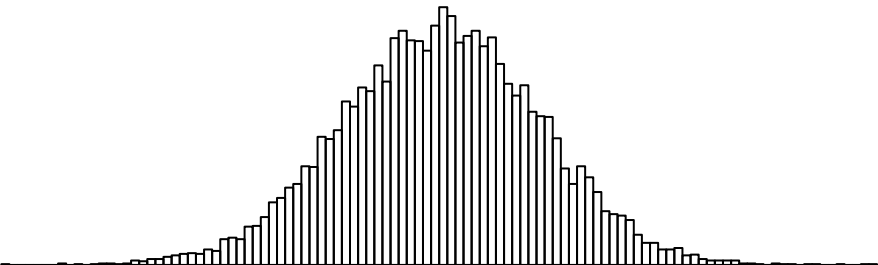

B224:18

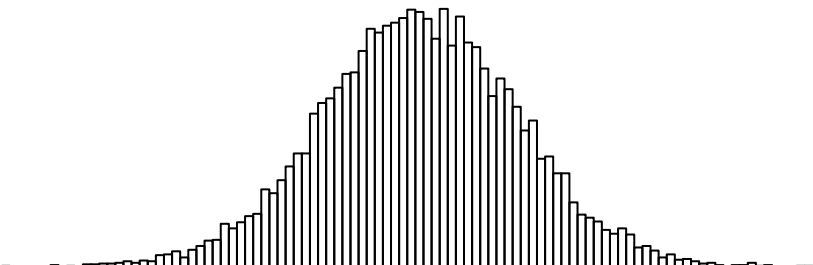

D206:18

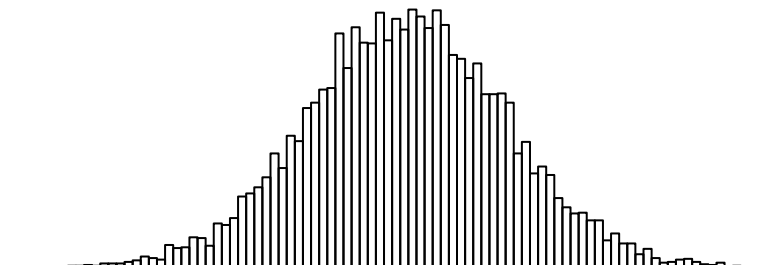

-9.0      -8.5      -8.0      -7.5      -7.0      -6.5      -6.0

Unidentified Metabolite 33

A194:18 – B184:18

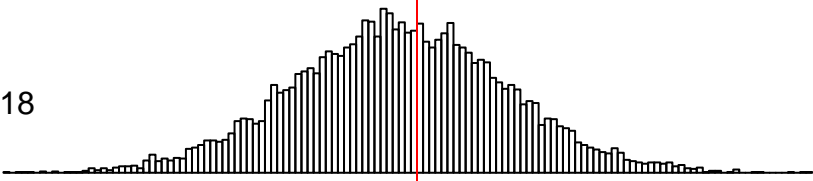

A194:18 – B224:18

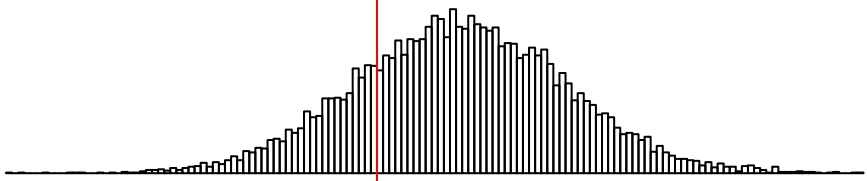

A194:18 – D206:18

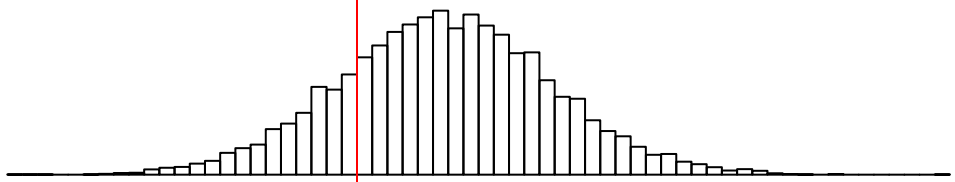

B184:18 – B224:18

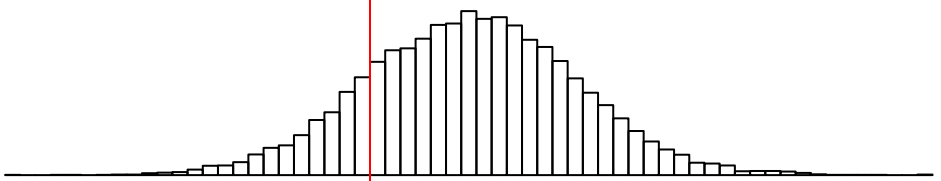

B184:18 – D206:18

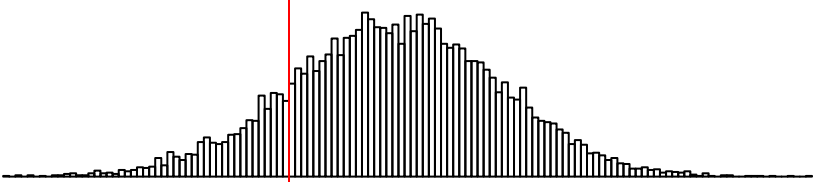

B224:18 – D206:18

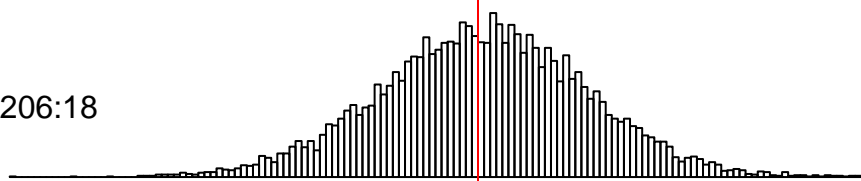

delta(Unidentified Metabolite 33)

A194:18

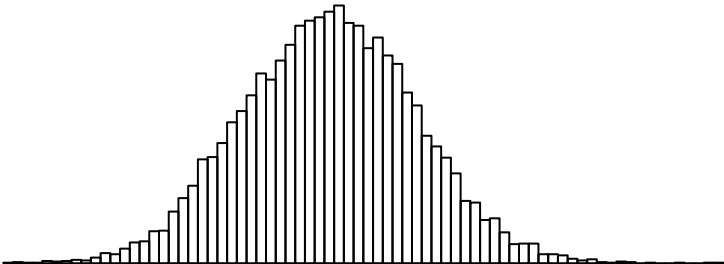

B184:18

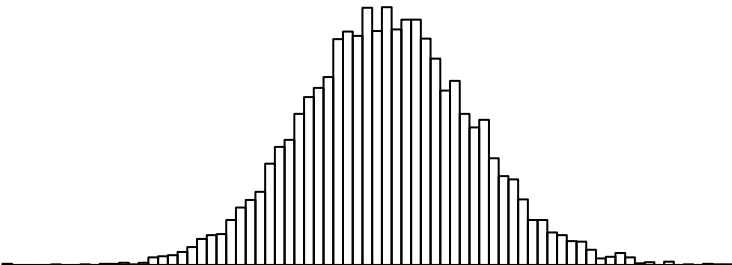

B224:18

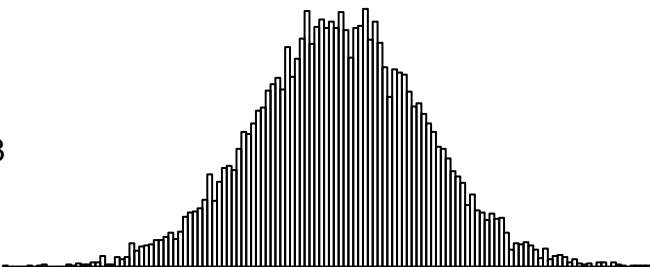

D206:18

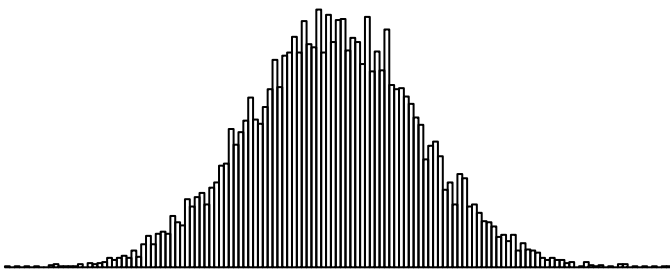

-9.0      -8.5      -8.0      -7.5      -7.0      -6.5

Unidentified Metabolite 34

A194:18 – B184:18

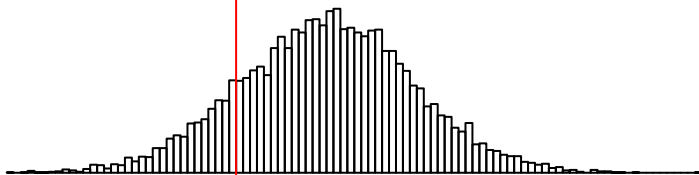

A194:18 – B224:18

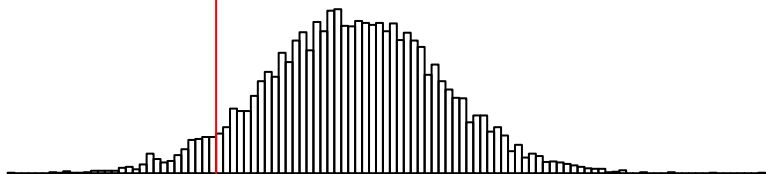

A194:18 – D206:18

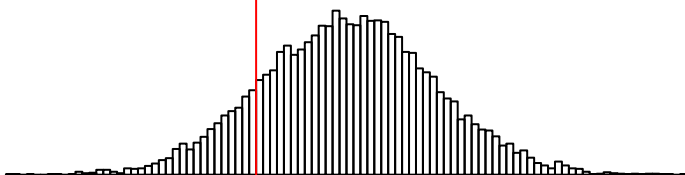

B184:18 – B224:18

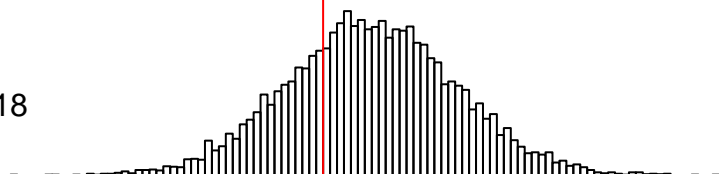

B184:18 – D206:18

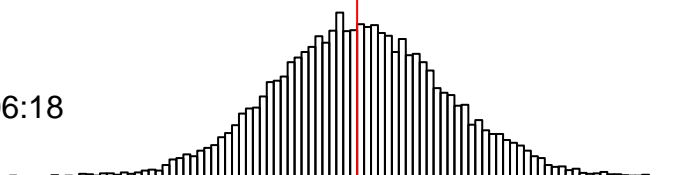

B224:18 – D206:18

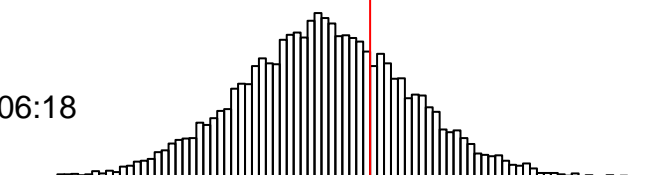

-1.5      -1.0      -0.5      0.0      0.5      1.0      1.5      2.0

delta(Unidentified Metabolite 34)



A194:18

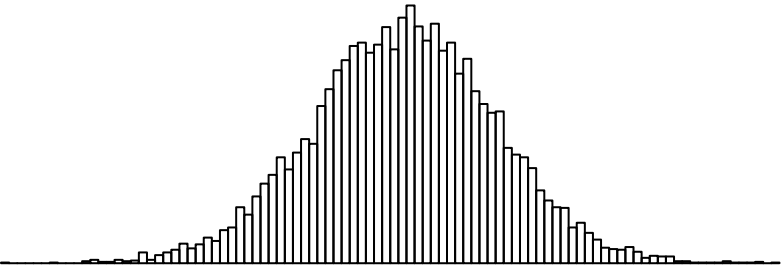

B184:18

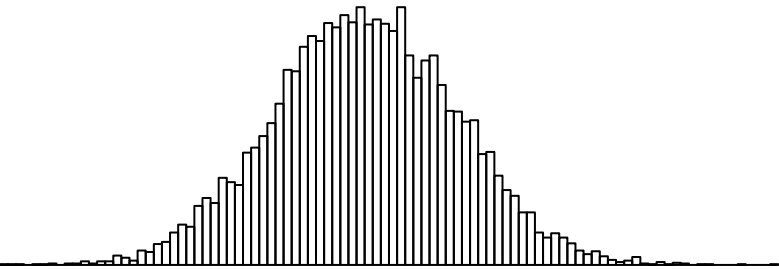

B224:18

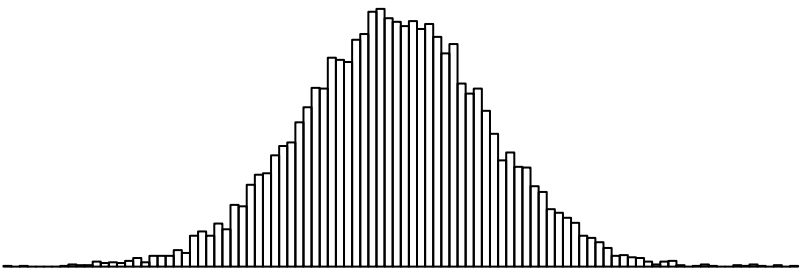

D206:18

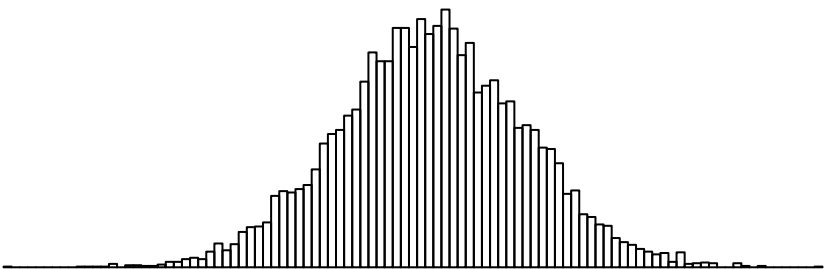

-8.0 -7.5 -7.0 -6.5 -6.0 -5.5 -5.0

Unidentified Metabolite 35

A194:18 – B184:18

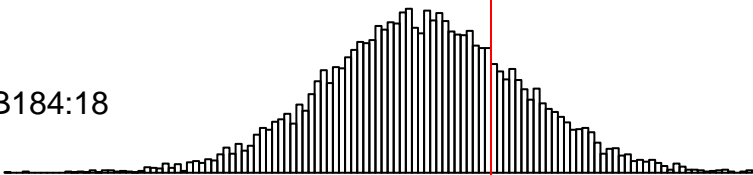

A194:18 – B224:18

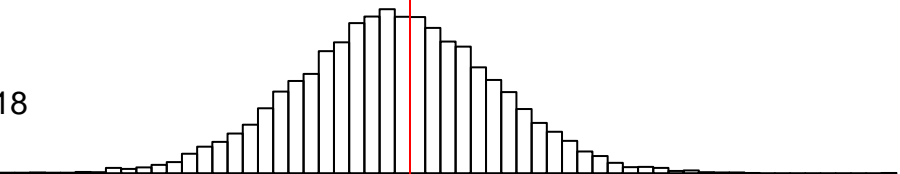

A194:18 – D206:18

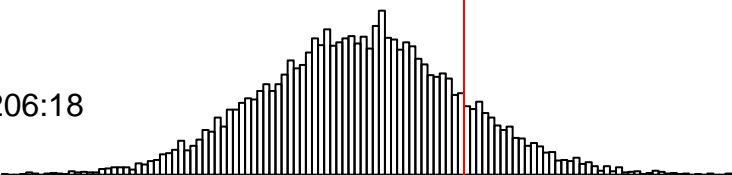

B184:18 – B224:18

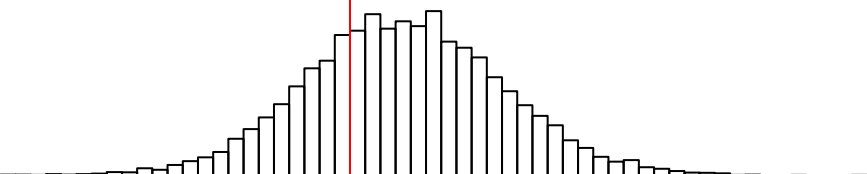

B184:18 – D206:18

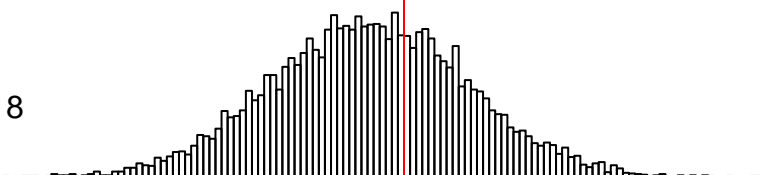

B224:18 – D206:18

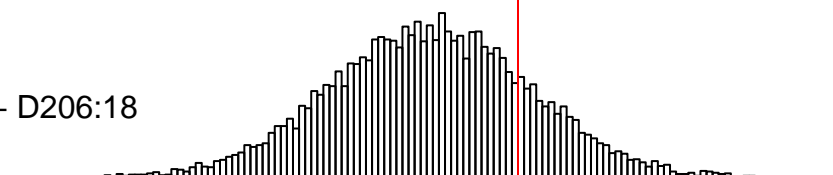

-2 -1 0 1 2

delta(Unidentified Metabolite 35)

A194:18

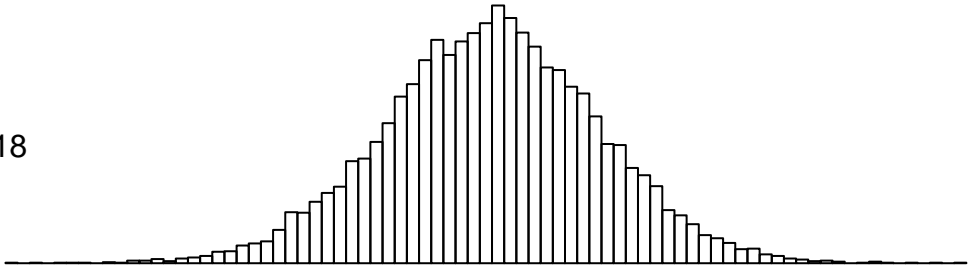

B184:18

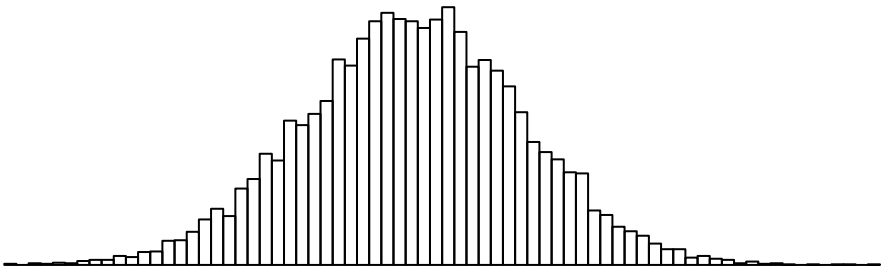

B224:18

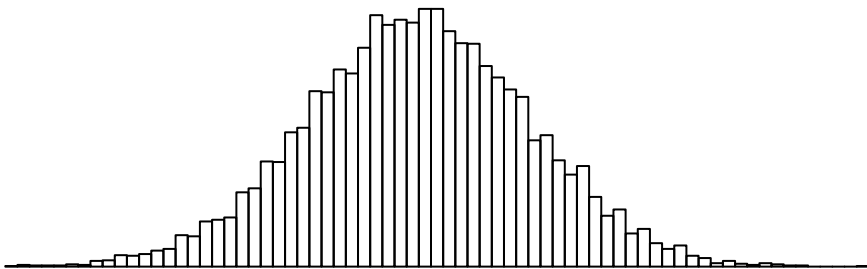

D206:18

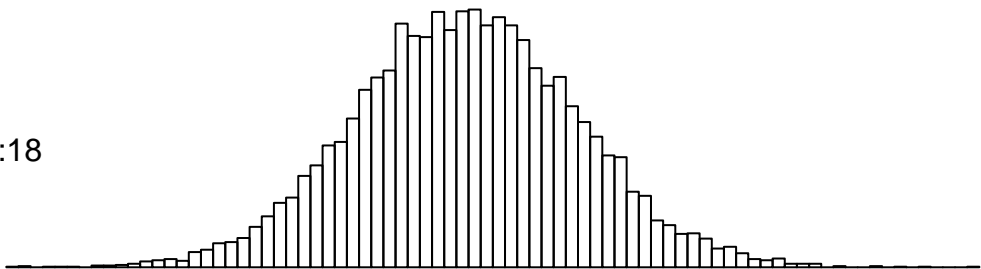

-8 -7 -6 -5 -4 -3

Unidentified Metabolite 36

A194:18 – B184:18

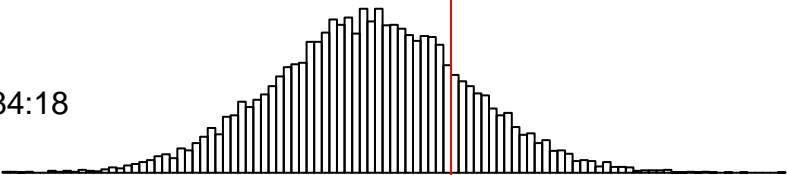

A194:18 – B224:18

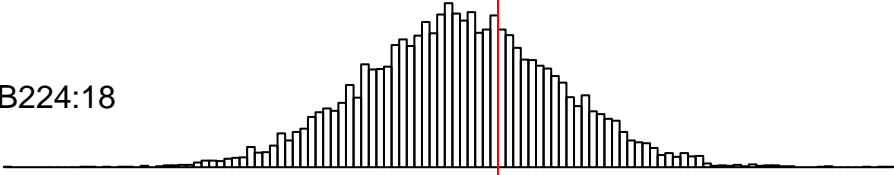

A194:18 – D206:18

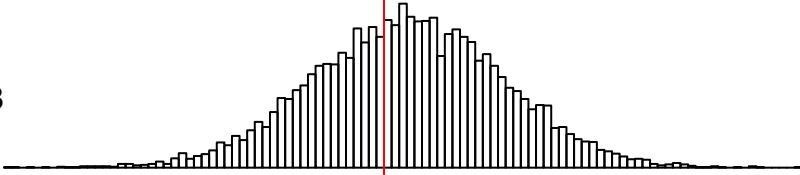

B184:18 – B224:18

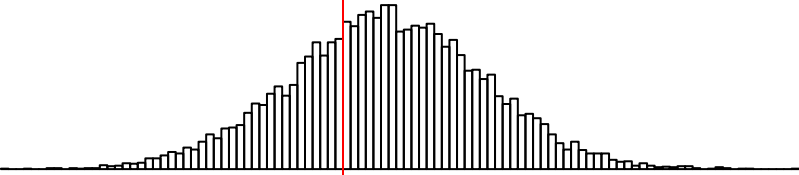

B184:18 – D206:18

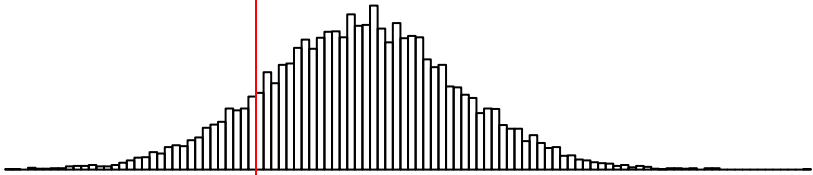

B224:18 – D206:18

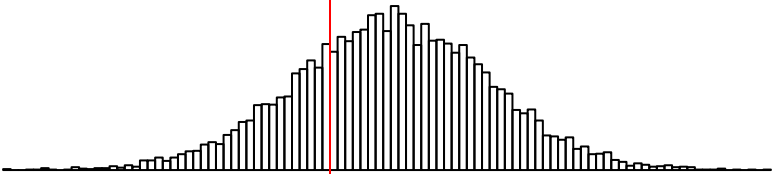

-4 -2 0 2 4

delta(Unidentified Metabolite 36)

A194:18

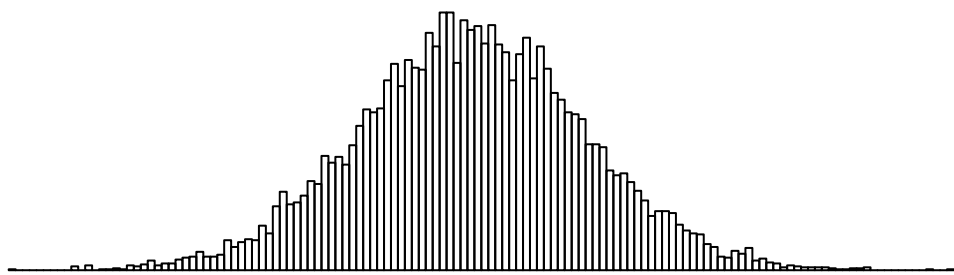

B184:18

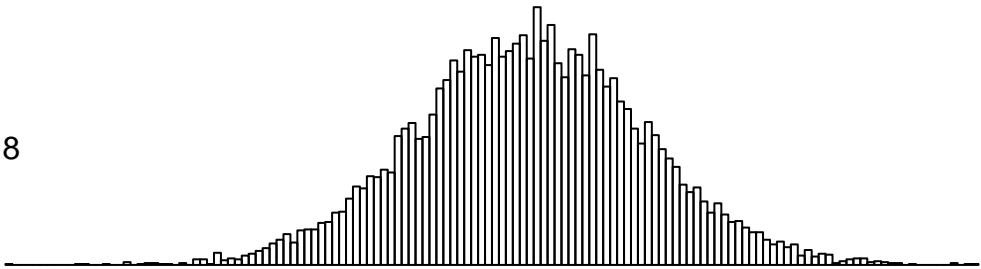

B224:18

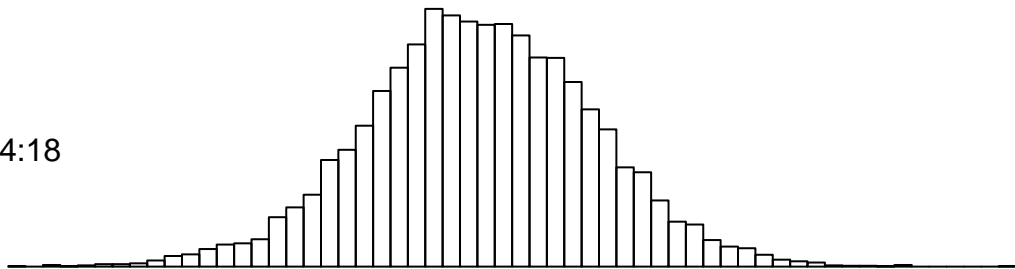

D206:18

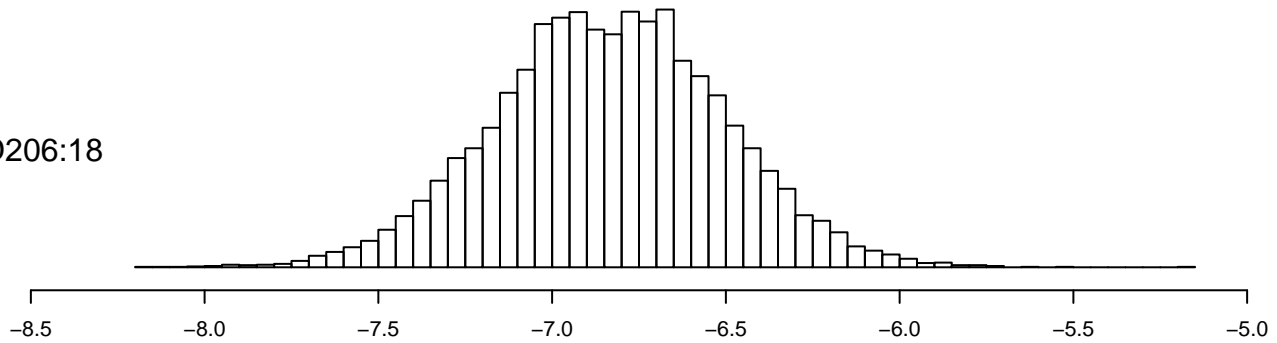

Unidentified Metabolite 38

A194:18 – B184:18

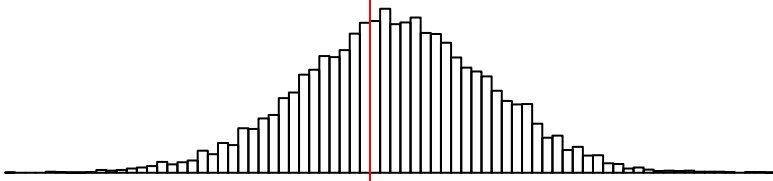

A194:18 – B224:18

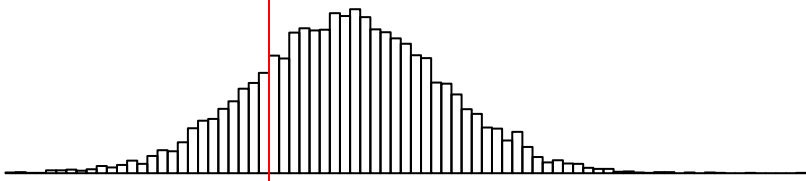

A194:18 – D206:18

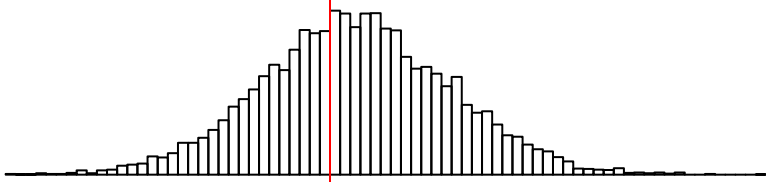

B184:18 – B224:18

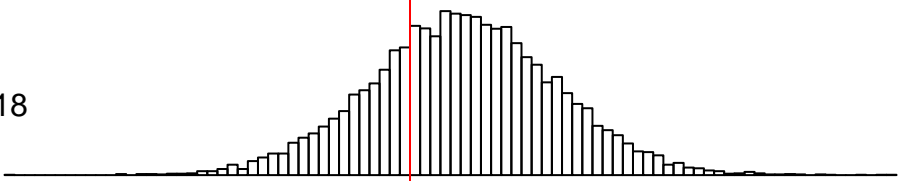

B184:18 – D206:18

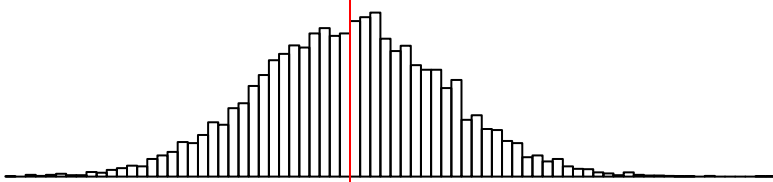

B224:18 – D206:18

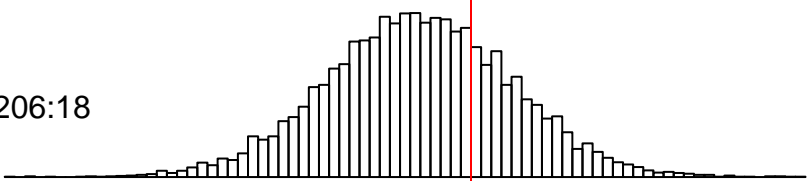

-3 -2 -1 0 1 2 3

delta(Unidentified Metabolite 38)

A194:18

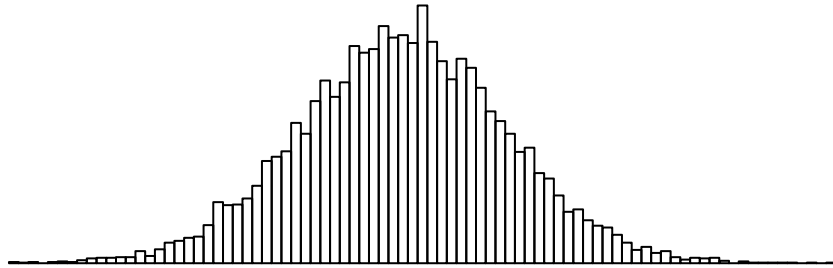

B184:18

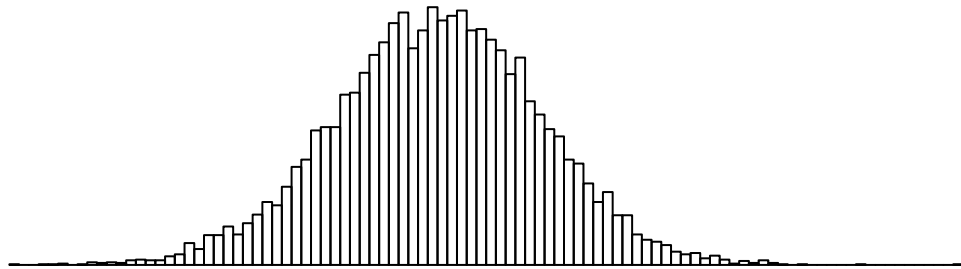

B224:18

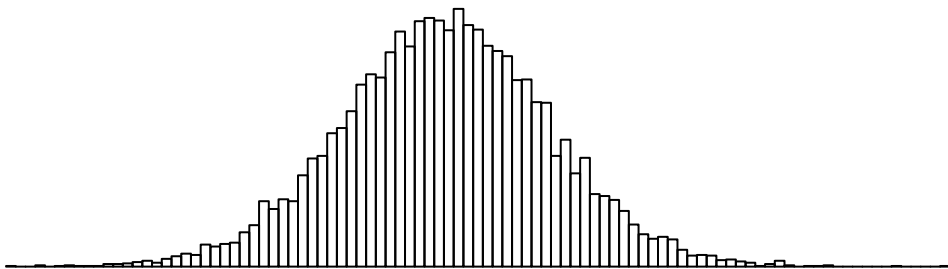

D206:18

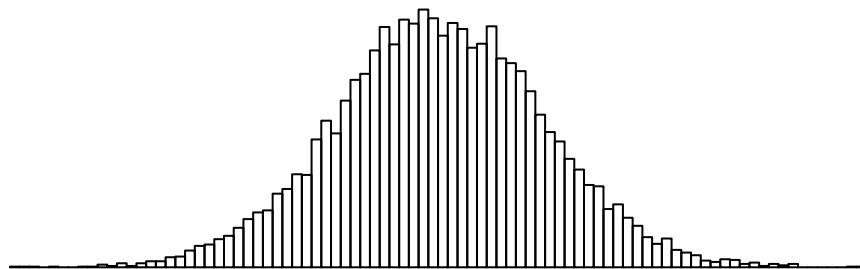

-8.5      -8.0      -7.5      -7.0      -6.5      -6.0

Unidentified Metabolite 39

A194:18 – B184:18

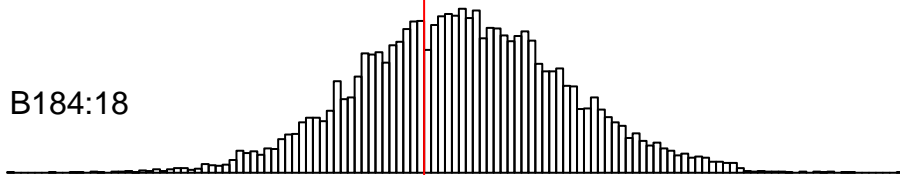

A194:18 – B224:18

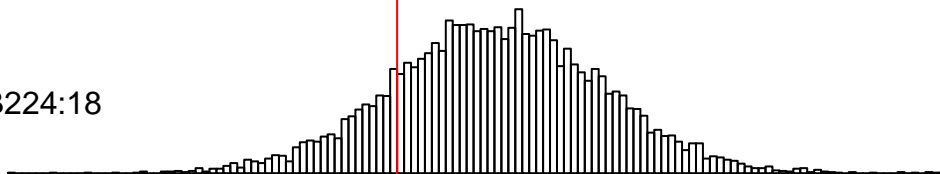

A194:18 – D206:18

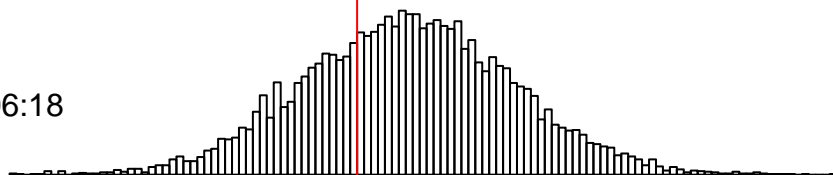

B184:18 – B224:18

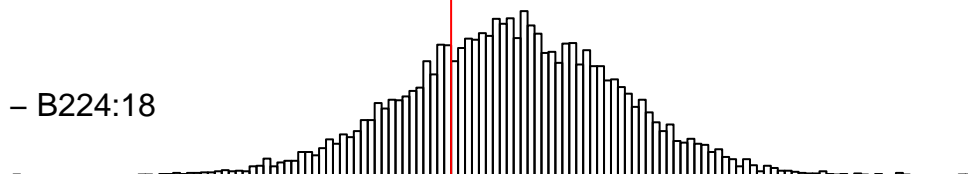

B184:18 – D206:18

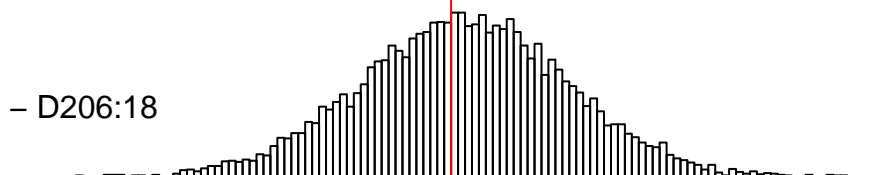

B224:18 – D206:18

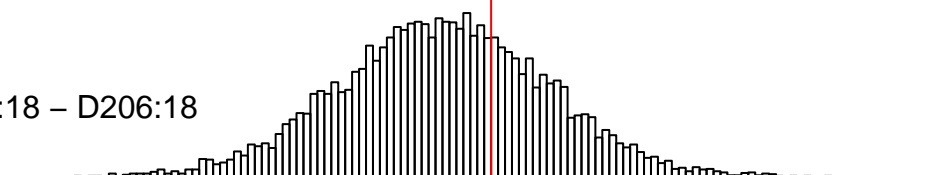

-1.5      -1.0      -0.5      0.0      0.5      1.0      1.5      2.0

delta(Unidentified Metabolite 39)



A194:18

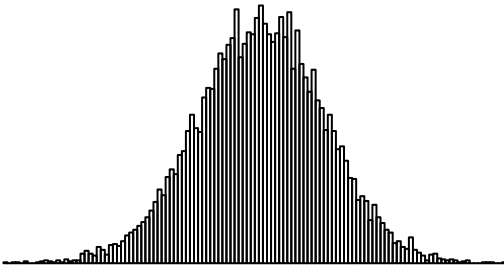

B184:18

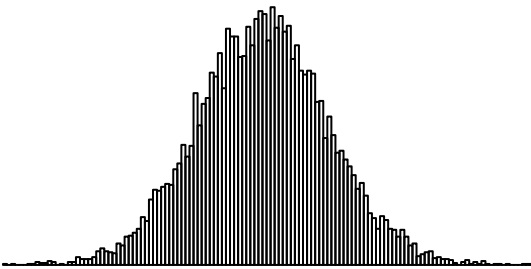

B224:18

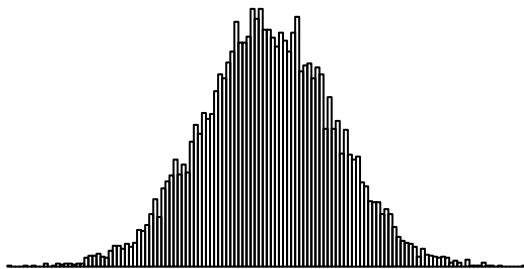

D206:18

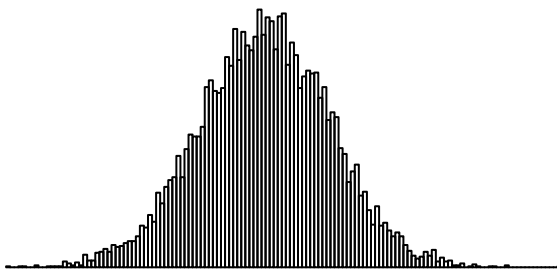

Unidentified Metabolite 42

A194:18 – B184:18

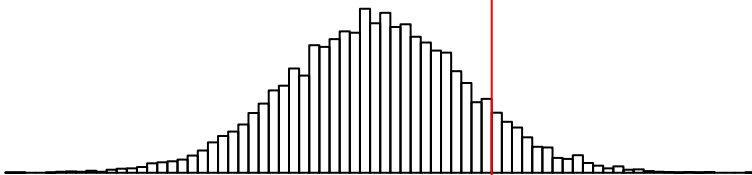

A194:18 – B224:18

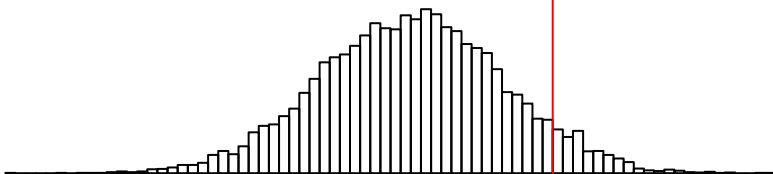

A194:18 – D206:18

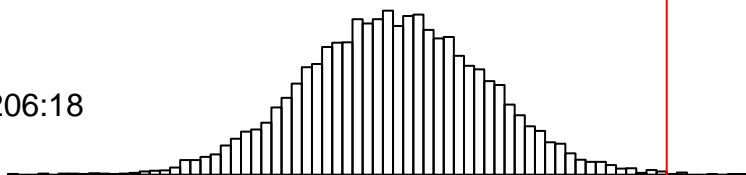

B184:18 – B224:18

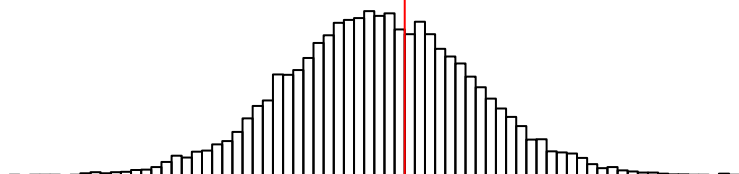

B184:18 – D206:18

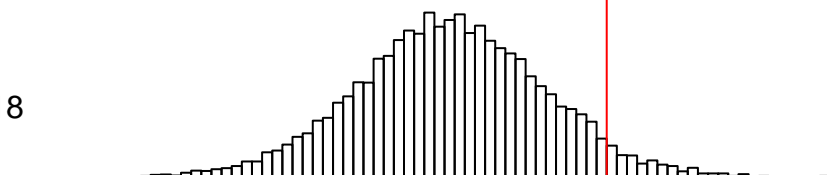

B224:18 – D206:18

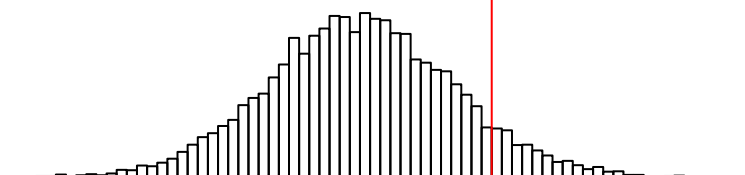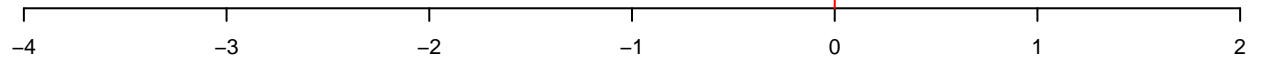

delta(Unidentified Metabolite 42)

A194:18

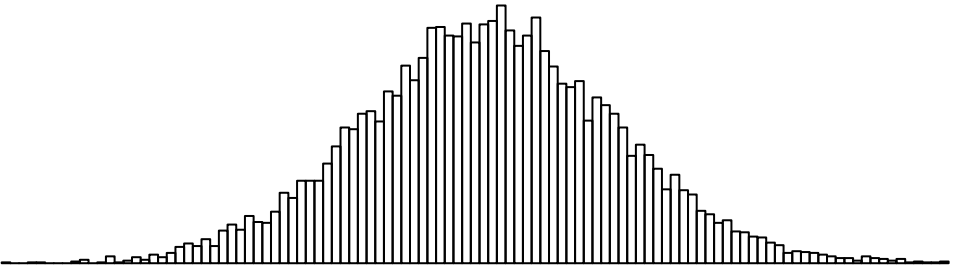

B184:18

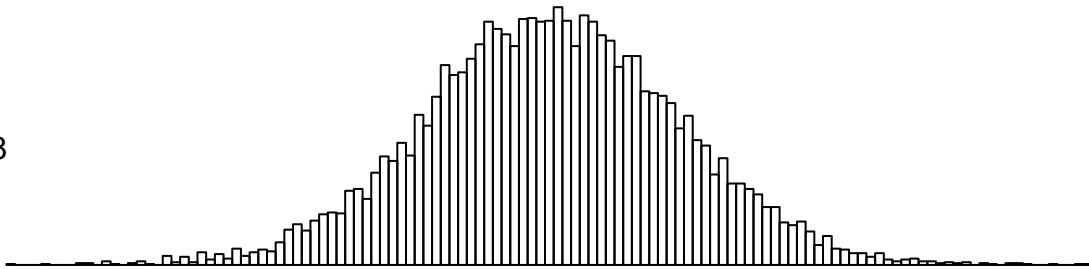

B224:18

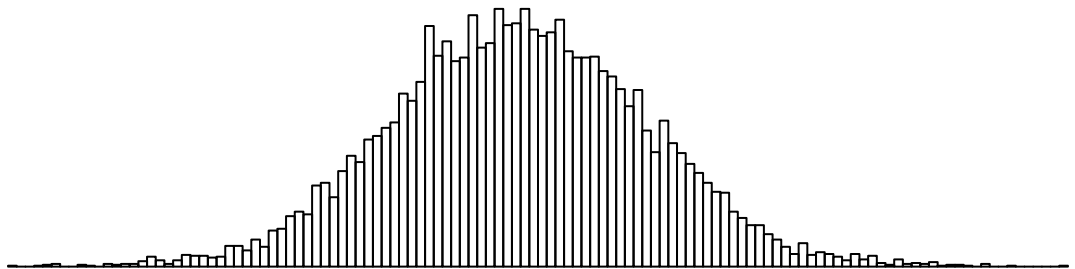

D206:18

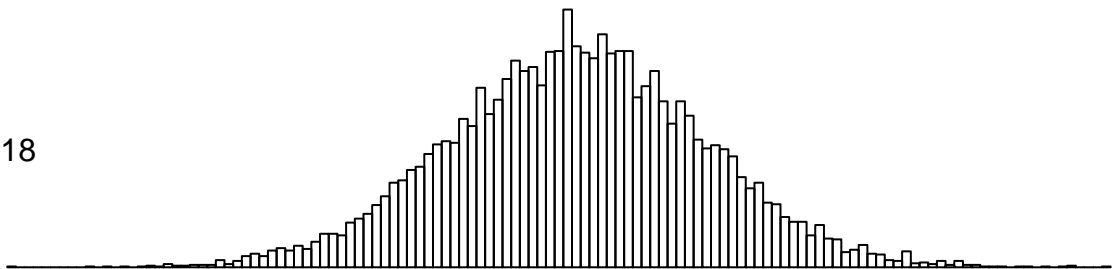

-8.6      -8.4      -8.2      -8.0      -7.8      -7.6      -7.4      -7.2

Unidentified Metabolite 43

A194:18 – B184:18

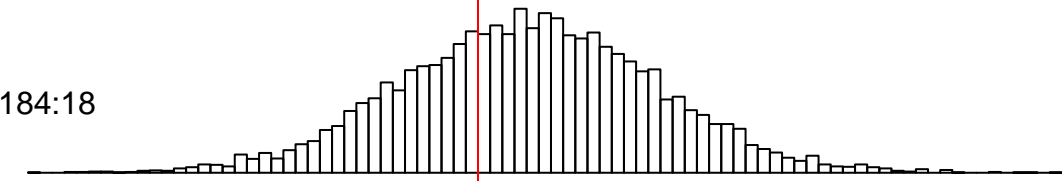

A194:18 – B224:18

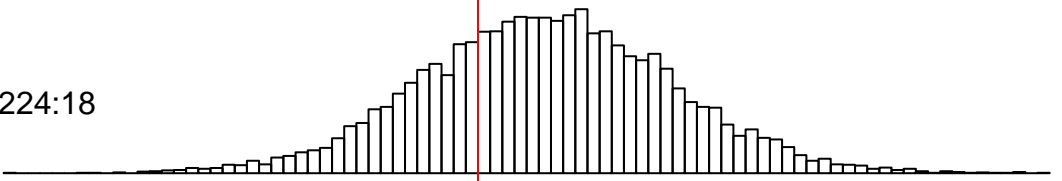

A194:18 – D206:18

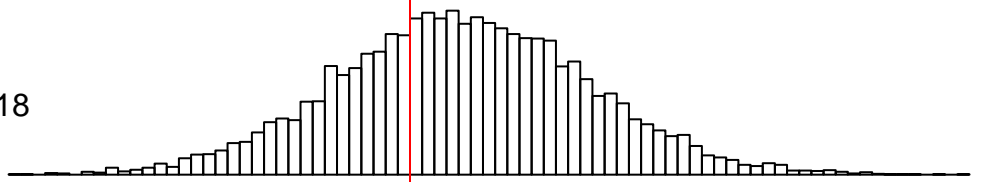

B184:18 – B224:18

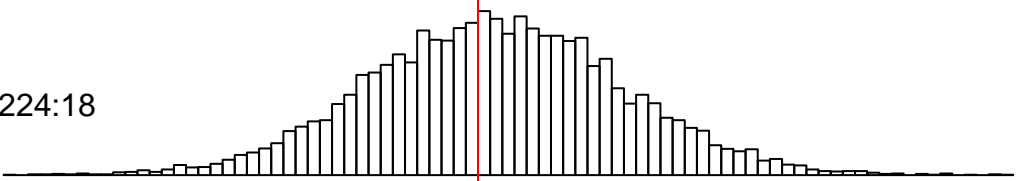

B184:18 – D206:18

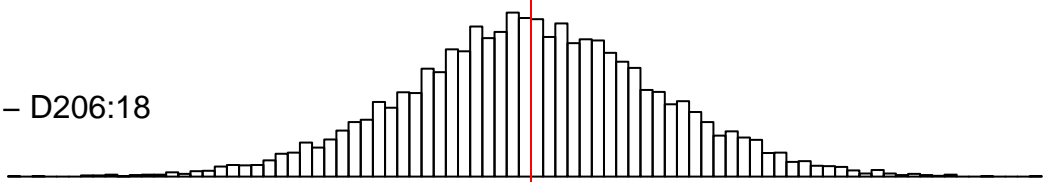

B224:18 – D206:18

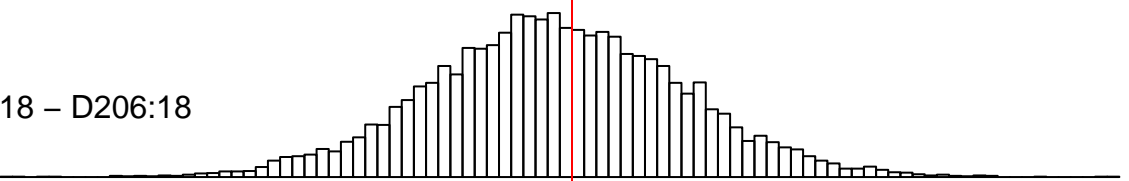

-1.0      -0.5      0.0      0.5      1.0

delta(Unidentified Metabolite 43)

A194:18

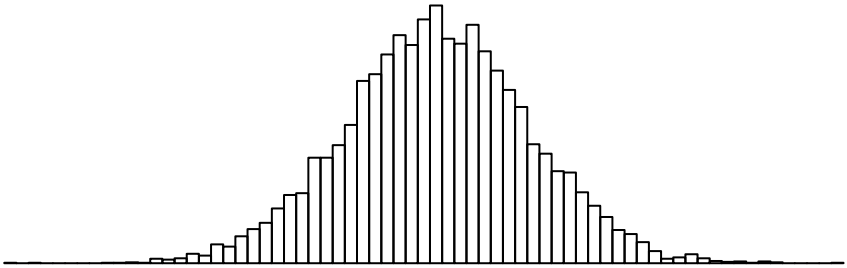

B184:18

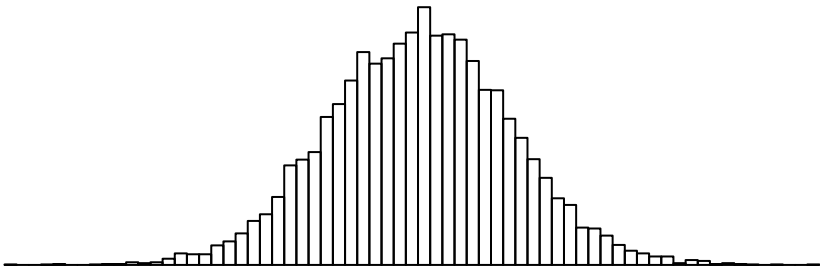

B224:18

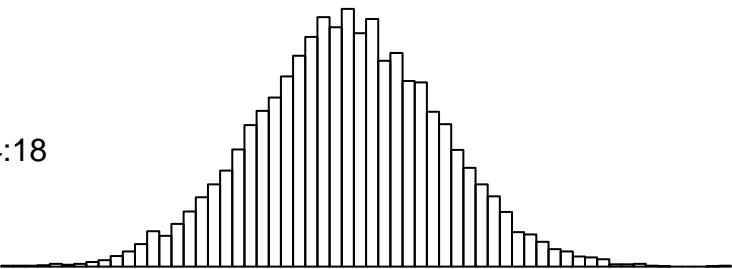

D206:18

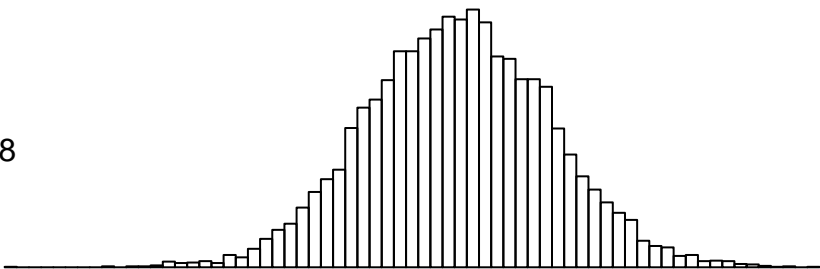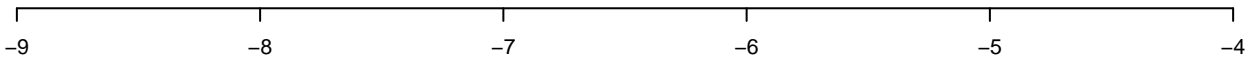

Unidentified Metabolite 45

A194:18 – B184:18

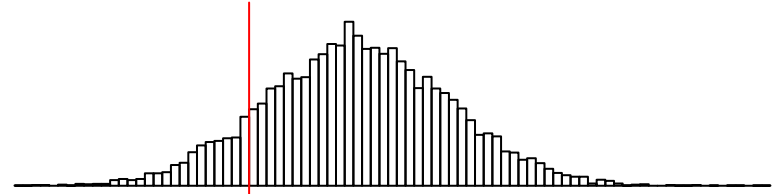

A194:18 – B224:18

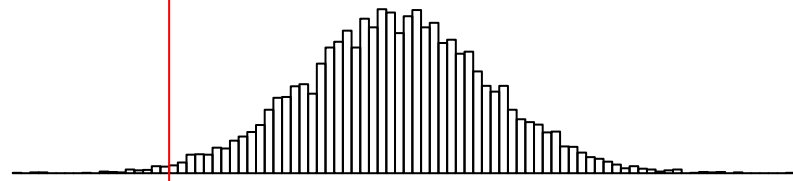

A194:18 – D206:18

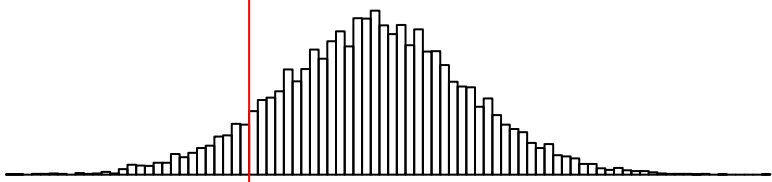

B184:18 – B224:18

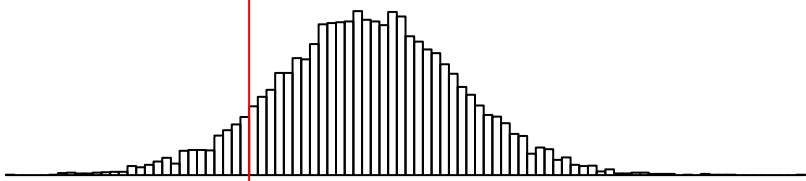

B184:18 – D206:18

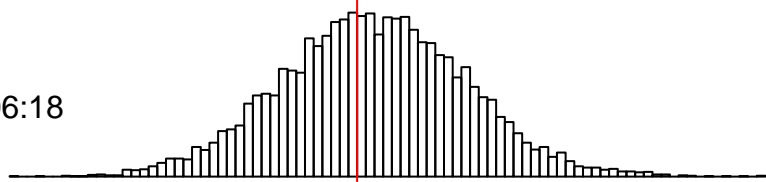

B224:18 – D206:18

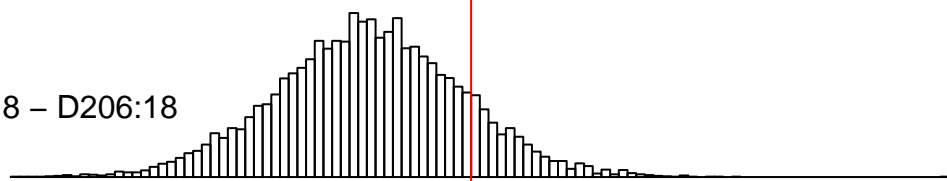

-3      -2      -1      0      1      2      3      4

delta(Unidentified Metabolite 45)

A194:18

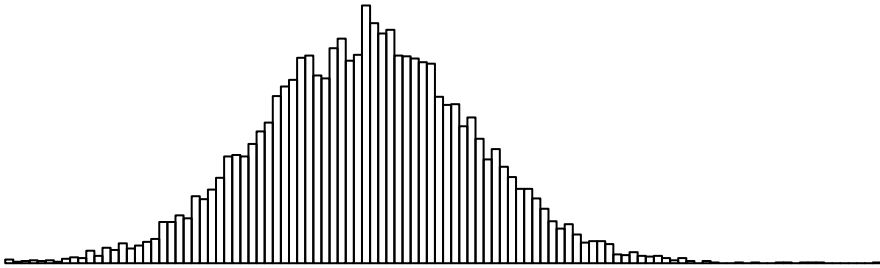

B184:18

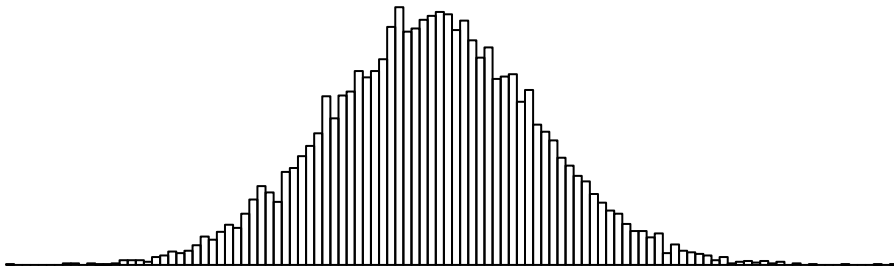

B224:18

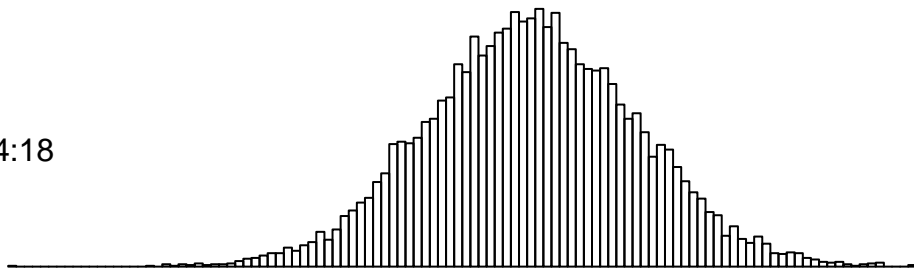

D206:18

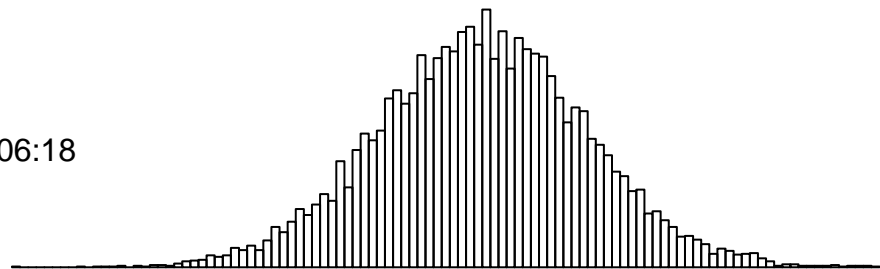

-8.5      -8.0      -7.5      -7.0      -6.5      -6.0      -5.5

Unidentified Metabolite 47

A194:18 – B184:18

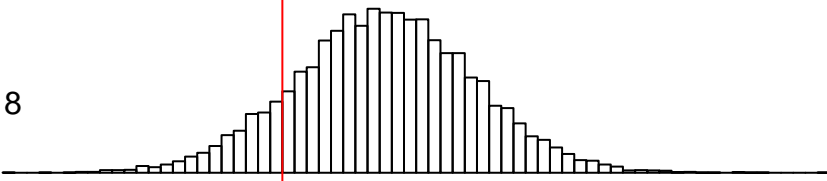

A194:18 – B224:18

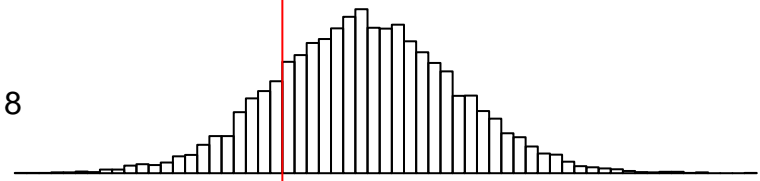

A194:18 – D206:18

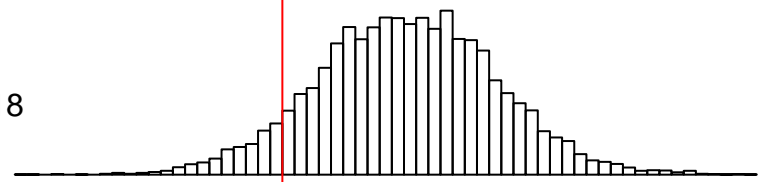

B184:18 – B224:18

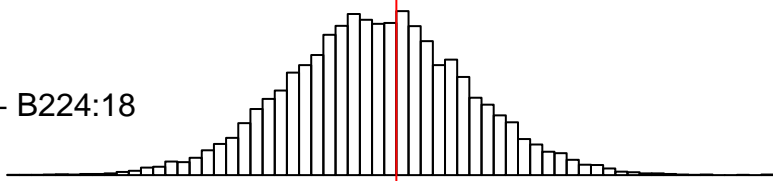

B184:18 – D206:18

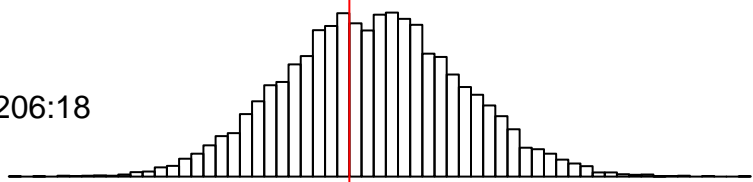

B224:18 – D206:18

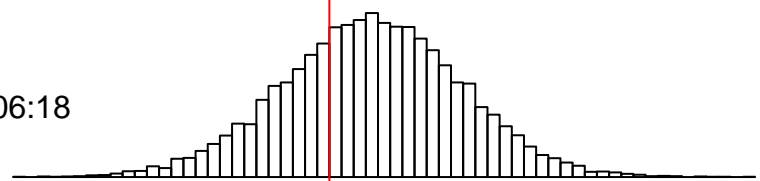

-2 -1 0 1 2 3

delta(Unidentified Metabolite 47)



A194:18

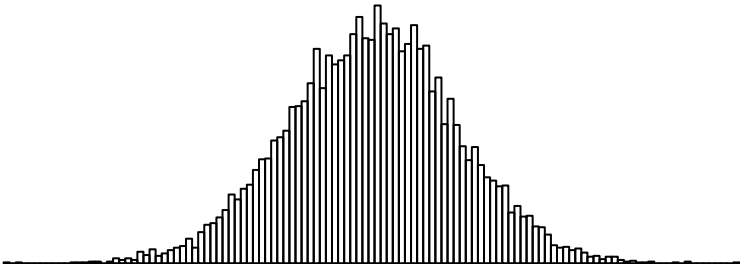

B184:18

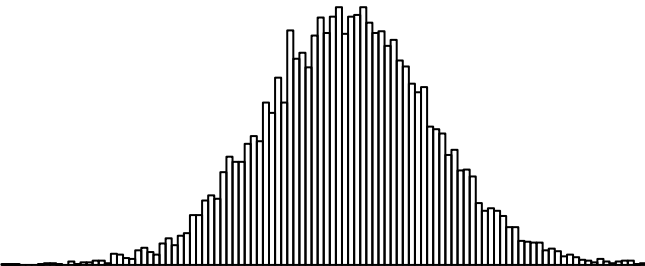

B224:18

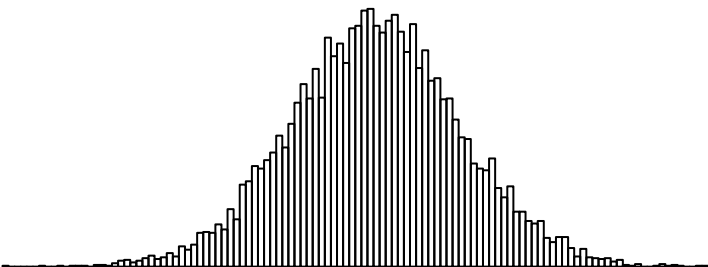

D206:18

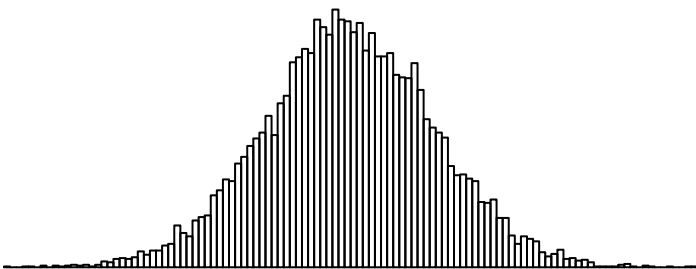

-8.5                      -8.0                      -7.5                      -7.0                      -6.5

Unidentified Metabolite 48

A194:18 – B184:18

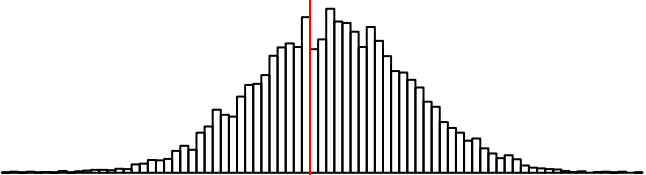

A194:18 – B224:18

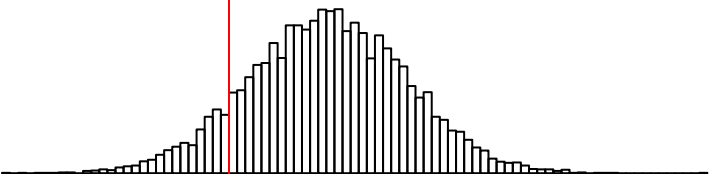

A194:18 – D206:18

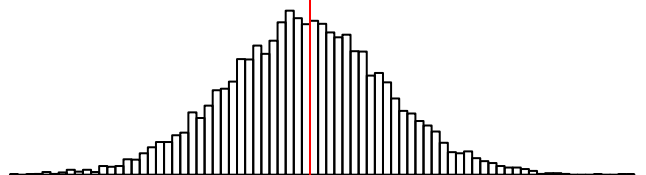

B184:18 – B224:18

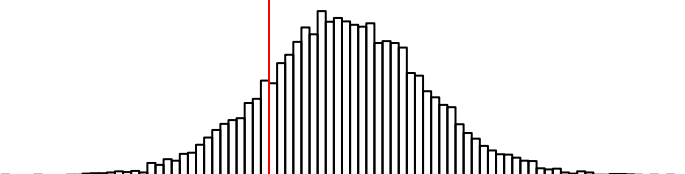

B184:18 – D206:18

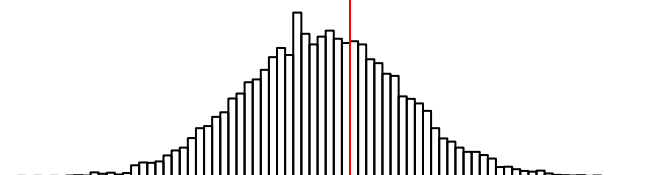

B224:18 – D206:18

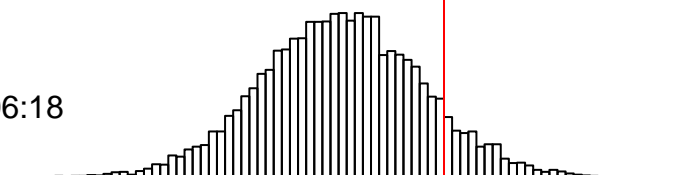

-1.5      -1.0      -0.5      0.0      0.5      1.0      1.5

delta(Unidentified Metabolite 48)

A194:18

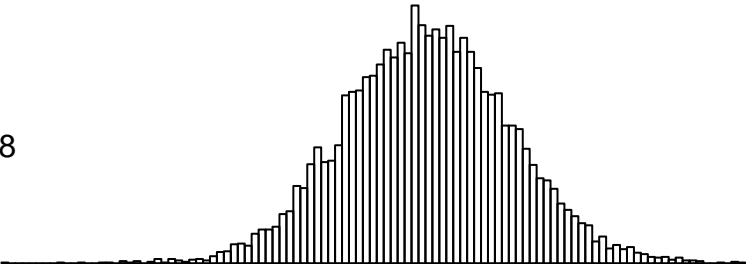

B184:18

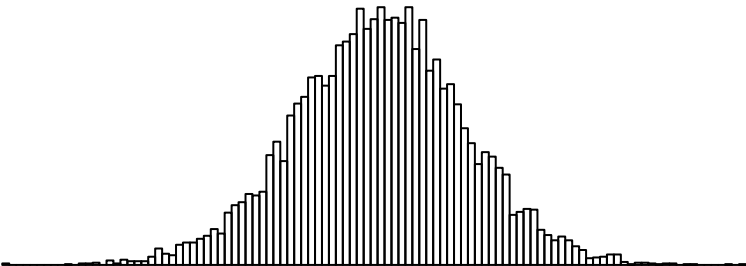

B224:18

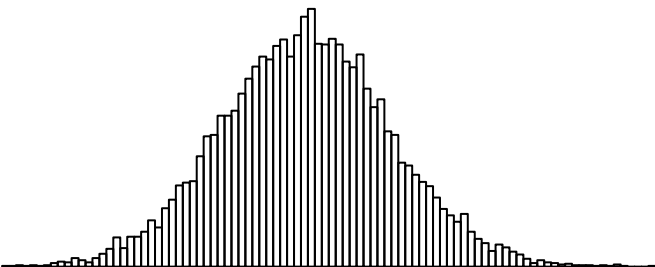

D206:18

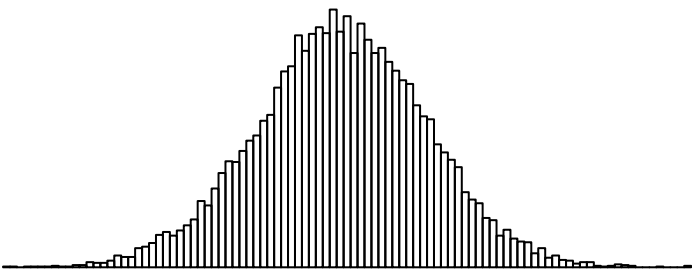

-9.0 -8.5 -8.0 -7.5 -7.0 -6.5 -6.0 -5.5

Unidentified Metabolite 49

A194:18 – B184:18

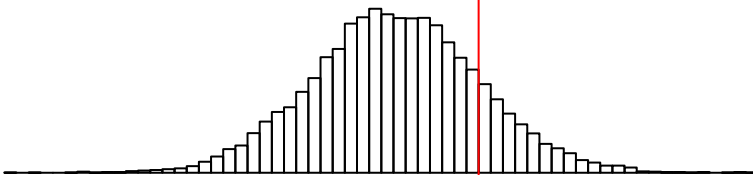

A194:18 – B224:18

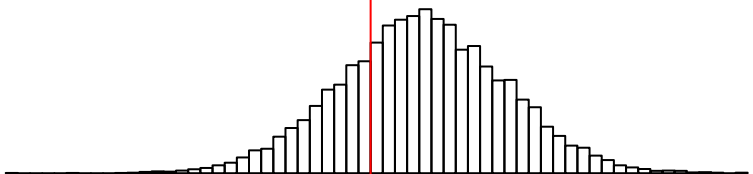

A194:18 – D206:18

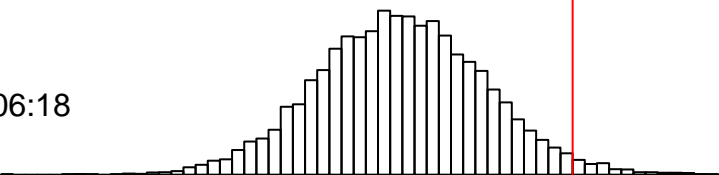

B184:18 – B224:18

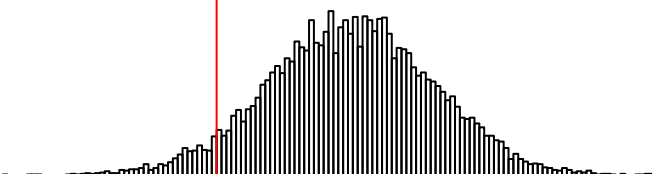

B184:18 – D206:18

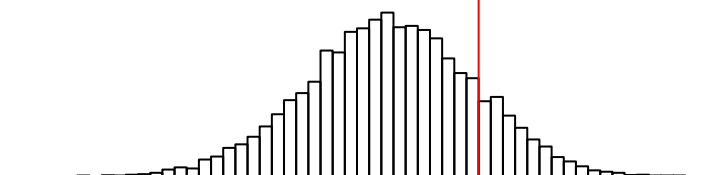

B224:18 – D206:18

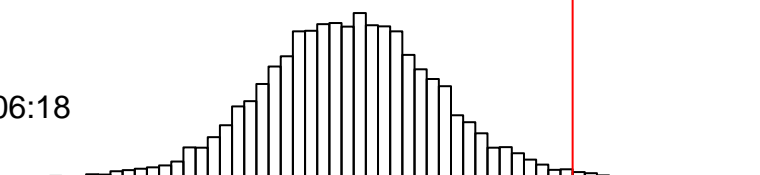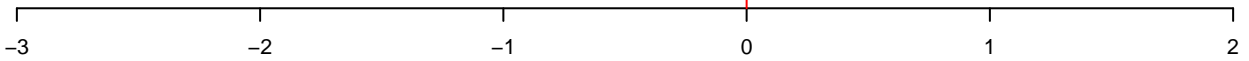

delta(Unidentified Metabolite 49)

A194:18

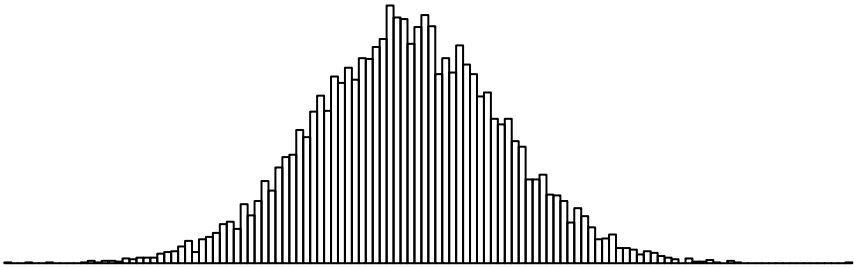

B184:18

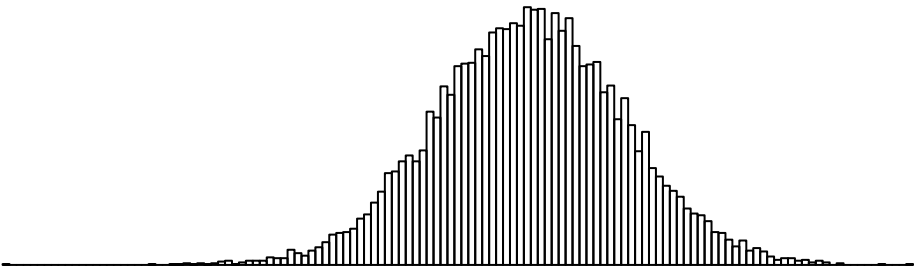

B224:18

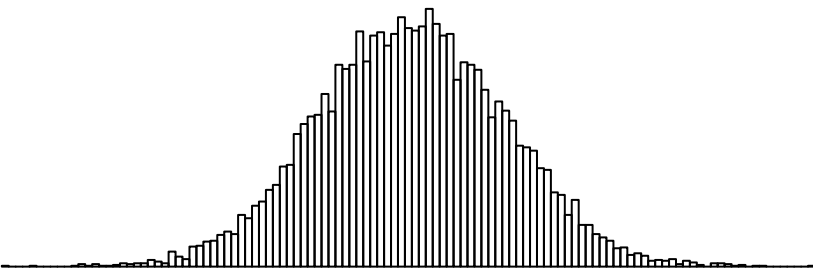

D206:18

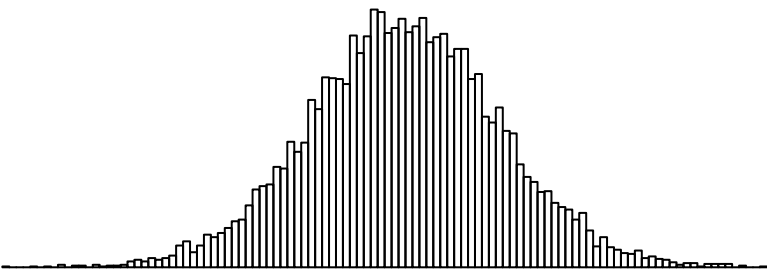

-8.5      -8.0      -7.5      -7.0      -6.5      -6.0      -5.5      -5.0

Unidentified Metabolite 50

A194:18 – B184:18

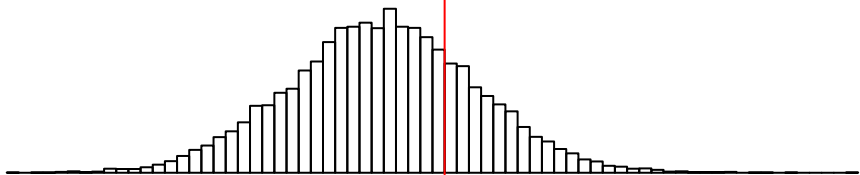

A194:18 – B224:18

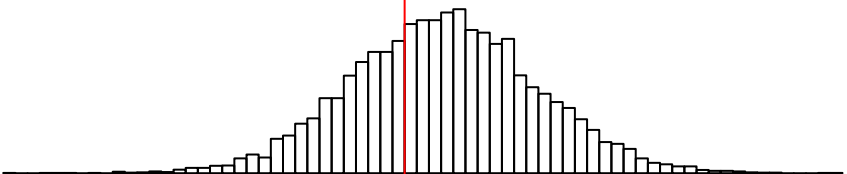

A194:18 – D206:18

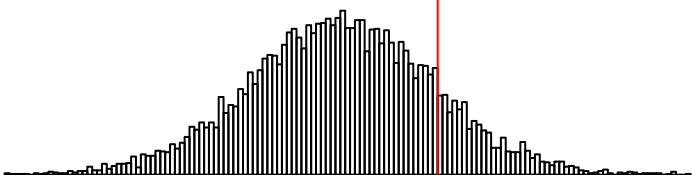

B184:18 – B224:18

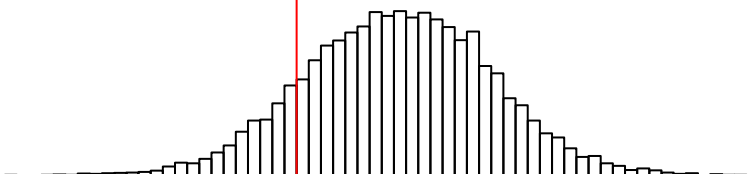

B184:18 – D206:18

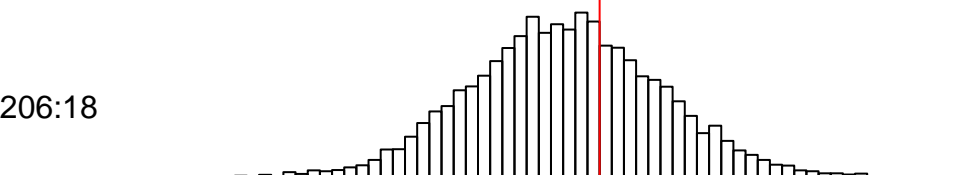

B224:18 – D206:18

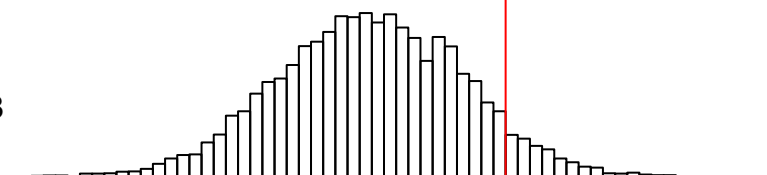

-3 -2 -1 0 1 2

delta(Unidentified Metabolite 50)

A194:18

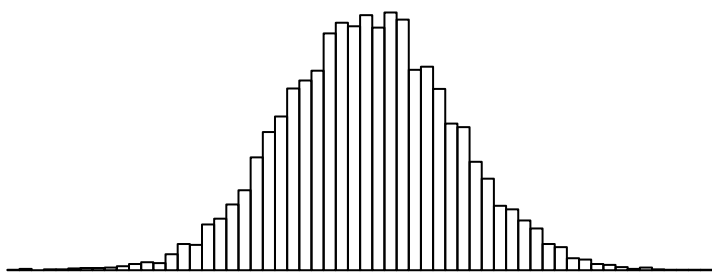

B184:18

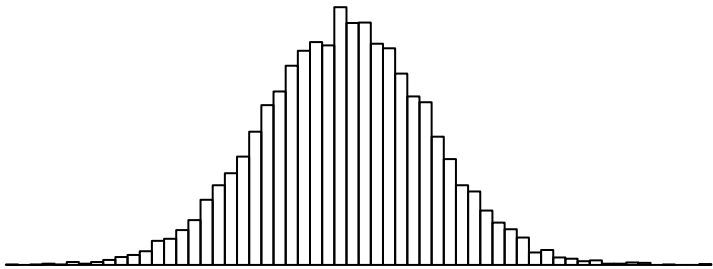

B224:18

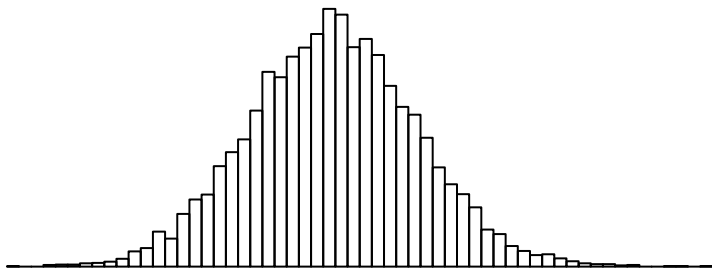

D206:18

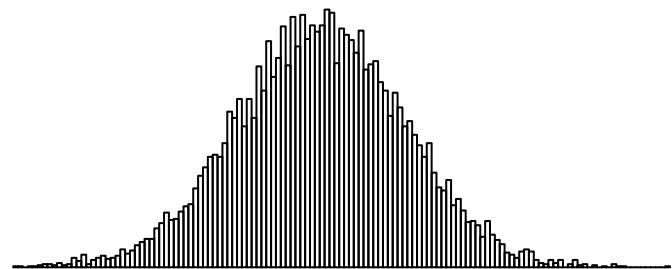

Unidentified Metabolite 51

A194:18 – B184:18

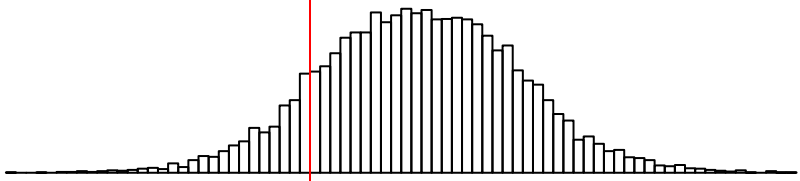

A194:18 – B224:18

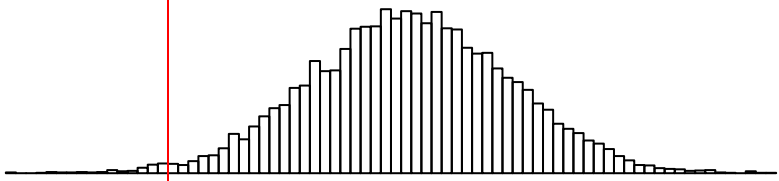

A194:18 – D206:18

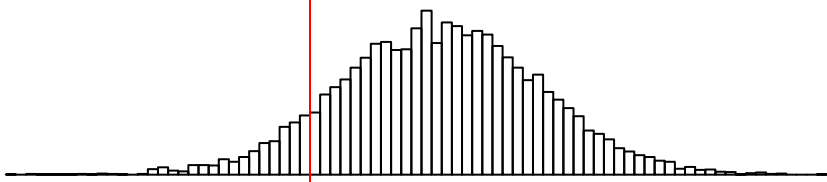

B184:18 – B224:18

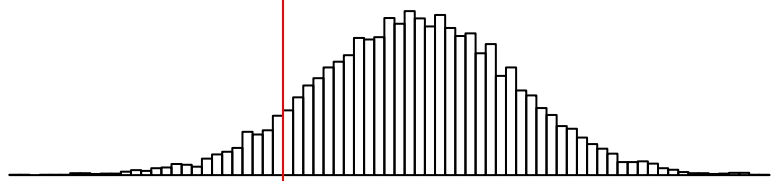

B184:18 – D206:18

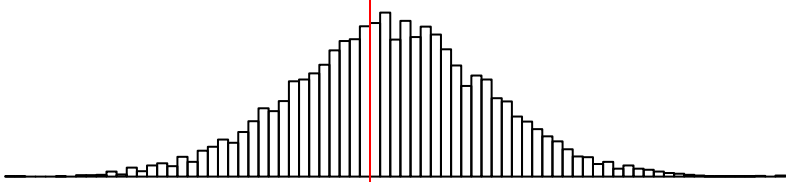

B224:18 – D206:18

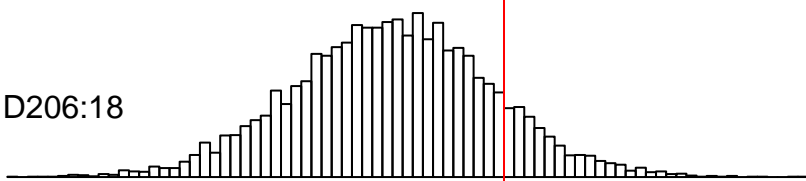

-3 -2 -1 0 1 2 3

delta(Unidentified Metabolite 51)



A194:18

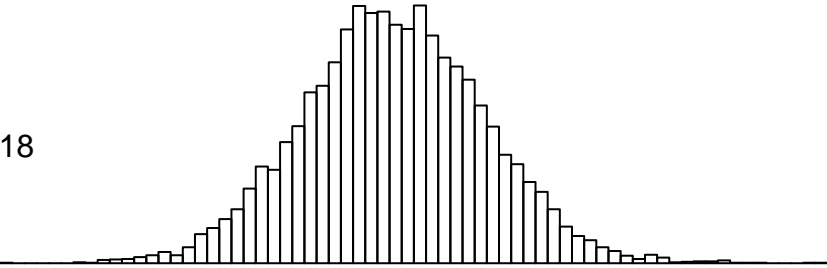

B184:18

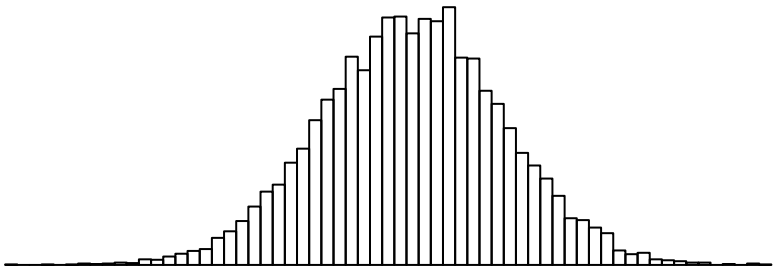

B224:18

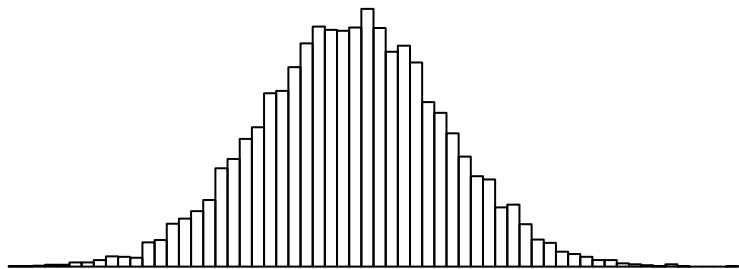

D206:18

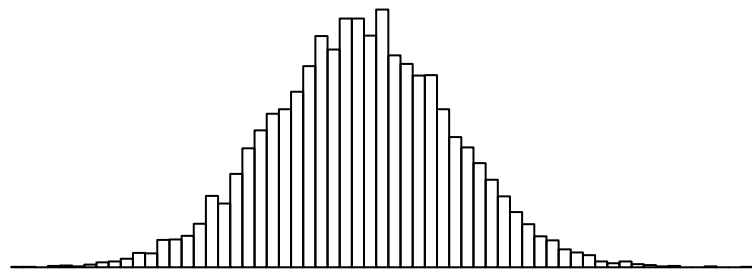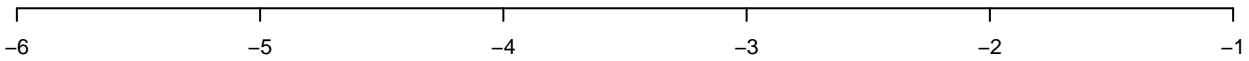

Unidentified Metabolite 55

A194:18 – B184:18

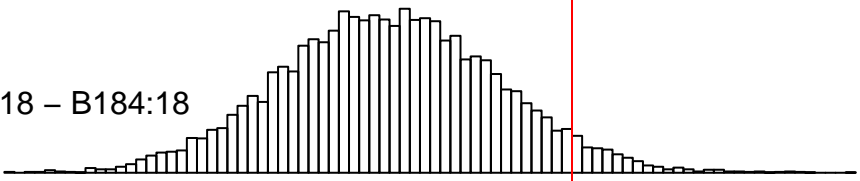

A194:18 – B224:18

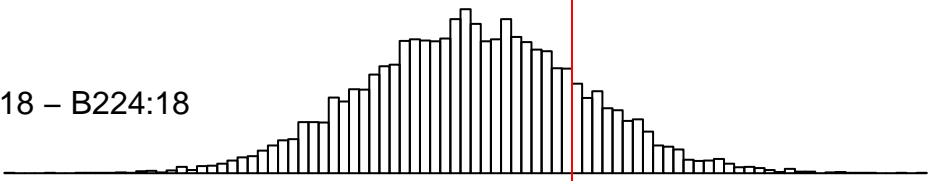

A194:18 – D206:18

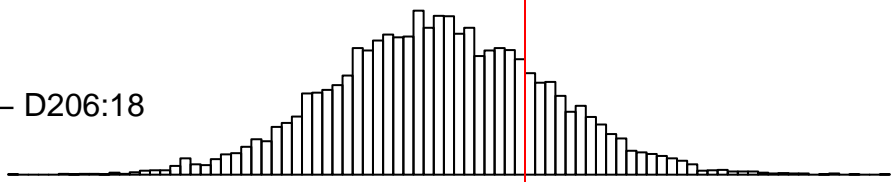

B184:18 – B224:18

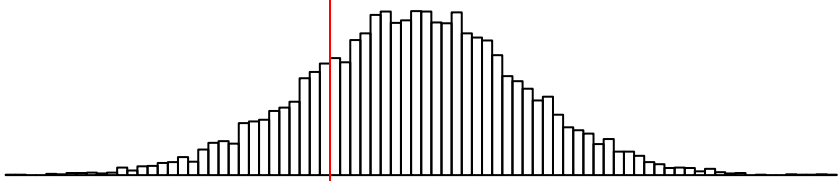

B184:18 – D206:18

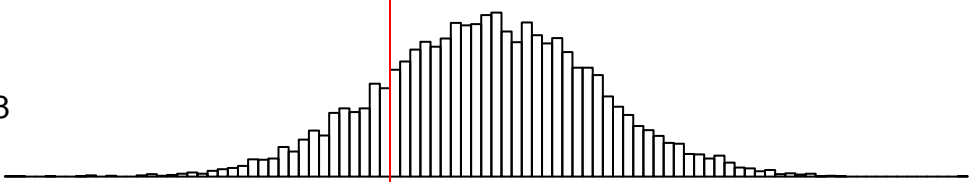

B224:18 – D206:18

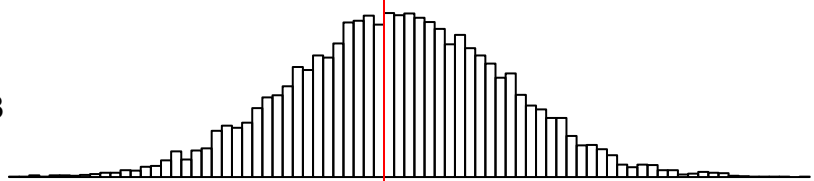

-3 -2 -1 0 1 2 3

delta(Unidentified Metabolite 55)

A194:18

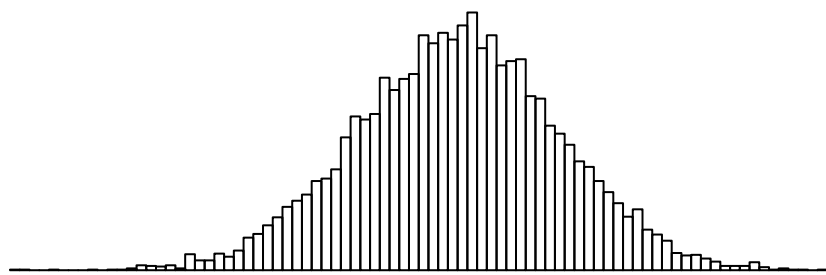

B184:18

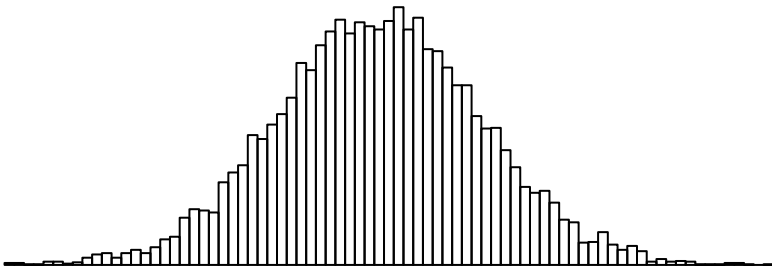

B224:18

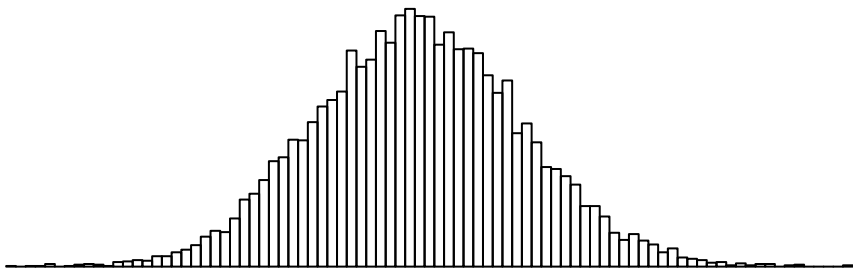

D206:18

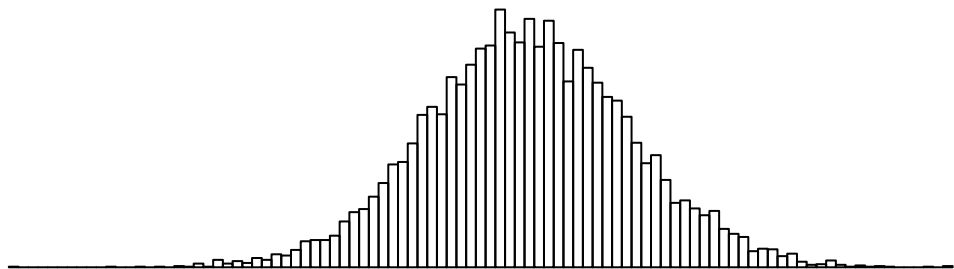

-9.0 -8.5 -8.0 -7.5 -7.0 -6.5

Unidentified Metabolite 56

A194:18 – B184:18

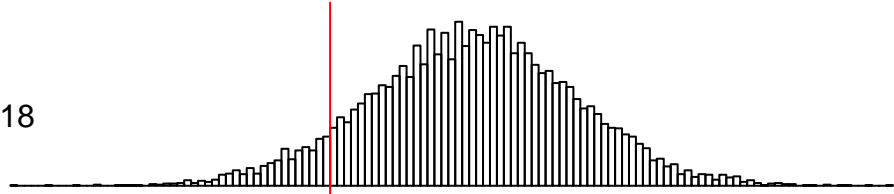

A194:18 – B224:18

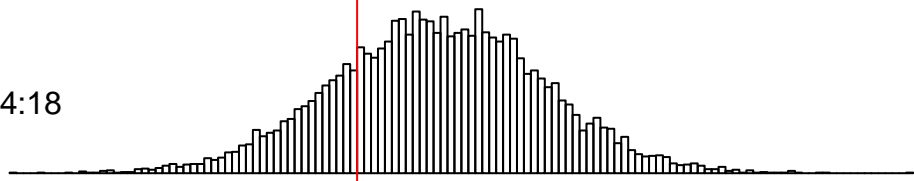

A194:18 – D206:18

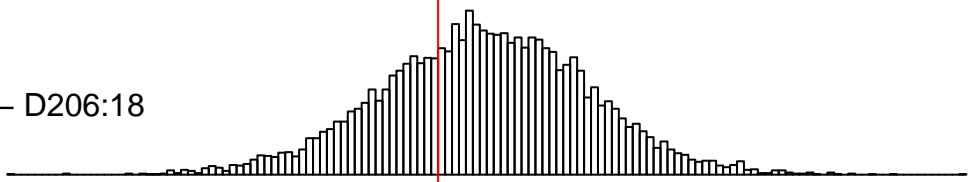

B184:18 – B224:18

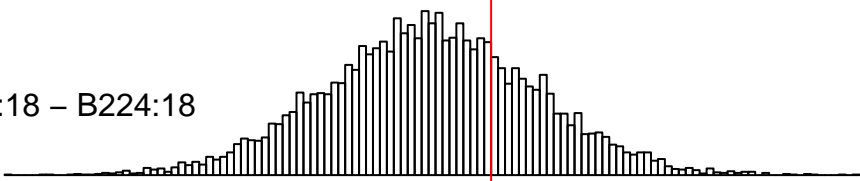

B184:18 – D206:18

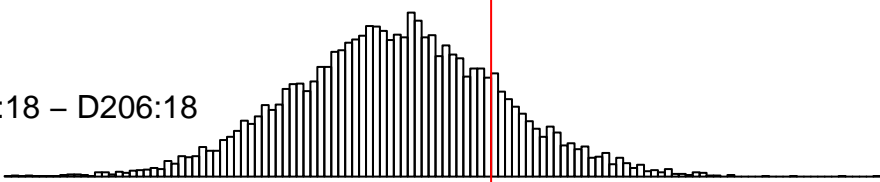

B224:18 – D206:18

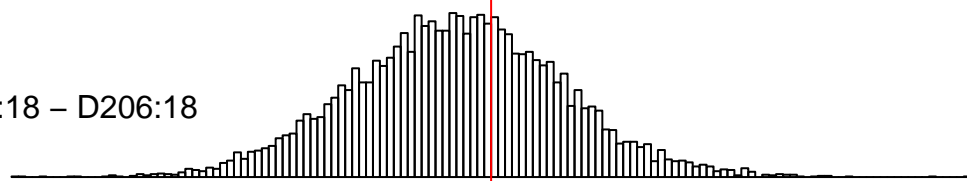

-1.5      -1.0      -0.5      0.0      0.5      1.0      1.5      2.0

delta(Unidentified Metabolite 56)

A194:18

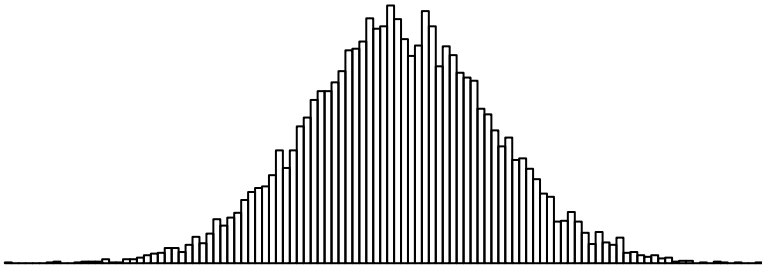

B184:18

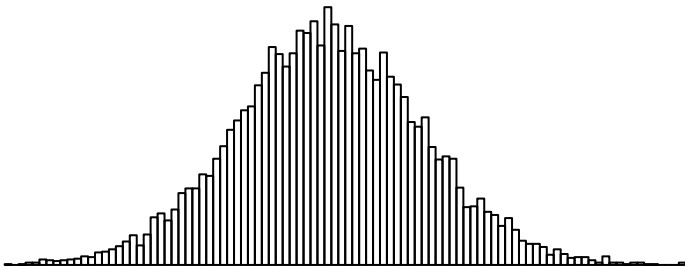

B224:18

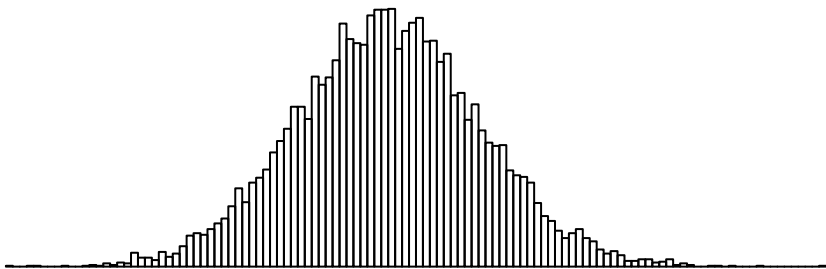

D206:18

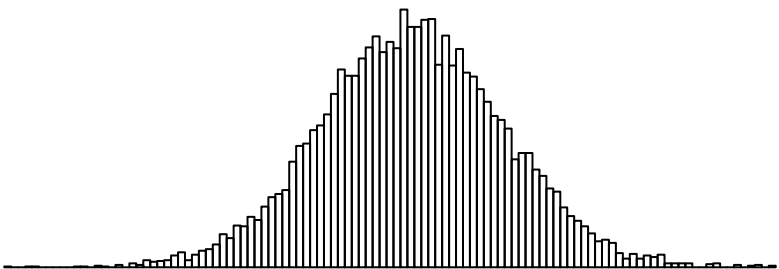

Unidentified Metabolite 58

A194:18 – B184:18

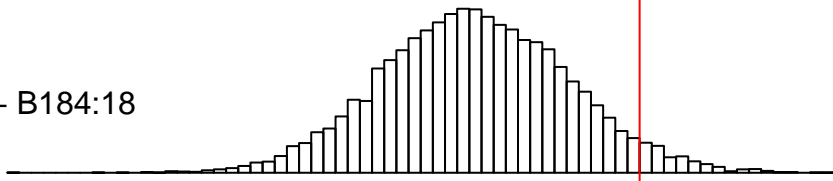

A194:18 – B224:18

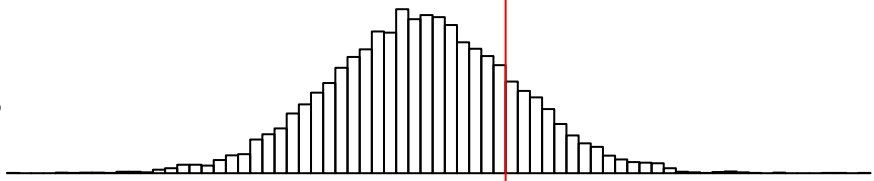

A194:18 – D206:18

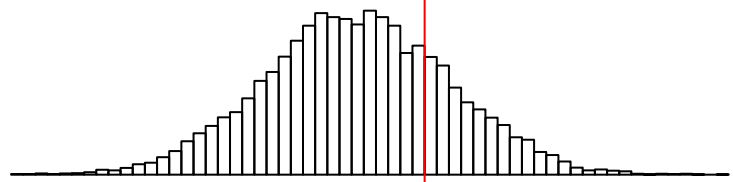

B184:18 – B224:18

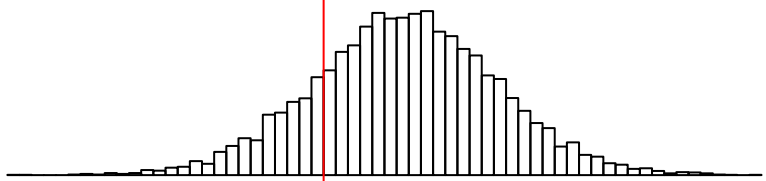

B184:18 – D206:18

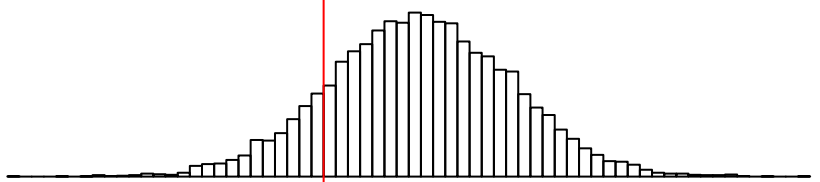

B224:18 – D206:18

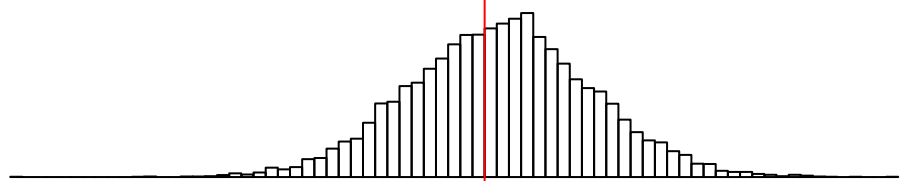

-3 -2 -1 0 1 2

delta(Unidentified Metabolite 58)

A194:18

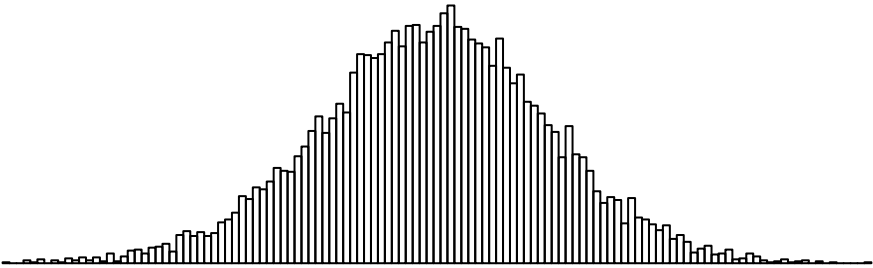

B184:18

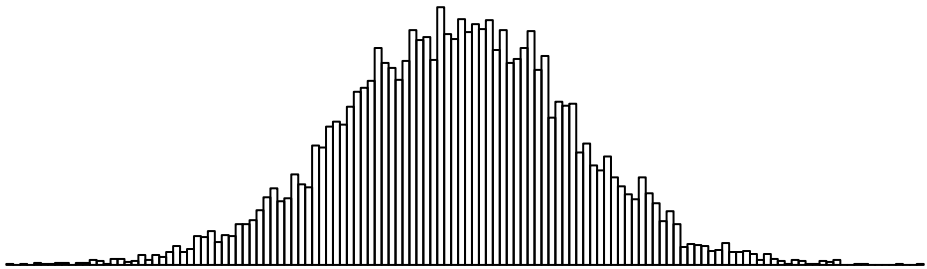

B224:18

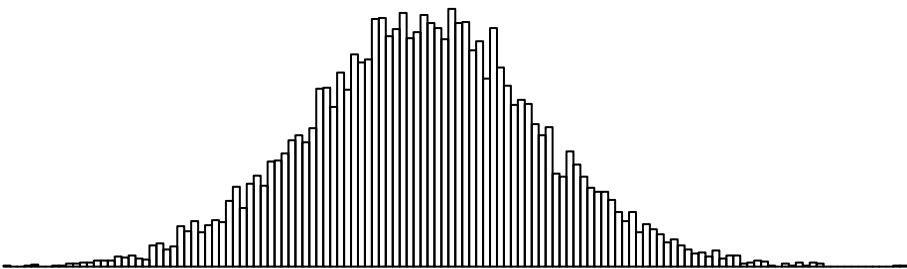

D206:18

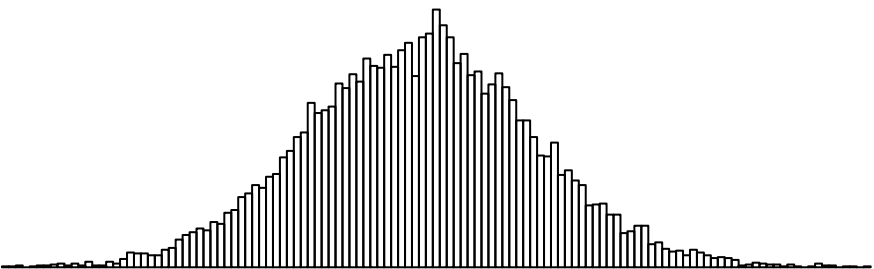

-7.0 -6.5 -6.0 -5.5 -5.0 -4.5 -4.0 -3.5

Unidentified Metabolite 59

A194:18 – B184:18

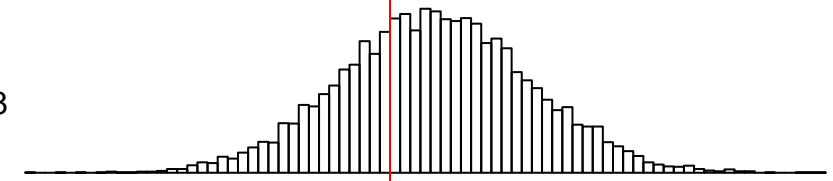

A194:18 – B224:18

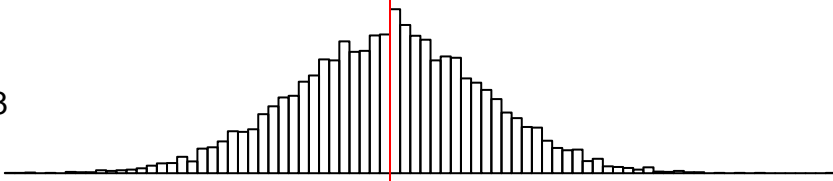

A194:18 – D206:18

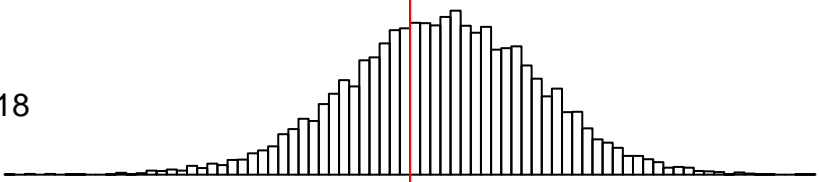

B184:18 – B224:18

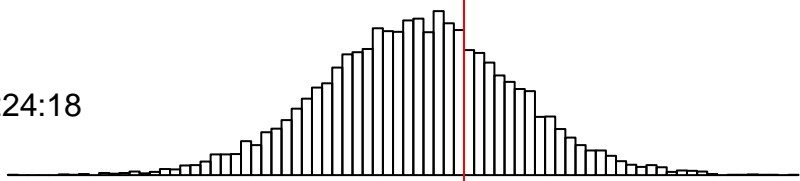

B184:18 – D206:18

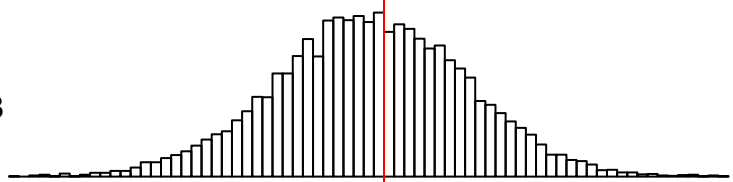

B224:18 – D206:18

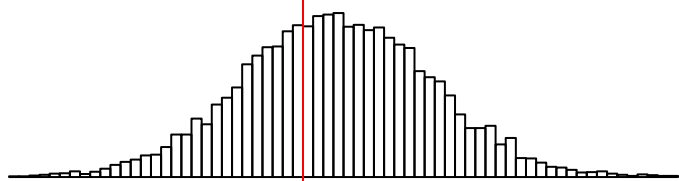

-3 -2 -1 0 1 2 3

delta(Unidentified Metabolite 59)



A194:18

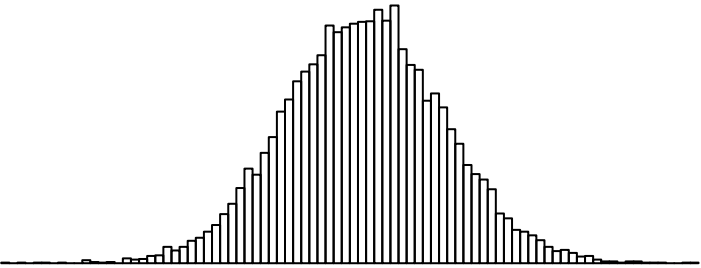

B184:18

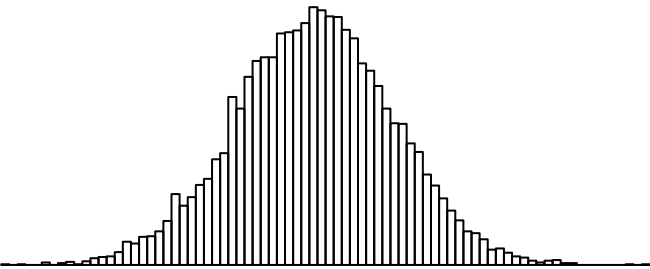

B224:18

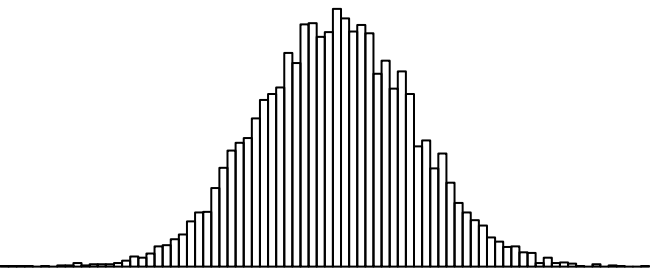

D206:18

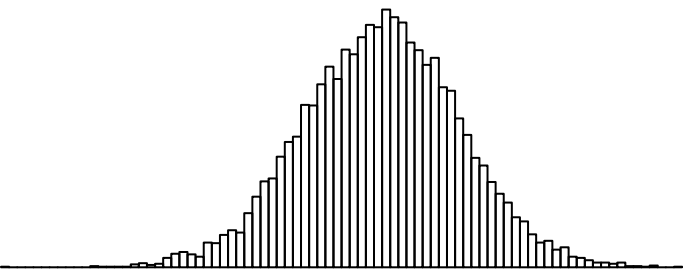

-9.0 -8.5 -8.0 -7.5 -7.0 -6.5 -6.0

Unidentified Metabolite 60

A194:18 – B184:18

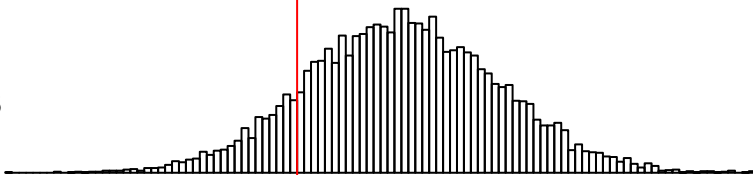

A194:18 – B224:18

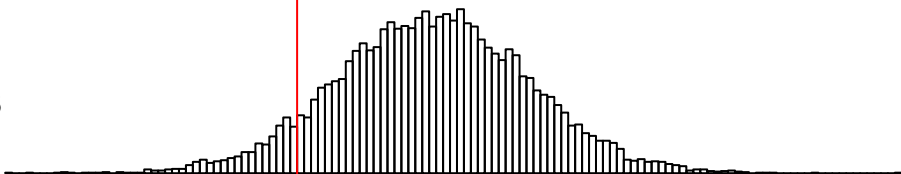

A194:18 – D206:18

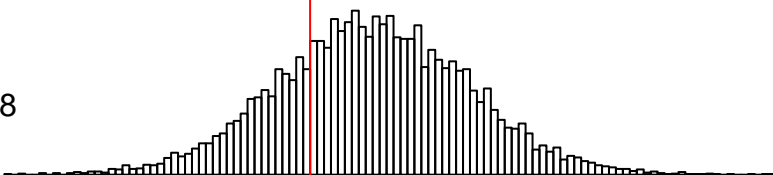

B184:18 – B224:18

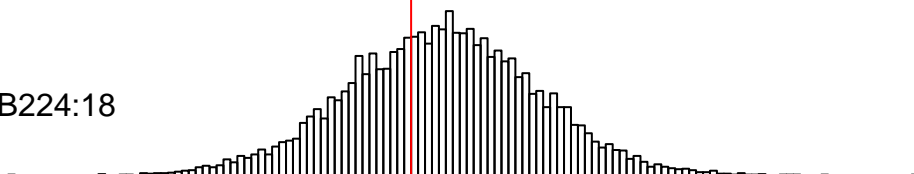

B184:18 – D206:18

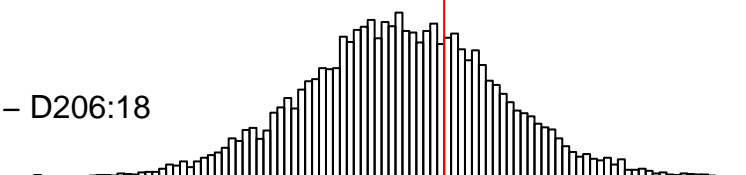

B224:18 – D206:18

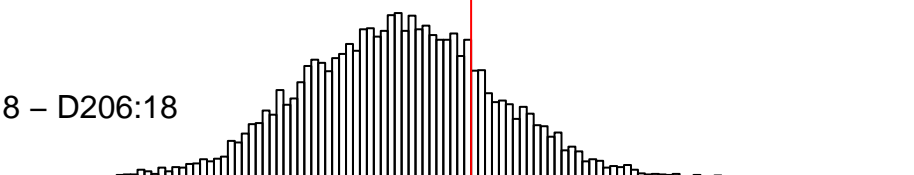

-1.5      -1.0      -0.5      0.0      0.5      1.0      1.5      2.0

delta(Unidentified Metabolite 60)

A194:18

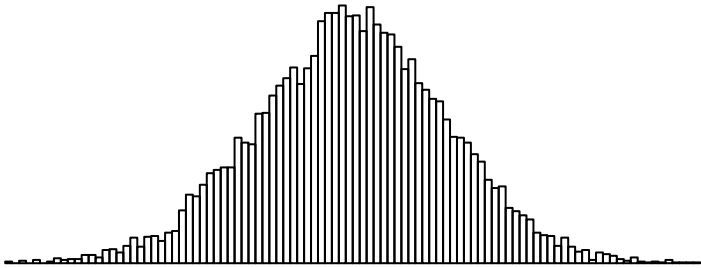

B184:18

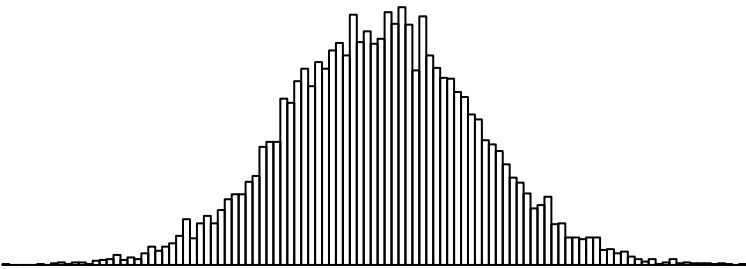

B224:18

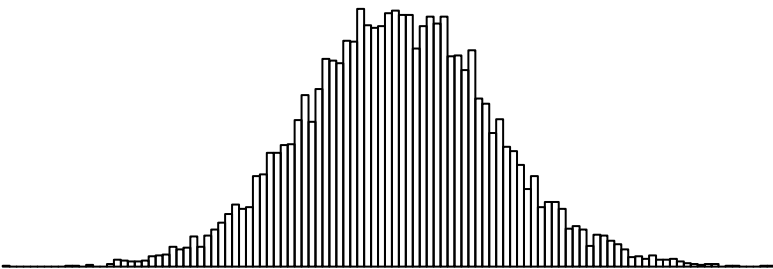

D206:18

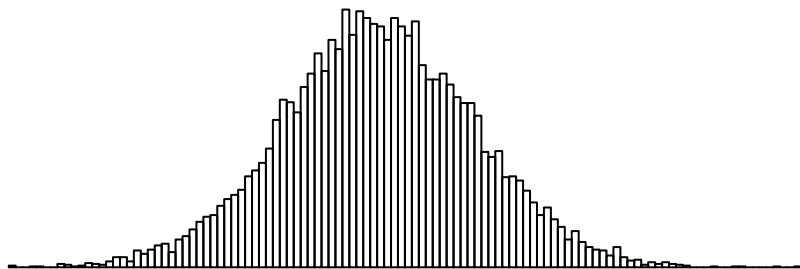

-9.0 -8.5 -8.0 -7.5 -7.0 -6.5 -6.0 -5.5

Unidentified Metabolite 61

A194:18 – B184:18

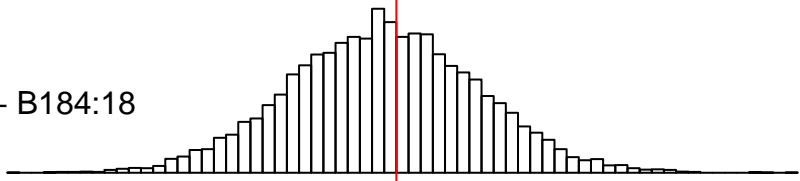

A194:18 – B224:18

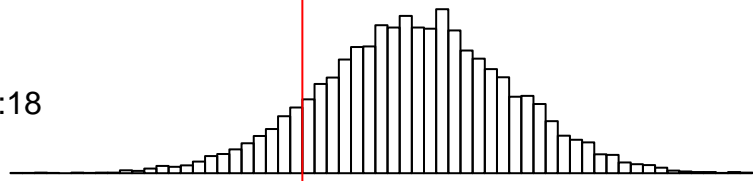

A194:18 – D206:18

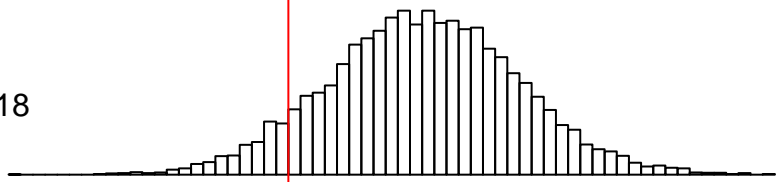

B184:18 – B224:18

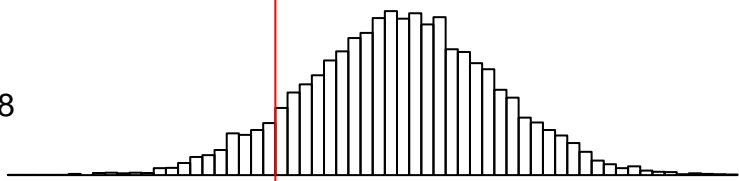

B184:18 – D206:18

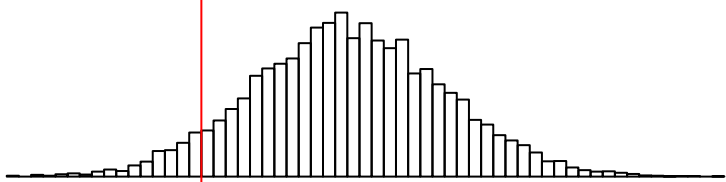

B224:18 – D206:18

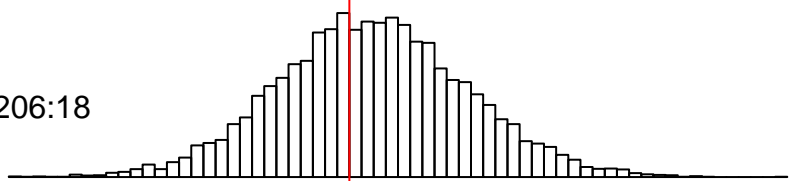

-2 -1 0 1 2 3

delta(Unidentified Metabolite 61)

A194:18

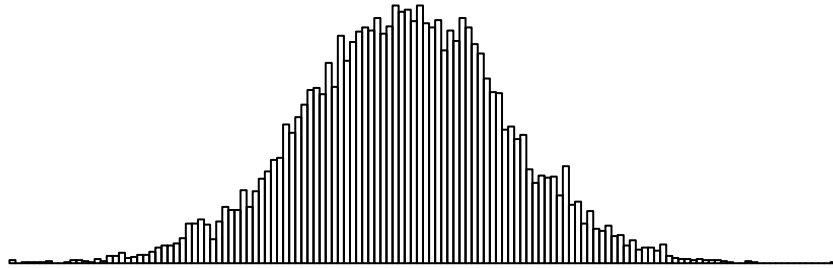

B184:18

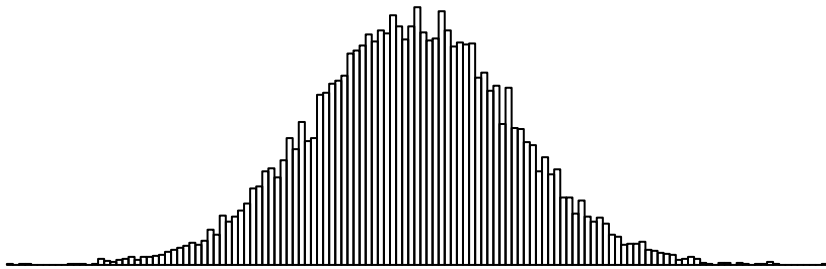

B224:18

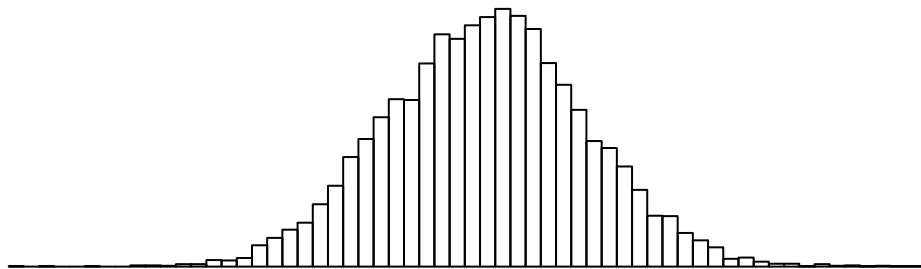

D206:18

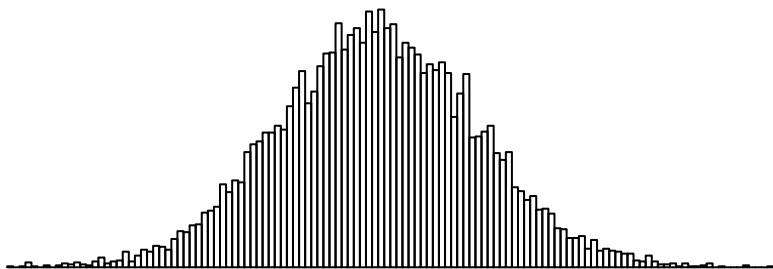

-10                      -9                      -8                      -7                      -6

Unidentified Metabolite 62

A194:18 – B184:18

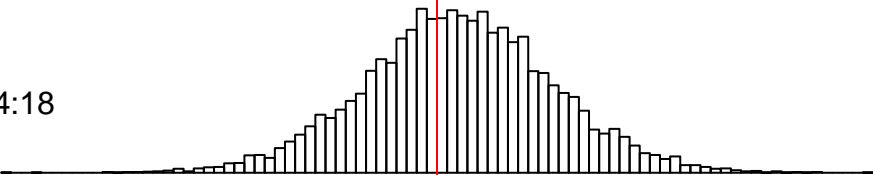

A194:18 – B224:18

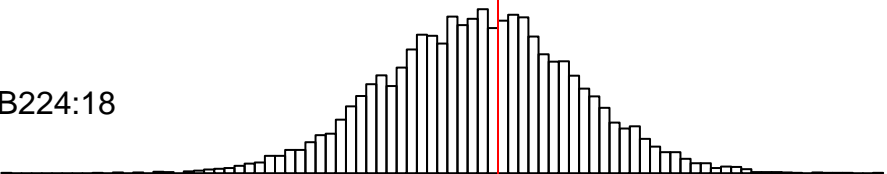

A194:18 – D206:18

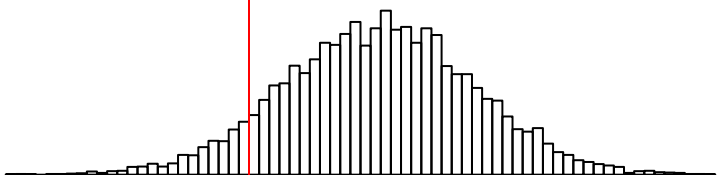

B184:18 – B224:18

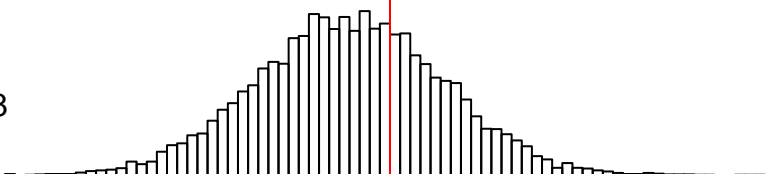

B184:18 – D206:18

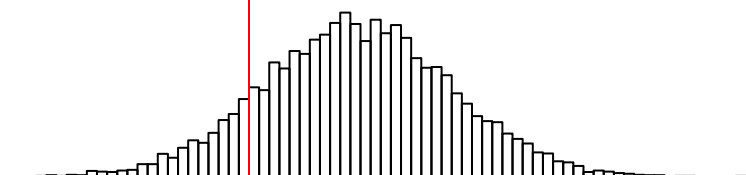

B224:18 – D206:18

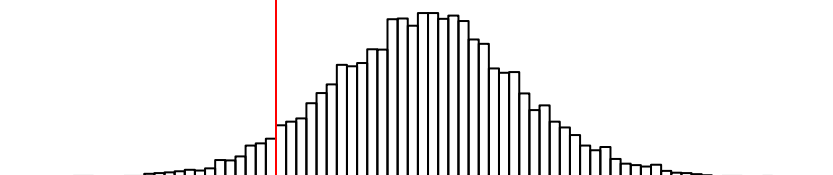

-3 -2 -1 0 1 2 3

delta(Unidentified Metabolite 62)

A194:18

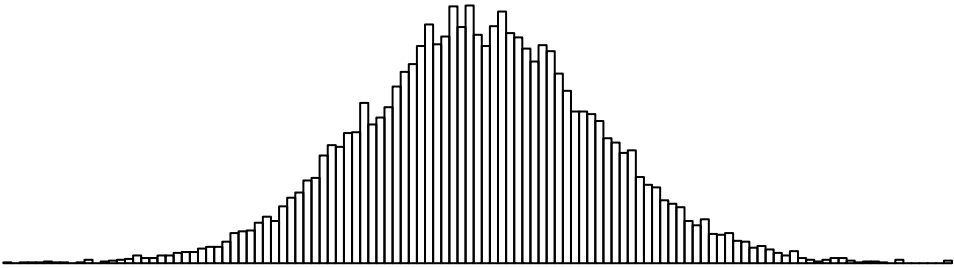

B184:18

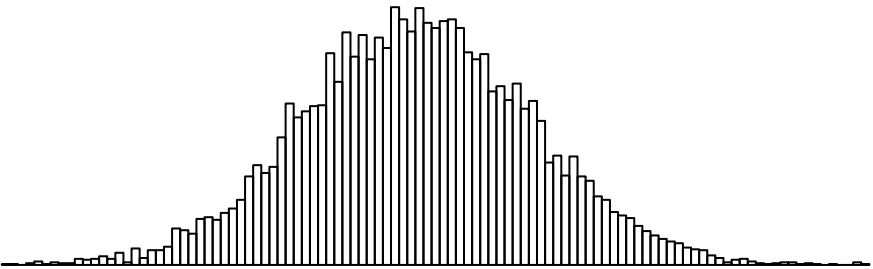

B224:18

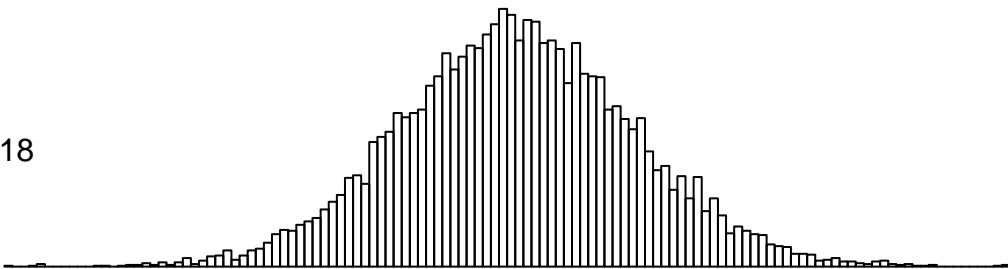

D206:18

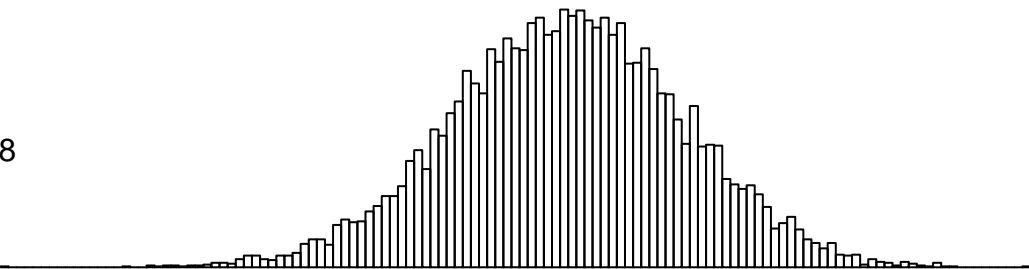

-7.0 -6.5 -6.0 -5.5 -5.0 -4.5 -4.0

Unidentified Metabolite 63

A194:18 – B184:18

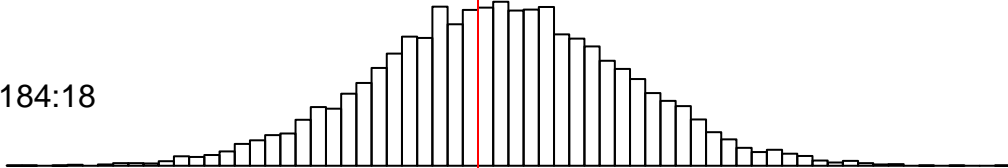

A194:18 – B224:18

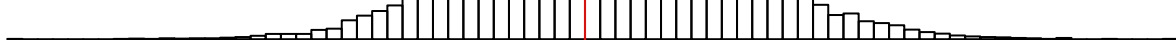

A194:18 – D206:18

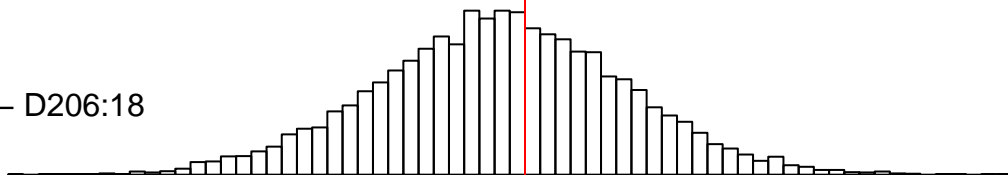

B184:18 – B224:18

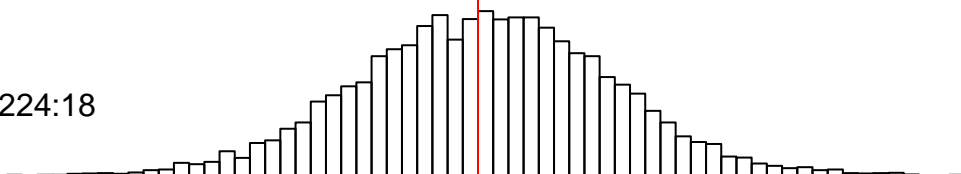

B184:18 – D206:18

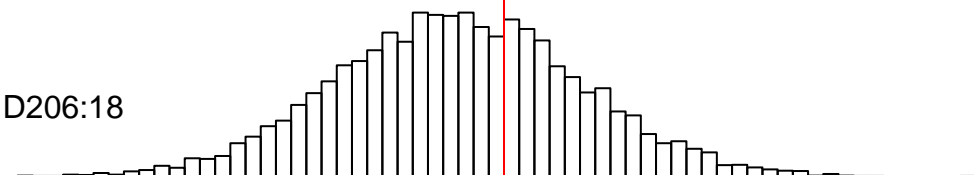

B224:18 – D206:18

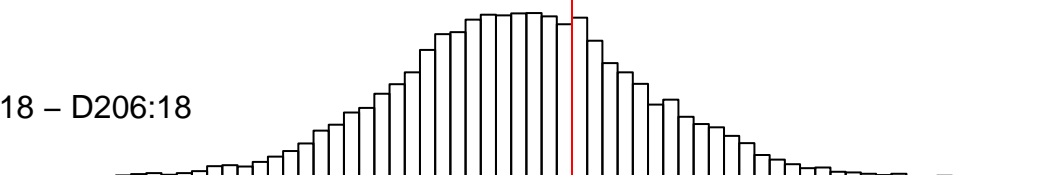

-2 -1 0 1 2

delta(Unidentified Metabolite 63)



A194:18

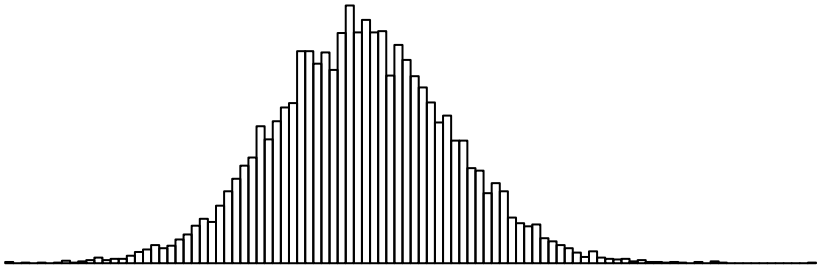

B184:18

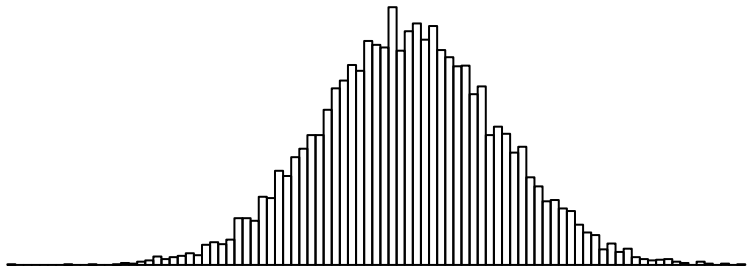

B224:18

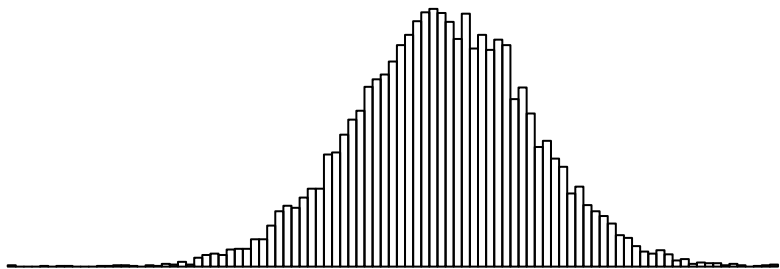

D206:18

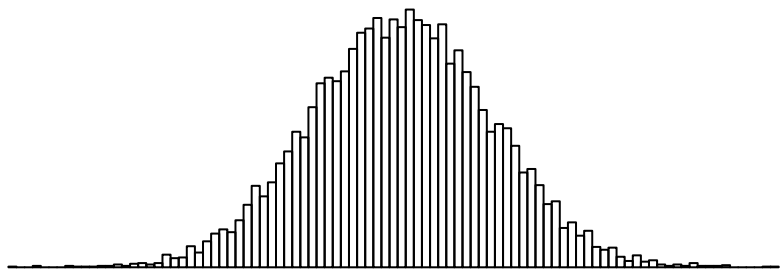

-9.5      -9.0      -8.5      -8.0      -7.5      -7.0      -6.5

Unidentified Metabolite 65

A194:18 – B184:18

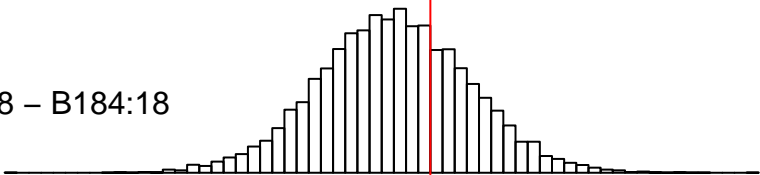

A194:18 – B224:18

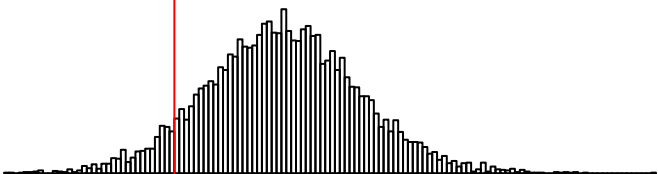

A194:18 – D206:18

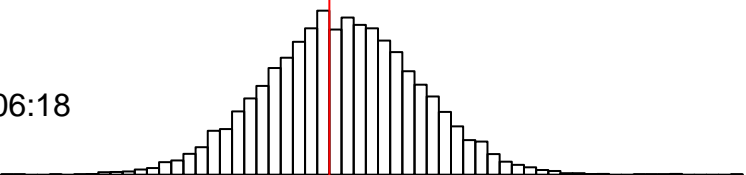

B184:18 – B224:18

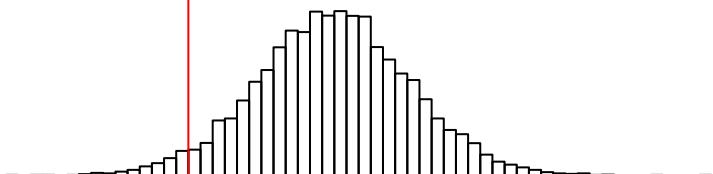

B184:18 – D206:18

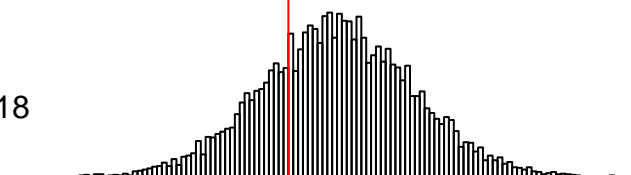

B224:18 – D206:18

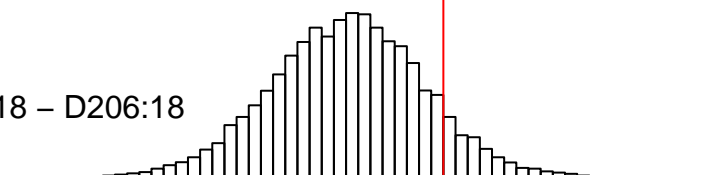

-2 -1 0 1 2 3

delta(Unidentified Metabolite 65)

A194:18

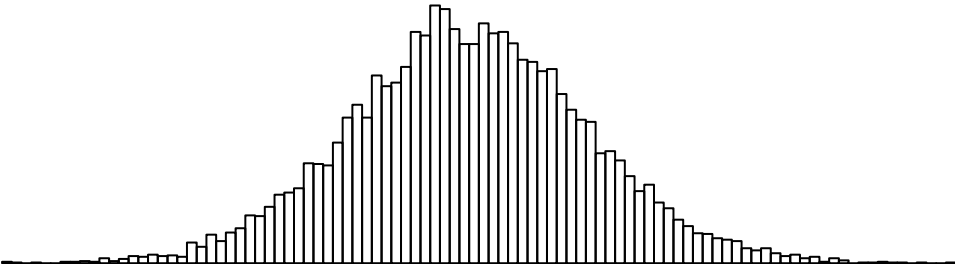

B184:18

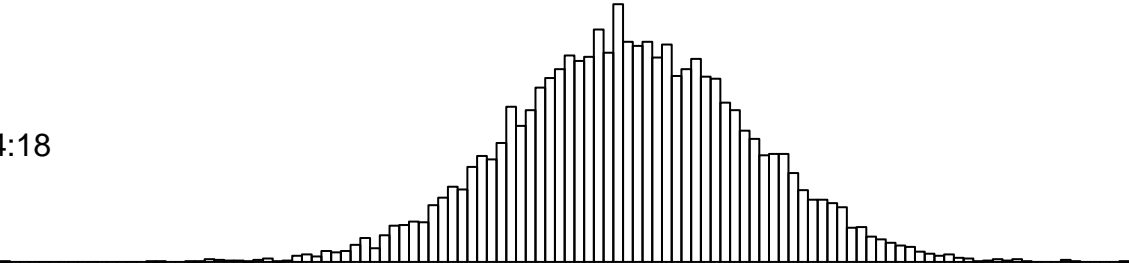

B224:18

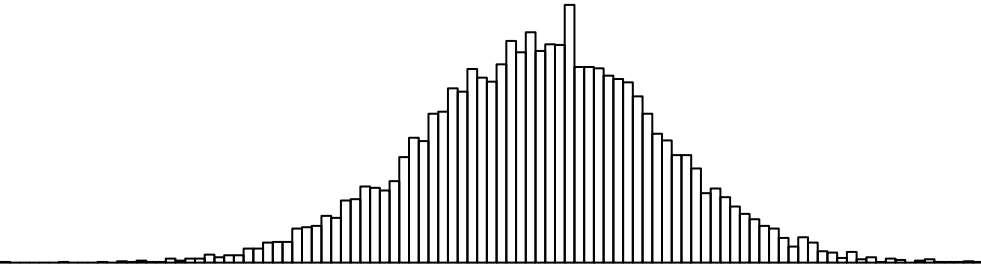

D206:18

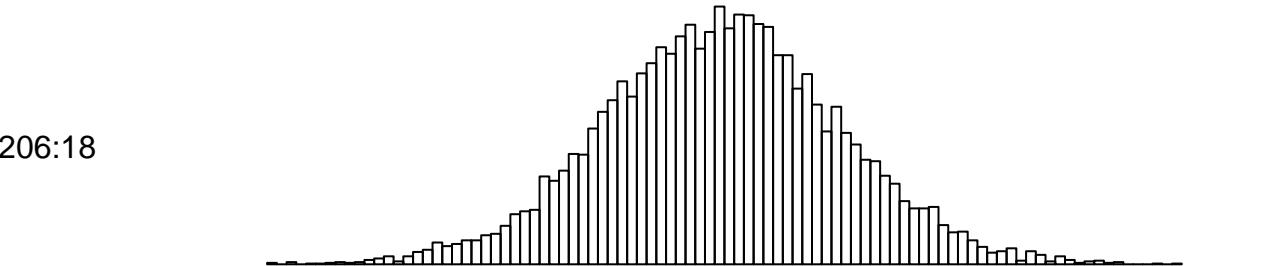

-9.0 -8.5 -8.0 -7.5 -7.0 -6.5

Unidentified Metabolite 68

A194:18 – B184:18

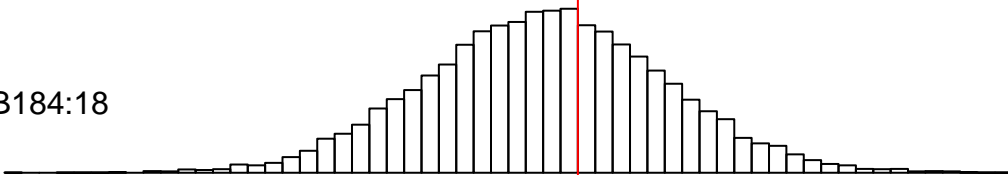

A194:18 – B224:18

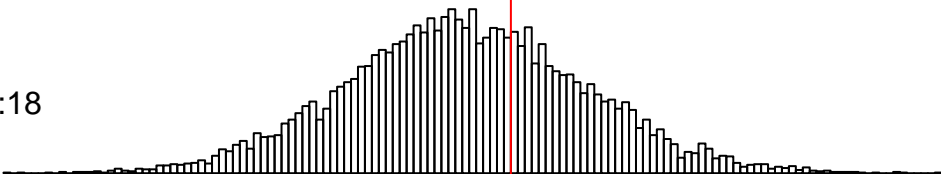

A194:18 – D206:18

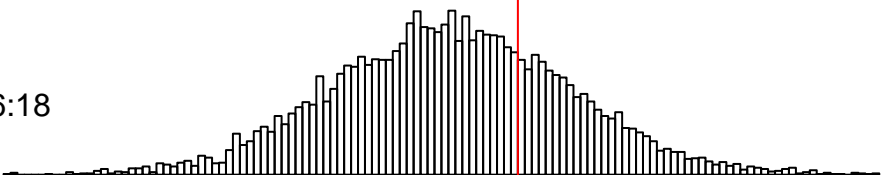

B184:18 – B224:18

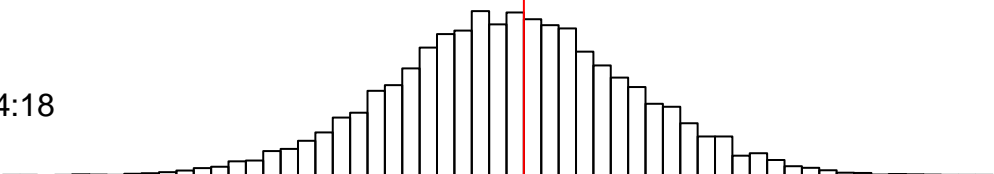

B184:18 – D206:18

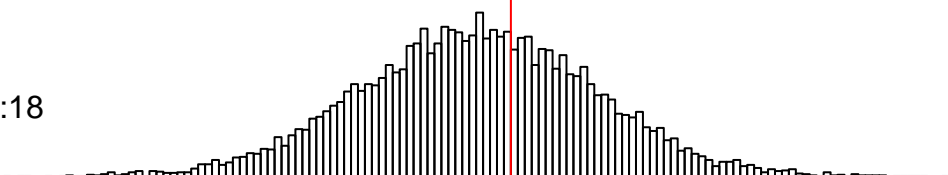

B224:18 – D206:18

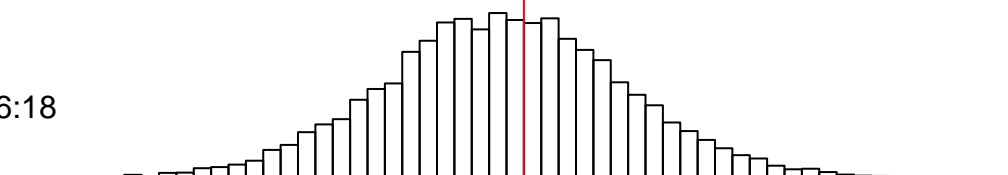

-2.0      -1.5      -1.0      -0.5      0.0      0.5      1.0      1.5

delta(Unidentified Metabolite 68)

A194:18

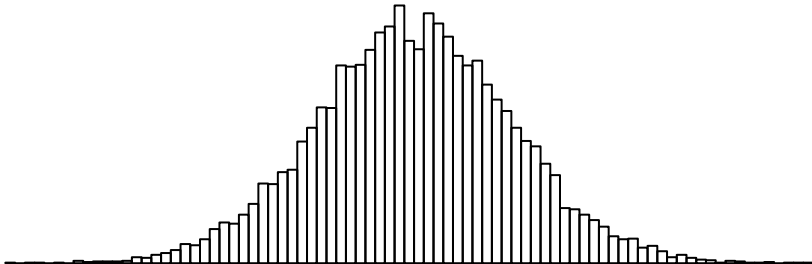

B184:18

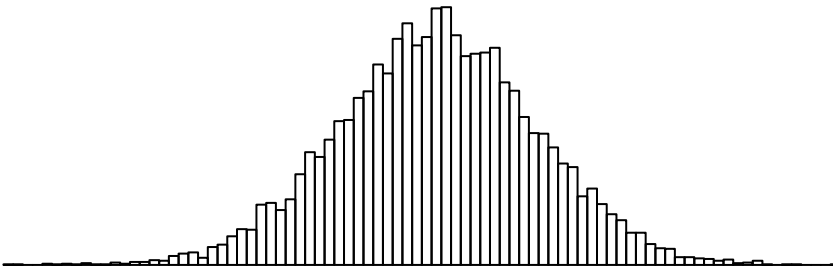

B224:18

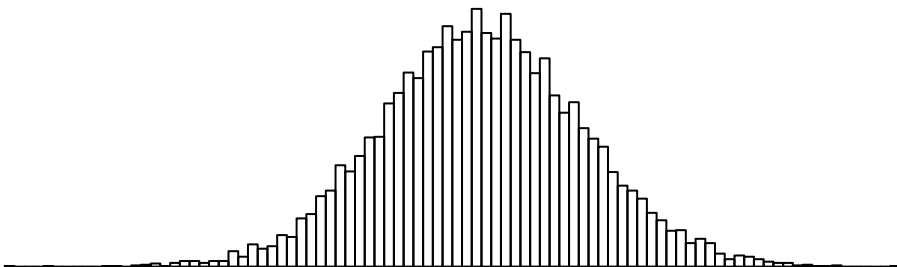

D206:18

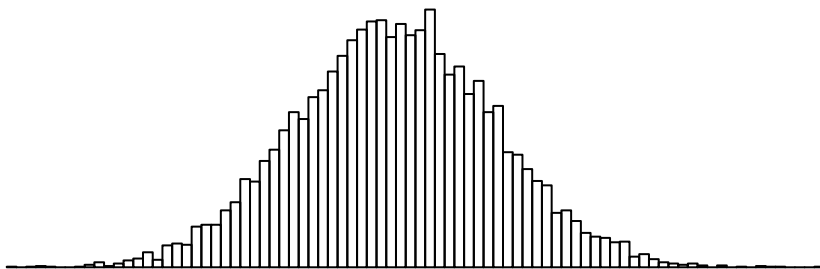

-7.0      -6.5      -6.0      -5.5      -5.0      -4.5

Unidentified Metabolite 69

A194:18 – B184:18

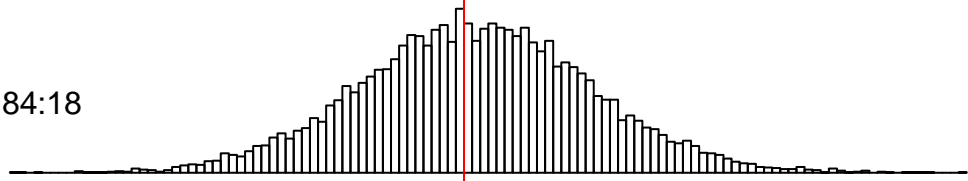

A194:18 – B224:18

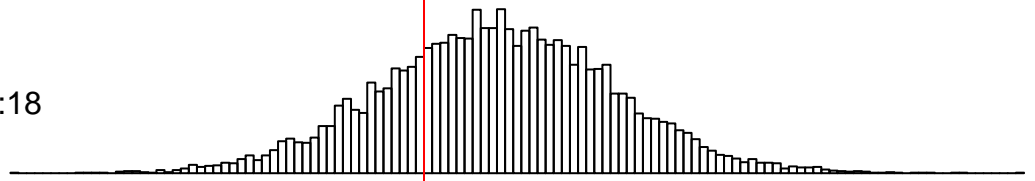

A194:18 – D206:18

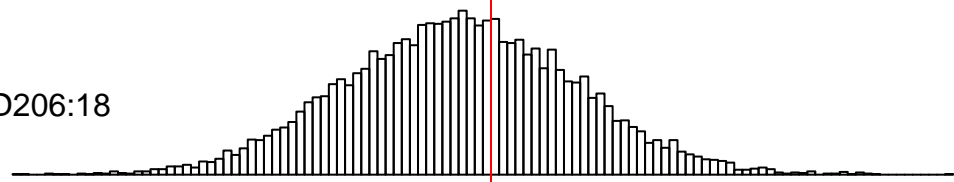

B184:18 – B224:18

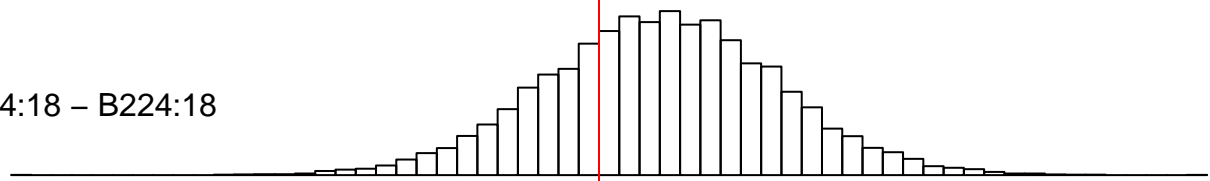

B184:18 – D206:18

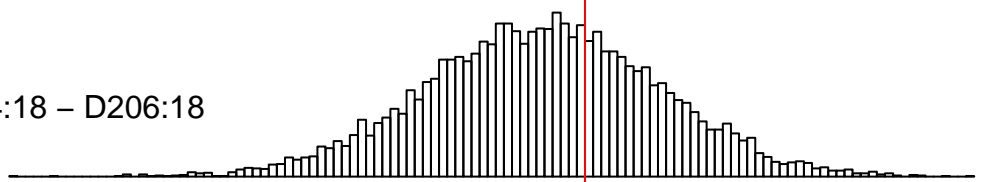

B224:18 – D206:18

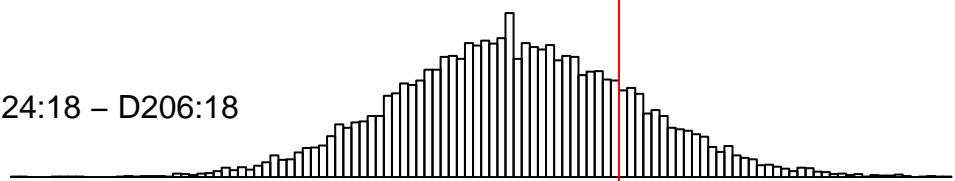

-1.5      -1.0      -0.5      0.0      0.5      1.0      1.5

delta(Unidentified Metabolite 69)

A194:18

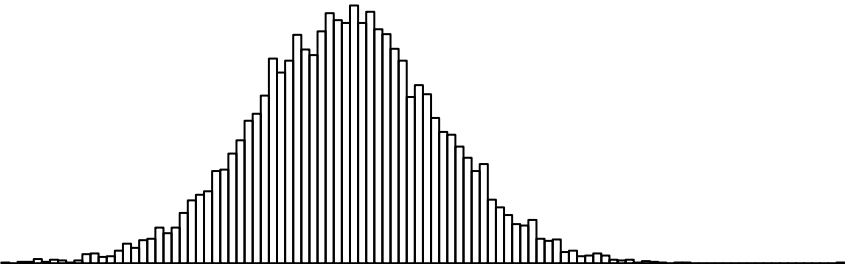

B184:18

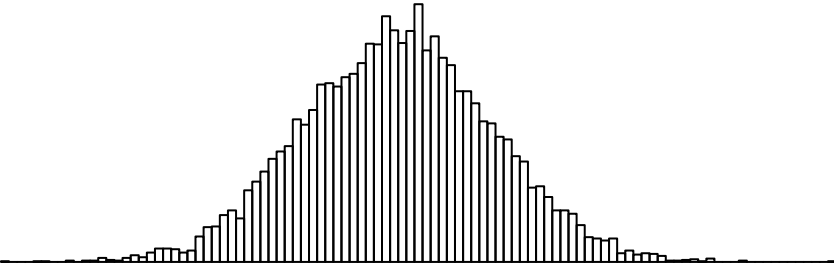

B224:18

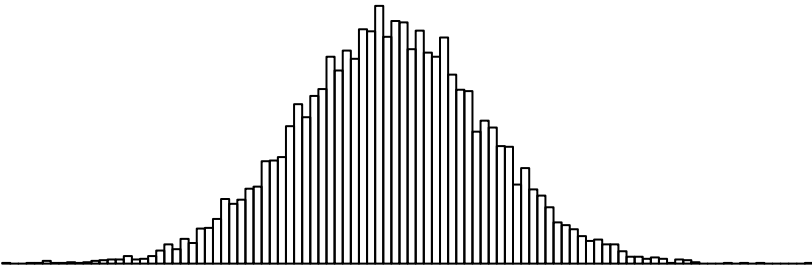

D206:18

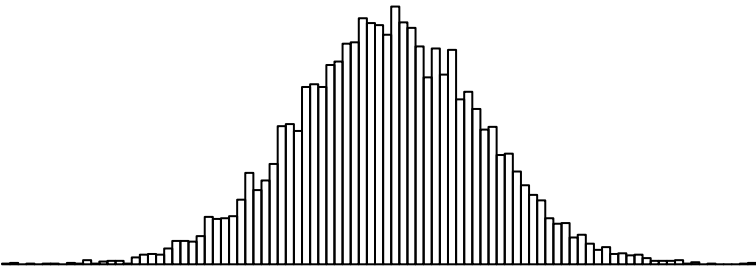

-8.5      -8.0      -7.5      -7.0      -6.5      -6.0      -5.5

Unidentified Metabolite 70

A194:18 – B184:18

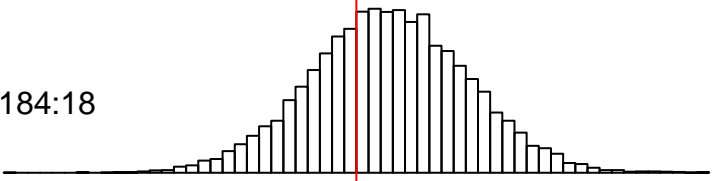

A194:18 – B224:18

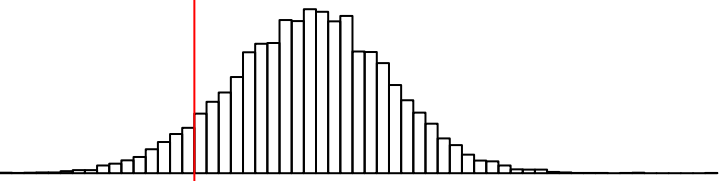

A194:18 – D206:18

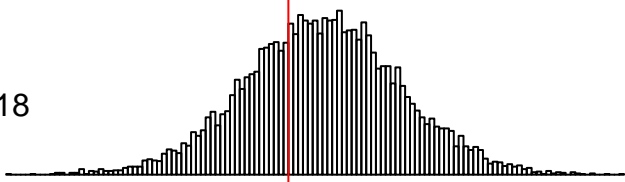

B184:18 – B224:18

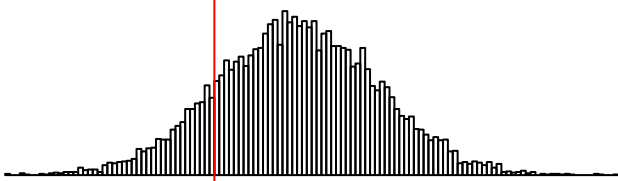

B184:18 – D206:18

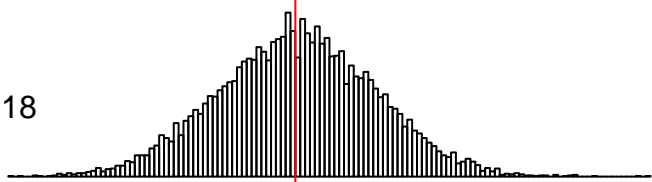

B224:18 – D206:18

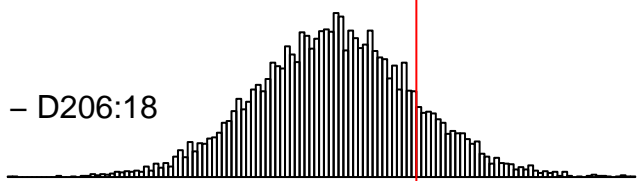

-2 -1 0 1 2 3

delta(Unidentified Metabolite 70)



A194:18

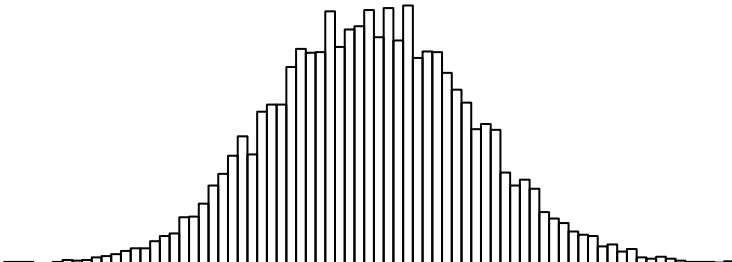

B184:18

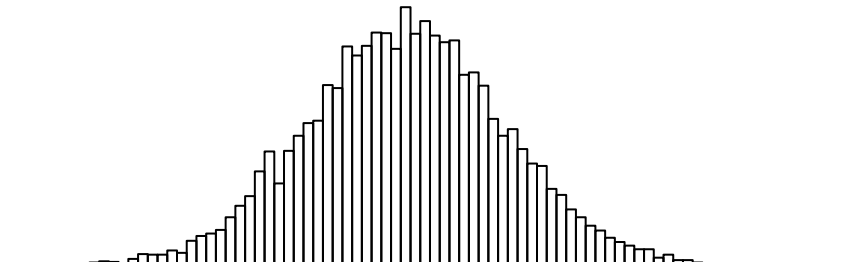

B224:18

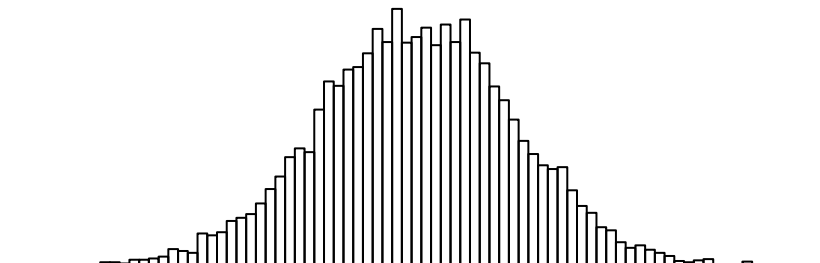

D206:18

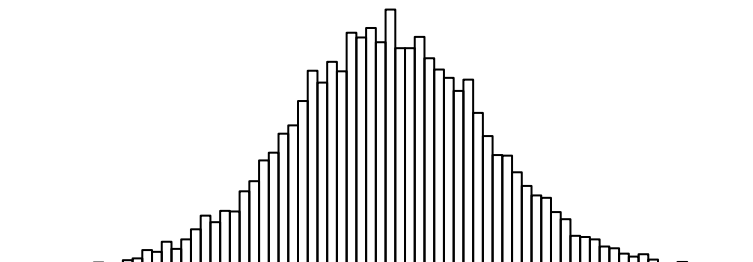

-9.5      -9.0      -8.5      -8.0      -7.5      -7.0

Unidentified Metabolite 71

A194:18 – B184:18

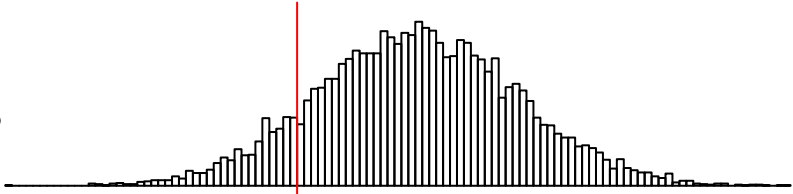

A194:18 – B224:18

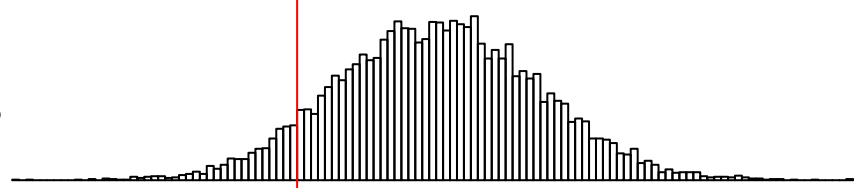

A194:18 – D206:18

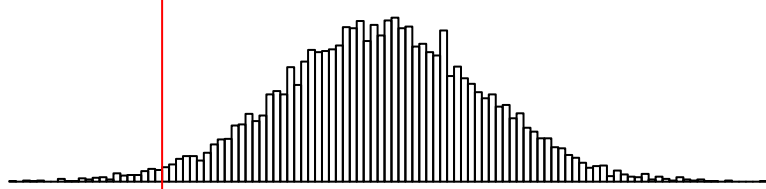

B184:18 – B224:18

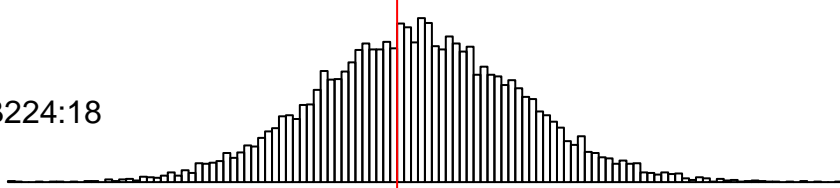

B184:18 – D206:18

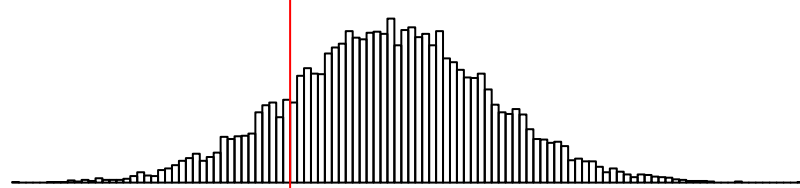

B224:18 – D206:18

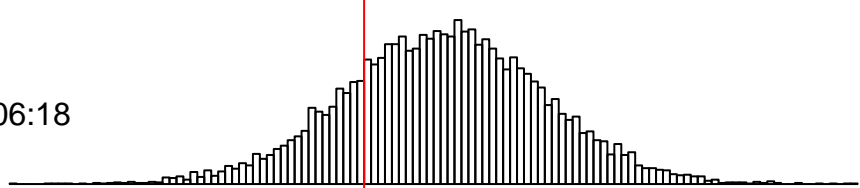

-1.5      -1.0      -0.5      0.0      0.5      1.0      1.5      2.0

delta(Unidentified Metabolite 71)

A194:18

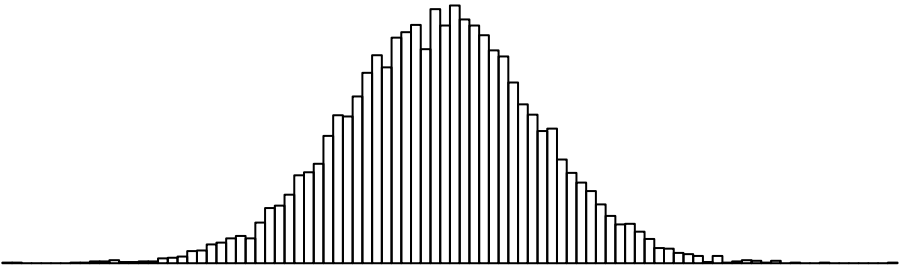

B184:18

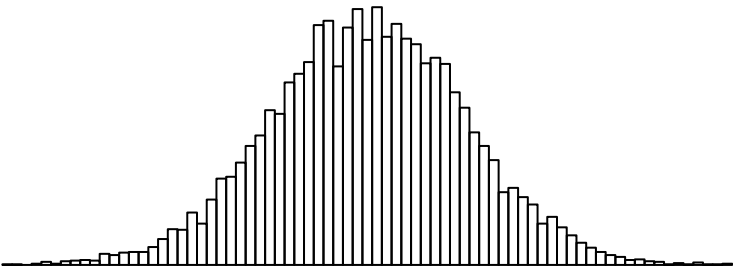

B224:18

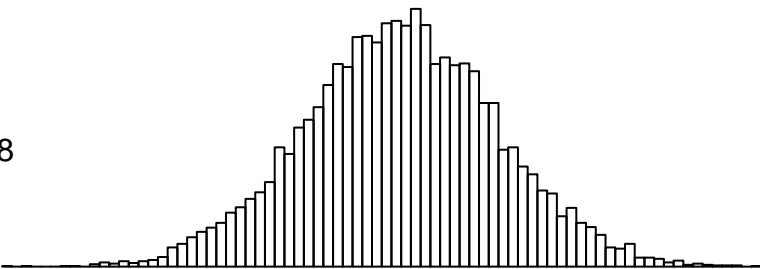

D206:18

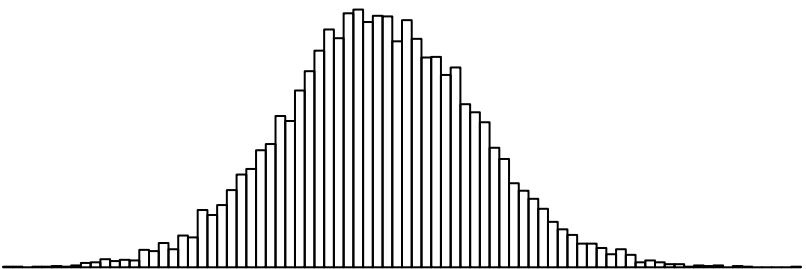

Unidentified Metabolite 72

A194:18 – B184:18

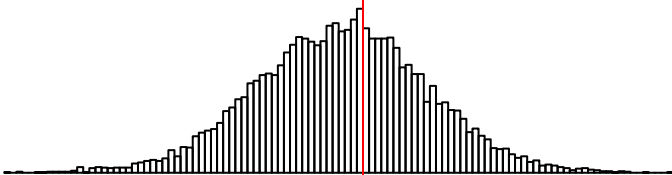

A194:18 – B224:18

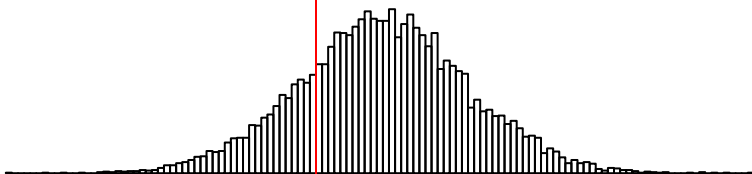

A194:18 – D206:18

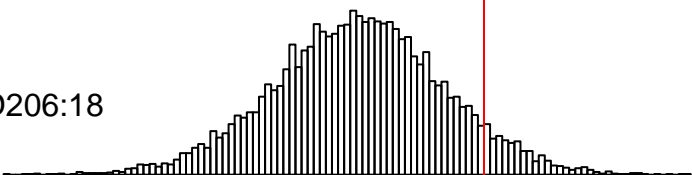

B184:18 – B224:18

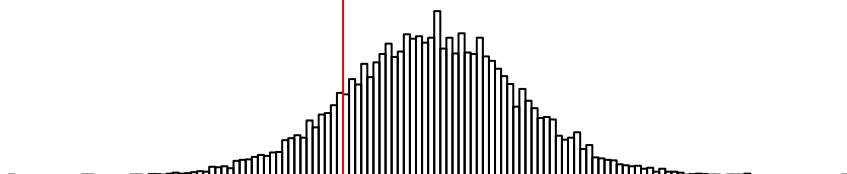

B184:18 – D206:18

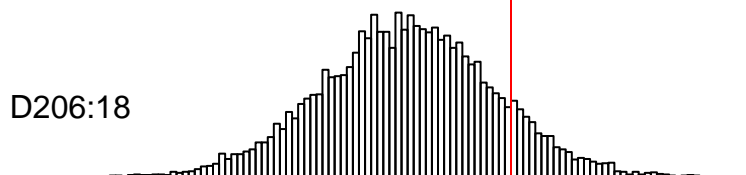

B224:18 – D206:18

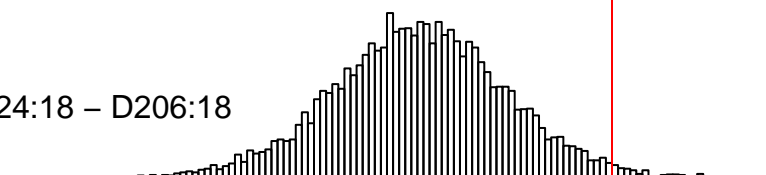

-2 -1 0 1 2

delta(Unidentified Metabolite 72)

A194:18

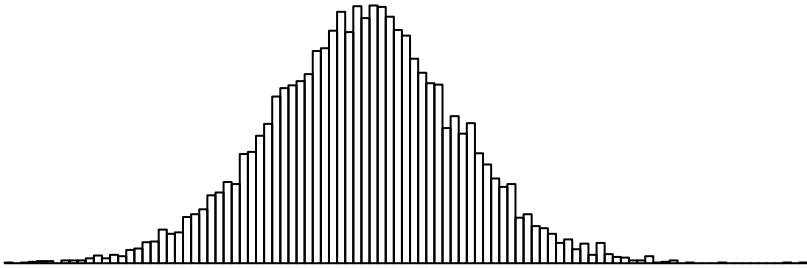

B184:18

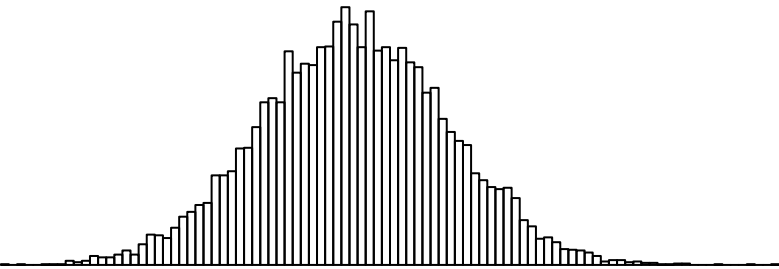

B224:18

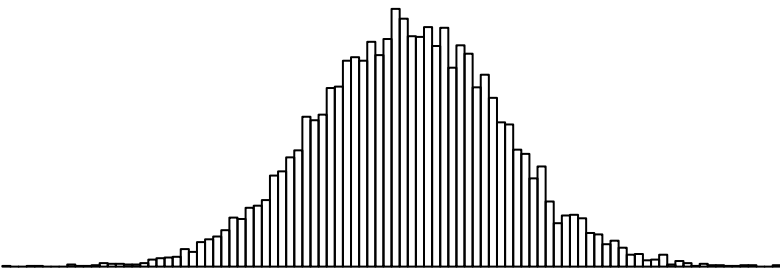

D206:18

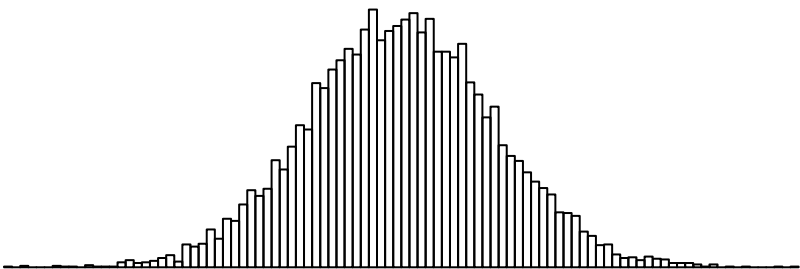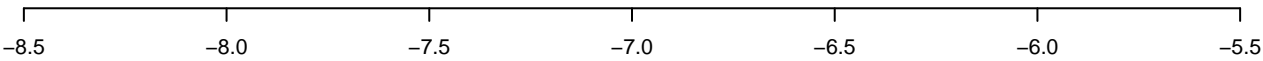

Unidentified Metabolite 73

A194:18 – B184:18

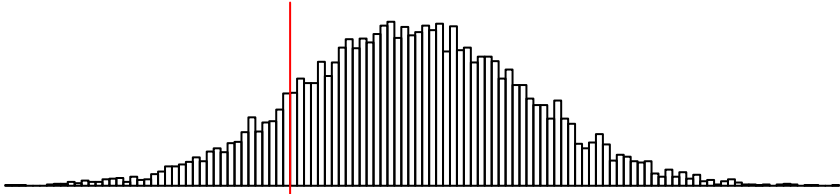

A194:18 – B224:18

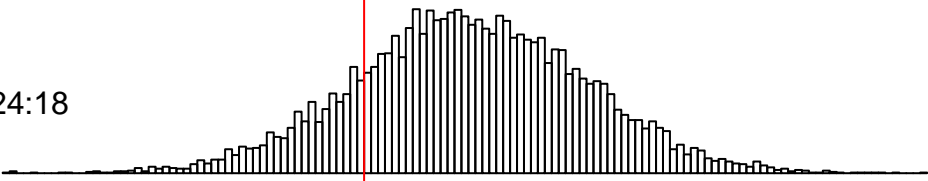

A194:18 – D206:18

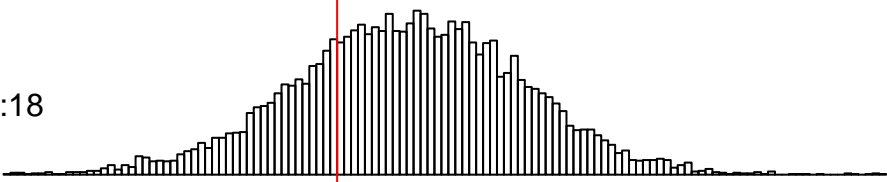

B184:18 – B224:18

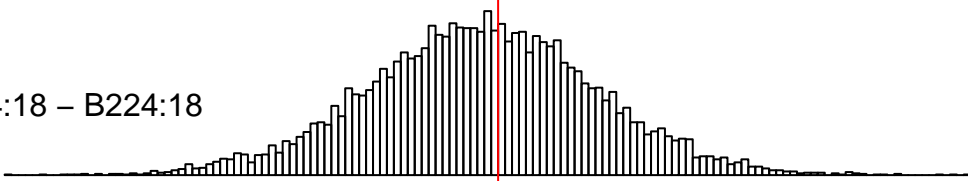

B184:18 – D206:18

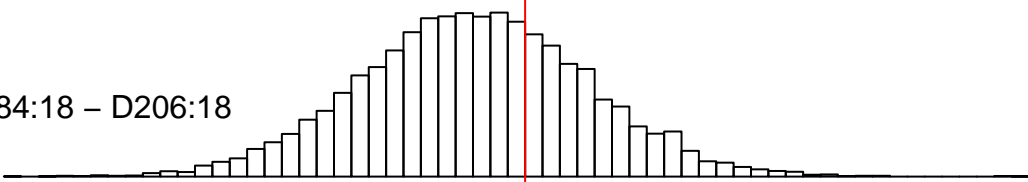

B224:18 – D206:18

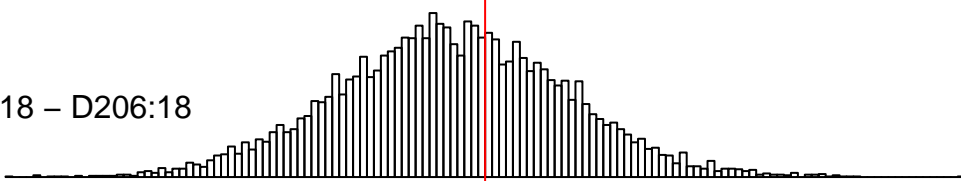

-1.5      -1.0      -0.5      0.0      0.5      1.0      1.5      2.0

delta(Unidentified Metabolite 73)

A194:18

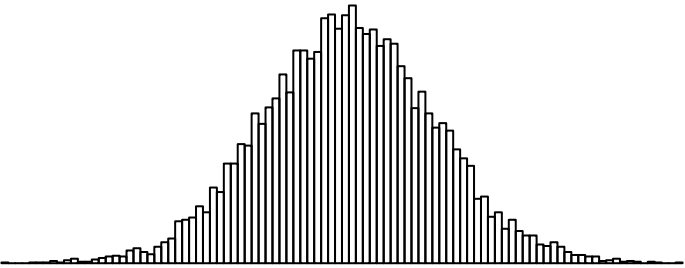

B184:18

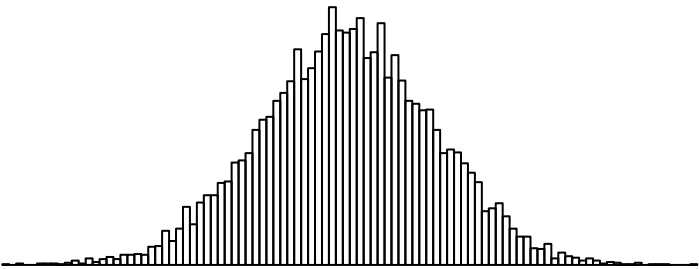

B224:18

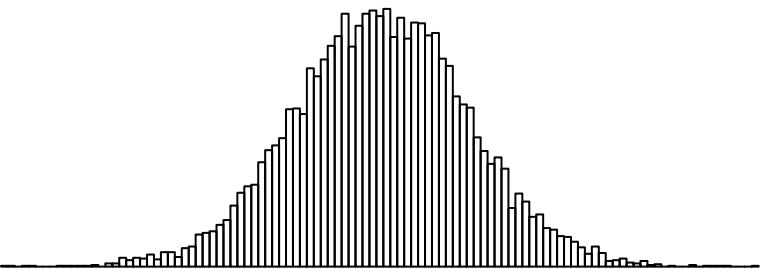

D206:18

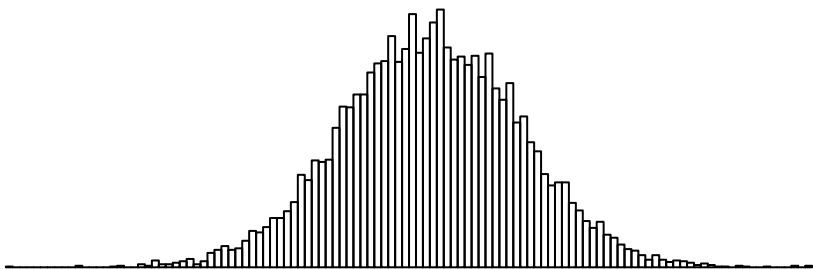

-10.0      -9.5      -9.0      -8.5      -8.0      -7.5      -7.0      -6.5

Unidentified Metabolite 74

A194:18 – B184:18

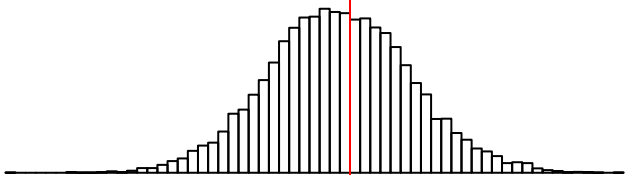

A194:18 – B224:18

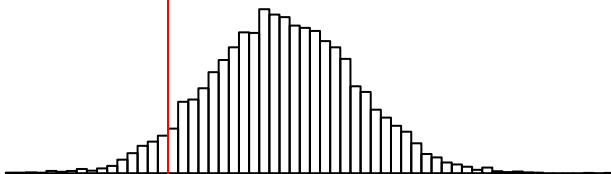

A194:18 – D206:18

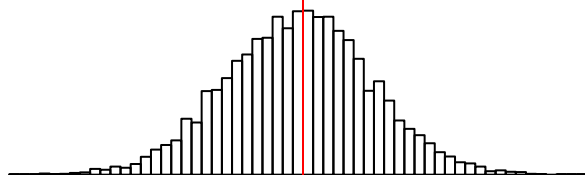

B184:18 – B224:18

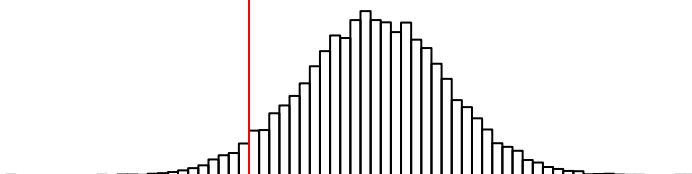

B184:18 – D206:18

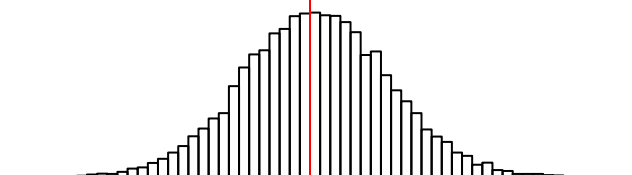

B224:18 – D206:18

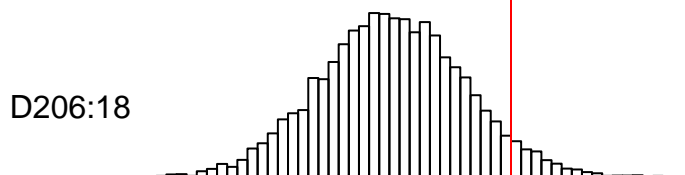

-3 -2 -1 0 1 2 3

delta(Unidentified Metabolite 74)



A194:18

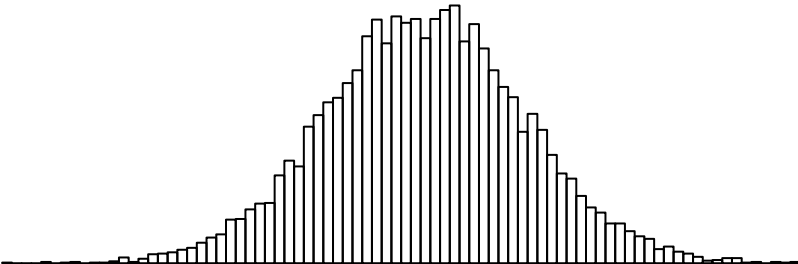

B184:18

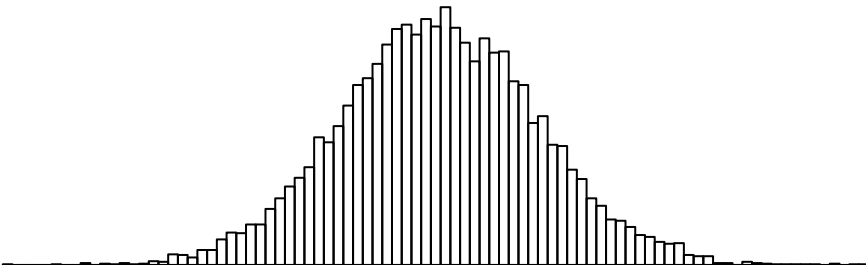

B224:18

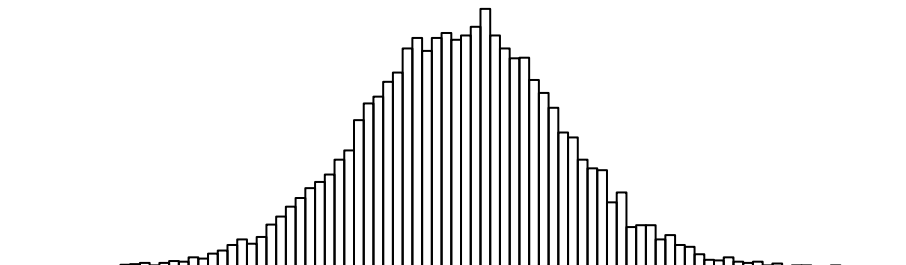

D206:18

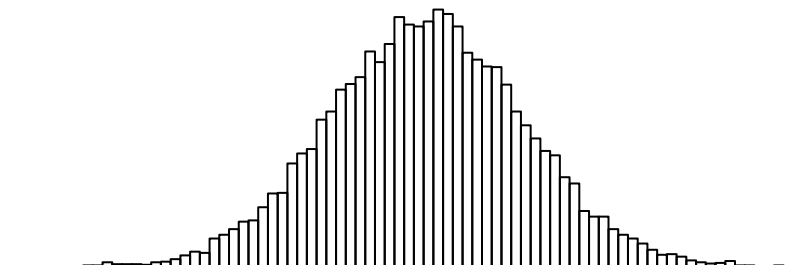

-10.5      -10.0      -9.5      -9.0      -8.5      -8.0

Unidentified Metabolite 75

A194:18 – B184:18

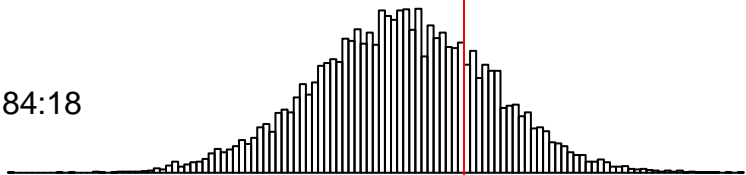

A194:18 – B224:18

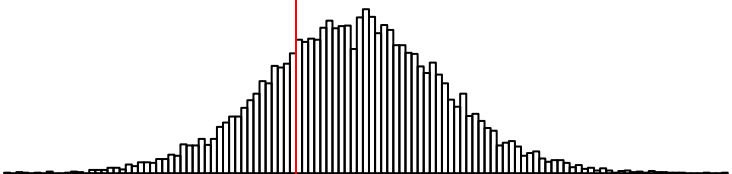

A194:18 – D206:18

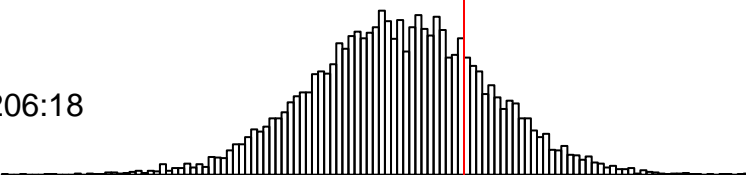

B184:18 – B224:18

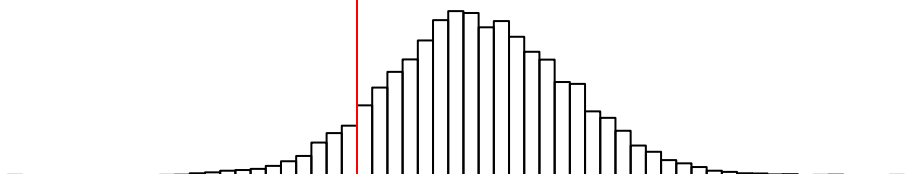

B184:18 – D206:18

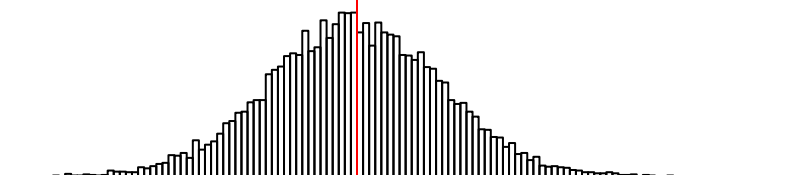

B224:18 – D206:18

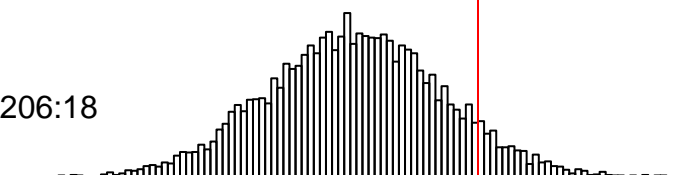

-2 -1 0 1 2

delta(Unidentified Metabolite 75)

A194:18

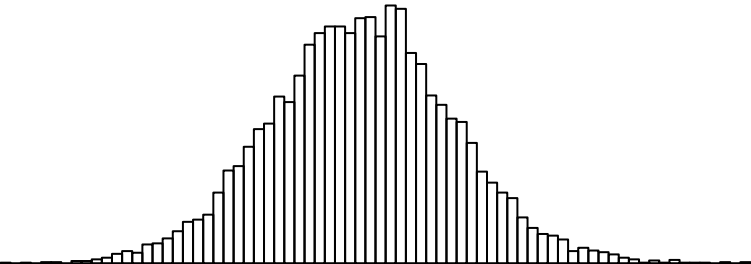

B184:18

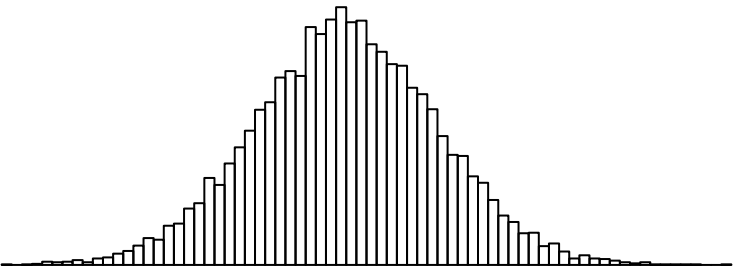

B224:18

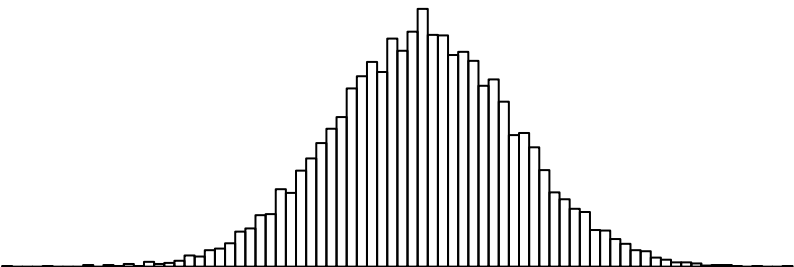

D206:18

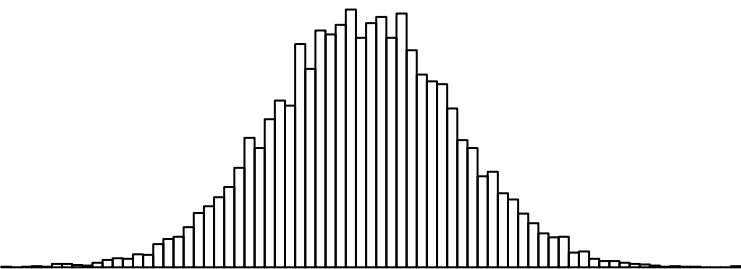

-8 -7 -6 -5 -4 -3 -2

Unidentified Metabolite 76

A194:18 – B184:18

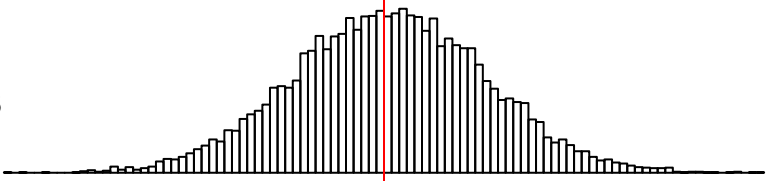

A194:18 – B224:18

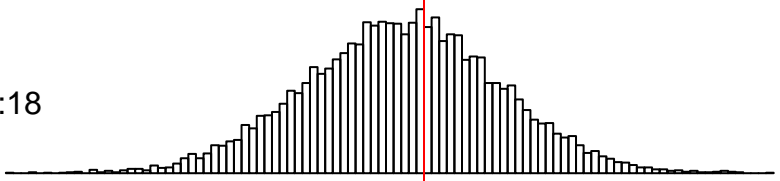

A194:18 – D206:18

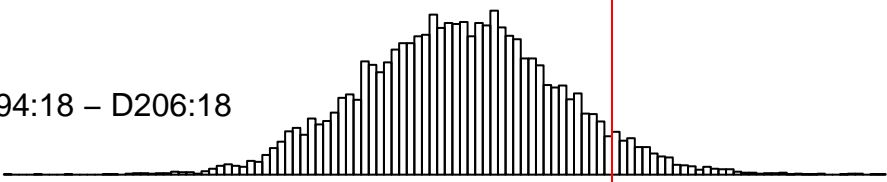

B184:18 – B224:18

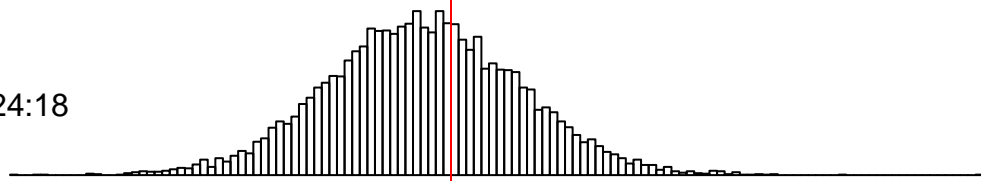

B184:18 – D206:18

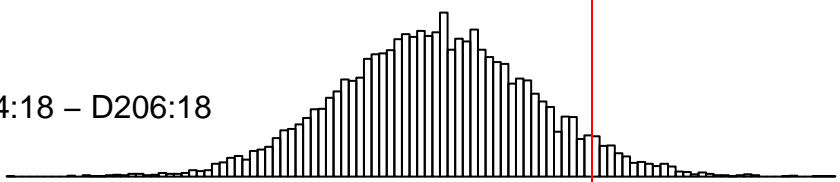

B224:18 – D206:18

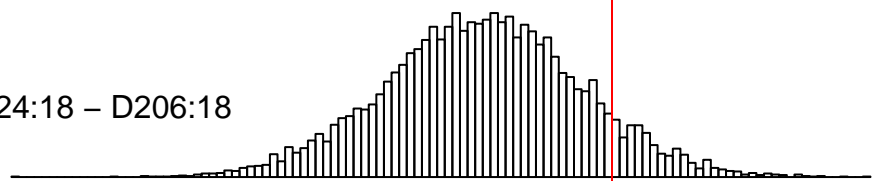

-4 -2 0 2 4

delta(Unidentified Metabolite 76)

A194:18

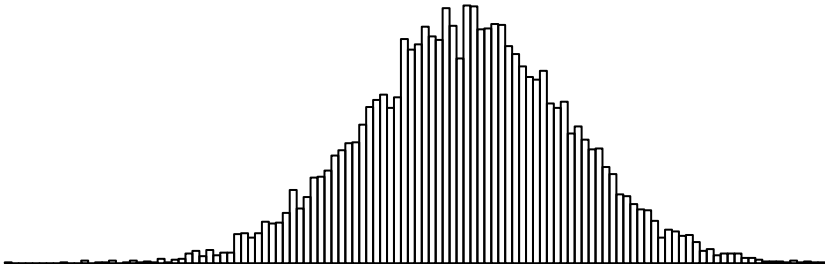

B184:18

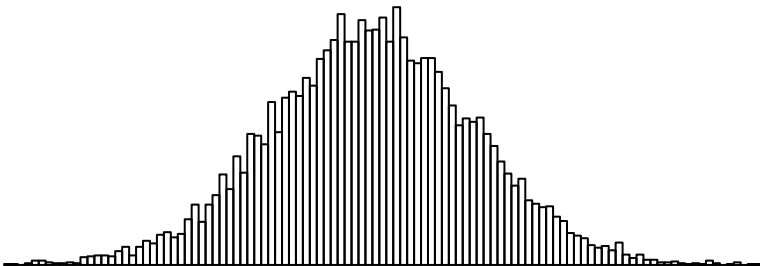

B224:18

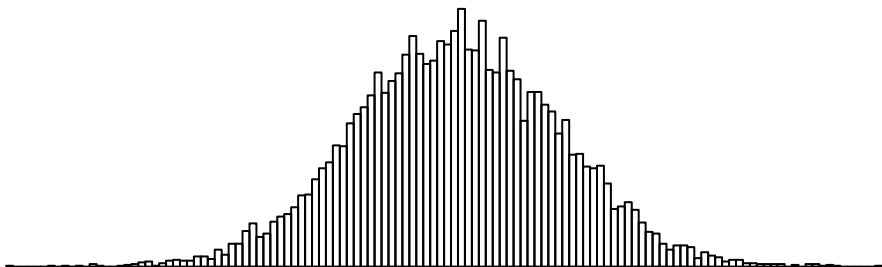

D206:18

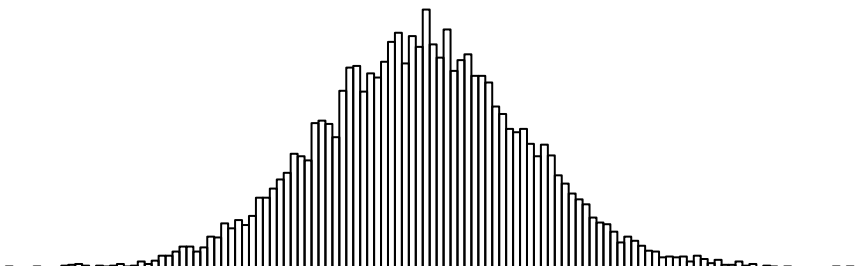

Unidentified Metabolite 77

A194:18 – B184:18

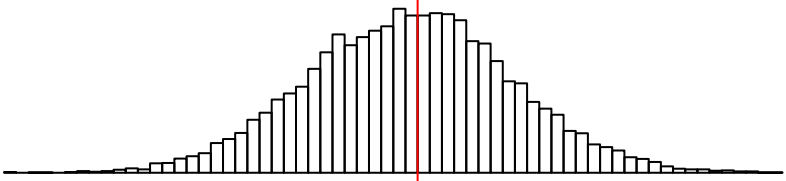

A194:18 – B224:18

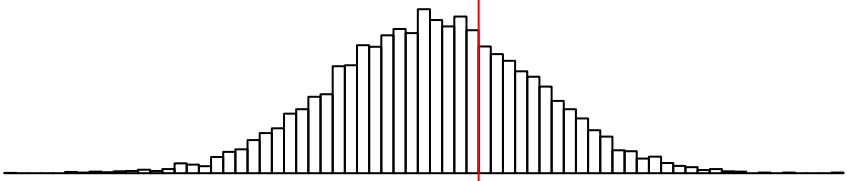

A194:18 – D206:18

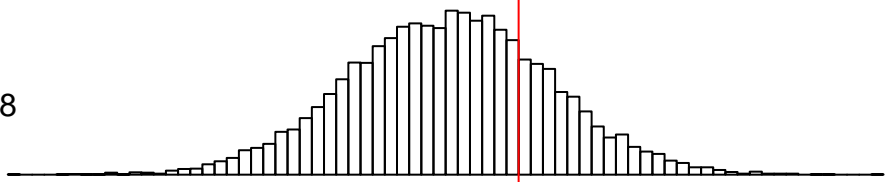

B184:18 – B224:18

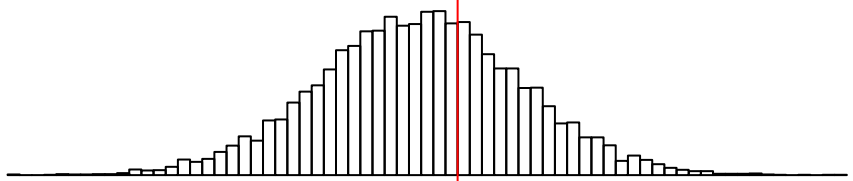

B184:18 – D206:18

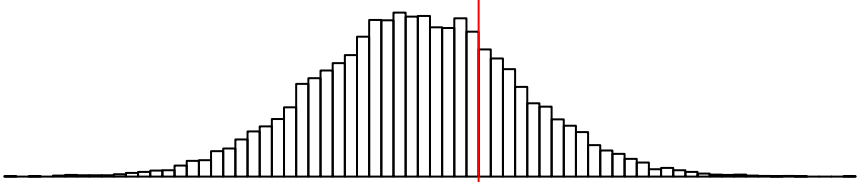

B224:18 – D206:18

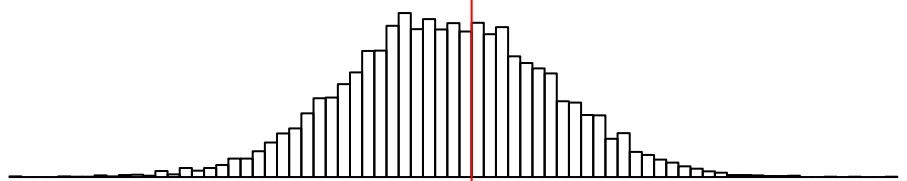

-3                      -2                      -1                      0                      1                      2

delta(Unidentified Metabolite 77)

A194:18

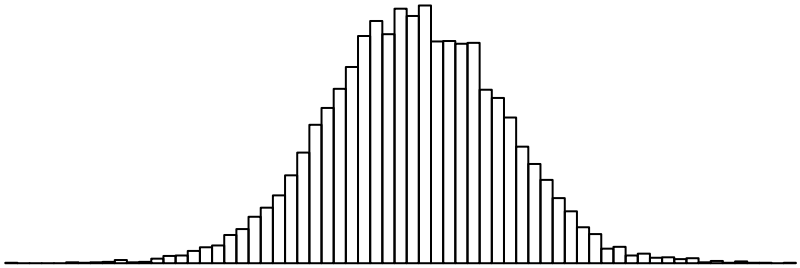

B184:18

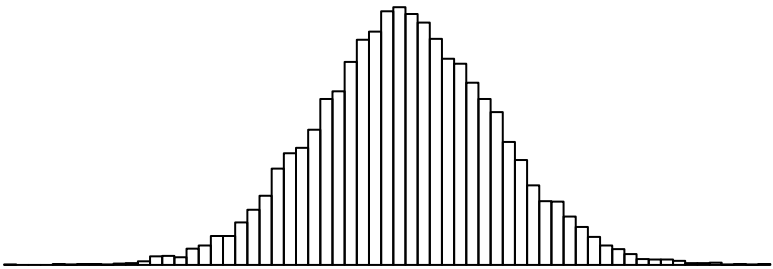

B224:18

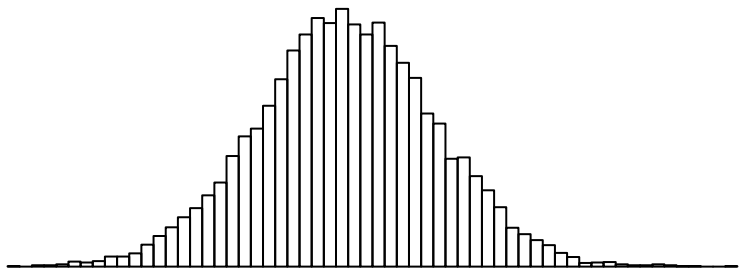

D206:18

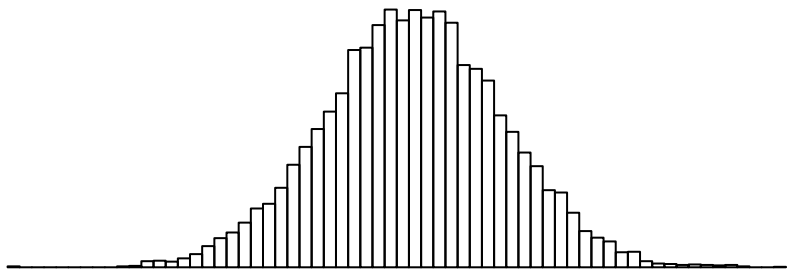

Unidentified Metabolite 78

A194:18 – B184:18

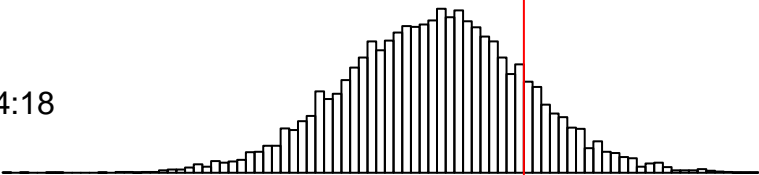

A194:18 – B224:18

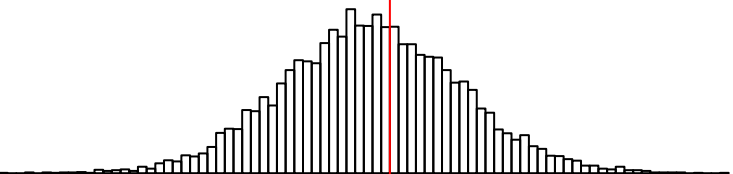

A194:18 – D206:18

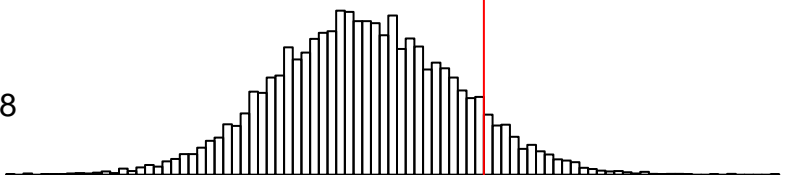

B184:18 – B224:18

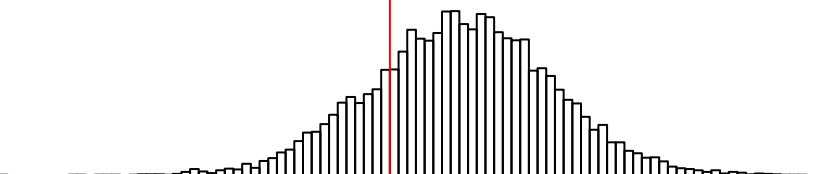

B184:18 – D206:18

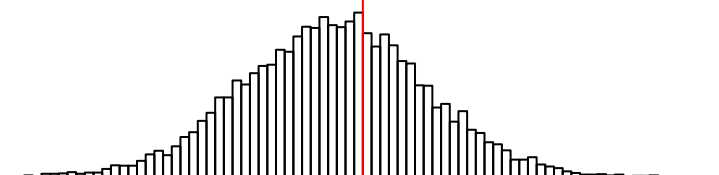

B224:18 – D206:18

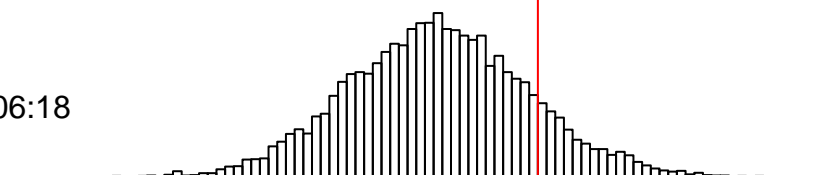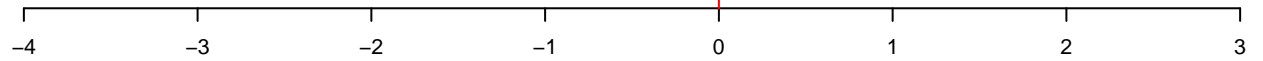

delta(Unidentified Metabolite 78)



A194:18

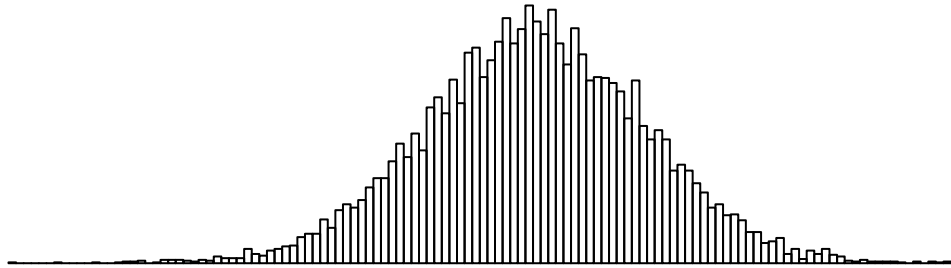

B184:18

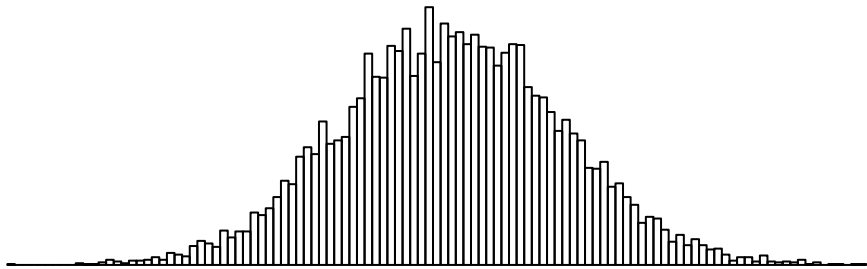

B224:18

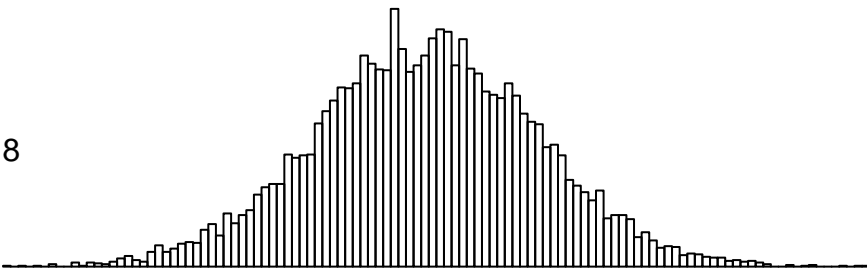

D206:18

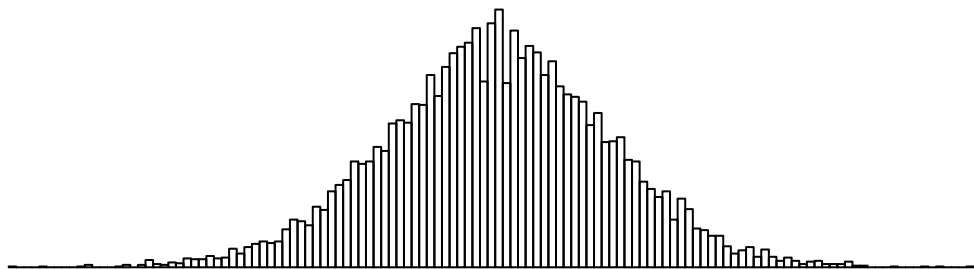

-8.5

-8.0

-7.5

Acid 2

A194:18 – B184:18

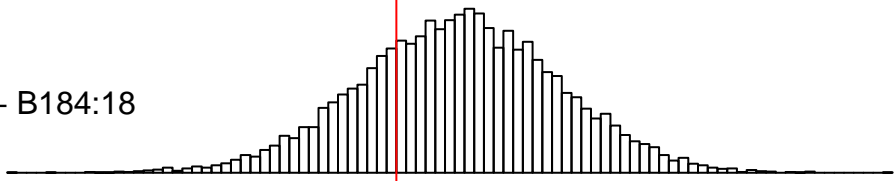

A194:18 – B224:18

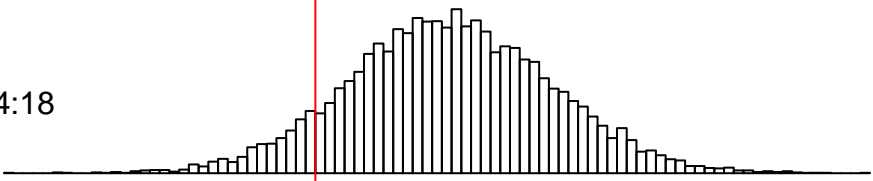

A194:18 – D206:18

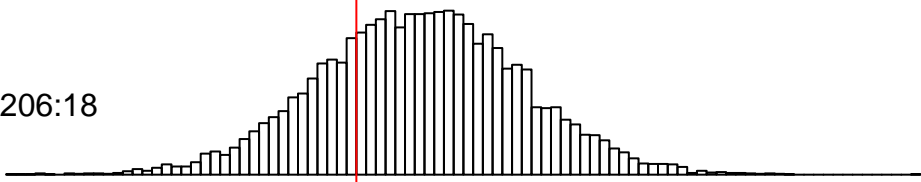

B184:18 – B224:18

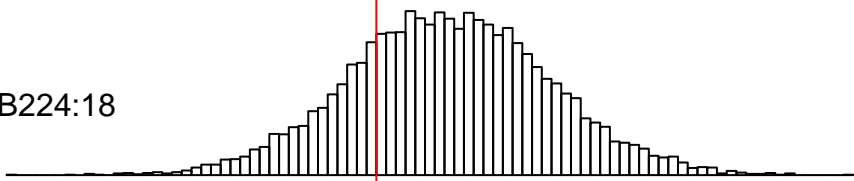

B184:18 – D206:18

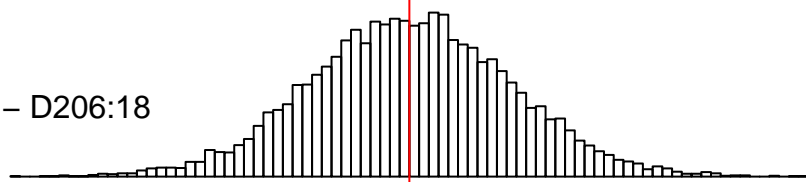

B224:18 – D206:18

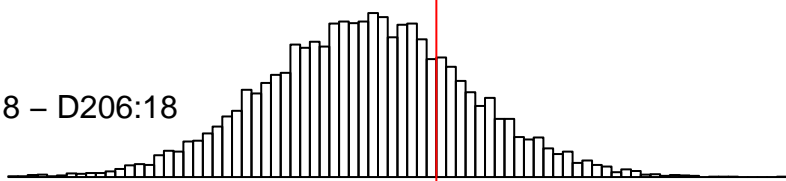

-1.0      -0.5      0.0      0.5      1.0      1.5

delta(Acid 2)

A194:18

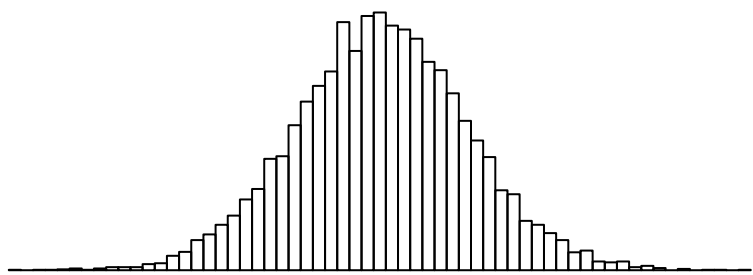

B184:18

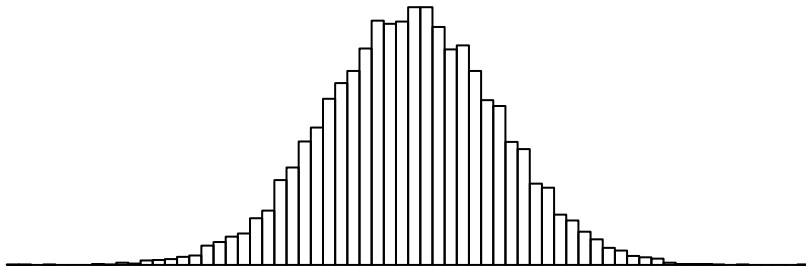

B224:18

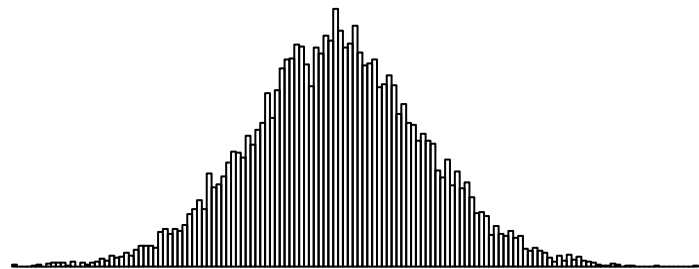

D206:18

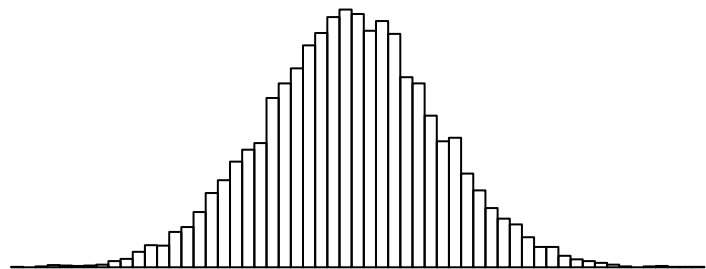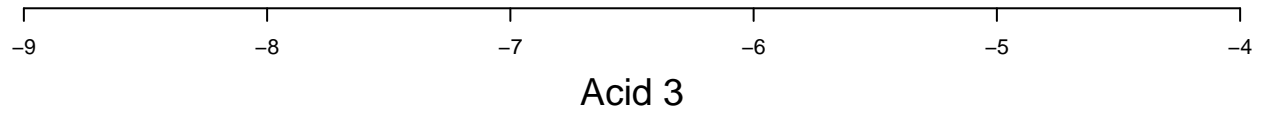

A194:18 – B184:18

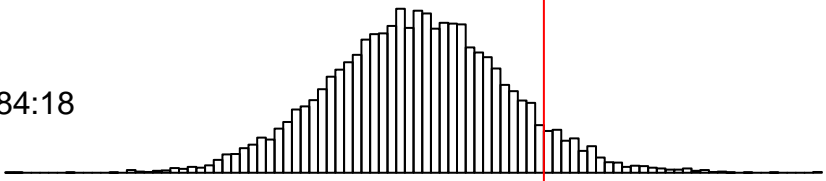

A194:18 – B224:18

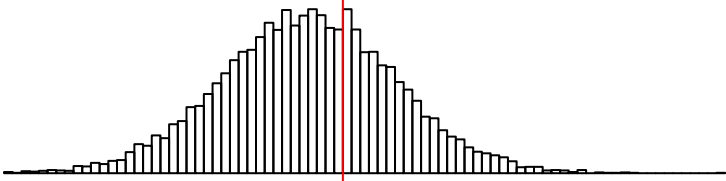

A194:18 – D206:18

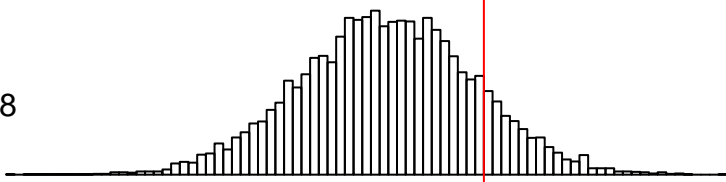

B184:18 – B224:18

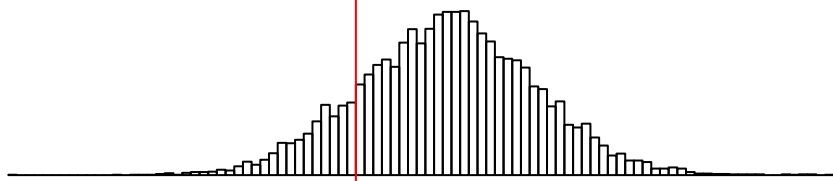

B184:18 – D206:18

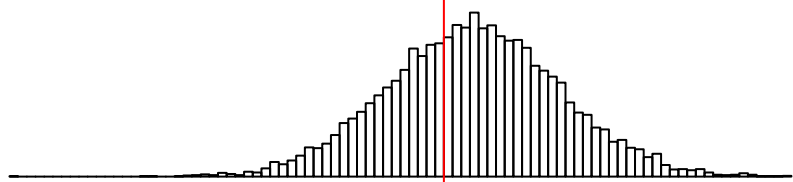

B224:18 – D206:18

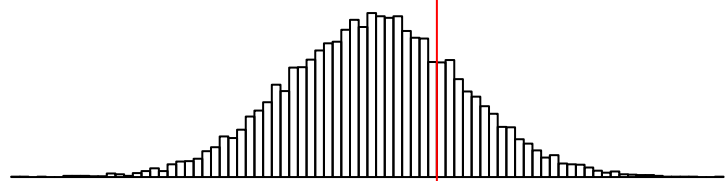

delta(Acid 3)

A194:18

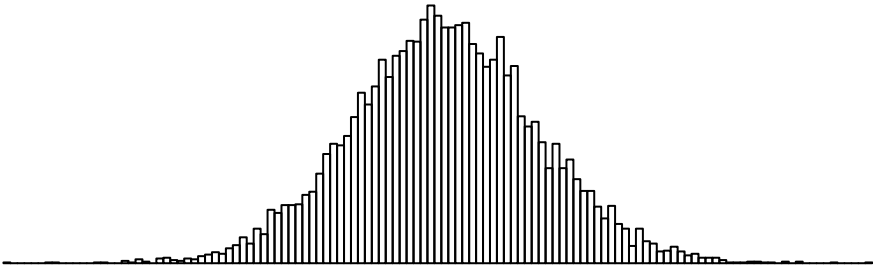

B184:18

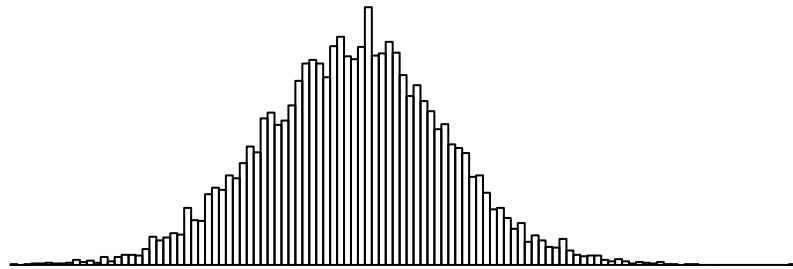

B224:18

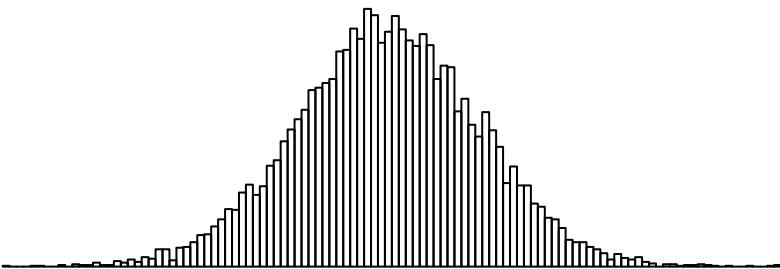

D206:18

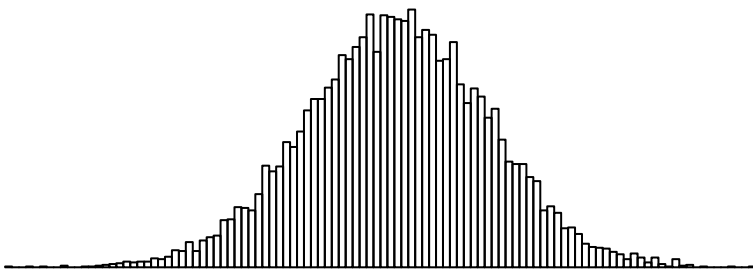

-8.0 -7.5 -7.0 -6.5 -6.0 -5.5 -5.0 -4.5

Acid 6

A194:18 – B184:18

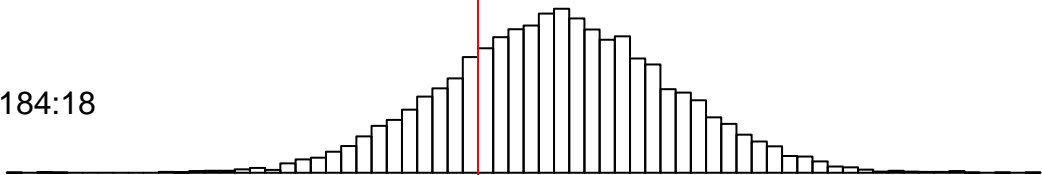

A194:18 – B224:18

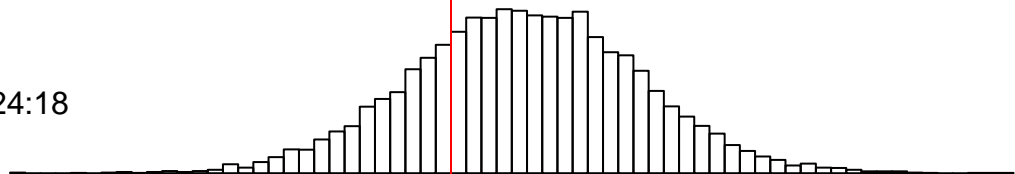

A194:18 – D206:18

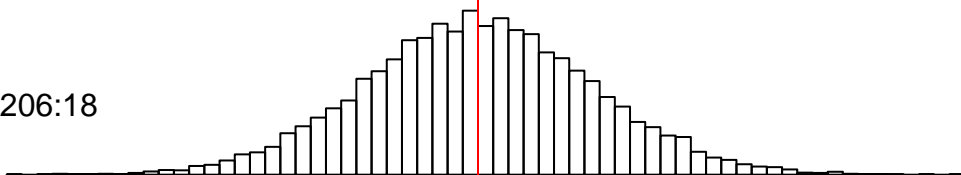

B184:18 – B224:18

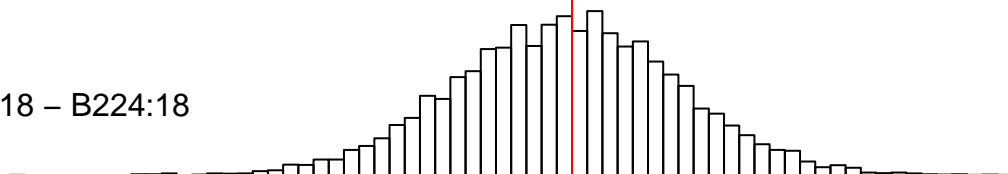

B184:18 – D206:18

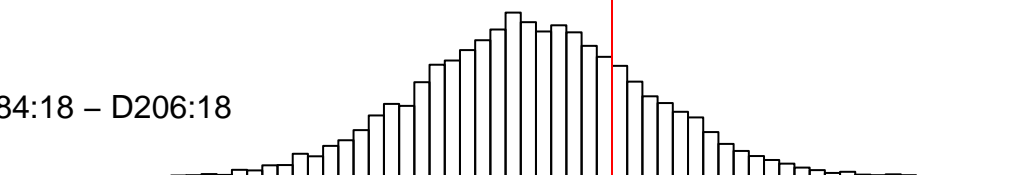

B224:18 – D206:18

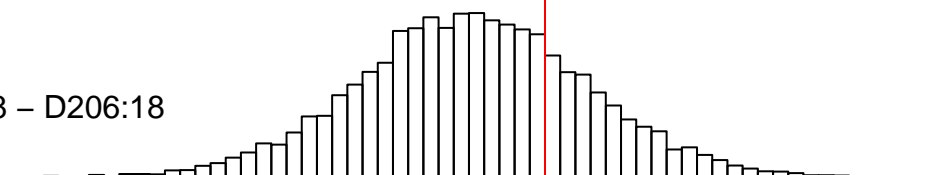

-2 -1 0 1 2

delta(Acid 6)

A194:18

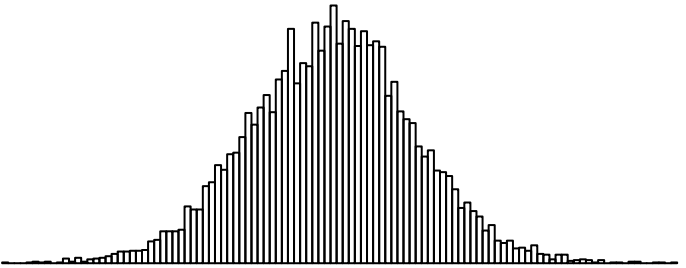

B184:18

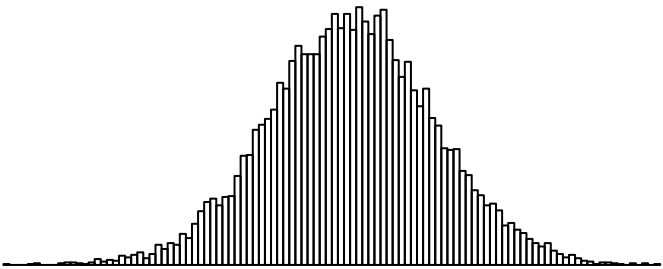

B224:18

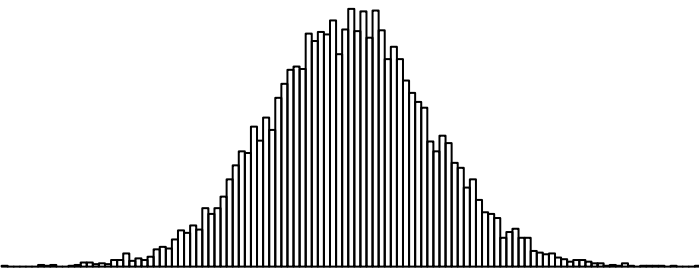

D206:18

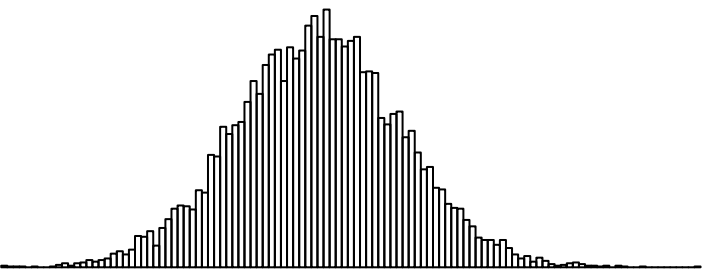

-8.5                      -8.0                      -7.5                      -7.0                      -6.5

Acid 7

A194:18 – B184:18

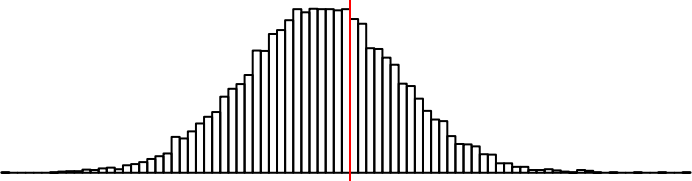

A194:18 – B224:18

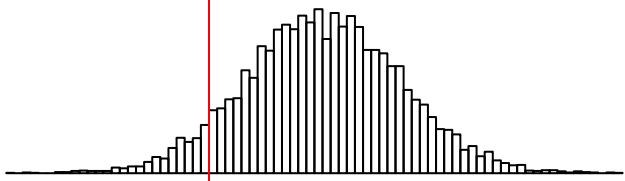

A194:18 – D206:18

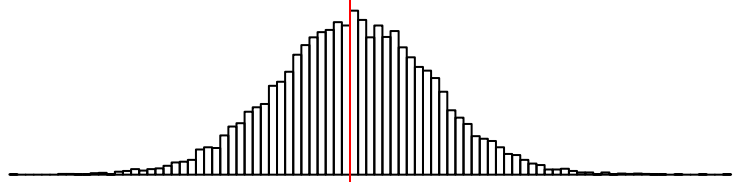

B184:18 – B224:18

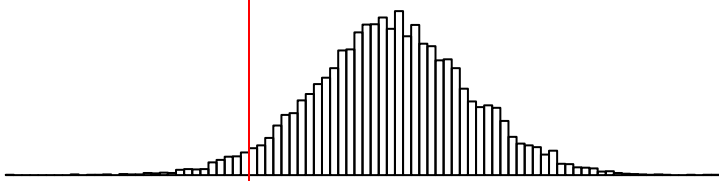

B184:18 – D206:18

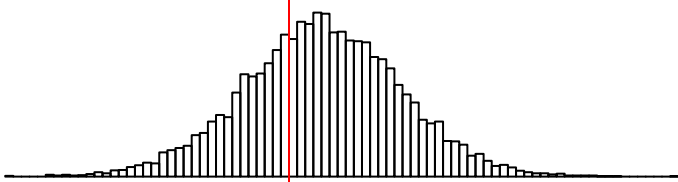

B224:18 – D206:18

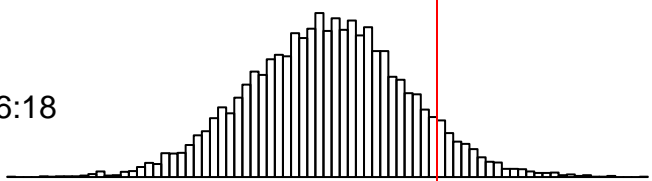

-1.5      -1.0      -0.5      0.0      0.5      1.0      1.5

delta(Acid 7)



A194:18

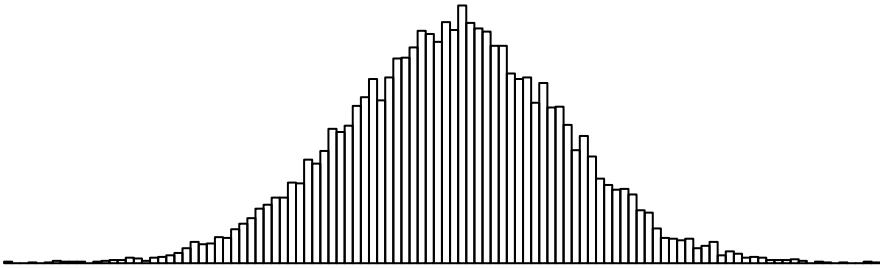

B184:18

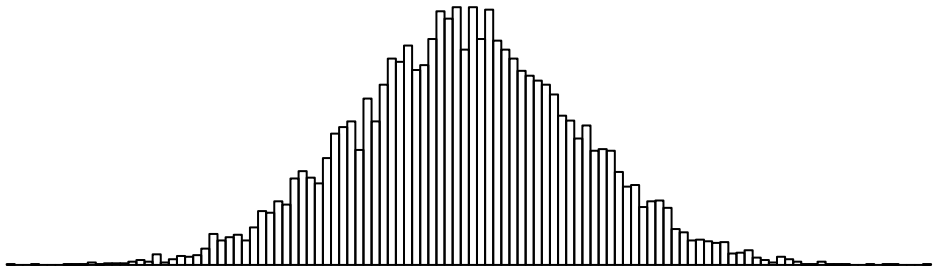

B224:18

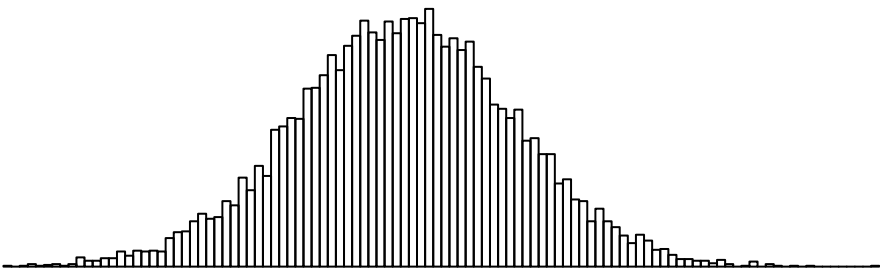

D206:18

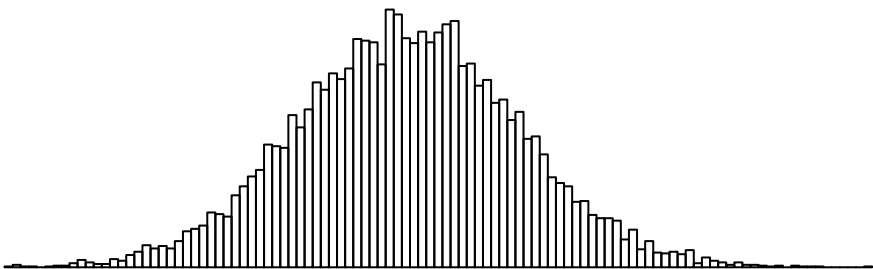

-5.0      -4.5      -4.0      -3.5      -3.0      -2.5      -2.0

Acid 8

A194:18 – B184:18

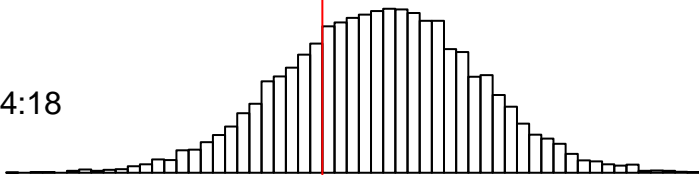

A194:18 – B224:18

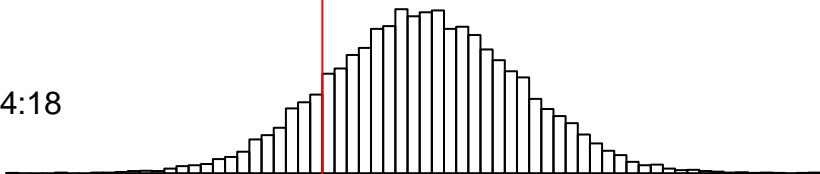

A194:18 – D206:18

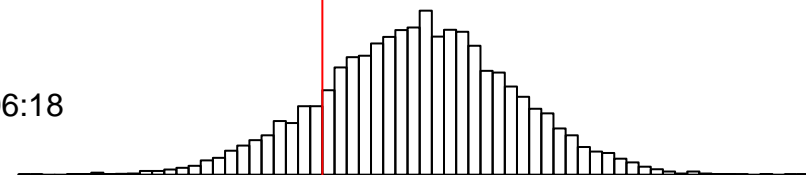

B184:18 – B224:18

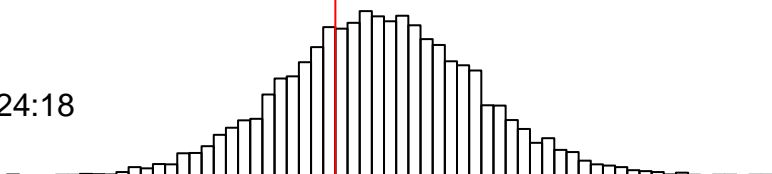

B184:18 – D206:18

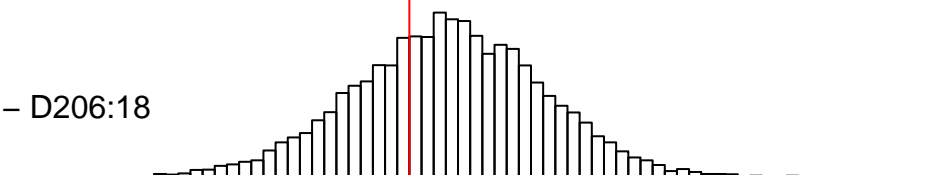

B224:18 – D206:18

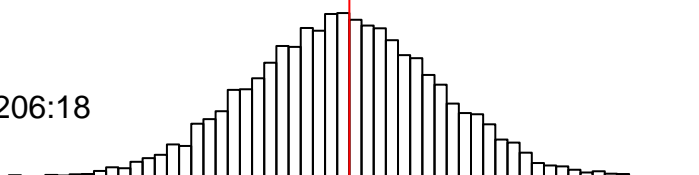

delta(Acid 8)

A194:18

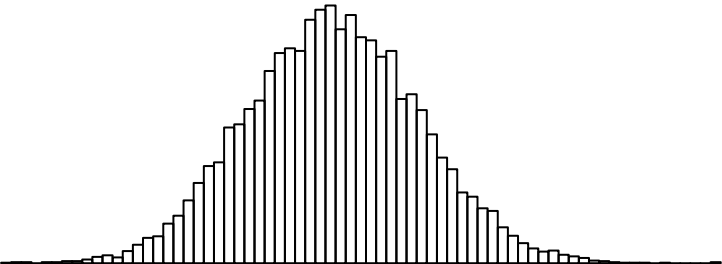

B184:18

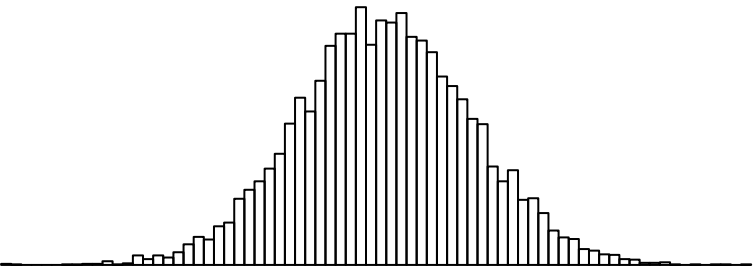

B224:18

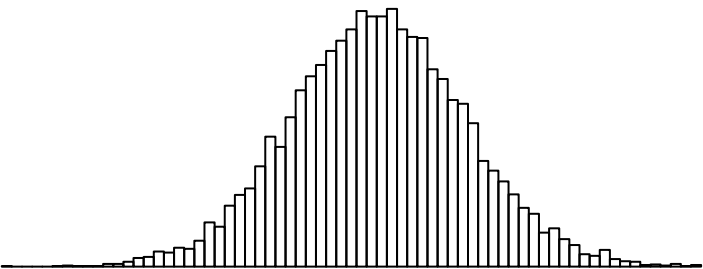

D206:18

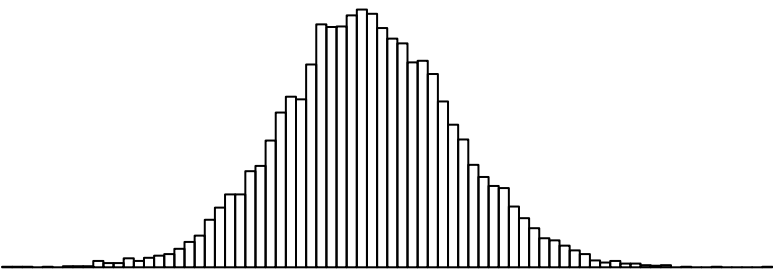

Acid 9

A194:18 – B184:18

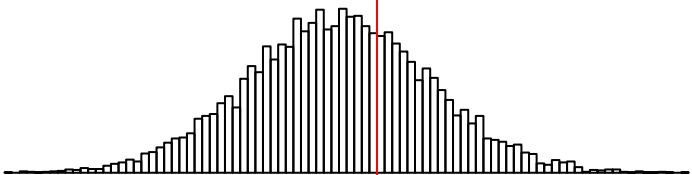

A194:18 – B224:18

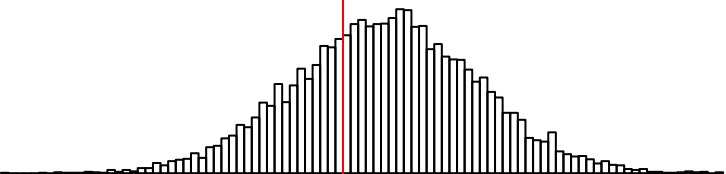

A194:18 – D206:18

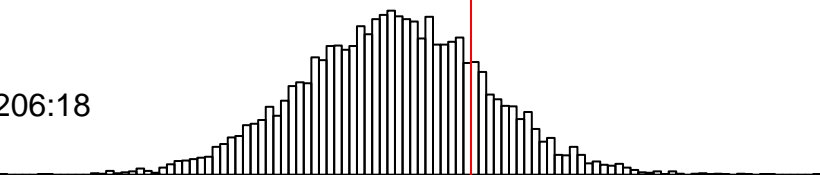

B184:18 – B224:18

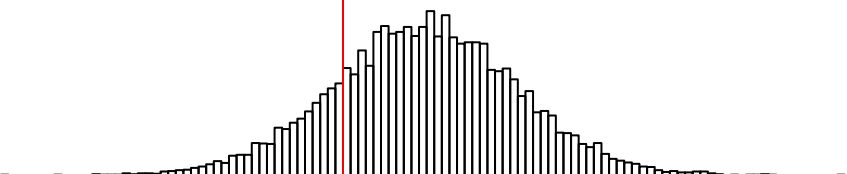

B184:18 – D206:18

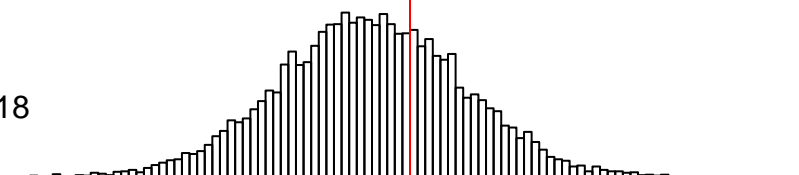

B224:18 – D206:18

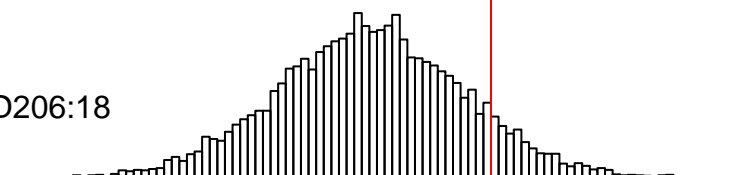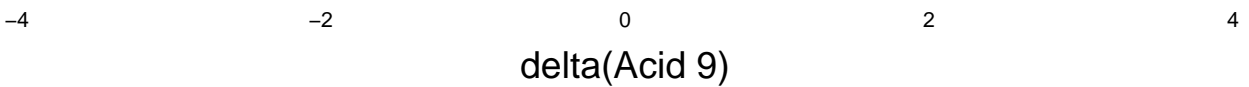

A194:18

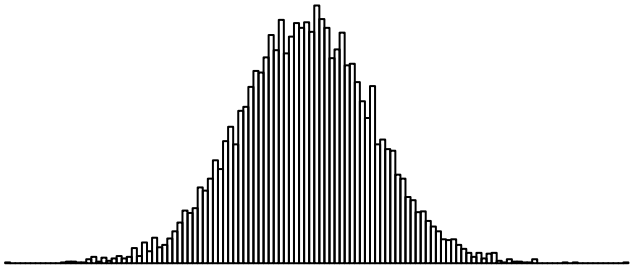

B184:18

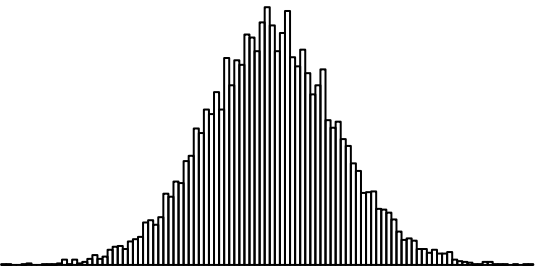

B224:18

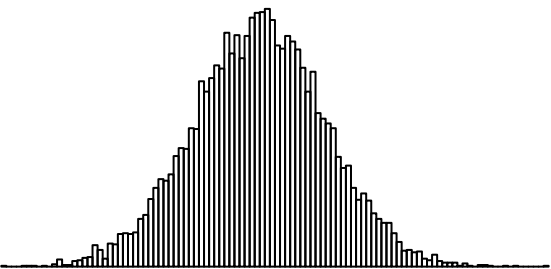

D206:18

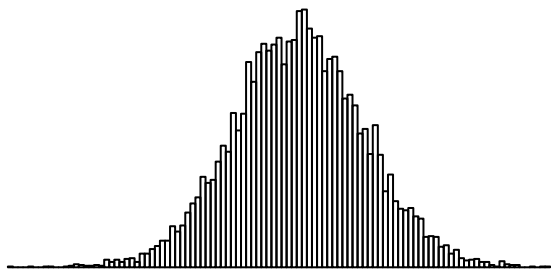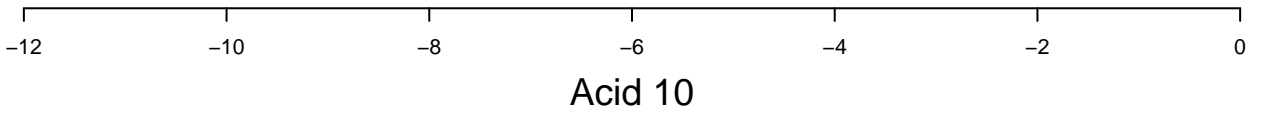

A194:18 – B184:18

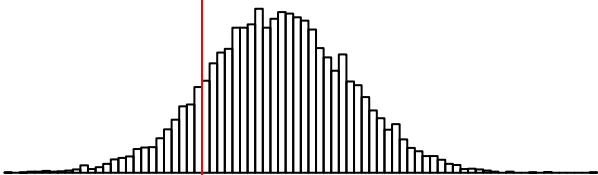

A194:18 – B224:18

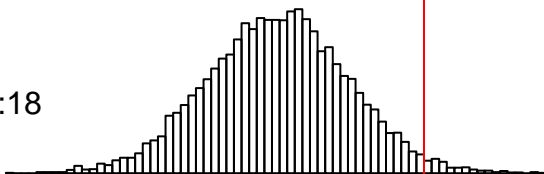

A194:18 – D206:18

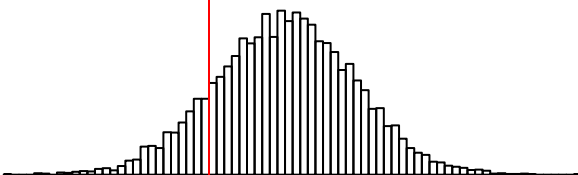

B184:18 – B224:18

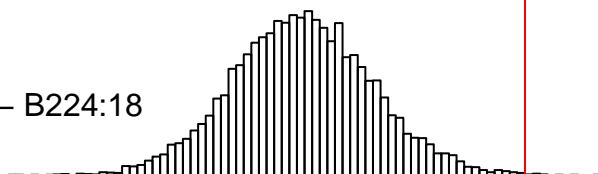

B184:18 – D206:18

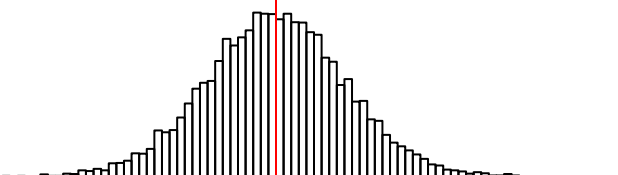

B224:18 – D206:18

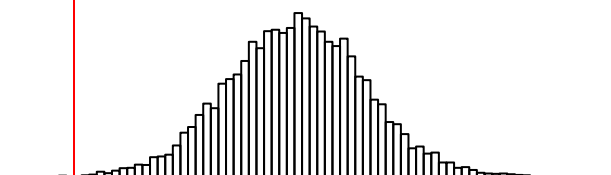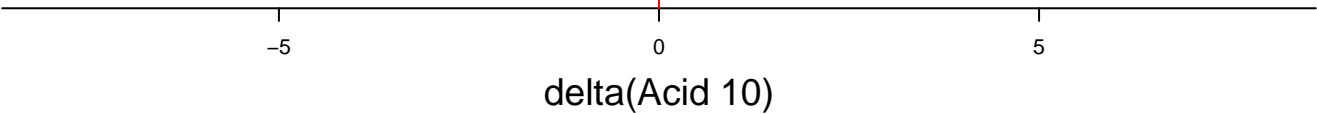

A194:18

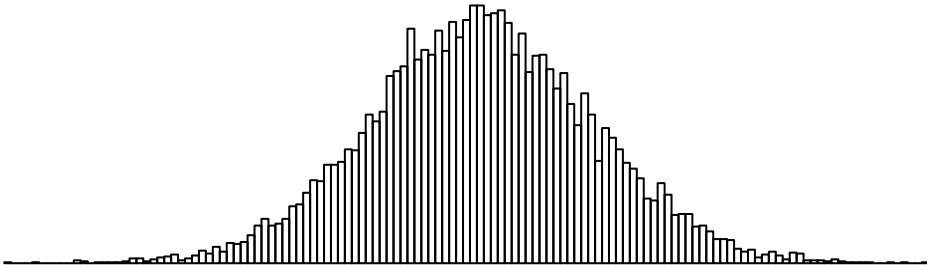

B184:18

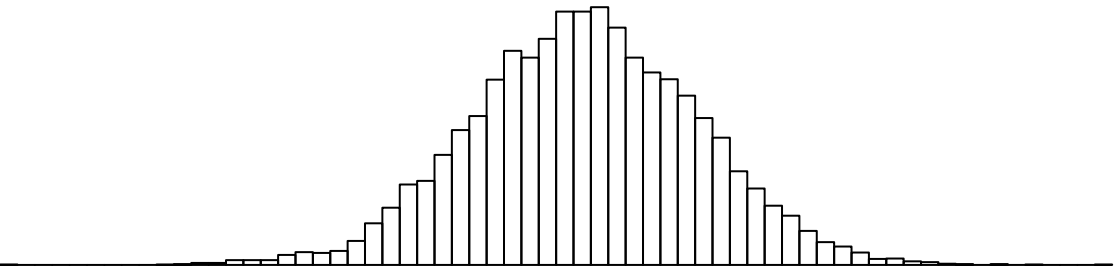

B224:18

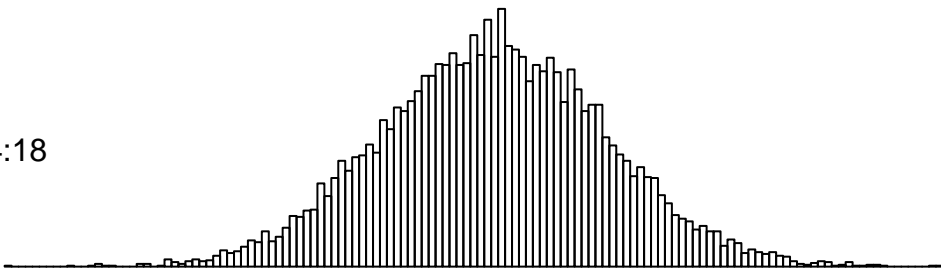

D206:18

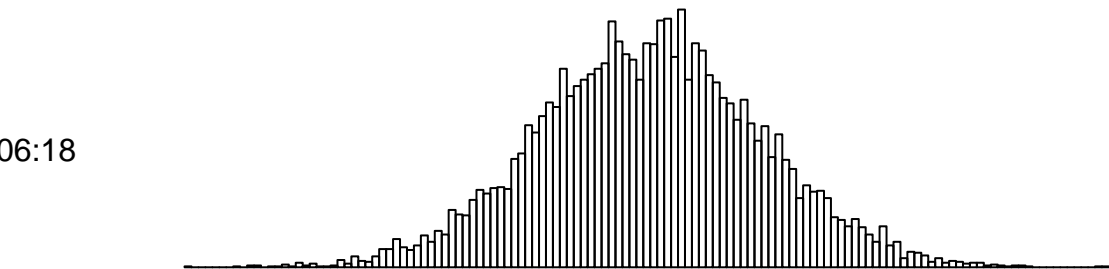

-8.5      -8.0      -7.5      -7.0      -6.5      -6.0      -5.5      -5.0

Acid 11

A194:18 – B184:18

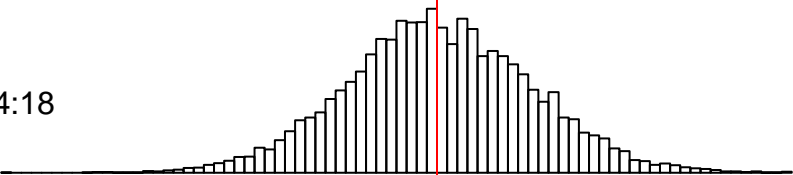

A194:18 – B224:18

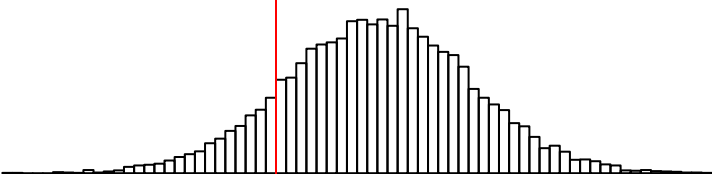

A194:18 – D206:18

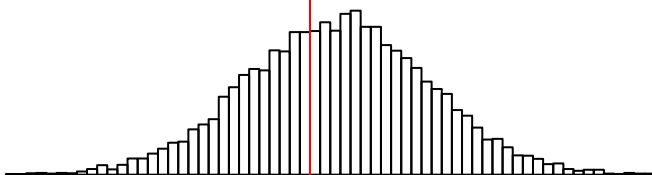

B184:18 – B224:18

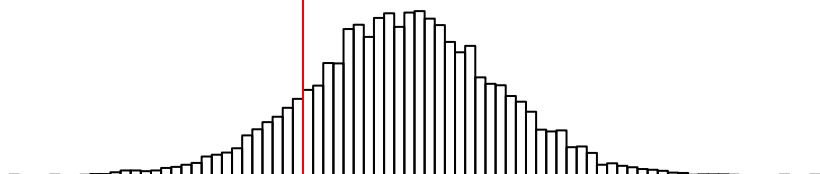

B184:18 – D206:18

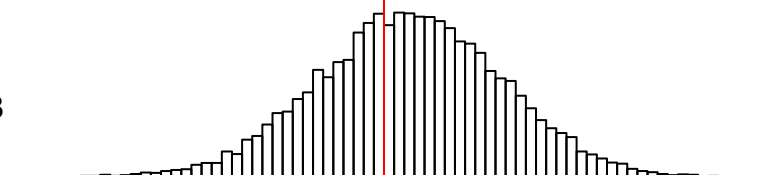

B224:18 – D206:18

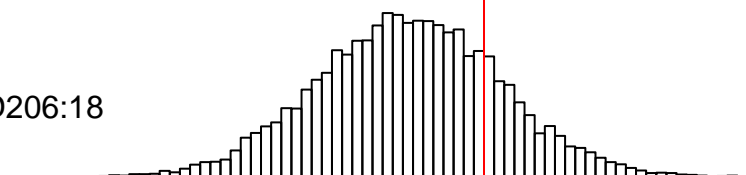

delta(Acid 11)



A194:18

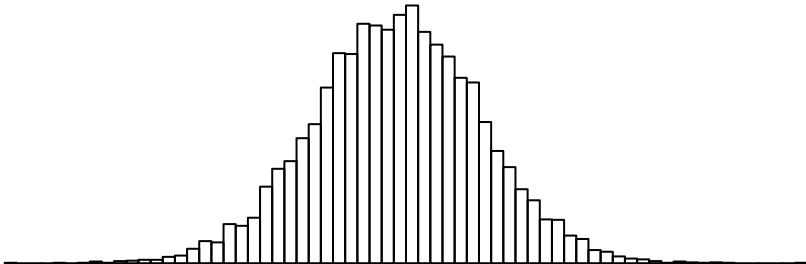

B184:18

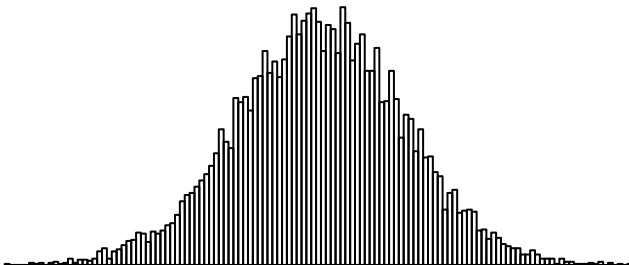

B224:18

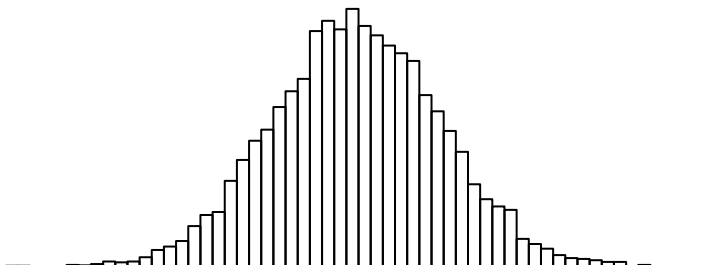

D206:18

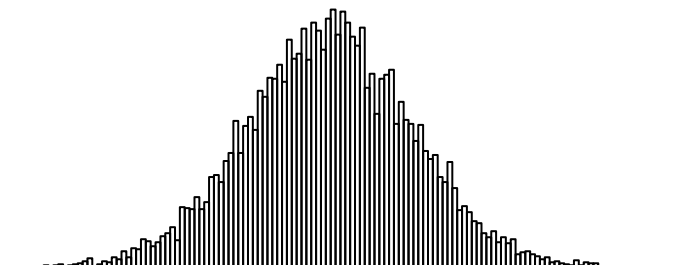

-8 -7 -6 -5 -4 -3

Acid 12

A194:18 – B184:18

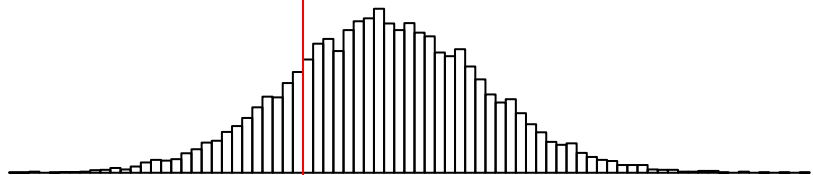

A194:18 – B224:18

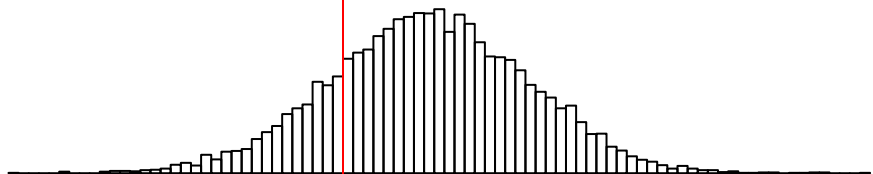

A194:18 – D206:18

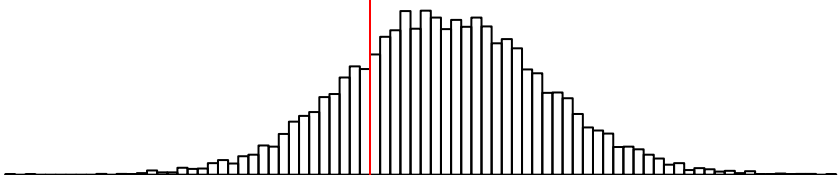

B184:18 – B224:18

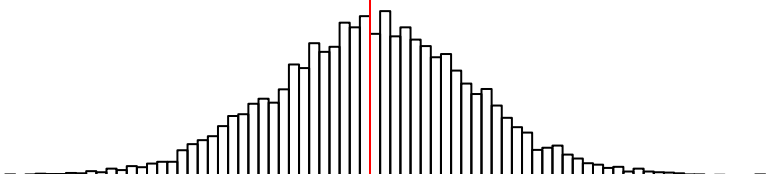

B184:18 – D206:18

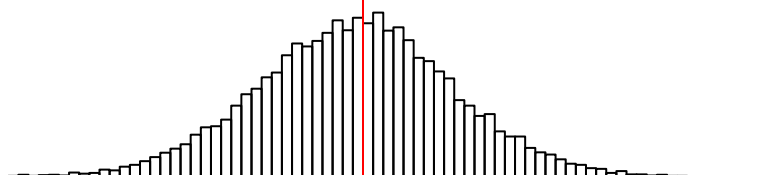

B224:18 – D206:18

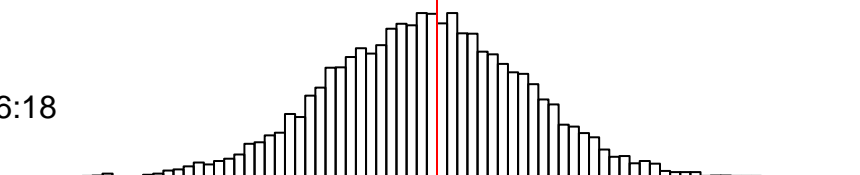

-3 -2 -1 0 1 2 3

delta(Acid 12)

A194:18

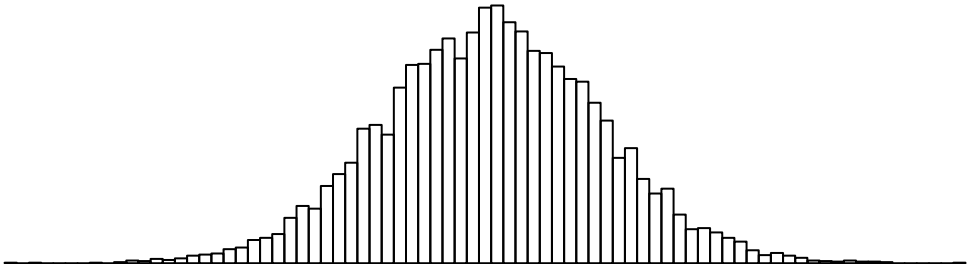

B184:18

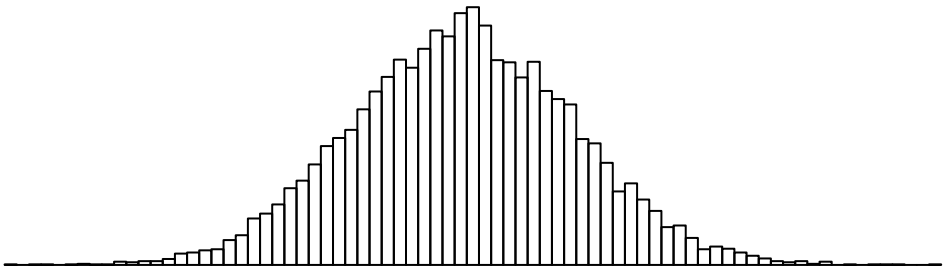

B224:18

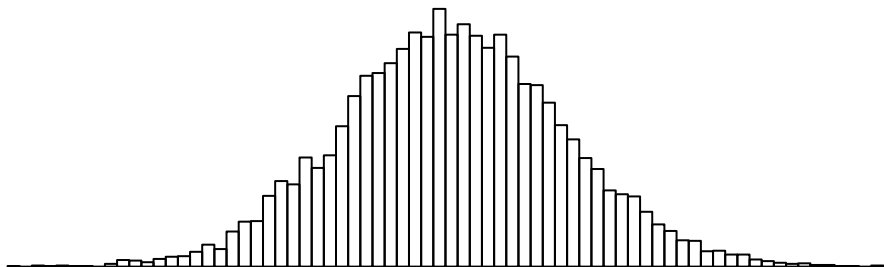

D206:18

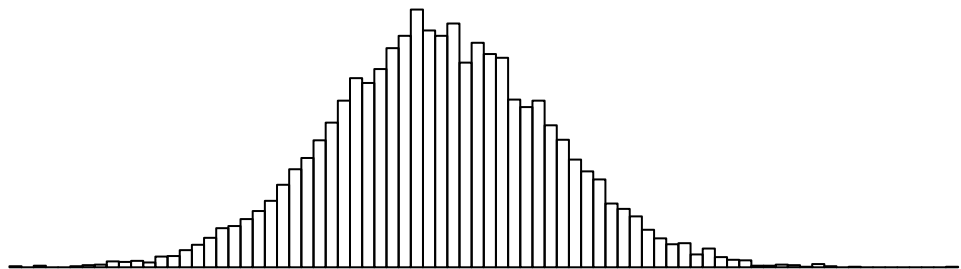

-10      -9      -8      -7      -6      -5

Acid 13

A194:18 – B184:18

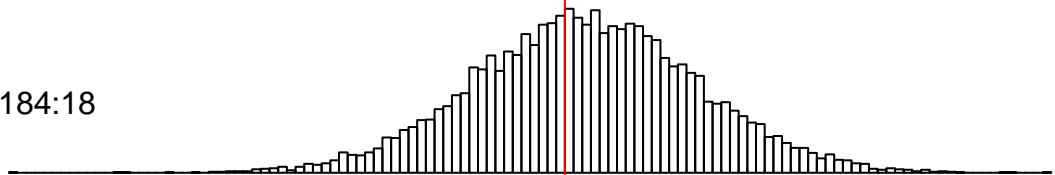

A194:18 – B224:18

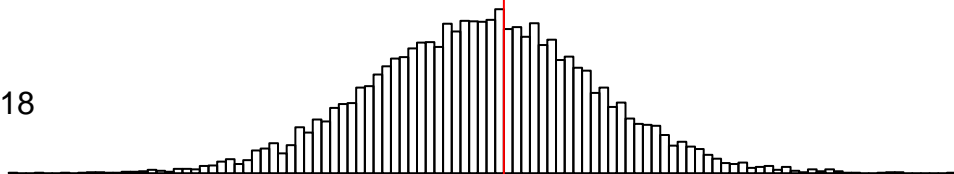

A194:18 – D206:18

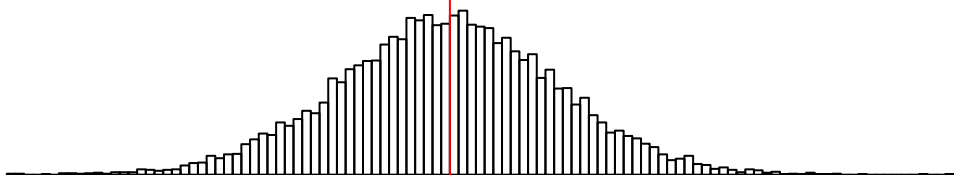

B184:18 – B224:18

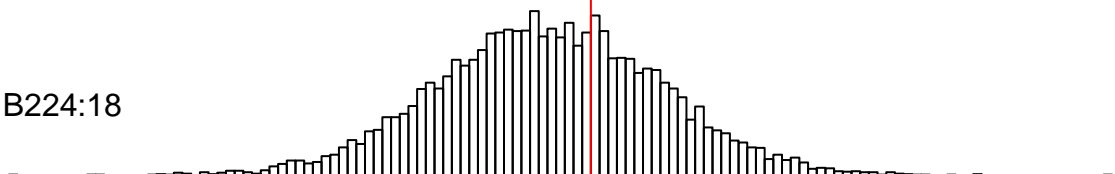

B184:18 – D206:18

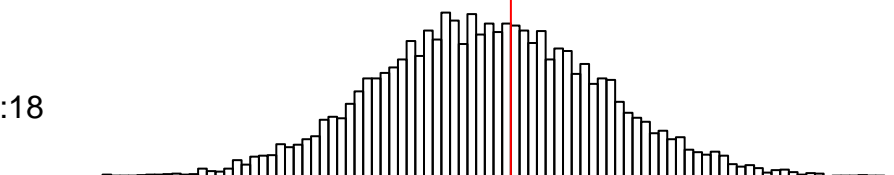

B224:18 – D206:18

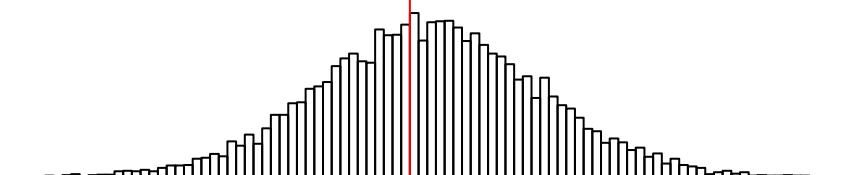

-4 -3 -2 -1 0 1 2 3

delta(Acid 13)

A194:18

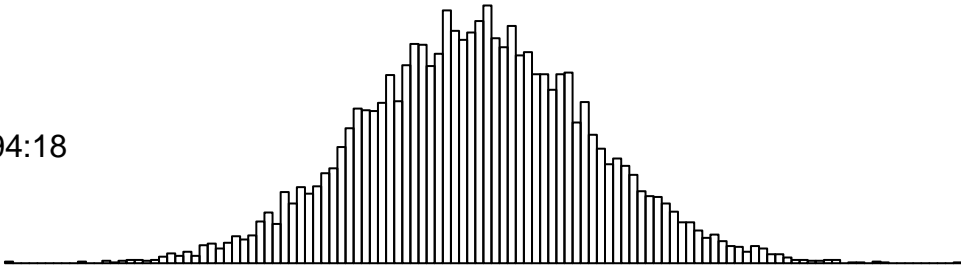

B184:18

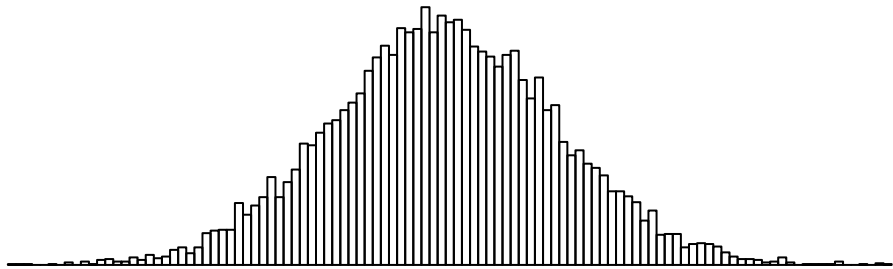

B224:18

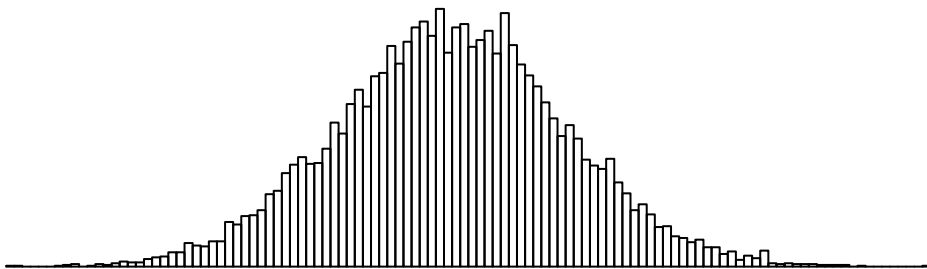

D206:18

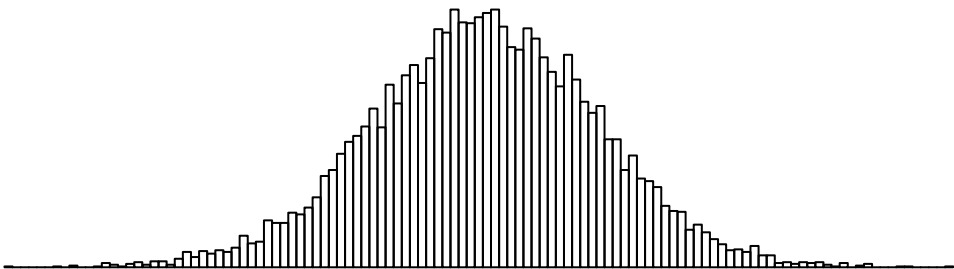

-8.0      -7.5      -7.0      -6.5      -6.0      -5.5      -5.0

Acid 14

A194:18 – B184:18

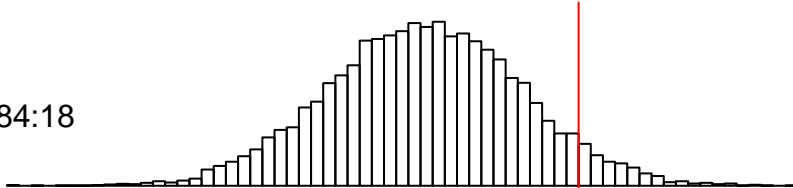

A194:18 – B224:18

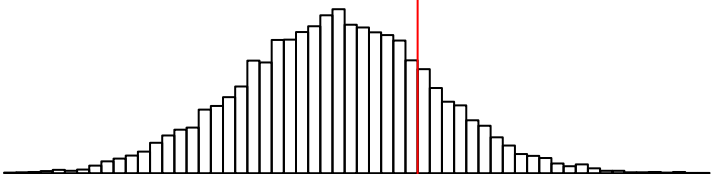

A194:18 – D206:18

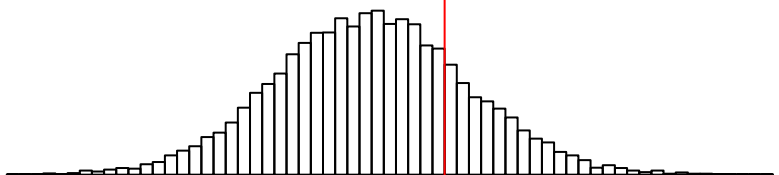

B184:18 – B224:18

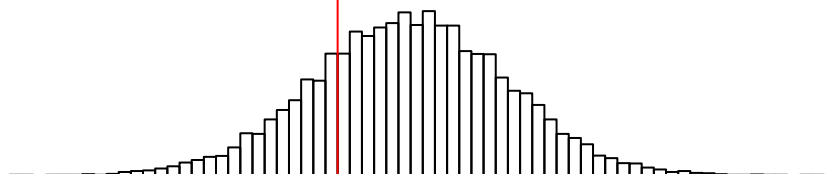

B184:18 – D206:18

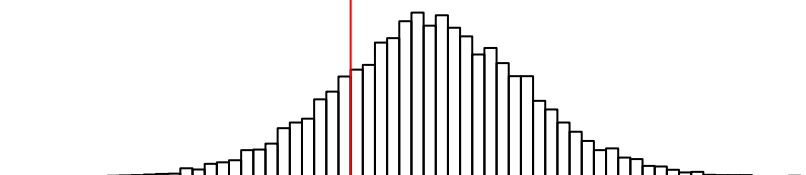

B224:18 – D206:18

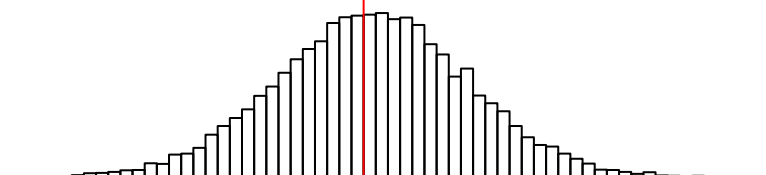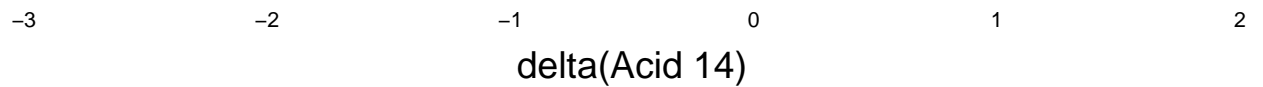

Supplement: s1 [file s1]
