# Supplementary material for: Taxonomic and Environmental Variation of Metabolite Profiles in Marine Dinoflagellates of the Genus Symbiodinium
Source: MDPI journal article supplement (doi:10.3390/metabo5010074), 2015-02-16
Supplement: s1 [file s1]

B184:240

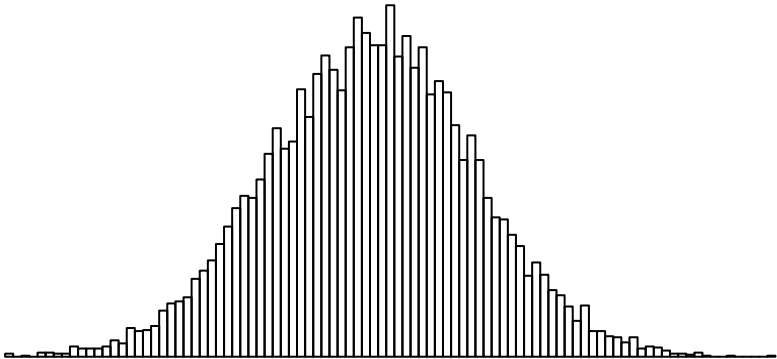

B184:120

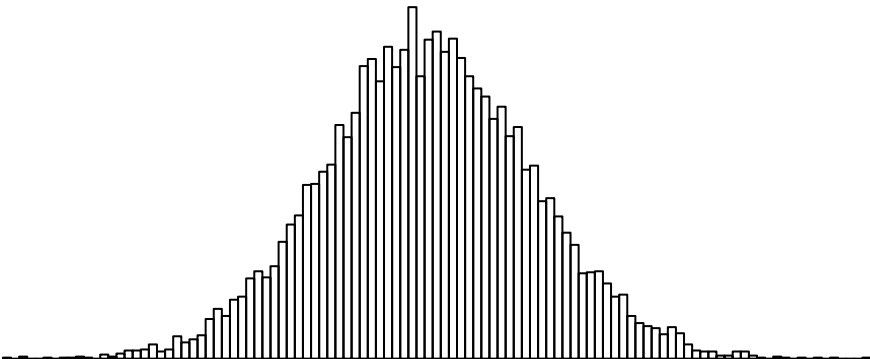

B184:45

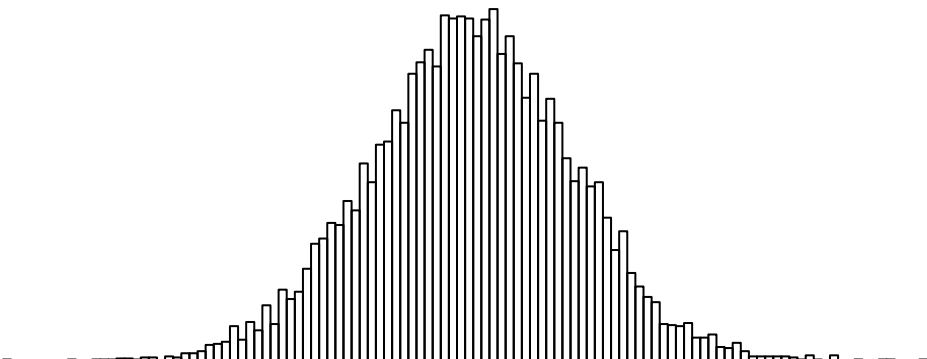

-5.5      -5.0      -4.5      -4.0      -3.5      -3.0      -2.5

Amino Acid 2

B184:240 – B184:120

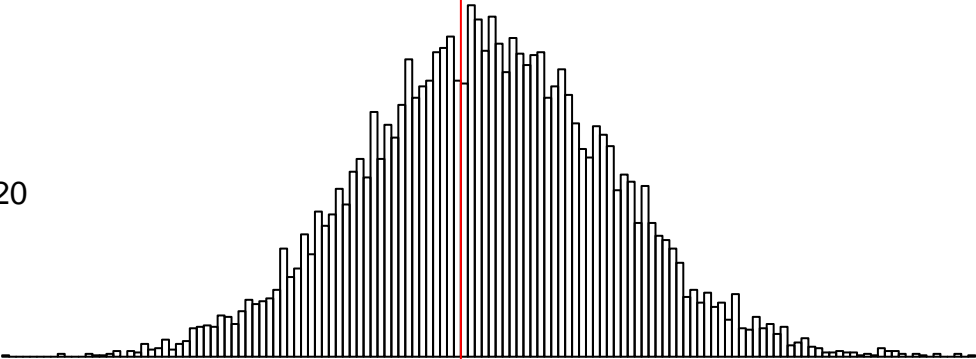

B184:240 – B184:45

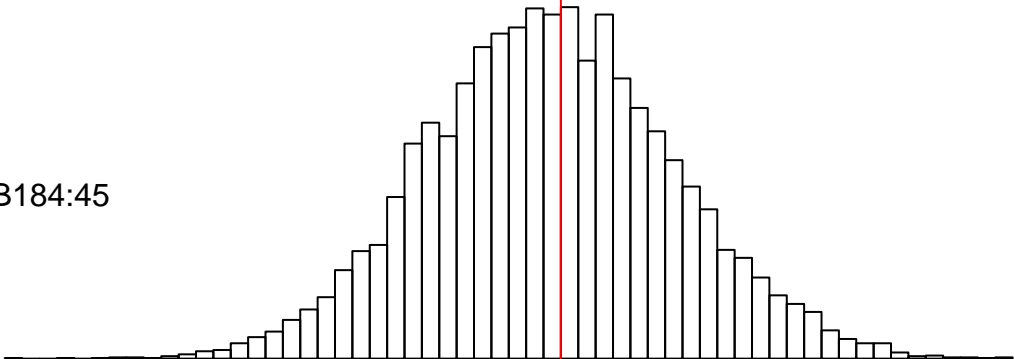

B184:120 – B184:45

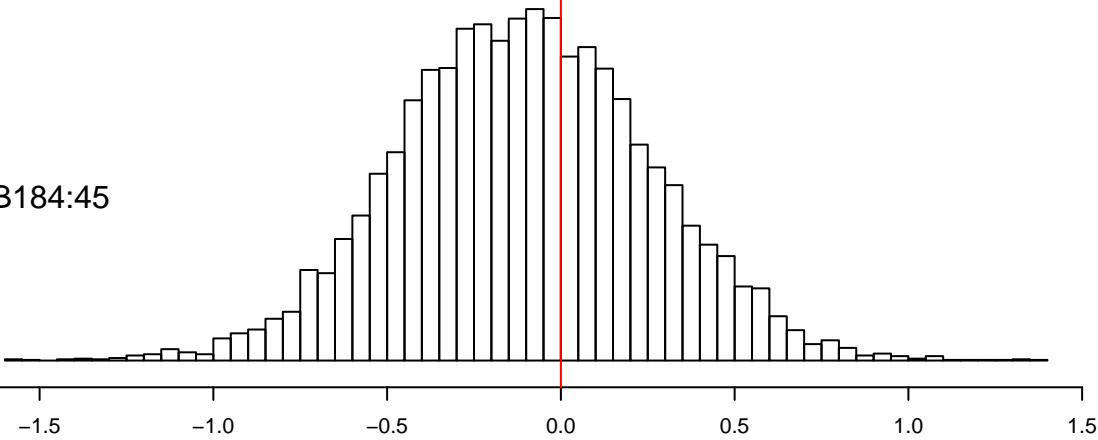

delta(Amino Acid 2)

B184:240

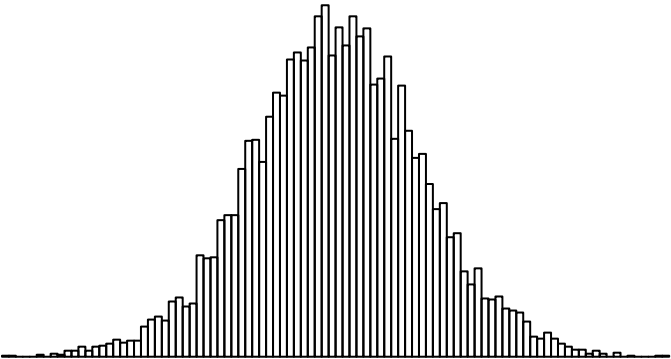

B184:120

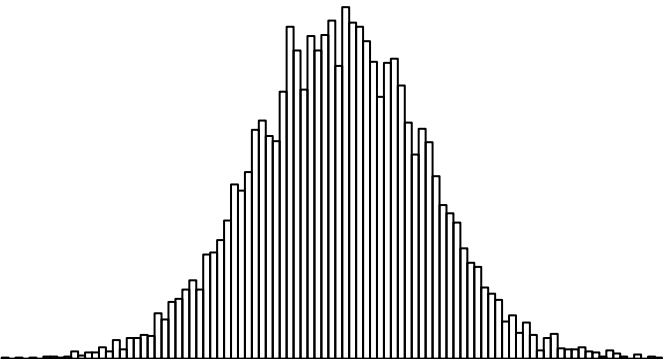

B184:45

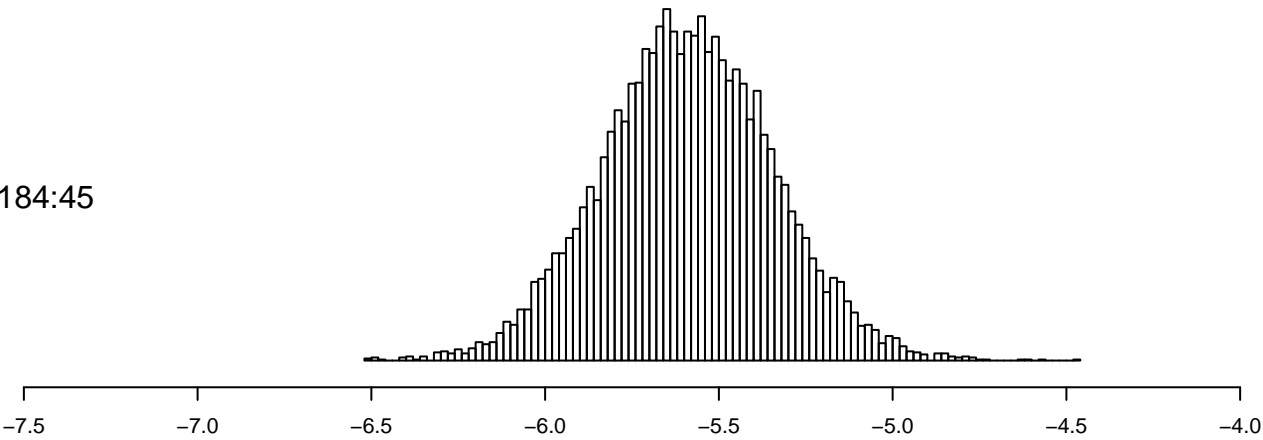

Amino Acid 3

B184:240 – B184:120

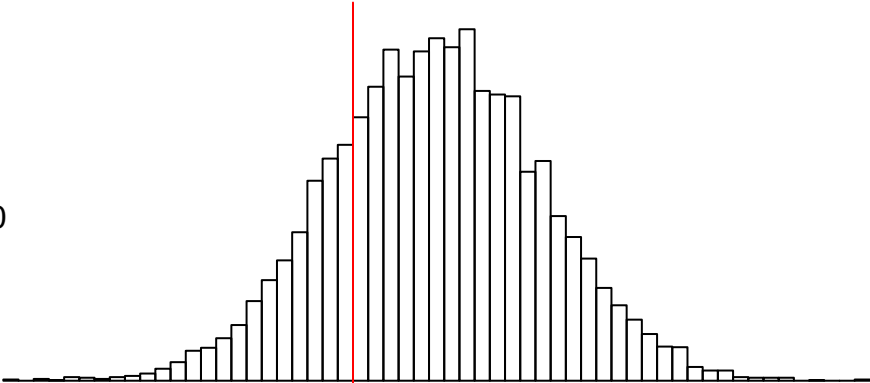

B184:240 – B184:45

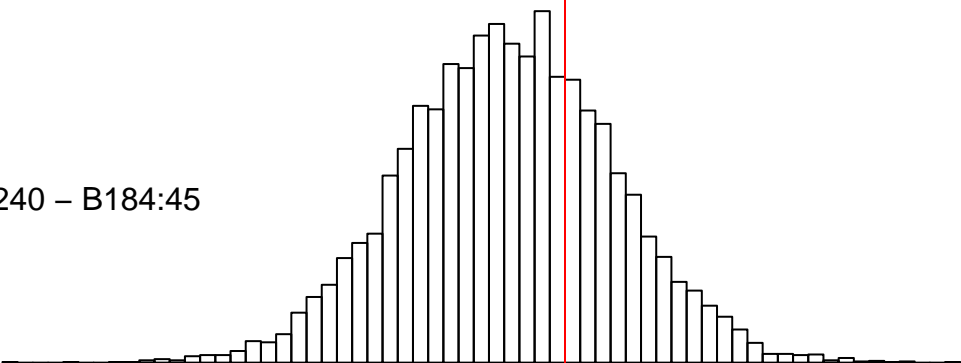

B184:120 – B184:45

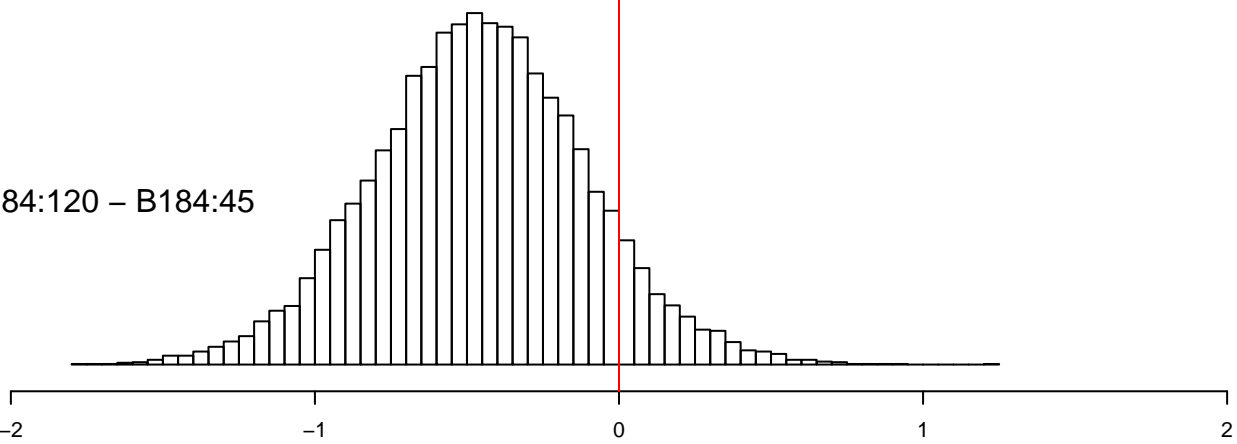

delta(Amino Acid 3)

B184:240

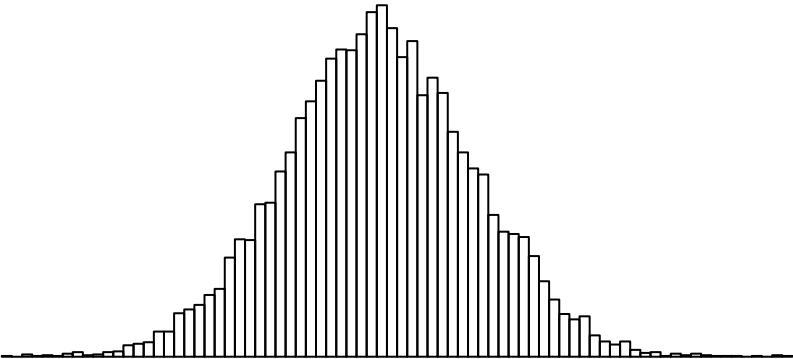

B184:120

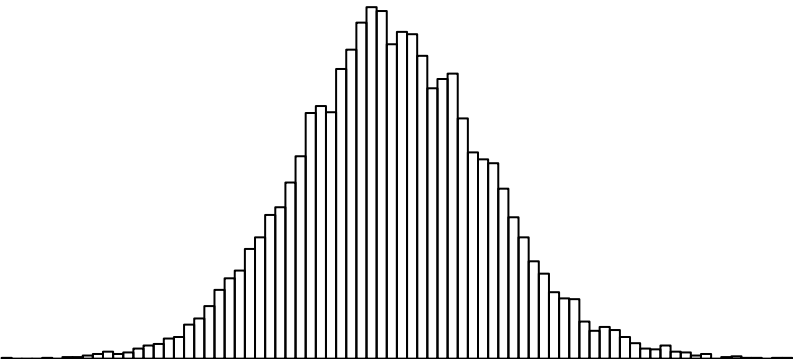

B184:45

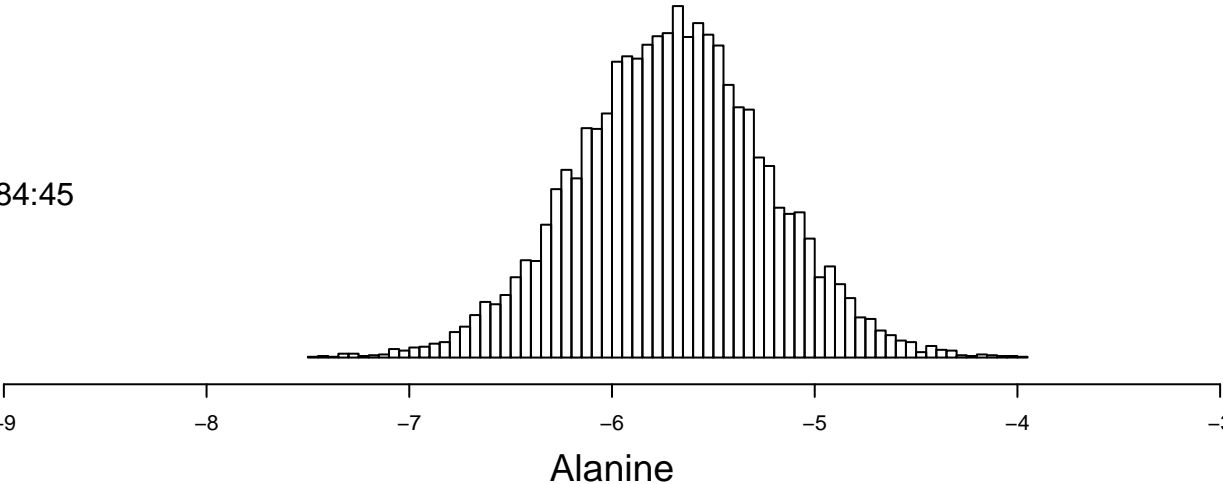

B184:240 – B184:120

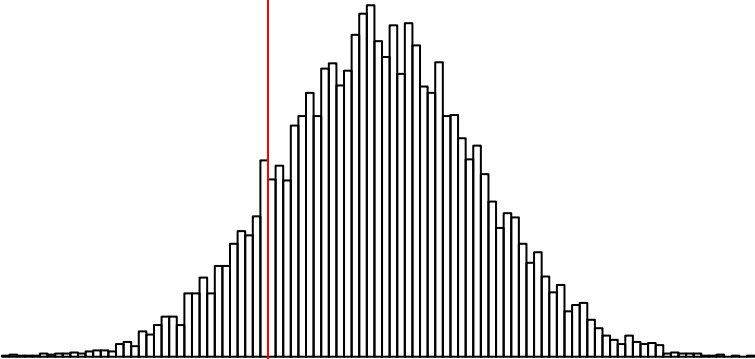

B184:240 – B184:45

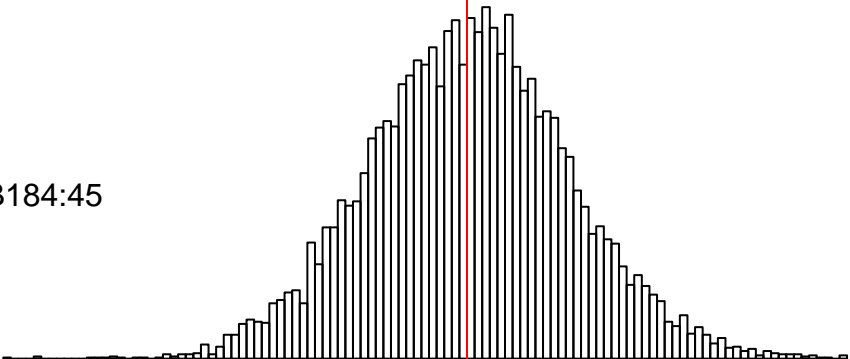

B184:120 – B184:45

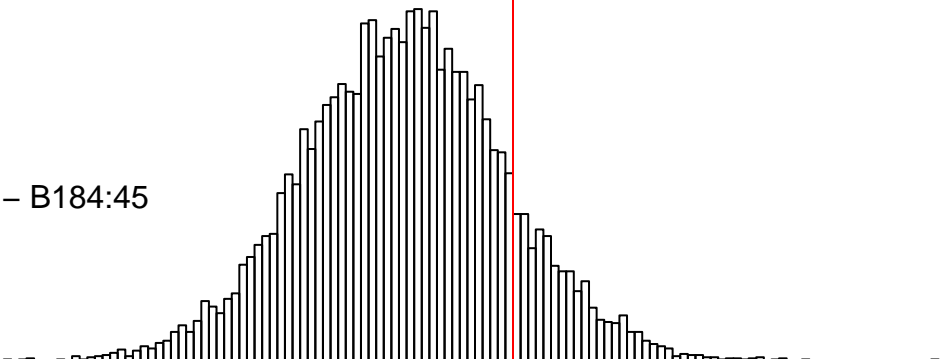

delta(Alanine)

B184:240

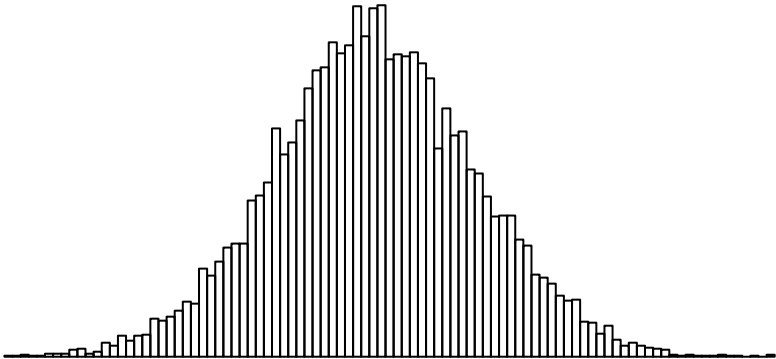

B184:120

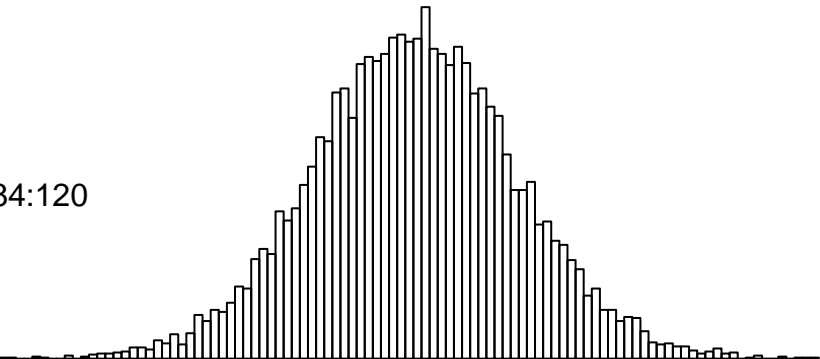

B184:45

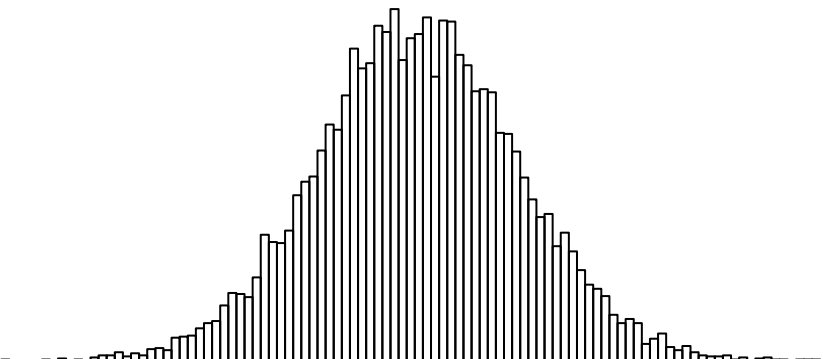

-8.0 -7.5 -7.0 -6.5 -6.0 -5.5 -5.0

Amino Acid 4

B184:240 – B184:120

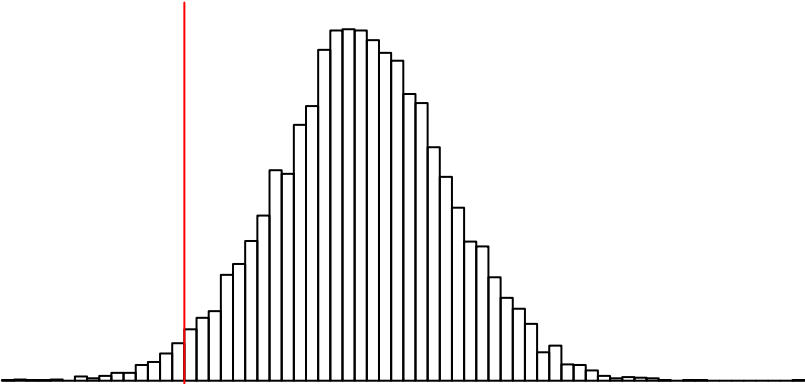

B184:240 – B184:45

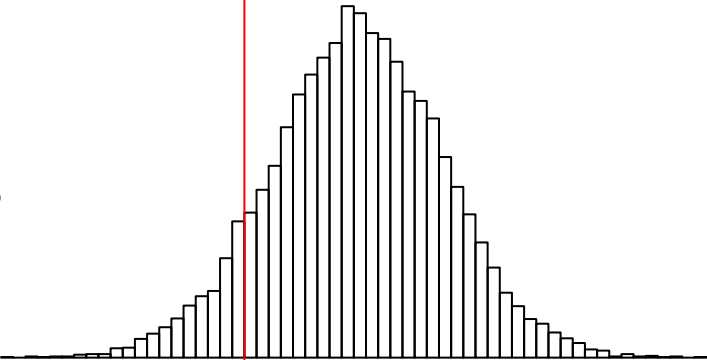

B184:120 – B184:45

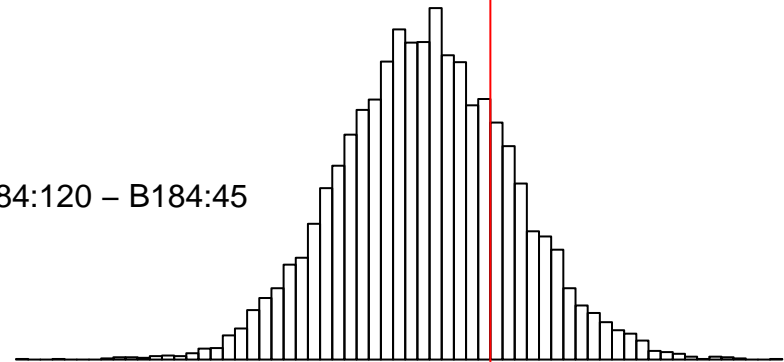

-2

-1

0

1

2

3

delta(Amino Acid 4)



B184:240

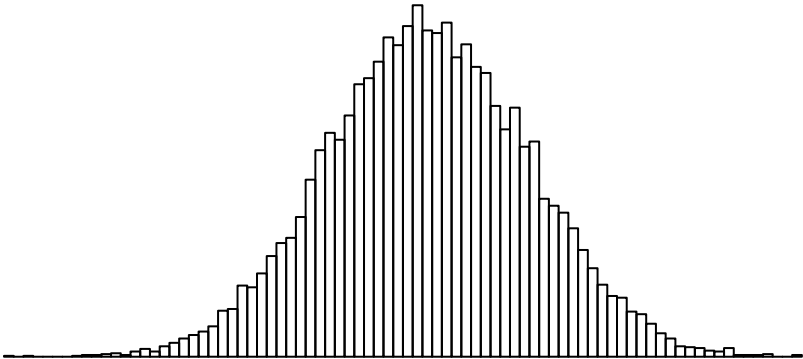

B184:120

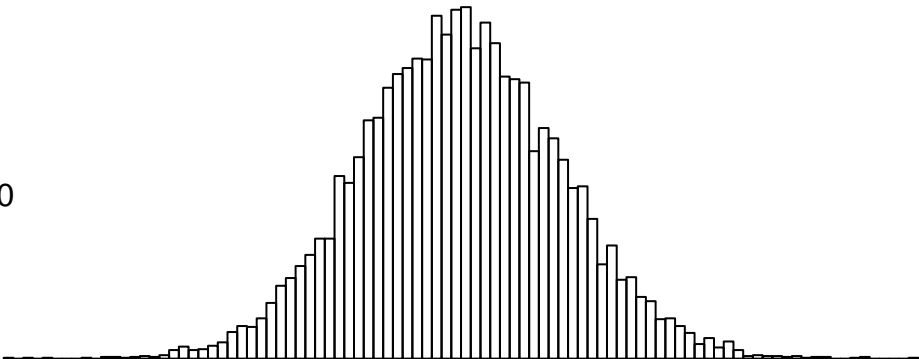

B184:45

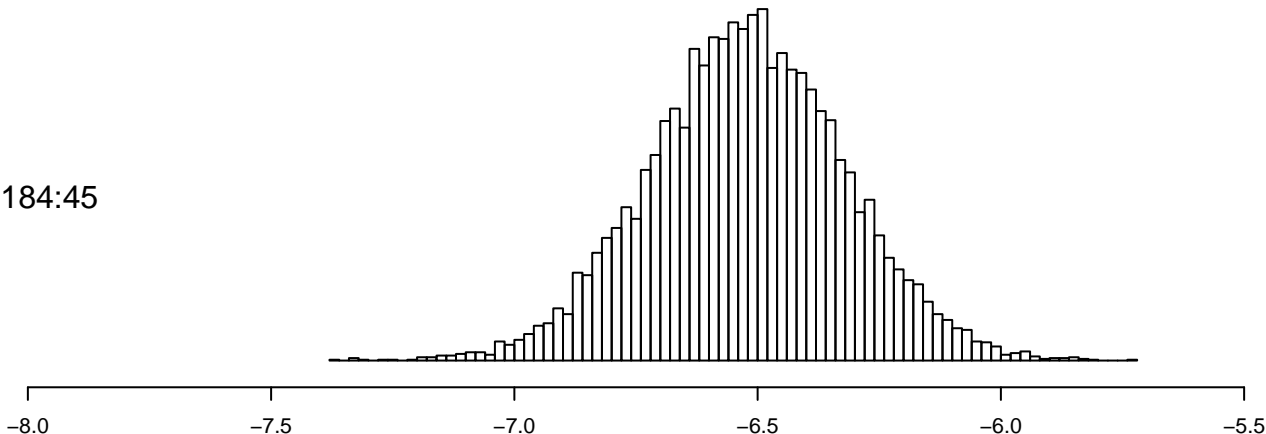

Amino Acid 6

B184:240 – B184:120

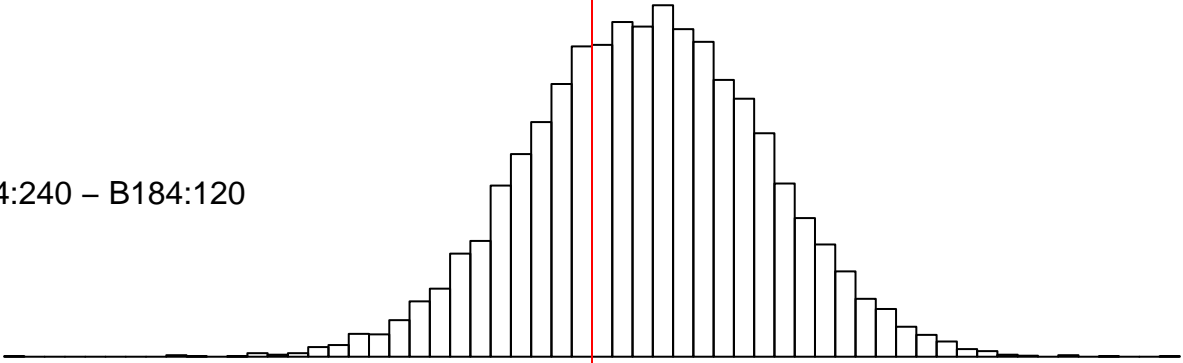

B184:240 – B184:45

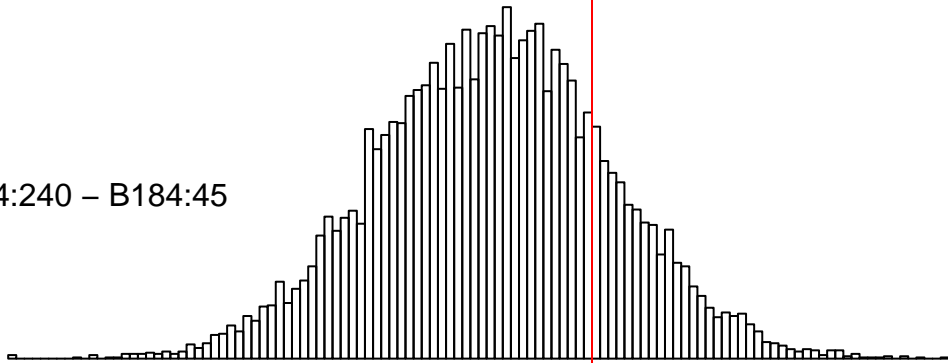

B184:120 – B184:45

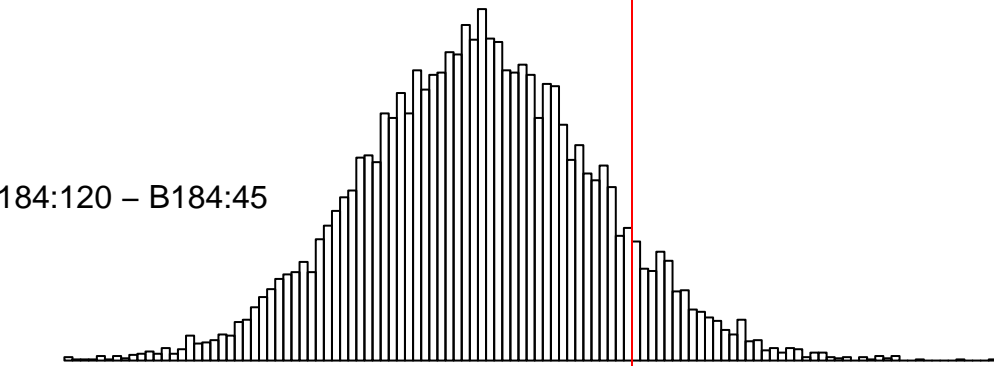

-1.5      -1.0      -0.5      0.0      0.5      1.0      1.5

delta(Amino Acid 6)

B184:240

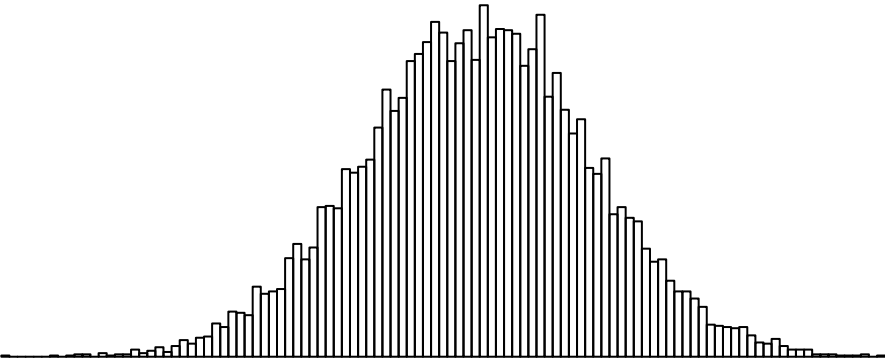

B184:120

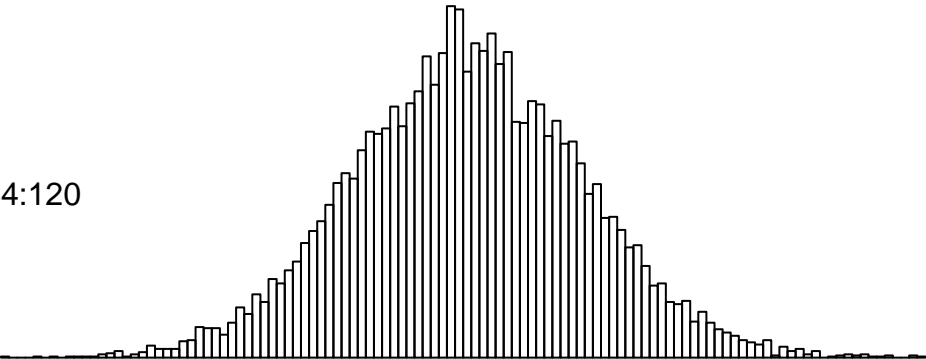

B184:45

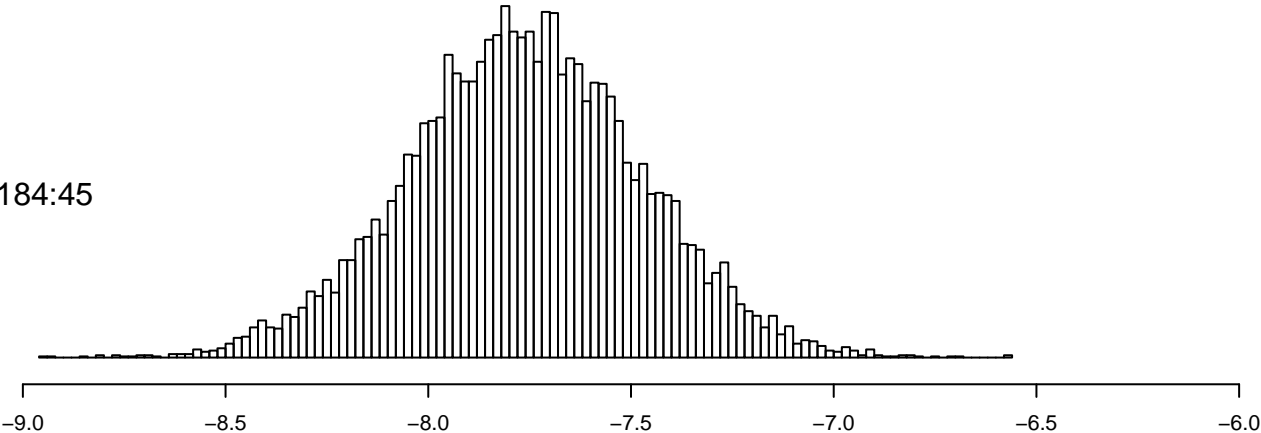

Valine

B184:240 – B184:120

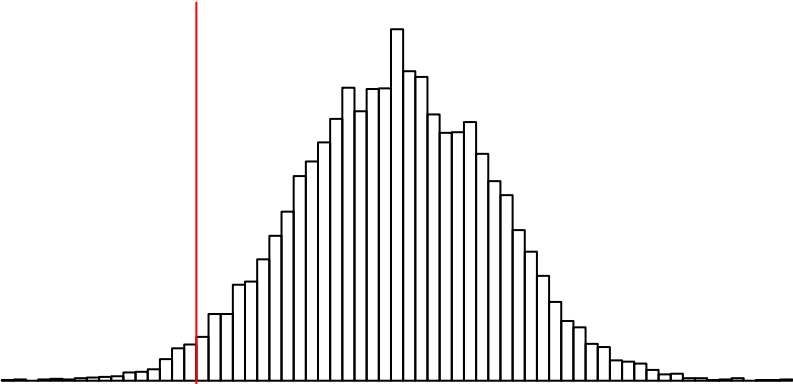

B184:240 – B184:45

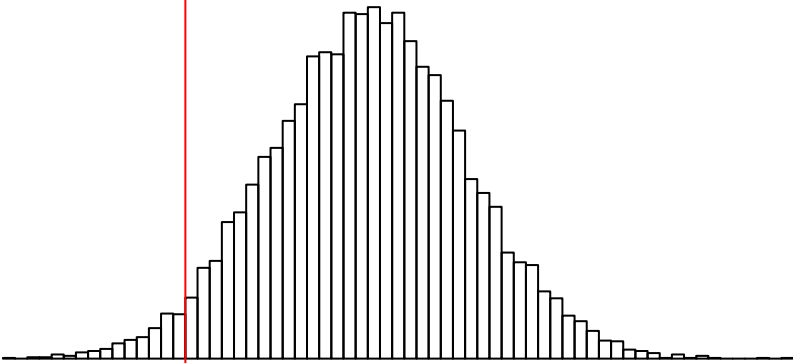

B184:120 – B184:45

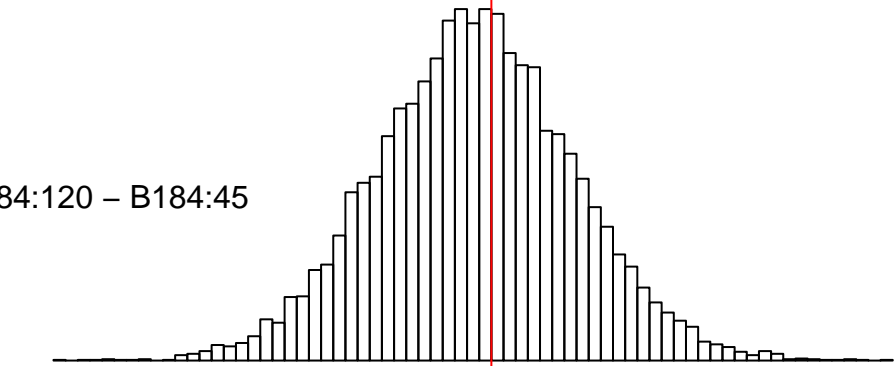

delta(Valine)

B184:240

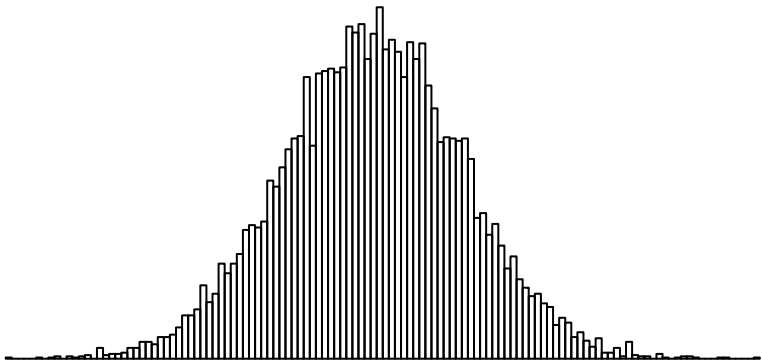

B184:120

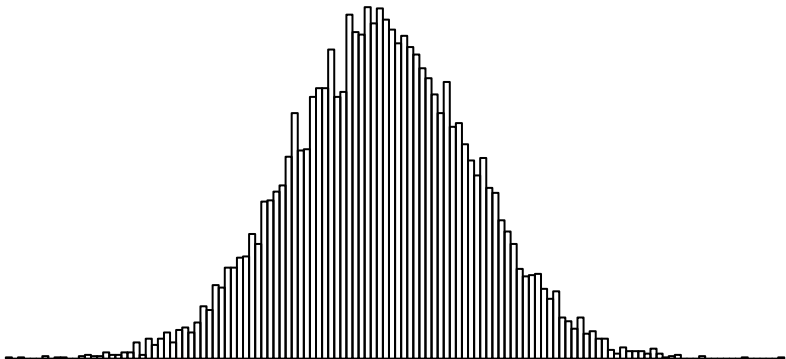

B184:45

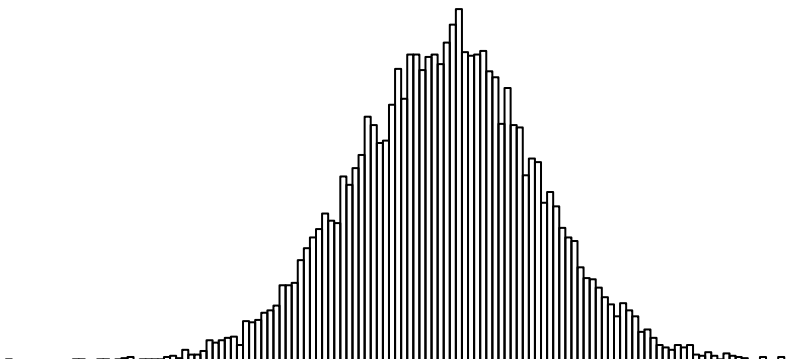

-8 -7 -6 -5 -4

Amino Acid 7

B184:240 – B184:120

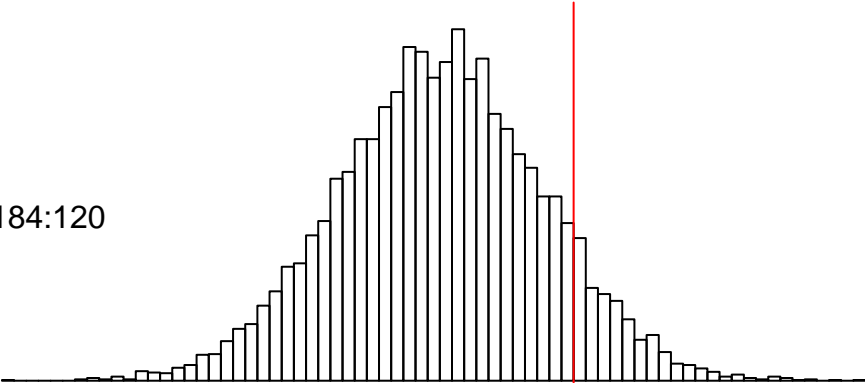

B184:240 – B184:45

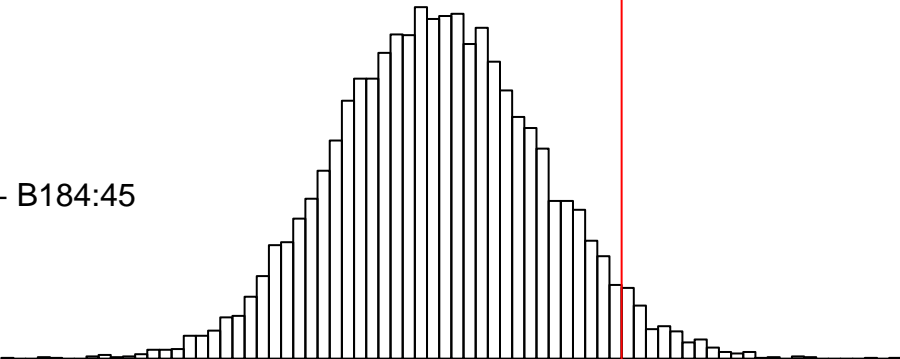

B184:120 – B184:45

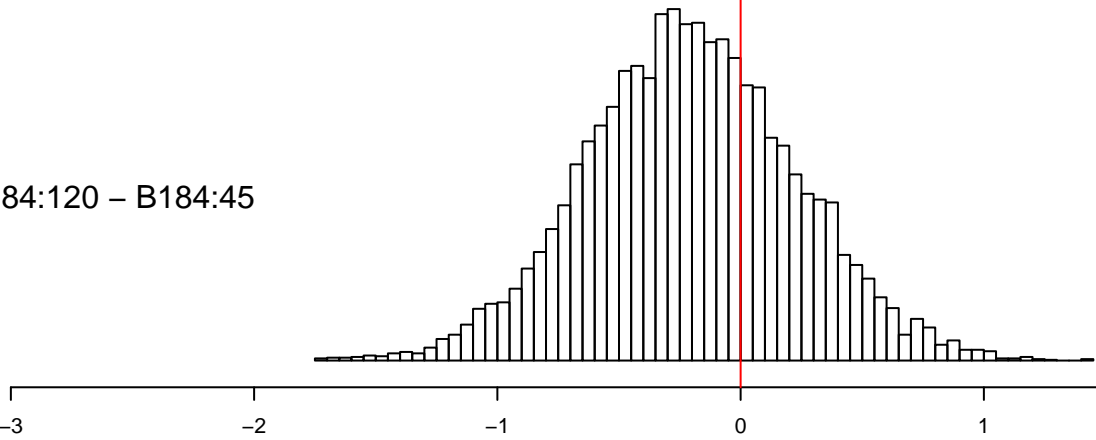

delta(Amino Acid 7)

B184:240

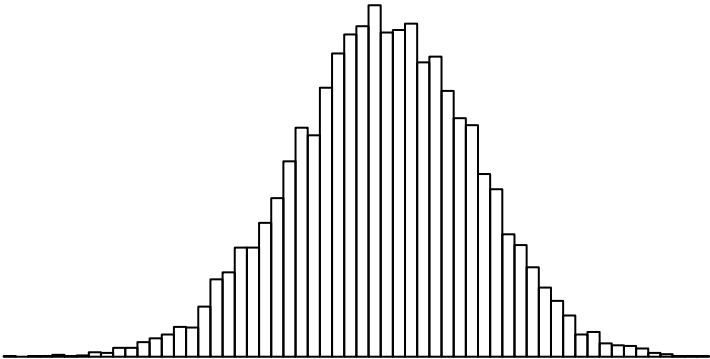

B184:120

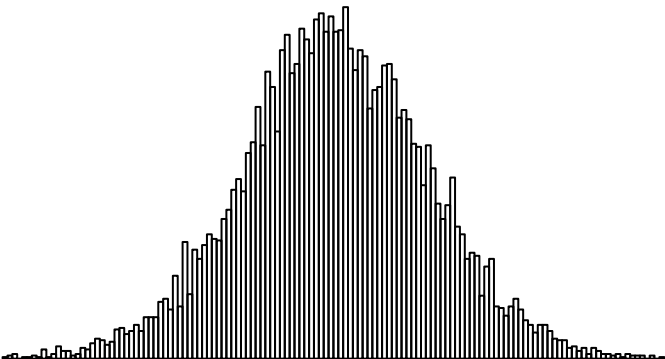

B184:45

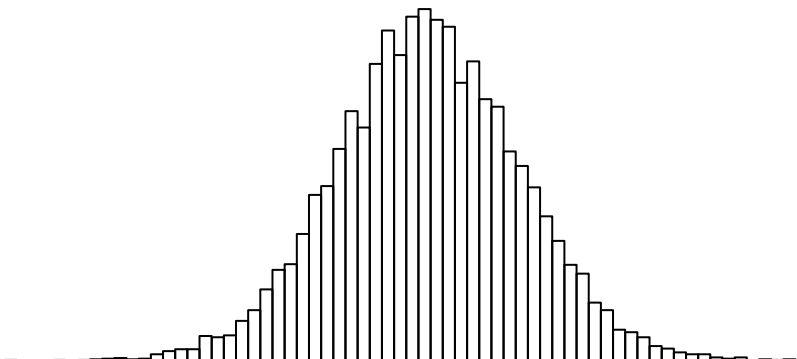

Glycine

B184:240 – B184:120

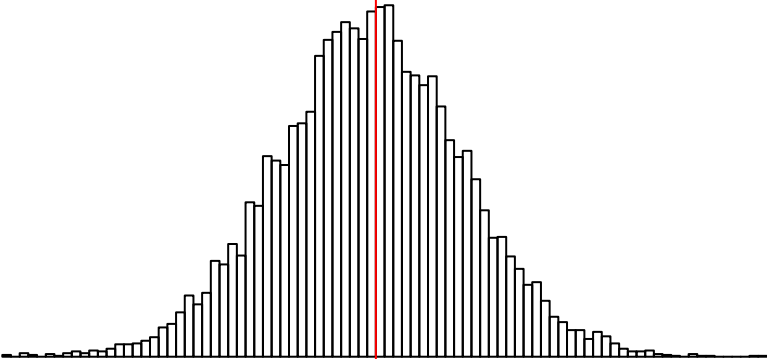

B184:240 – B184:45

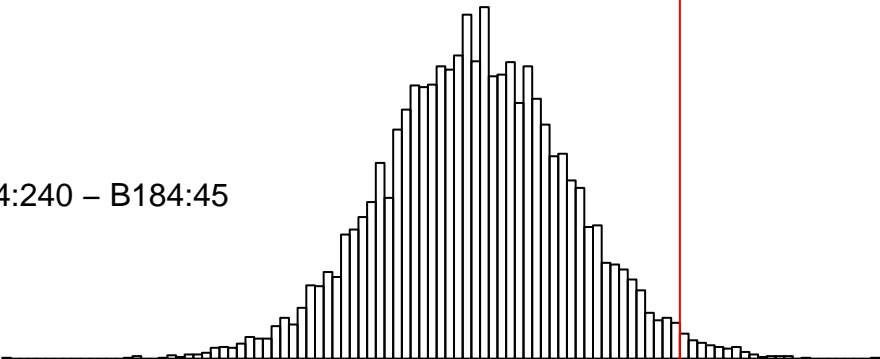

B184:120 – B184:45

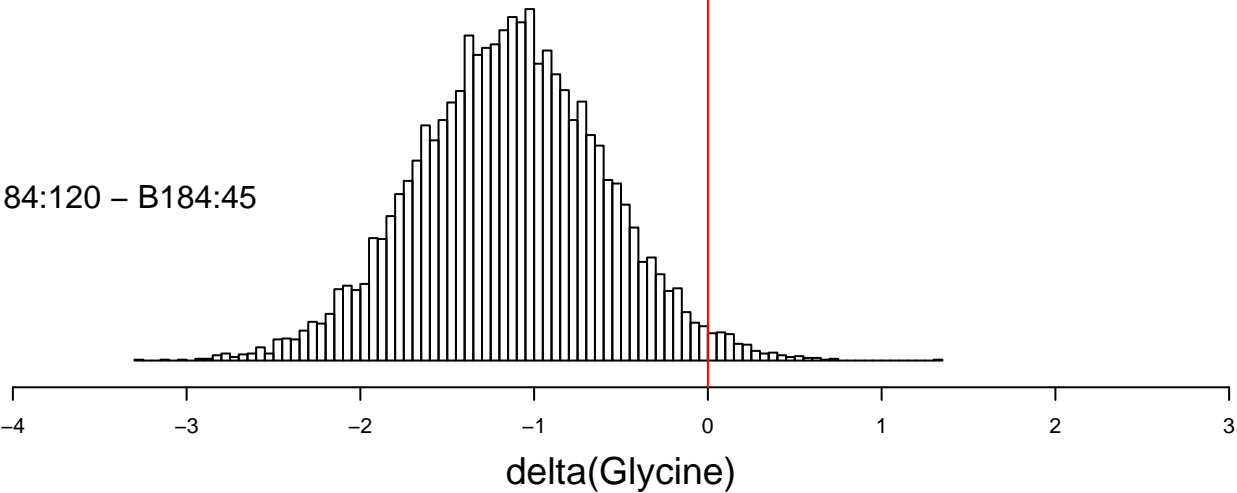



B184:240

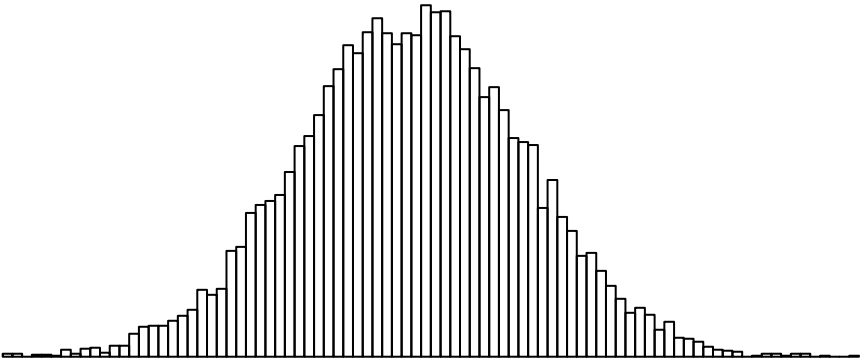

B184:120

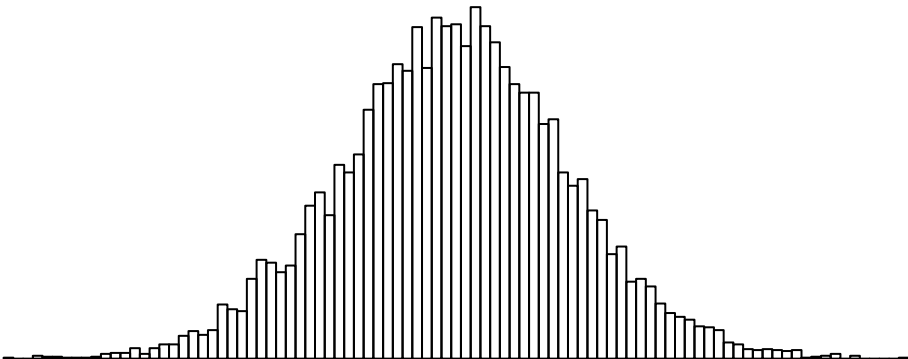

B184:45

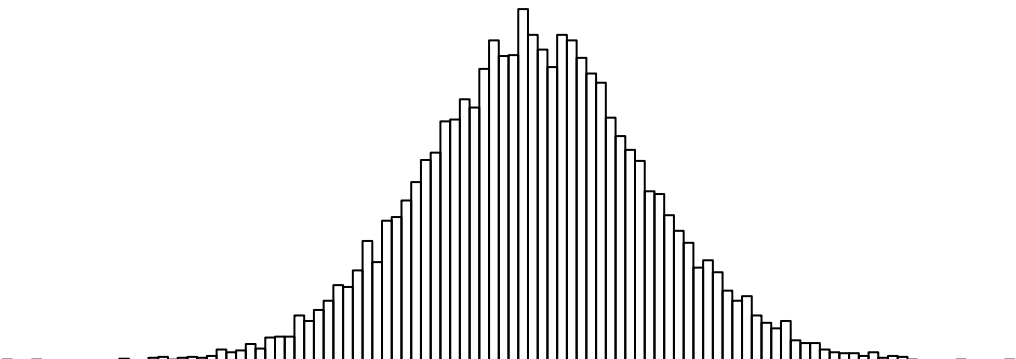

-9.0 -8.5 -8.0 -7.5 -7.0 -6.5

Amino Acid 8

B184:240 – B184:120

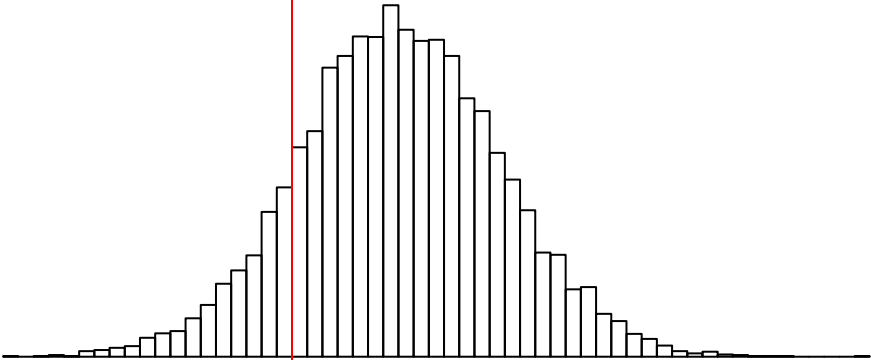

B184:240 – B184:45

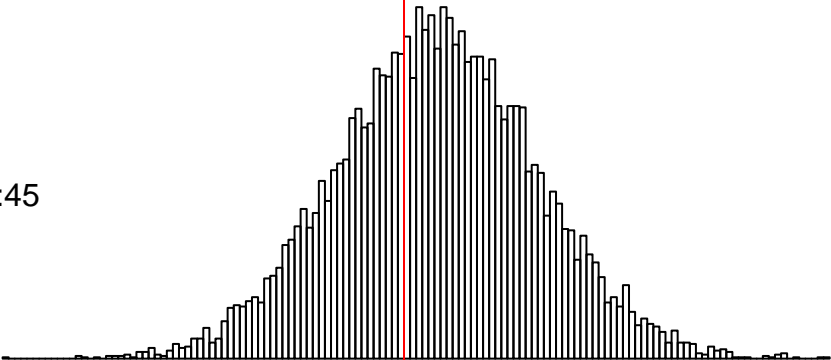

B184:120 – B184:45

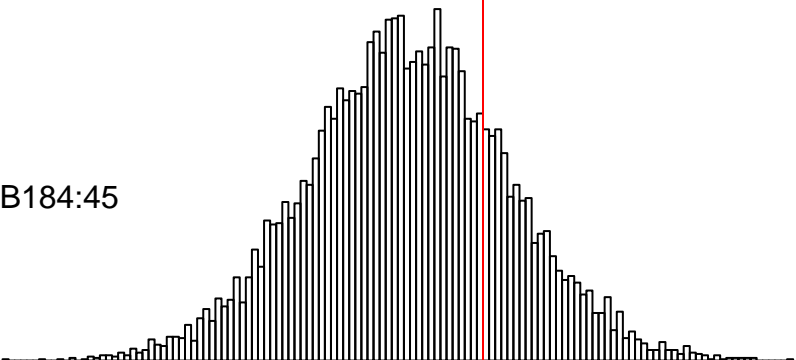

-2

-1

0

1

2

delta(Amino Acid 8)

B184:240

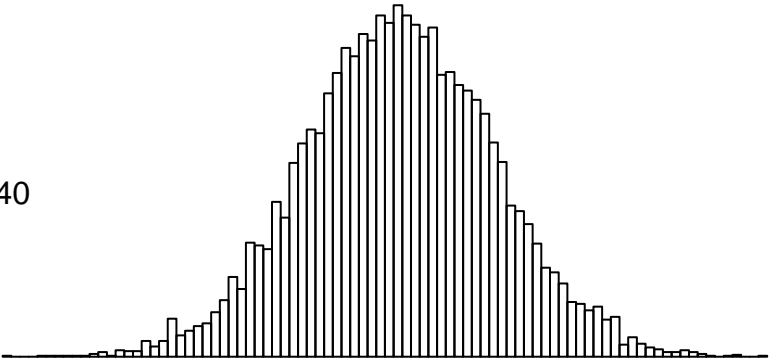

B184:120

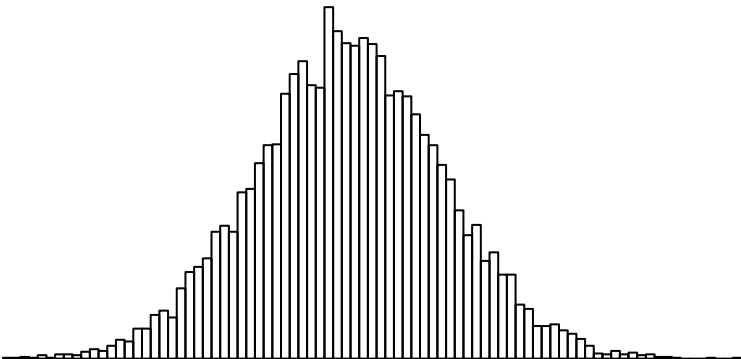

B184:45

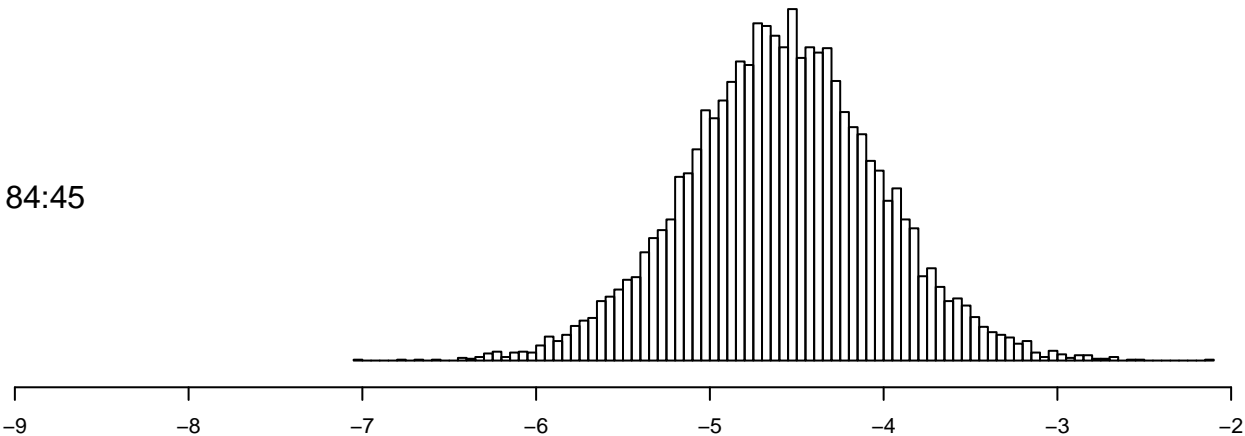

Amino Acid 10

B184:240 – B184:120

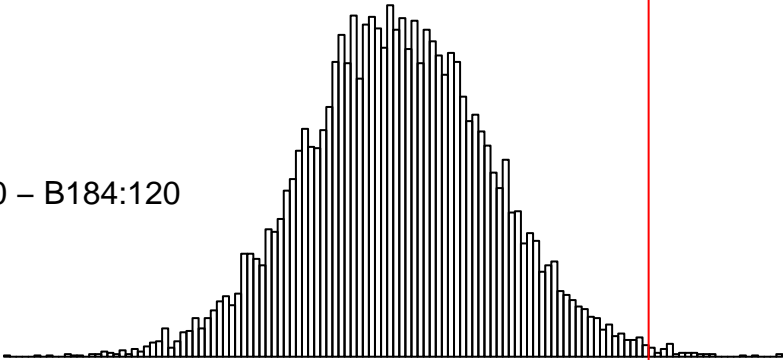

B184:240 – B184:45

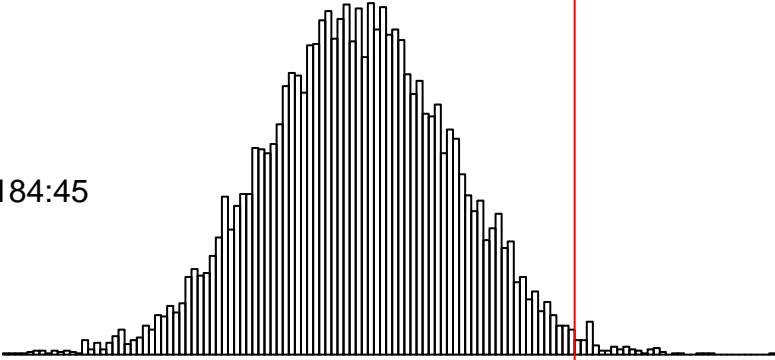

B184:120 – B184:45

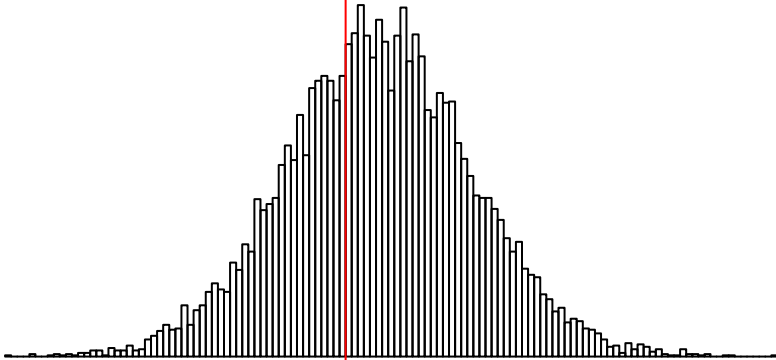

-6

-4

-2

0

2

4

delta(Amino Acid 10)

B184:240

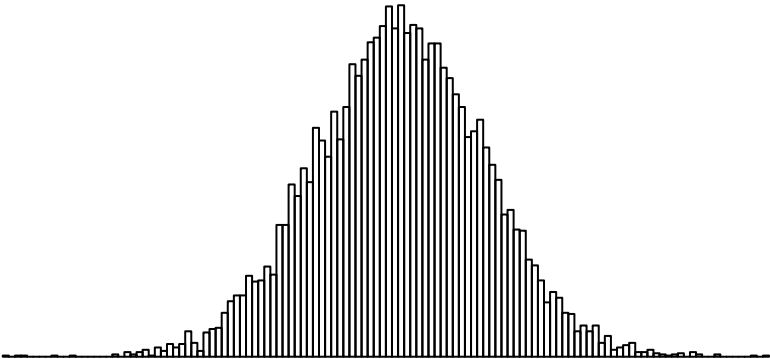

B184:120

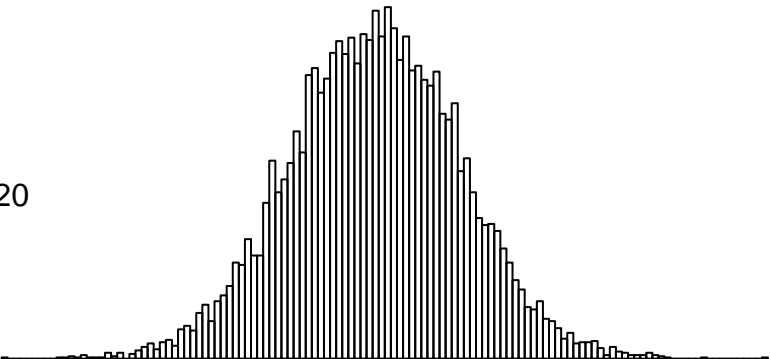

B184:45

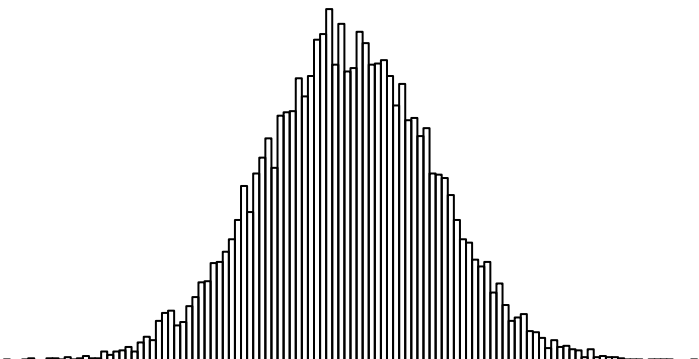

-7.0                      -6.5                      -6.0                      -5.5                      -5.0

Disaccharide 2

B184:240 – B184:120

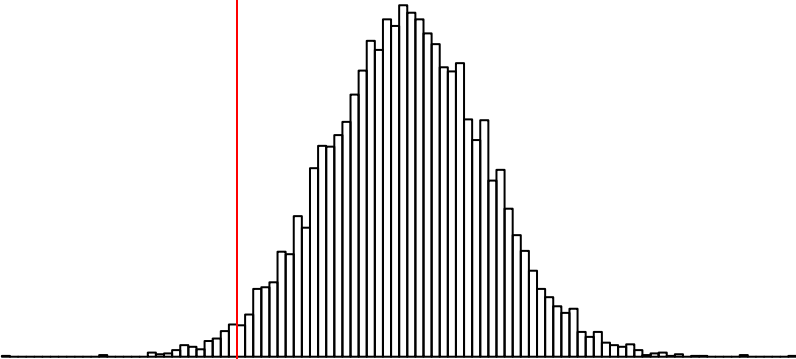

B184:240 – B184:45

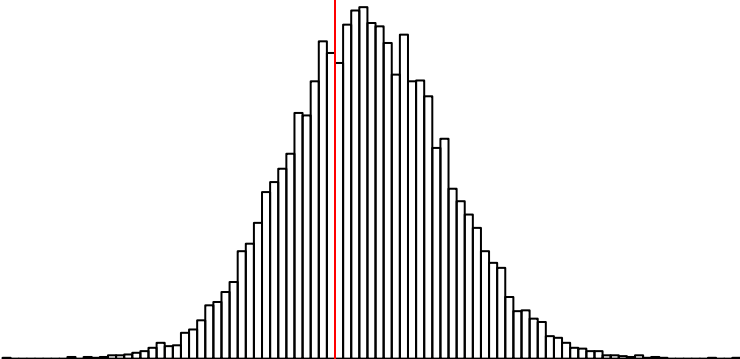

B184:120 – B184:45

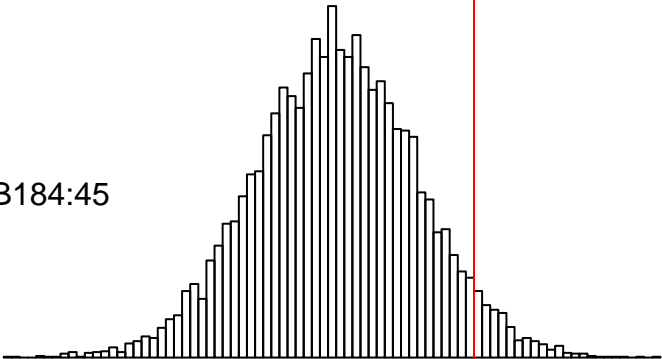

-1.5      -1.0      -0.5      0.0      0.5      1.0      1.5

delta(Disaccharide 2)

B184:240

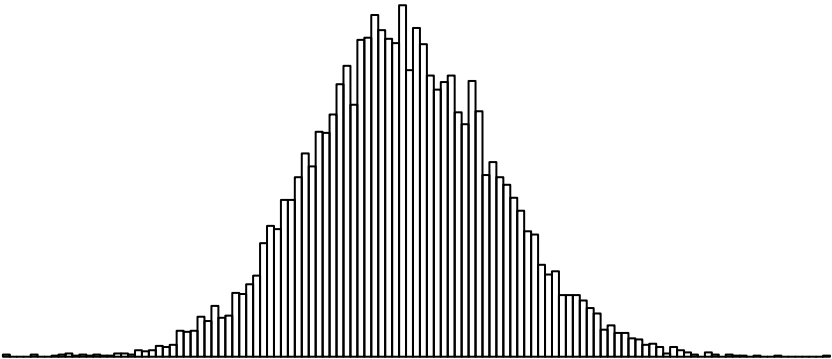

B184:120

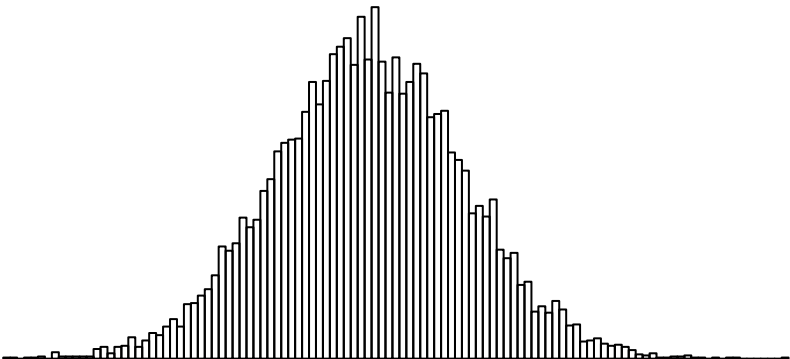

B184:45

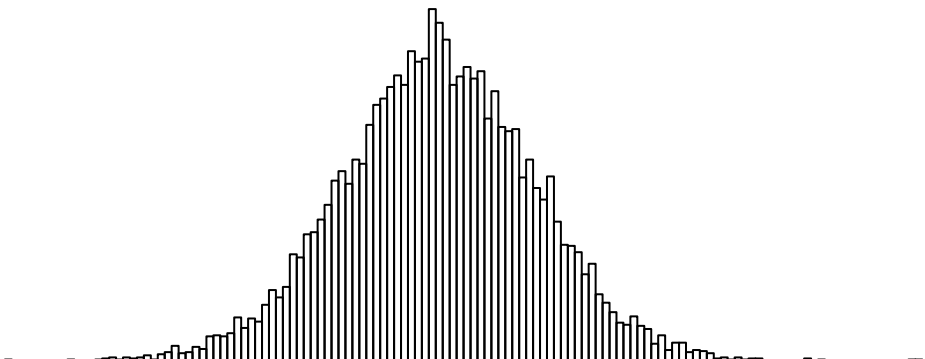

-8.0 -7.5 -7.0 -6.5 -6.0 -5.5 -5.0 -4.5

Disaccharide 3

B184:240 – B184:120

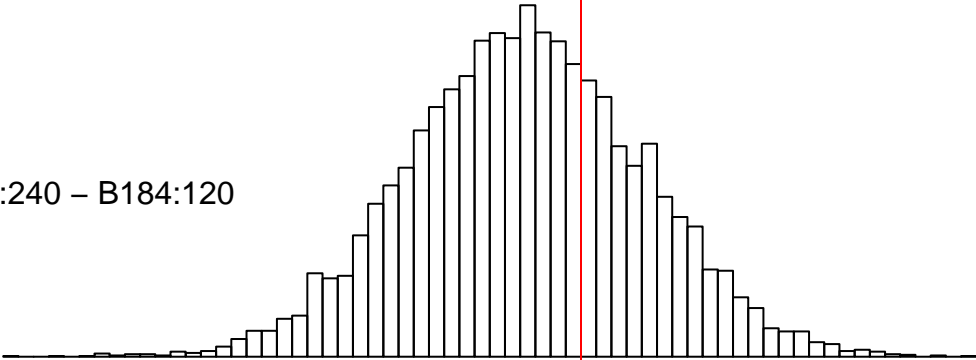

B184:240 – B184:45

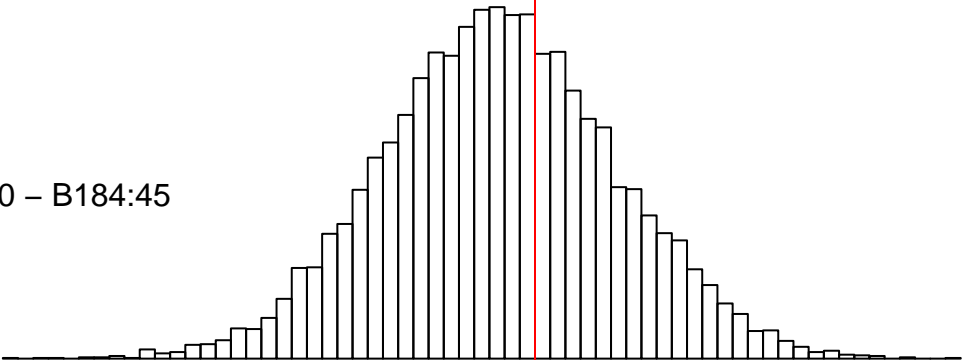

B184:120 – B184:45

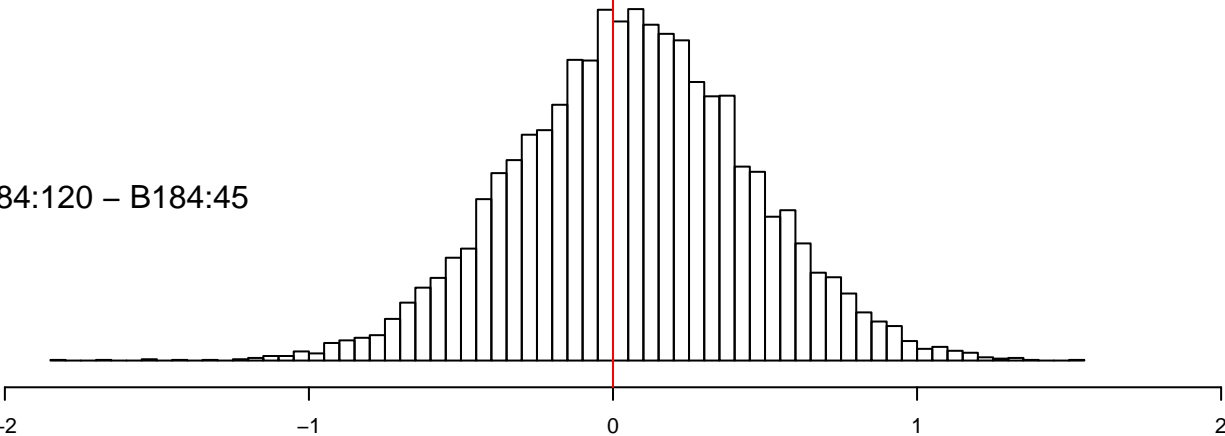

delta(Disaccharide 3)



B184:240

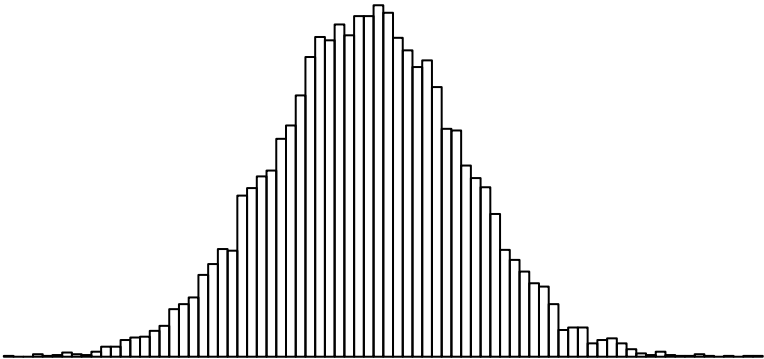

B184:120

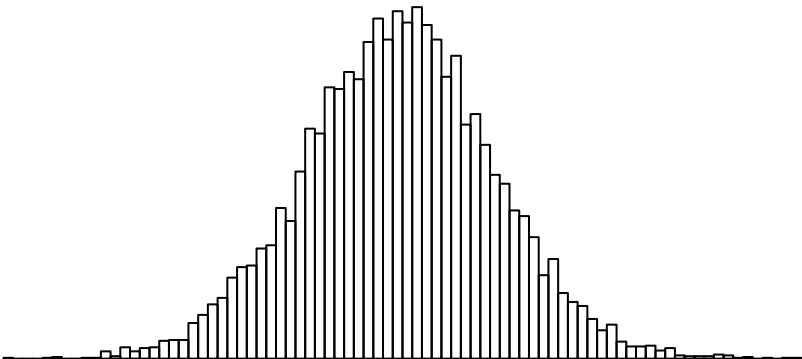

B184:45

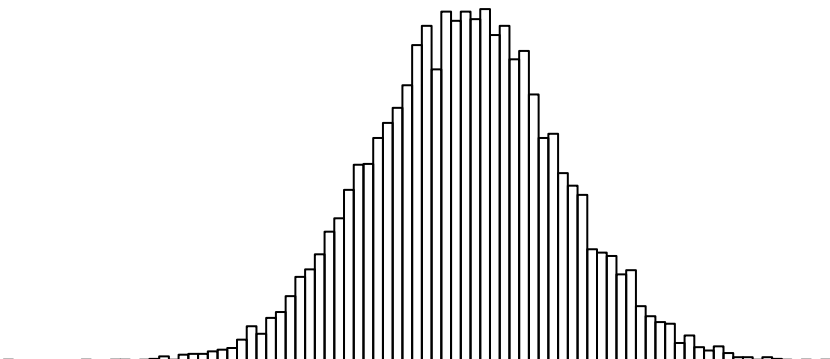

-7.5      -7.0      -6.5      -6.0      -5.5      -5.0

Disaccharide 4

B184:240 – B184:120

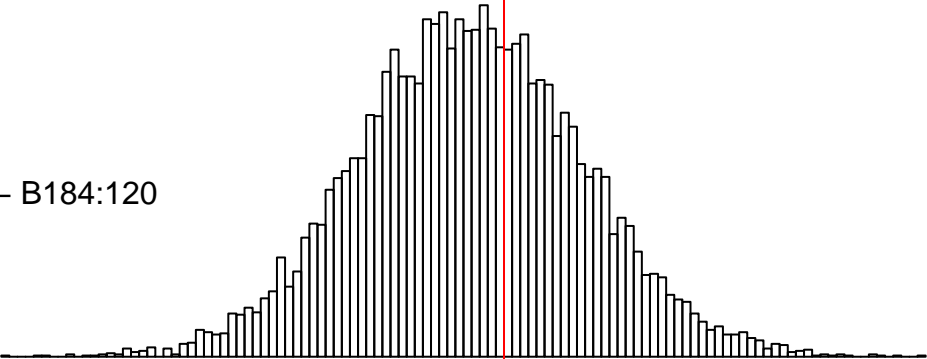

B184:240 – B184:45

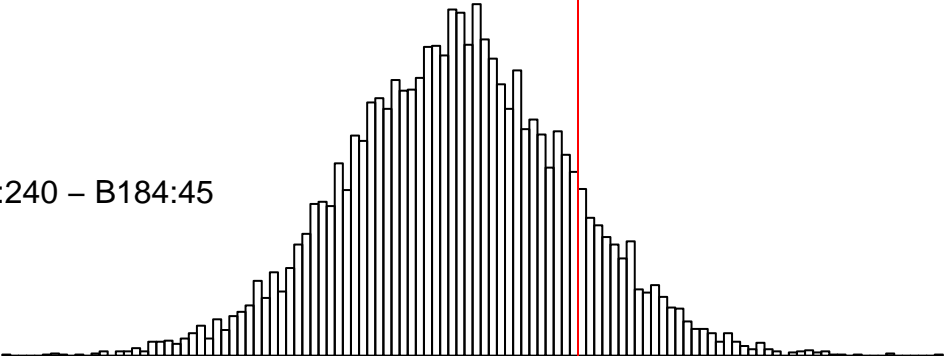

B184:120 – B184:45

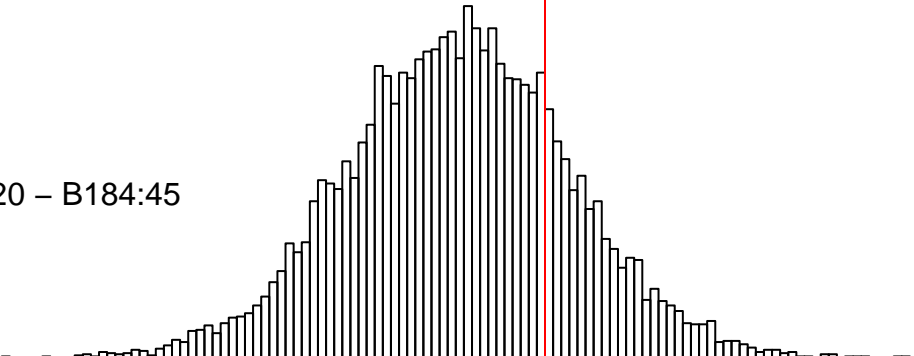

-1.5      -1.0      -0.5      0.0      0.5      1.0      1.5

delta(Disaccharide 4)

B184:240

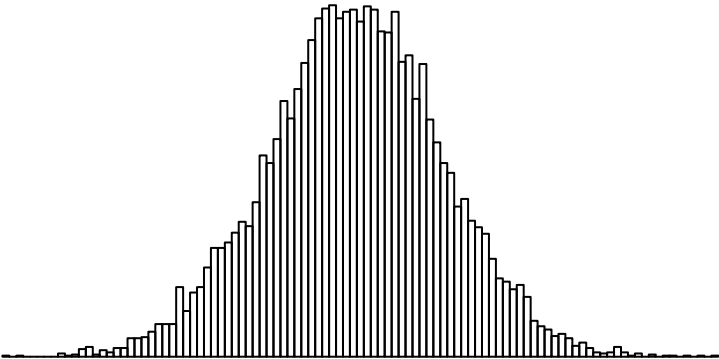

B184:120

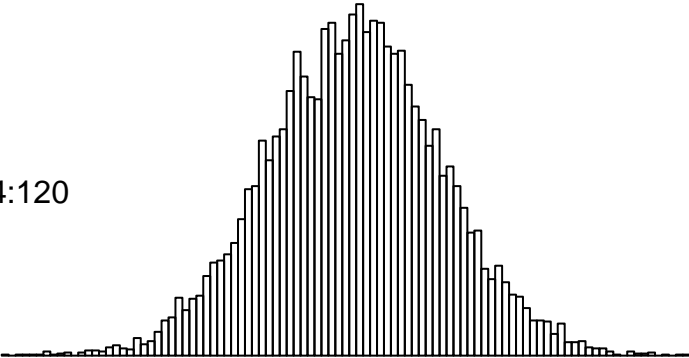

B184:45

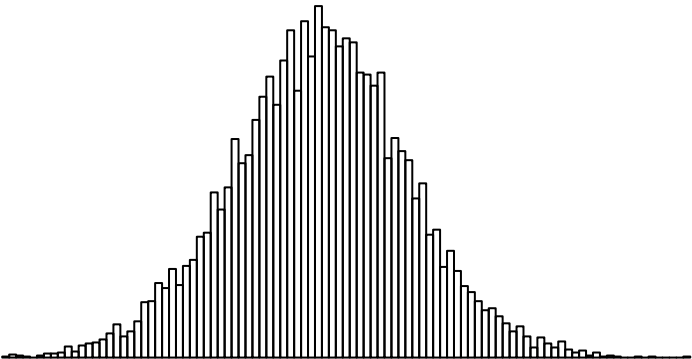

-7.5      -7.0      -6.5      -6.0      -5.5      -5.0      -4.5      -4.0

Disaccharide 5

B184:240 – B184:120

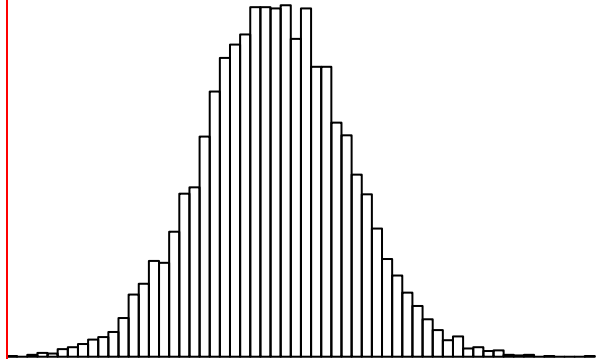

B184:240 – B184:45

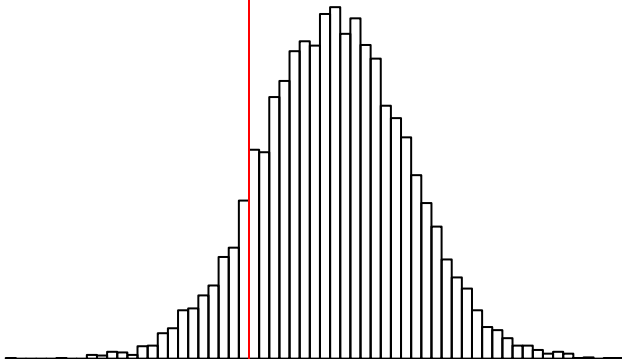

B184:120 – B184:45

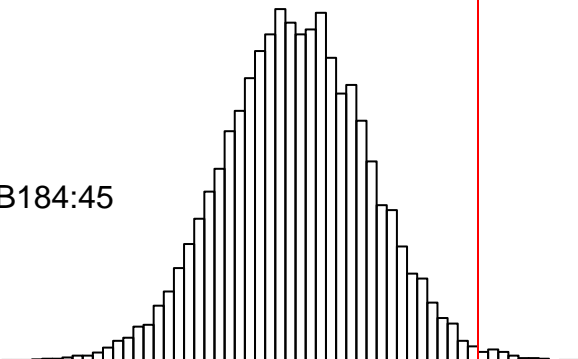

-3 -2 -1 0 1 2 3

delta(Disaccharide 5)

B184:240

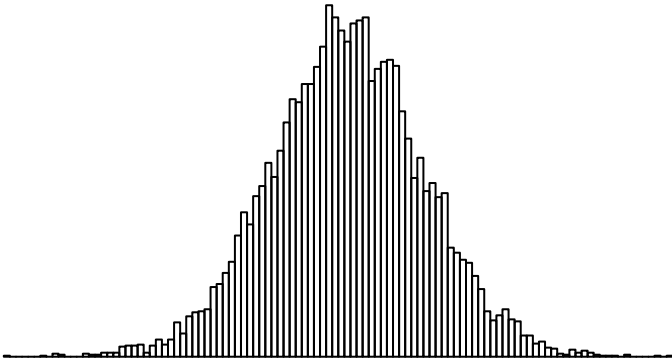

B184:120

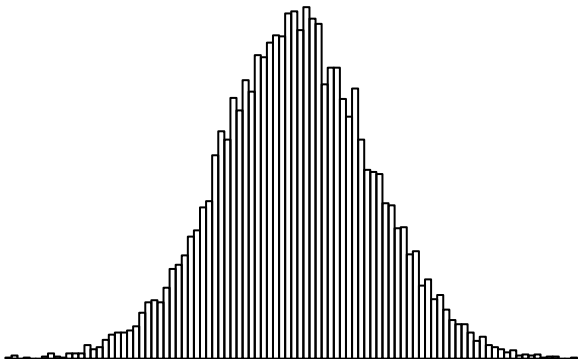

B184:45

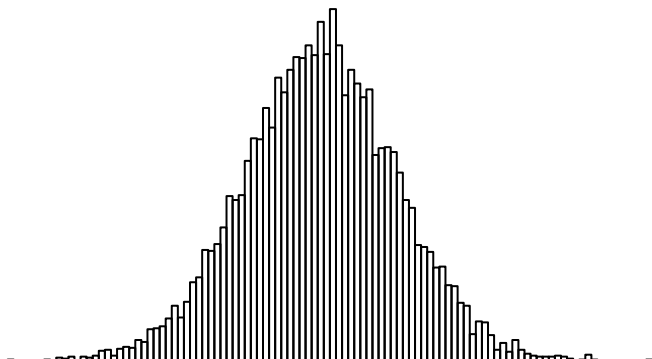

-7                      -6                      -5                      -4                      -3

Disaccharide 6

B184:240 – B184:120

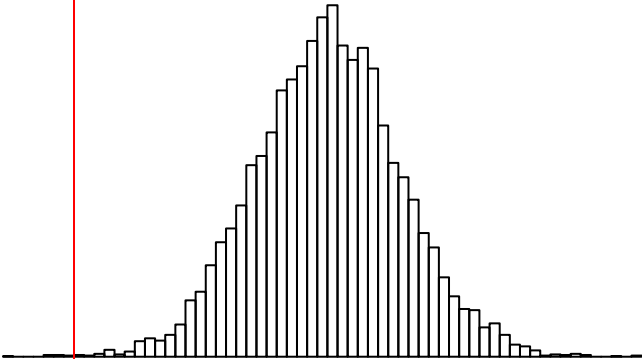

B184:240 – B184:45

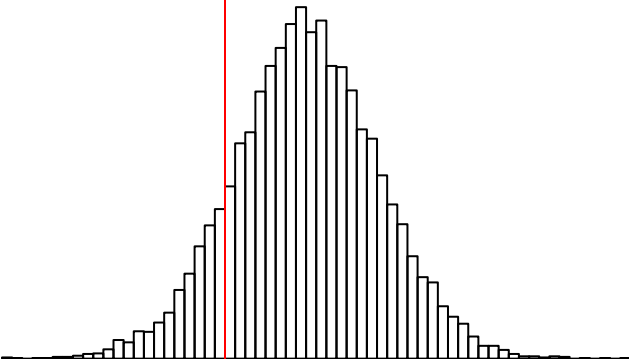

B184:120 – B184:45

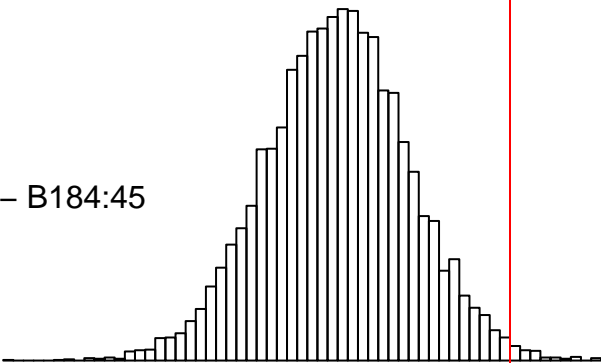

-3 -2 -1 0 1 2 3

delta(Disaccharide 6)

B184:240

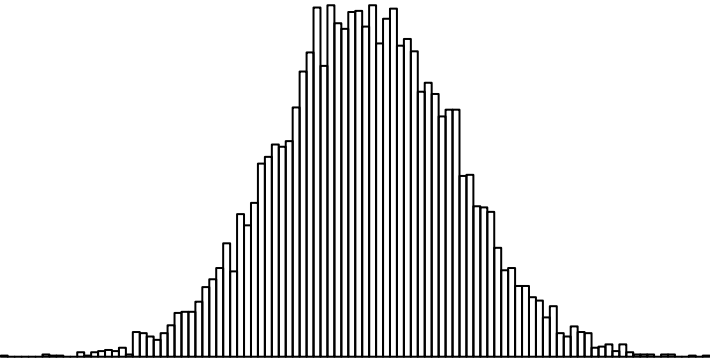

B184:120

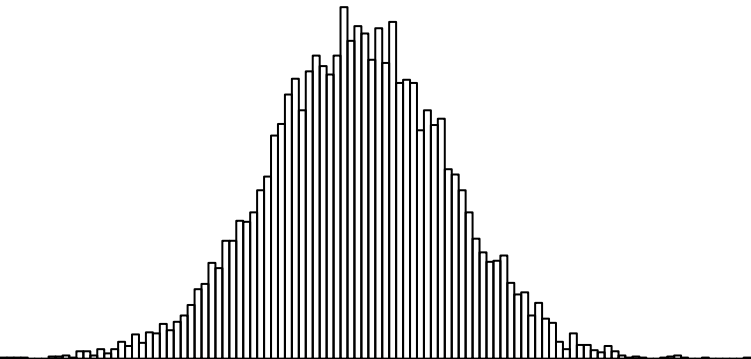

B184:45

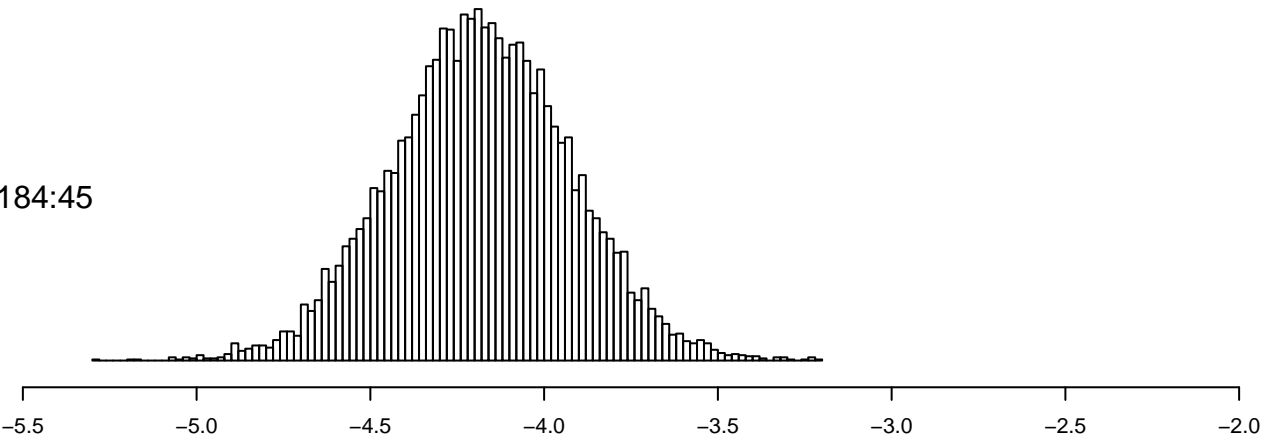

Disaccharide 7

B184:240 – B184:120

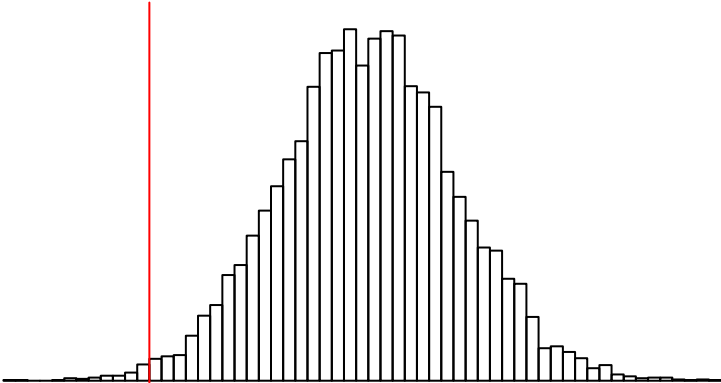

B184:240 – B184:45

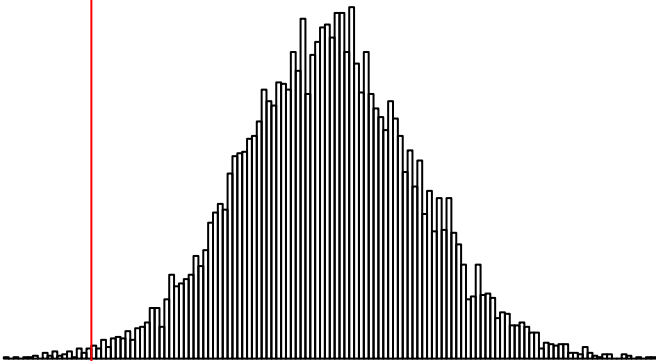

B184:120 – B184:45

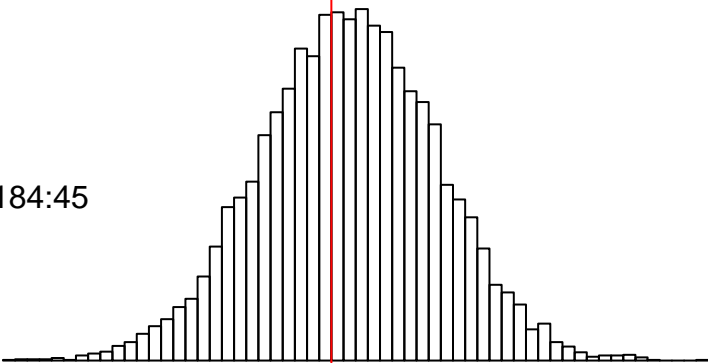

-2 -1 0 1 2 3

delta(Disaccharide 7)



B184:240

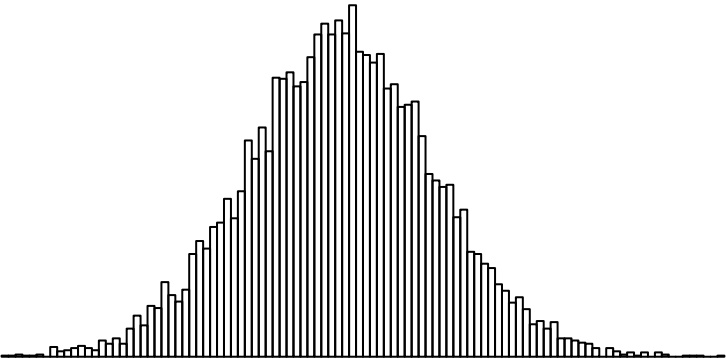

B184:120

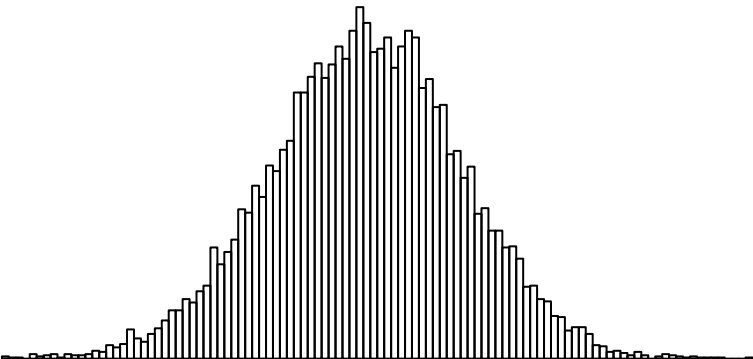

B184:45

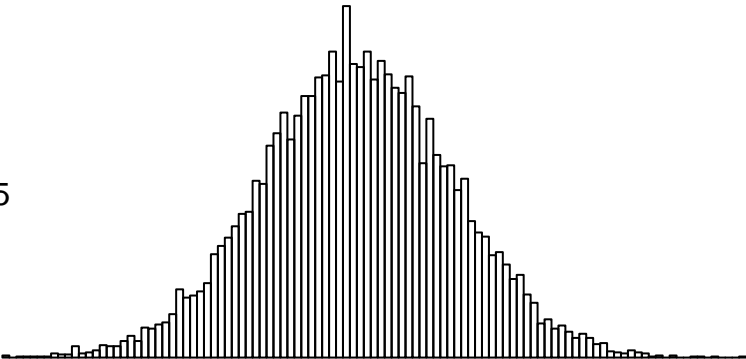

-7.0 -6.5 -6.0 -5.5 -5.0 -4.5 -4.0 -3.5

Disaccharide 8

B184:240 – B184:120

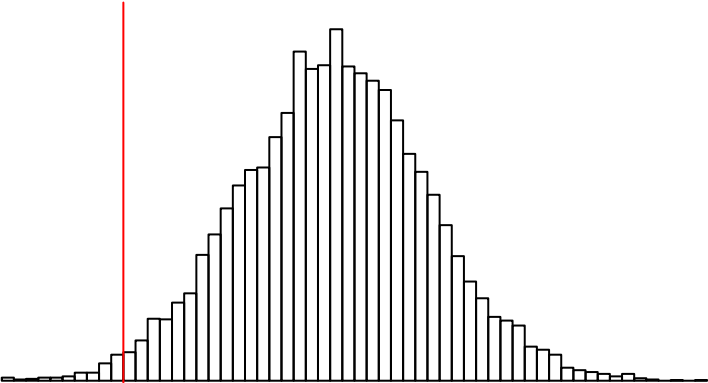

B184:240 – B184:45

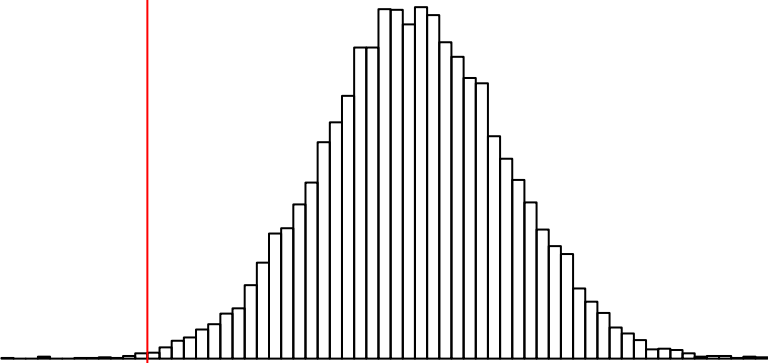

B184:120 – B184:45

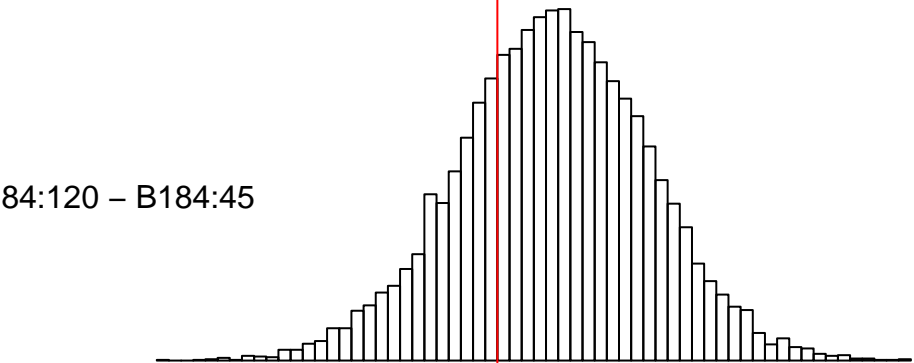

-2 -1 0 1 2 3

delta(Disaccharide 8)

B184:240

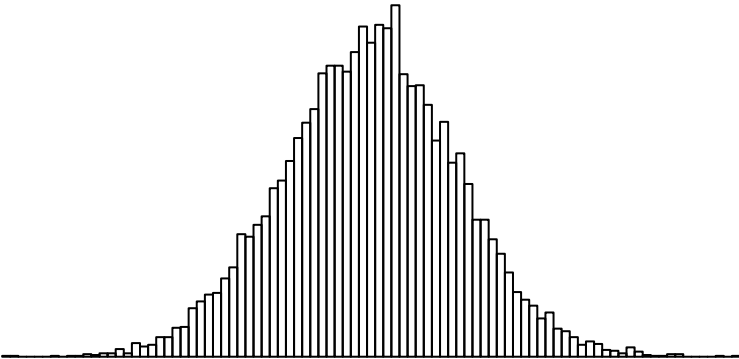

B184:120

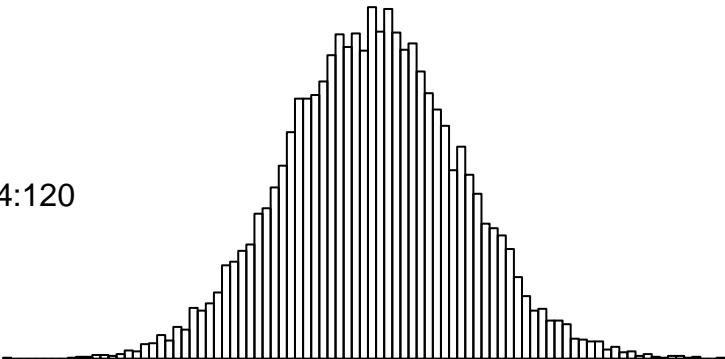

B184:45

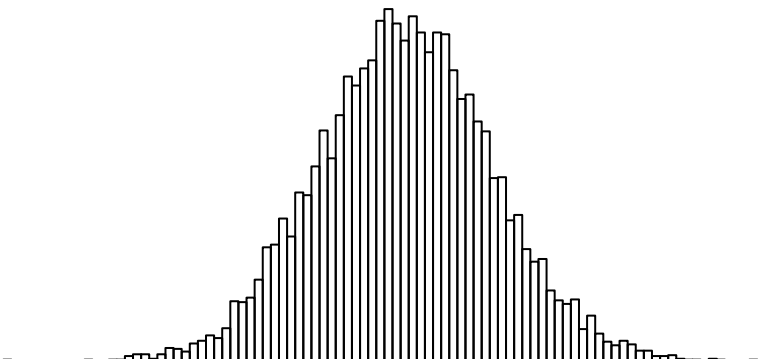

-9.0 -8.5 -8.0 -7.5 -7.0 -6.5 -6.0

Disaccharide 9

B184:240 – B184:120

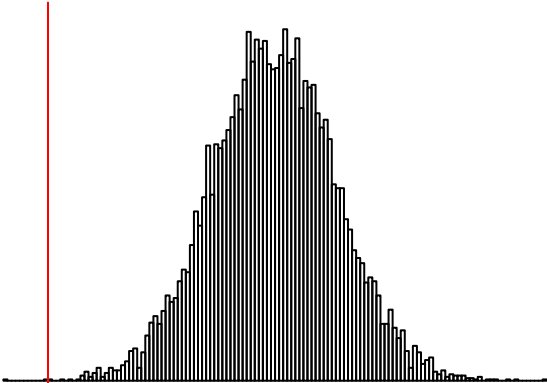

B184:240 – B184:45

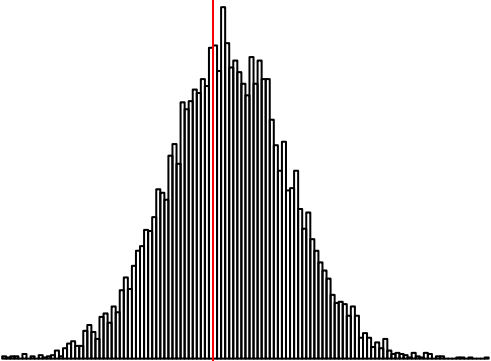

B184:120 – B184:45

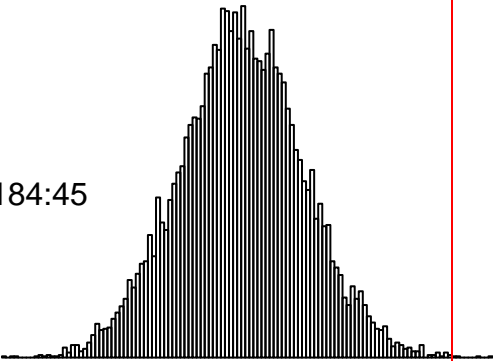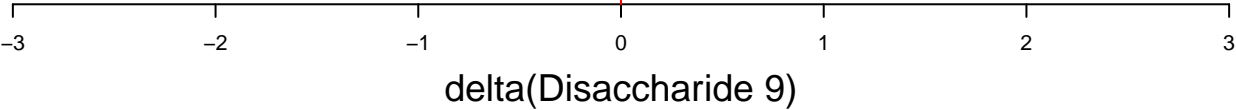

B184:240

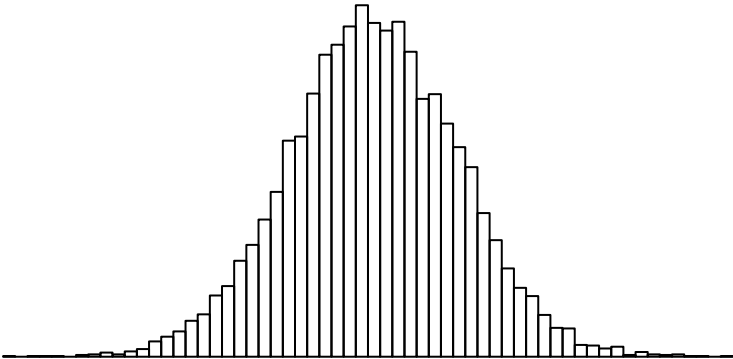

B184:120

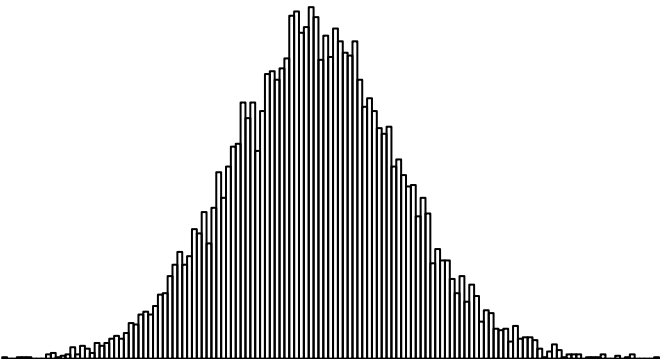

B184:45

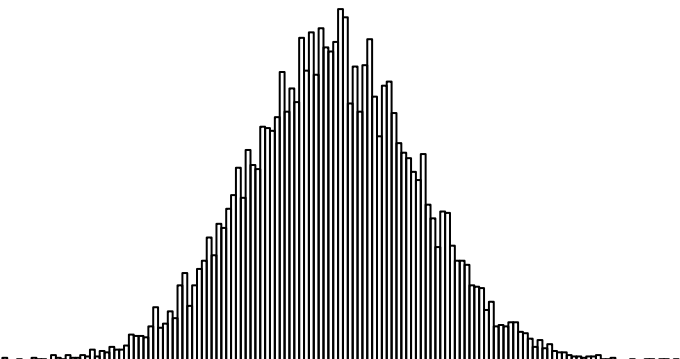

-9 -8 -7 -6 -5 -4

C12:0 Fatty Acid

B184:240 – B184:120

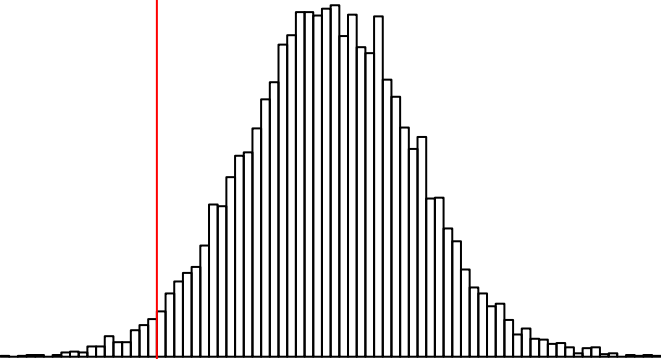

B184:240 – B184:45

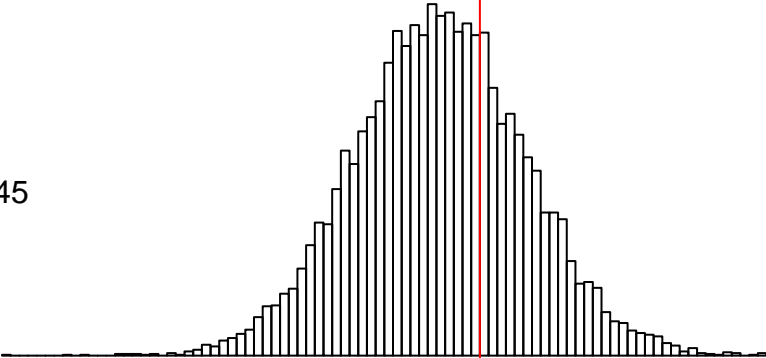

B184:120 – B184:45

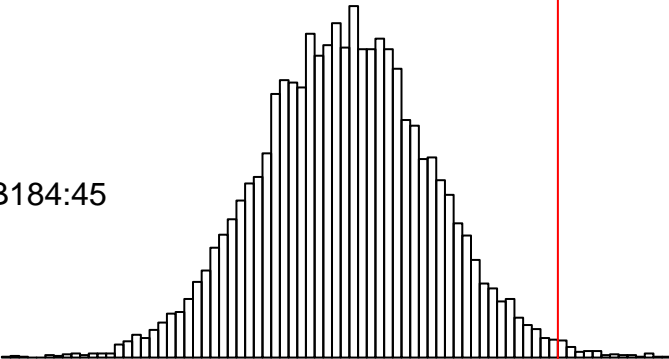

-4 -3 -2 -1 0 1 2 3

delta(C12:0 Fatty Acid)

B184:240

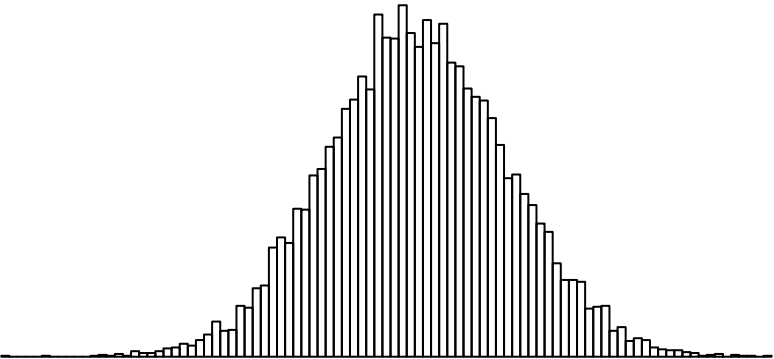

B184:120

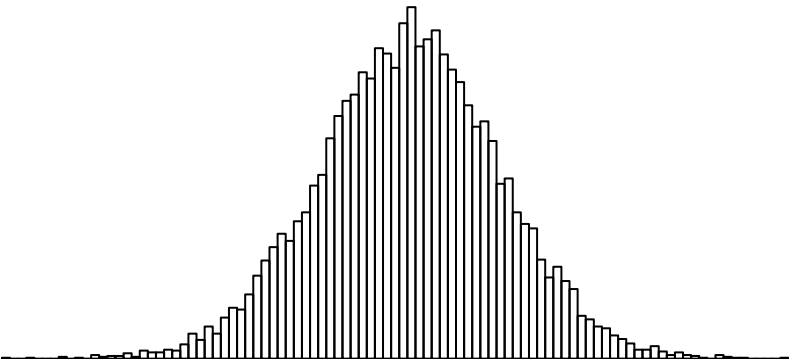

B184:45

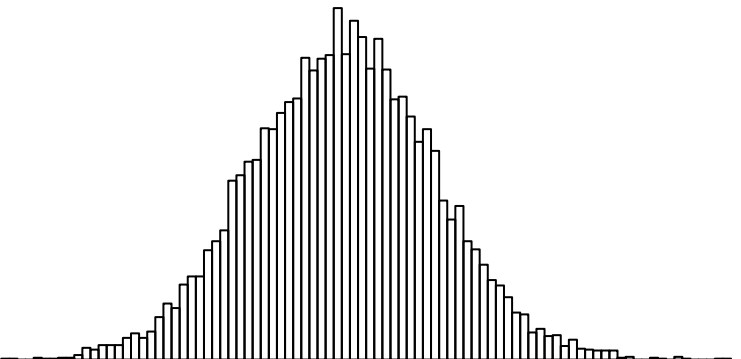

-8.5      -8.0      -7.5      -7.0      -6.5      -6.0      -5.5

C14:1 Fatty Acid

B184:240 – B184:120

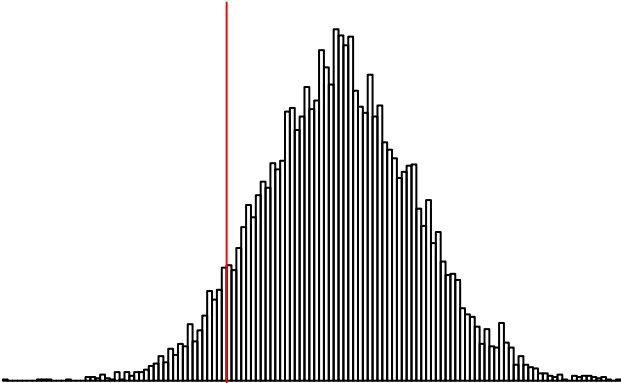

B184:240 – B184:45

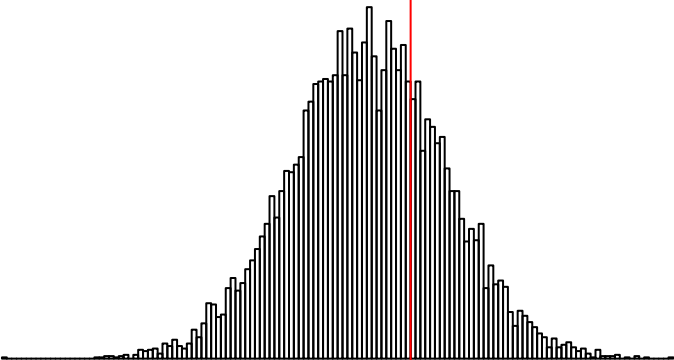

B184:120 – B184:45

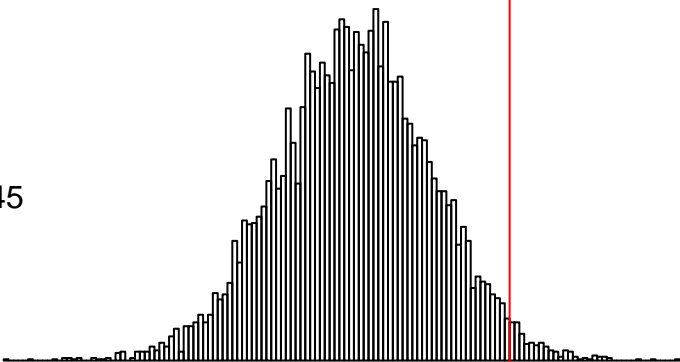

-3

-2

-1

0

1

2

delta(C14:1 Fatty Acid)



B184:240

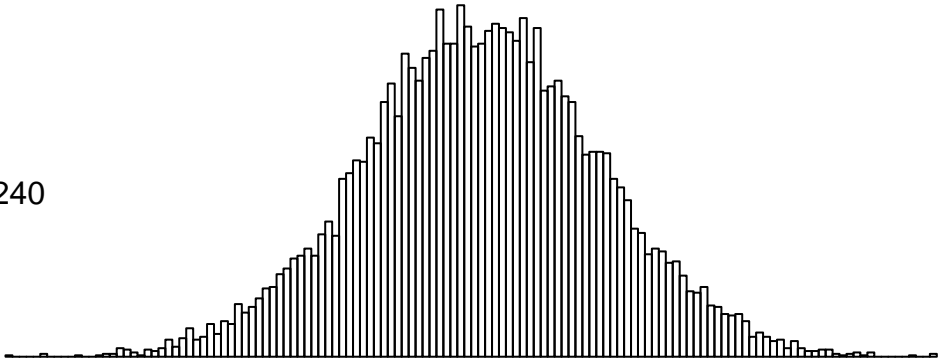

B184:120

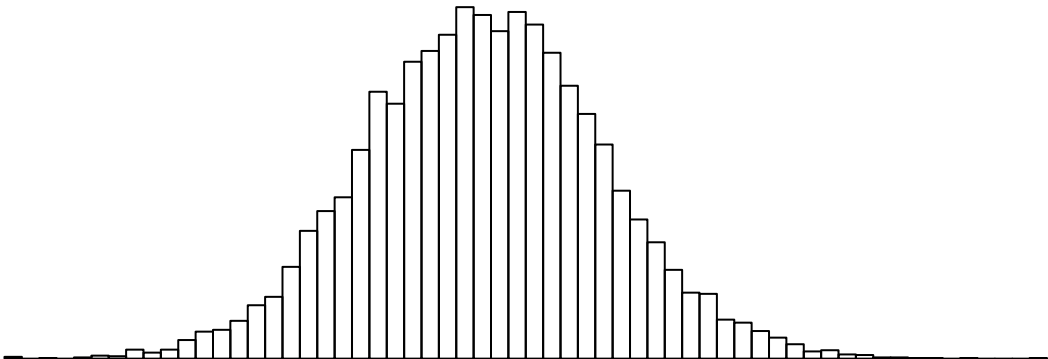

B184:45

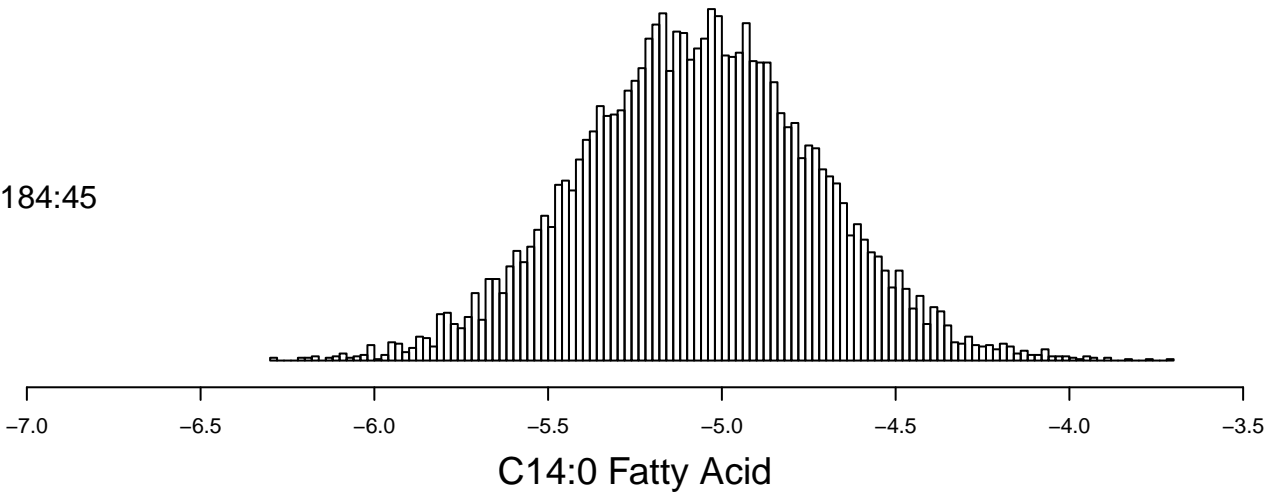

B184:240 – B184:120

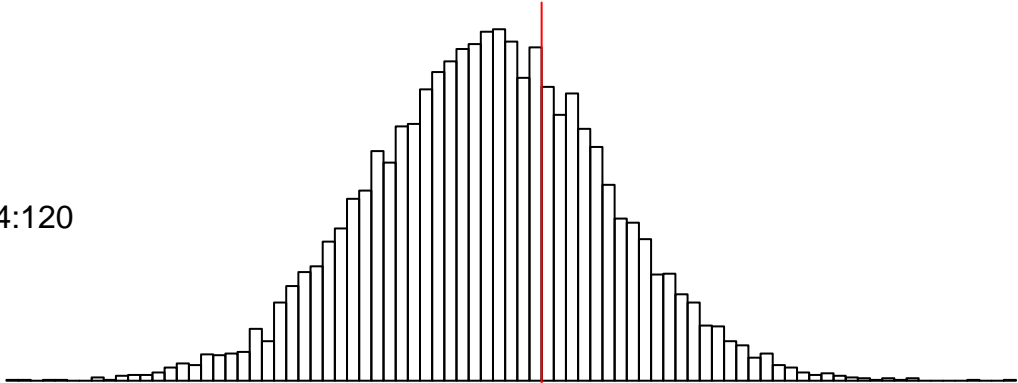

B184:240 – B184:45

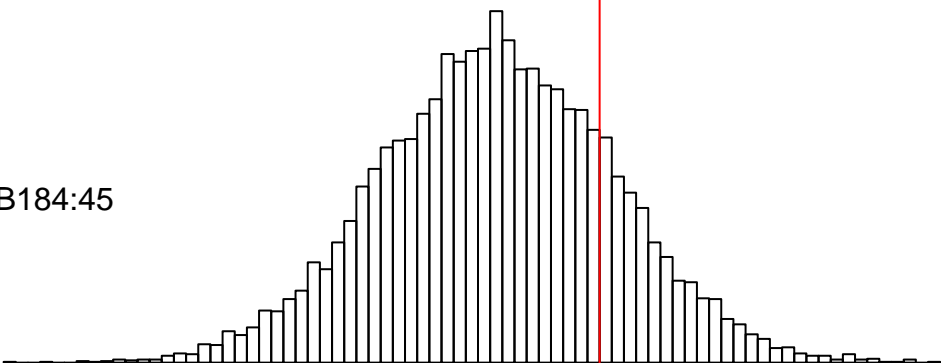

B184:120 – B184:45

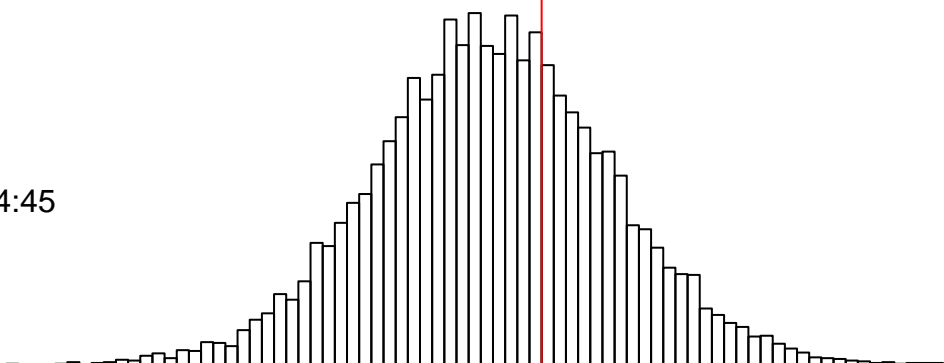

-3 -2 -1 0 1 2

delta(C14:0 Fatty Acid)

B184:240

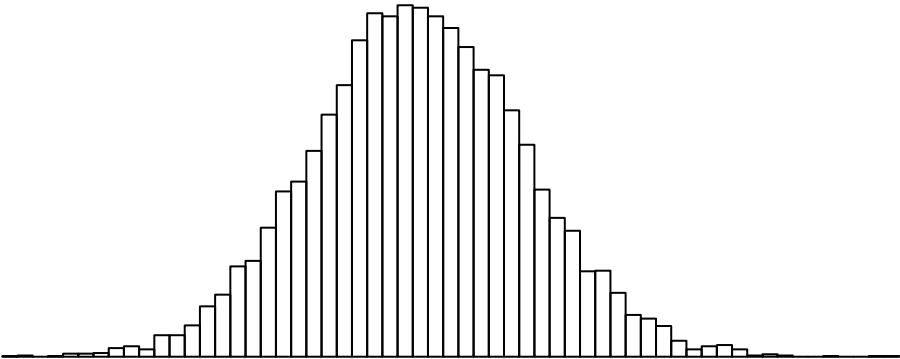

B184:120

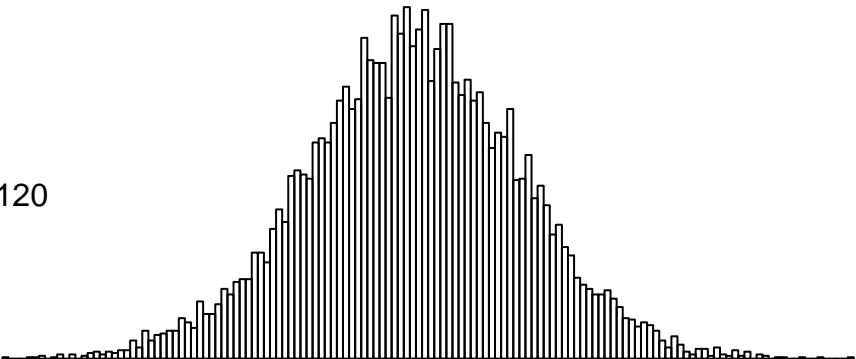

B184:45

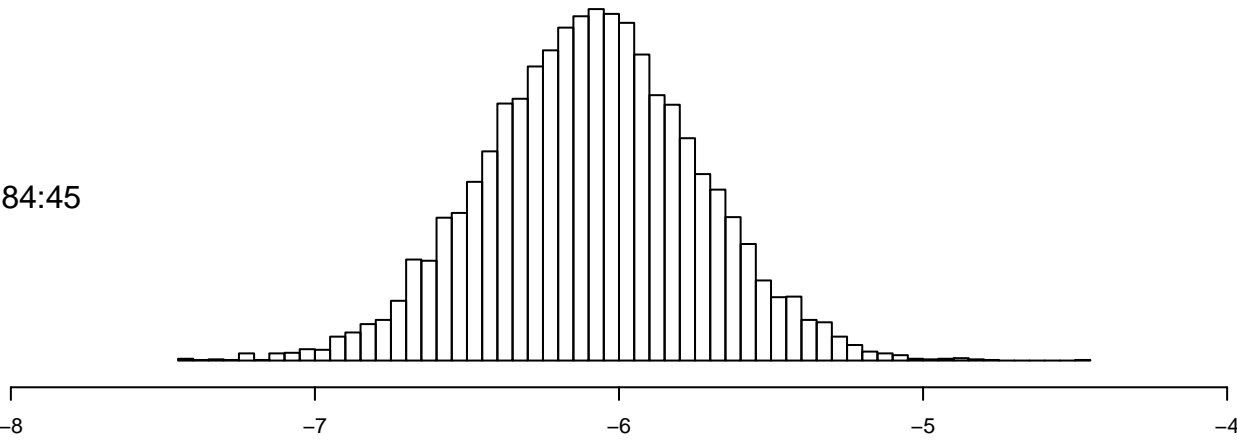

C16:1 Fatty Acid

B184:240 – B184:120

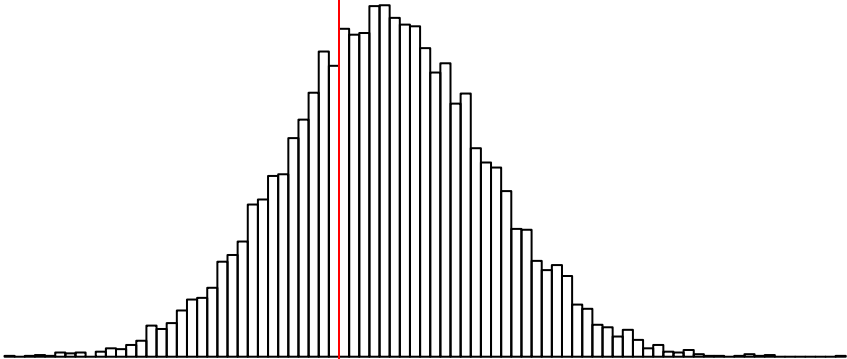

B184:240 – B184:45

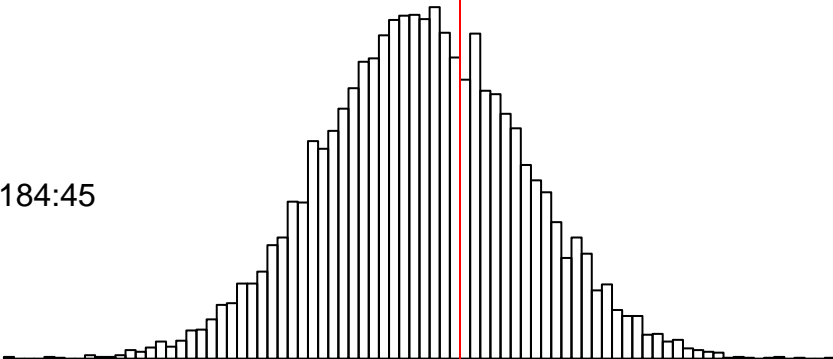

B184:120 – B184:45

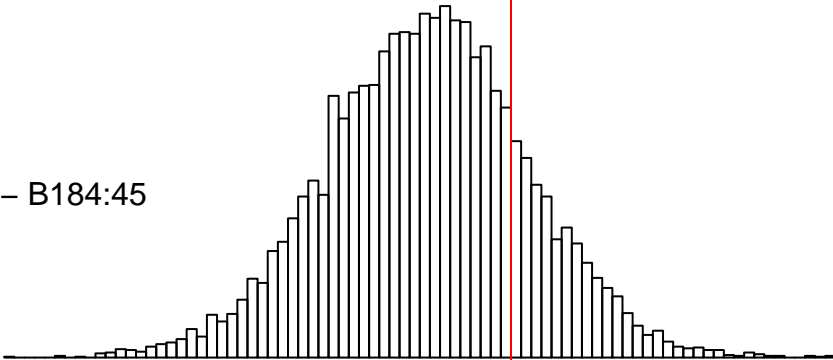

-3 -2 -1 0 1 2 3

delta(C16:1 Fatty Acid)

B184:240

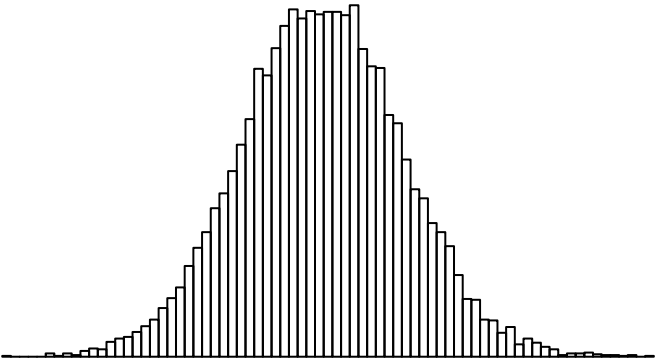

B184:120

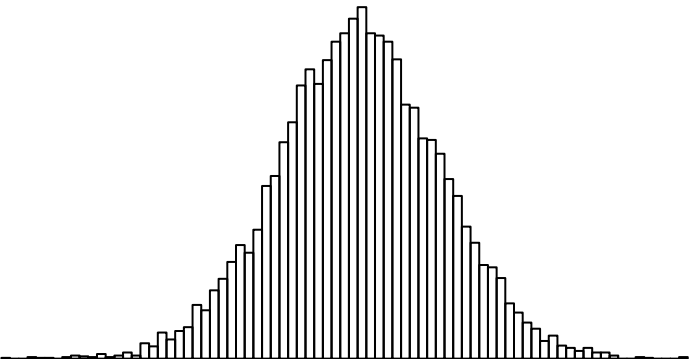

B184:45

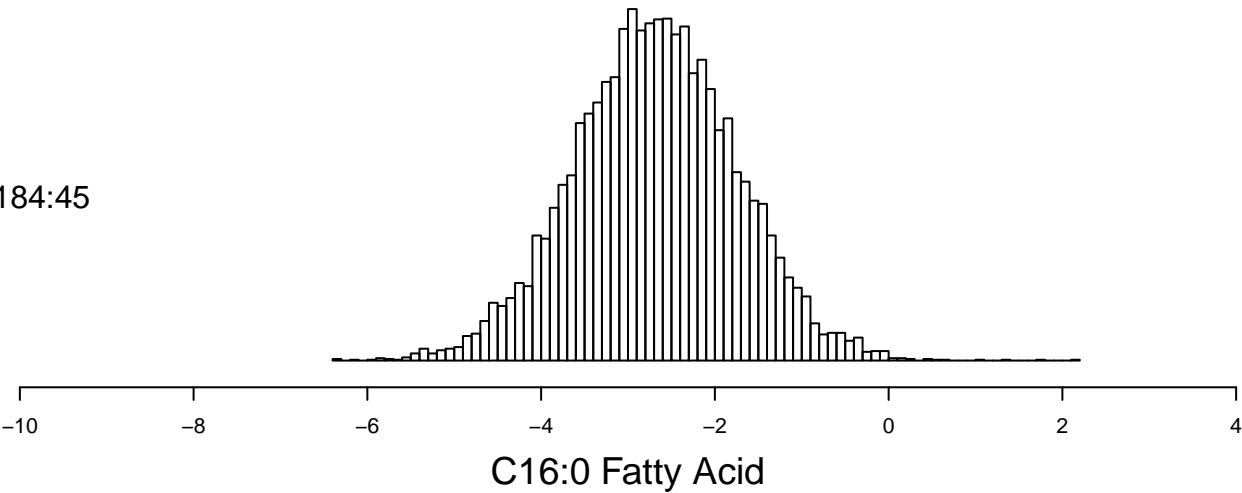

B184:240 – B184:120

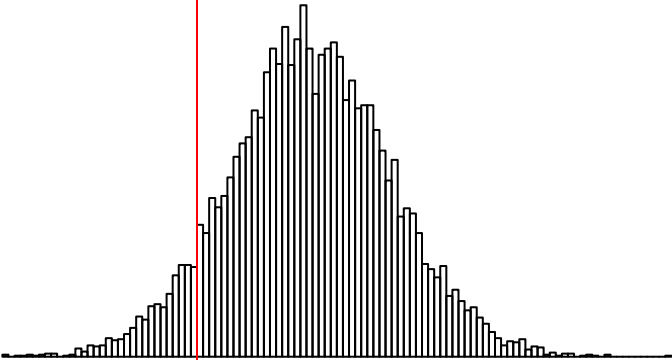

B184:240 – B184:45

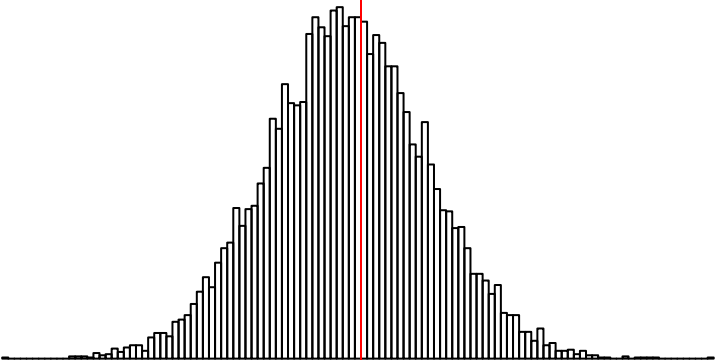

B184:120 – B184:45

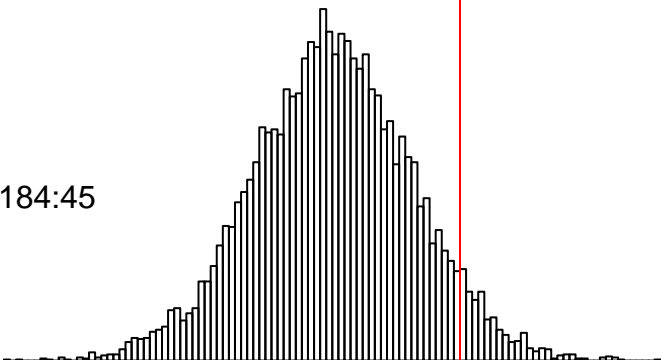

-10 -5 0 5 10

delta(C16:0 Fatty Acid)

B184:240

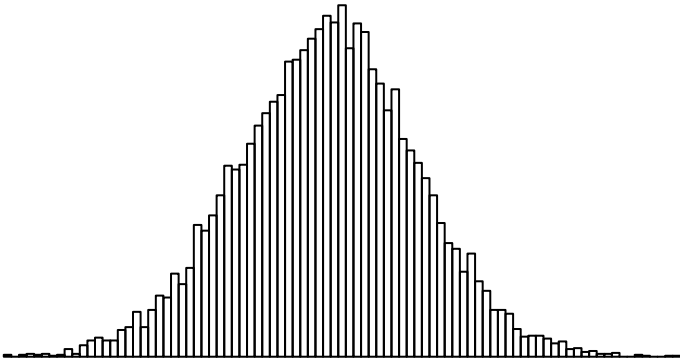

B184:120

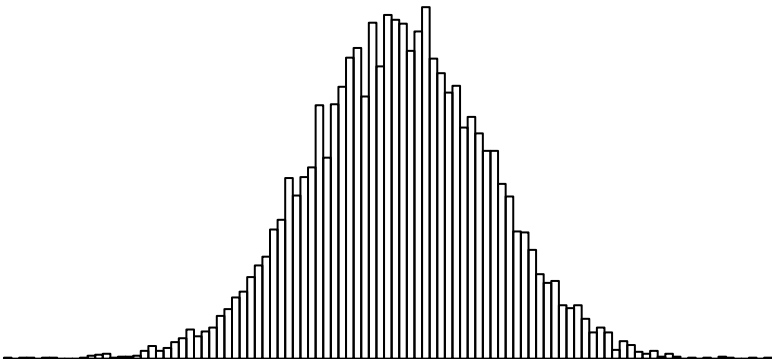

B184:45

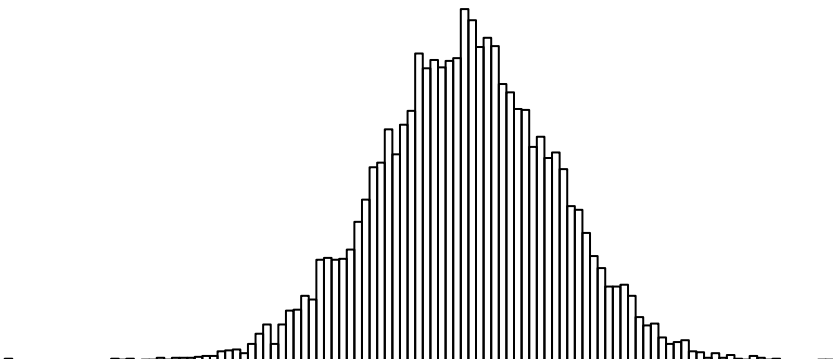

-10

-8

-6

-4

Polyunsaturated Fatty Acids 1

B184:240 – B184:120

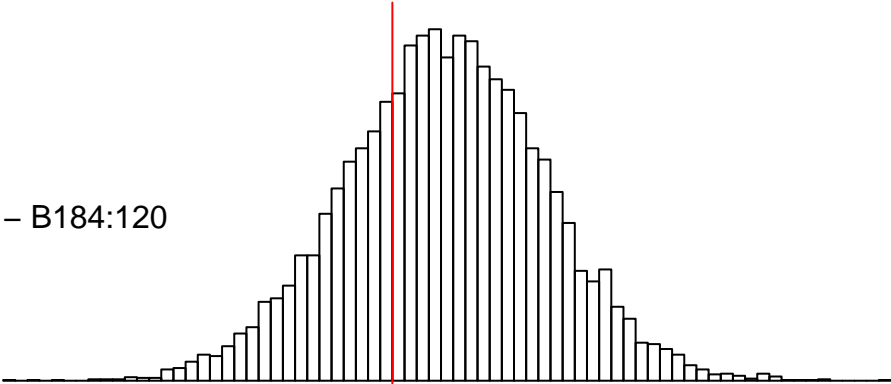

B184:240 – B184:45

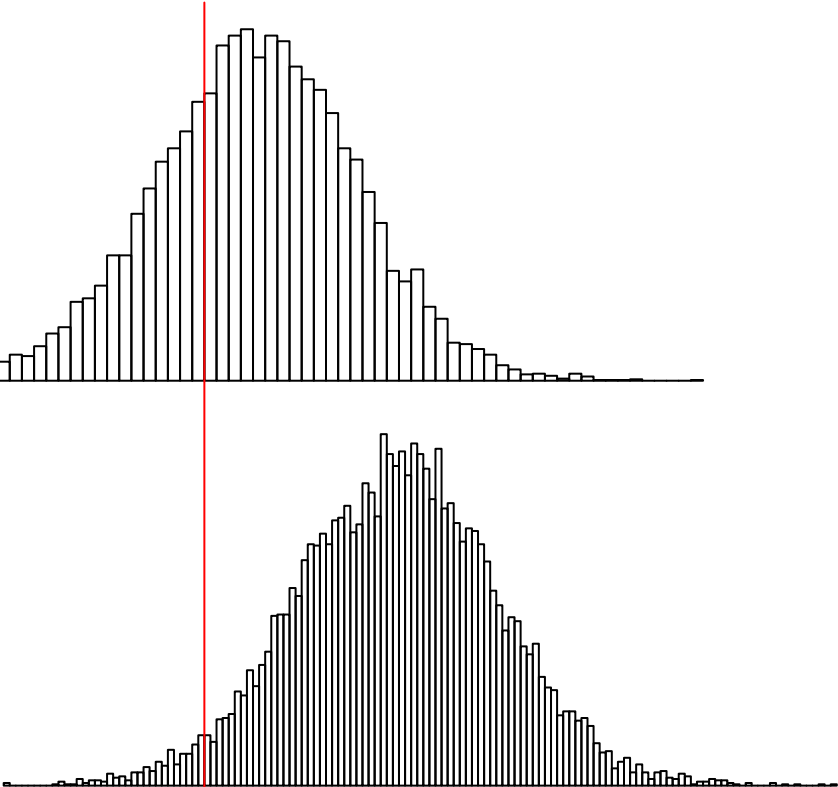

B184:120 – B184:45

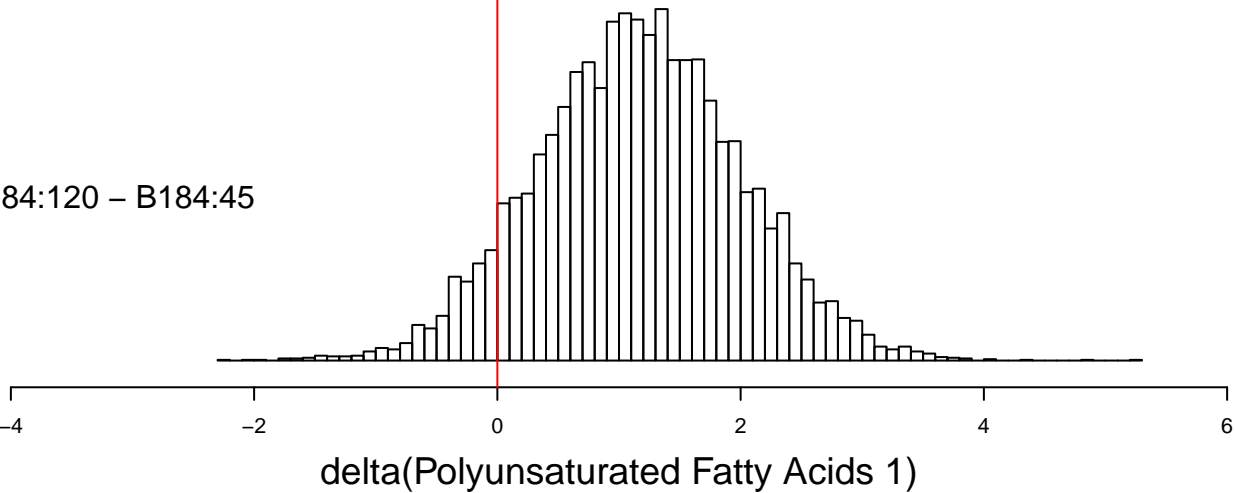



B184:240

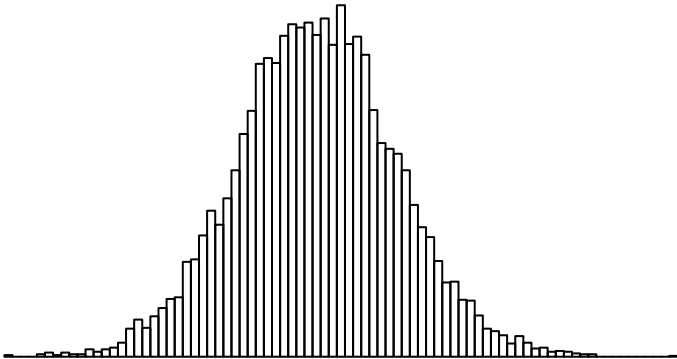

B184:120

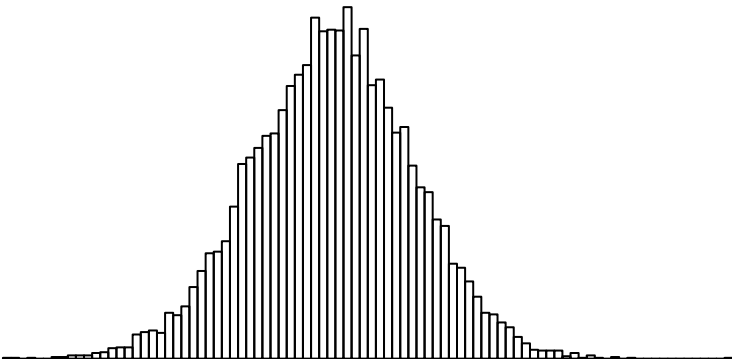

B184:45

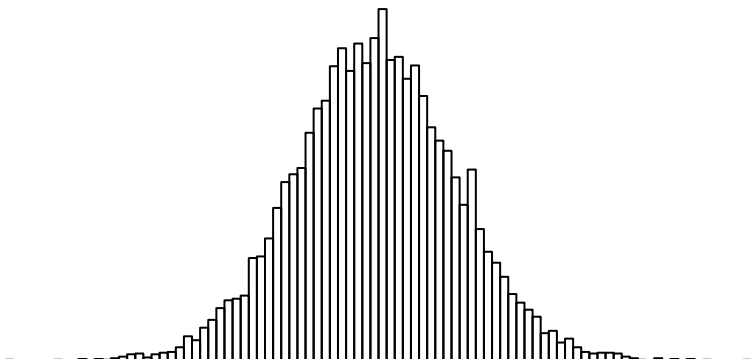

-9.5      -9.0      -8.5      -8.0      -7.5      -7.0      -6.5

Polyunsaturated Fatty Acids 3

B184:240 – B184:120

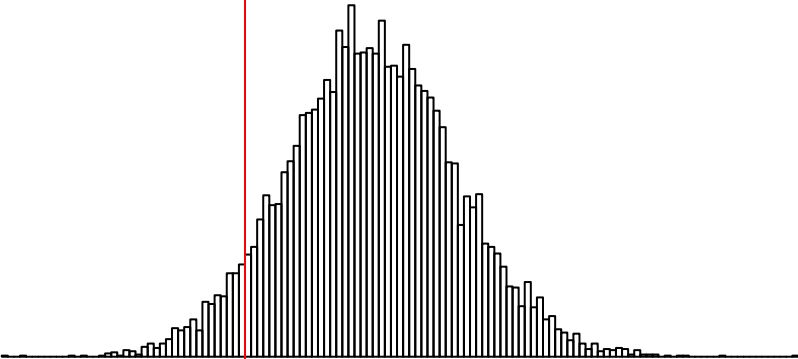

B184:240 – B184:45

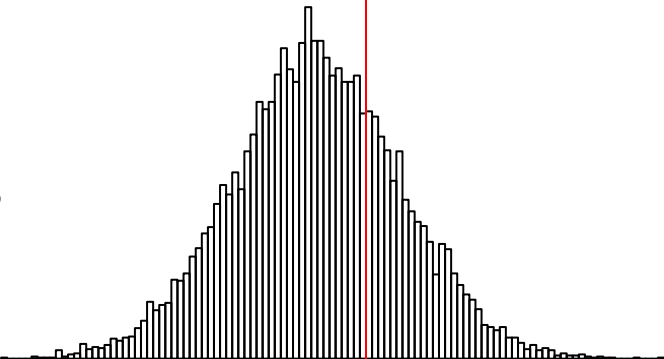

B184:120 – B184:45

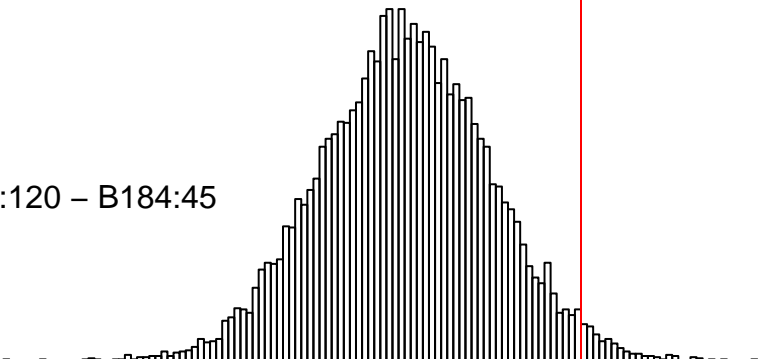

-2 -1 0 1 2

delta(Polyunsaturated Fatty Acids 3)

B184:240

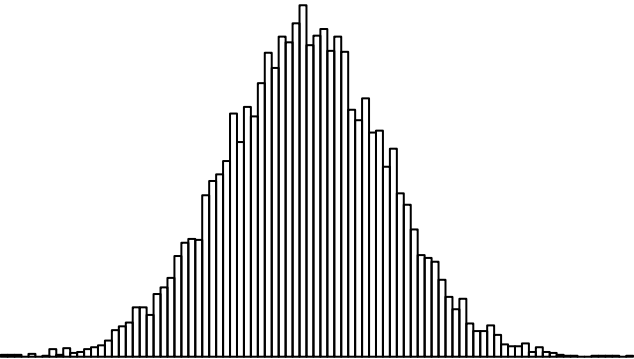

B184:120

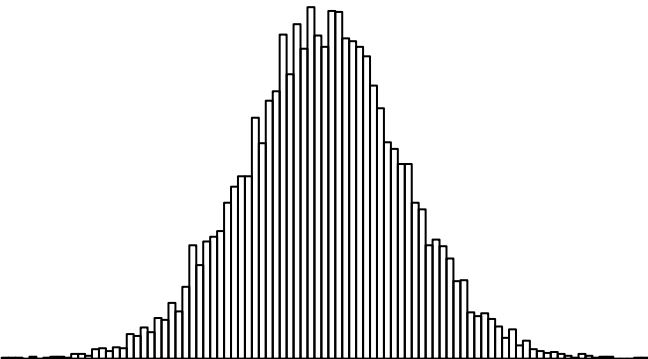

B184:45

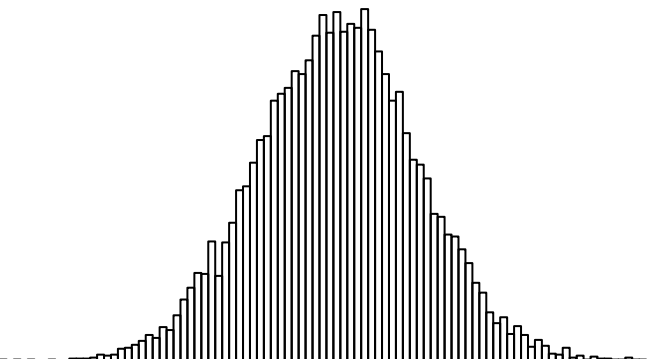

-9.5      -9.0      -8.5      -8.0      -7.5      -7.0      -6.5      -6.0

C18:2 Fatty Acid

B184:240 – B184:120

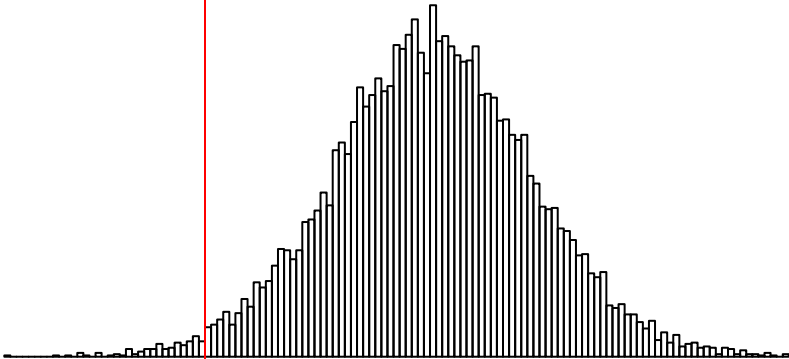

B184:240 – B184:45

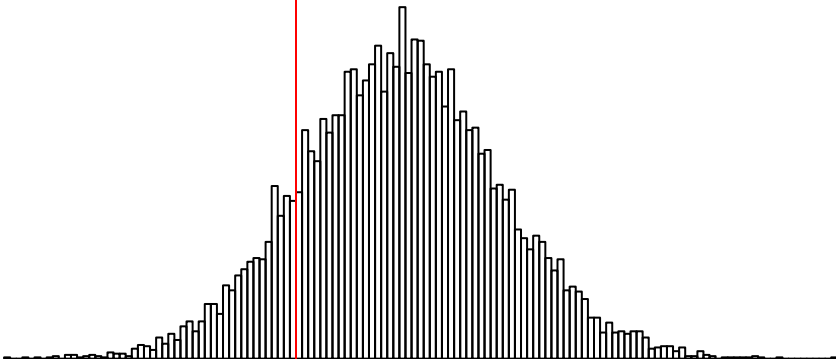

B184:120 – B184:45

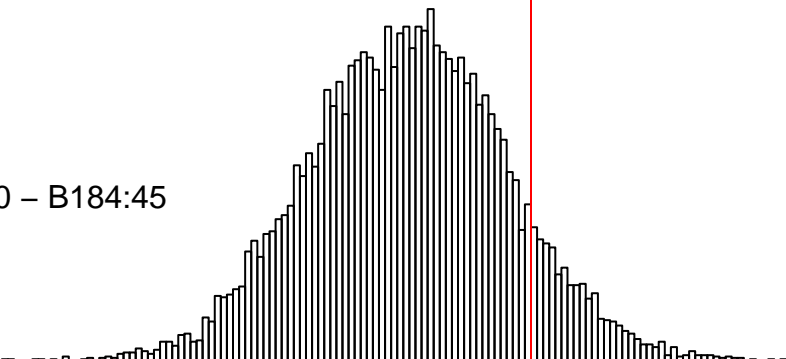

-2 -1 0 1 2

delta(C18:2 Fatty Acid)

B184:240

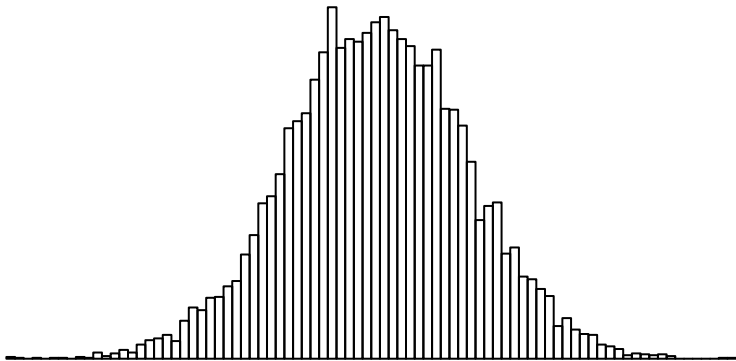

B184:120

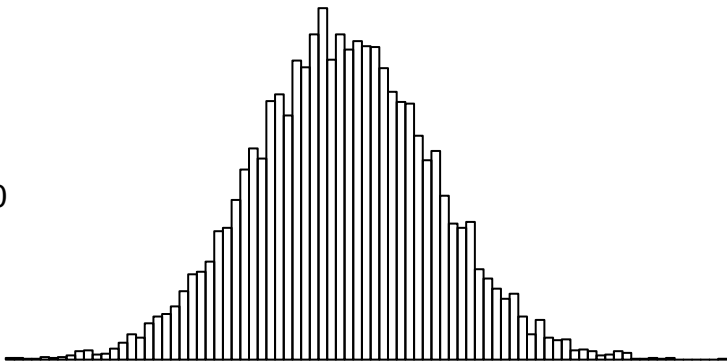

B184:45

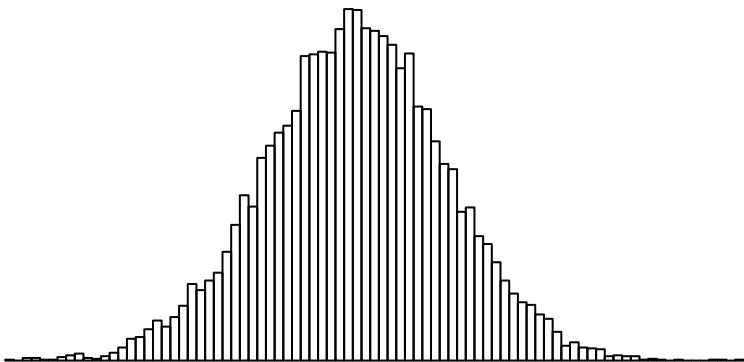

-8 -7 -6 -5 -4 -3 -2 -1

C18:0 Fatty Acid

B184:240 – B184:120

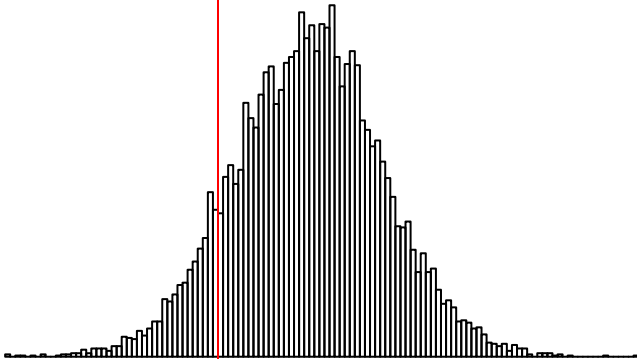

B184:240 – B184:45

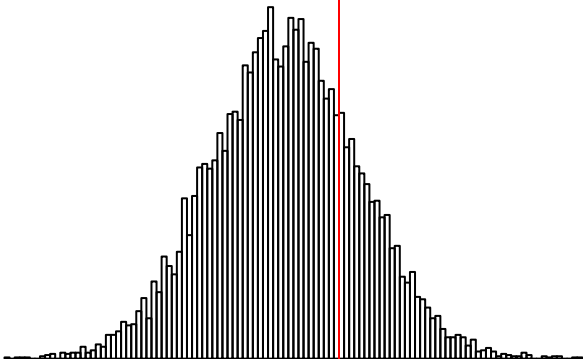

B184:120 – B184:45

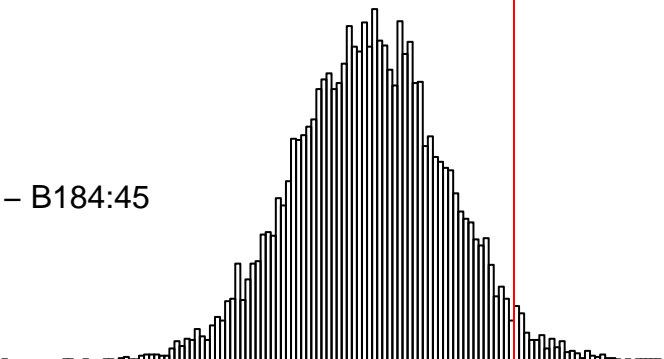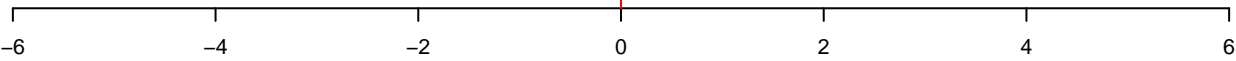

delta(C18:0 Fatty Acid)

B184:240

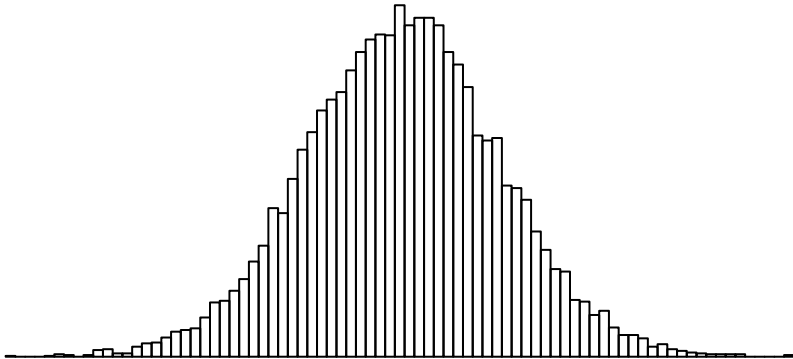

B184:120

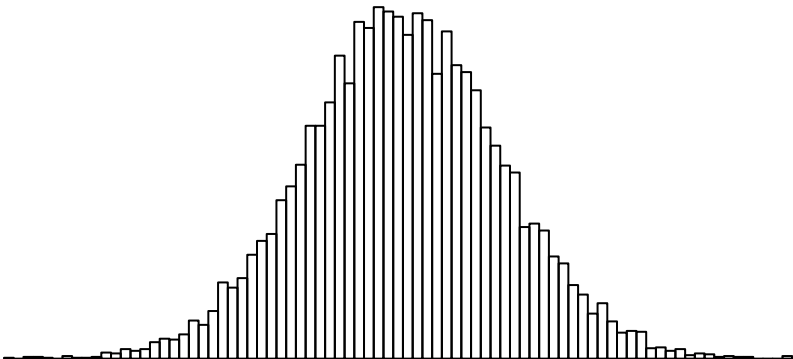

B184:45

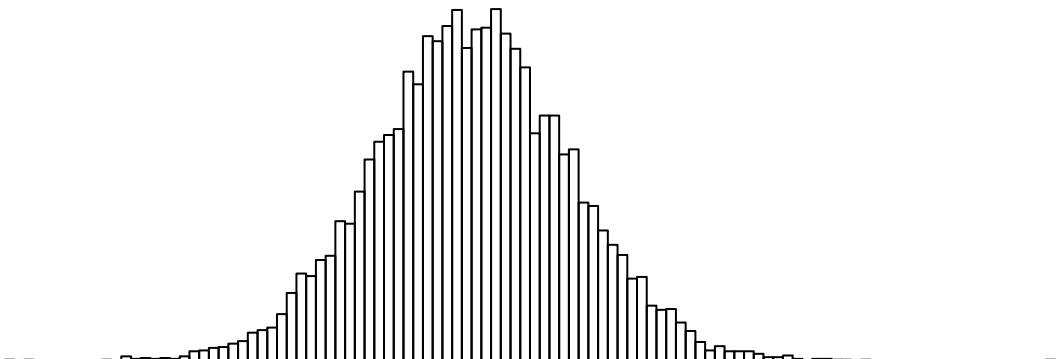

-8.5      -8.0      -7.5      -7.0      -6.5      -6.0

Unidentified Fatty Acid 2

B184:240 – B184:120

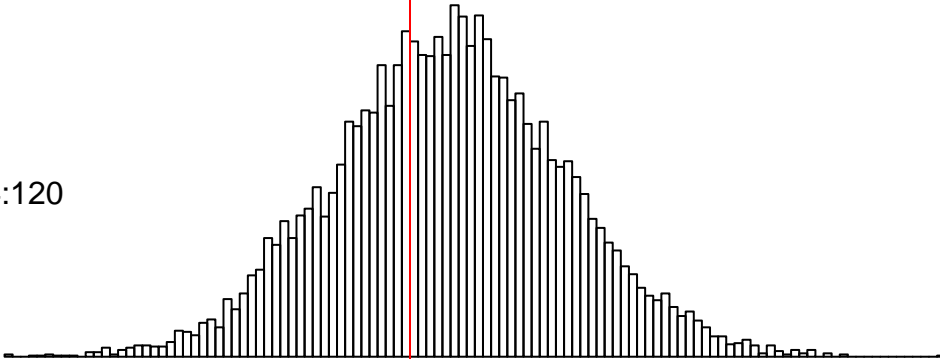

B184:240 – B184:45

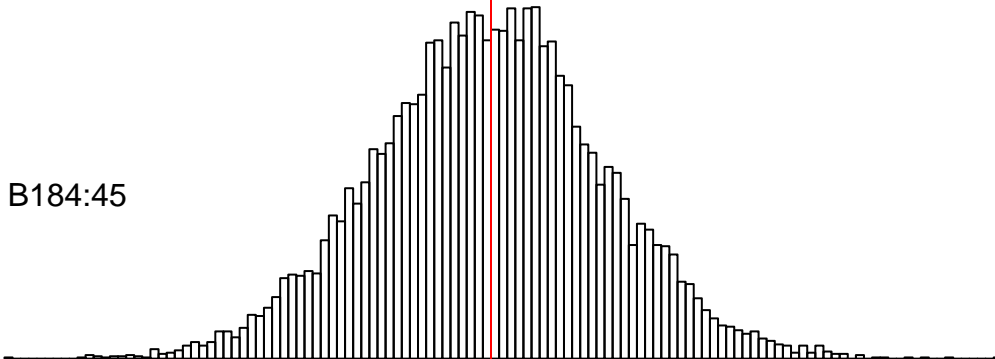

B184:120 – B184:45

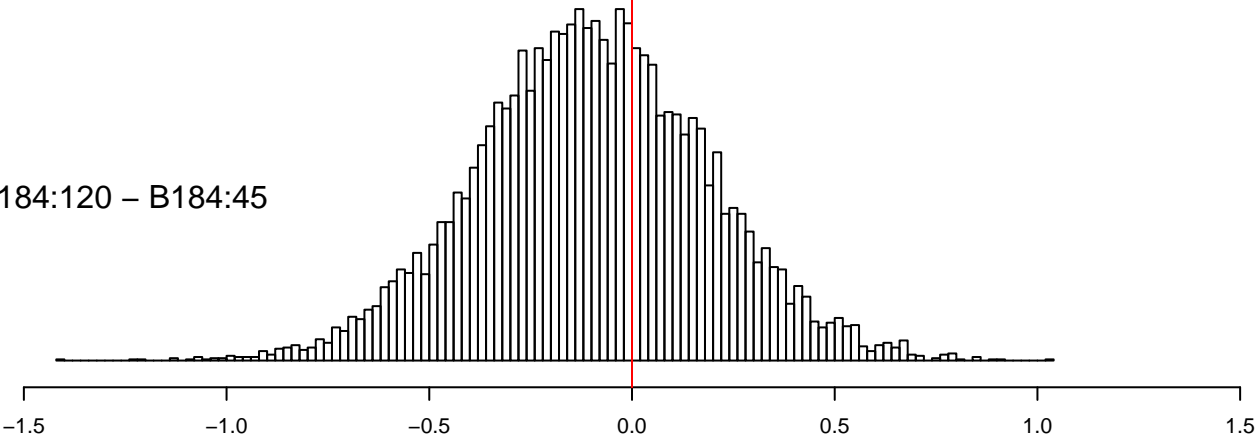

delta(Unidentified Fatty Acid 2)



B184:240

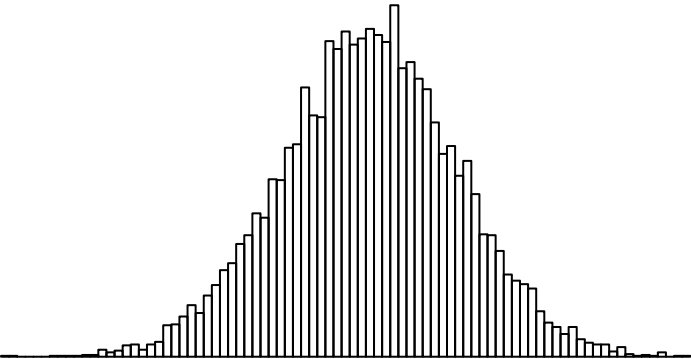

B184:120

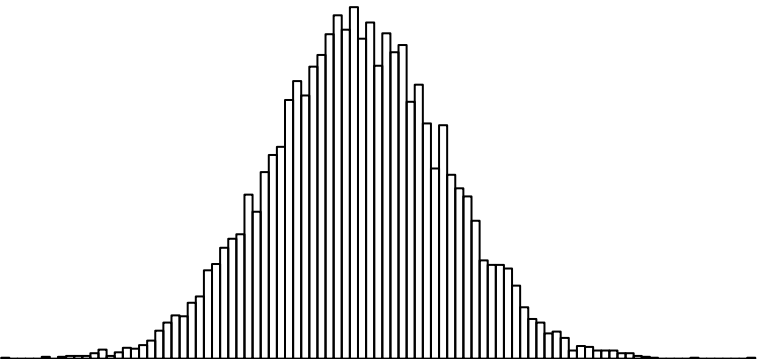

B184:45

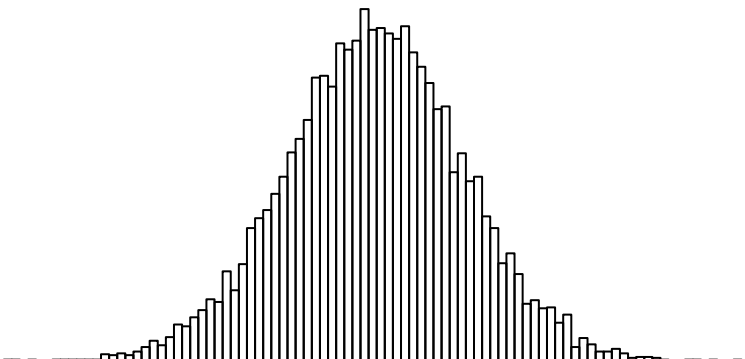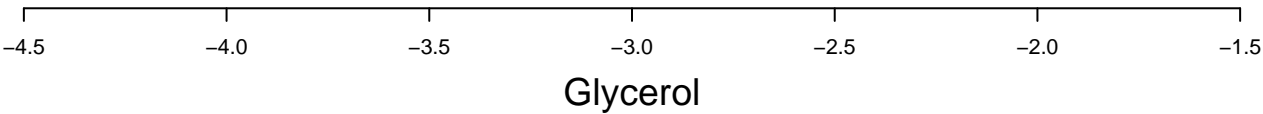

B184:240 – B184:120

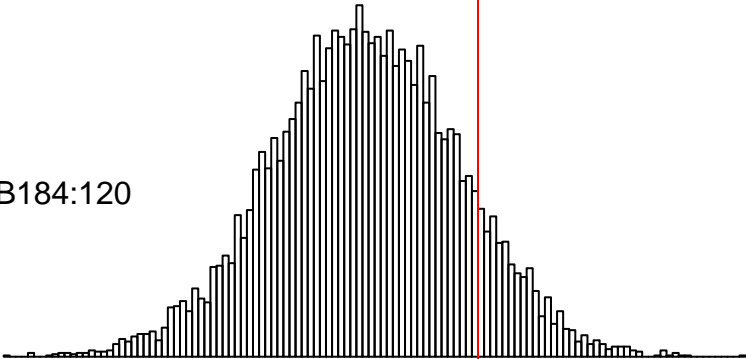

B184:240 – B184:45

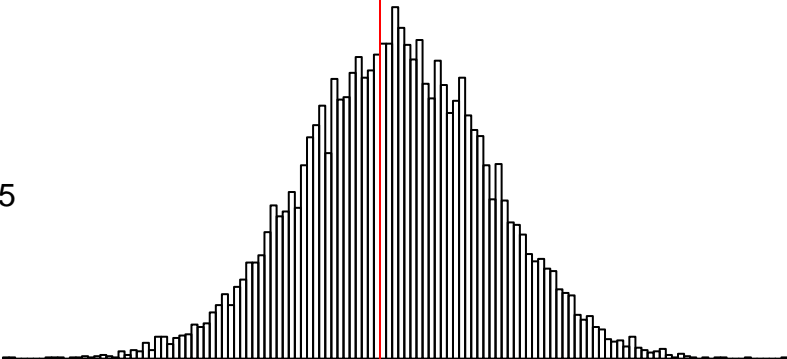

B184:120 – B184:45

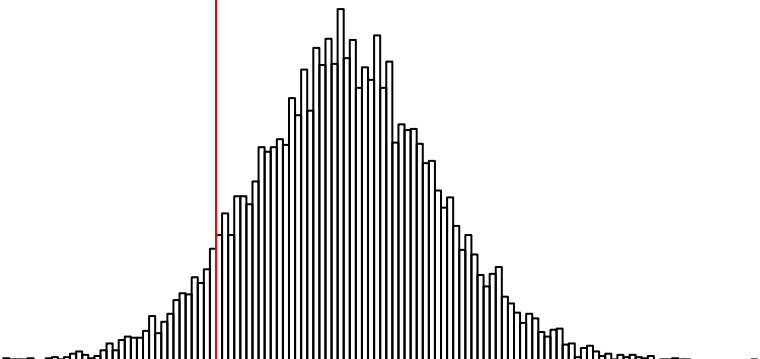

-2

-1

0

1

2

delta(Glycerol)

B184:240

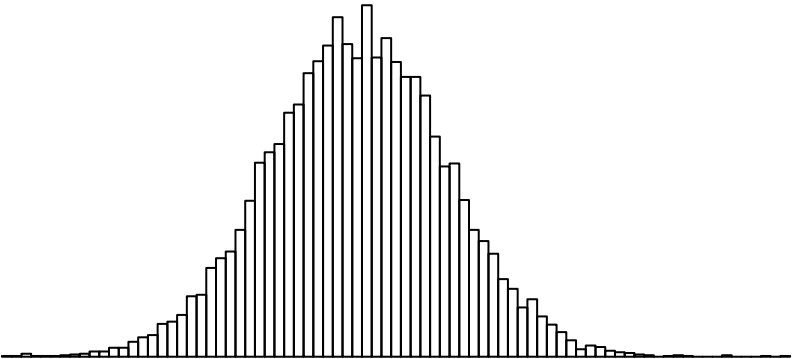

B184:120

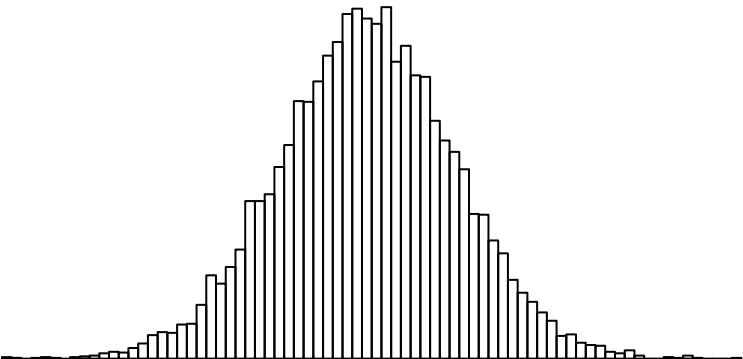

B184:45

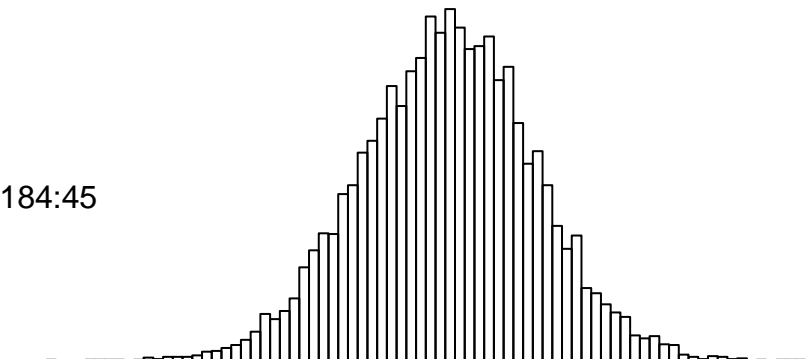

-4.0 -3.5 -3.0 -2.5 -2.0 -1.5

Inositol 1

B184:240 – B184:120

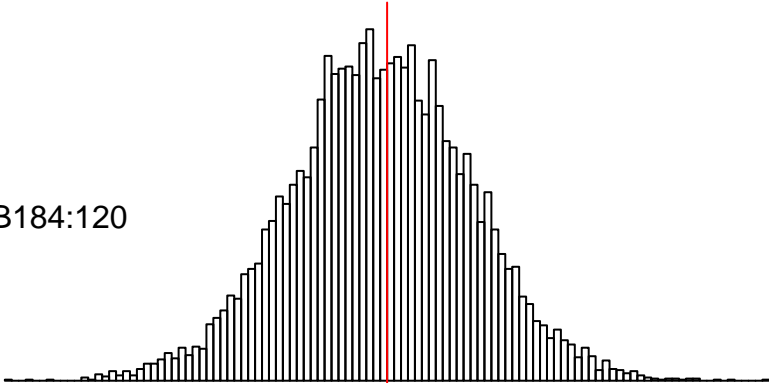

B184:240 – B184:45

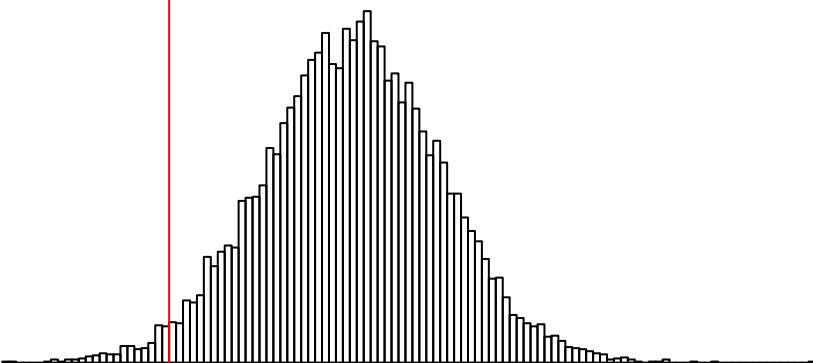

B184:120 – B184:45

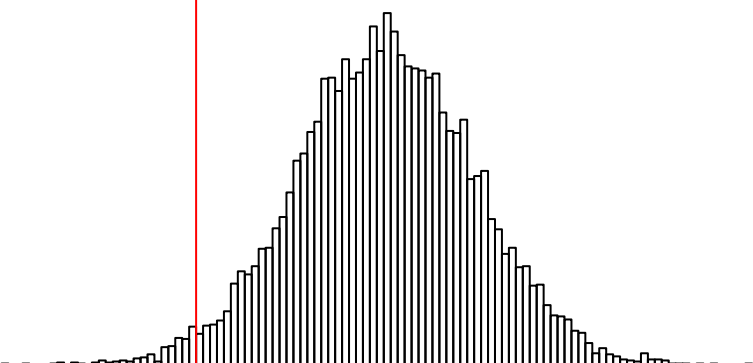

-1.5      -1.0      -0.5      0.0      0.5      1.0      1.5      2.0

delta(Inositol 1)

B184:240

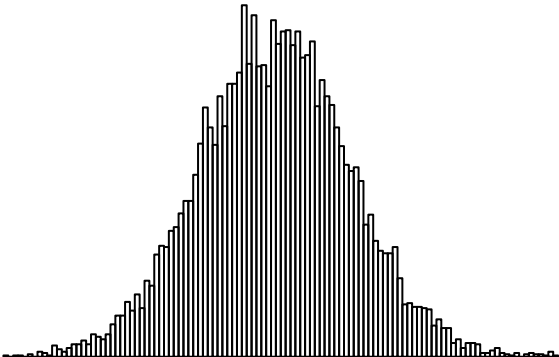

B184:120

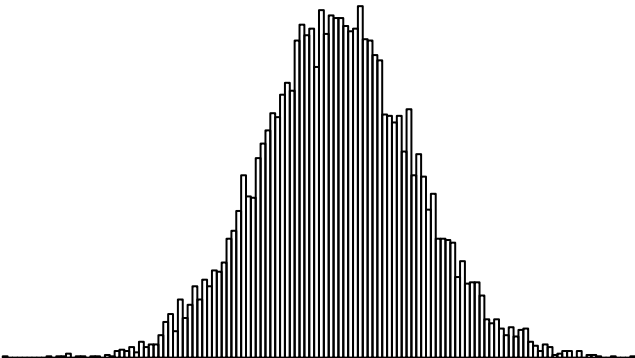

B184:45

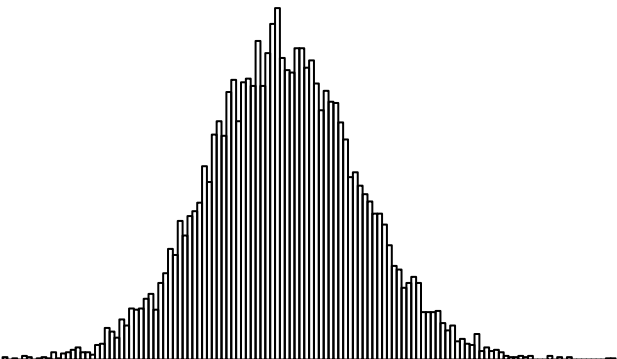

-5.0 -4.5 -4.0 -3.5 -3.0 -2.5

Inositol 2

B184:240 – B184:120

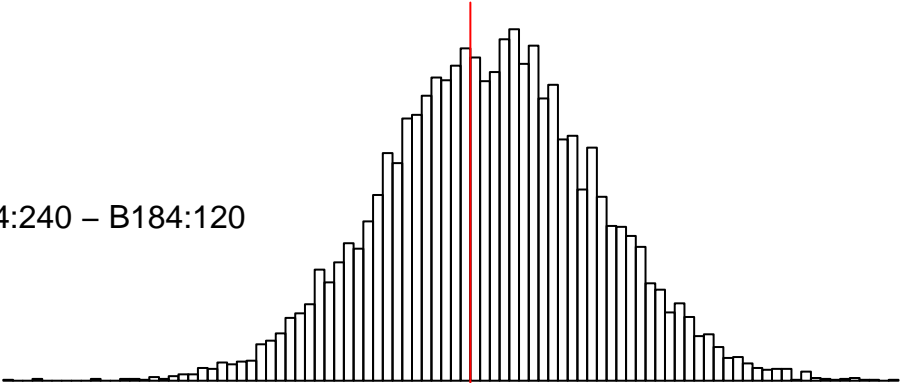

B184:240 – B184:45

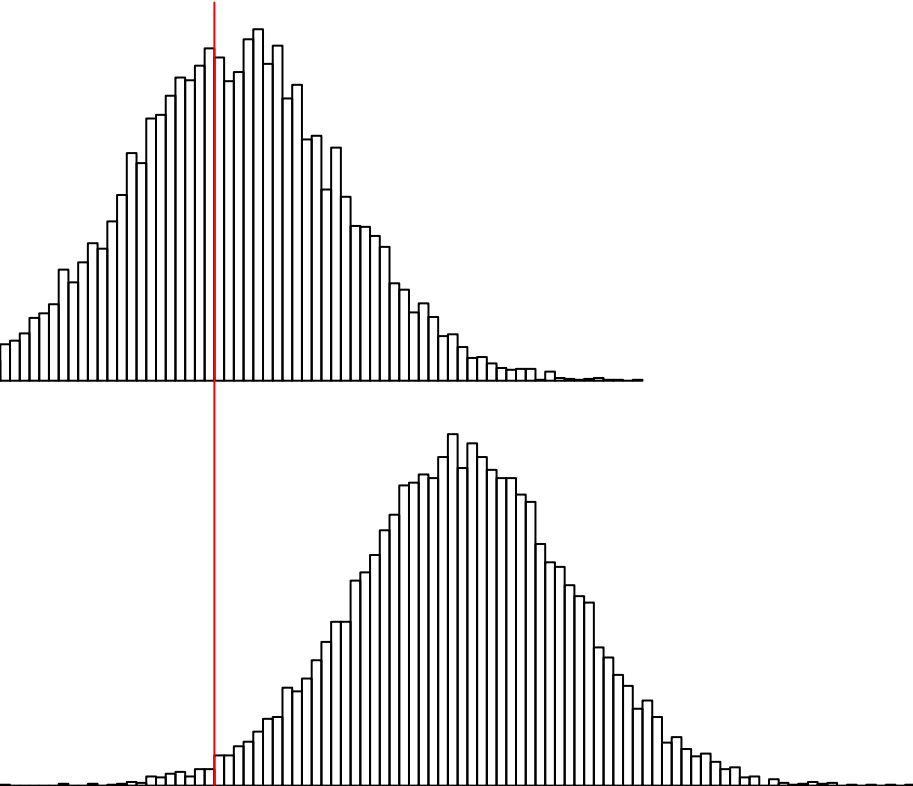

B184:120 – B184:45

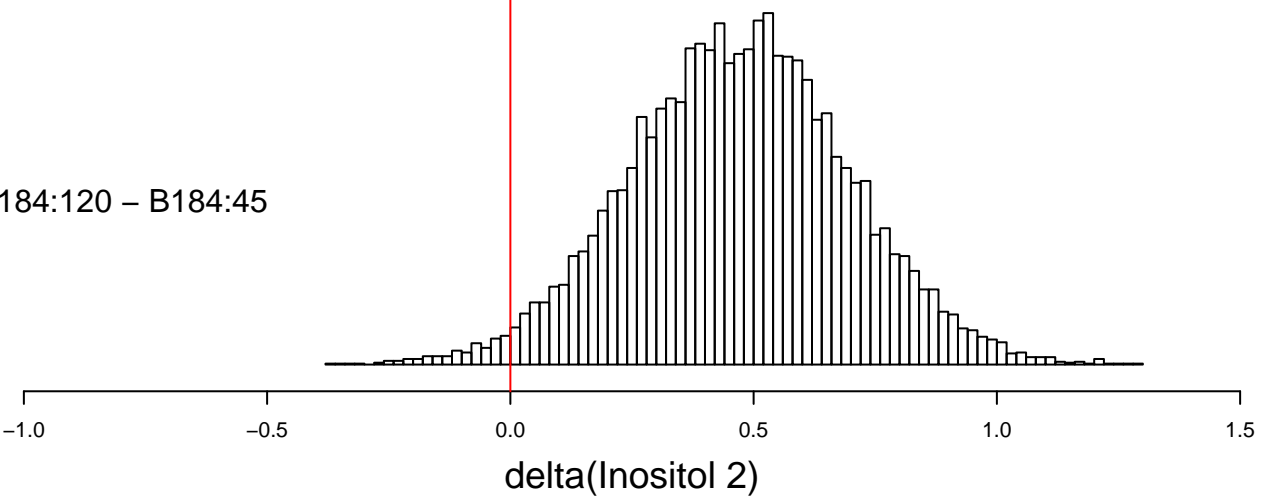

B184:240

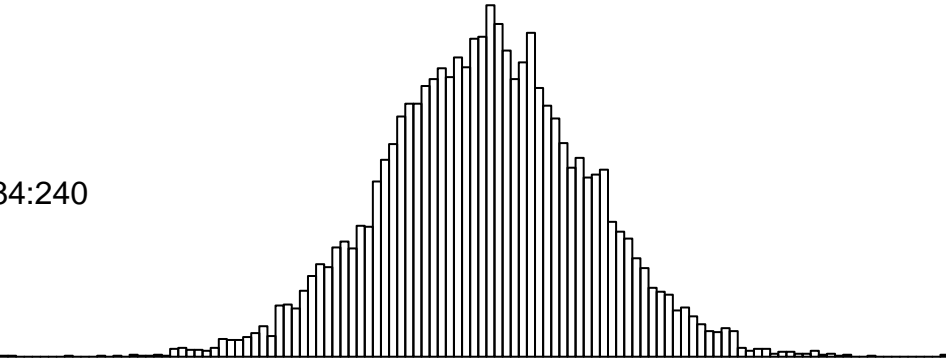

B184:120

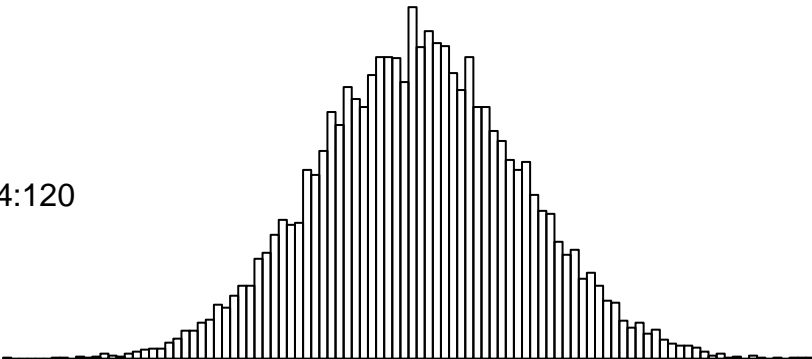

B184:45

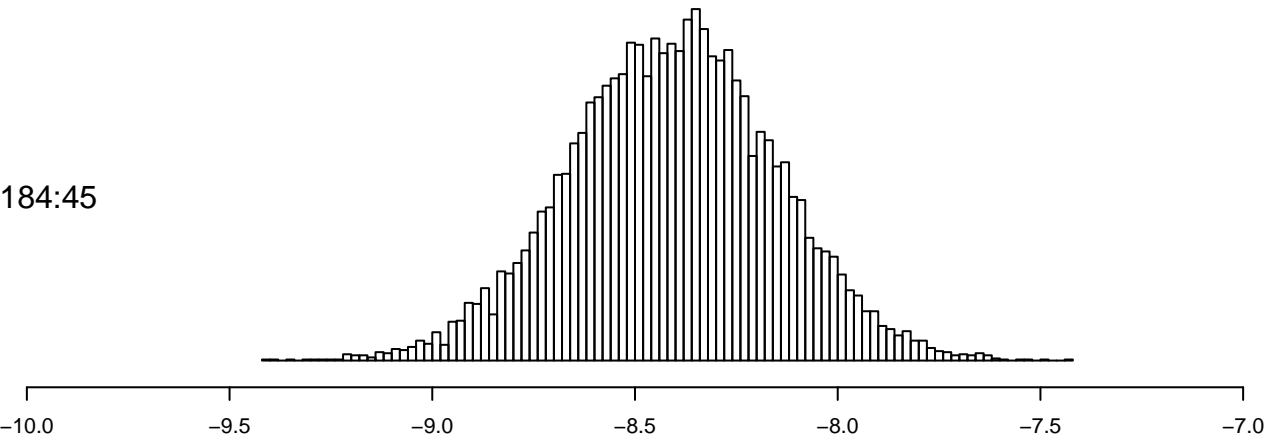

C29 Sterol 1

B184:240 – B184:120

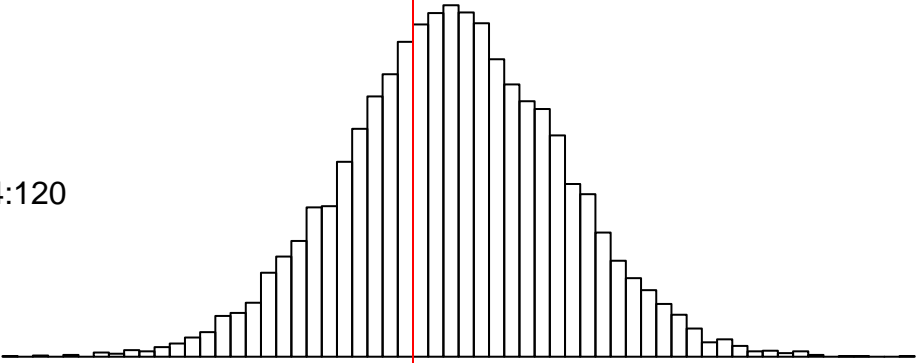

B184:240 – B184:45

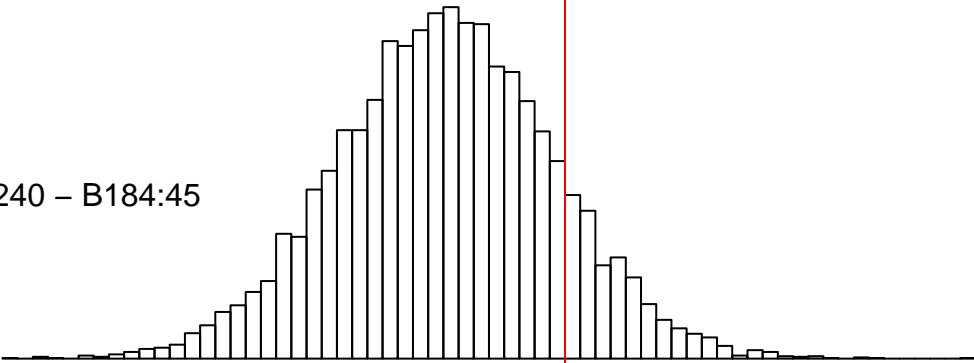

B184:120 – B184:45

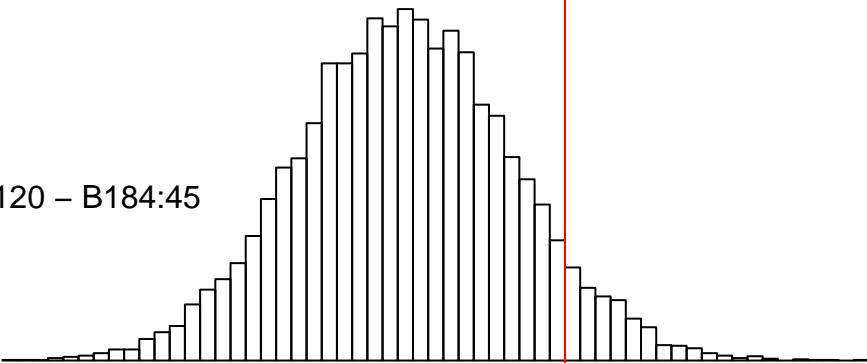

delta(C29 Sterol 1)



B184:240

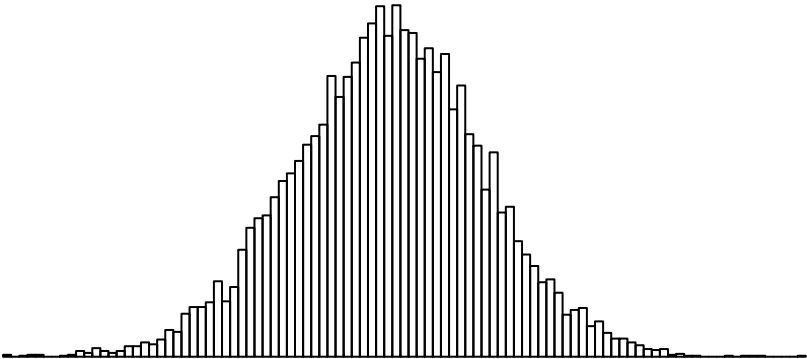

B184:120

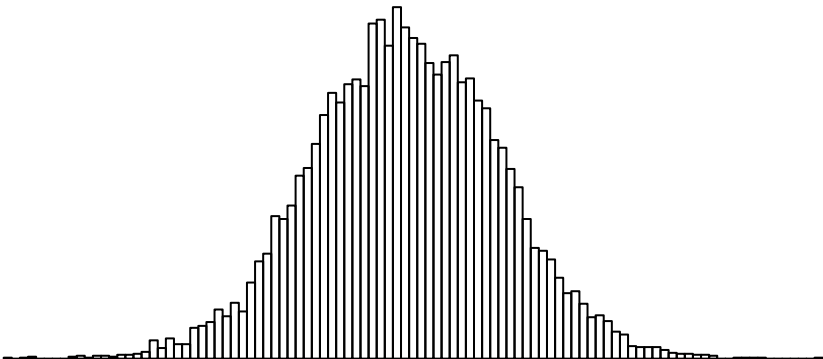

B184:45

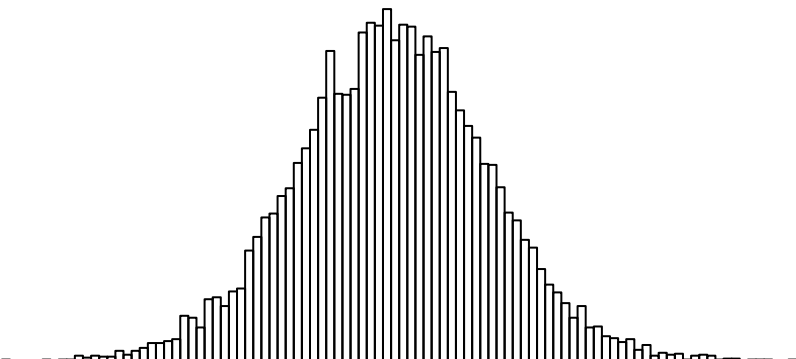

-10.0      -9.5      -9.0      -8.5      -8.0      -7.5      -7.0

C29 Stanol 1

B184:240 – B184:120

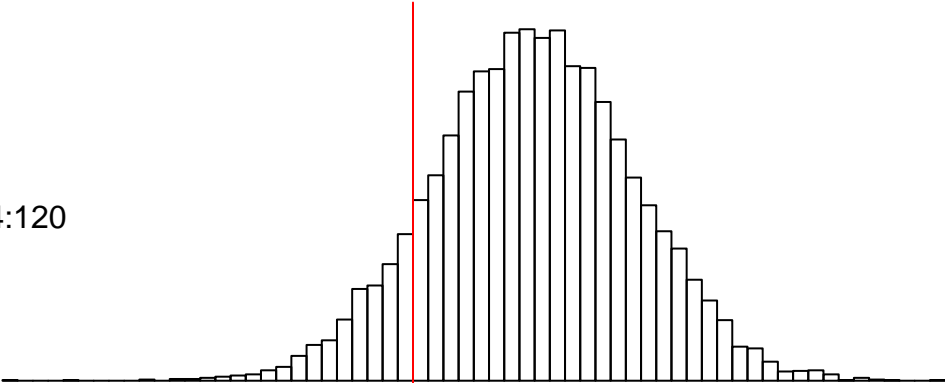

B184:240 – B184:45

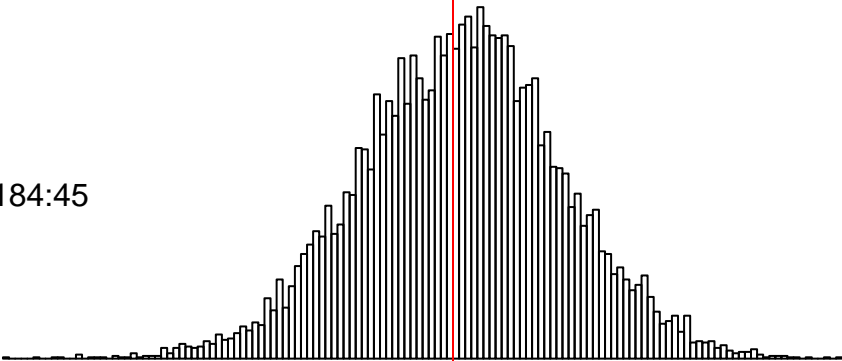

B184:120 – B184:45

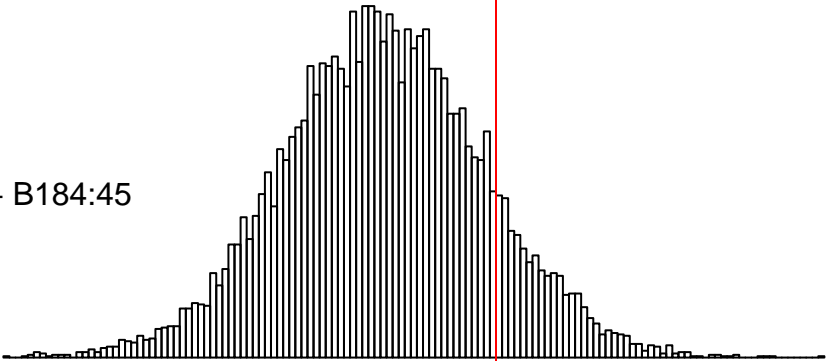

-2

-1

0

1

2

delta(C29 Stanol 1)

B184:240

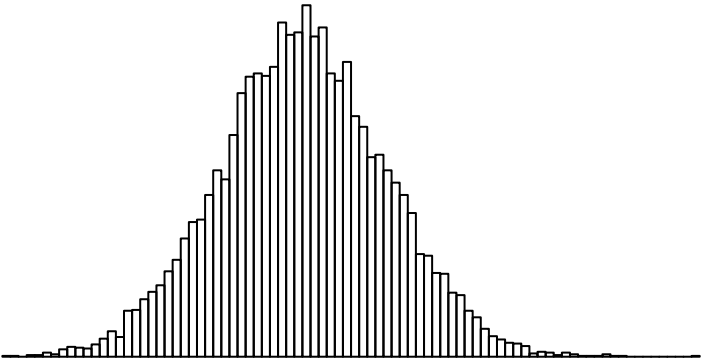

B184:120

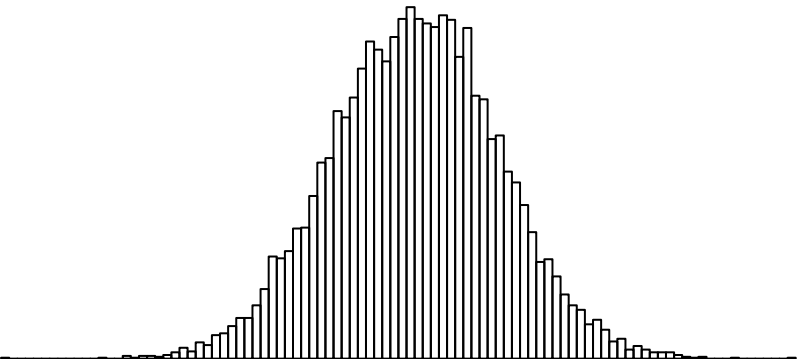

B184:45

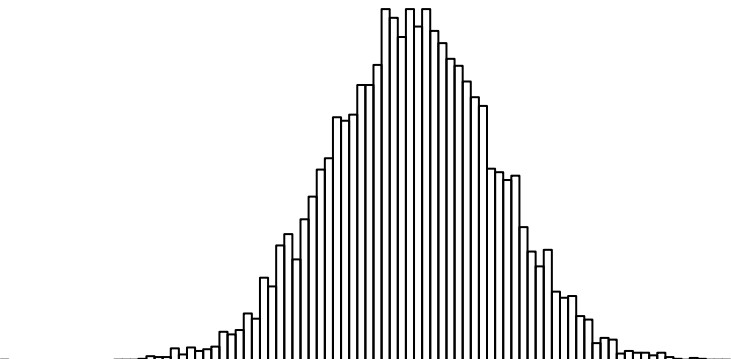

-9.5      -9.0      -8.5      -8.0      -7.5      -7.0      -6.5

C27<sup>5,22</sup> Sterol

B184:240 – B184:120

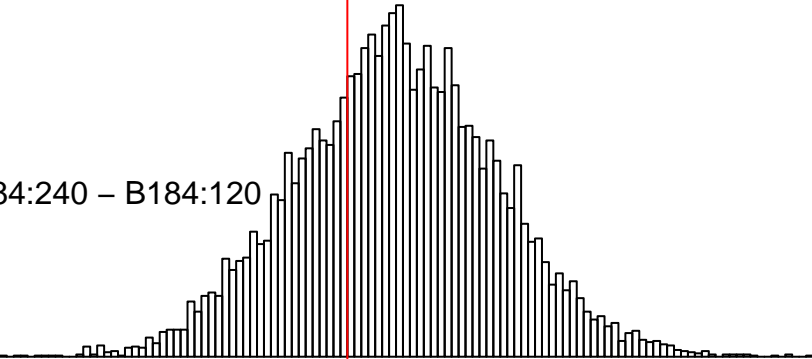

B184:240 – B184:45

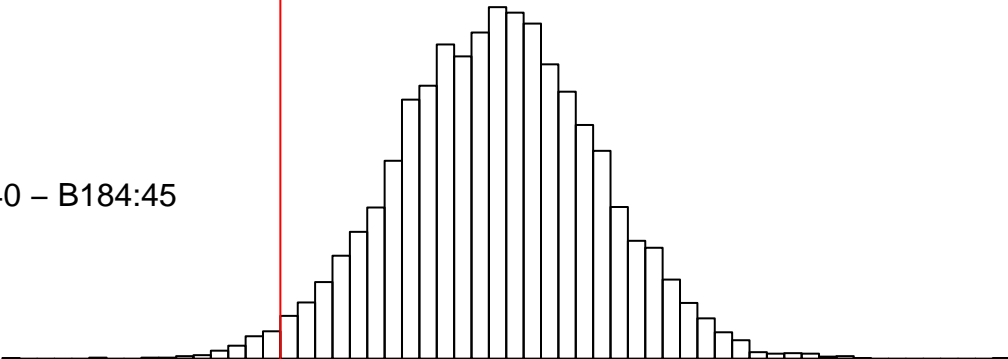

B184:120 – B184:45

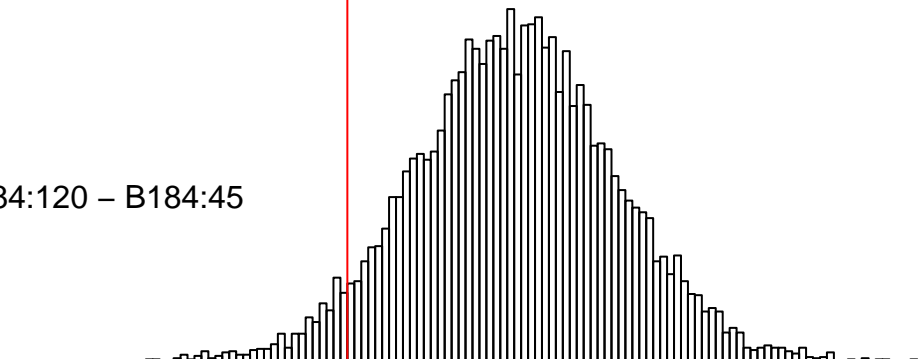

-1.0      -0.5      0.0      0.5      1.0      1.5      2.0      2.5

delta(C27"5,22 Sterol)

B184:240

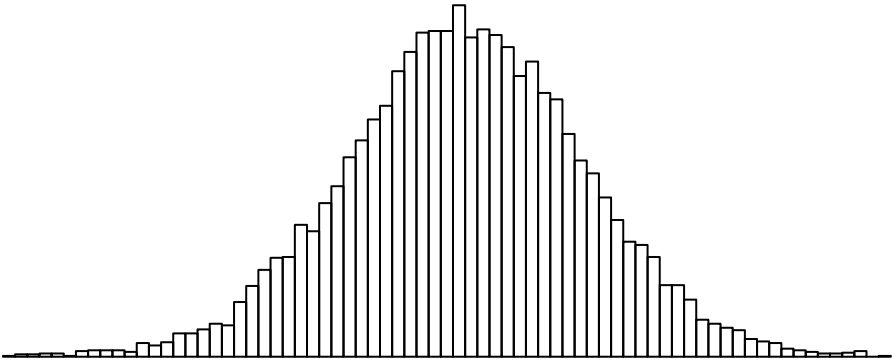

B184:120

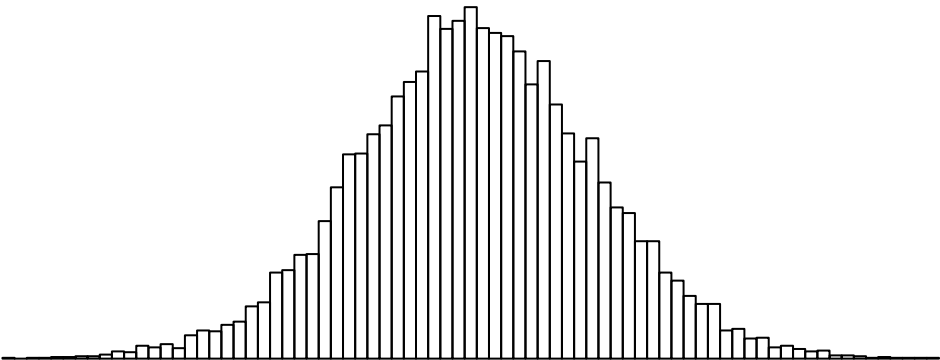

B184:45

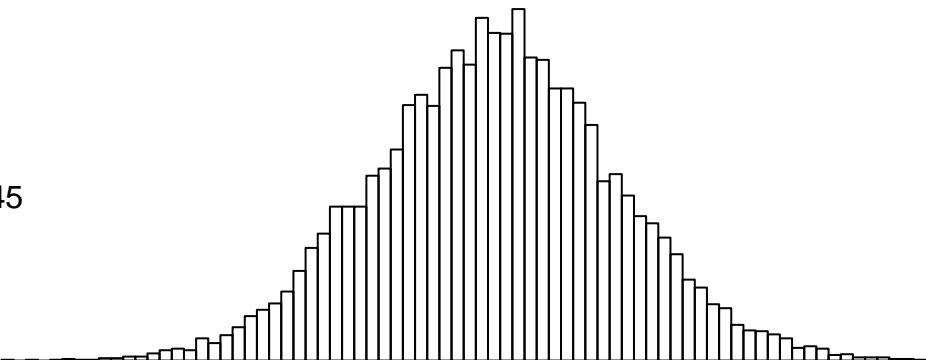

-7.0      -6.5      -6.0      -5.5      -5.0

C27"5 Sterol

B184:240 – B184:120

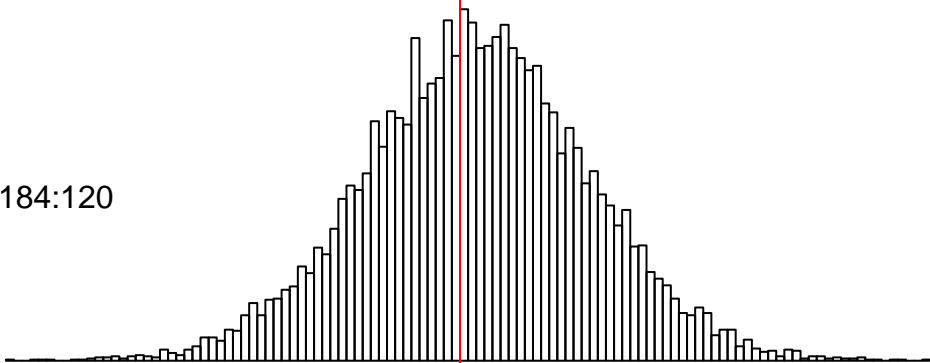

B184:240 – B184:45

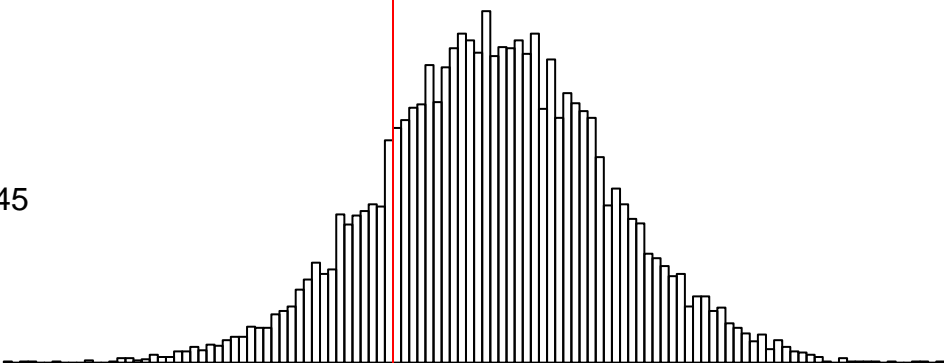

B184:120 – B184:45

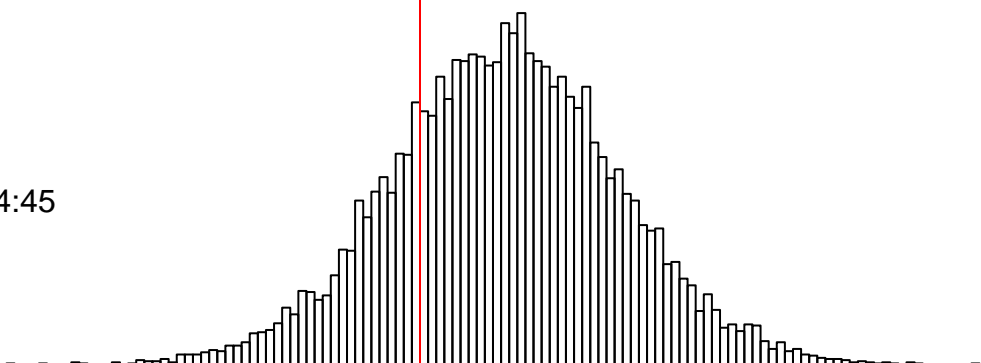

-1.5      -1.0      -0.5      0.0      0.5      1.0      1.5

delta(C27"5 Sterol)

B184:240

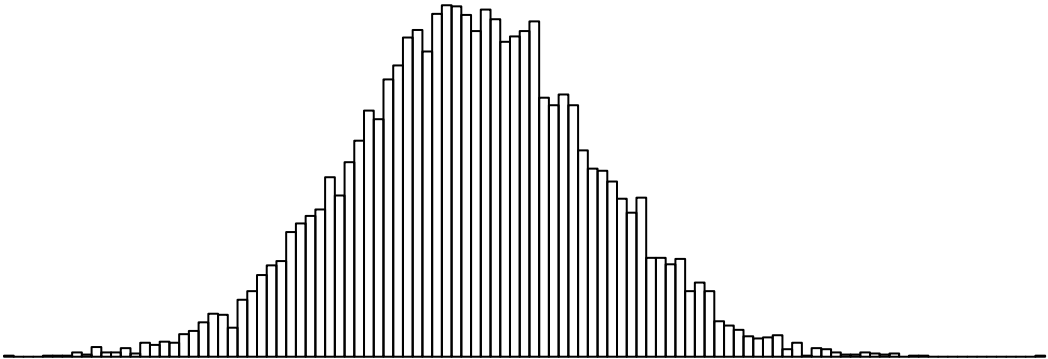

B184:120

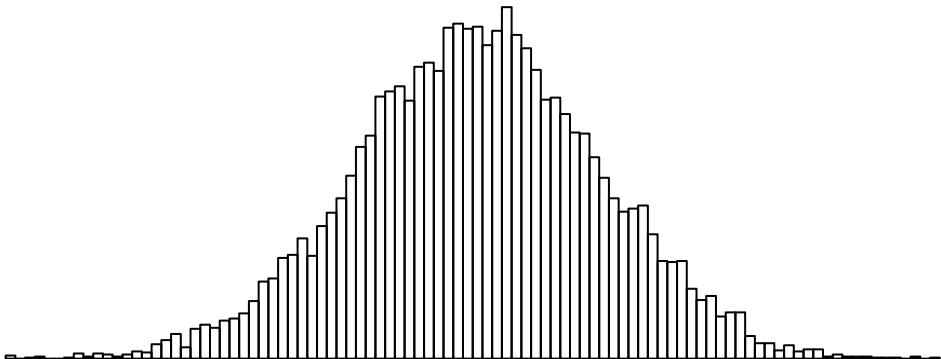

B184:45

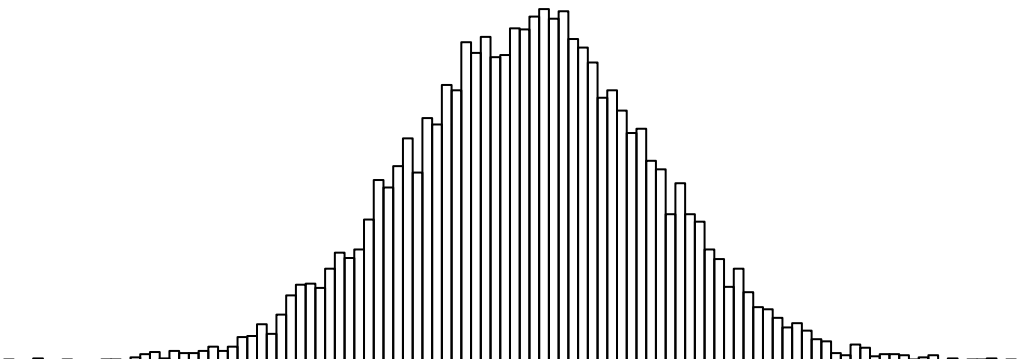

-8.5      -8.0      -7.5      -7.0      -6.5      -6.0

C28"5,22 Sterol

B184:240 – B184:120

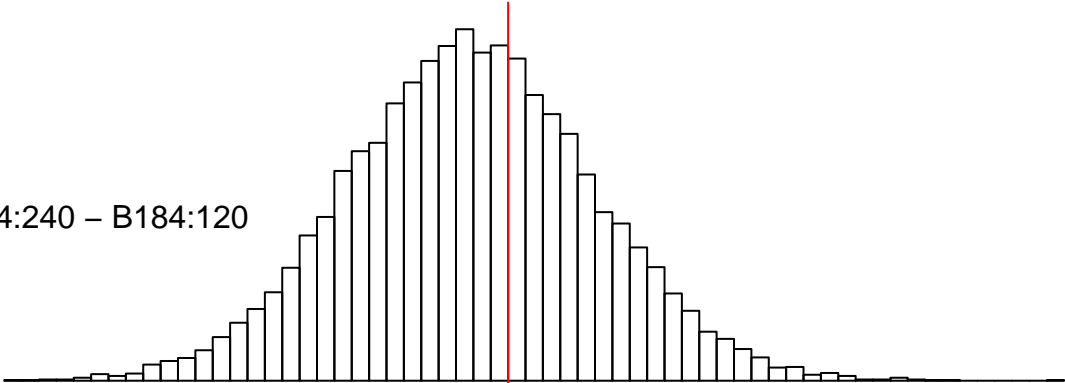

B184:240 – B184:45

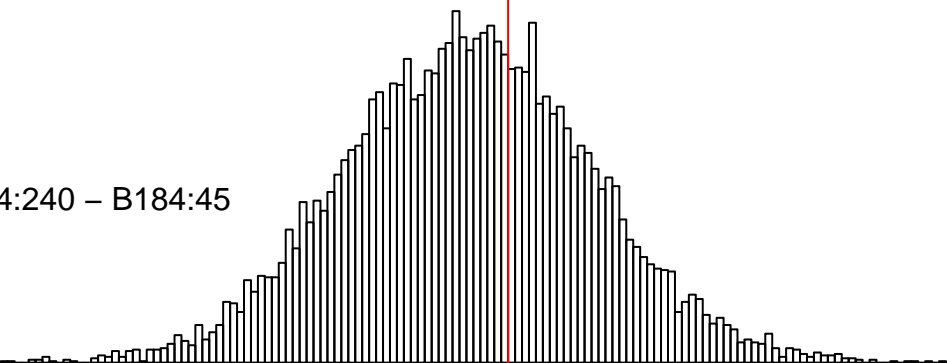

B184:120 – B184:45

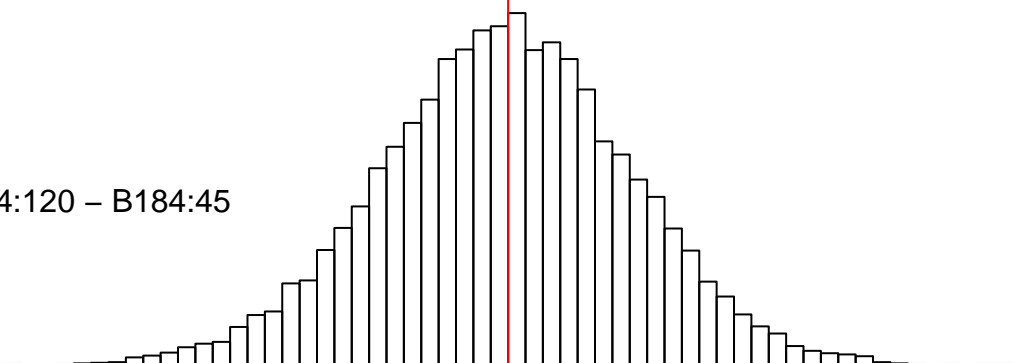

-1.5      -1.0      -0.5      0.0      0.5      1.0      1.5      2.0

delta(C28"5,22 Sterol)



B184:240

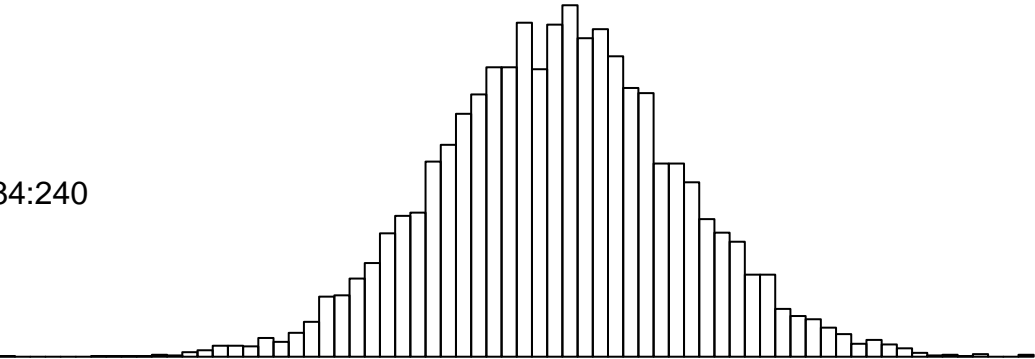

B184:120

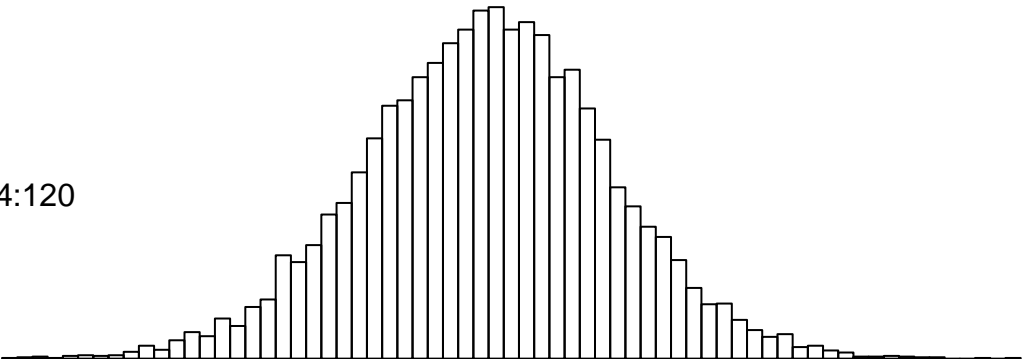

B184:45

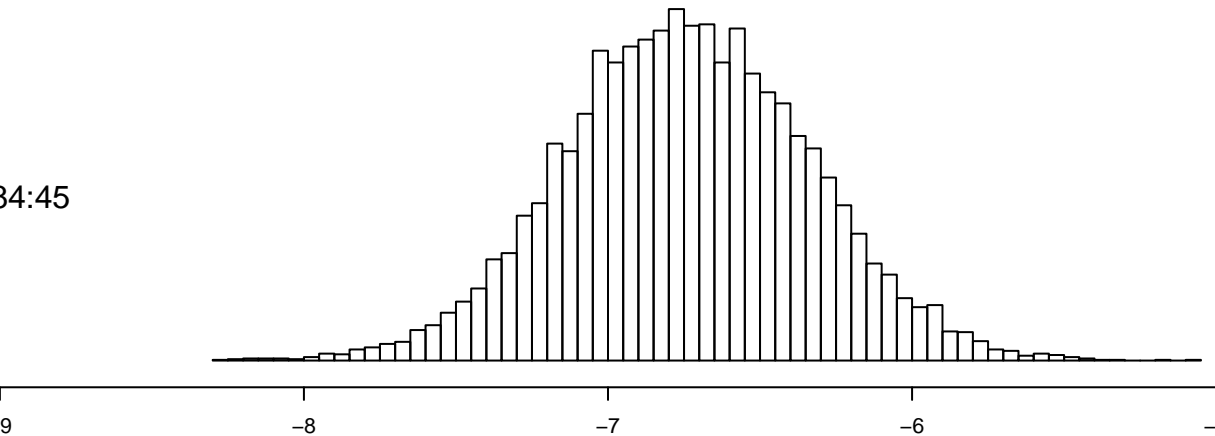

C28"5 Sterol

B184:240 – B184:120

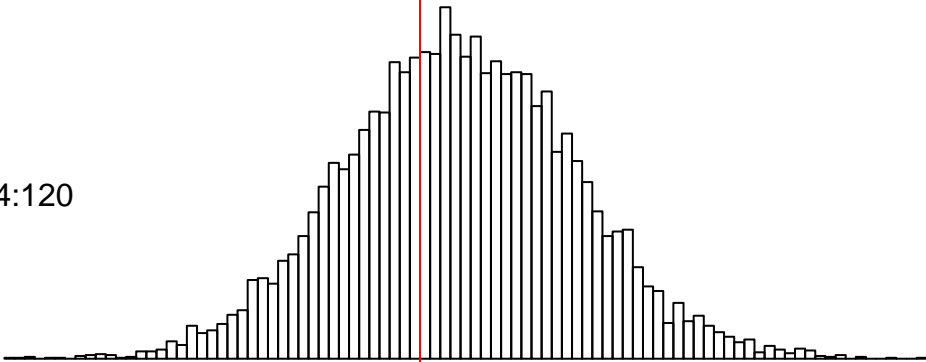

B184:240 – B184:45

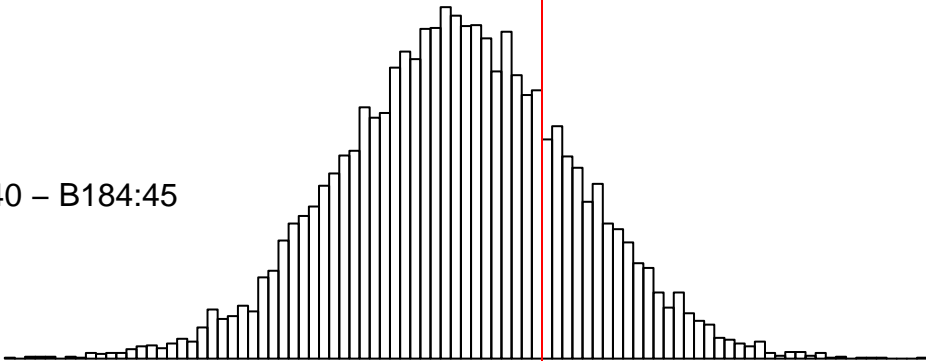

B184:120 – B184:45

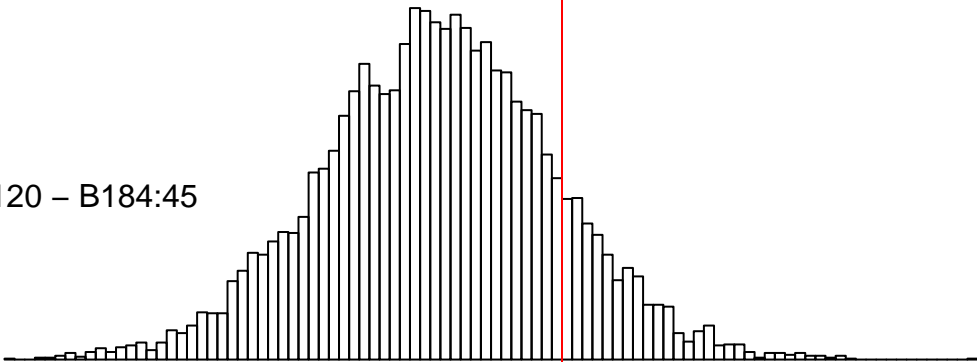

delta(C28"5 Sterol)

B184:240

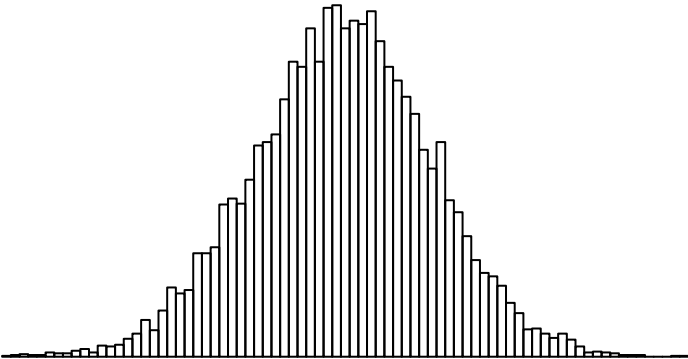

B184:120

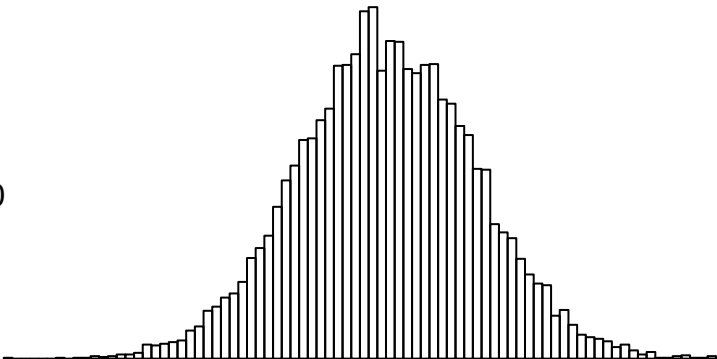

B184:45

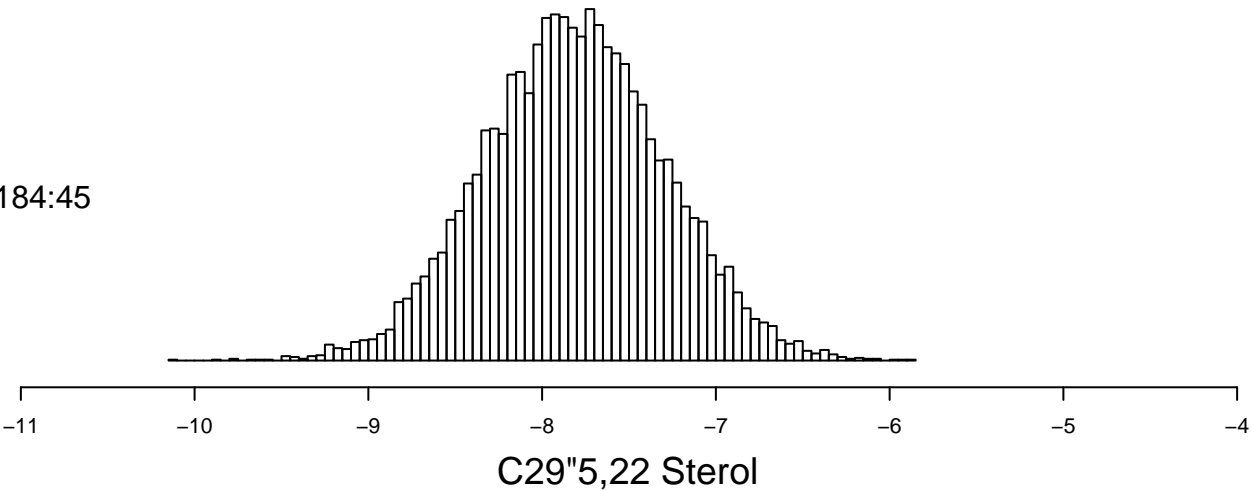

B184:240 – B184:120

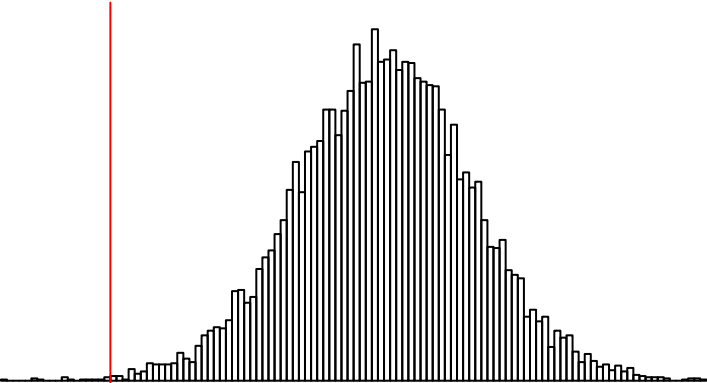

B184:240 – B184:45

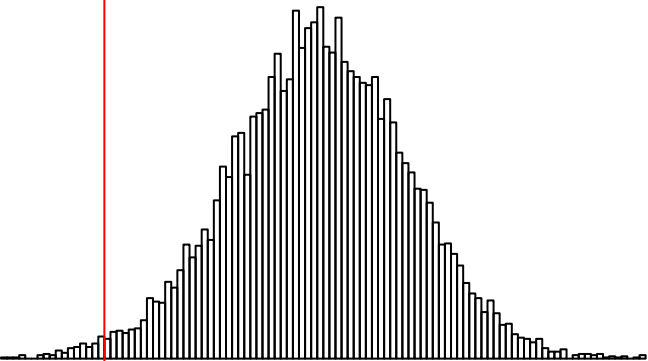

B184:120 – B184:45

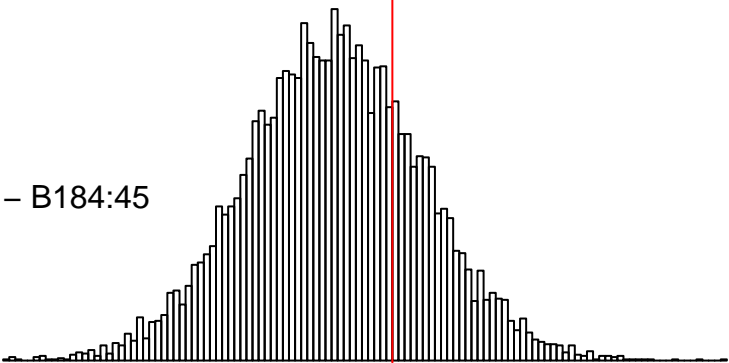

delta(C29"5,22 Sterol)

B184:240

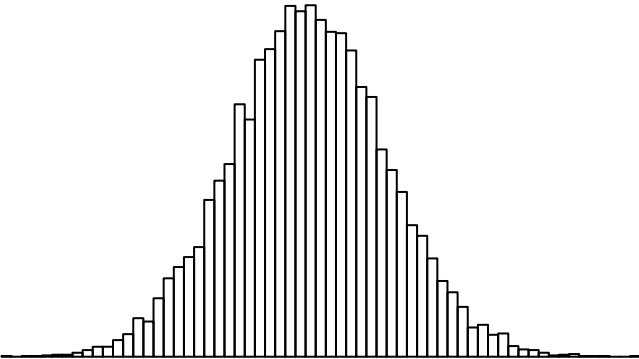

B184:120

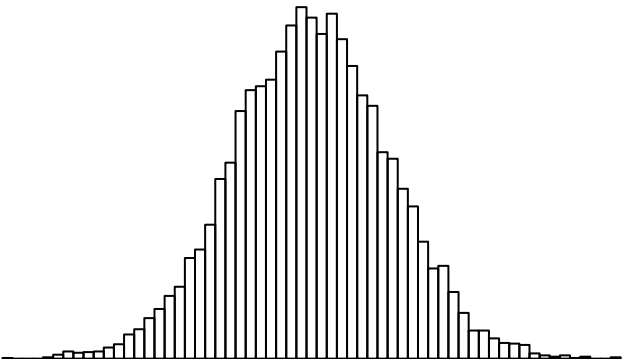

B184:45

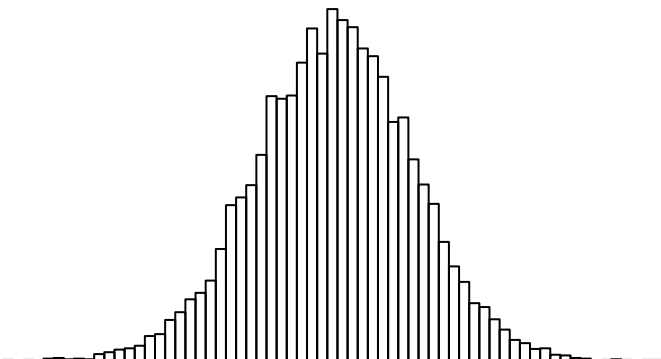

-8                      -7                      -6                      -5                      -4                      -3                      -2

C29 Sterol 2

B184:240 – B184:120

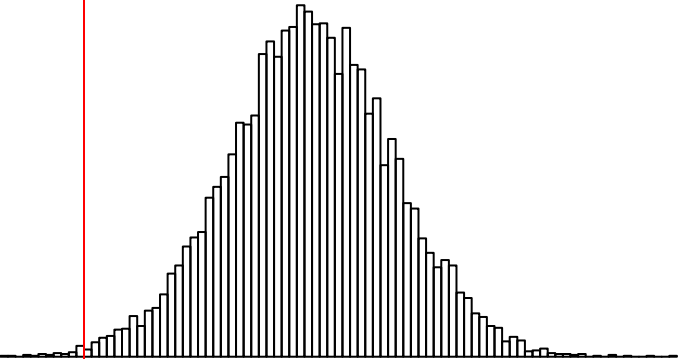

B184:240 – B184:45

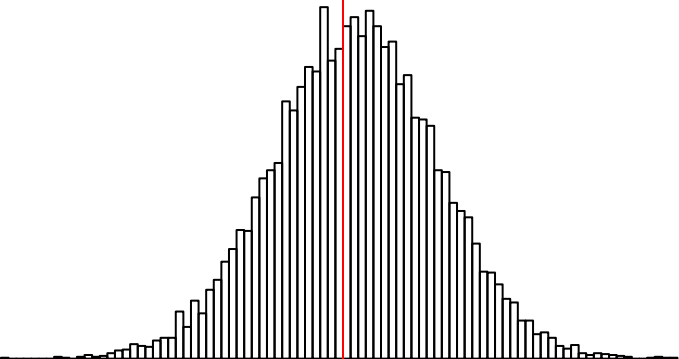

B184:120 – B184:45

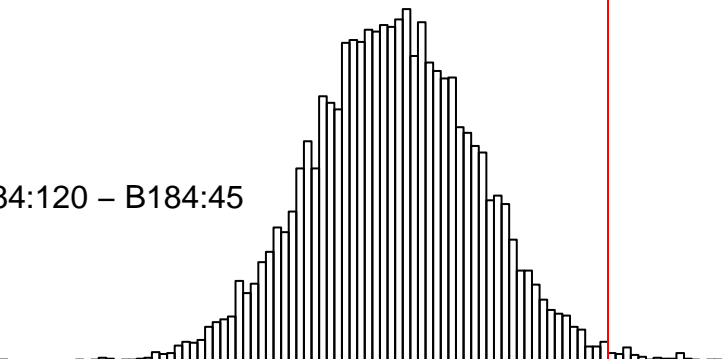

delta(C29 Sterol 2)

B184:240

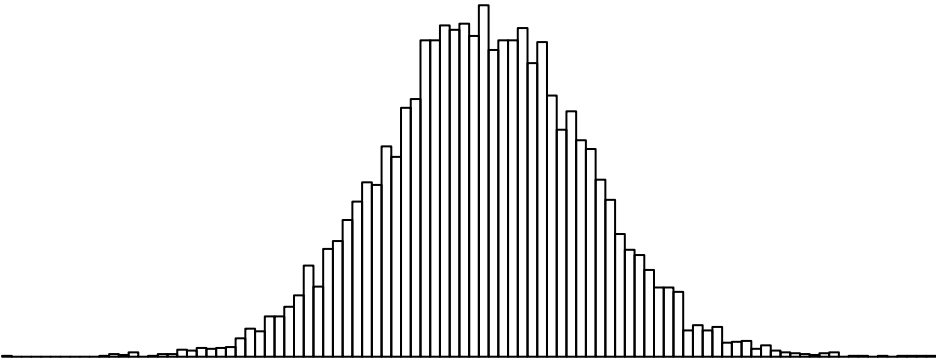

B184:120

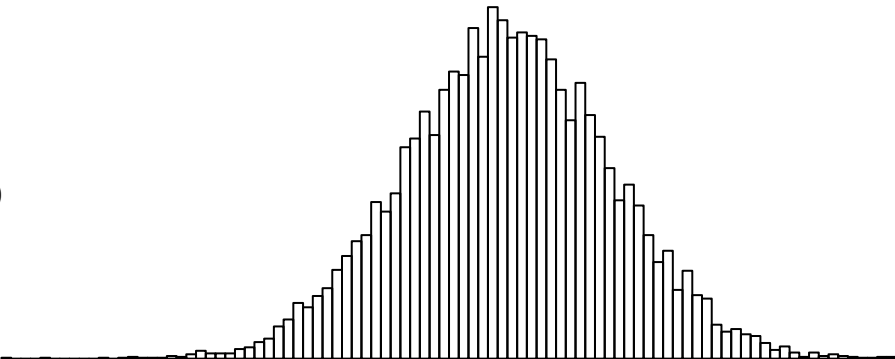

B184:45

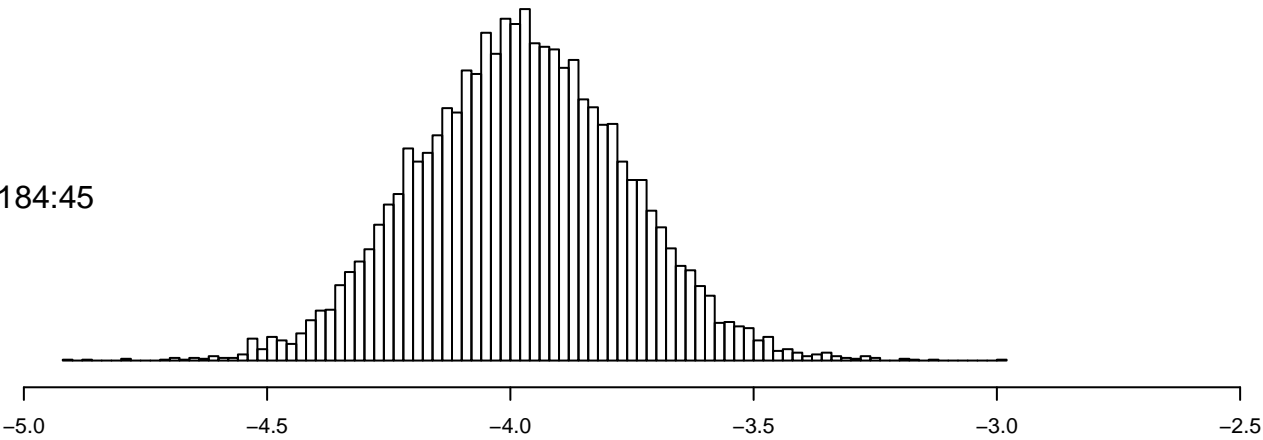

C29 Stanol 2

B184:240 – B184:120

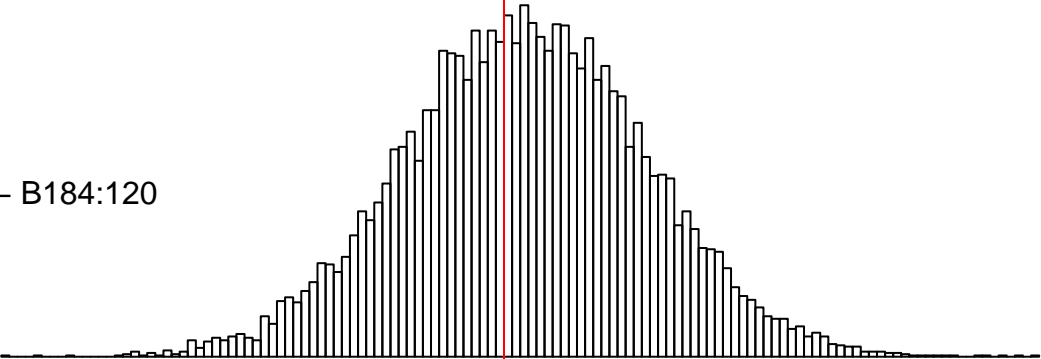

B184:240 – B184:45

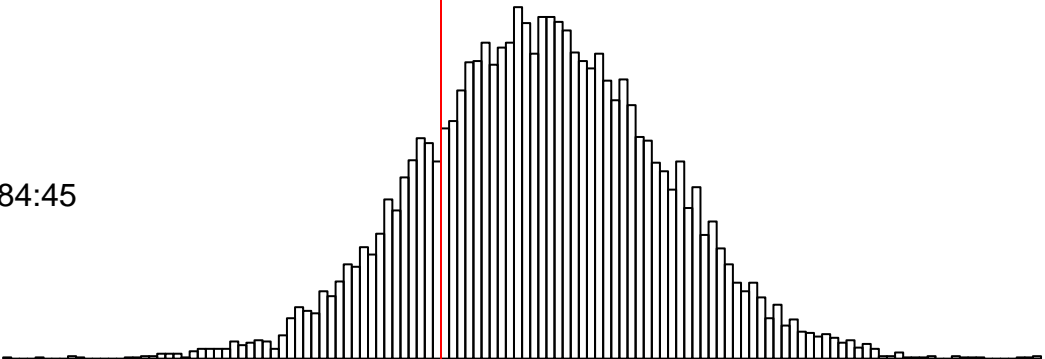

B184:120 – B184:45

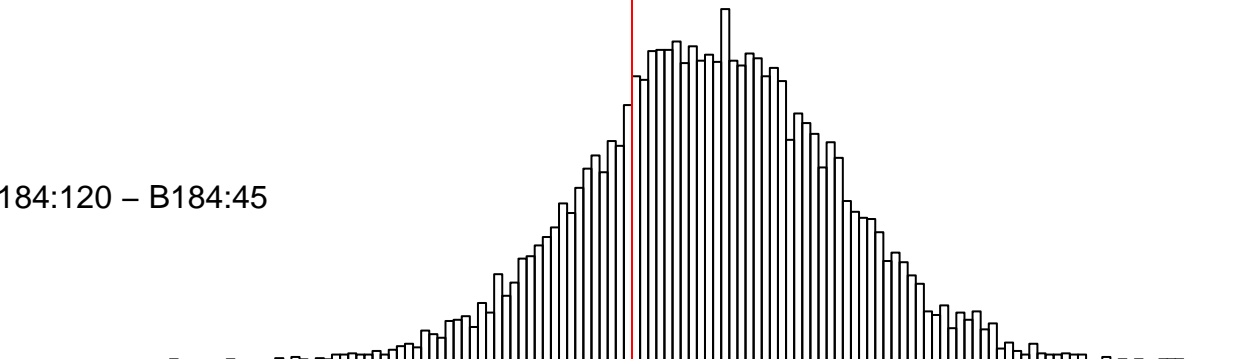

-1.5      -1.0      -0.5      0.0      0.5      1.0      1.5

delta(C29 Stanol 2)



B184:240

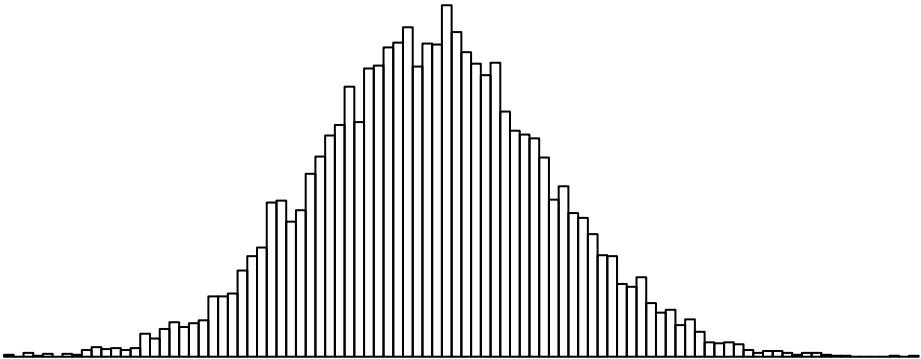

B184:120

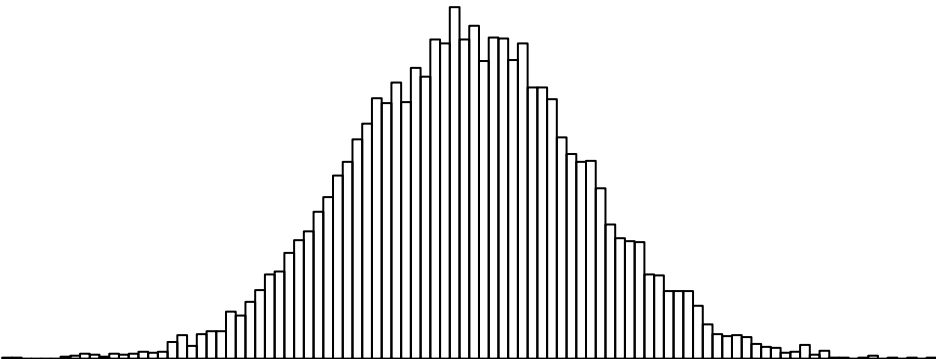

B184:45

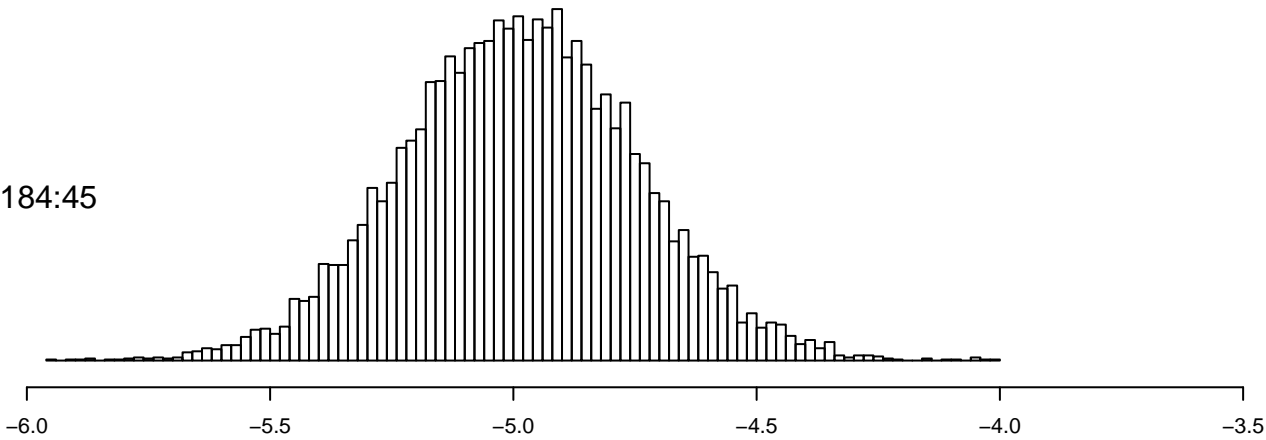

C29 Sterol 3

B184:240 – B184:120

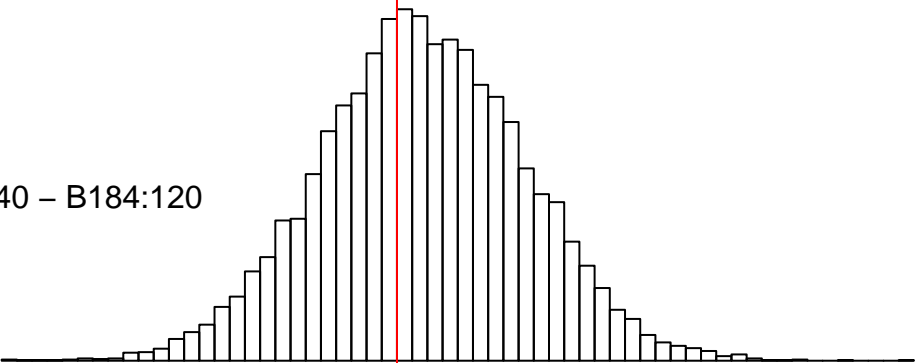

B184:240 – B184:45

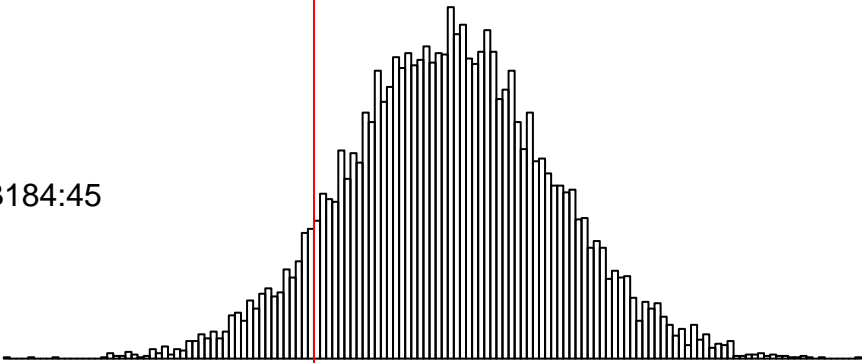

B184:120 – B184:45

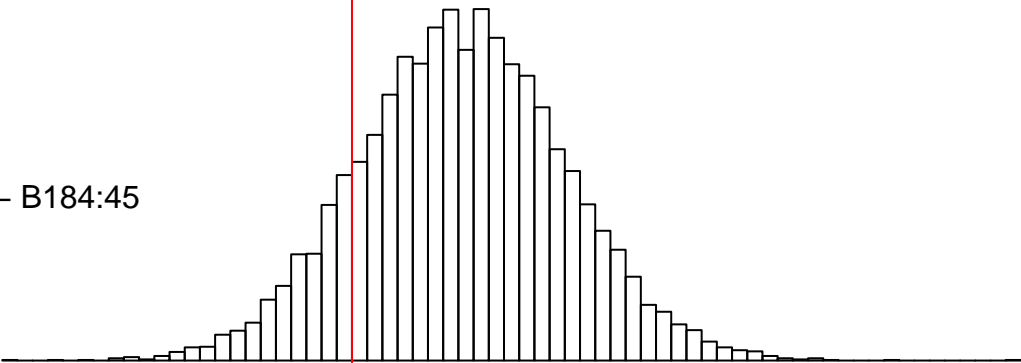

-1

0

1

2

delta(C29 Sterol 3)

B184:240

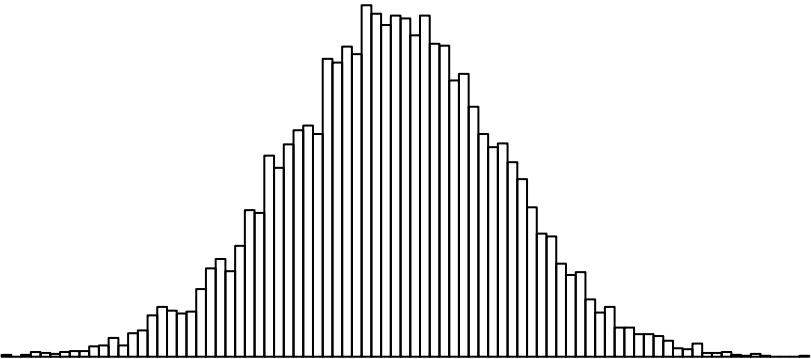

B184:120

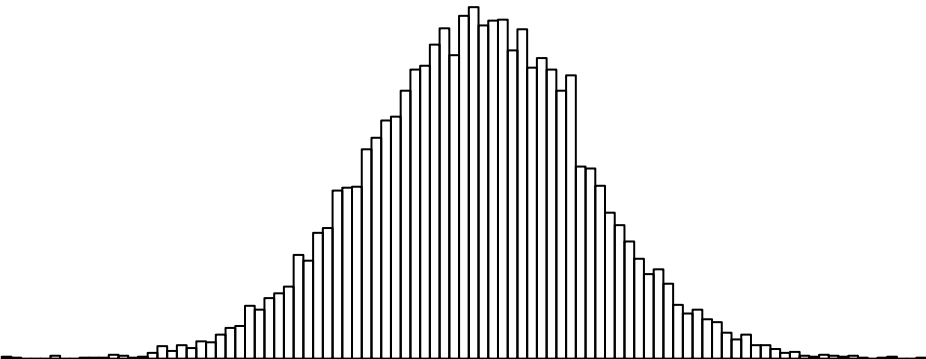

B184:45

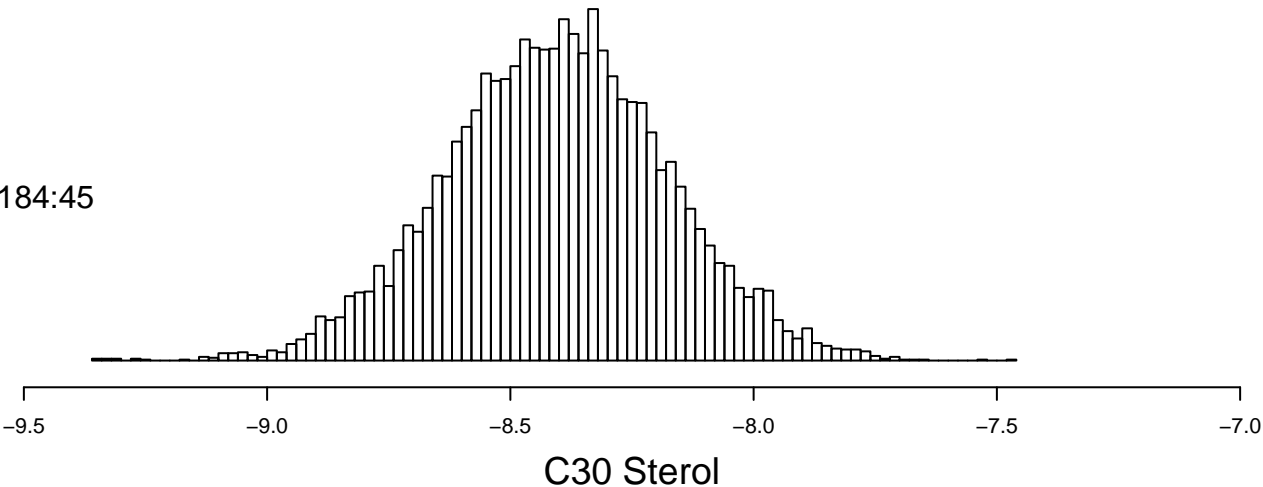

B184:240 – B184:120

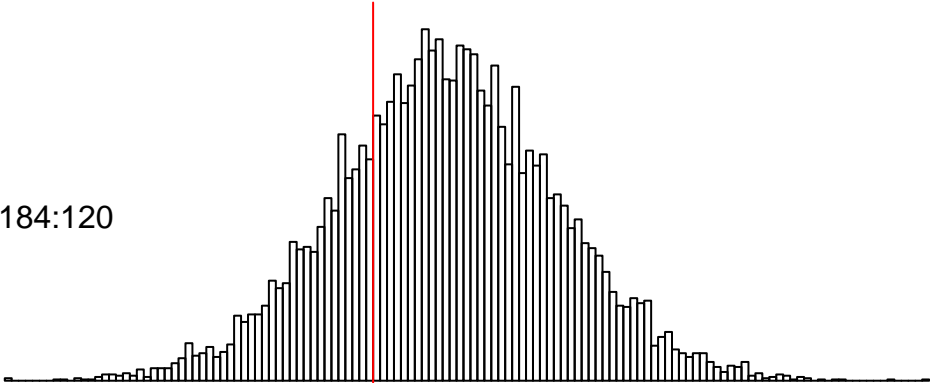

B184:240 – B184:45

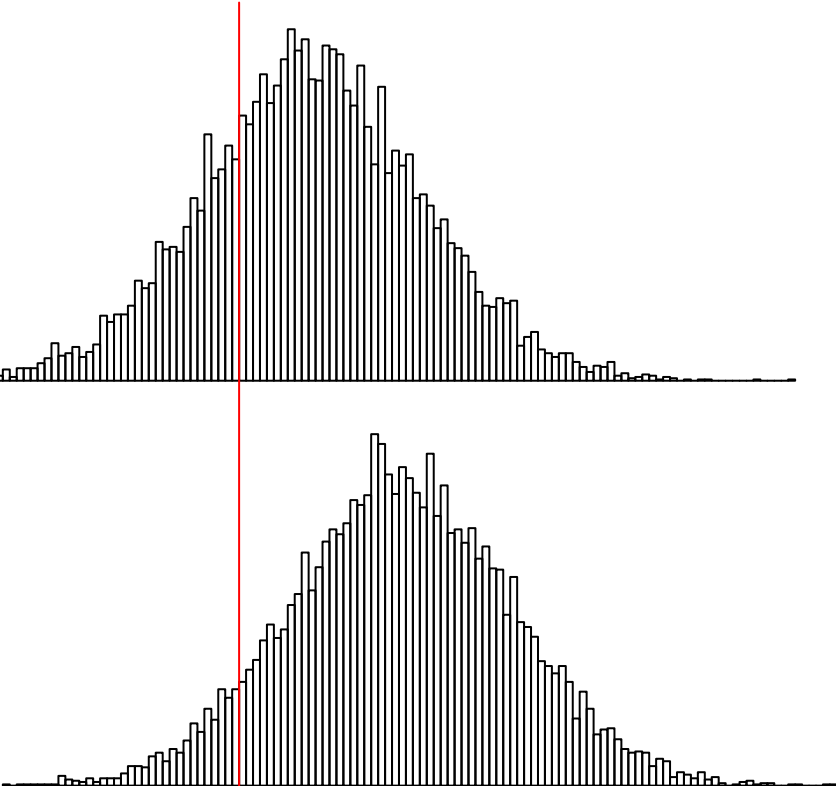

B184:120 – B184:45

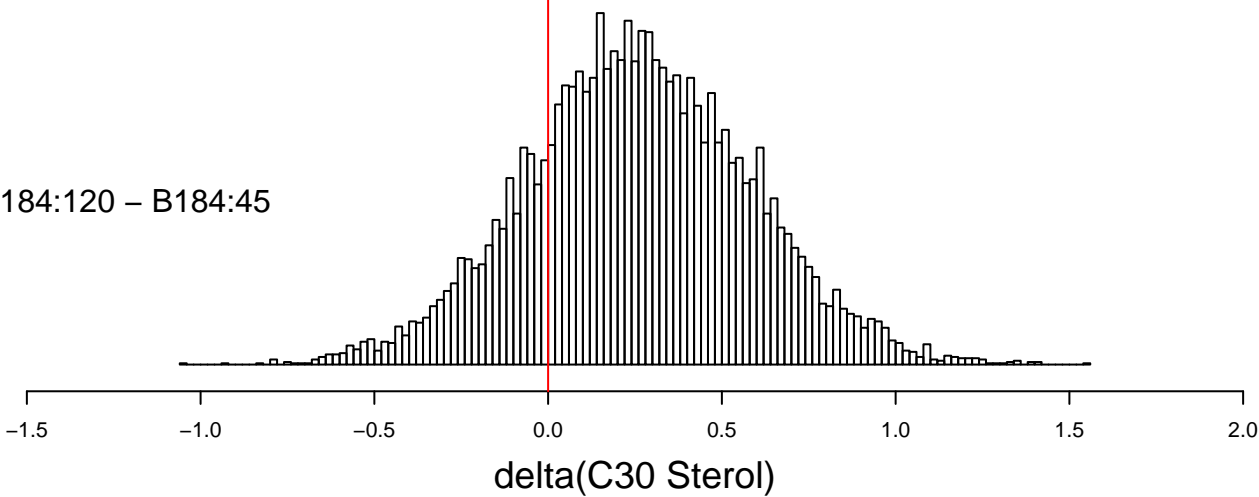

B184:240

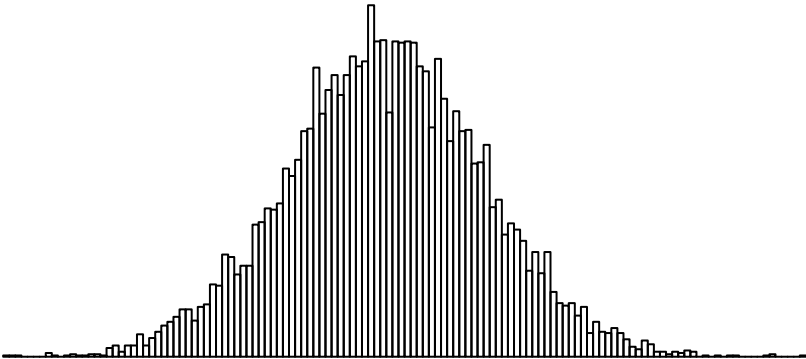

B184:120

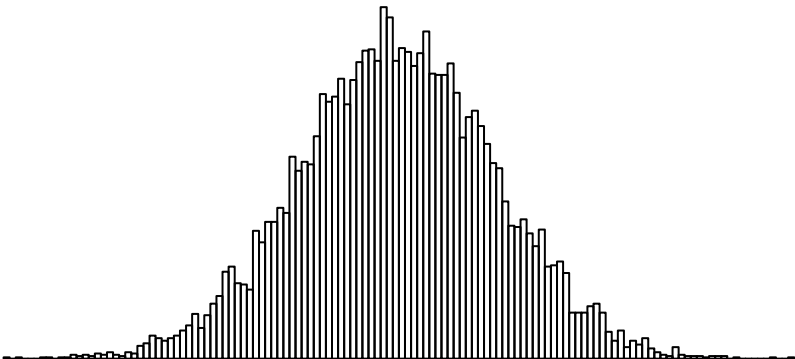

B184:45

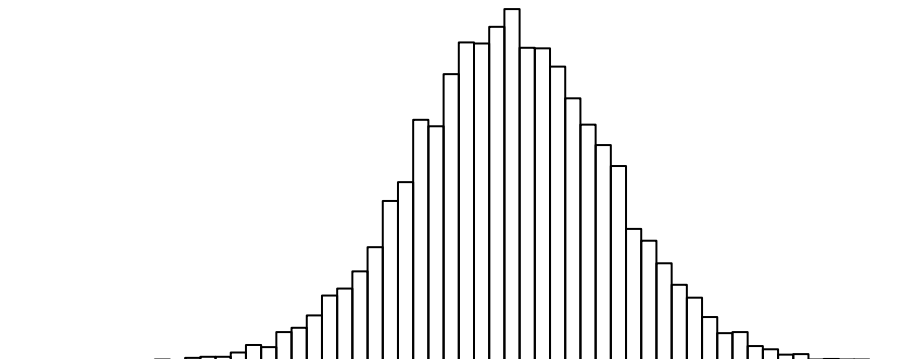

-8 -7 -6 -5 -4

C30'5 Sterol

B184:240 – B184:120

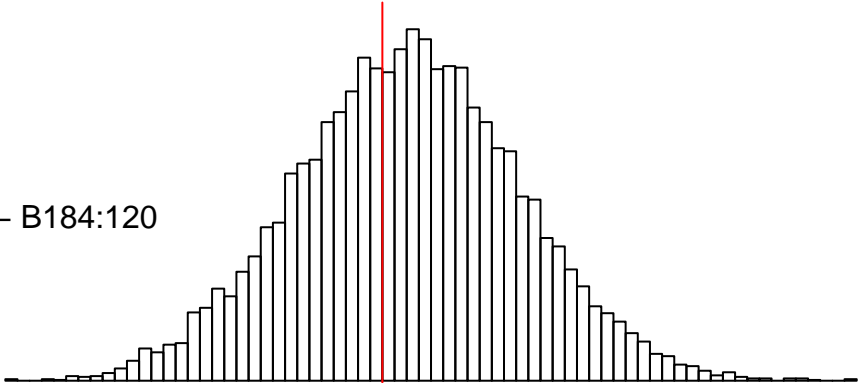

B184:240 – B184:45

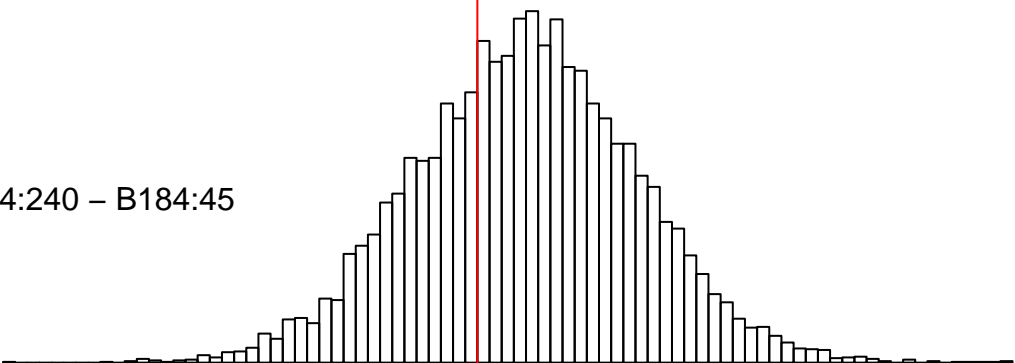

B184:120 – B184:45

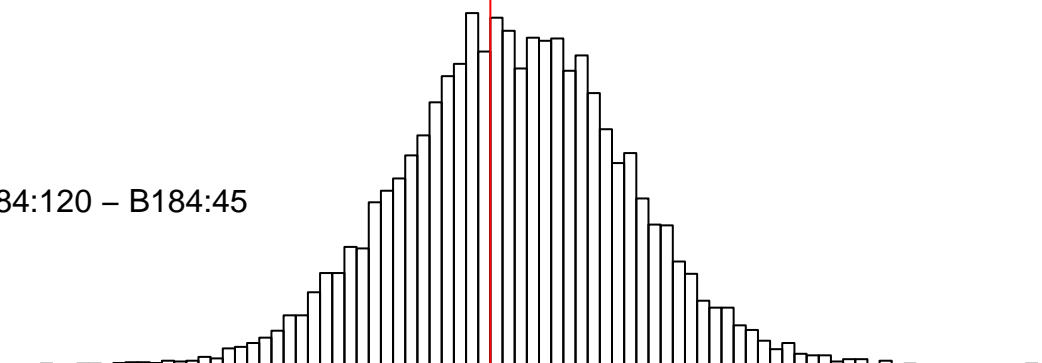

delta(C30"5 Sterol)

B184:240

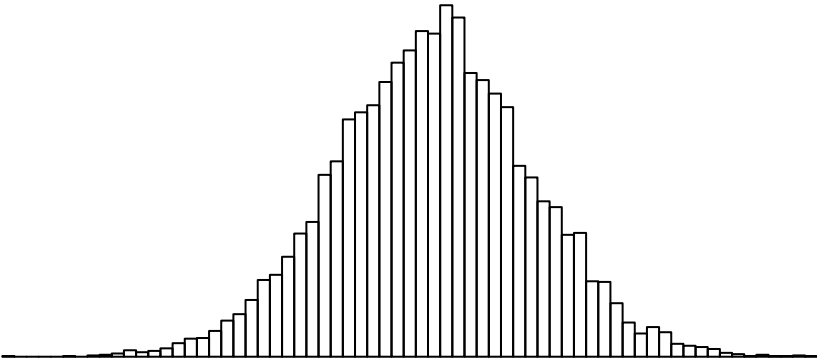

B184:120

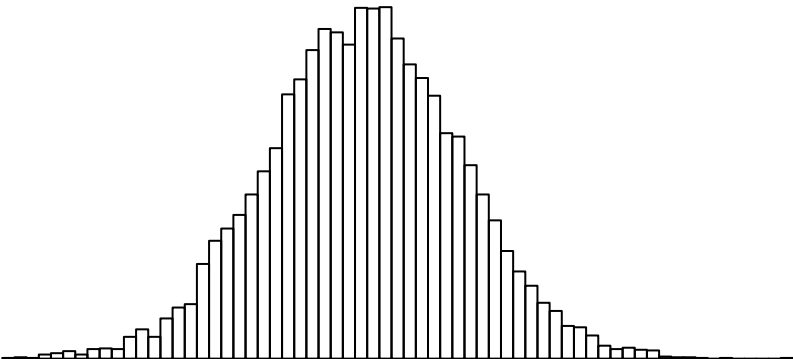

B184:45

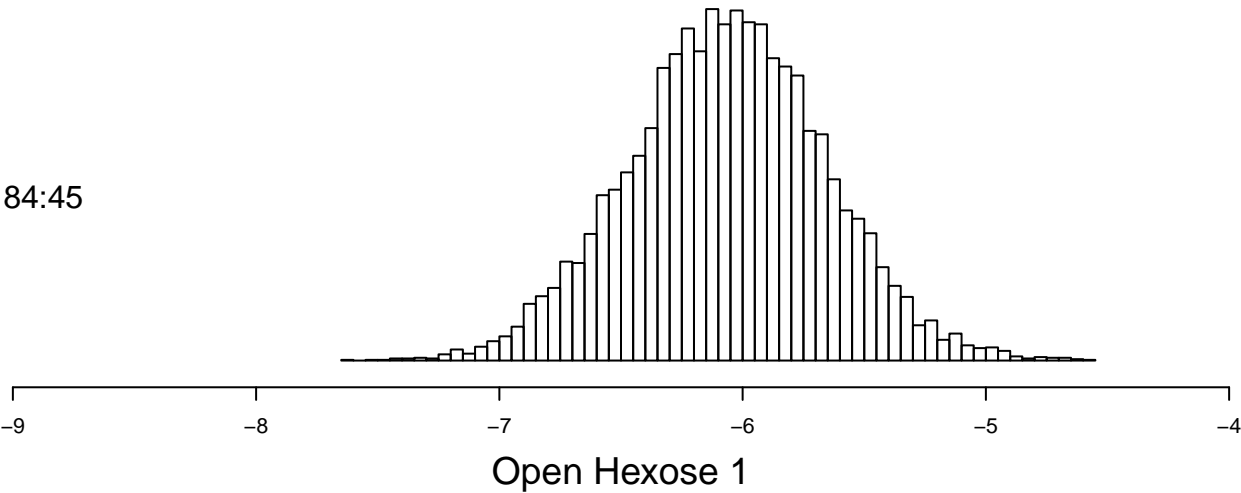

B184:240 – B184:120

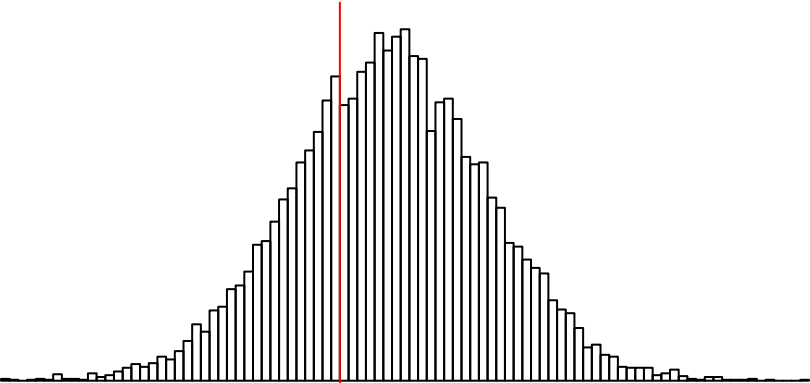

B184:240 – B184:45

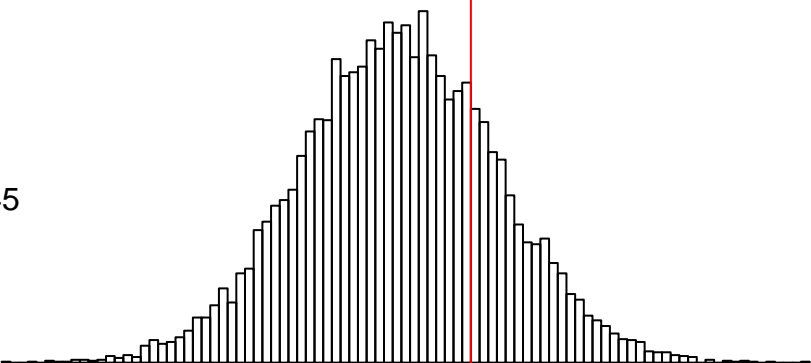

B184:120 – B184:45

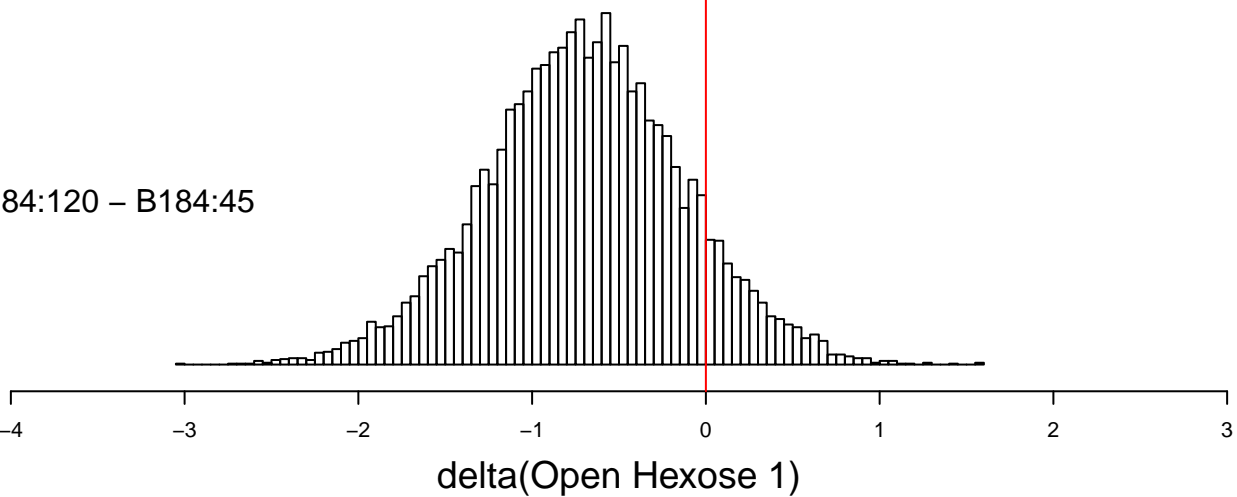



B184:240

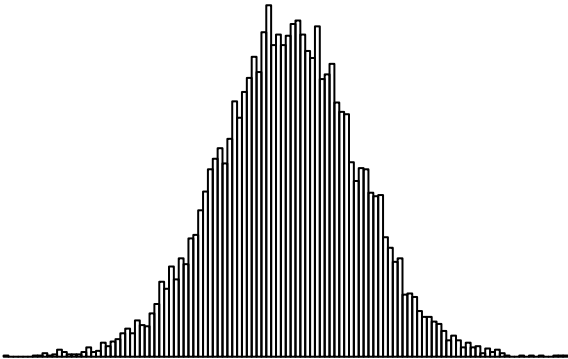

B184:120

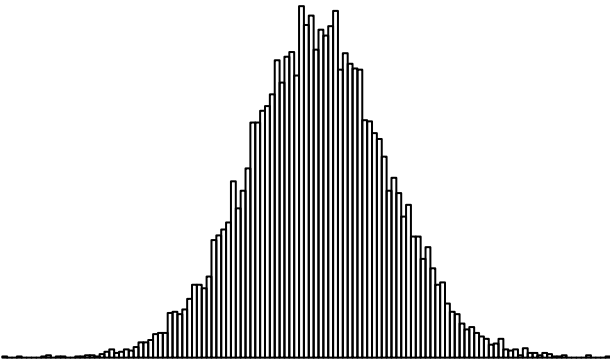

B184:45

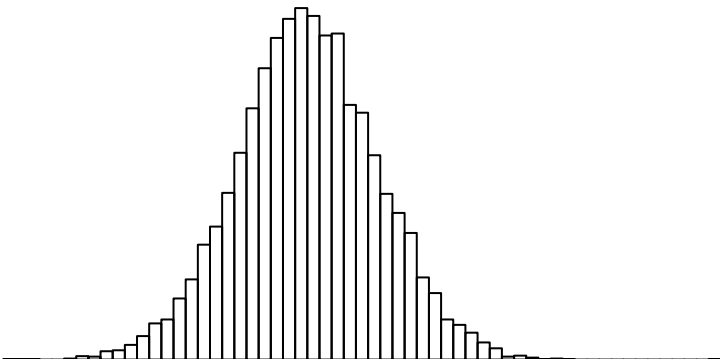

Closed Hexose 1

B184:240 – B184:120

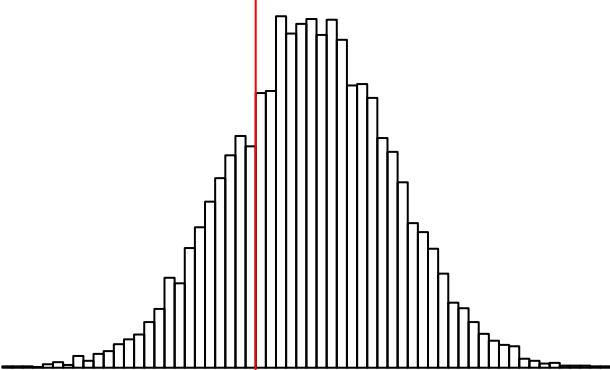

B184:240 – B184:45

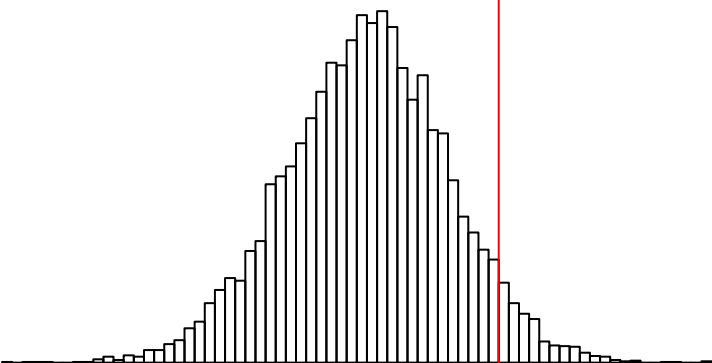

B184:120 – B184:45

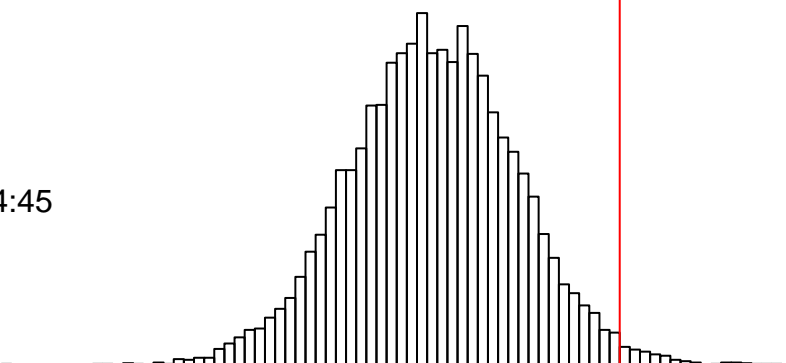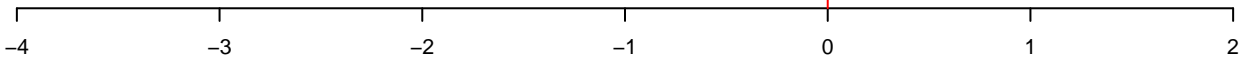

delta(Closed Hexose 1)

B184:240

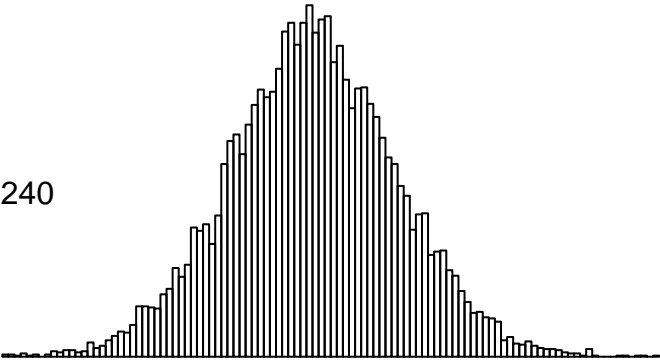

B184:120

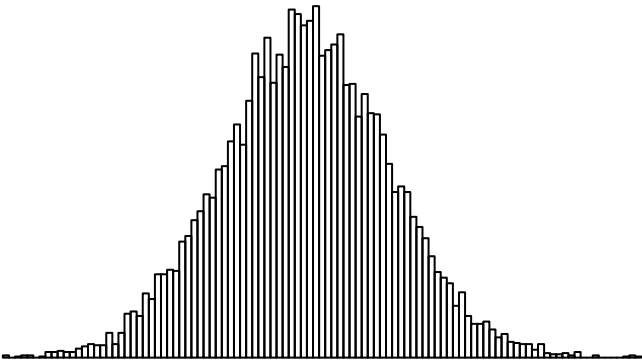

B184:45

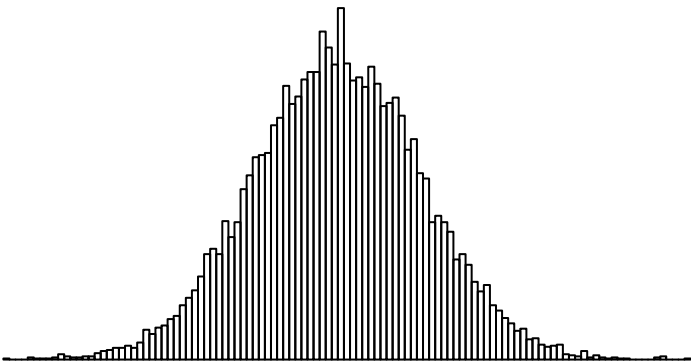

-10 -8 -6 -4 -2 0

Closed Hexose 2

B184:240 – B184:120

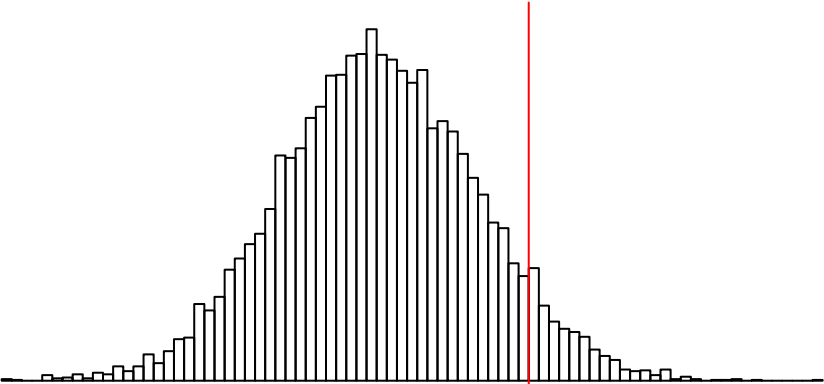

B184:240 – B184:45

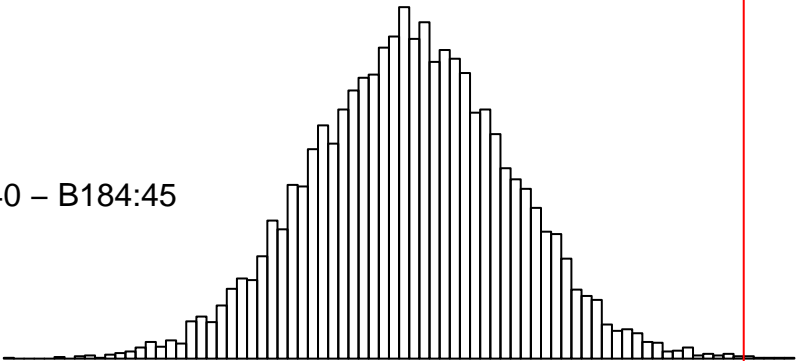

B184:120 – B184:45

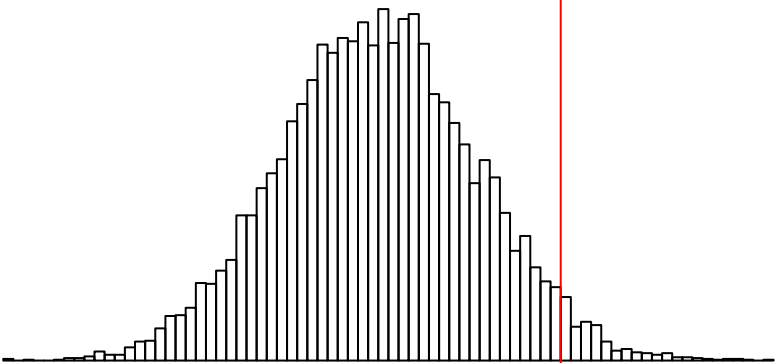

-8

-6

-4

-2

0

2

4

delta(Closed Hexose 2)

B184:240

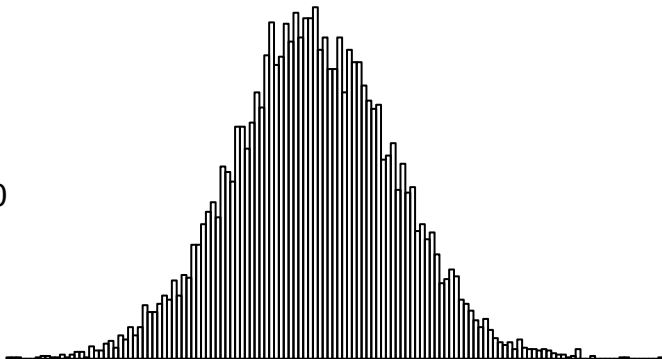

B184:120

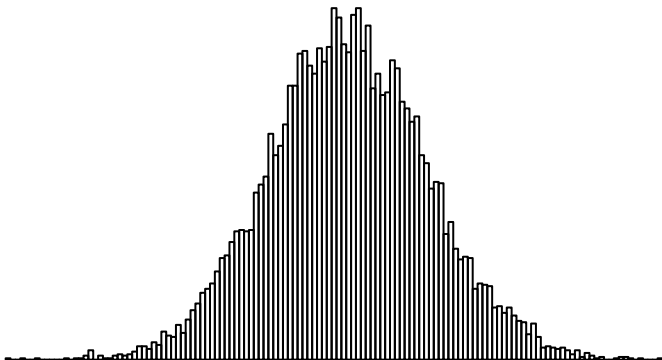

B184:45

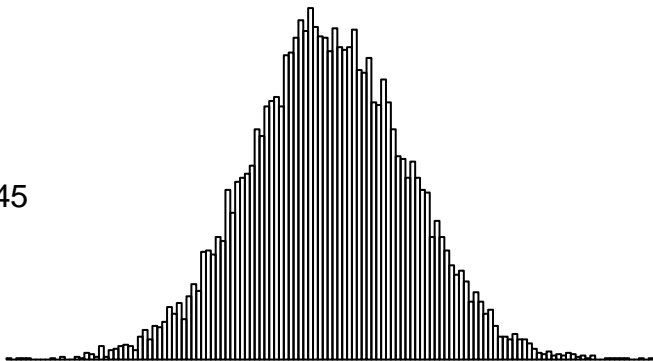

-4 -3 -2 -1 0 1

Open Hexose 2

B184:240 – B184:120

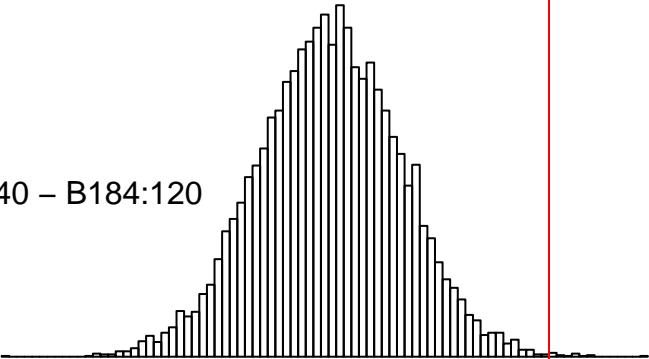

B184:240 – B184:45

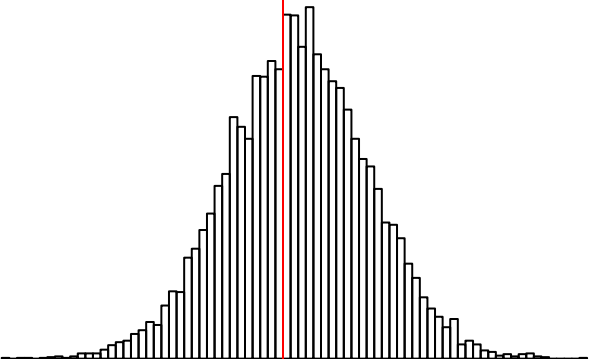

B184:120 – B184:45

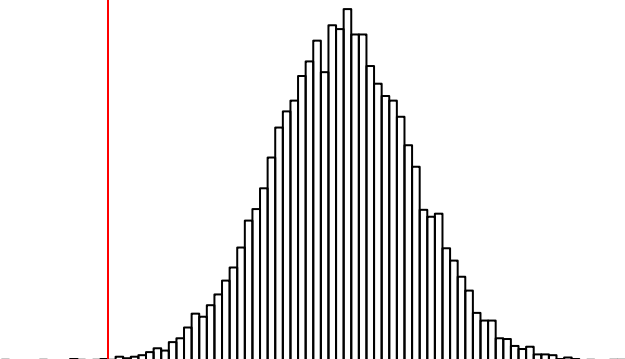

-4

-2

0

2

4

delta(Open Hexose 2)

B184:240

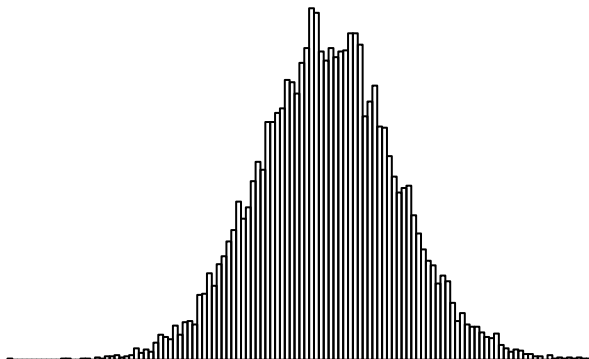

B184:120

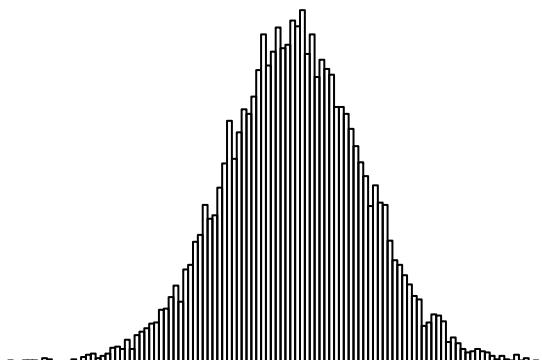

B184:45

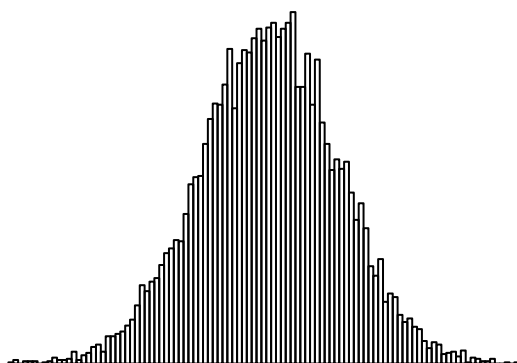

-6 -5 -4 -3 -2 -1

Open Hexose 3

B184:240 – B184:120

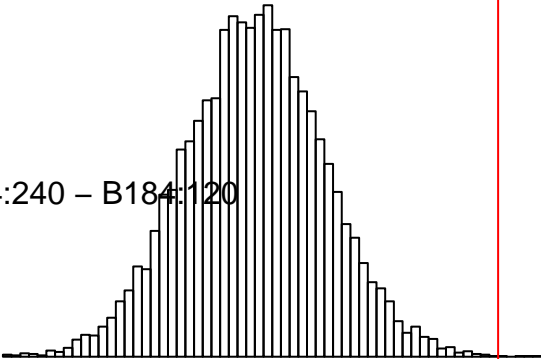

B184:240 – B184:45

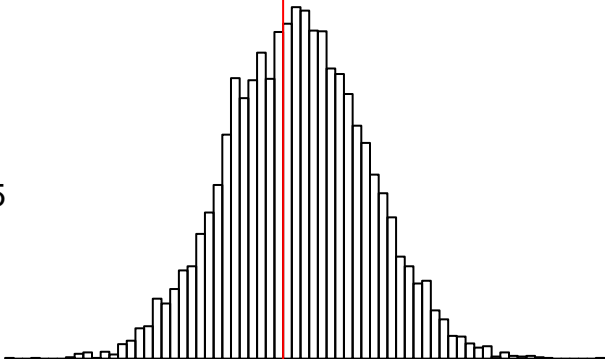

B184:120 – B184:45

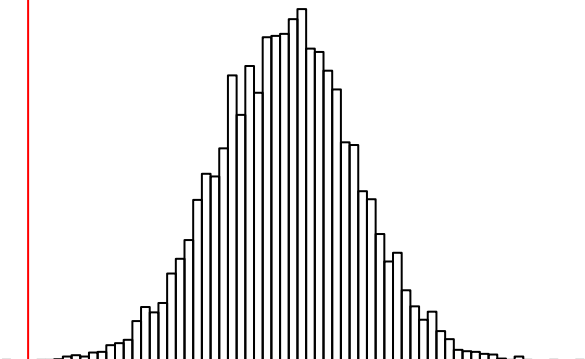

delta(Open Hexose 3)



B184:240

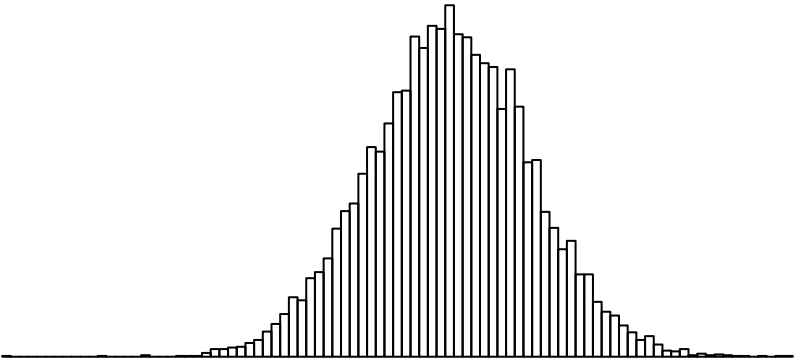

B184:120

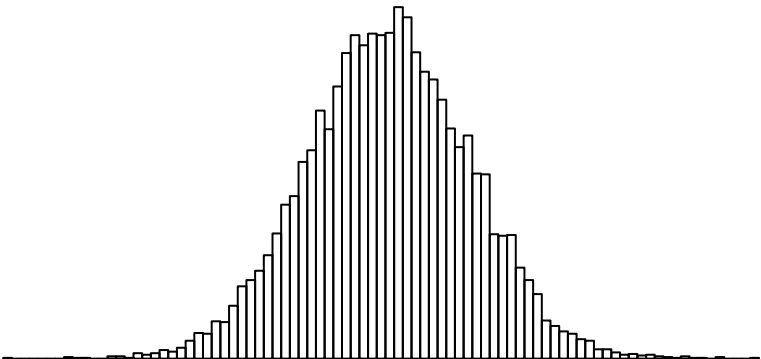

B184:45

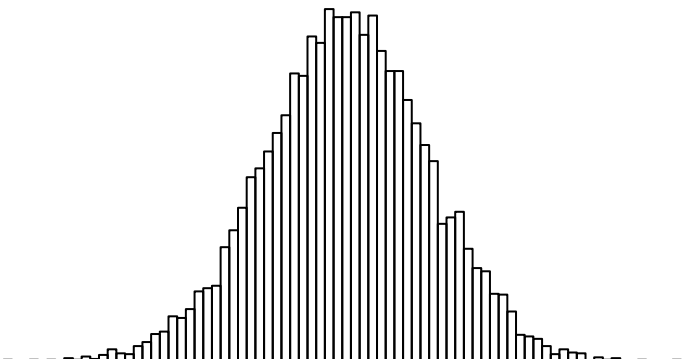

Closed Hexose 3

B184:240 – B184:120

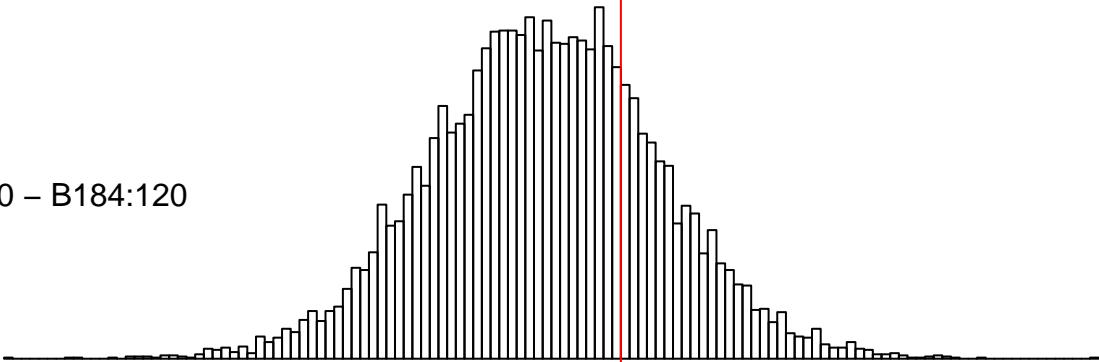

B184:240 – B184:45

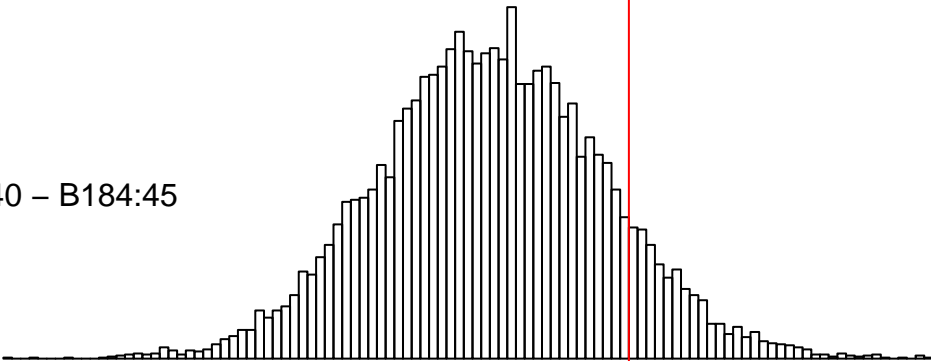

B184:120 – B184:45

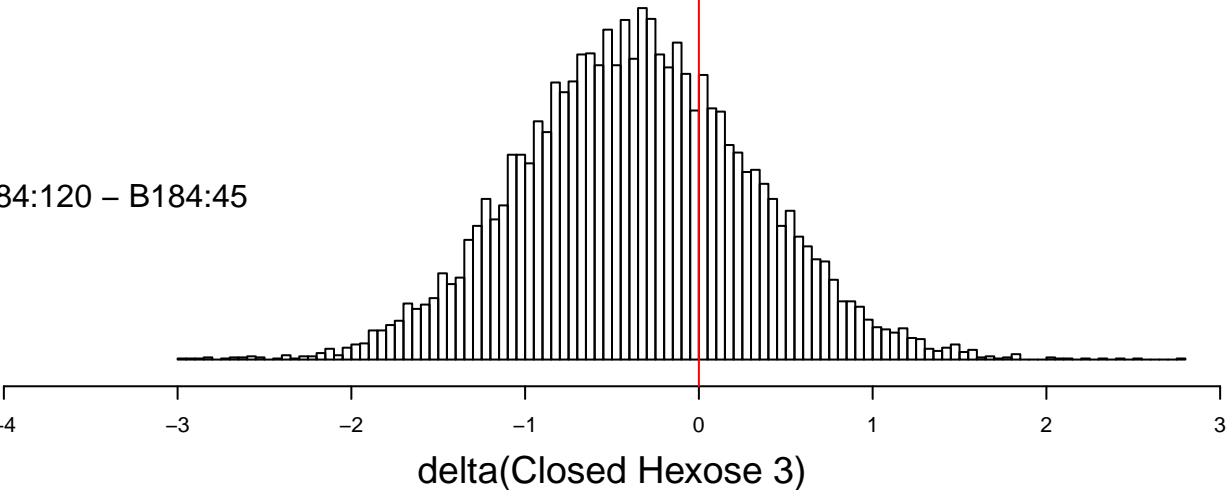

B184:240

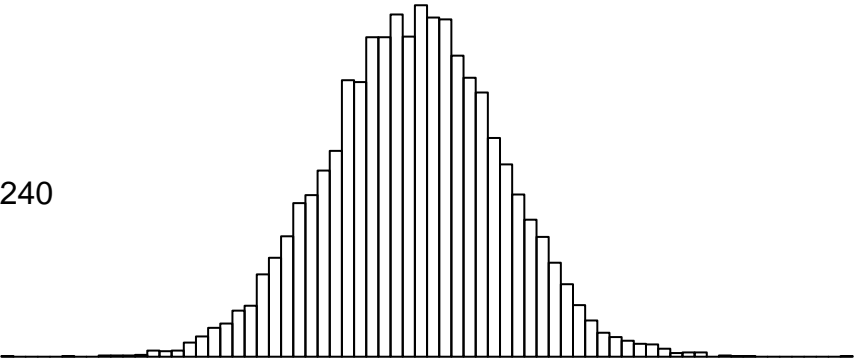

B184:120

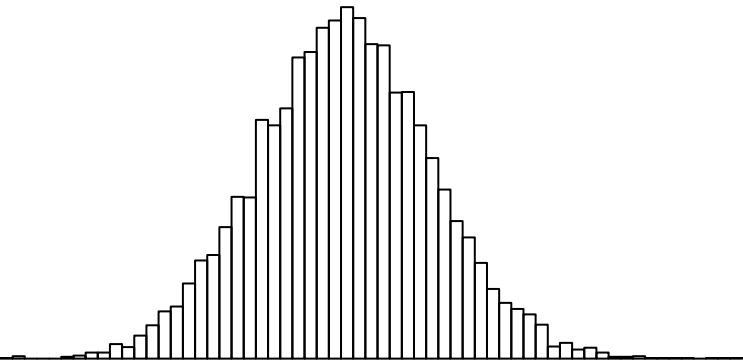

B184:45

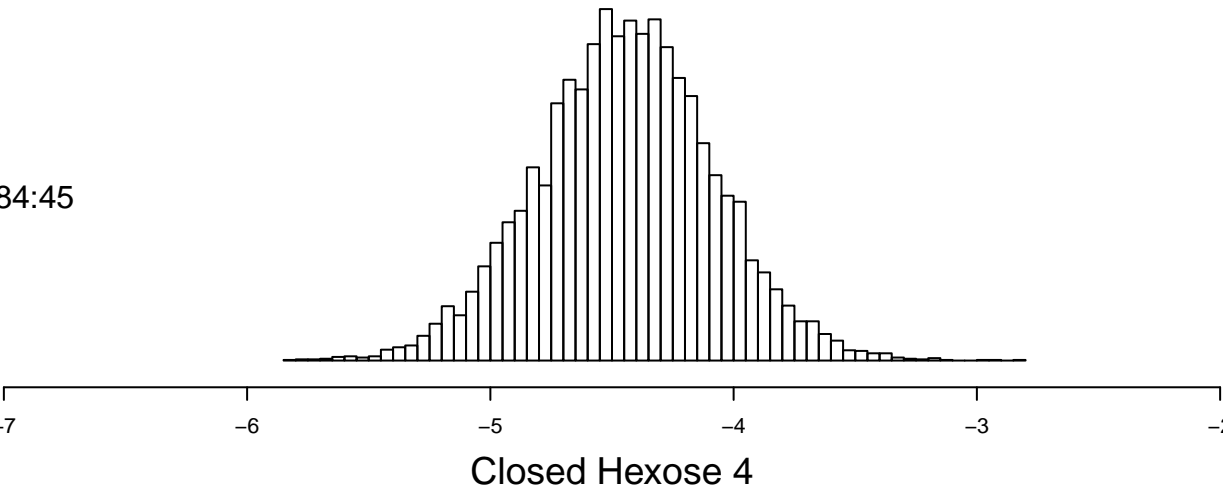

B184:240 – B184:120

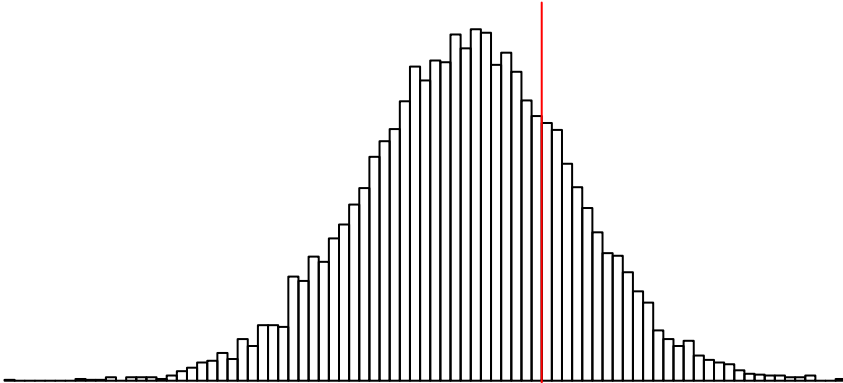

B184:240 – B184:45

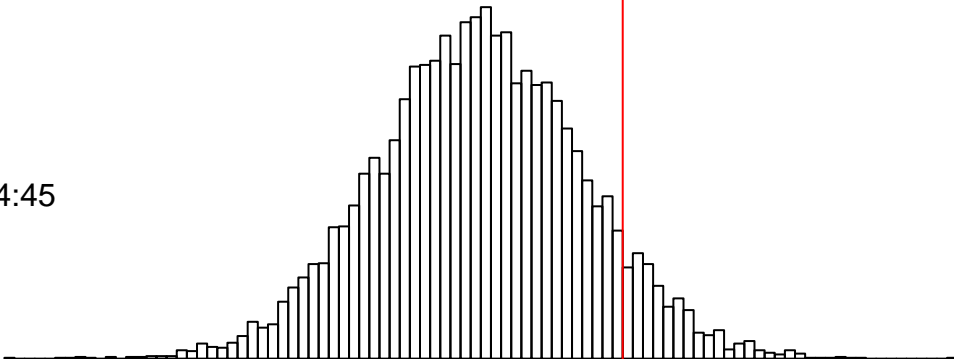

B184:120 – B184:45

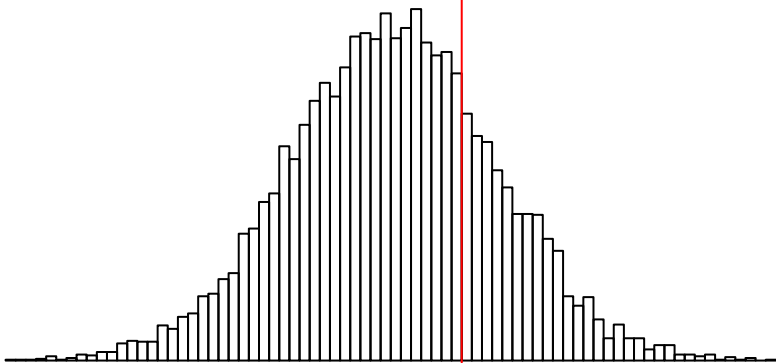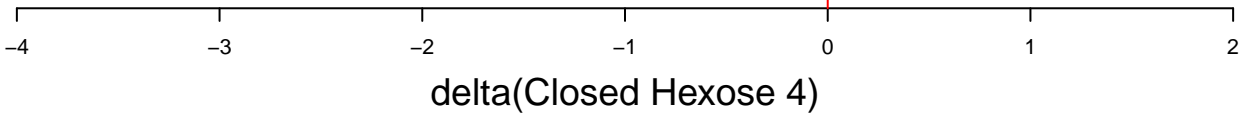

B184:240

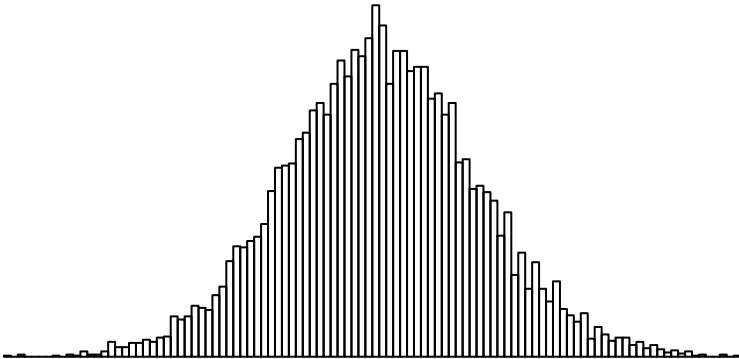

B184:120

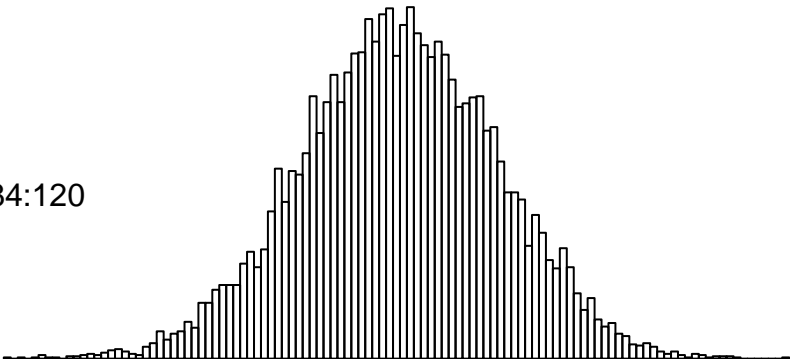

B184:45

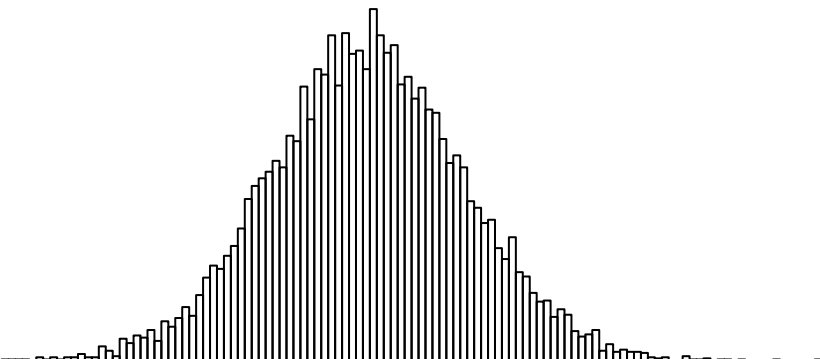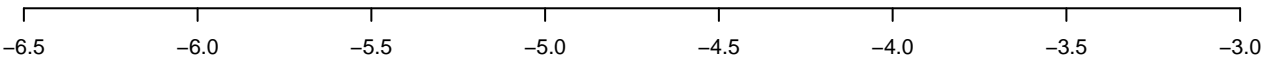

Hexose 1

B184:240 – B184:120

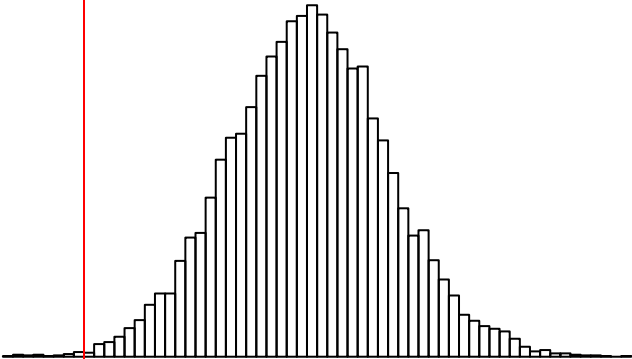

B184:240 – B184:45

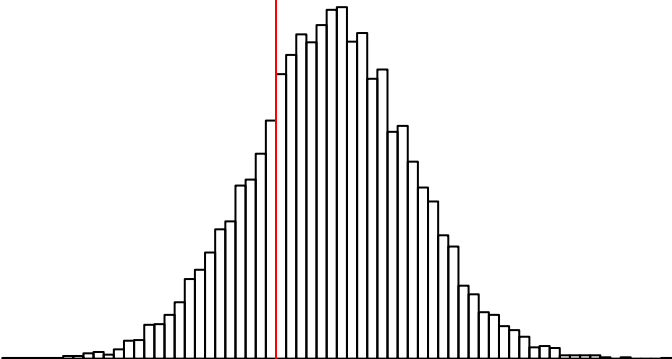

B184:120 – B184:45

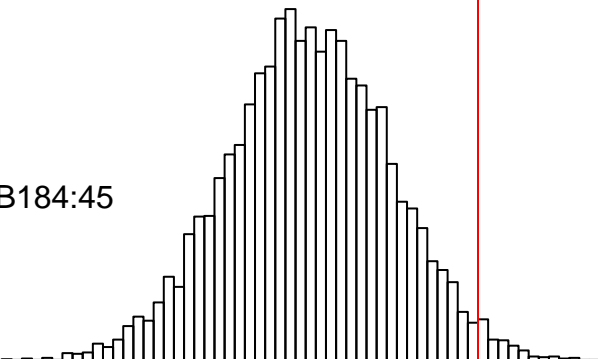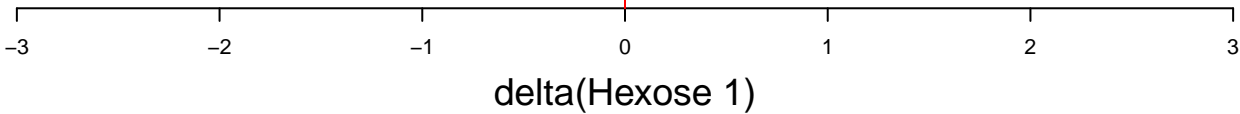

B184:240

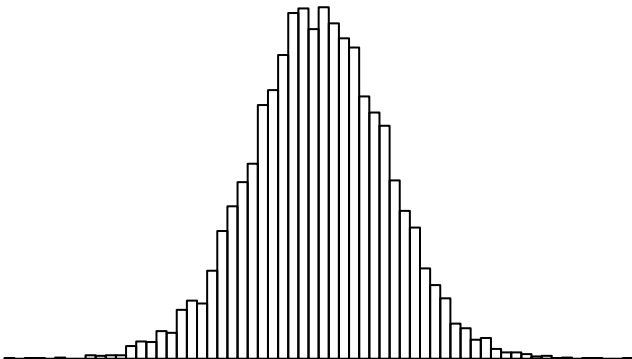

B184:120

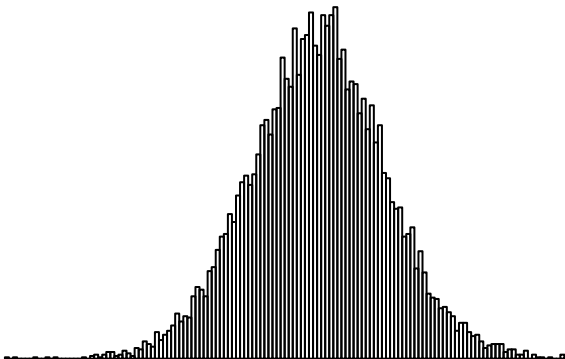

B184:45

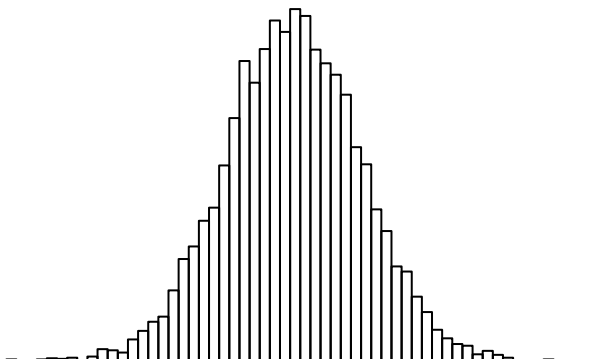

Closed Hexose 5

B184:240 – B184:120

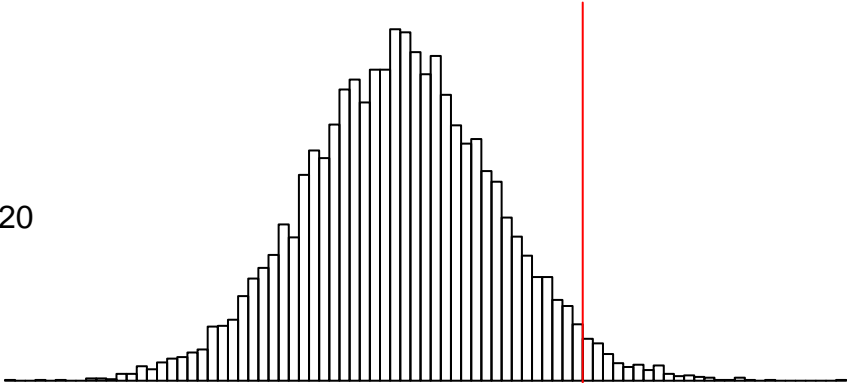

B184:240 – B184:45

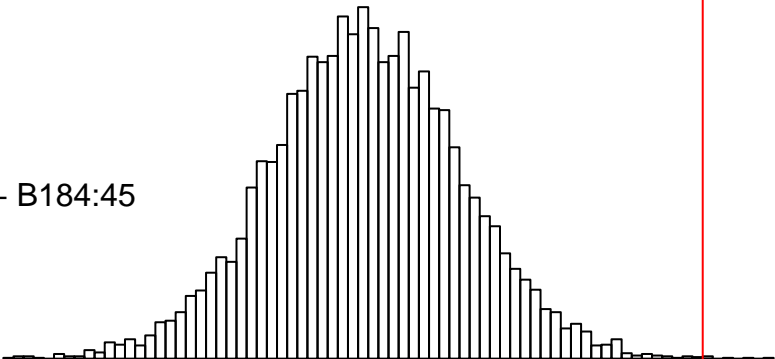

B184:120 – B184:45

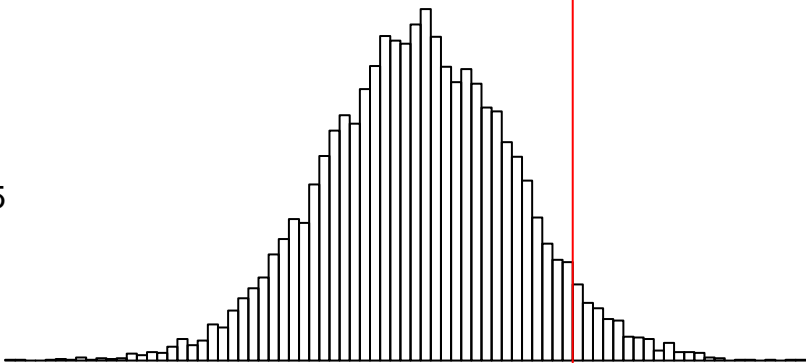

-4 -3 -2 -1 0 1 2

delta(Closed Hexose 5)



B184:240

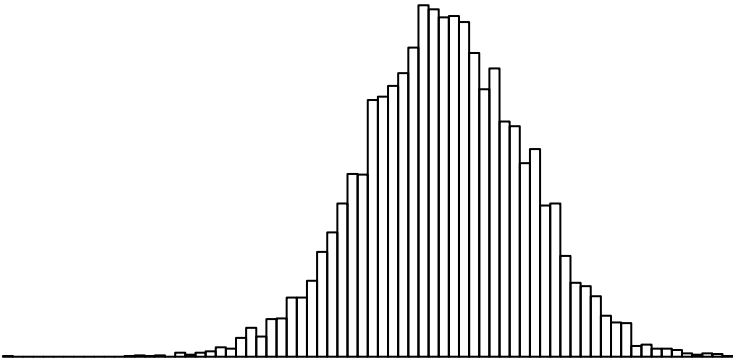

B184:120

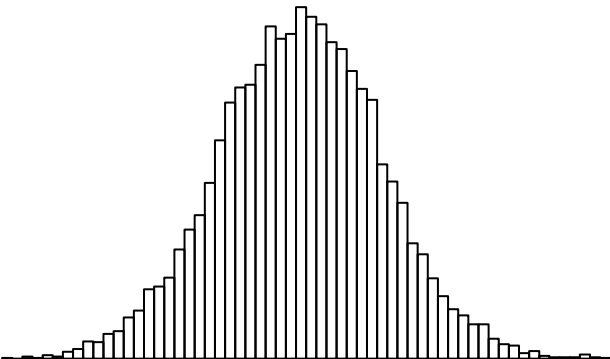

B184:45

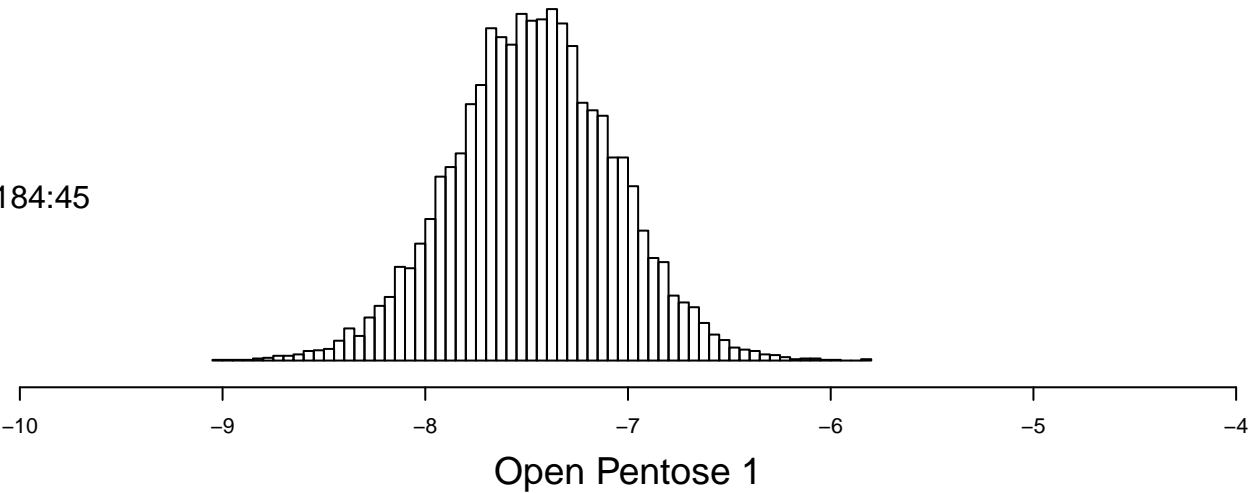

B184:240 – B184:120

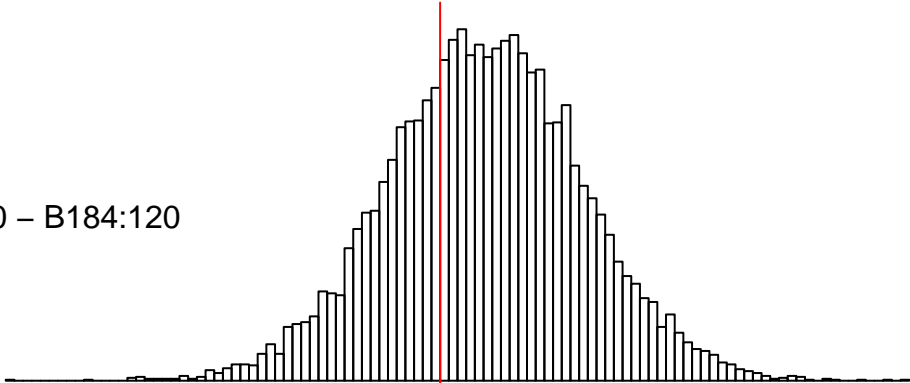

B184:240 – B184:45

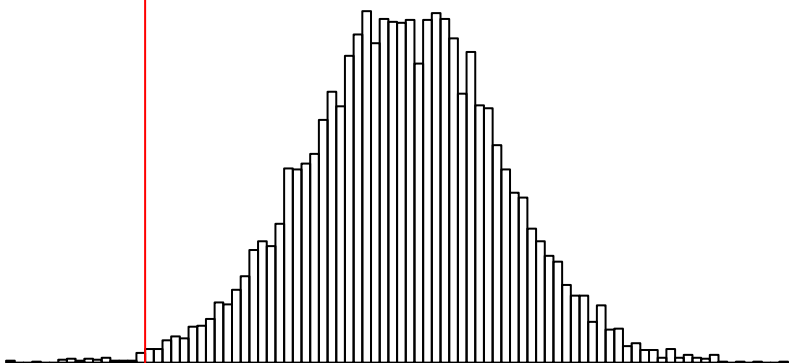

B184:120 – B184:45

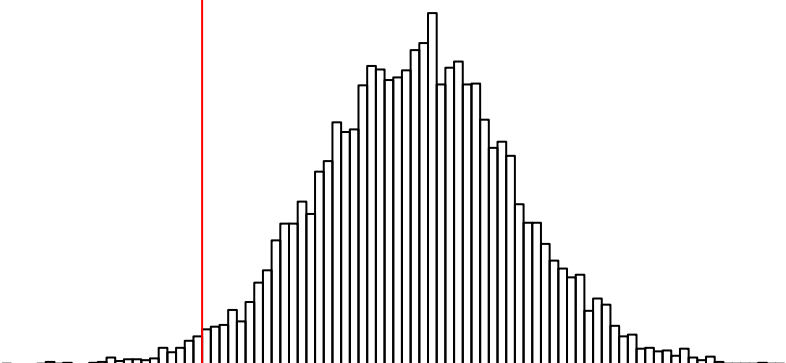

-3 -2 -1 0 1 2 3 4

delta(Open Pentose 1)

B184:240

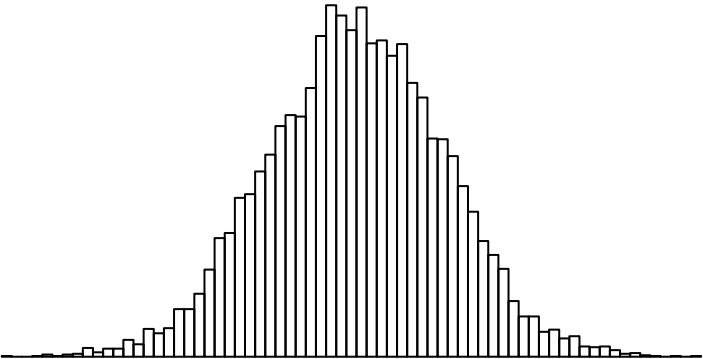

B184:120

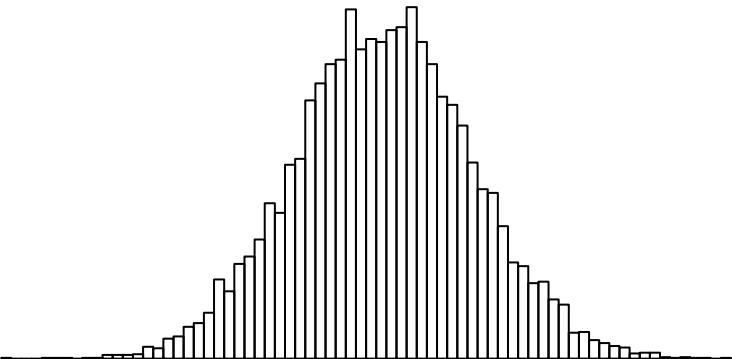

B184:45

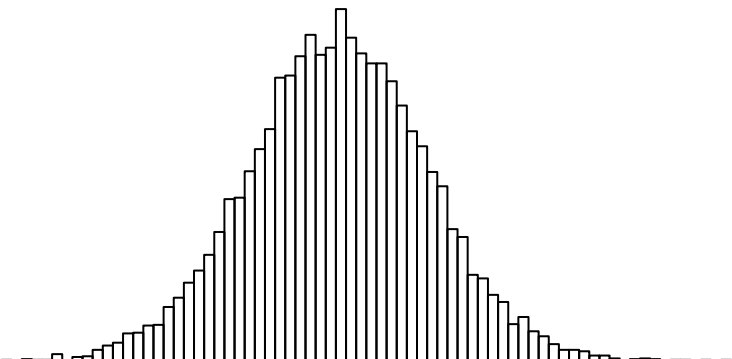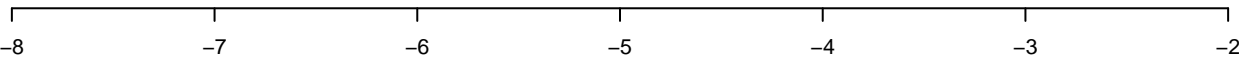

Open Pentose 2

B184:240 – B184:120

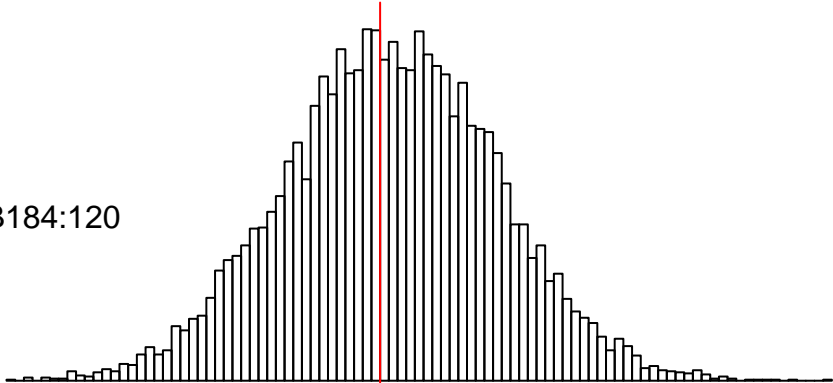

B184:240 – B184:45

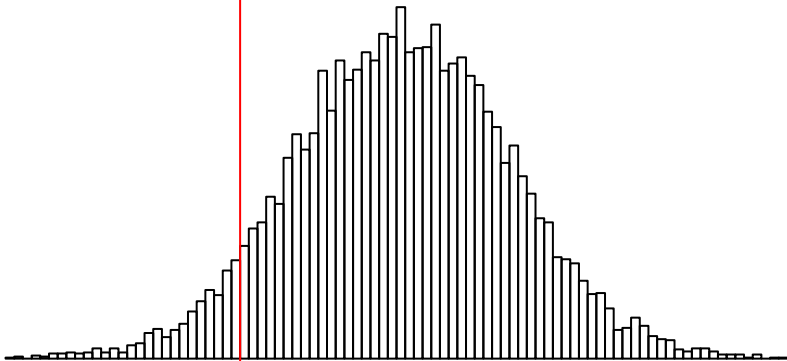

B184:120 – B184:45

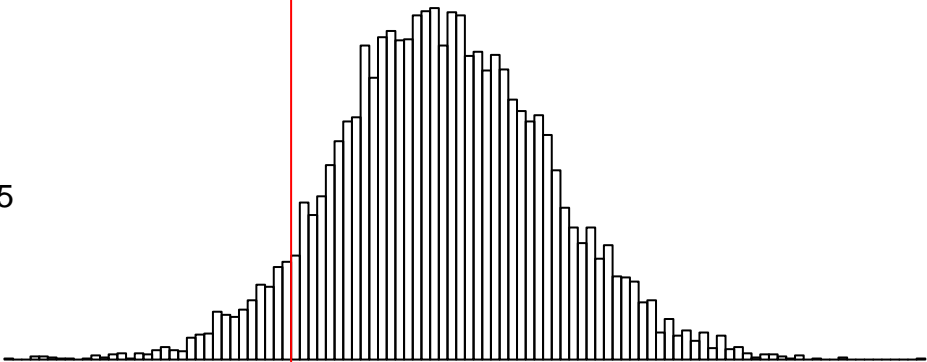

-3 -2 -1 0 1 2 3 4

delta(Open Pentose 2)

B184:240

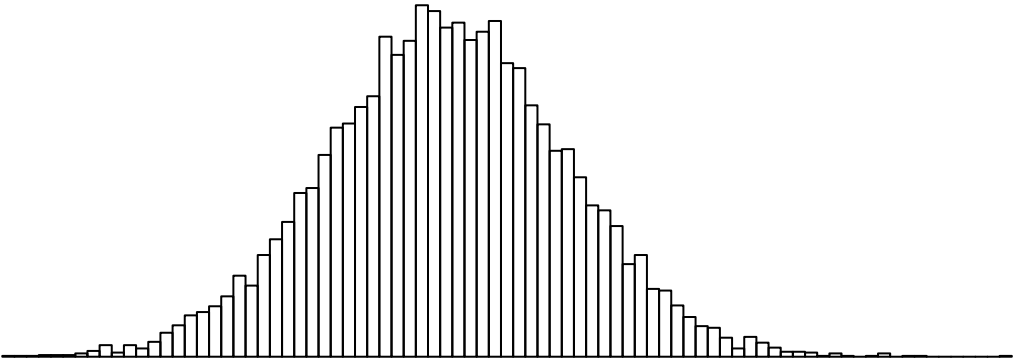

B184:120

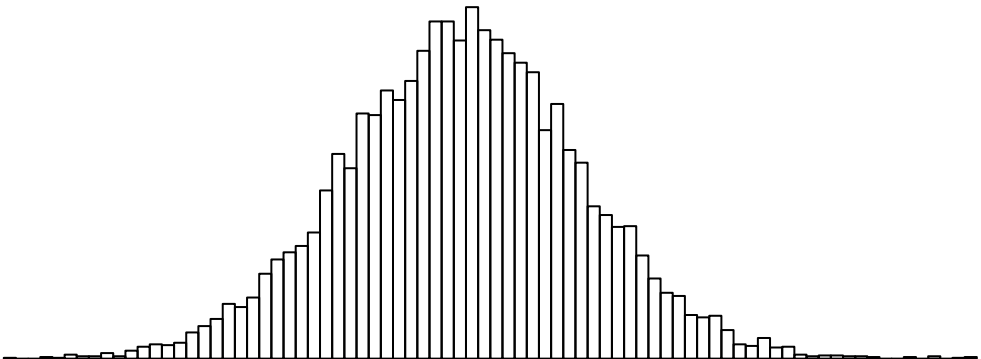

B184:45

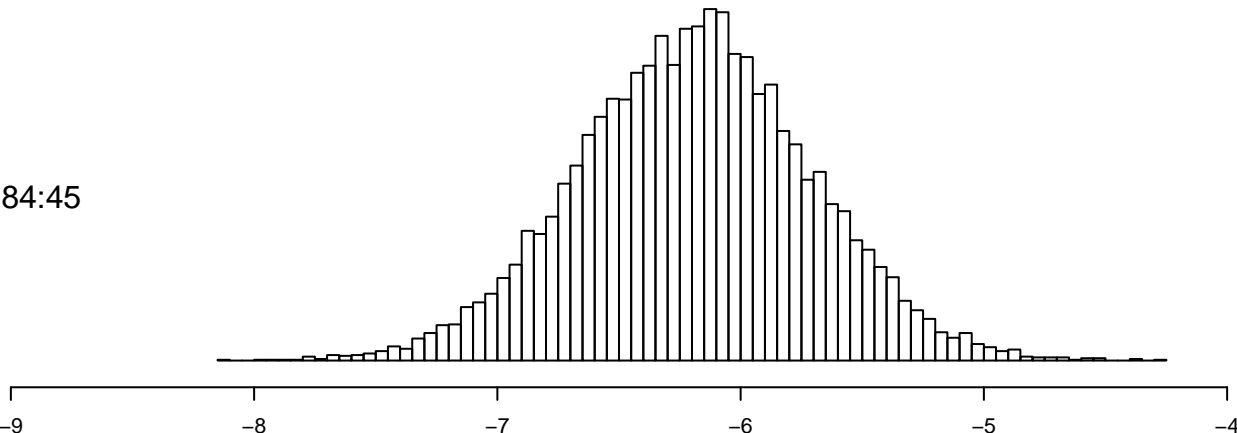

Closed Pentose 1

B184:240 – B184:120

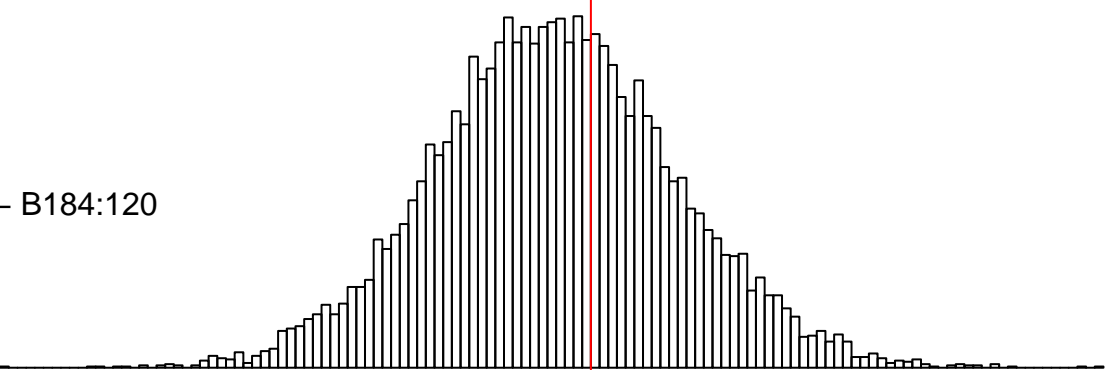

B184:240 – B184:45

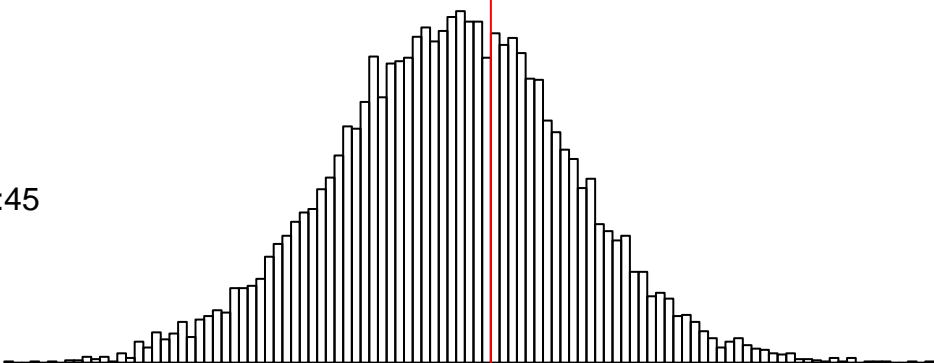

B184:120 – B184:45

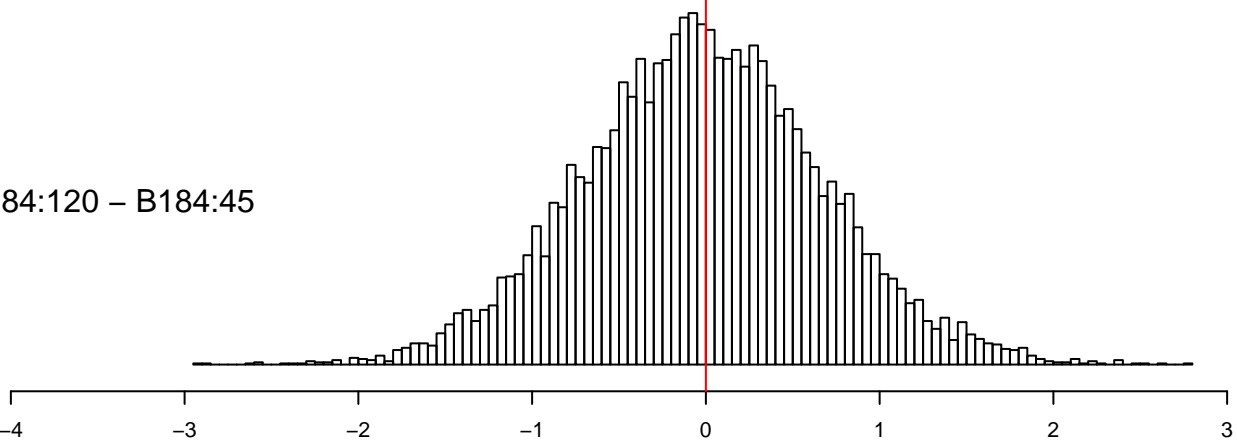

delta(Closed Pentose 1)

B184:240

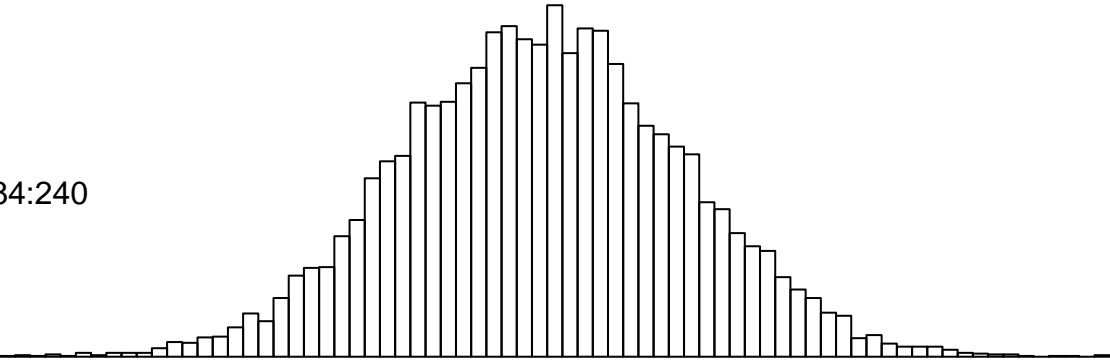

B184:120

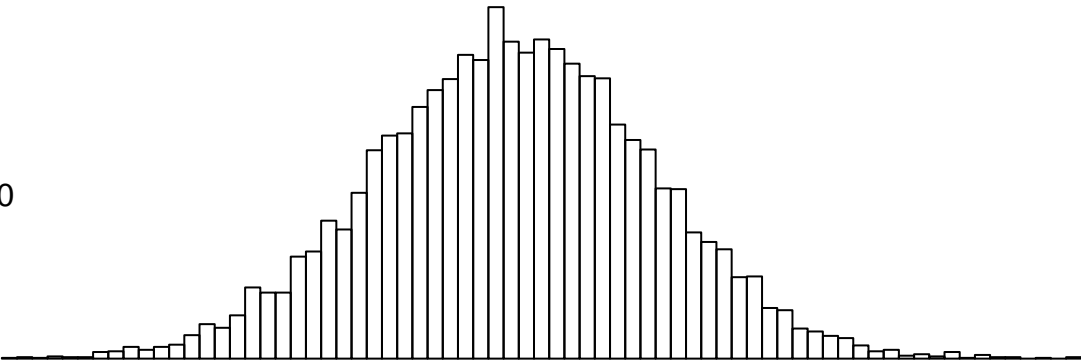

B184:45

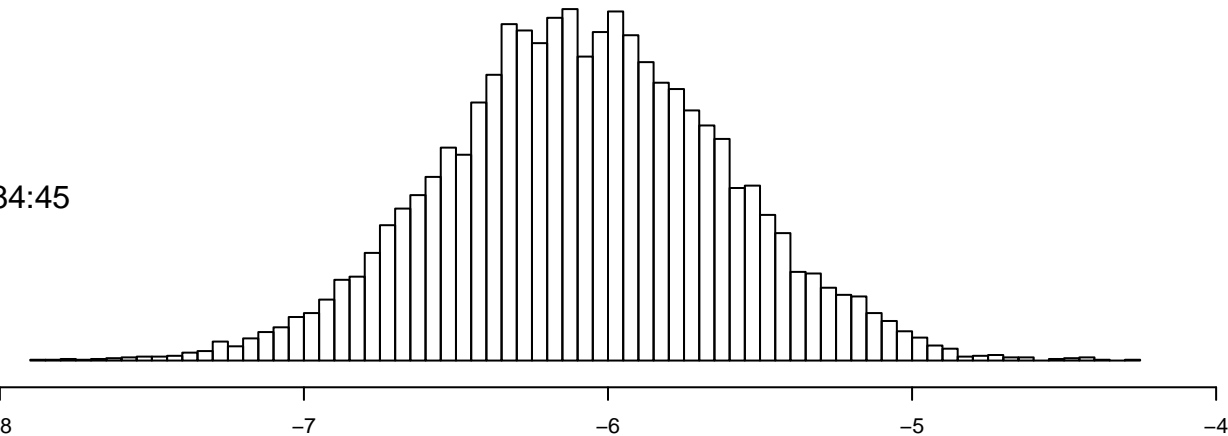

Closed Pentose 2

B184:240 – B184:120

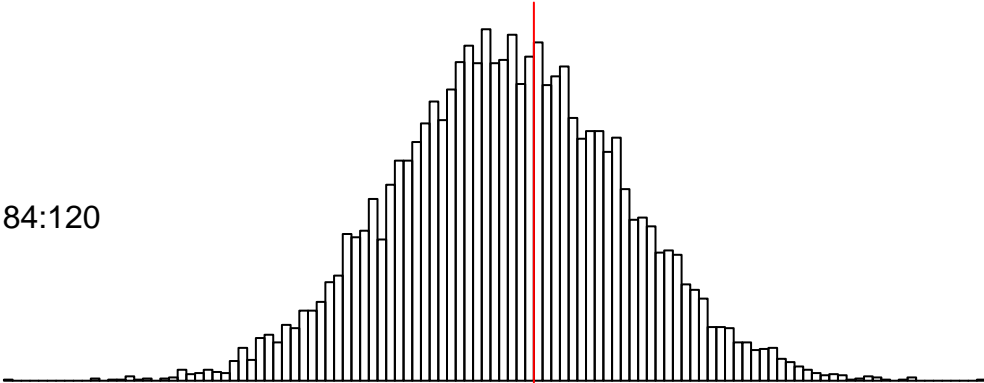

B184:240 – B184:45

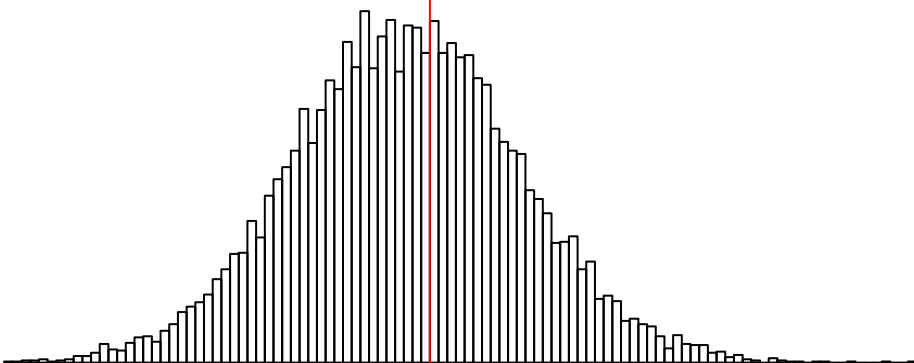

B184:120 – B184:45

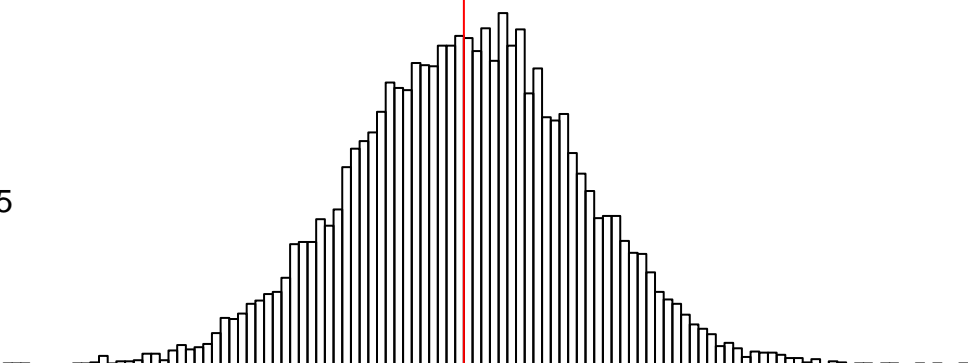

-4 -3 -2 -1 0 1 2 3

delta(Closed Pentose 2)



B184:240

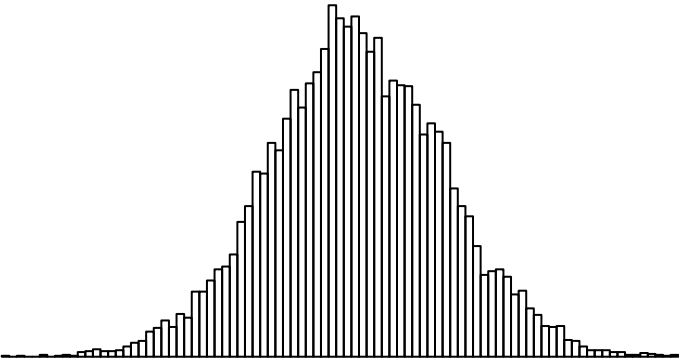

B184:120

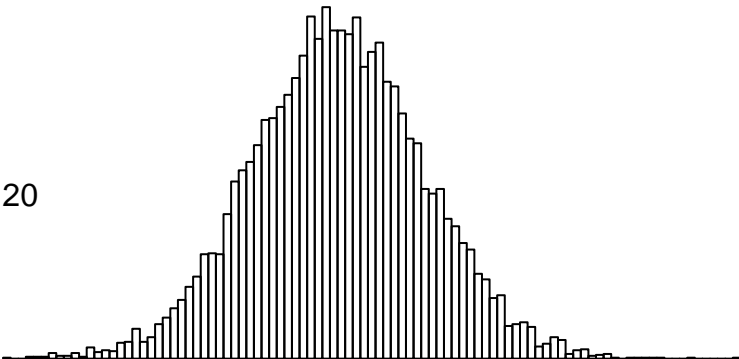

B184:45

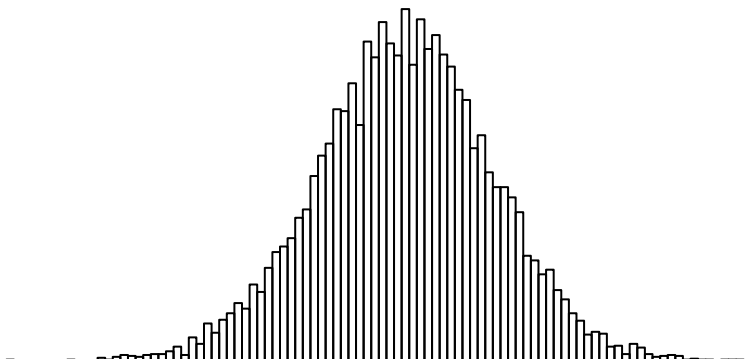

-10                      -8                      -6                      -4                      -2

Pentose 1

B184:240 – B184:120

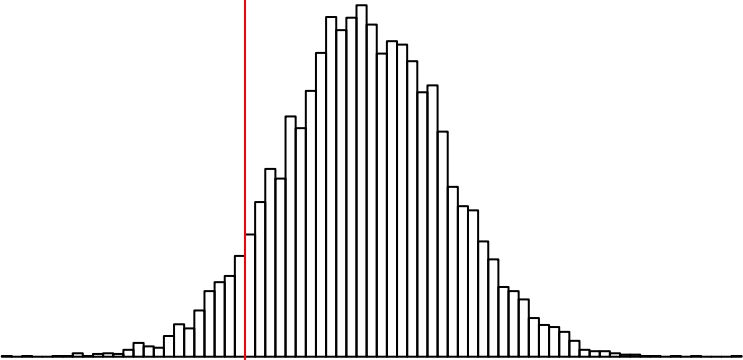

B184:240 – B184:45

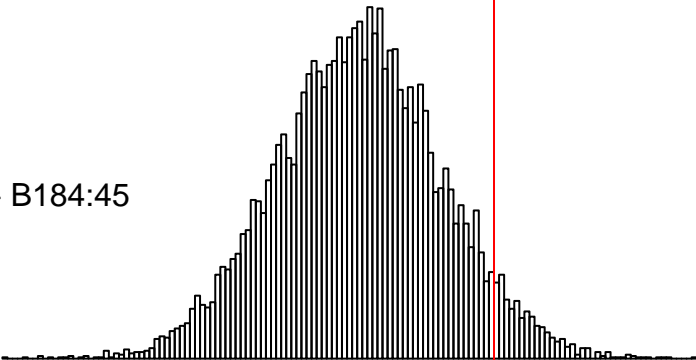

B184:120 – B184:45

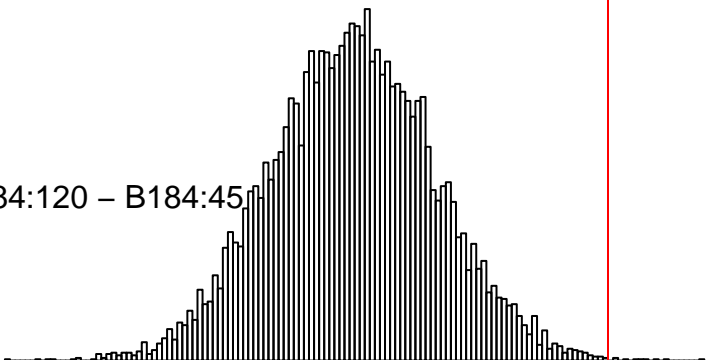

delta(Pentose 1)

B184:240

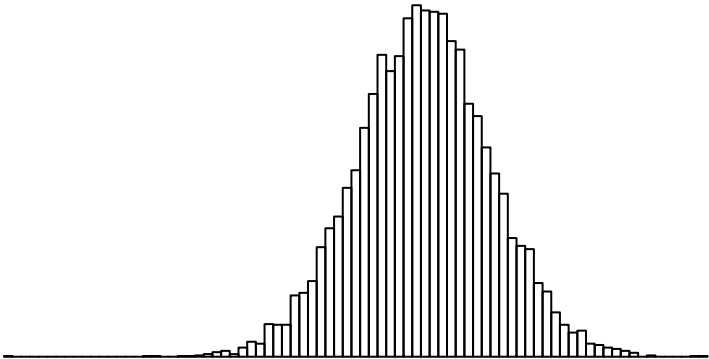

B184:120

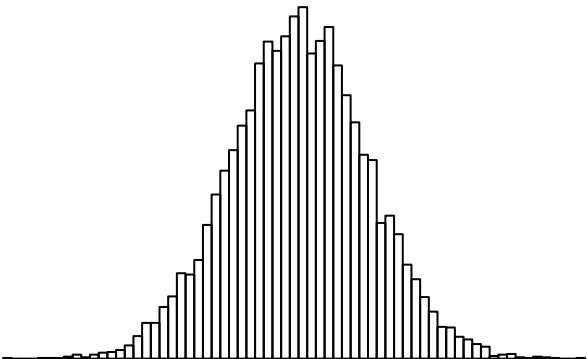

B184:45

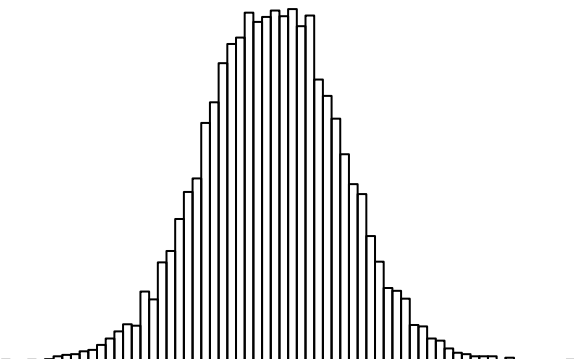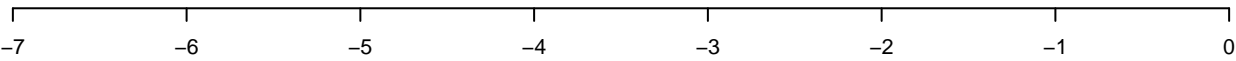

Open Pentose 3

B184:240 – B184:120

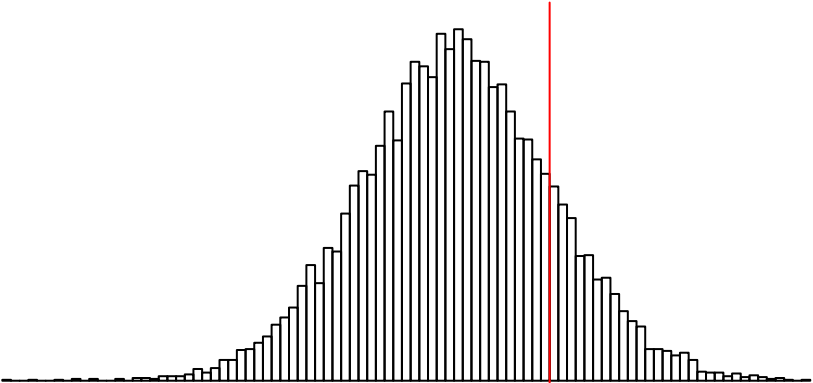

B184:240 – B184:45

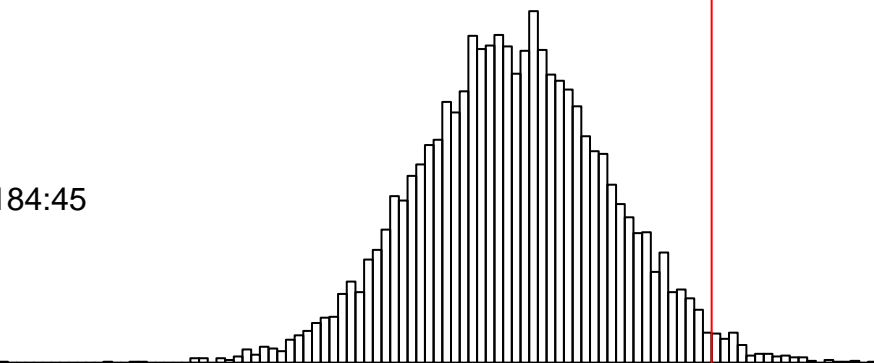

B184:120 – B184:45

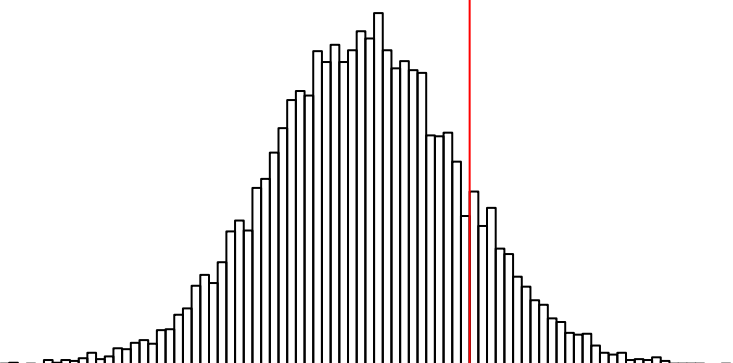

-5      -4      -3      -2      -1      0      1      2

delta(Open Pentose 3)

B184:240

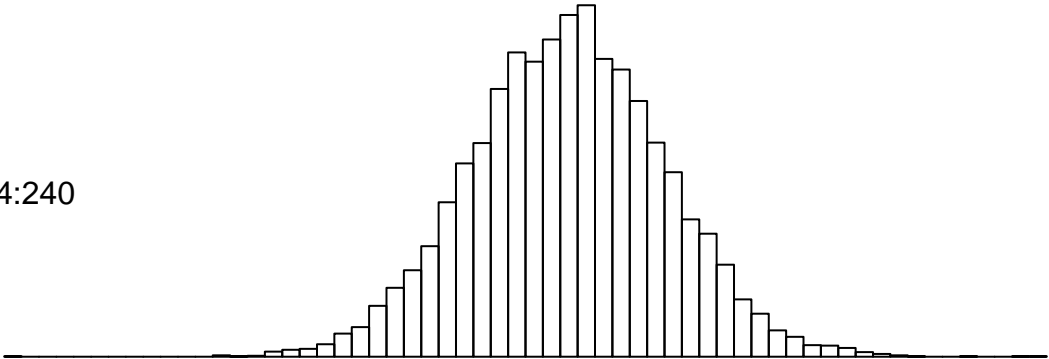

B184:120

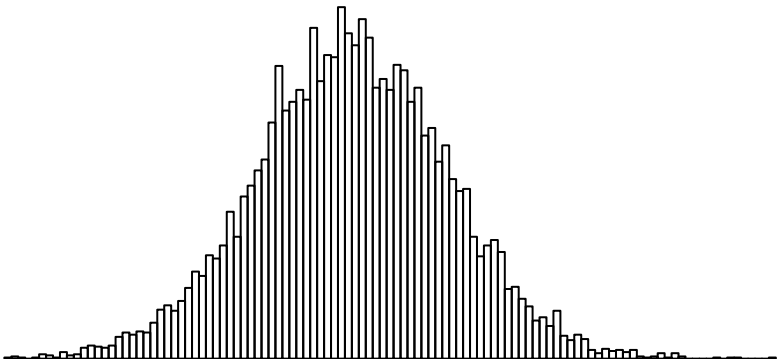

B184:45

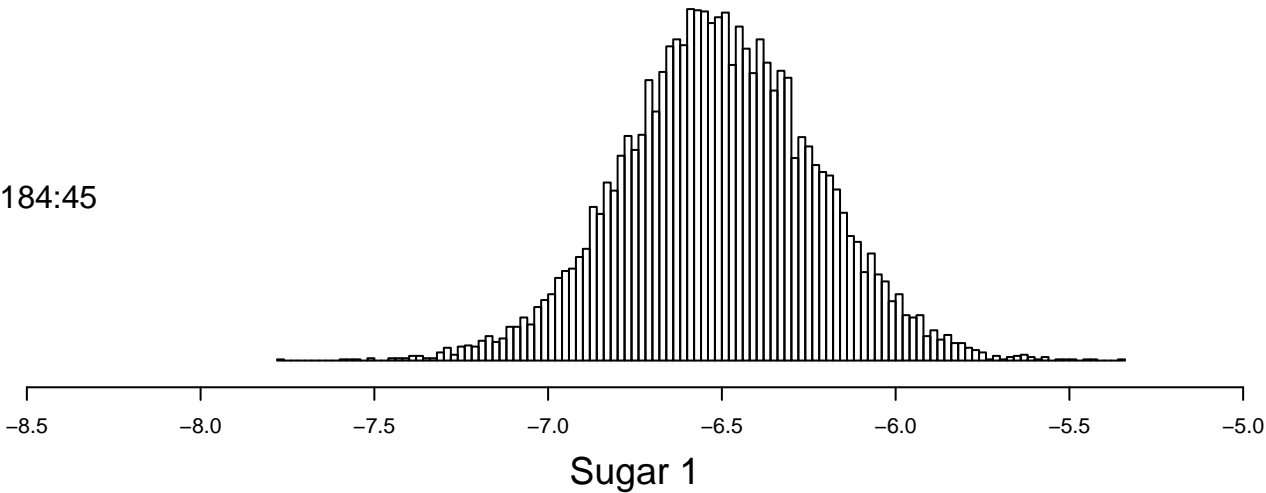

B184:240 – B184:120

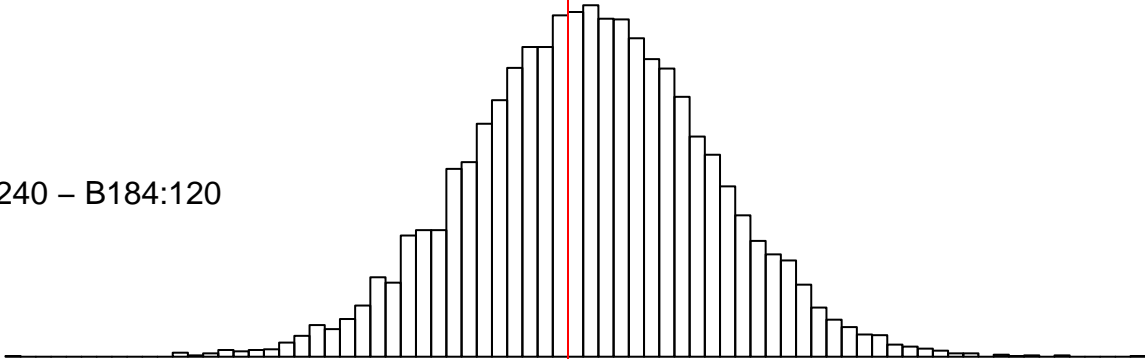

B184:240 – B184:45

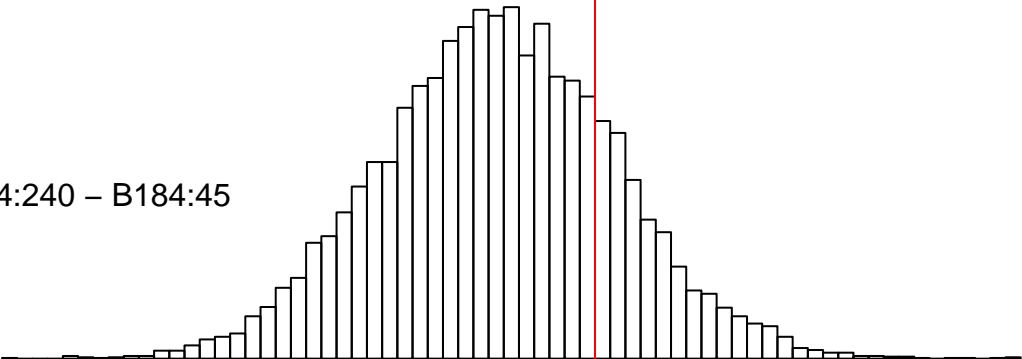

B184:120 – B184:45

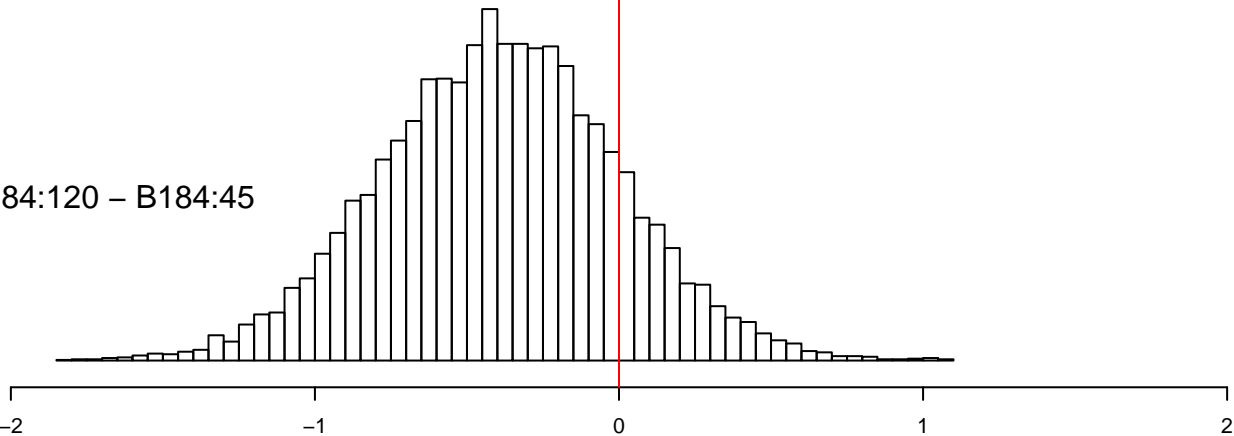

delta(Sugar 1)

B184:240

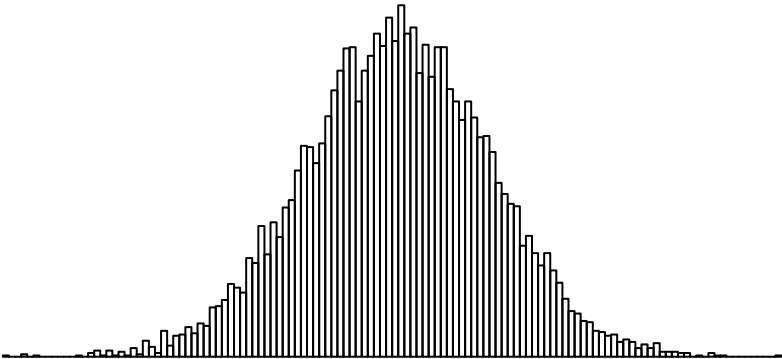

B184:120

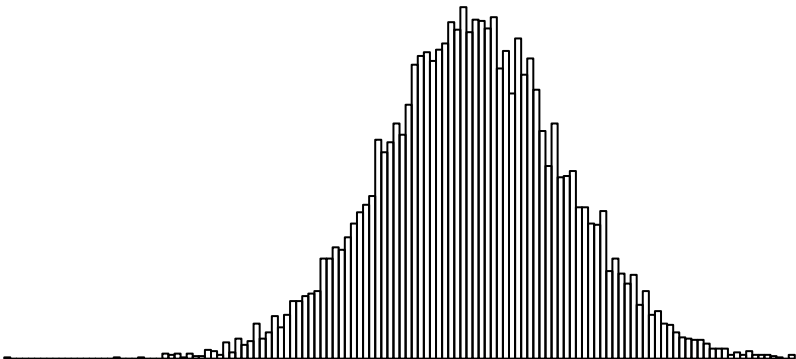

B184:45

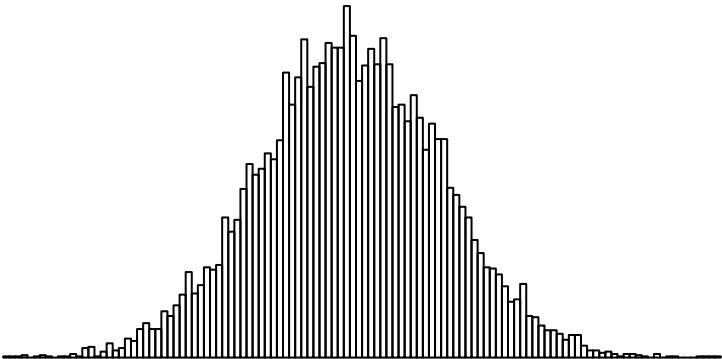

-10

-9

-8

-7

Sugar 3

B184:240 – B184:120

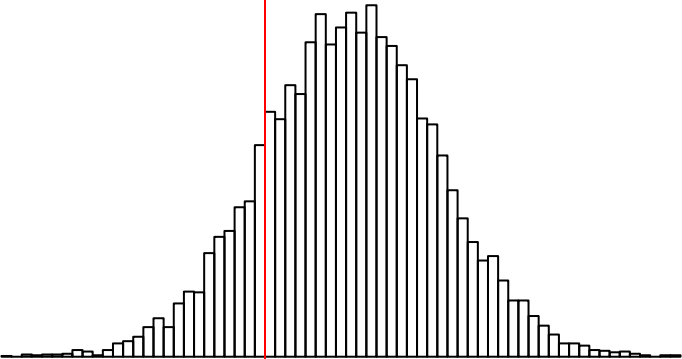

B184:240 – B184:45

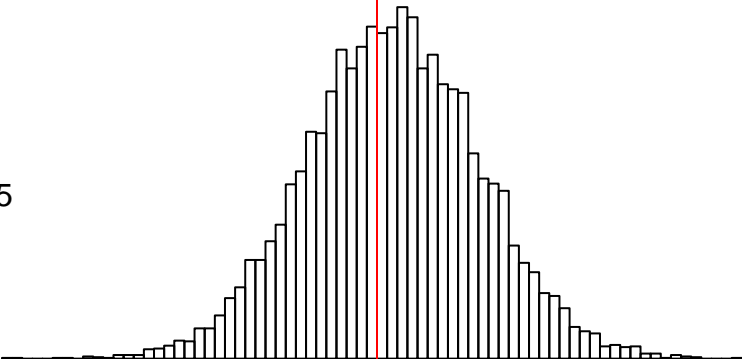

B184:120 – B184:45

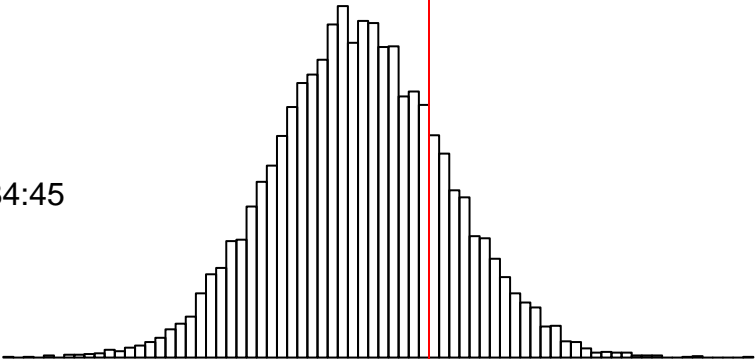

-3 -2 -1 0 1 2 3

delta(Sugar 3)



B184:240

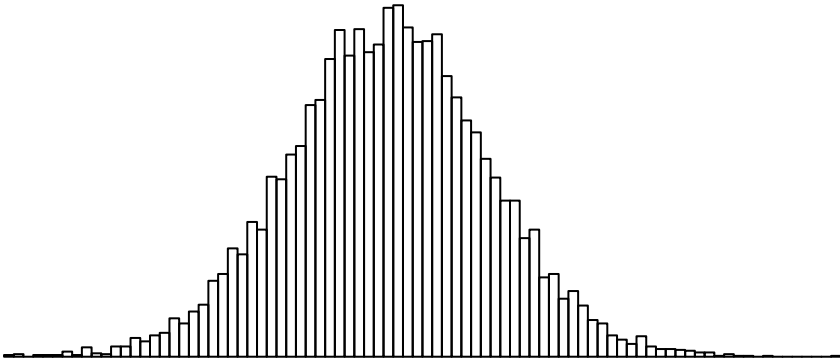

B184:120

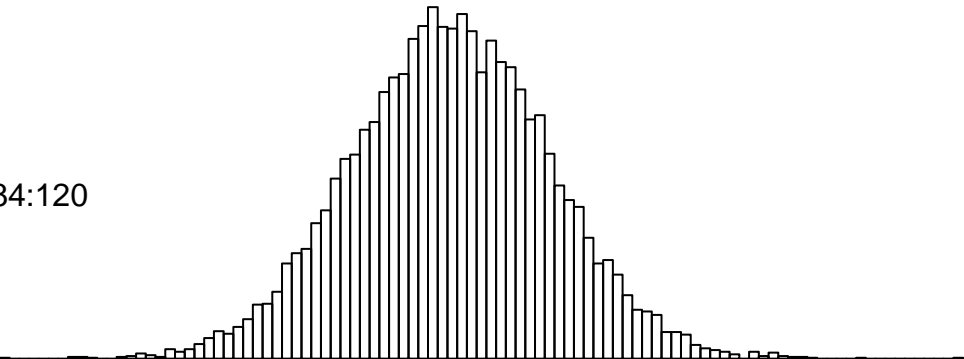

B184:45

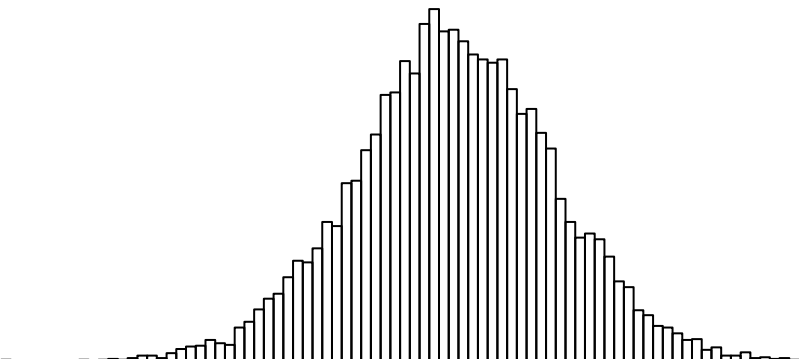

-8.5      -8.0      -7.5      -7.0      -6.5      -6.0

Sugar 4

B184:240 – B184:120

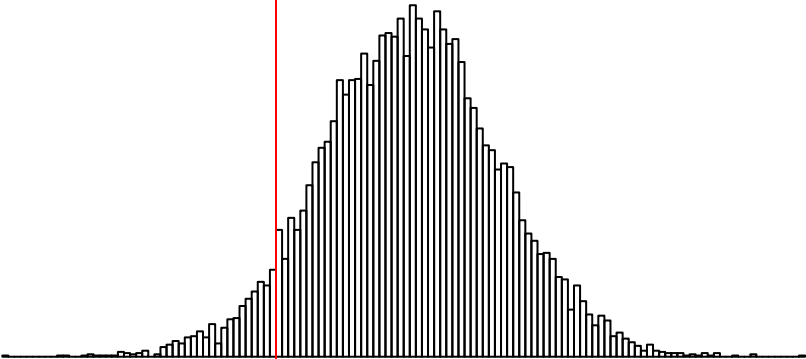

B184:240 – B184:45

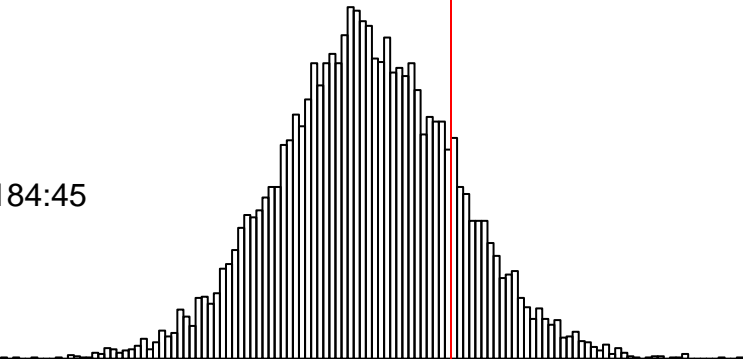

B184:120 – B184:45

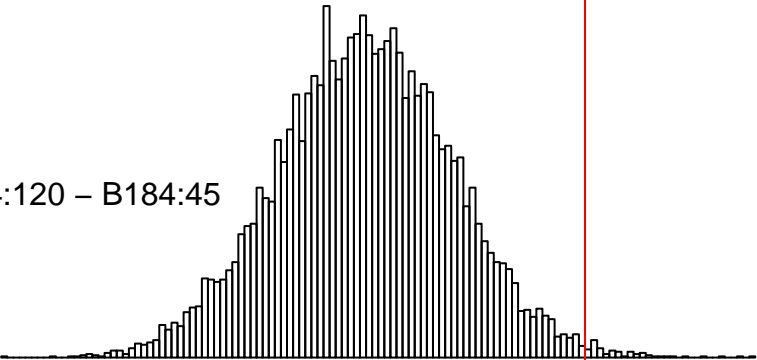

-2 -1 0 1 2

delta(Sugar 4)

B184:240

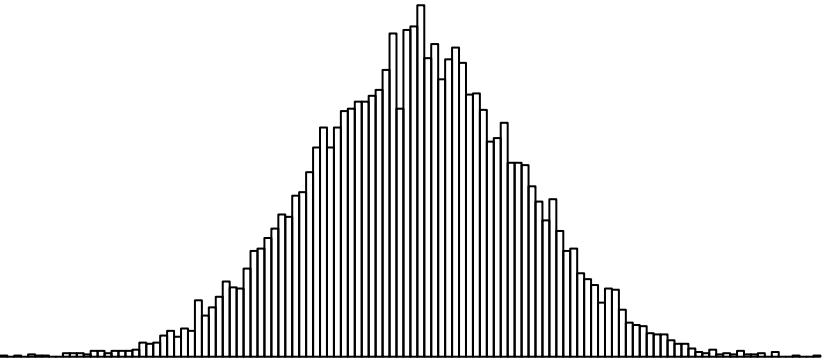

B184:120

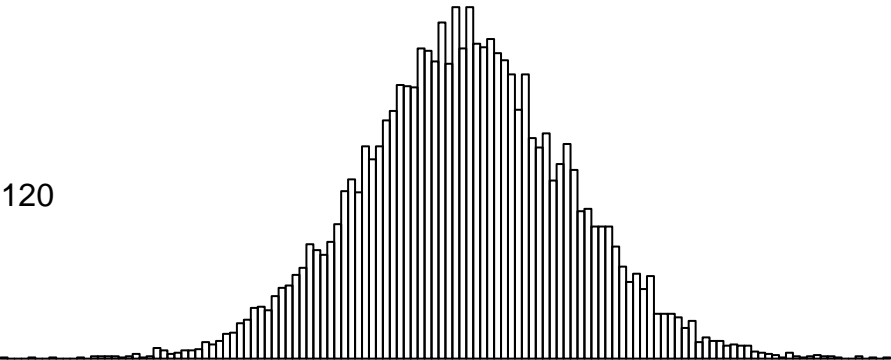

B184:45

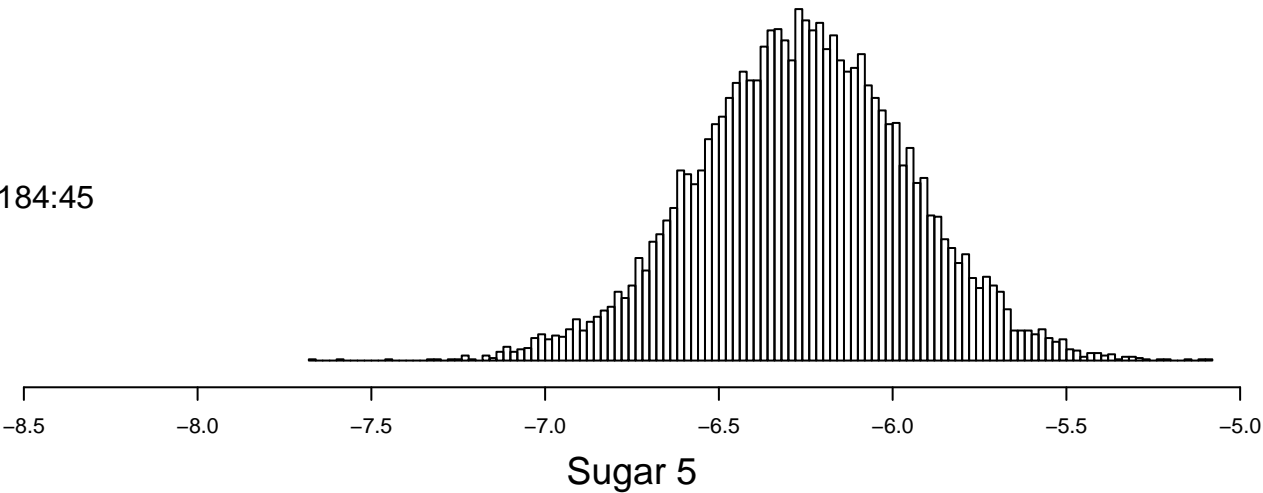

B184:240 – B184:120

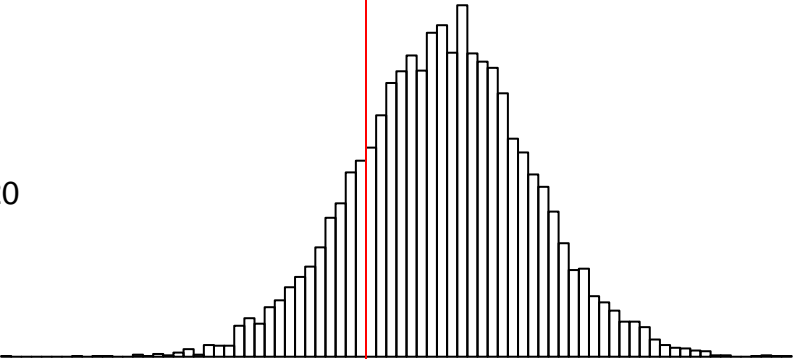

B184:240 – B184:45

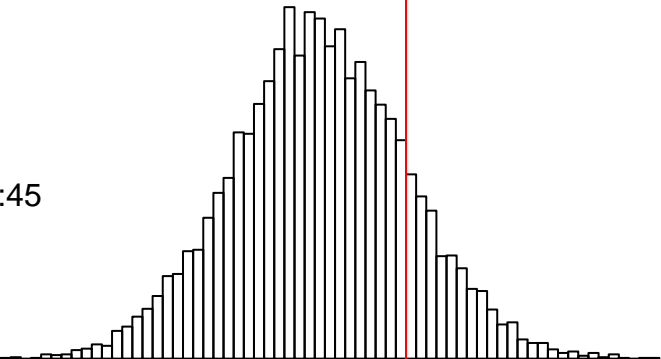

B184:120 – B184:45

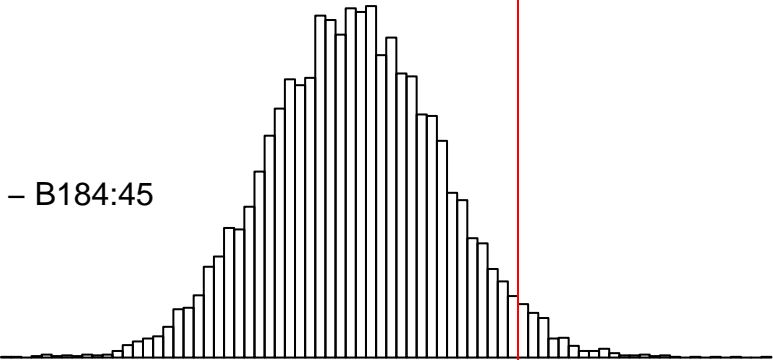

-3                      -2                      -1                      0                      1                      2                      3

delta(Sugar 5)

B184:240

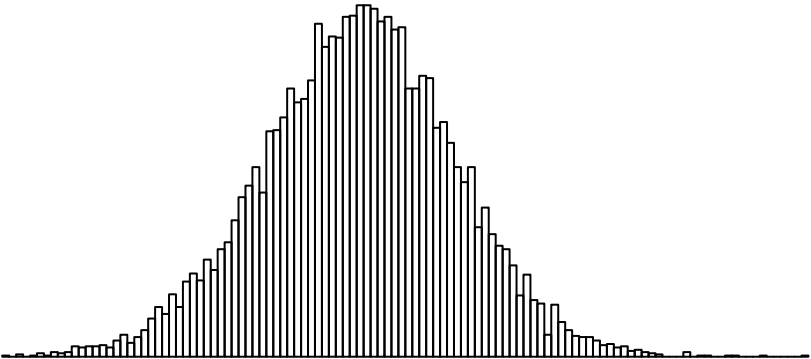

B184:120

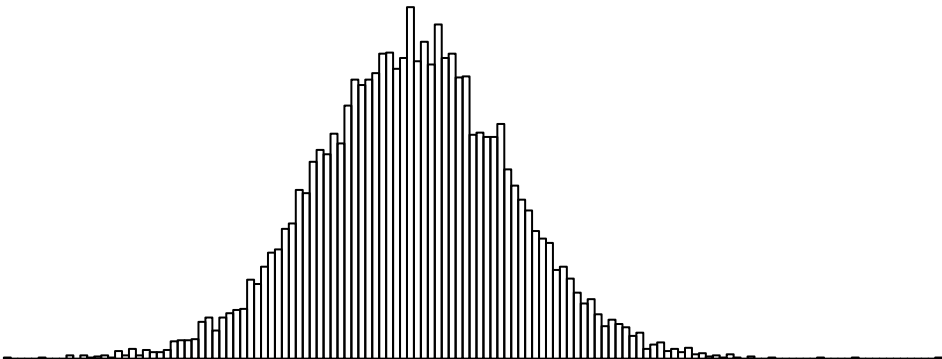

B184:45

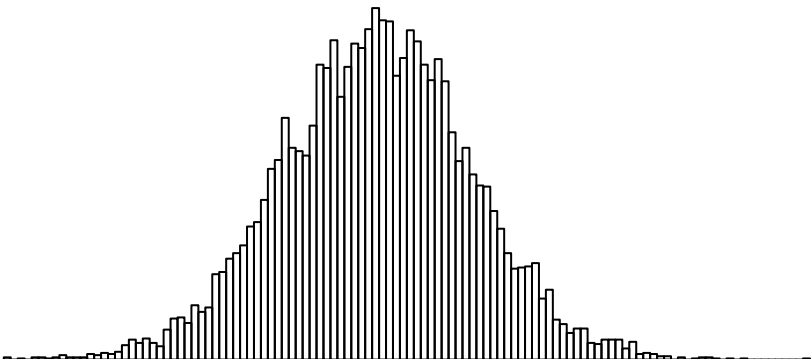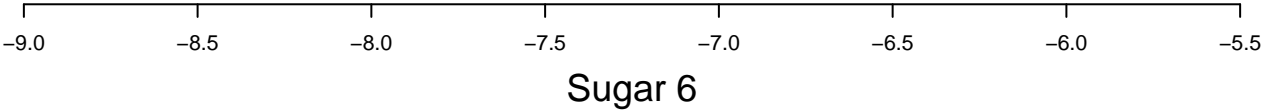

B184:240 – B184:120

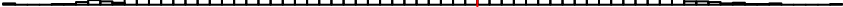

B184:240 – B184:45

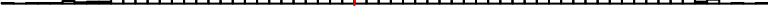

B184:120 – B184:45

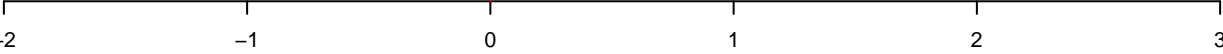

delta(Sugar 6)

B184:240

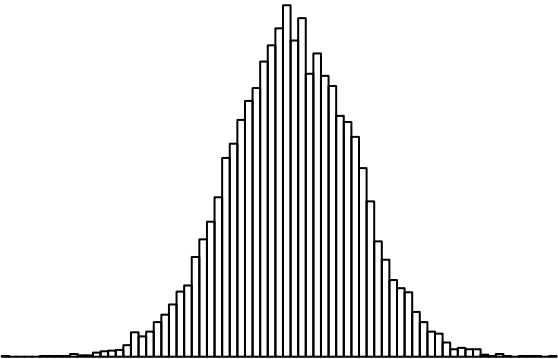

B184:120

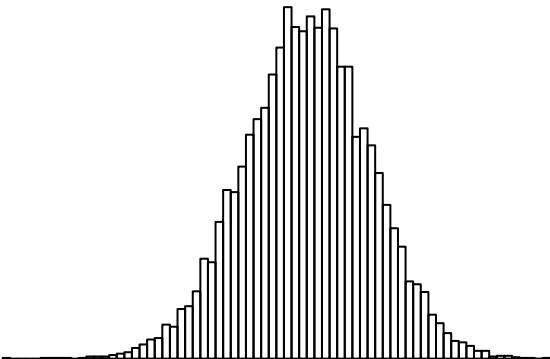

B184:45

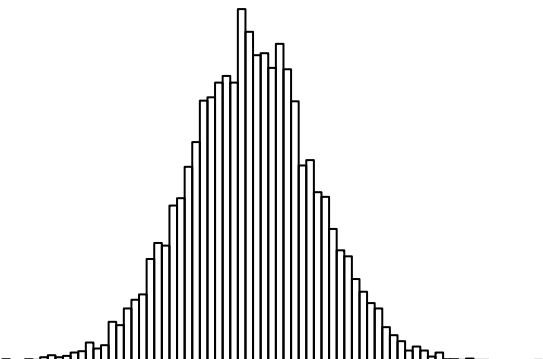

-10                      -8                      -6                      -4                      -2

Sugar 7

B184:240 – B184:120

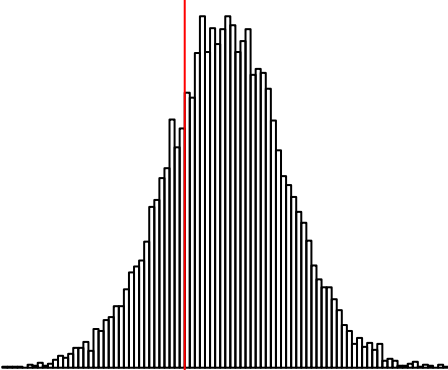

B184:240 – B184:45

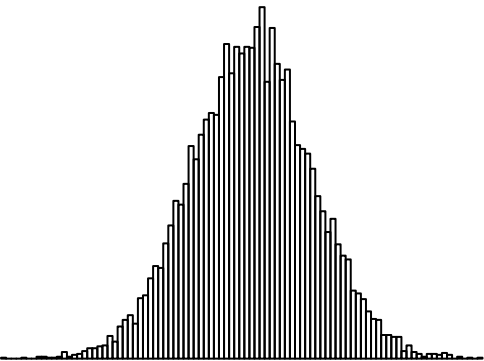

B184:120 – B184:45

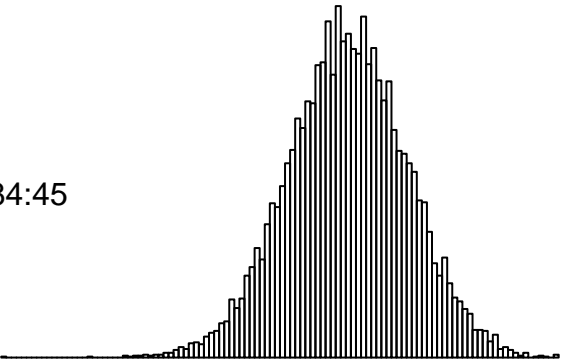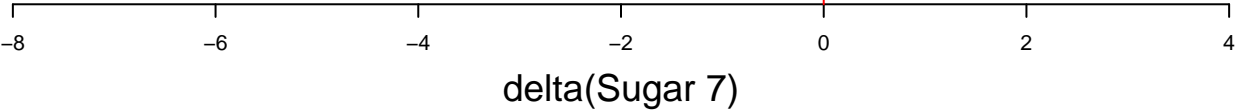



B184:240

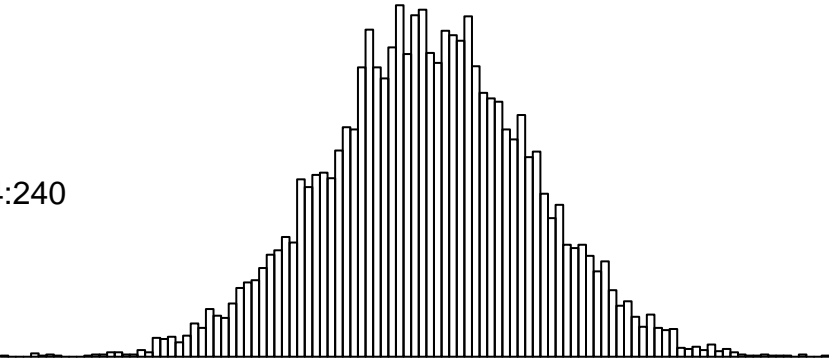

B184:120

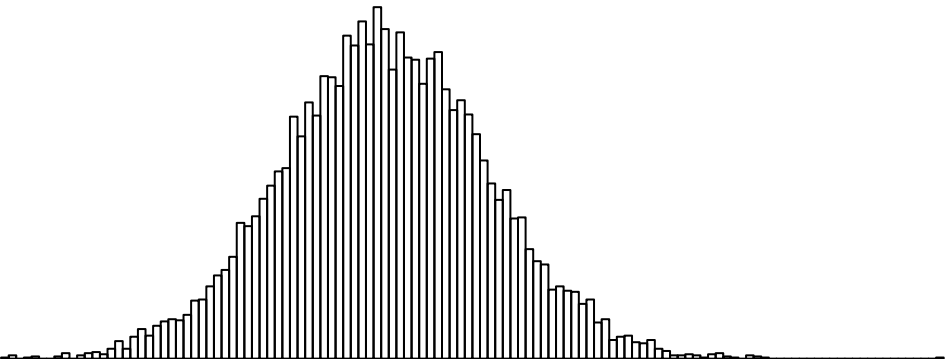

B184:45

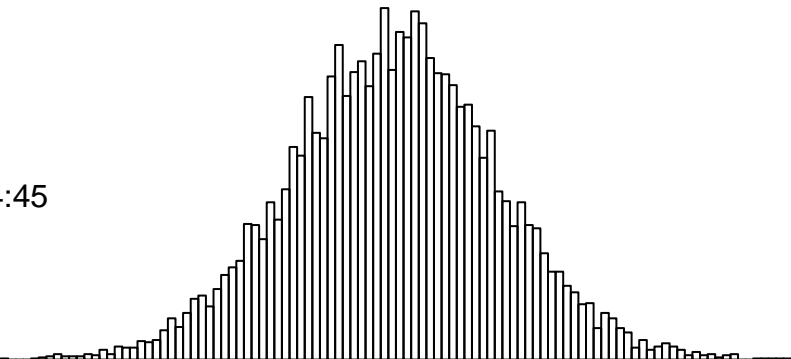

-8 -6 -4 -2 0

Sugar 8

B184:240 – B184:120

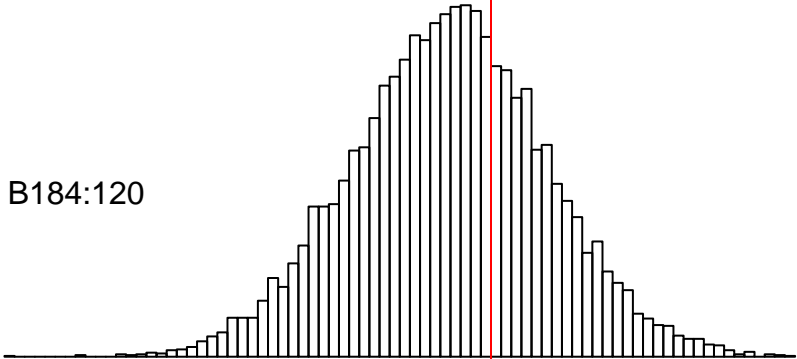

B184:240 – B184:45

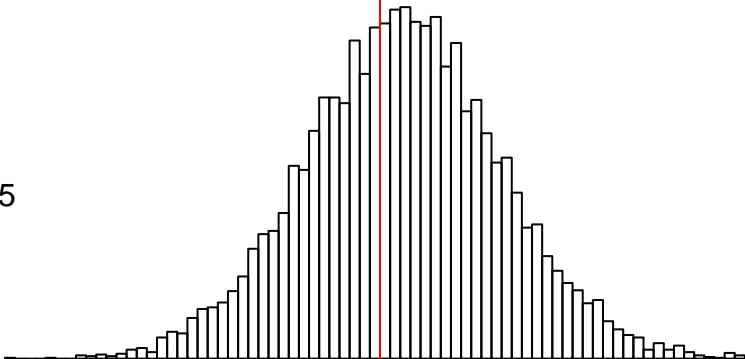

B184:120 – B184:45

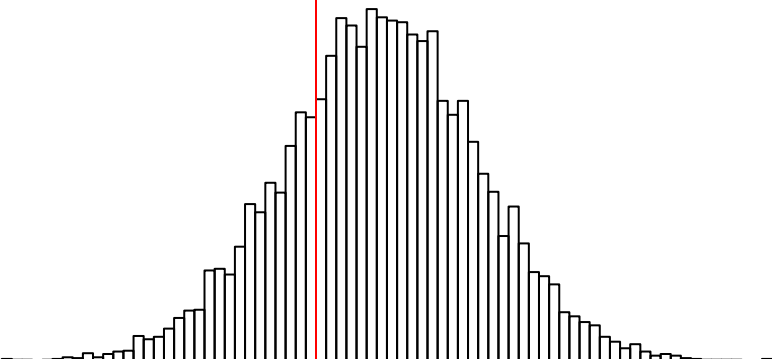

-6 -4 -2 0 2 4 6

delta(Sugar 8)

B184:240

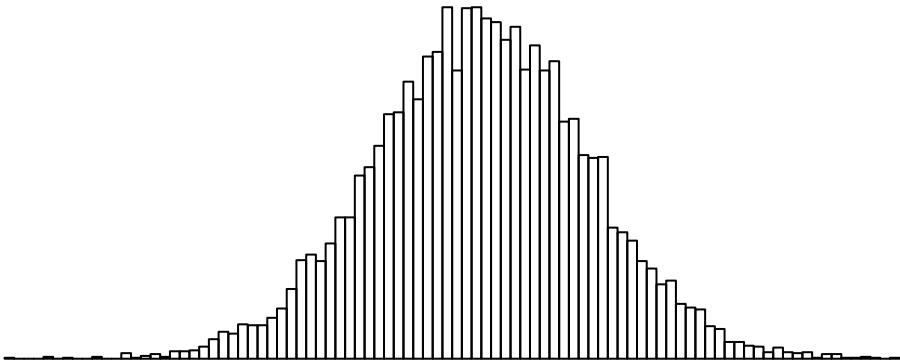

B184:120

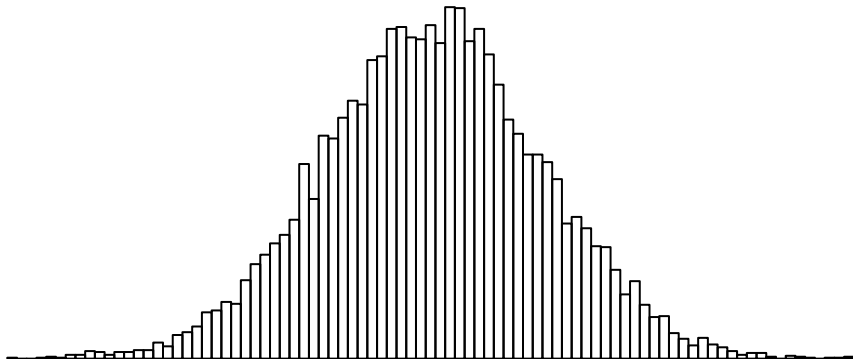

B184:45

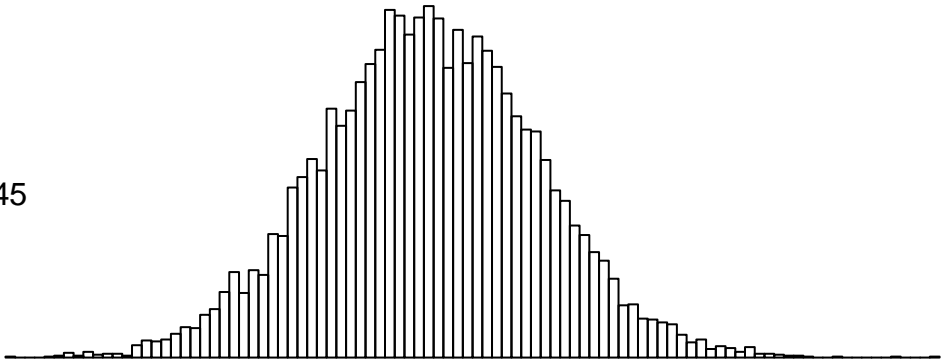

-9.0      -8.5      -8.0      -7.5      -7.0      -6.5

Sugar 9

B184:240 – B184:120

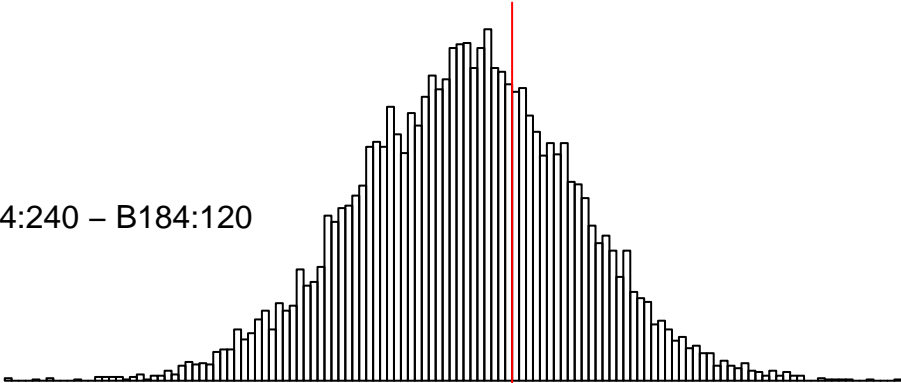

B184:240 – B184:45

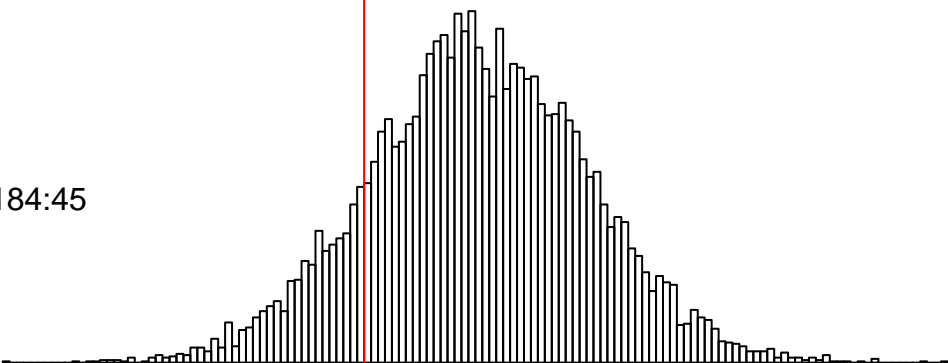

B184:120 – B184:45

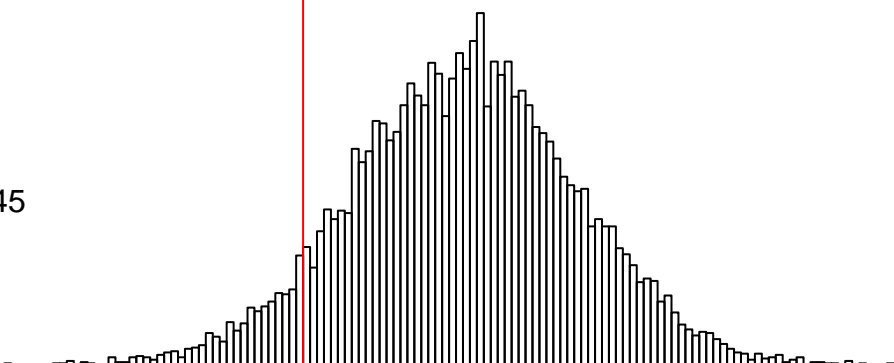

-1.5      -1.0      -0.5      0.0      0.5      1.0      1.5      2.0

delta(Sugar 9)

B184:240

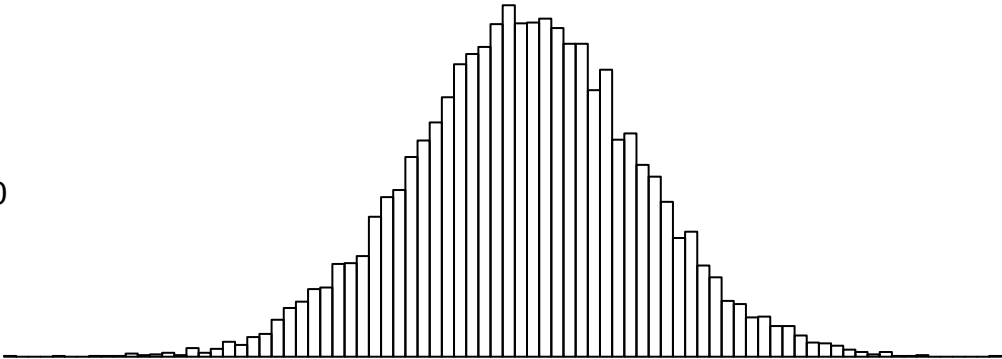

B184:120

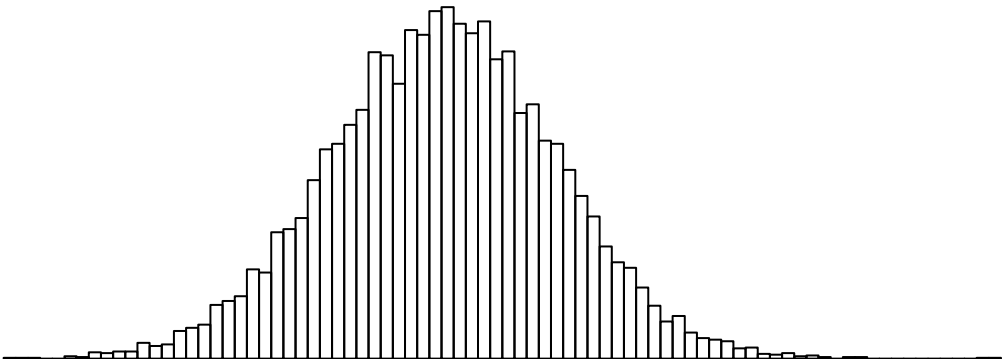

B184:45

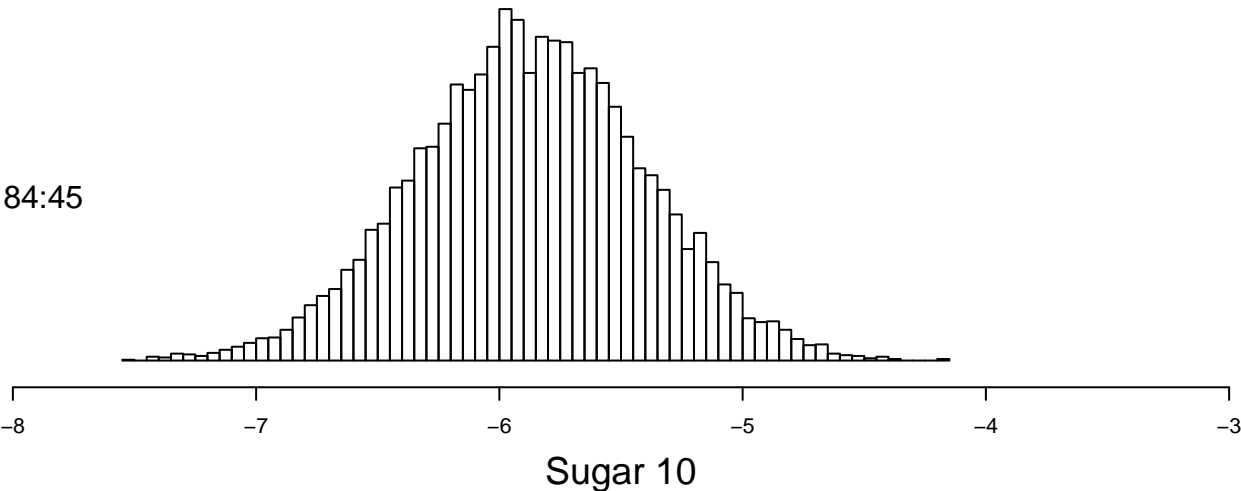

B184:240 – B184:120

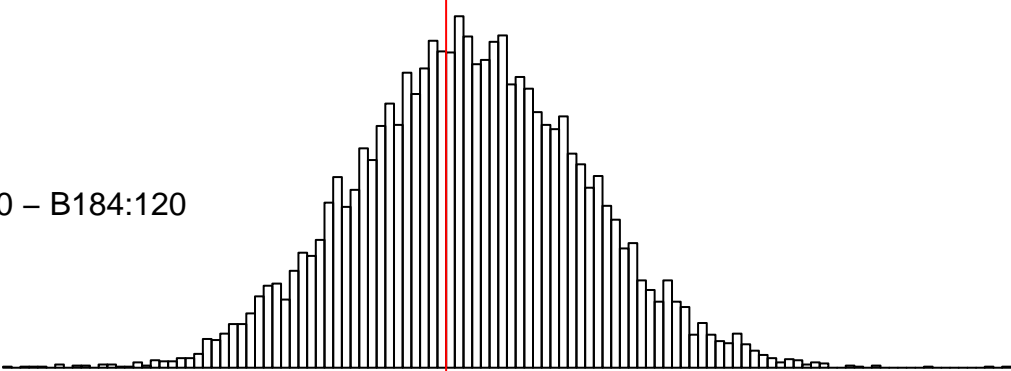

B184:240 – B184:45

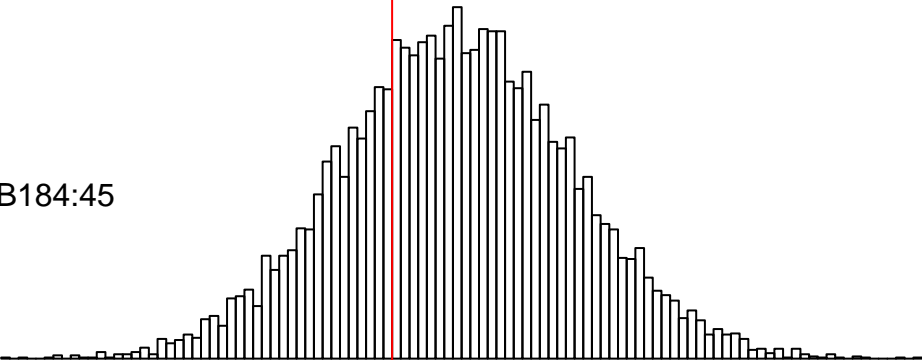

B184:120 – B184:45

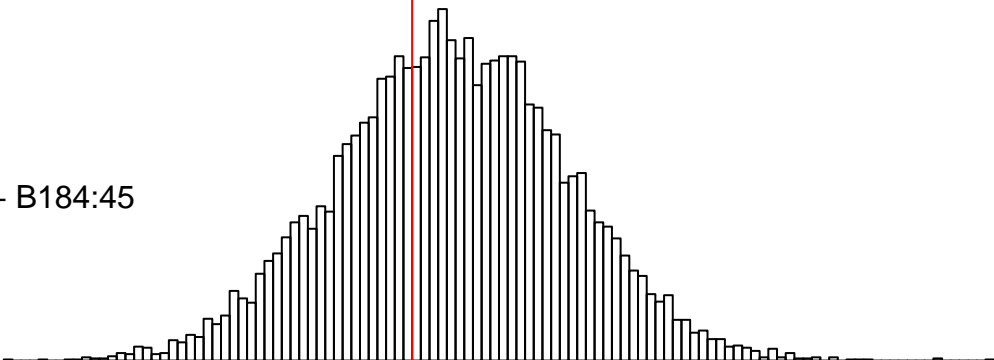

-3

-2

-1

0

1

2

3

4

delta(Sugar 10)

B184:240

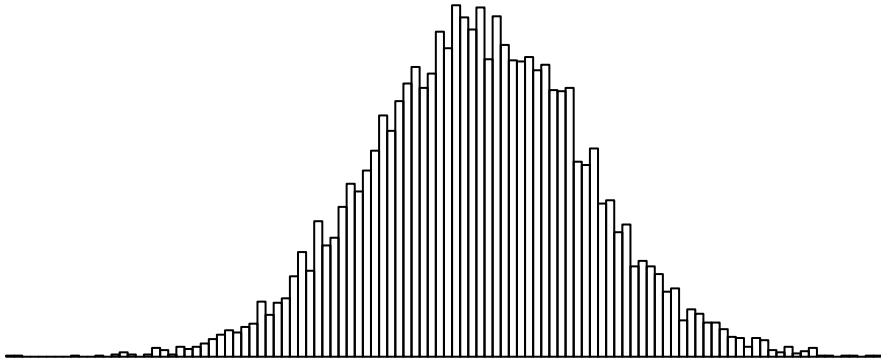

B184:120

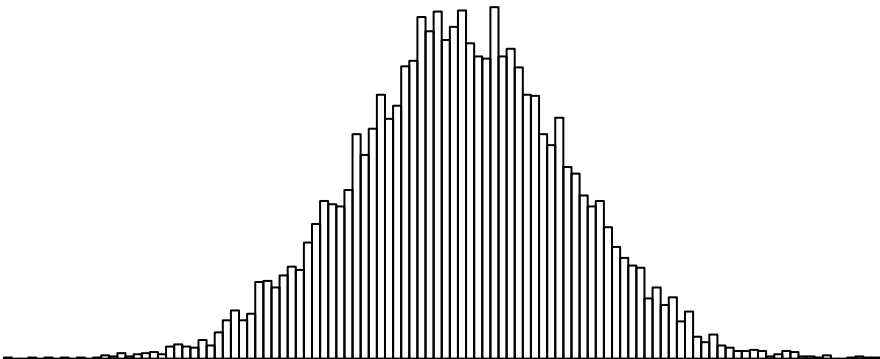

B184:45

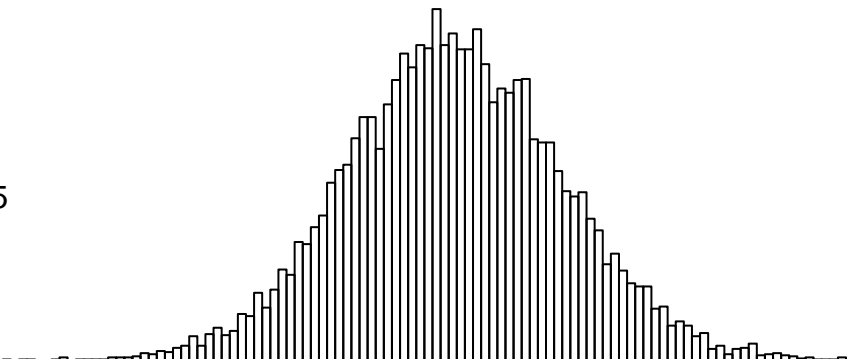

-8.5      -8.0      -7.5      -7.0      -6.5      -6.0      -5.5

Sugar 11

B184:240 – B184:120

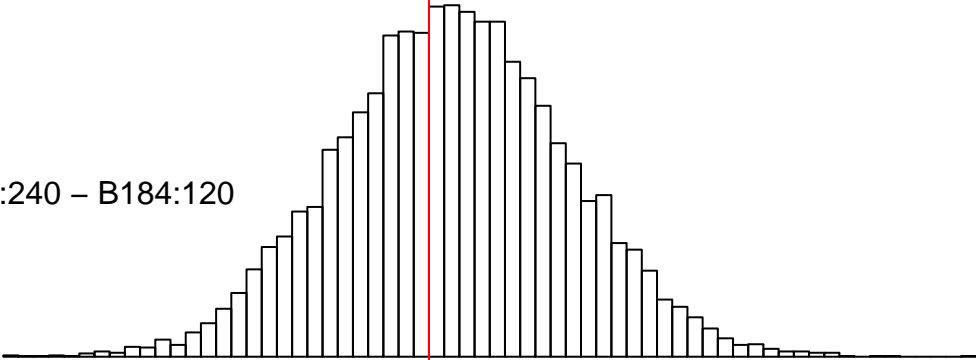

B184:240 – B184:45

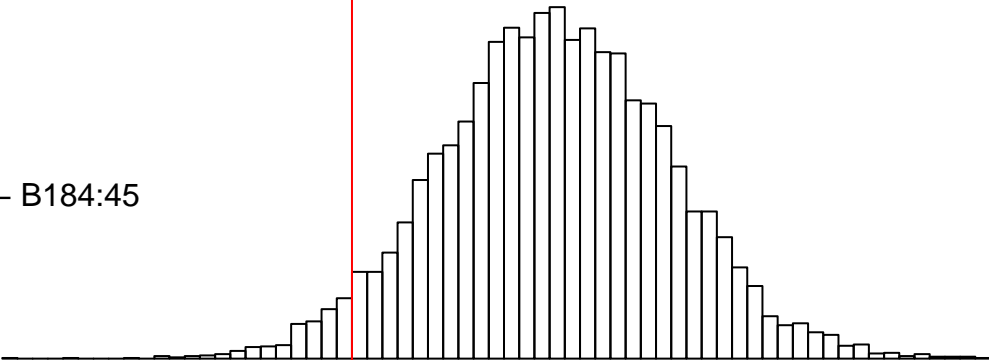

B184:120 – B184:45

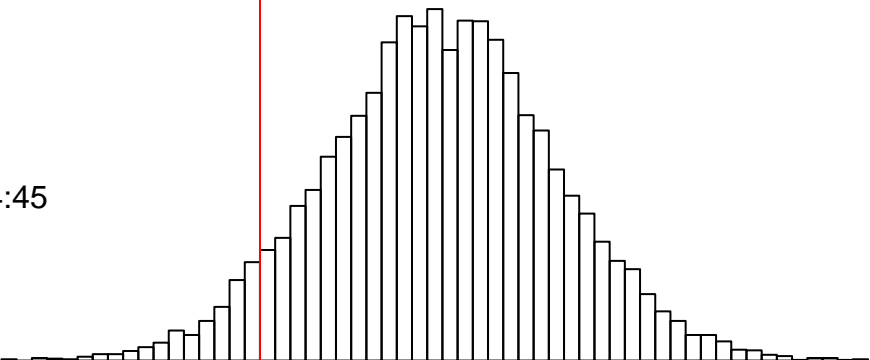

-1

0

1

2

delta(Sugar 11)



B184:240

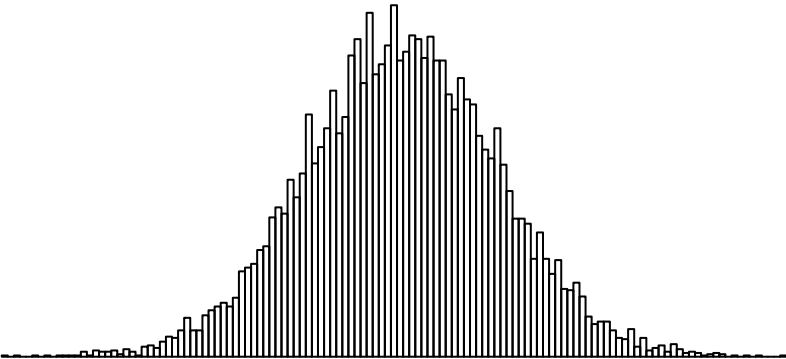

B184:120

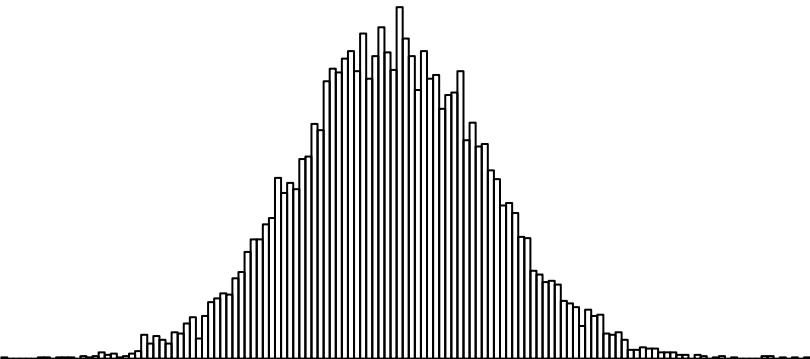

B184:45

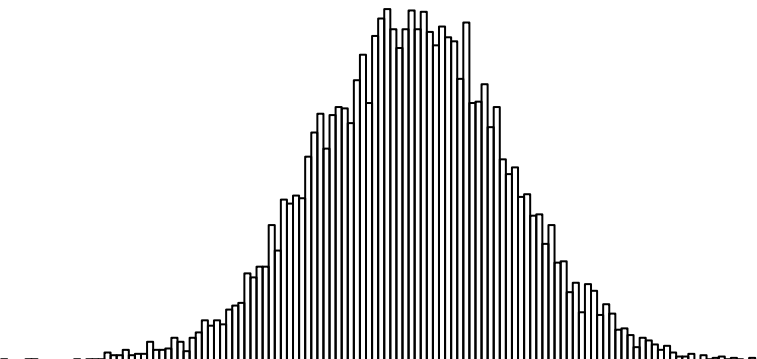

-9.0      -8.5      -8.0      -7.5      -7.0

Sugar 12

B184:240 – B184:120

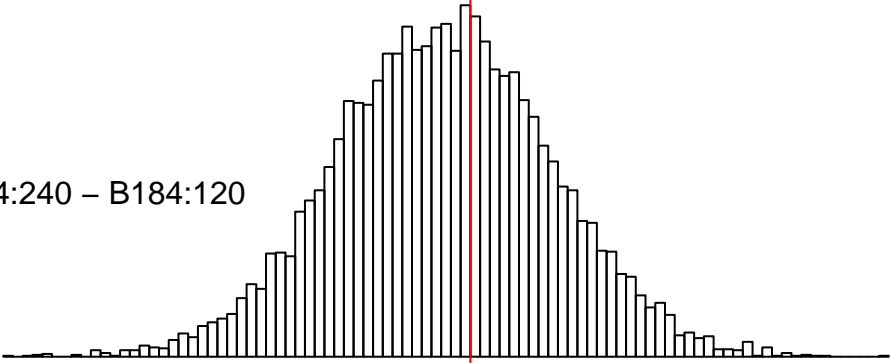

B184:240 – B184:45

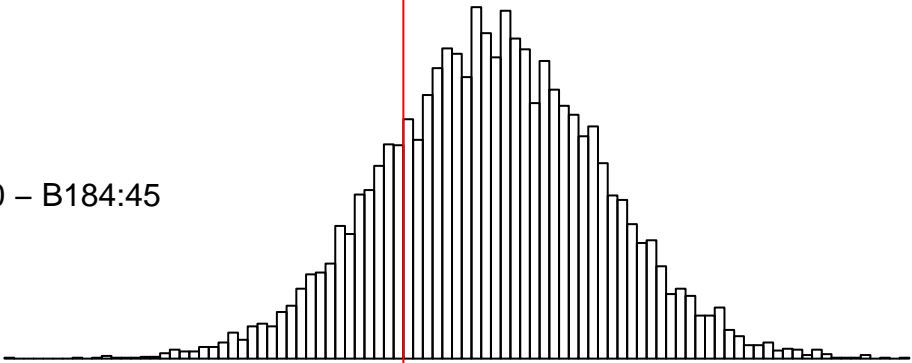

B184:120 – B184:45

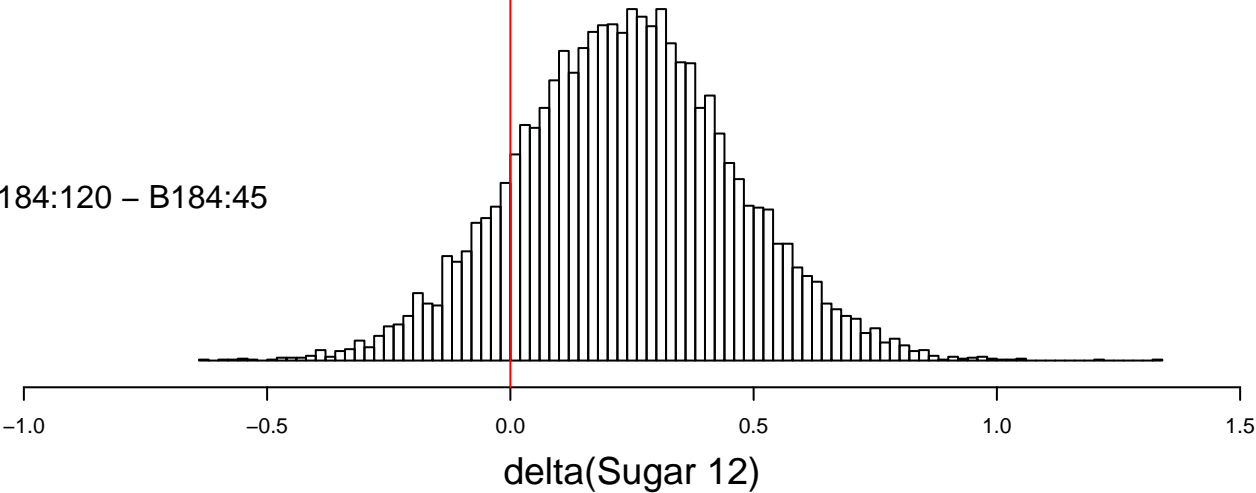

B184:240

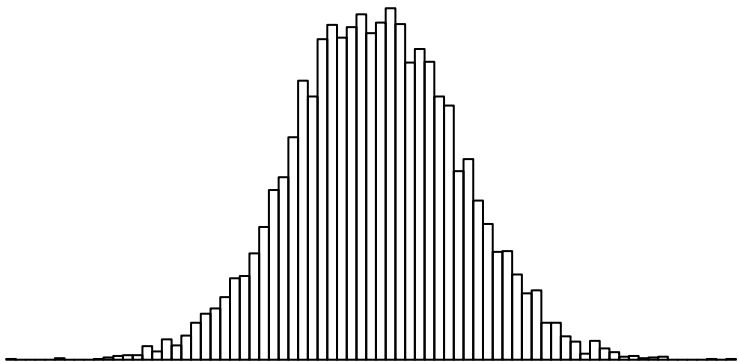

B184:120

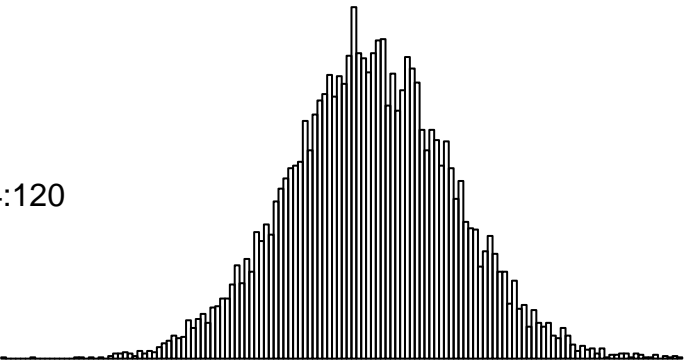

B184:45

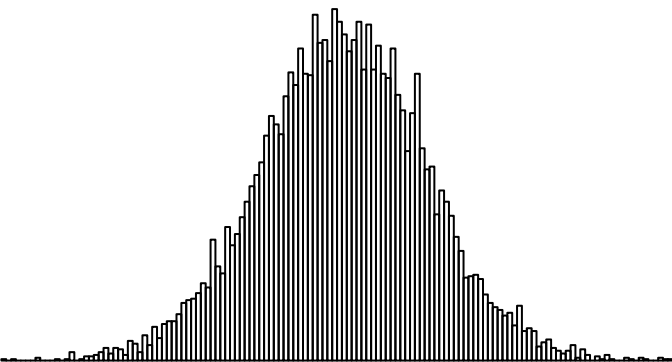

-9.0      -8.5      -8.0      -7.5      -7.0      -6.5

Sugar 14

B184:240 – B184:120

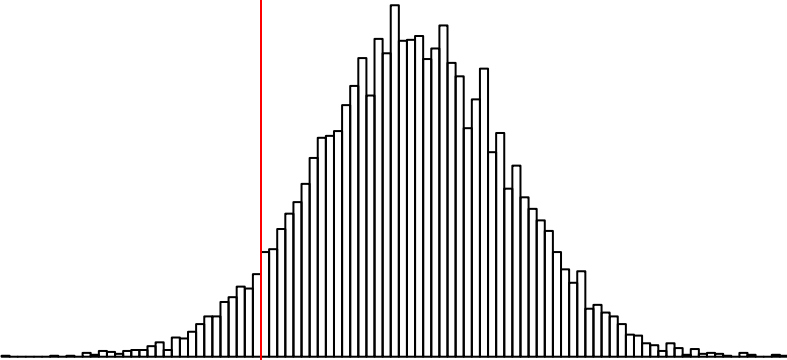

B184:240 – B184:45

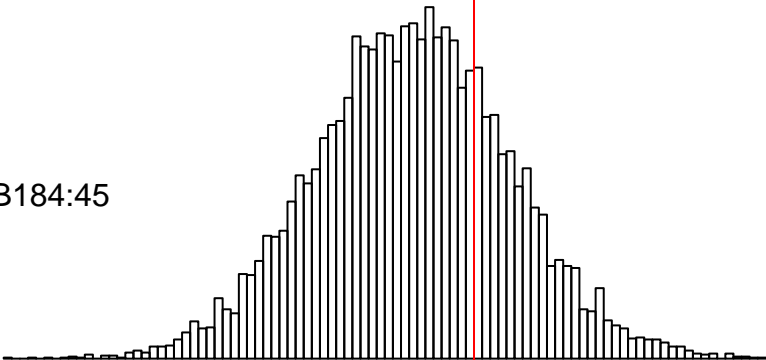

B184:120 – B184:45

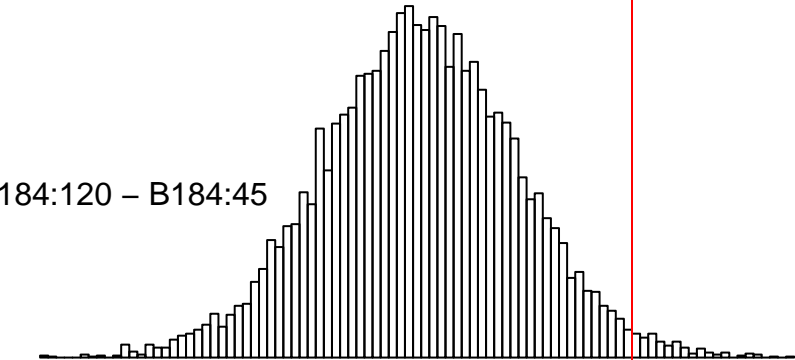

-1.5      -1.0      -0.5      0.0      0.5      1.0      1.5

delta(Sugar 14)

B184:240

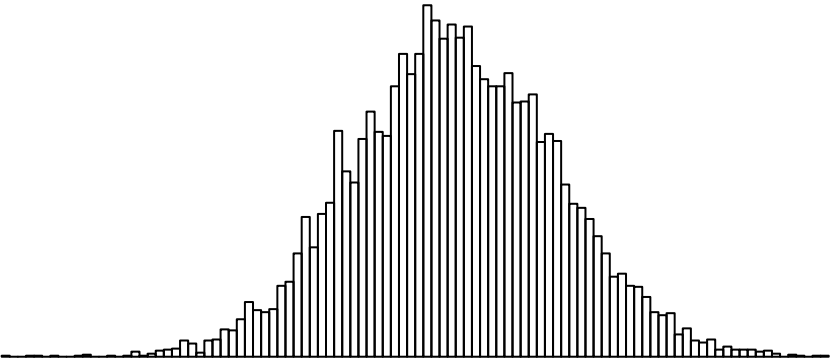

B184:120

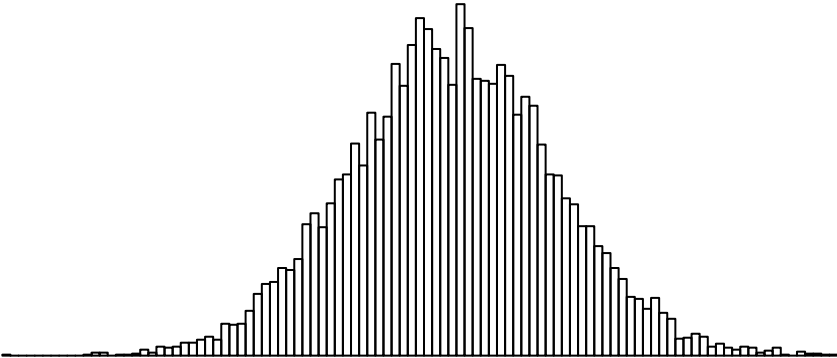

B184:45

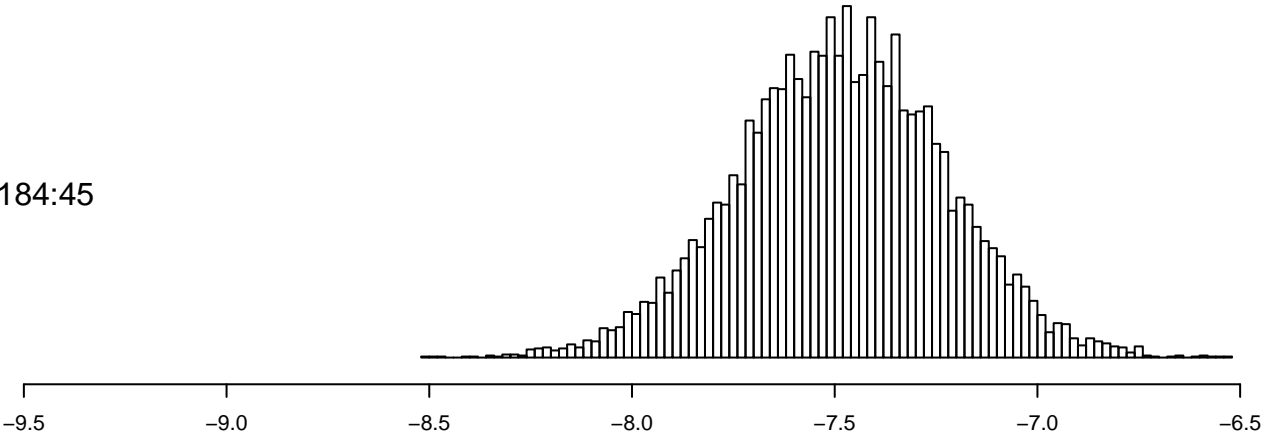

Sugar 16

B184:240 – B184:120

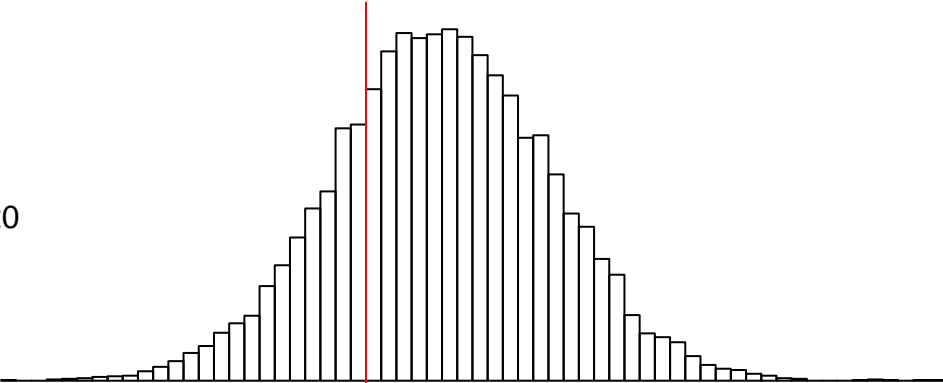

B184:240 – B184:45

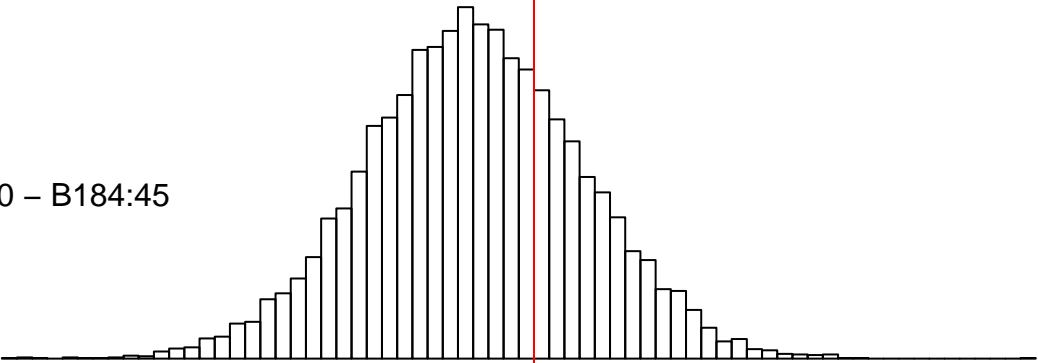

B184:120 – B184:45

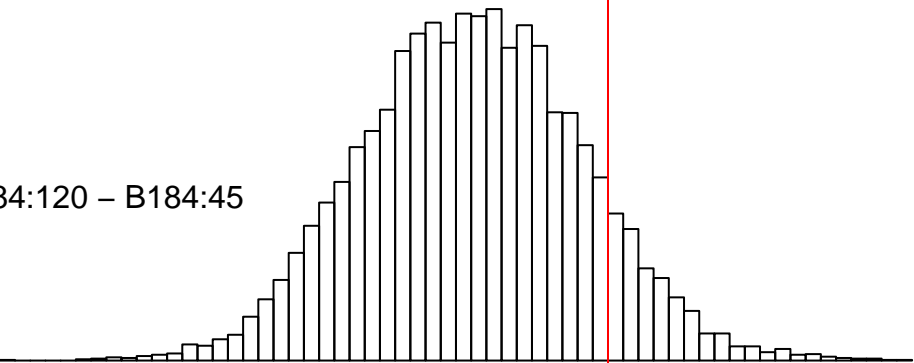

-2 -1 0 1 2

delta(Sugar 16)

B184:240

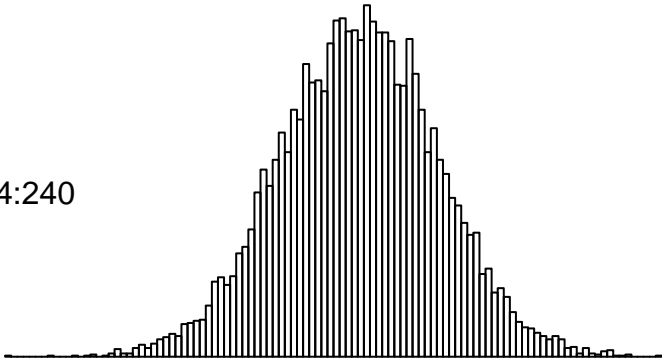

B184:120

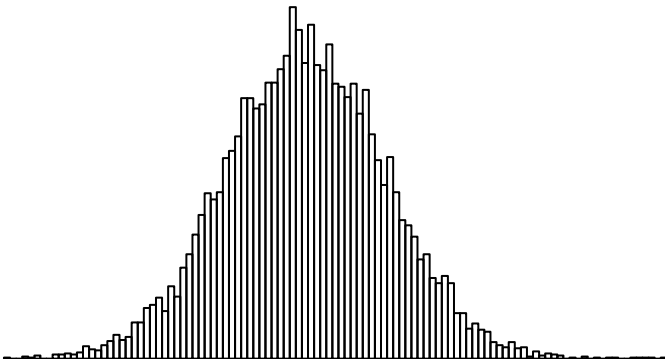

B184:45

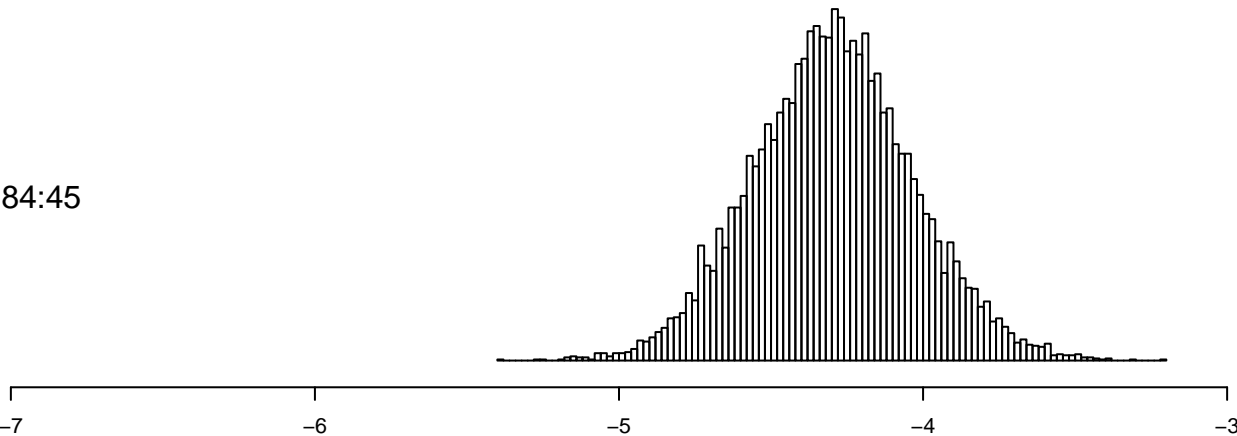

Sugar 17

B184:240 – B184:120

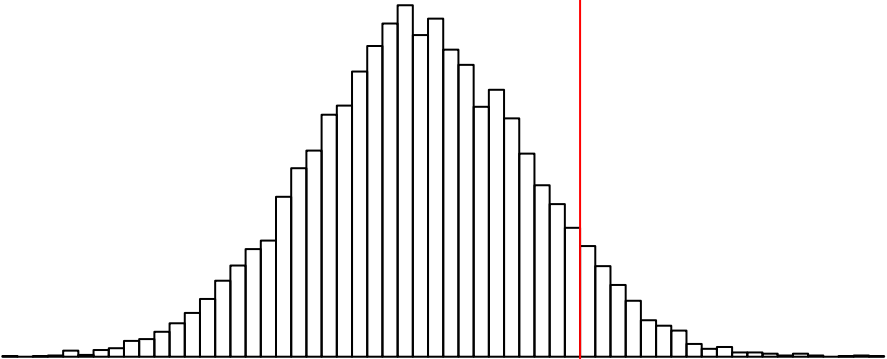

B184:240 – B184:45

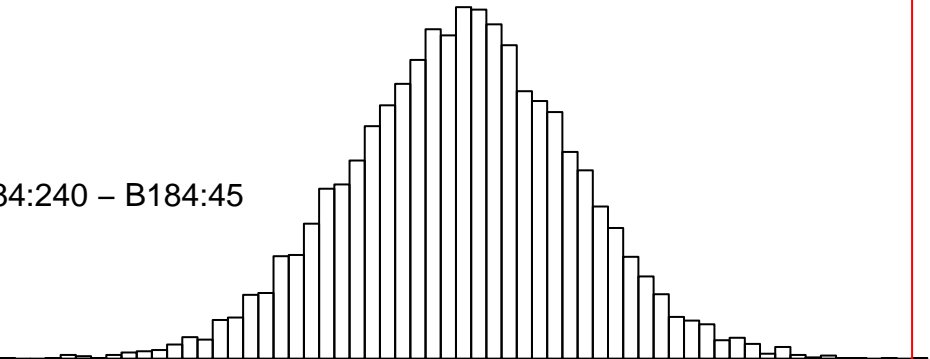

B184:120 – B184:45

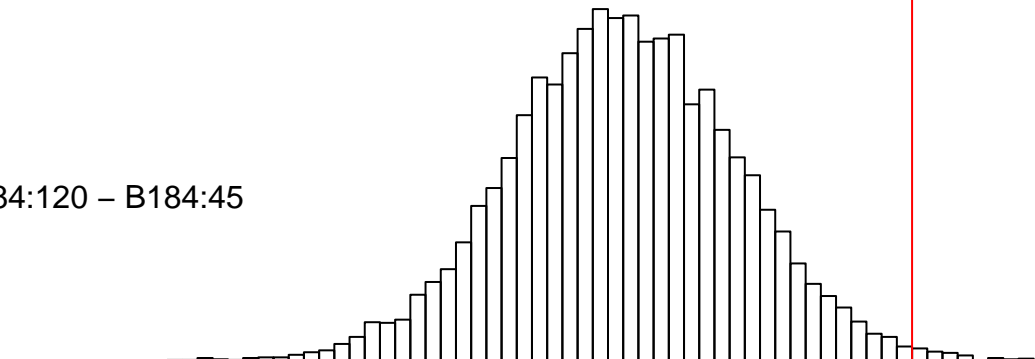

-3                      -2                      -1                      0                      1

delta(Sugar 17)



B184:240

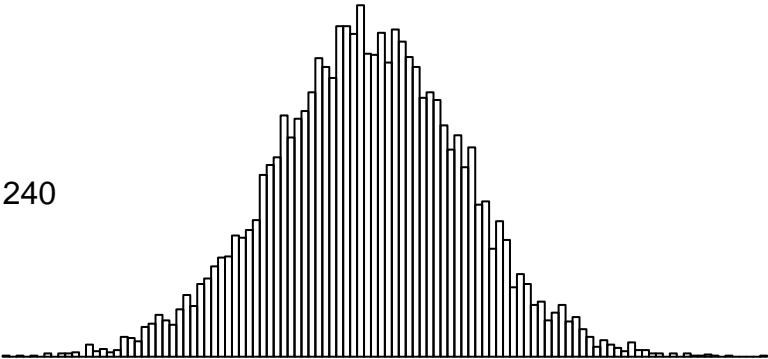

B184:120

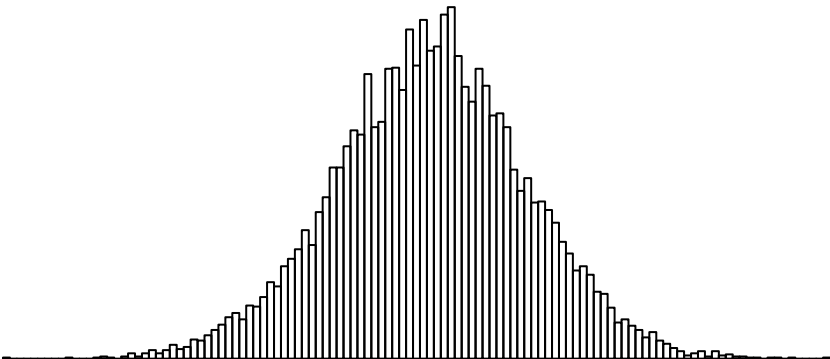

B184:45

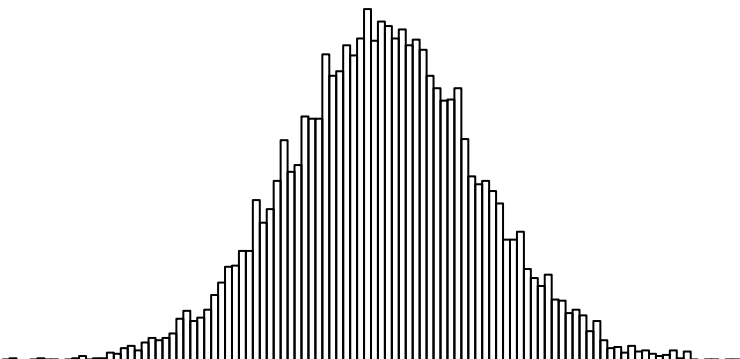

-7.5      -7.0      -6.5      -6.0      -5.5      -5.0      -4.5      -4.0

Sugar 18

B184:240 – B184:120

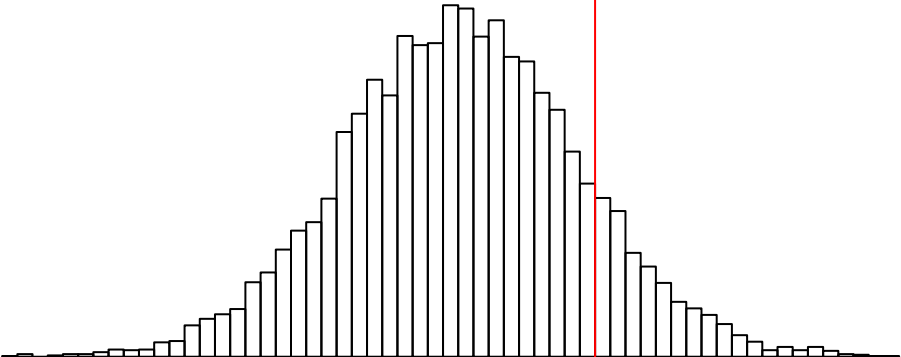

B184:240 – B184:45

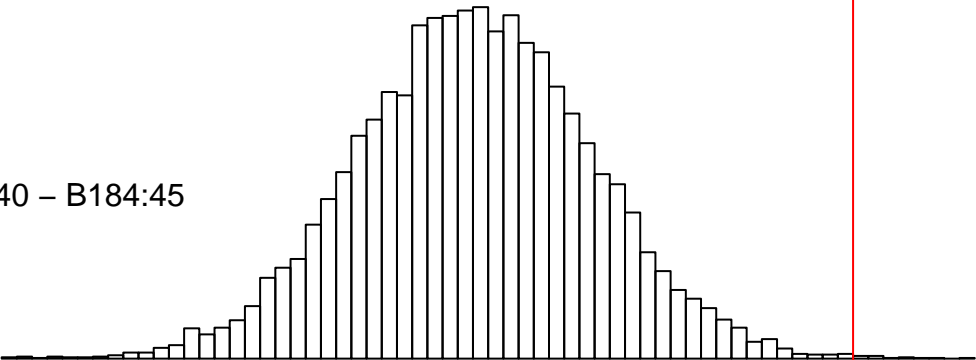

B184:120 – B184:45

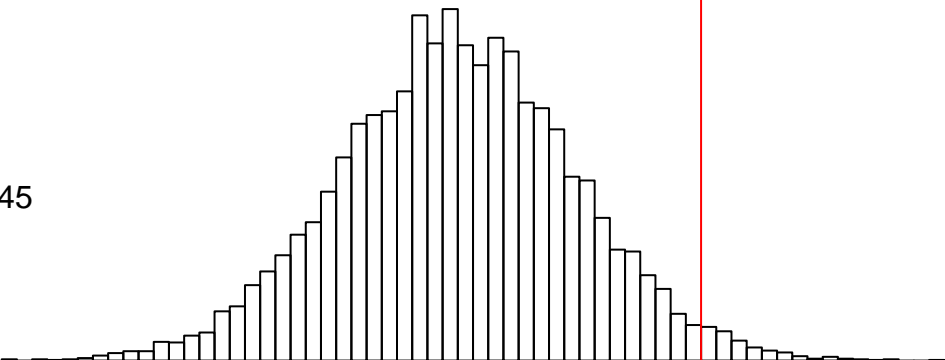

-3

-2

-1

0

1

delta(Sugar 18)

B184:240

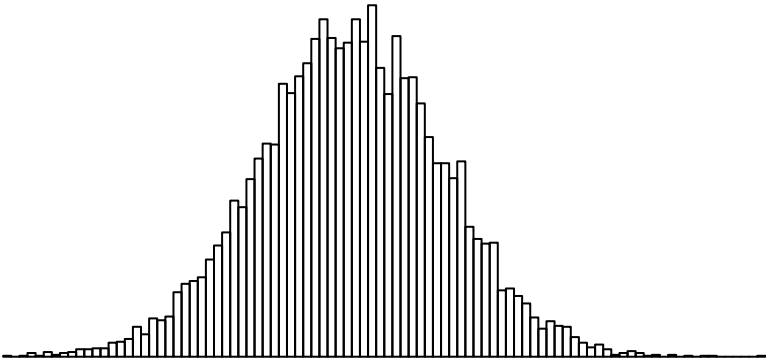

B184:120

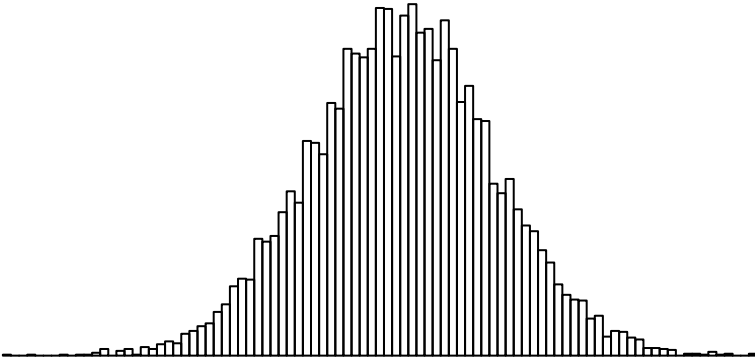

B184:45

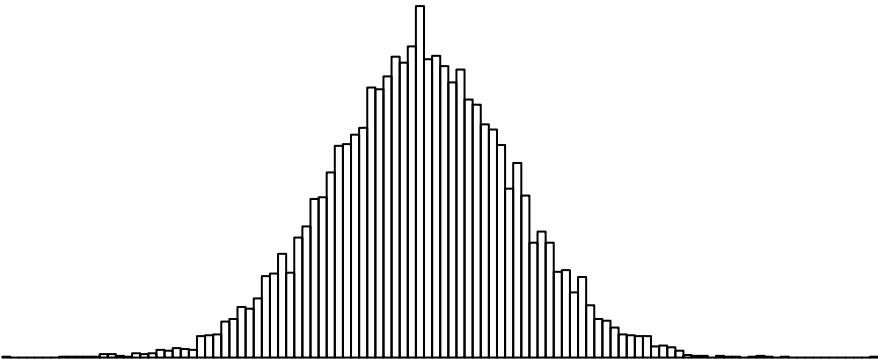

-9.0      -8.5      -8.0      -7.5      -7.0      -6.5      -6.0

Sugar 20

B184:240 – B184:120

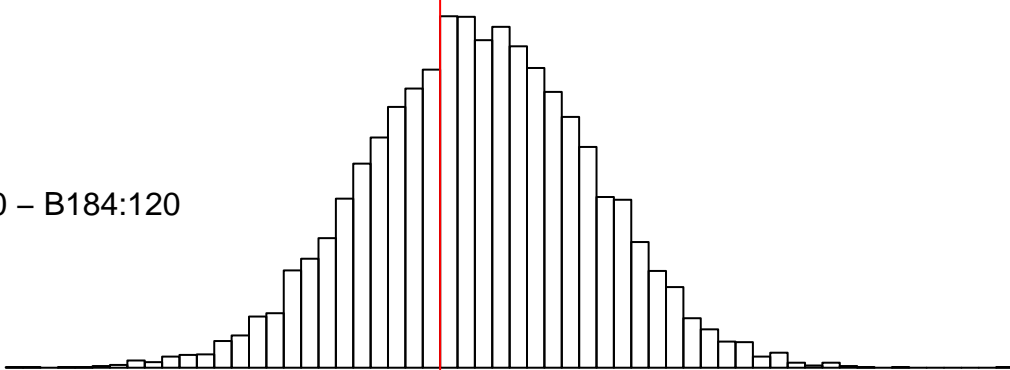

B184:240 – B184:45

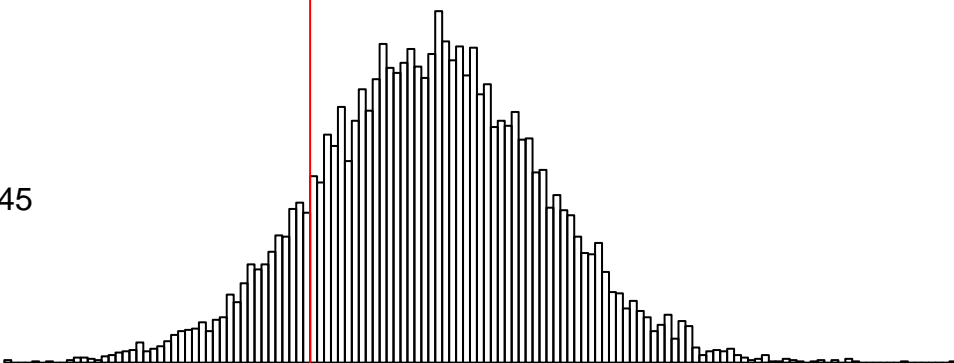

B184:120 – B184:45

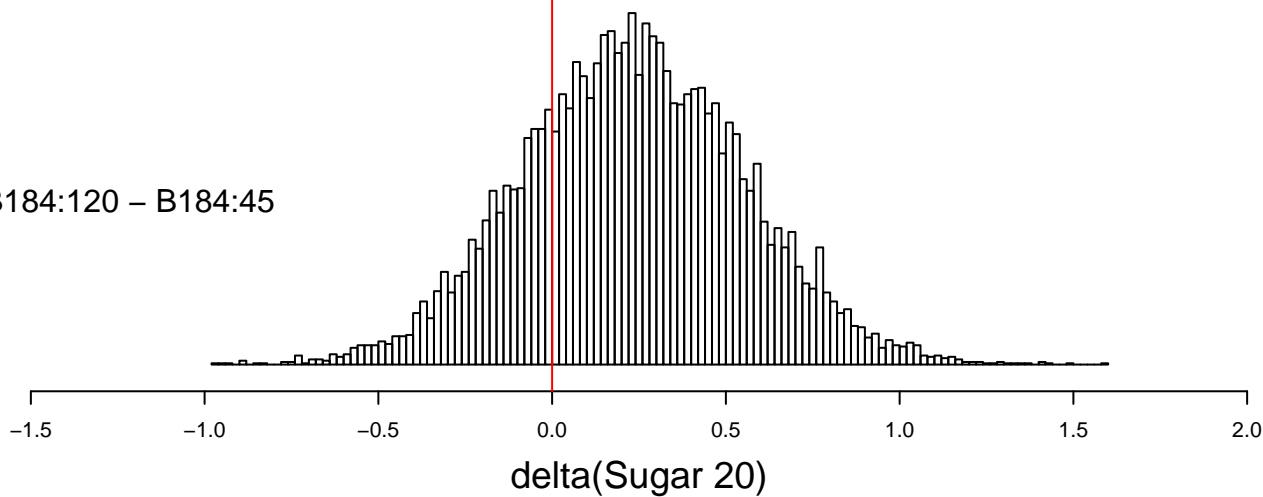

B184:240

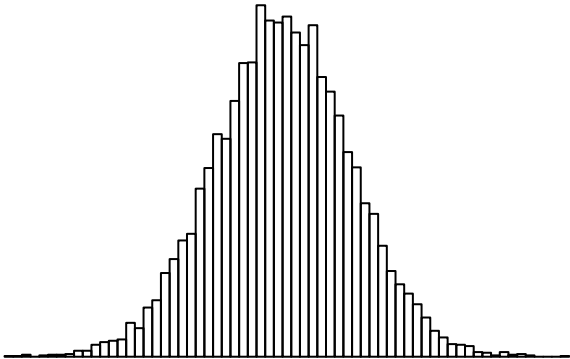

B184:120

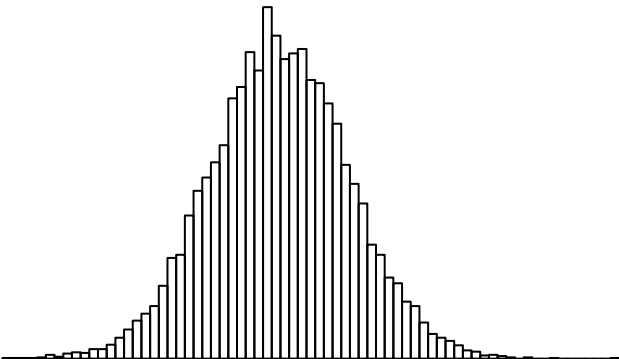

B184:45

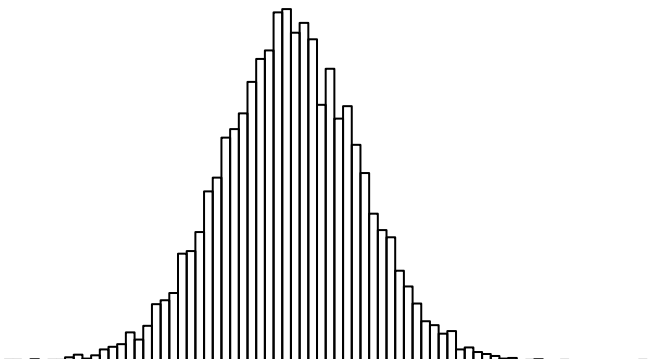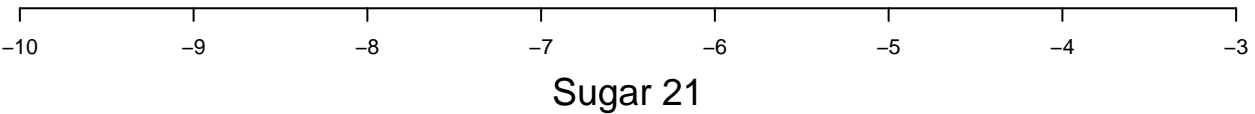

B184:240 – B184:120

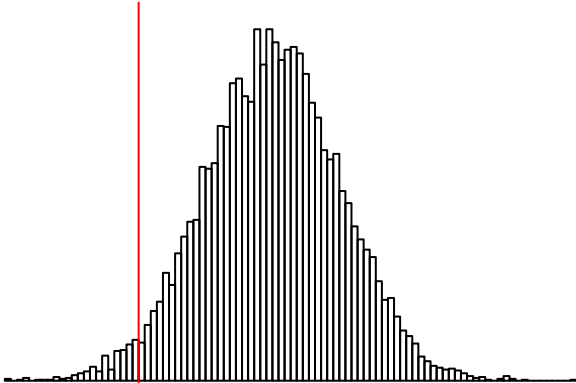

B184:240 – B184:45

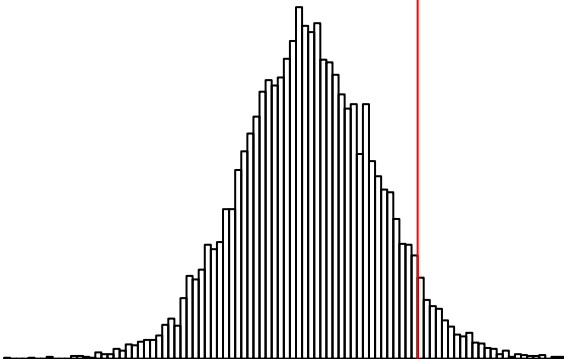

B184:120 – B184:45

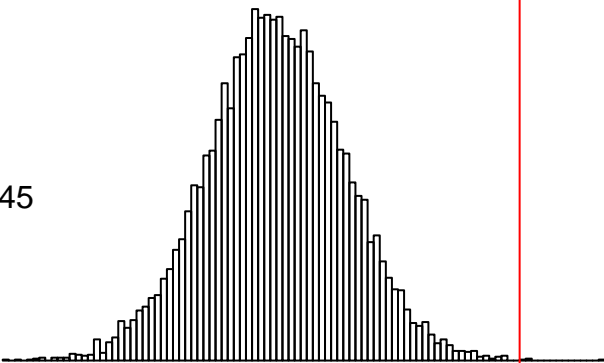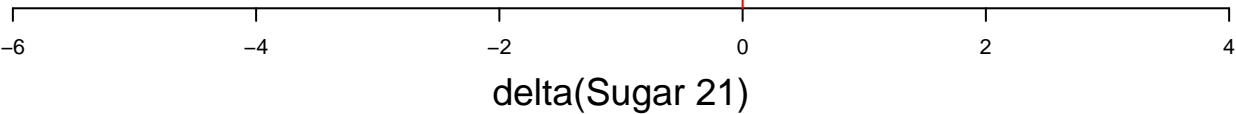

B184:240

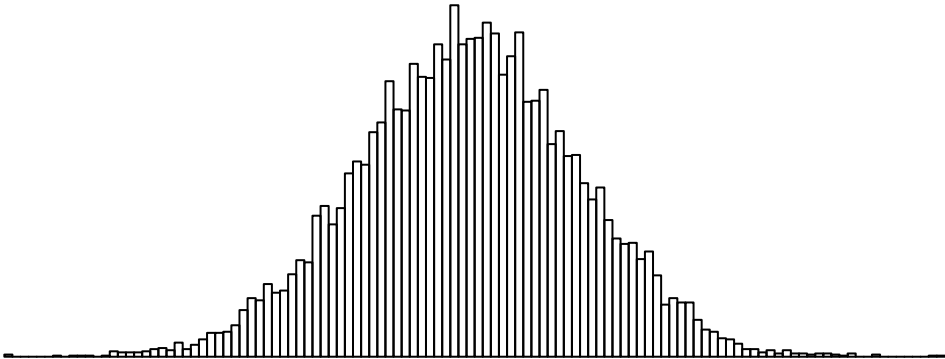

B184:120

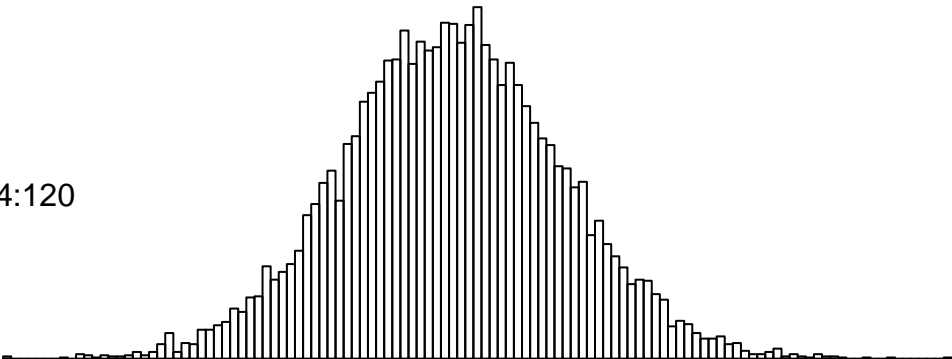

B184:45

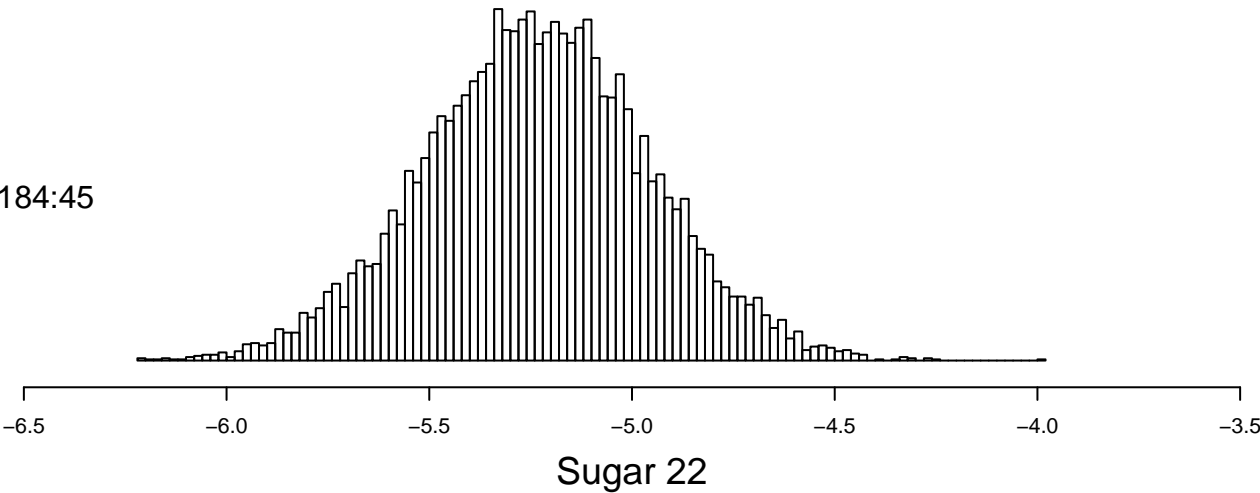

B184:240 – B184:120

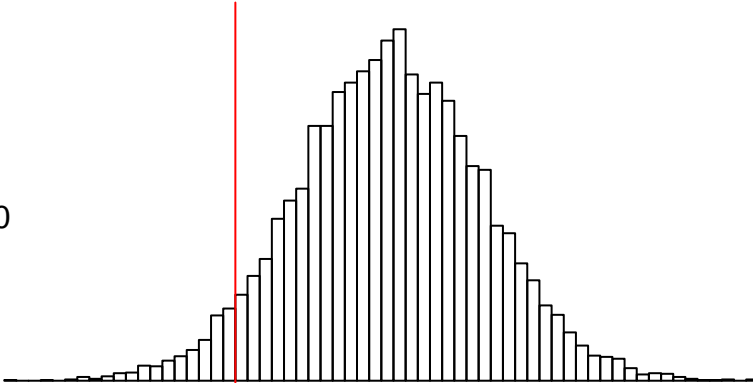

B184:240 – B184:45

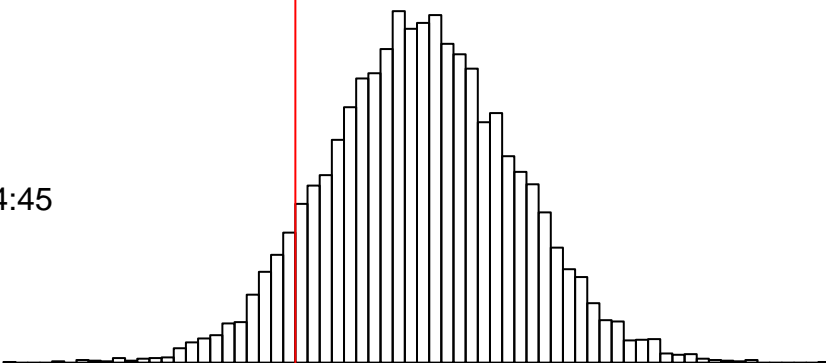

B184:120 – B184:45

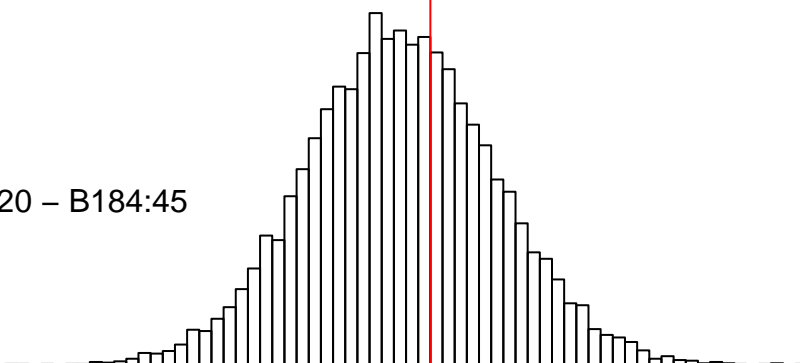

-2 -1 0 1 2 3

delta(Sugar 22)



B184:240

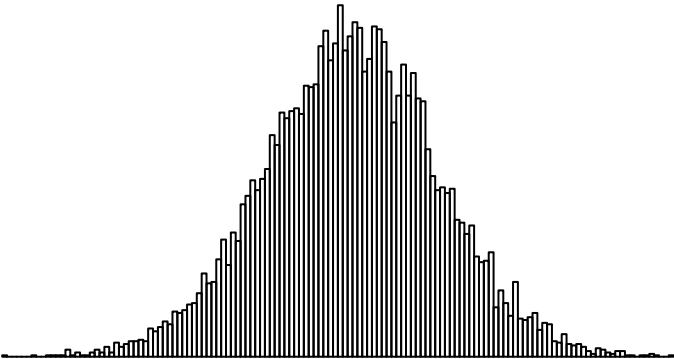

B184:120

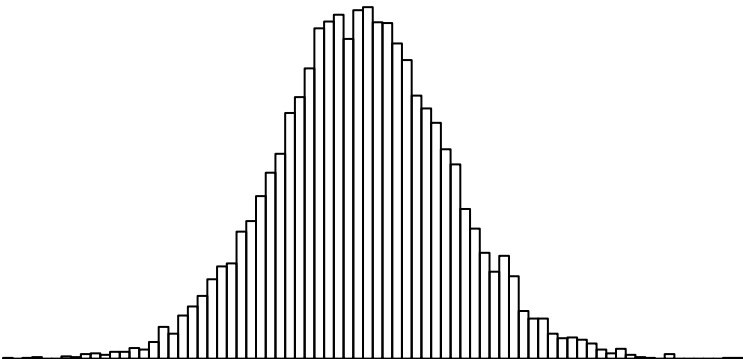

B184:45

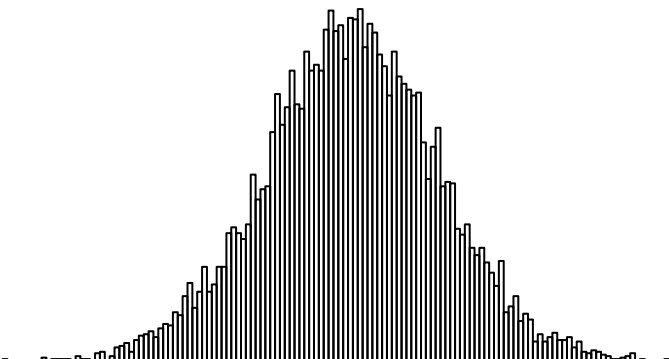

-8.5      -8.0      -7.5      -7.0      -6.5      -6.0

Sugar 23

B184:240 – B184:120

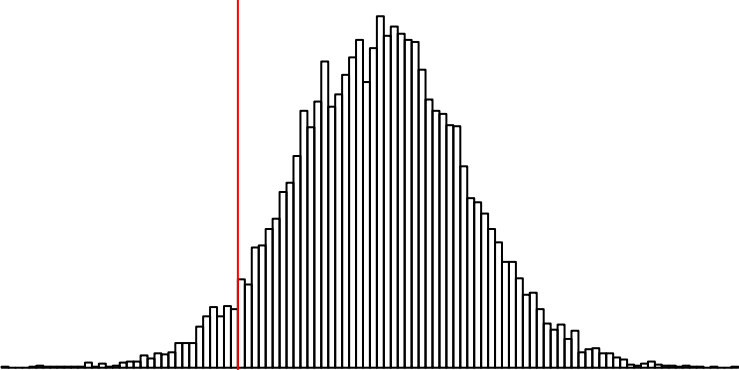

B184:240 – B184:45

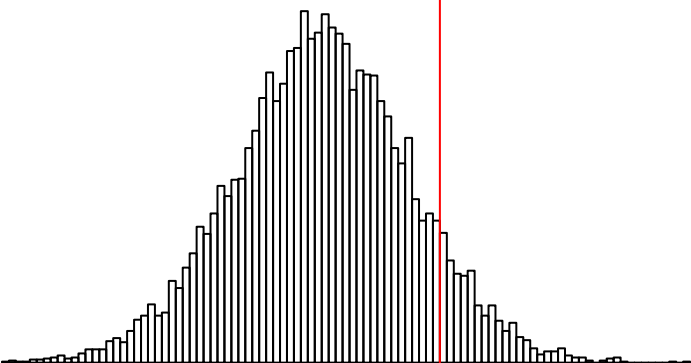

B184:120 – B184:45

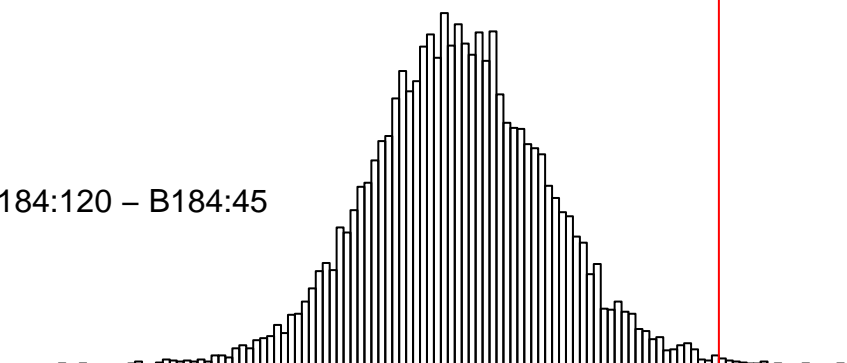

-2.0      -1.5      -1.0      -0.5      0.0      0.5      1.0      1.5

delta(Sugar 23)

B184:240

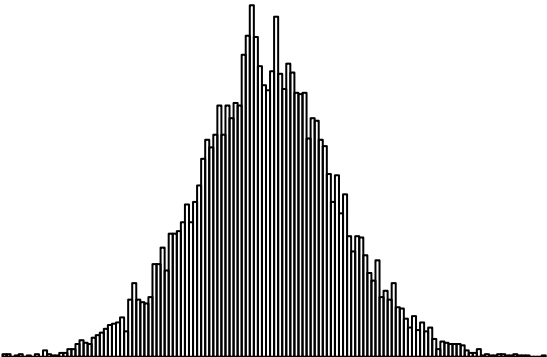

B184:120

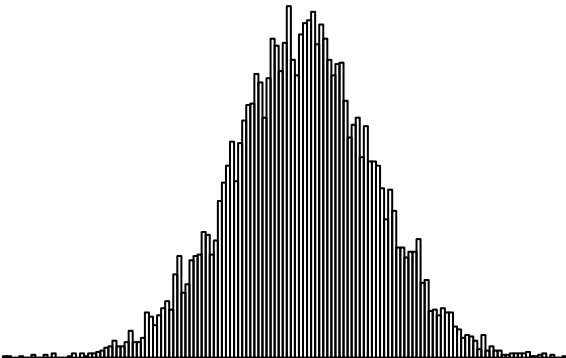

B184:45

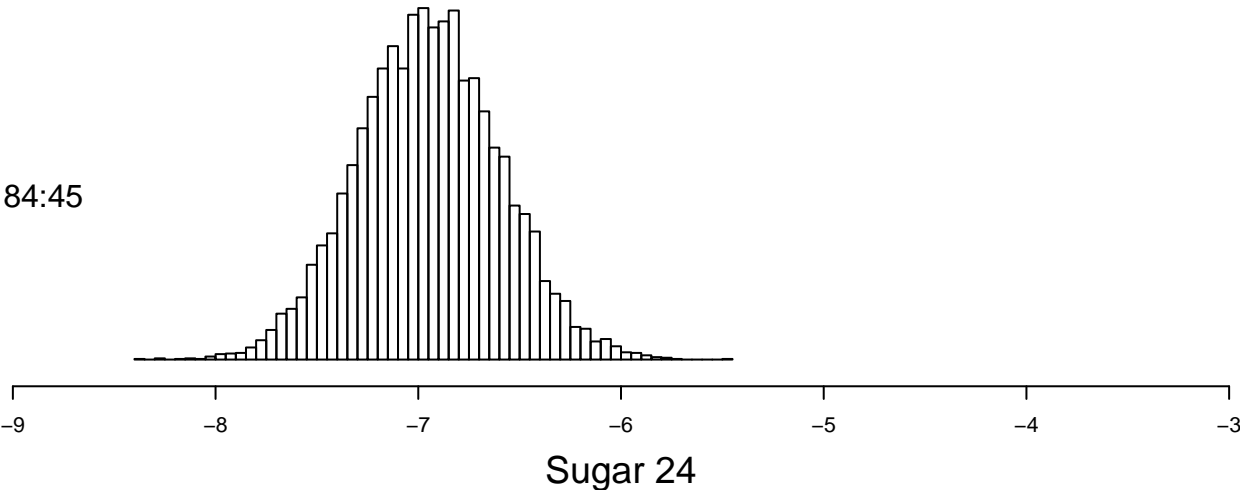

B184:240 – B184:120

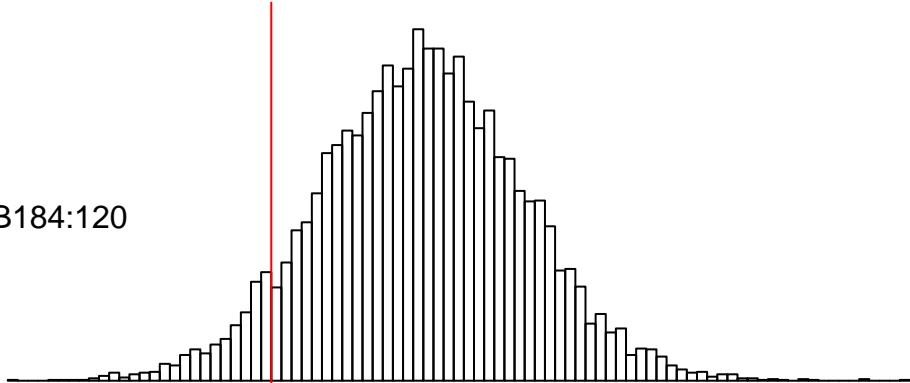

B184:240 – B184:45

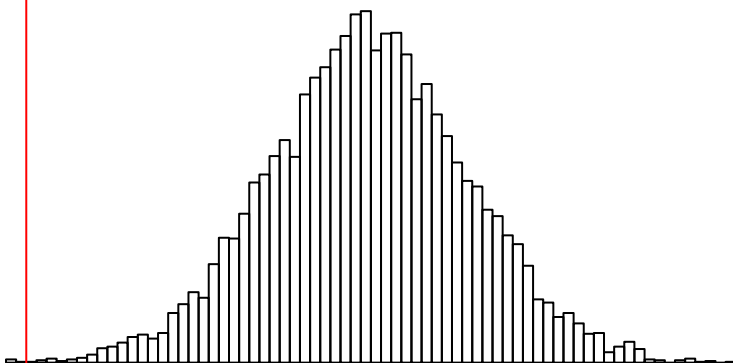

B184:120 – B184:45

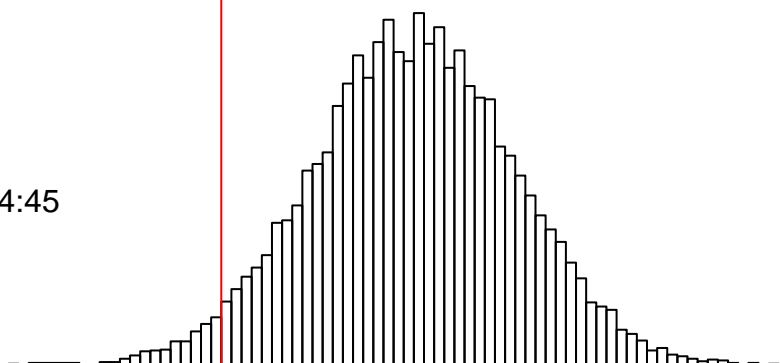

-2 -1 0 1 2 3 4

delta(Sugar 24)

B184:240

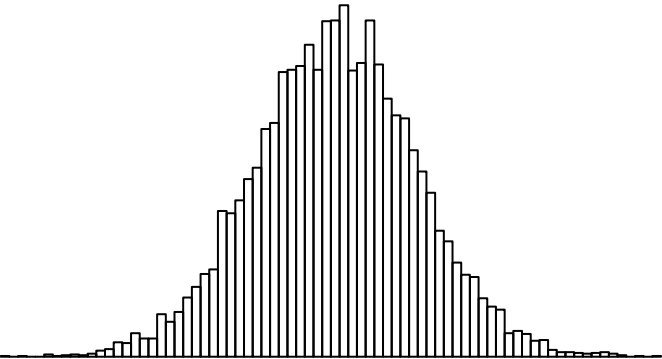

B184:120

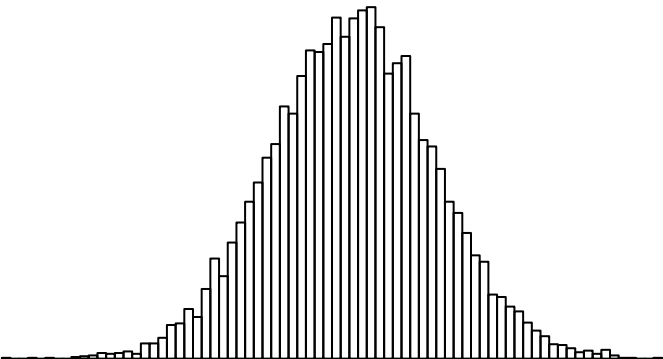

B184:45

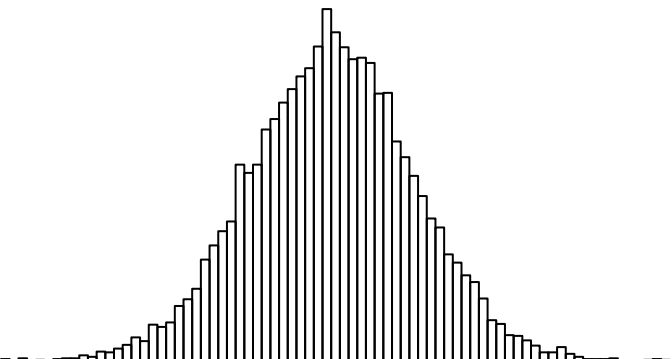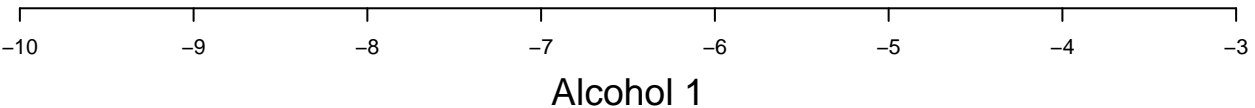

B184:240 – B184:120

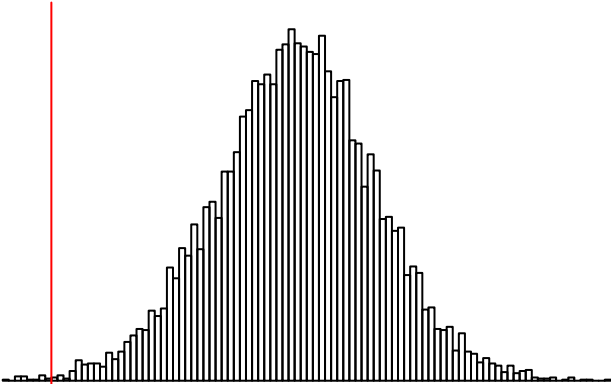

B184:240 – B184:45

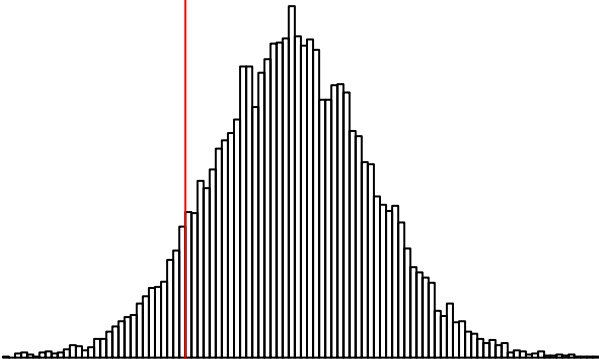

B184:120 – B184:45

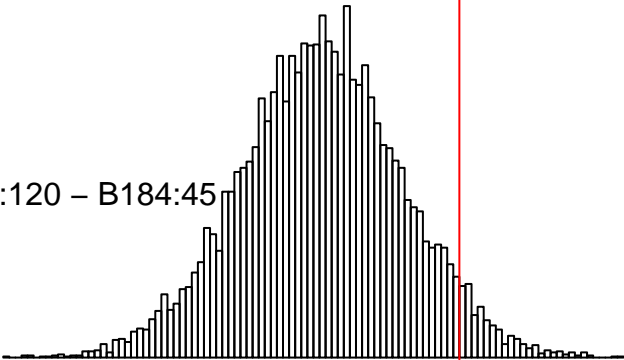

-4

-2

0

2

4

6

delta(Alcohol 1)

B184:240

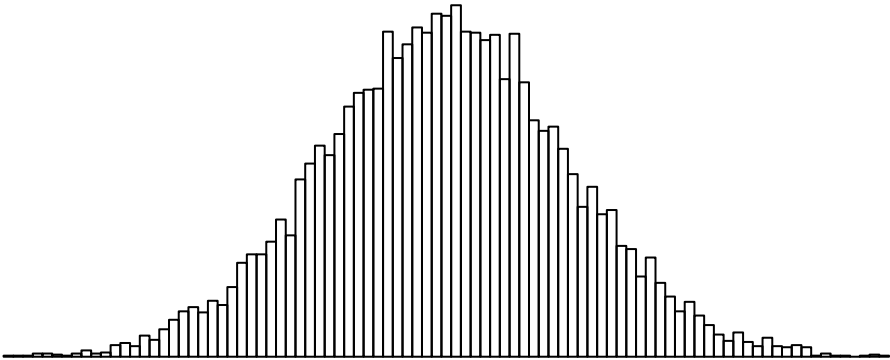

B184:120

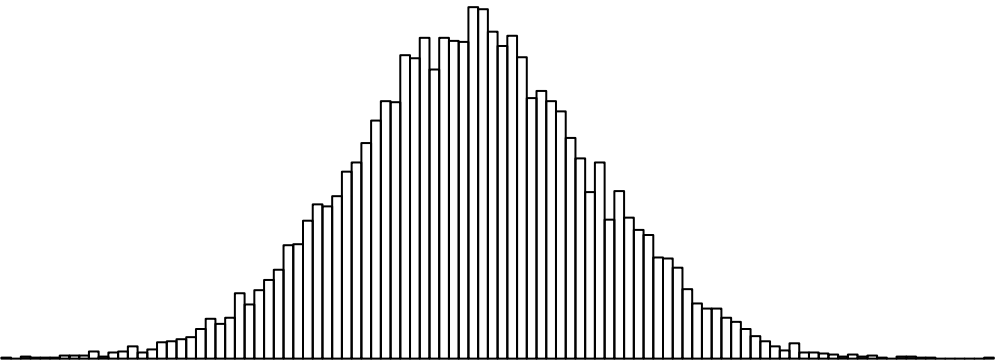

B184:45

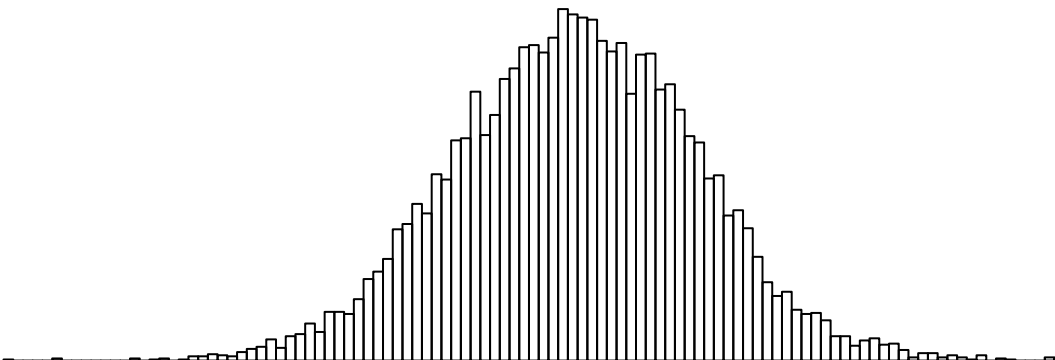

-8.0 -7.5 -7.0 -6.5 -6.0 -5.5

Hydrocarbon 1

B184:240 – B184:120

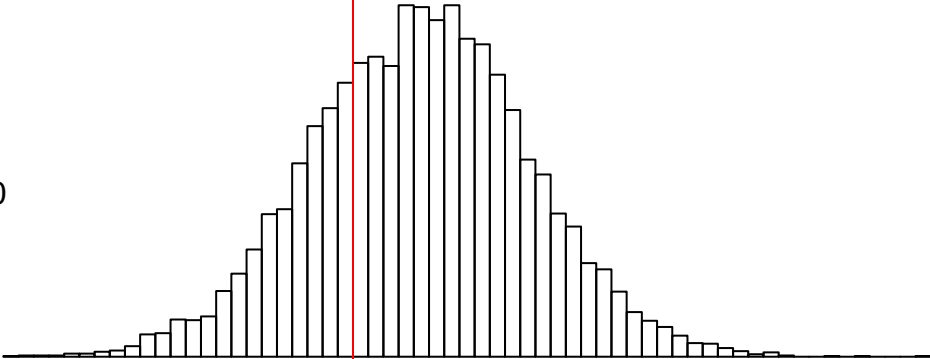

B184:240 – B184:45

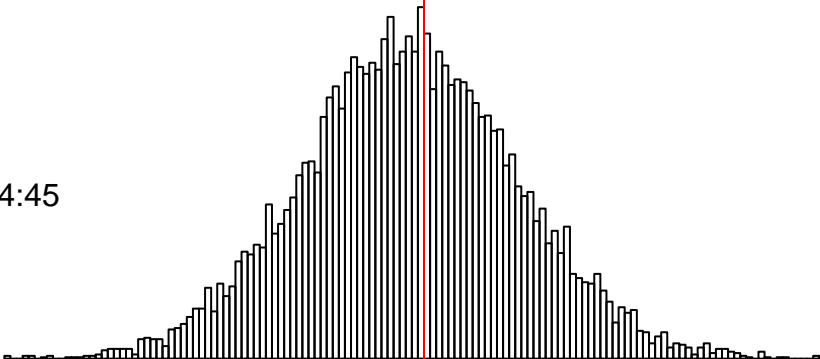

B184:120 – B184:45

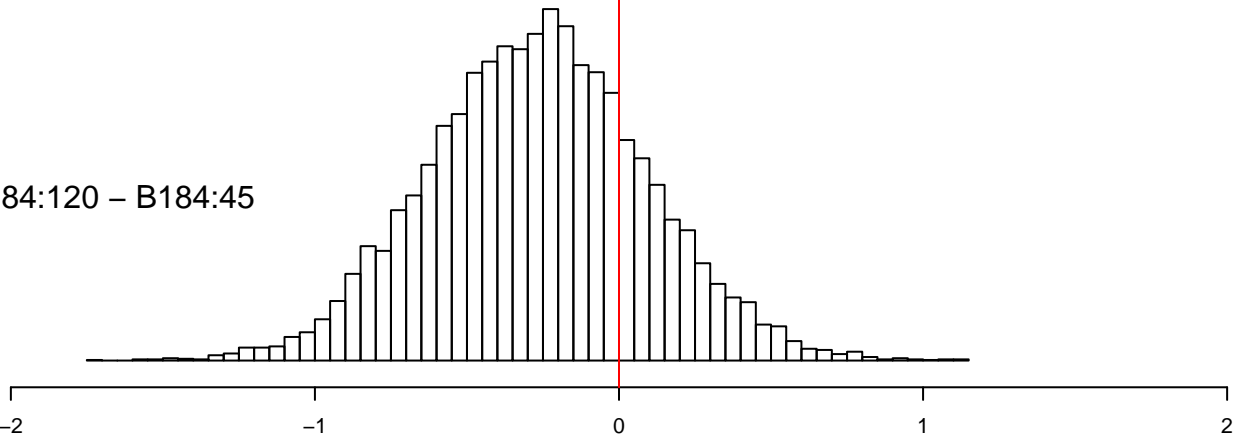

delta(Hydrocarbon 1)



B184:240

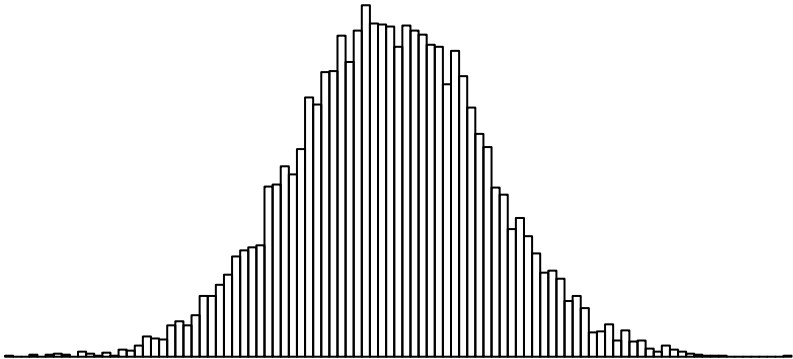

B184:120

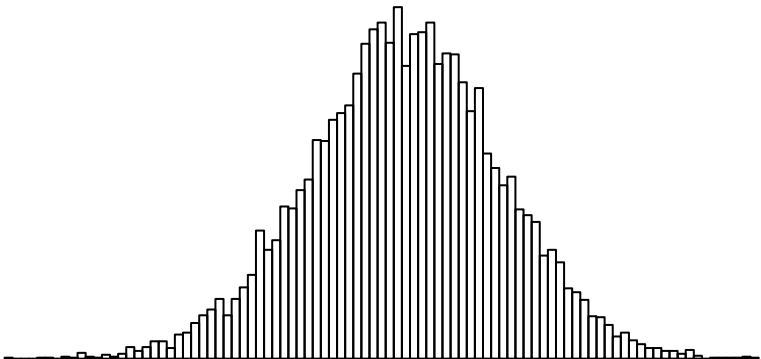

B184:45

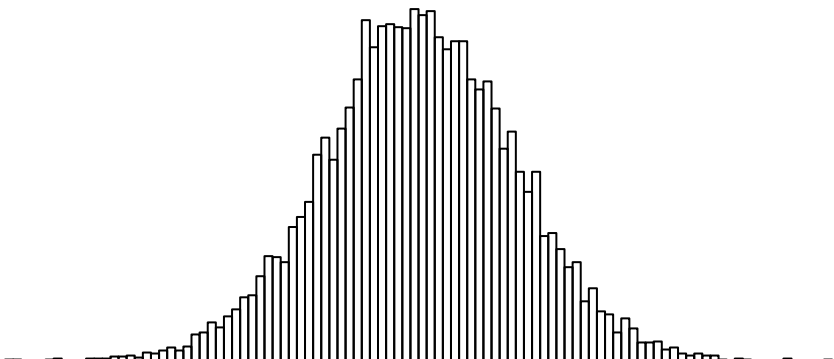

-7.5      -7.0      -6.5      -6.0      -5.5      -5.0      -4.5

Hydrocarbon 2

B184:240 – B184:120

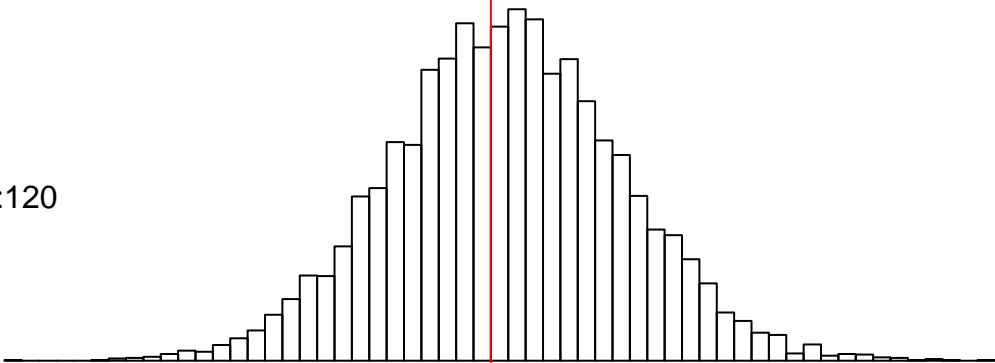

B184:240 – B184:45

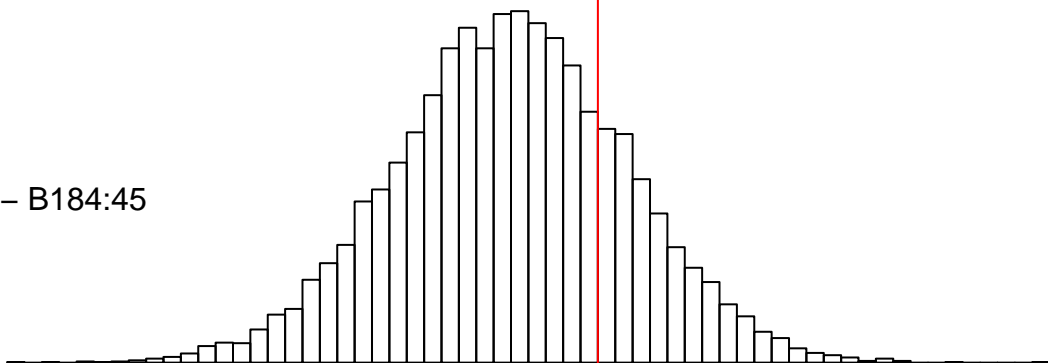

B184:120 – B184:45

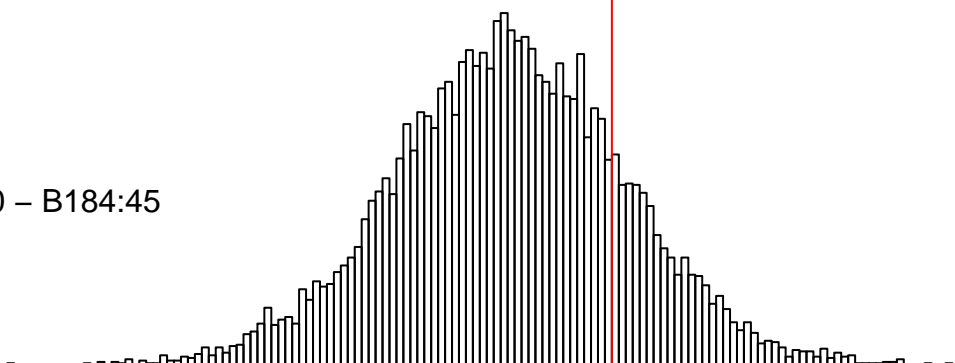

-2.0      -1.5      -1.0      -0.5      0.0      0.5      1.0      1.5

delta(Hydrocarbon 2)

B184:240

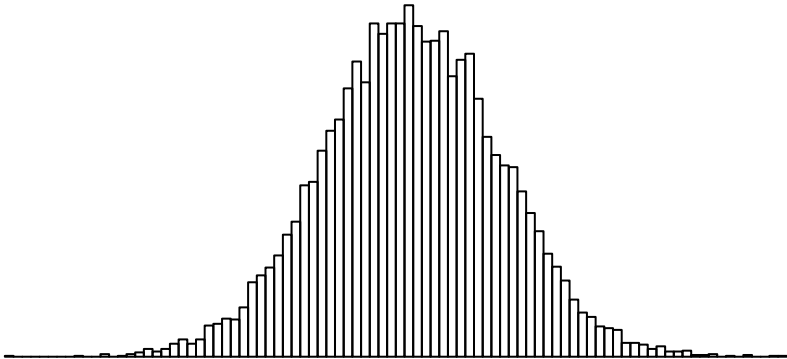

B184:120

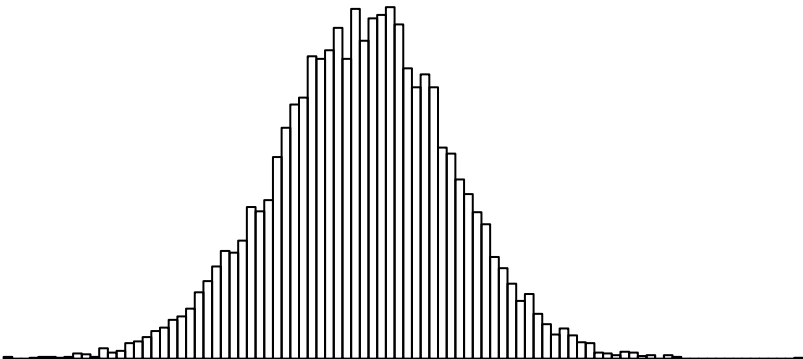

B184:45

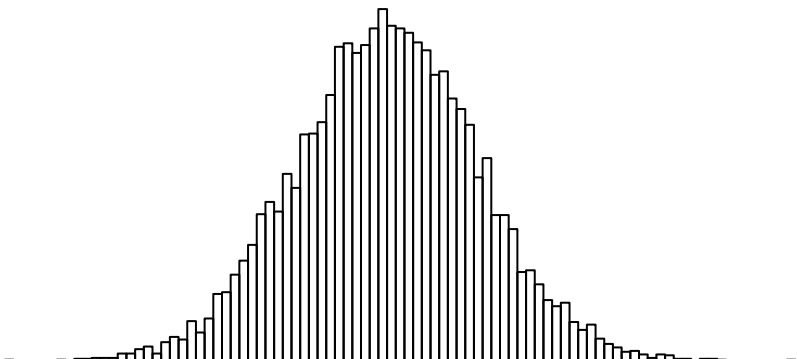

-10 -9 -8 -7 -6 -5 -4 -3

Hydrocarbon 3

B184:240 – B184:120

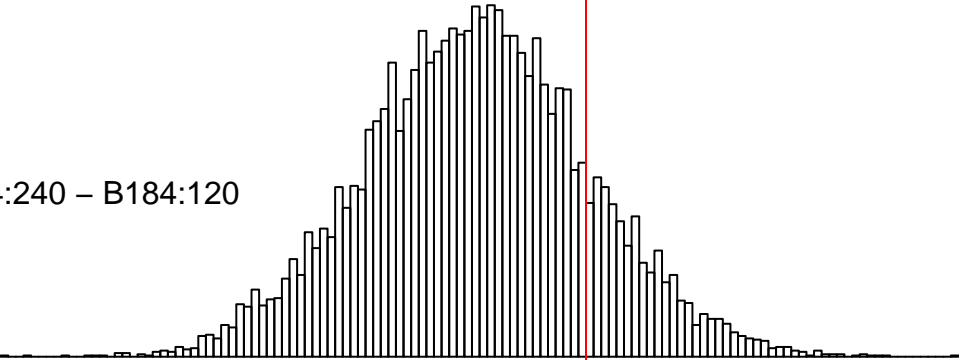

B184:240 – B184:45

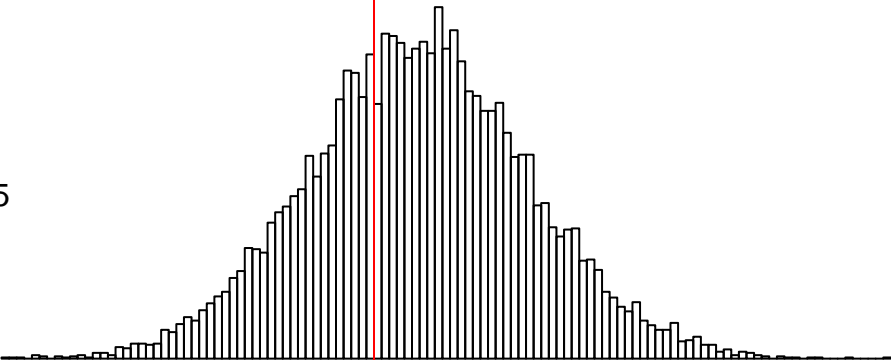

B184:120 – B184:45

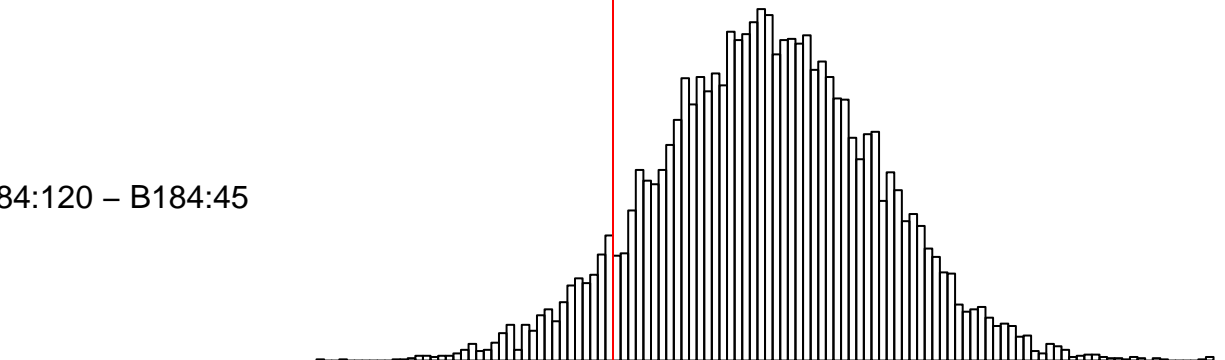

-4

-2

0

2

4

delta(Hydrocarbon 3)

B184:240

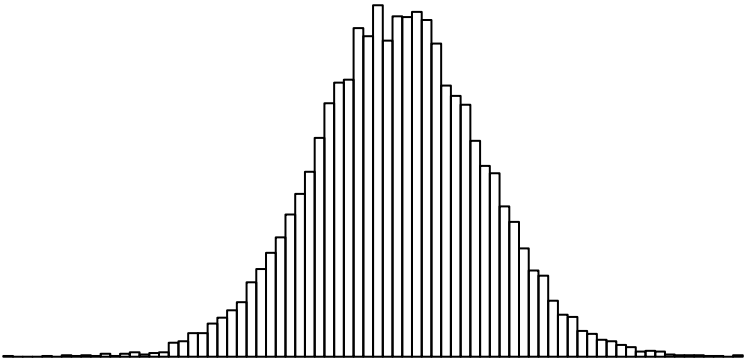

B184:120

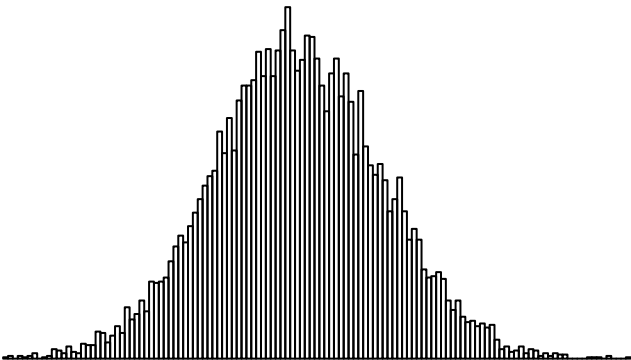

B184:45

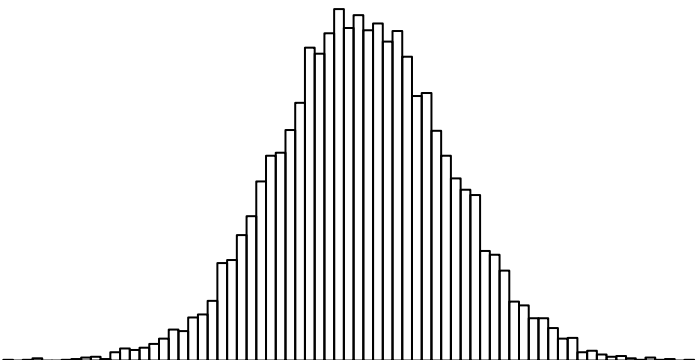

-9.0 -8.5 -8.0 -7.5 -7.0 -6.5

Hydrocarbon 4

B184:240 – B184:120

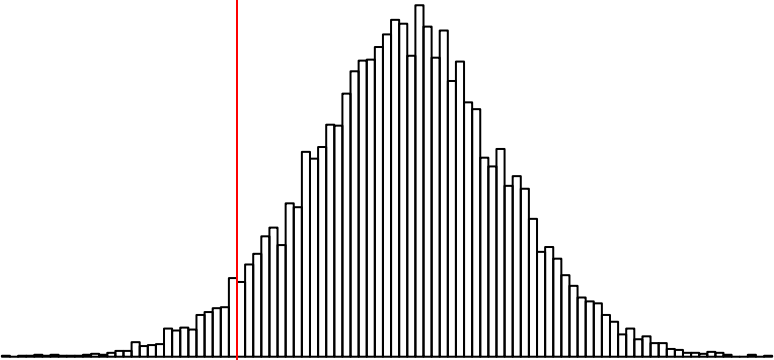

B184:240 – B184:45

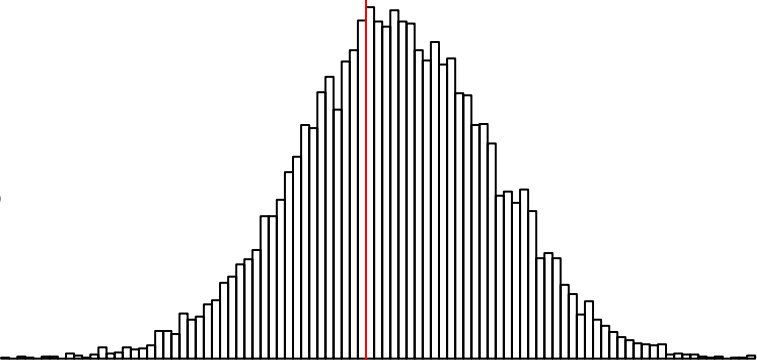

B184:120 – B184:45

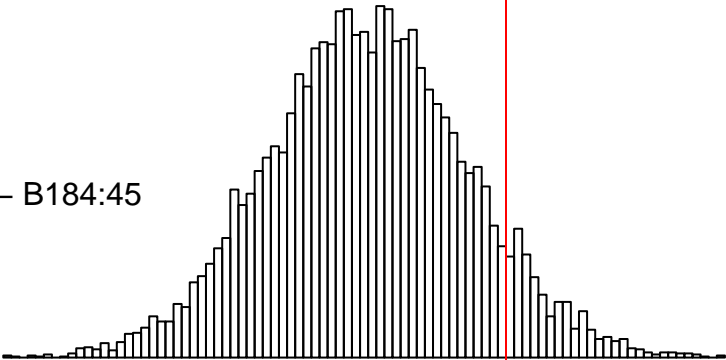

-1.5      -1.0      -0.5      0.0      0.5      1.0      1.5

delta(Hydrocarbon 4)

B184:240

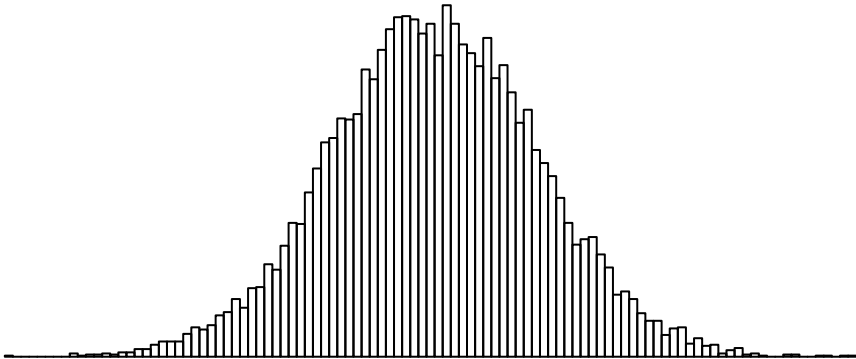

B184:120

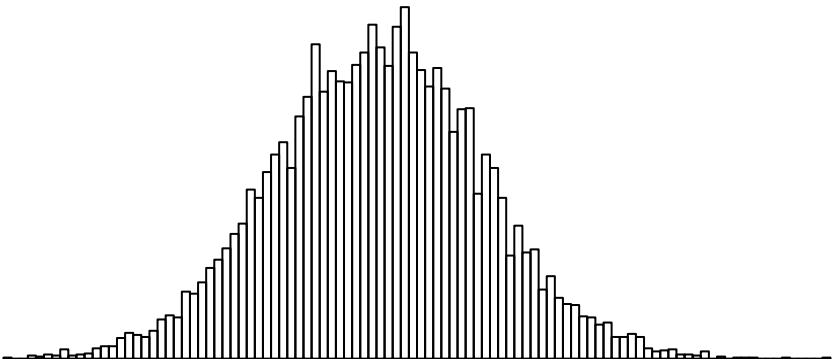

B184:45

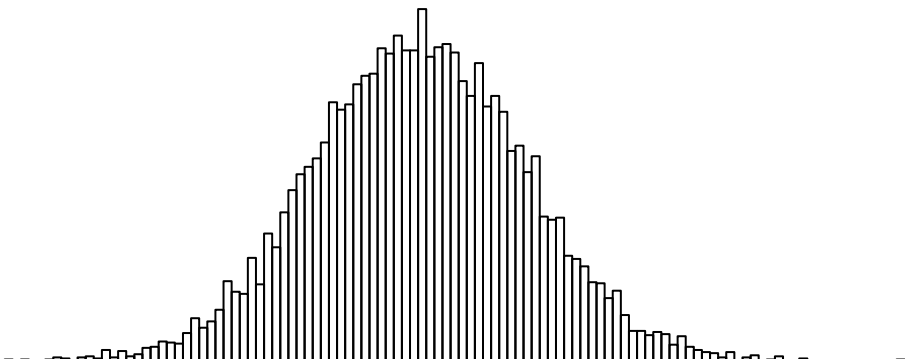

-9.0      -8.5      -8.0      -7.5      -7.0      -6.5      -6.0

Unidentified Metabolite 1

B184:240 – B184:120

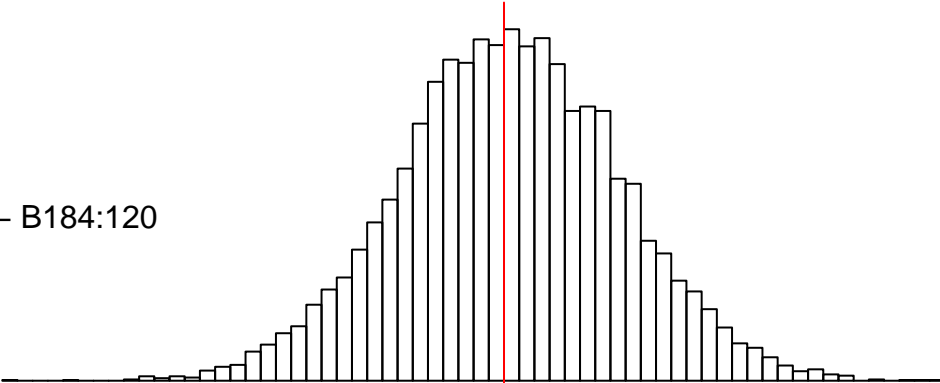

B184:240 – B184:45

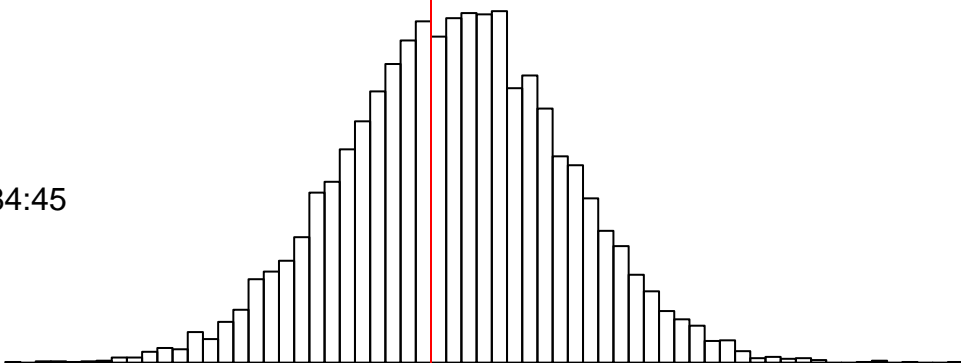

B184:120 – B184:45

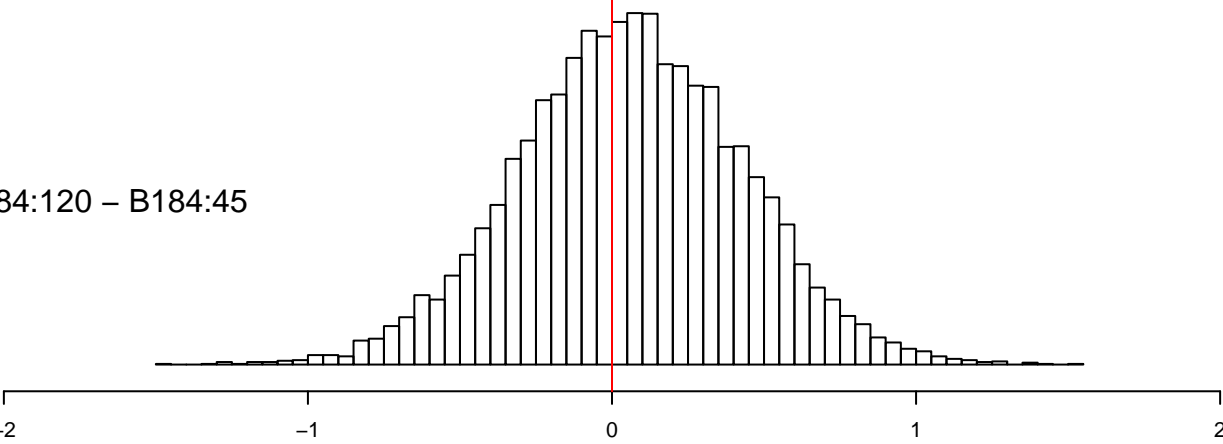

delta(Unidentified Metabolite 1)



B184:240

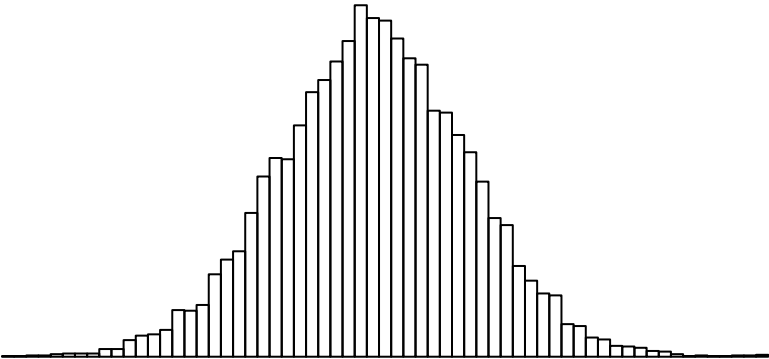

B184:120

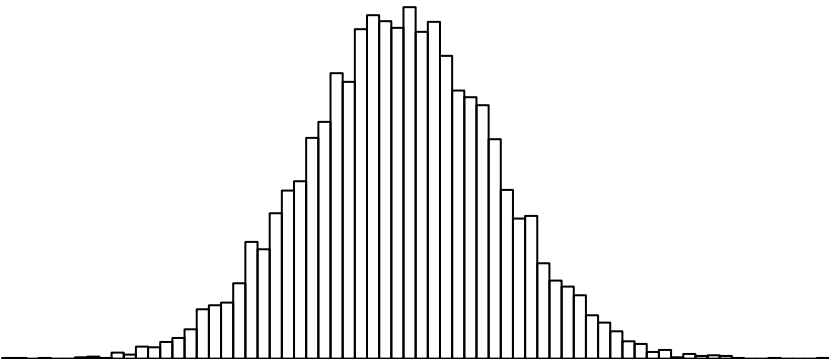

B184:45

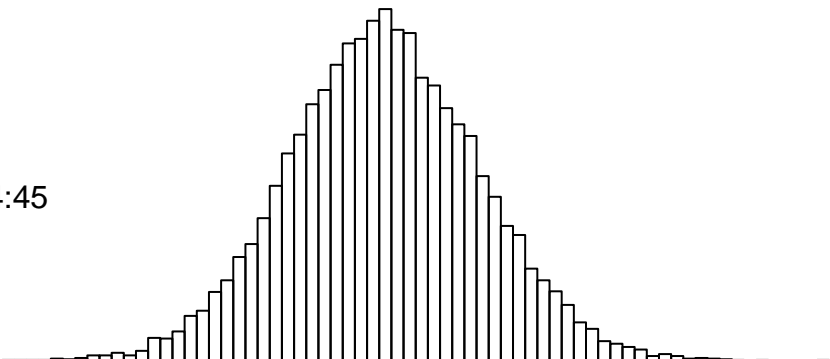

Unidentified Metabolite 2

B184:240 – B184:120

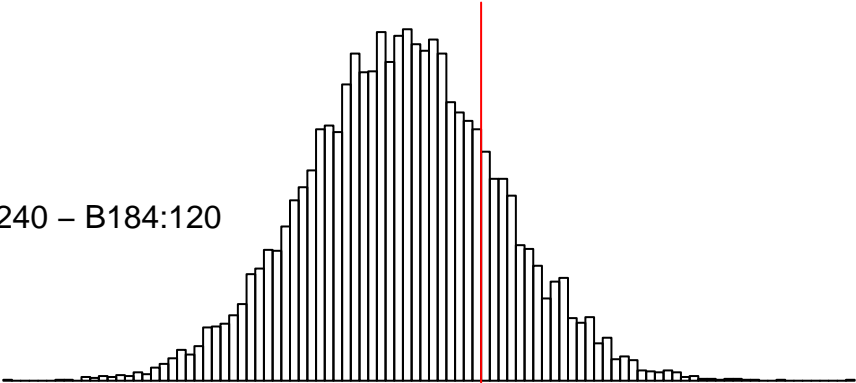

B184:240 – B184:45

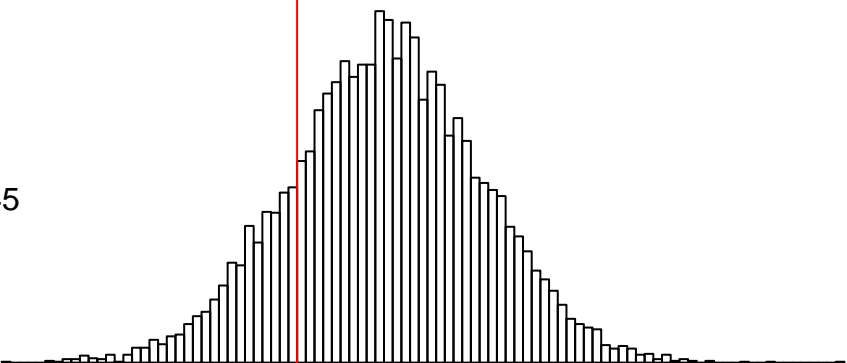

B184:120 – B184:45

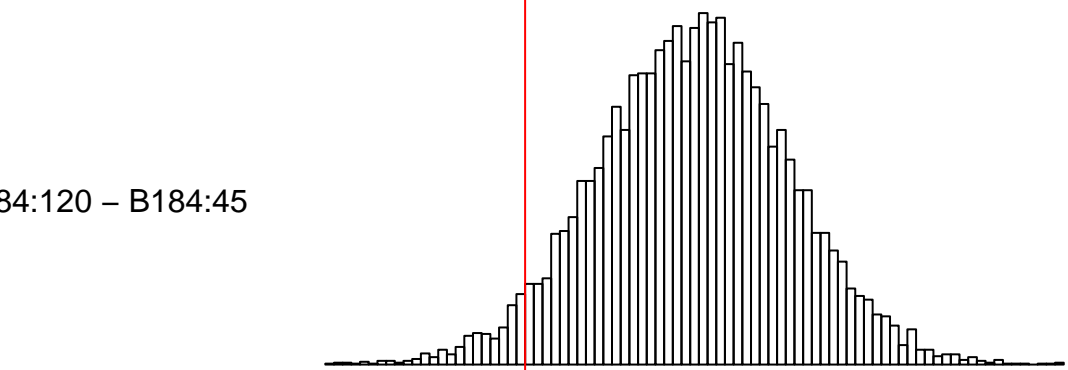

delta(Unidentified Metabolite 2)

B184:240

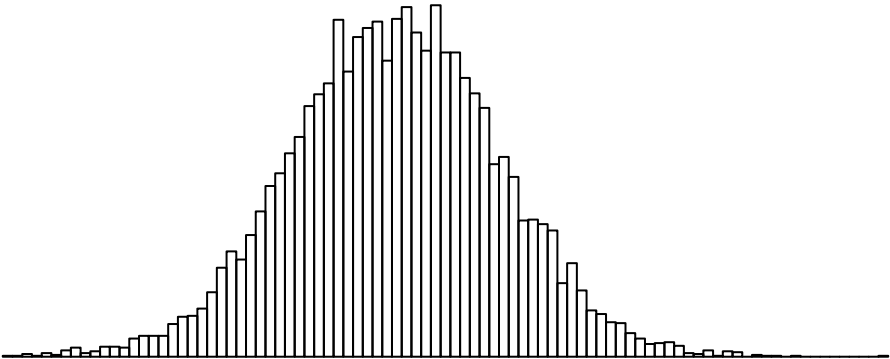

B184:120

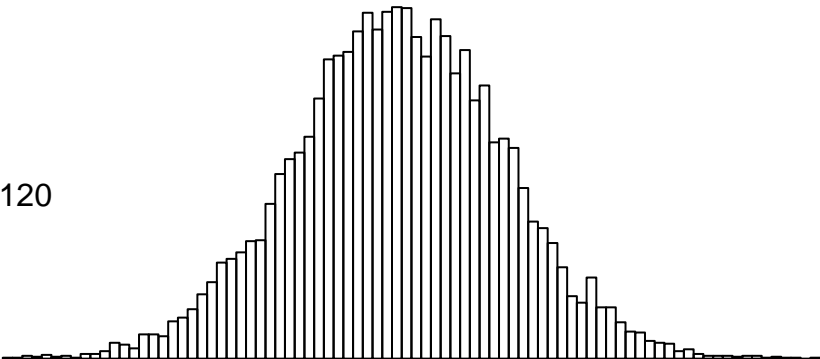

B184:45

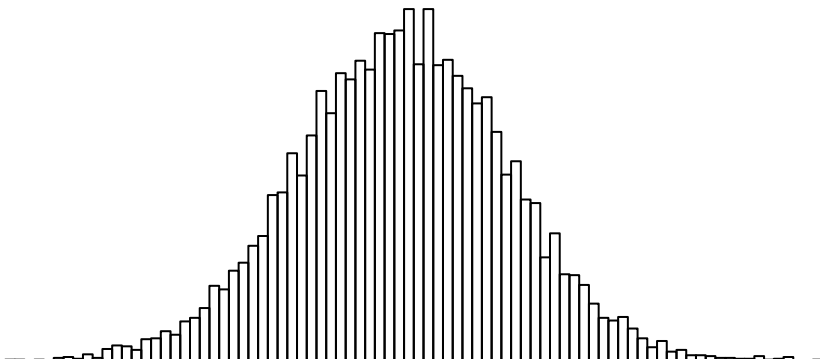

-10.0      -9.5      -9.0      -8.5      -8.0      -7.5

Unidentified Metabolite 3

B184:240 – B184:120

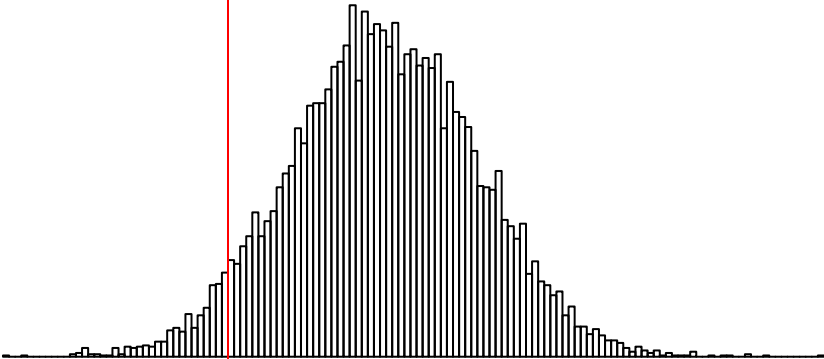

B184:240 – B184:45

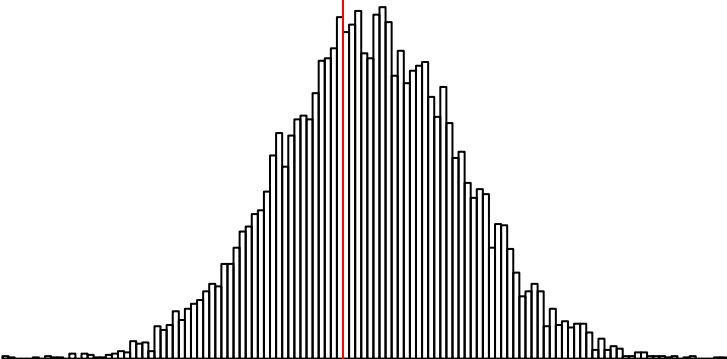

B184:120 – B184:45

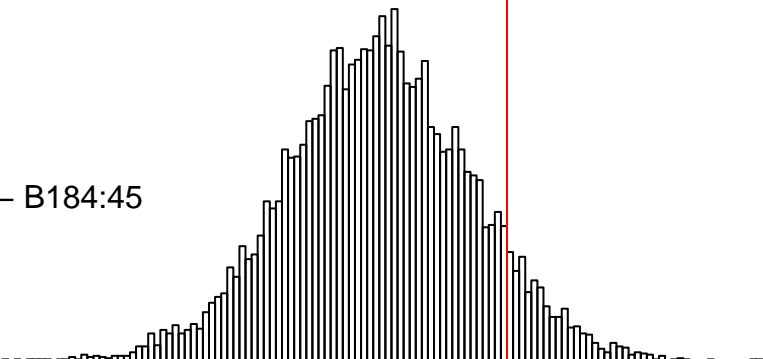

-2 -1 0 1 2

delta(Unidentified Metabolite 3)

B184:240

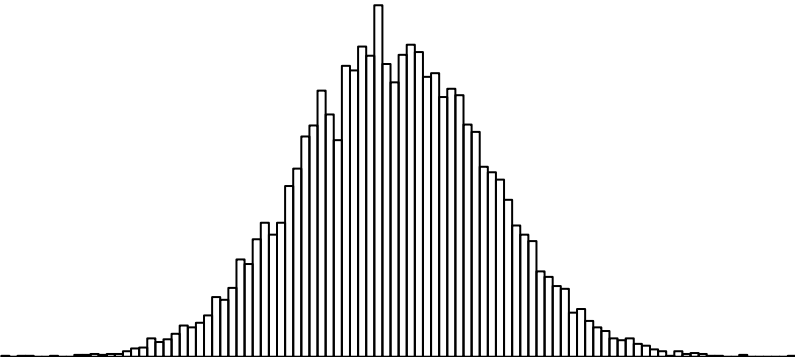

B184:120

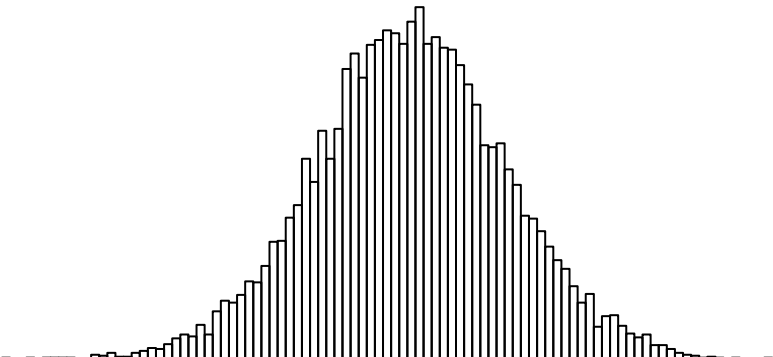

B184:45

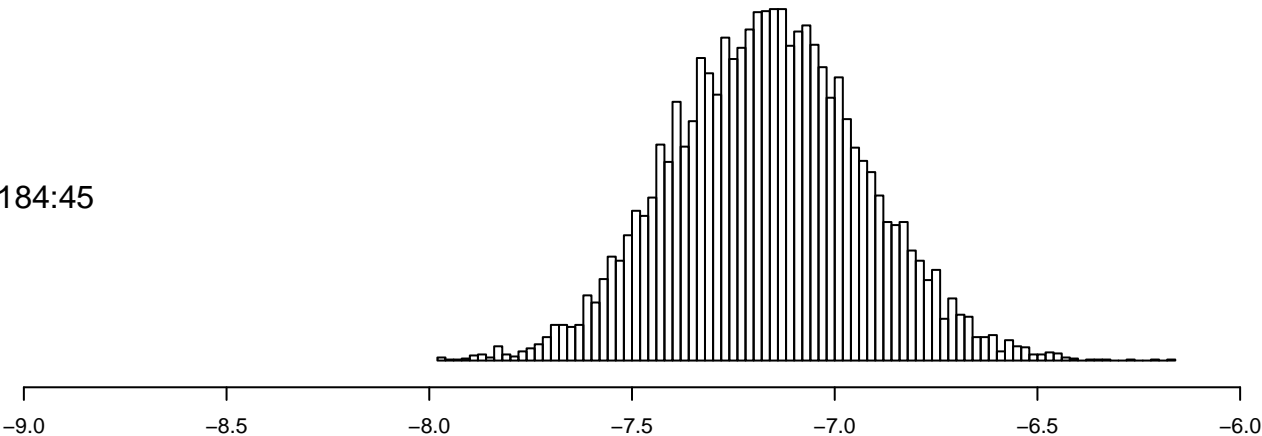

Unidentified Metabolite 4

B184:240 – B184:120

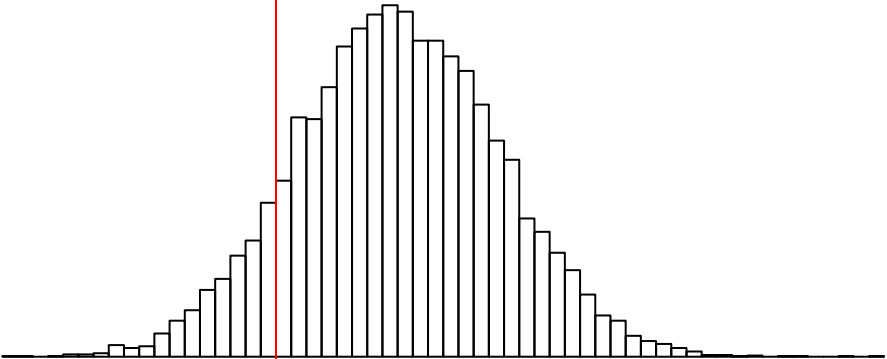

B184:240 – B184:45

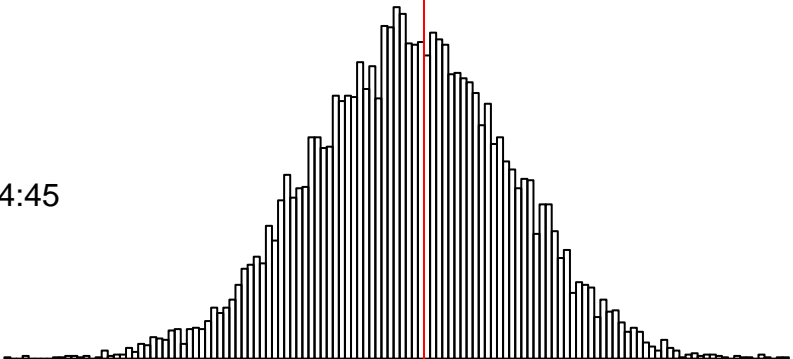

B184:120 – B184:45

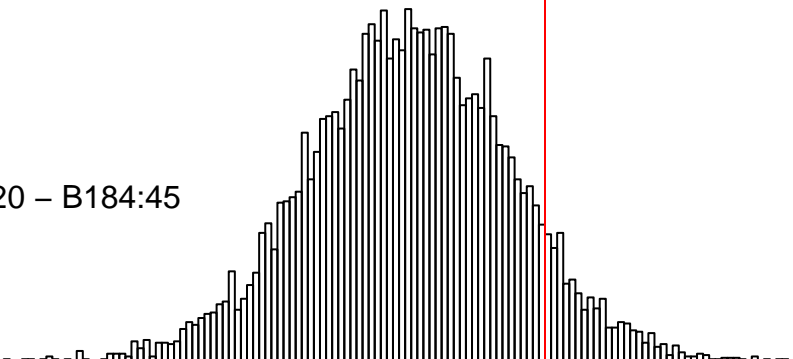

-2 -1 0 1 2

delta(Unidentified Metabolite 4)

B184:240

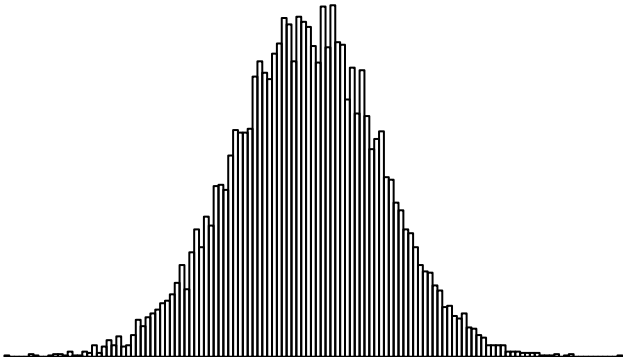

B184:120

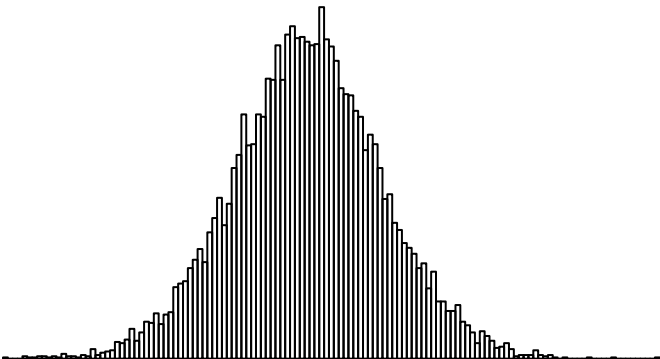

B184:45

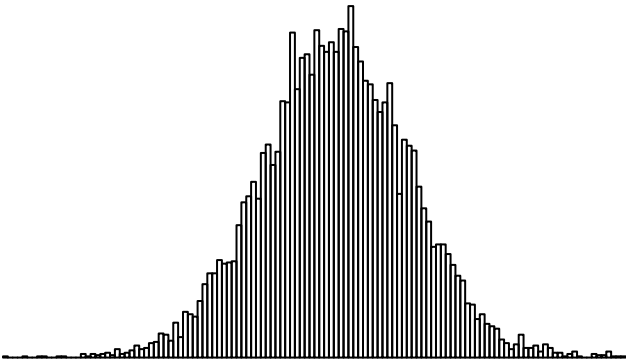

-10      -9      -8      -7      -6      -5

Unidentified Metabolite 5

B184:240 – B184:120

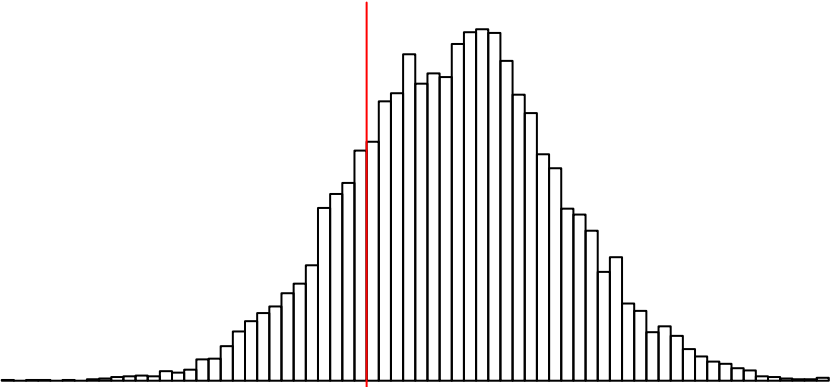

B184:240 – B184:45

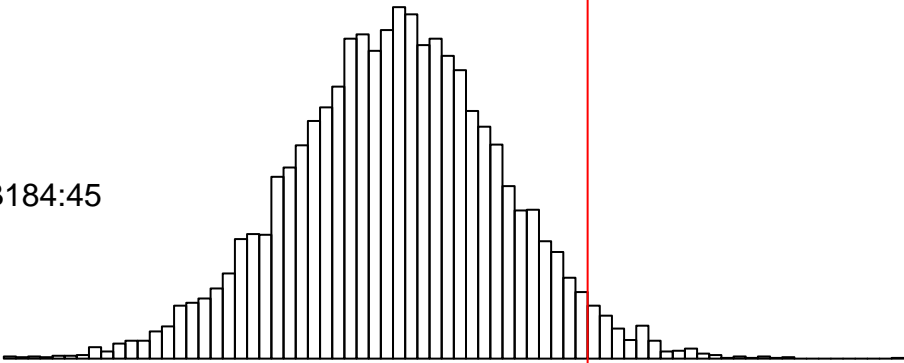

B184:120 – B184:45

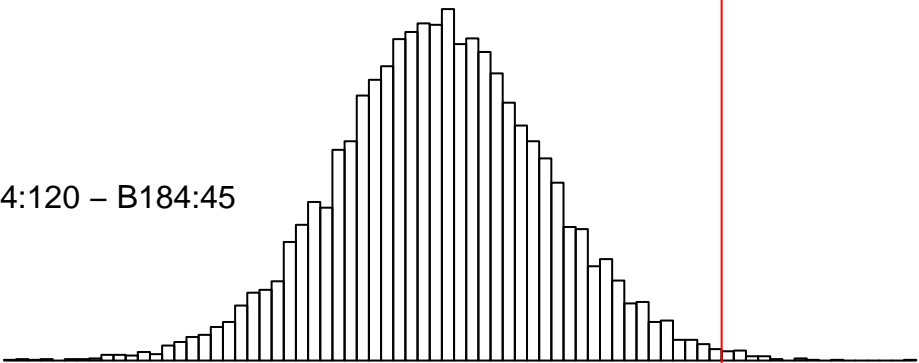

delta(Unidentified Metabolite 5)



B184:240

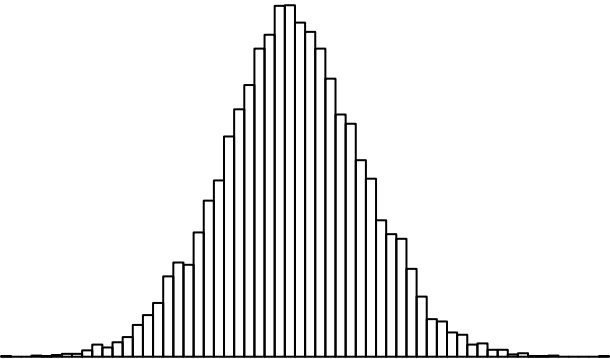

B184:120

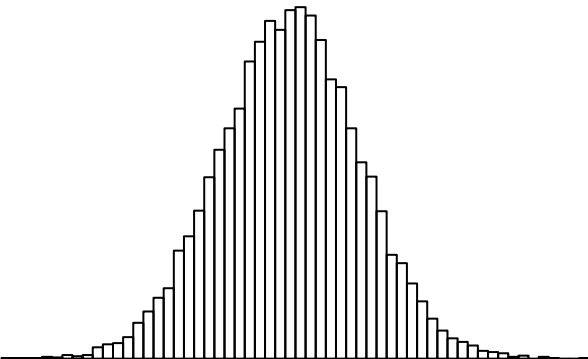

B184:45

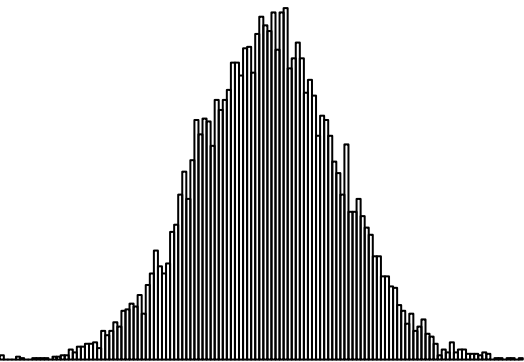

-9                      -8                      -7                      -6                      -5                      -4                      -3

Unidentified Metabolite 6

B184:240 – B184:120

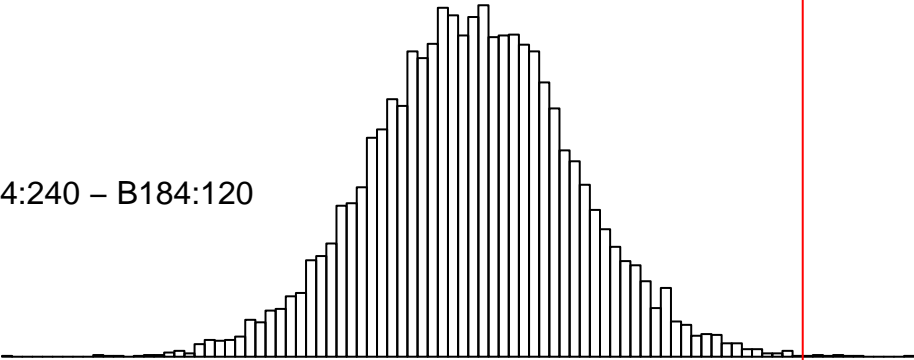

B184:240 – B184:45

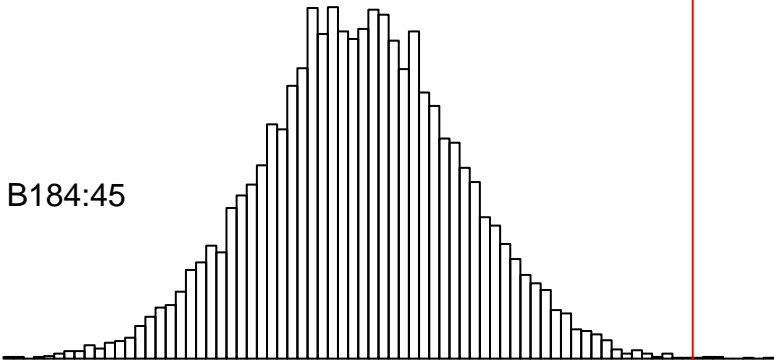

B184:120 – B184:45

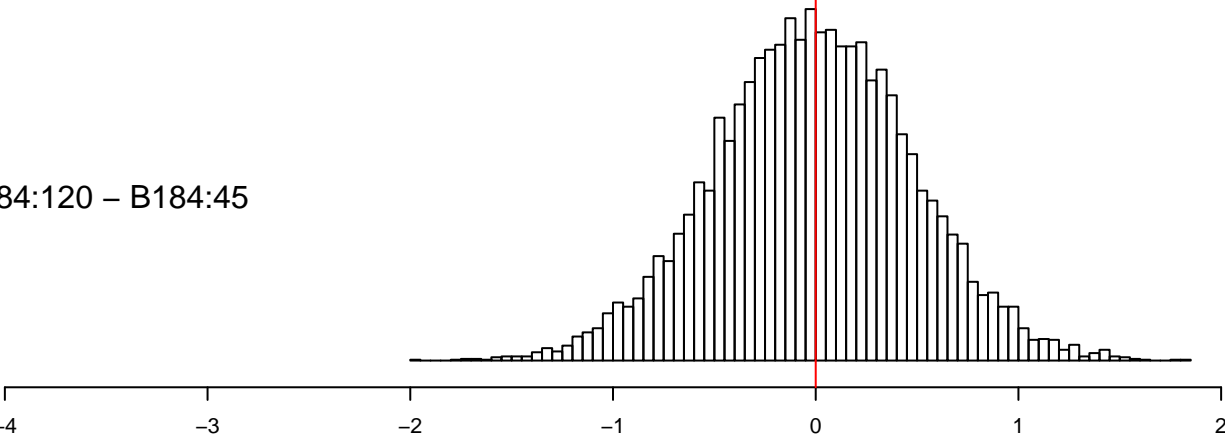

delta(Unidentified Metabolite 6)

B184:240

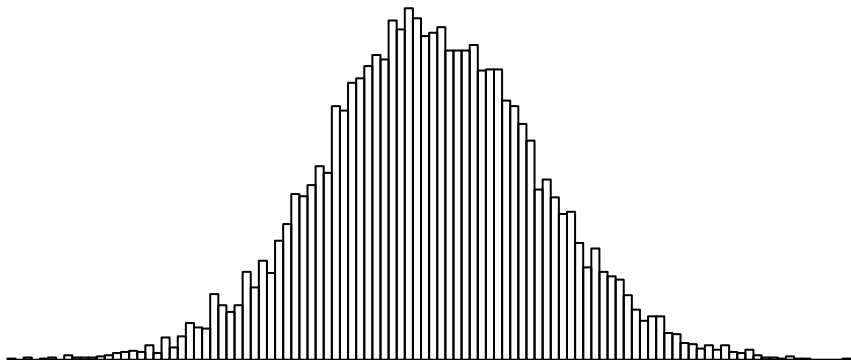

B184:120

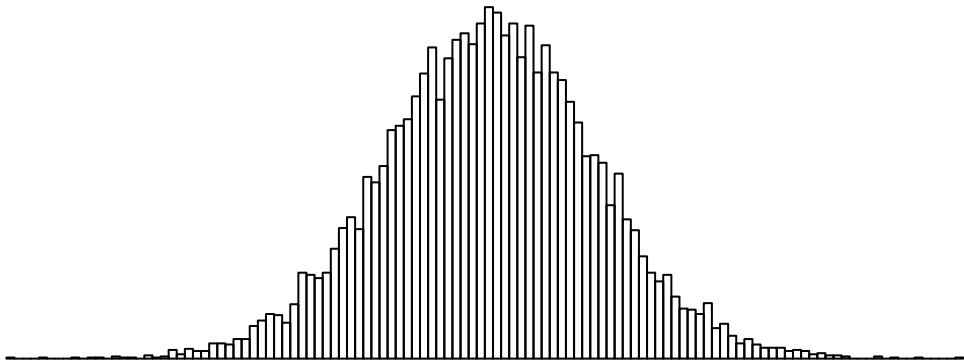

B184:45

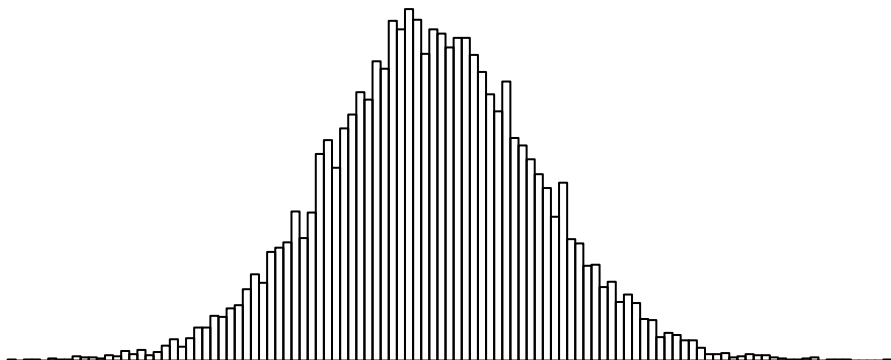

-8.0 -7.5 -7.0 -6.5 -6.0 -5.5 -5.0

Unidentified Metabolite 7

B184:240 – B184:120

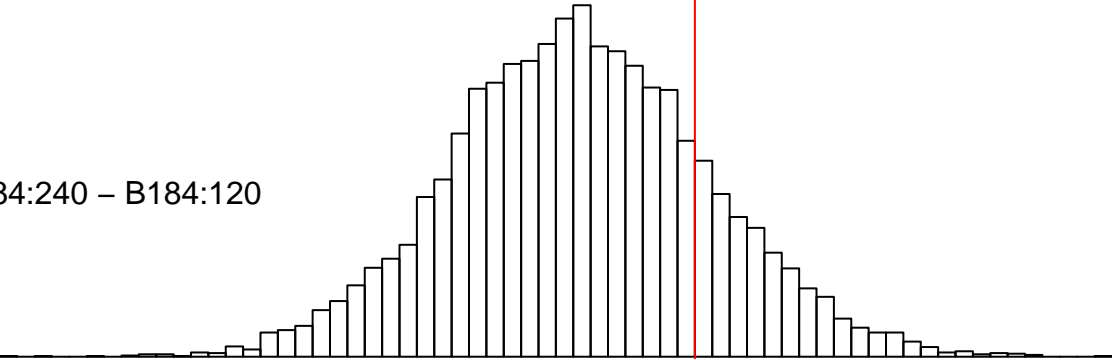

B184:240 – B184:45

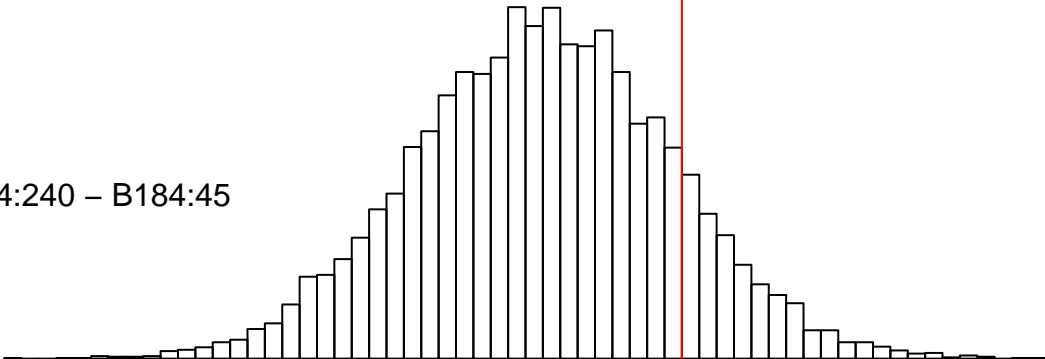

B184:120 – B184:45

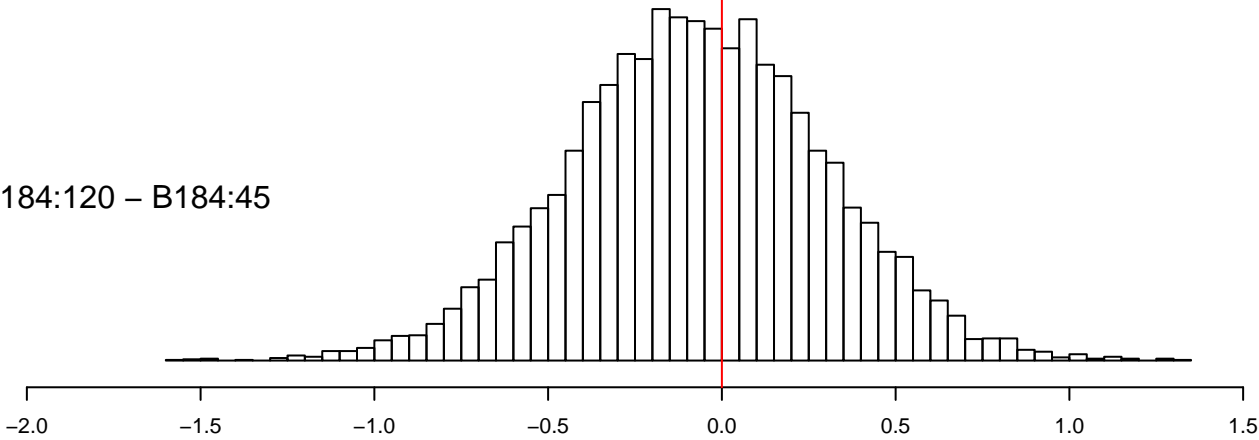

delta(Unidentified Metabolite 7)

B184:240

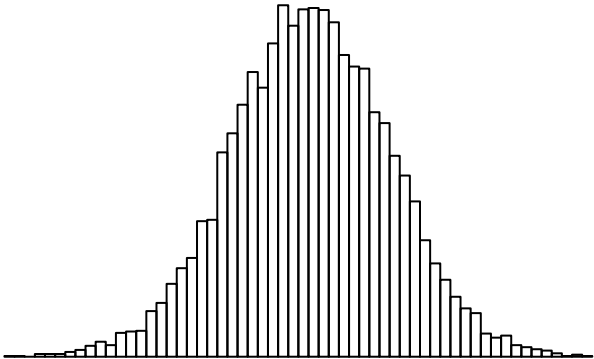

B184:120

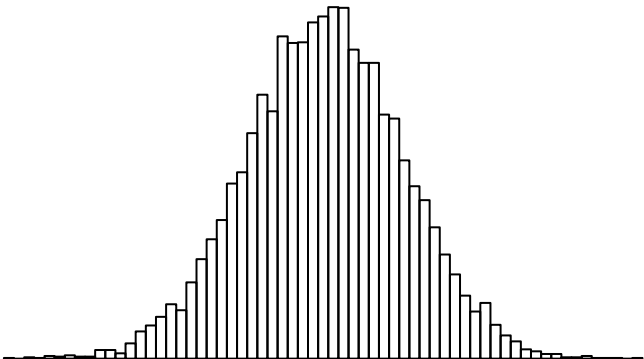

B184:45

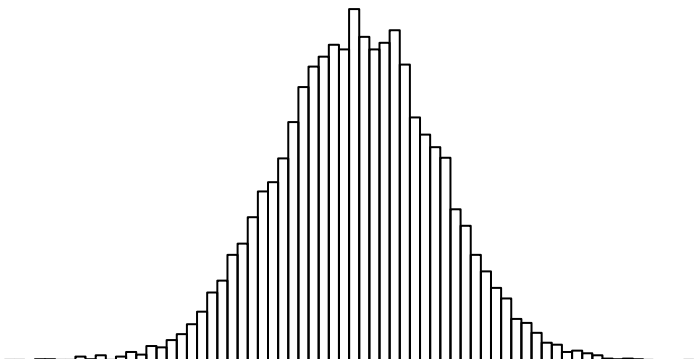

-8                      -7                      -6                      -5                      -4                      -3                      -2

Unidentified Metabolite 8

B184:240 – B184:120

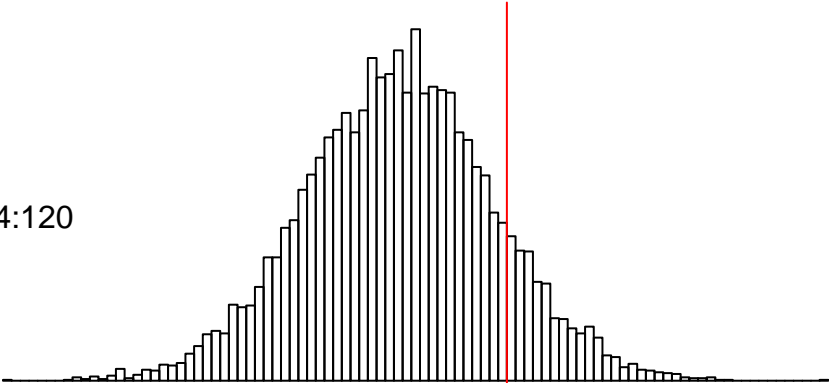

B184:240 – B184:45

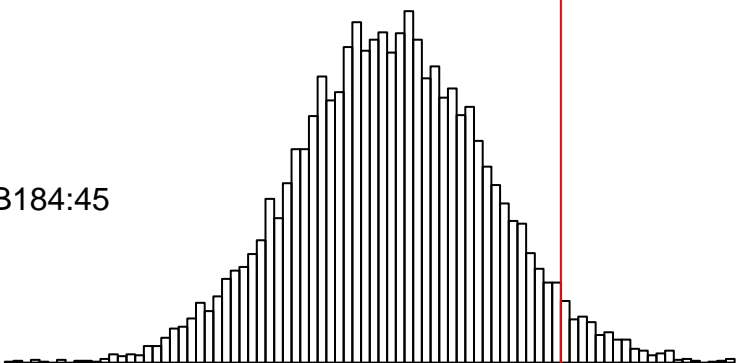

B184:120 – B184:45

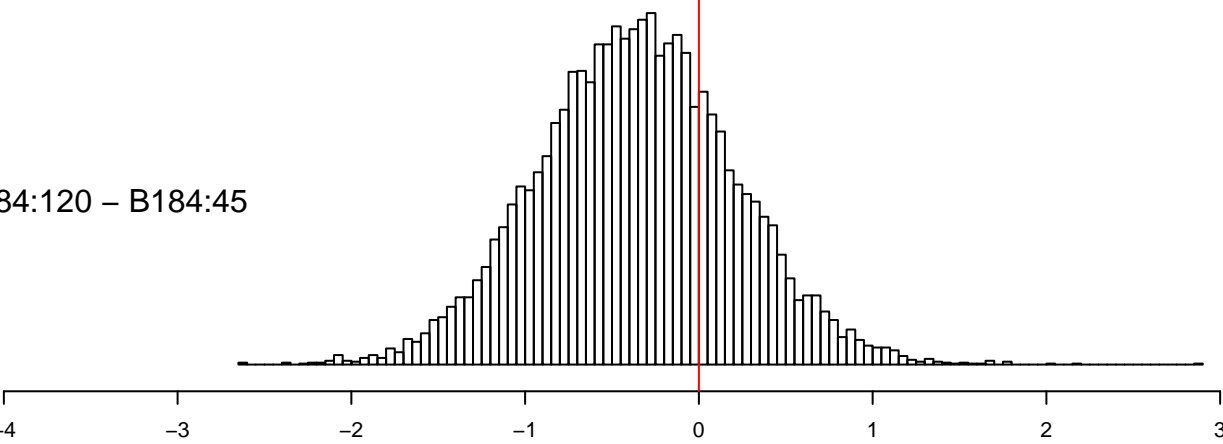

delta(Unidentified Metabolite 8)

B184:240

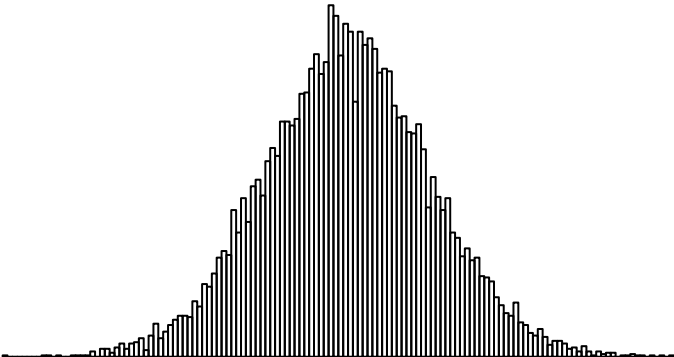

B184:120

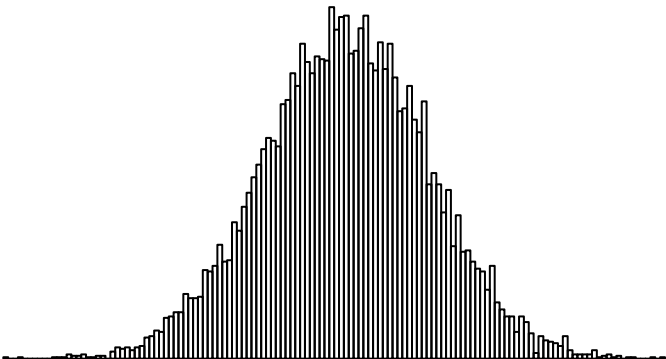

B184:45

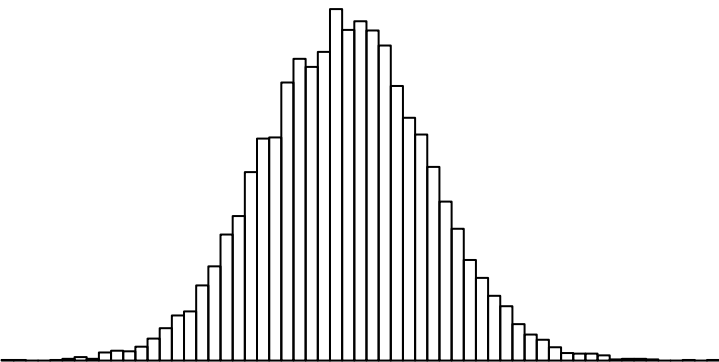

-9                      -8                      -7                      -6                      -5                      -4

Unidentified Metabolite 9

B184:240 – B184:120

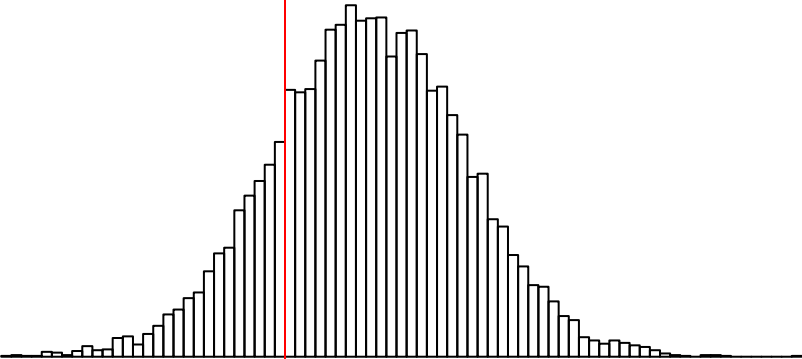

B184:240 – B184:45

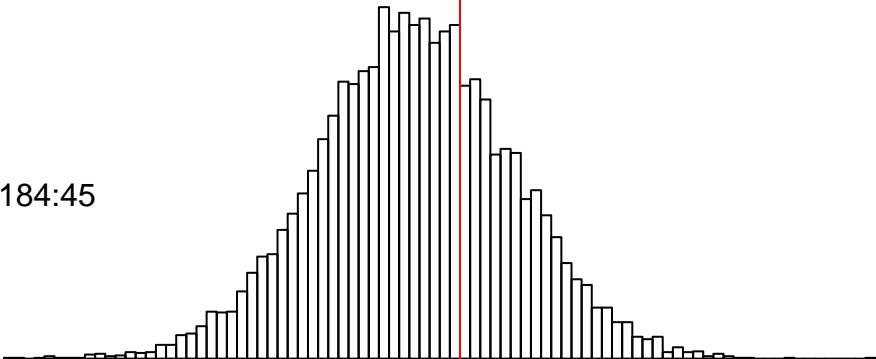

B184:120 – B184:45

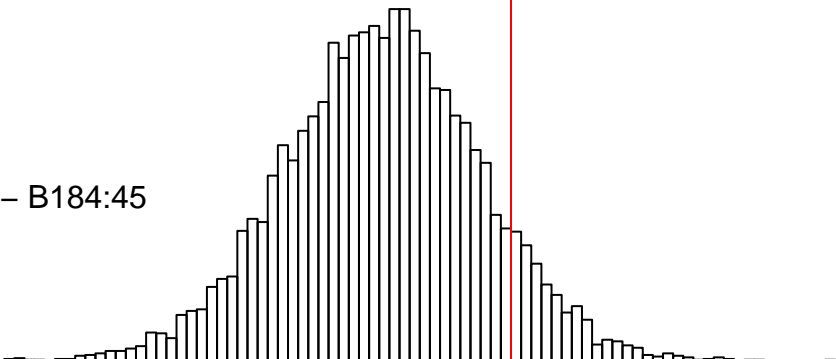

delta(Unidentified Metabolite 9)



B184:240

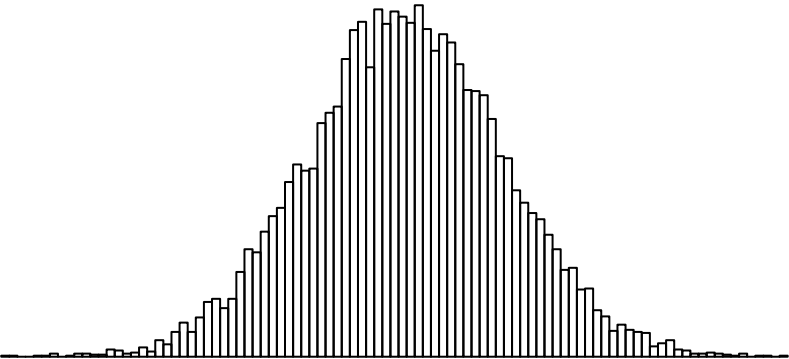

B184:120

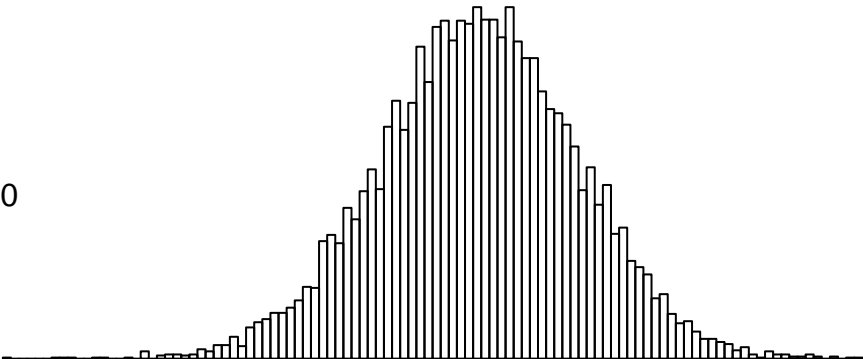

B184:45

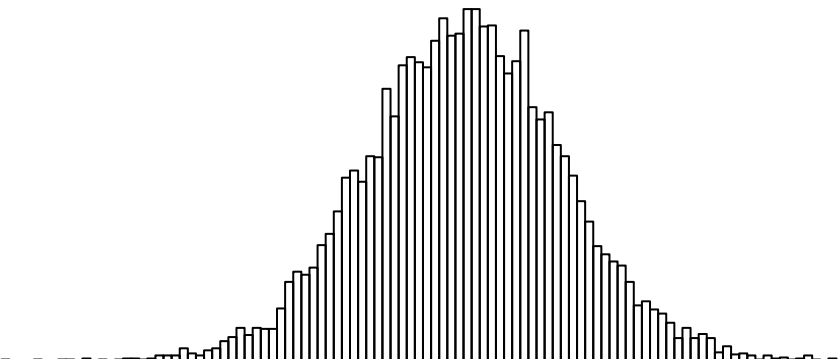

-8.5      -8.0      -7.5      -7.0      -6.5      -6.0      -5.5

Unidentified Metabolite 10

B184:240 – B184:120

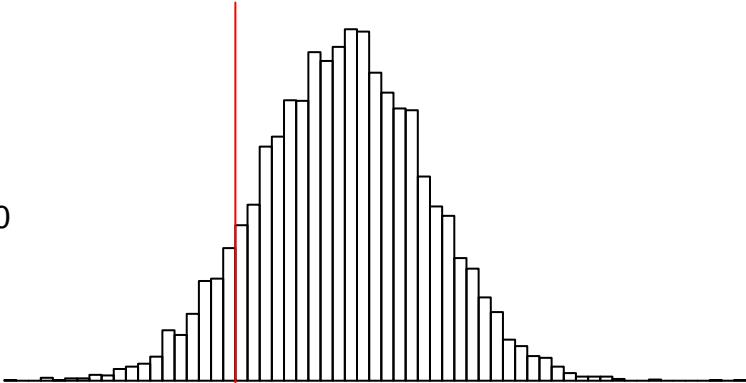

B184:240 – B184:45

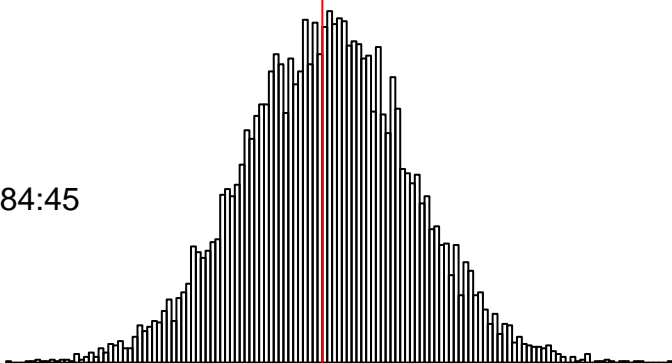

B184:120 – B184:45

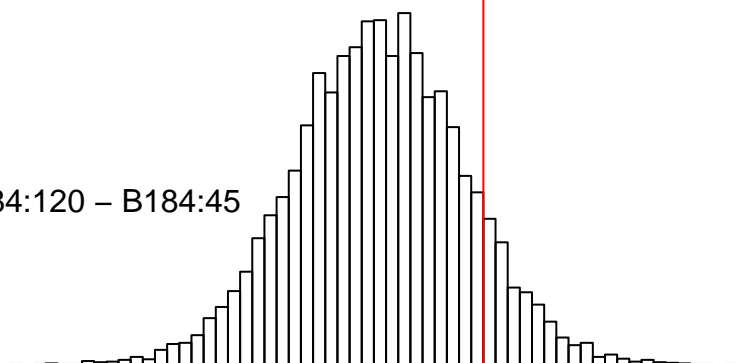

-2 -1 0 1 2 3

delta(Unidentified Metabolite 10)

B184:240

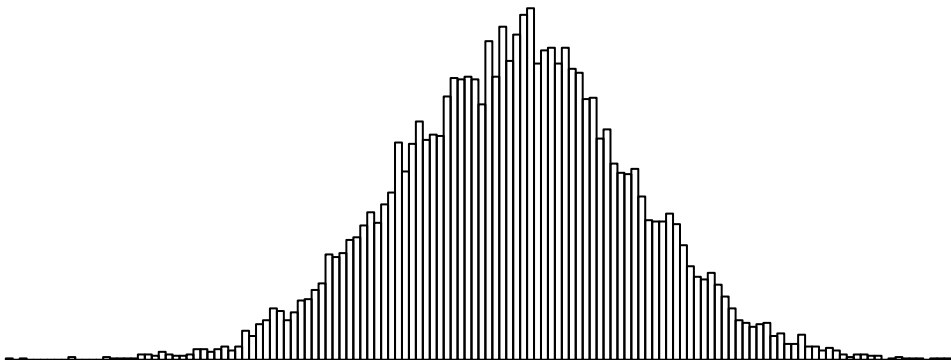

B184:120

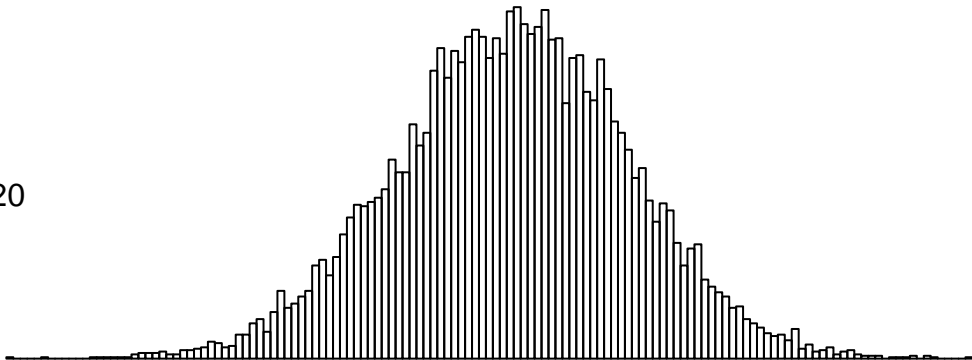

B184:45

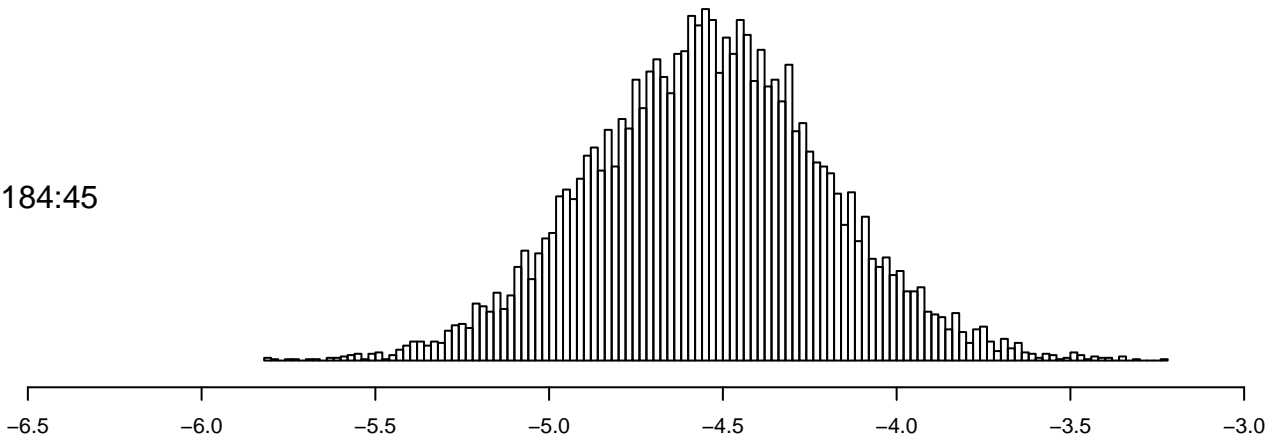

Unidentified Metabolite 11

B184:240 – B184:120

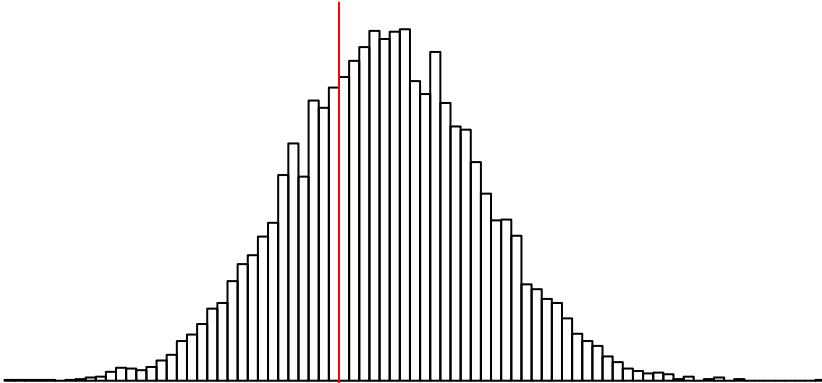

B184:240 – B184:45

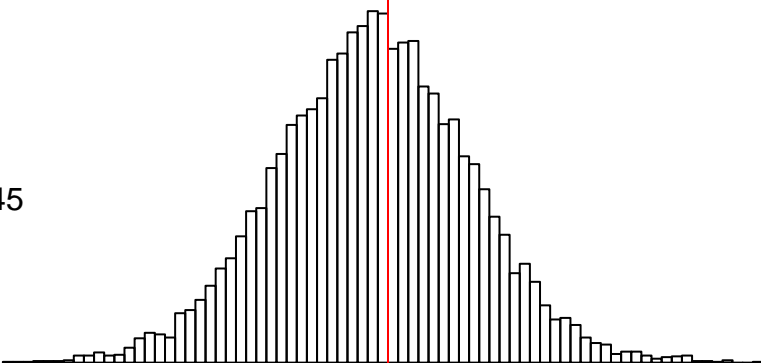

B184:120 – B184:45

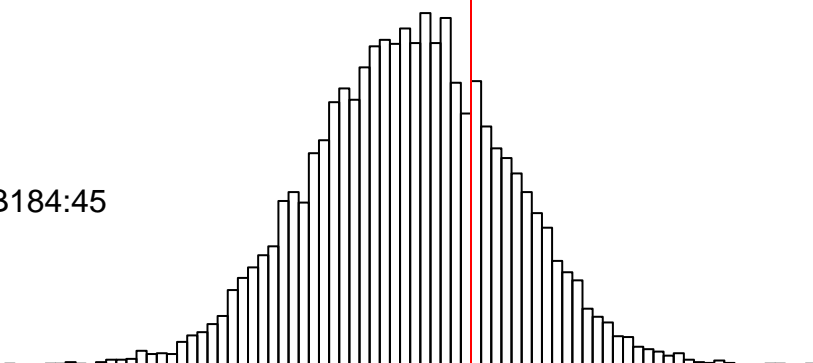

-3 -2 -1 0 1 2 3

delta(Unidentified Metabolite 11)

B184:240

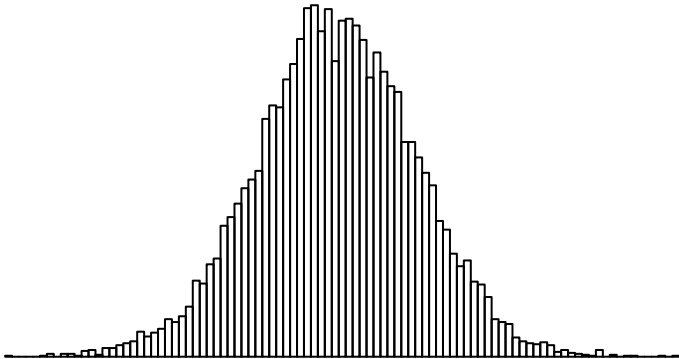

B184:120

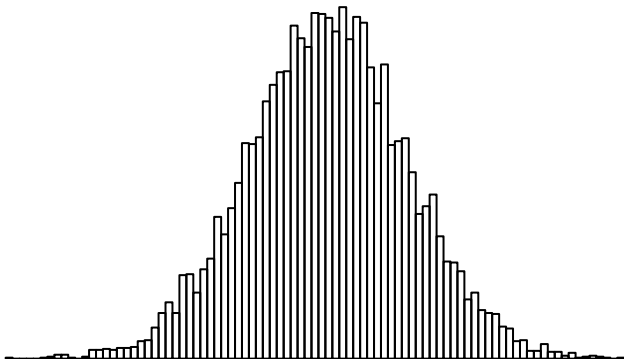

B184:45

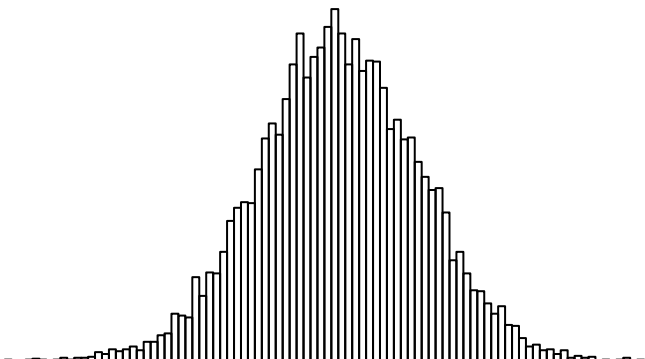

-9.5 -9.0 -8.5 -8.0 -7.5 -7.0 -6.5 -6.0

Unidentified Metabolite 12

B184:240 – B184:120

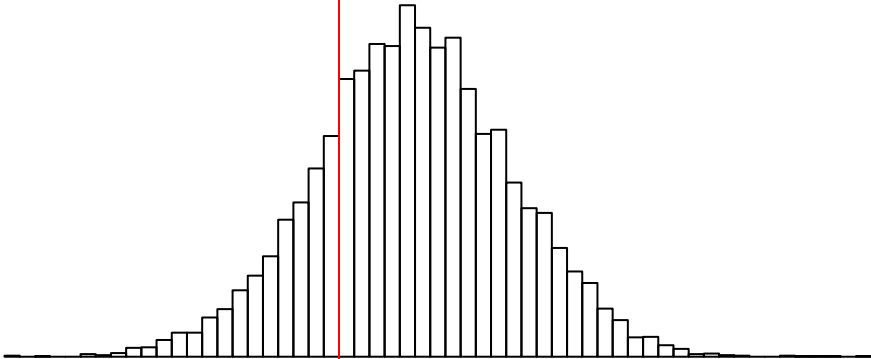

B184:240 – B184:45

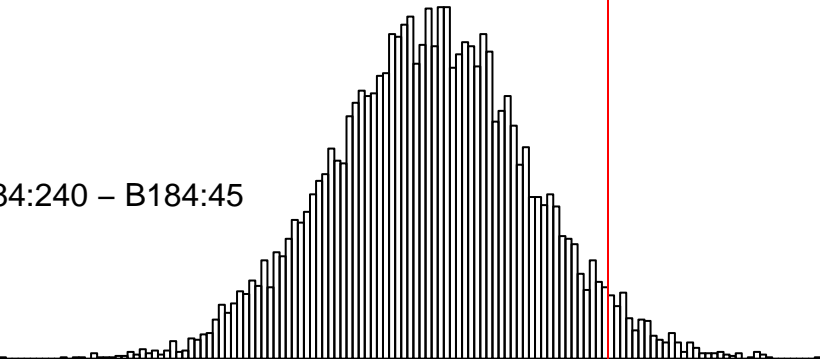

B184:120 – B184:45

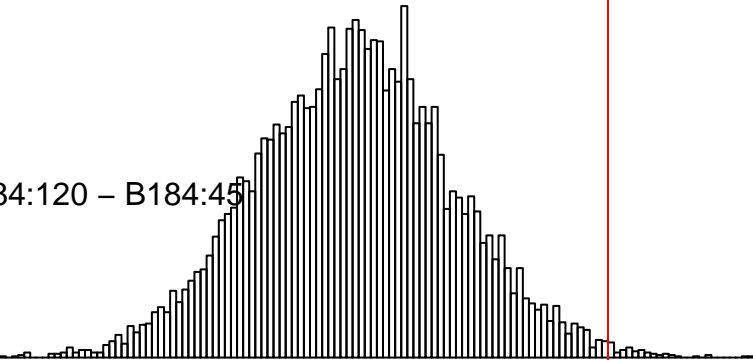

-2 -1 0 1 2

delta(Unidentified Metabolite 12)

B184:240

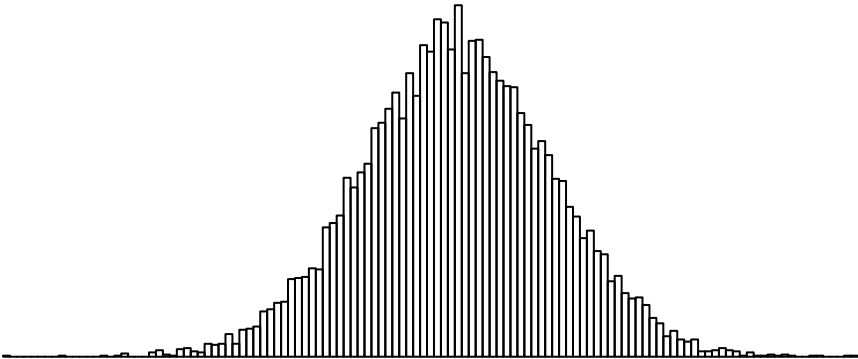

B184:120

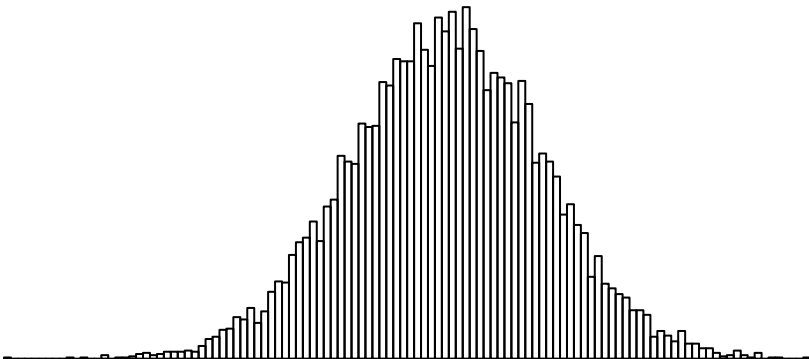

B184:45

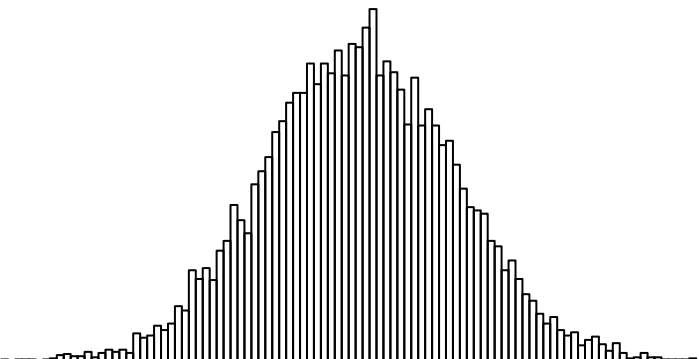

Unidentified Metabolite 14

B184:240 – B184:120

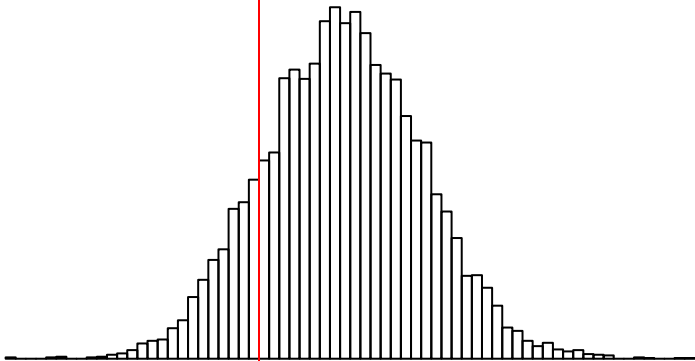

B184:240 – B184:45

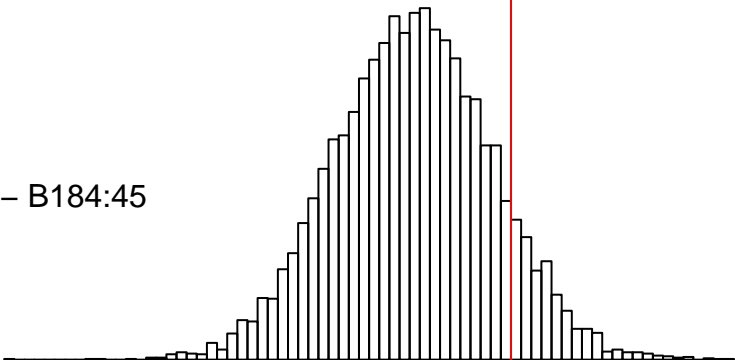

B184:120 – B184:45

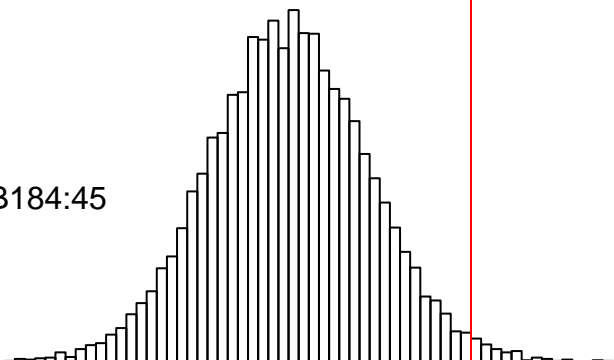

-3

-2

-1

0

1

2

3

delta(Unidentified Metabolite 14)



B184:240

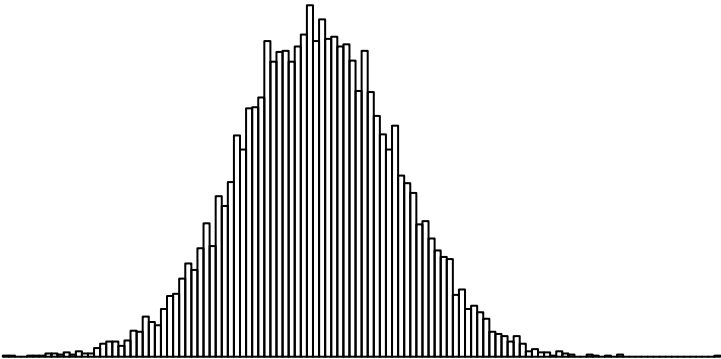

B184:120

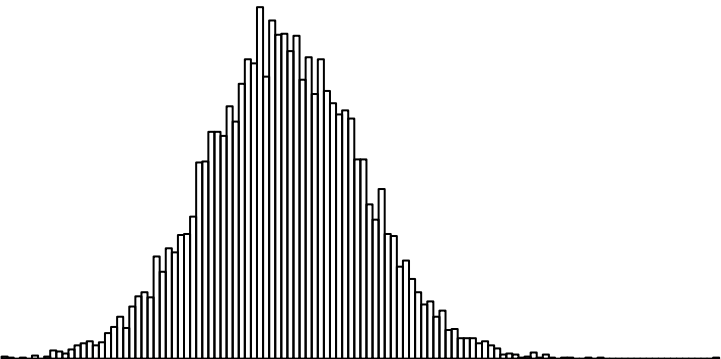

B184:45

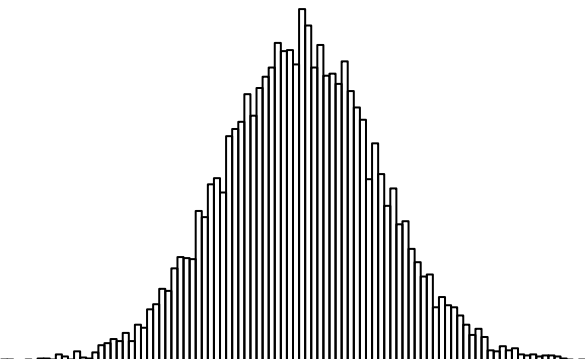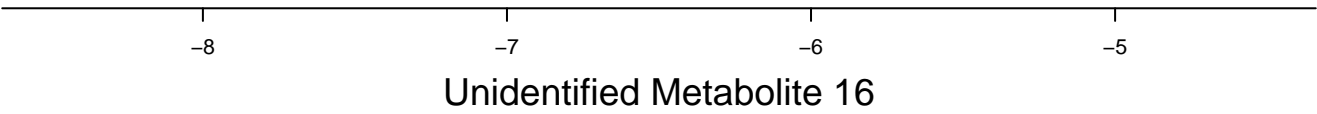

B184:240 – B184:120

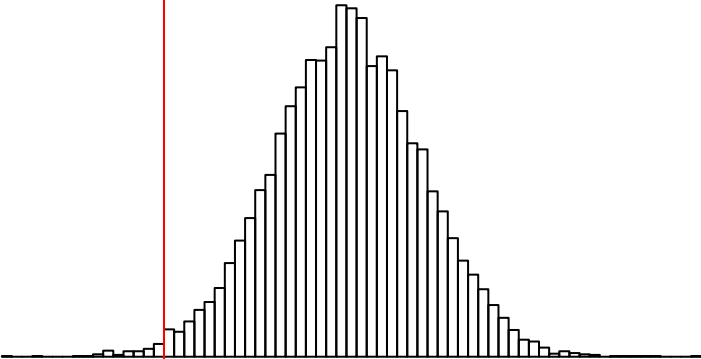

B184:240 – B184:45

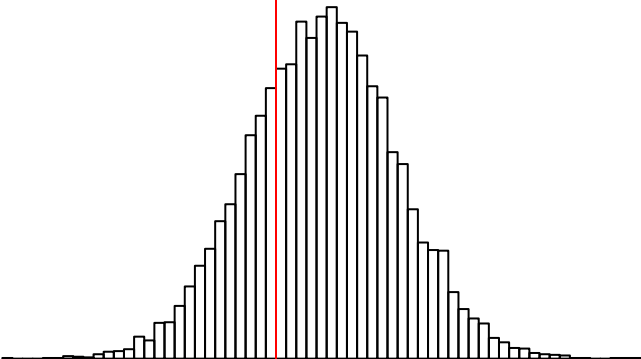

B184:120 – B184:45

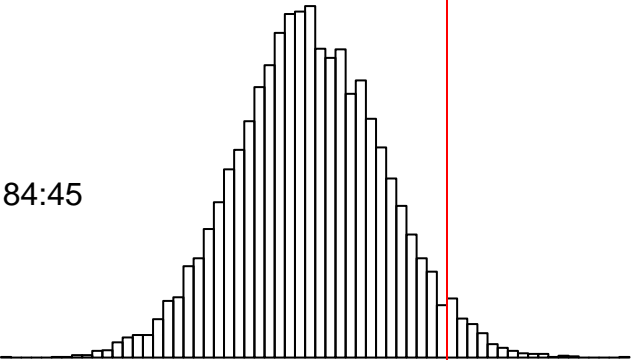

-3 -2 -1 0 1 2 3

delta(Unidentified Metabolite 16)

B184:240

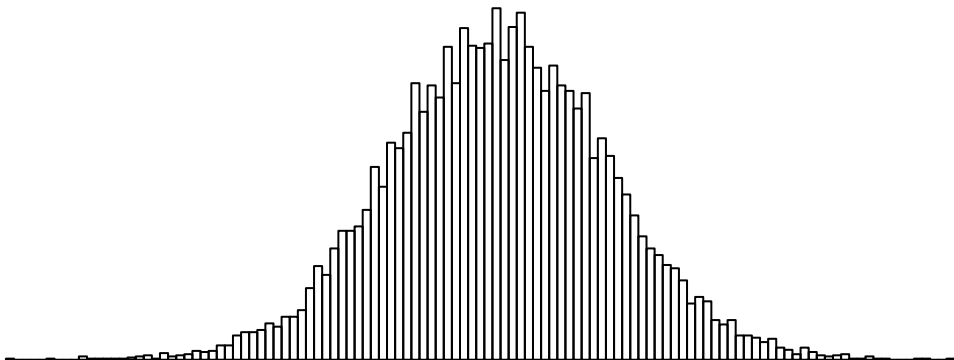

B184:120

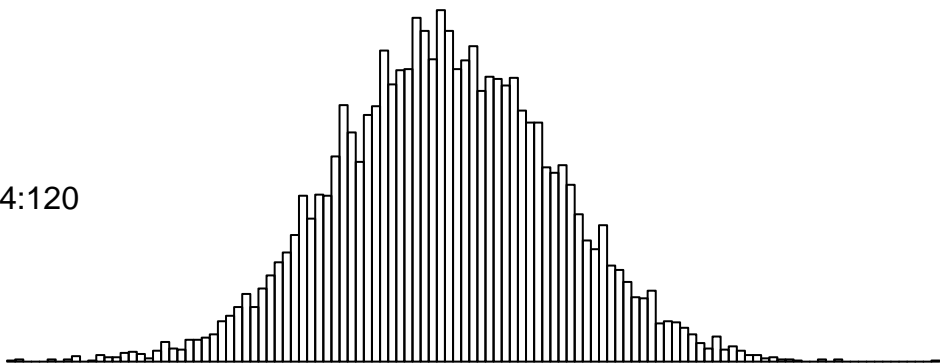

B184:45

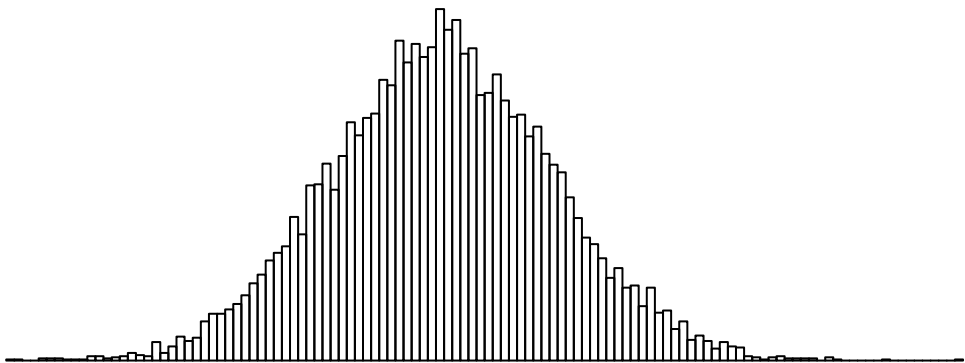

-8.5      -8.0      -7.5      -7.0      -6.5      -6.0      -5.5

Unidentified Metabolite 17

B184:240 – B184:120

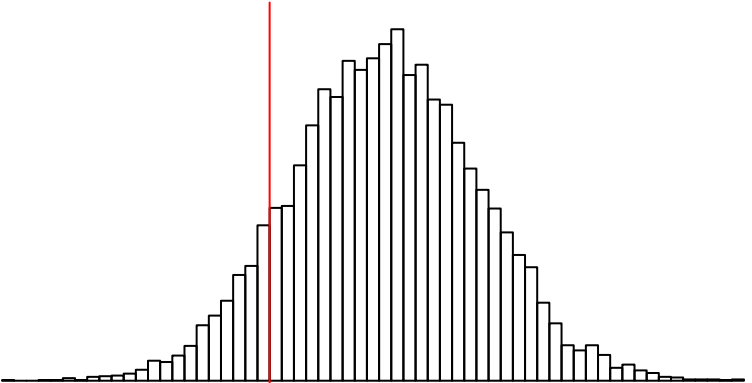

B184:240 – B184:45

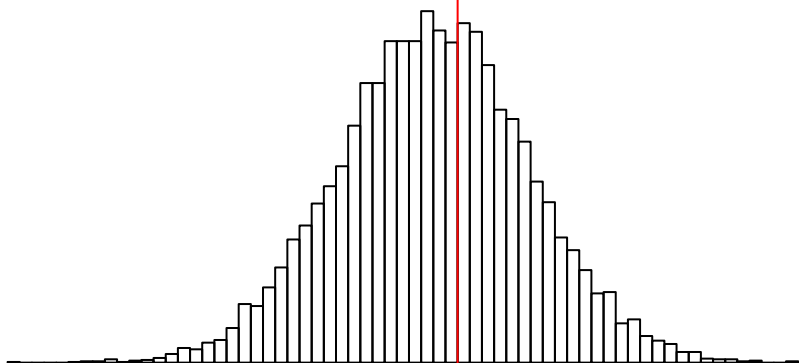

B184:120 – B184:45

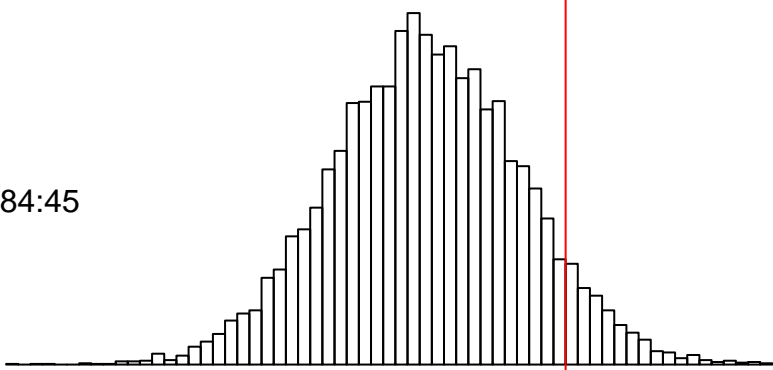

-3 -2 -1 0 1 2

delta(Unidentified Metabolite 17)

B184:240

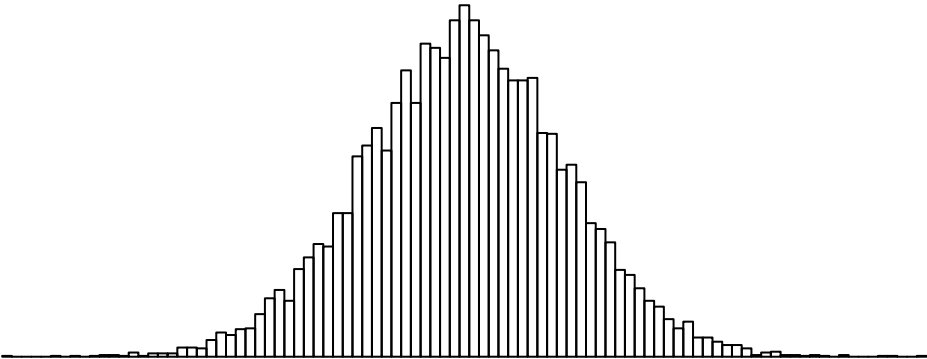

B184:120

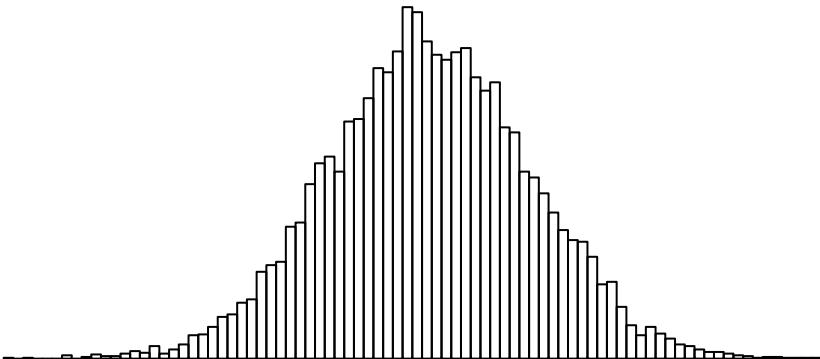

B184:45

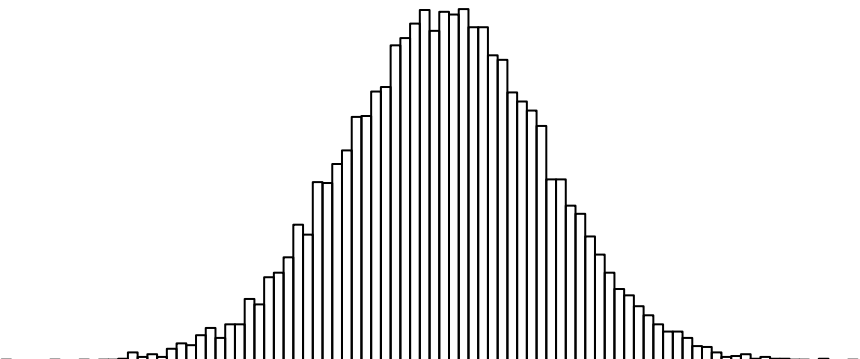

-8.0      -7.5      -7.0      -6.5      -6.0      -5.5

Unidentified Metabolite 18

B184:240 – B184:120

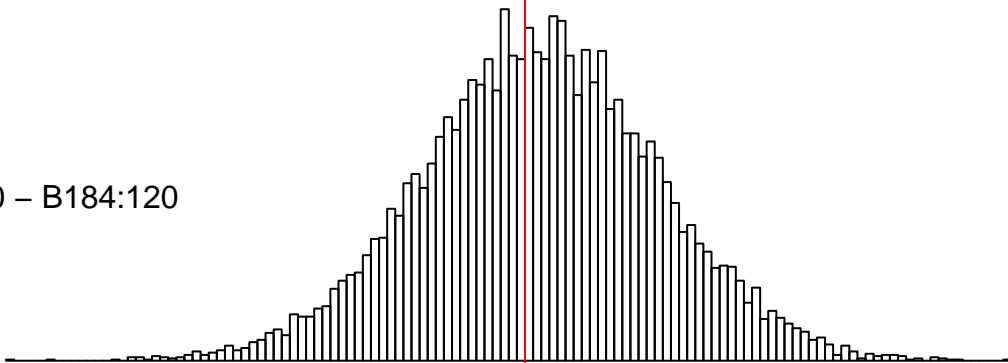

B184:240 – B184:45

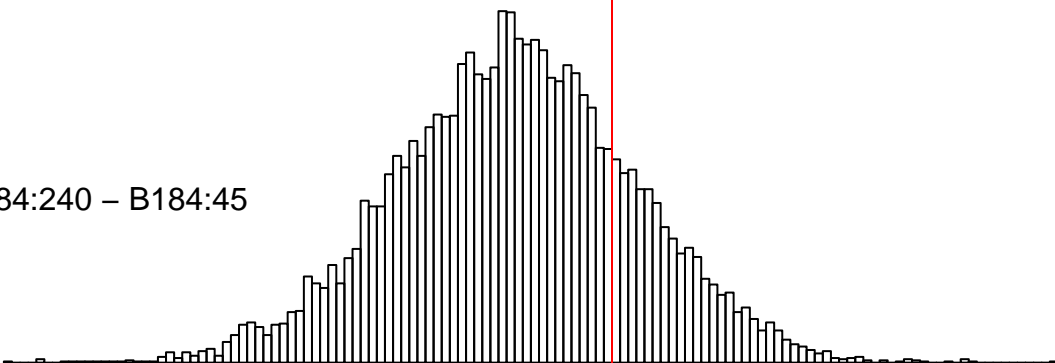

B184:120 – B184:45

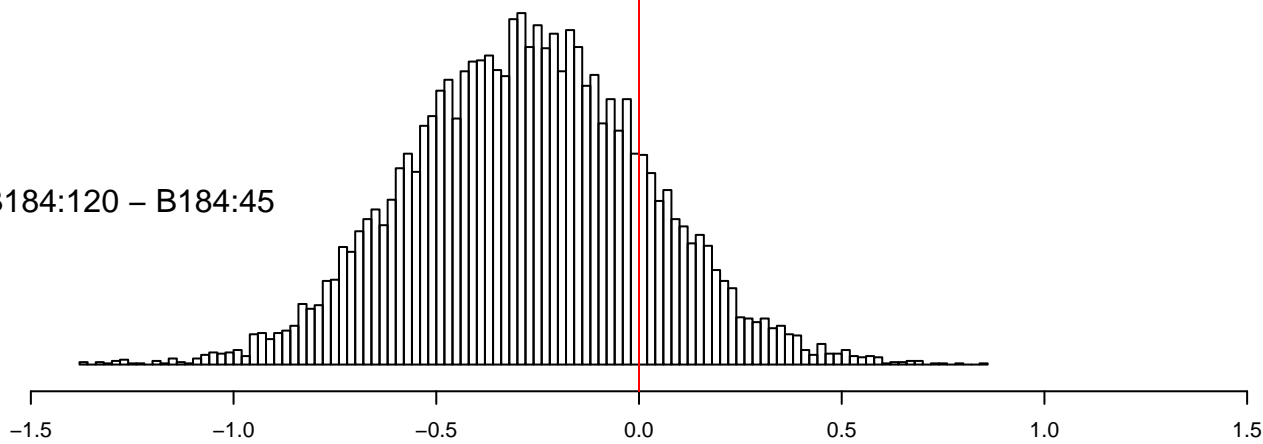

delta(Unidentified Metabolite 18)

B184:240

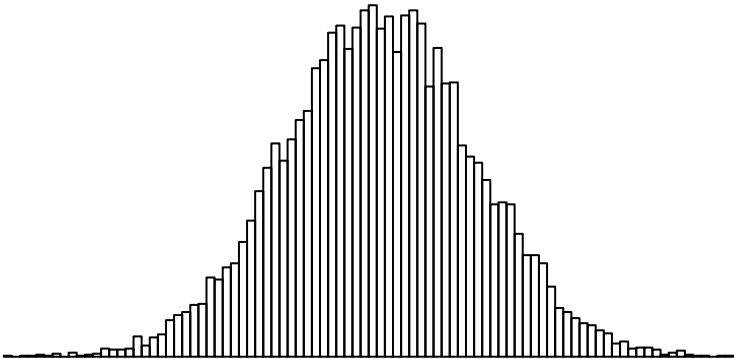

B184:120

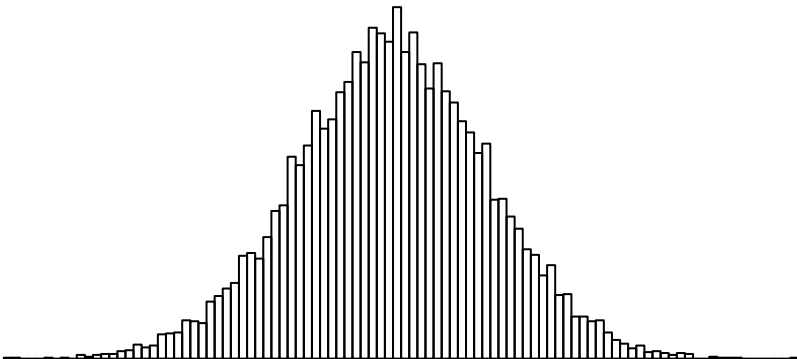

B184:45

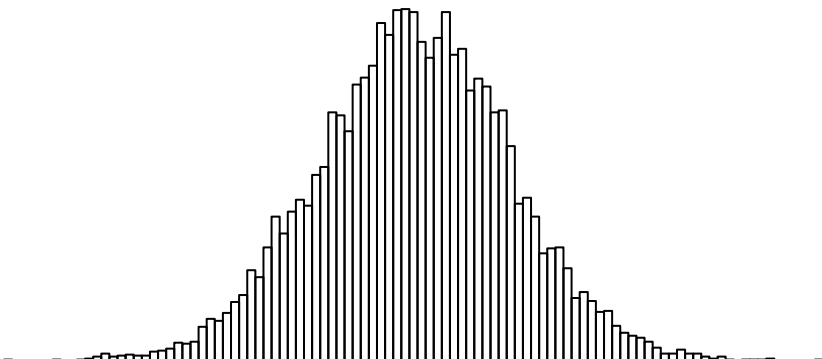

-7.0      -6.5      -6.0      -5.5      -5.0      -4.5      -4.0

Unidentified Metabolite 20

B184:240 – B184:120

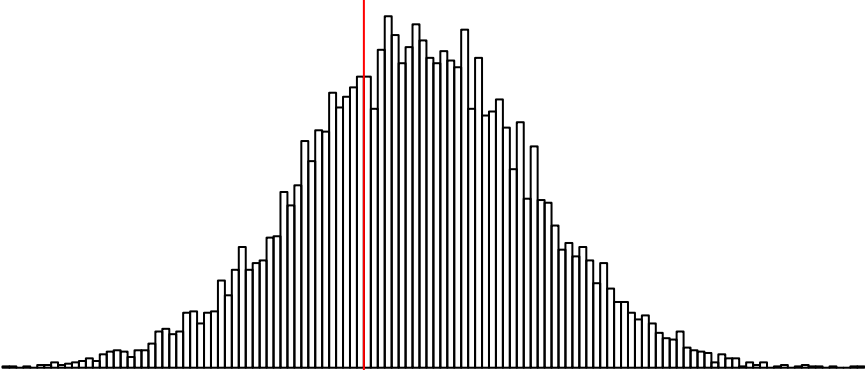

B184:240 – B184:45

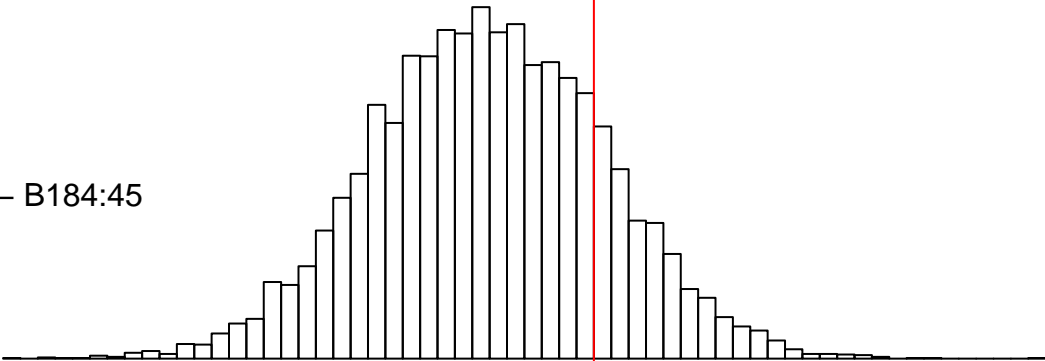

B184:120 – B184:45

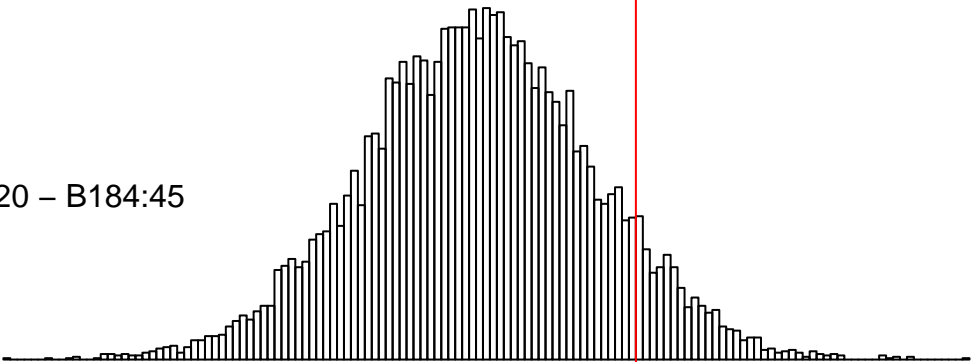

-2.0      -1.5      -1.0      -0.5      0.0      0.5      1.0      1.5

delta(Unidentified Metabolite 20)



B184:240

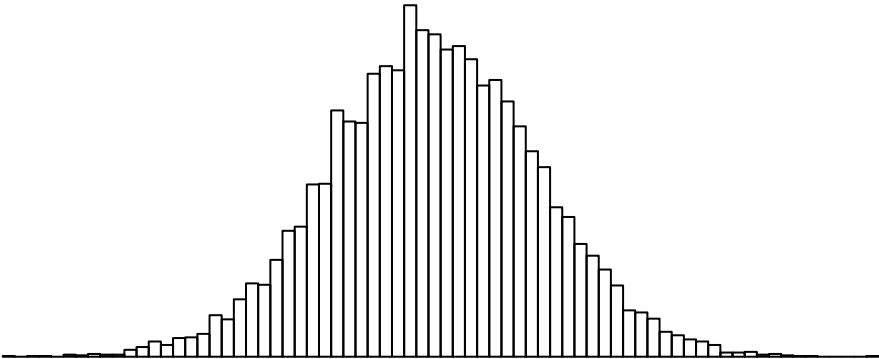

B184:120

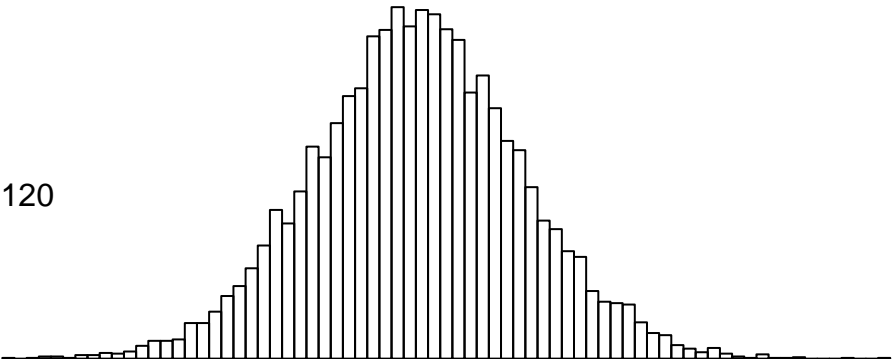

B184:45

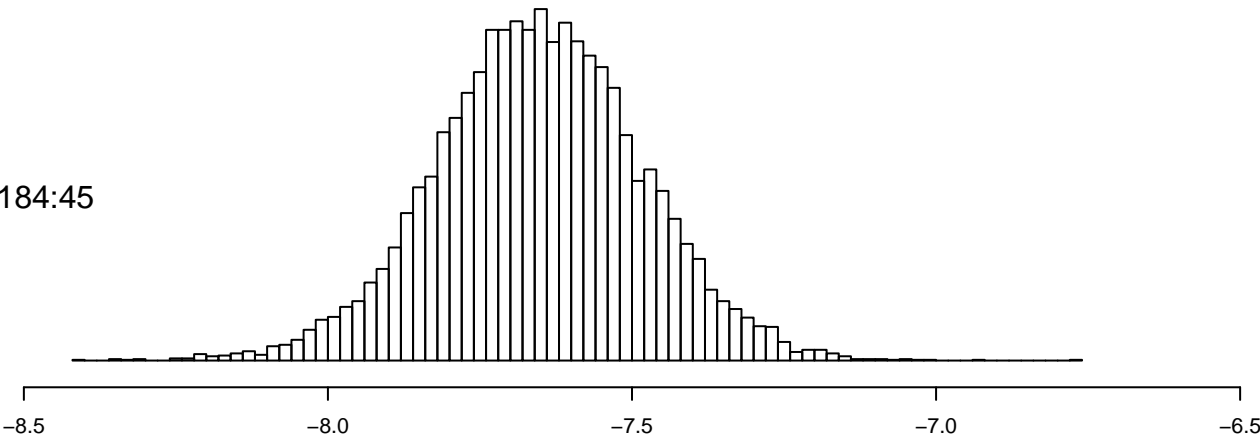

Unidentified Metabolite 22

B184:240 – B184:120

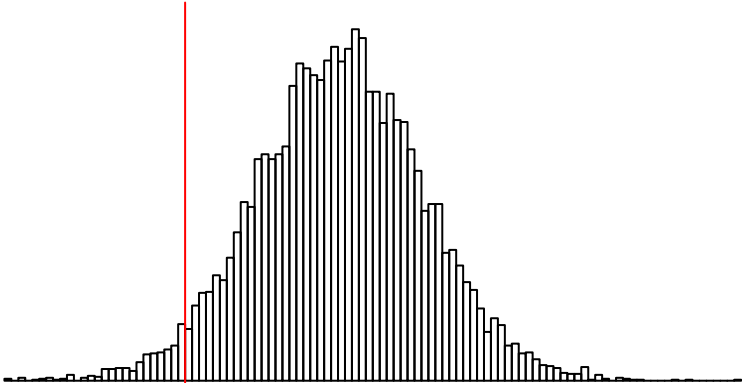

B184:240 – B184:45

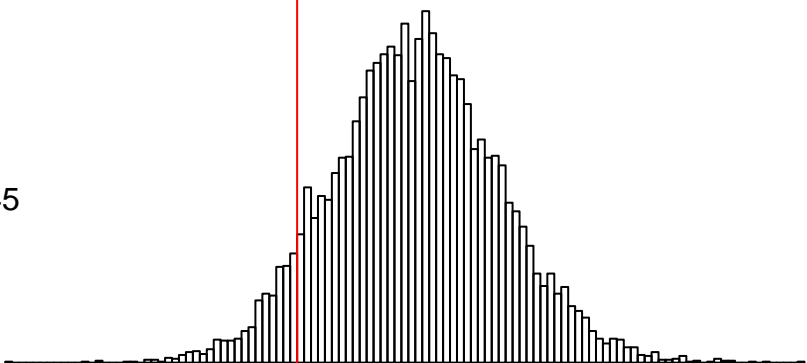

B184:120 – B184:45

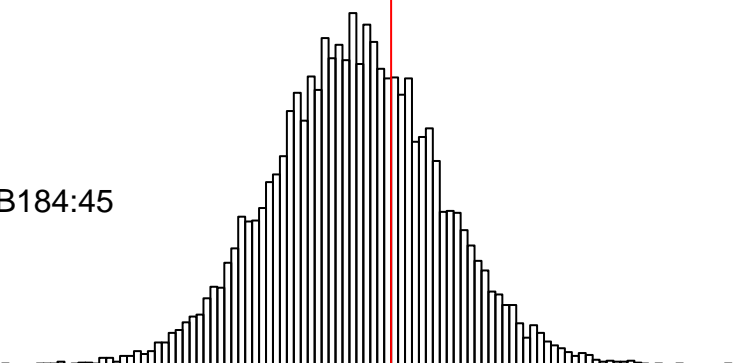

-1.5      -1.0      -0.5      0.0      0.5      1.0      1.5      2.0

delta(Unidentified Metabolite 22)

B184:240

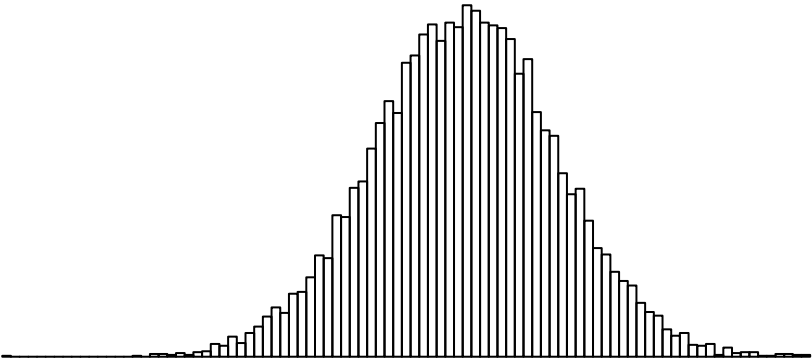

B184:120

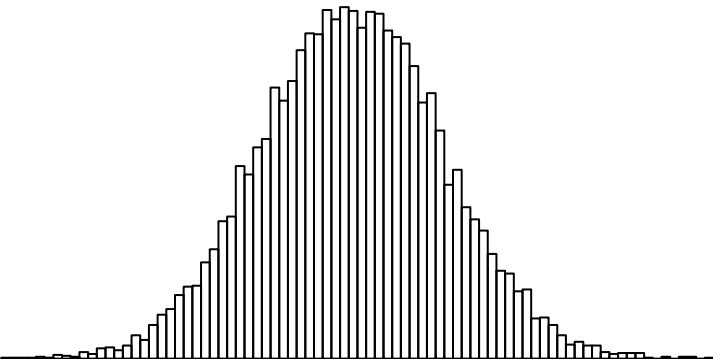

B184:45

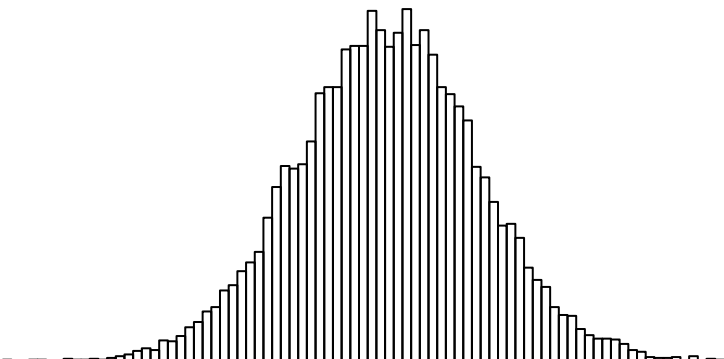

-10      -9      -8      -7      -6      -5      -4      -3

Unidentified Metabolite 23

B184:240 – B184:120

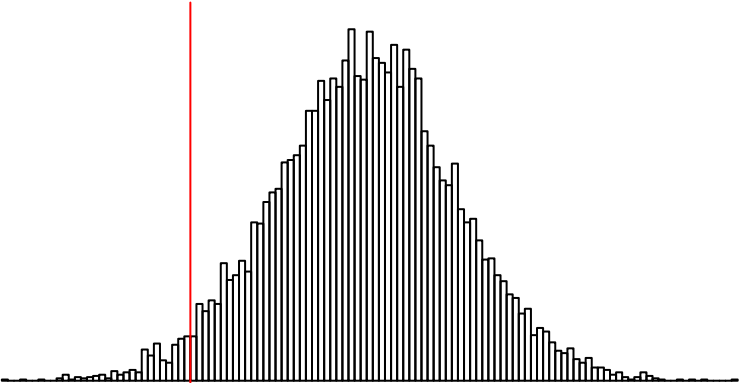

B184:240 – B184:45

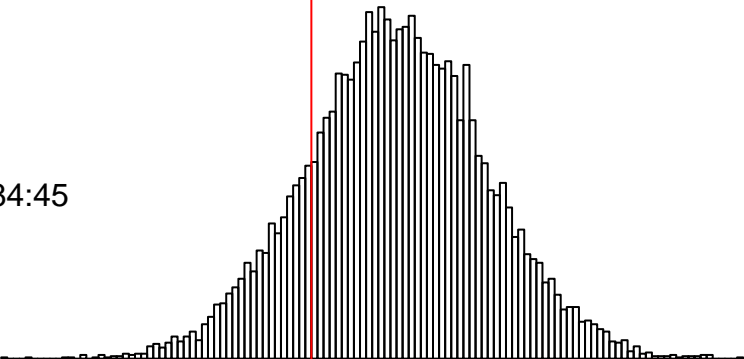

B184:120 – B184:45

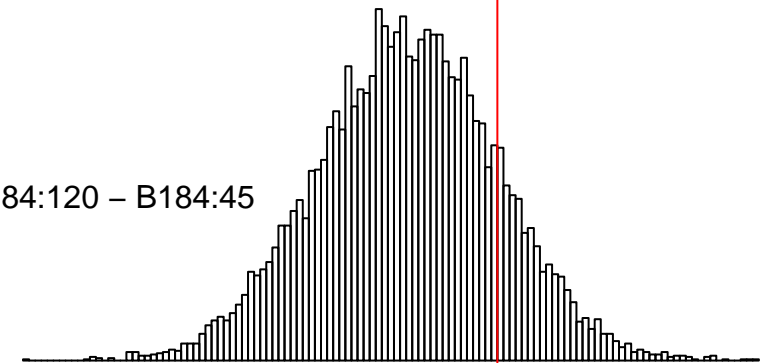

-4 -2 0 2 4 6

delta(Unidentified Metabolite 23)

B184:240

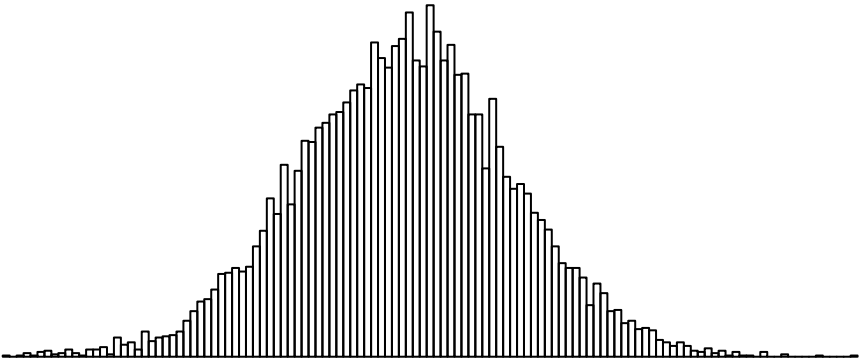

B184:120

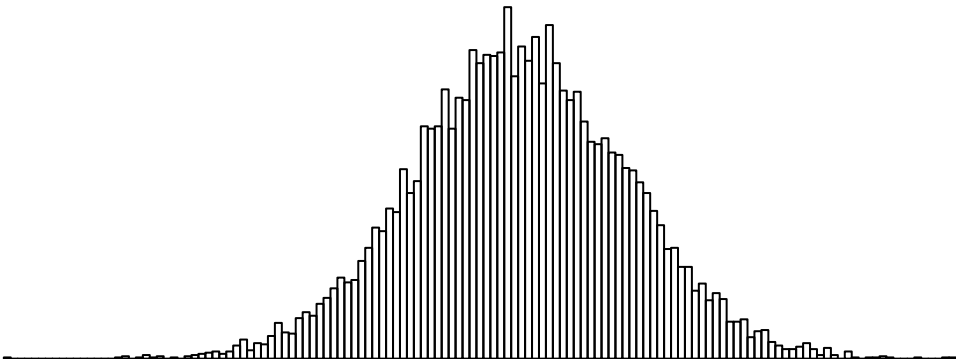

B184:45

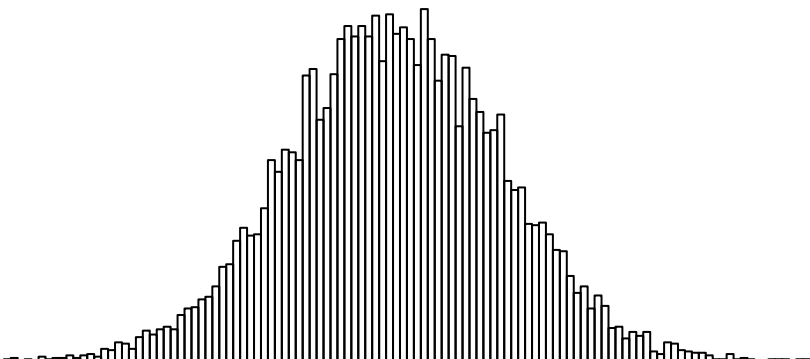

-7.0 -6.5 -6.0 -5.5 -5.0 -4.5 -4.0 -3.5

Unidentified Metabolite 24

B184:240 – B184:120

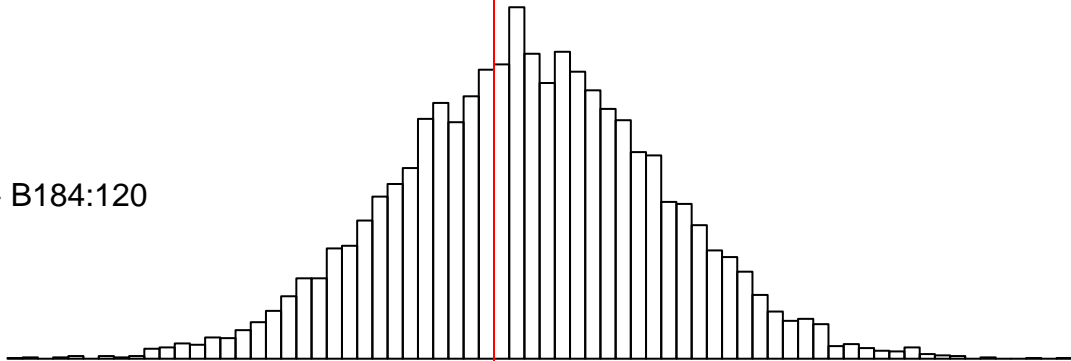

B184:240 – B184:45

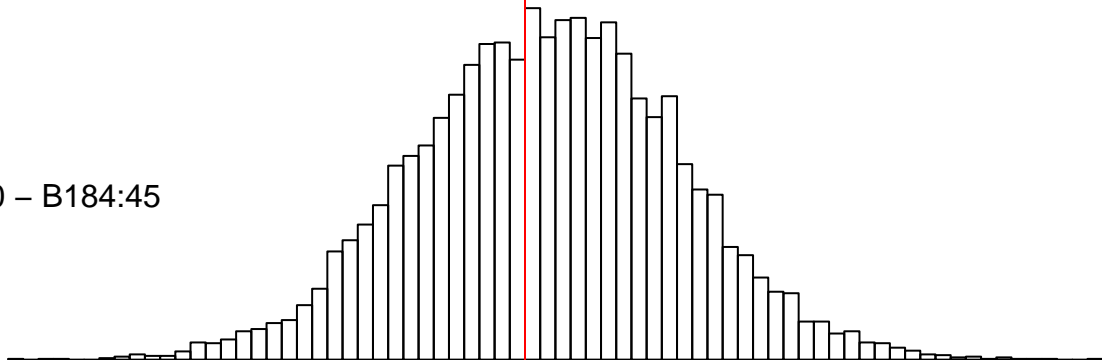

B184:120 – B184:45

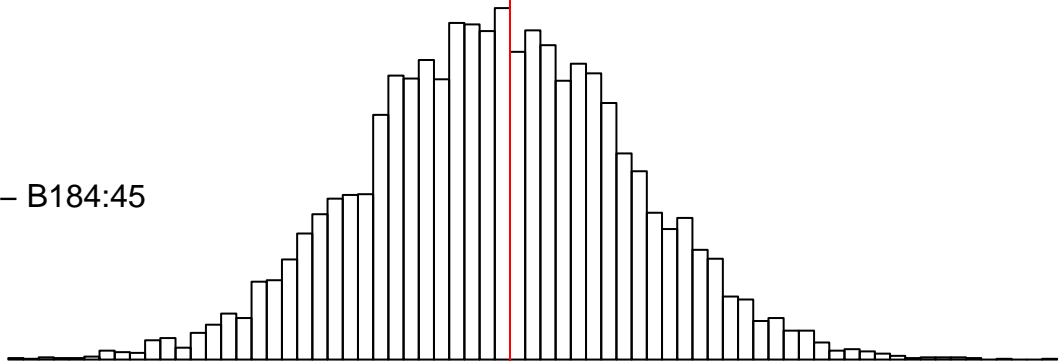

-2

-1

0

1

2

delta(Unidentified Metabolite 24)

B184:240

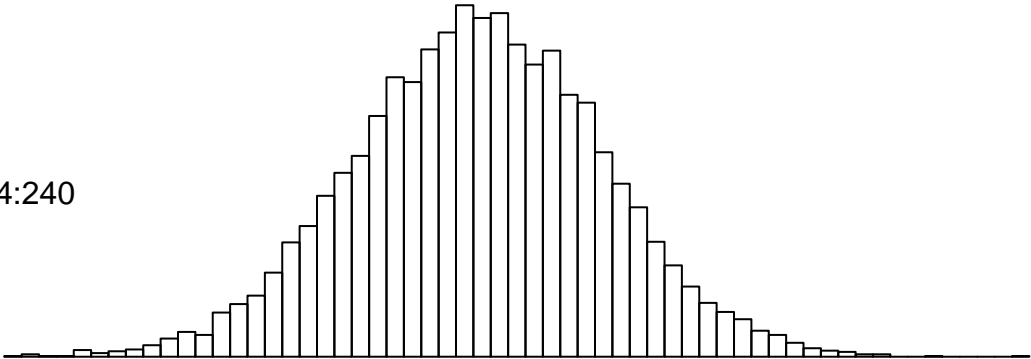

B184:120

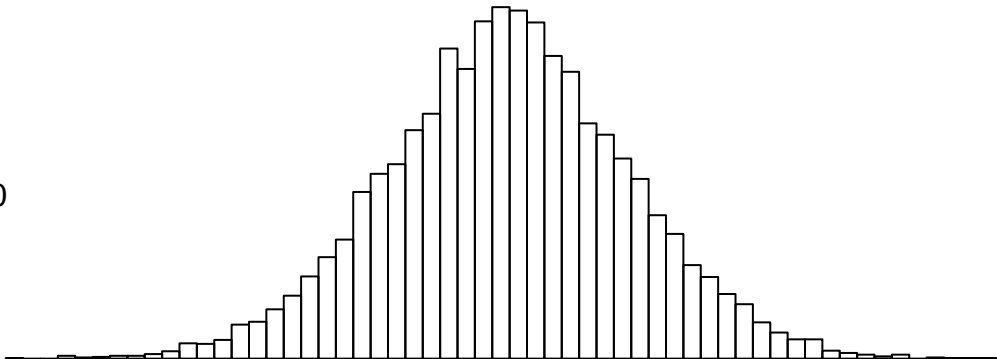

B184:45

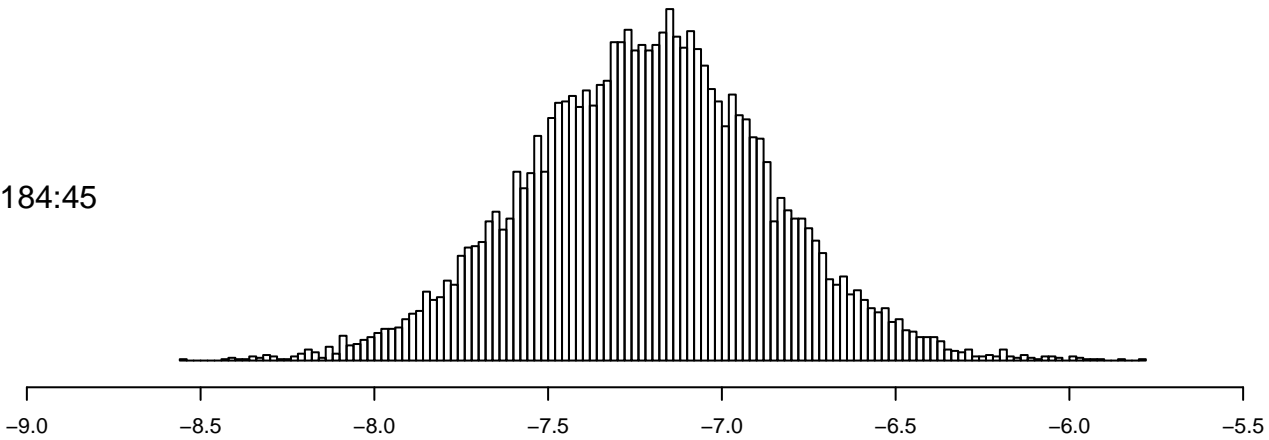

Unidentified Metabolite 25

B184:240 – B184:120

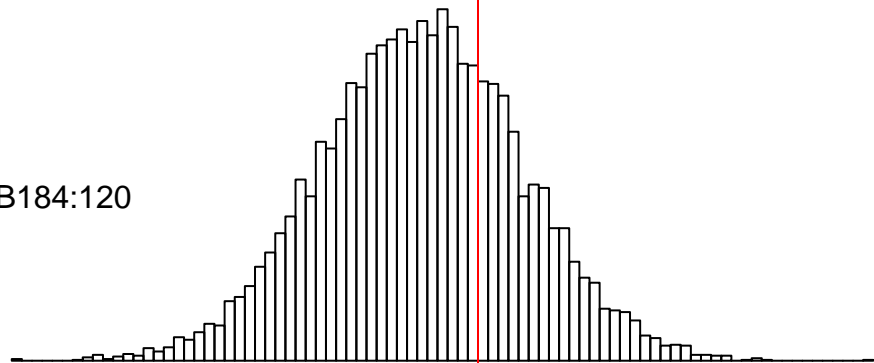

B184:240 – B184:45

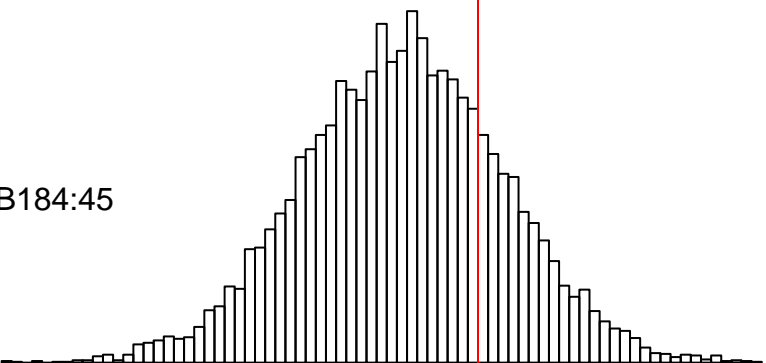

B184:120 – B184:45

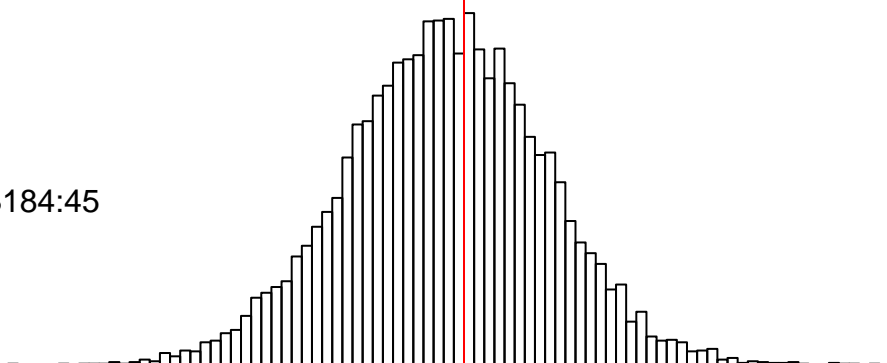

-3 -2 -1 0 1 2 3

delta(Unidentified Metabolite 25)



B184:240

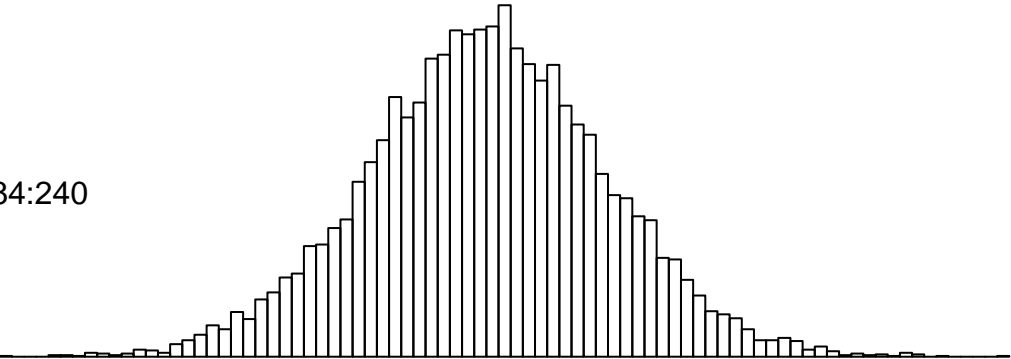

B184:120

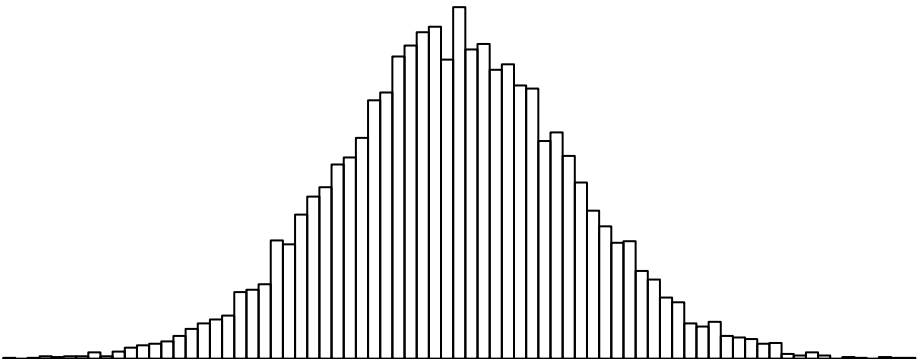

B184:45

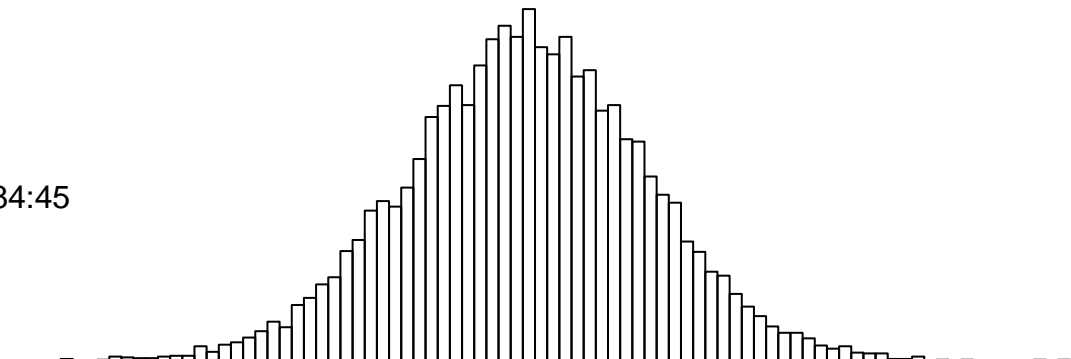

-8 -7 -6 -5 -4 -3

Unidentified Metabolite 26

B184:240 – B184:120

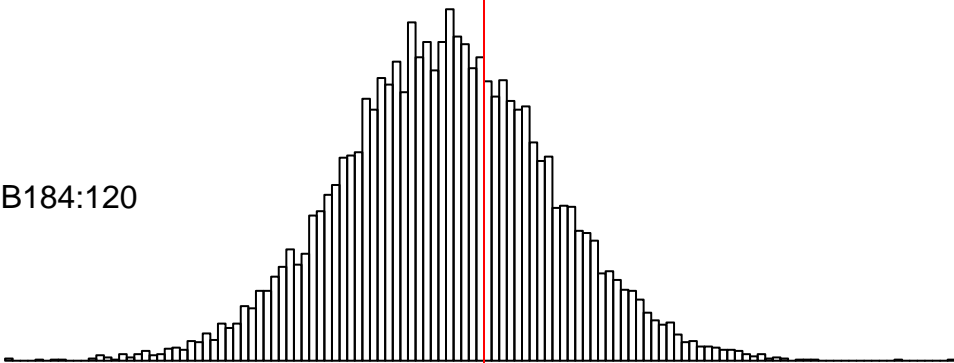

B184:240 – B184:45

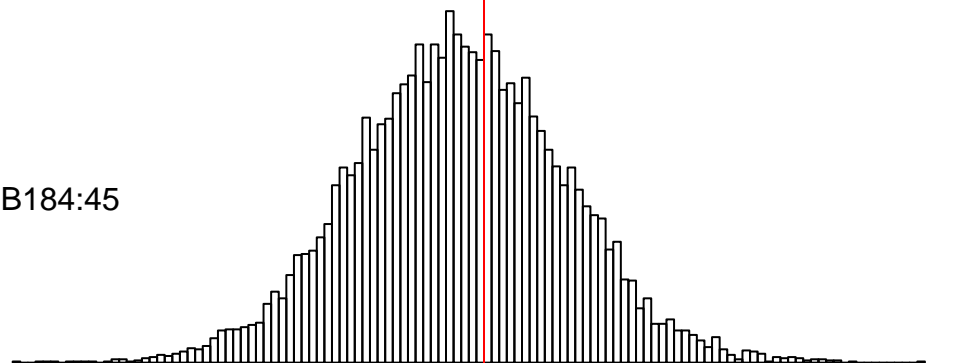

B184:120 – B184:45

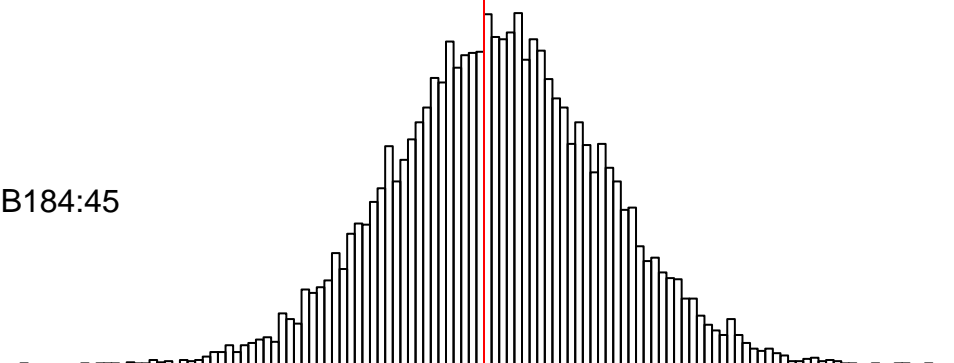

-4 -2 0 2 4

delta(Unidentified Metabolite 26)

B184:240

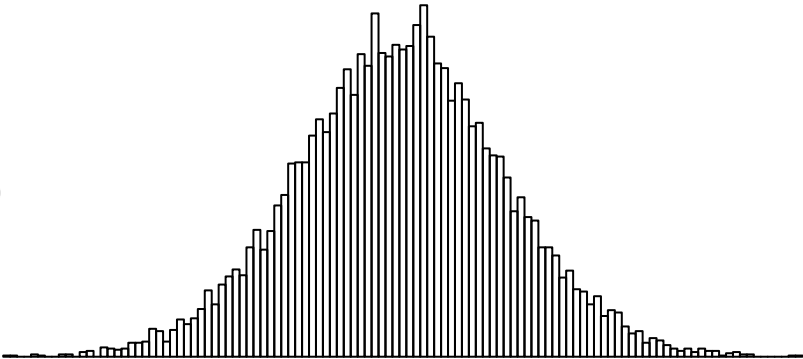

B184:120

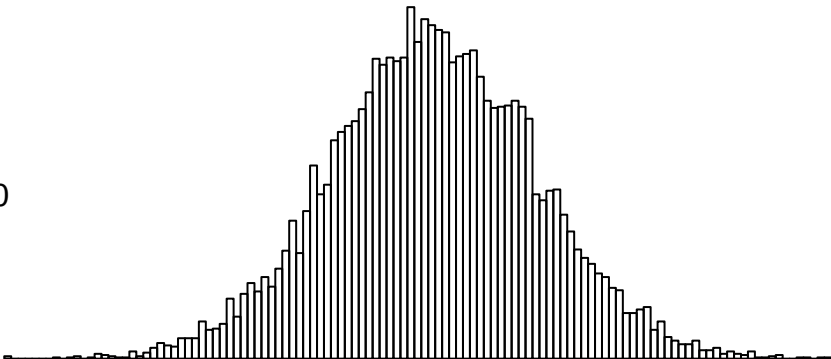

B184:45

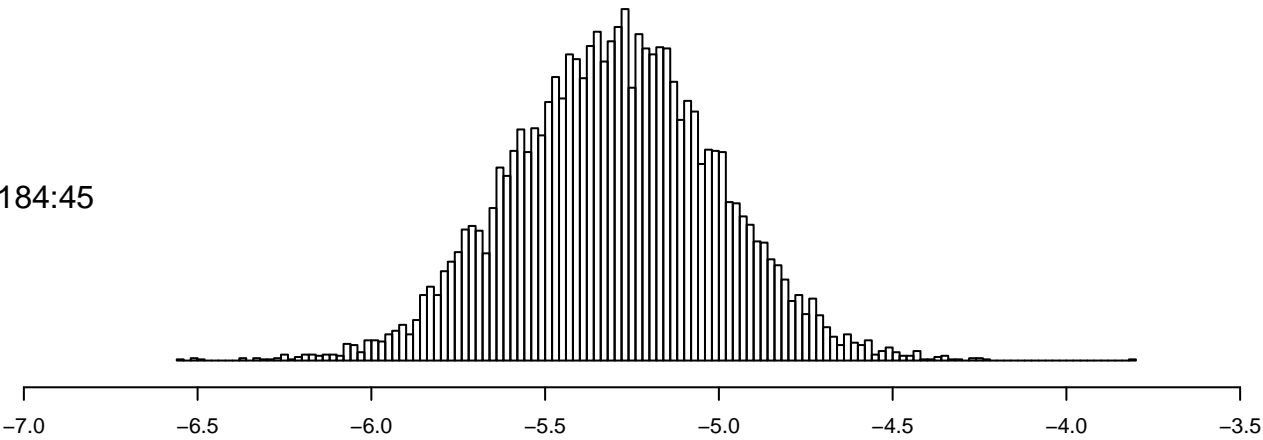

Unidentified Metabolite 27

B184:240 – B184:120

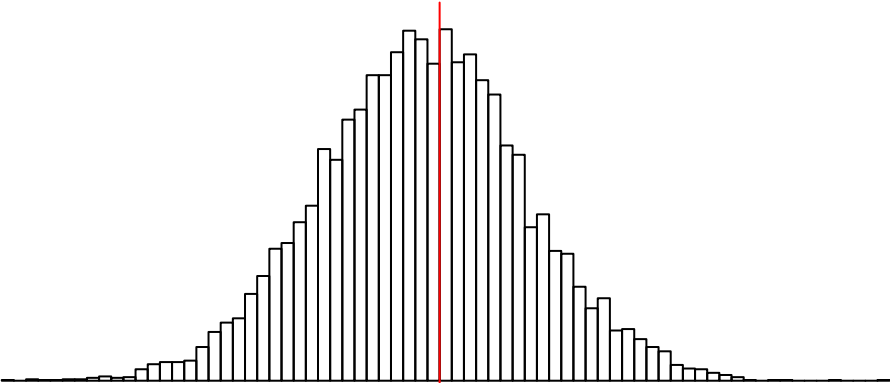

B184:240 – B184:45

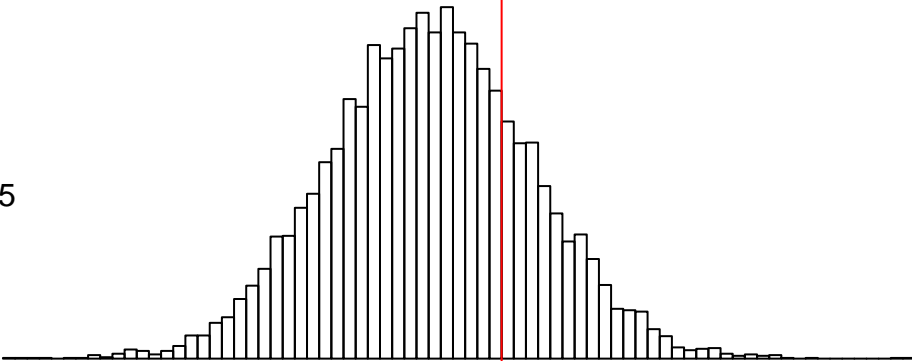

B184:120 – B184:45

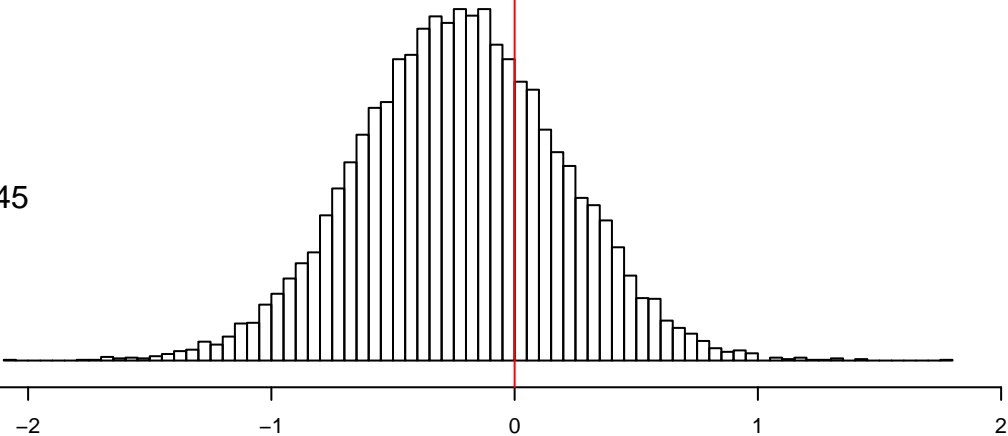

delta(Unidentified Metabolite 27)

B184:240

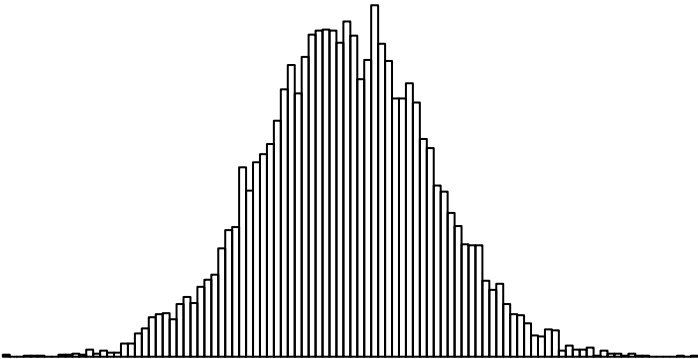

B184:120

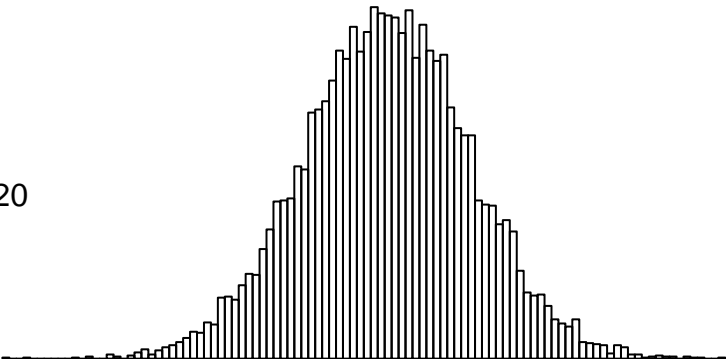

B184:45

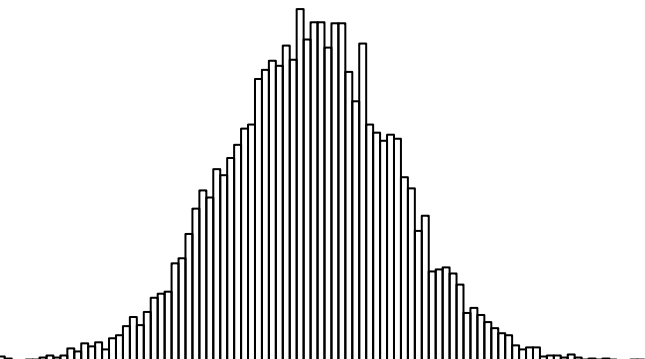

-9.0      -8.5      -8.0      -7.5      -7.0      -6.5      -6.0      -5.5

Unidentified Metabolite 29

B184:240 – B184:120

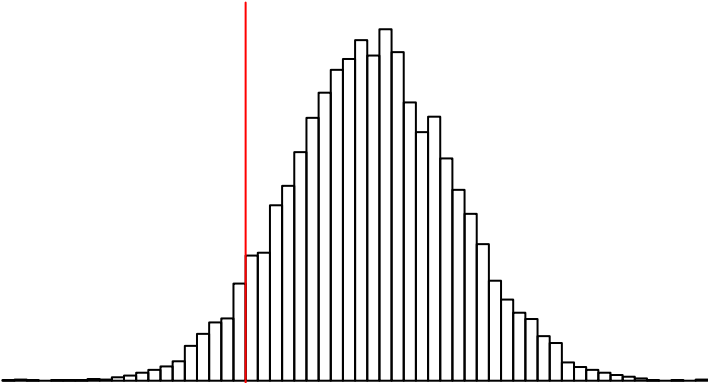

B184:240 – B184:45

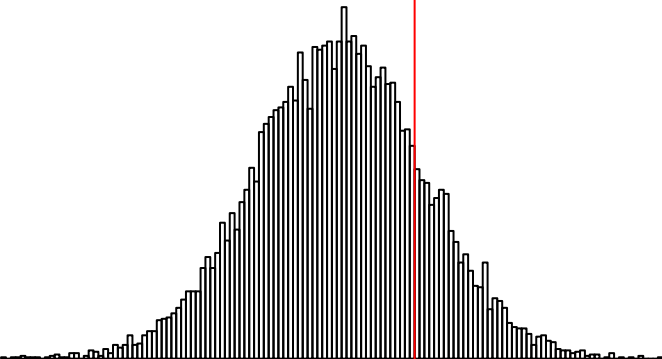

B184:120 – B184:45

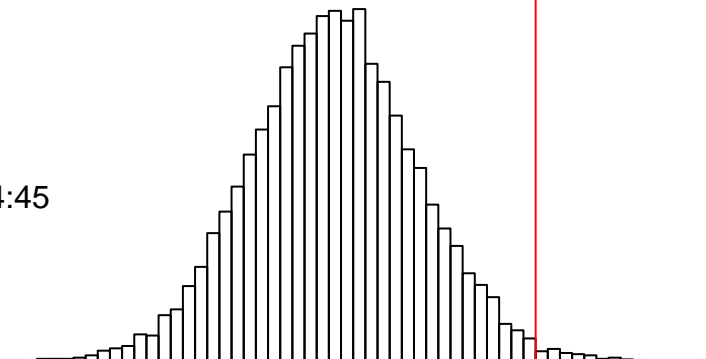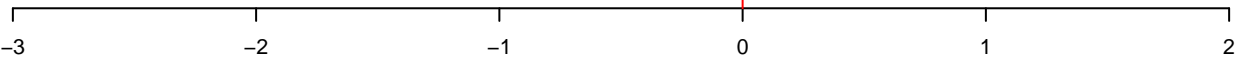

delta(Unidentified Metabolite 29)

B184:240

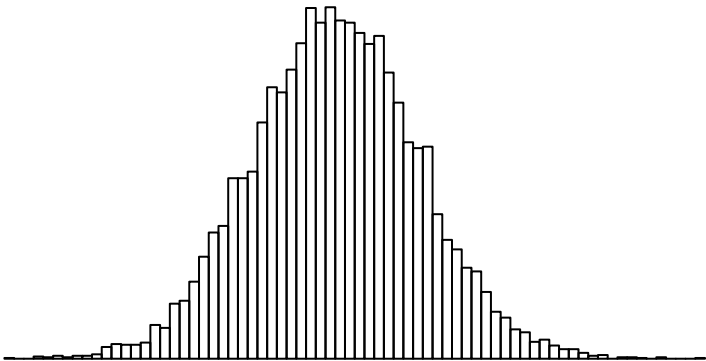

B184:120

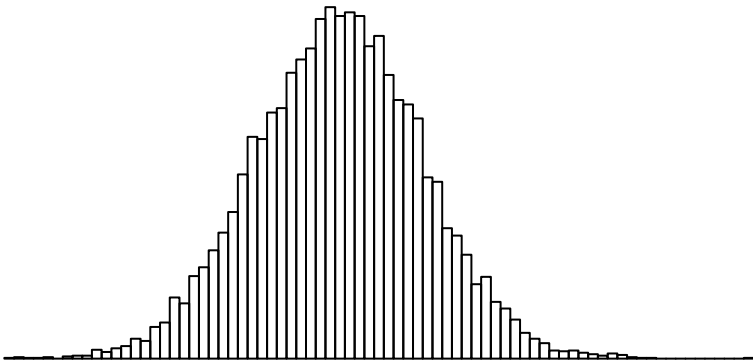

B184:45

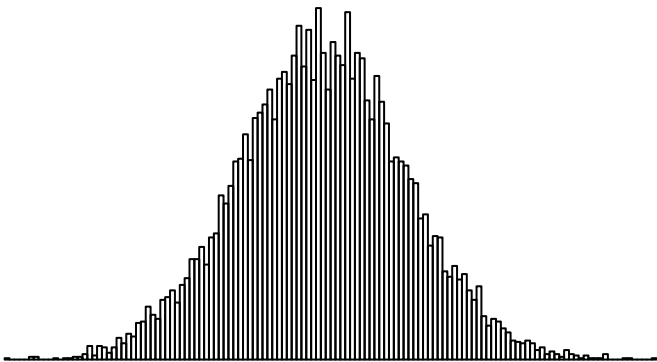

-9.5                      -9.0                      -8.5                      -8.0                      -7.5                      -7.0

Unidentified Metabolite 30

B184:240 – B184:120

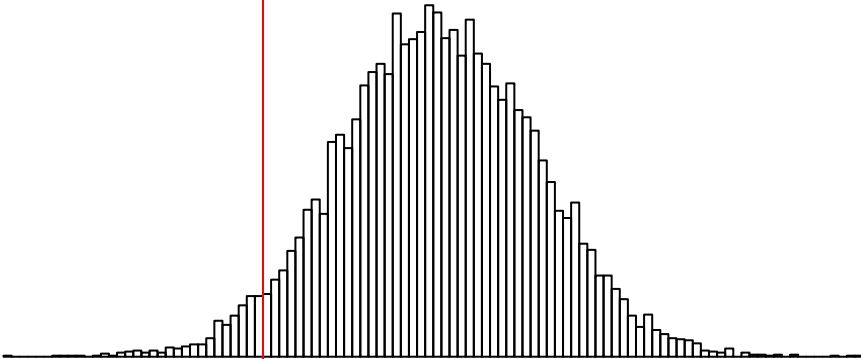

B184:240 – B184:45

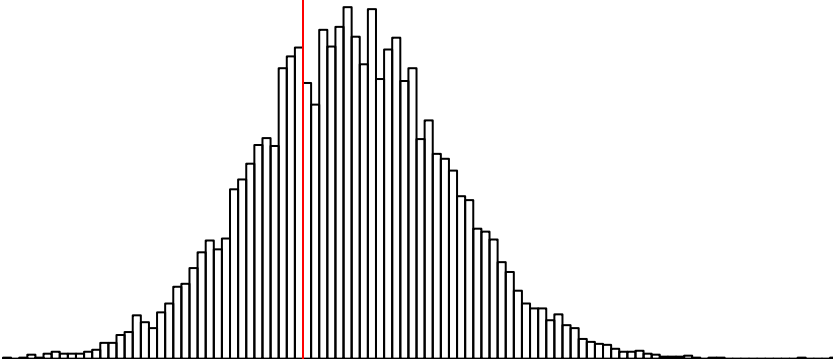

B184:120 – B184:45

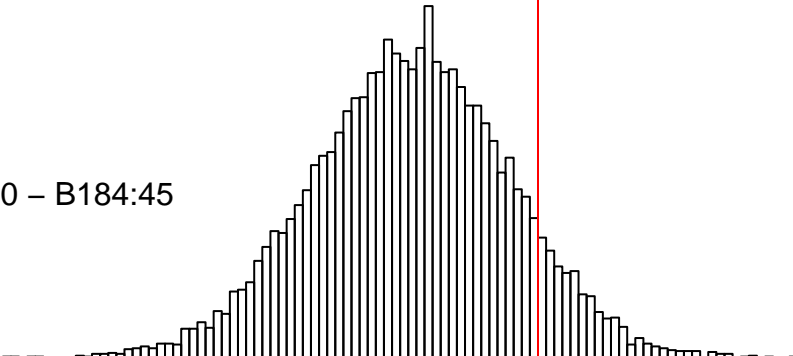

-1.5      -1.0      -0.5      0.0      0.5      1.0      1.5

delta(Unidentified Metabolite 30)



B184:240

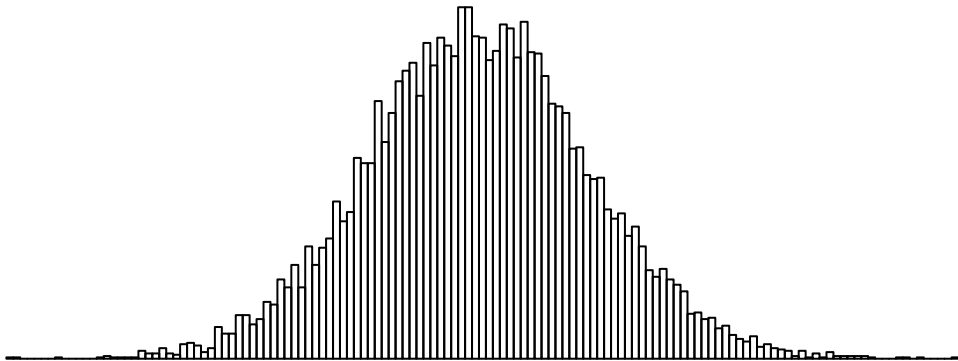

B184:120

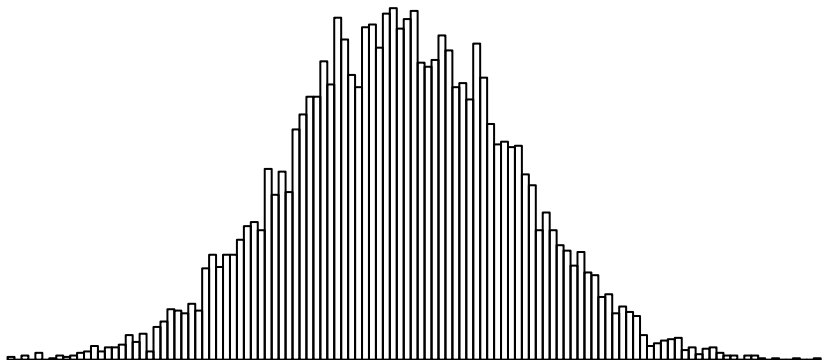

B184:45

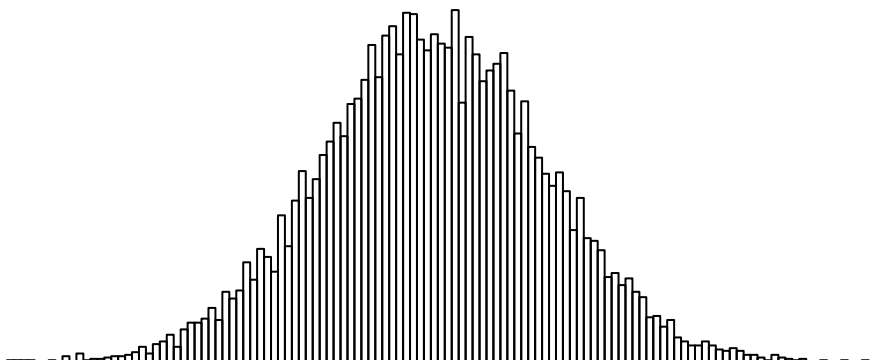

-10.0      -9.5      -9.0      -8.5      -8.0      -7.5      -7.0      -6.5

Unidentified Metabolite 31

B184:240 – B184:120

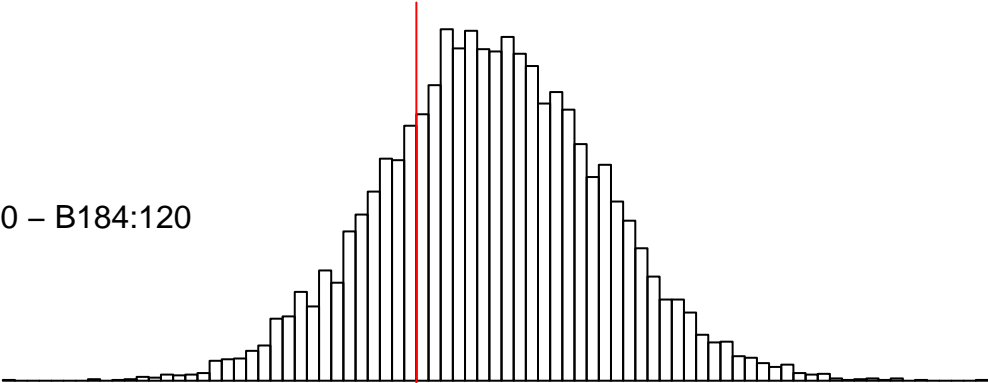

B184:240 – B184:45

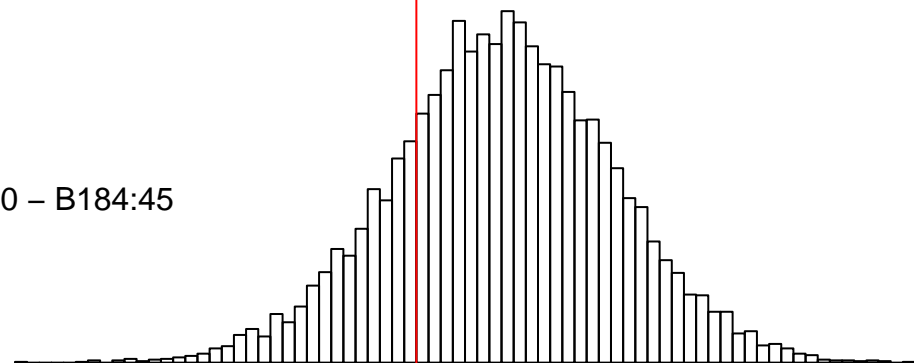

B184:120 – B184:45

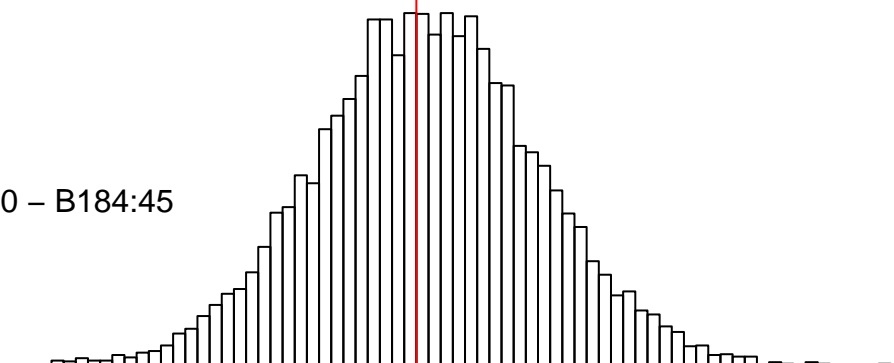

-2 -1 0 1 2 3

delta(Unidentified Metabolite 31)

B184:240

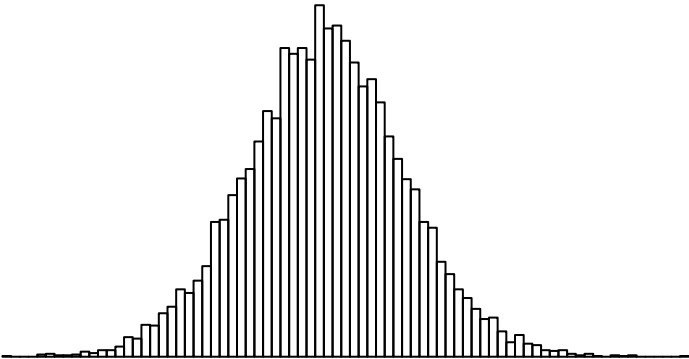

B184:120

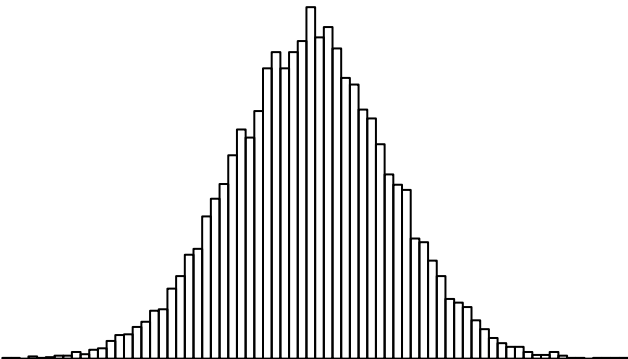

B184:45

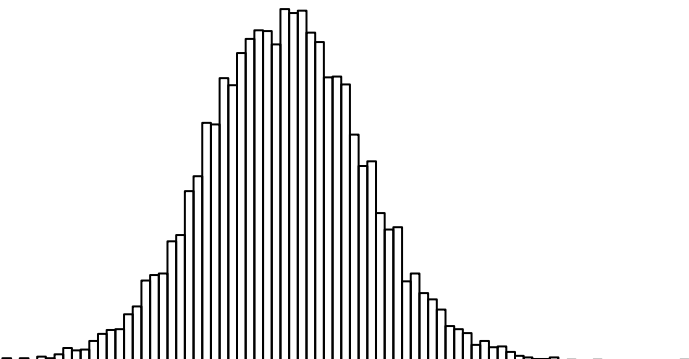

-13      -12      -11      -10      -9      -8      -7      -6

Unidentified Metabolite 32

B184:240 – B184:120

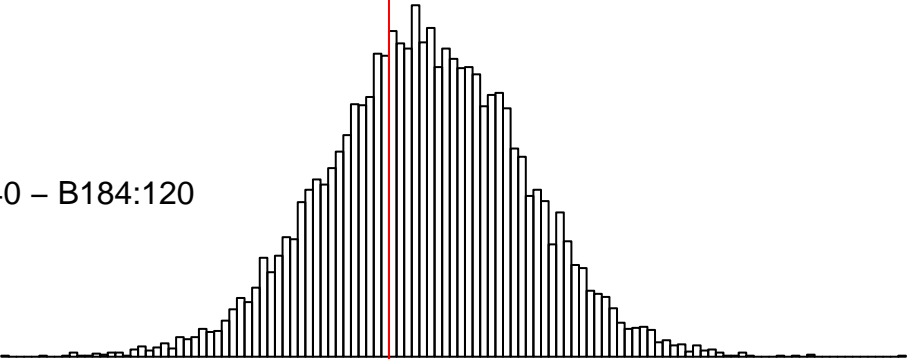

B184:240 – B184:45

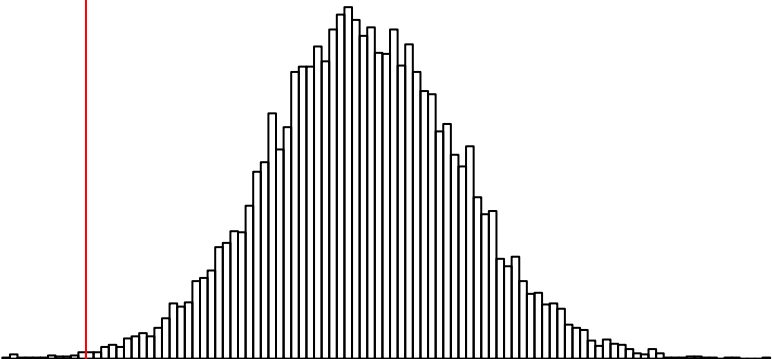

B184:120 – B184:45

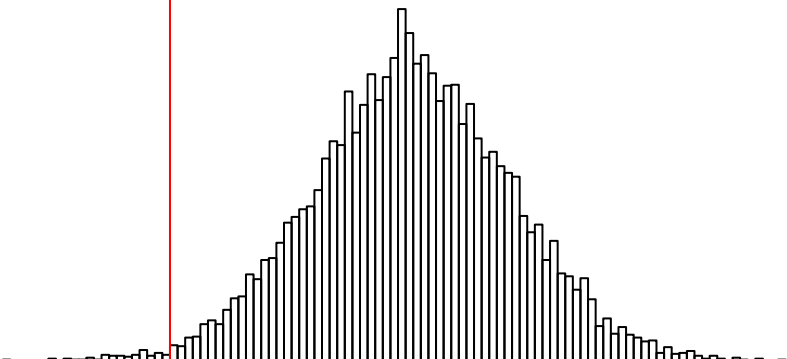

-2

0

2

4

delta(Unidentified Metabolite 32)

B184:240

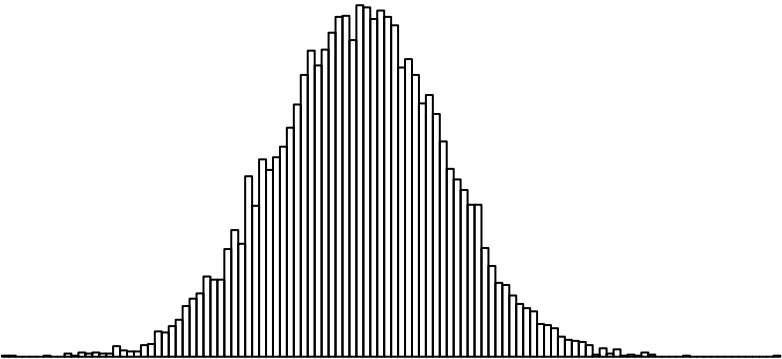

B184:120

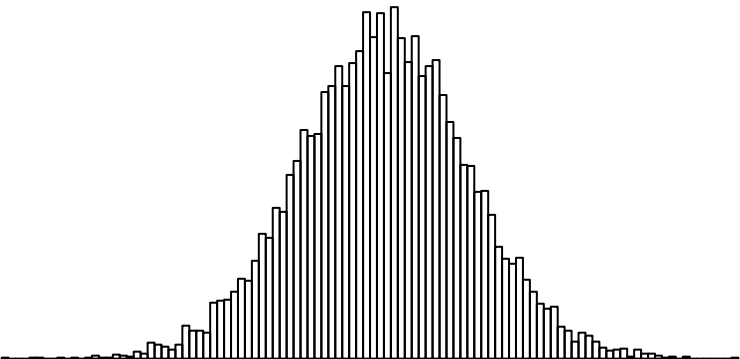

B184:45

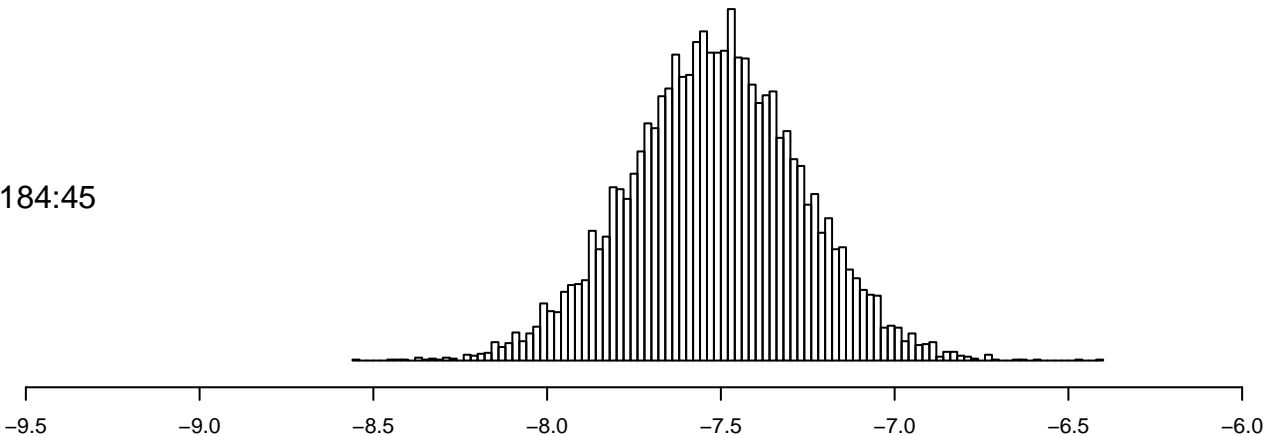

Unidentified Metabolite 33

B184:240 – B184:120

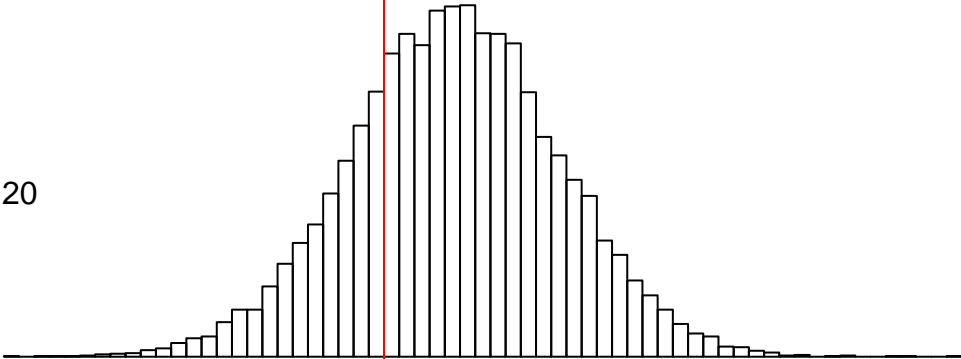

B184:240 – B184:45

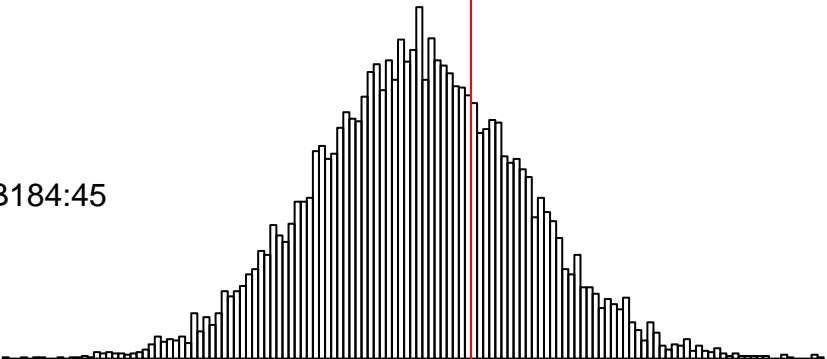

B184:120 – B184:45

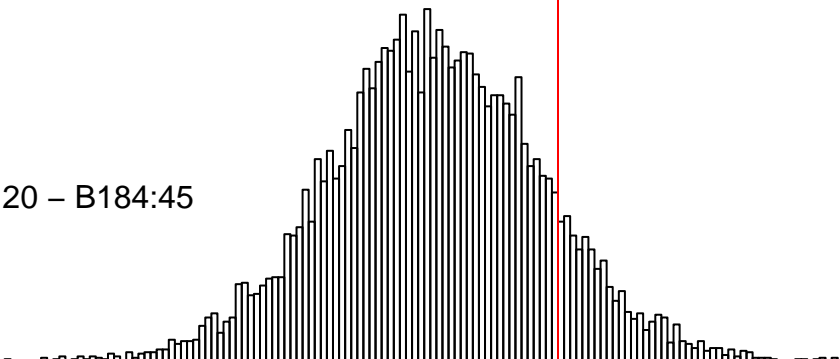

-2 -1 0 1 2

delta(Unidentified Metabolite 33)

B184:240

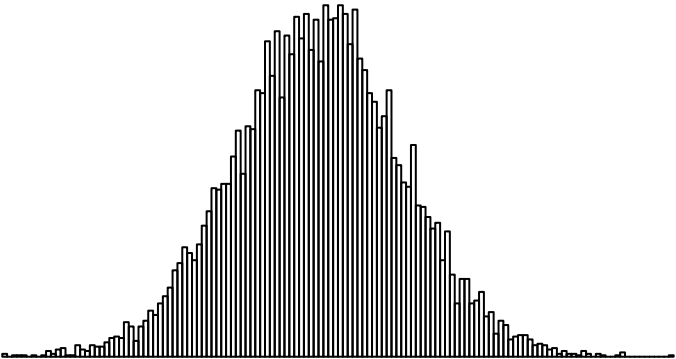

B184:120

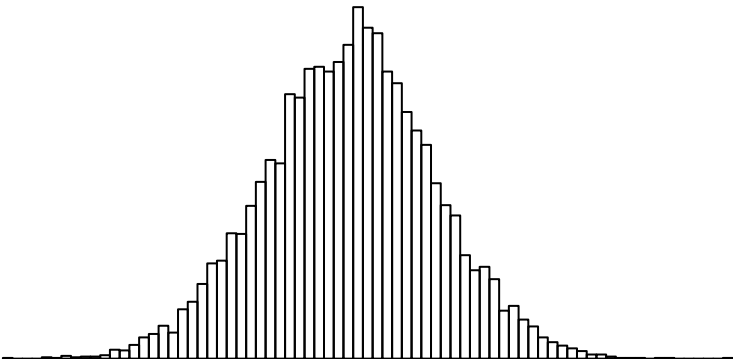

B184:45

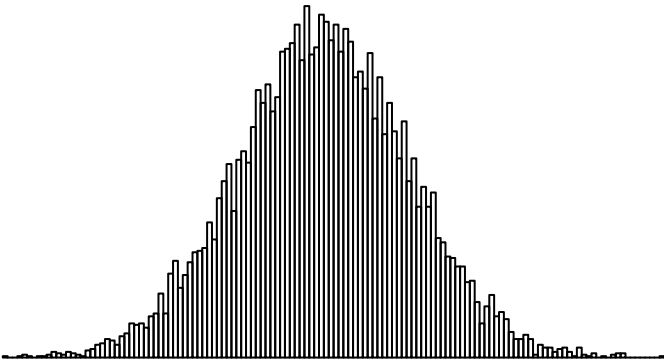

-9.5      -9.0      -8.5      -8.0      -7.5      -7.0

Unidentified Metabolite 34

B184:240 – B184:120

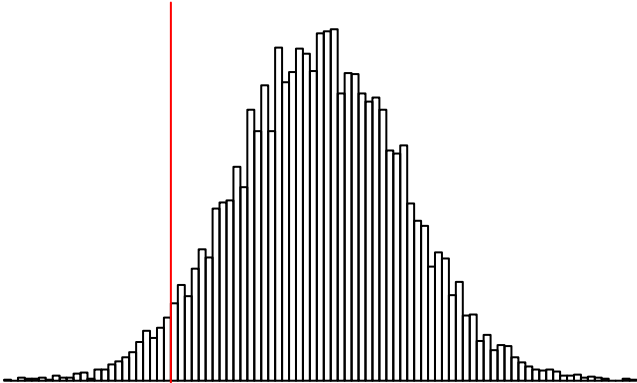

B184:240 – B184:45

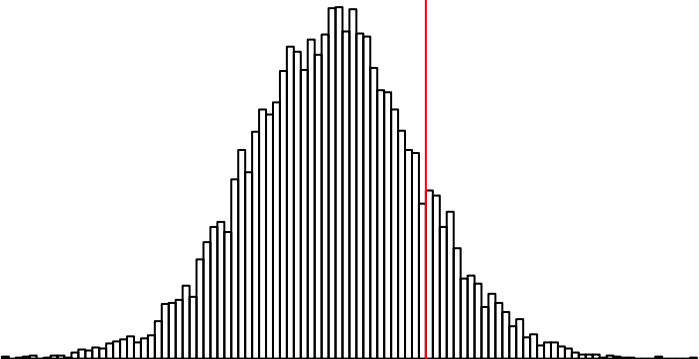

B184:120 – B184:45

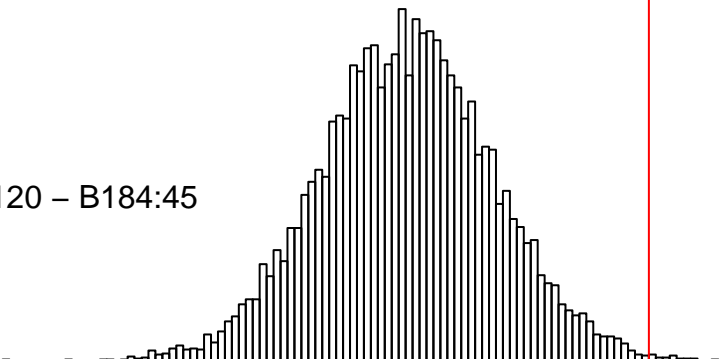

-2.0 -1.5 -1.0 -0.5 0.0 0.5 1.0 1.5

delta(Unidentified Metabolite 34)



B184:240

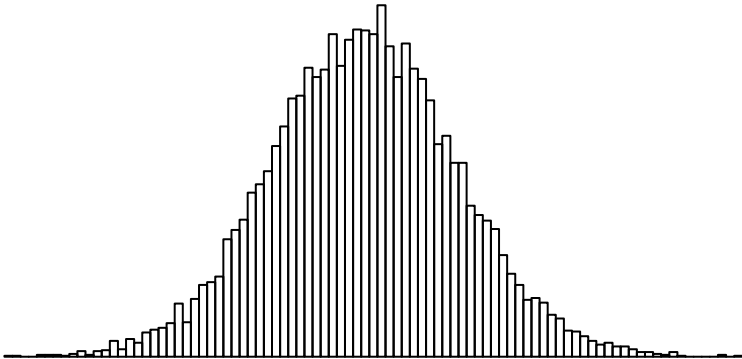

B184:120

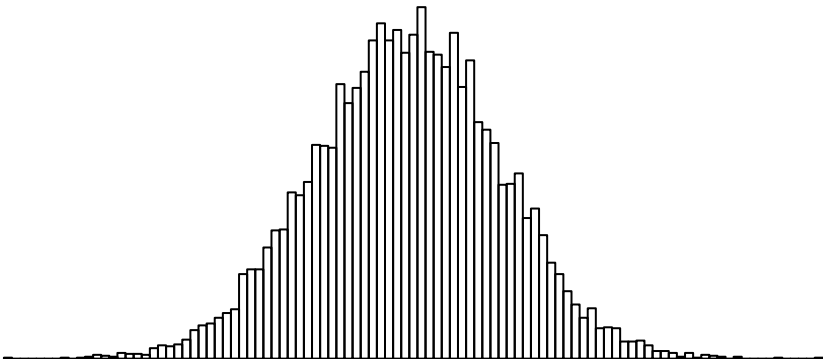

B184:45

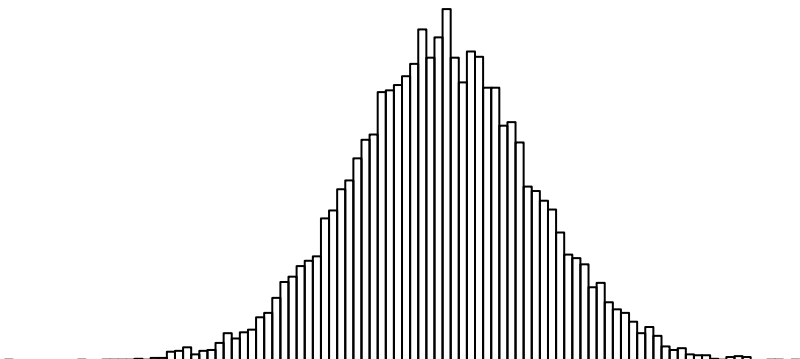

-8.0      -7.5      -7.0      -6.5      -6.0      -5.5      -5.0

Unidentified Metabolite 35

B184:240 – B184:120

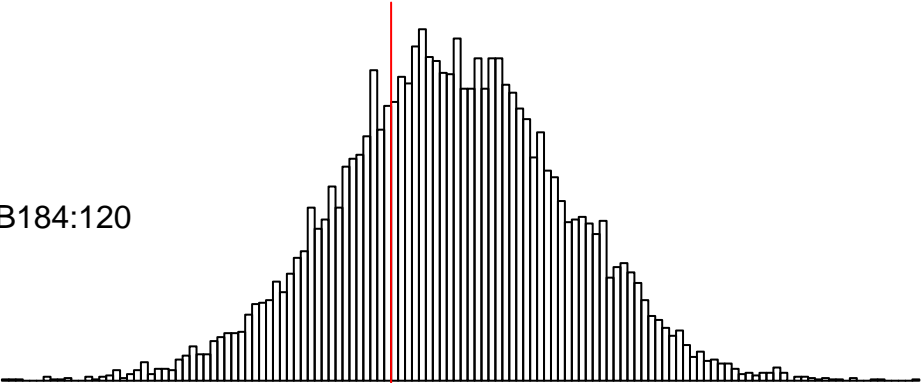

B184:240 – B184:45

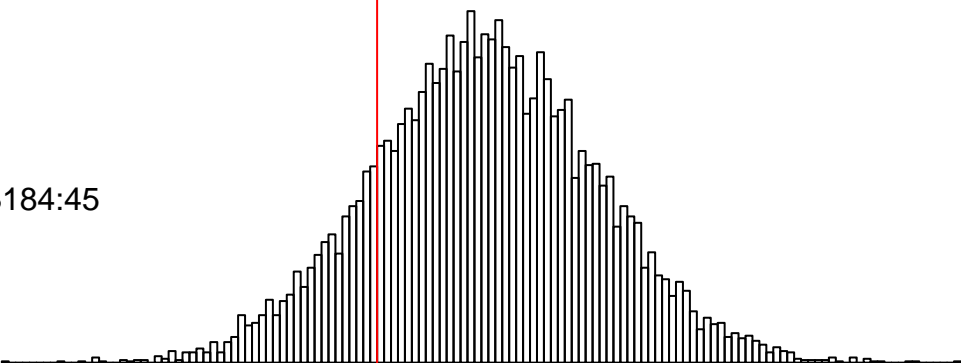

B184:120 – B184:45

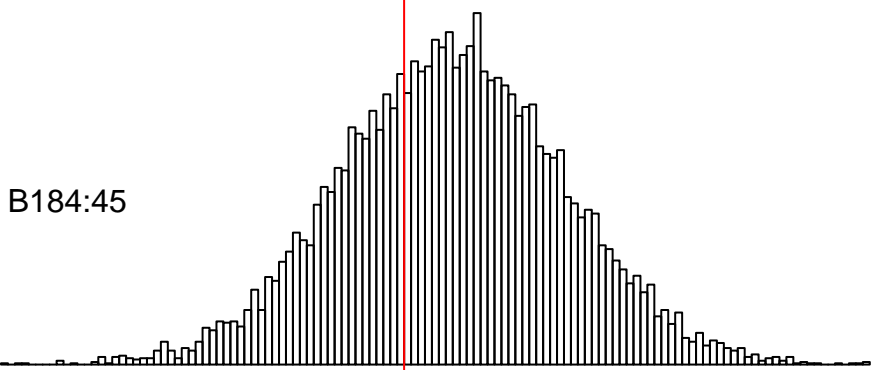

-1.5      -1.0      -0.5      0.0      0.5      1.0      1.5      2.0

delta(Unidentified Metabolite 35)

B184:240

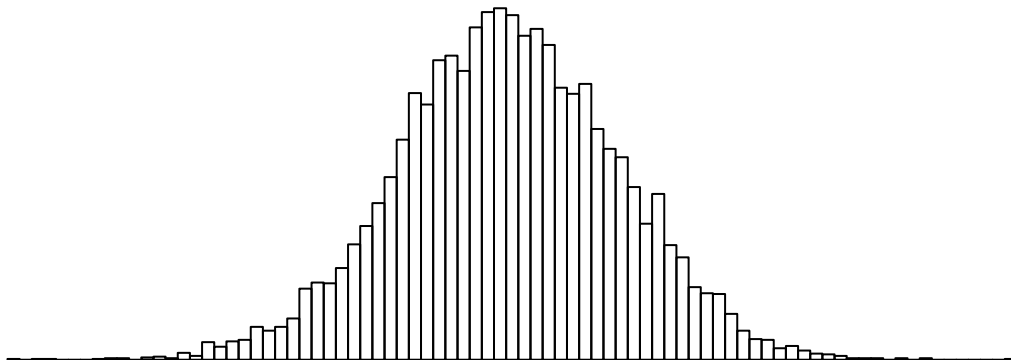

B184:120

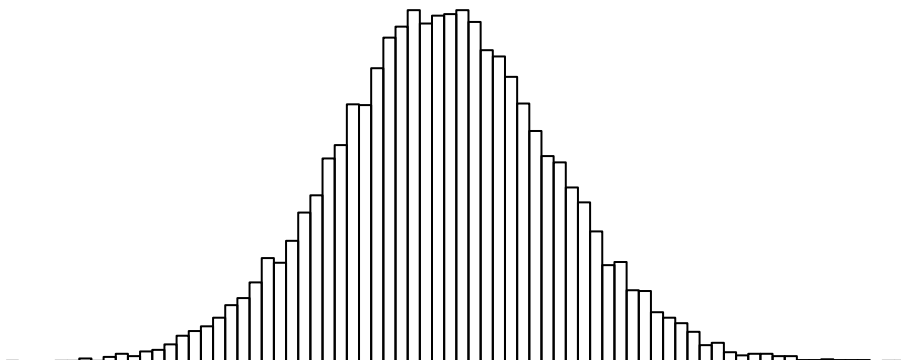

B184:45

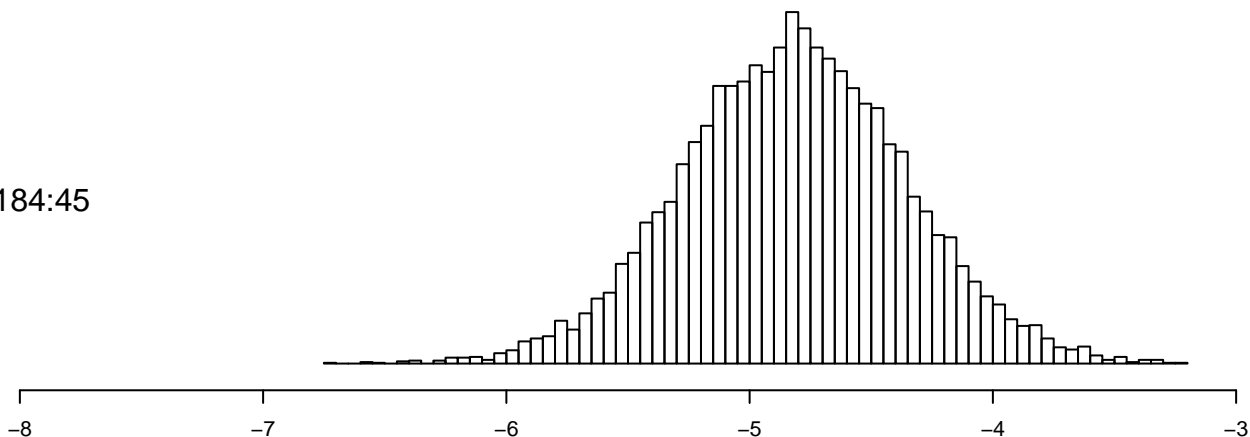

Unidentified Metabolite 36

B184:240 – B184:120

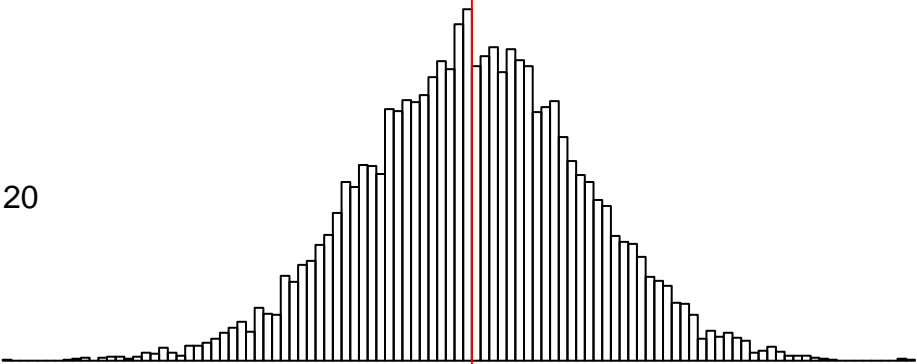

B184:240 – B184:45

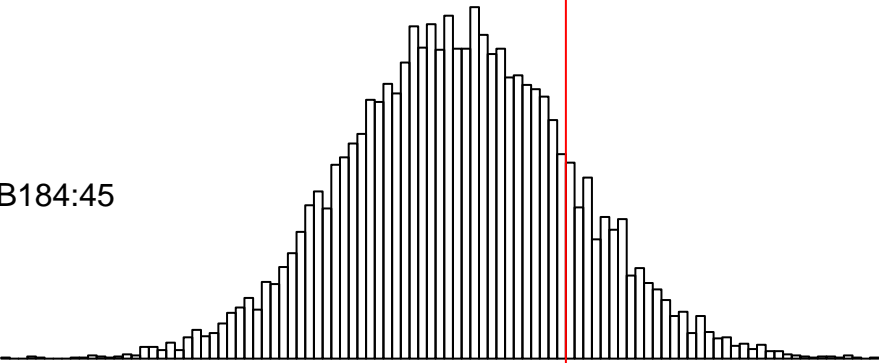

B184:120 – B184:45

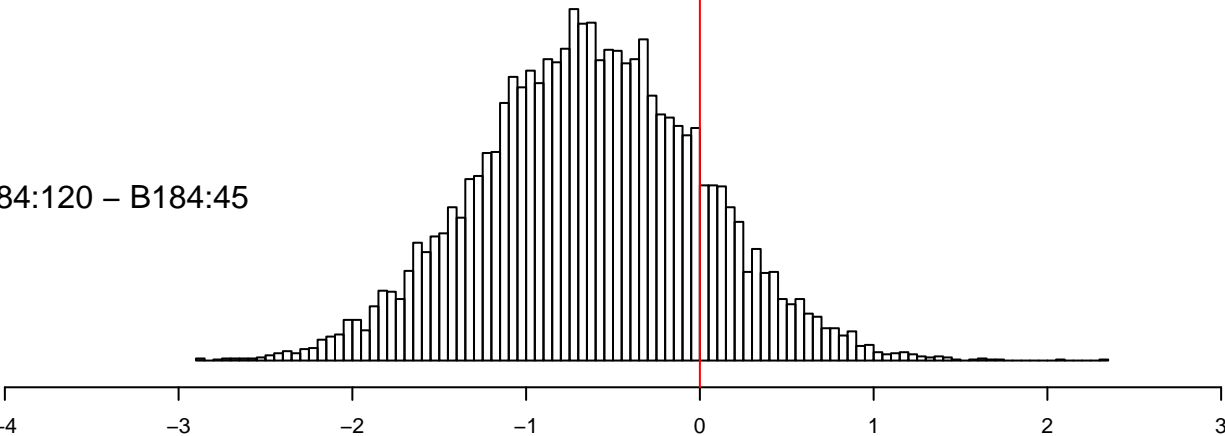

delta(Unidentified Metabolite 36)

B184:240

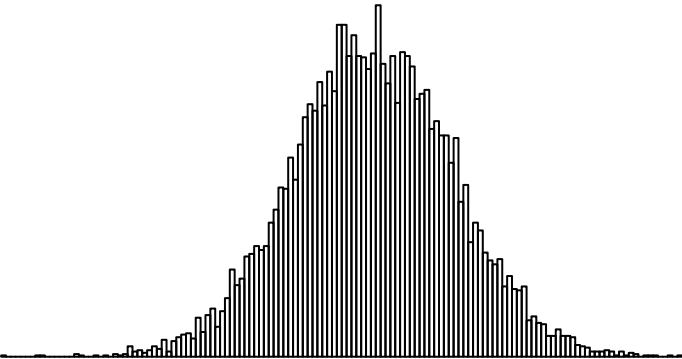

B184:120

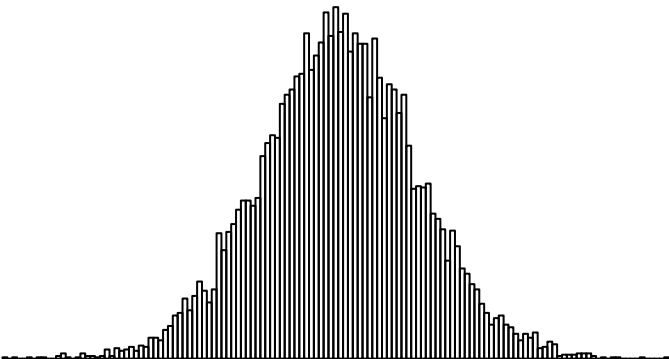

B184:45

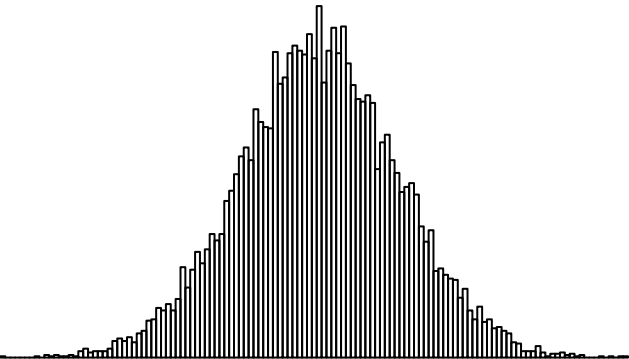

-10      -9      -8      -7      -6      -5

Unidentified Metabolite 38

B184:240 – B184:120

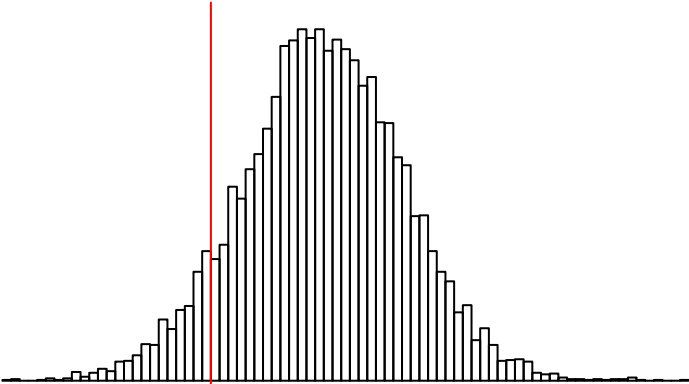

B184:240 – B184:45

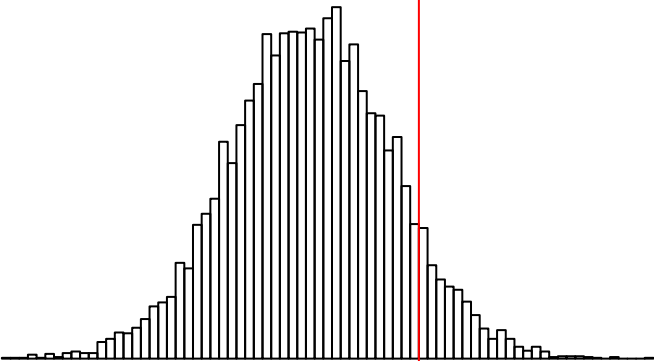

B184:120 – B184:45

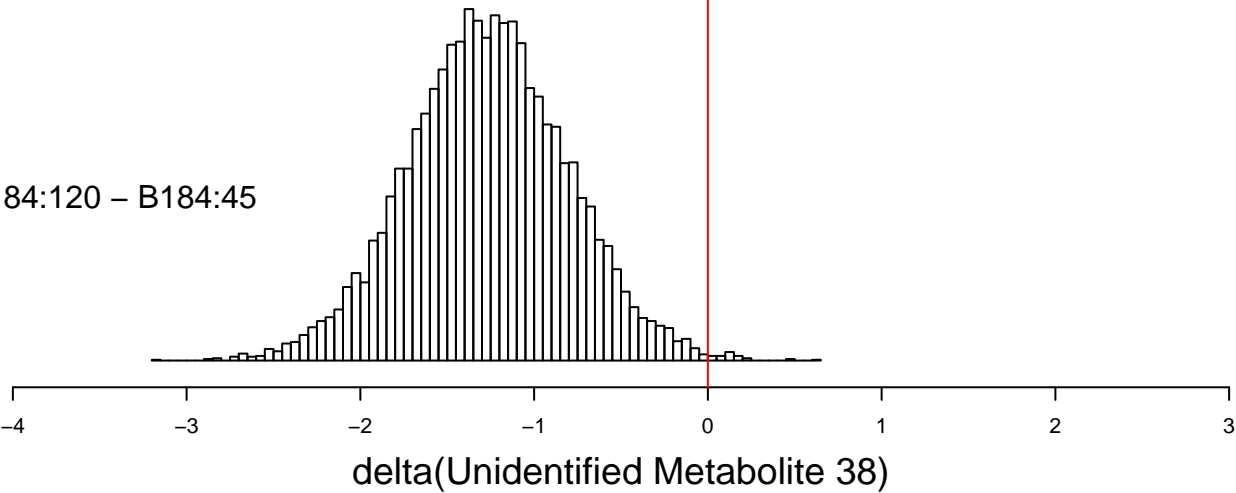

B184:240

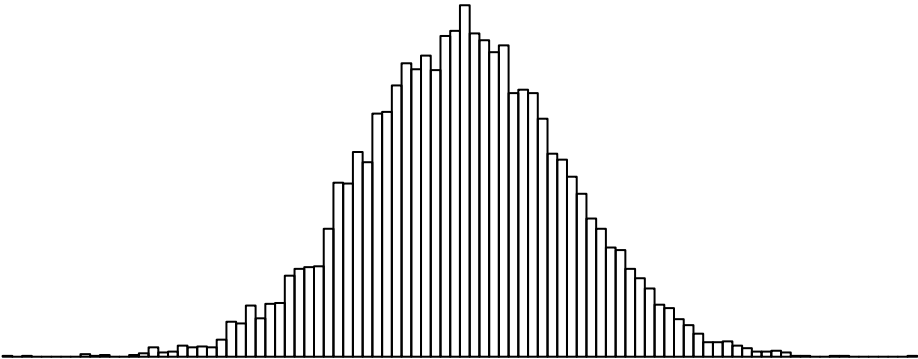

B184:120

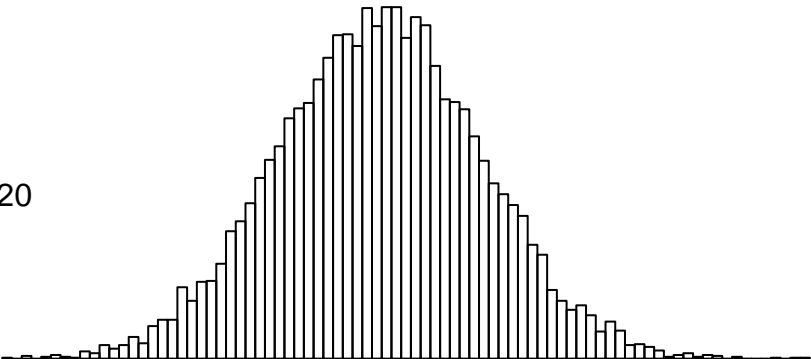

B184:45

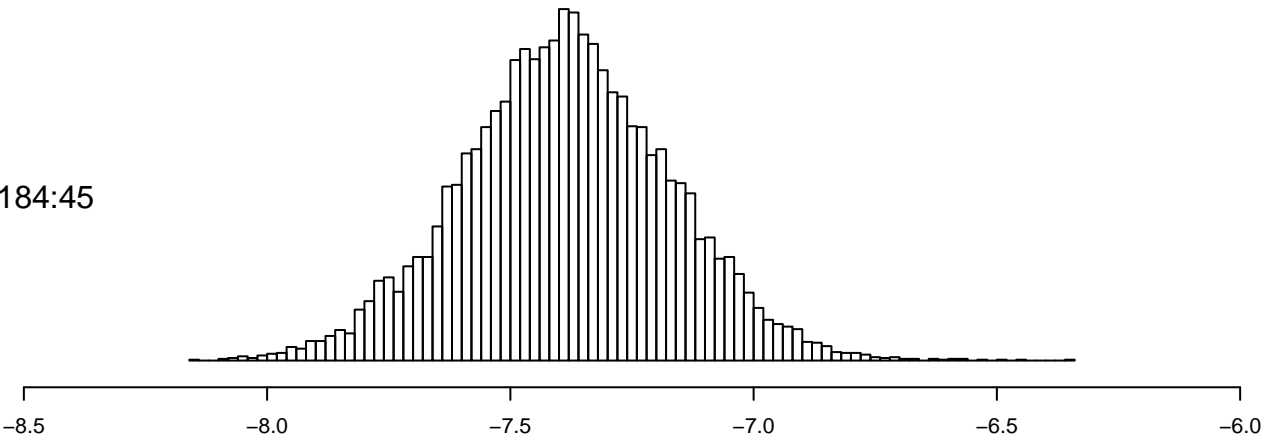

Unidentified Metabolite 39

B184:240 – B184:120

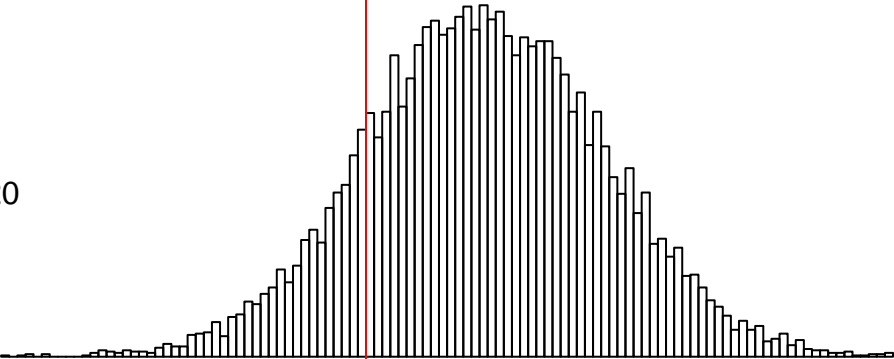

B184:240 – B184:45

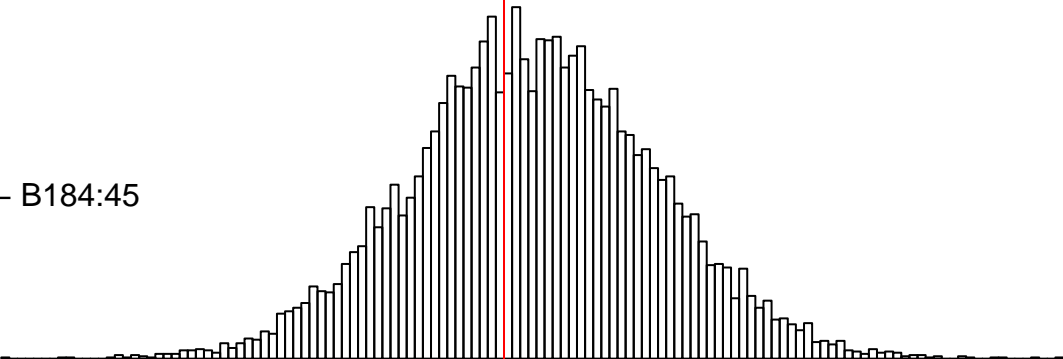

B184:120 – B184:45

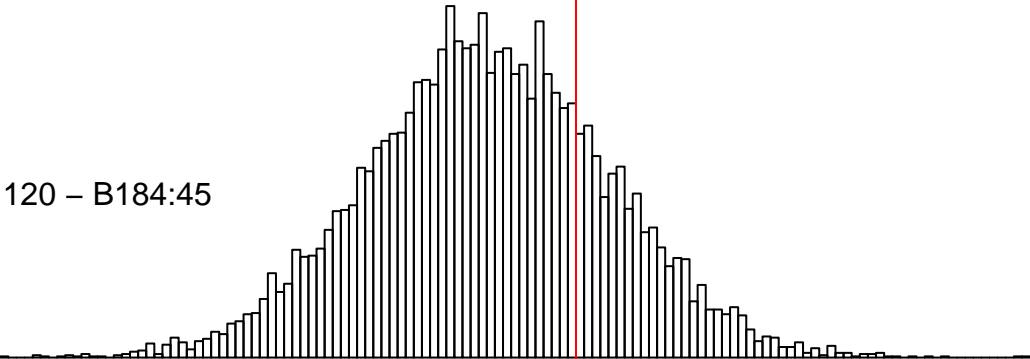

-1.5      -1.0      -0.5      0.0      0.5      1.0      1.5

delta(Unidentified Metabolite 39)



B184:240

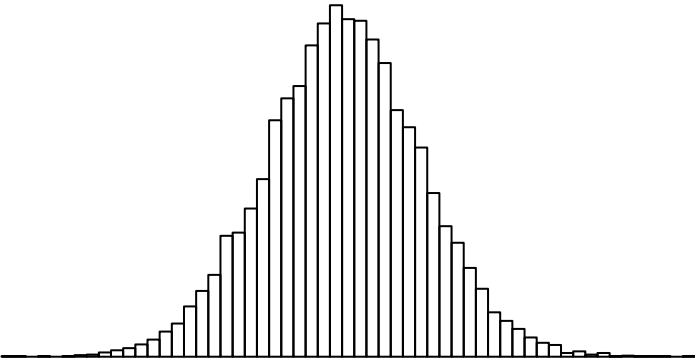

B184:120

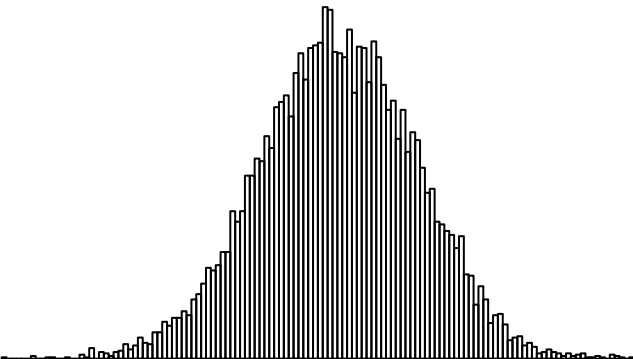

B184:45

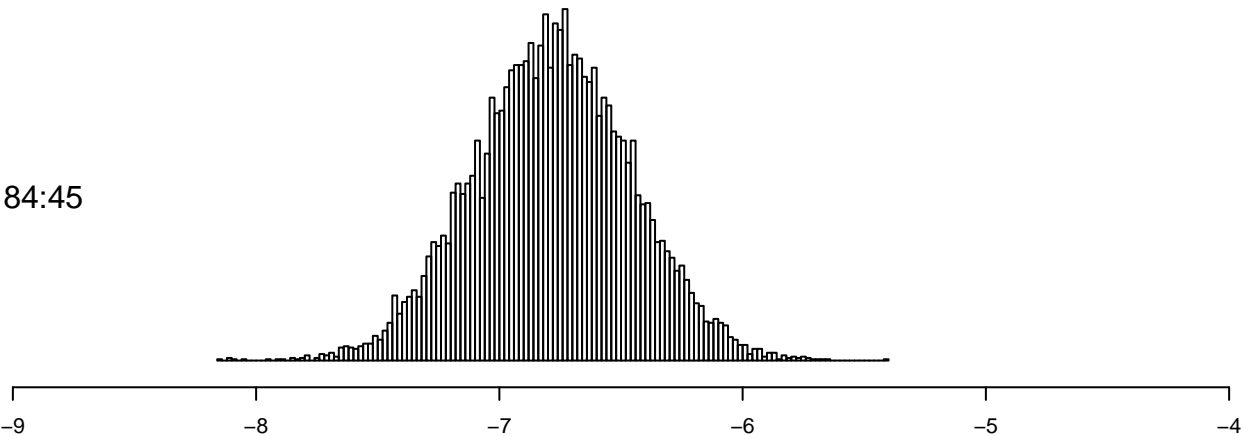

Unidentified Metabolite 42

B184:240 – B184:120

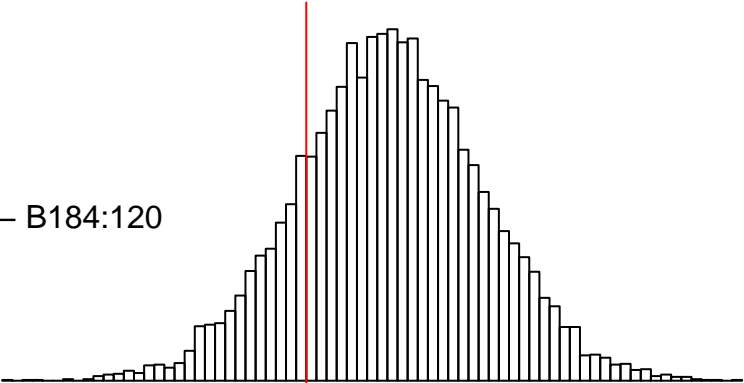

B184:240 – B184:45

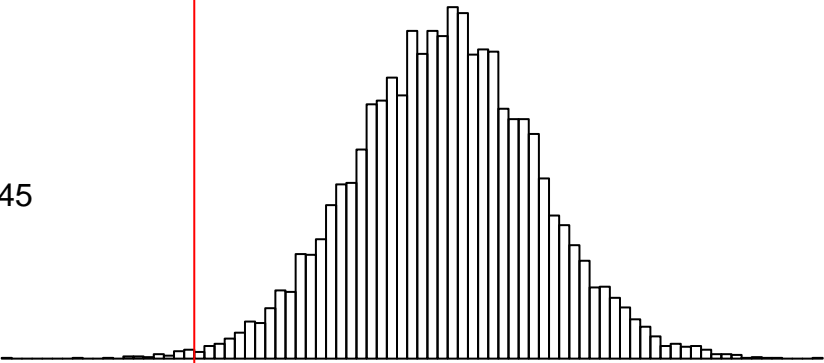

B184:120 – B184:45

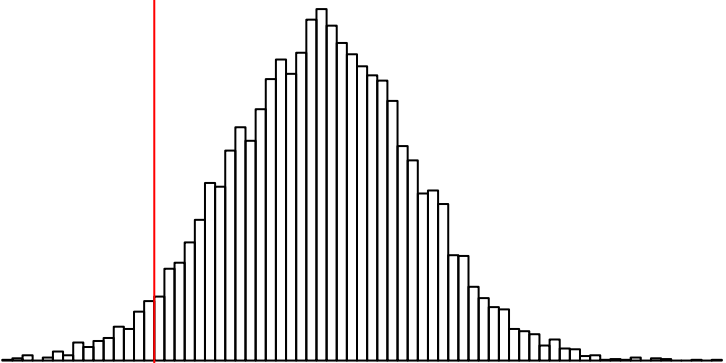

-2 -1 0 1 2 3 4

delta(Unidentified Metabolite 42)

B184:240

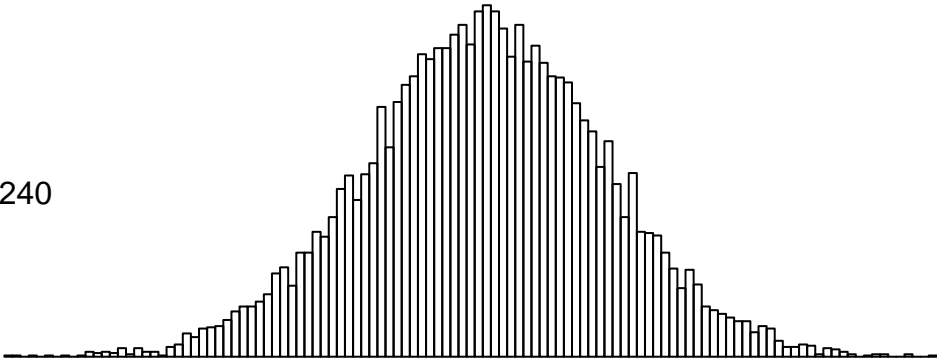

B184:120

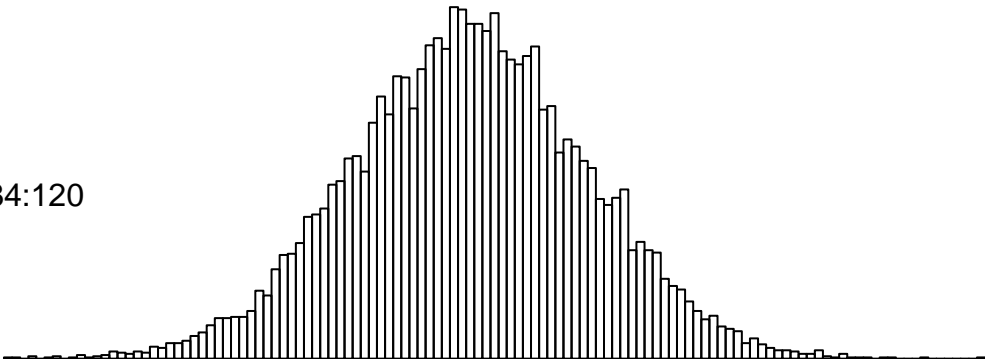

B184:45

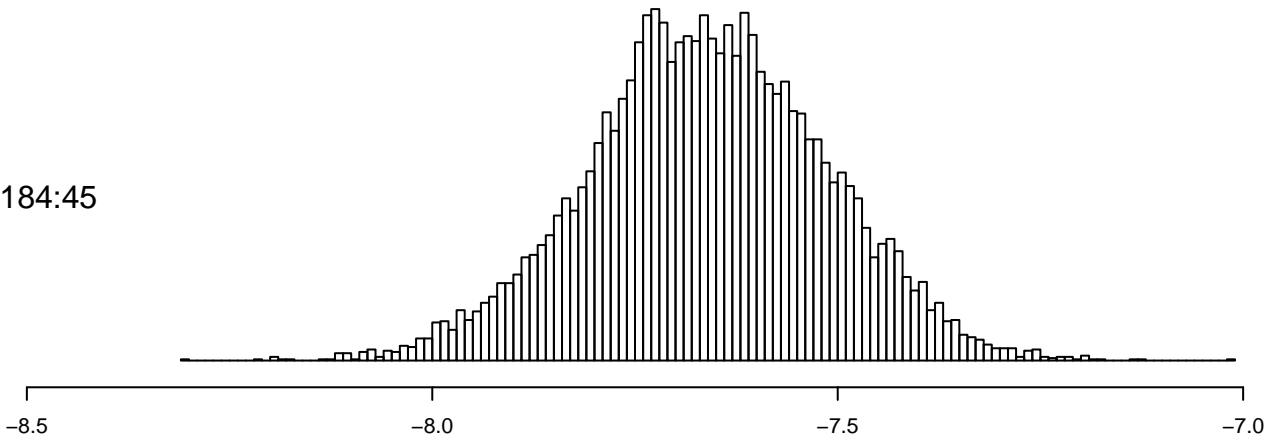

Unidentified Metabolite 43

B184:240 – B184:120

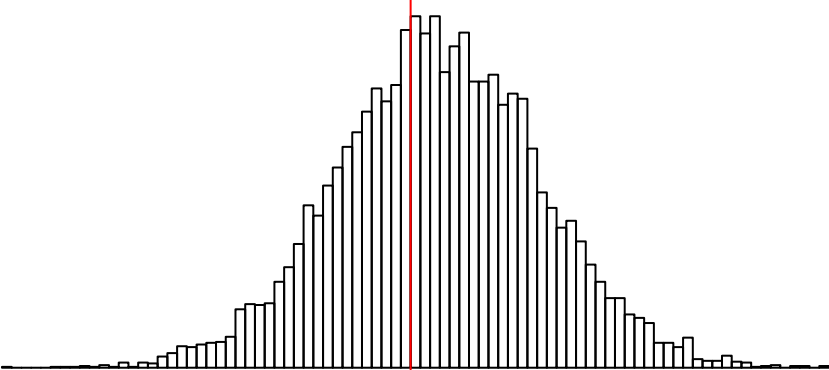

B184:240 – B184:45

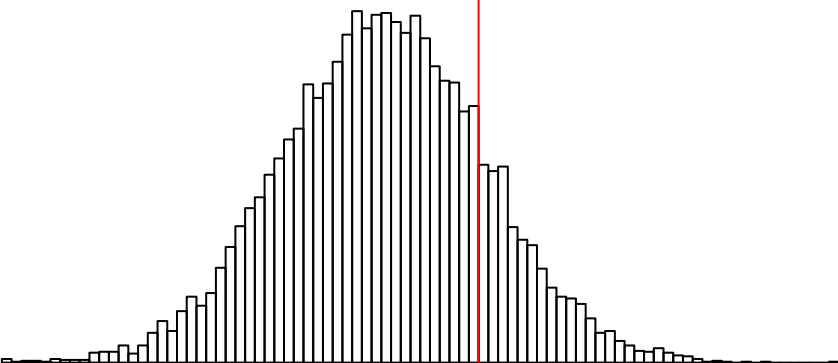

B184:120 – B184:45

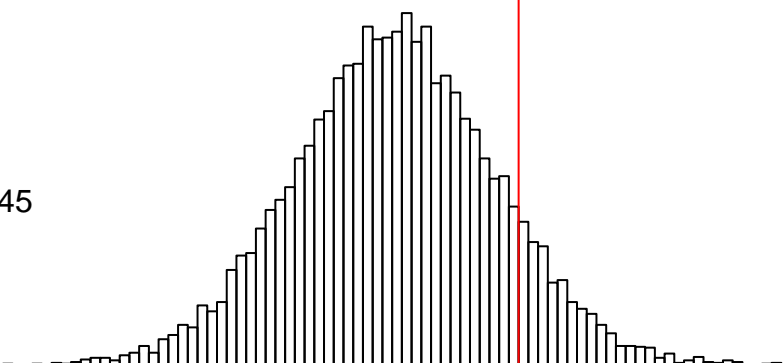

-1.5      -1.0      -0.5      0.0      0.5      1.0

delta(Unidentified Metabolite 43)

B184:240

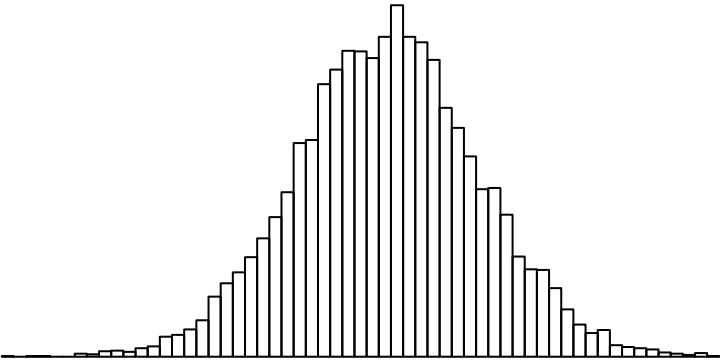

B184:120

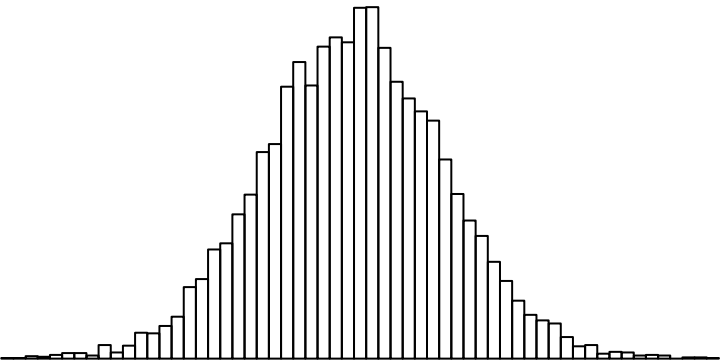

B184:45

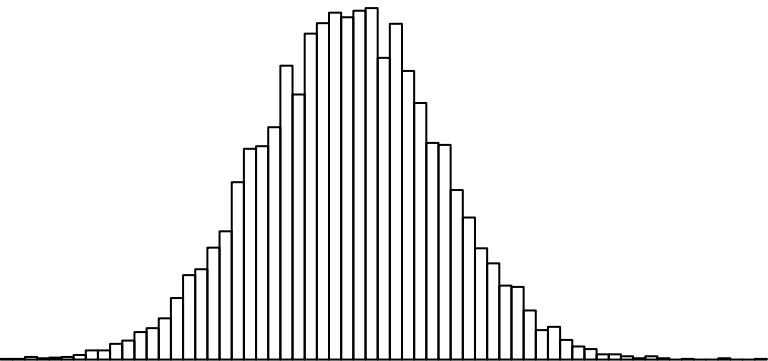

-10      -9      -8      -7      -6      -5

Unidentified Metabolite 45

B184:240 – B184:120

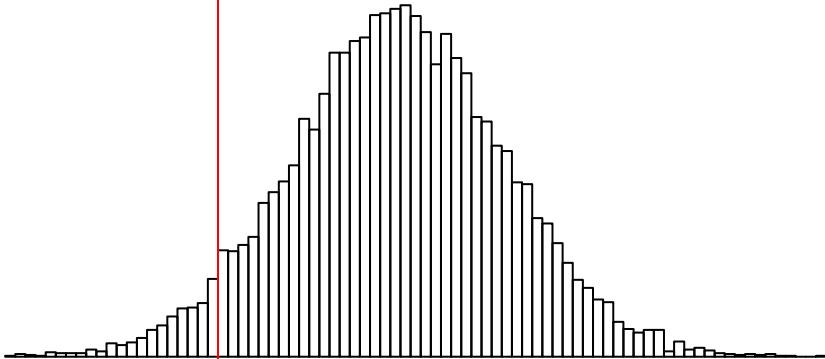

B184:240 – B184:45

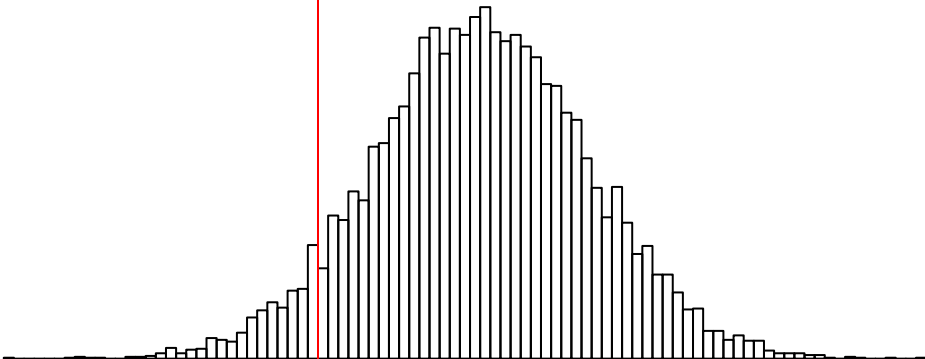

B184:120 – B184:45

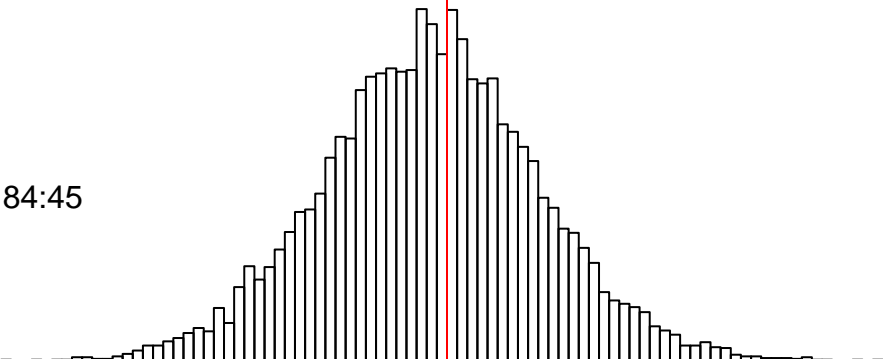

-3 -2 -1 0 1 2 3

delta(Unidentified Metabolite 45)

B184:240

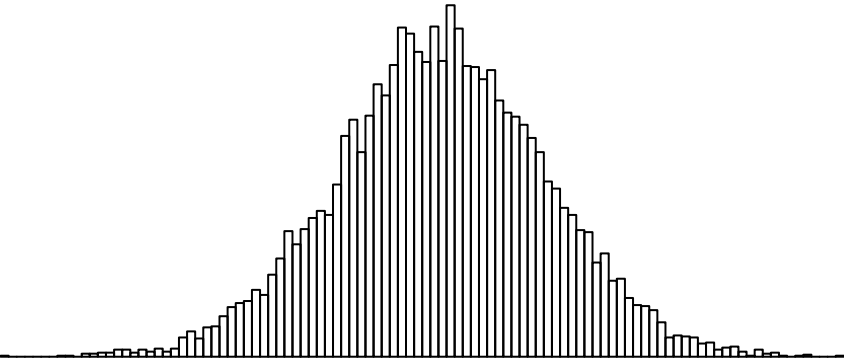

B184:120

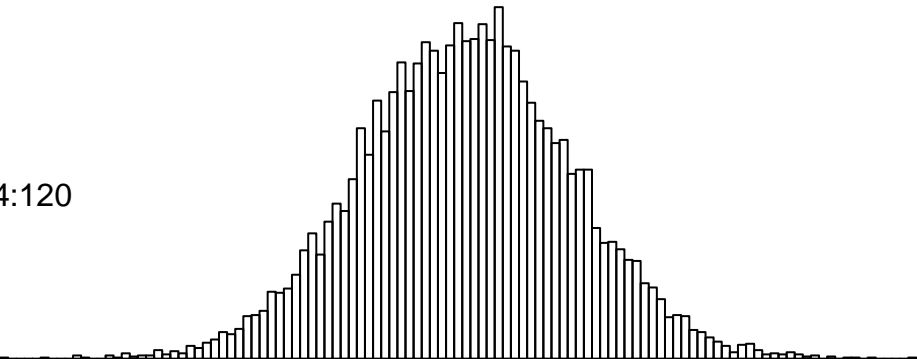

B184:45

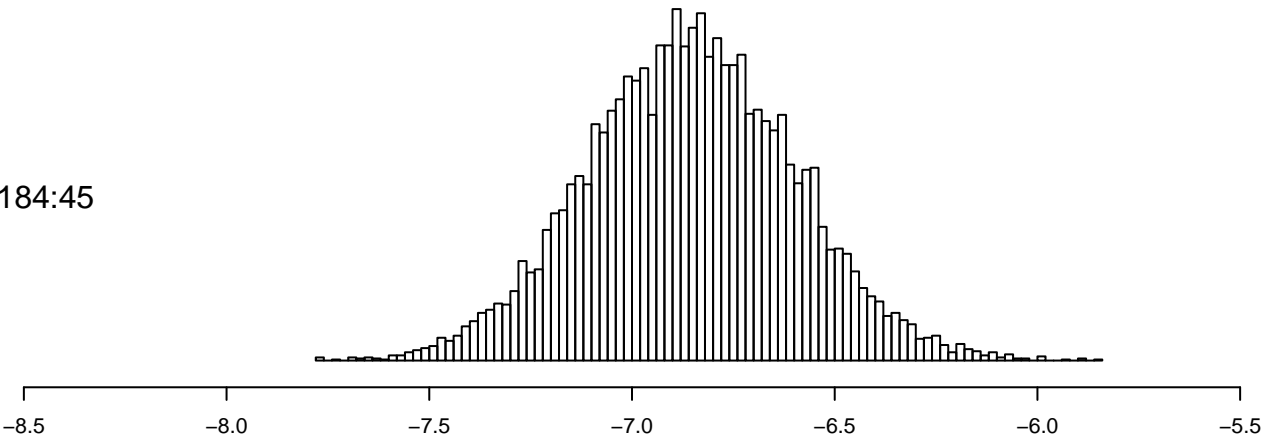

Unidentified Metabolite 47

B184:240 – B184:120

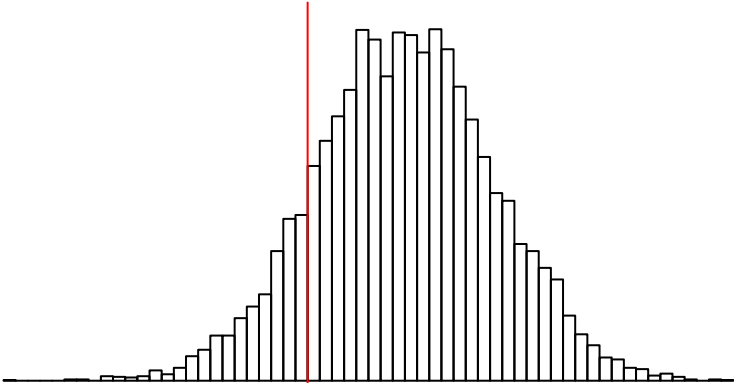

B184:240 – B184:45

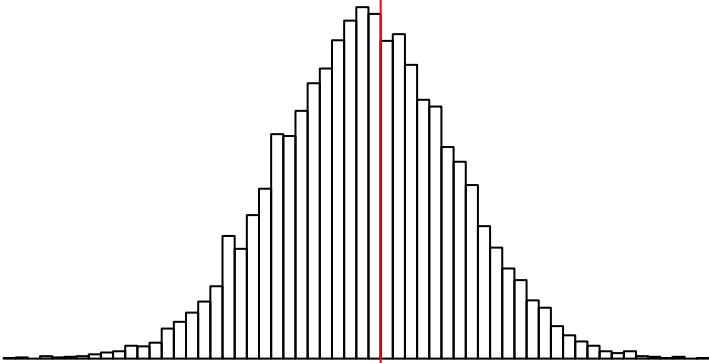

B184:120 – B184:45

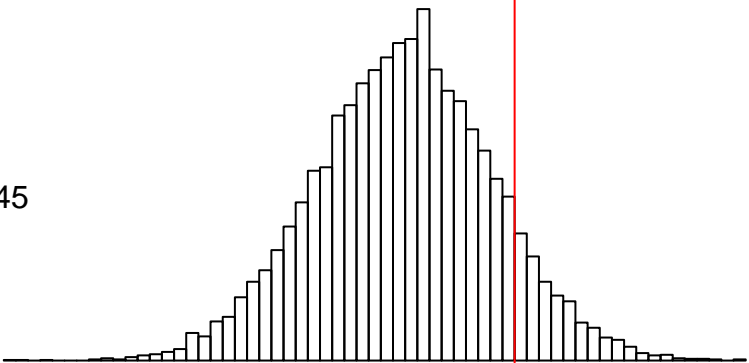

-3 -2 -1 0 1 2

delta(Unidentified Metabolite 47)



B184:240

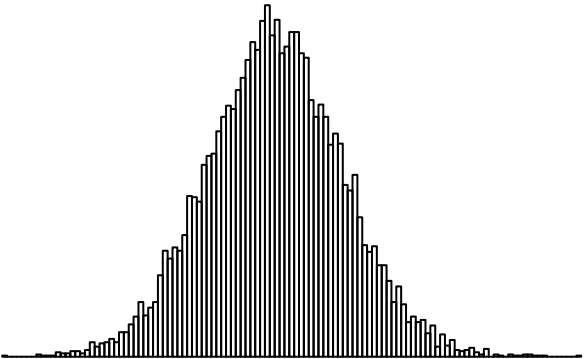

B184:120

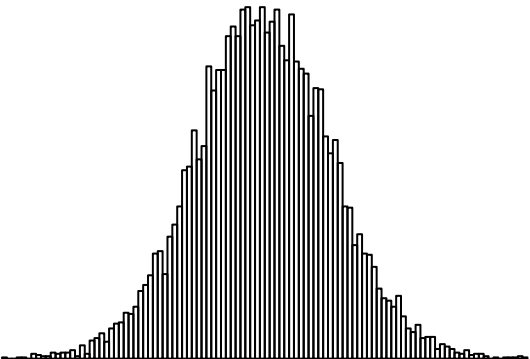

B184:45

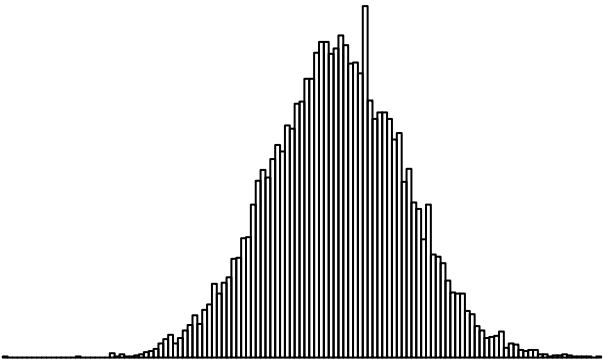

-9.0      -8.5      -8.0      -7.5      -7.0      -6.5

Unidentified Metabolite 48

B184:240 – B184:120

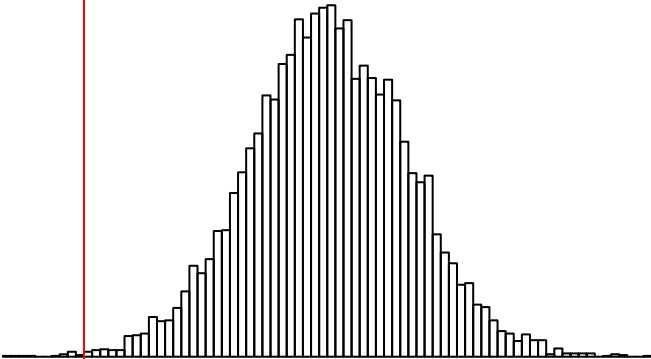

B184:240 – B184:45

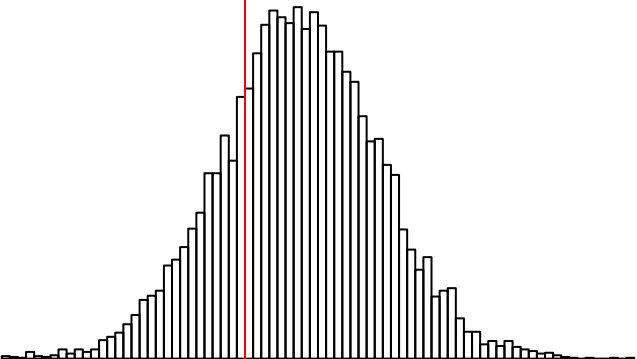

B184:120 – B184:45

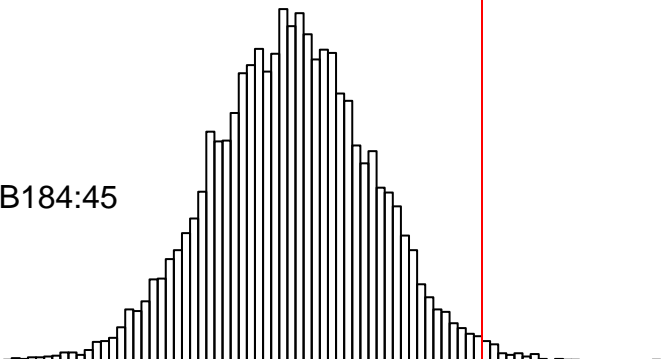

-1.5      -1.0      -0.5      0.0      0.5      1.0      1.5

delta(Unidentified Metabolite 48)

B184:240

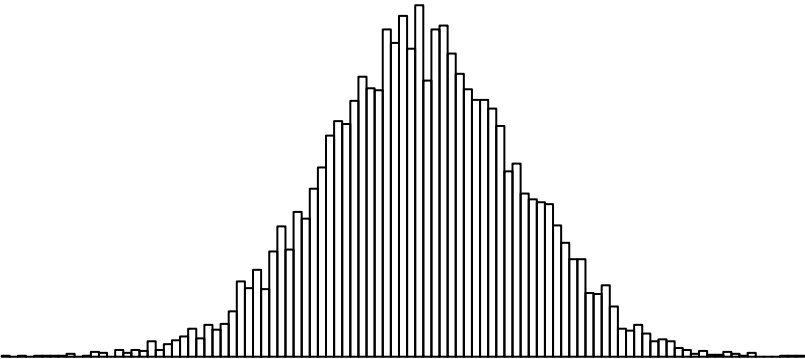

B184:120

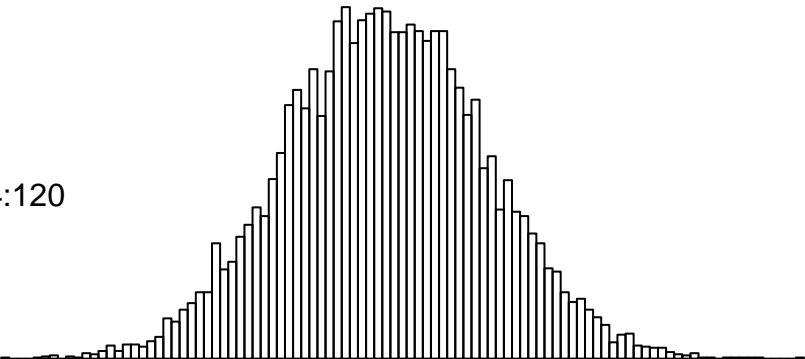

B184:45

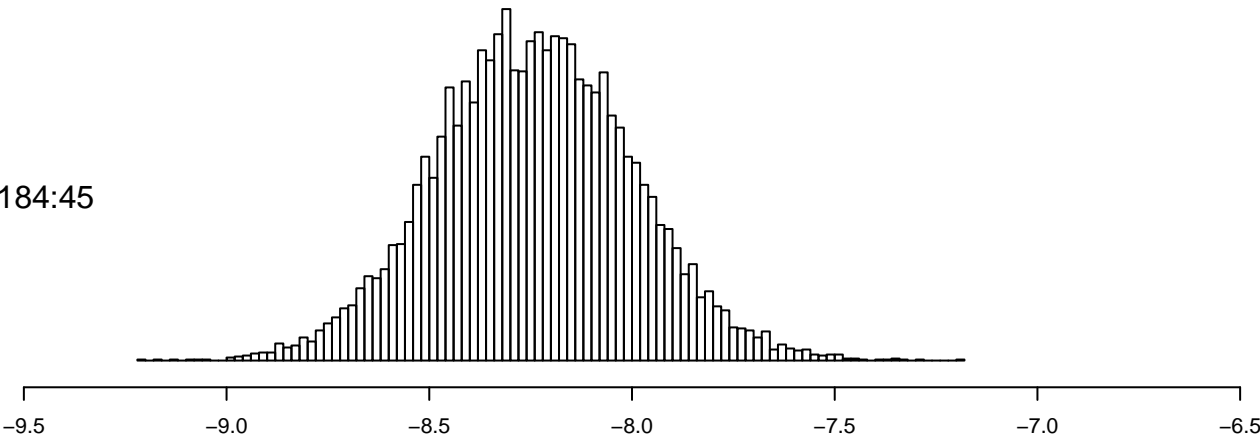

Unidentified Metabolite 49

B184:240 – B184:120

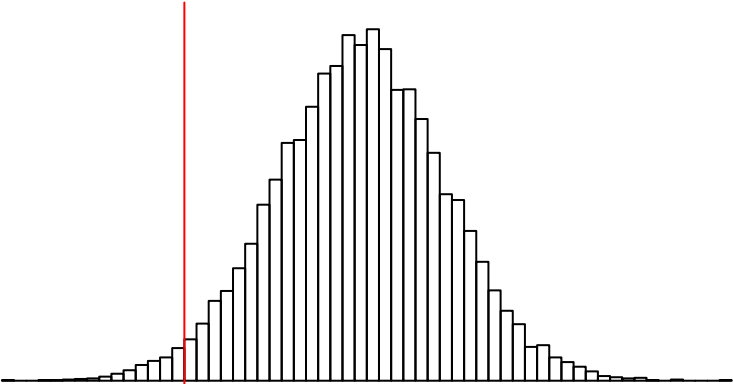

B184:240 – B184:45

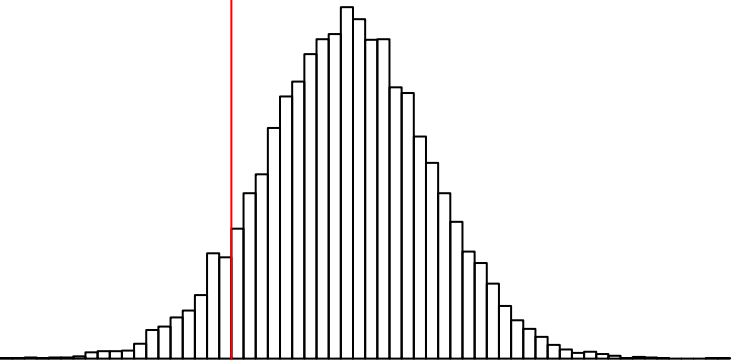

B184:120 – B184:45

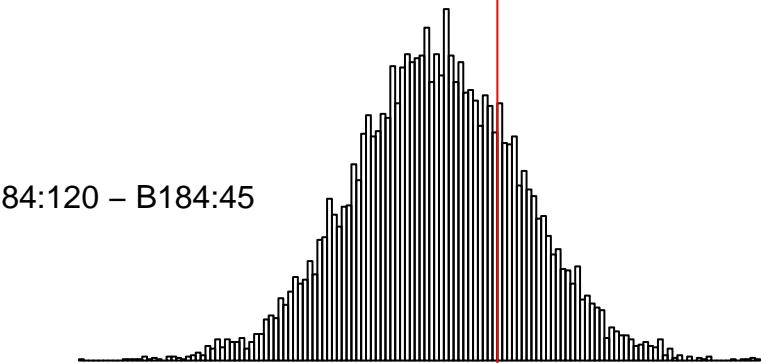

-2 -1 0 1 2 3

delta(Unidentified Metabolite 49)

B184:240

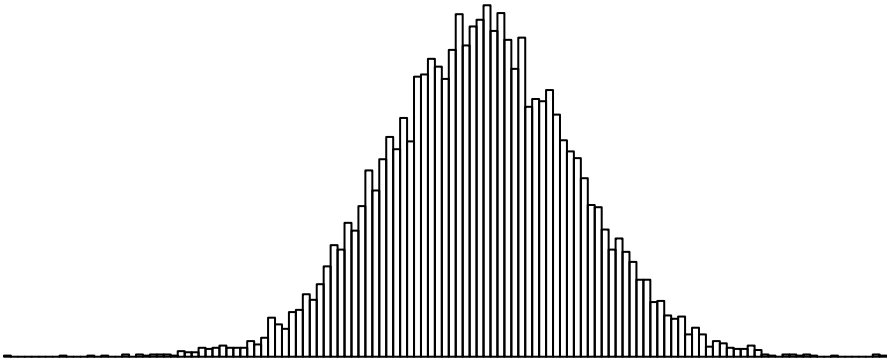

B184:120

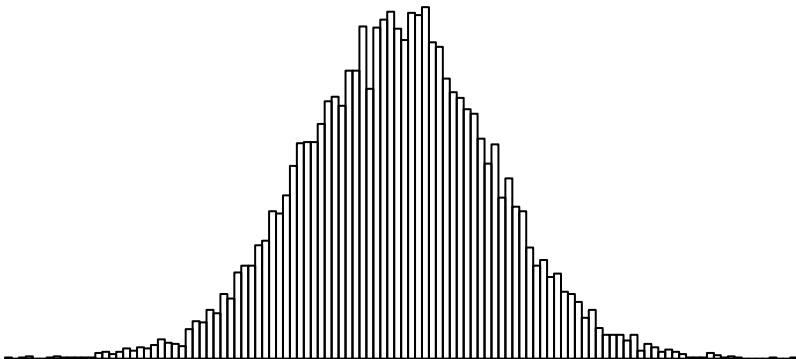

B184:45

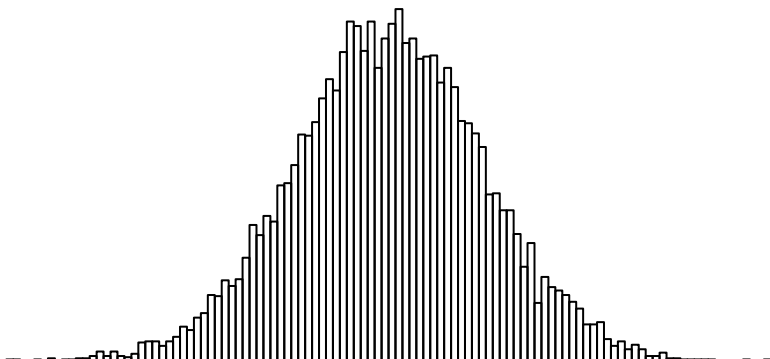

-9.0      -8.5      -8.0      -7.5      -7.0      -6.5      -6.0      -5.5

Unidentified Metabolite 50

B184:240 – B184:120

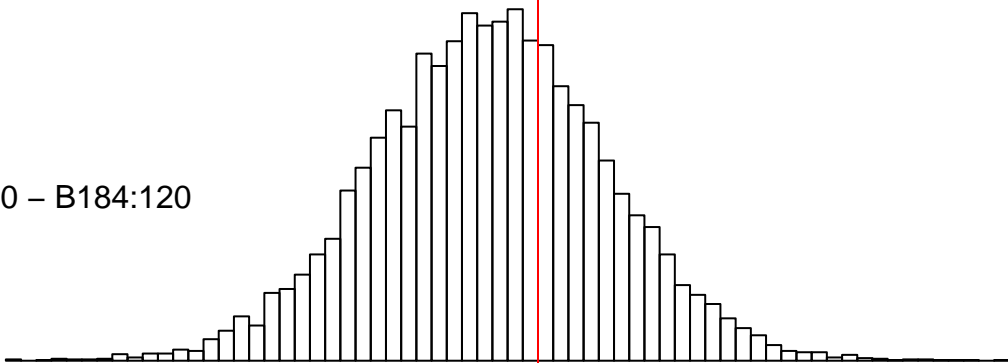

B184:240 – B184:45

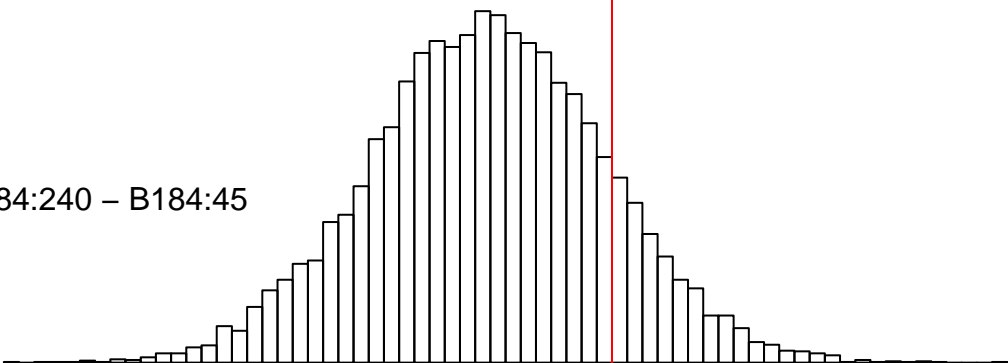

B184:120 – B184:45

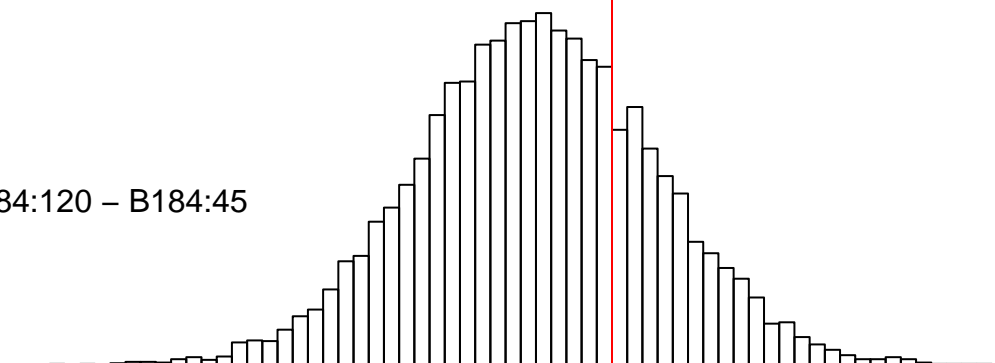

-2 -1 0 1 2

delta(Unidentified Metabolite 50)

B184:240

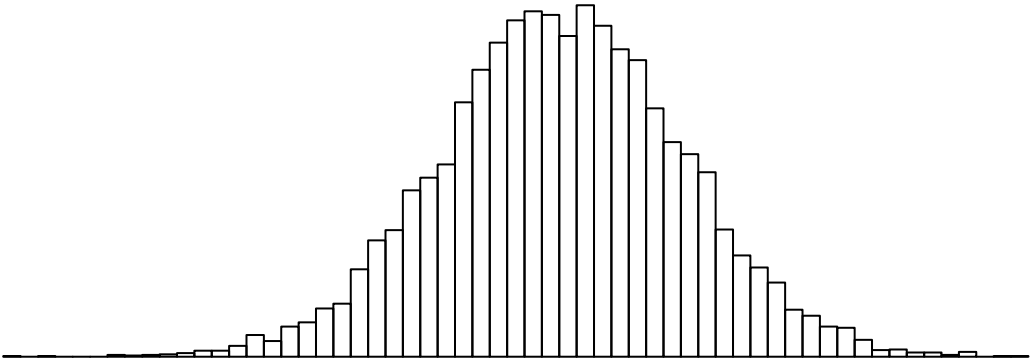

B184:120

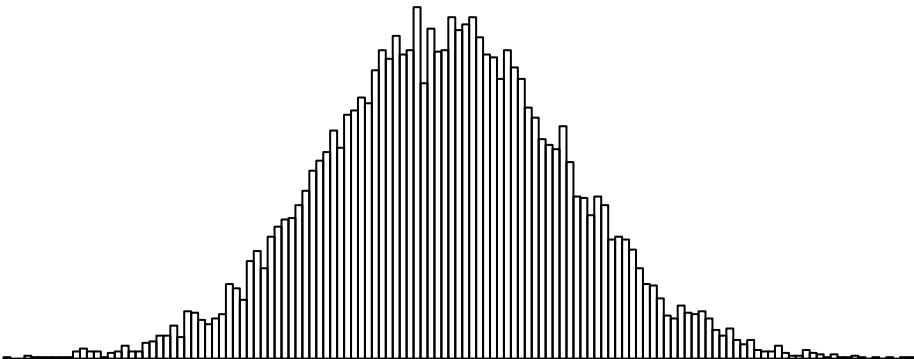

B184:45

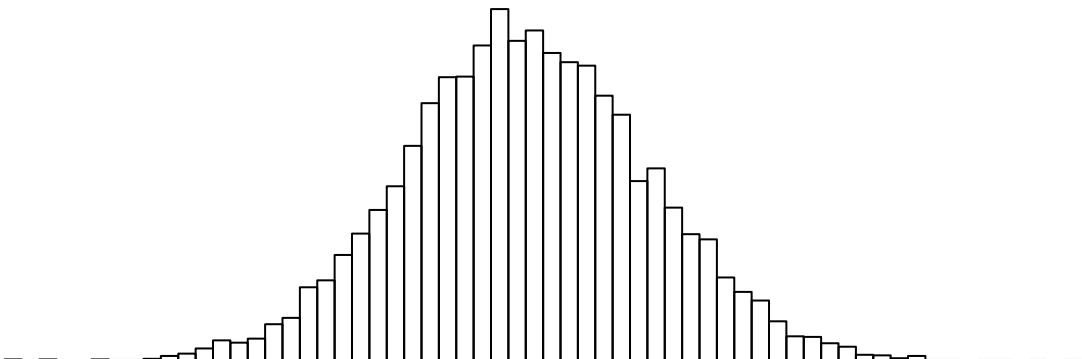

-8.5      -8.0      -7.5      -7.0      -6.5      -6.0      -5.5      -5.0

Unidentified Metabolite 51

B184:240 – B184:120

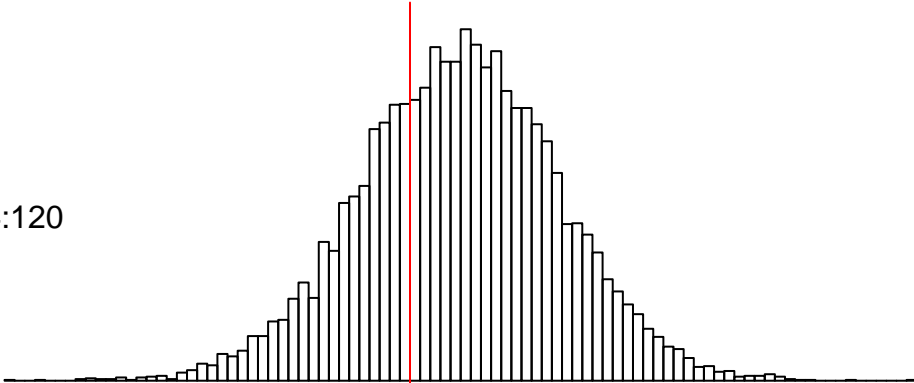

B184:240 – B184:45

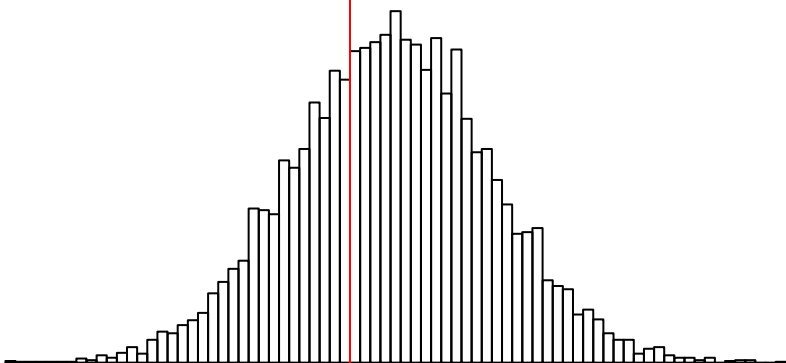

B184:120 – B184:45

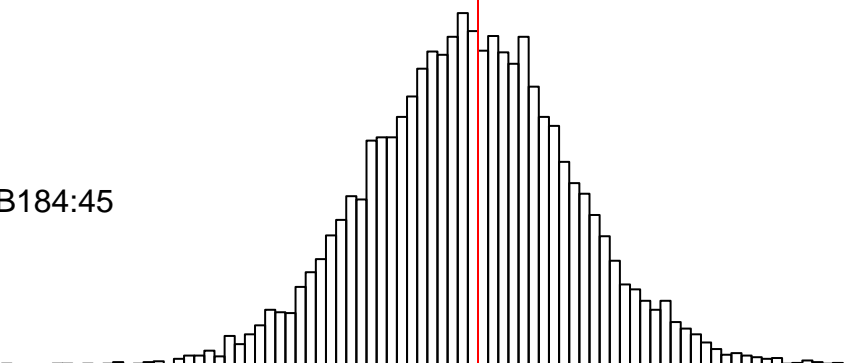

-3 -2 -1 0 1 2 3

delta(Unidentified Metabolite 51)



B184:240

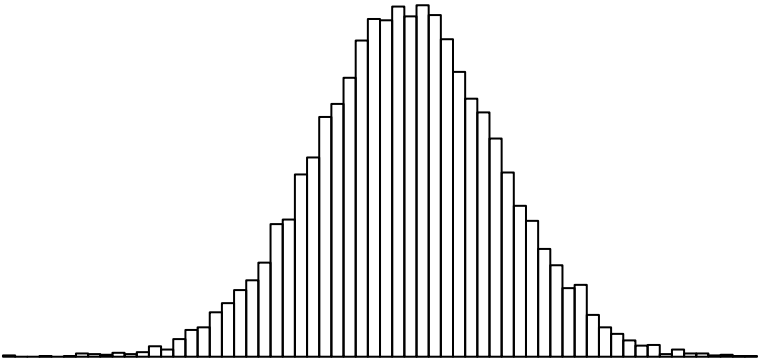

B184:120

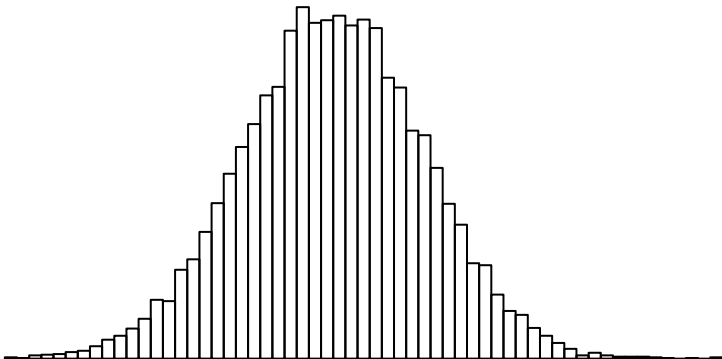

B184:45

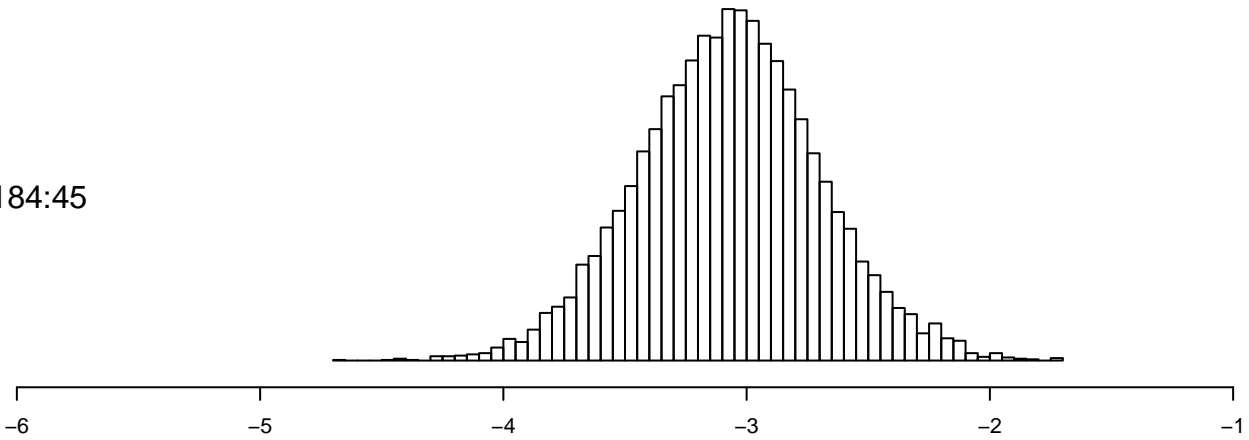

Unidentified Metabolite 55

B184:240 – B184:120

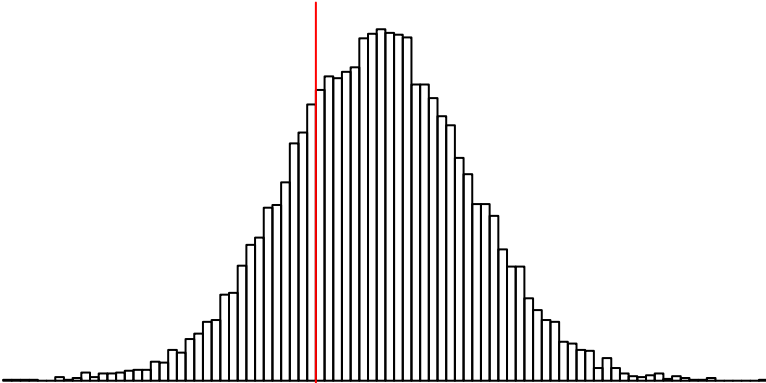

B184:240 – B184:45

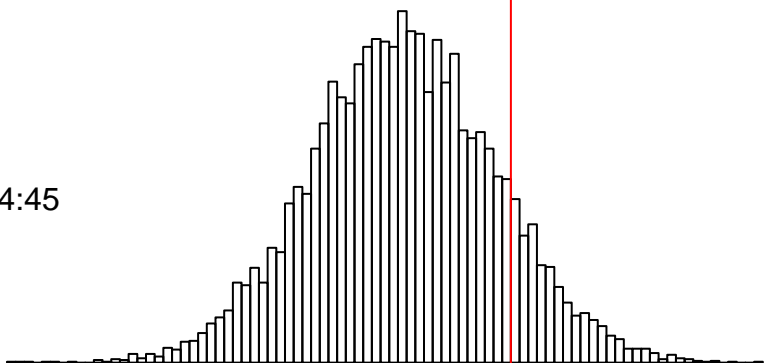

B184:120 – B184:45

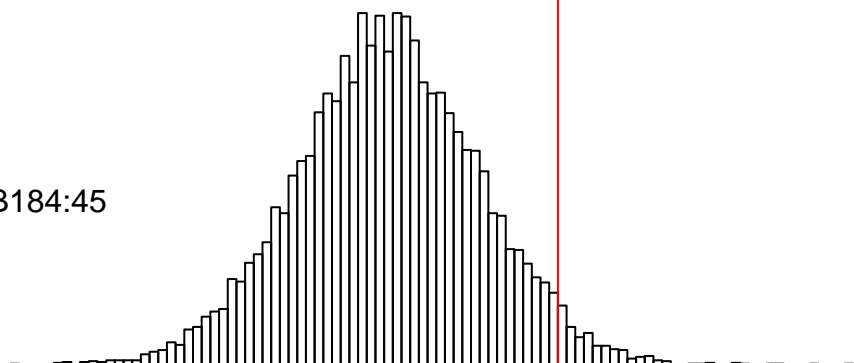

-4 -3 -2 -1 0 1 2 3

delta(Unidentified Metabolite 55)

B184:240

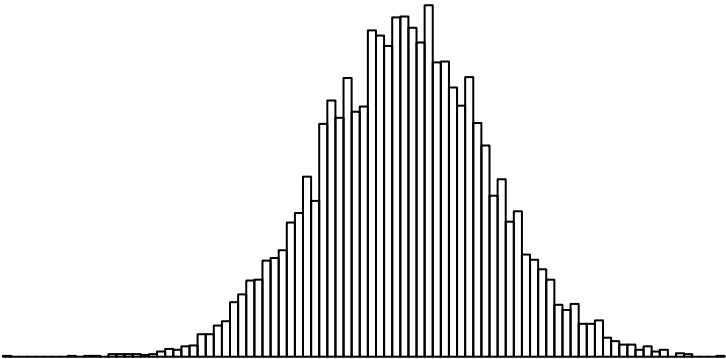

B184:120

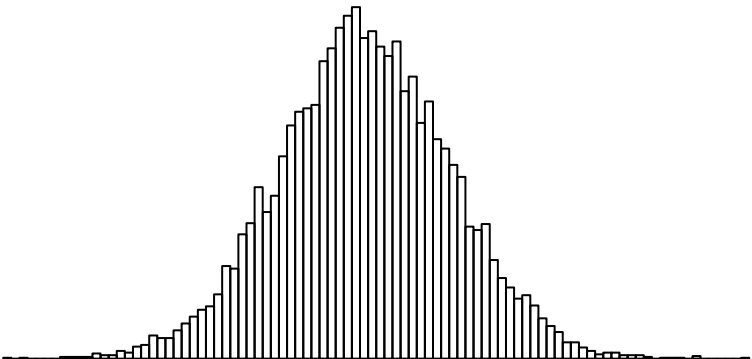

B184:45

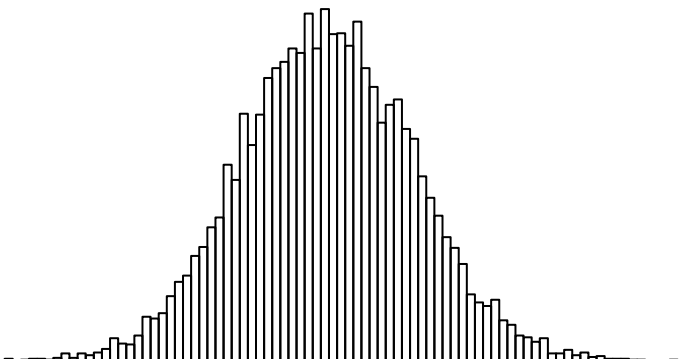

-9.5      -9.0      -8.5      -8.0      -7.5      -7.0      -6.5

Unidentified Metabolite 56

B184:240 – B184:120

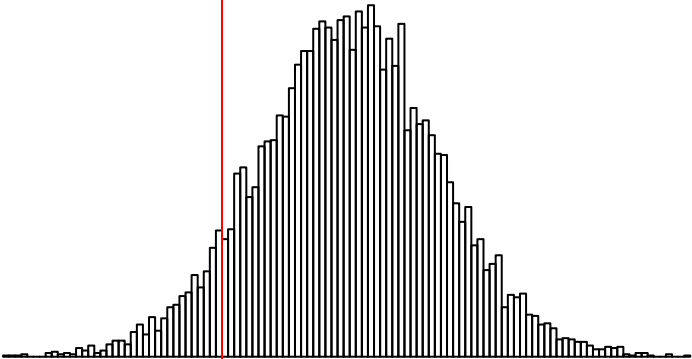

B184:240 – B184:45

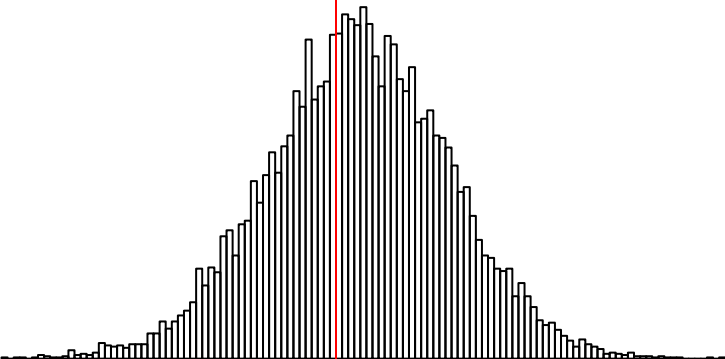

B184:120 – B184:45

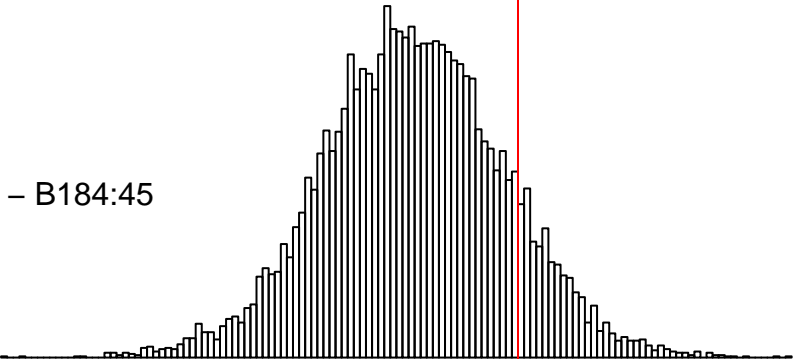

-2 -1 0 1 2

delta(Unidentified Metabolite 56)

B184:240

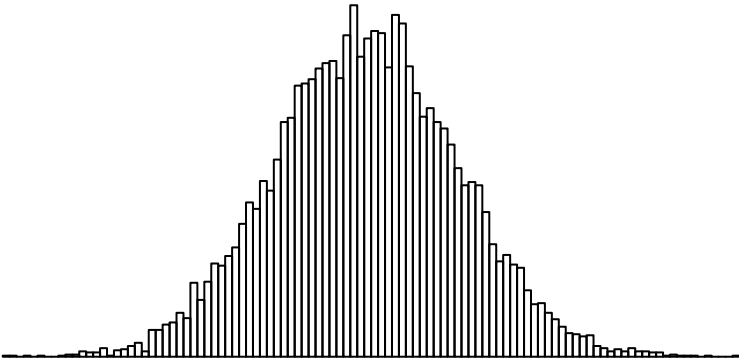

B184:120

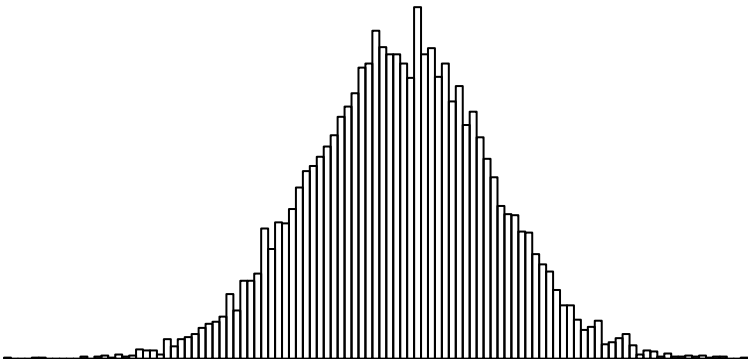

B184:45

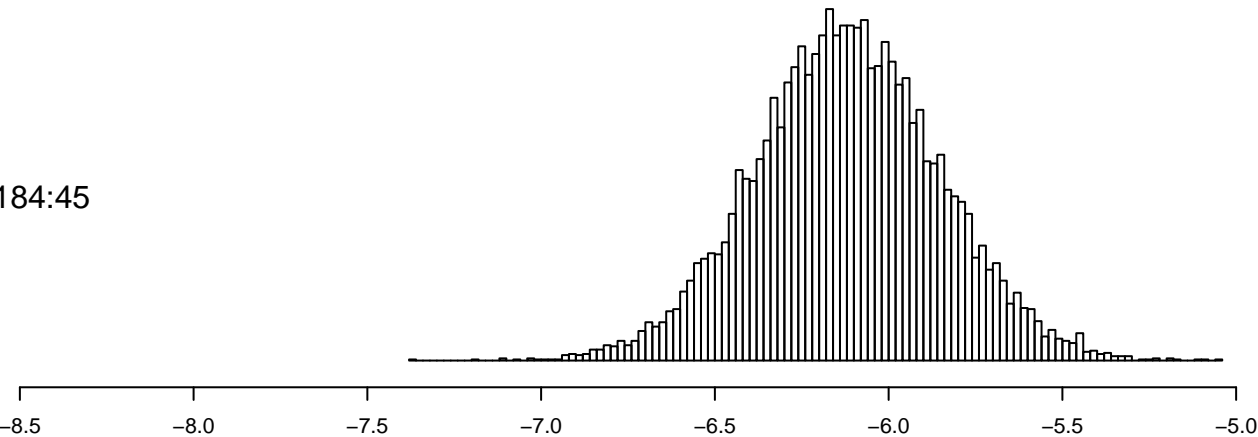

Unidentified Metabolite 58

B184:240 – B184:120

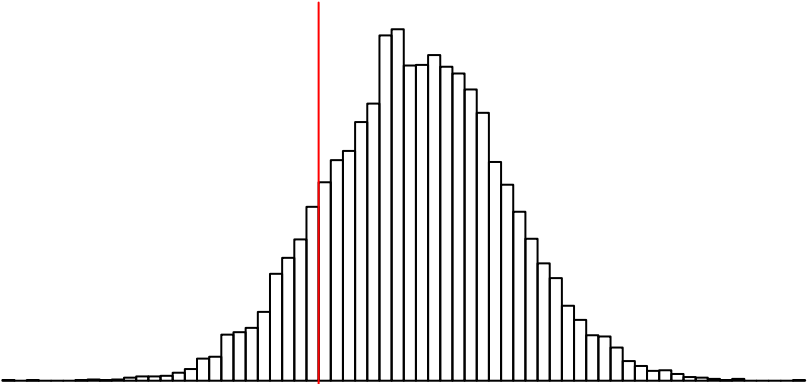

B184:240 – B184:45

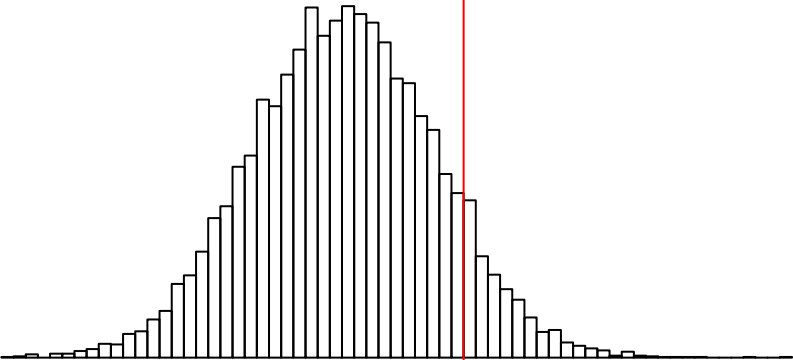

B184:120 – B184:45

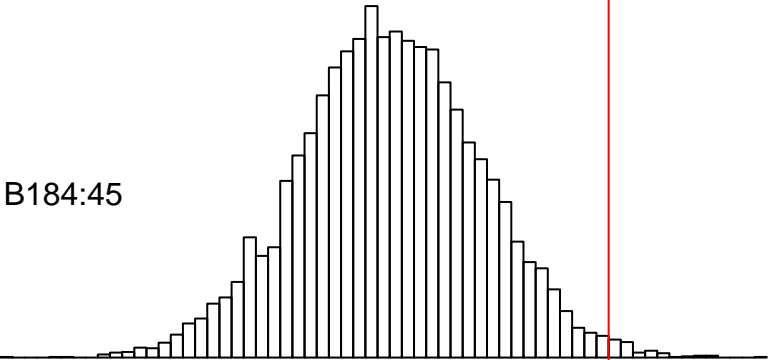

-3

-2

-1

0

1

2

delta(Unidentified Metabolite 58)

B184:240

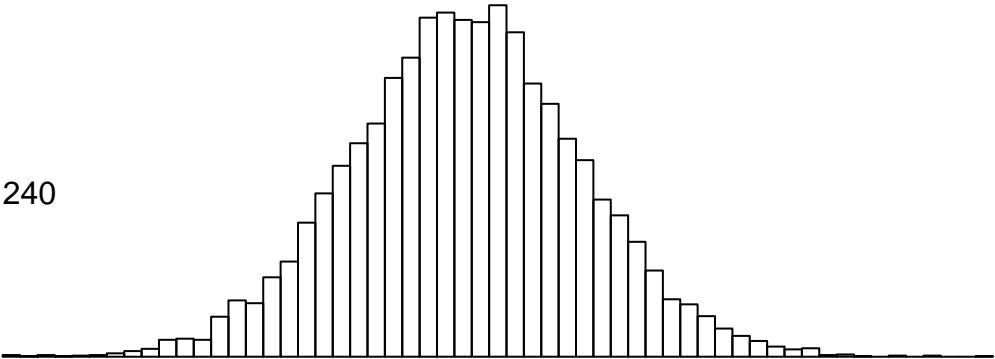

B184:120

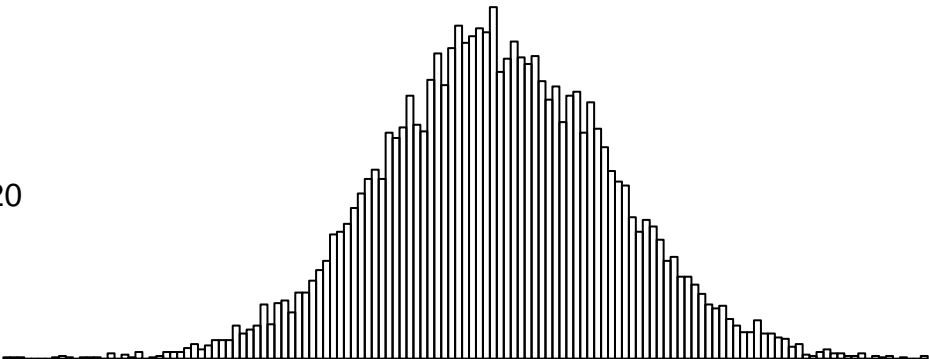

B184:45

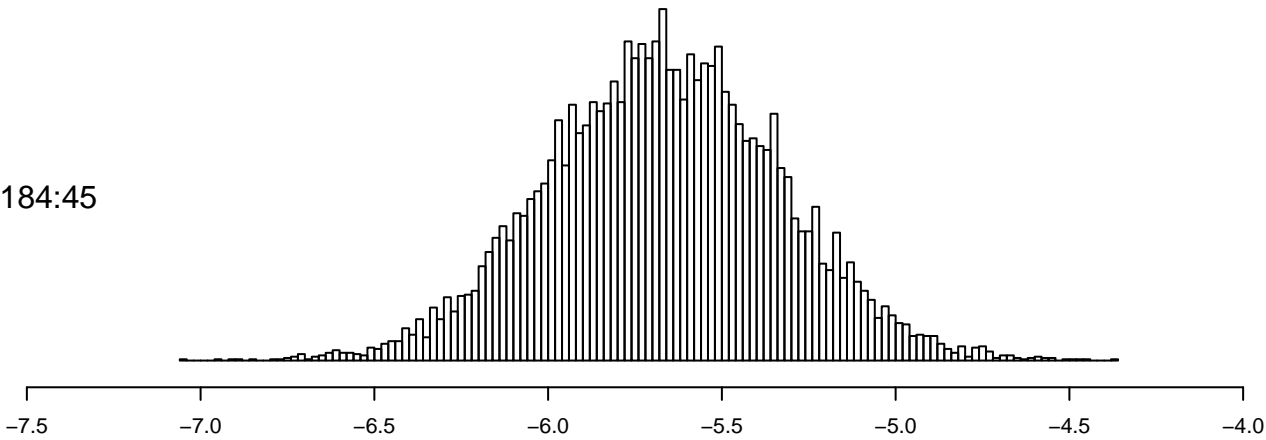

Unidentified Metabolite 59

B184:240 – B184:120

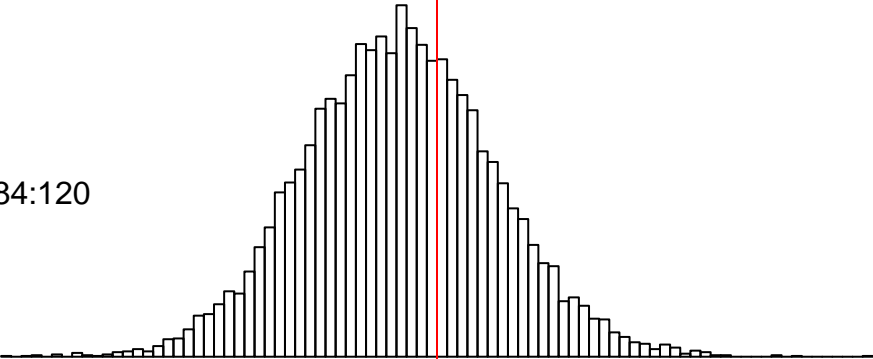

B184:240 – B184:45

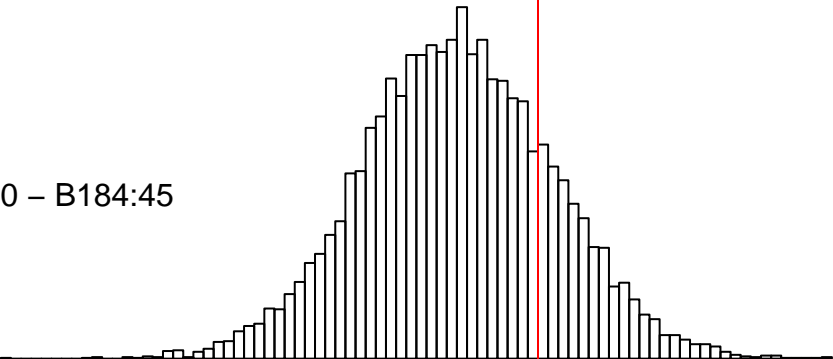

B184:120 – B184:45

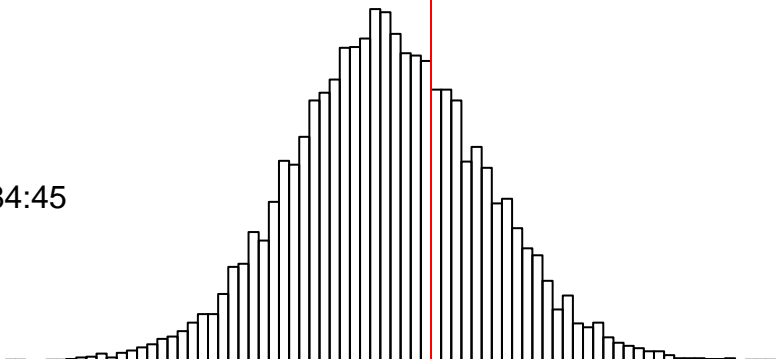

-3 -2 -1 0 1 2 3

delta(Unidentified Metabolite 59)



B184:240

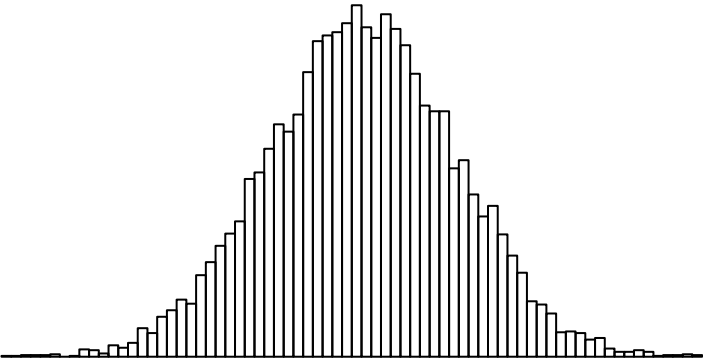

B184:120

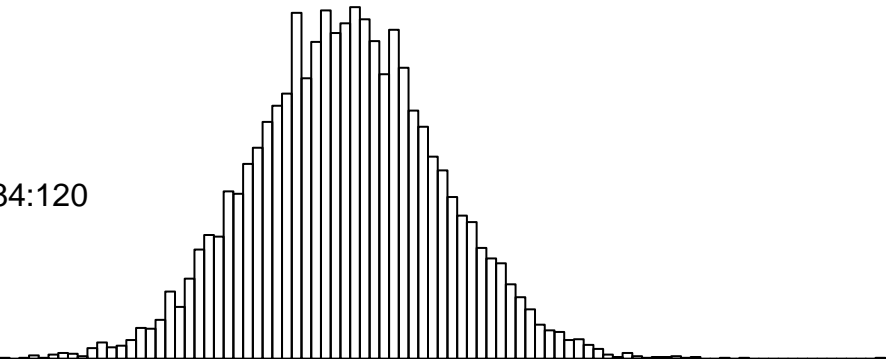

B184:45

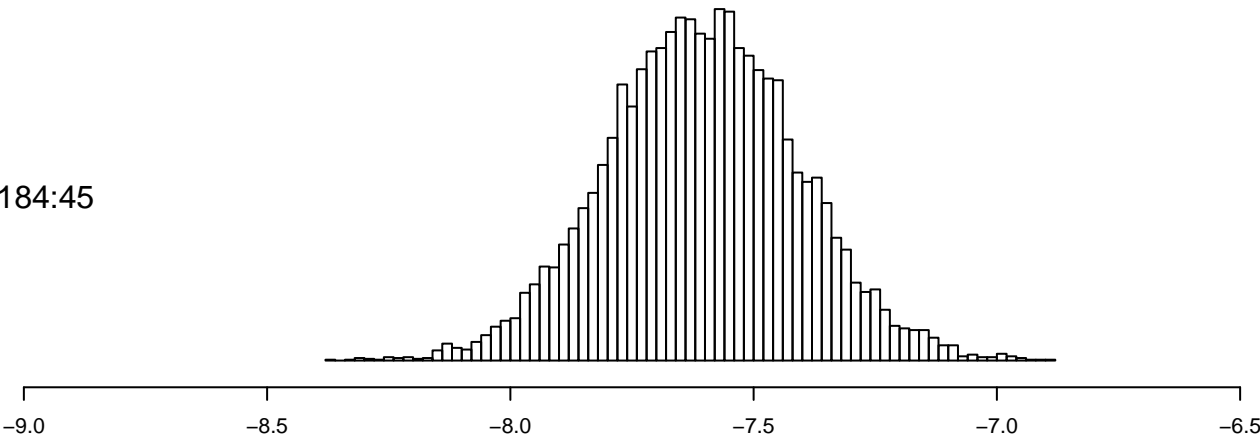

Unidentified Metabolite 60

B184:240 – B184:120

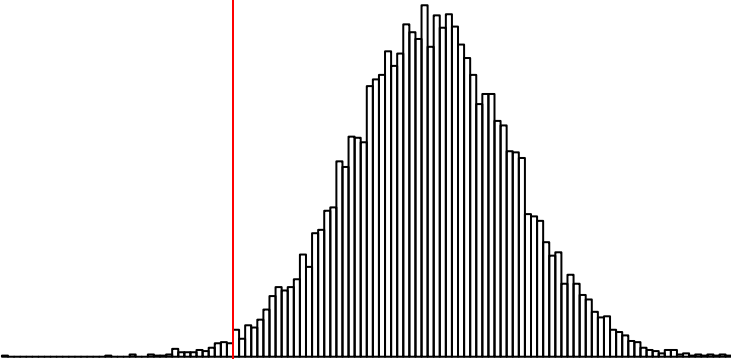

B184:240 – B184:45

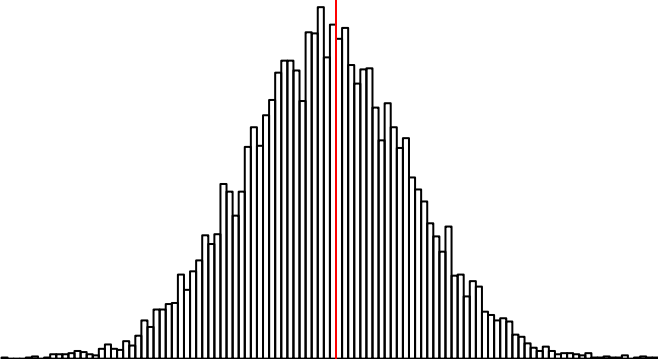

B184:120 – B184:45

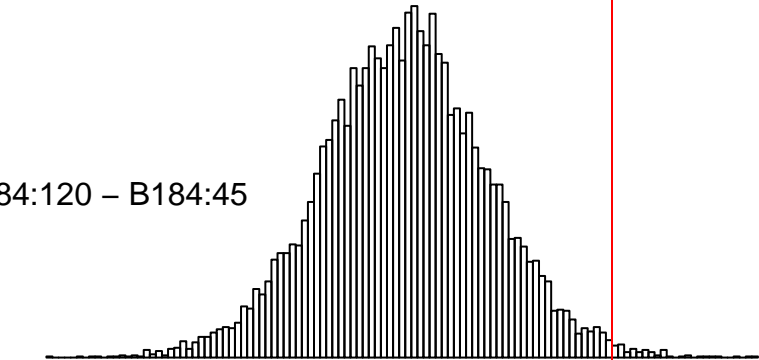

-2

-1

0

1

2

delta(Unidentified Metabolite 60)

B184:240

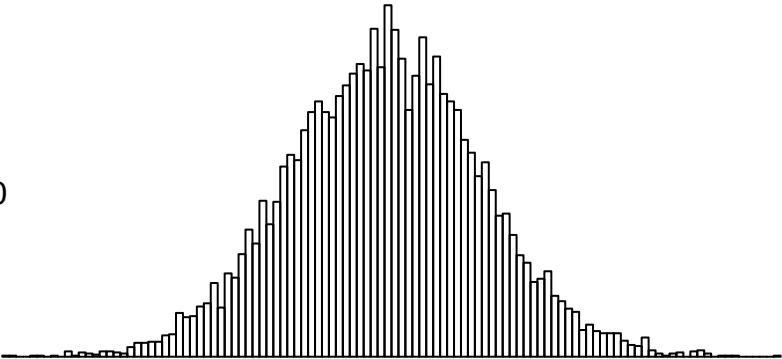

B184:120

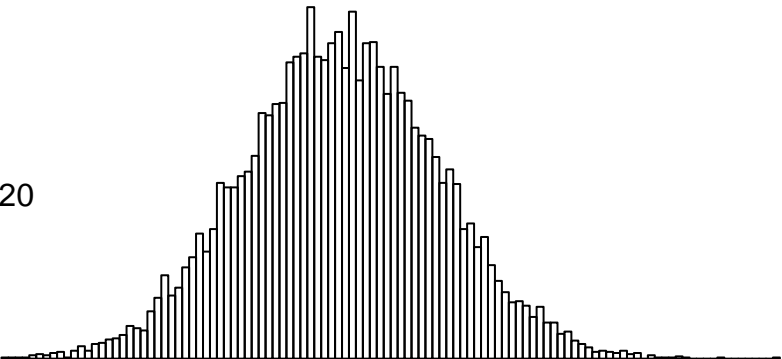

B184:45

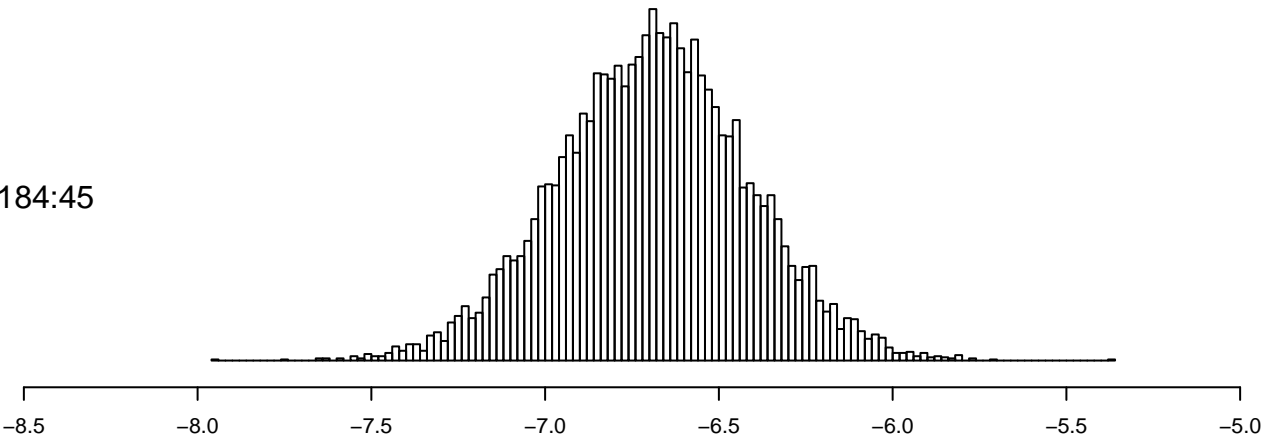

Unidentified Metabolite 61

B184:240 – B184:120

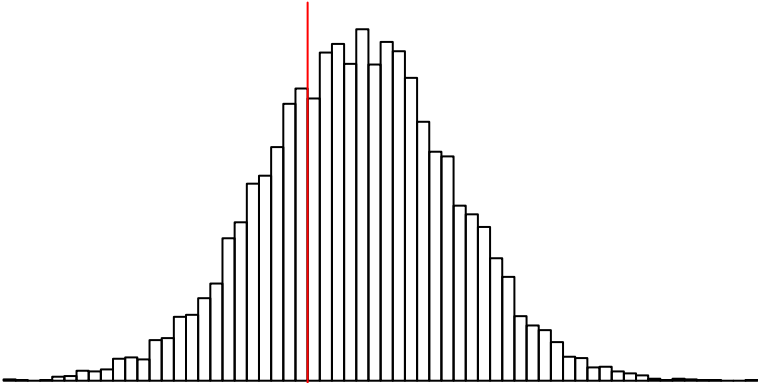

B184:240 – B184:45

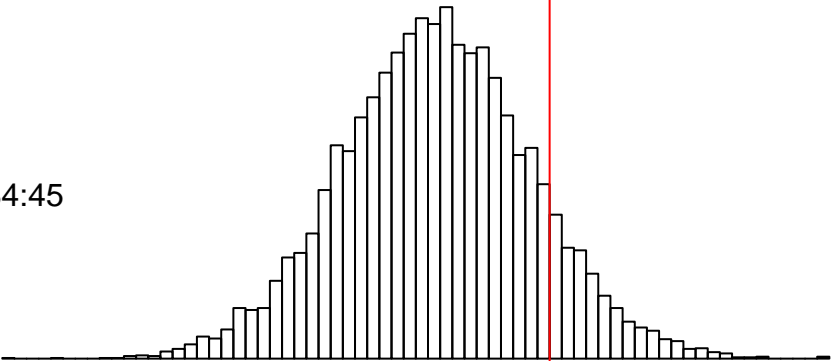

B184:120 – B184:45

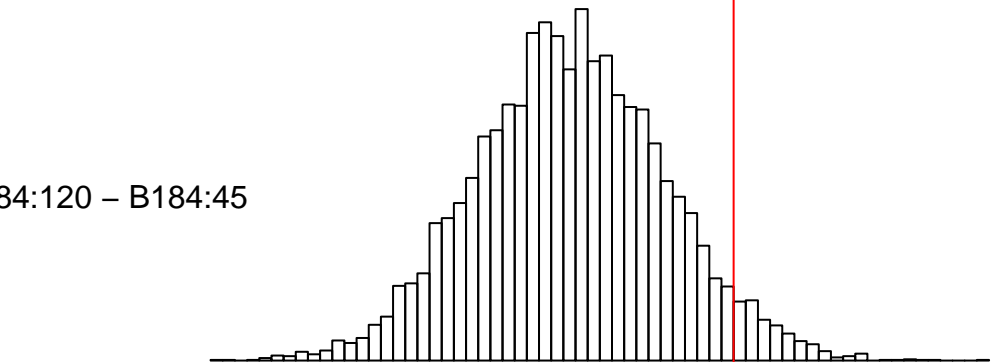

-3 -2 -1 0 1 2

delta(Unidentified Metabolite 61)

B184:240

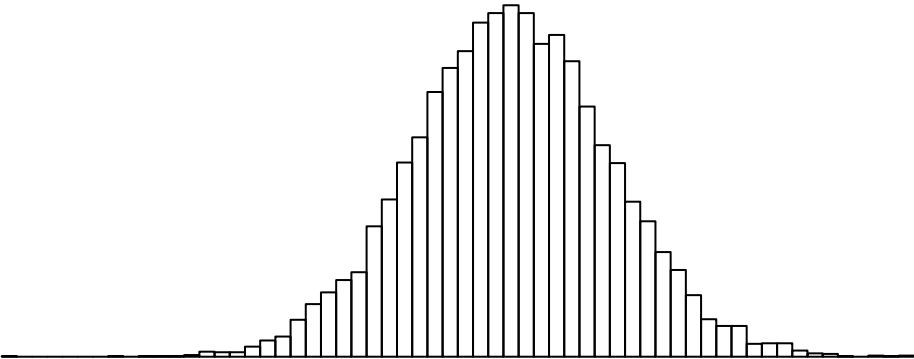

B184:120

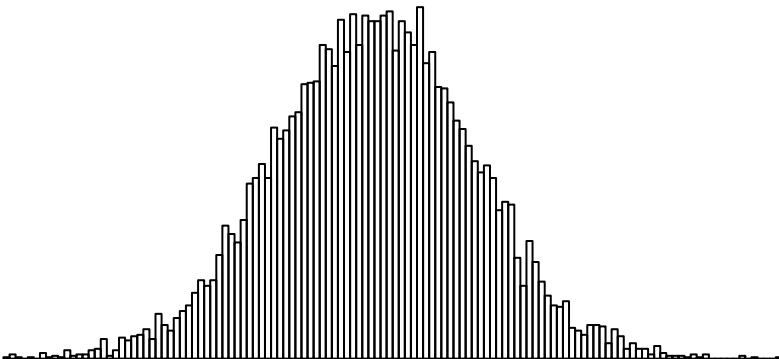

B184:45

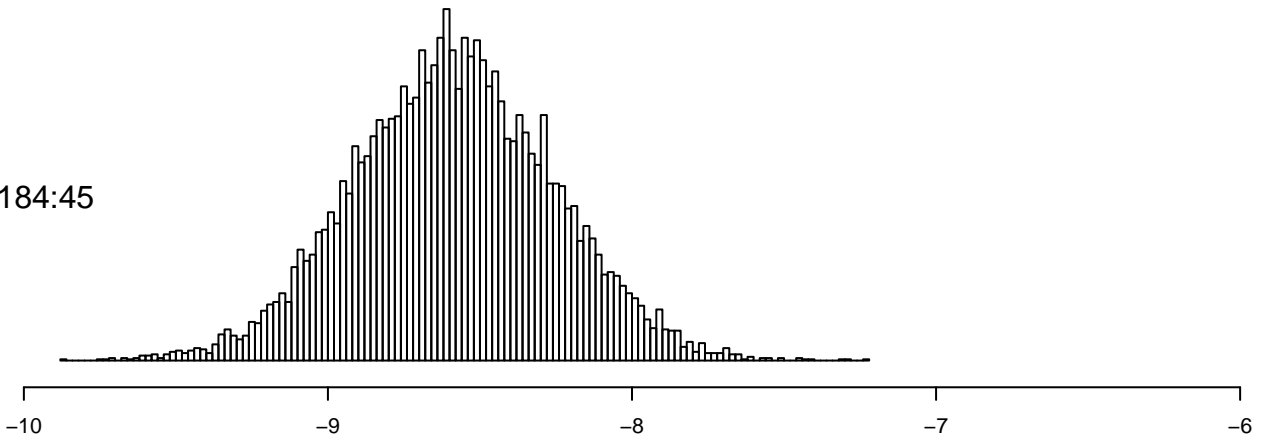

Unidentified Metabolite 62

B184:240 – B184:120

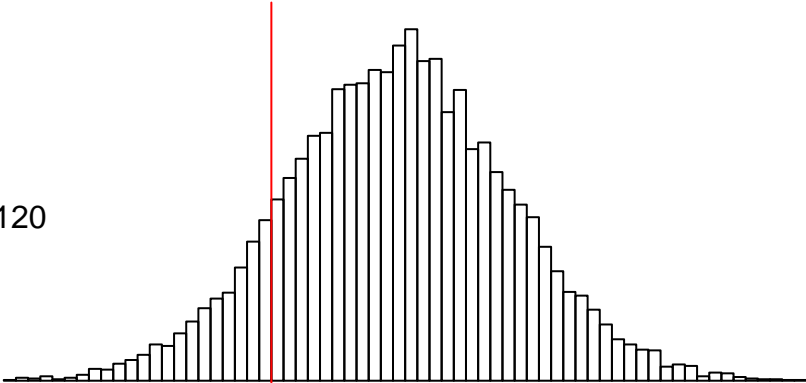

B184:240 – B184:45

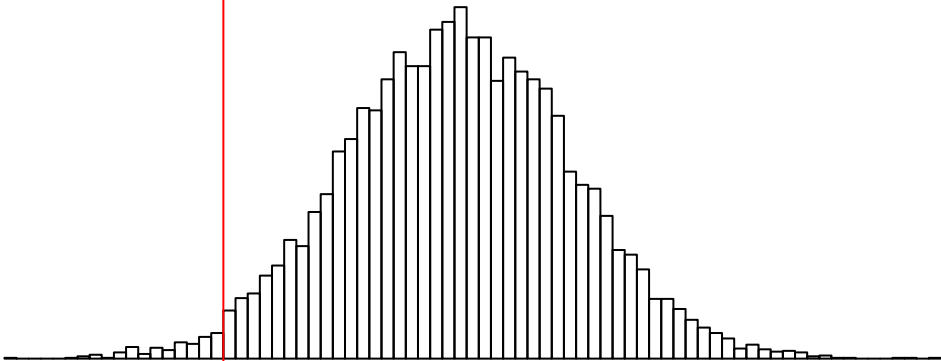

B184:120 – B184:45

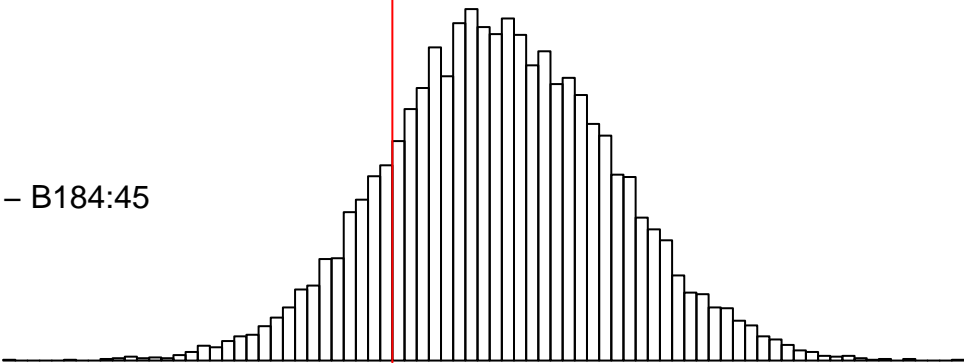

-2

-1

0

1

2

3

delta(Unidentified Metabolite 62)

B184:240

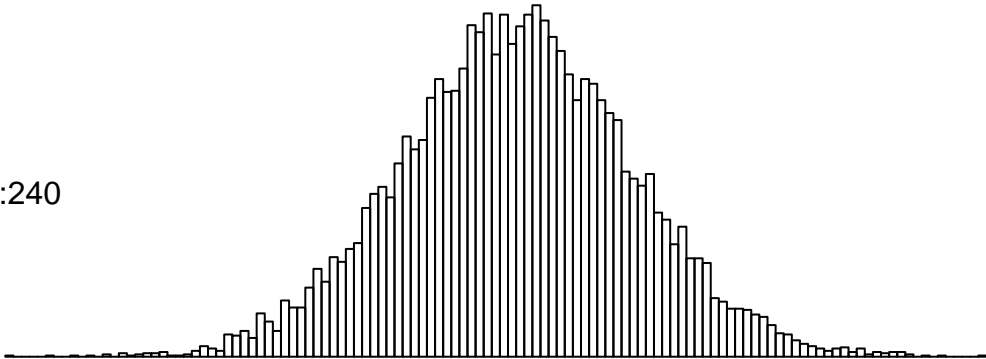

B184:120

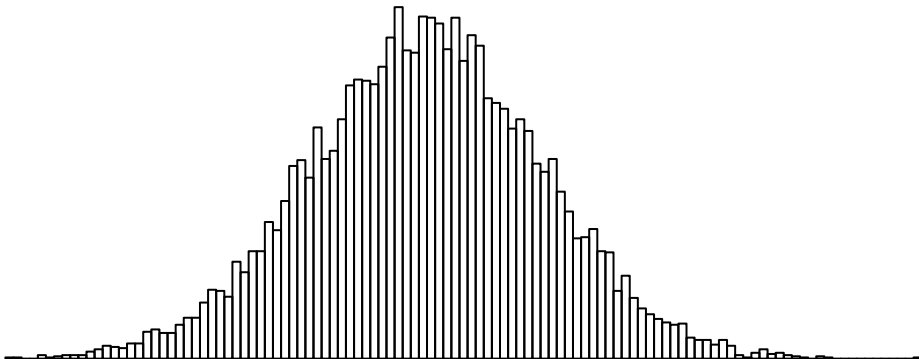

B184:45

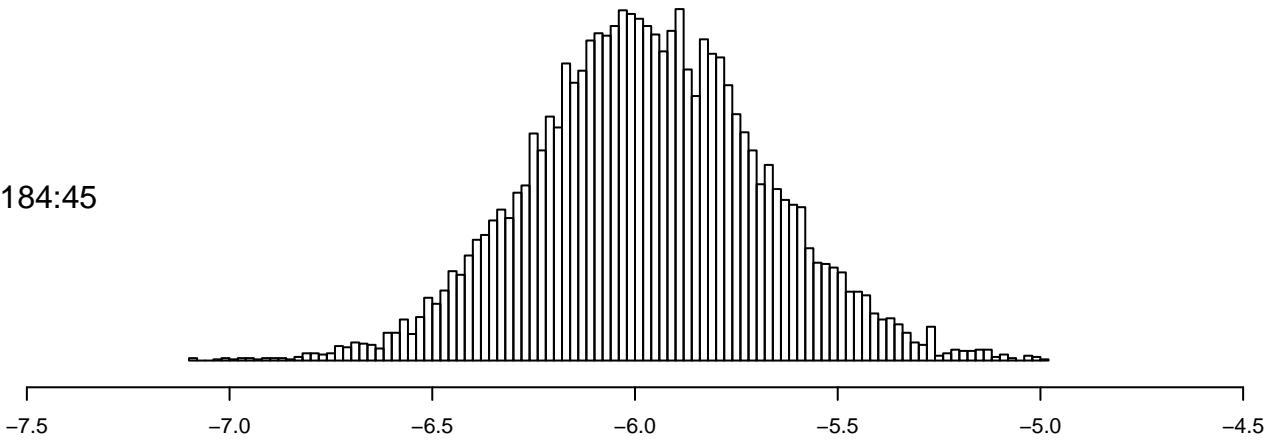

Unidentified Metabolite 63

B184:240 – B184:120

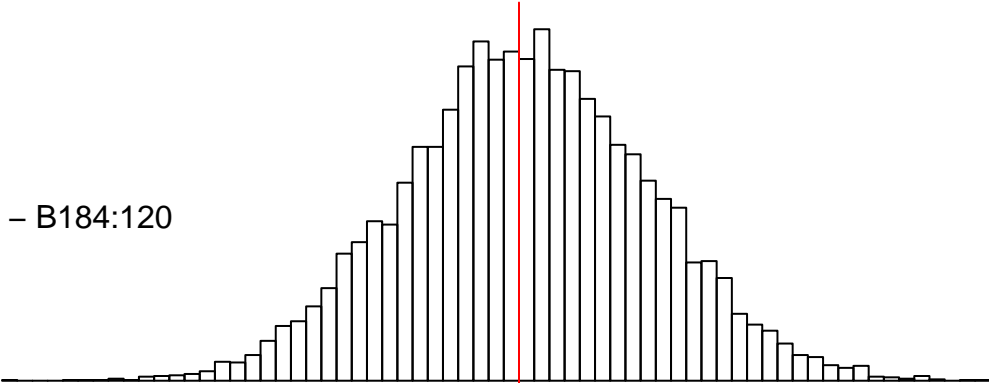

B184:240 – B184:45

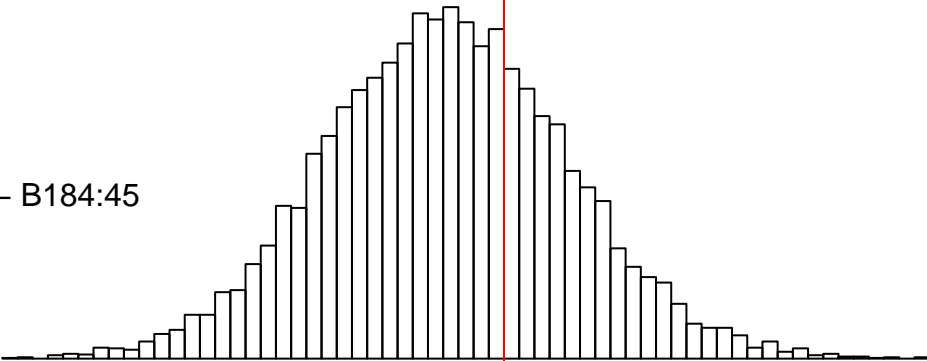

B184:120 – B184:45

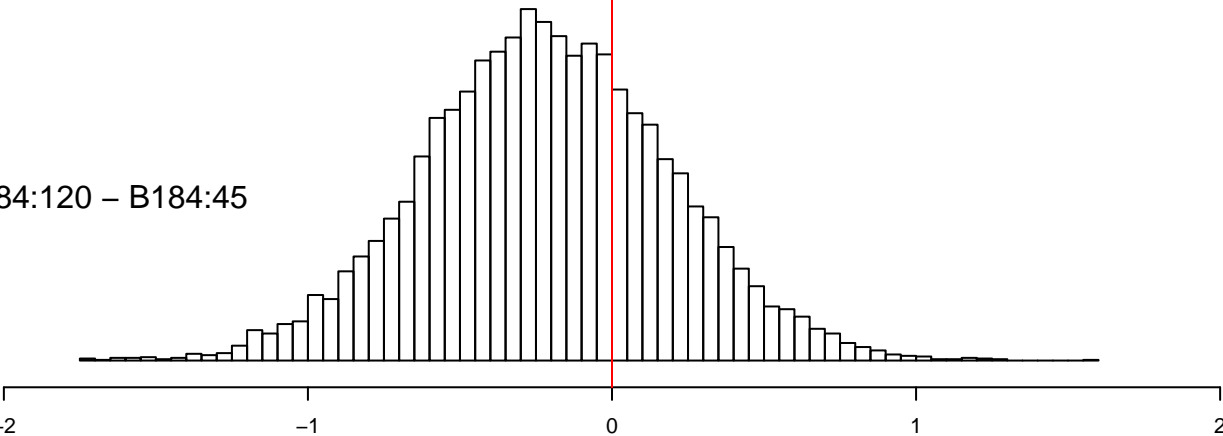

delta(Unidentified Metabolite 63)



B184:240

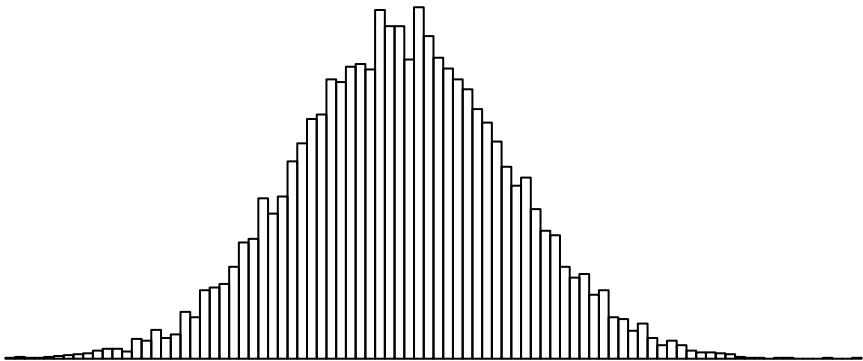

B184:120

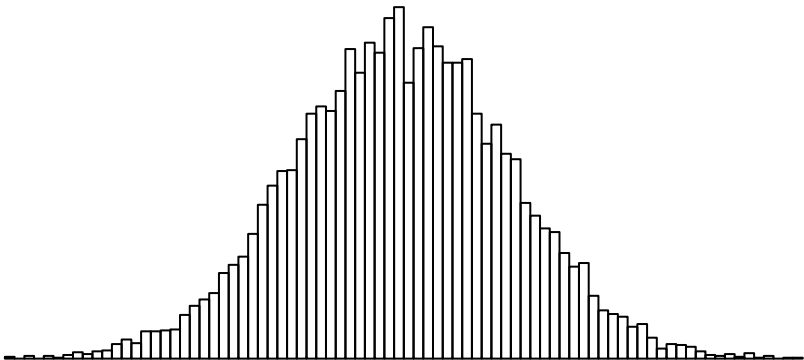

B184:45

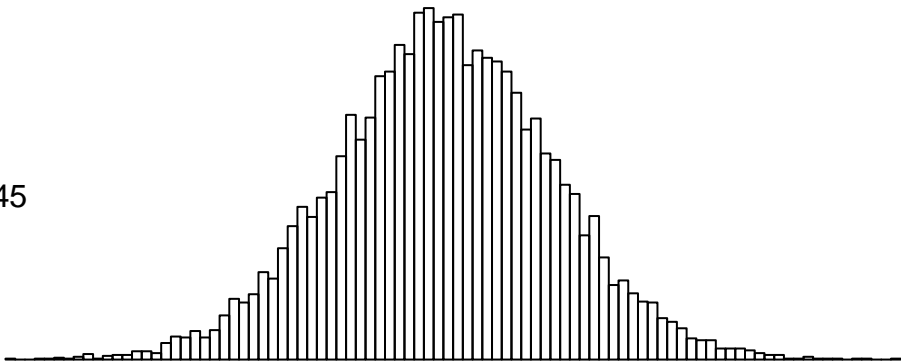

-8.5      -8.0      -7.5      -7.0      -6.5      -6.0

Unidentified Metabolite 65

B184:240 – B184:120

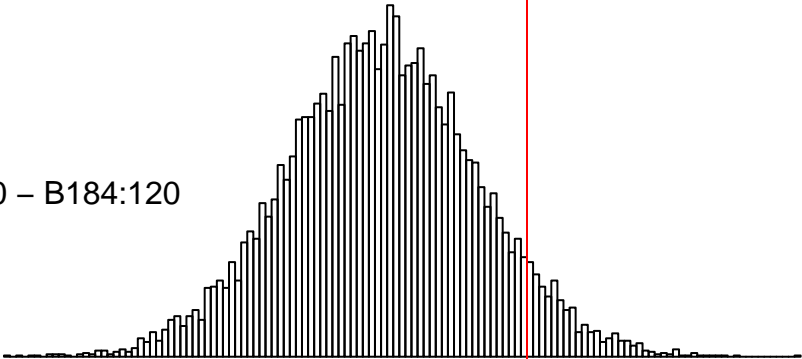

B184:240 – B184:45

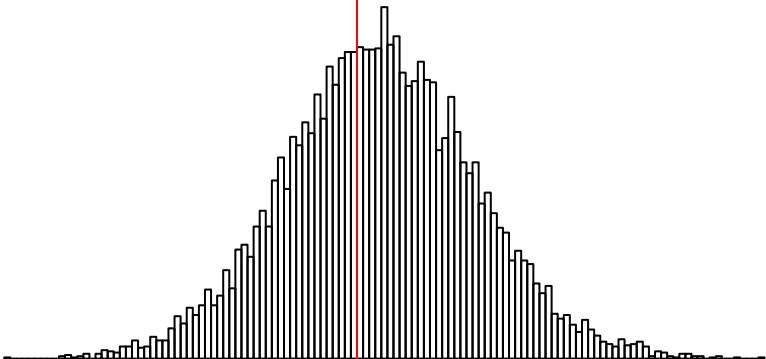

B184:120 – B184:45

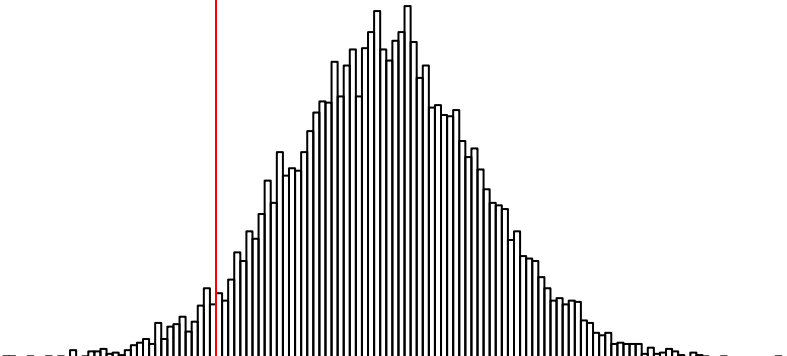

-2 -1 0 1 2

delta(Unidentified Metabolite 65)

B184:240

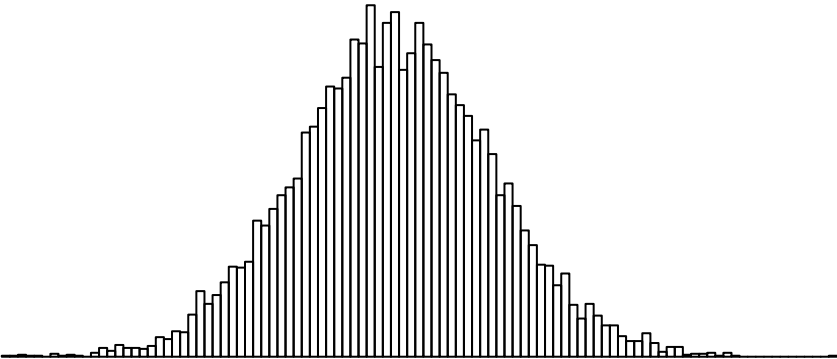

B184:120

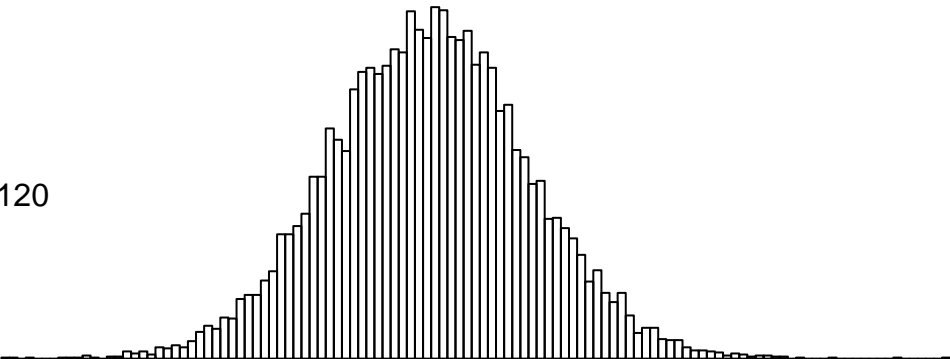

B184:45

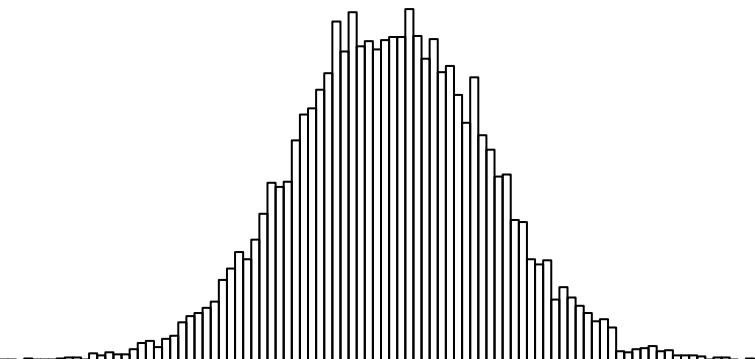

-9.0      -8.5      -8.0      -7.5      -7.0      -6.5      -6.0

Unidentified Metabolite 68

B184:240 – B184:120

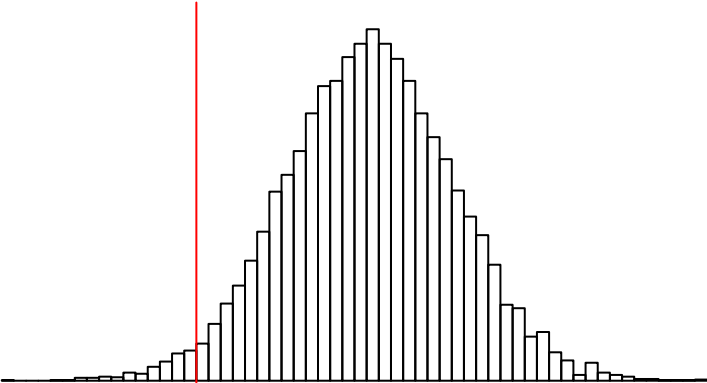

B184:240 – B184:45

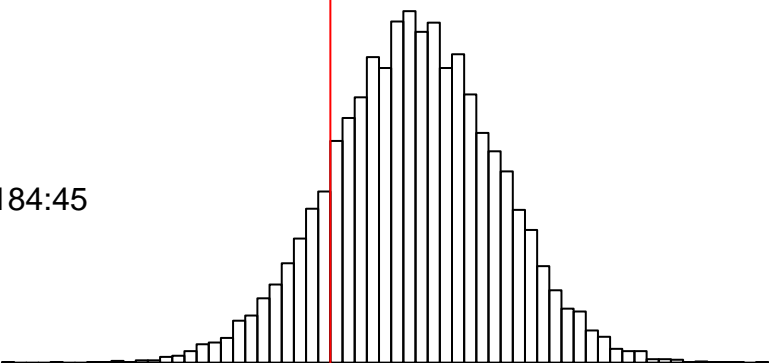

B184:120 – B184:45

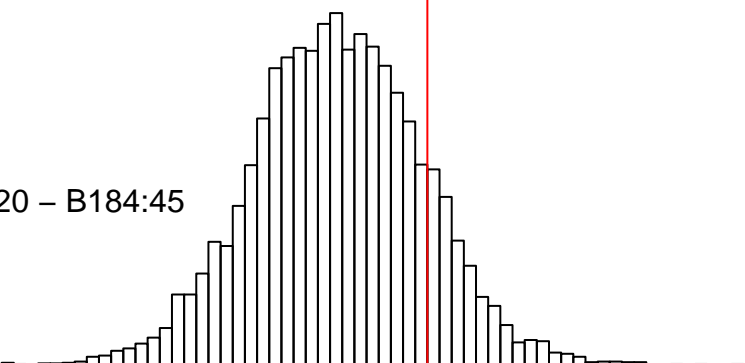

-2 -1 0 1 2 3

delta(Unidentified Metabolite 68)

B184:240

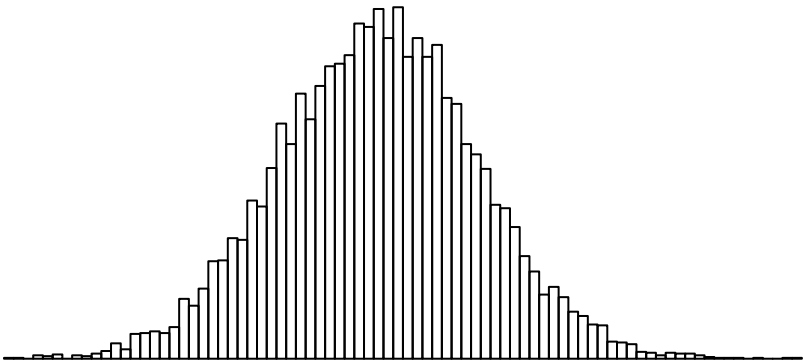

B184:120

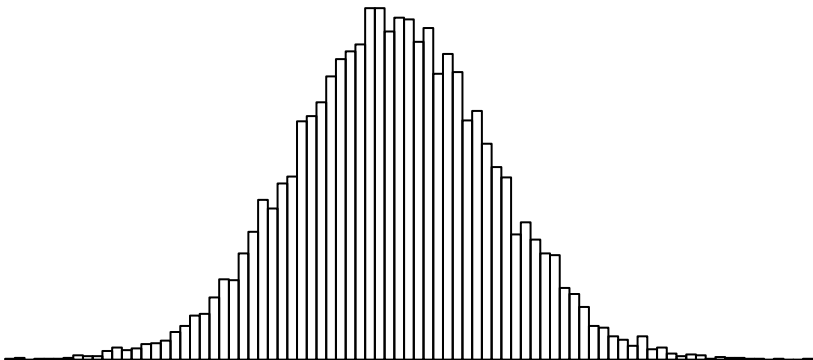

B184:45

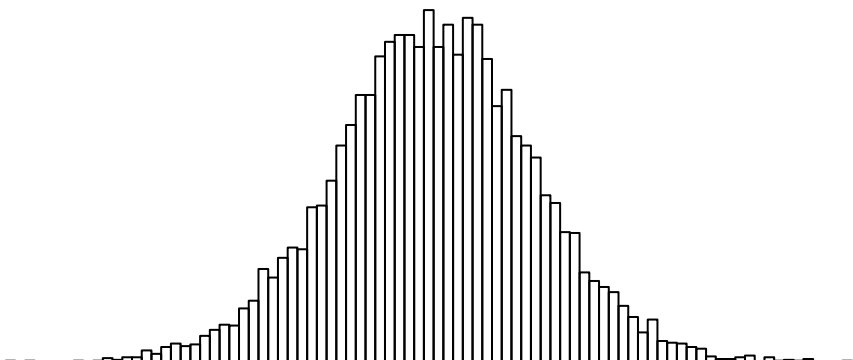

-7.5      -7.0      -6.5      -6.0      -5.5      -5.0

Unidentified Metabolite 69

B184:240 – B184:120

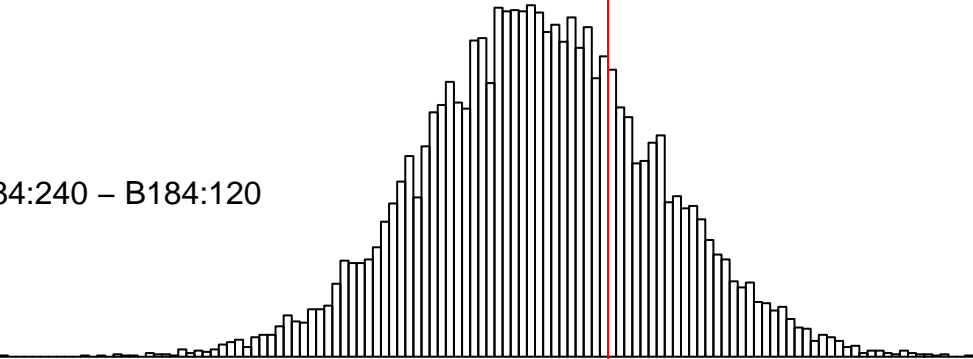

B184:240 – B184:45

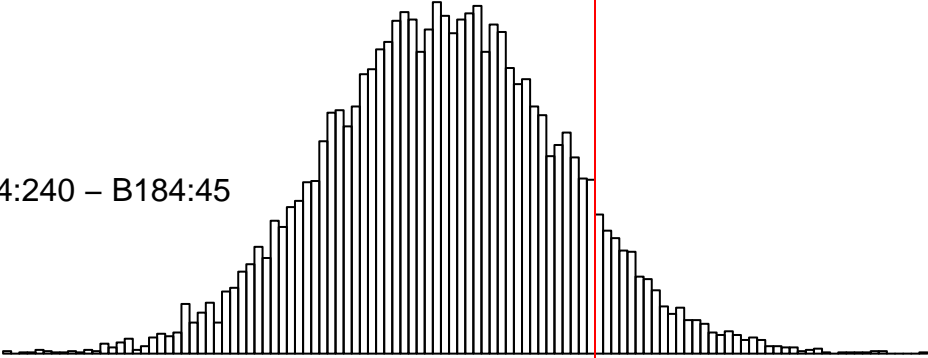

B184:120 – B184:45

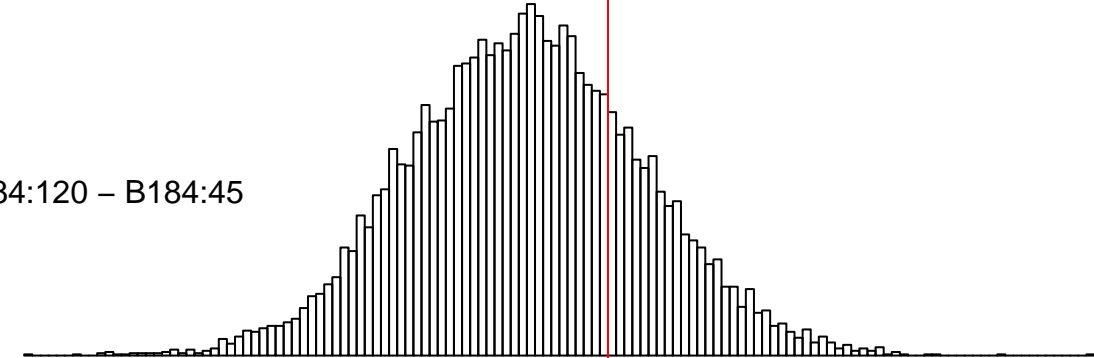

-1.5      -1.0      -0.5      0.0      0.5      1.0      1.5

delta(Unidentified Metabolite 69)

B184:240

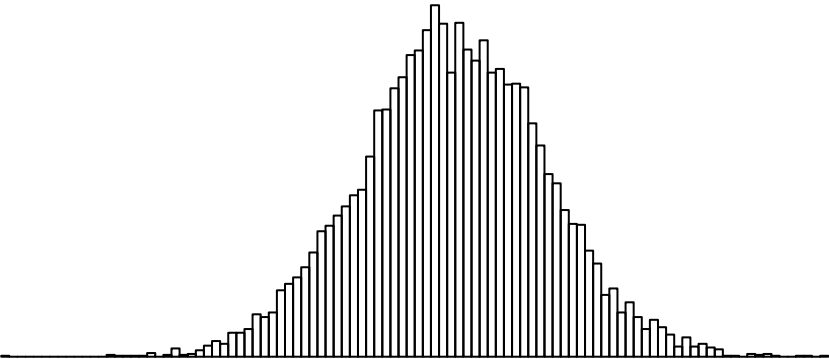

B184:120

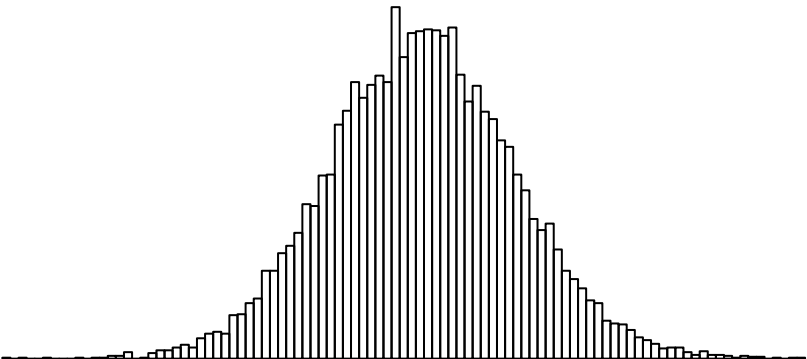

B184:45

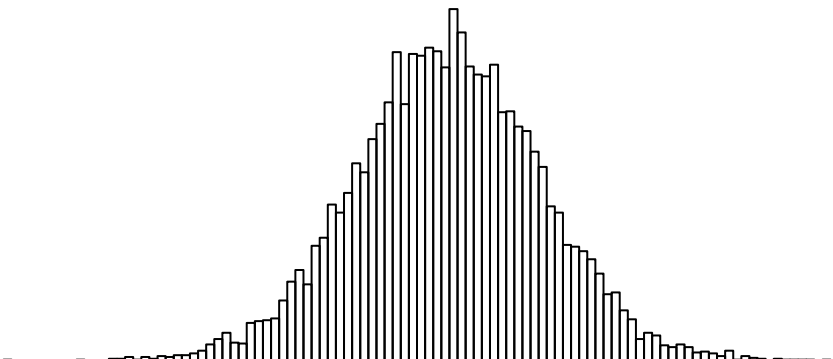

-9.0      -8.5      -8.0      -7.5      -7.0      -6.5      -6.0

Unidentified Metabolite 70

B184:240 – B184:120

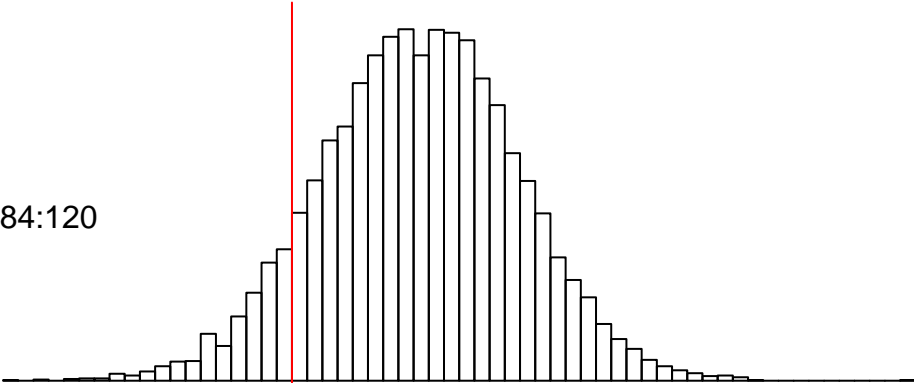

B184:240 – B184:45

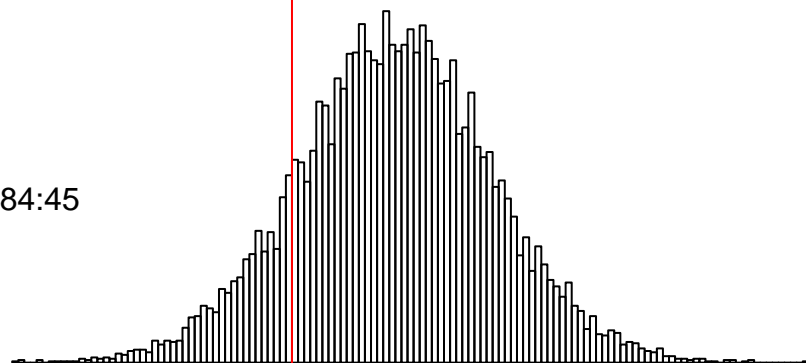

B184:120 – B184:45

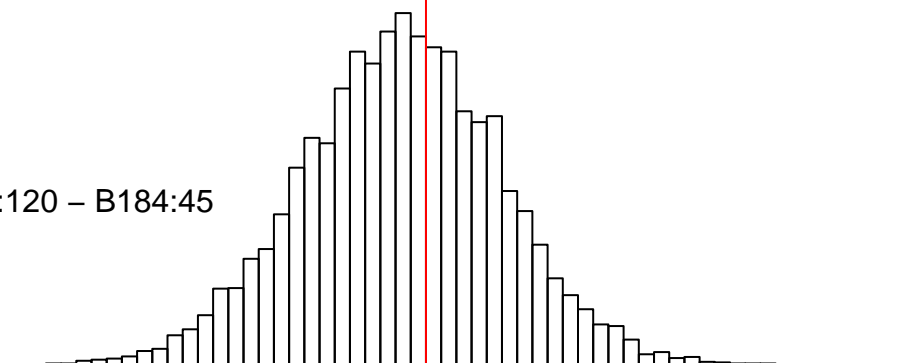

-1

0

1

2

delta(Unidentified Metabolite 70)



B184:240

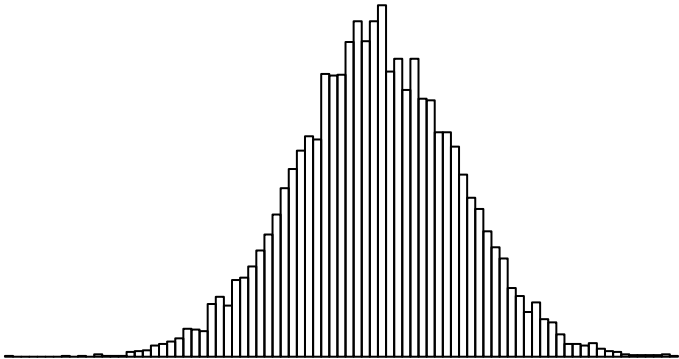

B184:120

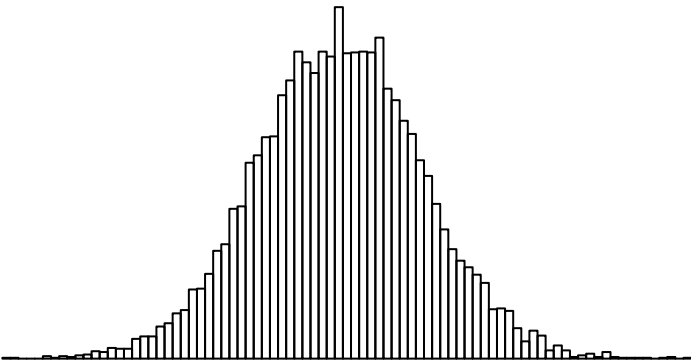

B184:45

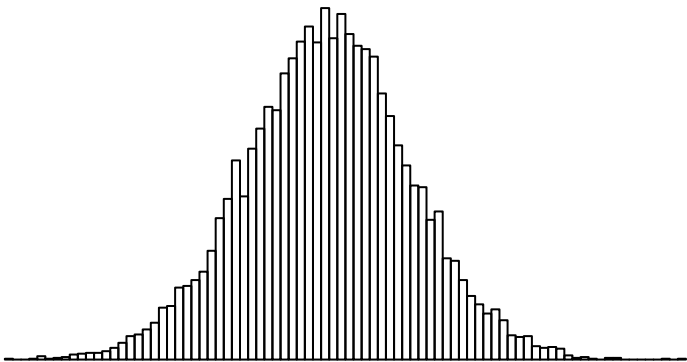

-10.0      -9.5      -9.0      -8.5      -8.0      -7.5      -7.0

Unidentified Metabolite 71

B184:240 – B184:120

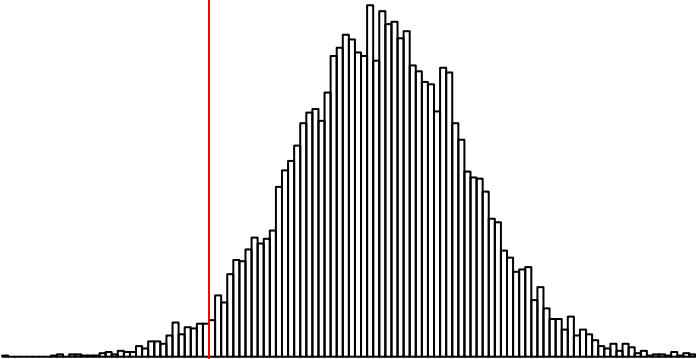

B184:240 – B184:45

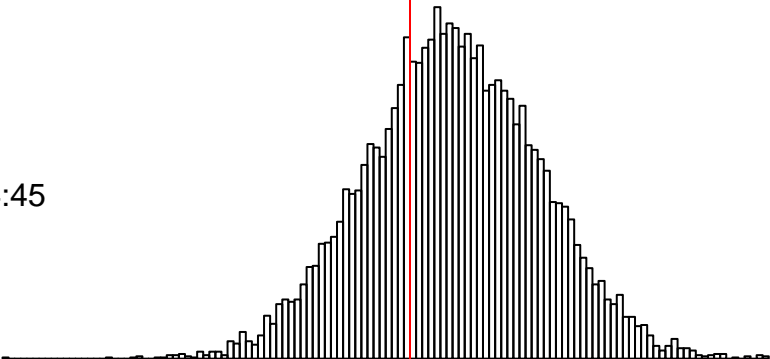

B184:120 – B184:45

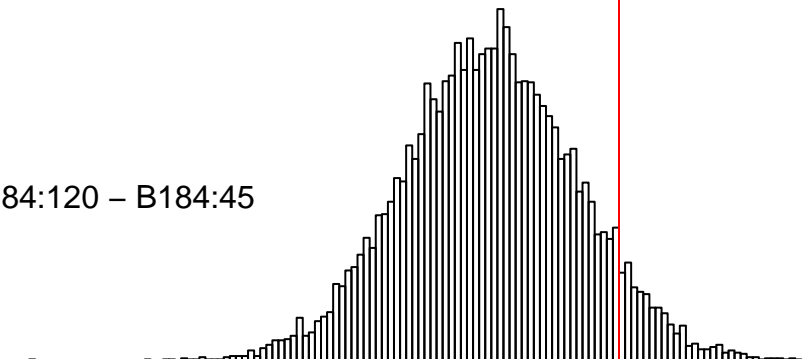

-2 -1 0 1 2

delta(Unidentified Metabolite 71)

B184:240

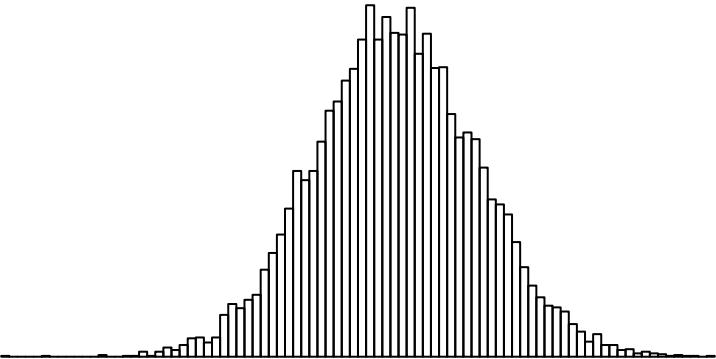

B184:120

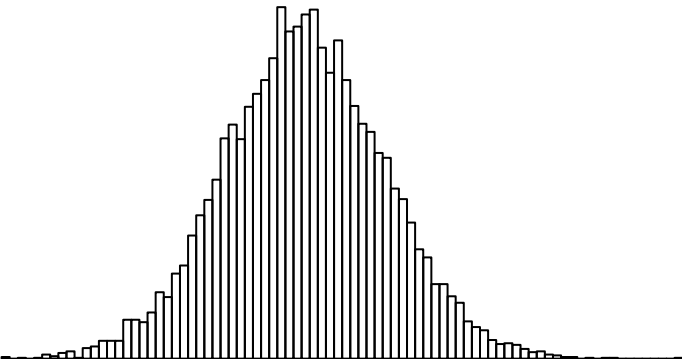

B184:45

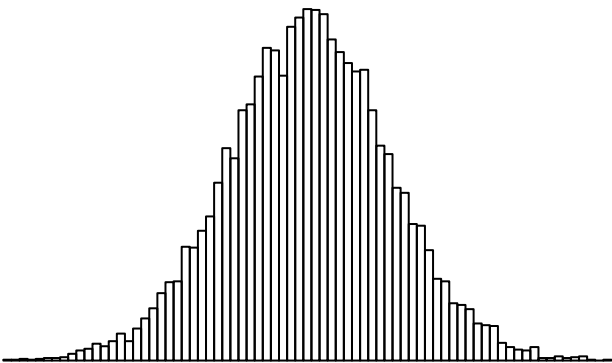

-7.5      -7.0      -6.5      -6.0      -5.5      -5.0      -4.5

Unidentified Metabolite 72

B184:240 – B184:120

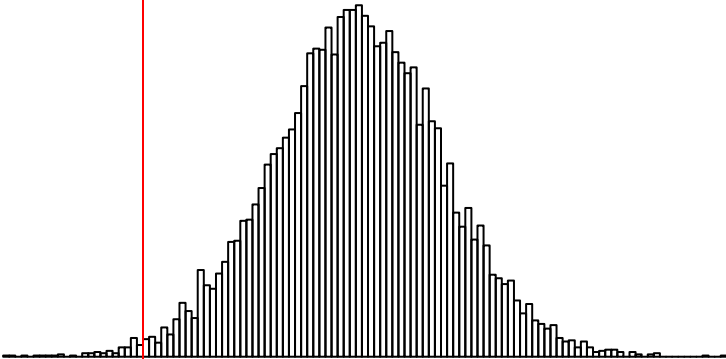

B184:240 – B184:45

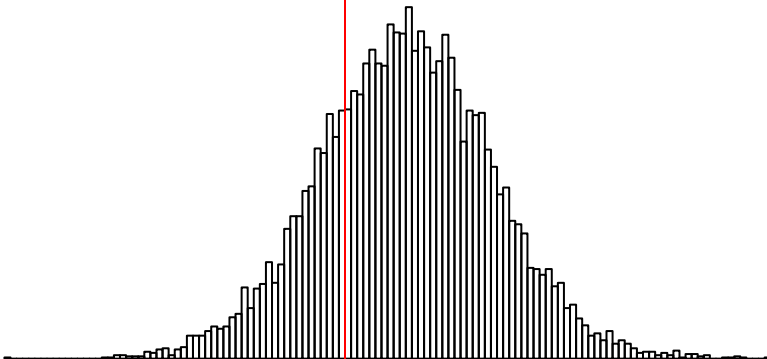

B184:120 – B184:45

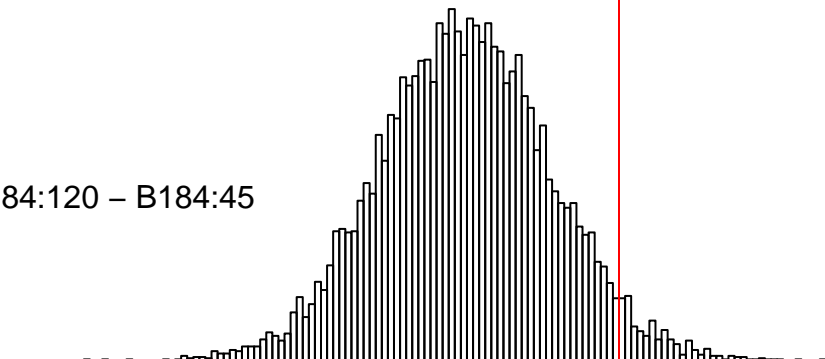

-2

-1

0

1

2

delta(Unidentified Metabolite 72)

B184:240

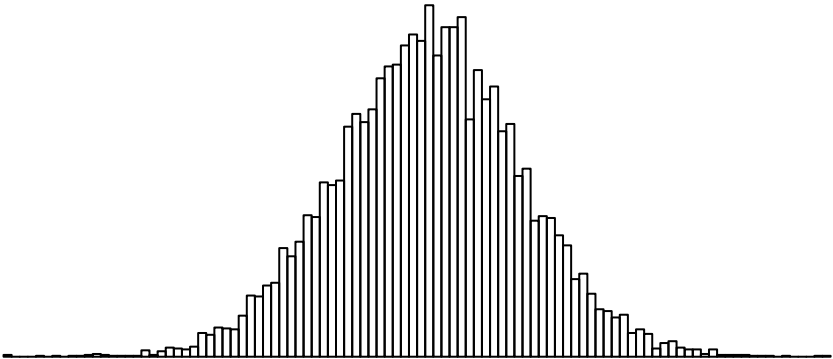

B184:120

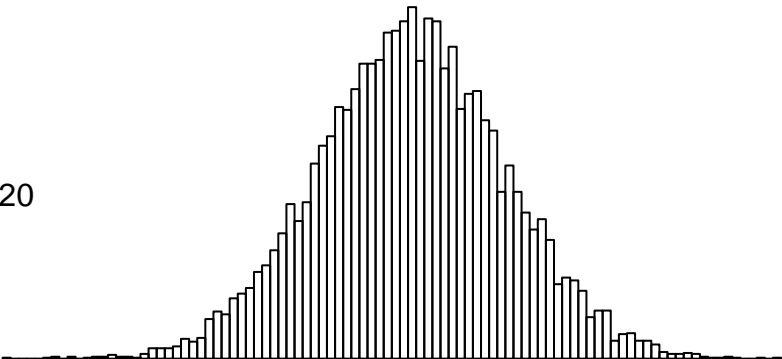

B184:45

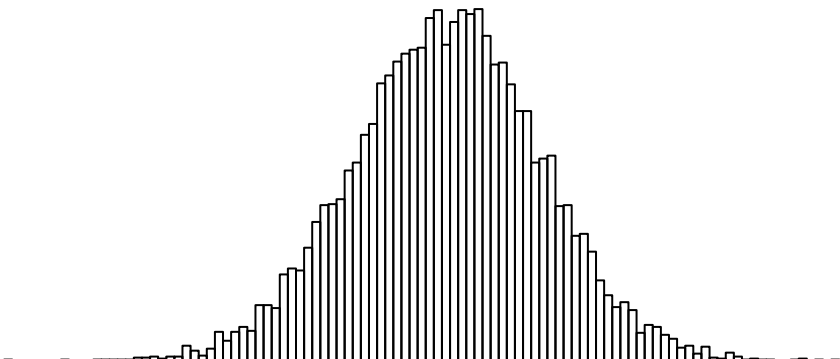

-9.0      -8.5      -8.0      -7.5      -7.0      -6.5      -6.0

Unidentified Metabolite 73

B184:240 – B184:120

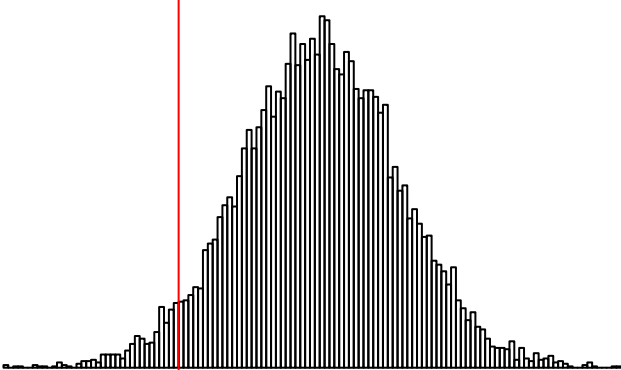

B184:240 – B184:45

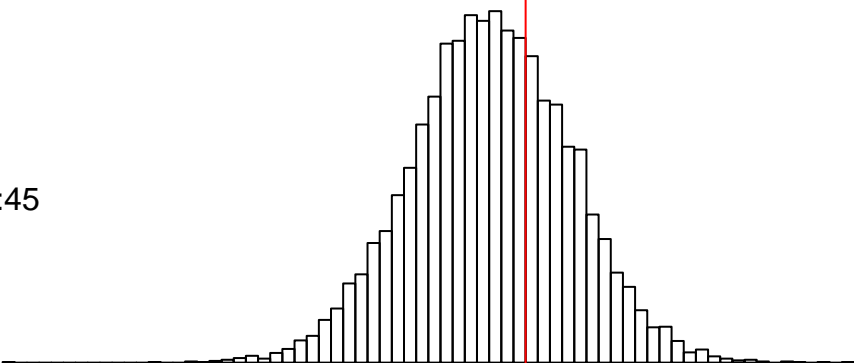

B184:120 – B184:45

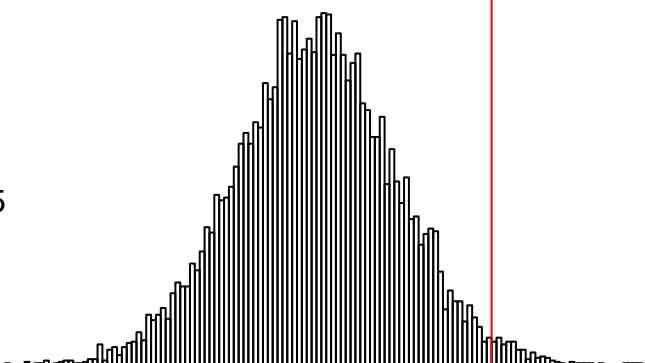

-3 -2 -1 0 1 2

delta(Unidentified Metabolite 73)

B184:240

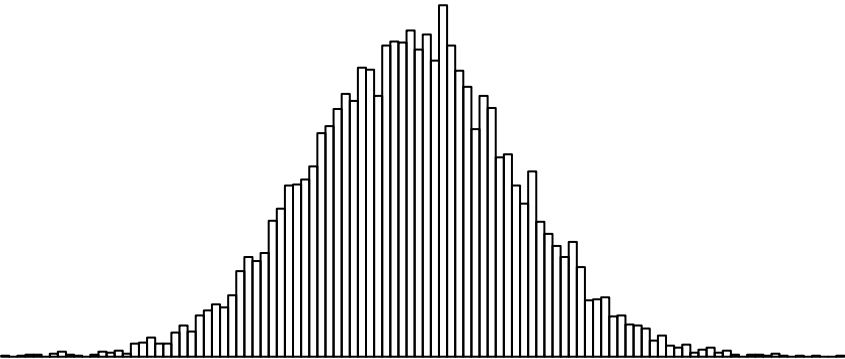

B184:120

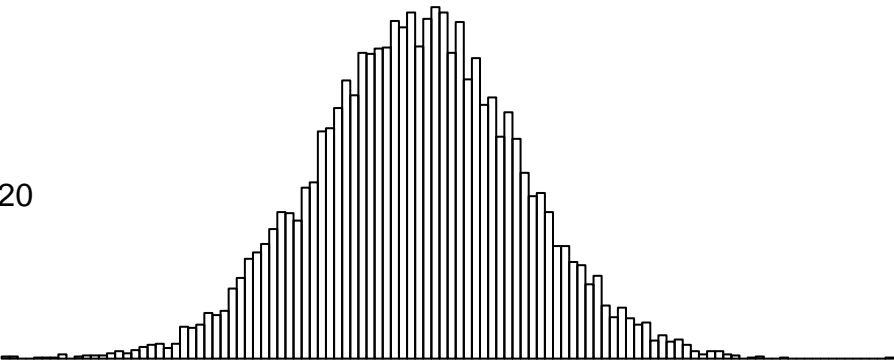

B184:45

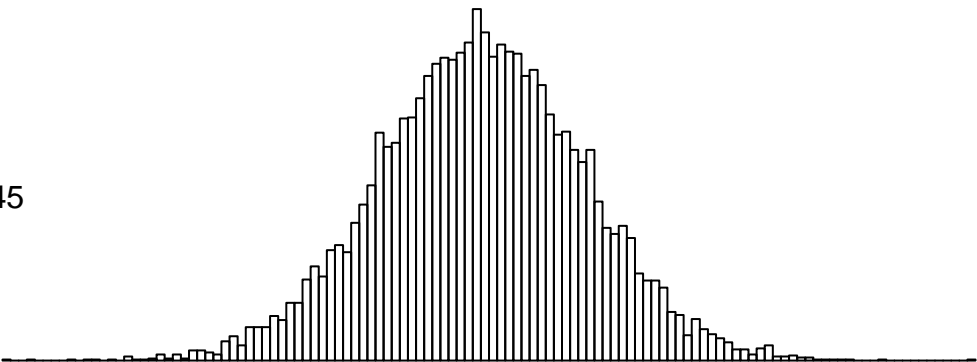

-10.0      -9.5      -9.0      -8.5      -8.0      -7.5      -7.0

Unidentified Metabolite 74

B184:240 – B184:120

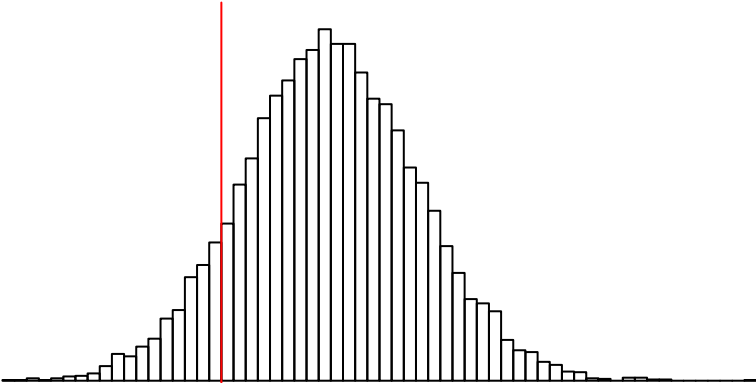

B184:240 – B184:45

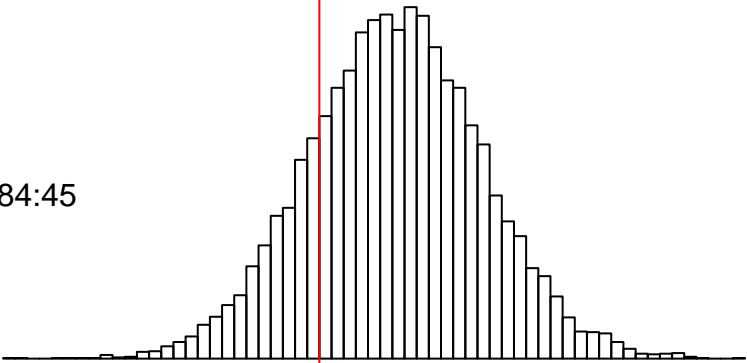

B184:120 – B184:45

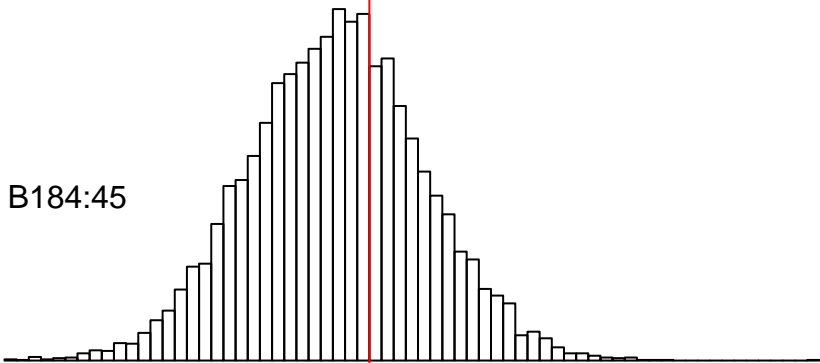

-2 -1 0 1 2 3

delta(Unidentified Metabolite 74)



B184:240

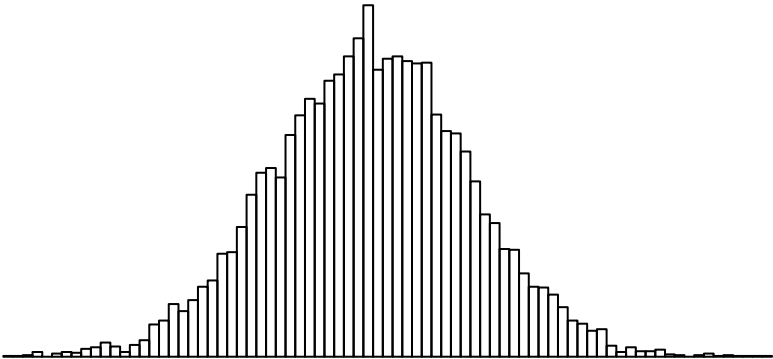

B184:120

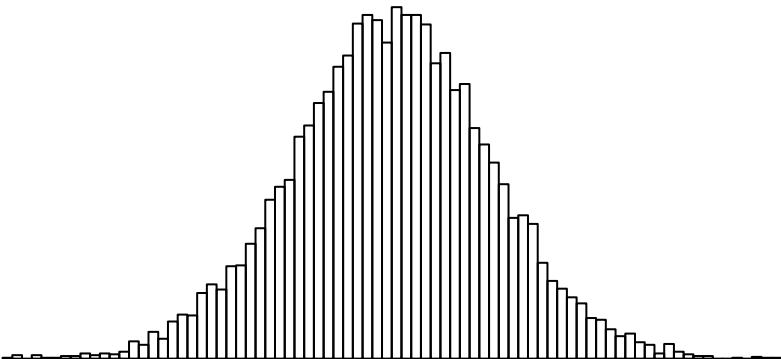

B184:45

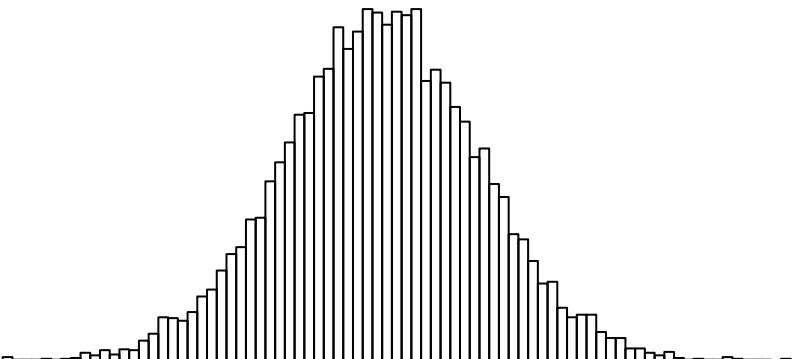

-11.0      -10.5      -10.0      -9.5      -9.0      -8.5

Unidentified Metabolite 75

B184:240 – B184:120

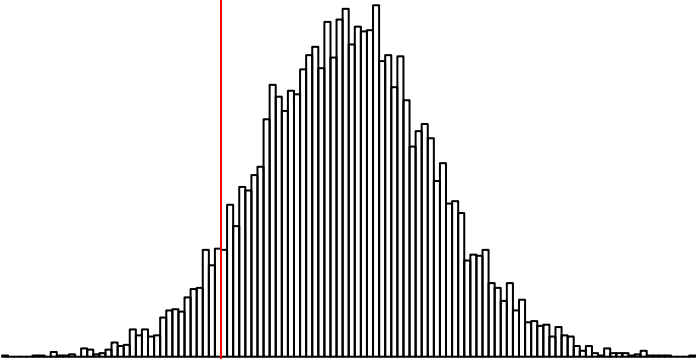

B184:240 – B184:45

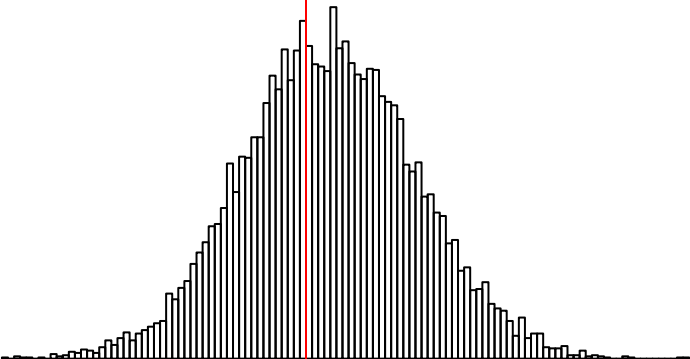

B184:120 – B184:45

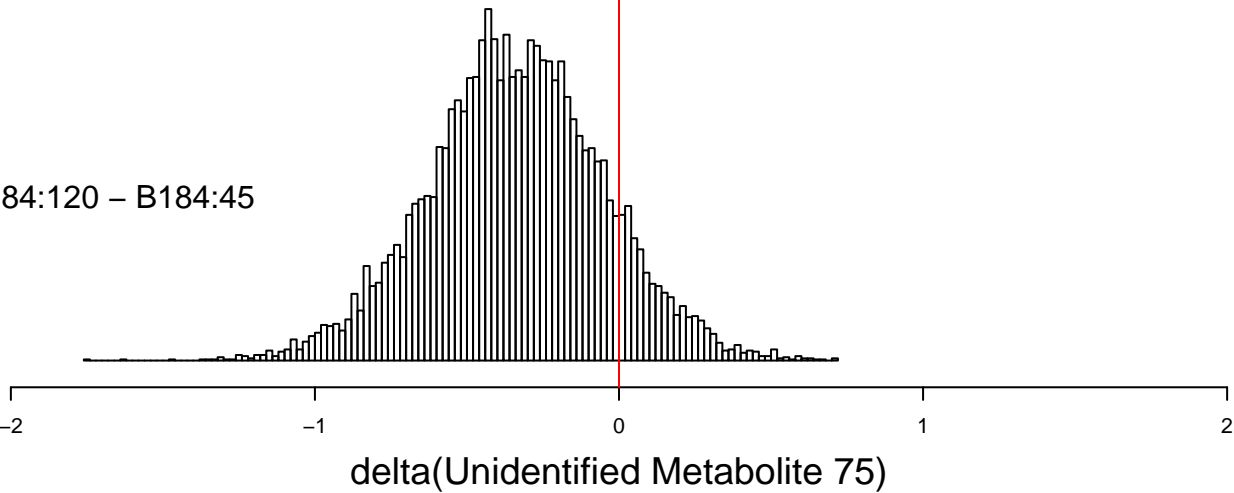

B184:240

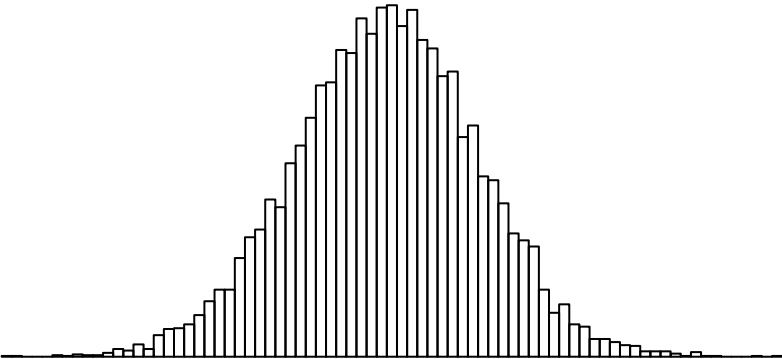

B184:120

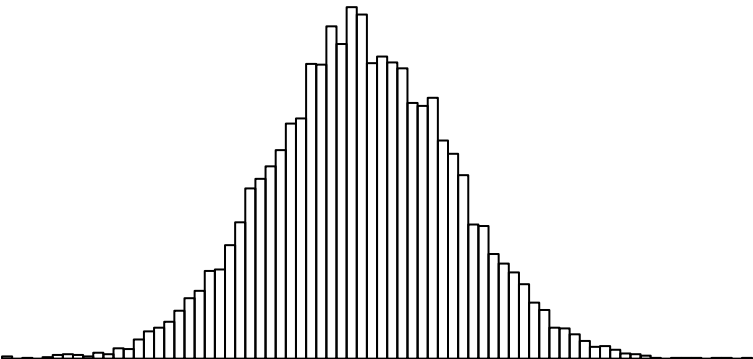

B184:45

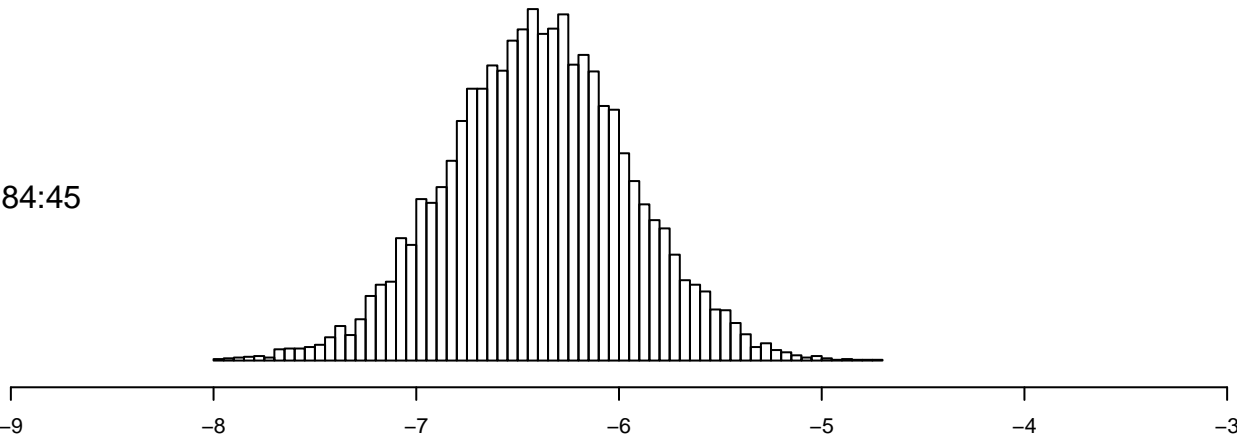

Unidentified Metabolite 76

B184:240 – B184:120

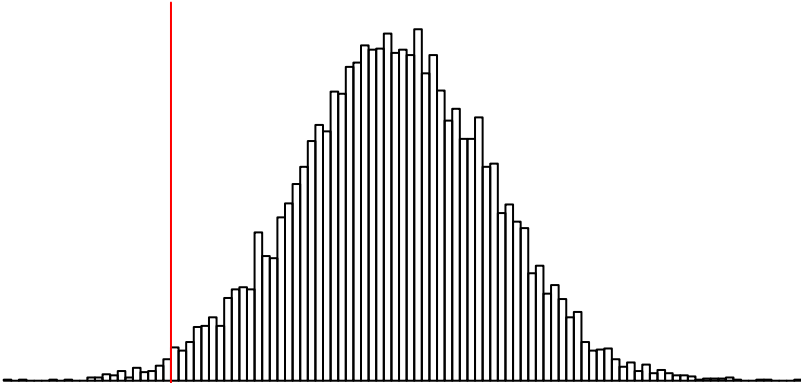

B184:240 – B184:45

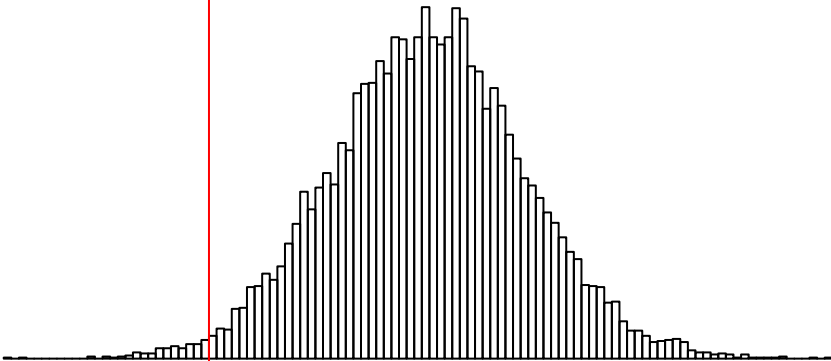

B184:120 – B184:45

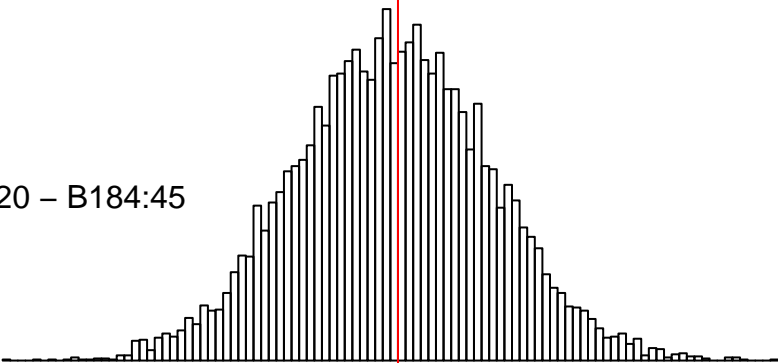

-2

0

2

4

delta(Unidentified Metabolite 76)

B184:240

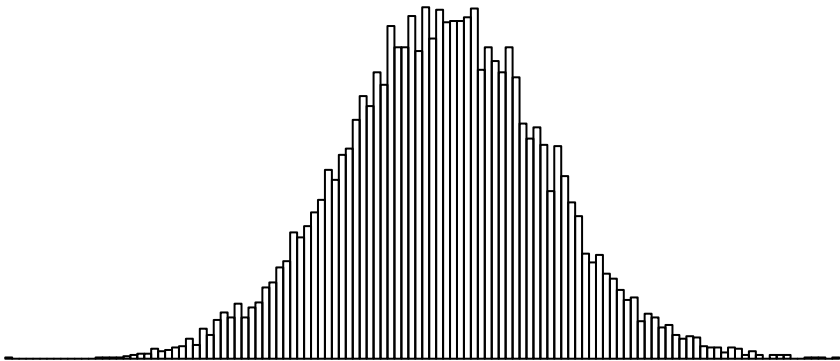

B184:120

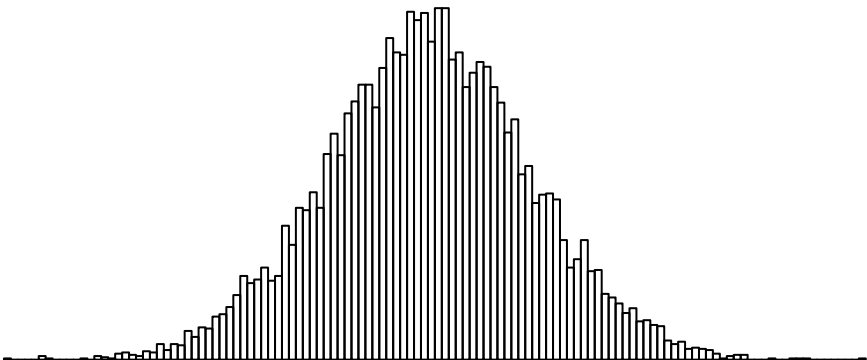

B184:45

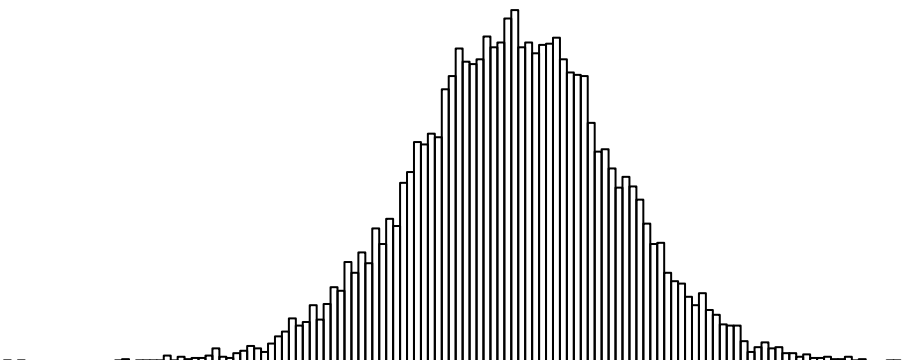

-8.5      -8.0      -7.5      -7.0      -6.5      -6.0      -5.5      -5.0

Unidentified Metabolite 77

B184:240 – B184:120

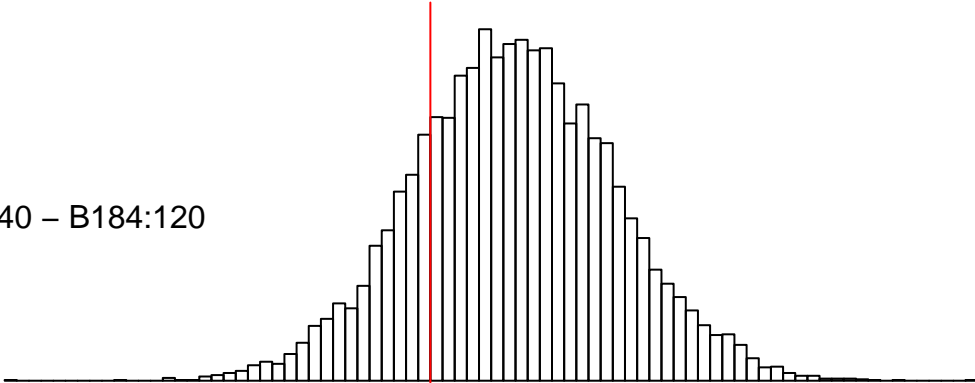

B184:240 – B184:45

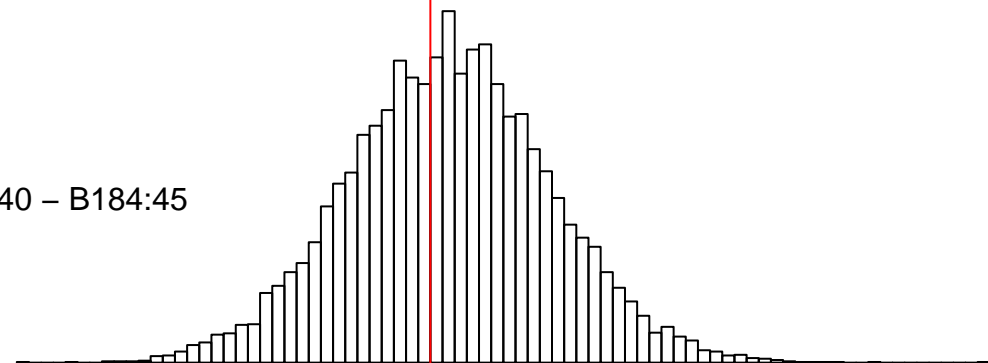

B184:120 – B184:45

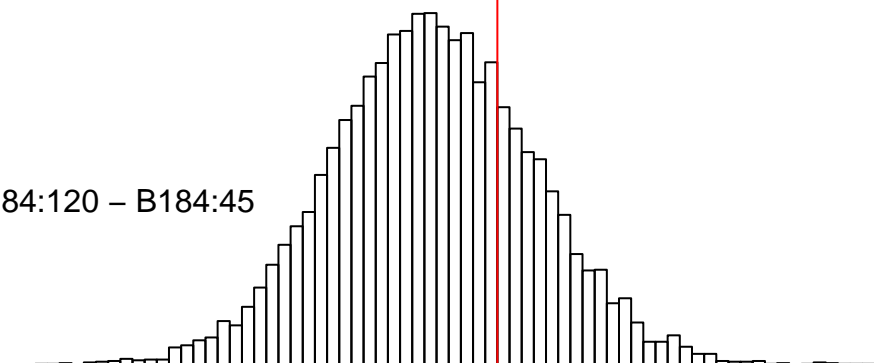

-2 -1 0 1 2 3

delta(Unidentified Metabolite 77)

B184:240

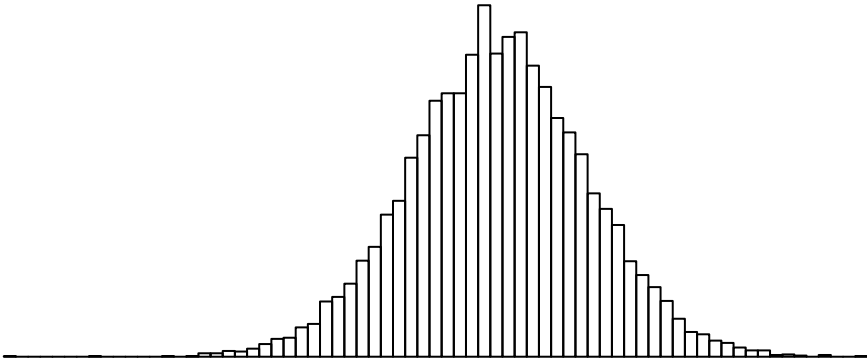

B184:120

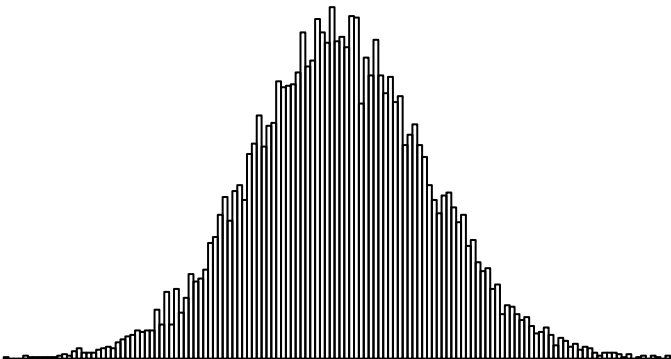

B184:45

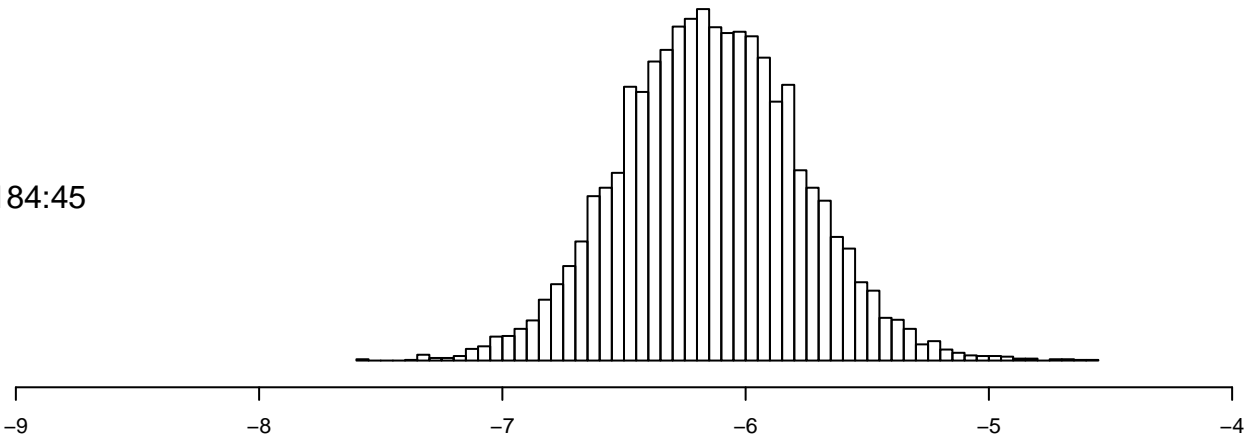

Unidentified Metabolite 78

B184:240 – B184:120

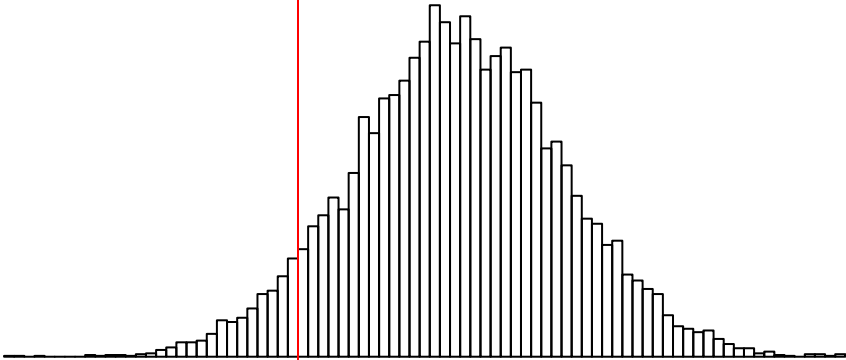

B184:240 – B184:45

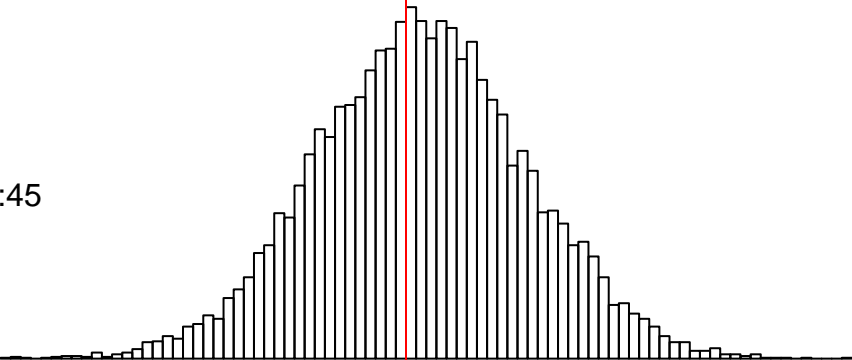

B184:120 – B184:45

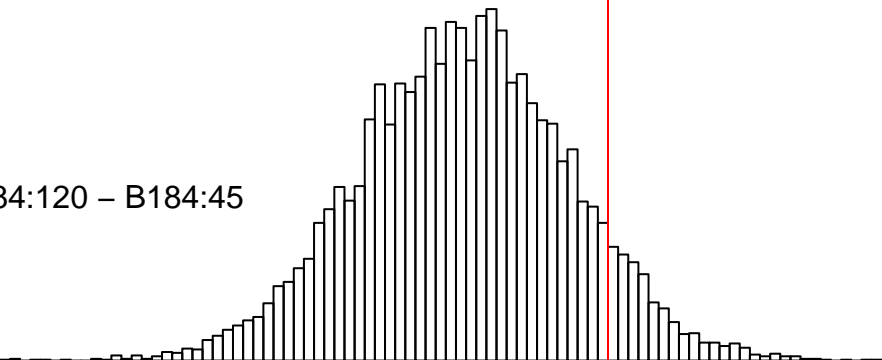

-3 -2 -1 0 1 2 3

delta(Unidentified Metabolite 78)



B184:240

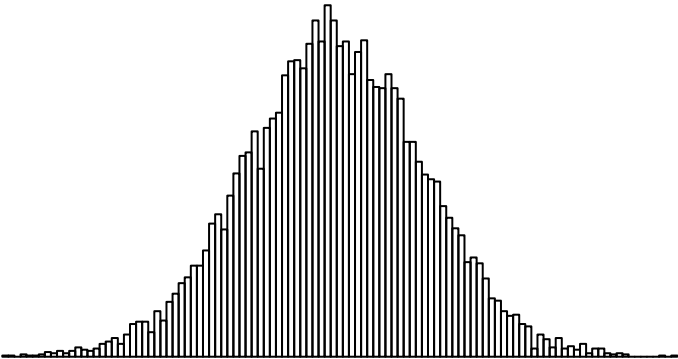

B184:120

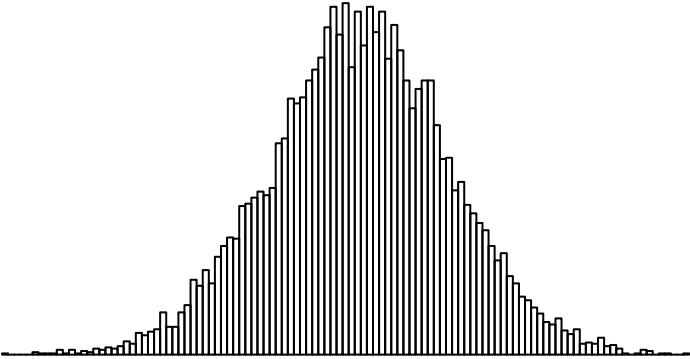

B184:45

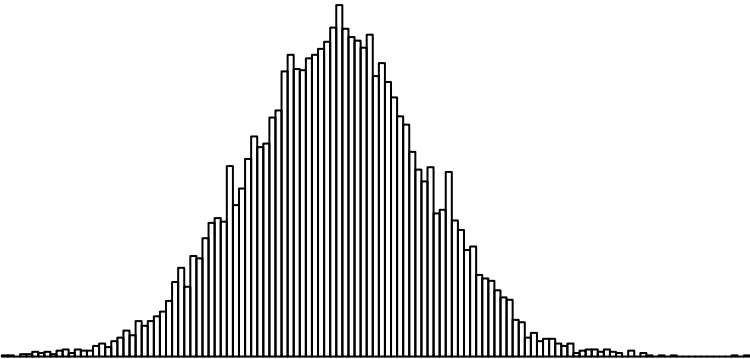

-9.5                      -9.0                      -8.5                      -8.0                      -7.5

Acid 2

B184:240 – B184:120

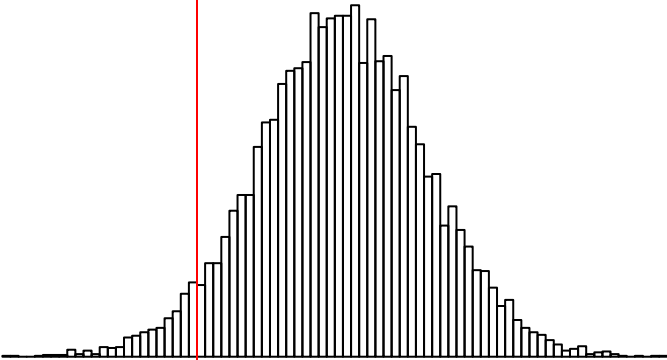

B184:240 – B184:45

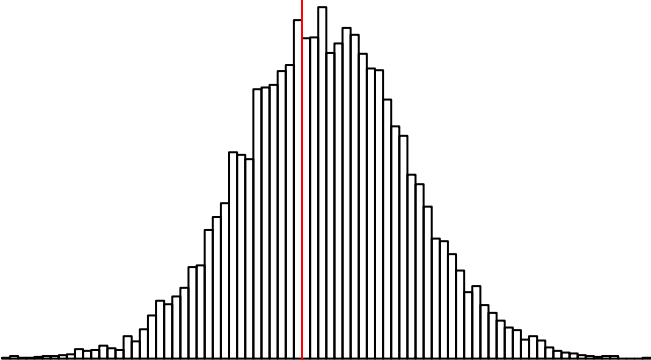

B184:120 – B184:45

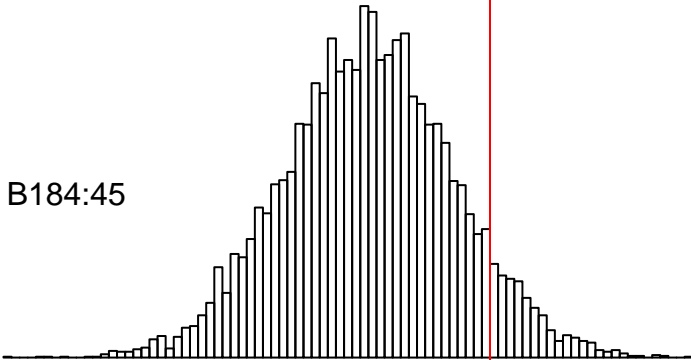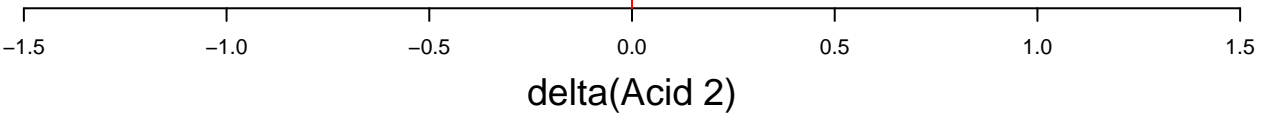

B184:240

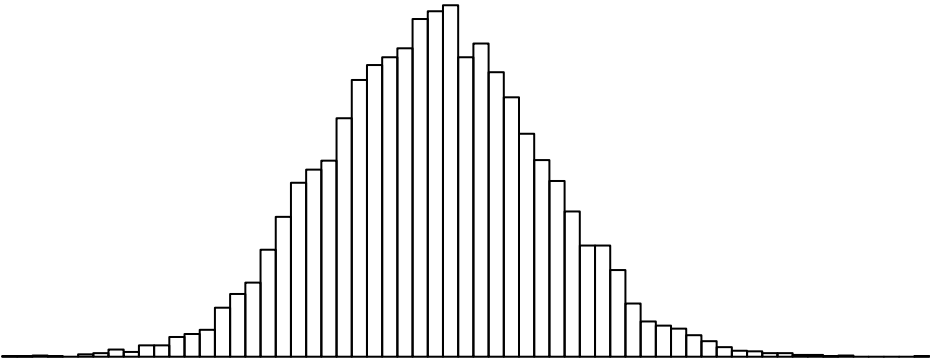

B184:120

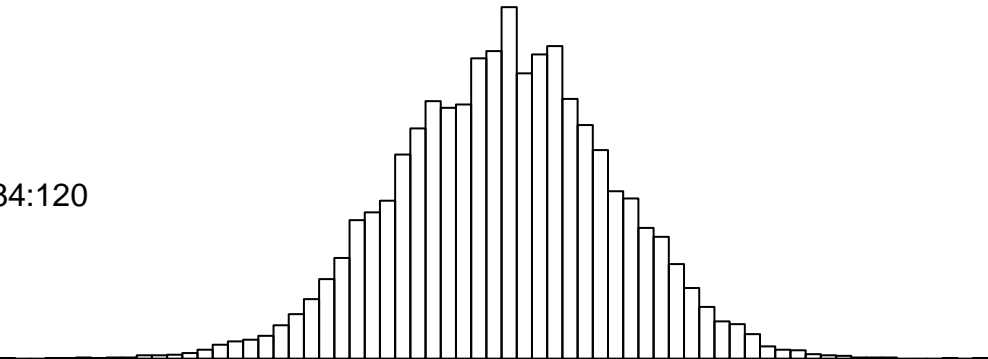

B184:45

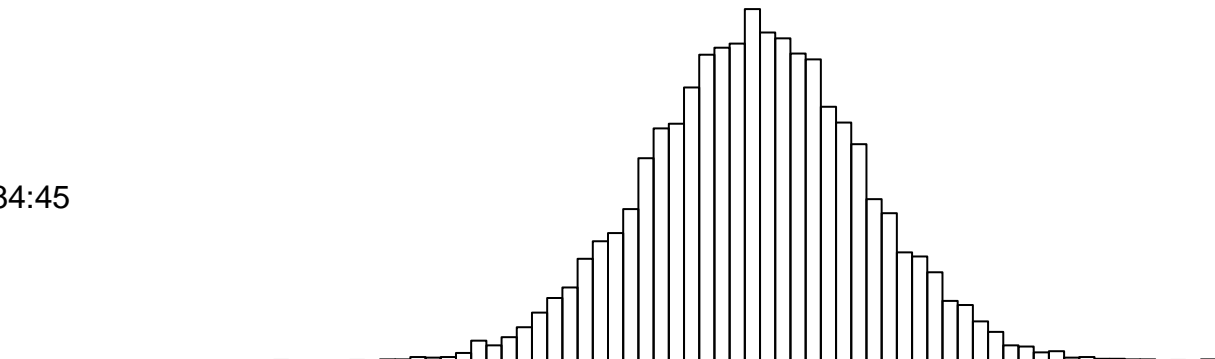

Acid 3

B184:240 – B184:120

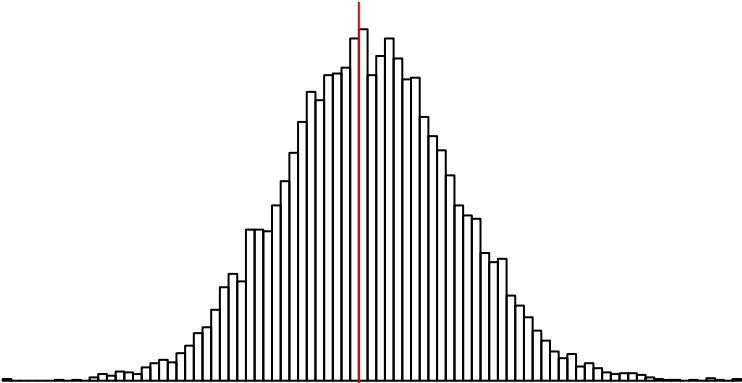

B184:240 – B184:45

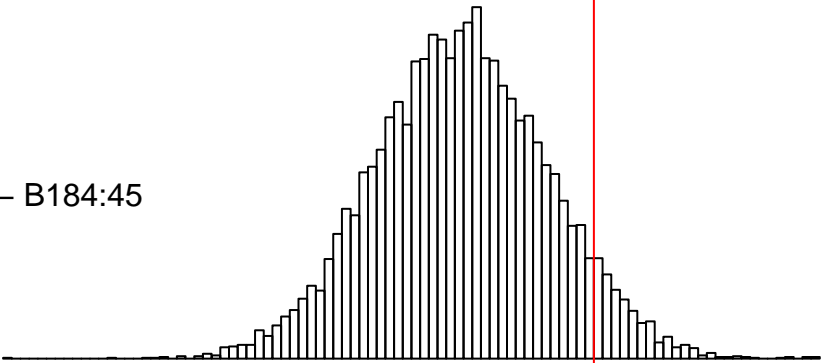

B184:120 – B184:45

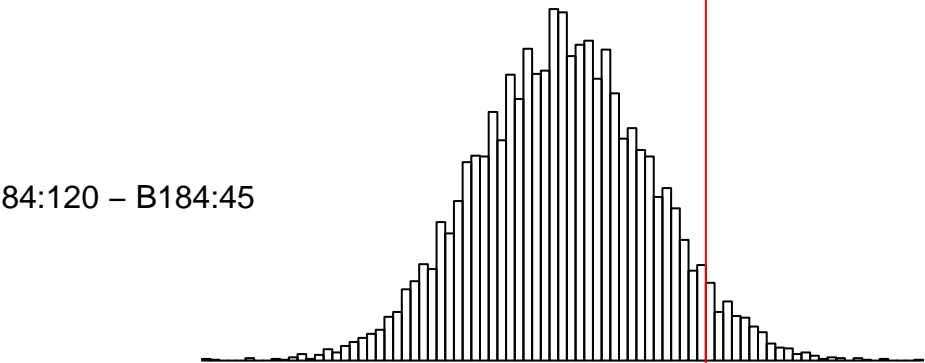

-4 -3 -2 -1 0 1 2 3

delta(Acid 3)

B184:240

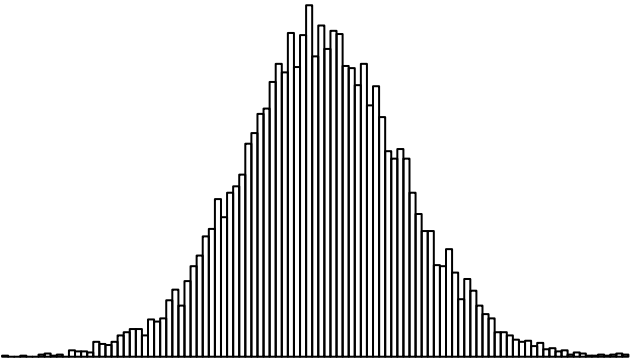

B184:120

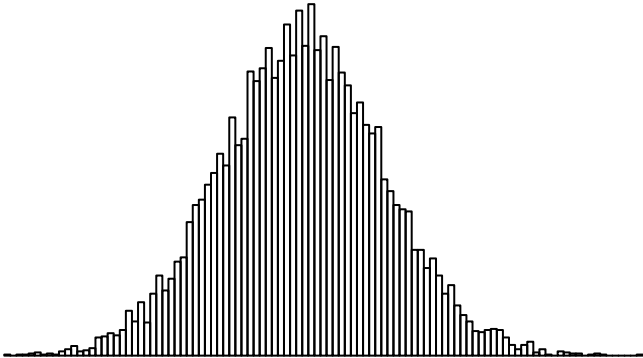

B184:45

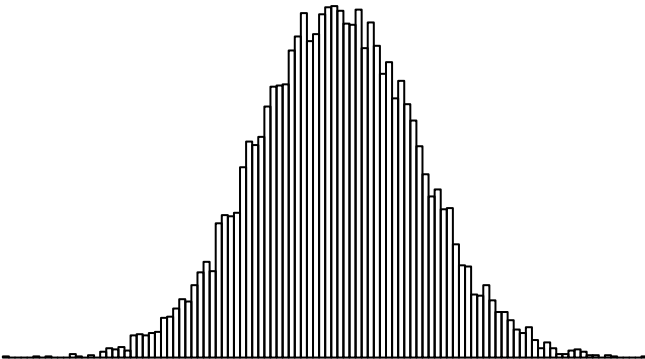

-9

-8

-7

-6

-5

Acid 6

B184:240 – B184:120

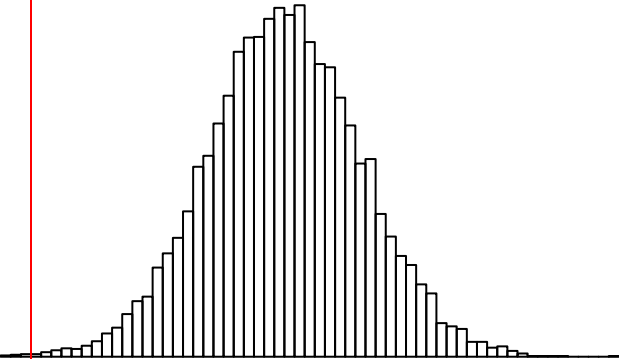

B184:240 – B184:45

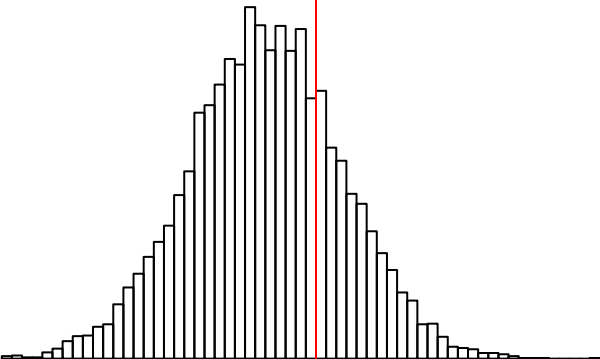

B184:120 – B184:45

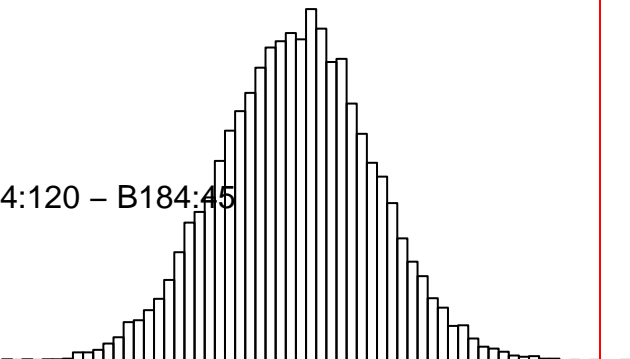

delta(Acid 6)

B184:240

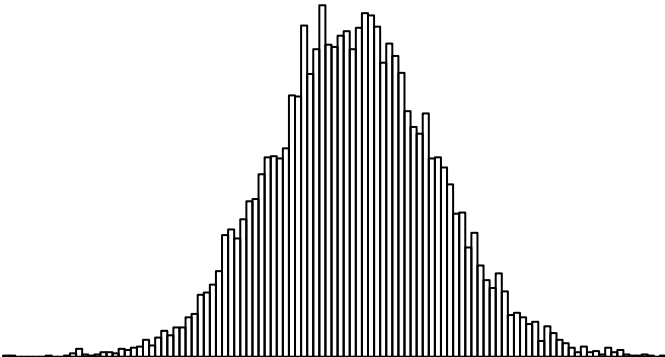

B184:120

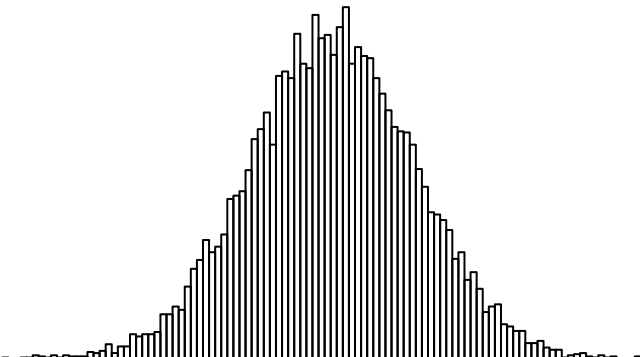

B184:45

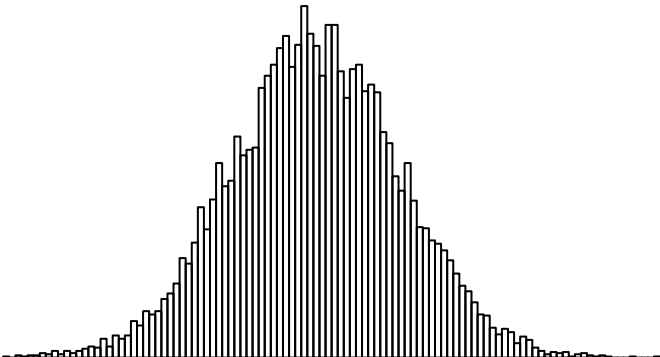

-8.5                      -8.0                      -7.5                      -7.0                      -6.5

Acid 7

B184:240 – B184:120

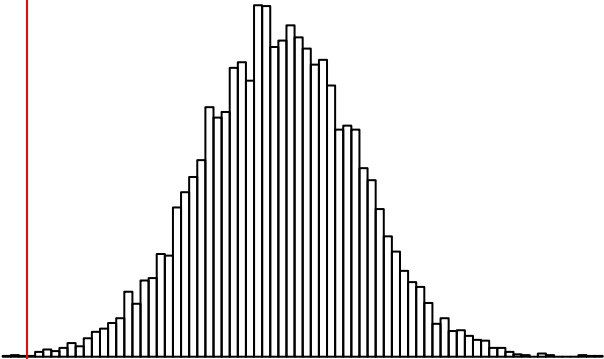

B184:240 – B184:45

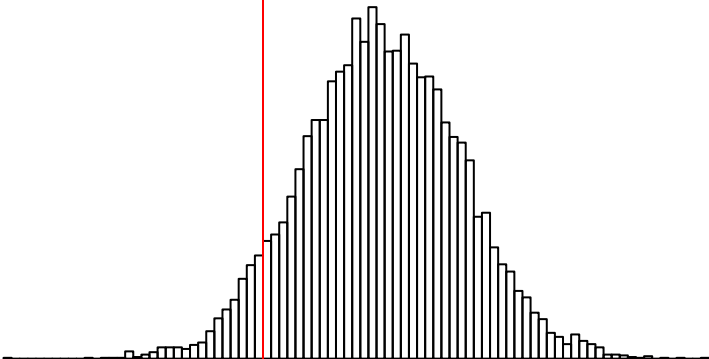

B184:120 – B184:45

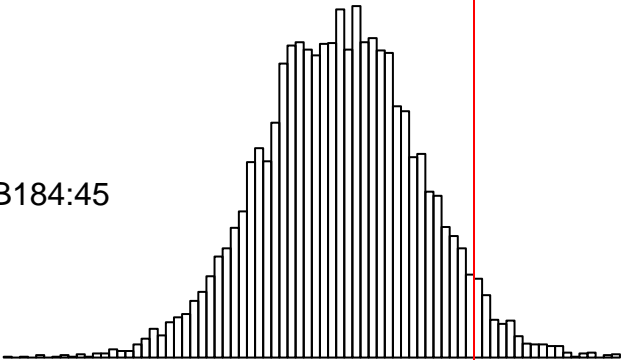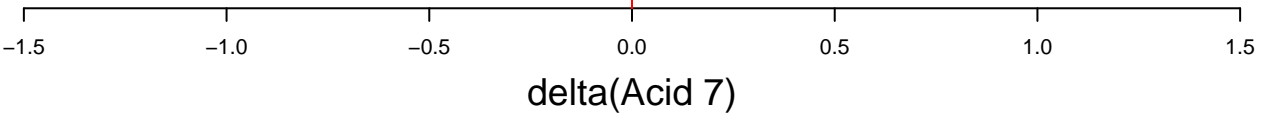



B184:240

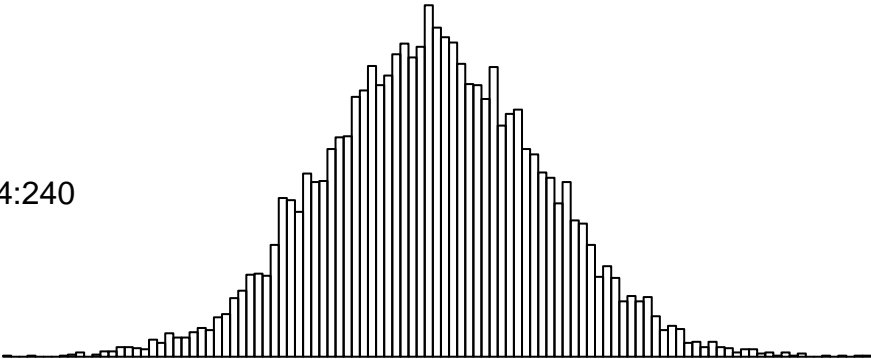

B184:120

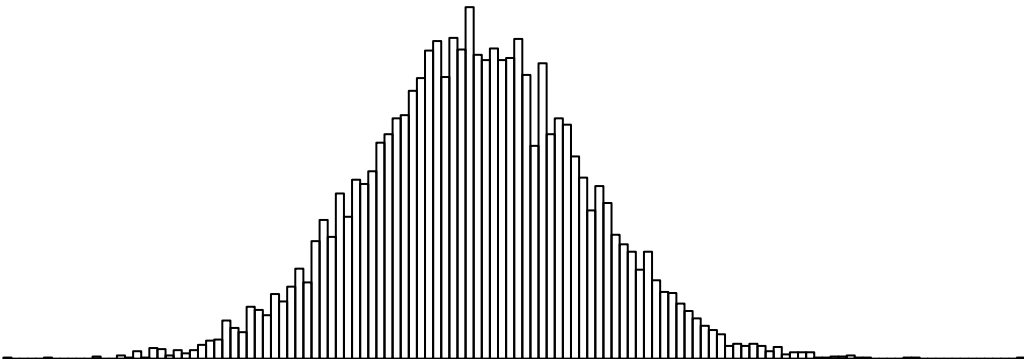

B184:45

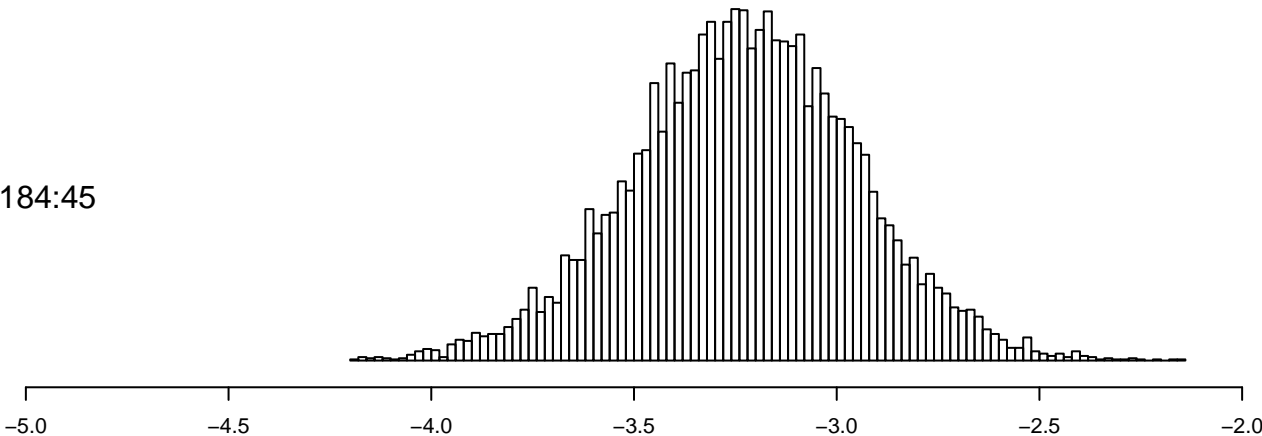

Acid 8

B184:240 – B184:120

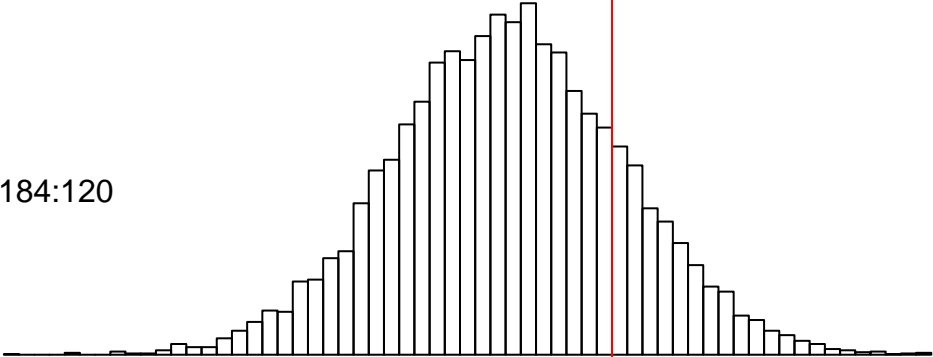

B184:240 – B184:45

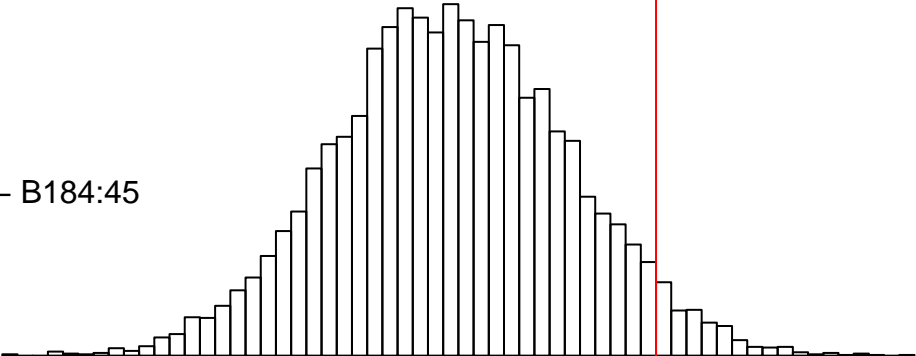

B184:120 – B184:45

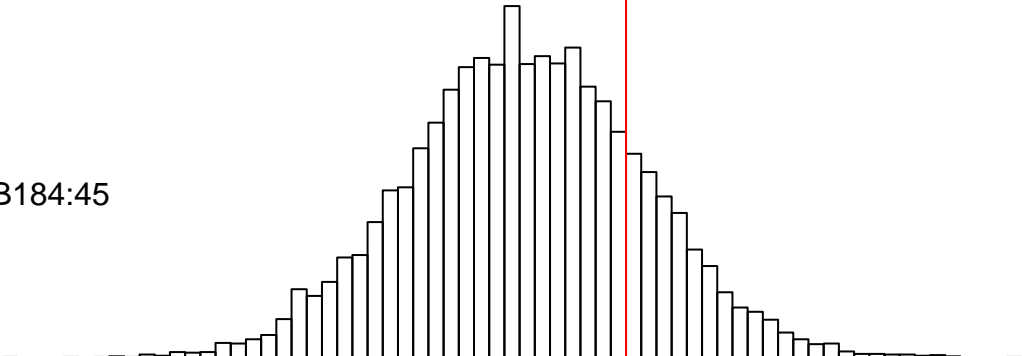

-2

-1

0

1

delta(Acid 8)

B184:240

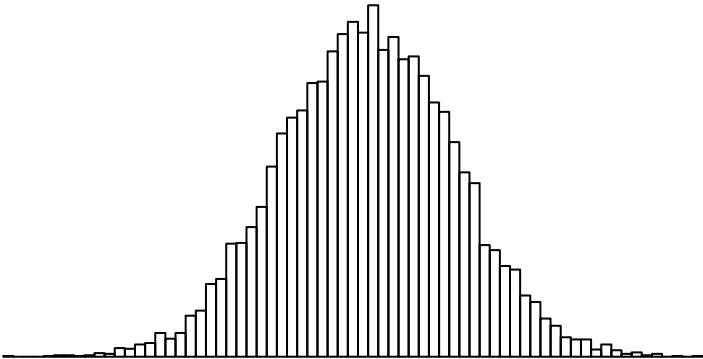

B184:120

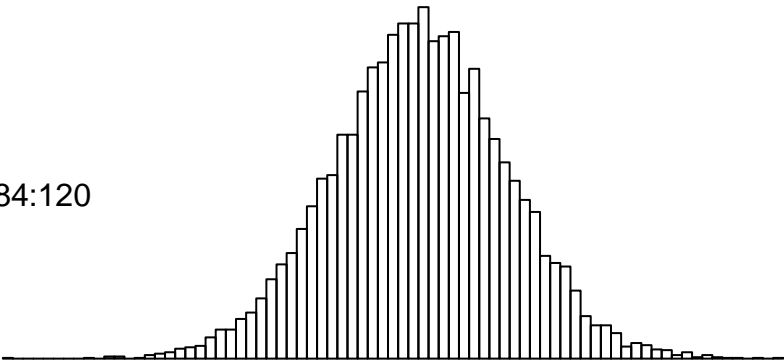

B184:45

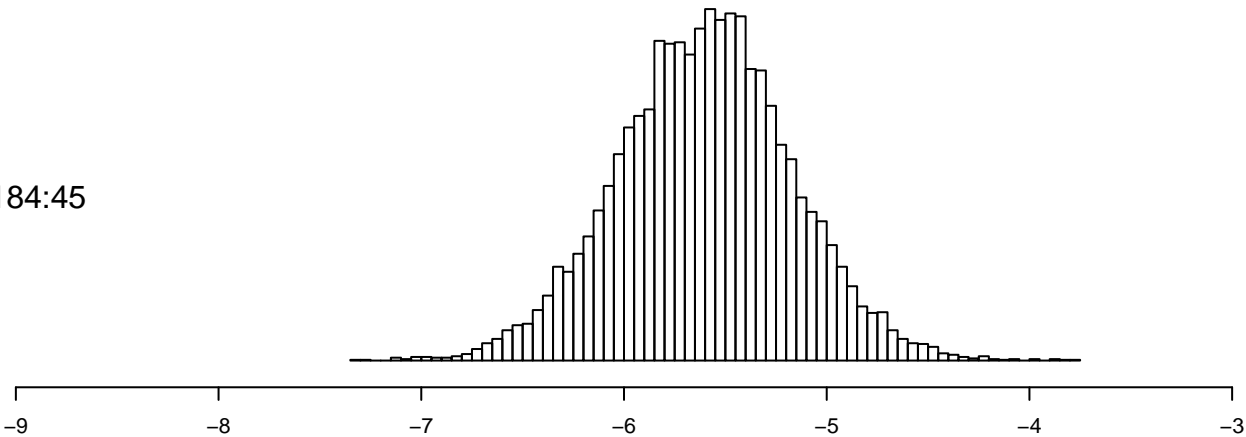

Acid 9

B184:240 – B184:120

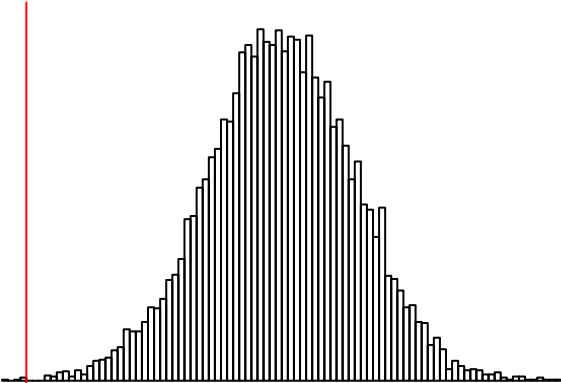

B184:240 – B184:45

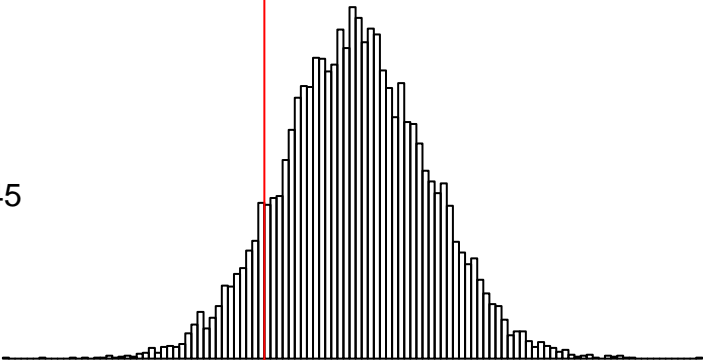

B184:120 – B184:45

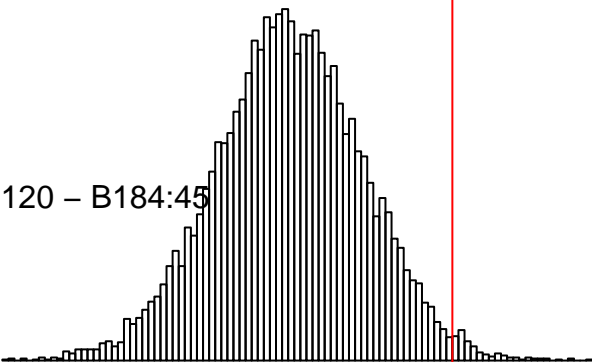

-4

-2

0

2

4

6

delta(Acid 9)

B184:240

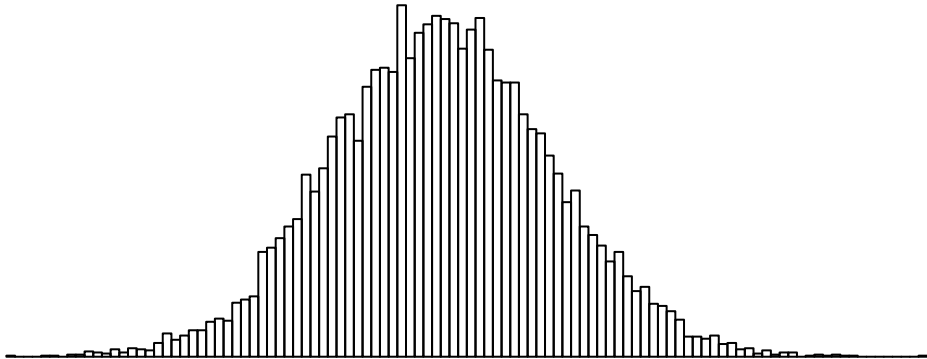

B184:120

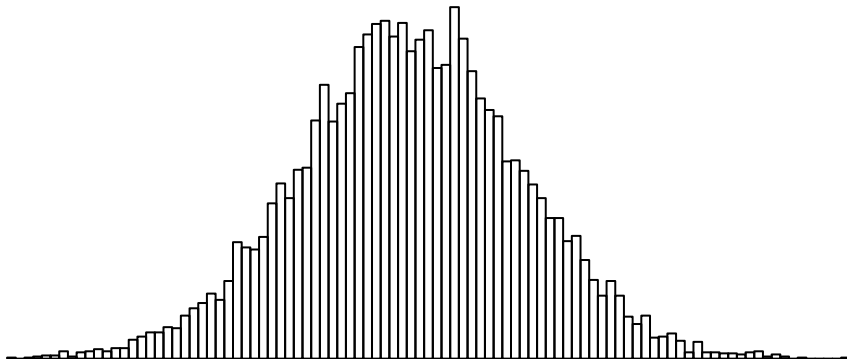

B184:45

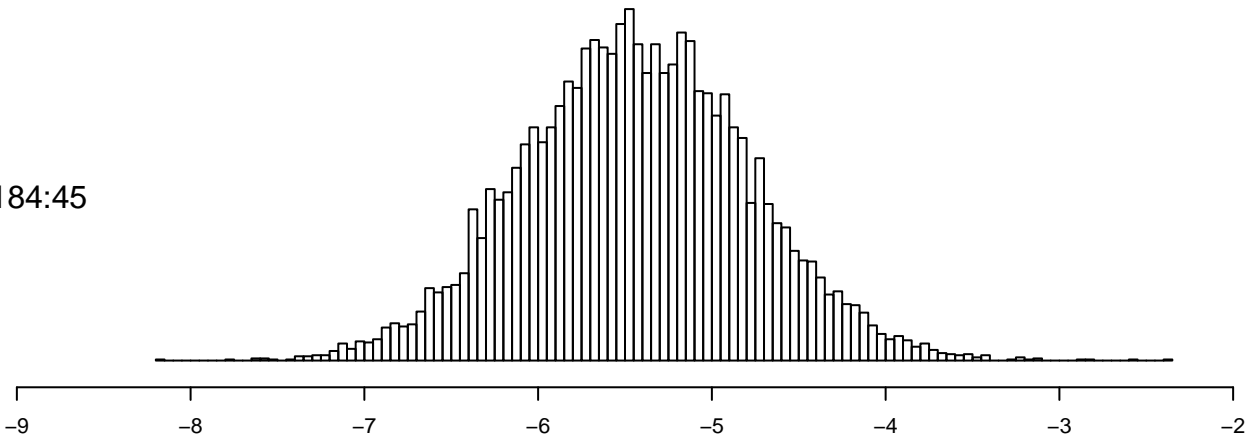

Acid 10

B184:240 – B184:120

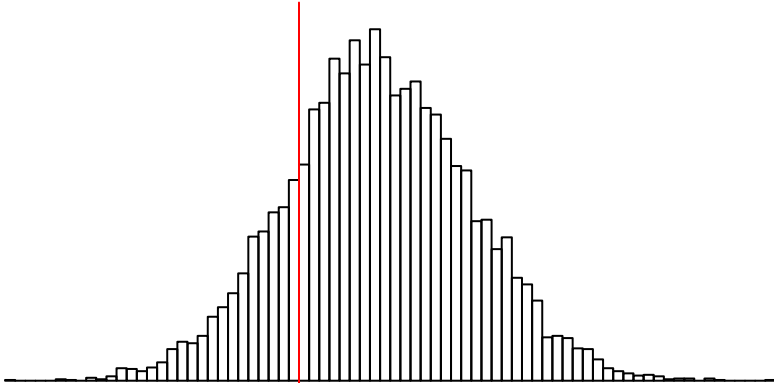

B184:240 – B184:45

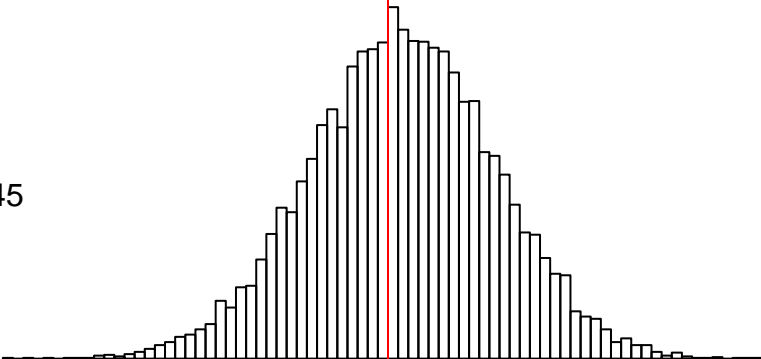

B184:120 – B184:45

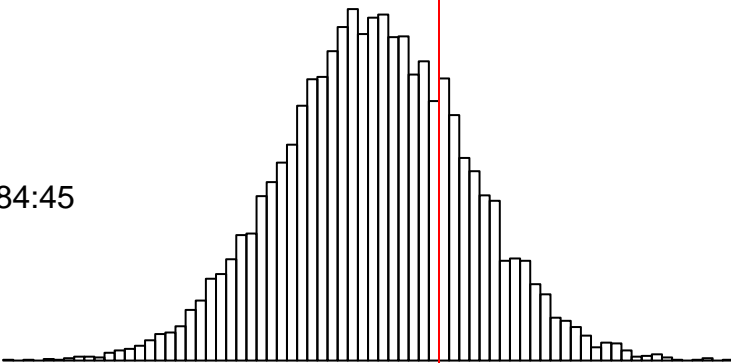

-6 -4 -2 0 2 4 6

delta(Acid 10)

B184:240

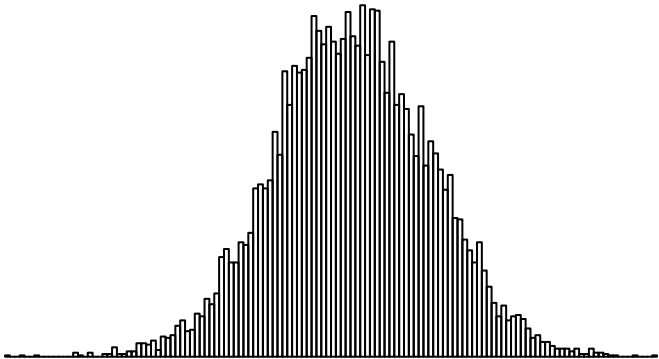

B184:120

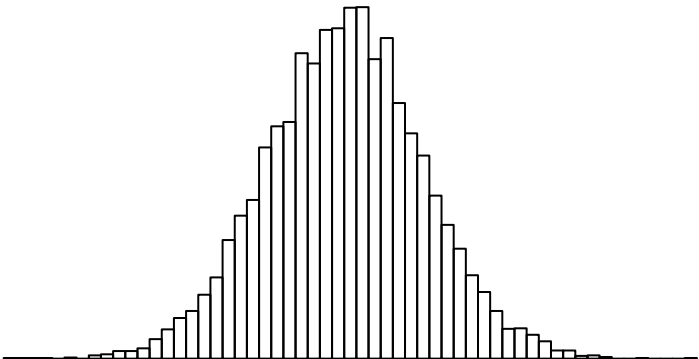

B184:45

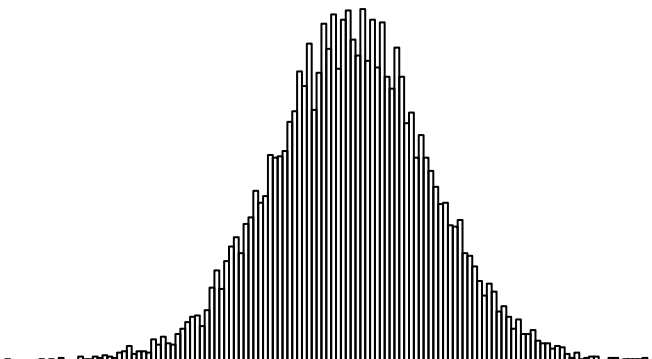

Acid 11

B184:240 – B184:120

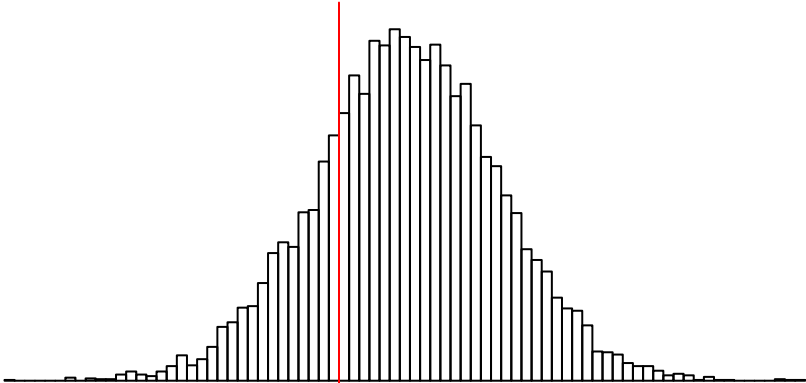

B184:240 – B184:45

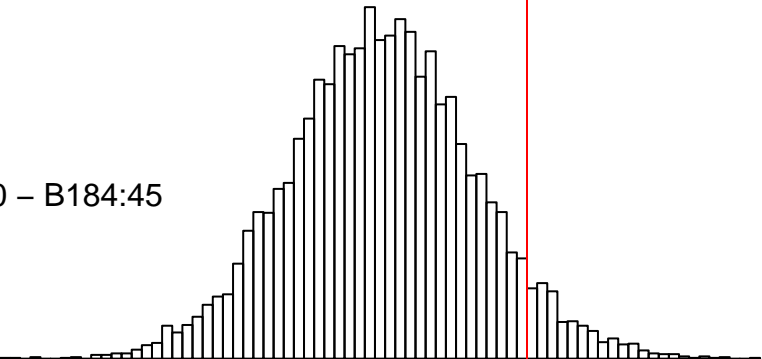

B184:120 – B184:45

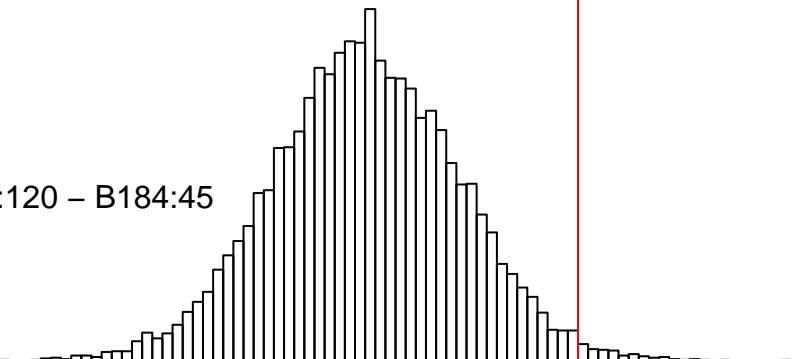

delta(Acid 11)



B184:240

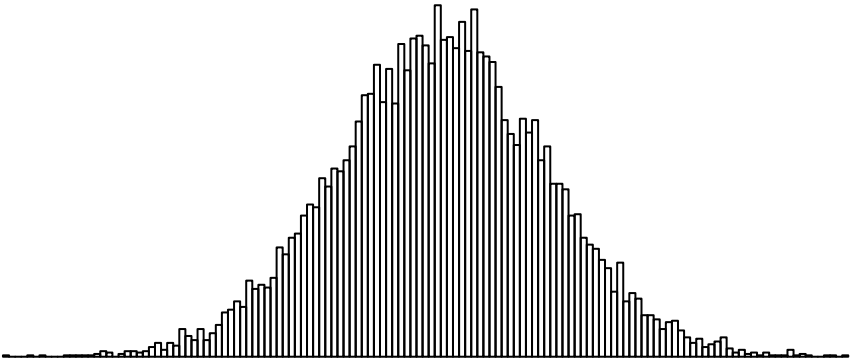

B184:120

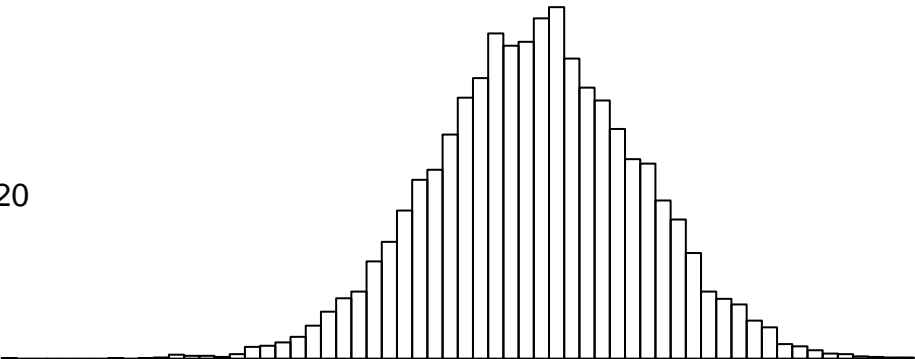

B184:45

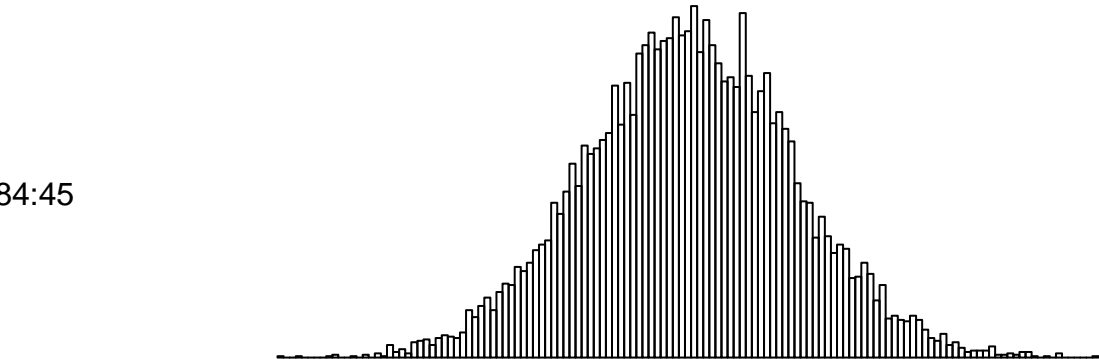

-8 -7 -6 -5 -4

Acid 12

B184:240 – B184:120

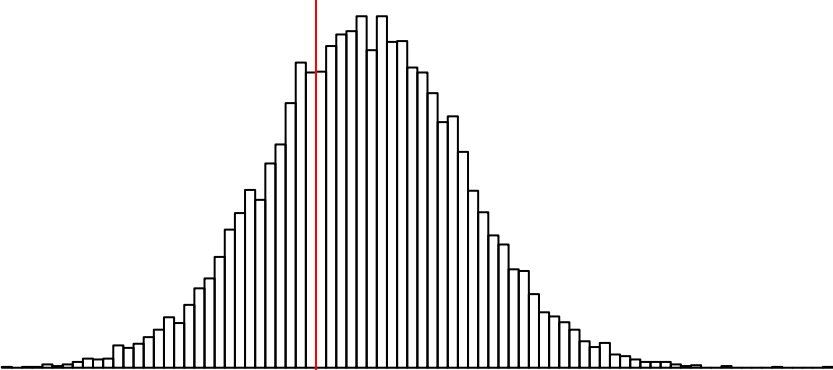

B184:240 – B184:45

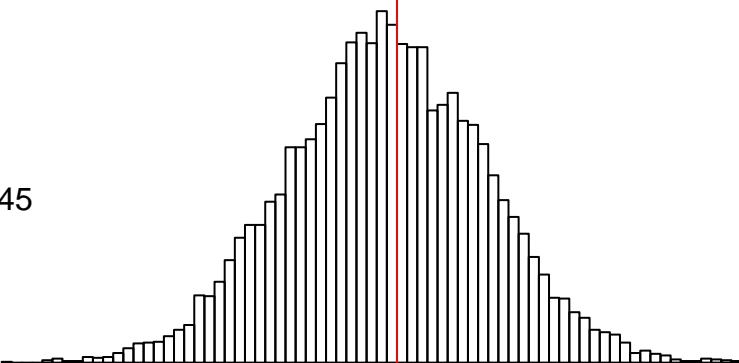

B184:120 – B184:45

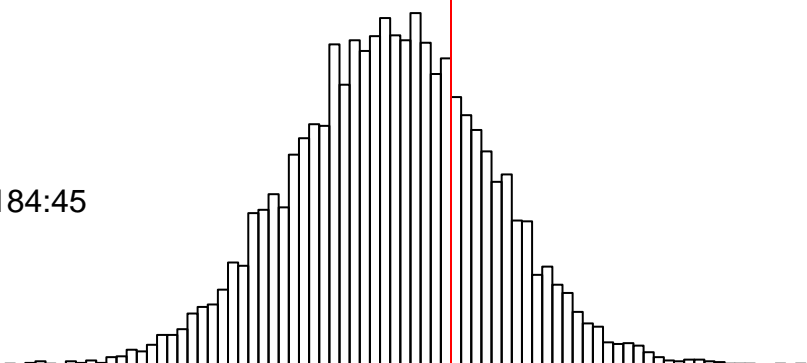

delta(Acid 12)

B184:240

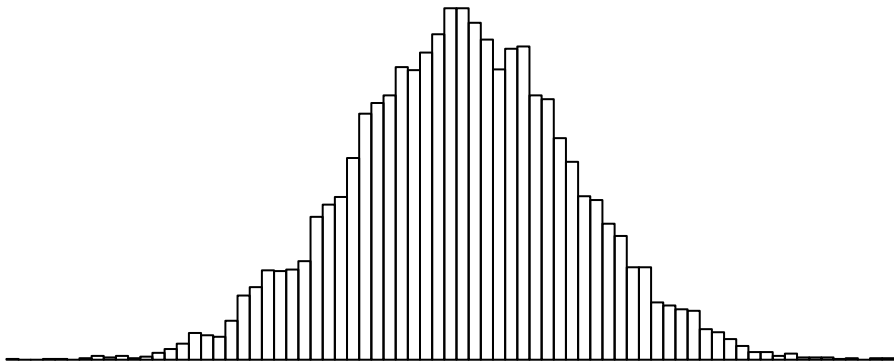

B184:120

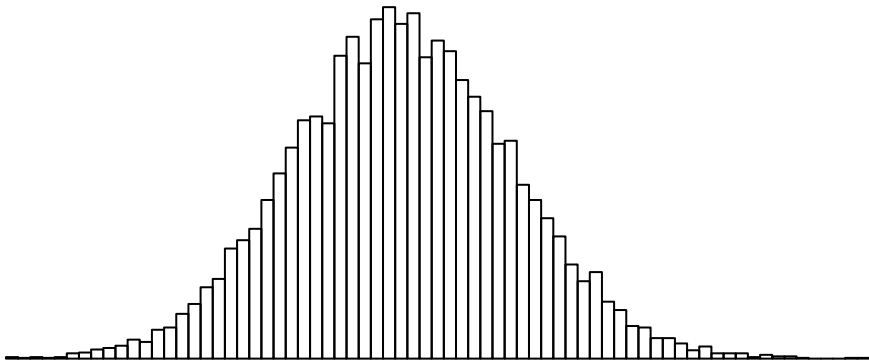

B184:45

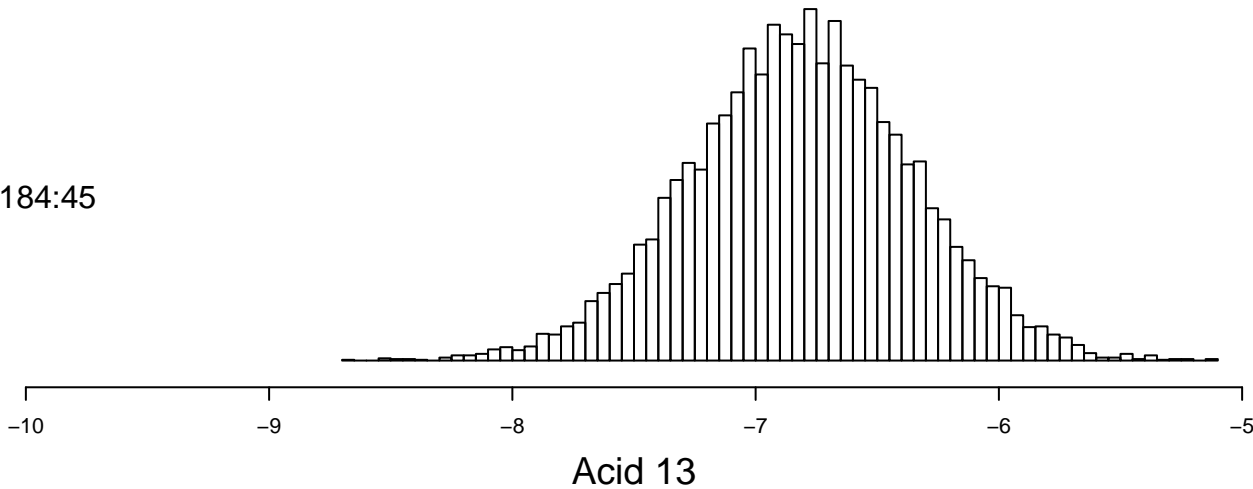

B184:240 – B184:120

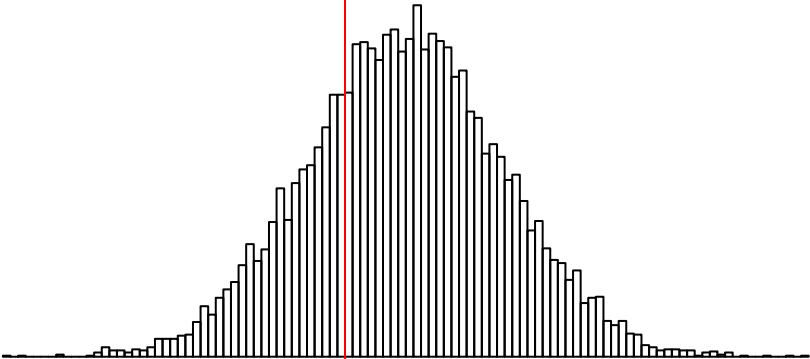

B184:240 – B184:45

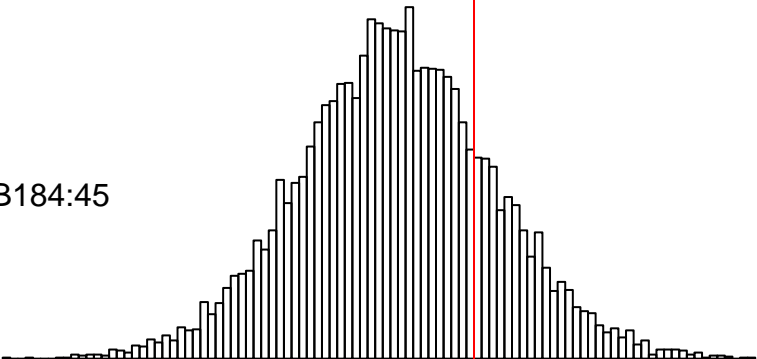

B184:120 – B184:45

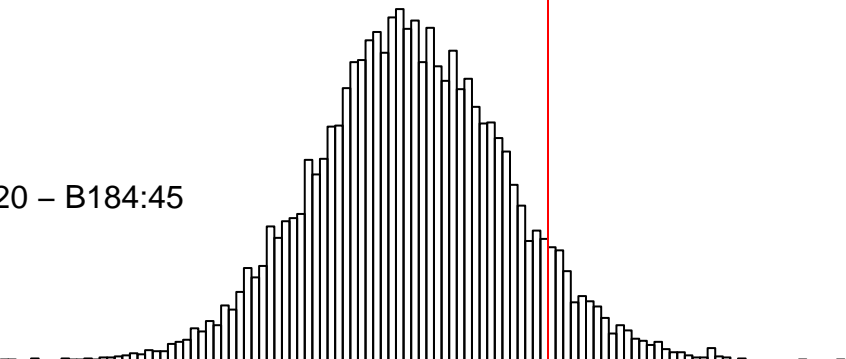

delta(Acid 13)

B184:240

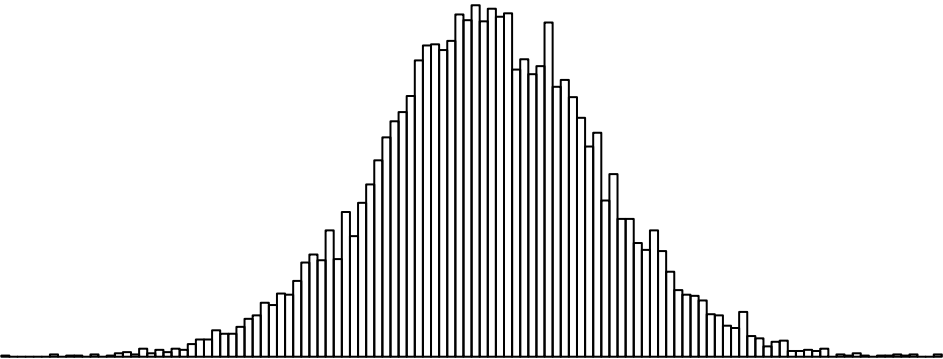

B184:120

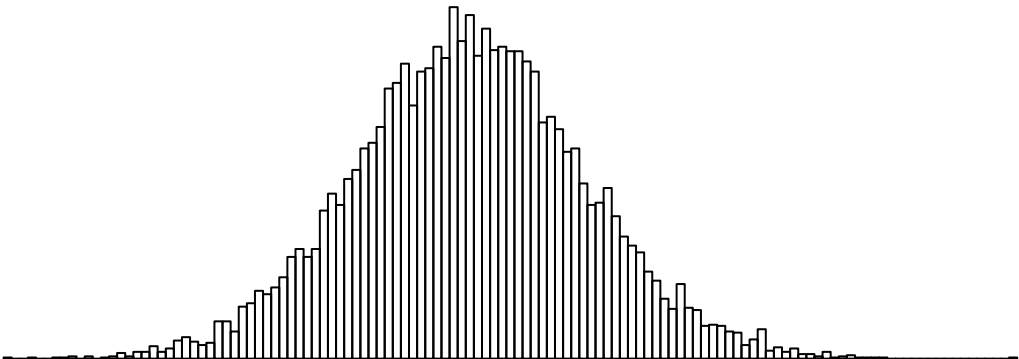

B184:45

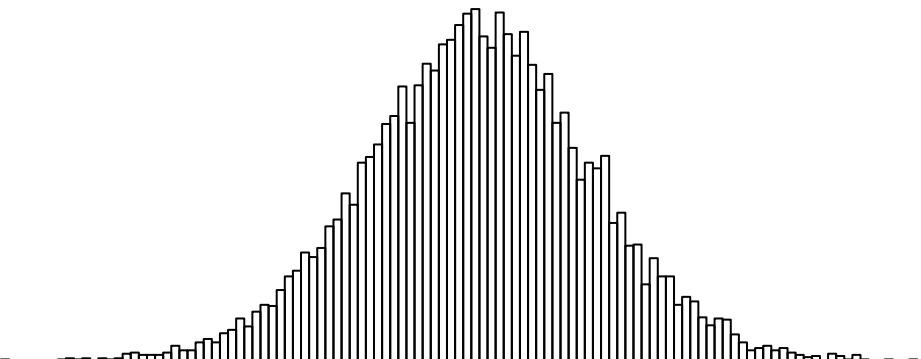

-8.0 -7.5 -7.0 -6.5 -6.0 -5.5 -5.0

Acid 14

B184:240 – B184:120

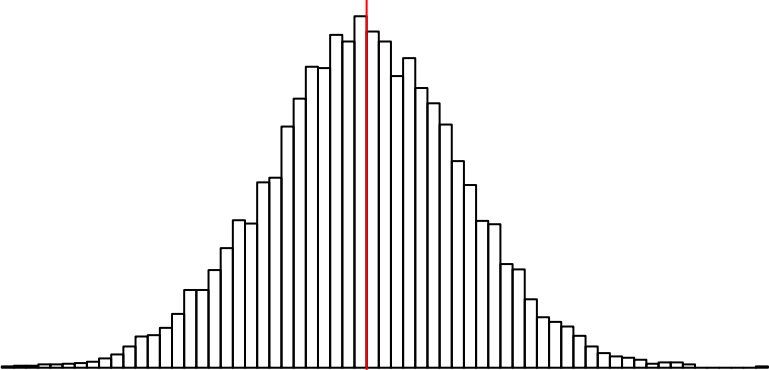

B184:240 – B184:45

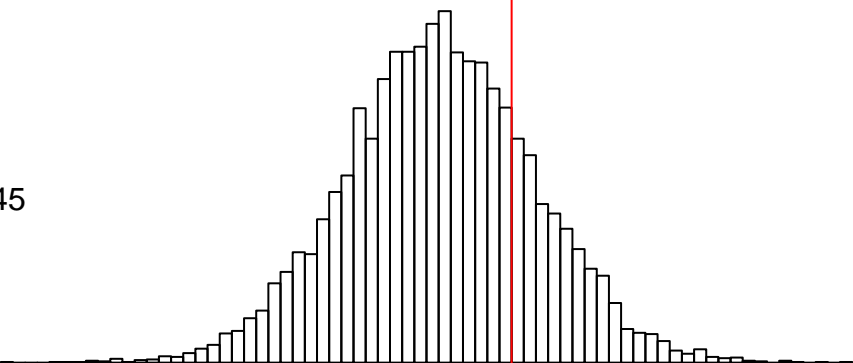

B184:120 – B184:45

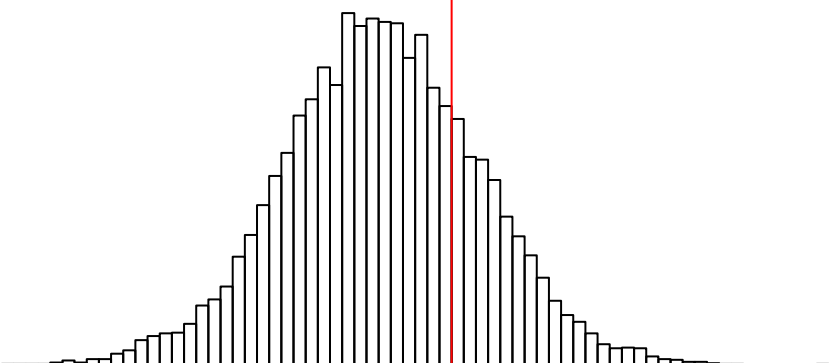

delta(Acid 14)
