# Supplementary material for: Taxonomic and Environmental Variation of Metabolite Profiles in Marine Dinoflagellates of the Genus Symbiodinium
Source: MDPI journal article supplement (doi:10.3390/metabo5010074), 2015-02-16
Supplement: s1 [file s1]

D206:240

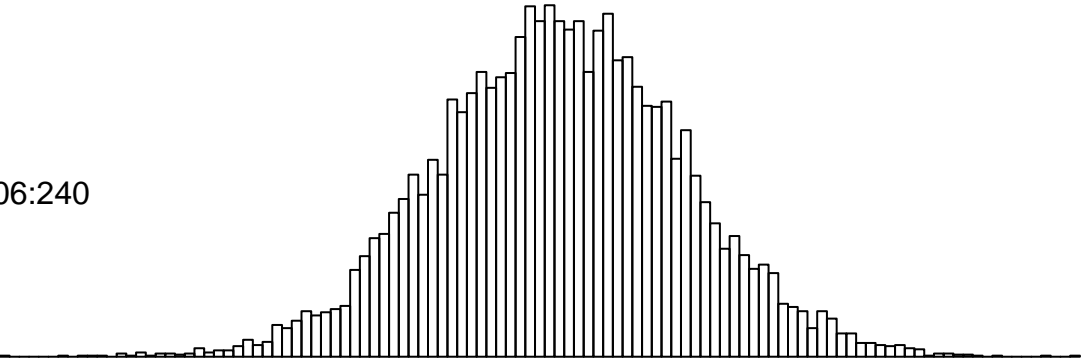

D206:120

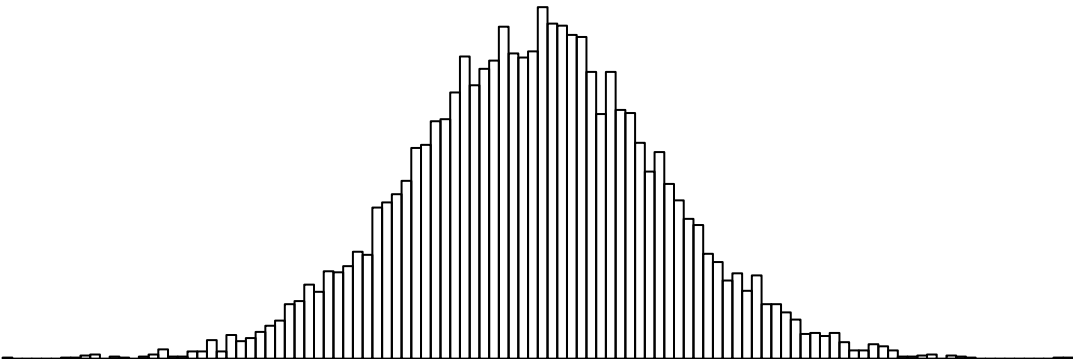

D206:45

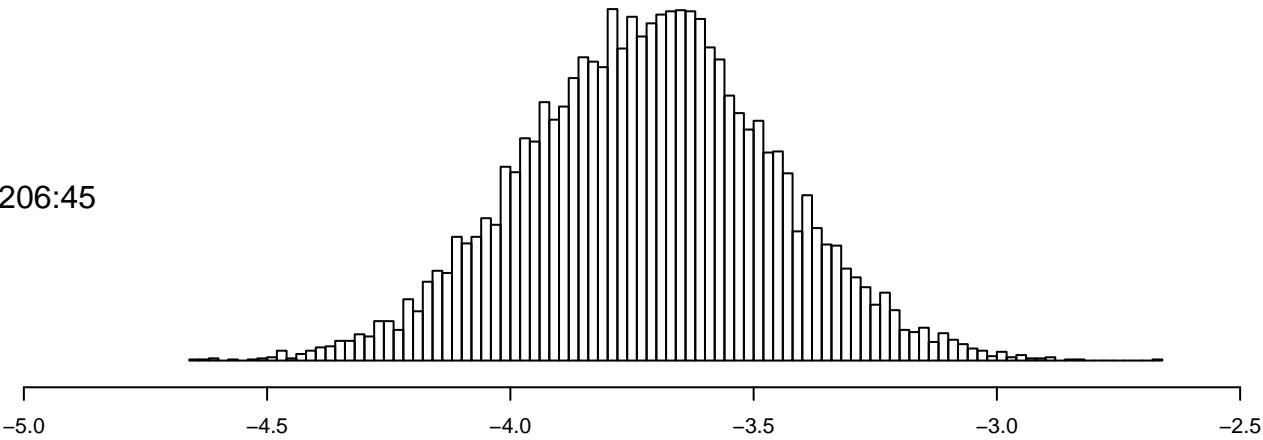

Amino Acid 2

D206:240 – D206:120

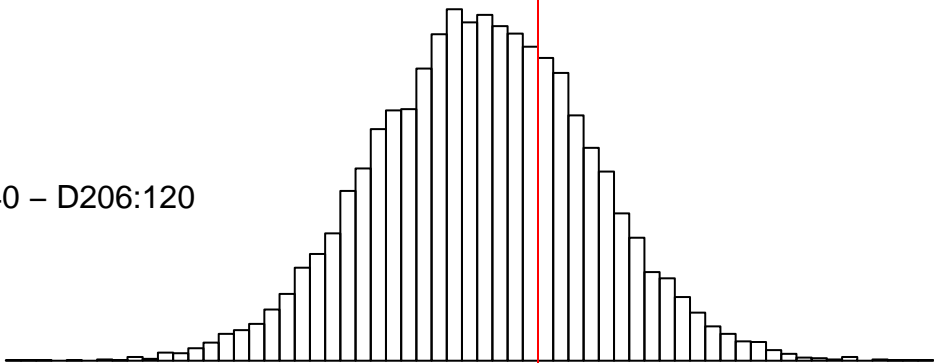

D206:240 – D206:45

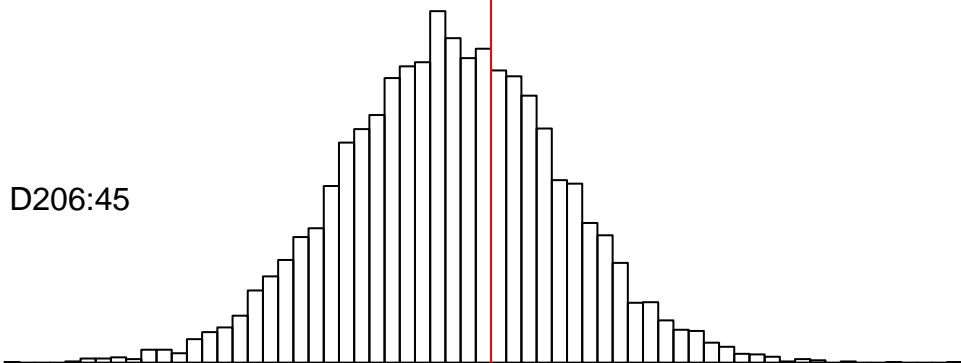

D206:120 – D206:45

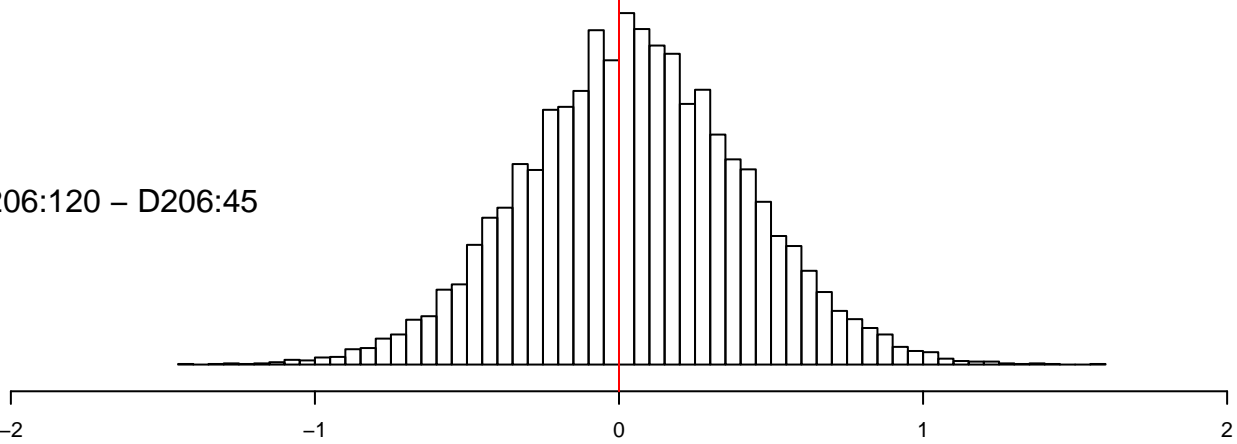

delta(Amino Acid 2)

D206:240

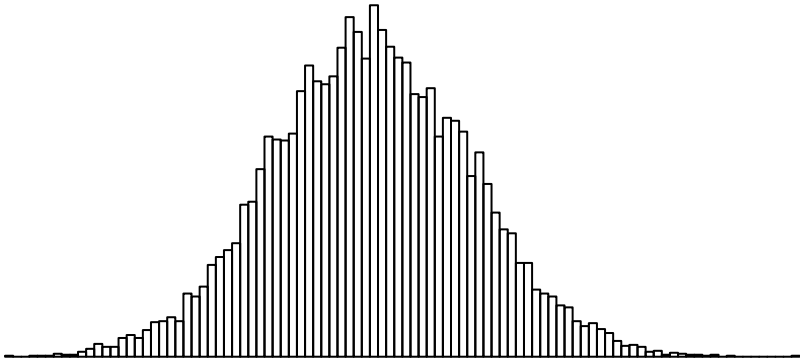

D206:120

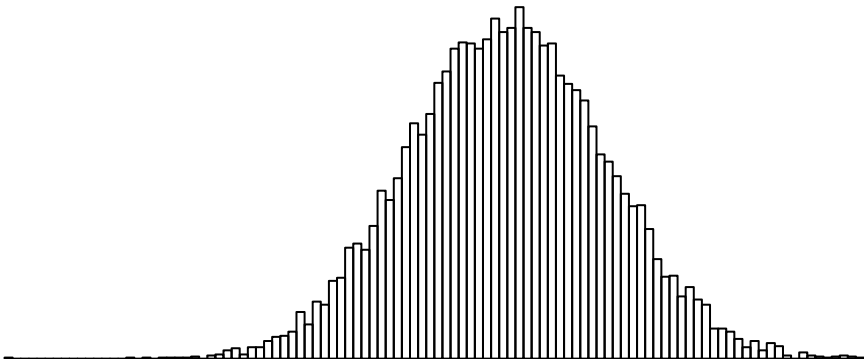

D206:45

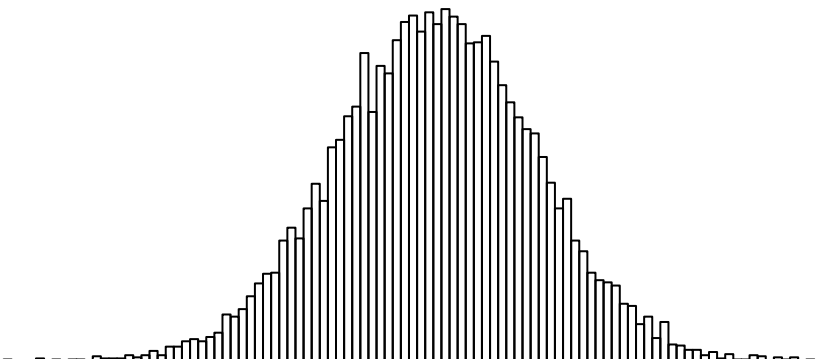

-7.5 -7.0 -6.5 -6.0 -5.5 -5.0 -4.5

Amino Acid 3

D206:240 – D206:120

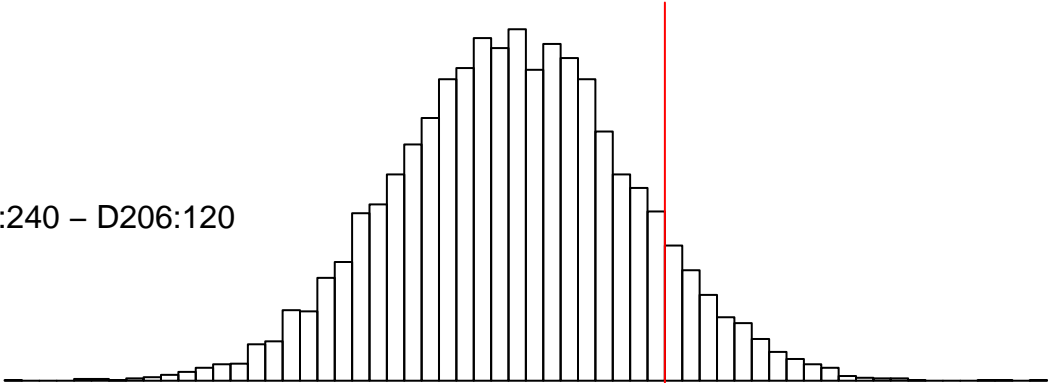

D206:240 – D206:45

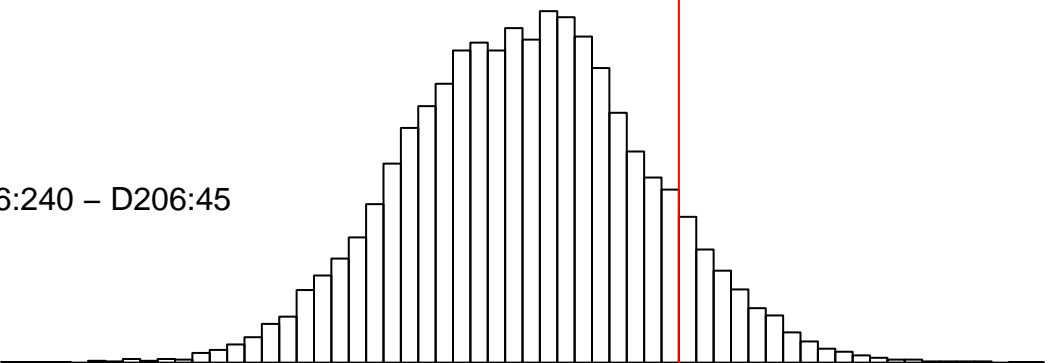

D206:120 – D206:45

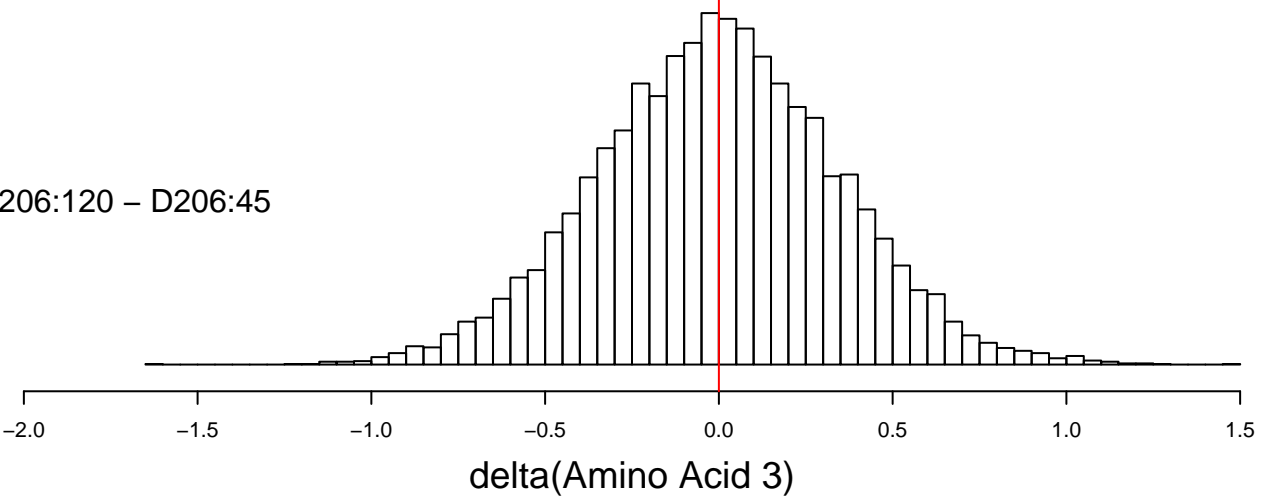

D206:240

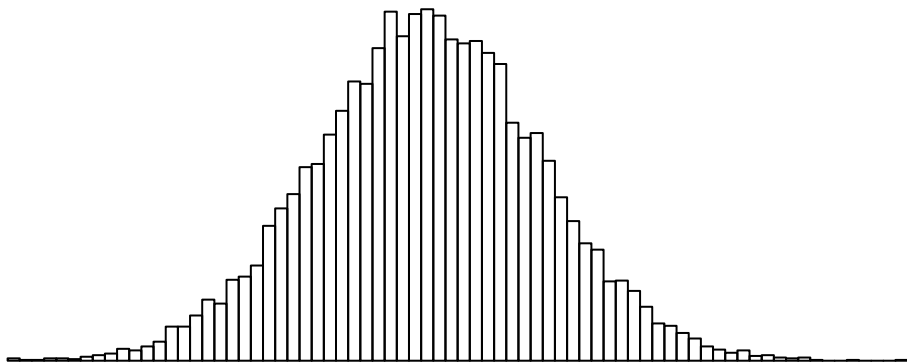

D206:120

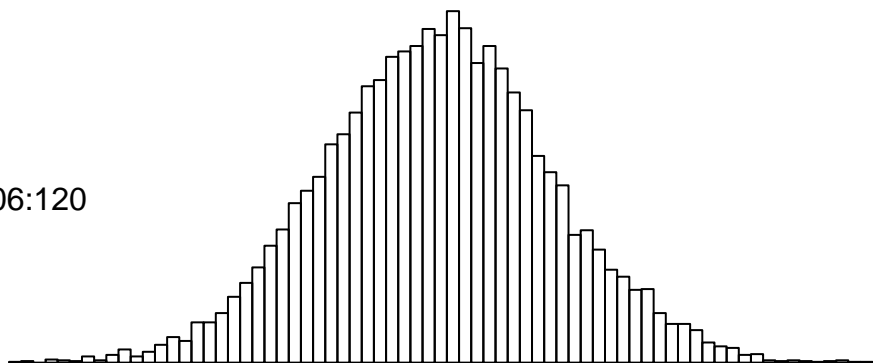

D206:45

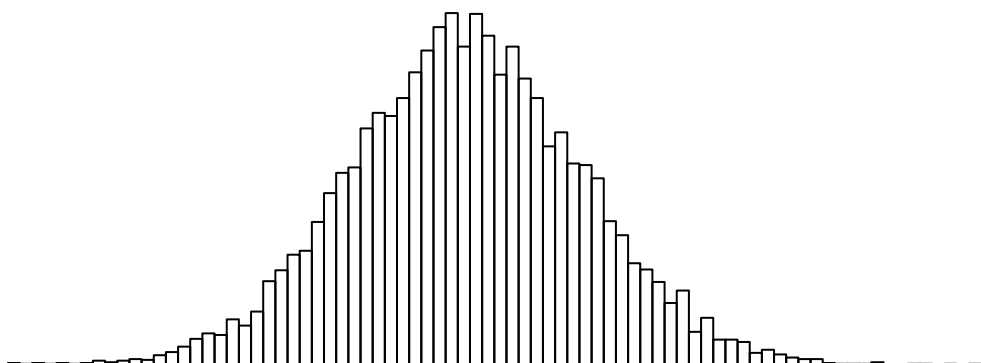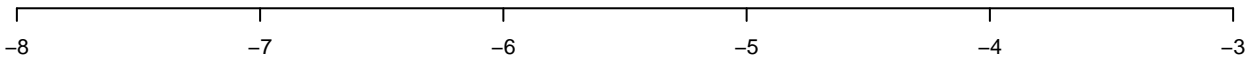

Alanine

D206:240 – D206:120

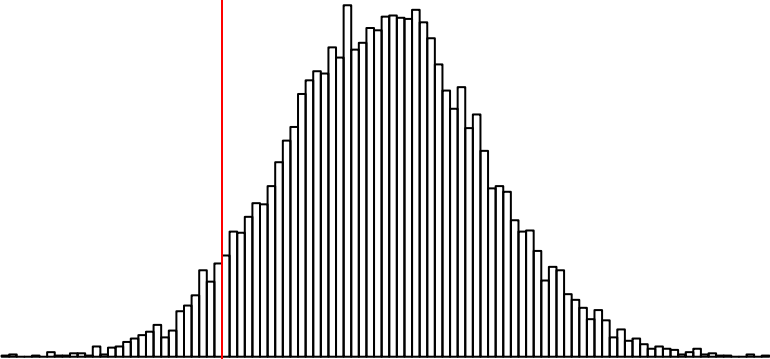

D206:240 – D206:45

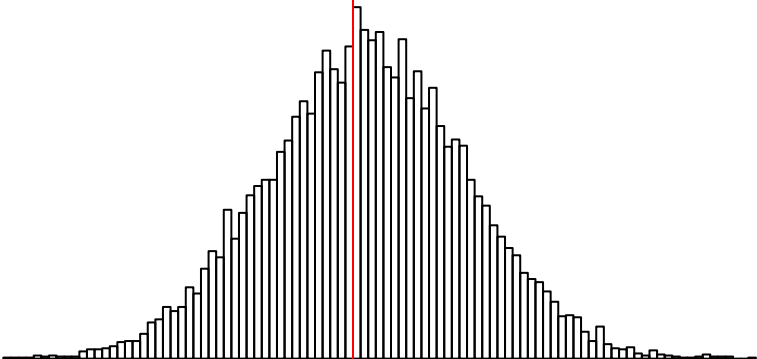

D206:120 – D206:45

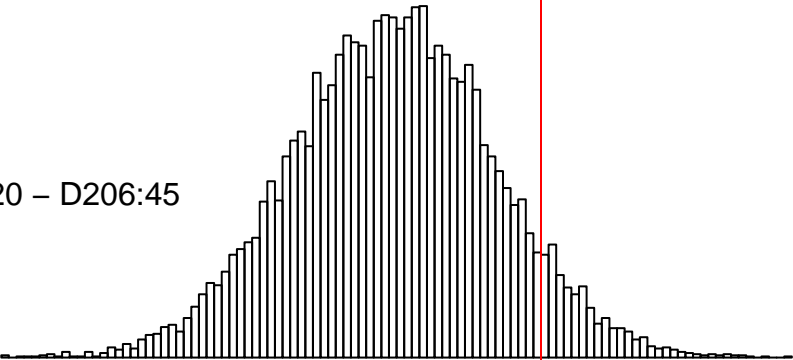

-4

-2

0

2

4

delta(Alanine)

D206:240

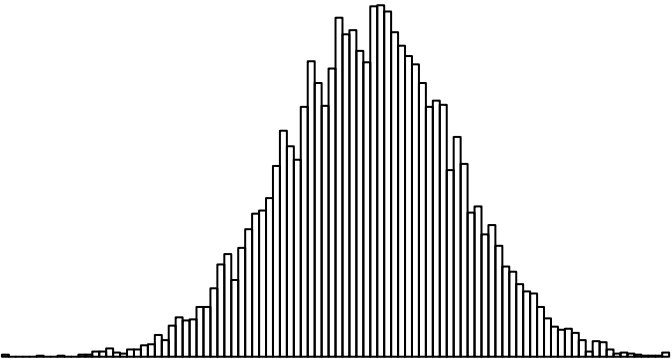

D206:120

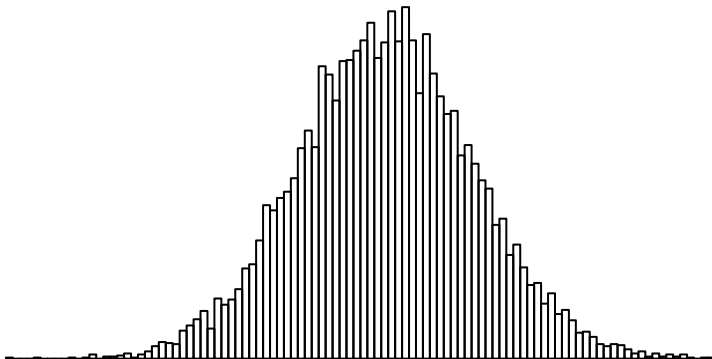

D206:45

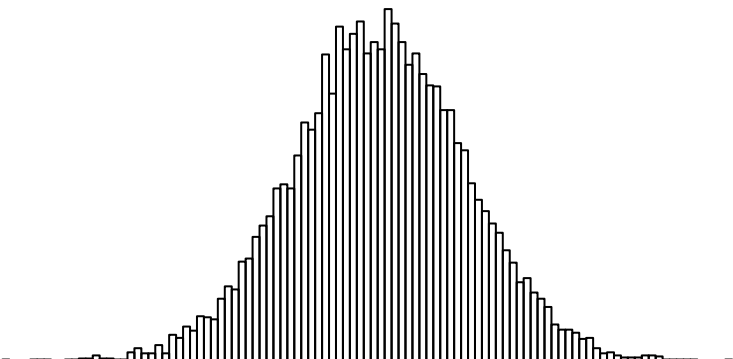

-8.5      -8.0      -7.5      -7.0      -6.5      -6.0      -5.5      -5.0

Amino Acid 4

D206:240 – D206:120

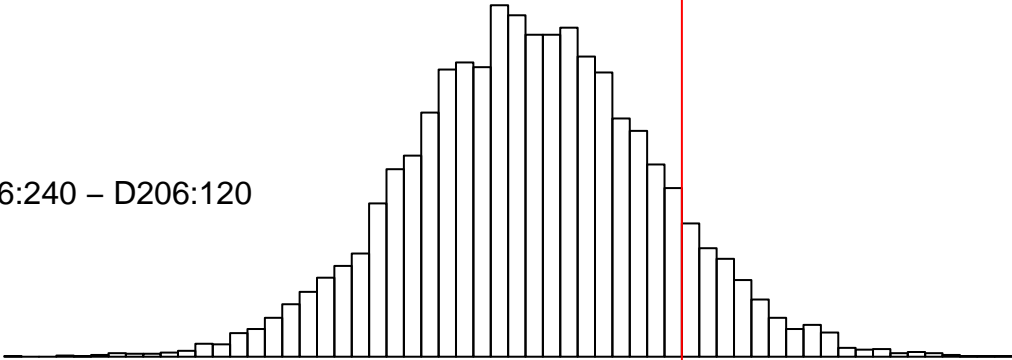

D206:240 – D206:45

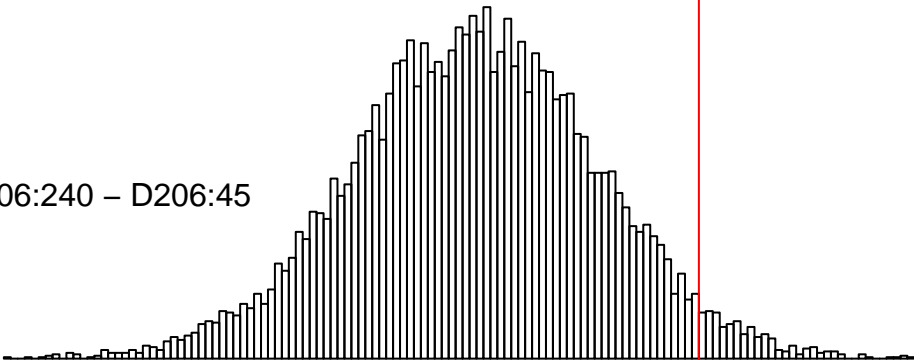

D206:120 – D206:45

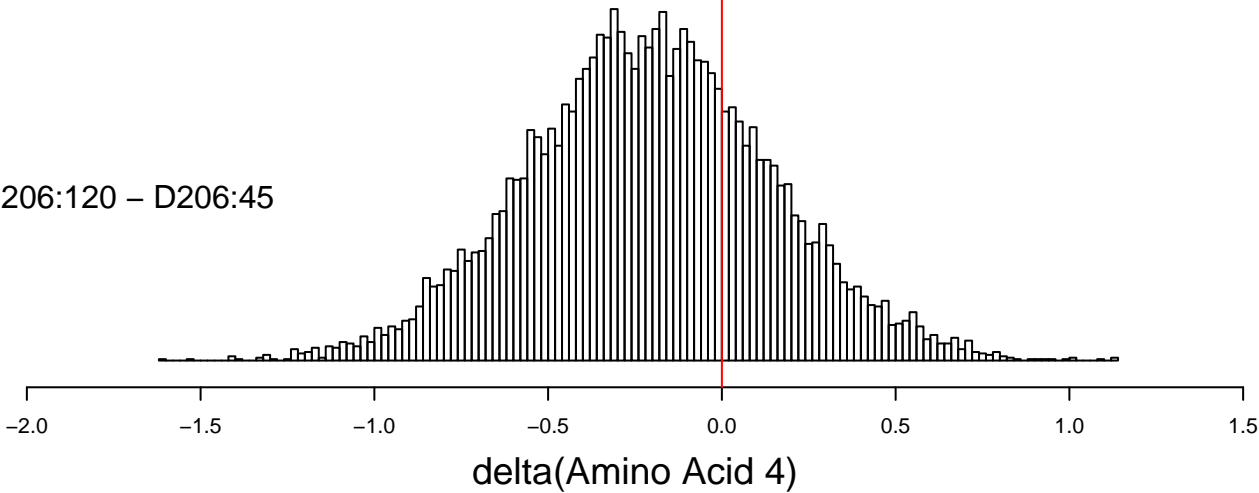



D206:240

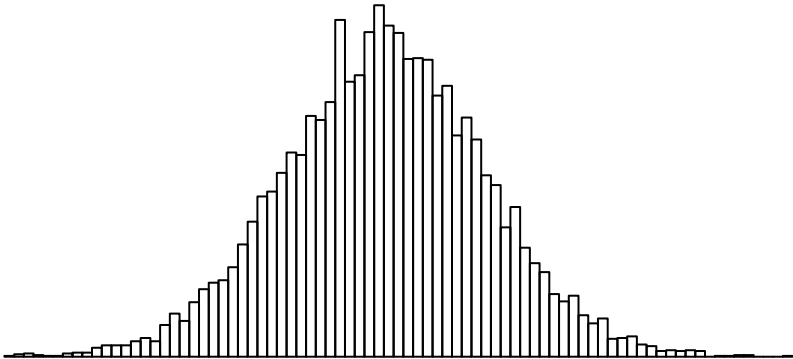

D206:120

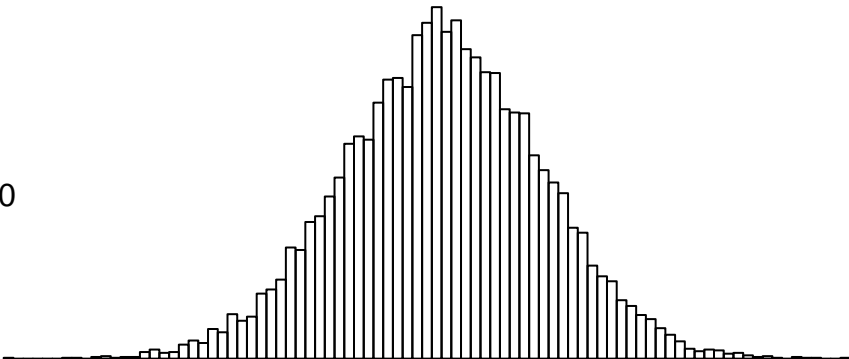

D206:45

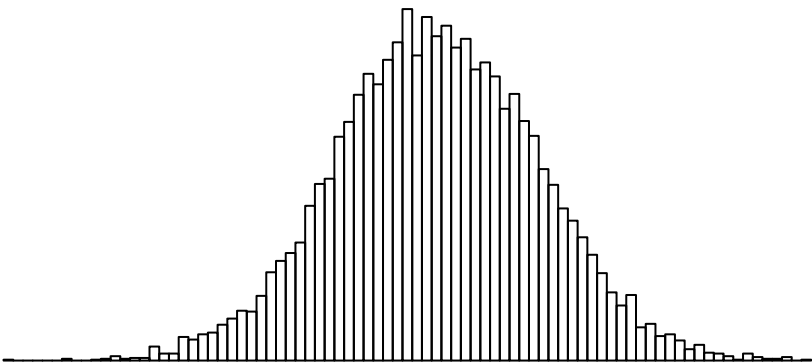

-8.0      -7.5      -7.0      -6.5      -6.0      -5.5

Amino Acid 6

D206:240 – D206:120

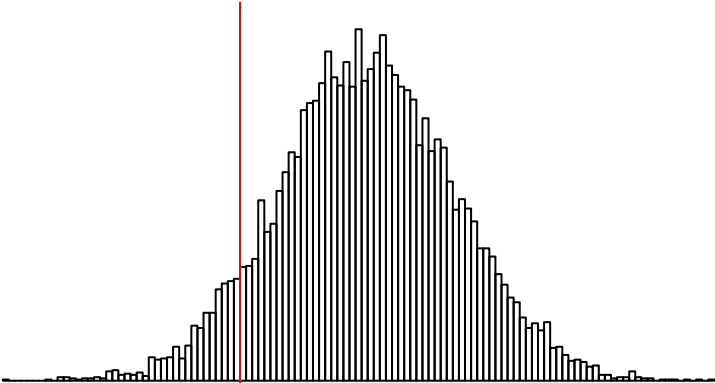

D206:240 – D206:45

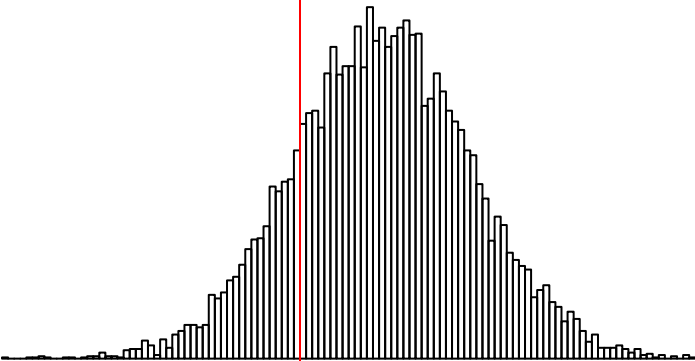

D206:120 – D206:45

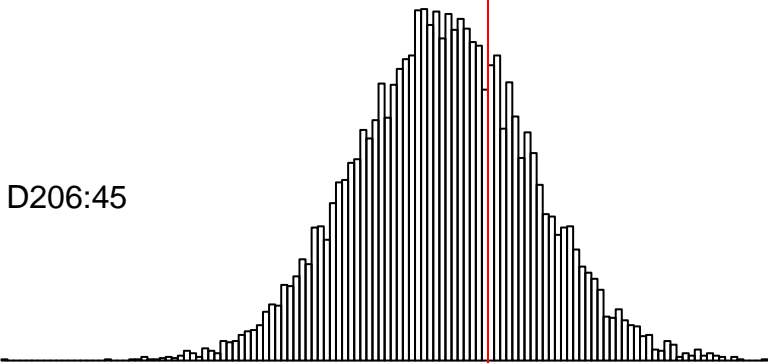

-2

-1

0

1

2

delta(Amino Acid 6)

D206:240

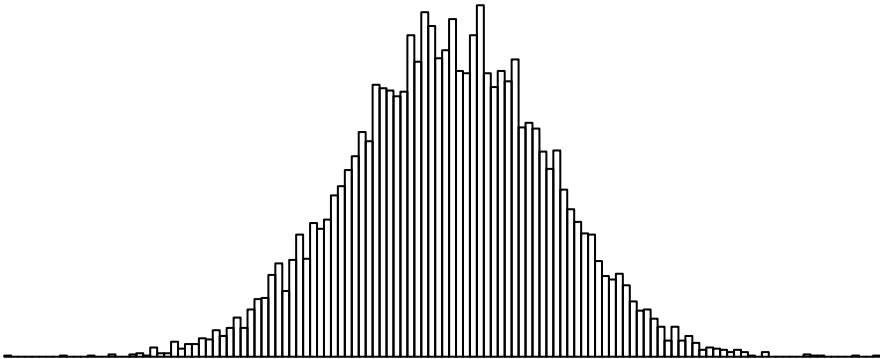

D206:120

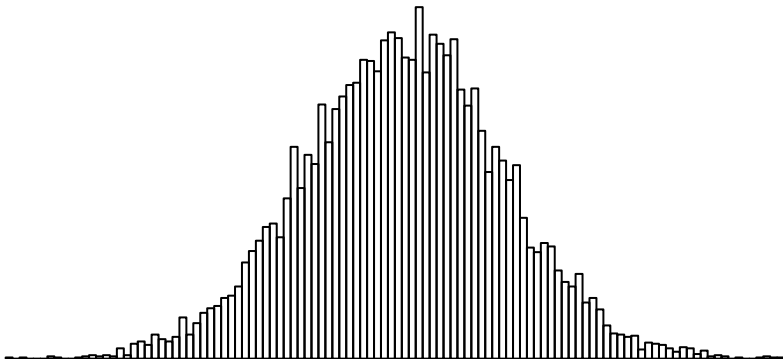

D206:45

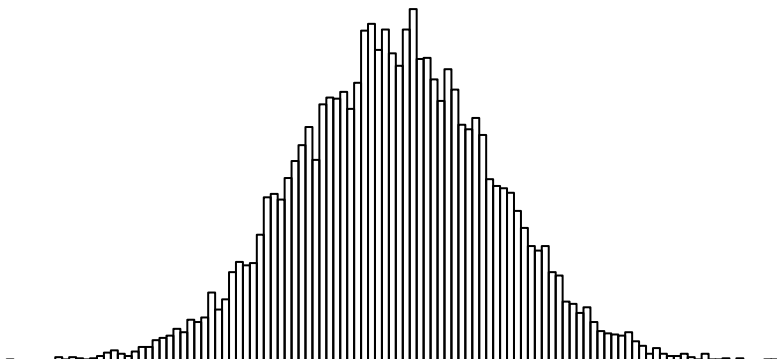

-9.5      -9.0      -8.5      -8.0      -7.5      -7.0      -6.5      -6.0

Valine

D206:240 – D206:120

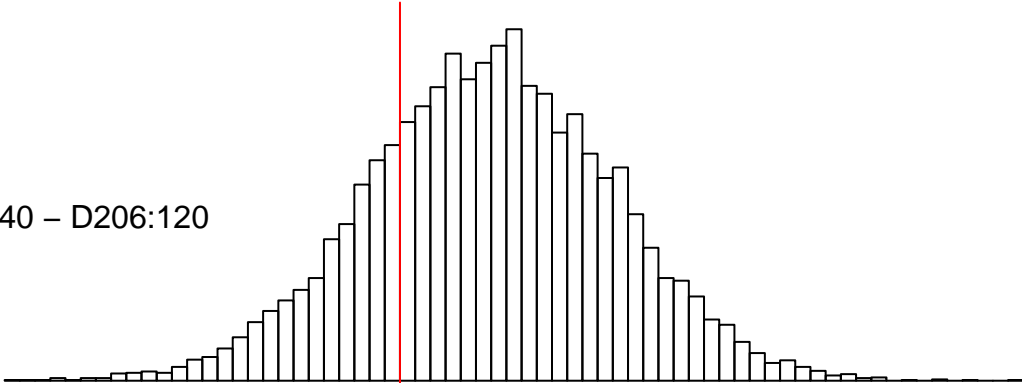

D206:240 – D206:45

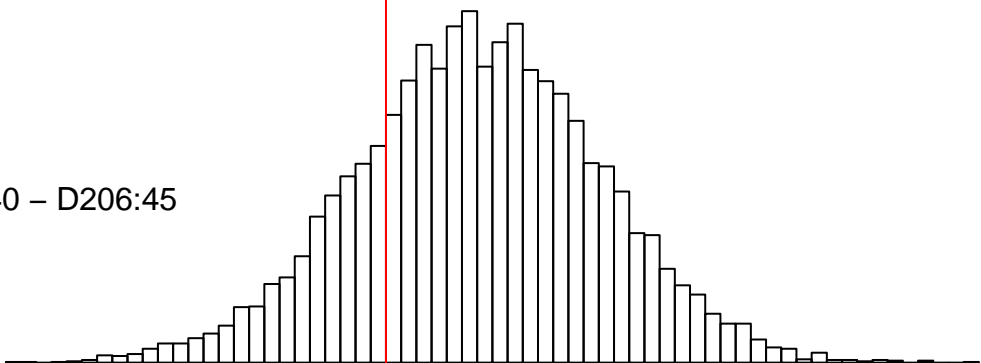

D206:120 – D206:45

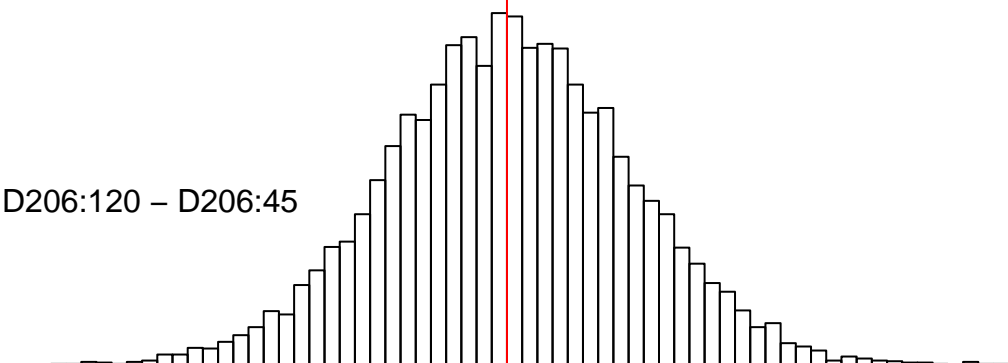

delta(Valine)

D206:240

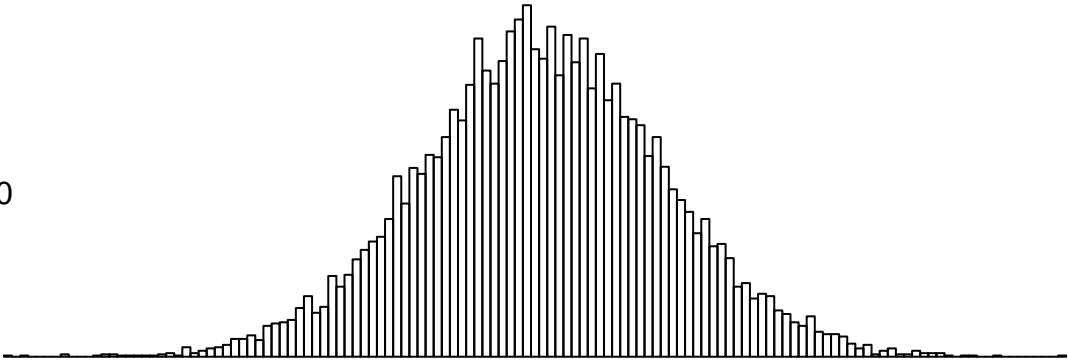

D206:120

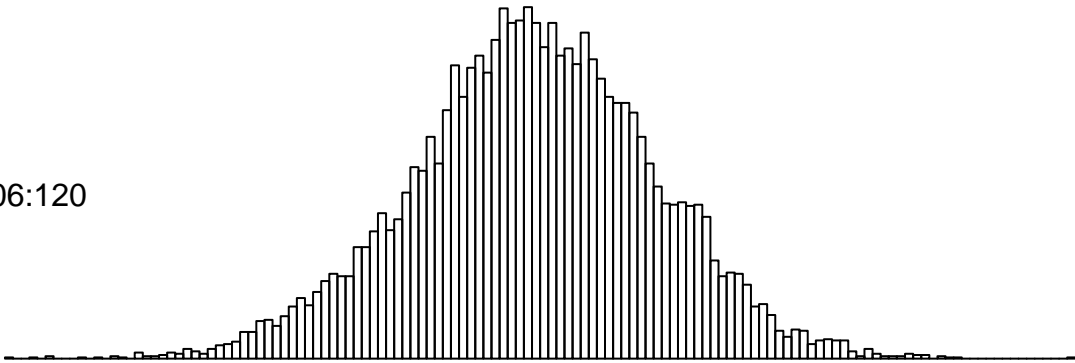

D206:45

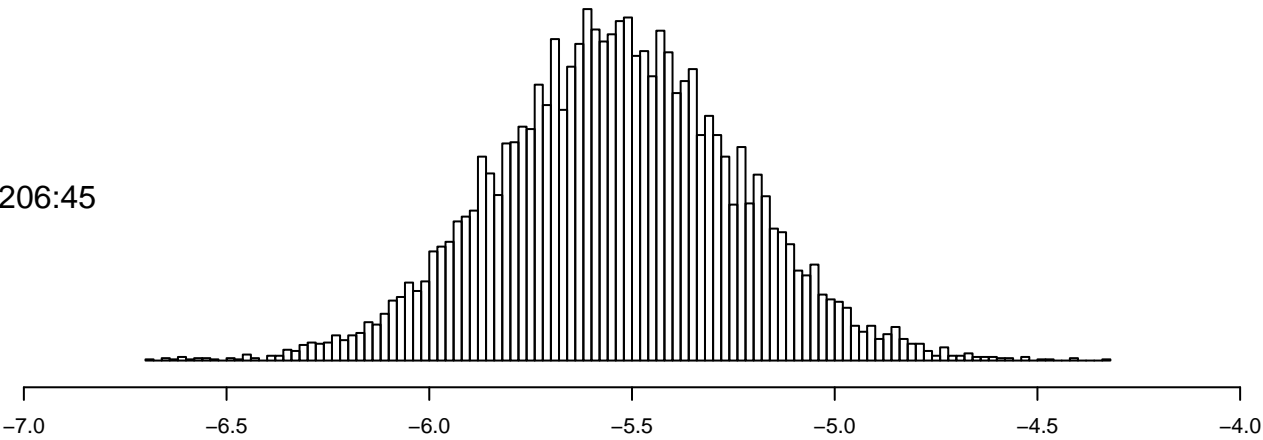

Amino Acid 7

D206:240 – D206:120

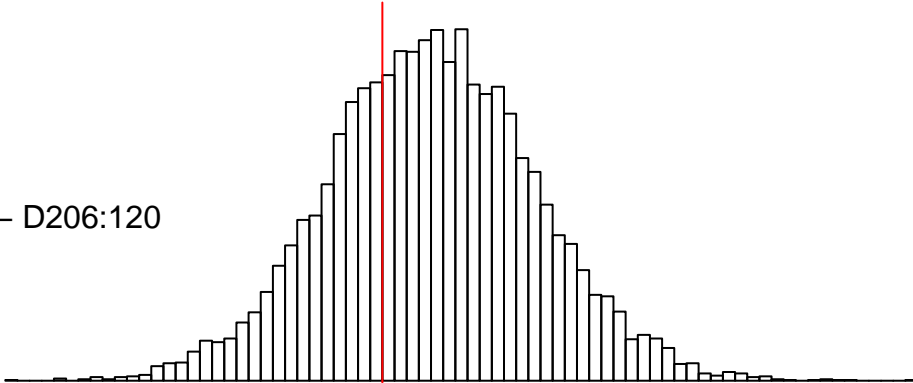

D206:240 – D206:45

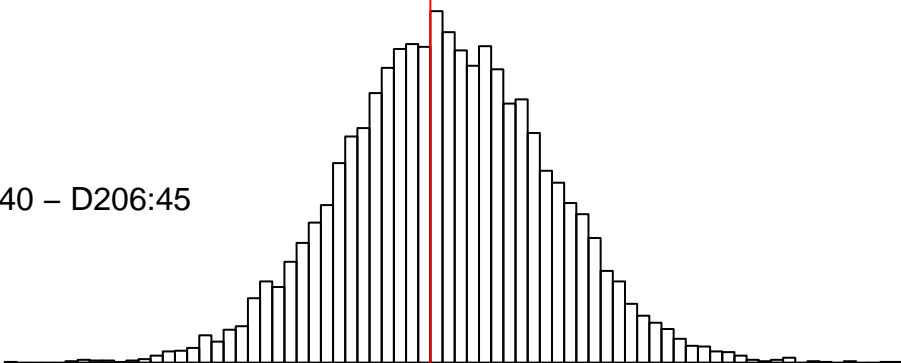

D206:120 – D206:45

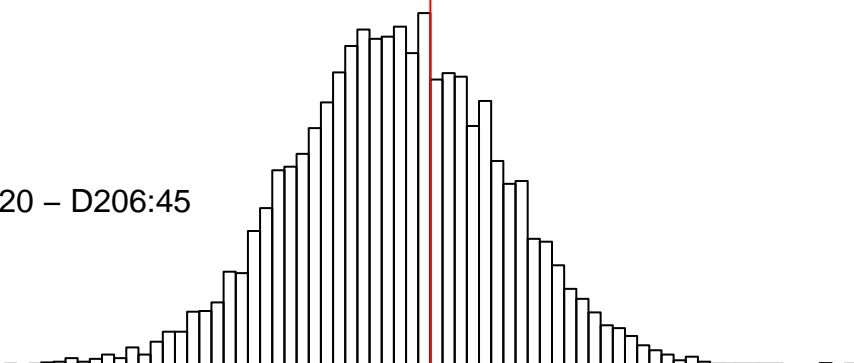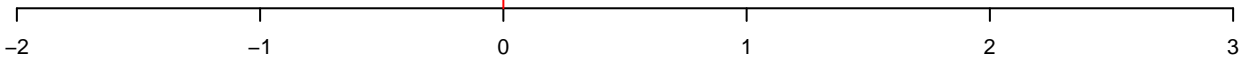

delta(Amino Acid 7)

D206:240

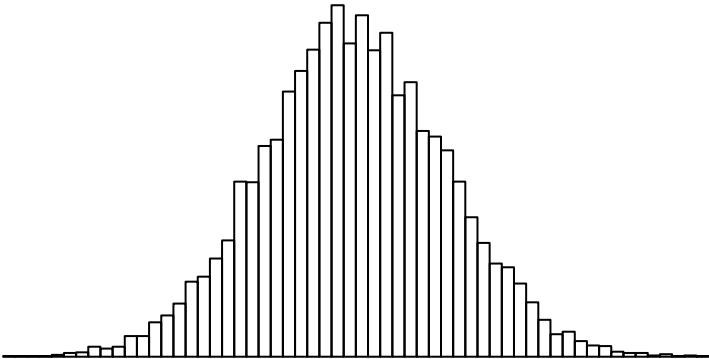

D206:120

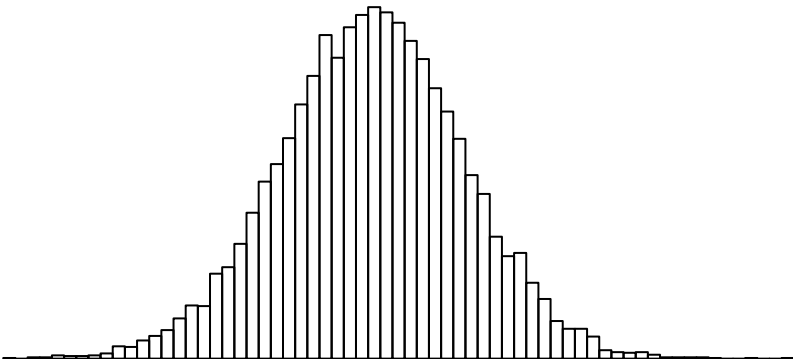

D206:45

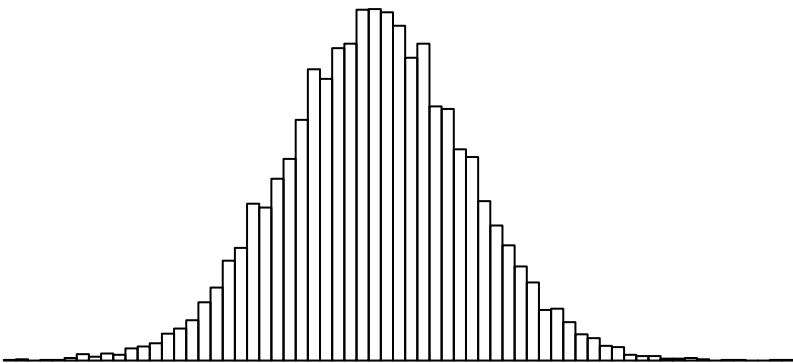

-9      -8      -7      -6      -5      -4

Glycine

D206:240 – D206:120

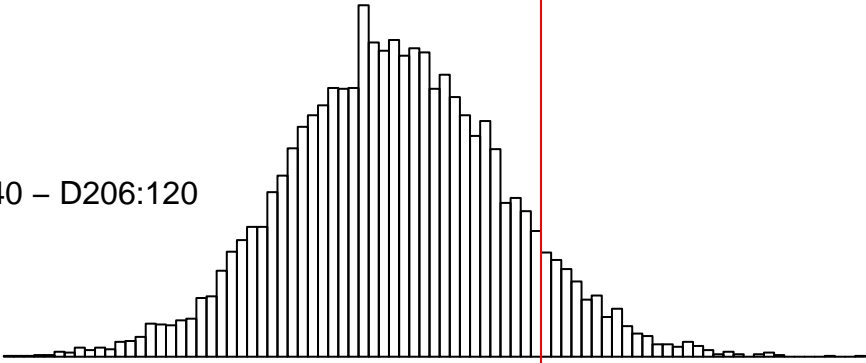

D206:240 – D206:45

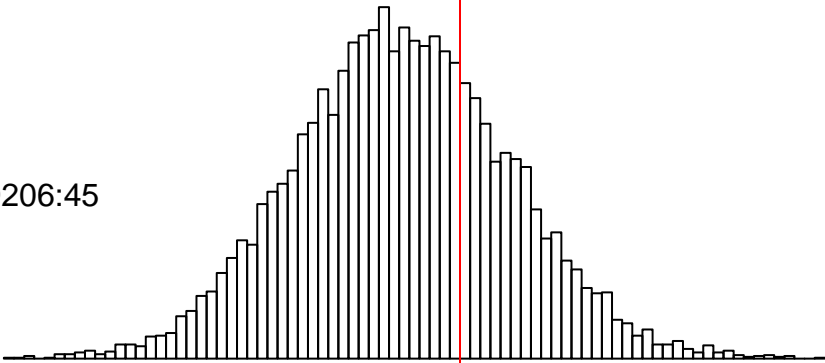

D206:120 – D206:45

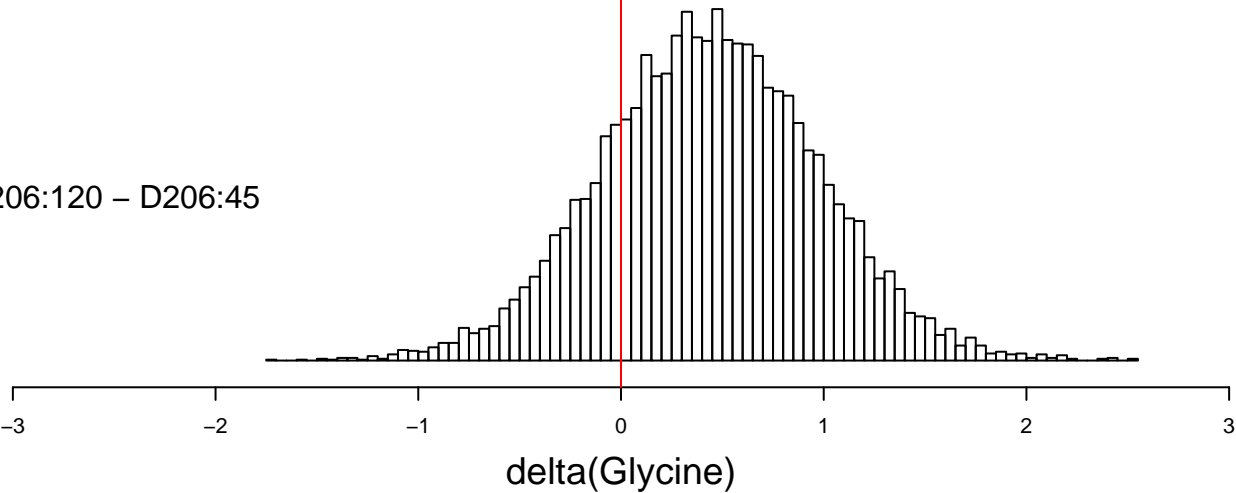



D206:240

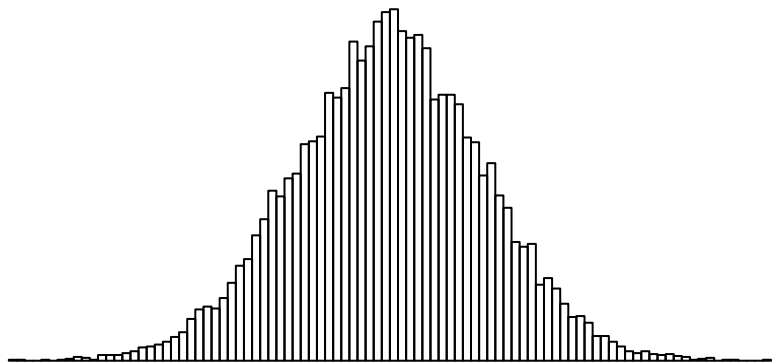

D206:120

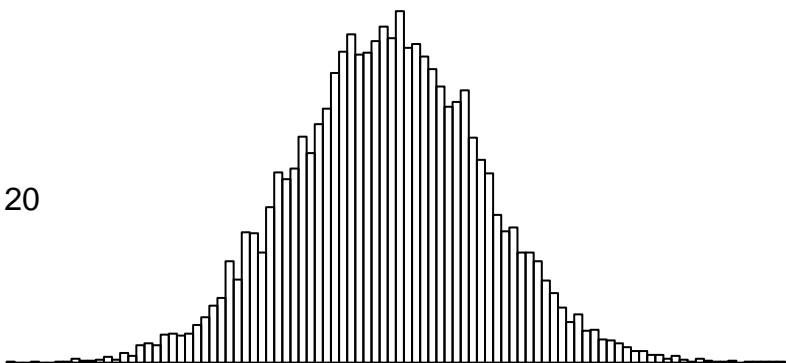

D206:45

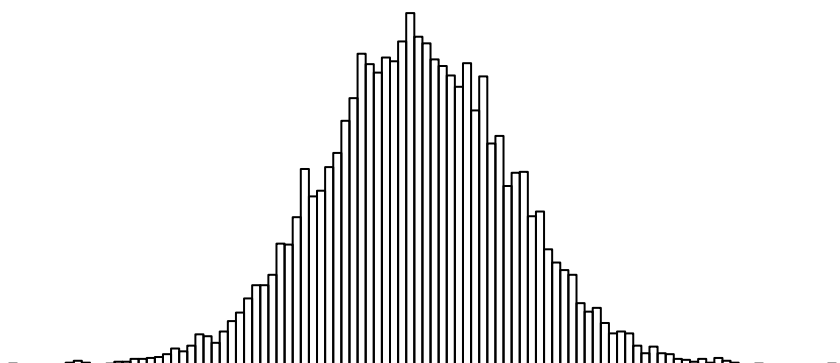

-9.0 -8.5 -8.0 -7.5 -7.0 -6.5 -6.0

Amino Acid 8

D206:240 – D206:120

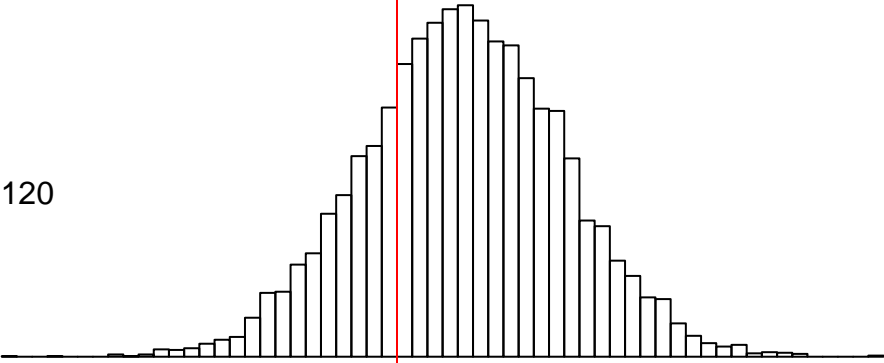

D206:240 – D206:45

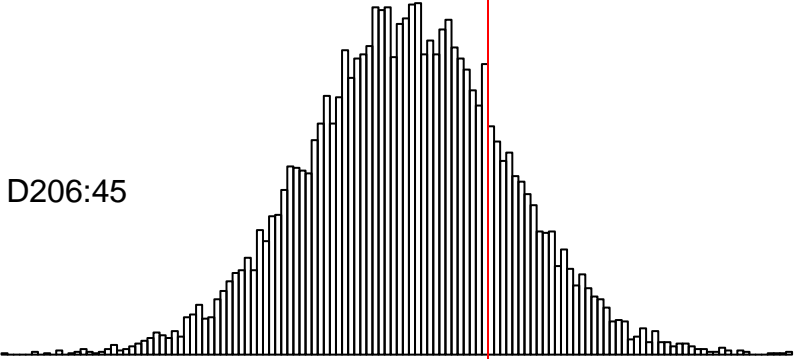

D206:120 – D206:45

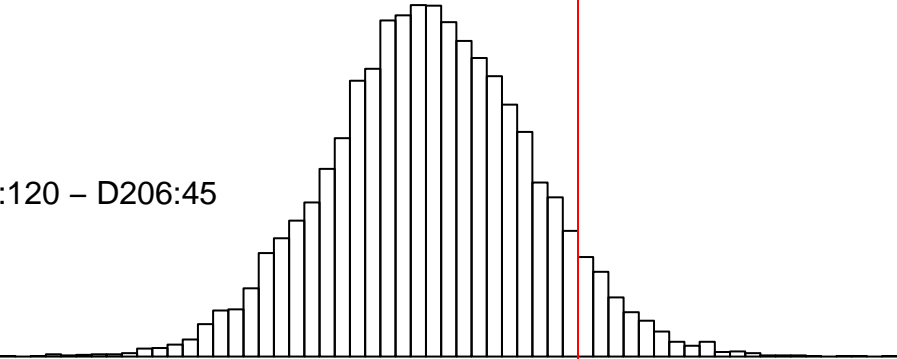

-2

-1

0

1

2

delta(Amino Acid 8)

D206:240

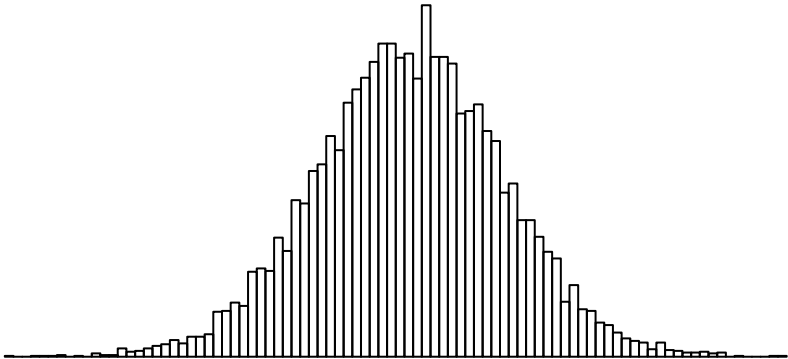

D206:120

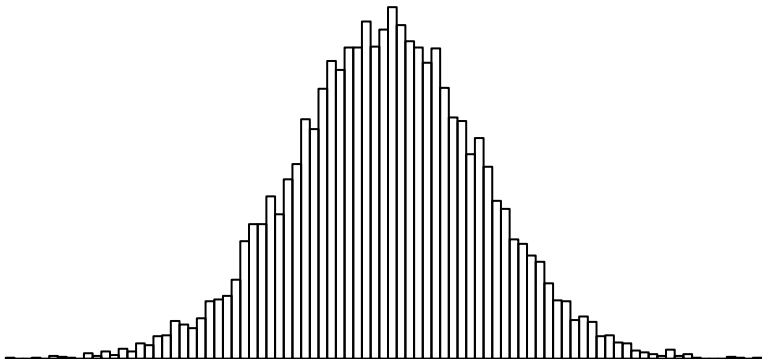

D206:45

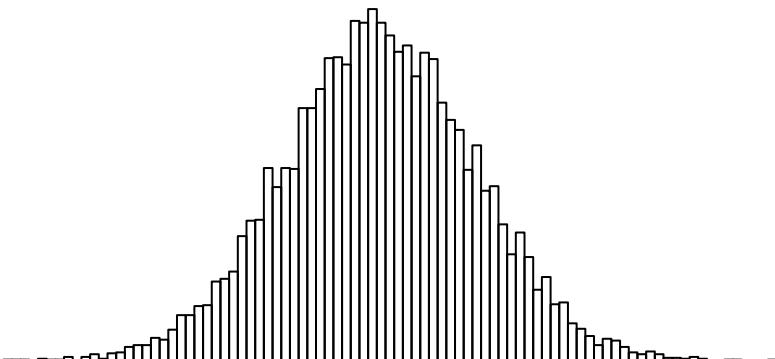

-9      -8      -7      -6      -5      -4      -3      -2

Amino Acid 10

D206:240 – D206:120

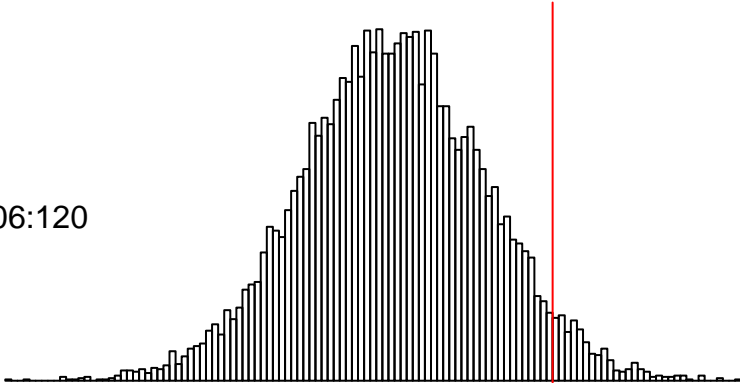

D206:240 – D206:45

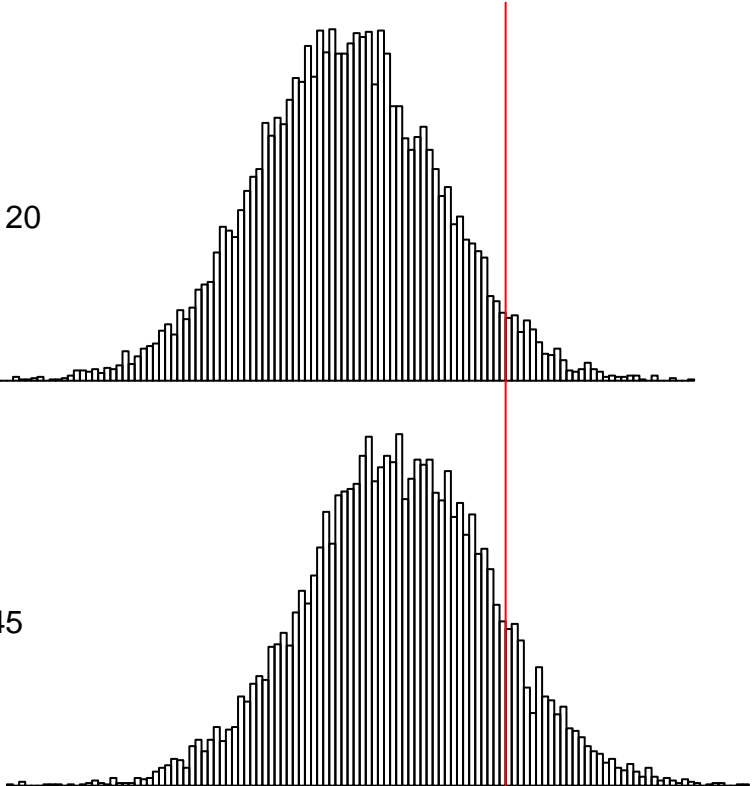

D206:120 – D206:45

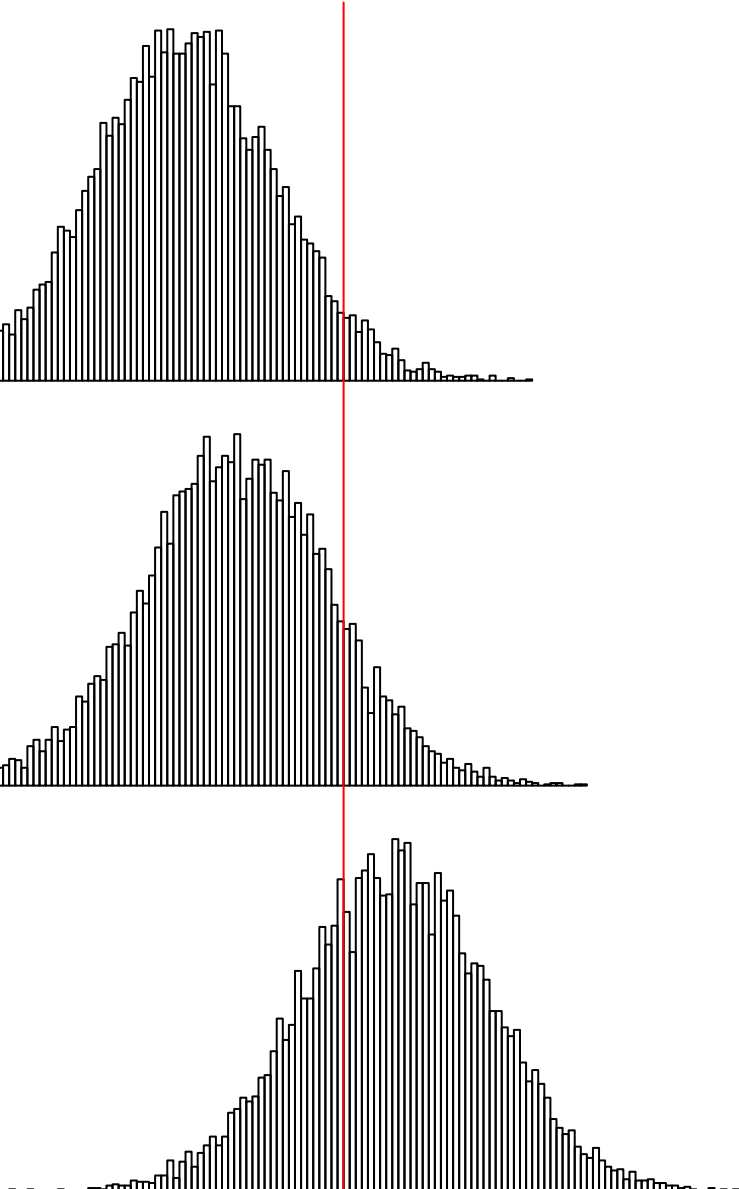

-6 -4 -2 0 2 4

delta(Amino Acid 10)

D206:240

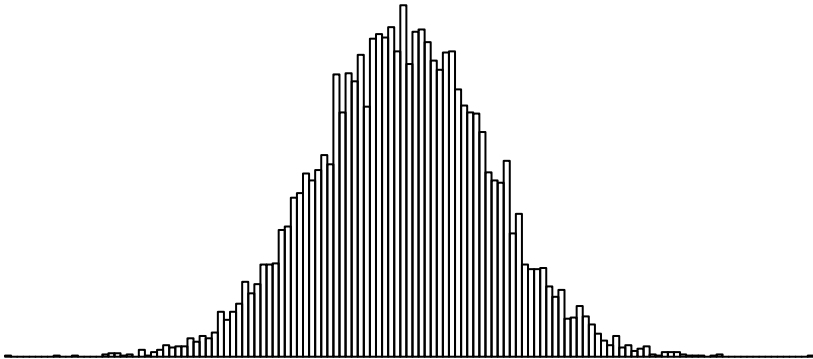

D206:120

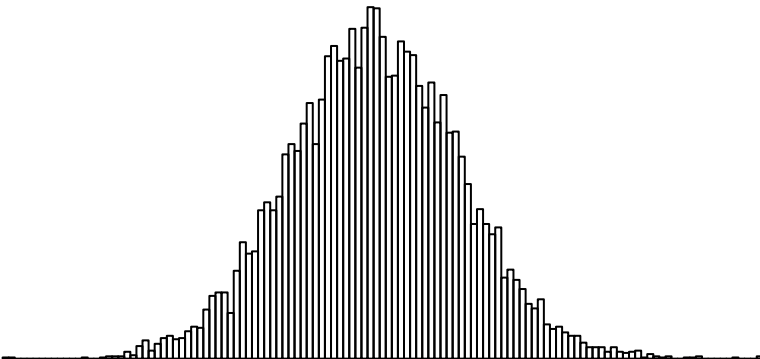

D206:45

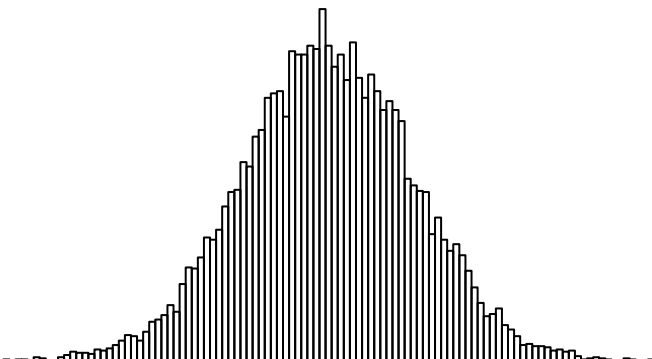

-7.0                      -6.5                      -6.0                      -5.5                      -5.0

Disaccharide 2

D206:240 – D206:120

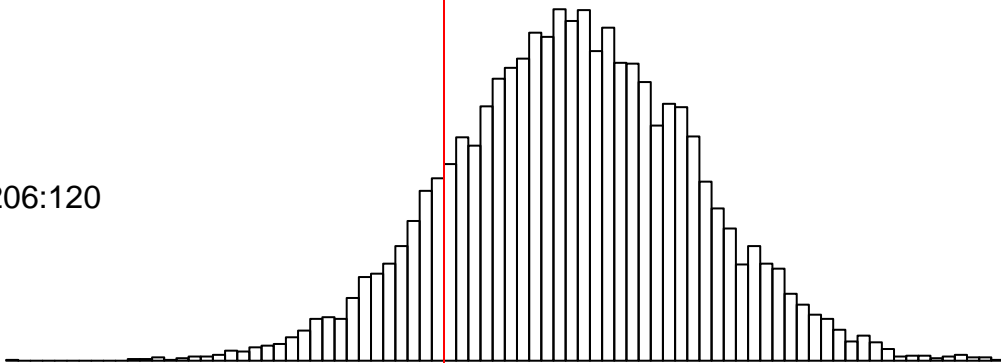

D206:240 – D206:45

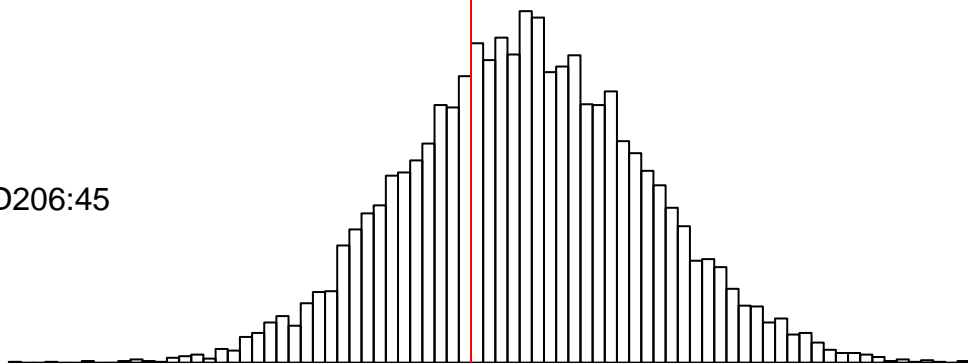

D206:120 – D206:45

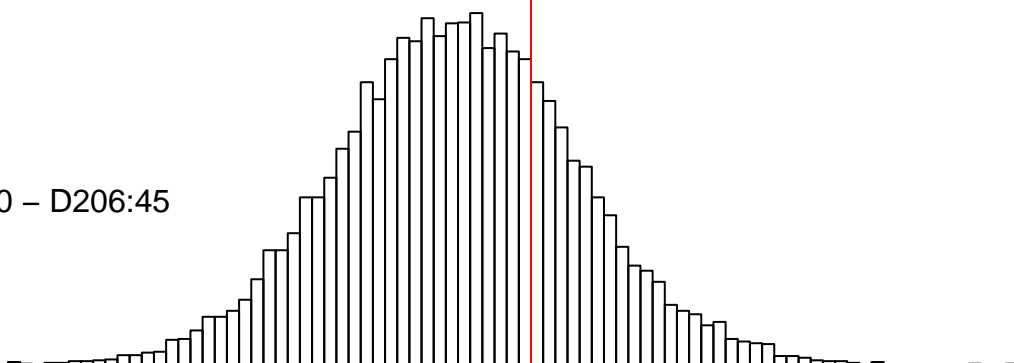

-1.0      -0.5      0.0      0.5      1.0

delta(Disaccharide 2)

D206:240

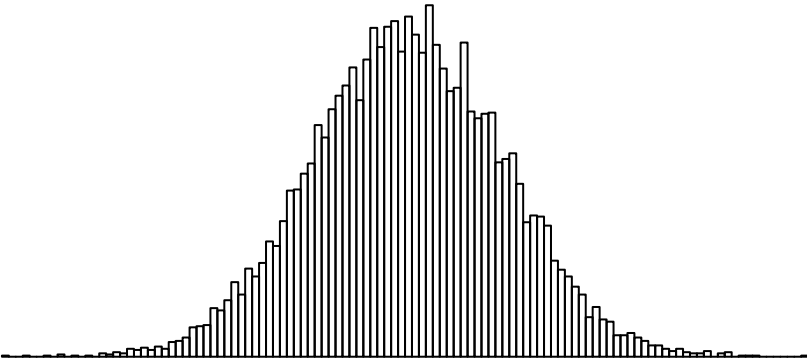

D206:120

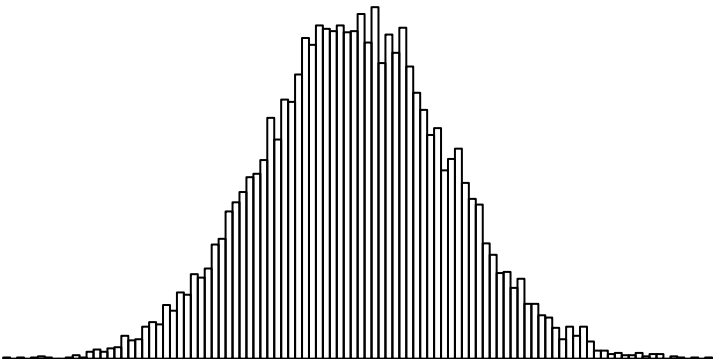

D206:45

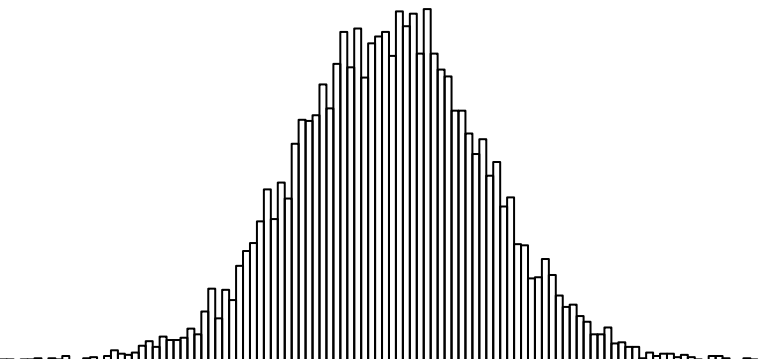

-8.5      -8.0      -7.5      -7.0      -6.5      -6.0      -5.5      -5.0

Disaccharide 3

D206:240 – D206:120

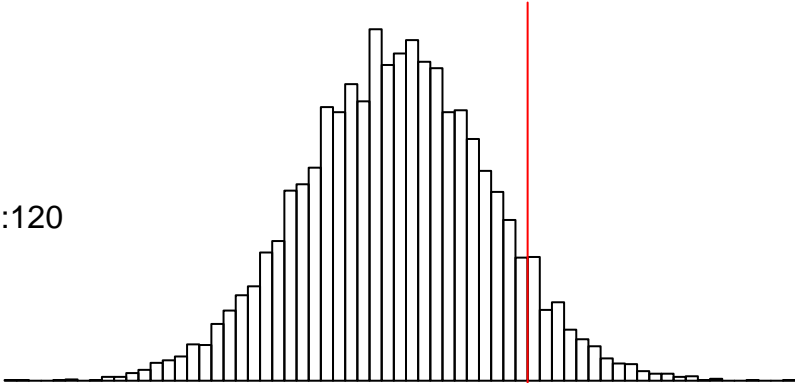

D206:240 – D206:45

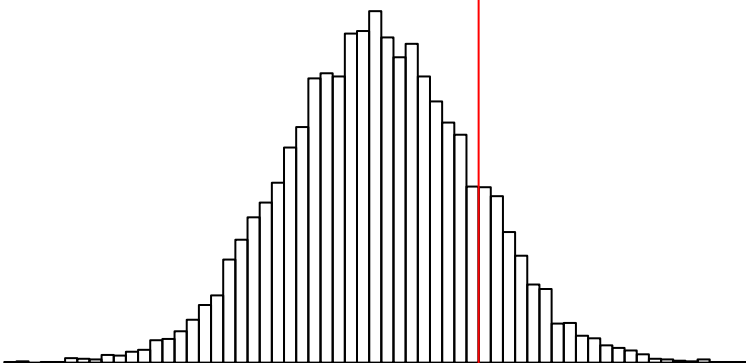

D206:120 – D206:45

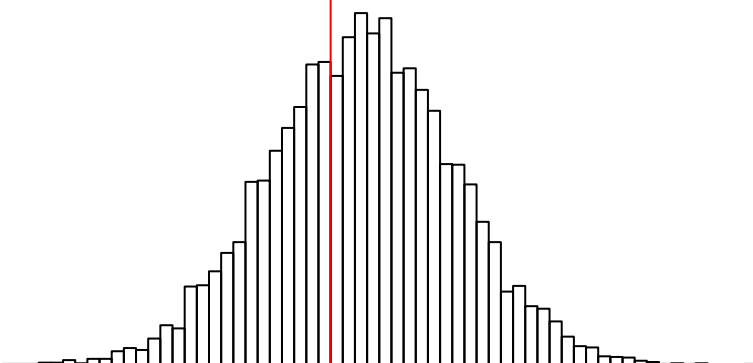

-3 -2 -1 0 1 2

delta(Disaccharide 3)



D206:240

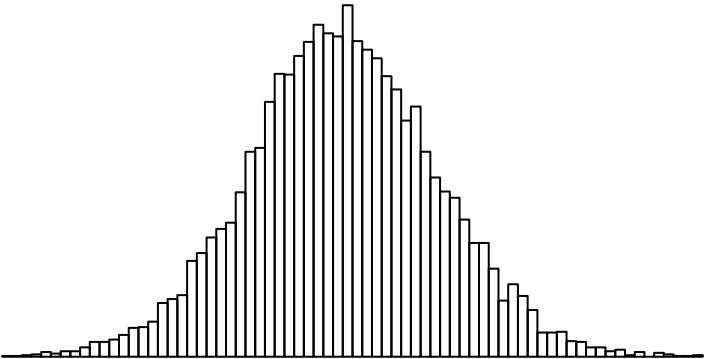

D206:120

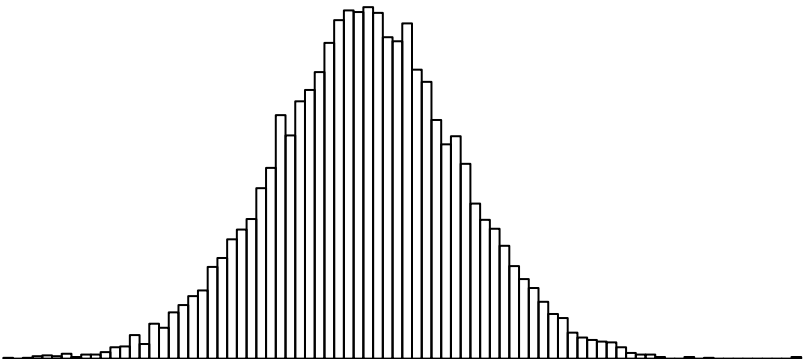

D206:45

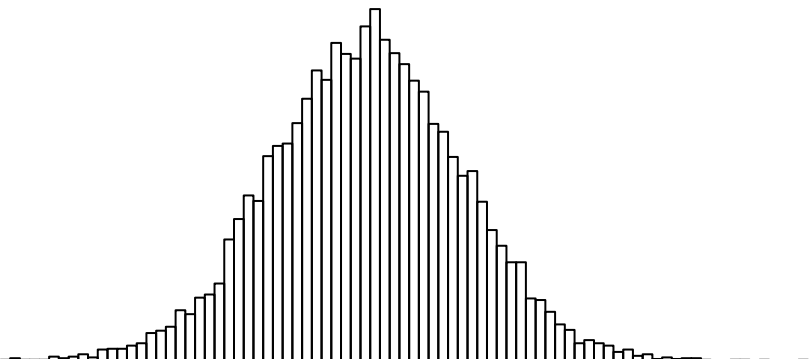

-7.5      -7.0      -6.5      -6.0      -5.5      -5.0

Disaccharide 4

D206:240 – D206:120

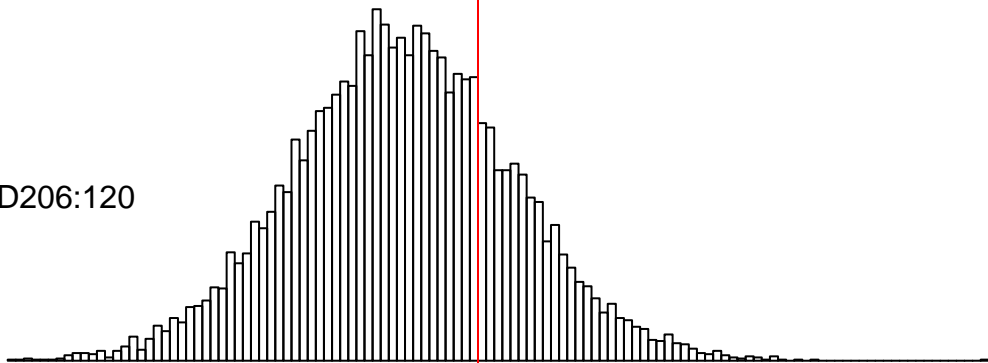

D206:240 – D206:45

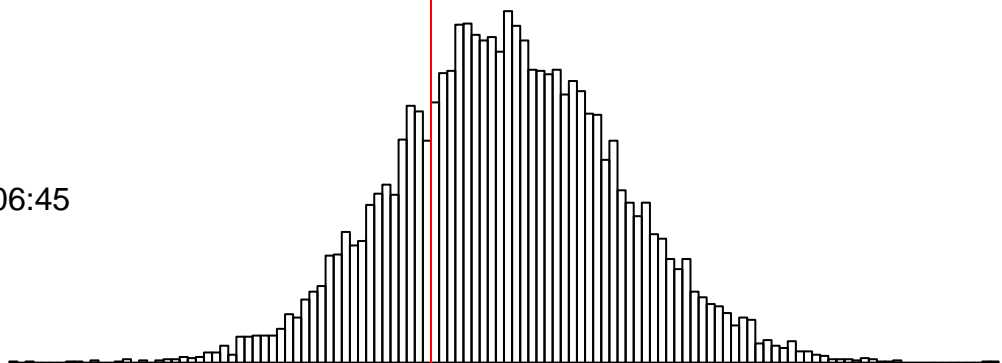

D206:120 – D206:45

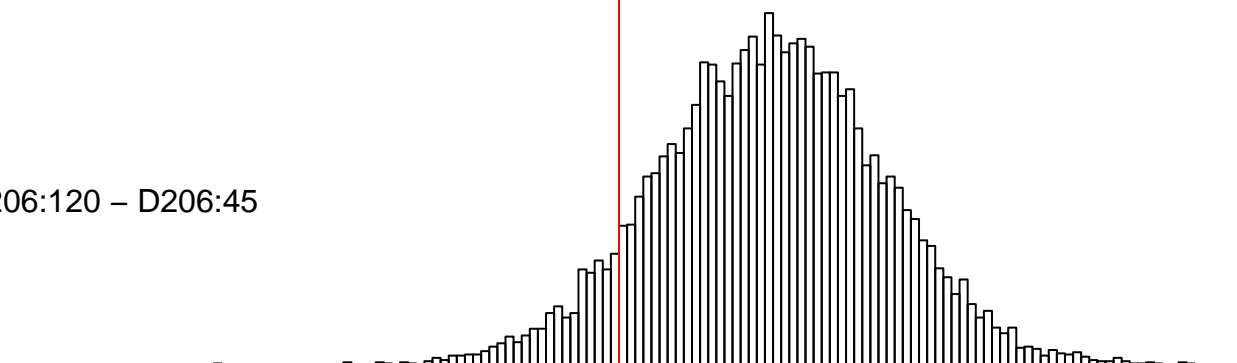

-1.5      -1.0      -0.5      0.0      0.5      1.0      1.5

delta(Disaccharide 4)

D206:240

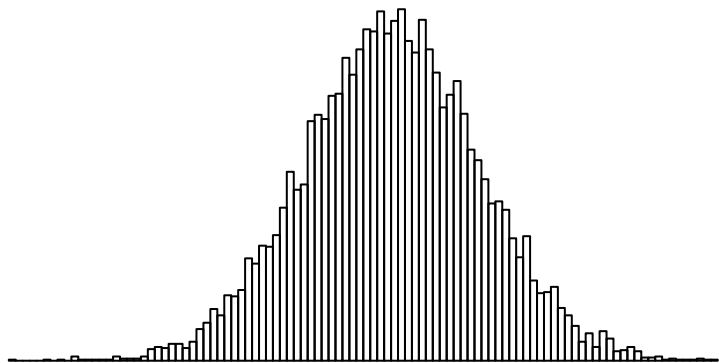

D206:120

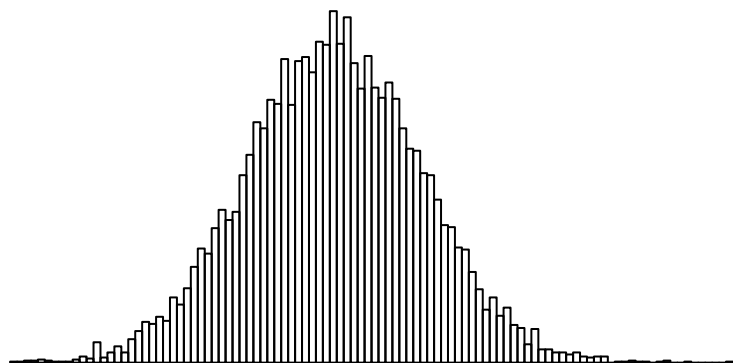

D206:45

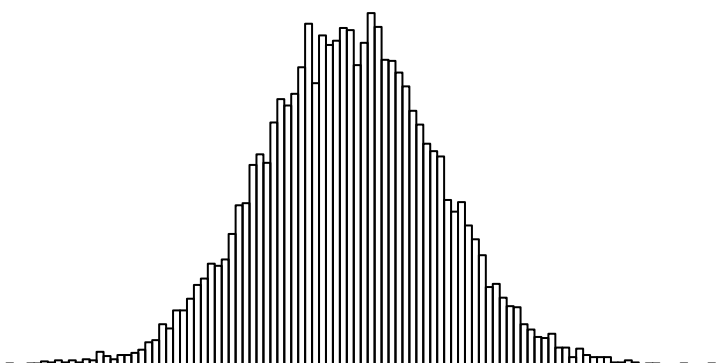

-7.0      -6.5      -6.0      -5.5      -5.0      -4.5      -4.0      -3.5

Disaccharide 5

D206:240 – D206:120

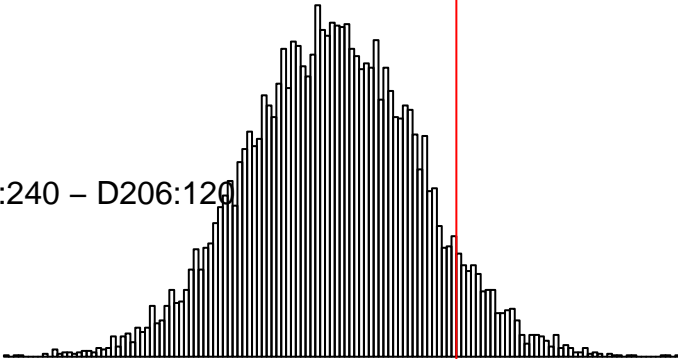

D206:240 – D206:45

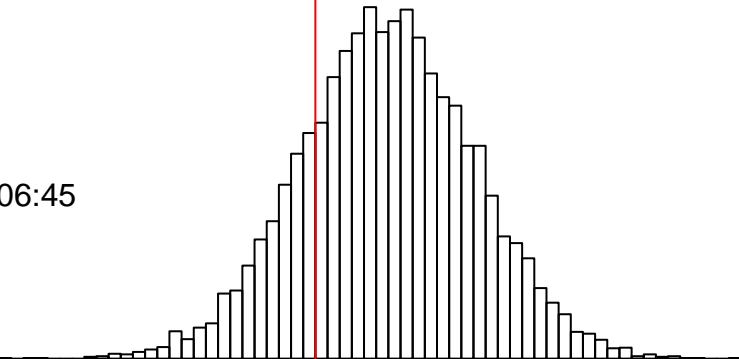

D206:120 – D206:45

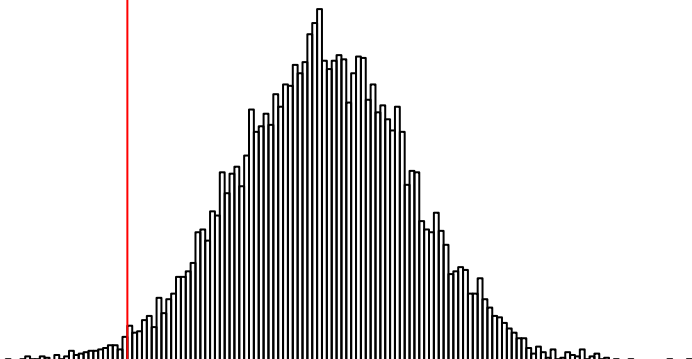

-2 -1 0 1 2 3

delta(Disaccharide 5)

D206:240

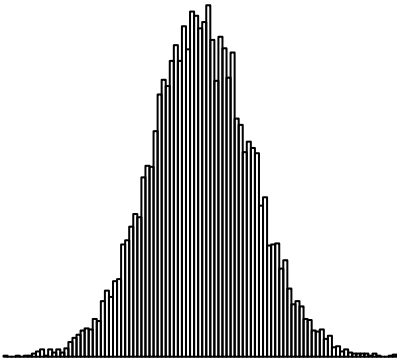

D206:120

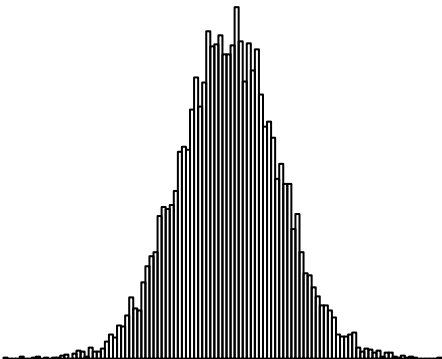

D206:45

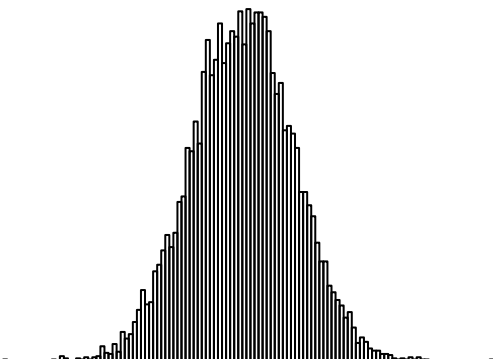

-9                      -8                      -7                      -6                      -5                      -4                      -3

Disaccharide 6

D206:240 – D206:120

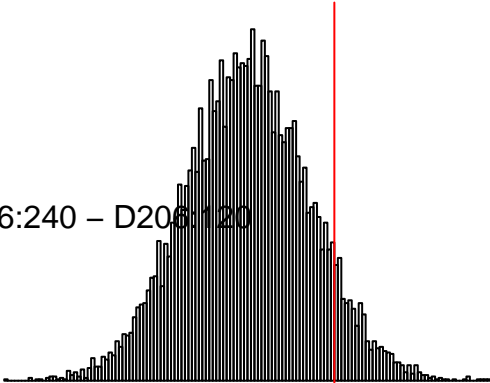

D206:240 – D206:45

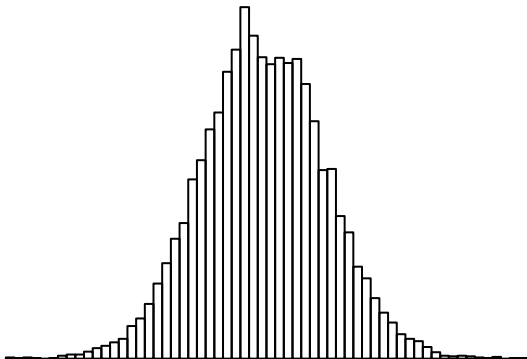

D206:120 – D206:45

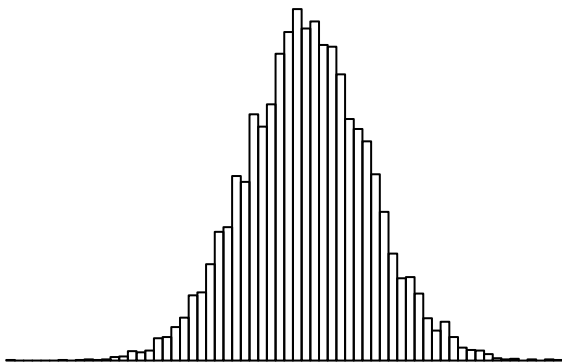

-2 -1 0 1 2 3 4 5

delta(Disaccharide 6)

D206:240

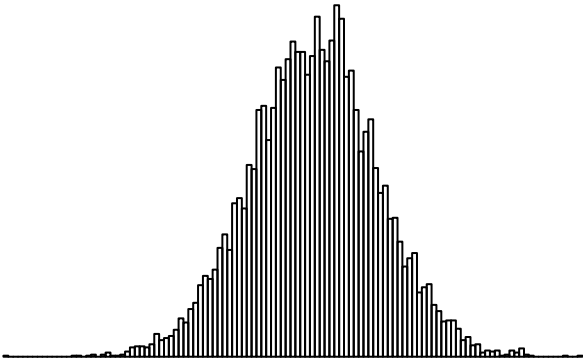

D206:120

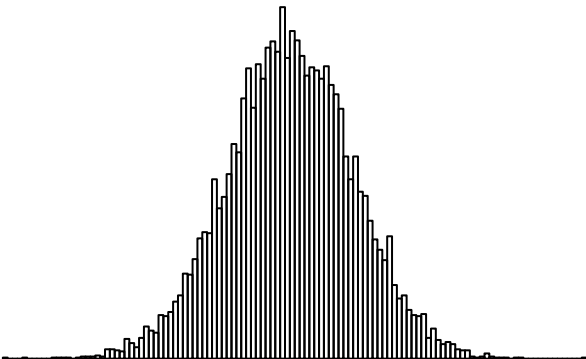

D206:45

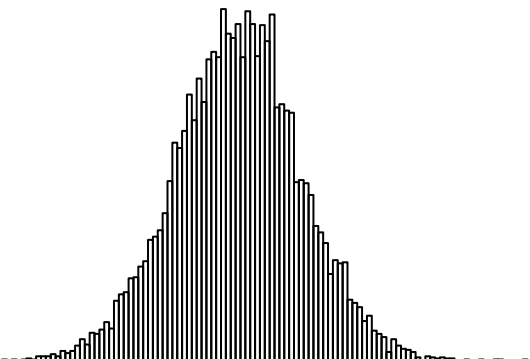

-7                      -6                      -5                      -4                      -3                      -2

Disaccharide 7

D206:240 – D206:120

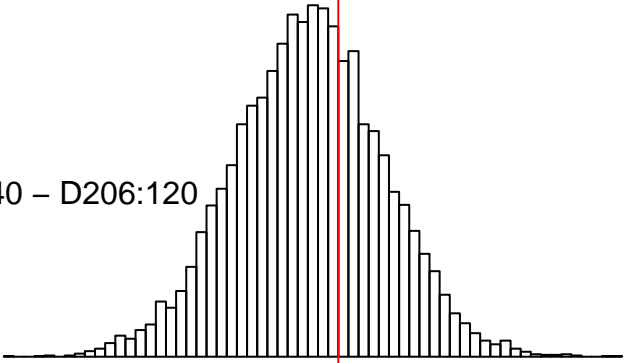

D206:240 – D206:45

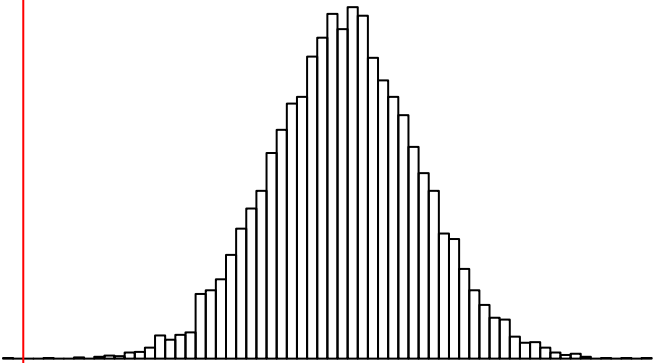

D206:120 – D206:45

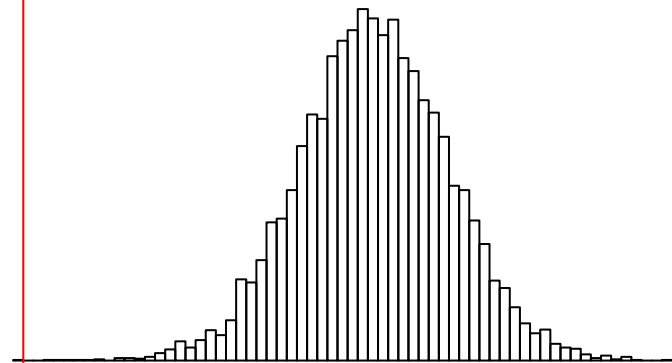

-2

-1

0

1

2

3

4

delta(Disaccharide 7)



D206:240

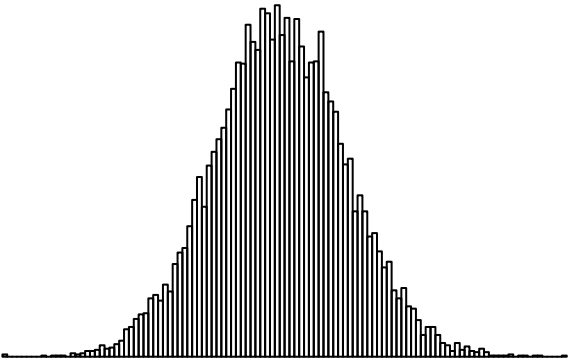

D206:120

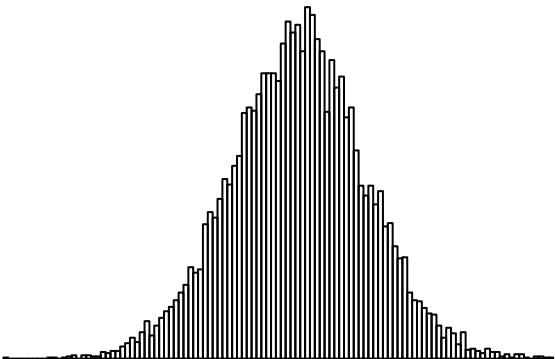

D206:45

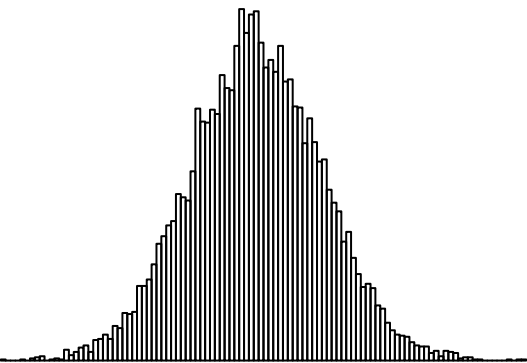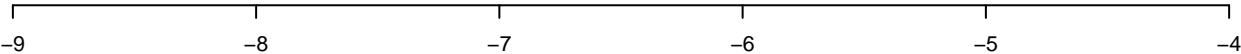

Disaccharide 8

D206:240 – D206:120

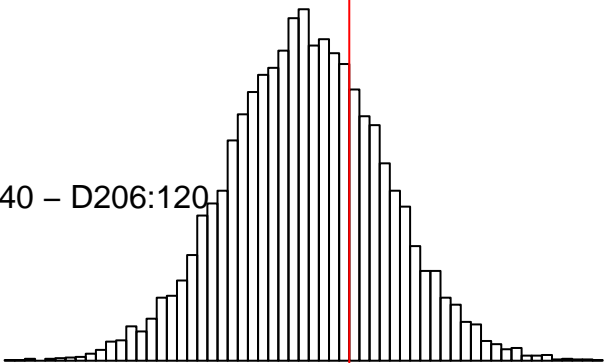

D206:240 – D206:45

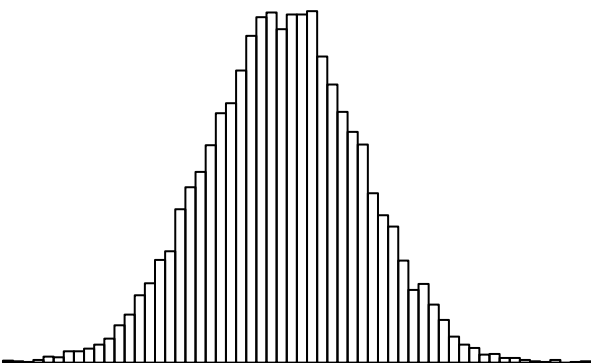

D206:120 – D206:45

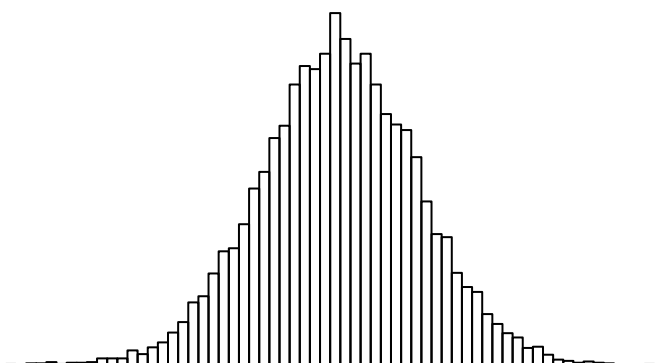

-2 -1 0 1 2 3 4

delta(Disaccharide 8)

D206:240

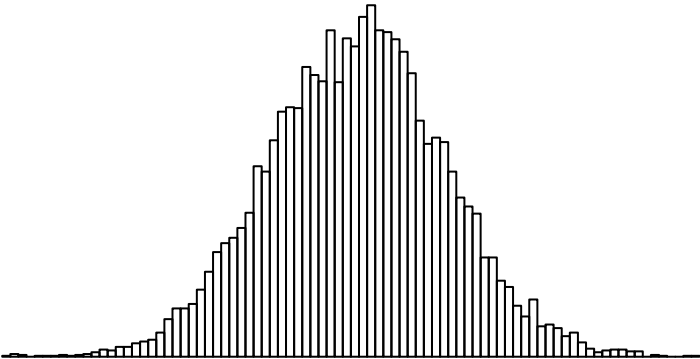

D206:120

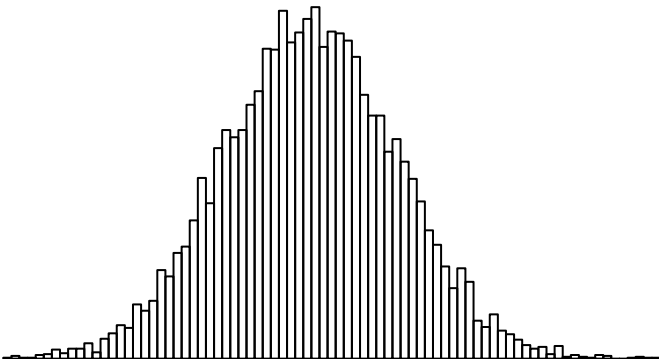

D206:45

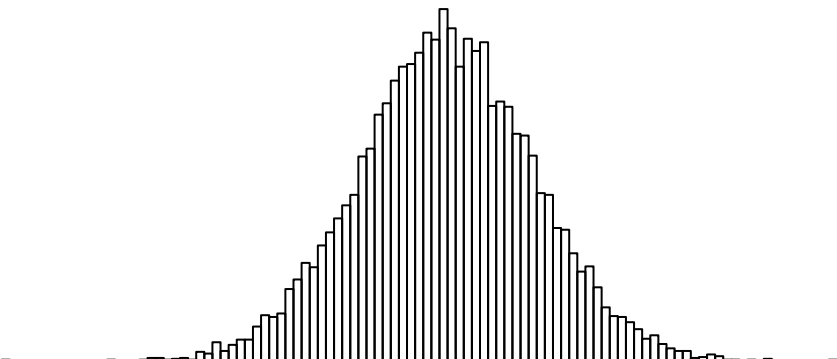

-9.5      -9.0      -8.5      -8.0      -7.5      -7.0      -6.5

Disaccharide 9

D206:240 – D206:120

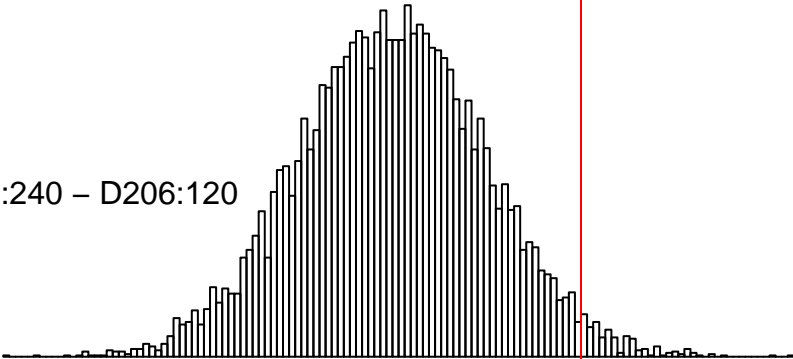

D206:240 – D206:45

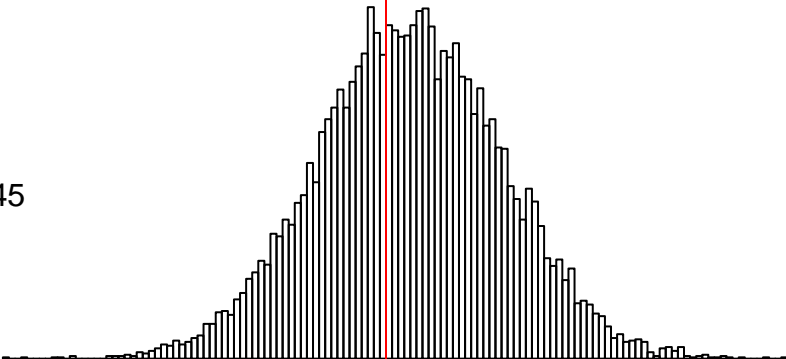

D206:120 – D206:45

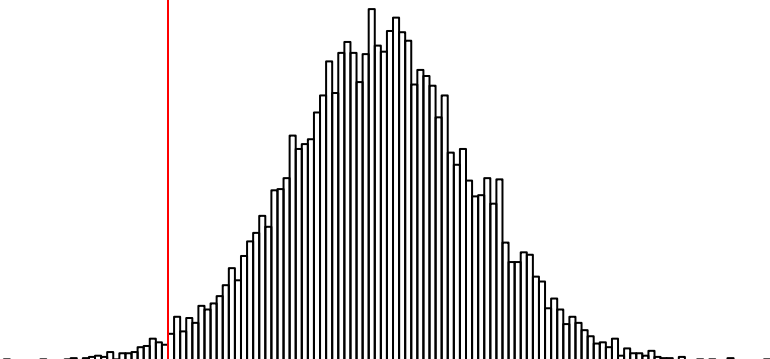

-2 -1 0 1 2

delta(Disaccharide 9)

D206:240

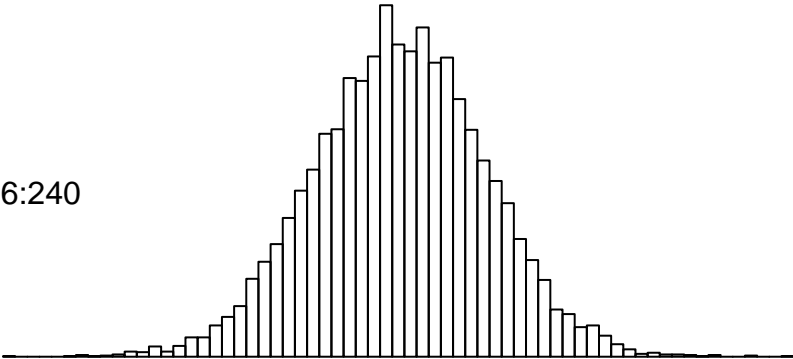

D206:120

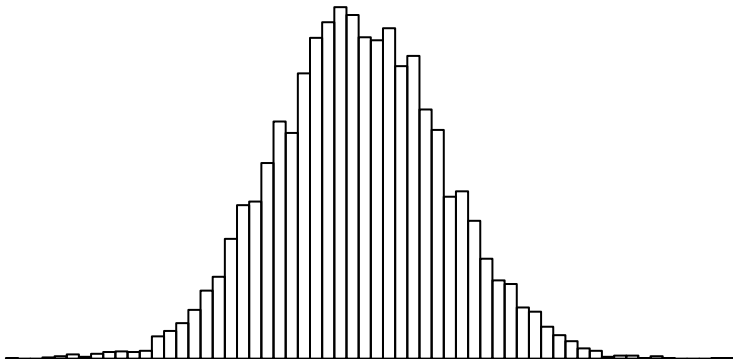

D206:45

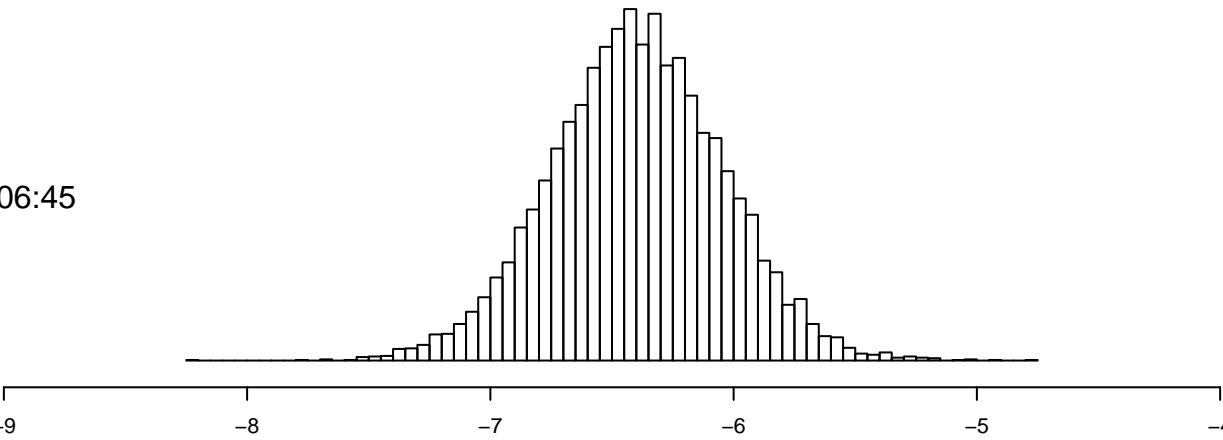

C12:0 Fatty Acid

D206:240 – D206:120

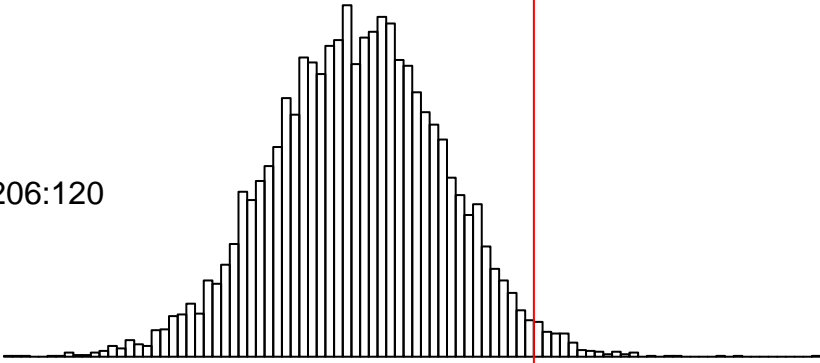

D206:240 – D206:45

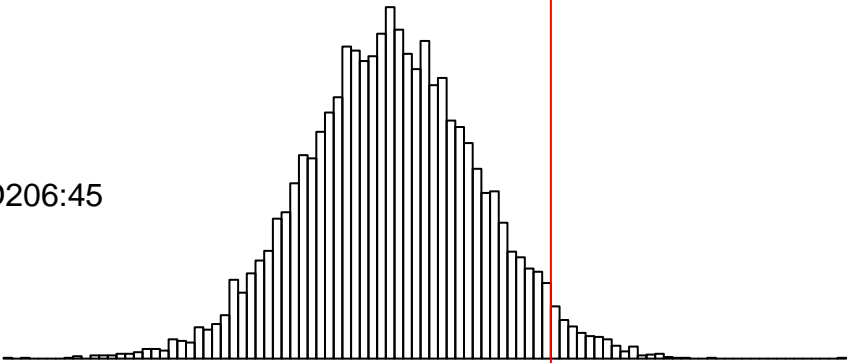

D206:120 – D206:45

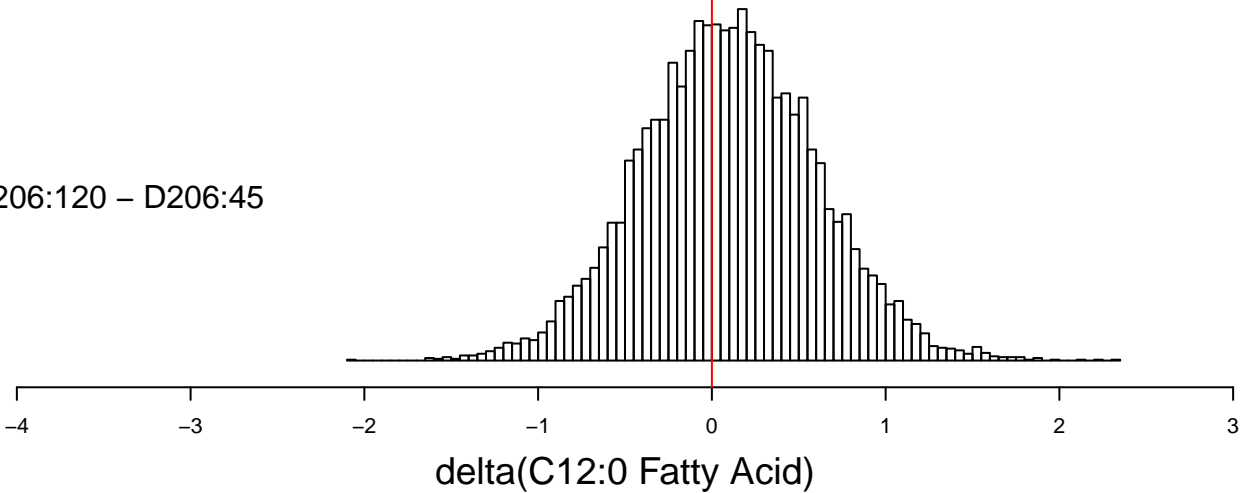

D206:240

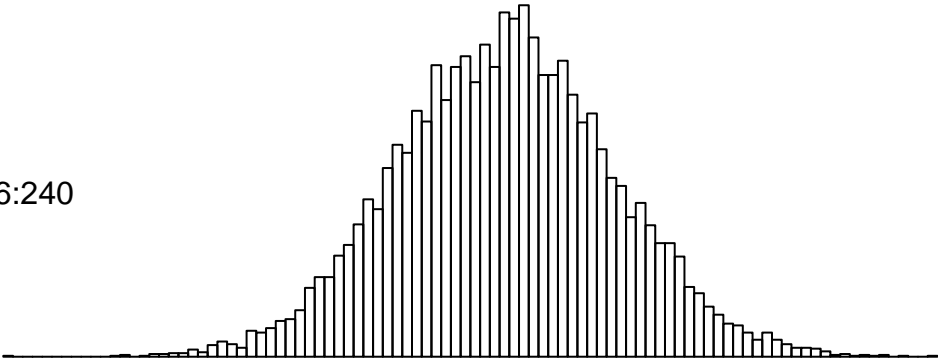

D206:120

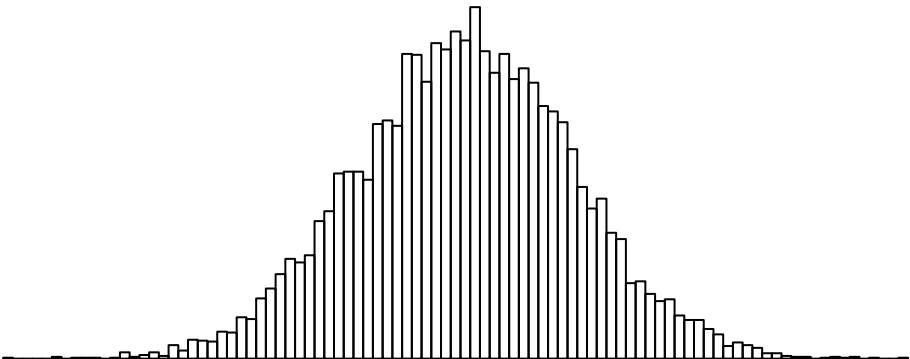

D206:45

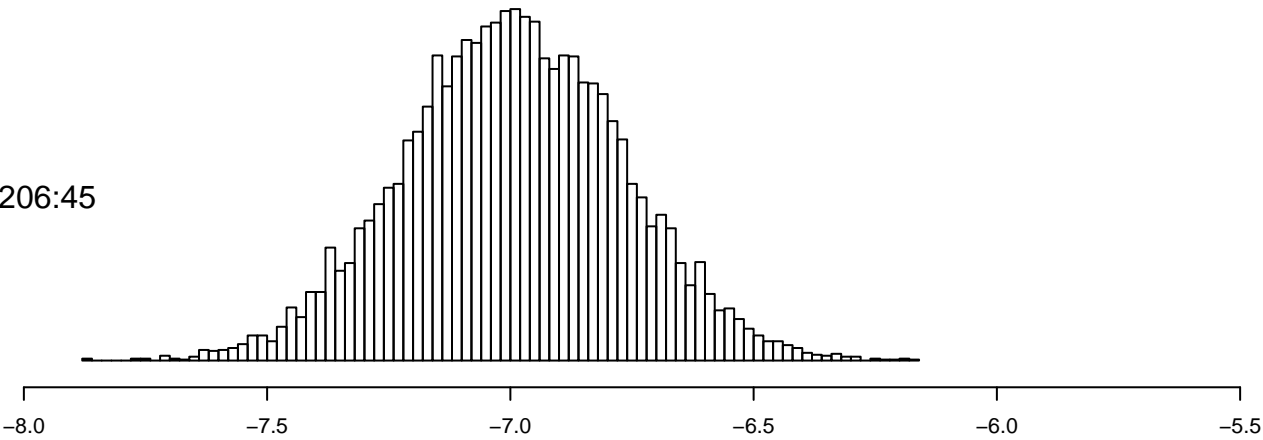

C14:1 Fatty Acid

D206:240 – D206:120

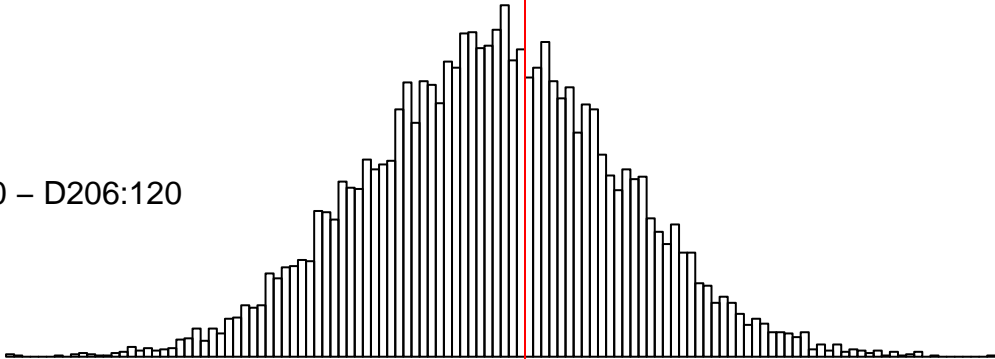

D206:240 – D206:45

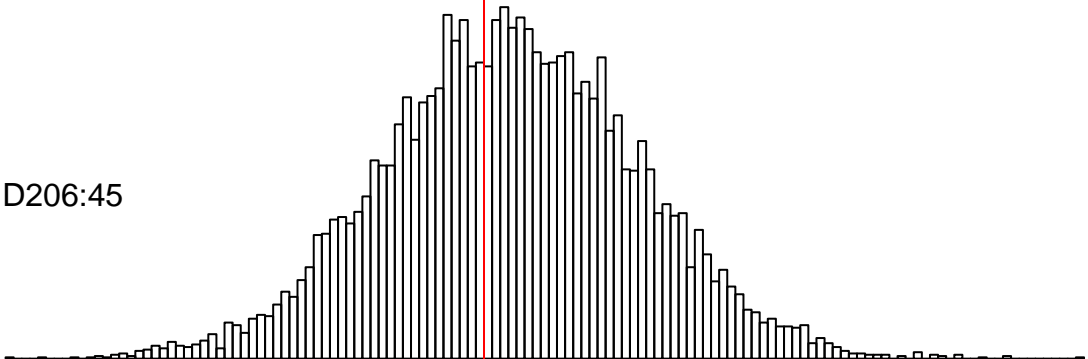

D206:120 – D206:45

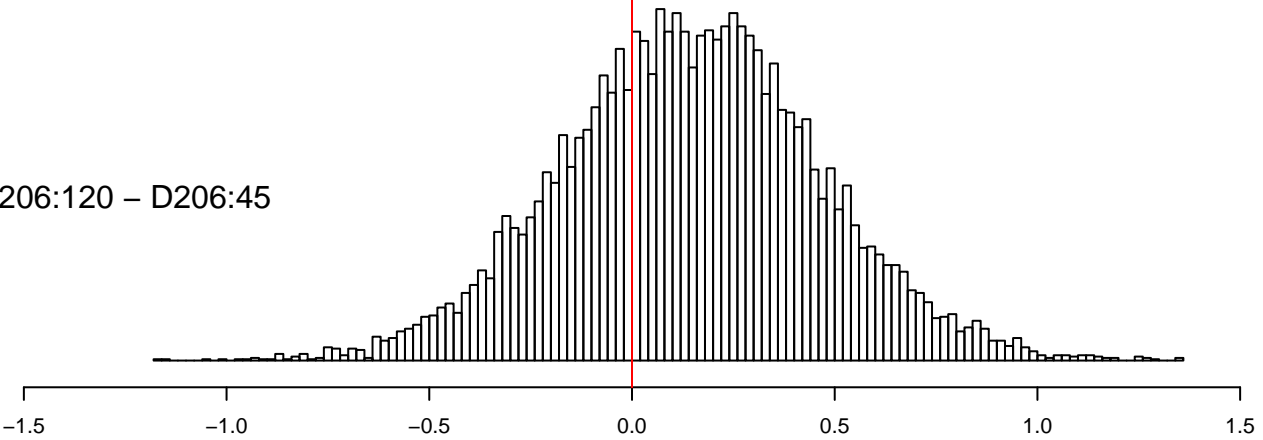

delta(C14:1 Fatty Acid)



D206:240

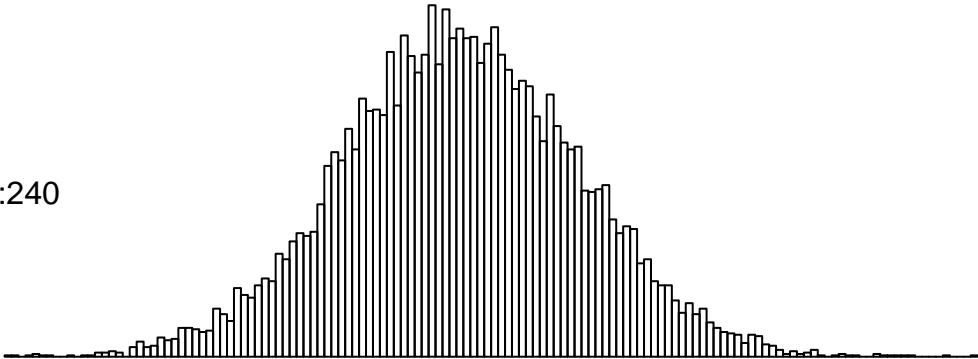

D206:120

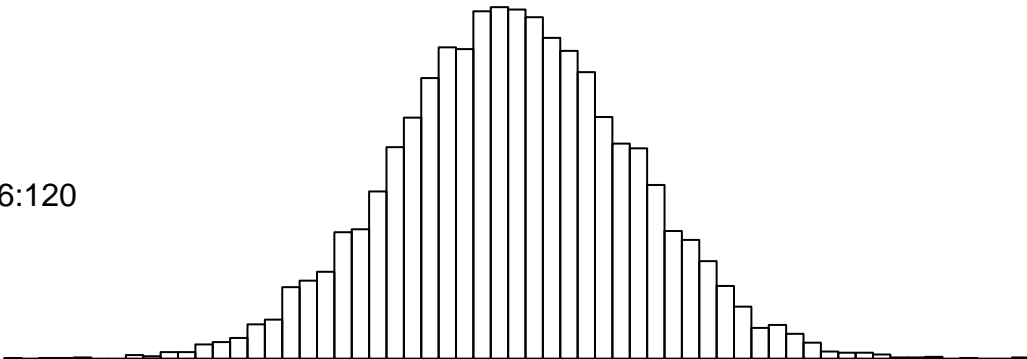

D206:45

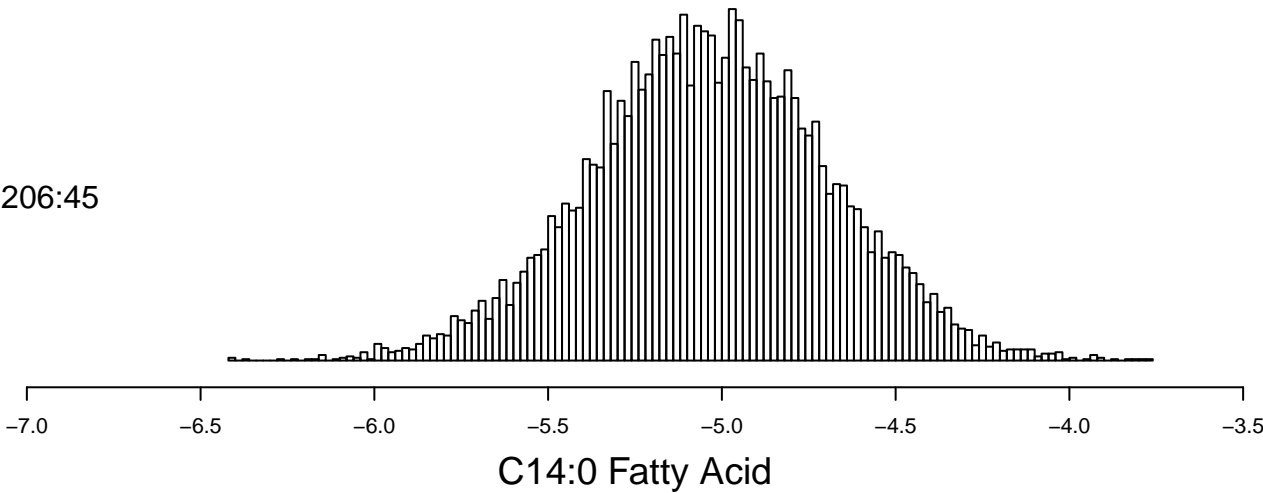

D206:240 – D206:120

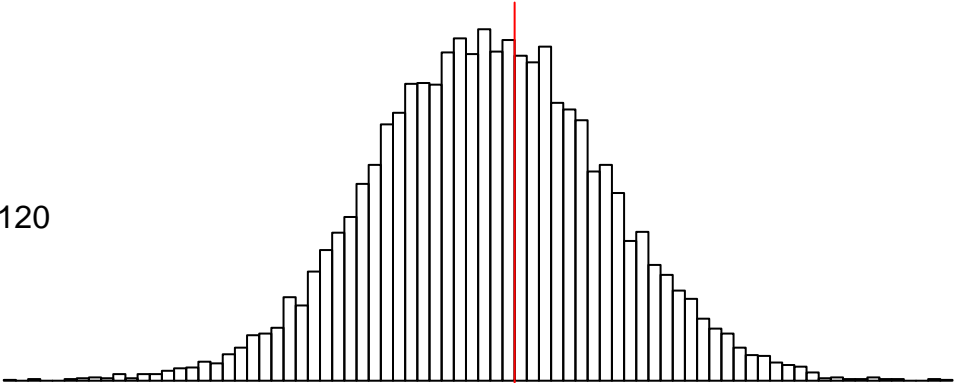

D206:240 – D206:45

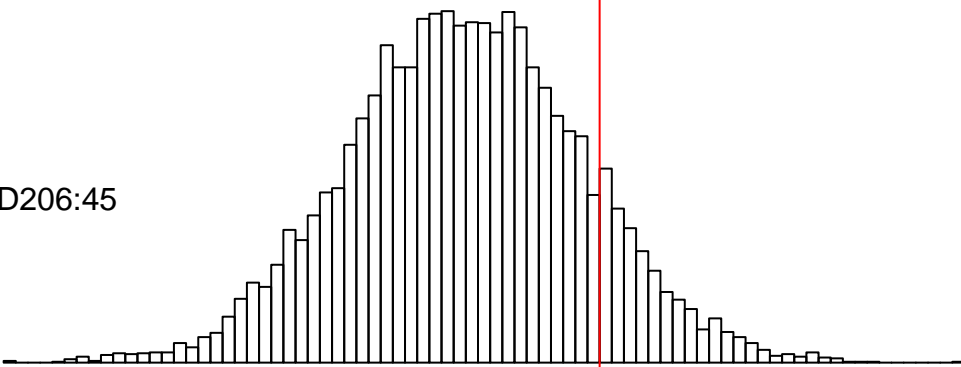

D206:120 – D206:45

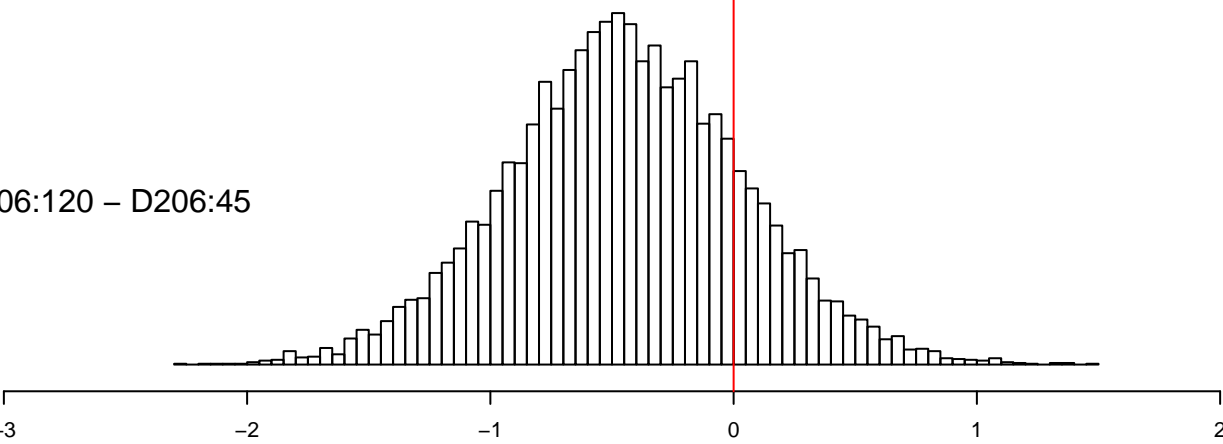

delta(C14:0 Fatty Acid)

D206:240

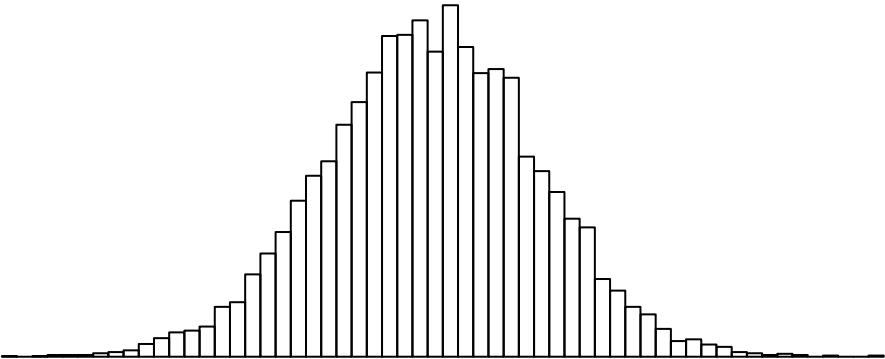

D206:120

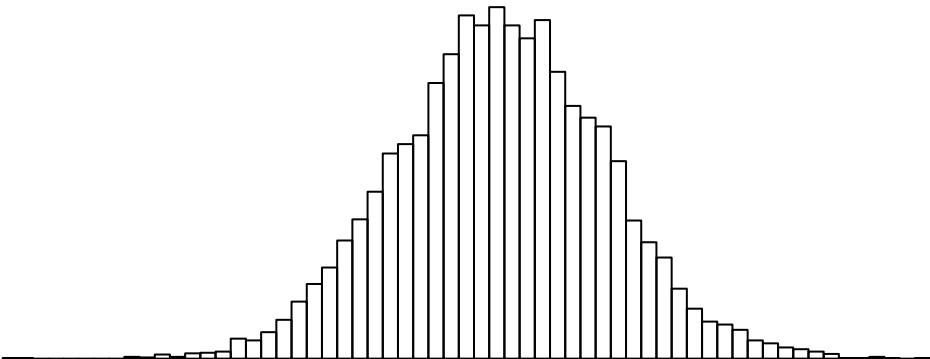

D206:45

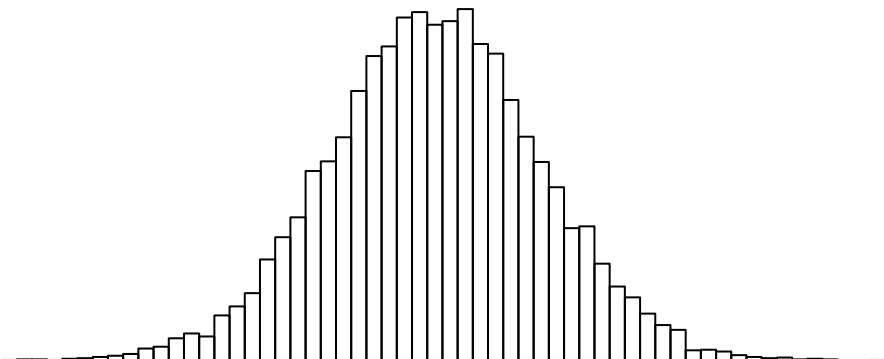

-8

-7

-6

-5

C16:1 Fatty Acid

D206:240 – D206:120

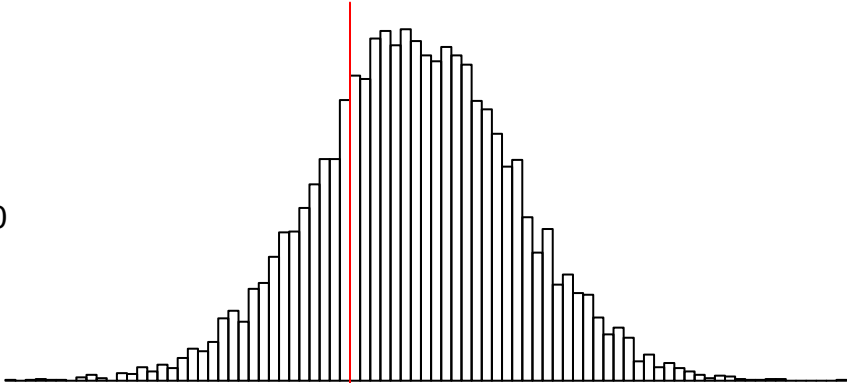

D206:240 – D206:45

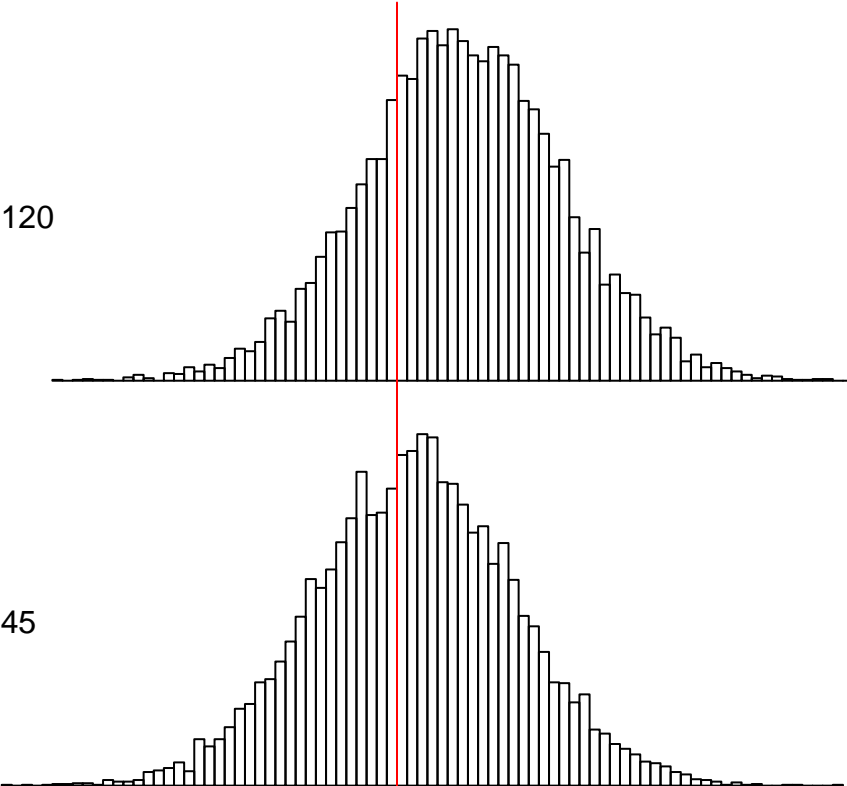

D206:120 – D206:45

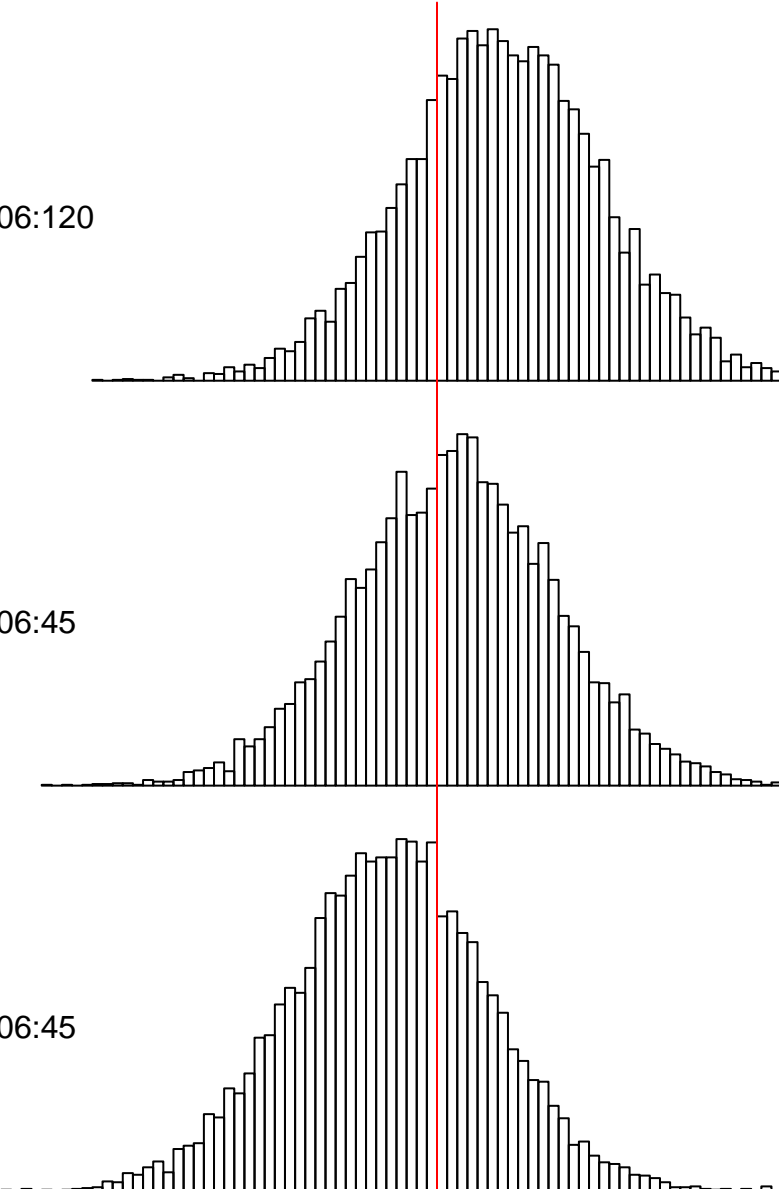

-3 -2 -1 0 1 2 3

delta(C16:1 Fatty Acid)

D206:240

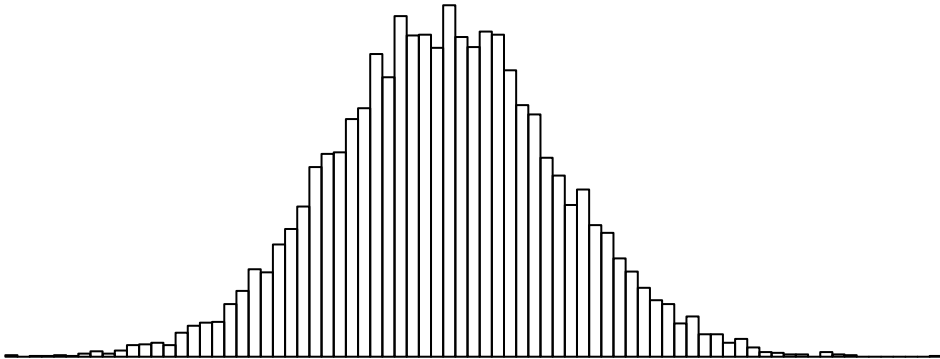

D206:120

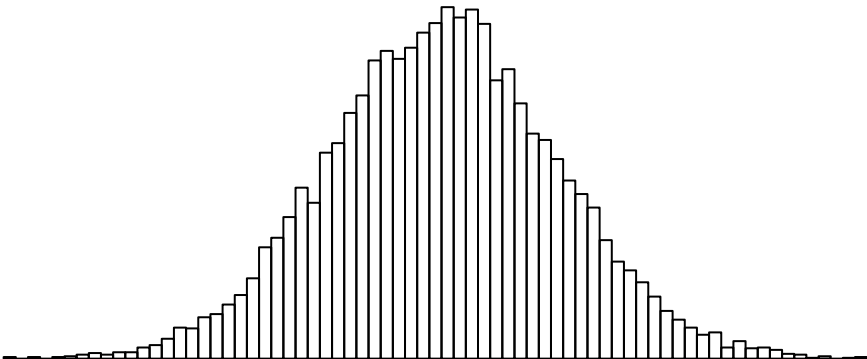

D206:45

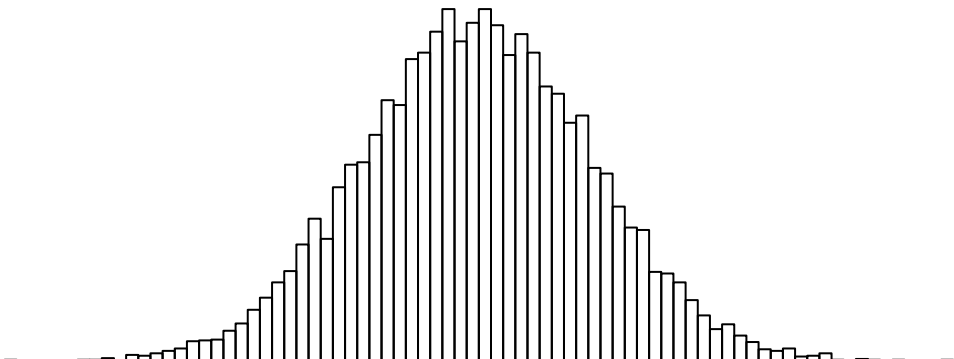

C16:0 Fatty Acid

D206:240 – D206:120

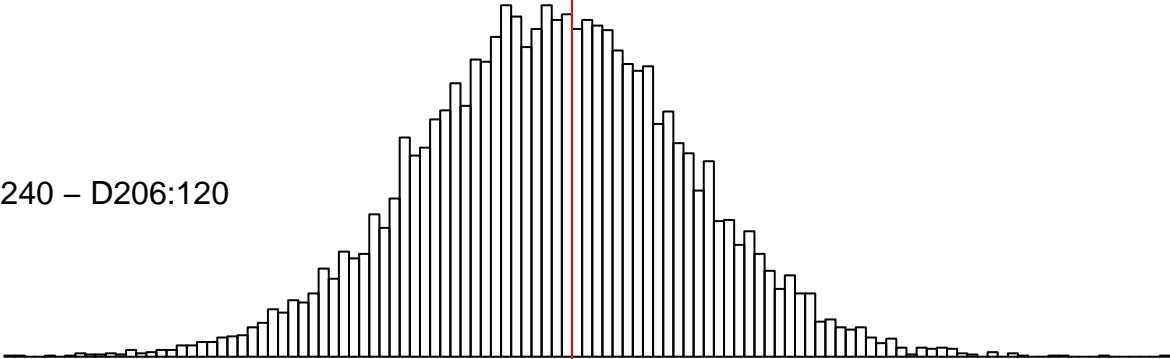

D206:240 – D206:45

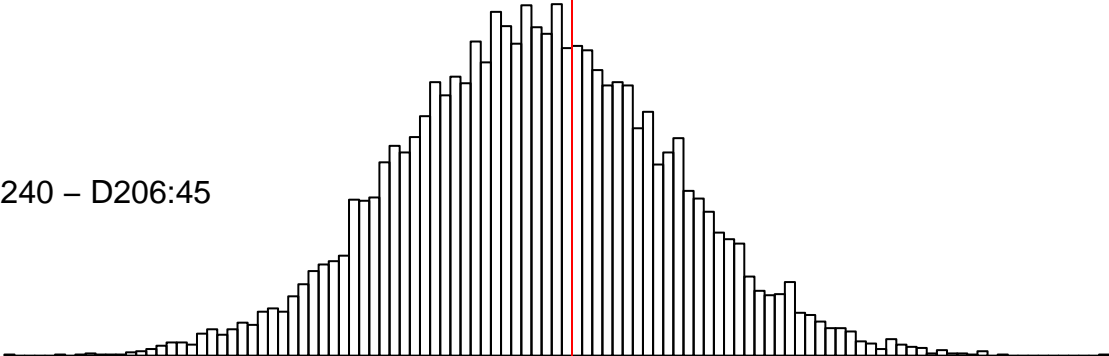

D206:120 – D206:45

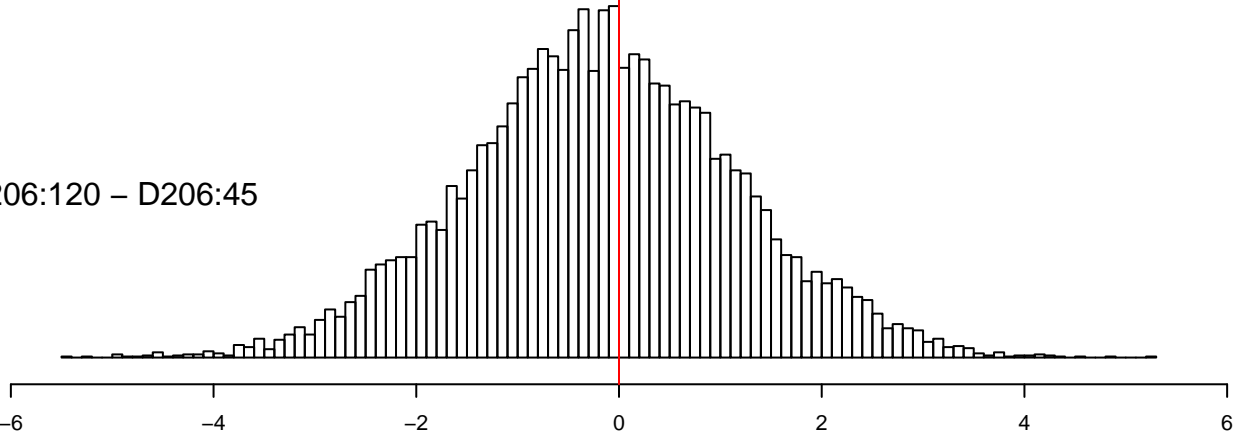

delta(C16:0 Fatty Acid)

D206:240

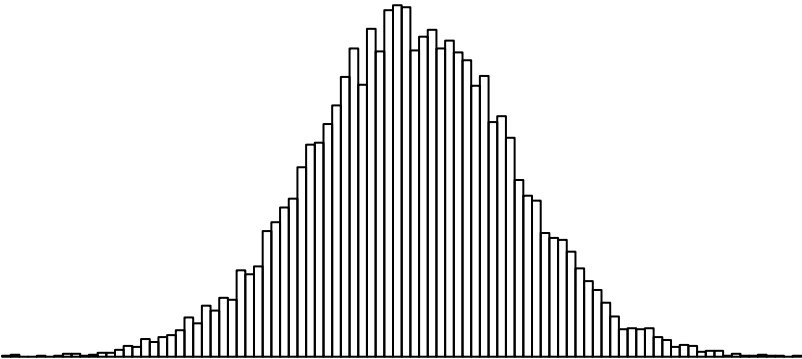

D206:120

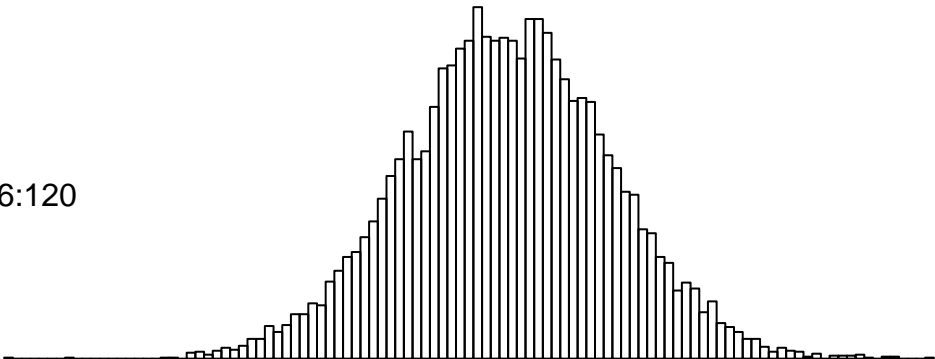

D206:45

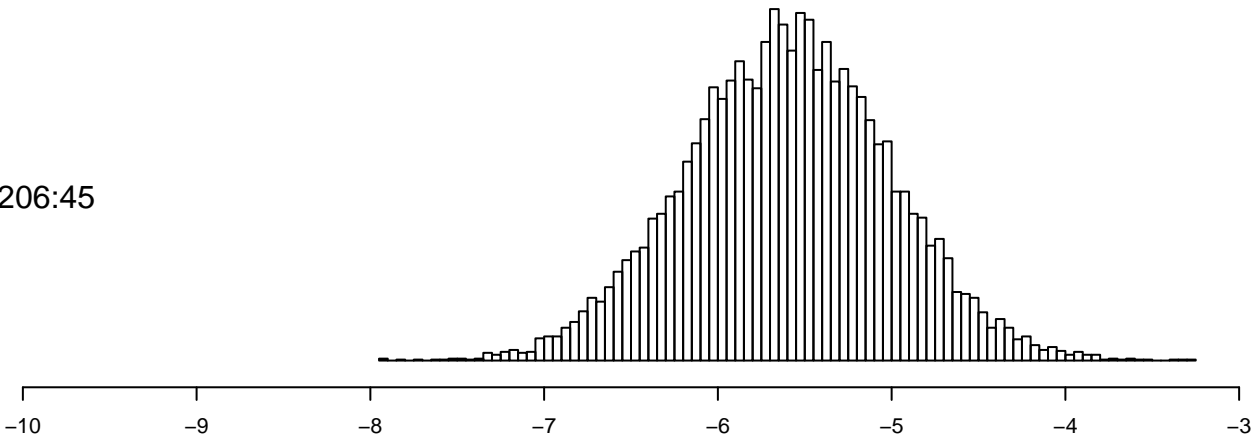

Polyunsaturated Fatty Acids 1

D206:240 – D206:120

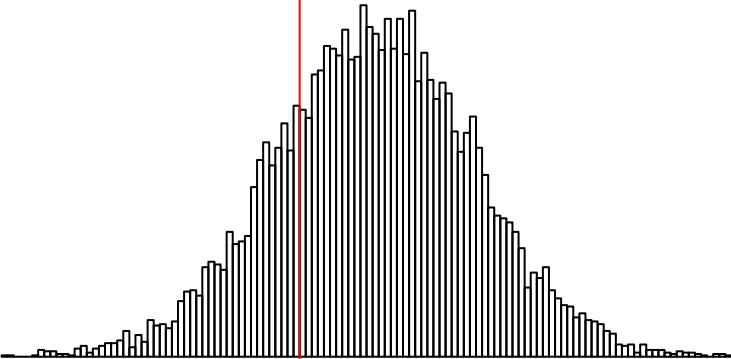

D206:240 – D206:45

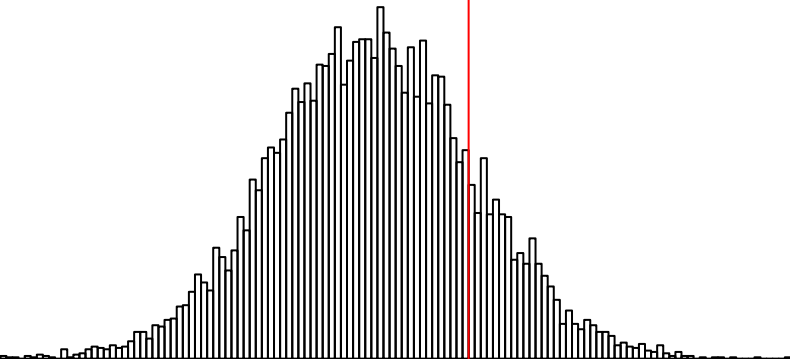

D206:120 – D206:45

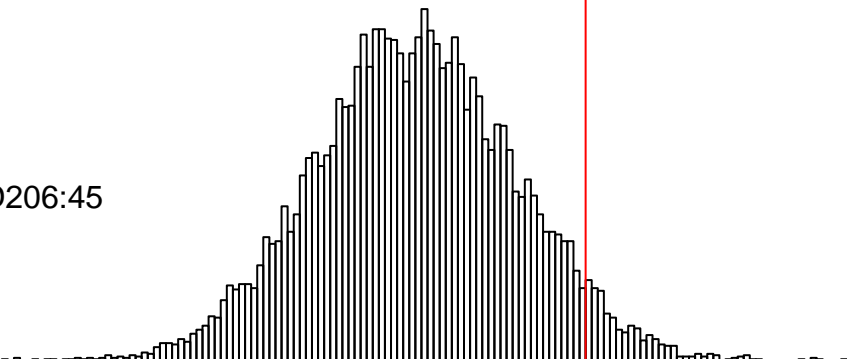

-6 -4 -2 0 2 4

delta(Polyunsaturated Fatty Acids 1)



D206:240

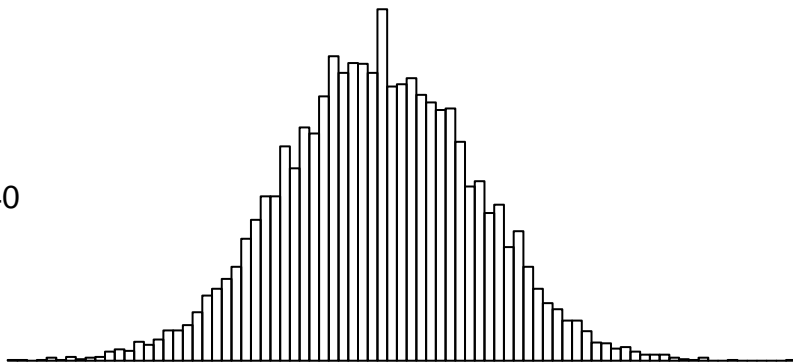

D206:120

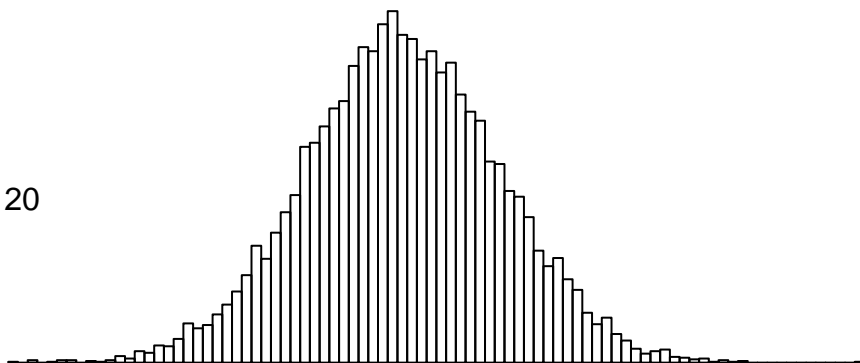

D206:45

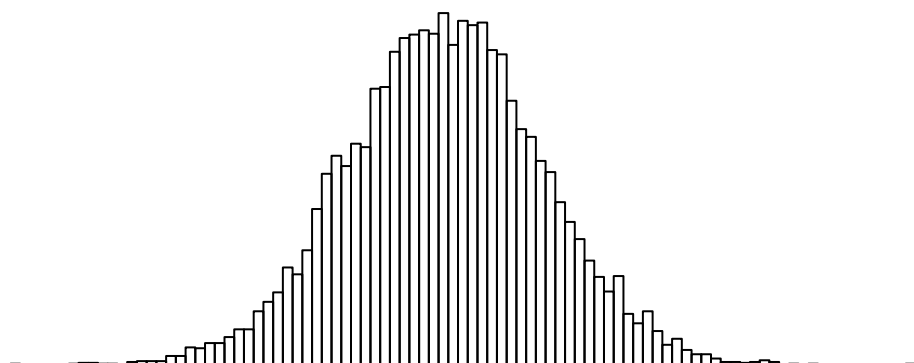

-9.0 -8.5 -8.0 -7.5 -7.0 -6.5

Polyunsaturated Fatty Acids 3

D206:240 – D206:120

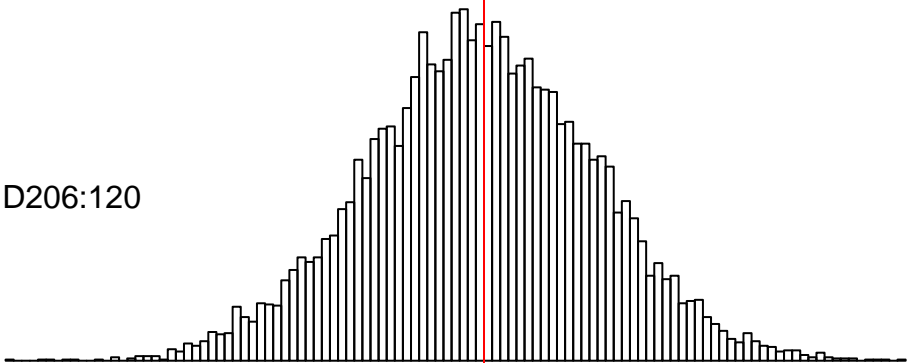

D206:240 – D206:45

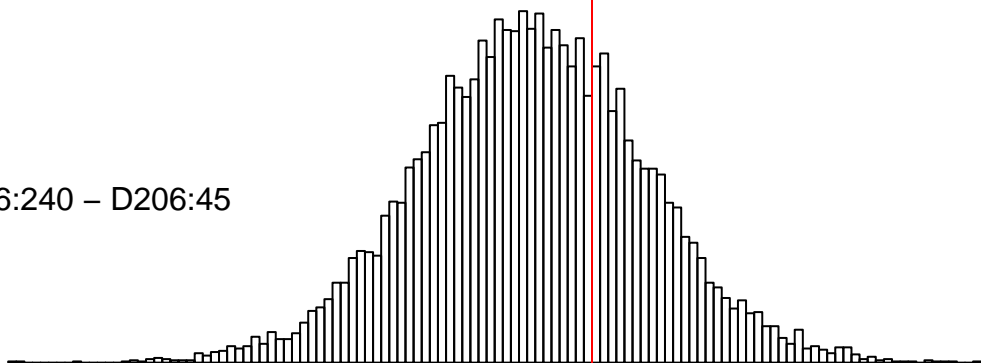

D206:120 – D206:45

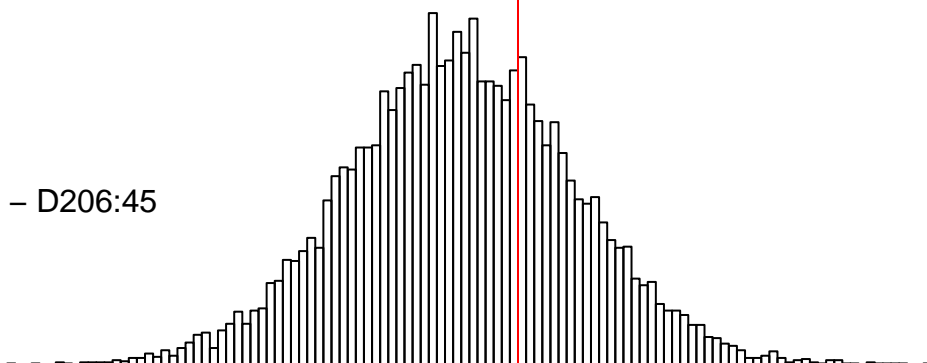

delta(Polyunsaturated Fatty Acids 3)

D206:240

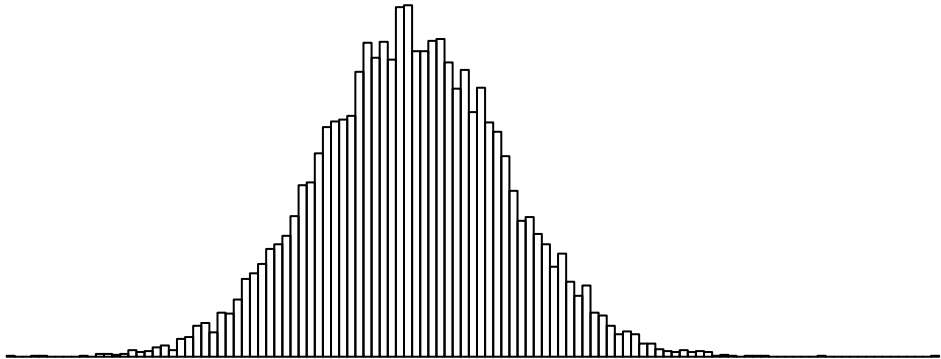

D206:120

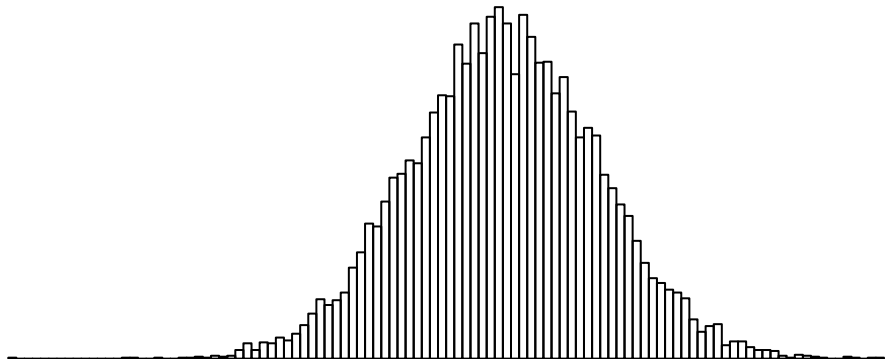

D206:45

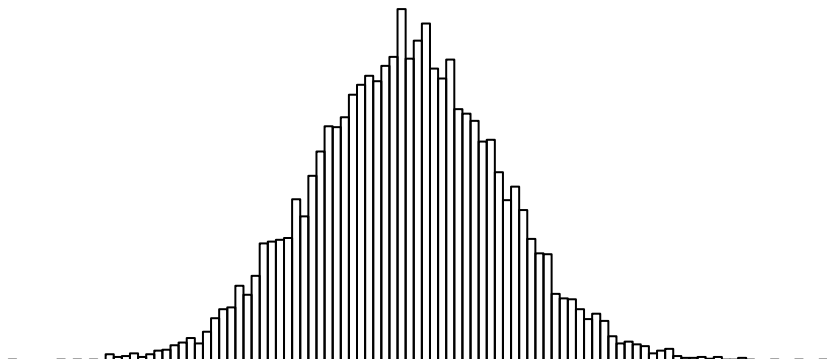

-9.5      -9.0      -8.5      -8.0      -7.5      -7.0      -6.5

C18:2 Fatty Acid

D206:240 – D206:120

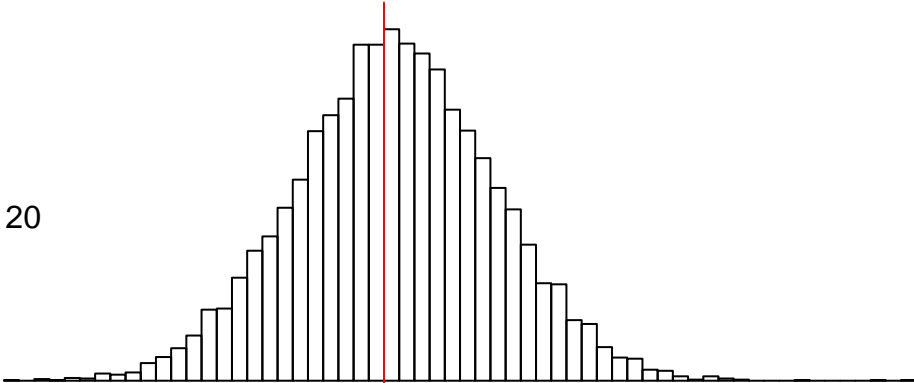

D206:240 – D206:45

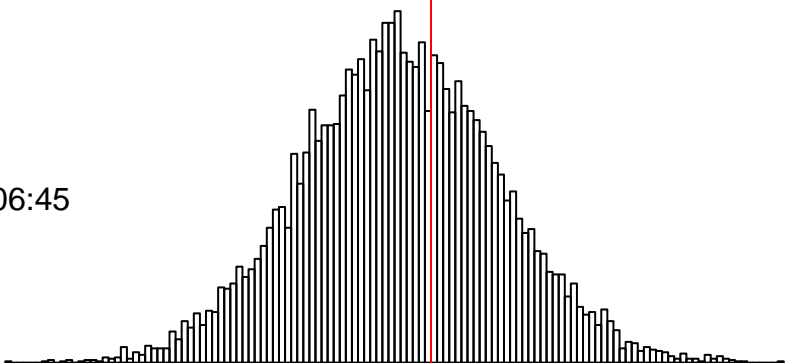

D206:120 – D206:45

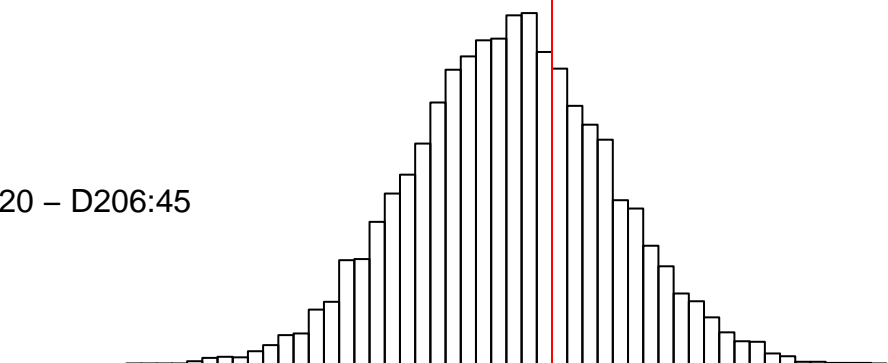

-2                      -1                      0                      1                      2

delta(C18:2 Fatty Acid)

D206:240

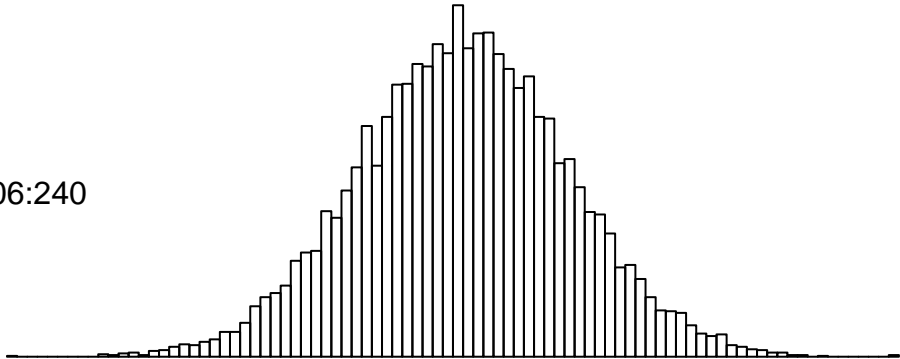

D206:120

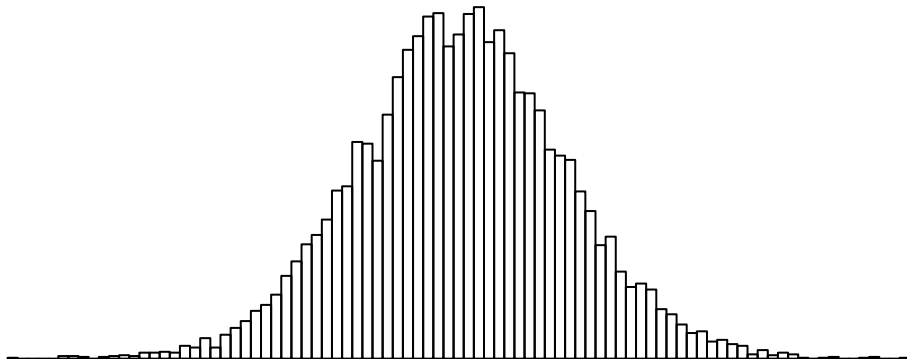

D206:45

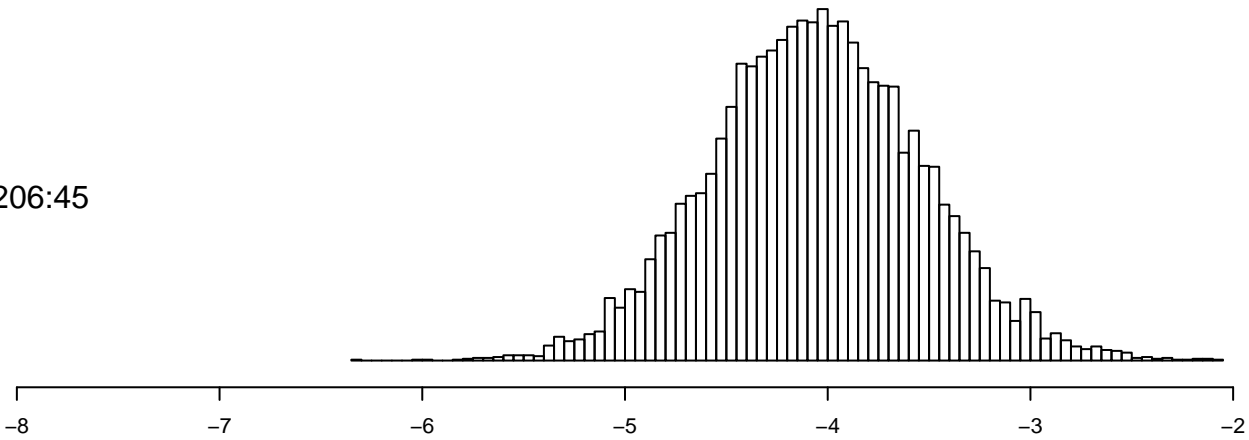

C18:0 Fatty Acid

D206:240 – D206:120

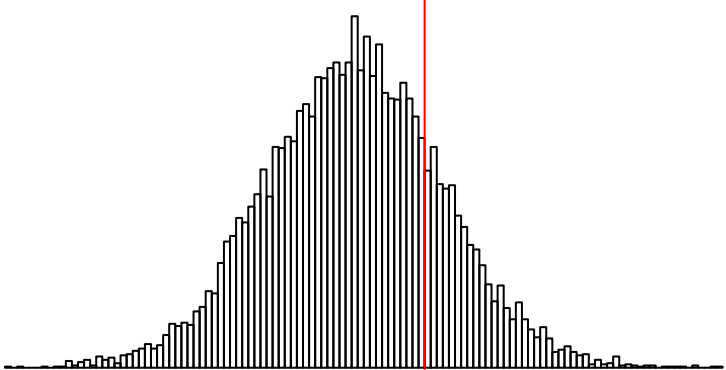

D206:240 – D206:45

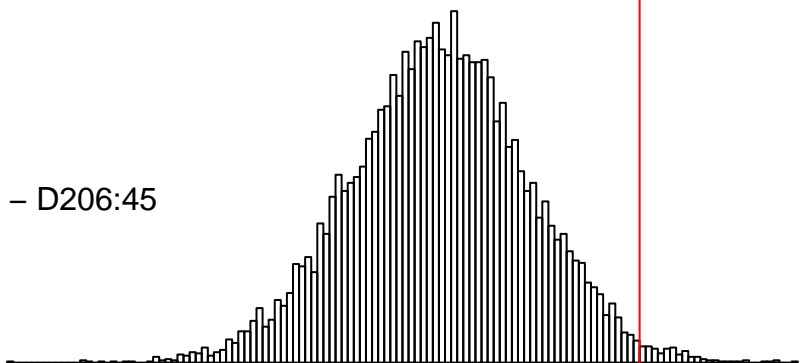

D206:120 – D206:45

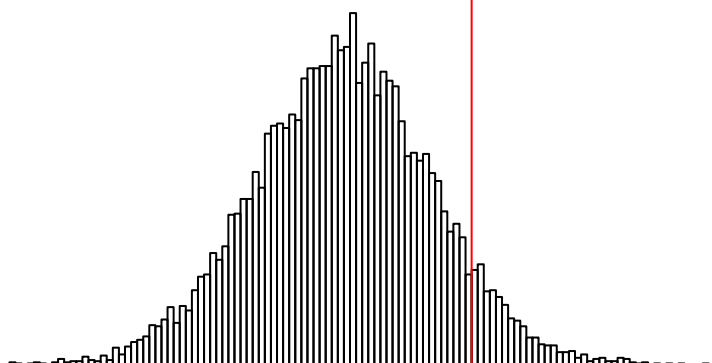

-6 -4 -2 0 2 4

delta(C18:0 Fatty Acid)

D206:240

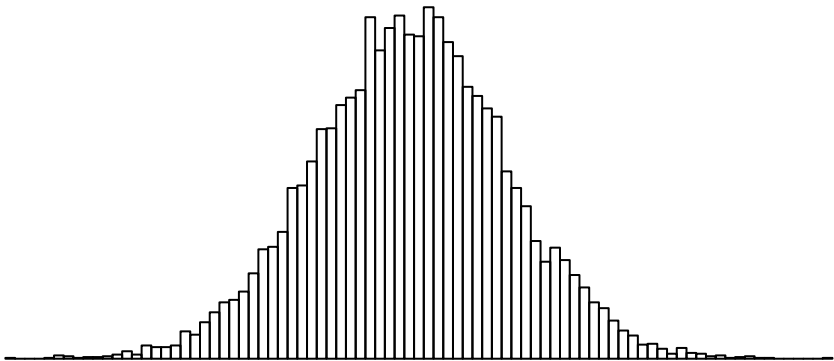

D206:120

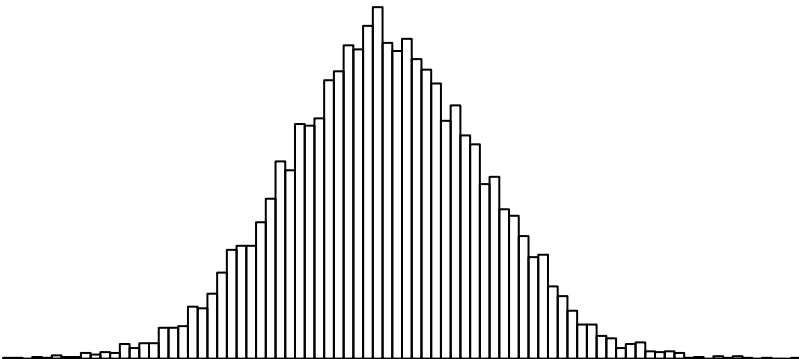

D206:45

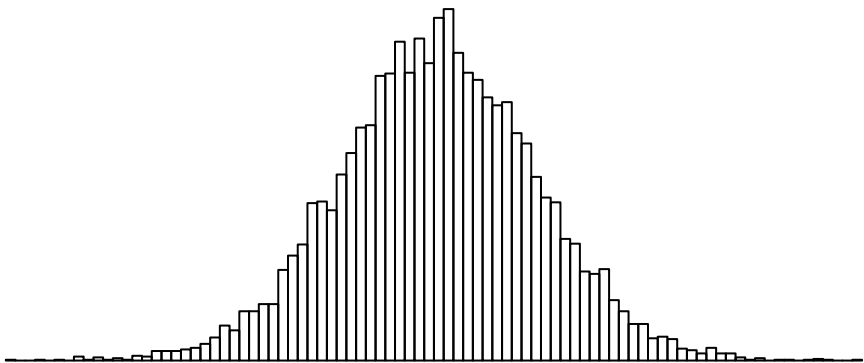

-8.5      -8.0      -7.5      -7.0      -6.5      -6.0

Unidentified Fatty Acid 2

D206:240 – D206:120

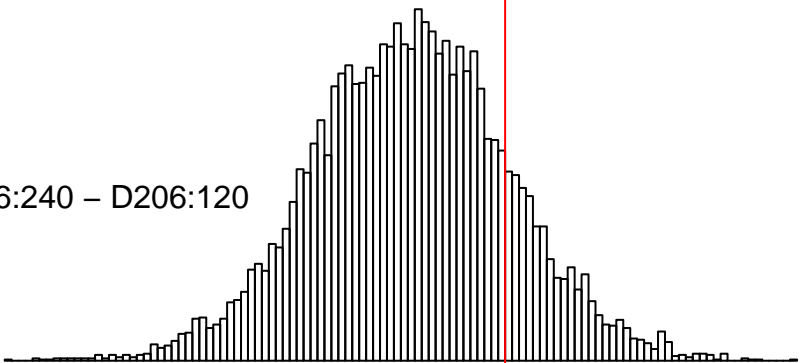

D206:240 – D206:45

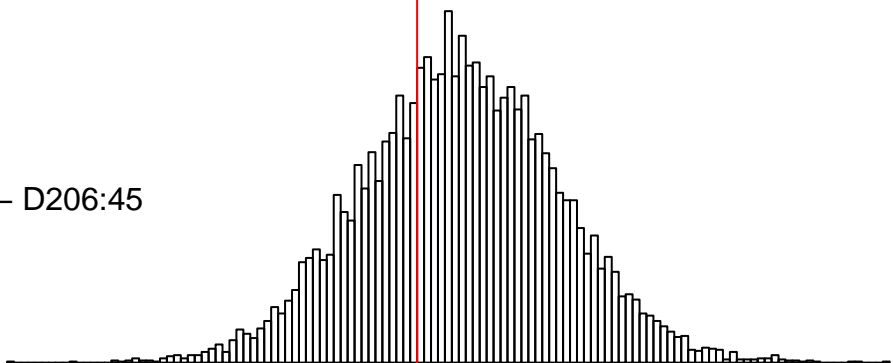

D206:120 – D206:45

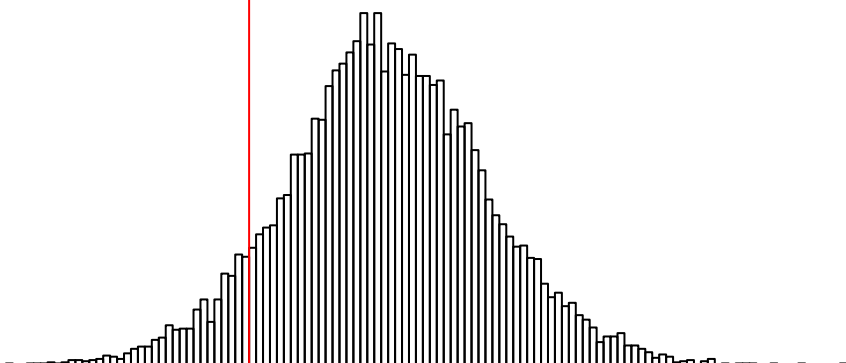

-1.5      -1.0      -0.5      0.0      0.5      1.0      1.5      2.0

delta(Unidentified Fatty Acid 2)



D206:240

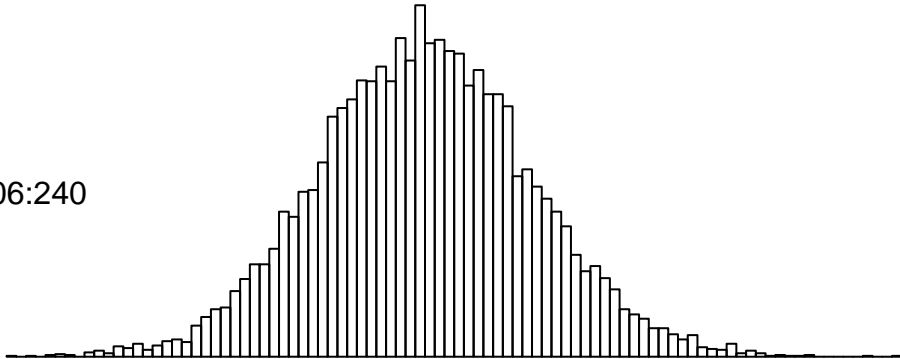

D206:120

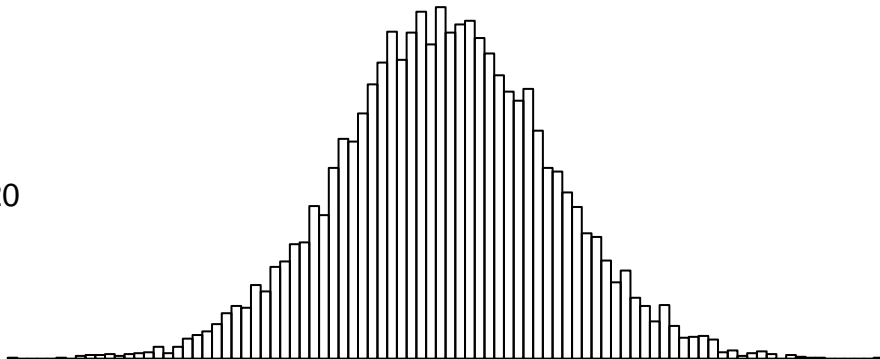

D206:45

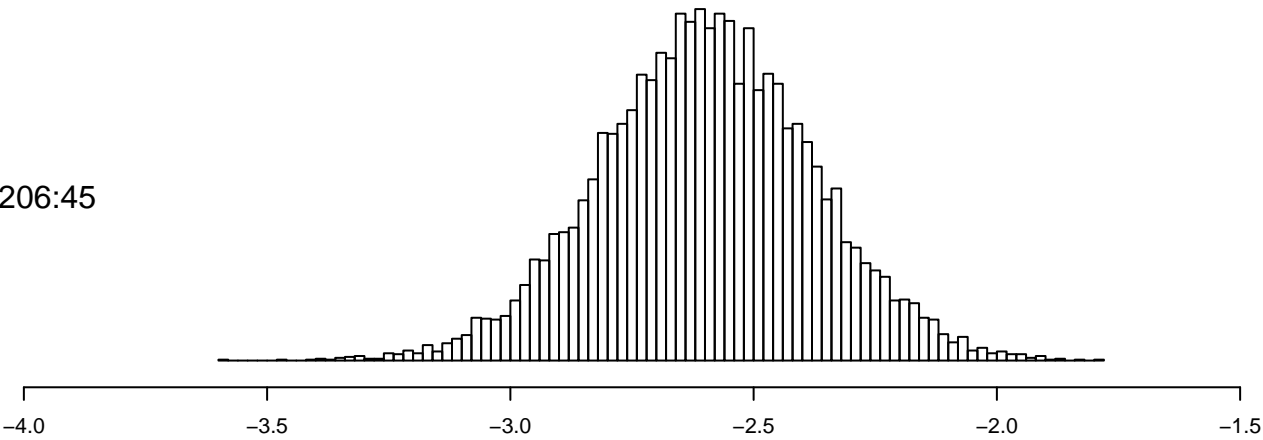

Glycerol

D206:240 – D206:120

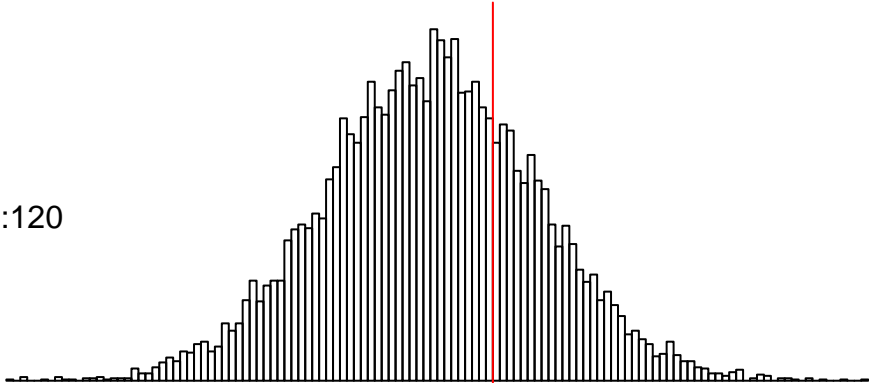

D206:240 – D206:45

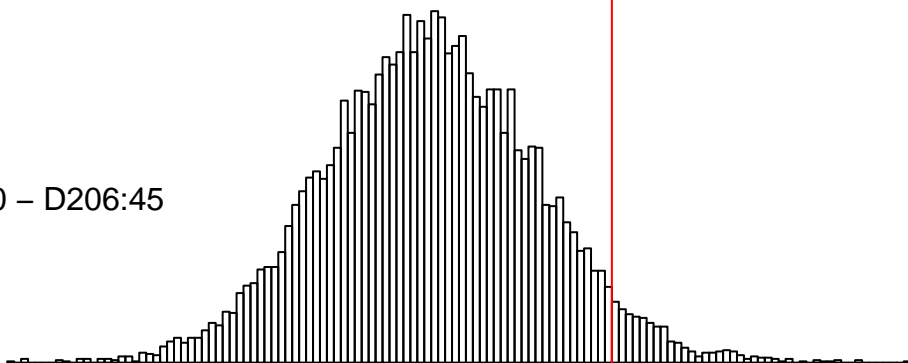

D206:120 – D206:45

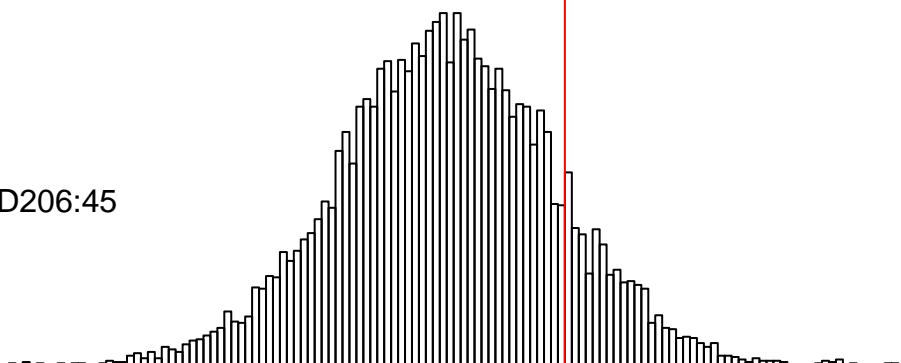

-2.0      -1.5      -1.0      -0.5      0.0      0.5      1.0      1.5

delta(Glycerol)

D206:240

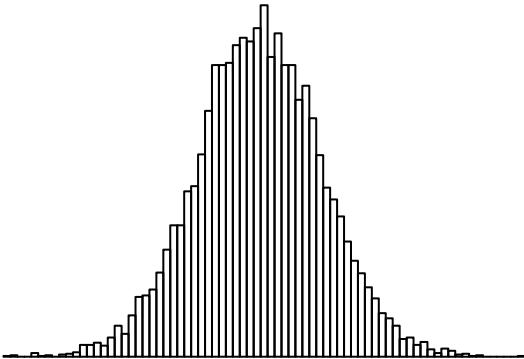

D206:120

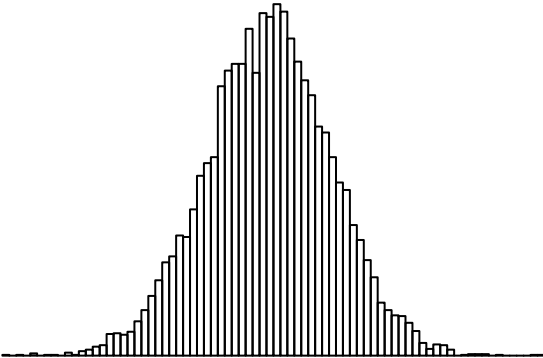

D206:45

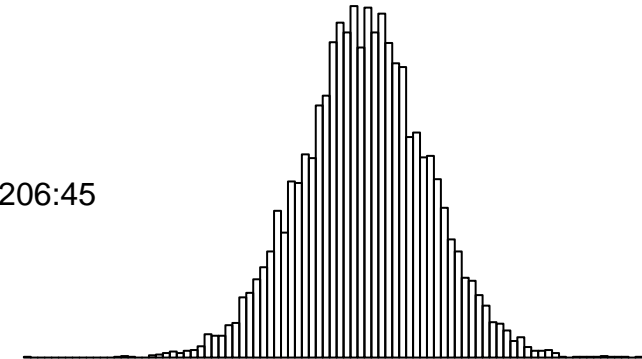

-6.0      -5.5      -5.0      -4.5      -4.0      -3.5      -3.0      -2.5

Inositol 1

D206:240 – D206:120

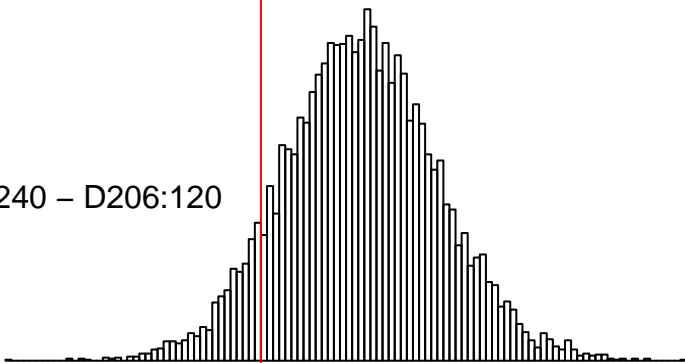

D206:240 – D206:45

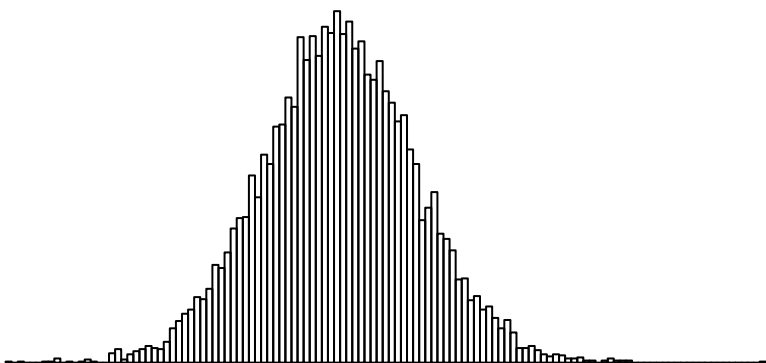

D206:120 – D206:45

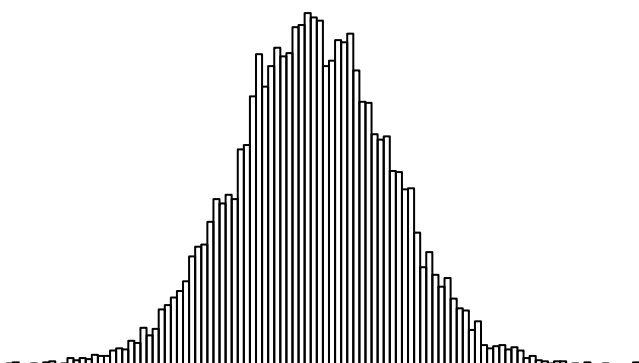

-1 0 1 2 3

delta(Inositol 1)

D206:240

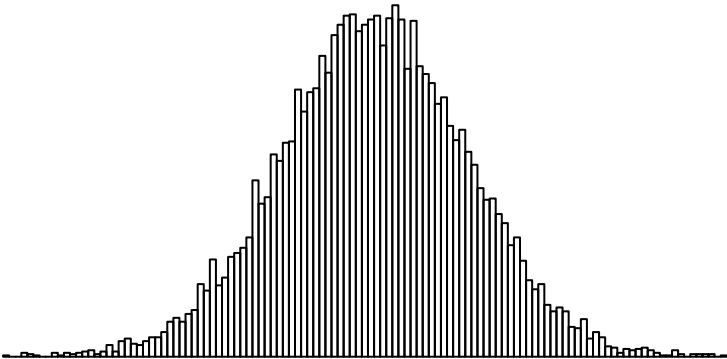

D206:120

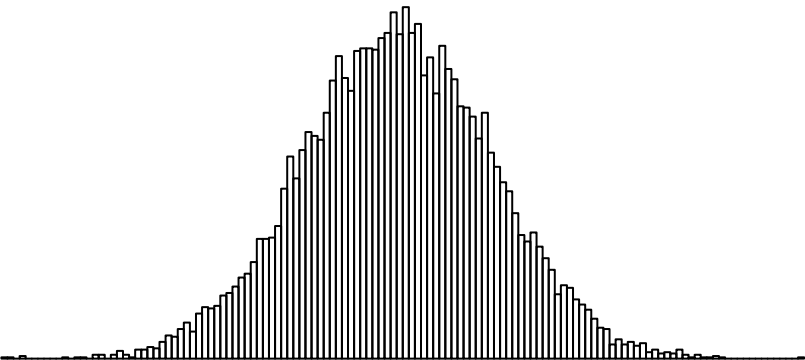

D206:45

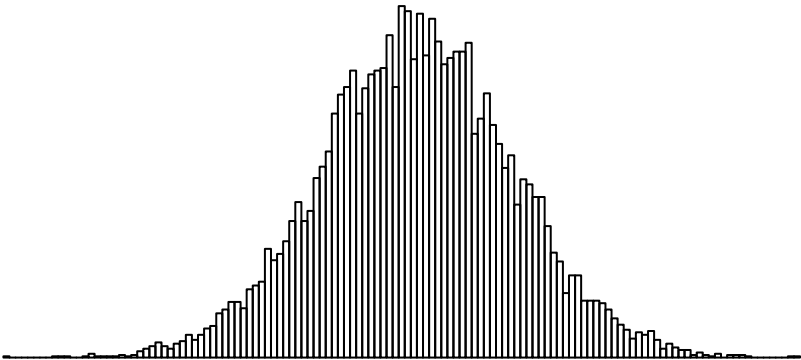

-6.5                      -6.0                      -5.5                      -5.0                      -4.5

Inositol 2

D206:240 – D206:120

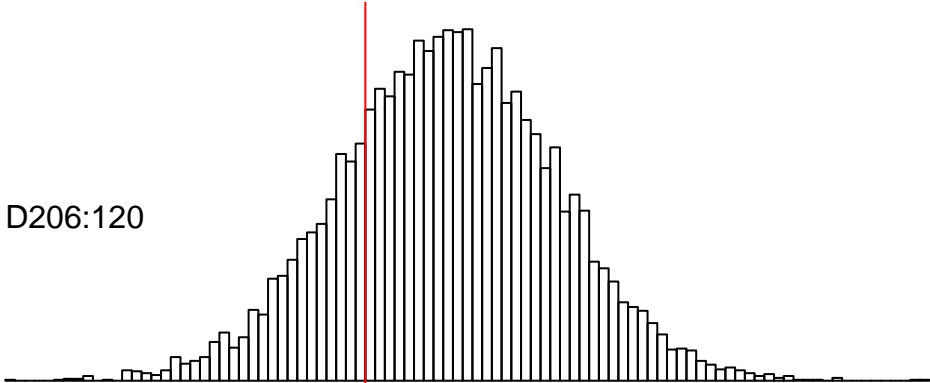

D206:240 – D206:45

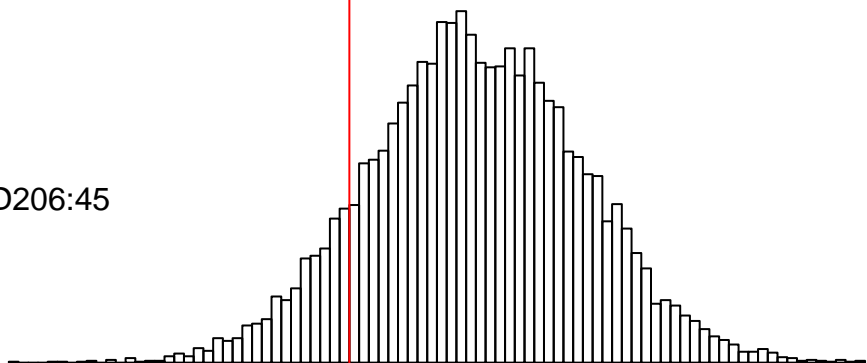

D206:120 – D206:45

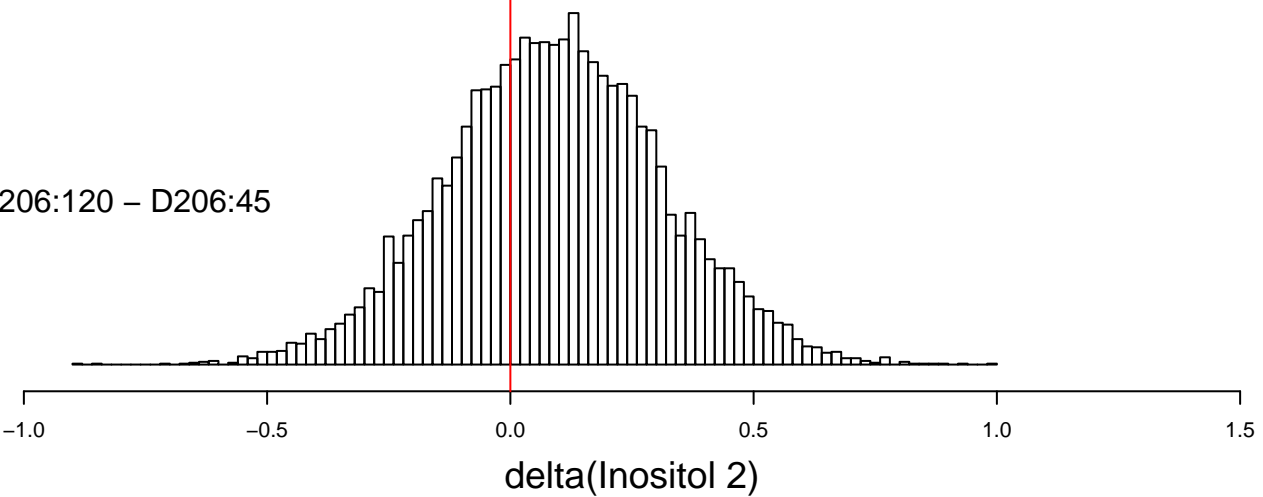

D206:240

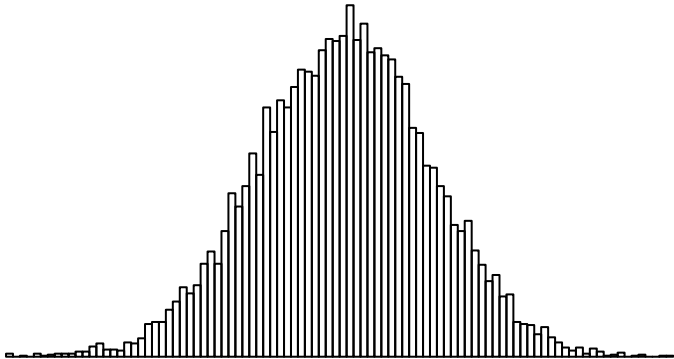

D206:120

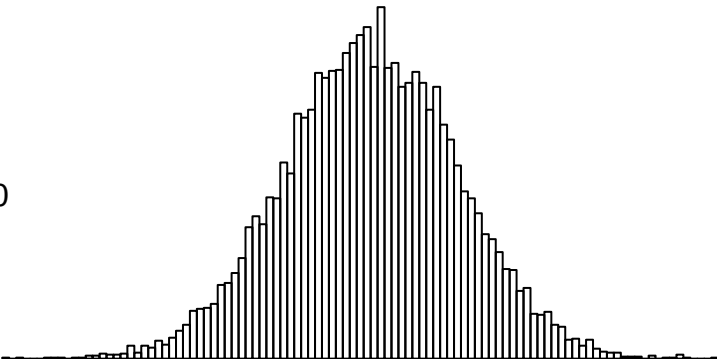

D206:45

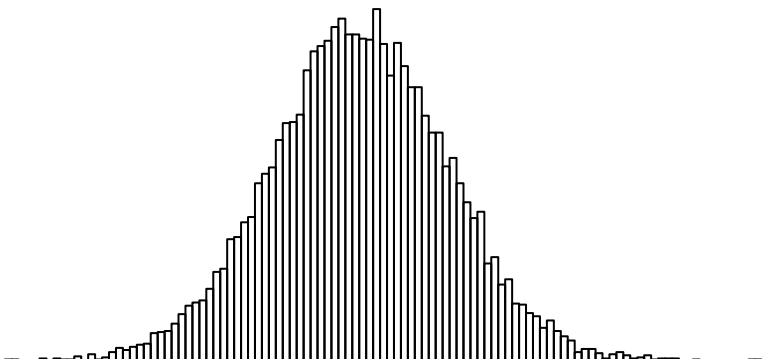

-10.0      -9.5      -9.0      -8.5      -8.0      -7.5      -7.0      -6.5

C29 Sterol 1

D206:240 – D206:120

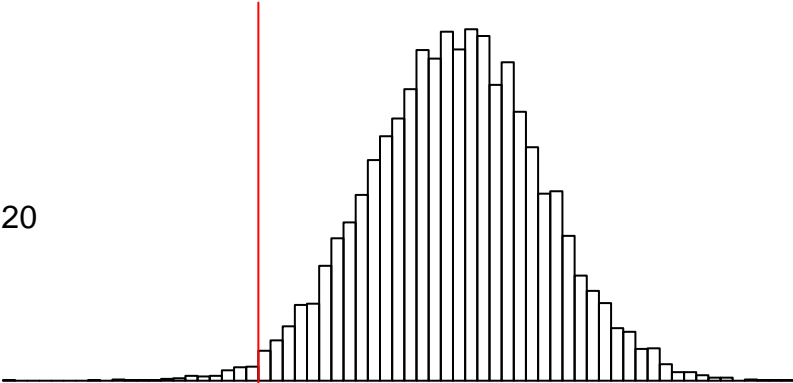

D206:240 – D206:45

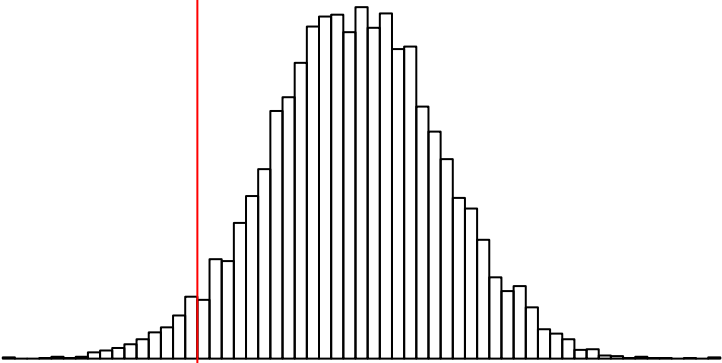

D206:120 – D206:45

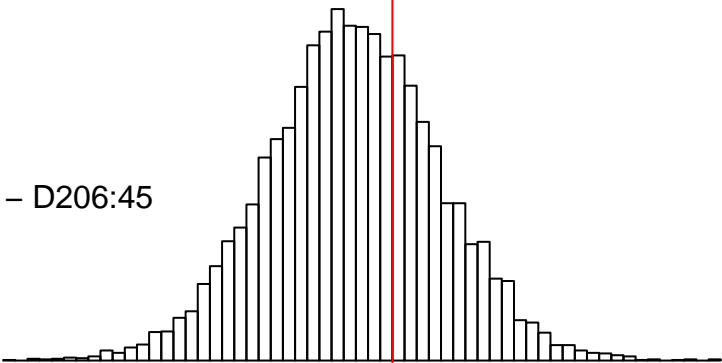

delta(C29 Sterol 1)



D206:240

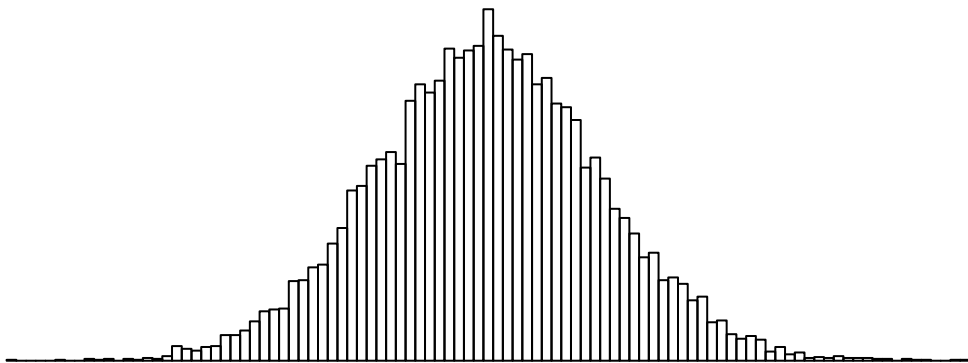

D206:120

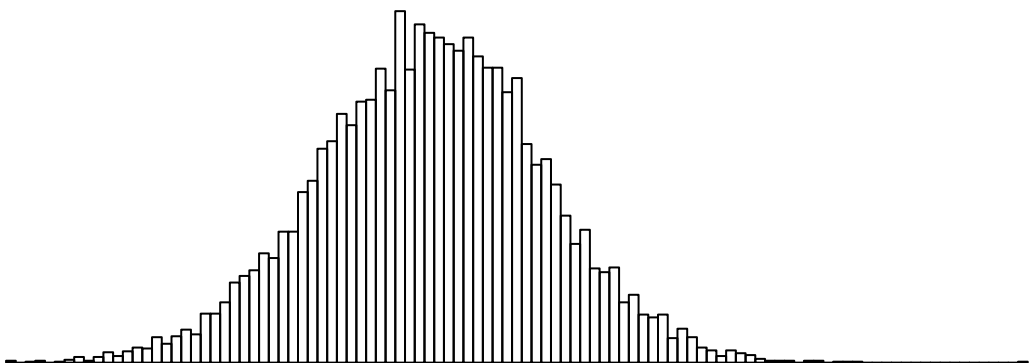

D206:45

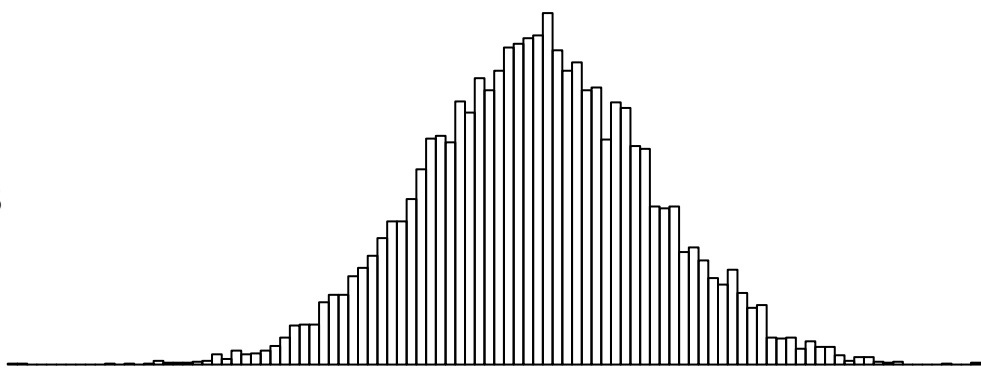

-9.5                      -9.0                      -8.5                      -8.0                      -7.5                      -7.0

C29 Stanol 1

D206:240 – D206:120

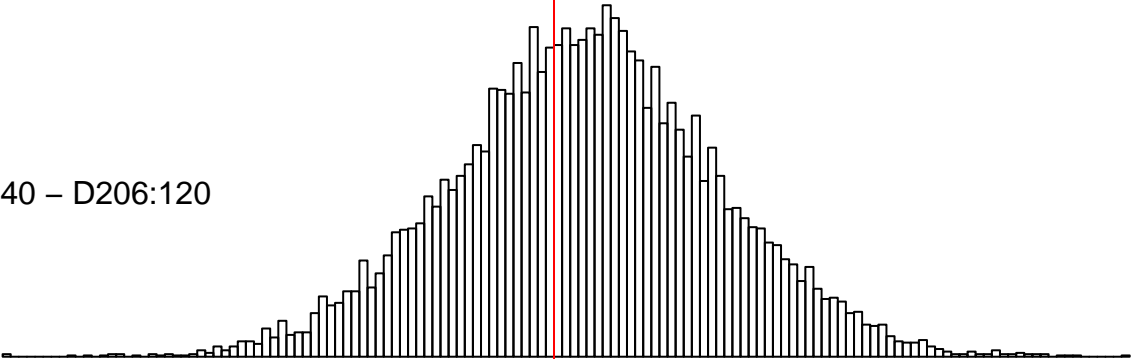

D206:240 – D206:45

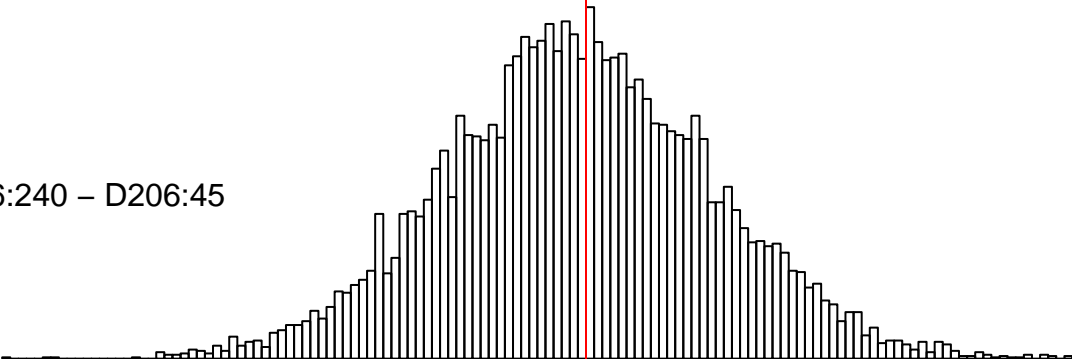

D206:120 – D206:45

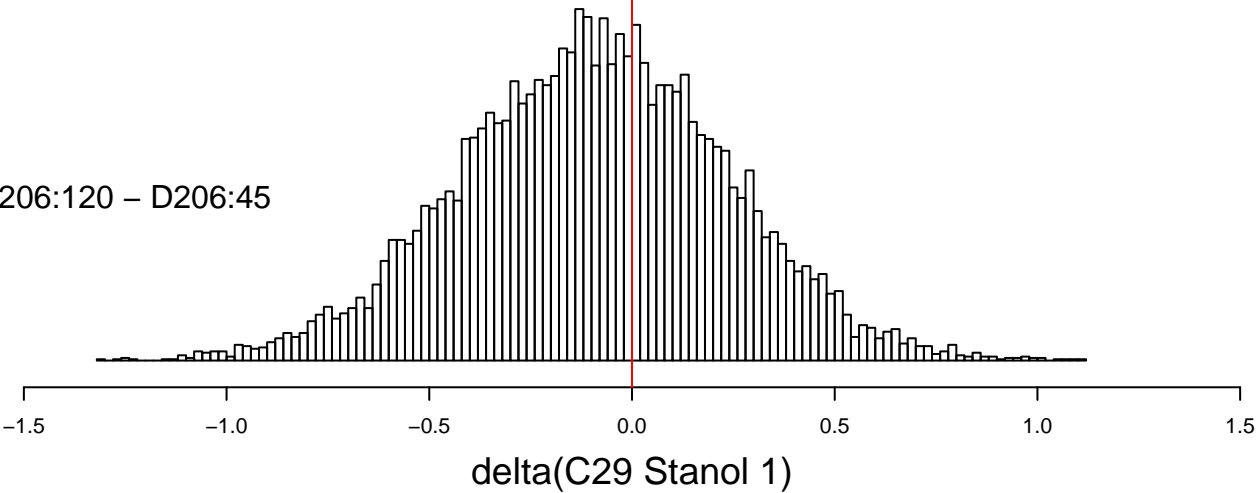

D206:240

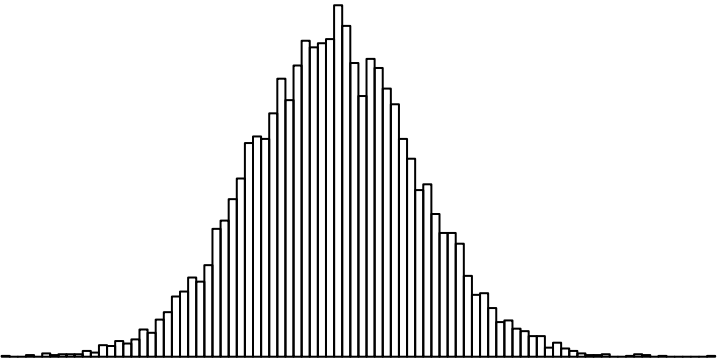

D206:120

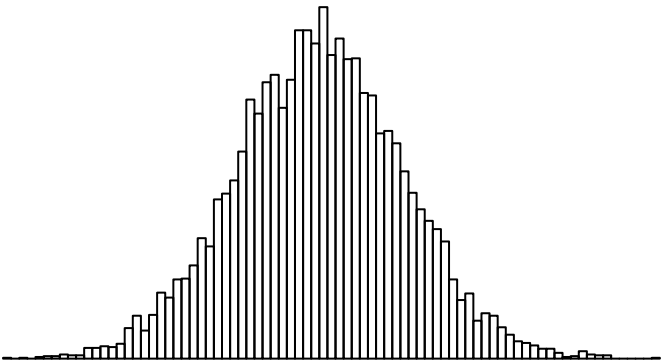

D206:45

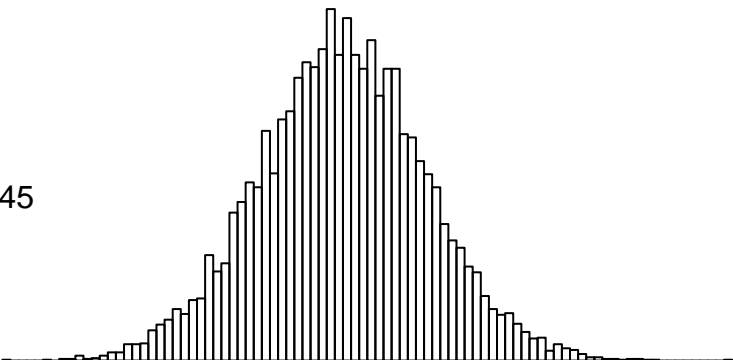

-8.5      -8.0      -7.5      -7.0      -6.5      -6.0      -5.5

C27<sup>5,22</sup> Sterol

D206:240 – D206:120

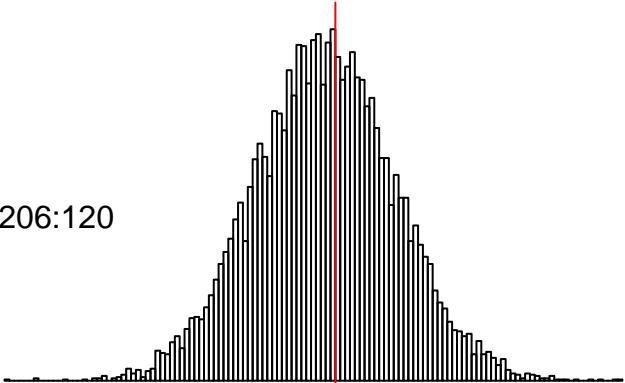

D206:240 – D206:45

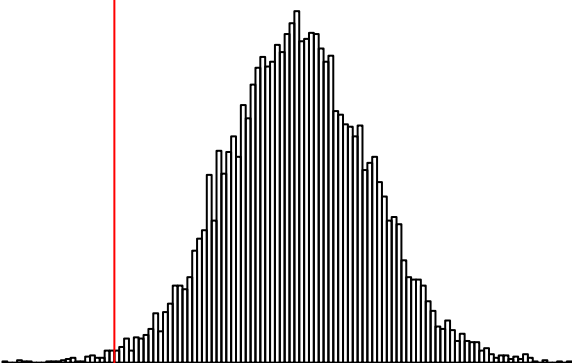

D206:120 – D206:45

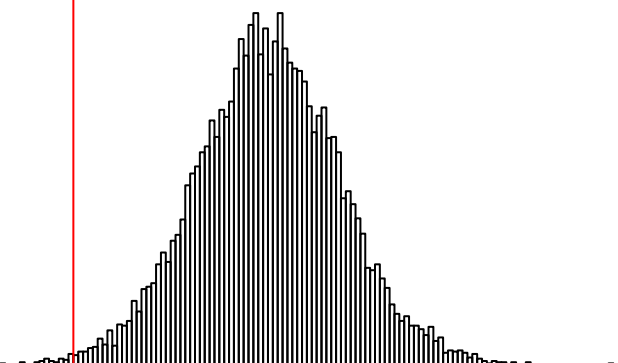

-2 -1 0 1 2 3

delta(C27"5,22 Sterol)

D206:240

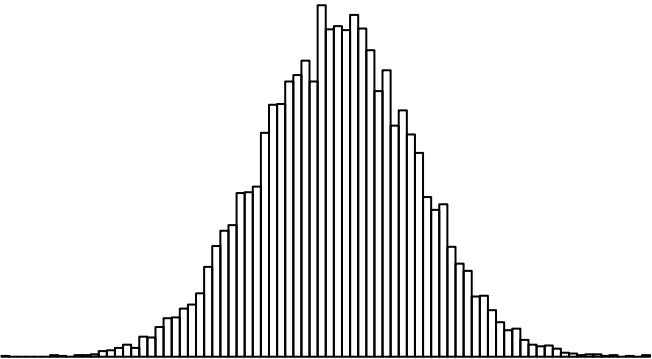

D206:120

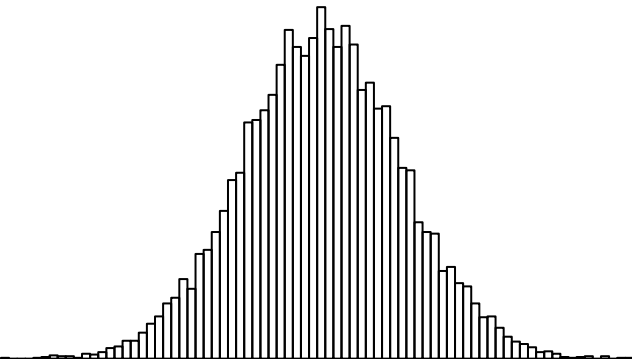

D206:45

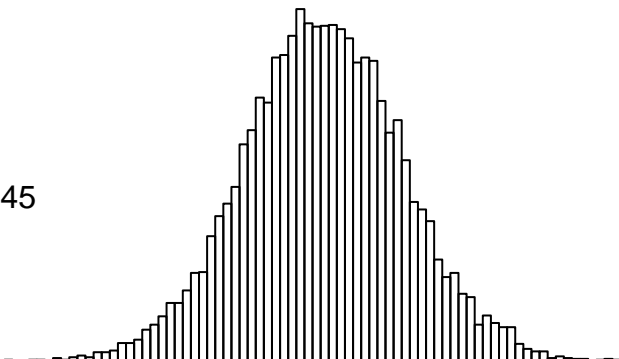

-8.0 -7.5 -7.0 -6.5 -6.0 -5.5 -5.0

C27"5 Sterol

D206:240 – D206:120

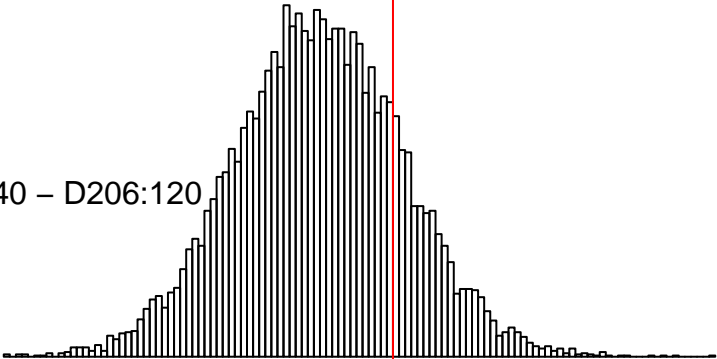

D206:240 – D206:45

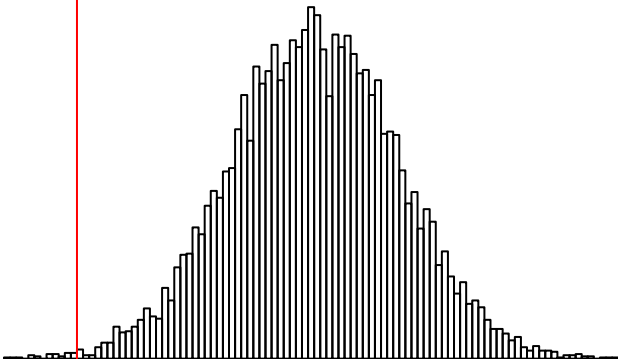

D206:120 – D206:45

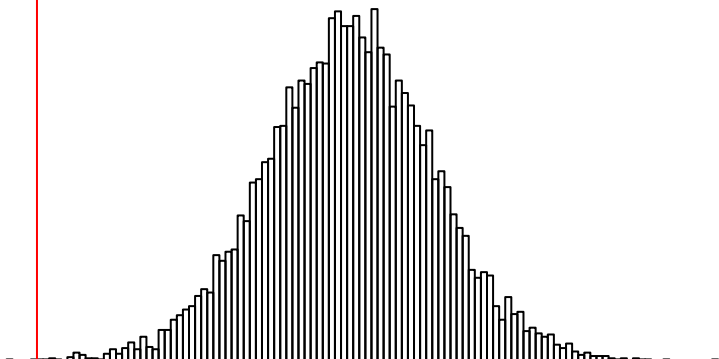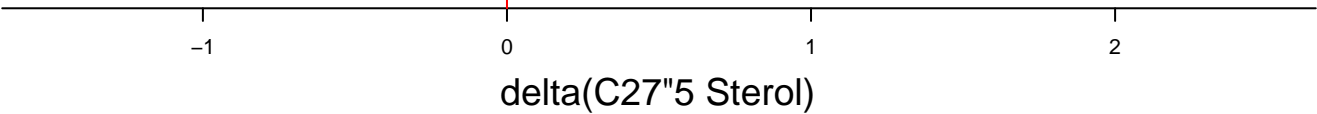

D206:240

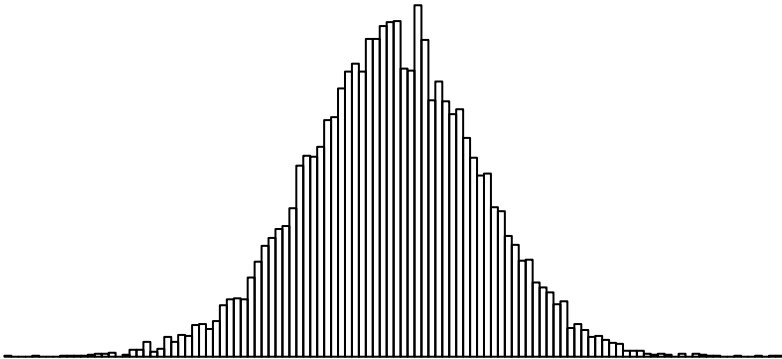

D206:120

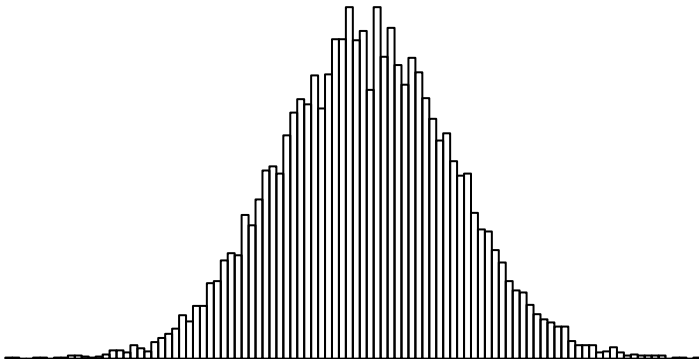

D206:45

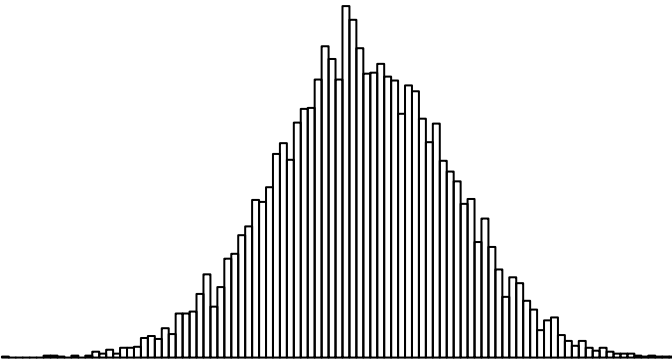

-7.0      -6.5      -6.0      -5.5      -5.0      -4.5      -4.0      -3.5

C28<sup>5,22</sup> Sterol

D206:240 – D206:120

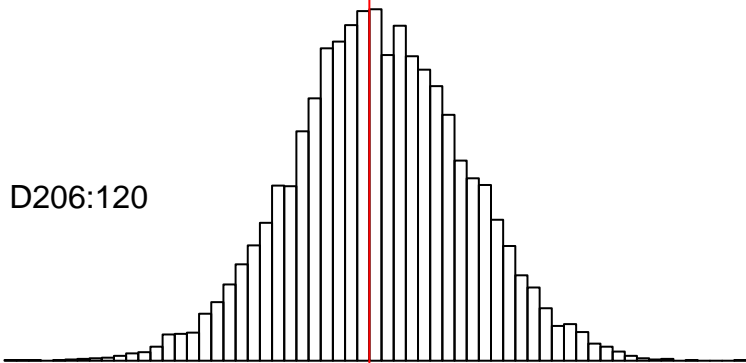

D206:240 – D206:45

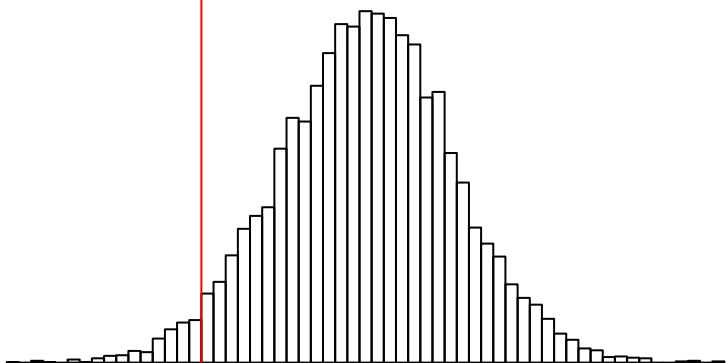

D206:120 – D206:45

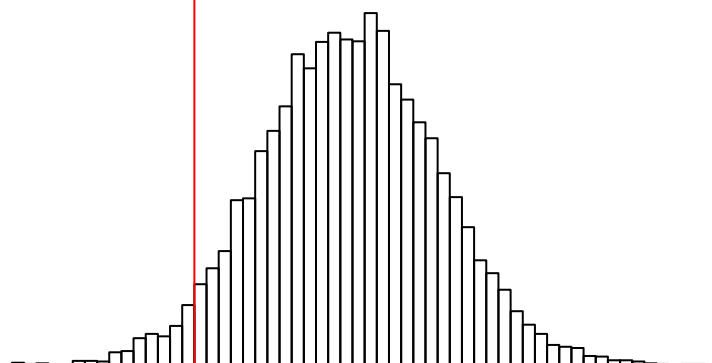

-2 -1 0 1 2 3

delta(C28"5,22 Sterol)



D206:240

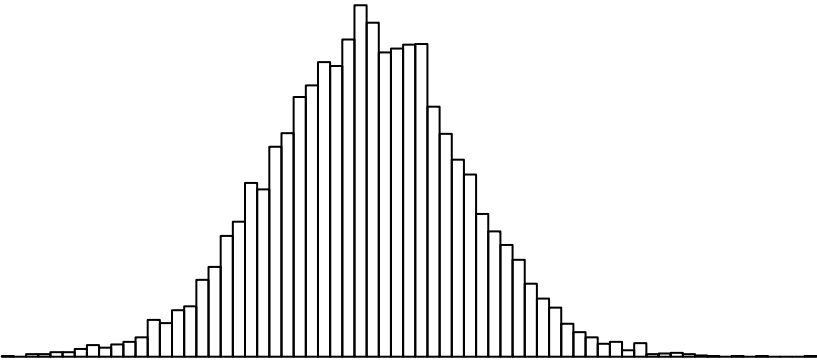

D206:120

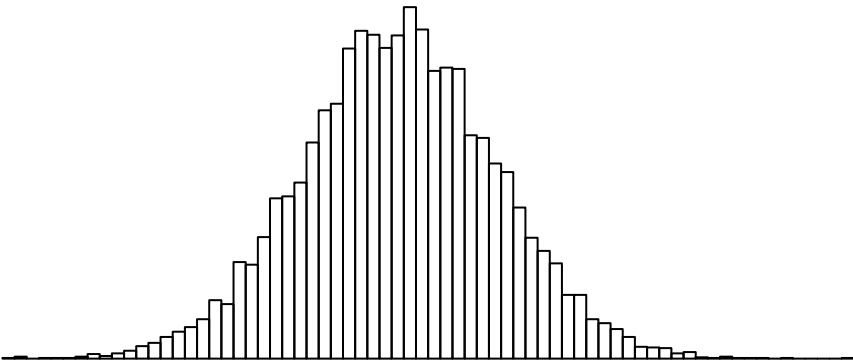

D206:45

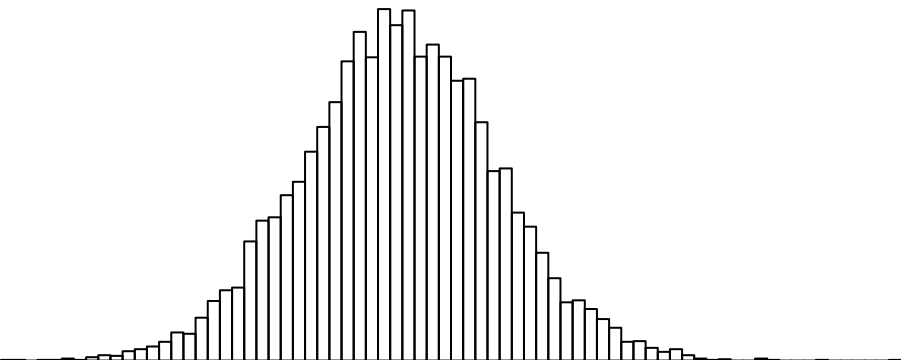

-10      -9      -8      -7      -6      -5

C28<sup>5</sup> Sterol

D206:240 – D206:120

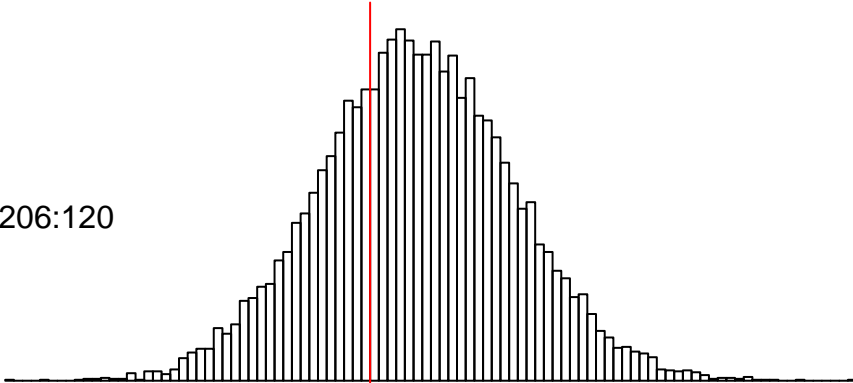

D206:240 – D206:45

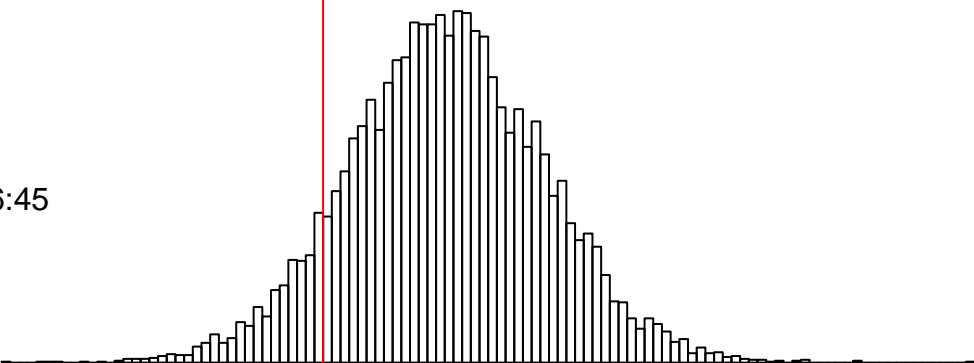

D206:120 – D206:45

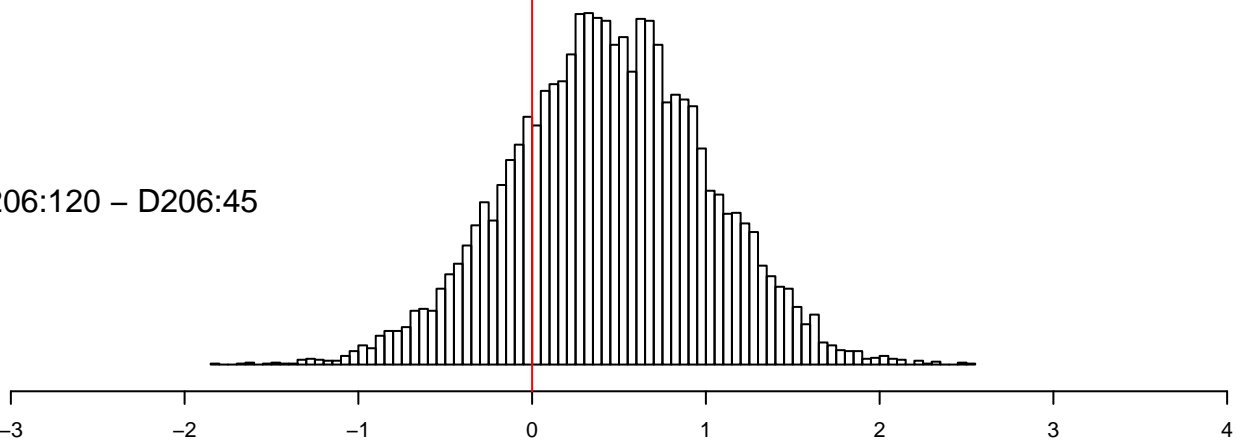

delta(C28"5 Sterol)

D206:240

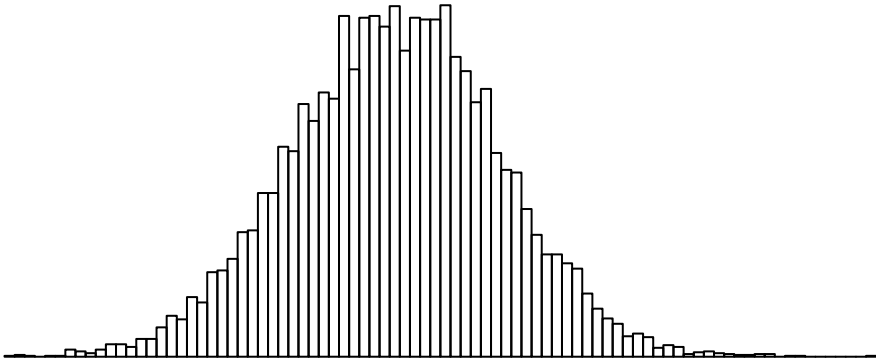

D206:120

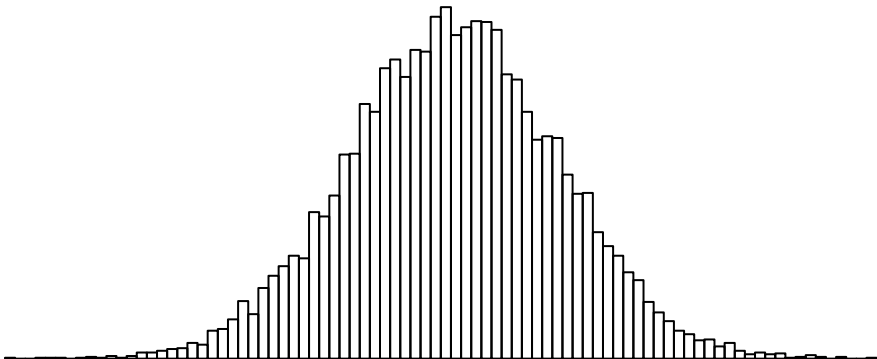

D206:45

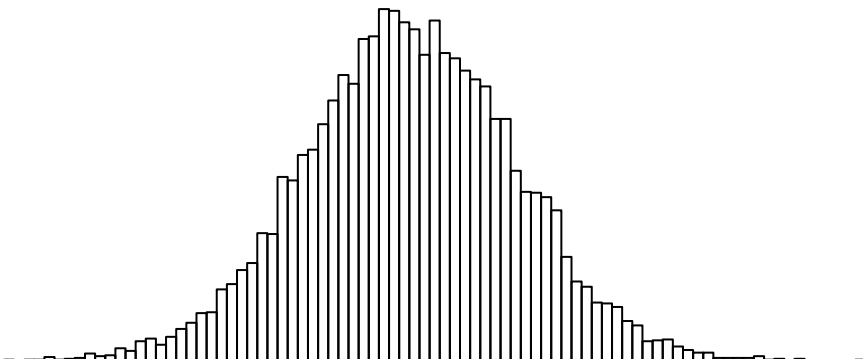

-11 -10 -9 -8 -7 -6 -5

C29"5,22 Sterol

D206:240 – D206:120

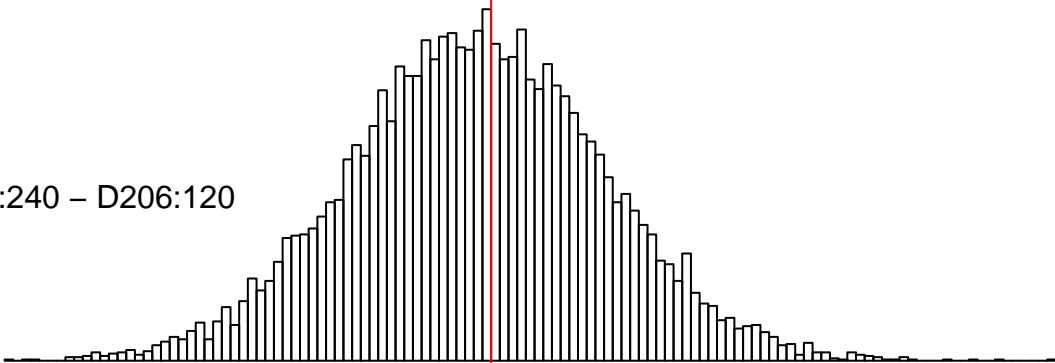

D206:240 – D206:45

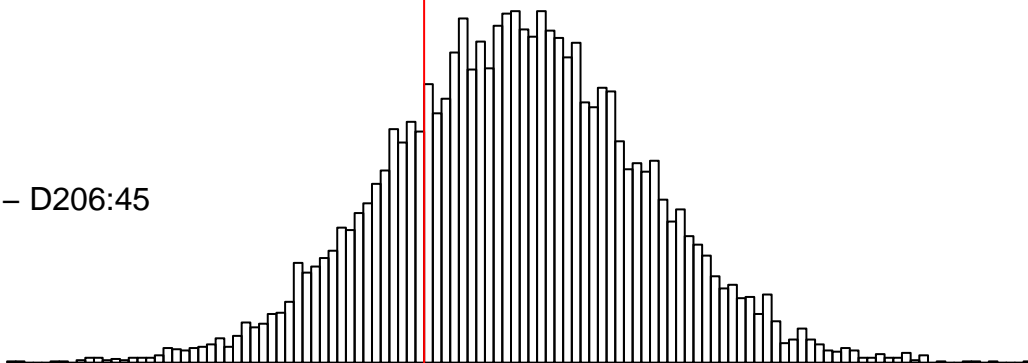

D206:120 – D206:45

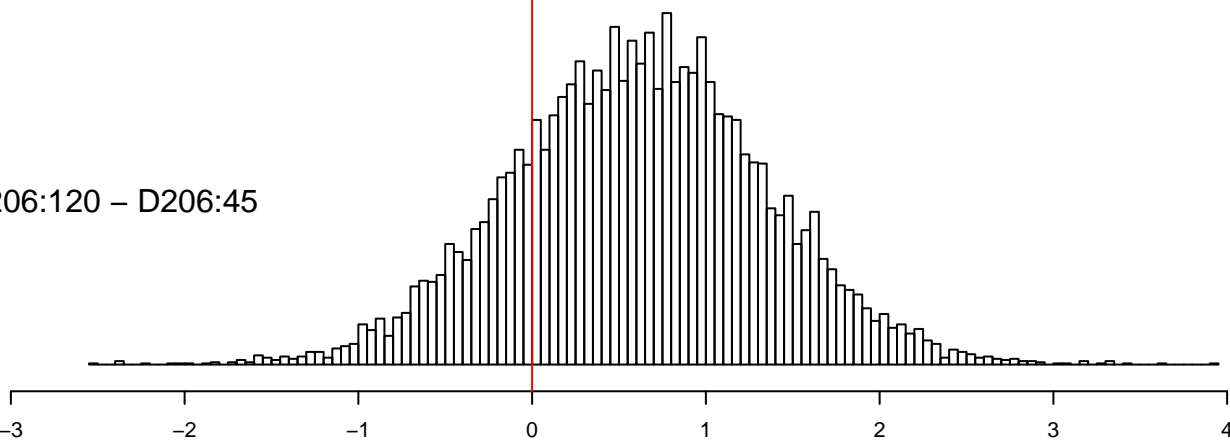

delta(C29"5,22 Sterol)

D206:240

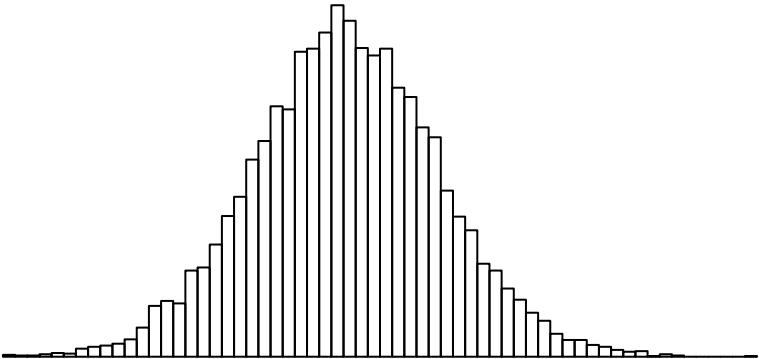

D206:120

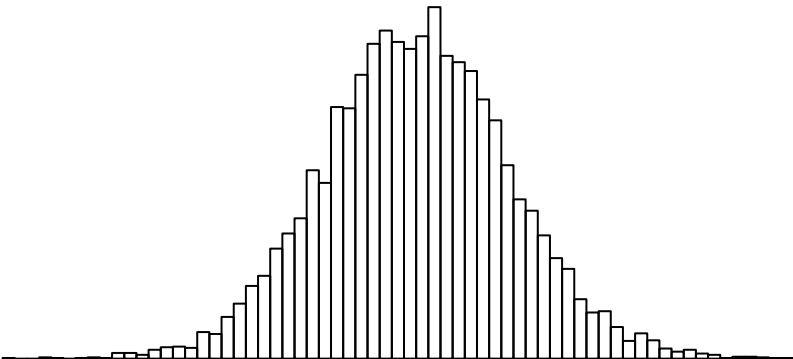

D206:45

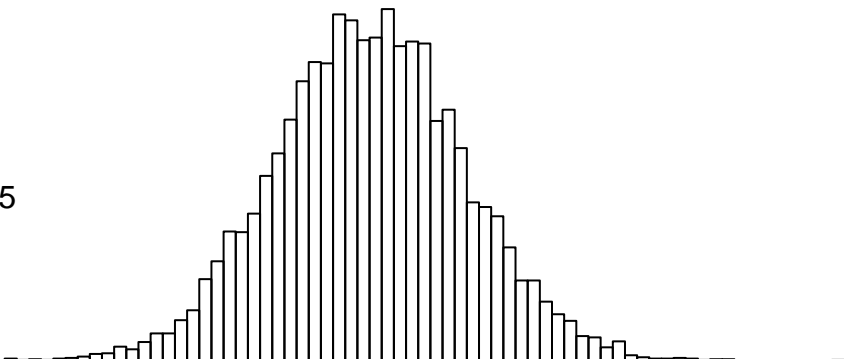

-7 -6 -5 -4 -3 -2

C29 Sterol 2

D206:240 – D206:120

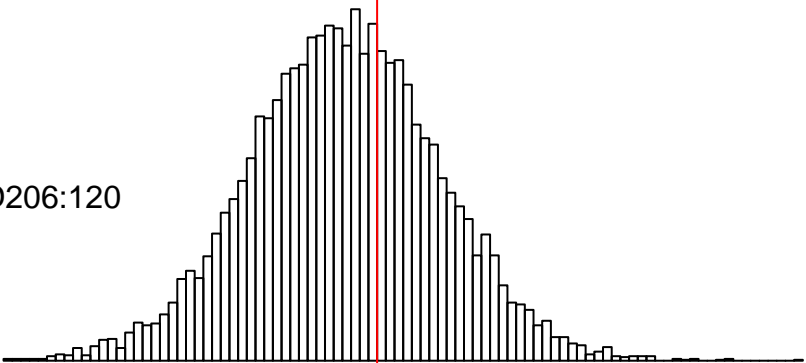

D206:240 – D206:45

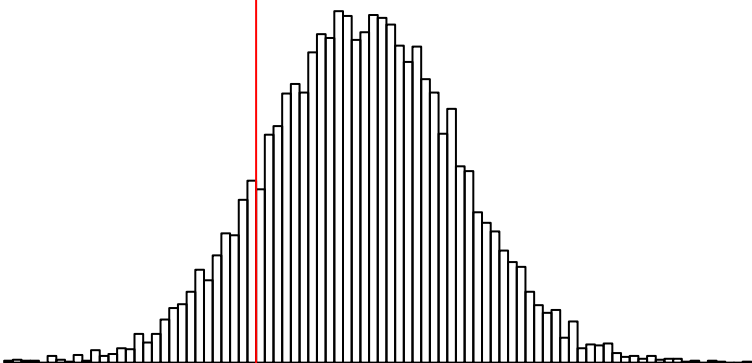

D206:120 – D206:45

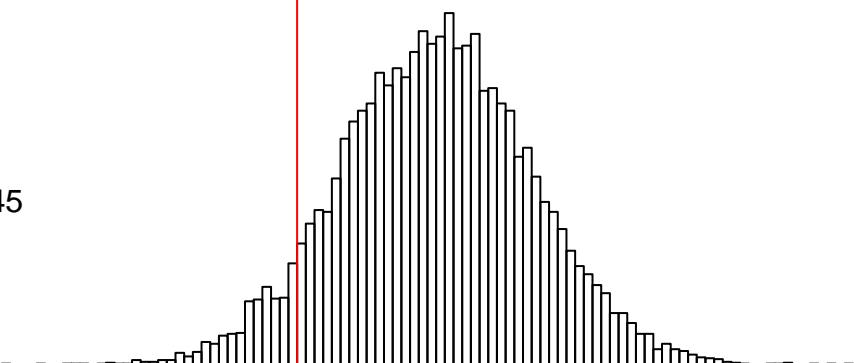

delta(C29 Sterol 2)

D206:240

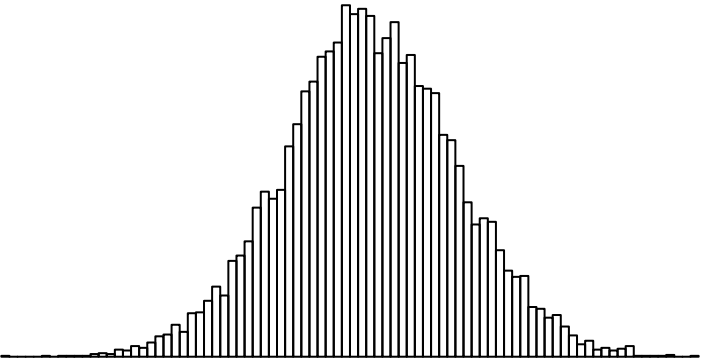

D206:120

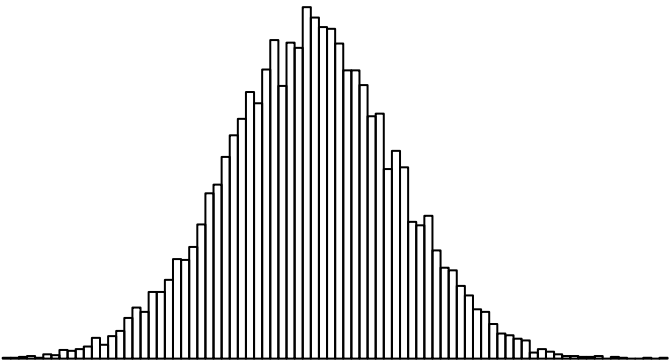

D206:45

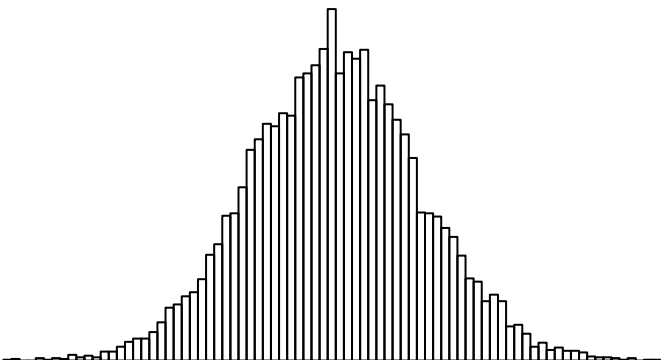

-7.5      -7.0      -6.5      -6.0      -5.5      -5.0      -4.5

C29 Stanol 2

D206:240 – D206:120

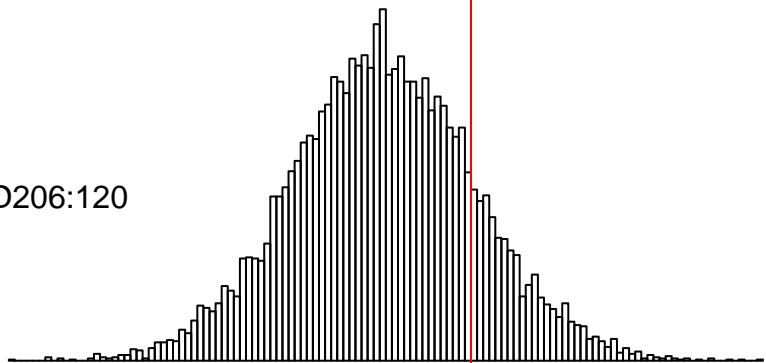

D206:240 – D206:45

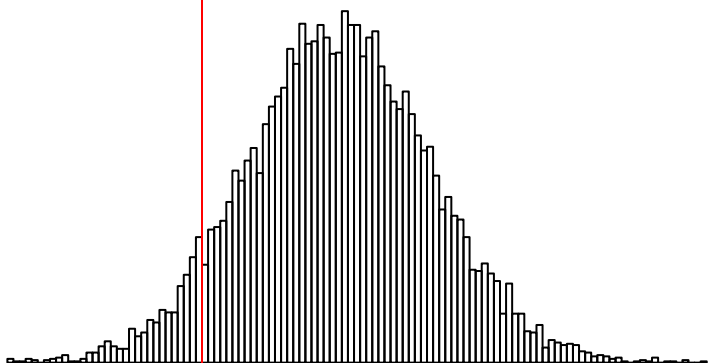

D206:120 – D206:45

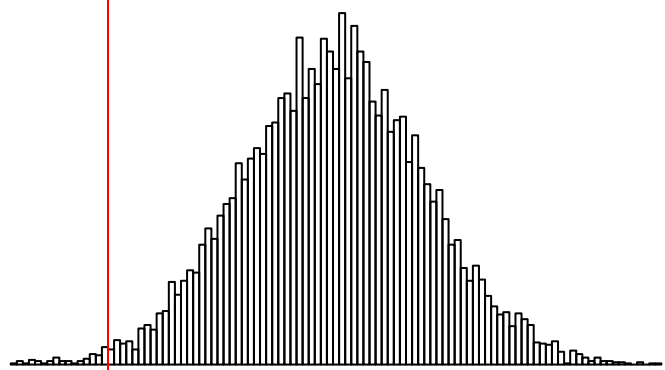

-2                      -1                      0                      1                      2

delta(C29 Stanol 2)



D206:240

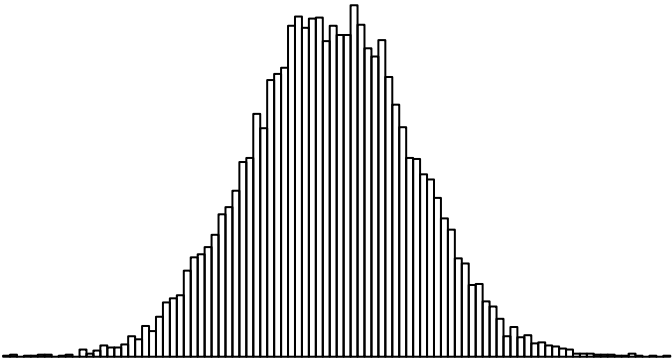

D206:120

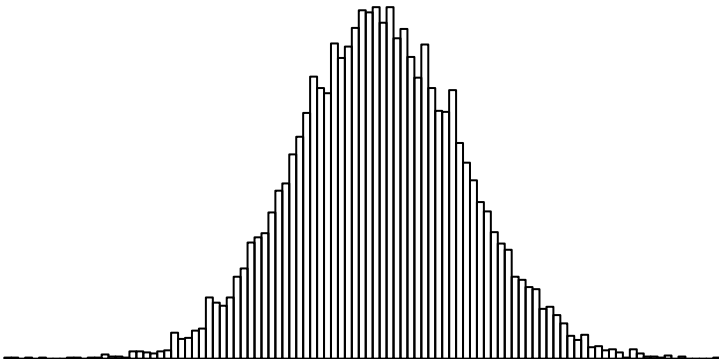

D206:45

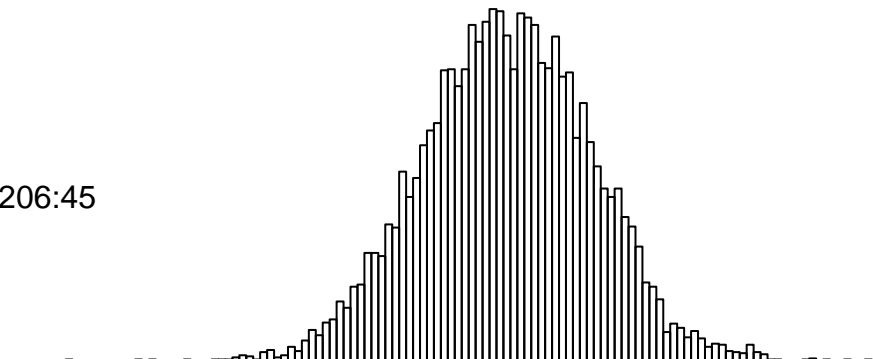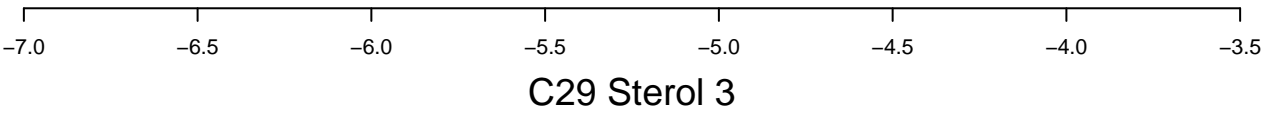

D206:240 – D206:120

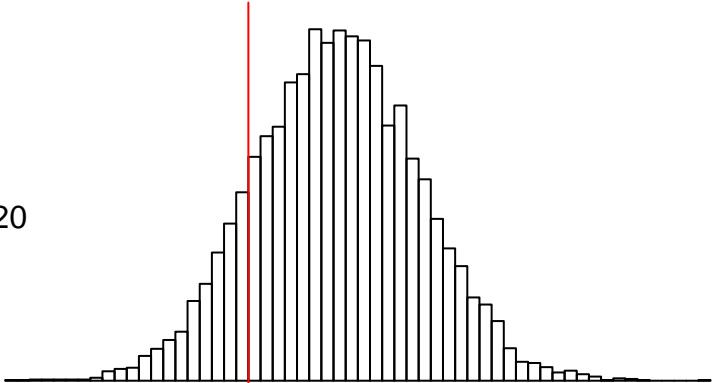

D206:240 – D206:45

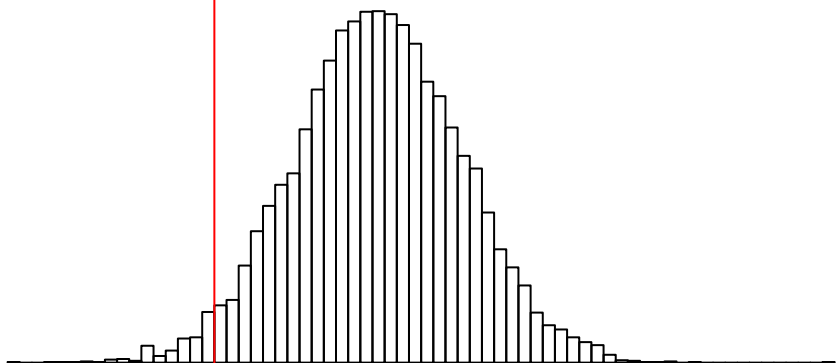

D206:120 – D206:45

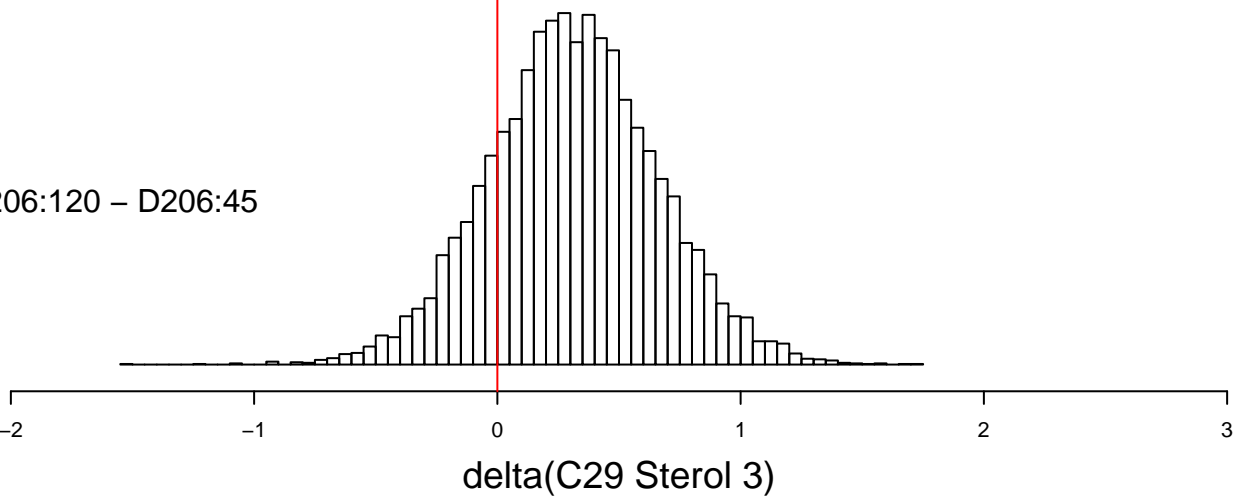

D206:240

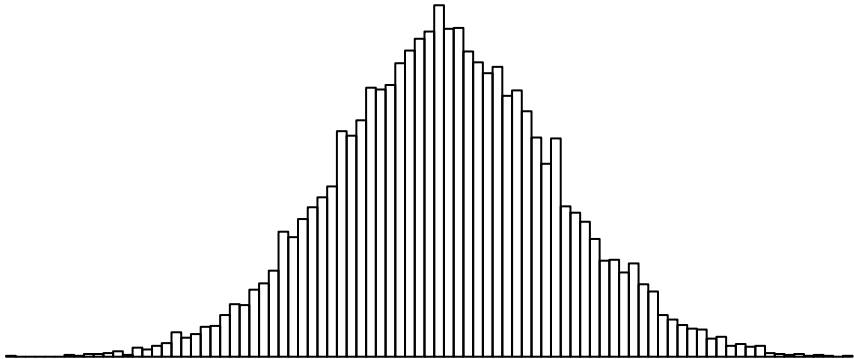

D206:120

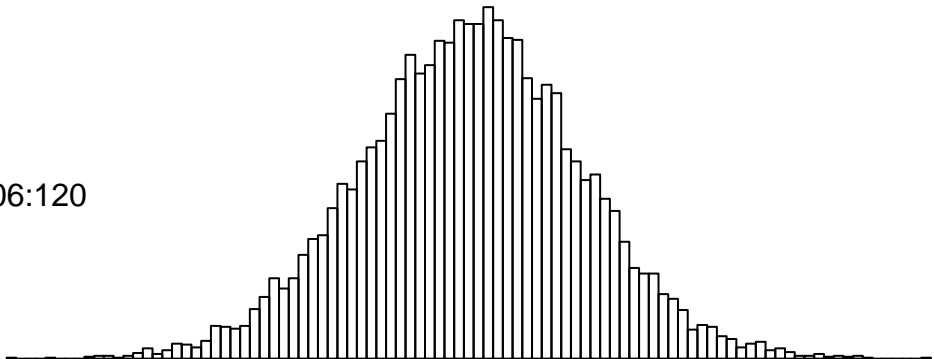

D206:45

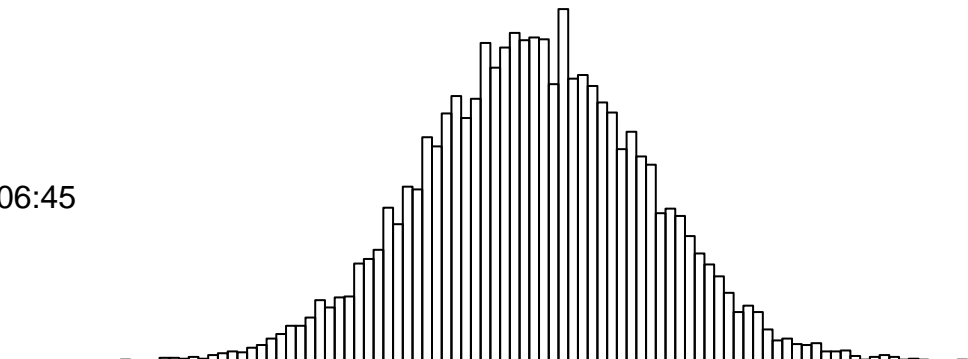

-9.5      -9.0      -8.5      -8.0      -7.5      -7.0

C30 Sterol

D206:240 – D206:120

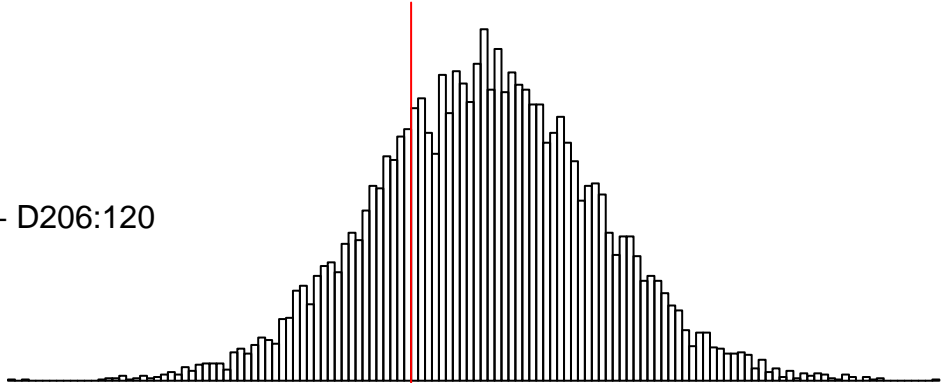

D206:240 – D206:45

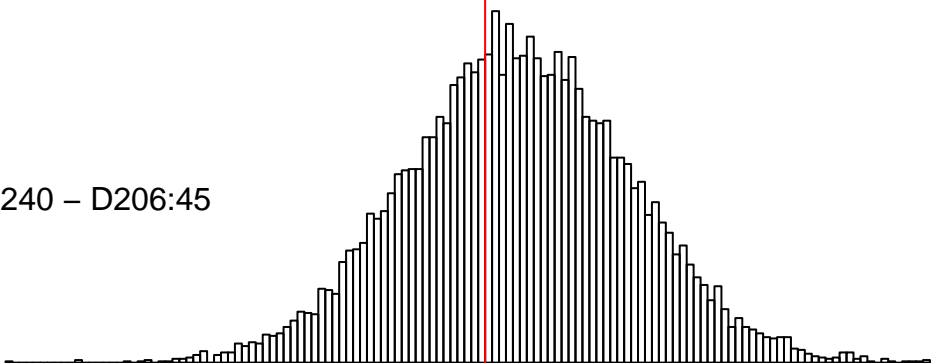

D206:120 – D206:45

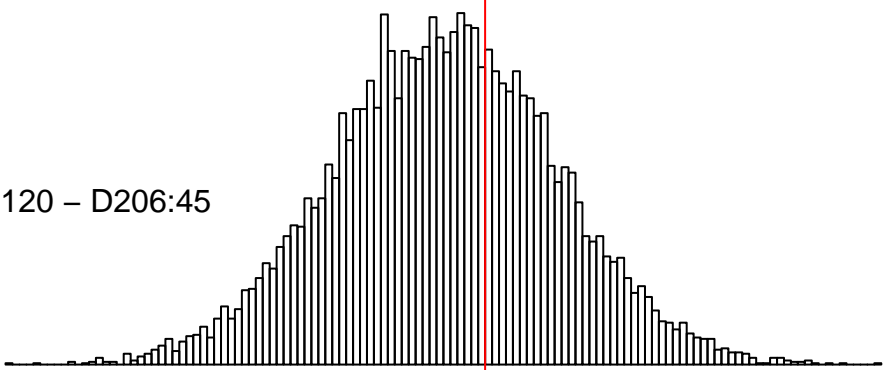

-1.5      -1.0      -0.5      0.0      0.5      1.0      1.5      2.0

delta(C30 Sterol)

D206:240

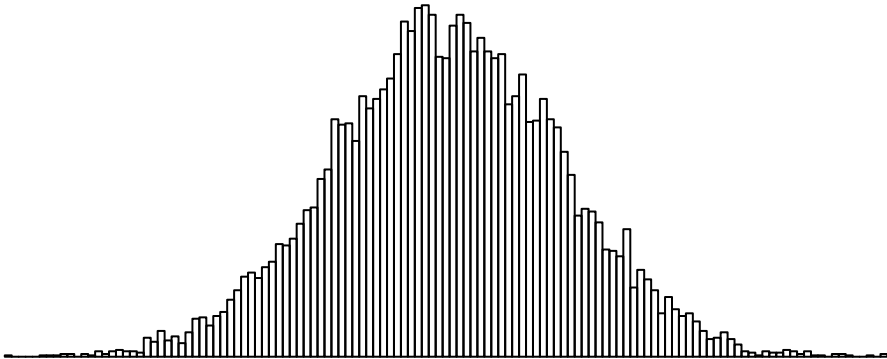

D206:120

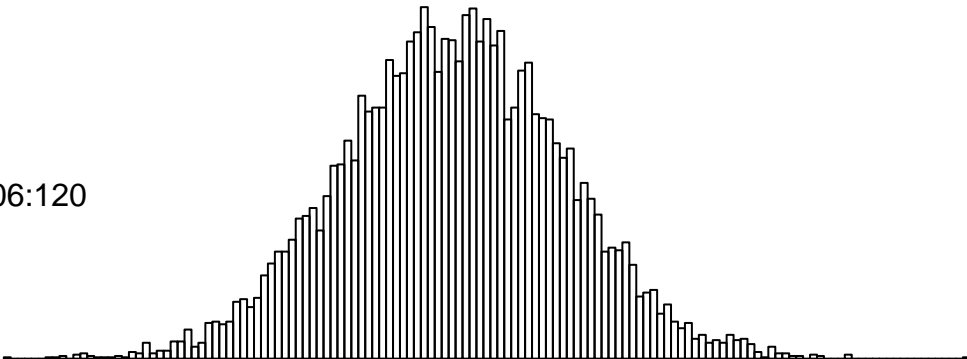

D206:45

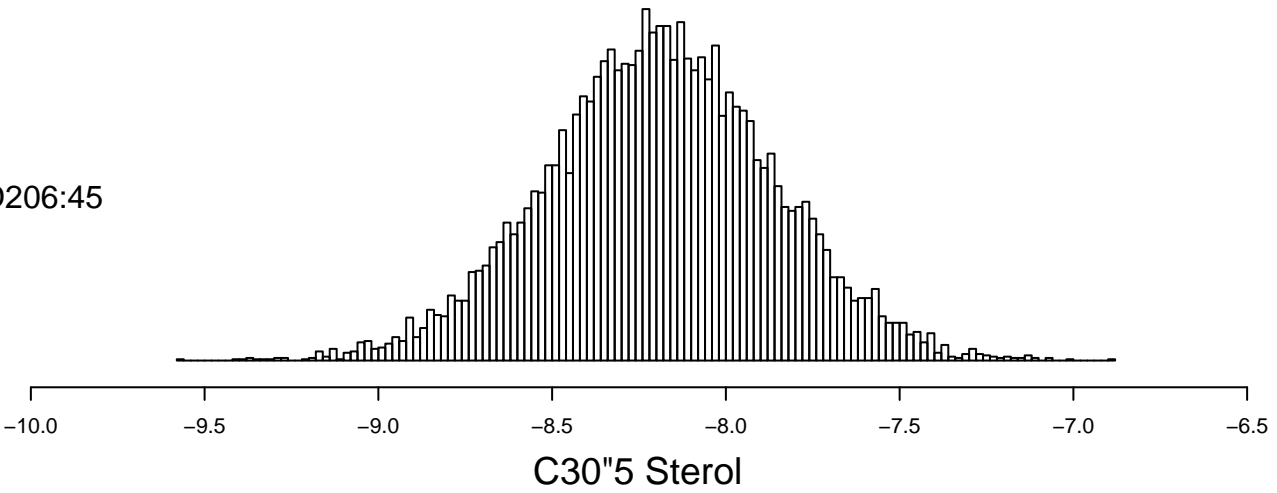

D206:240 – D206:120

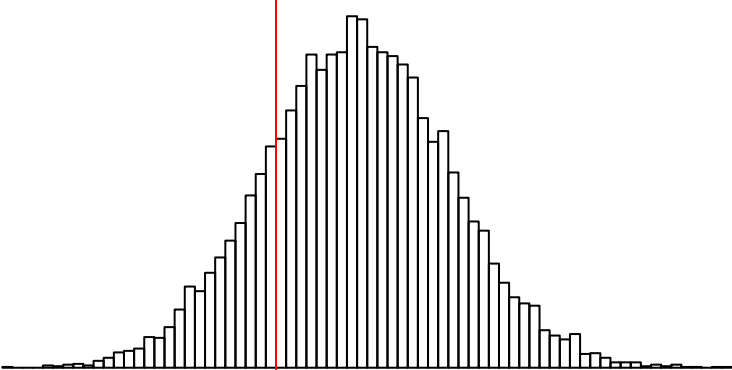

D206:240 – D206:45

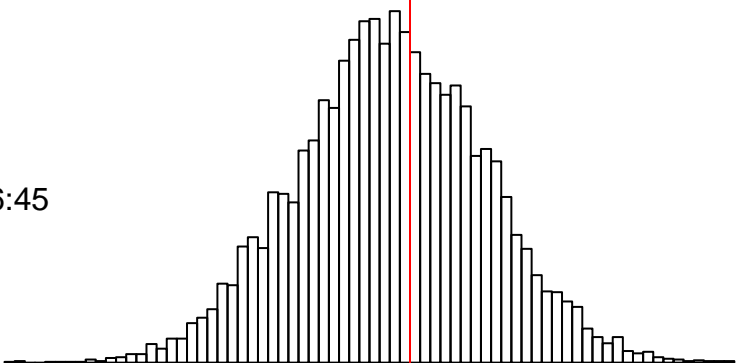

D206:120 – D206:45

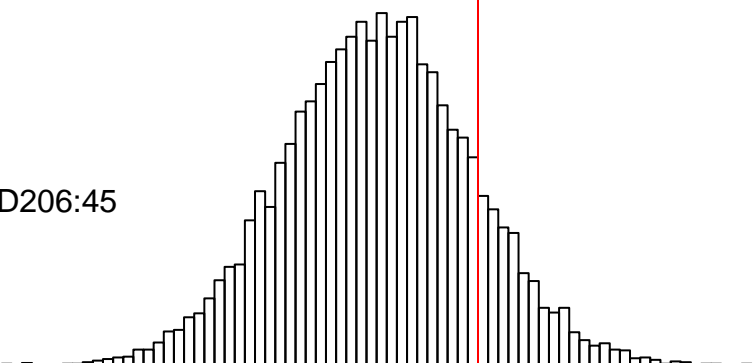

-3      -2      -1      0      1      2      3

delta(C30"5 Sterol)

D206:240

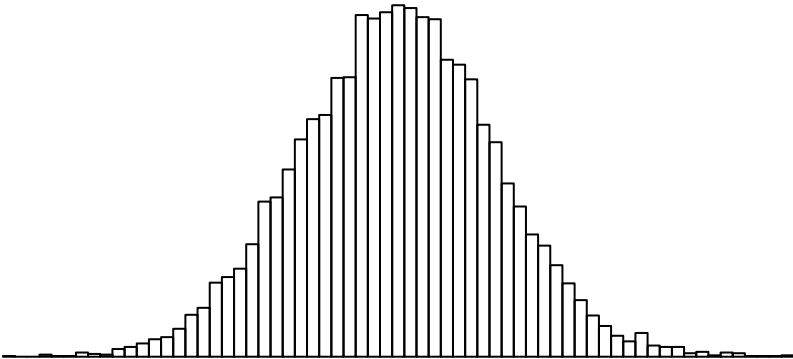

D206:120

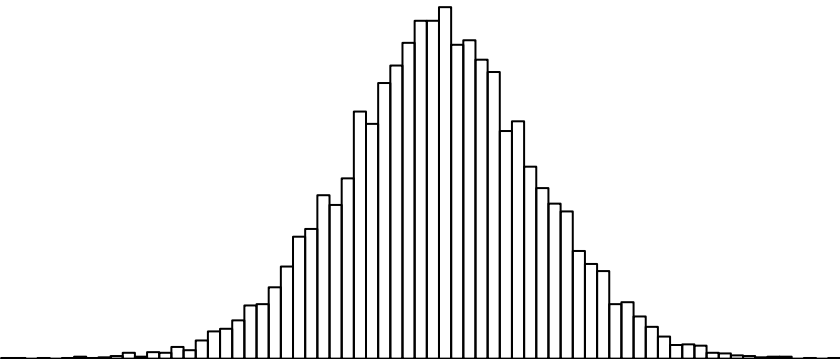

D206:45

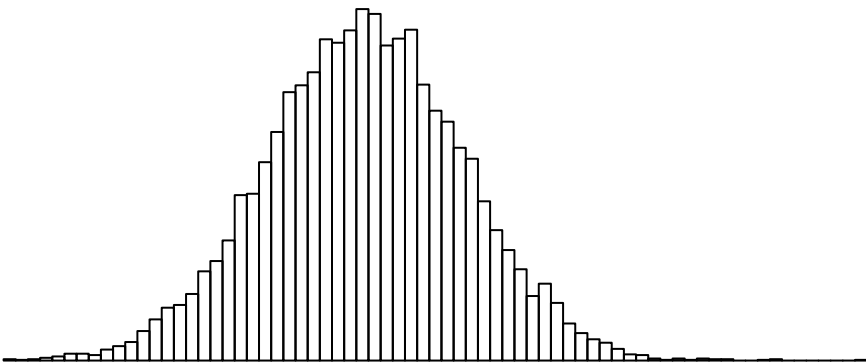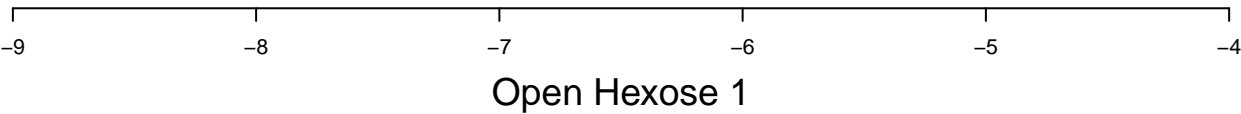

D206:240 – D206:120

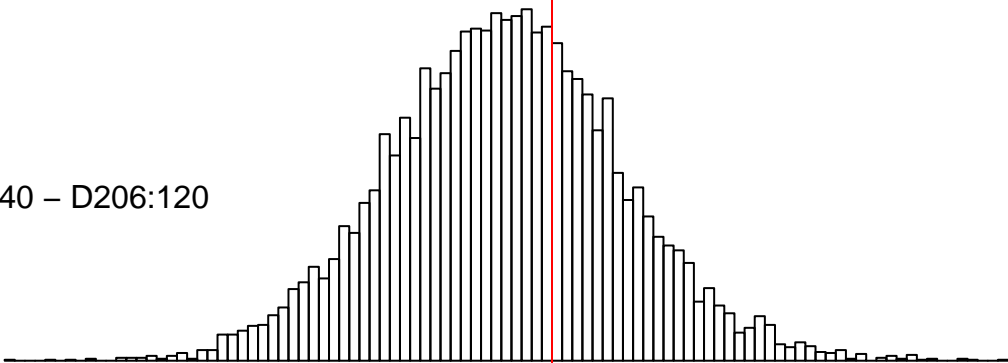

D206:240 – D206:45

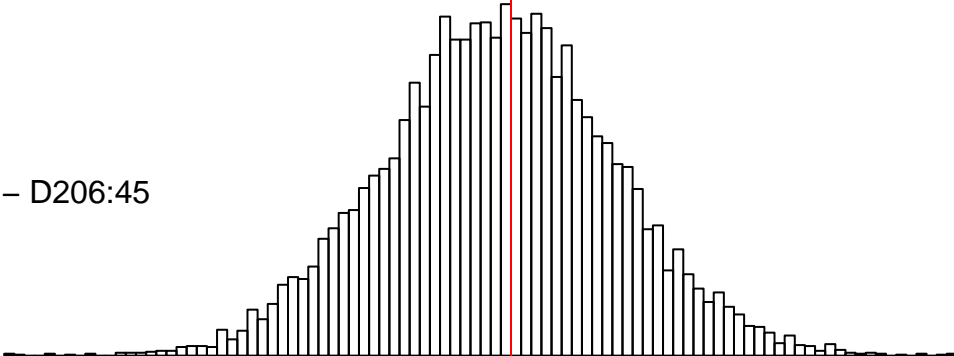

D206:120 – D206:45

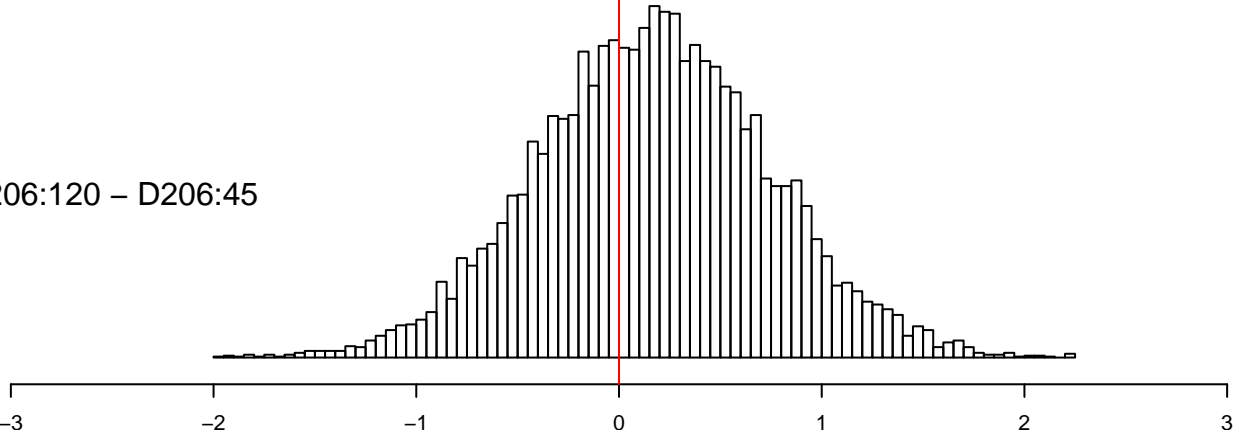

delta(Open Hexose 1)



D206:240

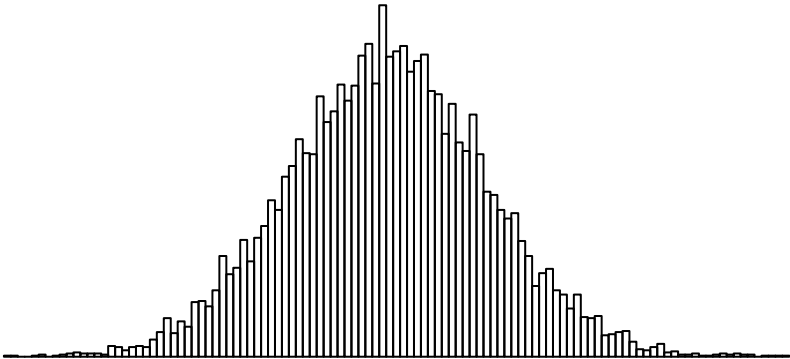

D206:120

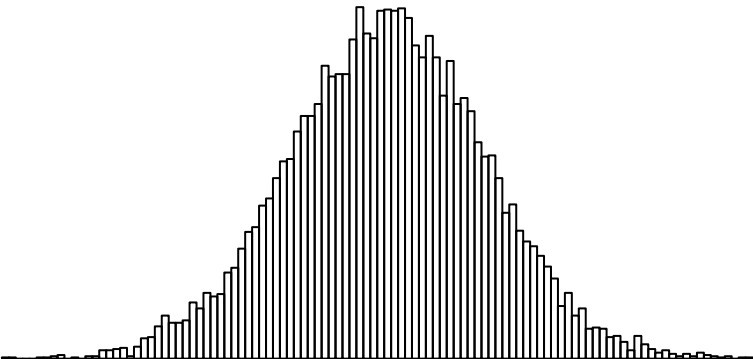

D206:45

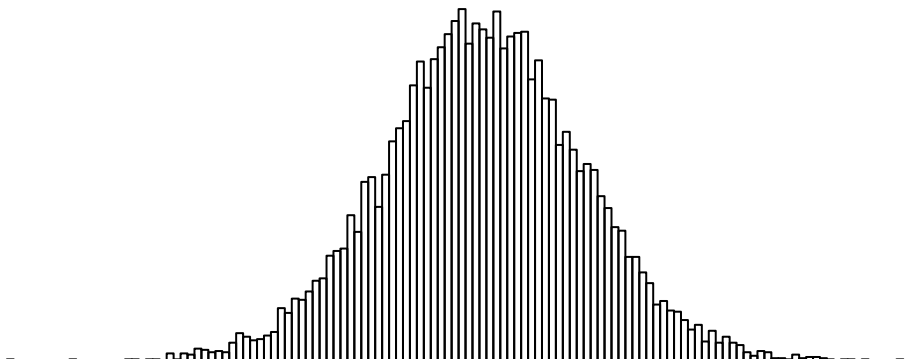

-9.0      -8.5      -8.0      -7.5      -7.0      -6.5      -6.0      -5.5

Closed Hexose 1

D206:240 – D206:120

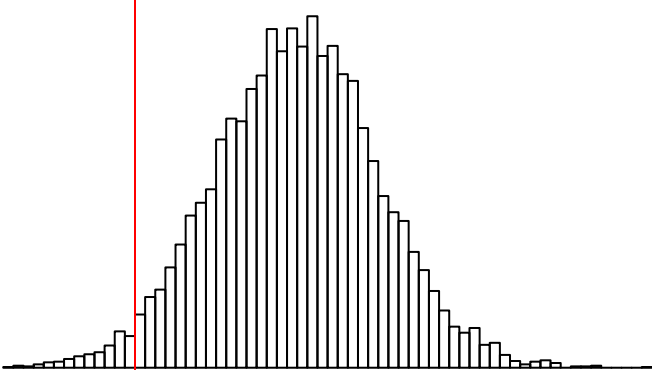

D206:240 – D206:45

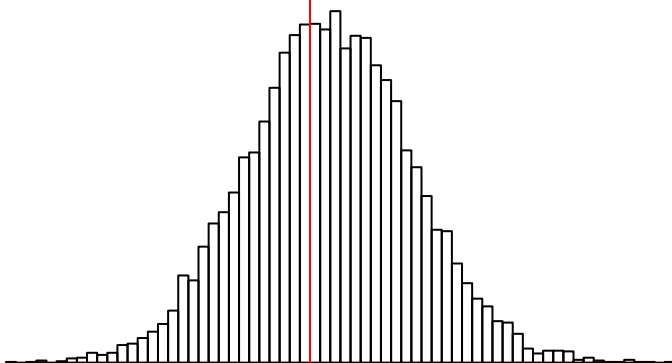

D206:120 – D206:45

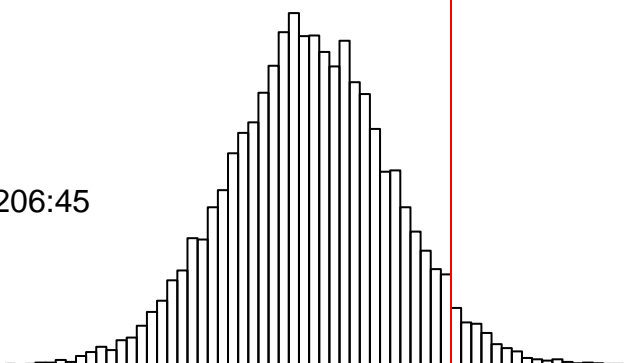

-3 -2 -1 0 1 2 3

delta(Closed Hexose 1)

D206:240

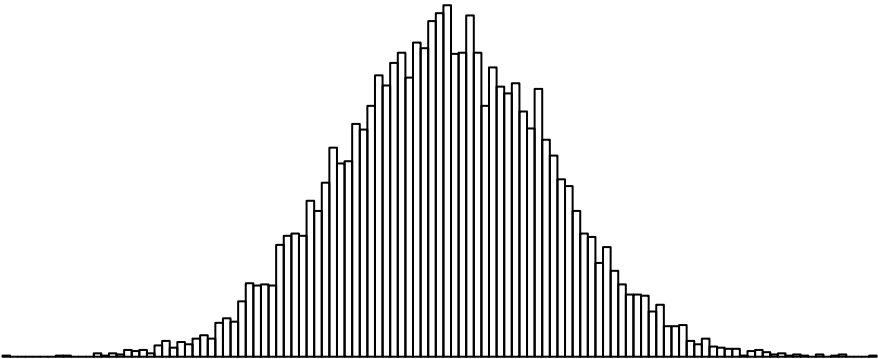

D206:120

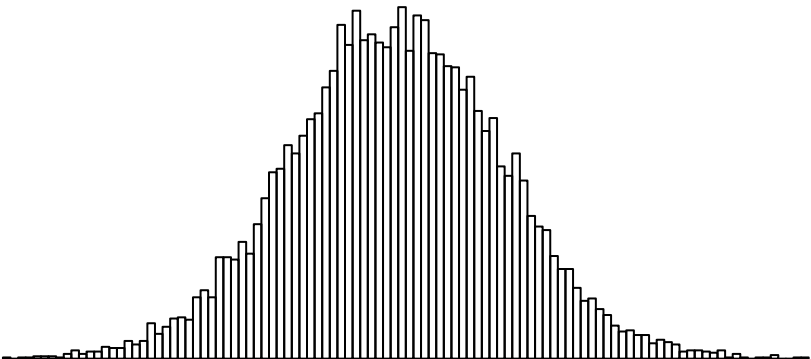

D206:45

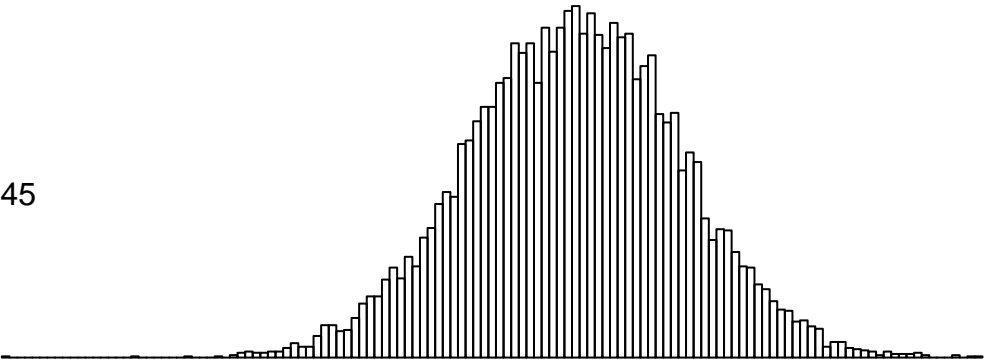

-8

-6

-4

-2

Closed Hexose 2

D206:240 – D206:120

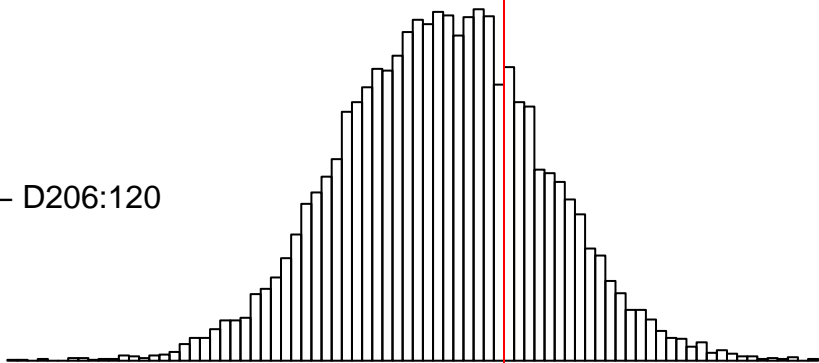

D206:240 – D206:45

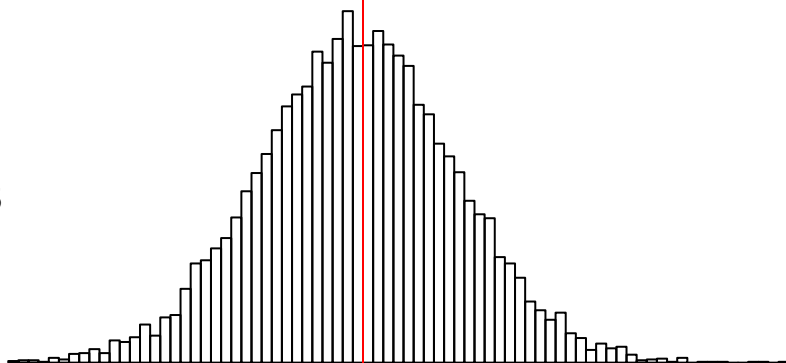

D206:120 – D206:45

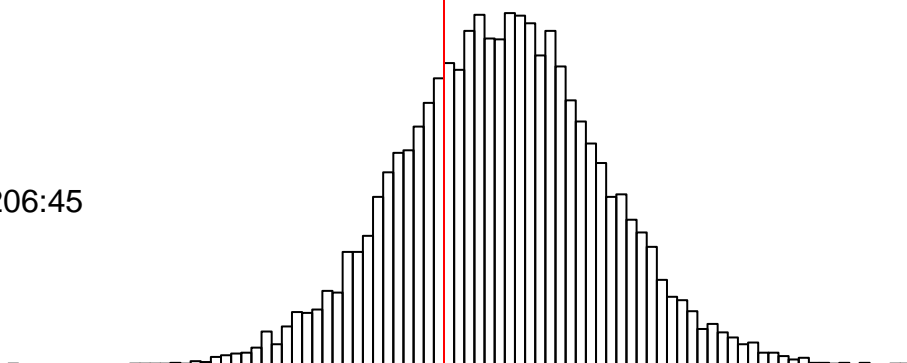

-6 -4 -2 0 2 4 6

delta(Closed Hexose 2)

D206:240

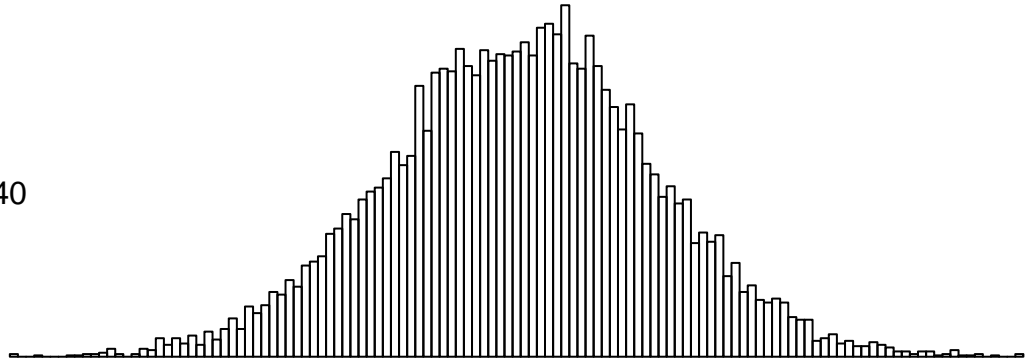

D206:120

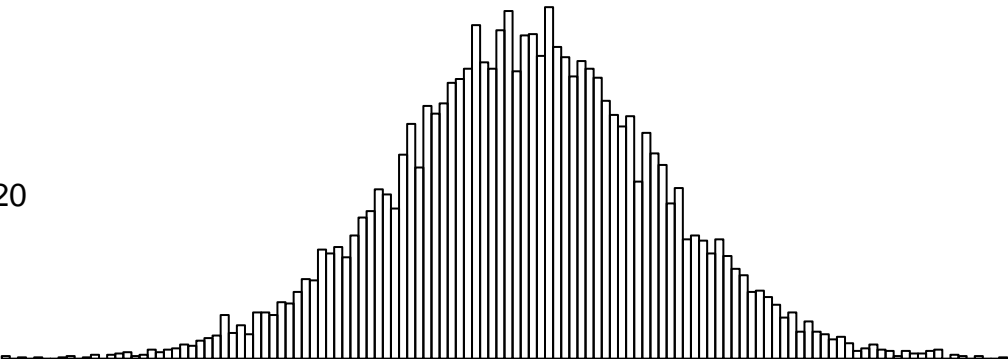

D206:45

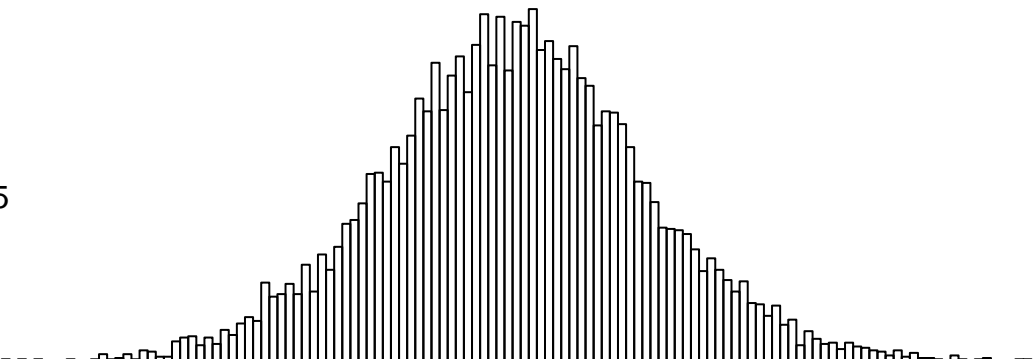

-3.0 -2.5 -2.0 -1.5 -1.0 -0.5 0.0

Open Hexose 2

D206:240 – D206:120

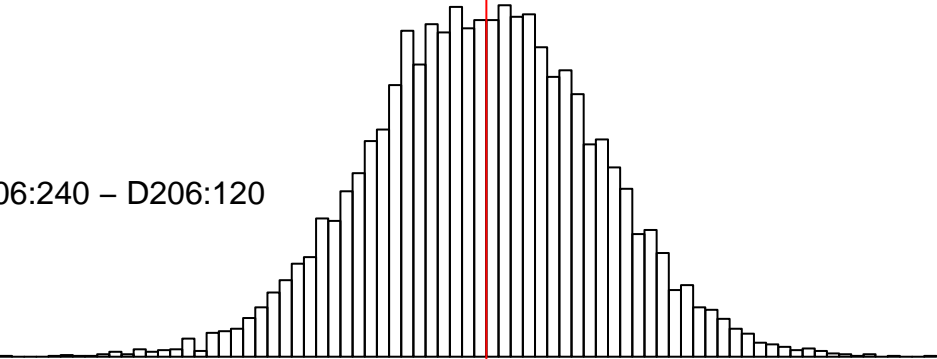

D206:240 – D206:45

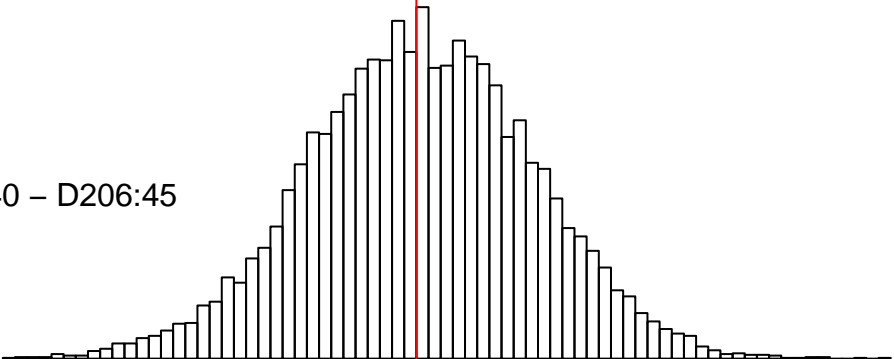

D206:120 – D206:45

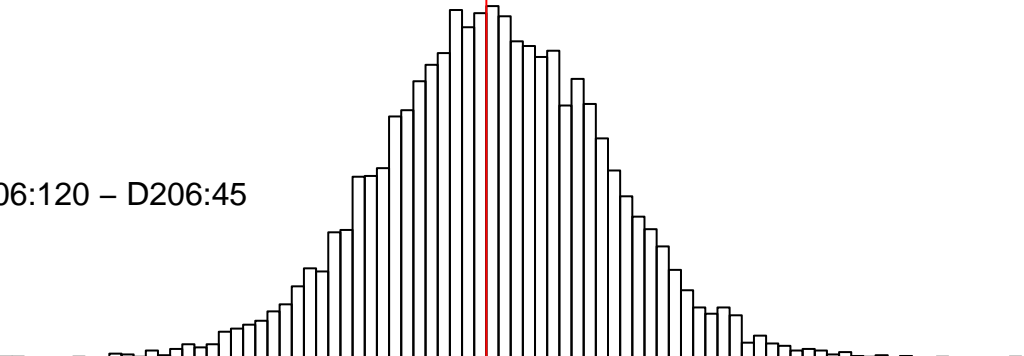

delta(Open Hexose 2)

D206:240

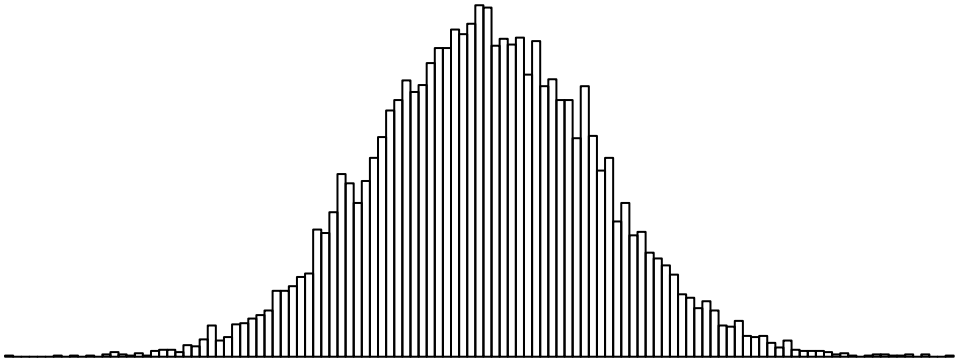

D206:120

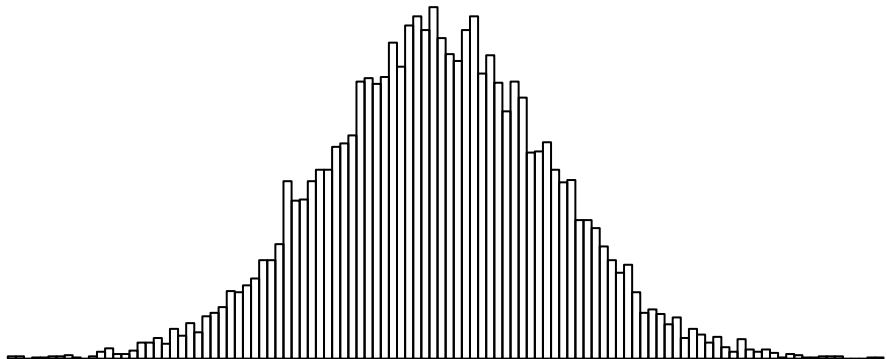

D206:45

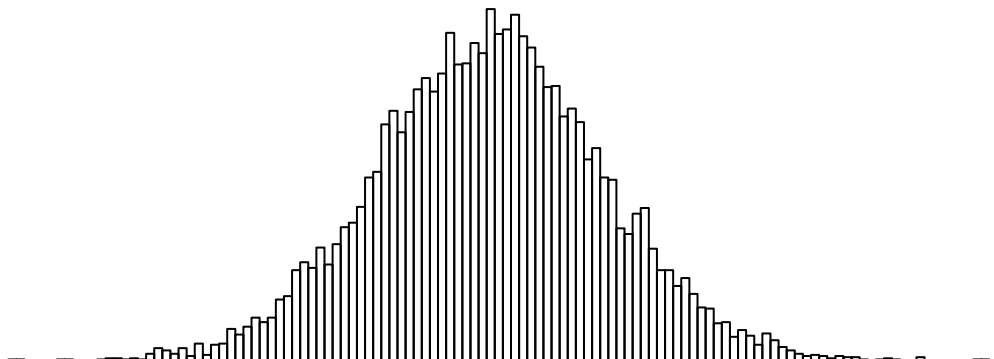

-5.0 -4.5 -4.0 -3.5 -3.0 -2.5 -2.0

Open Hexose 3

D206:240 – D206:120

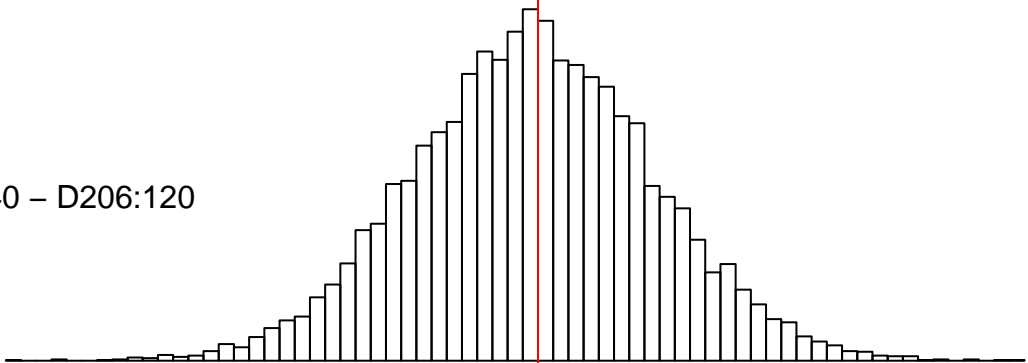

D206:240 – D206:45

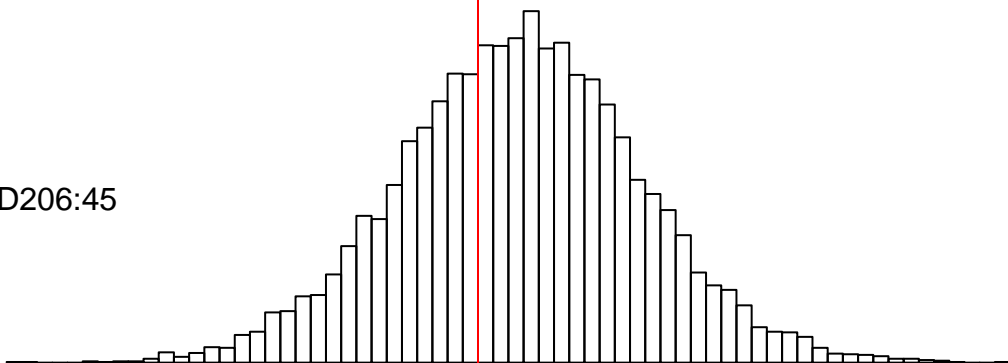

D206:120 – D206:45

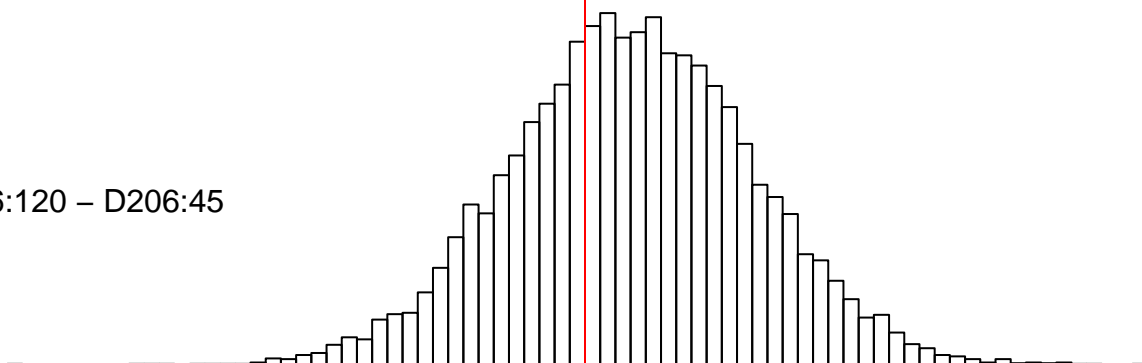

-2

-1

0

1

2

delta(Open Hexose 3)



D206:240

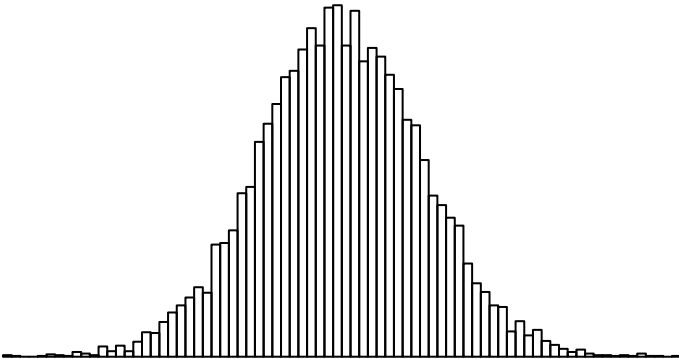

D206:120

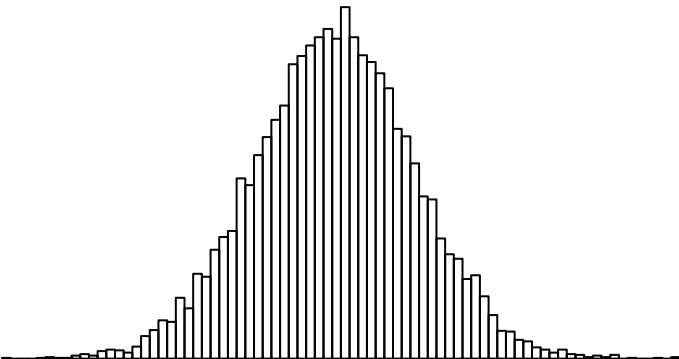

D206:45

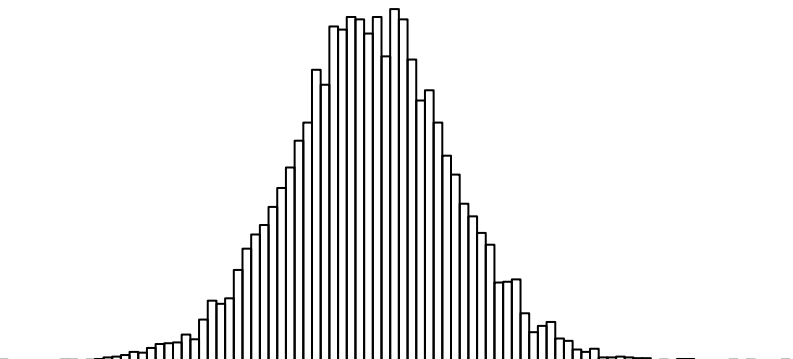

Closed Hexose 3

D206:240 – D206:120

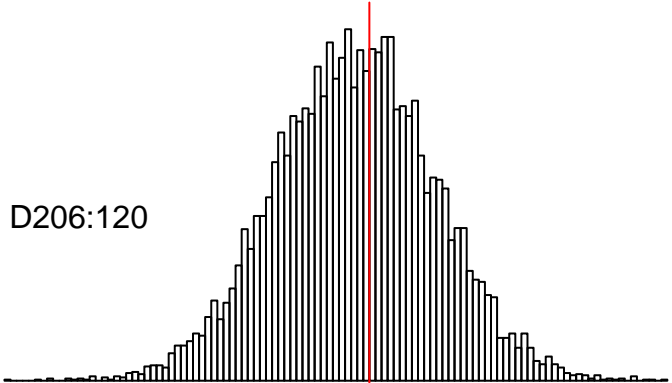

D206:240 – D206:45

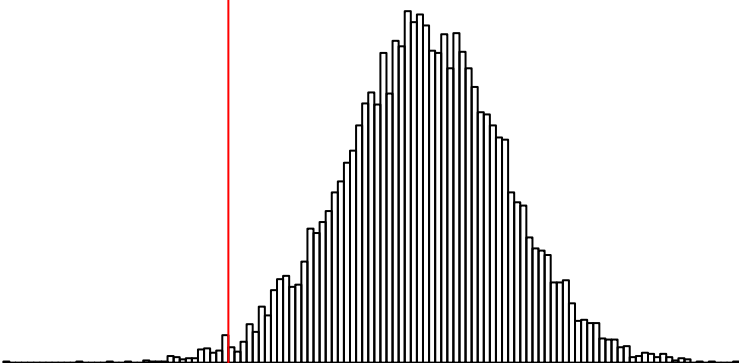

D206:120 – D206:45

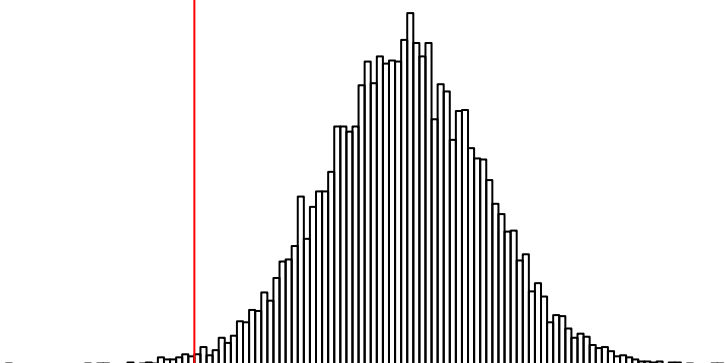

-4 -2 0 2 4 6

delta(Closed Hexose 3)

D206:240

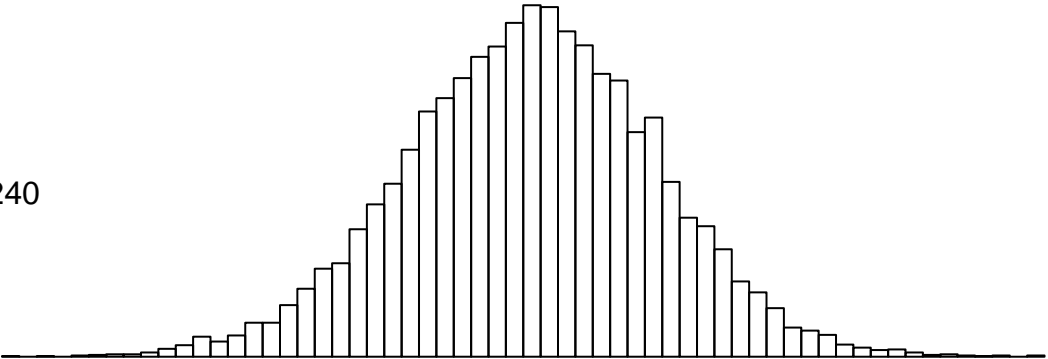

D206:120

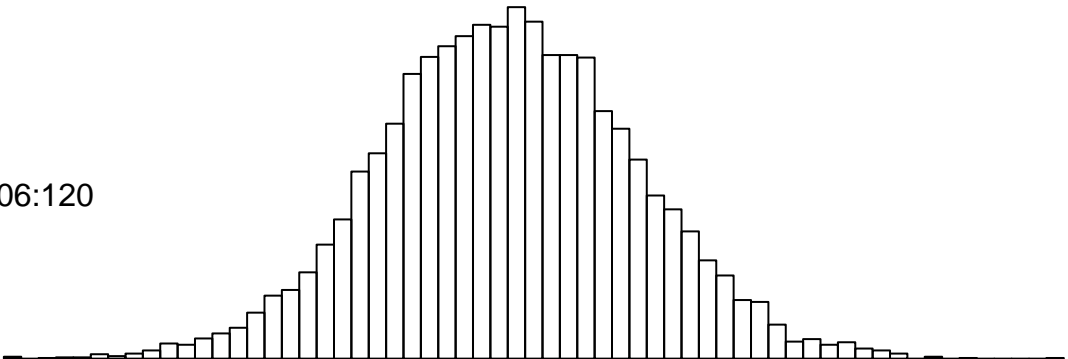

D206:45

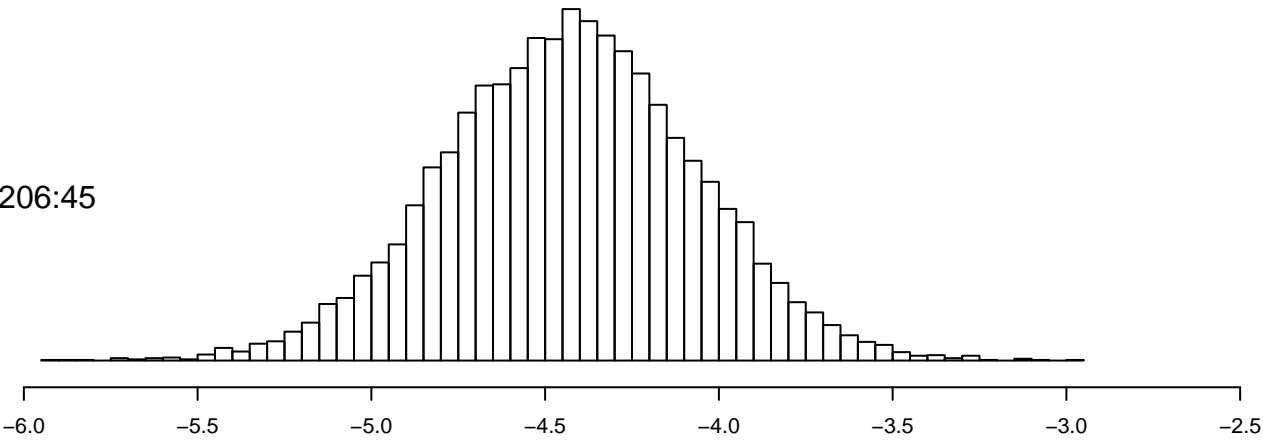

Closed Hexose 4

D206:240 – D206:120

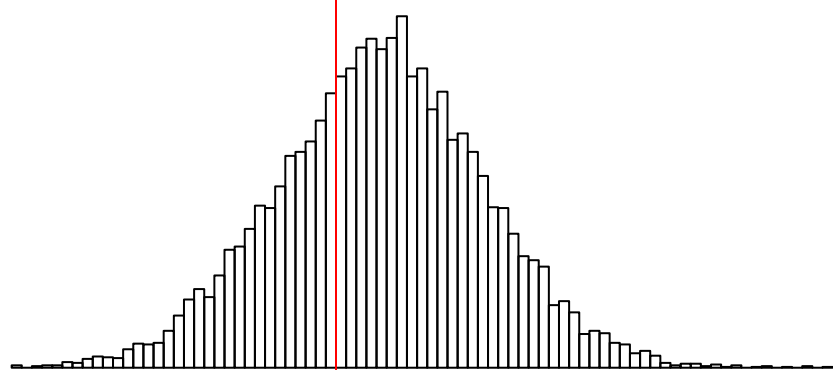

D206:240 – D206:45

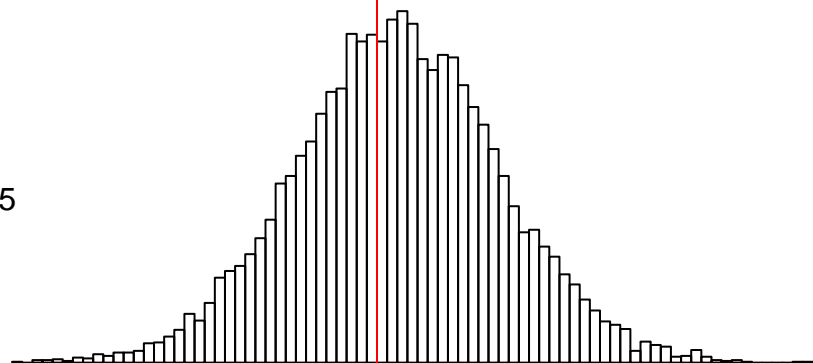

D206:120 – D206:45

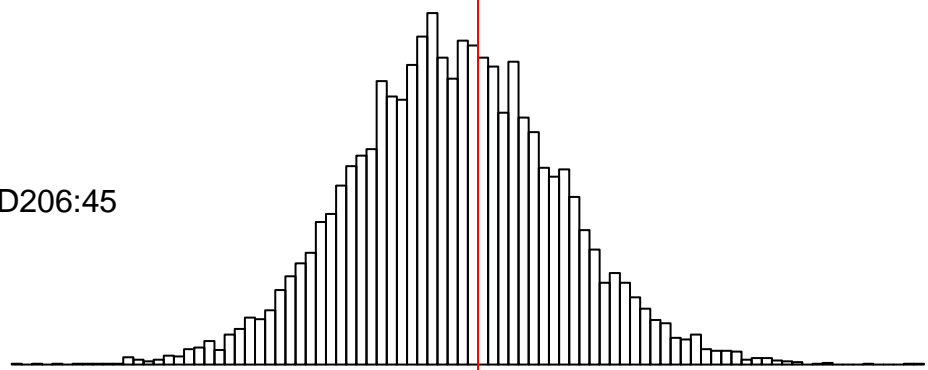

-3 -2 -1 0 1 2 3

delta(Closed Hexose 4)

D206:240

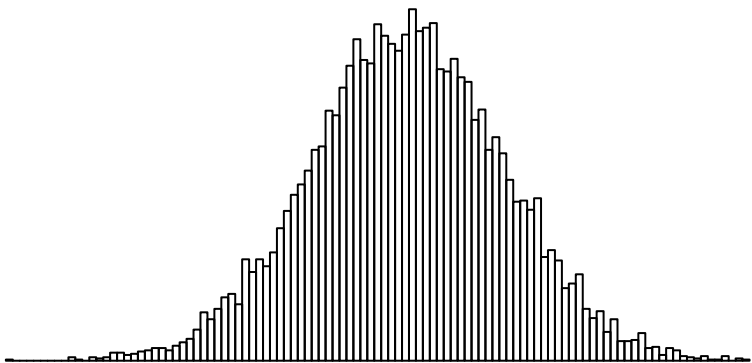

D206:120

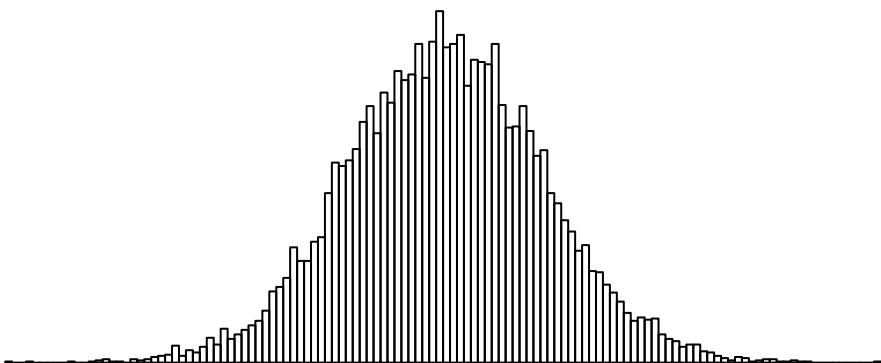

D206:45

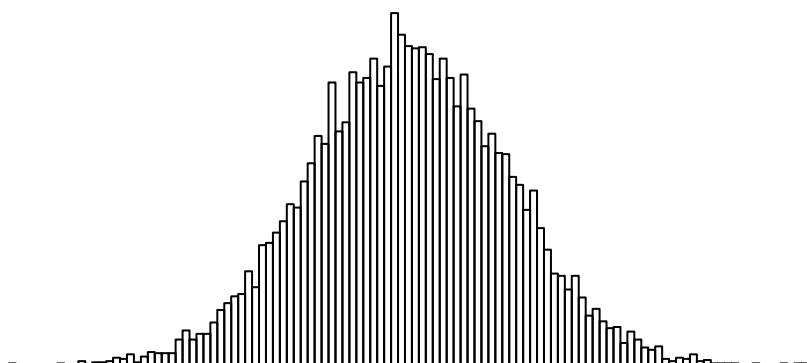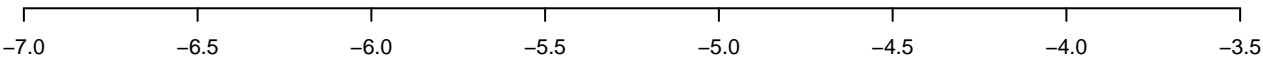

Hexose 1

D206:240 – D206:120

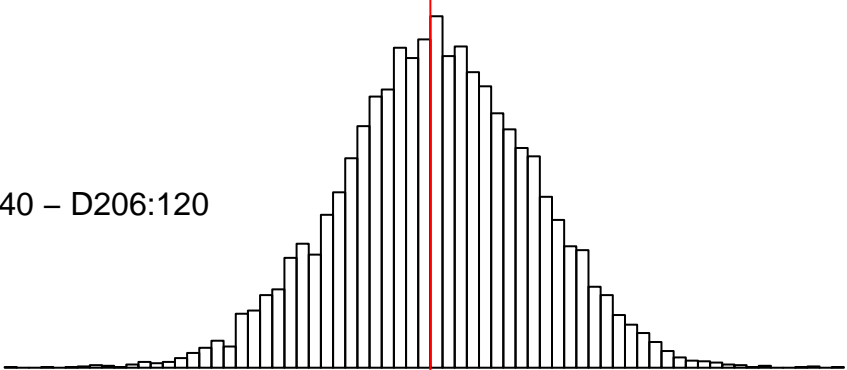

D206:240 – D206:45

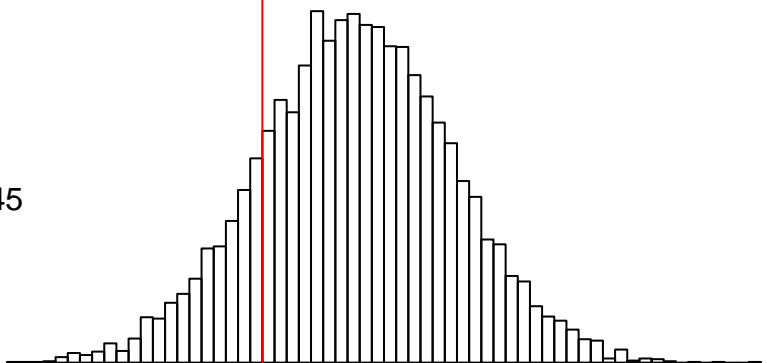

D206:120 – D206:45

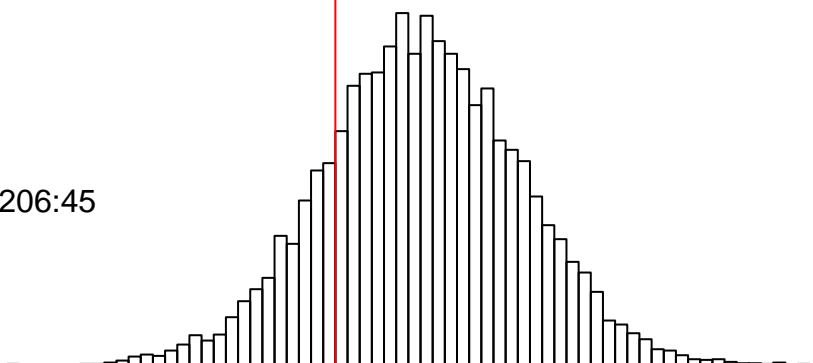

-2 -1 0 1 2 3

delta(Hexose 1)

D206:240

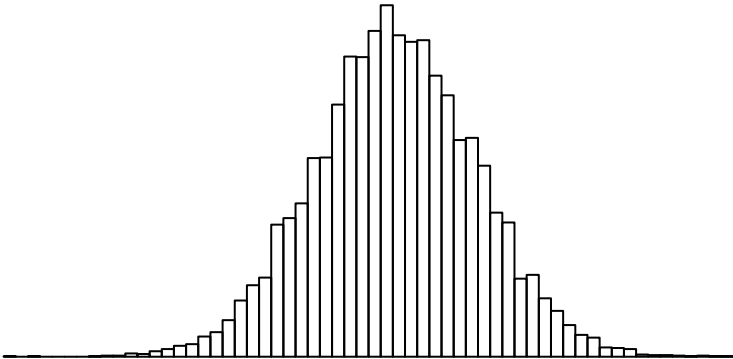

D206:120

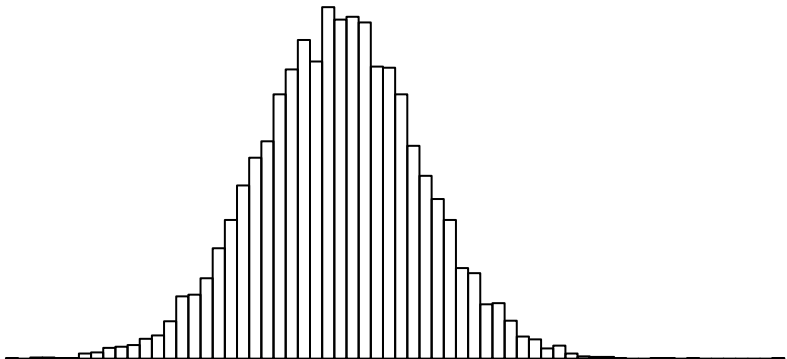

D206:45

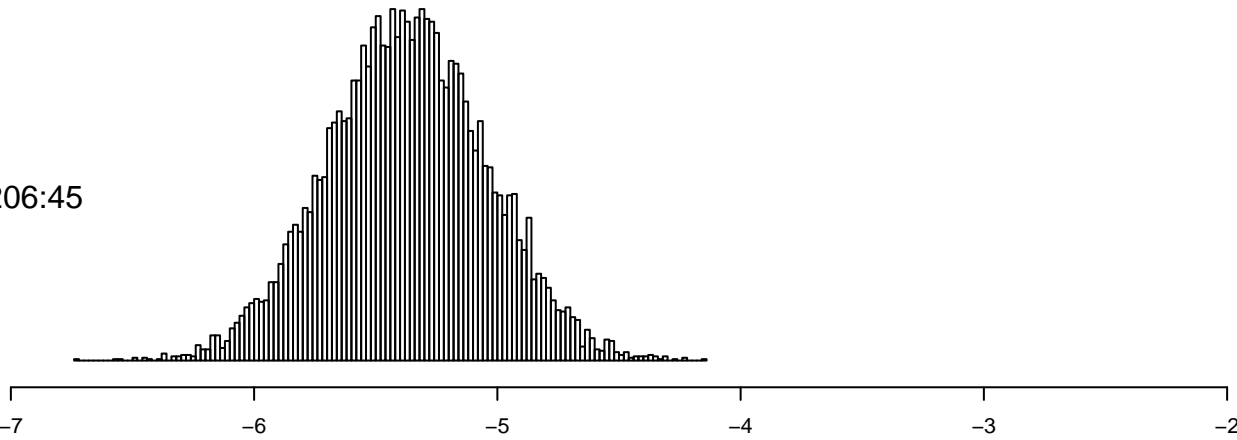

Closed Hexose 5

D206:240 – D206:120

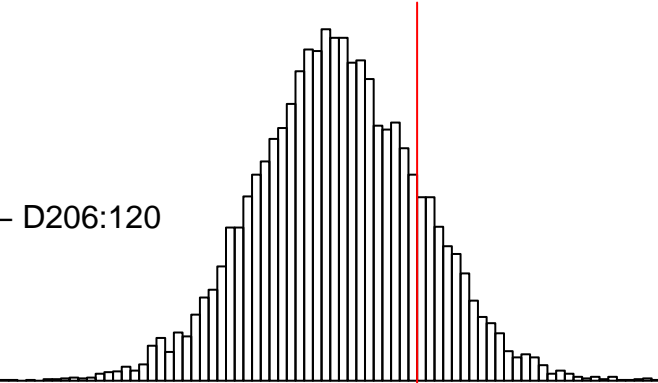

D206:240 – D206:45

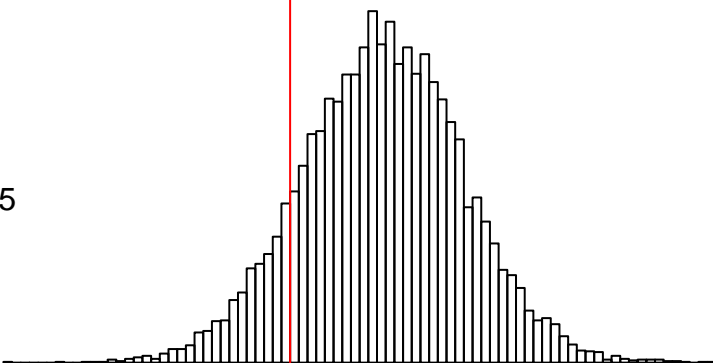

D206:120 – D206:45

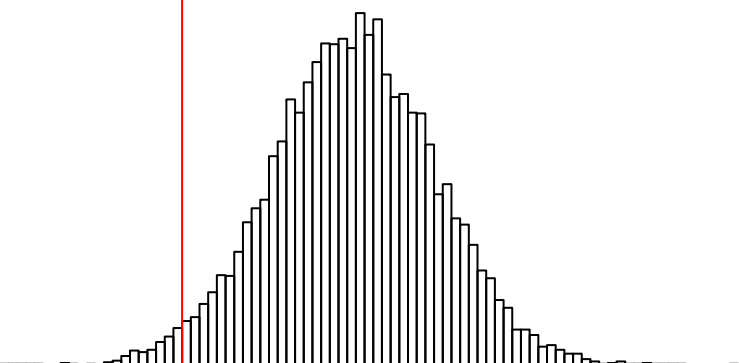

-3 -2 -1 0 1 2 3 4

delta(Closed Hexose 5)



D206:240

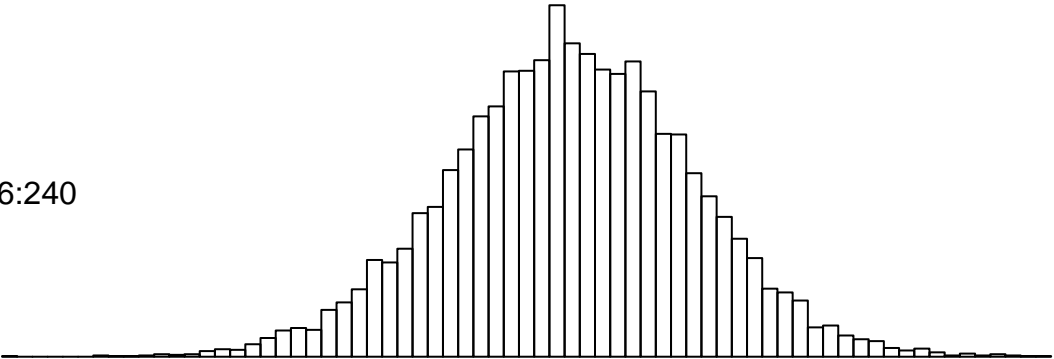

D206:120

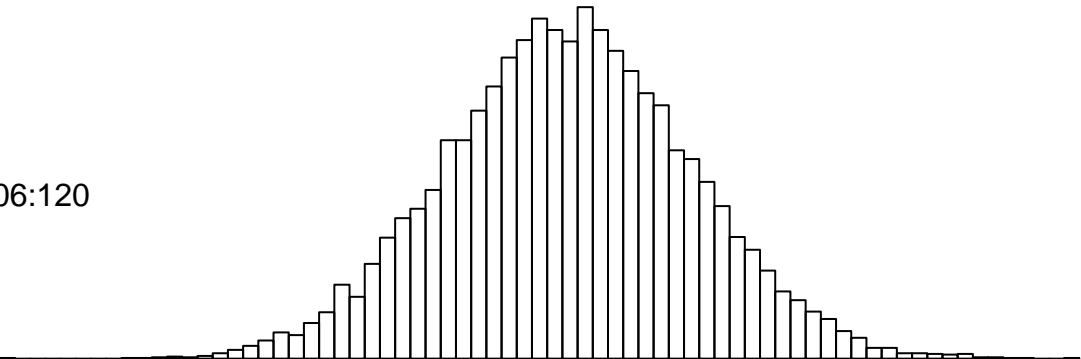

D206:45

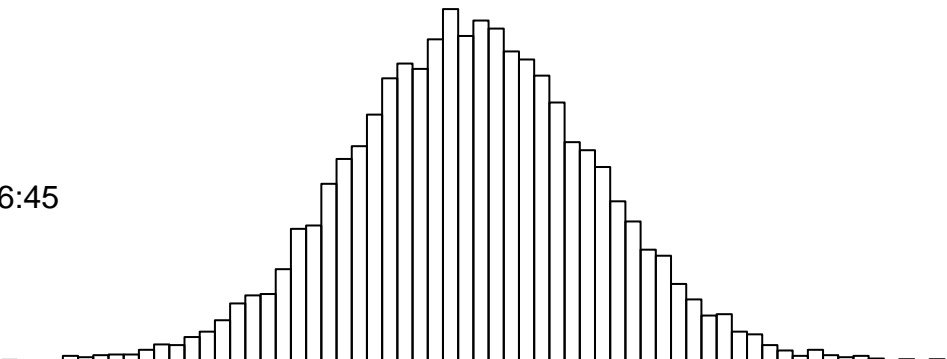

-8

-7

-6

-5

Open Pentose 1

D206:240 – D206:120

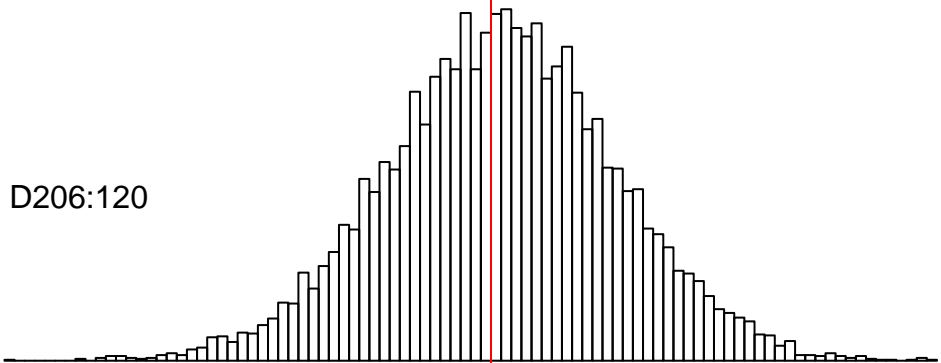

D206:240 – D206:45

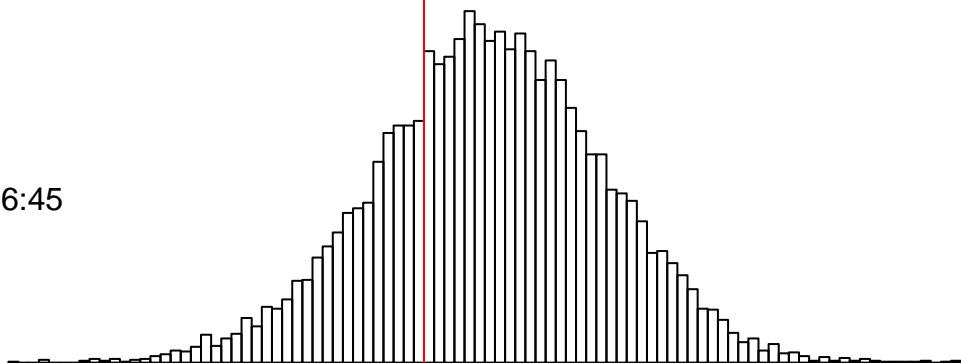

D206:120 – D206:45

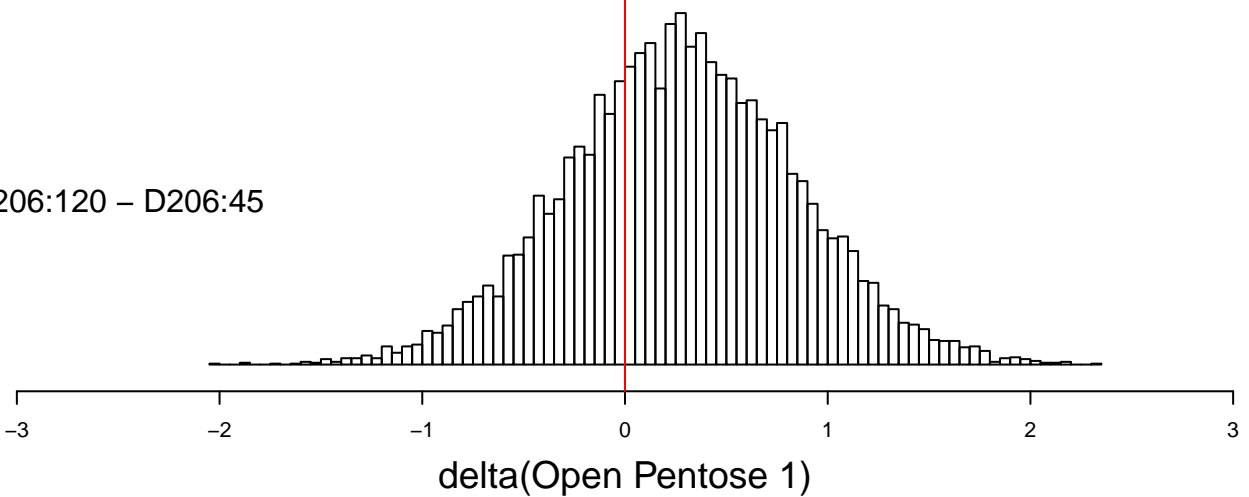

D206:240

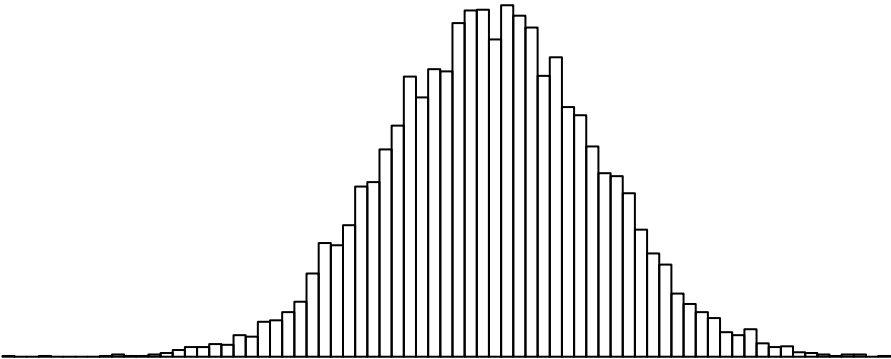

D206:120

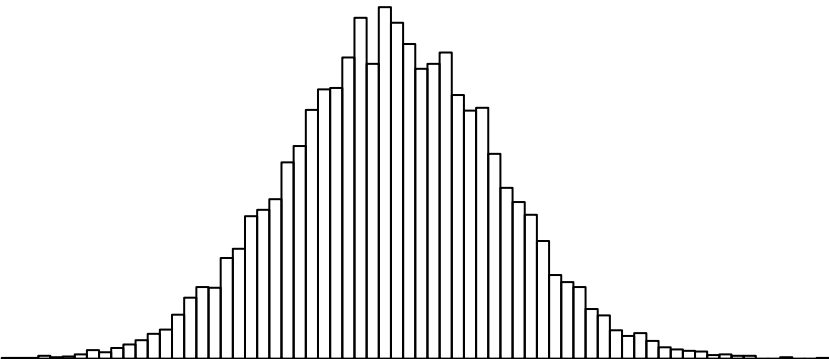

D206:45

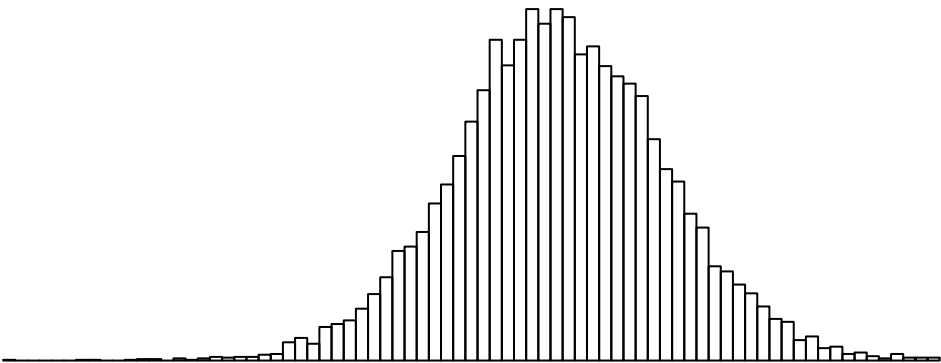

-8                      -7                      -6                      -5                      -4                      -3

Open Pentose 2

D206:240 – D206:120

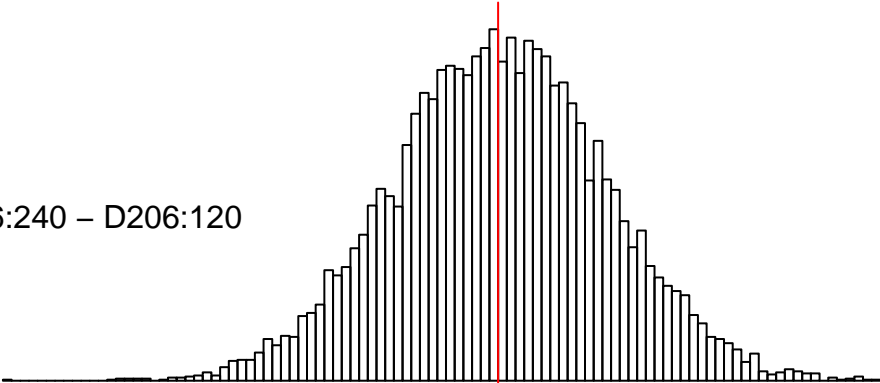

D206:240 – D206:45

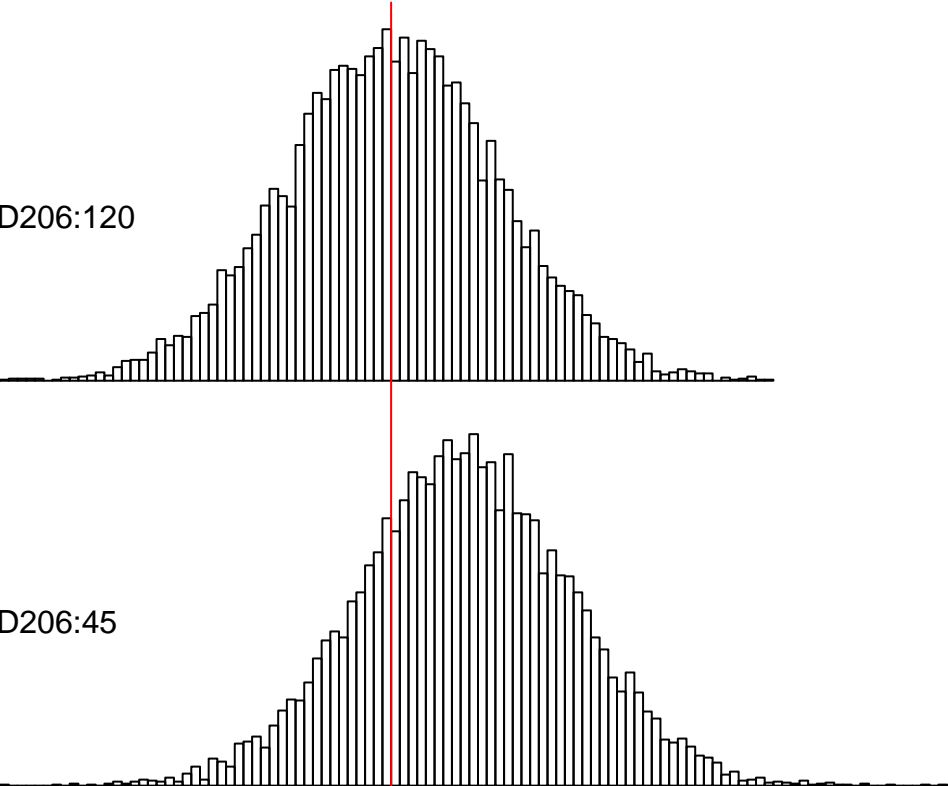

D206:120 – D206:45

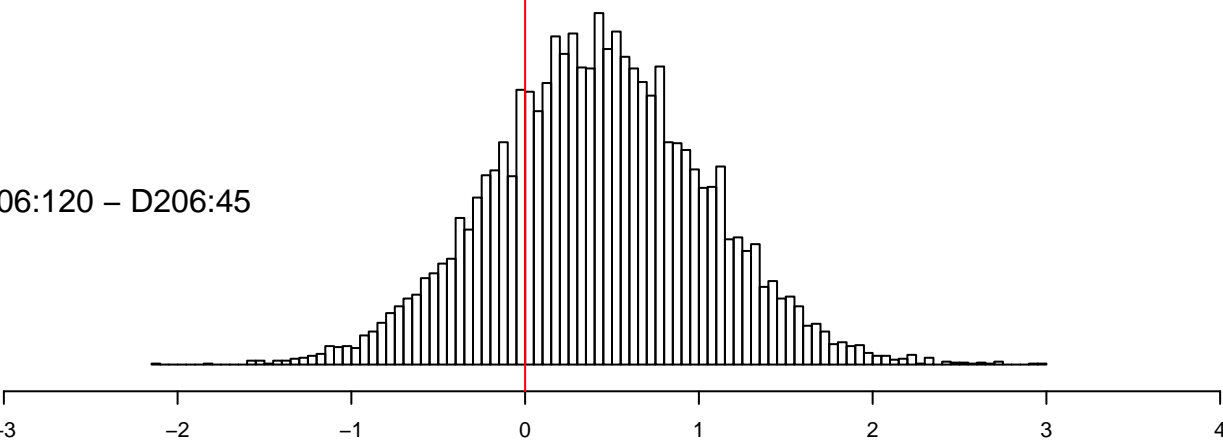

delta(Open Pentose 2)

D206:240

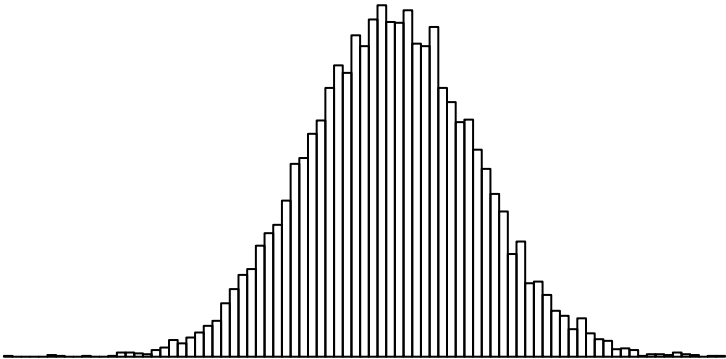

D206:120

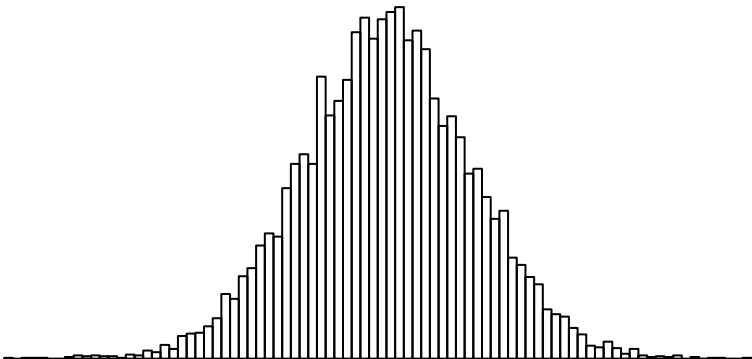

D206:45

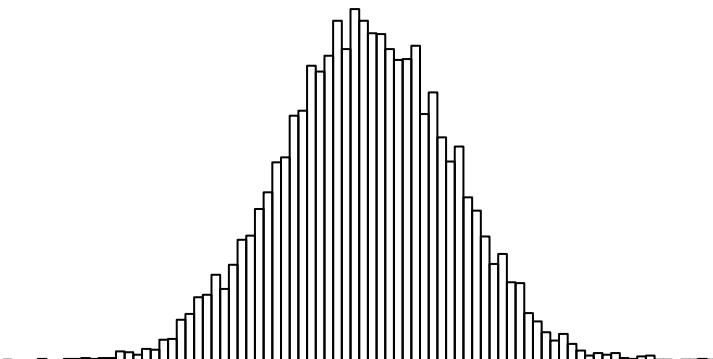

-10      -9      -8      -7      -6      -5      -4      -3

Closed Pentose 1

D206:240 – D206:120

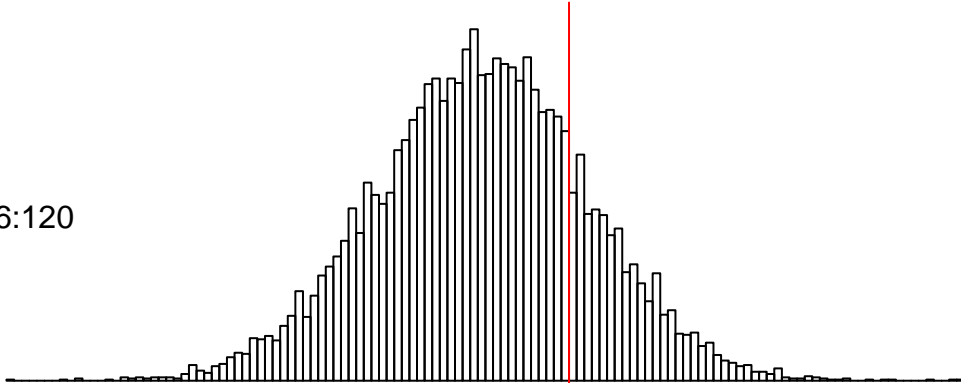

D206:240 – D206:45

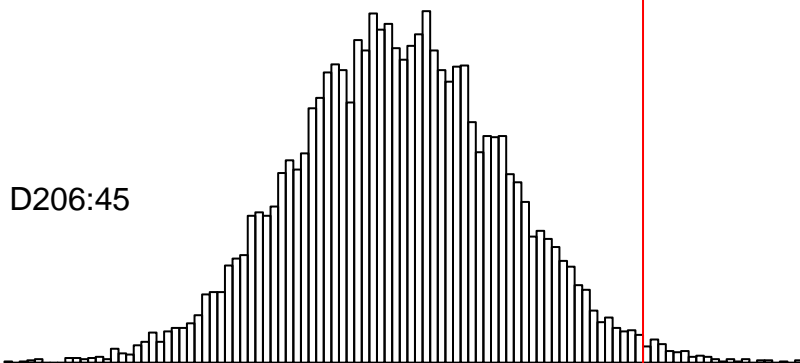

D206:120 – D206:45

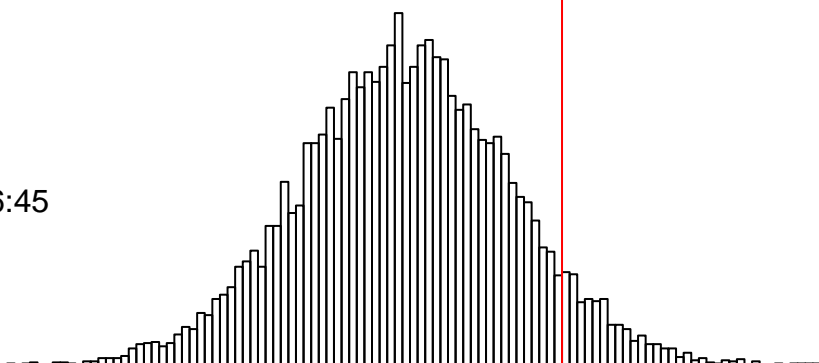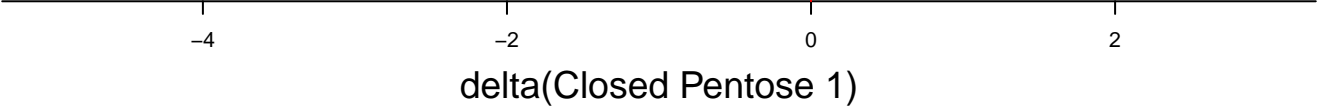

D206:240

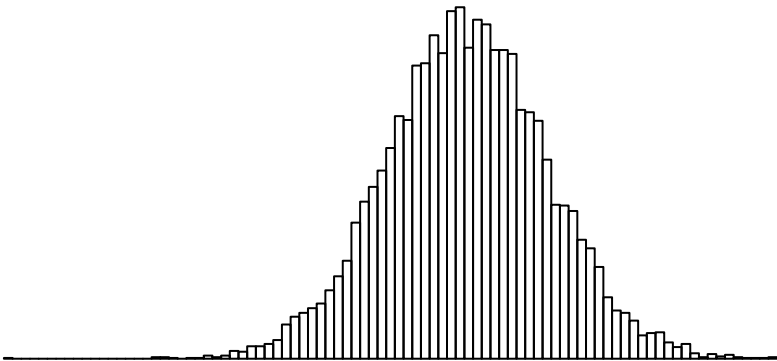

D206:120

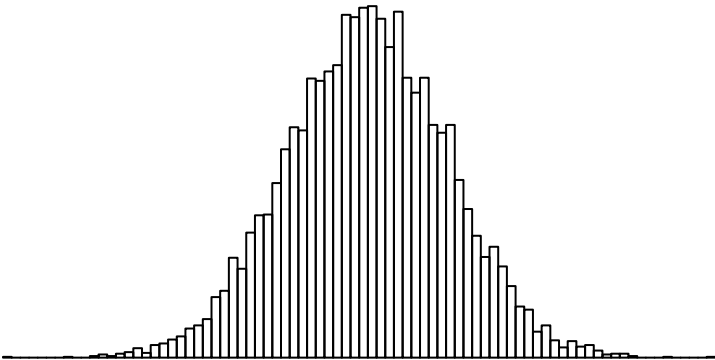

D206:45

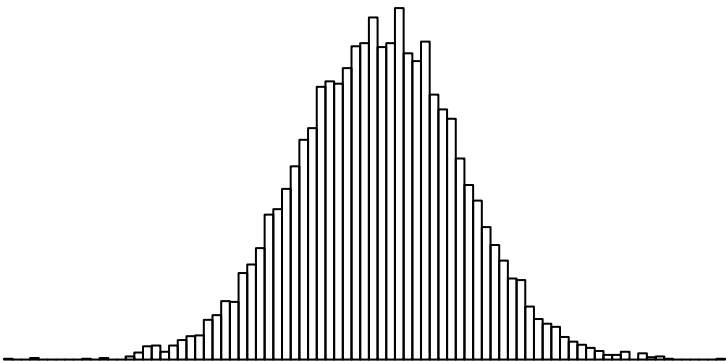

-10

-9

-8

-7

-6

-5

-4

-3

Closed Pentose 2

D206:240 – D206:120

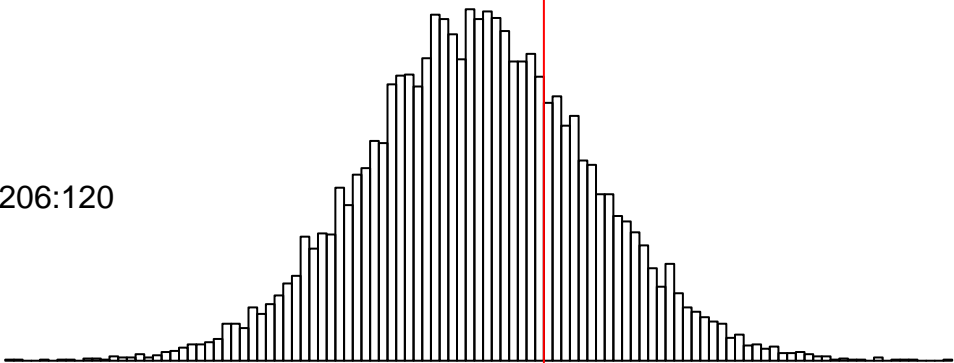

D206:240 – D206:45

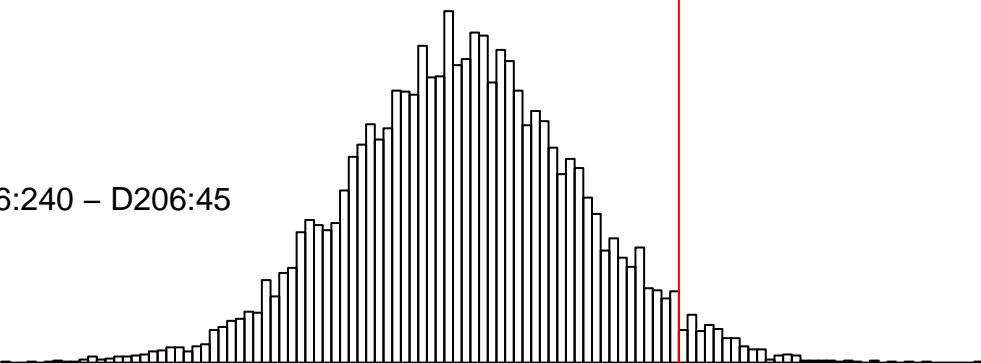

D206:120 – D206:45

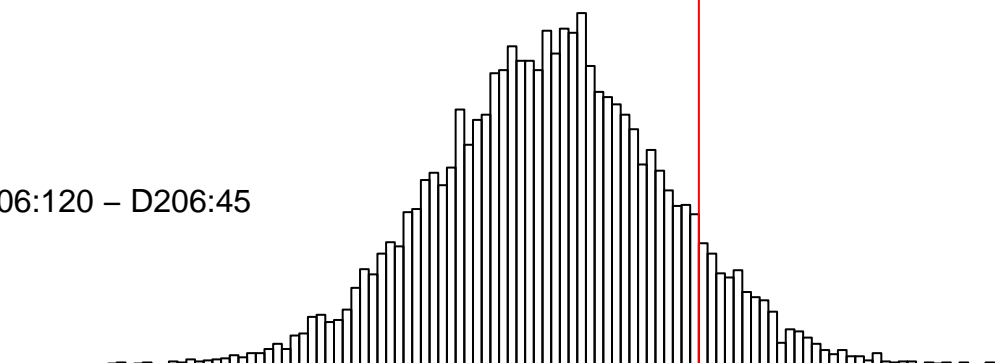

-4      -3      -2      -1      0      1      2      3

delta(Closed Pentose 2)



D206:240

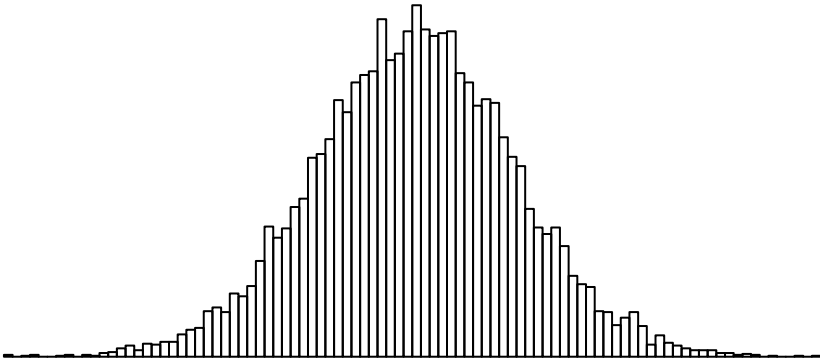

D206:120

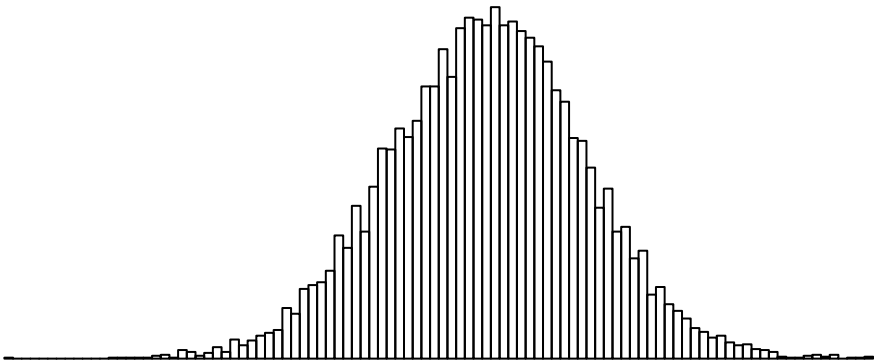

D206:45

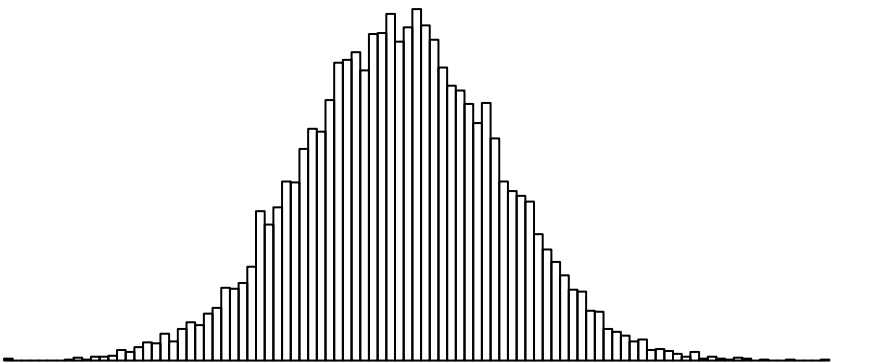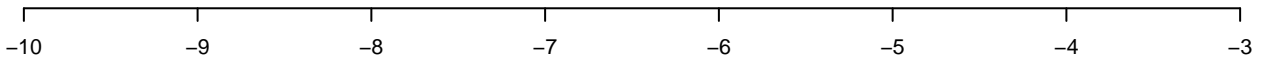

Pentose 1

D206:240 – D206:120

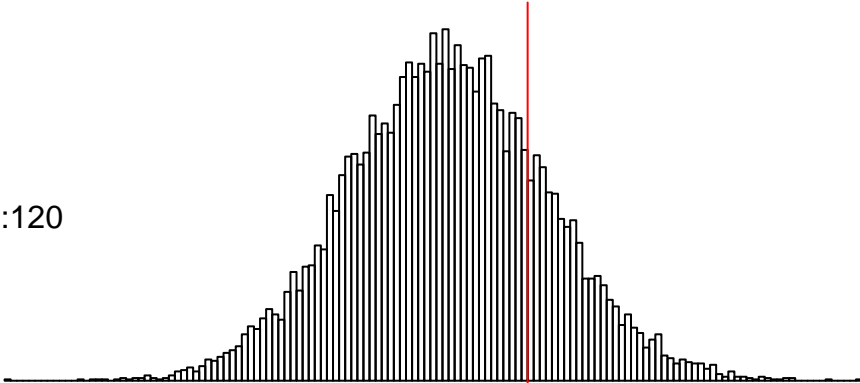

D206:240 – D206:45

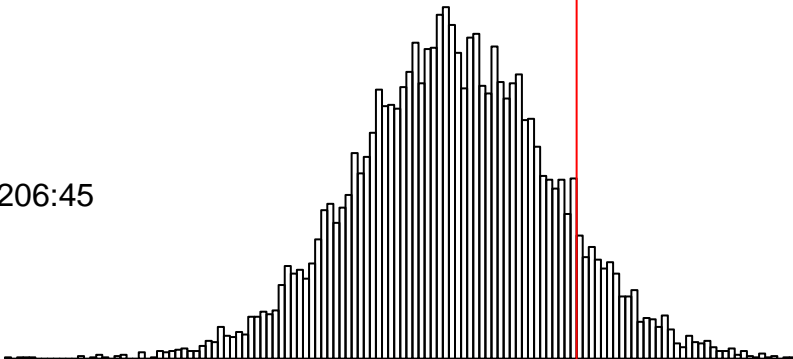

D206:120 – D206:45

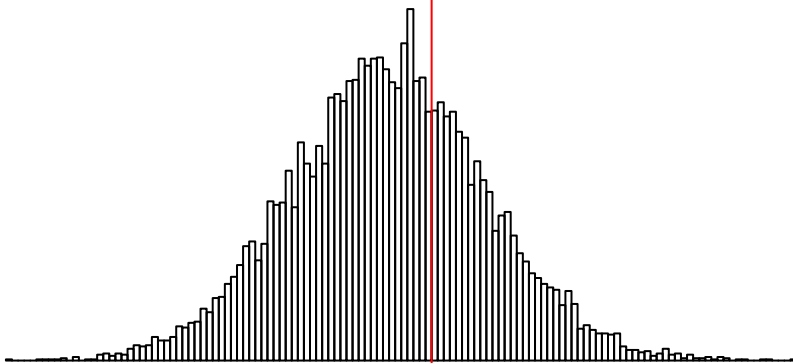

-6

-4

-2

0

2

4

delta(Pentose 1)

D206:240

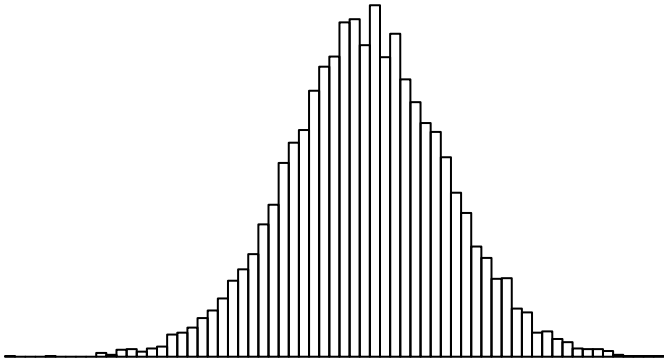

D206:120

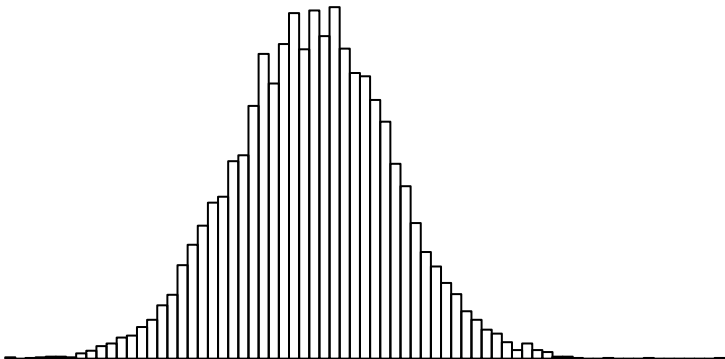

D206:45

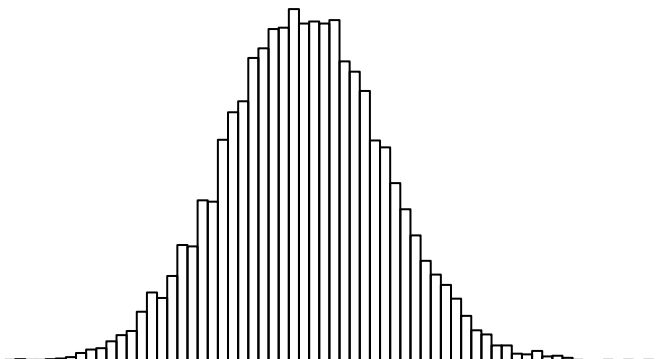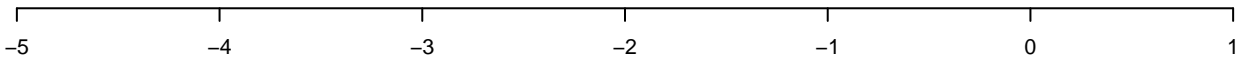

Open Pentose 3

D206:240 – D206:120

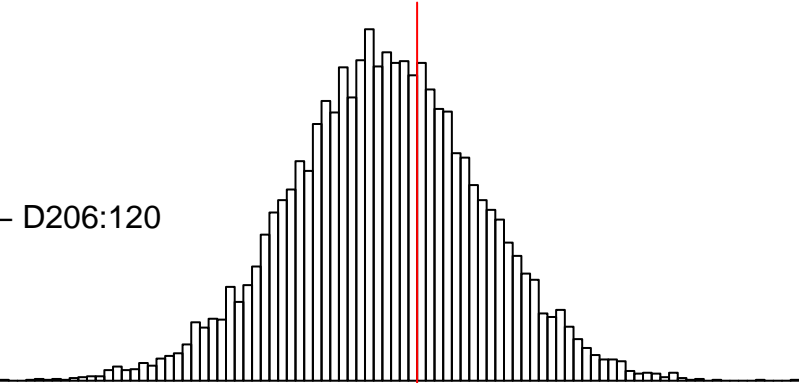

D206:240 – D206:45

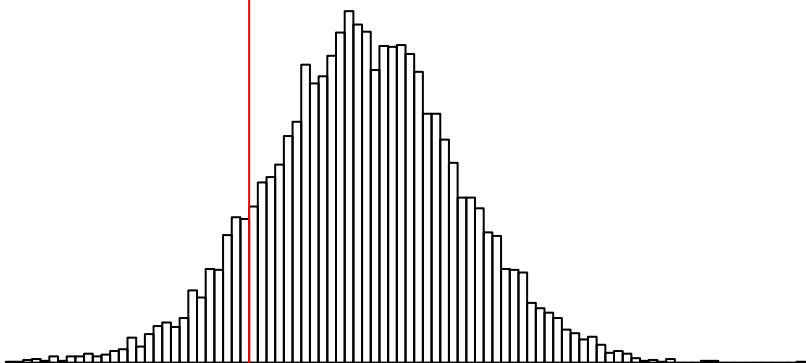

D206:120 – D206:45

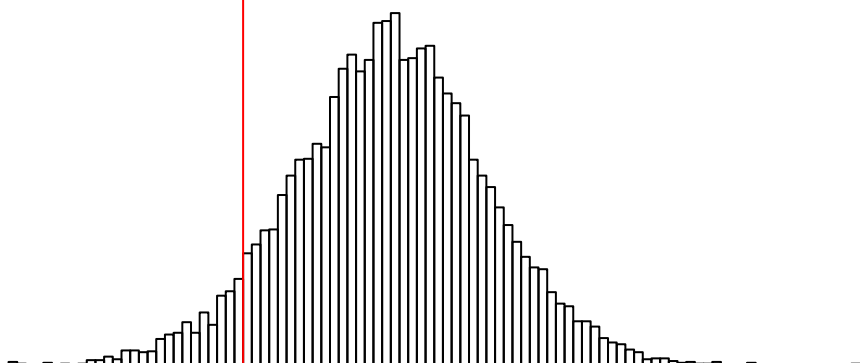

-3 -2 -1 0 1 2 3 4

delta(Open Pentose 3)

D206:240

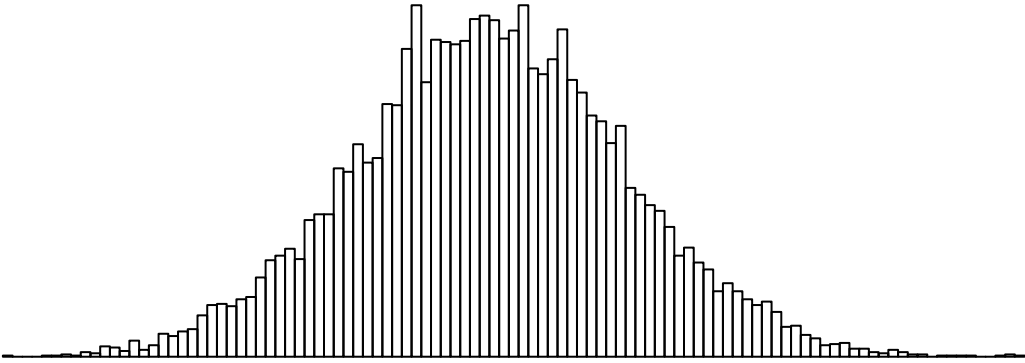

D206:120

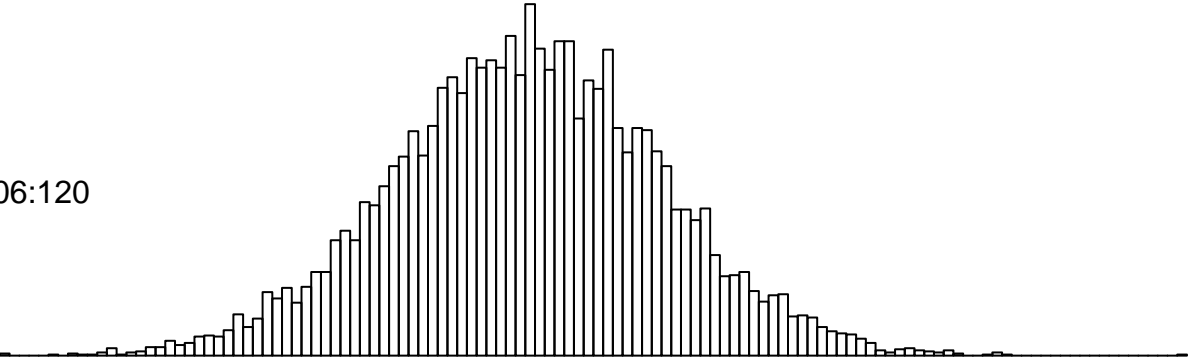

D206:45

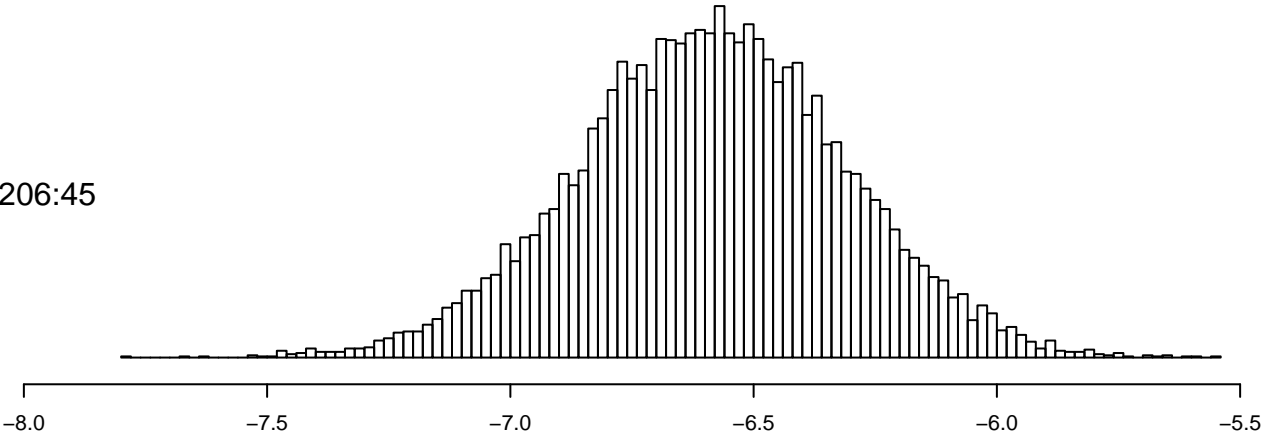

Sugar 1

D206:240 – D206:120

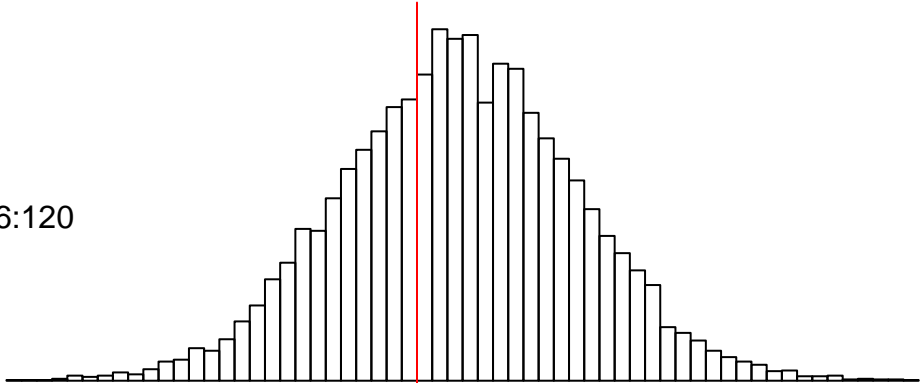

D206:240 – D206:45

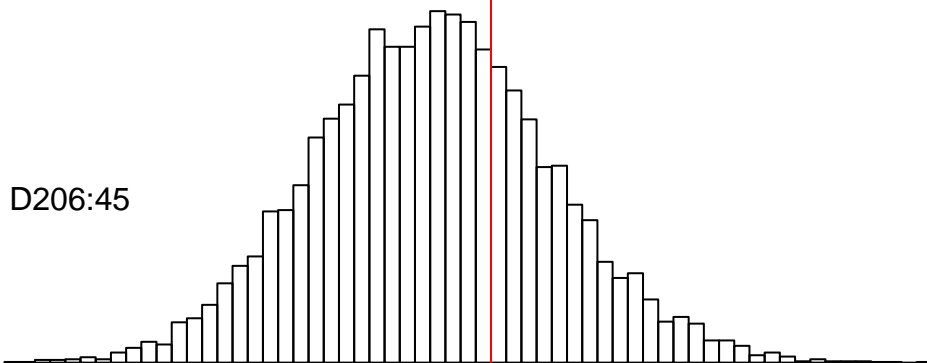

D206:120 – D206:45

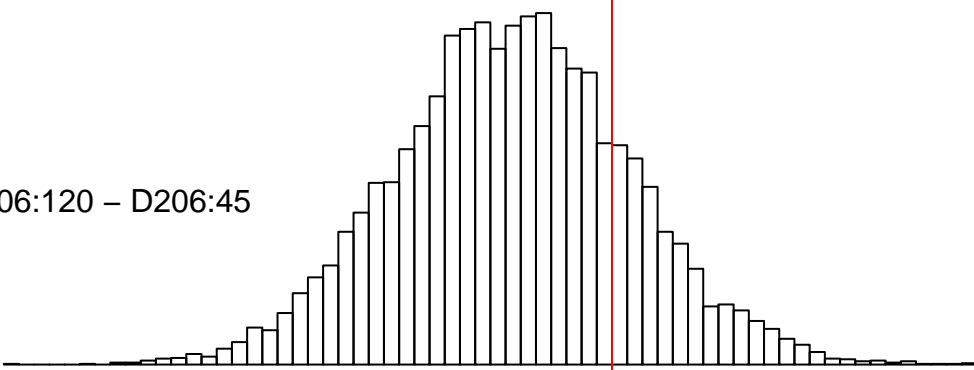

-2 -1 0 1 2

delta(Sugar 1)

D206:240

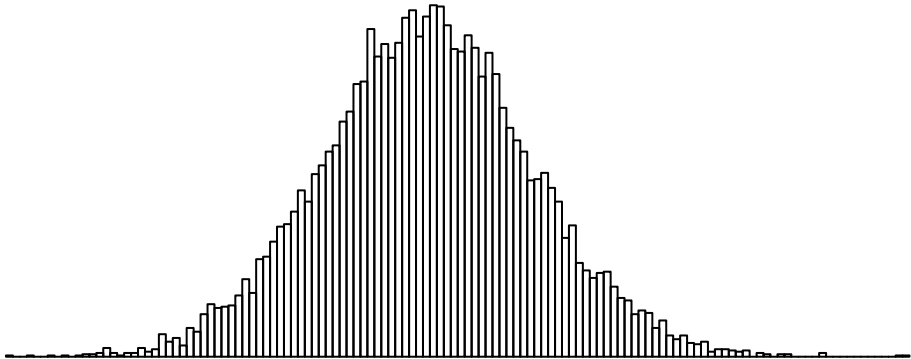

D206:120

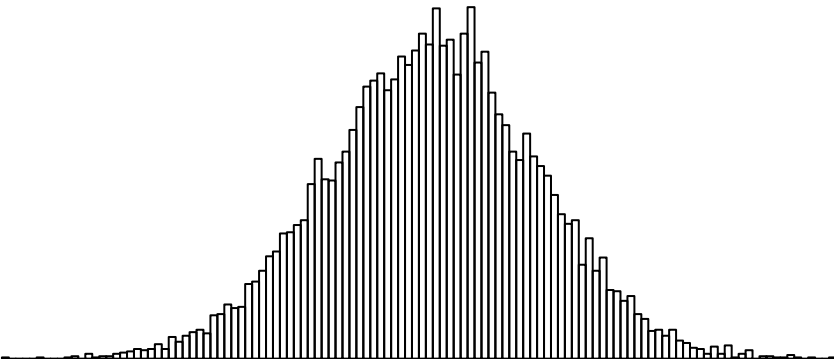

D206:45

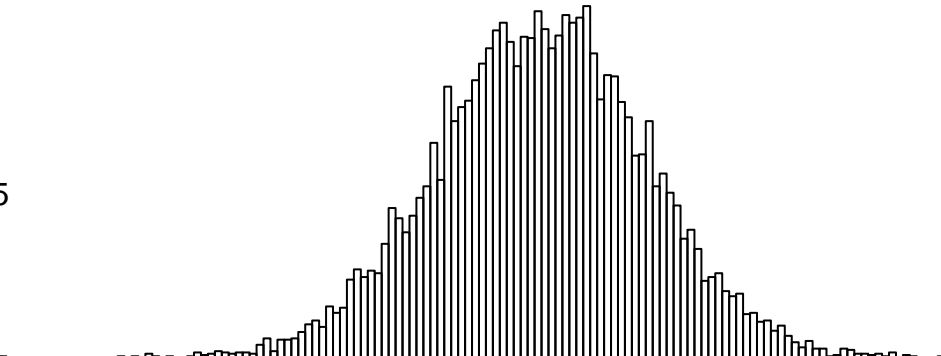

-10.0      -9.5      -9.0      -8.5      -8.0      -7.5      -7.0      -6.5

Sugar 3

D206:240 – D206:120

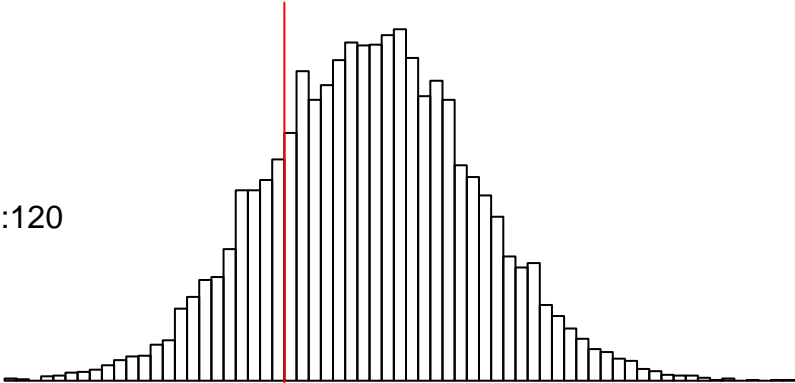

D206:240 – D206:45

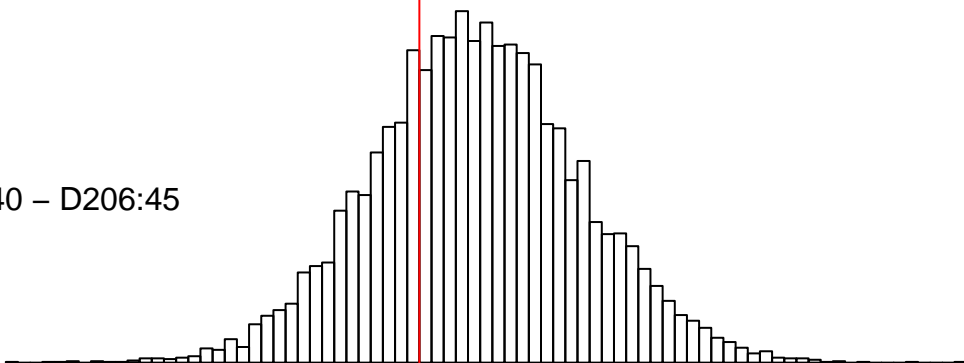

D206:120 – D206:45

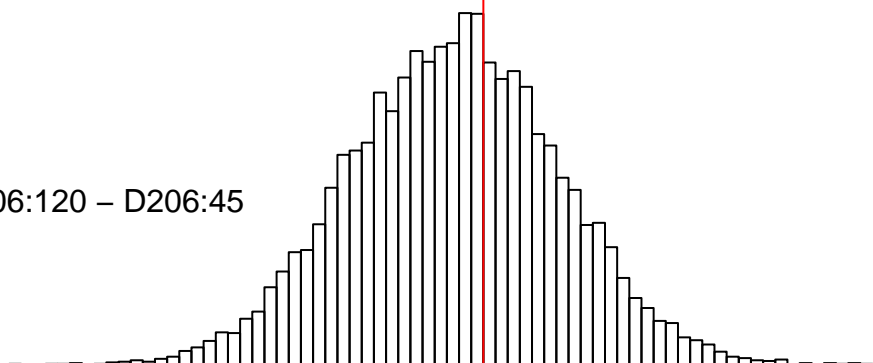

-2 -1 0 1 2 3

delta(Sugar 3)



D206:240

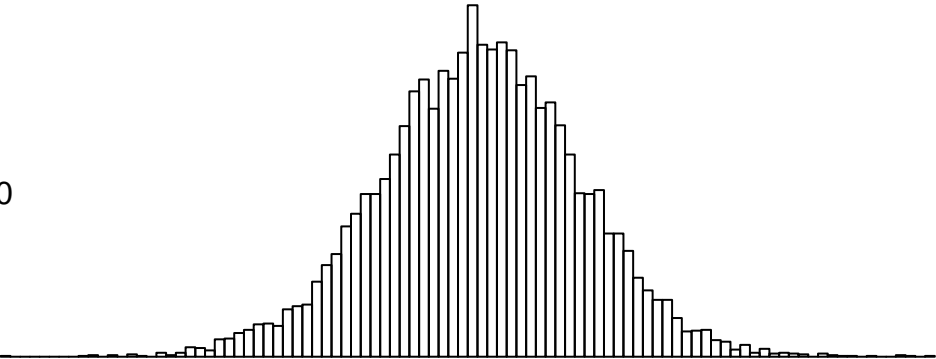

D206:120

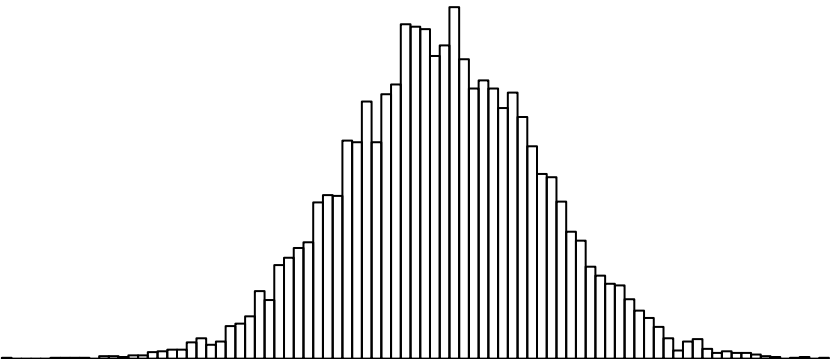

D206:45

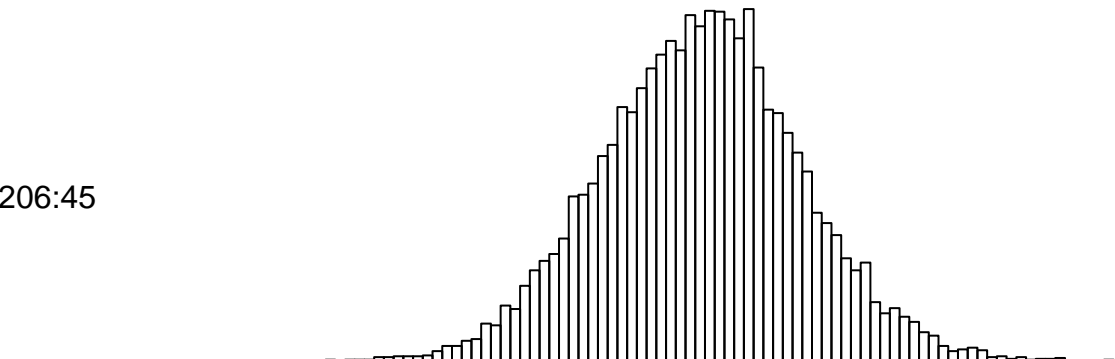

-8.5      -8.0      -7.5      -7.0      -6.5      -6.0

Sugar 4

D206:240 – D206:120

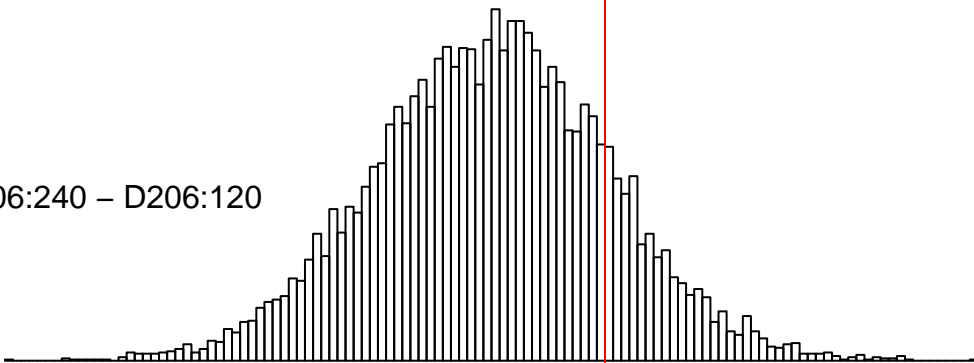

D206:240 – D206:45

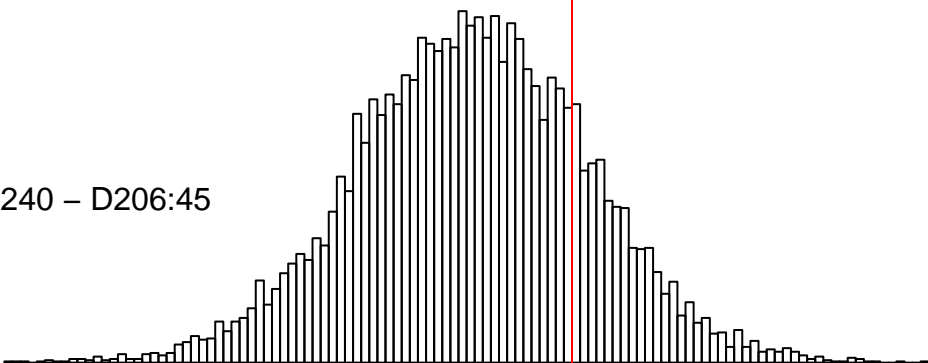

D206:120 – D206:45

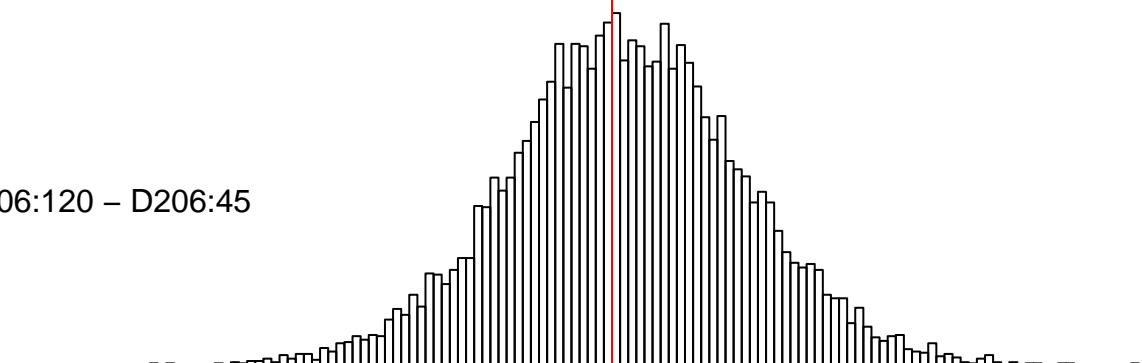

-1.5      -1.0      -0.5      0.0      0.5      1.0      1.5

delta(Sugar 4)

D206:240

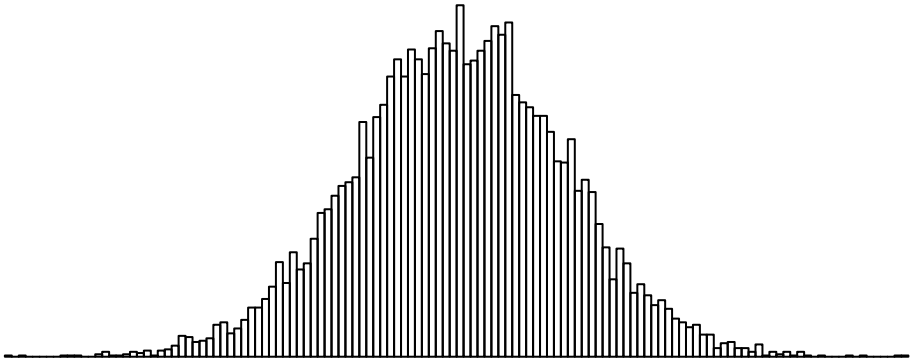

D206:120

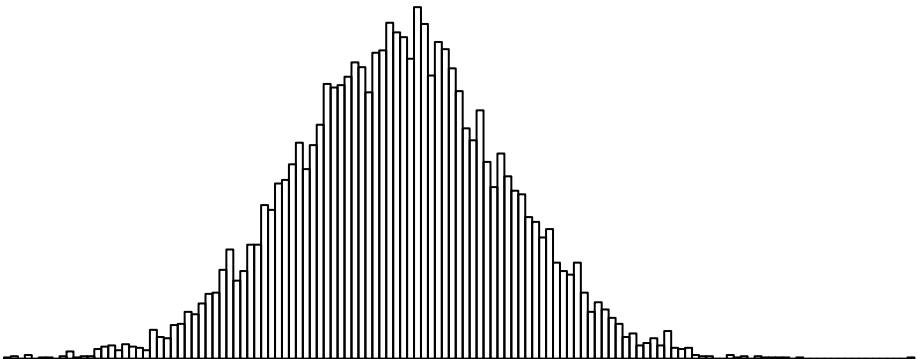

D206:45

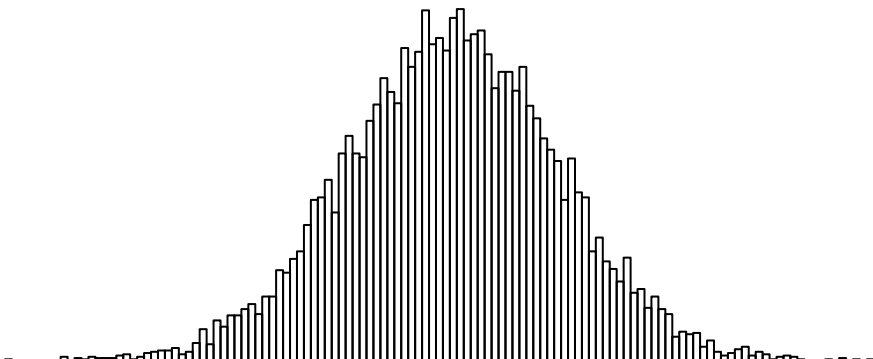

-8.5      -8.0      -7.5      -7.0      -6.5      -6.0      -5.5      -5.0

Sugar 5

D206:240 – D206:120

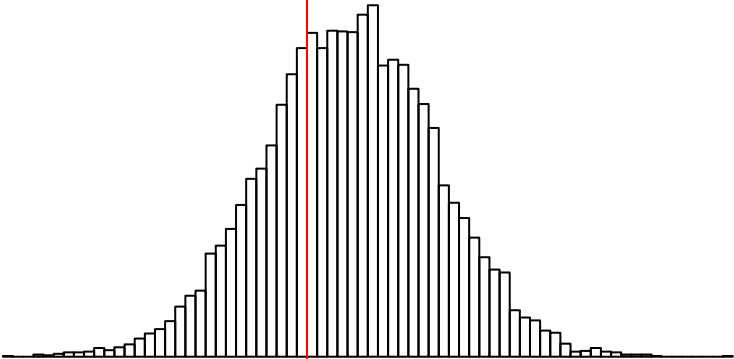

D206:240 – D206:45

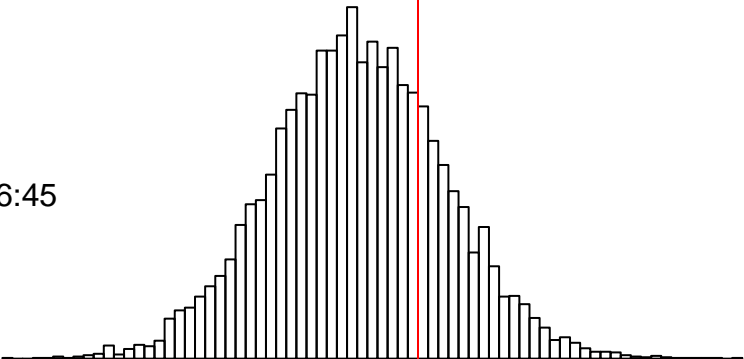

D206:120 – D206:45

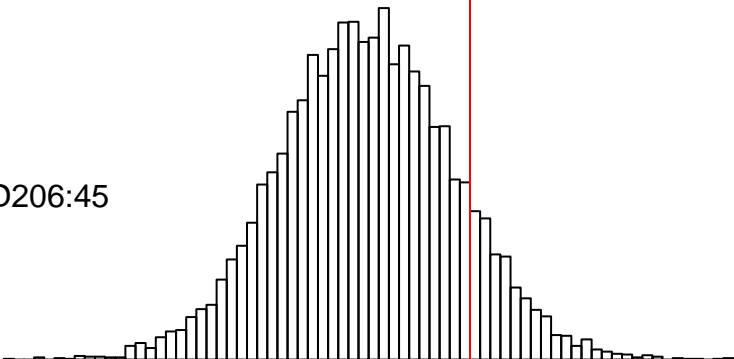

-3 -2 -1 0 1 2 3

delta(Sugar 5)

D206:240

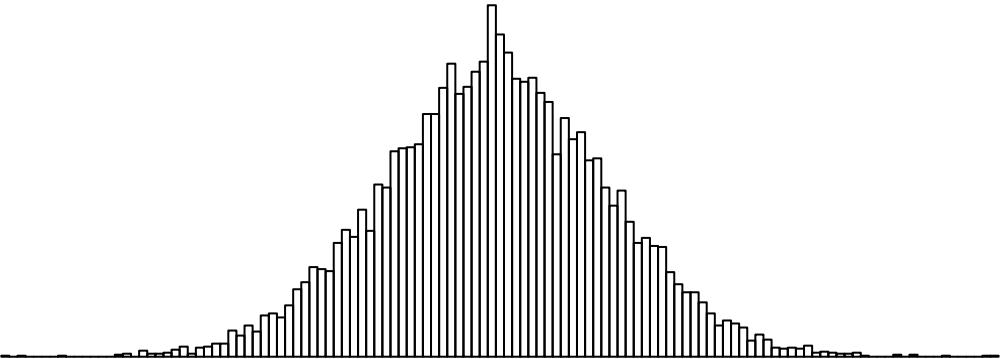

D206:120

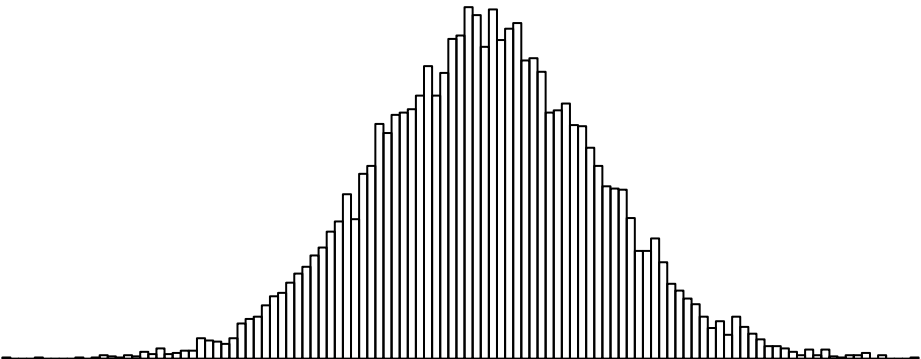

D206:45

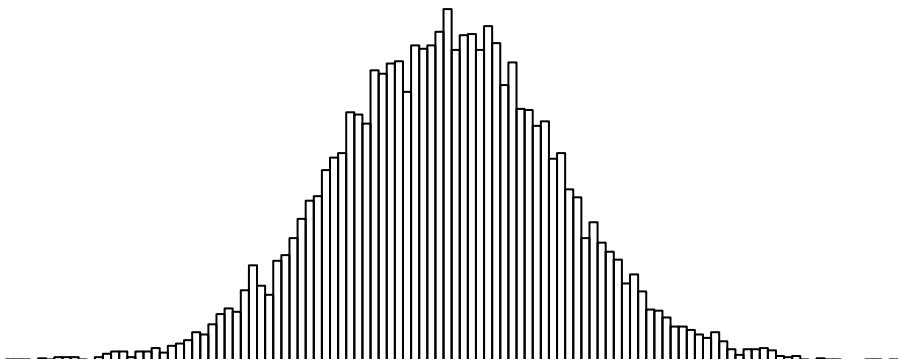

-9.0 -8.5 -8.0 -7.5 -7.0 -6.5 -6.0

Sugar 6

D206:240 – D206:120

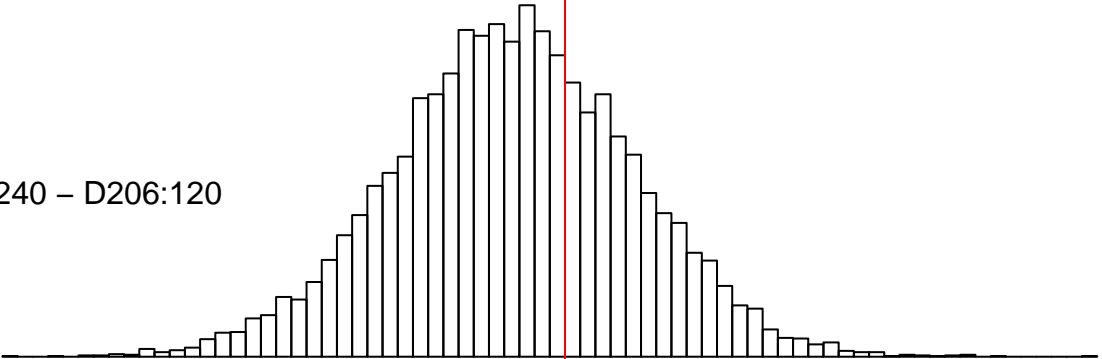

D206:240 – D206:45

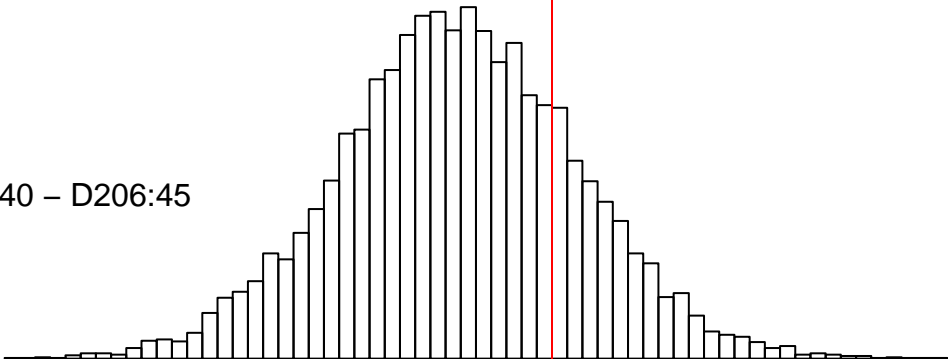

D206:120 – D206:45

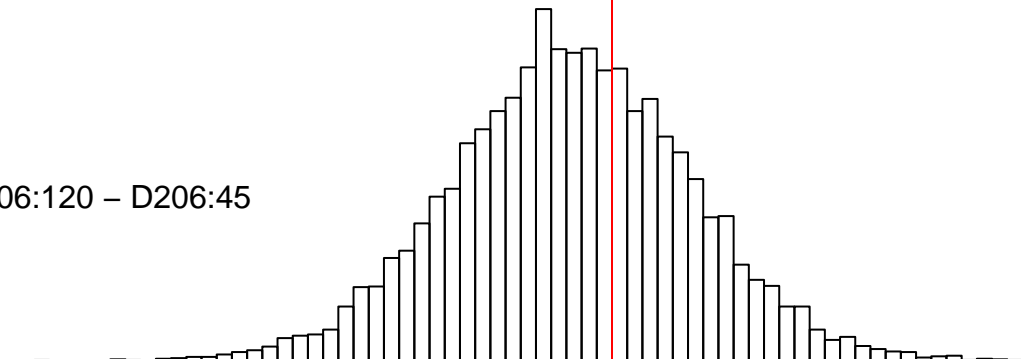

-2                      -1                      0                      1                      2

delta(Sugar 6)

D206:240

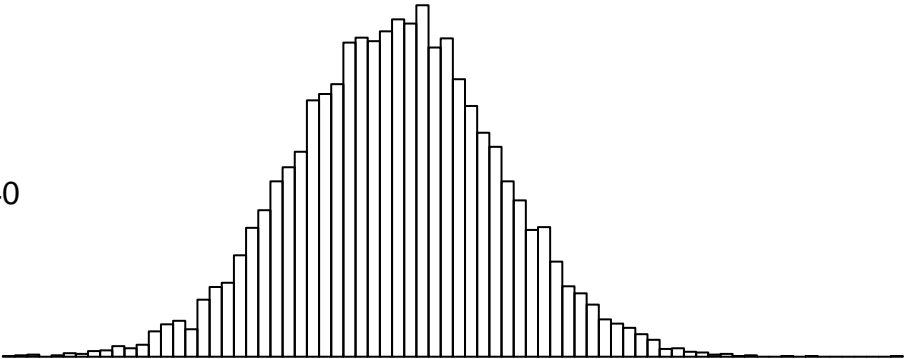

D206:120

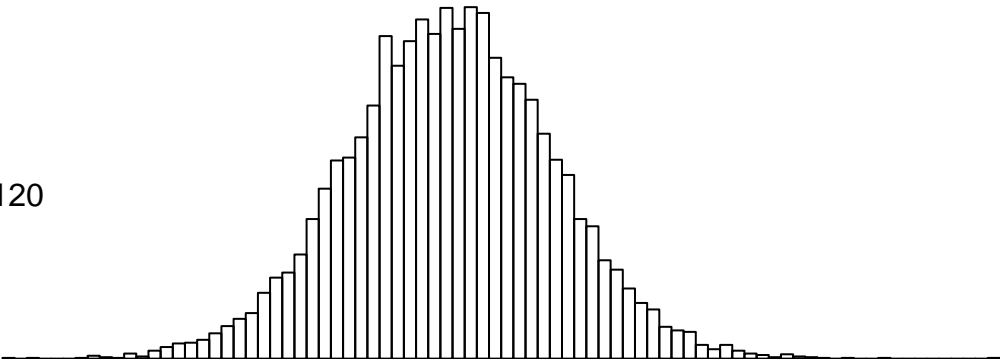

D206:45

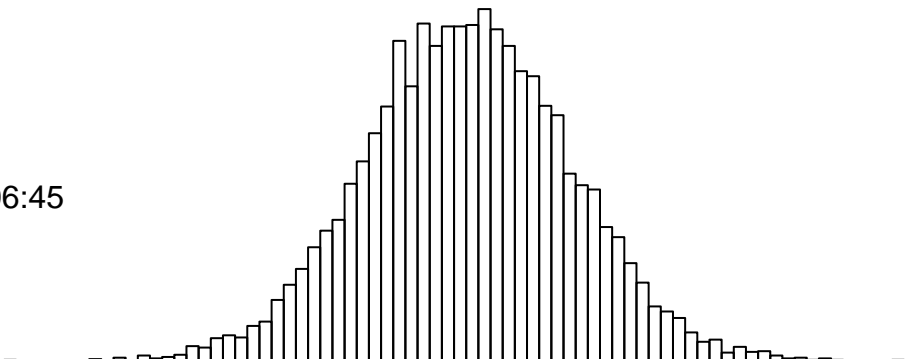

Sugar 7

D206:240 – D206:120

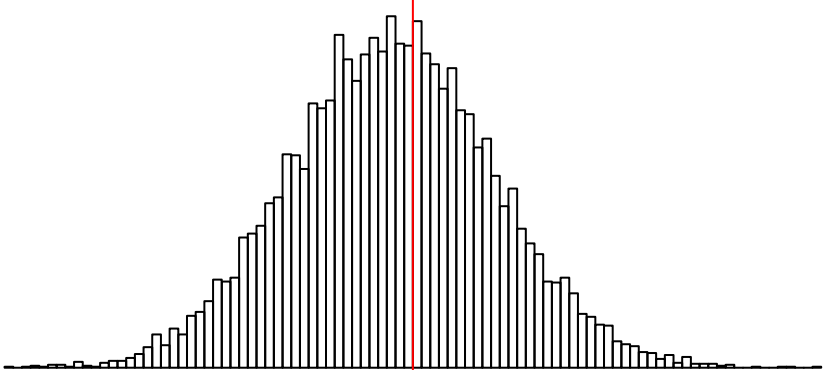

D206:240 – D206:45

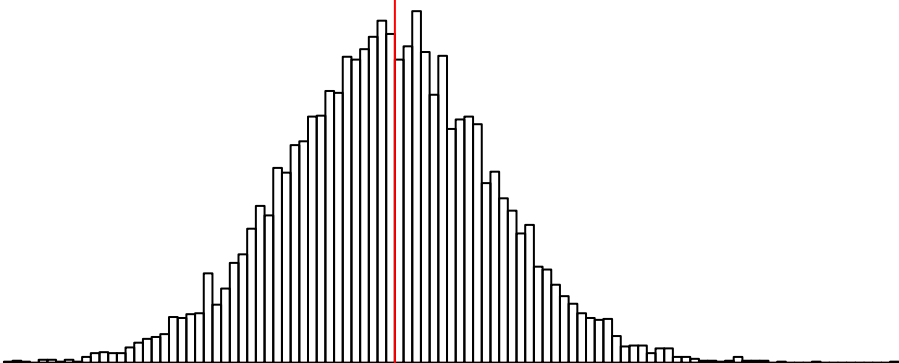

D206:120 – D206:45

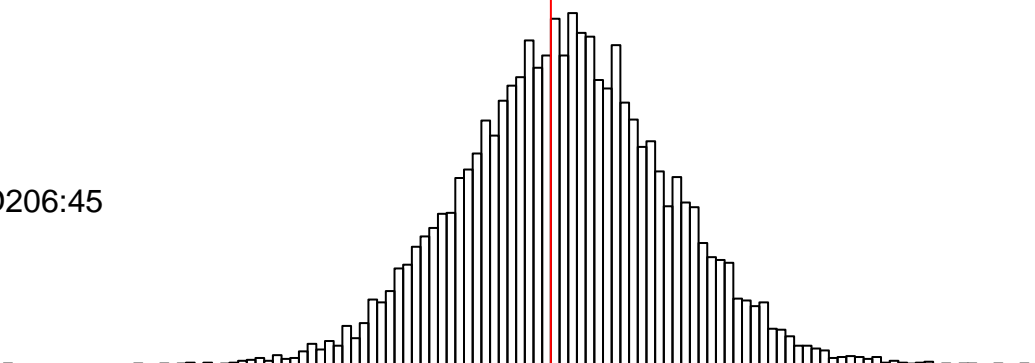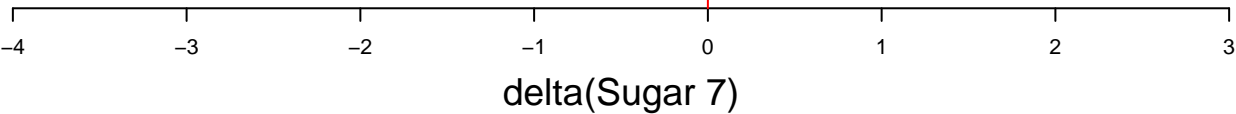



D206:240

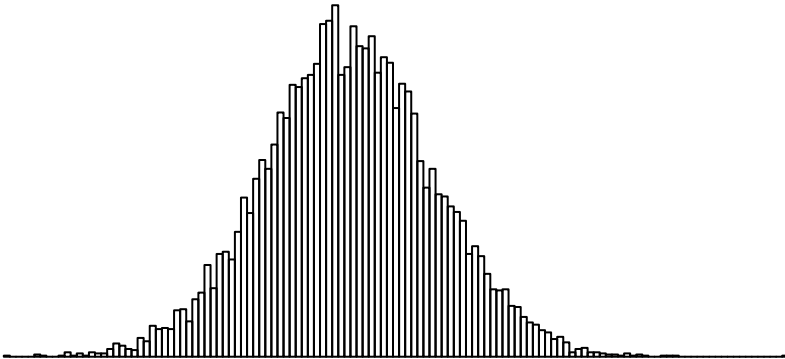

D206:120

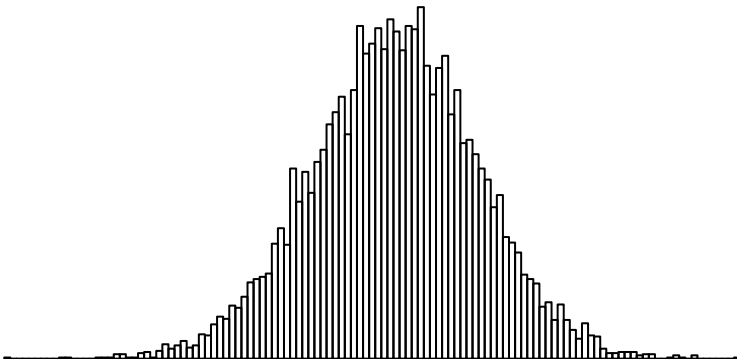

D206:45

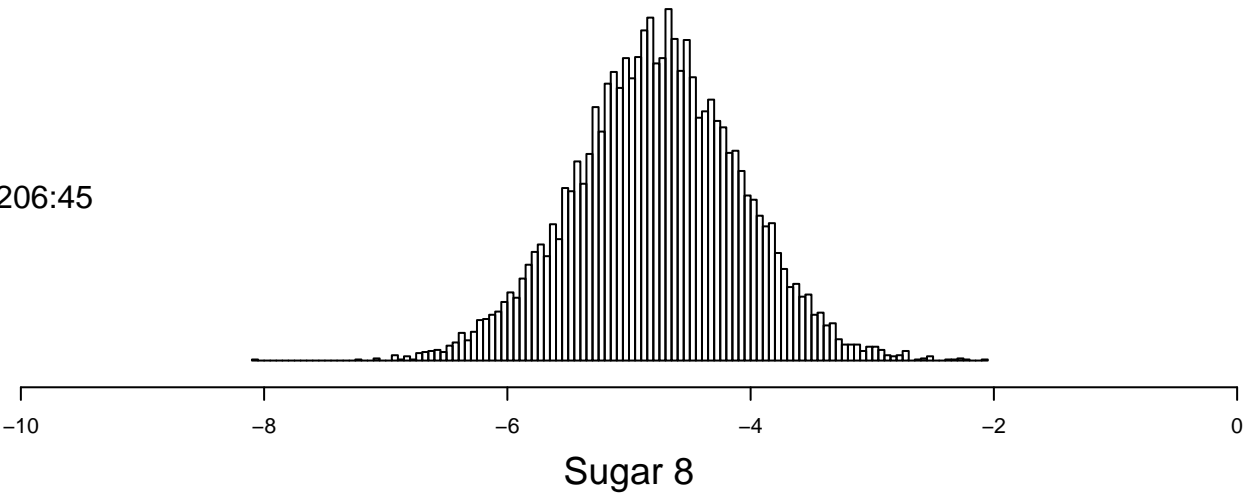

D206:240 – D206:120

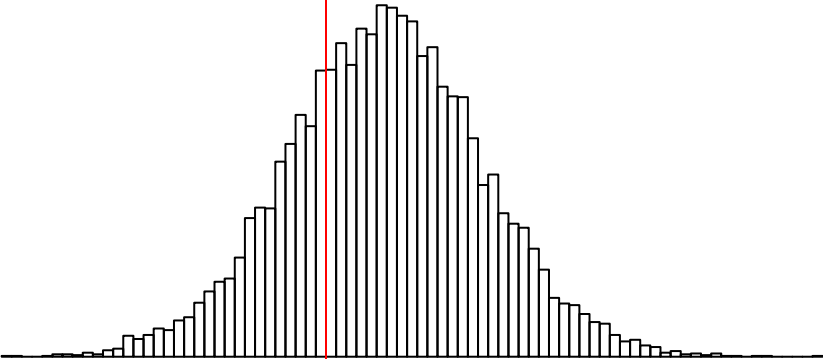

D206:240 – D206:45

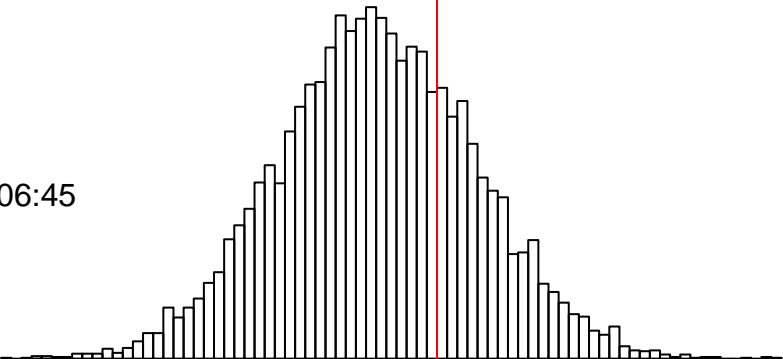

D206:120 – D206:45

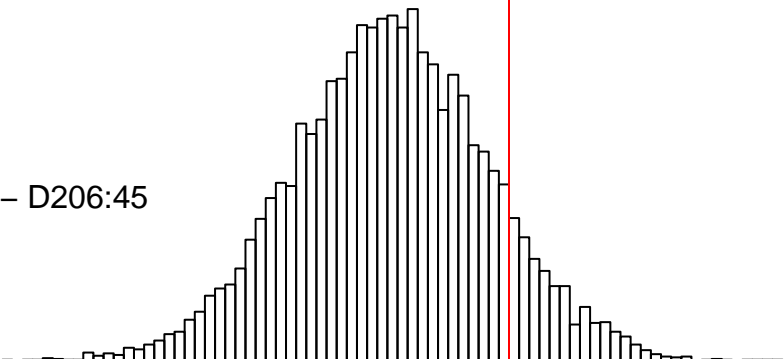

-6 -4 -2 0 2 4 6

delta(Sugar 8)

D206:240

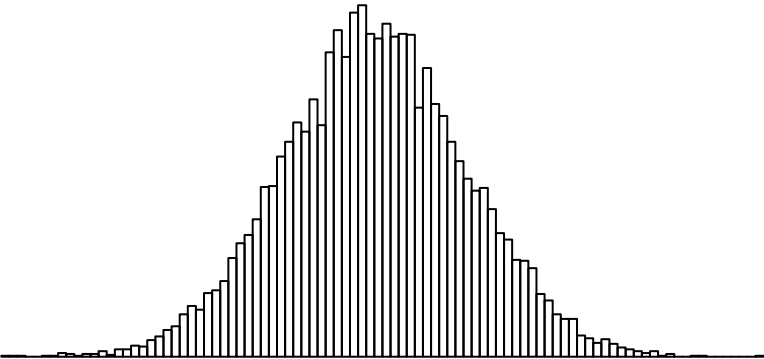

D206:120

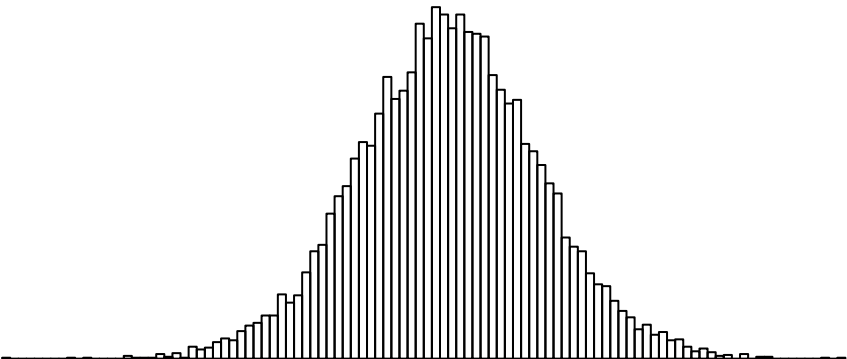

D206:45

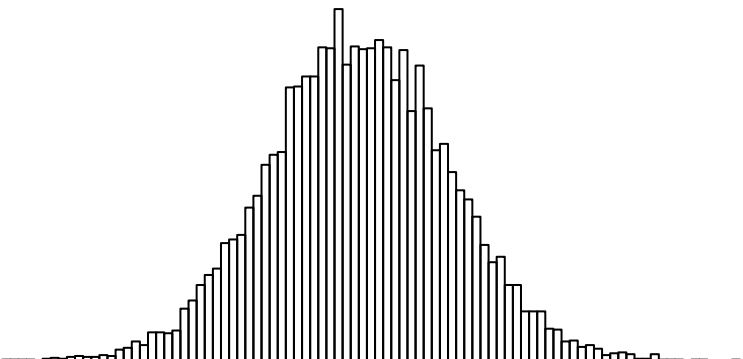

-9.5      -9.0      -8.5      -8.0      -7.5      -7.0      -6.5

Sugar 9

D206:240 – D206:120

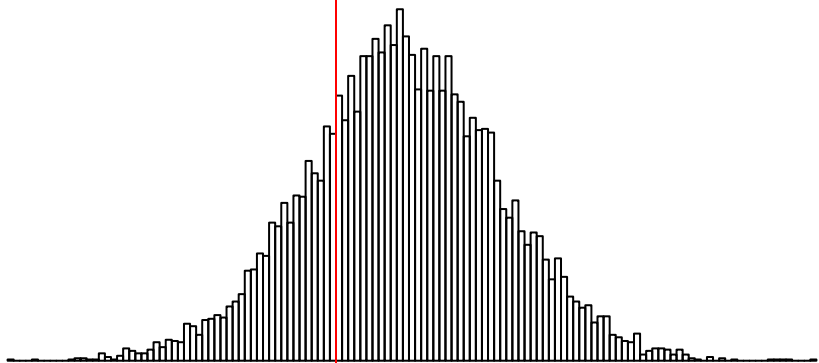

D206:240 – D206:45

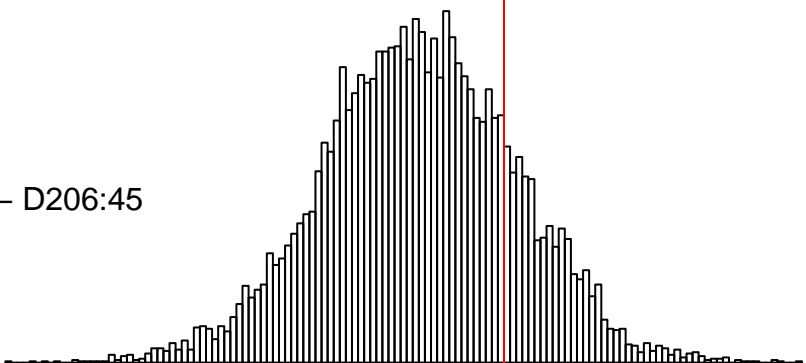

D206:120 – D206:45

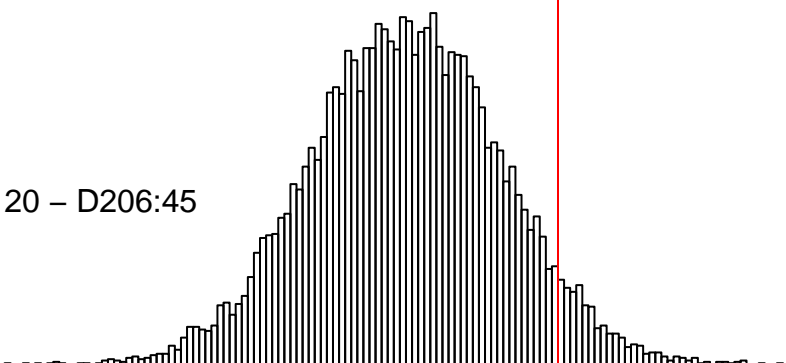

-2                      -1                      0                      1                      2

delta(Sugar 9)

D206:240

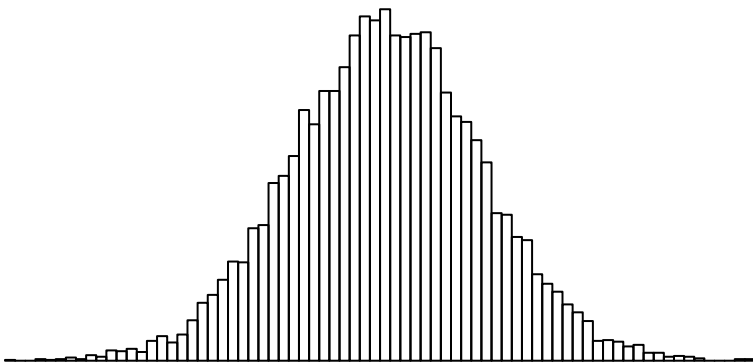

D206:120

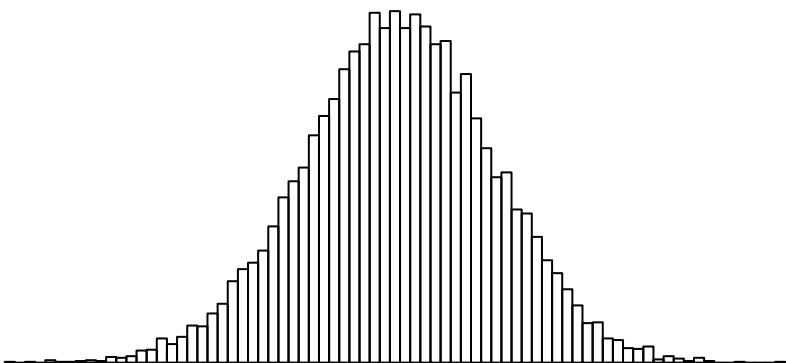

D206:45

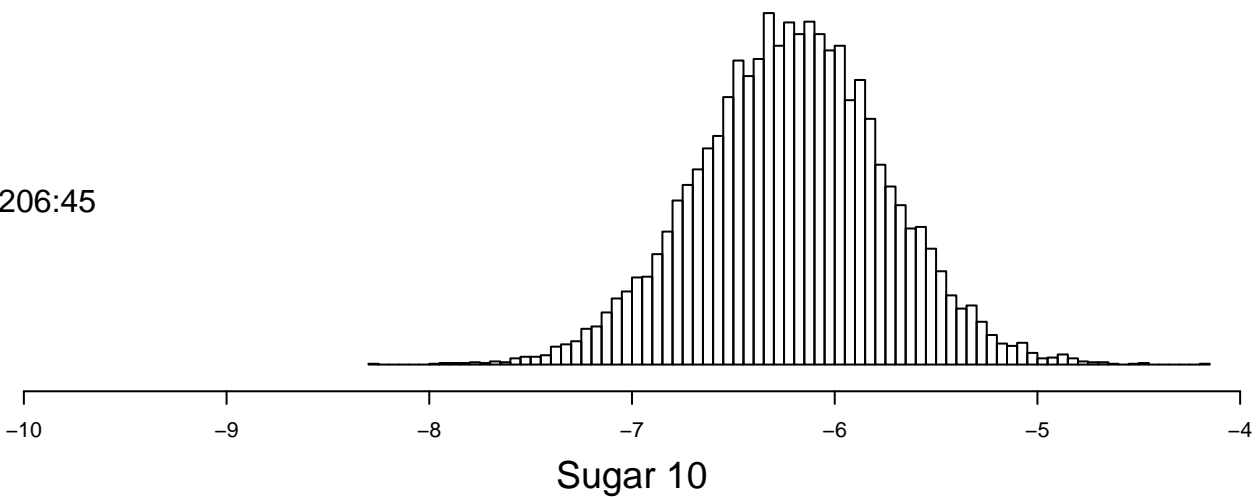

D206:240 – D206:120

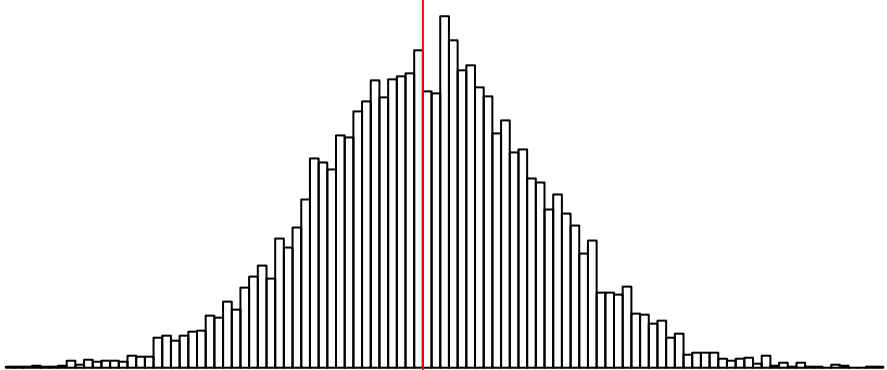

D206:240 – D206:45

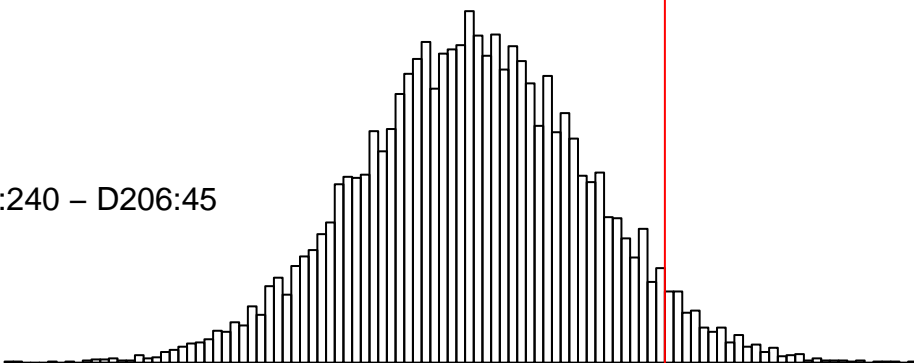

D206:120 – D206:45

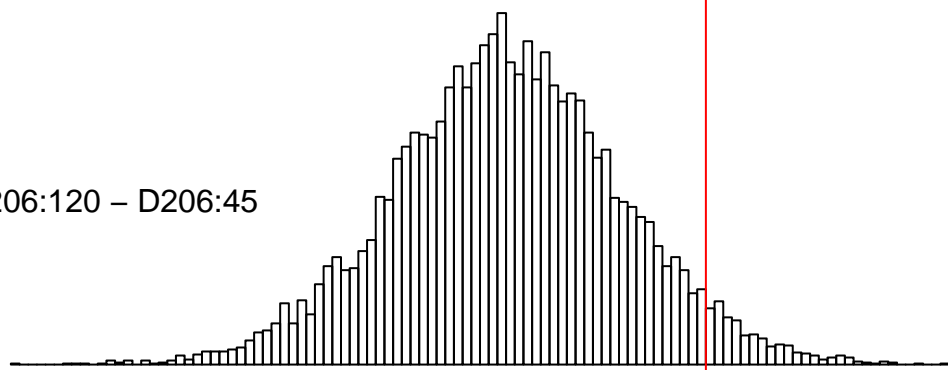

delta(Sugar 10)

D206:240

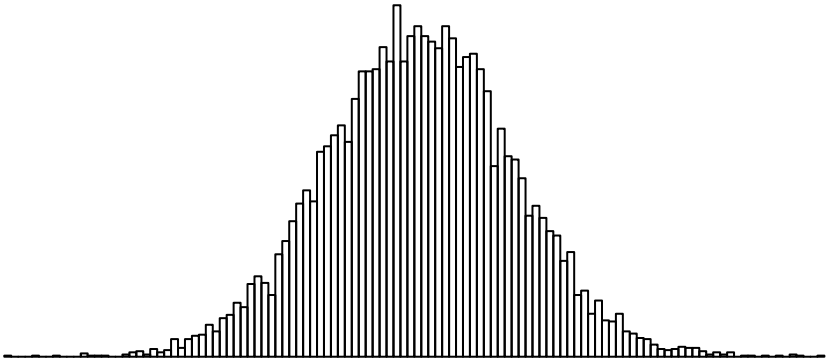

D206:120

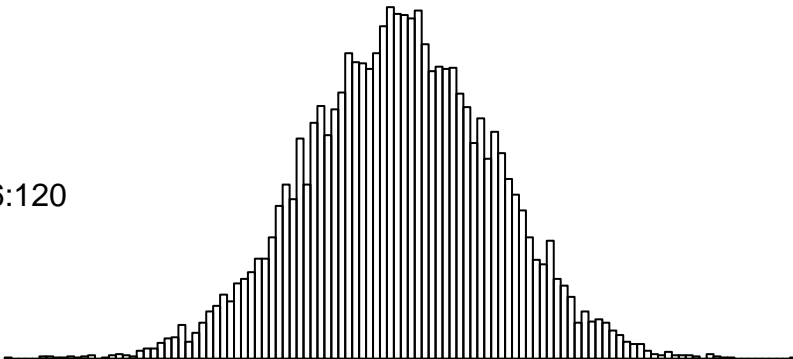

D206:45

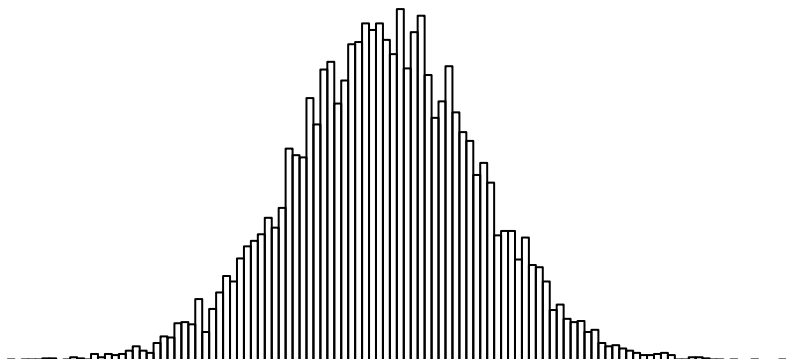

-9.0 -8.5 -8.0 -7.5 -7.0 -6.5 -6.0 -5.5

Sugar 11

D206:240 – D206:120

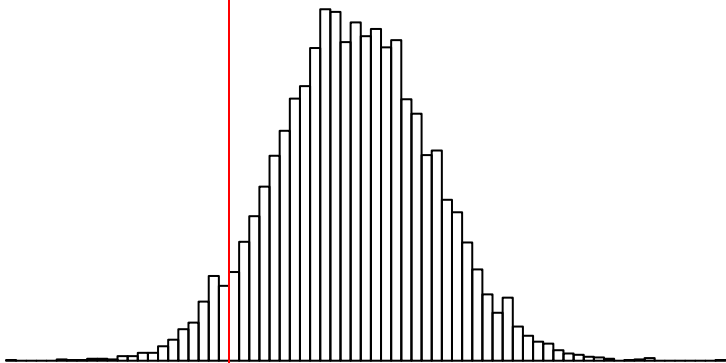

D206:240 – D206:45

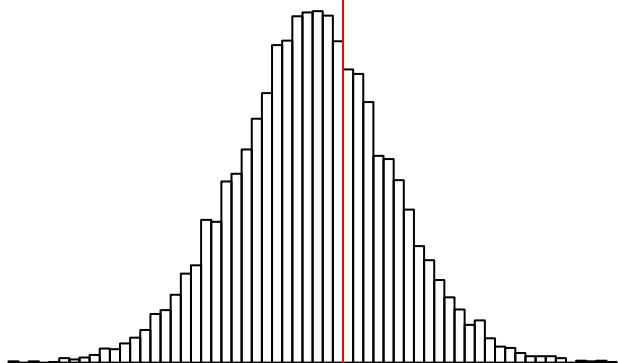

D206:120 – D206:45

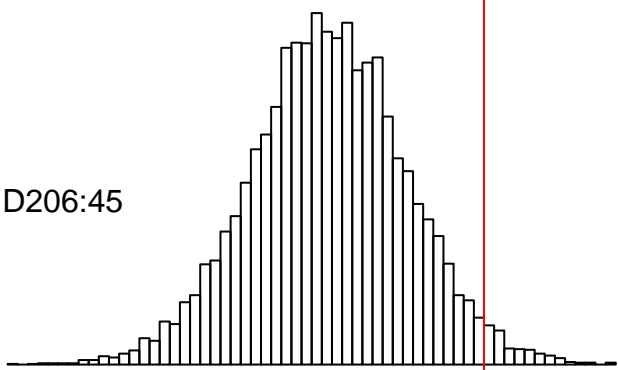

-3      -2      -1      0      1      2      3

delta(Sugar 11)



D206:240

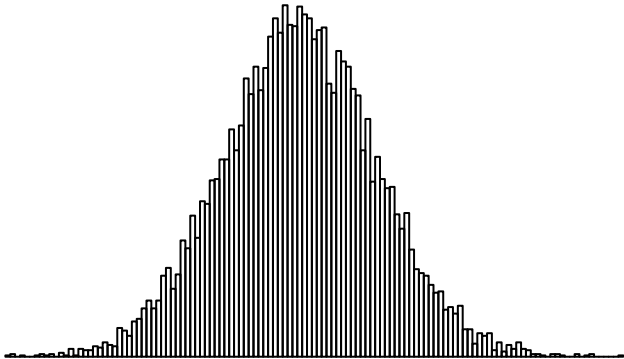

D206:120

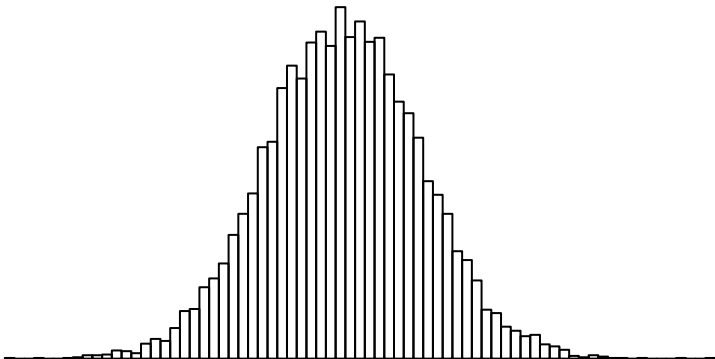

D206:45

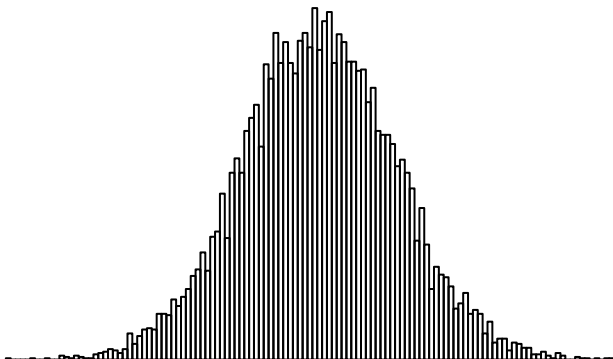

-9.0      -8.5      -8.0      -7.5      -7.0      -6.5

Sugar 12

D206:240 – D206:120

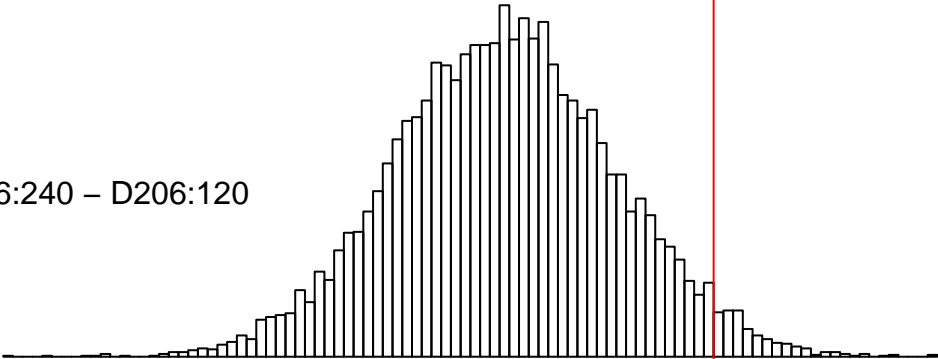

D206:240 – D206:45

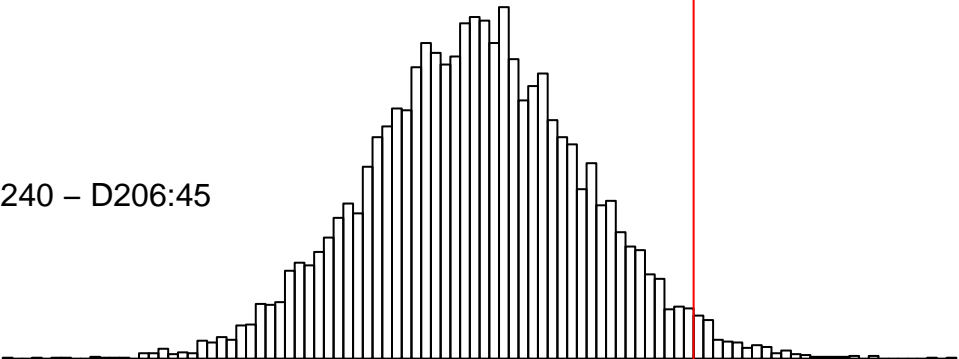

D206:120 – D206:45

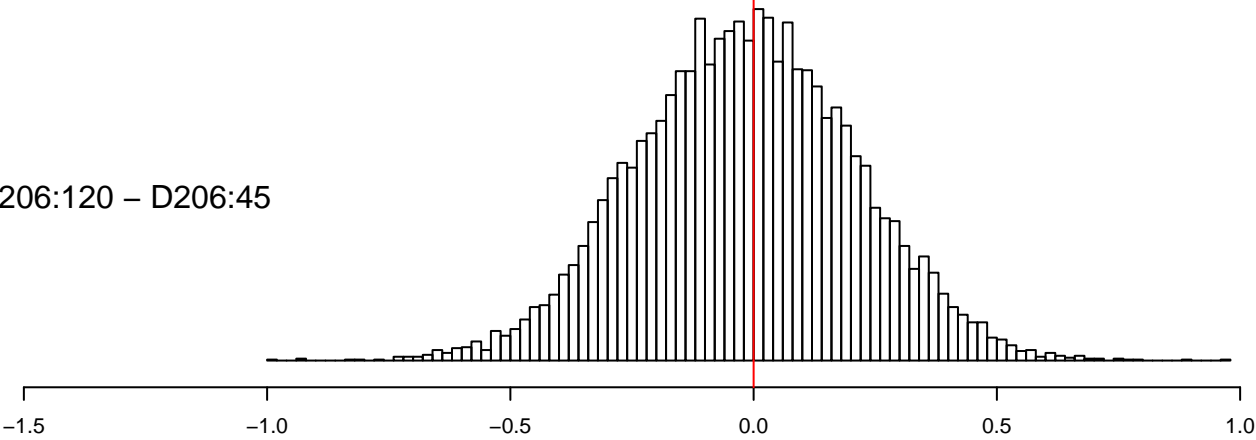

delta(Sugar 12)

D206:240

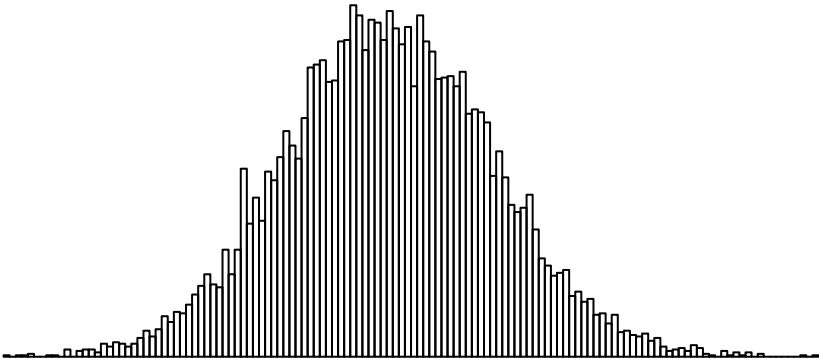

D206:120

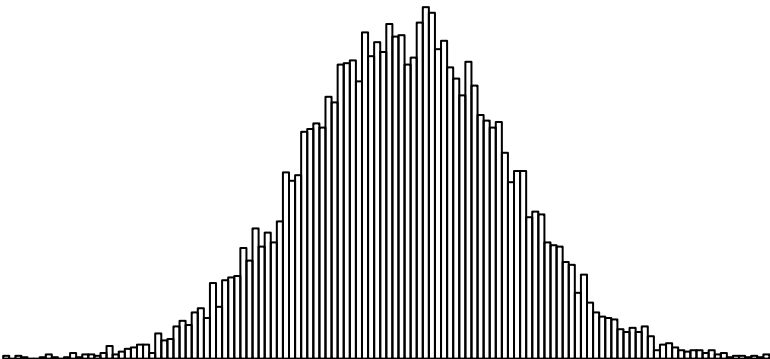

D206:45

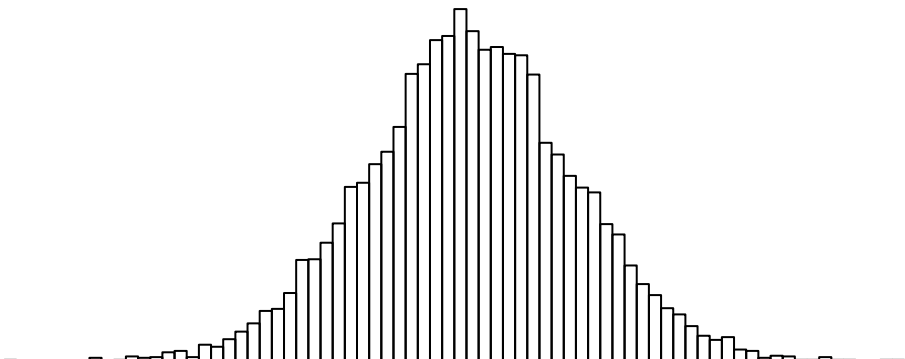

-9.0                      -8.5                      -8.0                      -7.5                      -7.0

Sugar 14

D206:240 – D206:120

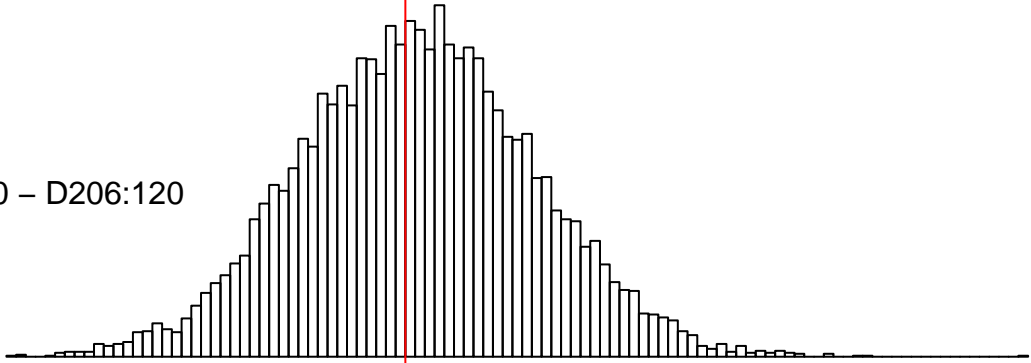

D206:240 – D206:45

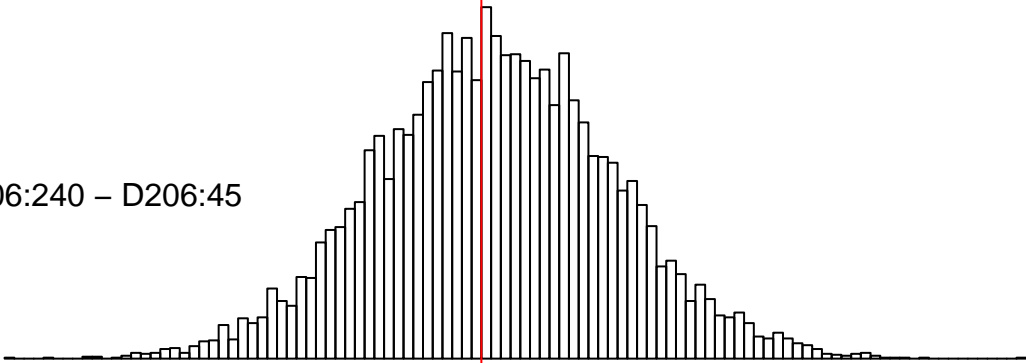

D206:120 – D206:45

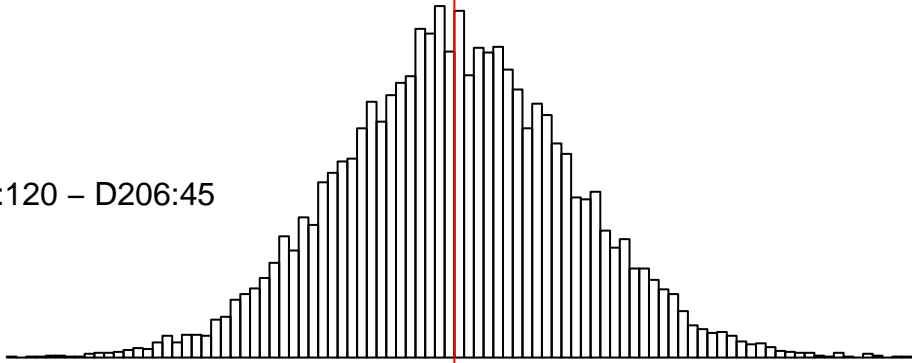

-1.0      -0.5      0.0      0.5      1.0      1.5

delta(Sugar 14)

D206:240

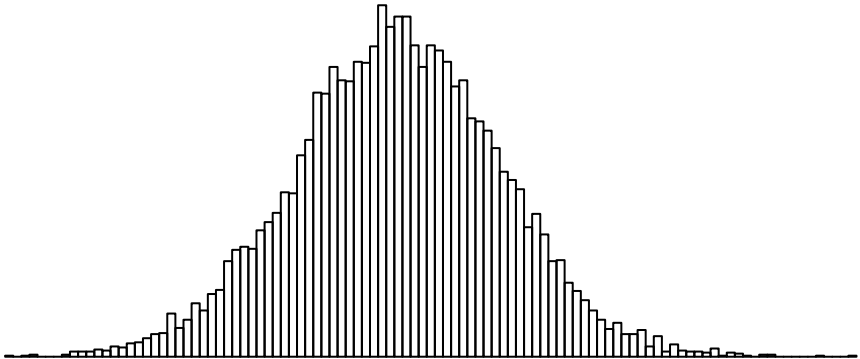

D206:120

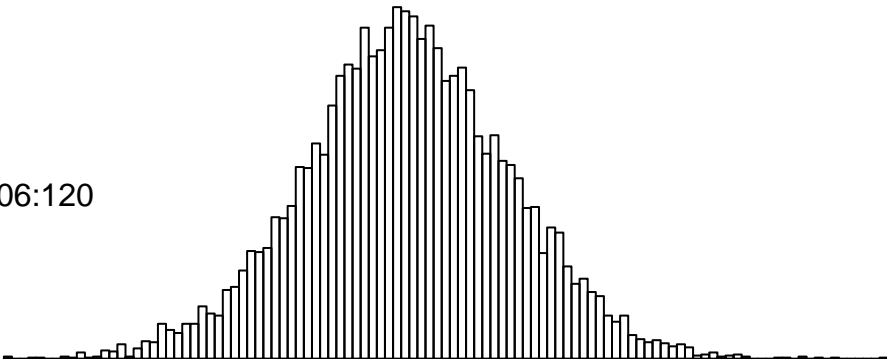

D206:45

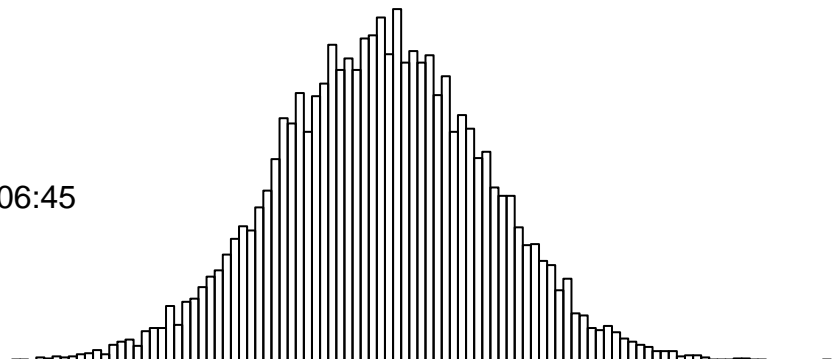

-9.0 -8.5 -8.0 -7.5 -7.0 -6.5 -6.0

Sugar 16

D206:240 – D206:120

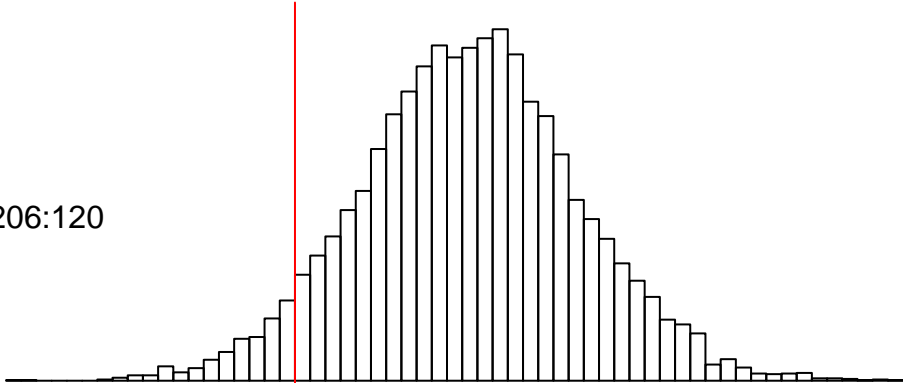

D206:240 – D206:45

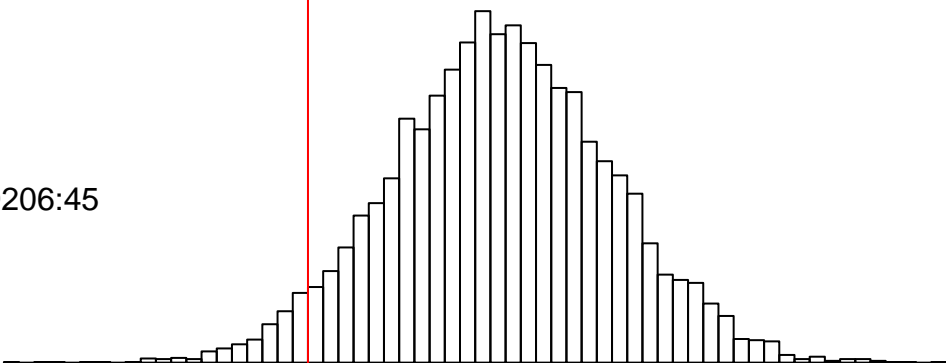

D206:120 – D206:45

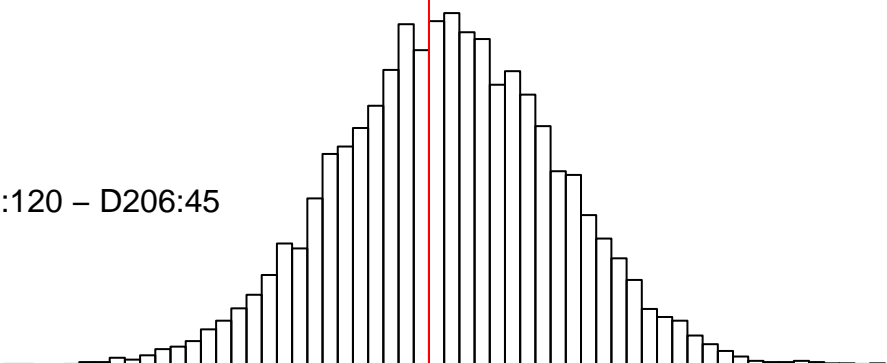

-1

0

1

2

delta(Sugar 16)

D206:240

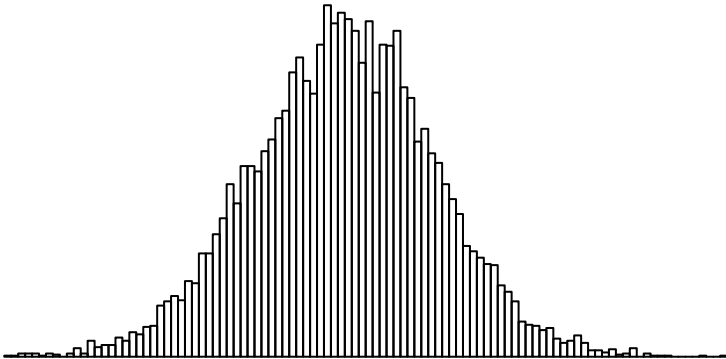

D206:120

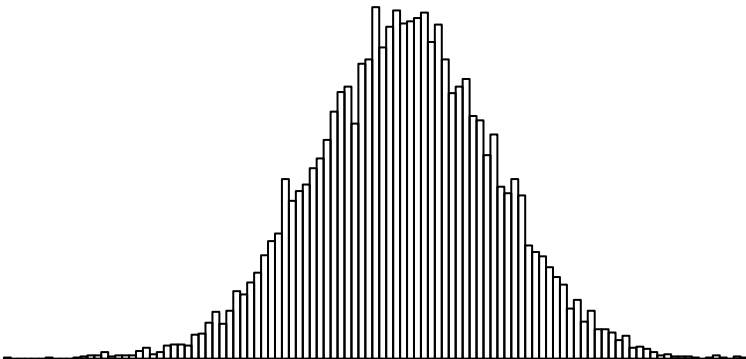

D206:45

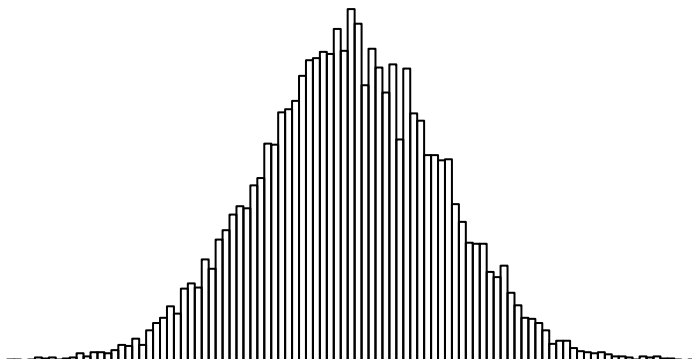

-8.0      -7.5      -7.0      -6.5      -6.0      -5.5      -5.0      -4.5

Sugar 17

D206:240 – D206:120

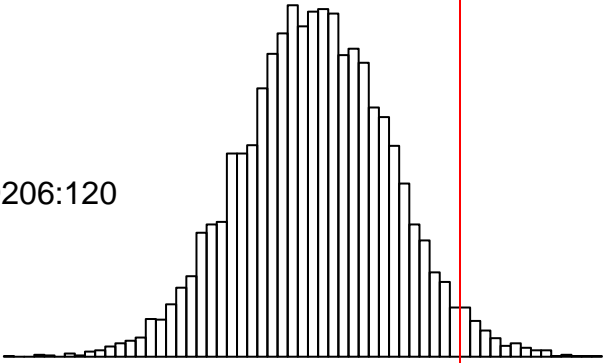

D206:240 – D206:45

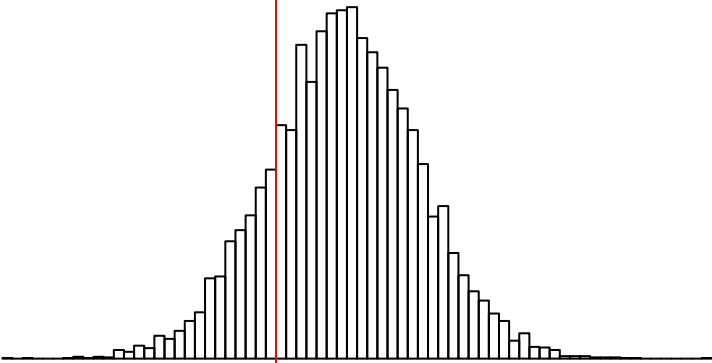

D206:120 – D206:45

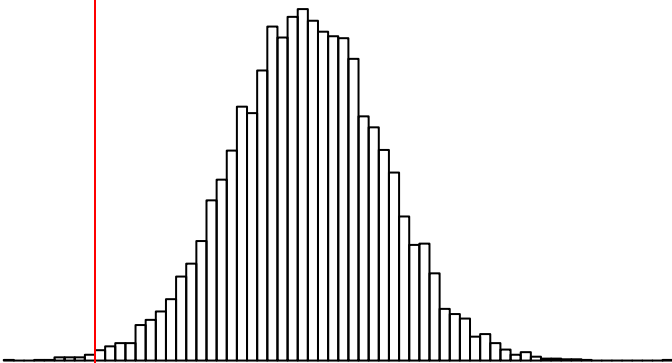

-3 -2 -1 0 1 2 3

delta(Sugar 17)



D206:240

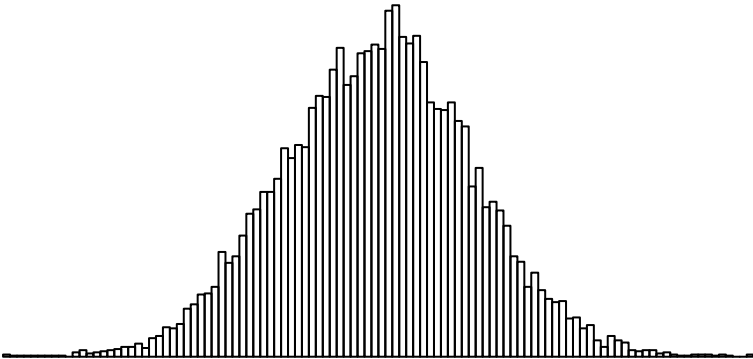

D206:120

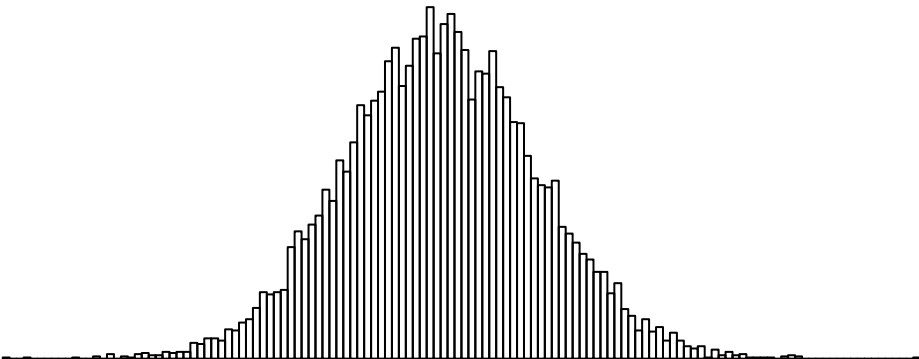

D206:45

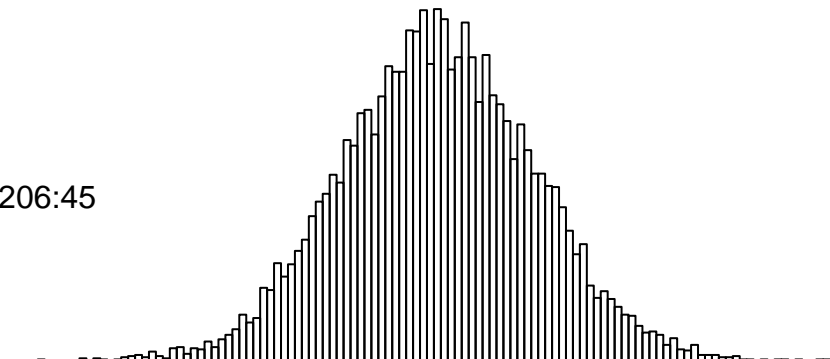

Sugar 18

D206:240 – D206:120

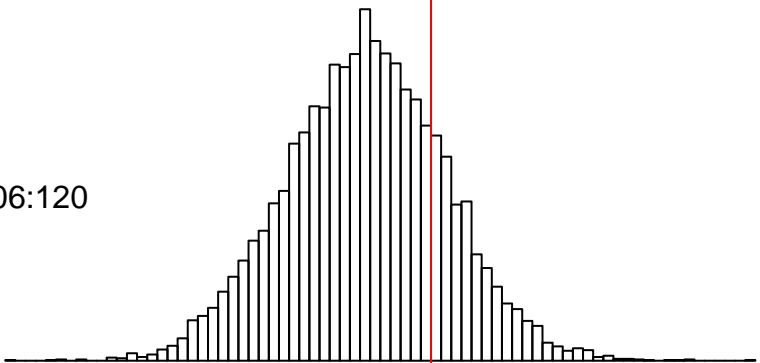

D206:240 – D206:45

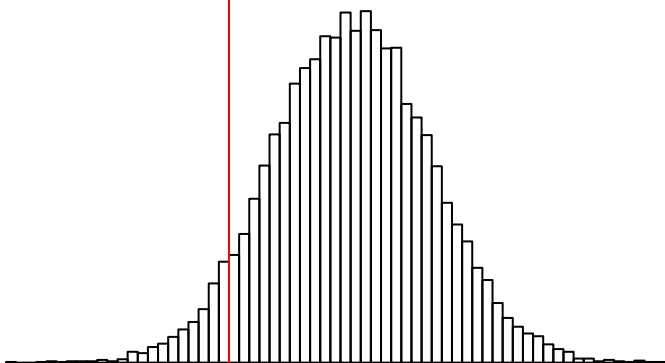

D206:120 – D206:45

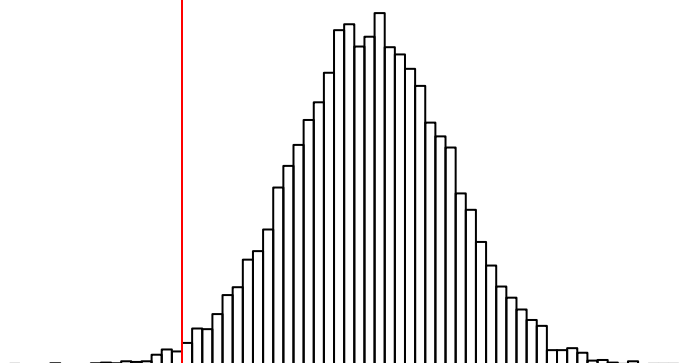

-3 -2 -1 0 1 2 3

delta(Sugar 18)

D206:240

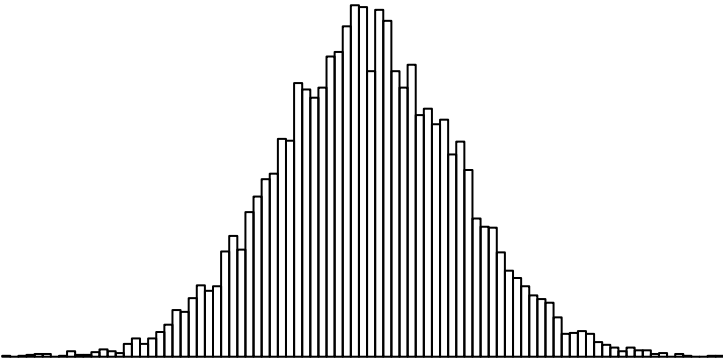

D206:120

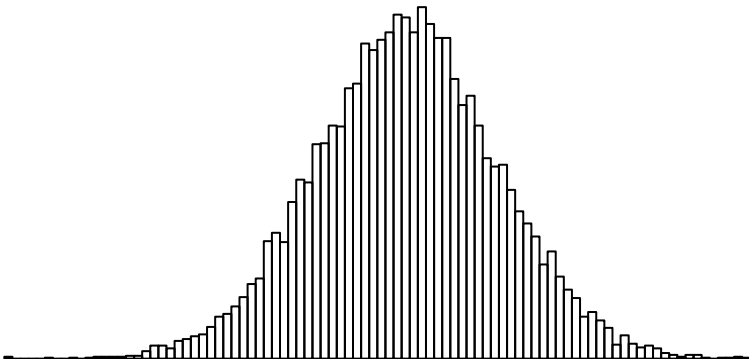

D206:45

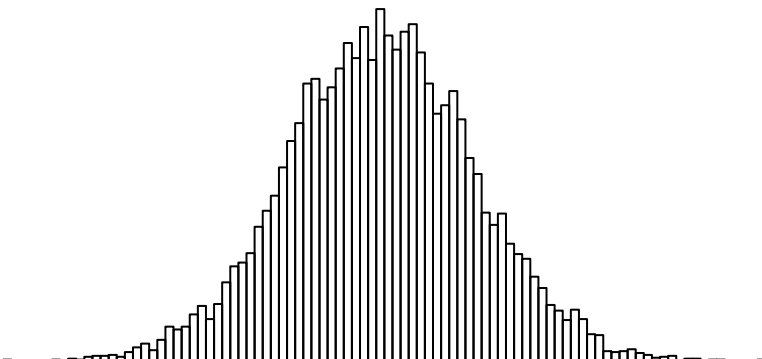

-9.0      -8.5      -8.0      -7.5      -7.0      -6.5      -6.0

Sugar 20

D206:240 – D206:120

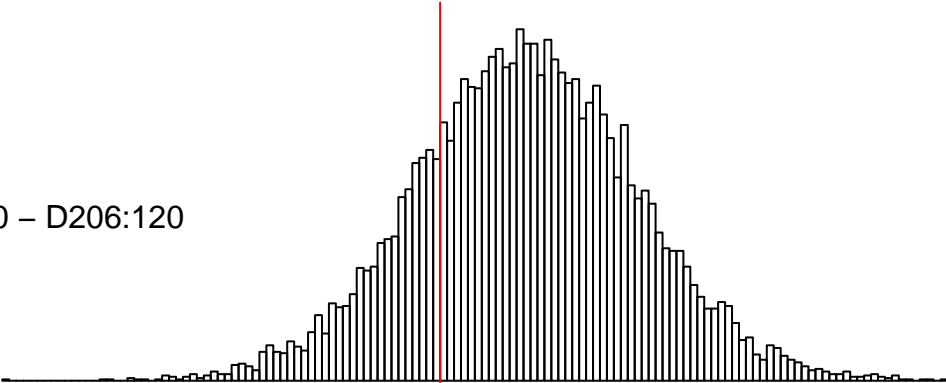

D206:240 – D206:45

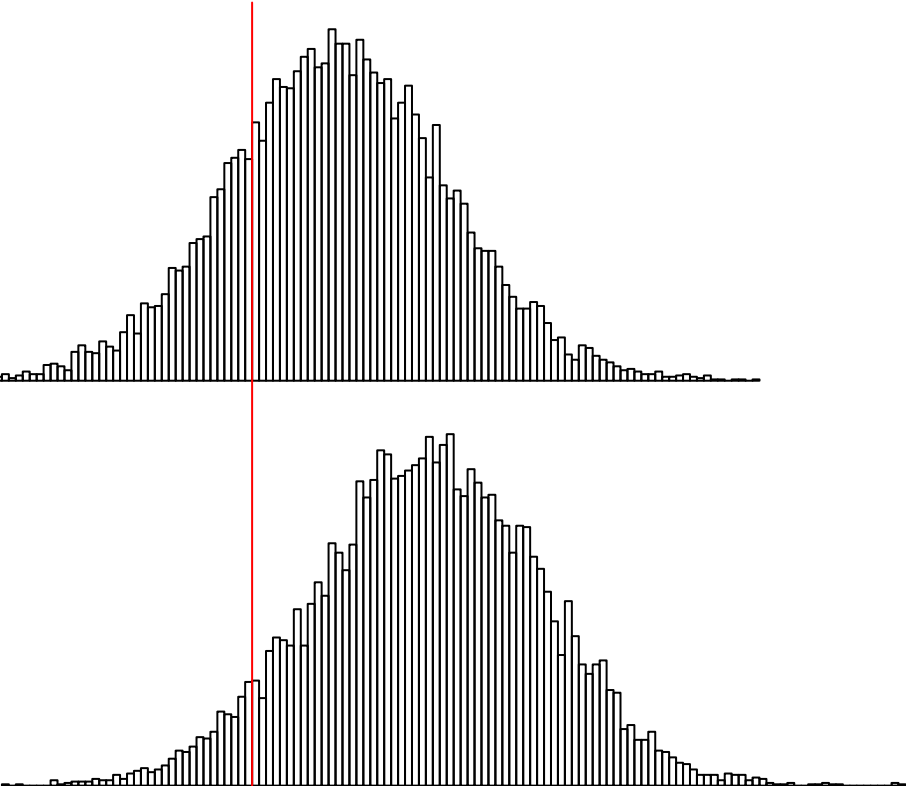

D206:120 – D206:45

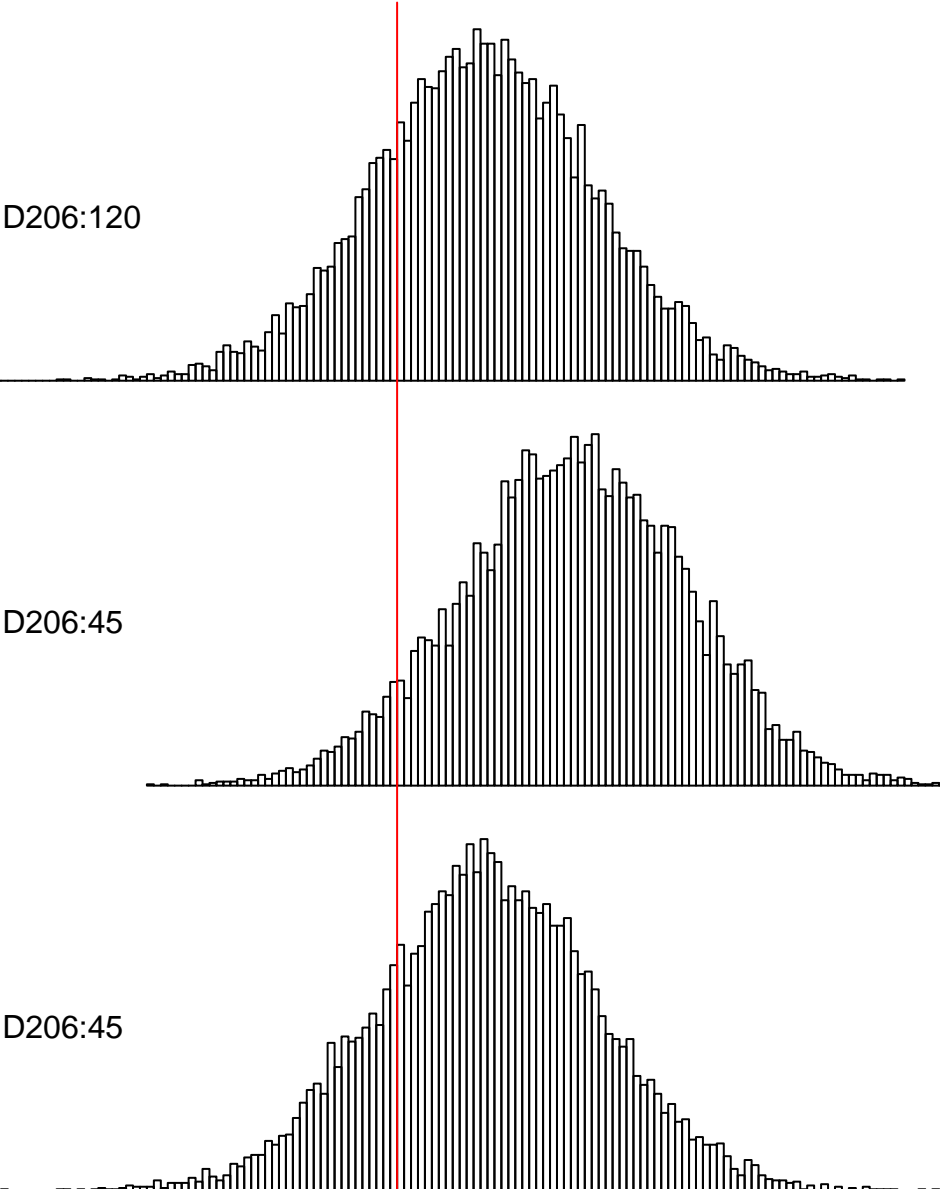

-1.5      -1.0      -0.5      0.0      0.5      1.0      1.5      2.0

delta(Sugar 20)

D206:240

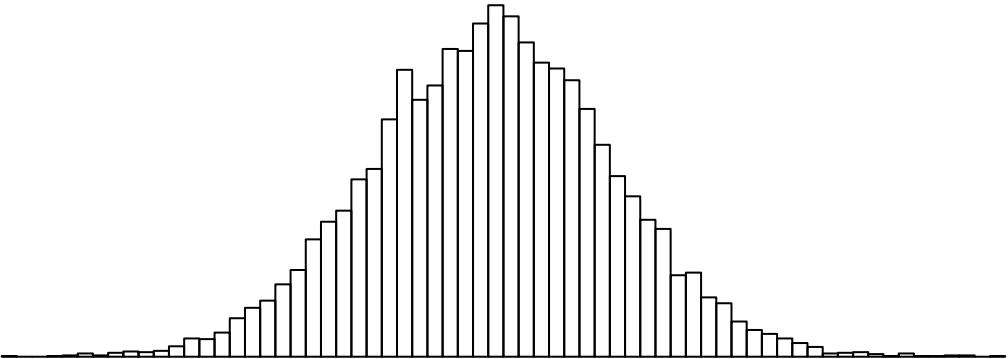

D206:120

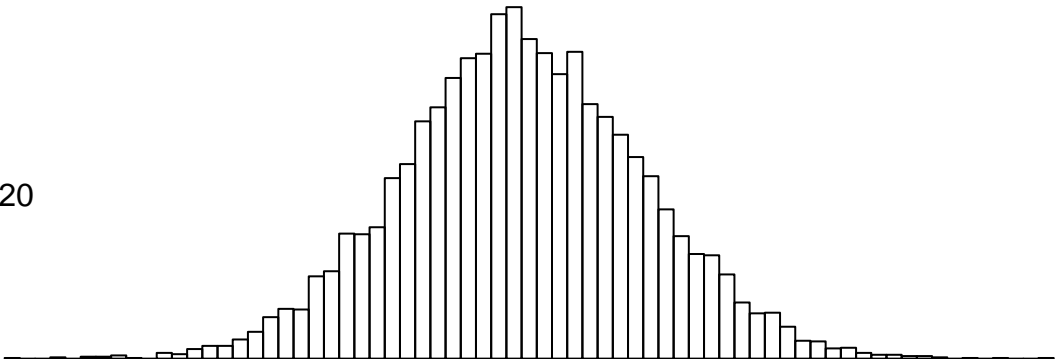

D206:45

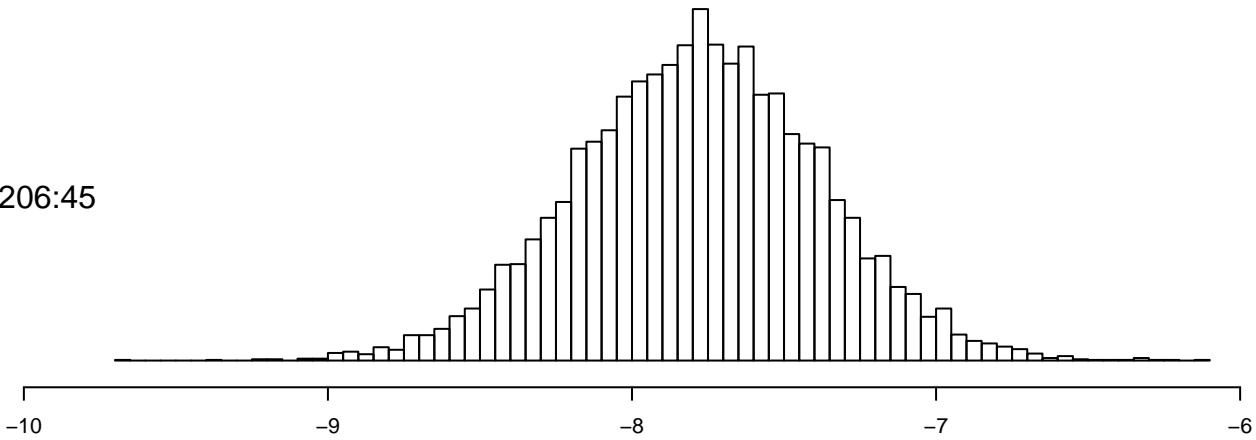

Sugar 21

D206:240 – D206:120

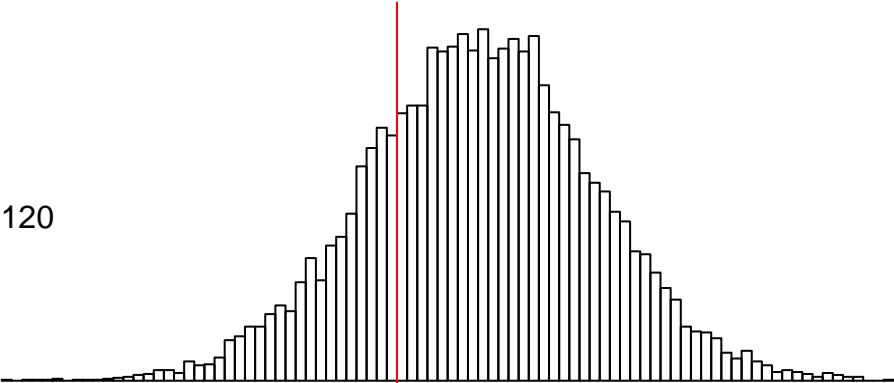

D206:240 – D206:45

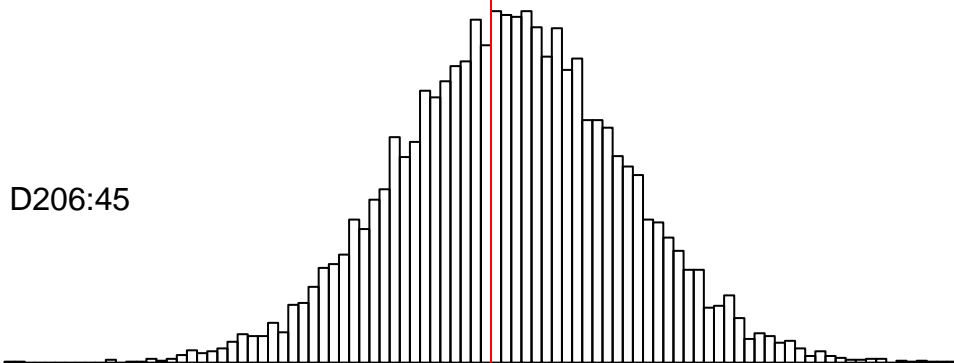

D206:120 – D206:45

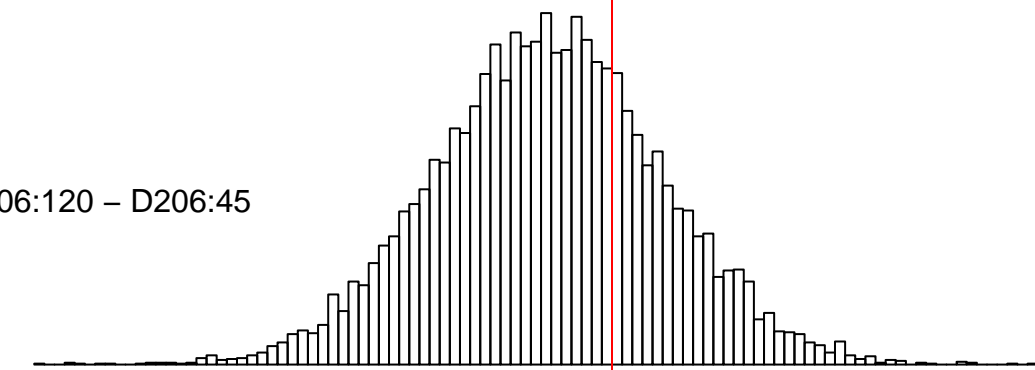

-3 -2 -1 0 1 2 3

delta(Sugar 21)

D206:240

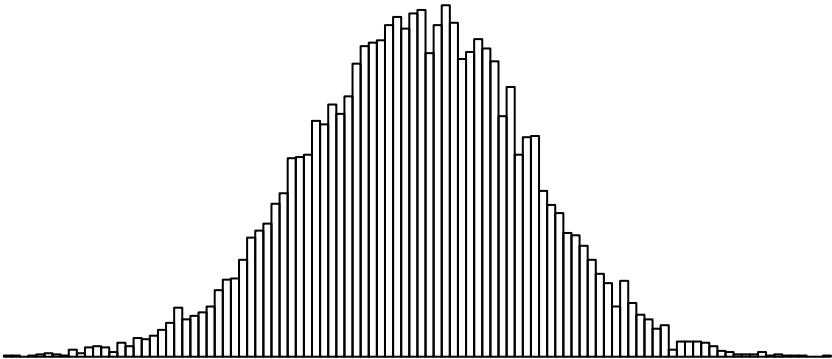

D206:120

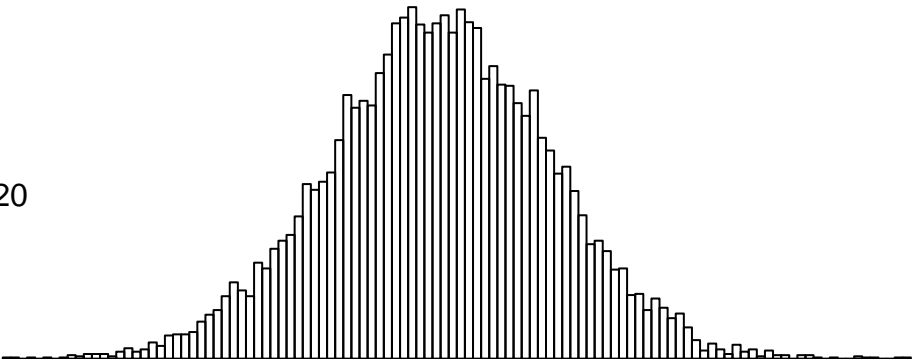

D206:45

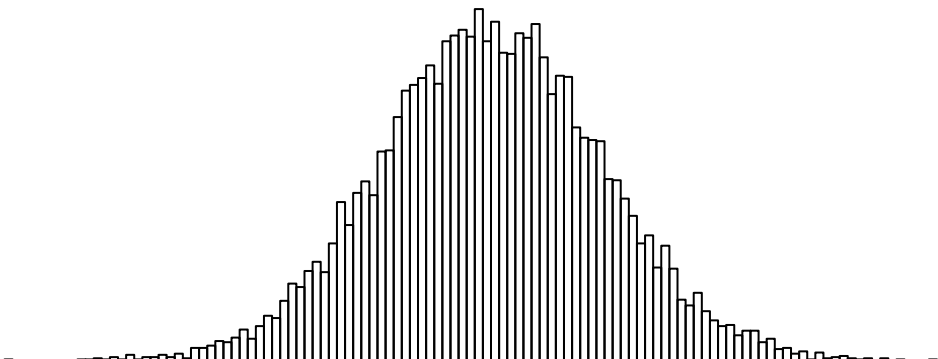

-6.5      -6.0      -5.5      -5.0      -4.5      -4.0      -3.5

Sugar 22

D206:240 – D206:120

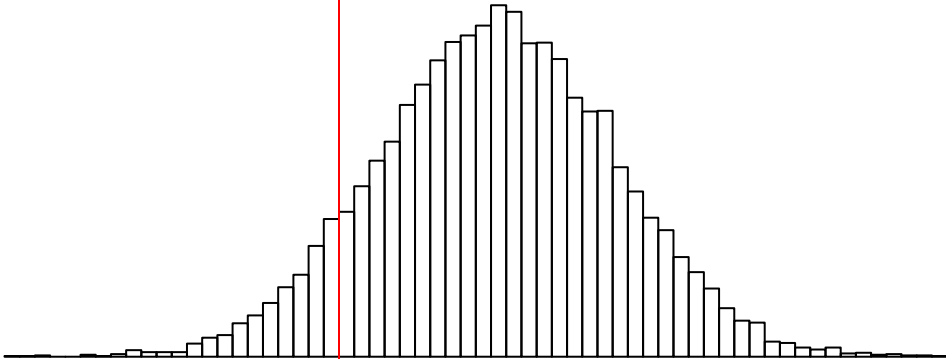

D206:240 – D206:45

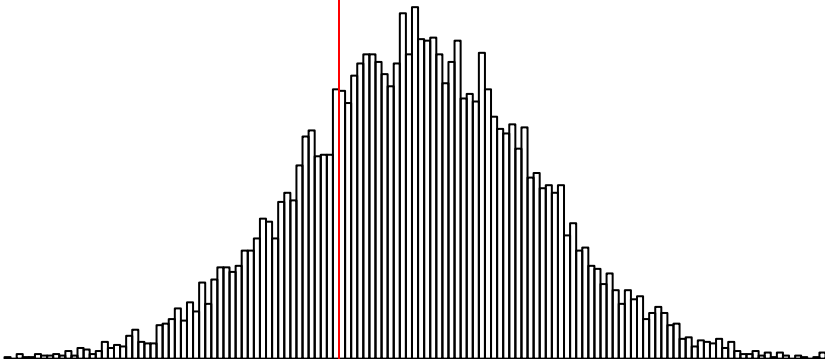

D206:120 – D206:45

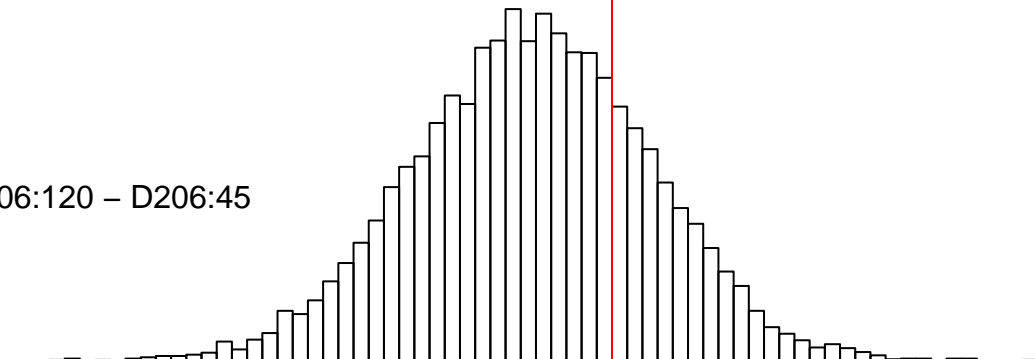

-2 -1 0 1 2

delta(Sugar 22)



D206:240

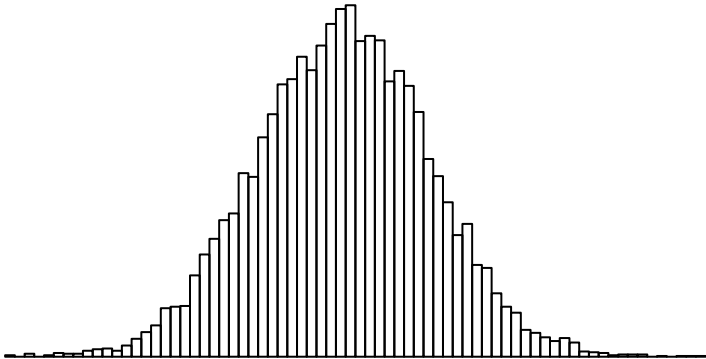

D206:120

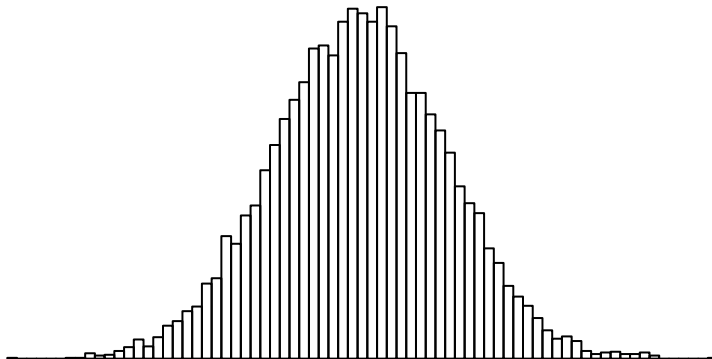

D206:45

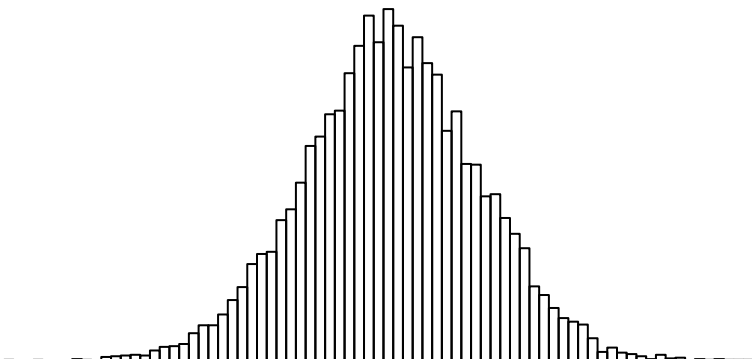

-8.0      -7.5      -7.0      -6.5      -6.0      -5.5

Sugar 23

D206:240 – D206:120

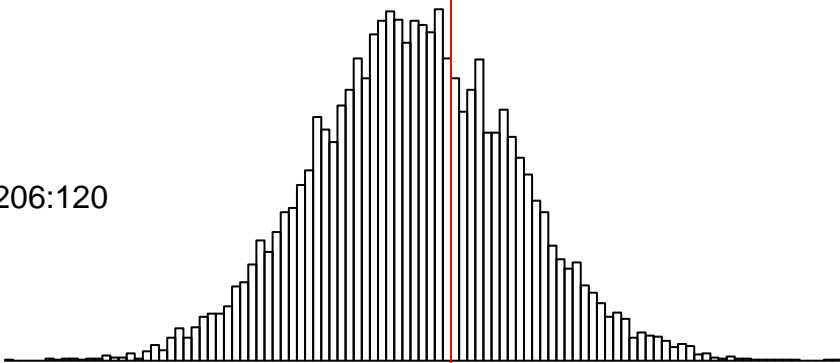

D206:240 – D206:45

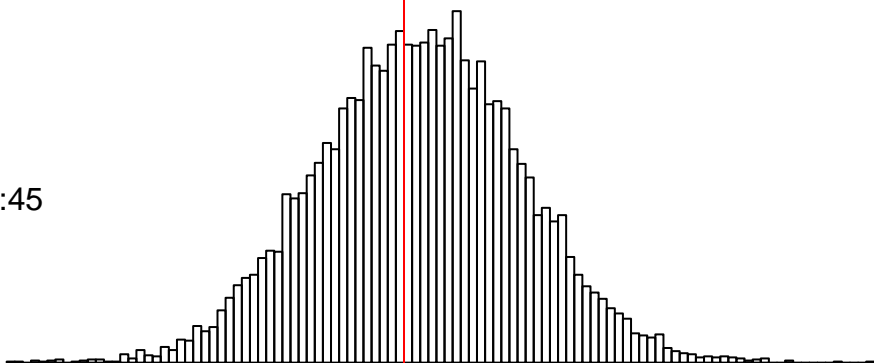

D206:120 – D206:45

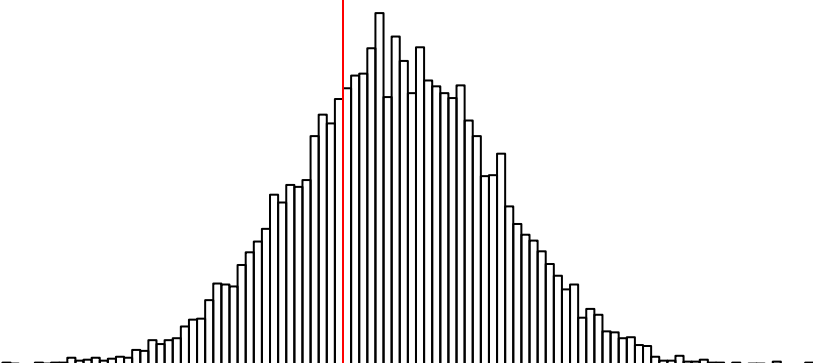

-1.5      -1.0      -0.5      0.0      0.5      1.0      1.5

delta(Sugar 23)

D206:240

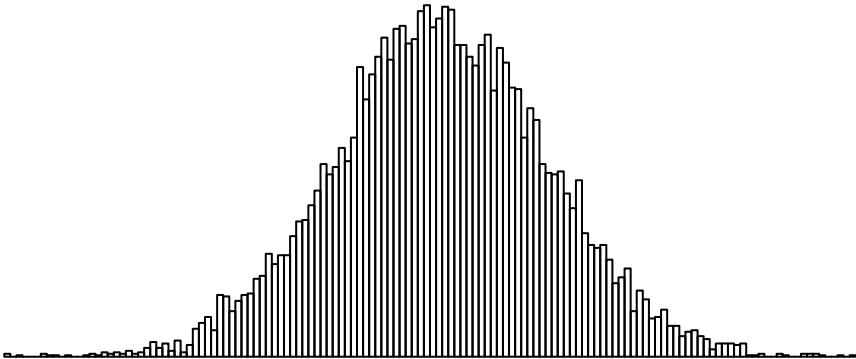

D206:120

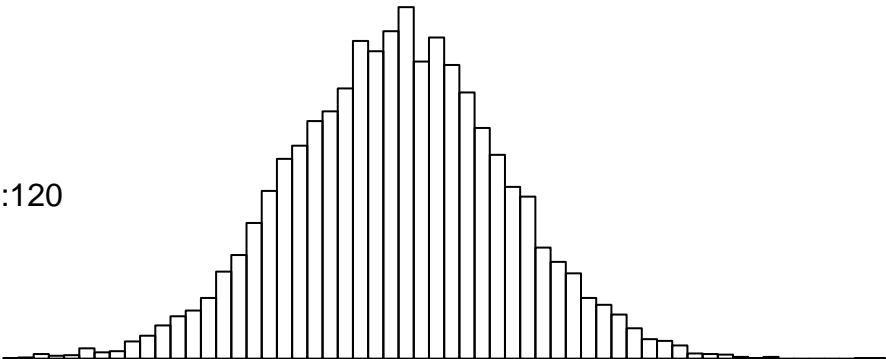

D206:45

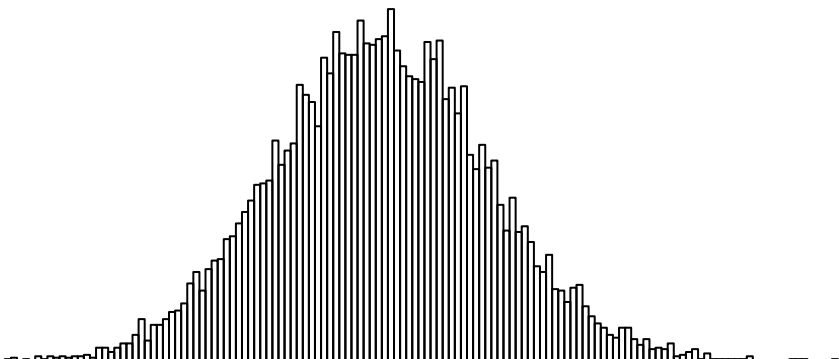

-7

-6

-5

-4

Sugar 24

D206:240 – D206:120

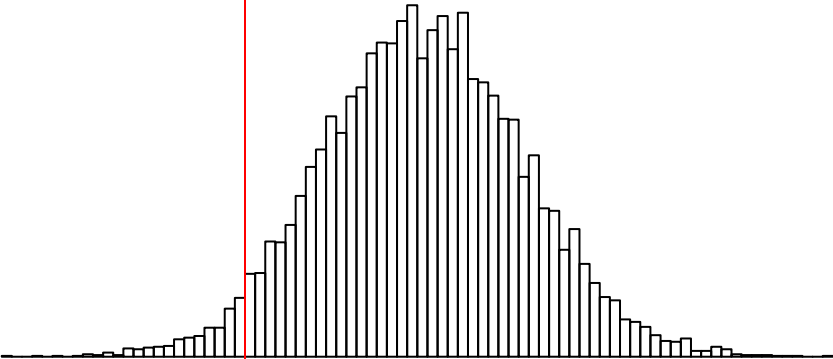

D206:240 – D206:45

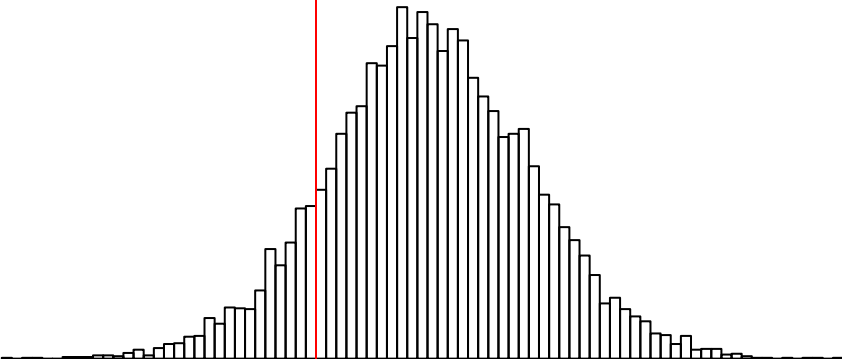

D206:120 – D206:45

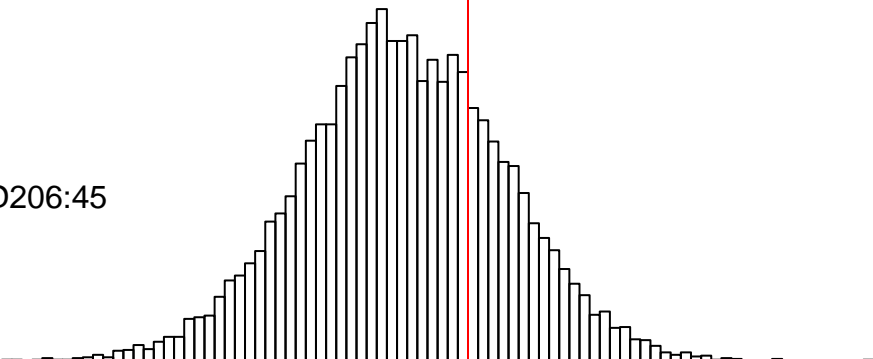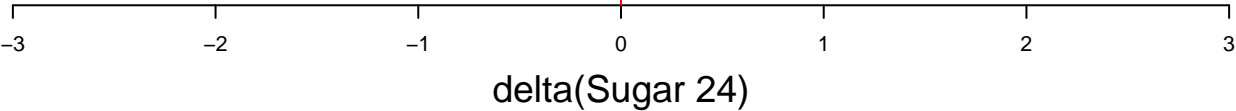

D206:240

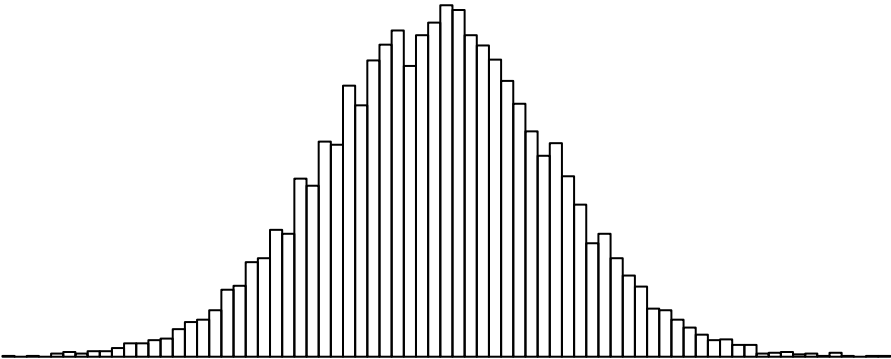

D206:120

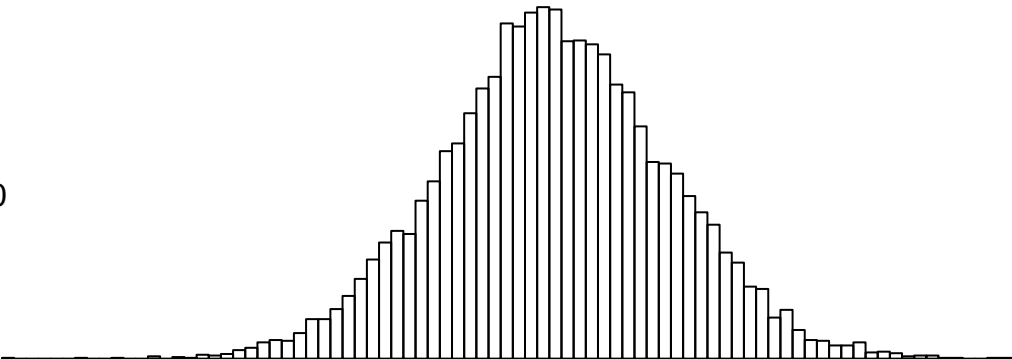

D206:45

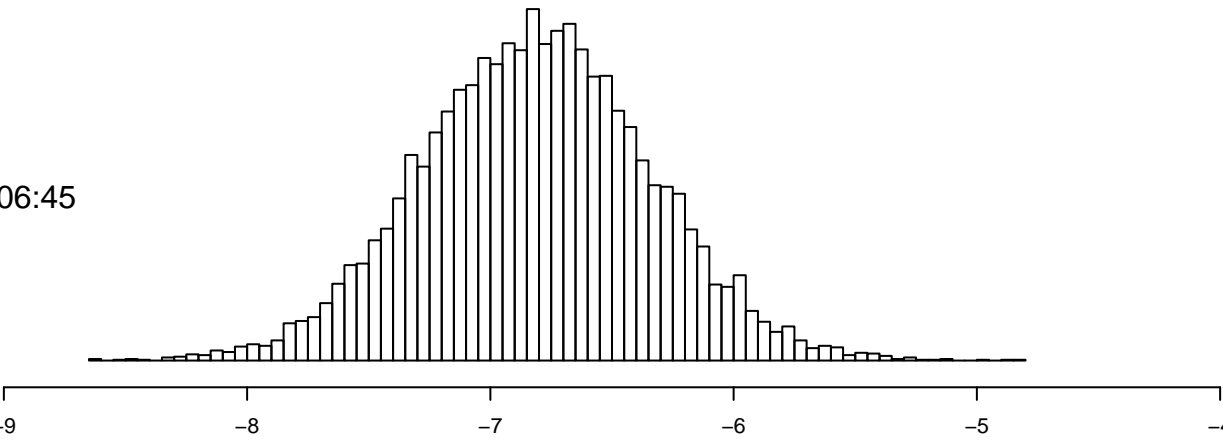

Alcohol 1

D206:240 – D206:120

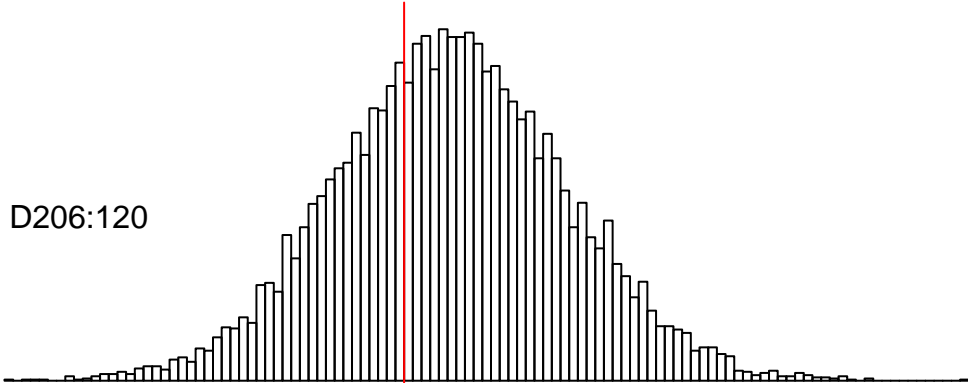

D206:240 – D206:45

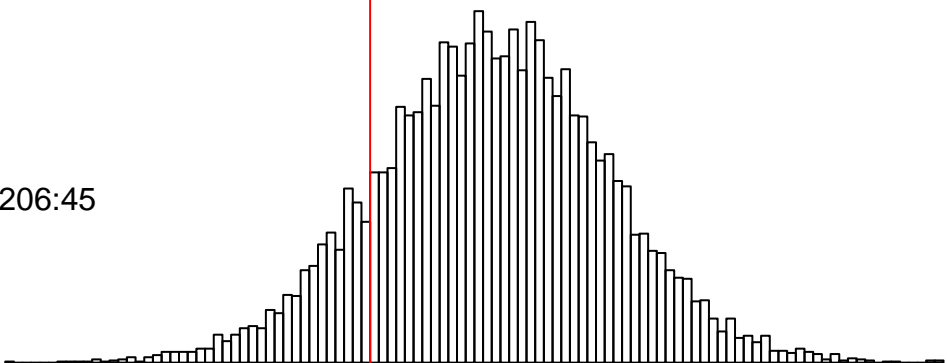

D206:120 – D206:45

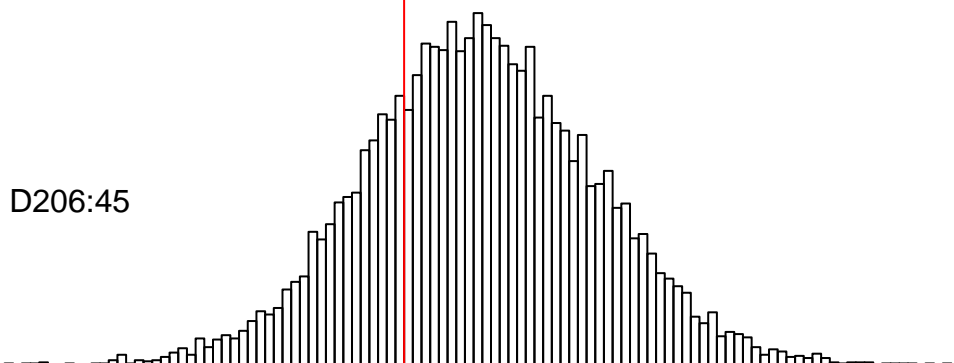

-3 -2 -1 0 1 2 3 4

delta(Alcohol 1)

D206:240

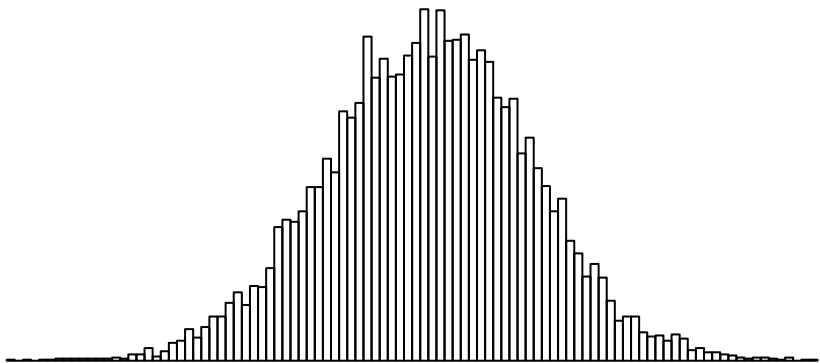

D206:120

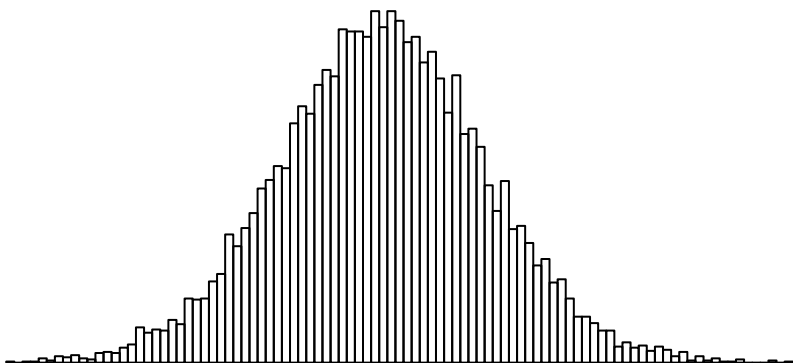

D206:45

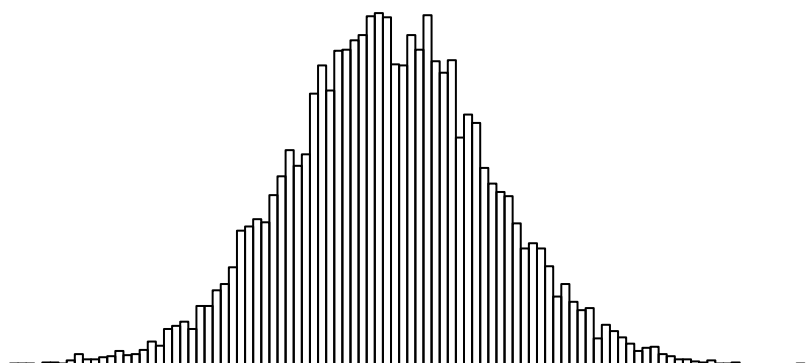

-8.0      -7.5      -7.0      -6.5      -6.0      -5.5      -5.0

Hydrocarbon 1

D206:240 – D206:120

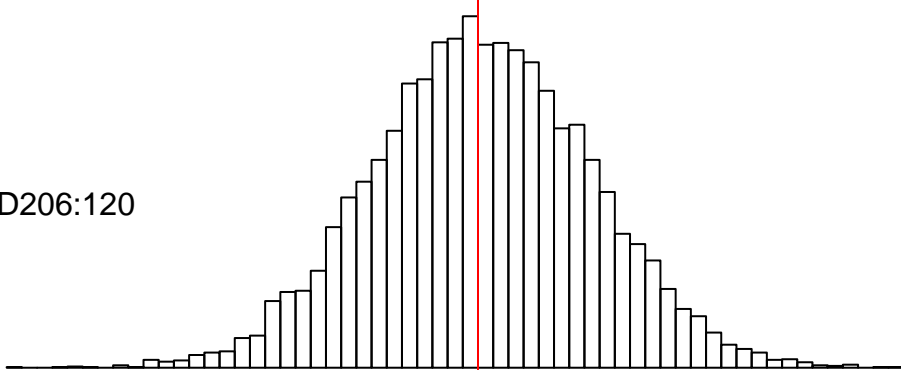

D206:240 – D206:45

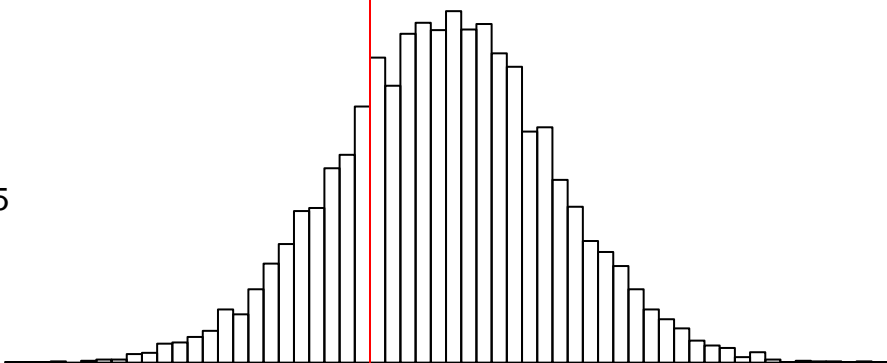

D206:120 – D206:45

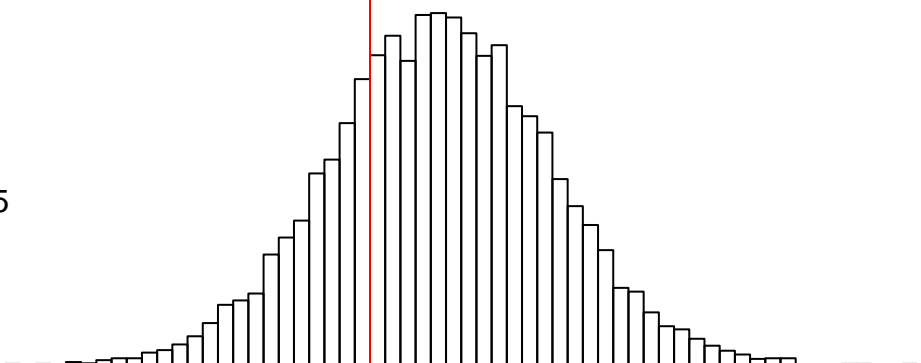

-2

-1

0

1

2

delta(Hydrocarbon 1)



D206:240

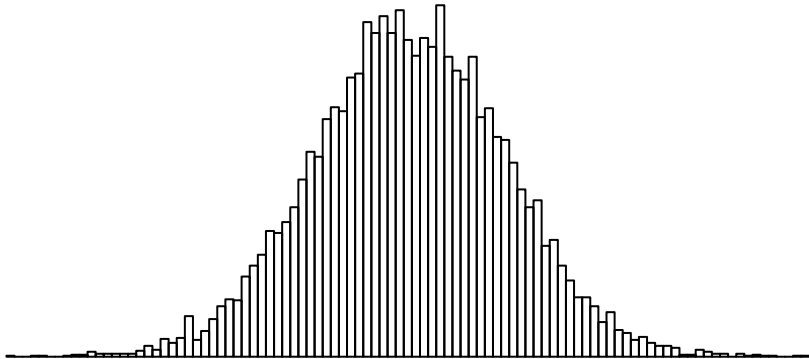

D206:120

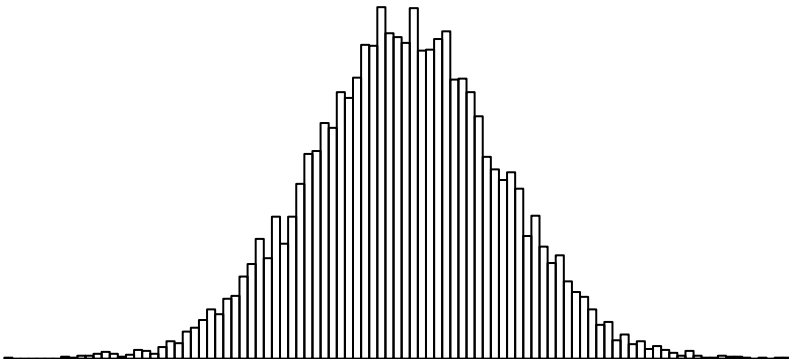

D206:45

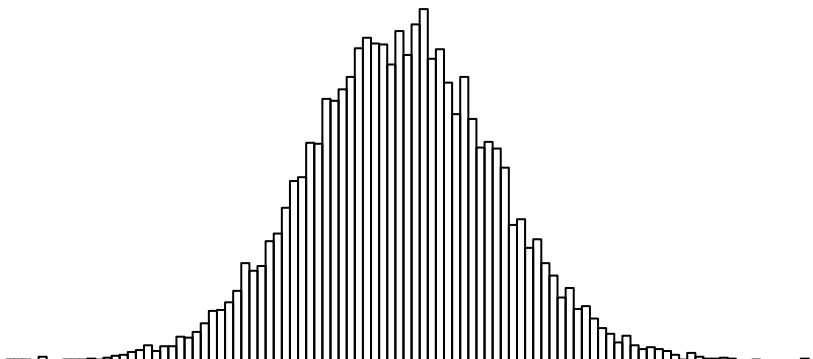

-7.5      -7.0      -6.5      -6.0      -5.5      -5.0      -4.5

Hydrocarbon 2

D206:240 – D206:120

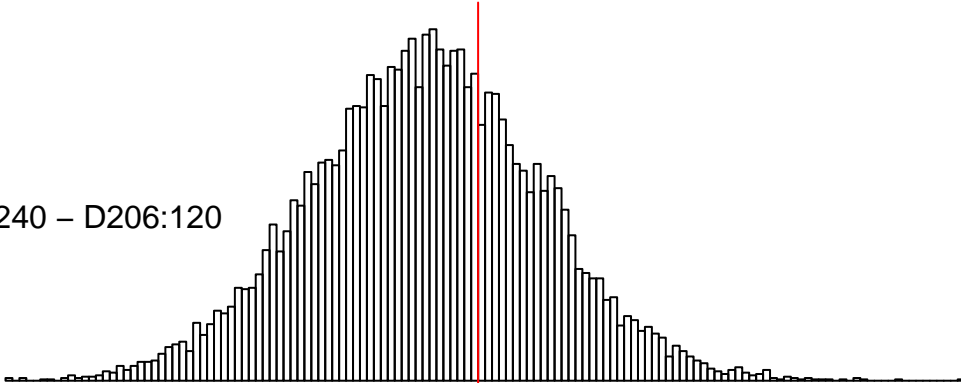

D206:240 – D206:45

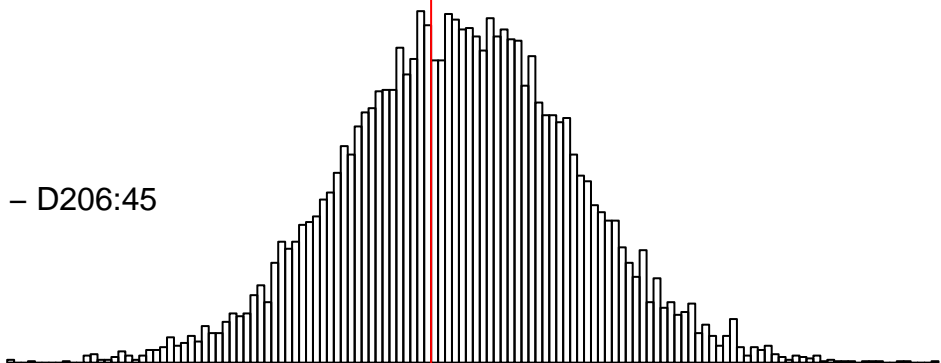

D206:120 – D206:45

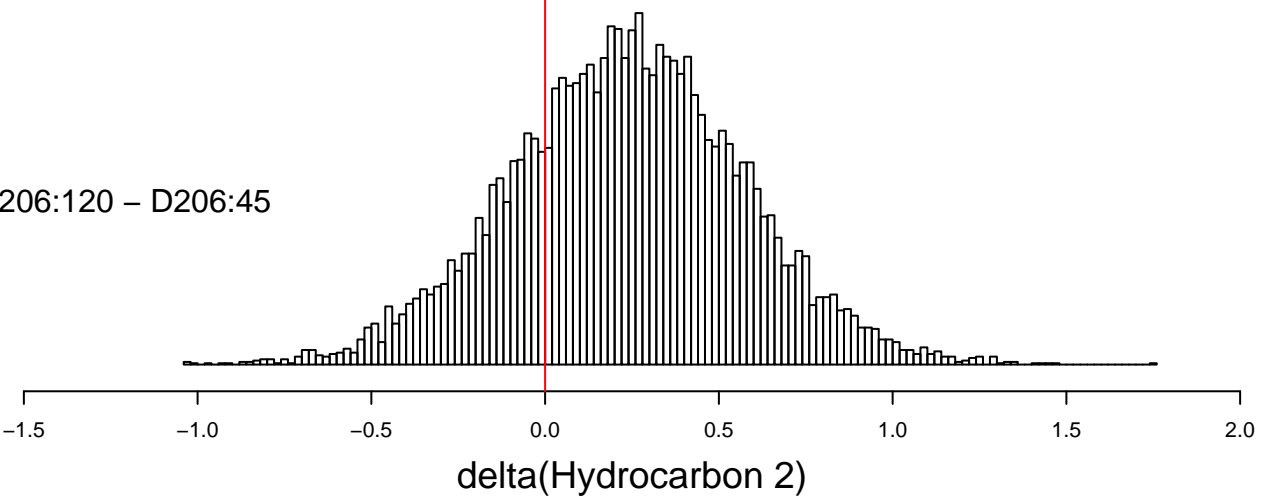

D206:240

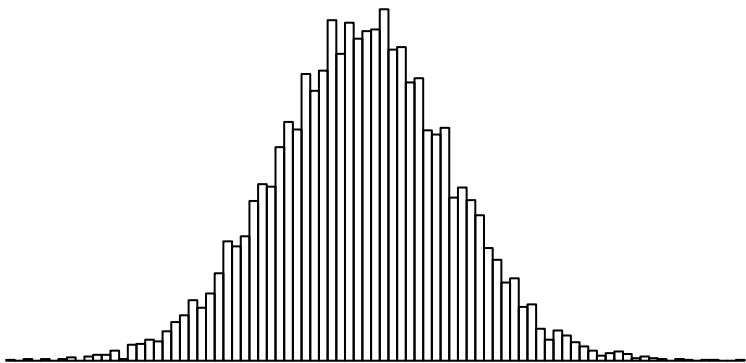

D206:120

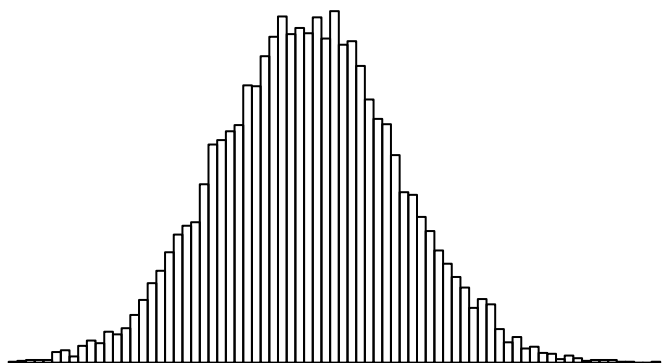

D206:45

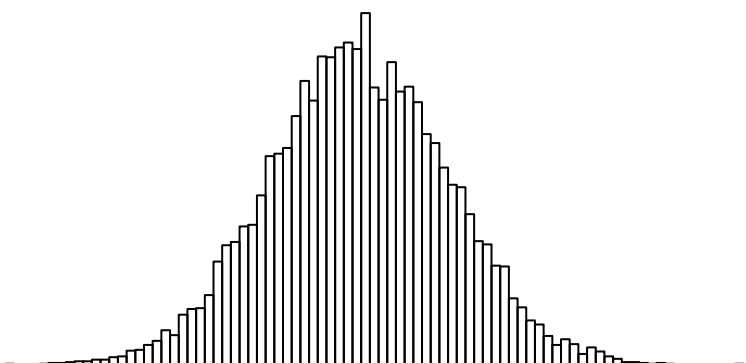

-10      -9      -8      -7      -6      -5      -4      -3

Hydrocarbon 3

D206:240 – D206:120

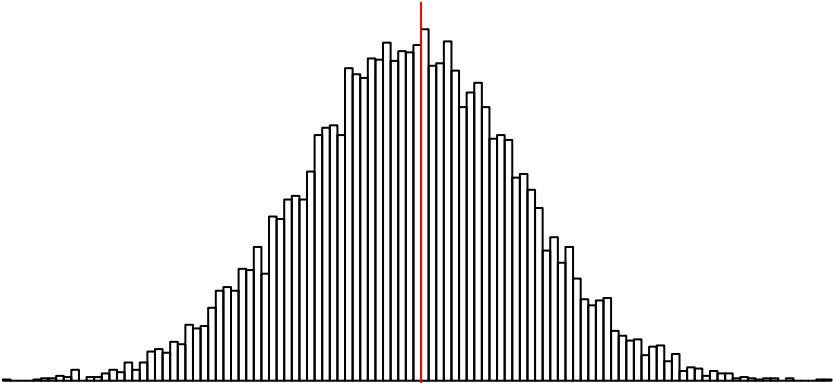

D206:240 – D206:45

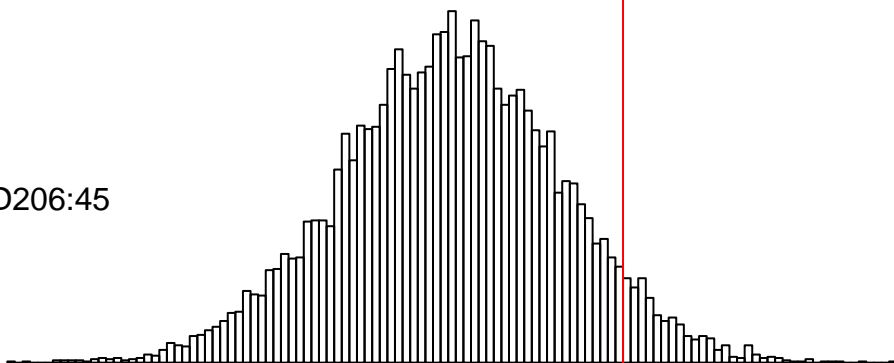

D206:120 – D206:45

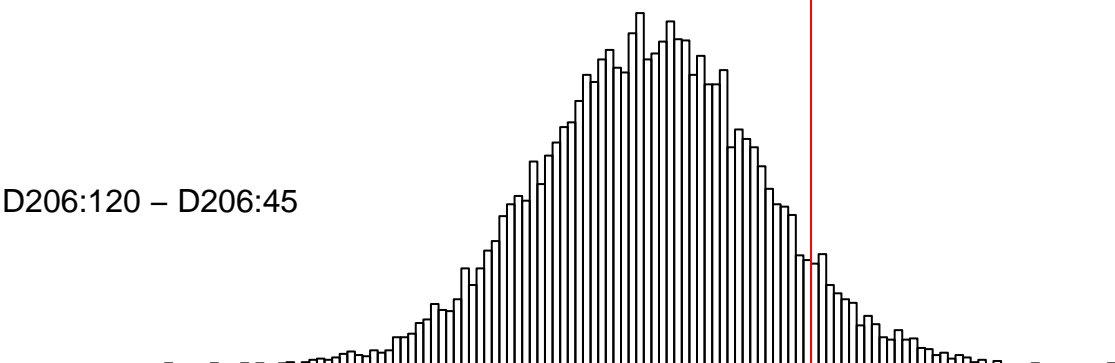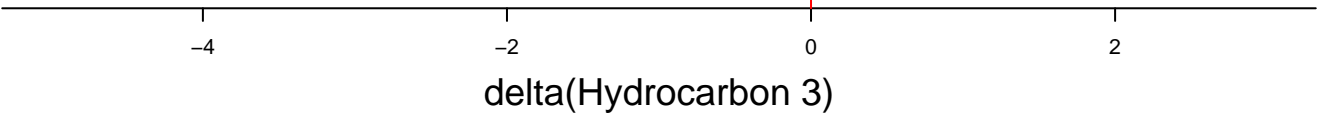

D206:240

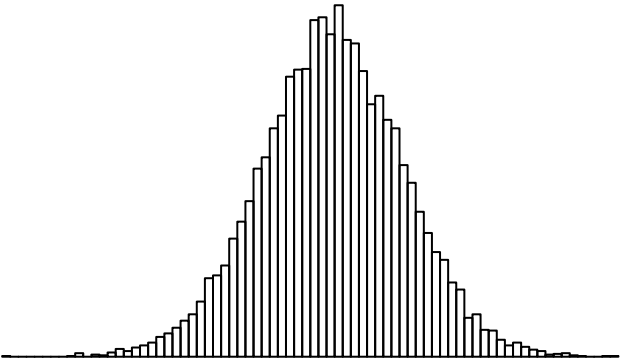

D206:120

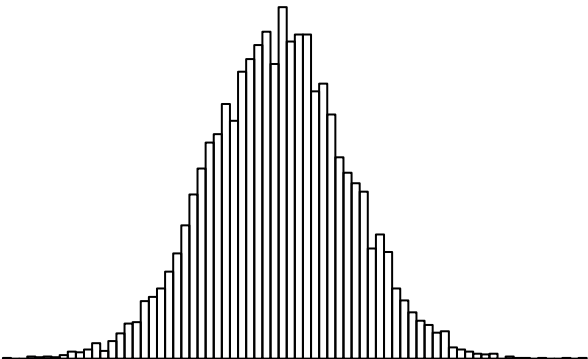

D206:45

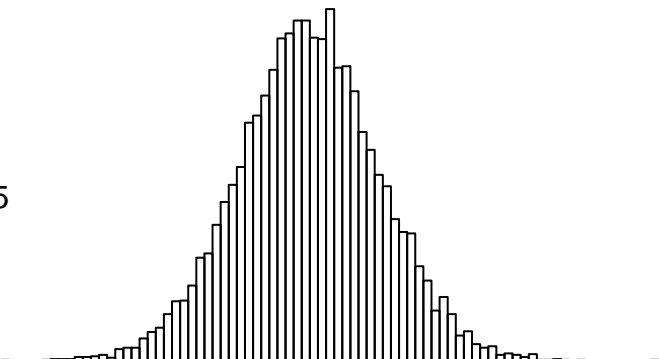

-9.0      -8.5      -8.0      -7.5      -7.0      -6.5      -6.0

Hydrocarbon 4

D206:240 – D206:120

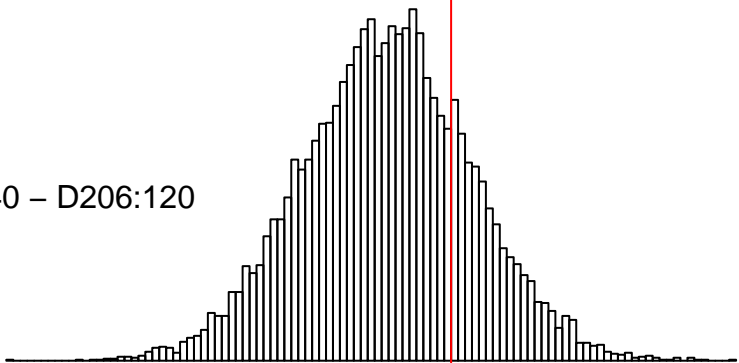

D206:240 – D206:45

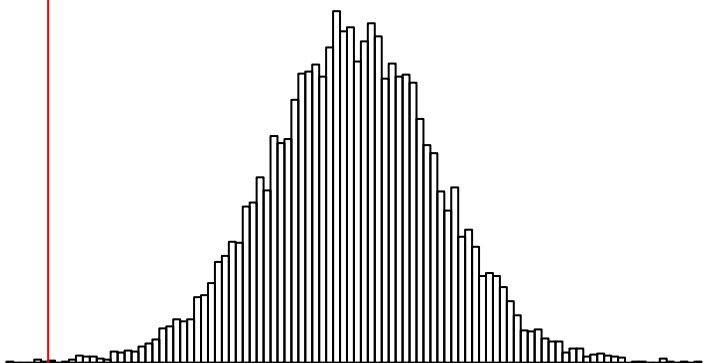

D206:120 – D206:45

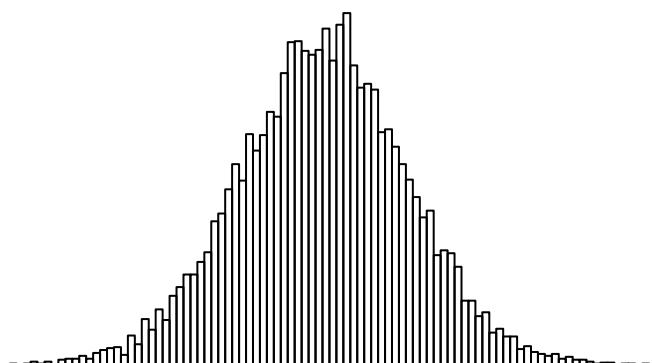

-1.5      -1.0      -0.5      0.0      0.5      1.0      1.5      2.0

delta(Hydrocarbon 4)

D206:240

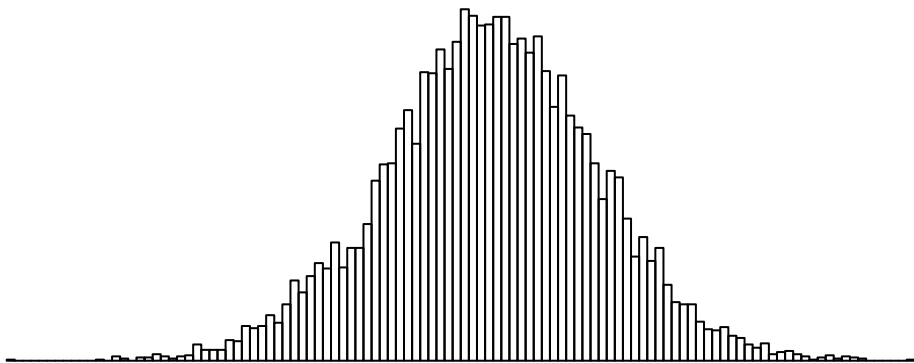

D206:120

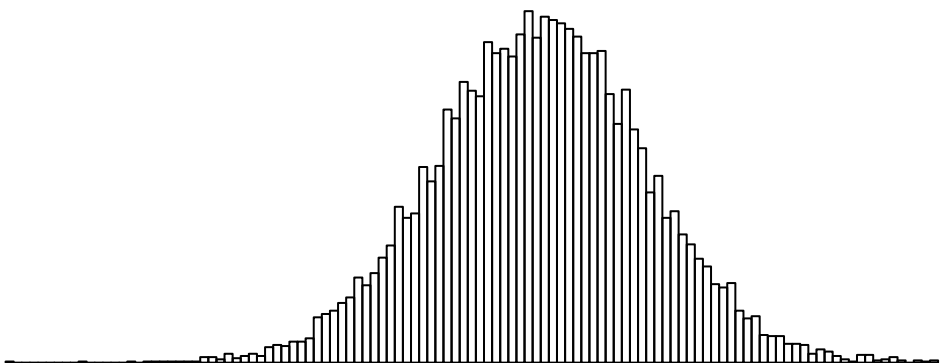

D206:45

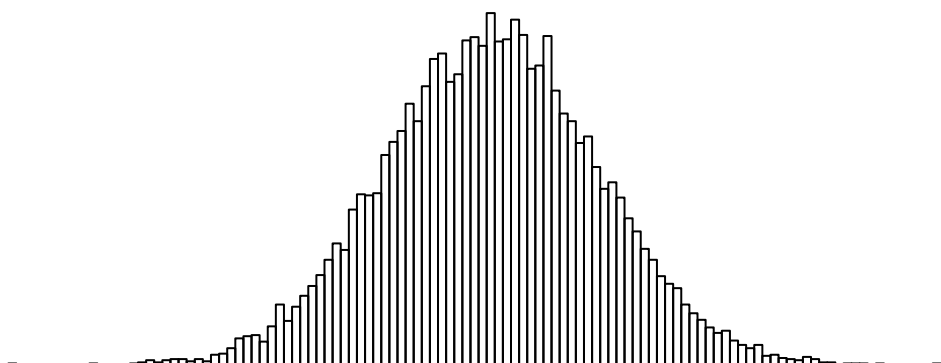

-9.0 -8.5 -8.0 -7.5 -7.0 -6.5 -6.0

Unidentified Metabolite 1

D206:240 – D206:120

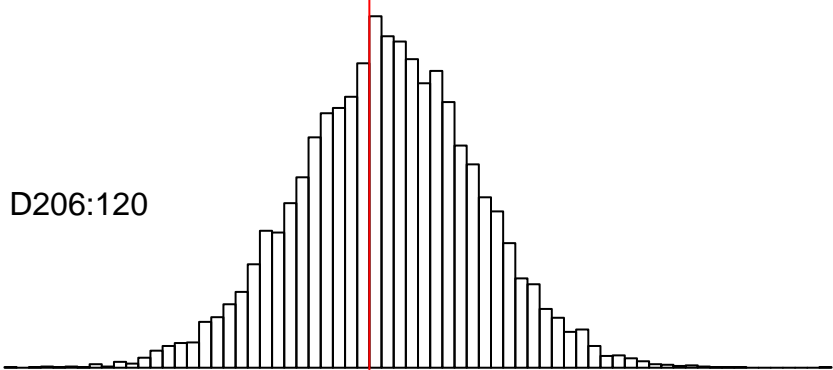

D206:240 – D206:45

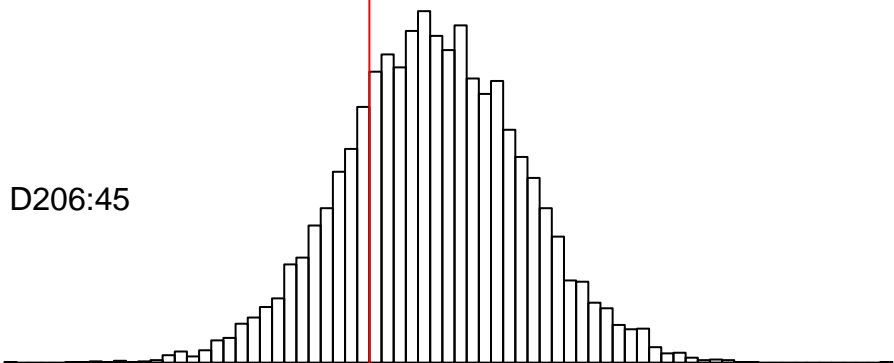

D206:120 – D206:45

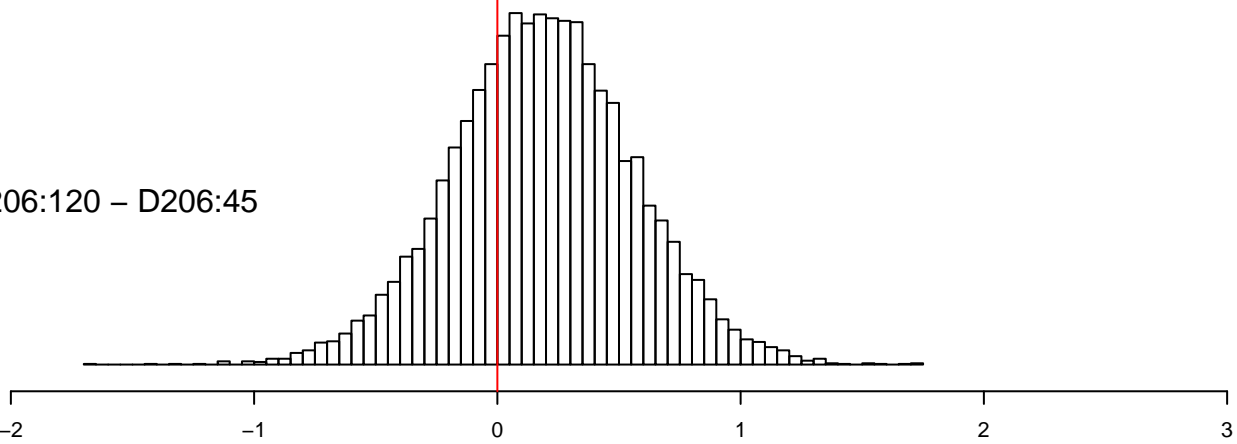

delta(Unidentified Metabolite 1)



D206:240

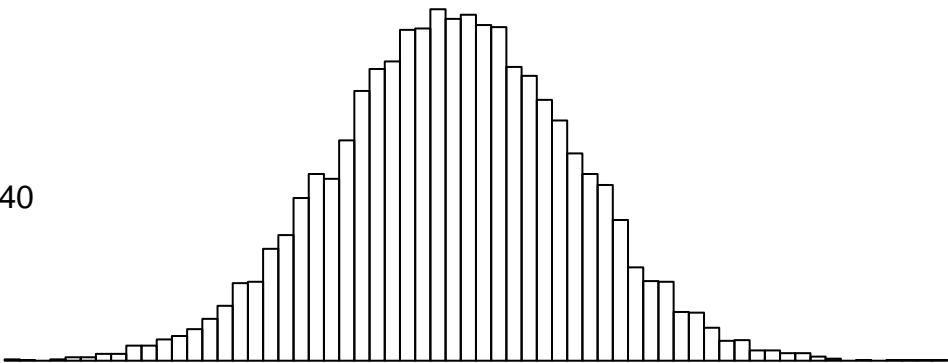

D206:120

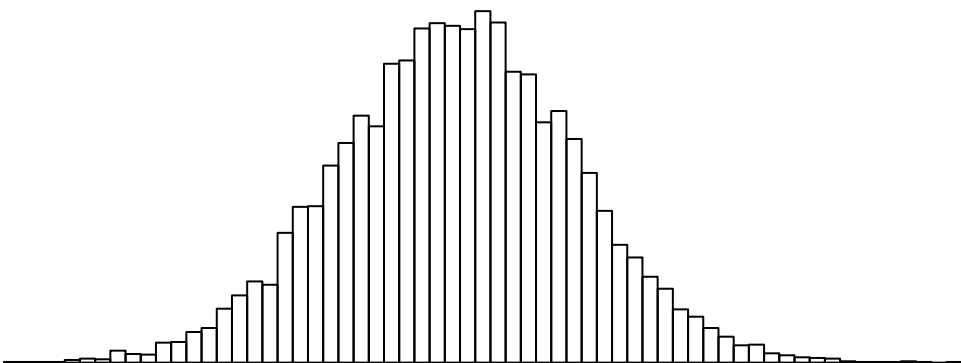

D206:45

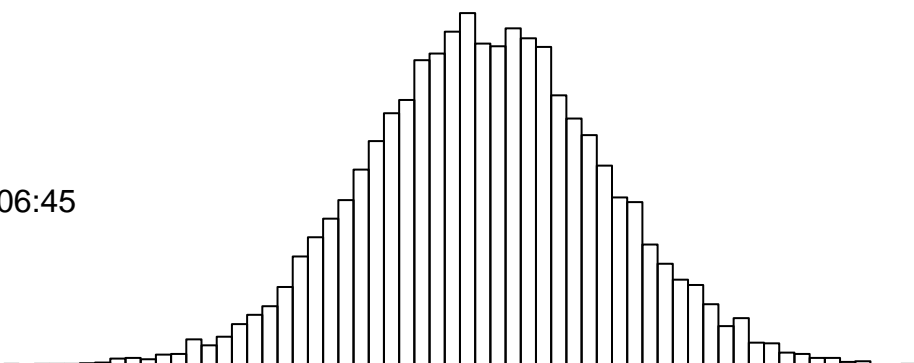

-9 -8 -7 -6 -5

Unidentified Metabolite 2

D206:240 – D206:120

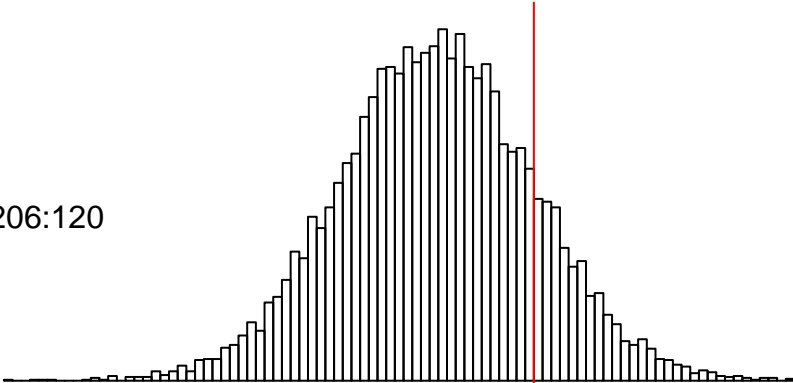

D206:240 – D206:45

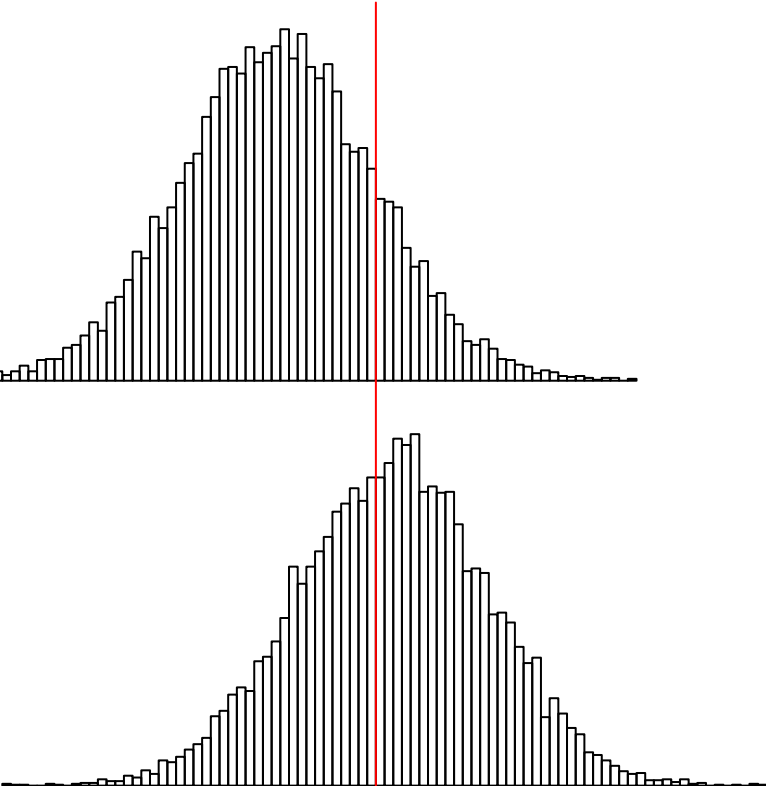

D206:120 – D206:45

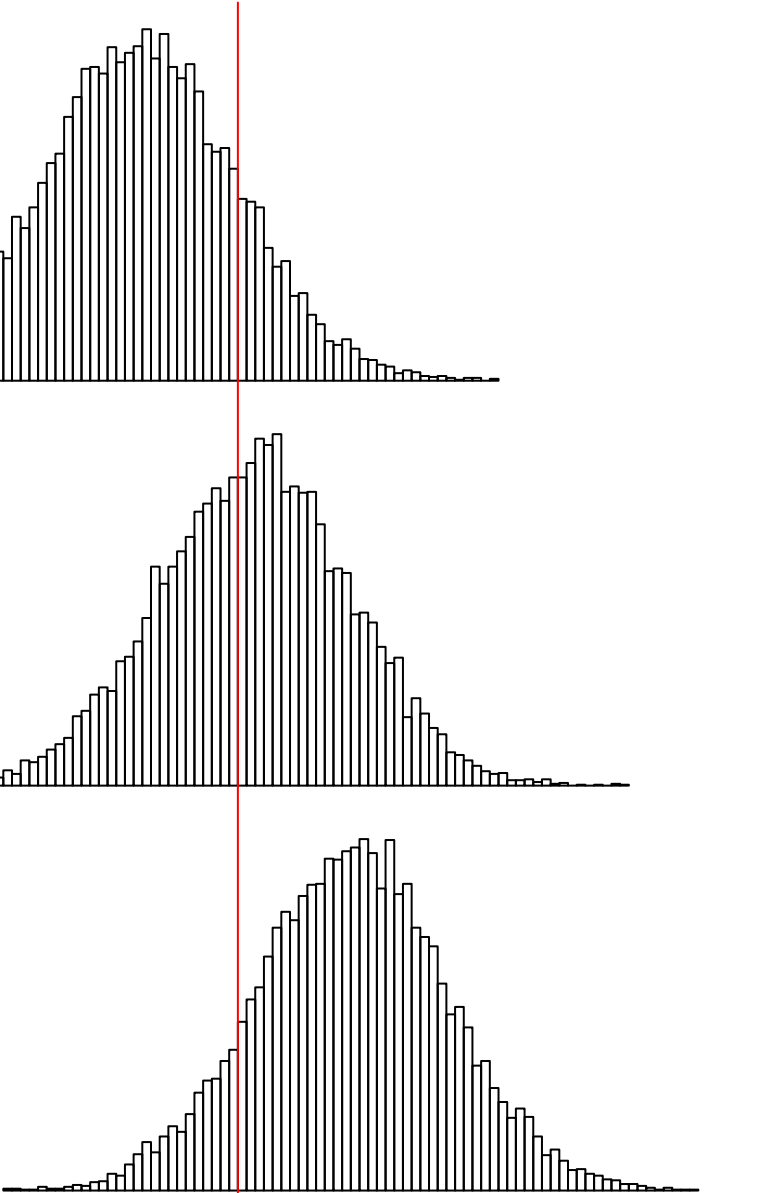

delta(Unidentified Metabolite 2)

D206:240

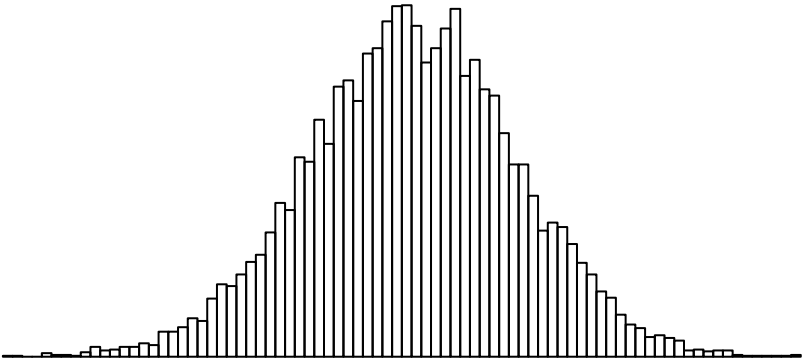

D206:120

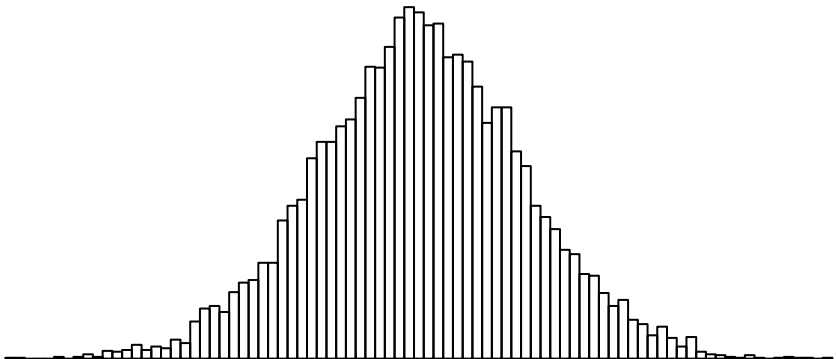

D206:45

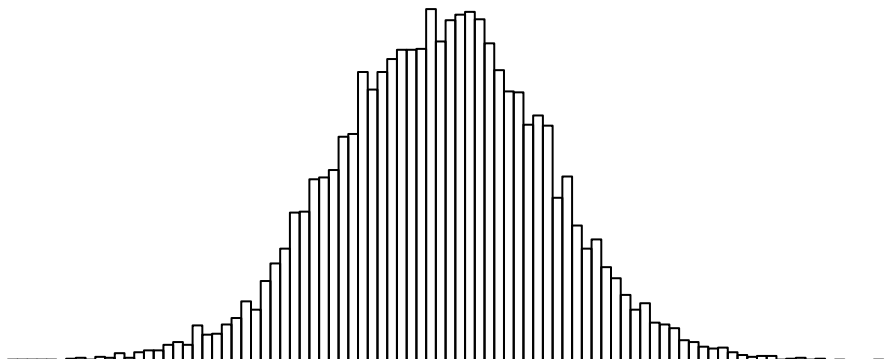

-10.0      -9.5      -9.0      -8.5      -8.0      -7.5

Unidentified Metabolite 3

D206:240 – D206:120

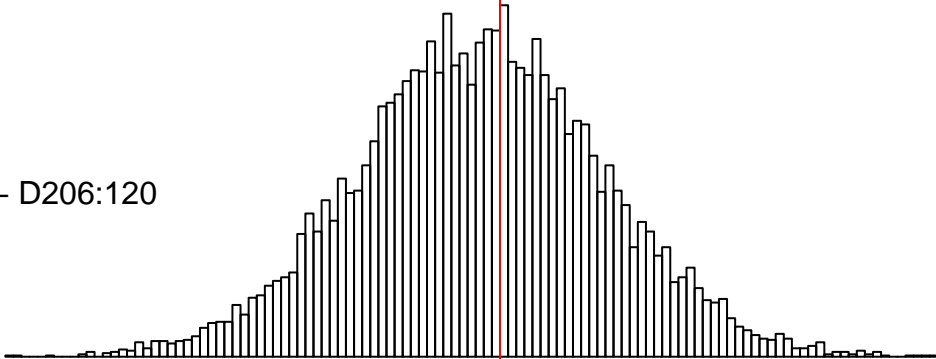

D206:240 – D206:45

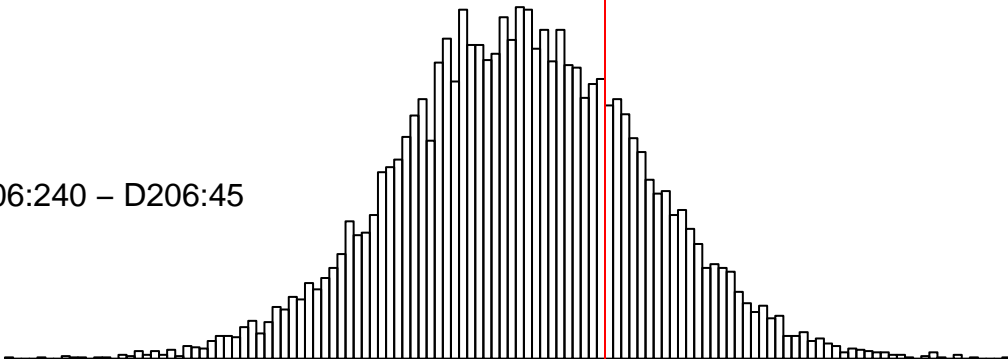

D206:120 – D206:45

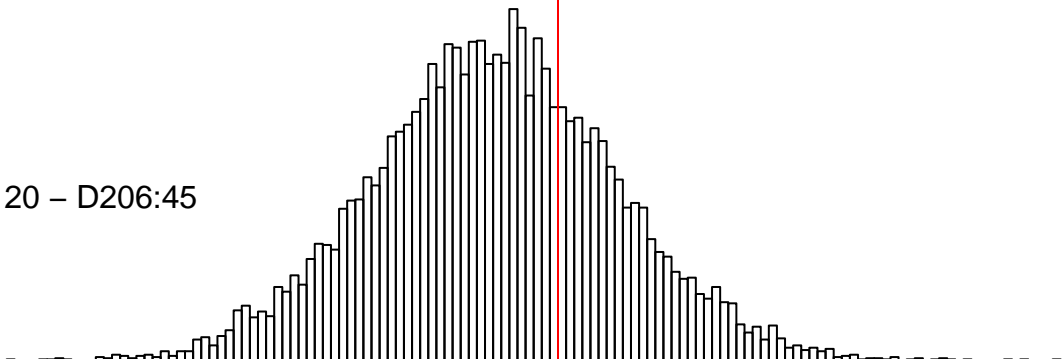

-1.5      -1.0      -0.5      0.0      0.5      1.0      1.5

delta(Unidentified Metabolite 3)

D206:240

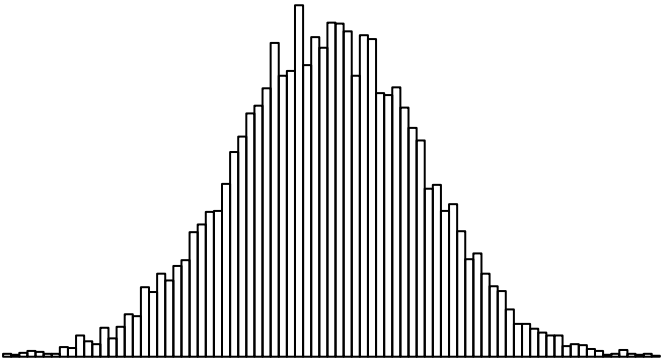

D206:120

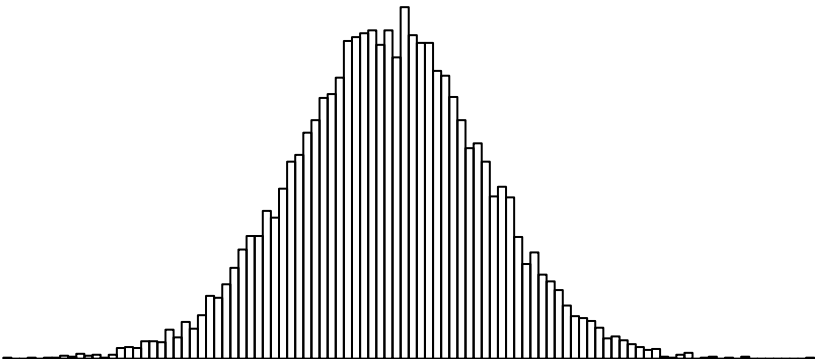

D206:45

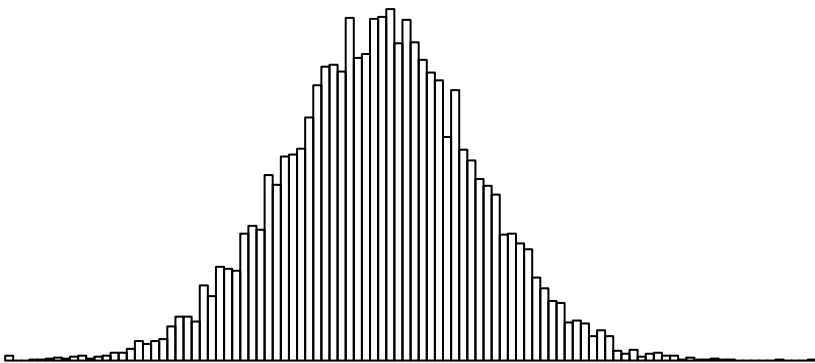

-9.0      -8.5      -8.0      -7.5      -7.0      -6.5      -6.0

Unidentified Metabolite 4

D206:240 – D206:120

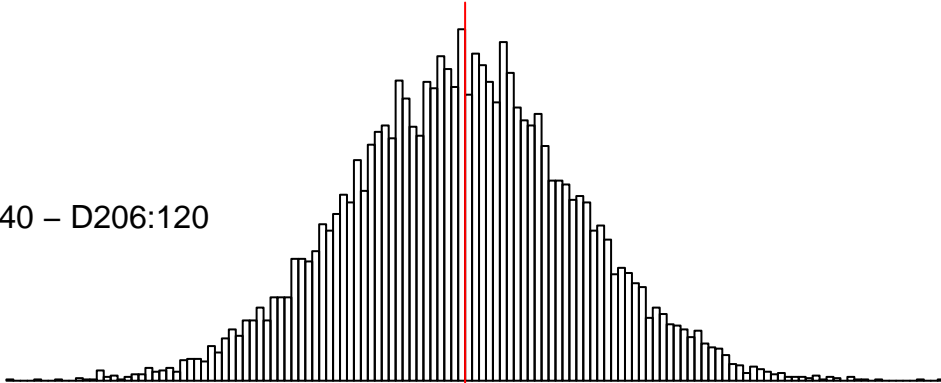

D206:240 – D206:45

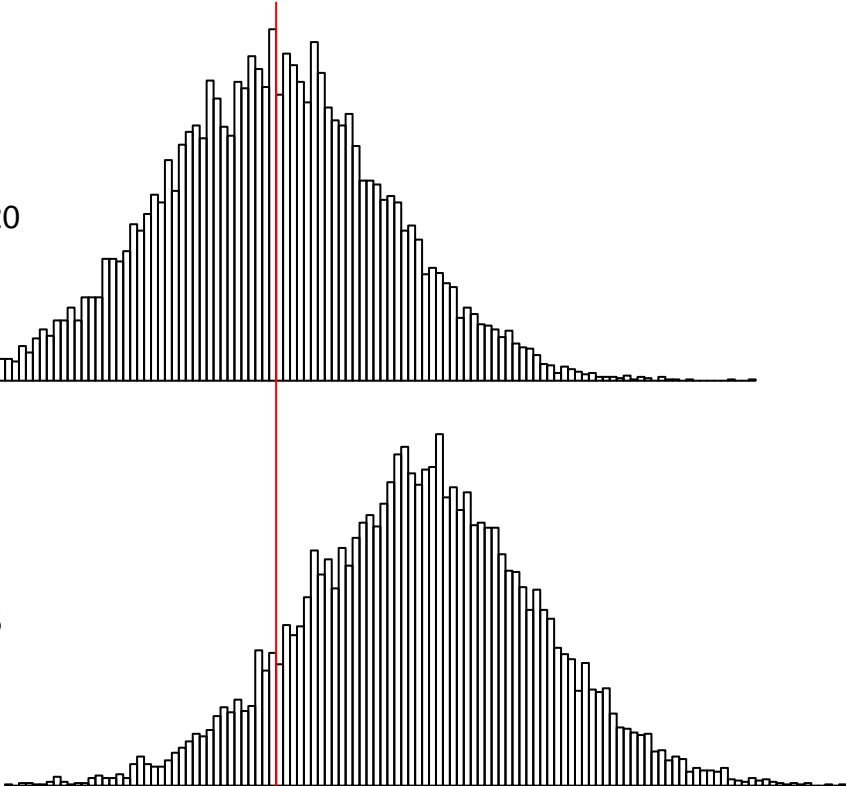

D206:120 – D206:45

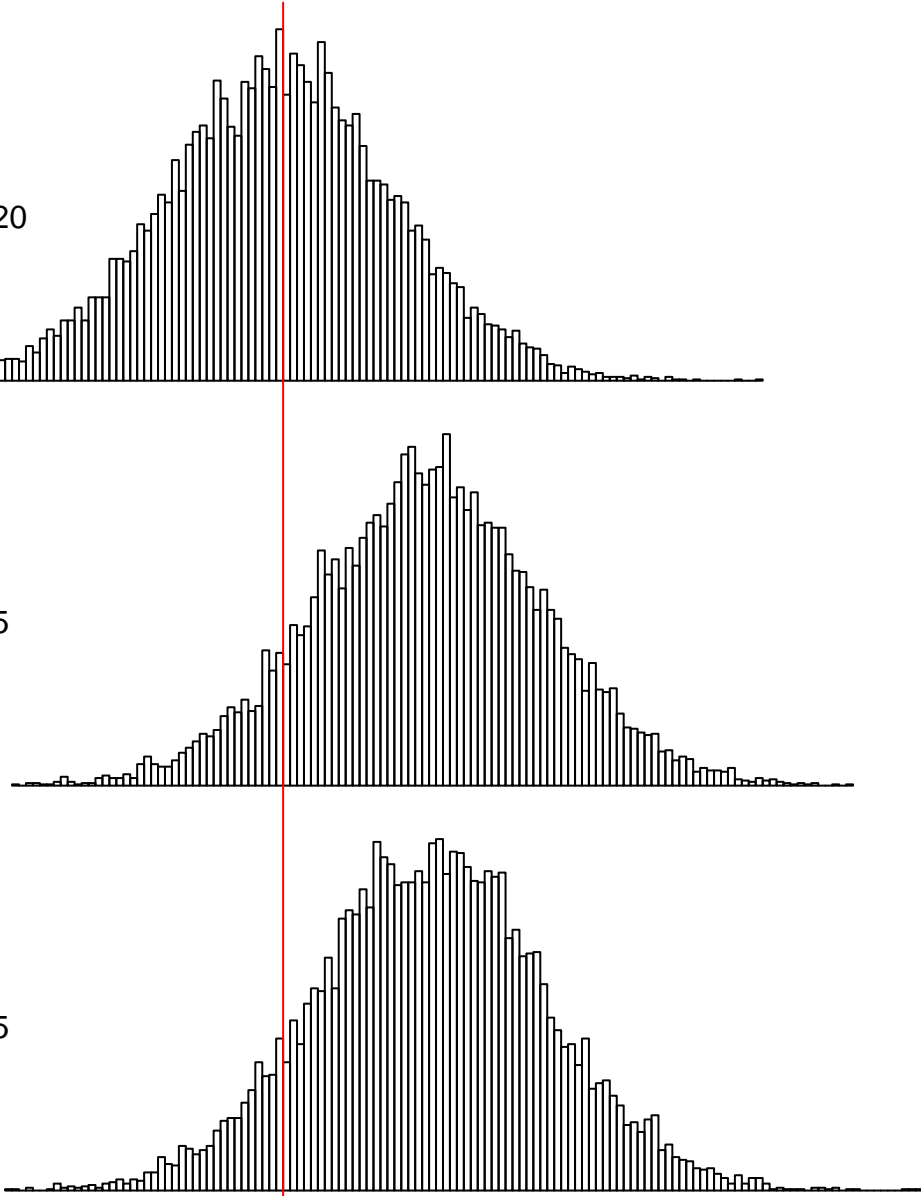

-1.5      -1.0      -0.5      0.0      0.5      1.0      1.5      2.0

delta(Unidentified Metabolite 4)

D206:240

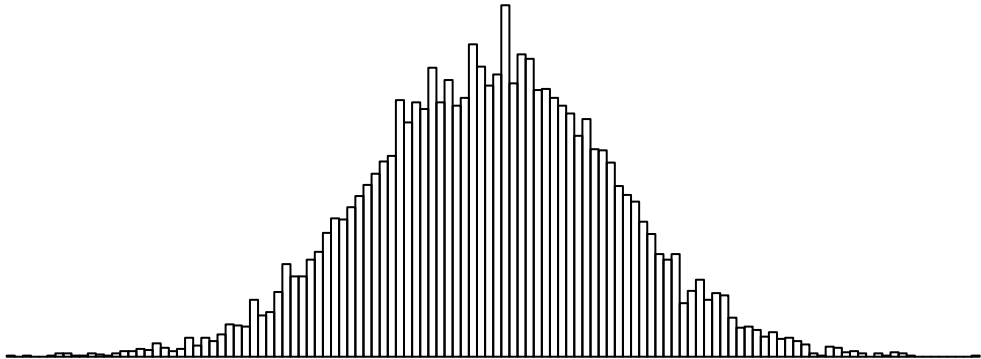

D206:120

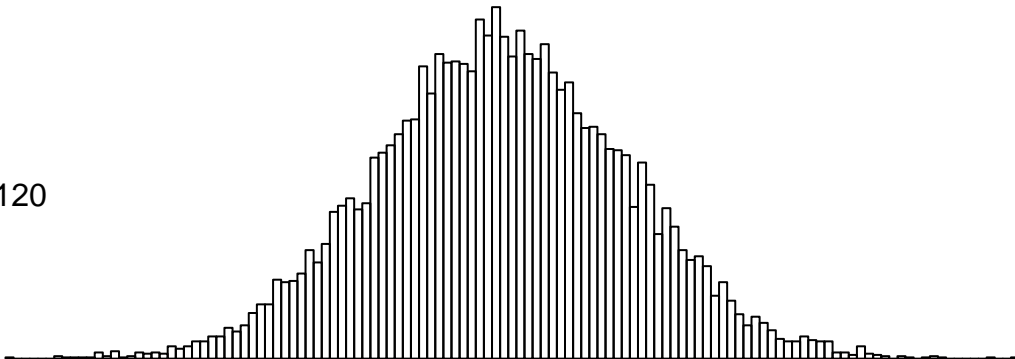

D206:45

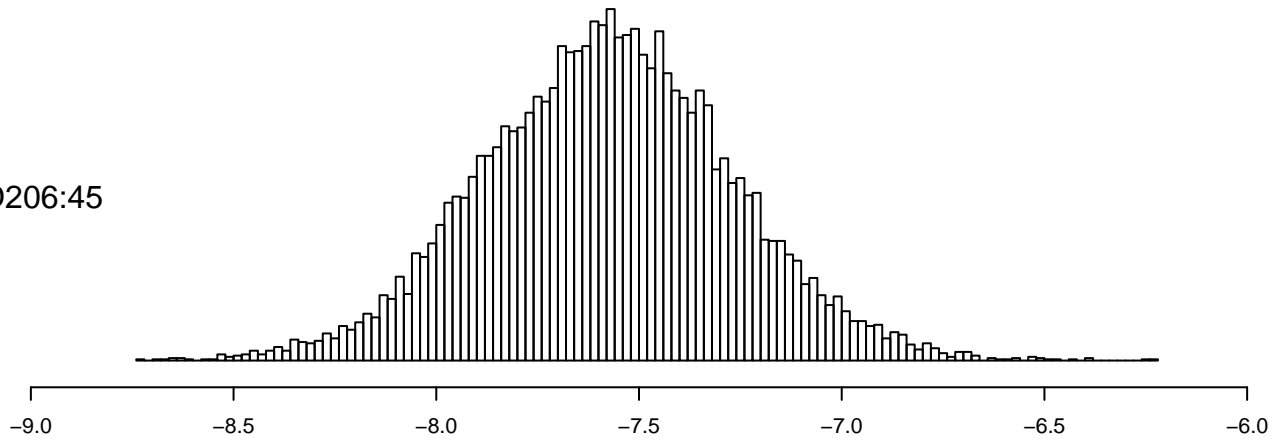

Unidentified Metabolite 5

D206:240 – D206:120

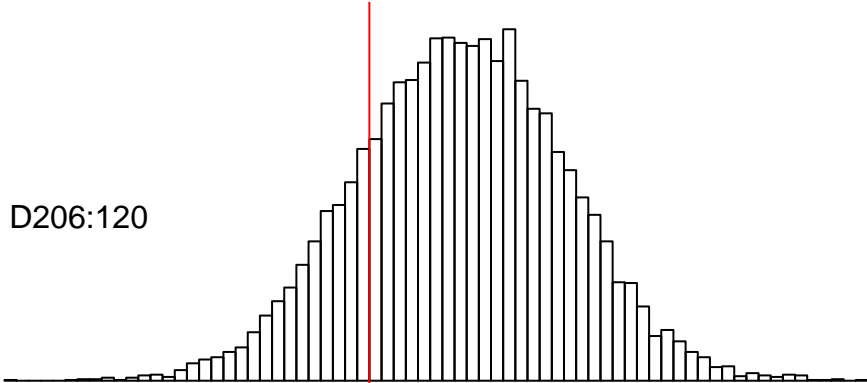

D206:240 – D206:45

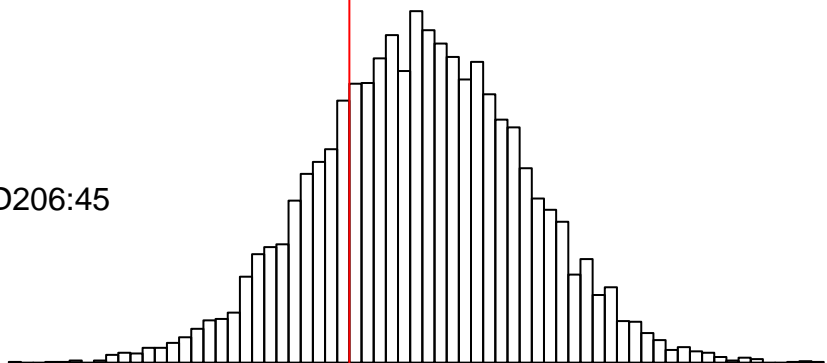

D206:120 – D206:45

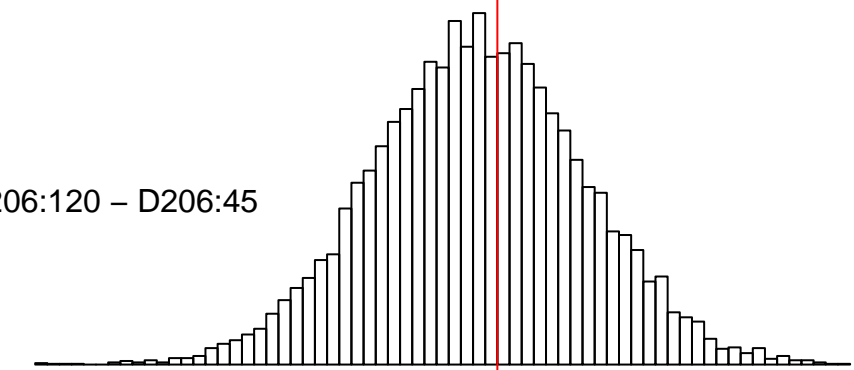

delta(Unidentified Metabolite 5)



D206:240

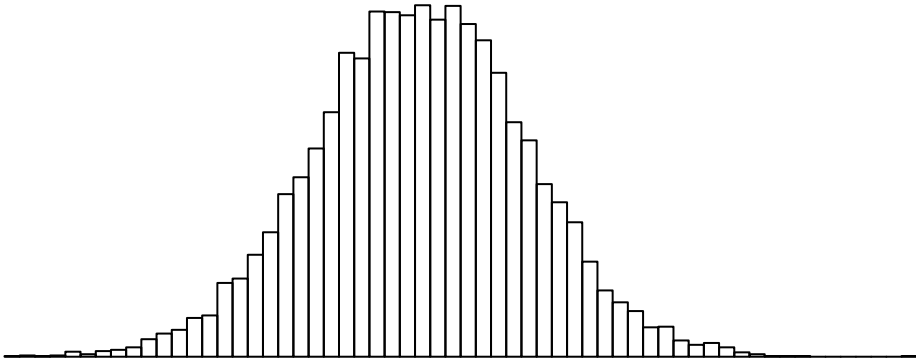

D206:120

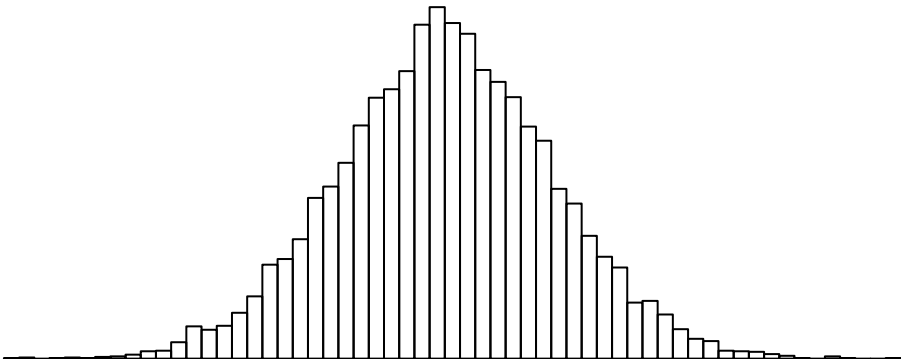

D206:45

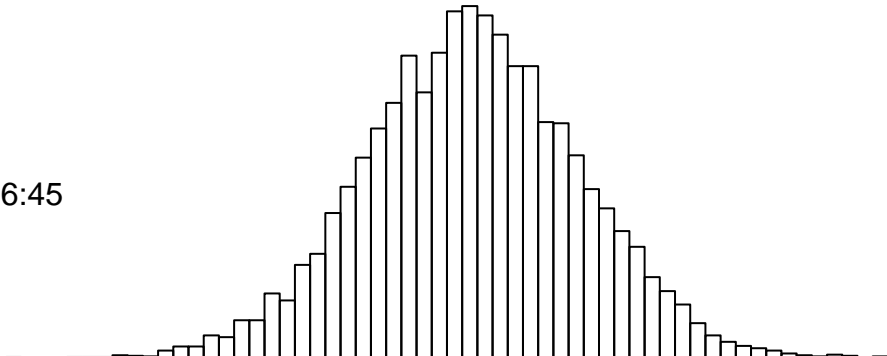

-7 -6 -5 -4 -3

Unidentified Metabolite 6

D206:240 – D206:120

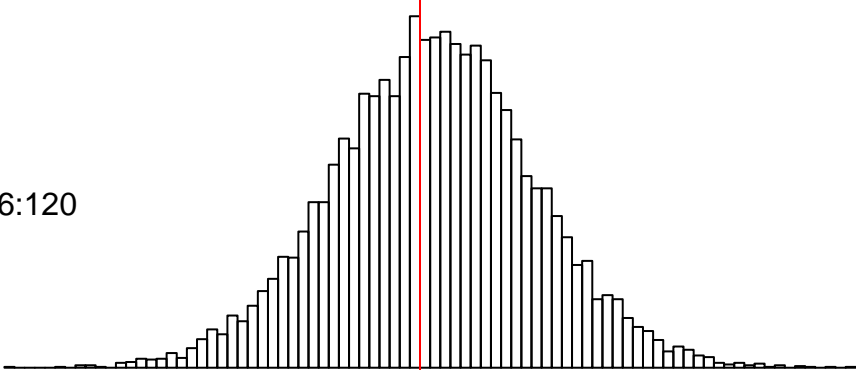

D206:240 – D206:45

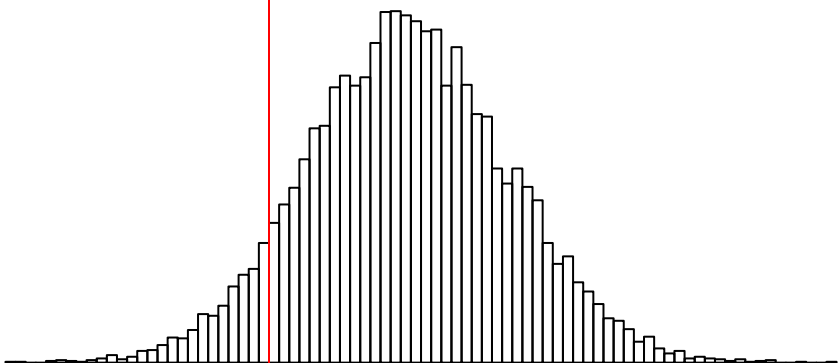

D206:120 – D206:45

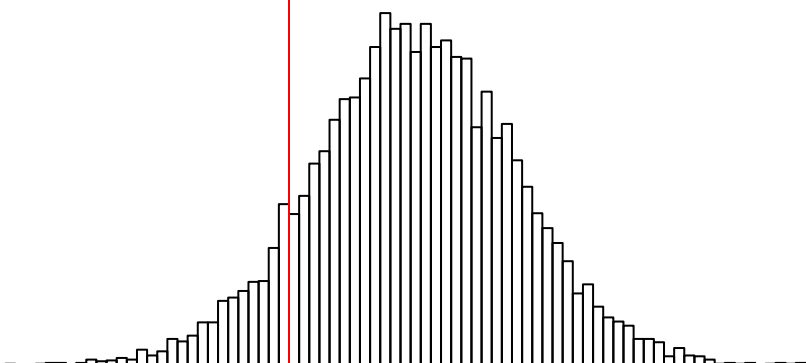

delta(Unidentified Metabolite 6)

D206:240

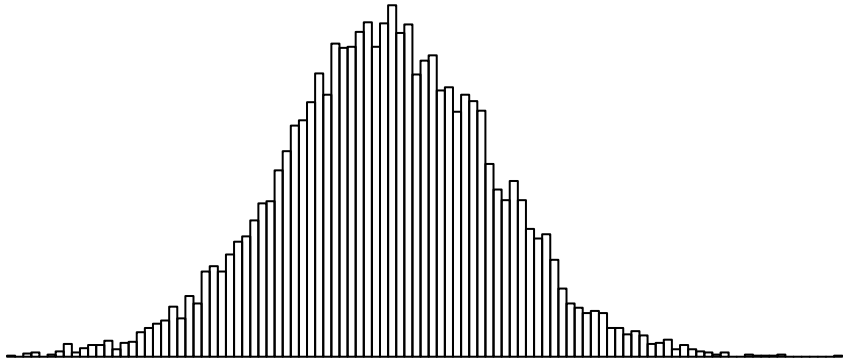

D206:120

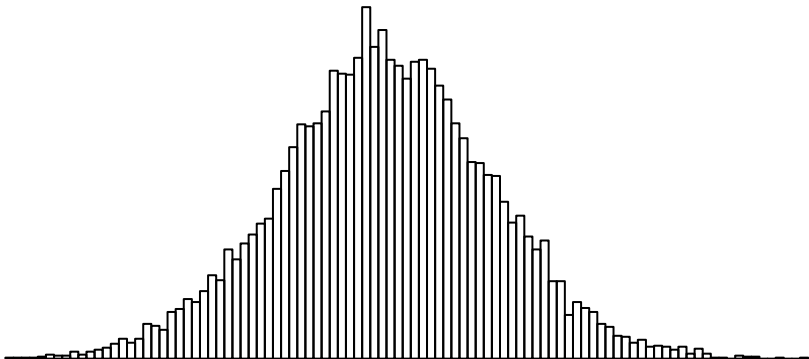

D206:45

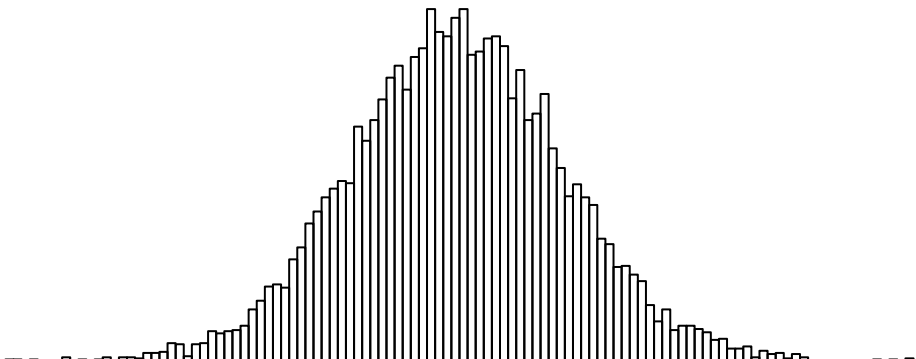

Unidentified Metabolite 7

D206:240 – D206:120

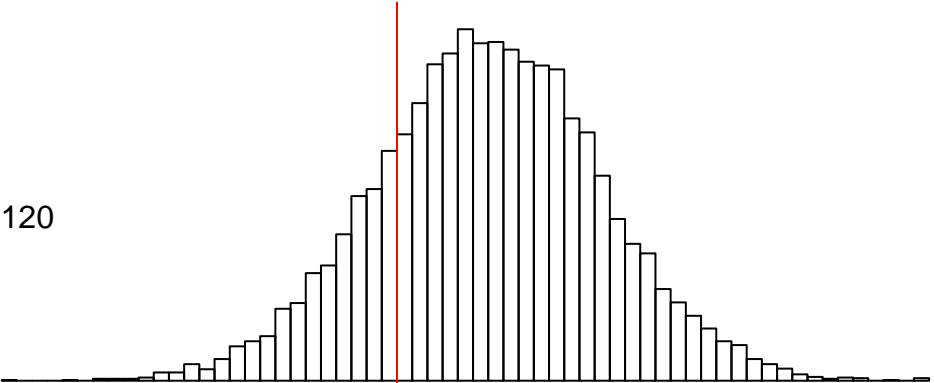

D206:240 – D206:45

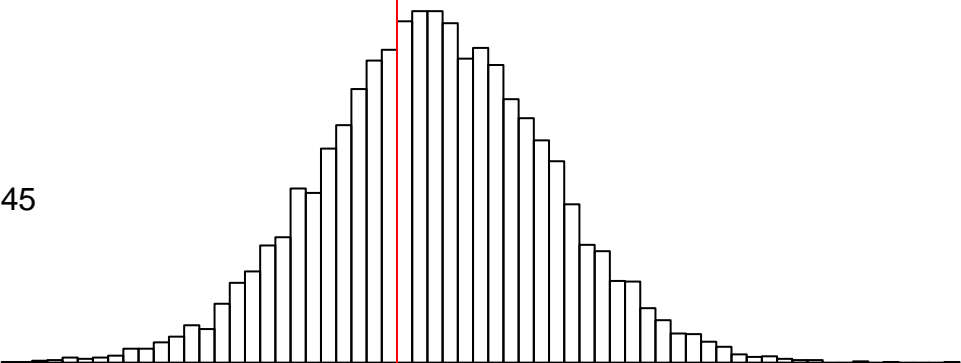

D206:120 – D206:45

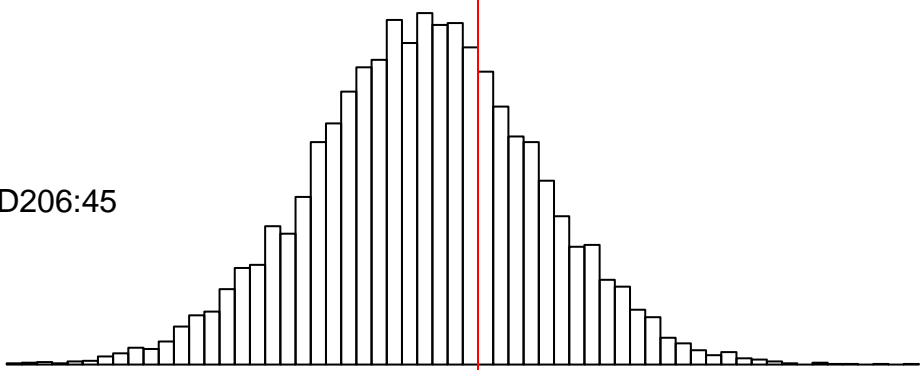

delta(Unidentified Metabolite 7)

D206:240

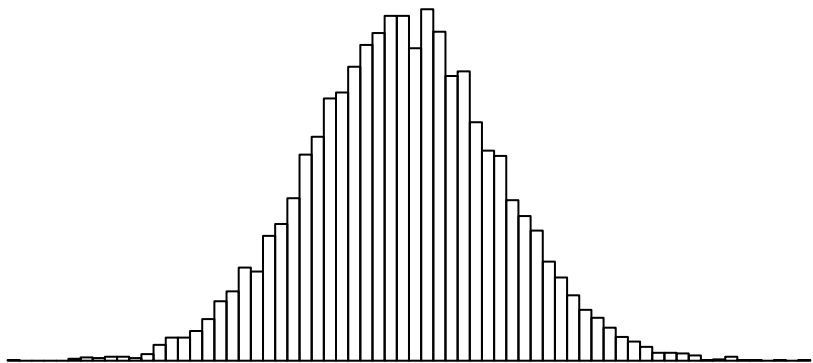

D206:120

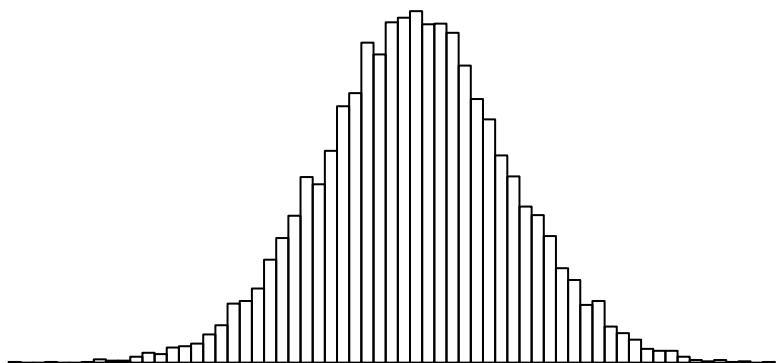

D206:45

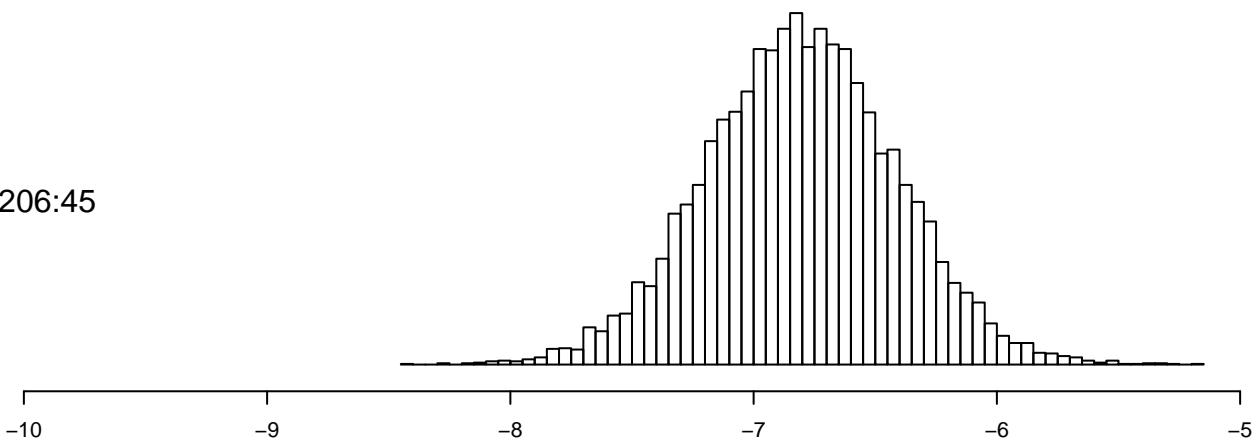

Unidentified Metabolite 8

D206:240 – D206:120

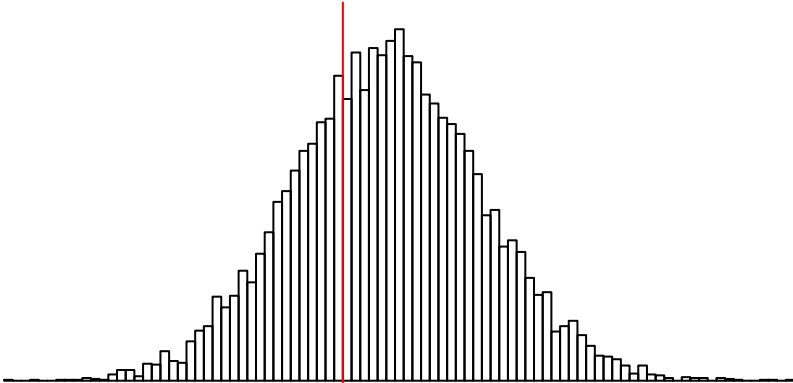

D206:240 – D206:45

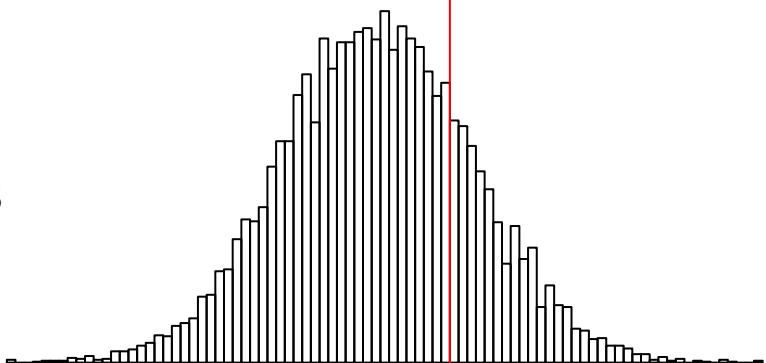

D206:120 – D206:45

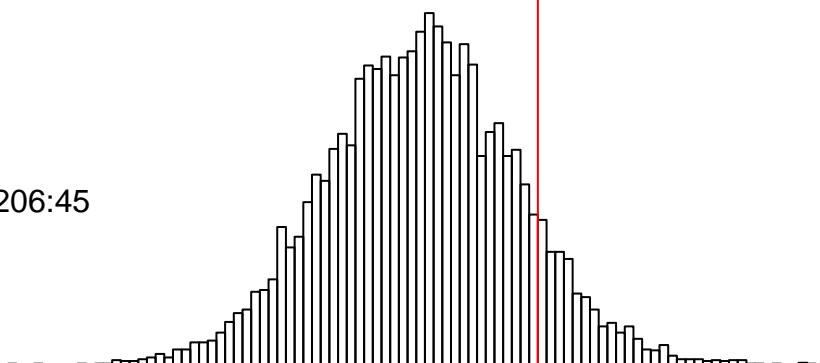

delta(Unidentified Metabolite 8)

D206:240

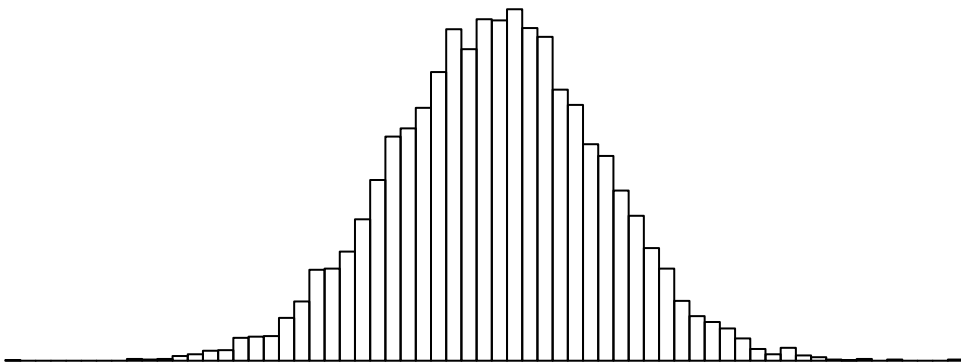

D206:120

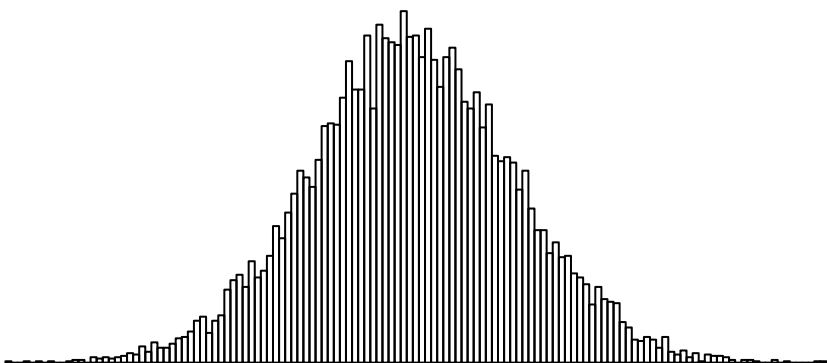

D206:45

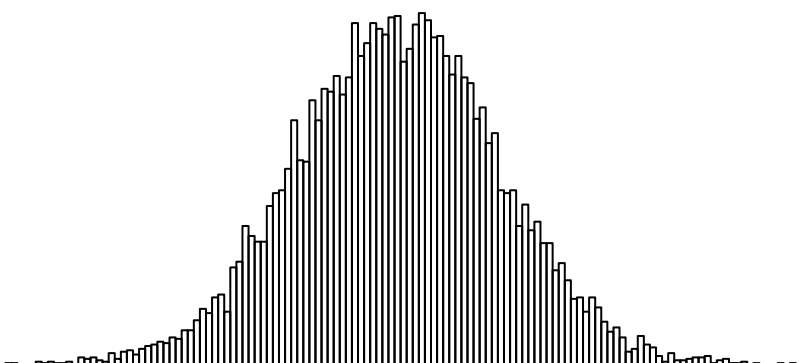

-8 -7 -6 -5 -4

Unidentified Metabolite 9

D206:240 – D206:120

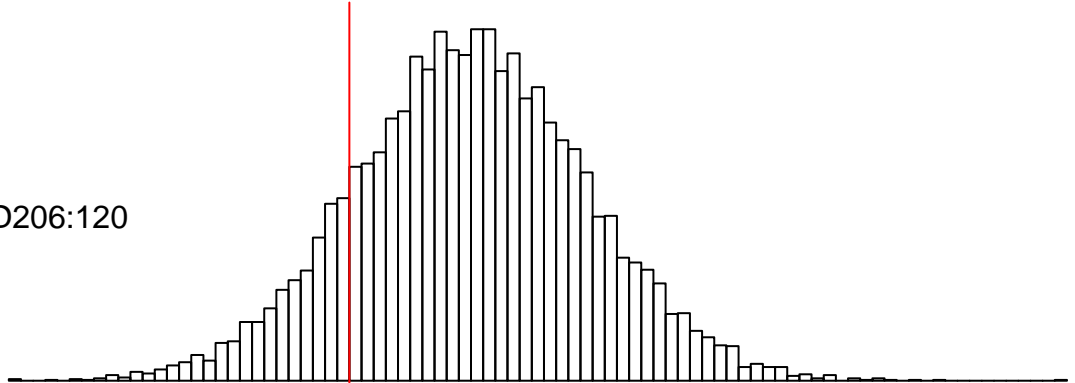

D206:240 – D206:45

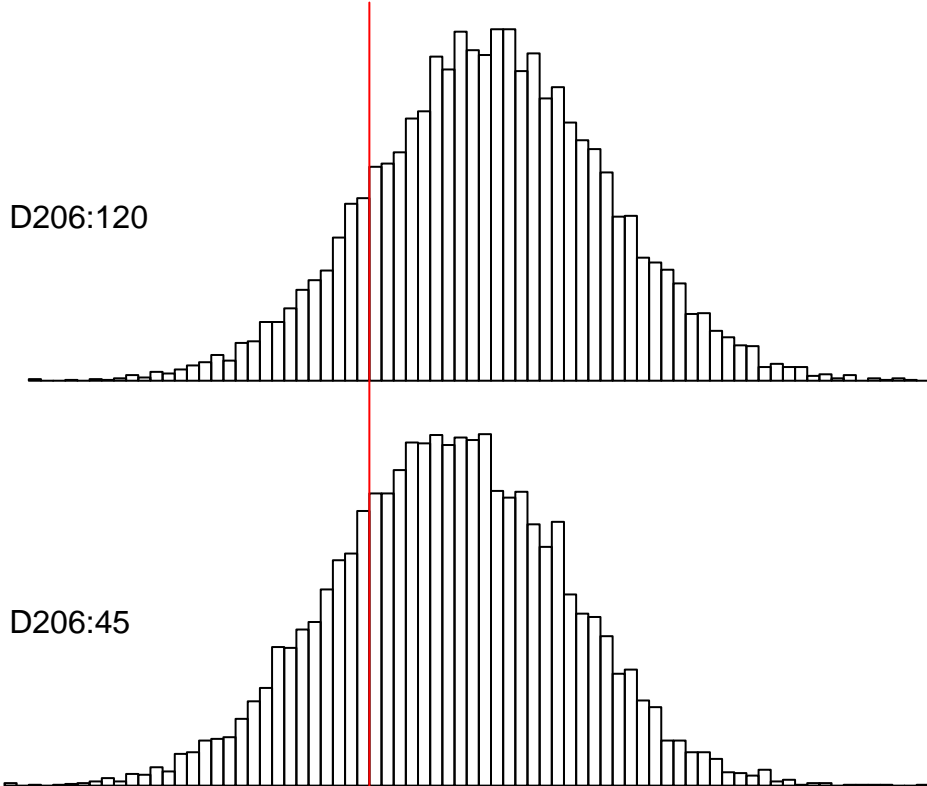

D206:120 – D206:45

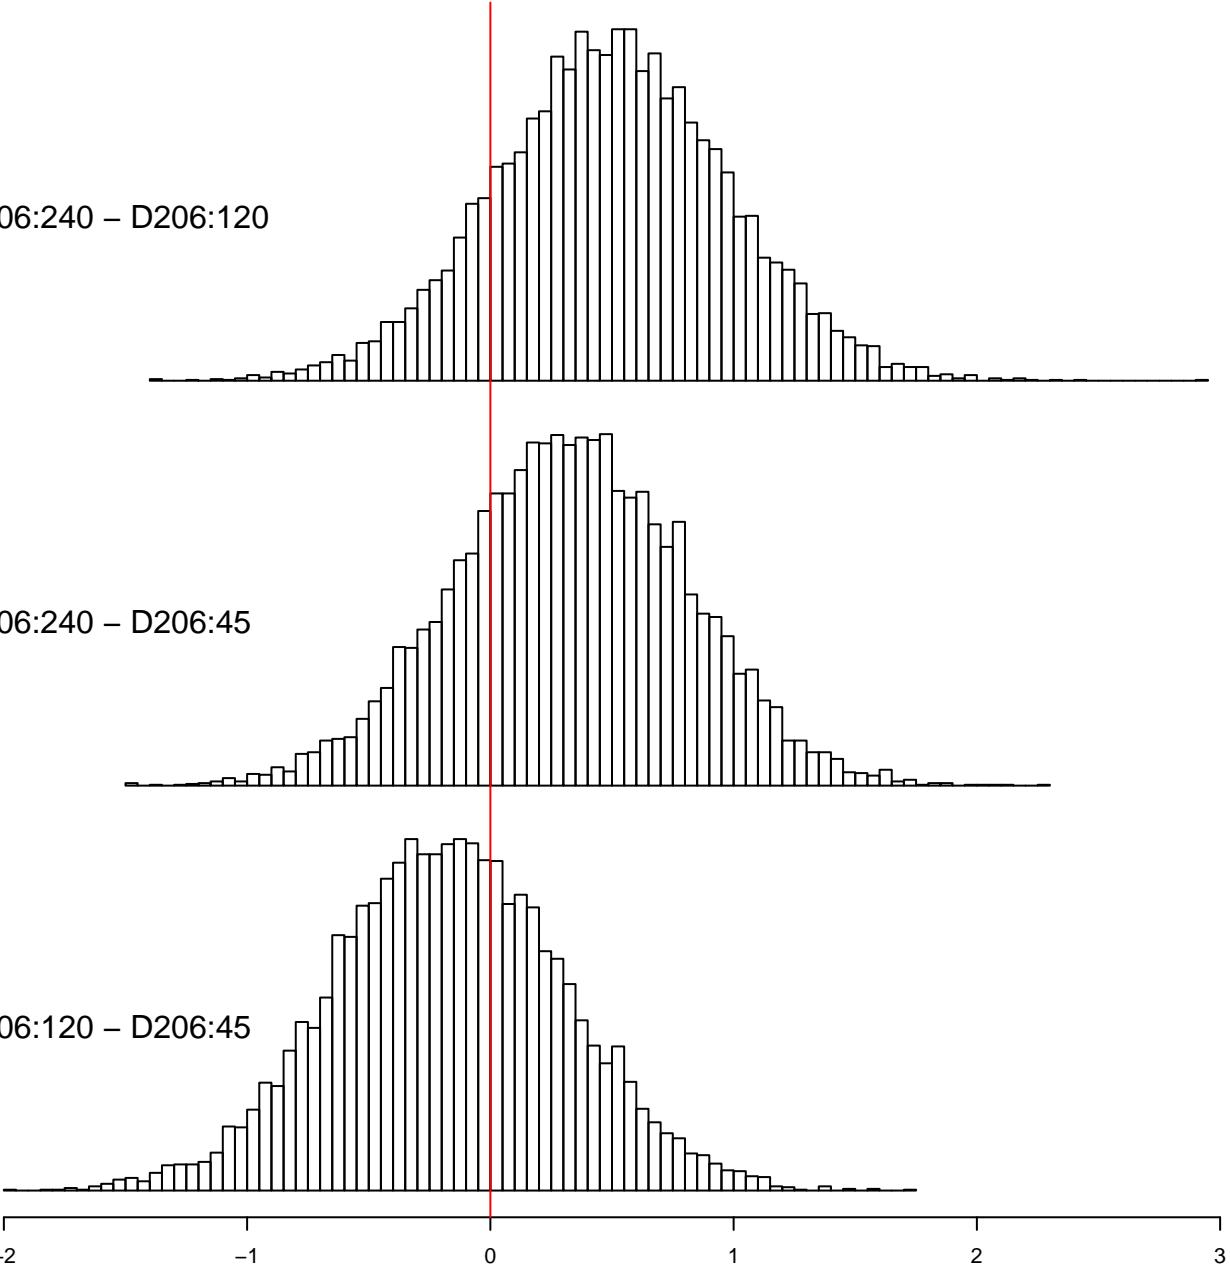

delta(Unidentified Metabolite 9)



D206:240

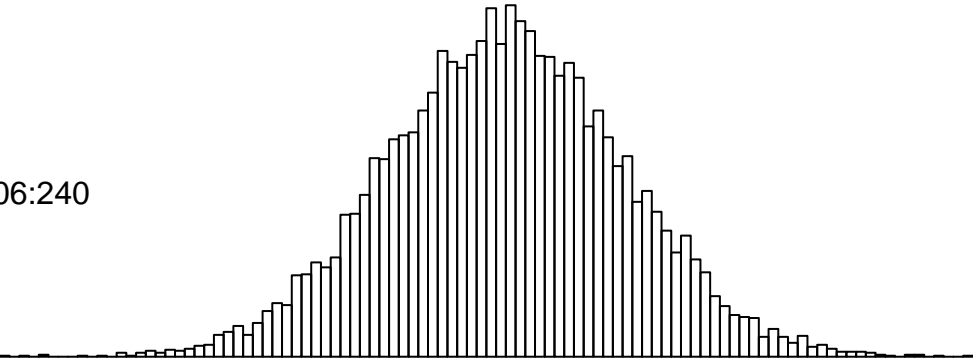

D206:120

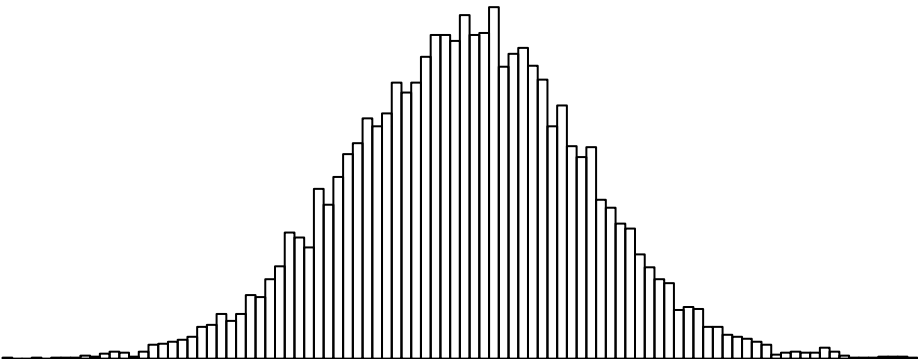

D206:45

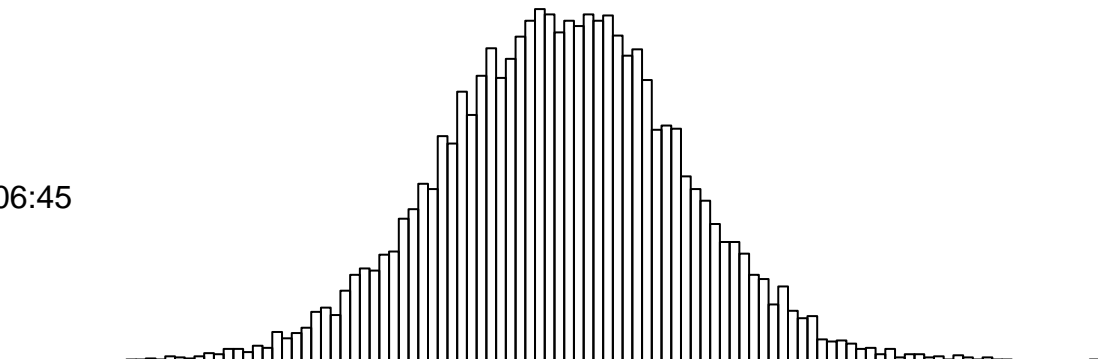

Unidentified Metabolite 10

D206:240 – D206:120

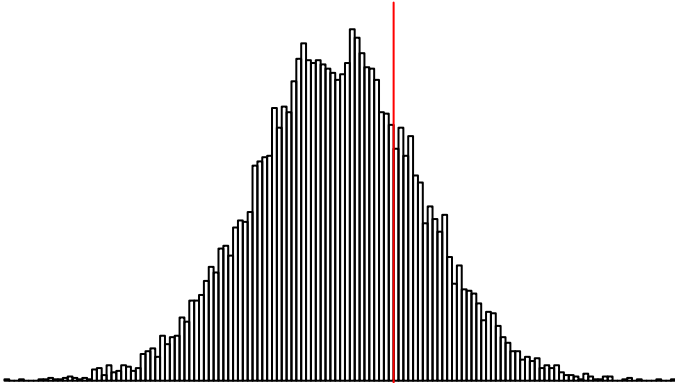

D206:240 – D206:45

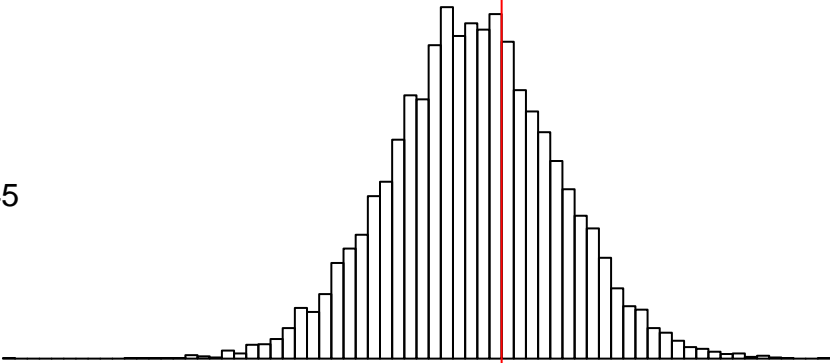

D206:120 – D206:45

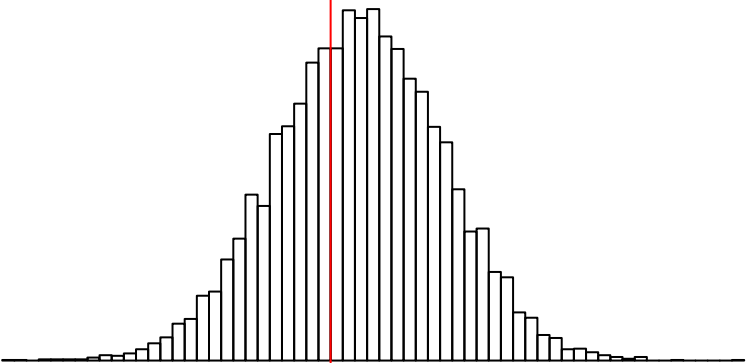

-3 -2 -1 0 1 2

delta(Unidentified Metabolite 10)

D206:240

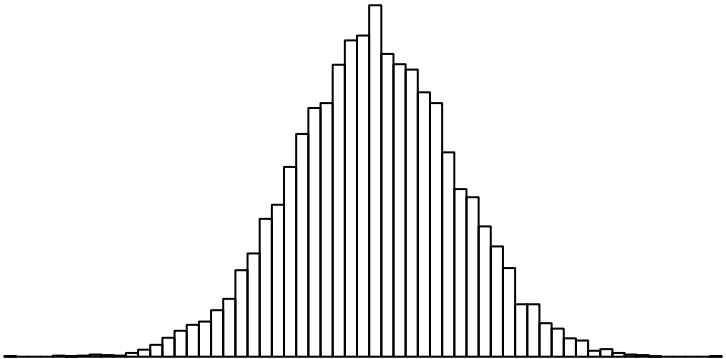

D206:120

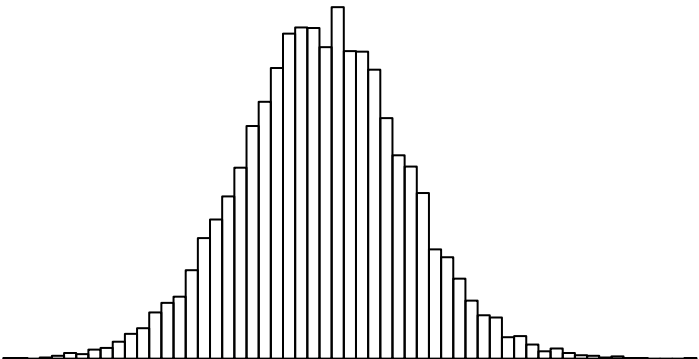

D206:45

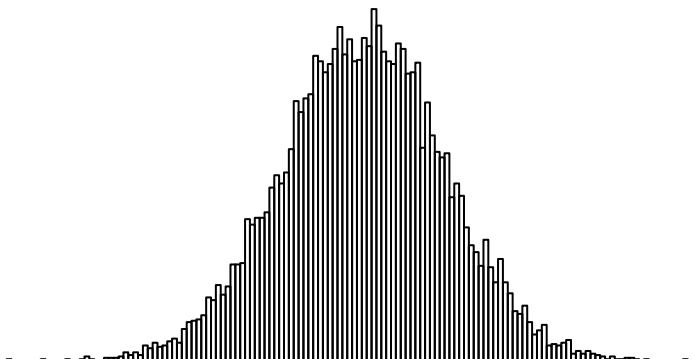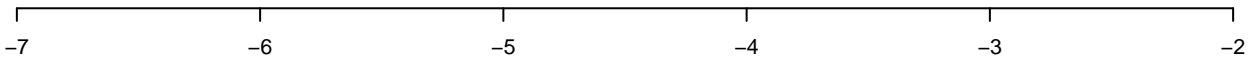

Unidentified Metabolite 11

D206:240 – D206:120

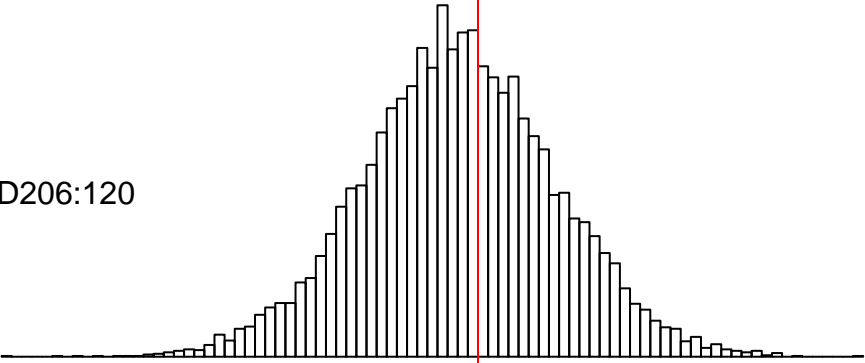

D206:240 – D206:45

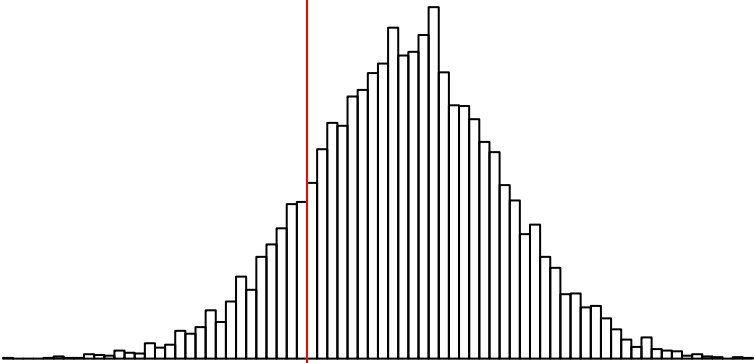

D206:120 – D206:45

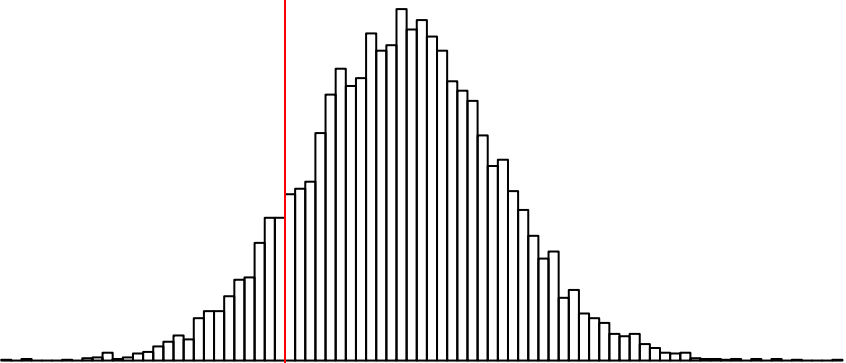

-3 -2 -1 0 1 2 3

delta(Unidentified Metabolite 11)

D206:240

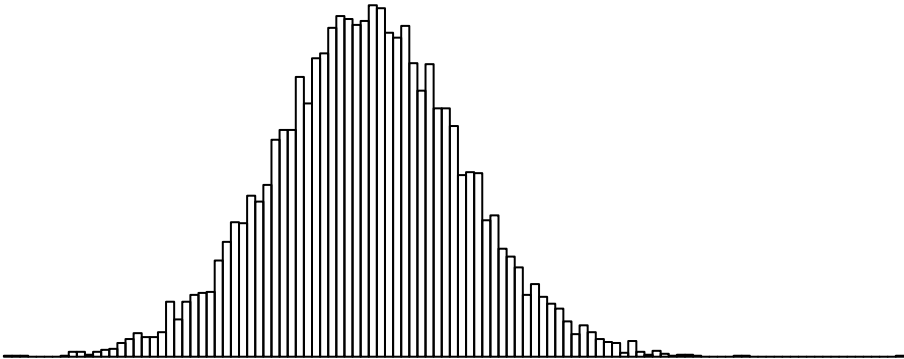

D206:120

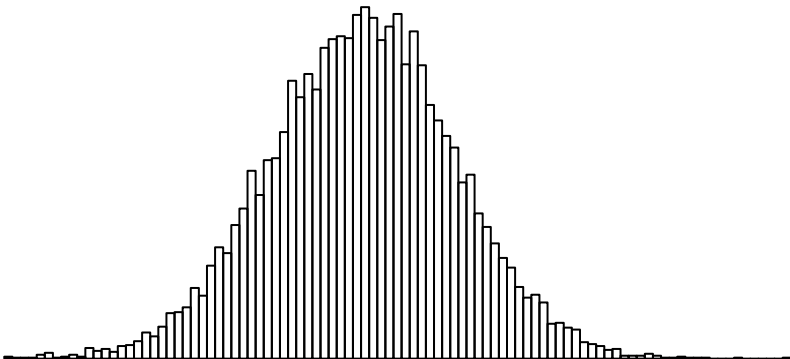

D206:45

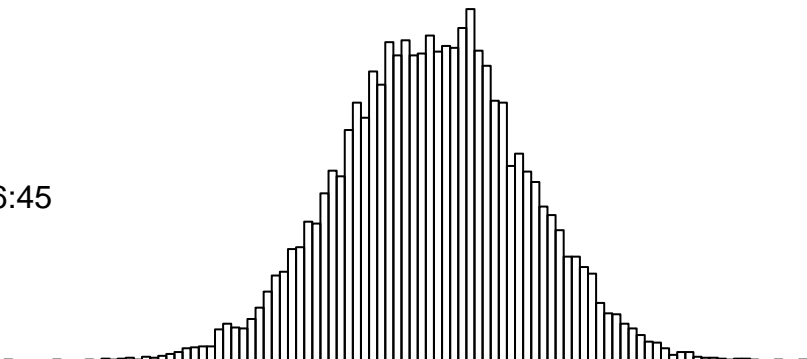

-9.0      -8.5      -8.0      -7.5      -7.0      -6.5      -6.0

Unidentified Metabolite 12

D206:240 – D206:120

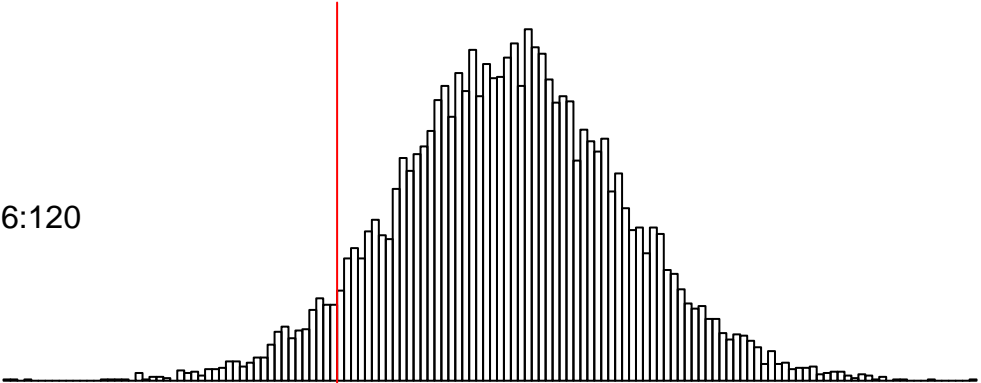

D206:240 – D206:45

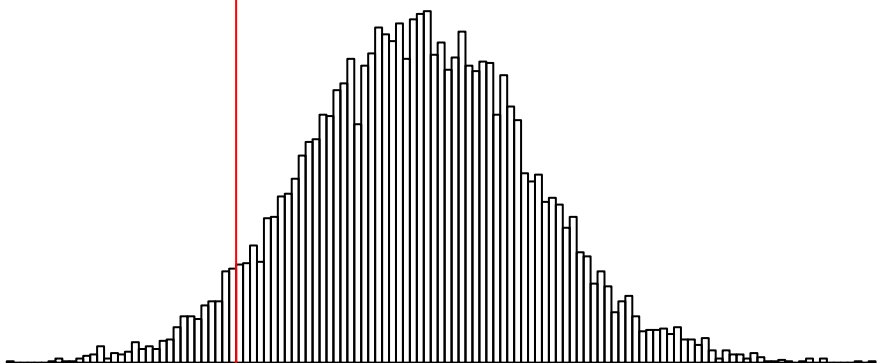

D206:120 – D206:45

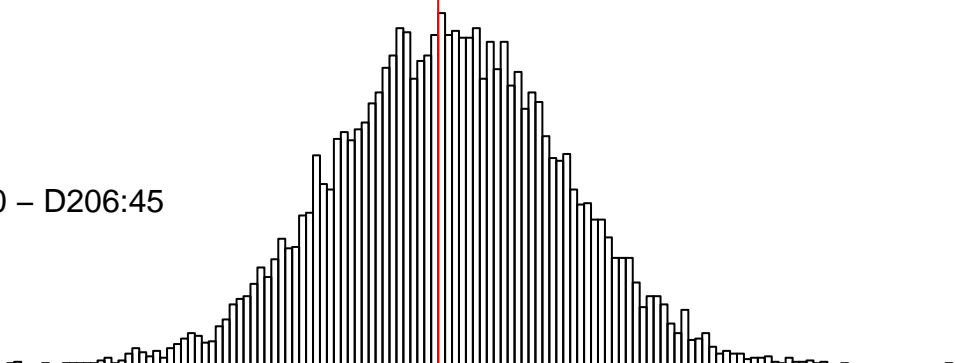

-1.5      -1.0      -0.5      0.0      0.5      1.0      1.5      2.0

delta(Unidentified Metabolite 12)

D206:240

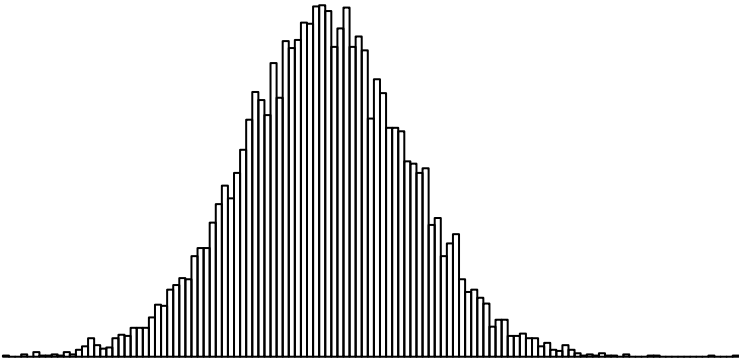

D206:120

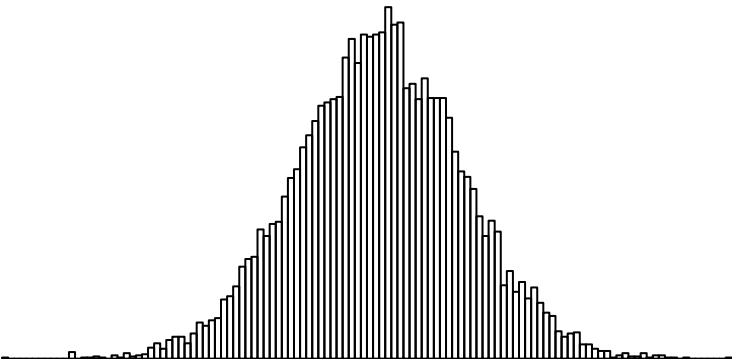

D206:45

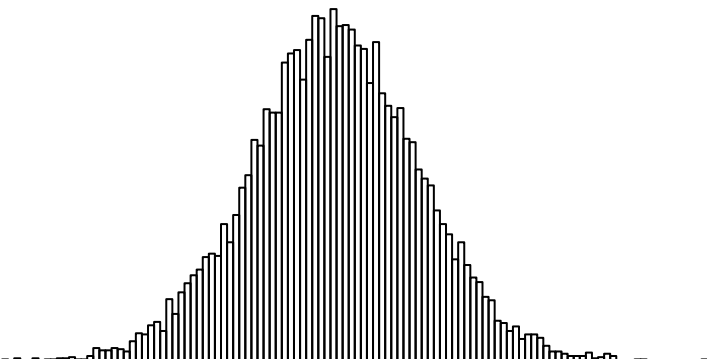

-9

-8

-7

-6

-5

Unidentified Metabolite 14

D206:240 – D206:120

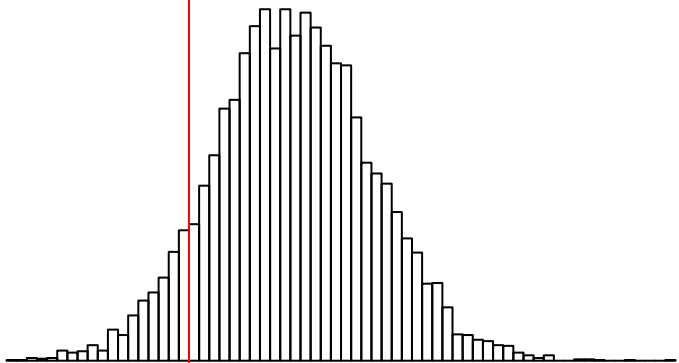

D206:240 – D206:45

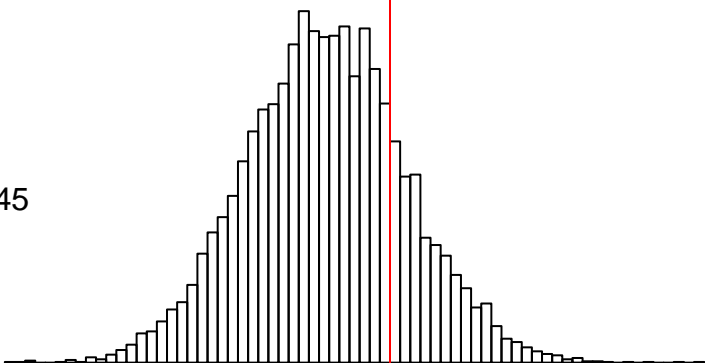

D206:120 – D206:45

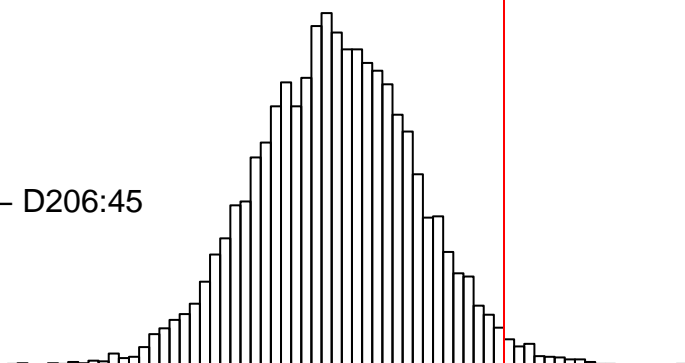

-3                      -2                      -1                      0                      1                      2                      3

delta(Unidentified Metabolite 14)



D206:240

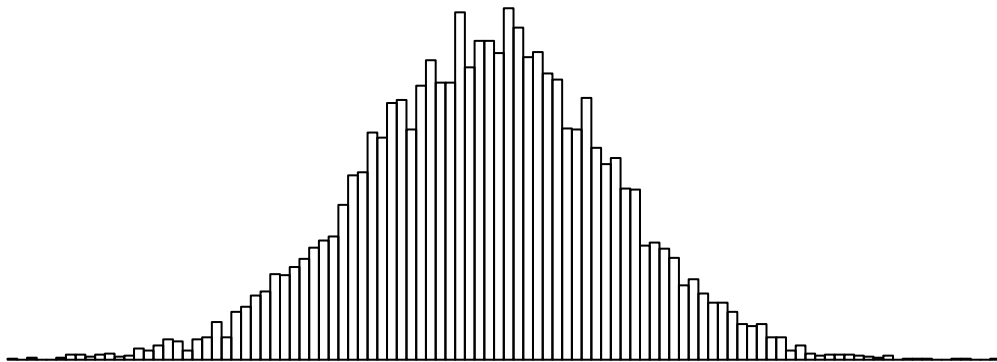

D206:120

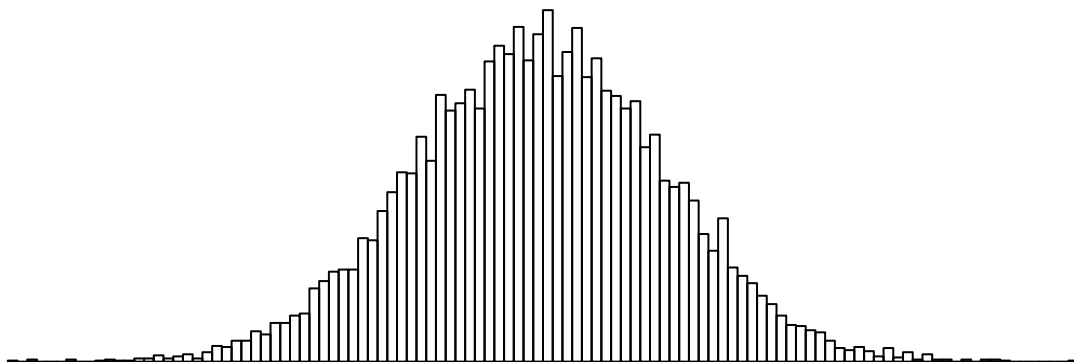

D206:45

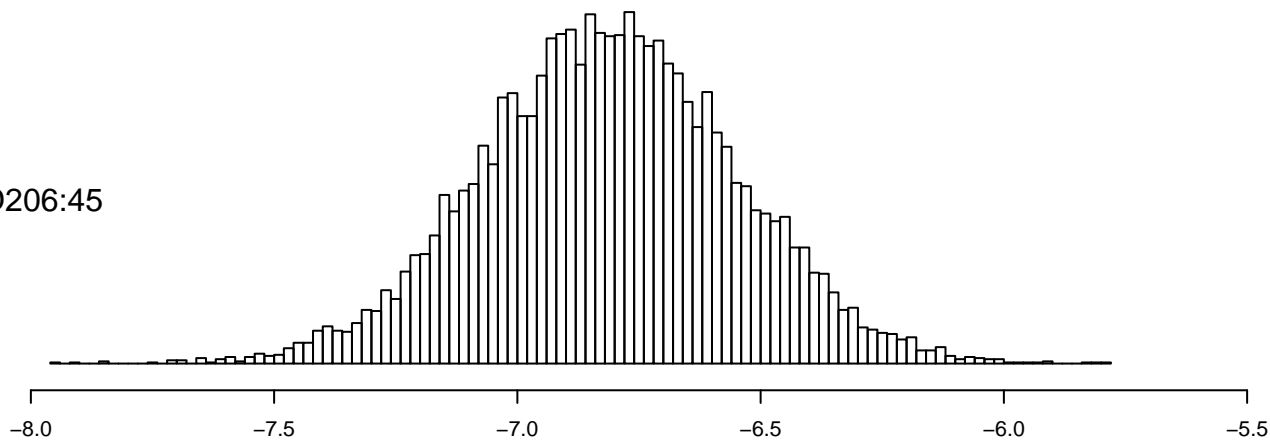

Unidentified Metabolite 16

D206:240 – D206:120

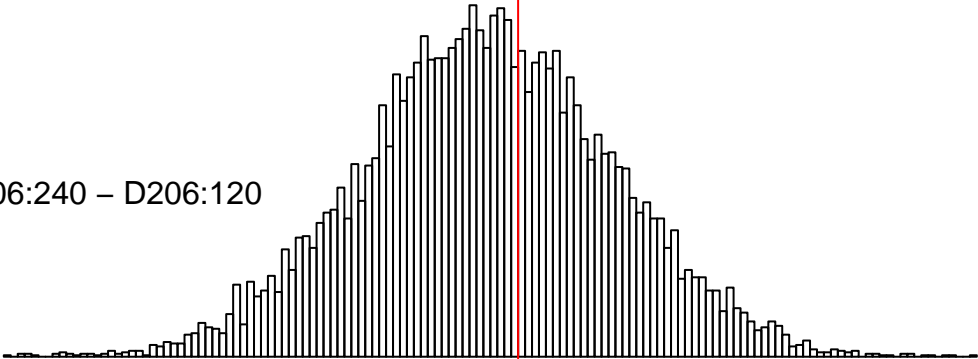

D206:240 – D206:45

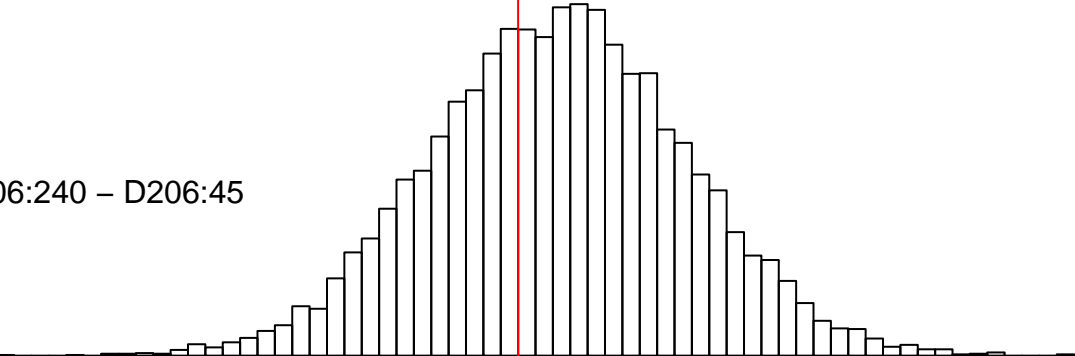

D206:120 – D206:45

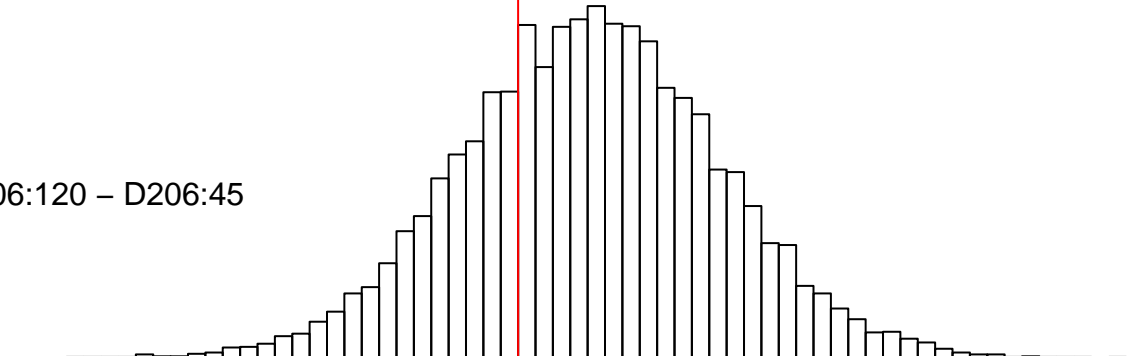

-1.5      -1.0      -0.5      0.0      0.5      1.0      1.5      2.0

delta(Unidentified Metabolite 16)

D206:240

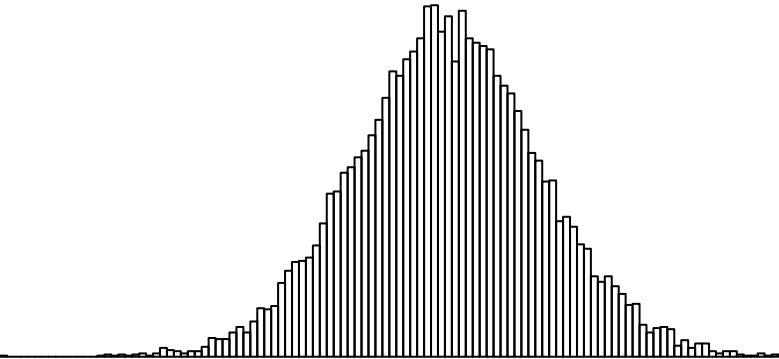

D206:120

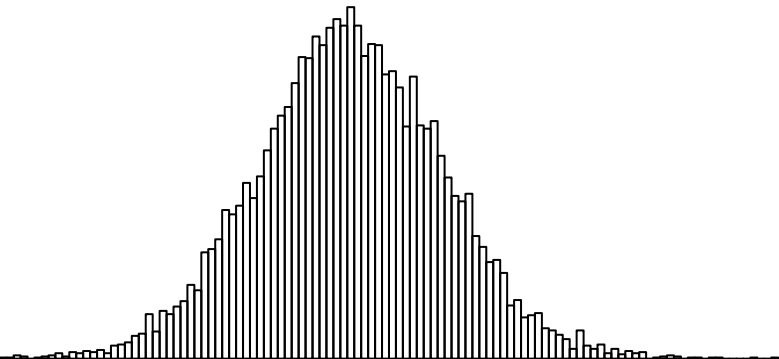

D206:45

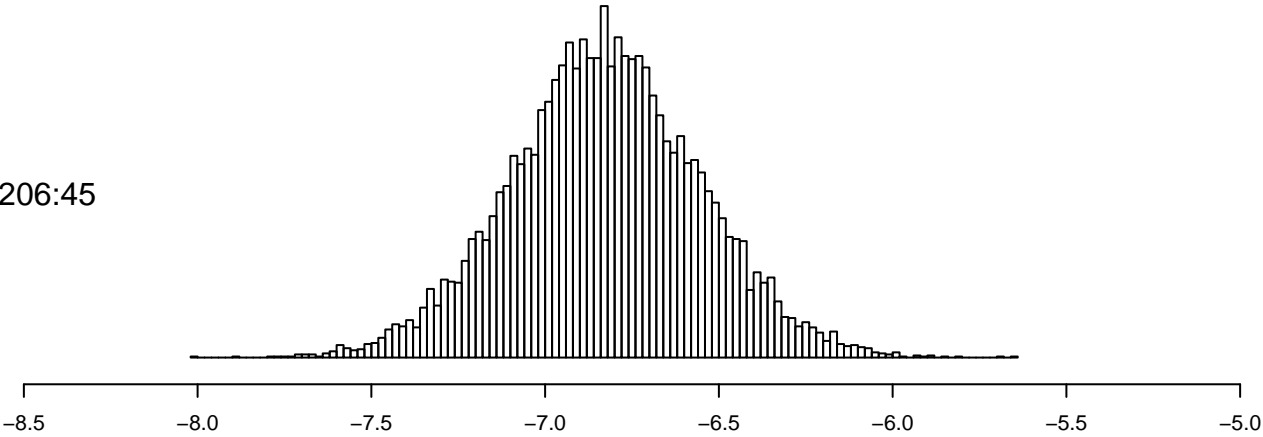

Unidentified Metabolite 17

D206:240 – D206:120

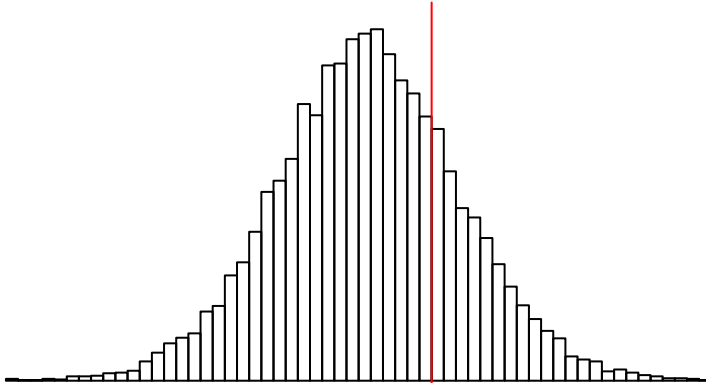

D206:240 – D206:45

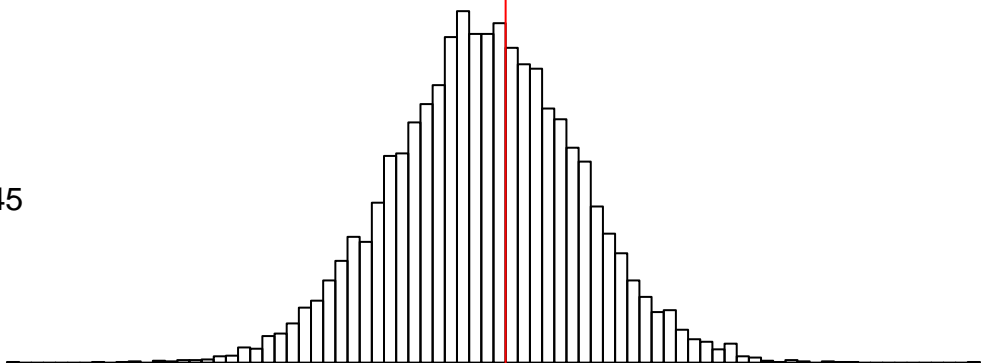

D206:120 – D206:45

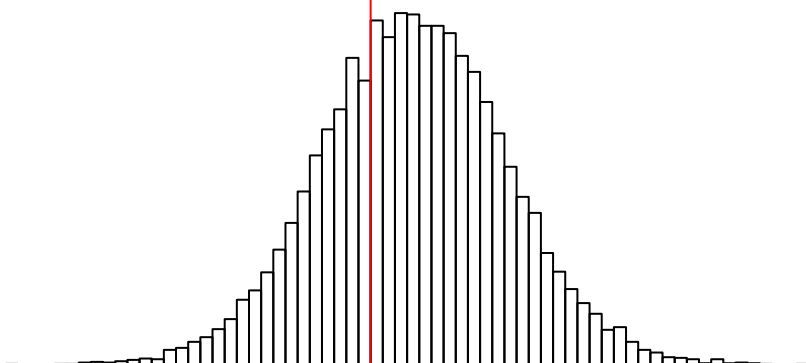

-3      -2      -1      0      1      2

delta(Unidentified Metabolite 17)

D206:240

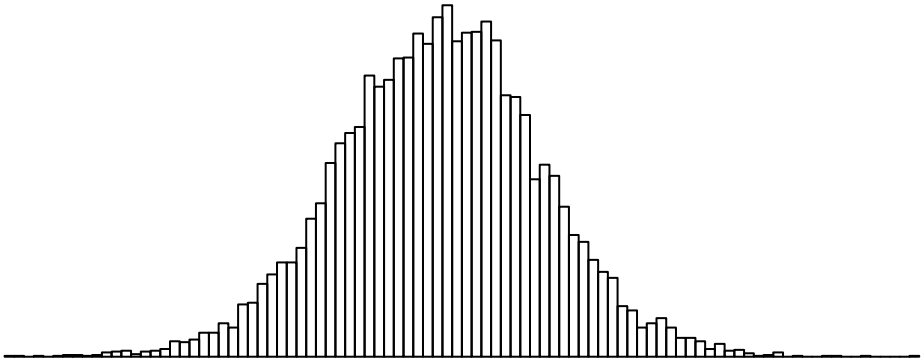

D206:120

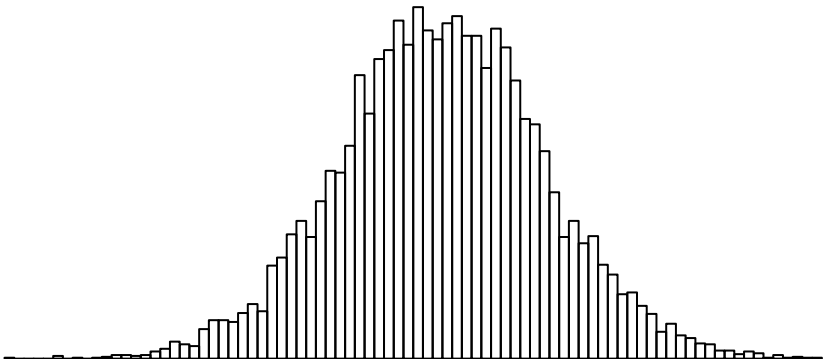

D206:45

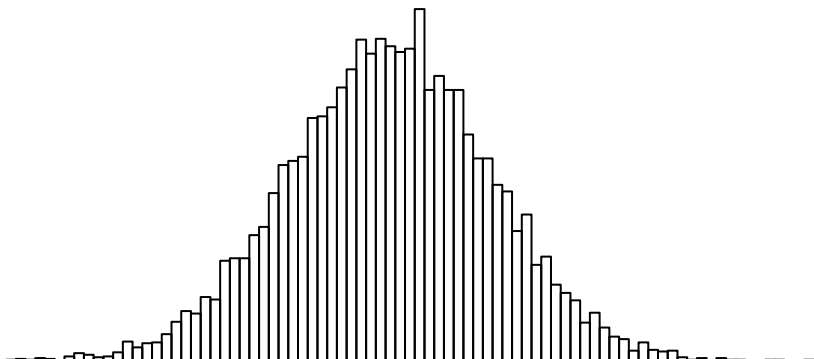

Unidentified Metabolite 18

D206:240 – D206:120

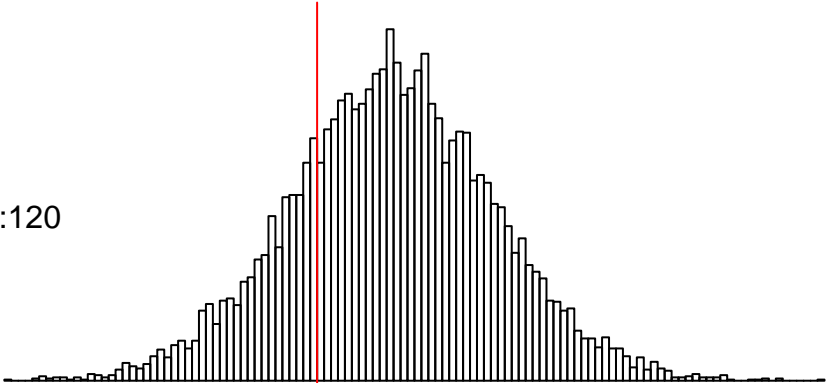

D206:240 – D206:45

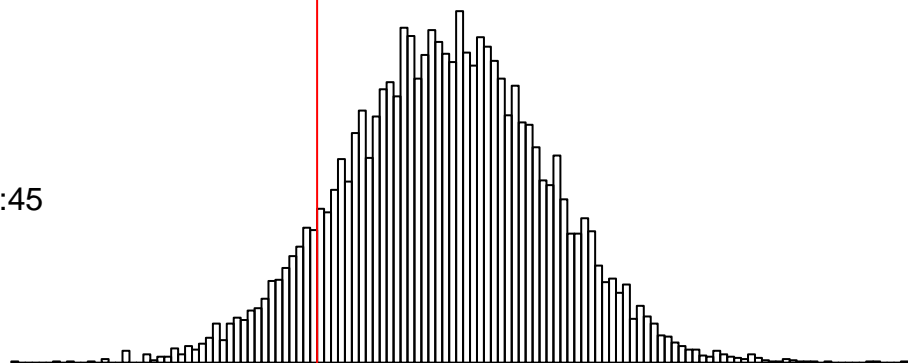

D206:120 – D206:45

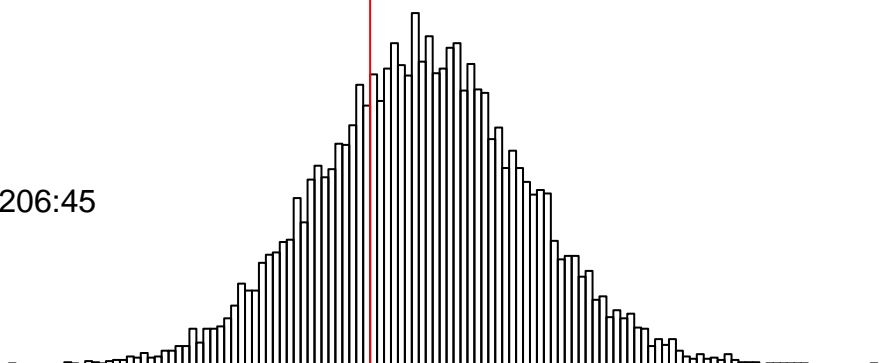

-1.5      -1.0      -0.5      0.0      0.5      1.0      1.5      2.0

delta(Unidentified Metabolite 18)

D206:240

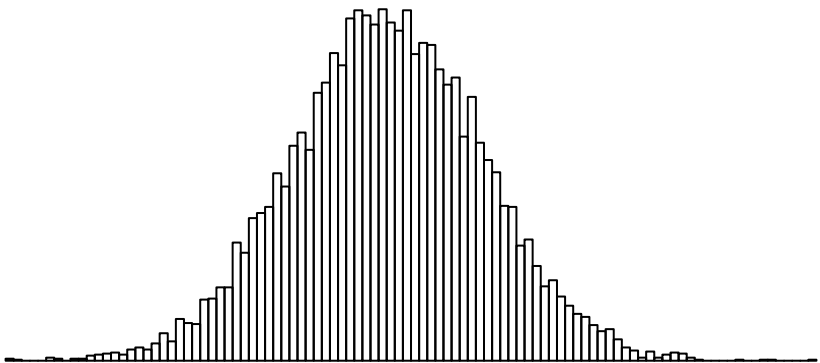

D206:120

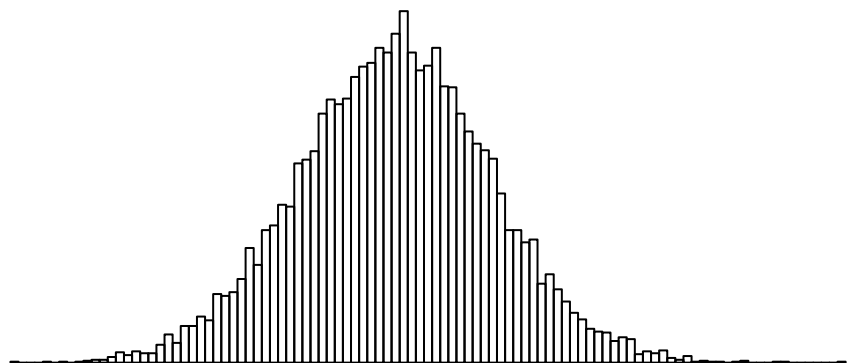

D206:45

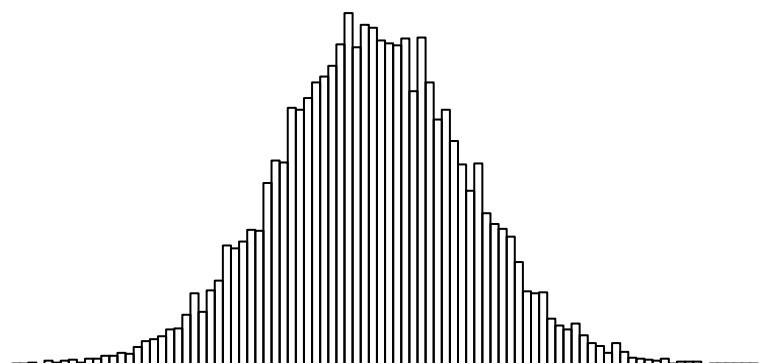

-6.5      -6.0      -5.5      -5.0      -4.5      -4.0      -3.5

Unidentified Metabolite 20

D206:240 – D206:120

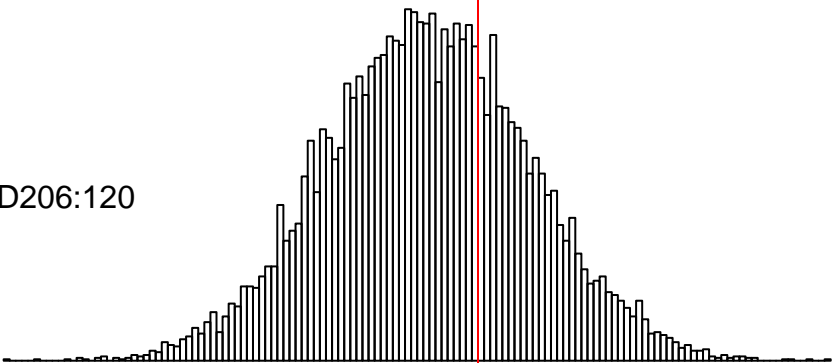

D206:240 – D206:45

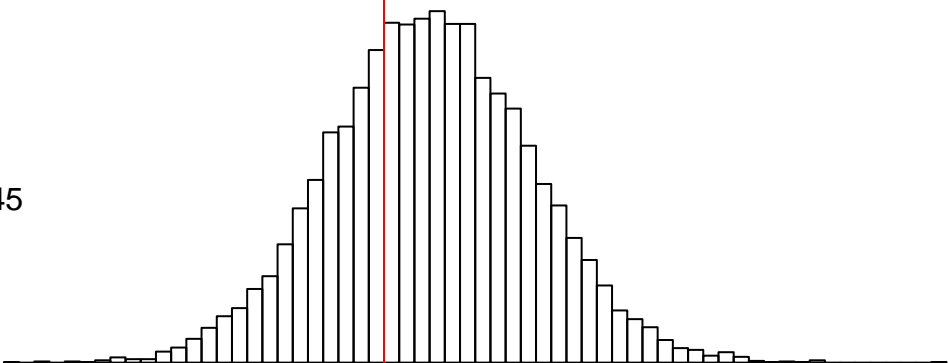

D206:120 – D206:45

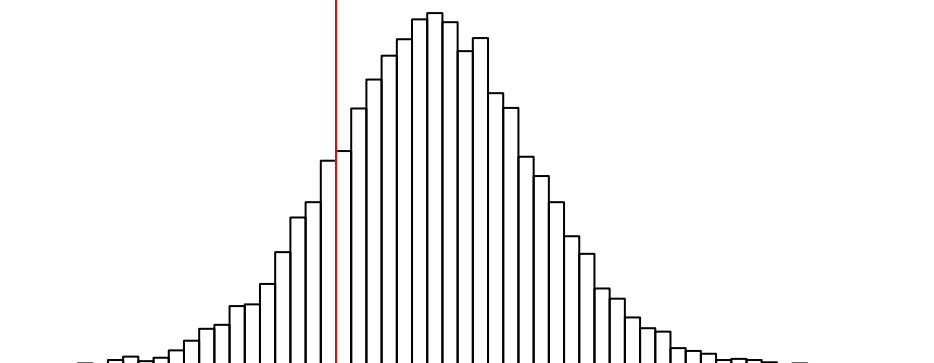

-2 -1 0 1 2

delta(Unidentified Metabolite 20)



D206:240

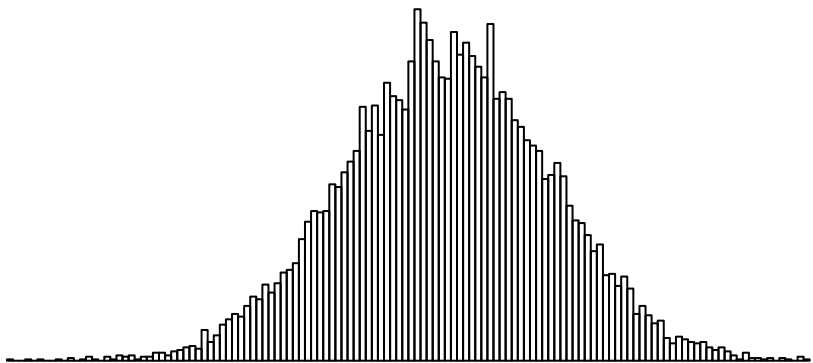

D206:120

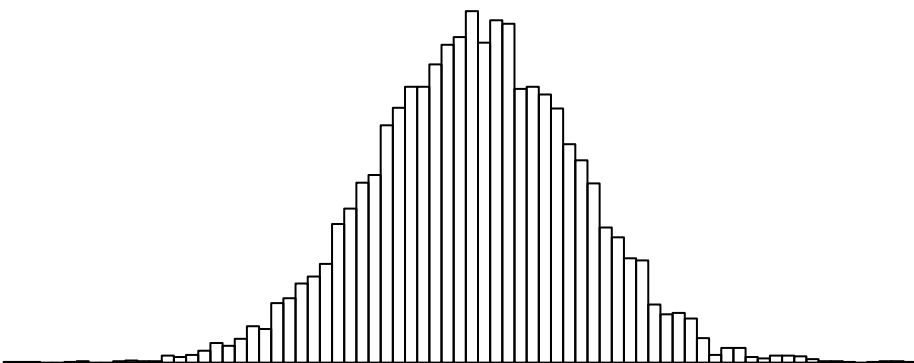

D206:45

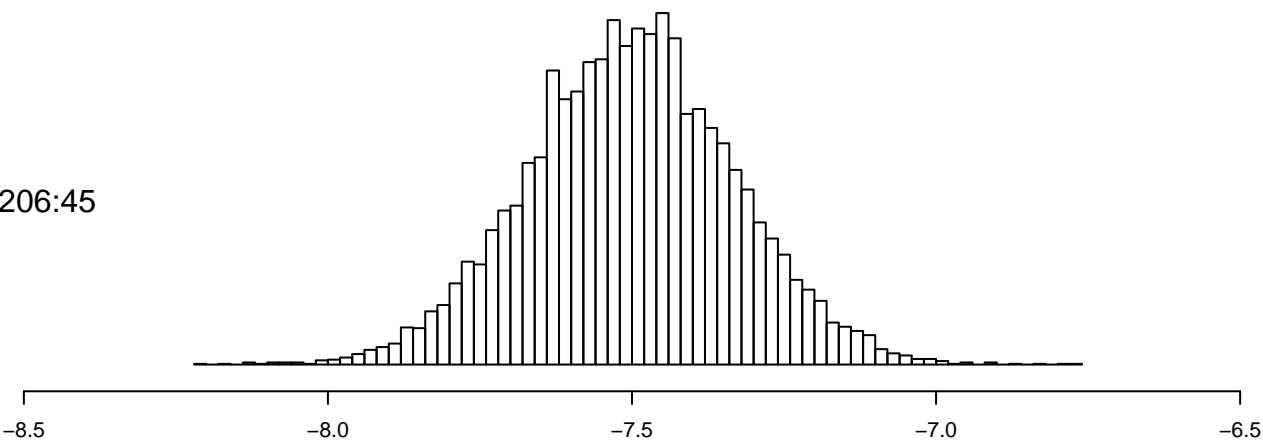

Unidentified Metabolite 22

D206:240 – D206:120

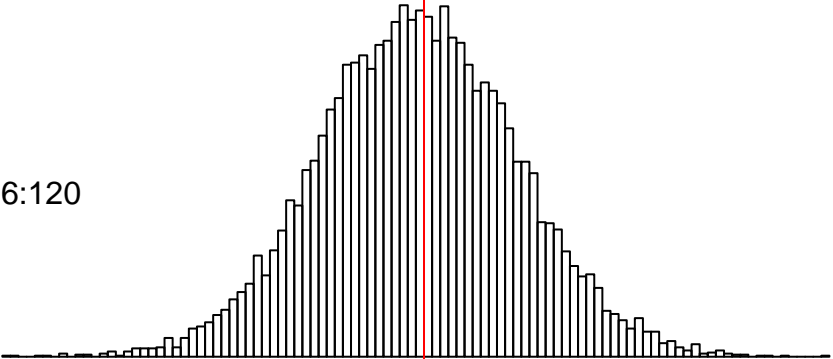

D206:240 – D206:45

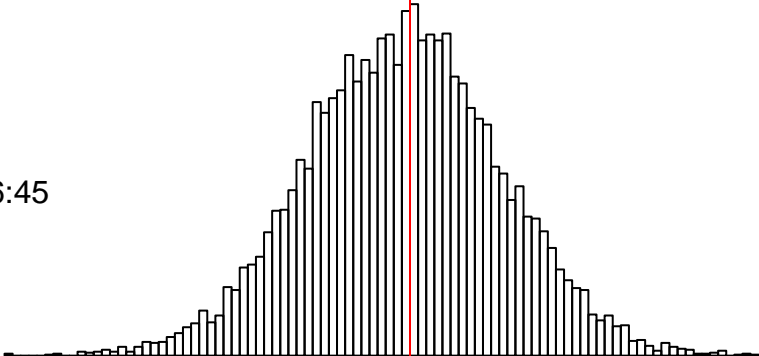

D206:120 – D206:45

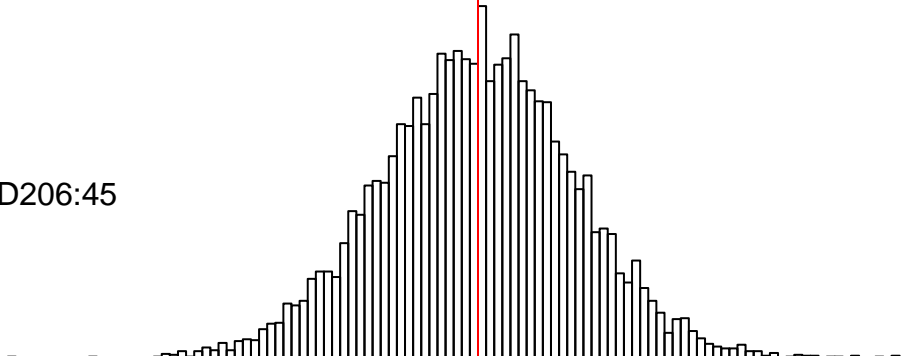

-1.5      -1.0      -0.5      0.0      0.5      1.0      1.5

delta(Unidentified Metabolite 22)

D206:240

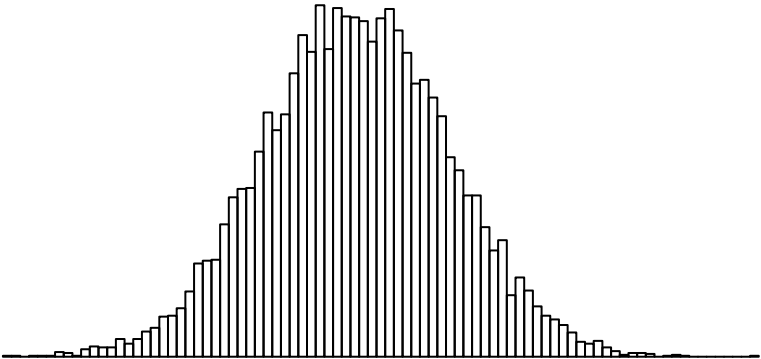

D206:120

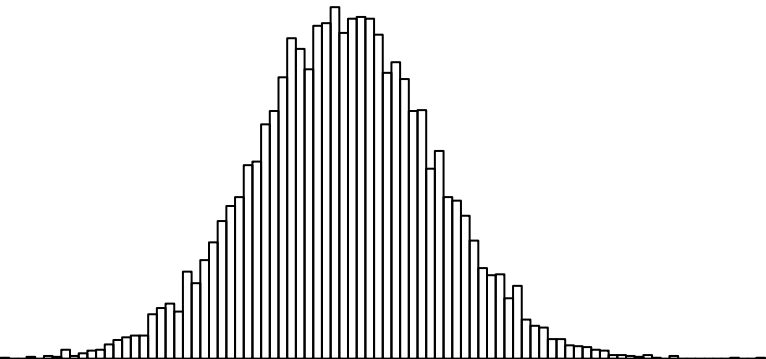

D206:45

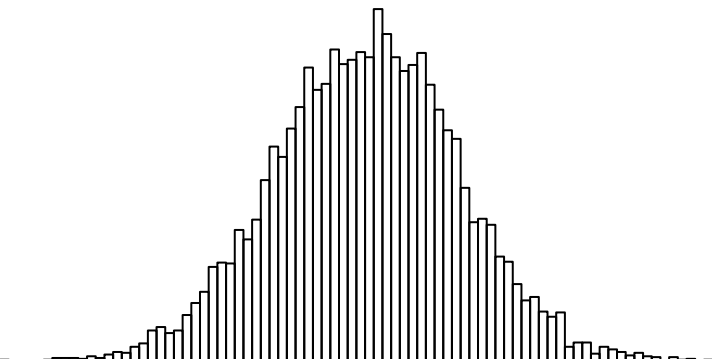

-10      -9      -8      -7      -6      -5      -4      -3

Unidentified Metabolite 23

D206:240 – D206:120

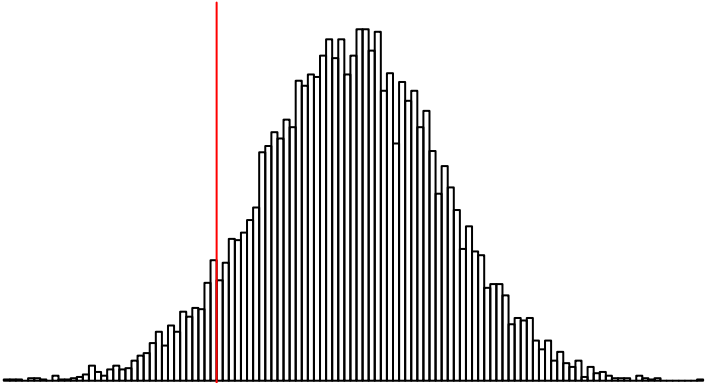

D206:240 – D206:45

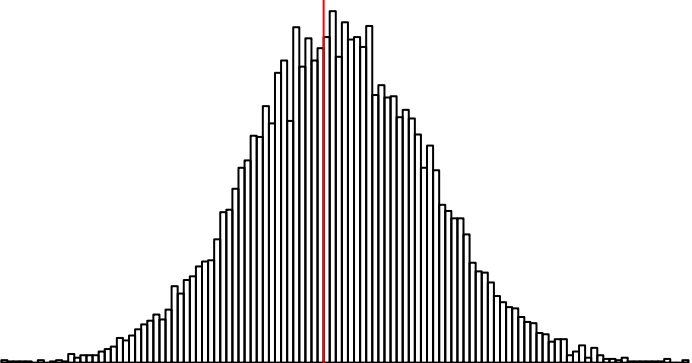

D206:120 – D206:45

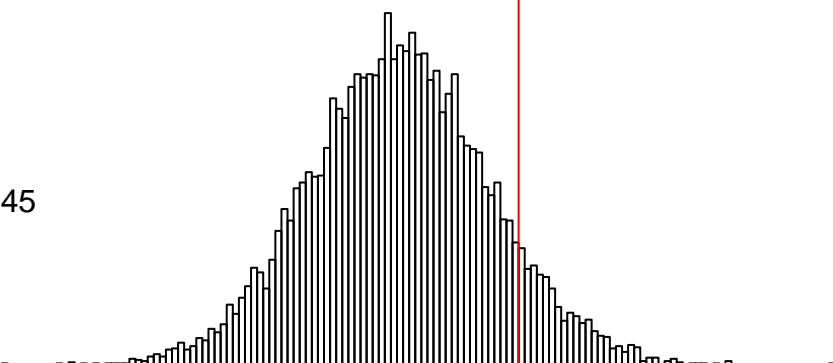

-6 -4 -2 0 2 4

delta(Unidentified Metabolite 23)

D206:240

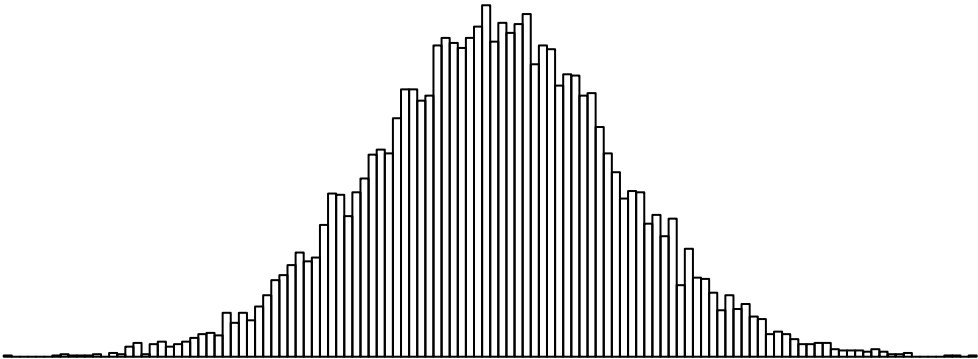

D206:120

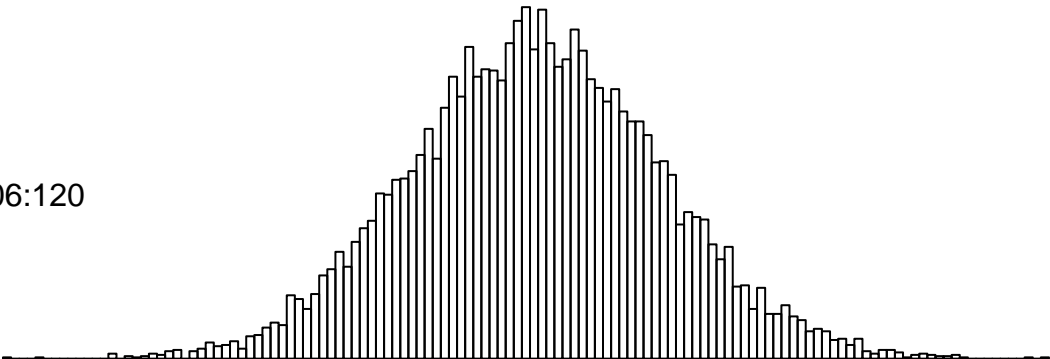

D206:45

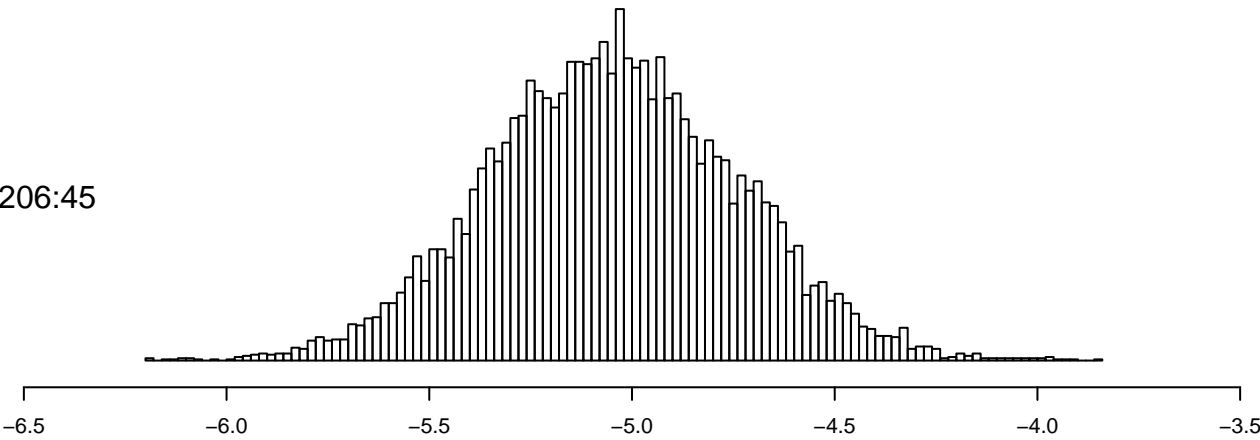

Unidentified Metabolite 24

D206:240 – D206:120

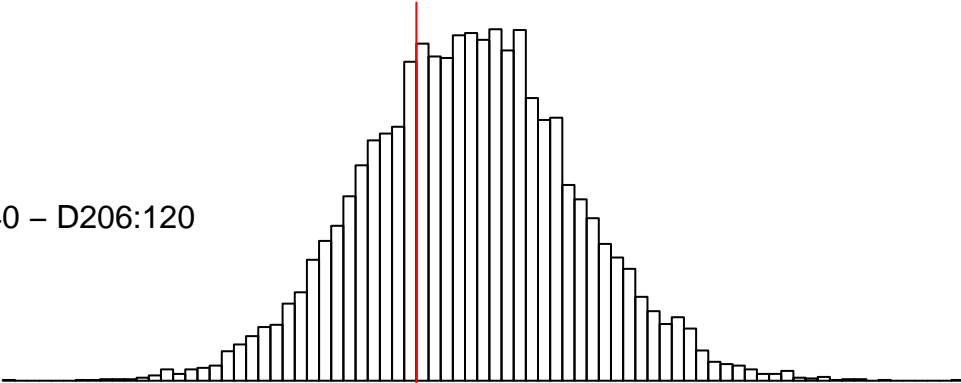

D206:240 – D206:45

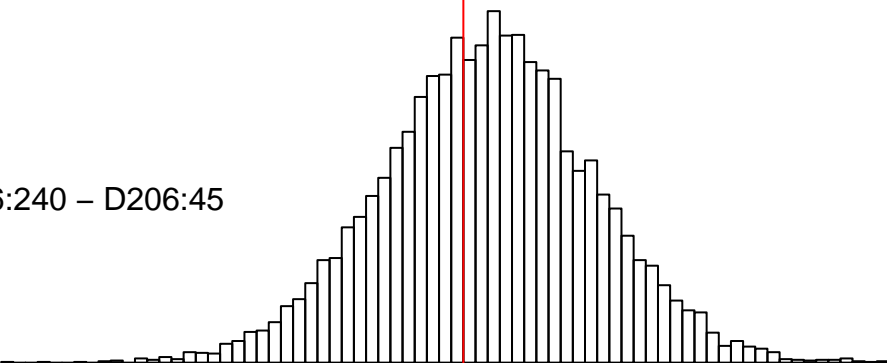

D206:120 – D206:45

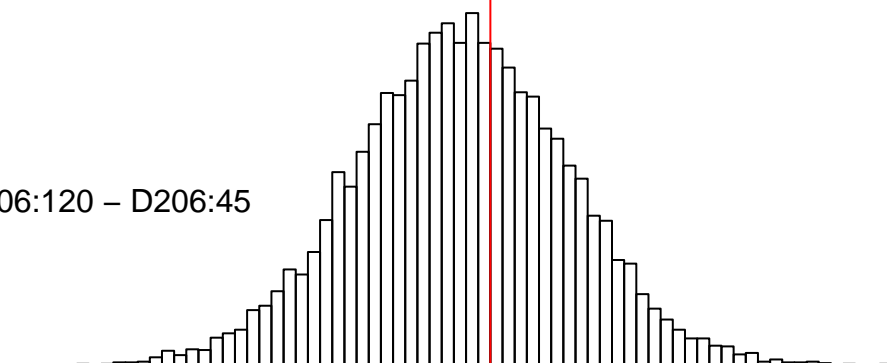

-2 -1 0 1 2 3

delta(Unidentified Metabolite 24)

D206:240

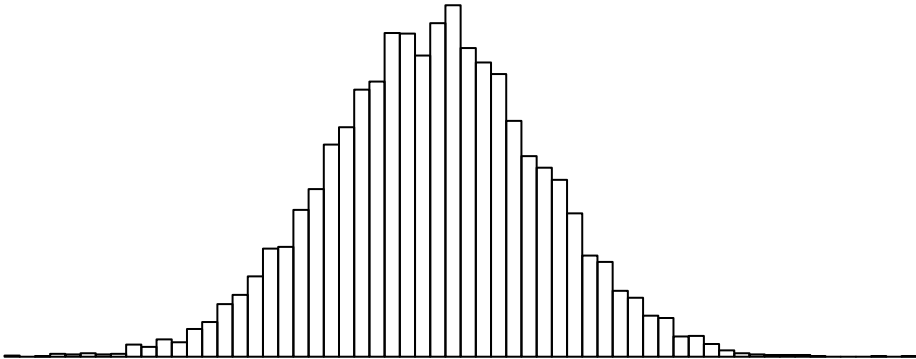

D206:120

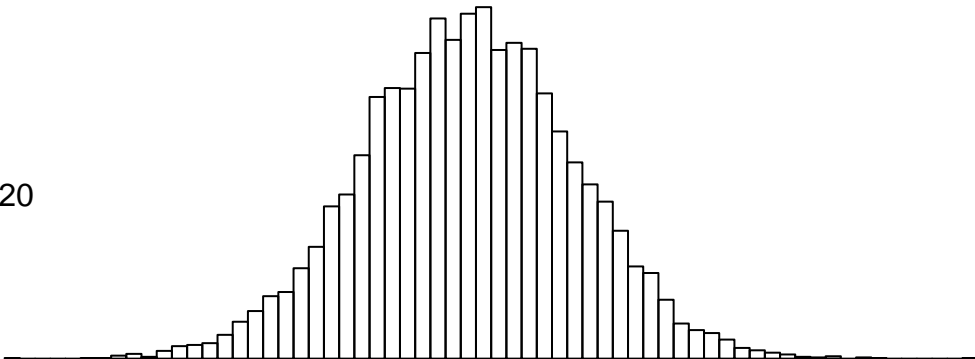

D206:45

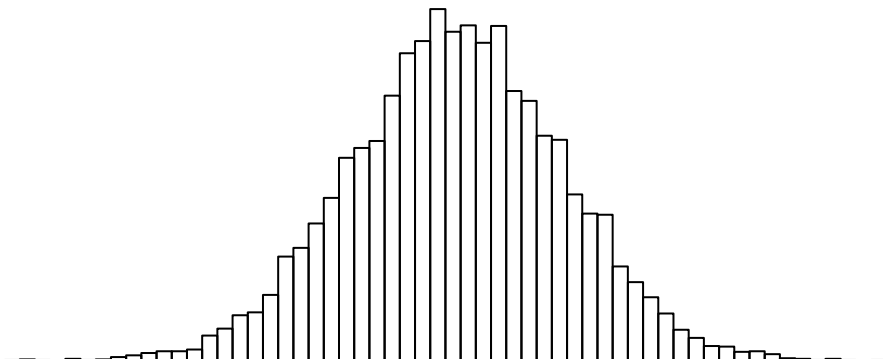

-9 -8 -7 -6 -5

Unidentified Metabolite 25

D206:240 – D206:120

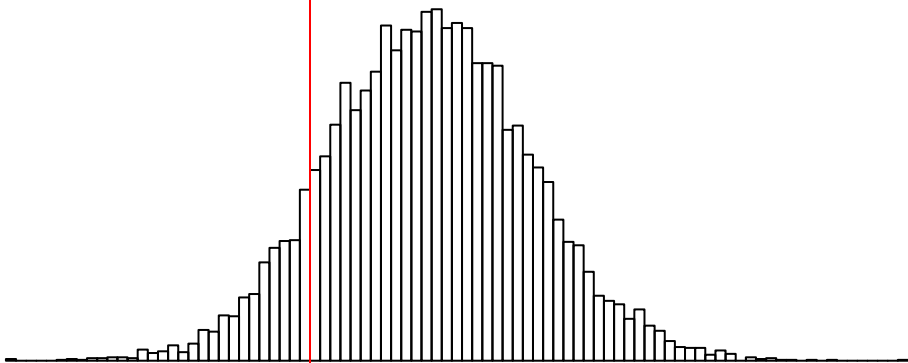

D206:240 – D206:45

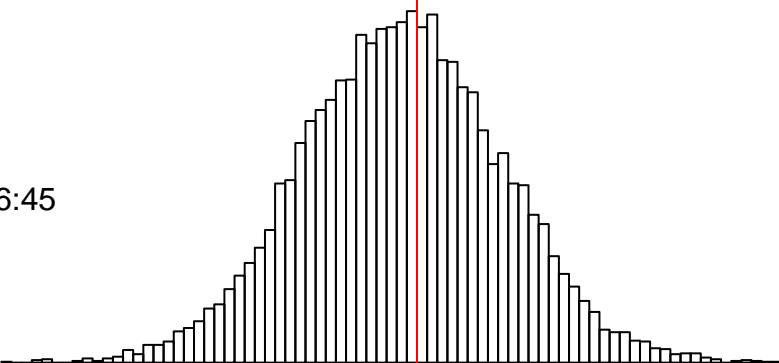

D206:120 – D206:45

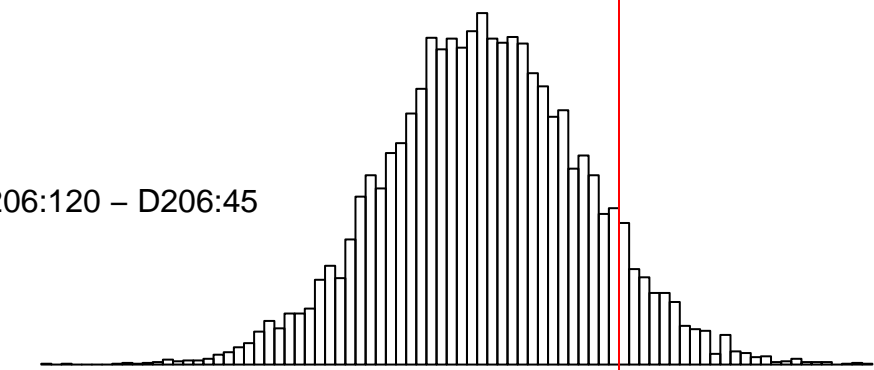

-3      -2      -1      0      1      2      3

delta(Unidentified Metabolite 25)



D206:240

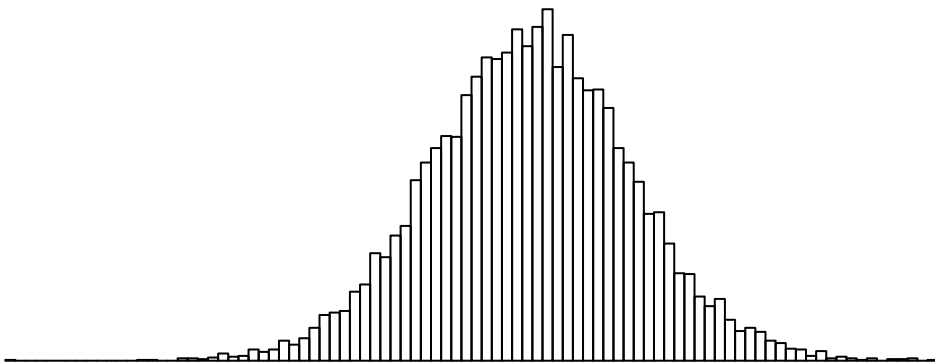

D206:120

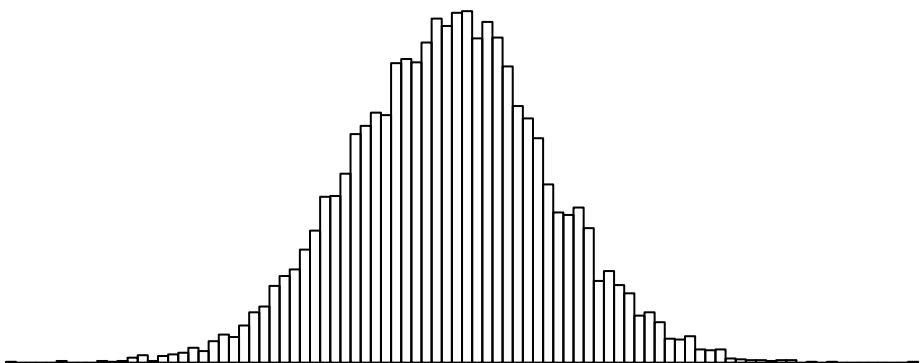

D206:45

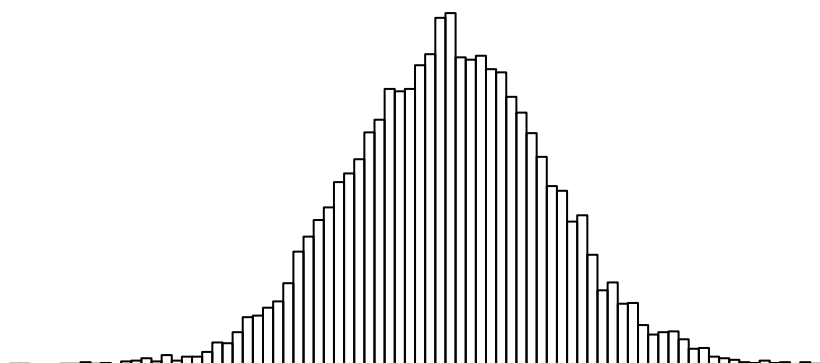

-11      -10      -9      -8      -7      -6      -5

Unidentified Metabolite 26

D206:240 – D206:120

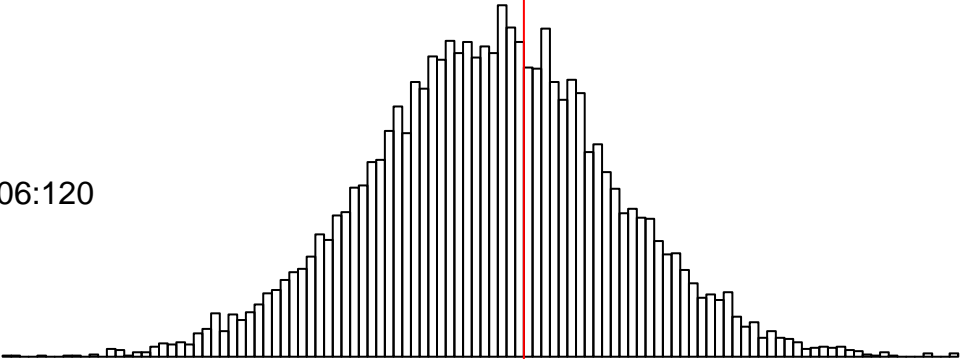

D206:240 – D206:45

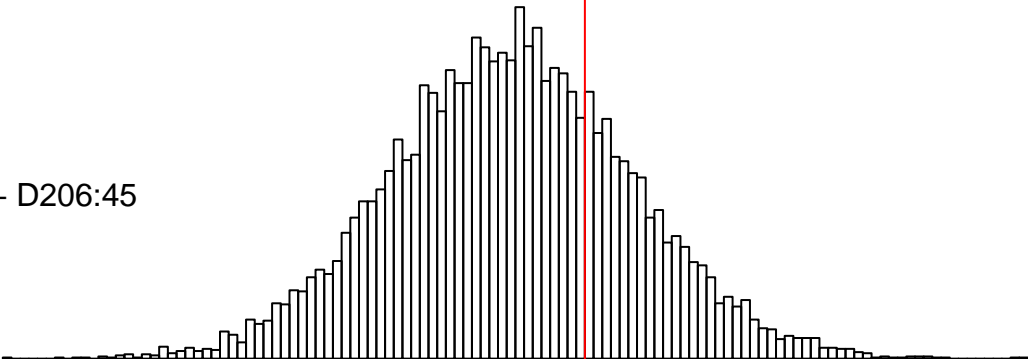

D206:120 – D206:45

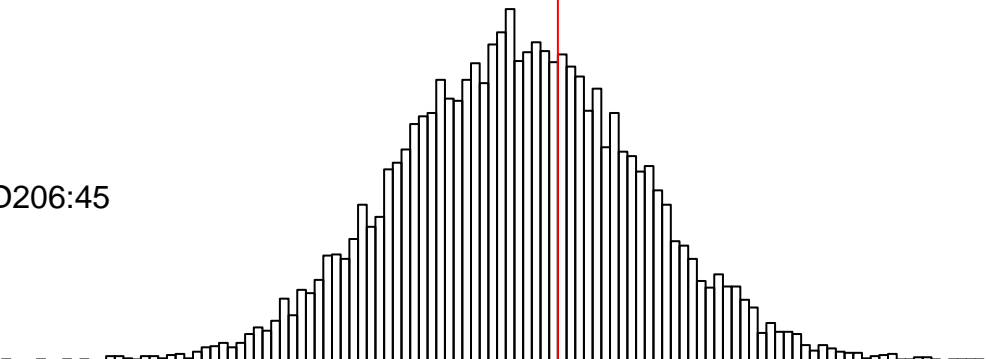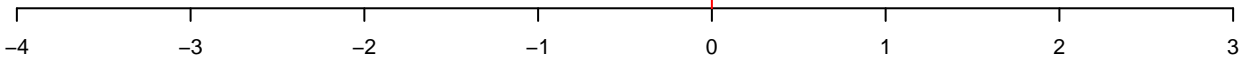

delta(Unidentified Metabolite 26)

D206:240

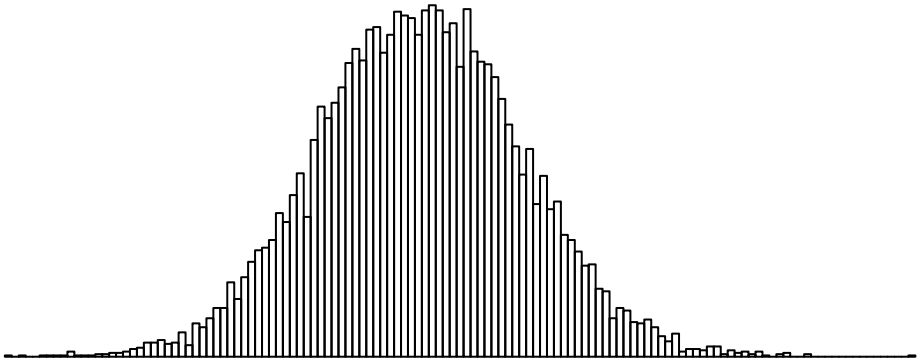

D206:120

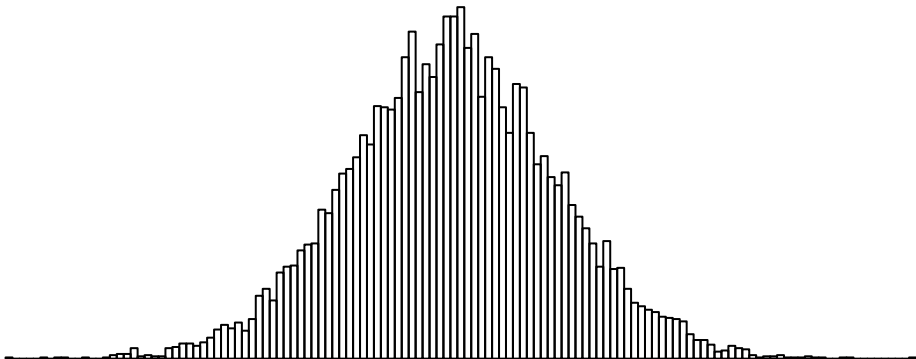

D206:45

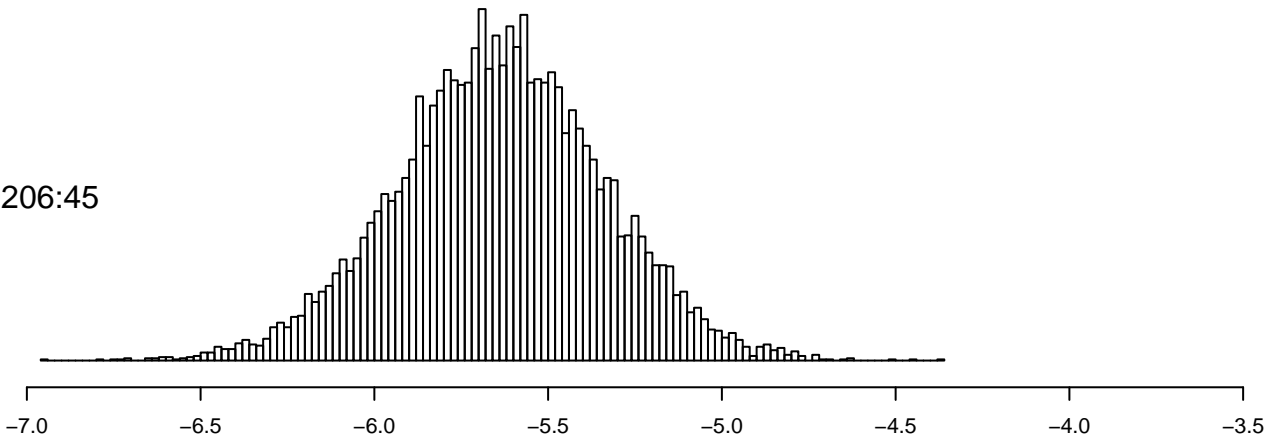

Unidentified Metabolite 27

D206:240 – D206:120

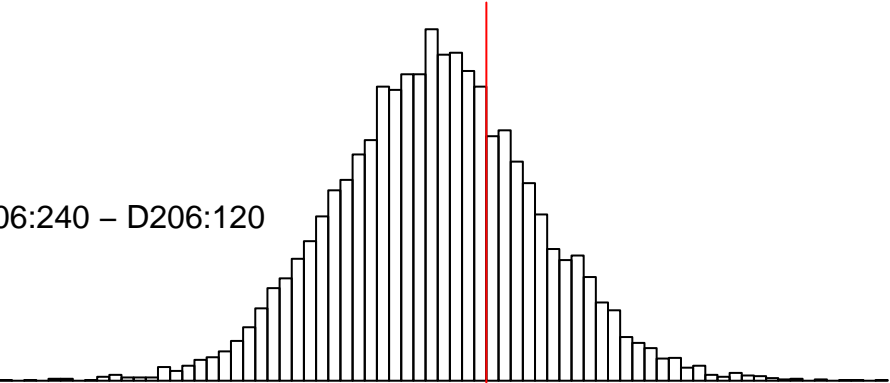

D206:240 – D206:45

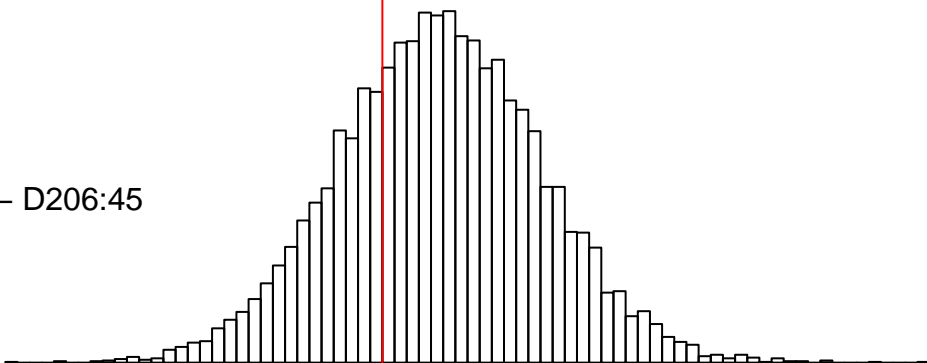

D206:120 – D206:45

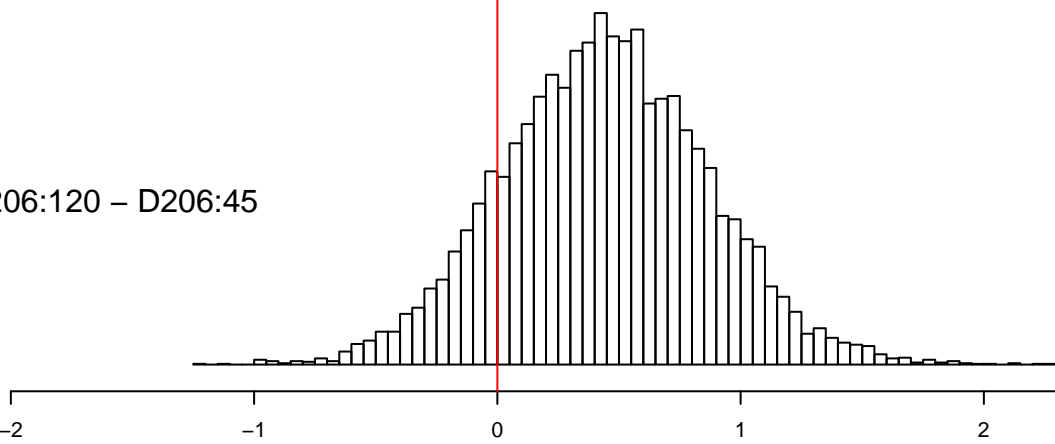

delta(Unidentified Metabolite 27)

D206:240

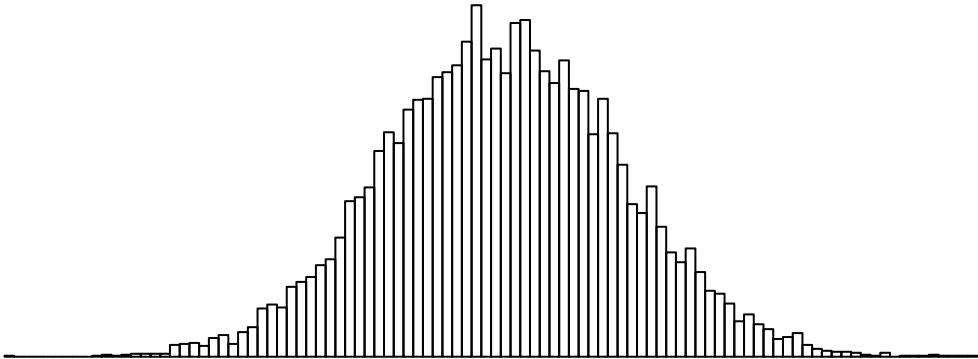

D206:120

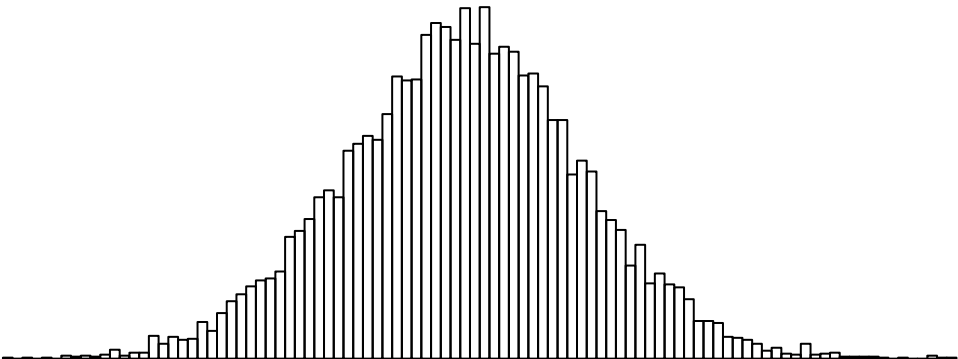

D206:45

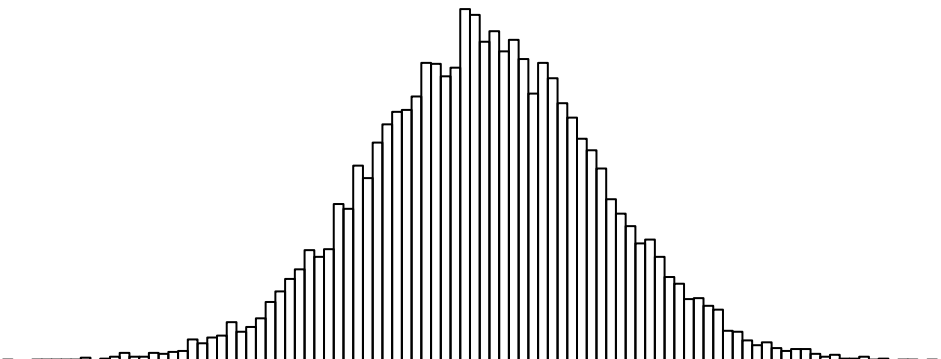

-8.5      -8.0      -7.5      -7.0      -6.5      -6.0

Unidentified Metabolite 29

D206:240 – D206:120

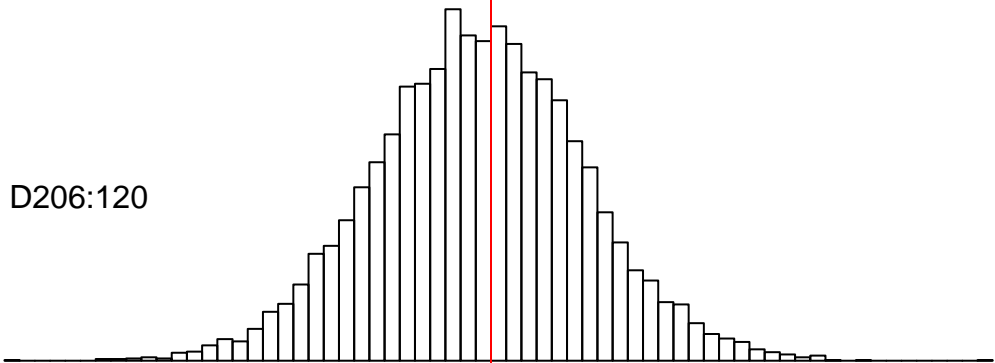

D206:240 – D206:45

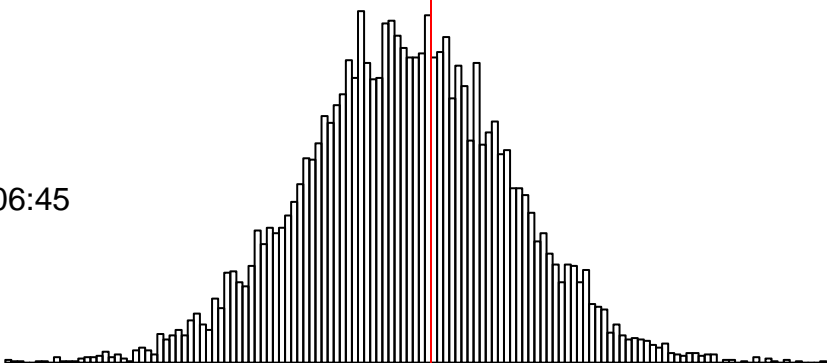

D206:120 – D206:45

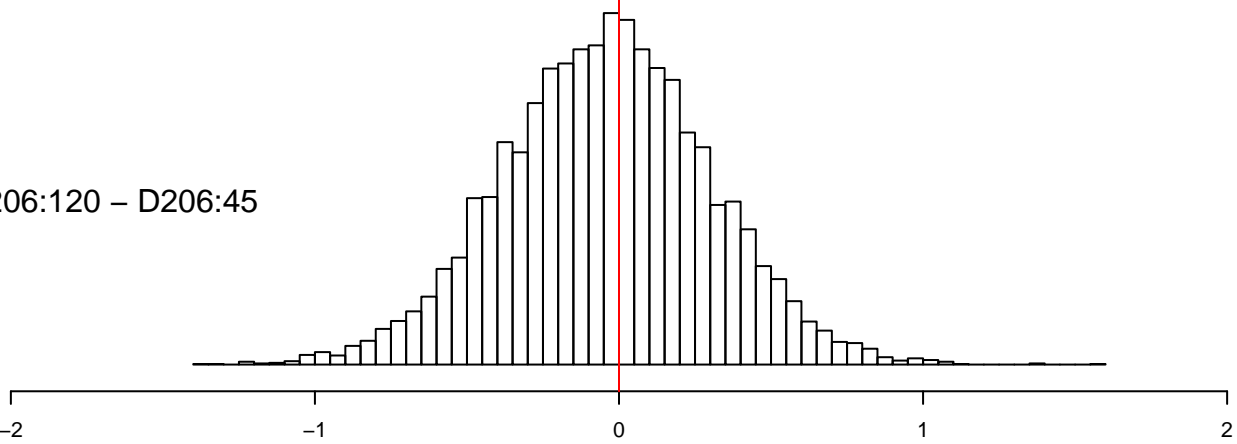

delta(Unidentified Metabolite 29)

D206:240

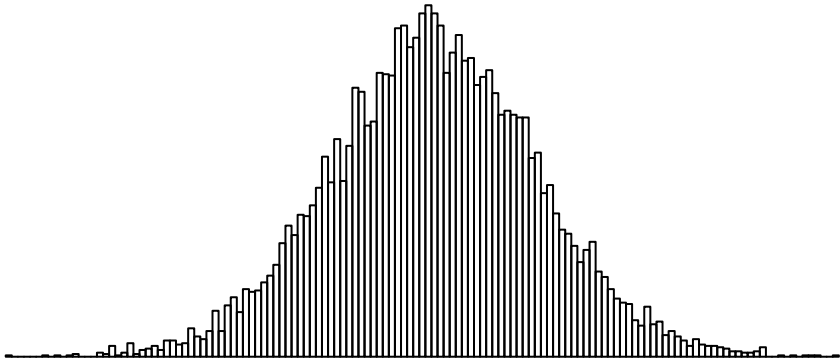

D206:120

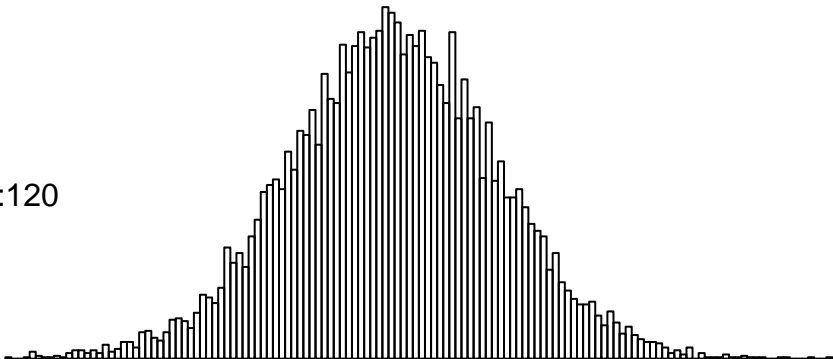

D206:45

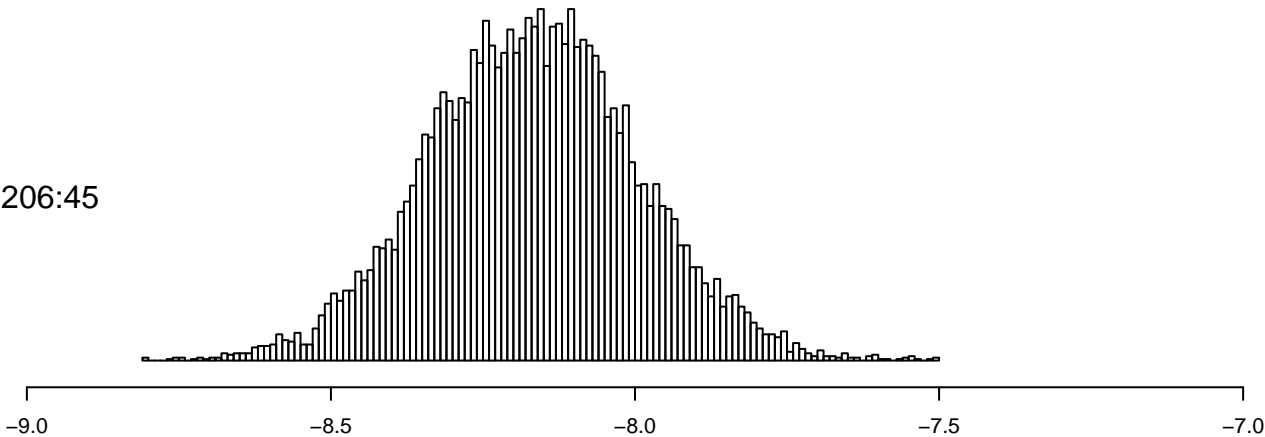

Unidentified Metabolite 30

D206:240 – D206:120

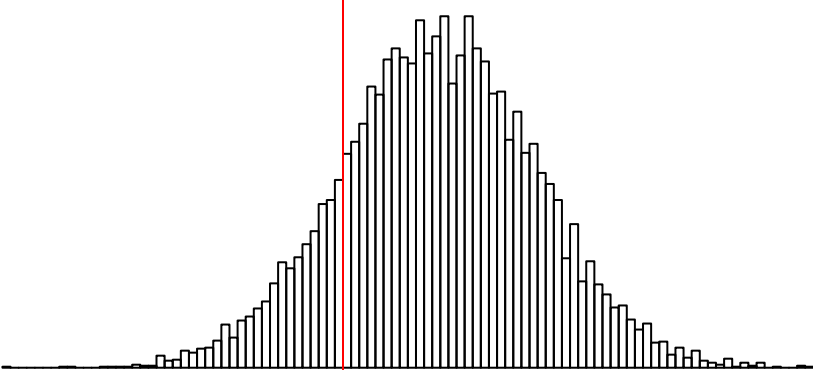

D206:240 – D206:45

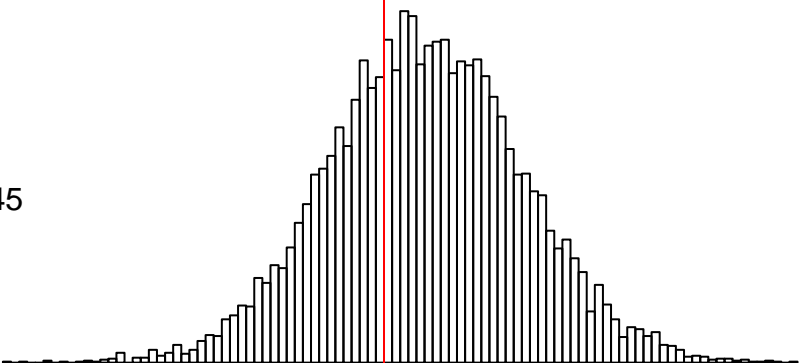

D206:120 – D206:45

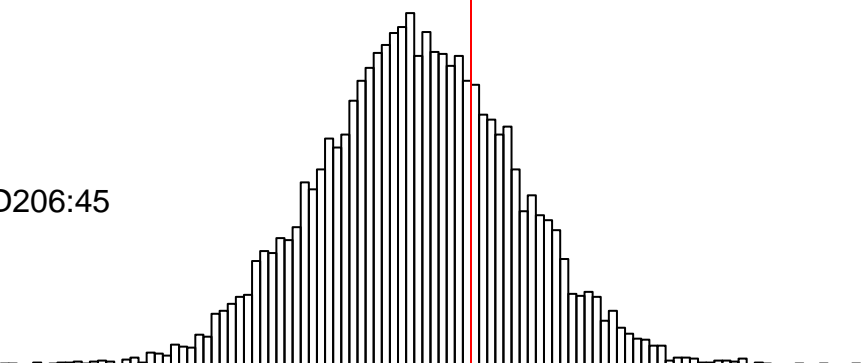

-1.5      -1.0      -0.5      0.0      0.5      1.0      1.5

delta(Unidentified Metabolite 30)



D206:240

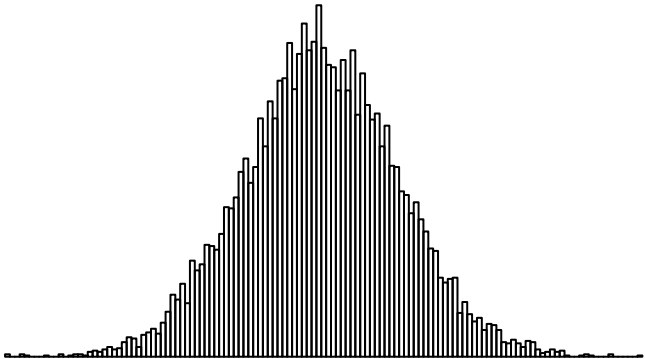

D206:120

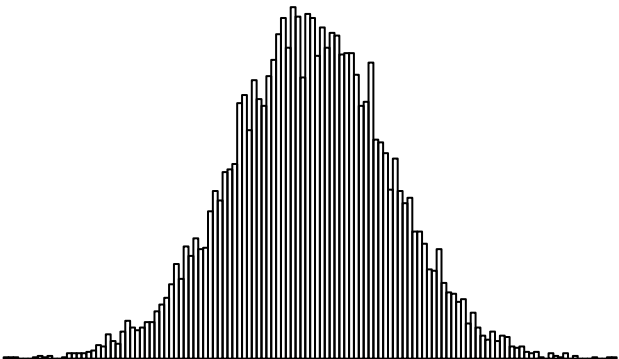

D206:45

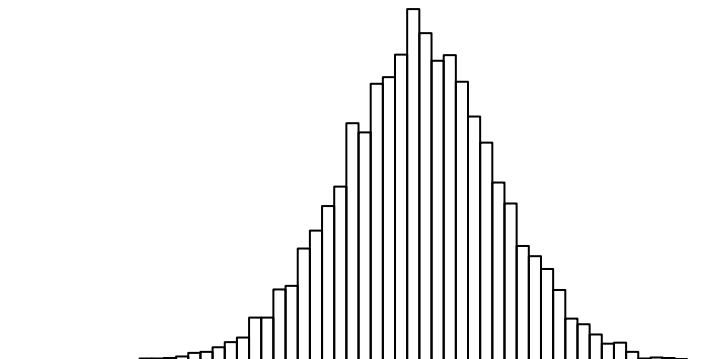

-11      -10      -9      -8      -7      -6

Unidentified Metabolite 31

D206:240 – D206:120

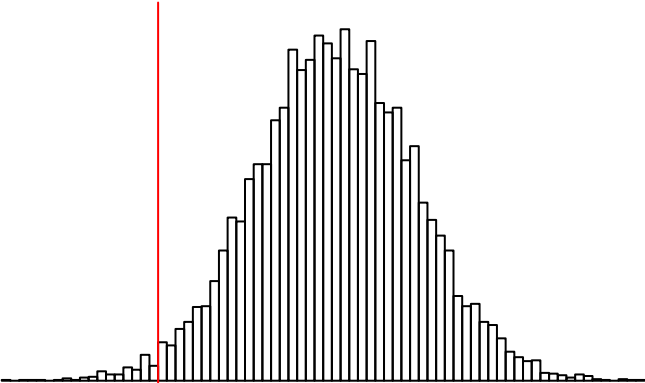

D206:240 – D206:45

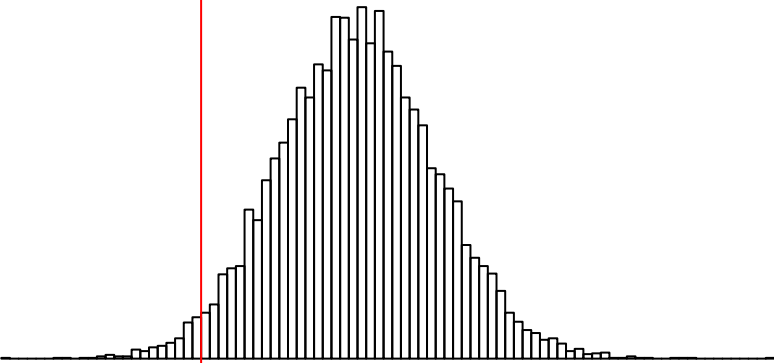

D206:120 – D206:45

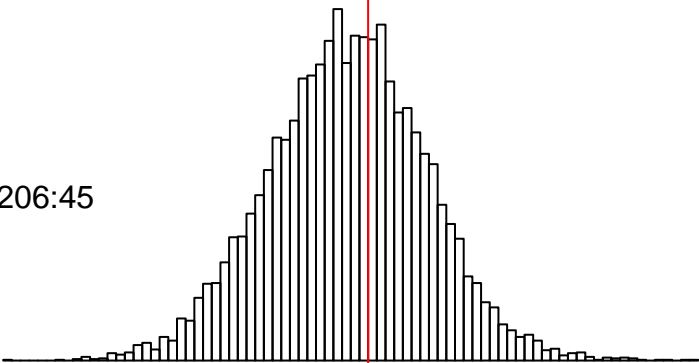

-3 -2 -1 0 1 2 3 4

delta(Unidentified Metabolite 31)

D206:240

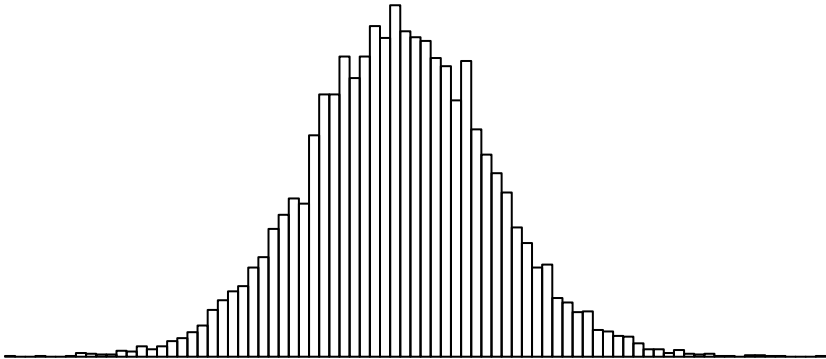

D206:120

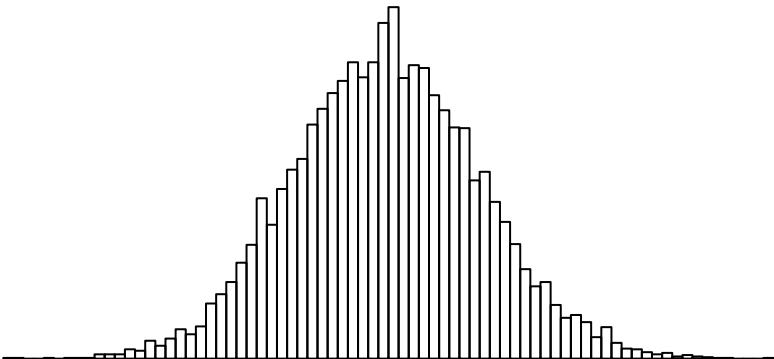

D206:45

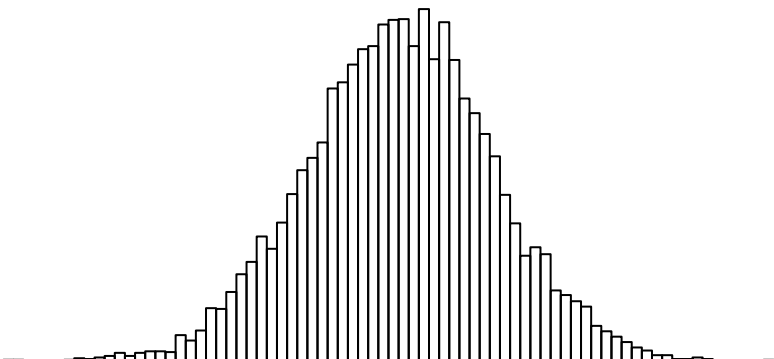

-12

-11

-10

-9

-8

-7

-6

Unidentified Metabolite 32

D206:240 – D206:120

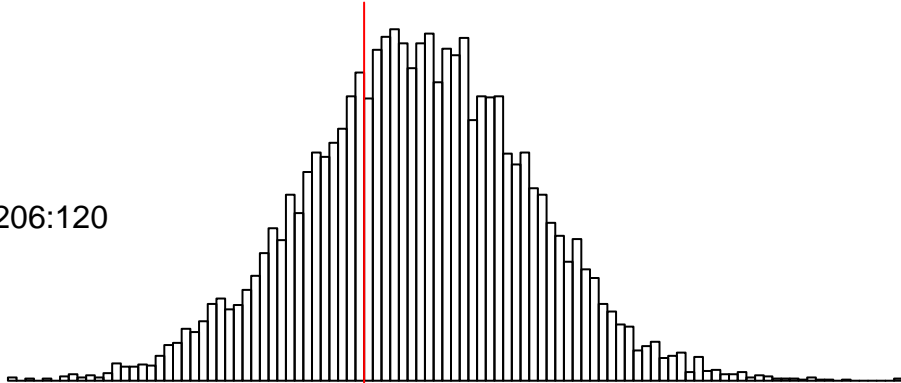

D206:240 – D206:45

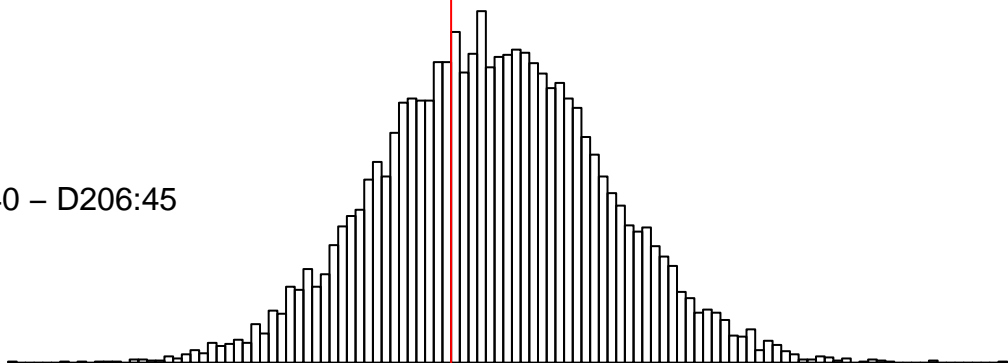

D206:120 – D206:45

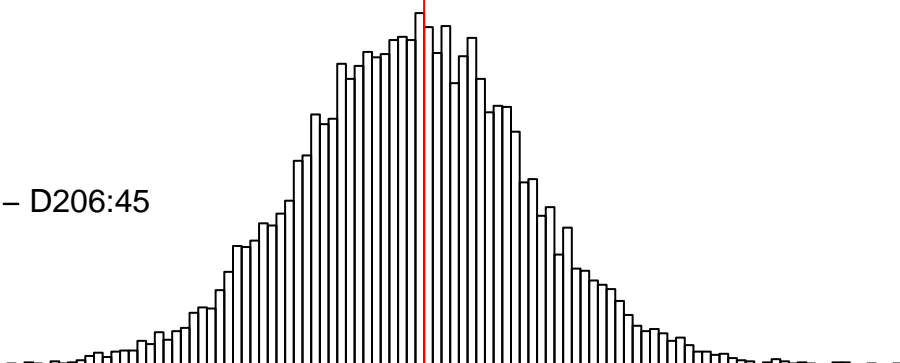

-3 -2 -1 0 1 2 3 4

delta(Unidentified Metabolite 32)

D206:240

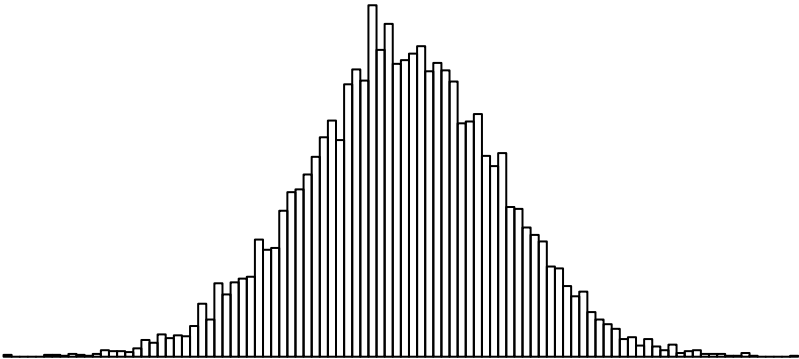

D206:120

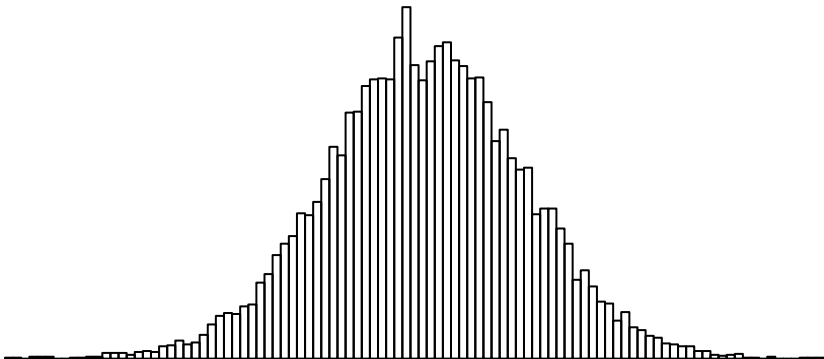

D206:45

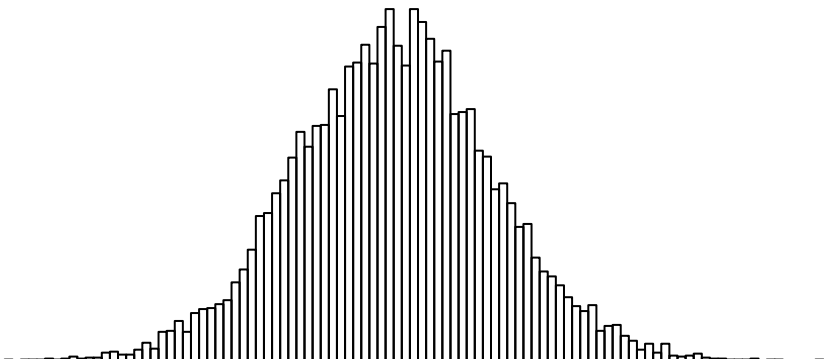

-9.0      -8.5      -8.0      -7.5      -7.0      -6.5      -6.0

Unidentified Metabolite 33

D206:240 – D206:120

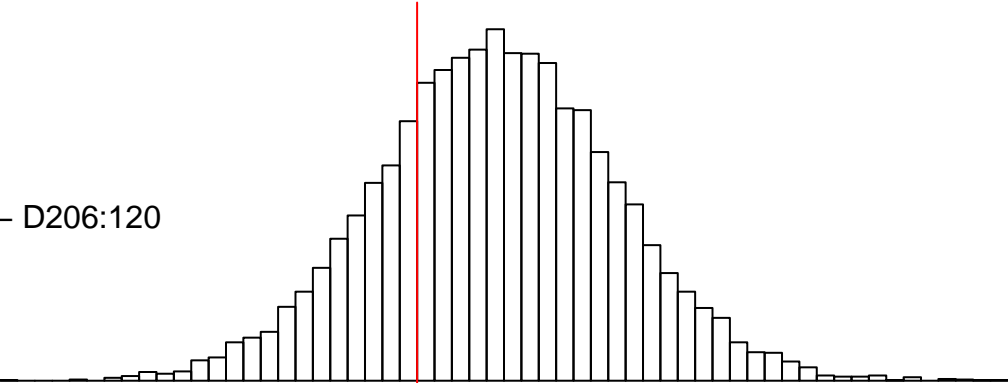

D206:240 – D206:45

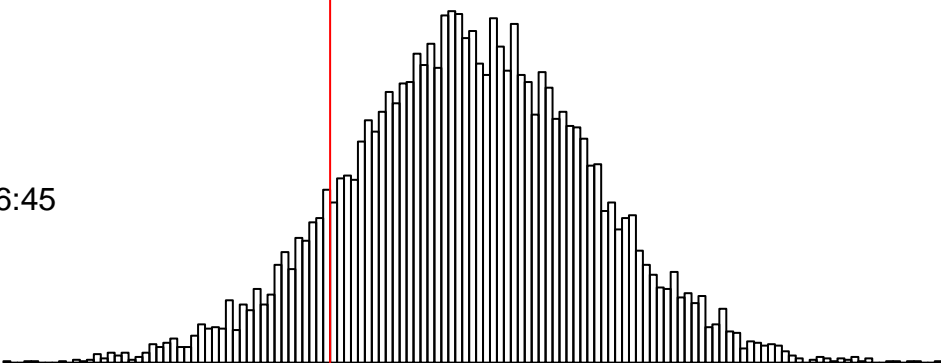

D206:120 – D206:45

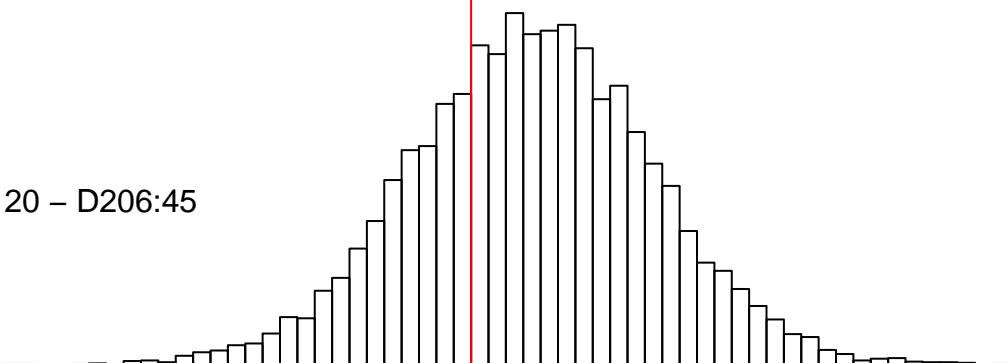

-1.5      -1.0      -0.5      0.0      0.5      1.0      1.5      2.0

delta(Unidentified Metabolite 33)

D206:240

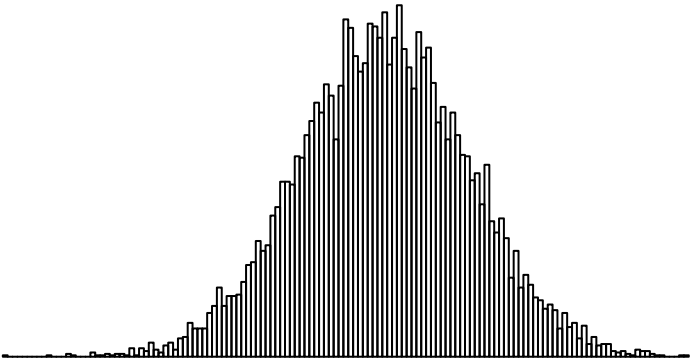

D206:120

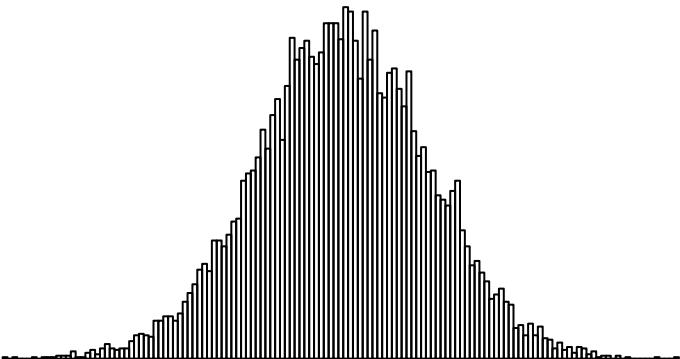

D206:45

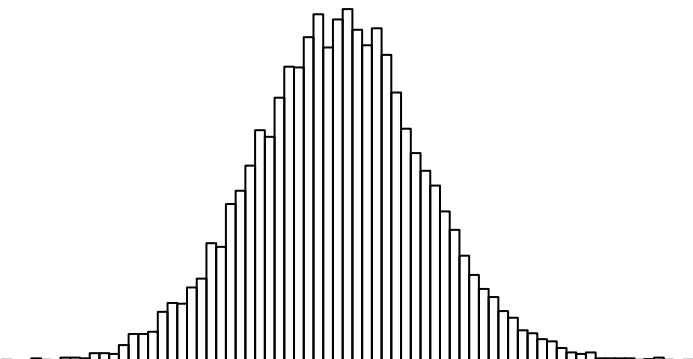

-9.5      -9.0      -8.5      -8.0      -7.5      -7.0

Unidentified Metabolite 34

D206:240 – D206:120

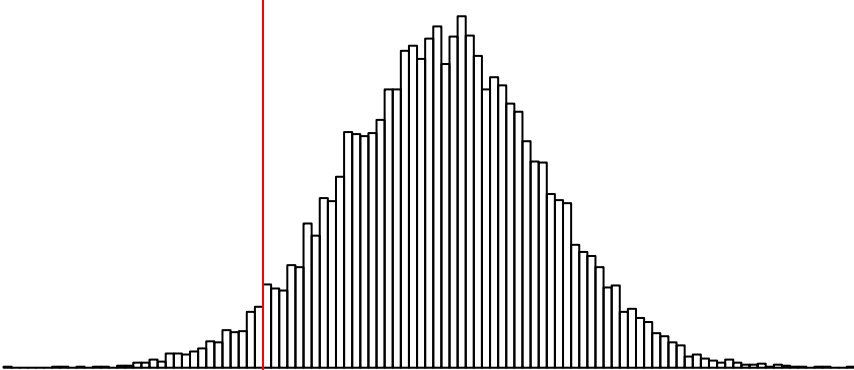

D206:240 – D206:45

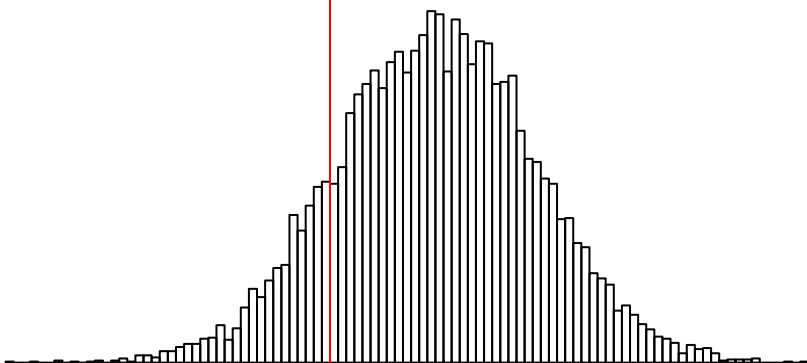

D206:120 – D206:45

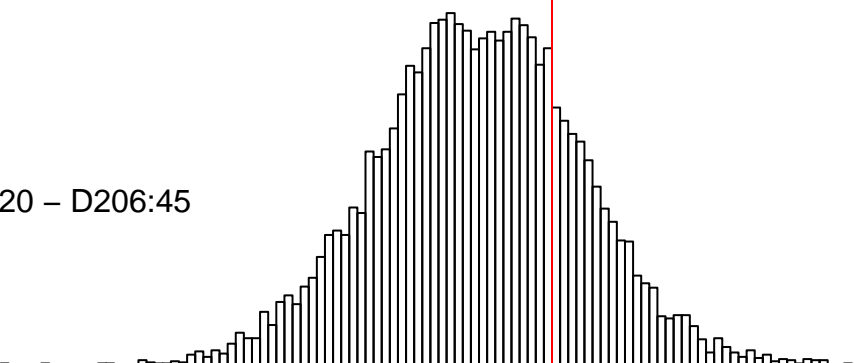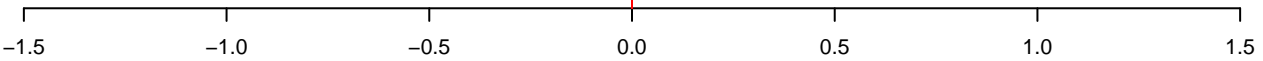

delta(Unidentified Metabolite 34)



D206:240

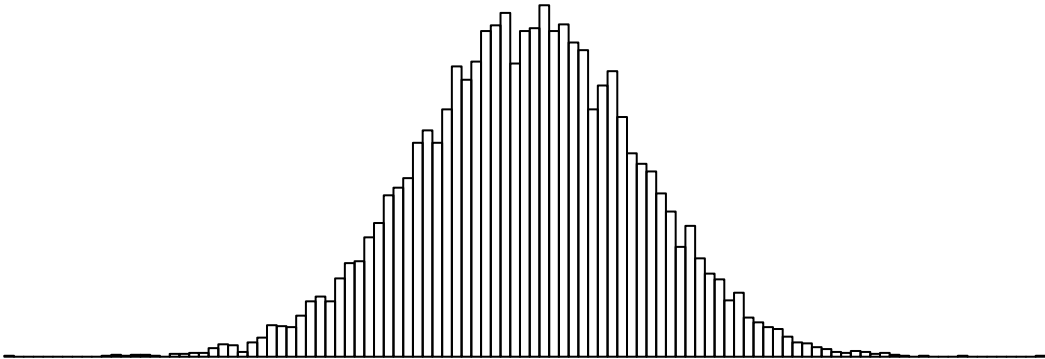

D206:120

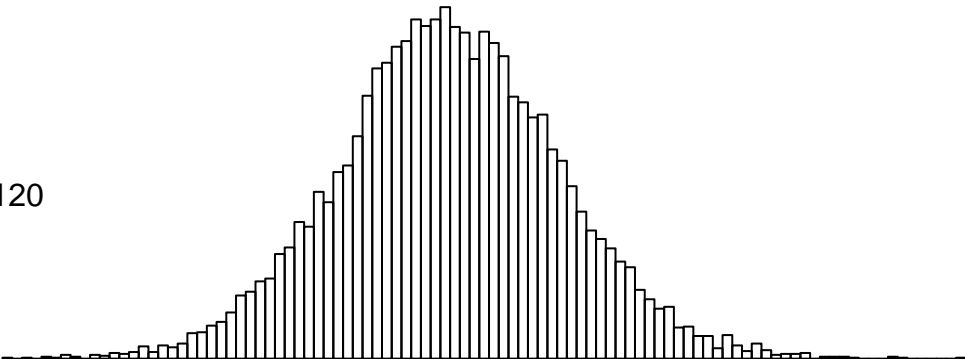

D206:45

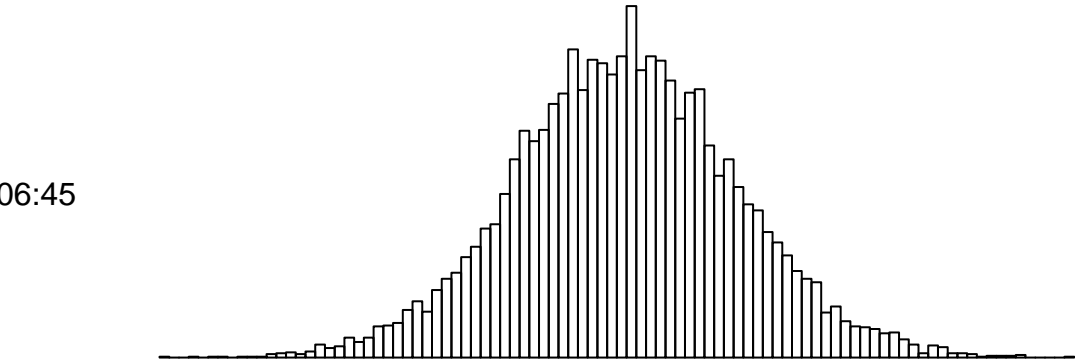

-7.5      -7.0      -6.5      -6.0      -5.5      -5.0

Unidentified Metabolite 35

D206:240 – D206:120

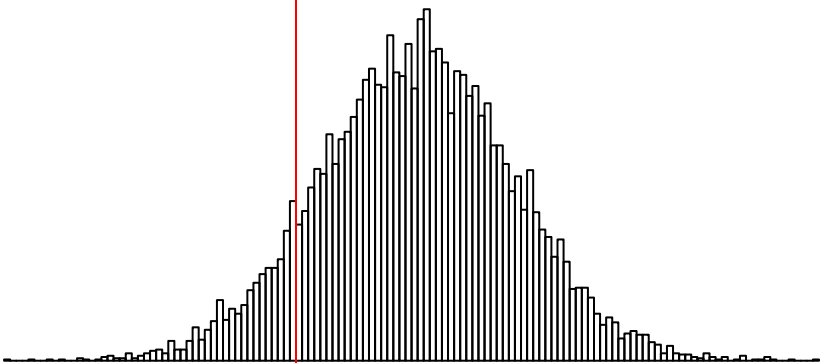

D206:240 – D206:45

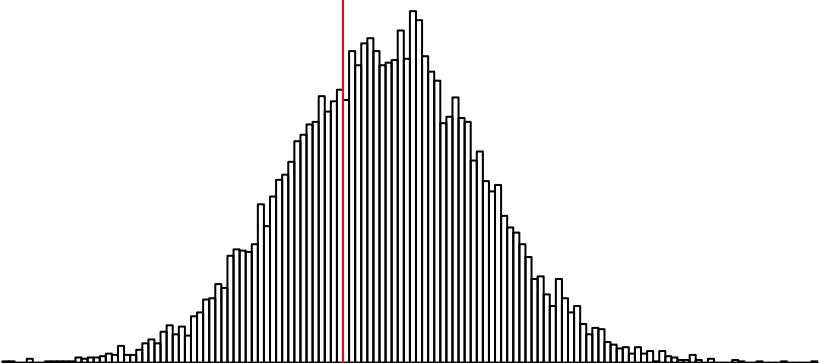

D206:120 – D206:45

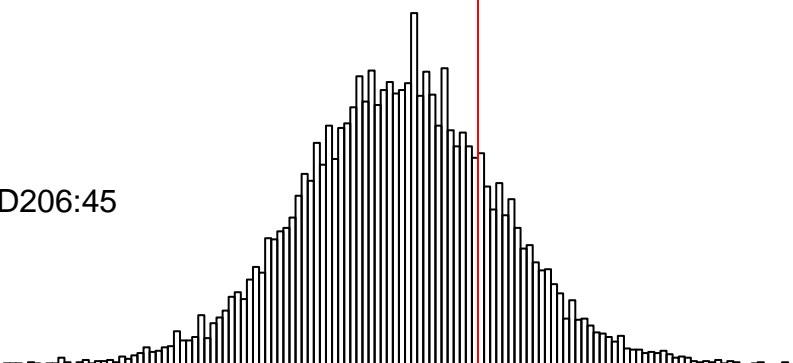

-2                      -1                      0                      1                      2

delta(Unidentified Metabolite 35)

D206:240

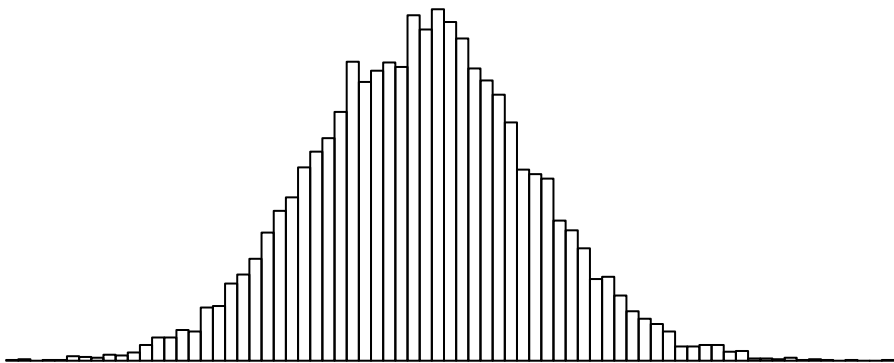

D206:120

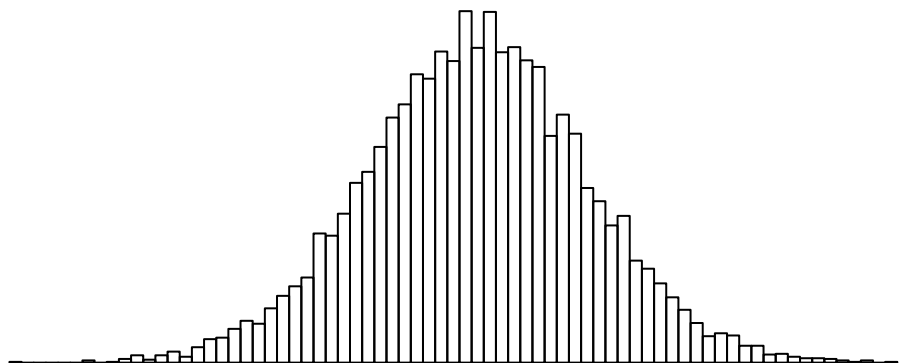

D206:45

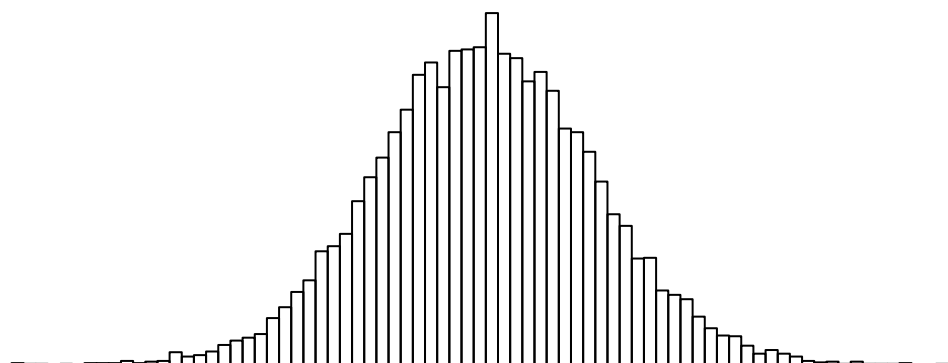

-9                      -8                      -7                      -6                      -5                      -4

Unidentified Metabolite 36

D206:240 – D206:120

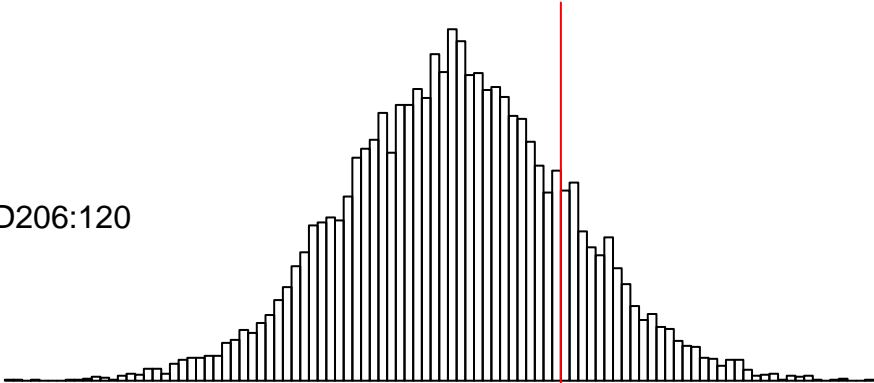

D206:240 – D206:45

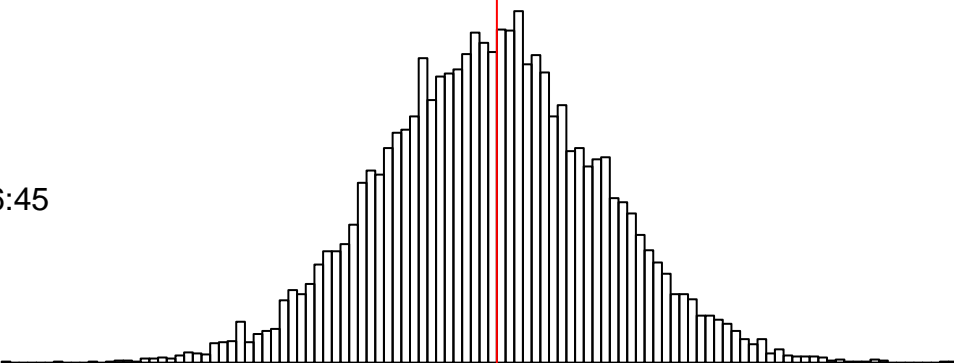

D206:120 – D206:45

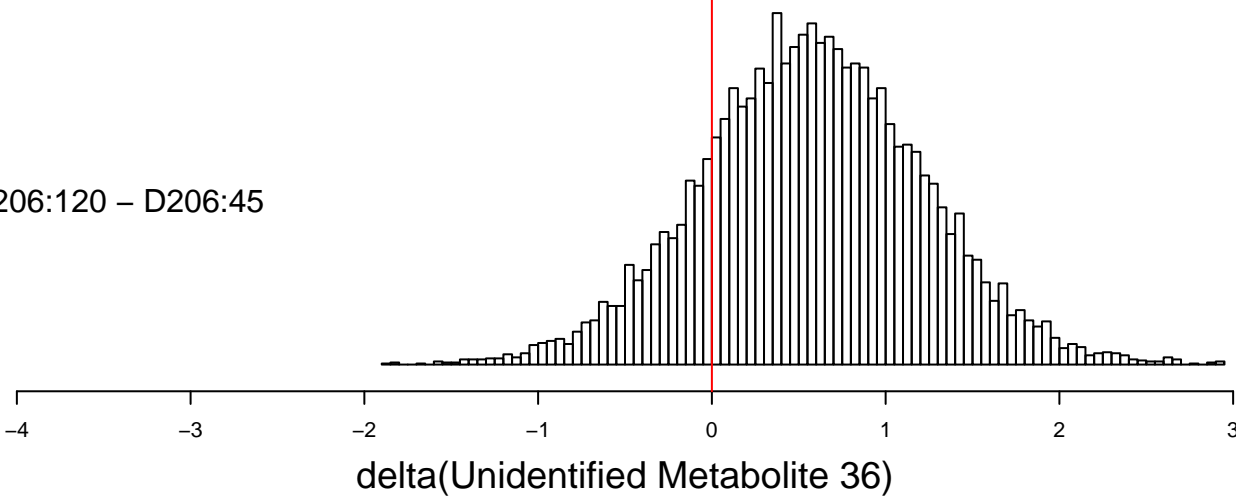

D206:240

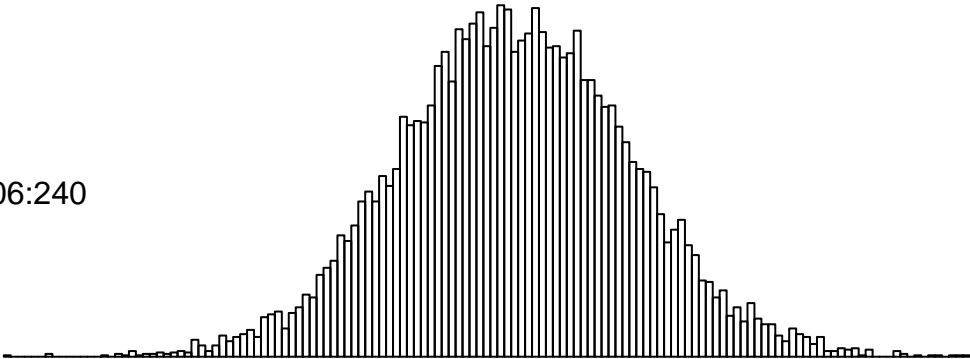

D206:120

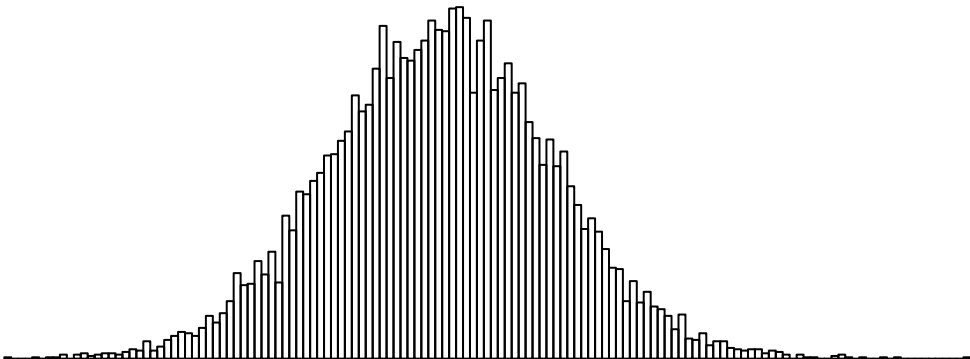

D206:45

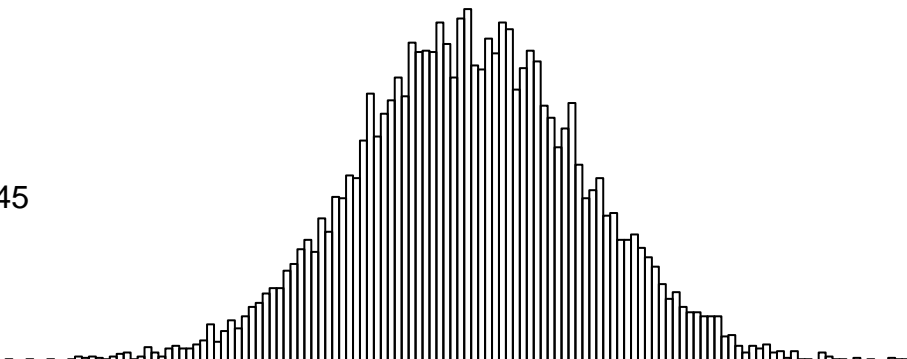

-8.5      -8.0      -7.5      -7.0      -6.5      -6.0      -5.5      -5.0

Unidentified Metabolite 38

D206:240 – D206:120

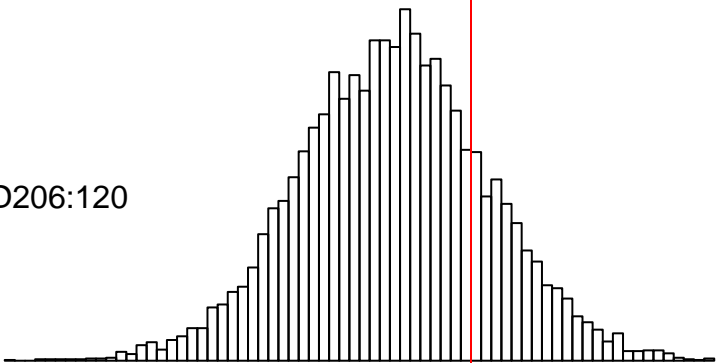

D206:240 – D206:45

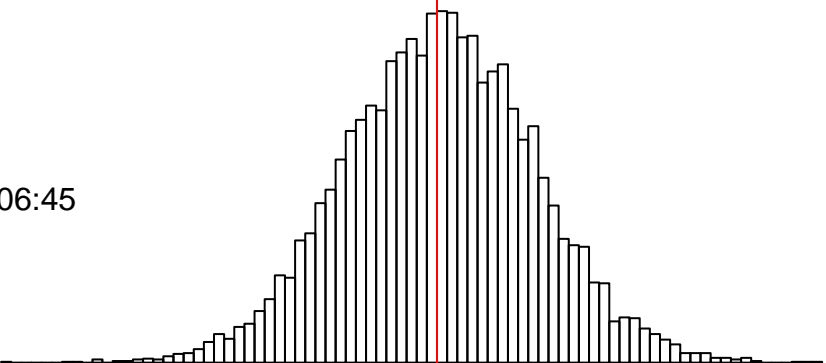

D206:120 – D206:45

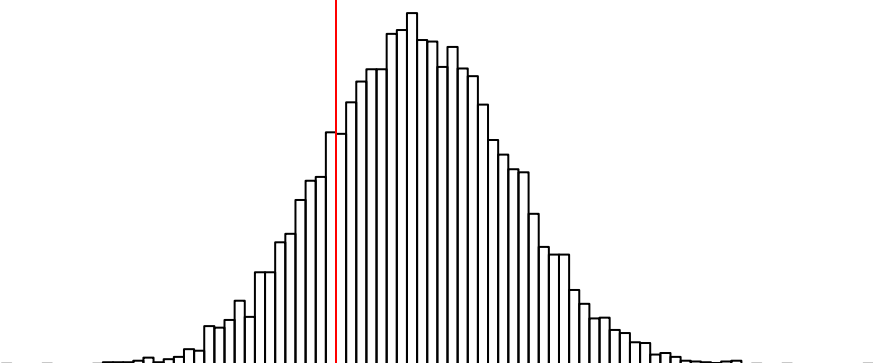

-3 -2 -1 0 1 2 3

delta(Unidentified Metabolite 38)

D206:240

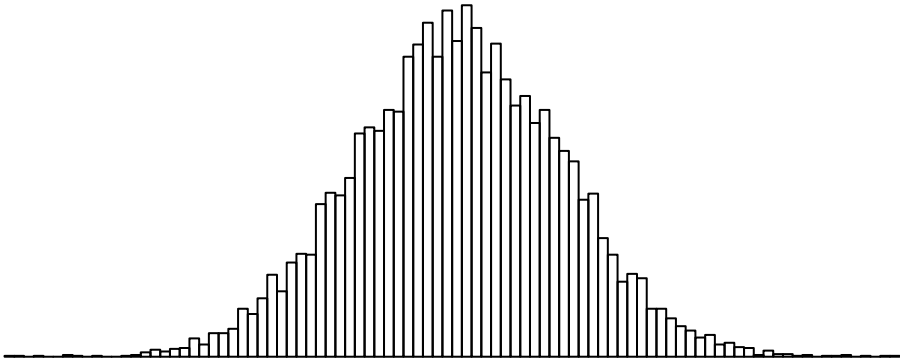

D206:120

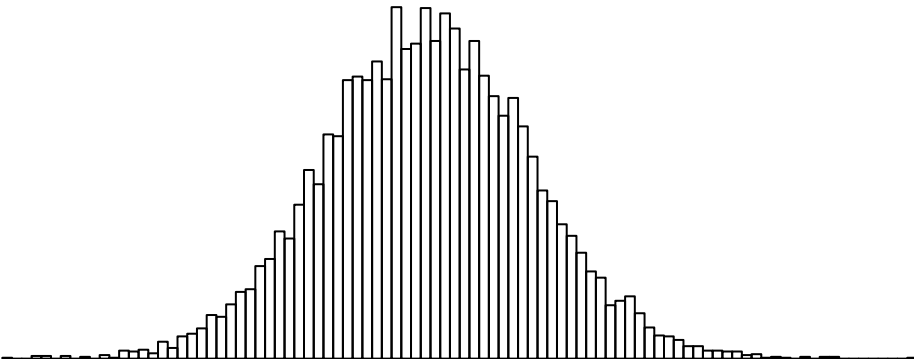

D206:45

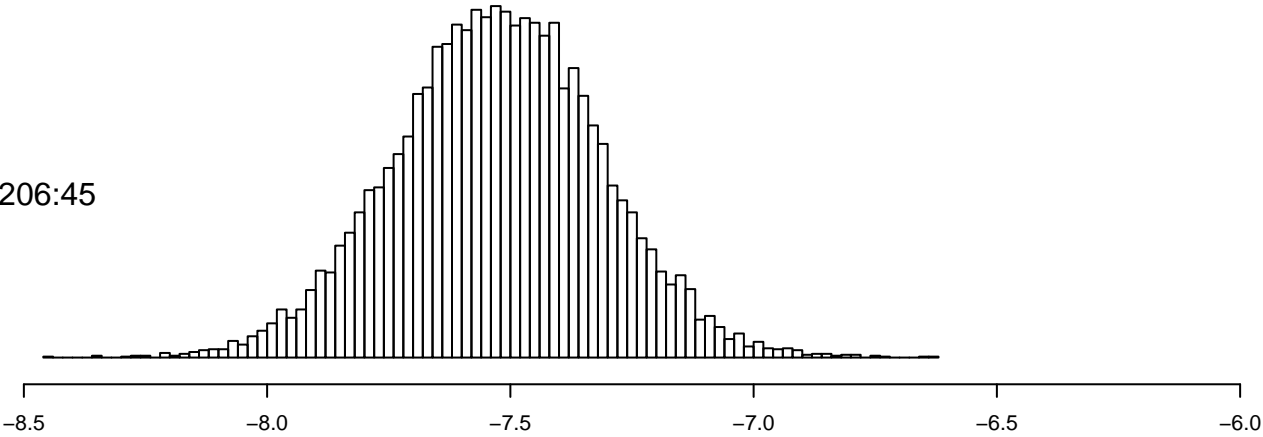

Unidentified Metabolite 39

D206:240 – D206:120

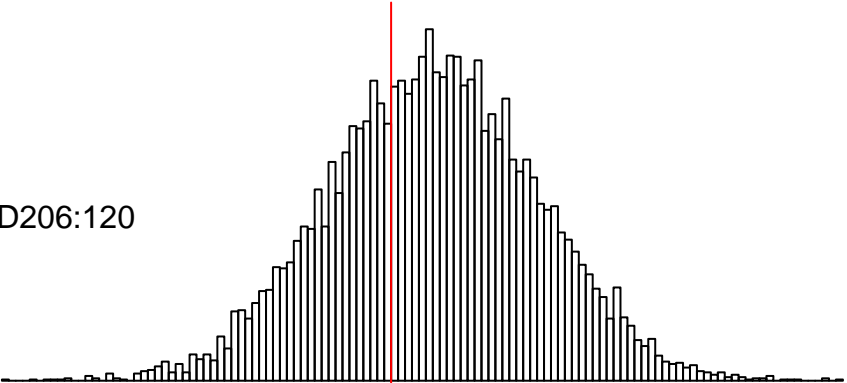

D206:240 – D206:45

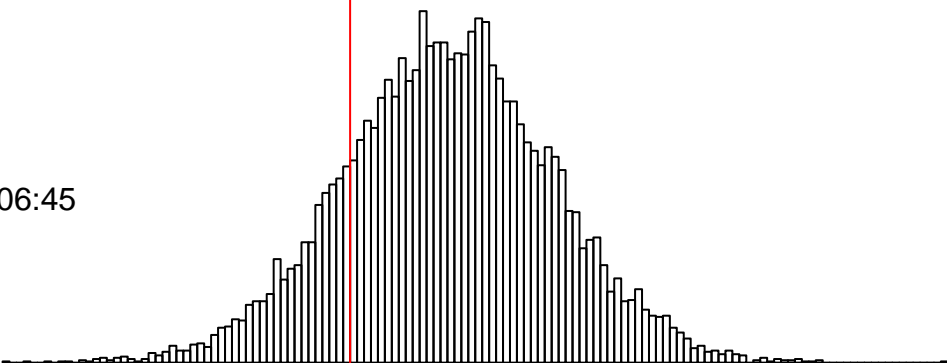

D206:120 – D206:45

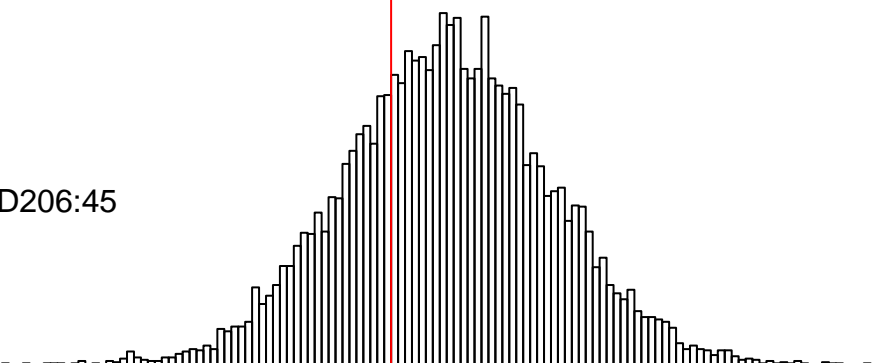

-1.5      -1.0      -0.5      0.0      0.5      1.0      1.5      2.0

delta(Unidentified Metabolite 39)



D206:240

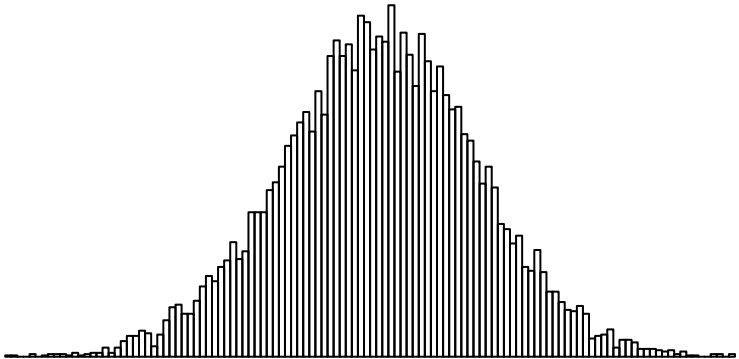

D206:120

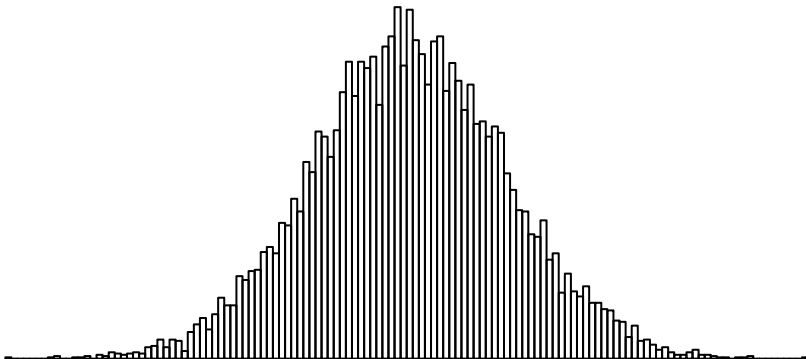

D206:45

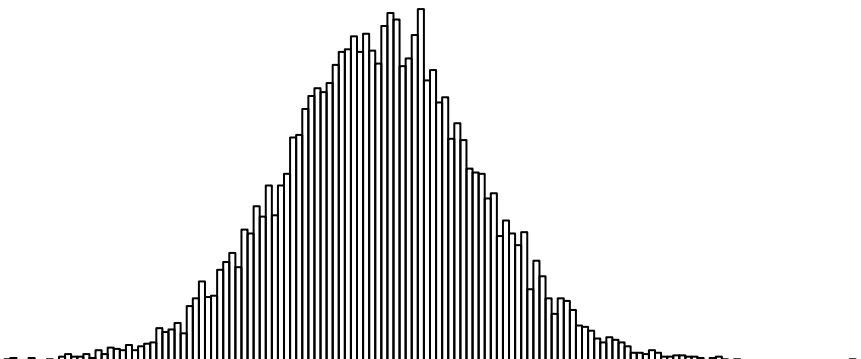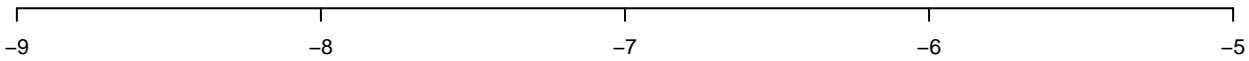

Unidentified Metabolite 42

D206:240 – D206:120

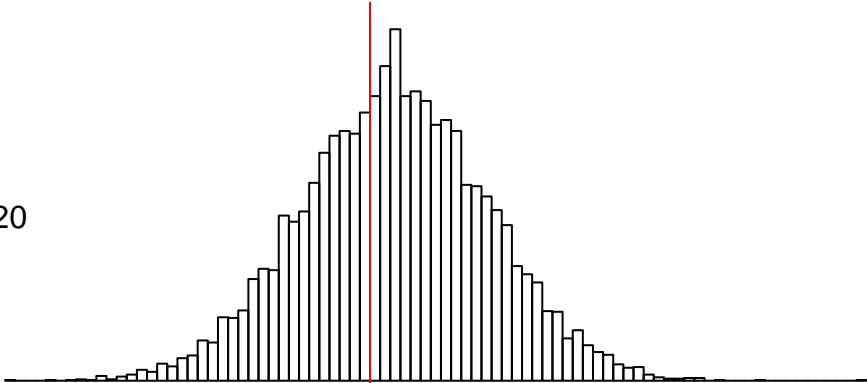

D206:240 – D206:45

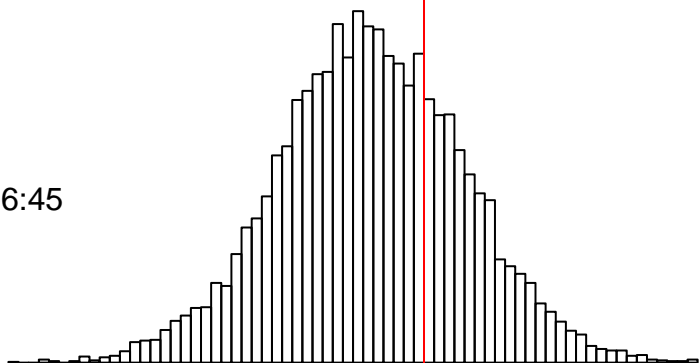

D206:120 – D206:45

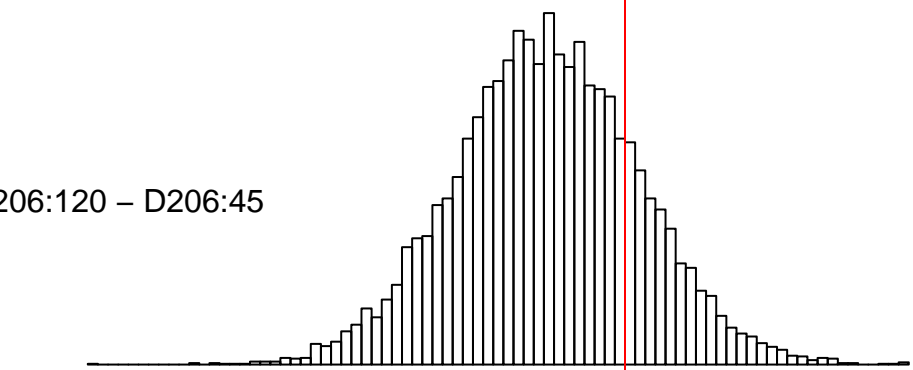

-3 -2 -1 0 1 2 3

delta(Unidentified Metabolite 42)

D206:240

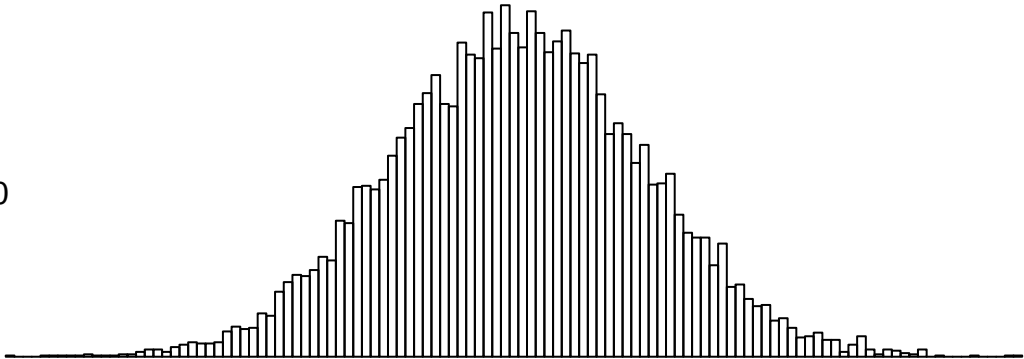

D206:120

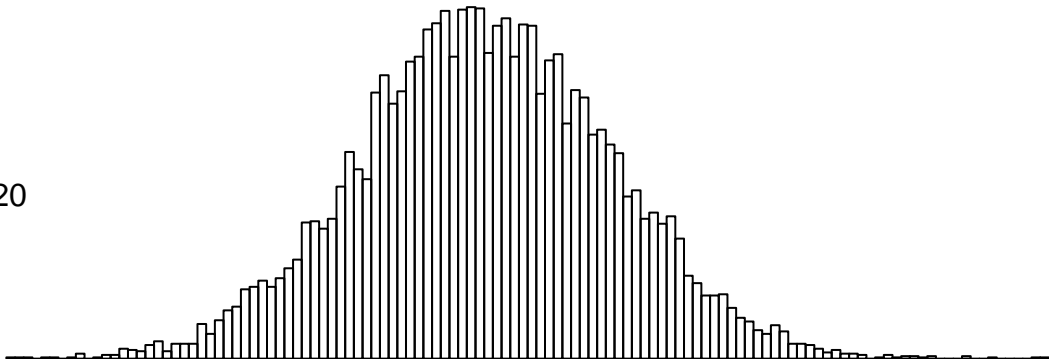

D206:45

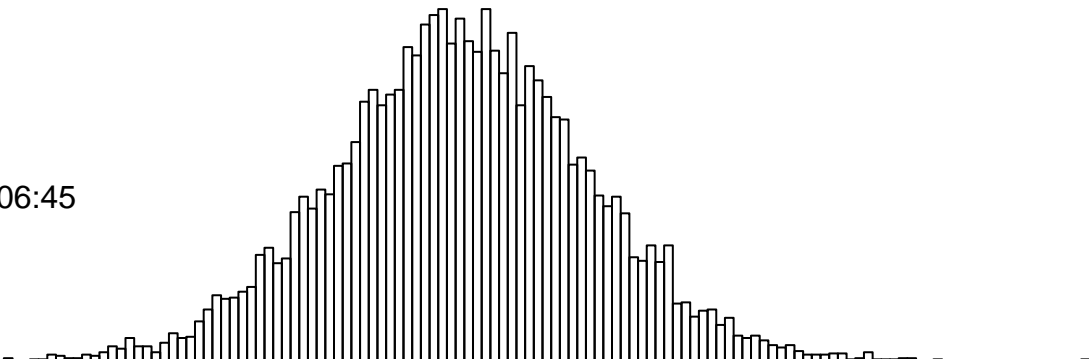

Unidentified Metabolite 43

D206:240 – D206:120

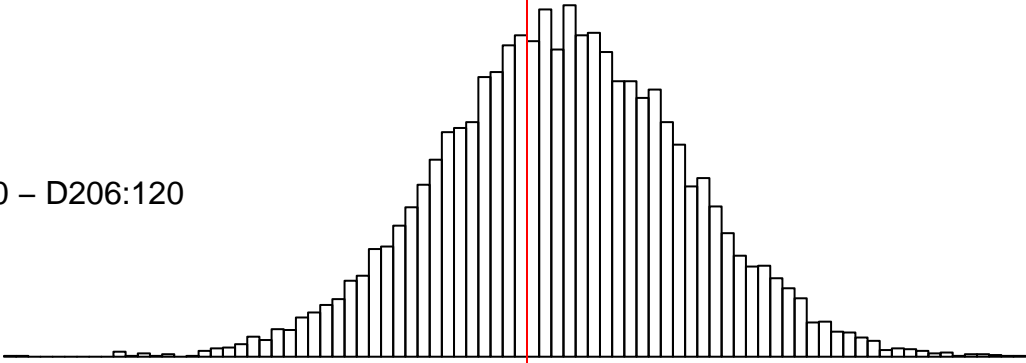

D206:240 – D206:45

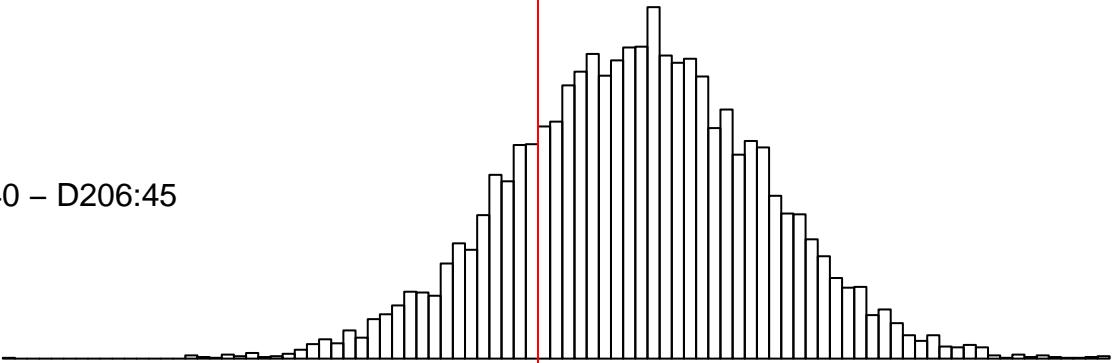

D206:120 – D206:45

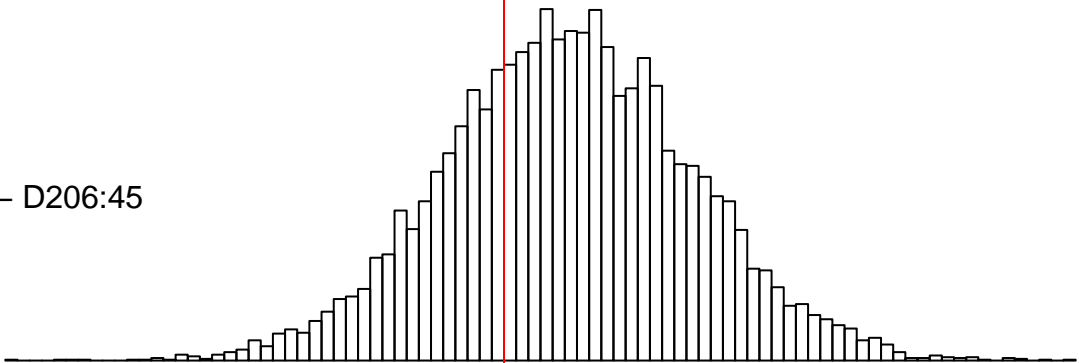

-1.0      -0.5      0.0      0.5      1.0

delta(Unidentified Metabolite 43)

D206:240

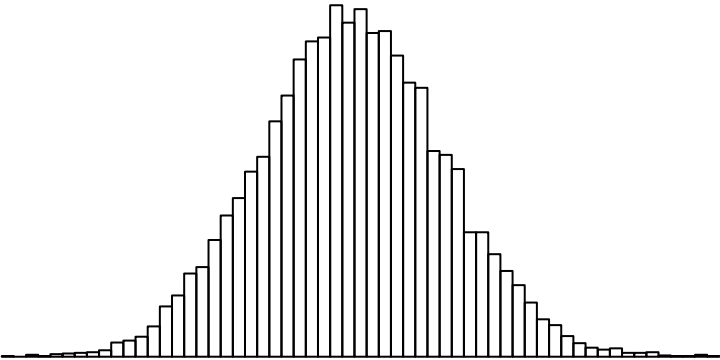

D206:120

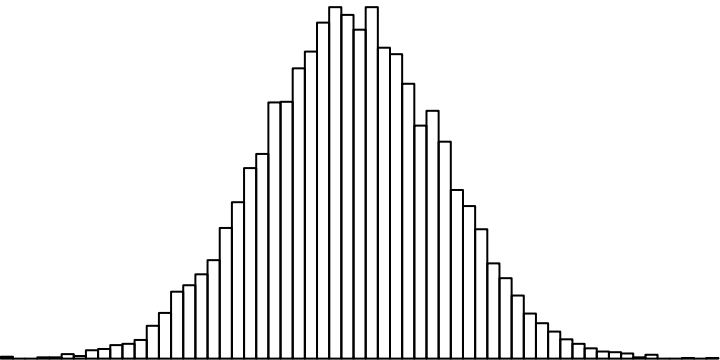

D206:45

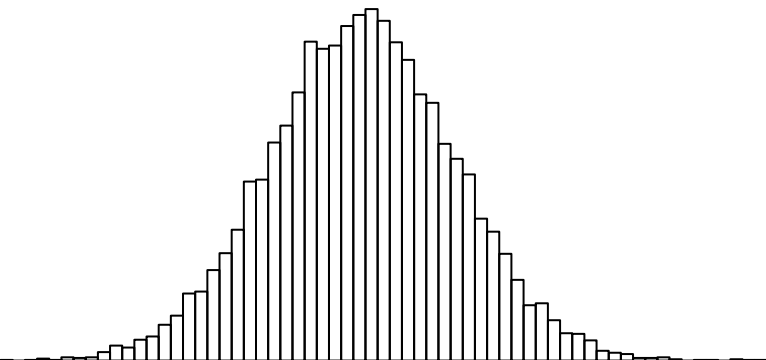

-10      -9      -8      -7      -6      -5

Unidentified Metabolite 45

D206:240 – D206:120

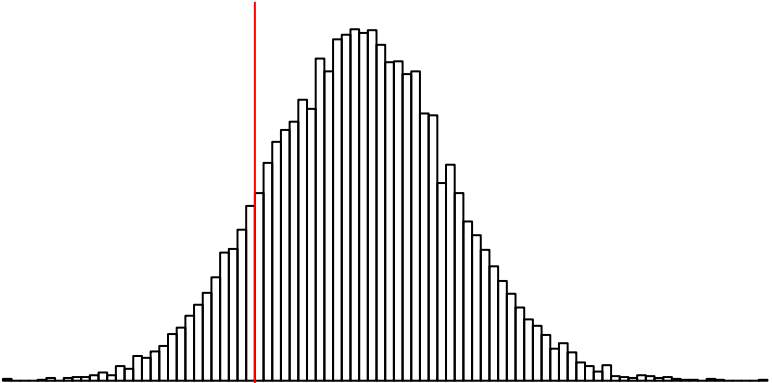

D206:240 – D206:45

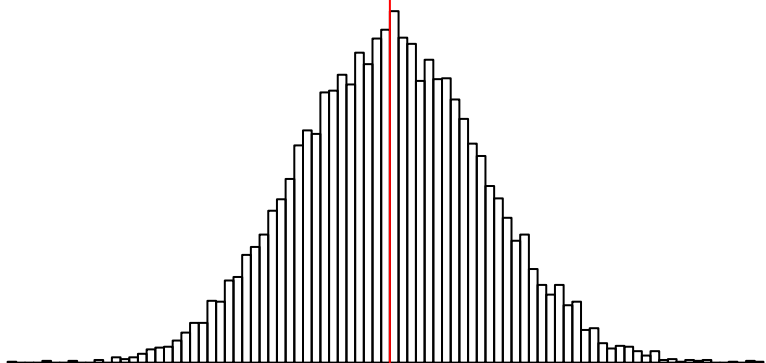

D206:120 – D206:45

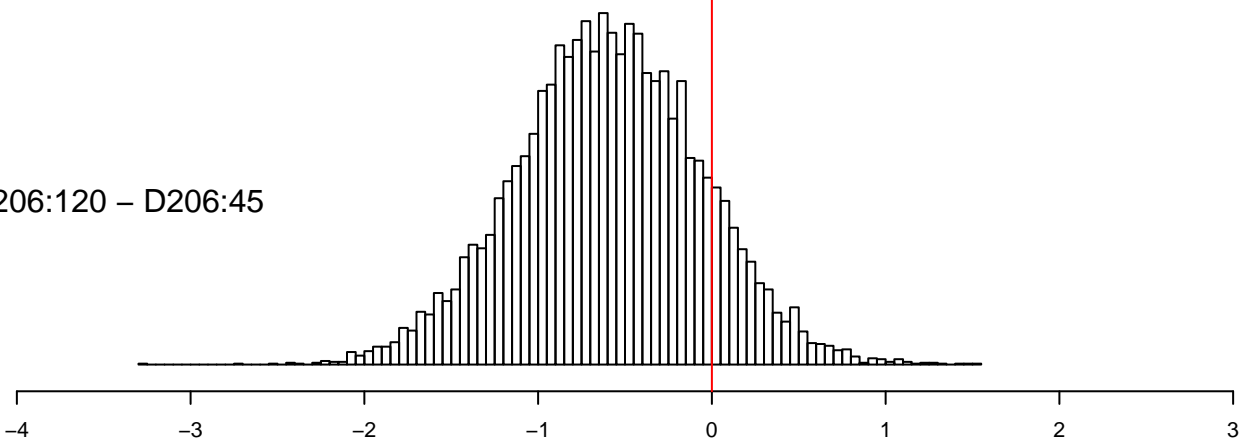

delta(Unidentified Metabolite 45)

D206:240

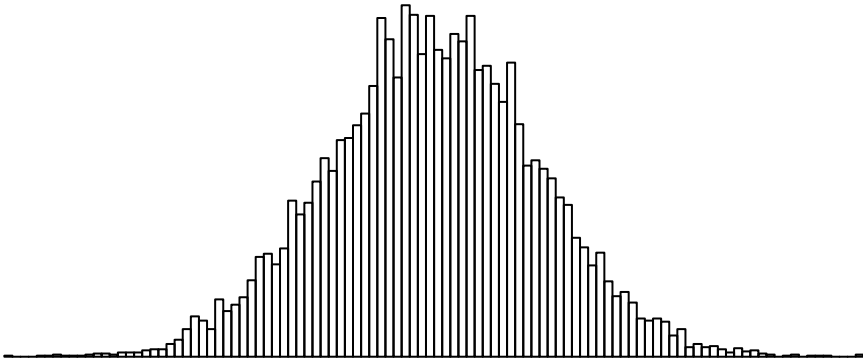

D206:120

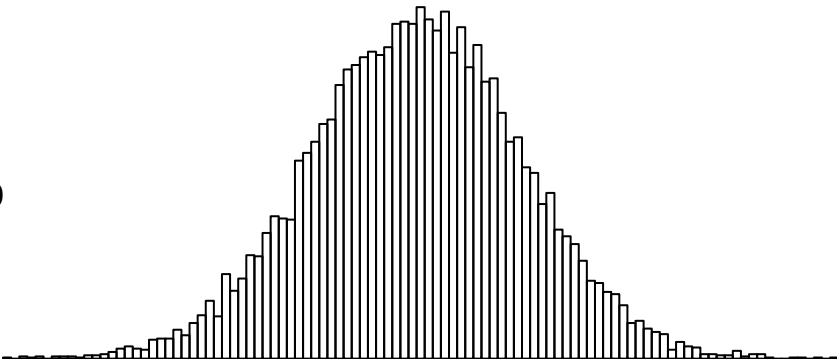

D206:45

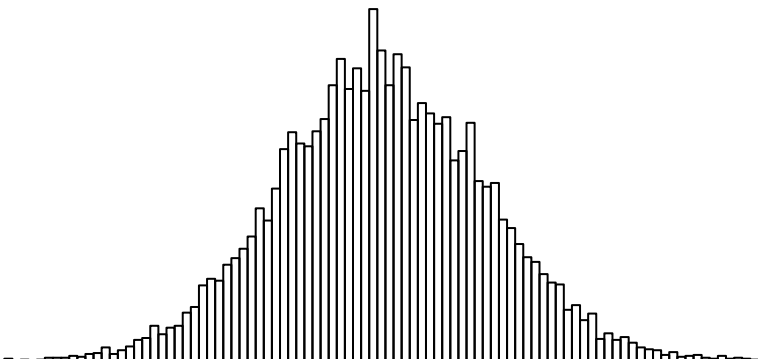

-8.0      -7.5      -7.0      -6.5      -6.0      -5.5      -5.0

Unidentified Metabolite 47

D206:240 – D206:120

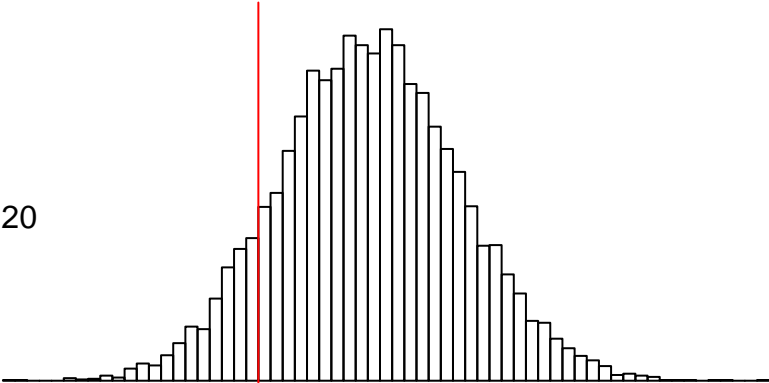

D206:240 – D206:45

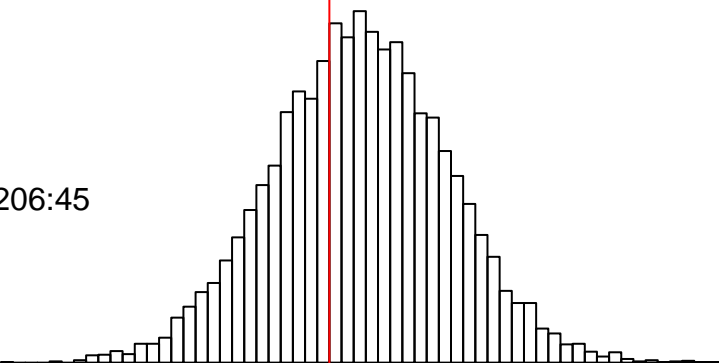

D206:120 – D206:45

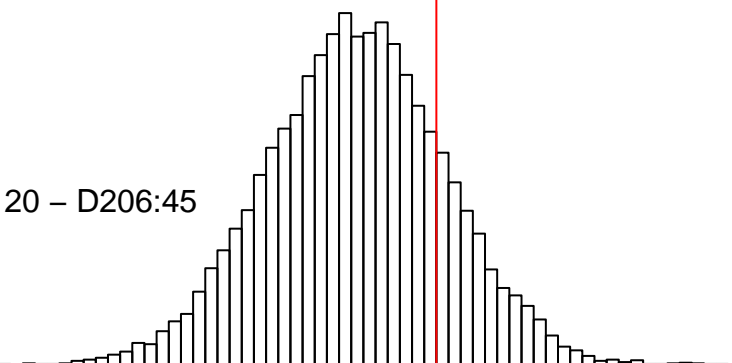

-2 -1 0 1 2 3

delta(Unidentified Metabolite 47)



D206:240

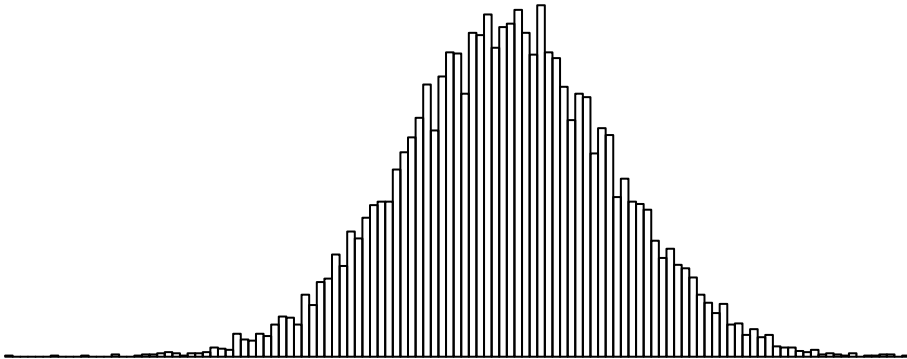

D206:120

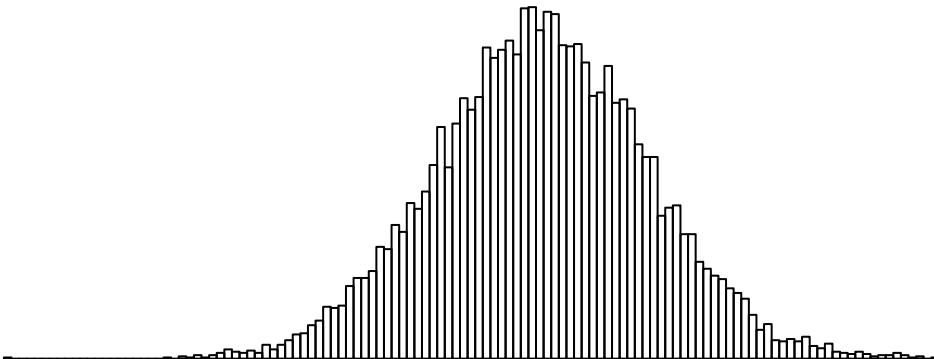

D206:45

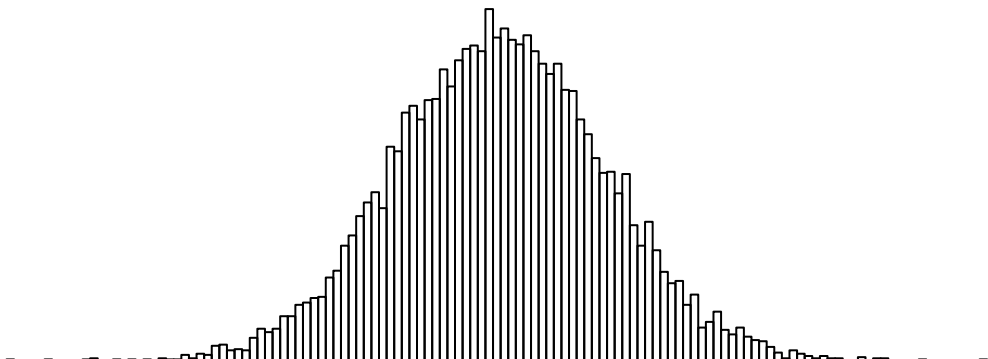

-8.0

-7.5

-7.0

Unidentified Metabolite 48

D206:240 – D206:120

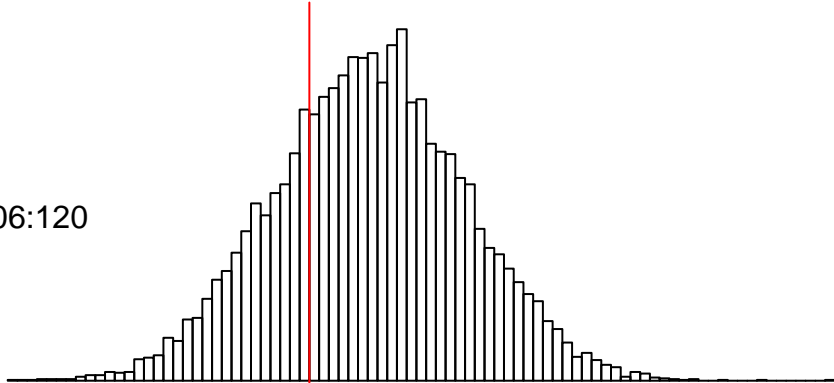

D206:240 – D206:45

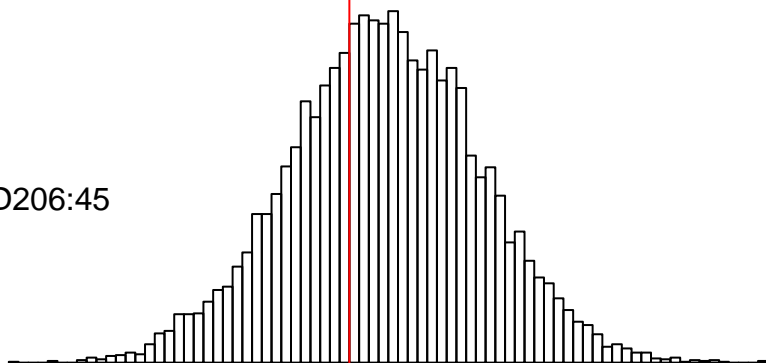

D206:120 – D206:45

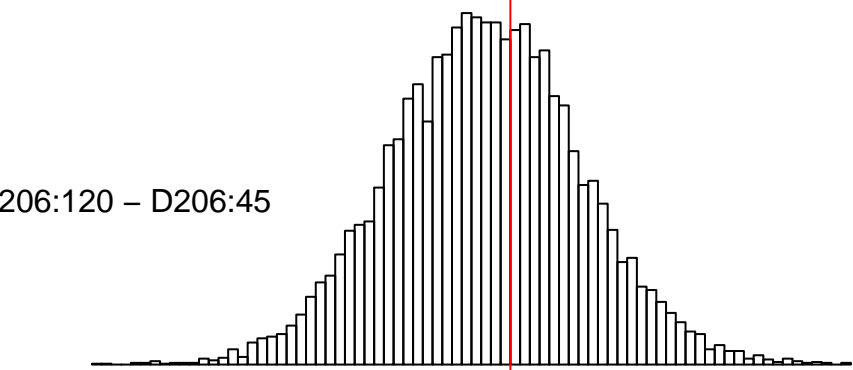

-1.0      -0.5      0.0      0.5      1.0      1.5

delta(Unidentified Metabolite 48)

D206:240

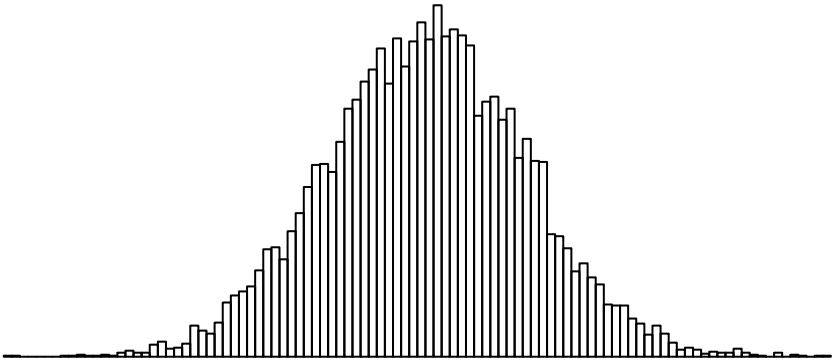

D206:120

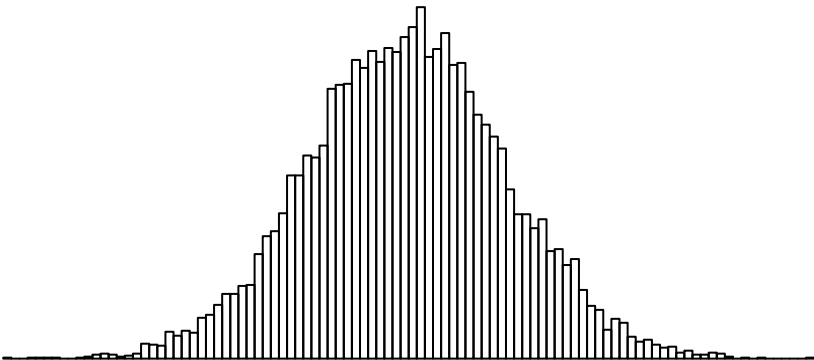

D206:45

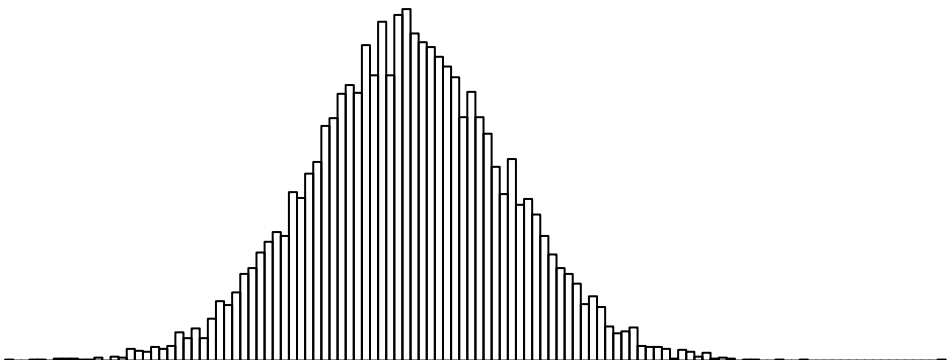

-9.5      -9.0      -8.5      -8.0      -7.5      -7.0      -6.5

Unidentified Metabolite 49

D206:240 – D206:120

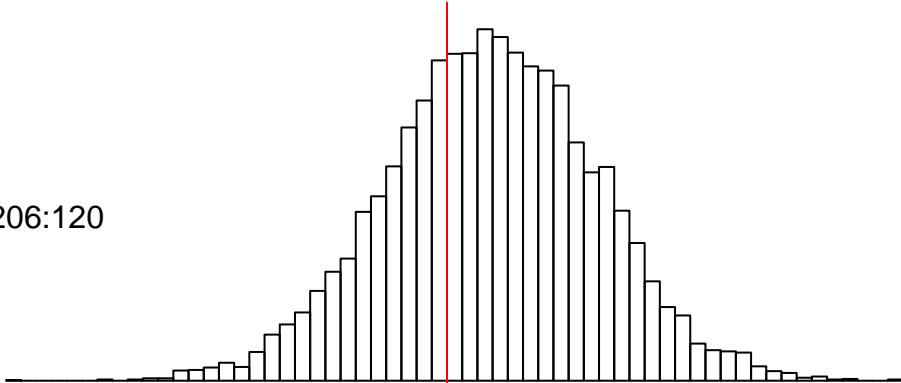

D206:240 – D206:45

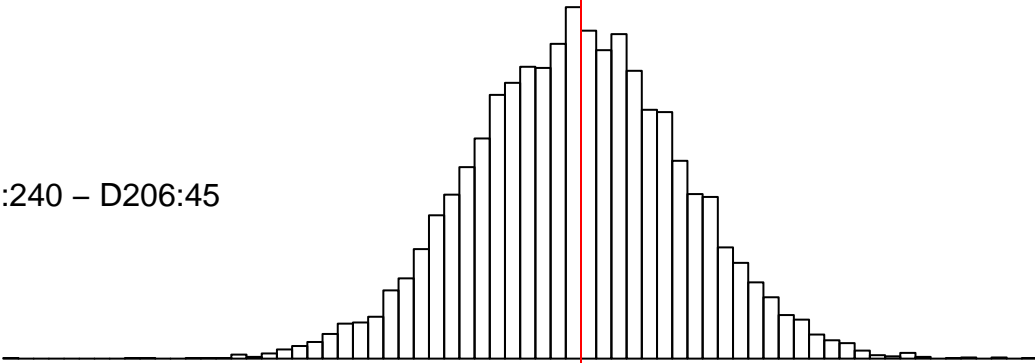

D206:120 – D206:45

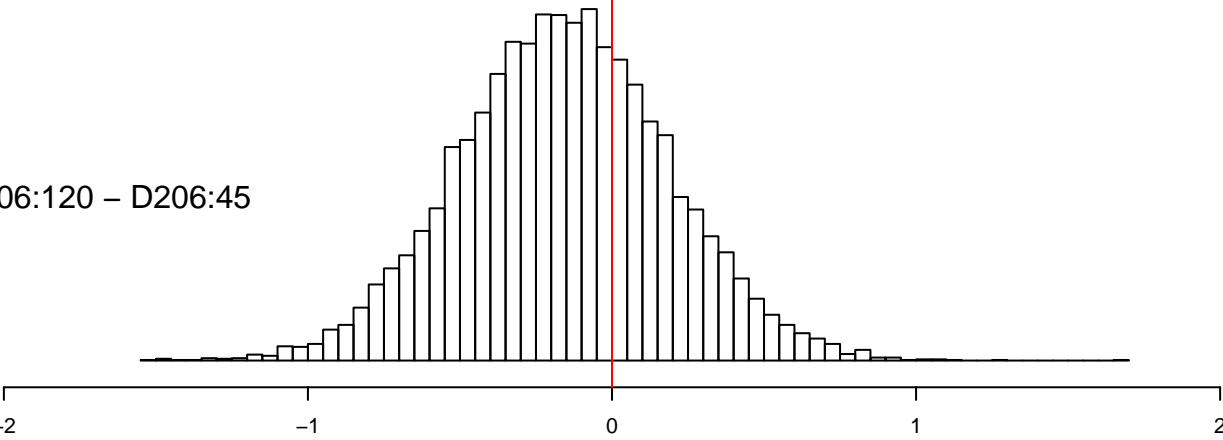

delta(Unidentified Metabolite 49)

D206:240

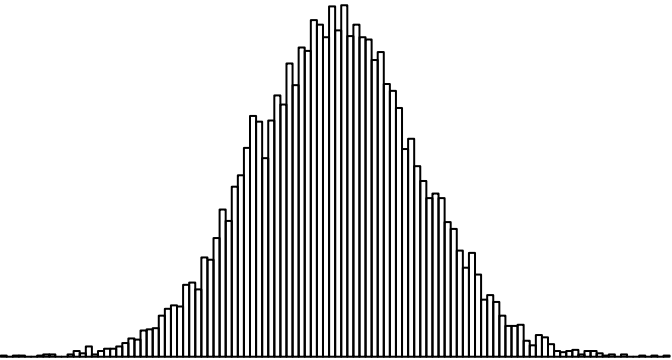

D206:120

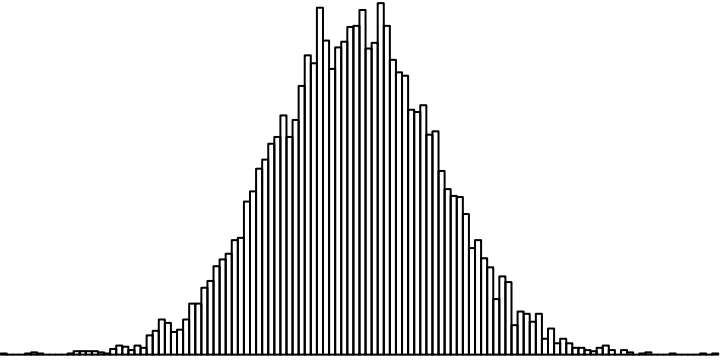

D206:45

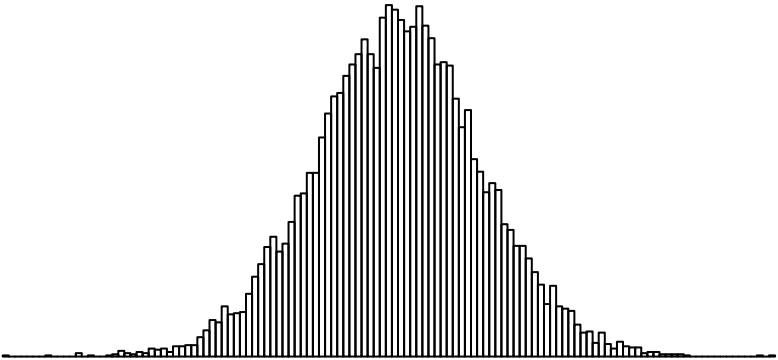

-9

-8

-7

-6

-5

Unidentified Metabolite 50

D206:240 – D206:120

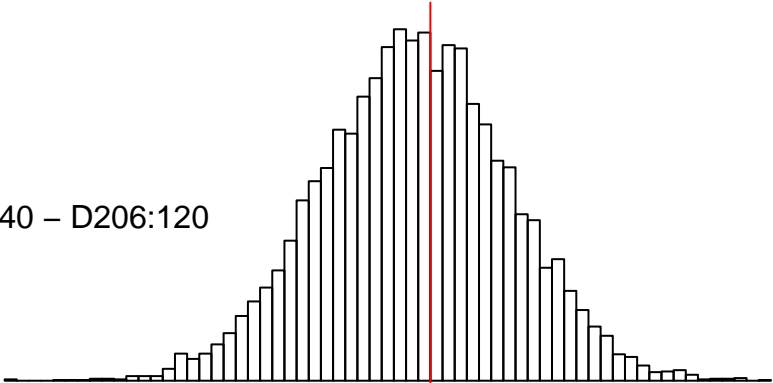

D206:240 – D206:45

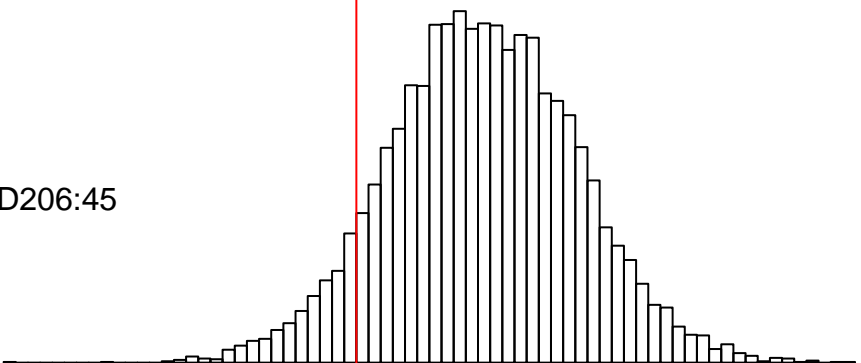

D206:120 – D206:45

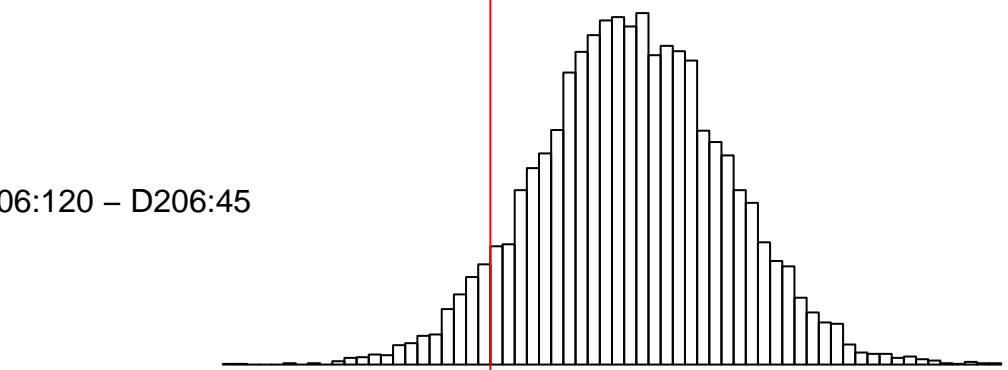

-2 -1 0 1 2 3

delta(Unidentified Metabolite 50)

D206:240

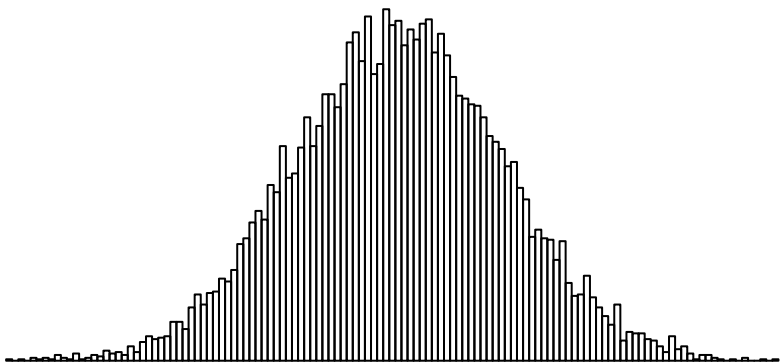

D206:120

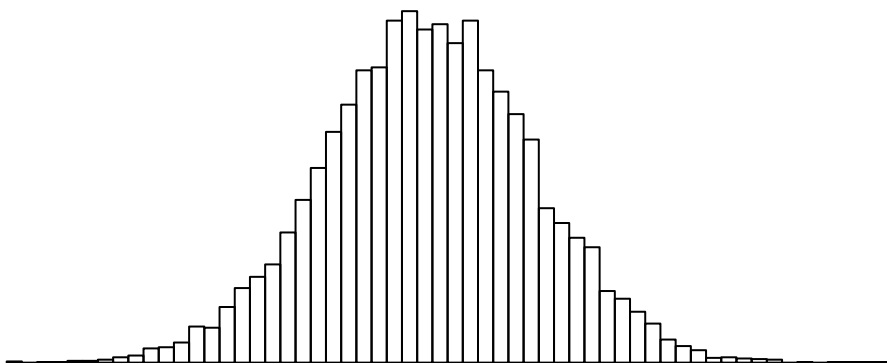

D206:45

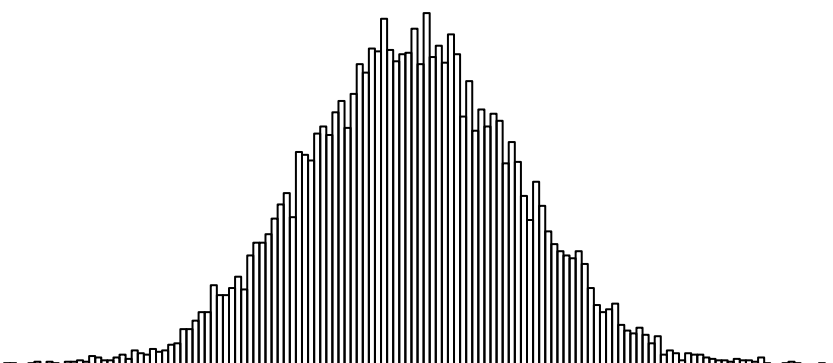

-9 -8 -7 -6 -5

Unidentified Metabolite 51

D206:240 – D206:120

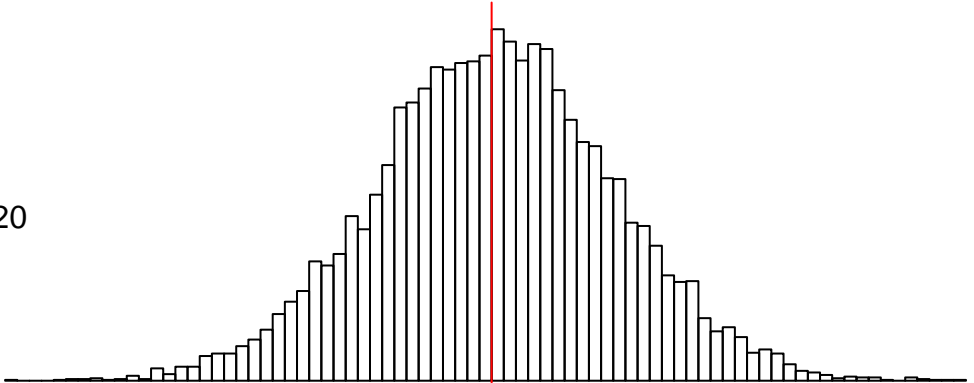

D206:240 – D206:45

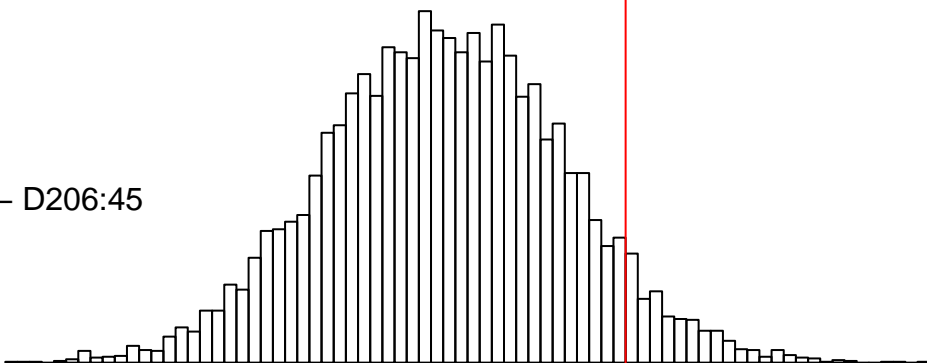

D206:120 – D206:45

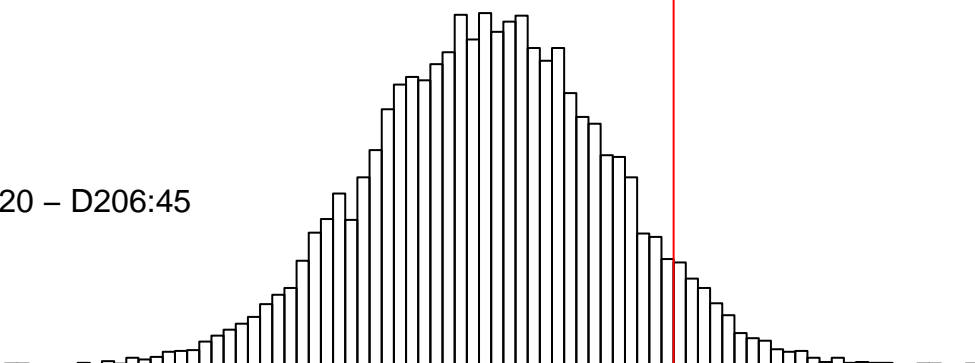

-3 -2 -1 0 1 2

delta(Unidentified Metabolite 51)



D206:240

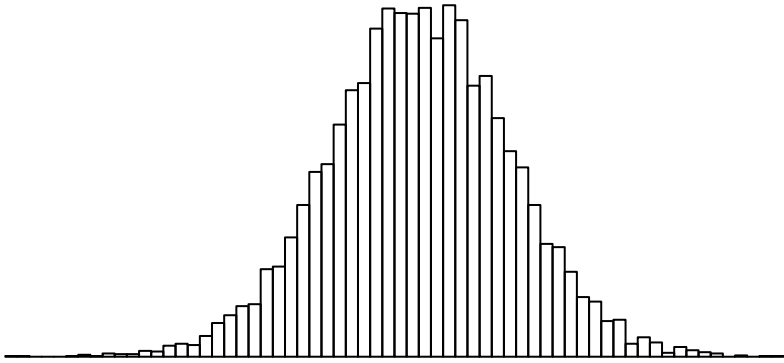

D206:120

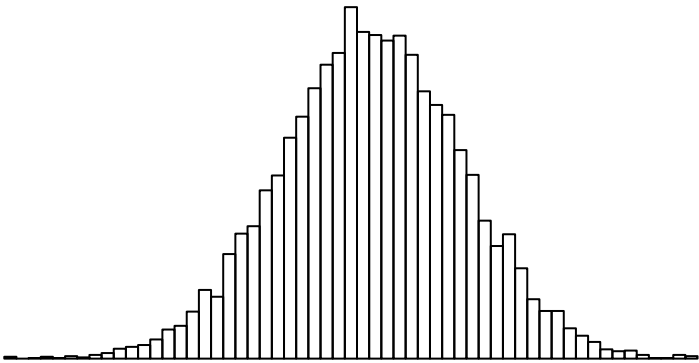

D206:45

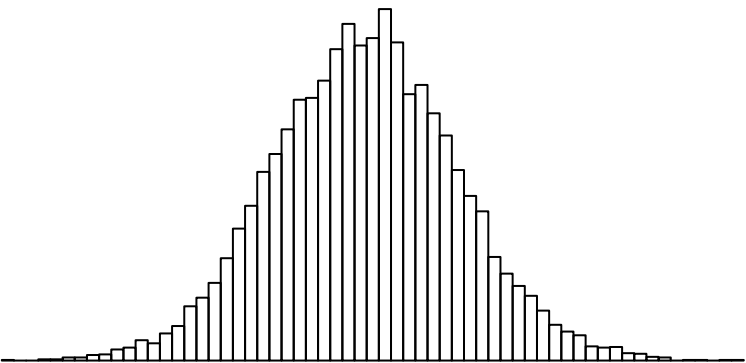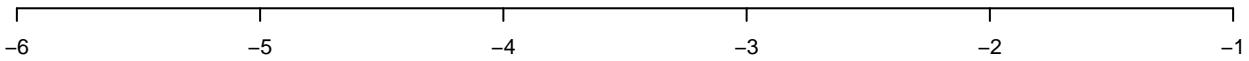

Unidentified Metabolite 55

D206:240 – D206:120

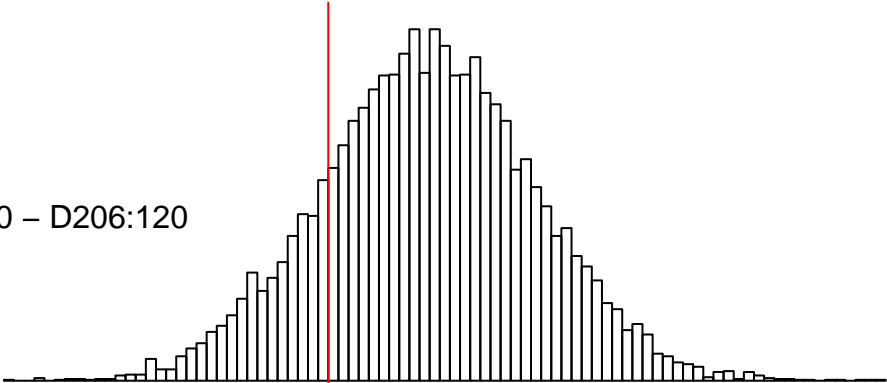

D206:240 – D206:45

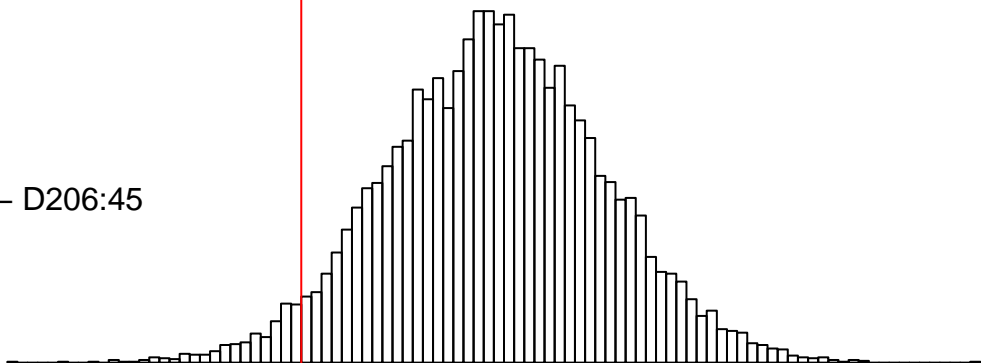

D206:120 – D206:45

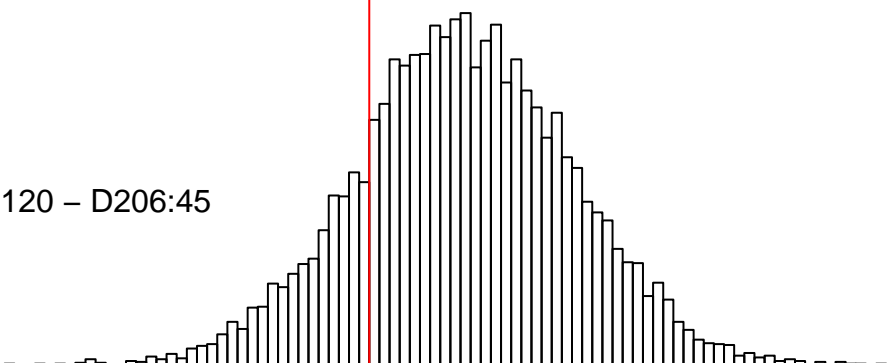

-2 -1 0 1 2 3 4

delta(Unidentified Metabolite 55)

D206:240

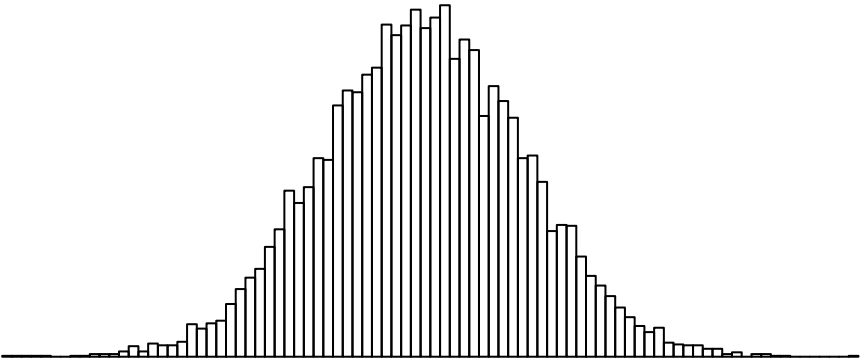

D206:120

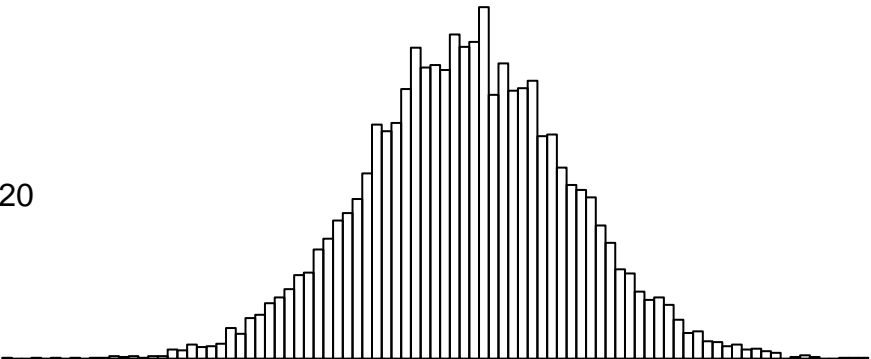

D206:45

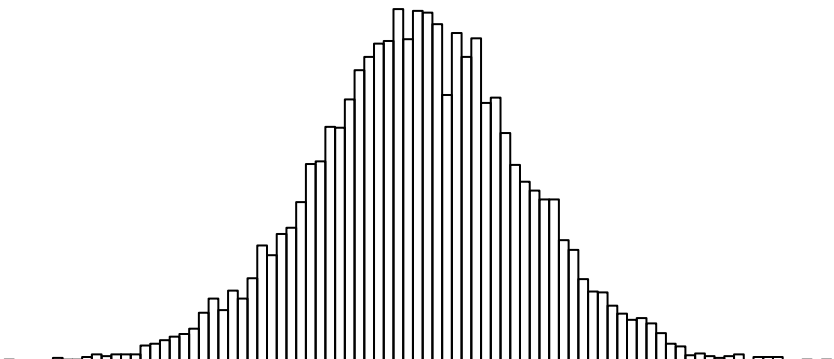

-9.0      -8.5      -8.0      -7.5      -7.0      -6.5

Unidentified Metabolite 56

D206:240 – D206:120

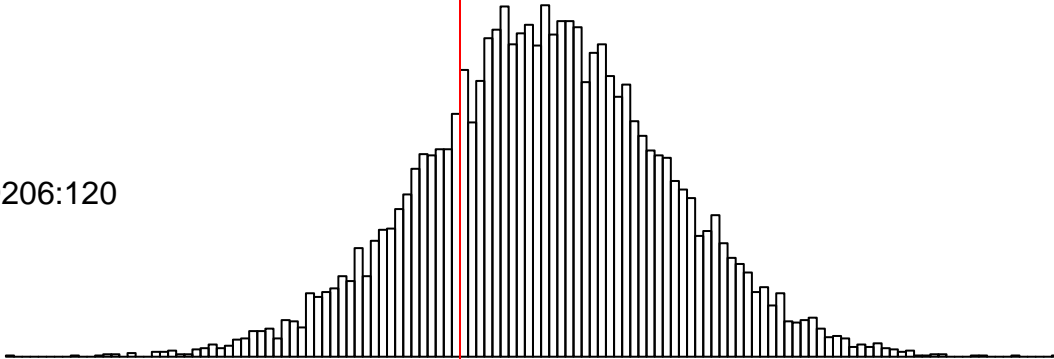

D206:240 – D206:45

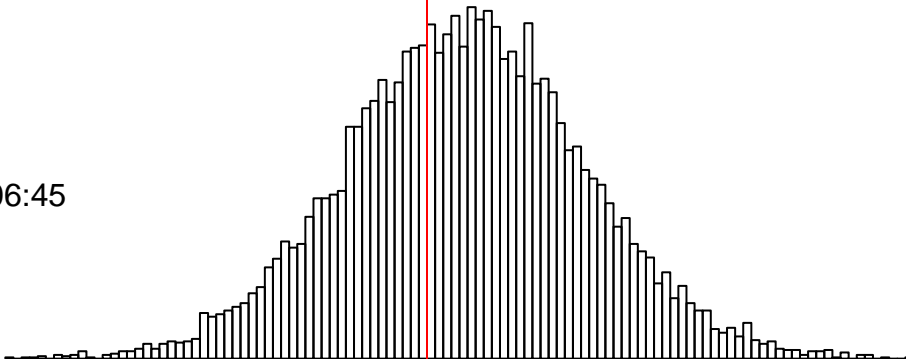

D206:120 – D206:45

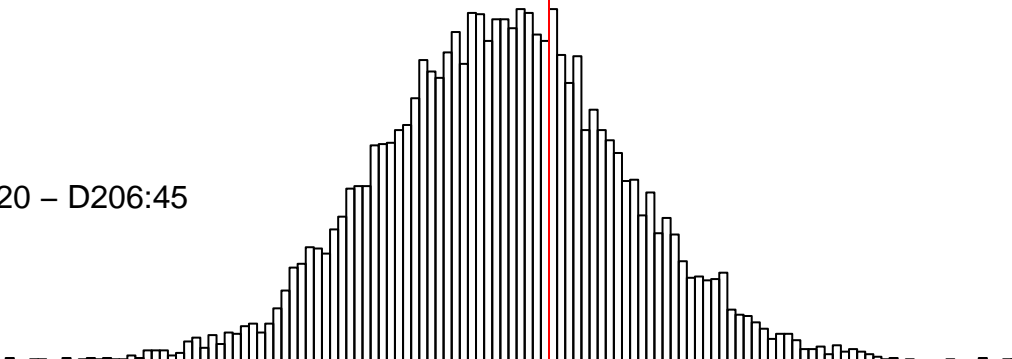

-1.5      -1.0      -0.5      0.0      0.5      1.0      1.5

delta(Unidentified Metabolite 56)

D206:240

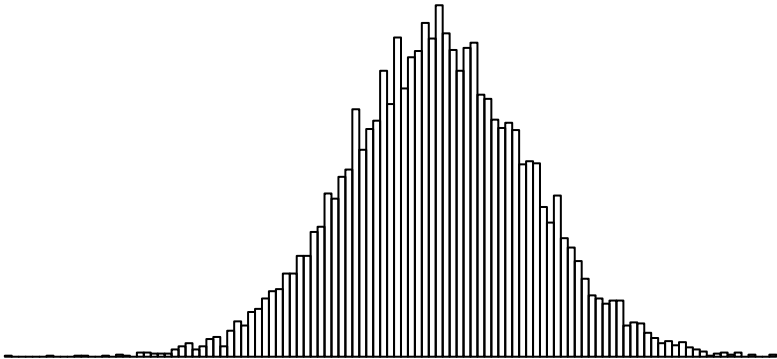

D206:120

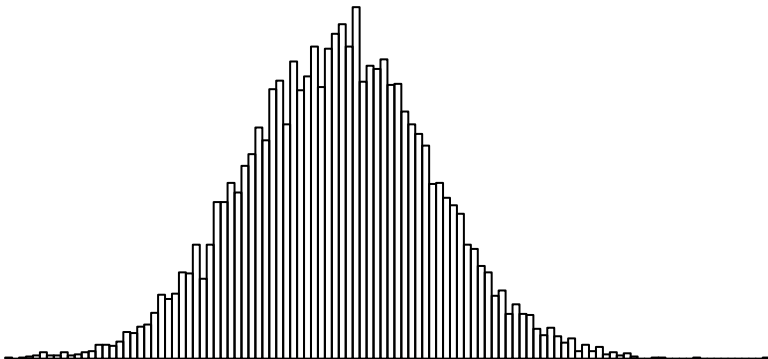

D206:45

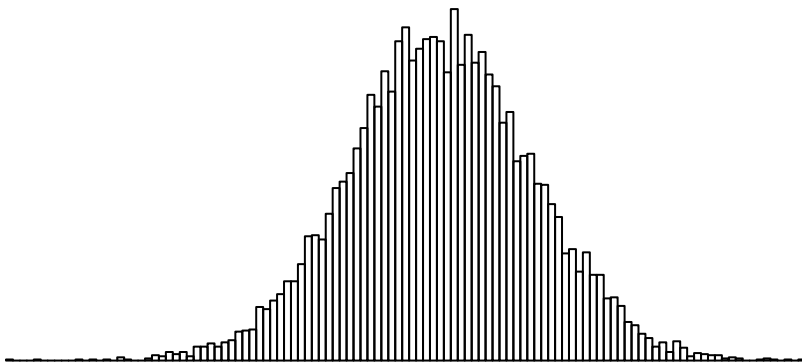

-8.5      -8.0      -7.5      -7.0      -6.5      -6.0      -5.5      -5.0

Unidentified Metabolite 58

D206:240 – D206:120

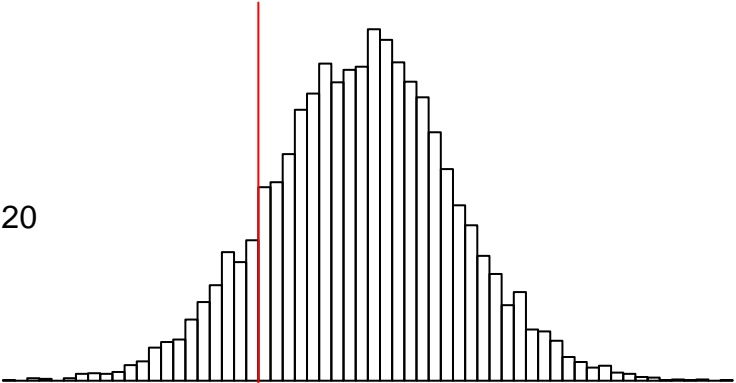

D206:240 – D206:45

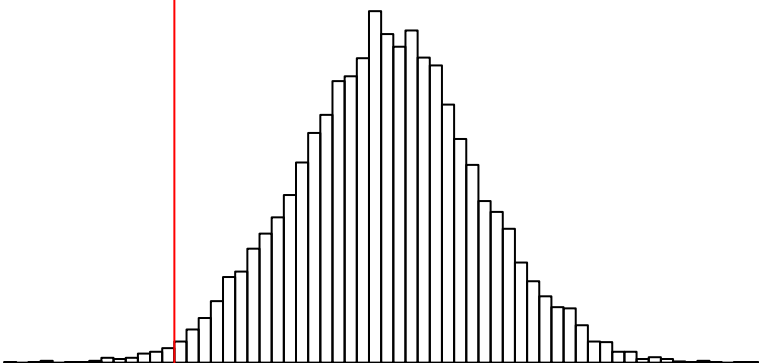

D206:120 – D206:45

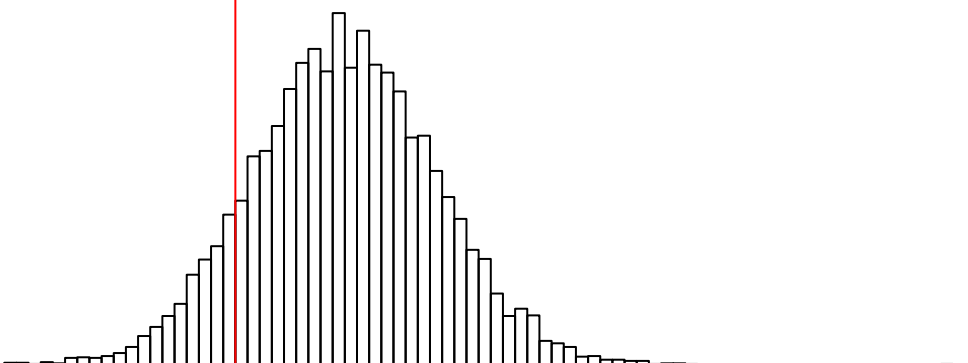

-2 -1 0 1 2 3

delta(Unidentified Metabolite 58)

D206:240

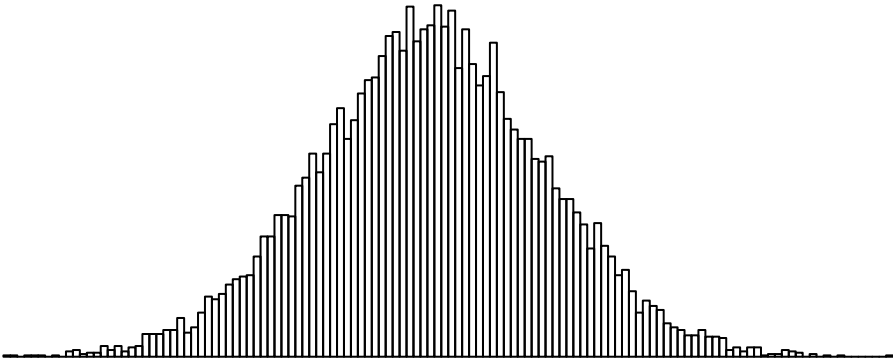

D206:120

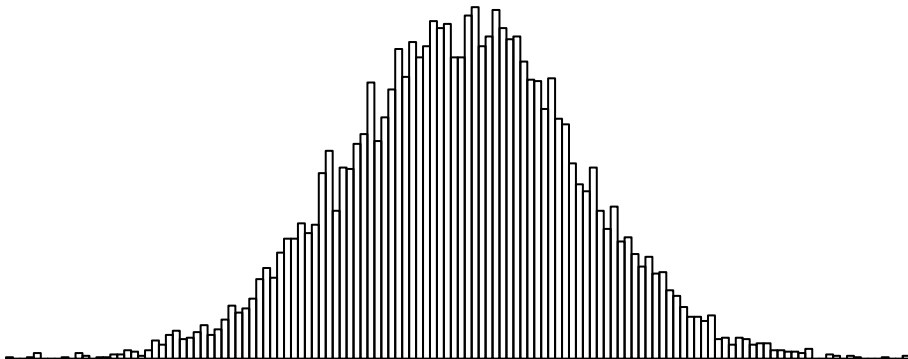

D206:45

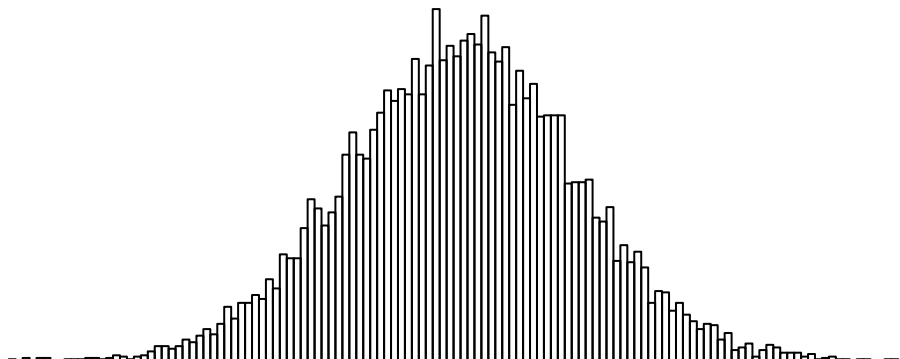

-7.5      -7.0      -6.5      -6.0      -5.5      -5.0      -4.5      -4.0

Unidentified Metabolite 59

D206:240 – D206:120

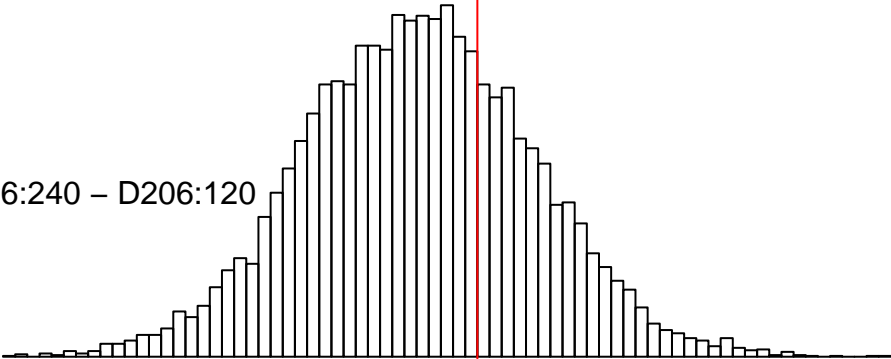

D206:240 – D206:45

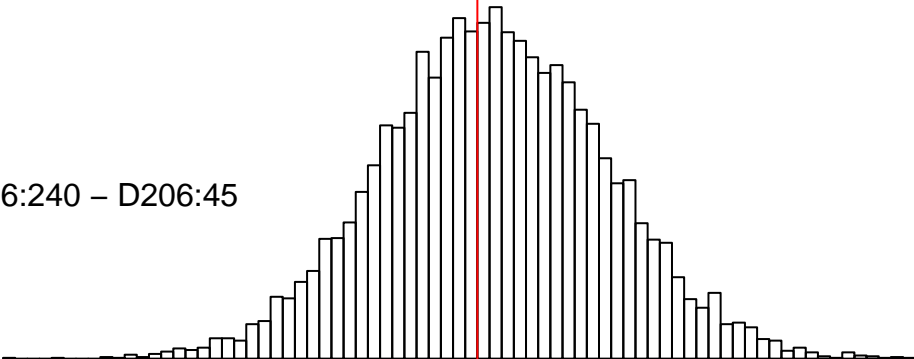

D206:120 – D206:45

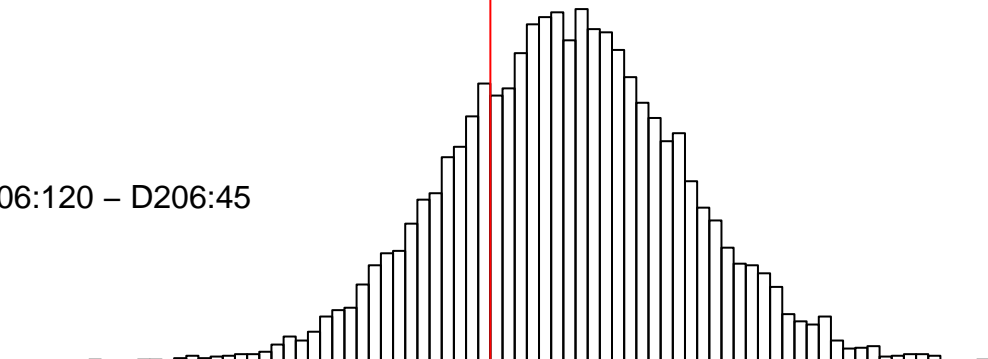

-2 -1 0 1 2 3

delta(Unidentified Metabolite 59)



D206:240

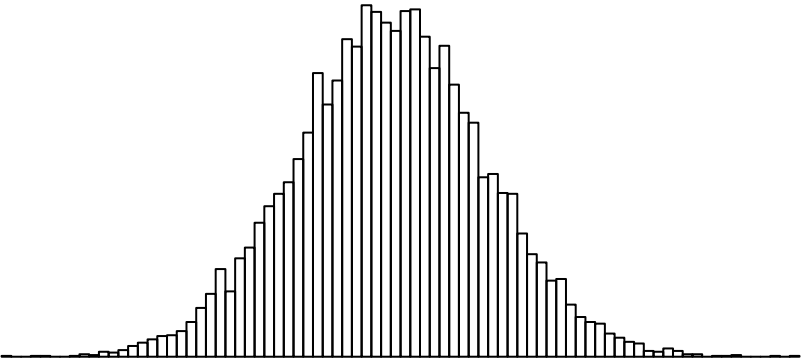

D206:120

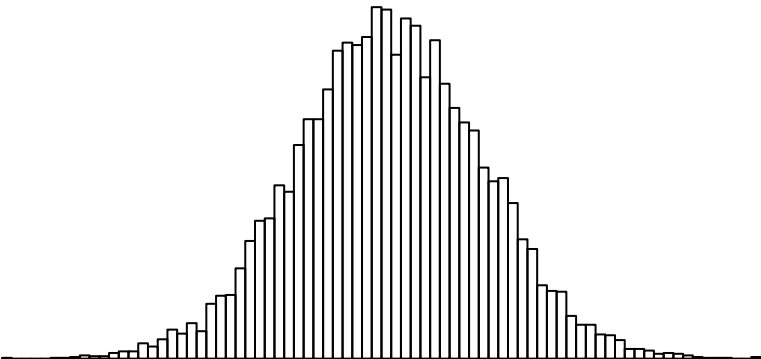

D206:45

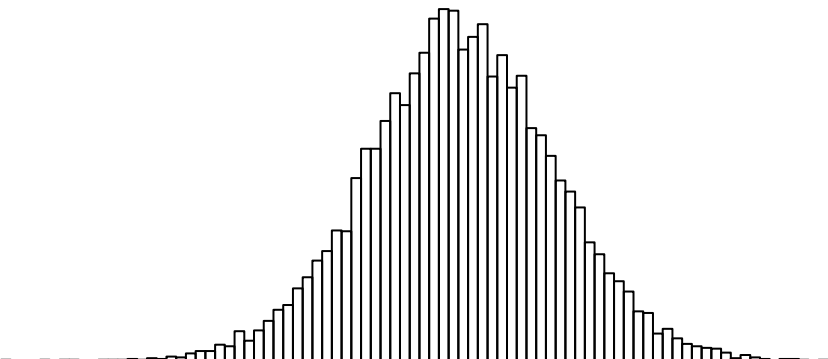

-9.0      -8.5      -8.0      -7.5      -7.0      -6.5

Unidentified Metabolite 60

D206:240 – D206:120

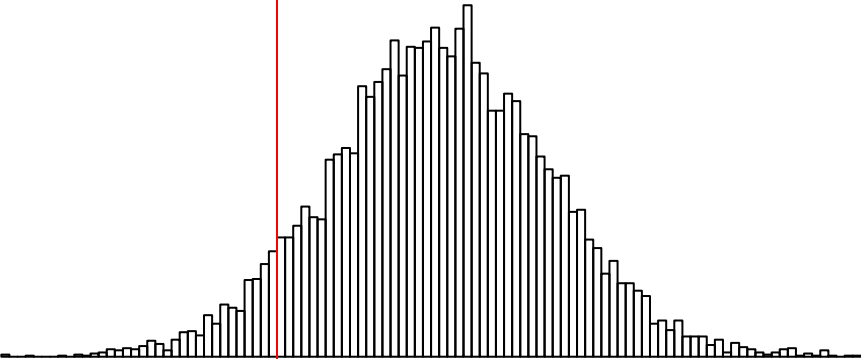

D206:240 – D206:45

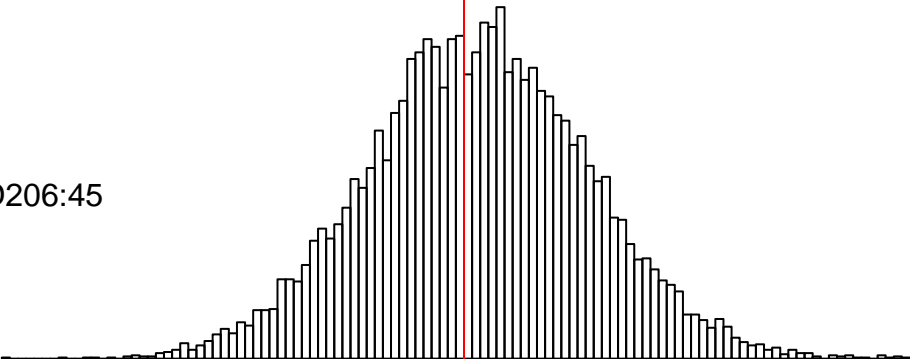

D206:120 – D206:45

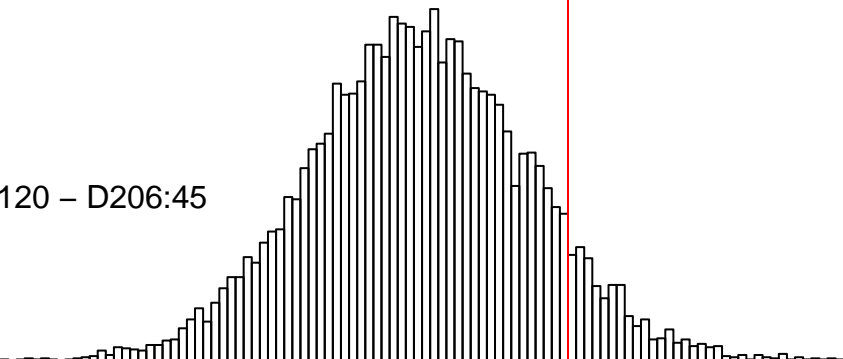

-1.5      -1.0      -0.5      0.0      0.5      1.0      1.5

delta(Unidentified Metabolite 60)

D206:240

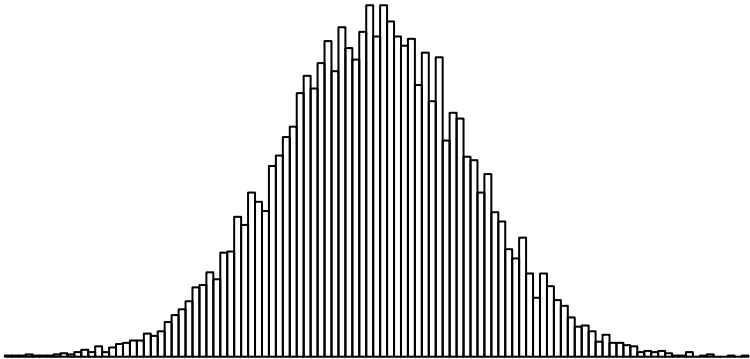

D206:120

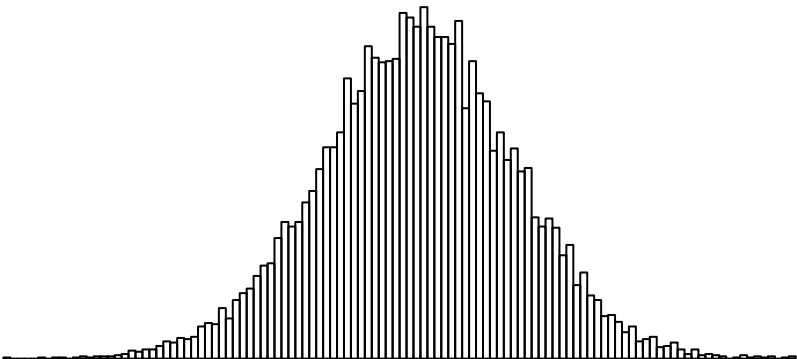

D206:45

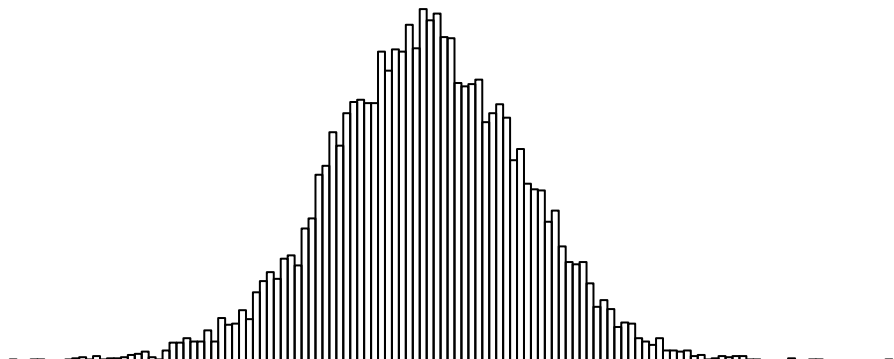

-9.0      -8.5      -8.0      -7.5      -7.0      -6.5      -6.0      -5.5

Unidentified Metabolite 61

D206:240 – D206:120

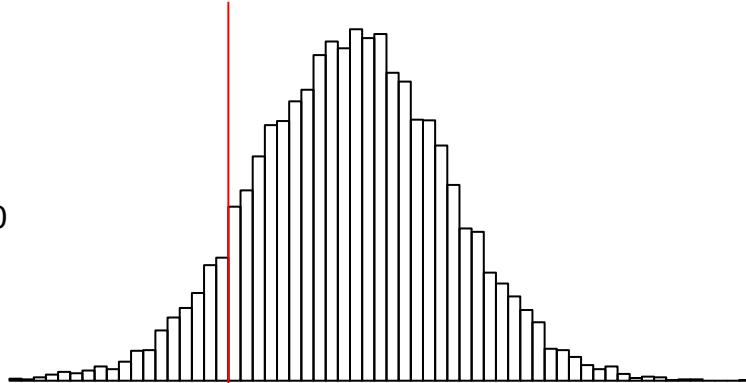

D206:240 – D206:45

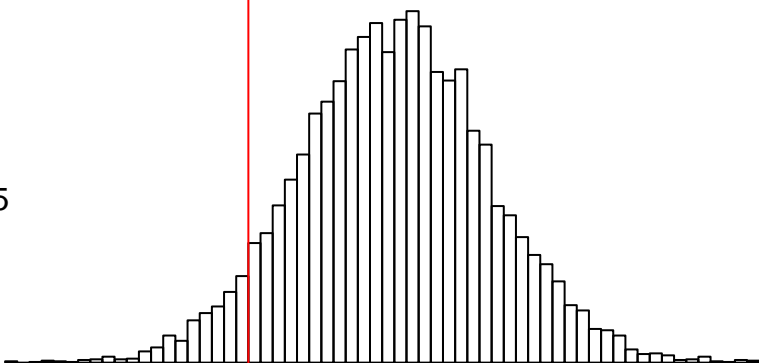

D206:120 – D206:45

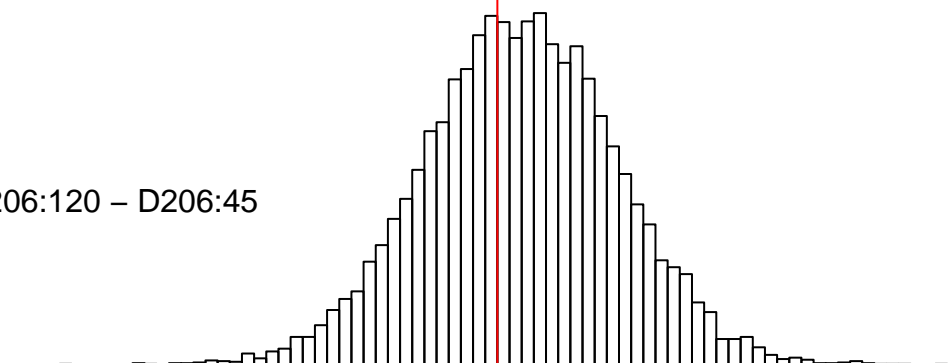

-2 -1 0 1 2 3

delta(Unidentified Metabolite 61)

D206:240

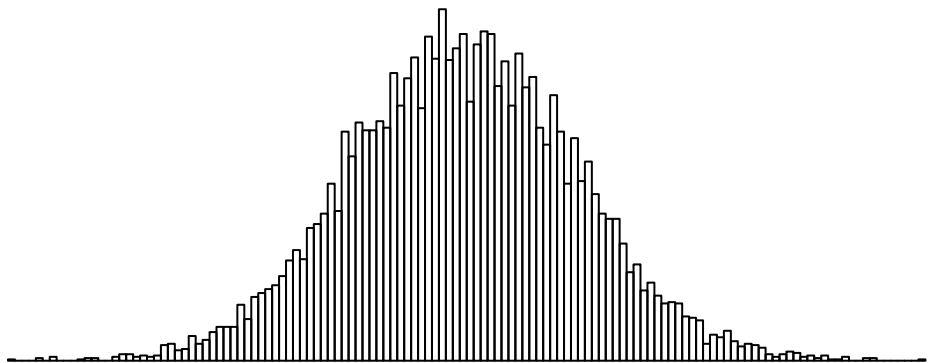

D206:120

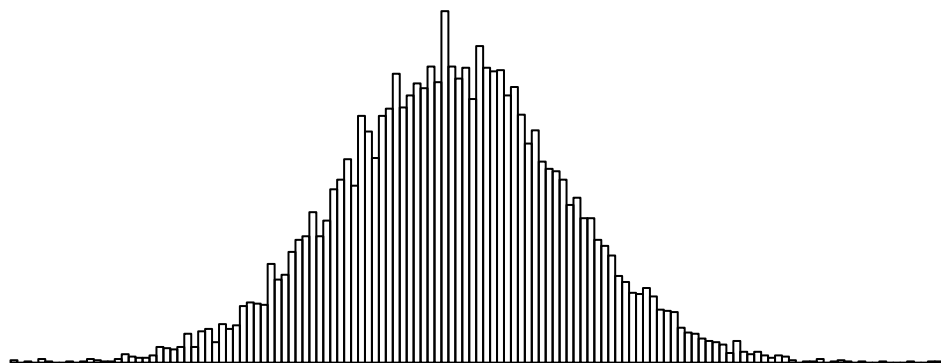

D206:45

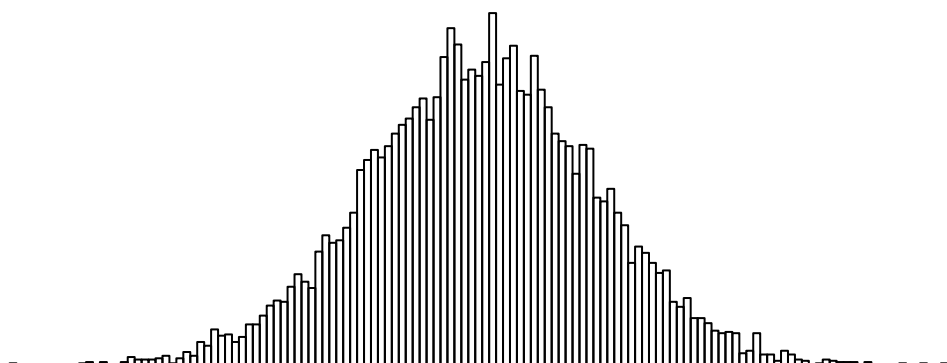

-10.0      -9.5      -9.0      -8.5      -8.0      -7.5      -7.0      -6.5

Unidentified Metabolite 62

D206:240 – D206:120

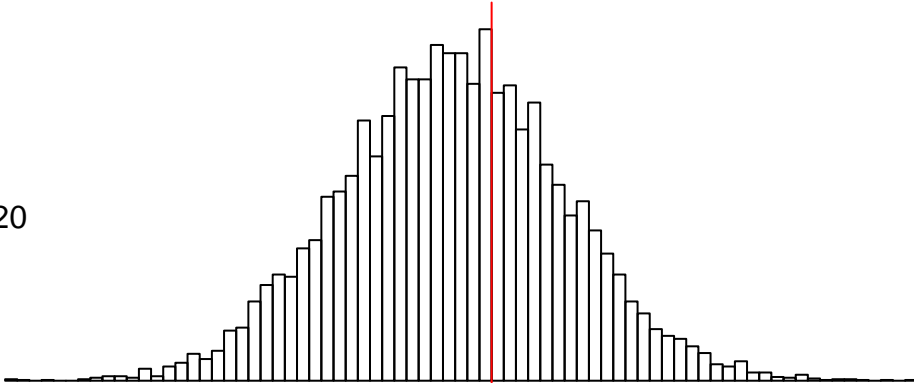

D206:240 – D206:45

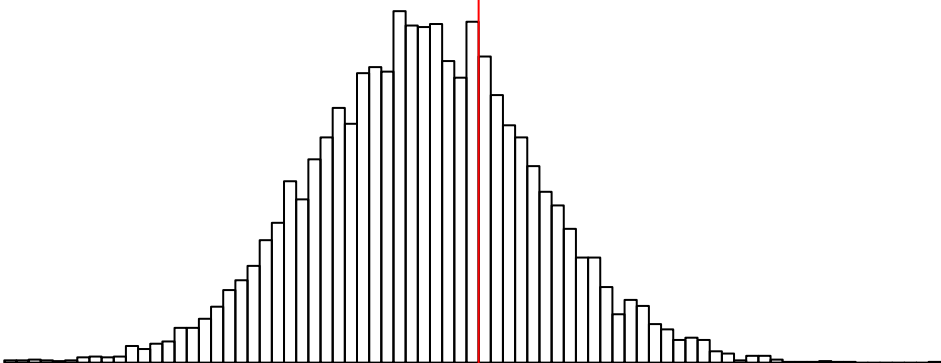

D206:120 – D206:45

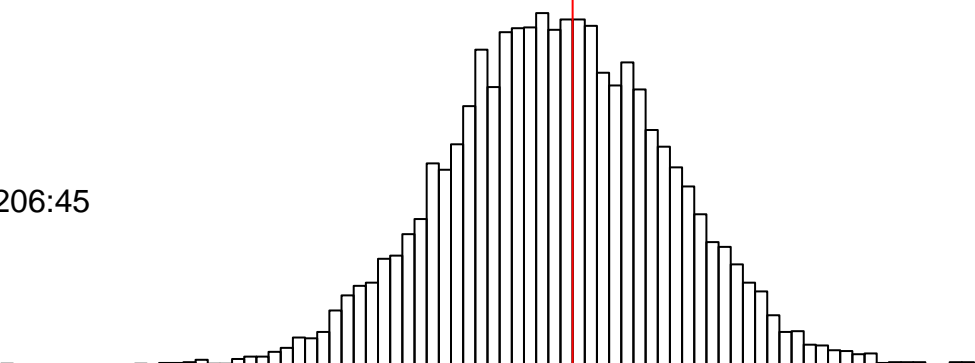

-3 -2 -1 0 1 2

delta(Unidentified Metabolite 62)

D206:240

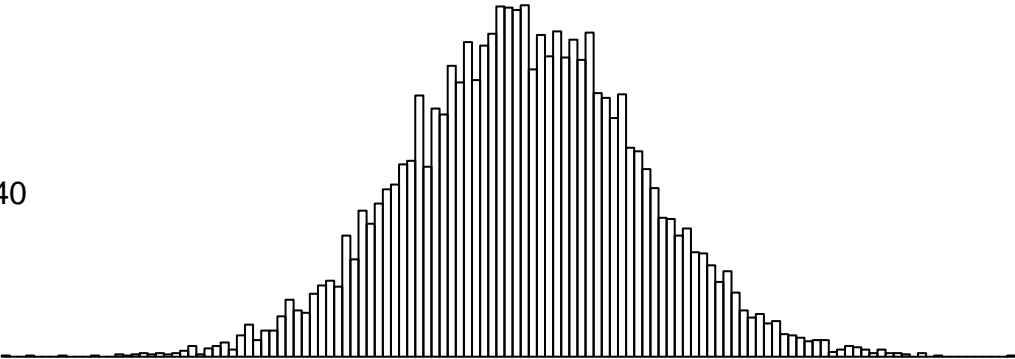

D206:120

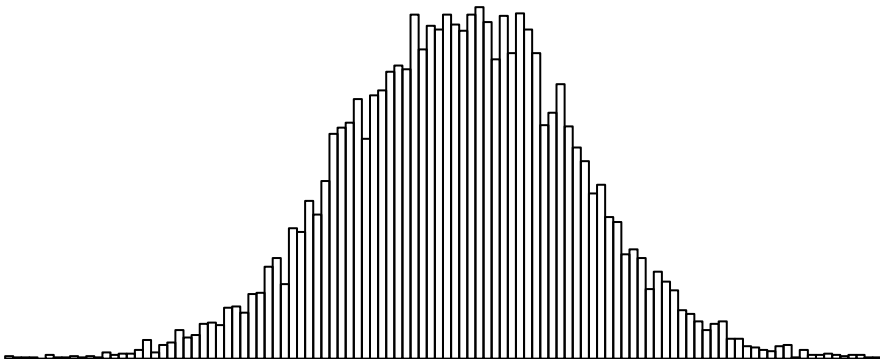

D206:45

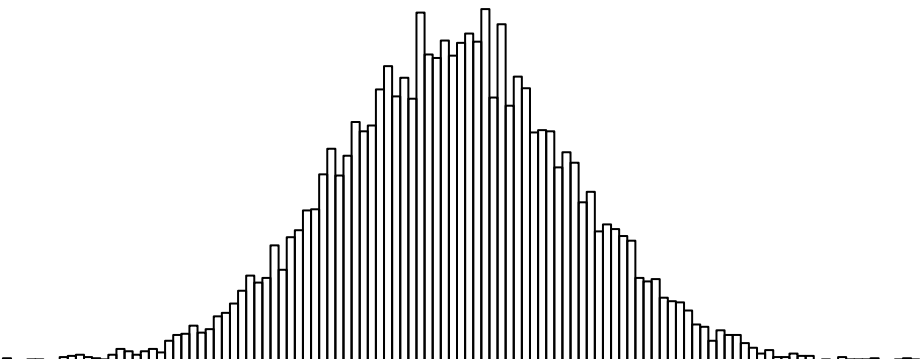

-7.5      -7.0      -6.5      -6.0      -5.5      -5.0      -4.5

Unidentified Metabolite 63

D206:240 – D206:120

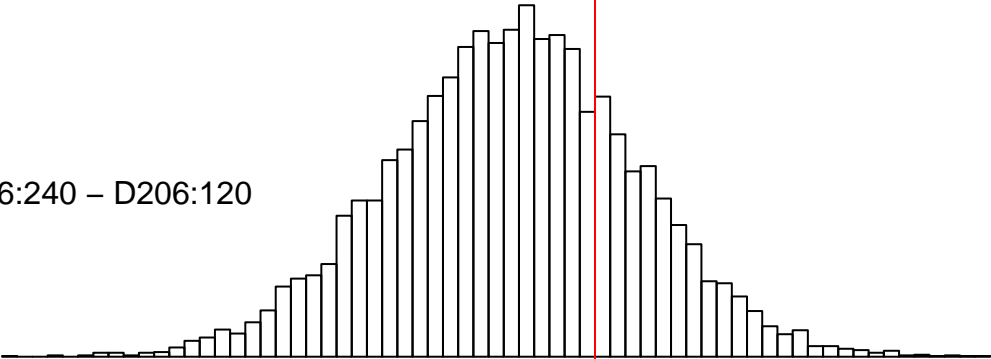

D206:240 – D206:45

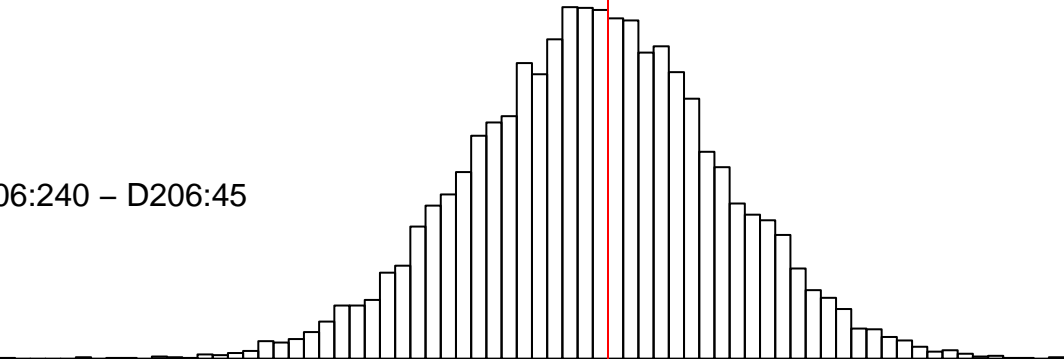

D206:120 – D206:45

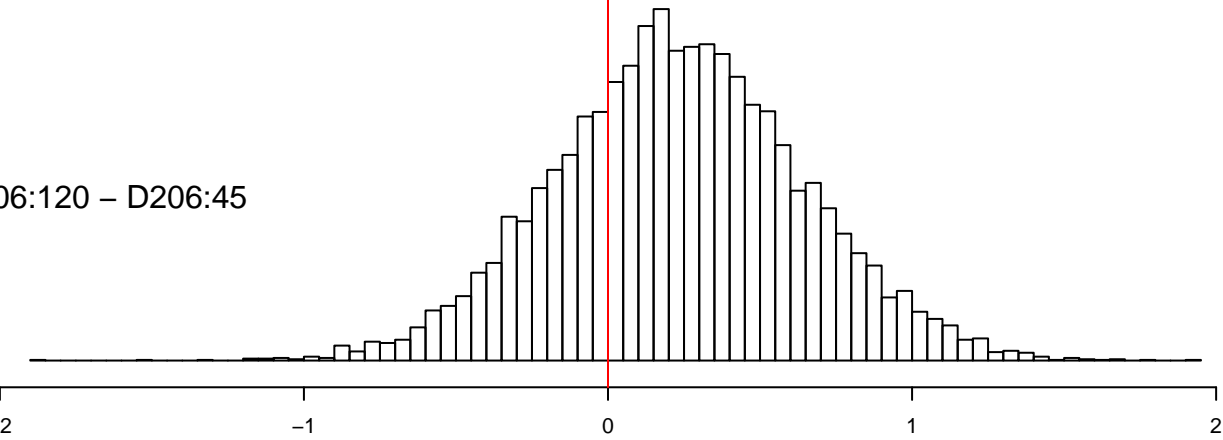

delta(Unidentified Metabolite 63)



D206:240

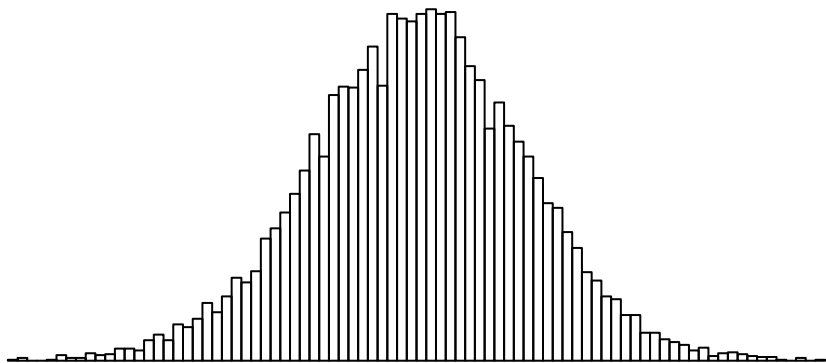

D206:120

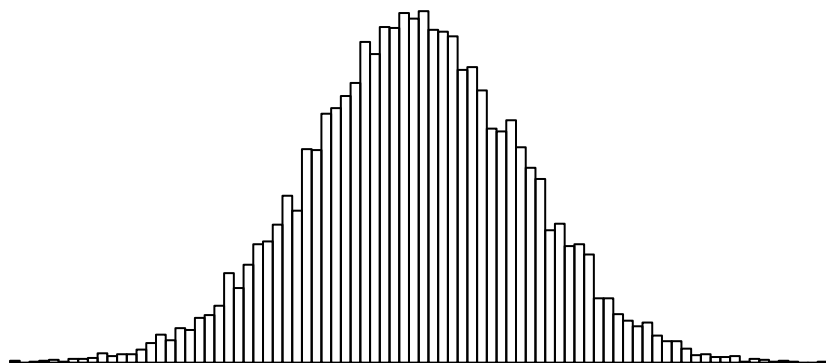

D206:45

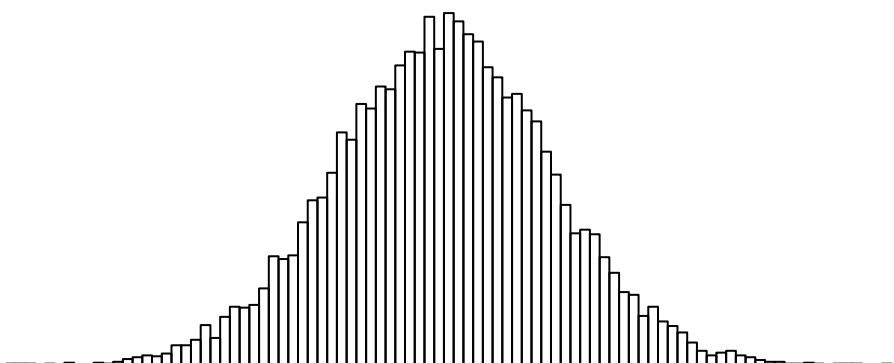

-9.0      -8.5      -8.0      -7.5      -7.0      -6.5

Unidentified Metabolite 65

D206:240 – D206:120

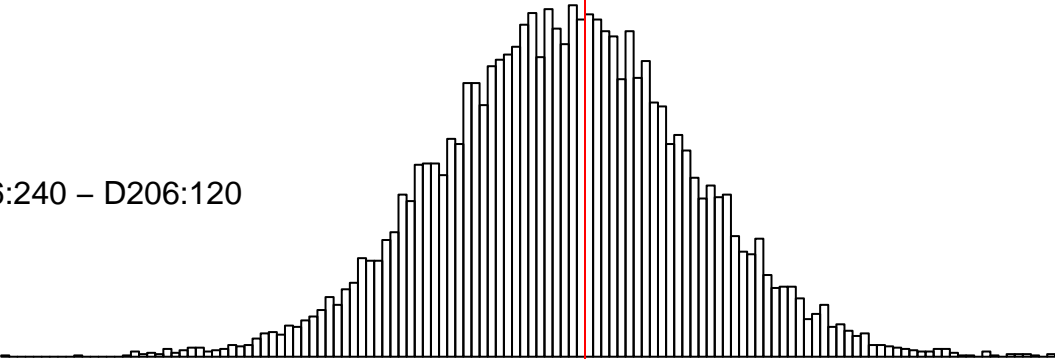

D206:240 – D206:45

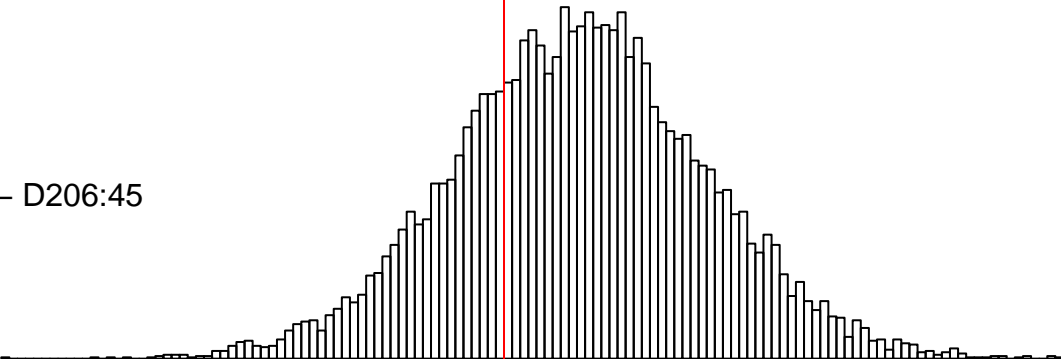

D206:120 – D206:45

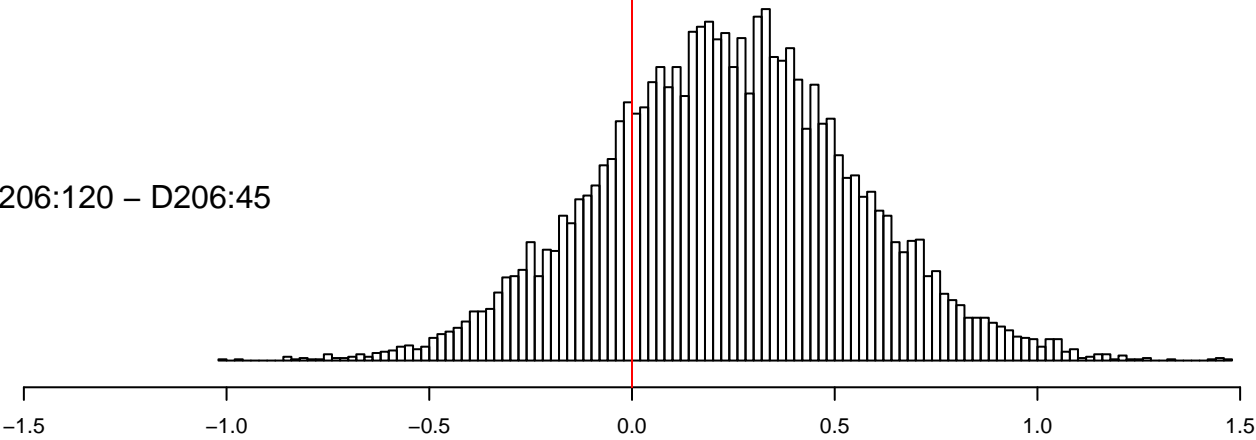

delta(Unidentified Metabolite 65)

D206:240

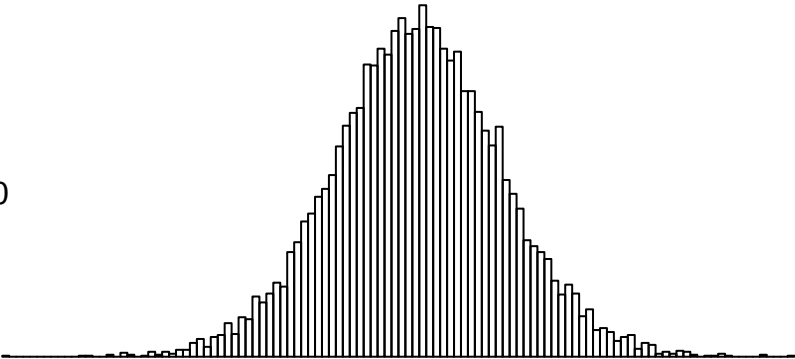

D206:120

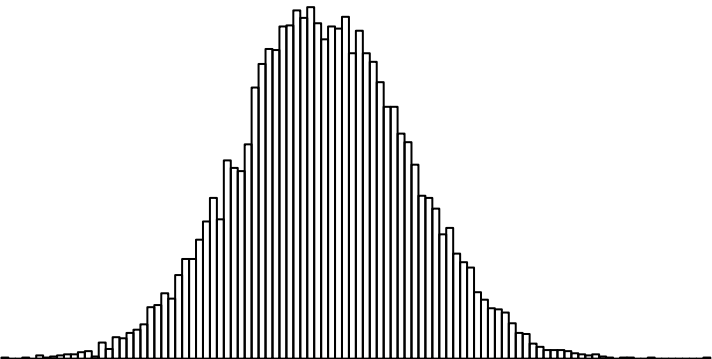

D206:45

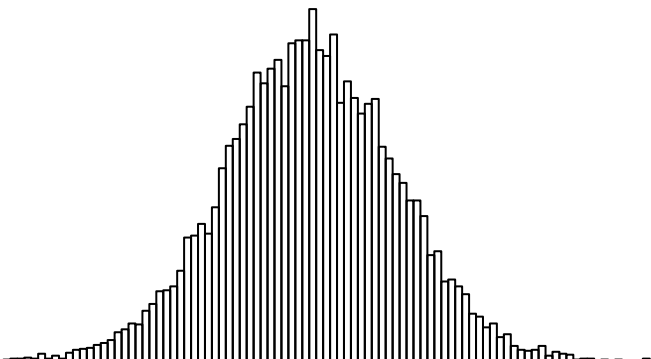

-9.5      -9.0      -8.5      -8.0      -7.5      -7.0      -6.5      -6.0

Unidentified Metabolite 68

D206:240 – D206:120

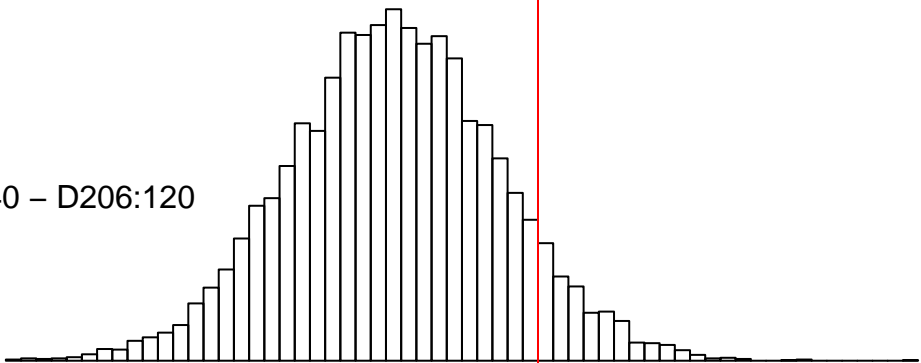

D206:240 – D206:45

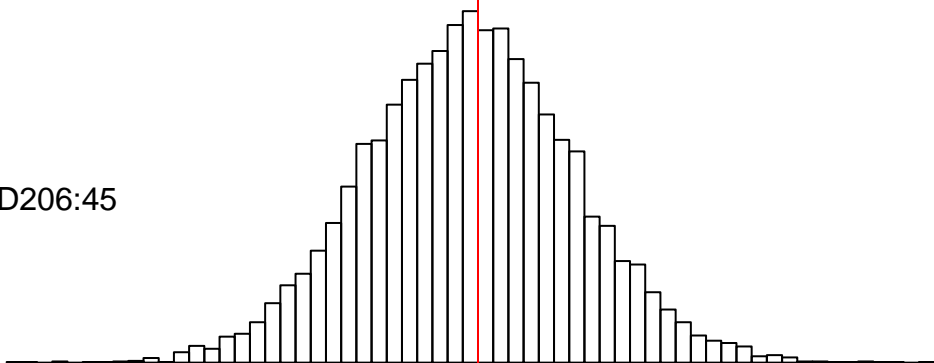

D206:120 – D206:45

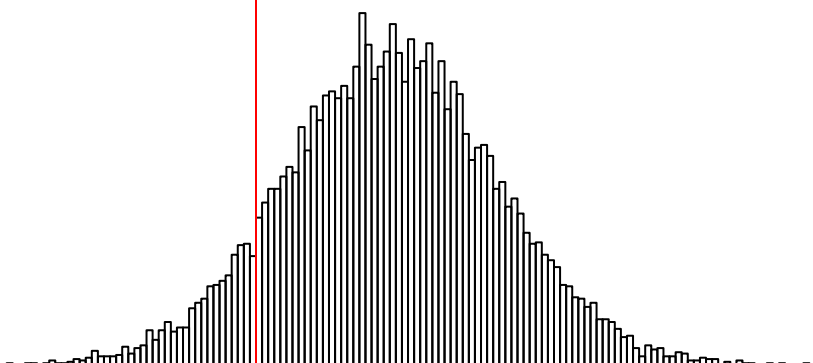

-2 -1 0 1 2

delta(Unidentified Metabolite 68)

D206:240

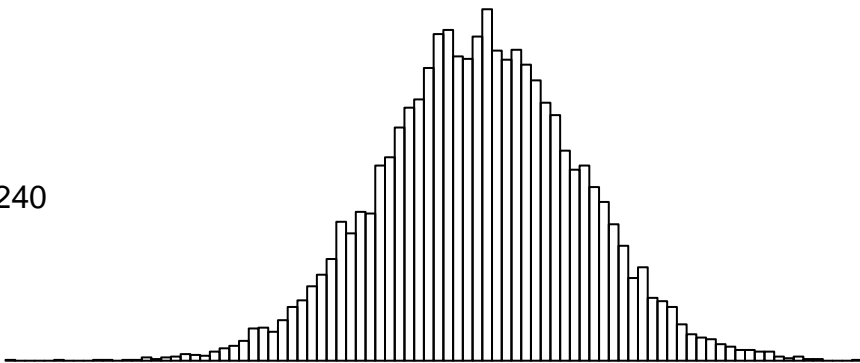

D206:120

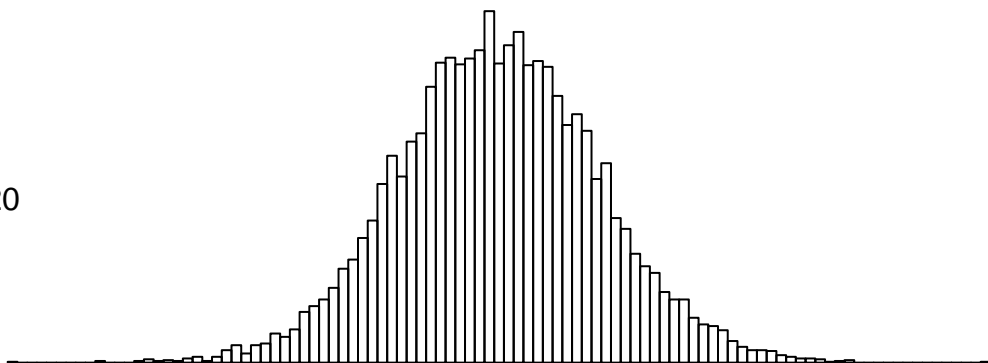

D206:45

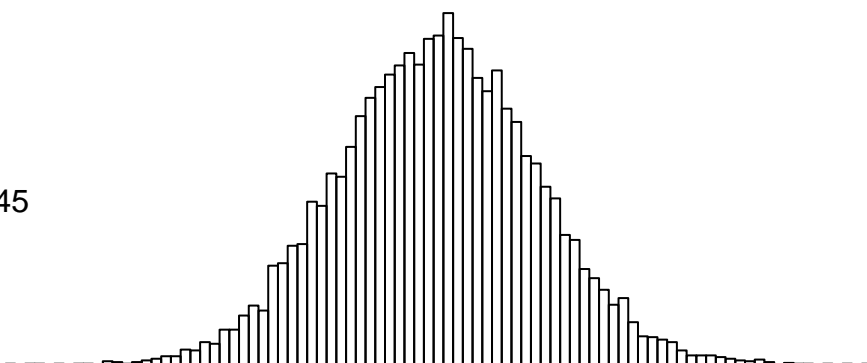

-7.0      -6.5      -6.0      -5.5      -5.0      -4.5

Unidentified Metabolite 69

D206:240 – D206:120

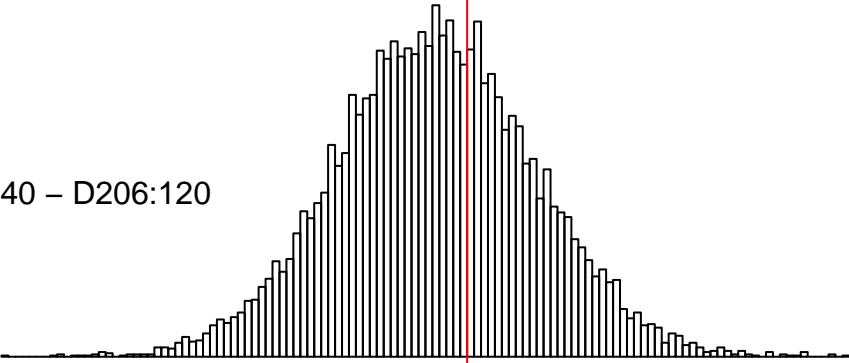

D206:240 – D206:45

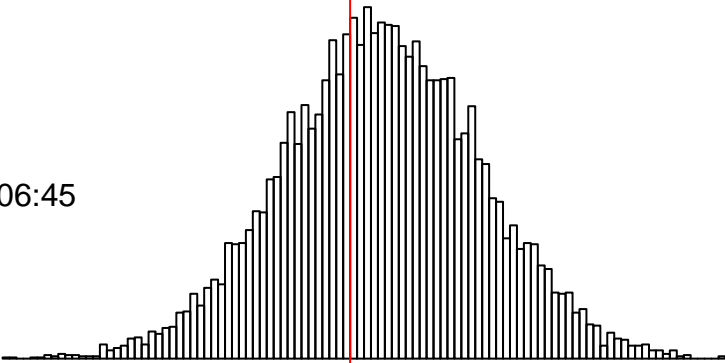

D206:120 – D206:45

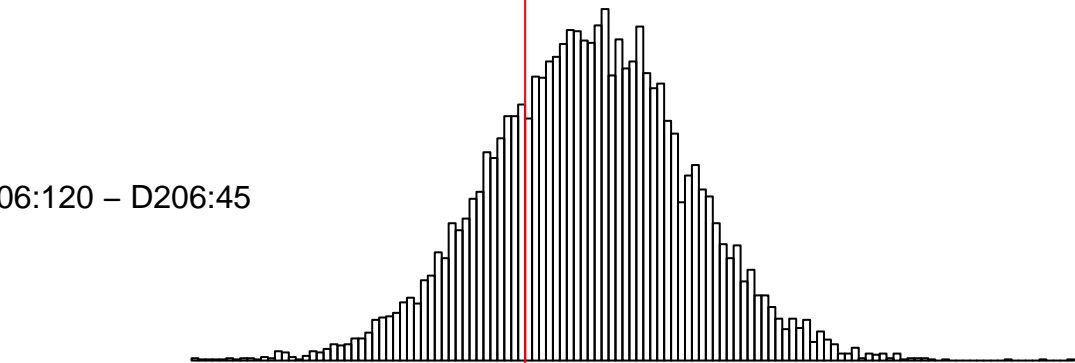

-1.5      -1.0      -0.5      0.0      0.5      1.0      1.5      2.0

delta(Unidentified Metabolite 69)

D206:240

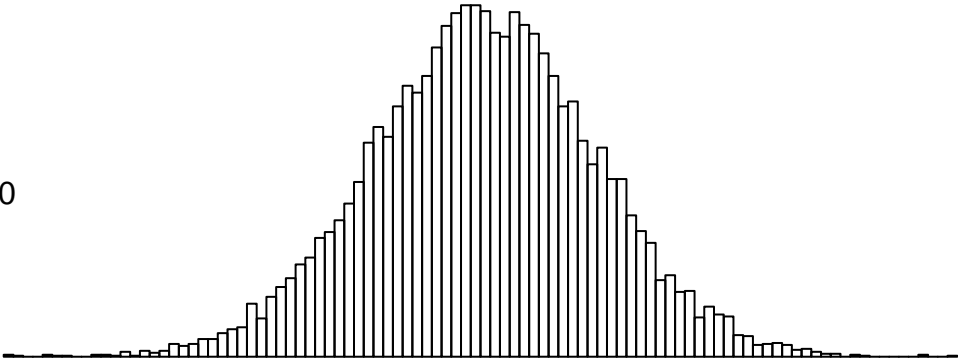

D206:120

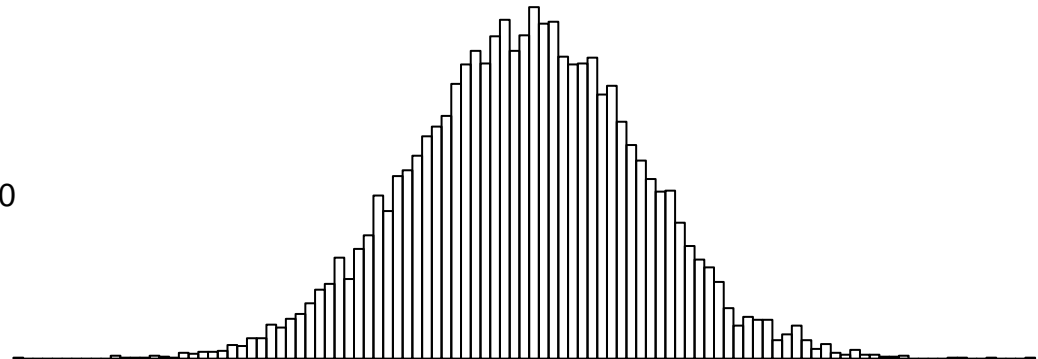

D206:45

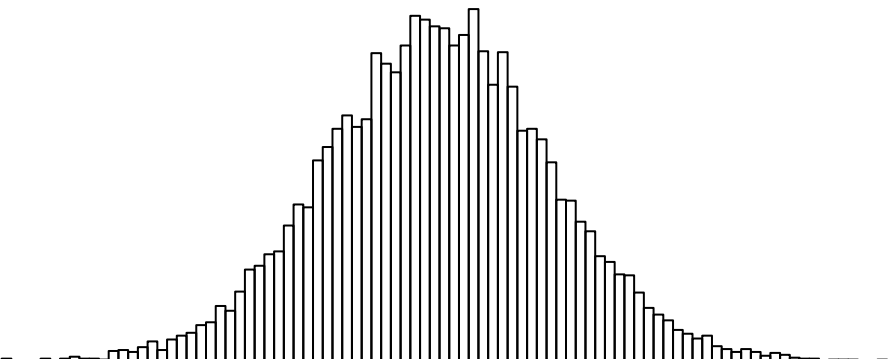

-8.5      -8.0      -7.5      -7.0      -6.5      -6.0

Unidentified Metabolite 70

D206:240 – D206:120

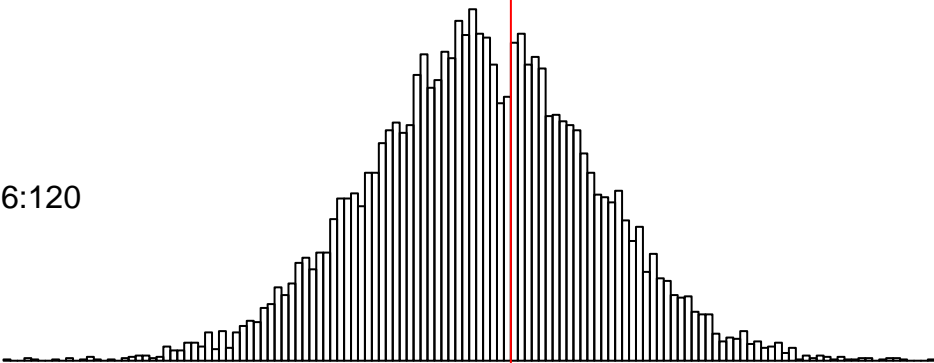

D206:240 – D206:45

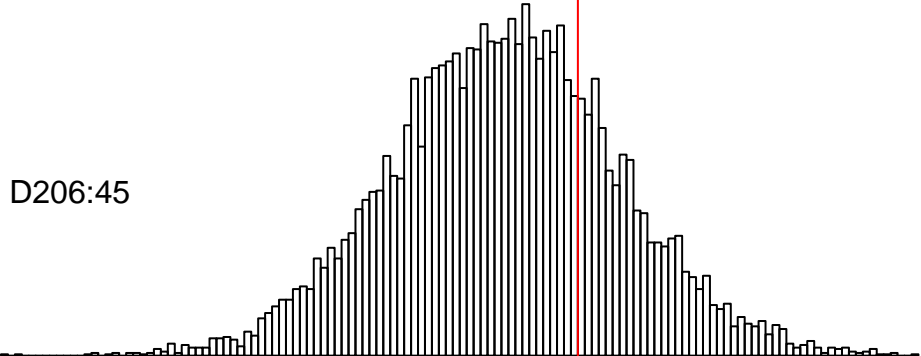

D206:120 – D206:45

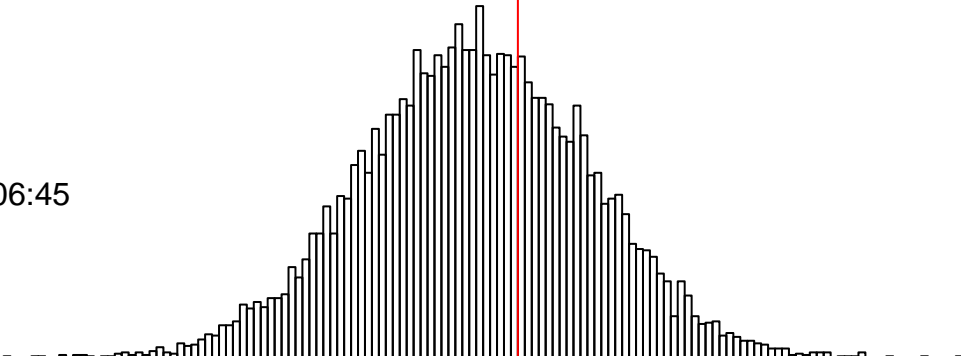

-2.0      -1.5      -1.0      -0.5      0.0      0.5      1.0      1.5

delta(Unidentified Metabolite 70)



D206:240

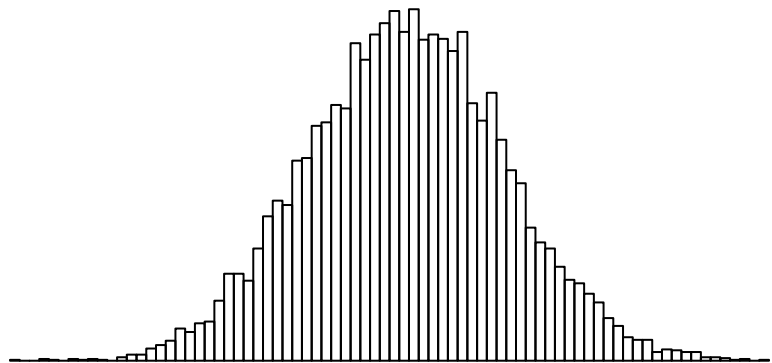

D206:120

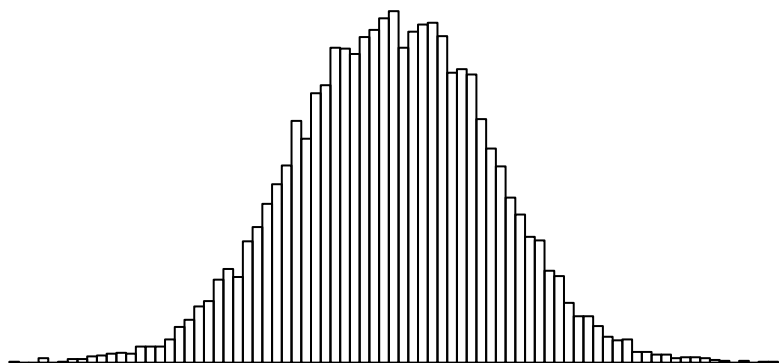

D206:45

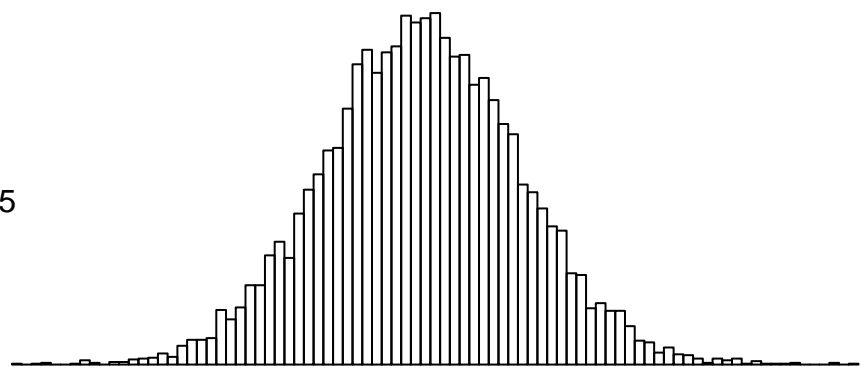

-9.5      -9.0      -8.5      -8.0      -7.5      -7.0

Unidentified Metabolite 71

D206:240 – D206:120

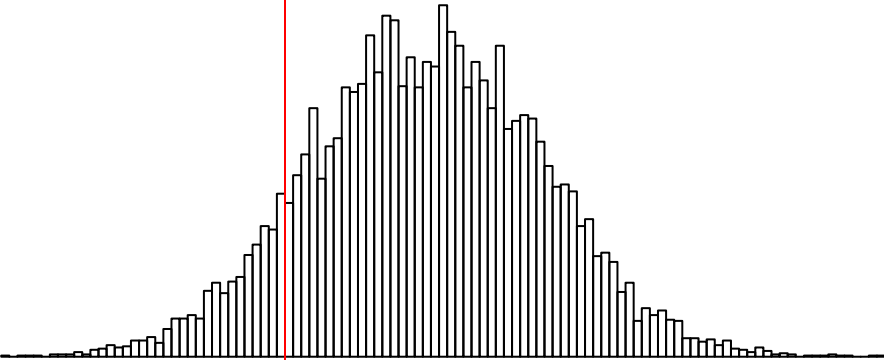

D206:240 – D206:45

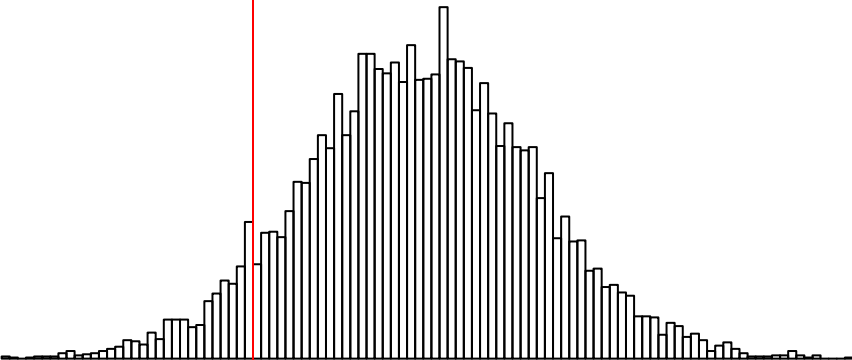

D206:120 – D206:45

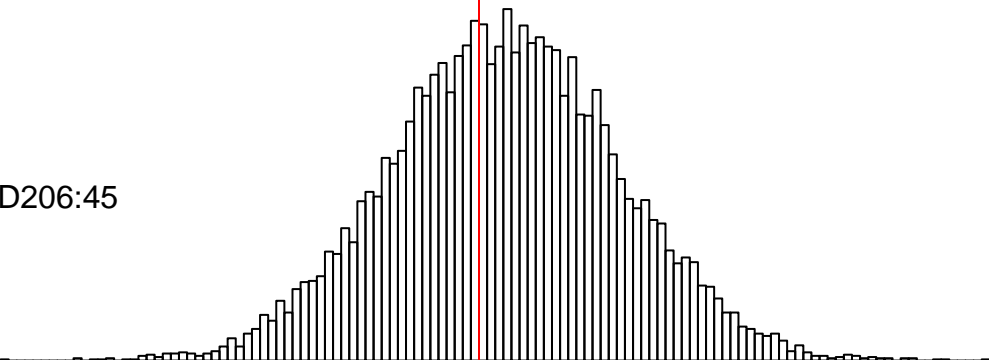

-1.5      -1.0      -0.5      0.0      0.5      1.0      1.5

delta(Unidentified Metabolite 71)

D206:240

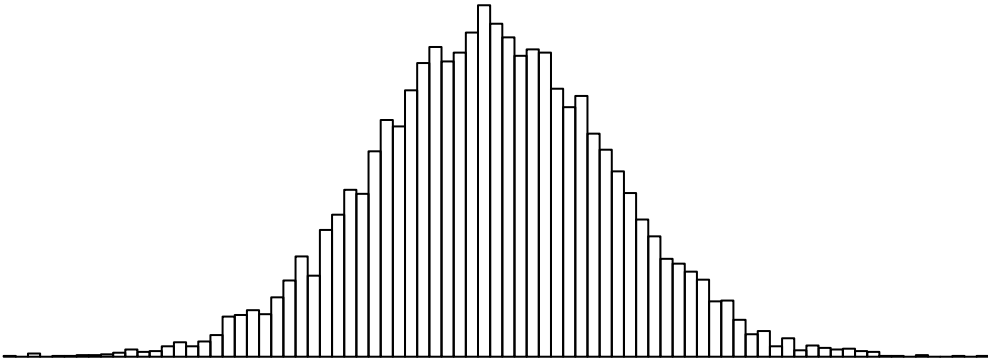

D206:120

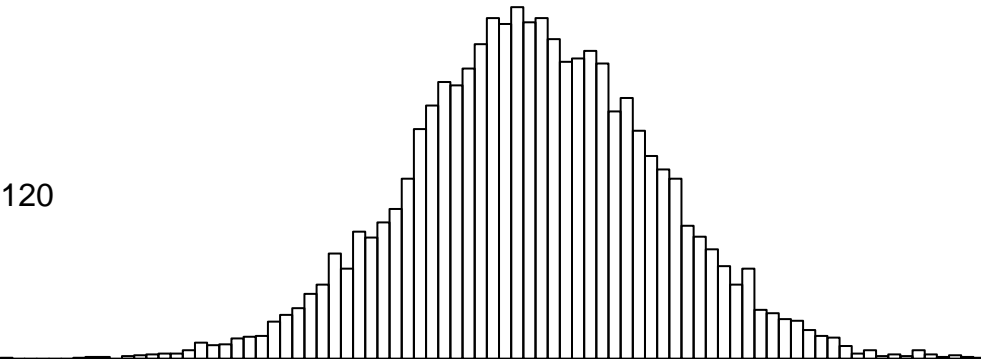

D206:45

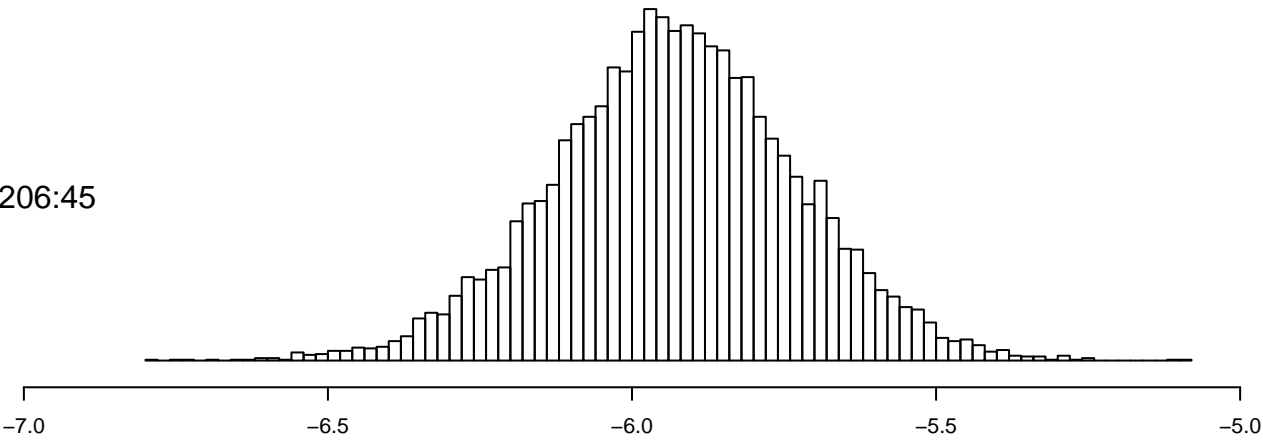

Unidentified Metabolite 72

D206:240 – D206:120

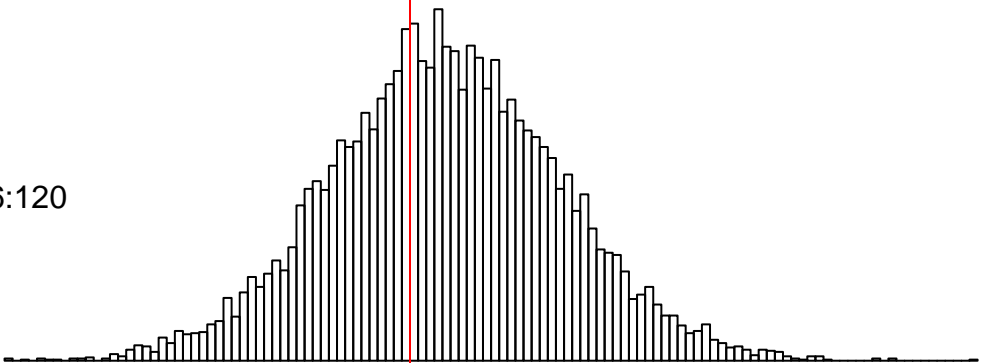

D206:240 – D206:45

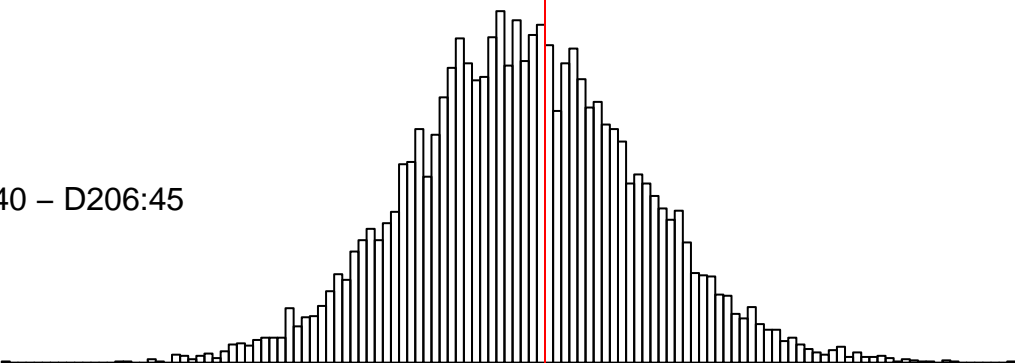

D206:120 – D206:45

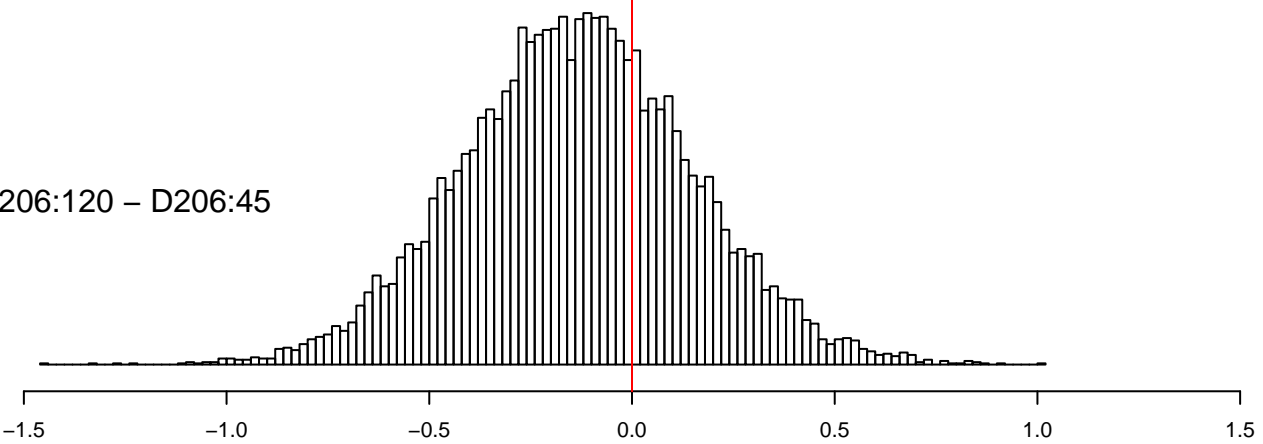

-1.5      -1.0      -0.5      0.0      0.5      1.0      1.5

delta(Unidentified Metabolite 72)

D206:240

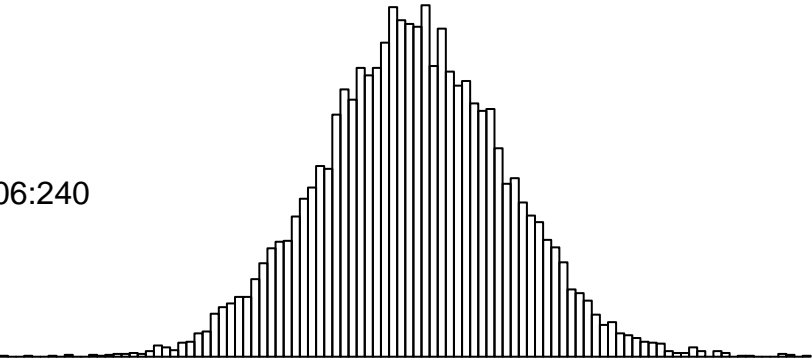

D206:120

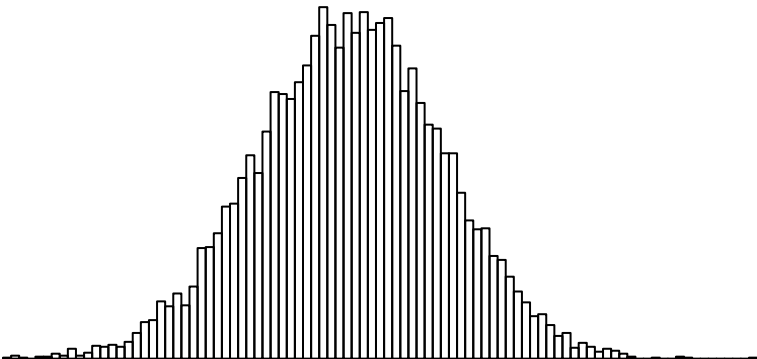

D206:45

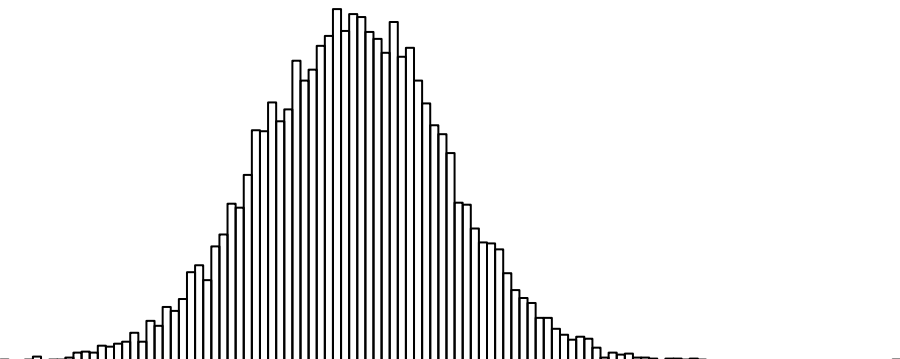

-8.0      -7.5      -7.0      -6.5      -6.0      -5.5      -5.0

Unidentified Metabolite 73

D206:240 – D206:120

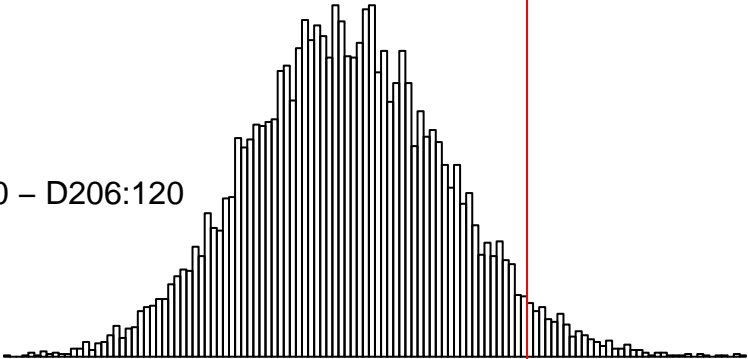

D206:240 – D206:45

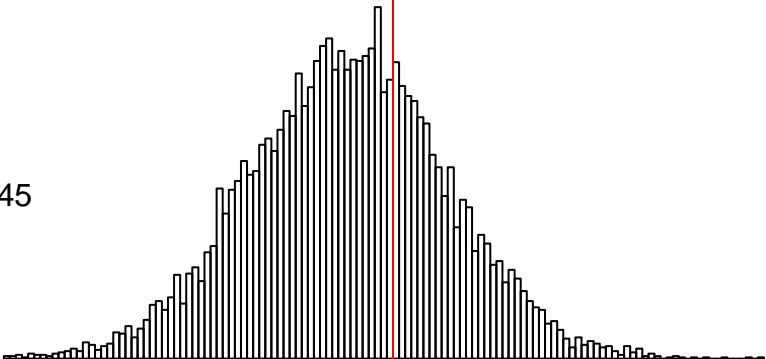

D206:120 – D206:45

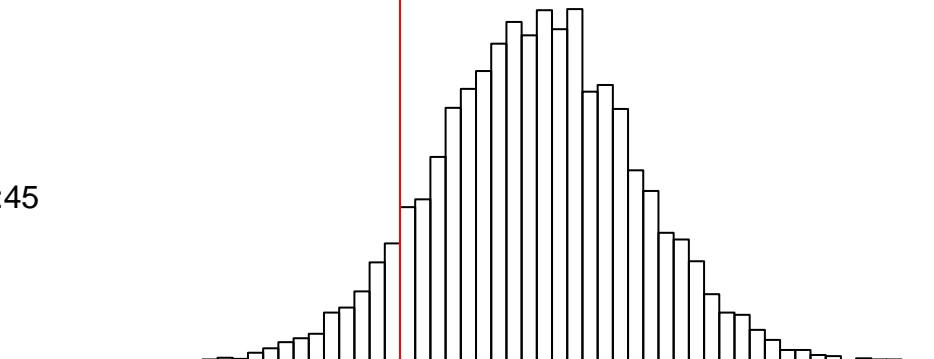

-2

-1

0

1

2

delta(Unidentified Metabolite 73)

D206:240

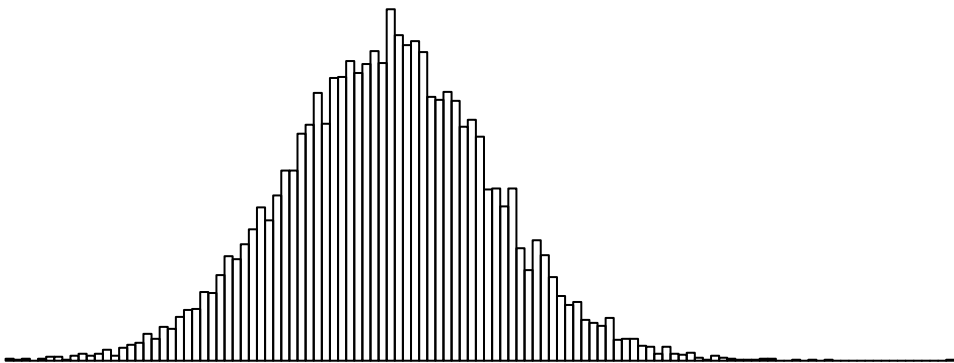

D206:120

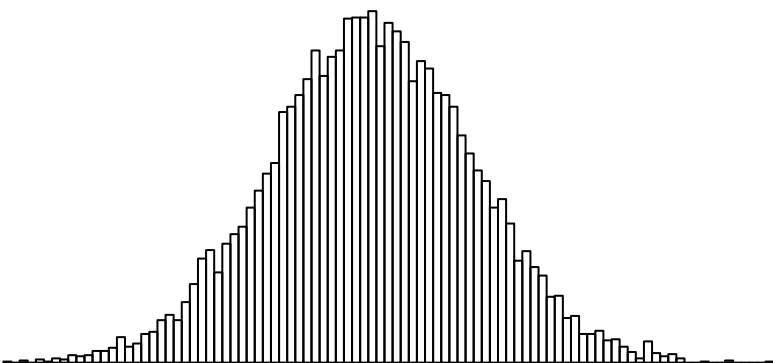

D206:45

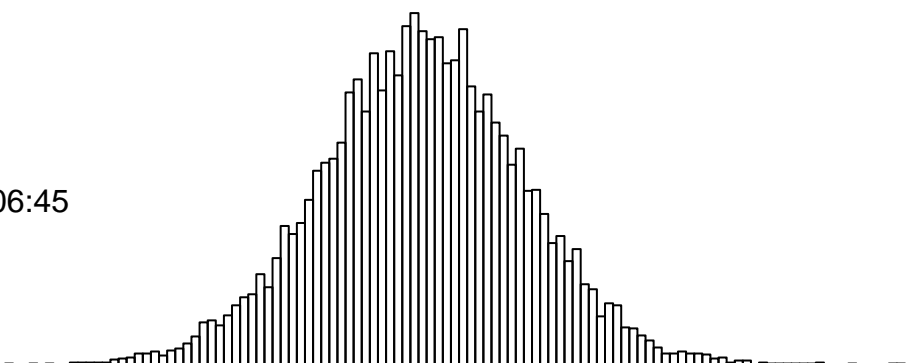

-9.5      -9.0      -8.5      -8.0      -7.5      -7.0      -6.5

Unidentified Metabolite 74

D206:240 – D206:120

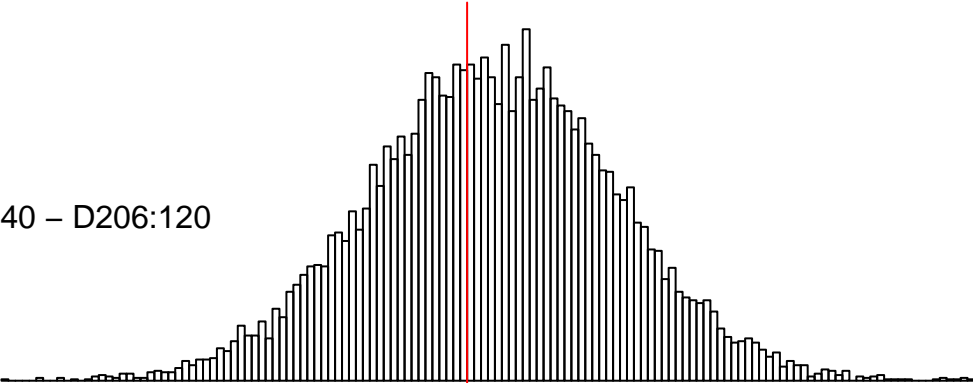

D206:240 – D206:45

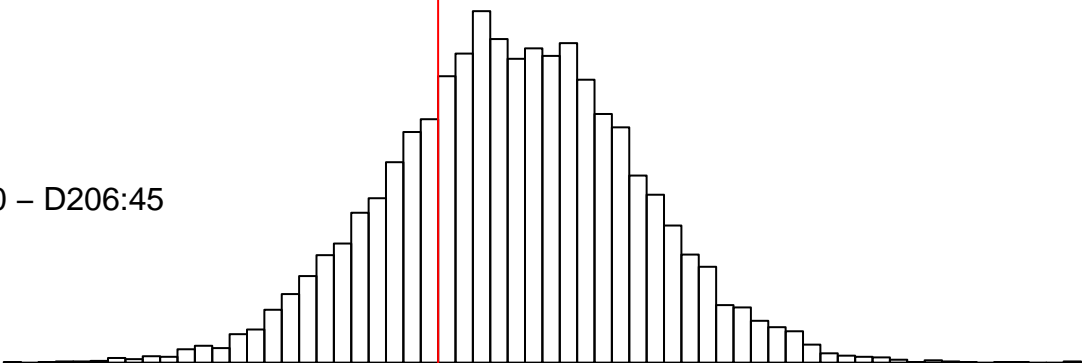

D206:120 – D206:45

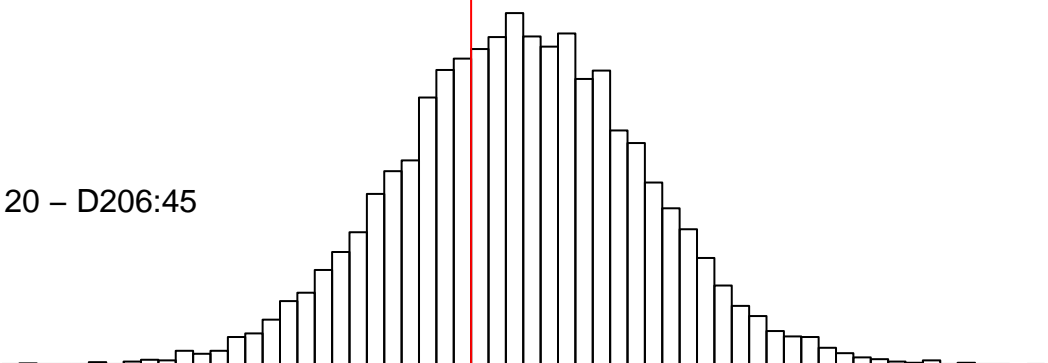

-1.5      -1.0      -0.5      0.0      0.5      1.0      1.5      2.0

delta(Unidentified Metabolite 74)



D206:240

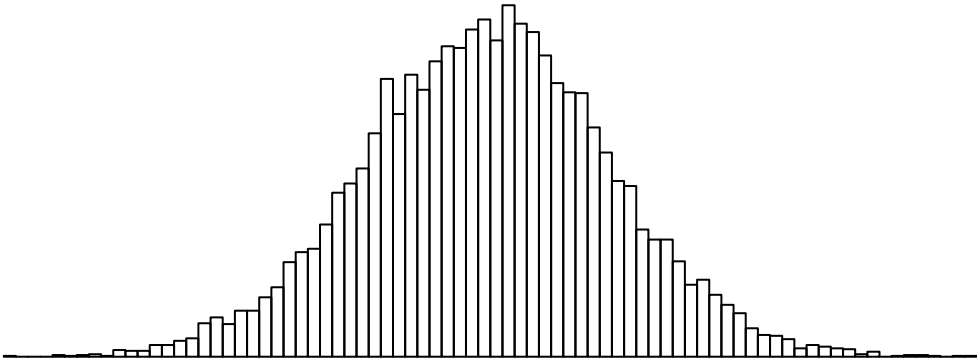

D206:120

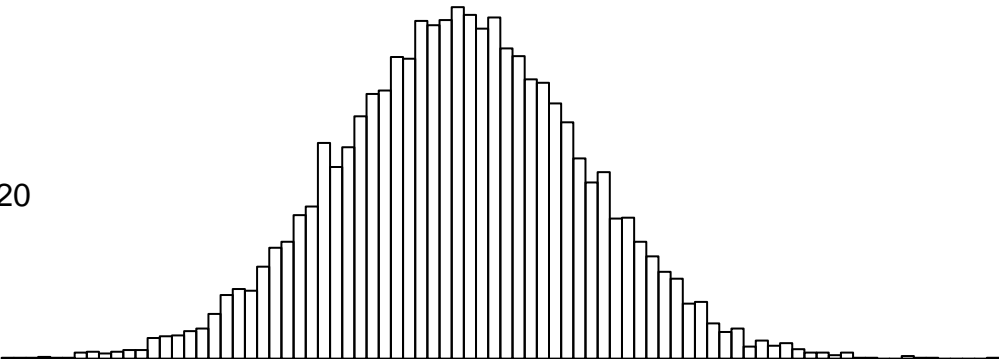

D206:45

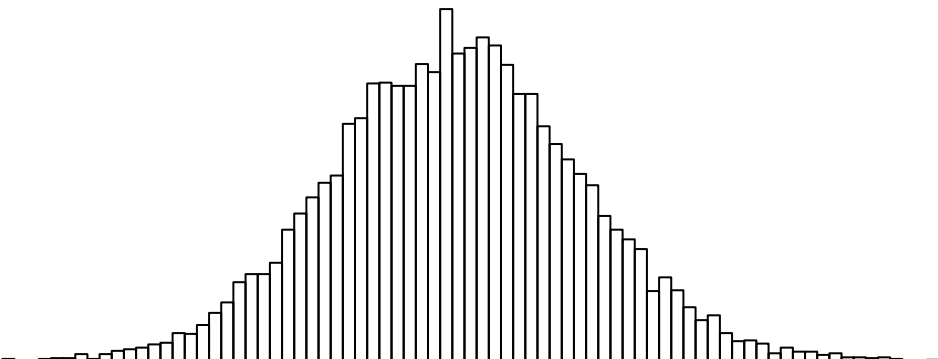

-10.5      -10.0      -9.5      -9.0      -8.5

Unidentified Metabolite 75

D206:240 – D206:120

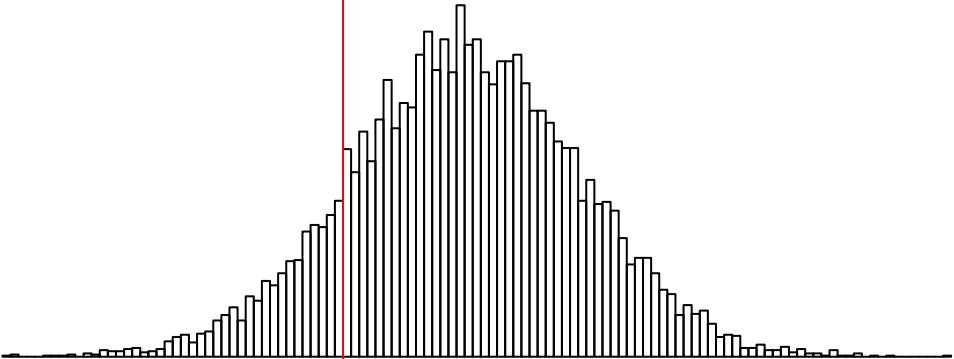

D206:240 – D206:45

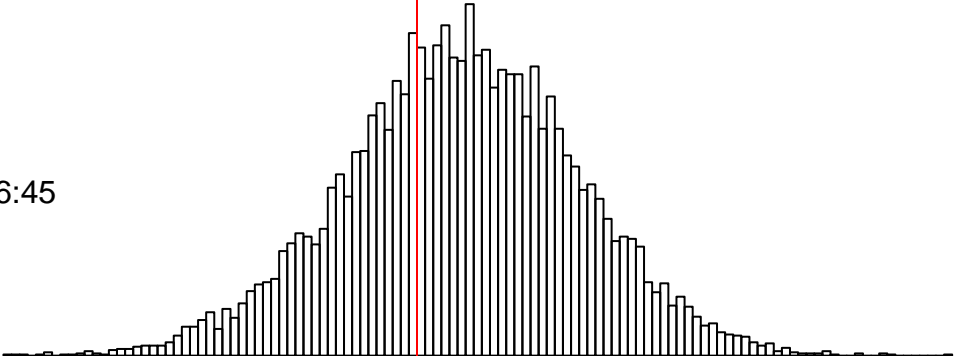

D206:120 – D206:45

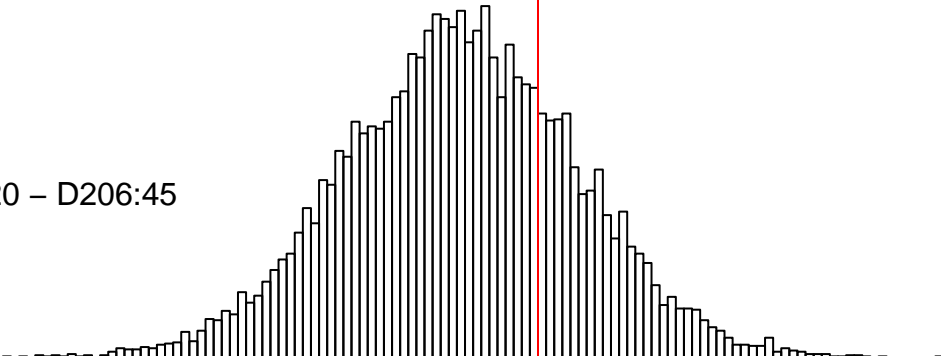

-1.5      -1.0      -0.5      0.0      0.5      1.0      1.5

delta(Unidentified Metabolite 75)

D206:240

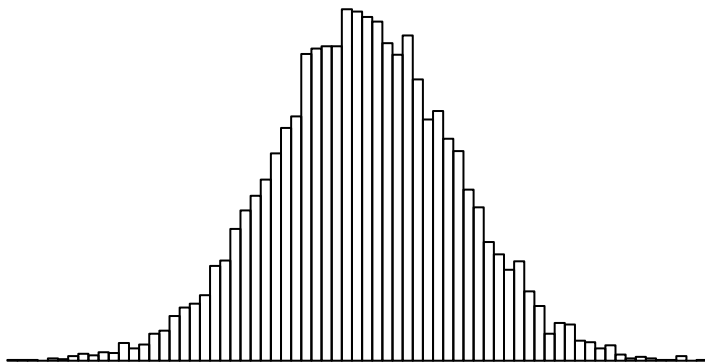

D206:120

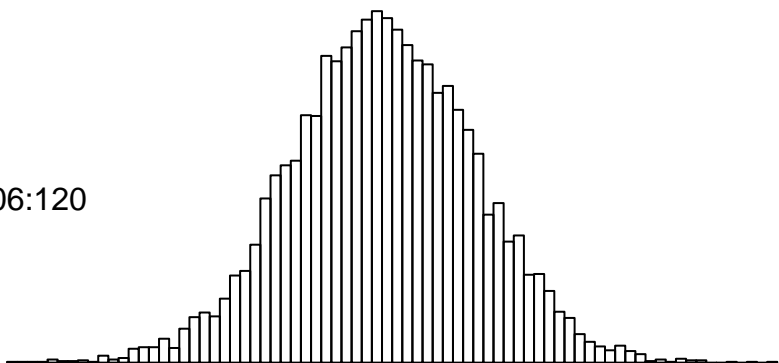

D206:45

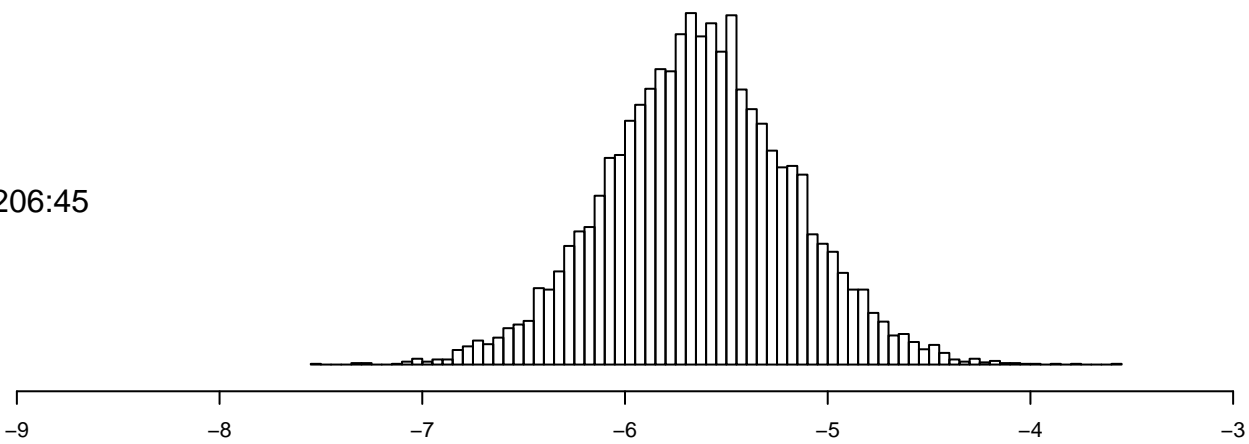

Unidentified Metabolite 76

D206:240 – D206:120

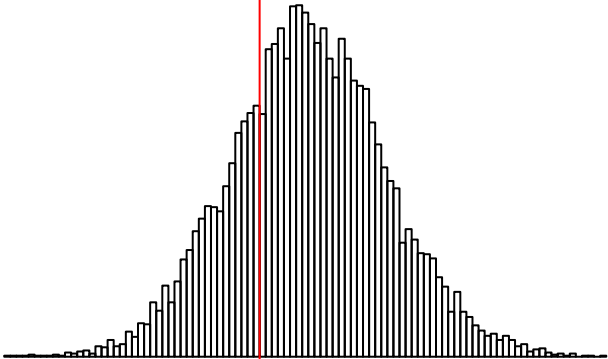

D206:240 – D206:45

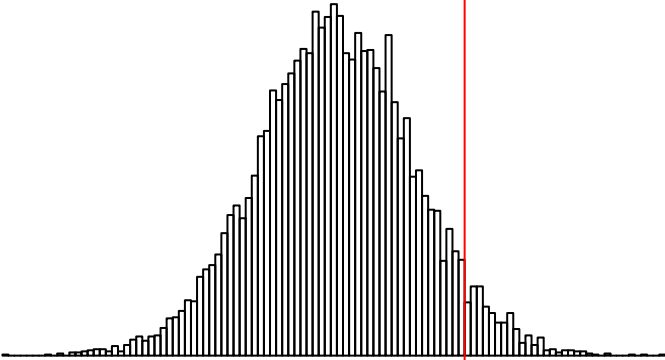

D206:120 – D206:45

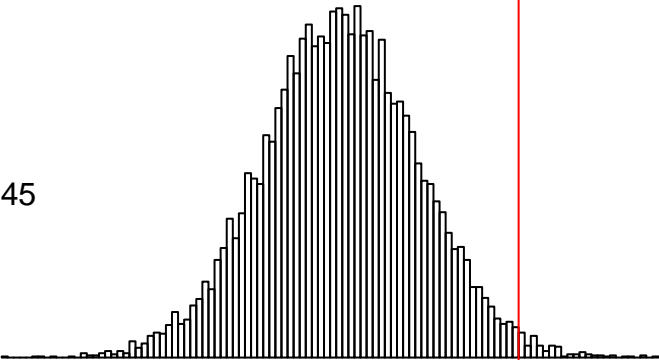

-6 -4 -2 0 2 4

delta(Unidentified Metabolite 76)

D206:240

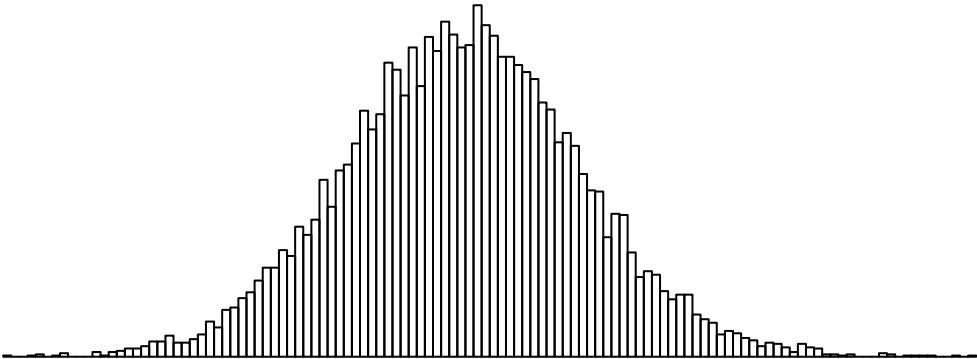

D206:120

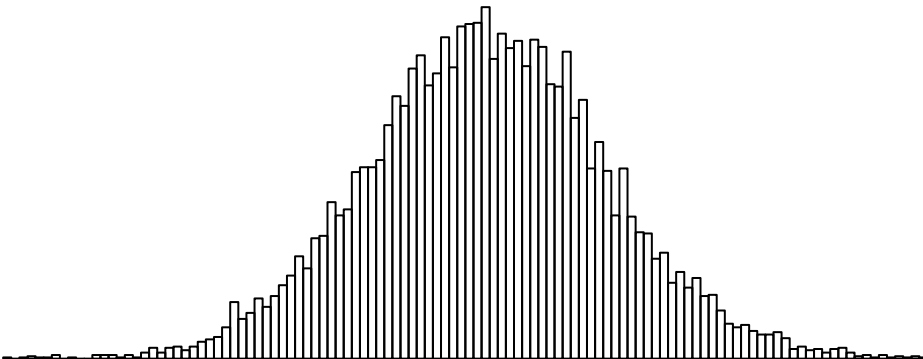

D206:45

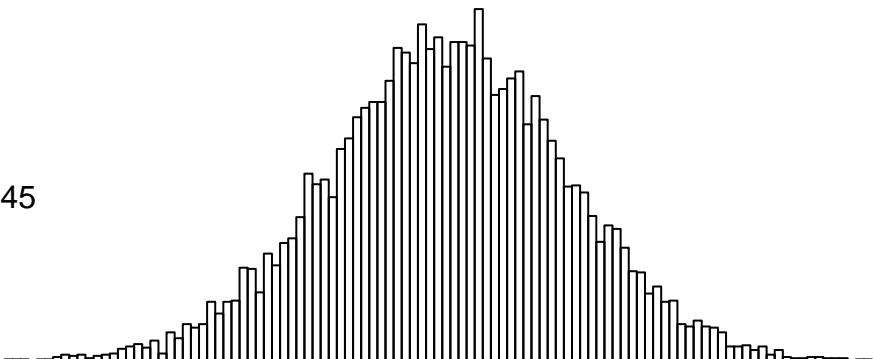

-8.0      -7.5      -7.0      -6.5      -6.0      -5.5      -5.0

Unidentified Metabolite 77

D206:240 – D206:120

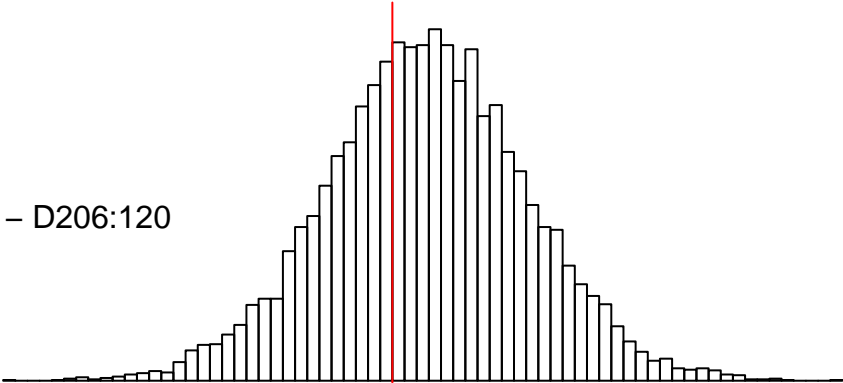

D206:240 – D206:45

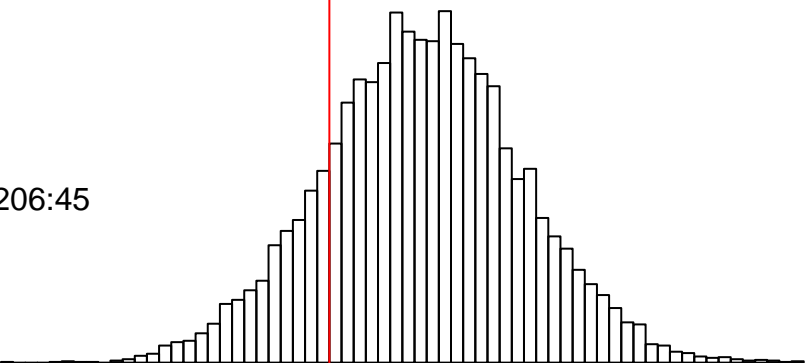

D206:120 – D206:45

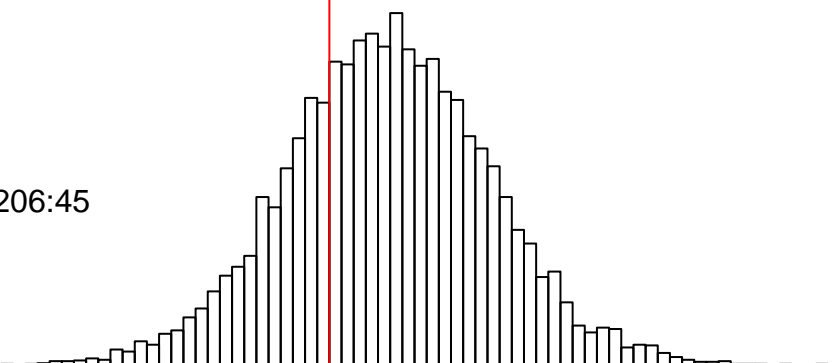

-2 -1 0 1 2 3

delta(Unidentified Metabolite 77)

D206:240

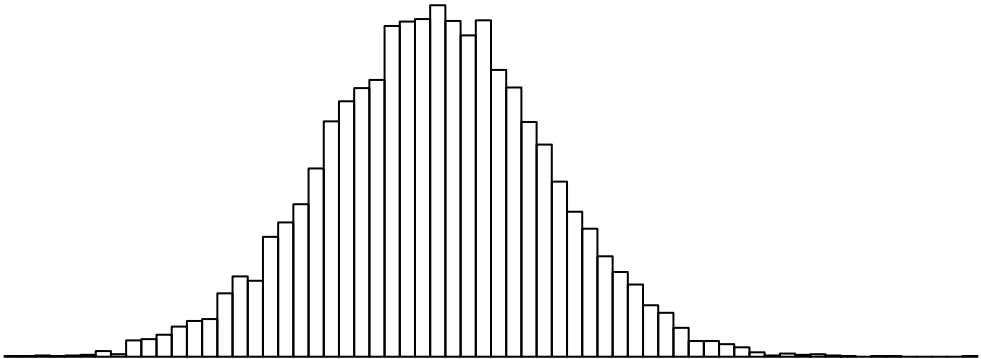

D206:120

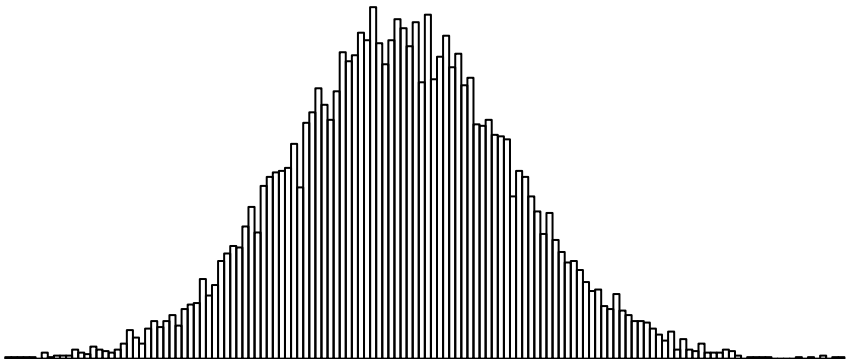

D206:45

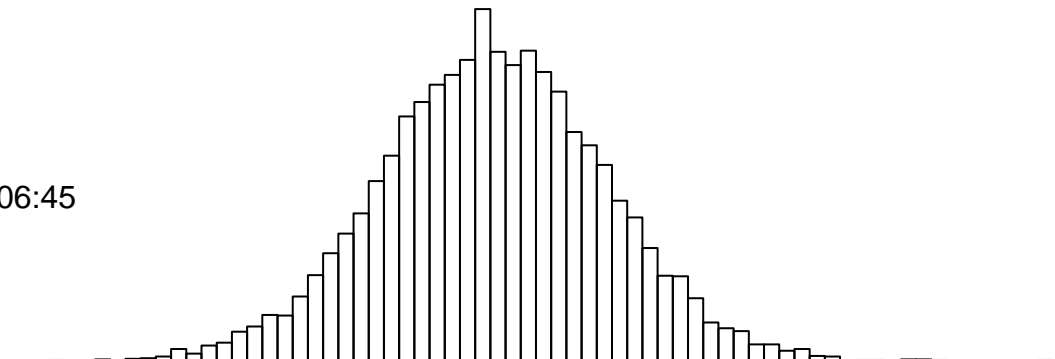

-8 -7 -6 -5 -4

Unidentified Metabolite 78

D206:240 – D206:120

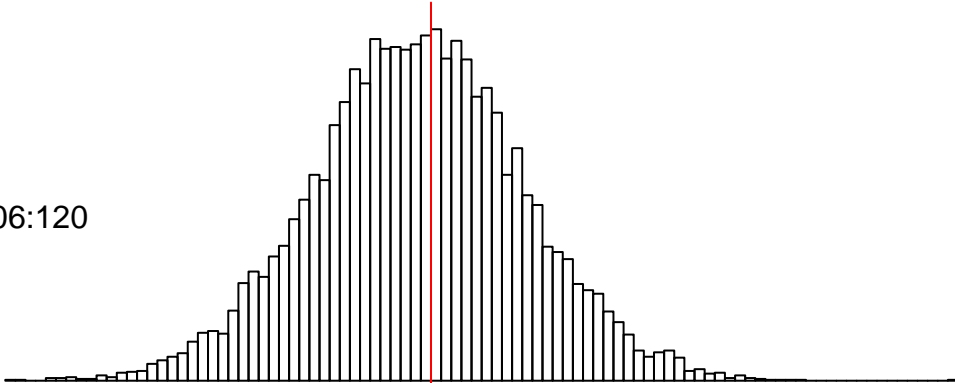

D206:240 – D206:45

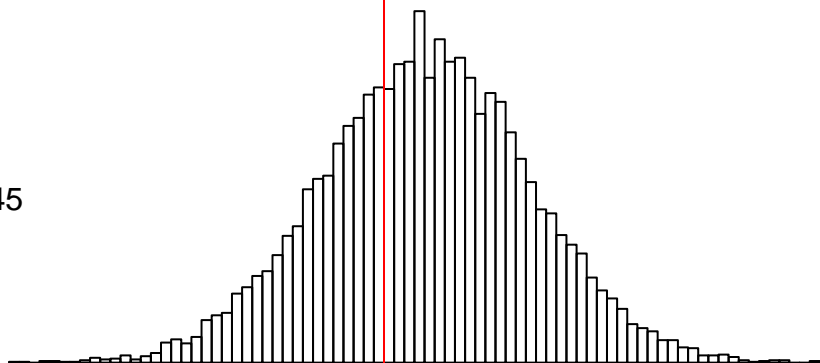

D206:120 – D206:45

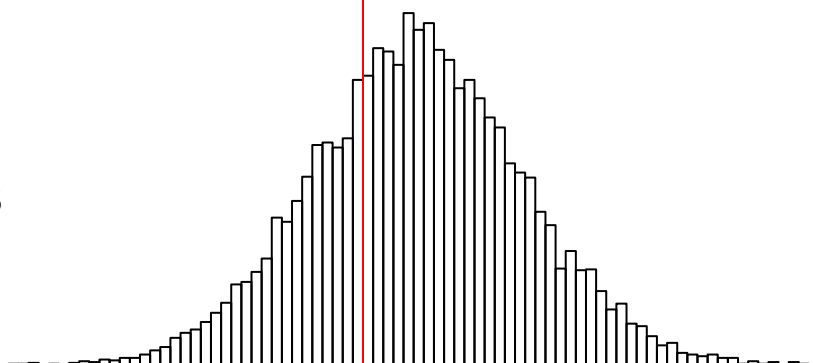

-3 -2 -1 0 1 2 3

delta(Unidentified Metabolite 78)



D206:240

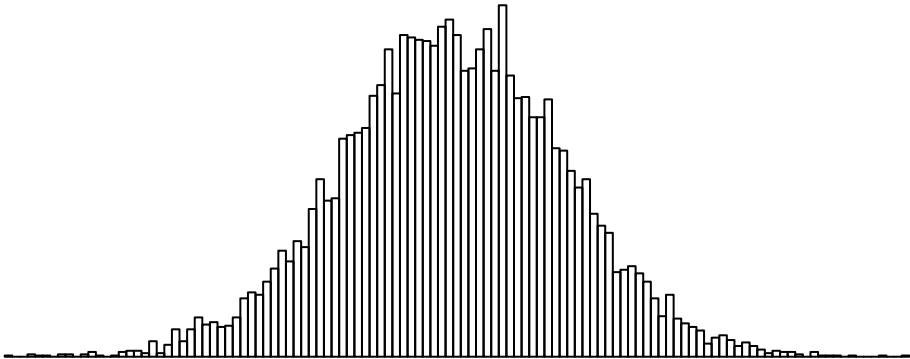

D206:120

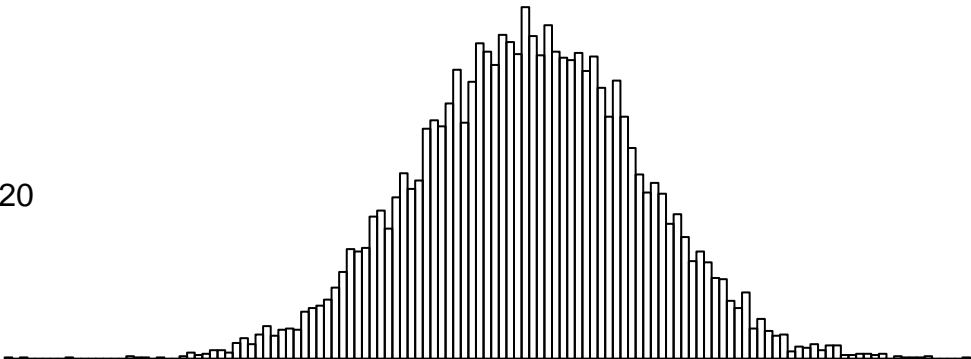

D206:45

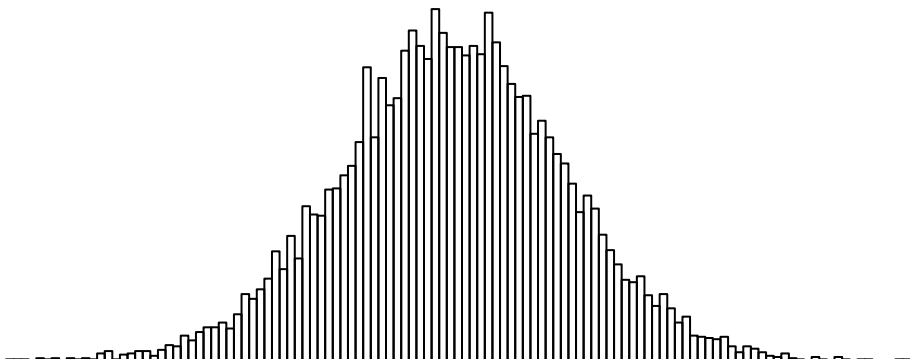

-9.0                      -8.5                      -8.0                      -7.5

Acid 2

D206:240 – D206:120

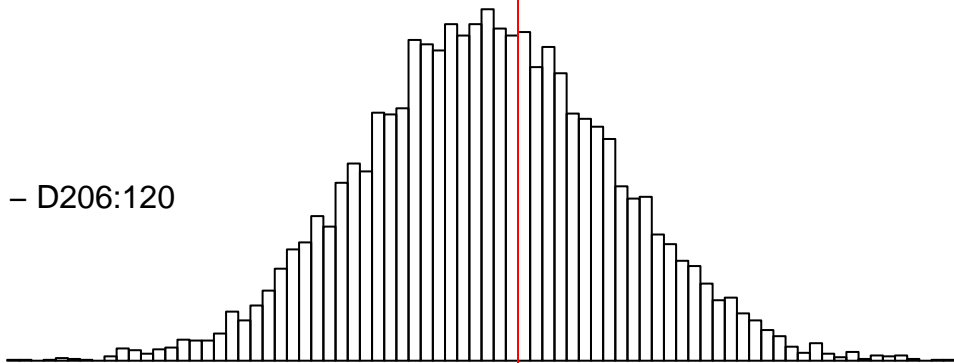

D206:240 – D206:45

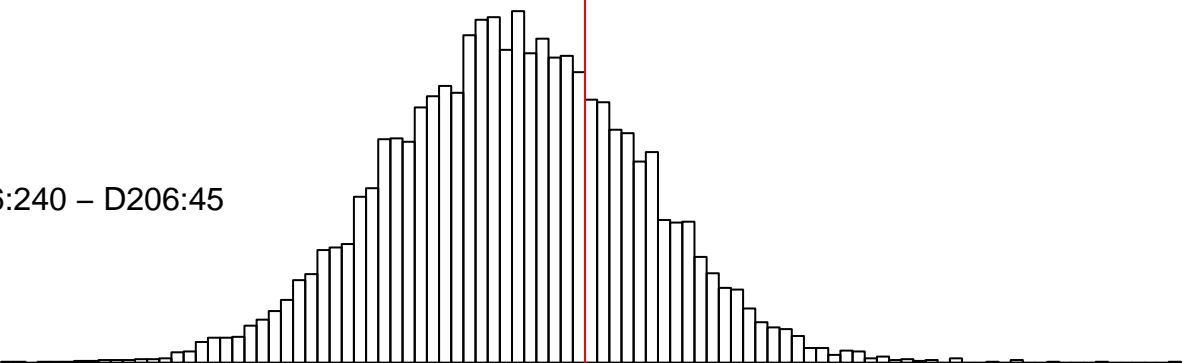

D206:120 – D206:45

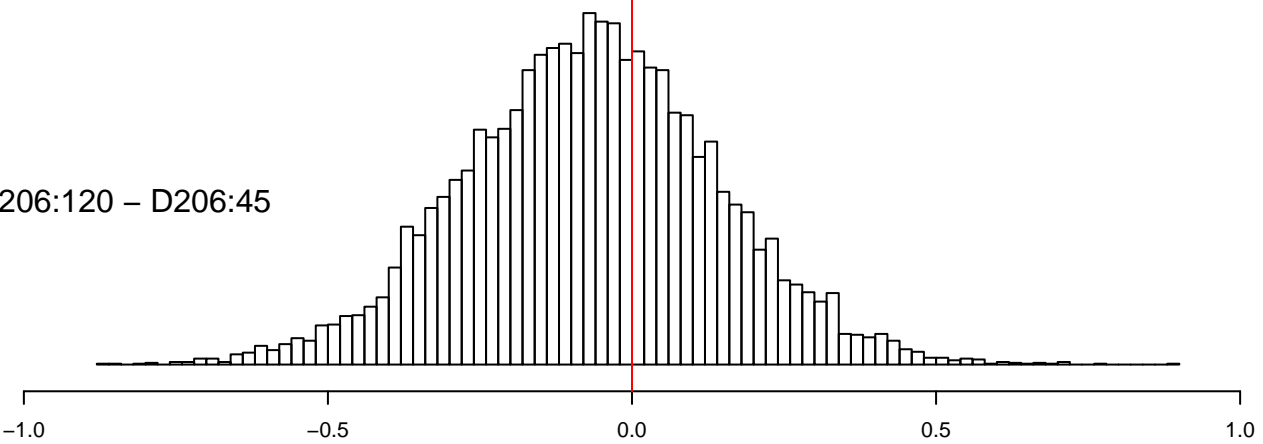

-1.0                      -0.5                      0.0                      0.5                      1.0

delta(Acid 2)

D206:240

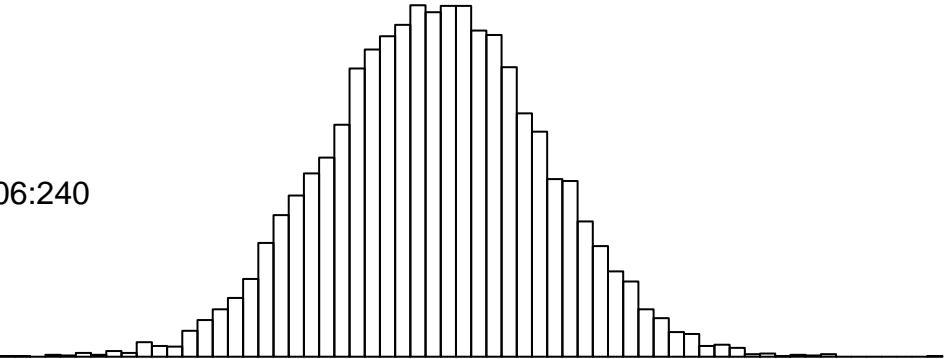

D206:120

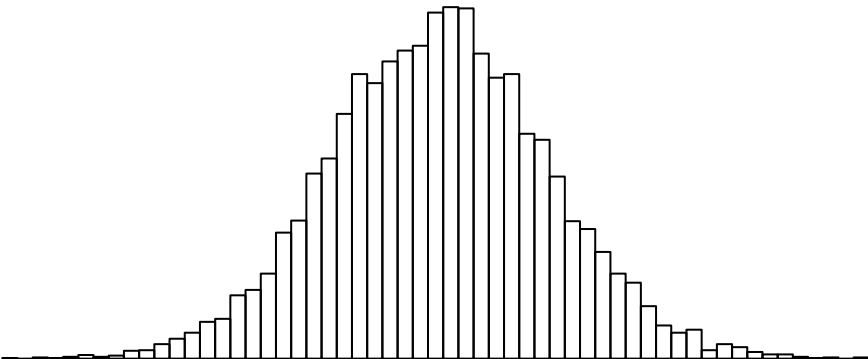

D206:45

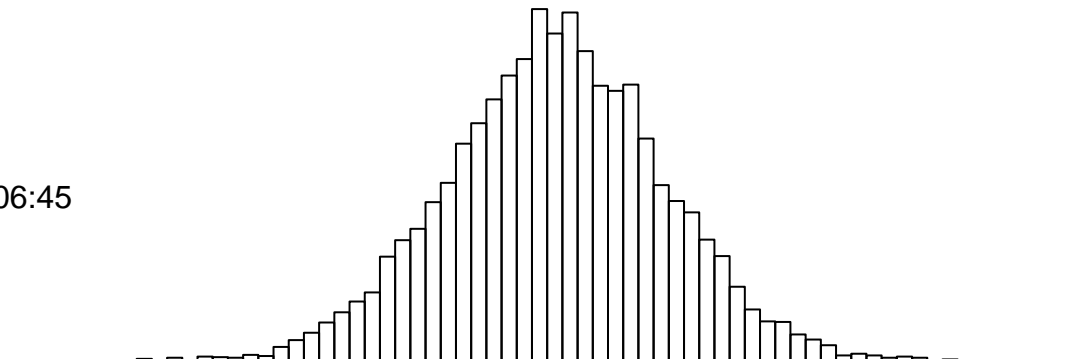

Acid 3

D206:240 – D206:120

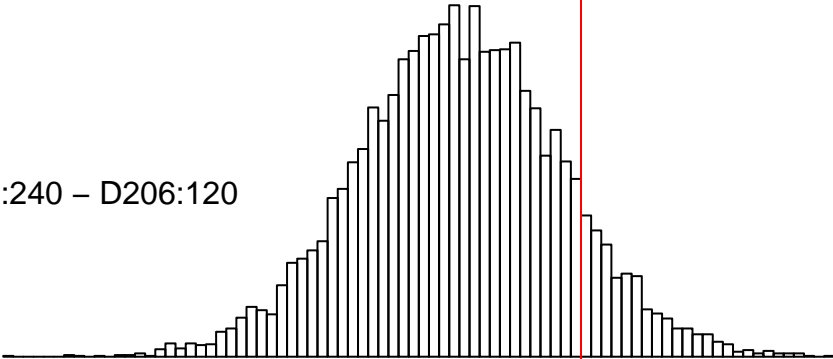

D206:240 – D206:45

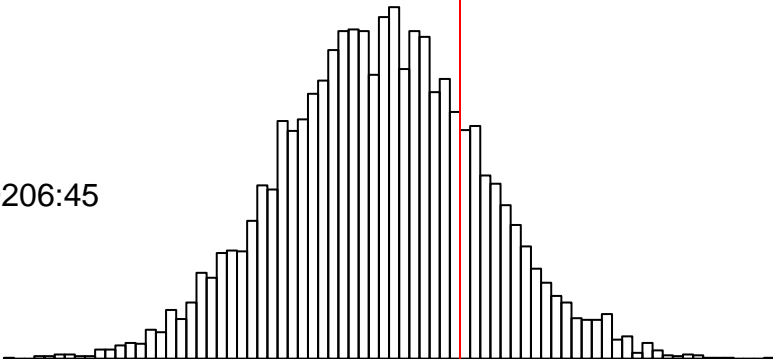

D206:120 – D206:45

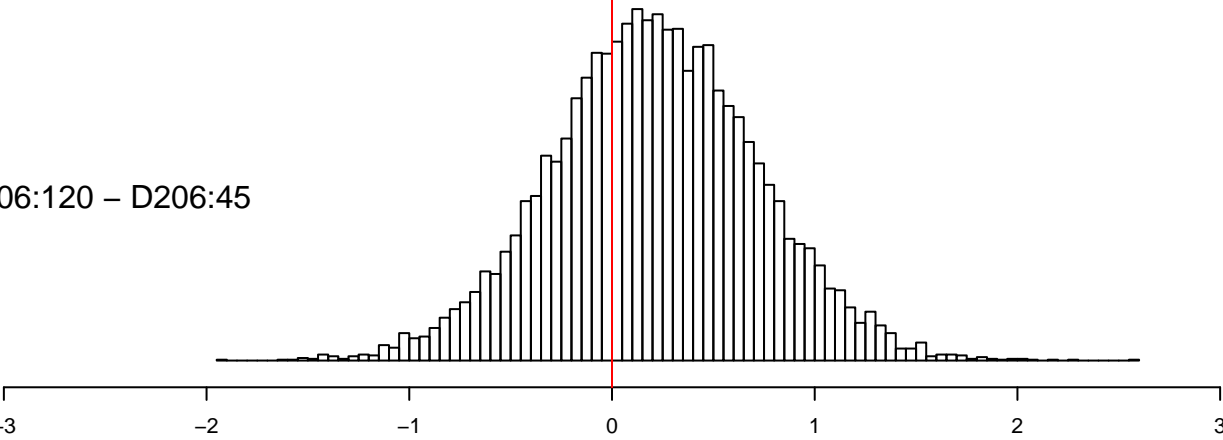

delta(Acid 3)

D206:240

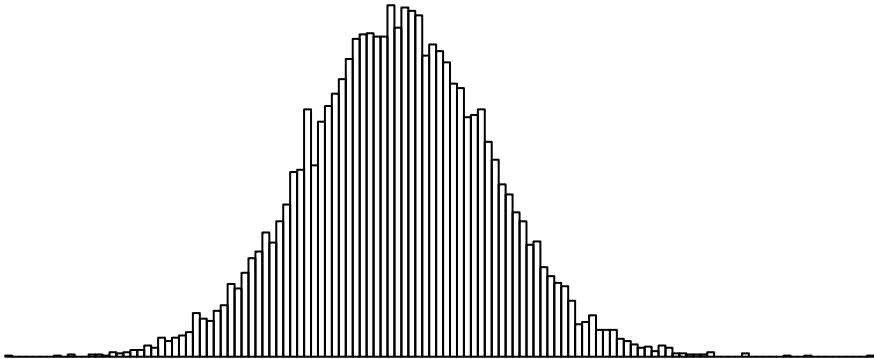

D206:120

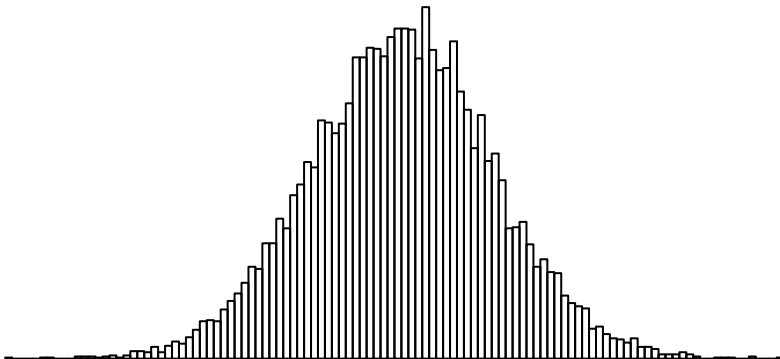

D206:45

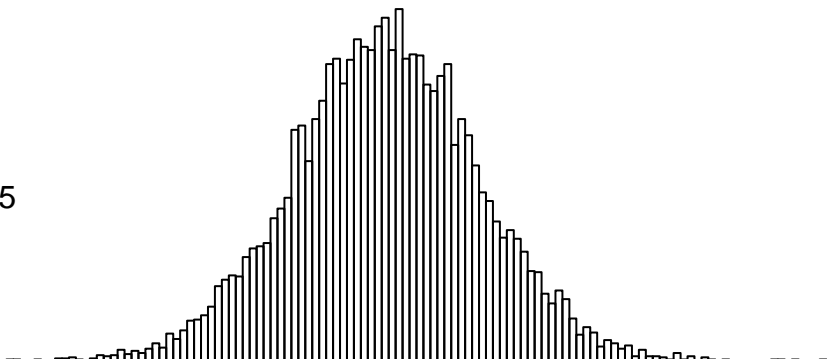

-8.0      -7.5      -7.0      -6.5      -6.0      -5.5      -5.0      -4.5

Acid 6

D206:240 – D206:120

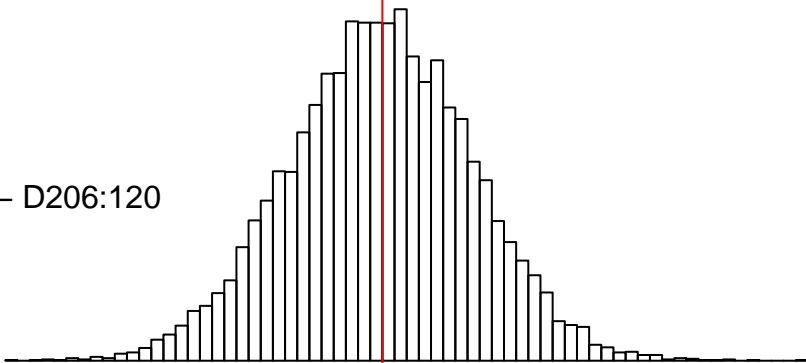

D206:240 – D206:45

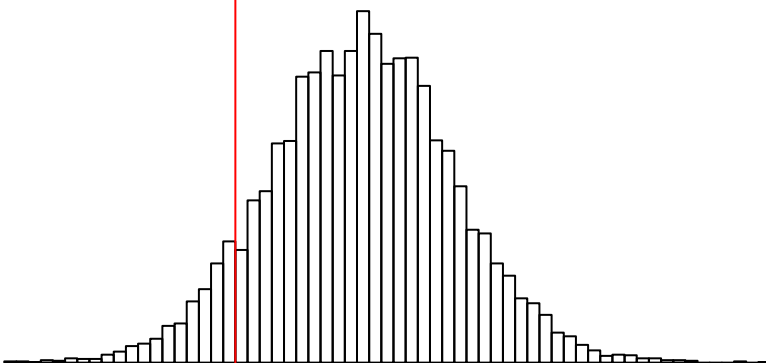

D206:120 – D206:45

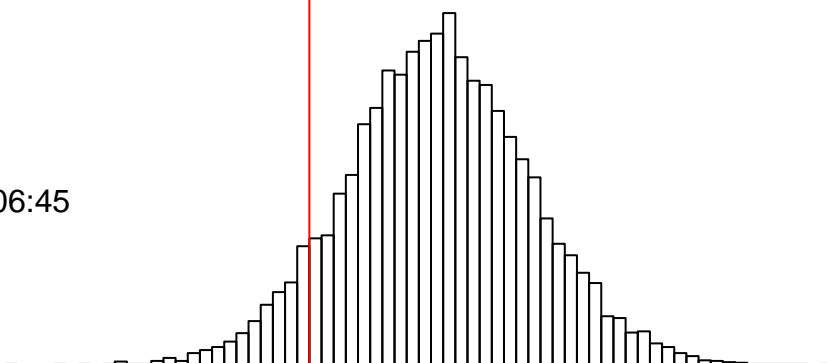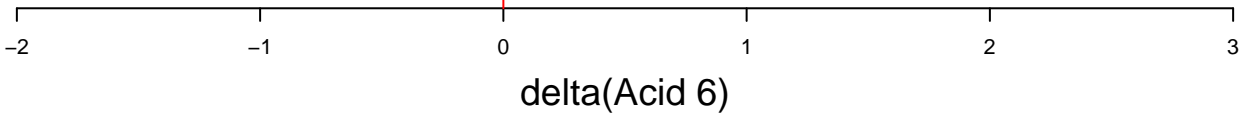

D206:240

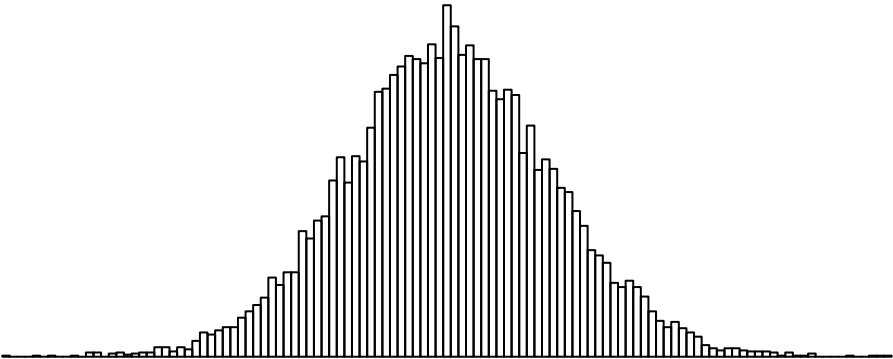

D206:120

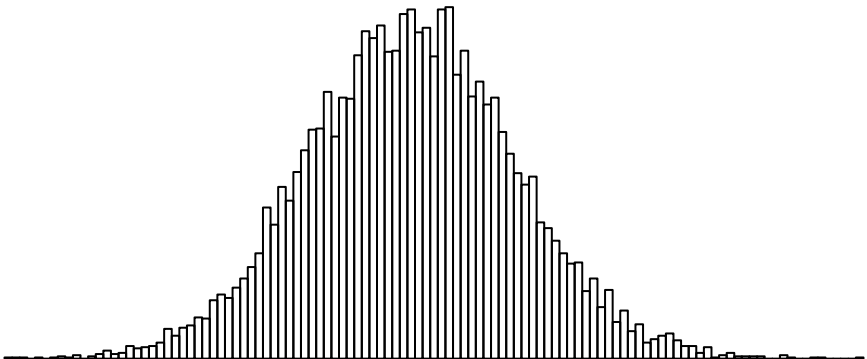

D206:45

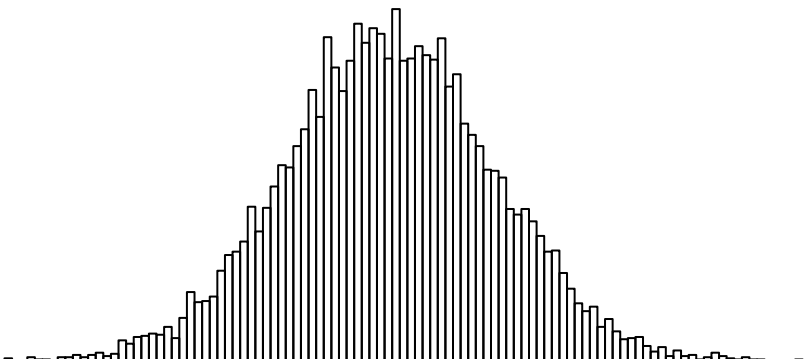

-8.0                      -7.5                      -7.0                      -6.5

Acid 7

D206:240 – D206:120

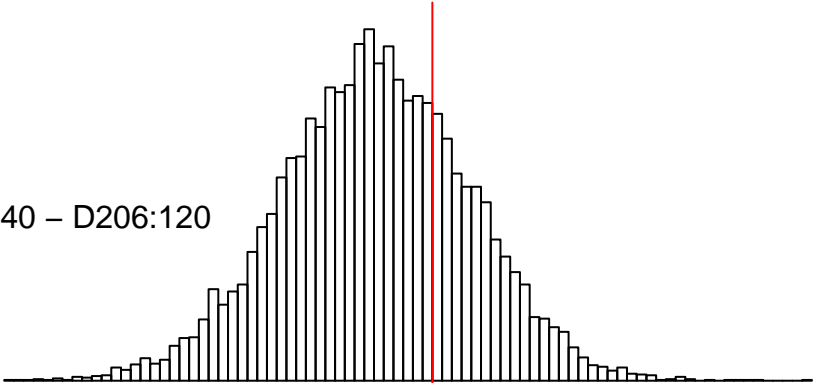

D206:240 – D206:45

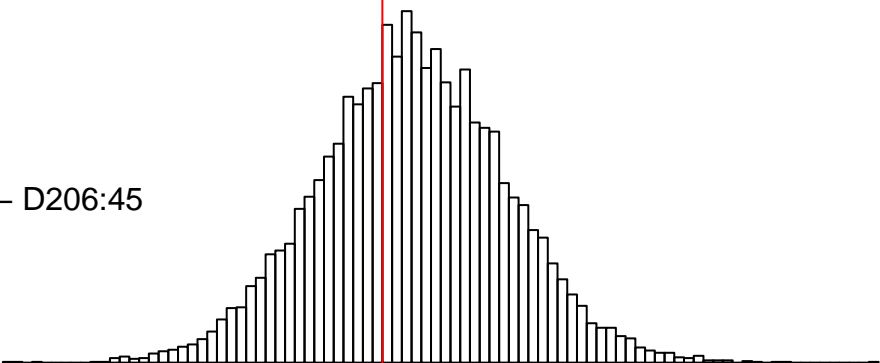

D206:120 – D206:45

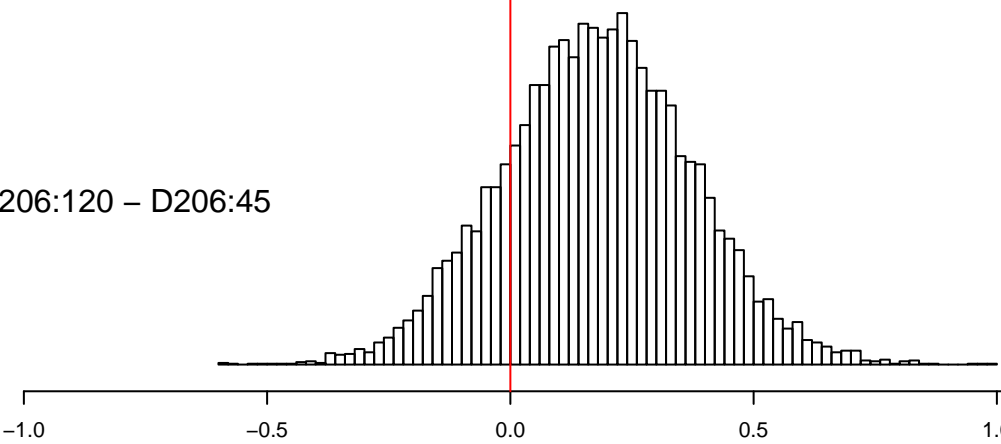

delta(Acid 7)



D206:240

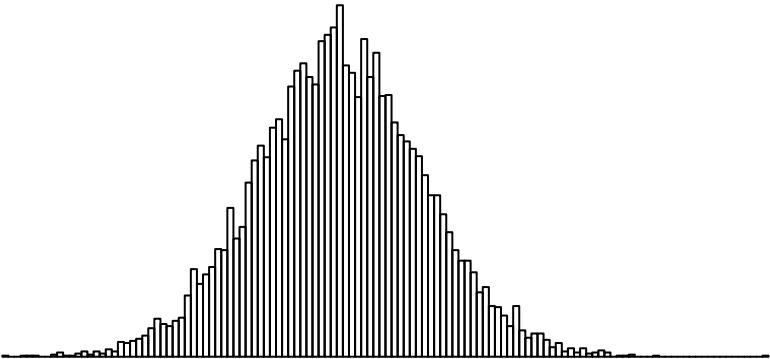

D206:120

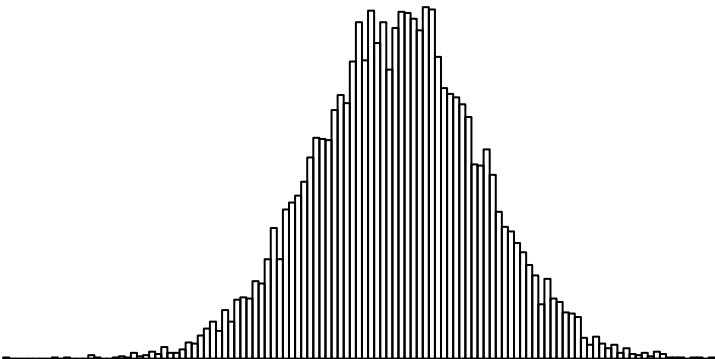

D206:45

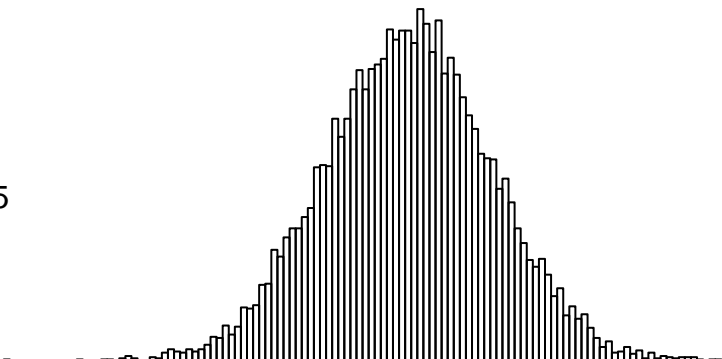

-5 -4 -3 -2 -1

Acid 8

D206:240 – D206:120

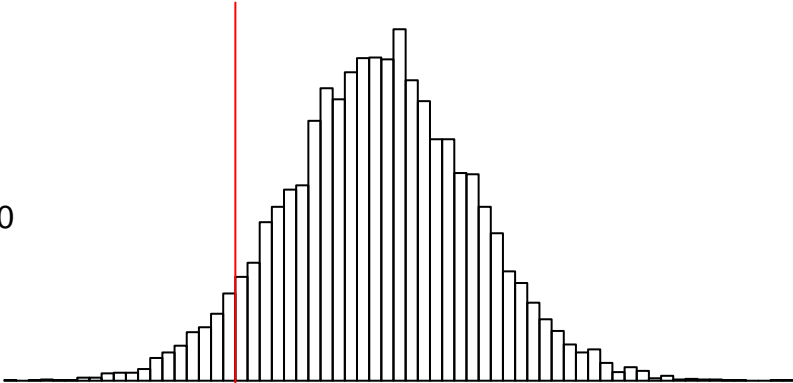

D206:240 – D206:45

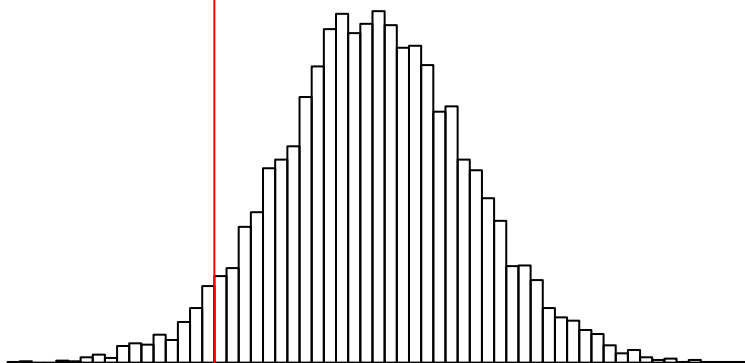

D206:120 – D206:45

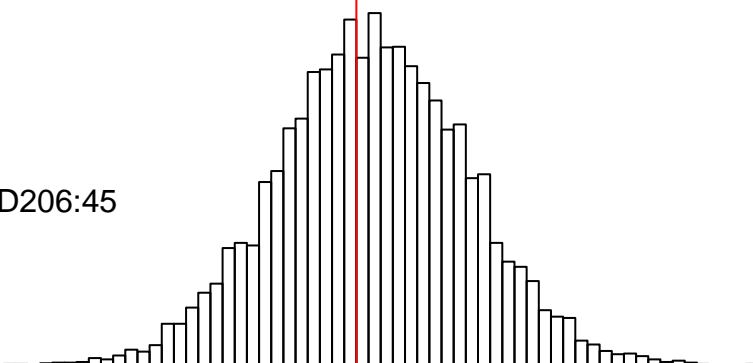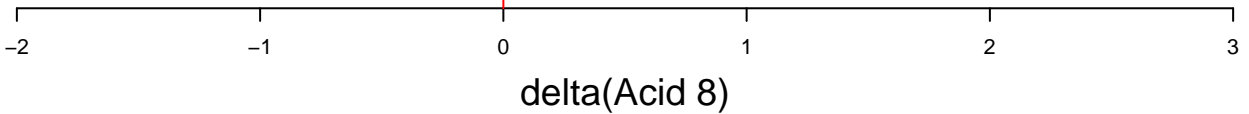

D206:240

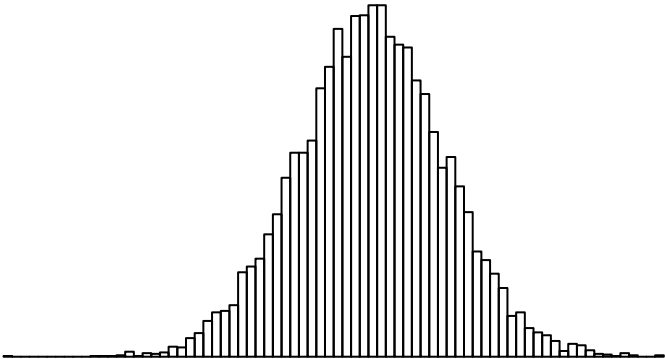

D206:120

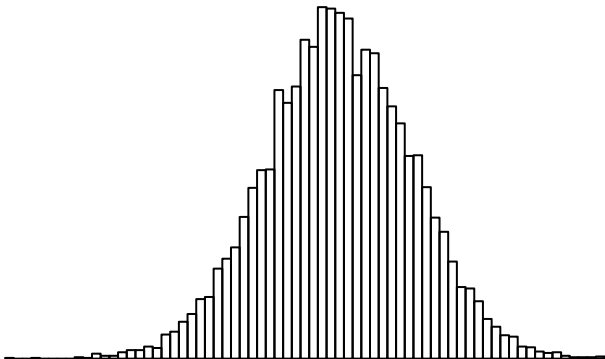

D206:45

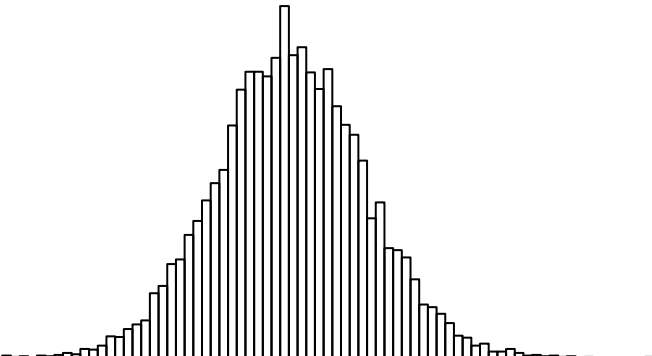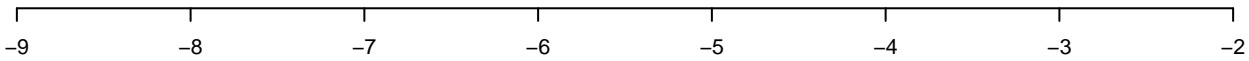

Acid 9

D206:240 – D206:120

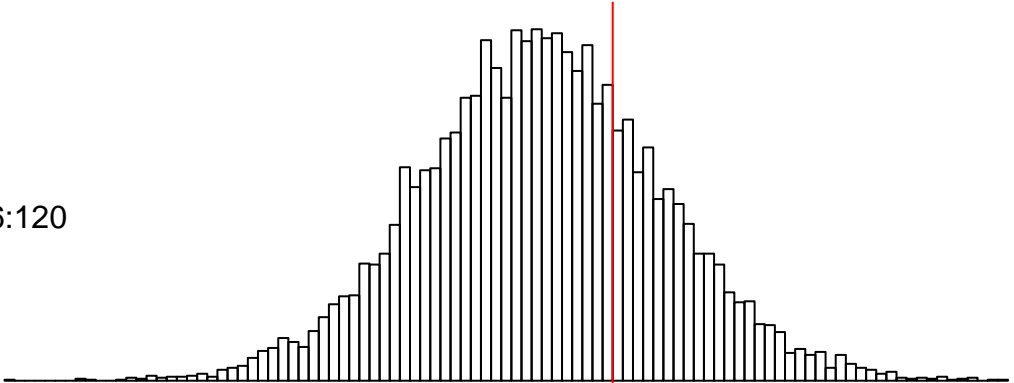

D206:240 – D206:45

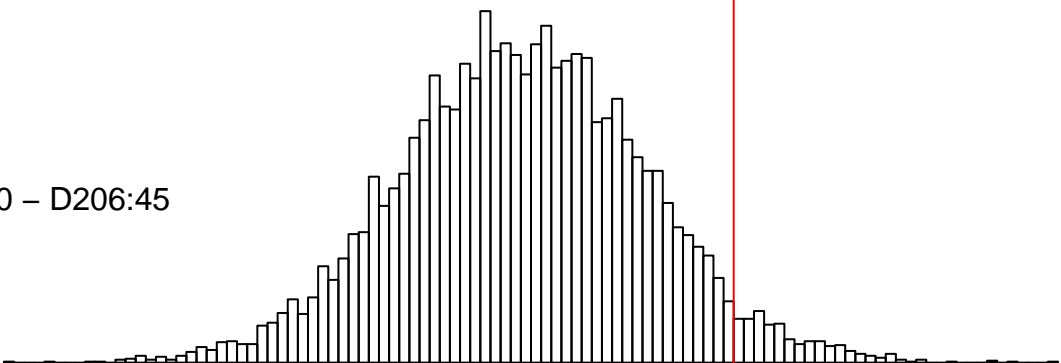

D206:120 – D206:45

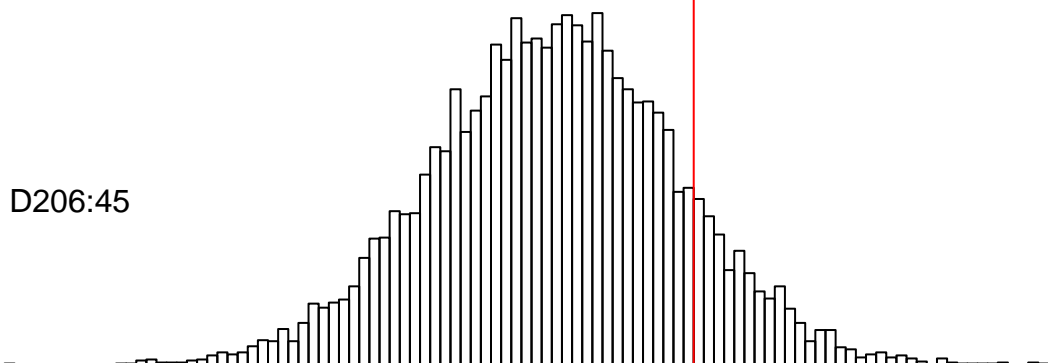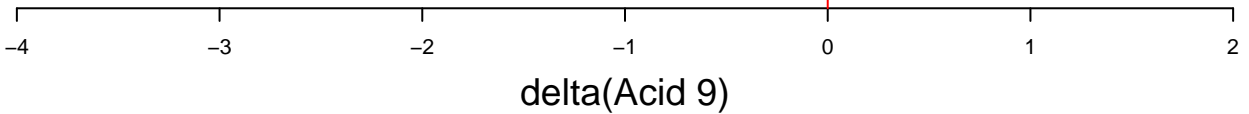

D206:240

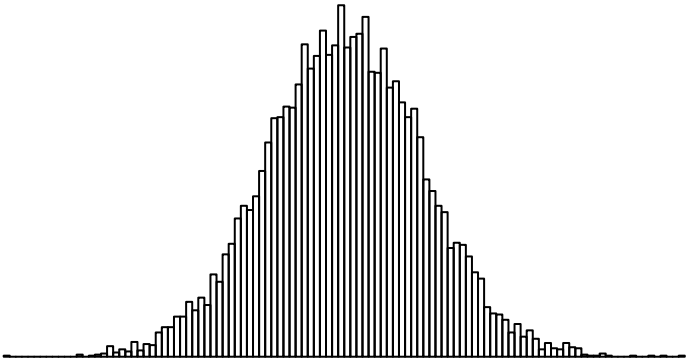

D206:120

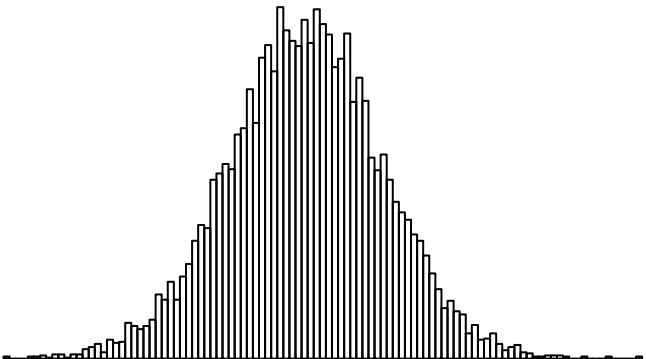

D206:45

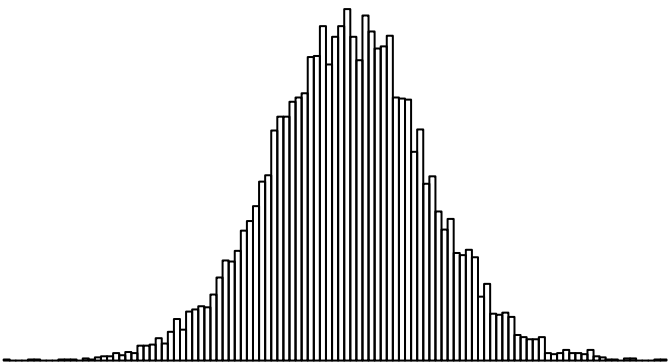

-12      -10      -8      -6      -4      -2

Acid 10

D206:240 – D206:120

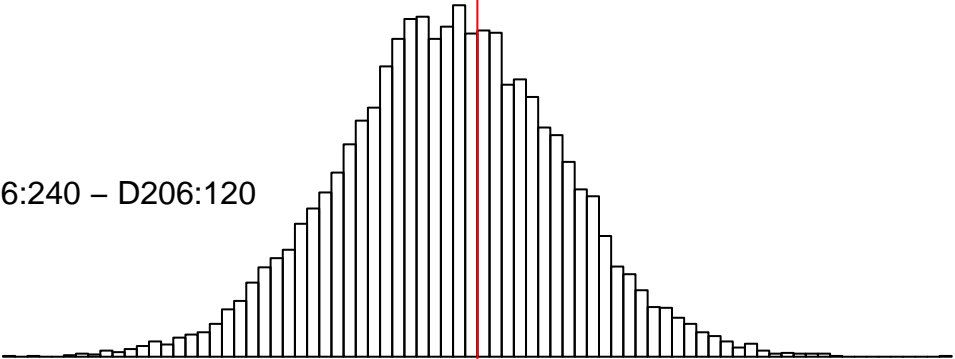

D206:240 – D206:45

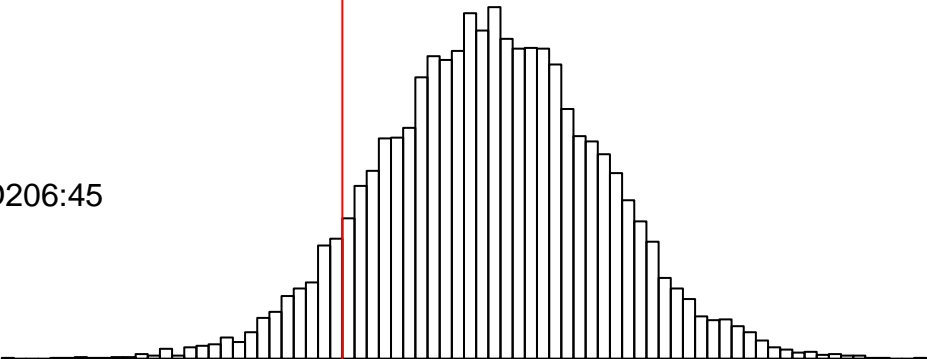

D206:120 – D206:45

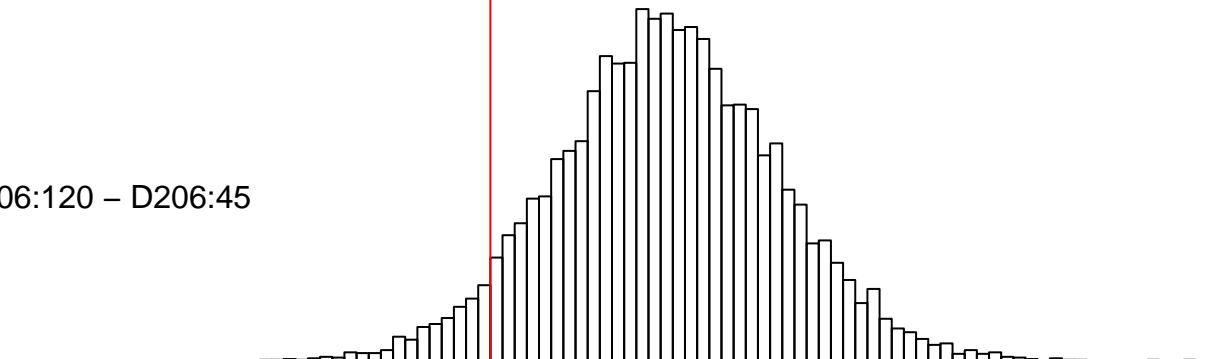

delta(Acid 10)

D206:240

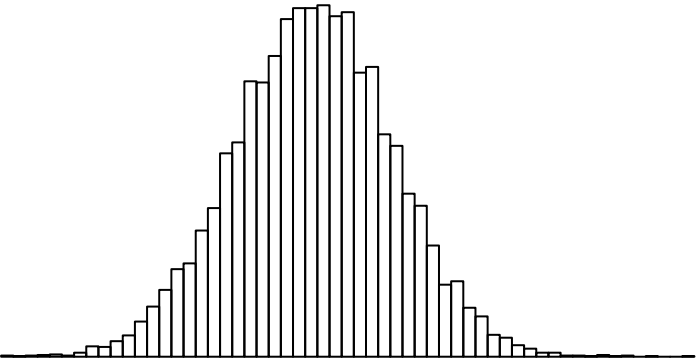

D206:120

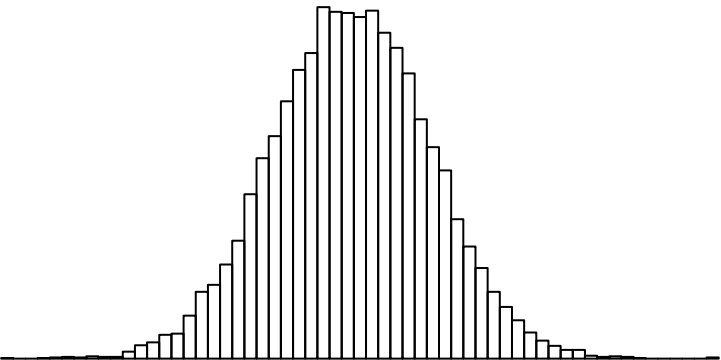

D206:45

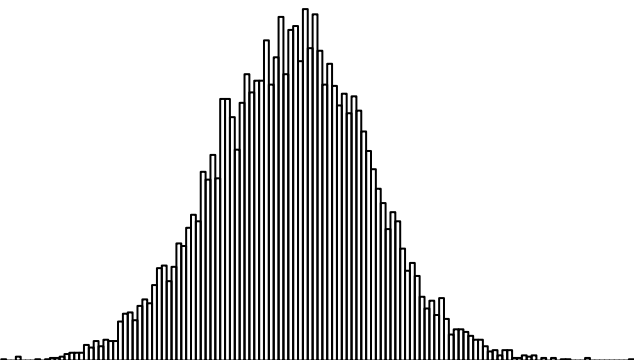

-9 -8 -7 -6 -5 -4

Acid 11

D206:240 – D206:120

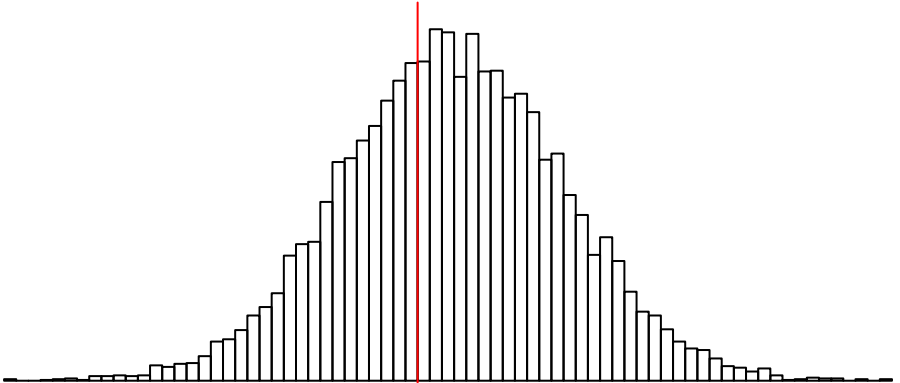

D206:240 – D206:45

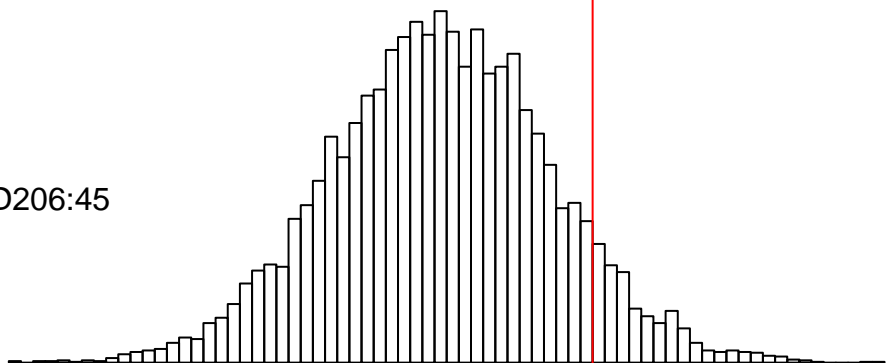

D206:120 – D206:45

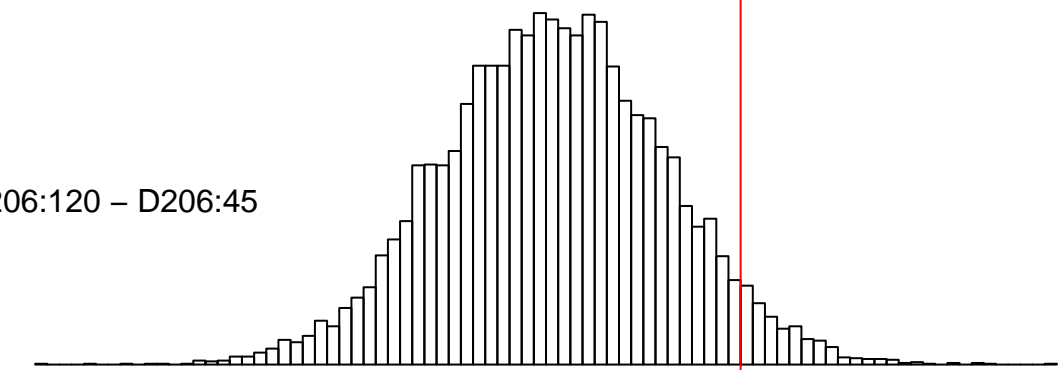

-3 -2 -1 0 1 2

delta(Acid 11)



D206:240

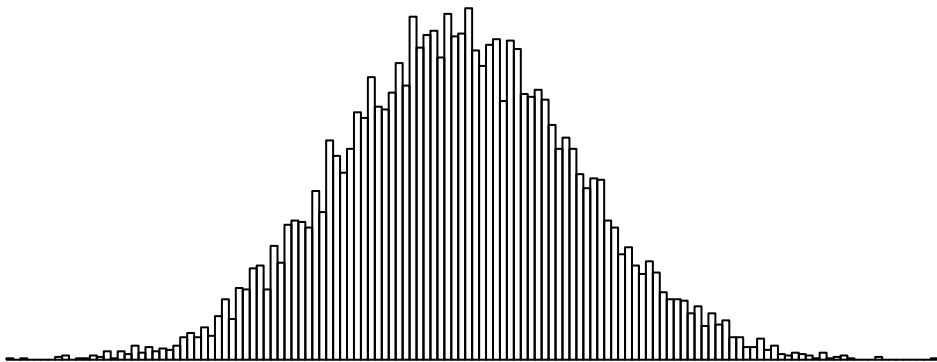

D206:120

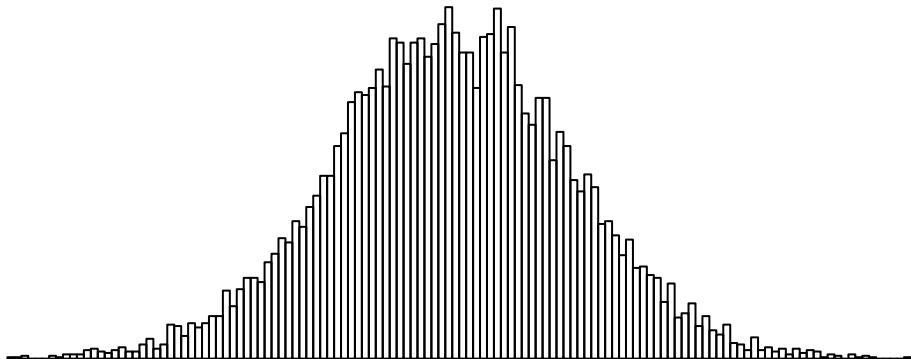

D206:45

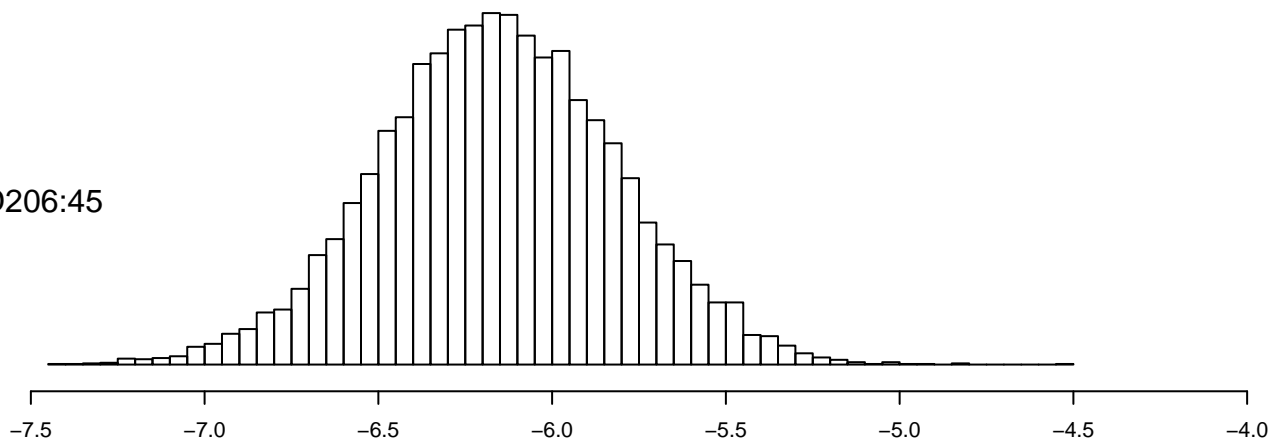

Acid 12

D206:240 – D206:120

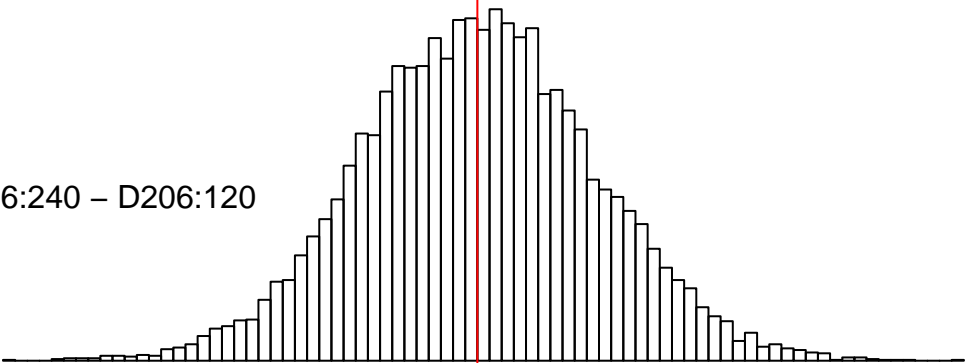

D206:240 – D206:45

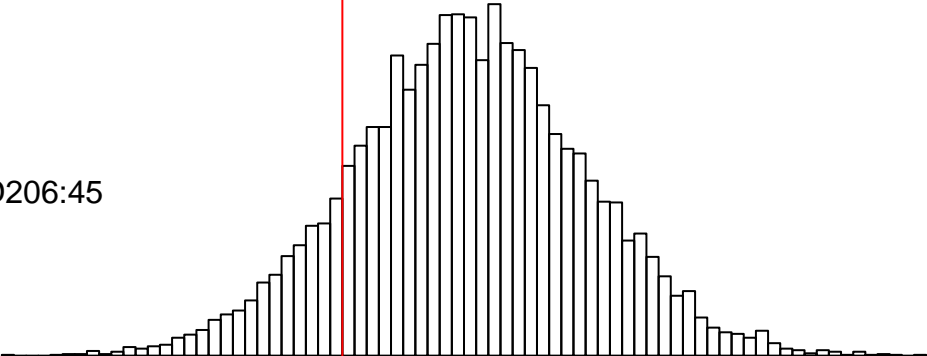

D206:120 – D206:45

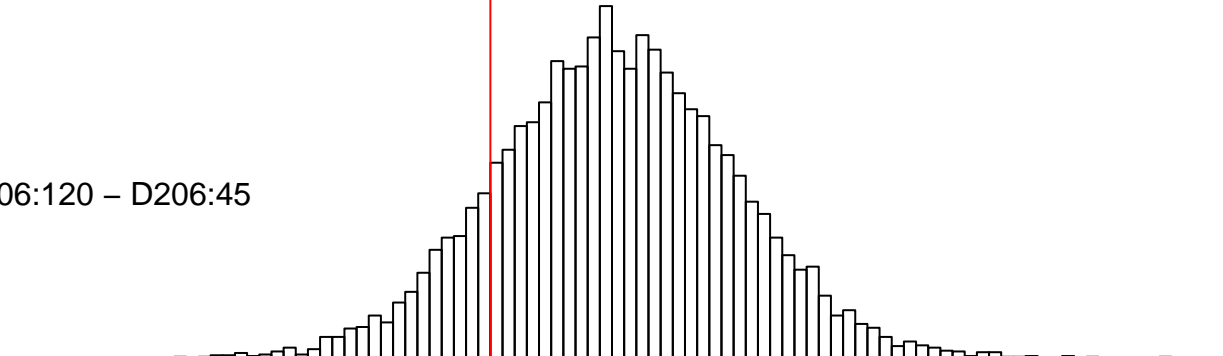

delta(Acid 12)

D206:240

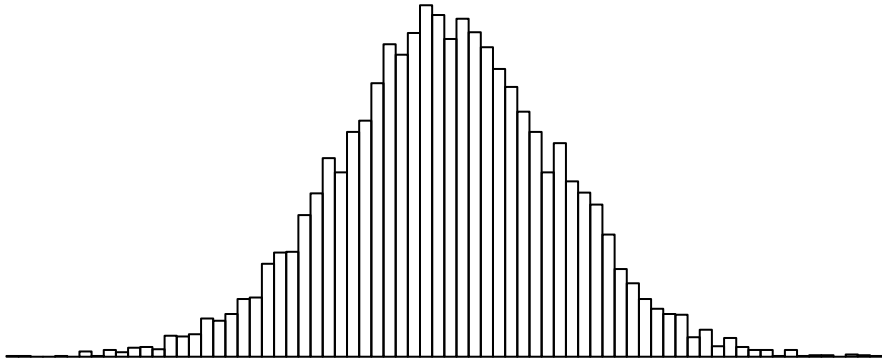

D206:120

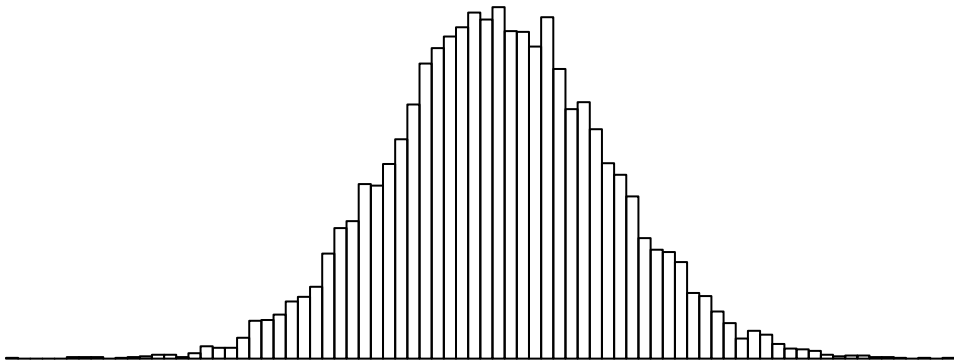

D206:45

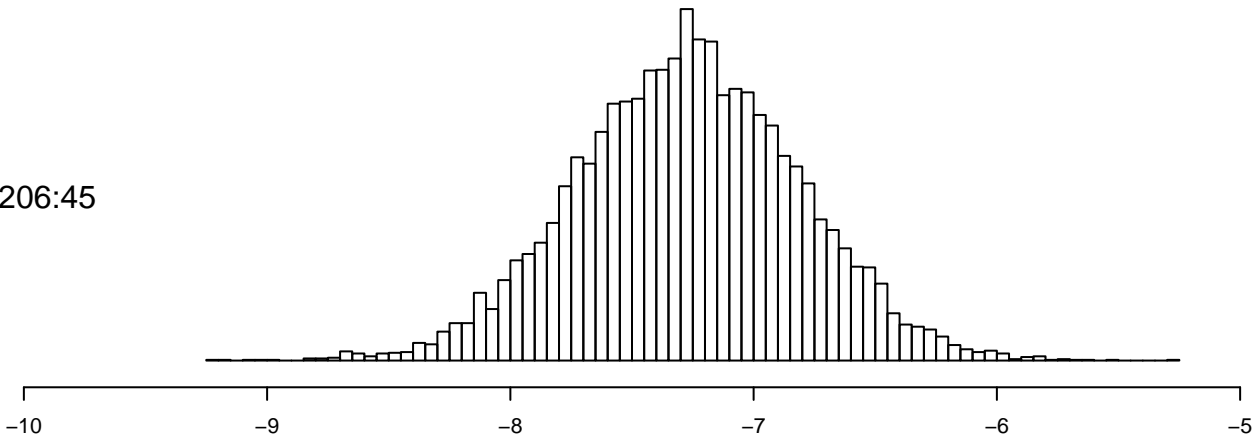

Acid 13

D206:240 – D206:120

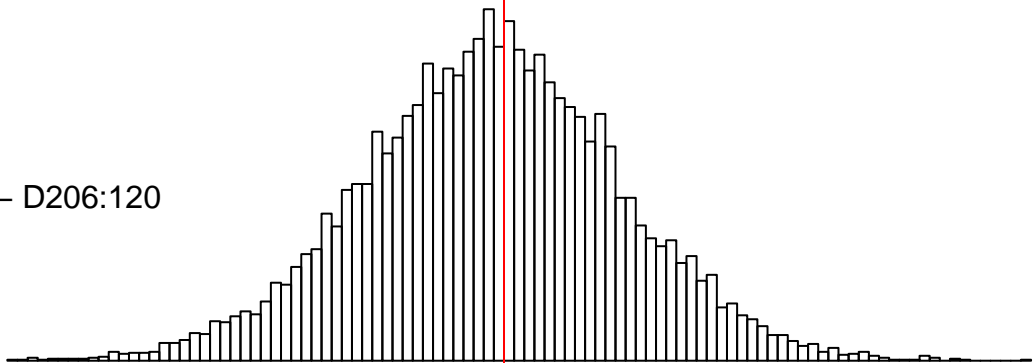

D206:240 – D206:45

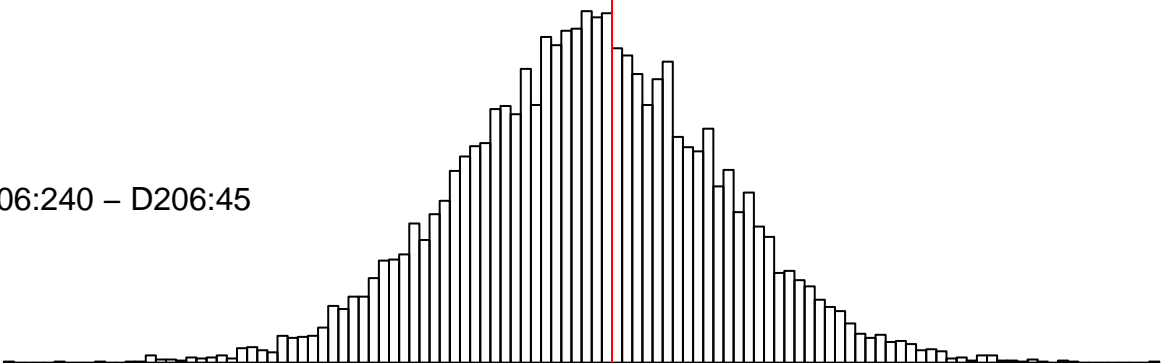

D206:120 – D206:45

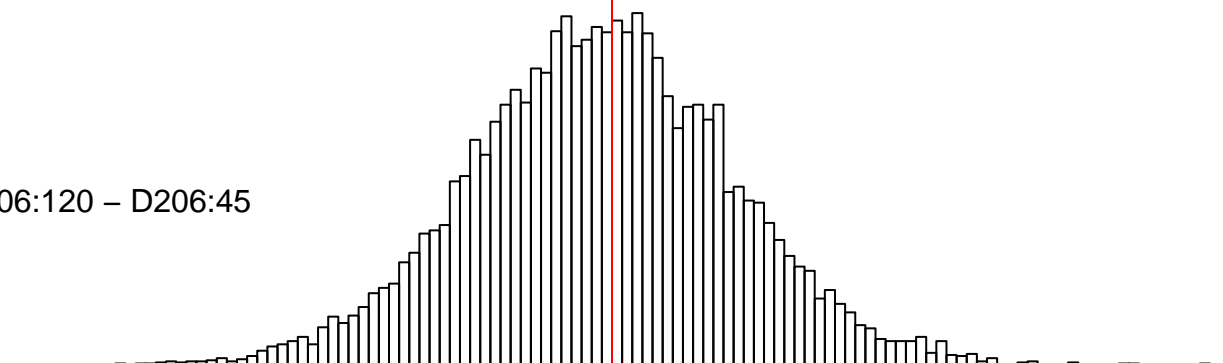

delta(Acid 13)

D206:240

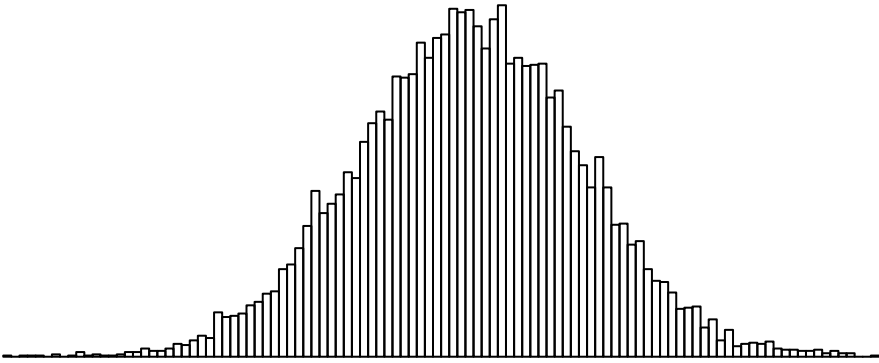

D206:120

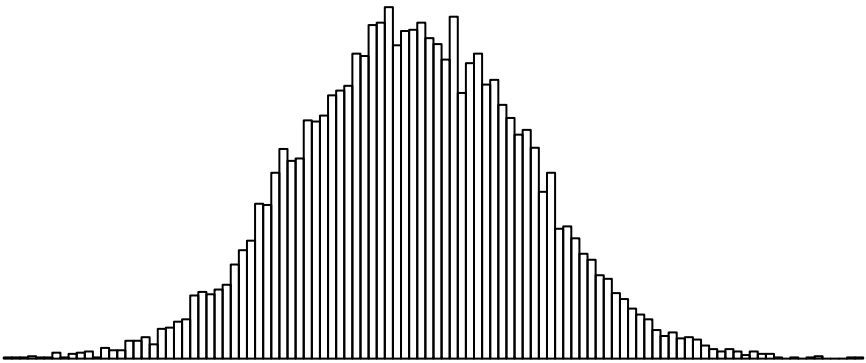

D206:45

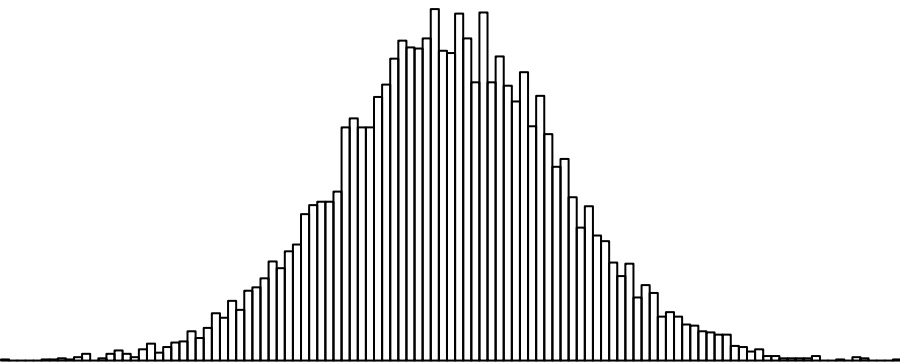

-8.0 -7.5 -7.0 -6.5 -6.0 -5.5 -5.0

Acid 14

D206:240 – D206:120

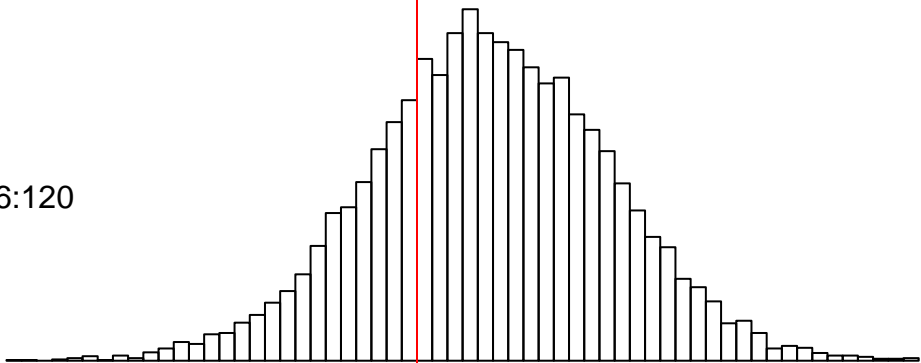

D206:240 – D206:45

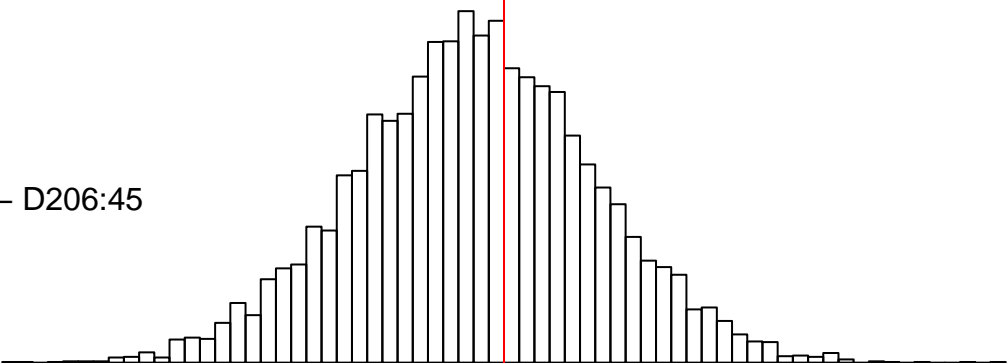

D206:120 – D206:45

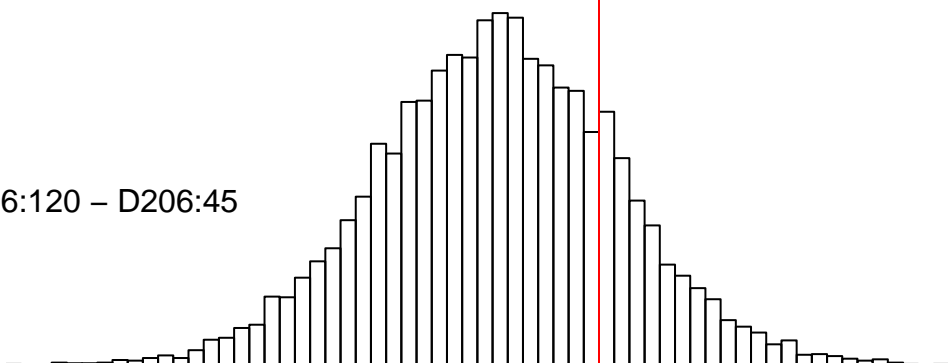

-2                      -1                      0                      1                      2

delta(Acid 14)
