# Supplementary material for: Taxonomic and Environmental Variation of Metabolite Profiles in Marine Dinoflagellates of the Genus Symbiodinium
Source: MDPI journal article supplement (doi:10.3390/metabo5010074), 2015-02-16
Supplement: s1 [file s1]

A194:240

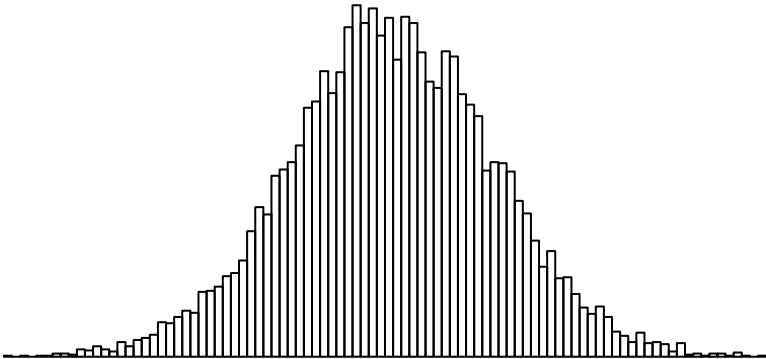

A194:120

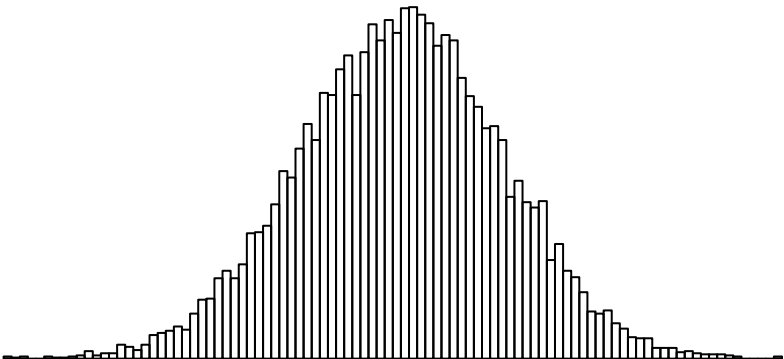

A194:45

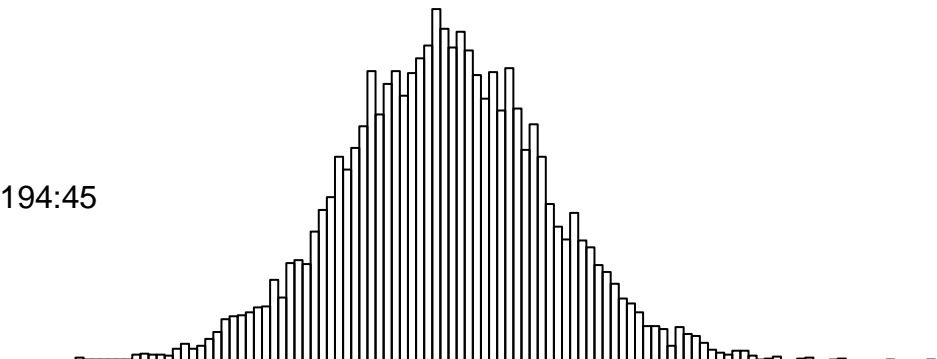

-5.5      -5.0      -4.5      -4.0      -3.5      -3.0      -2.5

Amino Acid 2

A194:240 – A194:120

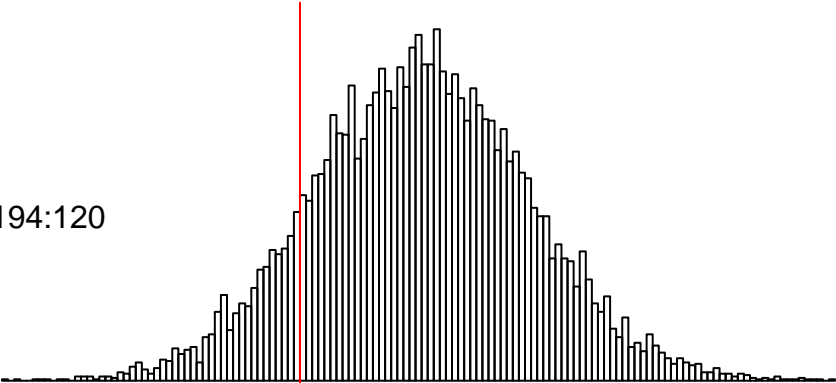

A194:240 – A194:45

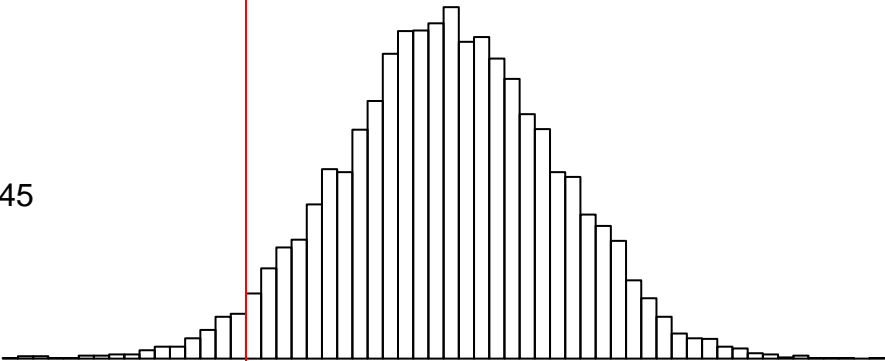

A194:120 – A194:45

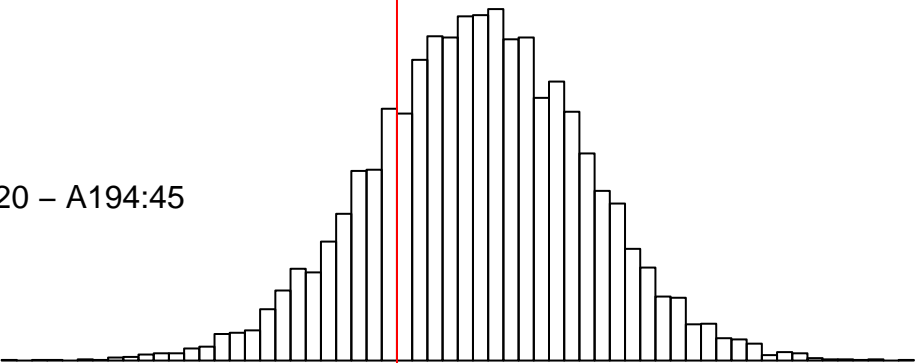

-1

0

1

2

delta(Amino Acid 2)

A194:240

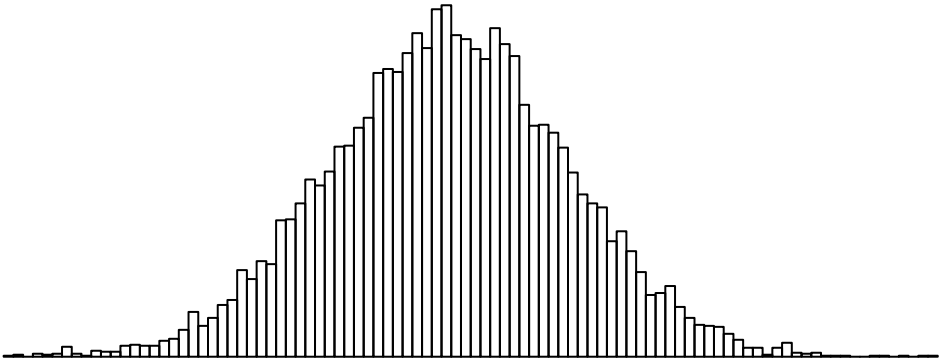

A194:120

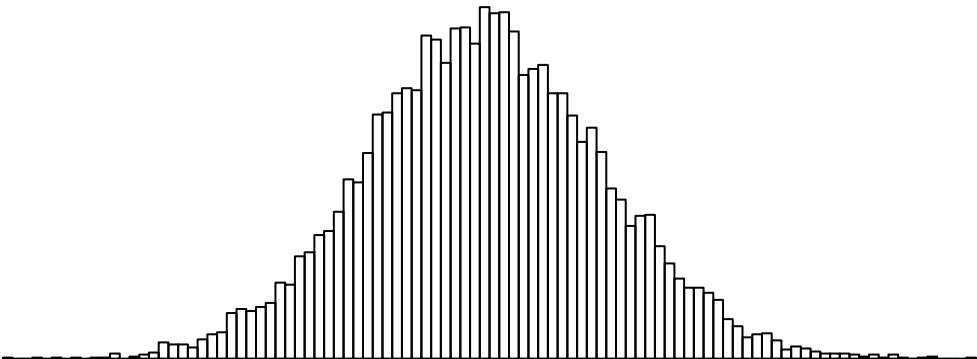

A194:45

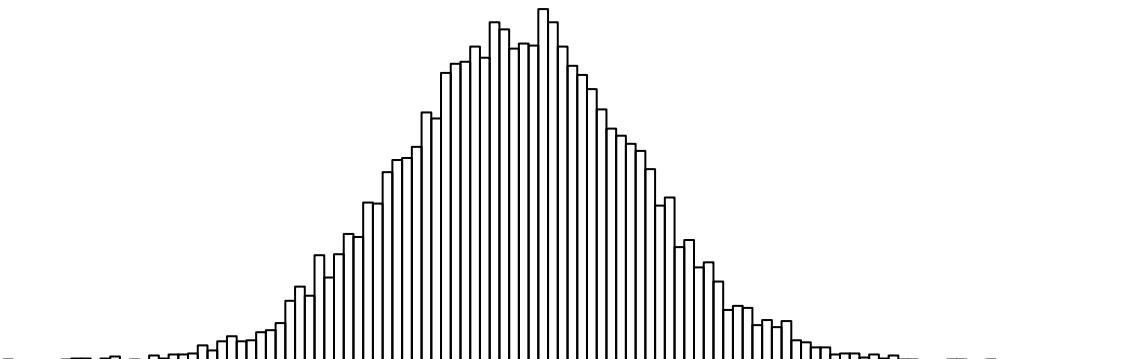

-7.5      -7.0      -6.5      -6.0      -5.5      -5.0

Amino Acid 3

A194:240 – A194:120

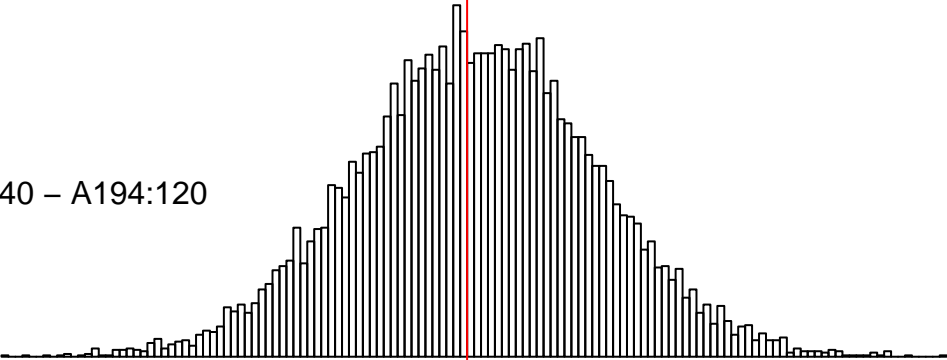

A194:240 – A194:45

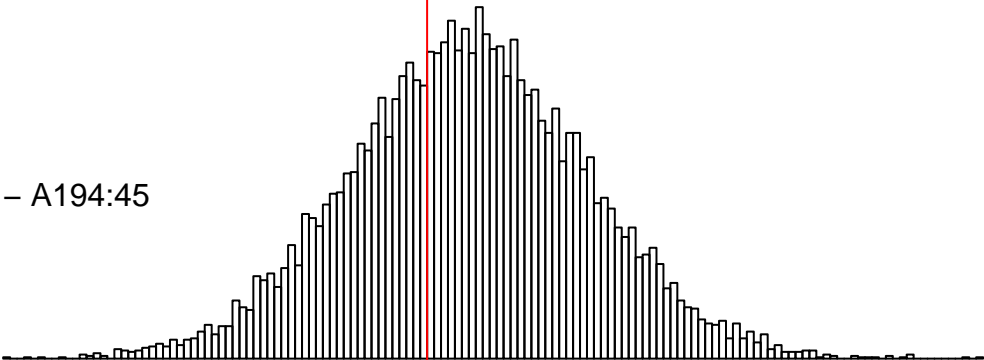

A194:120 – A194:45

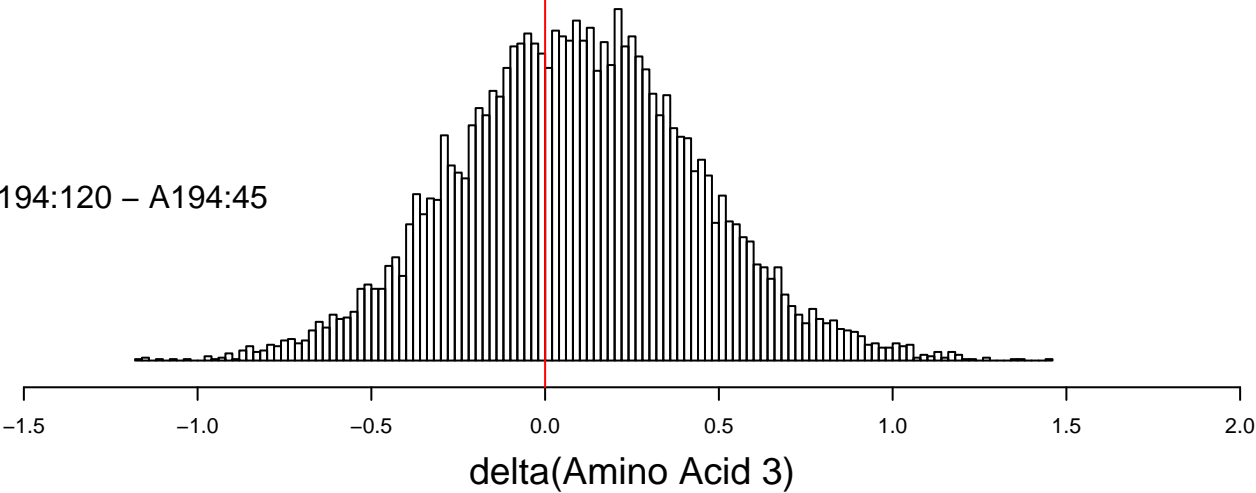

A194:240

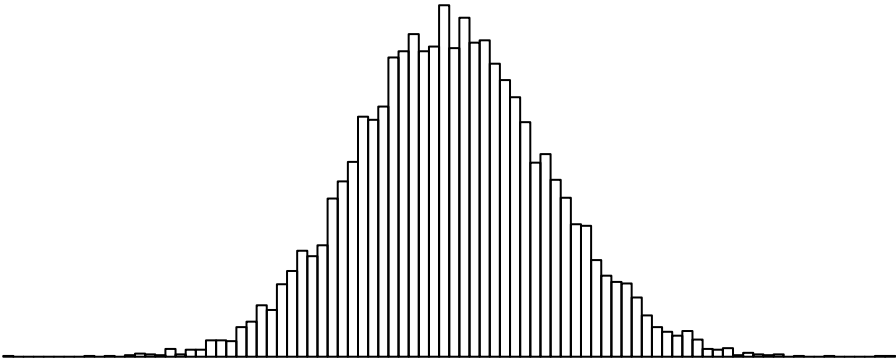

A194:120

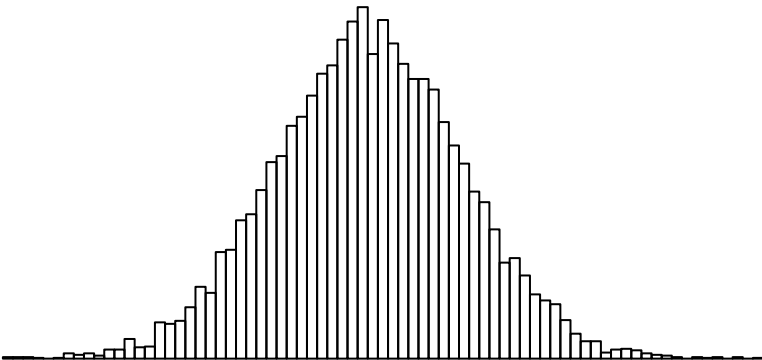

A194:45

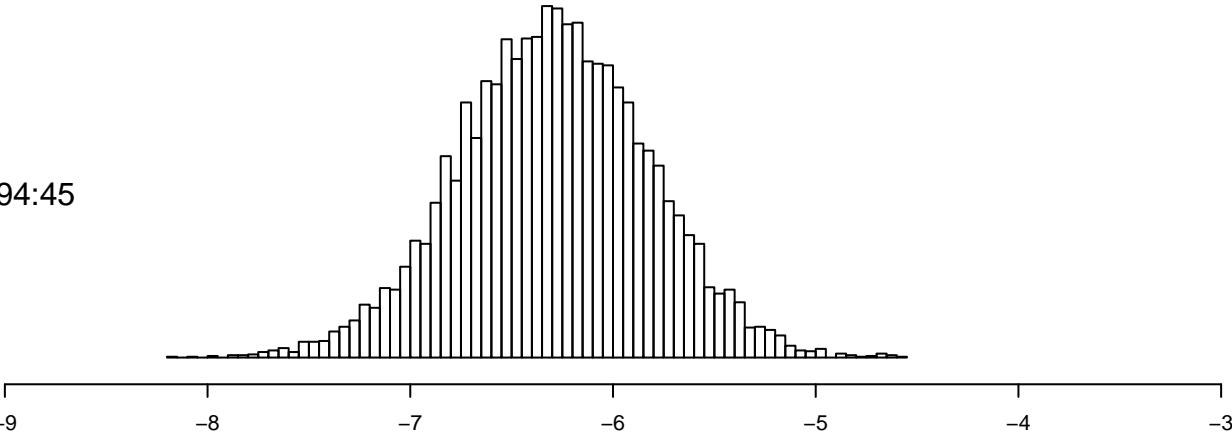

Alanine

A194:240 – A194:120

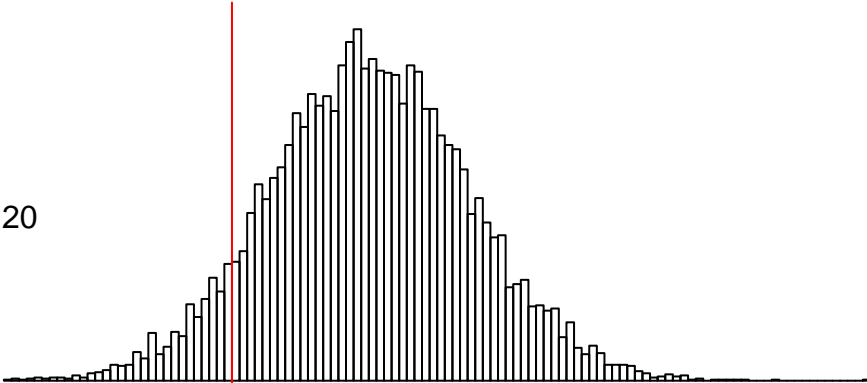

A194:240 – A194:45

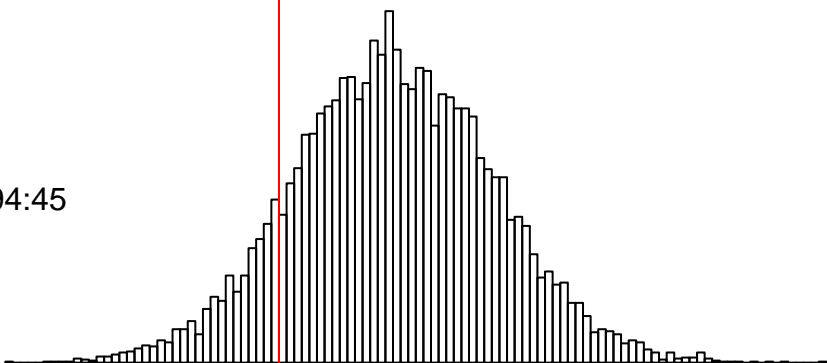

A194:120 – A194:45

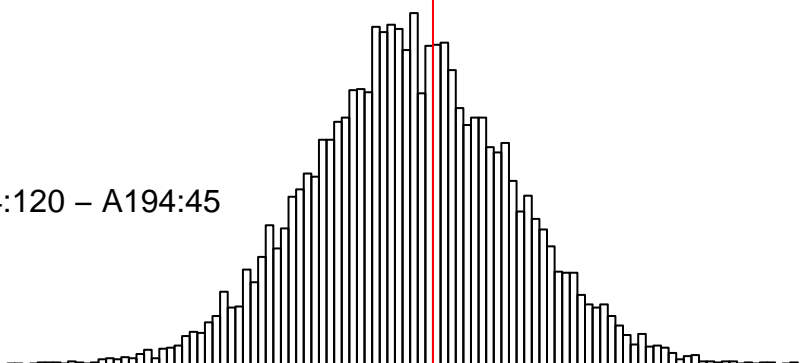

-2

0

2

4

delta(Alanine)

A194:240

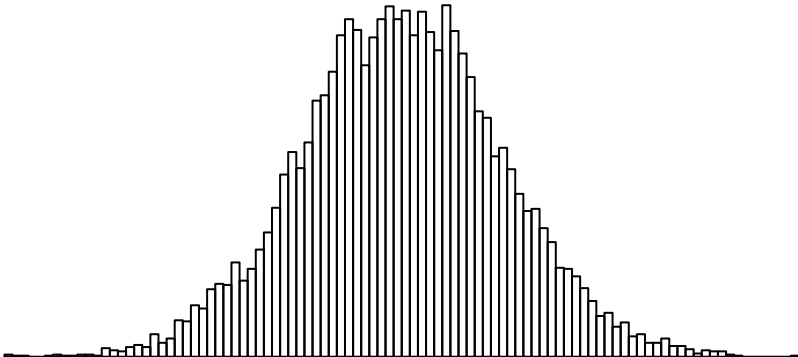

A194:120

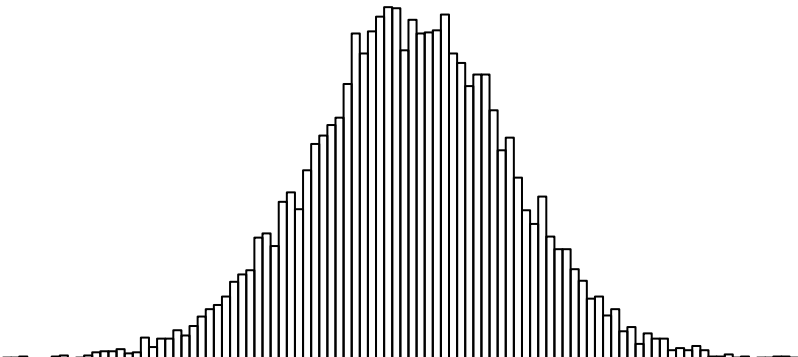

A194:45

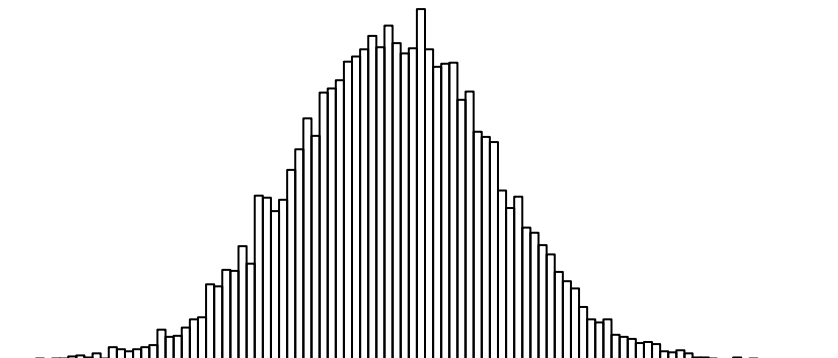

-8.5      -8.0      -7.5      -7.0      -6.5      -6.0      -5.5

Amino Acid 4

A194:240 – A194:120

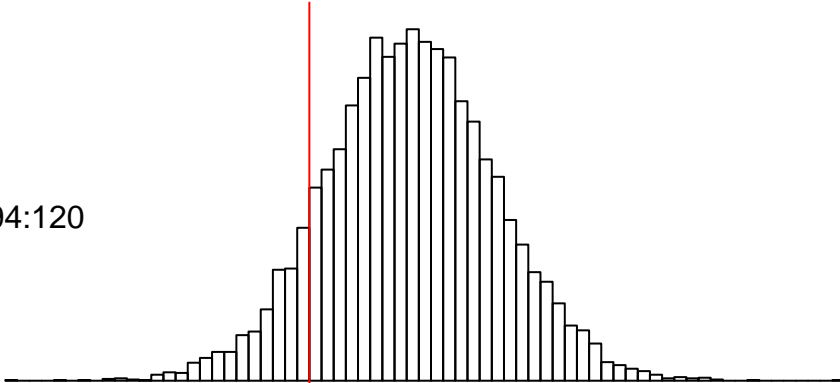

A194:240 – A194:45

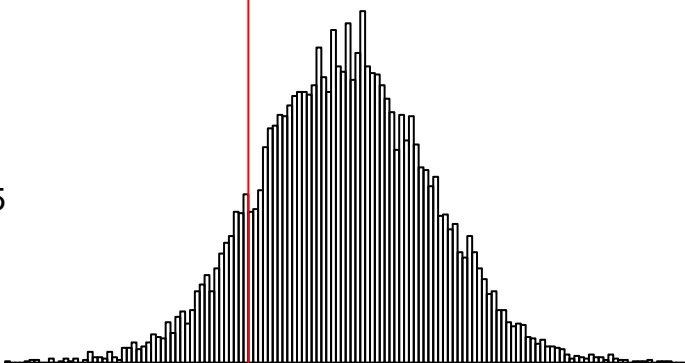

A194:120 – A194:45

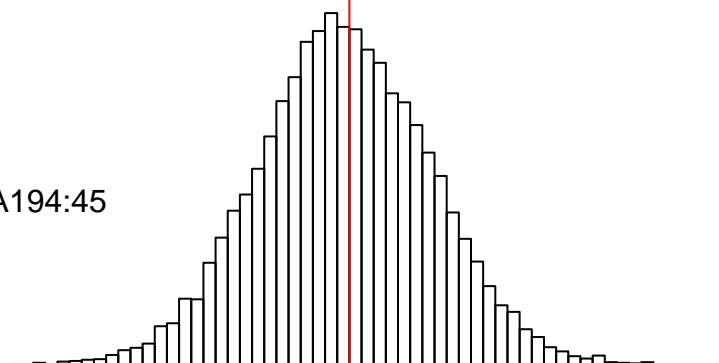

-2 -1 0 1 2 3

delta(Amino Acid 4)



A194:240

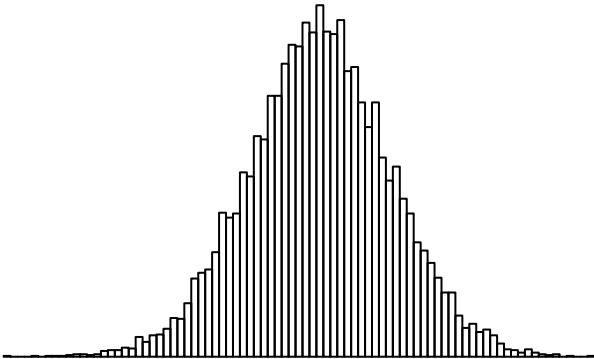

A194:120

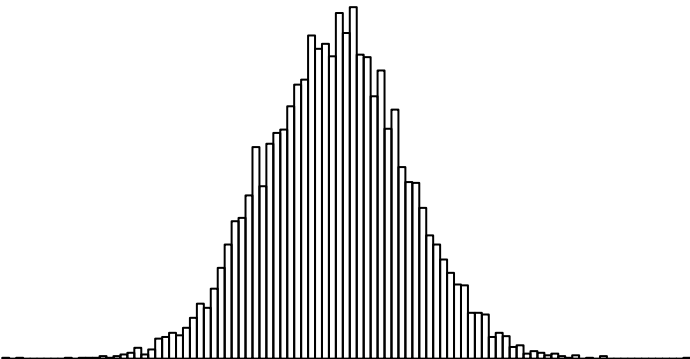

A194:45

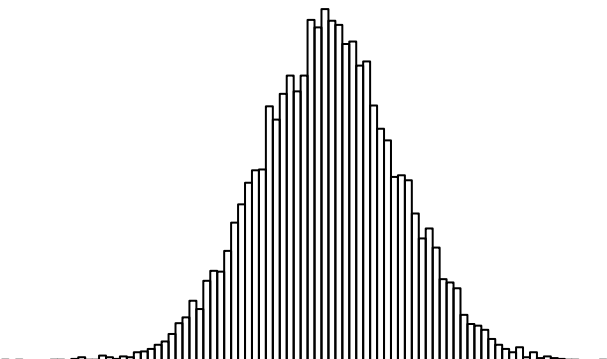

-9.0 -8.5 -8.0 -7.5 -7.0 -6.5 -6.0 -5.5

Amino Acid 6

A194:240 – A194:120

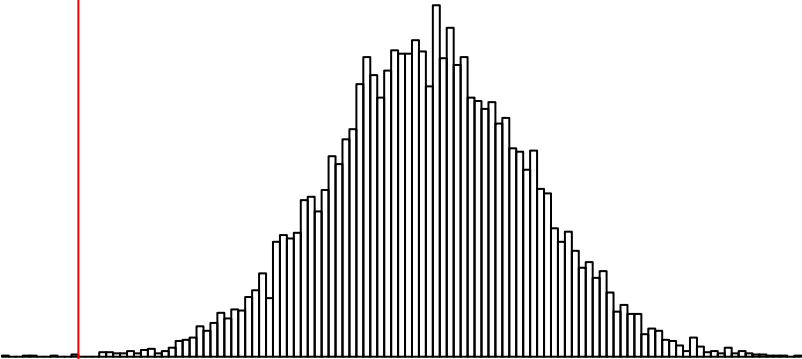

A194:240 – A194:45

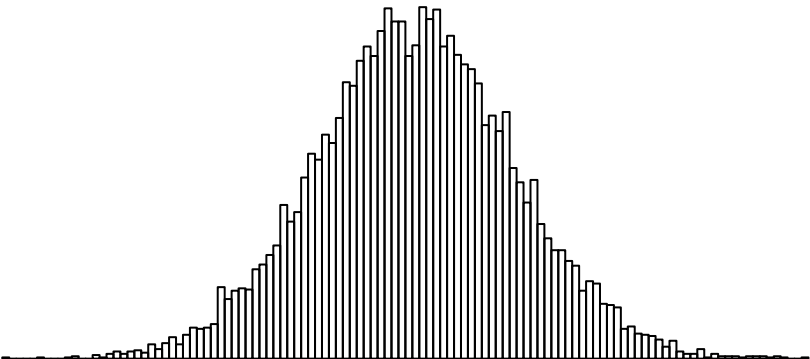

A194:120 – A194:45

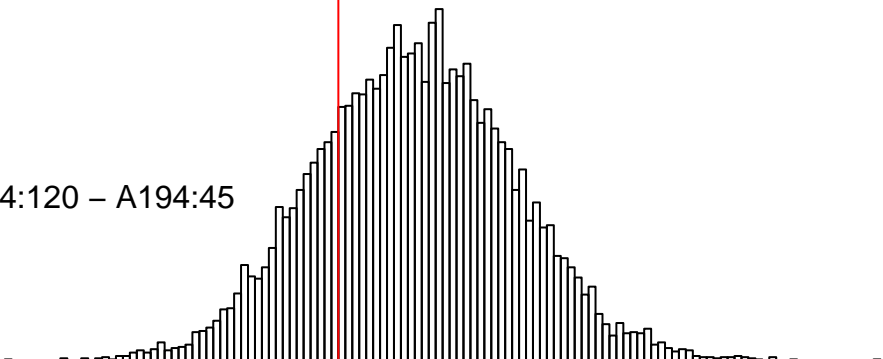

-1.0 -0.5 0.0 0.5 1.0 1.5 2.0 2.5

delta(Amino Acid 6)

A194:240

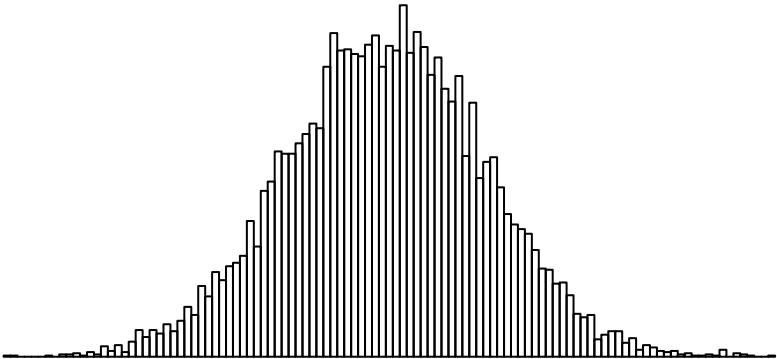

A194:120

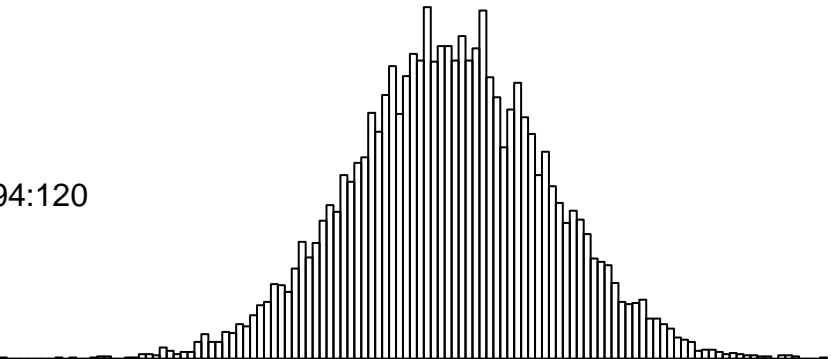

A194:45

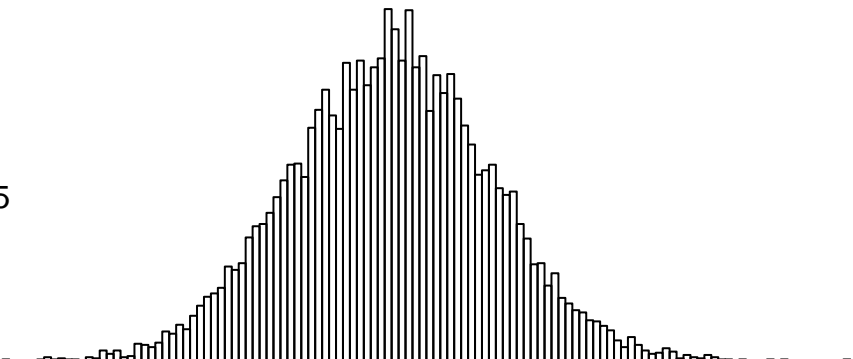

-9.5      -9.0      -8.5      -8.0      -7.5      -7.0      -6.5      -6.0

Valine

A194:240 – A194:120

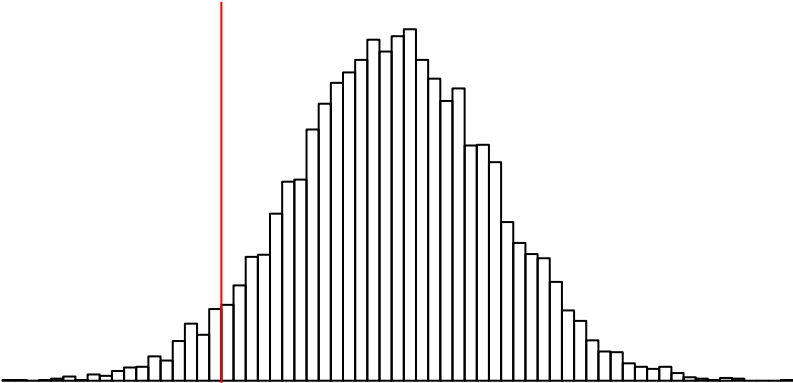

A194:240 – A194:45

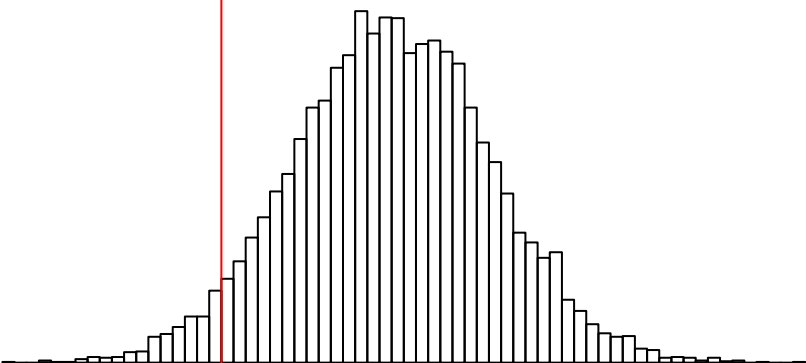

A194:120 – A194:45

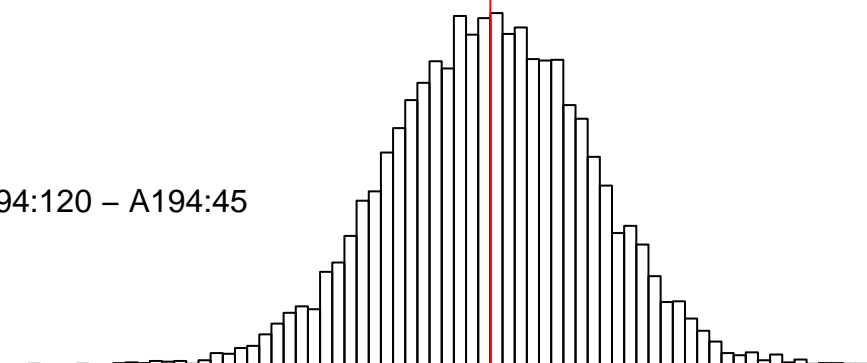

delta(Valine)

A194:240

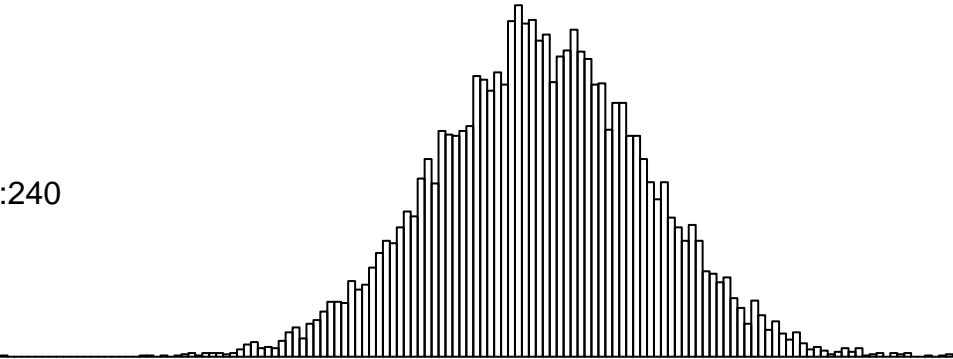

A194:120

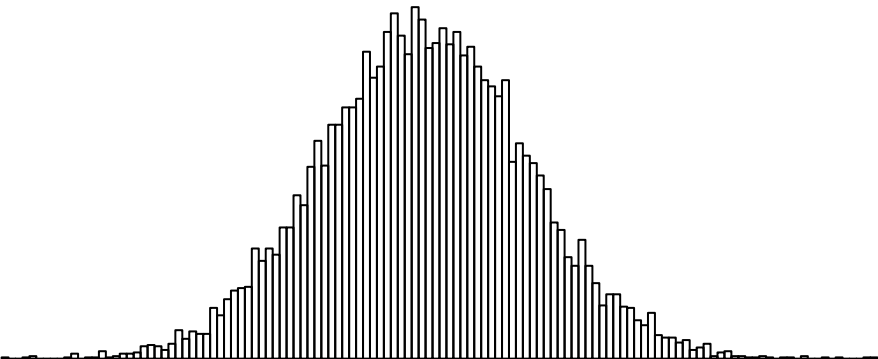

A194:45

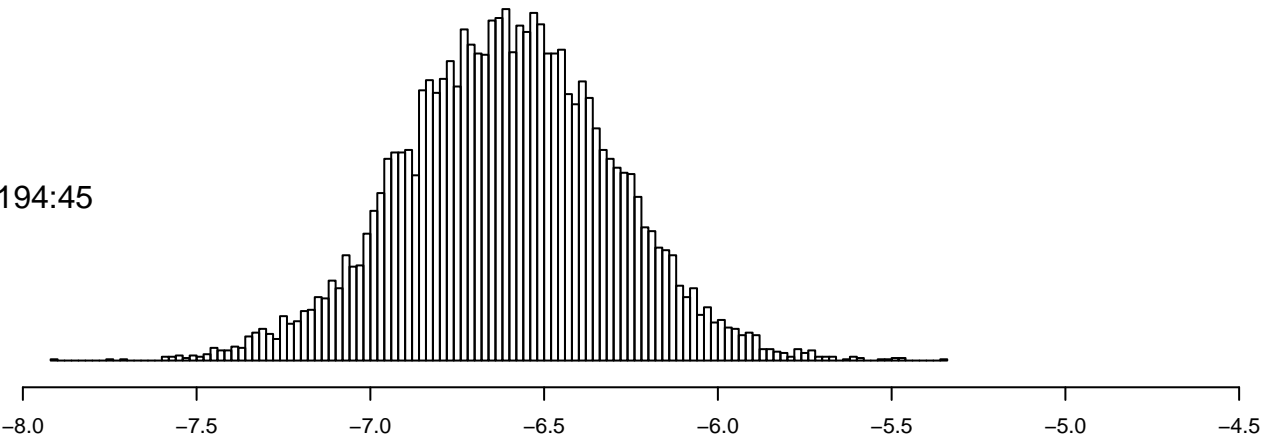

Amino Acid 7

A194:240 – A194:120

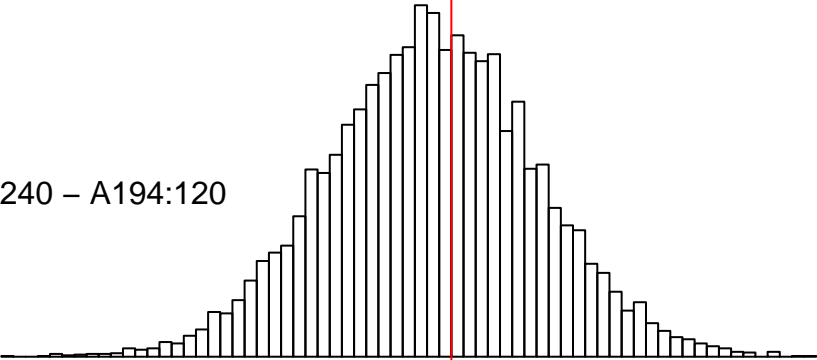

A194:240 – A194:45

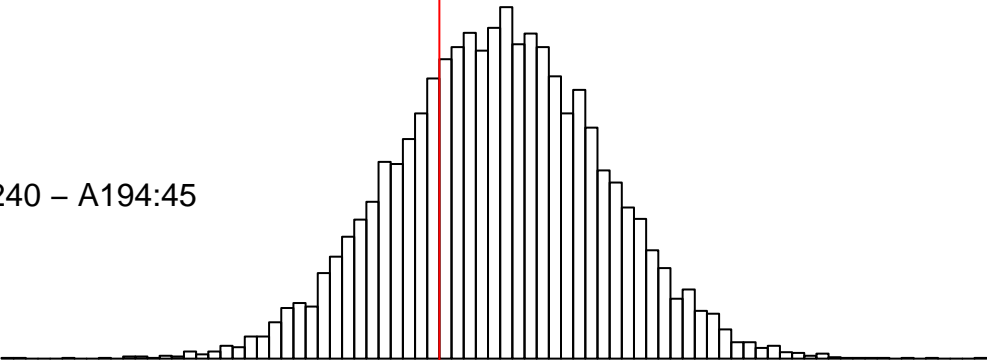

A194:120 – A194:45

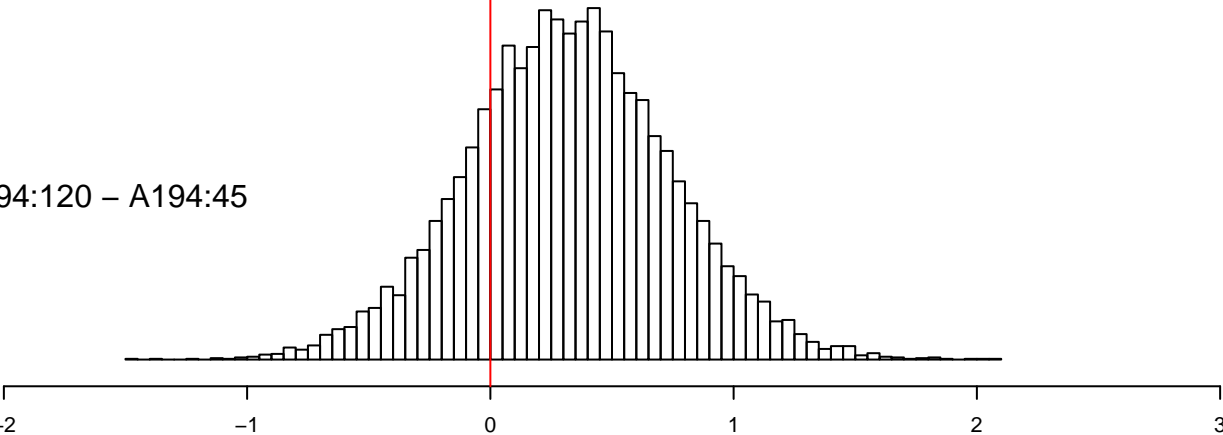

delta(Amino Acid 7)

A194:240

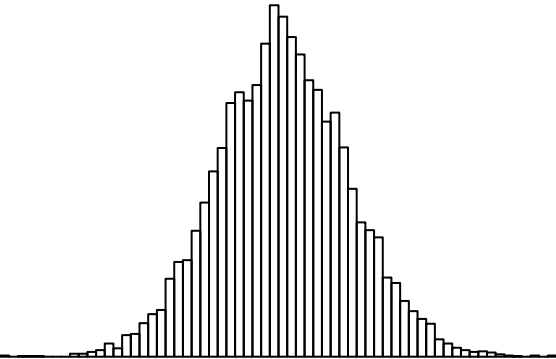

A194:120

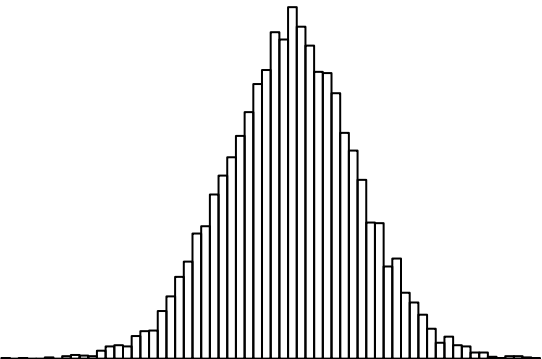

A194:45

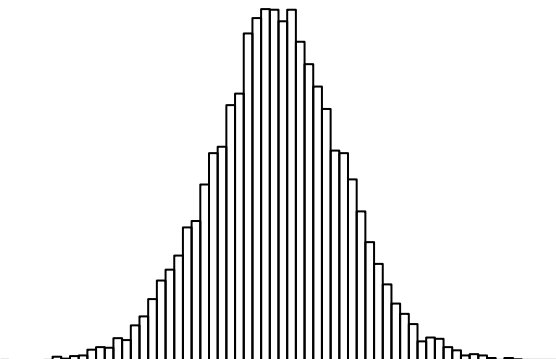

Glycine

A194:240 – A194:120

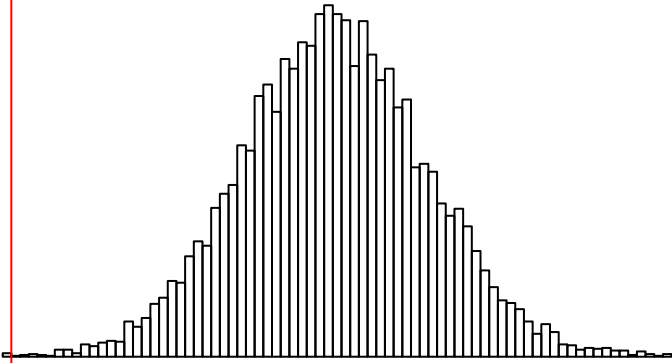

A194:240 – A194:45

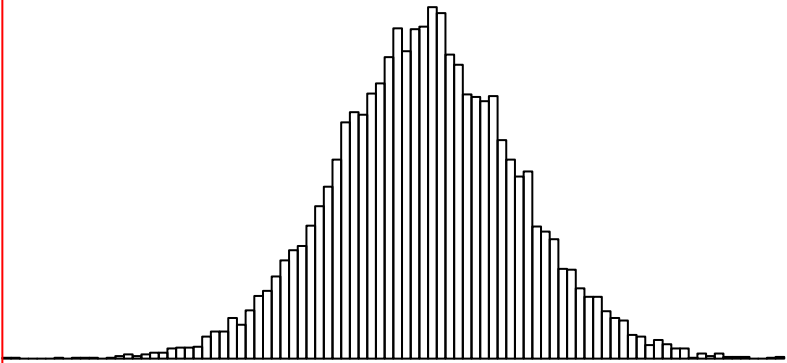

A194:120 – A194:45

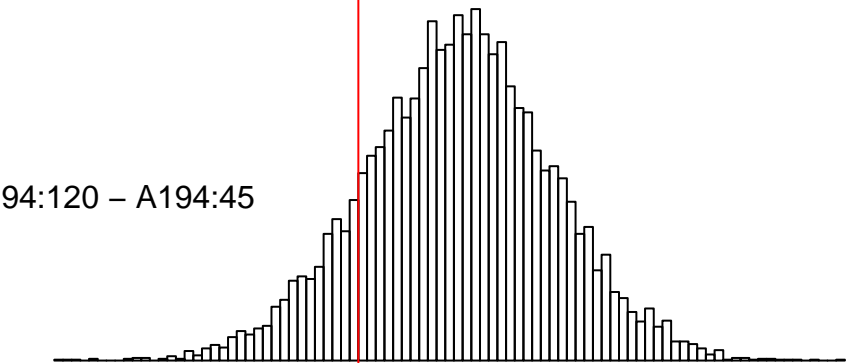

delta(Glycine)



A194:240

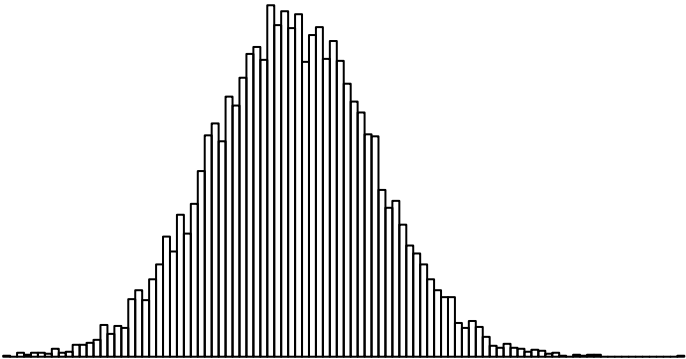

A194:120

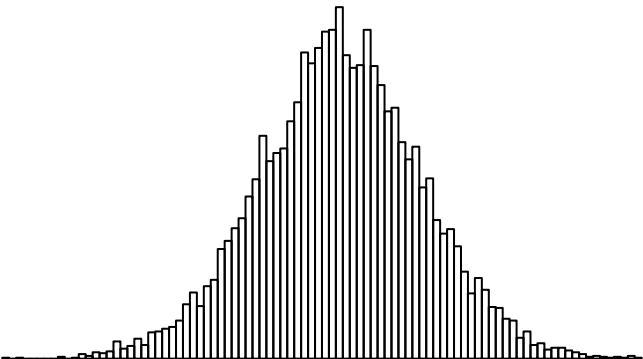

A194:45

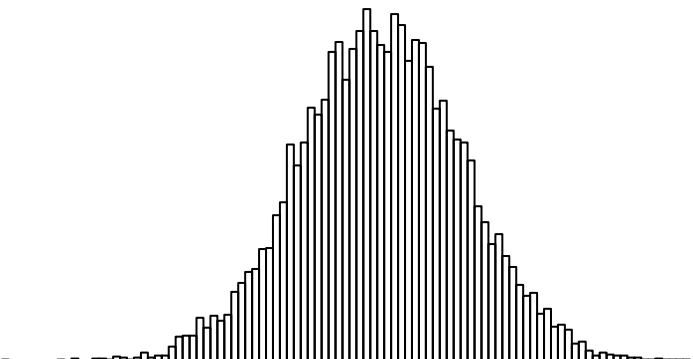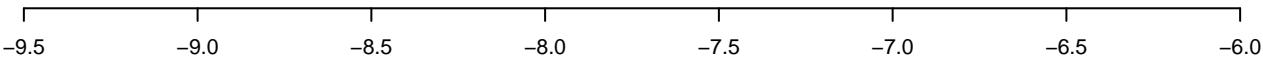

Amino Acid 8

A194:240 – A194:120

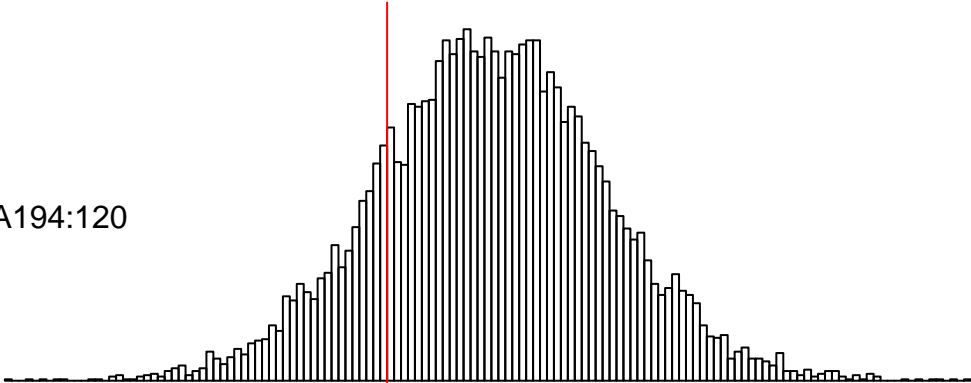

A194:240 – A194:45

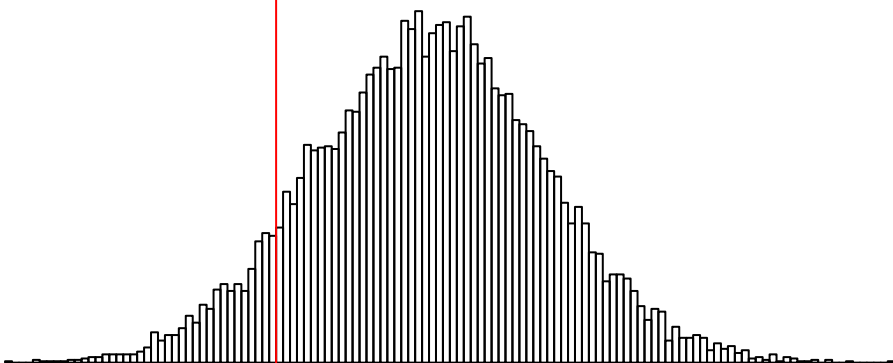

A194:120 – A194:45

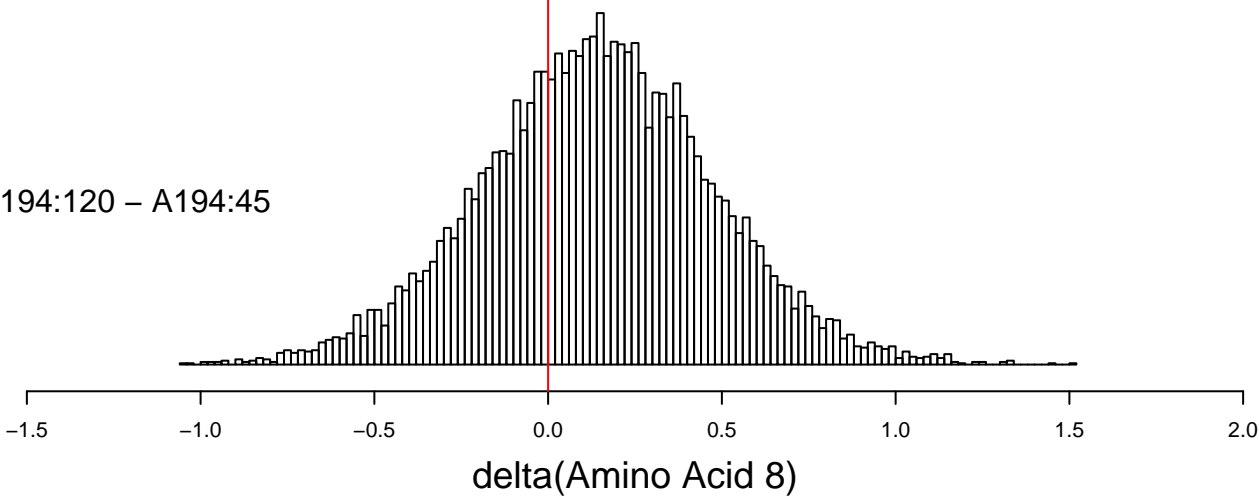

A194:240

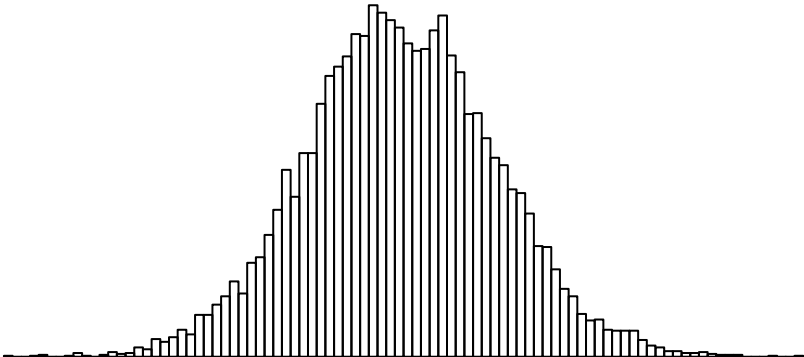

A194:120

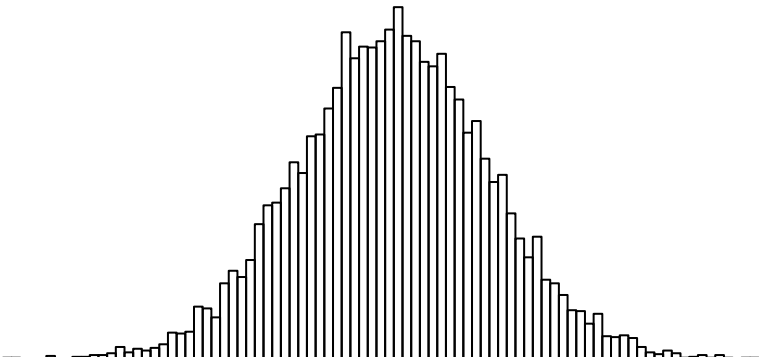

A194:45

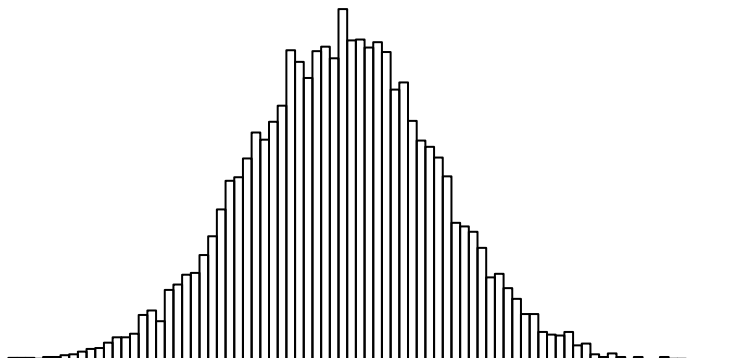

-10      -9      -8      -7      -6      -5      -4      -3

Amino Acid 10

A194:240 – A194:120

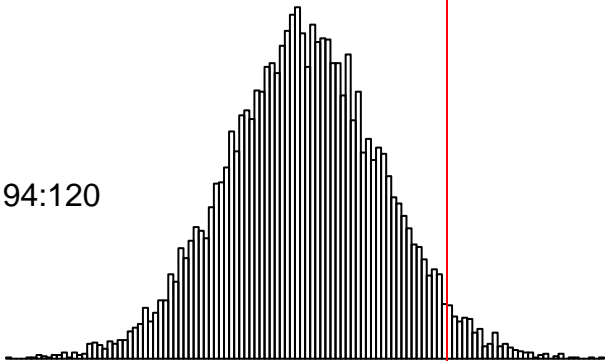

A194:240 – A194:45

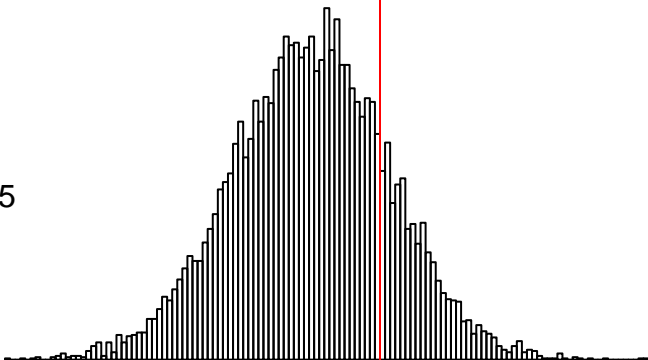

A194:120 – A194:45

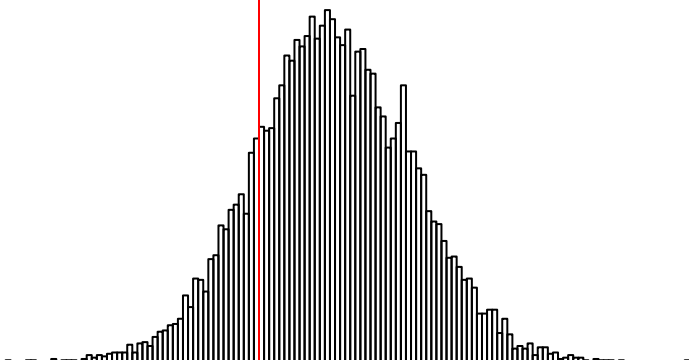

-6 -4 -2 0 2 4 6

delta(Amino Acid 10)

A194:240

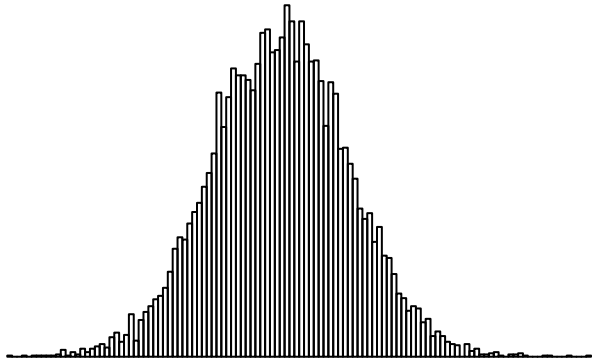

A194:120

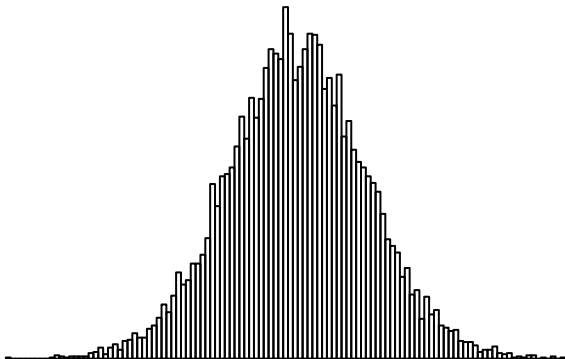

A194:45

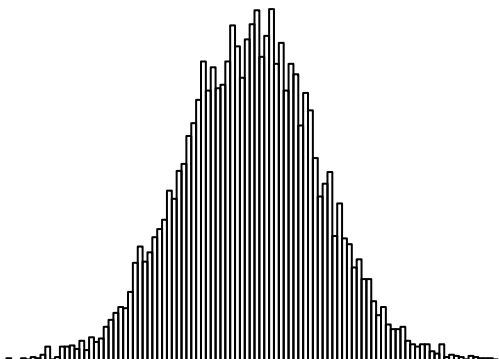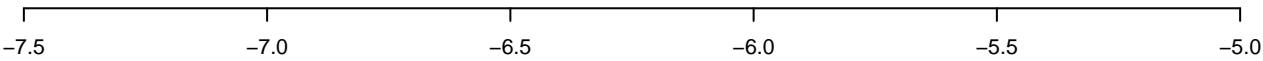

Disaccharide 2

A194:240 – A194:120

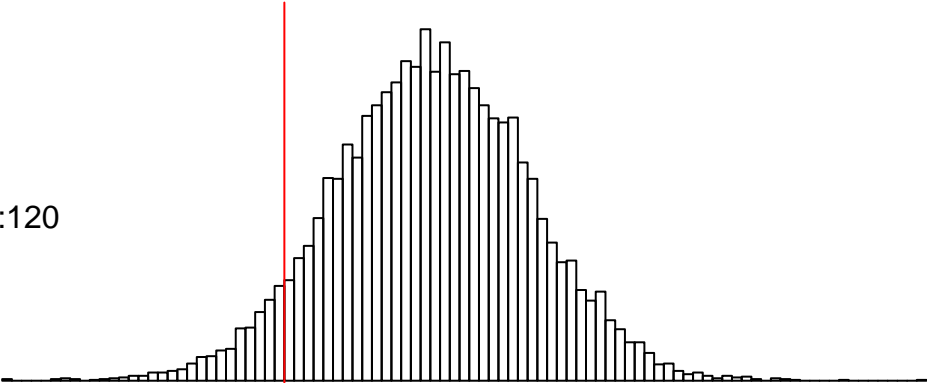

A194:240 – A194:45

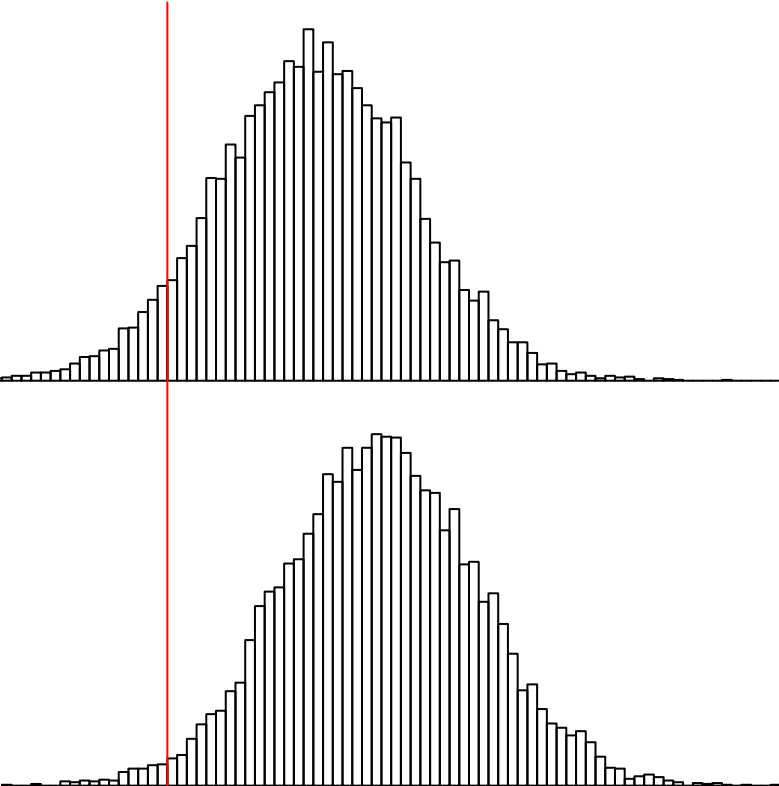

A194:120 – A194:45

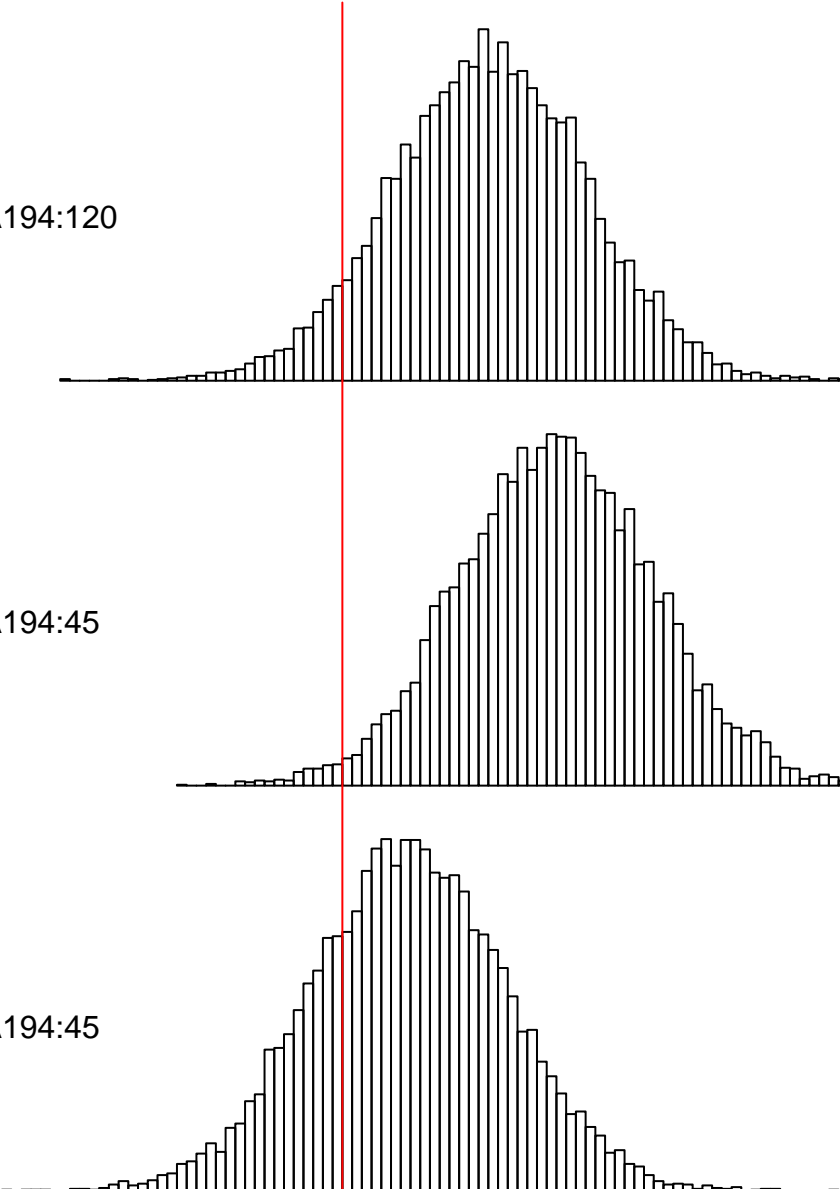

-1.0      -0.5      0.0      0.5      1.0      1.5

delta(Disaccharide 2)

A194:240

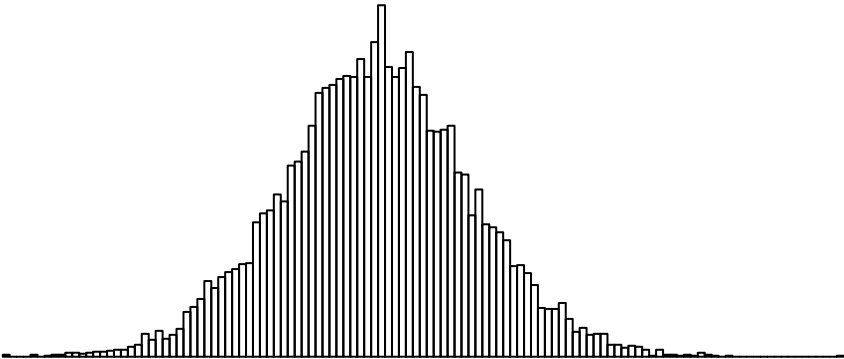

A194:120

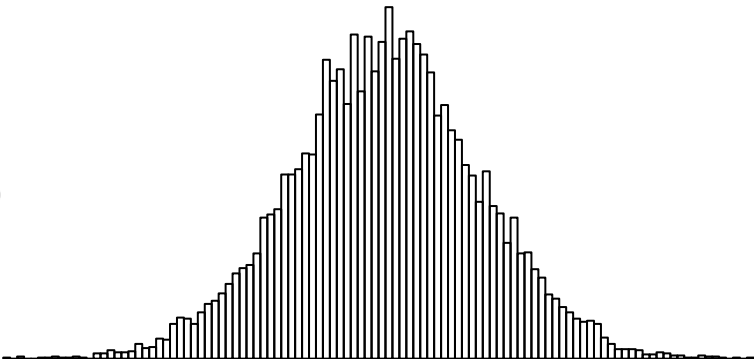

A194:45

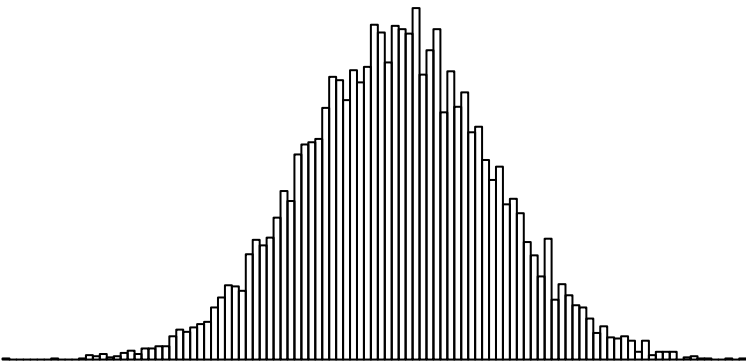

-9.0 -8.5 -8.0 -7.5 -7.0 -6.5 -6.0 -5.5

Disaccharide 3

A194:240 – A194:120

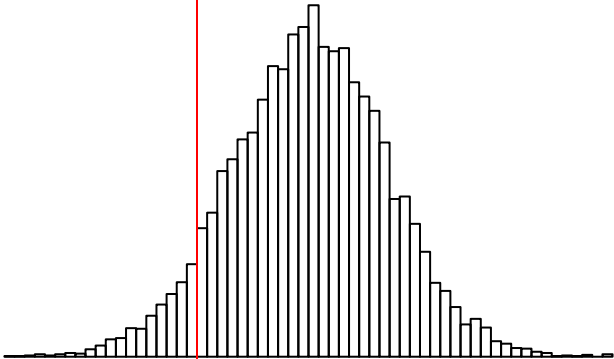

A194:240 – A194:45

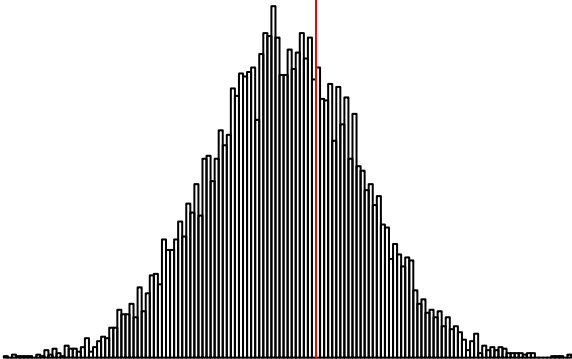

A194:120 – A194:45

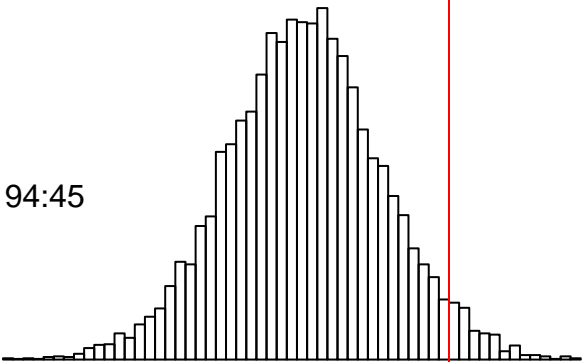

-3 -2 -1 0 1 2 3

delta(Disaccharide 3)



A194:240

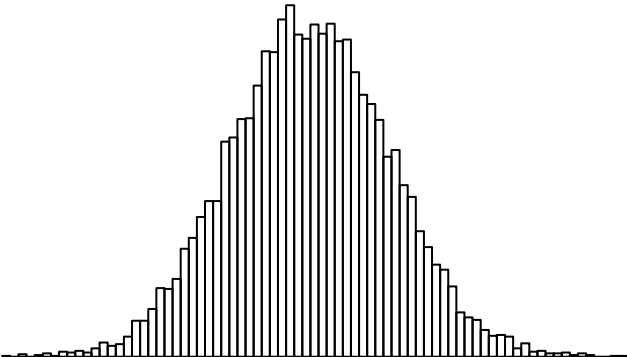

A194:120

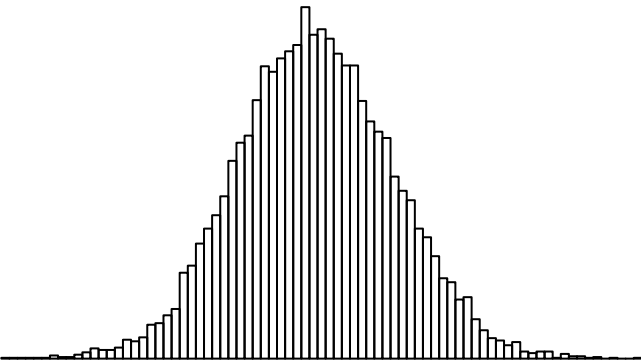

A194:45

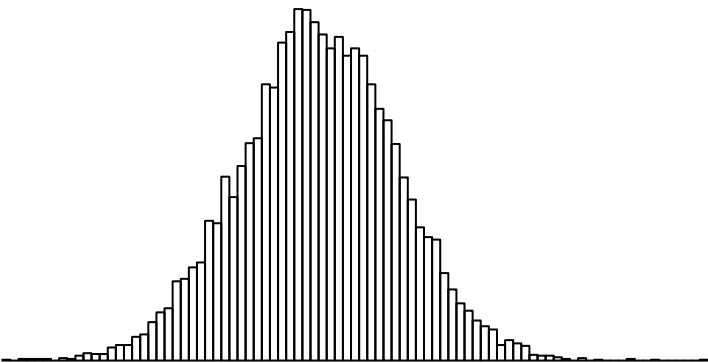

-8.0      -7.5      -7.0      -6.5      -6.0      -5.5      -5.0

Disaccharide 4

A194:240 – A194:120

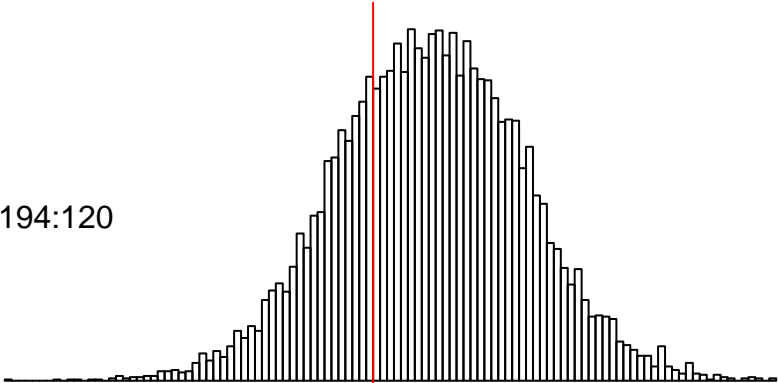

A194:240 – A194:45

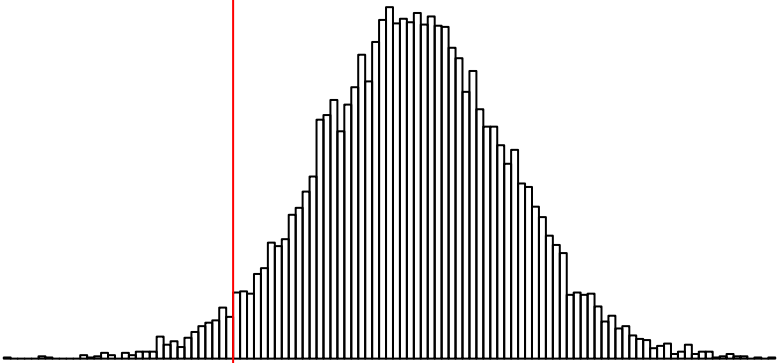

A194:120 – A194:45

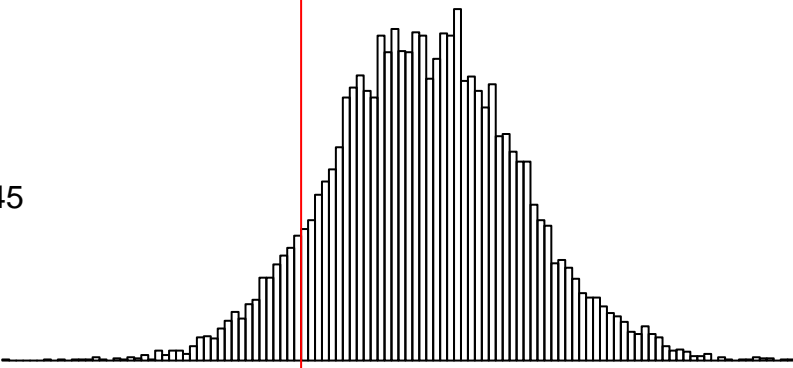

-1.5      -1.0      -0.5      0.0      0.5      1.0      1.5      2.0

delta(Disaccharide 4)

A194:240

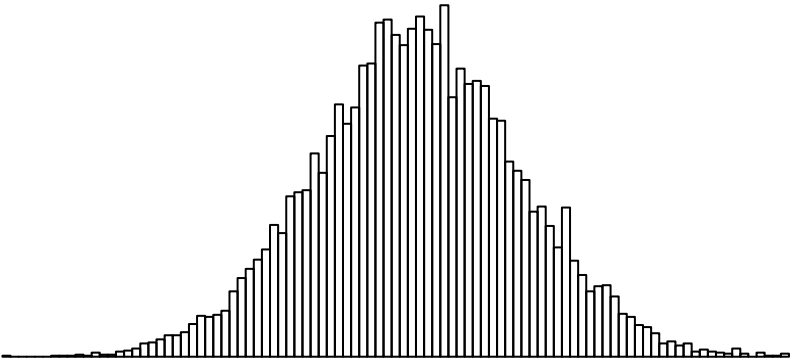

A194:120

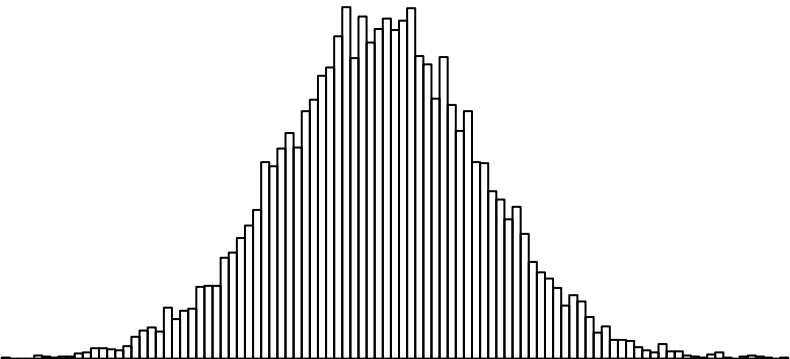

A194:45

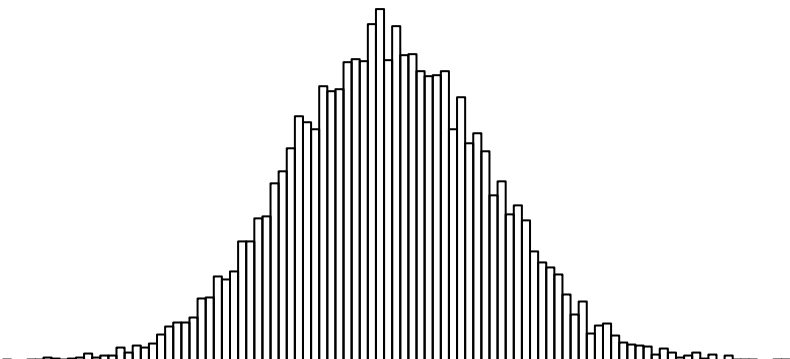

-8.0 -7.5 -7.0 -6.5 -6.0 -5.5 -5.0

Disaccharide 5

A194:240 – A194:120

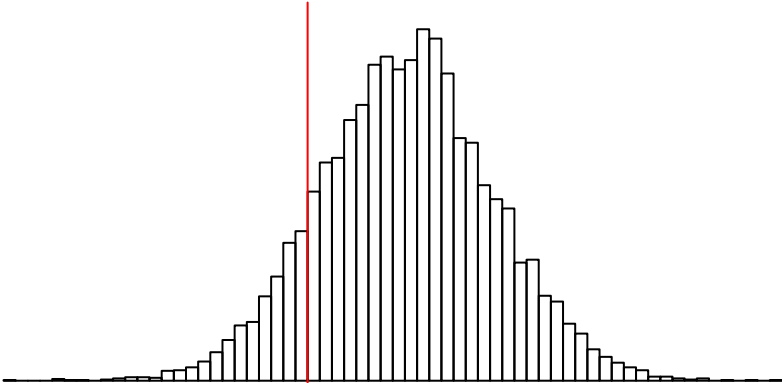

A194:240 – A194:45

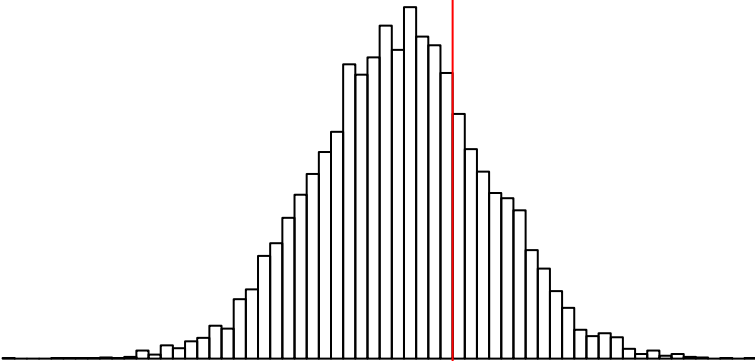

A194:120 – A194:45

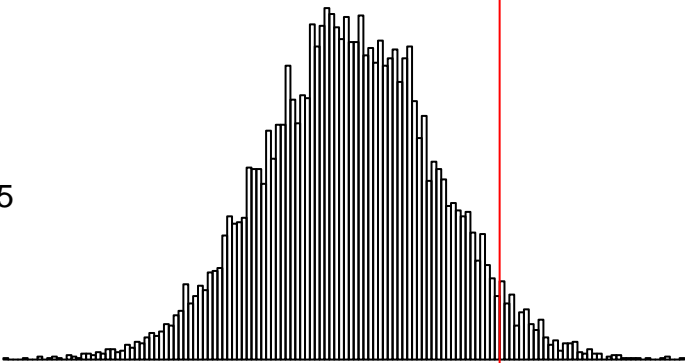

-3

-2

-1

0

1

2

delta(Disaccharide 5)

A194:240

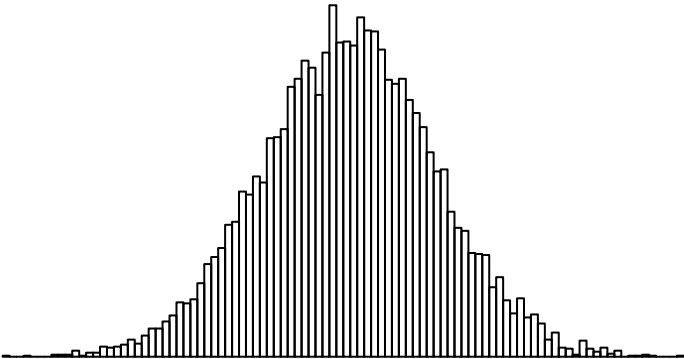

A194:120

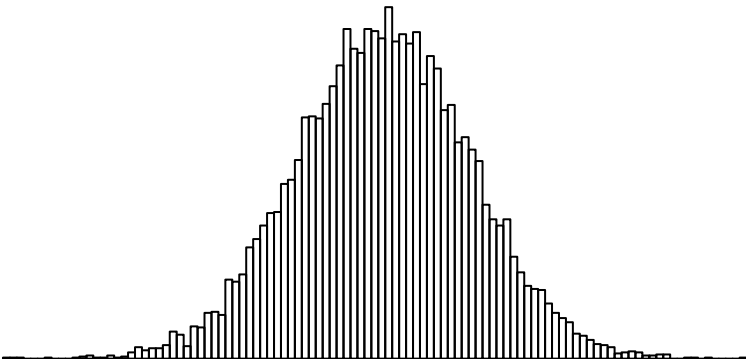

A194:45

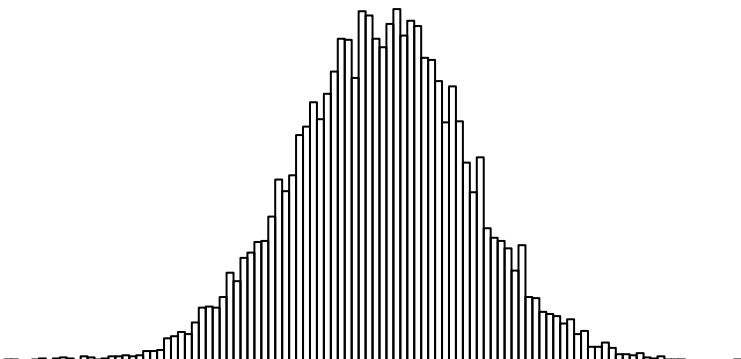

-7.5      -7.0      -6.5      -6.0      -5.5      -5.0      -4.5      -4.0

Disaccharide 6

A194:240 – A194:120

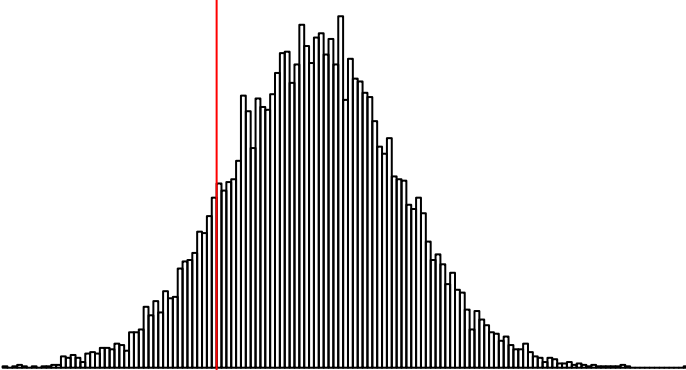

A194:240 – A194:45

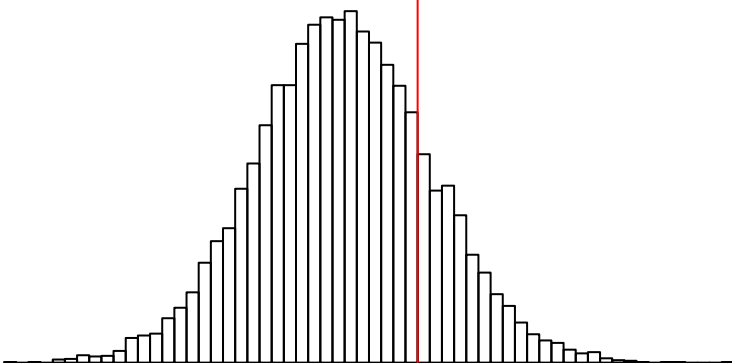

A194:120 – A194:45

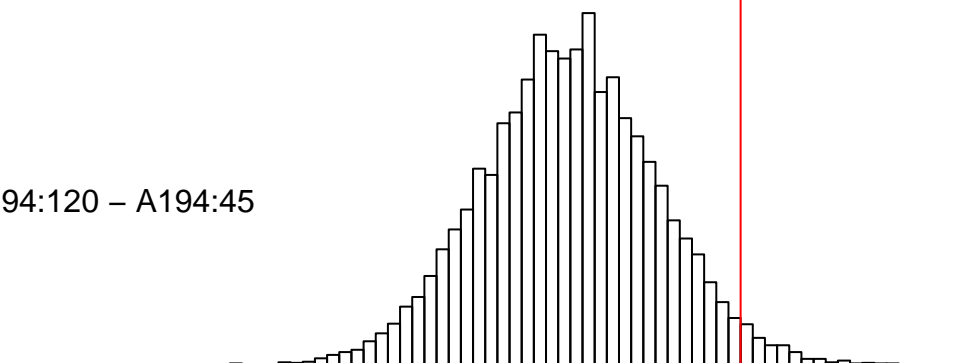

delta(Disaccharide 6)

A194:240

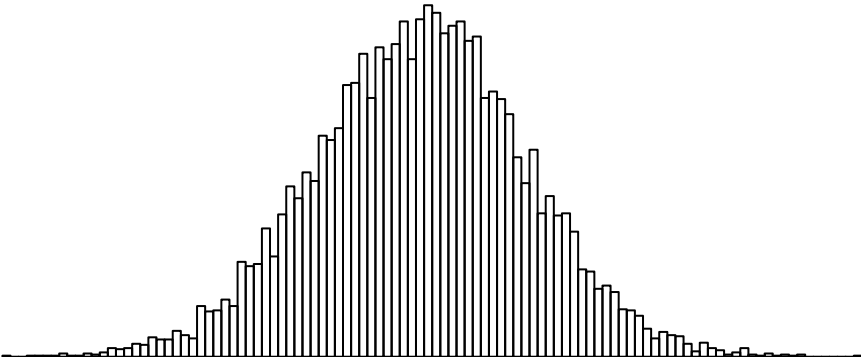

A194:120

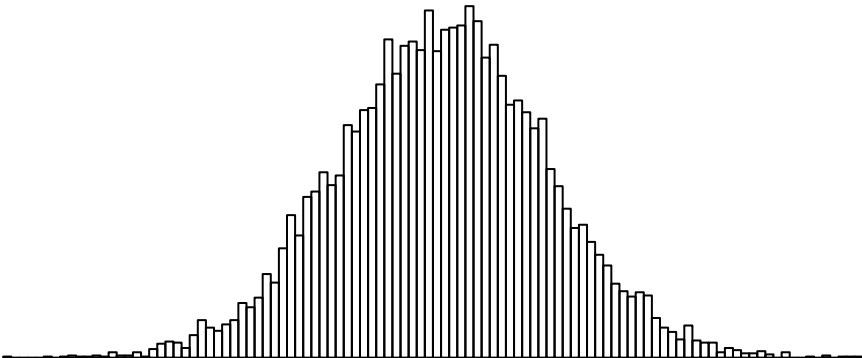

A194:45

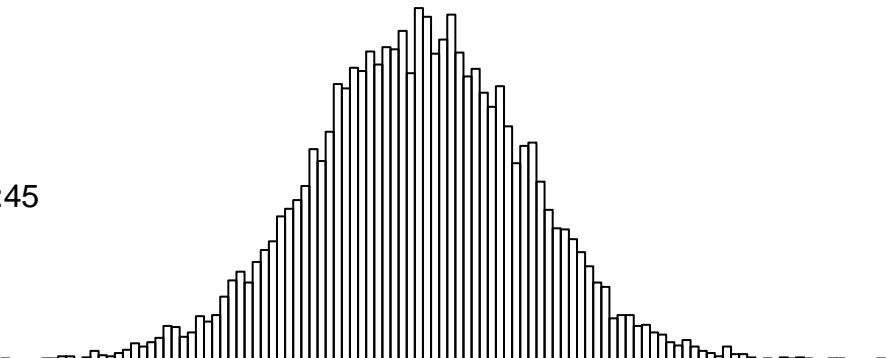

-6.0 -5.5 -5.0 -4.5 -4.0 -3.5 -3.0

Disaccharide 7

A194:240 – A194:120

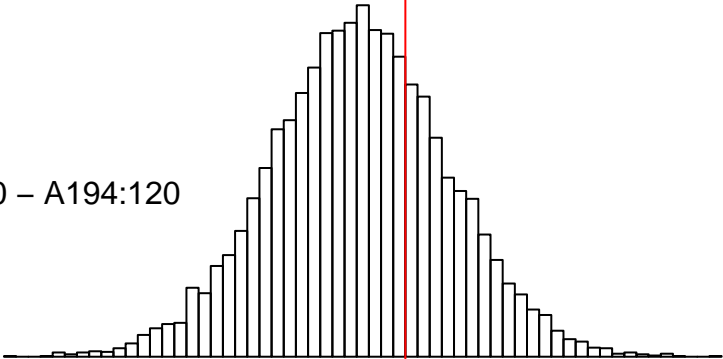

A194:240 – A194:45

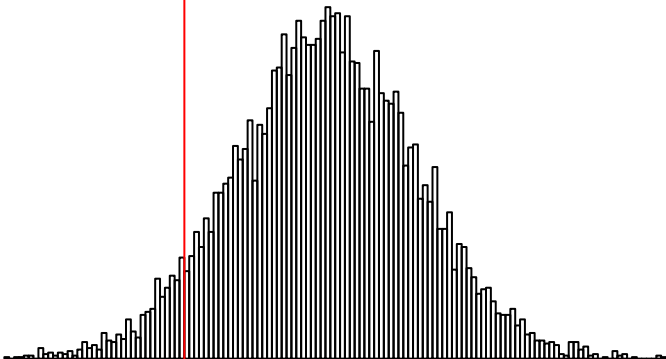

A194:120 – A194:45

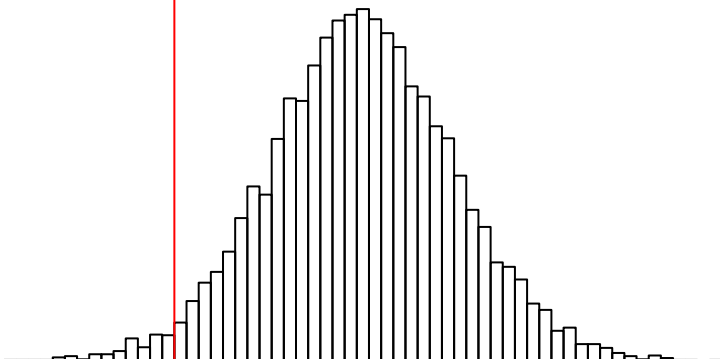

-2

-1

0

1

2

3

delta(Disaccharide 7)



A194:240

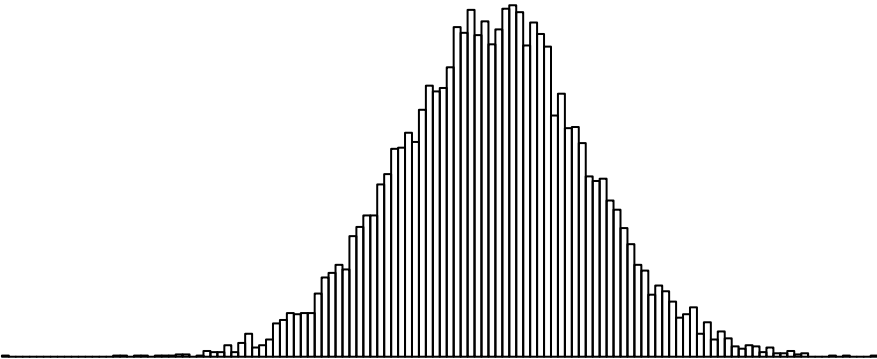

A194:120

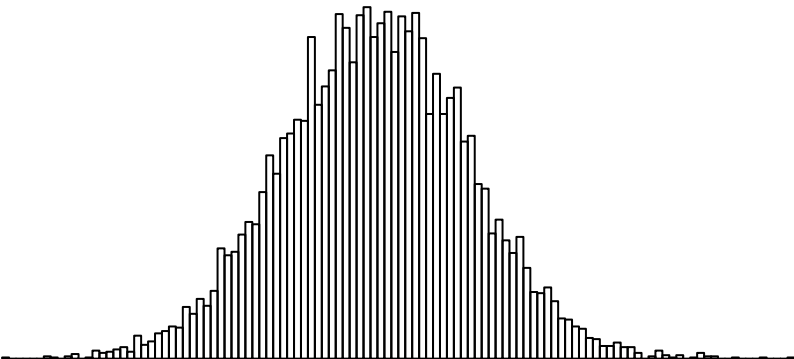

A194:45

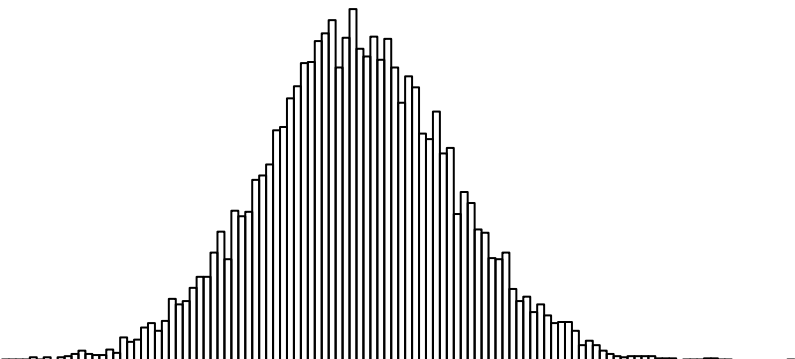

-8.0 -7.5 -7.0 -6.5 -6.0 -5.5 -5.0 -4.5

Disaccharide 8

A194:240 – A194:120

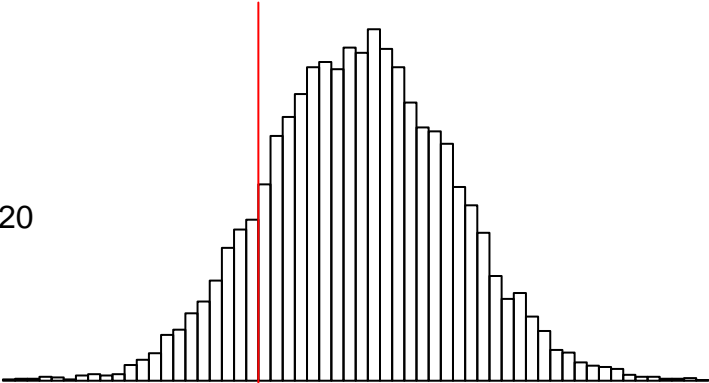

A194:240 – A194:45

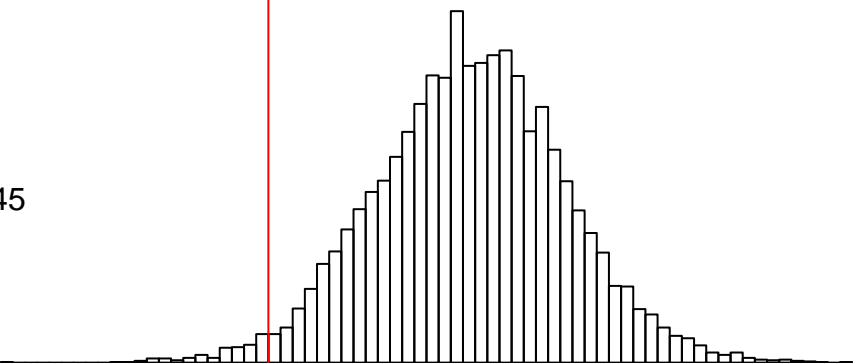

A194:120 – A194:45

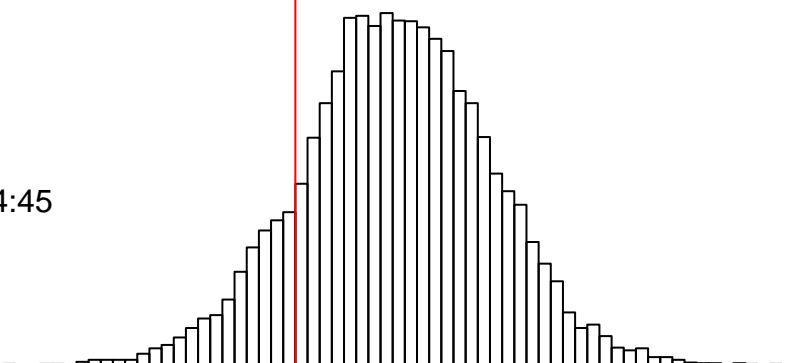

-2 -1 0 1 2 3

delta(Disaccharide 8)

A194:240

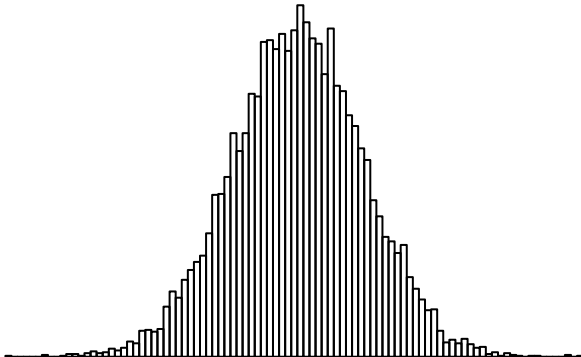

A194:120

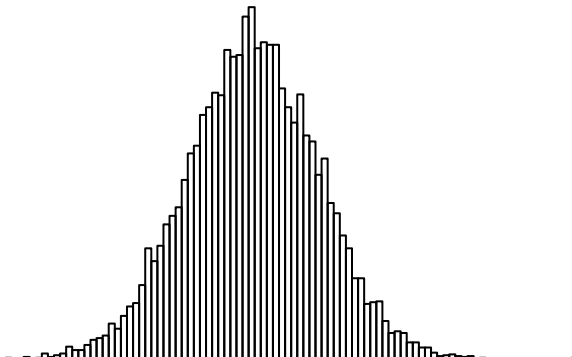

A194:45

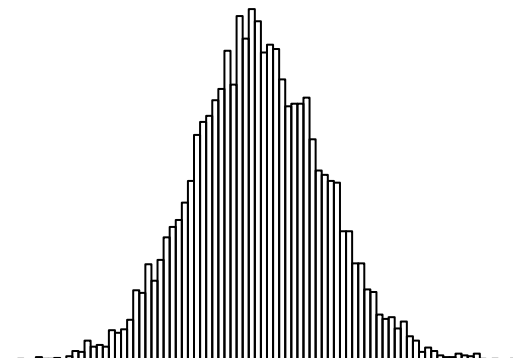

-9

-8

-7

-6

-5

Disaccharide 9

A194:240 – A194:120

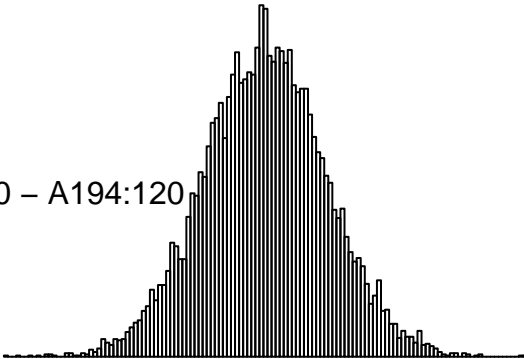

A194:240 – A194:45

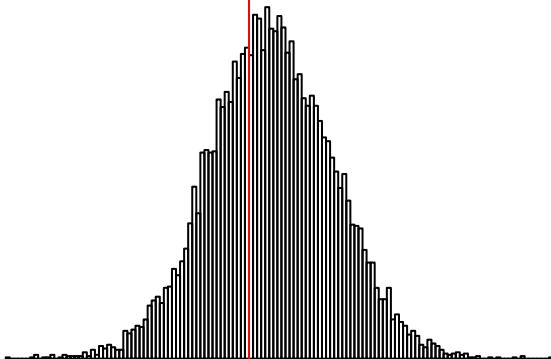

A194:120 – A194:45

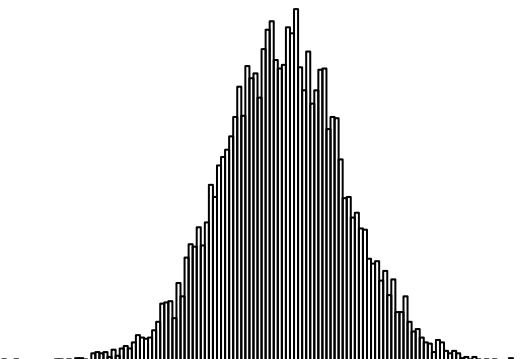

-3 -2 -1 0 1 2 3

delta(Disaccharide 9)

A194:240

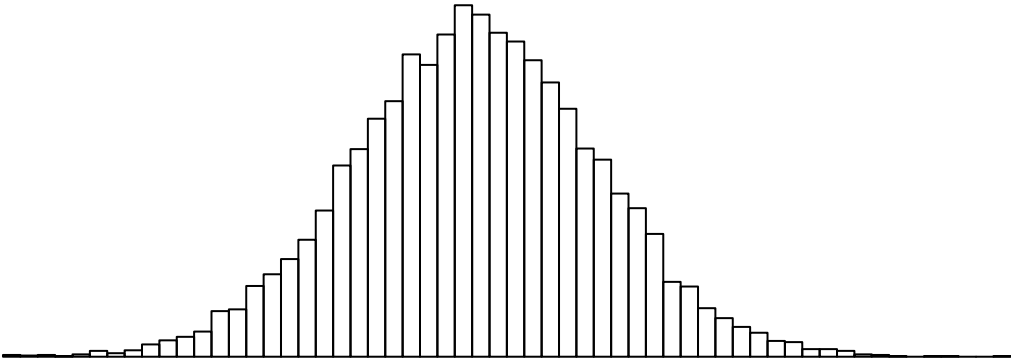

A194:120

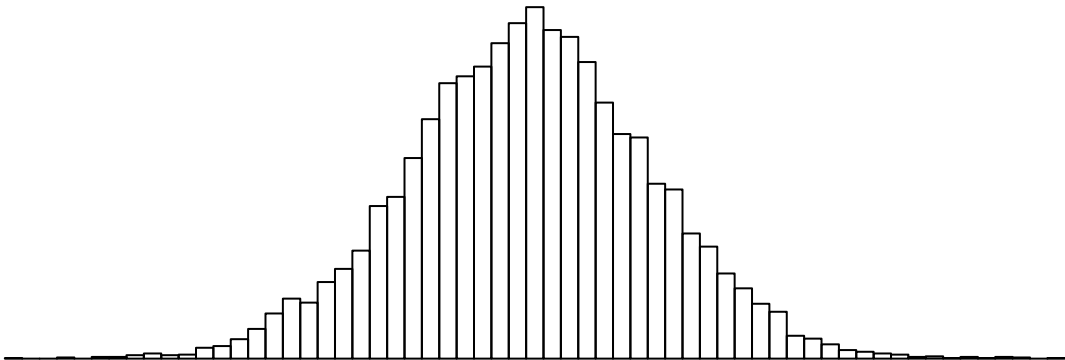

A194:45

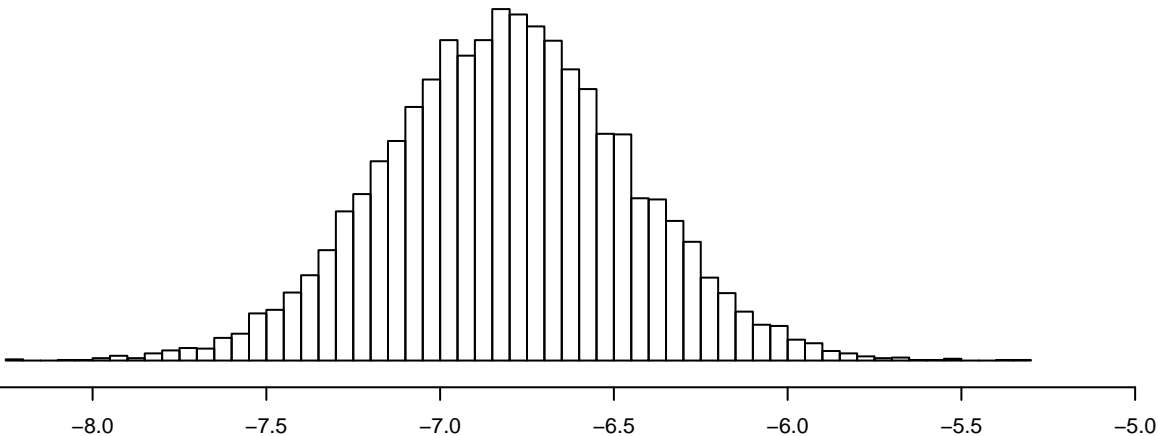

C12:0 Fatty Acid

A194:240 – A194:120

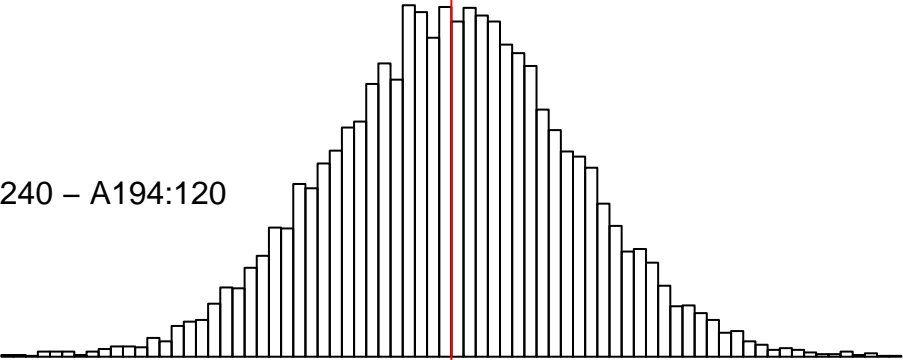

A194:240 – A194:45

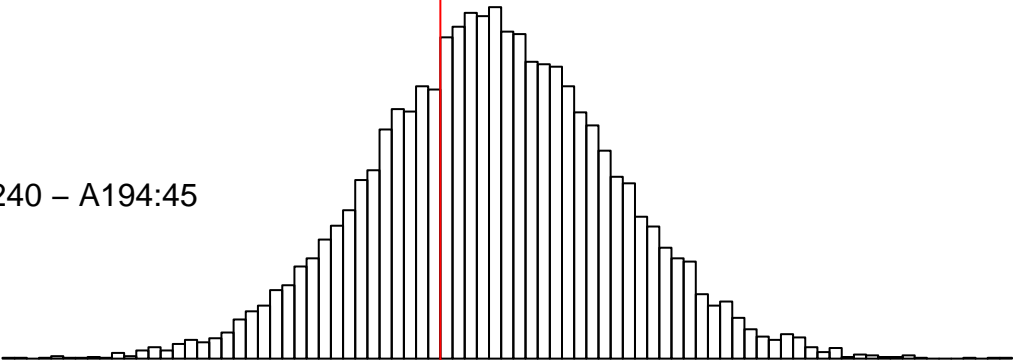

A194:120 – A194:45

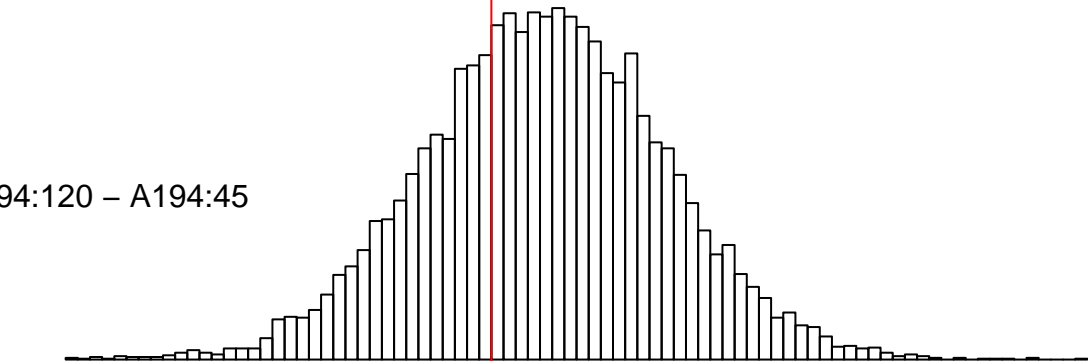

-2

-1

0

1

2

3

delta(C12:0 Fatty Acid)

A194:240

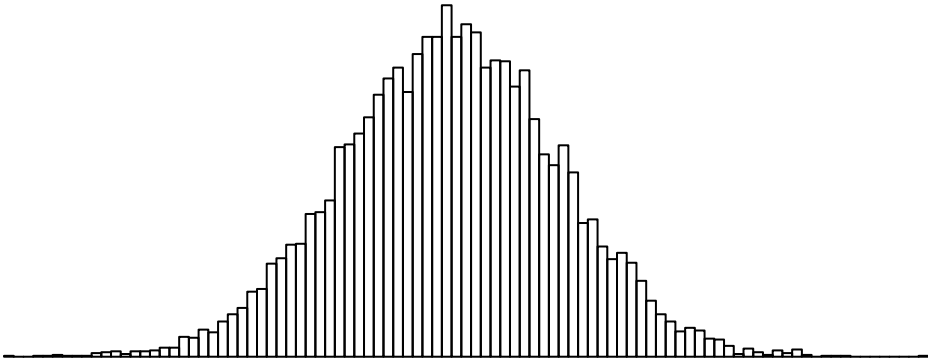

A194:120

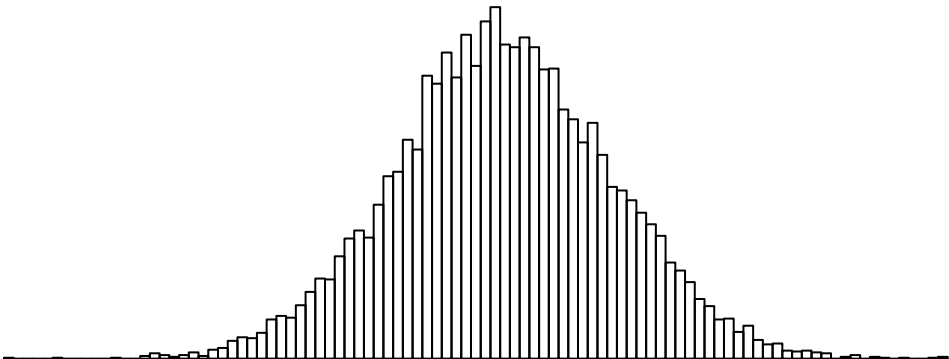

A194:45

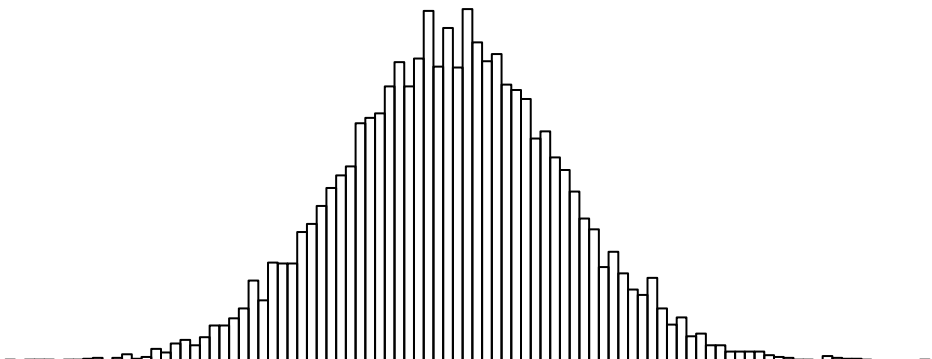

-8.5      -8.0      -7.5      -7.0      -6.5      -6.0

C14:1 Fatty Acid

A194:240 – A194:120

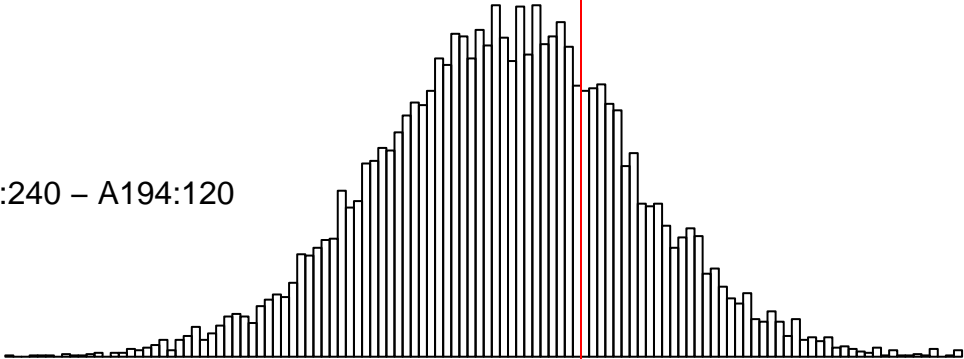

A194:240 – A194:45

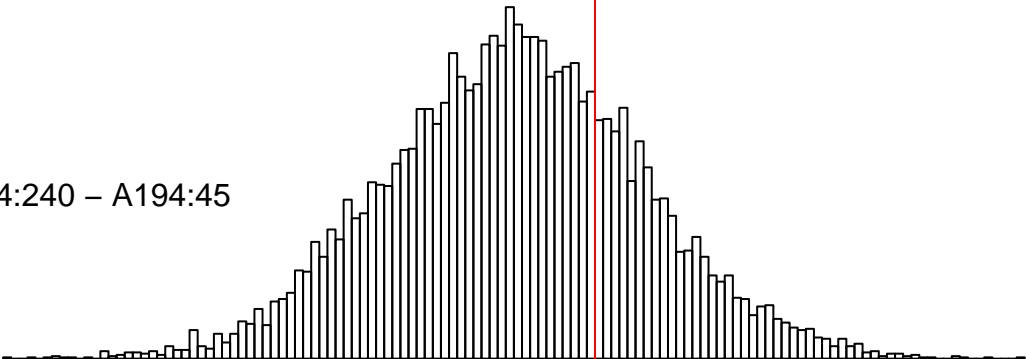

A194:120 – A194:45

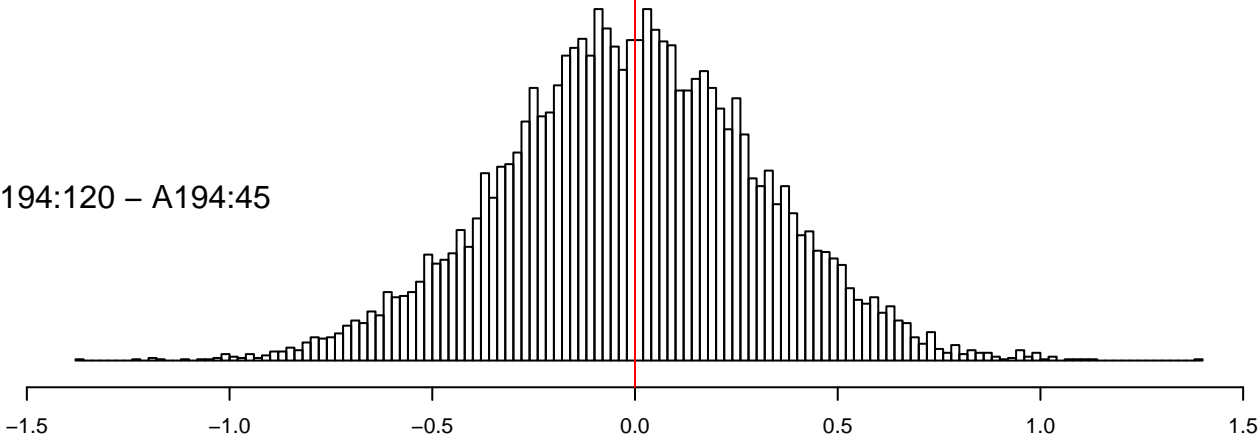

delta(C14:1 Fatty Acid)



A194:240

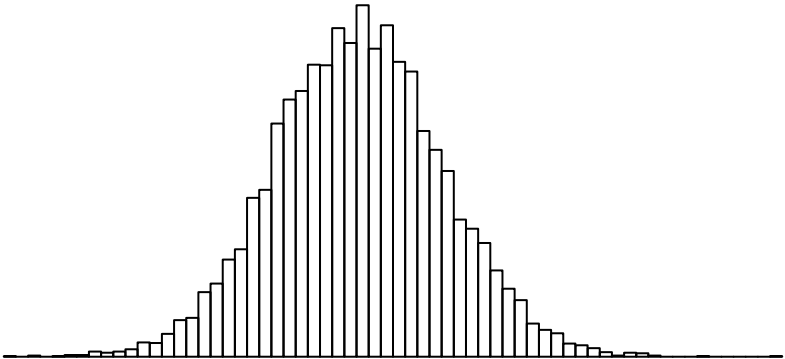

A194:120

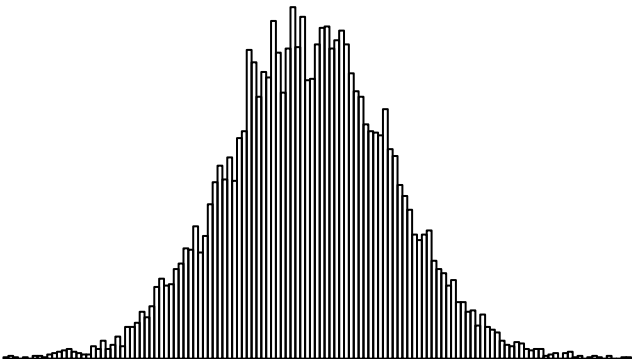

A194:45

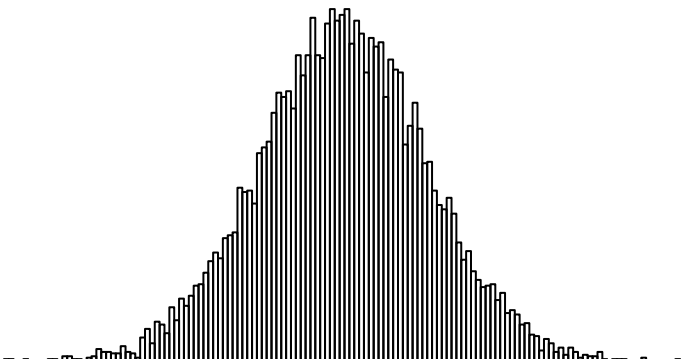

C14:0 Fatty Acid

A194:240 – A194:120

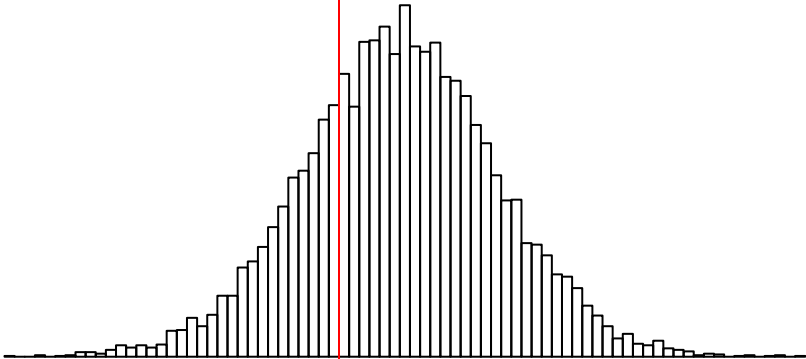

A194:240 – A194:45

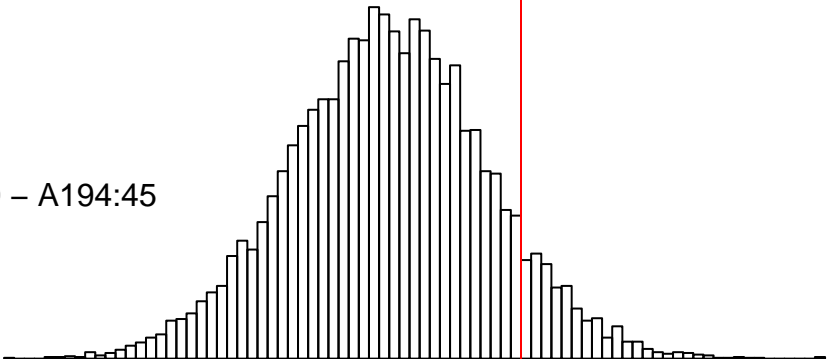

A194:120 – A194:45

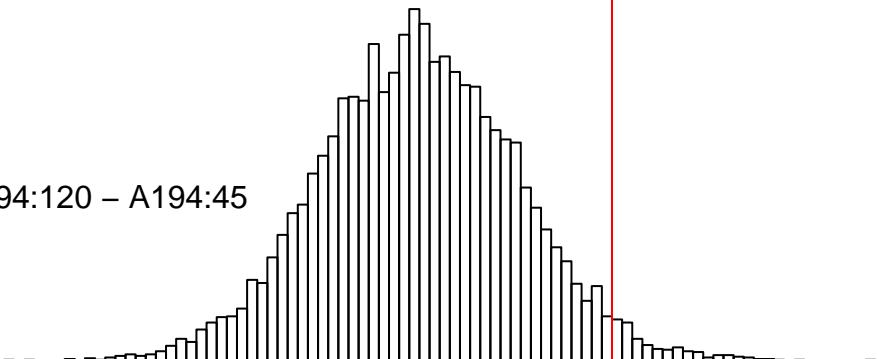

-3 -2 -1 0 1 2 3

delta(C14:0 Fatty Acid)

A194:240

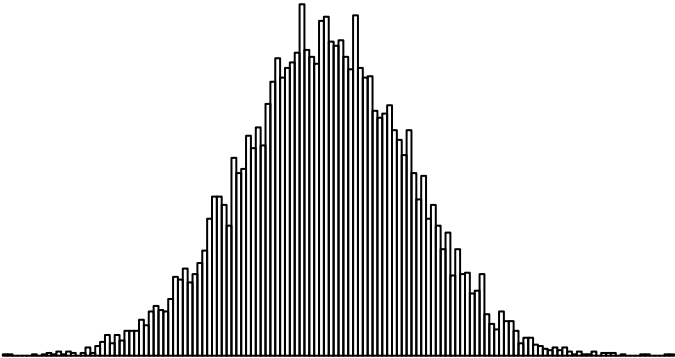

A194:120

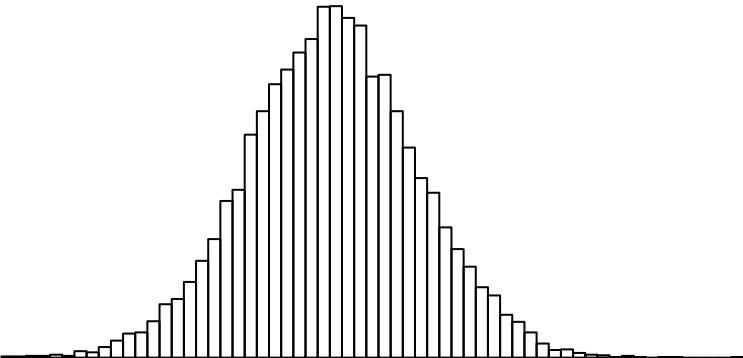

A194:45

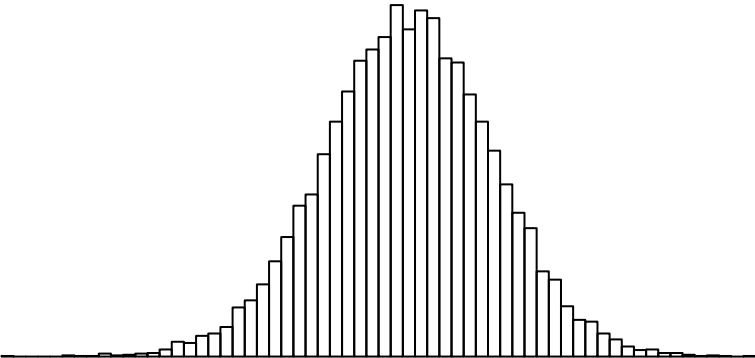

C16:1 Fatty Acid

A194:240 – A194:120

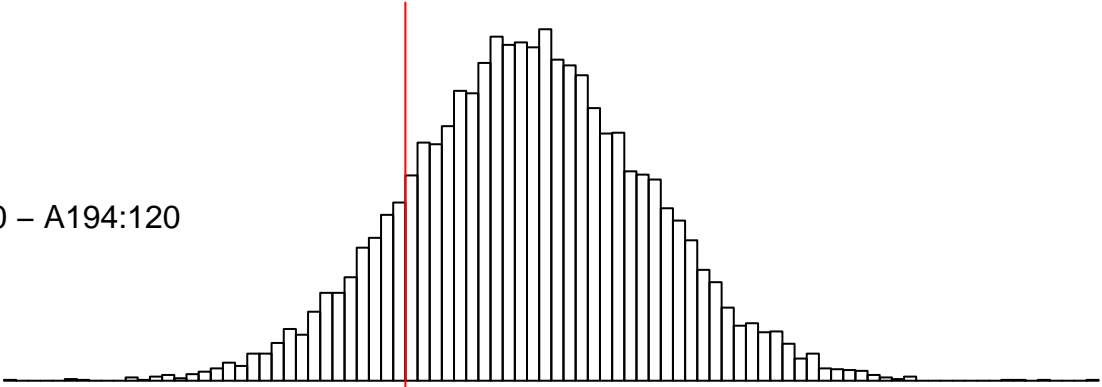

A194:240 – A194:45

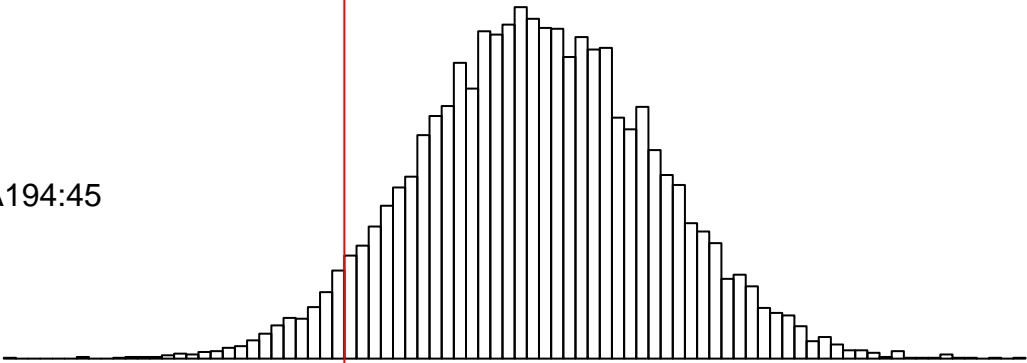

A194:120 – A194:45

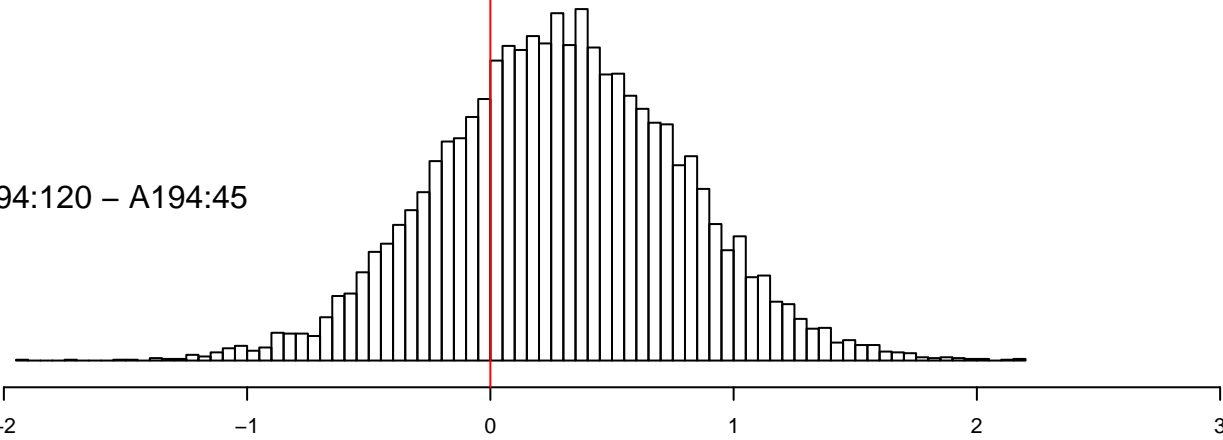

delta(C16:1 Fatty Acid)

A194:240

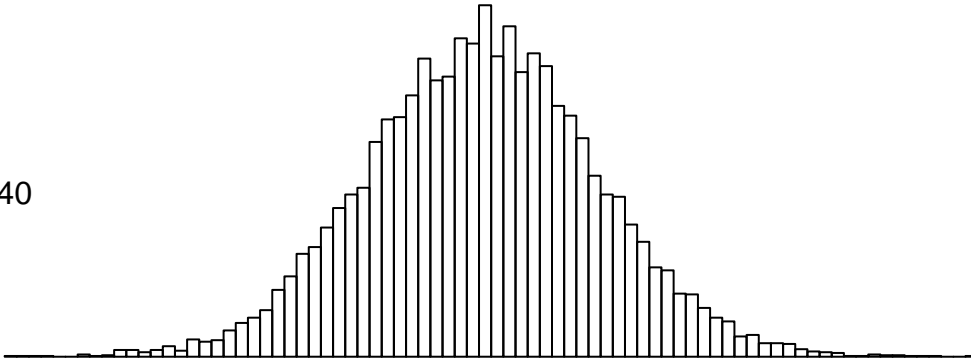

A194:120

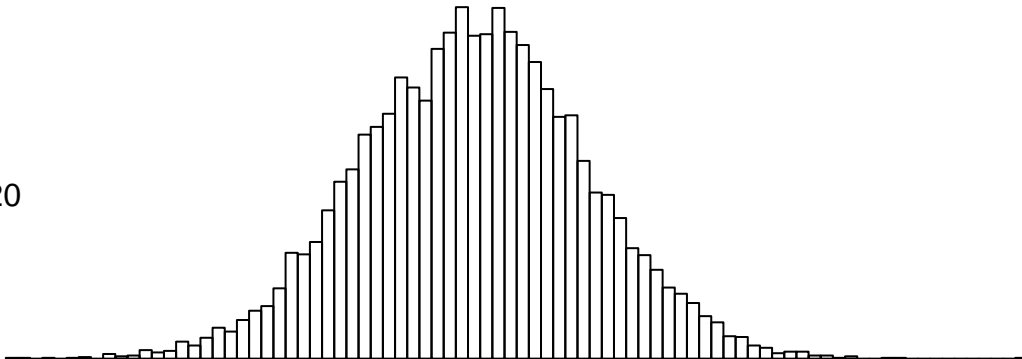

A194:45

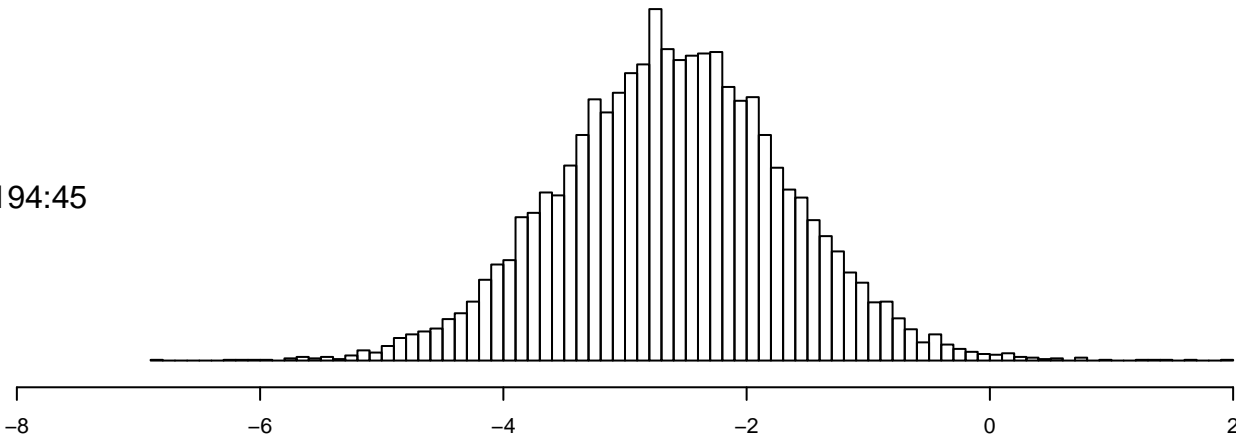

C16:0 Fatty Acid

A194:240 – A194:120

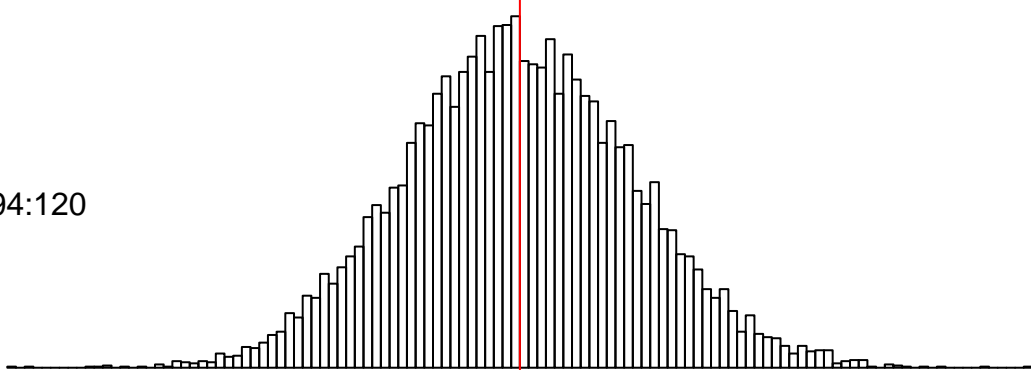

A194:240 – A194:45

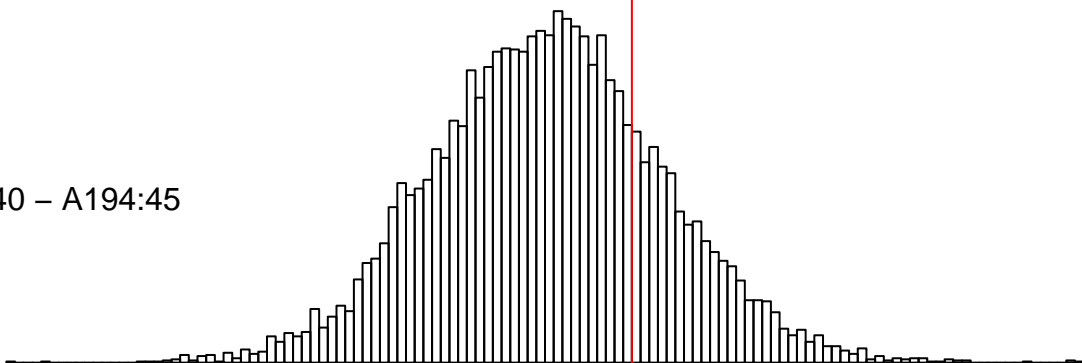

A194:120 – A194:45

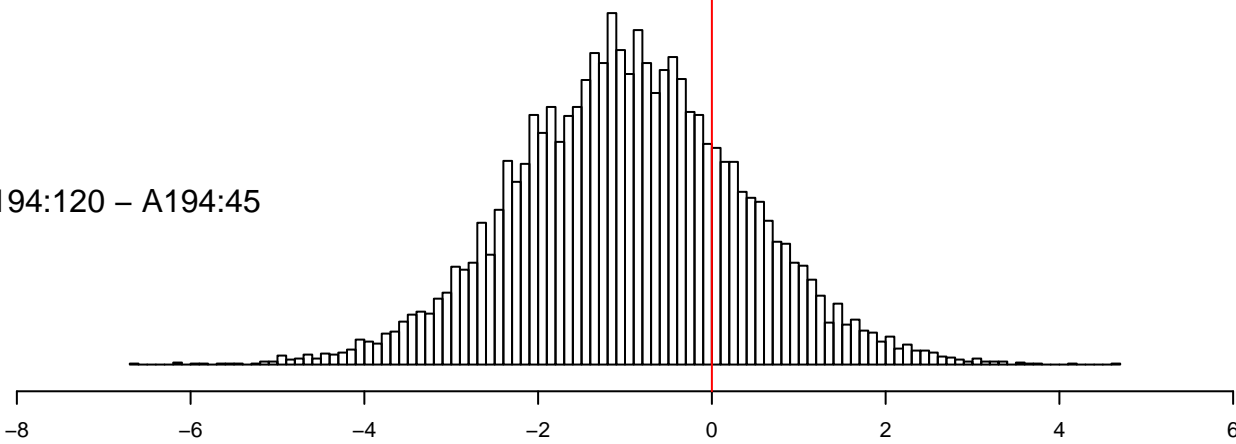

-8 -6 -4 -2 0 2 4 6

delta(C16:0 Fatty Acid)

A194:240

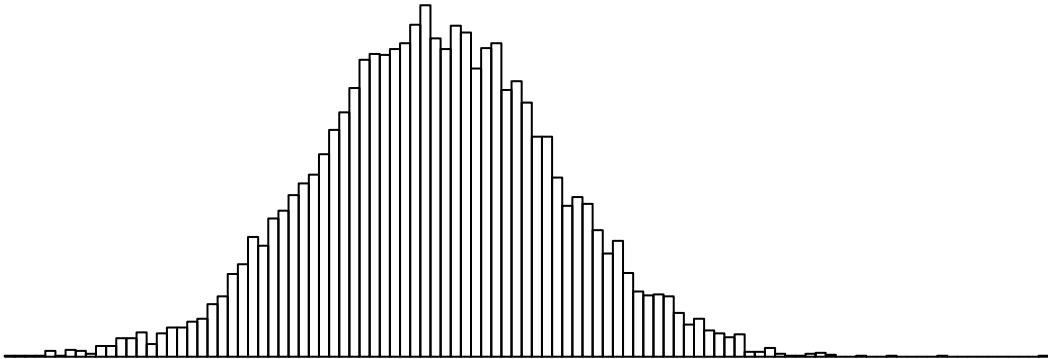

A194:120

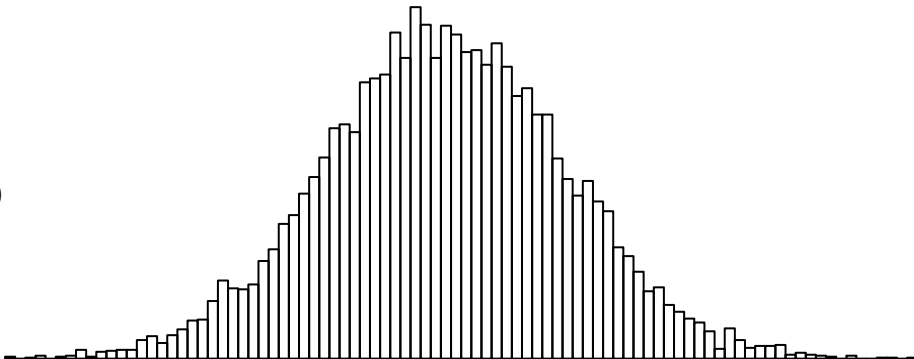

A194:45

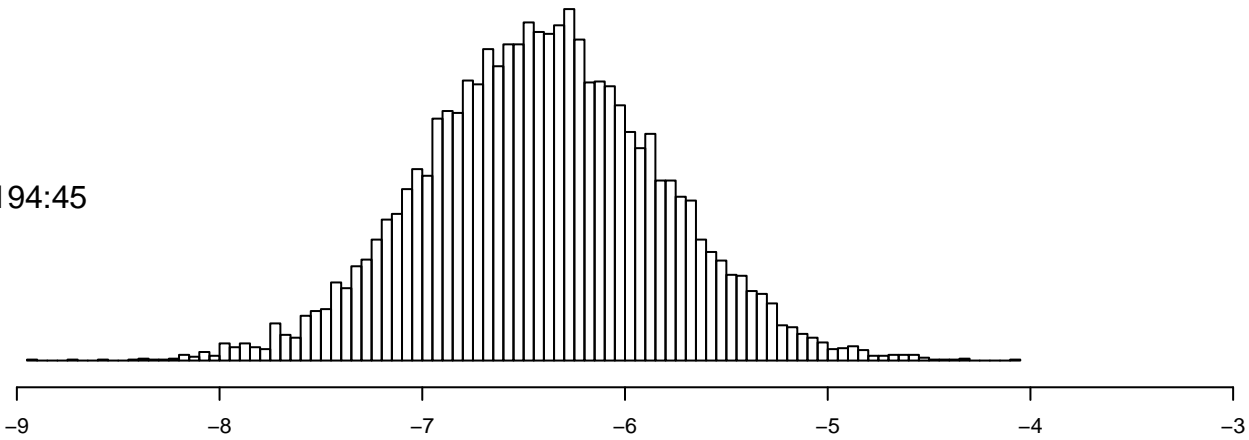

Polyunsaturated Fatty Acids 1

A194:240 – A194:120

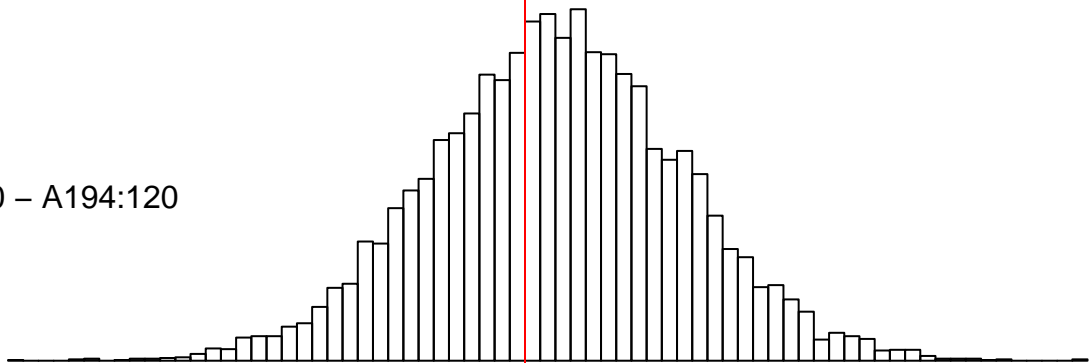

A194:240 – A194:45

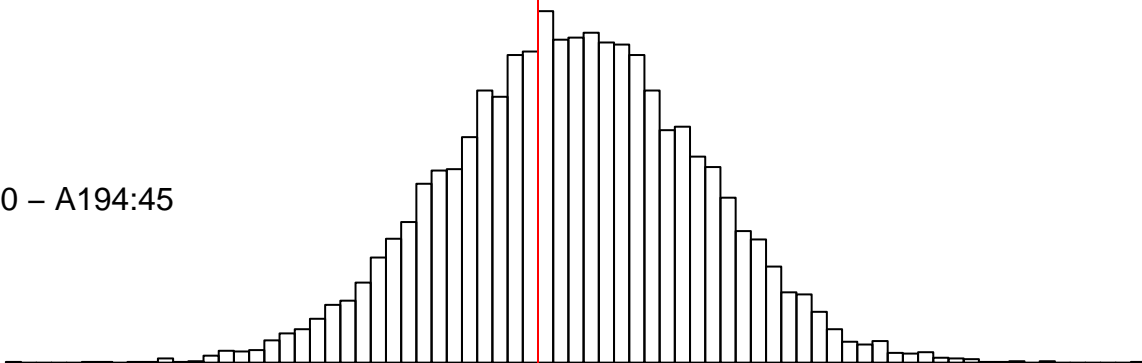

A194:120 – A194:45

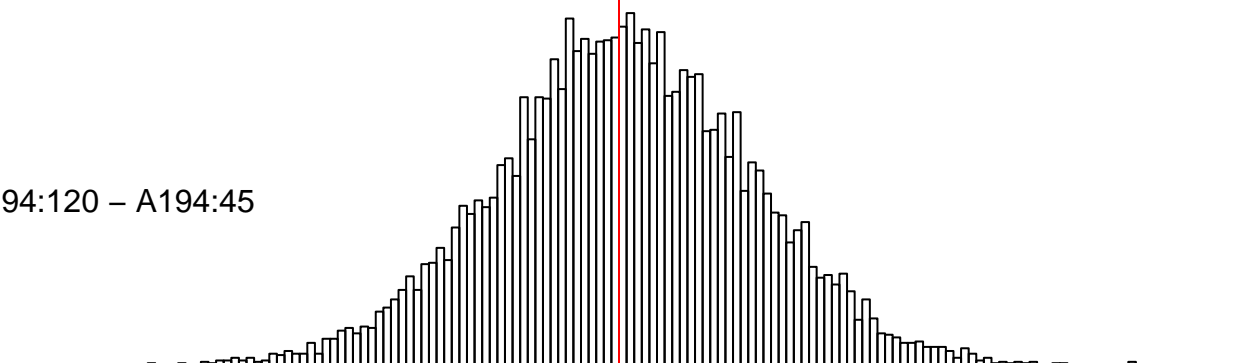

-4 -2 0 2 4

delta(Polyunsaturated Fatty Acids 1)



A194:240

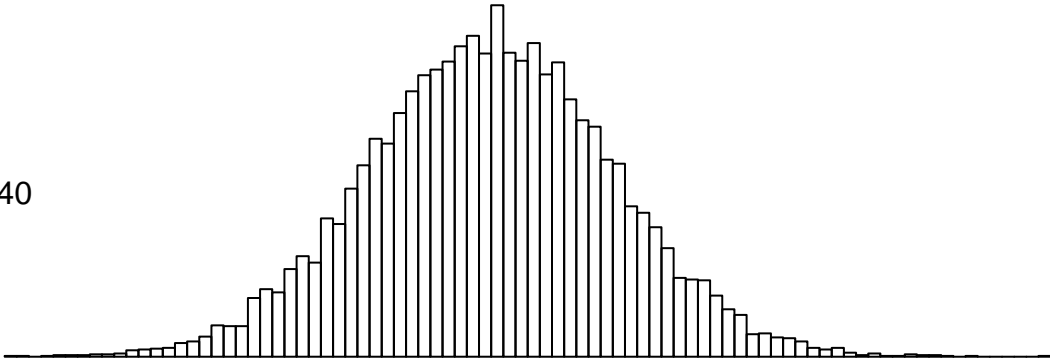

A194:120

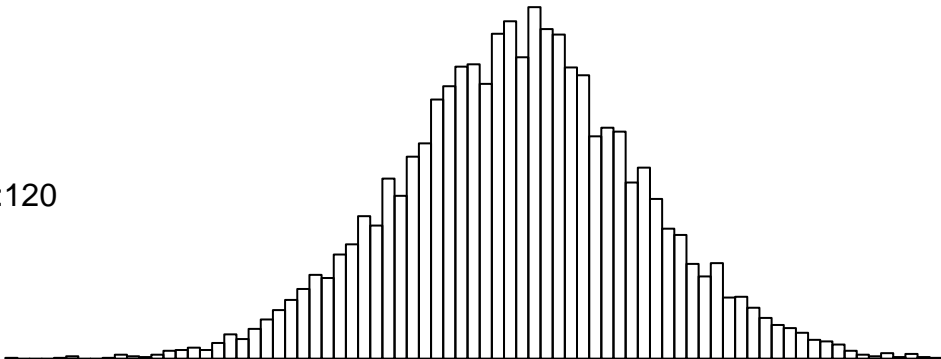

A194:45

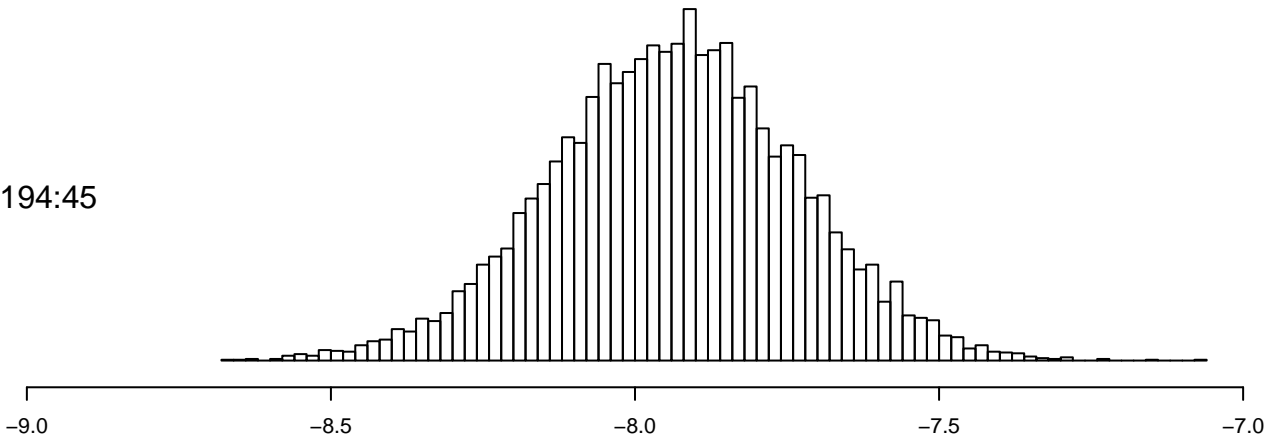

Polyunsaturated Fatty Acids 3

A194:240 – A194:120

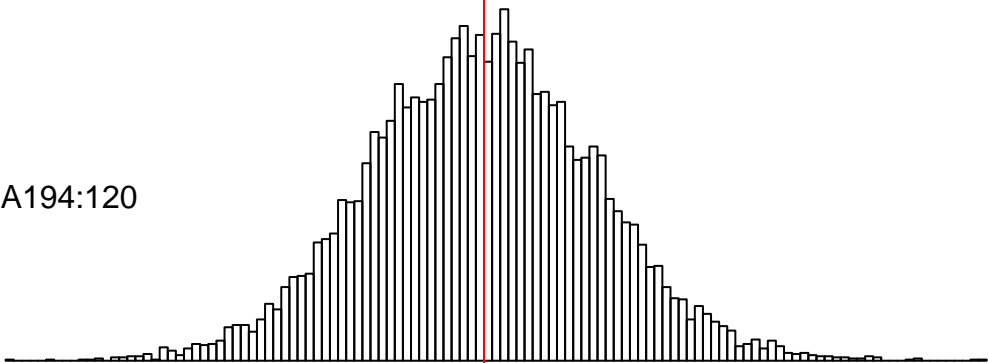

A194:240 – A194:45

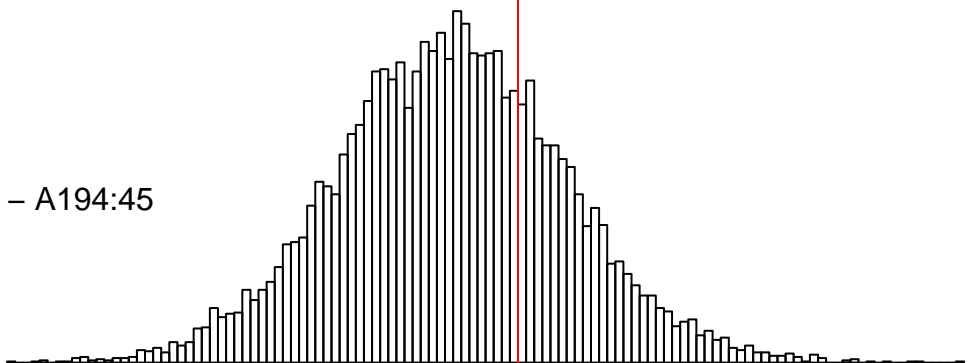

A194:120 – A194:45

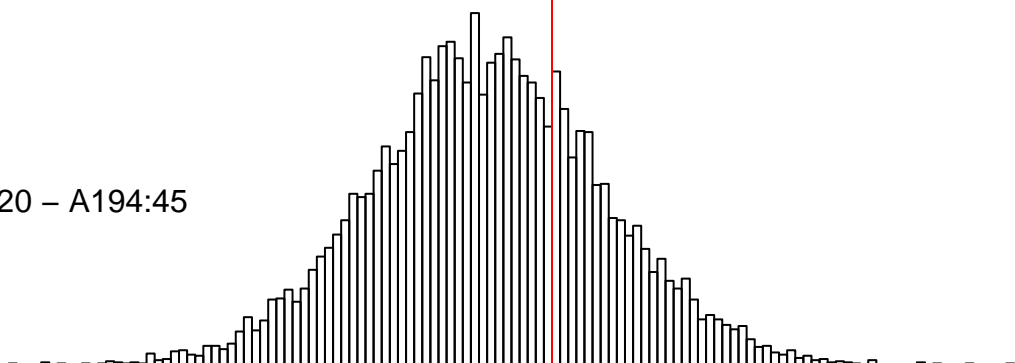

-1.5      -1.0      -0.5      0.0      0.5      1.0      1.5

delta(Polyunsaturated Fatty Acids 3)

A194:240

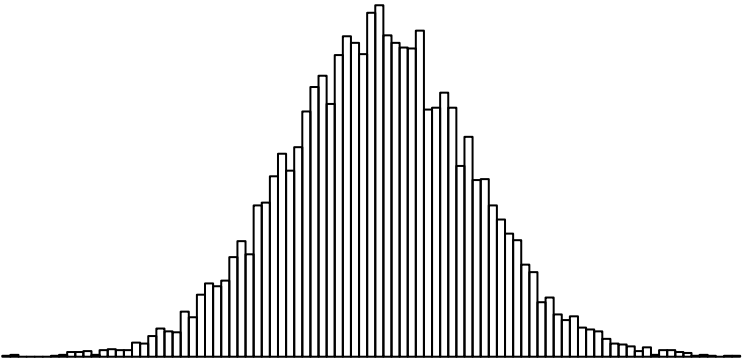

A194:120

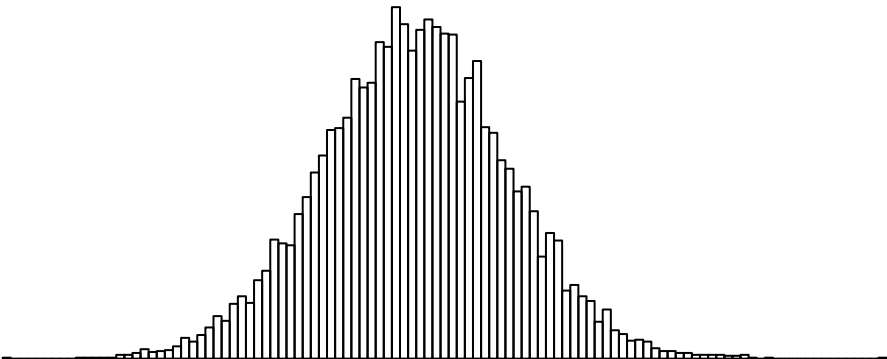

A194:45

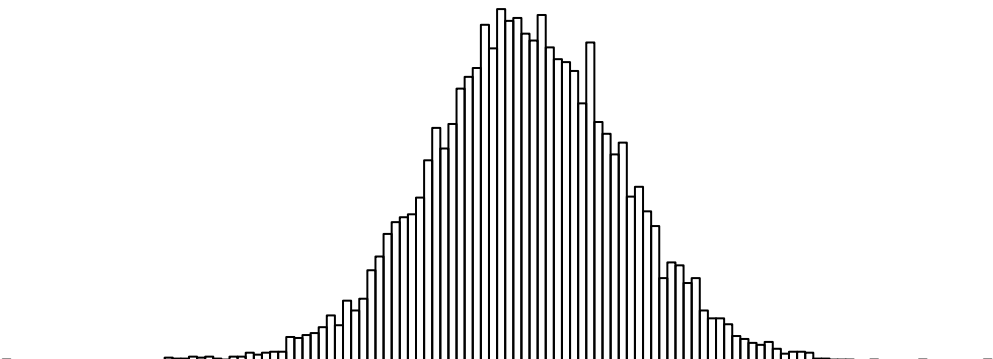

-10.0      -9.5      -9.0      -8.5      -8.0      -7.5      -7.0

C18:2 Fatty Acid

A194:240 – A194:120

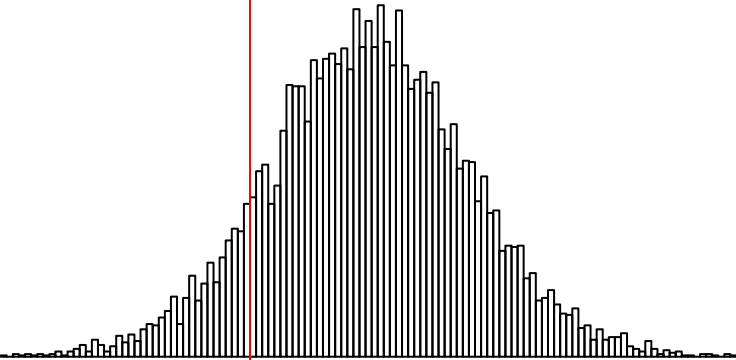

A194:240 – A194:45

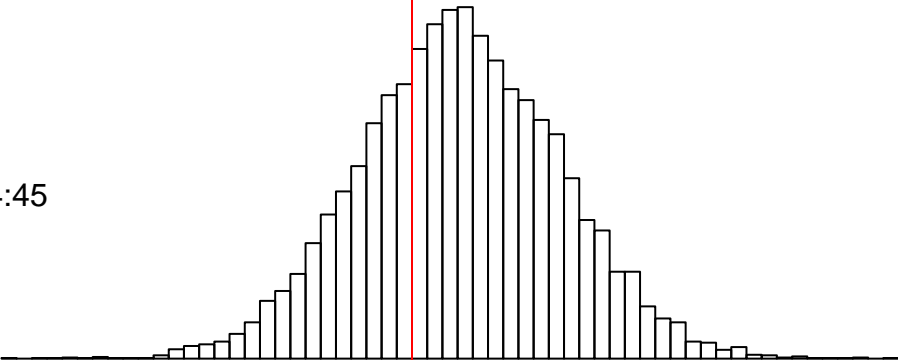

A194:120 – A194:45

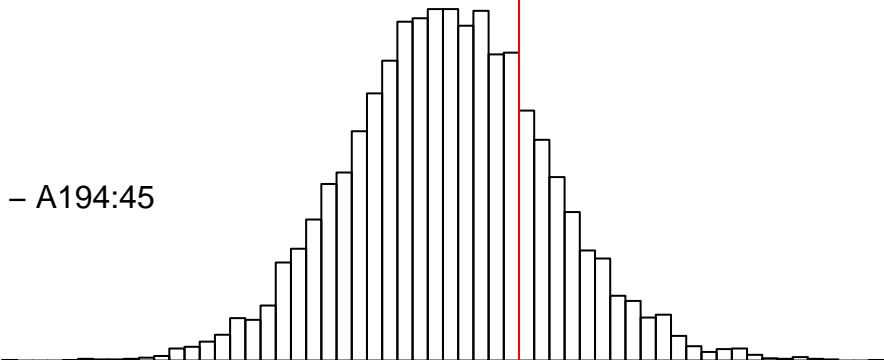

-2 -1 0 1 2

delta(C18:2 Fatty Acid)

A194:240

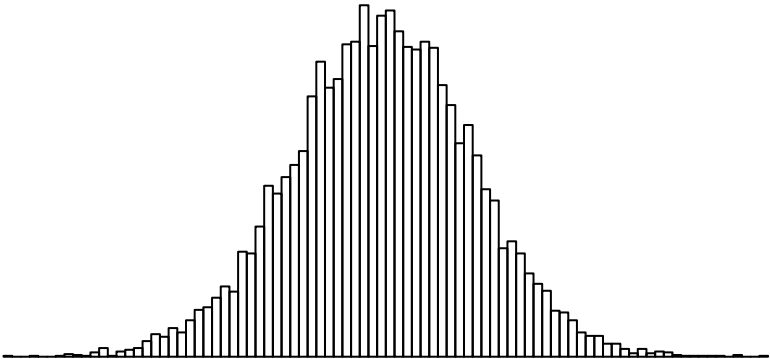

A194:120

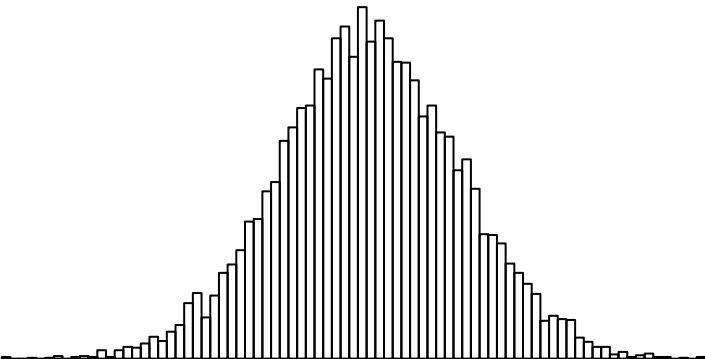

A194:45

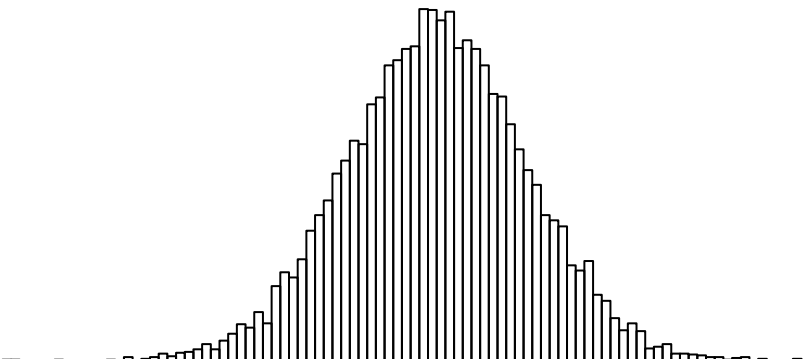

C18:0 Fatty Acid

A194:240 – A194:120

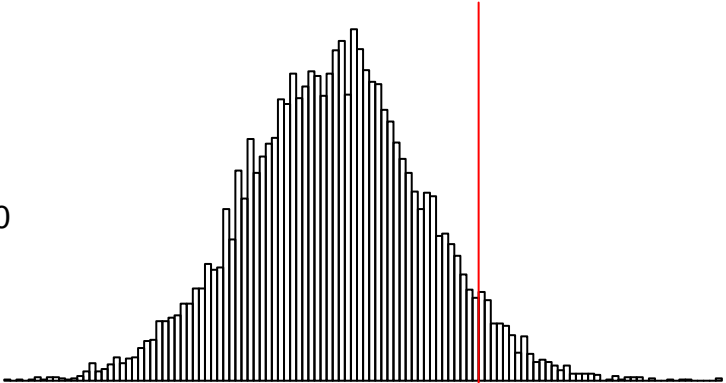

A194:240 – A194:45

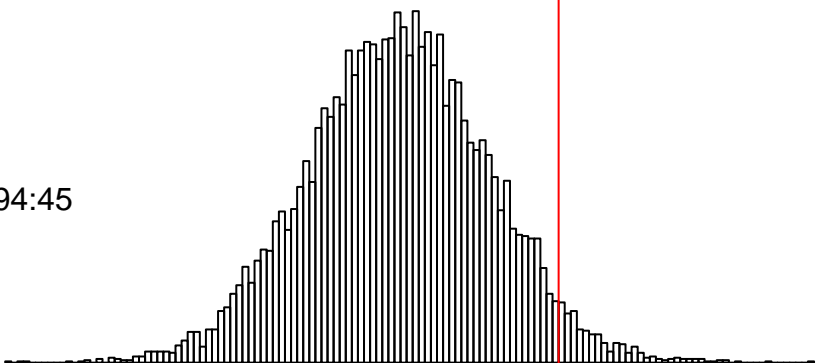

A194:120 – A194:45

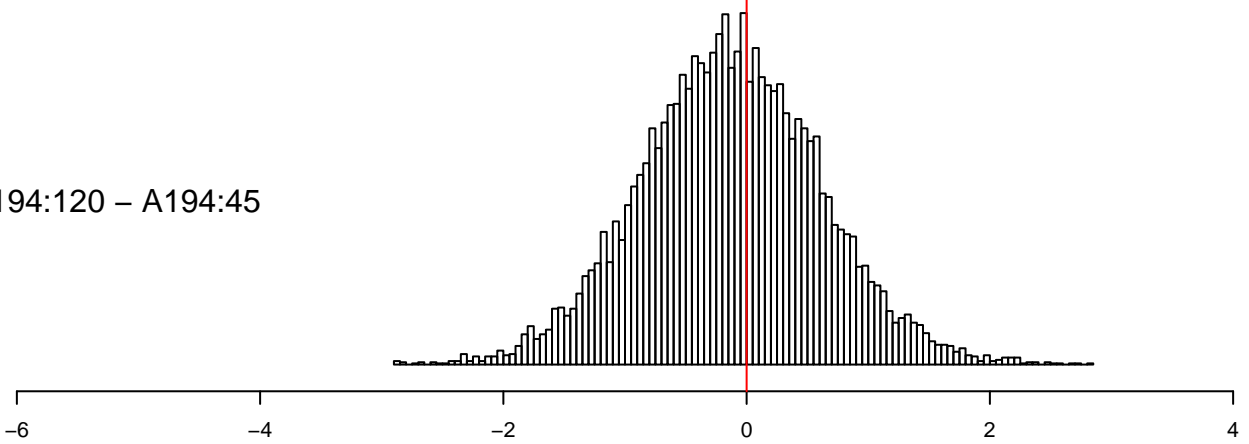

delta(C18:0 Fatty Acid)

A194:240

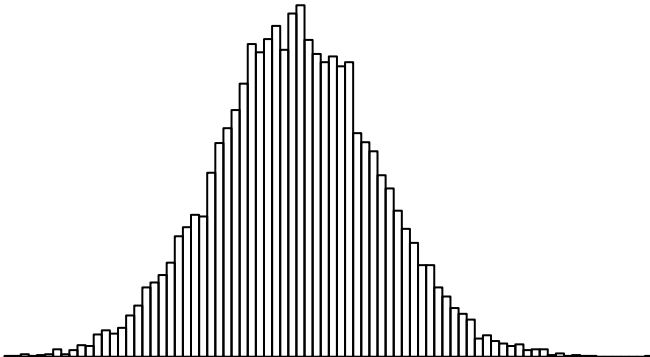

A194:120

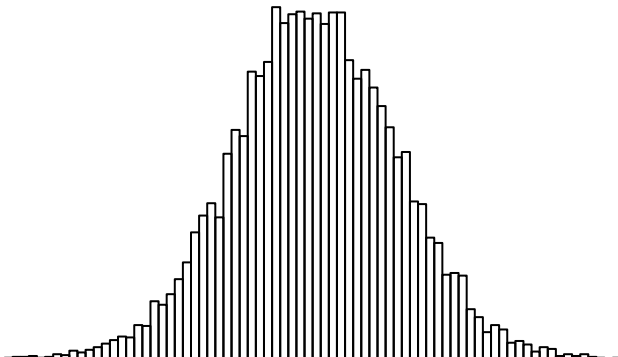

A194:45

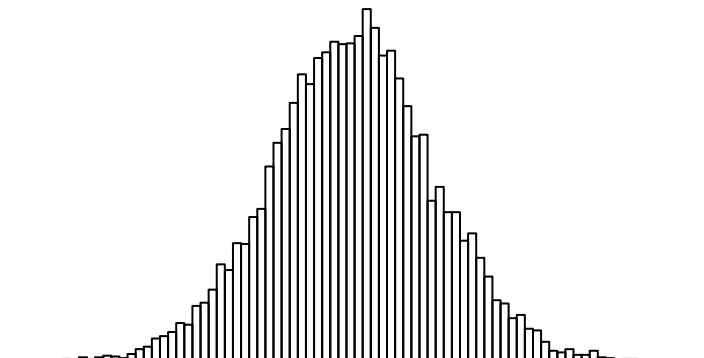

-9.0      -8.5      -8.0      -7.5      -7.0      -6.5      -6.0

Unidentified Fatty Acid 2

A194:240 – A194:120

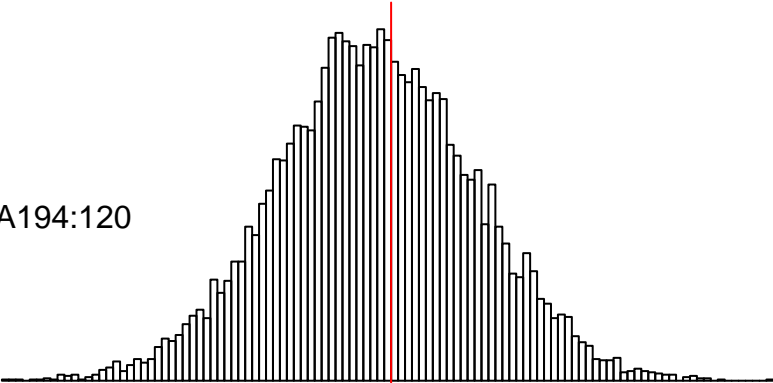

A194:240 – A194:45

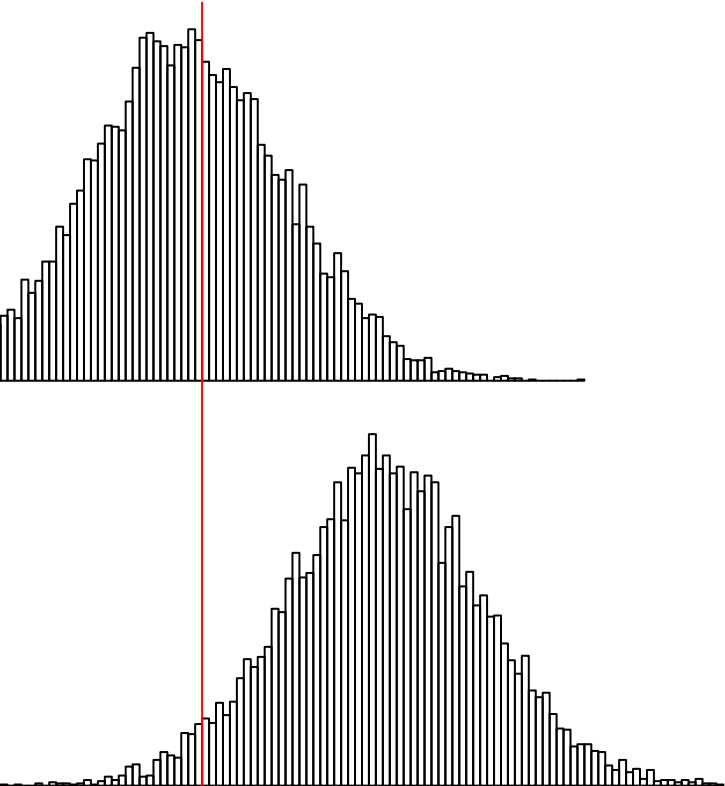

A194:120 – A194:45

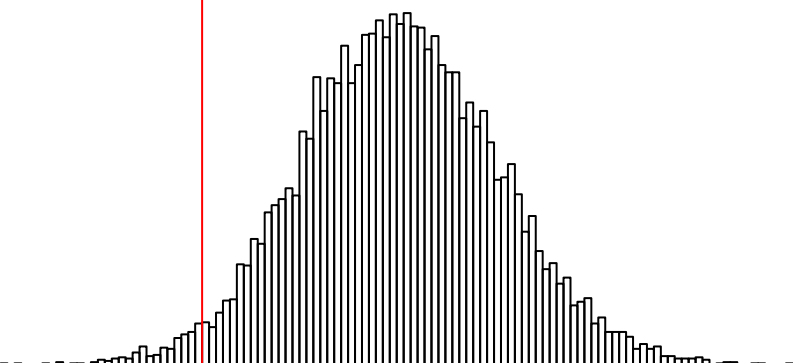

-1.5      -1.0      -0.5      0.0      0.5      1.0      1.5      2.0

delta(Unidentified Fatty Acid 2)



A194:240

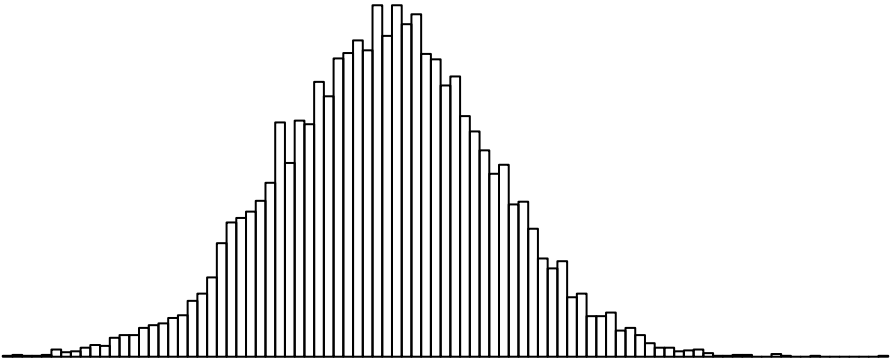

A194:120

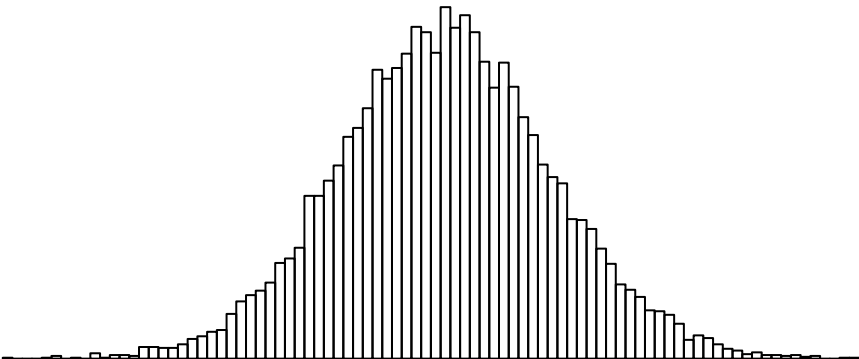

A194:45

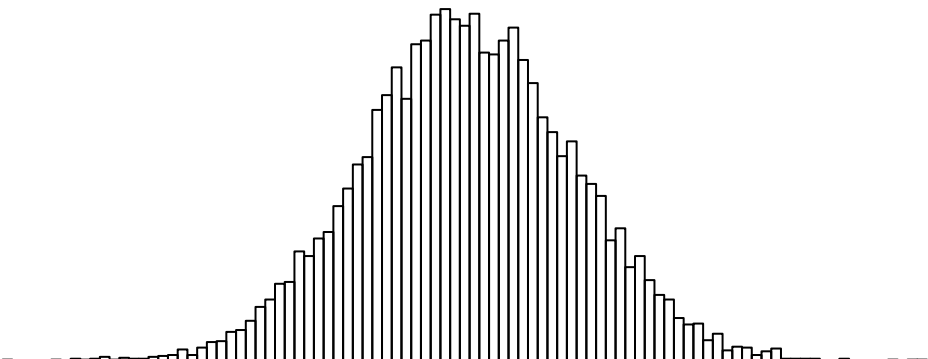

-4.5      -4.0      -3.5      -3.0      -2.5      -2.0

Glycerol

A194:240 – A194:120

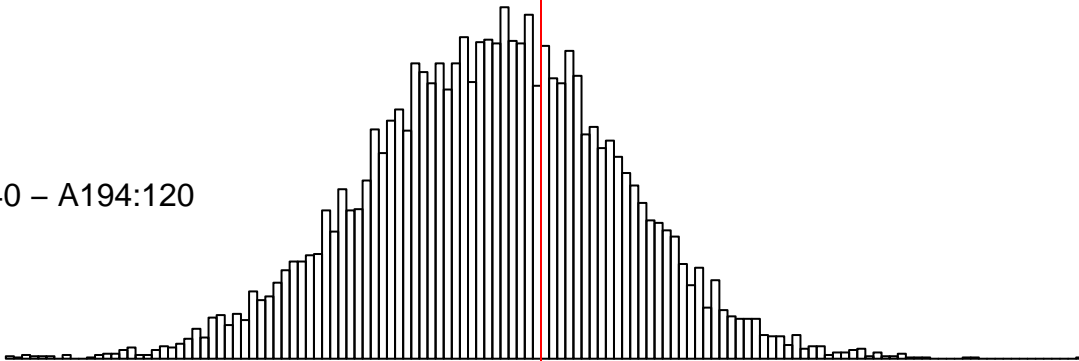

A194:240 – A194:45

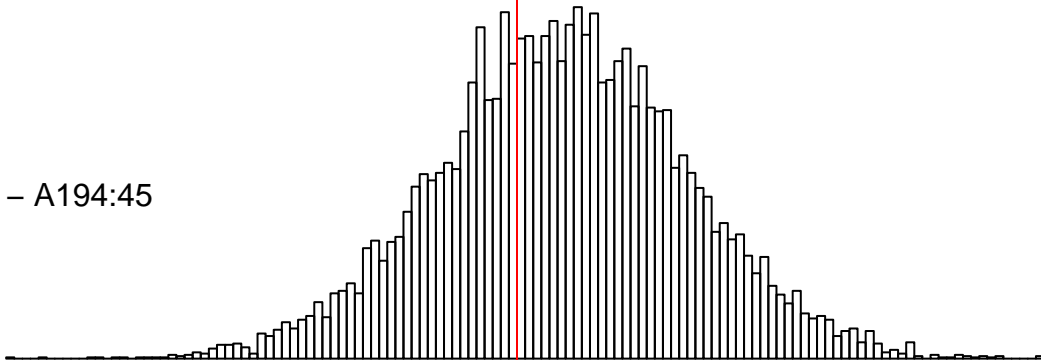

A194:120 – A194:45

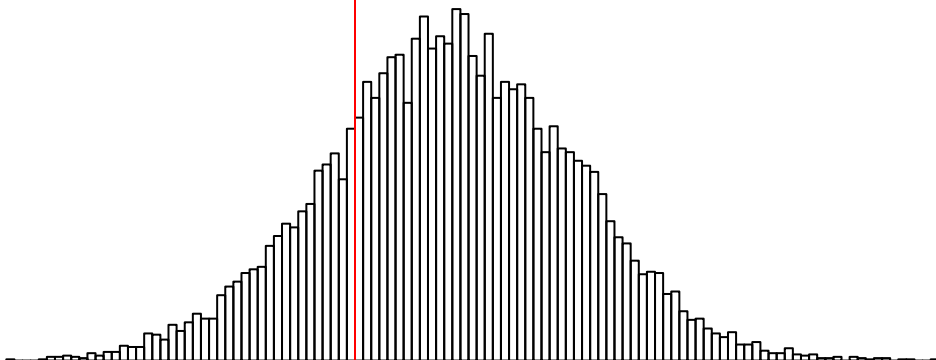

-1.5      -1.0      -0.5      0.0      0.5      1.0      1.5

delta(Glycerol)

A194:240

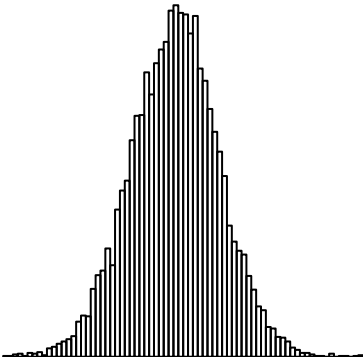

A194:120

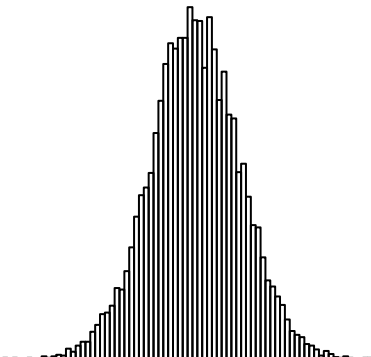

A194:45

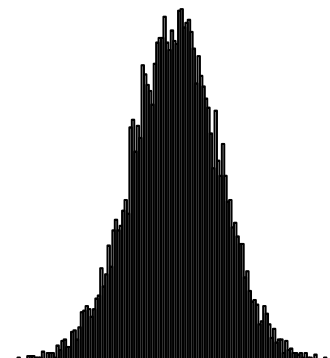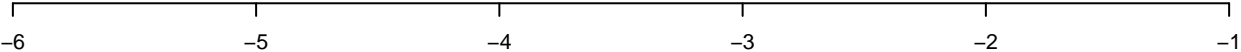

Inositol 1

A194:240 – A194:120

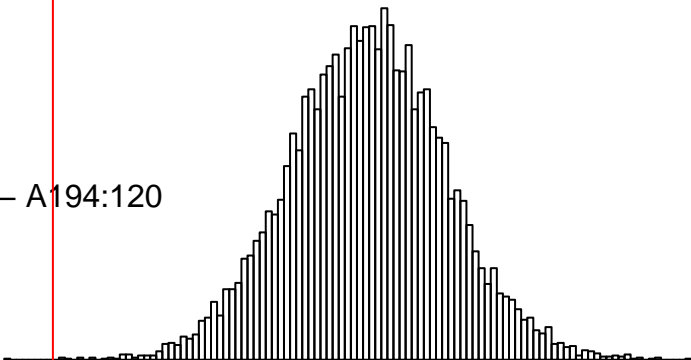

A194:240 – A194:45

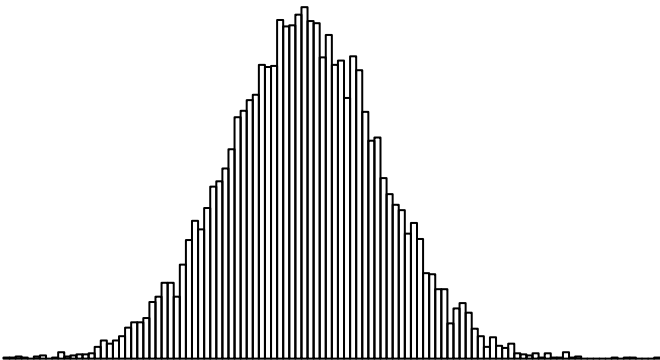

A194:120 – A194:45

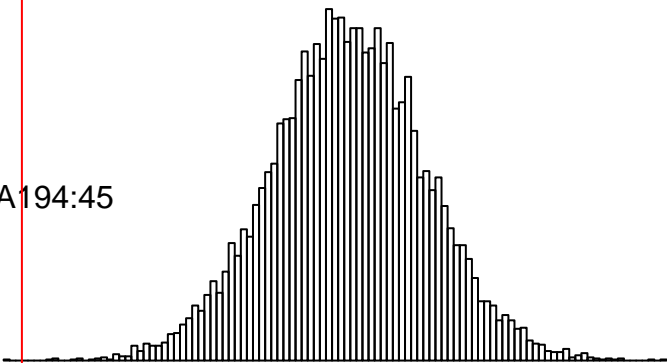

delta(Inositol 1)

A194:240

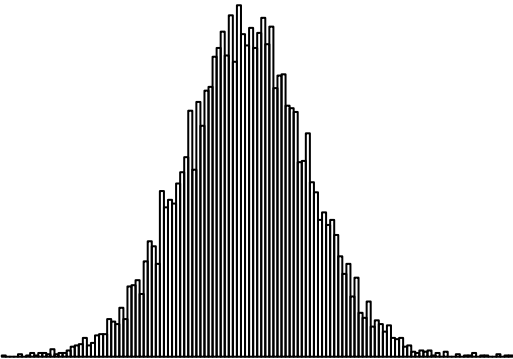

A194:120

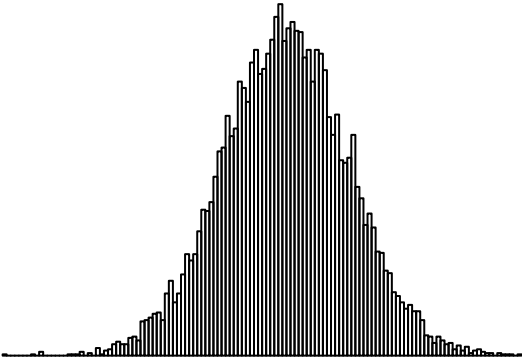

A194:45

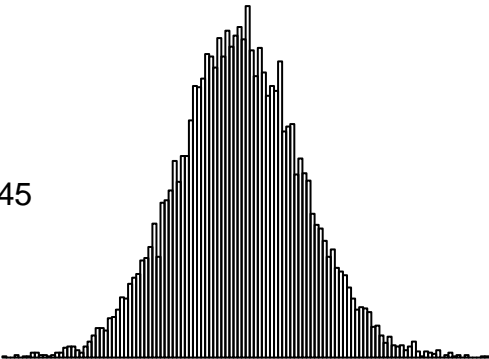

-6.5      -6.0      -5.5      -5.0      -4.5      -4.0      -3.5

Inositol 2

A194:240 – A194:120

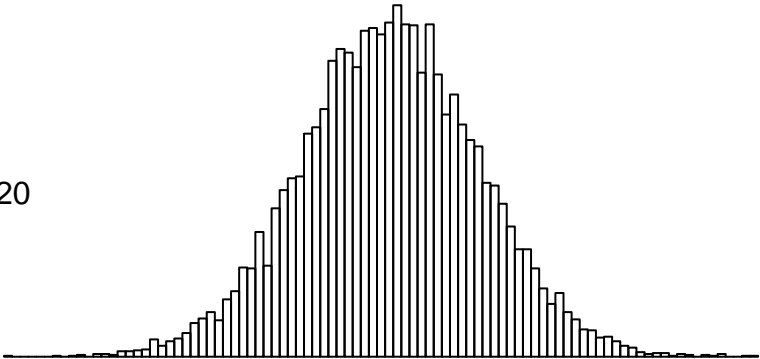

A194:240 – A194:45

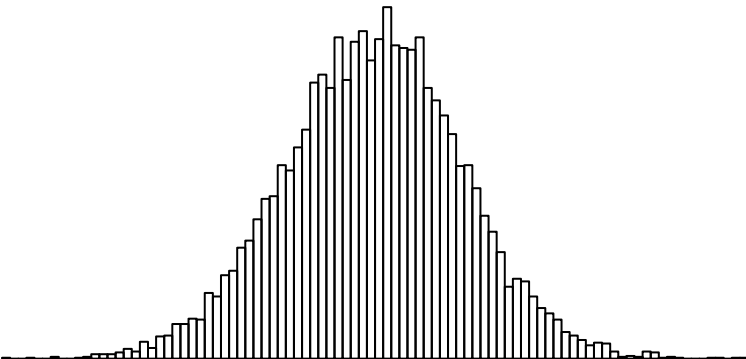

A194:120 – A194:45

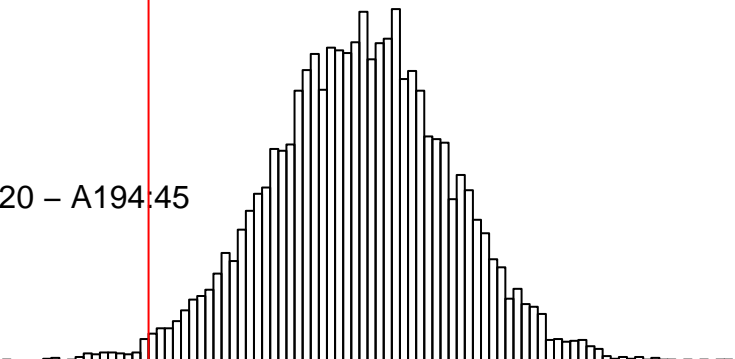

-0.5 0.0 0.5 1.0 1.5 2.0 2.5

delta(Inositol 2)

A194:240

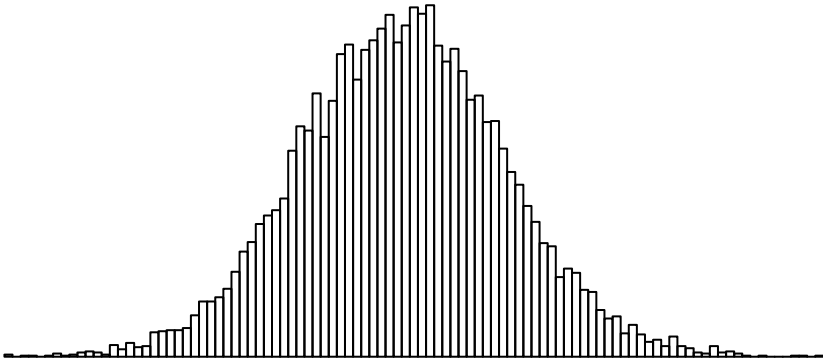

A194:120

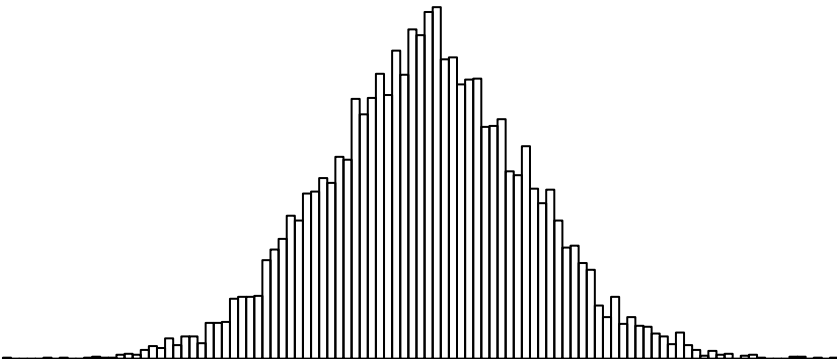

A194:45

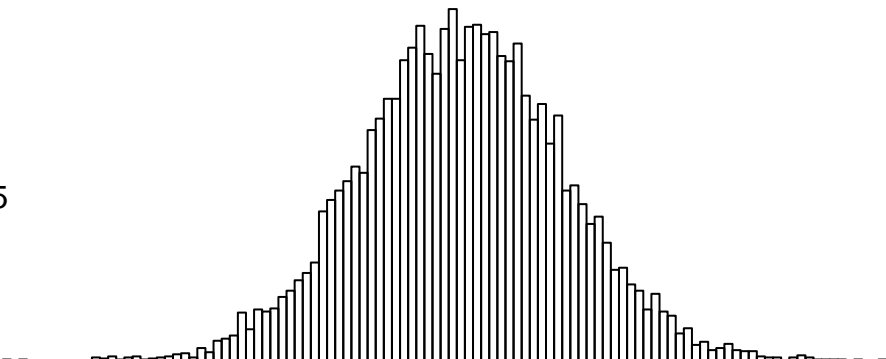

-10.5      -10.0      -9.5      -9.0      -8.5      -8.0      -7.5

C29 Sterol 1

A194:240 – A194:120

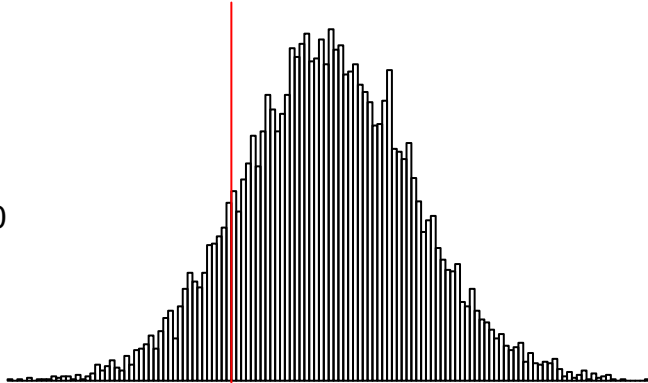

A194:240 – A194:45

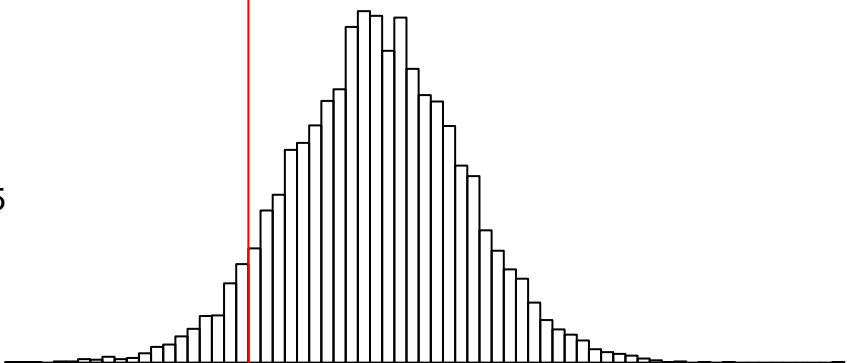

A194:120 – A194:45

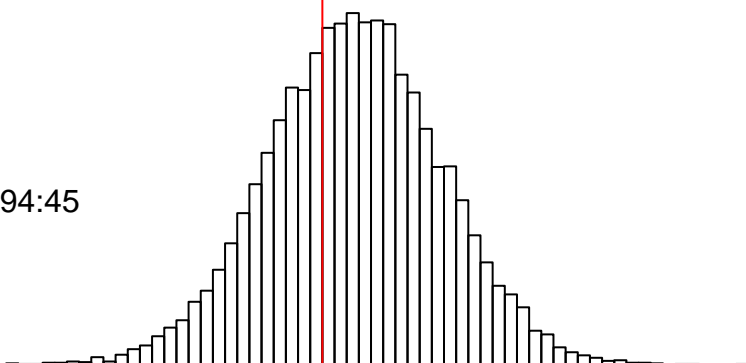

delta(C29 Sterol 1)



A194:240

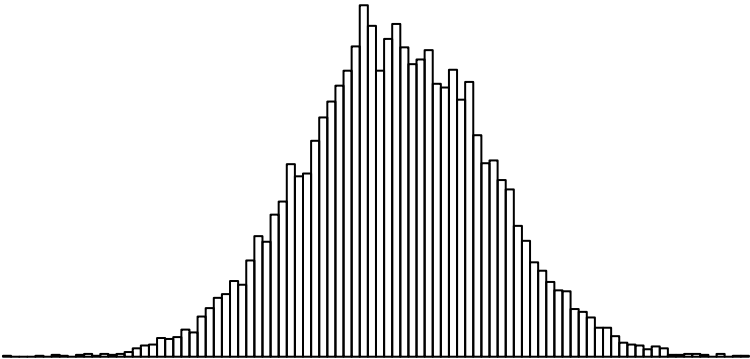

A194:120

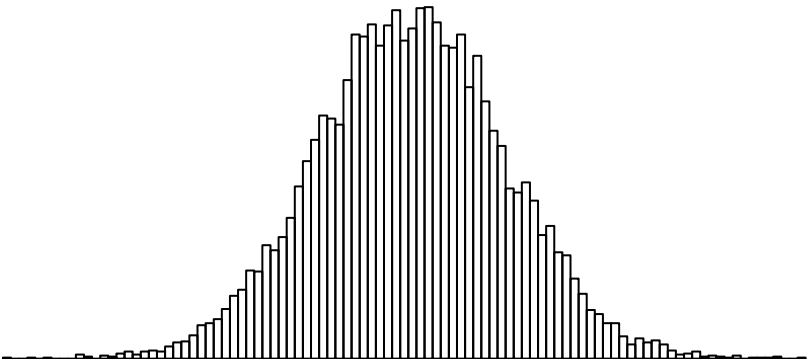

A194:45

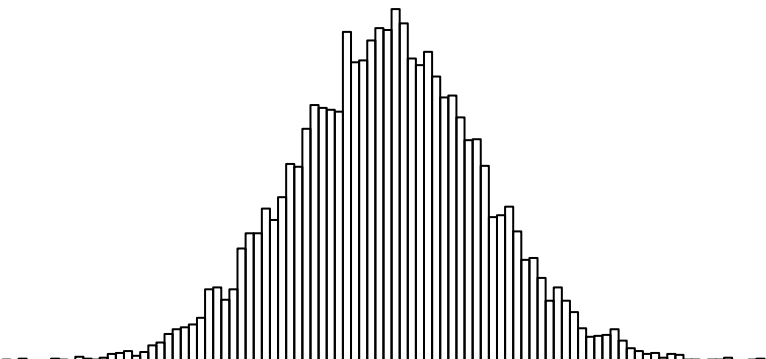

-10.0      -9.5      -9.0      -8.5      -8.0      -7.5      -7.0

C29 Stanol 1

A194:240 – A194:120

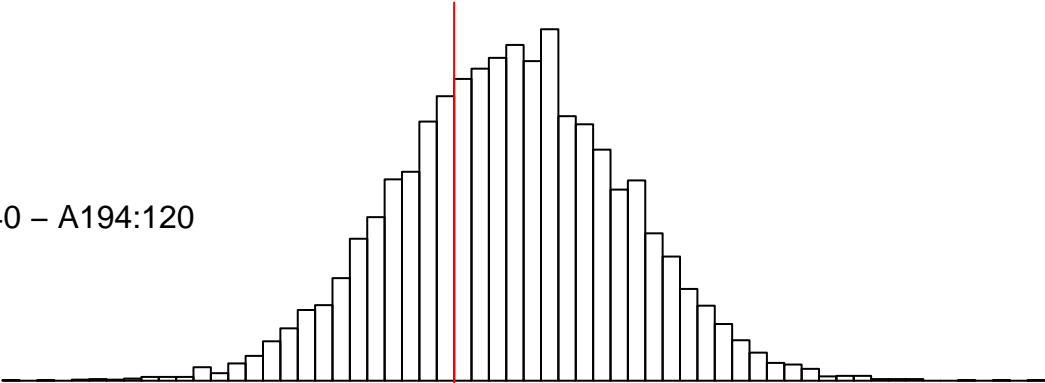

A194:240 – A194:45

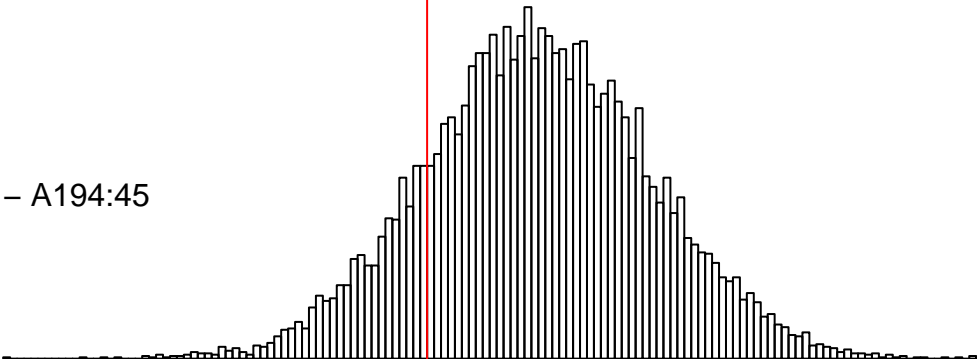

A194:120 – A194:45

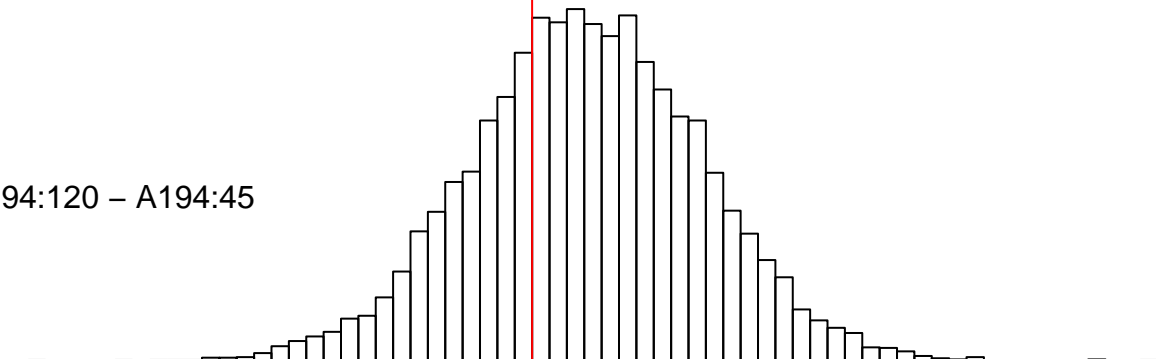

-1.5      -1.0      -0.5      0.0      0.5      1.0      1.5      2.0

delta(C29 Stanol 1)

A194:240

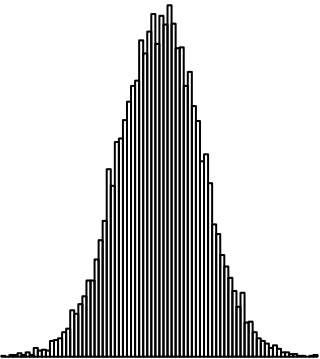

A194:120

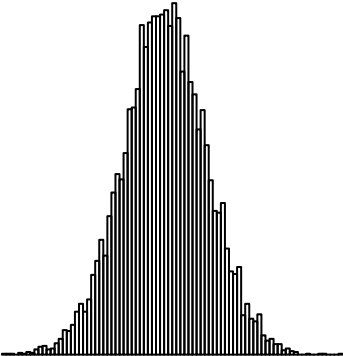

A194:45

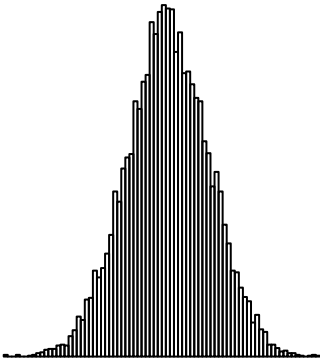

-11      -10      -9      -8      -7      -6      -5

C27<sup>5,22</sup> Sterol

A194:240 – A194:120

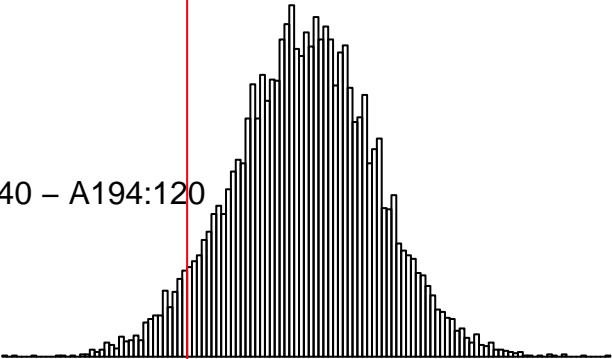

A194:240 – A194:45

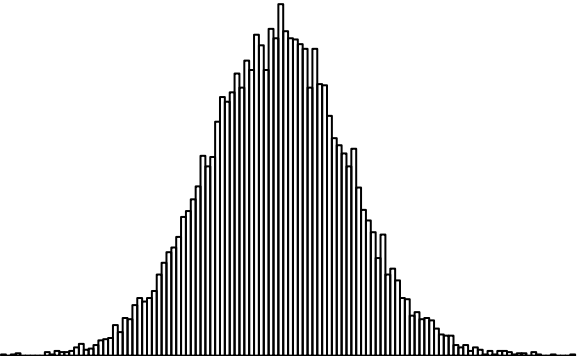

A194:120 – A194:45

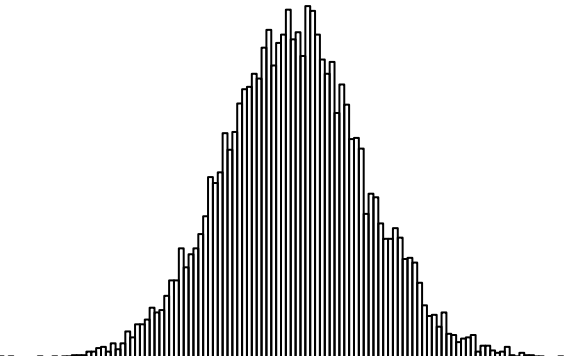

-1 0 1 2 3 4

delta(C27"5,22 Sterol)

A194:240

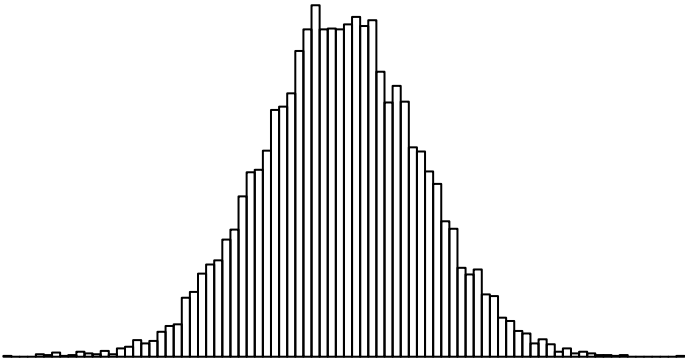

A194:120

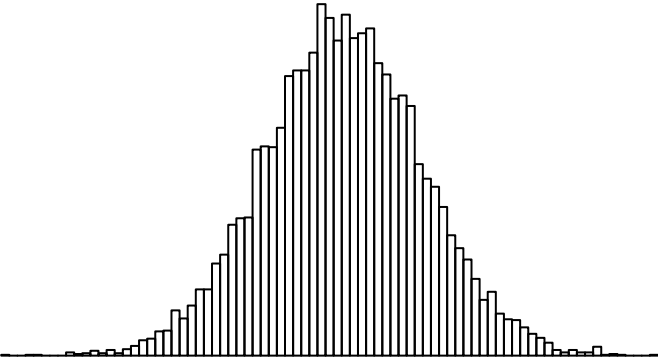

A194:45

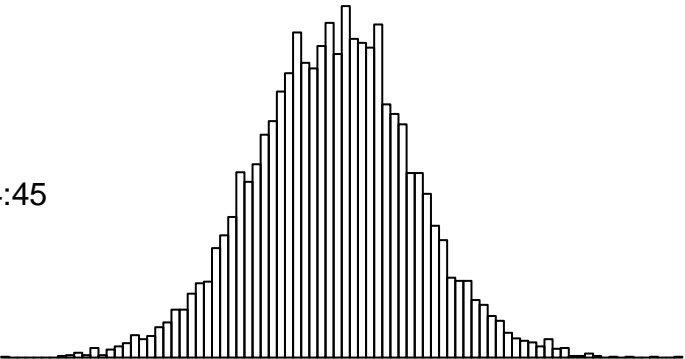

-7.0 -6.5 -6.0 -5.5 -5.0 -4.5 -4.0

C27"5 Sterol

A194:240 – A194:120

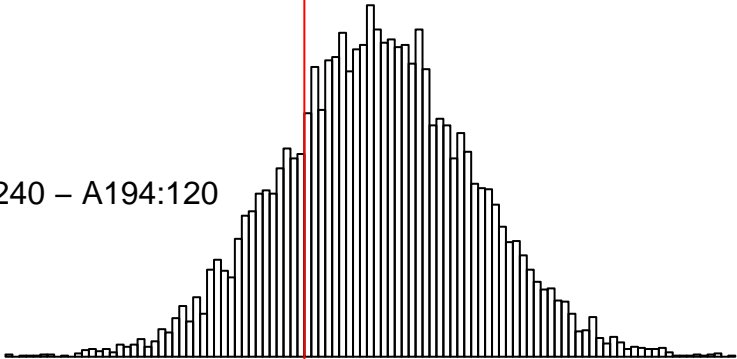

A194:240 – A194:45

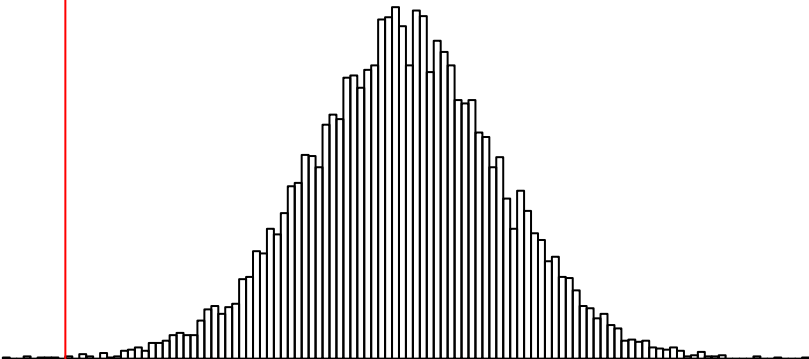

A194:120 – A194:45

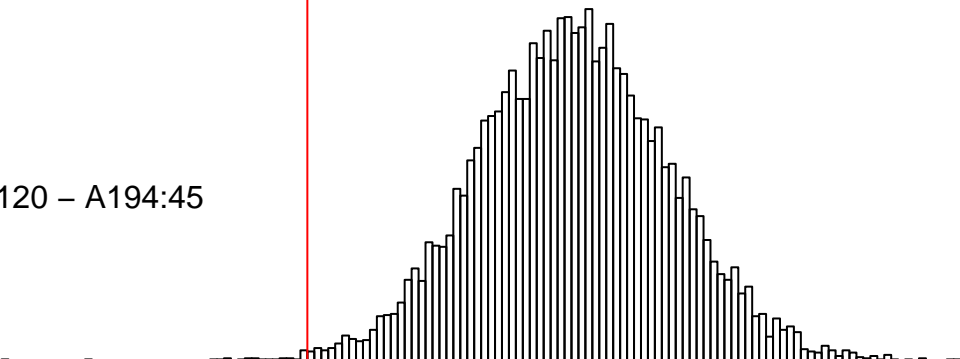

-1.0      -0.5      0.0      0.5      1.0      1.5      2.0      2.5

delta(C27<sup>5</sup> Sterol)

A194:240

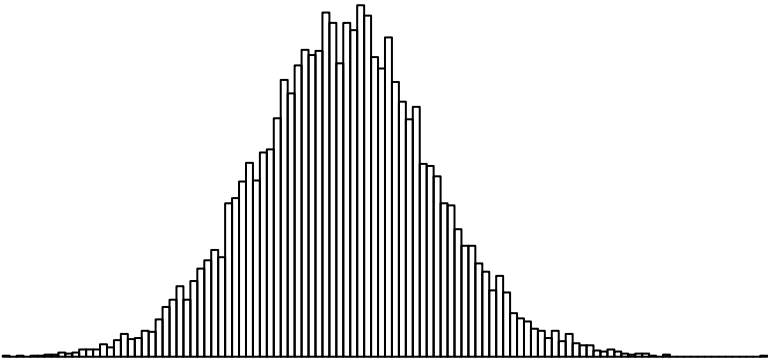

A194:120

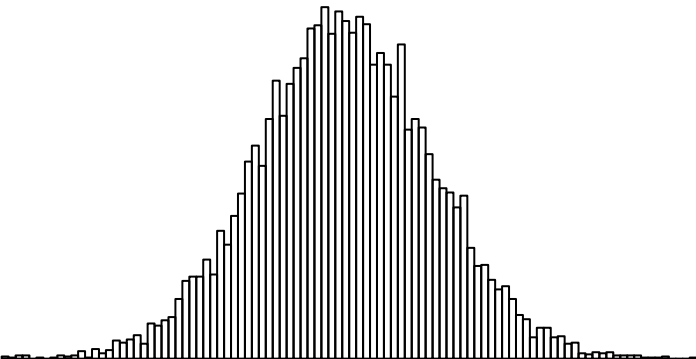

A194:45

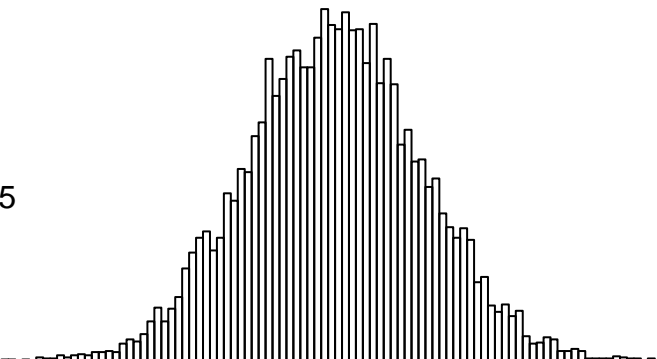

-8.5      -8.0      -7.5      -7.0      -6.5      -6.0      -5.5      -5.0

C28<sup>5,22</sup> Sterol

A194:240 – A194:120

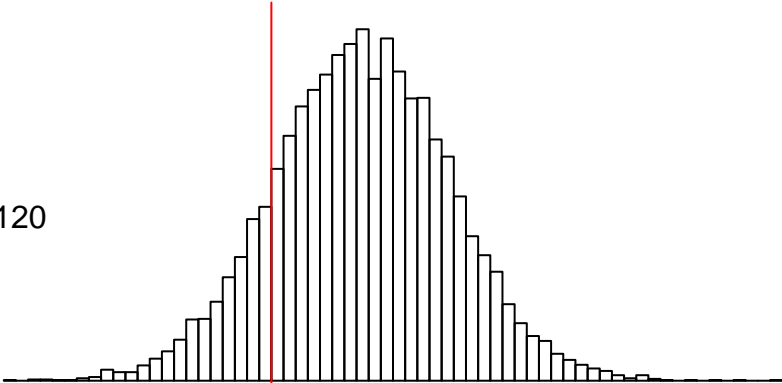

A194:240 – A194:45

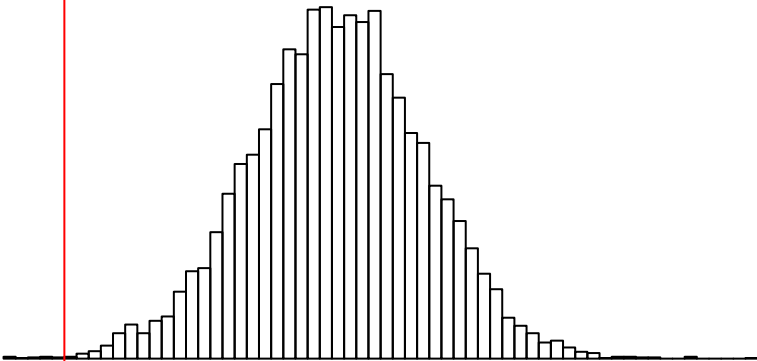

A194:120 – A194:45

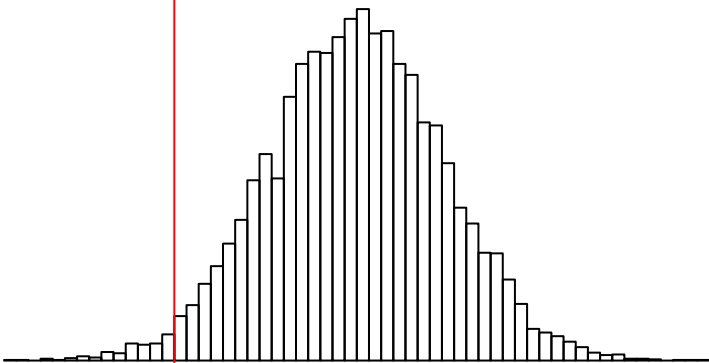

delta(C28''5,22 Sterol)



A194:240

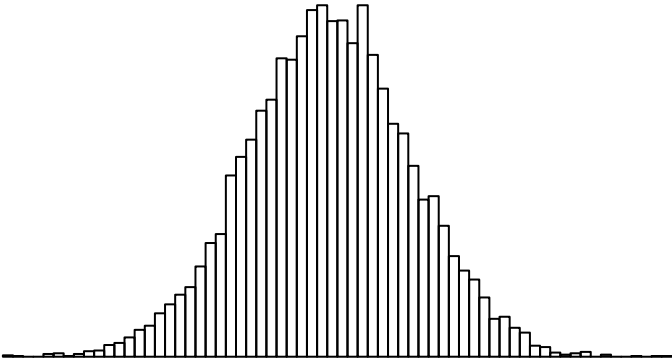

A194:120

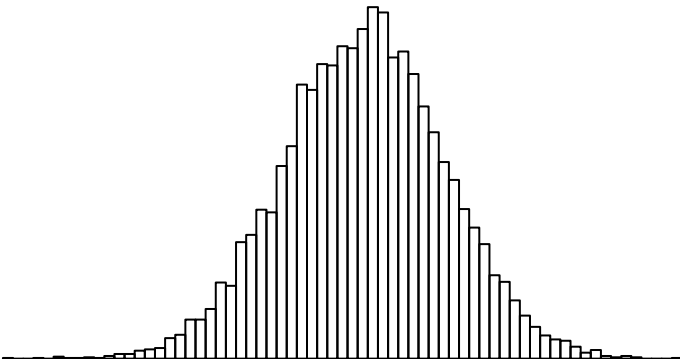

A194:45

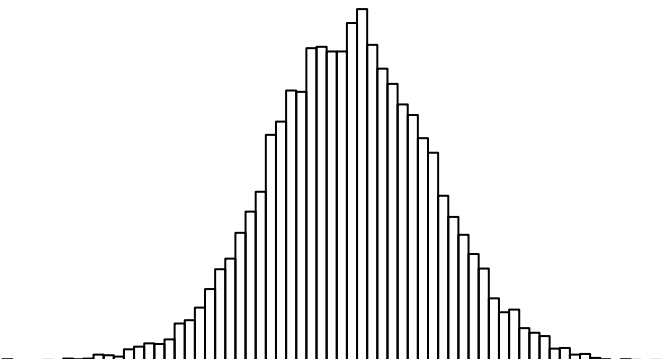

C28<sup>5</sup> Sterol

A194:240 – A194:120

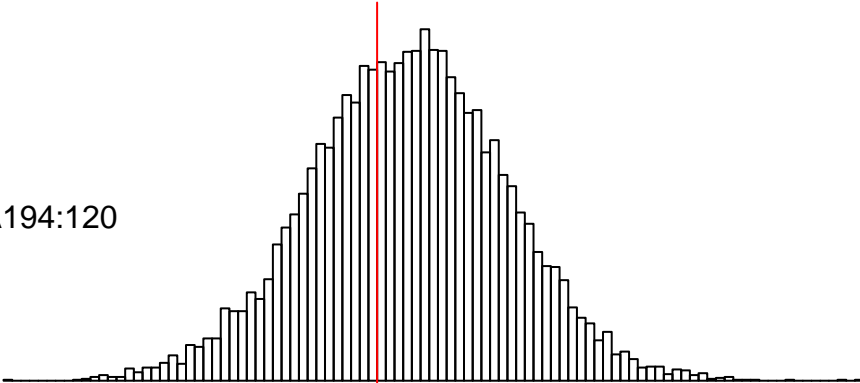

A194:240 – A194:45

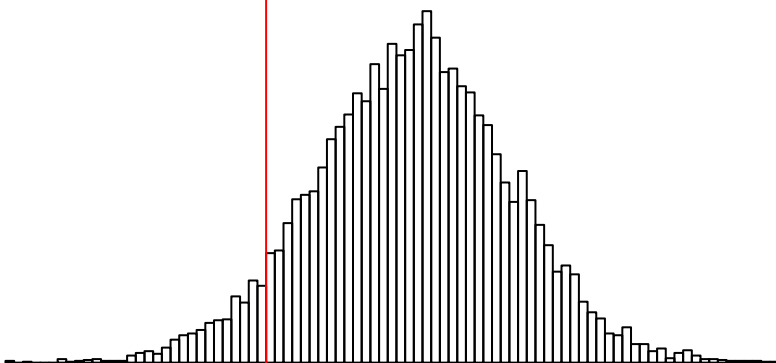

A194:120 – A194:45

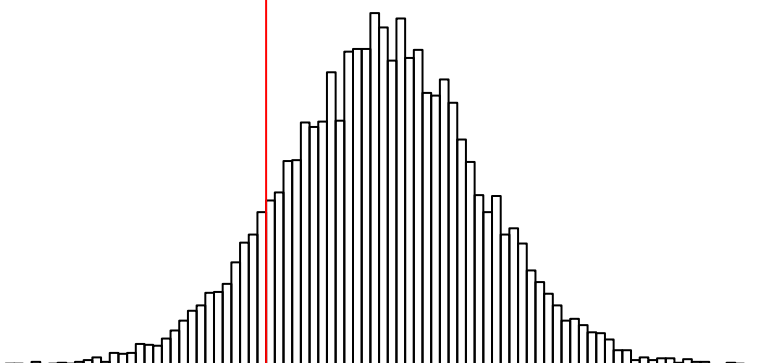

delta(C28"5 Sterol)

A194:240

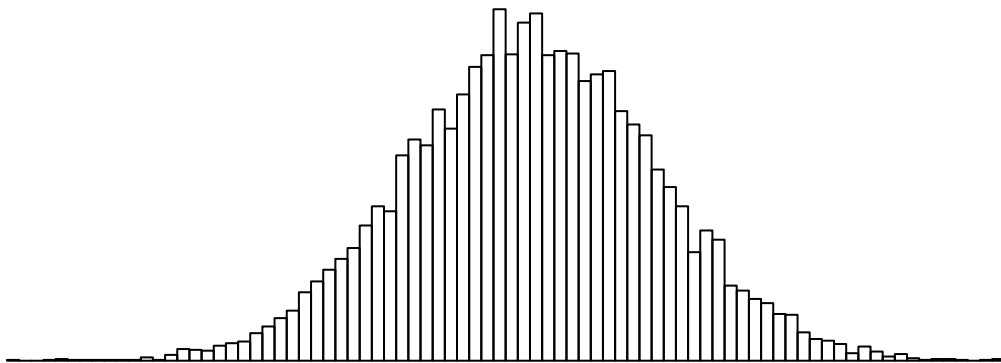

A194:120

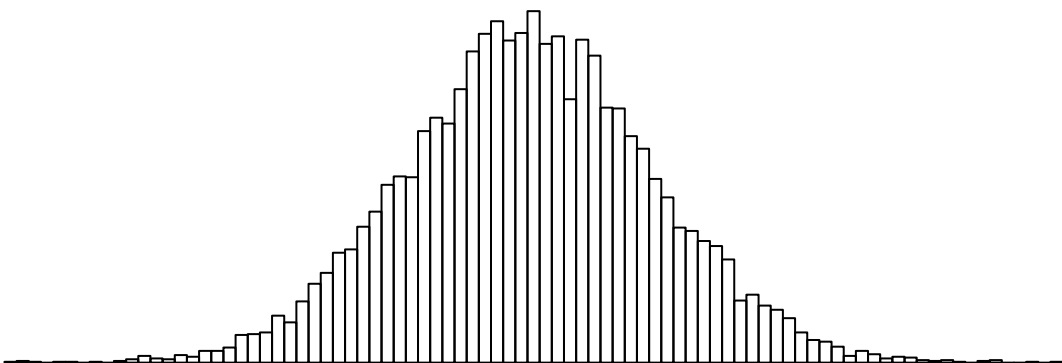

A194:45

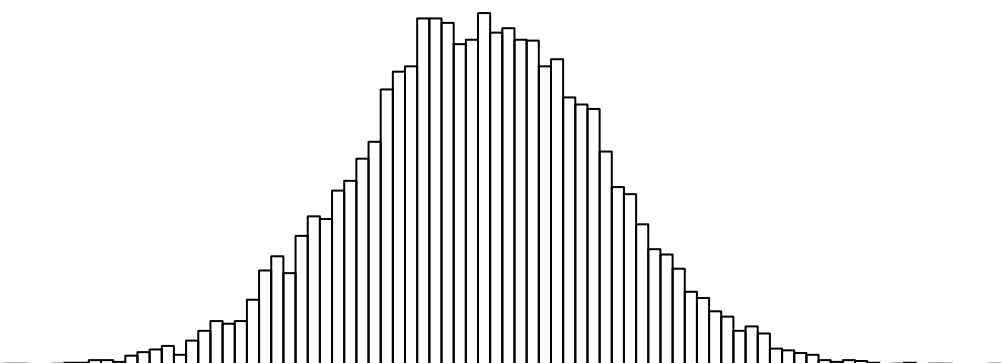

-9 -8 -7 -6 -5 -4

C29"5,22 Sterol

A194:240 – A194:120

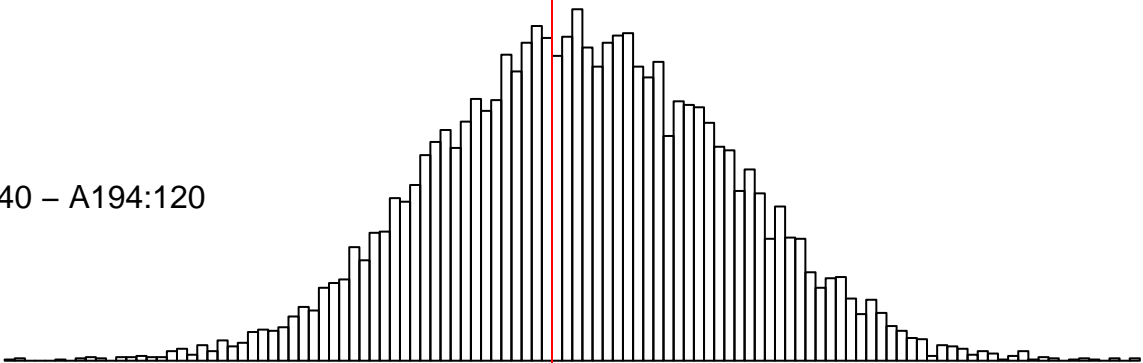

A194:240 – A194:45

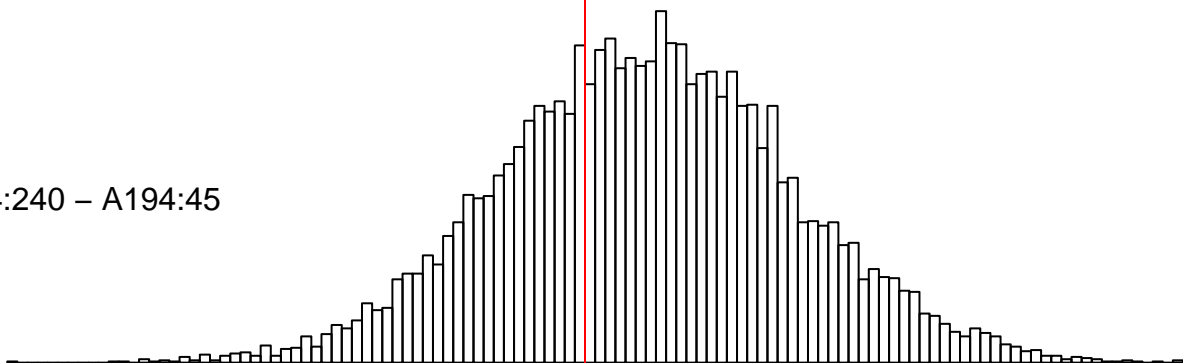

A194:120 – A194:45

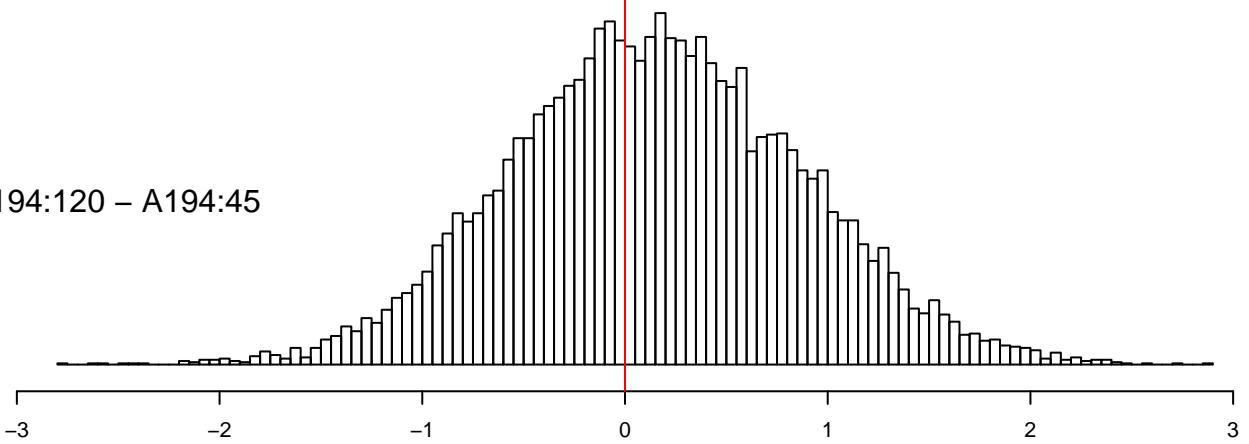

delta(C29'5,22 Sterol)

A194:240

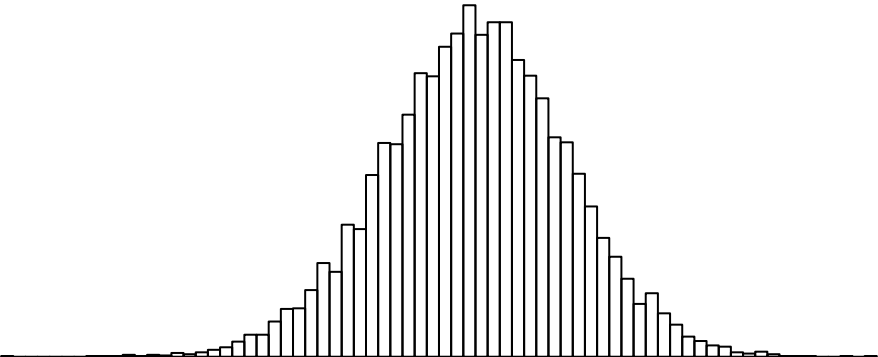

A194:120

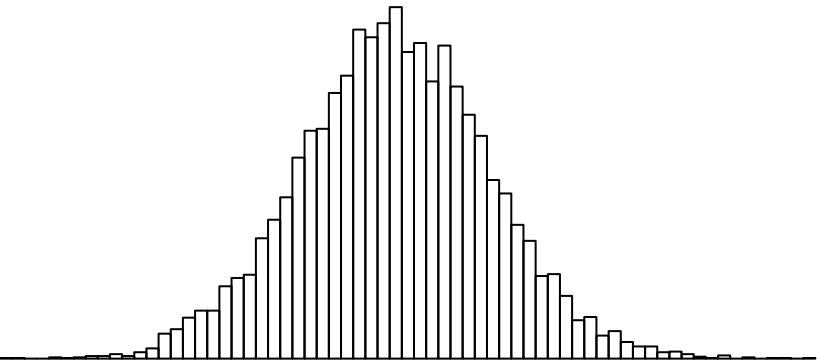

A194:45

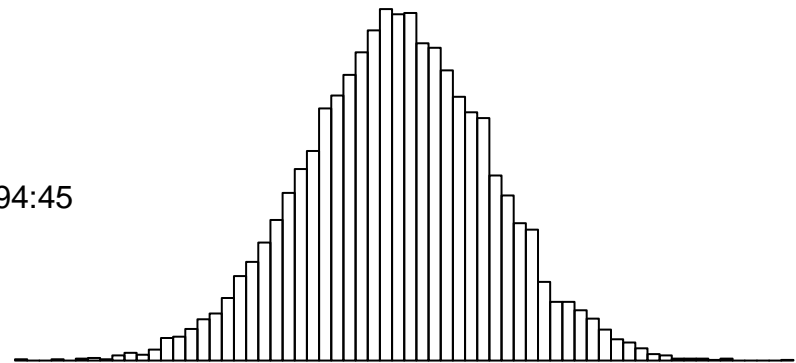

C29 Sterol 2

A194:240 – A194:120

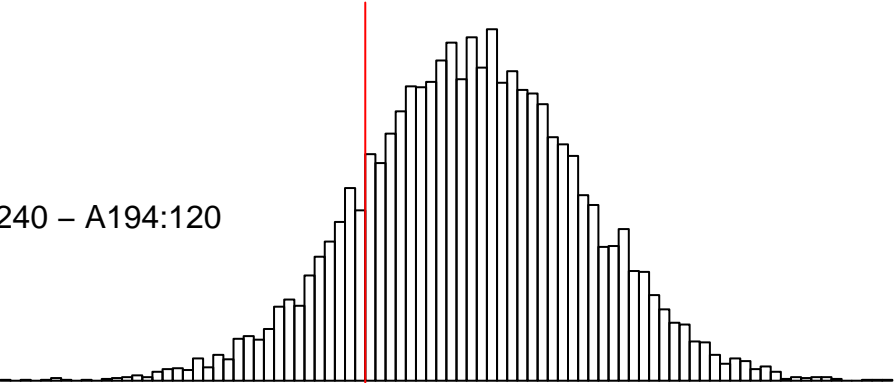

A194:240 – A194:45

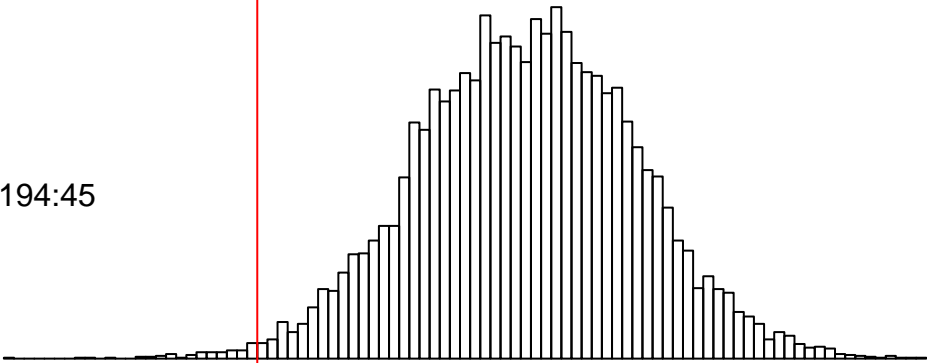

A194:120 – A194:45

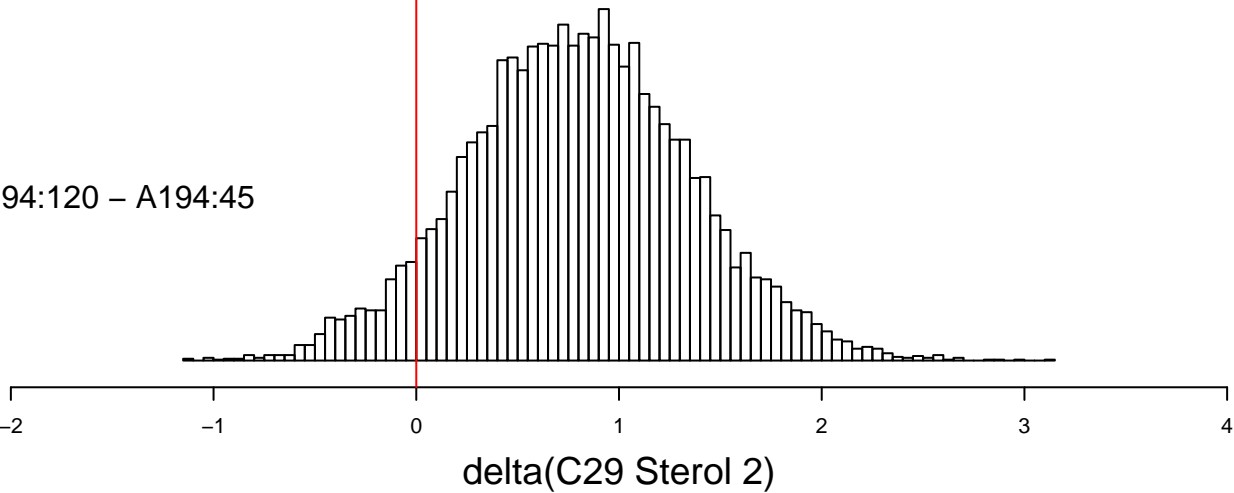

A194:240

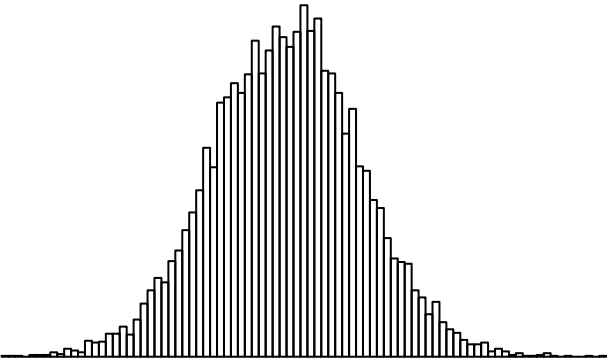

A194:120

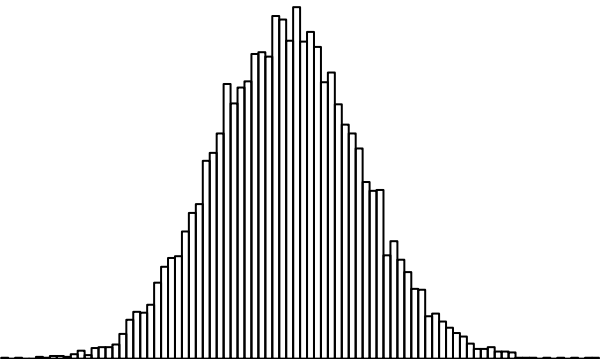

A194:45

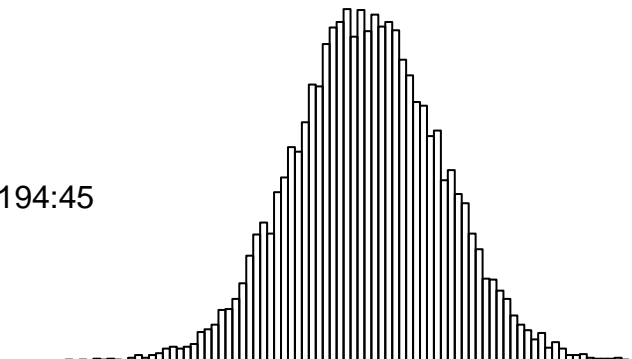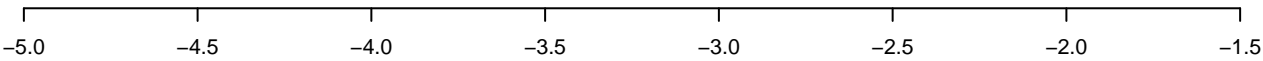

C29 Stanol 2

A194:240 – A194:120

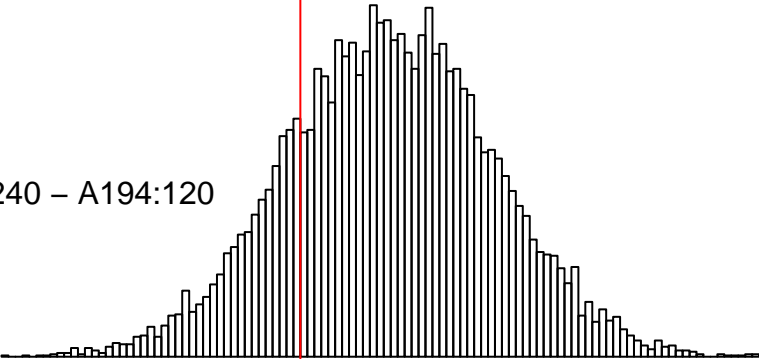

A194:240 – A194:45

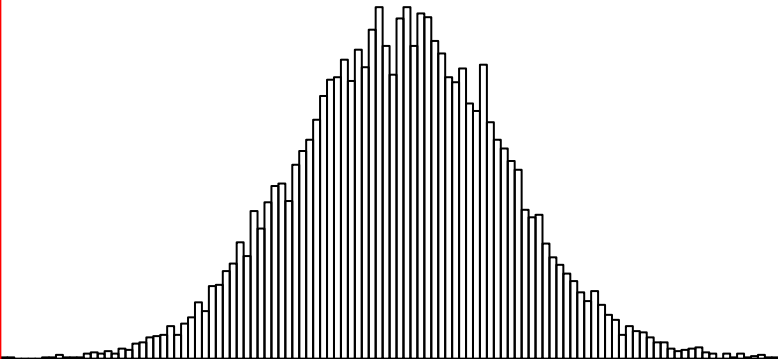

A194:120 – A194:45

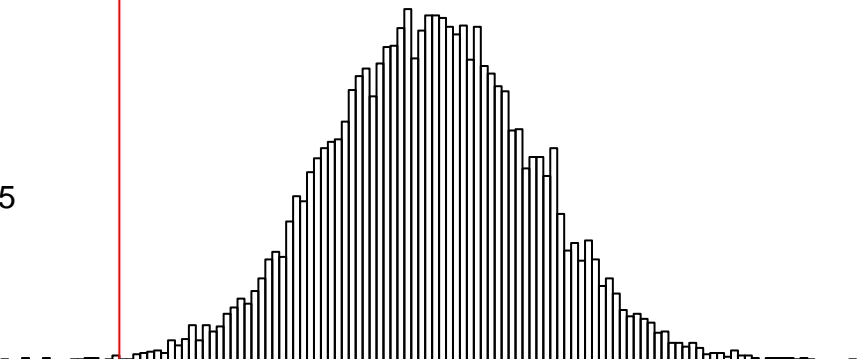

-1.0 -0.5 0.0 0.5 1.0 1.5 2.0 2.5

delta(C29 Stanol 2)



A194:240

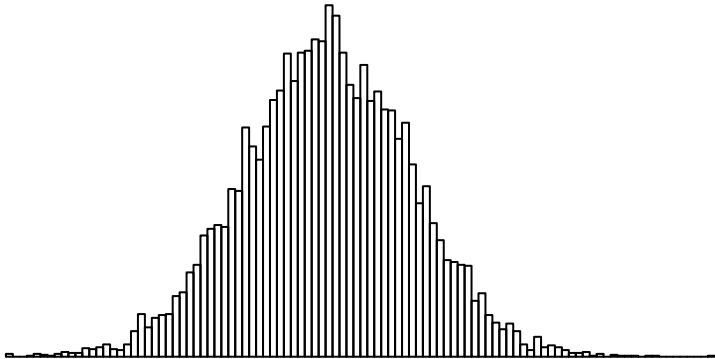

A194:120

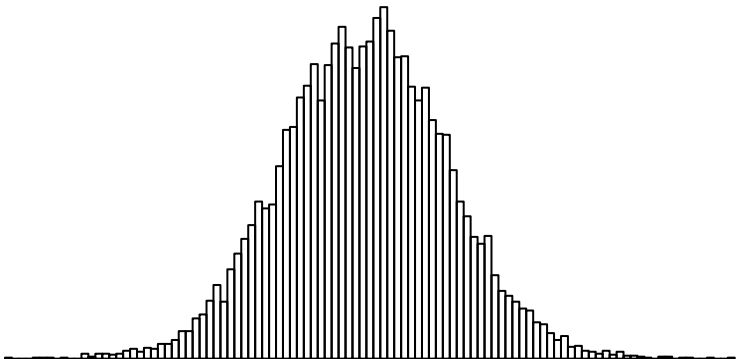

A194:45

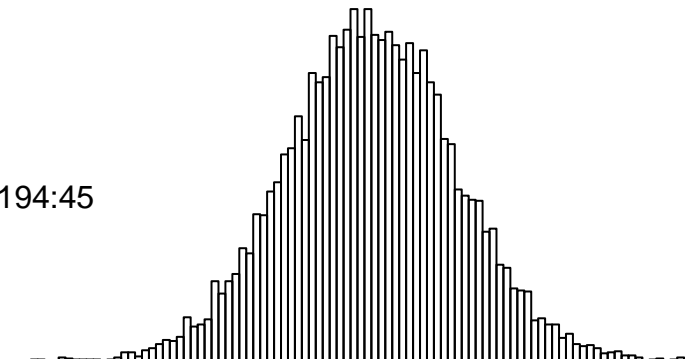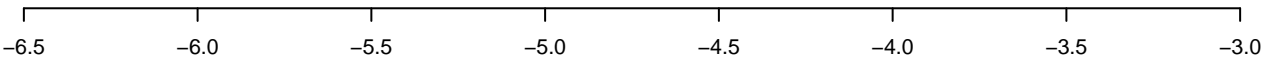

C29 Sterol 3

A194:240 – A194:120

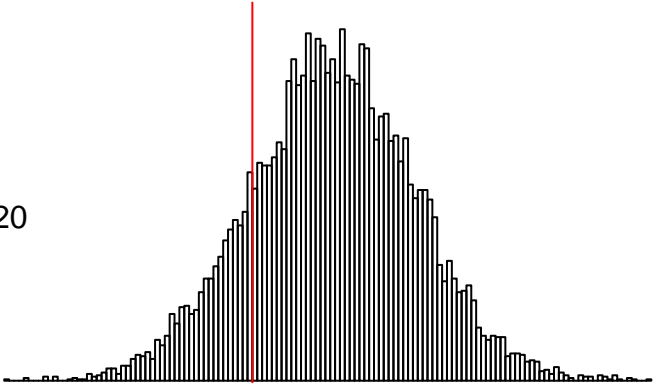

A194:240 – A194:45

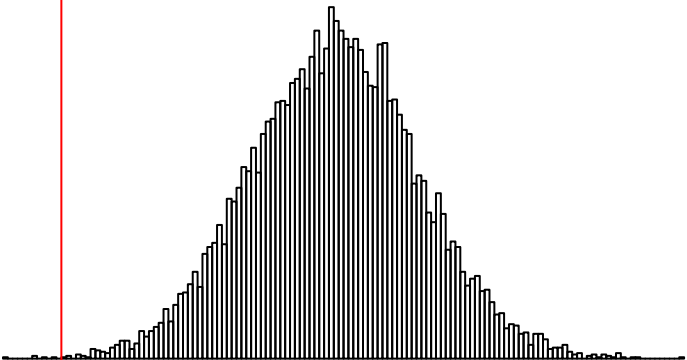

A194:120 – A194:45

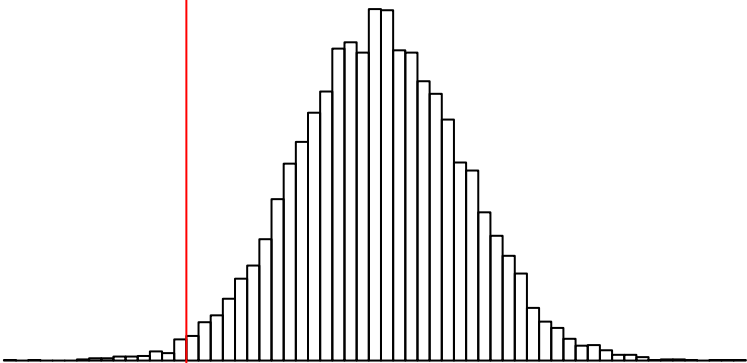

-2 -1 0 1 2 3

delta(C29 Sterol 3)

A194:240

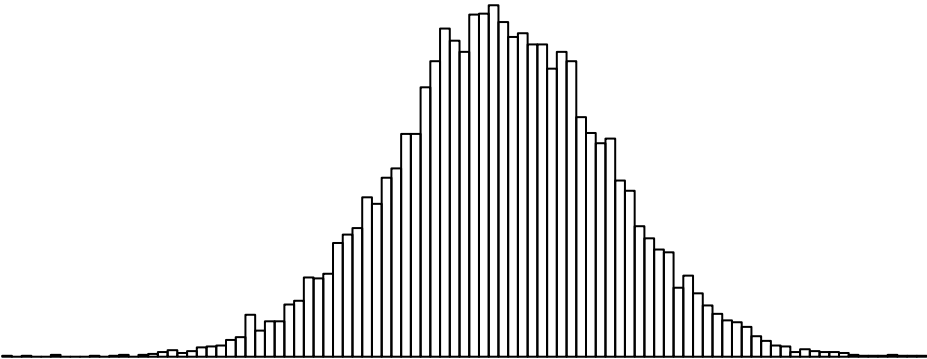

A194:120

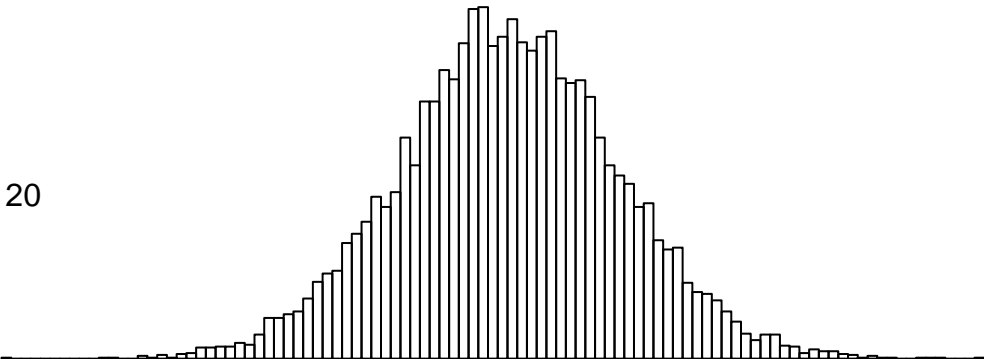

A194:45

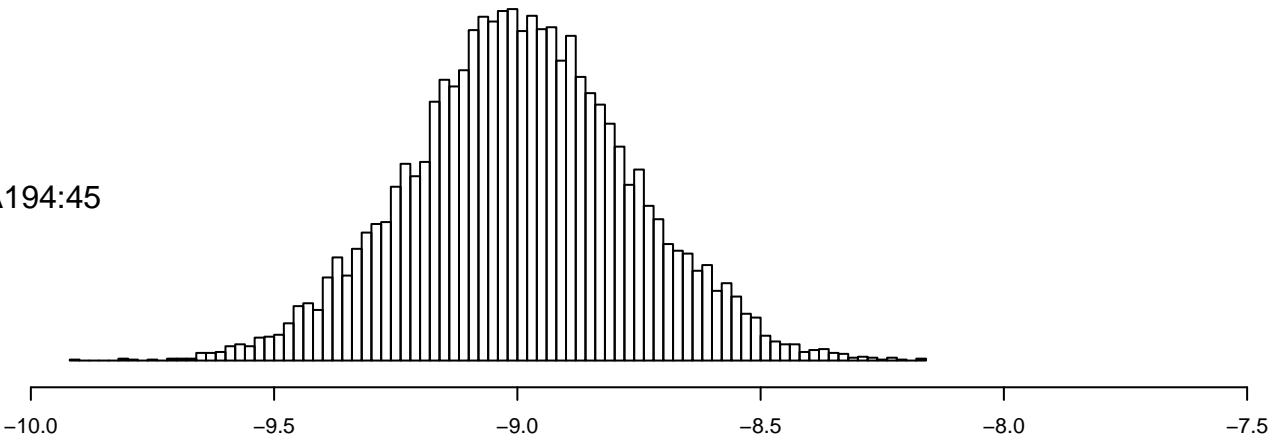

C30 Sterol

A194:240 – A194:120

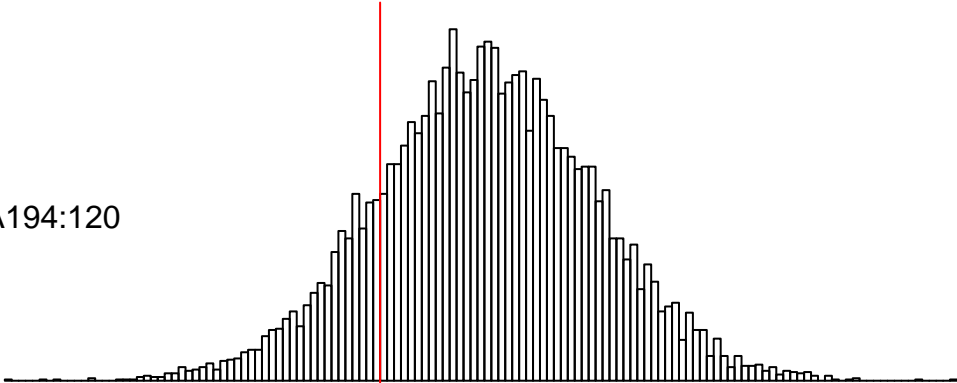

A194:240 – A194:45

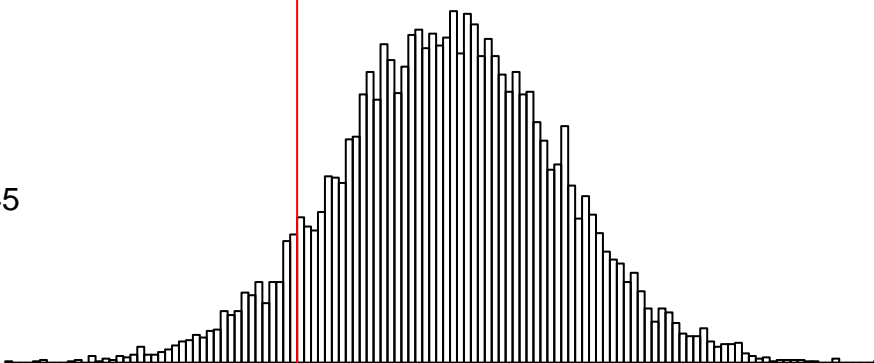

A194:120 – A194:45

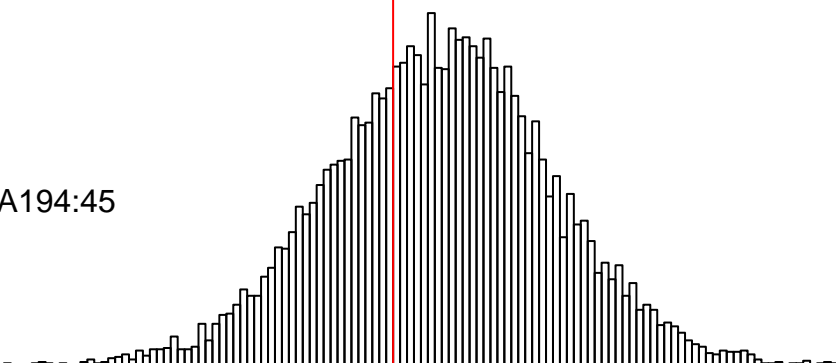

-1.5      -1.0      -0.5      0.0      0.5      1.0      1.5      2.0

delta(C30 Sterol)

A194:240

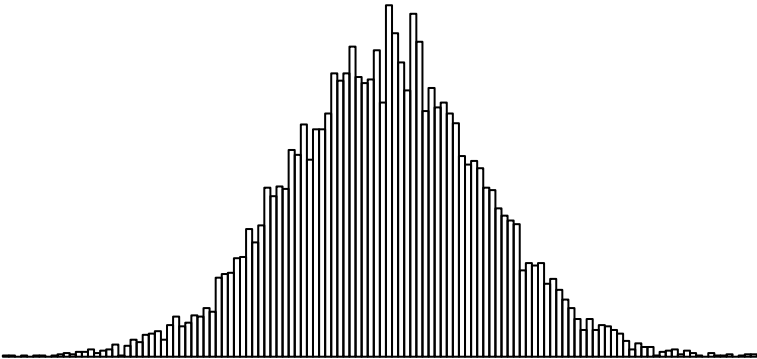

A194:120

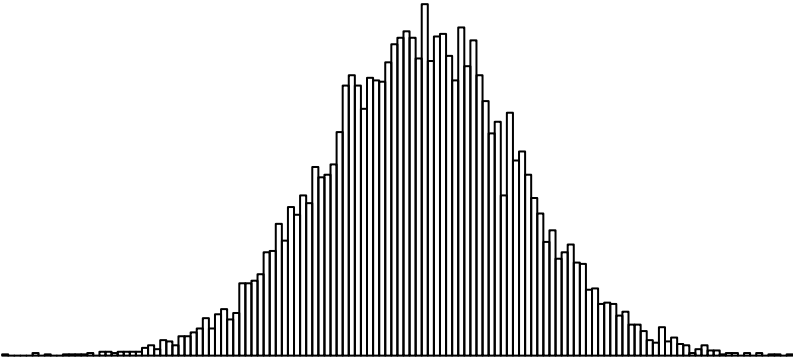

A194:45

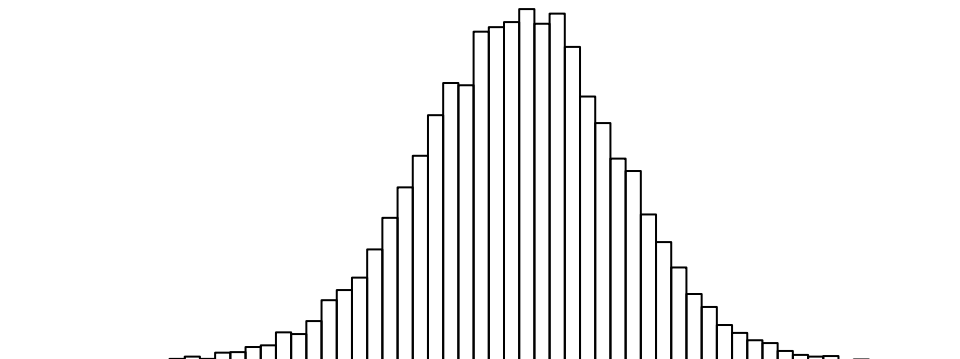

-8

-7

-6

-5

C30<sup>5</sup> Sterol

A194:240 – A194:120

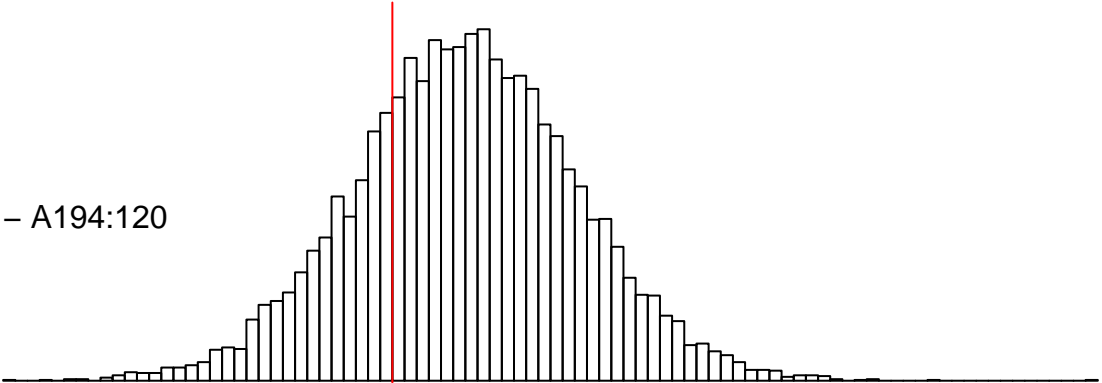

A194:240 – A194:45

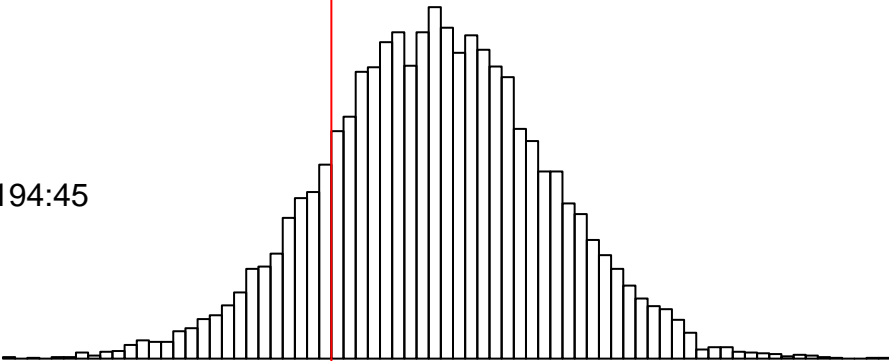

A194:120 – A194:45

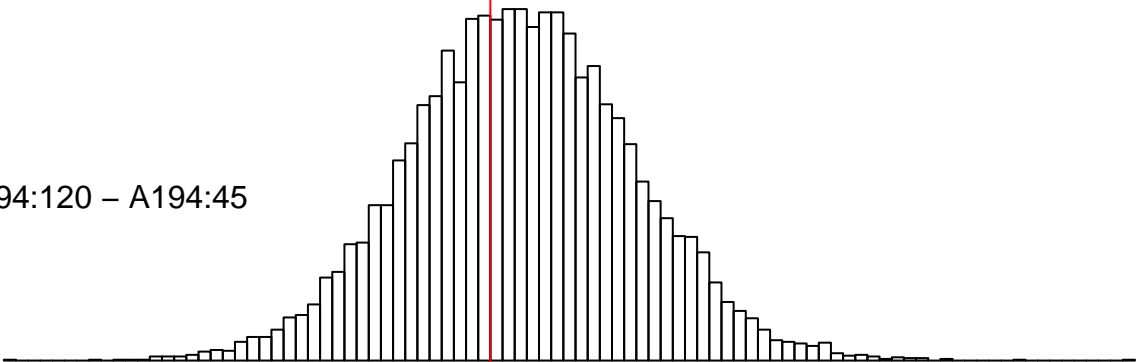

-2

-1

0

1

2

3

delta(C30"5 Sterol)

A194:240

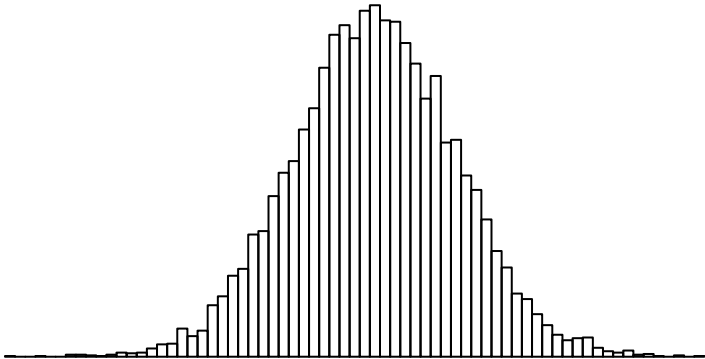

A194:120

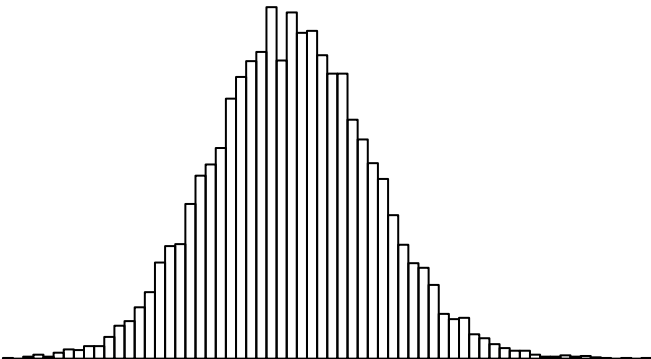

A194:45

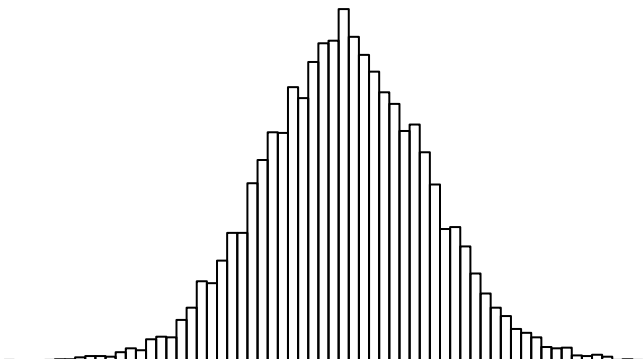

-9      -8      -7      -6      -5      -4      -3

Open Hexose 1

A194:240 – A194:120

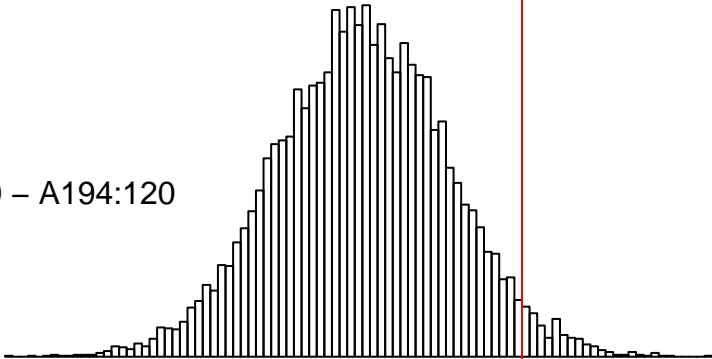

A194:240 – A194:45

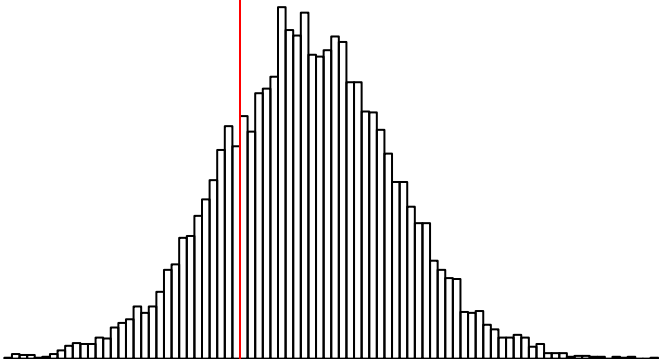

A194:120 – A194:45

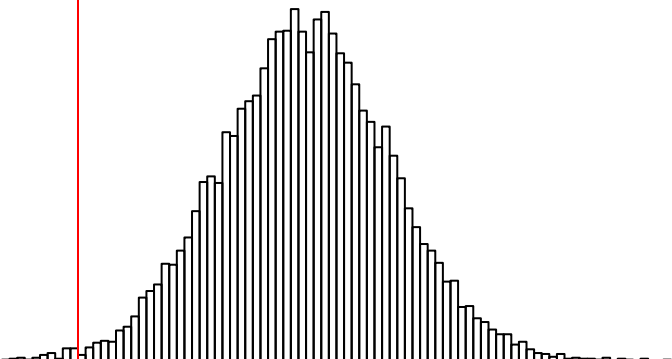

-4 -2 0 2 4

delta(Open Hexose 1)



A194:240

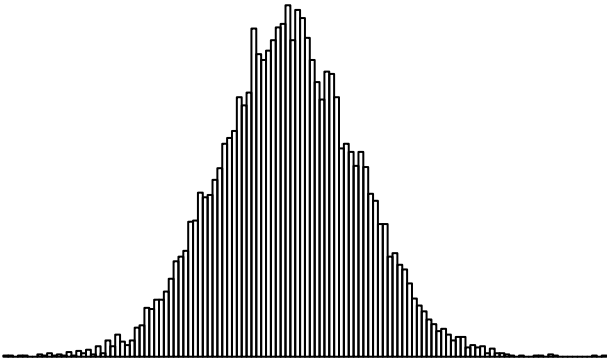

A194:120

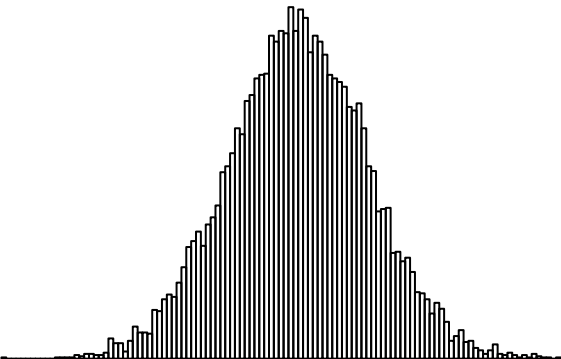

A194:45

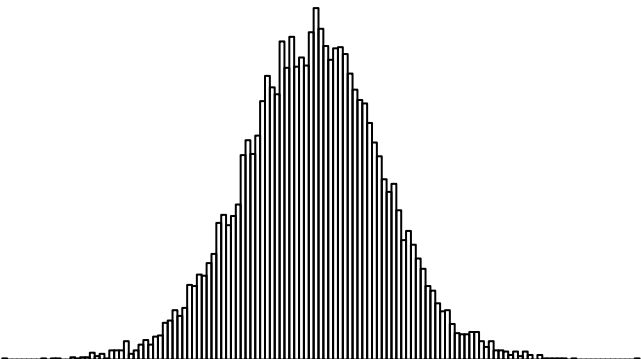

-10      -9      -8      -7      -6      -5

Closed Hexose 1

A194:240 – A194:120

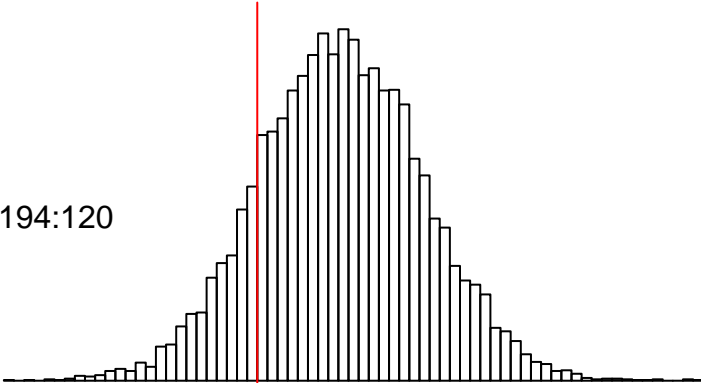

A194:240 – A194:45

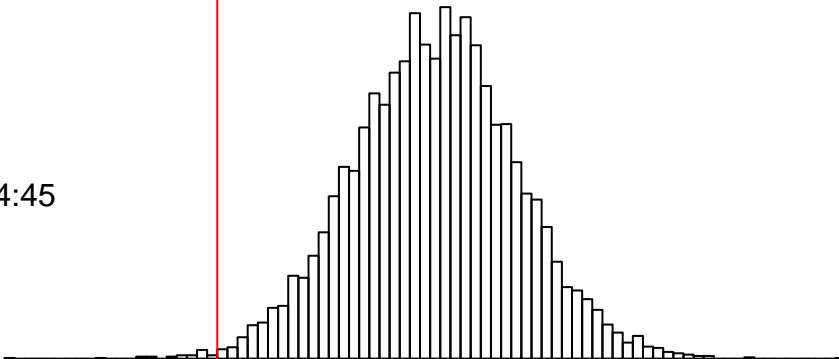

A194:120 – A194:45

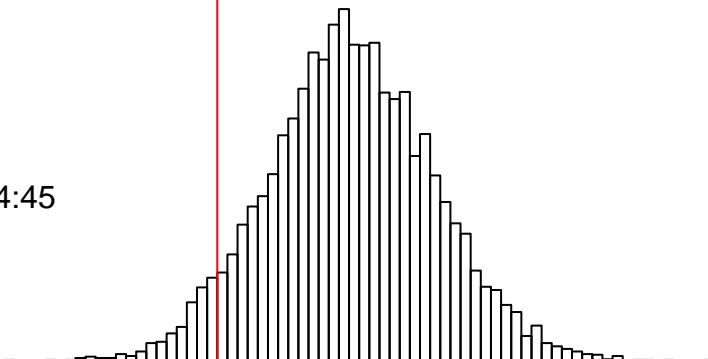

-2 -1 0 1 2 3 4

delta(Closed Hexose 1)

A194:240

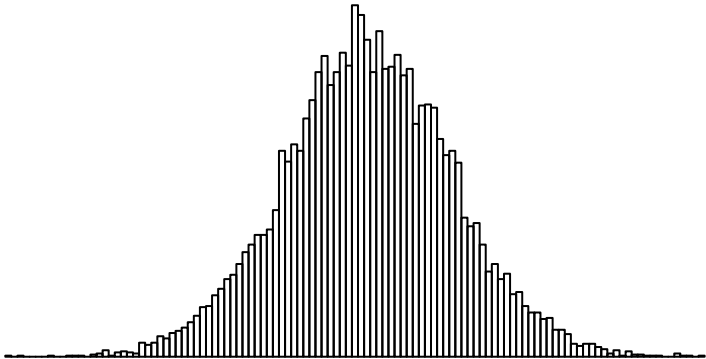

A194:120

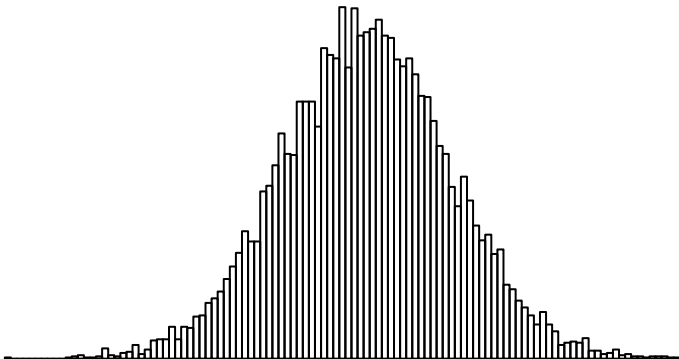

A194:45

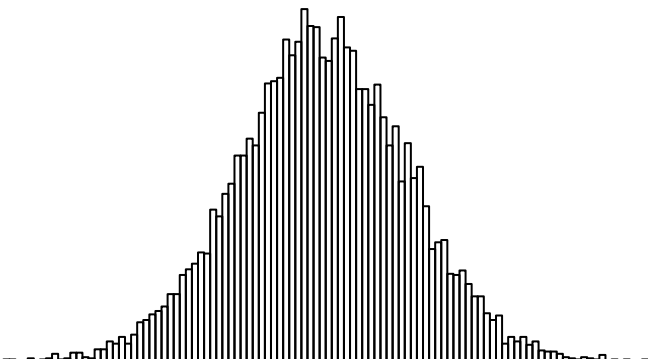

-10 -8 -6 -4 -2 0

Closed Hexose 2

A194:240 – A194:120

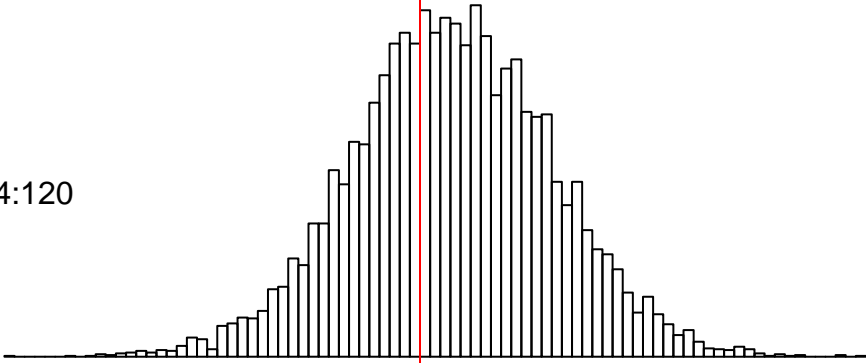

A194:240 – A194:45

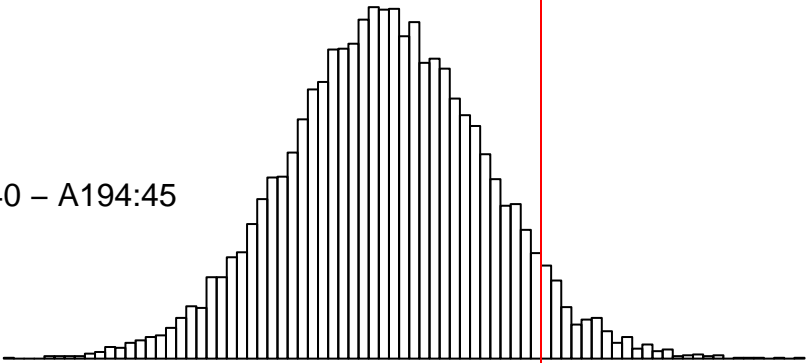

A194:120 – A194:45

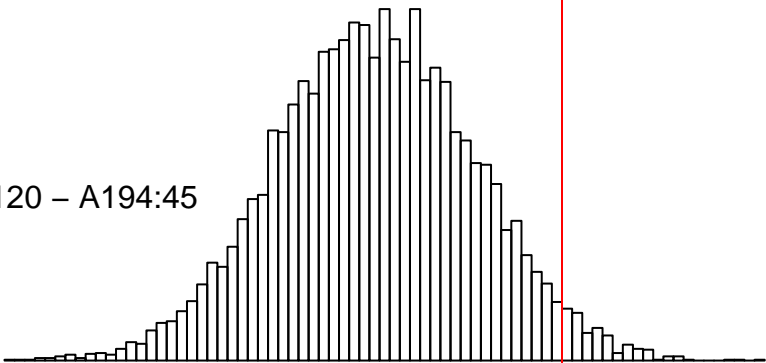

-6 -4 -2 0 2 4 6

delta(Closed Hexose 2)

A194:240

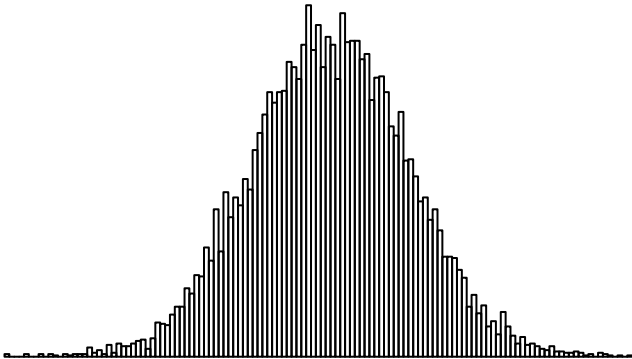

A194:120

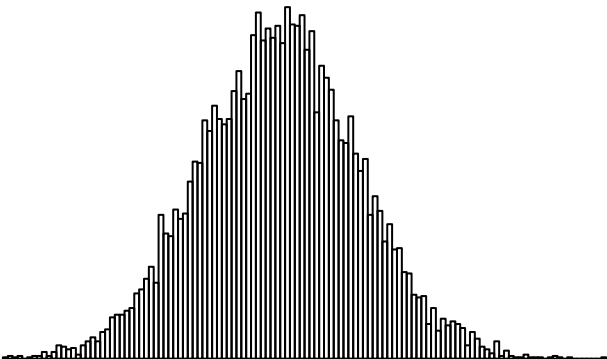

A194:45

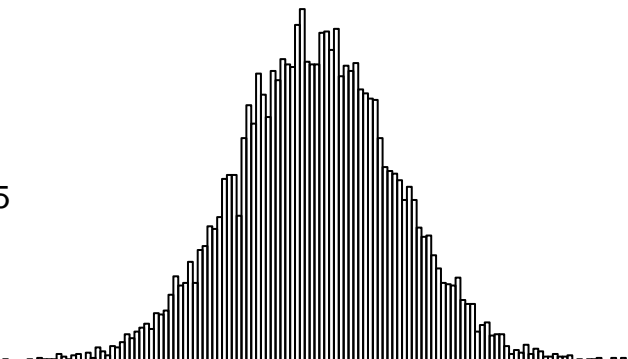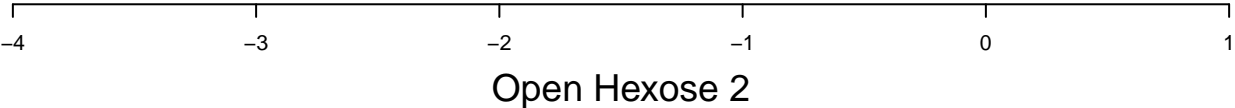

A194:240 – A194:120

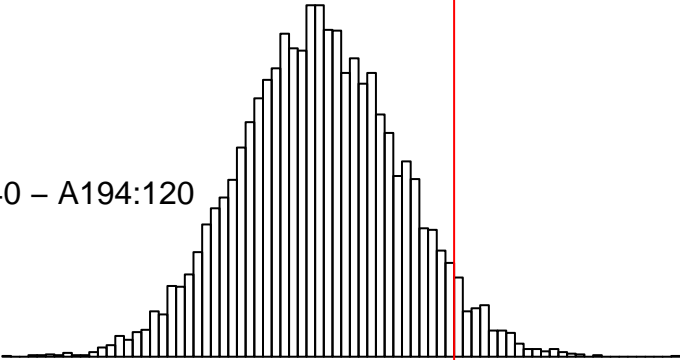

A194:240 – A194:45

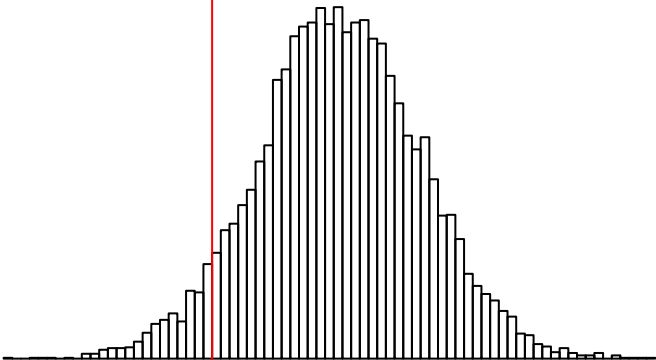

A194:120 – A194:45

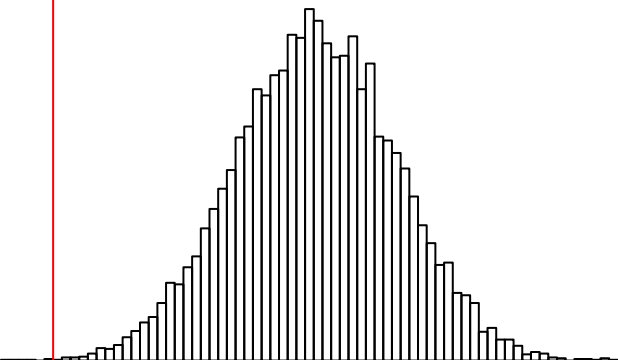

delta(Open Hexose 2)

A194:240

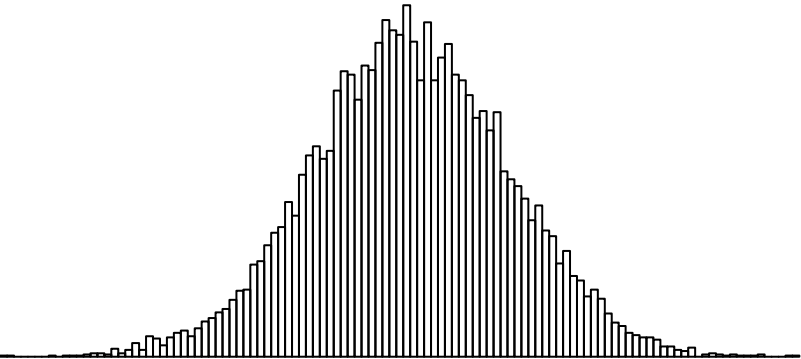

A194:120

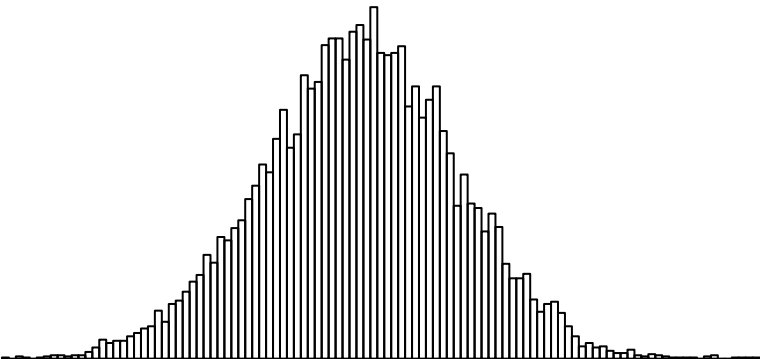

A194:45

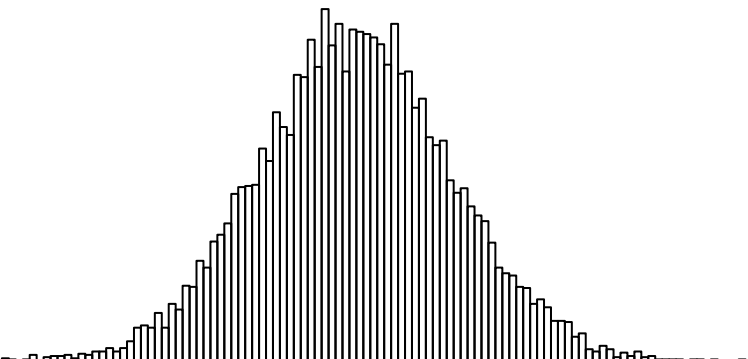

-5.0      -4.5      -4.0      -3.5      -3.0      -2.5      -2.0      -1.5

Open Hexose 3

A194:240 – A194:120

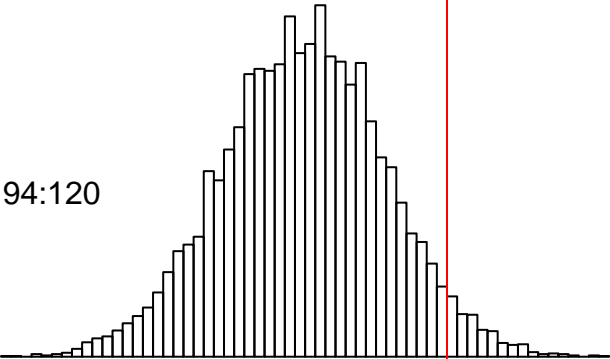

A194:240 – A194:45

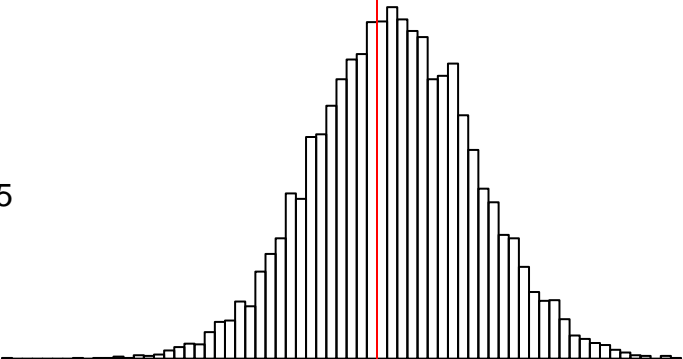

A194:120 – A194:45

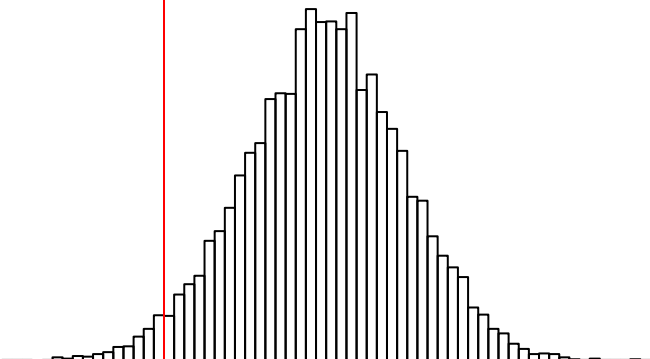

-3 -2 -1 0 1 2 3

delta(Open Hexose 3)



A194:240

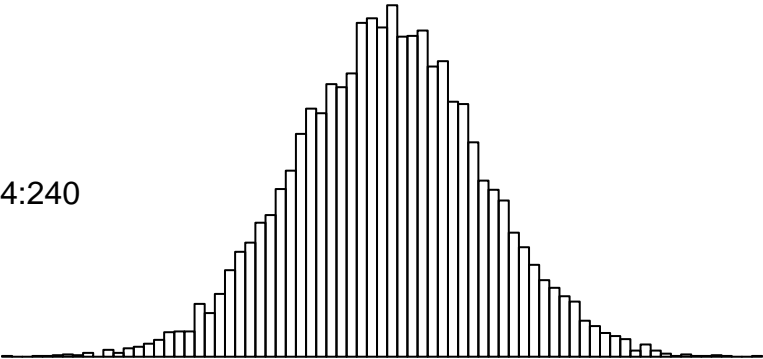

A194:120

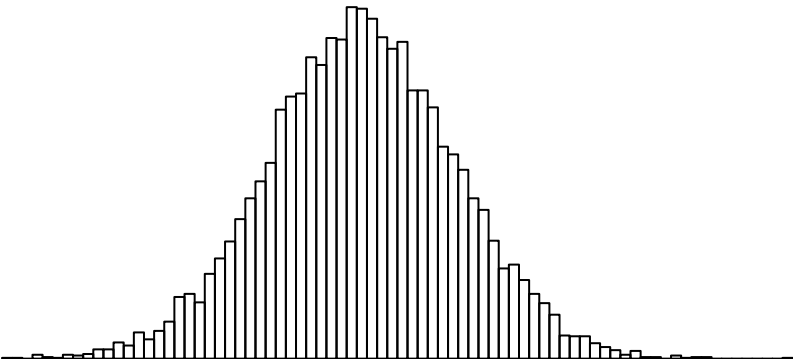

A194:45

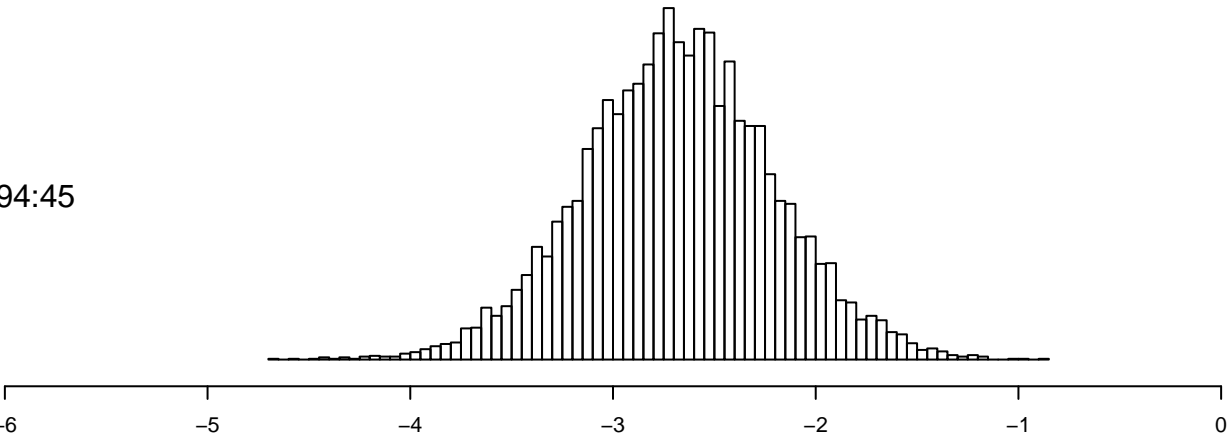

Closed Hexose 3

A194:240 – A194:120

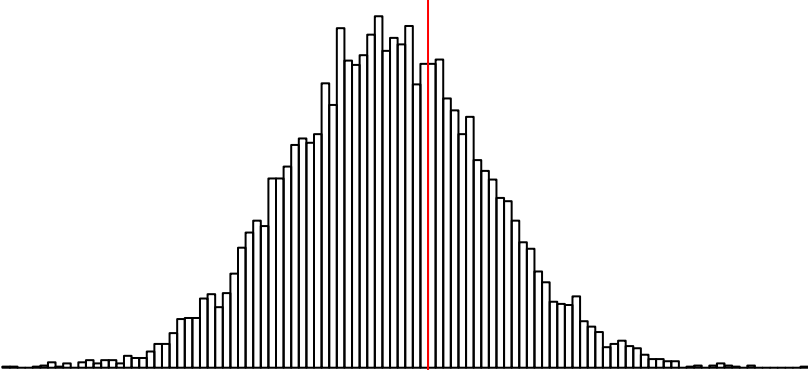

A194:240 – A194:45

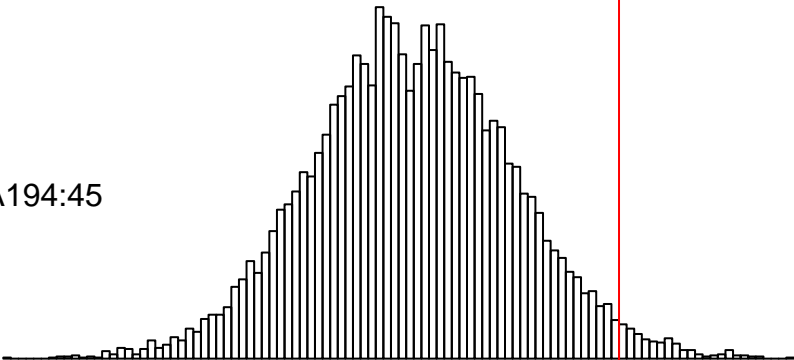

A194:120 – A194:45

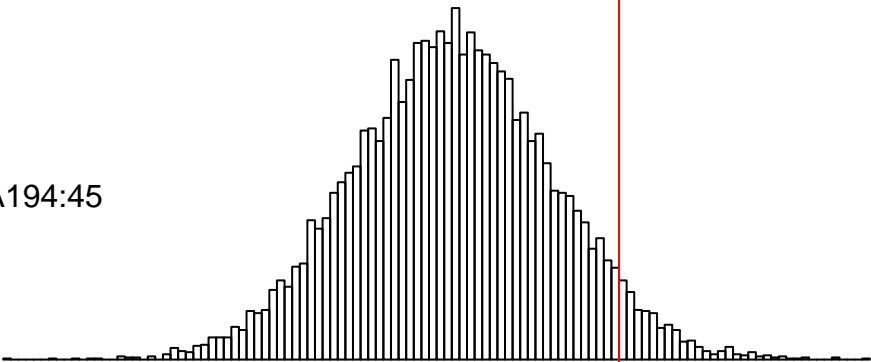

delta(Closed Hexose 3)

A194:240

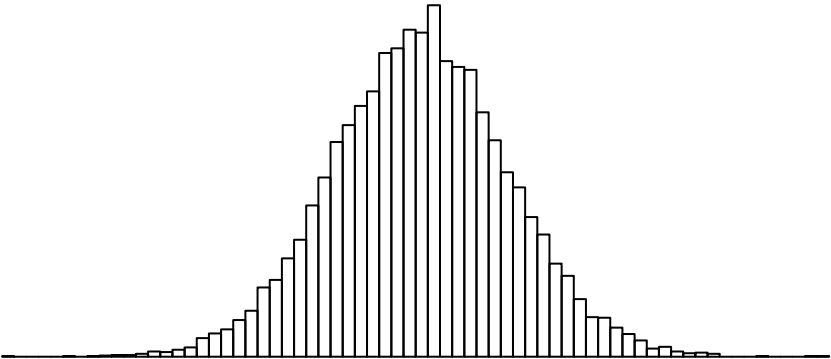

A194:120

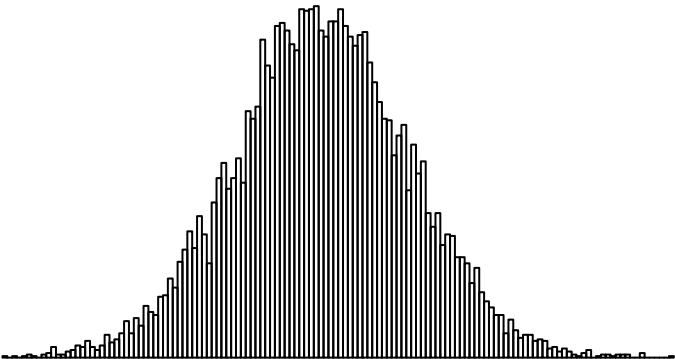

A194:45

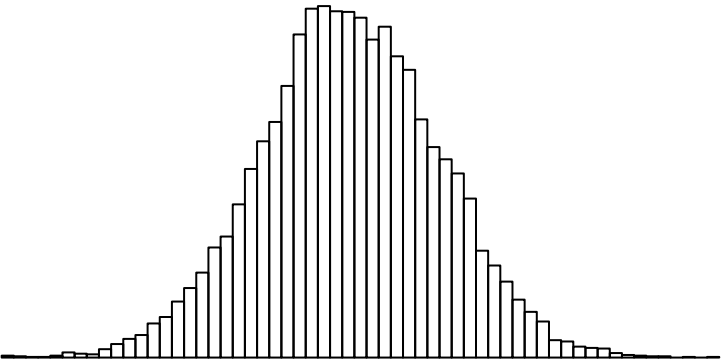

Closed Hexose 4

A194:240 – A194:120

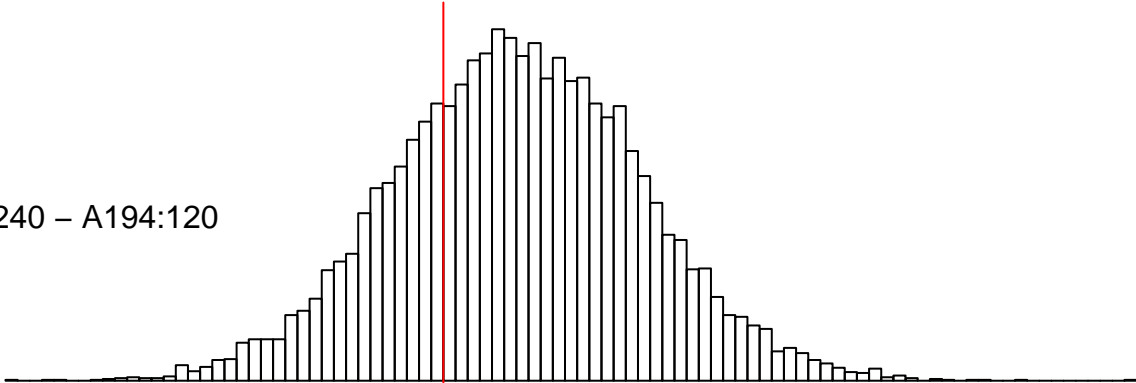

A194:240 – A194:45

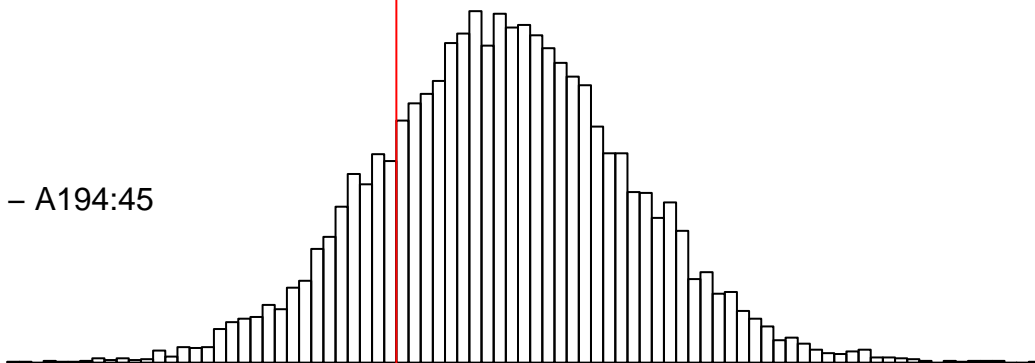

A194:120 – A194:45

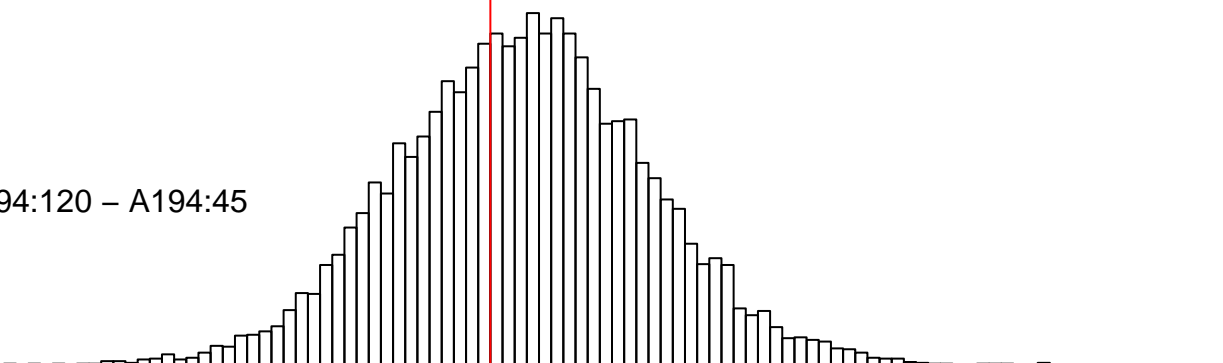

delta(Closed Hexose 4)

A194:240

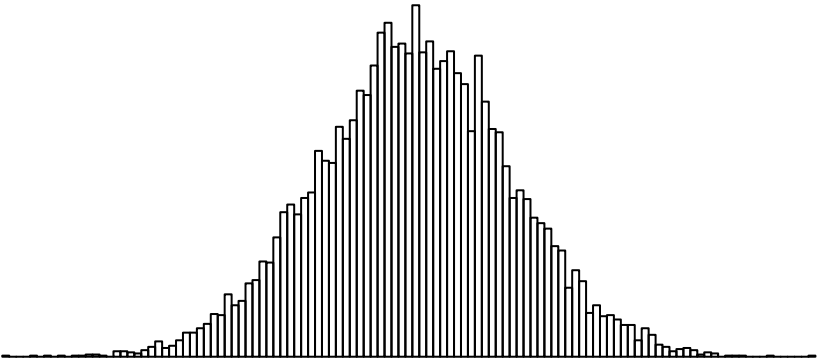

A194:120

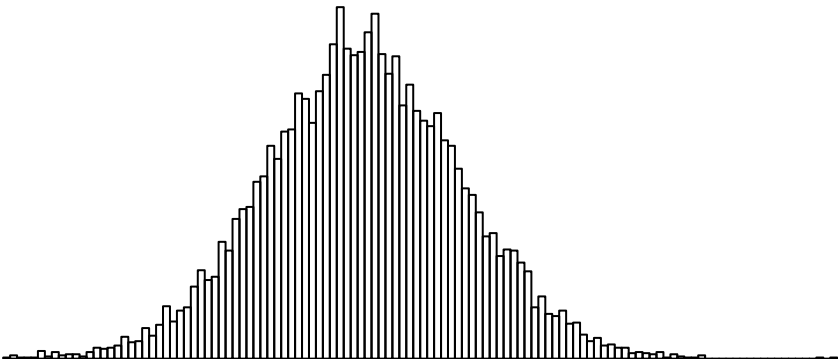

A194:45

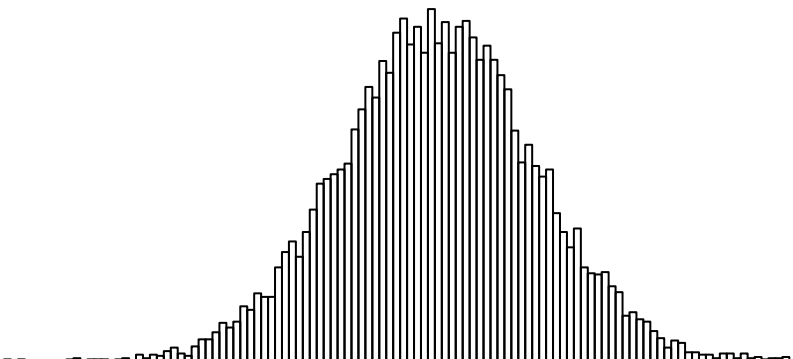

Hexose 1

A194:240 – A194:120

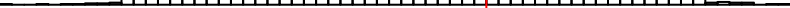

A194:240 – A194:45

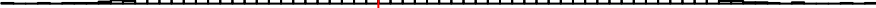

A194:120 – A194:45

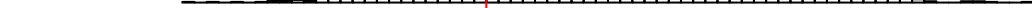

-2 -1 0 1 2 3

delta(Hexose 1)

A194:240

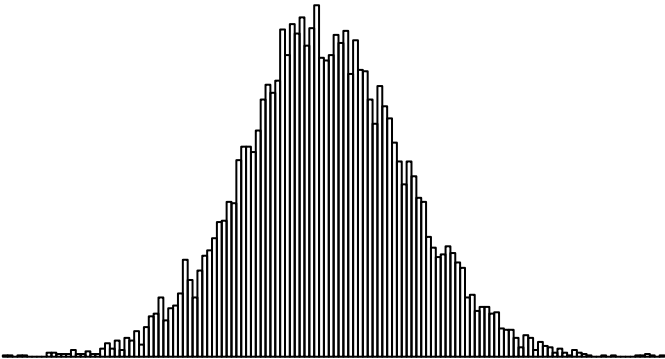

A194:120

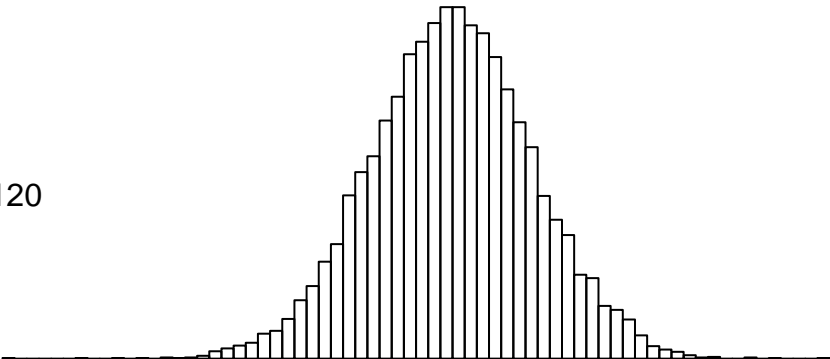

A194:45

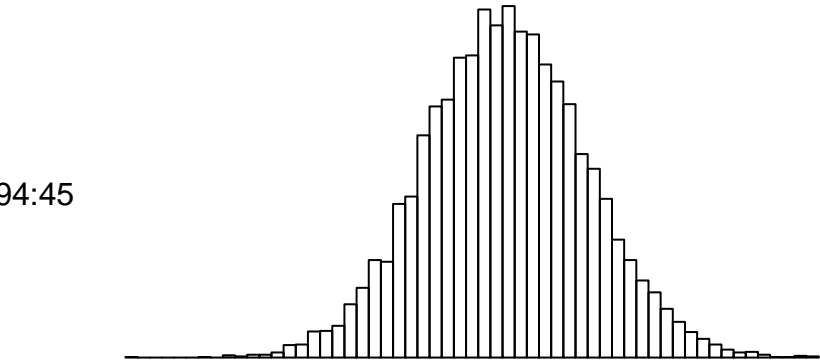

-6                      -5                      -4                      -3                      -2                      -1

Closed Hexose 5

A194:240 – A194:120

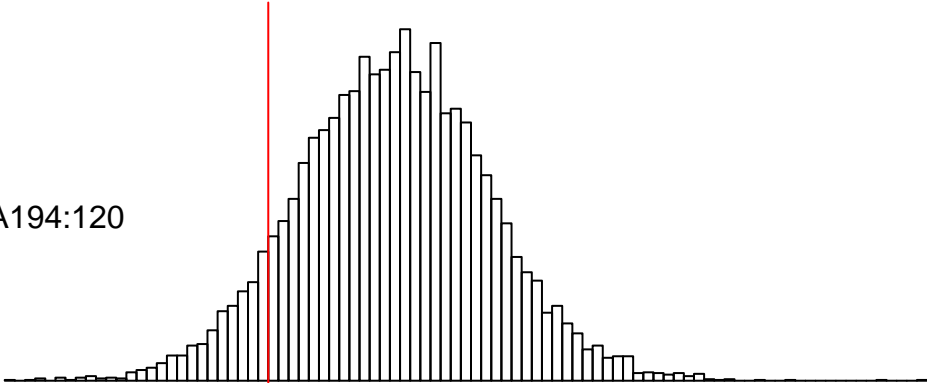

A194:240 – A194:45

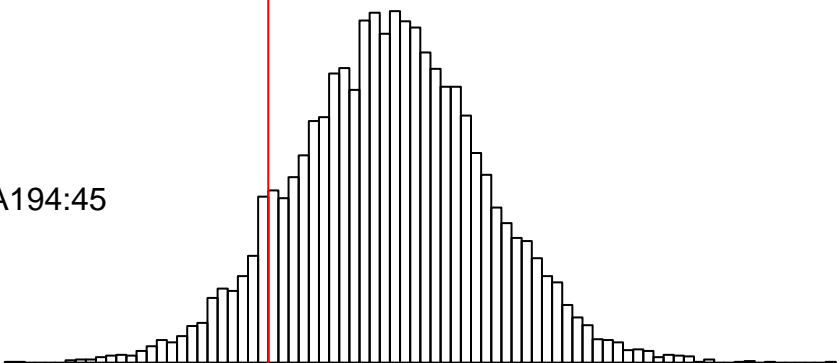

A194:120 – A194:45

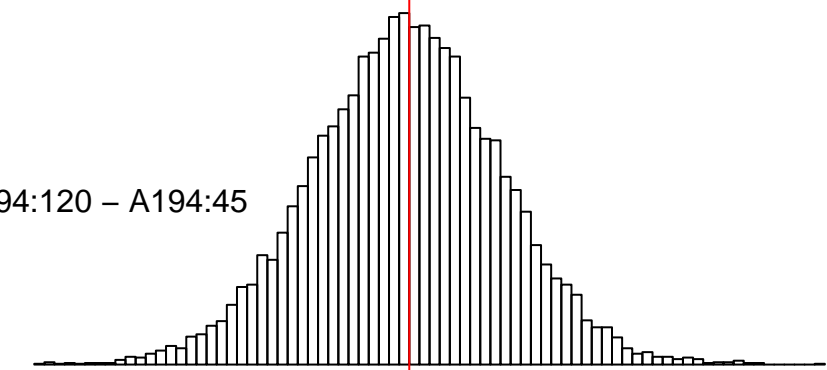

-2 -1 0 1 2 3 4

delta(Closed Hexose 5)



A194:240

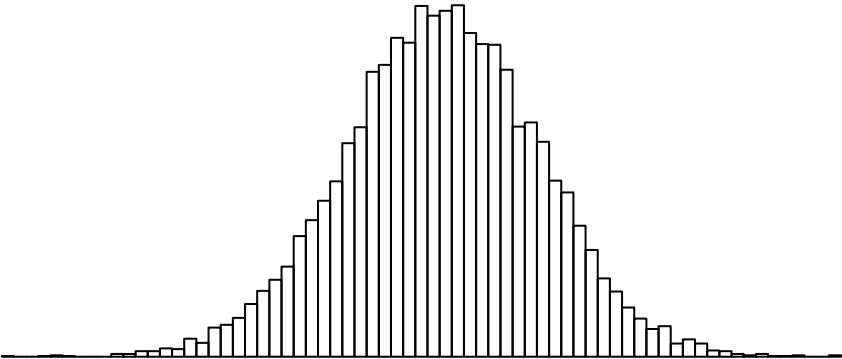

A194:120

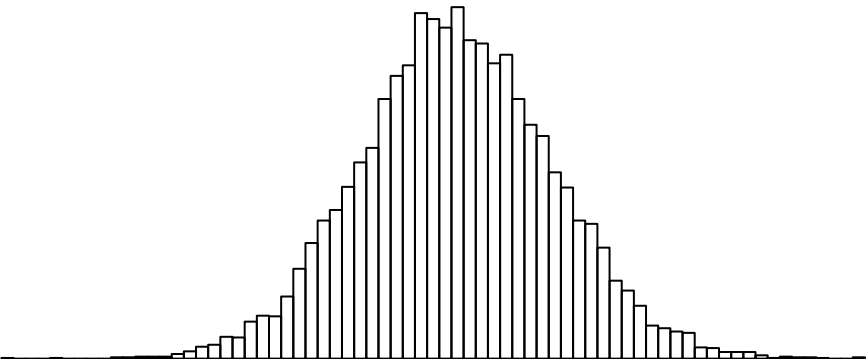

A194:45

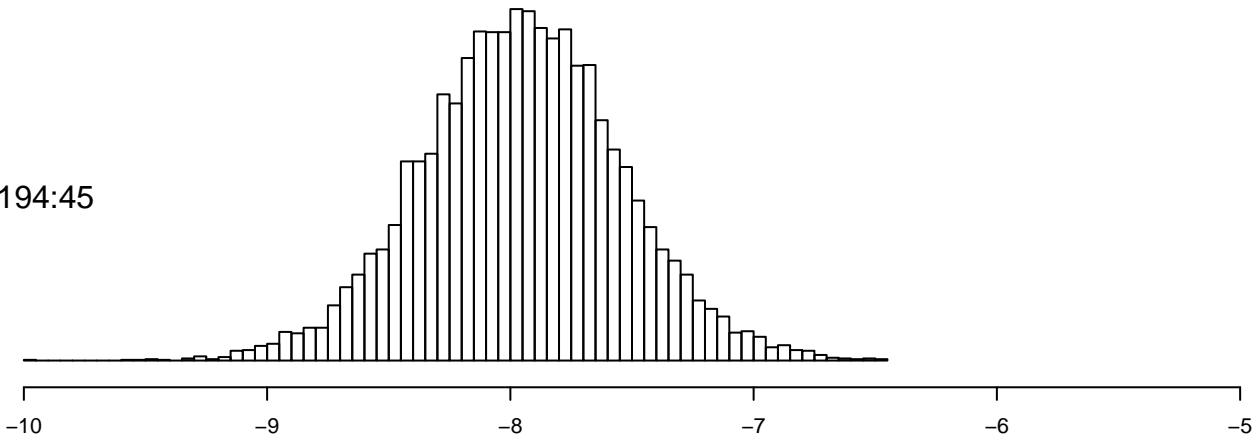

Open Pentose 1

A194:240 – A194:120

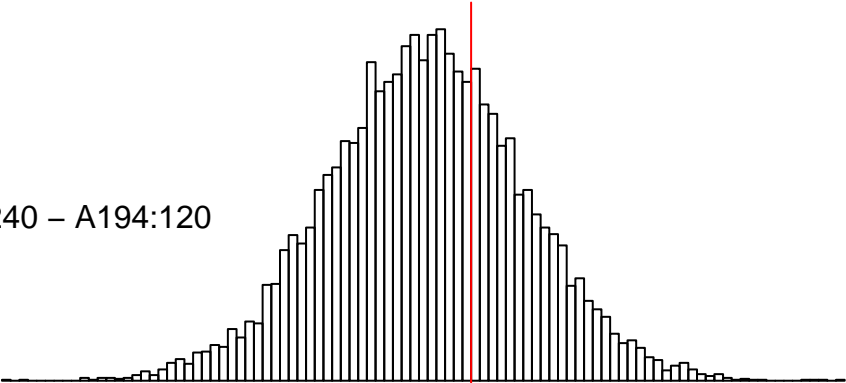

A194:240 – A194:45

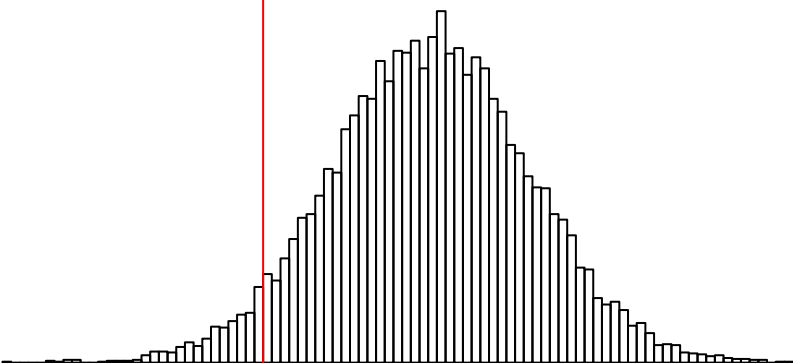

A194:120 – A194:45

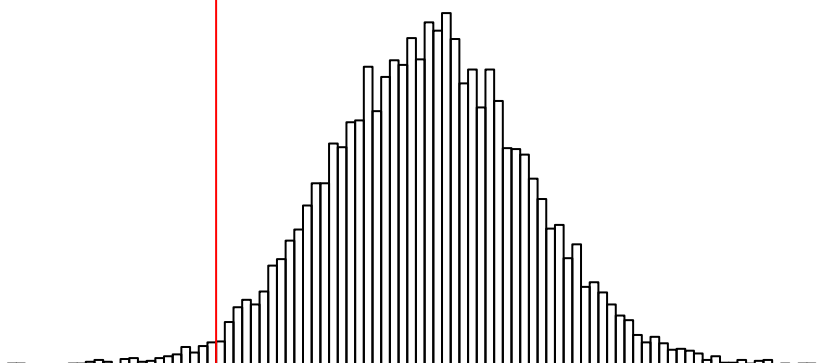

-3 -2 -1 0 1 2 3 4

delta(Open Pentose 1)

A194:240

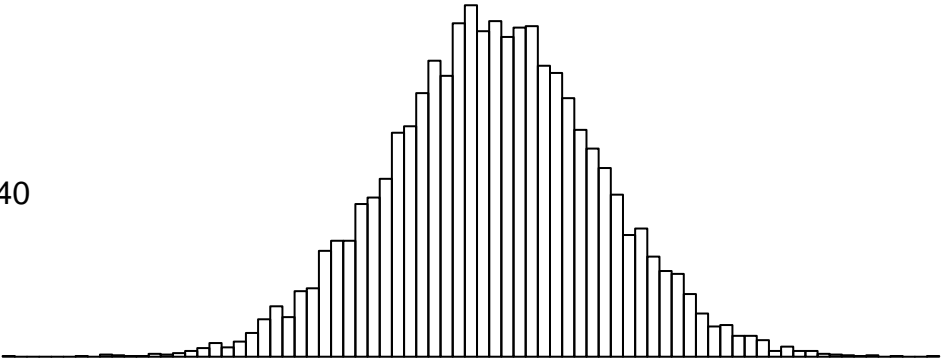

A194:120

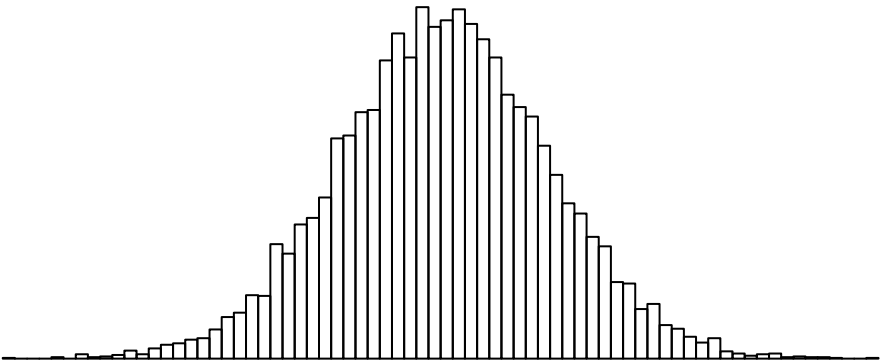

A194:45

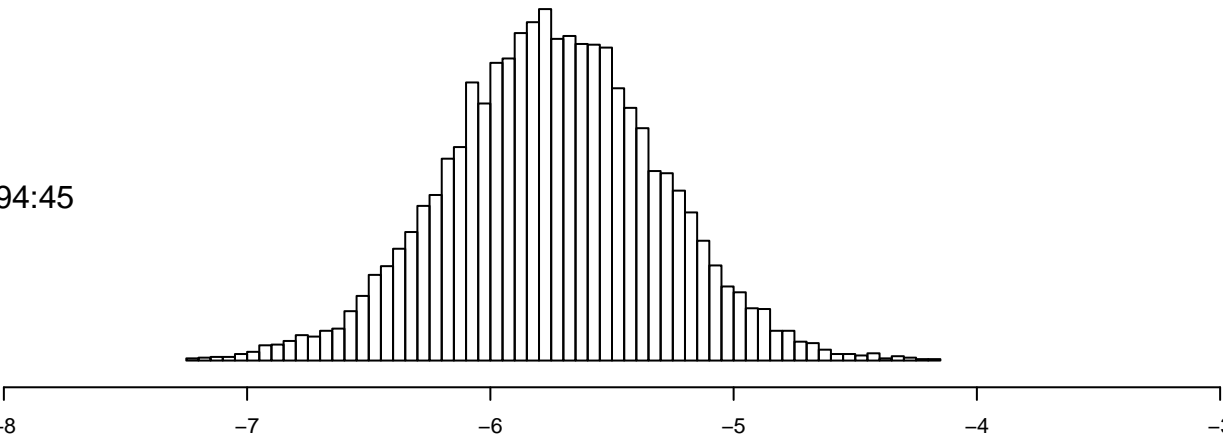

Open Pentose 2

A194:240 – A194:120

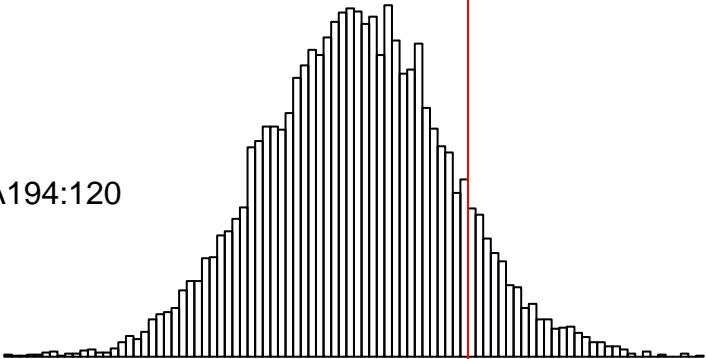

A194:240 – A194:45

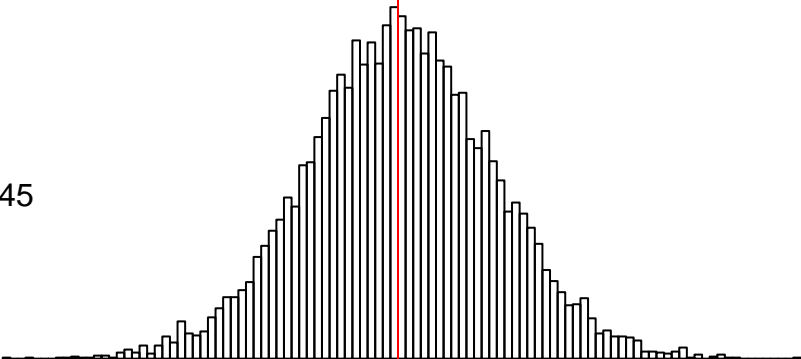

A194:120 – A194:45

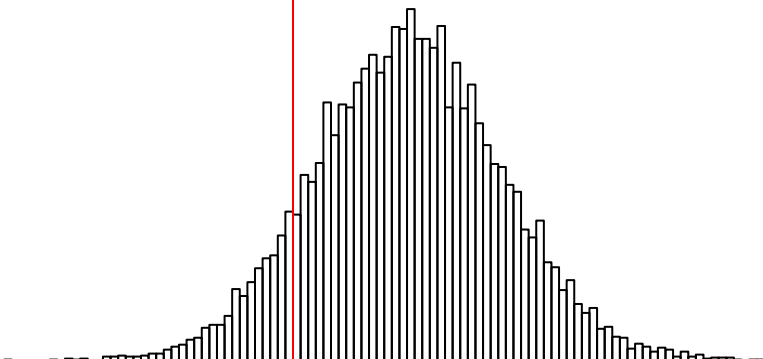

-4 -2 0 2 4

delta(Open Pentose 2)

A194:240

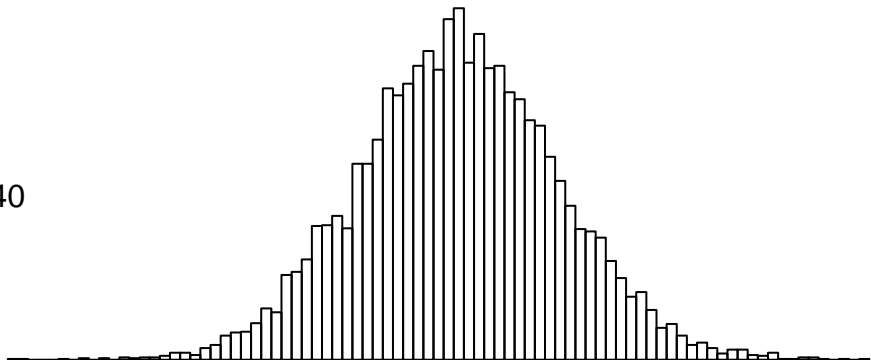

A194:120

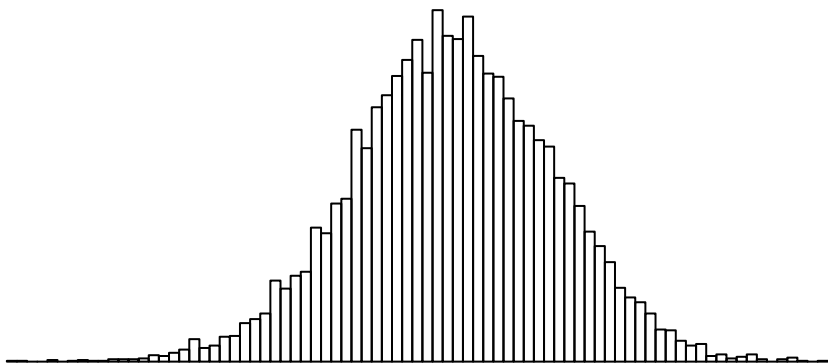

A194:45

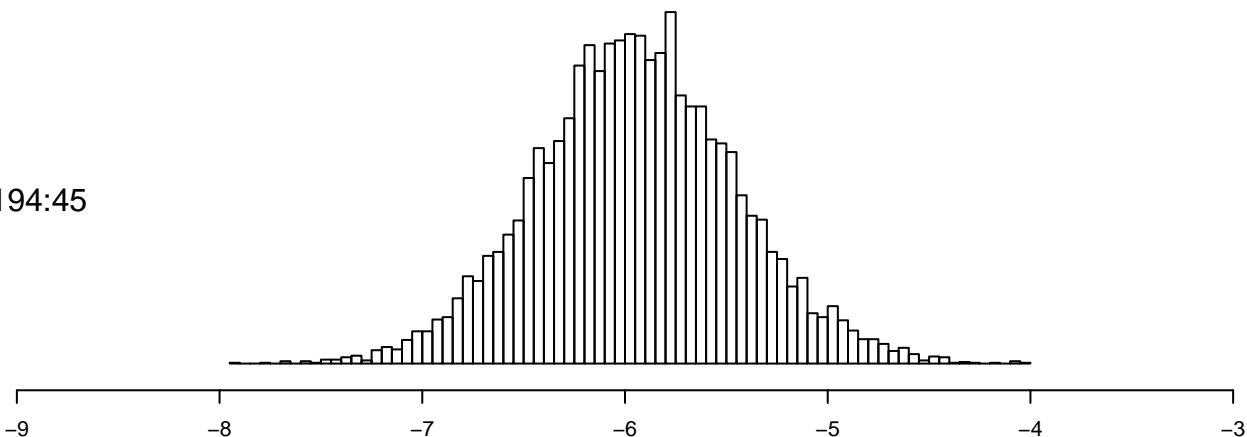

Closed Pentose 1

A194:240 – A194:120

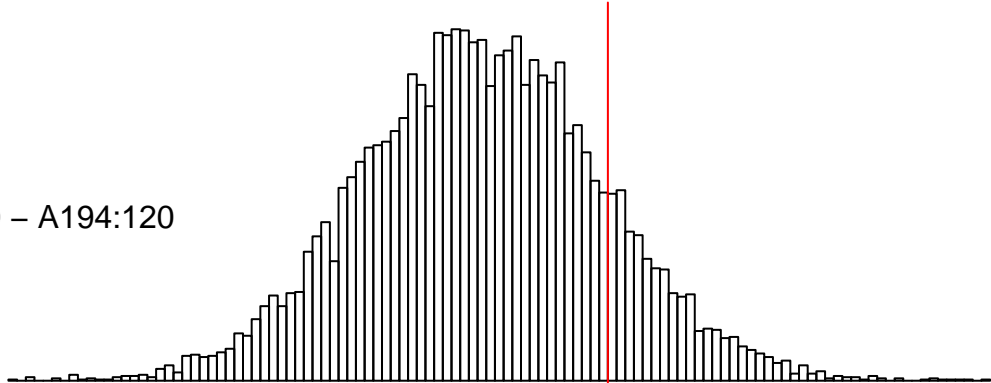

A194:240 – A194:45

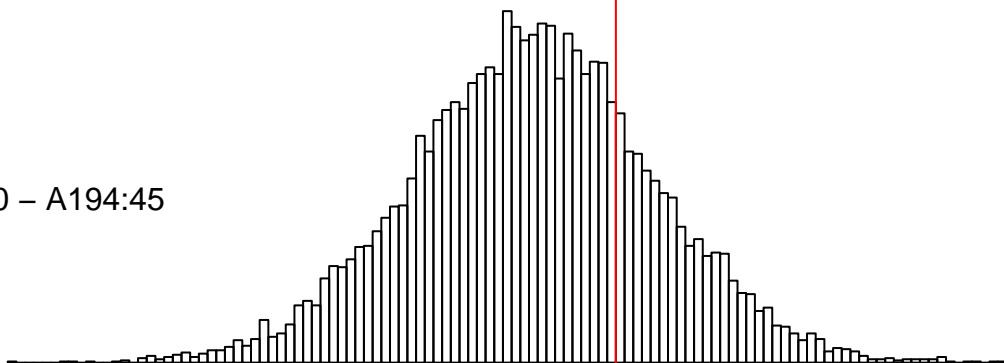

A194:120 – A194:45

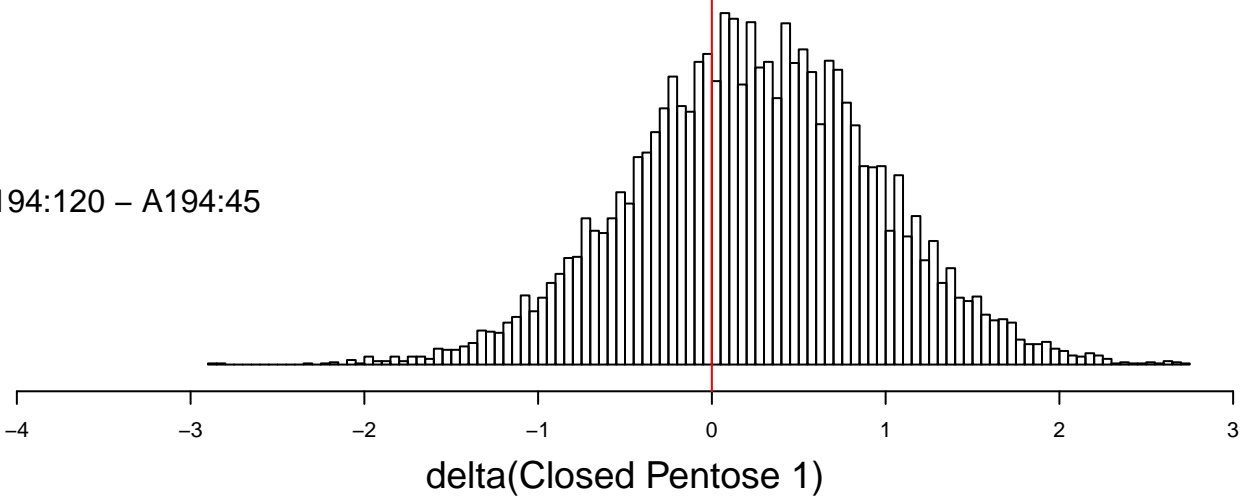

A194:240

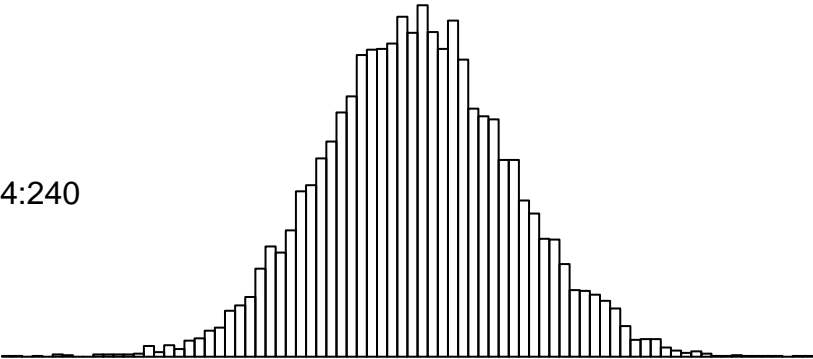

A194:120

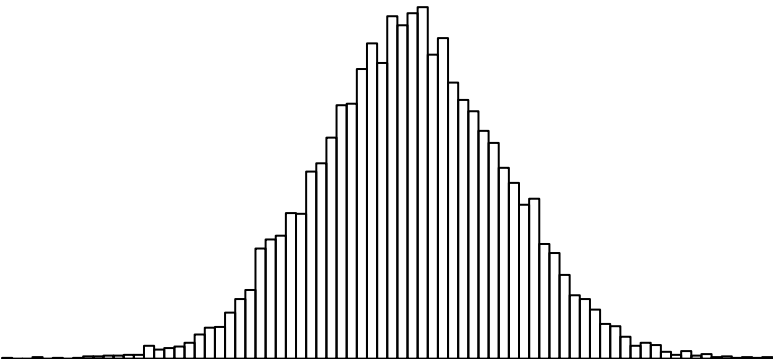

A194:45

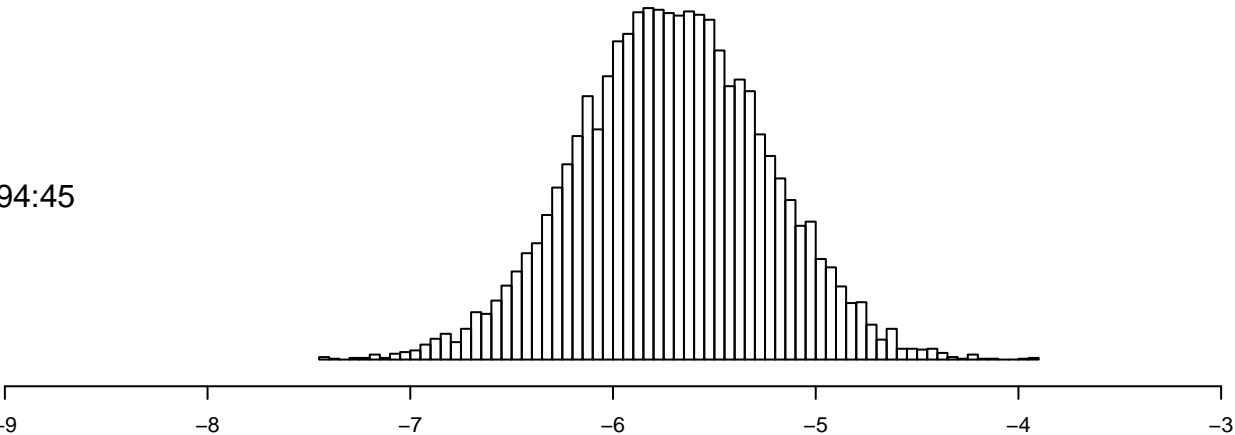

Closed Pentose 2

A194:240 – A194:120

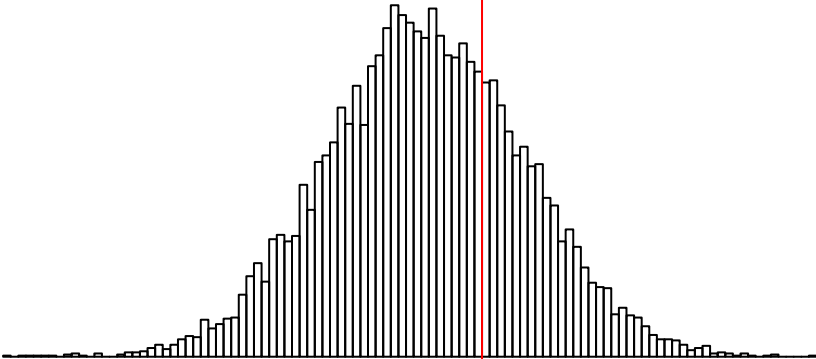

A194:240 – A194:45

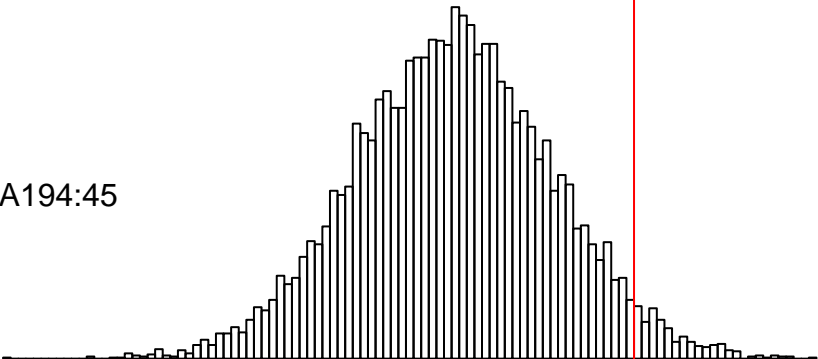

A194:120 – A194:45

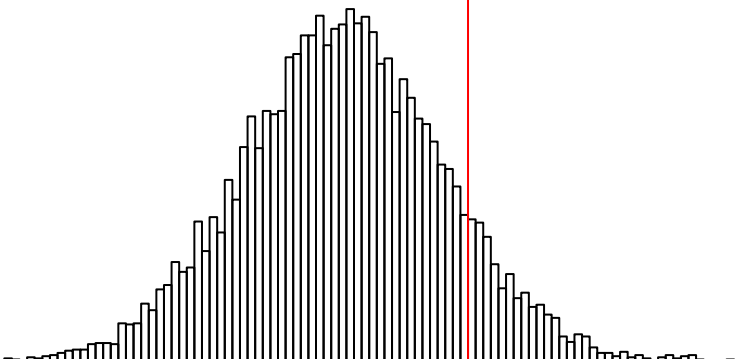

-4

-2

0

2

delta(Closed Pentose 2)



A194:240

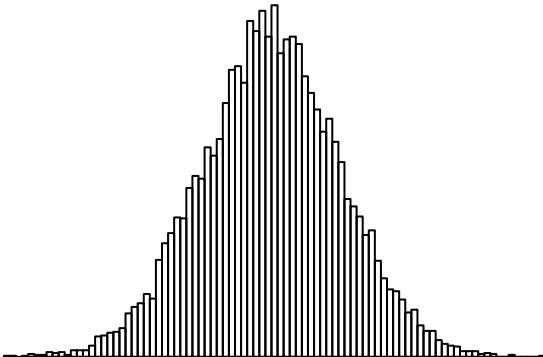

A194:120

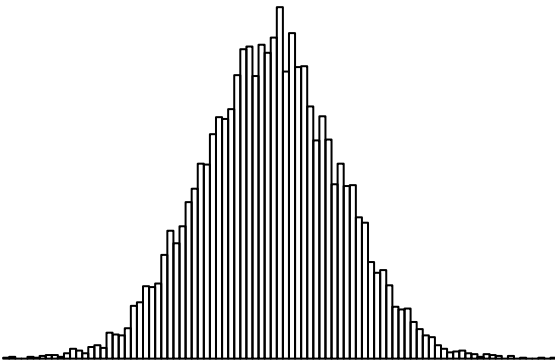

A194:45

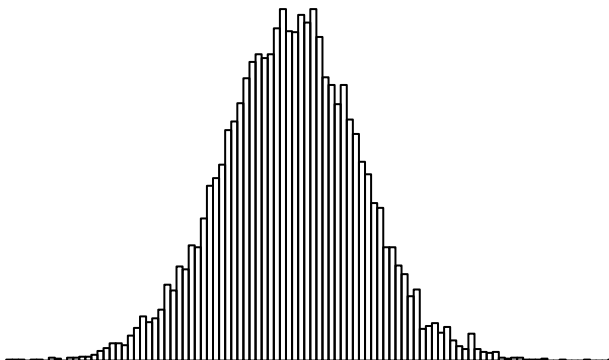

-10 -8 -6 -4 -2 0

Pentose 1

A194:240 – A194:120

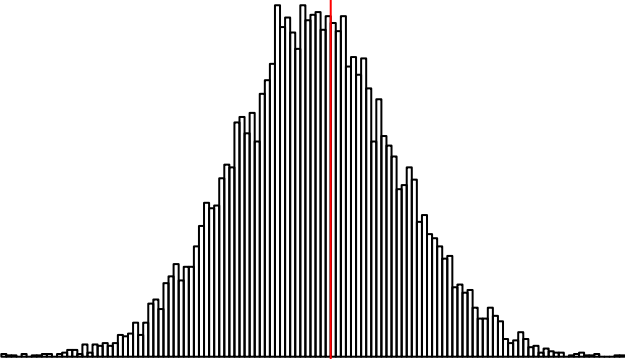

A194:240 – A194:45

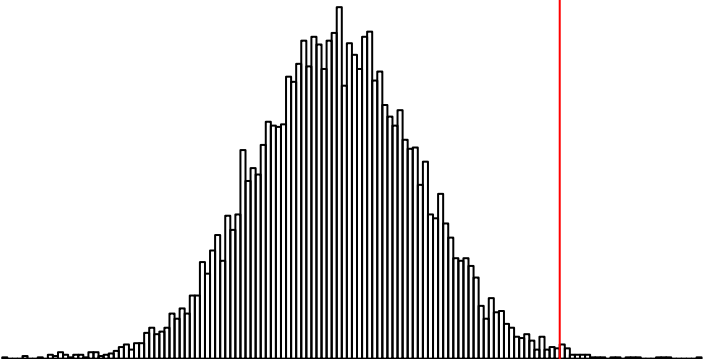

A194:120 – A194:45

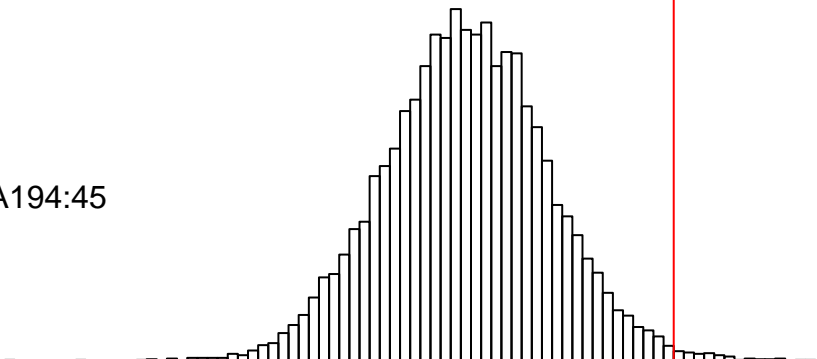

delta(Pentose 1)

A194:240

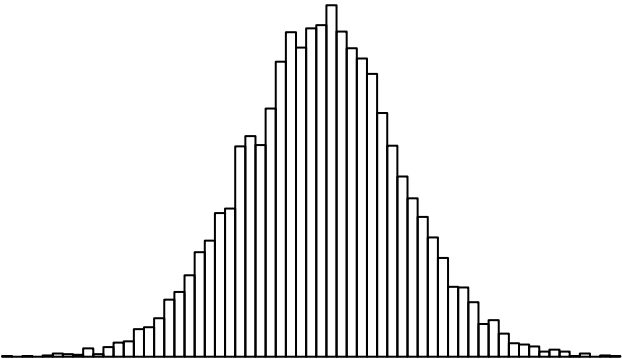

A194:120

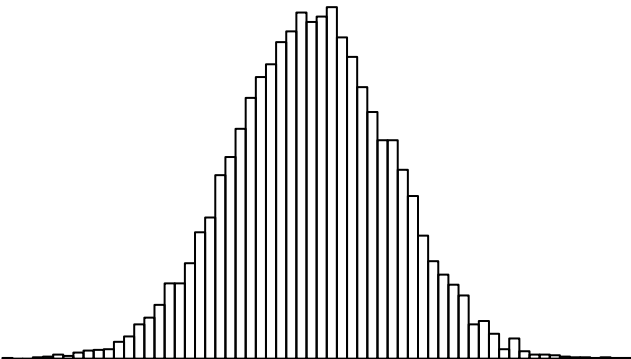

A194:45

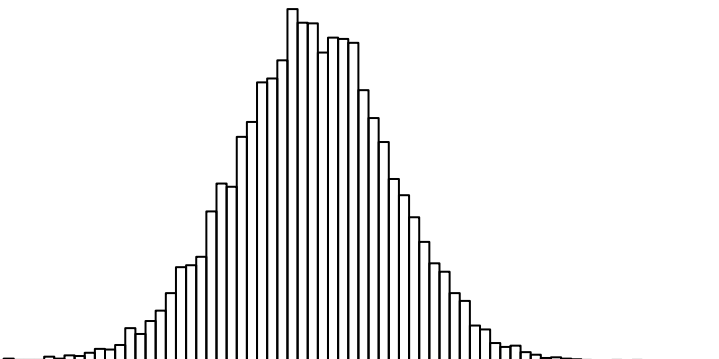

-5

-4

-3

-2

-1

0

1

Open Pentose 3

A194:240 – A194:120

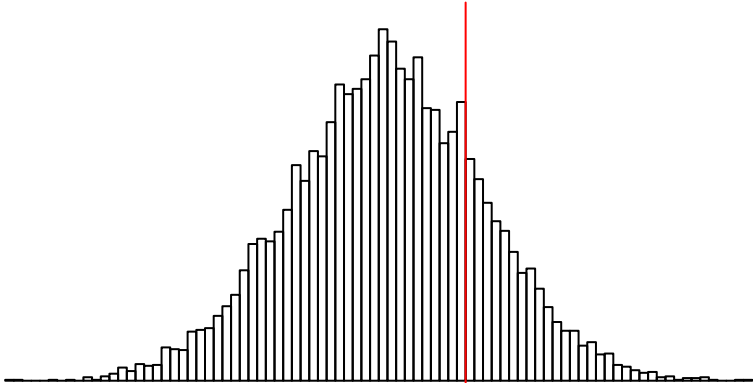

A194:240 – A194:45

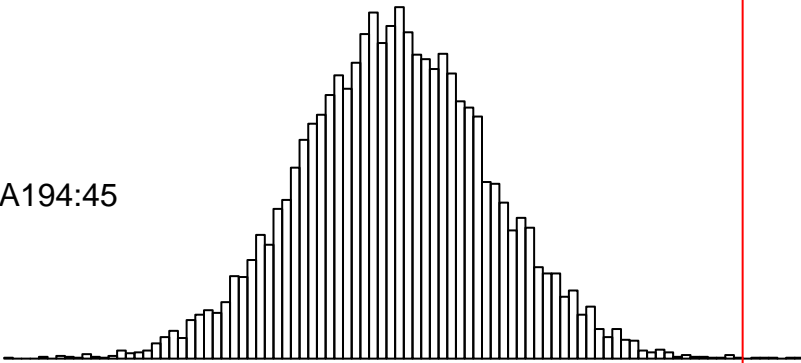

A194:120 – A194:45

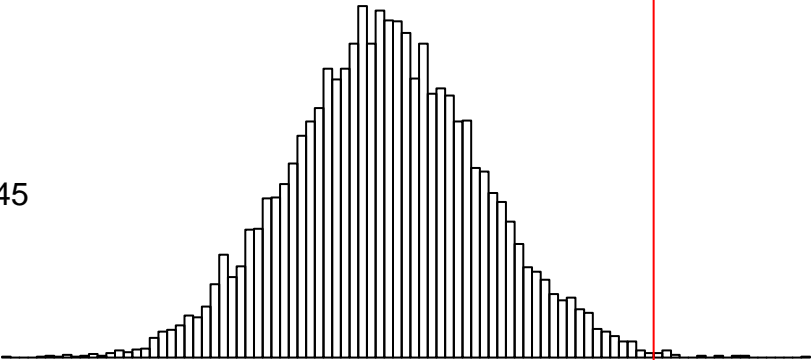

-5 -4 -3 -2 -1 0 1 2

delta(Open Pentose 3)

A194:240

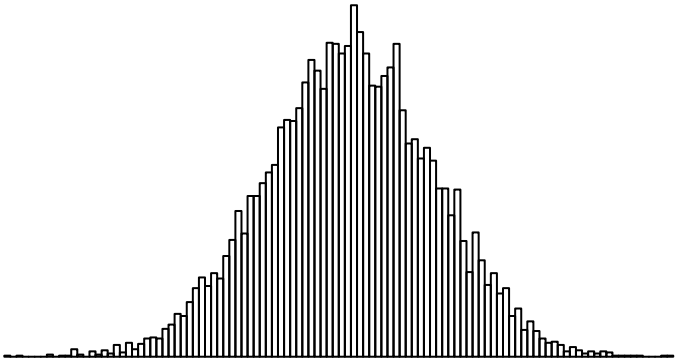

A194:120

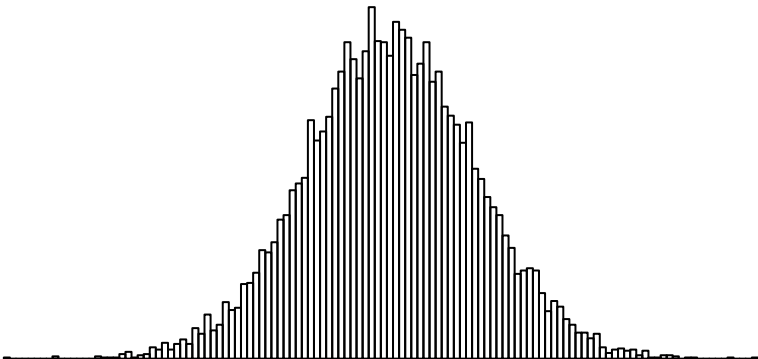

A194:45

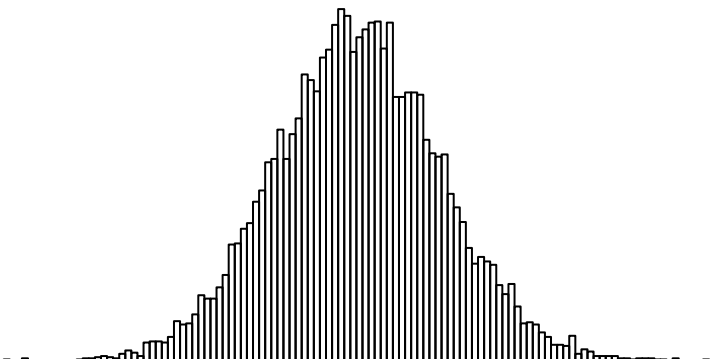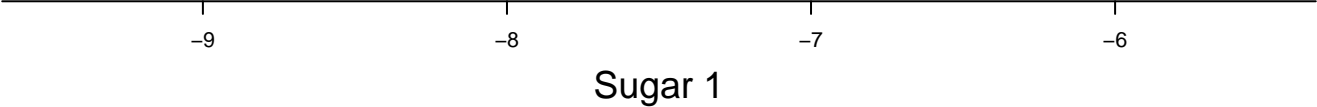

A194:240 – A194:120

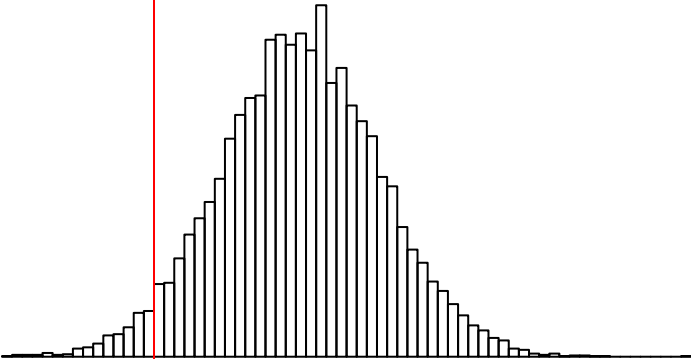

A194:240 – A194:45

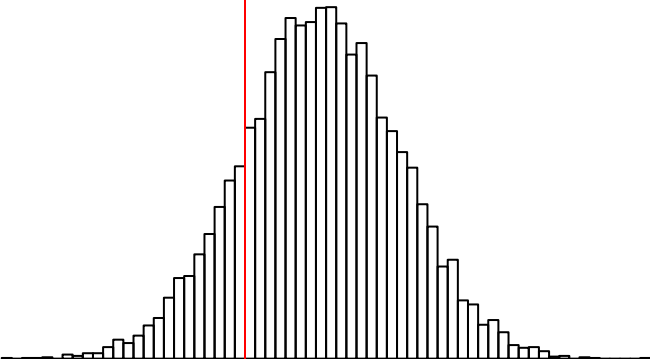

A194:120 – A194:45

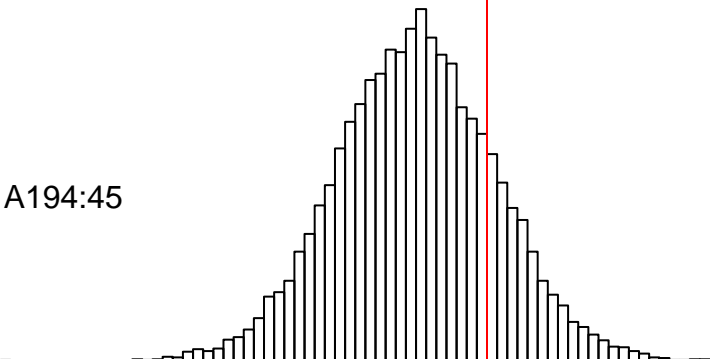

-3 -2 -1 0 1 2 3

delta(Sugar 1)

A194:240

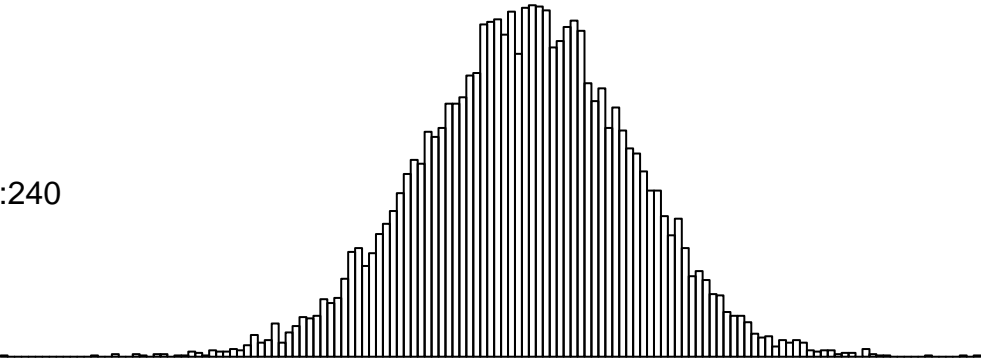

A194:120

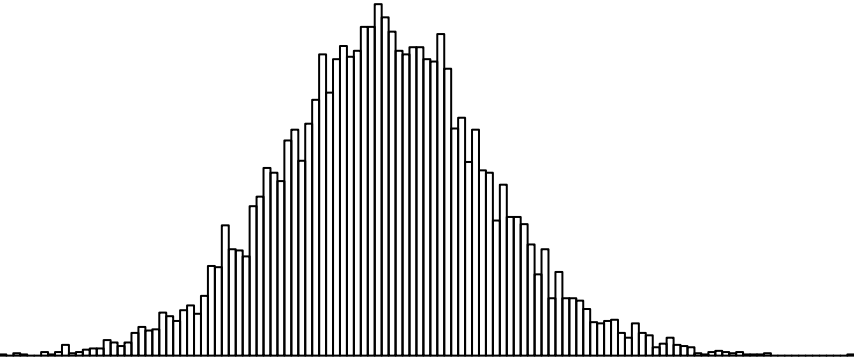

A194:45

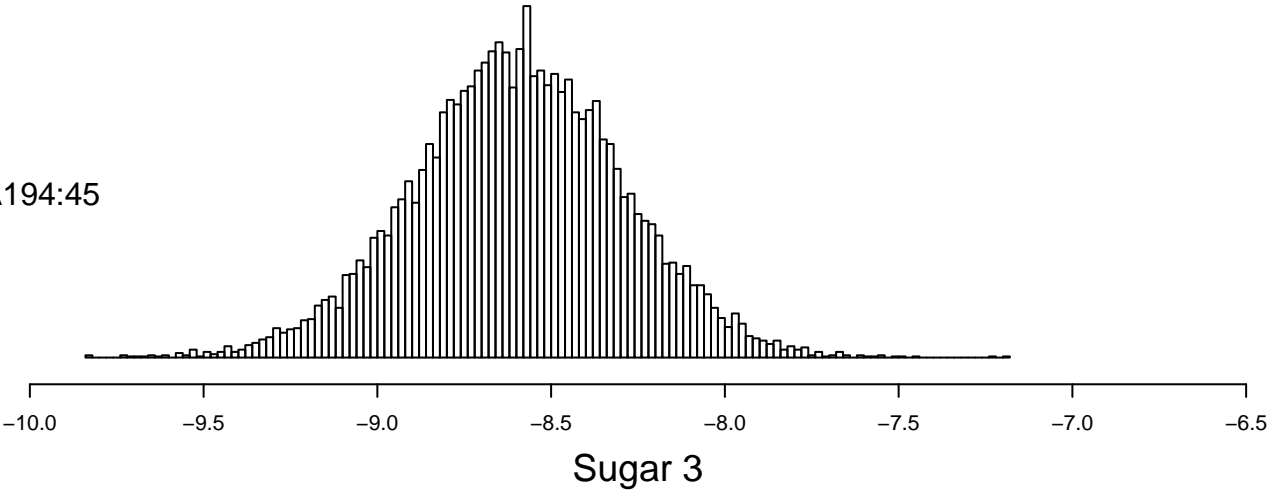

A194:240 – A194:120

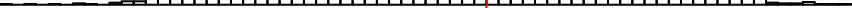

A194:240 – A194:45

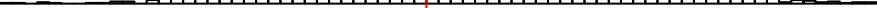

A194:120 – A194:45

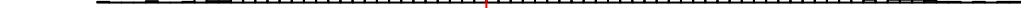

-2 -1 0 1 2 3

delta(Sugar 3)



A194:240

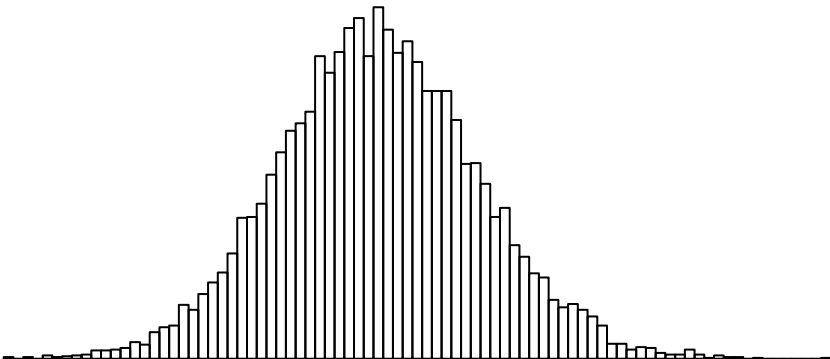

A194:120

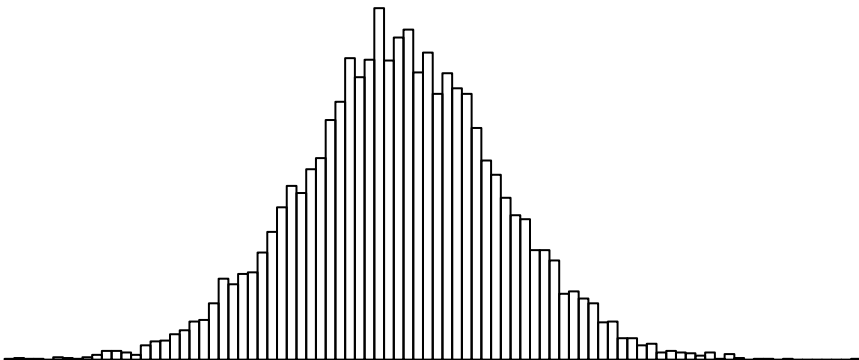

A194:45

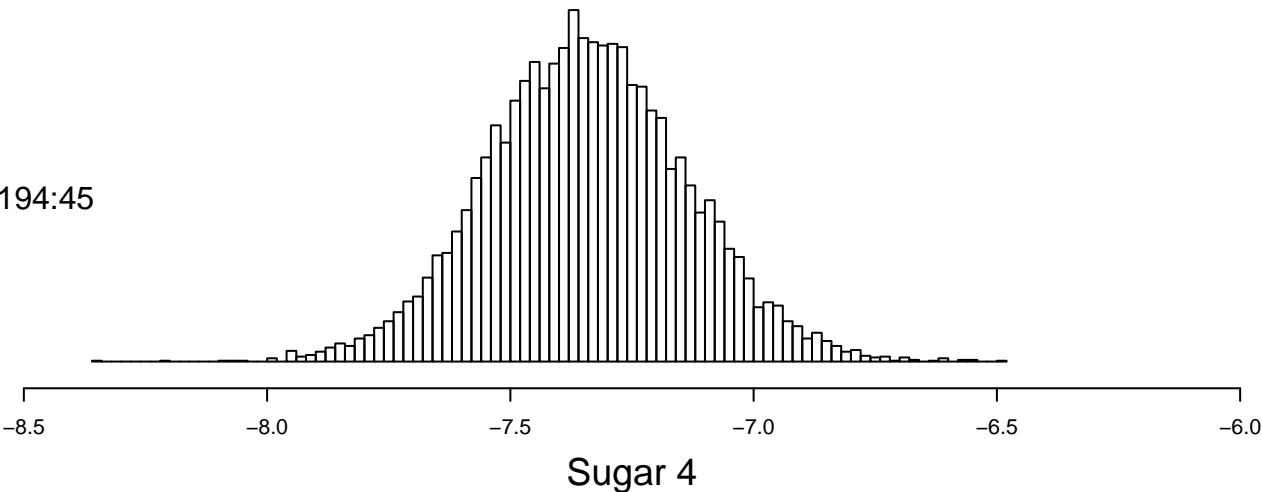

A194:240 – A194:120

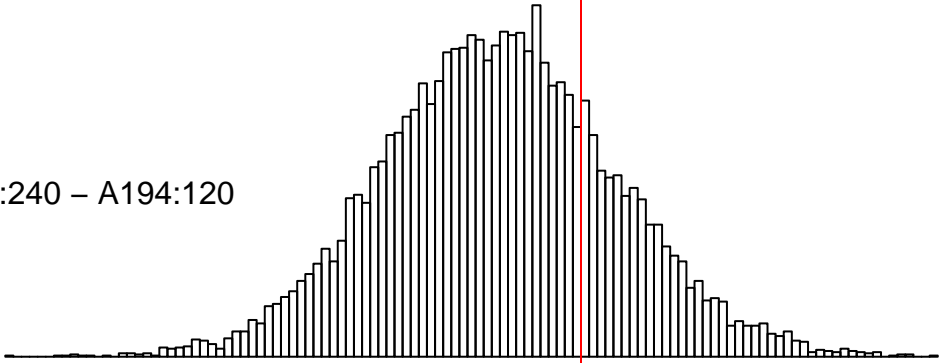

A194:240 – A194:45

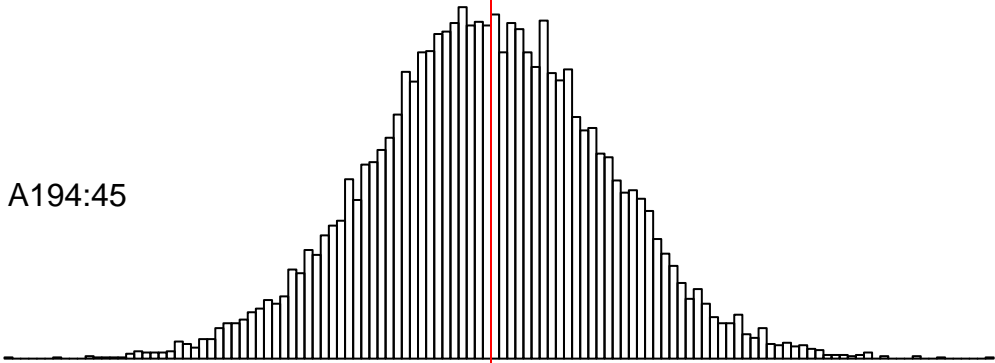

A194:120 – A194:45

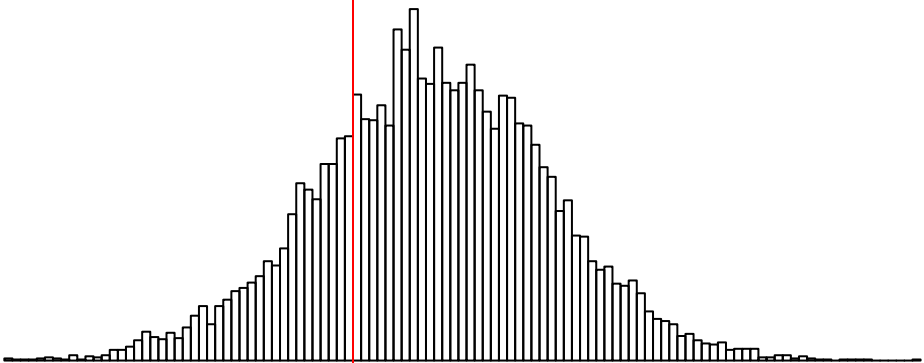

-1.5      -1.0      -0.5      0.0      0.5      1.0      1.5

delta(Sugar 4)

A194:240

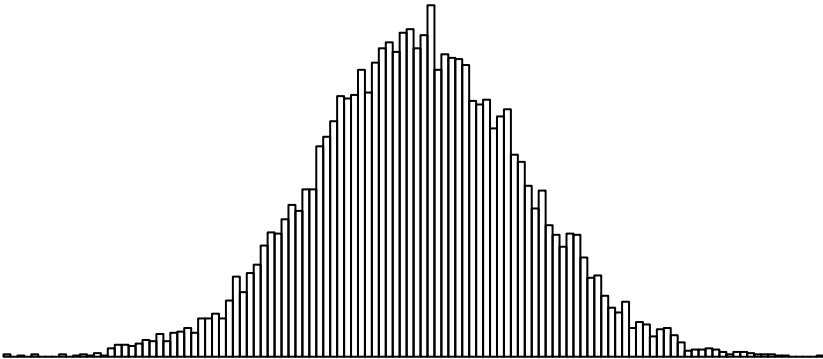

A194:120

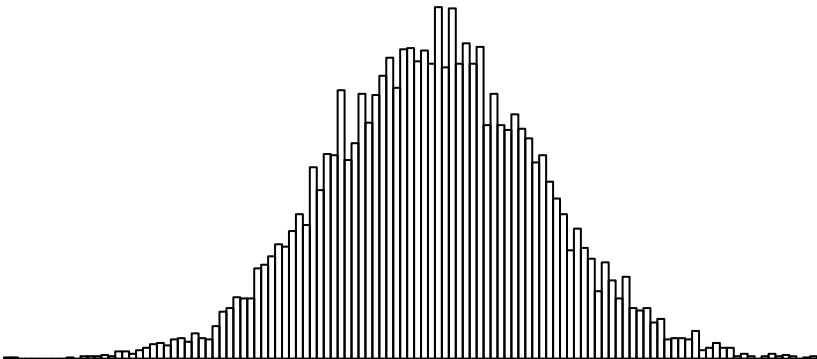

A194:45

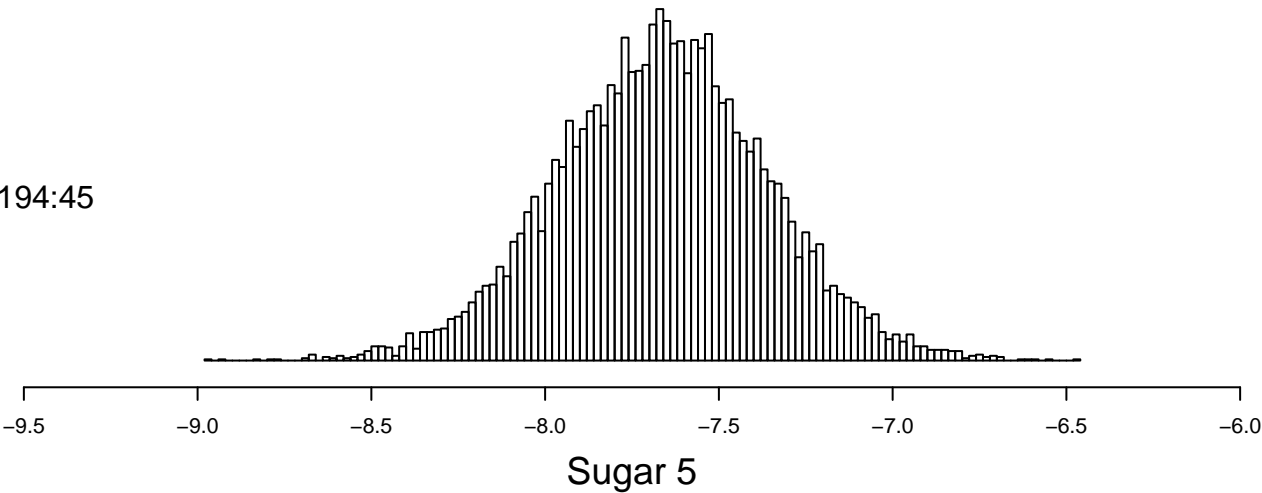

A194:240 – A194:120

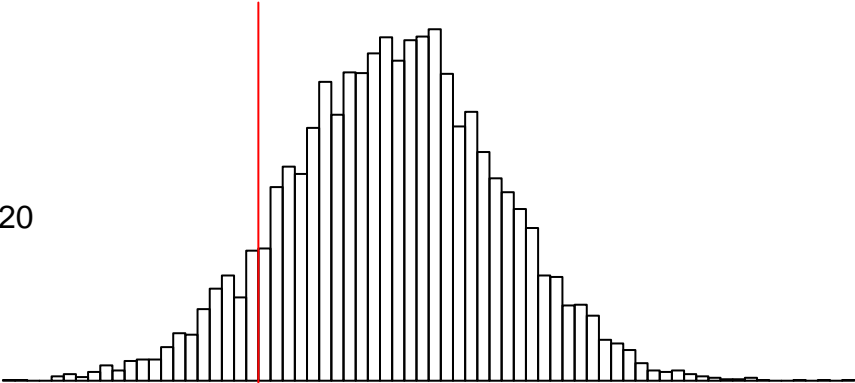

A194:240 – A194:45

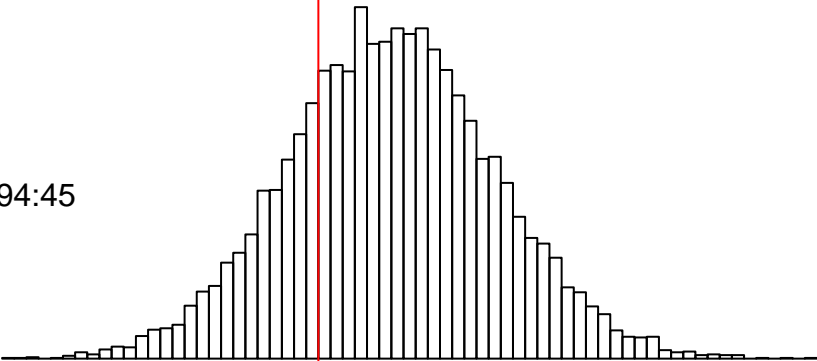

A194:120 – A194:45

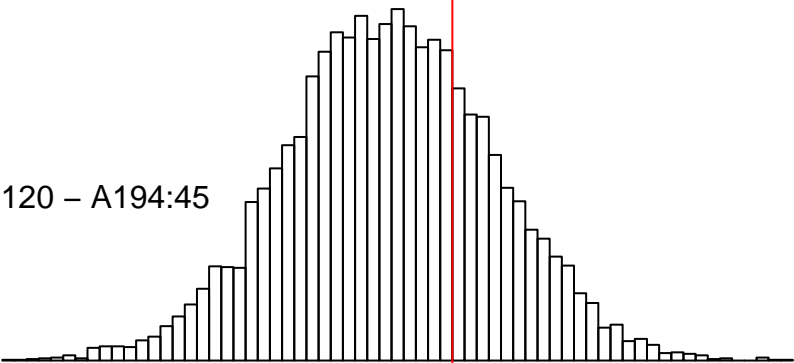

-2

-1

0

1

2

3

delta(Sugar 5)

A194:240

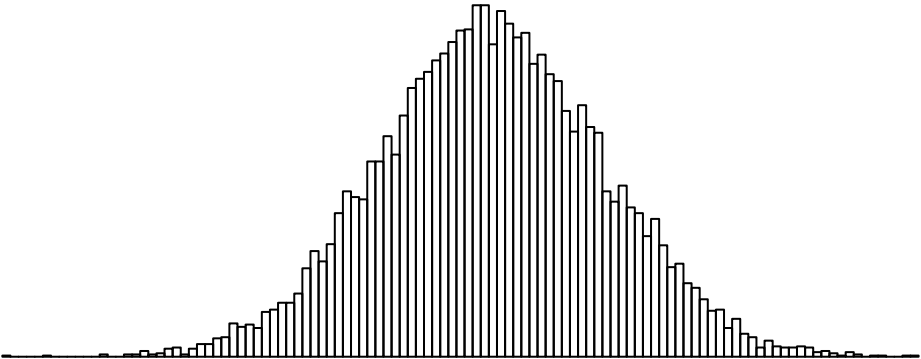

A194:120

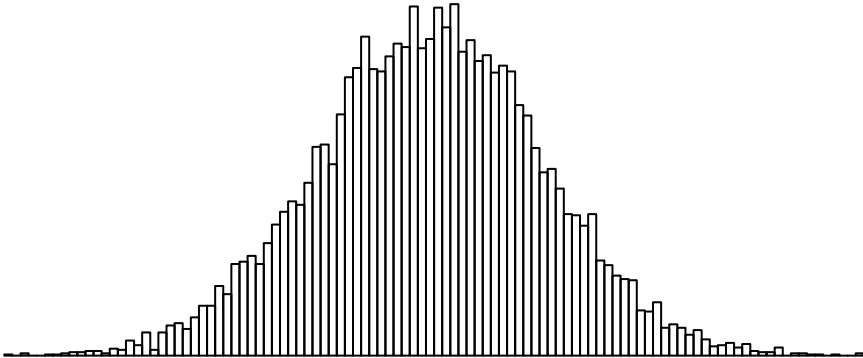

A194:45

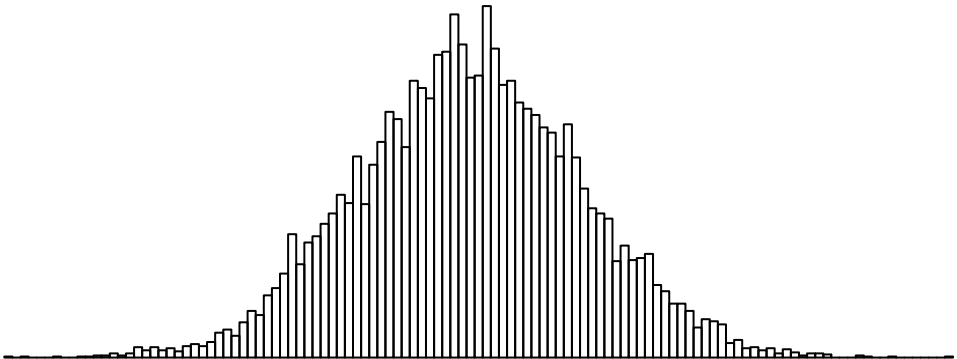

-9.0 -8.5 -8.0 -7.5 -7.0 -6.5 -6.0

Sugar 6

A194:240 – A194:120

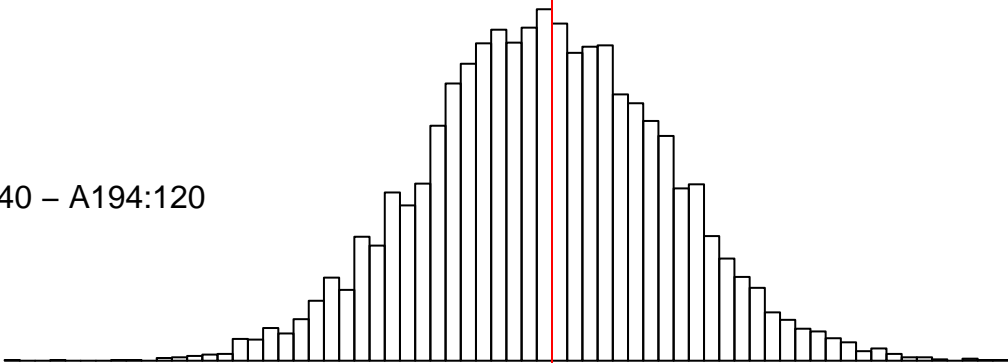

A194:240 – A194:45

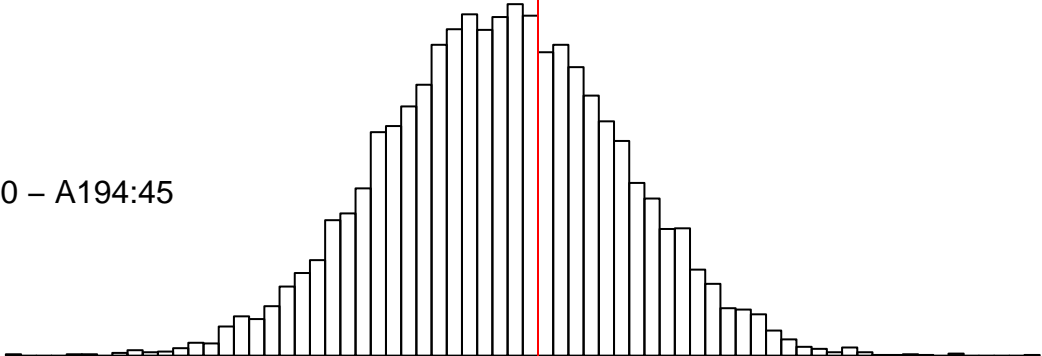

A194:120 – A194:45

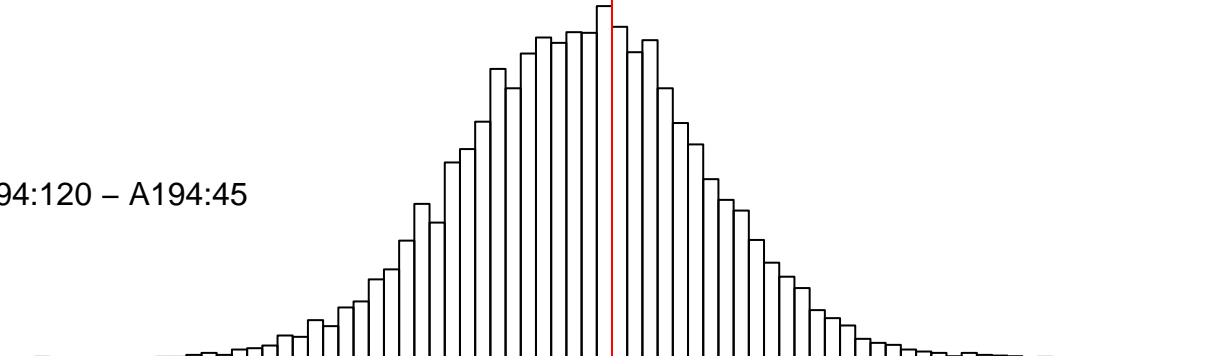

-2 -1 0 1 2

delta(Sugar 6)

A194:240

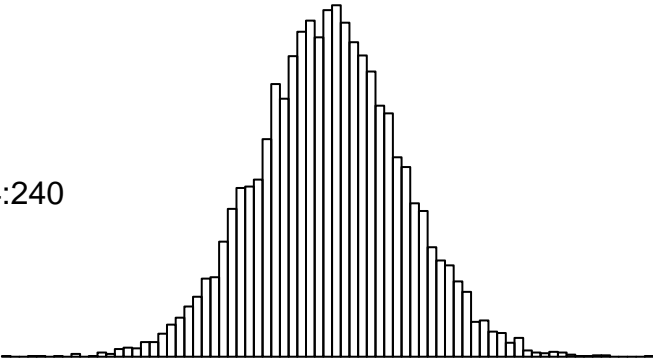

A194:120

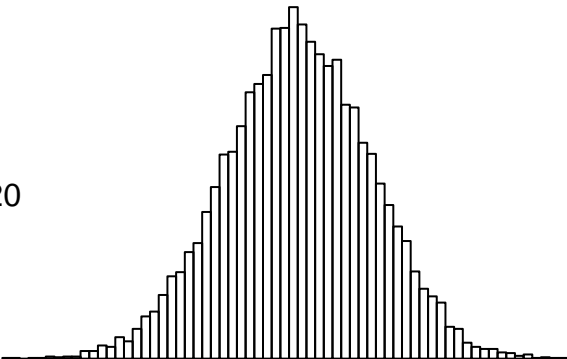

A194:45

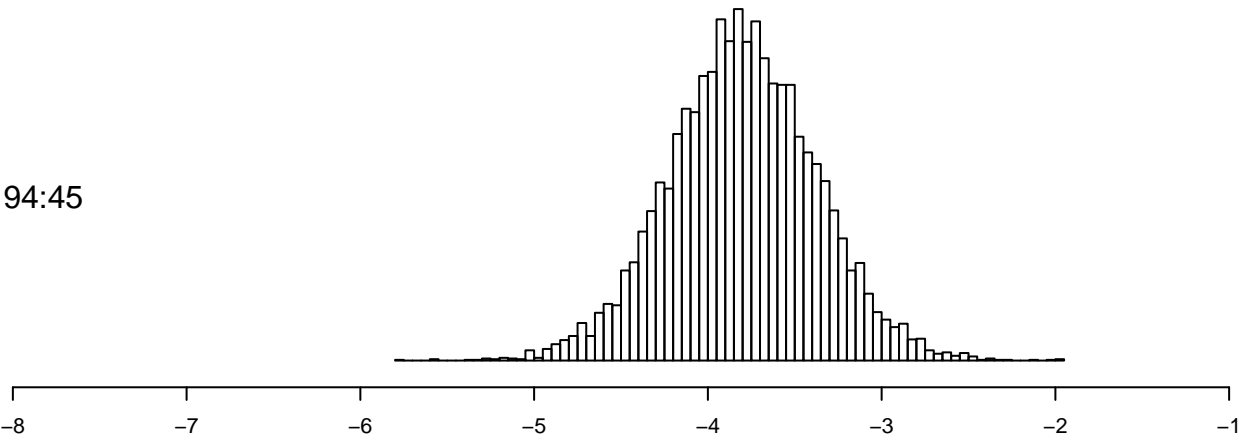

Sugar 7

A194:240 – A194:120

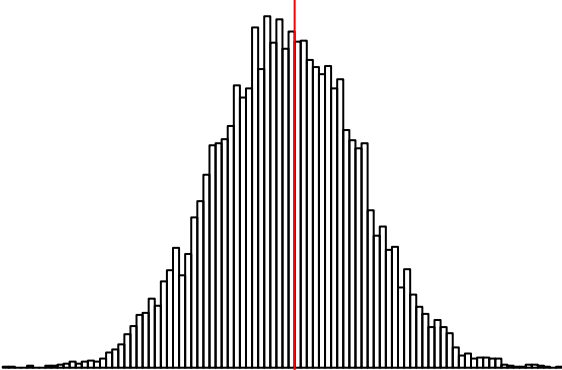

A194:240 – A194:45

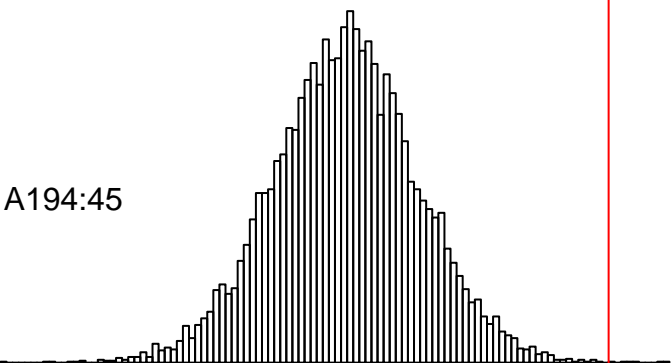

A194:120 – A194:45

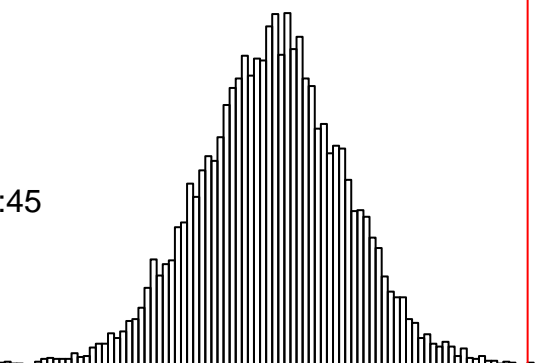

-6 -4 -2 0 2 4

delta(Sugar 7)



A194:240

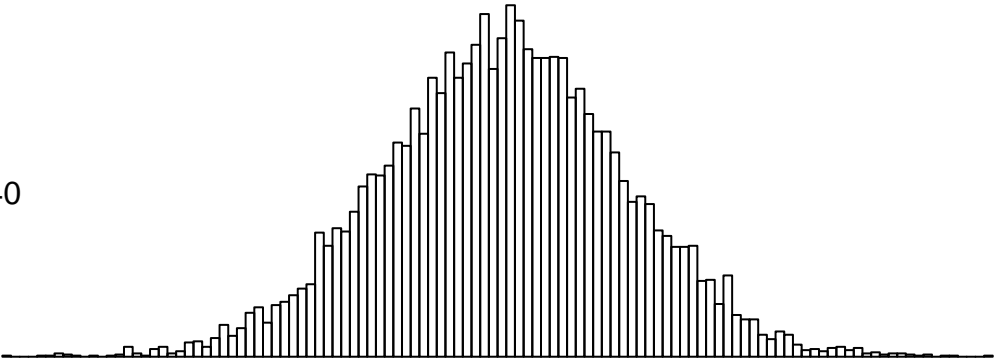

A194:120

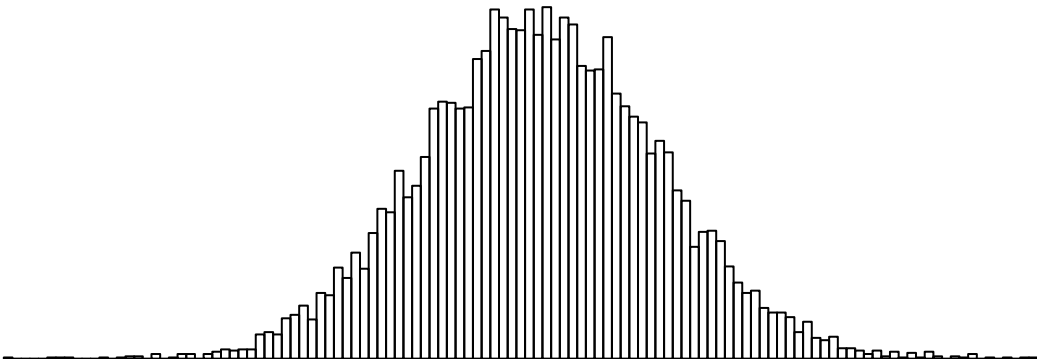

A194:45

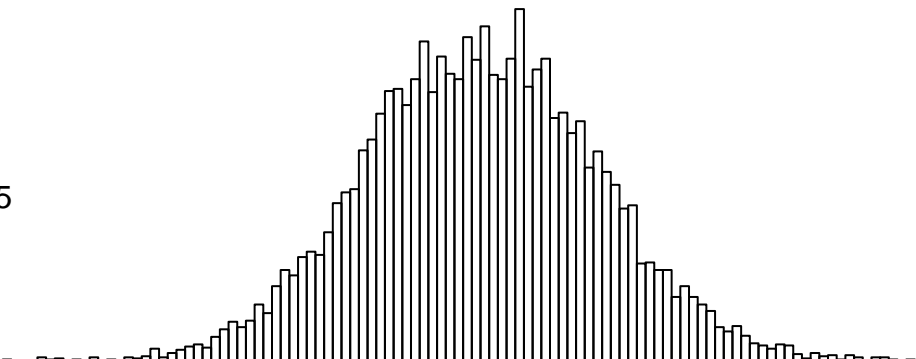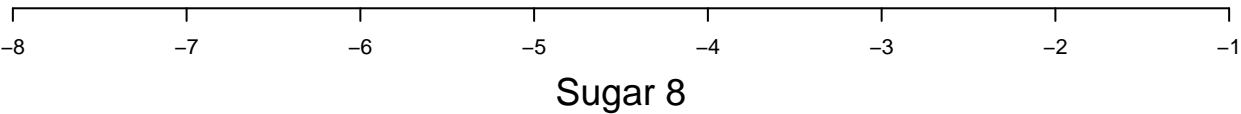

A194:240 – A194:120

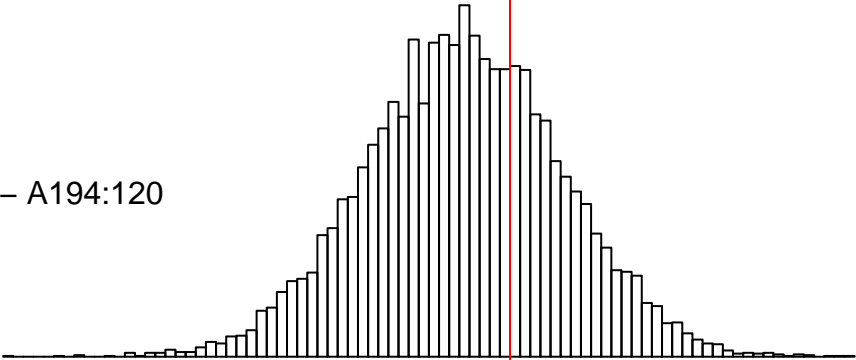

A194:240 – A194:45

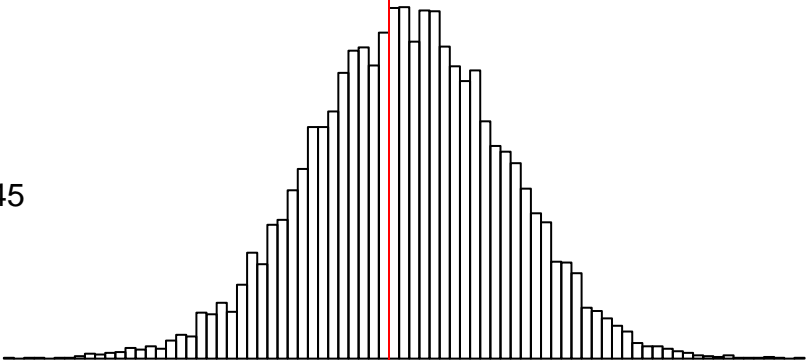

A194:120 – A194:45

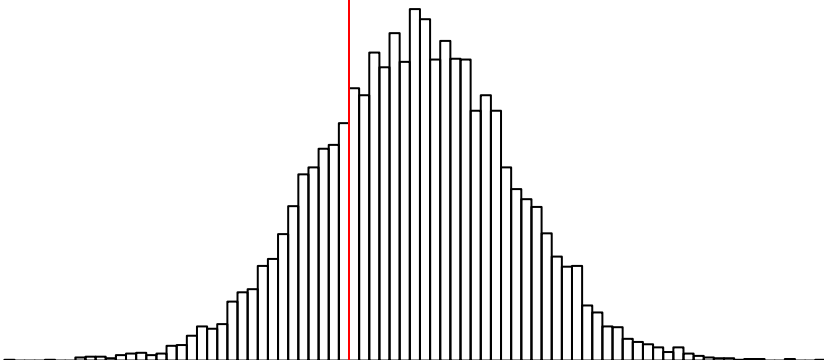

-6

-4

-2

0

2

4

6

delta(Sugar 8)

A194:240

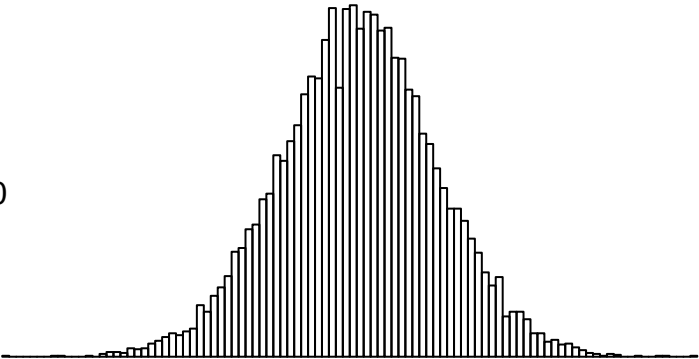

A194:120

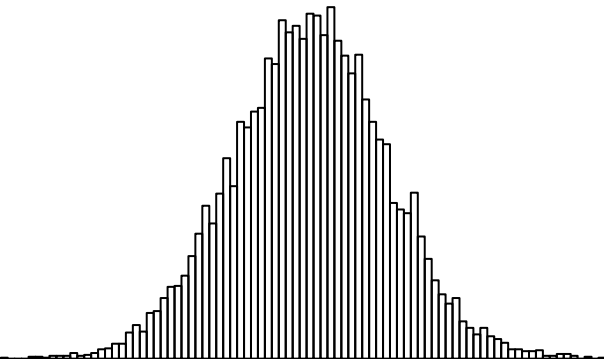

A194:45

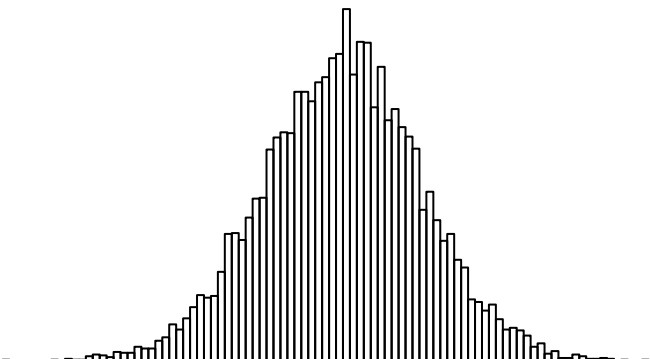

-9.5      -9.0      -8.5      -8.0      -7.5      -7.0      -6.5      -6.0

Sugar 9

A194:240 – A194:120

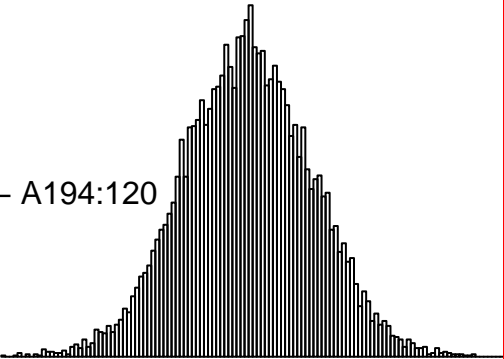

A194:240 – A194:45

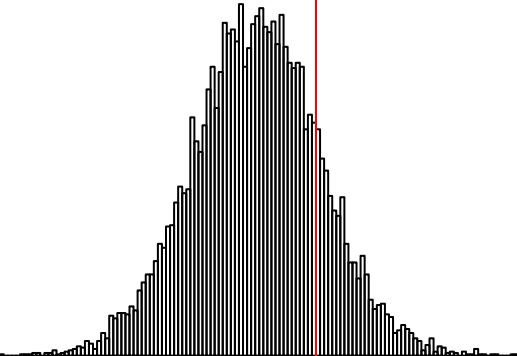

A194:120 – A194:45

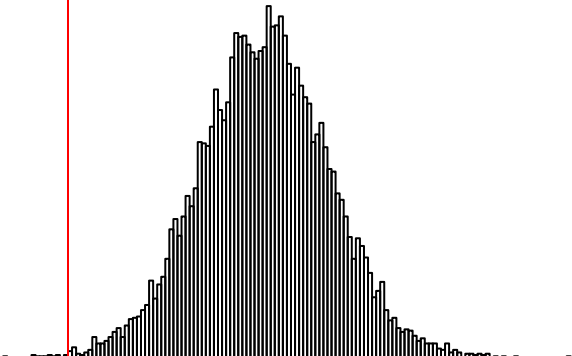

-3      -2      -1      0      1      2      3

delta(Sugar 9)

A194:240

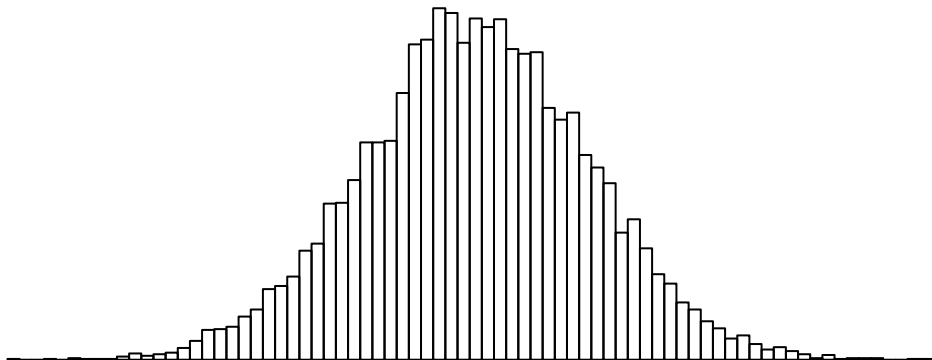

A194:120

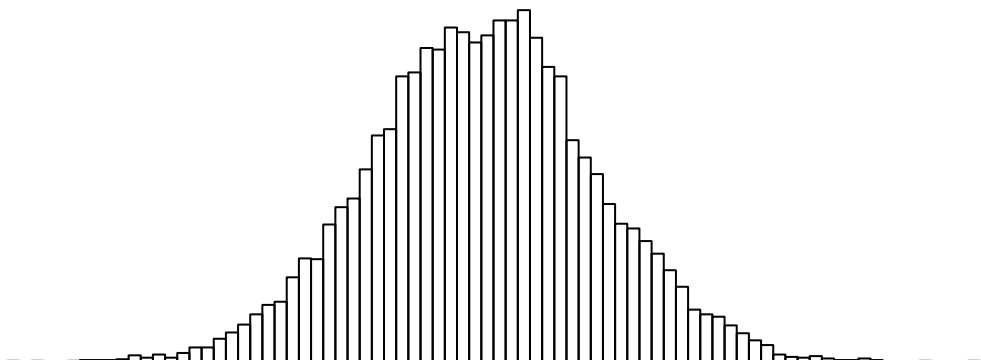

A194:45

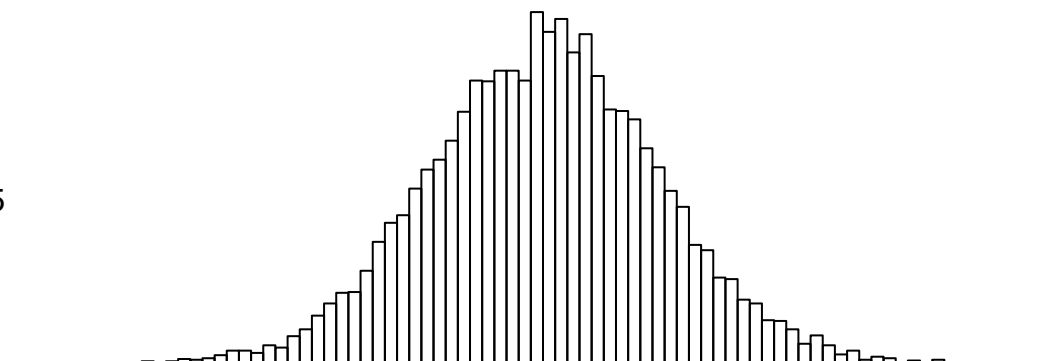

-9 -8 -7 -6 -5 -4

Sugar 10

A194:240 – A194:120

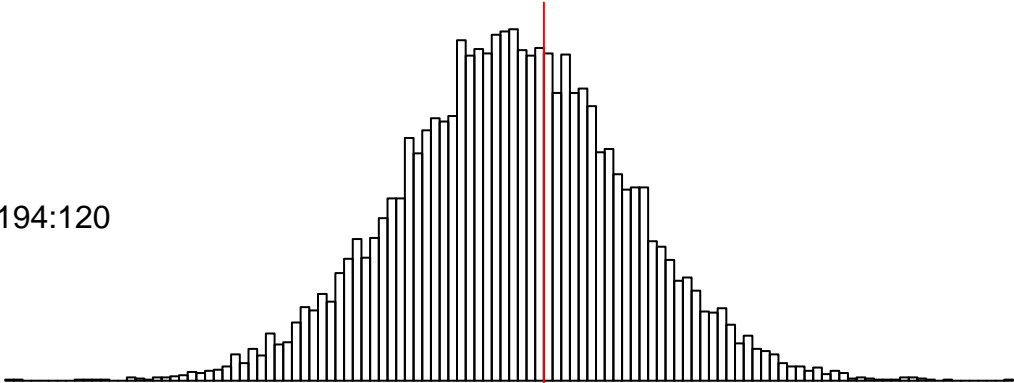

A194:240 – A194:45

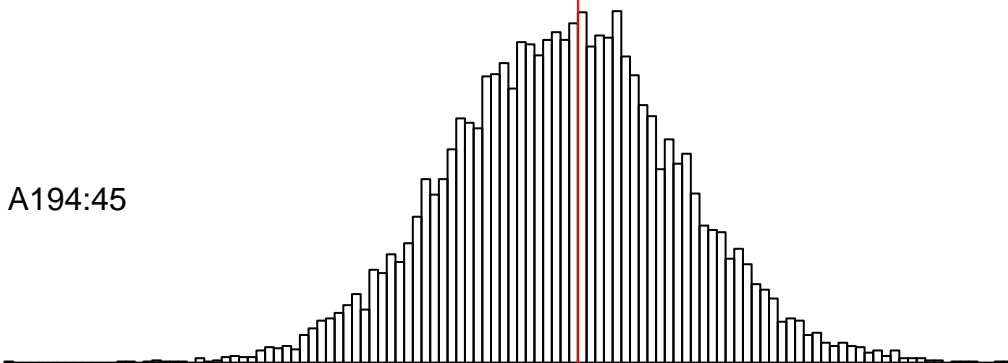

A194:120 – A194:45

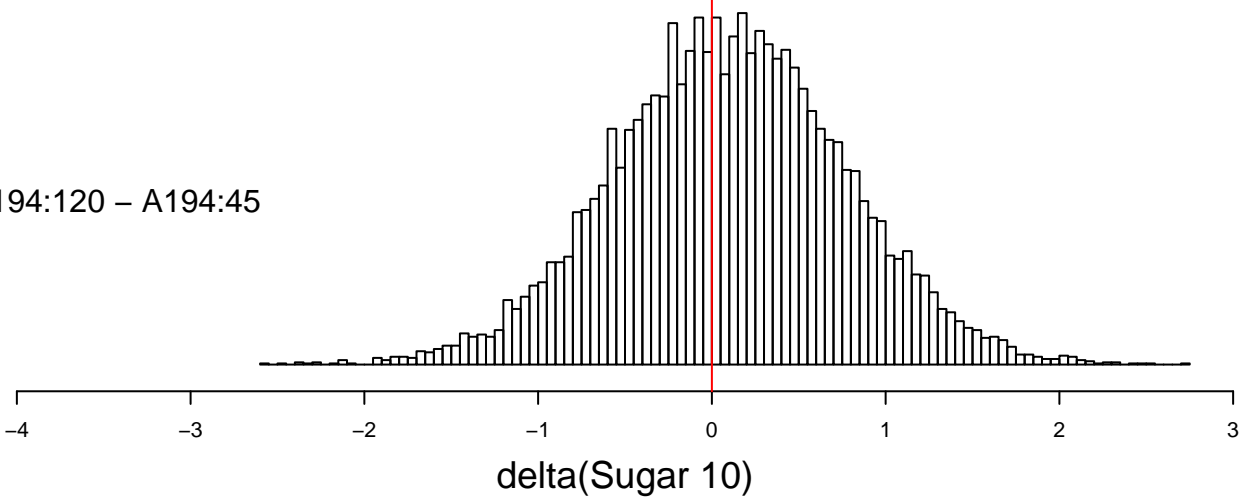

A194:240

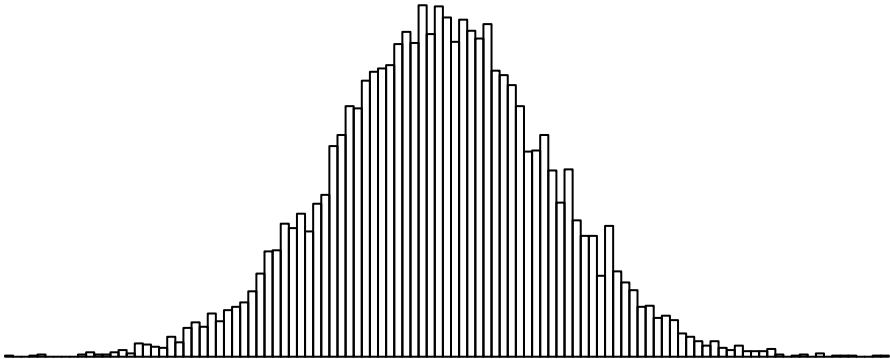

A194:120

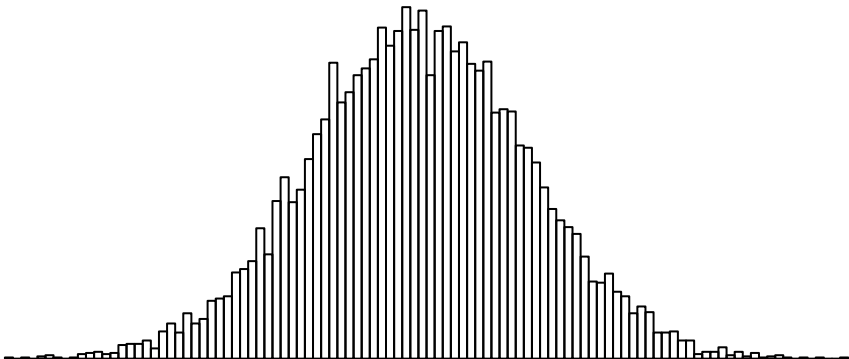

A194:45

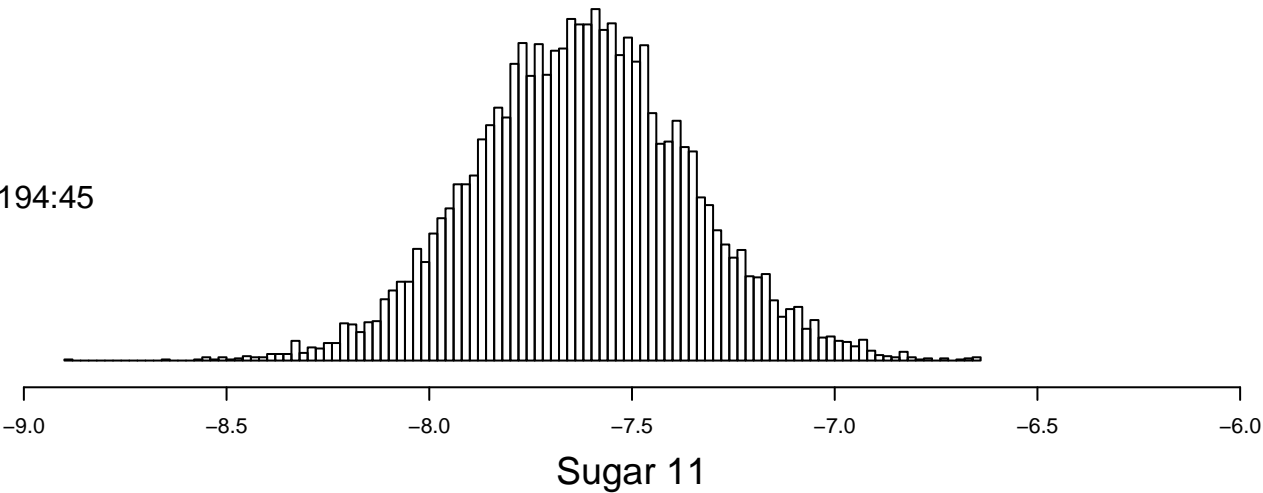

A194:240 – A194:120

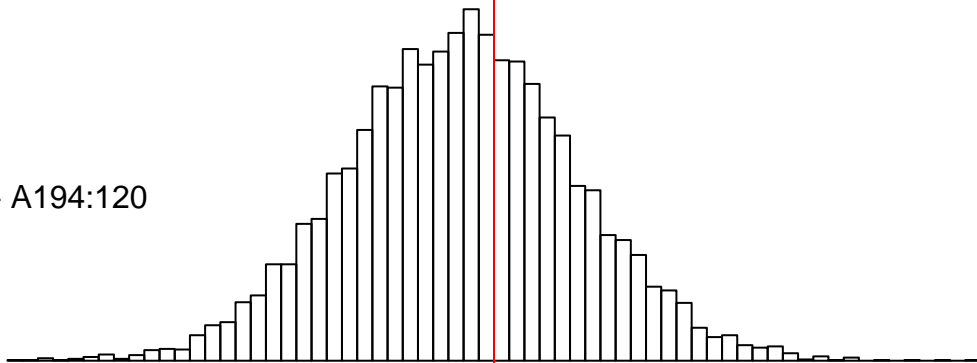

A194:240 – A194:45

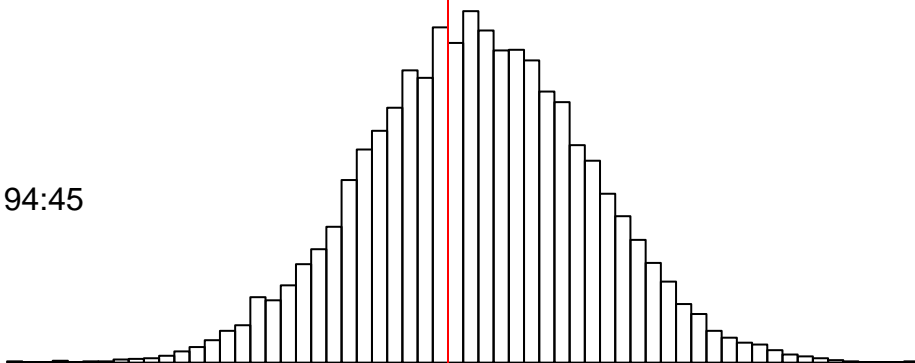

A194:120 – A194:45

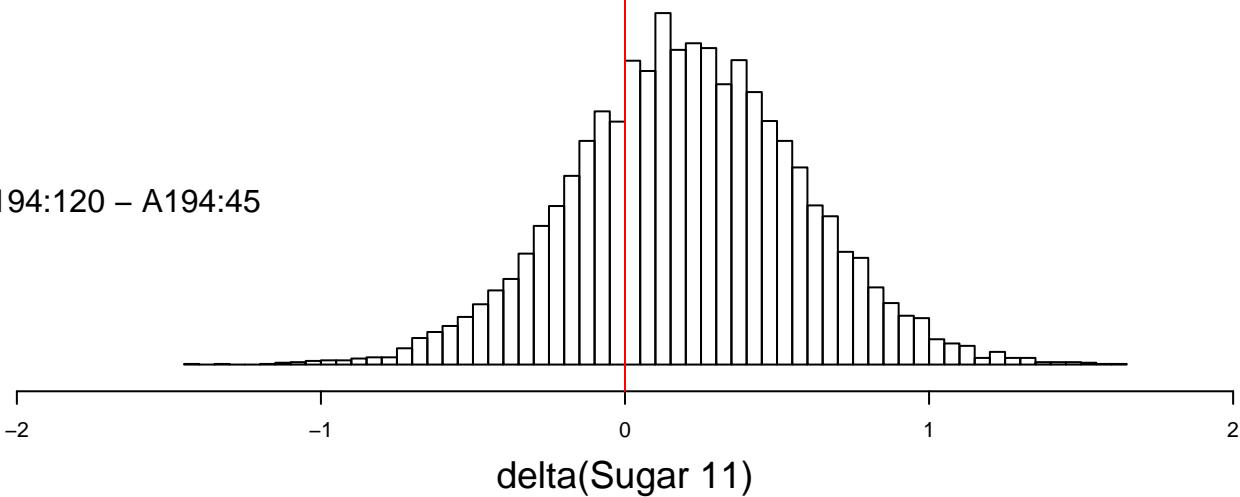



A194:240

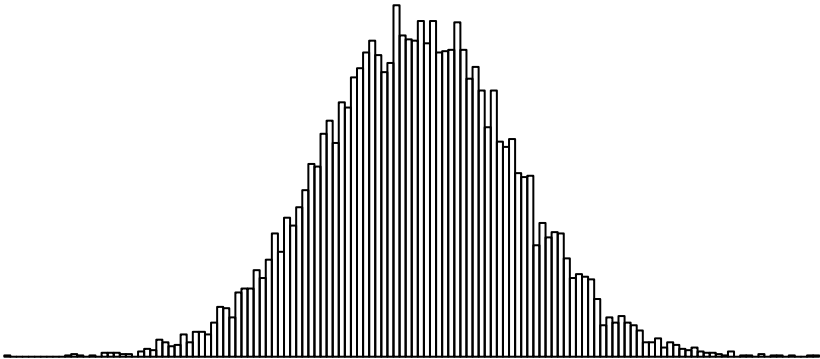

A194:120

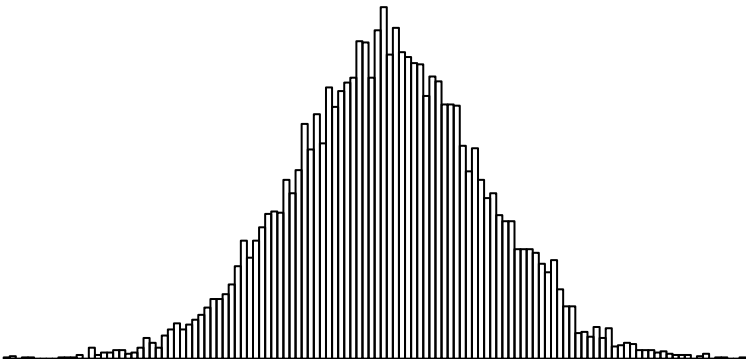

A194:45

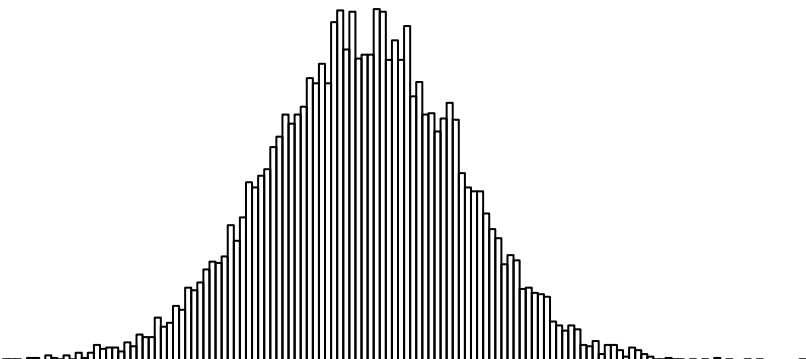

-9.0                      -8.5                      -8.0                      -7.5                      -7.0

Sugar 12

A194:240 – A194:120

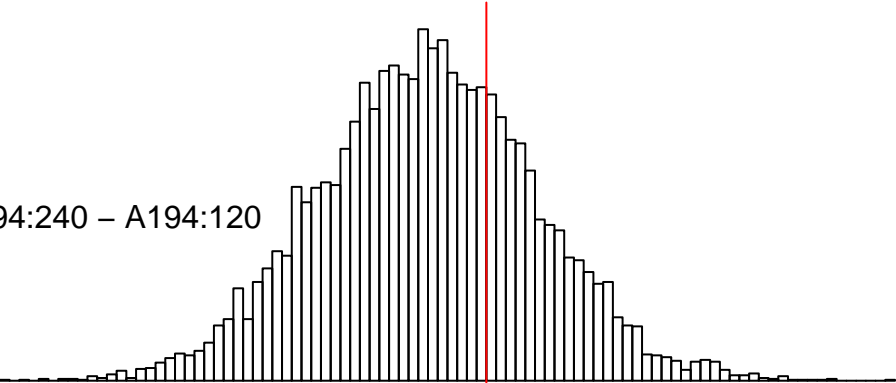

A194:240 – A194:45

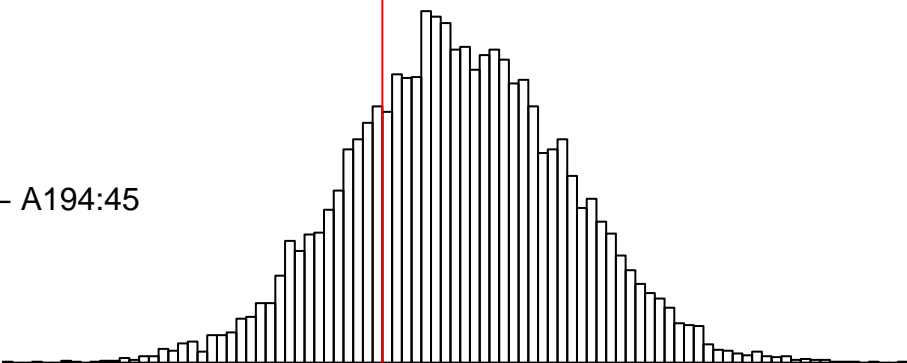

A194:120 – A194:45

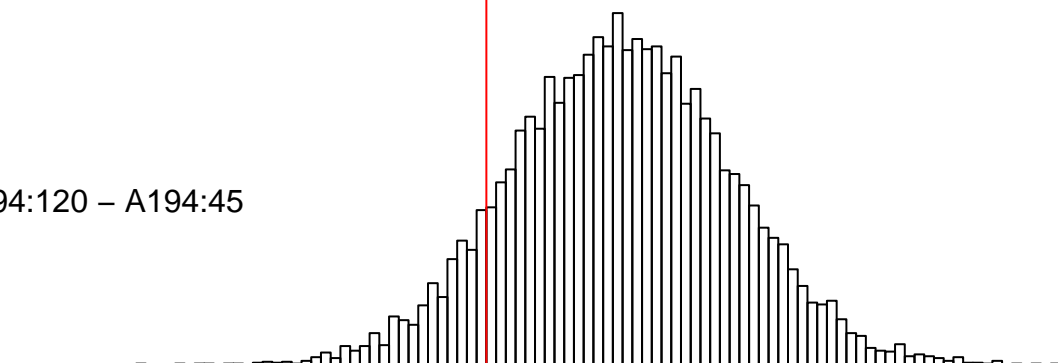

-1.0      -0.5      0.0      0.5      1.0      1.5

delta(Sugar 12)

A194:240

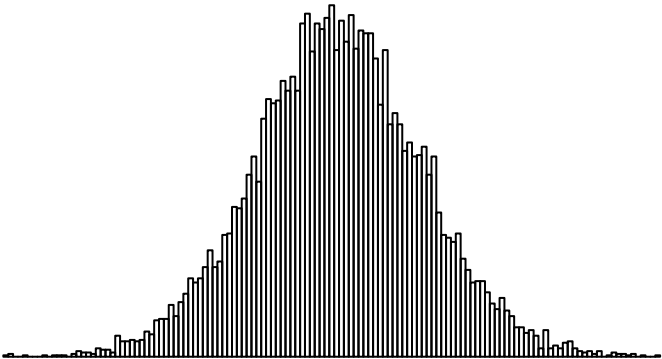

A194:120

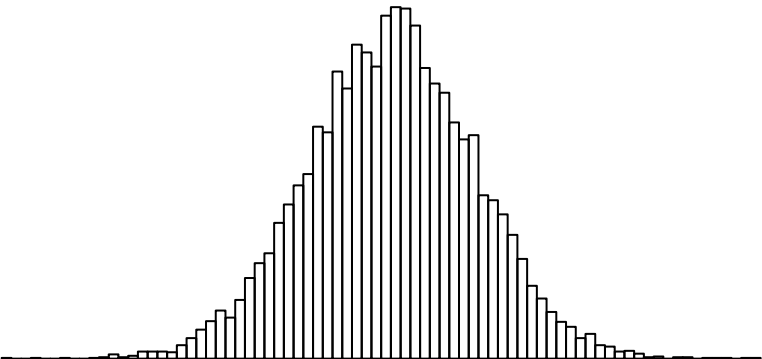

A194:45

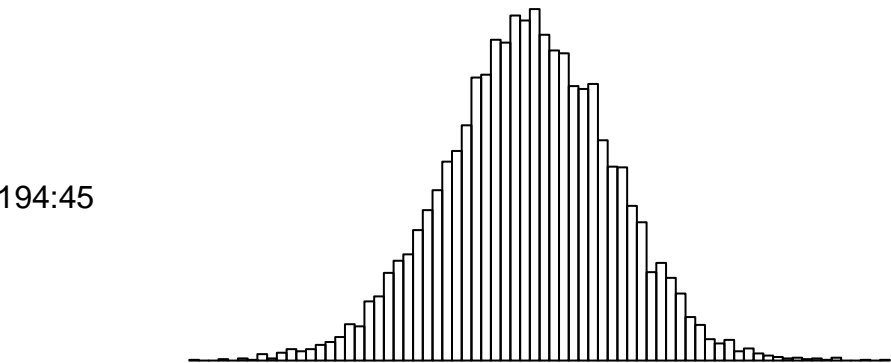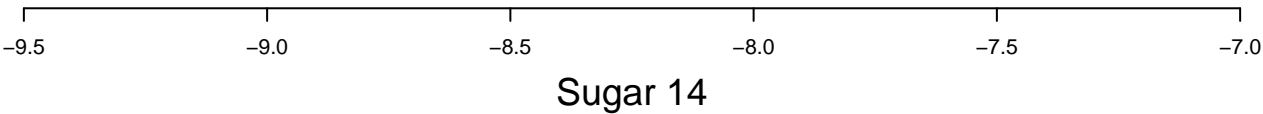

A194:240 – A194:120

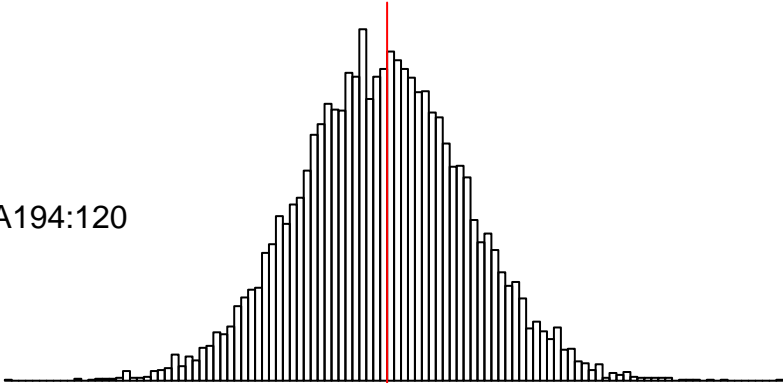

A194:240 – A194:45

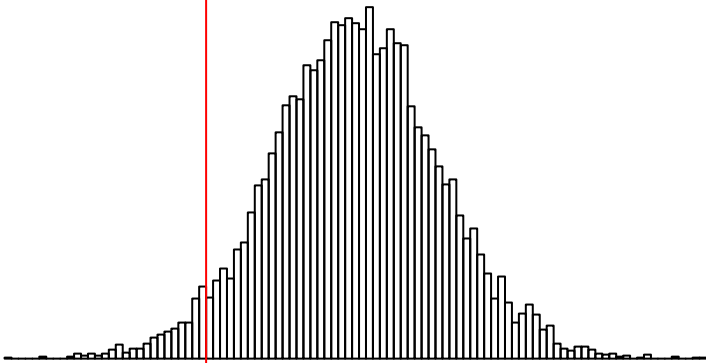

A194:120 – A194:45

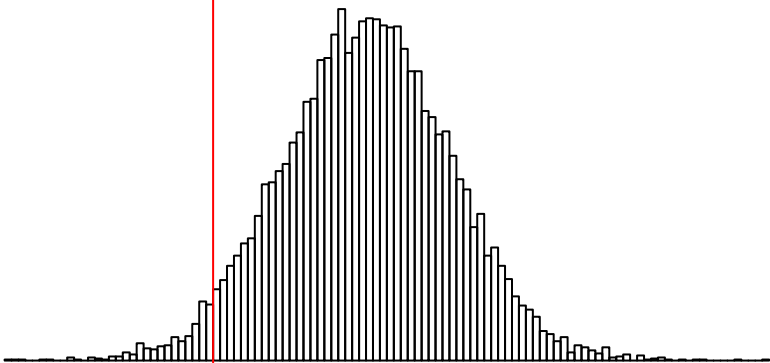

-1.5      -1.0      -0.5      0.0      0.5      1.0      1.5      2.0

delta(Sugar 14)

A194:240

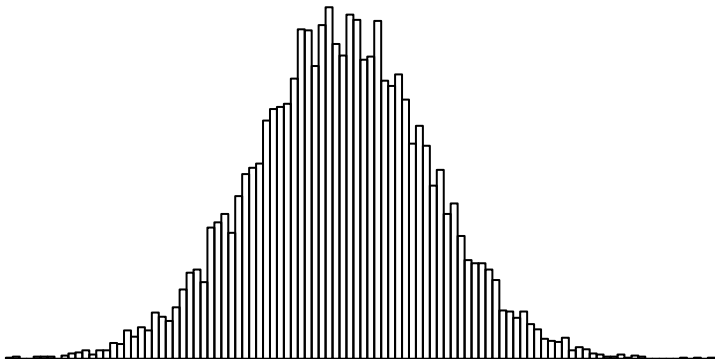

A194:120

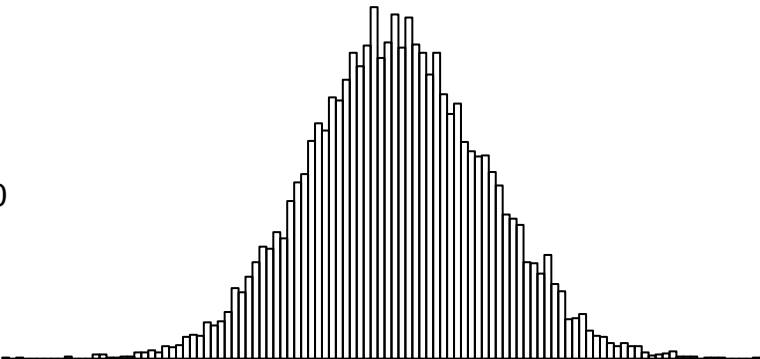

A194:45

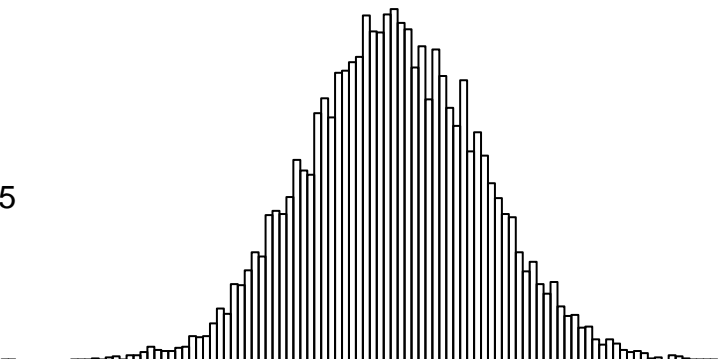

-9.5      -9.0      -8.5      -8.0      -7.5      -7.0      -6.5      -6.0

Sugar 16

A194:240 – A194:120

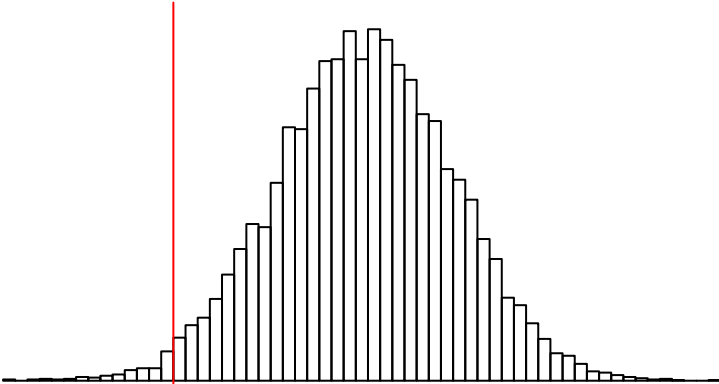

A194:240 – A194:45

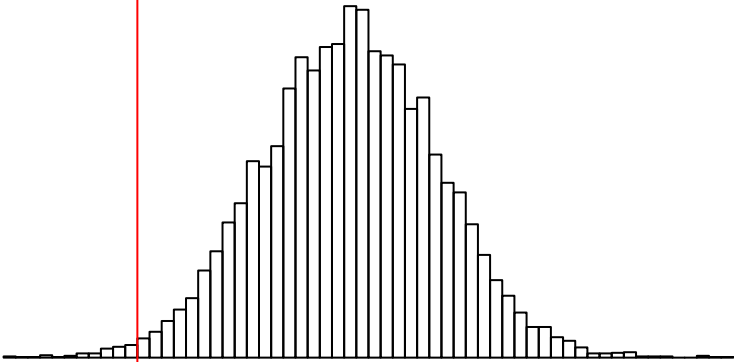

A194:120 – A194:45

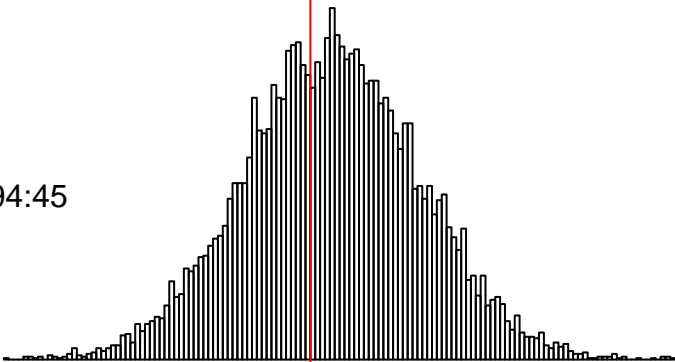

-2 -1 0 1 2 3

delta(Sugar 16)

A194:240

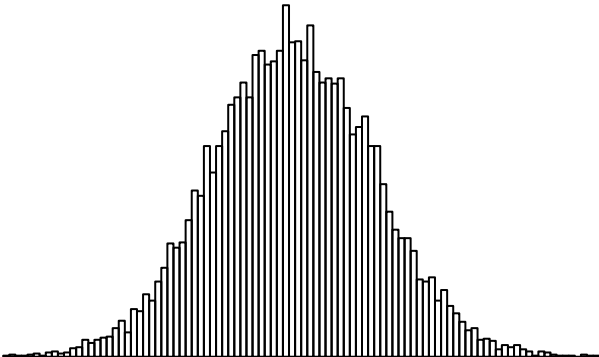

A194:120

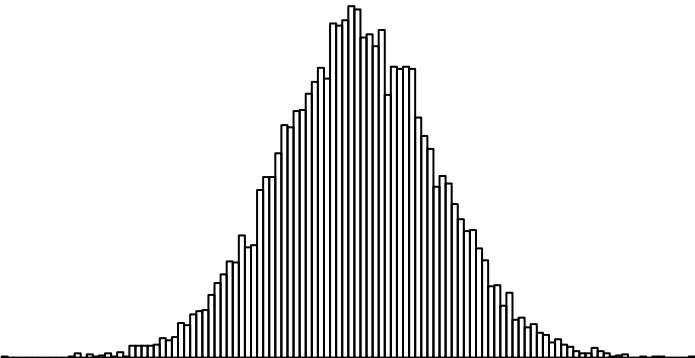

A194:45

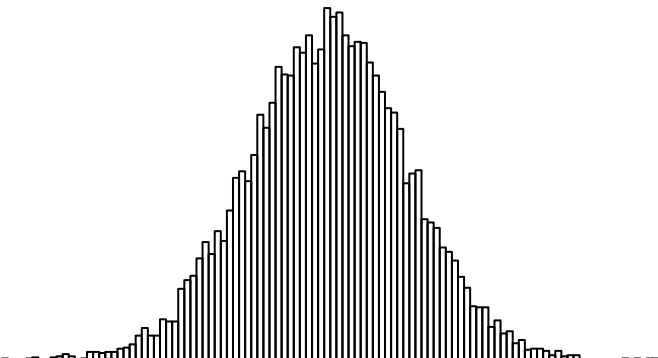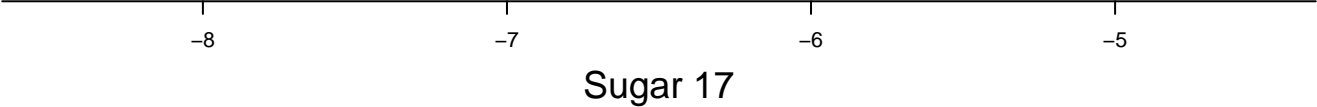

A194:240 – A194:120

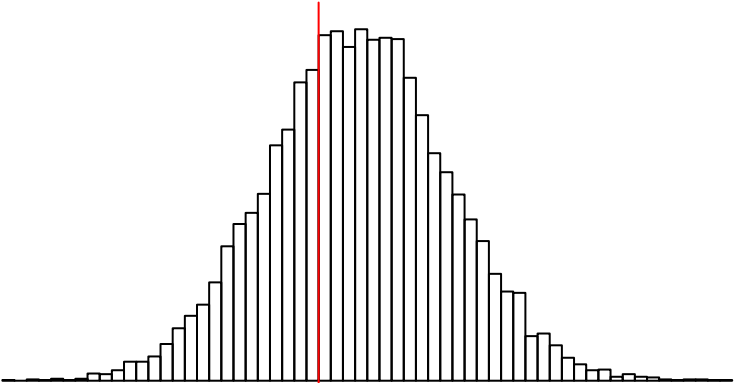

A194:240 – A194:45

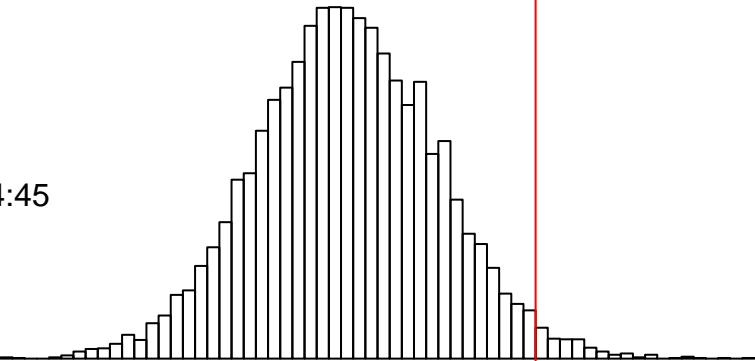

A194:120 – A194:45

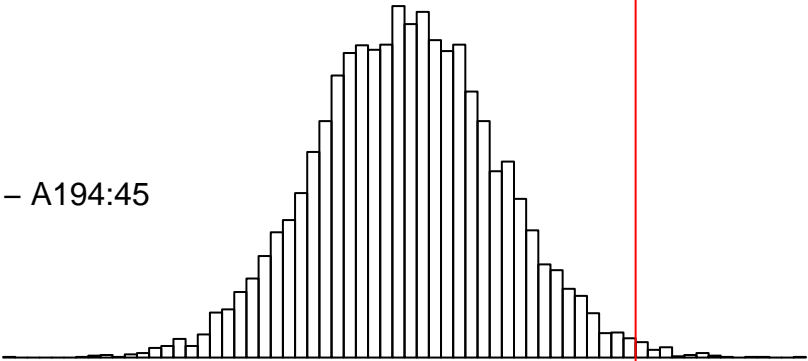

-3

-2

-1

0

1

2

delta(Sugar 17)



A194:240

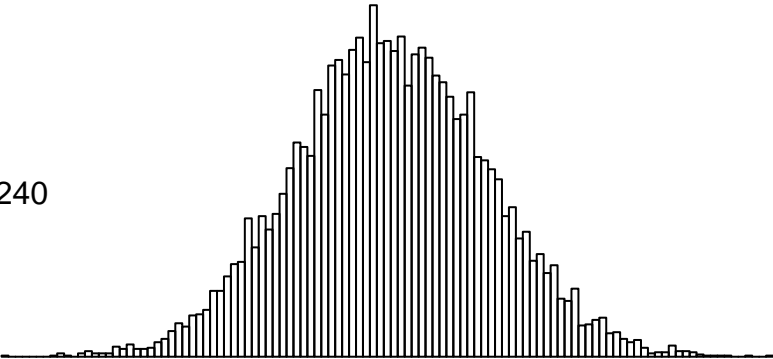

A194:120

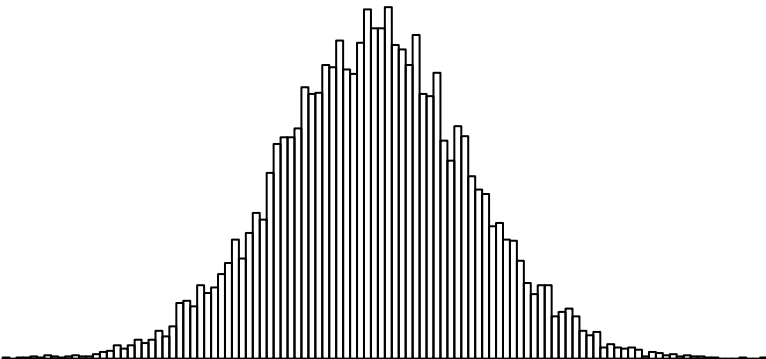

A194:45

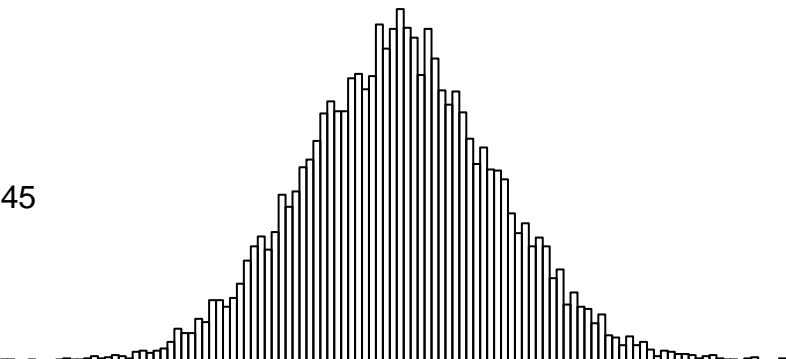

-7.0      -6.5      -6.0      -5.5      -5.0      -4.5      -4.0      -3.5

Sugar 18

A194:240 – A194:120

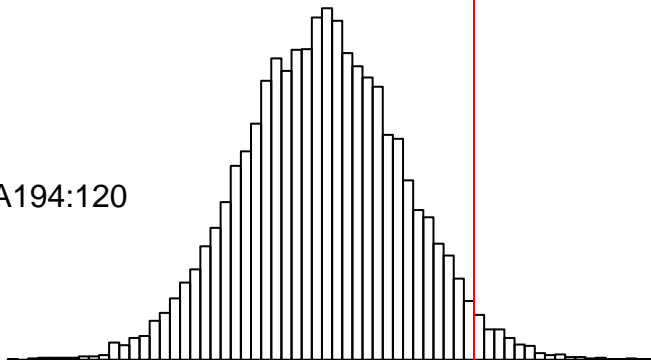

A194:240 – A194:45

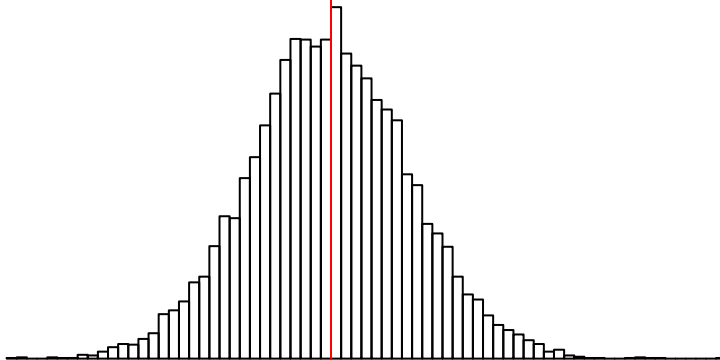

A194:120 – A194:45

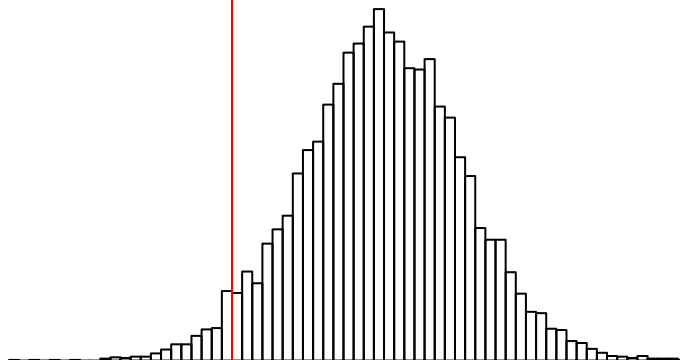

delta(Sugar 18)

A194:240

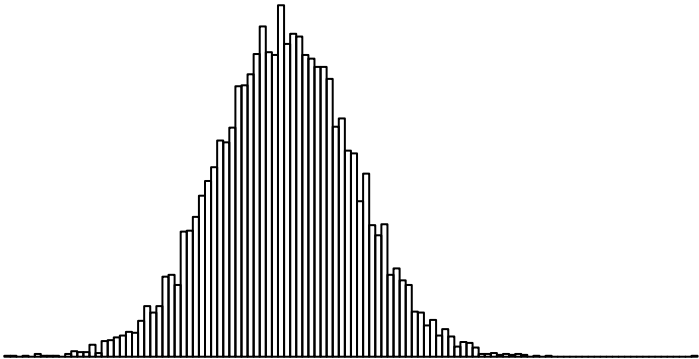

A194:120

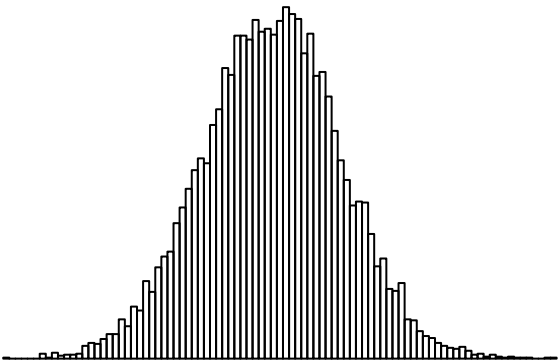

A194:45

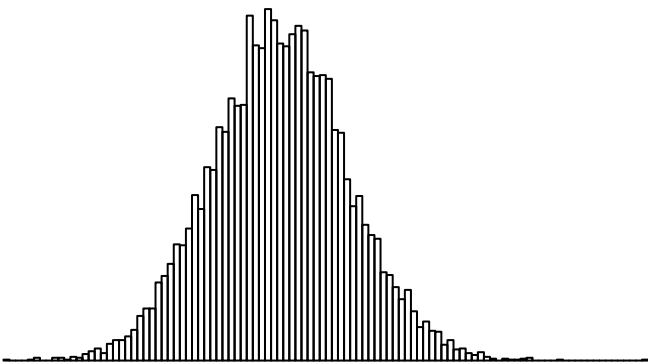

-9

-8

-7

-6

Sugar 20

A194:240 – A194:120

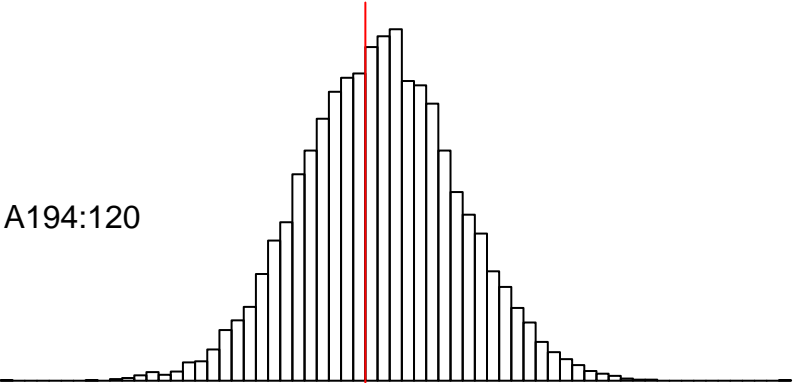

A194:240 – A194:45

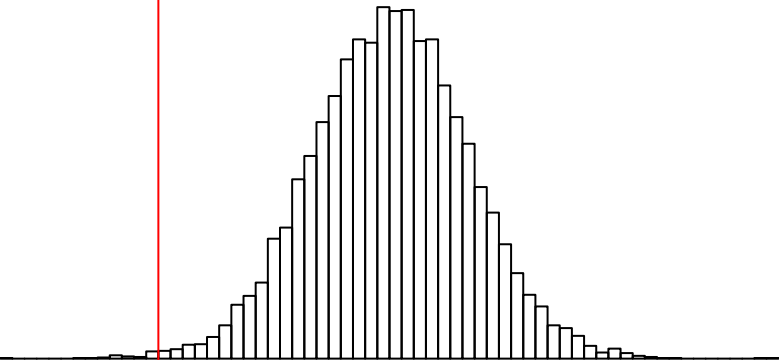

A194:120 – A194:45

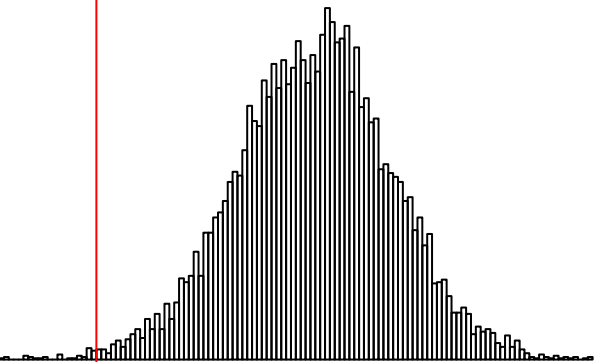

-2

-1

0

1

2

3

delta(Sugar 20)

A194:240

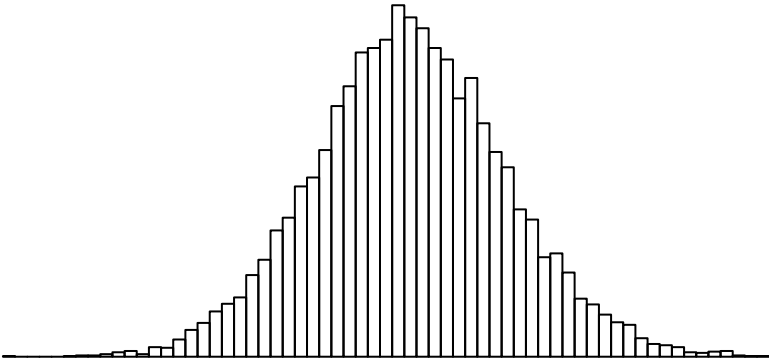

A194:120

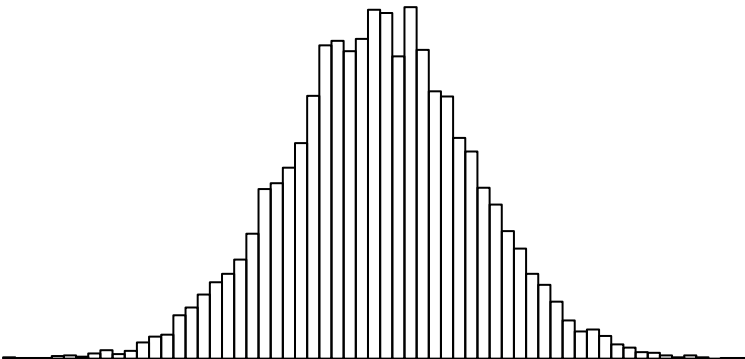

A194:45

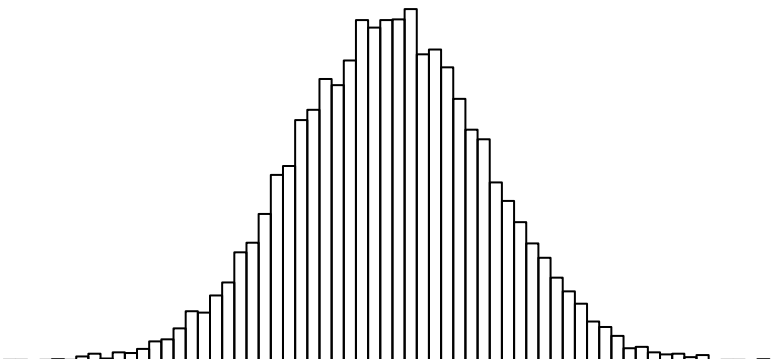

-10 -9 -8 -7 -6 -5

Sugar 21

A194:240 – A194:120

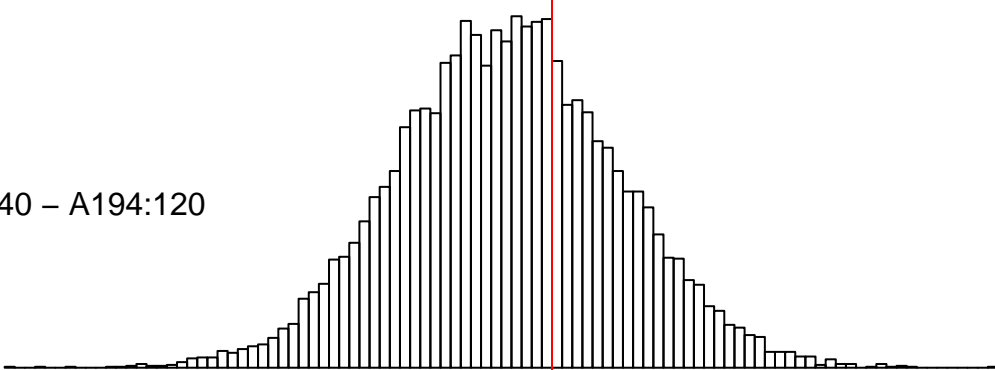

A194:240 – A194:45

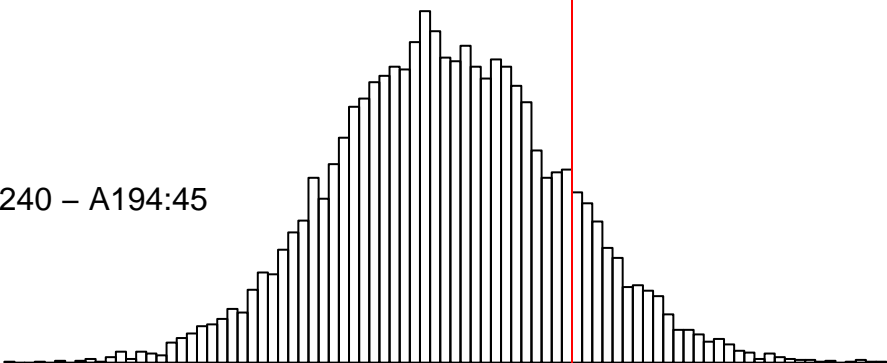

A194:120 – A194:45

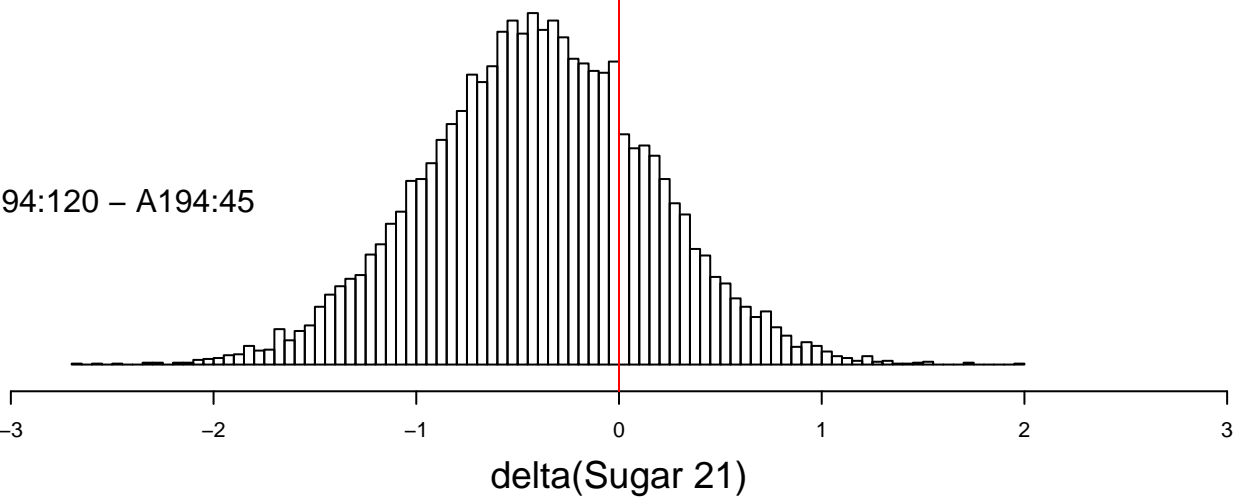

A194:240

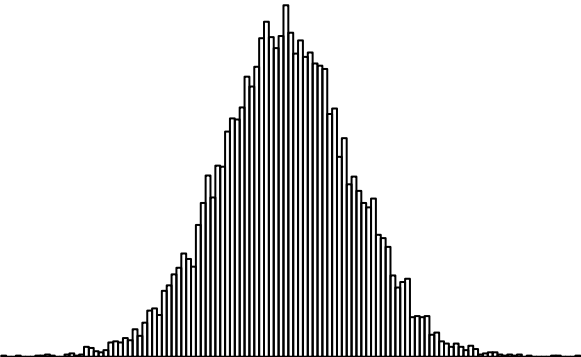

A194:120

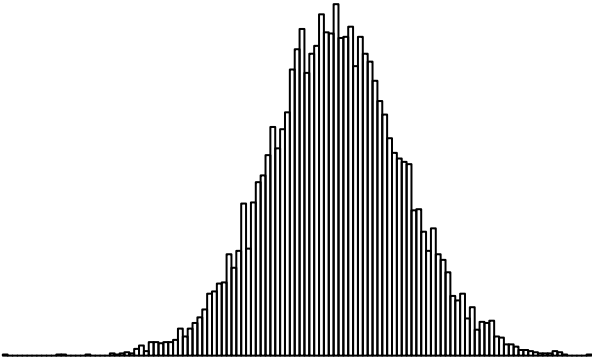

A194:45

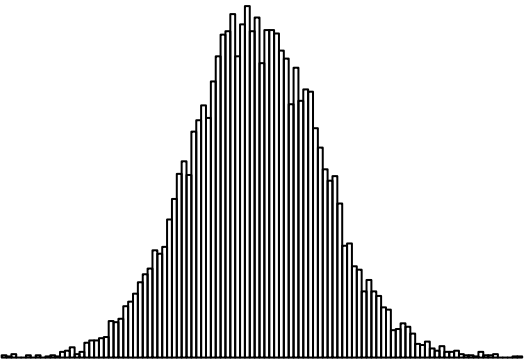

-8      -7      -6      -5      -4      -3

Sugar 22

A194:240 – A194:120

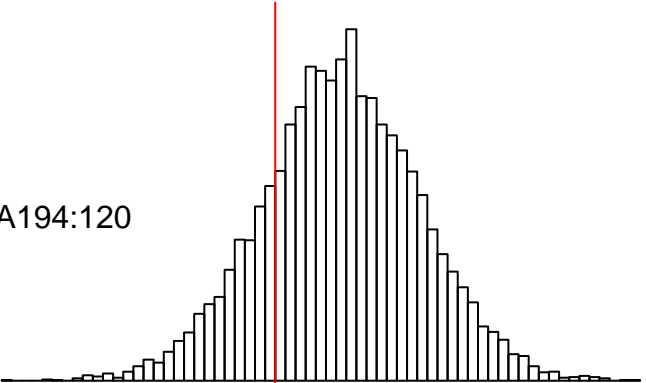

A194:240 – A194:45

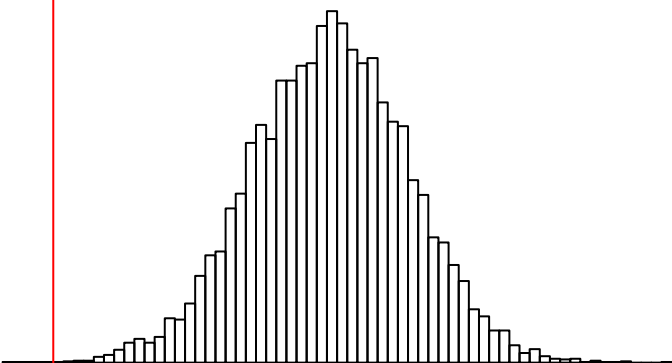

A194:120 – A194:45

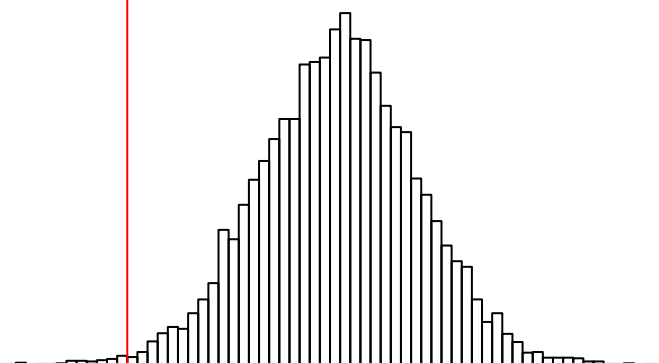

-2 -1 0 1 2 3 4

delta(Sugar 22)



A194:240

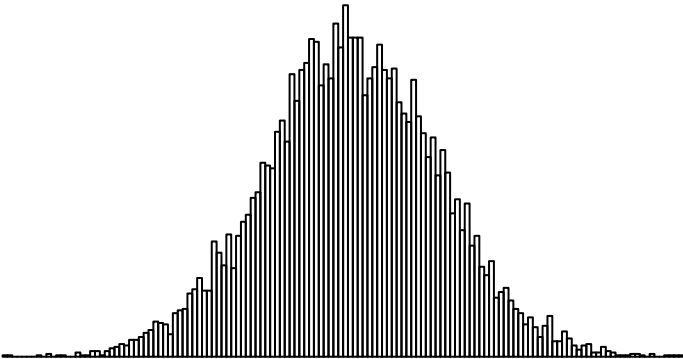

A194:120

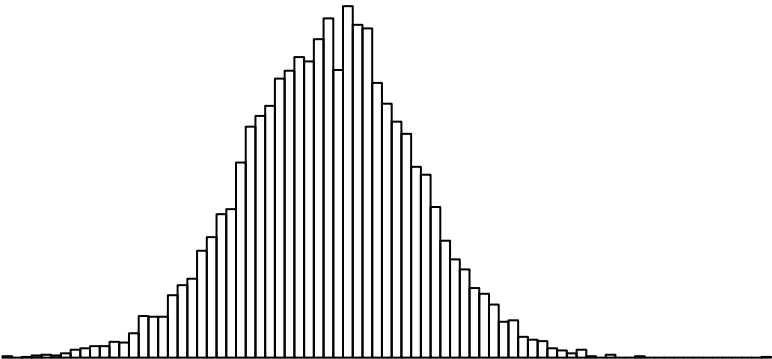

A194:45

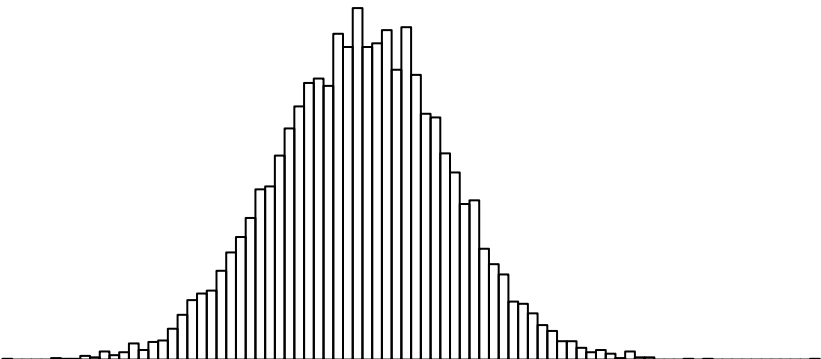

-8.0      -7.5      -7.0      -6.5      -6.0      -5.5

Sugar 23

A194:240 – A194:120

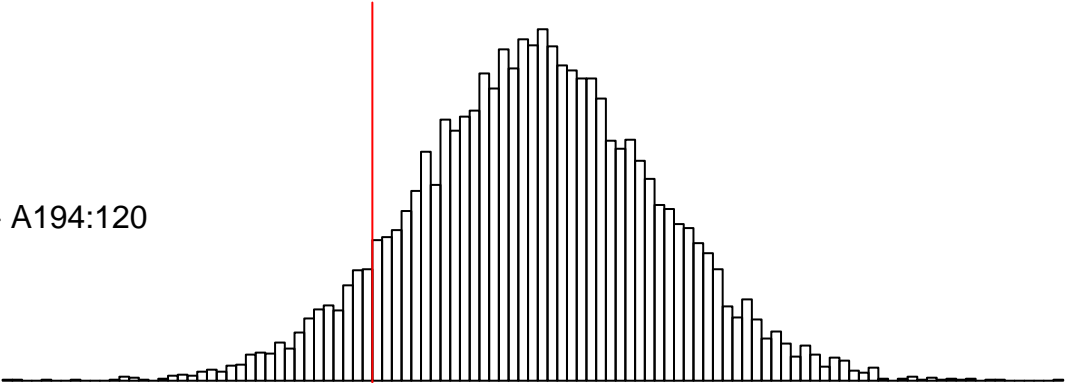

A194:240 – A194:45

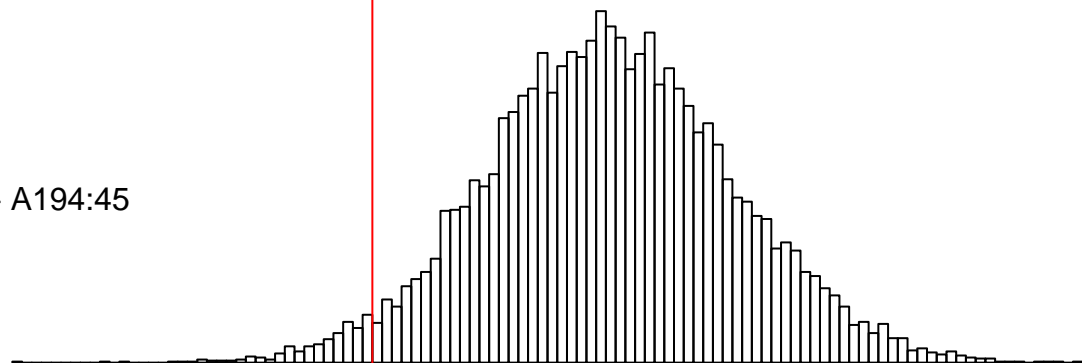

A194:120 – A194:45

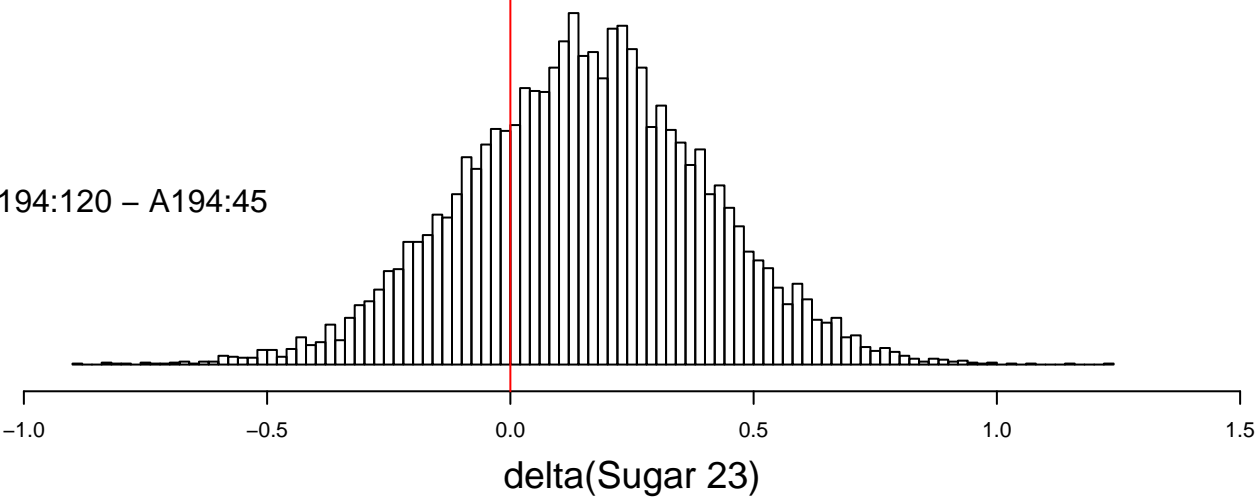

A194:240

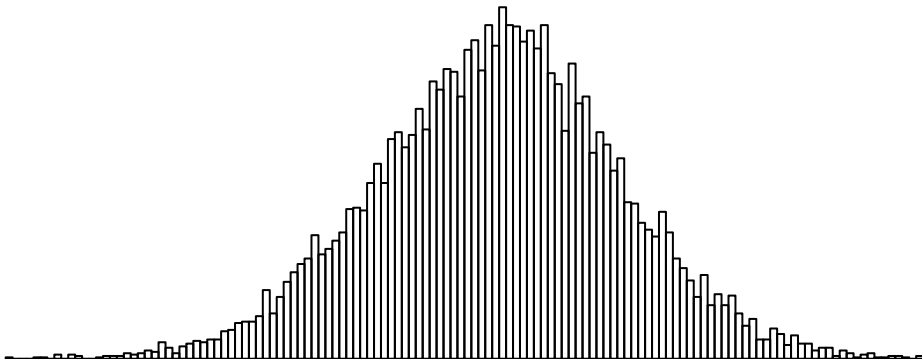

A194:120

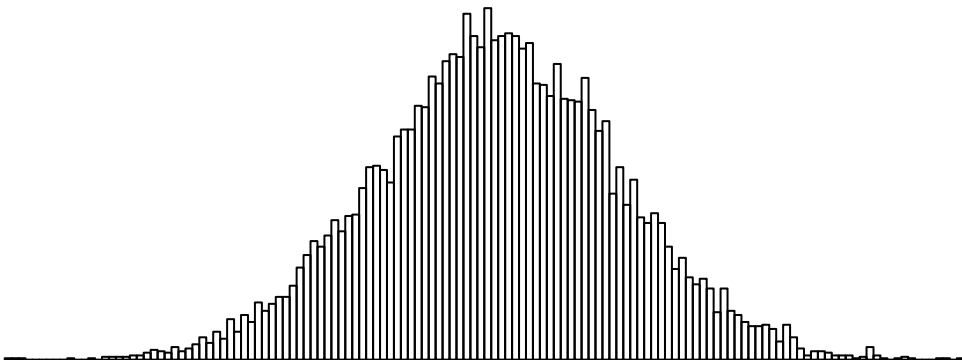

A194:45

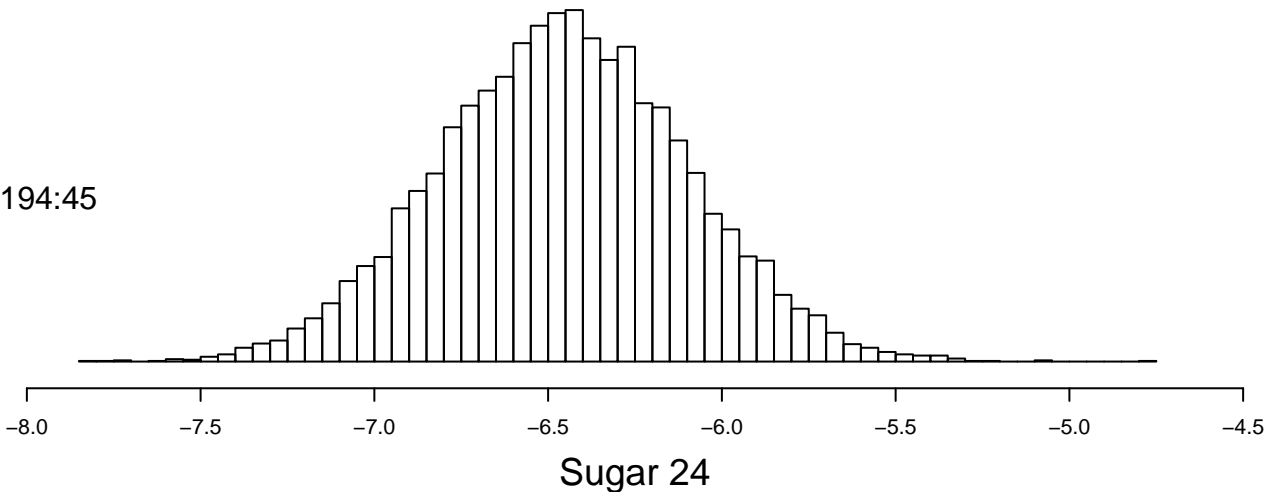

A194:240 – A194:120

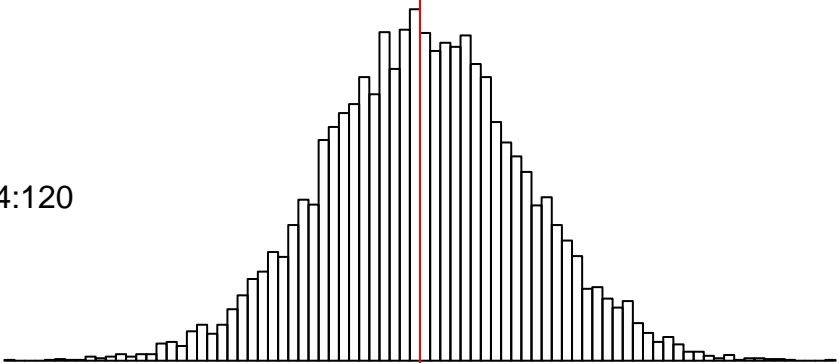

A194:240 – A194:45

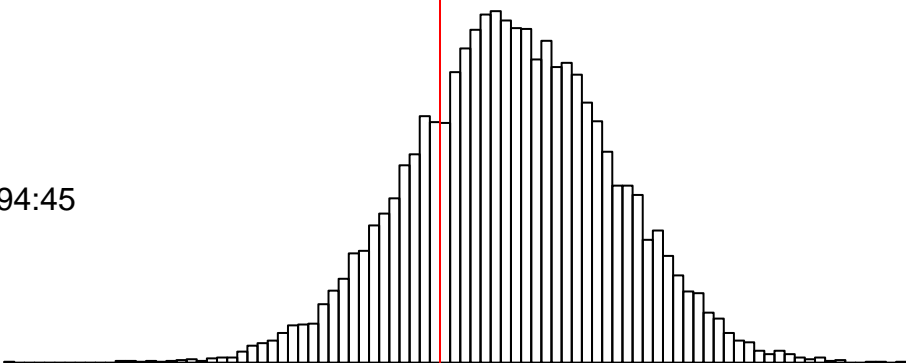

A194:120 – A194:45

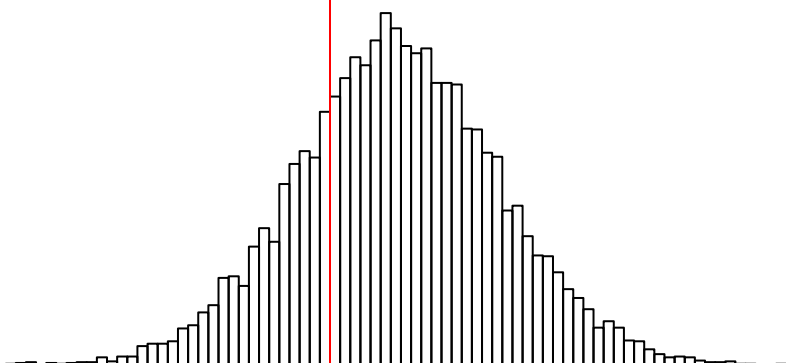

-3 -2 -1 0 1 2 3

delta(Sugar 24)

A194:240

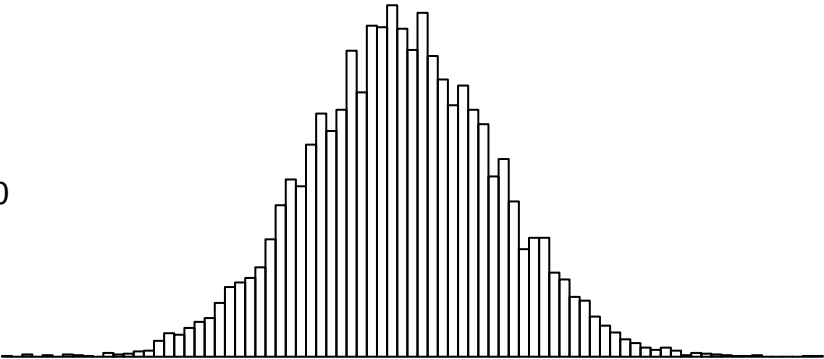

A194:120

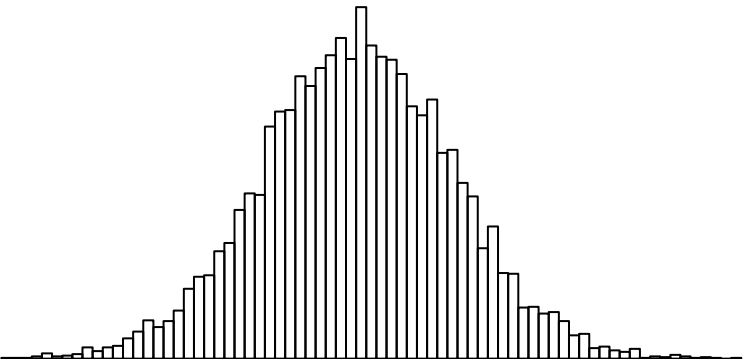

A194:45

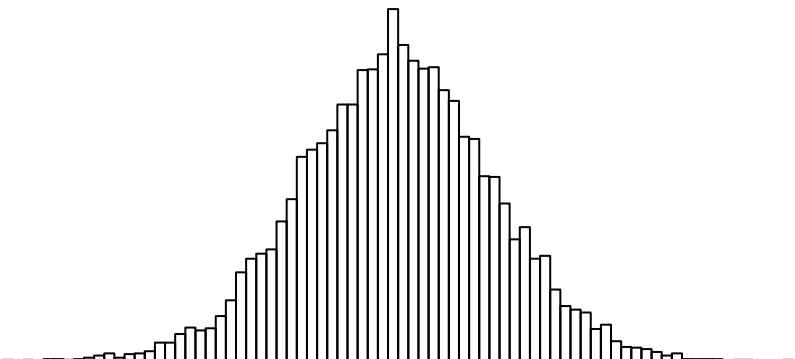

-9 -8 -7 -6 -5 -4 -3

Alcohol 1

A194:240 – A194:120

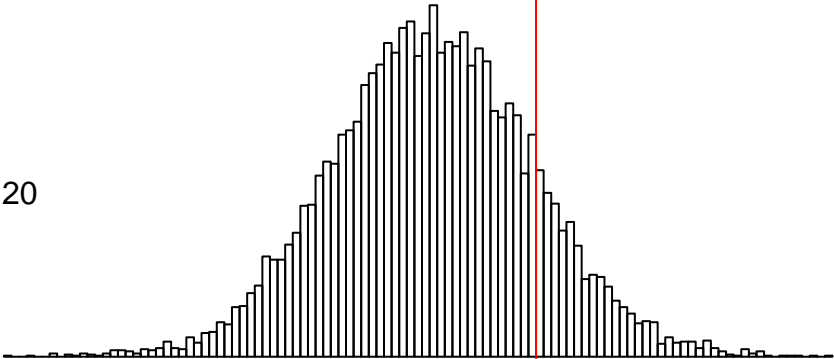

A194:240 – A194:45

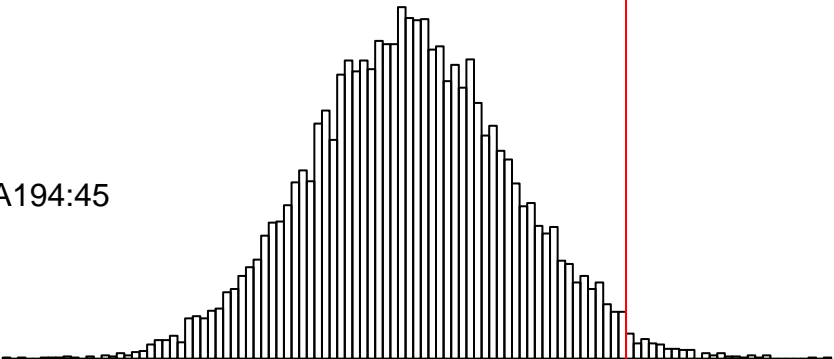

A194:120 – A194:45

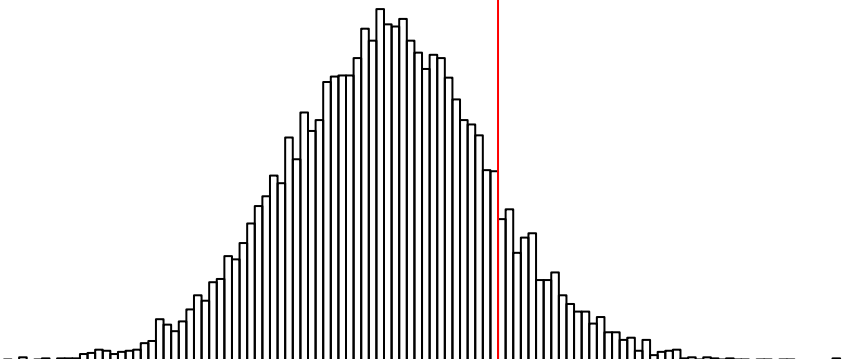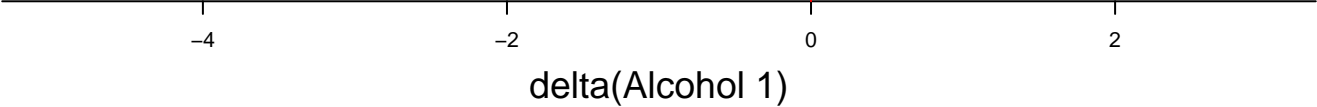

A194:240

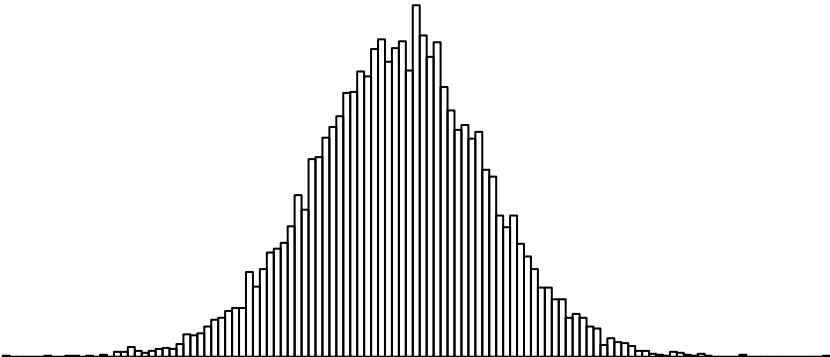

A194:120

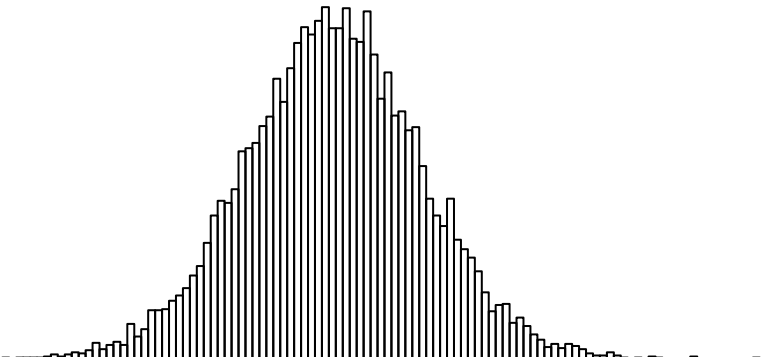

A194:45

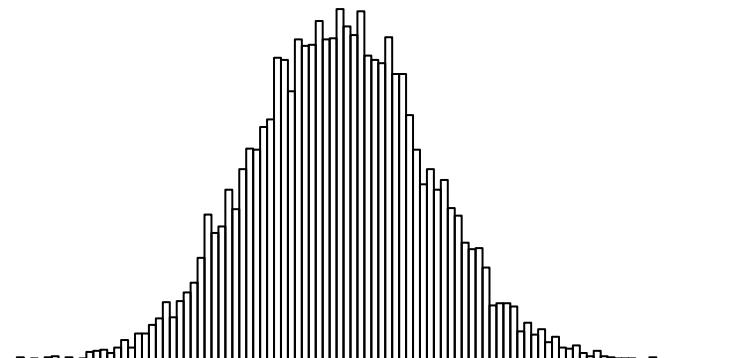

-8.5      -8.0      -7.5      -7.0      -6.5      -6.0      -5.5      -5.0

Hydrocarbon 1

A194:240 – A194:120

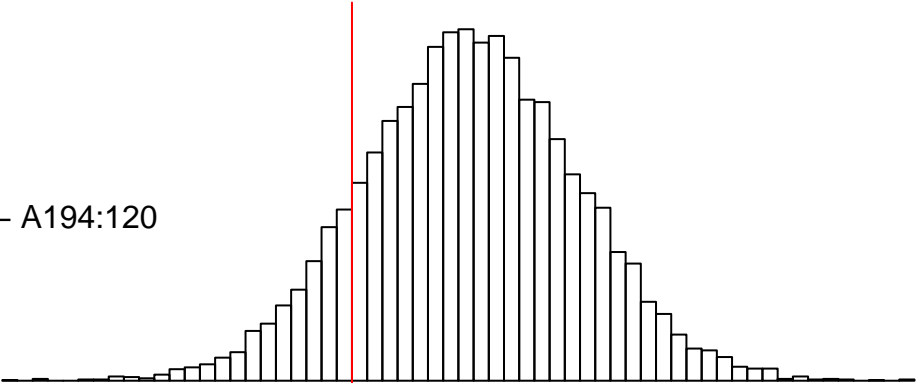

A194:240 – A194:45

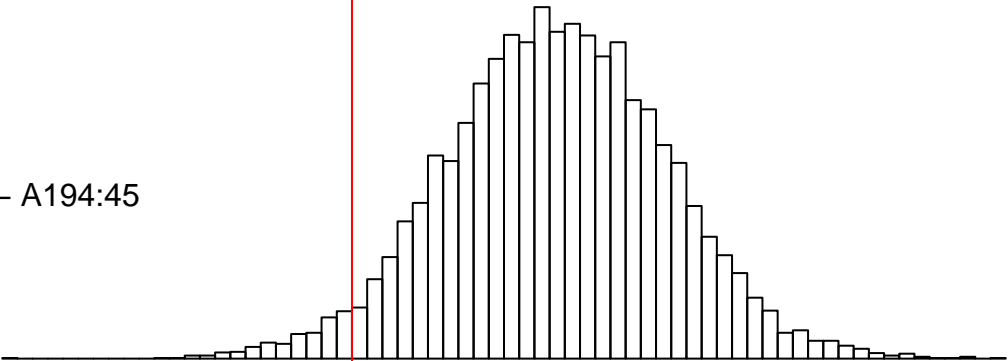

A194:120 – A194:45

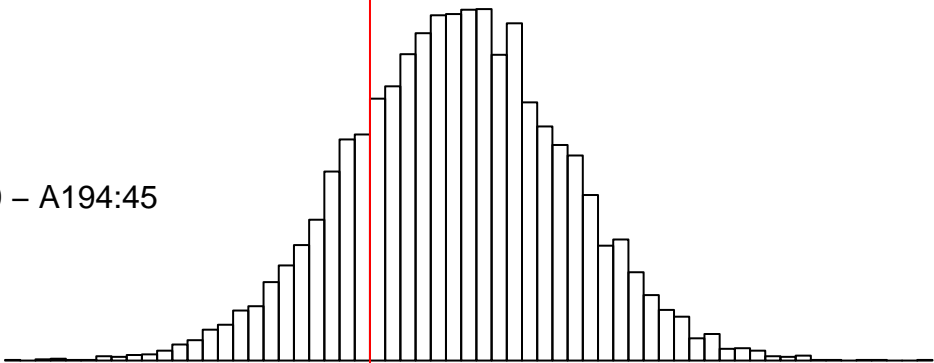

-1

0

1

2

delta(Hydrocarbon 1)



A194:240

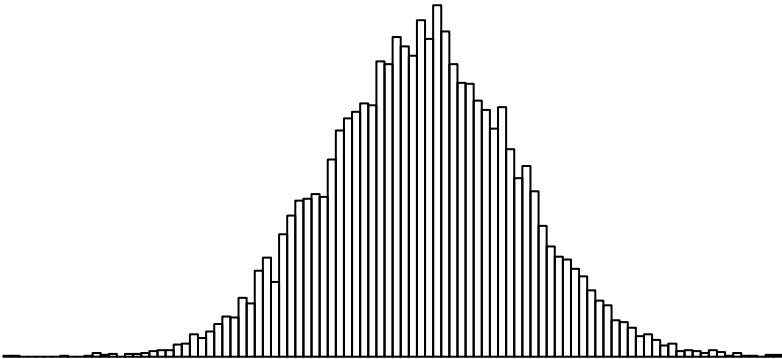

A194:120

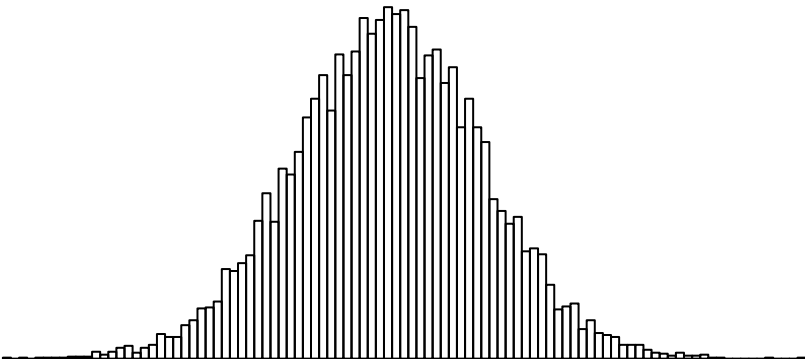

A194:45

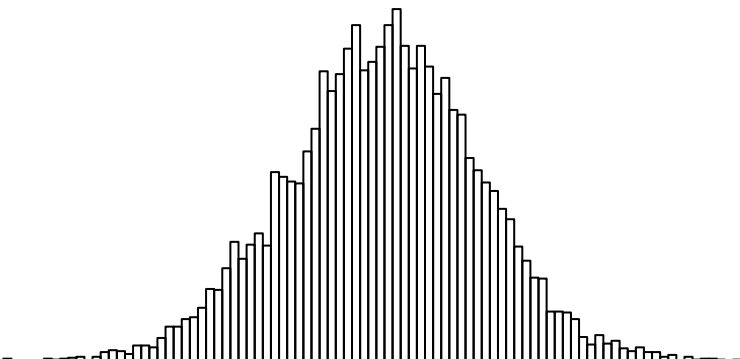

-8.0      -7.5      -7.0      -6.5      -6.0      -5.5      -5.0

Hydrocarbon 2

A194:240 – A194:120

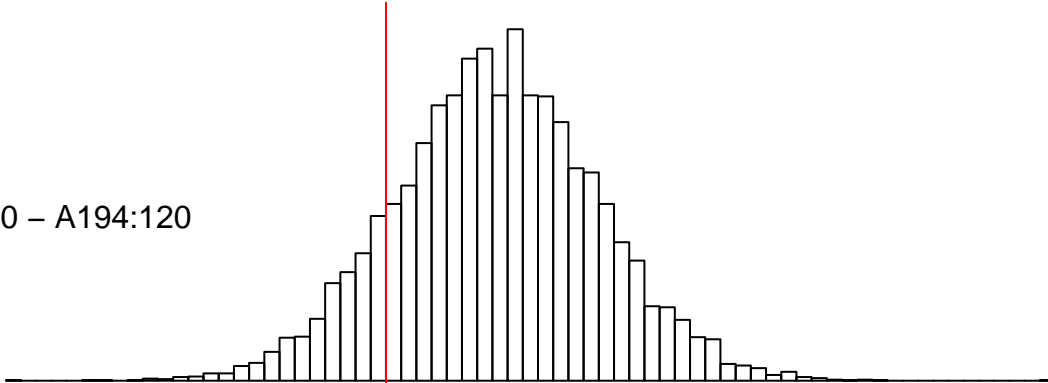

A194:240 – A194:45

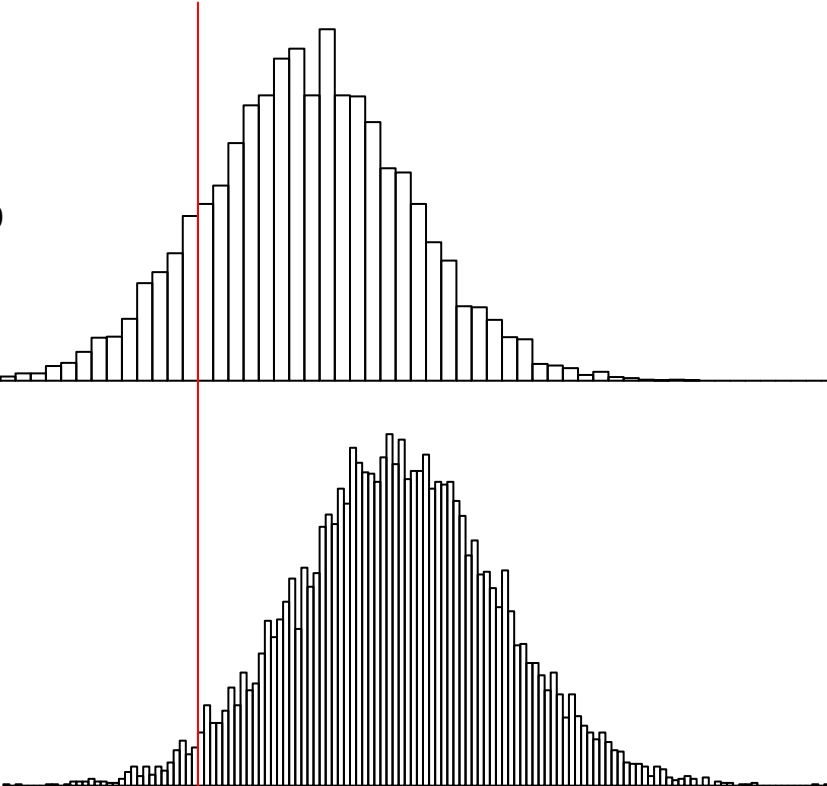

A194:120 – A194:45

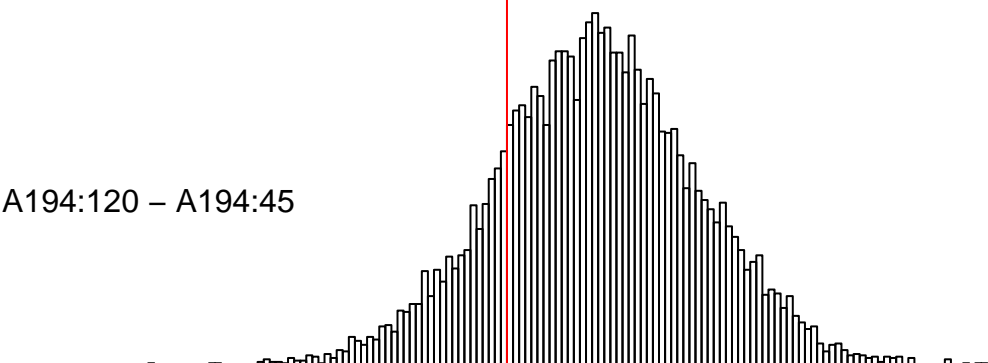

-1 0 1 2

delta(Hydrocarbon 2)

A194:240

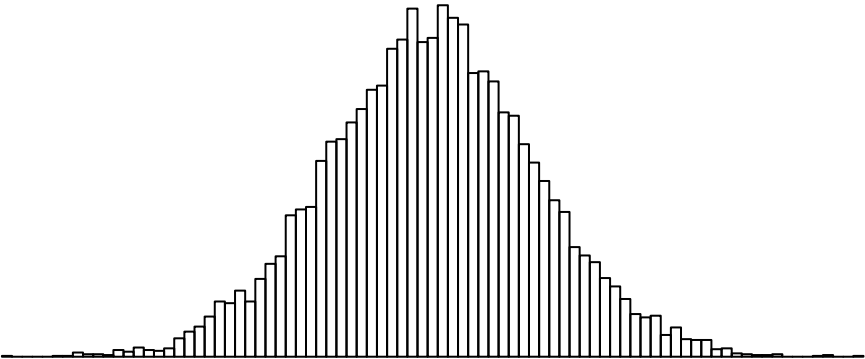

A194:120

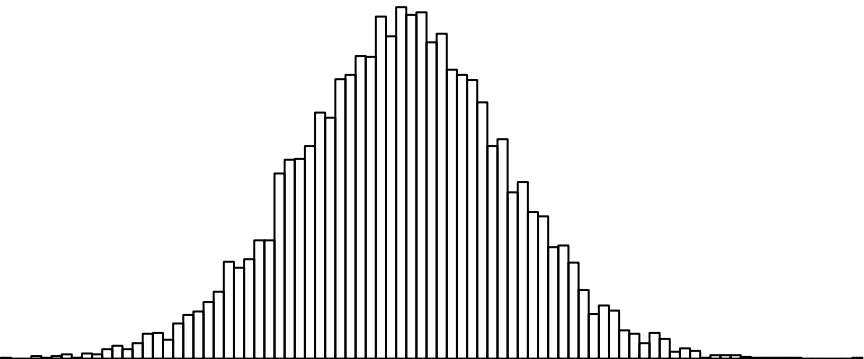

A194:45

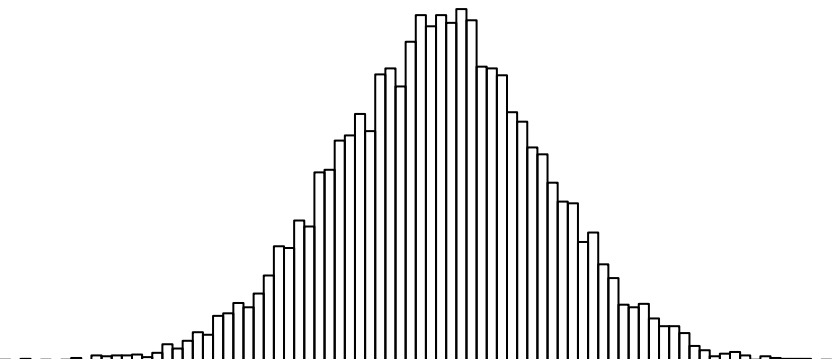

-10      -9      -8      -7      -6      -5      -4

Hydrocarbon 3

A194:240 – A194:120

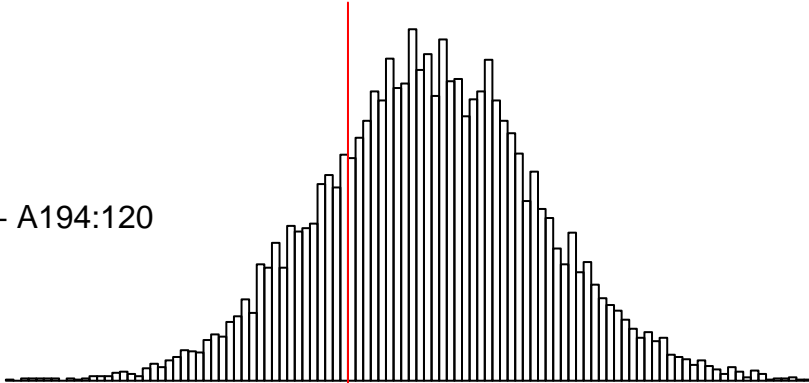

A194:240 – A194:45

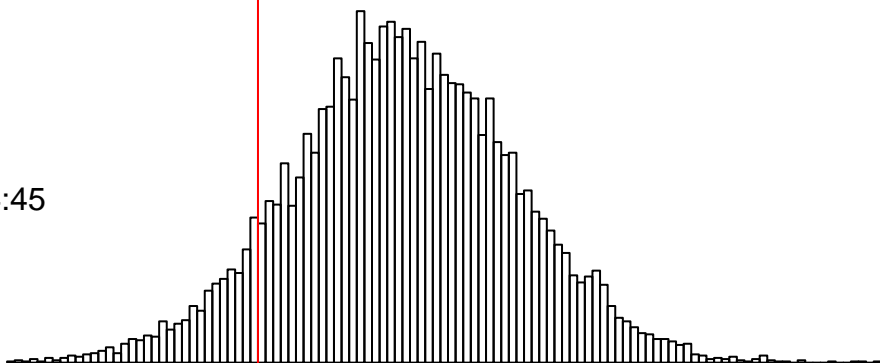

A194:120 – A194:45

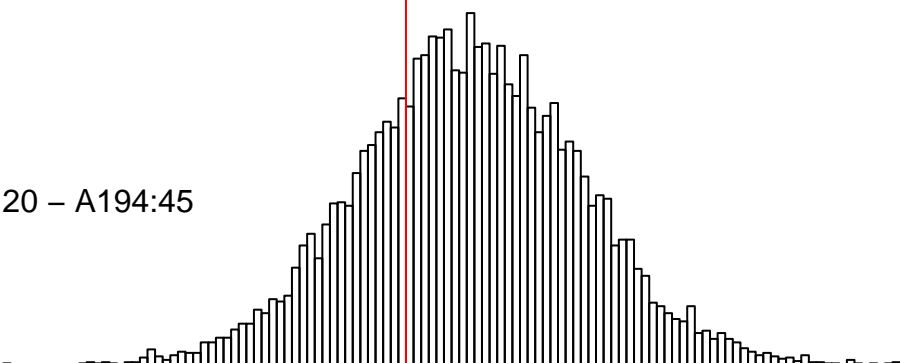

-2

0

2

4

delta(Hydrocarbon 3)

A194:240

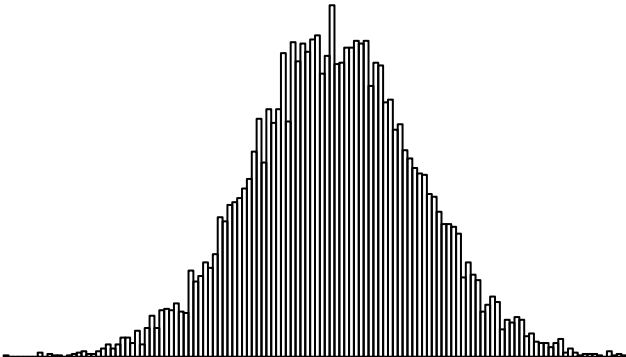

A194:120

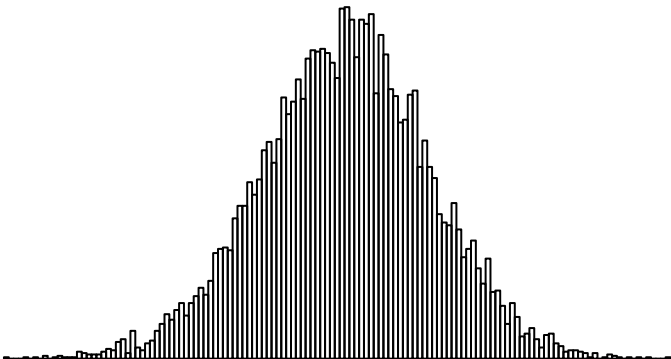

A194:45

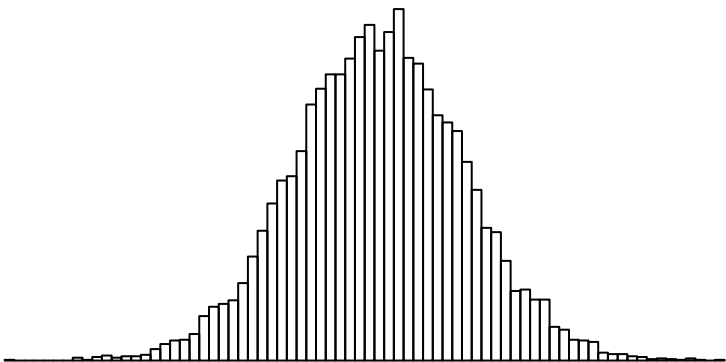

-9.5      -9.0      -8.5      -8.0      -7.5      -7.0

Hydrocarbon 4

A194:240 – A194:120

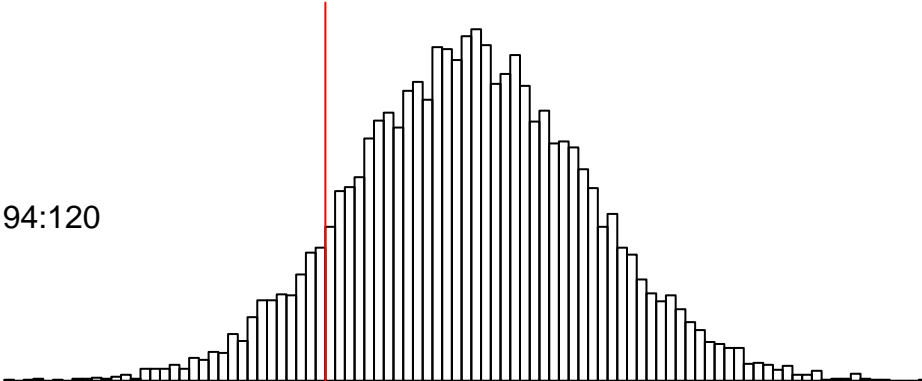

A194:240 – A194:45

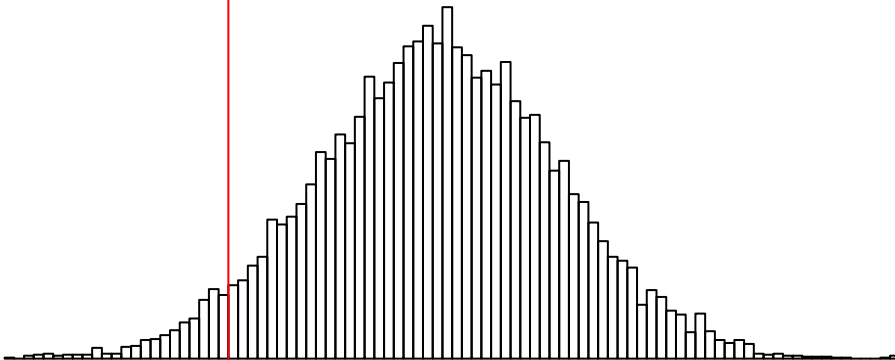

A194:120 – A194:45

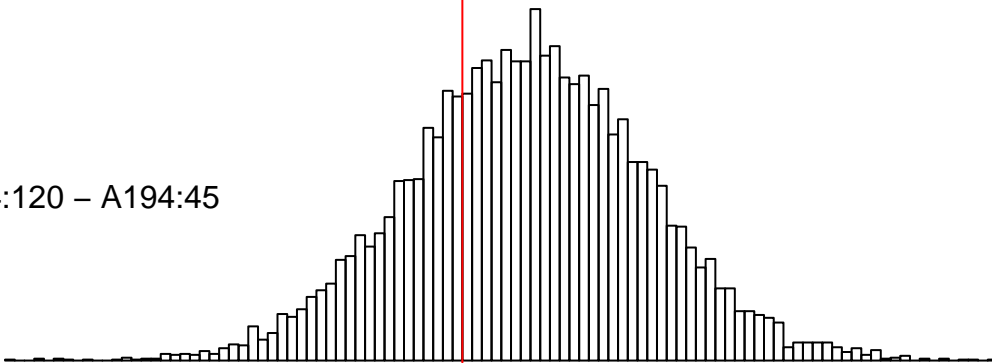

-1.0 -0.5 0.0 0.5 1.0 1.5

delta(Hydrocarbon 4)

A194:240

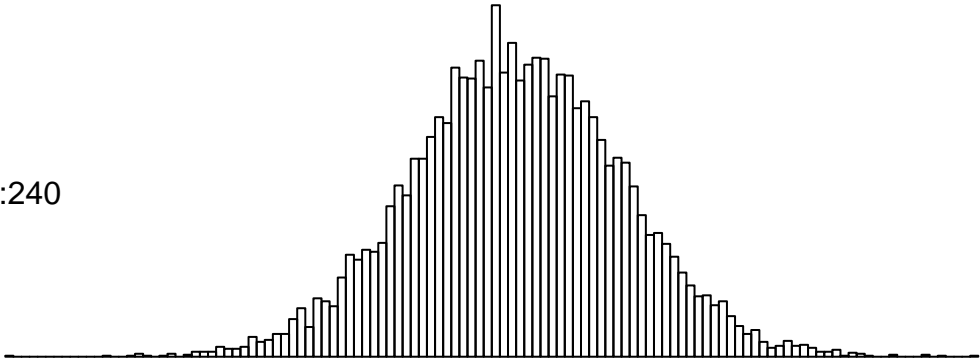

A194:120

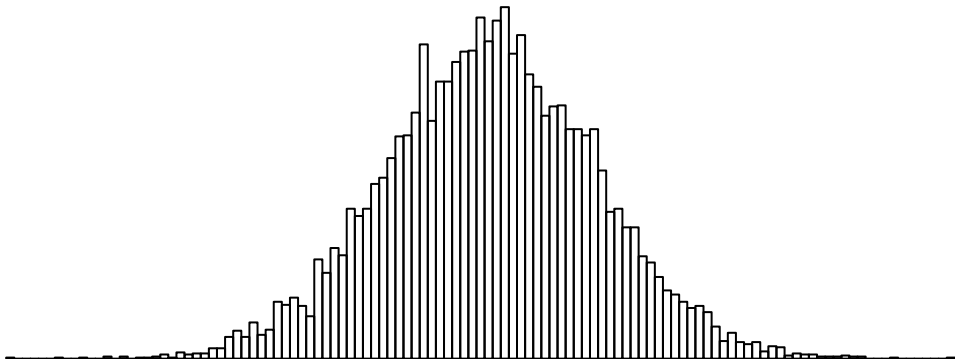

A194:45

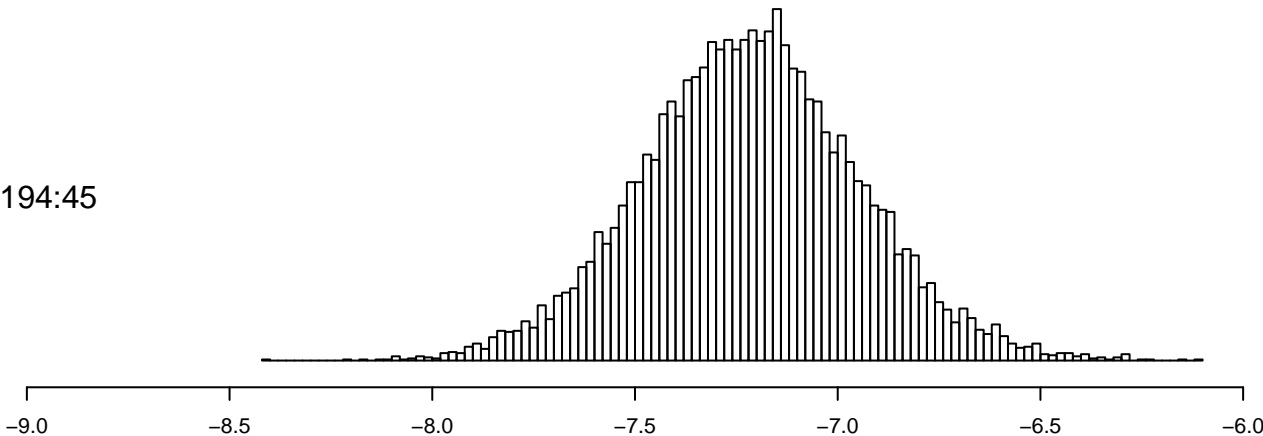

Unidentified Metabolite 1

A194:240 – A194:120

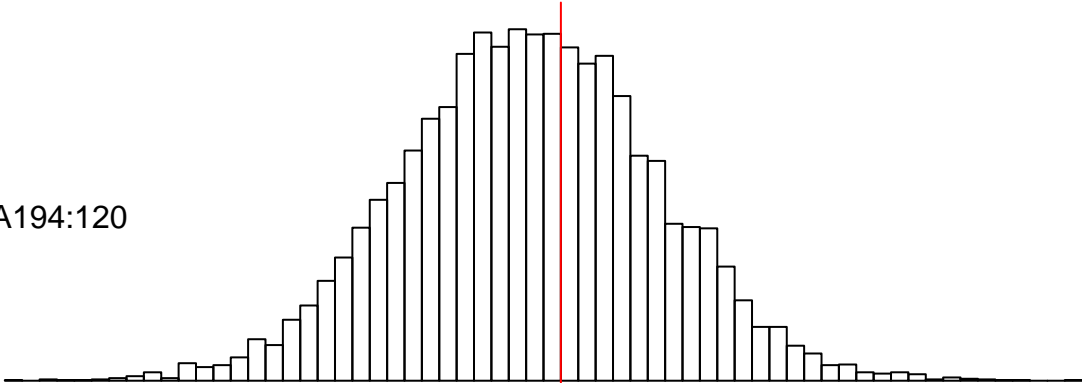

A194:240 – A194:45

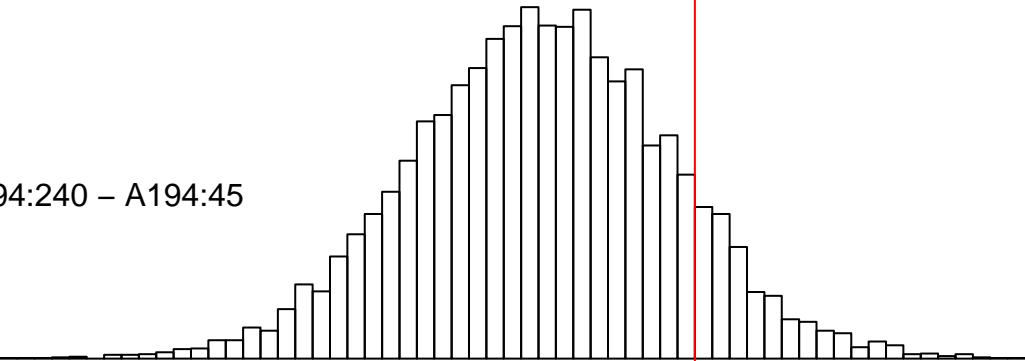

A194:120 – A194:45

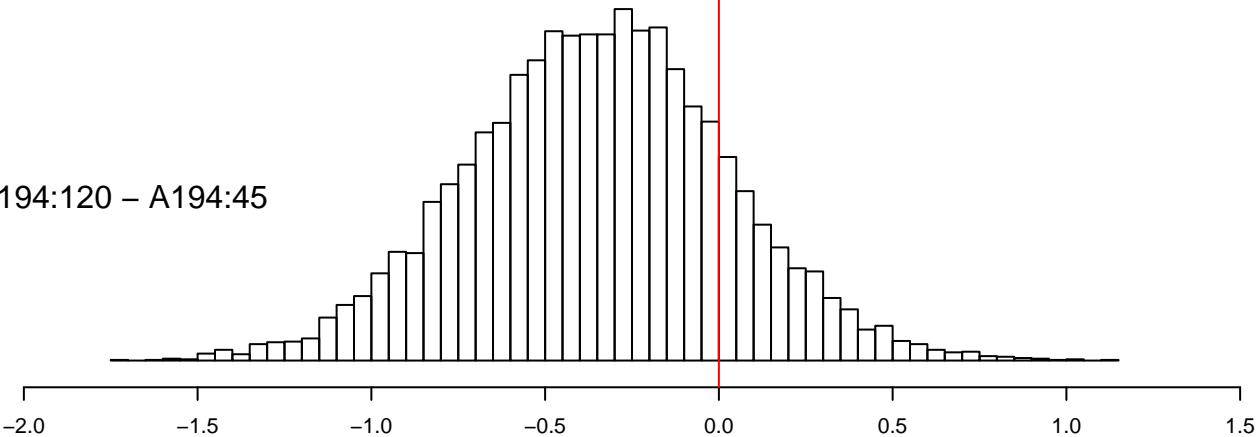

delta(Unidentified Metabolite 1)



A194:240

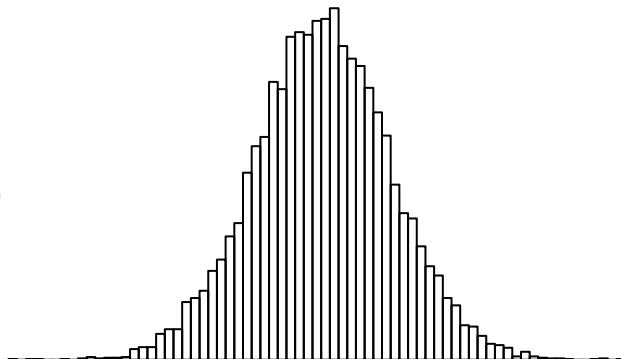

A194:120

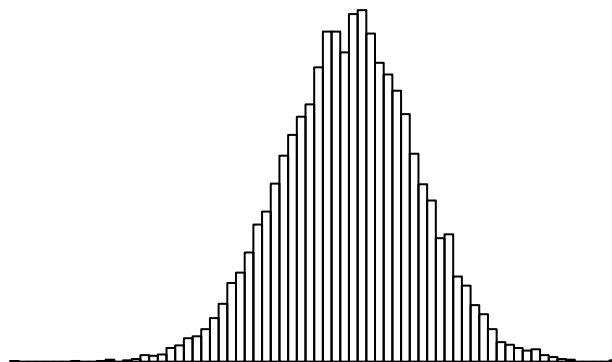

A194:45

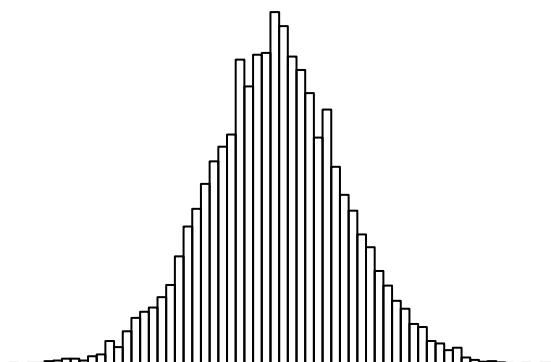

-11      -10      -9      -8      -7      -6      -5      -4

Unidentified Metabolite 2

A194:240 – A194:120

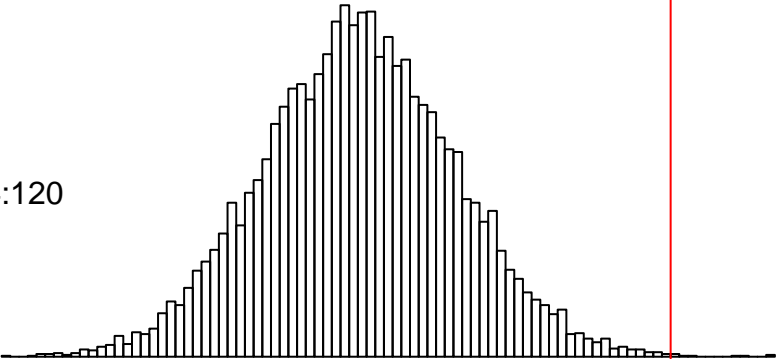

A194:240 – A194:45

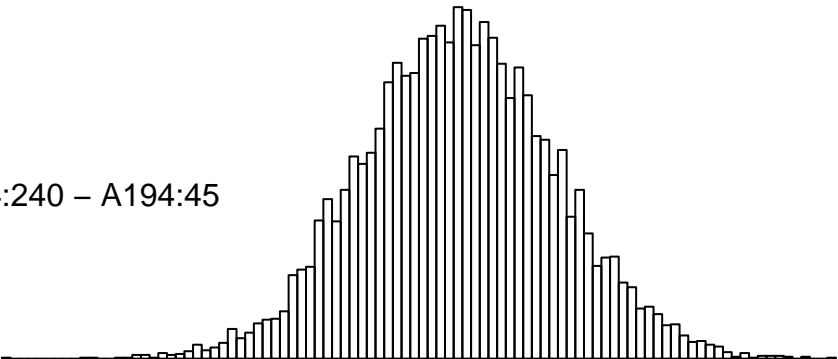

A194:120 – A194:45

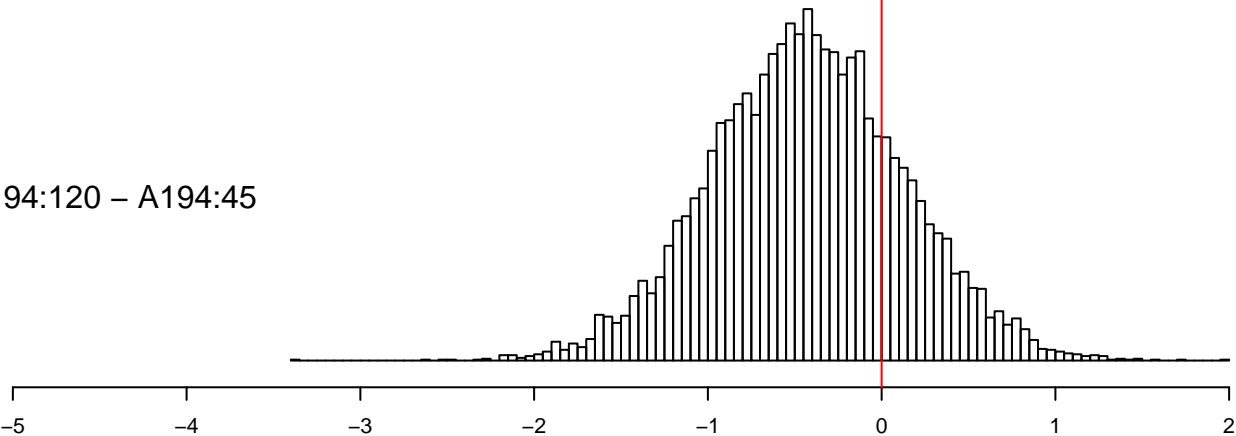

delta(Unidentified Metabolite 2)

A194:240

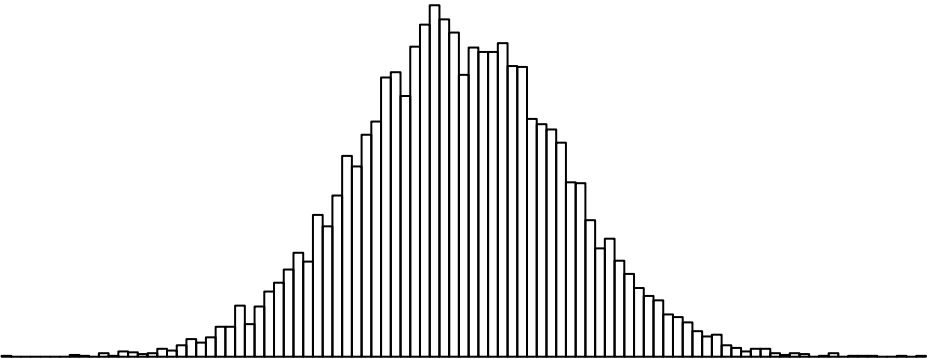

A194:120

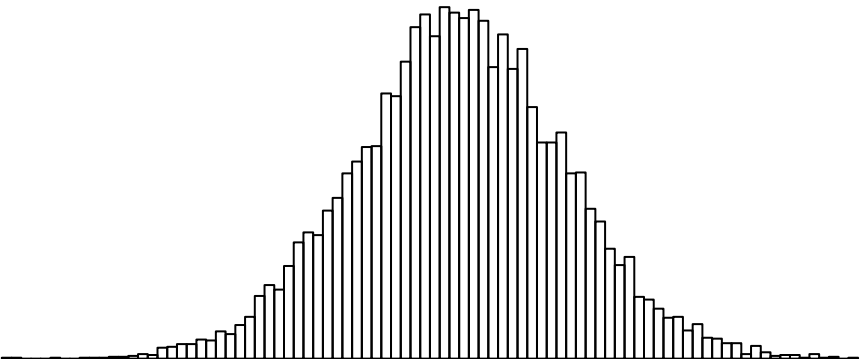

A194:45

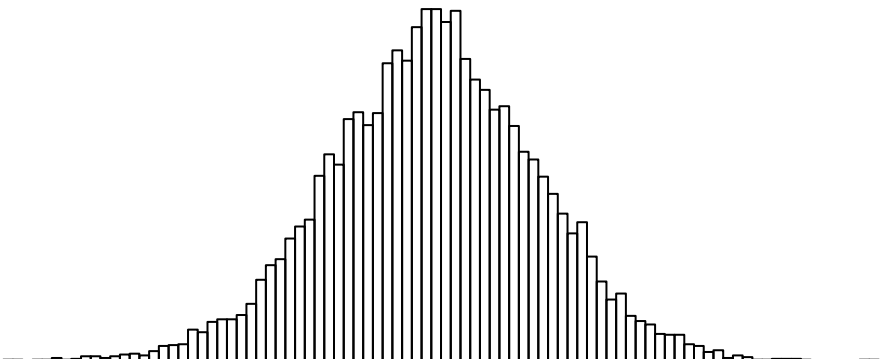

-10.5      -10.0      -9.5      -9.0      -8.5      -8.0

Unidentified Metabolite 3

A194:240 – A194:120

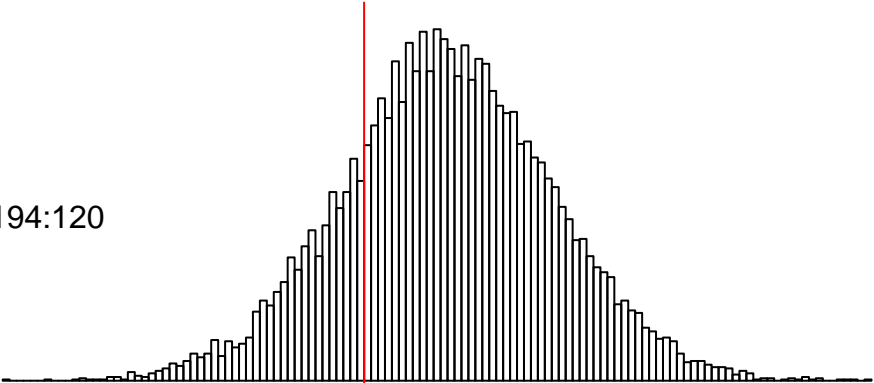

A194:240 – A194:45

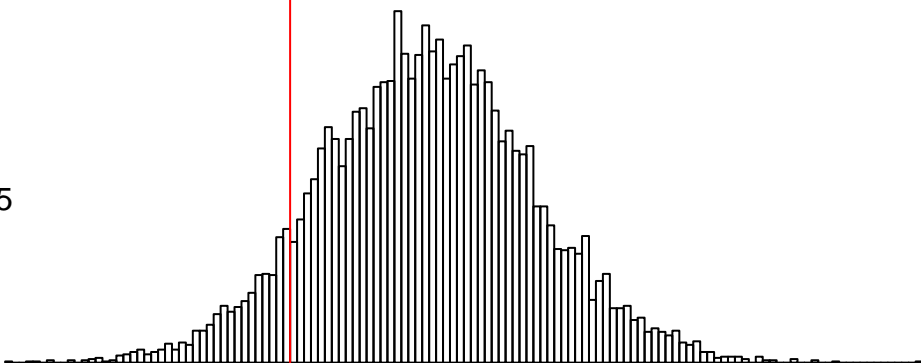

A194:120 – A194:45

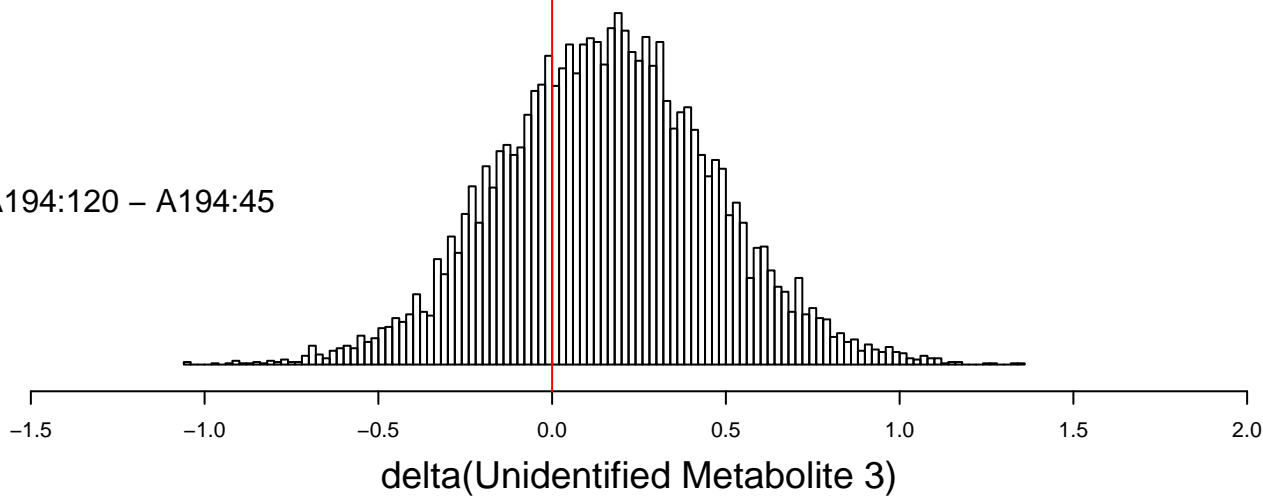

A194:240

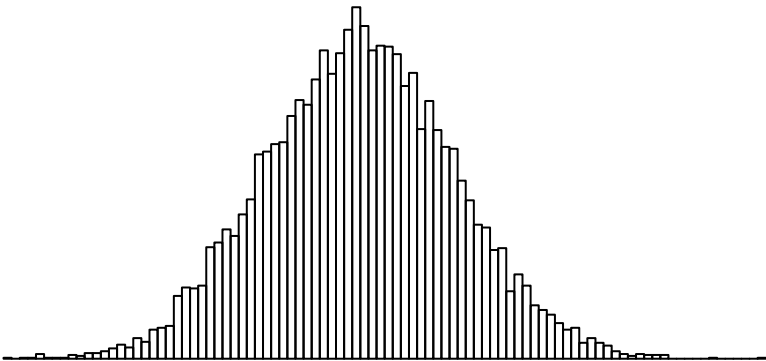

A194:120

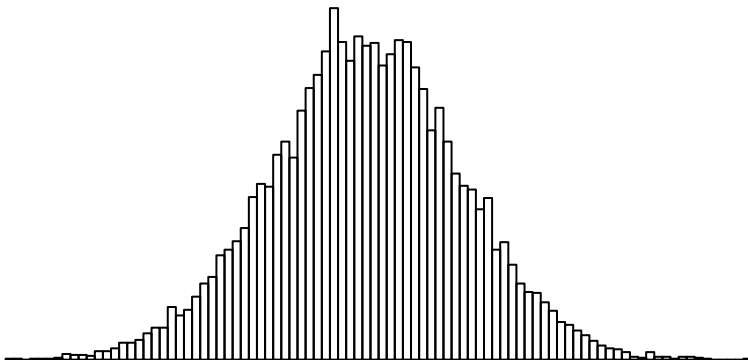

A194:45

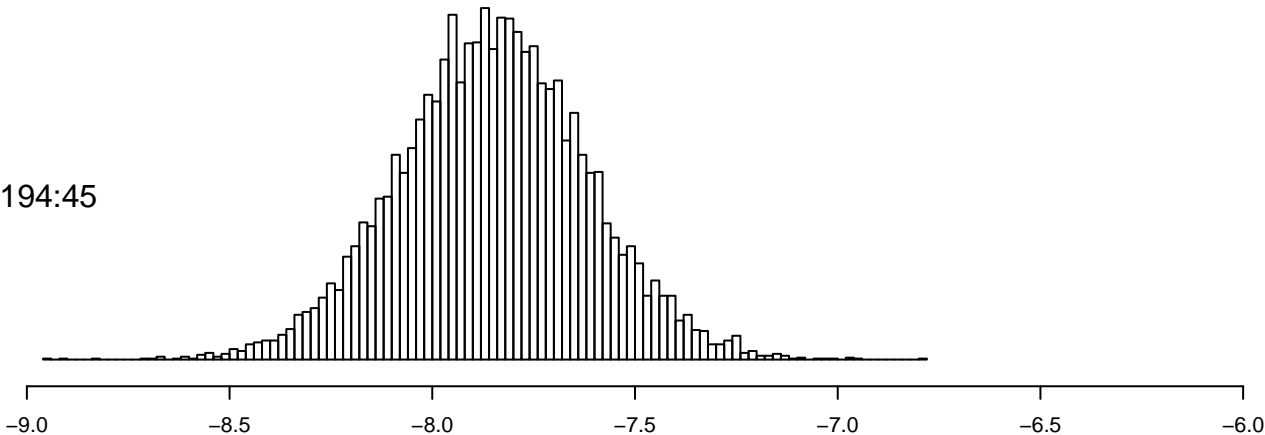

Unidentified Metabolite 4

A194:240 – A194:120

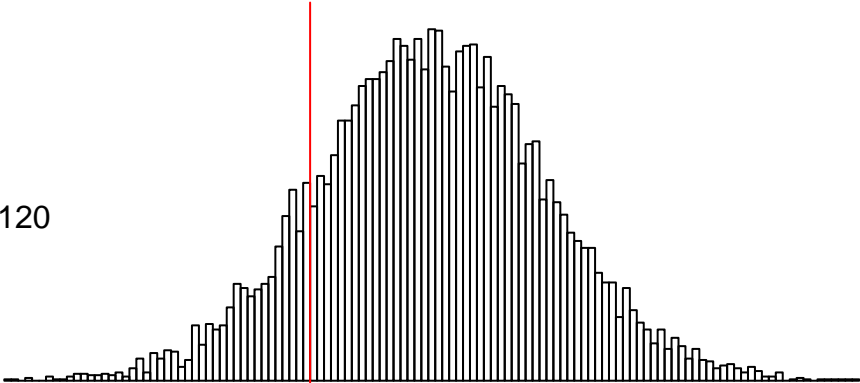

A194:240 – A194:45

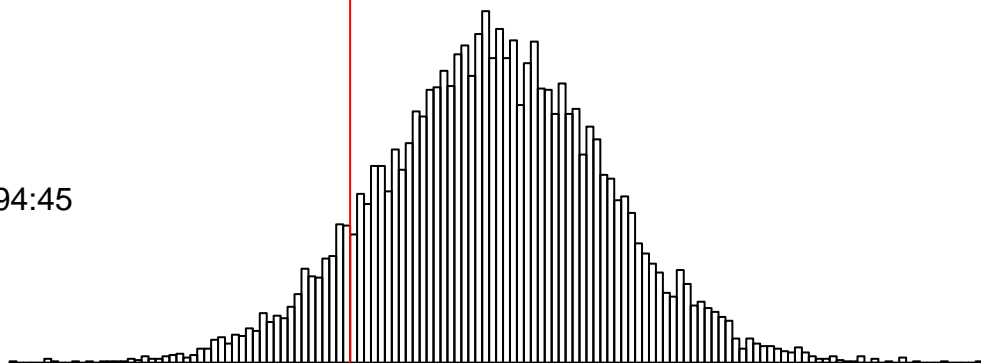

A194:120 – A194:45

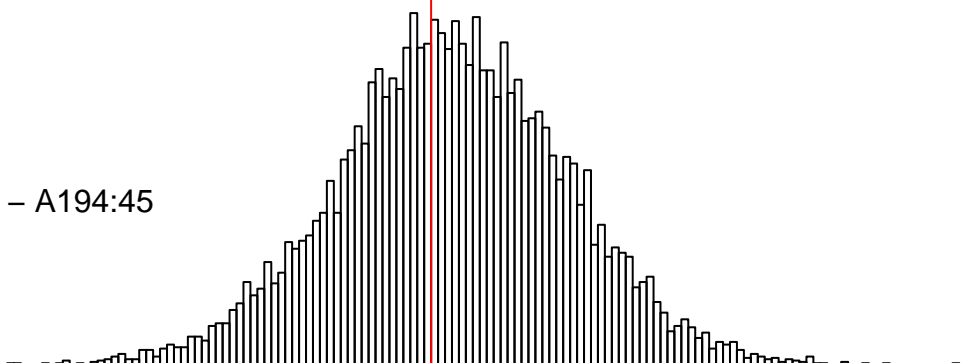

-1.5      -1.0      -0.5      0.0      0.5      1.0      1.5      2.0

delta(Unidentified Metabolite 4)

A194:240

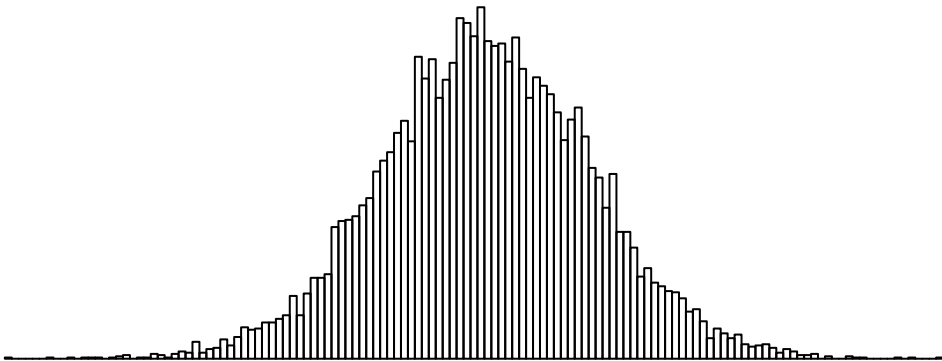

A194:120

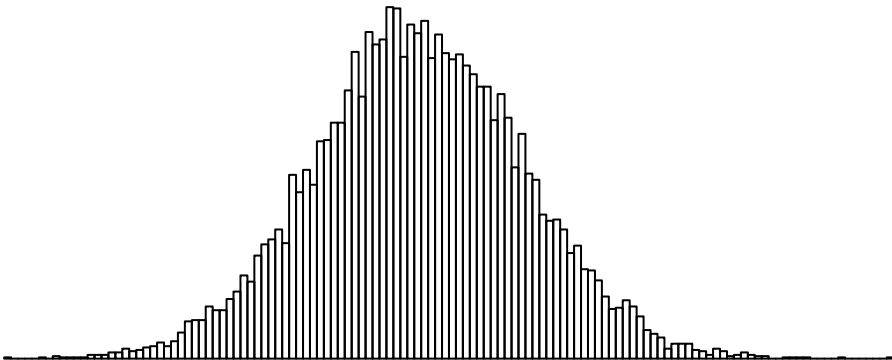

A194:45

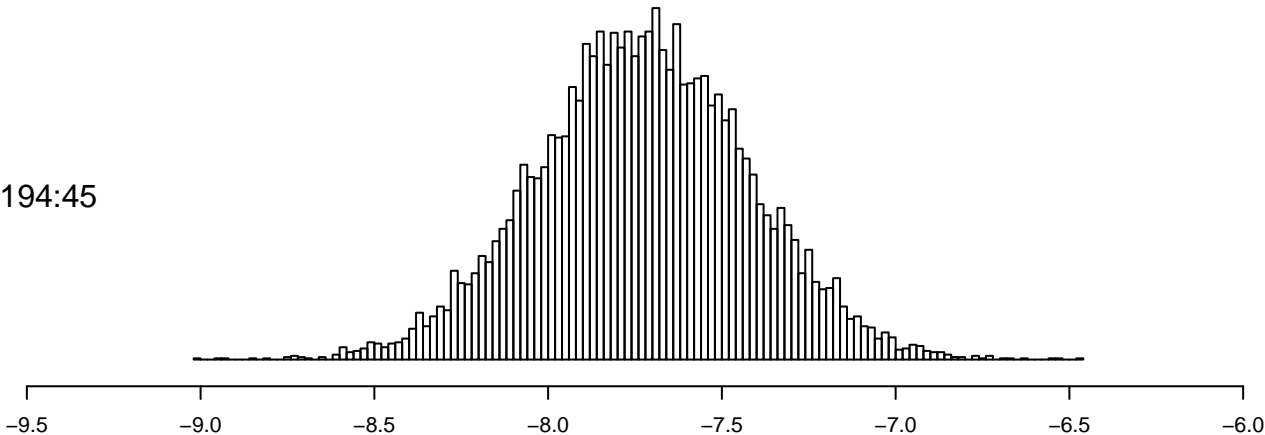

Unidentified Metabolite 5

A194:240 – A194:120

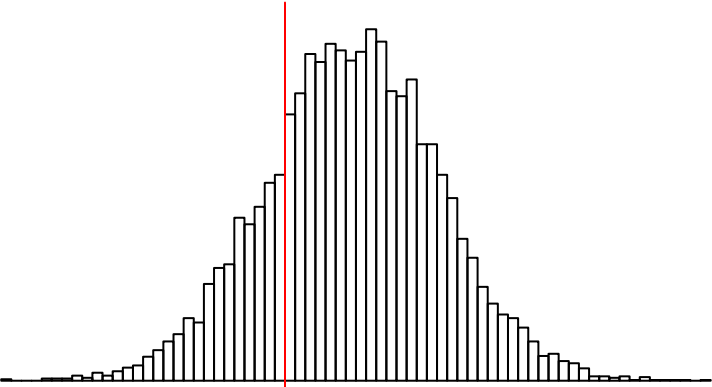

A194:240 – A194:45

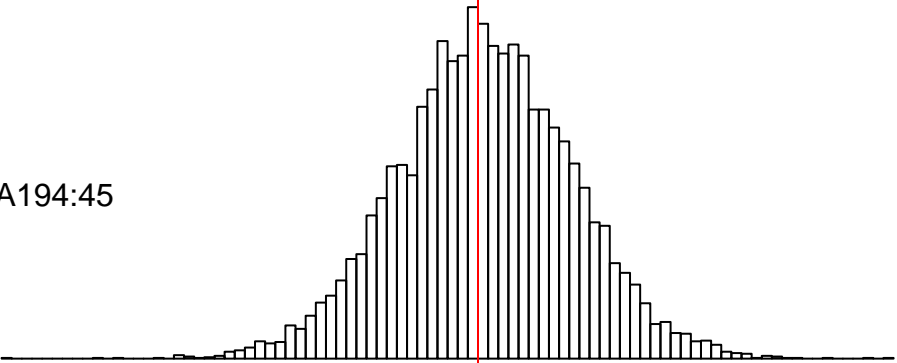

A194:120 – A194:45

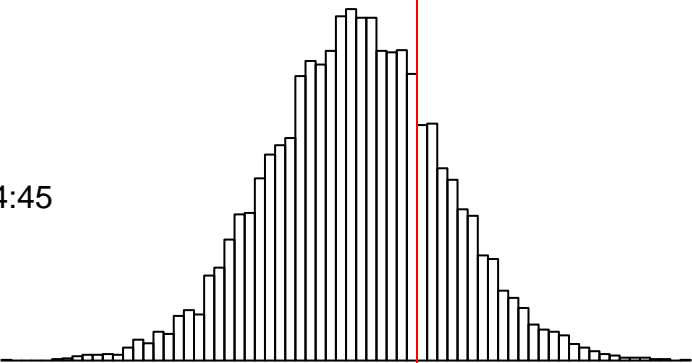

delta(Unidentified Metabolite 5)



A194:240

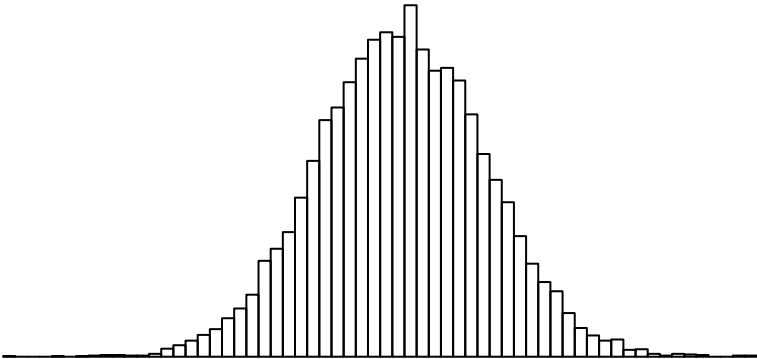

A194:120

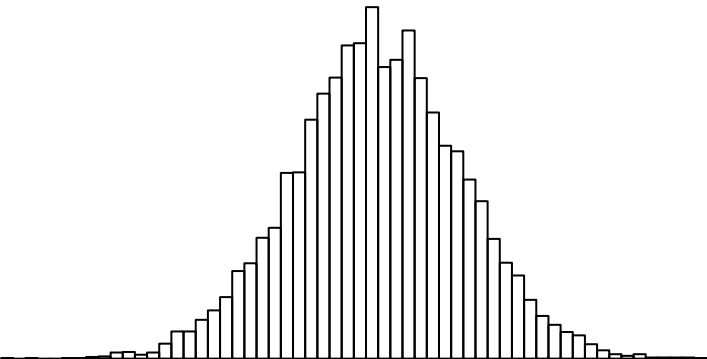

A194:45

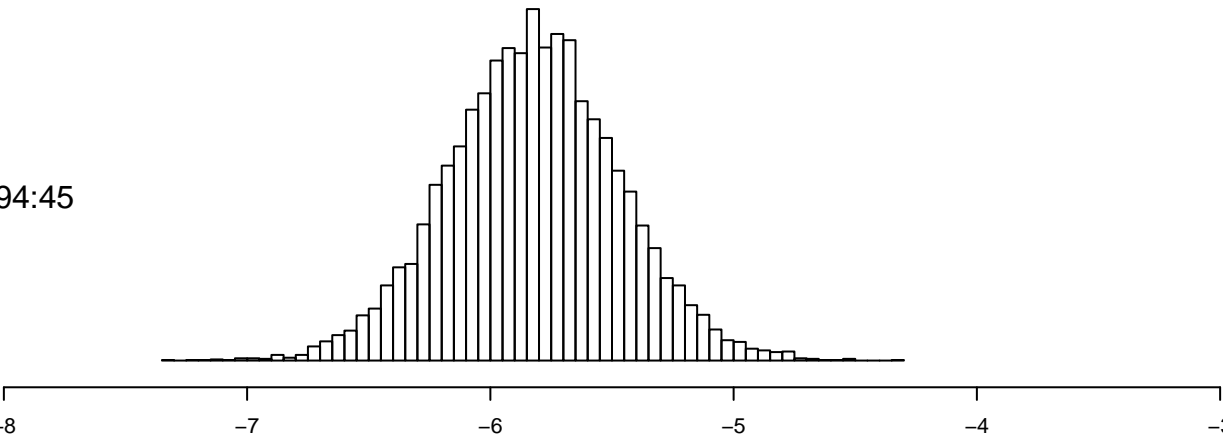

Unidentified Metabolite 6

A194:240 – A194:120

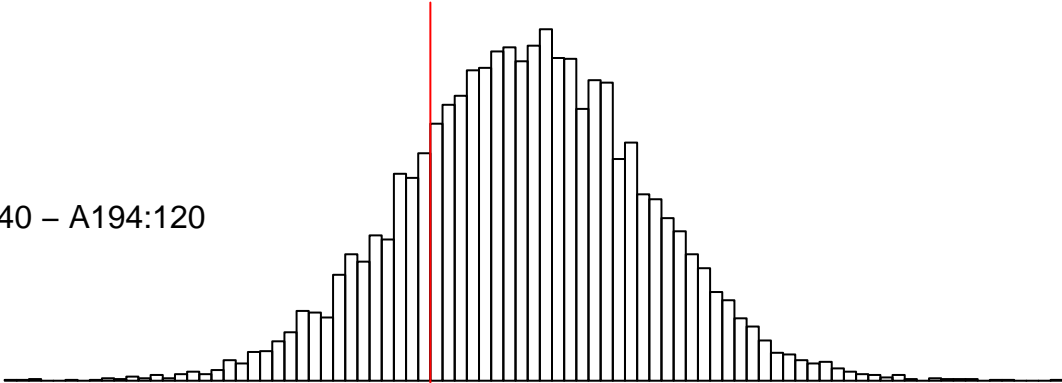

A194:240 – A194:45

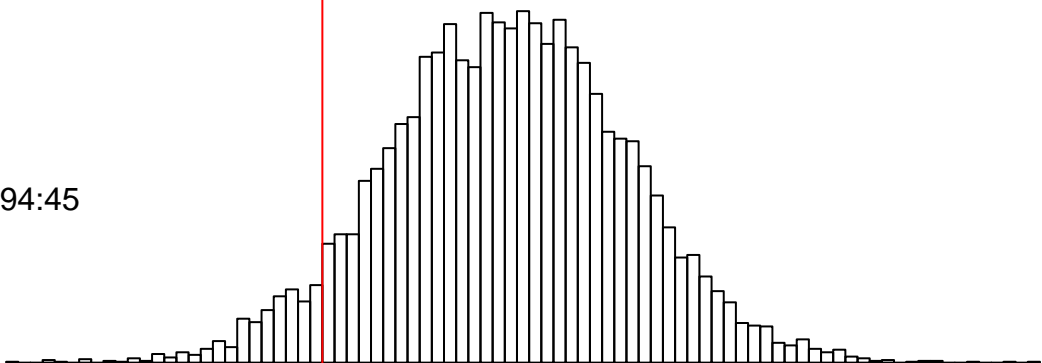

A194:120 – A194:45

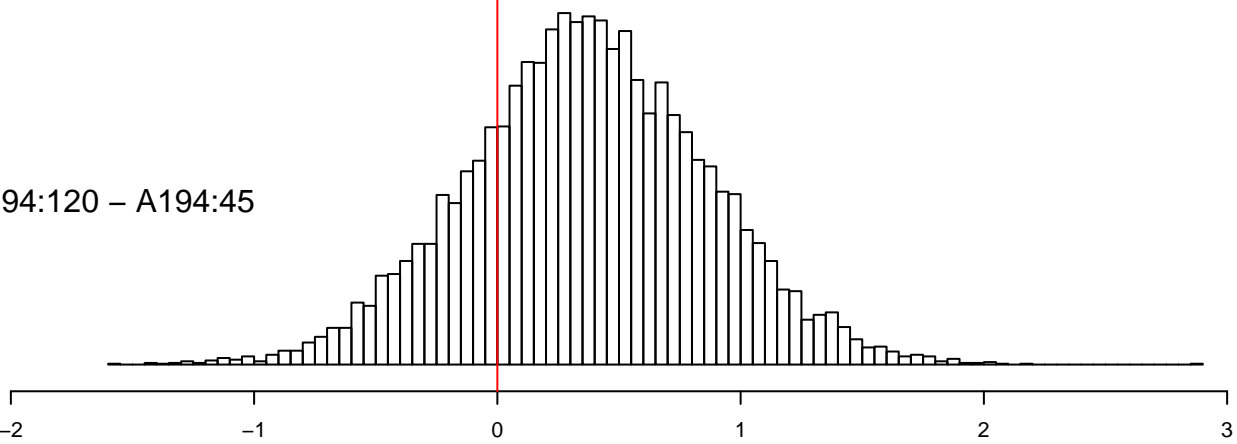

delta(Unidentified Metabolite 6)

A194:240

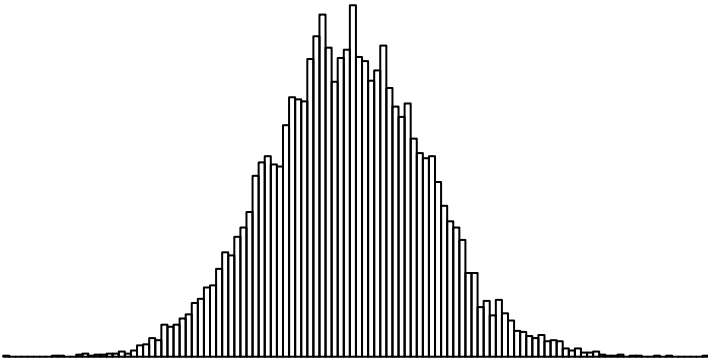

A194:120

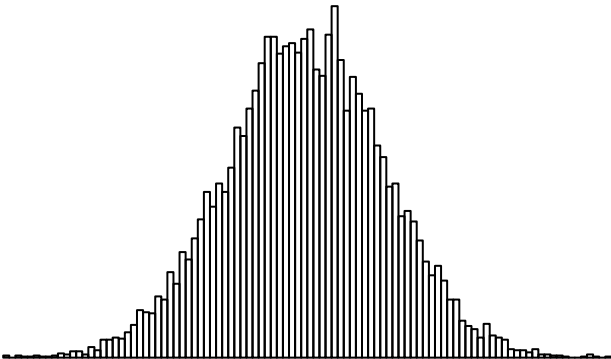

A194:45

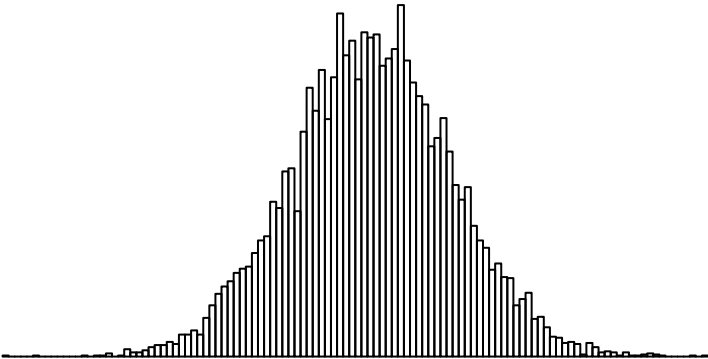

-8

-7

-6

-5

Unidentified Metabolite 7

A194:240 – A194:120

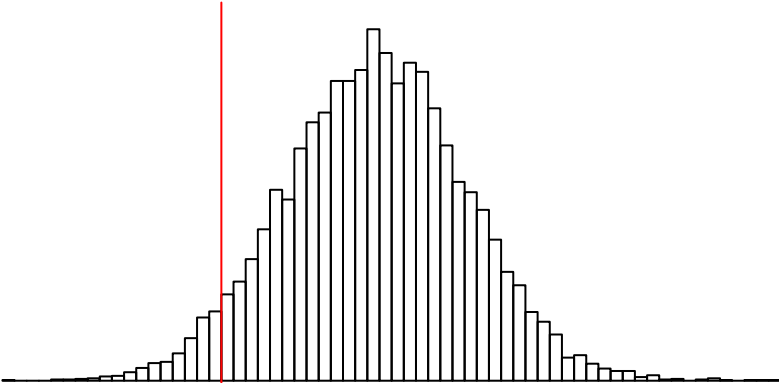

A194:240 – A194:45

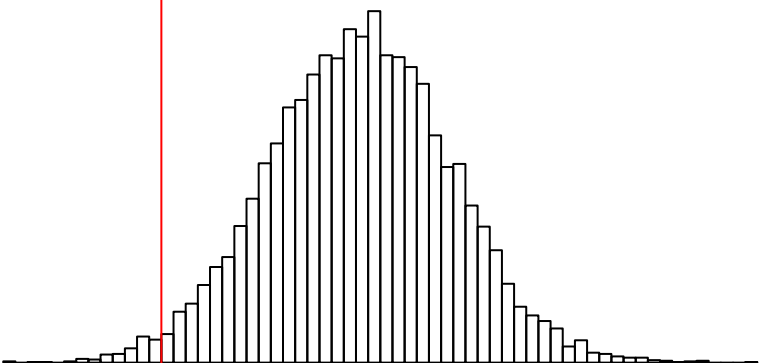

A194:120 – A194:45

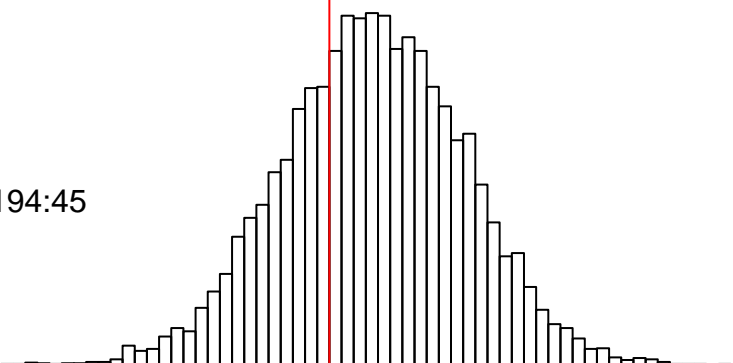

delta(Unidentified Metabolite 7)

A194:240

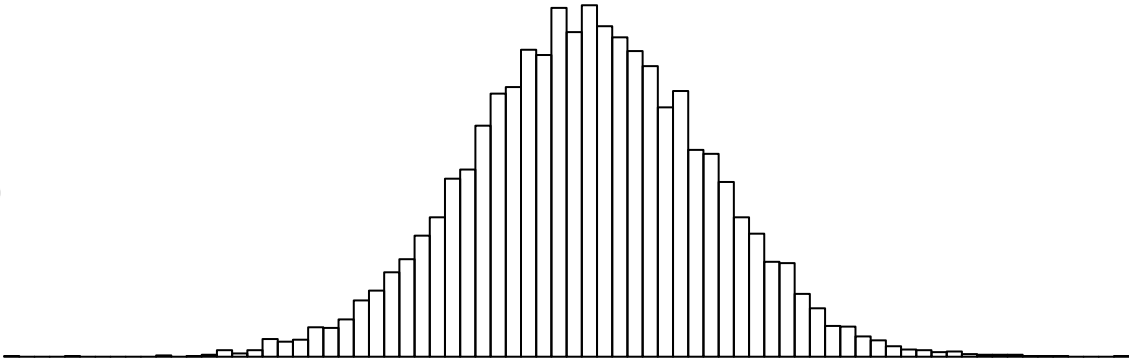

A194:120

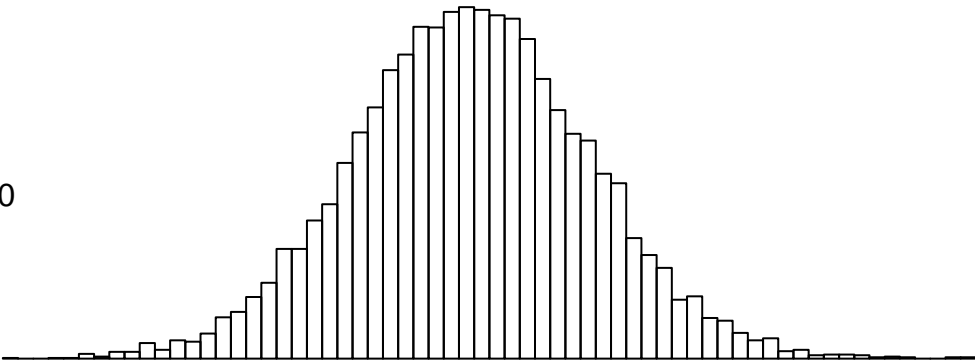

A194:45

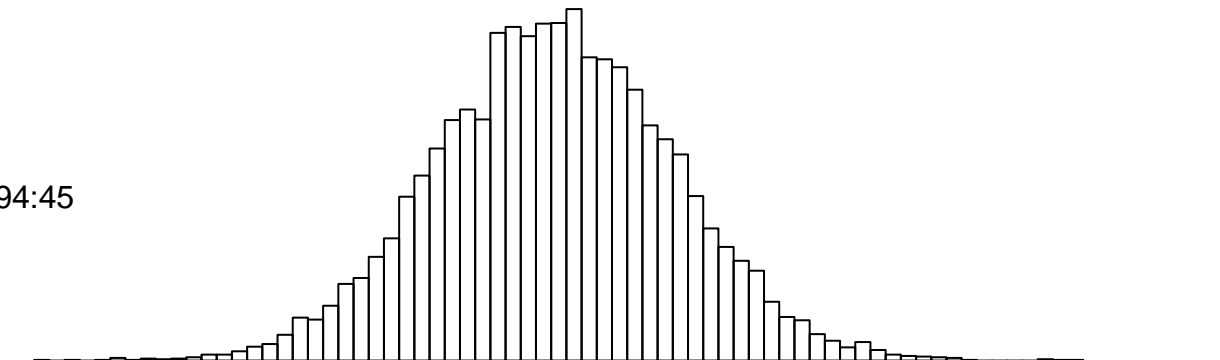

Unidentified Metabolite 8

A194:240 – A194:120

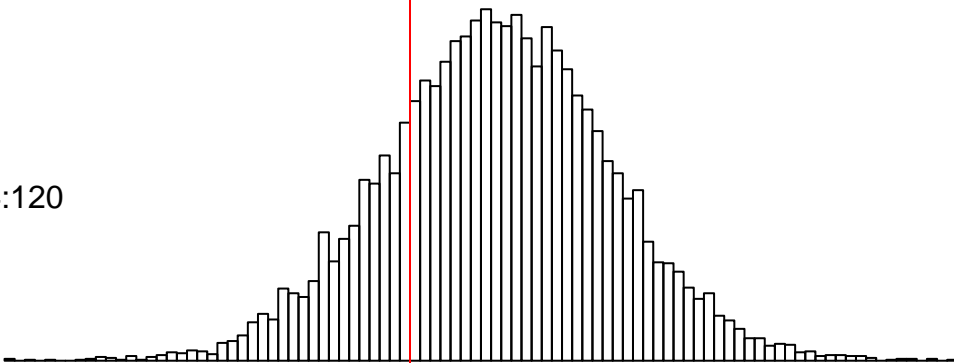

A194:240 – A194:45

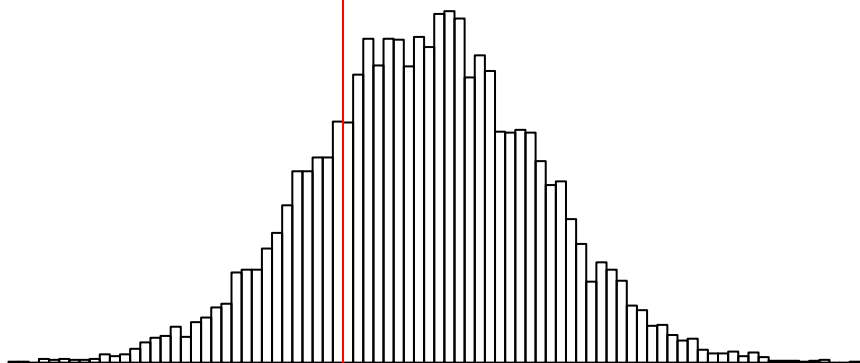

A194:120 – A194:45

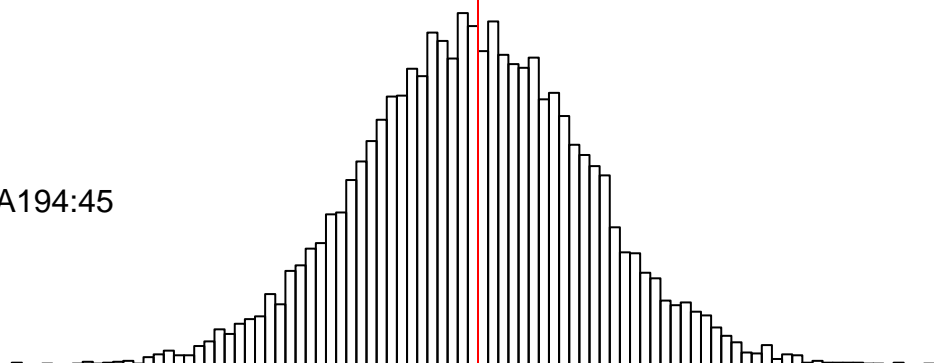

delta(Unidentified Metabolite 8)

A194:240

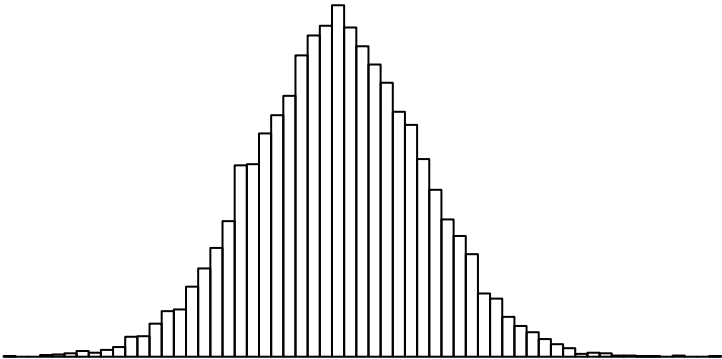

A194:120

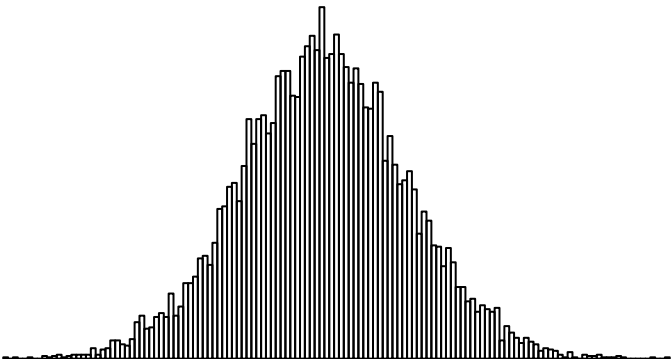

A194:45

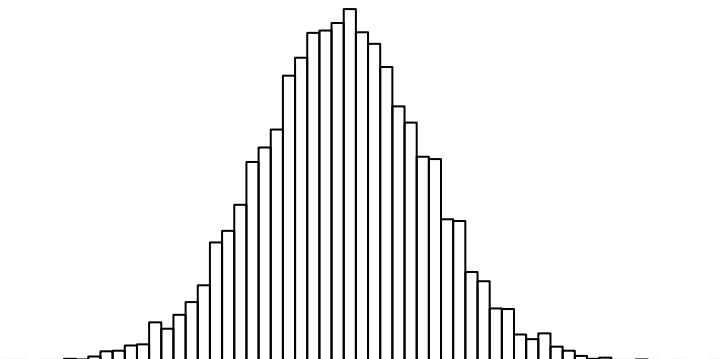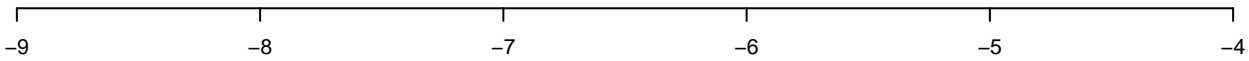

Unidentified Metabolite 9

A194:240 – A194:120

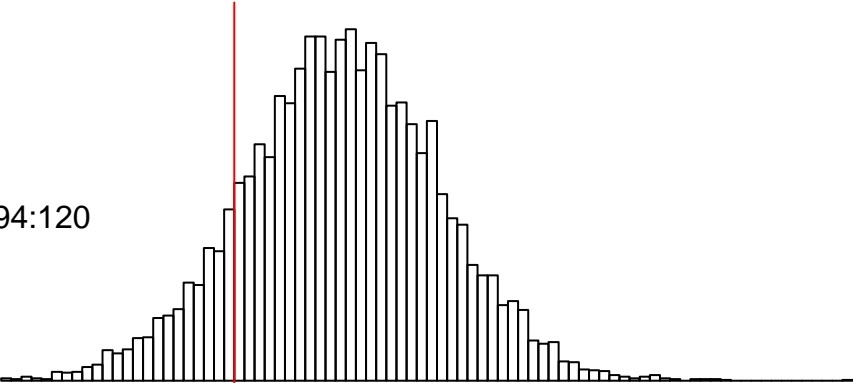

A194:240 – A194:45

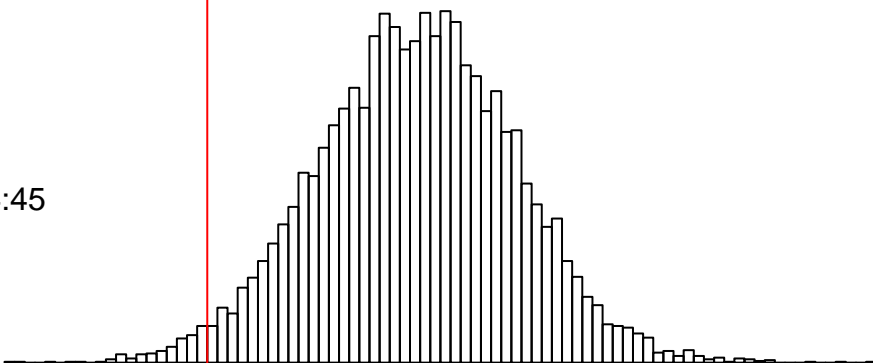

A194:120 – A194:45

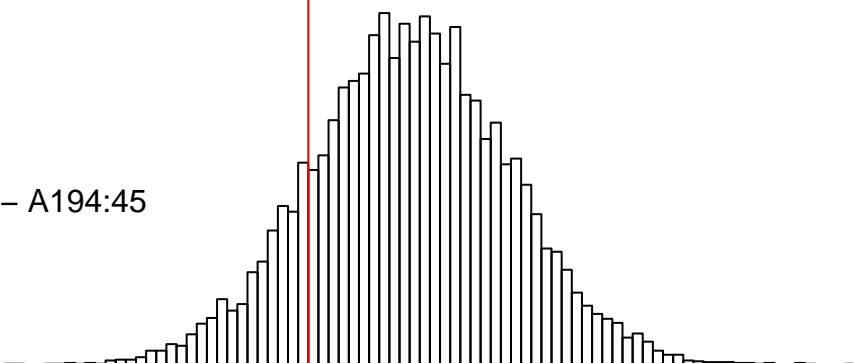

delta(Unidentified Metabolite 9)



A194:240

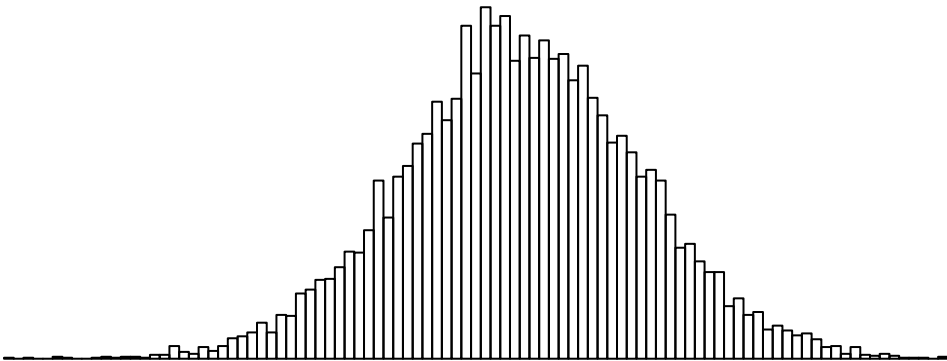

A194:120

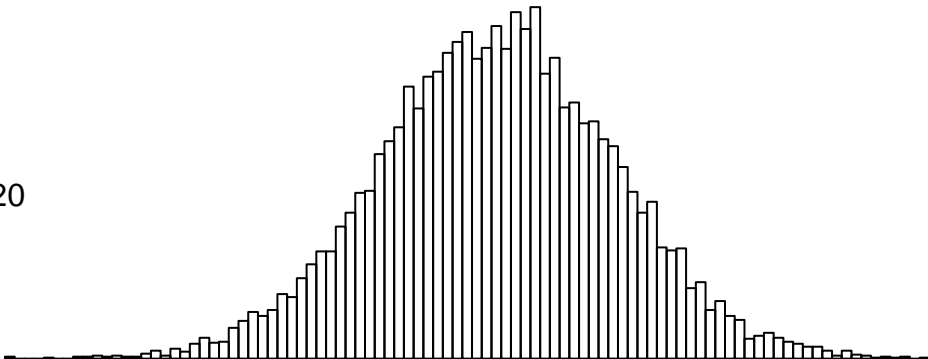

A194:45

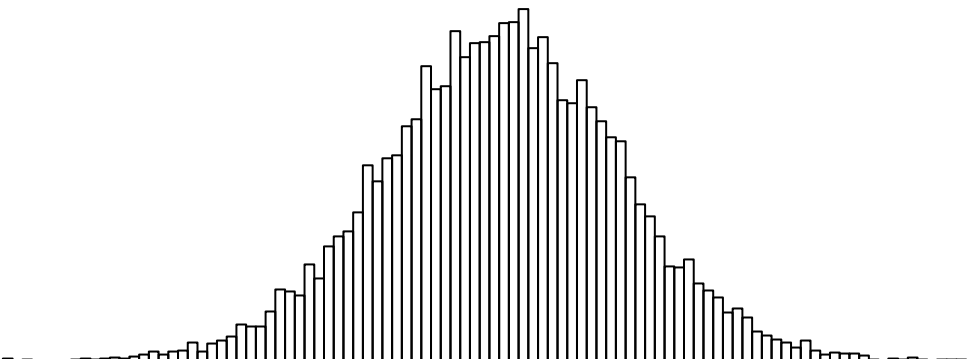

-8.5      -8.0      -7.5      -7.0      -6.5      -6.0

Unidentified Metabolite 10

A194:240 – A194:120

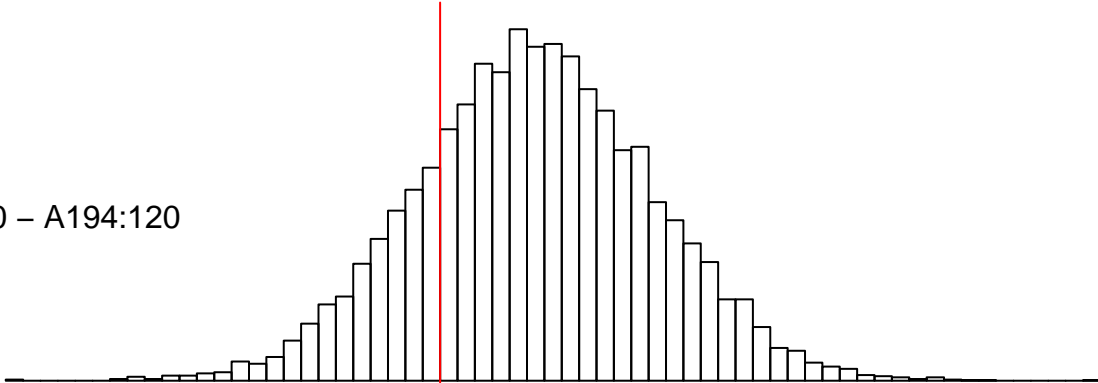

A194:240 – A194:45

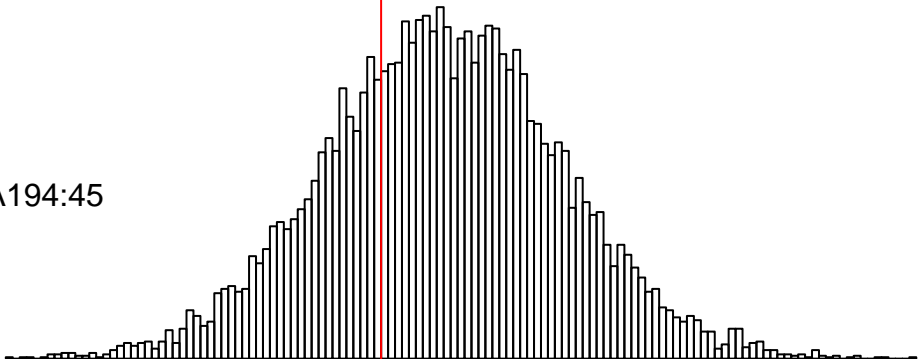

A194:120 – A194:45

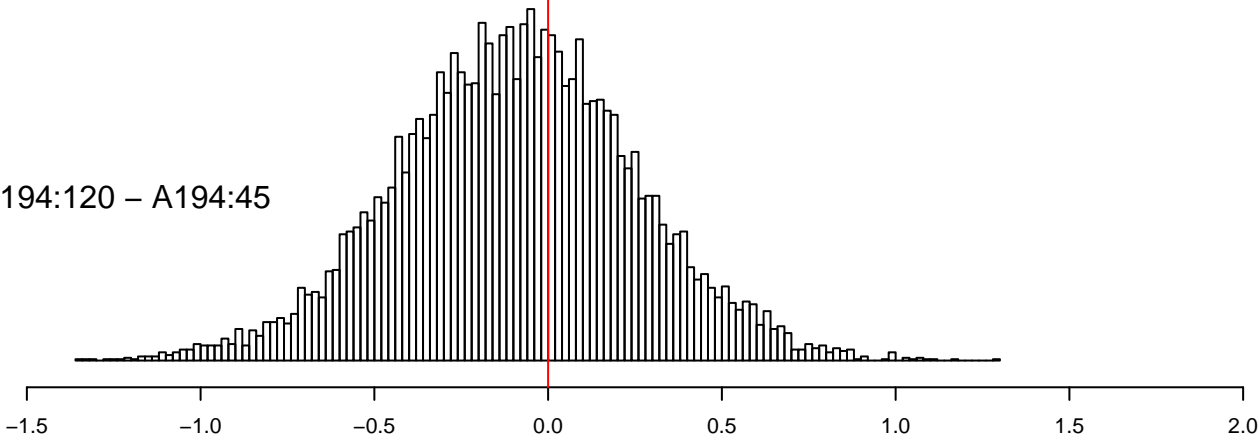

delta(Unidentified Metabolite 10)

A194:240

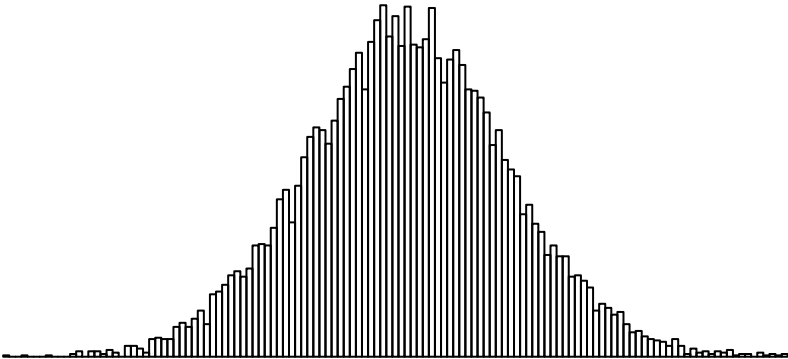

A194:120

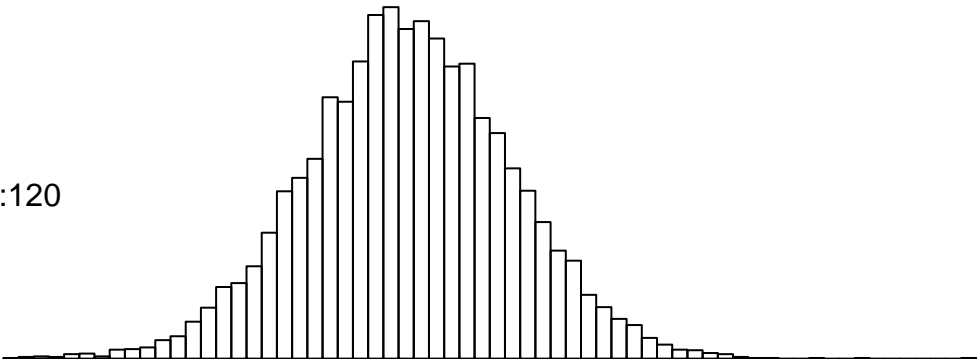

A194:45

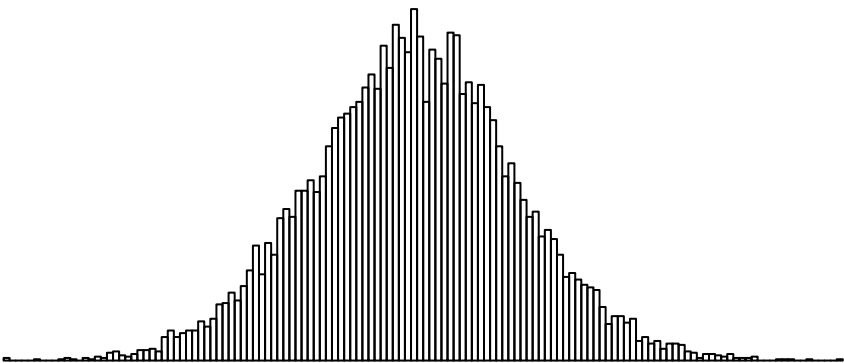

-7 -6 -5 -4 -3

Unidentified Metabolite 11

A194:240 – A194:120

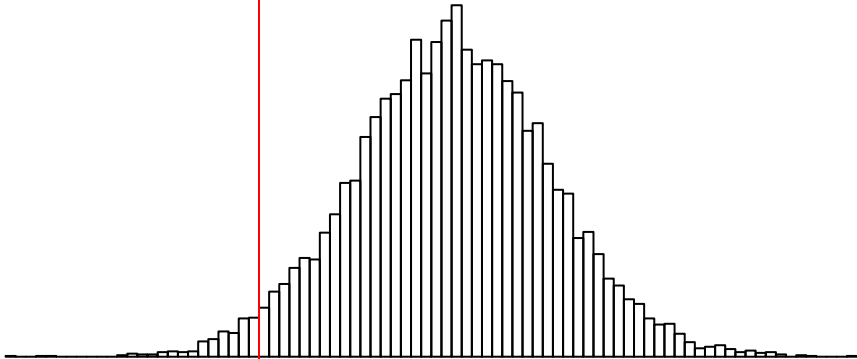

A194:240 – A194:45

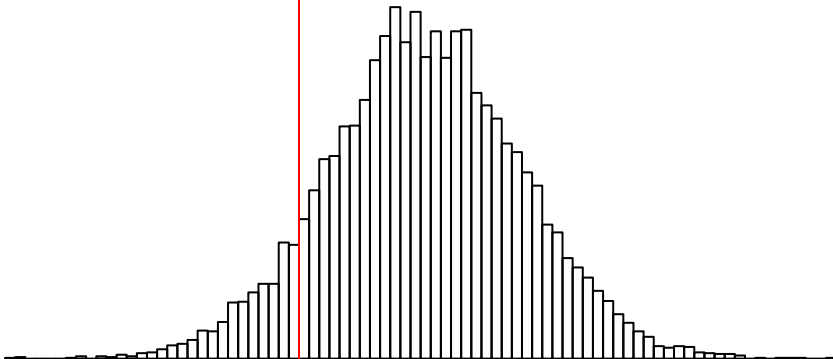

A194:120 – A194:45

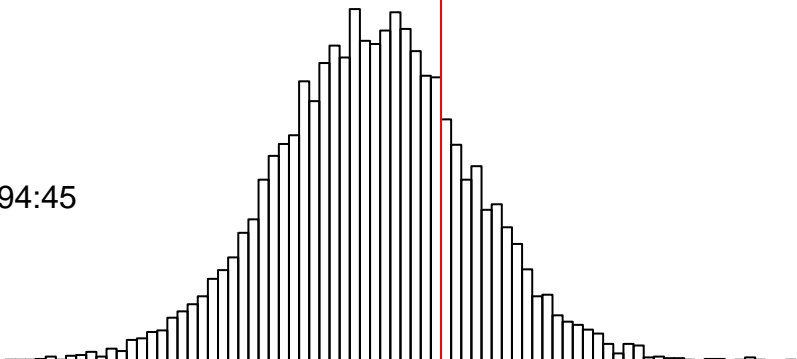

-3 -2 -1 0 1 2 3

delta(Unidentified Metabolite 11)

A194:240

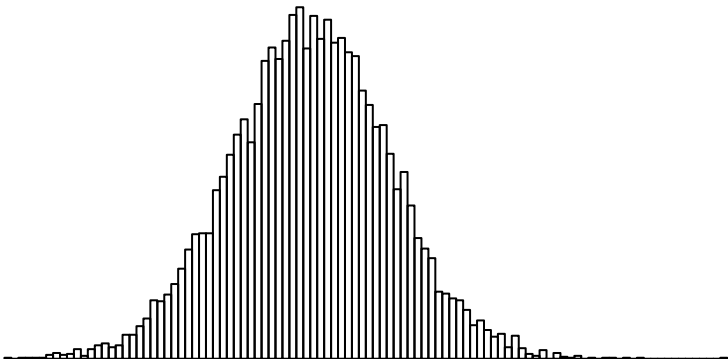

A194:120

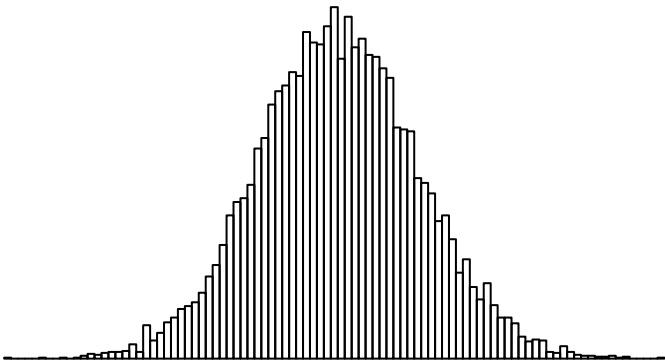

A194:45

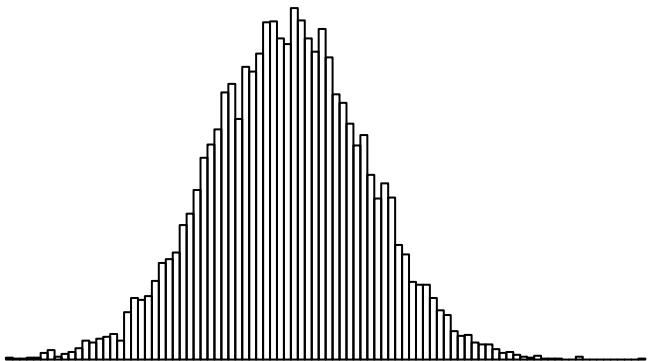

-9.5      -9.0      -8.5      -8.0      -7.5      -7.0      -6.5      -6.0

Unidentified Metabolite 12

A194:240 – A194:120

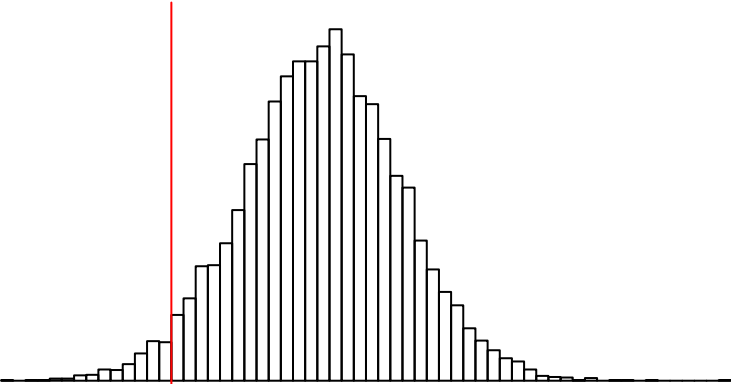

A194:240 – A194:45

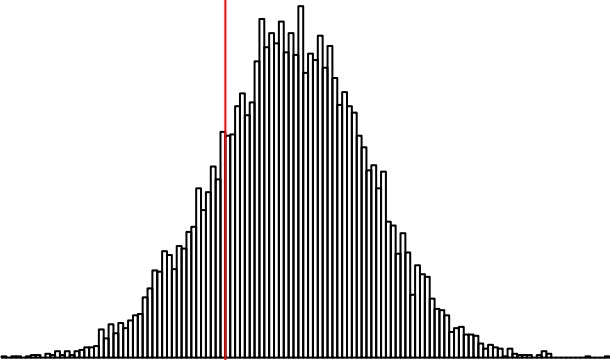

A194:120 – A194:45

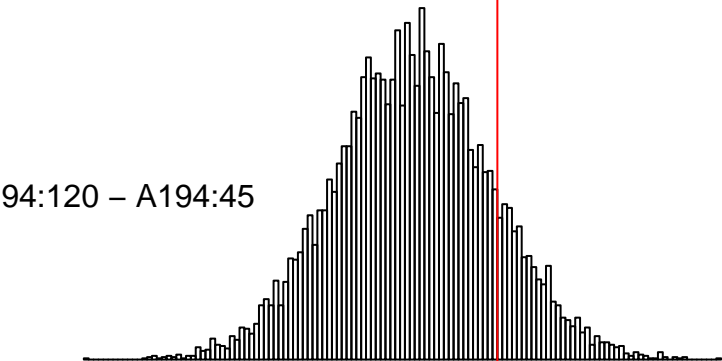

-2

-1

0

1

2

3

delta(Unidentified Metabolite 12)

A194:240

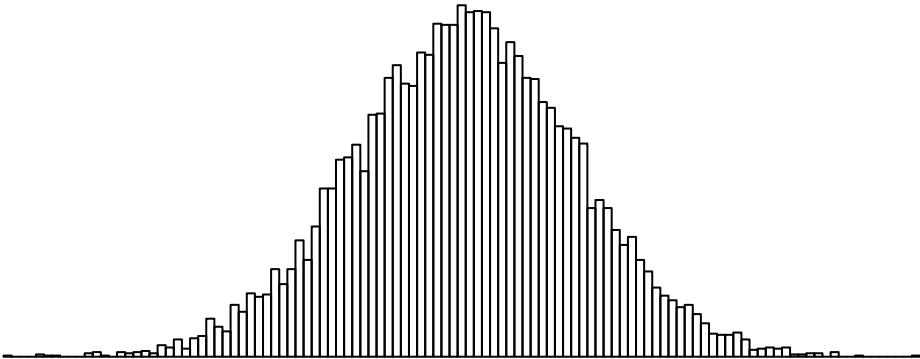

A194:120

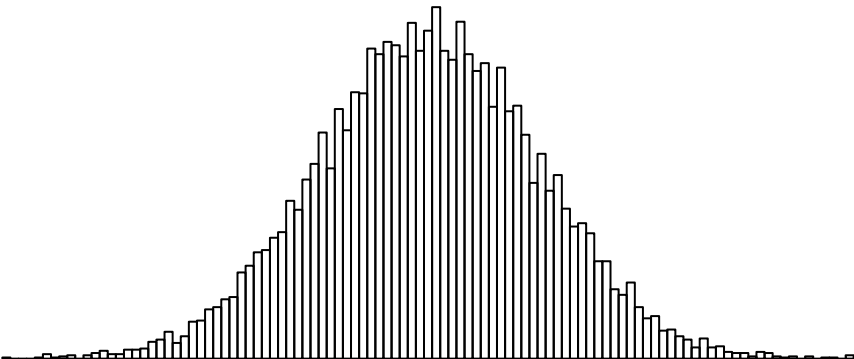

A194:45

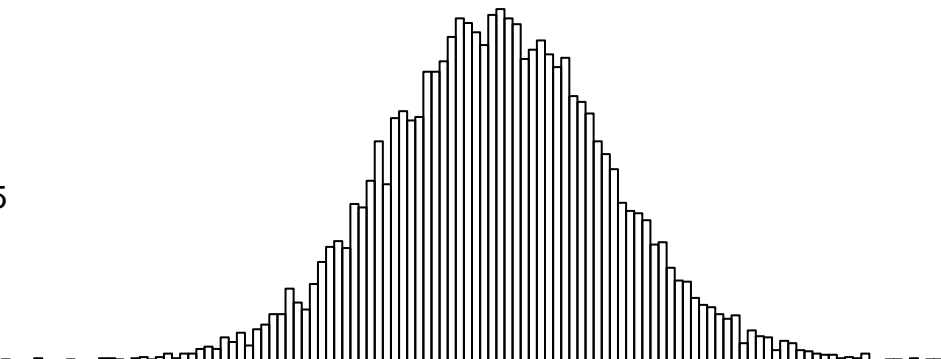

-9.0      -8.5      -8.0      -7.5      -7.0      -6.5      -6.0

Unidentified Metabolite 14

A194:240 – A194:120

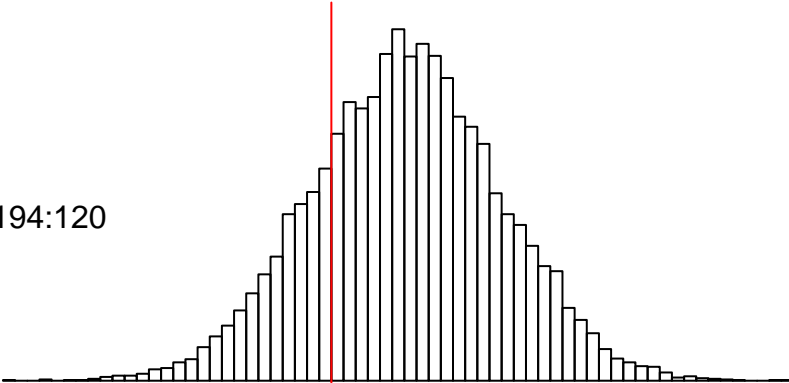

A194:240 – A194:45

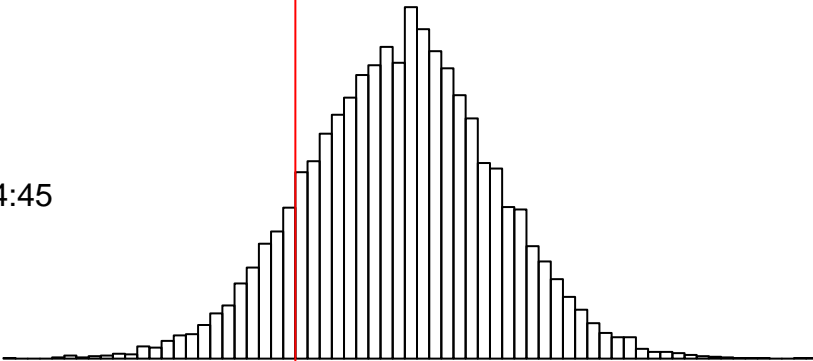

A194:120 – A194:45

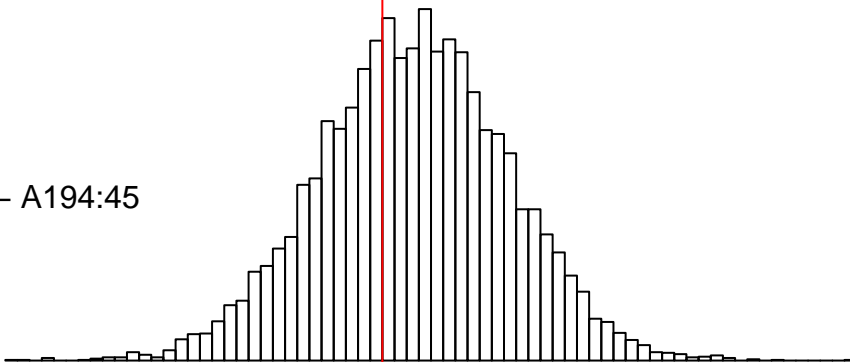

-2 -1 0 1 2 3

delta(Unidentified Metabolite 14)



A194:240

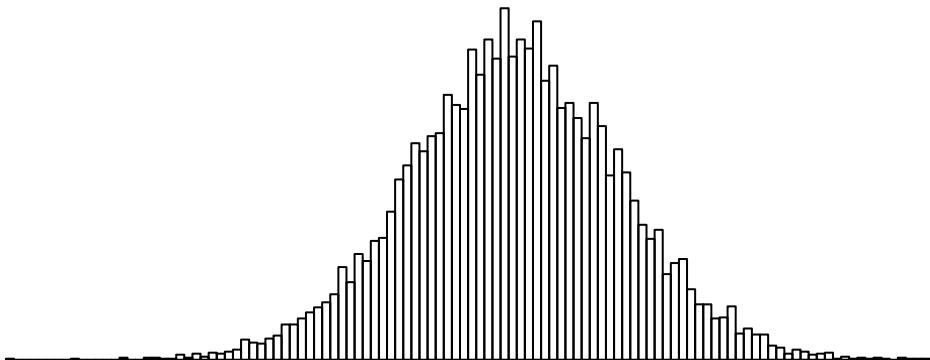

A194:120

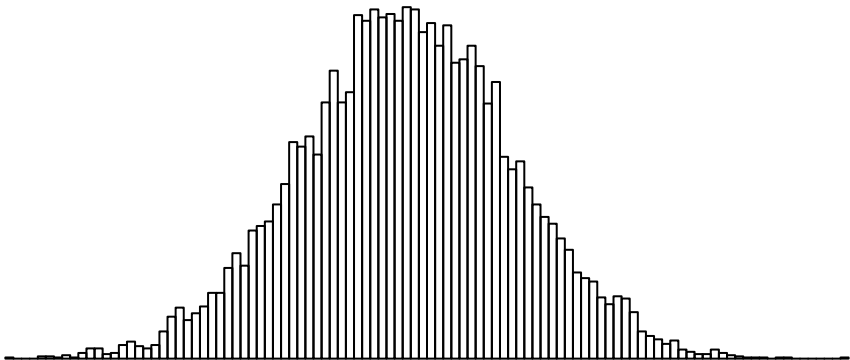

A194:45

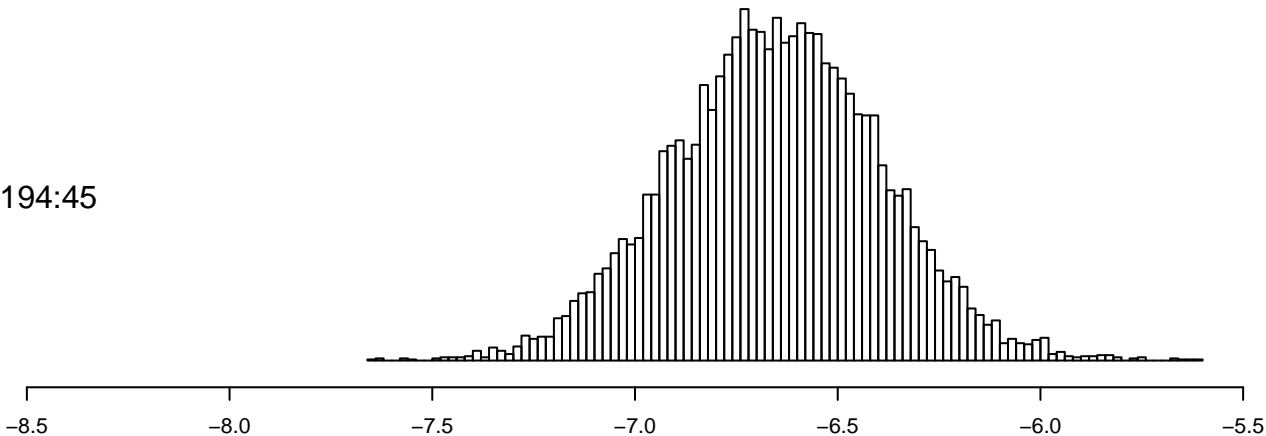

Unidentified Metabolite 16

A194:240 – A194:120

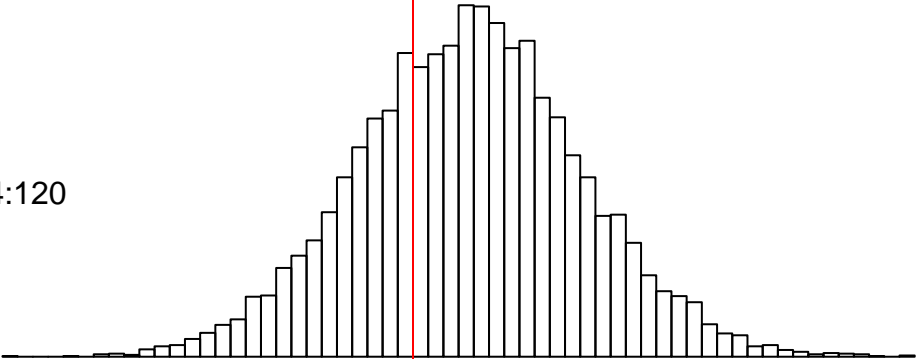

A194:240 – A194:45

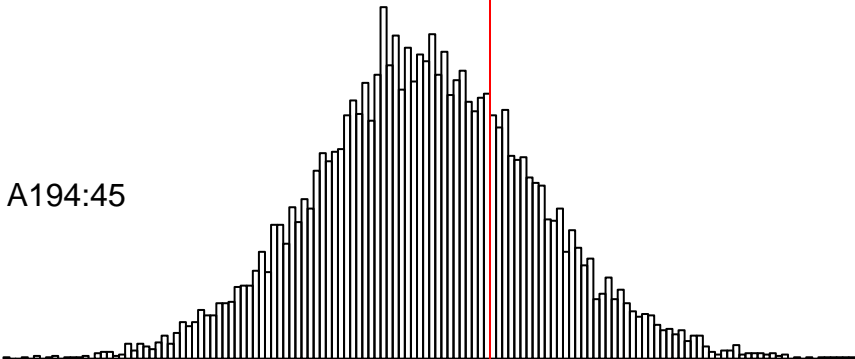

A194:120 – A194:45

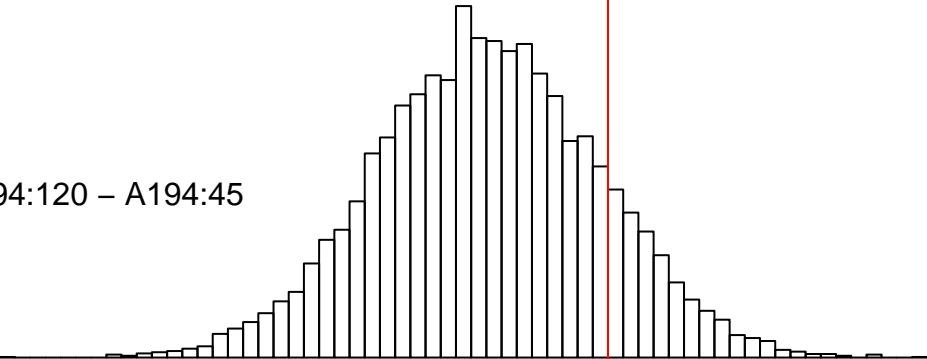

-2

-1

0

1

2

delta(Unidentified Metabolite 16)

A194:240

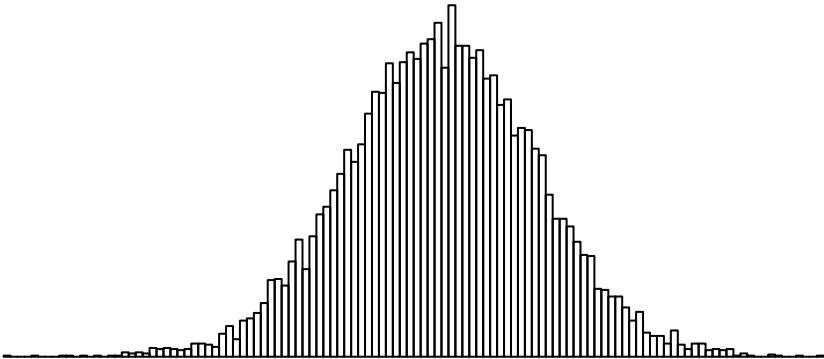

A194:120

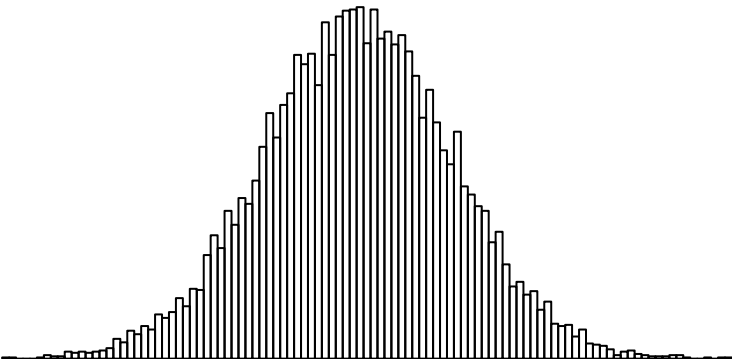

A194:45

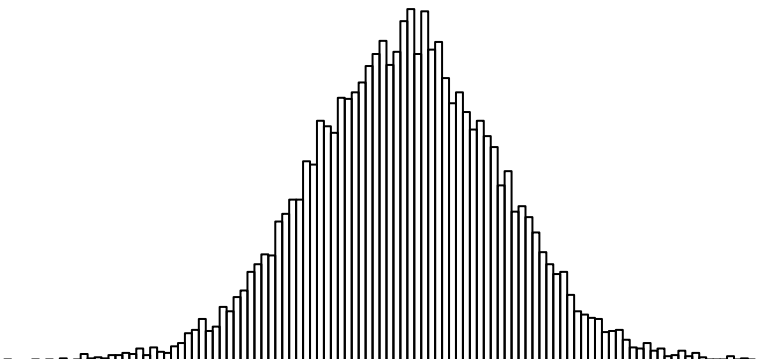

-9.0      -8.5      -8.0      -7.5      -7.0      -6.5      -6.0      -5.5

Unidentified Metabolite 17

A194:240 – A194:120

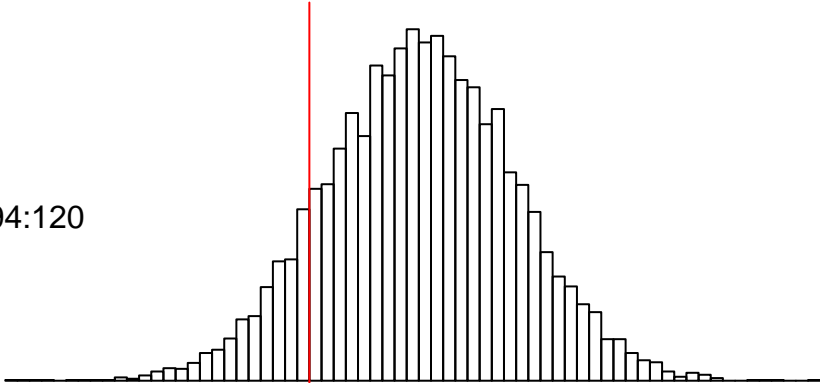

A194:240 – A194:45

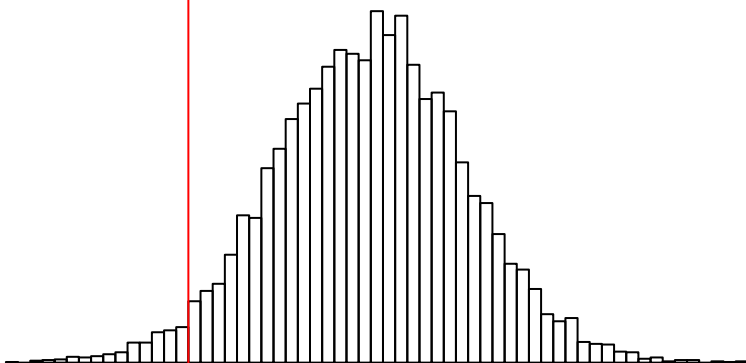

A194:120 – A194:45

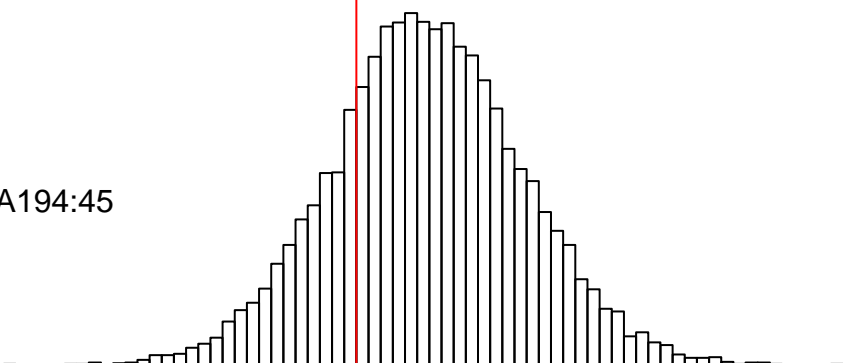

-2 -1 0 1 2 3

delta(Unidentified Metabolite 17)

A194:240

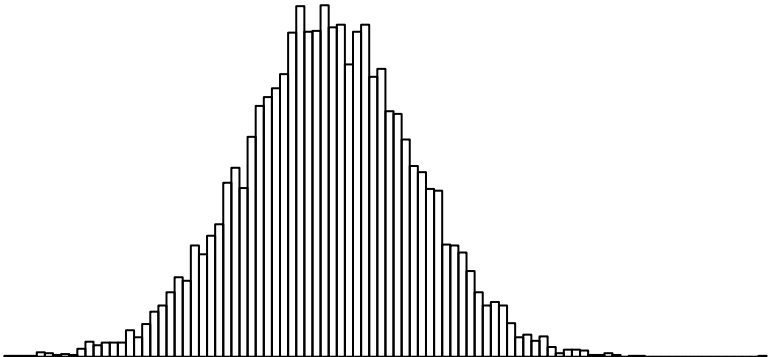

A194:120

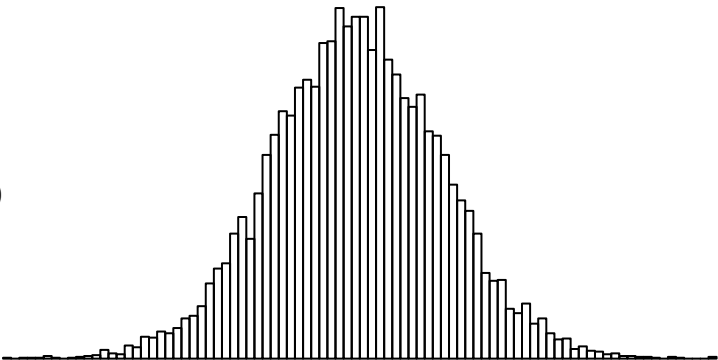

A194:45

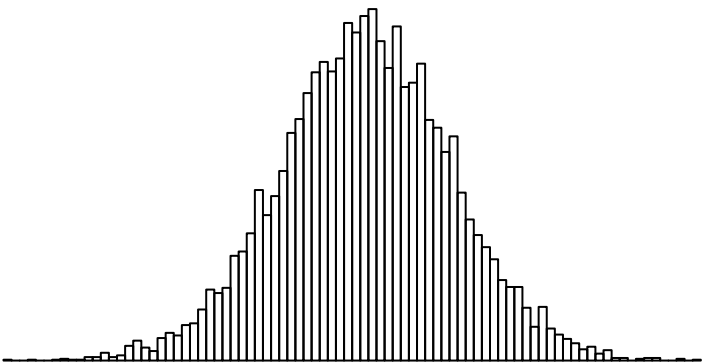

-8.0 -7.5 -7.0 -6.5 -6.0 -5.5 -5.0

Unidentified Metabolite 18

A194:240 – A194:120

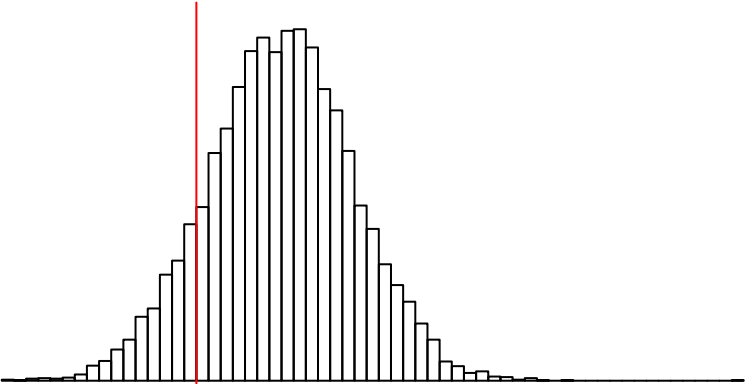

A194:240 – A194:45

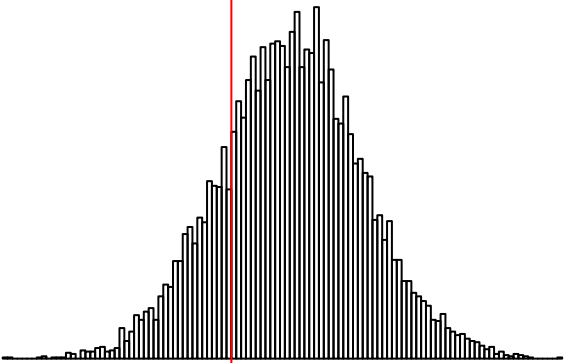

A194:120 – A194:45

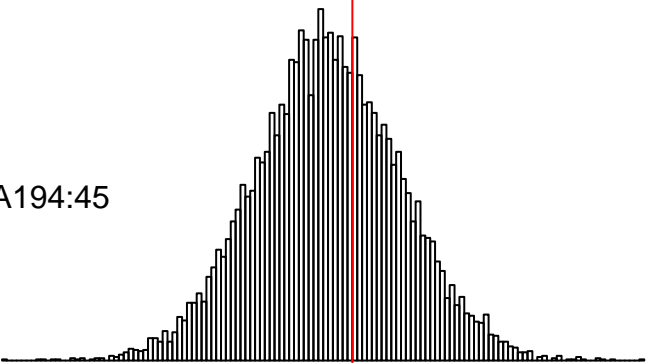

-2 -1 0 1 2 3

delta(Unidentified Metabolite 18)

A194:240

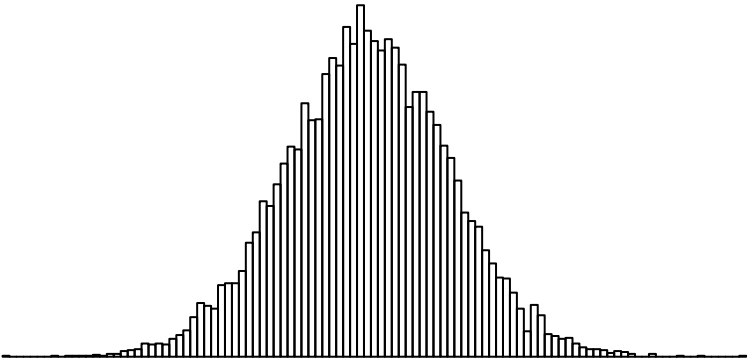

A194:120

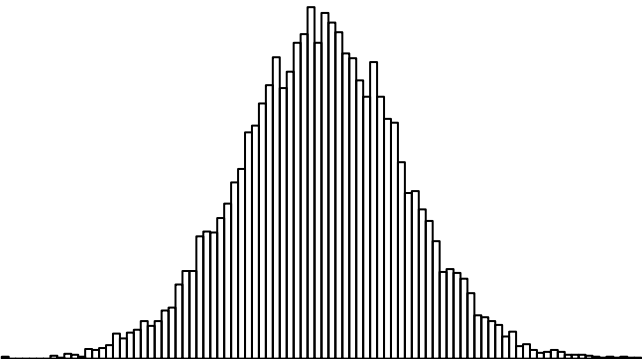

A194:45

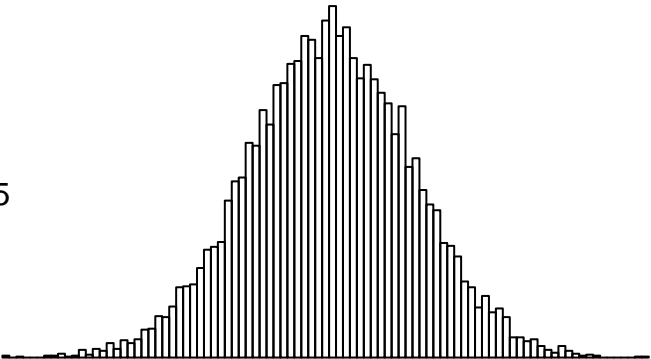

-7.0 -6.5 -6.0 -5.5 -5.0 -4.5 -4.0 -3.5

Unidentified Metabolite 20

A194:240 – A194:120

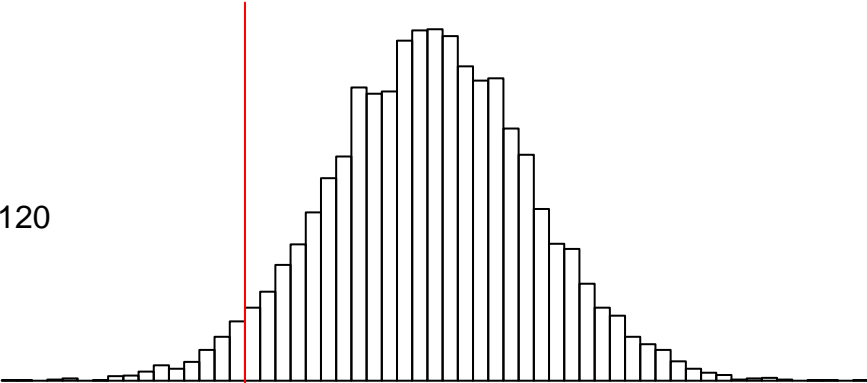

A194:240 – A194:45

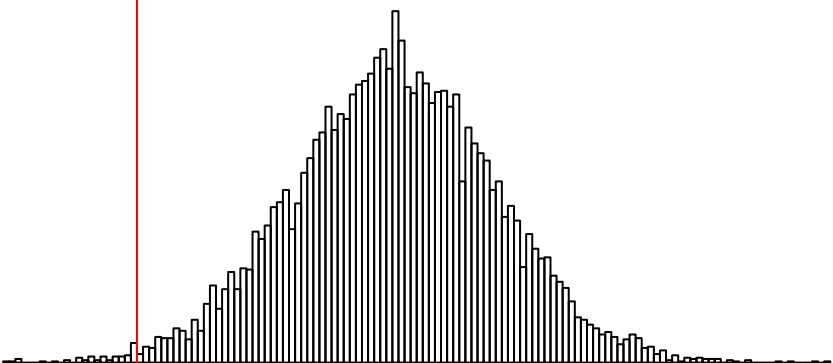

A194:120 – A194:45

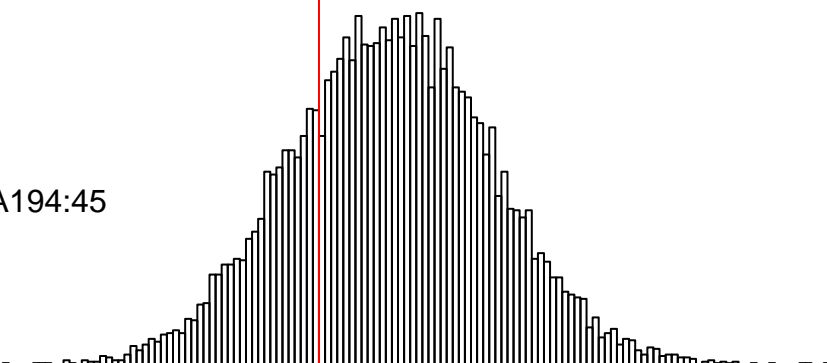

-1 0 1 2

delta(Unidentified Metabolite 20)



A194:240

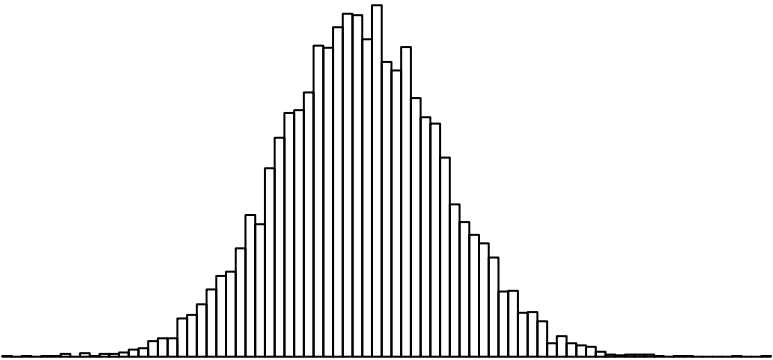

A194:120

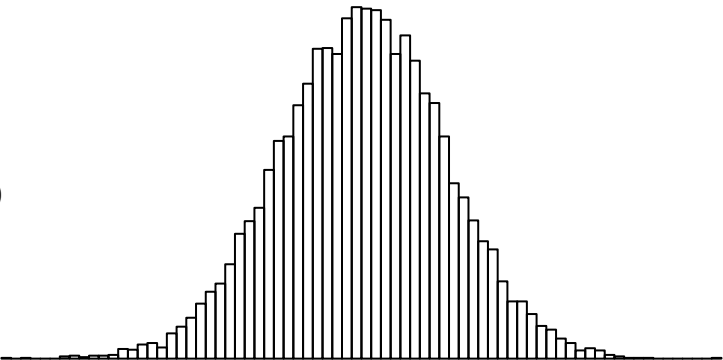

A194:45

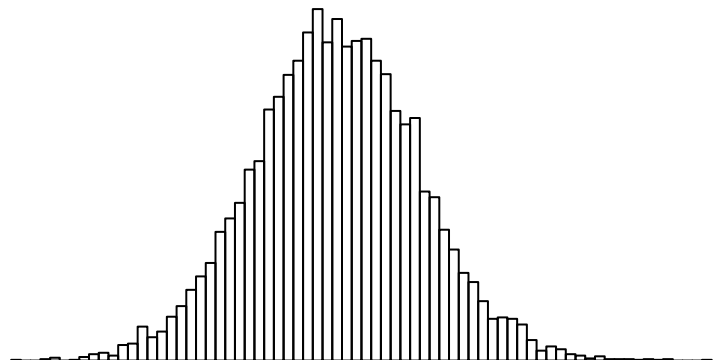

-9.0      -8.5      -8.0      -7.5      -7.0      -6.5

Unidentified Metabolite 22

A194:240 – A194:120

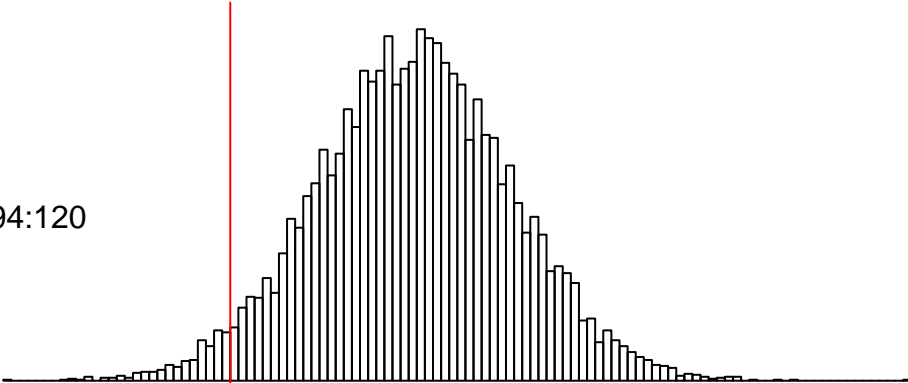

A194:240 – A194:45

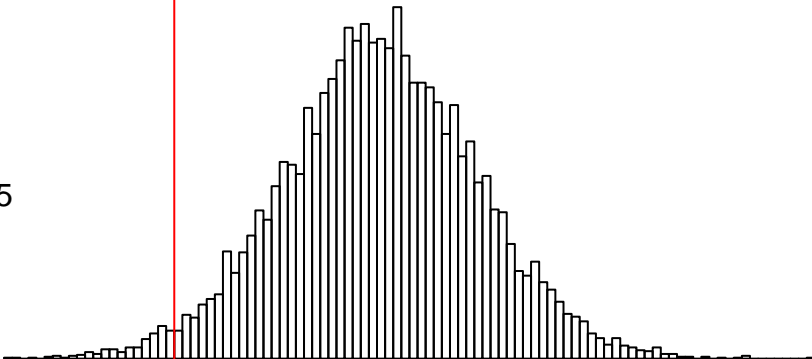

A194:120 – A194:45

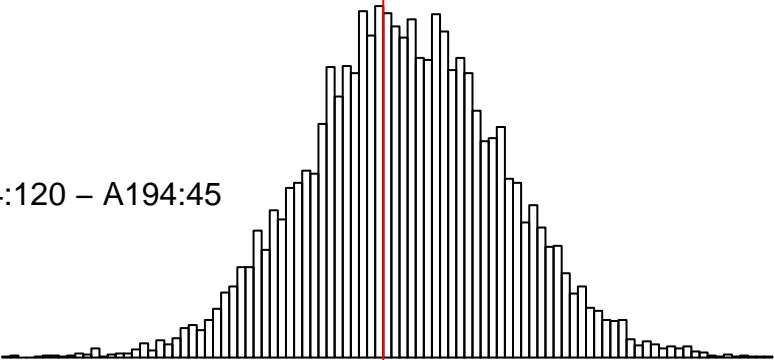

-1.0      -0.5      0.0      0.5      1.0      1.5      2.0

delta(Unidentified Metabolite 22)

A194:240

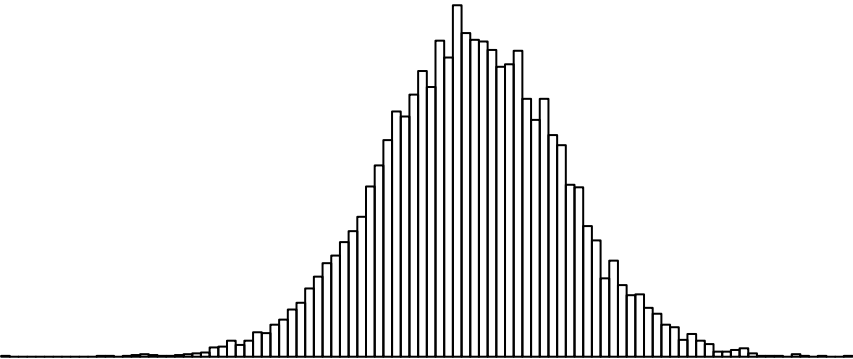

A194:120

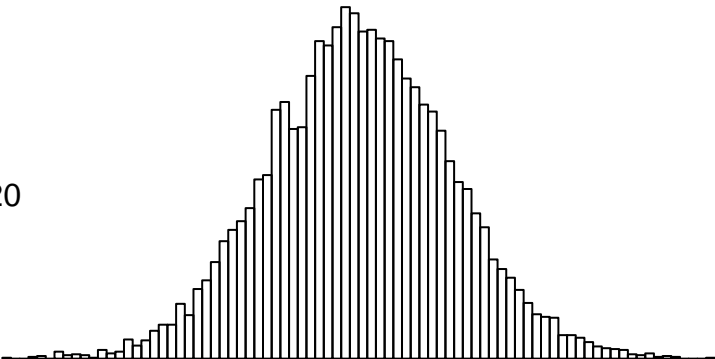

A194:45

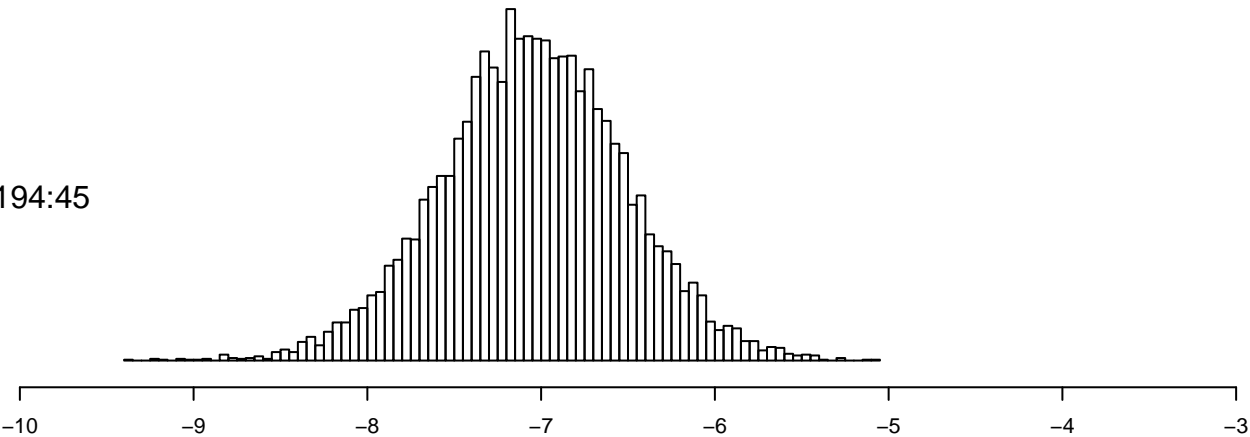

Unidentified Metabolite 23

A194:240 – A194:120

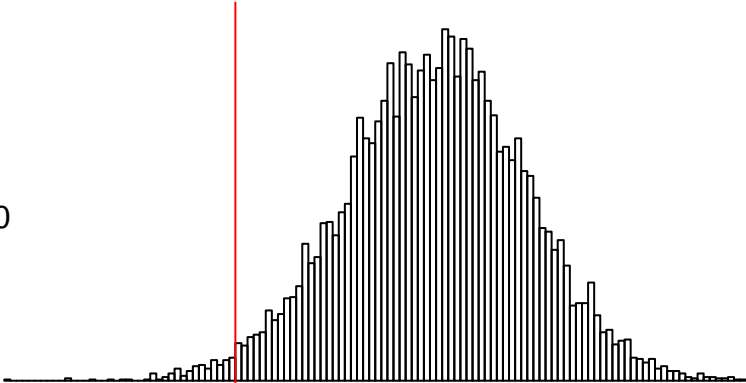

A194:240 – A194:45

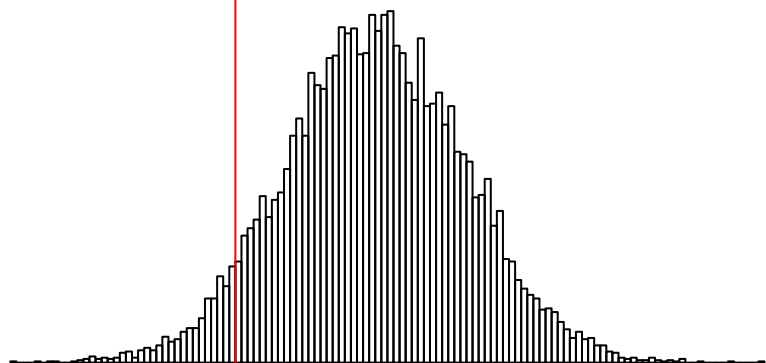

A194:120 – A194:45

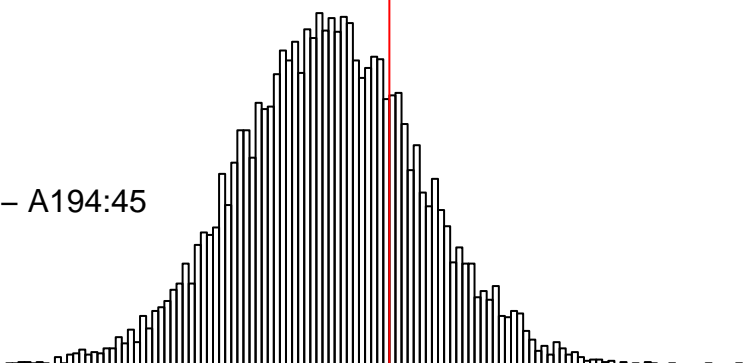

delta(Unidentified Metabolite 23)

A194:240

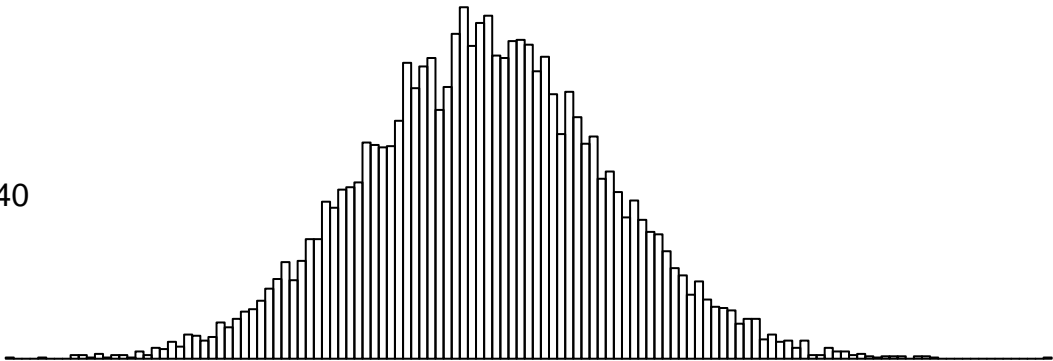

A194:120

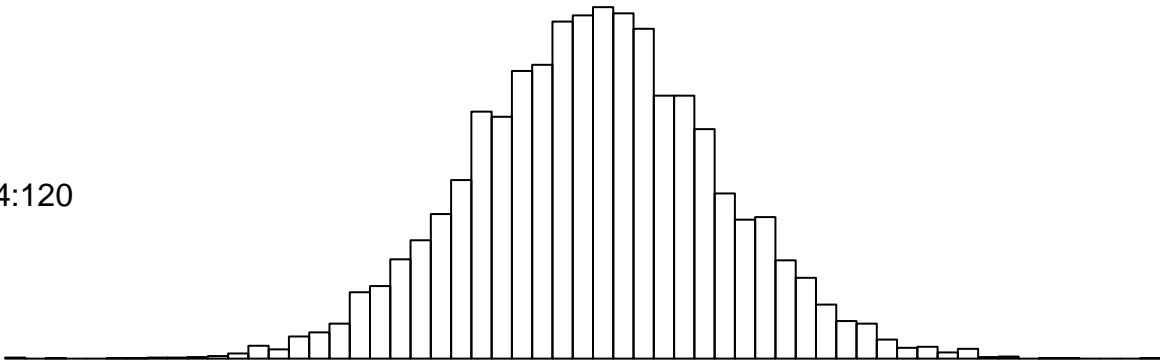

A194:45

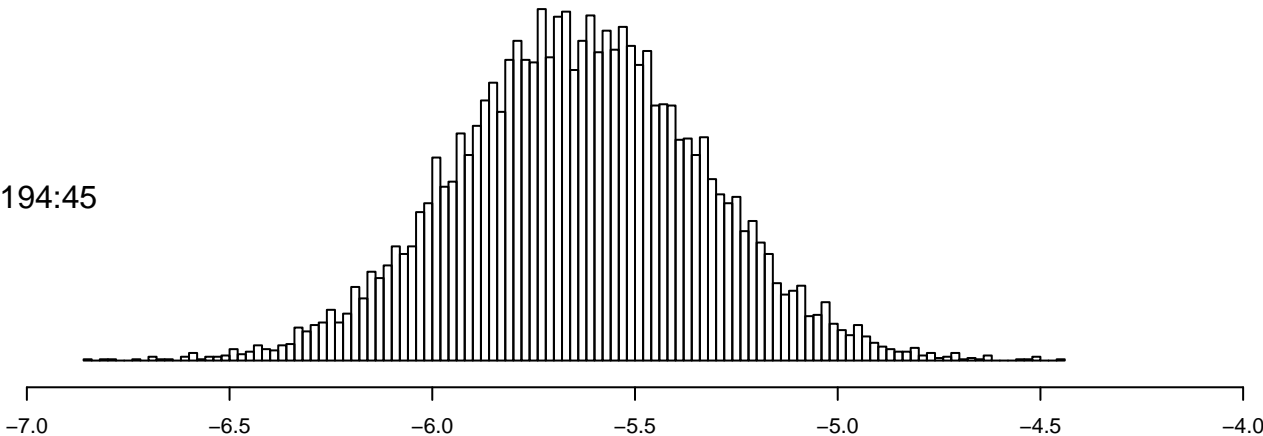

Unidentified Metabolite 24

A194:240 – A194:120

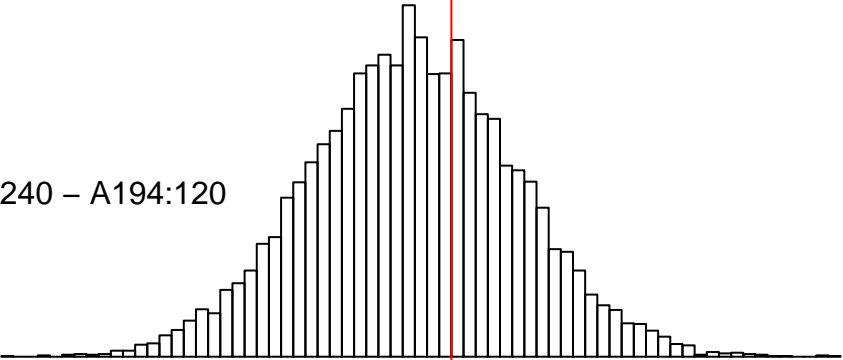

A194:240 – A194:45

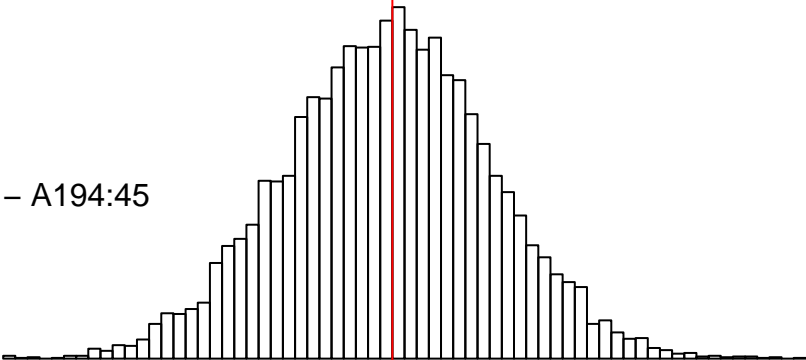

A194:120 – A194:45

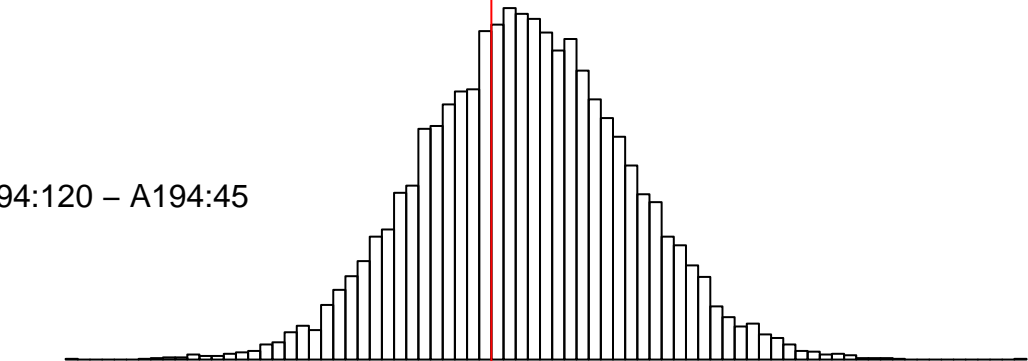

-2

-1

0

1

2

3

delta(Unidentified Metabolite 24)

A194:240

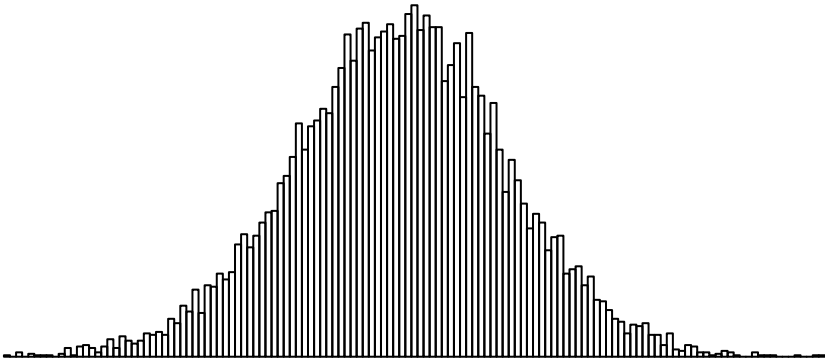

A194:120

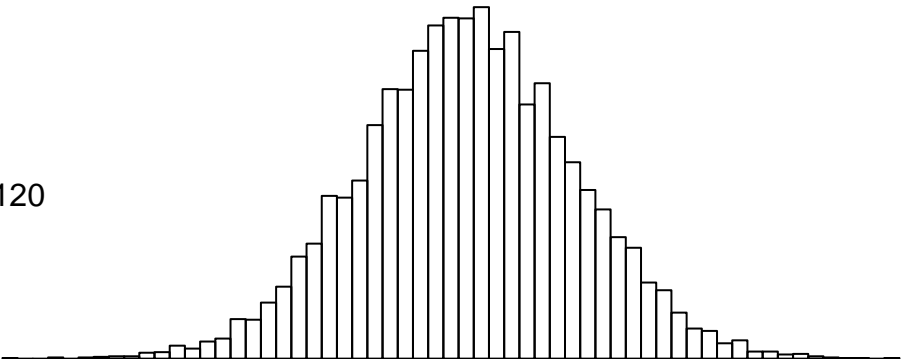

A194:45

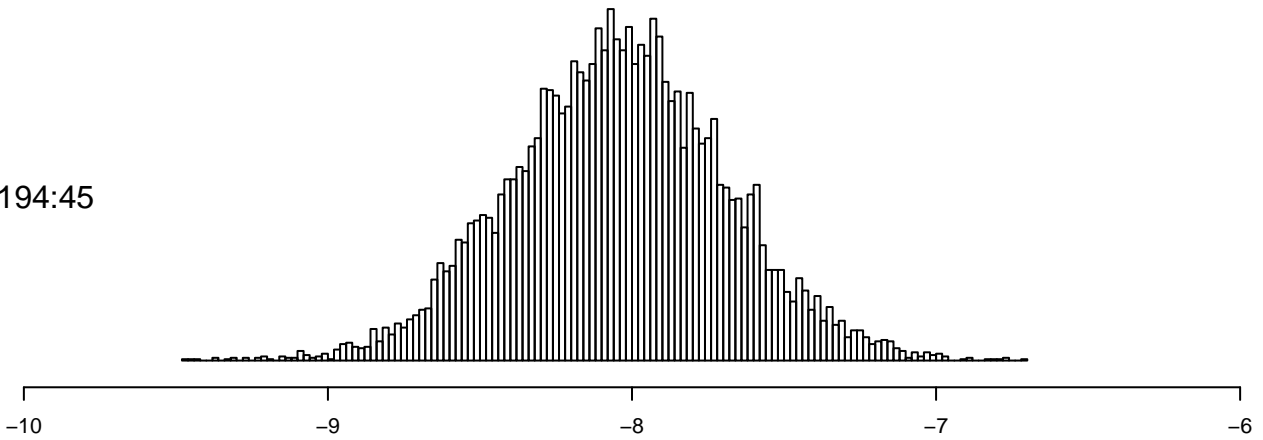

Unidentified Metabolite 25

A194:240 – A194:120

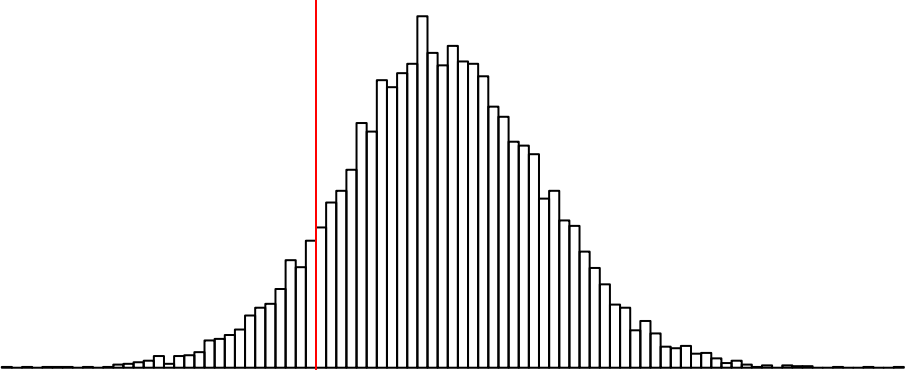

A194:240 – A194:45

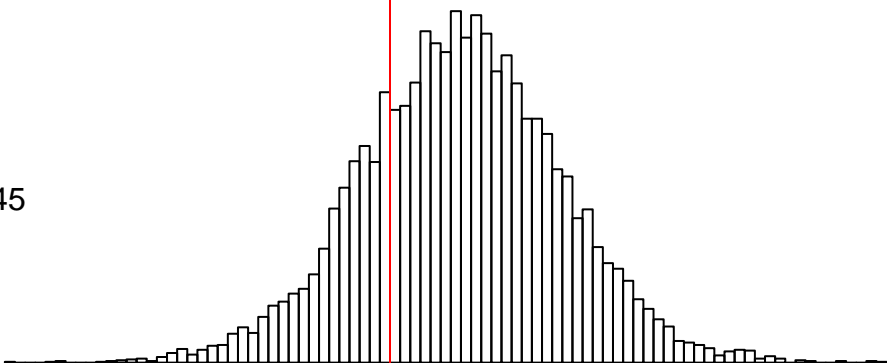

A194:120 – A194:45

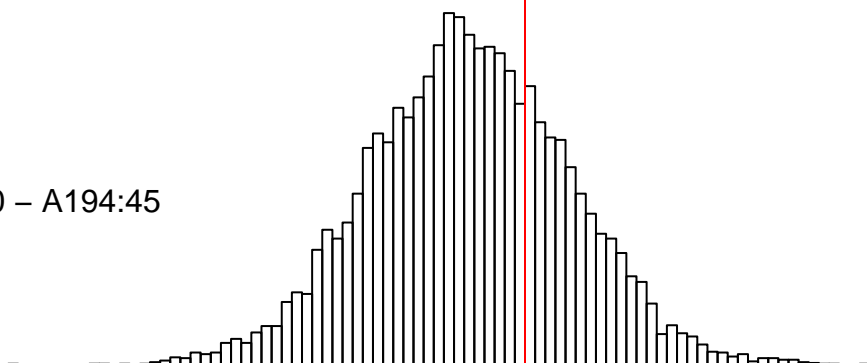

-3 -2 -1 0 1 2 3

delta(Unidentified Metabolite 25)



A194:240

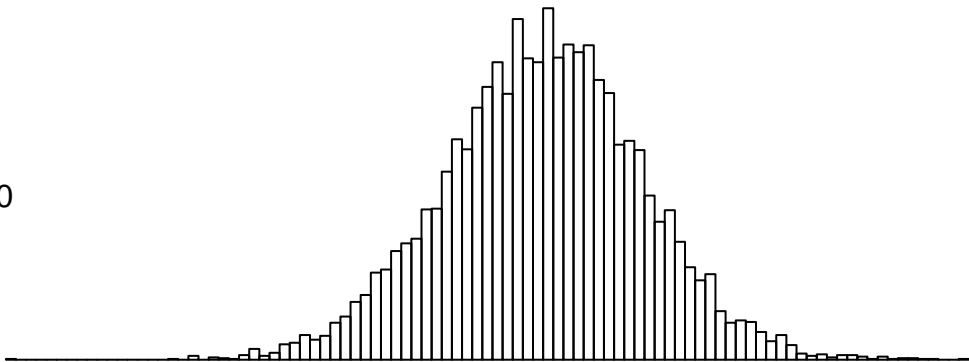

A194:120

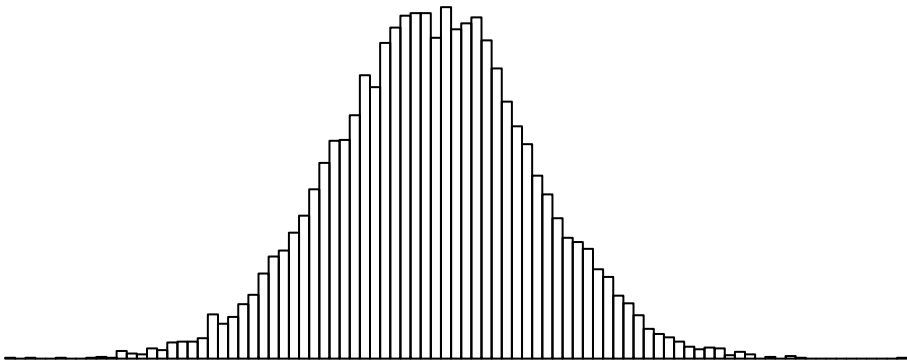

A194:45

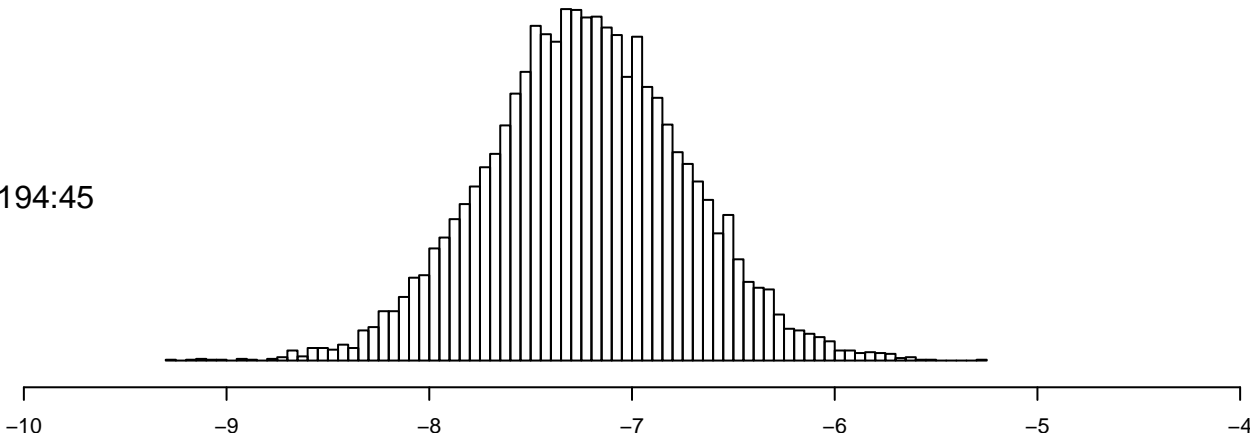

Unidentified Metabolite 26

A194:240 – A194:120

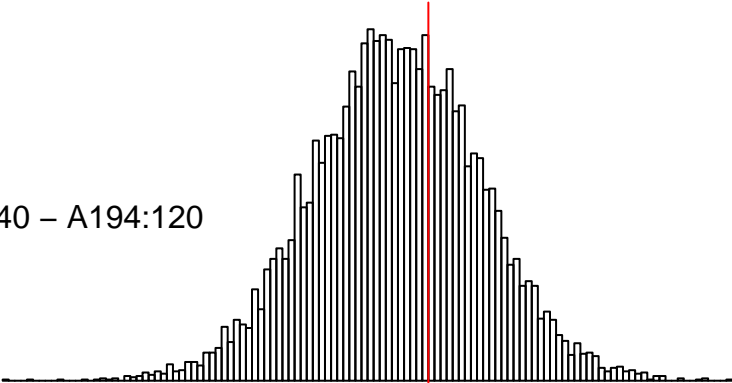

A194:240 – A194:45

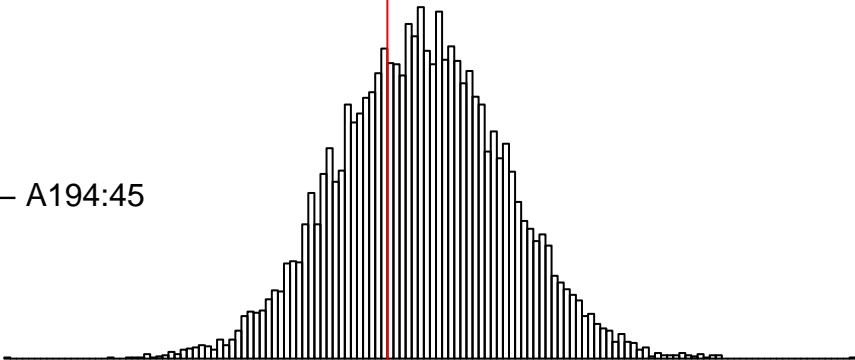

A194:120 – A194:45

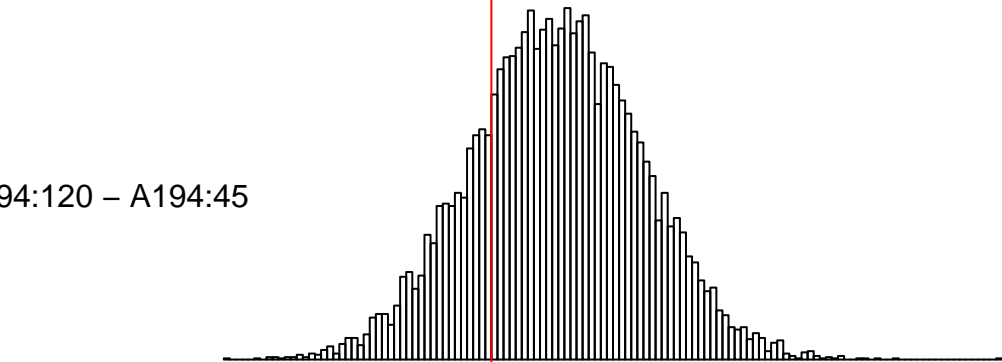

-4

-2

0

2

4

6

delta(Unidentified Metabolite 26)

A194:240

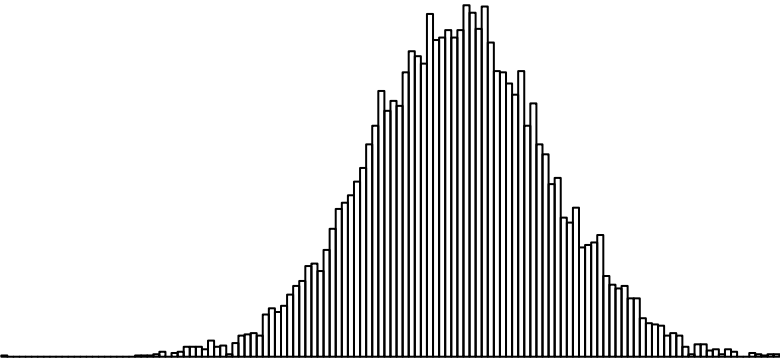

A194:120

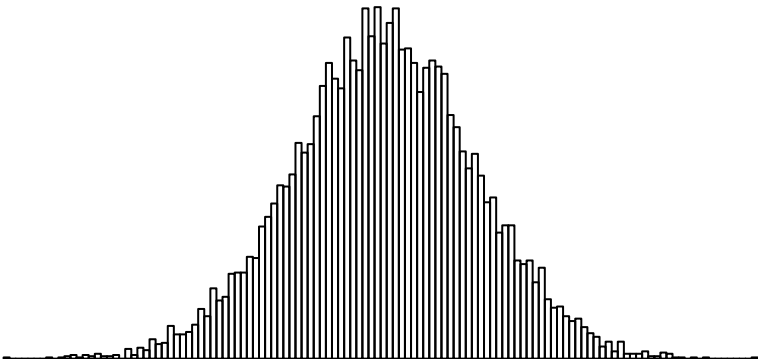

A194:45

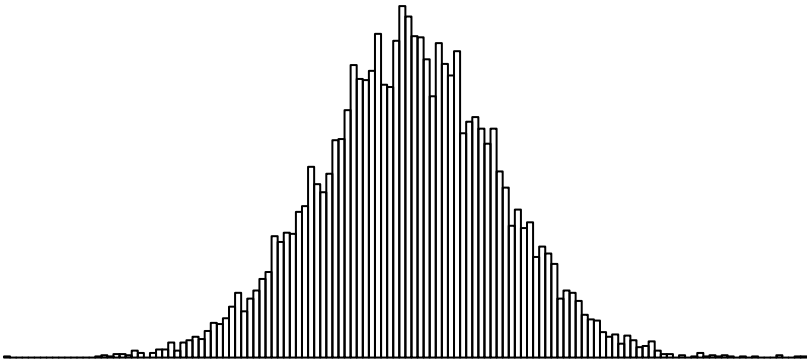

-8 -7 -6 -5 -4

Unidentified Metabolite 27

A194:240 – A194:120

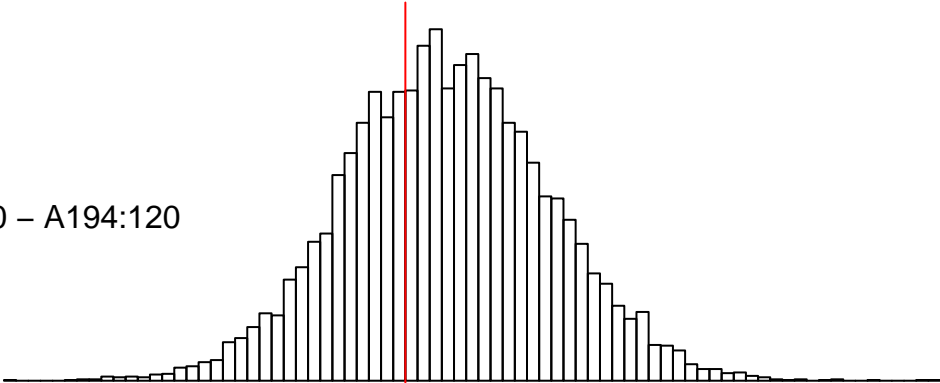

A194:240 – A194:45

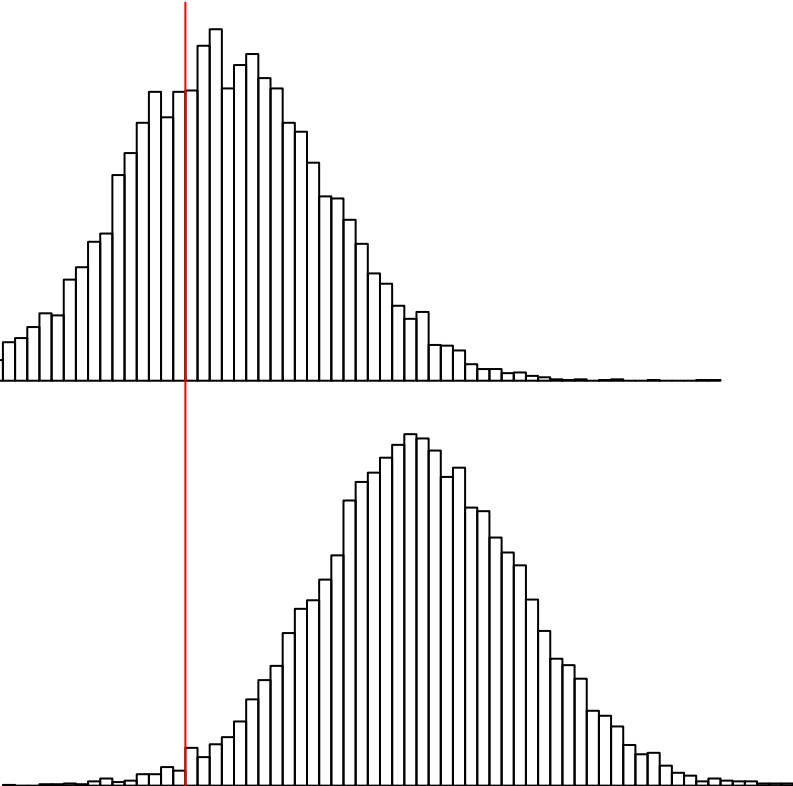

A194:120 – A194:45

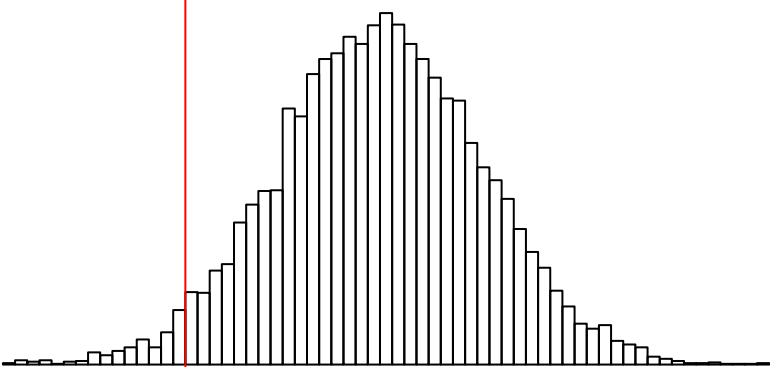

-2 -1 0 1 2 3

delta(Unidentified Metabolite 27)

A194:240

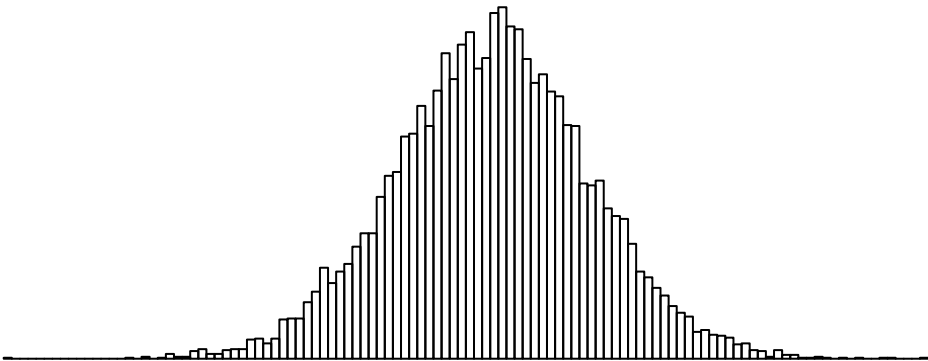

A194:120

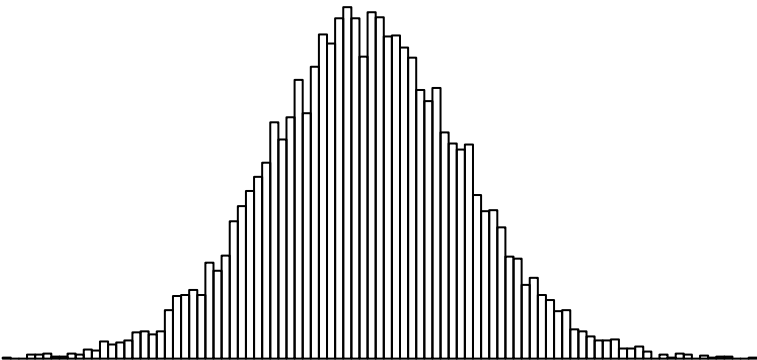

A194:45

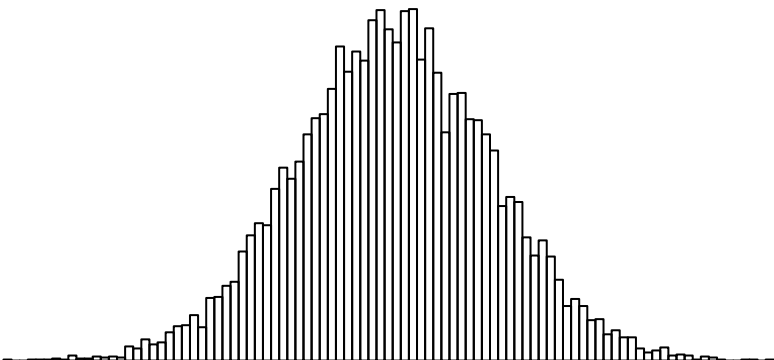

-9.0 -8.5 -8.0 -7.5 -7.0 -6.5 -6.0

Unidentified Metabolite 29

A194:240 – A194:120

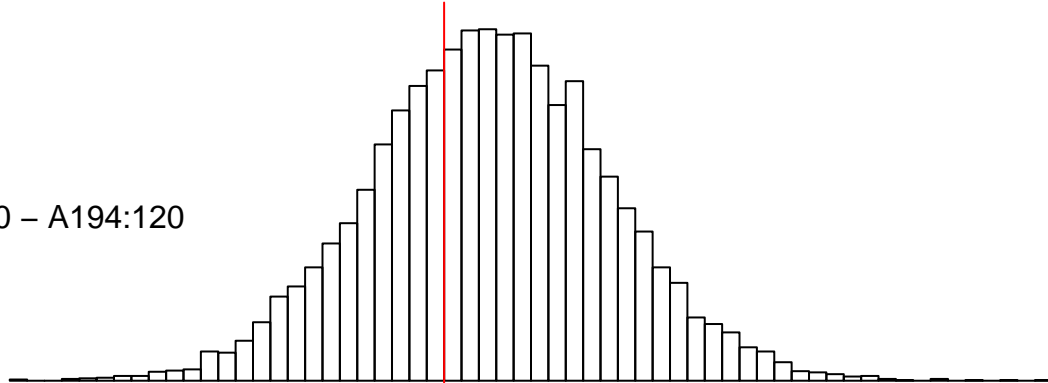

A194:240 – A194:45

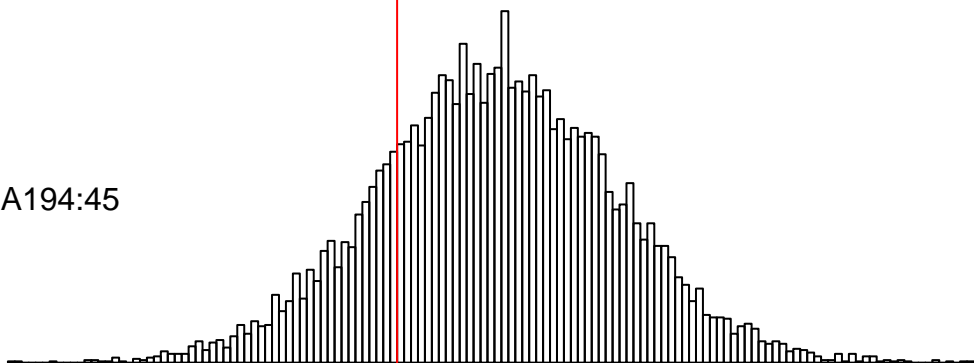

A194:120 – A194:45

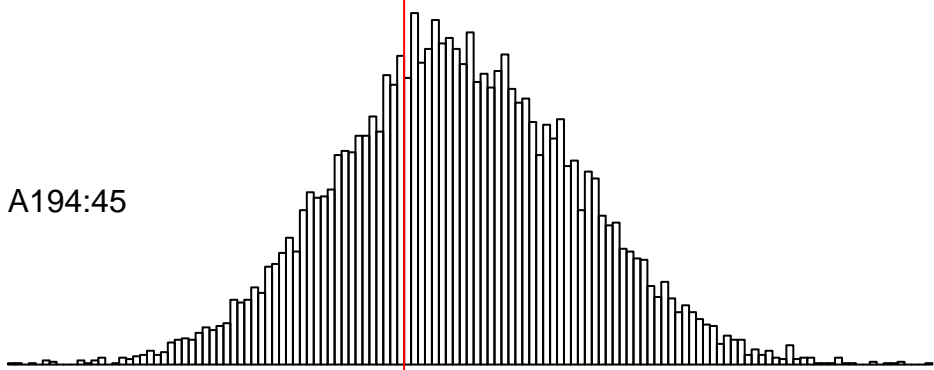

-1.5      -1.0      -0.5      0.0      0.5      1.0      1.5      2.0

delta(Unidentified Metabolite 29)

A194:240

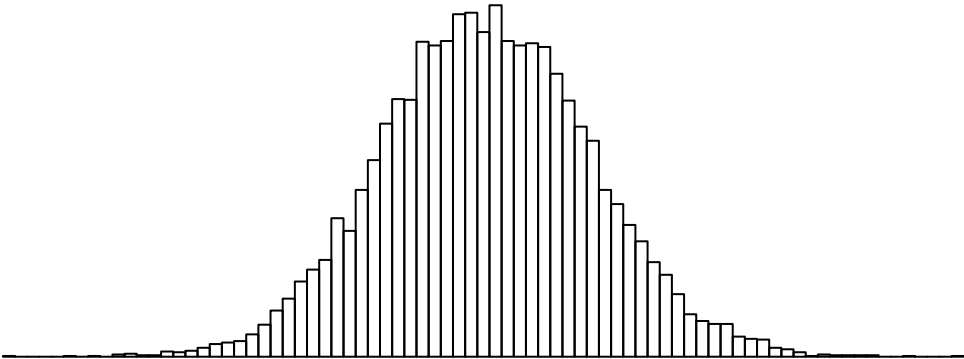

A194:120

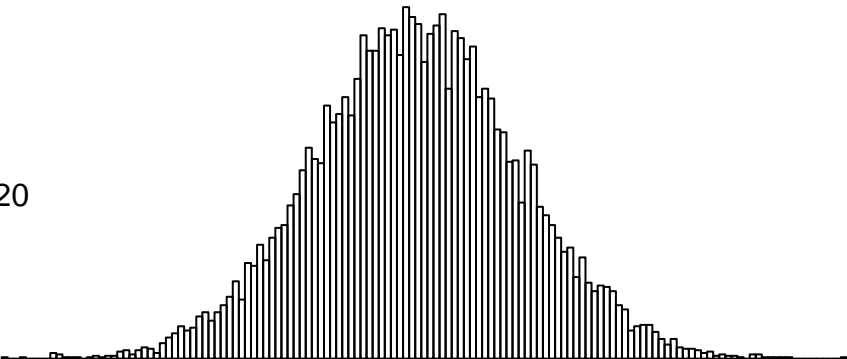

A194:45

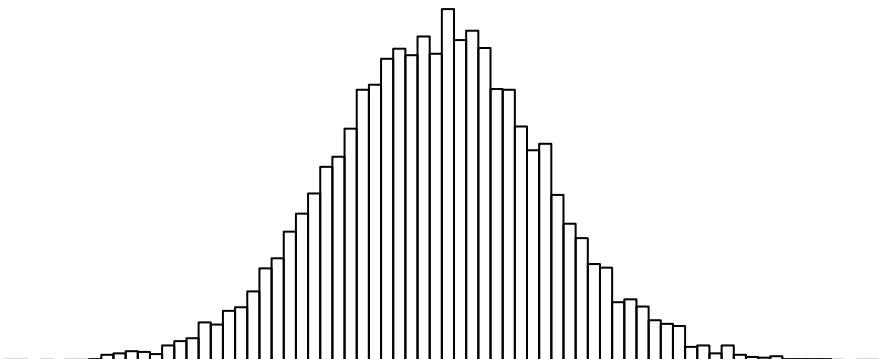

-9.5                      -9.0                      -8.5                      -8.0                      -7.5

Unidentified Metabolite 30

A194:240 – A194:120

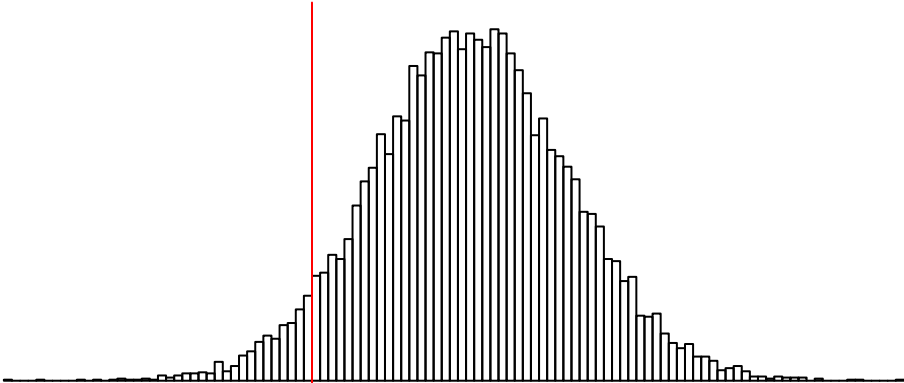

A194:240 – A194:45

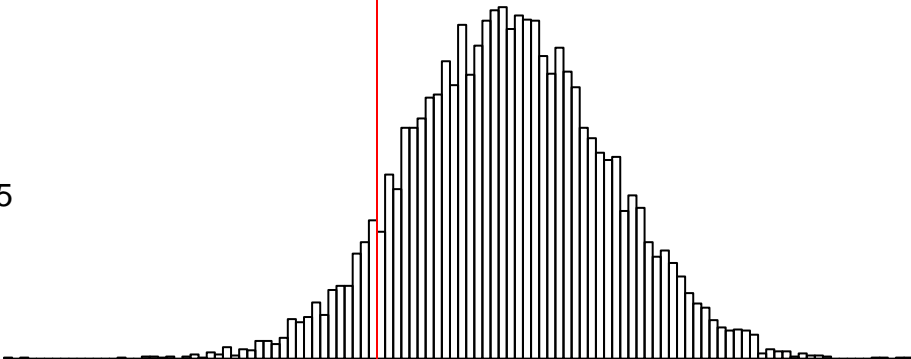

A194:120 – A194:45

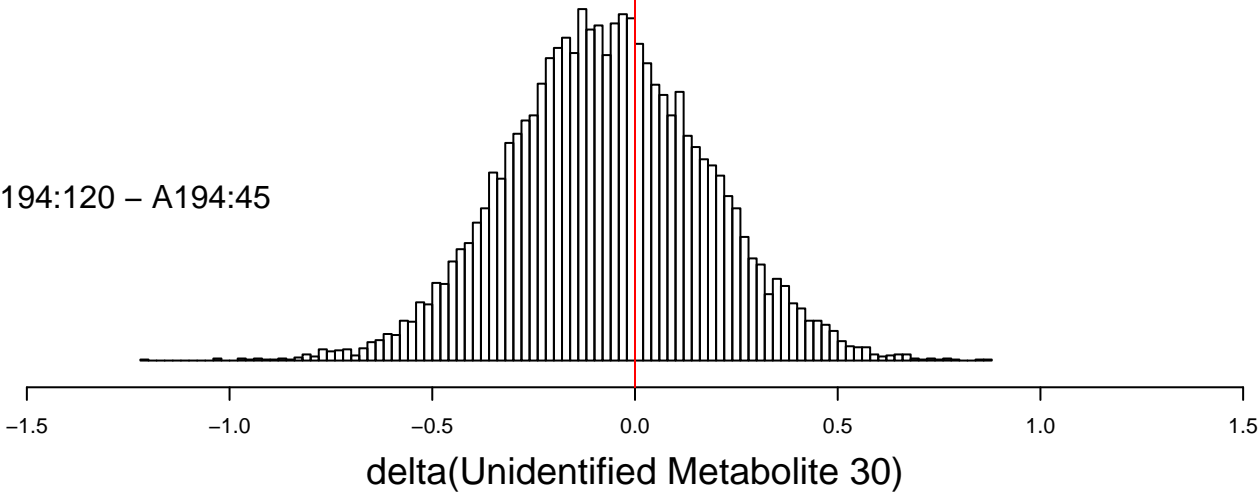



A194:240

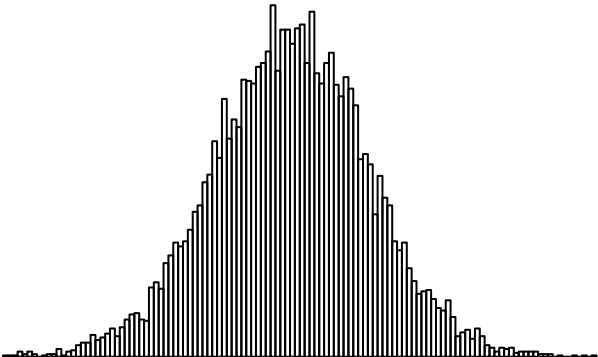

A194:120

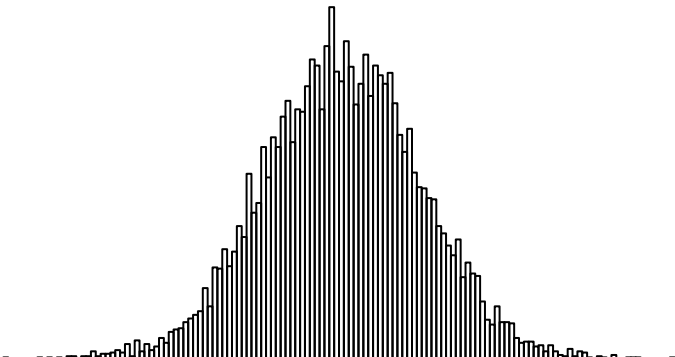

A194:45

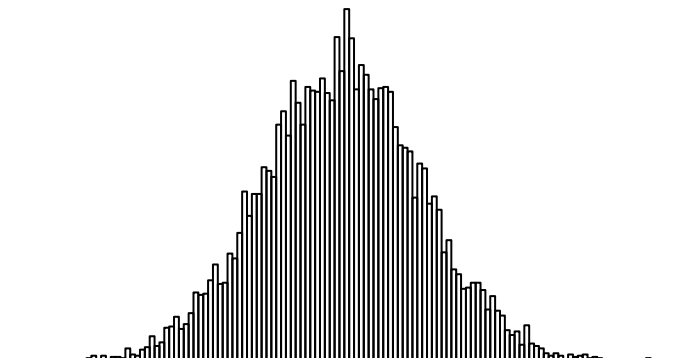

-11      -10      -9      -8      -7      -6

Unidentified Metabolite 31

A194:240 – A194:120

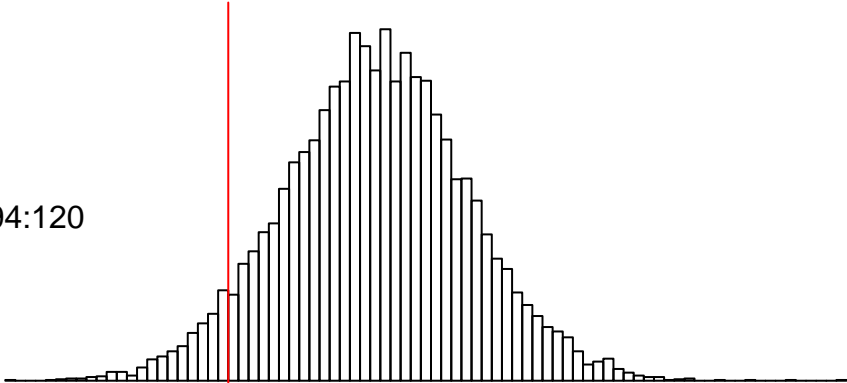

A194:240 – A194:45

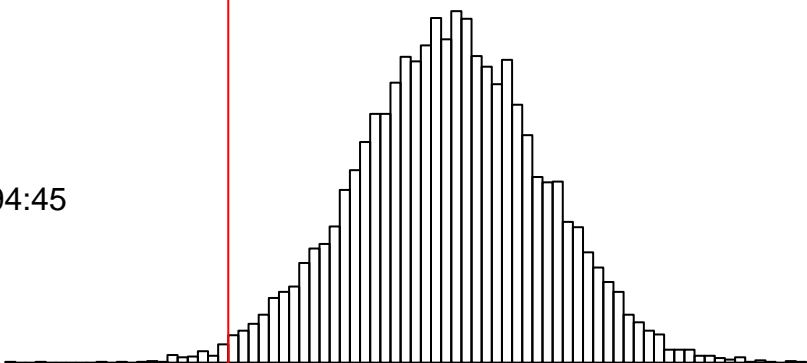

A194:120 – A194:45

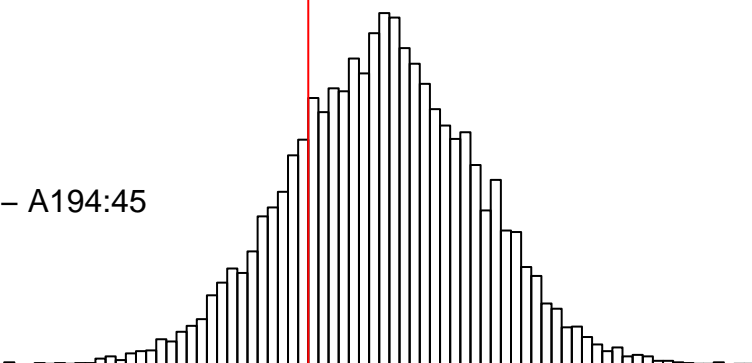

-2      -1      0      1      2      3      4

delta(Unidentified Metabolite 31)

A194:240

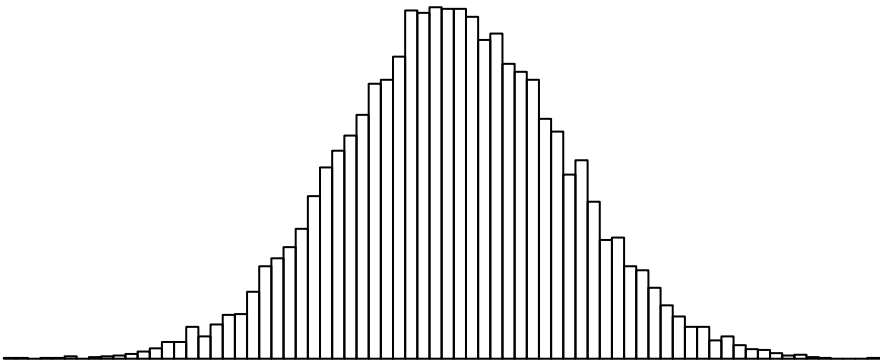

A194:120

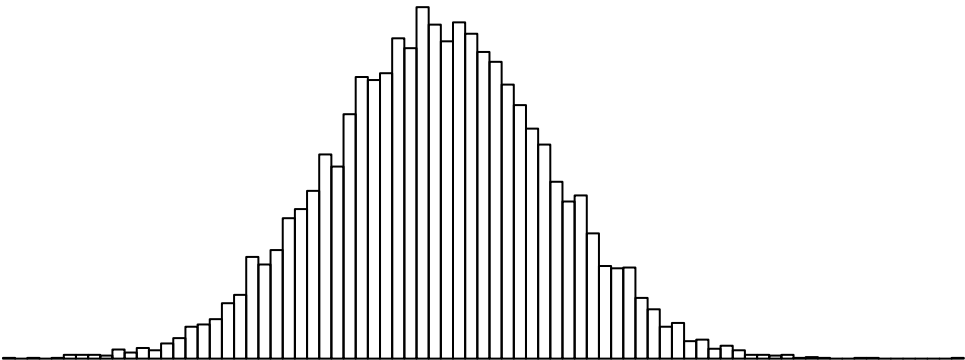

A194:45

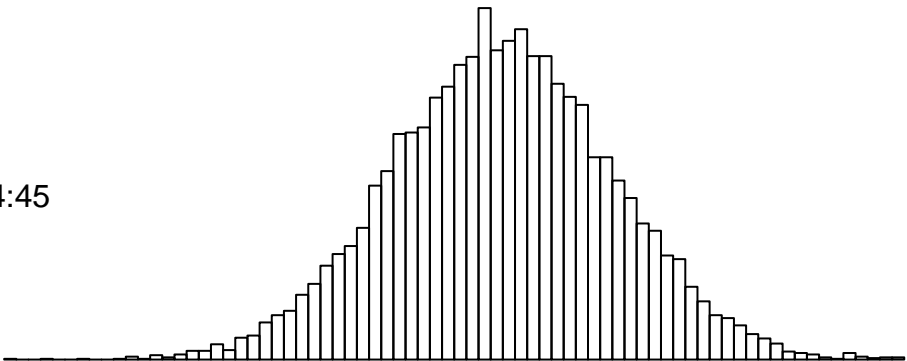

-12      -11      -10      -9      -8      -7

Unidentified Metabolite 32

A194:240 – A194:120

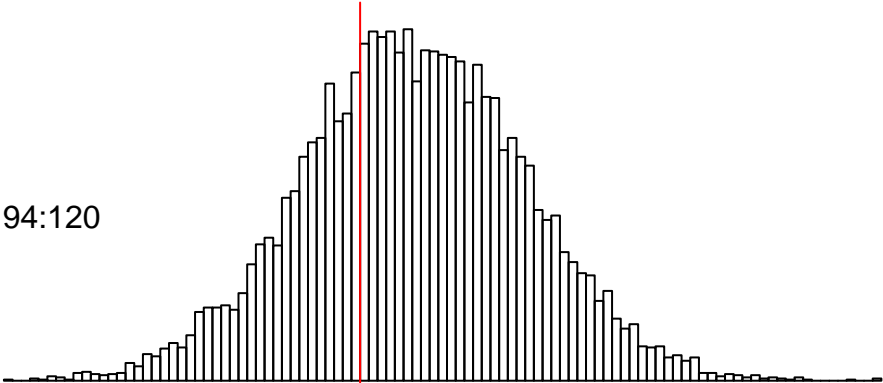

A194:240 – A194:45

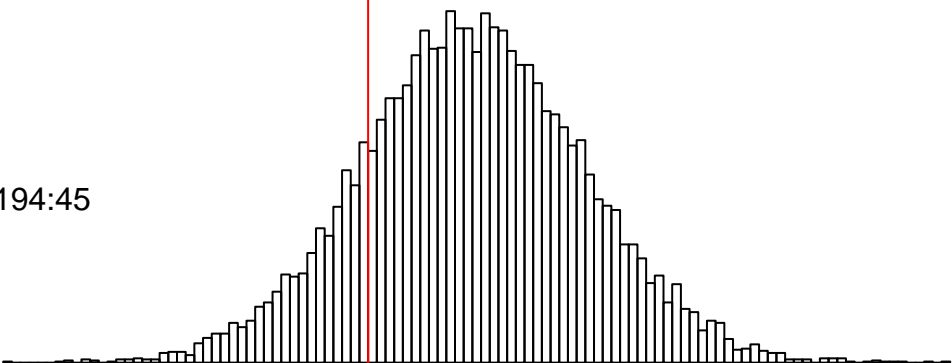

A194:120 – A194:45

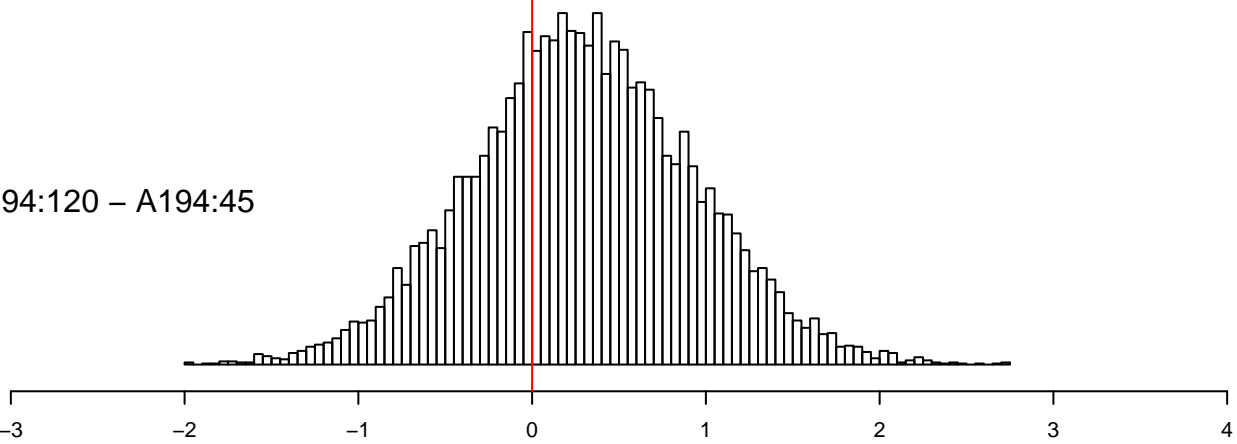

delta(Unidentified Metabolite 32)

A194:240

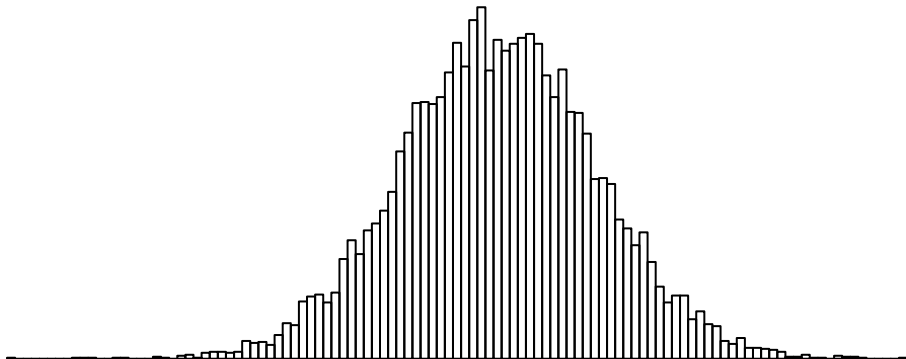

A194:120

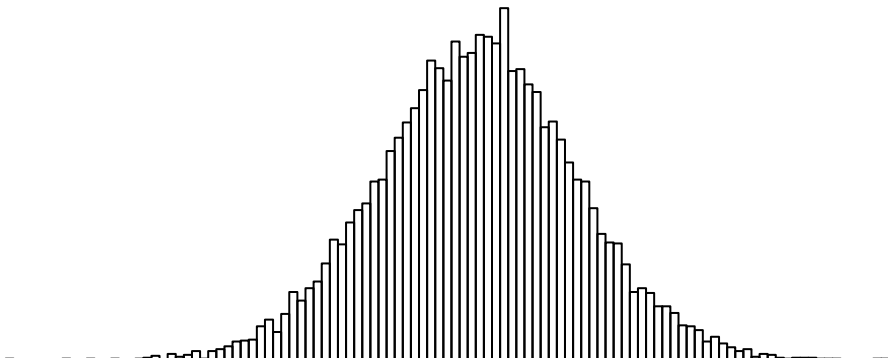

A194:45

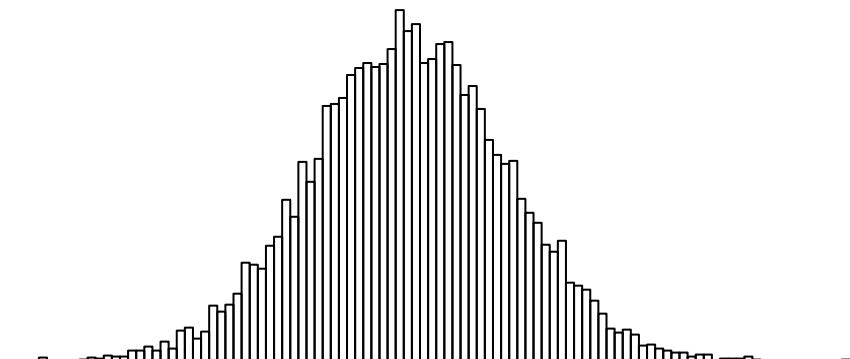

-9.5      -9.0      -8.5      -8.0      -7.5      -7.0      -6.5

Unidentified Metabolite 33

A194:240 – A194:120

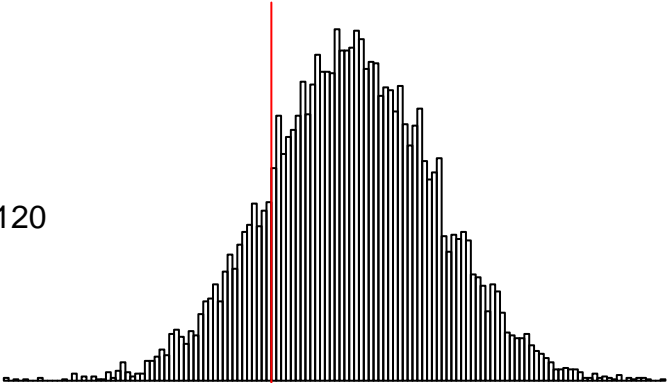

A194:240 – A194:45

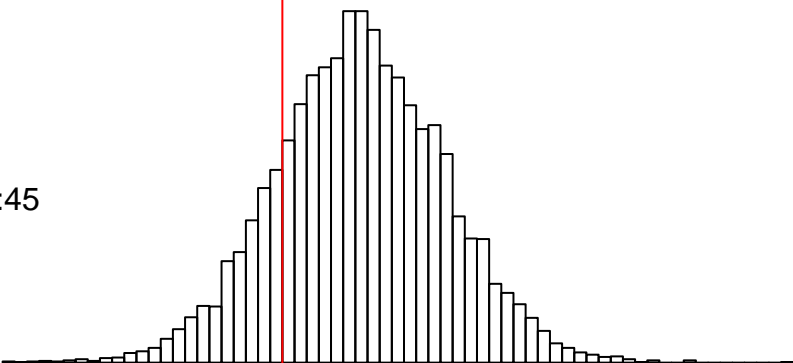

A194:120 – A194:45

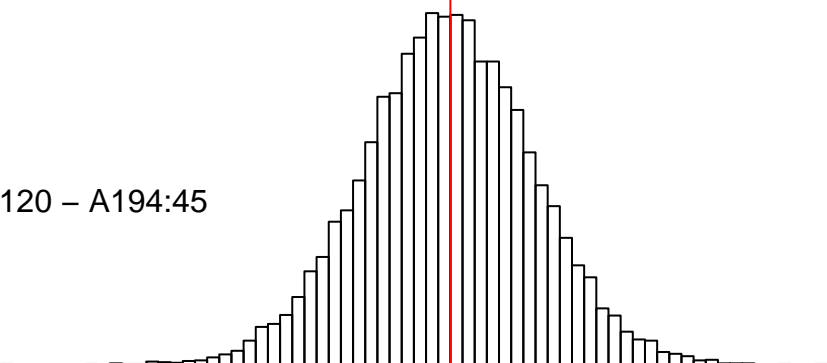

-2 -1 0 1 2 3

delta(Unidentified Metabolite 33)

A194:240

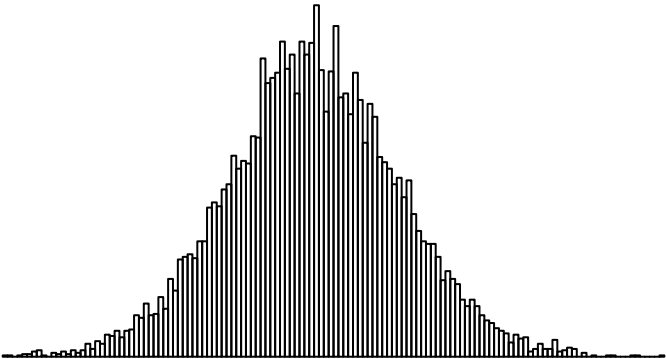

A194:120

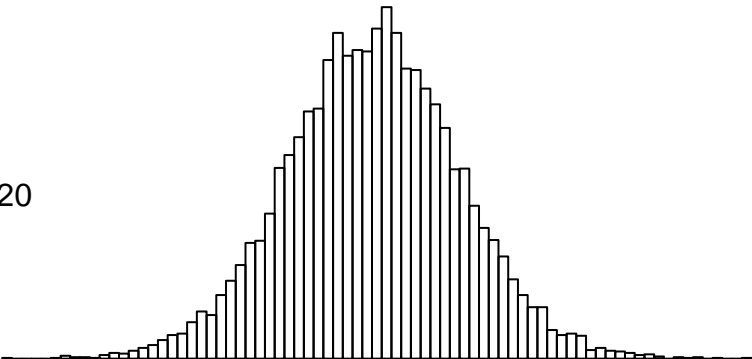

A194:45

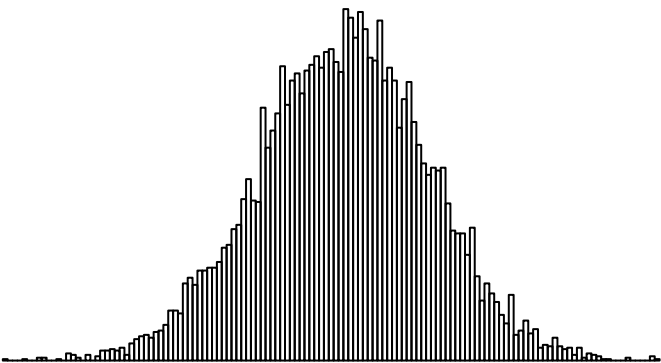

-9.5                      -9.0                      -8.5                      -8.0                      -7.5                      -7.0

Unidentified Metabolite 34

A194:240 – A194:120

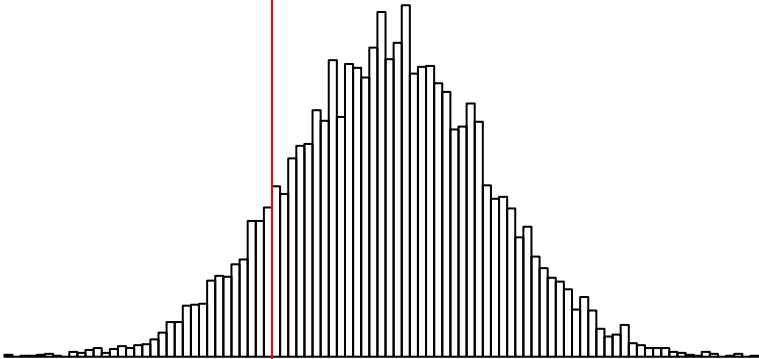

A194:240 – A194:45

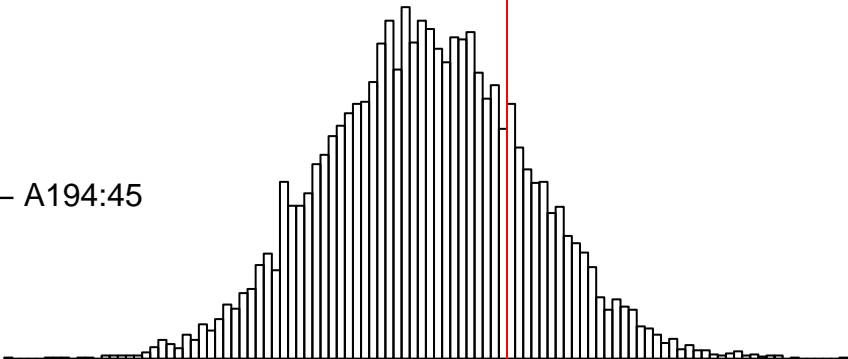

A194:120 – A194:45

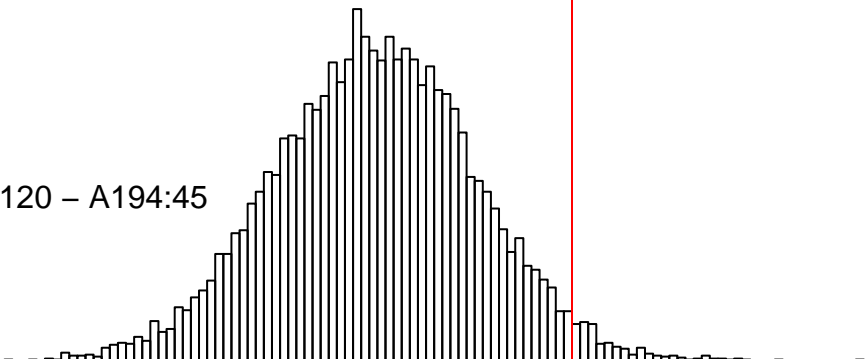

-1.5      -1.0      -0.5      0.0      0.5      1.0      1.5

delta(Unidentified Metabolite 34)



A194:240

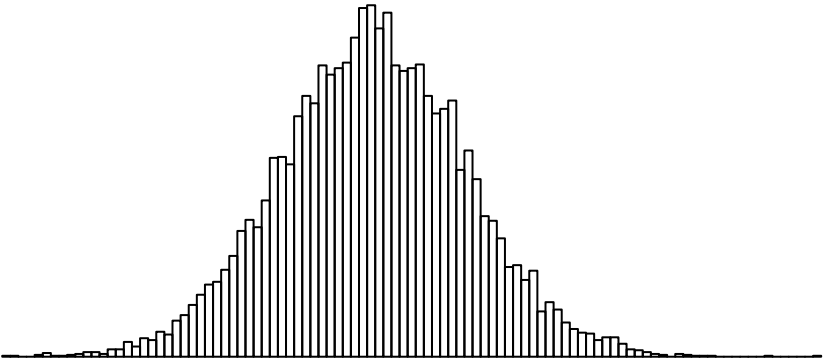

A194:120

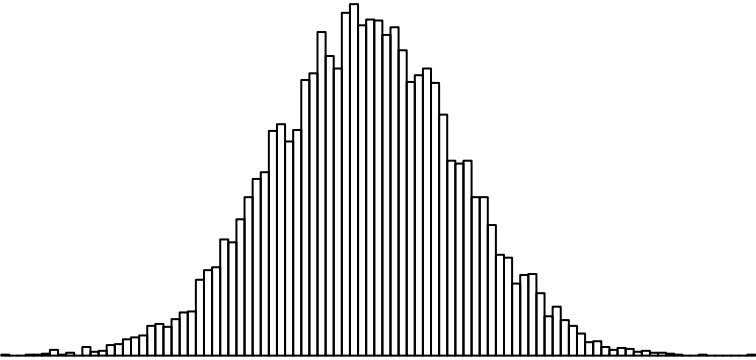

A194:45

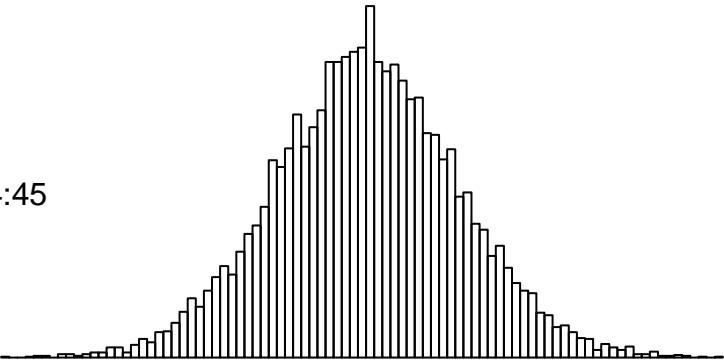

-8.0      -7.5      -7.0      -6.5      -6.0      -5.5      -5.0

Unidentified Metabolite 35

A194:240 – A194:120

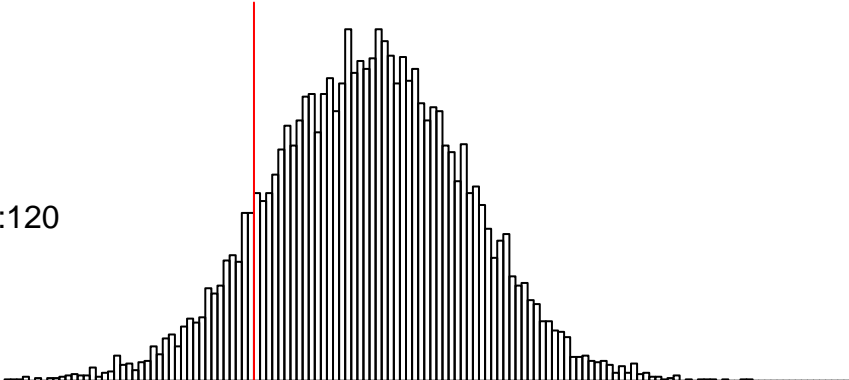

A194:240 – A194:45

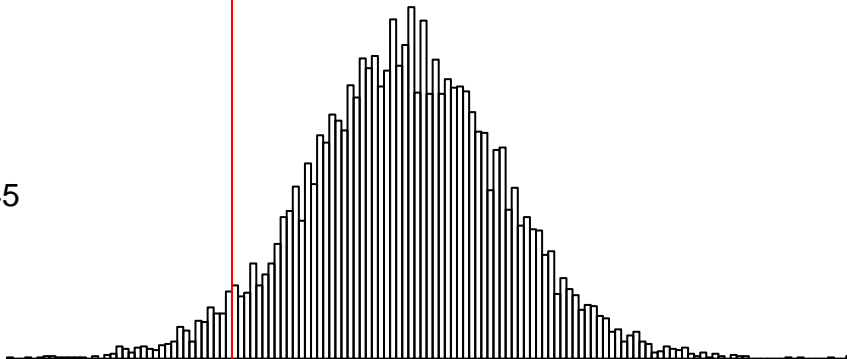

A194:120 – A194:45

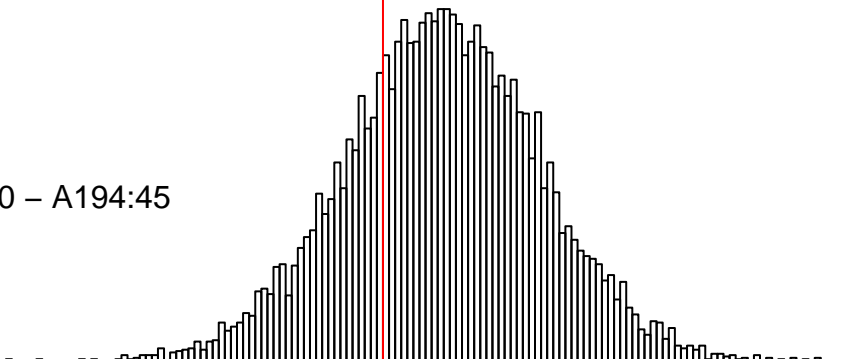

-1

0

1

2

delta(Unidentified Metabolite 35)

A194:240

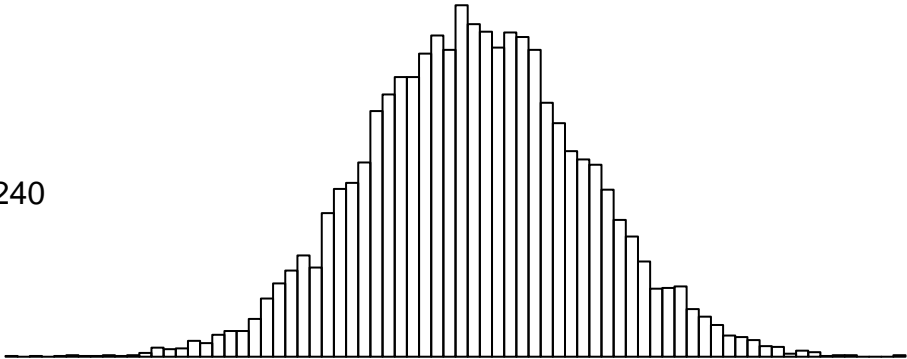

A194:120

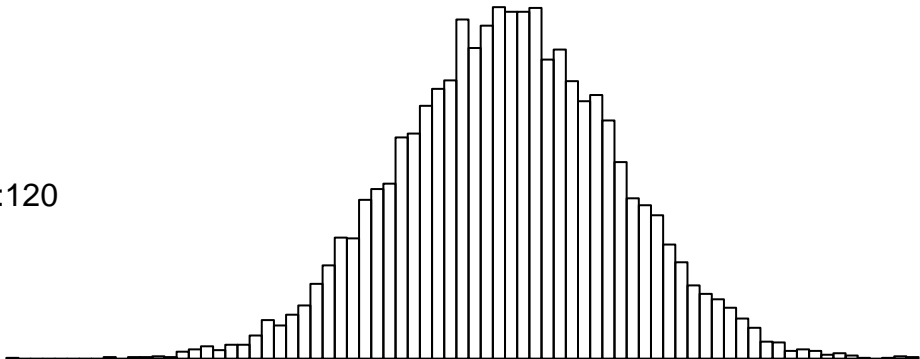

A194:45

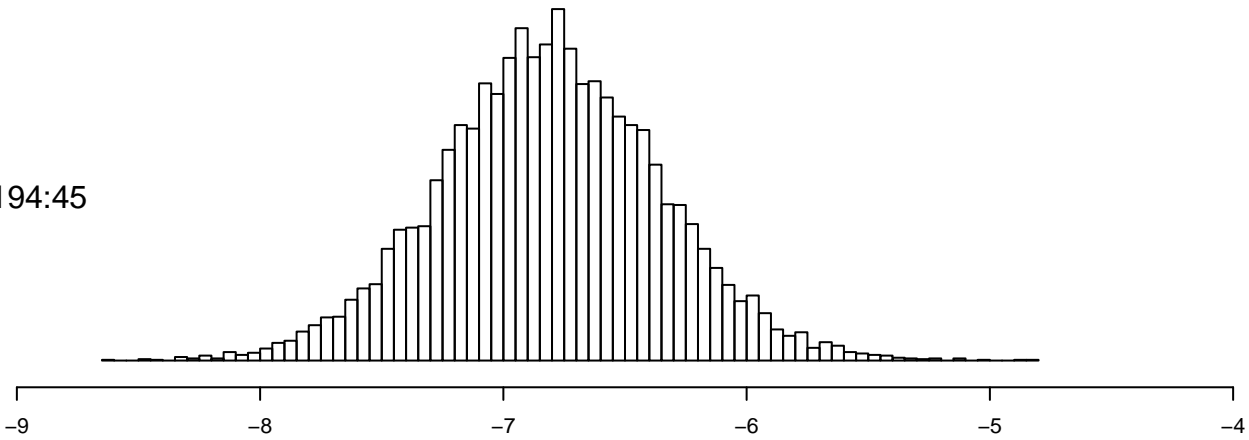

Unidentified Metabolite 36

A194:240 – A194:120

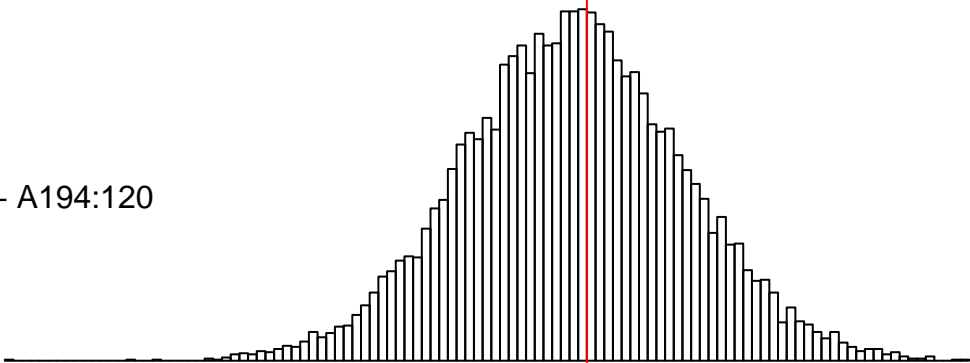

A194:240 – A194:45

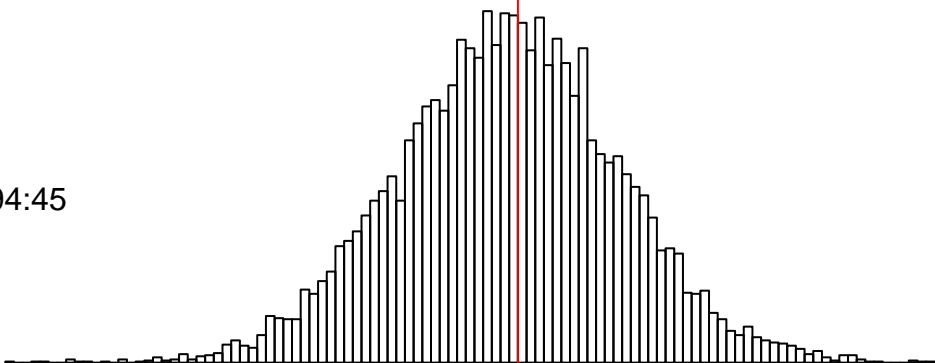

A194:120 – A194:45

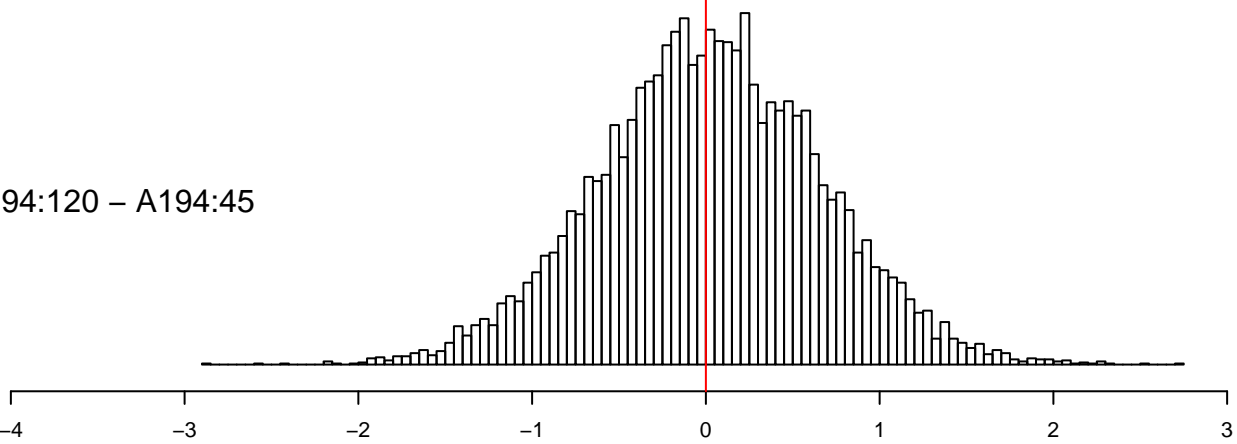

delta(Unidentified Metabolite 36)

A194:240

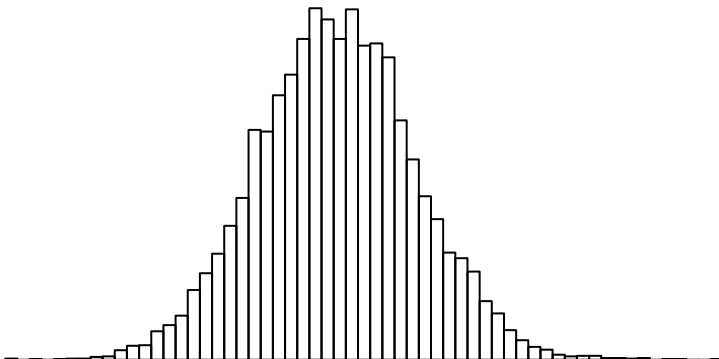

A194:120

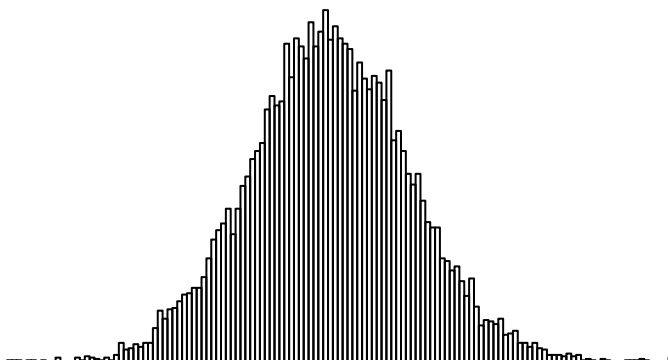

A194:45

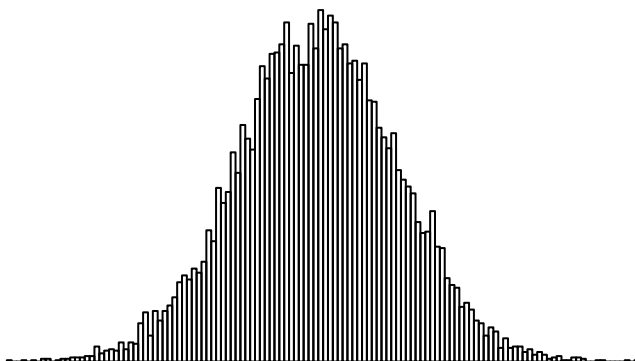

-10 -9 -8 -7 -6 -5

Unidentified Metabolite 38

A194:240 – A194:120

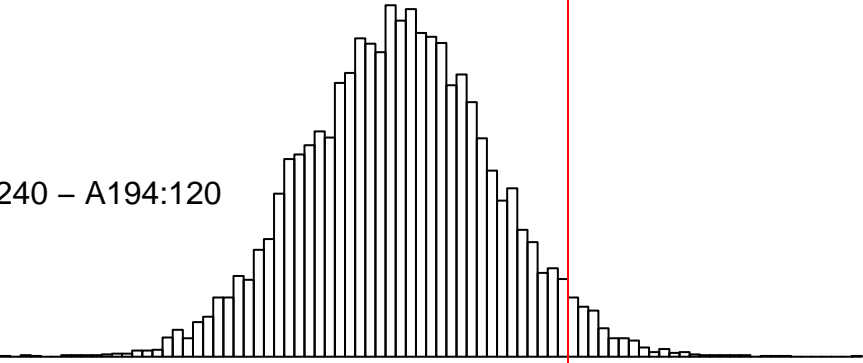

A194:240 – A194:45

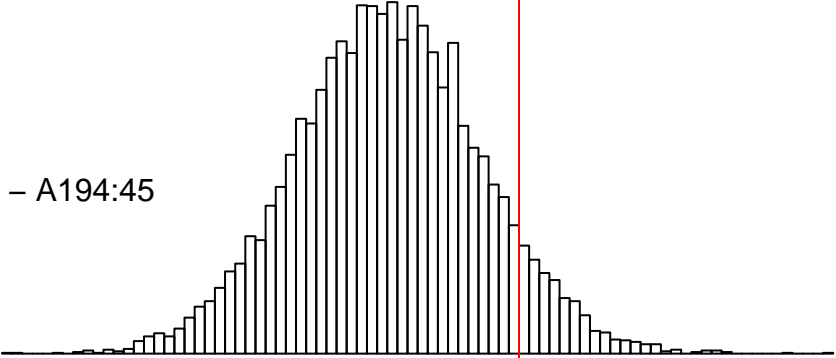

A194:120 – A194:45

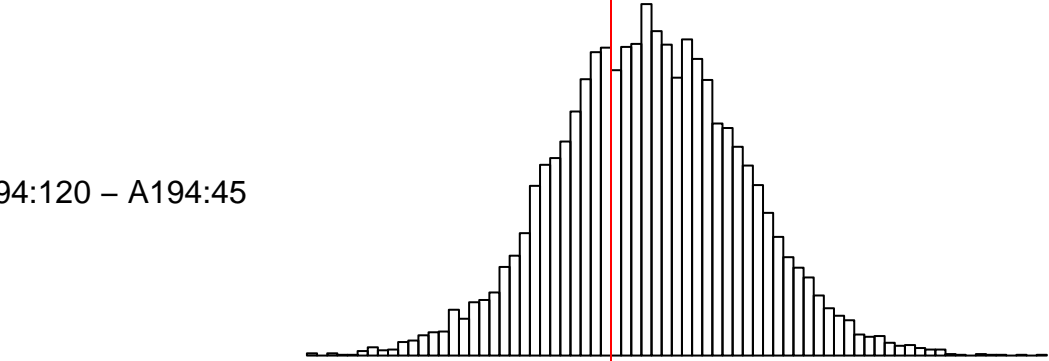

-3 -2 -1 0 1 2 3

delta(Unidentified Metabolite 38)

A194:240

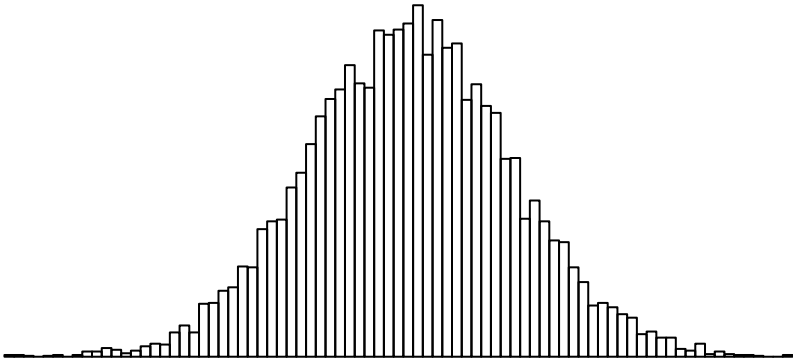

A194:120

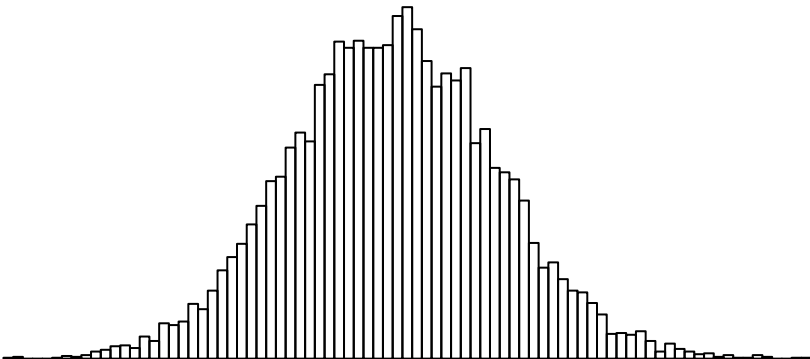

A194:45

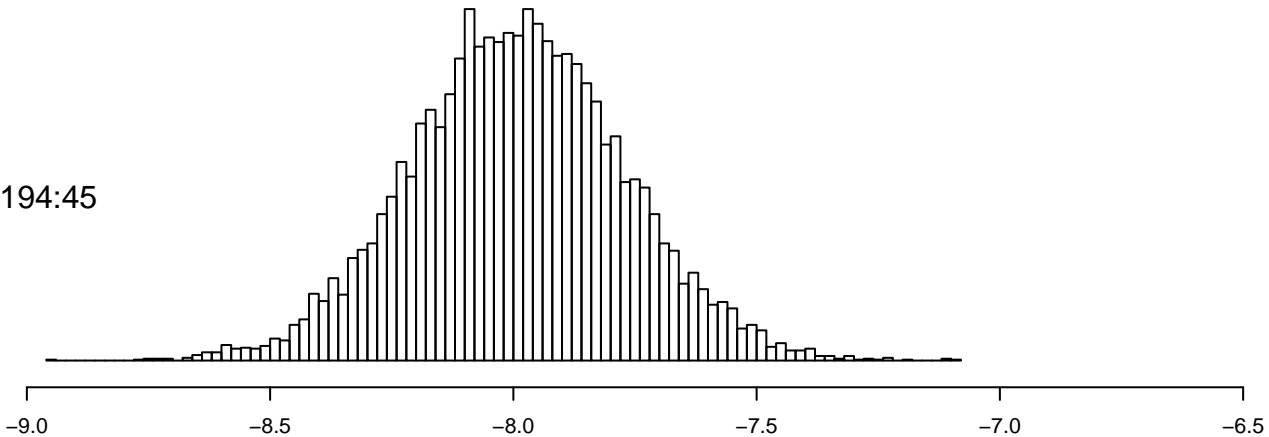

Unidentified Metabolite 39

A194:240 – A194:120

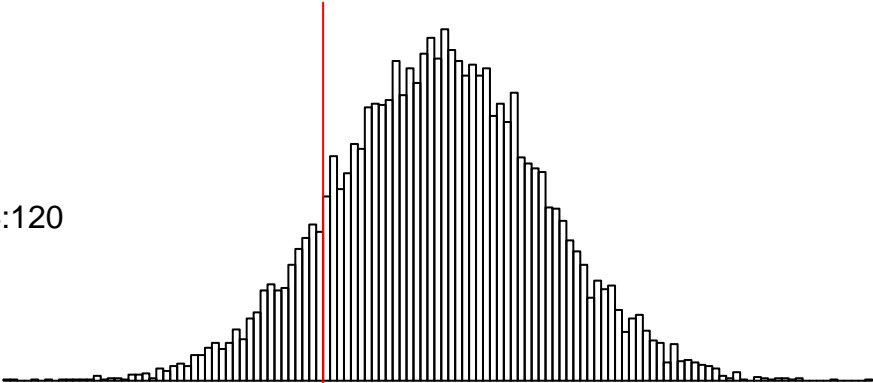

A194:240 – A194:45

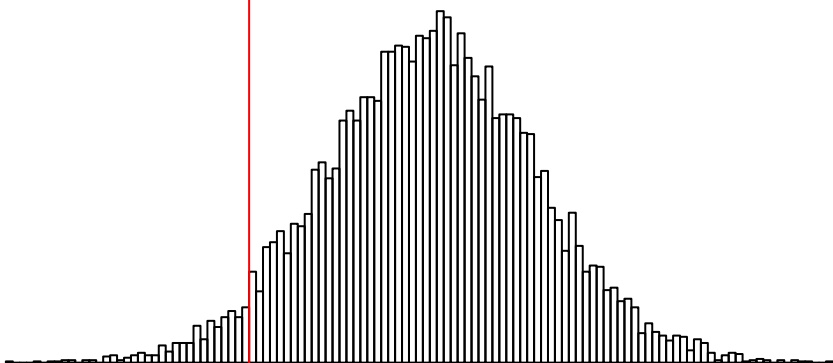

A194:120 – A194:45

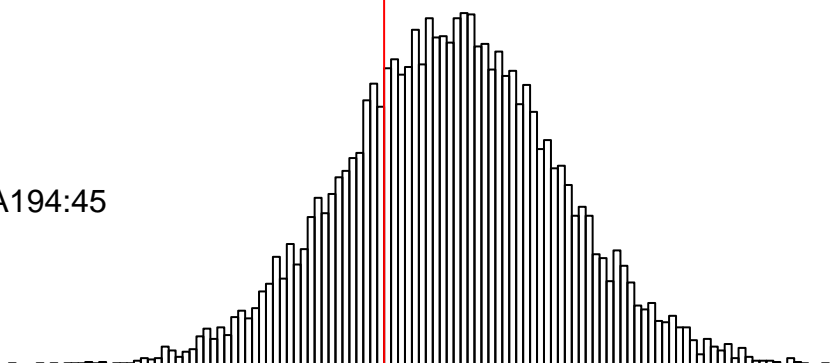

-1.5      -1.0      -0.5      0.0      0.5      1.0      1.5      2.0

delta(Unidentified Metabolite 39)



A194:240

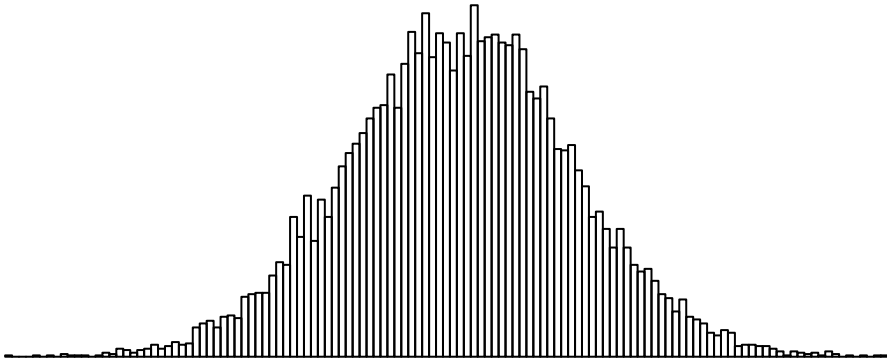

A194:120

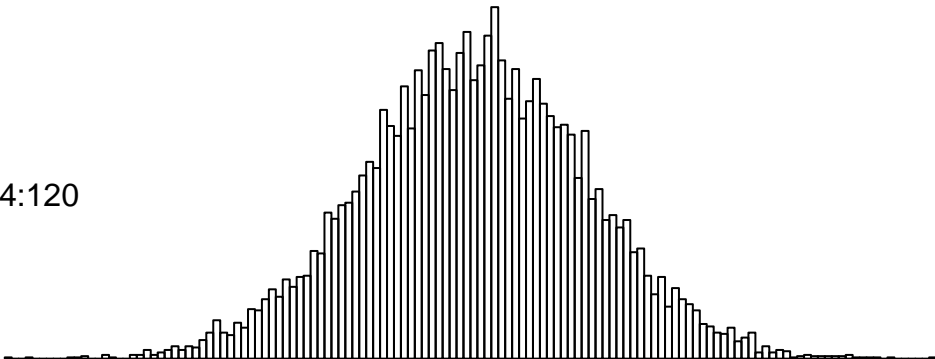

A194:45

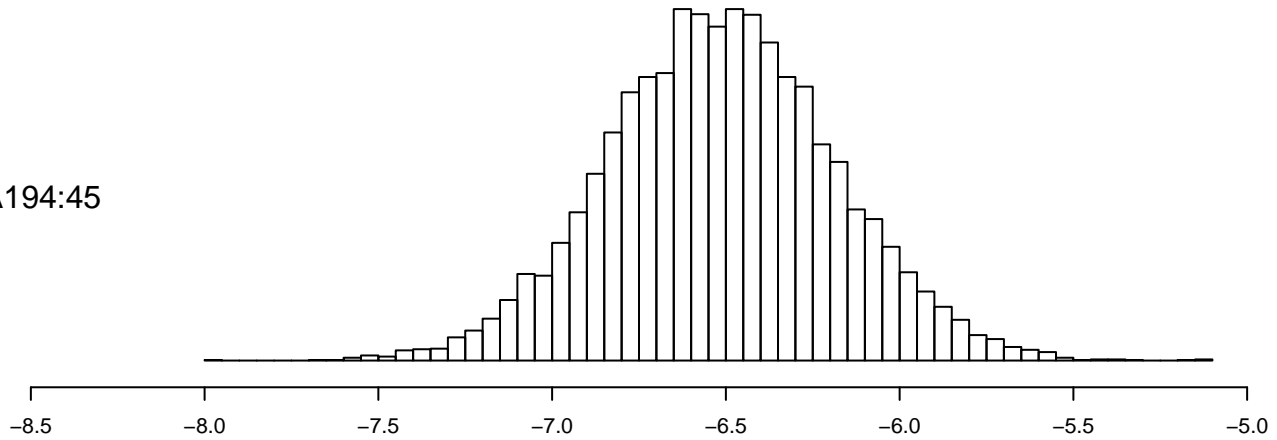

Unidentified Metabolite 42

A194:240 – A194:120

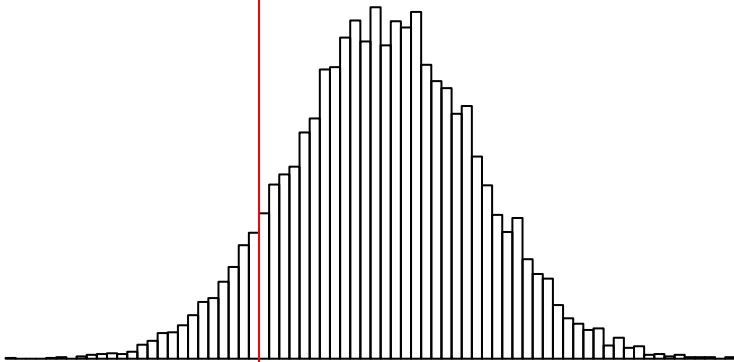

A194:240 – A194:45

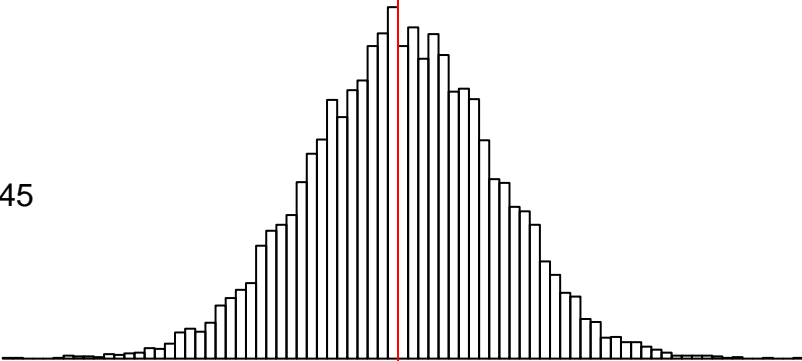

A194:120 – A194:45

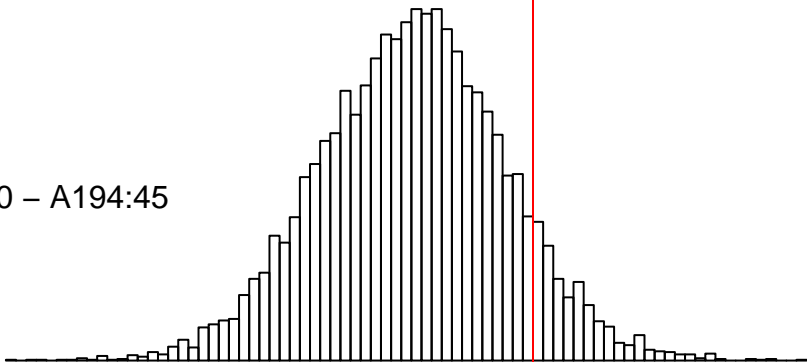

-3 -2 -1 0 1 2 3

delta(Unidentified Metabolite 42)

A194:240

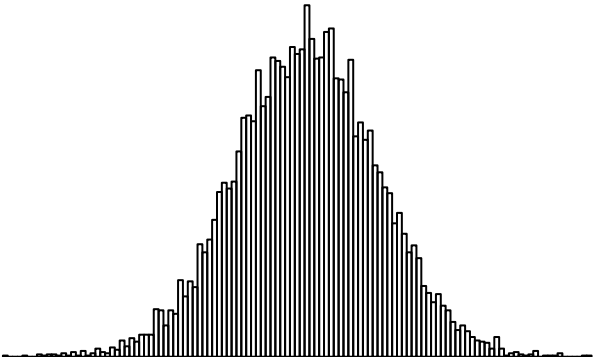

A194:120

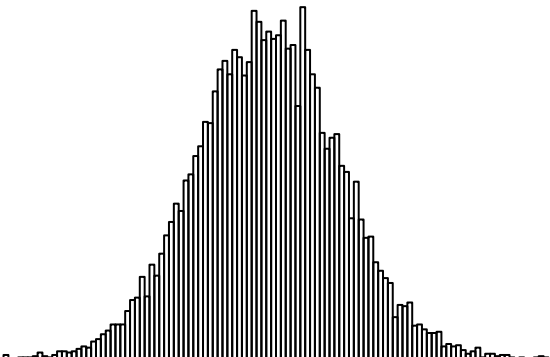

A194:45

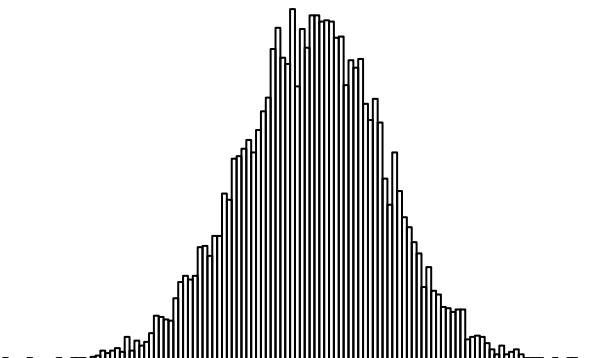

-9.0 -8.5 -8.0 -7.5 -7.0 -6.5

Unidentified Metabolite 43

A194:240 – A194:120

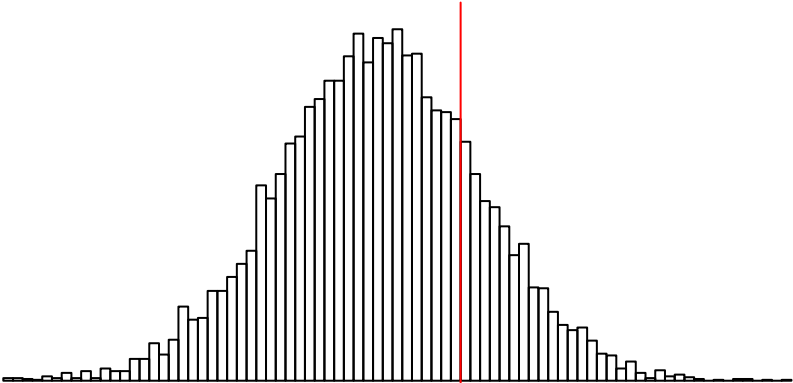

A194:240 – A194:45

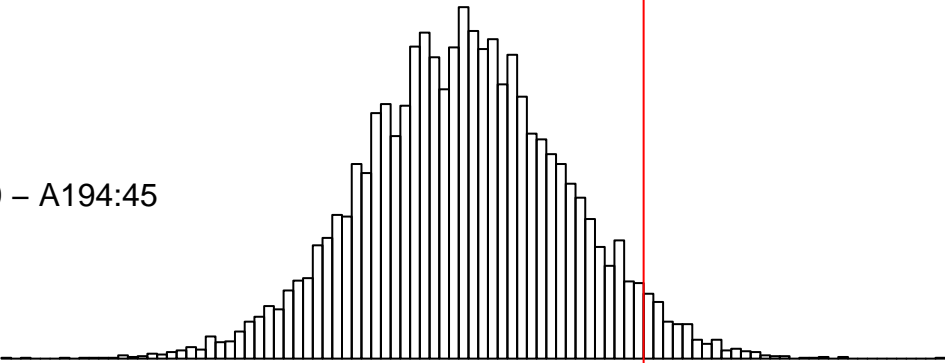

A194:120 – A194:45

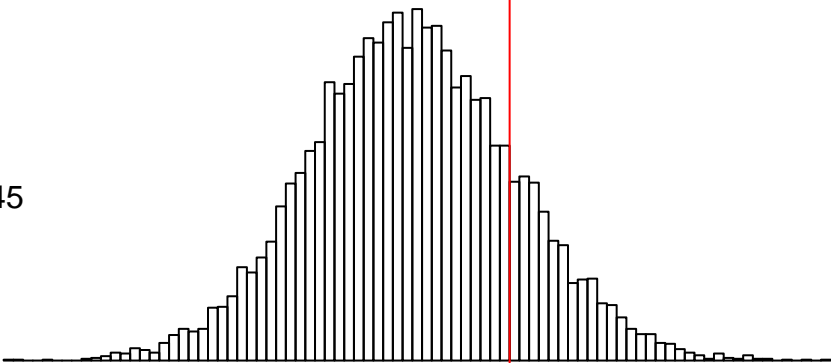

-1.5      -1.0      -0.5      0.0      0.5      1.0

delta(Unidentified Metabolite 43)

A194:240

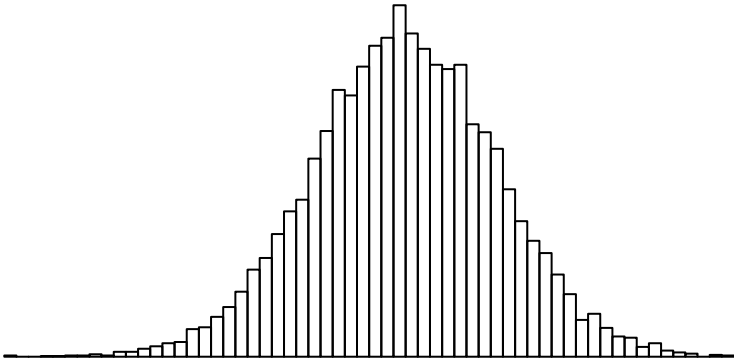

A194:120

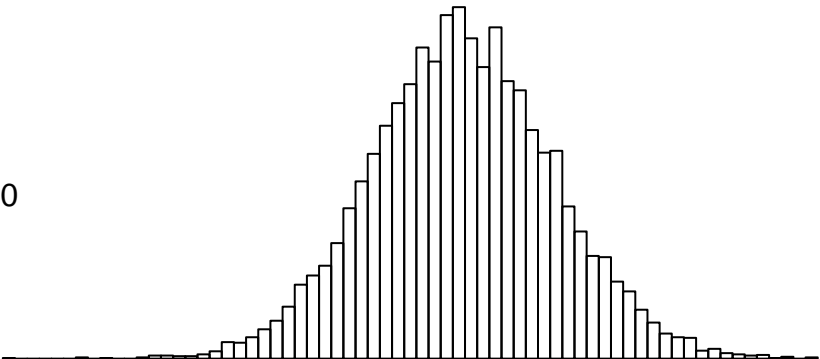

A194:45

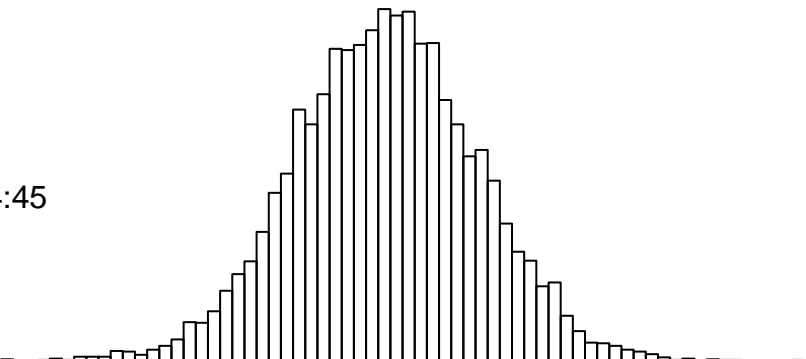

-10      -9      -8      -7      -6      -5

Unidentified Metabolite 45

A194:240 – A194:120

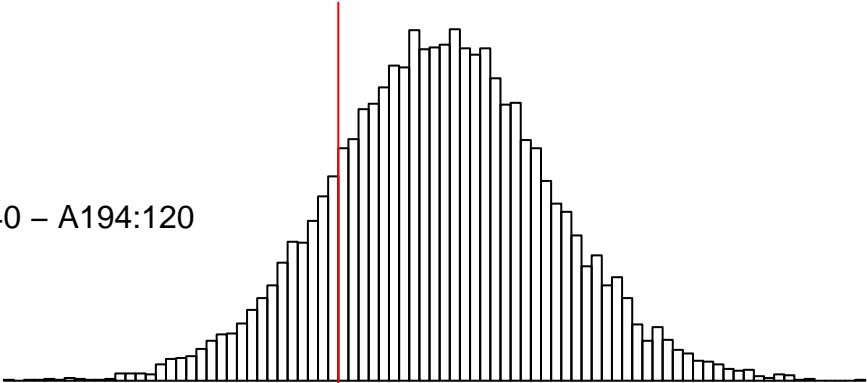

A194:240 – A194:45

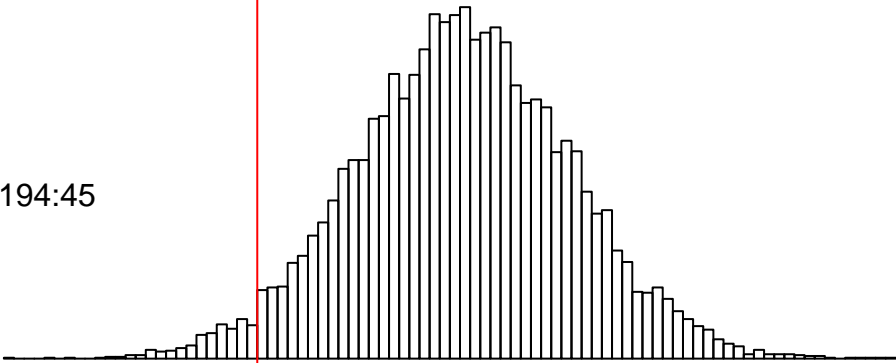

A194:120 – A194:45

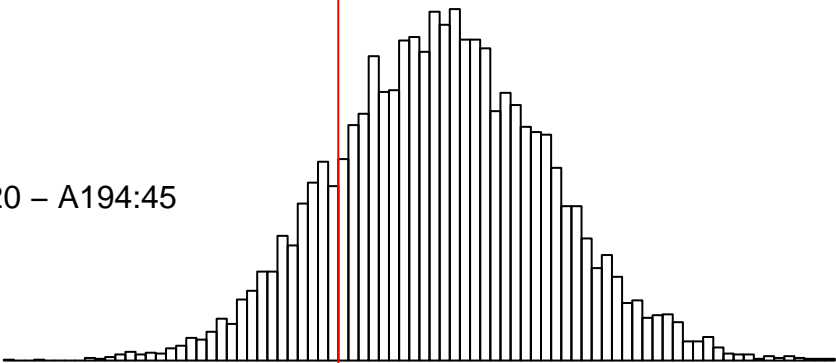

-2 -1 0 1 2 3 4

delta(Unidentified Metabolite 45)

A194:240

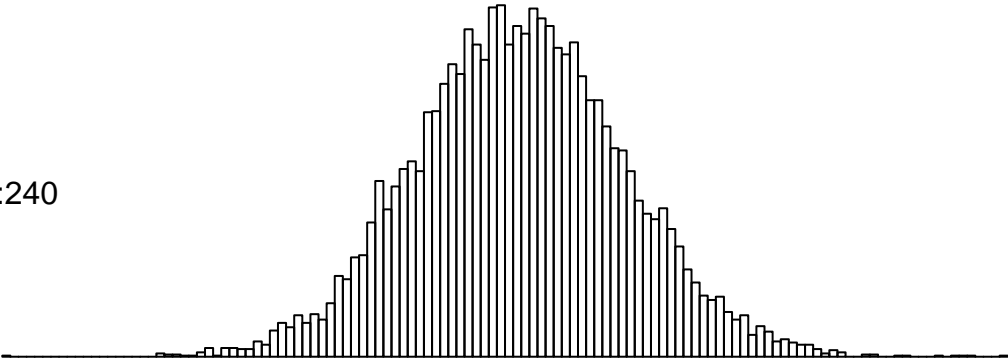

A194:120

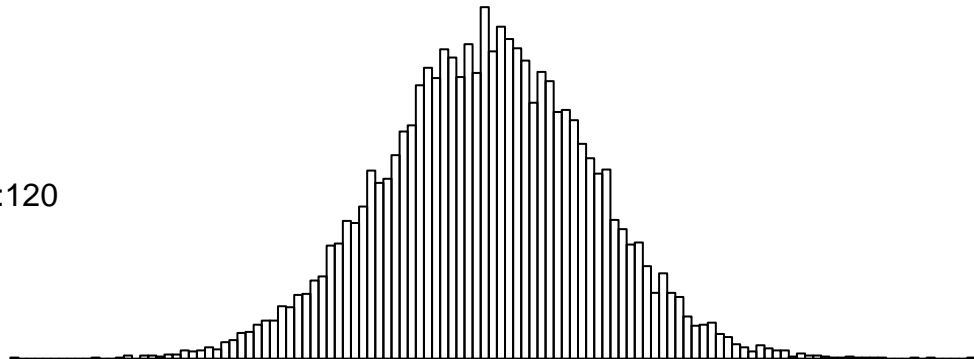

A194:45

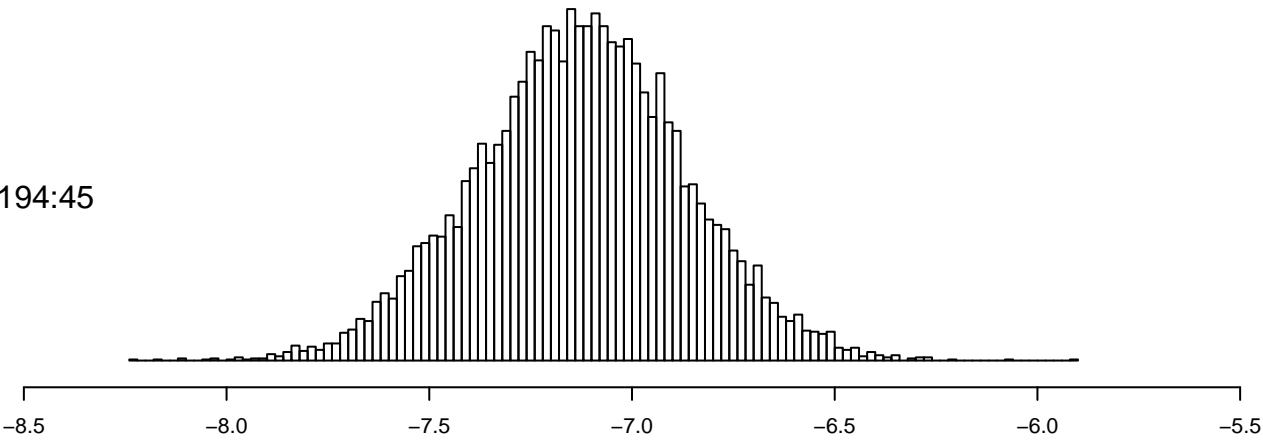

Unidentified Metabolite 47

A194:240 – A194:120

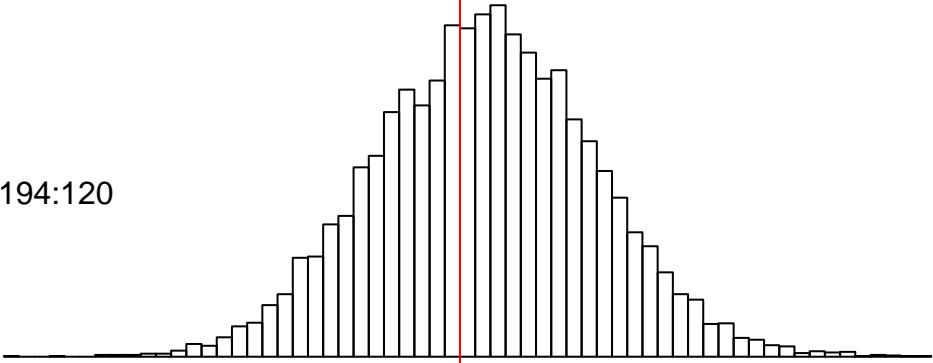

A194:240 – A194:45

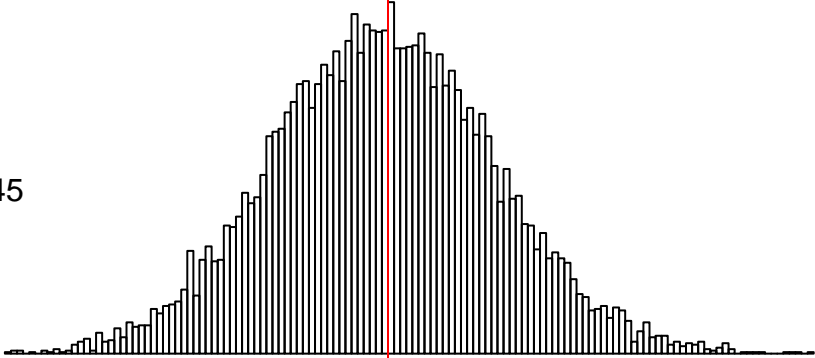

A194:120 – A194:45

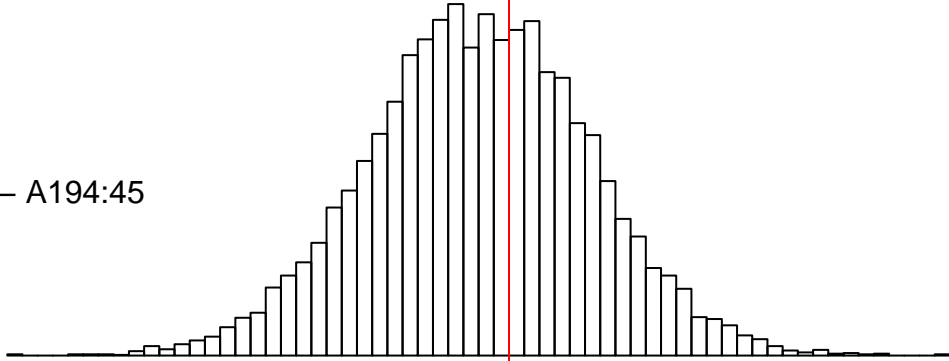

-2

-1

0

1

2

delta(Unidentified Metabolite 47)



A194:240

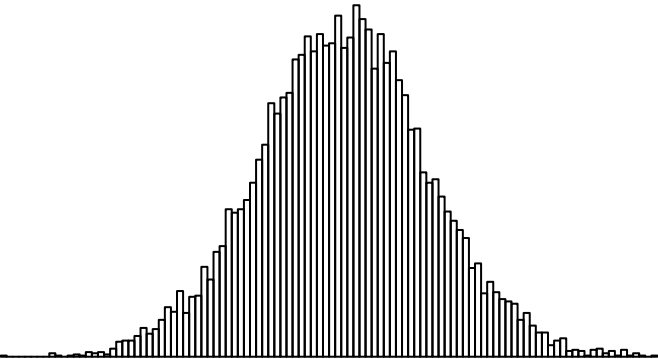

A194:120

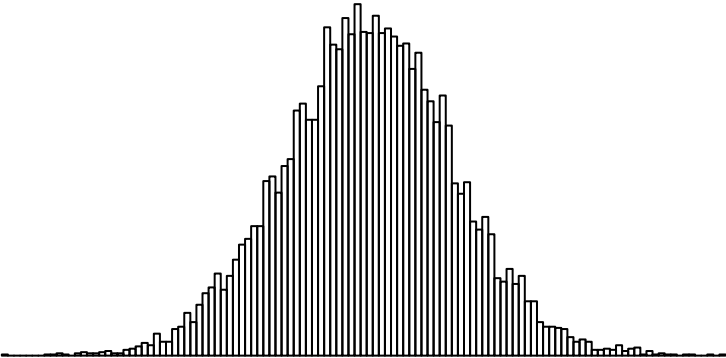

A194:45

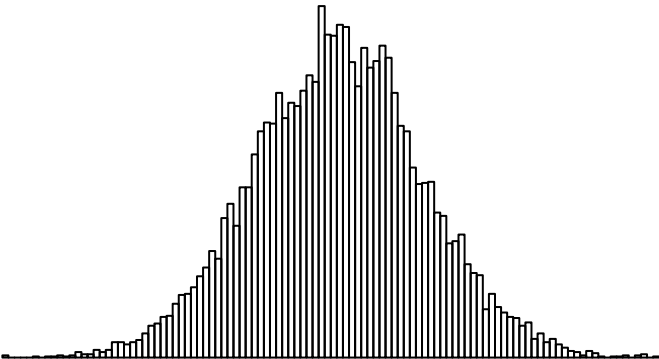

-9.0                      -8.5                      -8.0                      -7.5                      -7.0

Unidentified Metabolite 48

A194:240 – A194:120

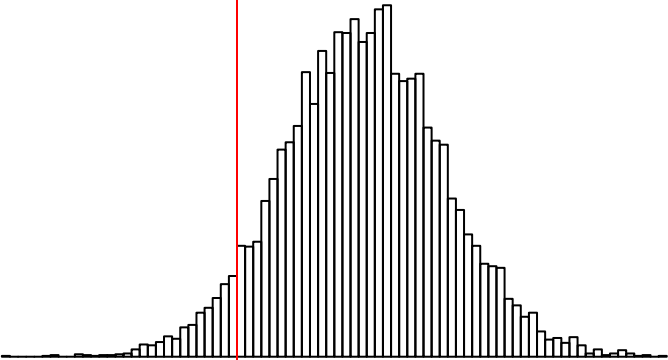

A194:240 – A194:45

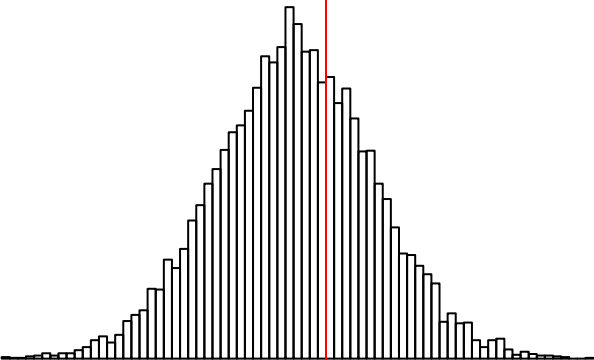

A194:120 – A194:45

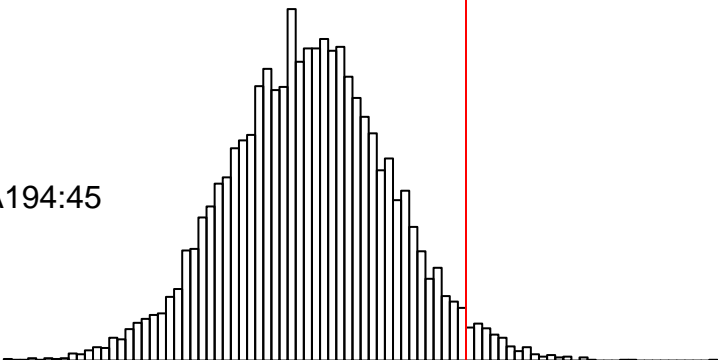

-1.5      -1.0      -0.5      0.0      0.5      1.0      1.5

delta(Unidentified Metabolite 48)

A194:240

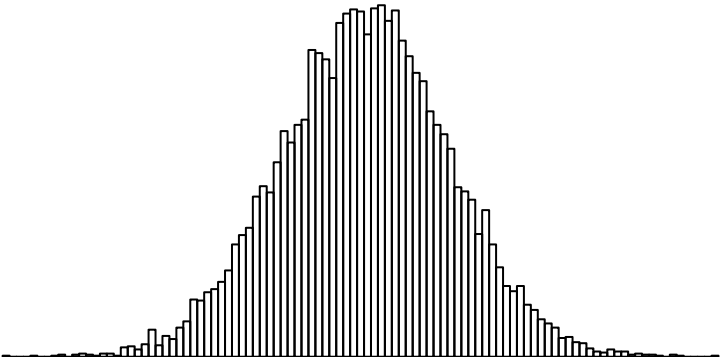

A194:120

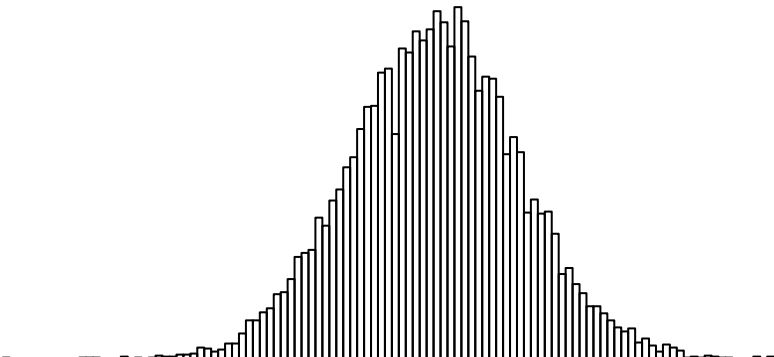

A194:45

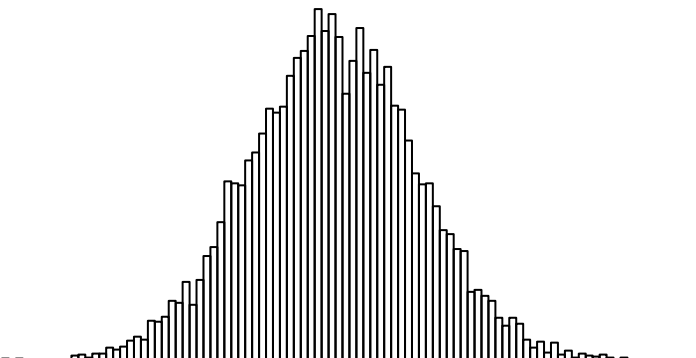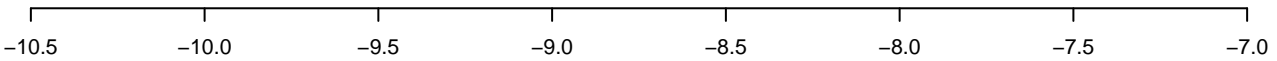

Unidentified Metabolite 49

A194:240 – A194:120

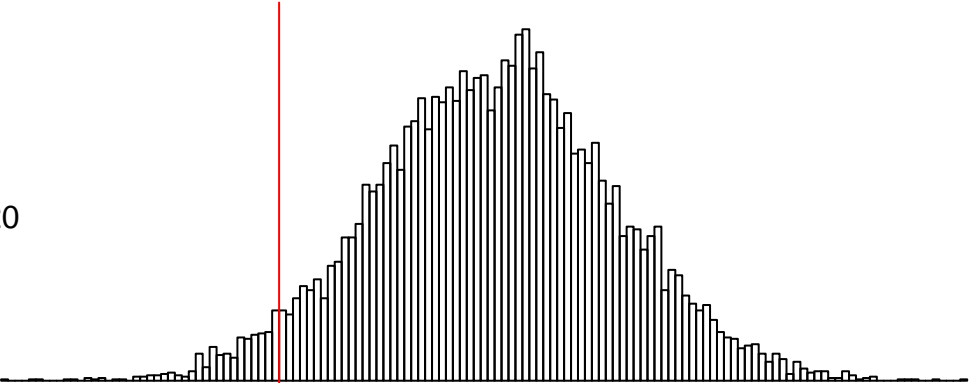

A194:240 – A194:45

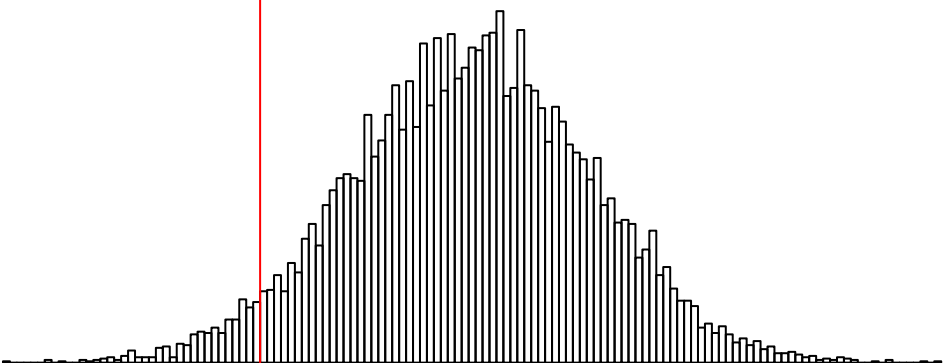

A194:120 – A194:45

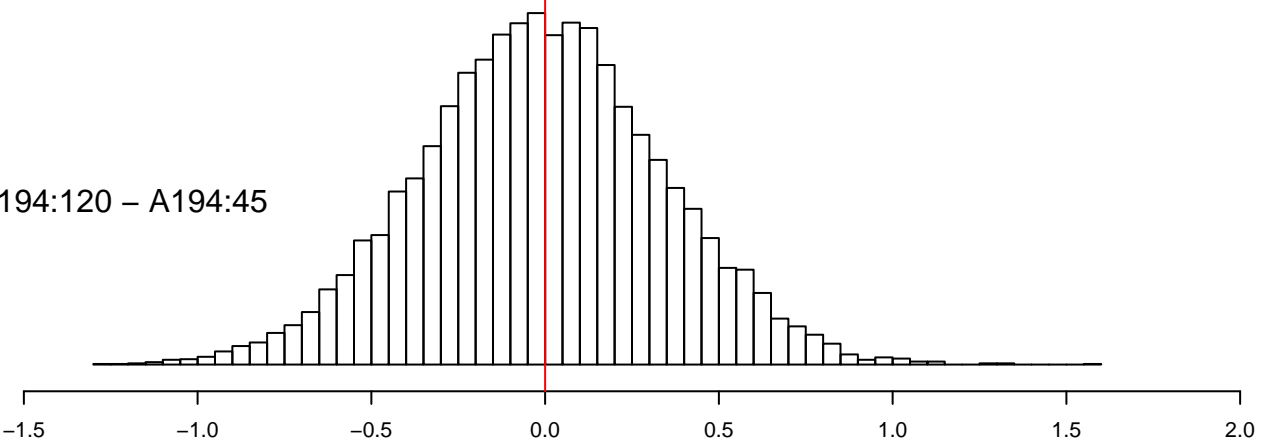

delta(Unidentified Metabolite 49)

A194:240

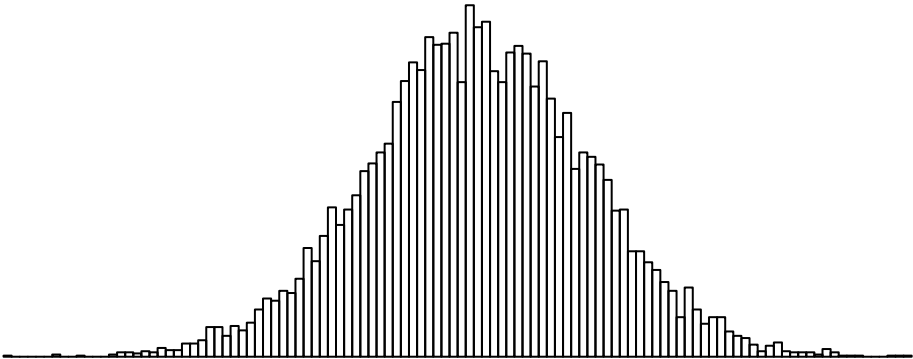

A194:120

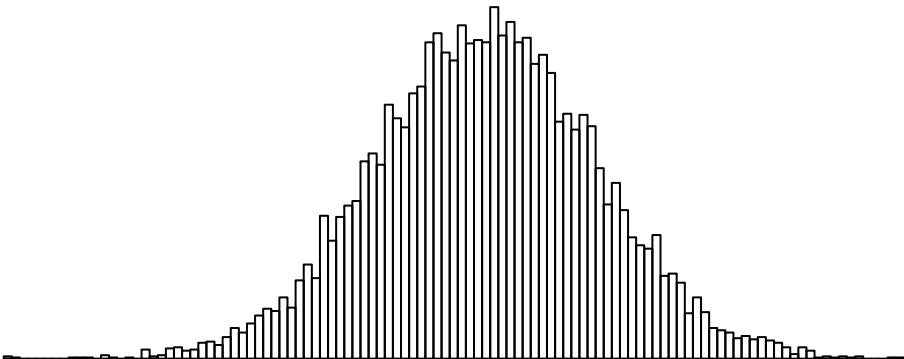

A194:45

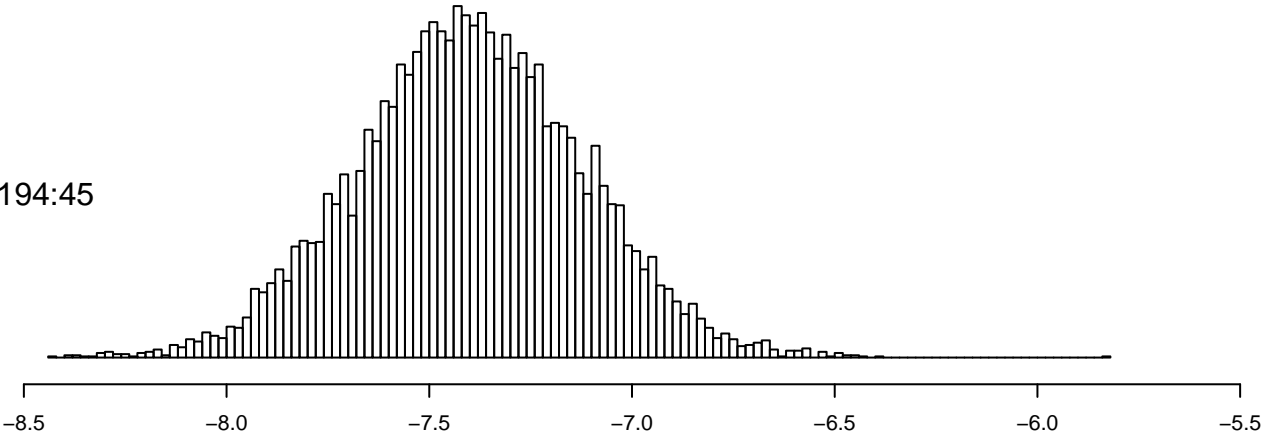

Unidentified Metabolite 50

A194:240 – A194:120

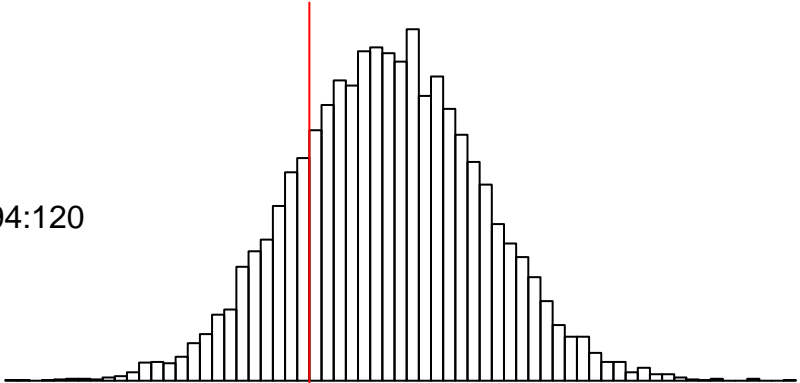

A194:240 – A194:45

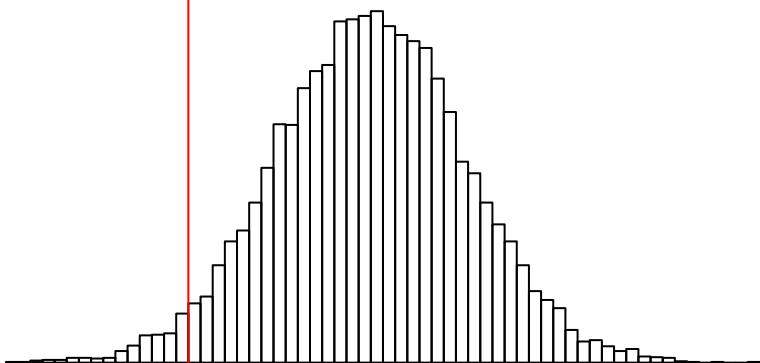

A194:120 – A194:45

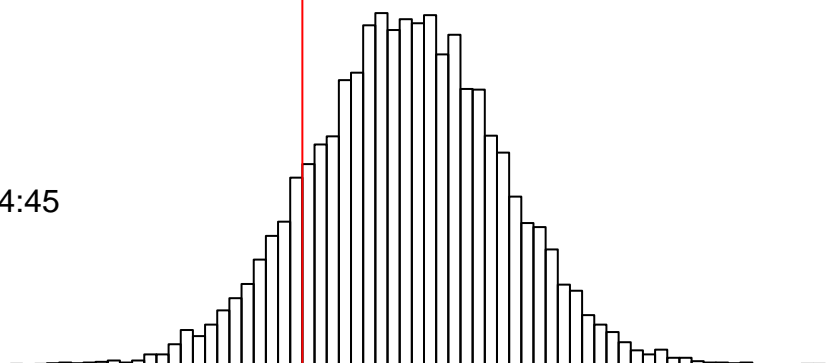

-2 -1 0 1 2 3

delta(Unidentified Metabolite 50)

A194:240

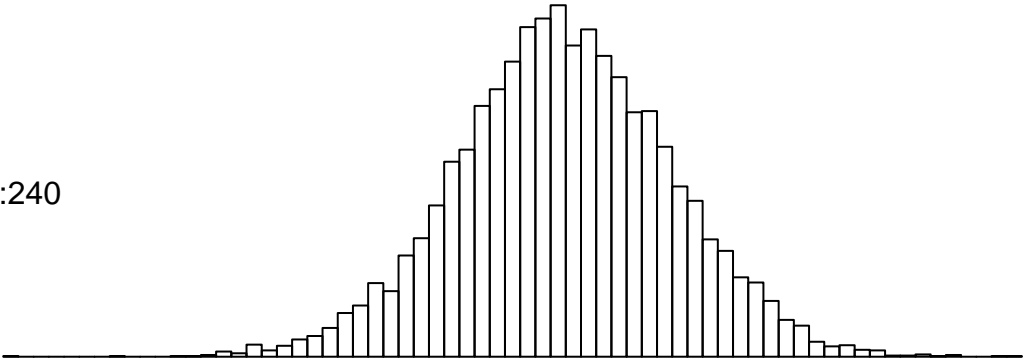

A194:120

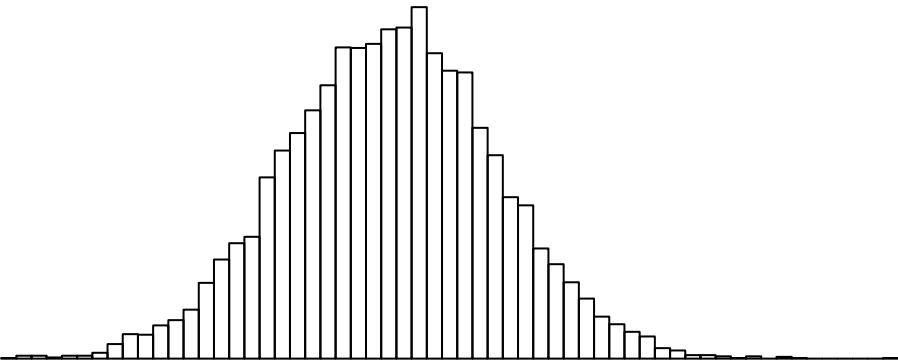

A194:45

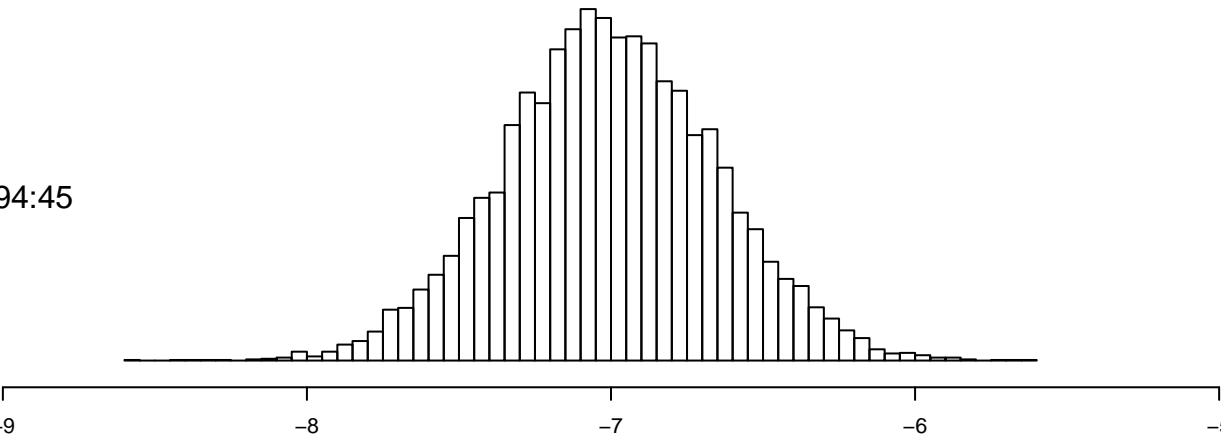

Unidentified Metabolite 51

A194:240 – A194:120

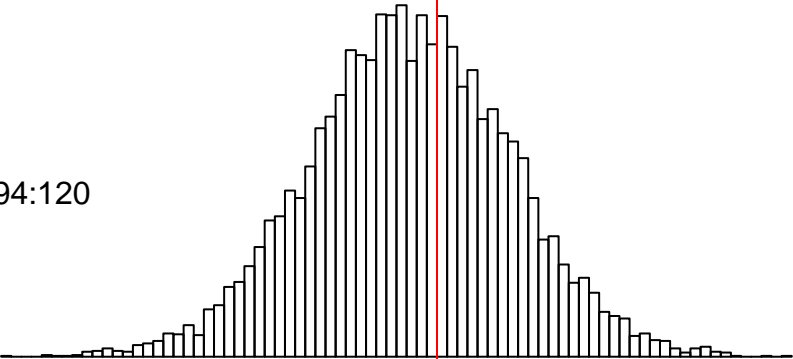

A194:240 – A194:45

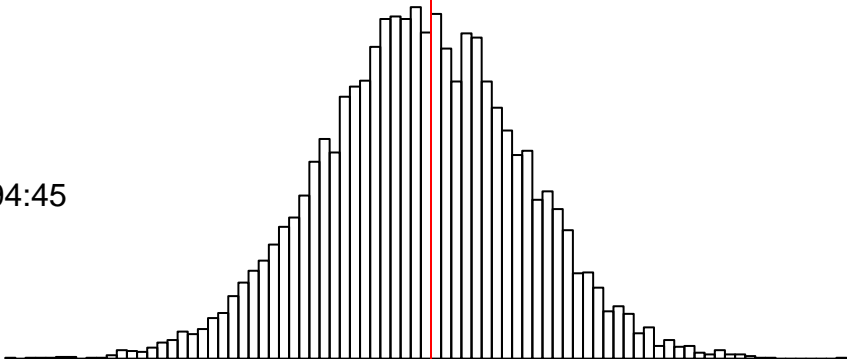

A194:120 – A194:45

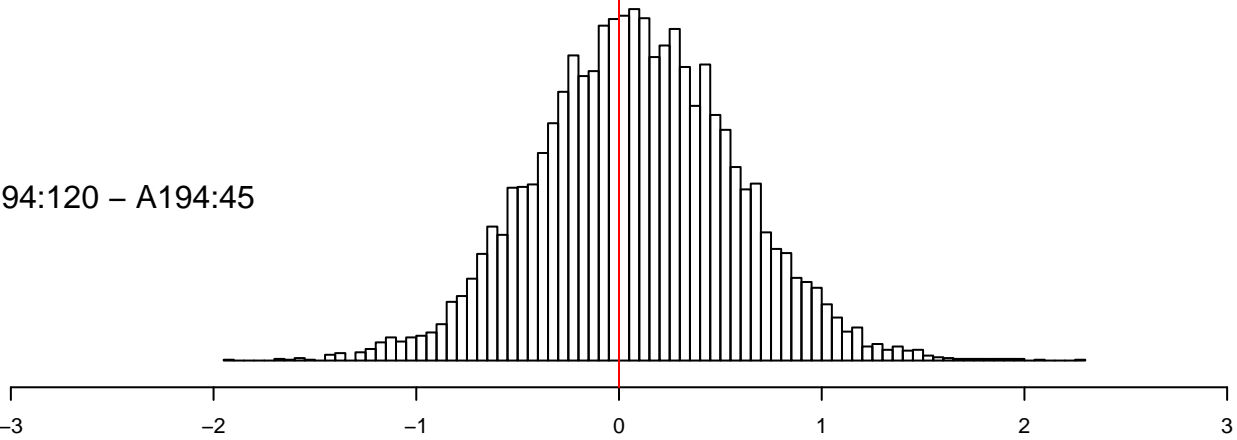

delta(Unidentified Metabolite 51)



A194:240

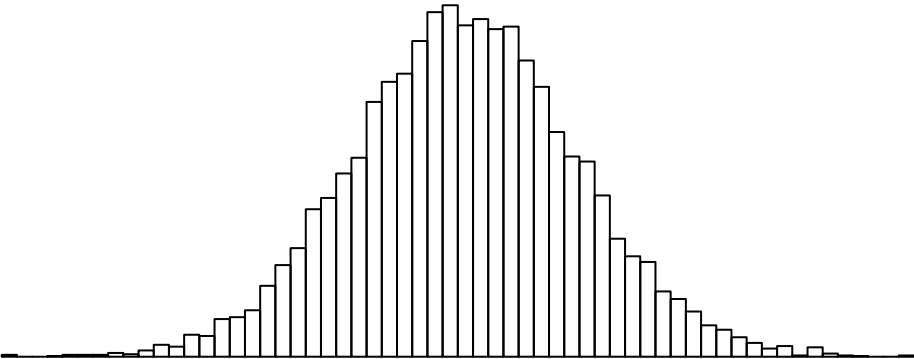

A194:120

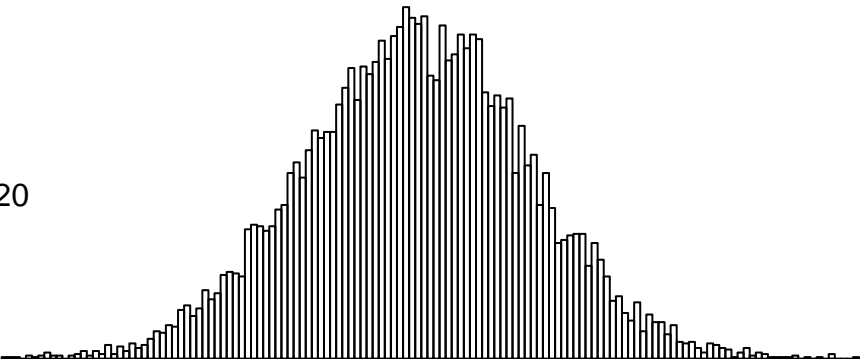

A194:45

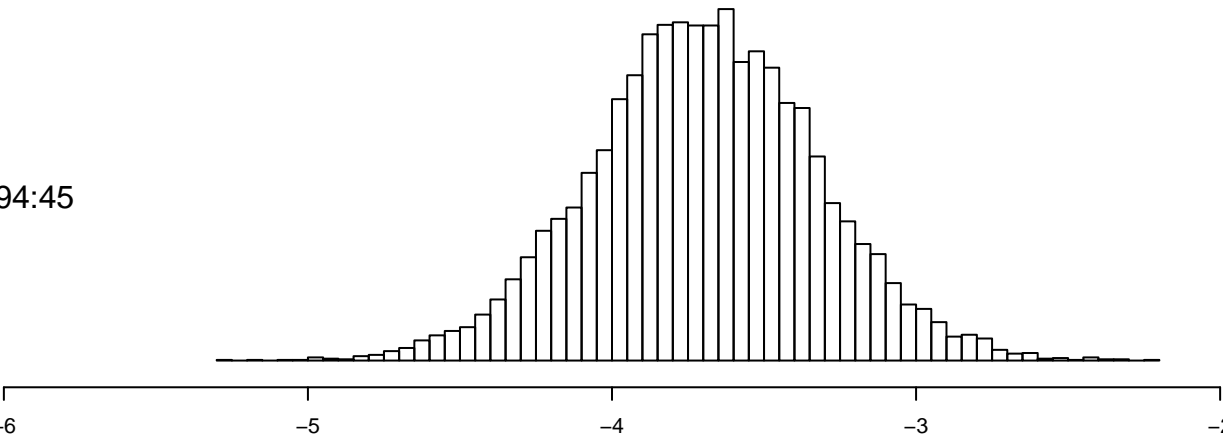

Unidentified Metabolite 55

A194:240 – A194:120

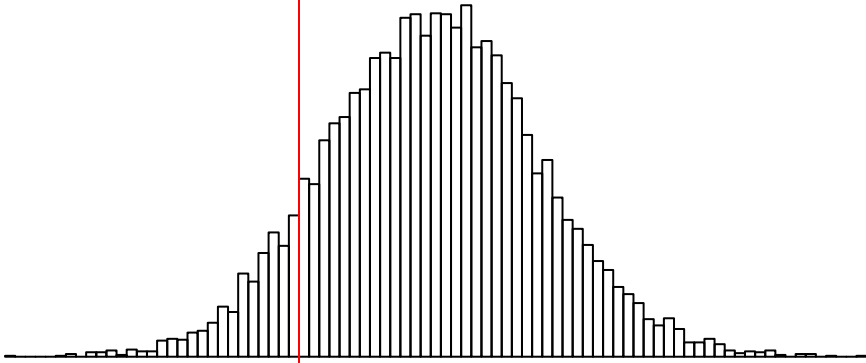

A194:240 – A194:45

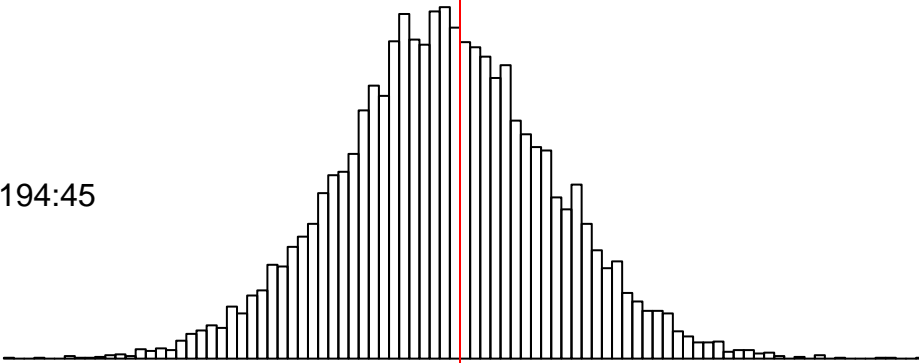

A194:120 – A194:45

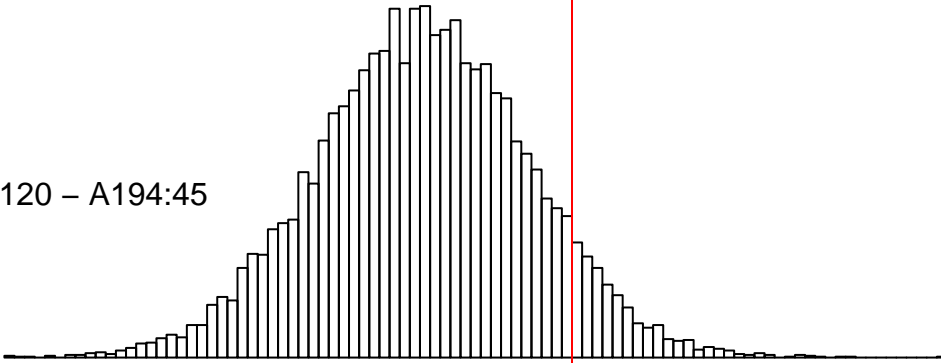

-3 -2 -1 0 1 2 3

delta(Unidentified Metabolite 55)

A194:240

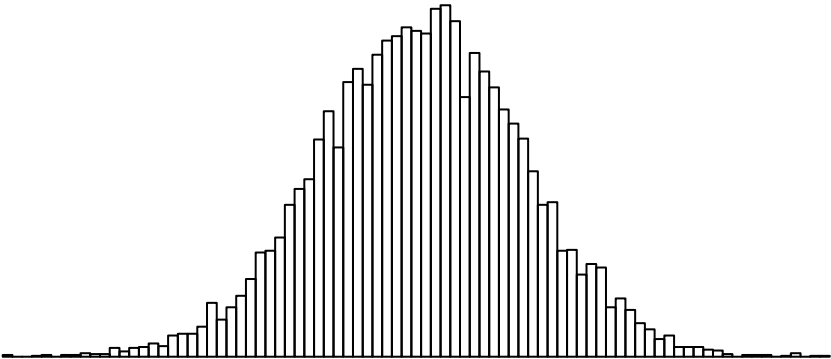

A194:120

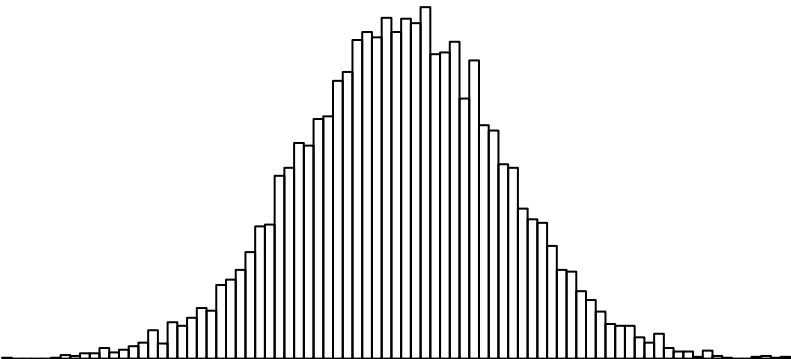

A194:45

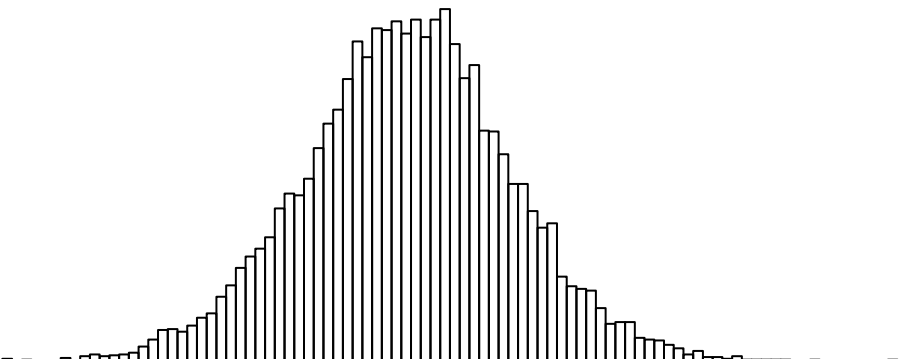

-9.5      -9.0      -8.5      -8.0      -7.5      -7.0

Unidentified Metabolite 56

A194:240 – A194:120

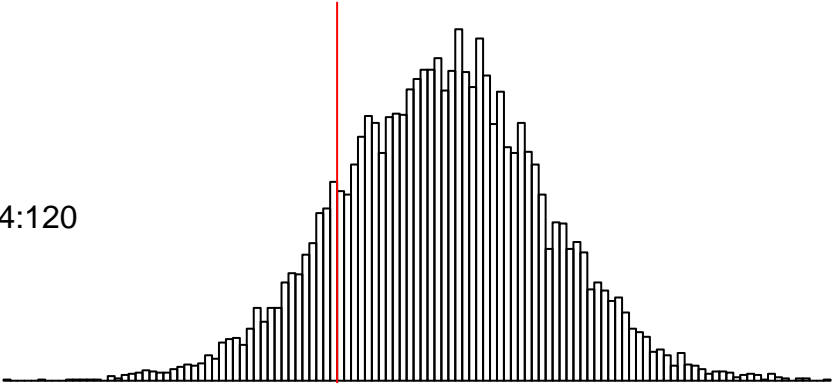

A194:240 – A194:45

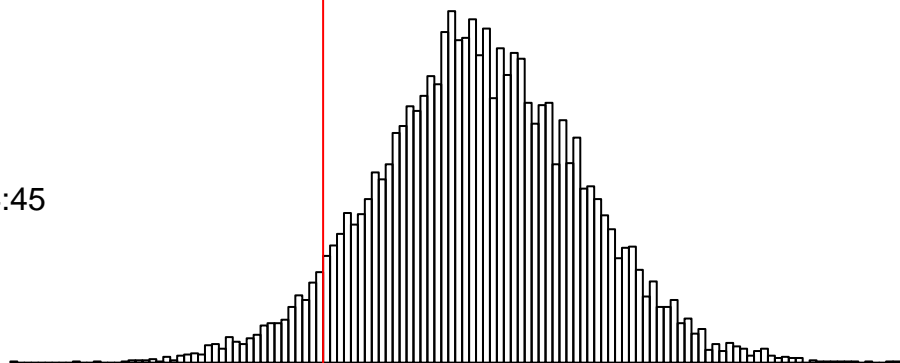

A194:120 – A194:45

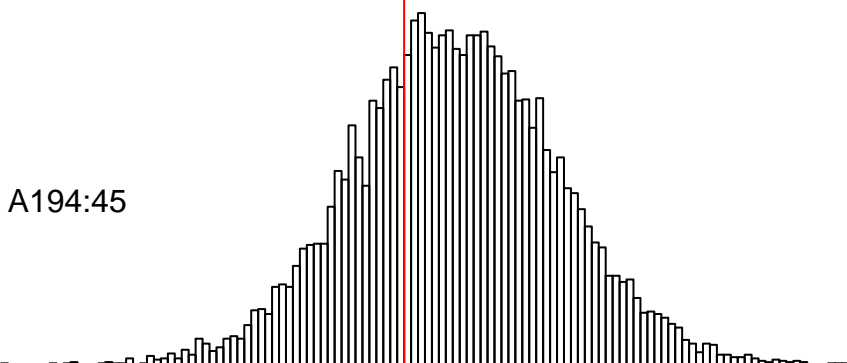

-1.5      -1.0      -0.5      0.0      0.5      1.0      1.5      2.0

delta(Unidentified Metabolite 56)

A194:240

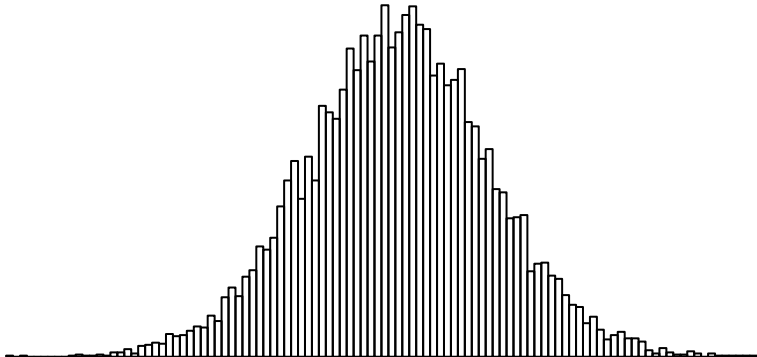

A194:120

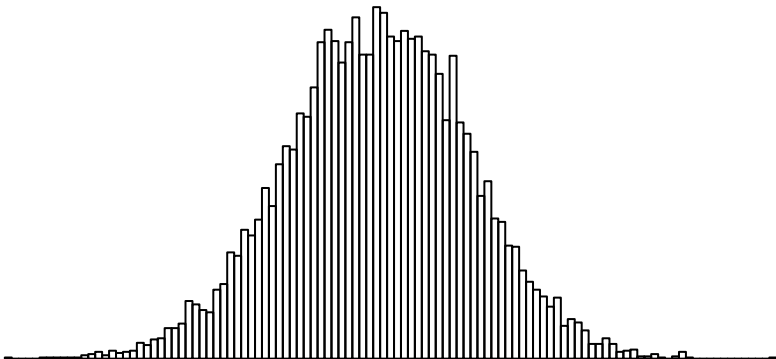

A194:45

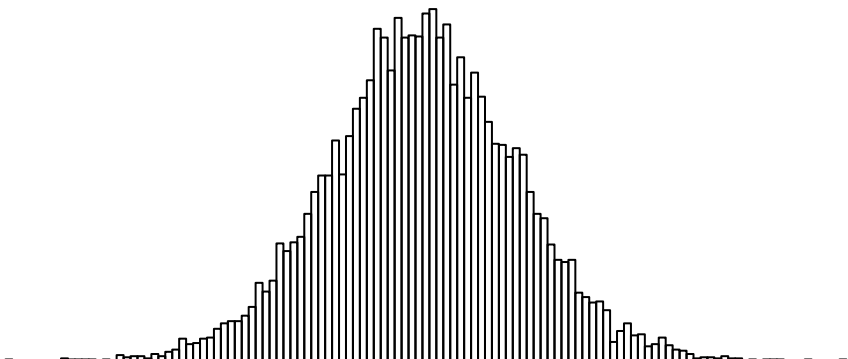

-9.0      -8.5      -8.0      -7.5      -7.0      -6.5      -6.0      -5.5

Unidentified Metabolite 58

A194:240 – A194:120

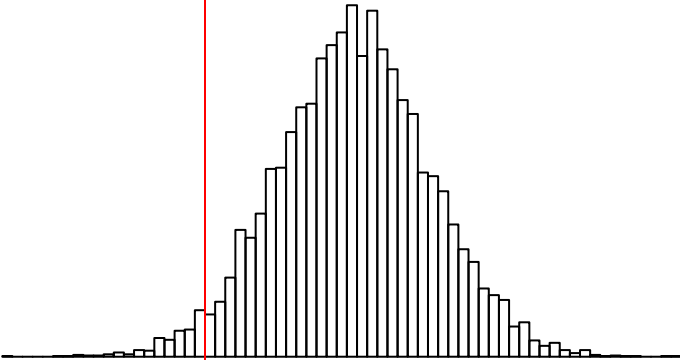

A194:240 – A194:45

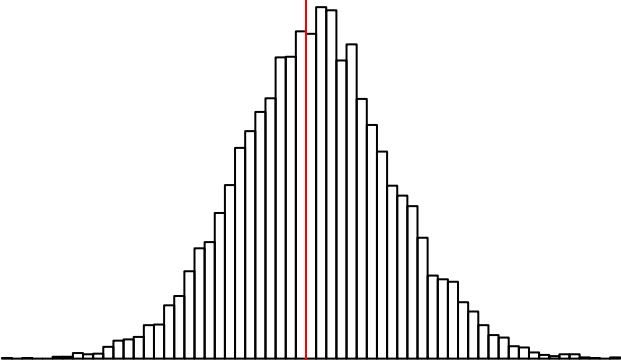

A194:120 – A194:45

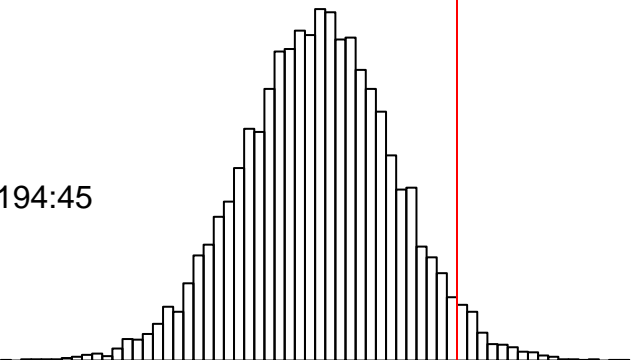

-3 -2 -1 0 1 2 3

delta(Unidentified Metabolite 58)

A194:240

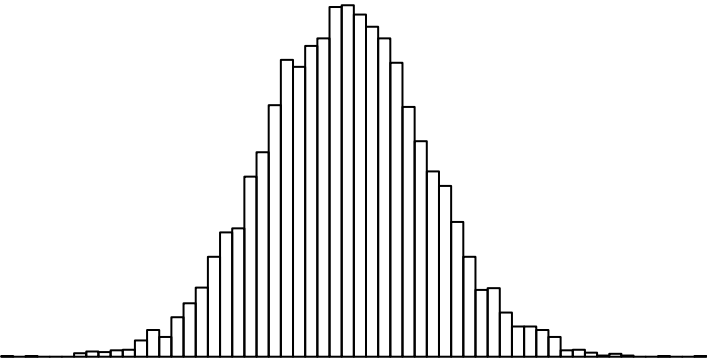

A194:120

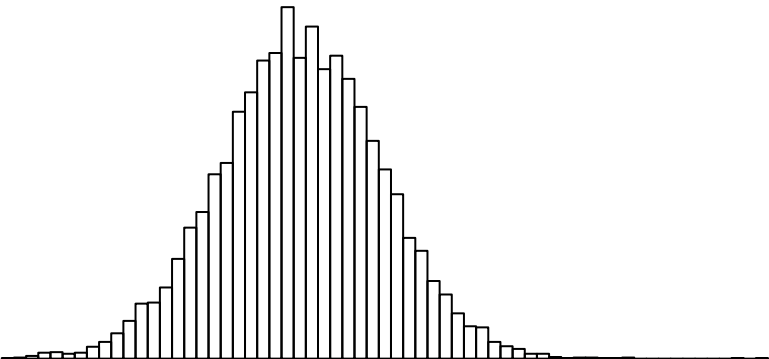

A194:45

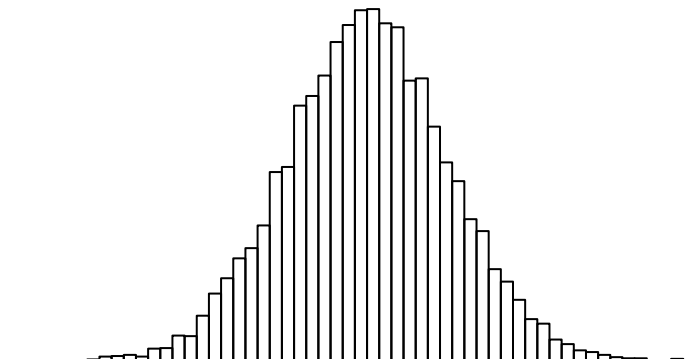

Unidentified Metabolite 59

A194:240 – A194:120

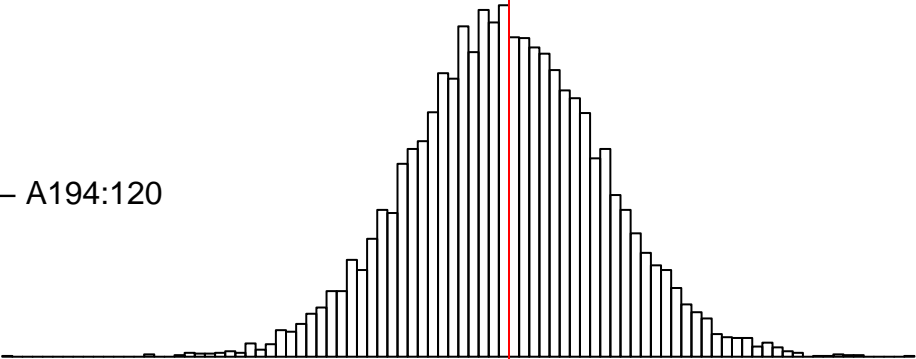

A194:240 – A194:45

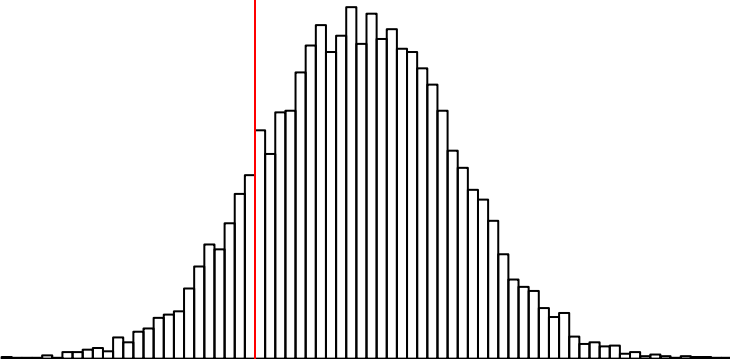

A194:120 – A194:45

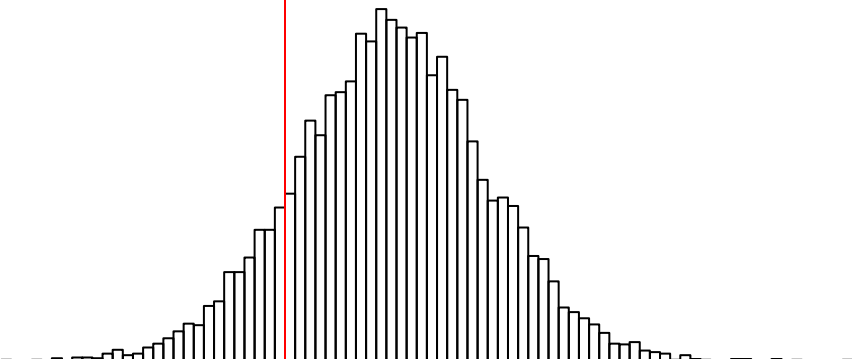

-3 -2 -1 0 1 2 3

delta(Unidentified Metabolite 59)



A194:240

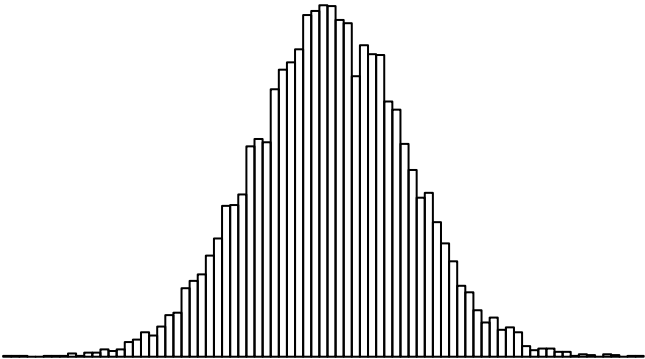

A194:120

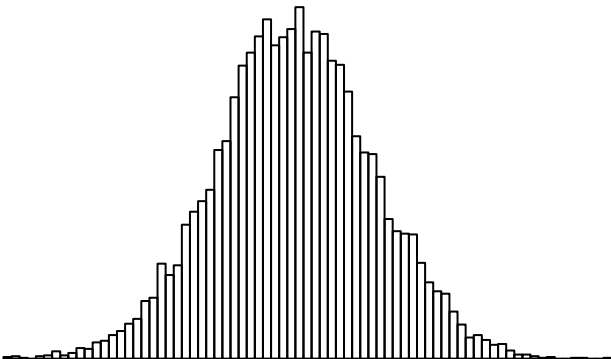

A194:45

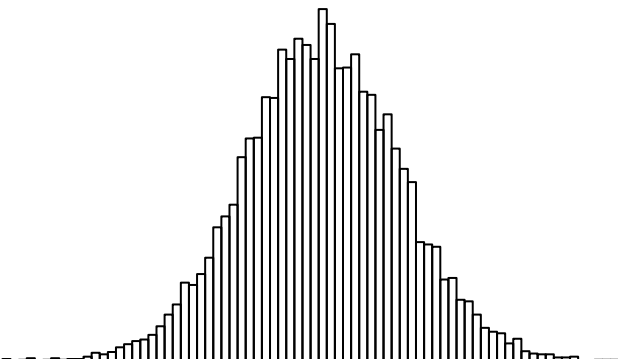

-9.5      -9.0      -8.5      -8.0      -7.5      -7.0      -6.5

Unidentified Metabolite 60

A194:240 – A194:120

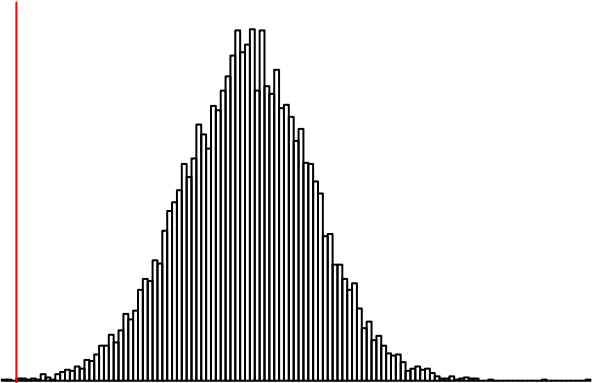

A194:240 – A194:45

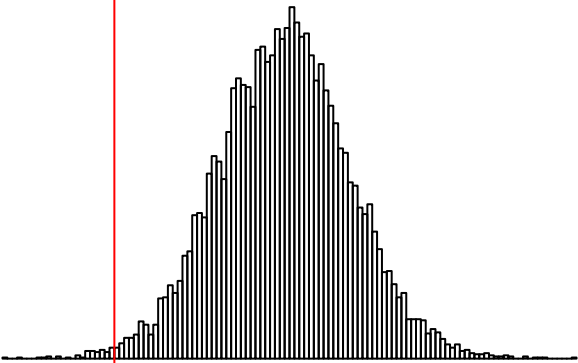

A194:120 – A194:45

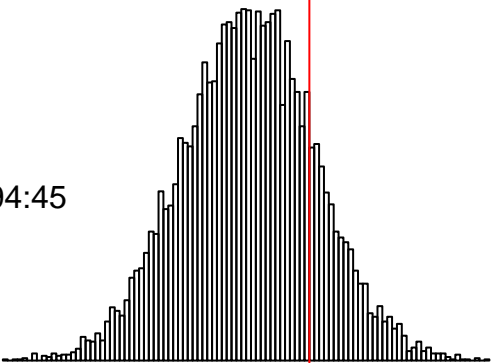

-2 -1 0 1 2 3

delta(Unidentified Metabolite 60)

A194:240

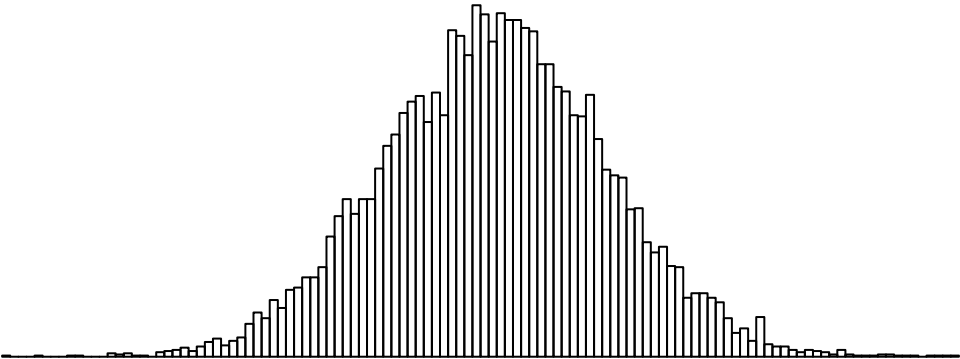

A194:120

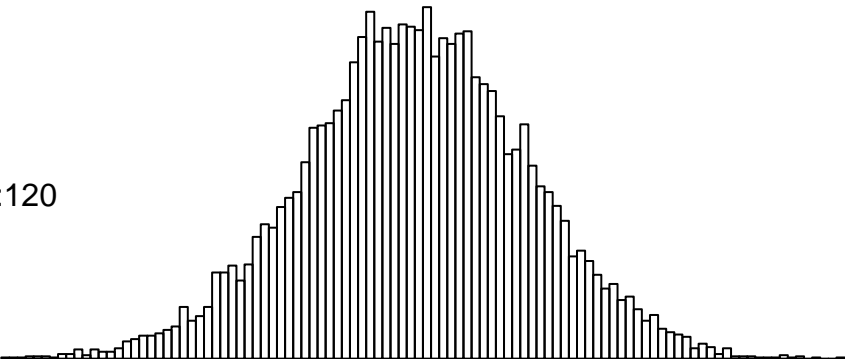

A194:45

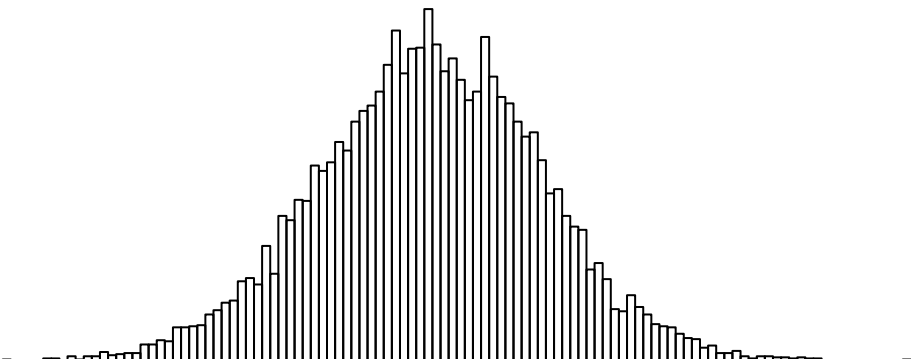

-9.0 -8.5 -8.0 -7.5 -7.0 -6.5 -6.0

Unidentified Metabolite 61

A194:240 – A194:120

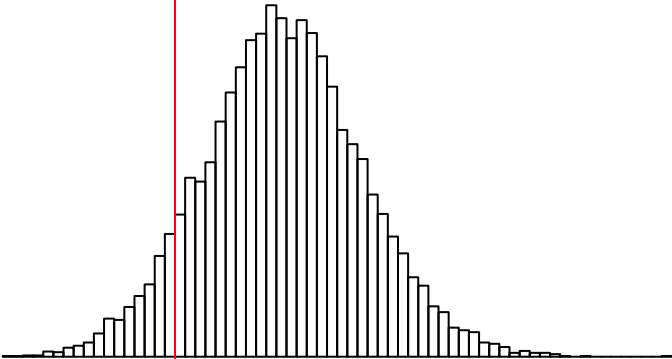

A194:240 – A194:45

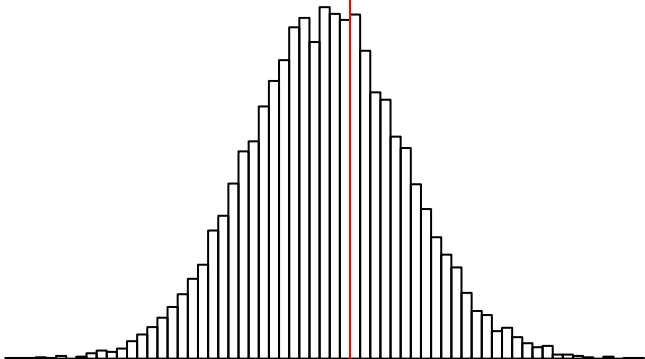

A194:120 – A194:45

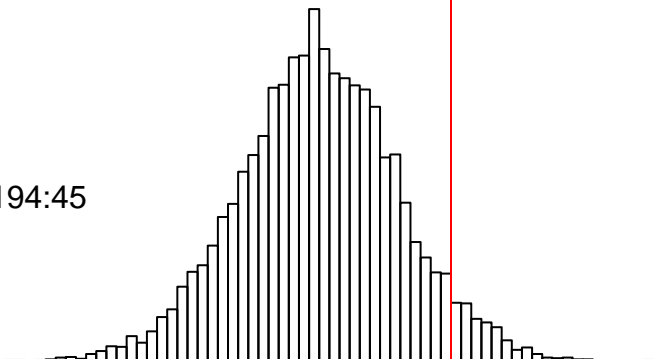

delta(Unidentified Metabolite 61)

A194:240

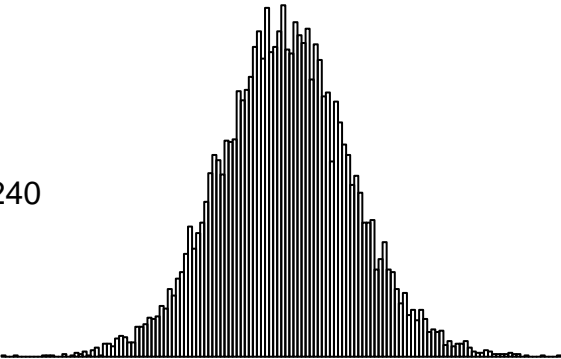

A194:120

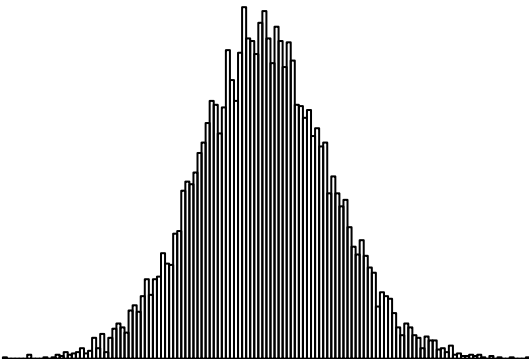

A194:45

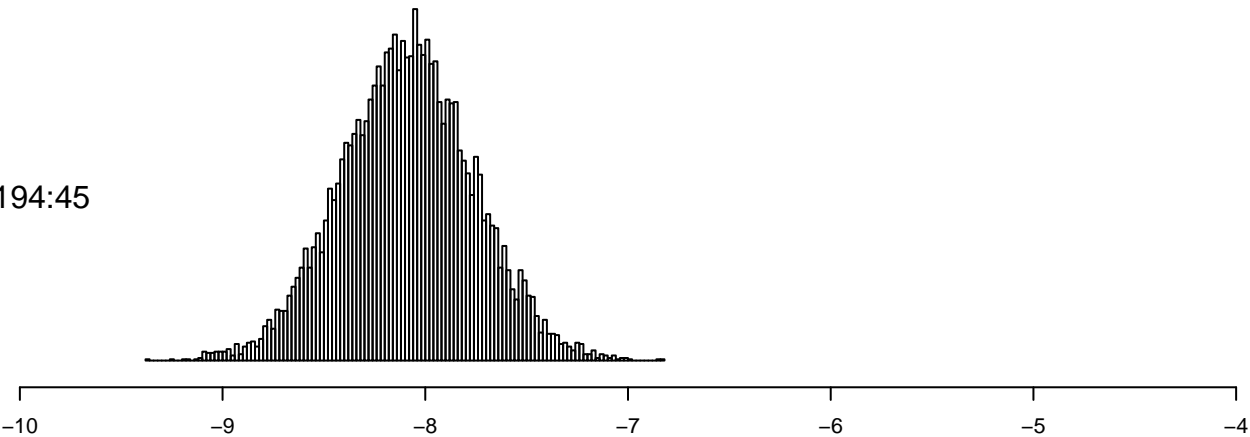

Unidentified Metabolite 62

A194:240 – A194:120

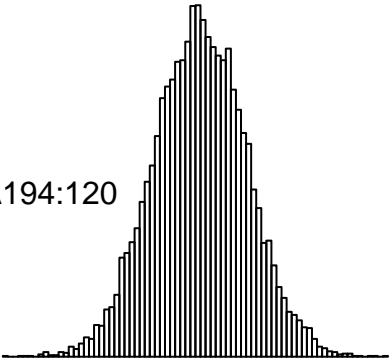

A194:240 – A194:45

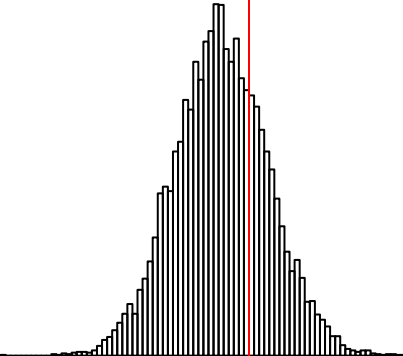

A194:120 – A194:45

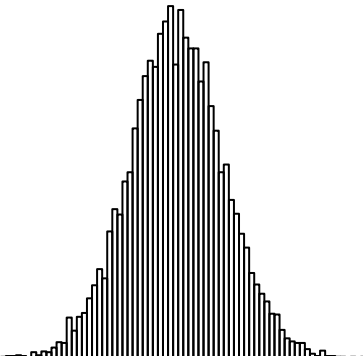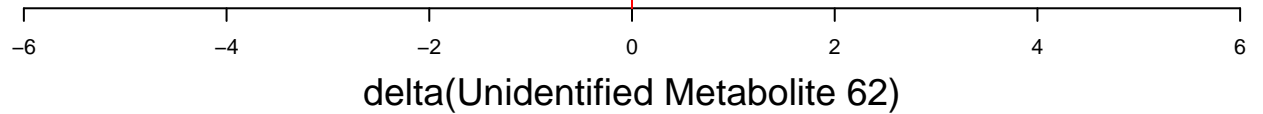

A194:240

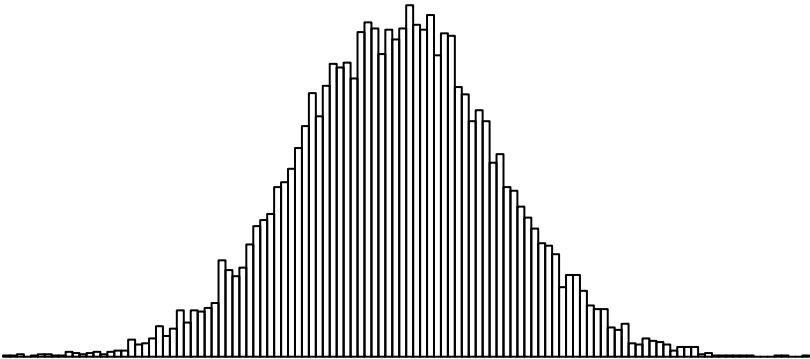

A194:120

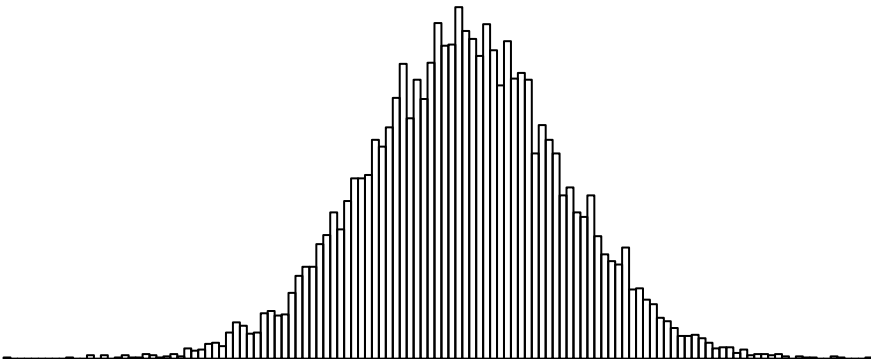

A194:45

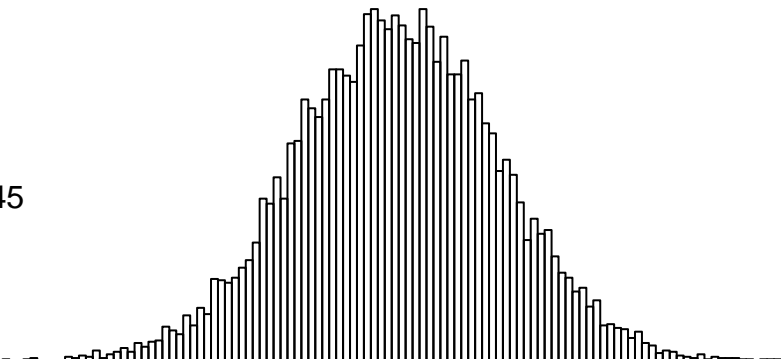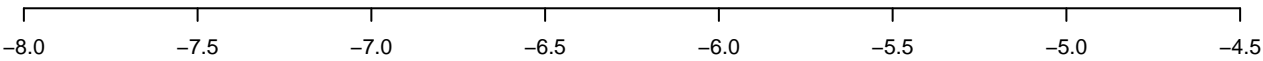

Unidentified Metabolite 63

A194:240 – A194:120

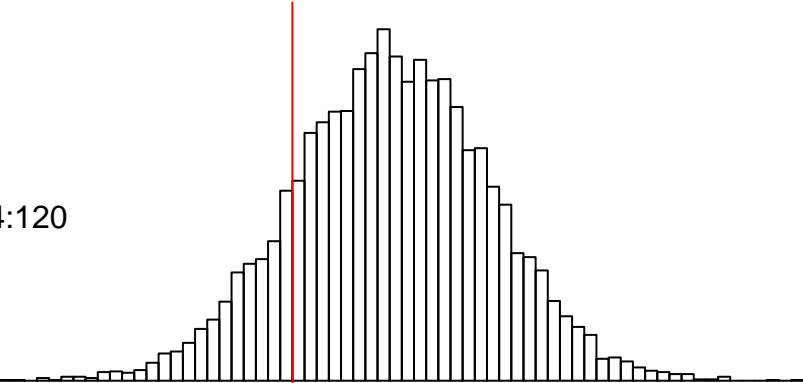

A194:240 – A194:45

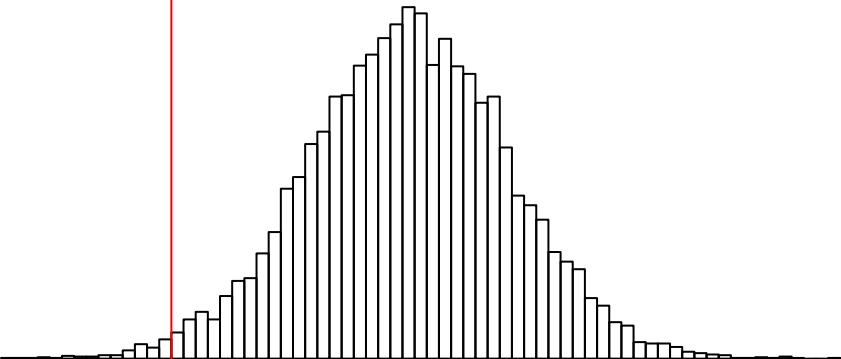

A194:120 – A194:45

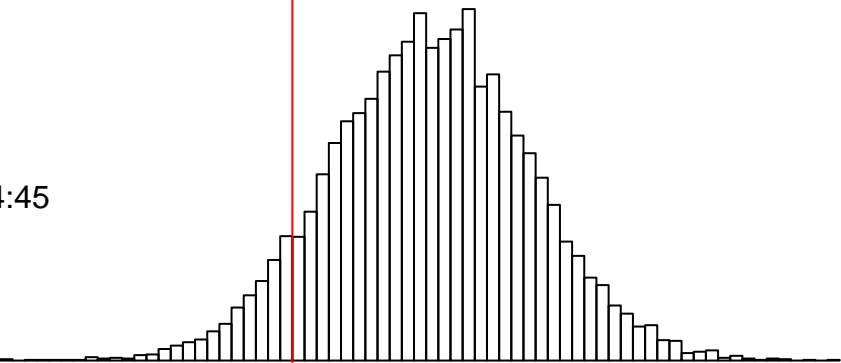

-2 -1 0 1 2 3

delta(Unidentified Metabolite 63)



A194:240

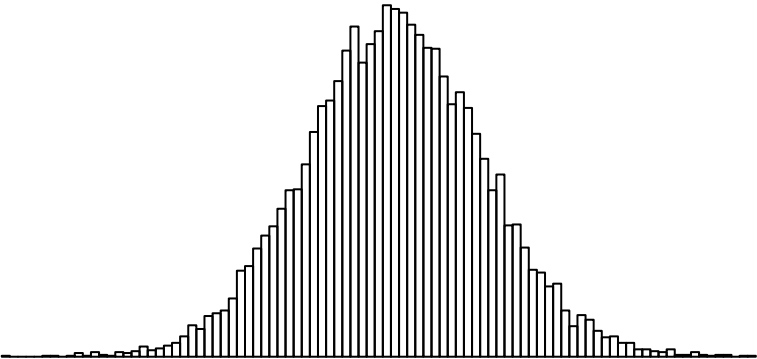

A194:120

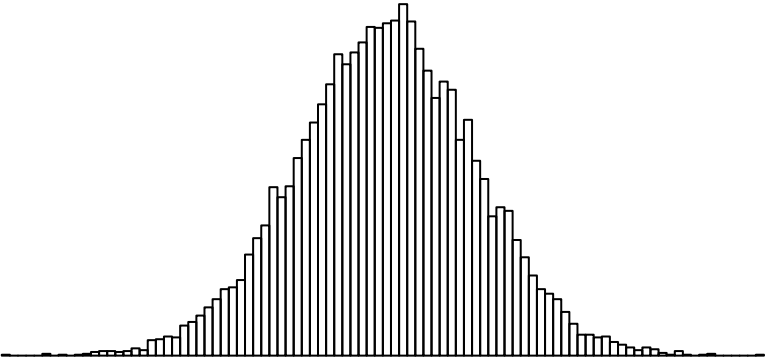

A194:45

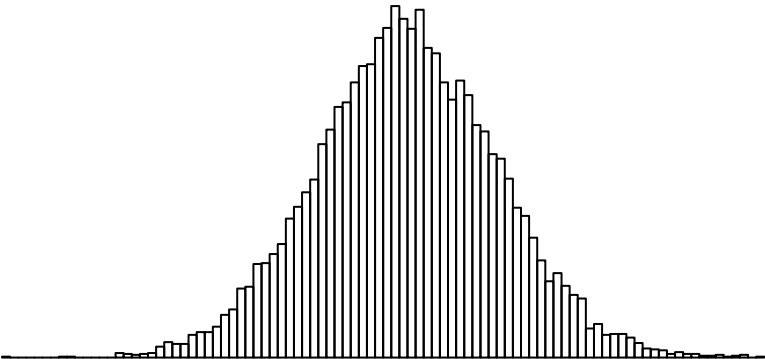

-9.5      -9.0      -8.5      -8.0      -7.5      -7.0      -6.5

Unidentified Metabolite 65

A194:240 – A194:120

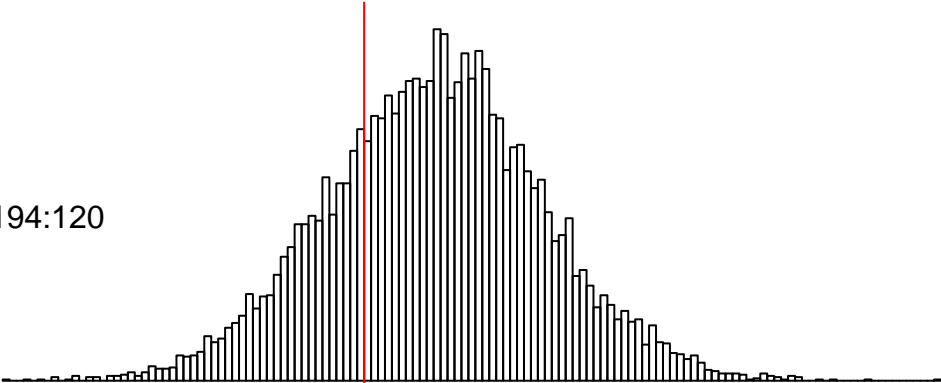

A194:240 – A194:45

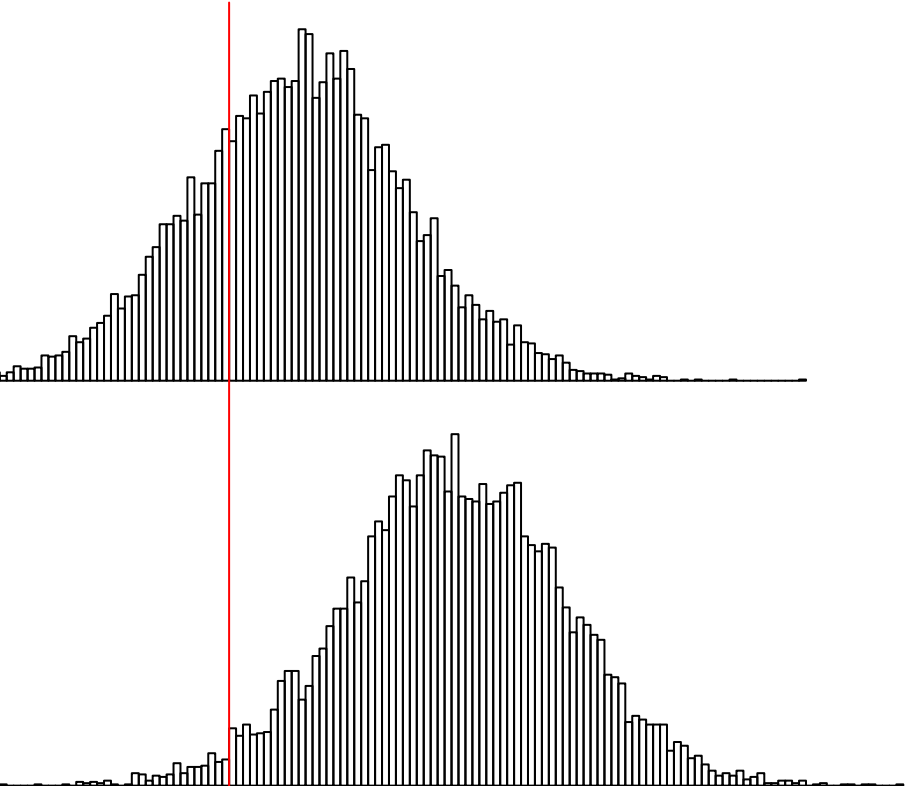

A194:120 – A194:45

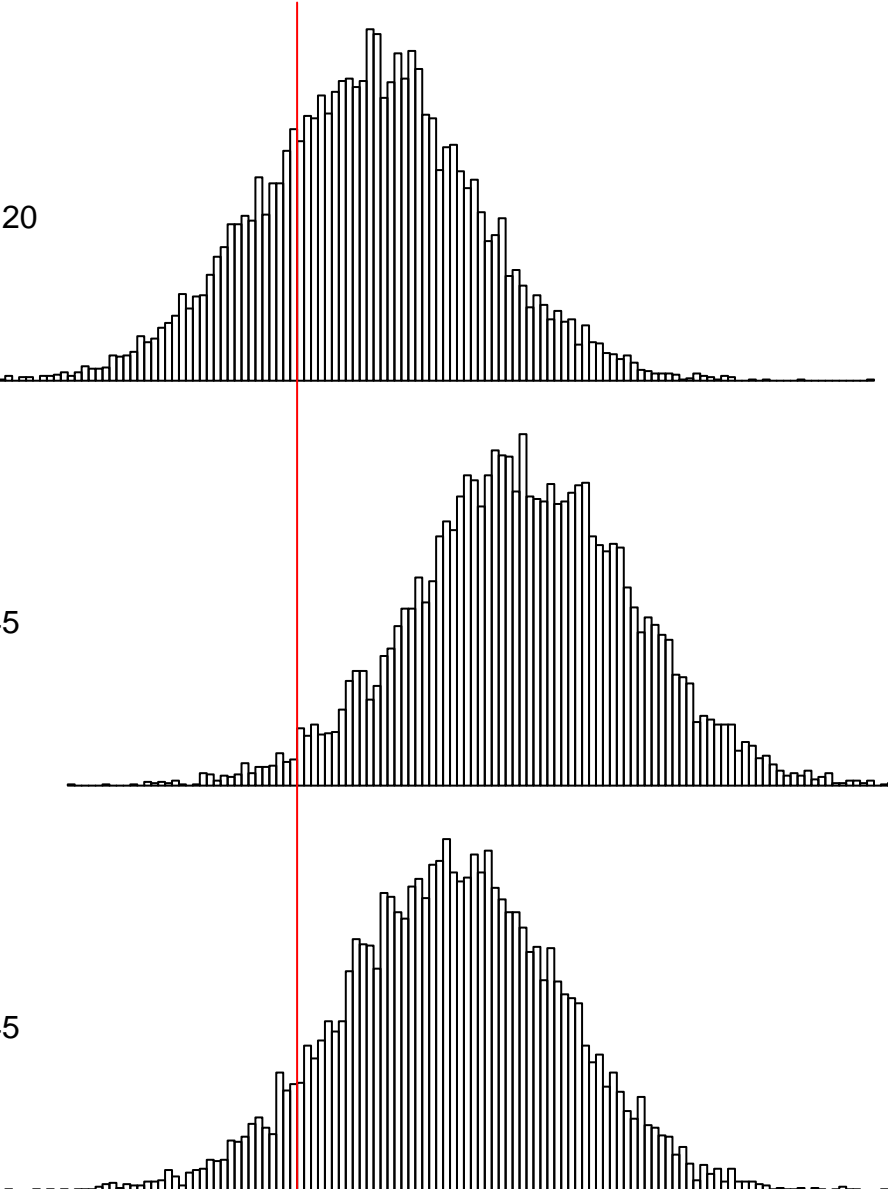

-1.5      -1.0      -0.5      0.0      0.5      1.0      1.5      2.0

delta(Unidentified Metabolite 65)

A194:240

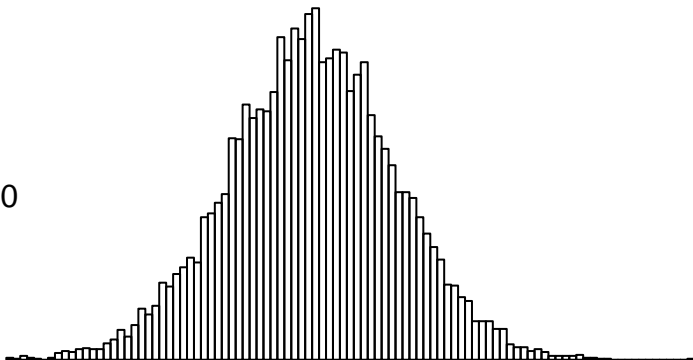

A194:120

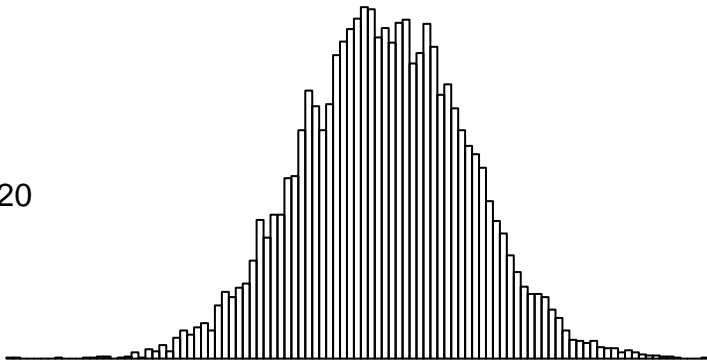

A194:45

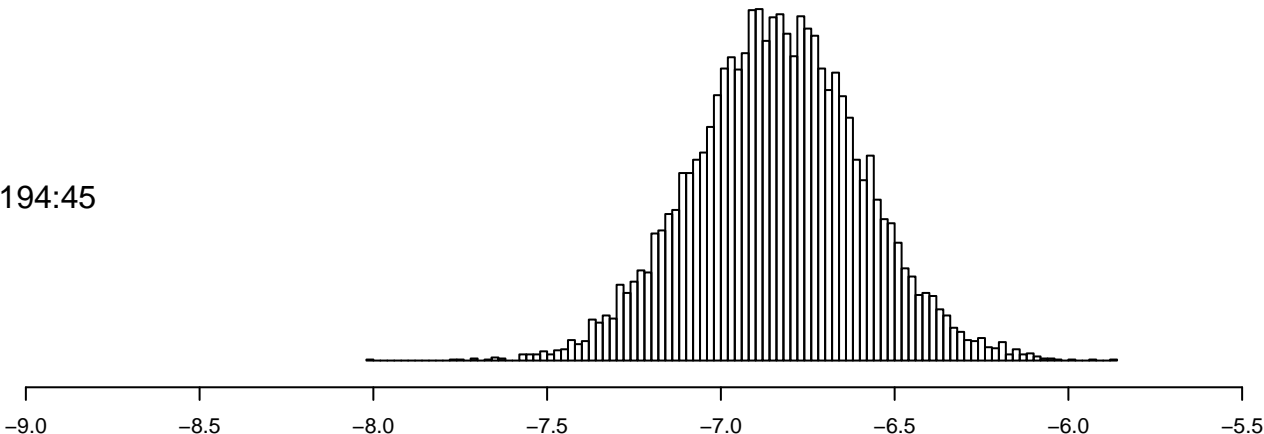

Unidentified Metabolite 68

A194:240 – A194:120

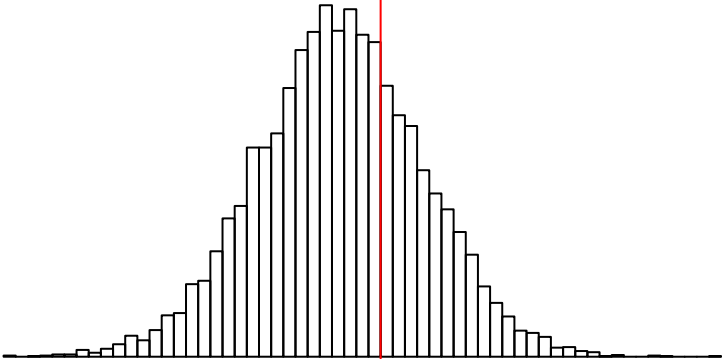

A194:240 – A194:45

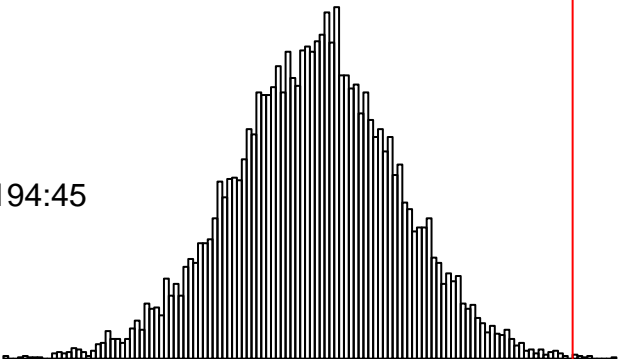

A194:120 – A194:45

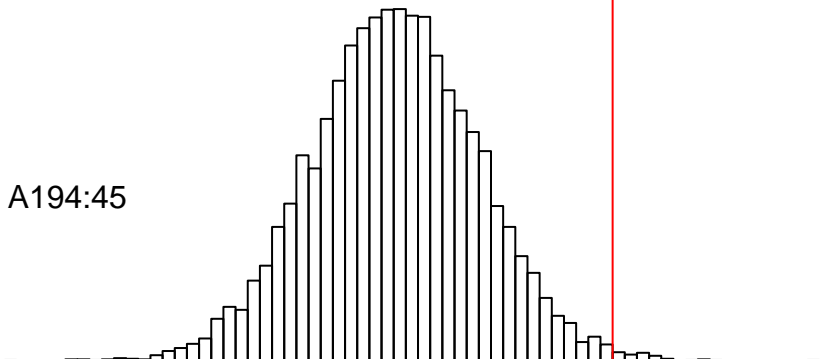

-3 -2 -1 0 1 2

delta(Unidentified Metabolite 68)

A194:240

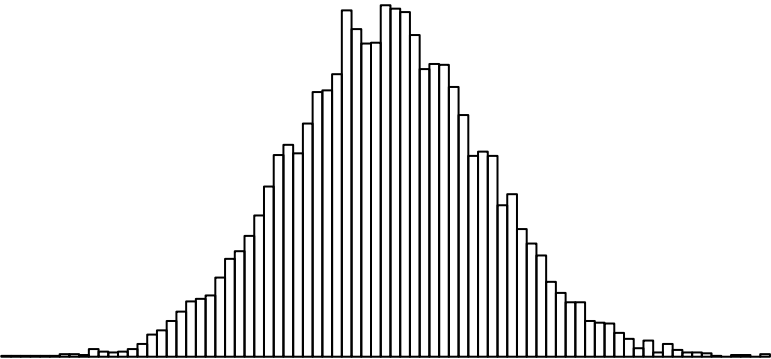

A194:120

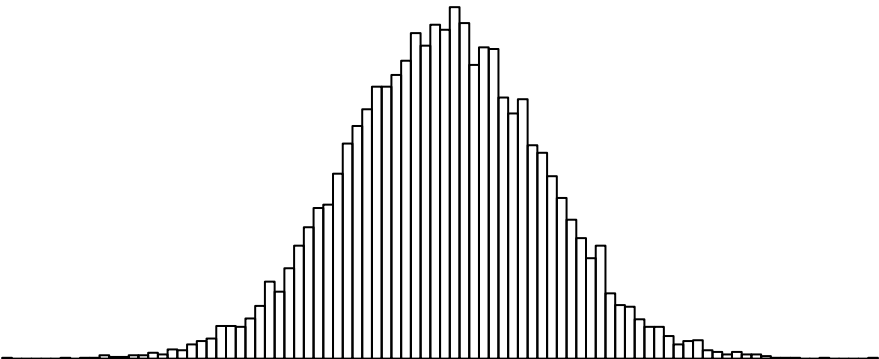

A194:45

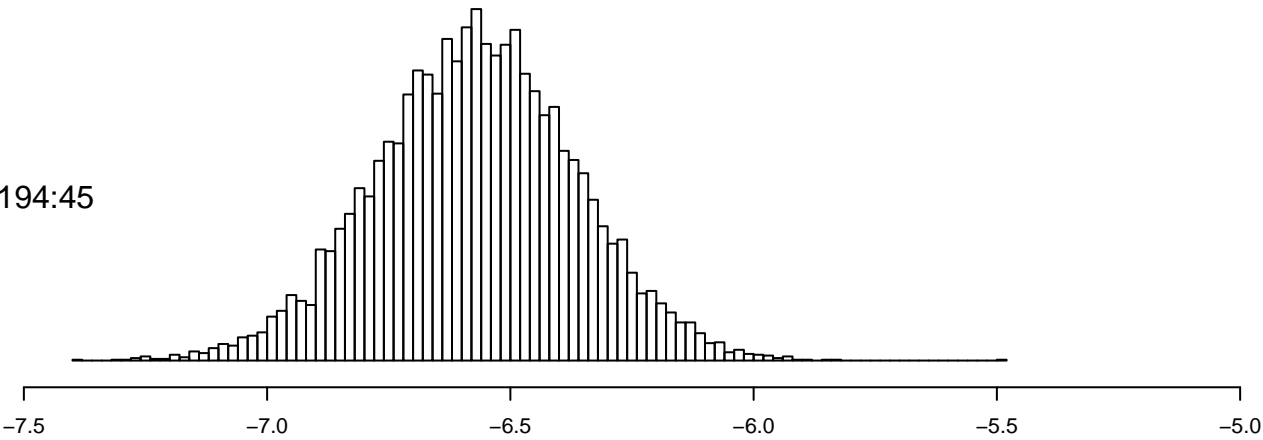

Unidentified Metabolite 69

A194:240 – A194:120

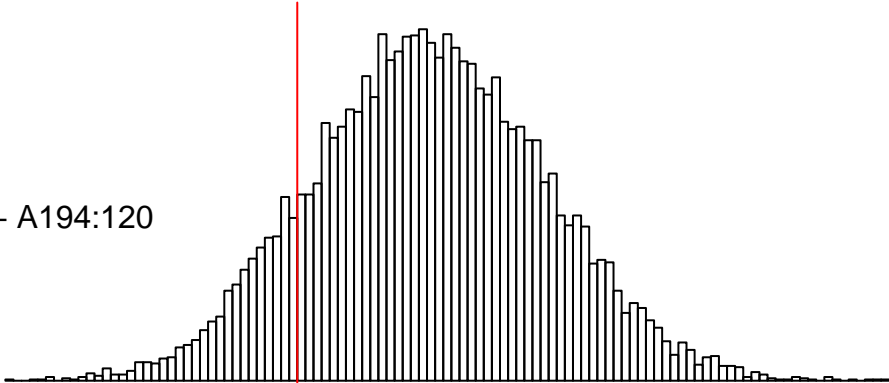

A194:240 – A194:45

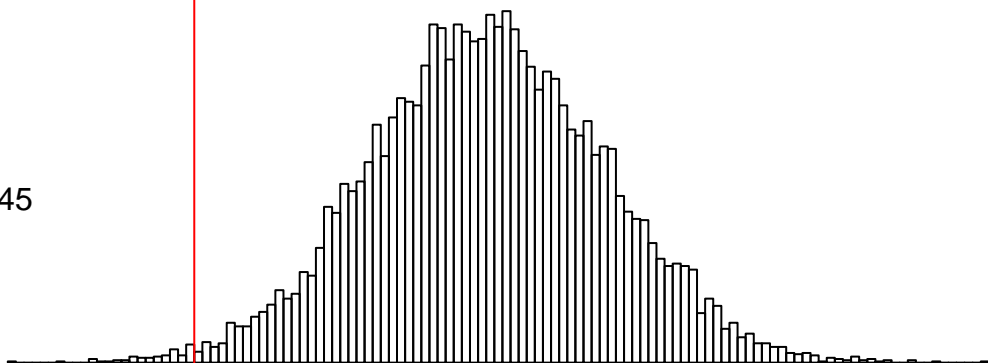

A194:120 – A194:45

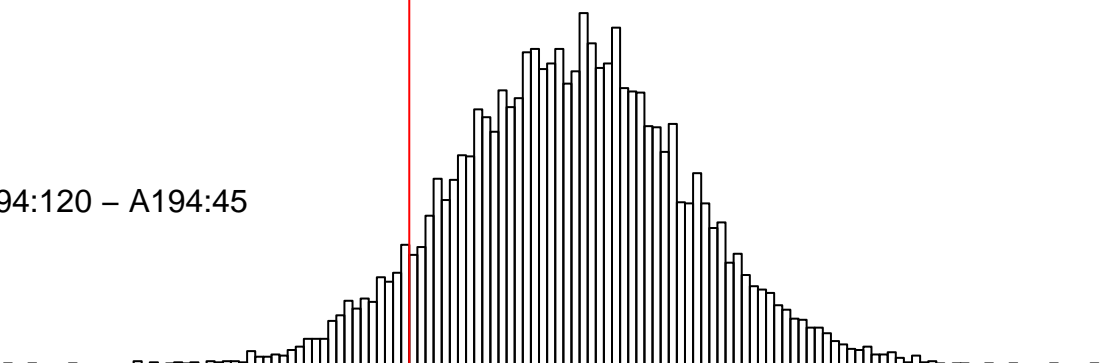

-1.0 -0.5 0.0 0.5 1.0 1.5 2.0

delta(Unidentified Metabolite 69)

A194:240

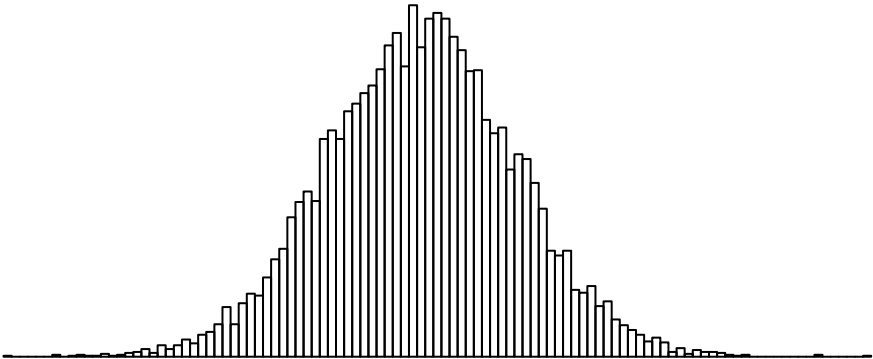

A194:120

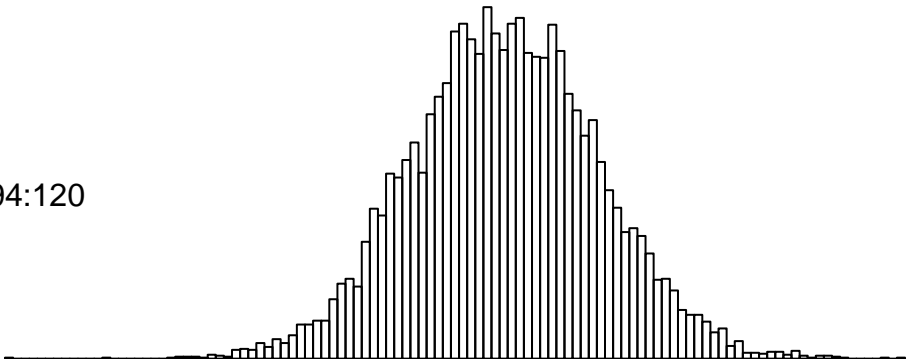

A194:45

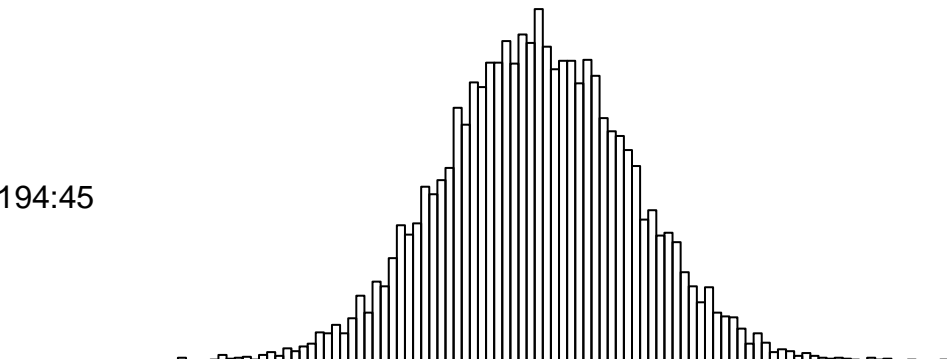

-9.0 -8.5 -8.0 -7.5 -7.0 -6.5 -6.0

Unidentified Metabolite 70

A194:240 – A194:120

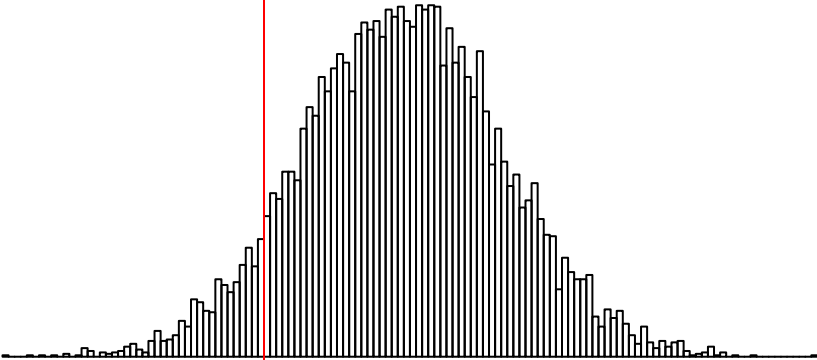

A194:240 – A194:45

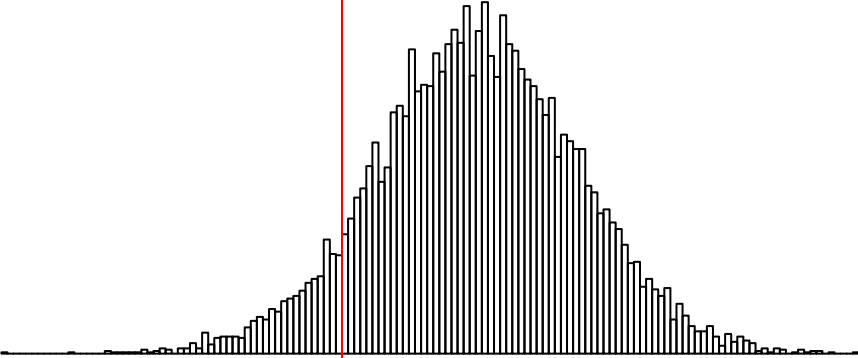

A194:120 – A194:45

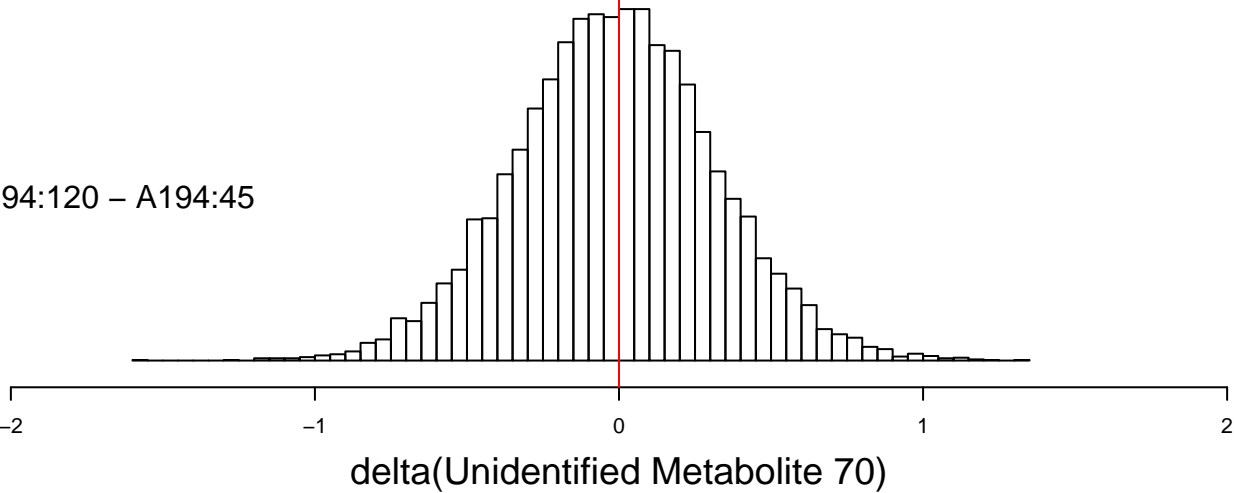



A194:240

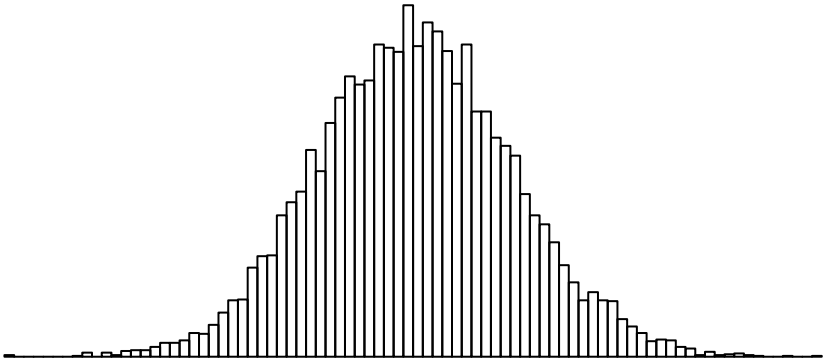

A194:120

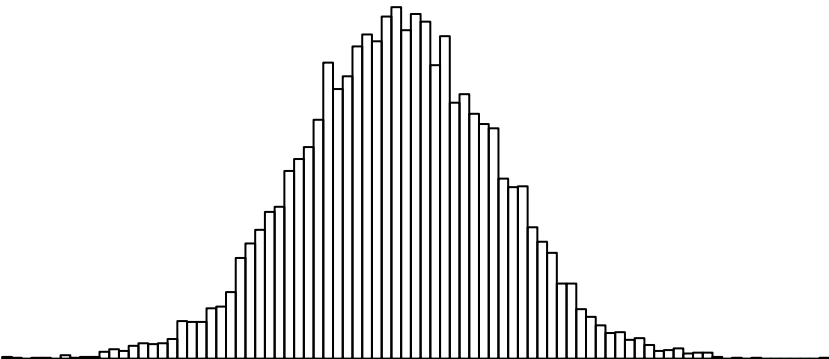

A194:45

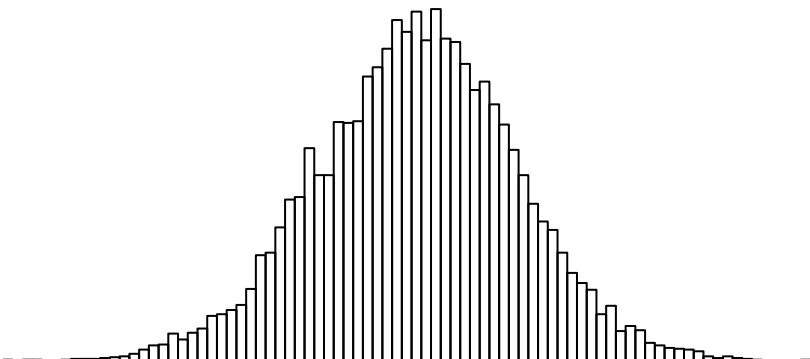

-10.0      -9.5      -9.0      -8.5      -8.0      -7.5

Unidentified Metabolite 71

A194:240 – A194:120

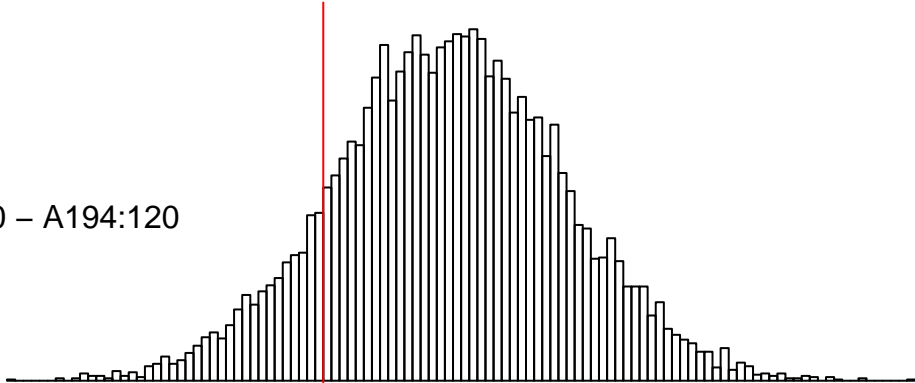

A194:240 – A194:45

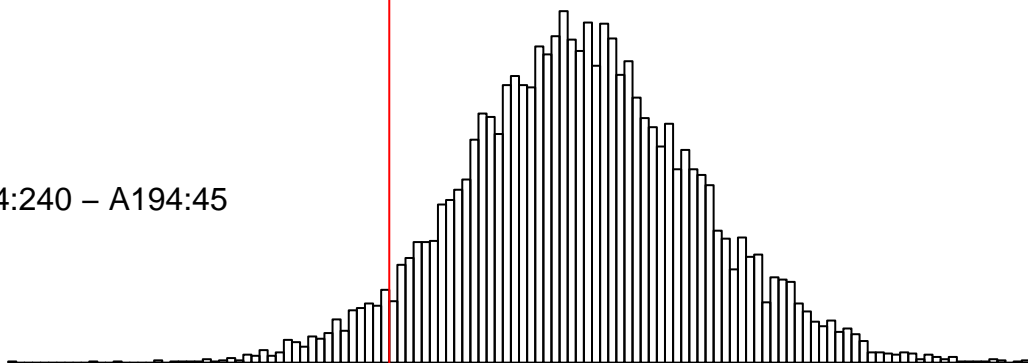

A194:120 – A194:45

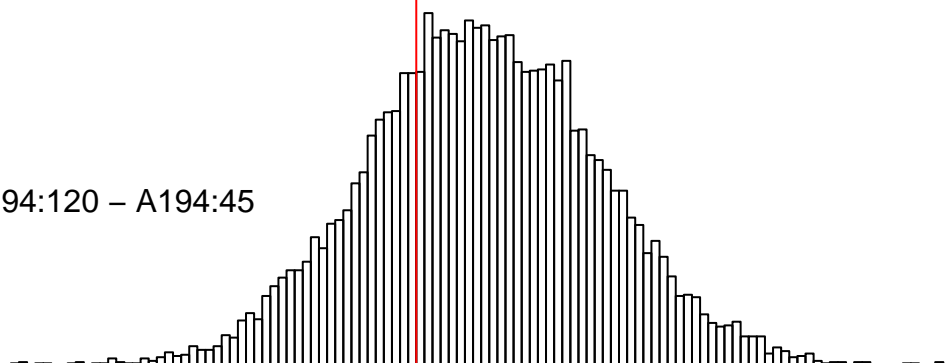

-1.0      -0.5      0.0      0.5      1.0      1.5      2.0

delta(Unidentified Metabolite 71)

A194:240

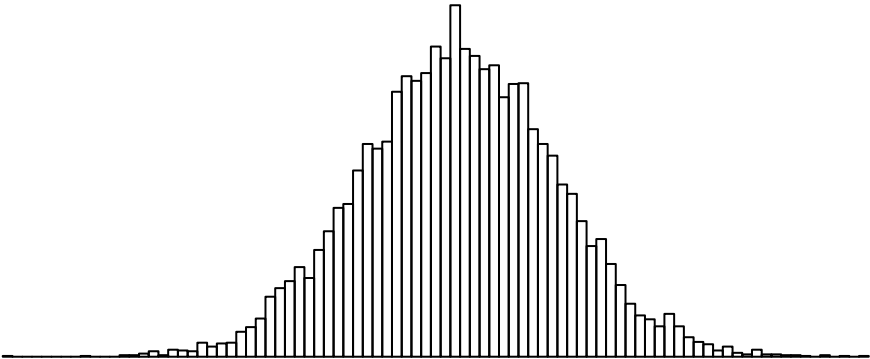

A194:120

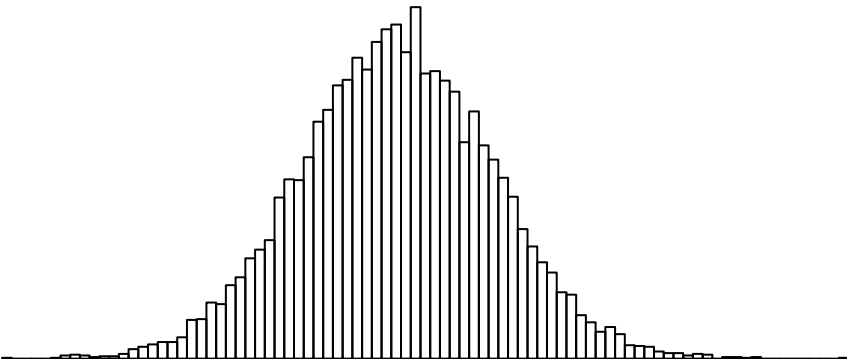

A194:45

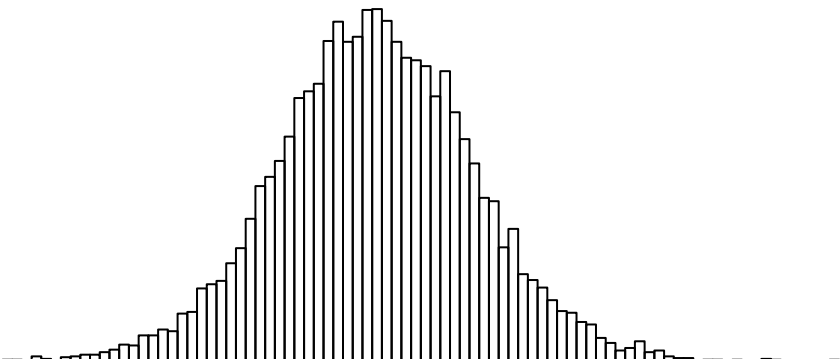

Unidentified Metabolite 72

A194:240 – A194:120

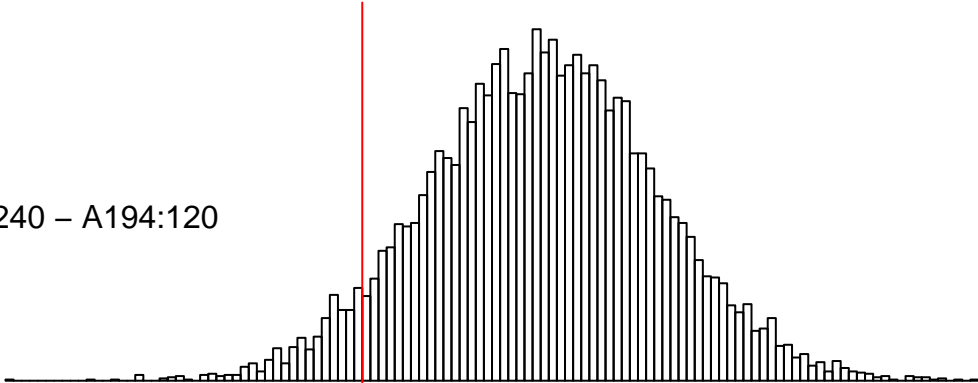

A194:240 – A194:45

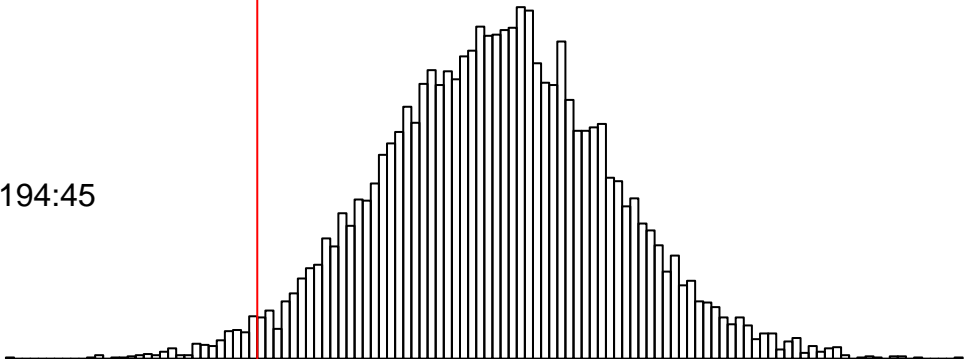

A194:120 – A194:45

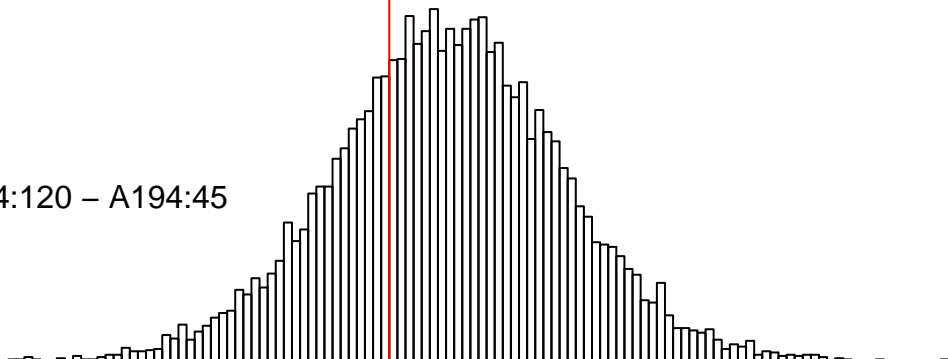

-1.0      -0.5      0.0      0.5      1.0      1.5      2.0

delta(Unidentified Metabolite 72)

A194:240

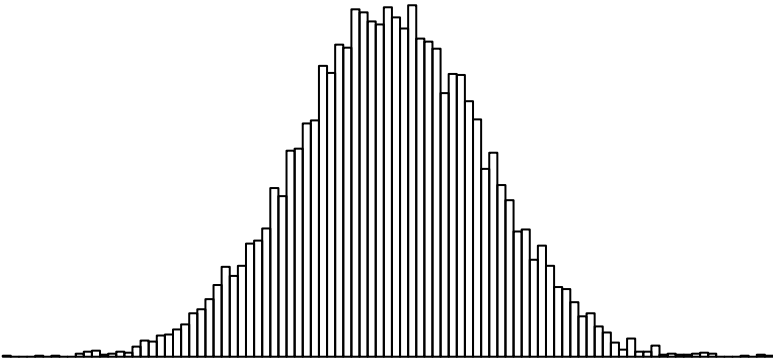

A194:120

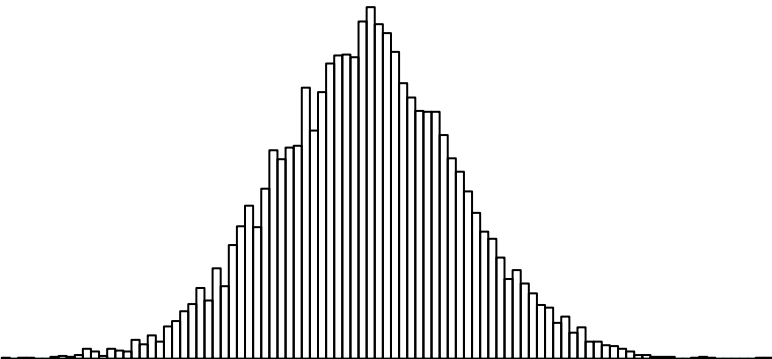

A194:45

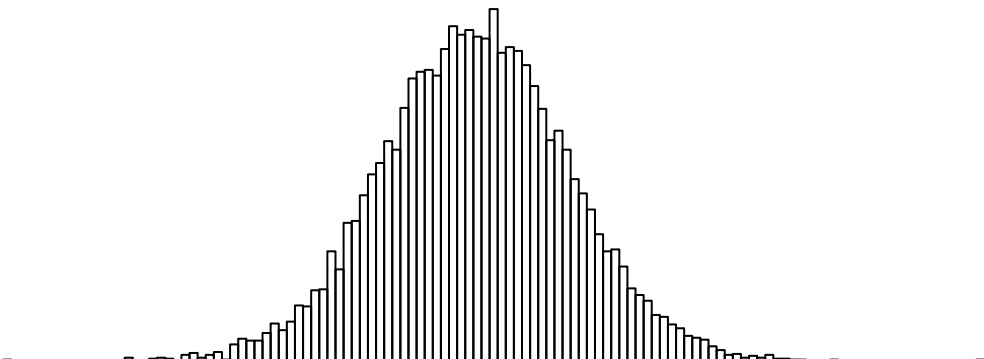

-9.0      -8.5      -8.0      -7.5      -7.0      -6.5      -6.0

Unidentified Metabolite 73

A194:240 – A194:120

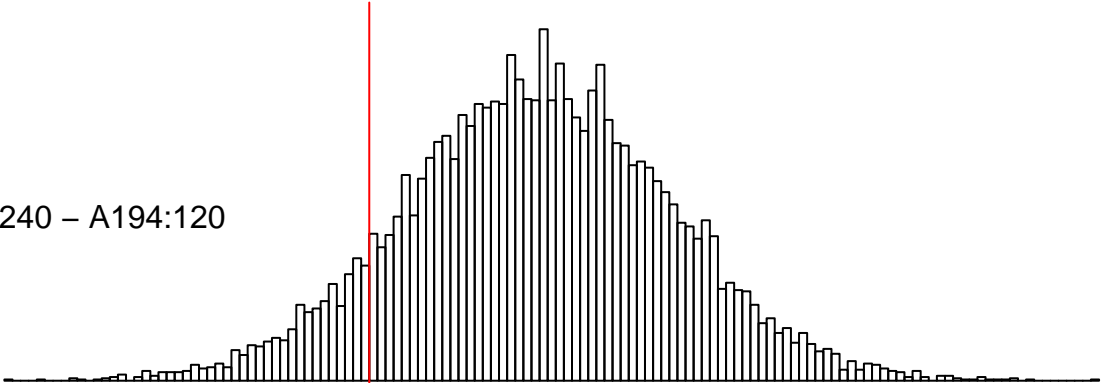

A194:240 – A194:45

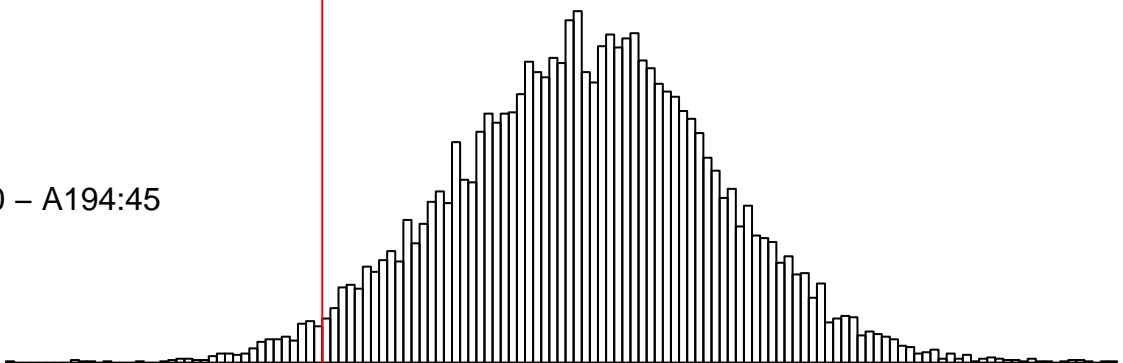

A194:120 – A194:45

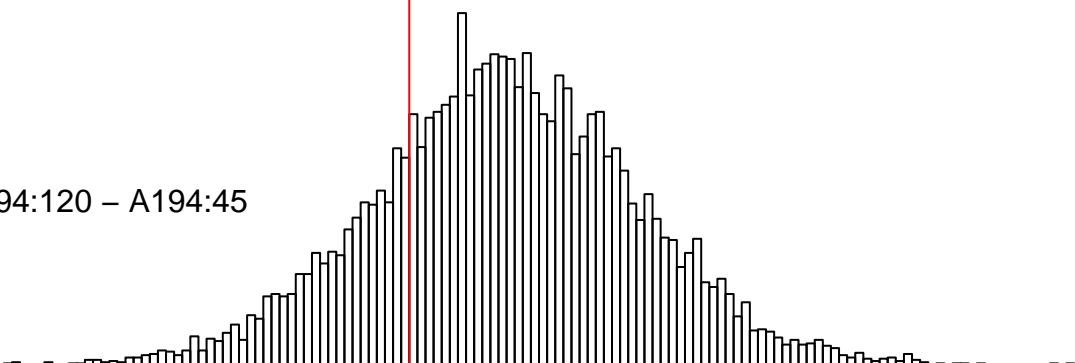

-1.0      -0.5      0.0      0.5      1.0      1.5      2.0

delta(Unidentified Metabolite 73)

A194:240

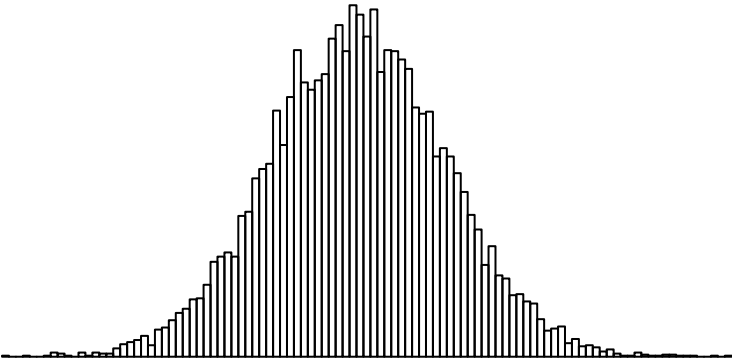

A194:120

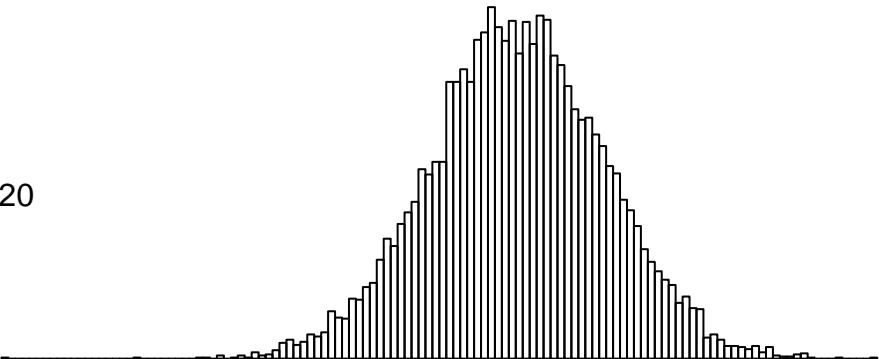

A194:45

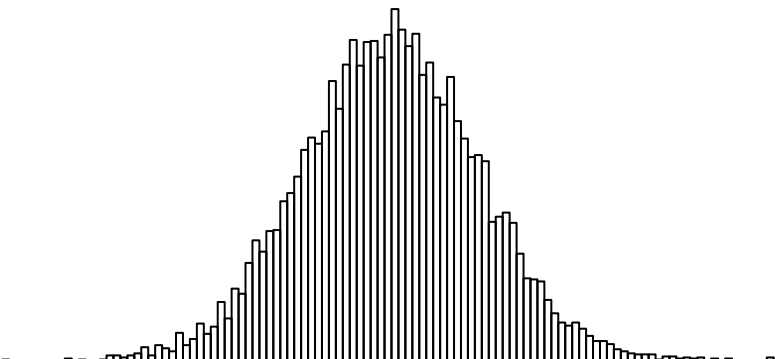

-10.5      -10.0      -9.5      -9.0      -8.5      -8.0      -7.5      -7.0

Unidentified Metabolite 74

A194:240 – A194:120

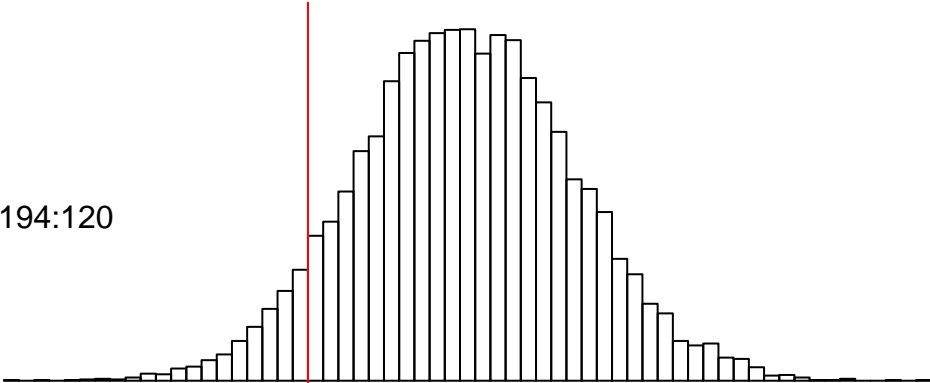

A194:240 – A194:45

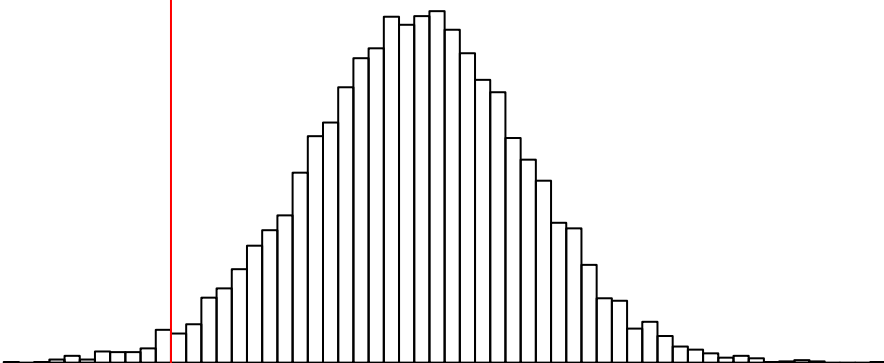

A194:120 – A194:45

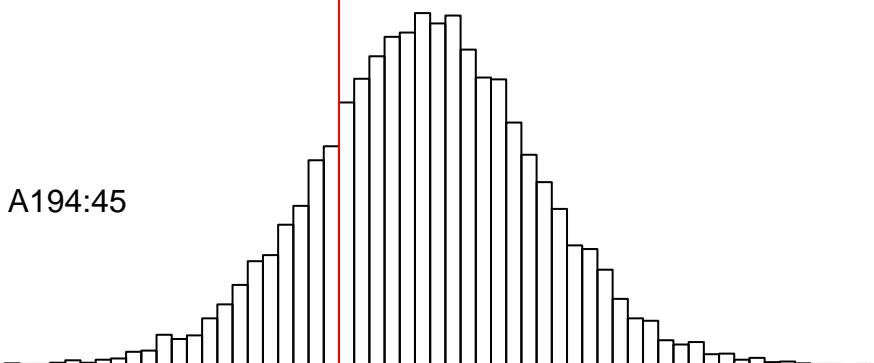

-1

0

1

2

delta(Unidentified Metabolite 74)



A194:240

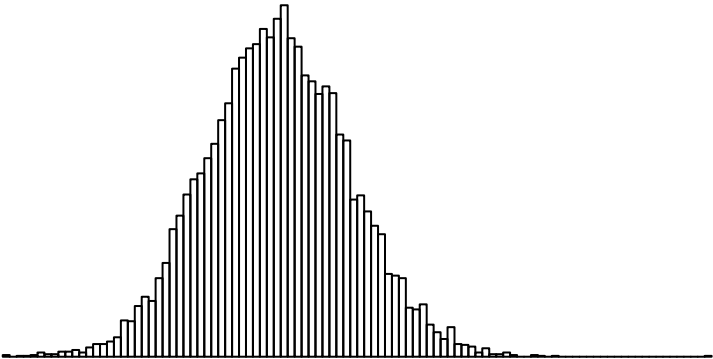

A194:120

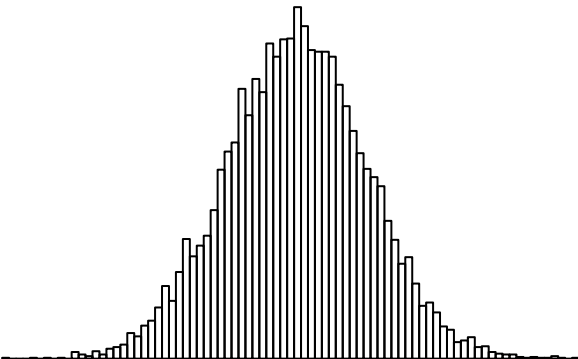

A194:45

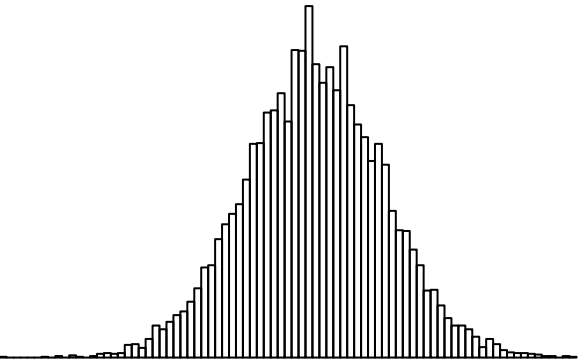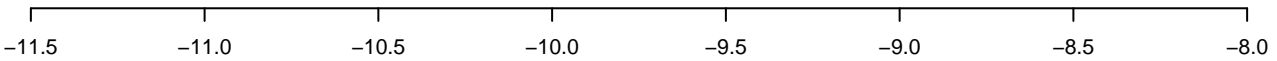

Unidentified Metabolite 75

A194:240 – A194:120

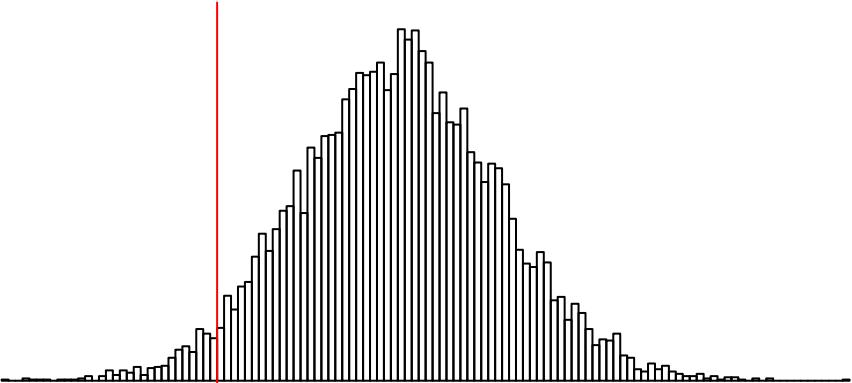

A194:240 – A194:45

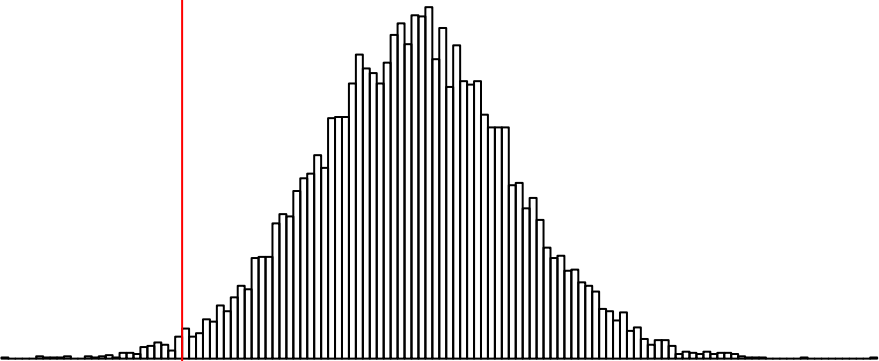

A194:120 – A194:45

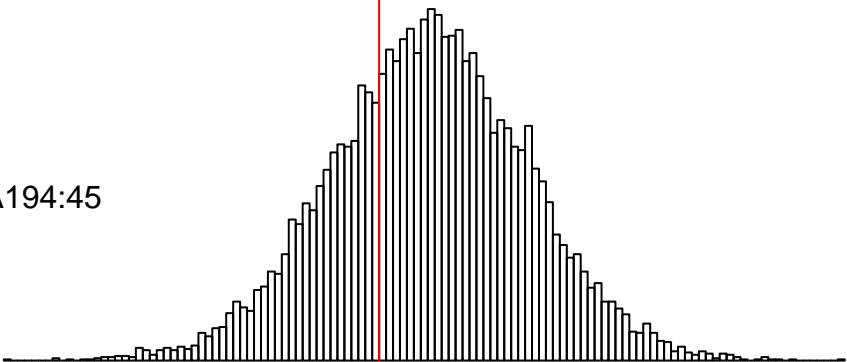

-1.5      -1.0      -0.5      0.0      0.5      1.0      1.5      2.0

delta(Unidentified Metabolite 75)

A194:240

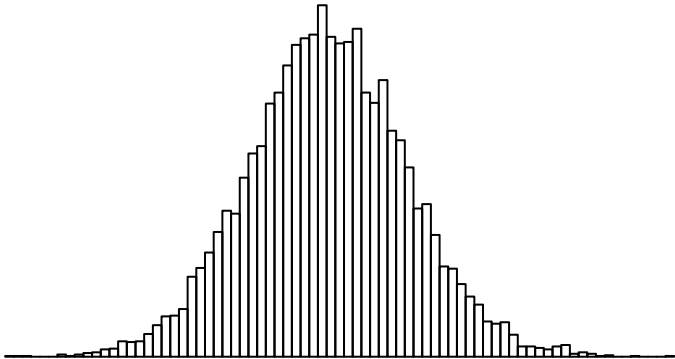

A194:120

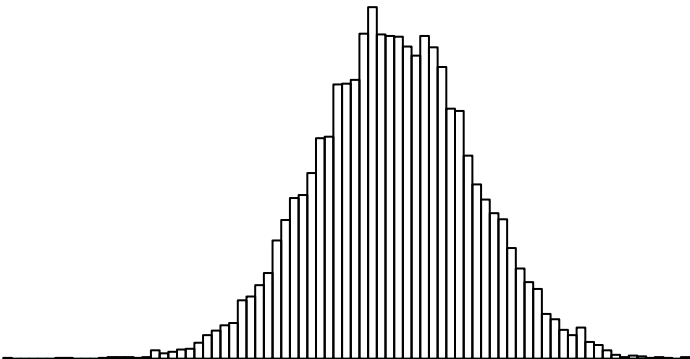

A194:45

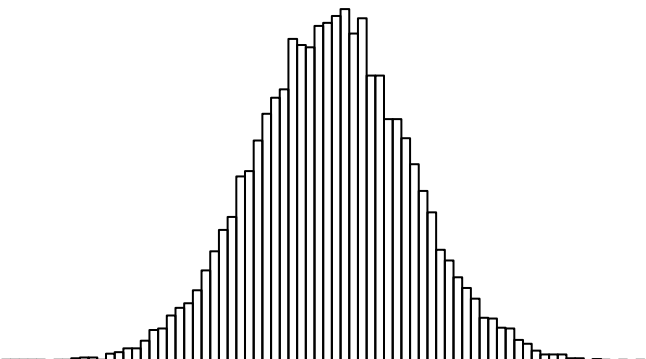

-10 -9 -8 -7 -6 -5 -4 -3

Unidentified Metabolite 76

A194:240 – A194:120

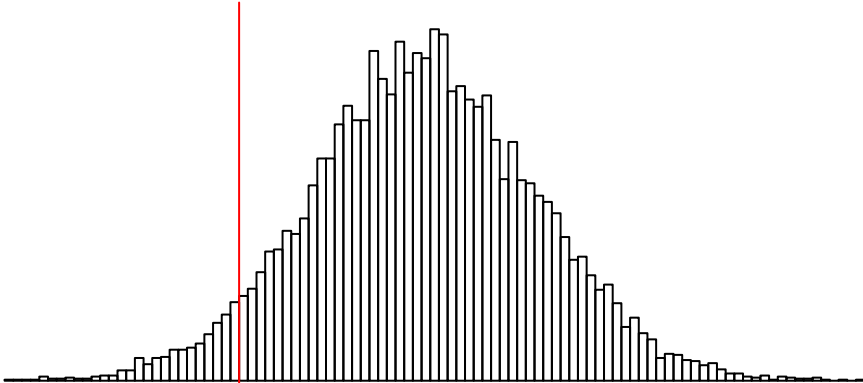

A194:240 – A194:45

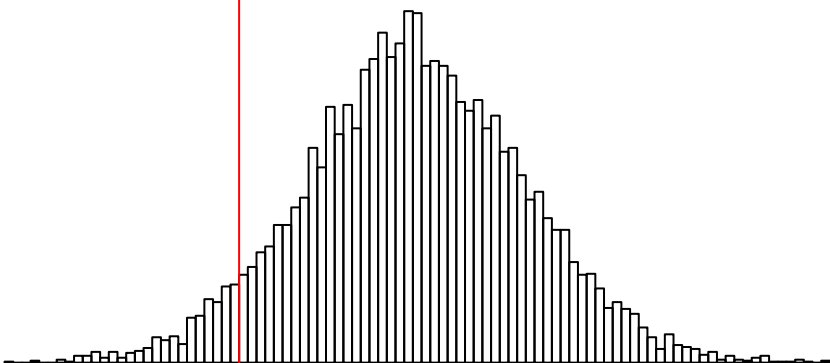

A194:120 – A194:45

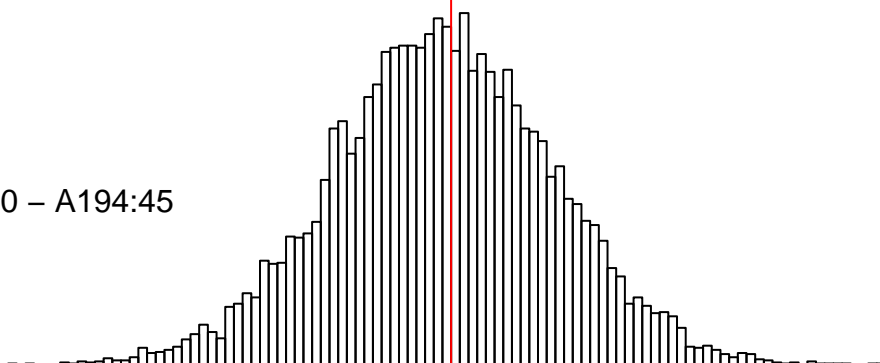

-3 -2 -1 0 1 2 3 4

delta(Unidentified Metabolite 76)

A194:240

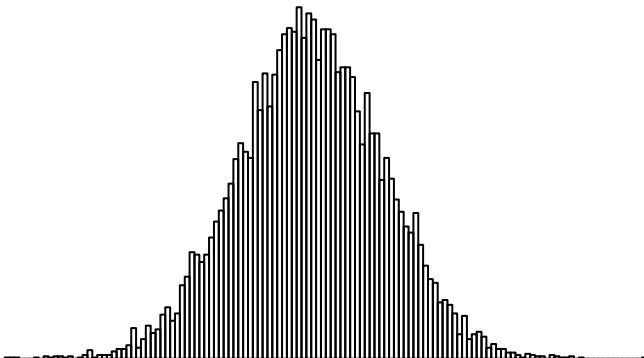

A194:120

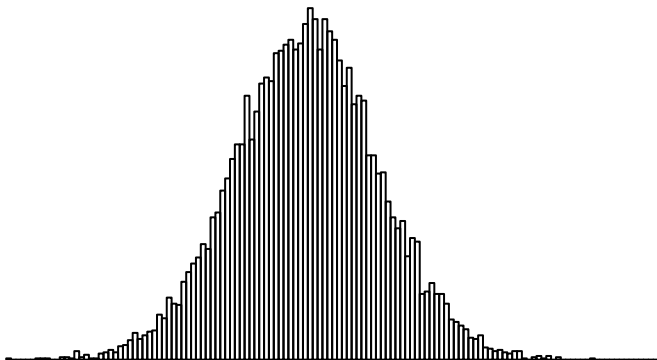

A194:45

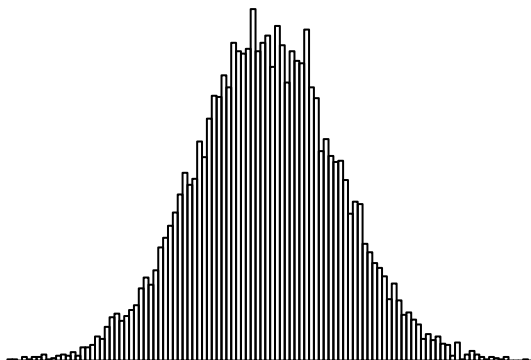

-9

-8

-7

-6

-5

-4

Unidentified Metabolite 77

A194:240 – A194:120

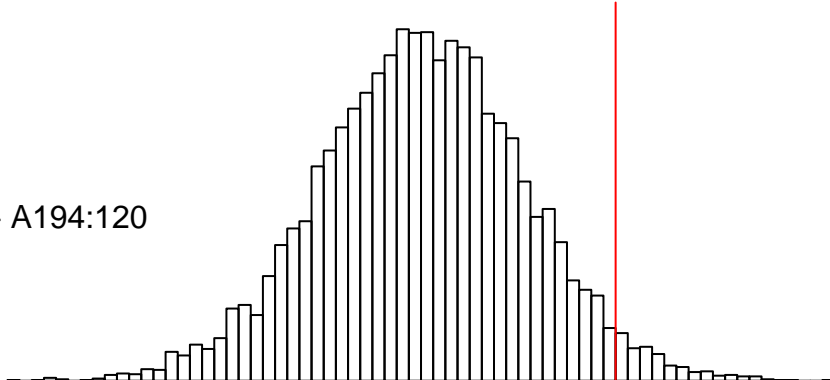

A194:240 – A194:45

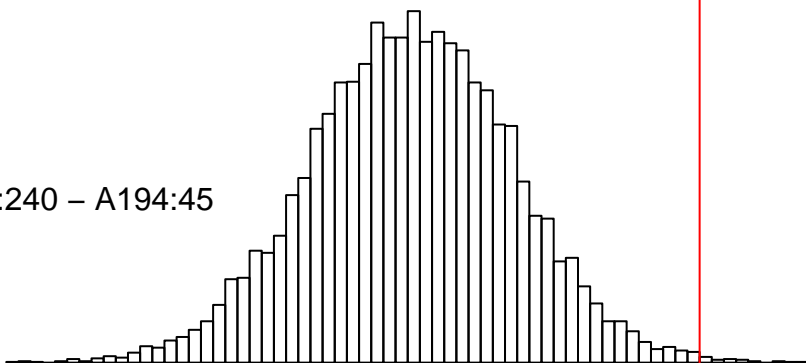

A194:120 – A194:45

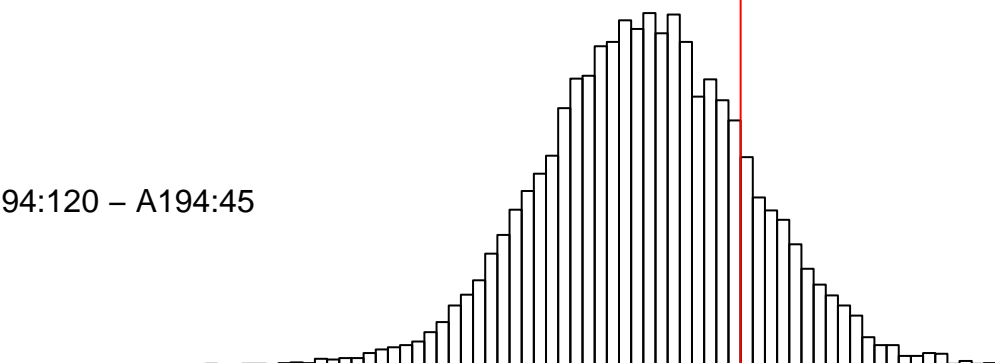

delta(Unidentified Metabolite 77)

A194:240

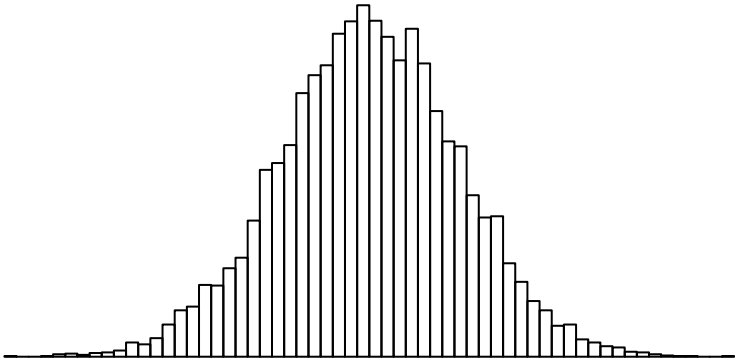

A194:120

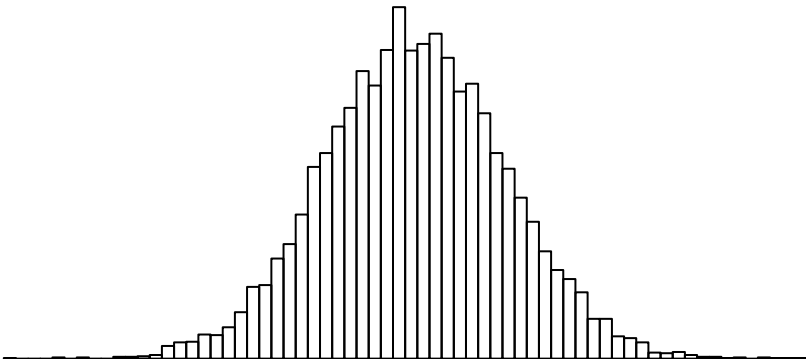

A194:45

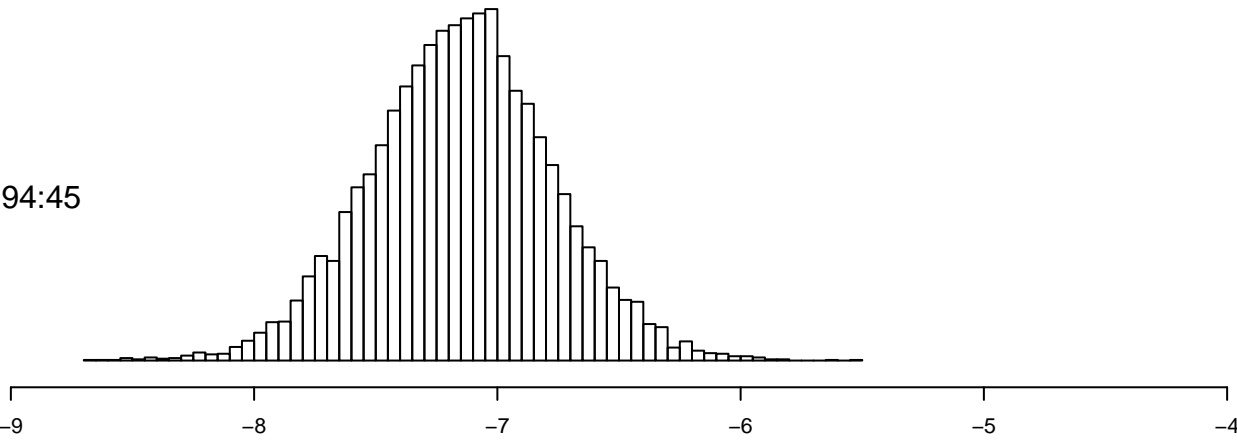

Unidentified Metabolite 78

A194:240 – A194:120

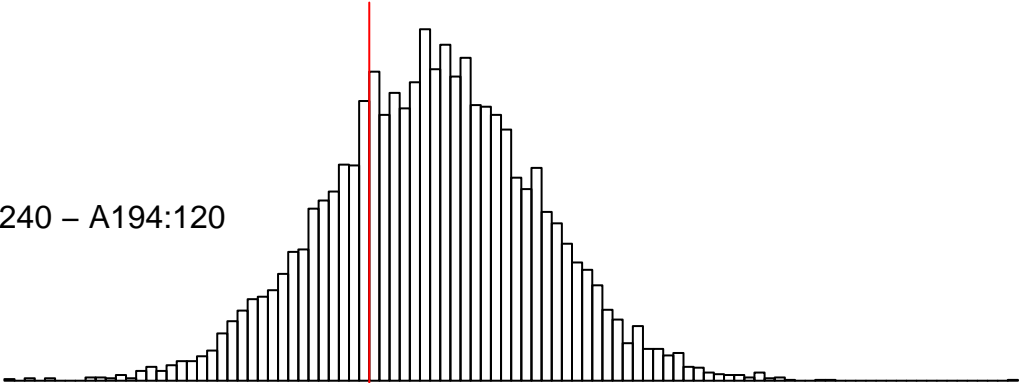

A194:240 – A194:45

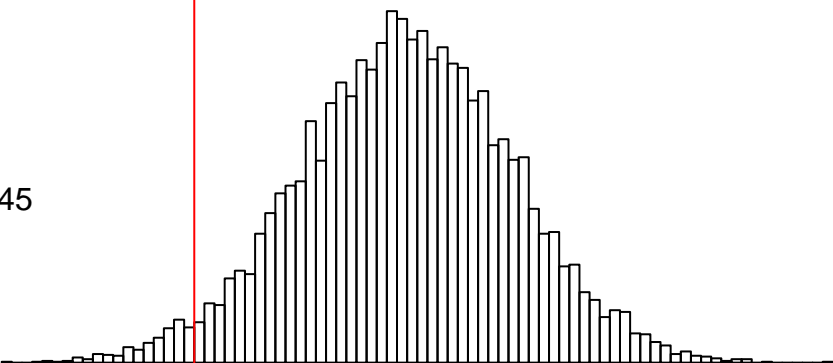

A194:120 – A194:45

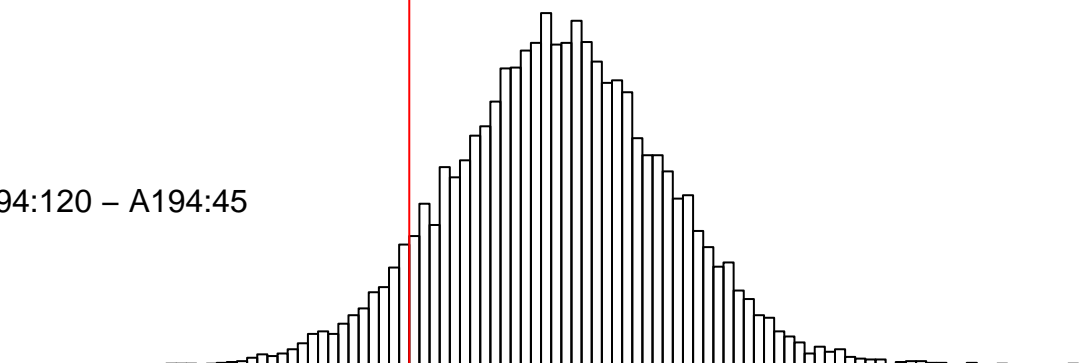

-2 -1 0 1 2 3 4

delta(Unidentified Metabolite 78)



A194:240

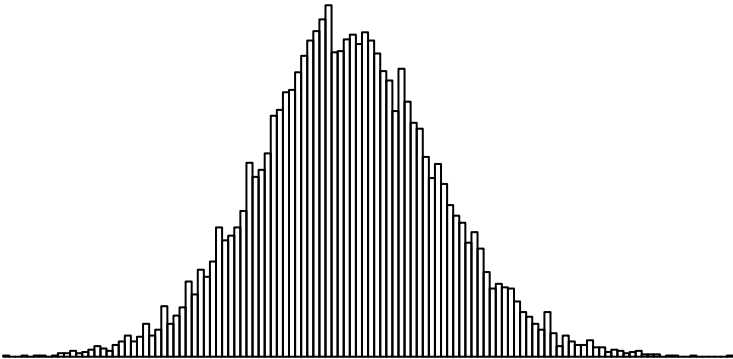

A194:120

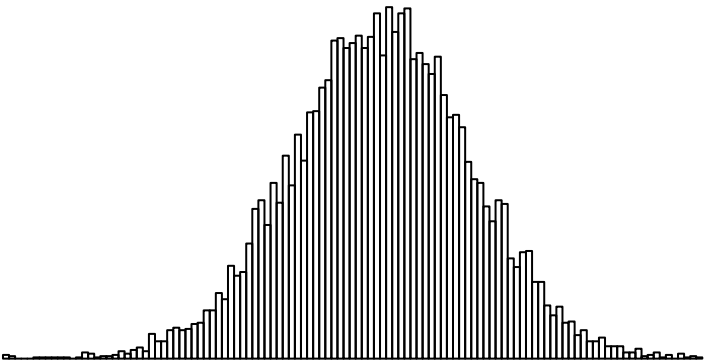

A194:45

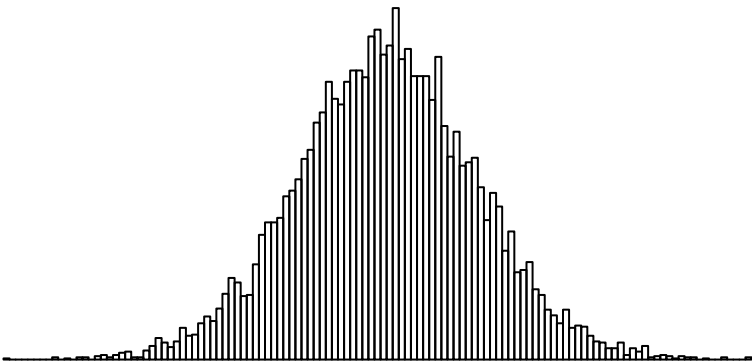

-9.5                      -9.0                      -8.5                      -8.0                      -7.5

Acid 2

A194:240 – A194:120

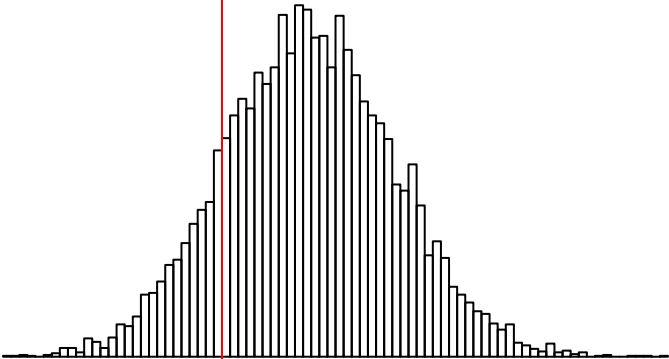

A194:240 – A194:45

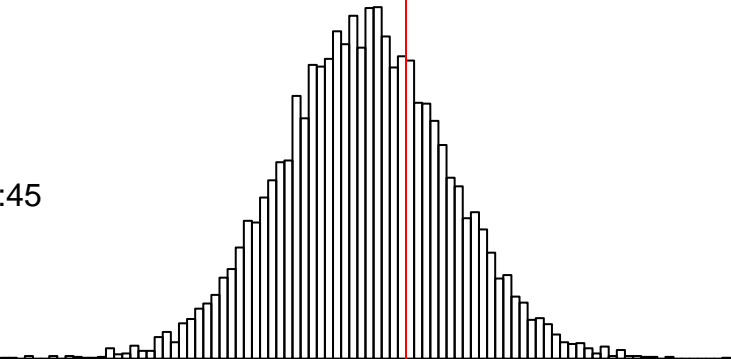

A194:120 – A194:45

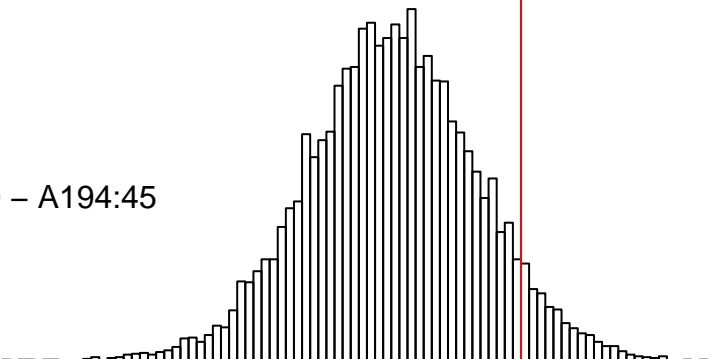

-1.5      -1.0      -0.5      0.0      0.5      1.0      1.5

delta(Acid 2)

A194:240

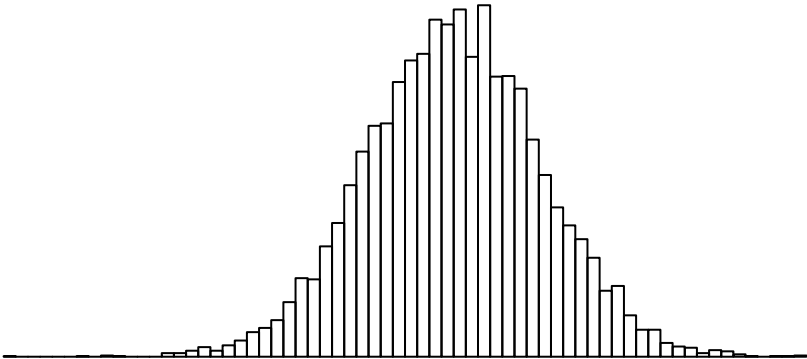

A194:120

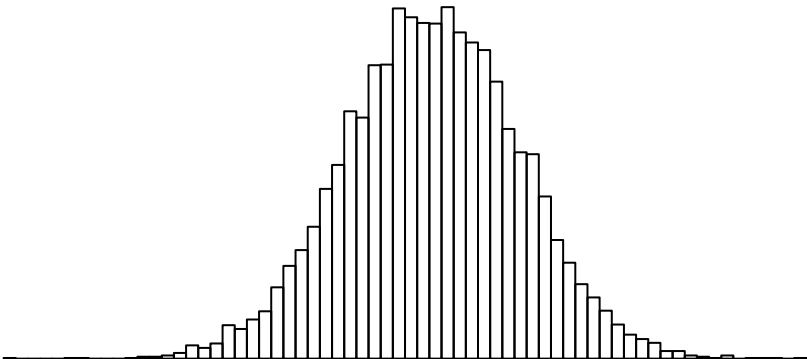

A194:45

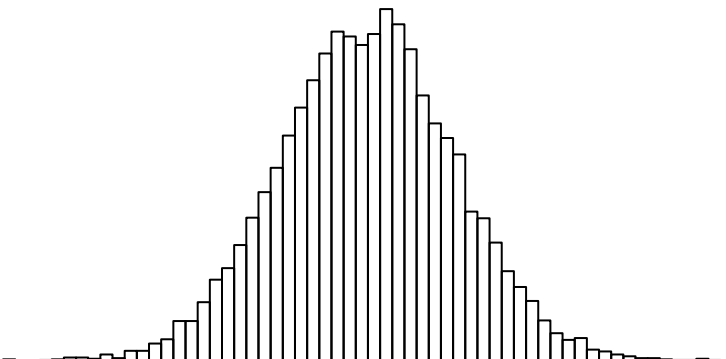

Acid 3

A194:240 – A194:120

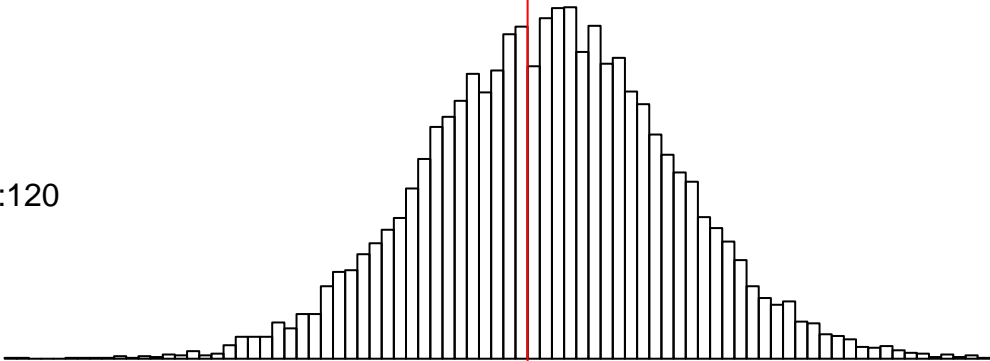

A194:240 – A194:45

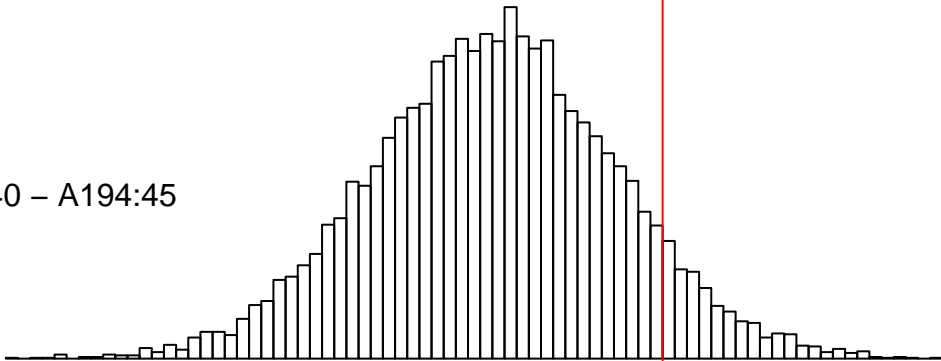

A194:120 – A194:45

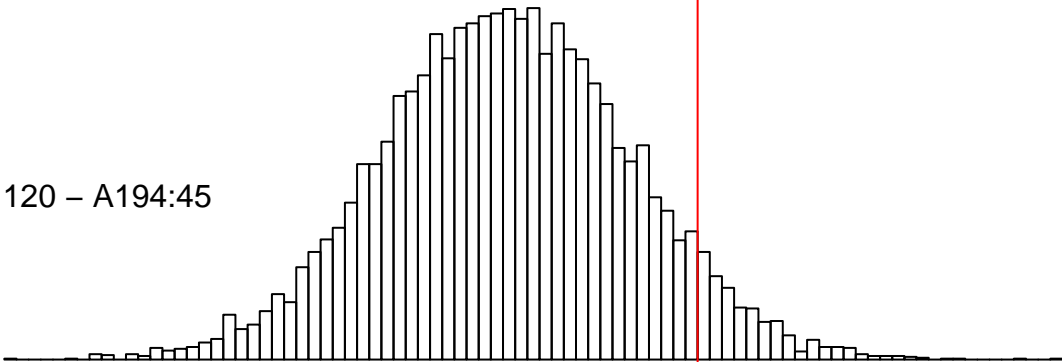

-3

-2

-1

0

1

2

delta(Acid 3)

A194:240

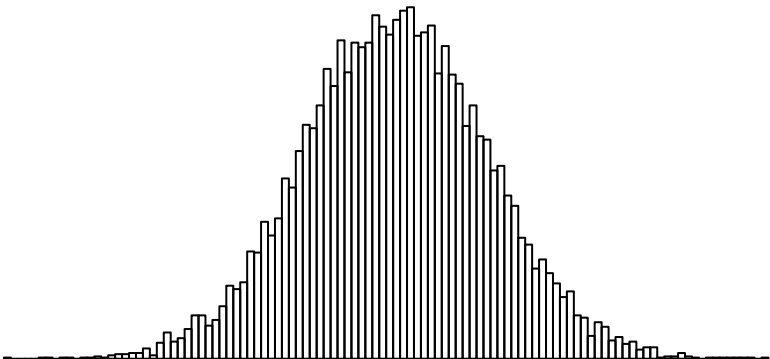

A194:120

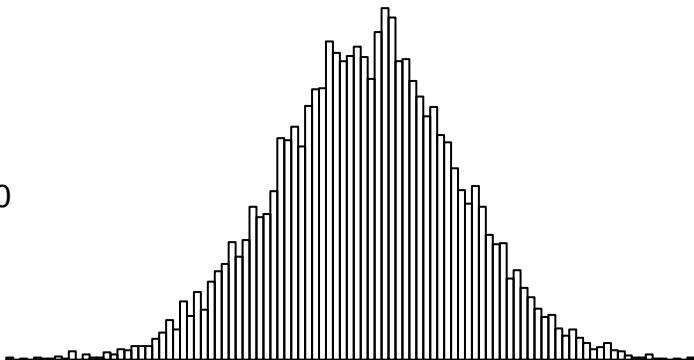

A194:45

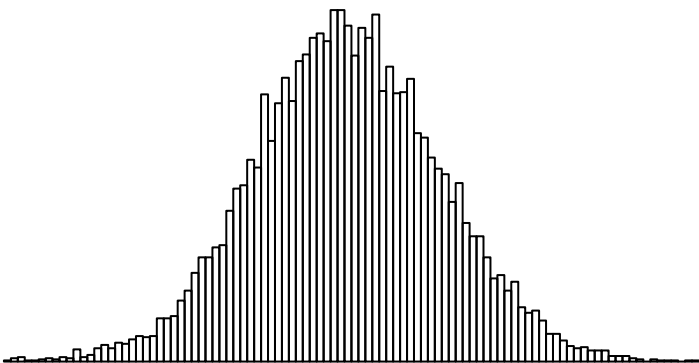

-8.5      -8.0      -7.5      -7.0      -6.5      -6.0      -5.5      -5.0

Acid 6

A194:240 – A194:120

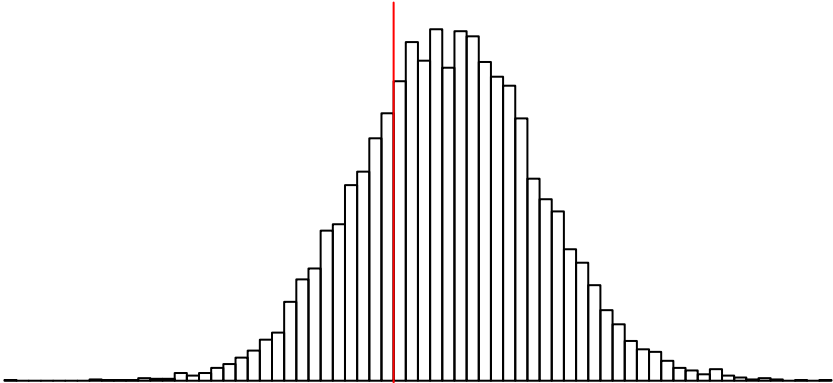

A194:240 – A194:45

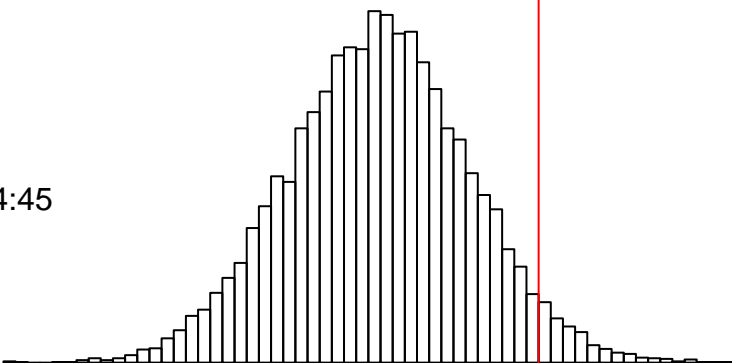

A194:120 – A194:45

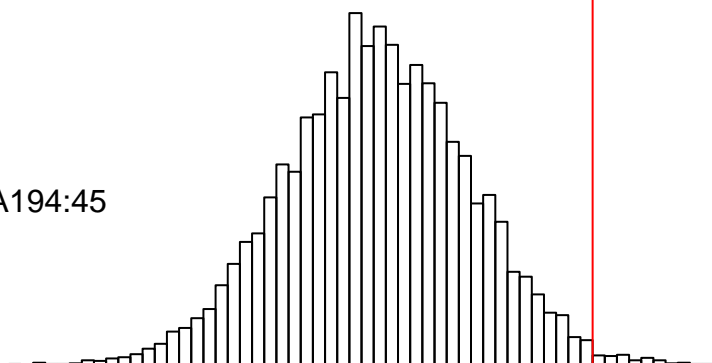

-3 -2 -1 0 1 2

delta(Acid 6)

A194:240

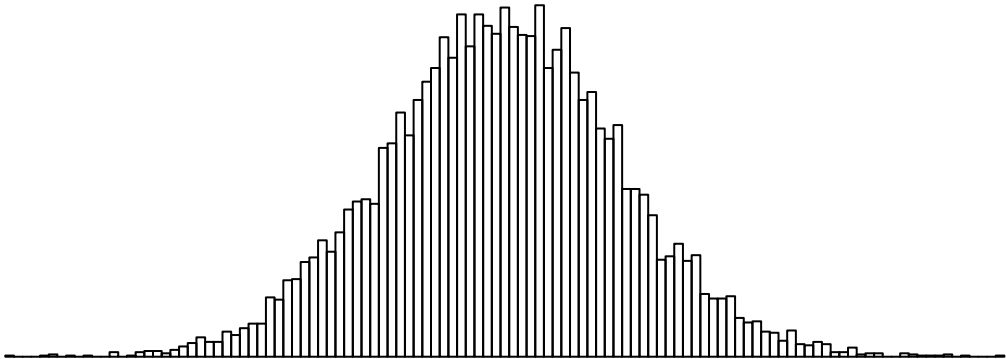

A194:120

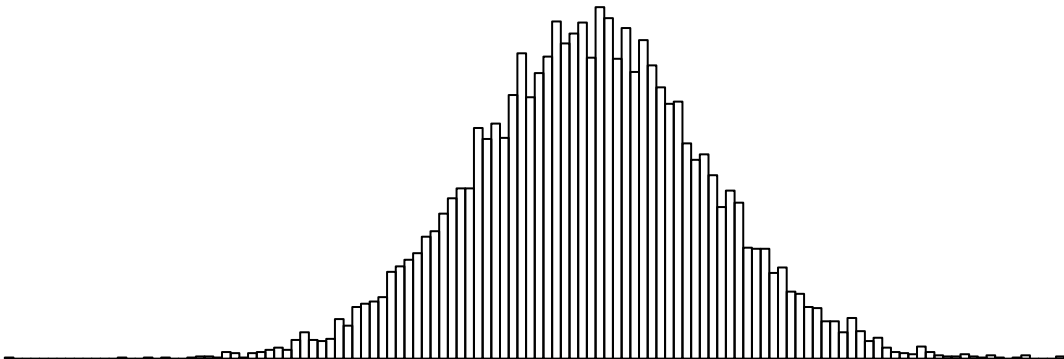

A194:45

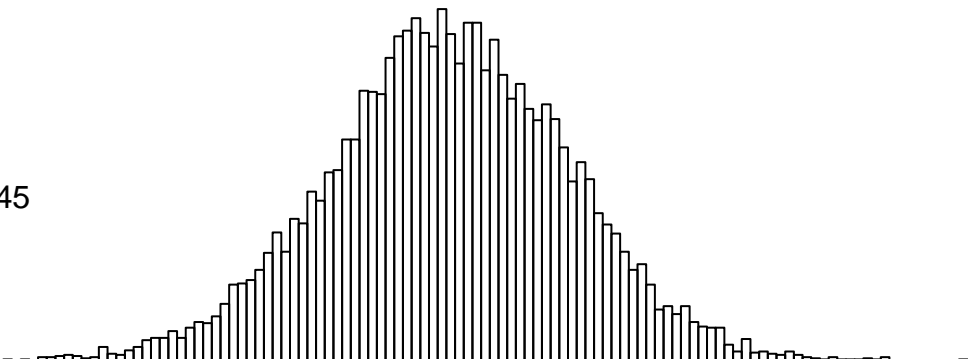

-8.0

-7.5

-7.0

Acid 7

A194:240 – A194:120

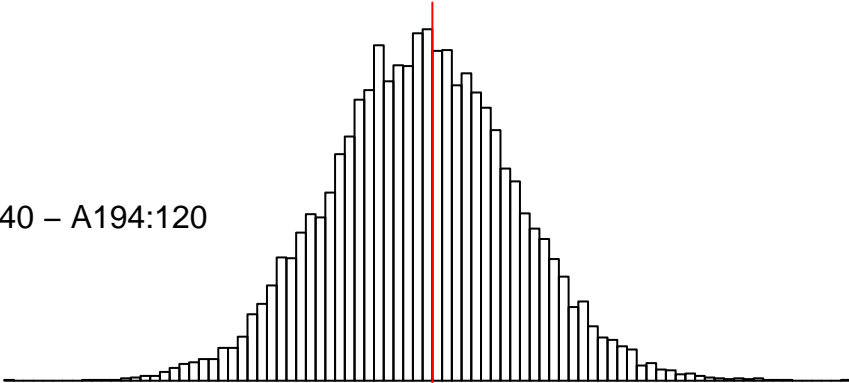

A194:240 – A194:45

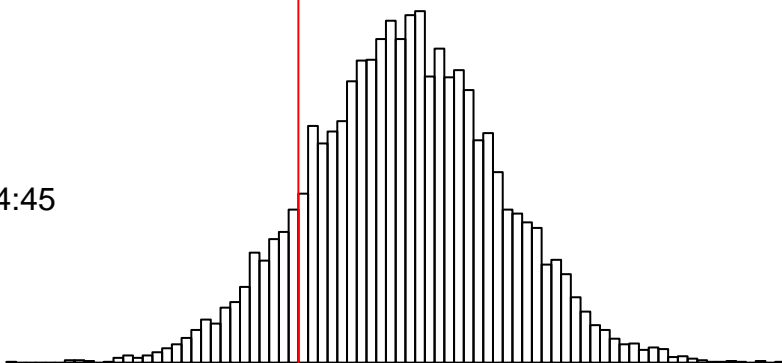

A194:120 – A194:45

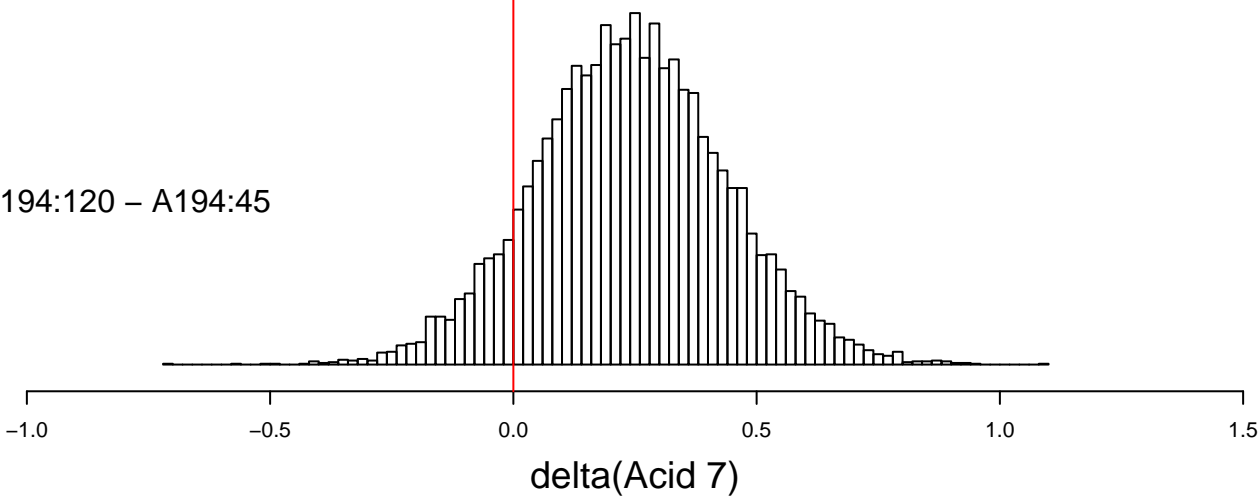



A194:240

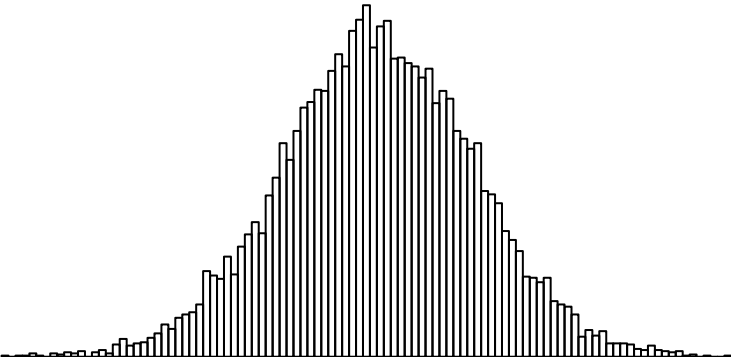

A194:120

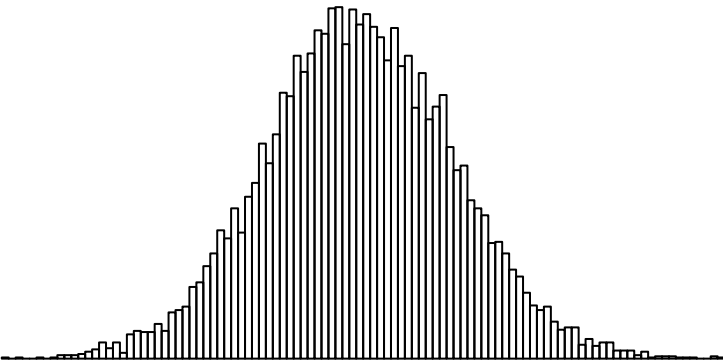

A194:45

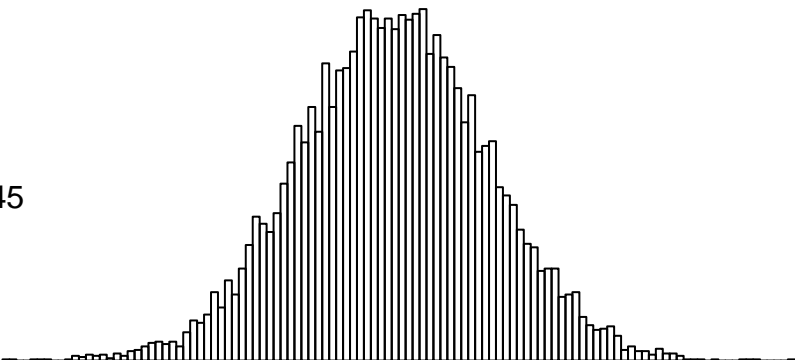

-5.5      -5.0      -4.5      -4.0      -3.5      -3.0      -2.5      -2.0

Acid 8

A194:240 – A194:120

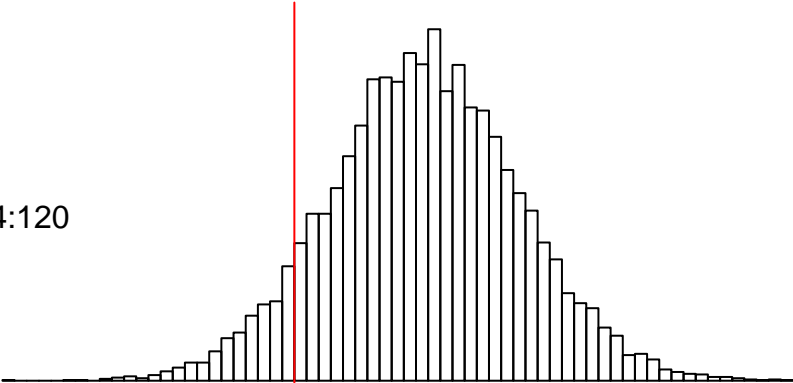

A194:240 – A194:45

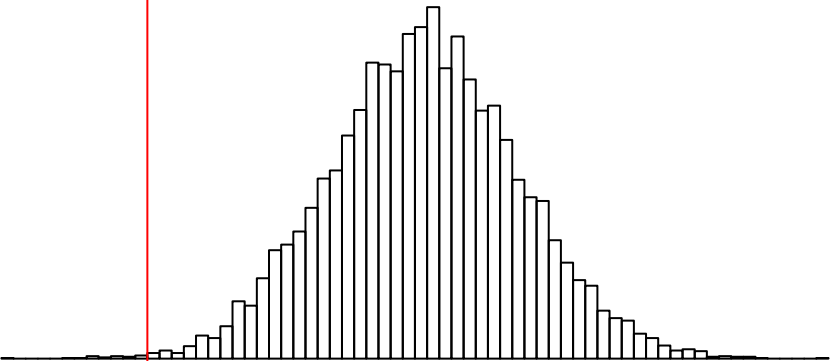

A194:120 – A194:45

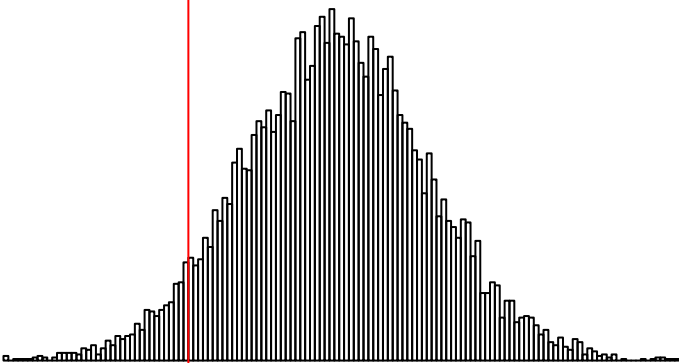

-2      -1      0      1      2      3

delta(Acid 8)

A194:240

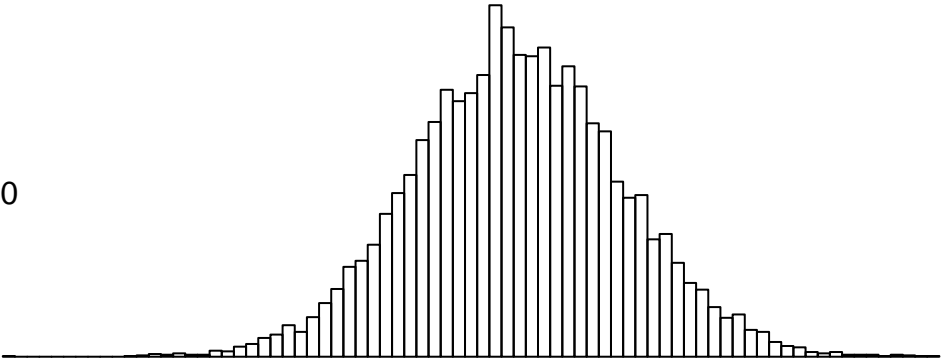

A194:120

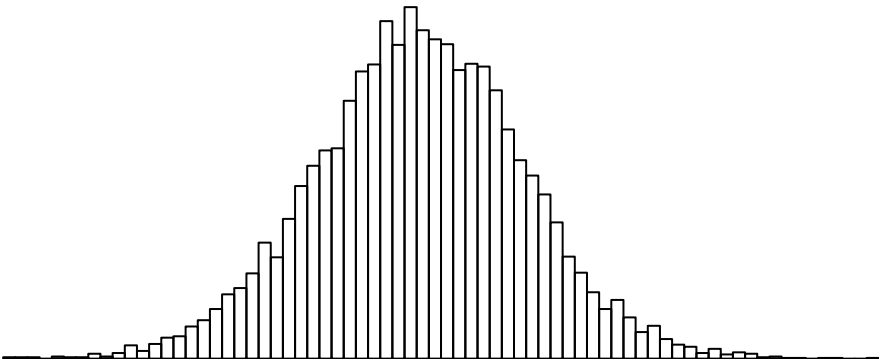

A194:45

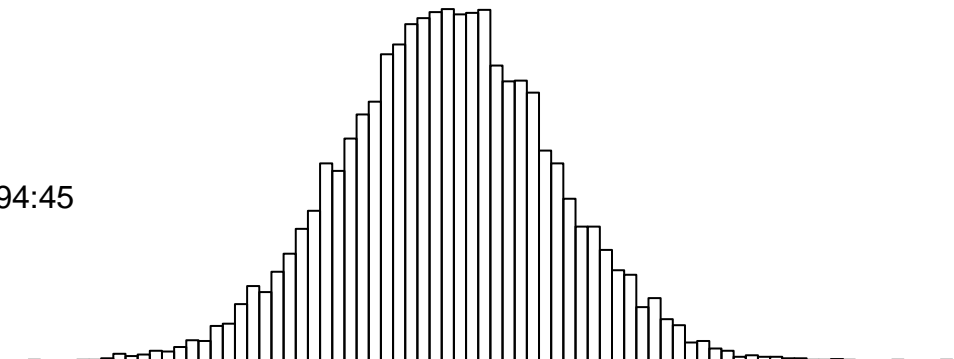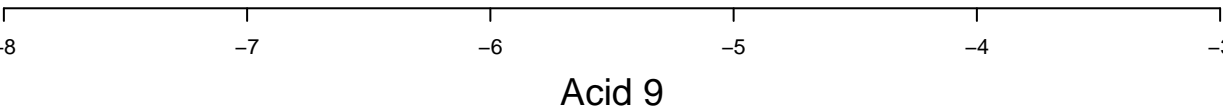

A194:240 – A194:120

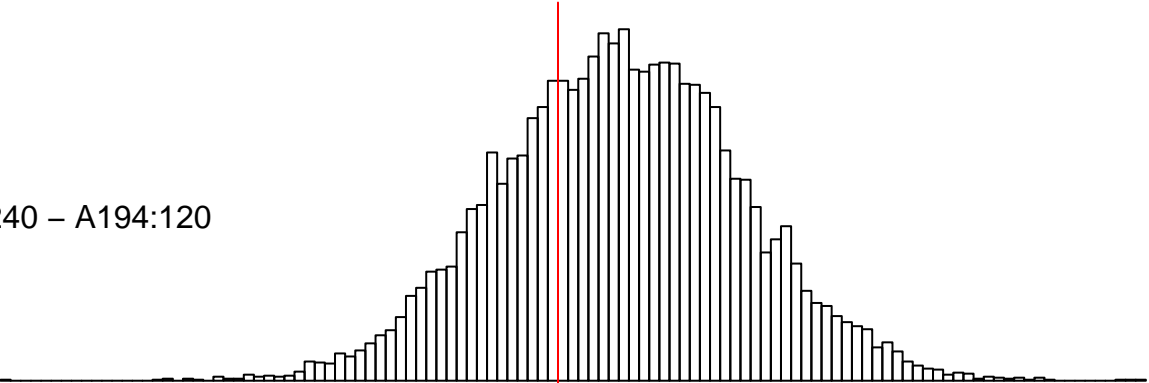

A194:240 – A194:45

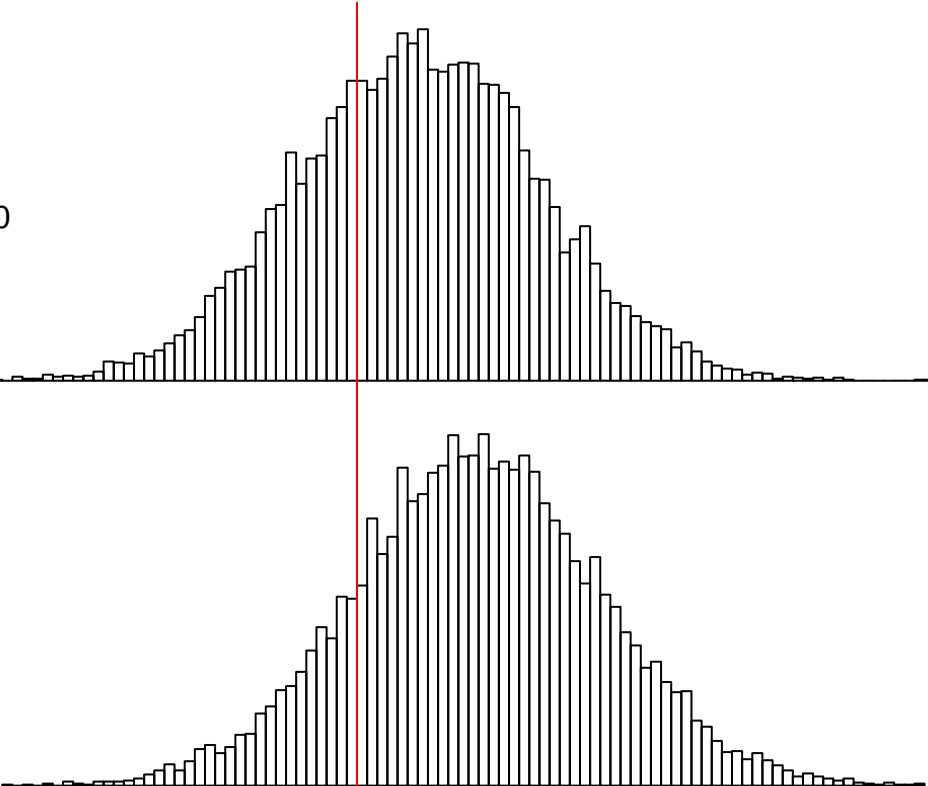

A194:120 – A194:45

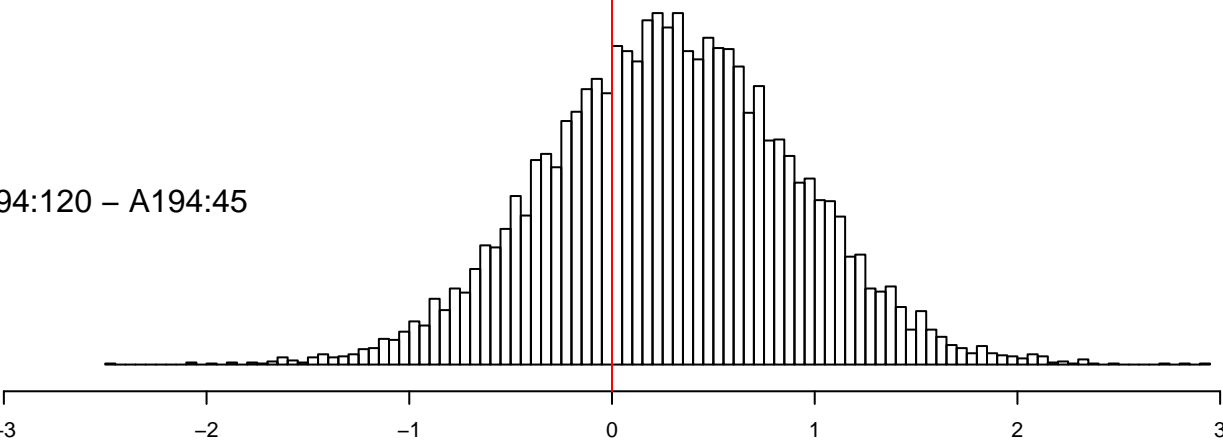

delta(Acid 9)

A194:240

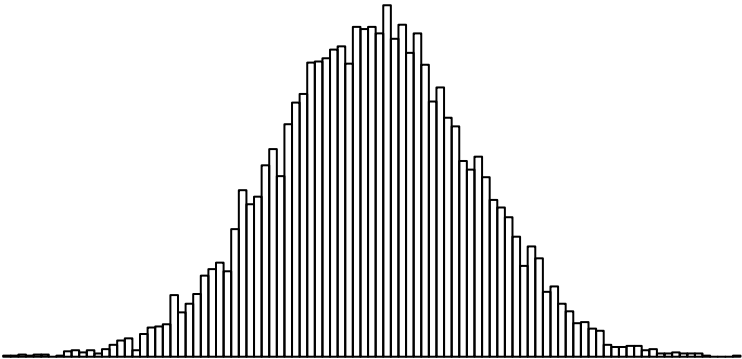

A194:120

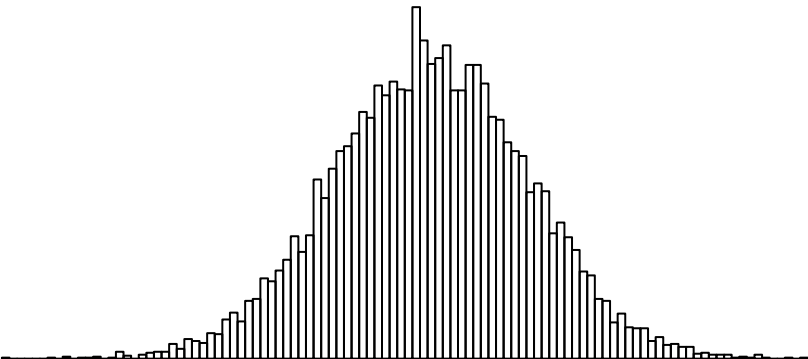

A194:45

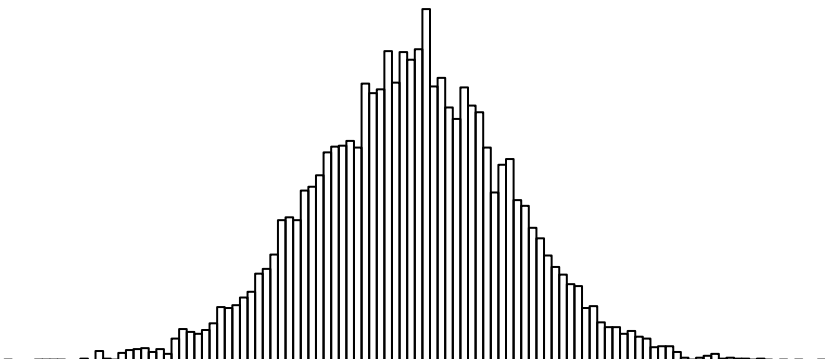

-10

-8

-6

-4

Acid 10

A194:240 – A194:120

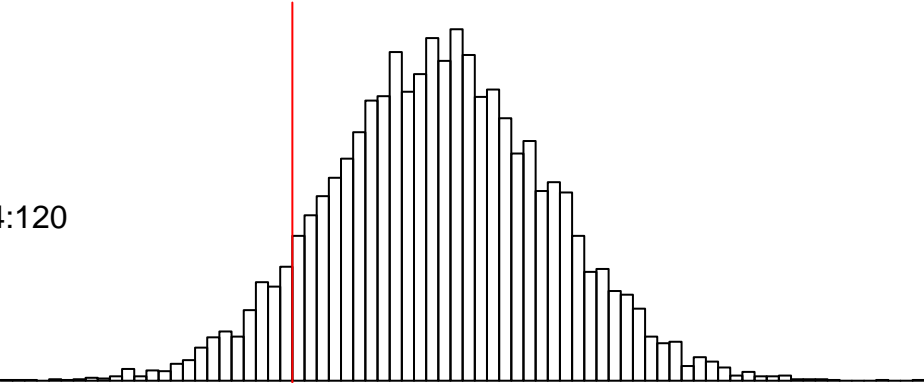

A194:240 – A194:45

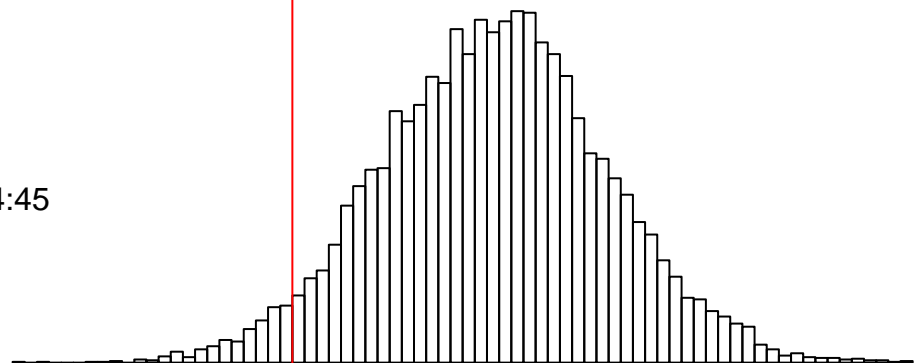

A194:120 – A194:45

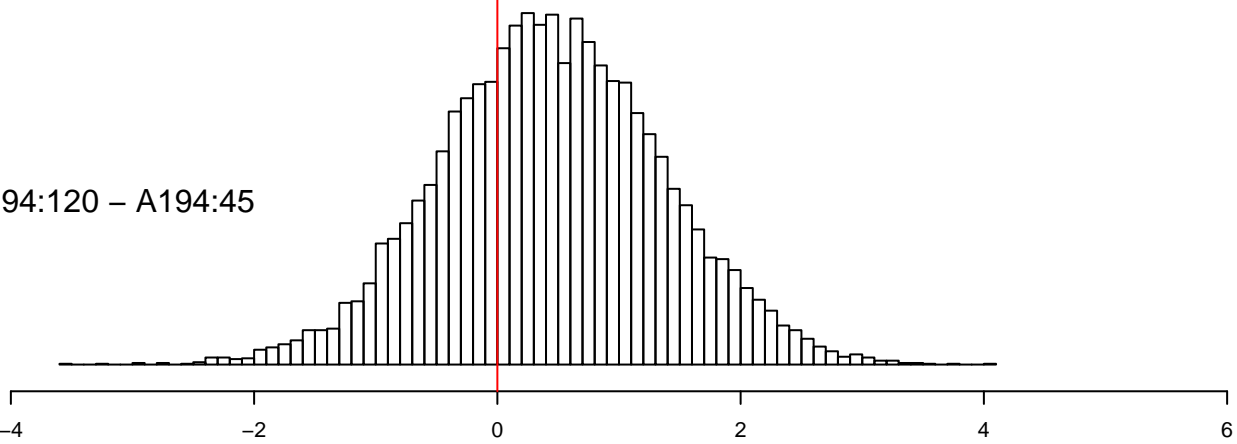

delta(Acid 10)

A194:240

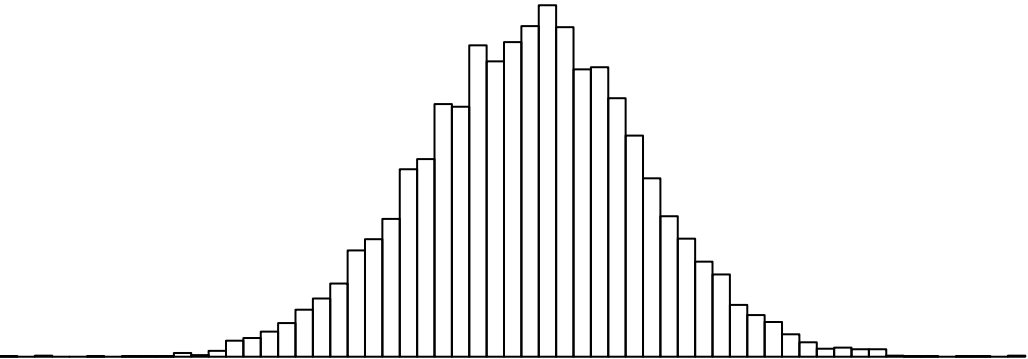

A194:120

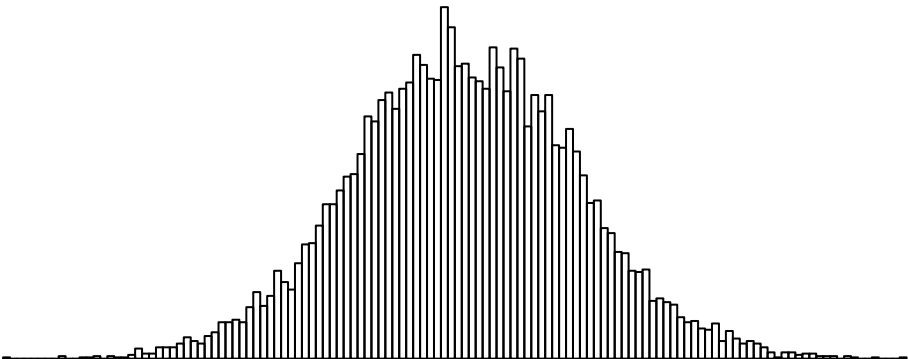

A194:45

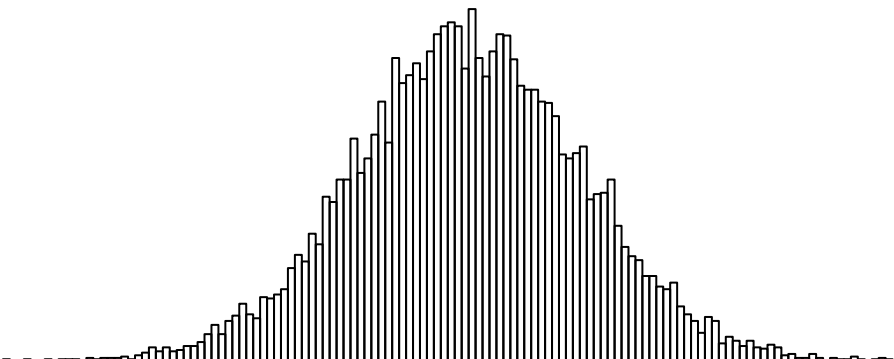

-9.0 -8.5 -8.0 -7.5 -7.0 -6.5 -6.0 -5.5

Acid 11

A194:240 – A194:120

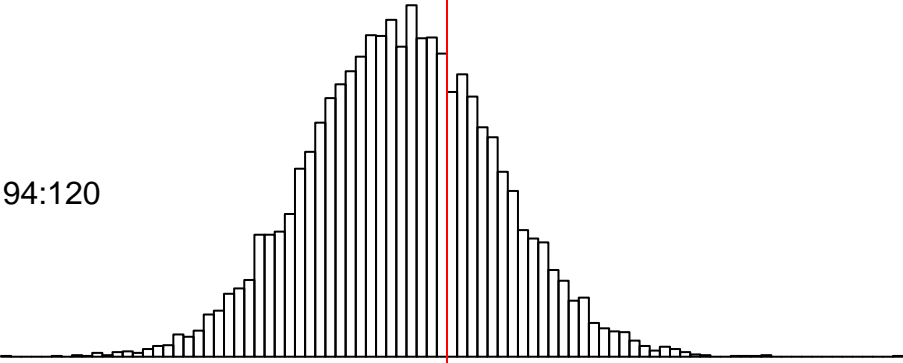

A194:240 – A194:45

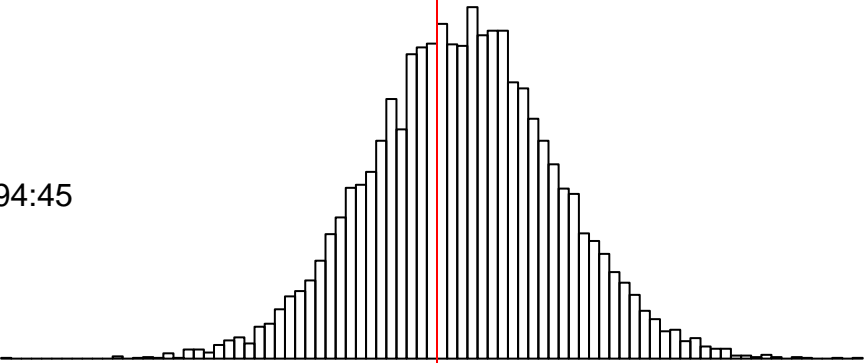

A194:120 – A194:45

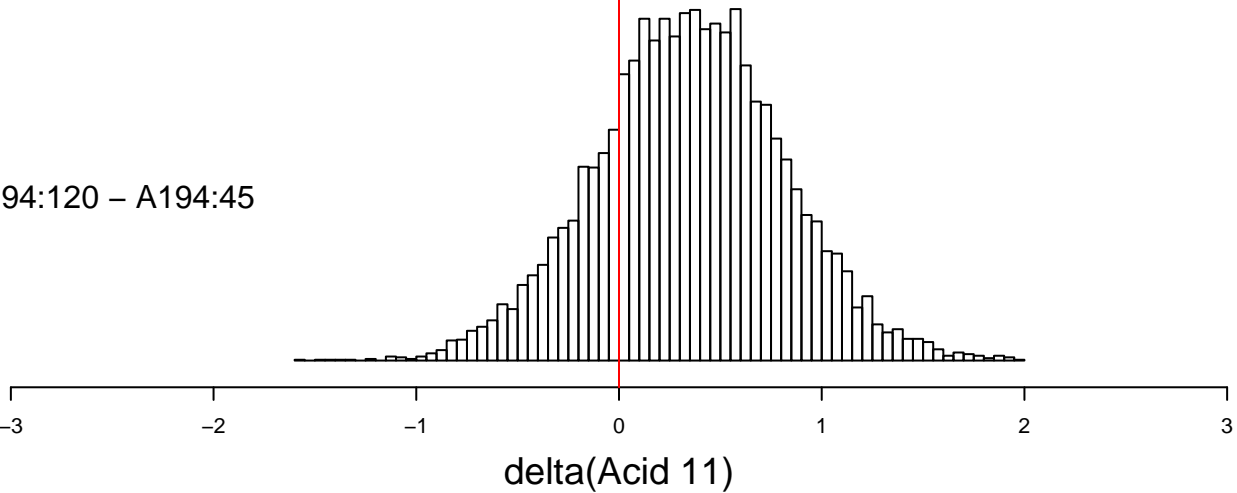



A194:240

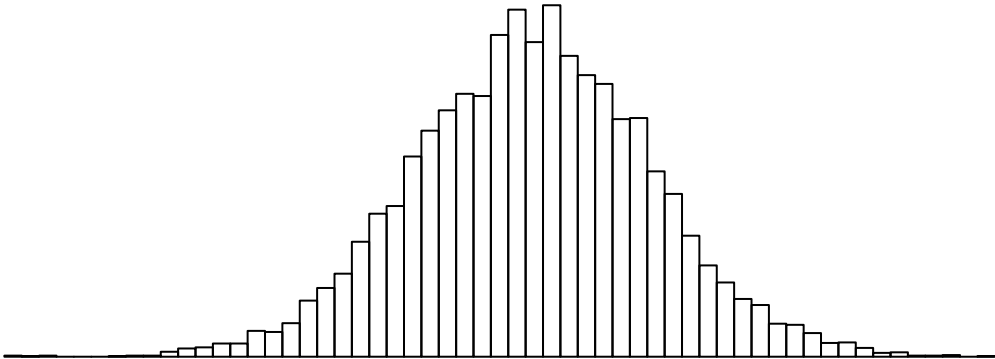

A194:120

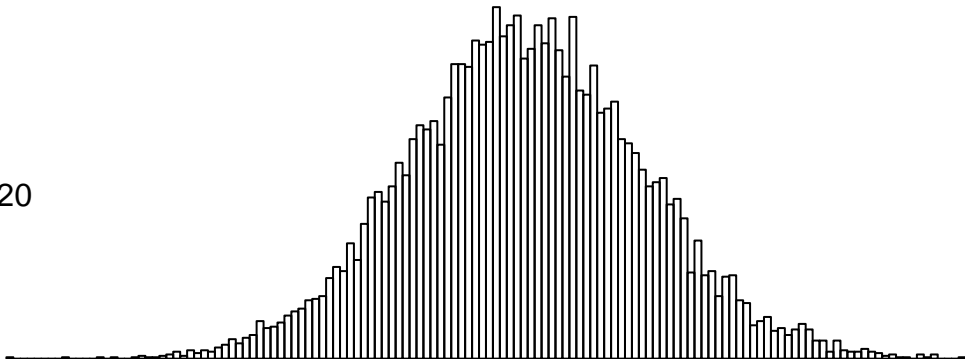

A194:45

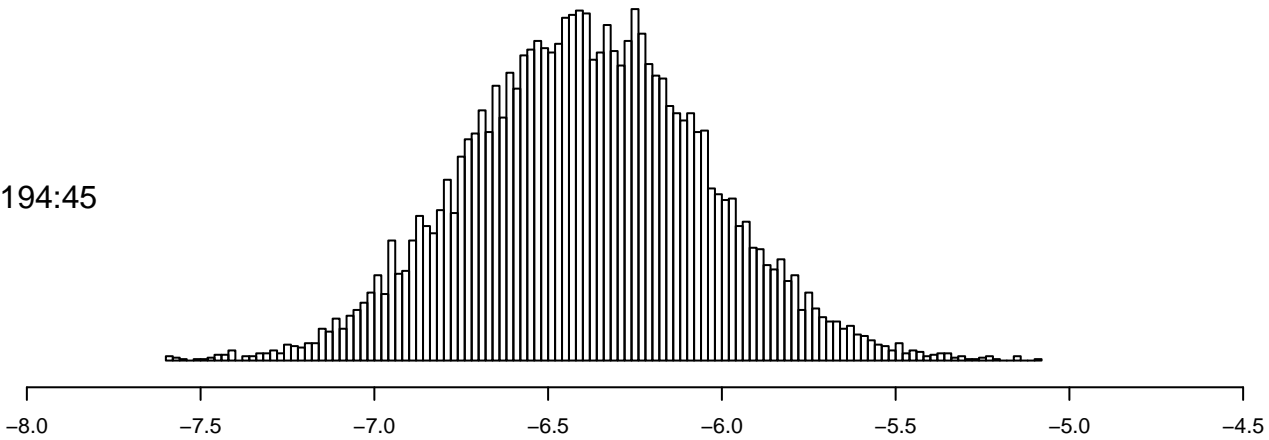

Acid 12

A194:240 – A194:120

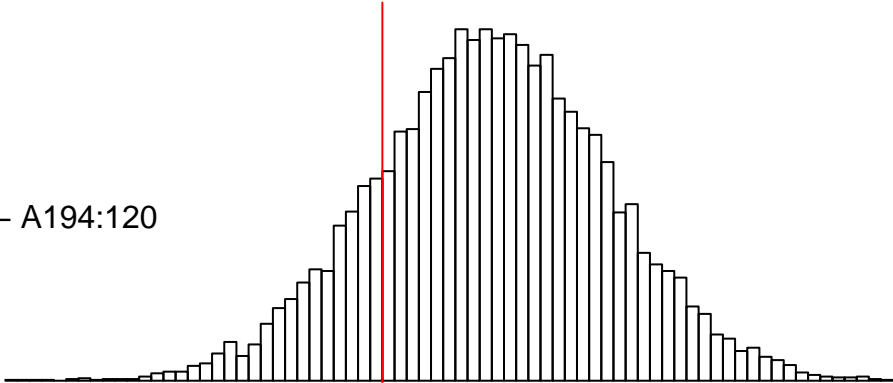

A194:240 – A194:45

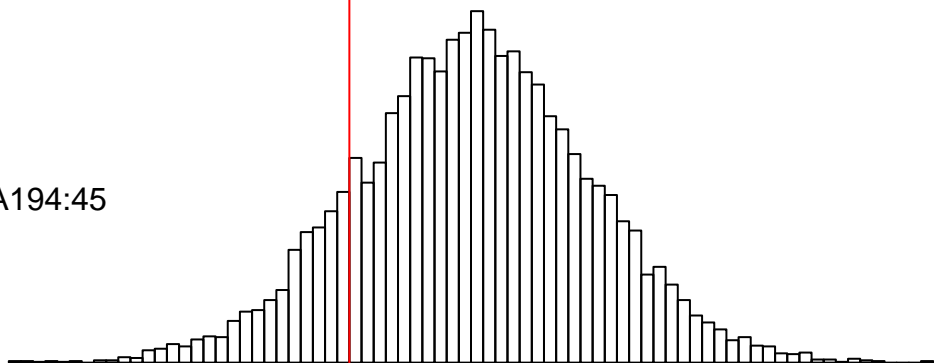

A194:120 – A194:45

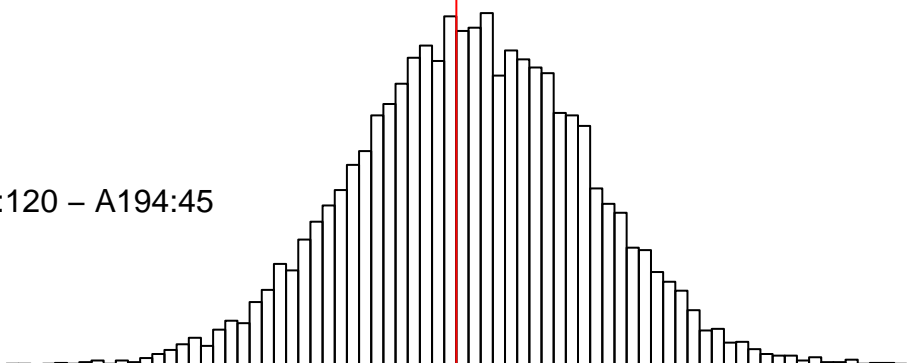

-2 -1 0 1 2 3

delta(Acid 12)

A194:240

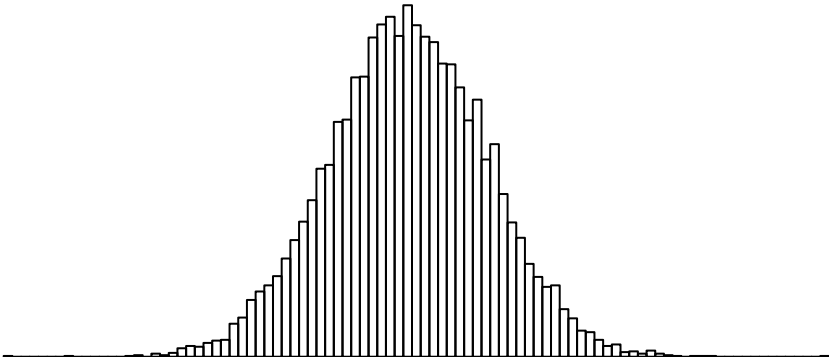

A194:120

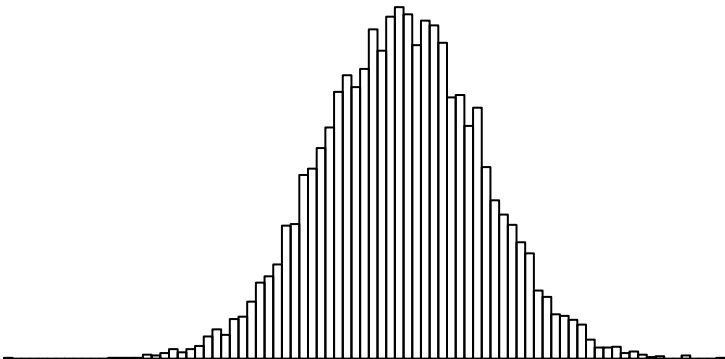

A194:45

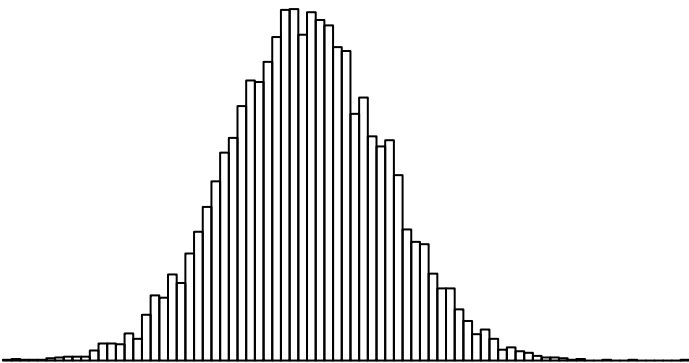

-11 -10 -9 -8 -7 -6 -5 -4

Acid 13

A194:240 – A194:120

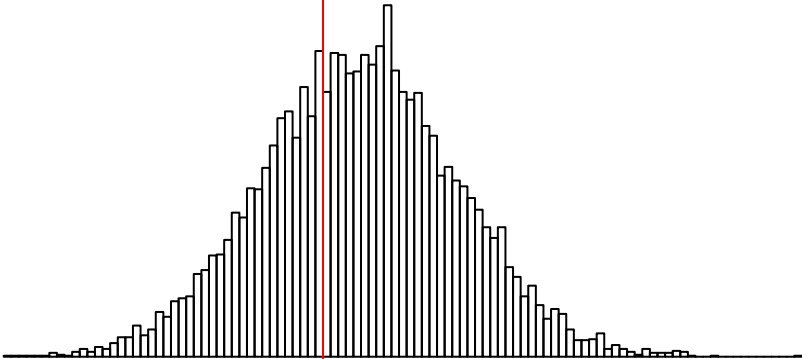

A194:240 – A194:45

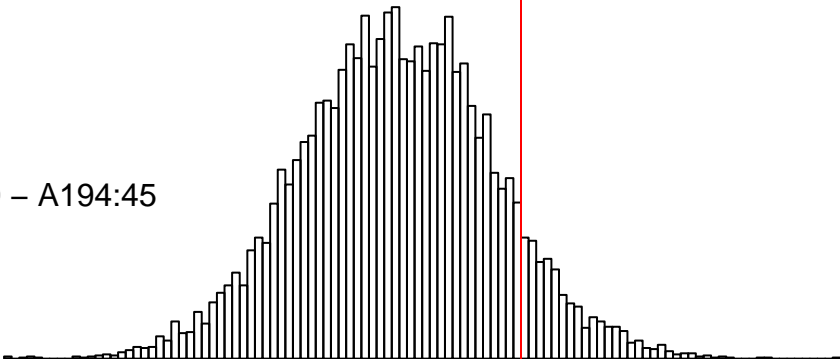

A194:120 – A194:45

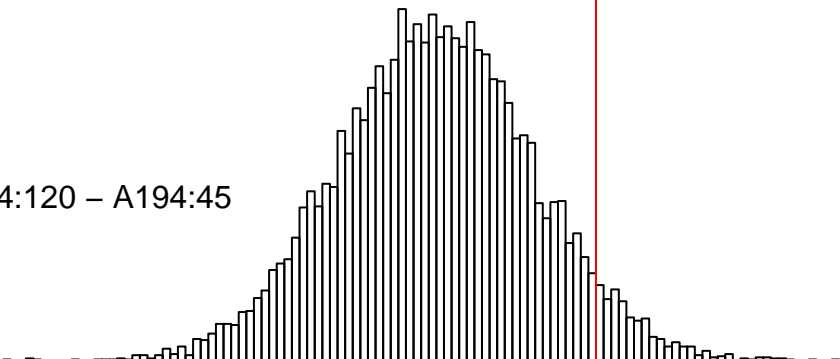

-4

-2

0

2

4

delta(Acid 13)

A194:240

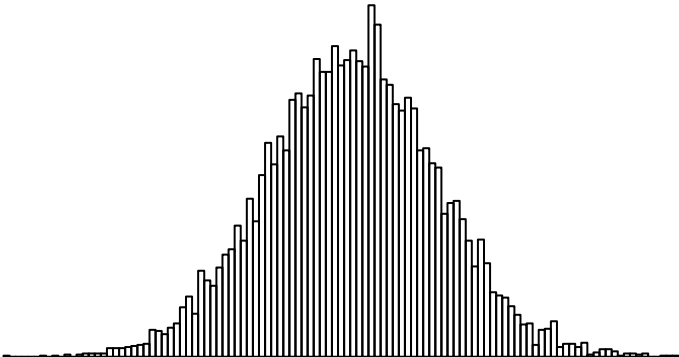

A194:120

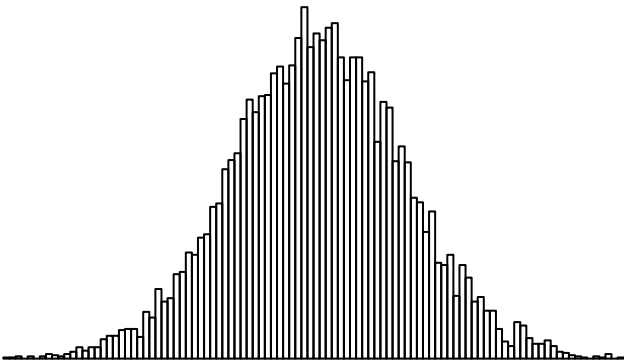

A194:45

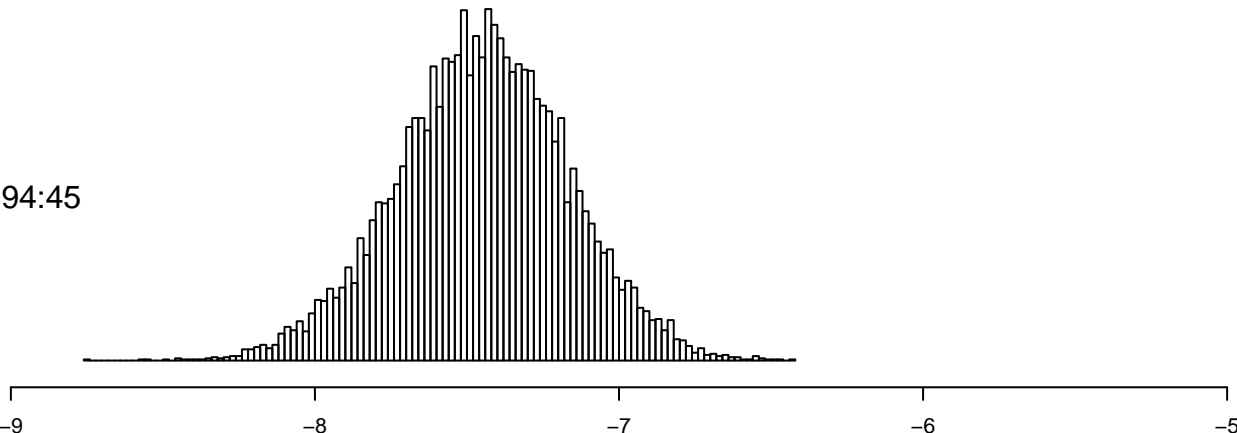

Acid 14

A194:240 – A194:120

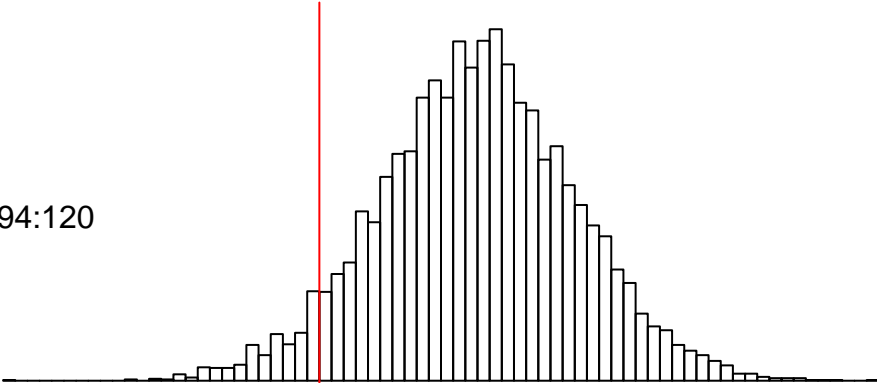

A194:240 – A194:45

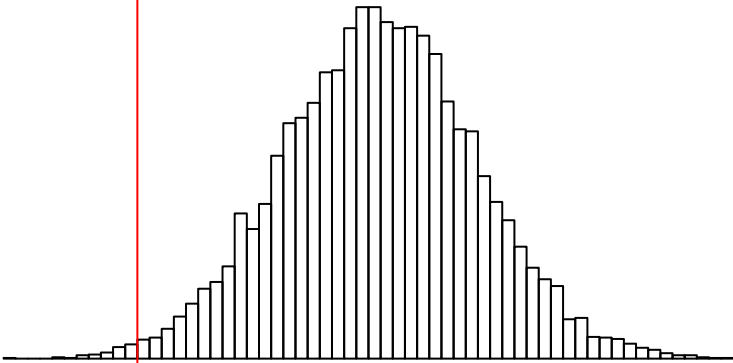

A194:120 – A194:45

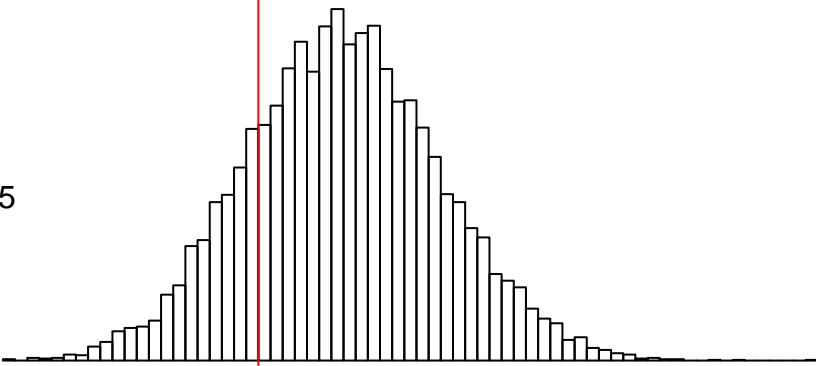

-2 -1 0 1 2 3

delta(Acid 14)
