# Supplementary material for: Taxonomic and Environmental Variation of Metabolite Profiles in Marine Dinoflagellates of the Genus Symbiodinium
Source: MDPI journal article supplement (doi:10.3390/metabo5010074), 2015-02-16
Supplement: s1 [file s1]

B224:240

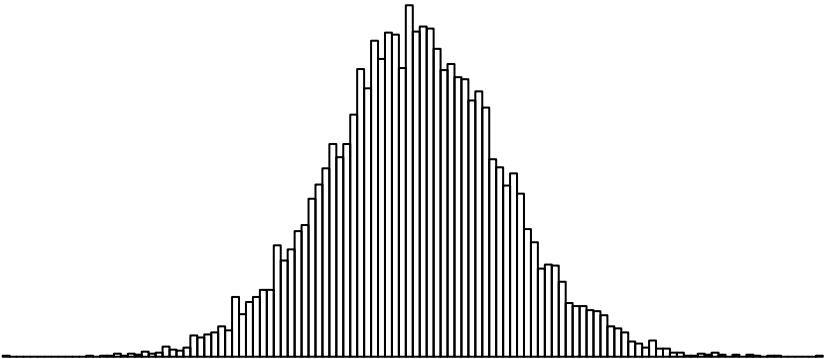

B224:120

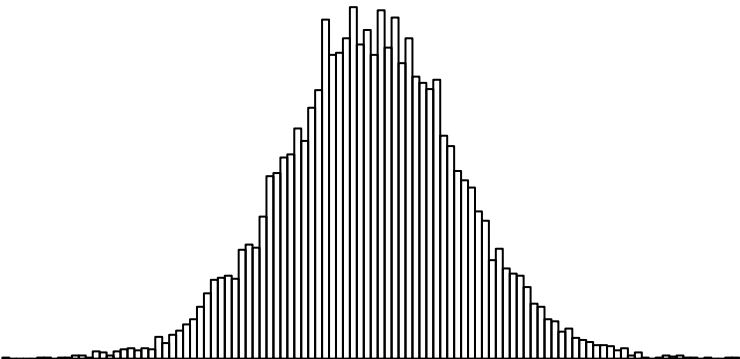

B224:45

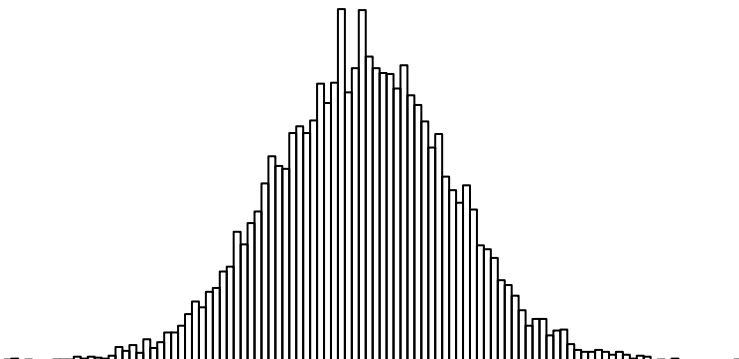

-7.0 -6.5 -6.0 -5.5 -5.0 -4.5 -4.0 -3.5

Amino Acid 2

B224:240 – B224:120

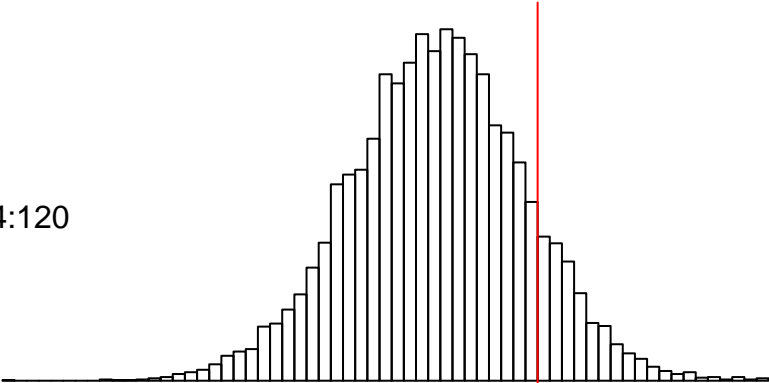

B224:240 – B224:45

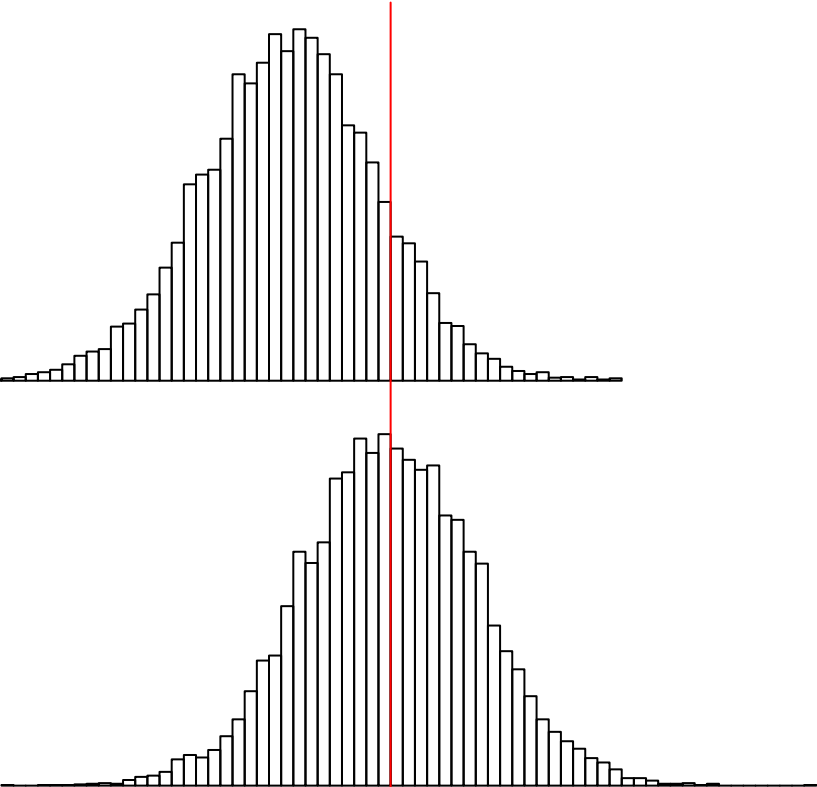

B224:120 – B224:45

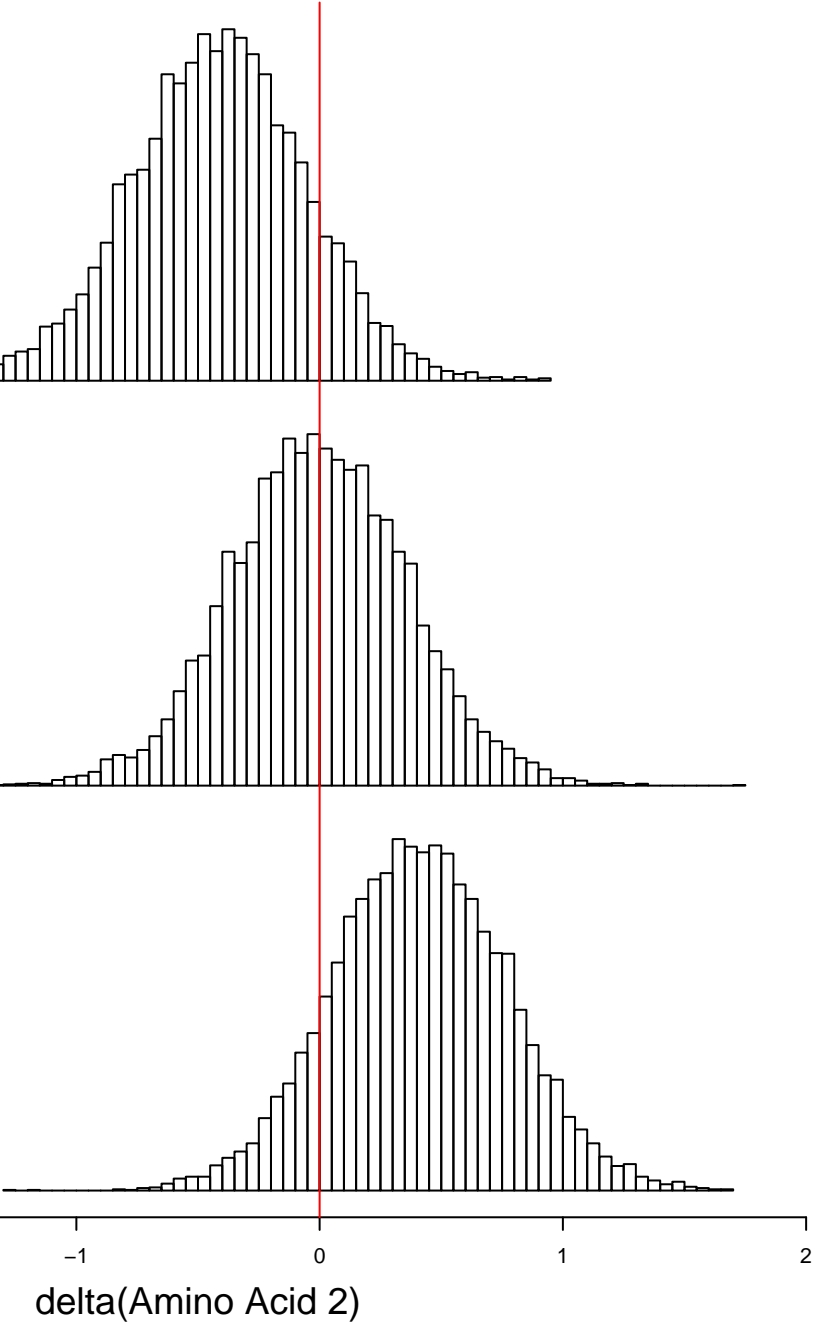

B224:240

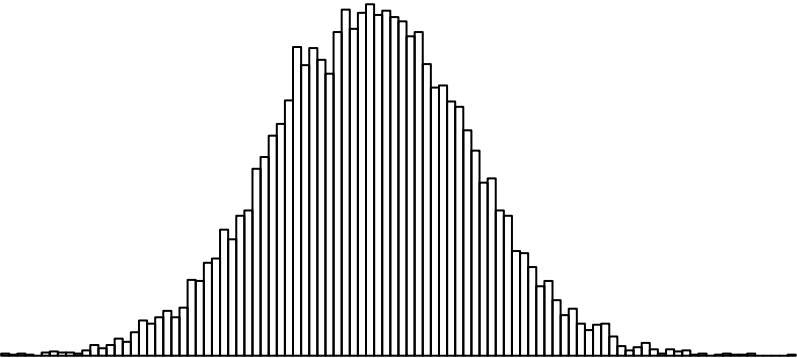

B224:120

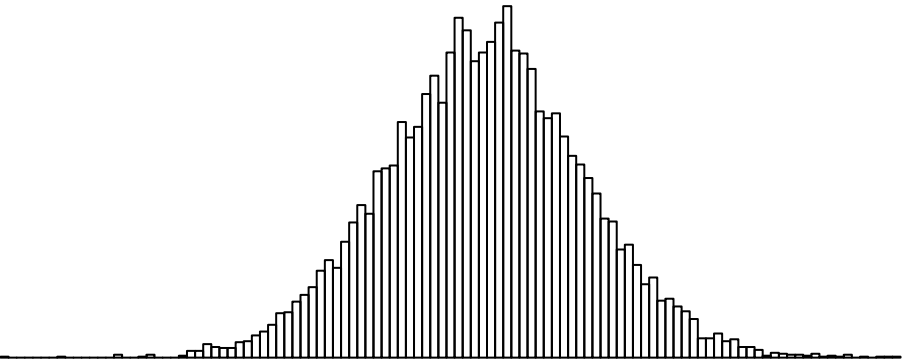

B224:45

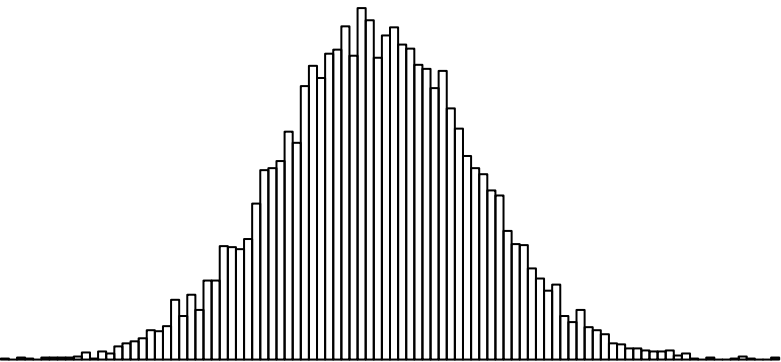

-8.5 -8.0 -7.5 -7.0 -6.5 -6.0 -5.5

Amino Acid 3

B224:240 – B224:120

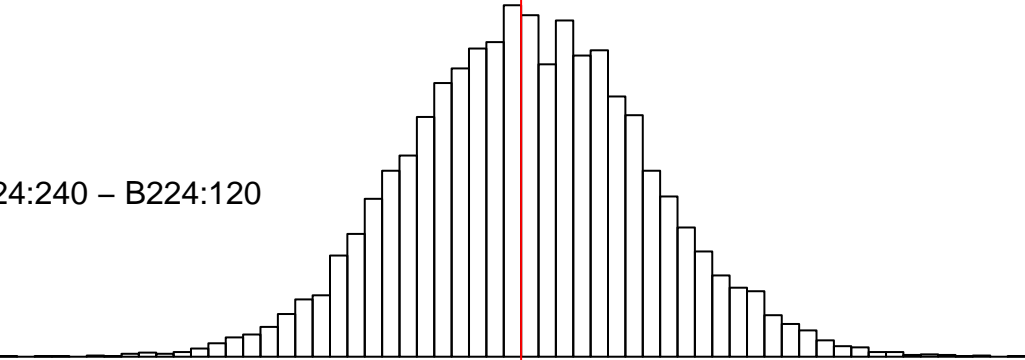

B224:240 – B224:45

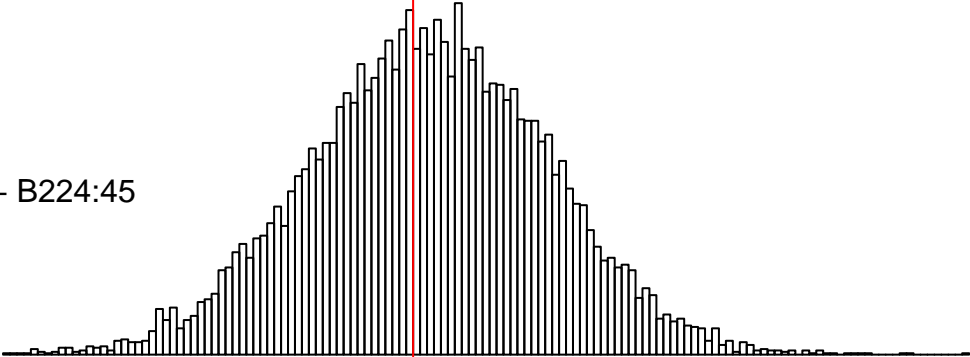

B224:120 – B224:45

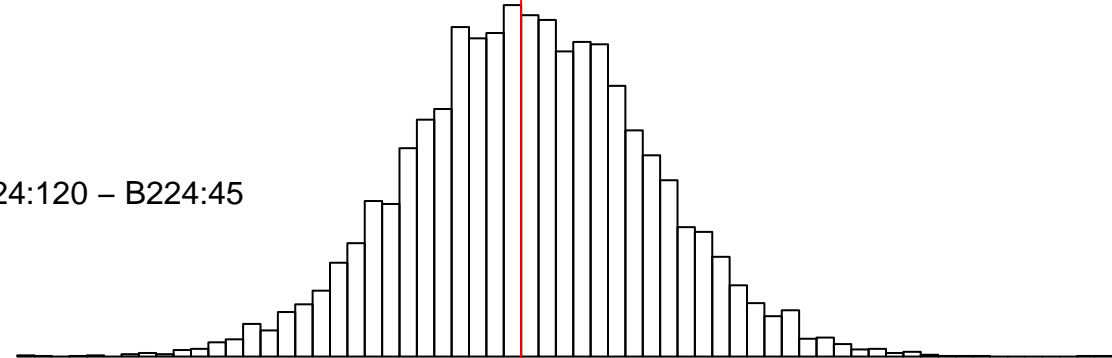

-1.5      -1.0      -0.5      0.0      0.5      1.0      1.5      2.0

delta(Amino Acid 3)

B224:240

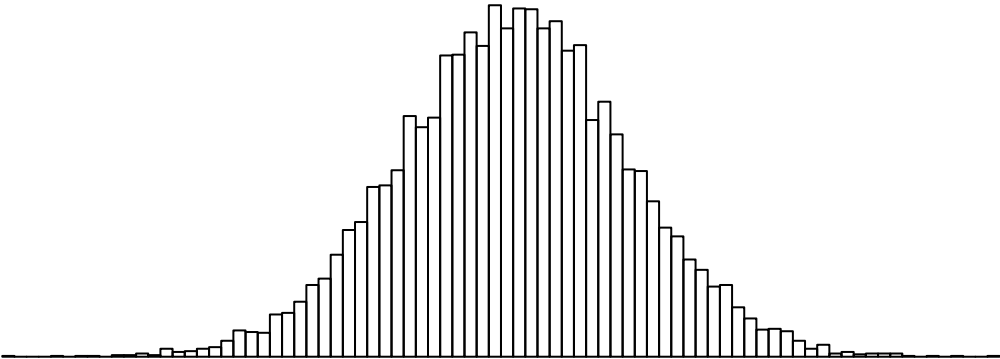

B224:120

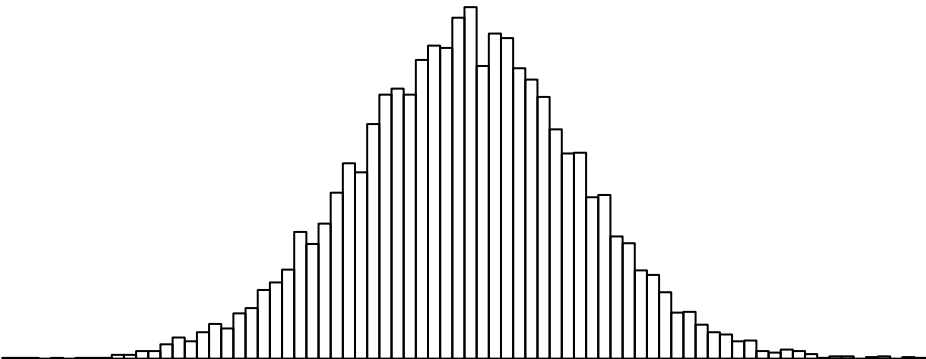

B224:45

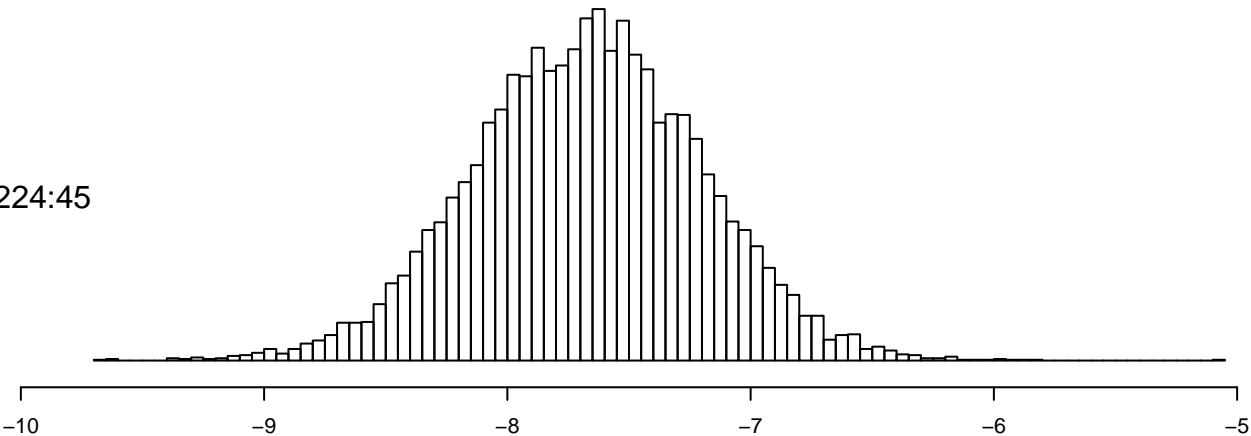

Alanine

B224:240 – B224:120

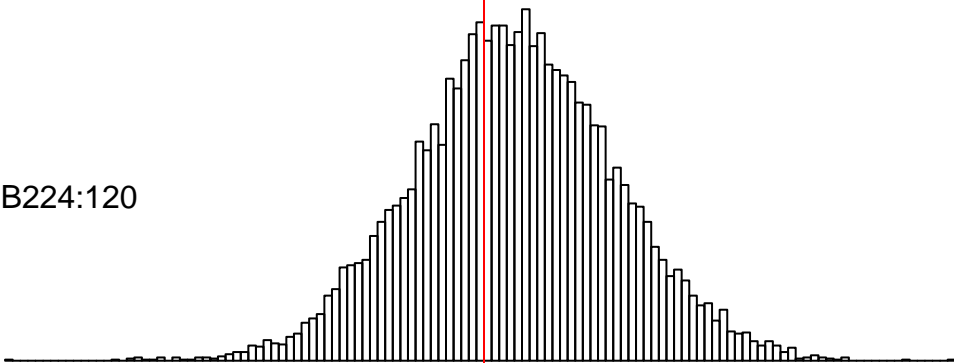

B224:240 – B224:45

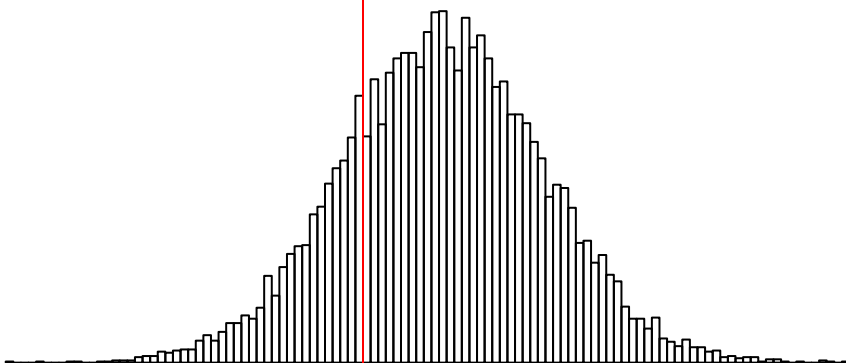

B224:120 – B224:45

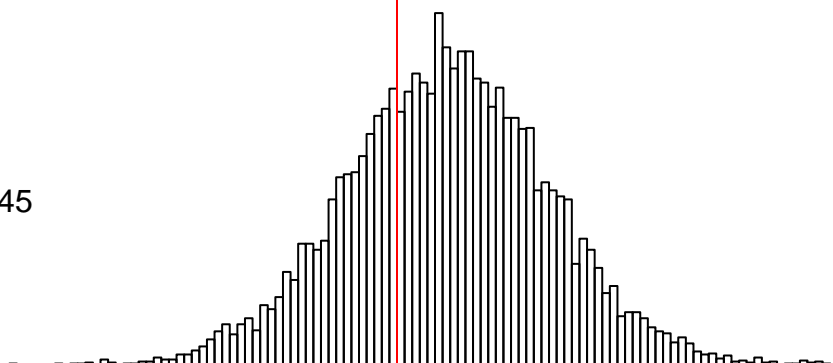

-4

-2

0

2

4

delta(Alanine)

B224:240

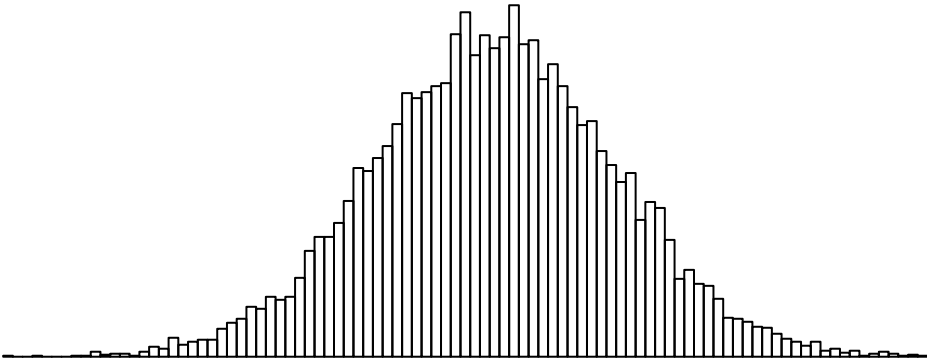

B224:120

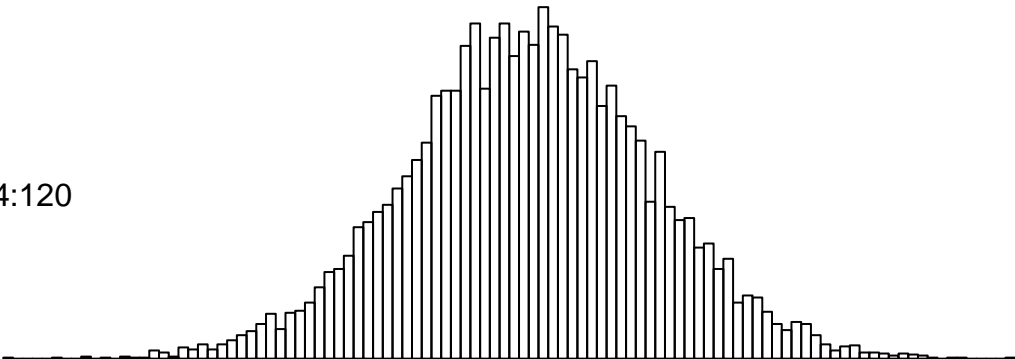

B224:45

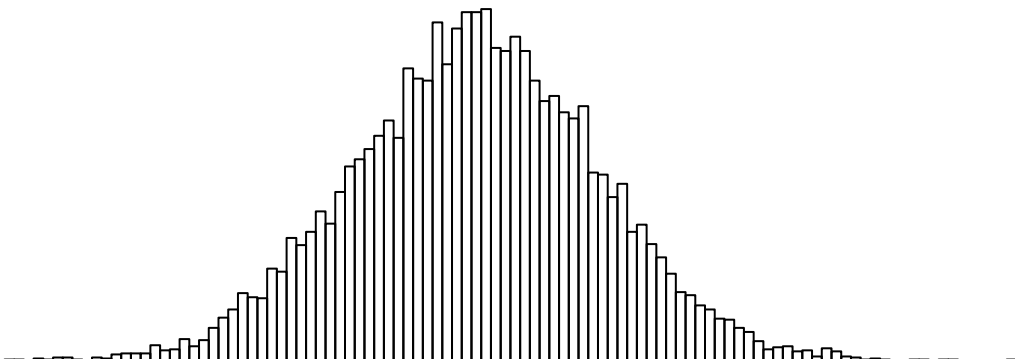

-9.0 -8.5 -8.0 -7.5 -7.0 -6.5

Amino Acid 4

B224:240 – B224:120

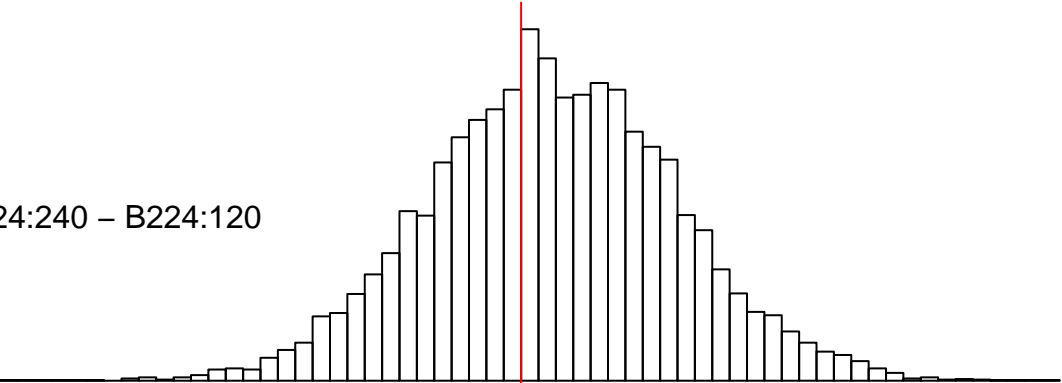

B224:240 – B224:45

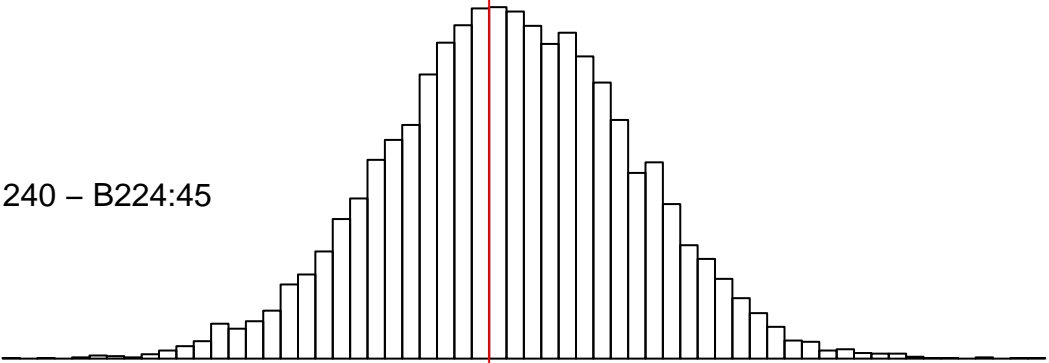

B224:120 – B224:45

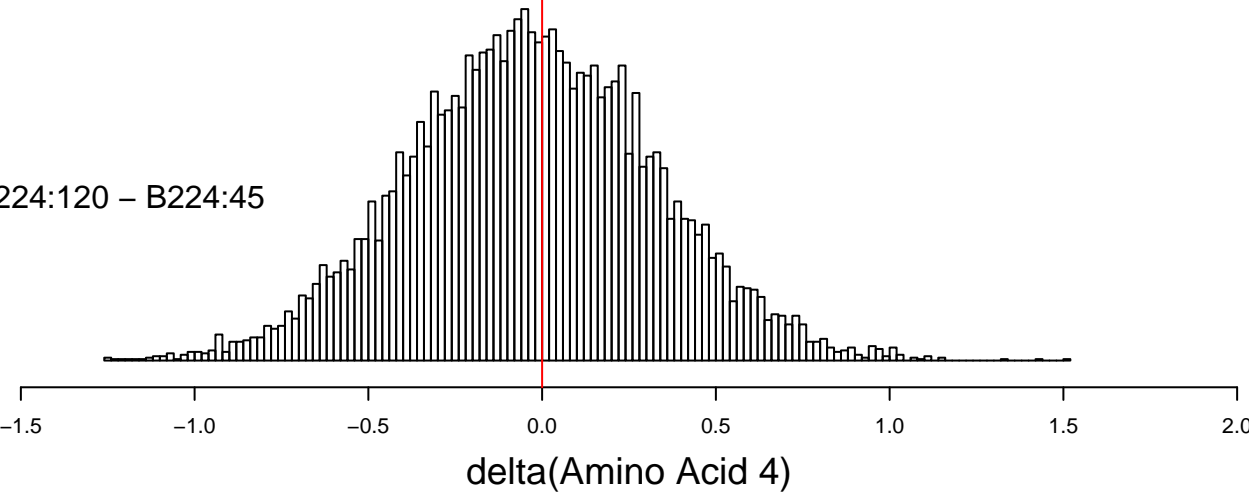



B224:240

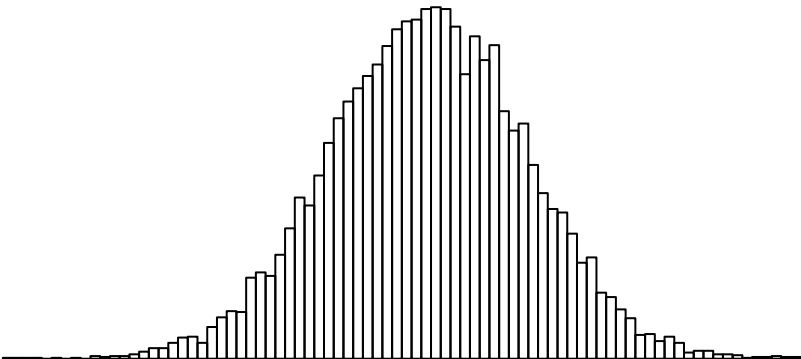

B224:120

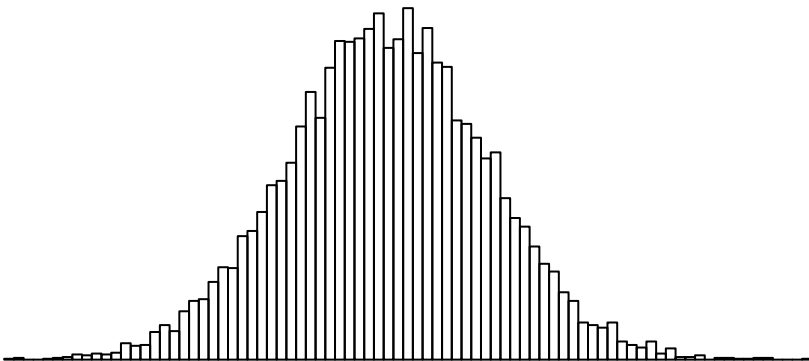

B224:45

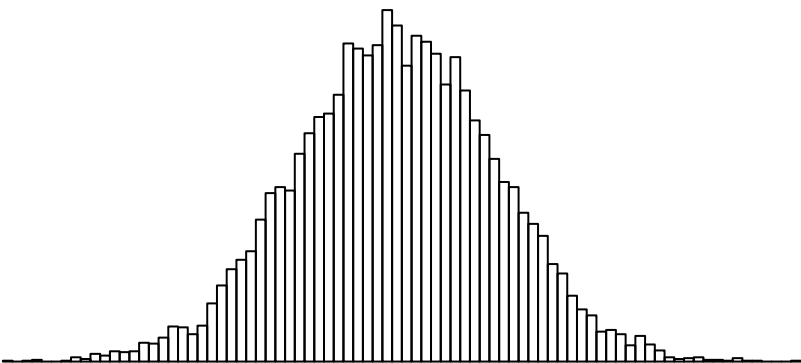

-9.0 -8.5 -8.0 -7.5 -7.0 -6.5

Amino Acid 6

B224:240 – B224:120

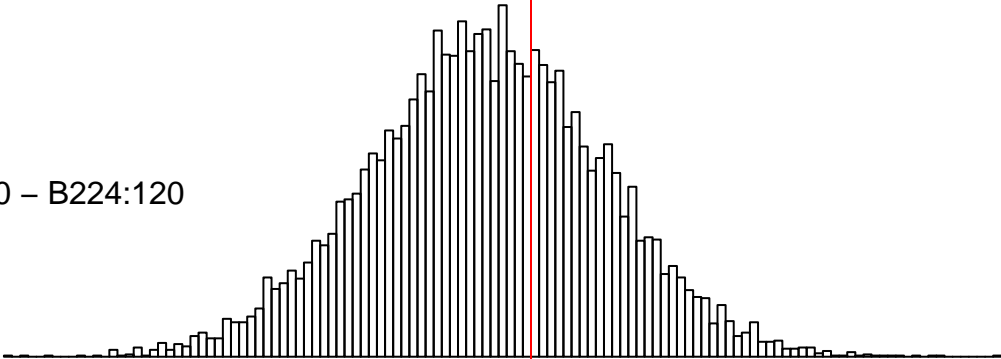

B224:240 – B224:45

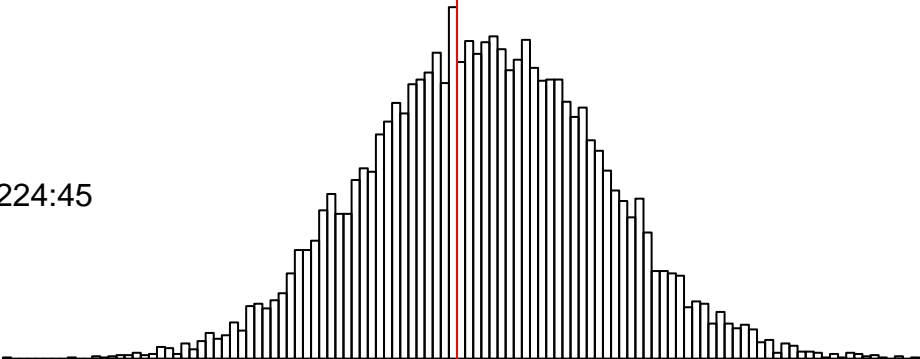

B224:120 – B224:45

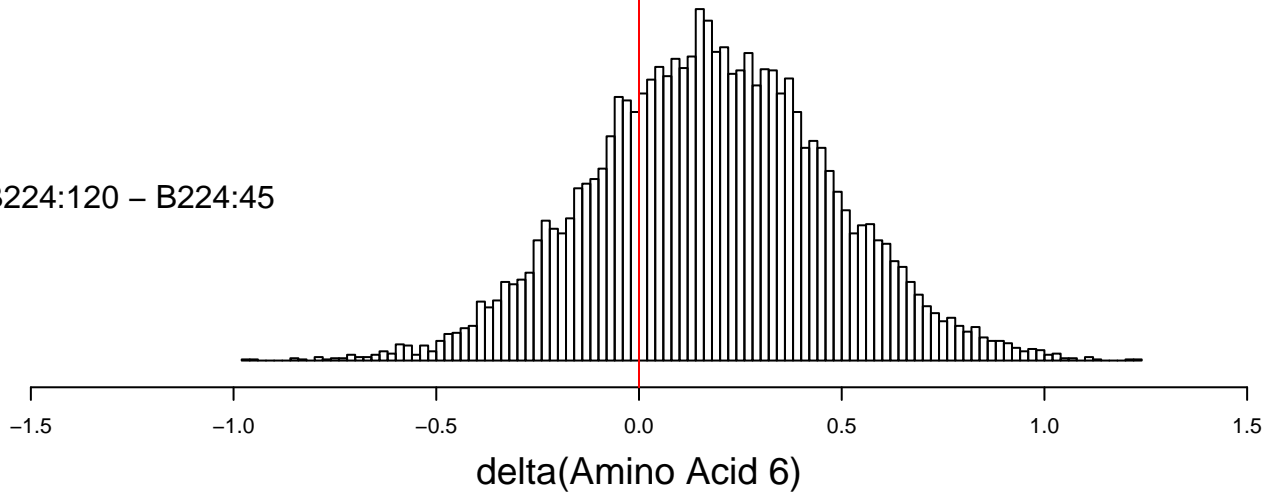

B224:240

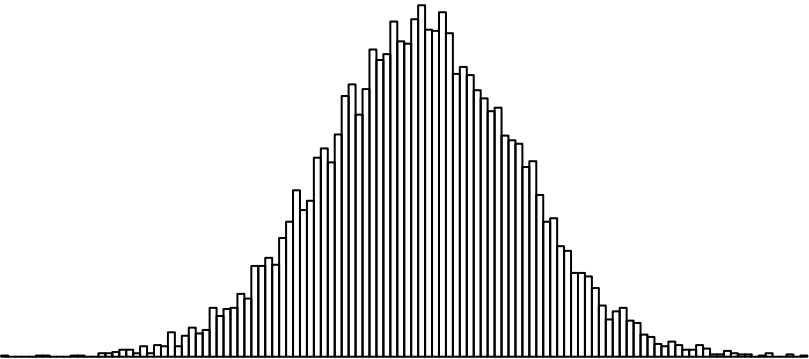

B224:120

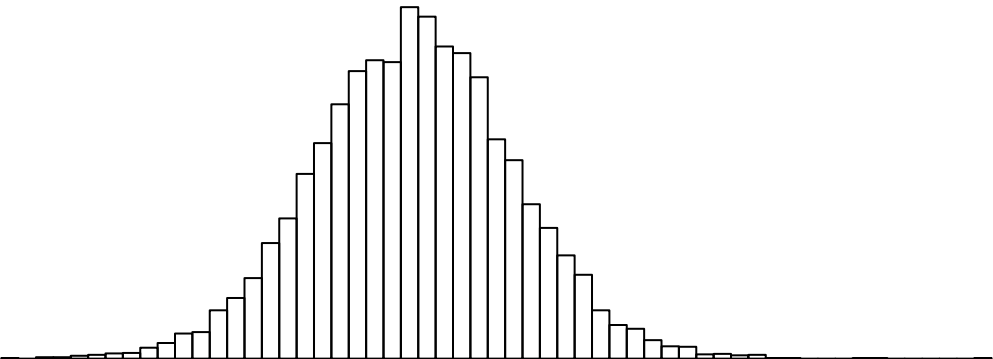

B224:45

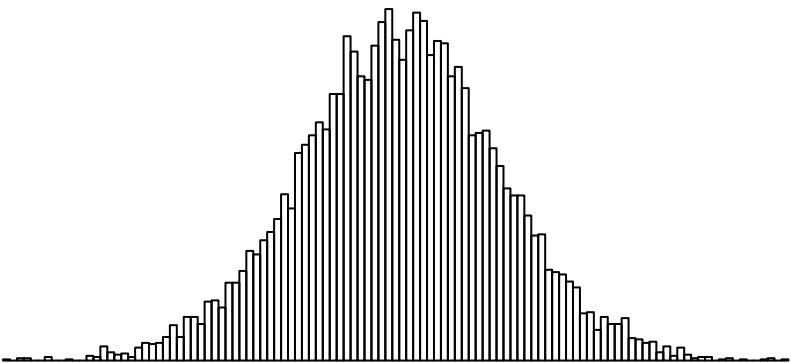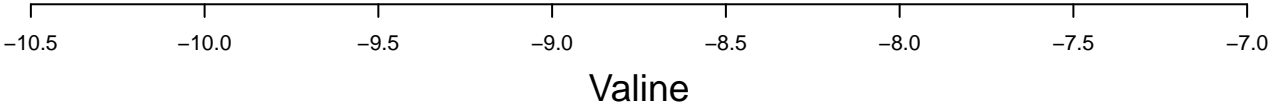

B224:240 – B224:120

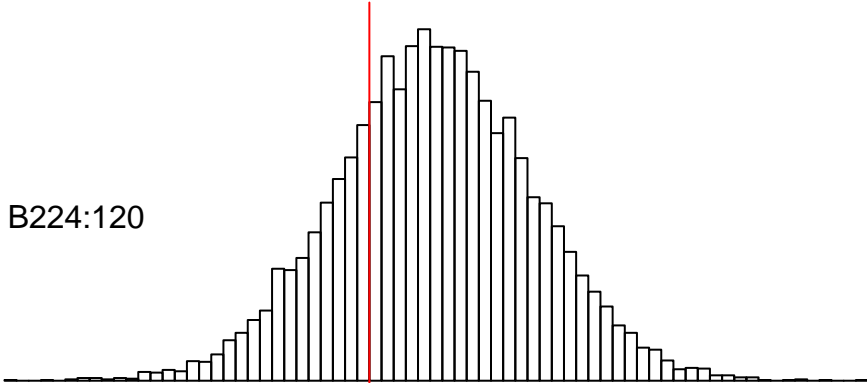

B224:240 – B224:45

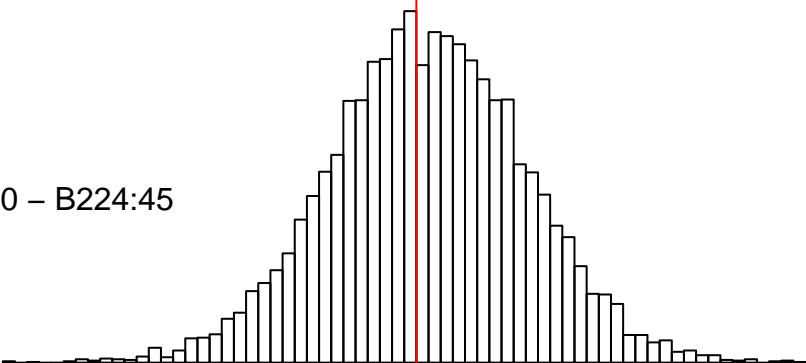

B224:120 – B224:45

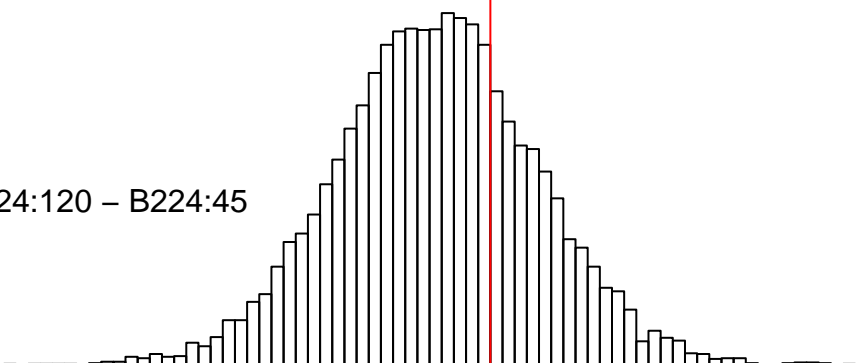

delta(Valine)

B224:240

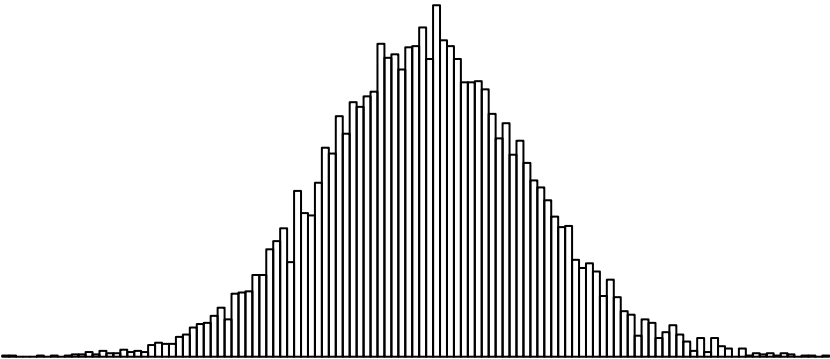

B224:120

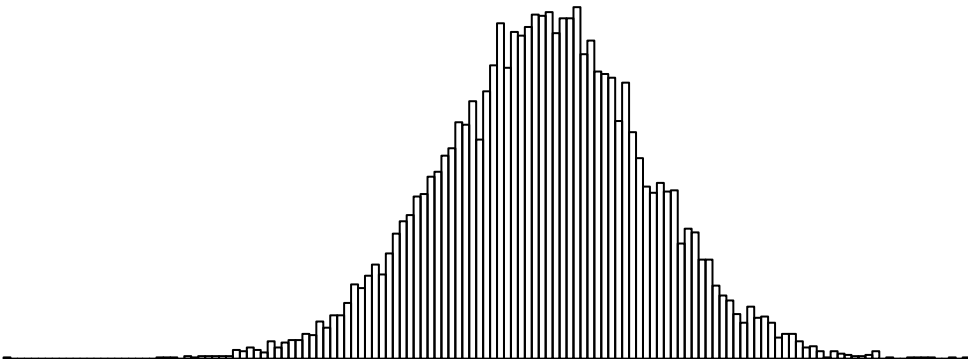

B224:45

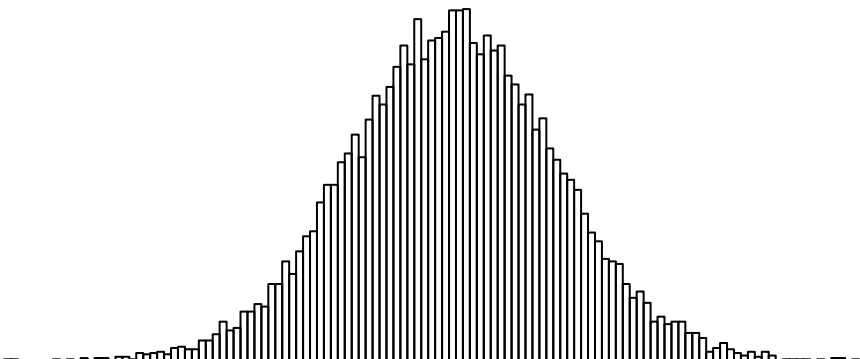

-9.0 -8.5 -8.0 -7.5 -7.0 -6.5 -6.0 -5.5

Amino Acid 7

B224:240 – B224:120

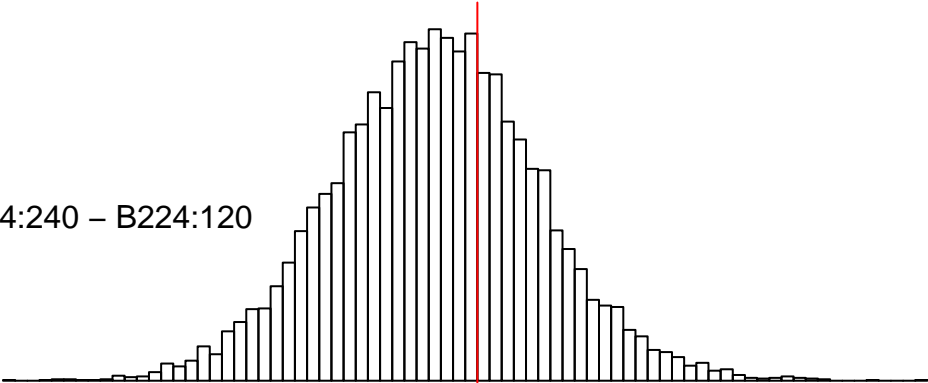

B224:240 – B224:45

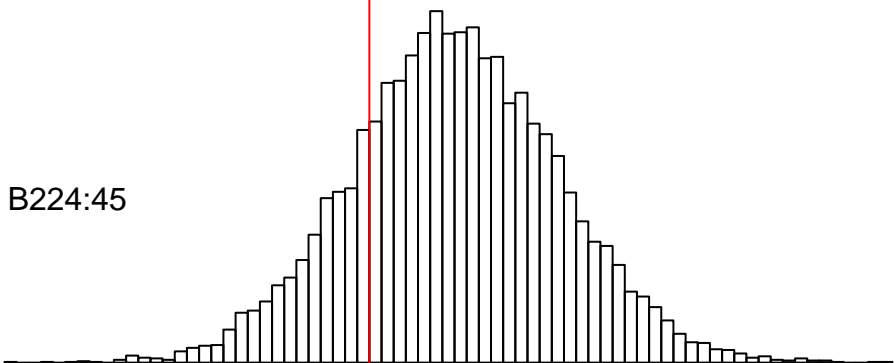

B224:120 – B224:45

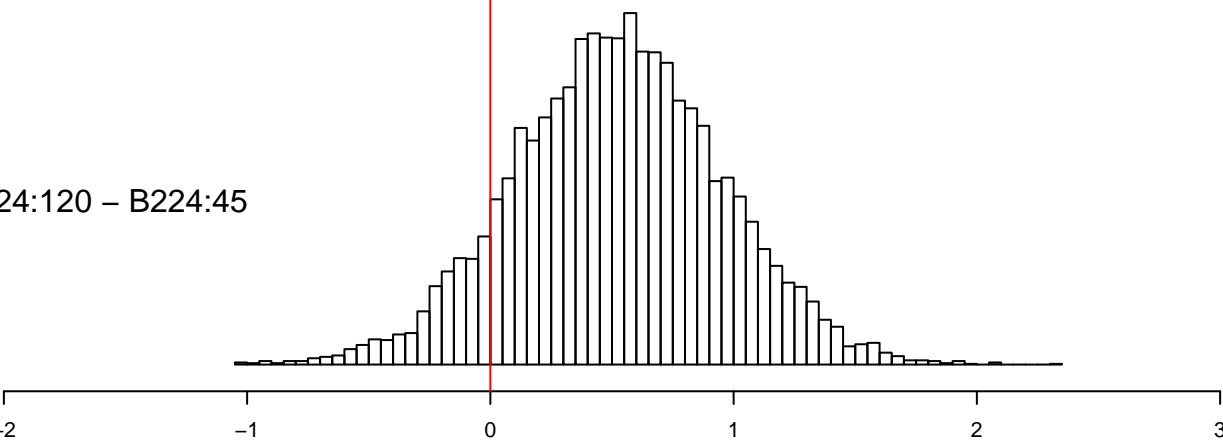

delta(Amino Acid 7)

B224:240

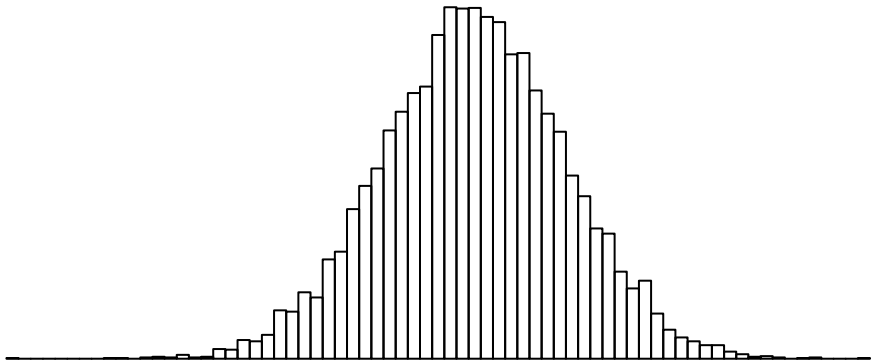

B224:120

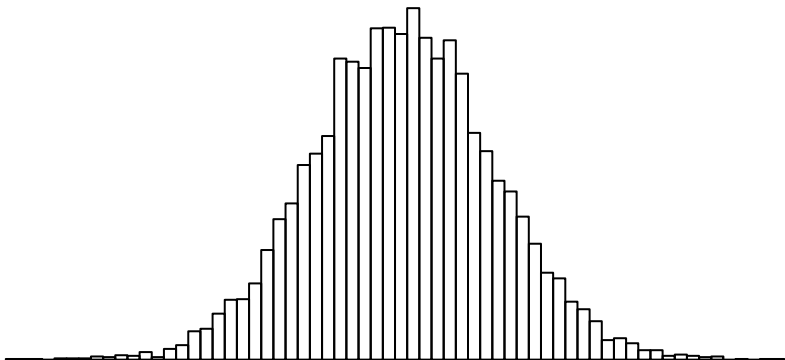

B224:45

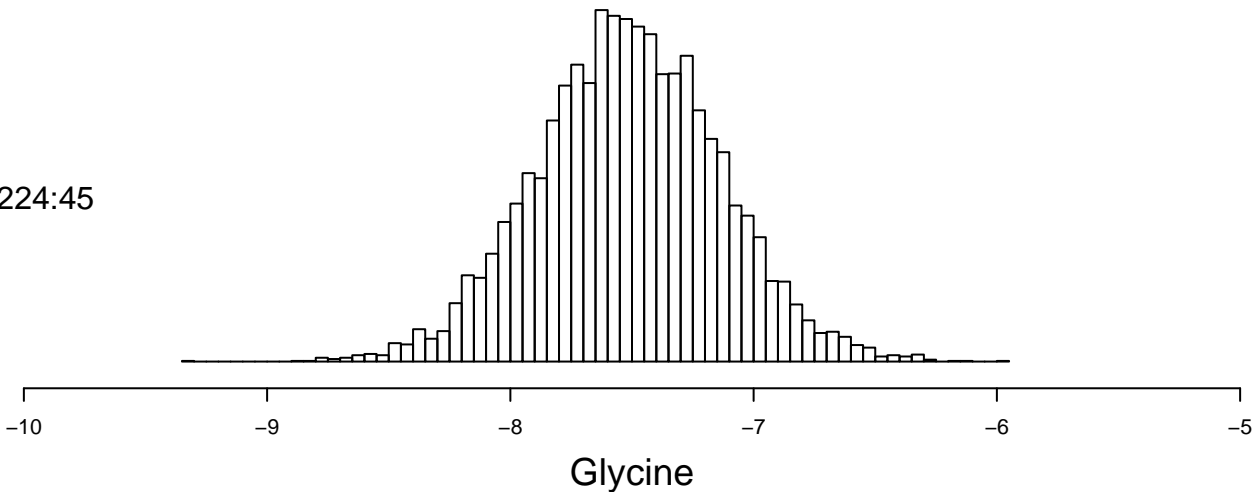

B224:240 – B224:120

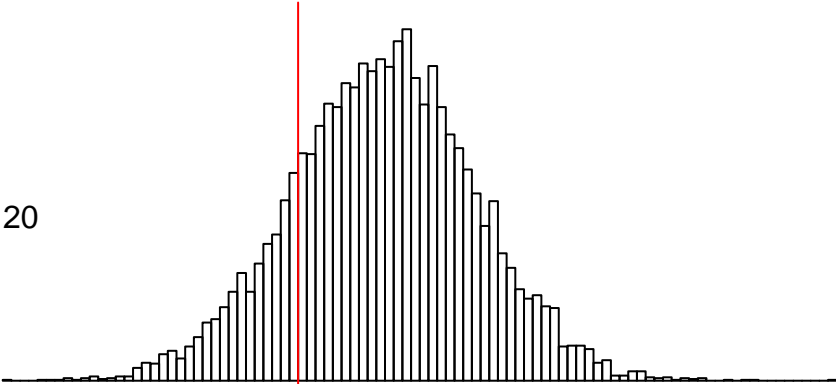

B224:240 – B224:45

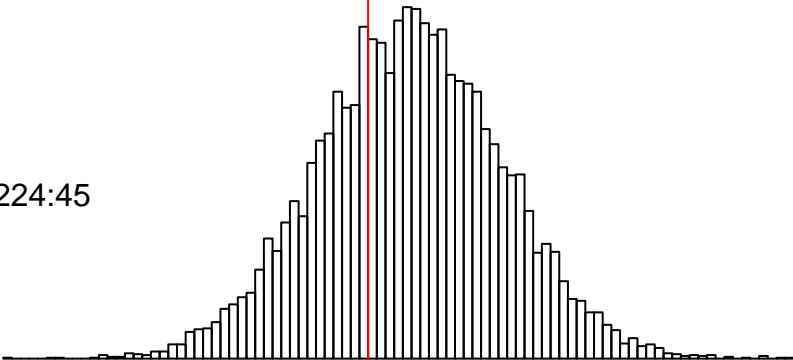

B224:120 – B224:45

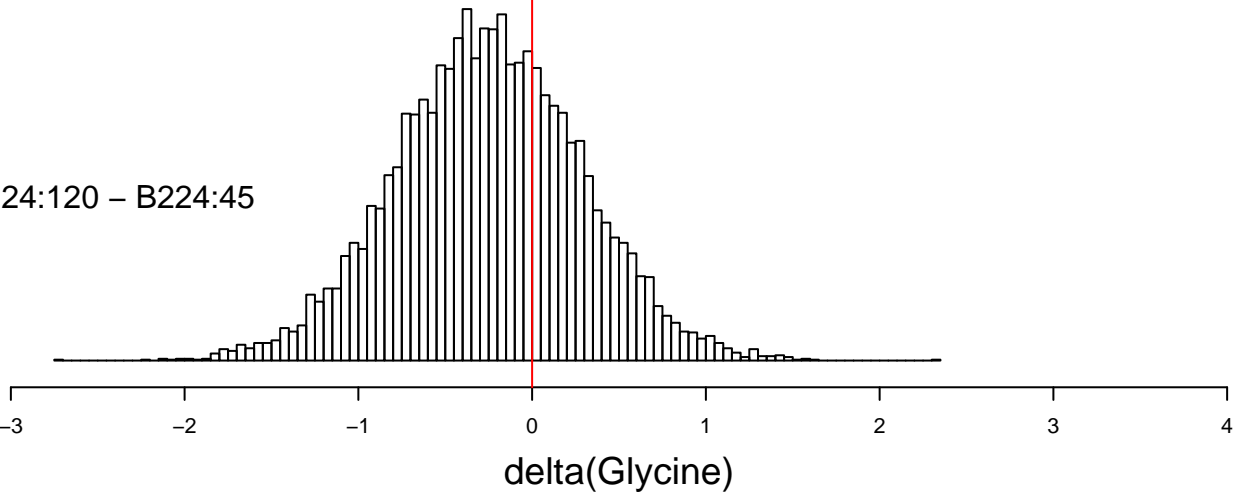



B224:240

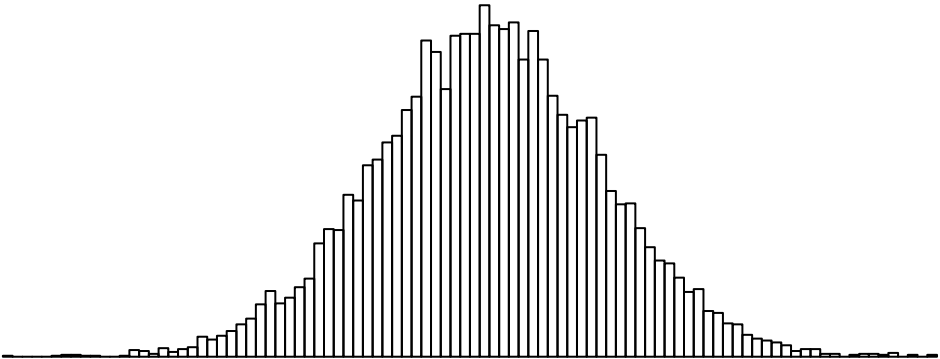

B224:120

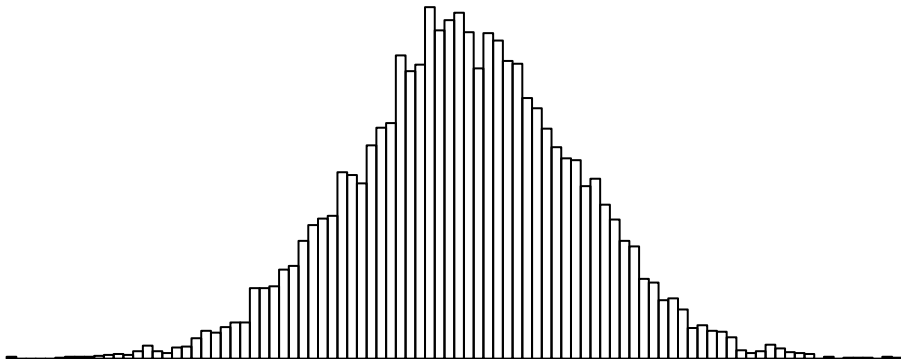

B224:45

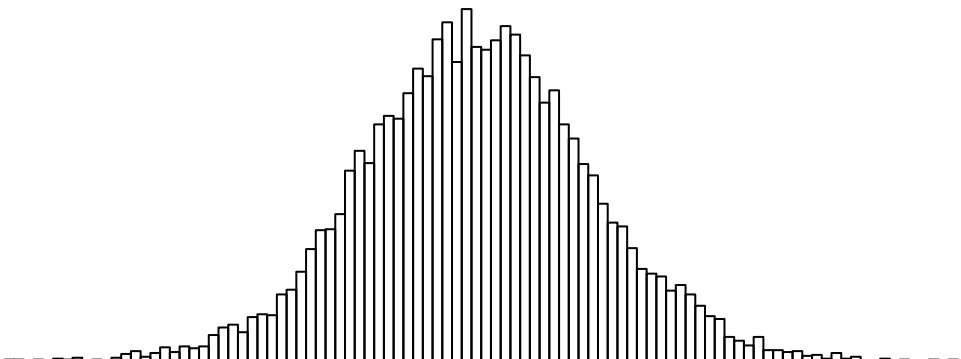

-10.0 -9.5 -9.0 -8.5 -8.0 -7.5

Amino Acid 8

B224:240 – B224:120

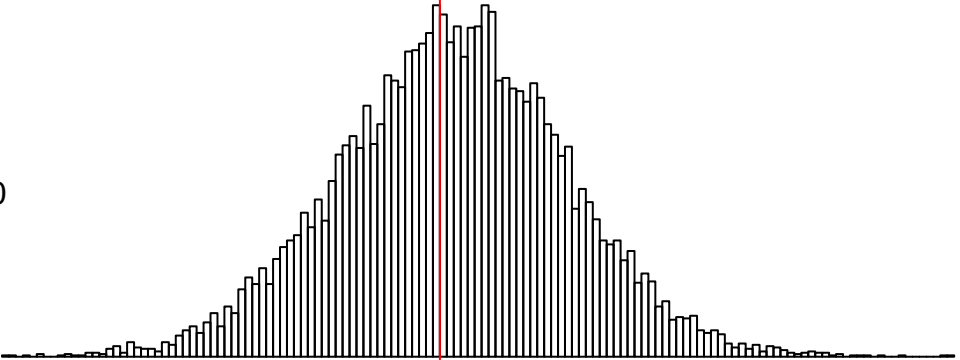

B224:240 – B224:45

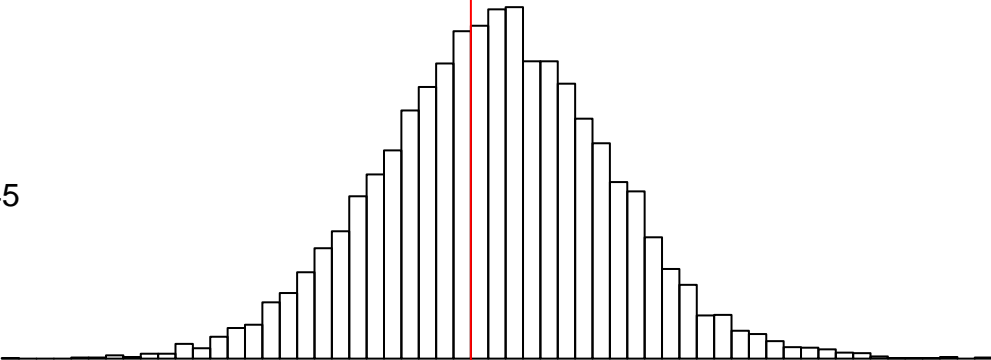

B224:120 – B224:45

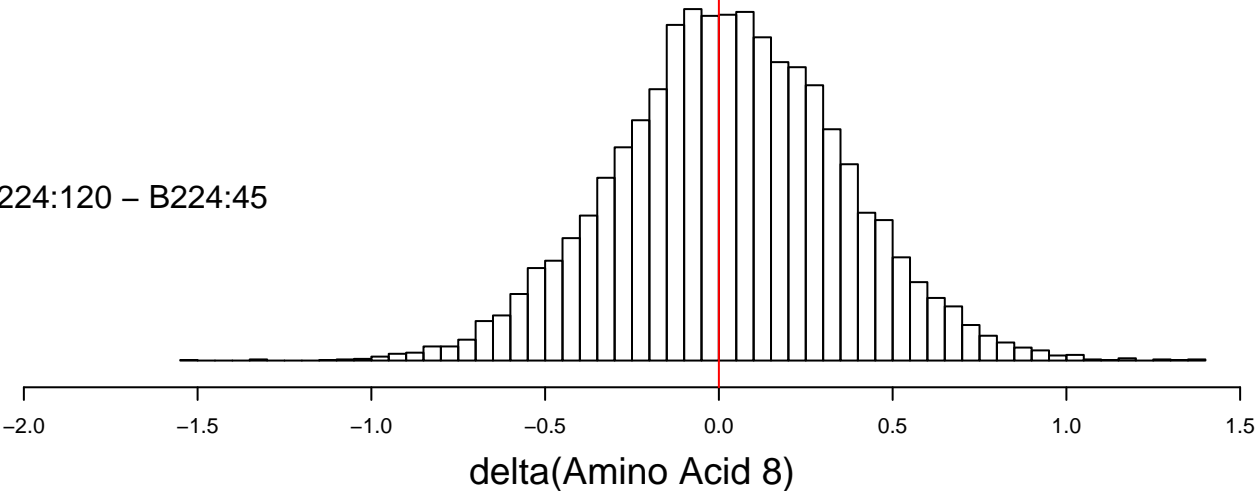

B224:240

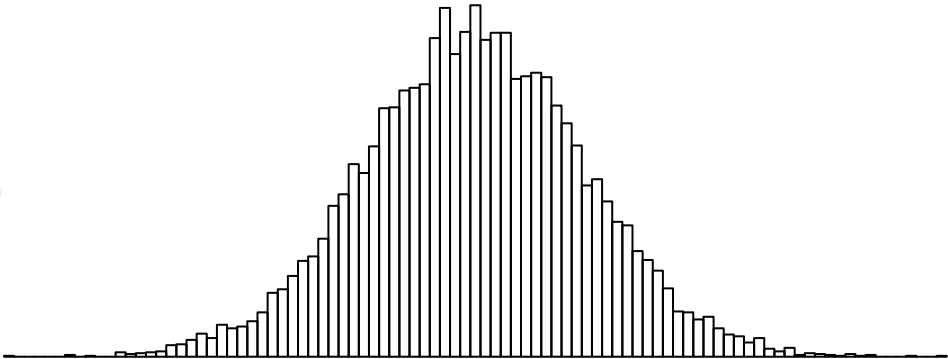

B224:120

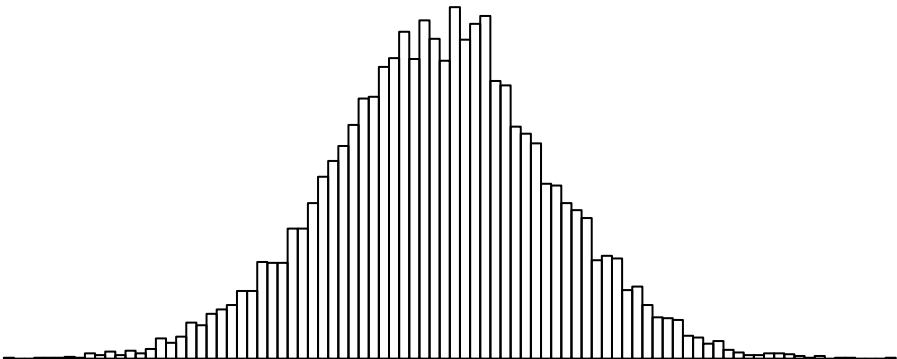

B224:45

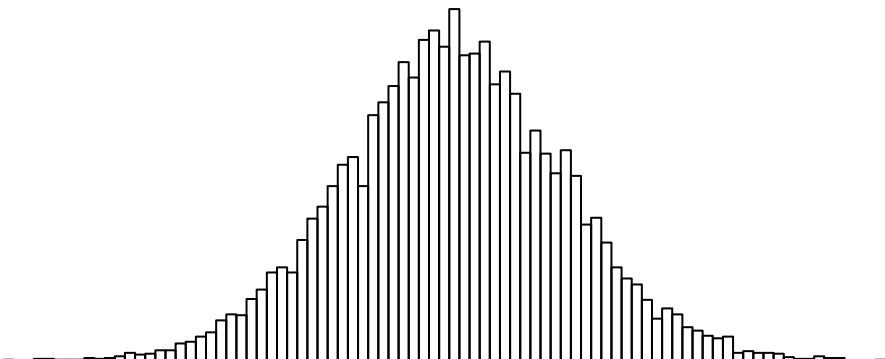

-9 -8 -7 -6 -5 -4 -3

Amino Acid 10

B224:240 – B224:120

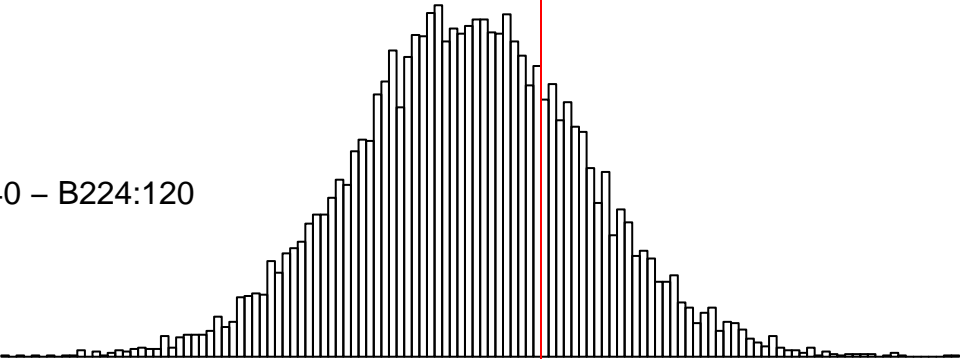

B224:240 – B224:45

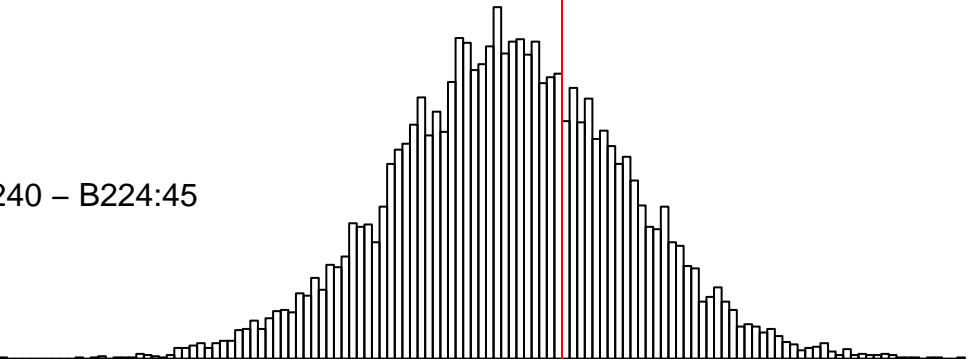

B224:120 – B224:45

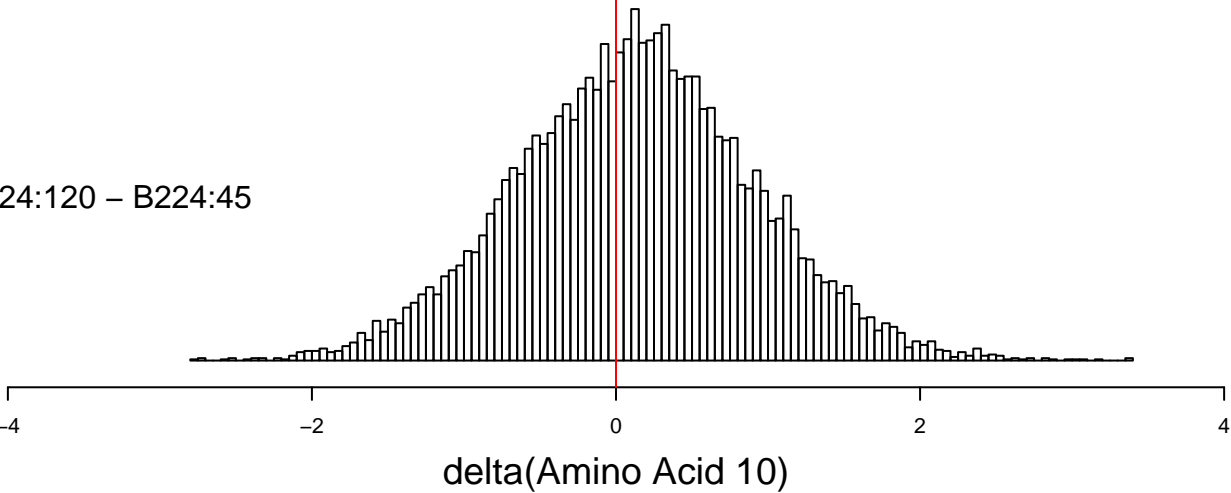

B224:240

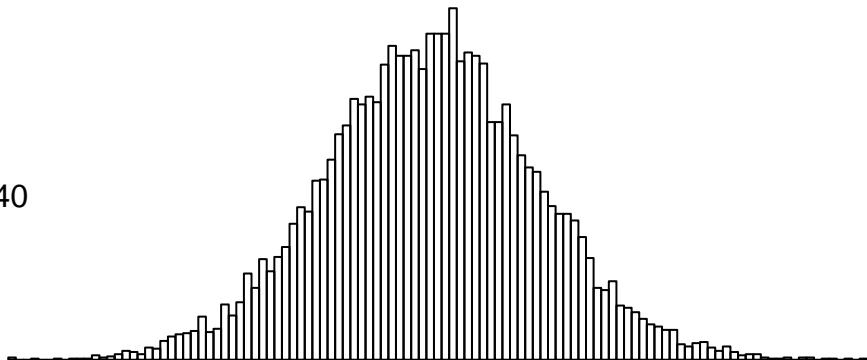

B224:120

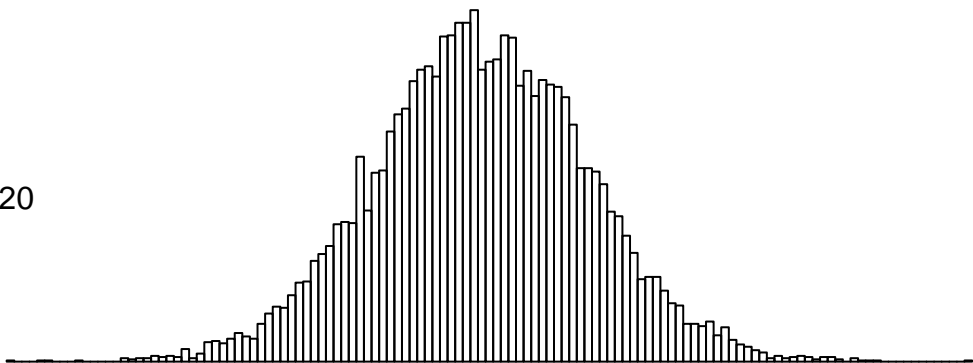

B224:45

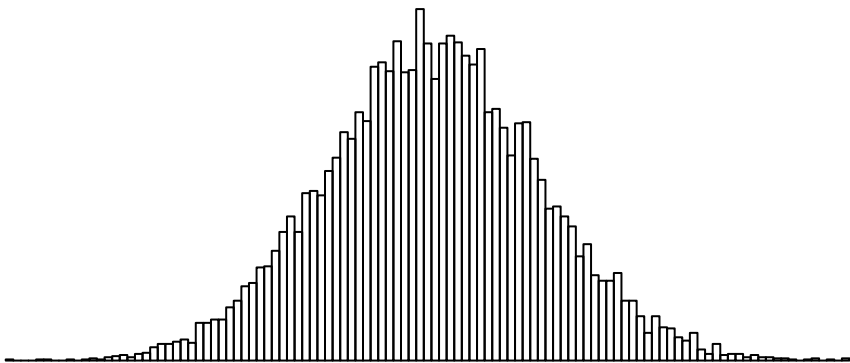

-7.5

-7.0

-6.5

Disaccharide 2

B224:240 – B224:120

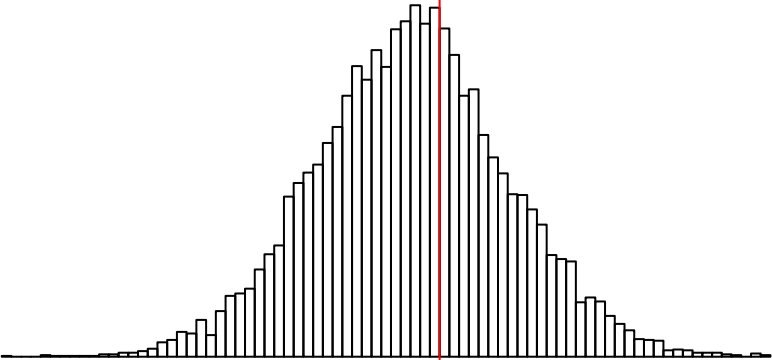

B224:240 – B224:45

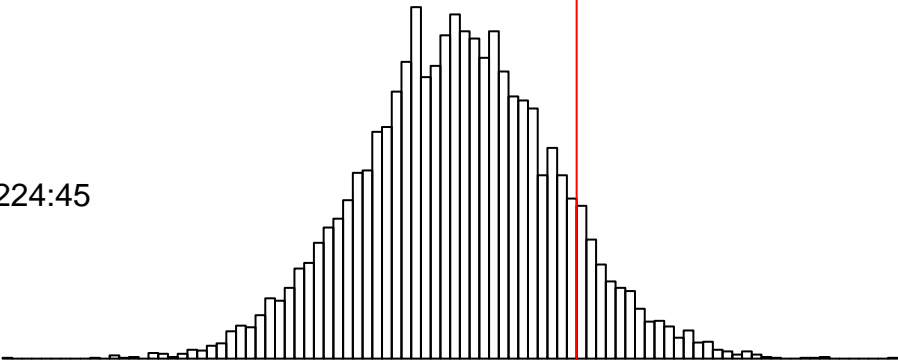

B224:120 – B224:45

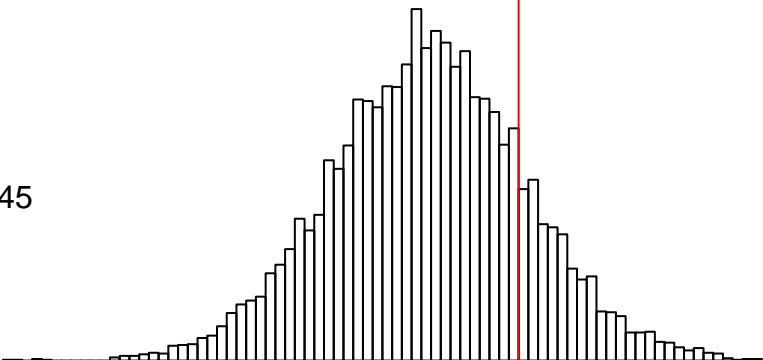

-1.5      -1.0      -0.5      0.0      0.5      1.0

delta(Disaccharide 2)

B224:240

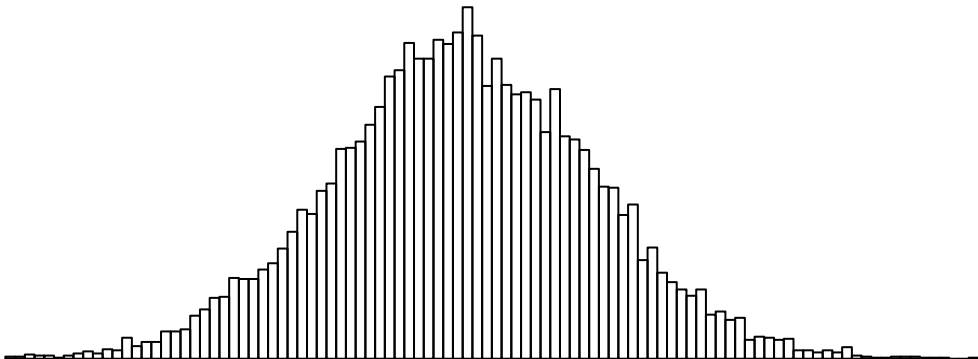

B224:120

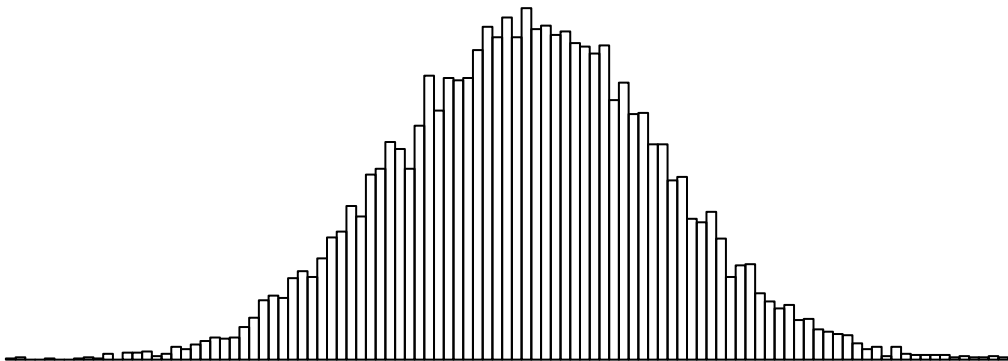

B224:45

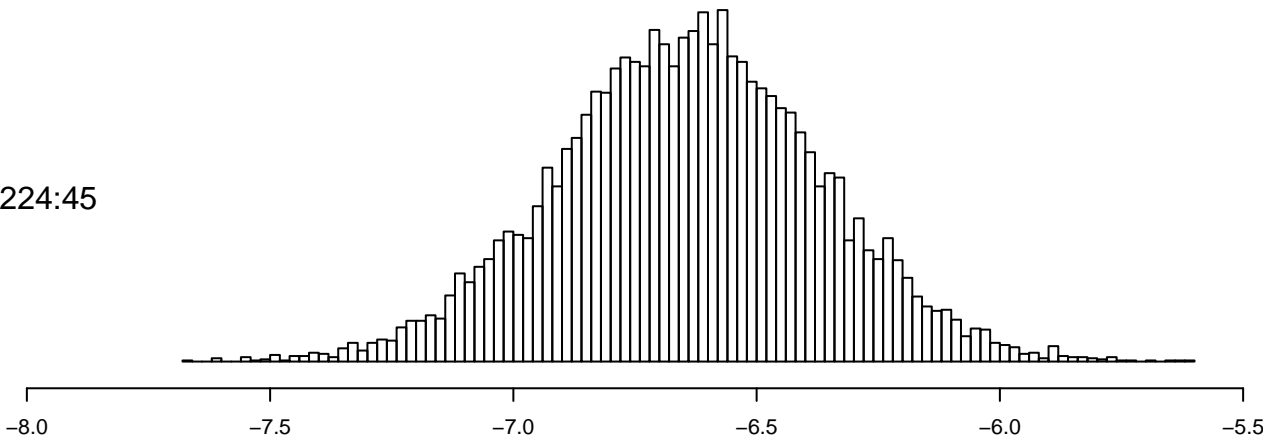

Disaccharide 3

B224:240 – B224:120

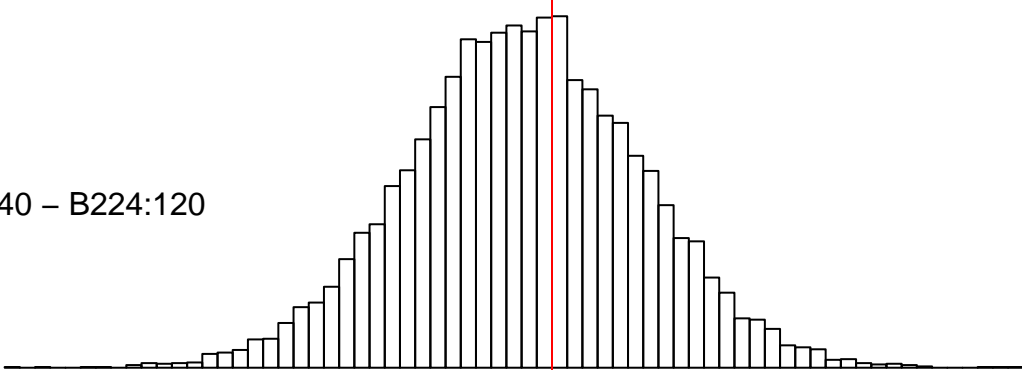

B224:240 – B224:45

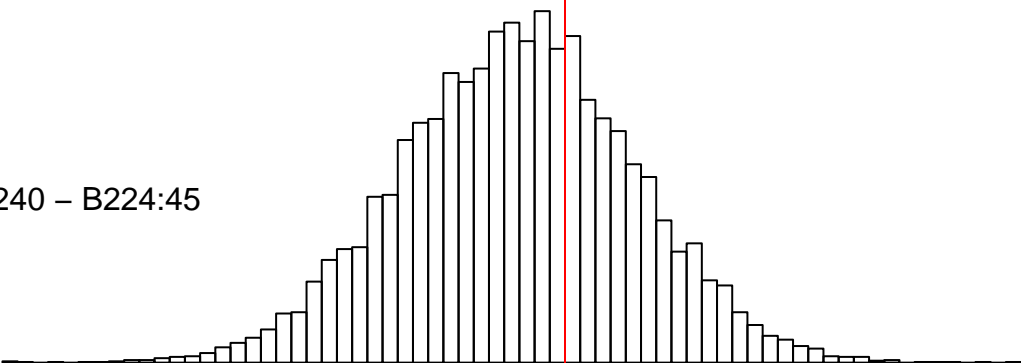

B224:120 – B224:45

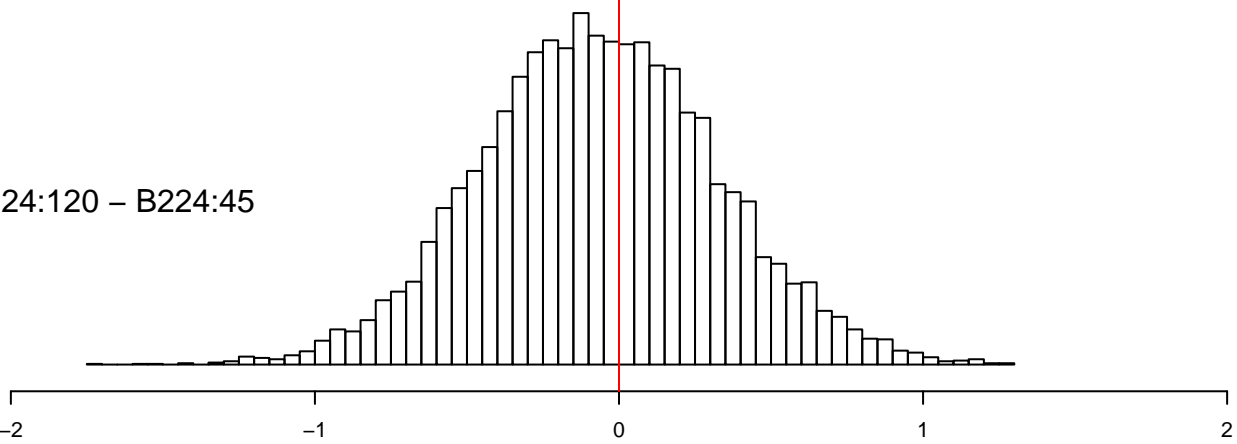

delta(Disaccharide 3)



B224:240

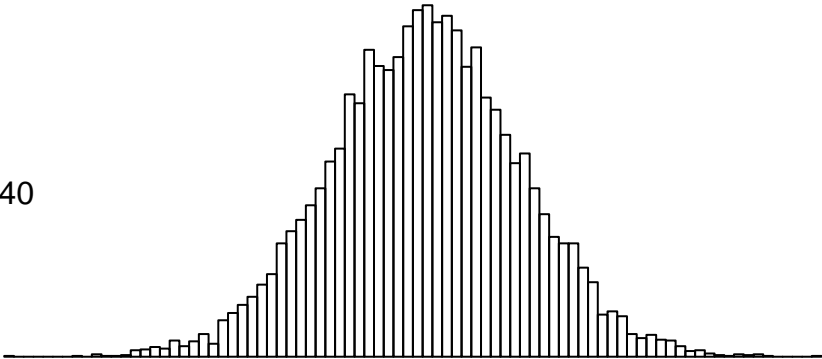

B224:120

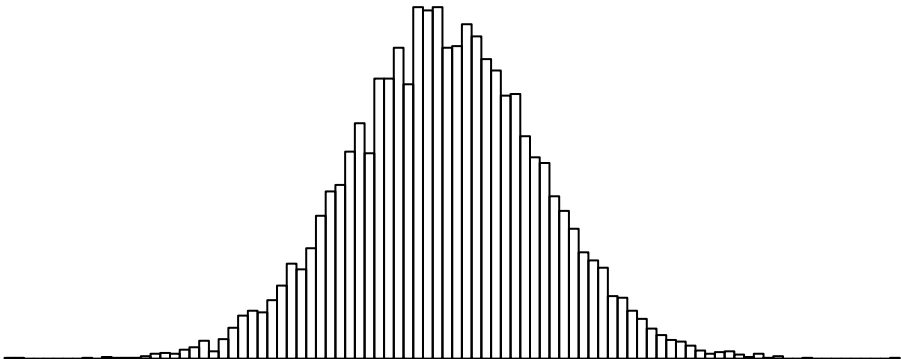

B224:45

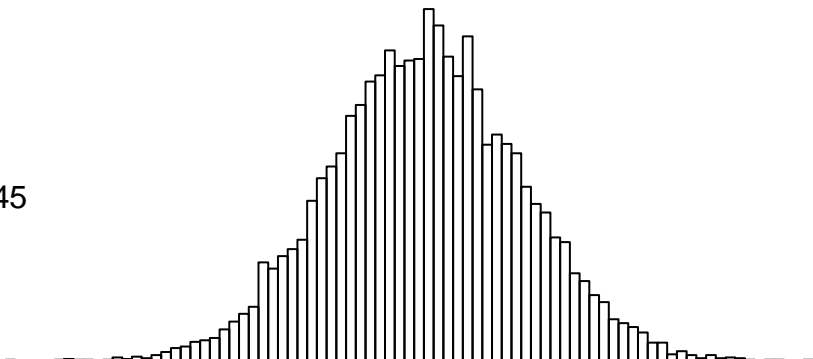

-8.5      -8.0      -7.5      -7.0      -6.5      -6.0

Disaccharide 4

B224:240 – B224:120

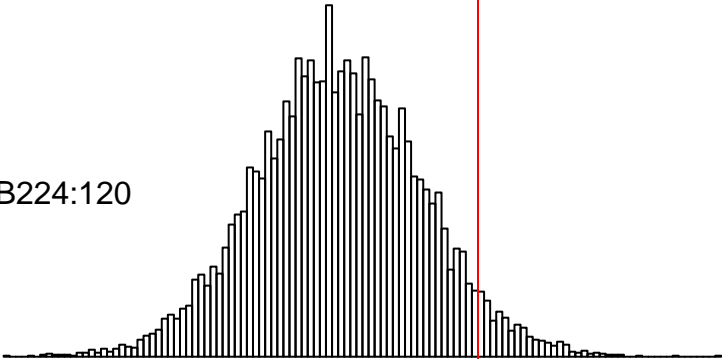

B224:240 – B224:45

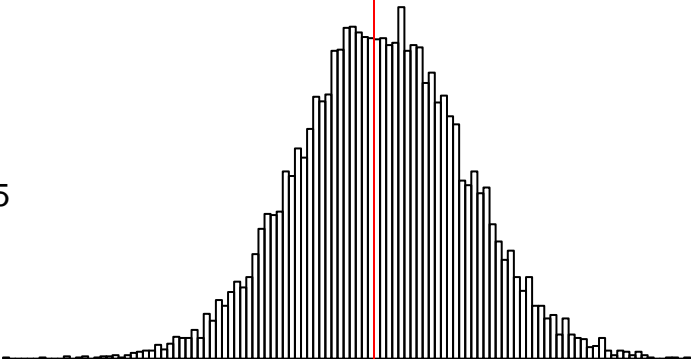

B224:120 – B224:45

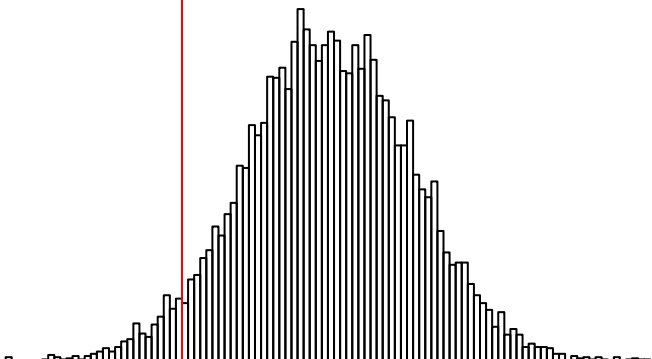

-2

-1

0

1

2

delta(Disaccharide 4)

B224:240

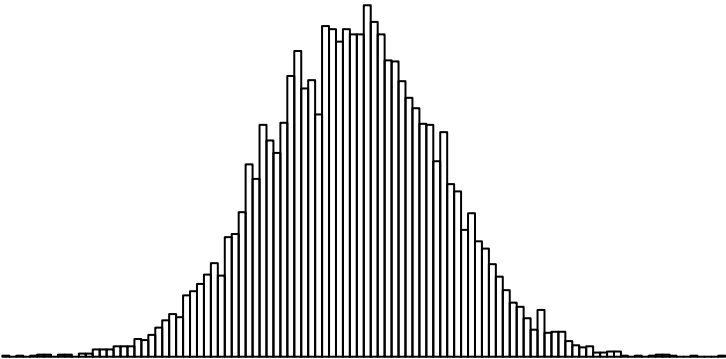

B224:120

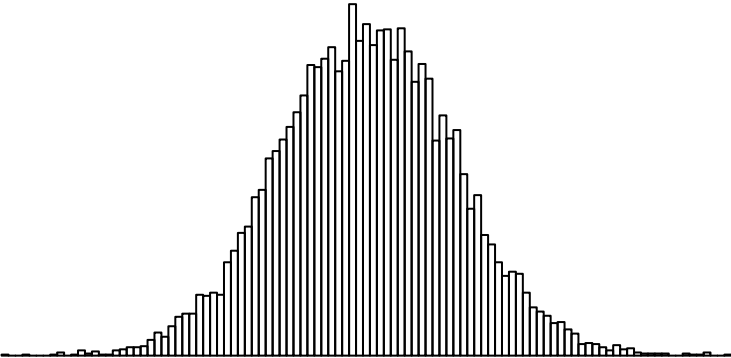

B224:45

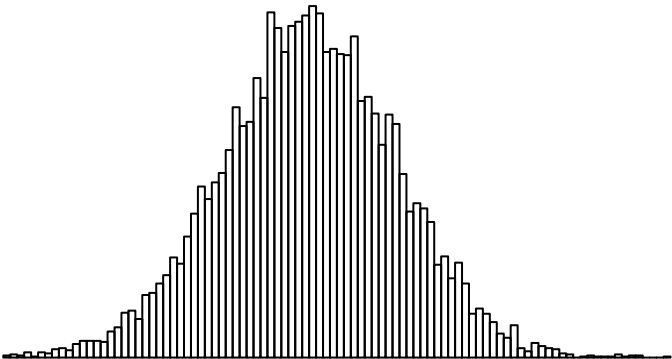

-6.5 -6.0 -5.5 -5.0 -4.5 -4.0 -3.5 -3.0

Disaccharide 5

B224:240 – B224:120

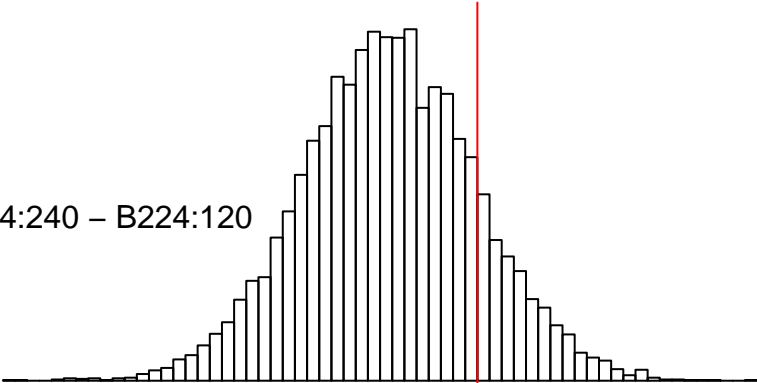

B224:240 – B224:45

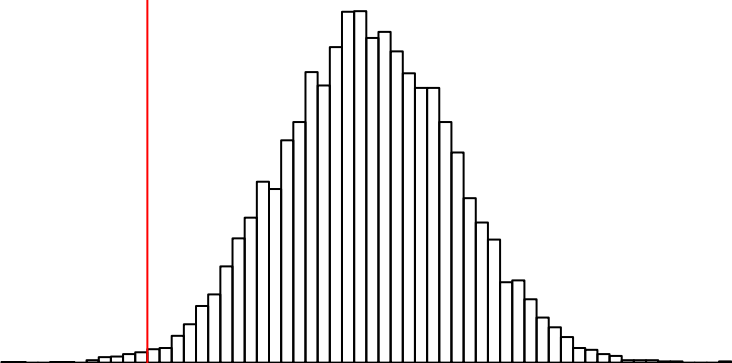

B224:120 – B224:45

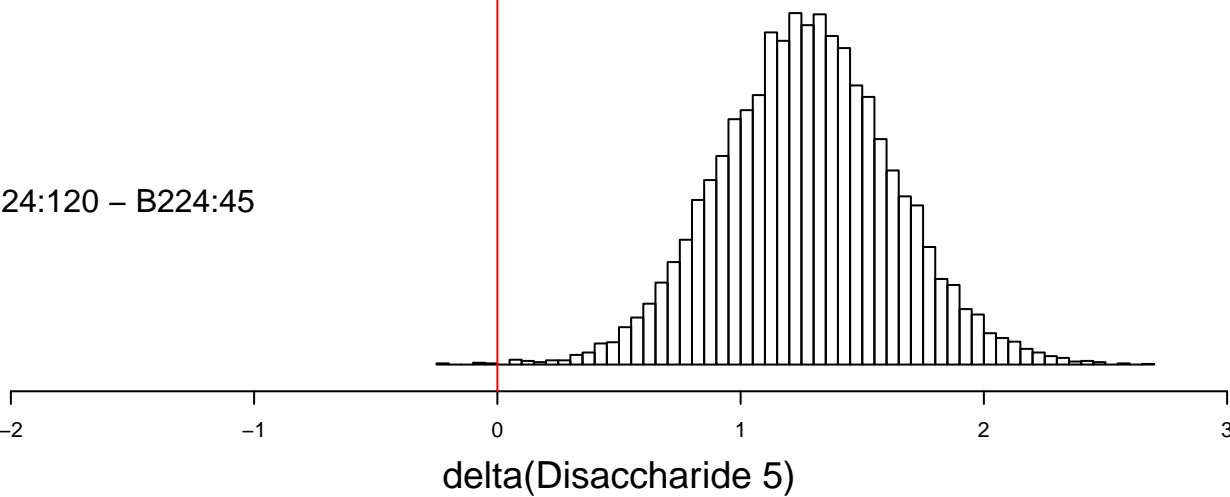

B224:240

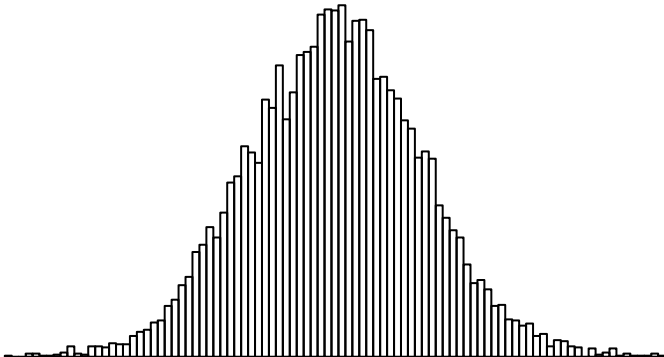

B224:120

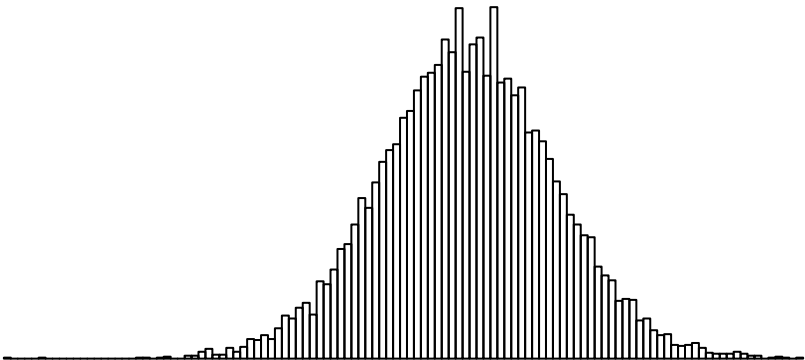

B224:45

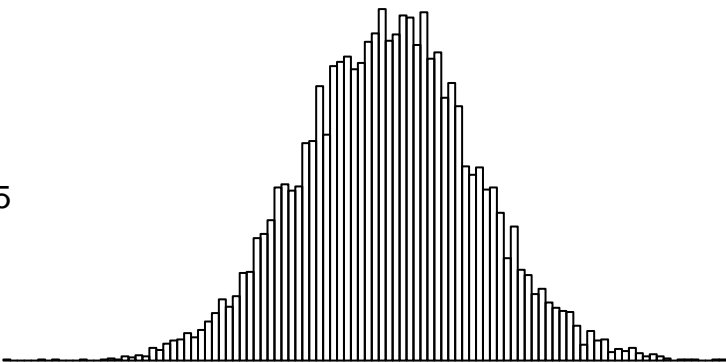

-6.0      -5.5      -5.0      -4.5      -4.0      -3.5      -3.0      -2.5

Disaccharide 6

B224:240 – B224:120

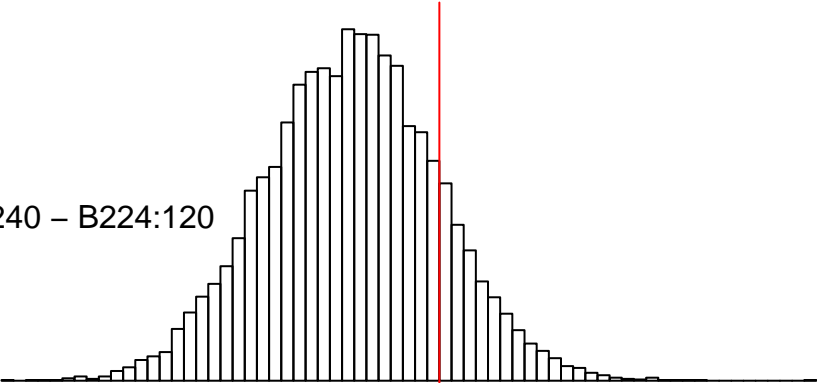

B224:240 – B224:45

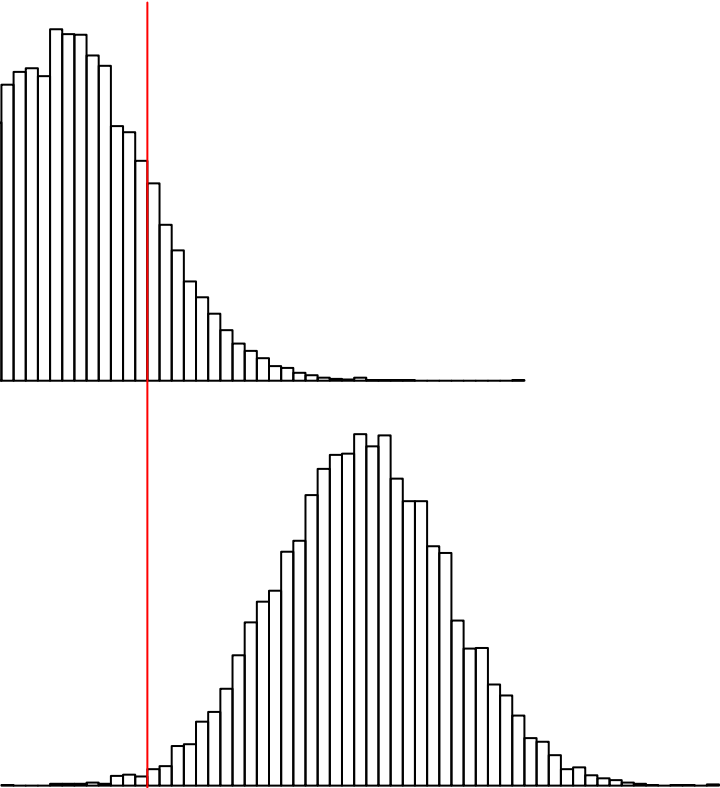

B224:120 – B224:45

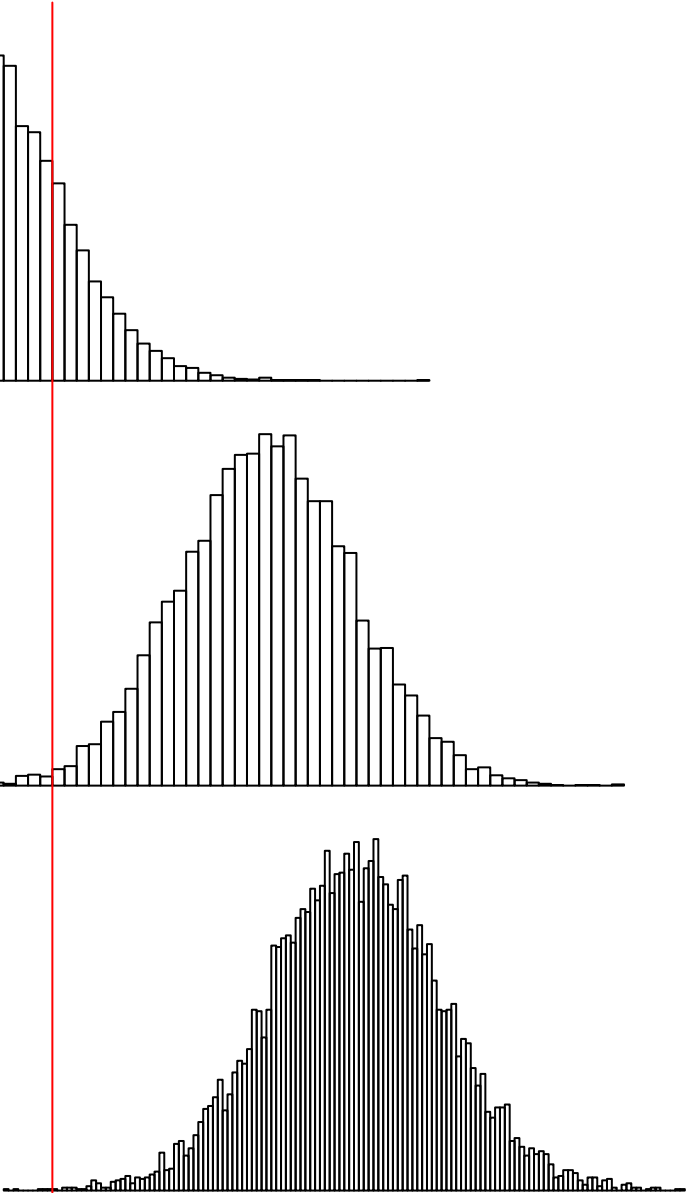

-2

-1

0

1

2

3

delta(Disaccharide 6)

B224:240

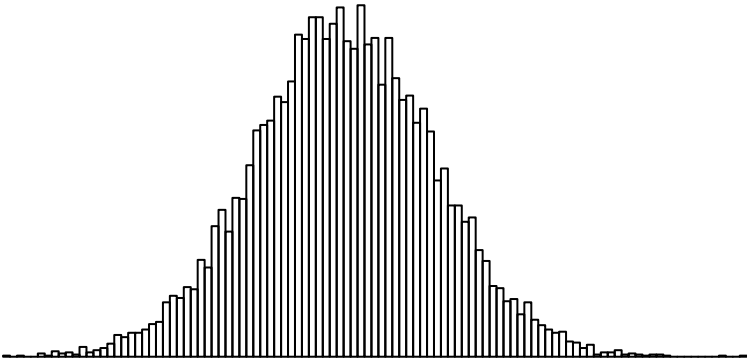

B224:120

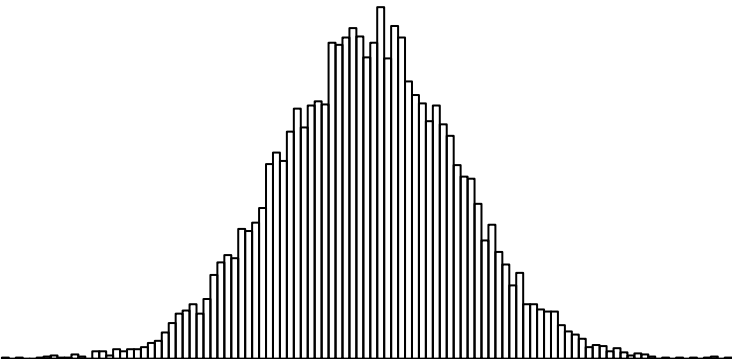

B224:45

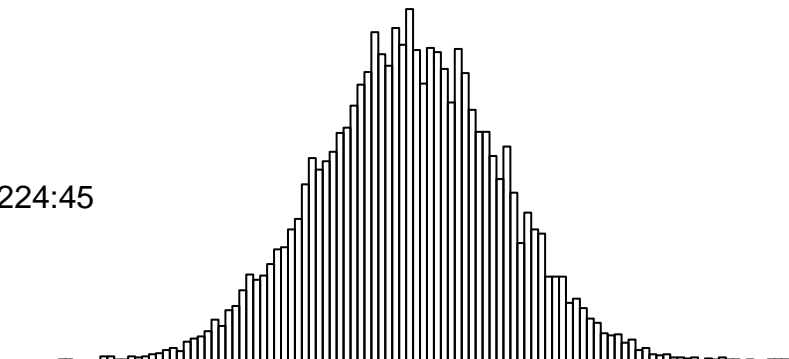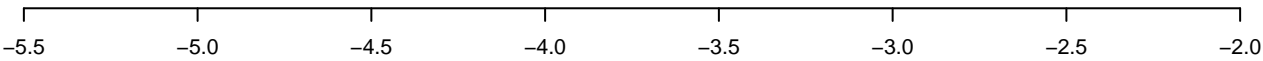

Disaccharide 7

B224:240 – B224:120

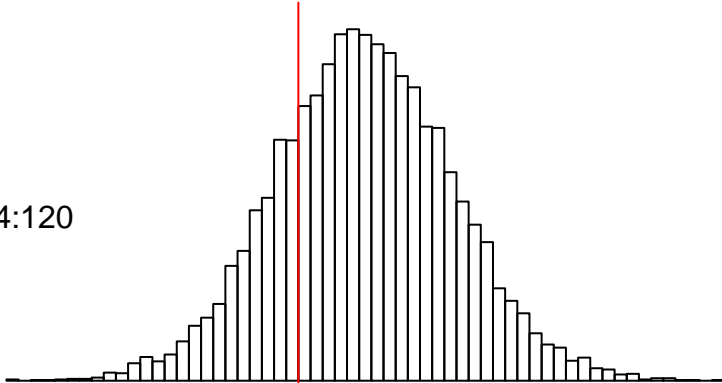

B224:240 – B224:45

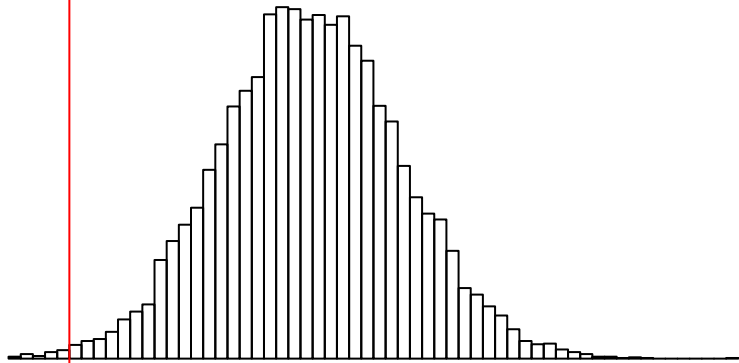

B224:120 – B224:45

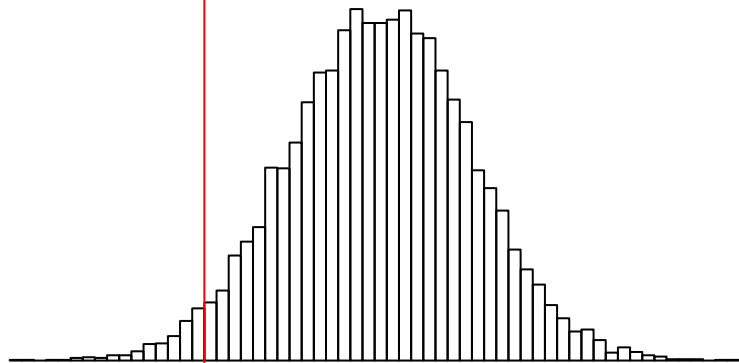

-2 -1 0 1 2 3

delta(Disaccharide 7)



B224:240

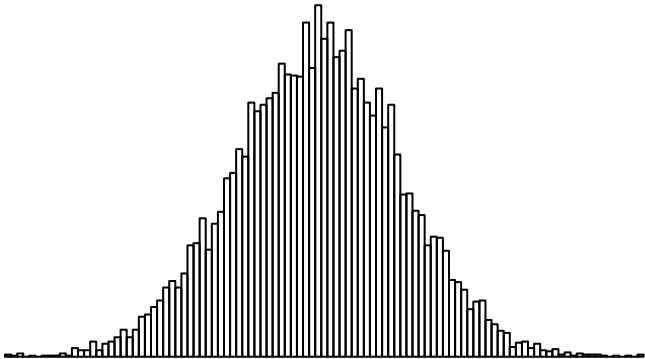

B224:120

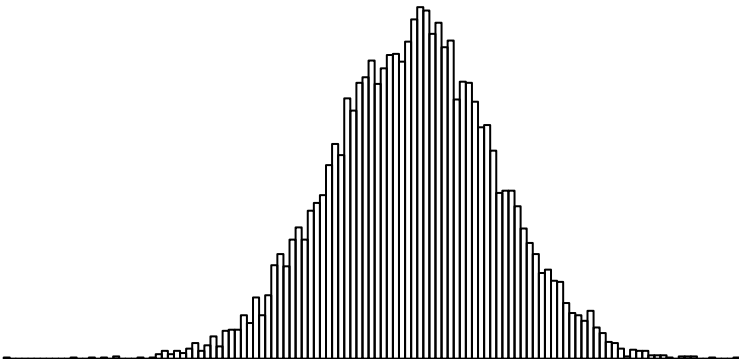

B224:45

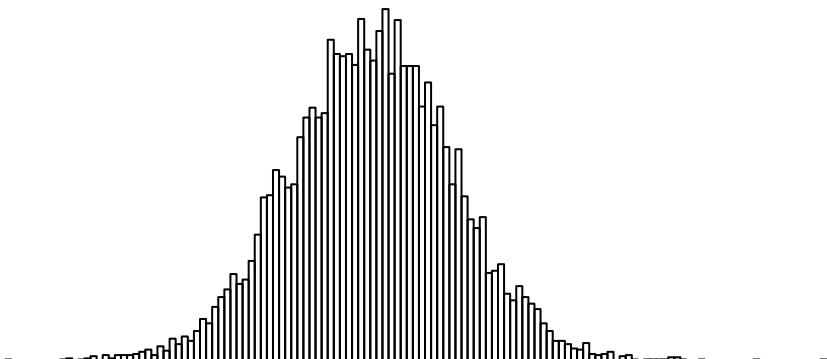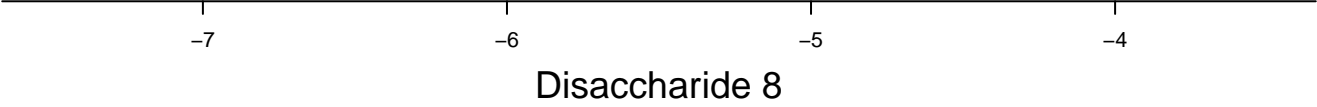

B224:240 – B224:120

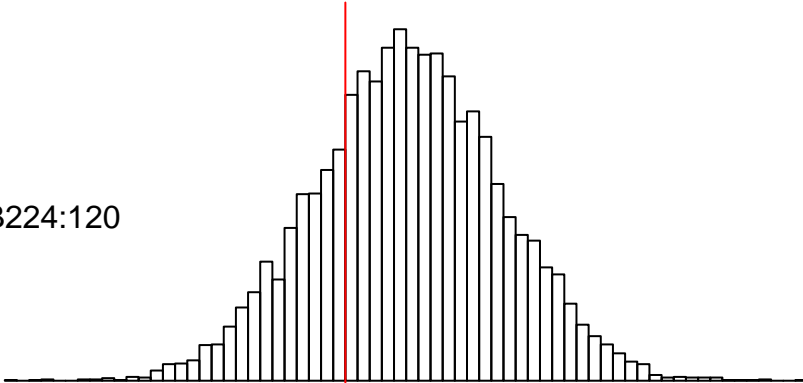

B224:240 – B224:45

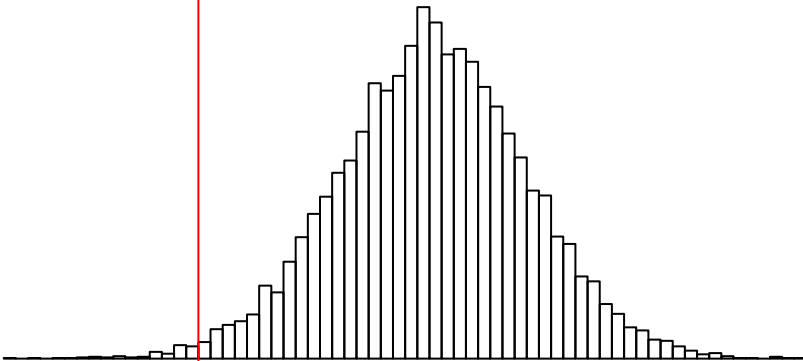

B224:120 – B224:45

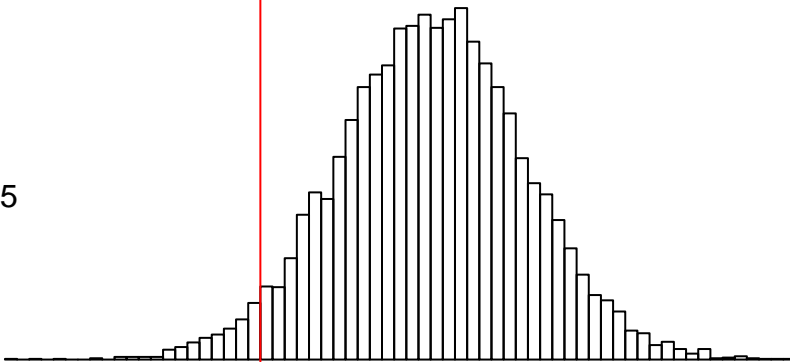

-2

-1

0

1

2

3

delta(Disaccharide 8)

B224:240

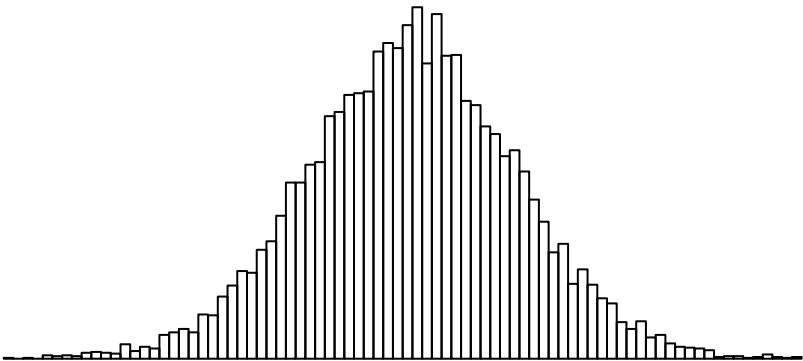

B224:120

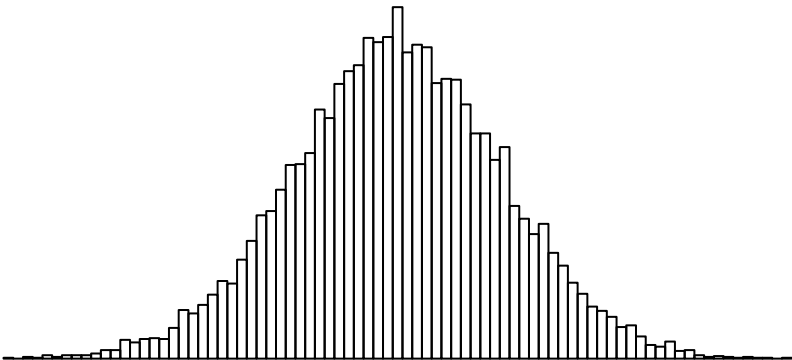

B224:45

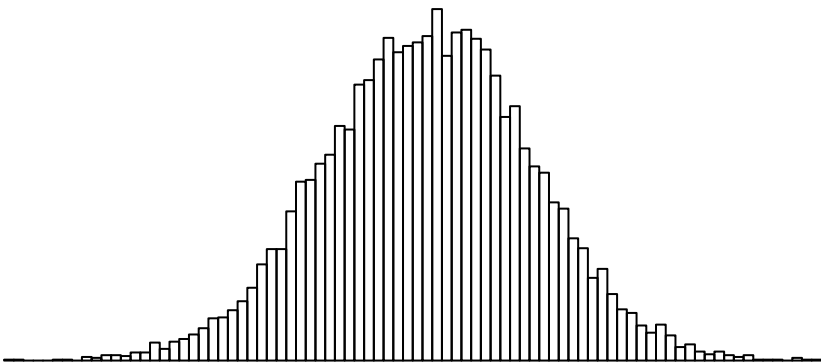

-9.5      -9.0      -8.5      -8.0      -7.5      -7.0

Disaccharide 9

B224:240 – B224:120

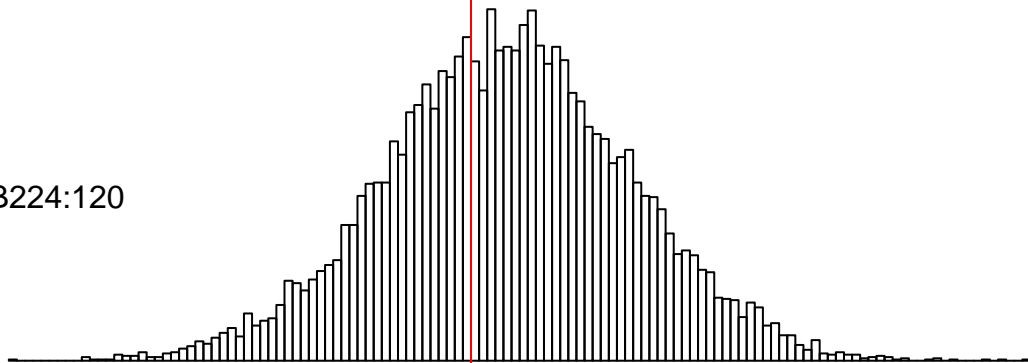

B224:240 – B224:45

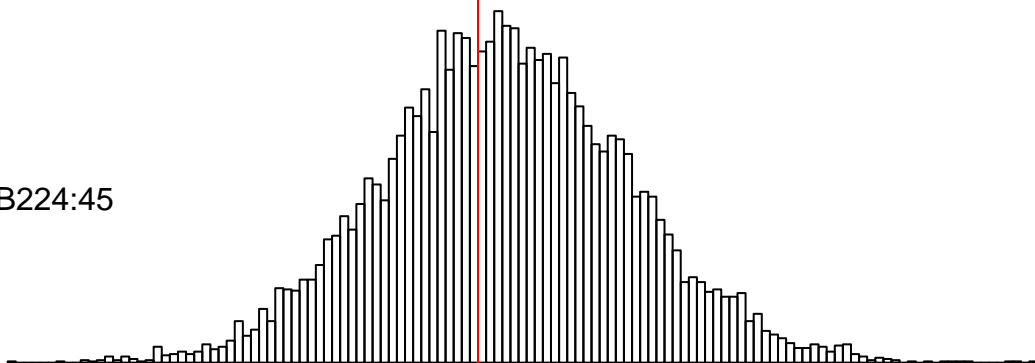

B224:120 – B224:45

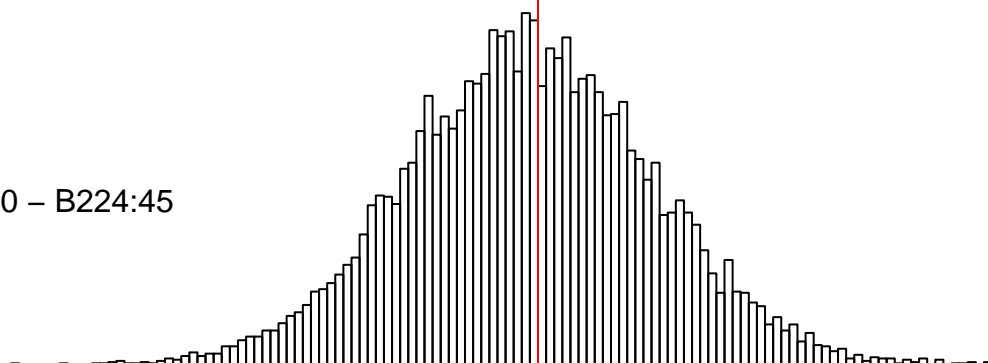

-1.5      -1.0      -0.5      0.0      0.5      1.0      1.5

delta(Disaccharide 9)

B224:240

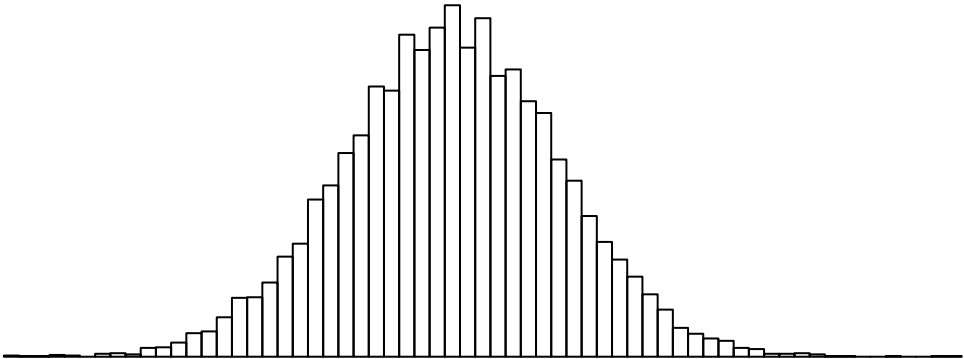

B224:120

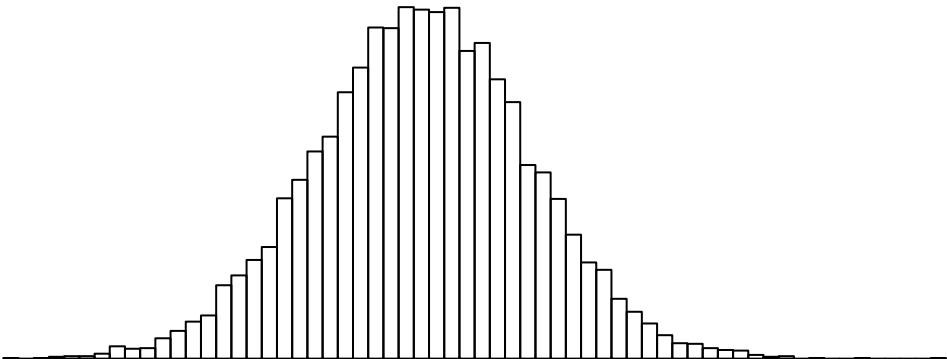

B224:45

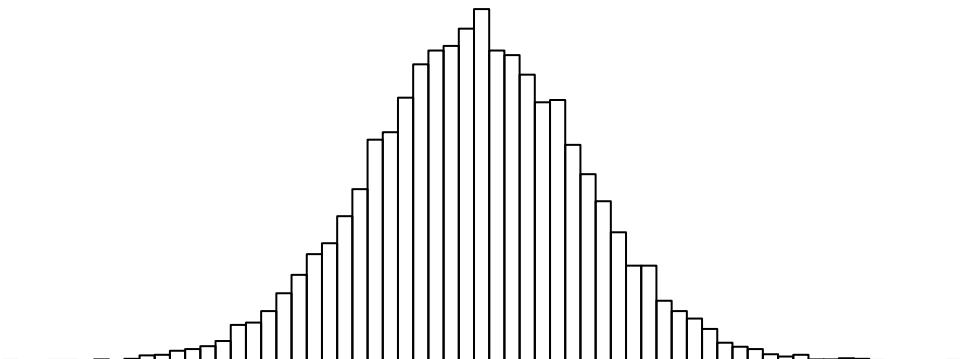

-10 -9 -8 -7

C12:0 Fatty Acid

B224:240 – B224:120

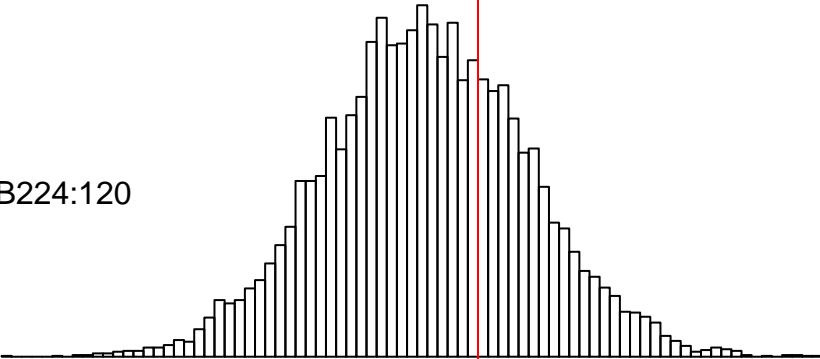

B224:240 – B224:45

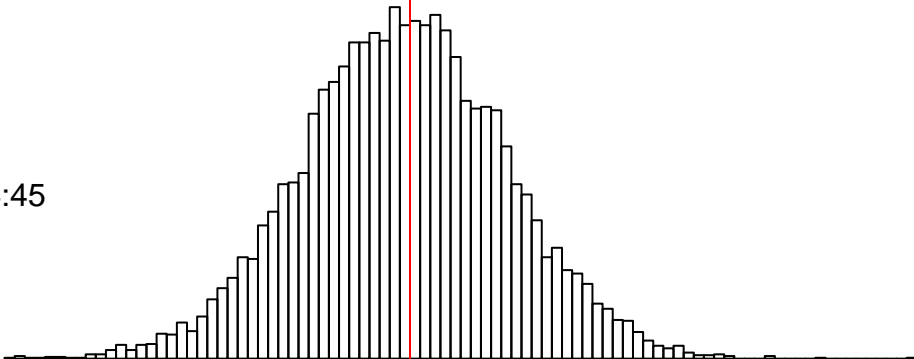

B224:120 – B224:45

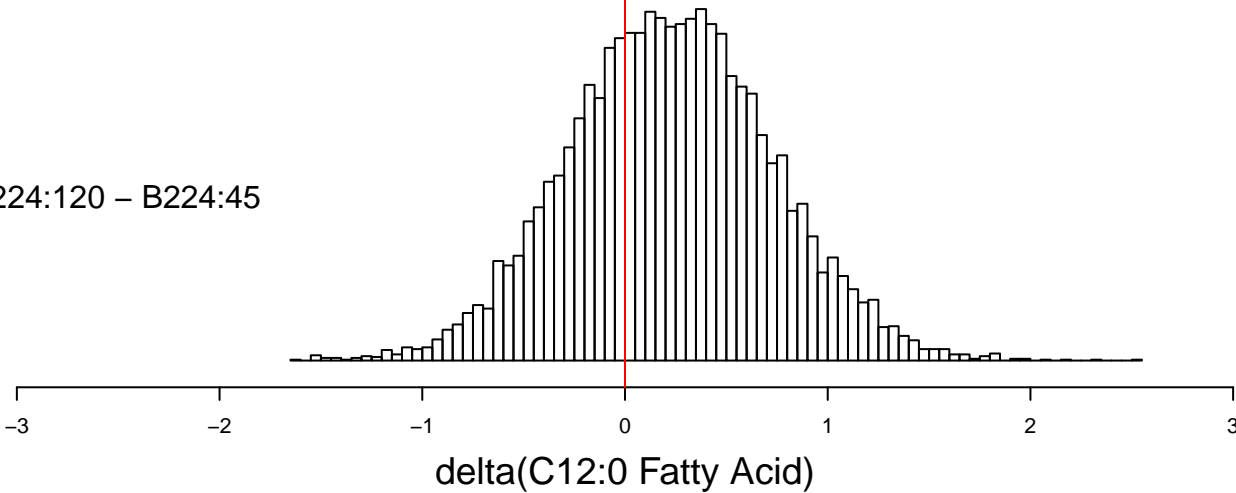

B224:240

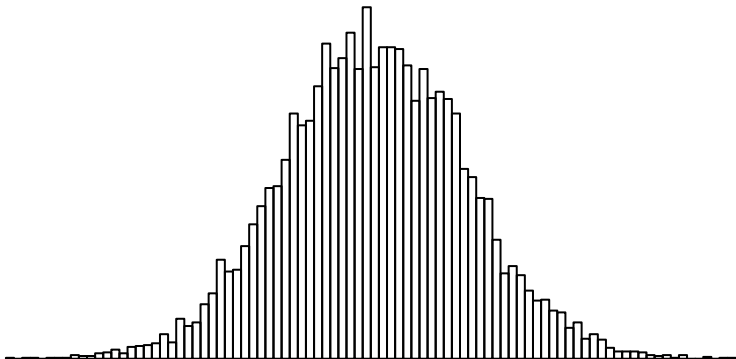

B224:120

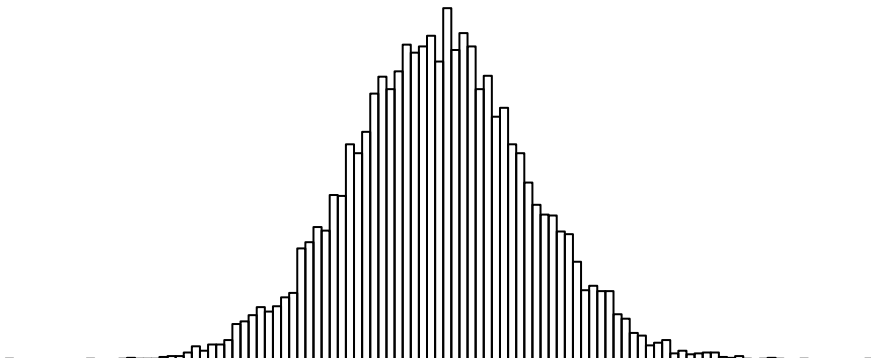

B224:45

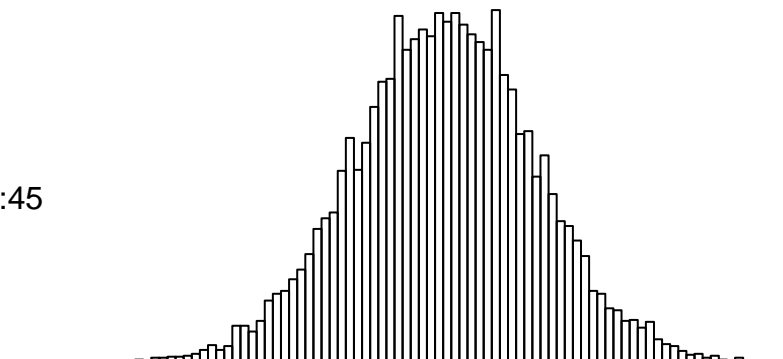

C14:1 Fatty Acid

B224:240 – B224:120

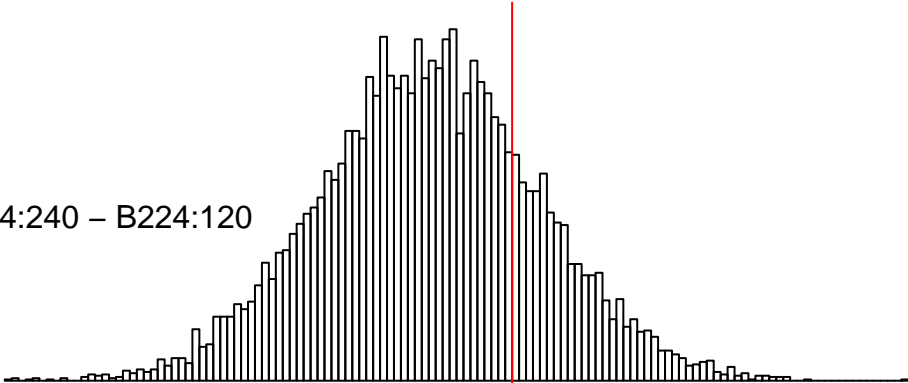

B224:240 – B224:45

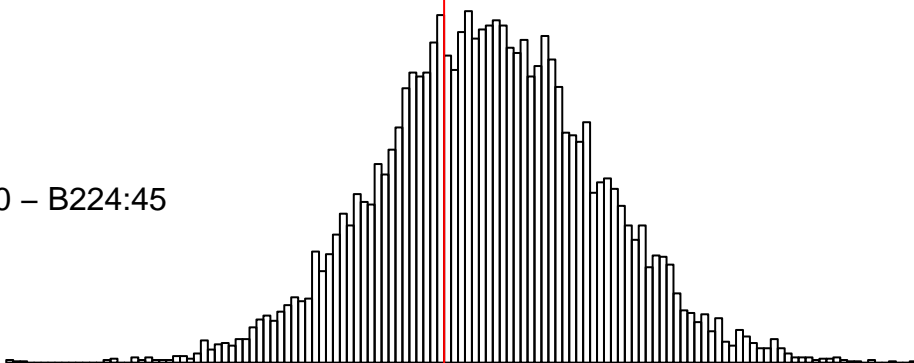

B224:120 – B224:45

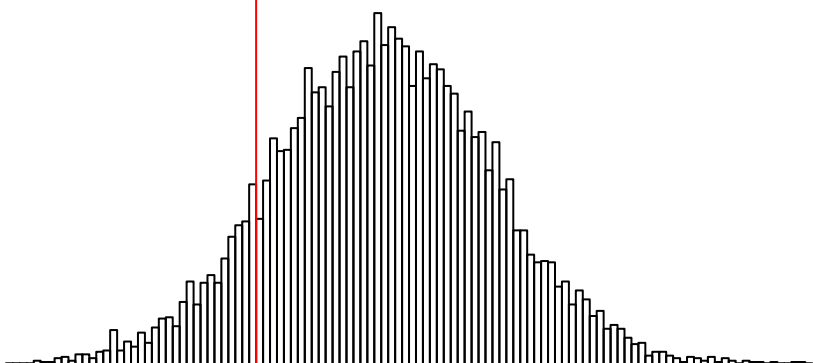

-1.5      -1.0      -0.5      0.0      0.5      1.0      1.5      2.0

delta(C14:1 Fatty Acid)



B224:240

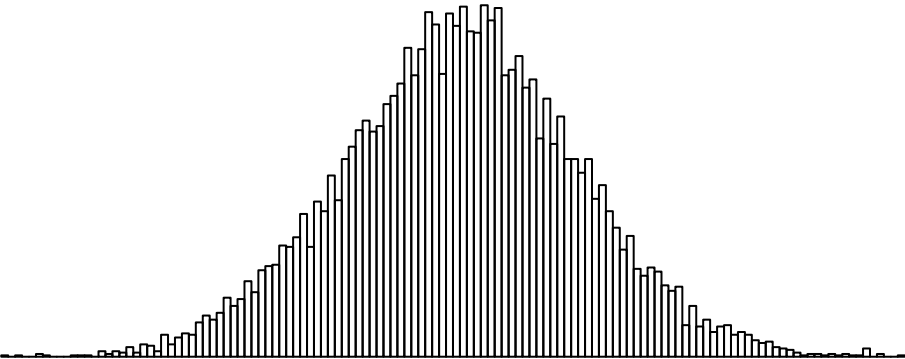

B224:120

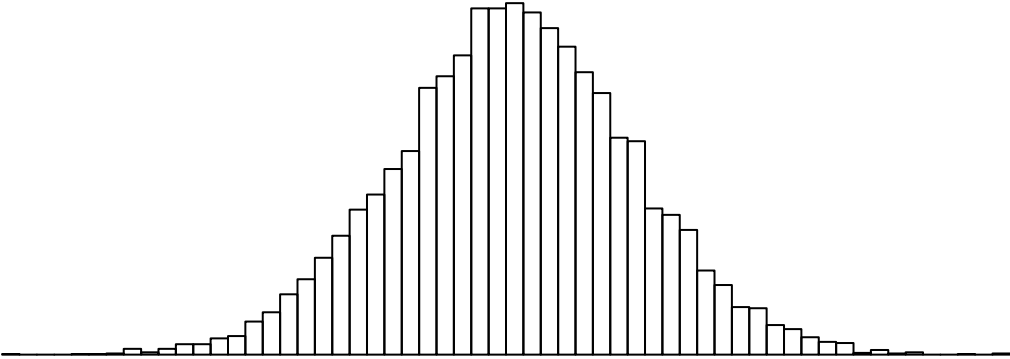

B224:45

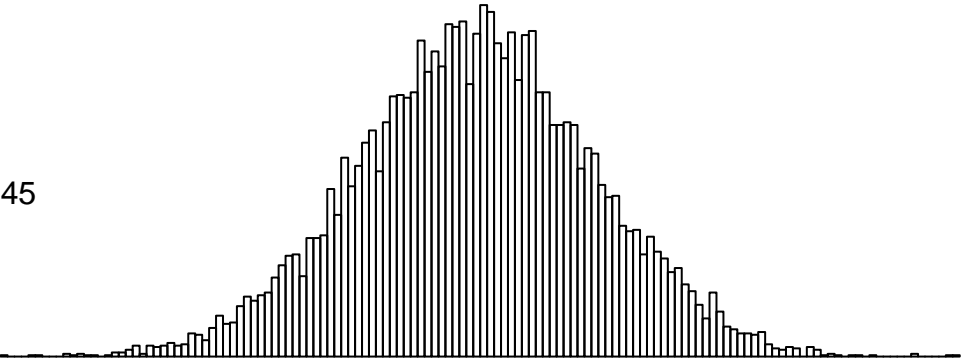

-8.5      -8.0      -7.5      -7.0      -6.5      -6.0      -5.5      -5.0

C14:0 Fatty Acid

B224:240 – B224:120

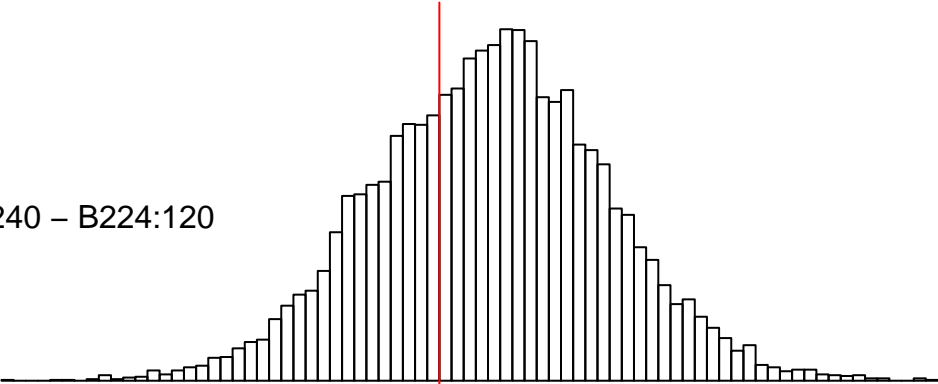

B224:240 – B224:45

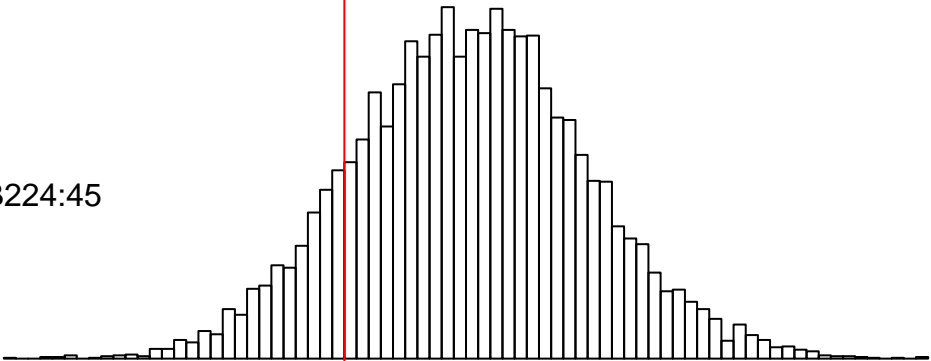

B224:120 – B224:45

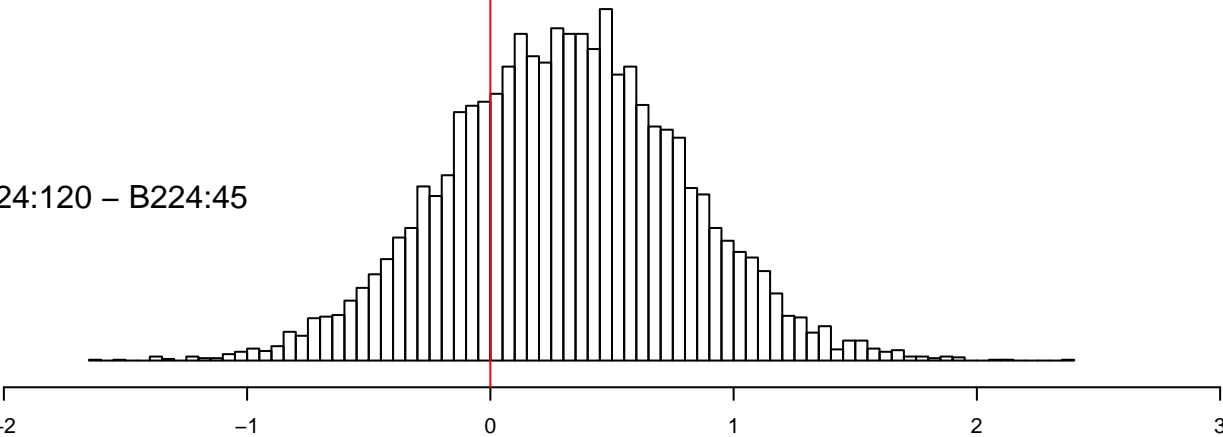

delta(C14:0 Fatty Acid)

B224:240

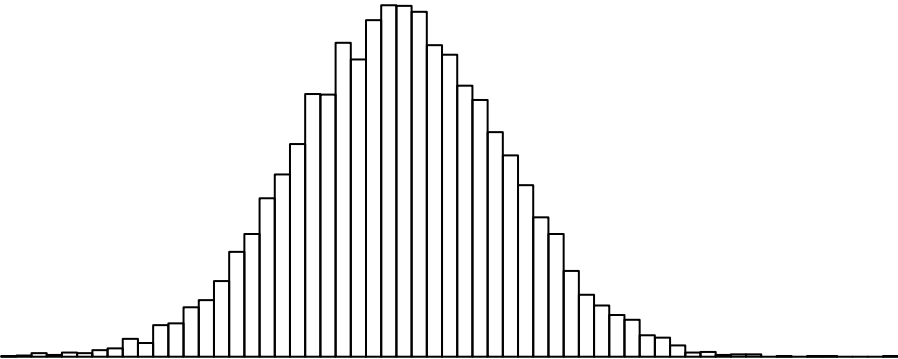

B224:120

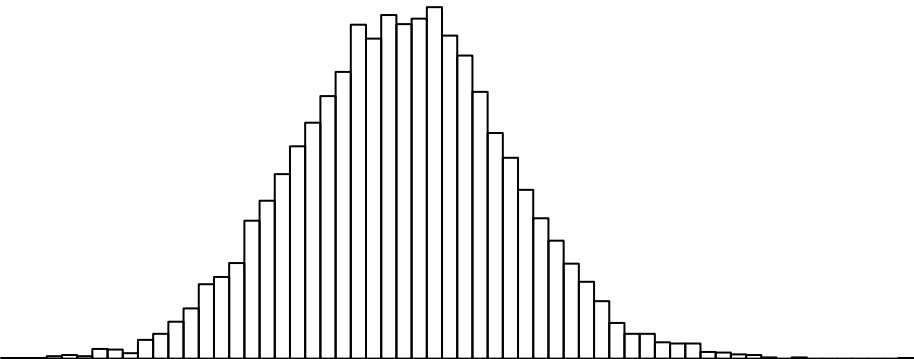

B224:45

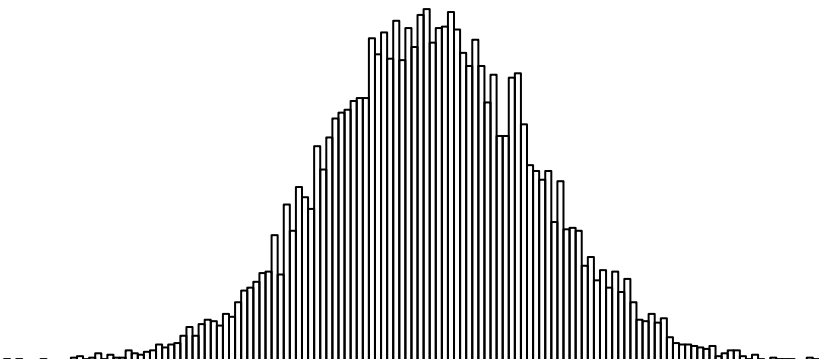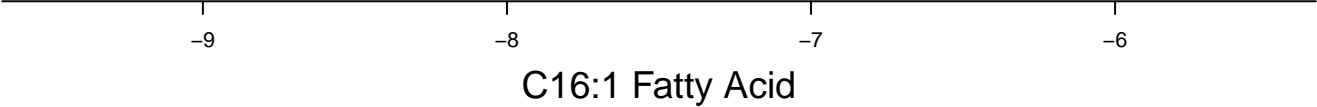

B224:240 – B224:120

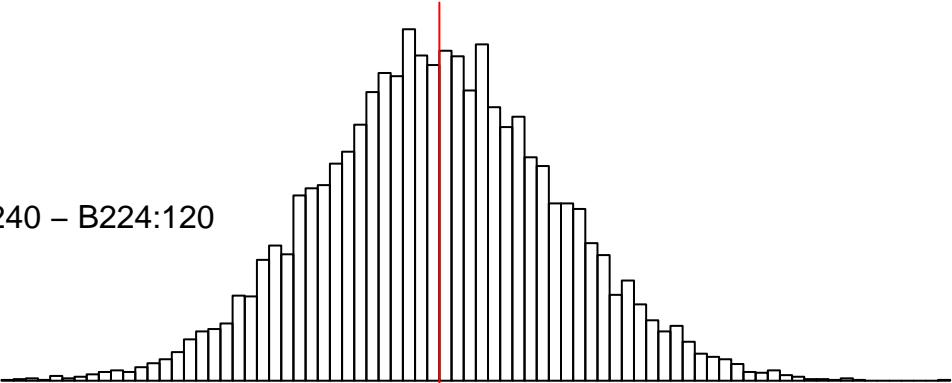

B224:240 – B224:45

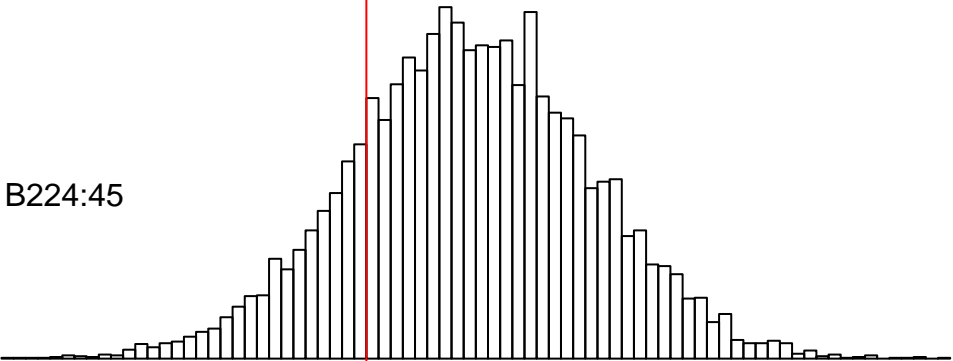

B224:120 – B224:45

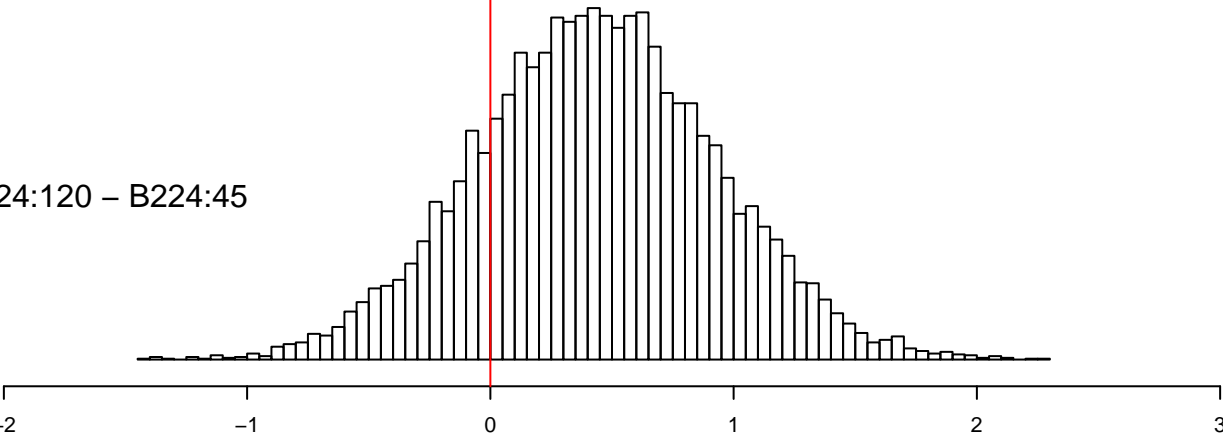

delta(C16:1 Fatty Acid)

B224:240

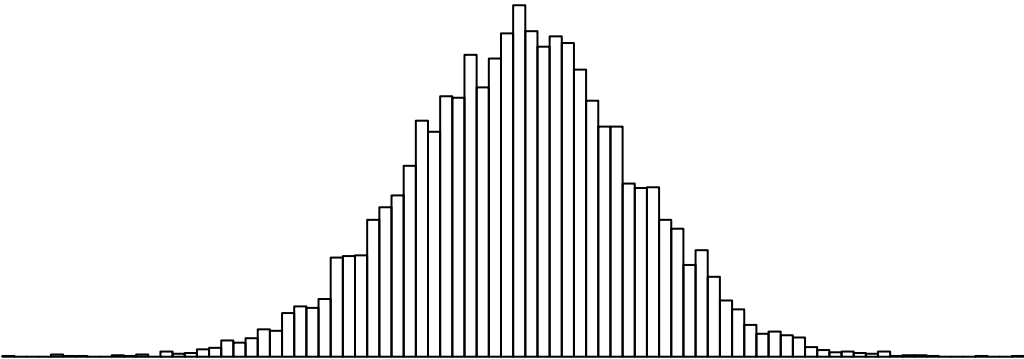

B224:120

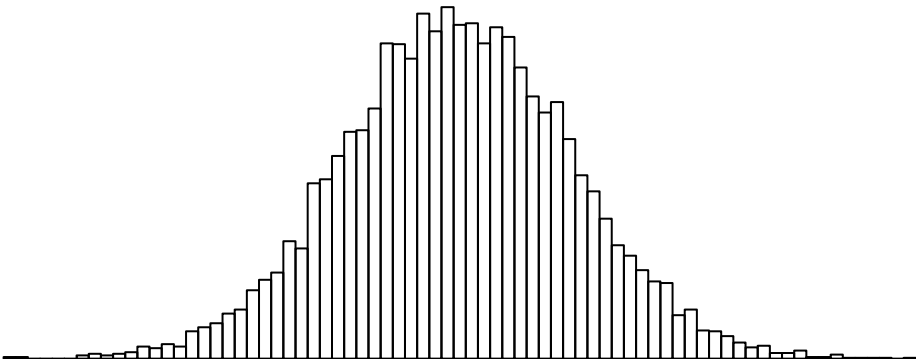

B224:45

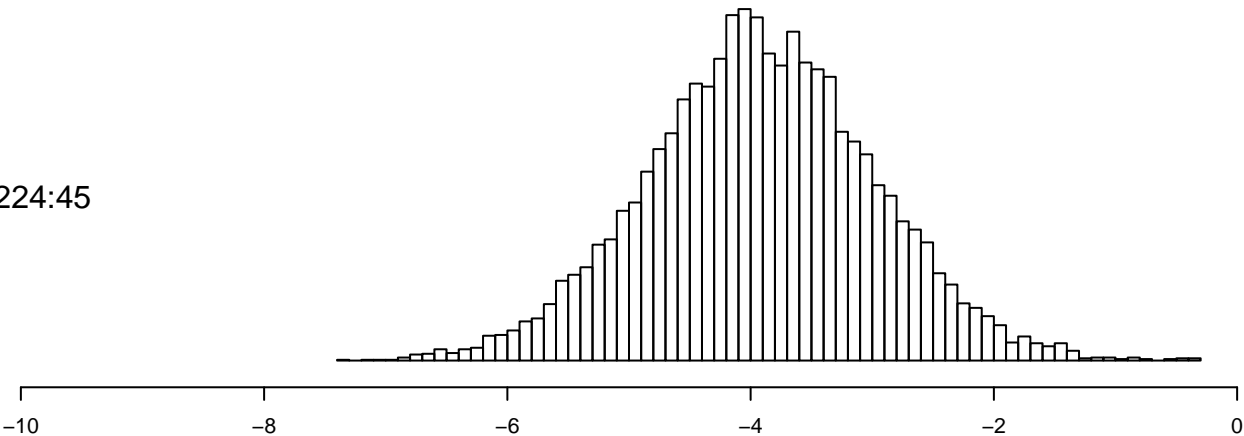

C16:0 Fatty Acid

B224:240 – B224:120

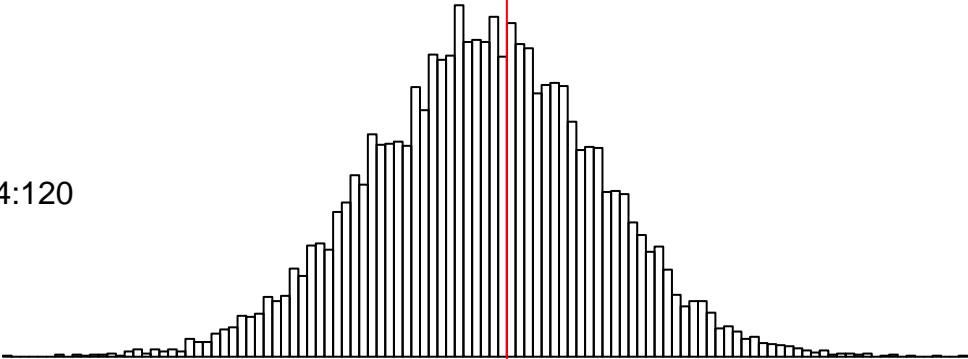

B224:240 – B224:45

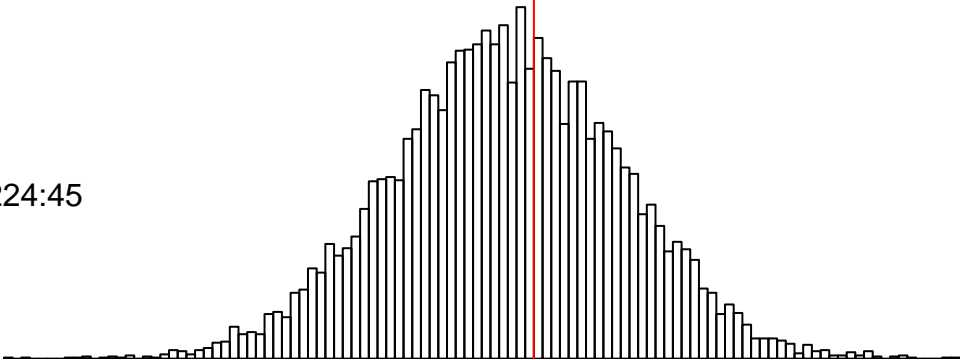

B224:120 – B224:45

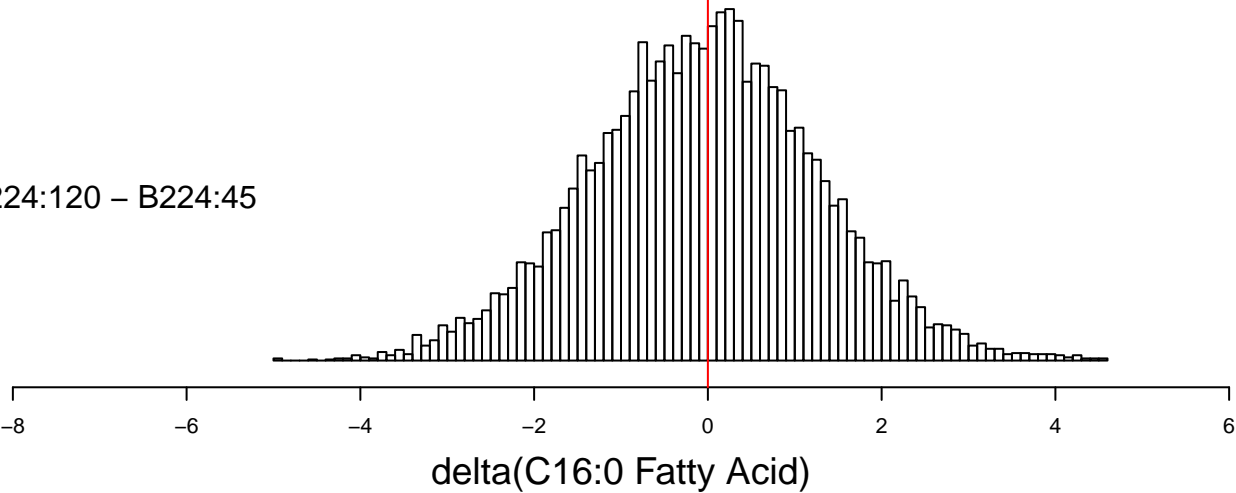

B224:240

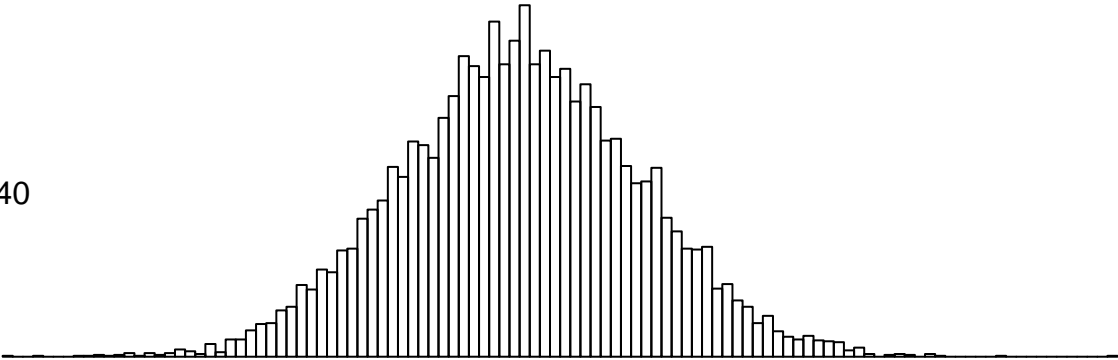

B224:120

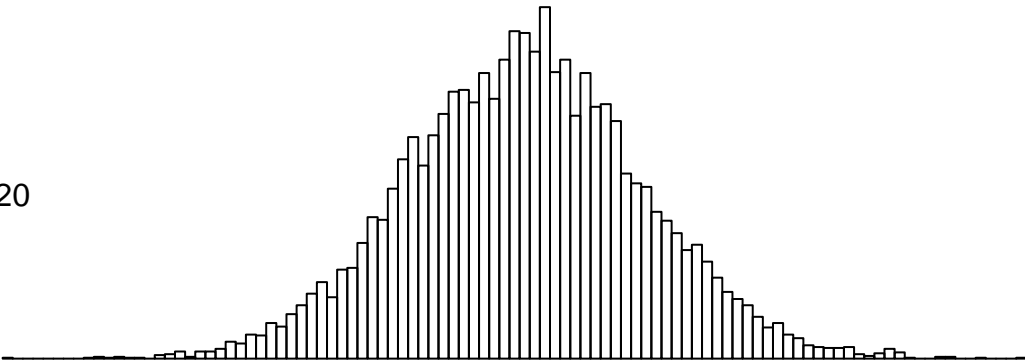

B224:45

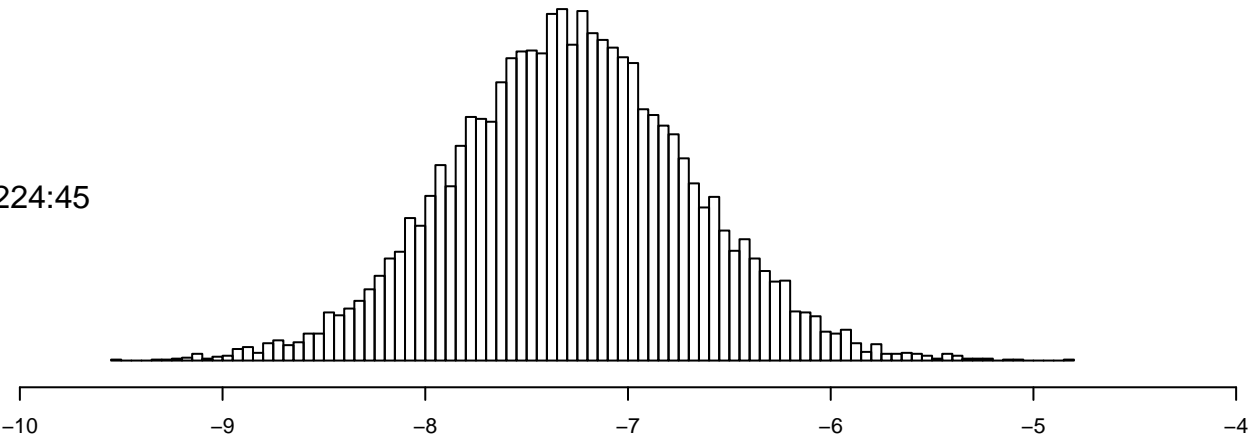

Polyunsaturated Fatty Acids 1

B224:240 – B224:120

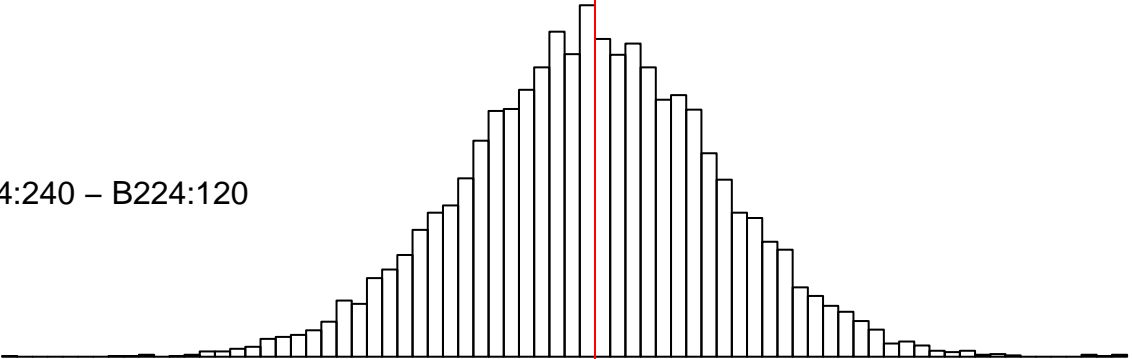

B224:240 – B224:45

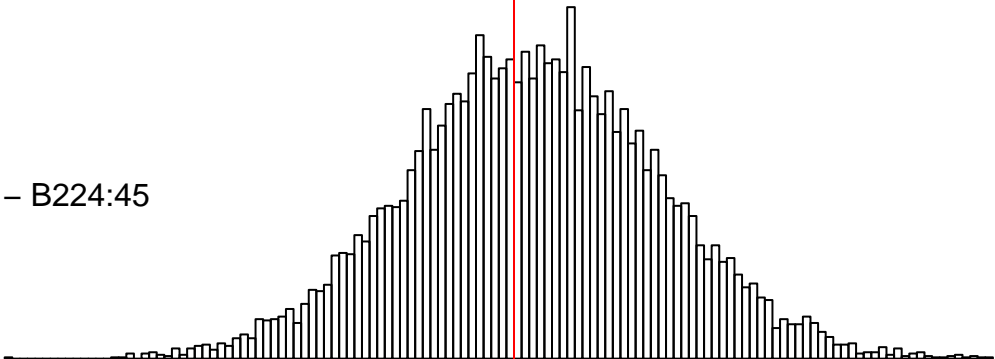

B224:120 – B224:45

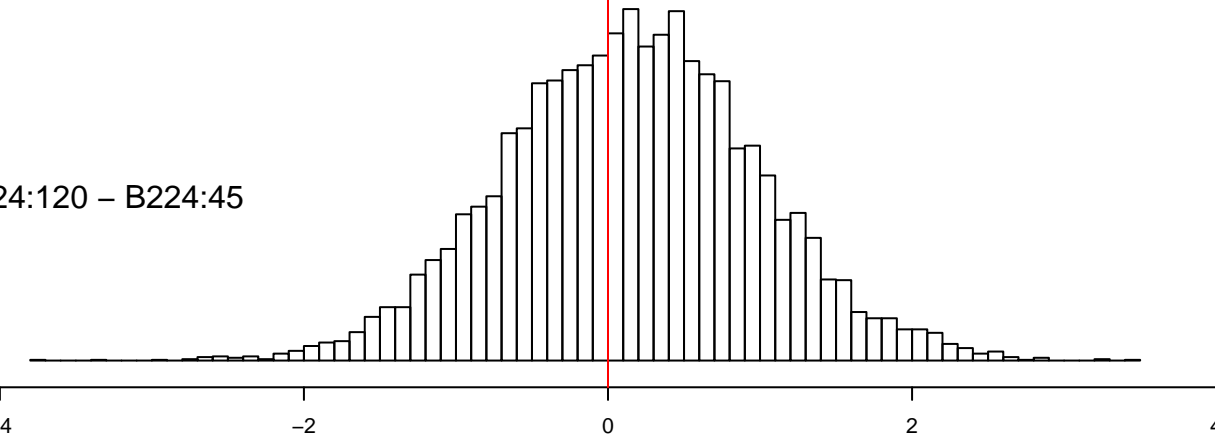

delta(Polyunsaturated Fatty Acids 1)



B224:240

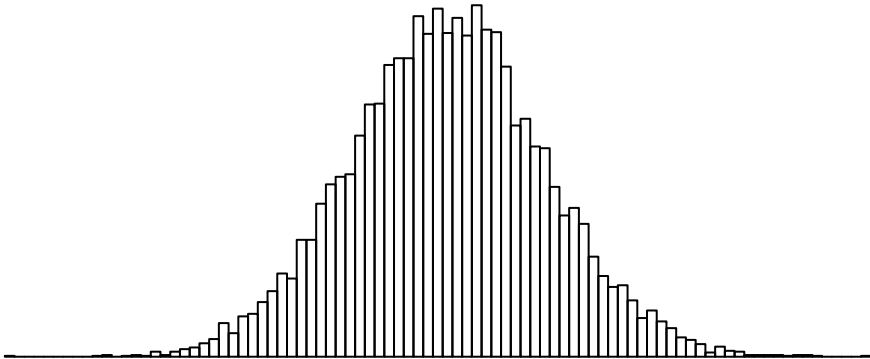

B224:120

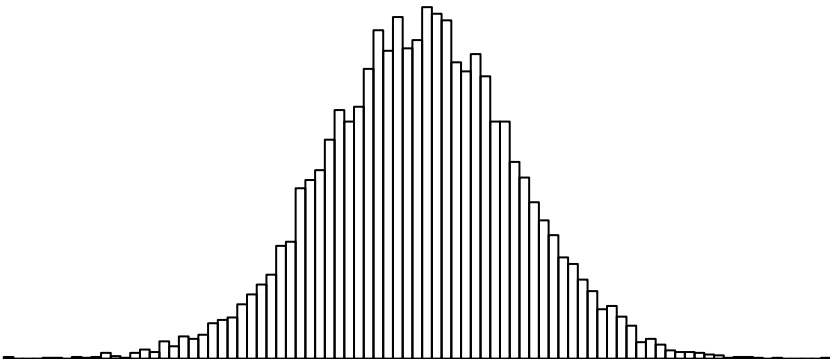

B224:45

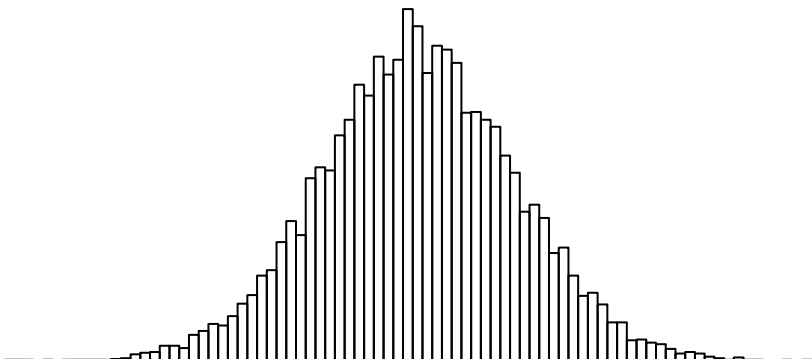

-10.5      -10.0      -9.5      -9.0      -8.5      -8.0

Polyunsaturated Fatty Acids 3

B224:240 – B224:120

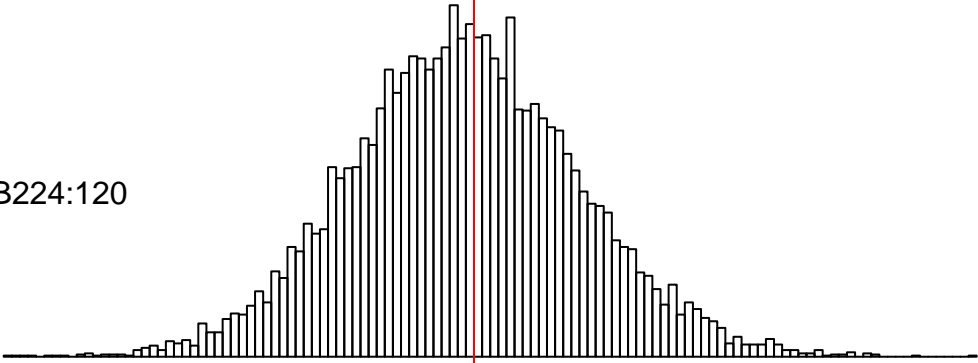

B224:240 – B224:45

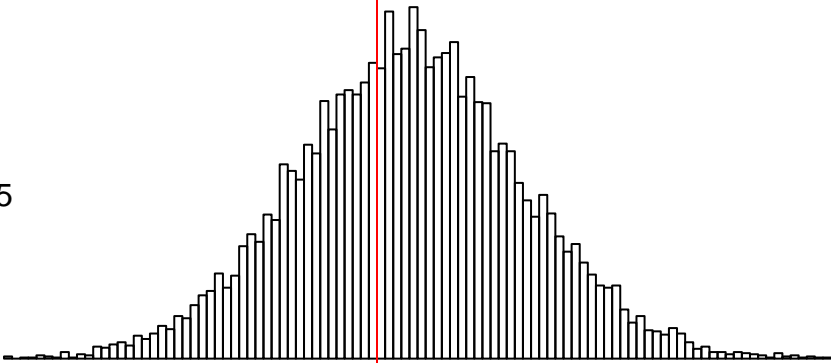

B224:120 – B224:45

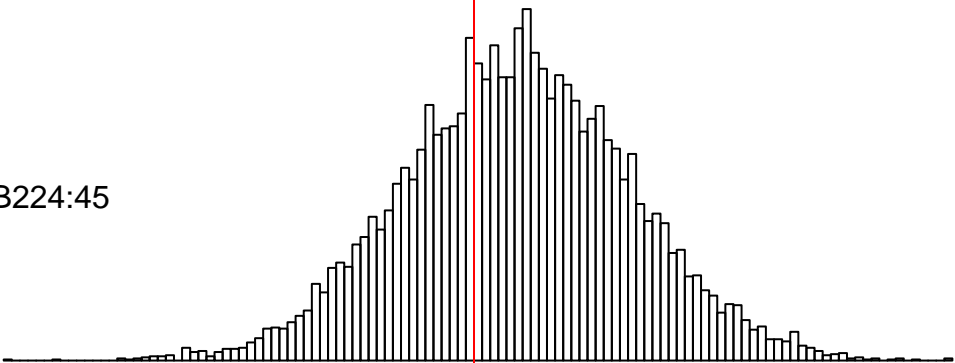

-1.5      -1.0      -0.5      0.0      0.5      1.0      1.5

delta(Polyunsaturated Fatty Acids 3)

B224:240

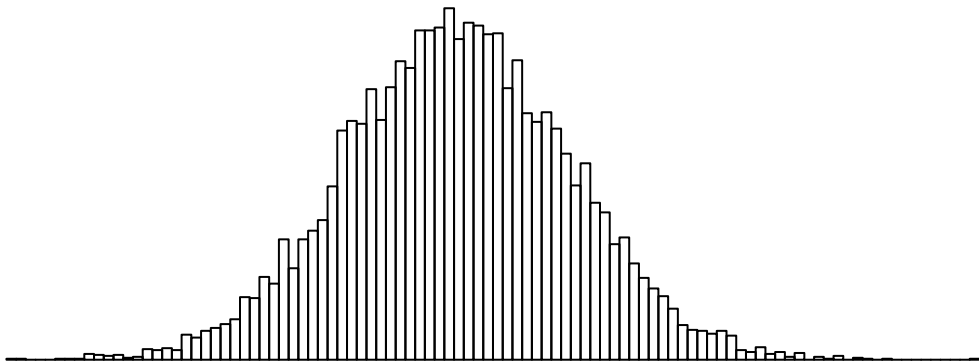

B224:120

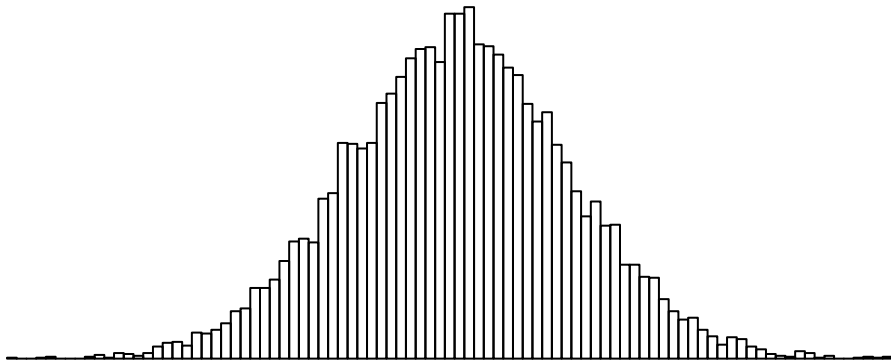

B224:45

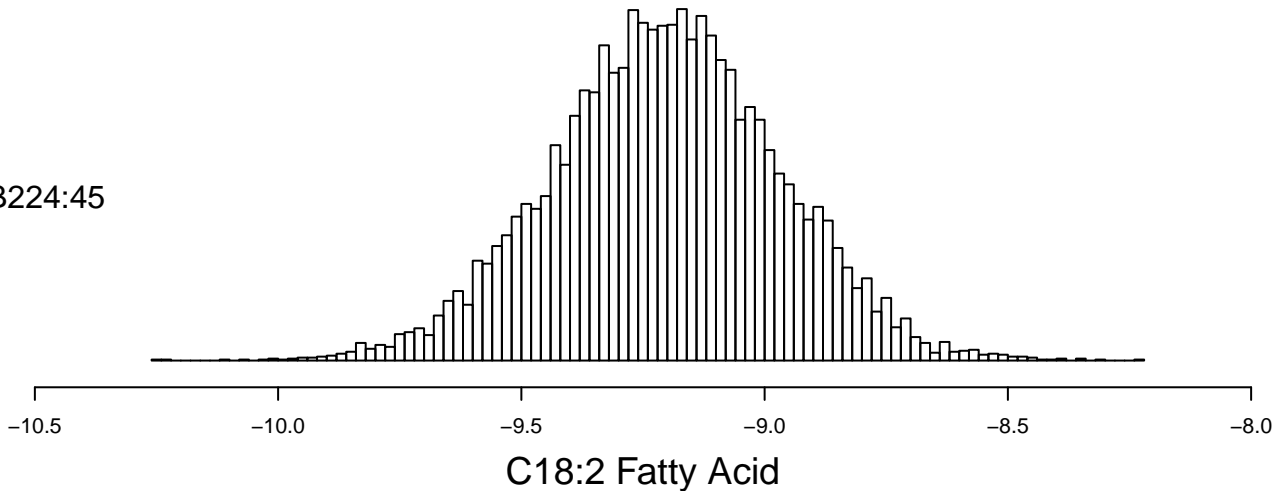

B224:240 – B224:120

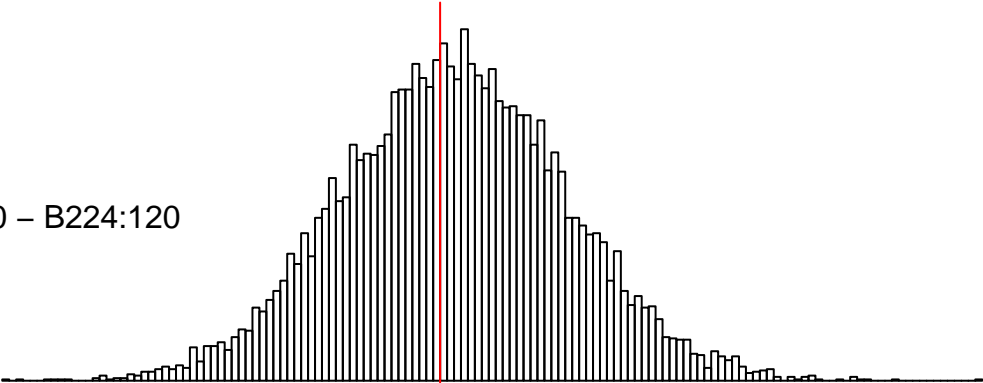

B224:240 – B224:45

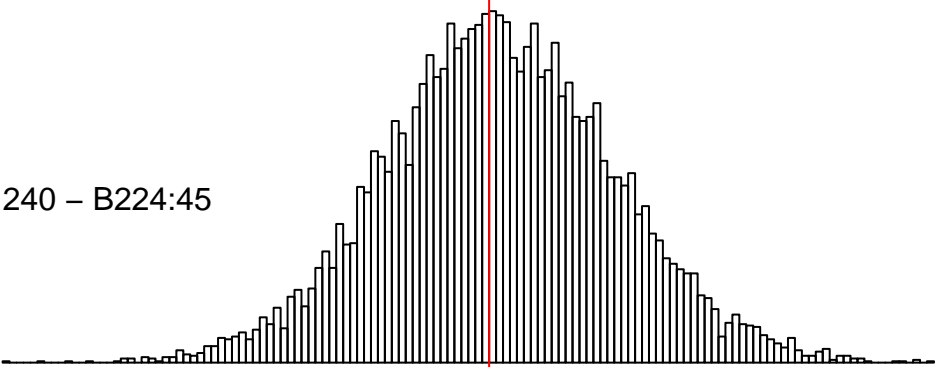

B224:120 – B224:45

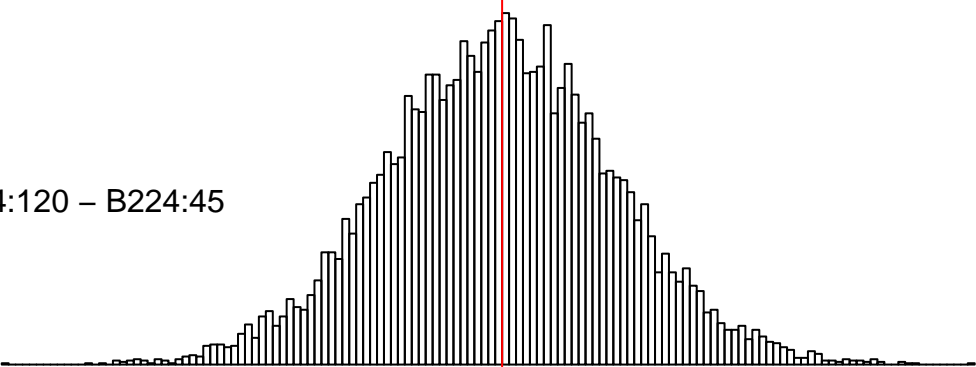

-1.5      -1.0      -0.5      0.0      0.5      1.0      1.5      2.0

delta(C18:2 Fatty Acid)

B224:240

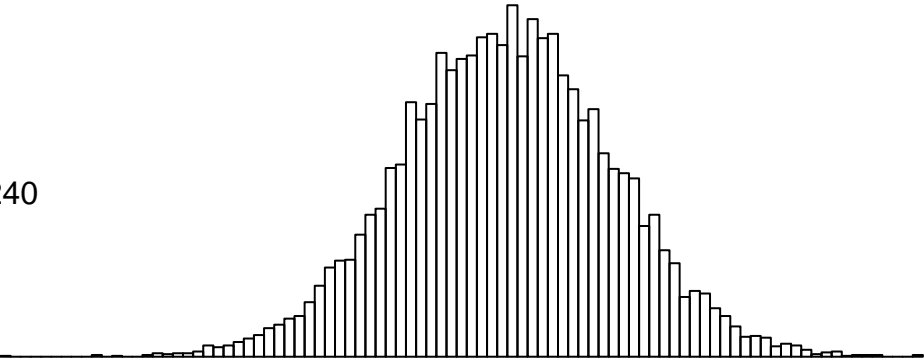

B224:120

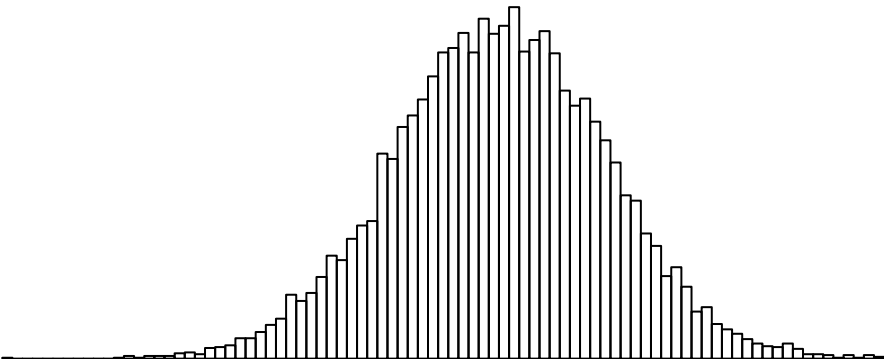

B224:45

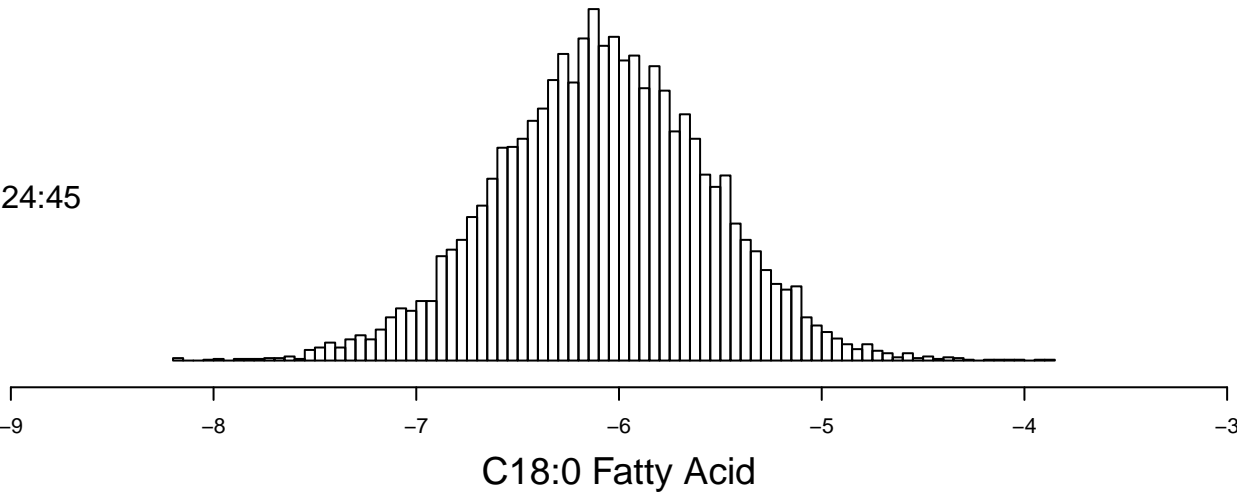

B224:240 – B224:120

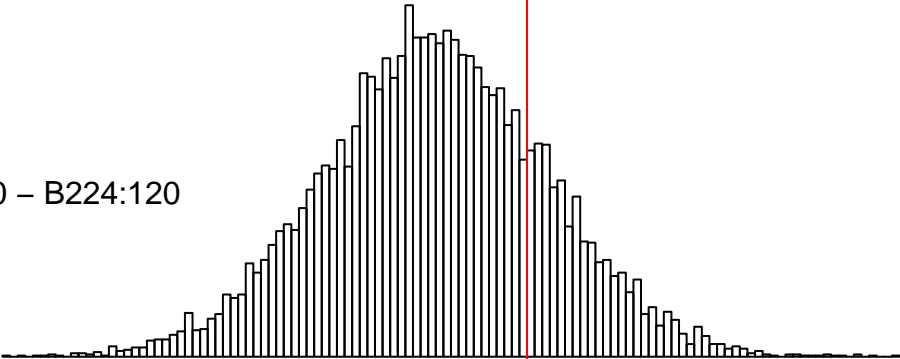

B224:240 – B224:45

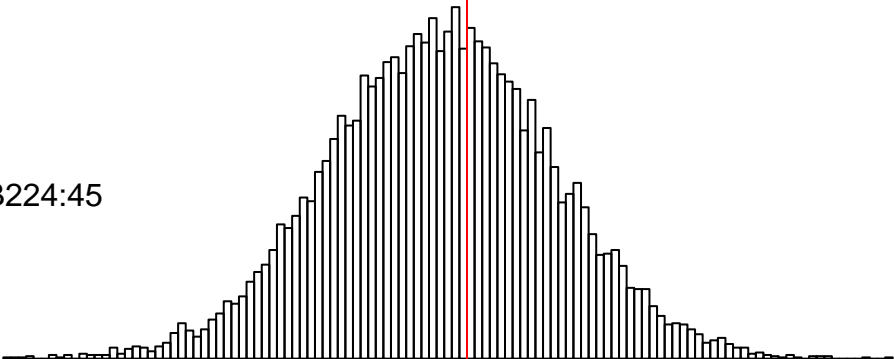

B224:120 – B224:45

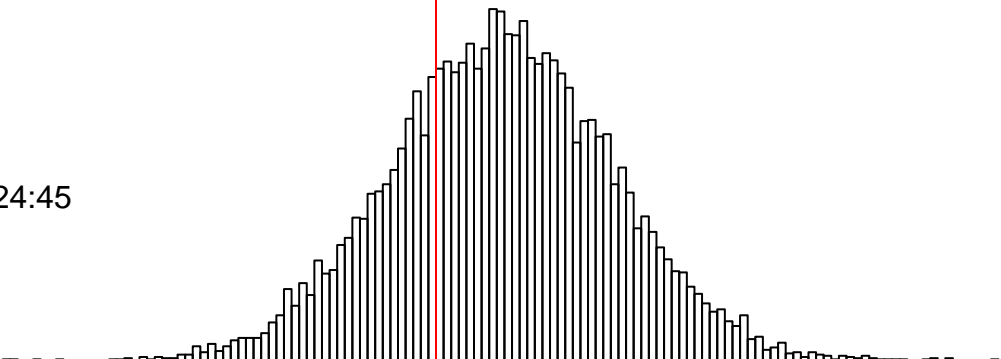

-4

-2

0

2

4

delta(C18:0 Fatty Acid)

B224:240

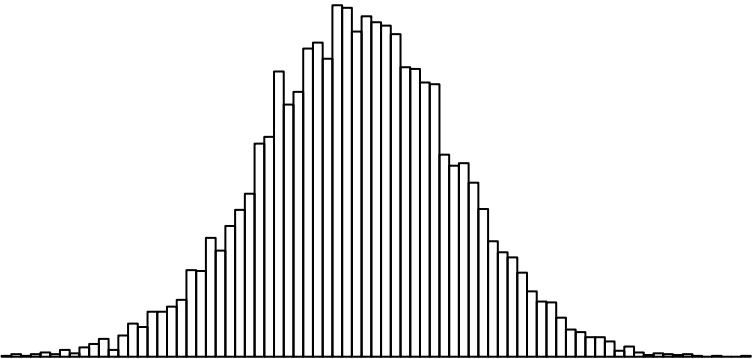

B224:120

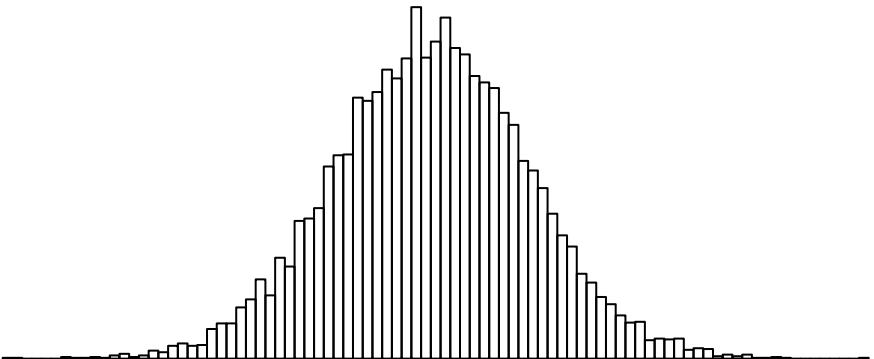

B224:45

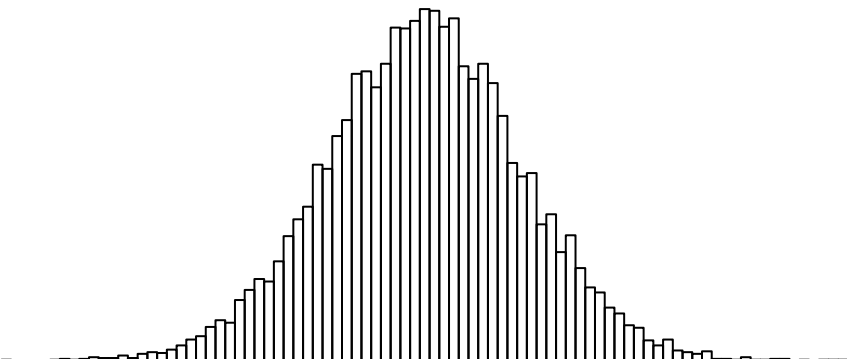

-9.5      -9.0      -8.5      -8.0      -7.5      -7.0

Unidentified Fatty Acid 2

B224:240 – B224:120

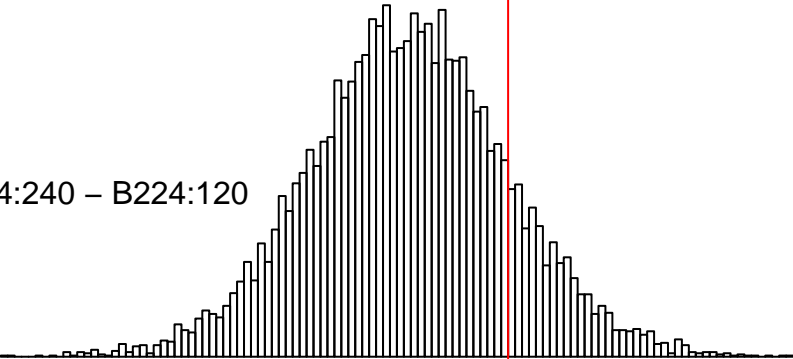

B224:240 – B224:45

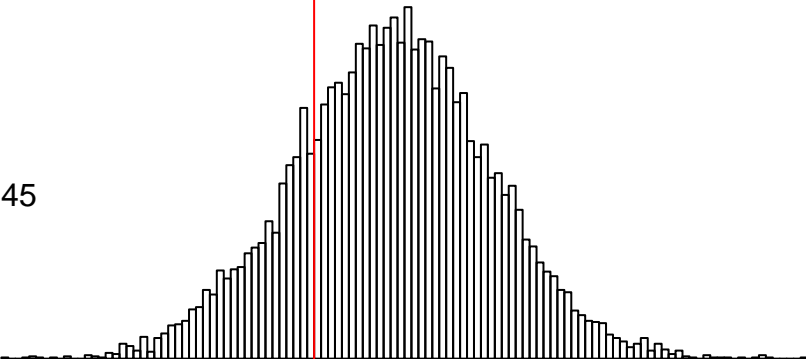

B224:120 – B224:45

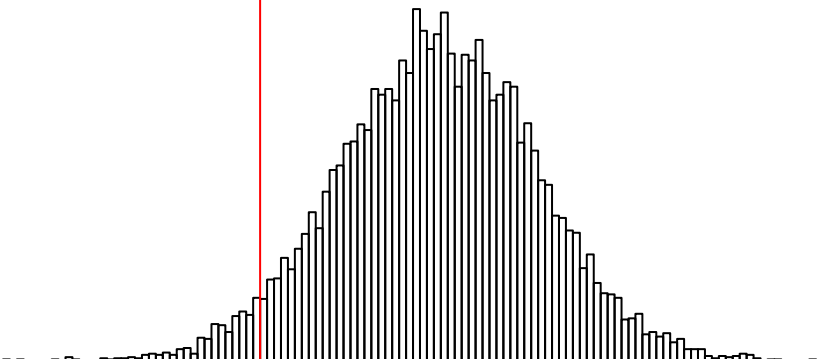

delta(Unidentified Fatty Acid 2)



B224:240

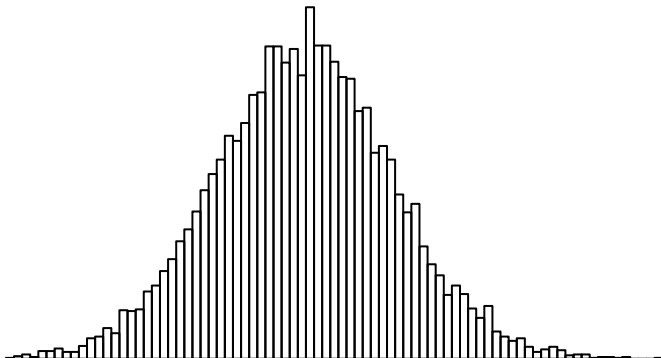

B224:120

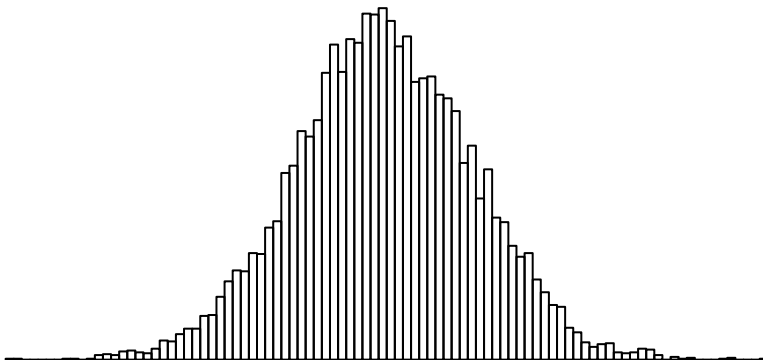

B224:45

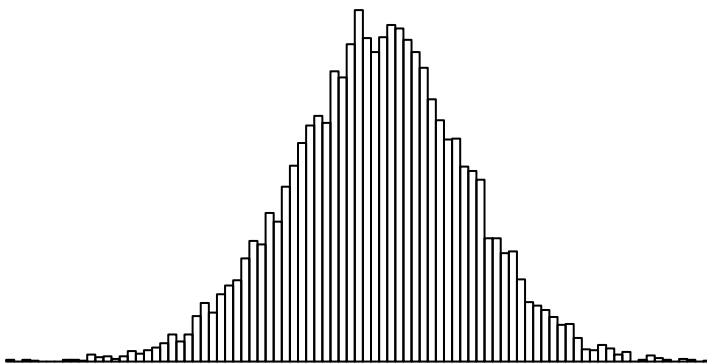

-5.0 -4.5 -4.0 -3.5 -3.0 -2.5 -2.0

Glycerol

B224:240 – B224:120

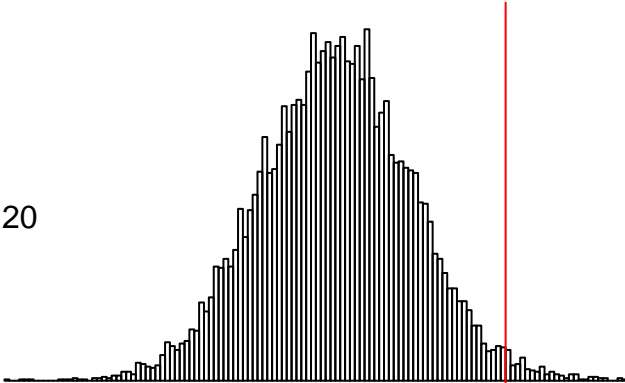

B224:240 – B224:45

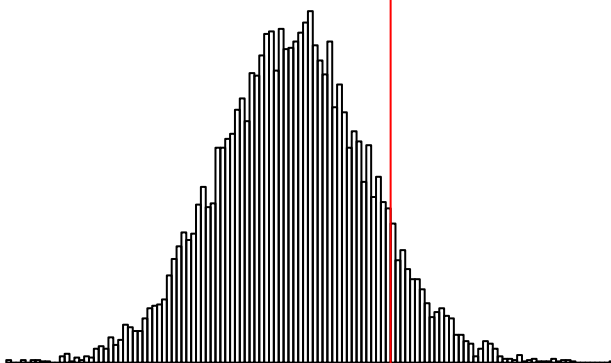

B224:120 – B224:45

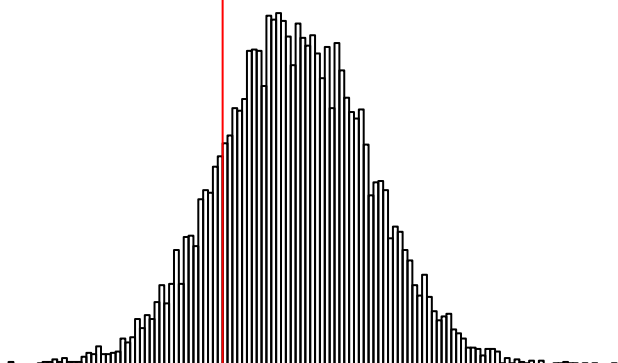

-3 -2 -1 0 1 2

delta(Glycerol)

B224:240

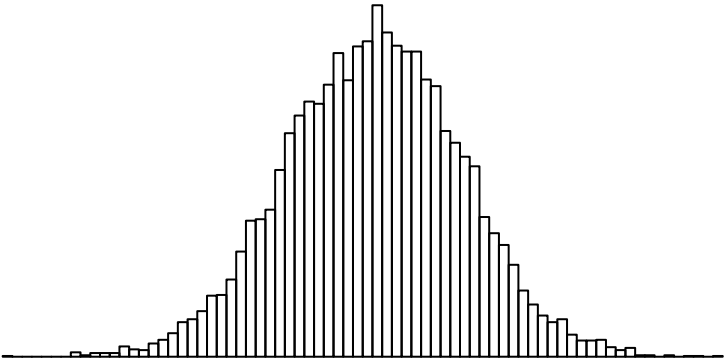

B224:120

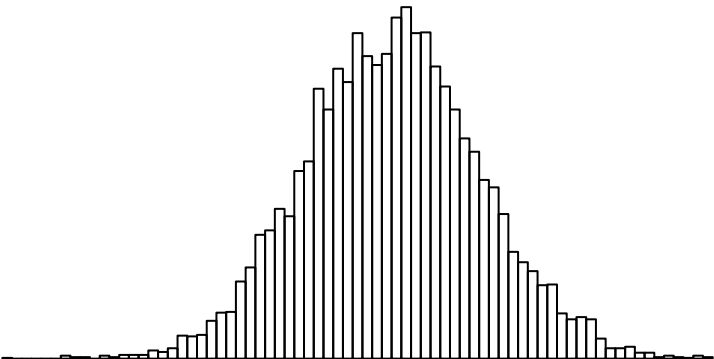

B224:45

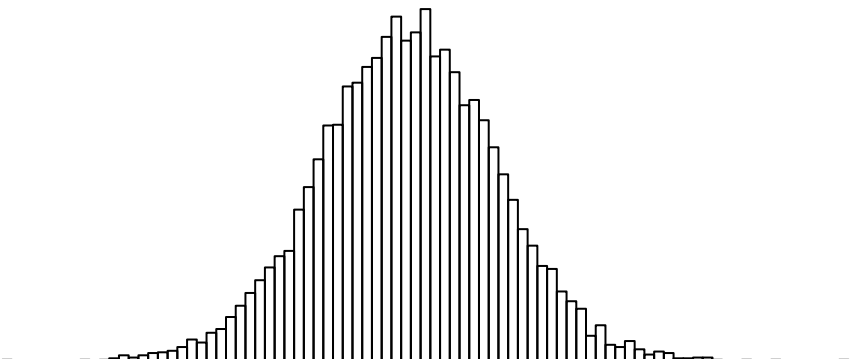

-2.5      -2.0      -1.5      -1.0      -0.5      0.0

Inositol 1

B224:240 – B224:120

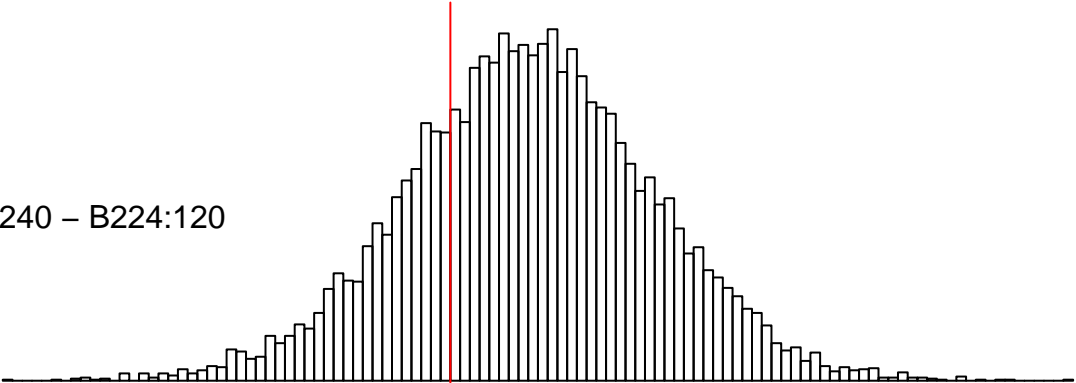

B224:240 – B224:45

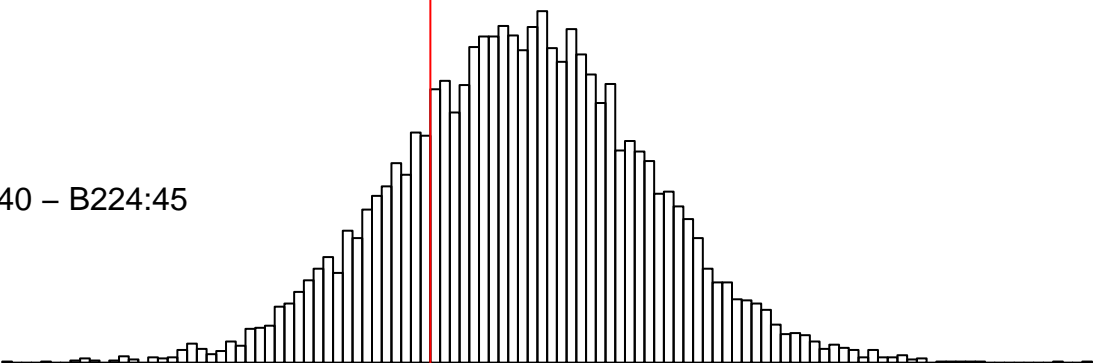

B224:120 – B224:45

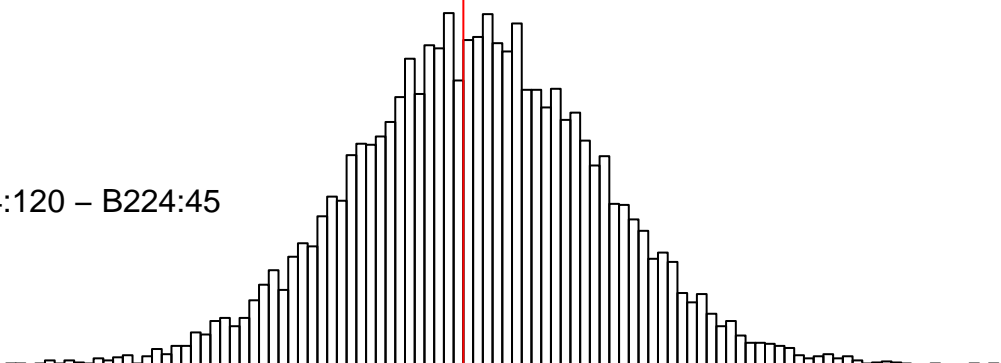

-1.0      -0.5      0.0      0.5      1.0      1.5

delta(Inositol 1)

B224:240

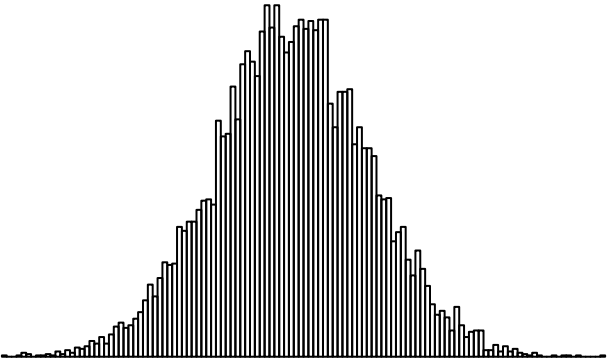

B224:120

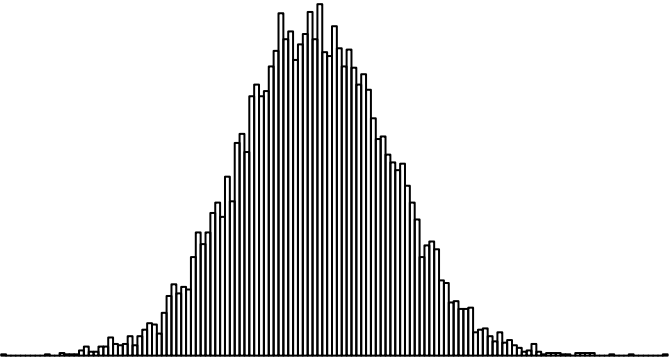

B224:45

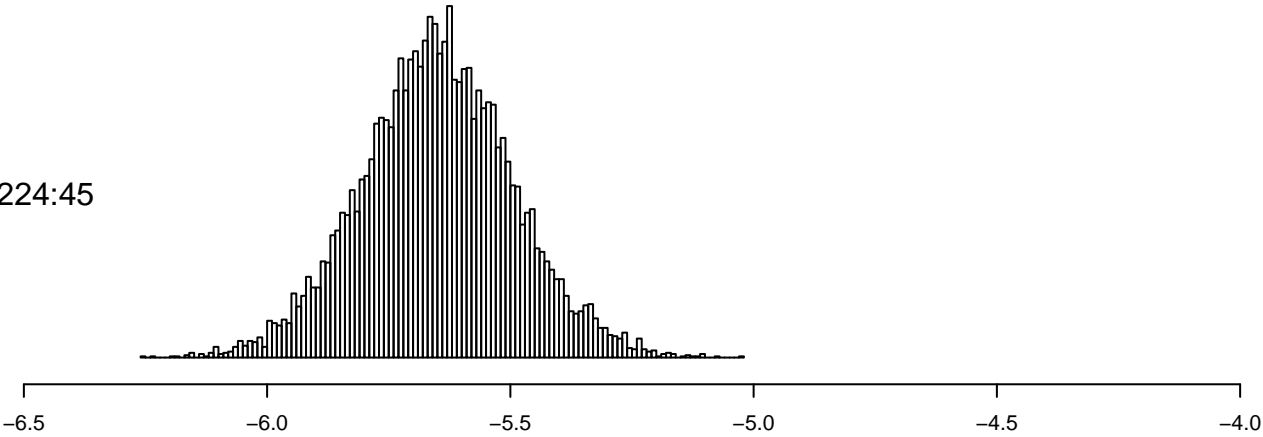

Inositol 2

B224:240 – B224:120

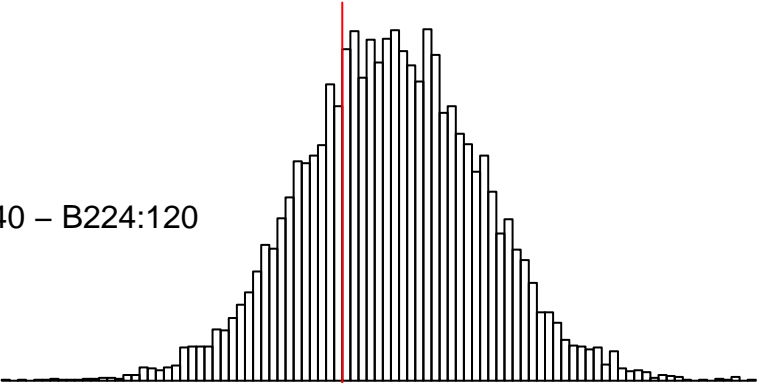

B224:240 – B224:45

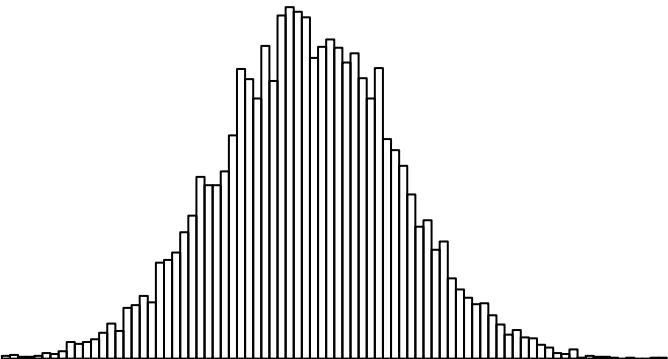

B224:120 – B224:45

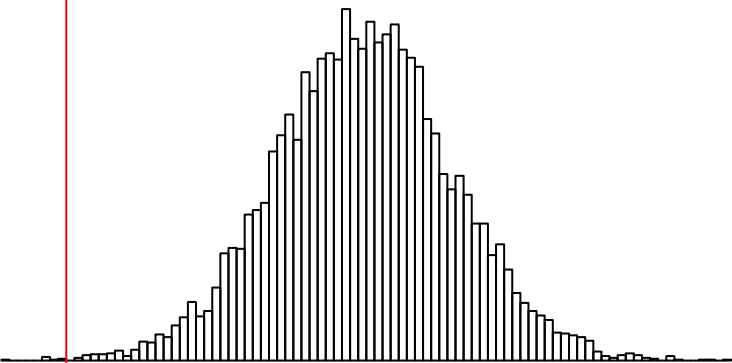

-1.0 -0.5 0.0 0.5 1.0 1.5 2.0

delta(Inositol 2)

B224:240

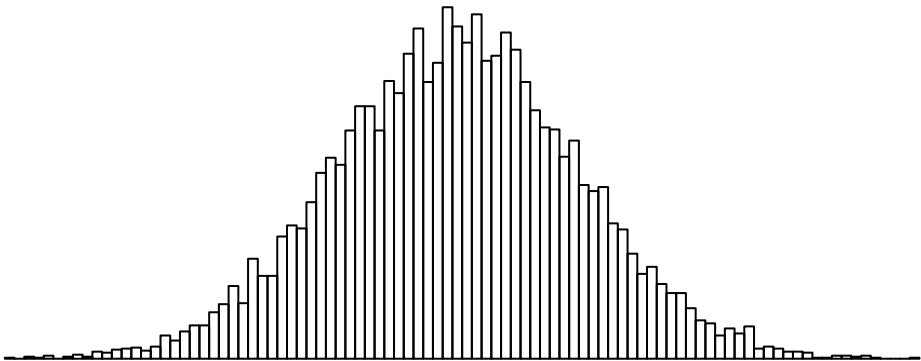

B224:120

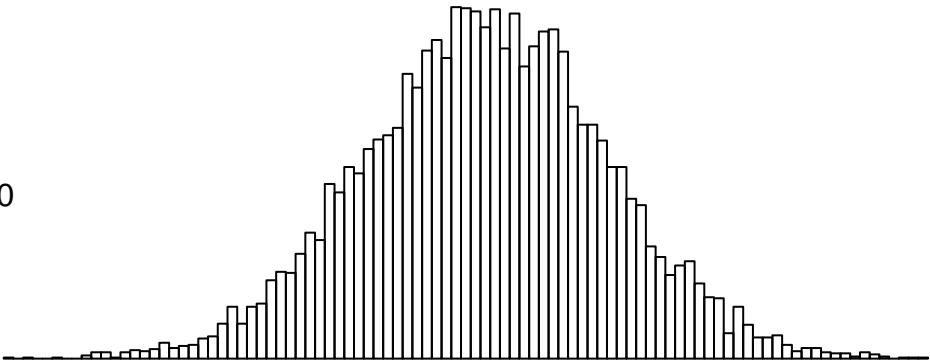

B224:45

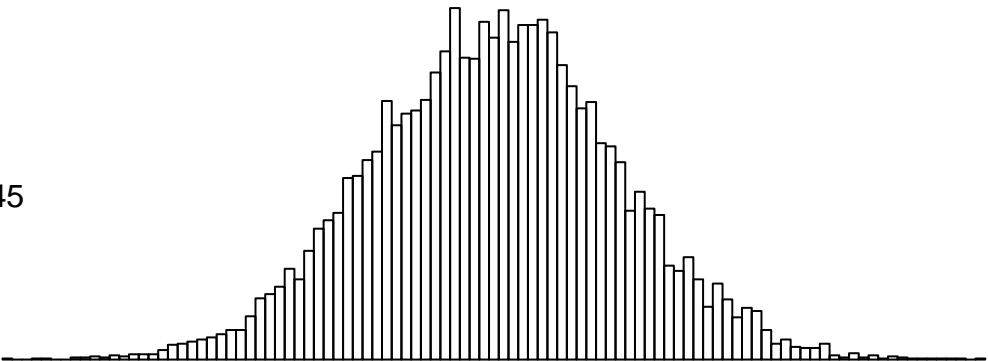

-11.0 -10.5 -10.0 -9.5 -9.0 -8.5

C29 Sterol 1

B224:240 – B224:120

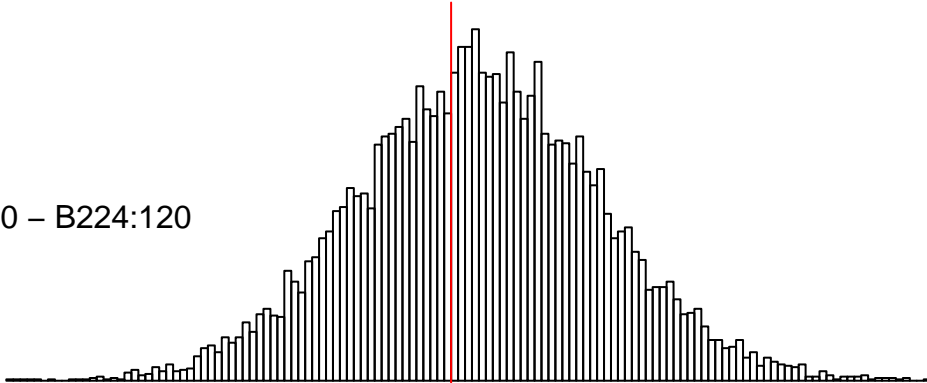

B224:240 – B224:45

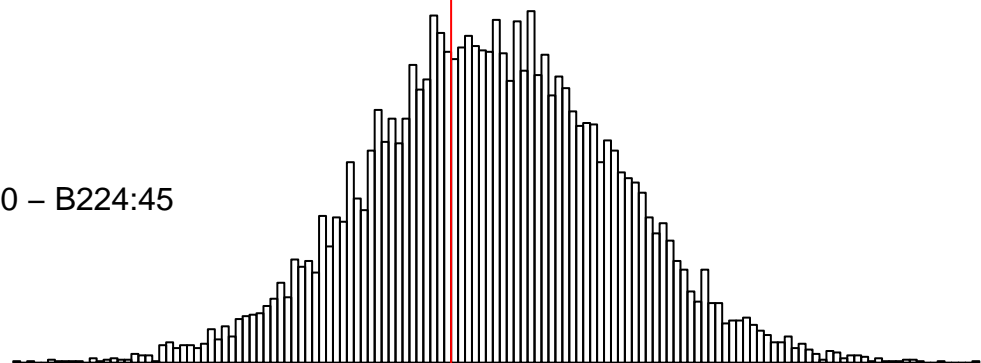

B224:120 – B224:45

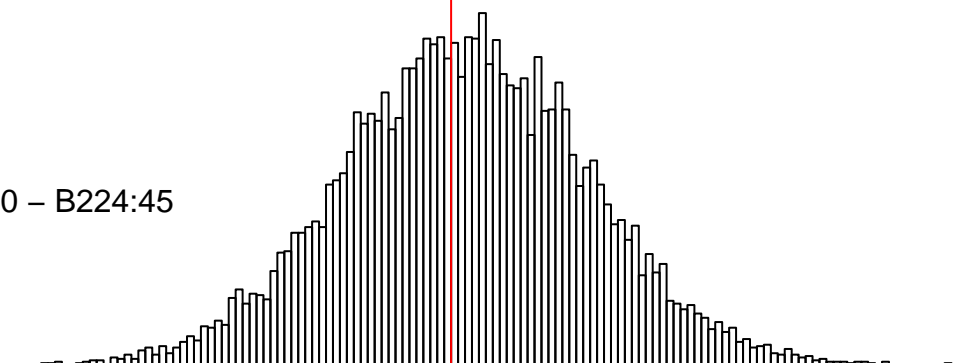

-1.5      -1.0      -0.5      0.0      0.5      1.0      1.5      2.0

delta(C29 Sterol 1)



B224:240

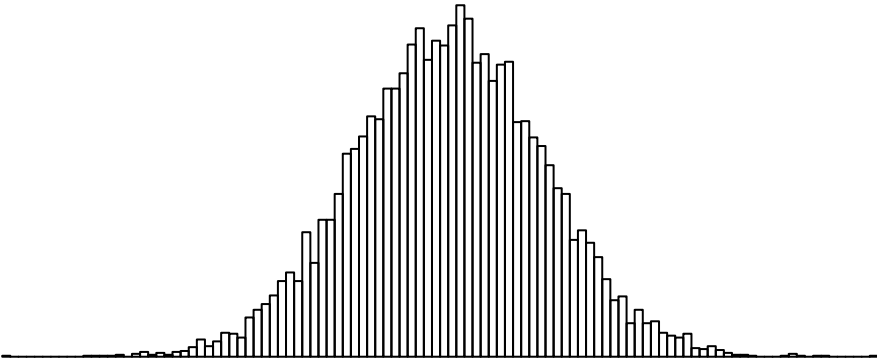

B224:120

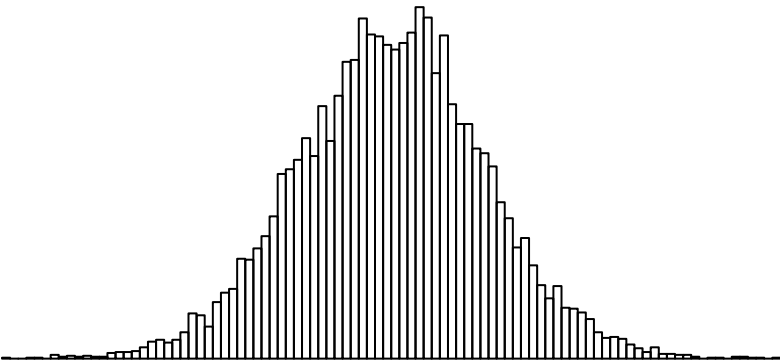

B224:45

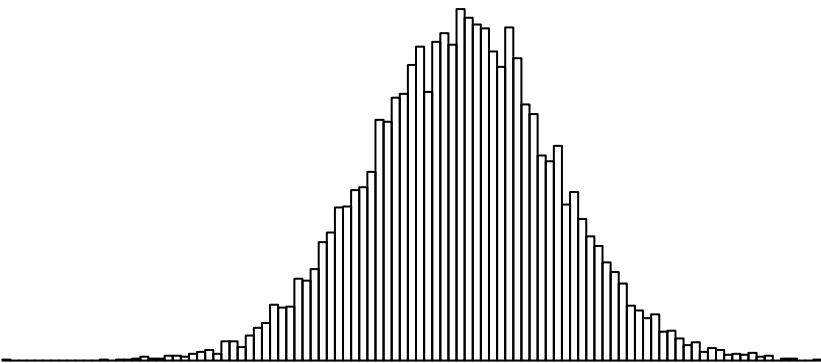

-11.0      -10.5      -10.0      -9.5      -9.0      -8.5      -8.0

C29 Stanol 1

B224:240 – B224:120

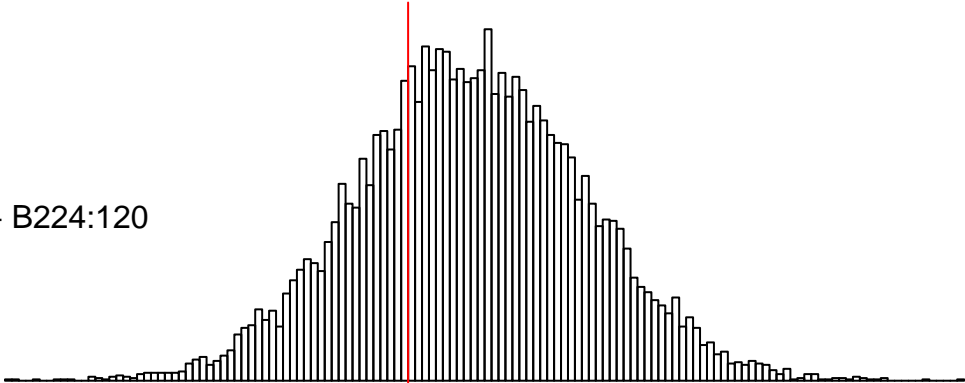

B224:240 – B224:45

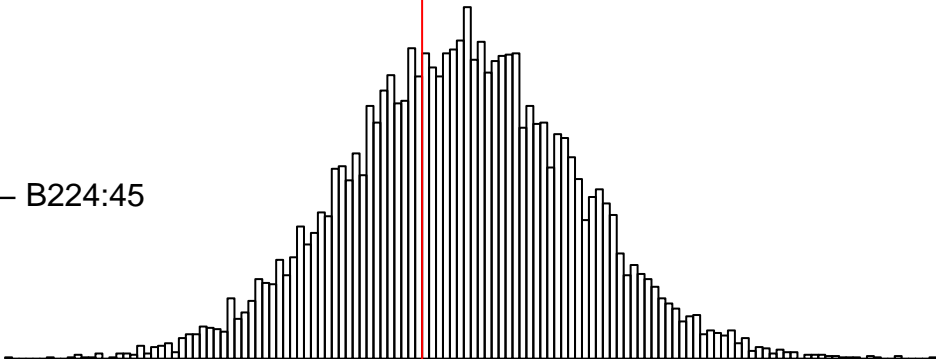

B224:120 – B224:45

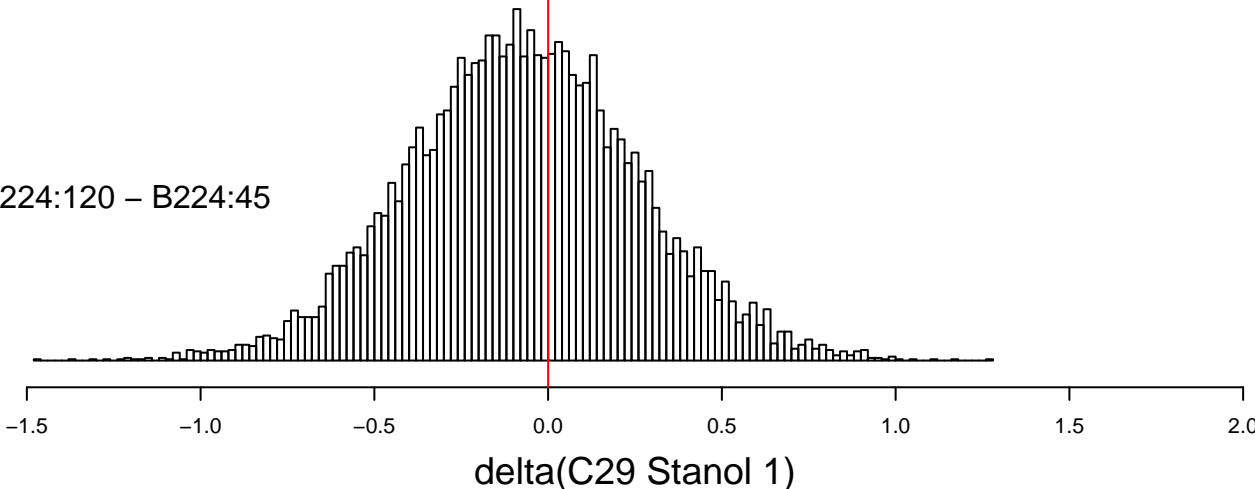

B224:240

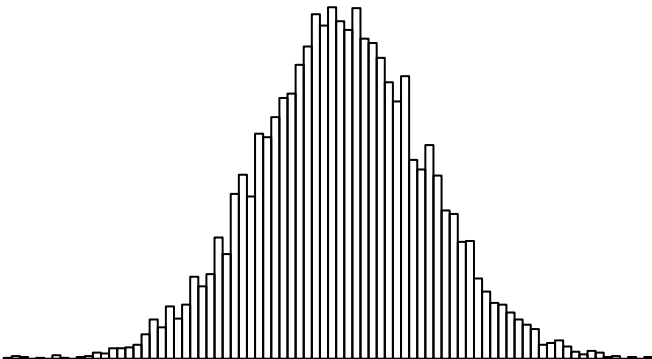

B224:120

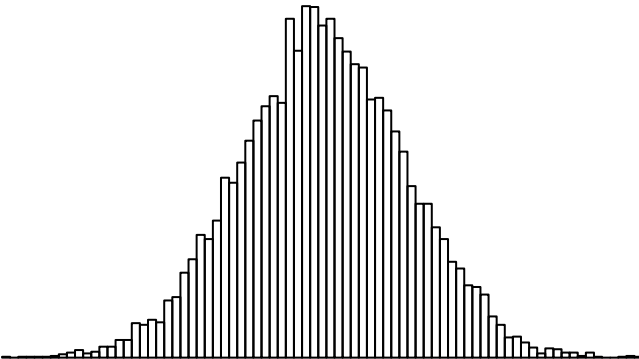

B224:45

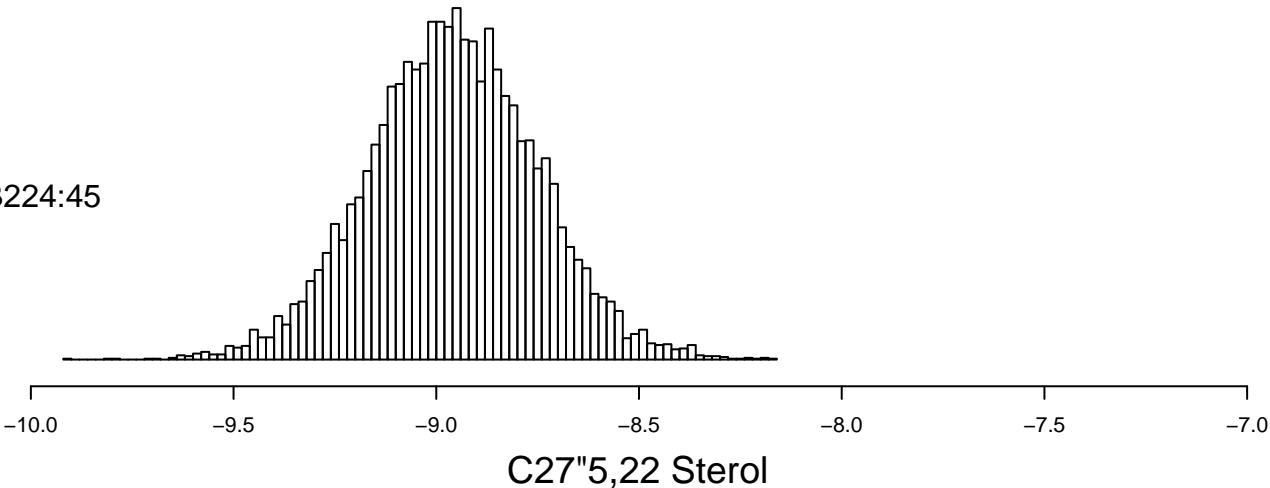

B224:240 – B224:120

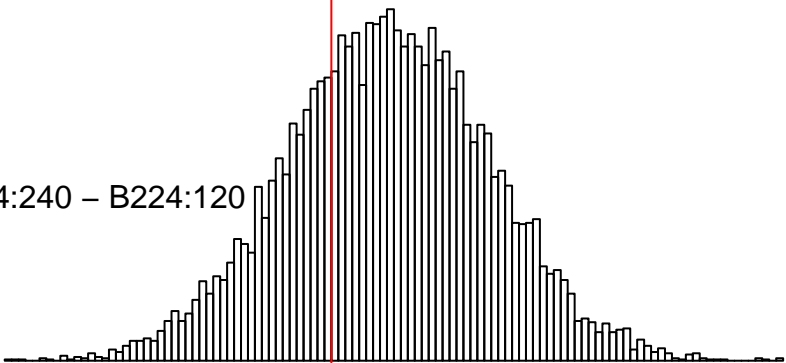

B224:240 – B224:45

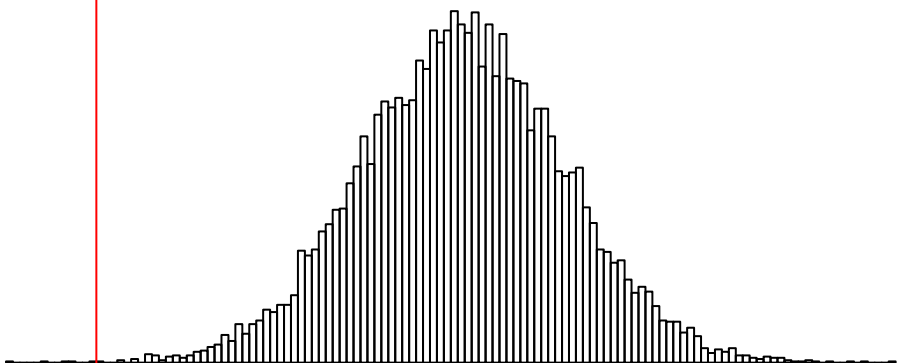

B224:120 – B224:45

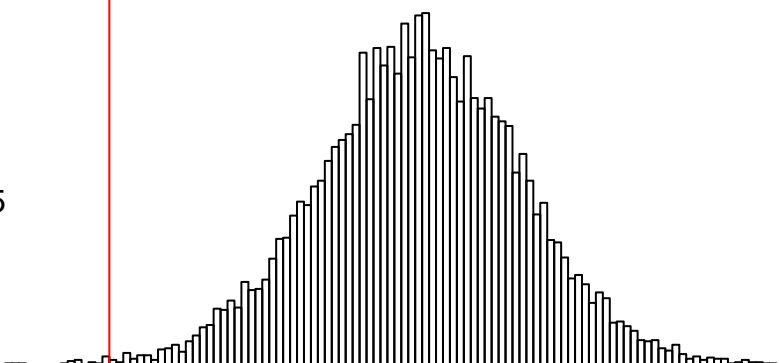

-1.0      -0.5      0.0      0.5      1.0      1.5      2.0      2.5

delta(C27"5,22 Sterol)

B224:240

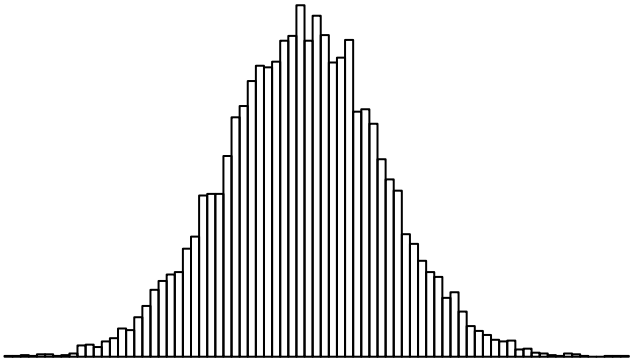

B224:120

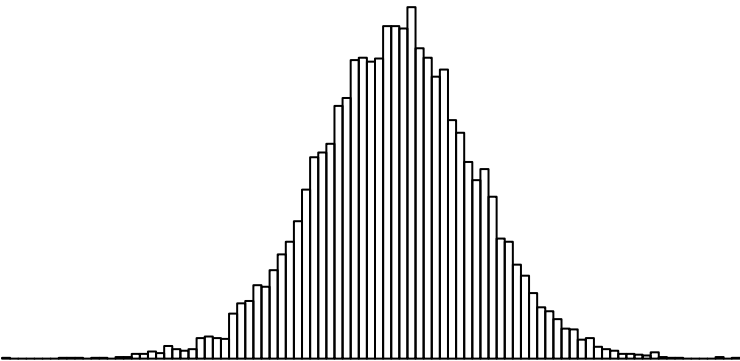

B224:45

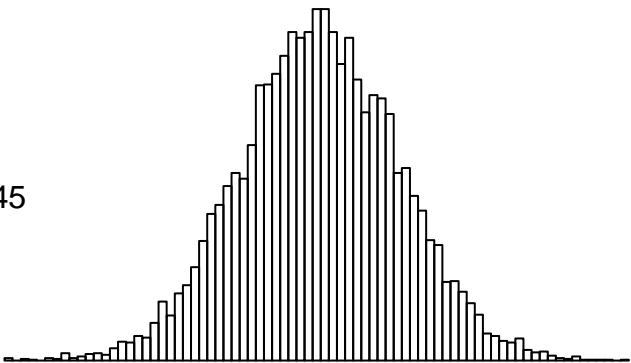

-8.0 -7.5 -7.0 -6.5 -6.0 -5.5 -5.0

C27"5 Sterol

B224:240 – B224:120

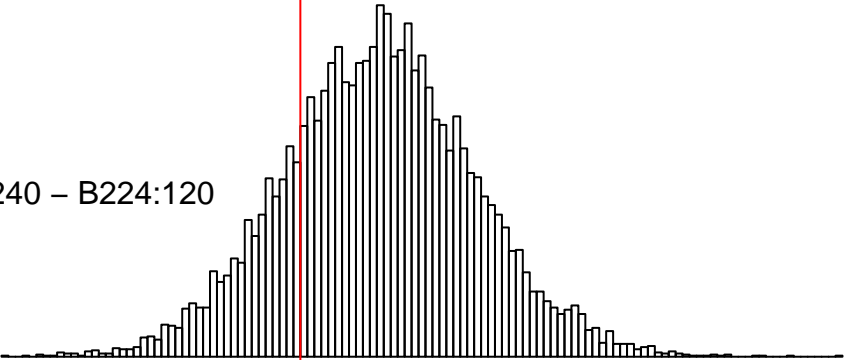

B224:240 – B224:45

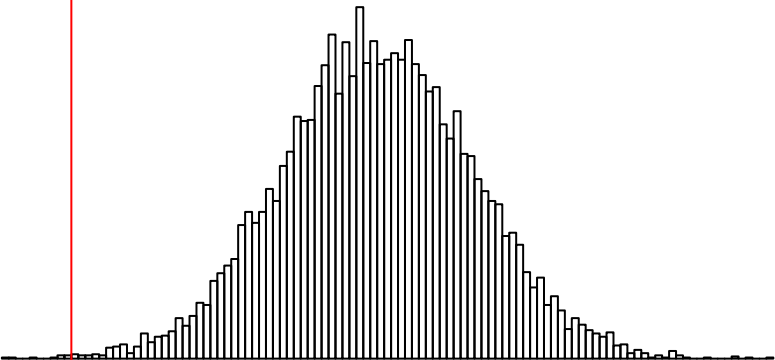

B224:120 – B224:45

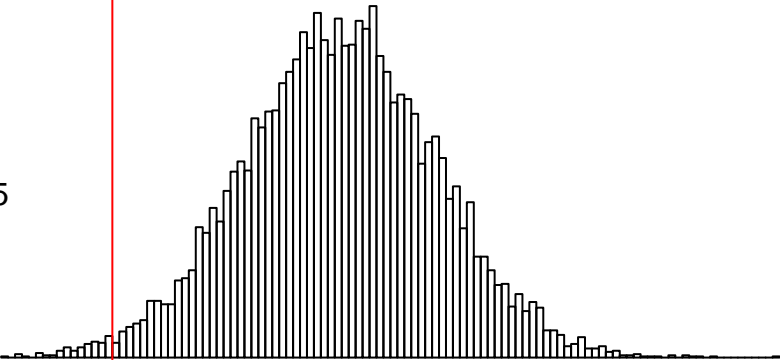

-1.0      -0.5      0.0      0.5      1.0      1.5      2.0      2.5

delta(C27<sup>5</sup> Sterol)

B224:240

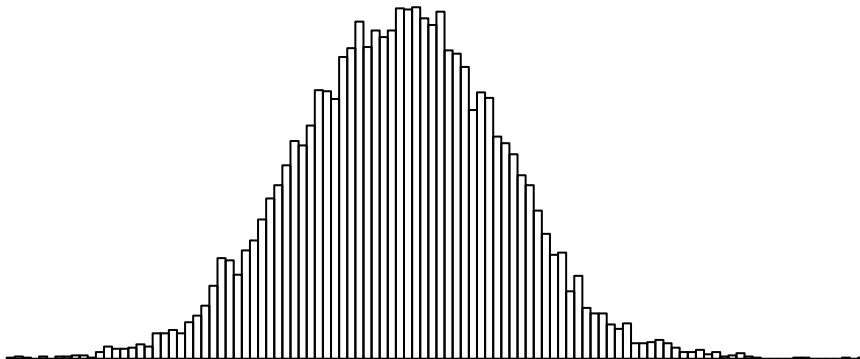

B224:120

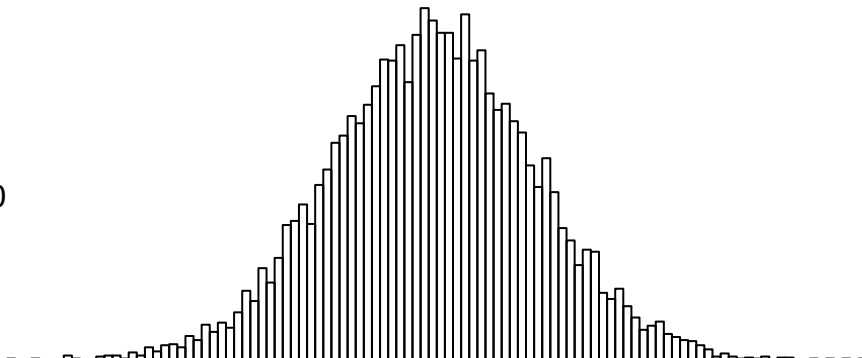

B224:45

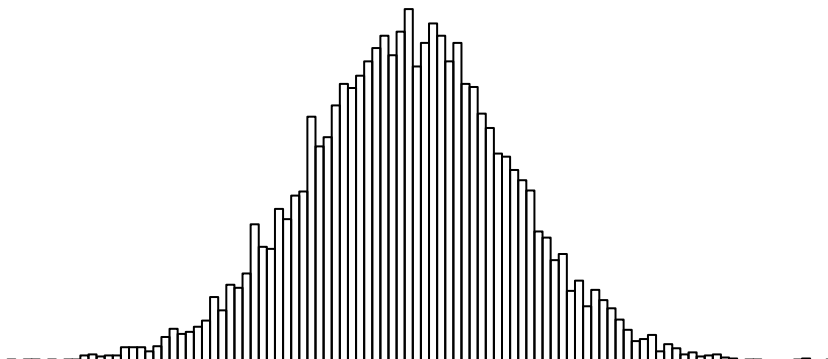

-10.5      -10.0      -9.5      -9.0      -8.5      -8.0      -7.5

C28<sup>5,22</sup> Sterol

B224:240 – B224:120

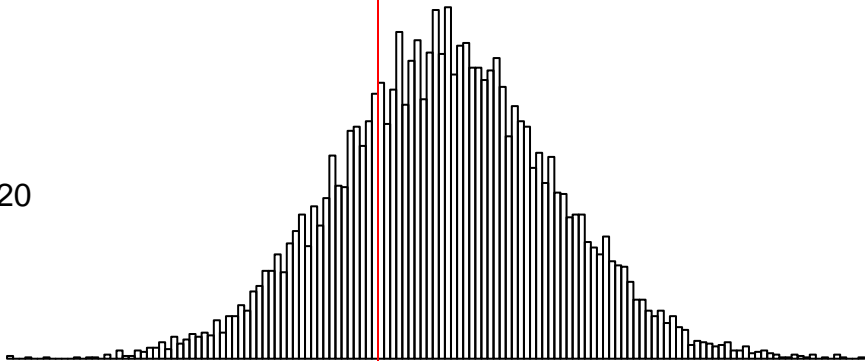

B224:240 – B224:45

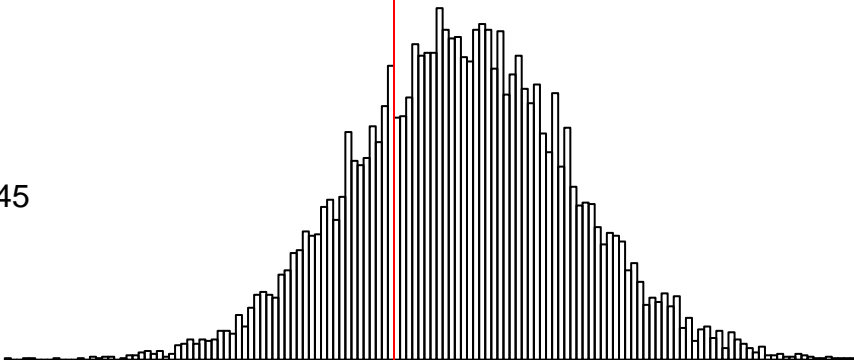

B224:120 – B224:45

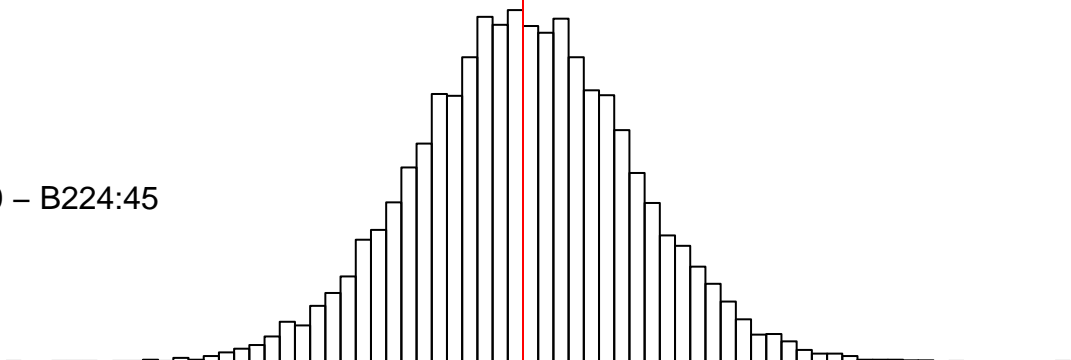

-2

-1

0

1

2

delta(C28"5,22 Sterol)



B224:240

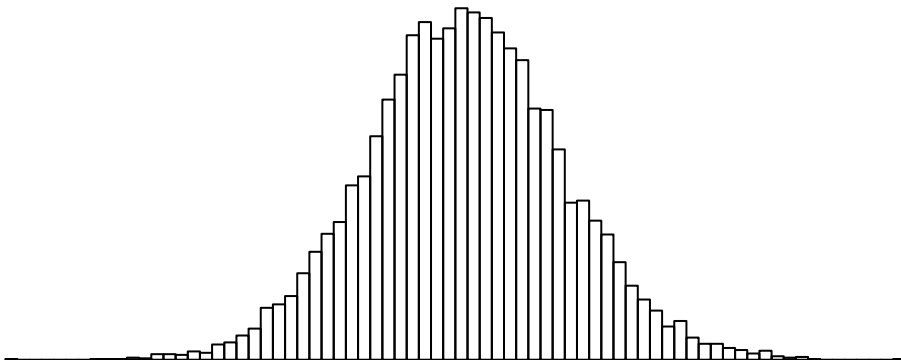

B224:120

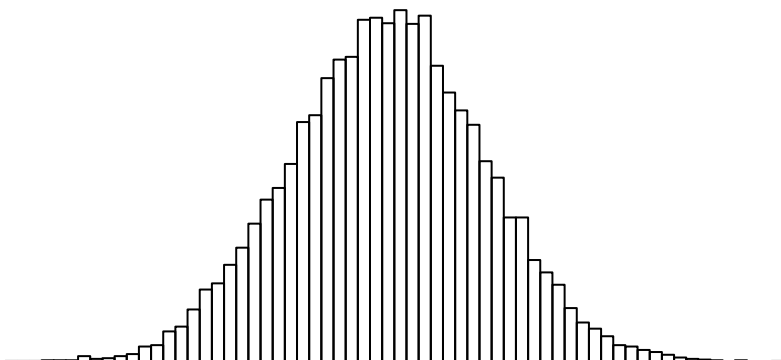

B224:45

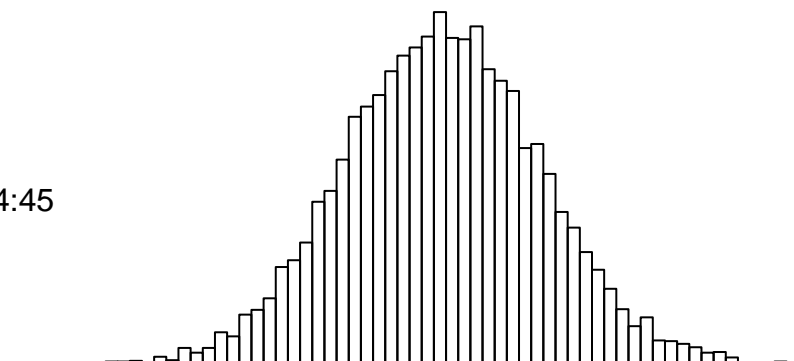

-11 -10 -9 -8 -7 -6

C28<sup>5</sup> Sterol

B224:240 – B224:120

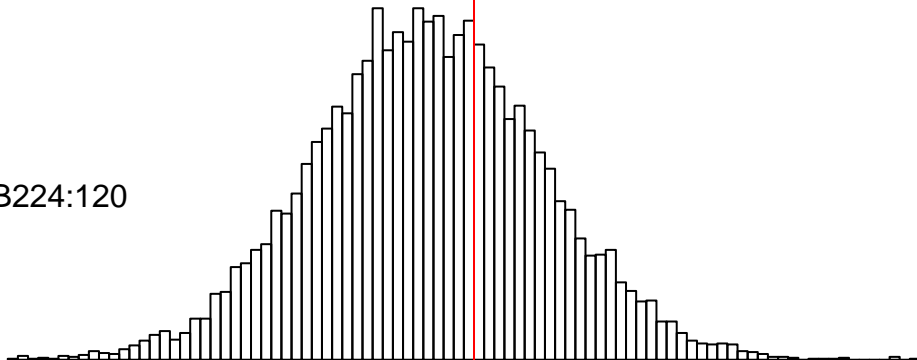

B224:240 – B224:45

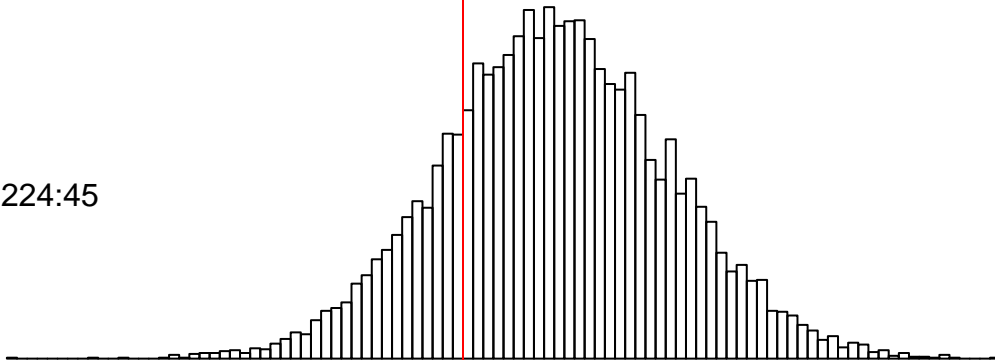

B224:120 – B224:45

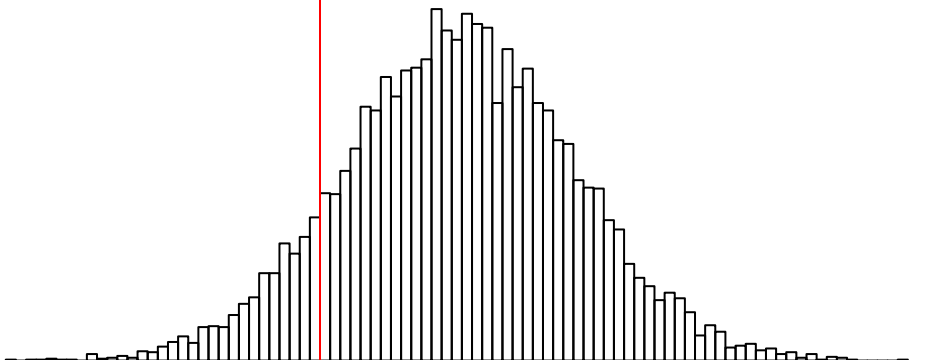

-3

-2

-1

0

1

2

3

delta(C28"5 Sterol)

B224:240

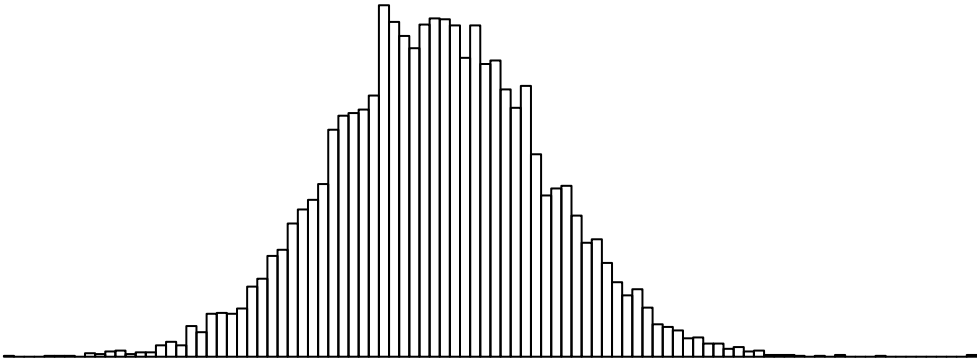

B224:120

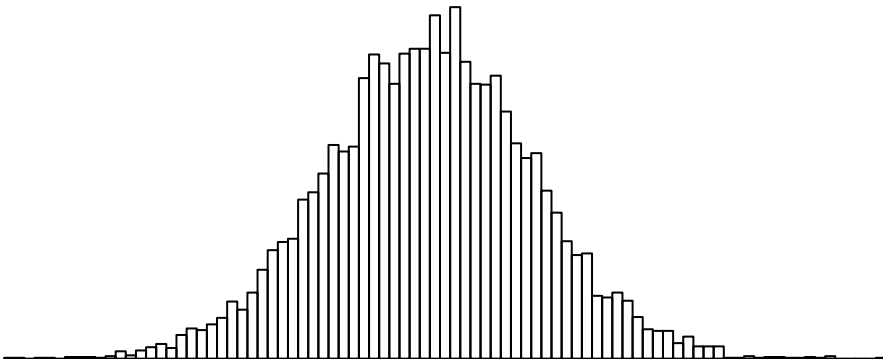

B224:45

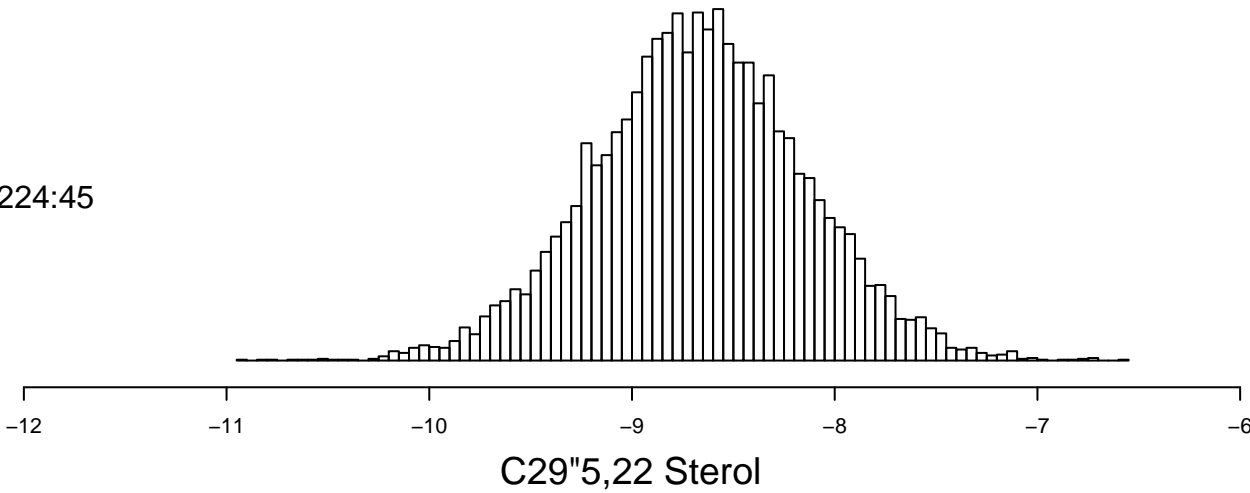

B224:240 – B224:120

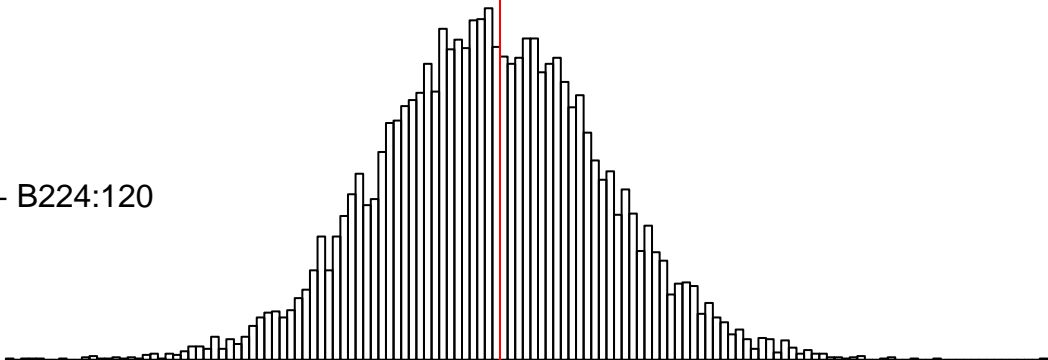

B224:240 – B224:45

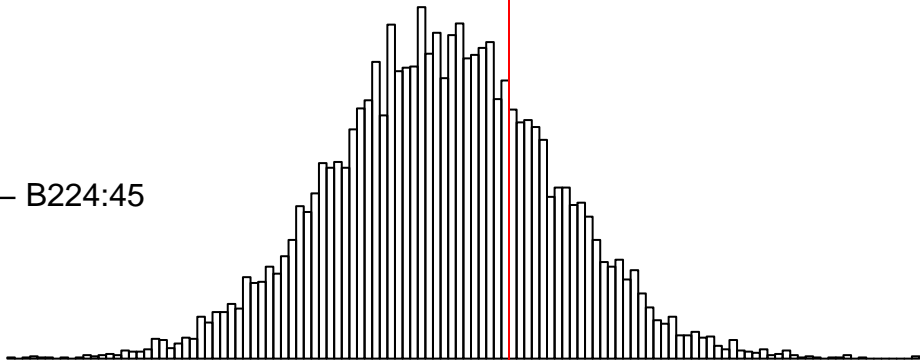

B224:120 – B224:45

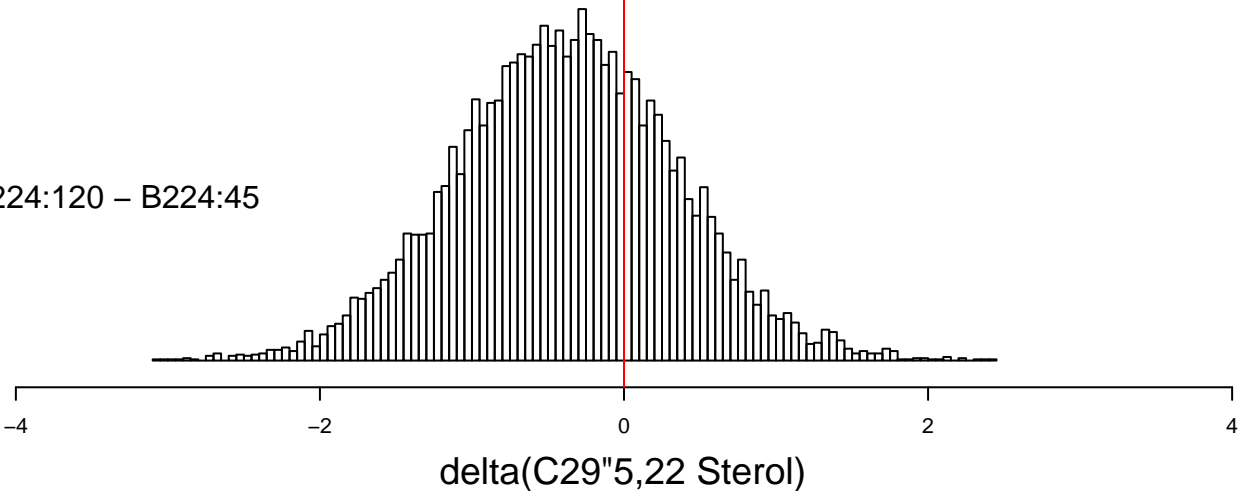

B224:240

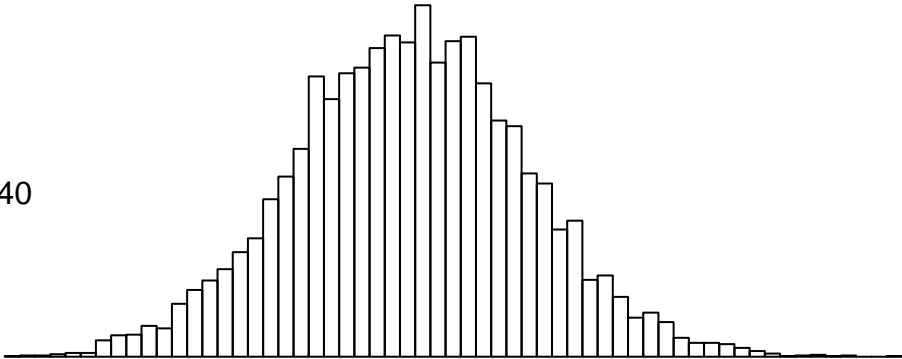

B224:120

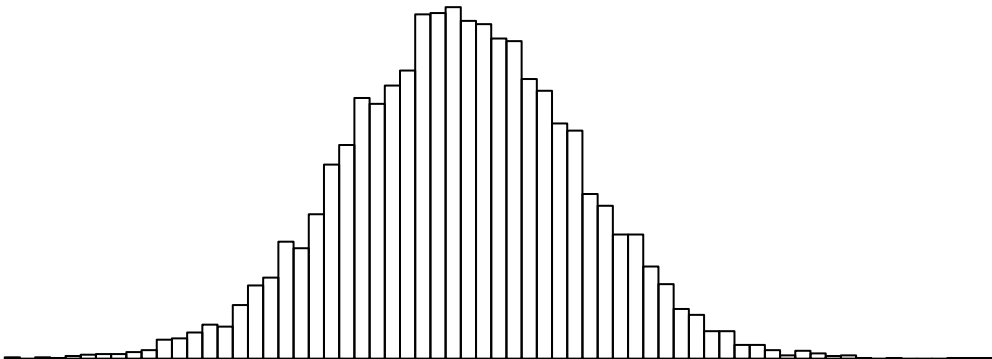

B224:45

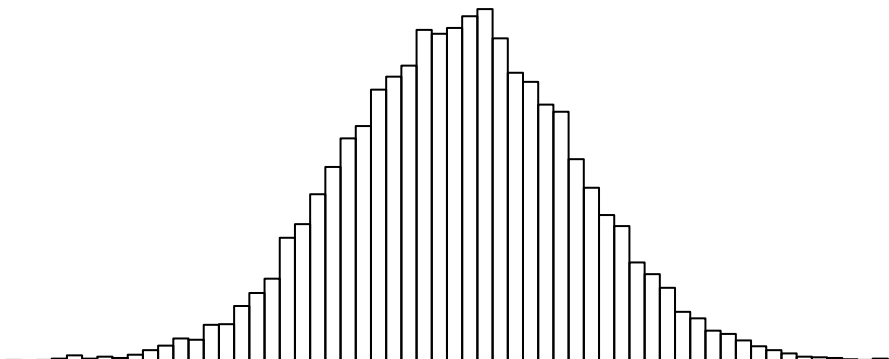

-9 -8 -7 -6 -5

C29 Sterol 2

B224:240 – B224:120

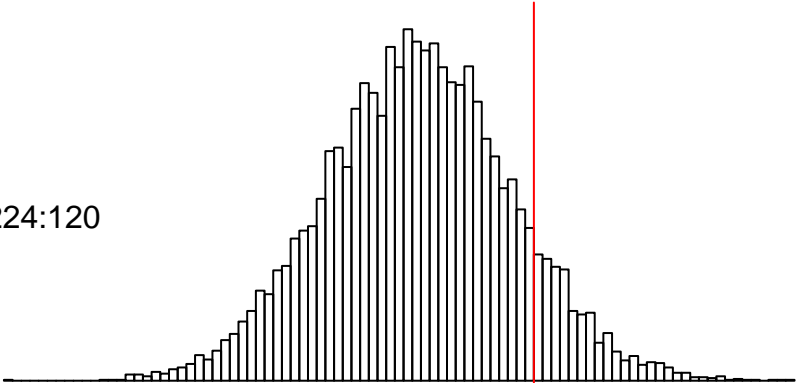

B224:240 – B224:45

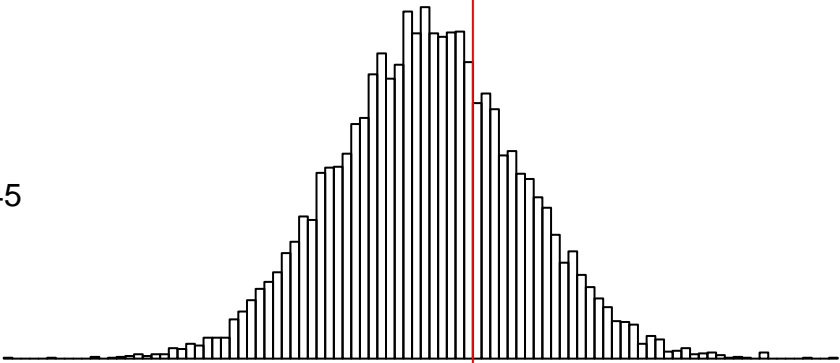

B224:120 – B224:45

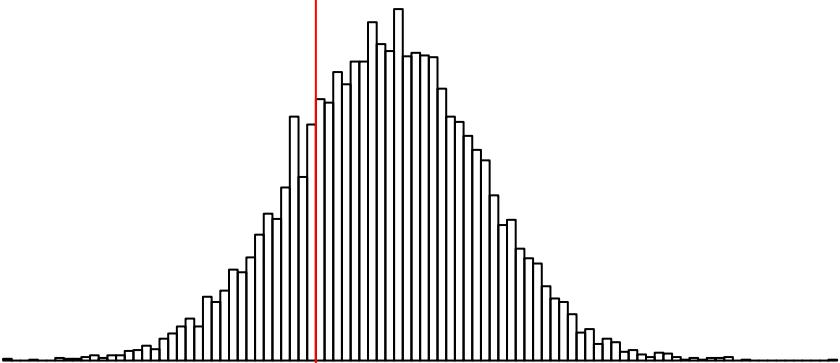

-4 -3 -2 -1 0 1 2 3

delta(C29 Sterol 2)

B224:240

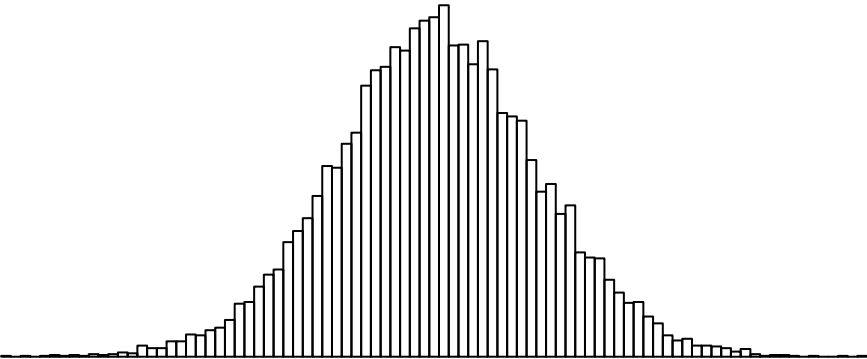

B224:120

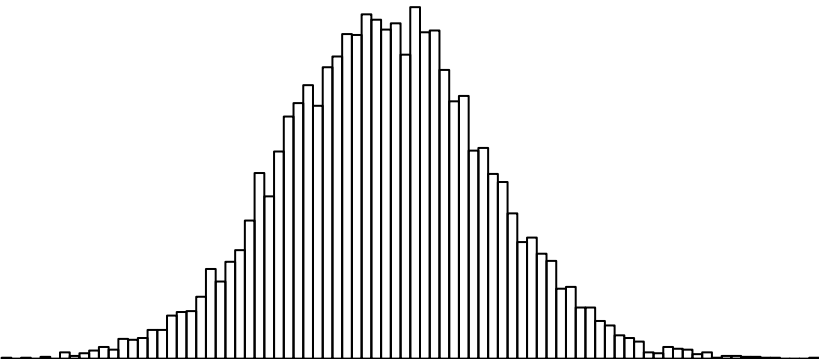

B224:45

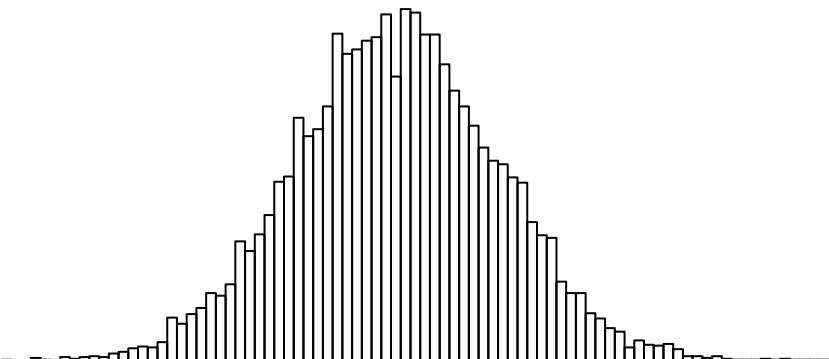

-7.0 -6.5 -6.0 -5.5 -5.0 -4.5

C29 Stanol 2

B224:240 – B224:120

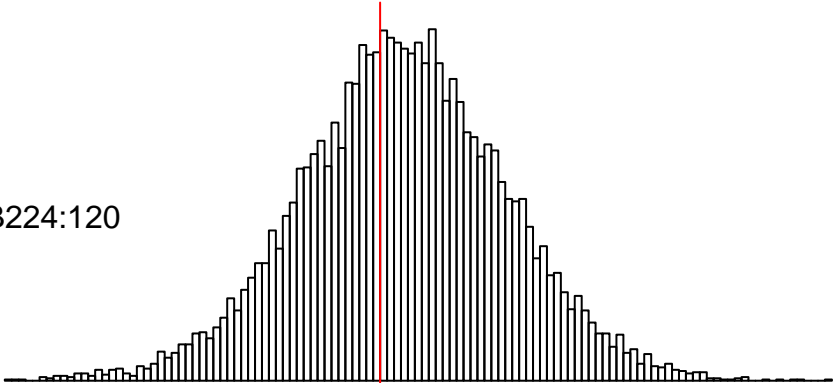

B224:240 – B224:45

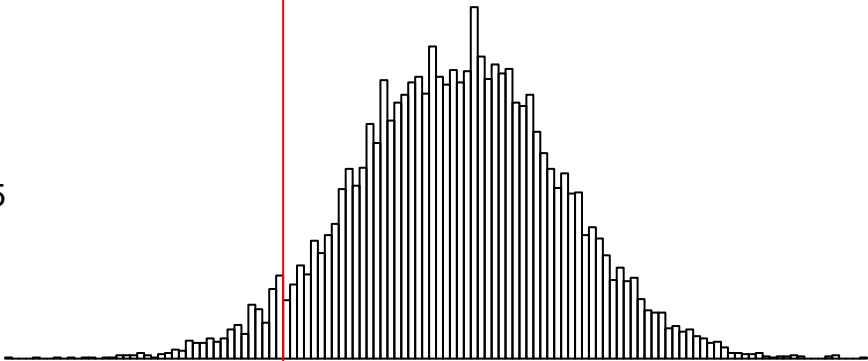

B224:120 – B224:45

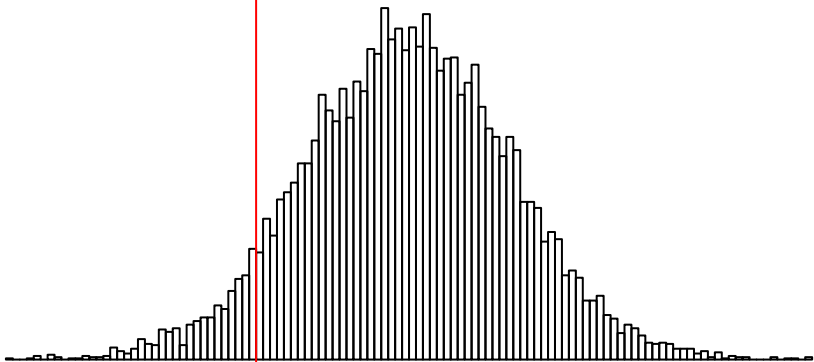

-1.5      -1.0      -0.5      0.0      0.5      1.0      1.5      2.0

delta(C29 Stanol 2)



B224:240

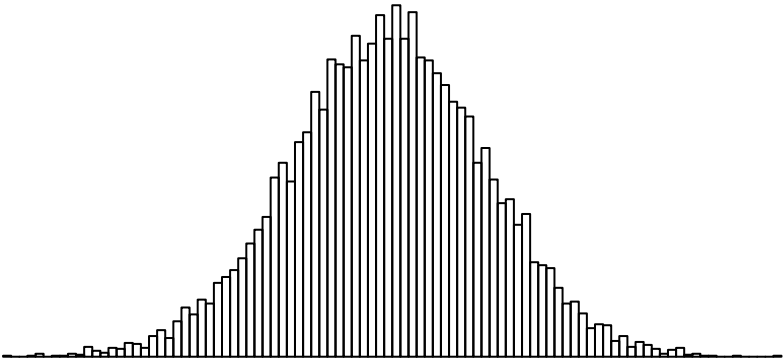

B224:120

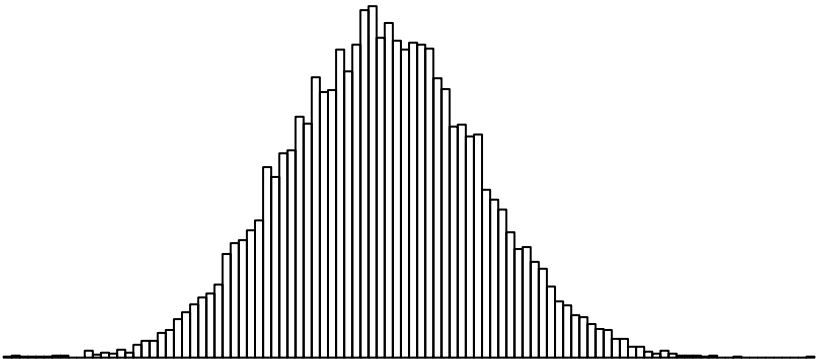

B224:45

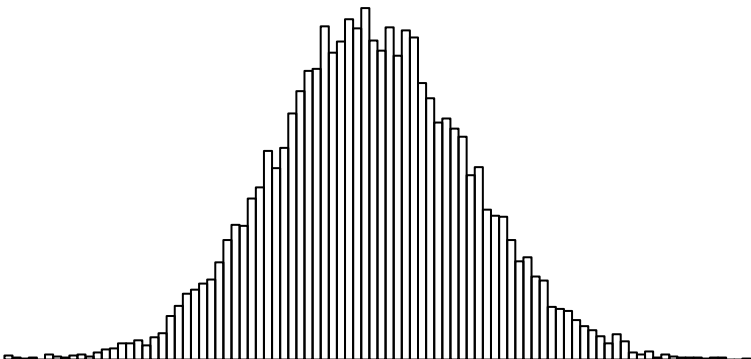

-7.0      -6.5      -6.0      -5.5      -5.0      -4.5      -4.0

C29 Sterol 3

B224:240 – B224:120

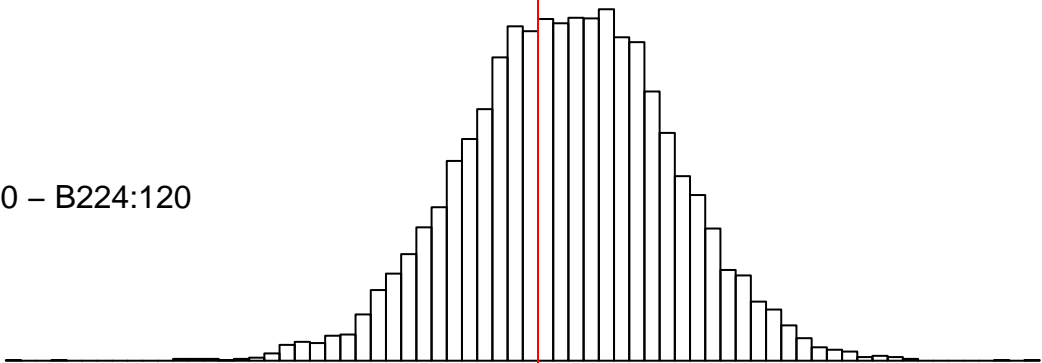

B224:240 – B224:45

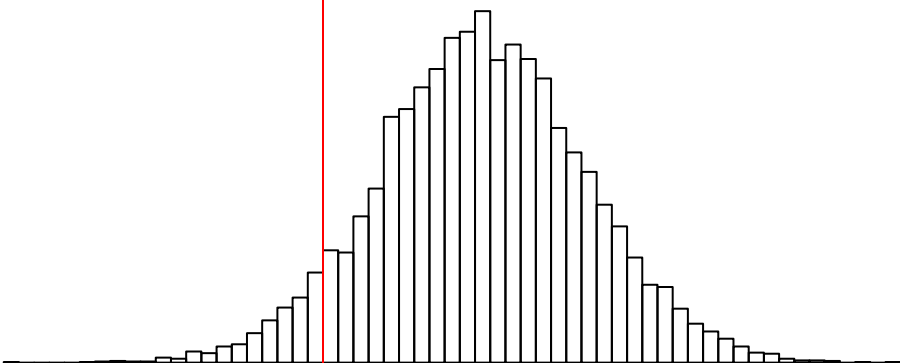

B224:120 – B224:45

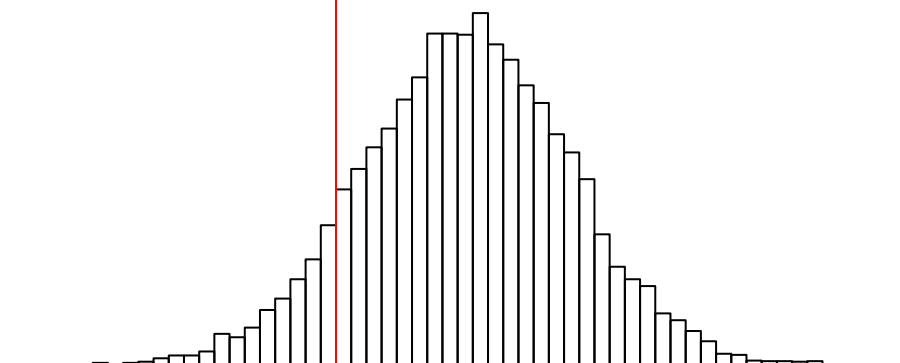

delta(C29 Sterol 3)

B224:240

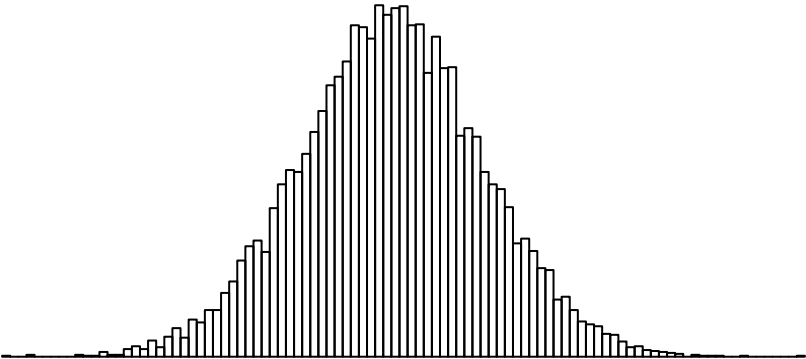

B224:120

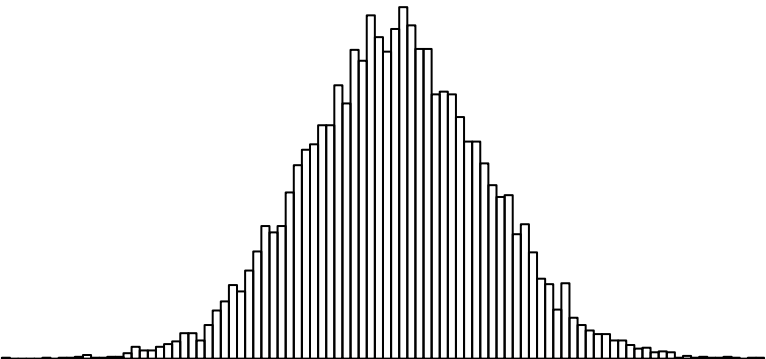

B224:45

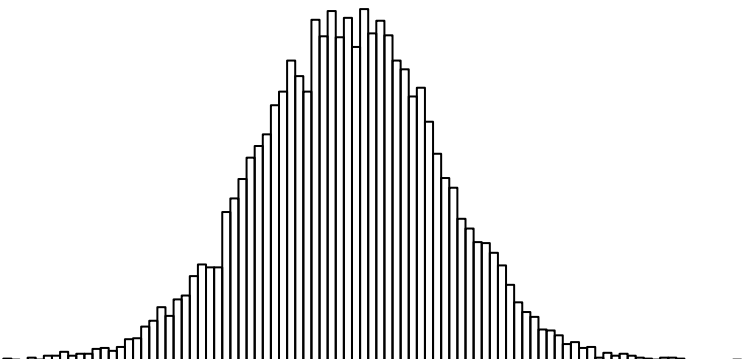

-11.5      -11.0      -10.5      -10.0      -9.5      -9.0      -8.5

C30 Sterol

B224:240 – B224:120

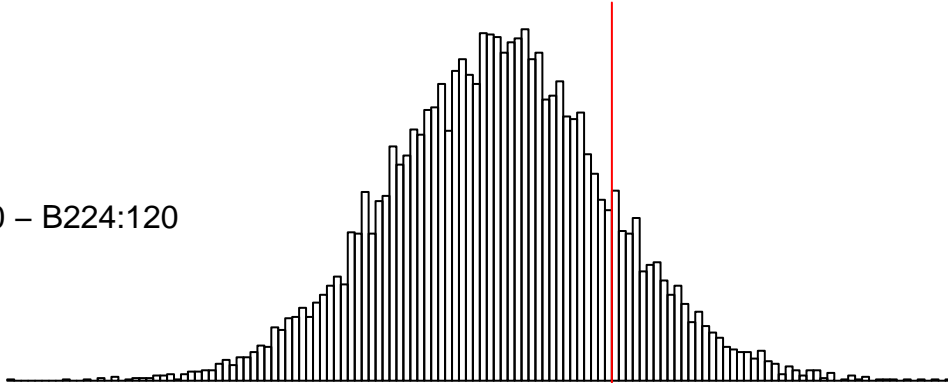

B224:240 – B224:45

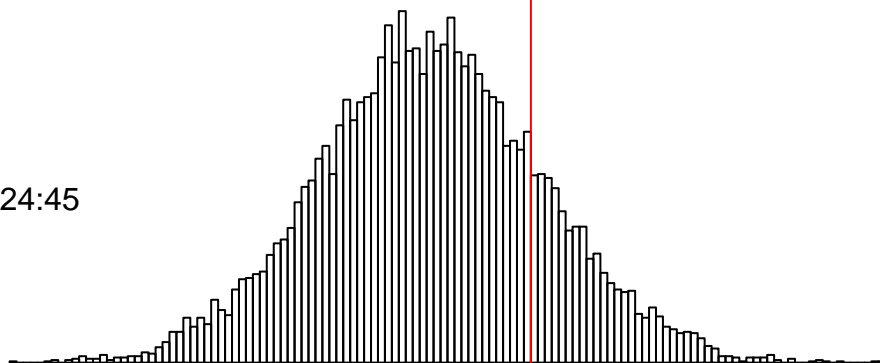

B224:120 – B224:45

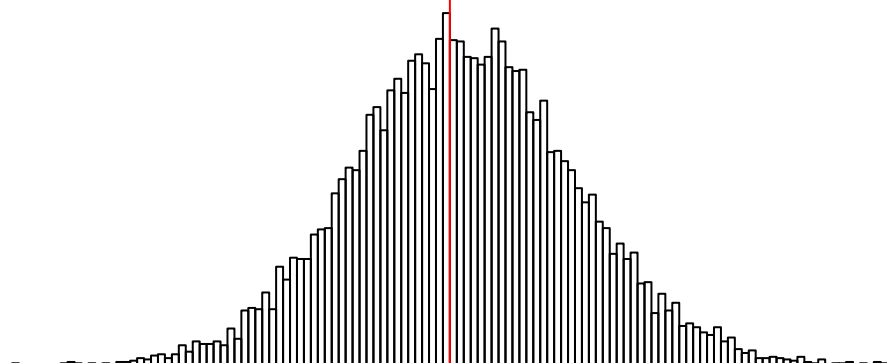

-2.0      -1.5      -1.0      -0.5      0.0      0.5      1.0      1.5

delta(C30 Sterol)

B224:240

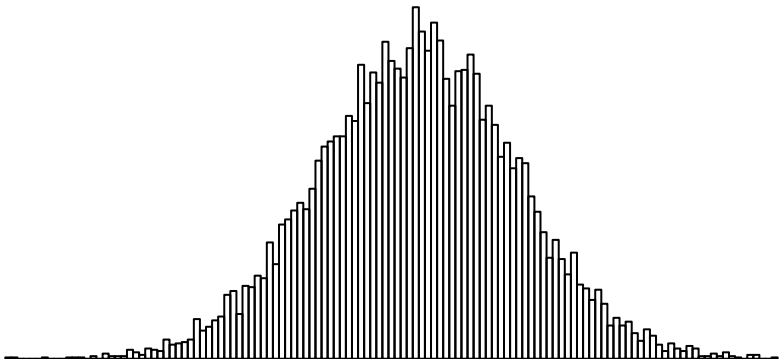

B224:120

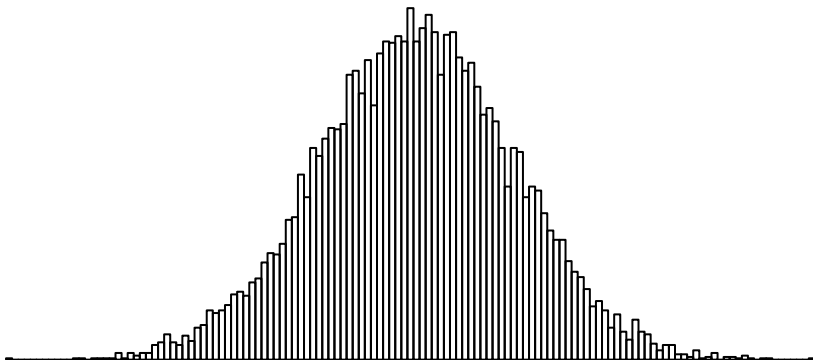

B224:45

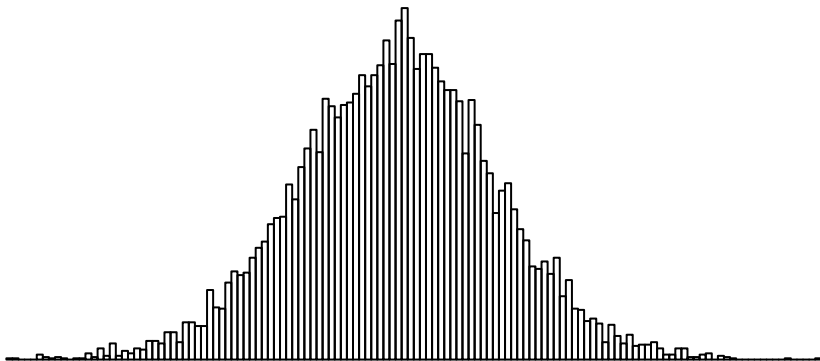

-11

-10

-9

-8

C30<sup>5</sup> Sterol

B224:240 – B224:120

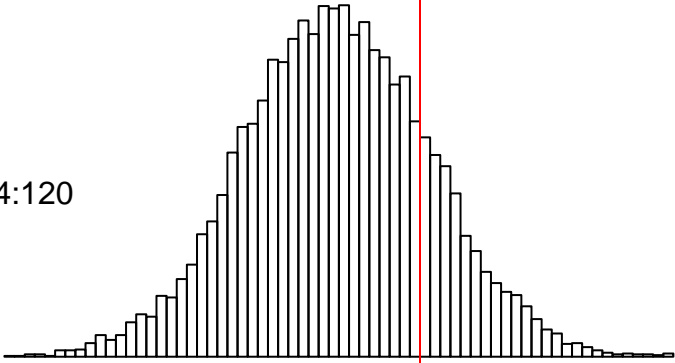

B224:240 – B224:45

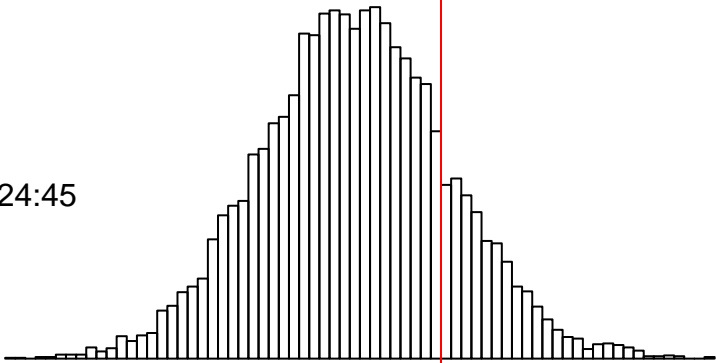

B224:120 – B224:45

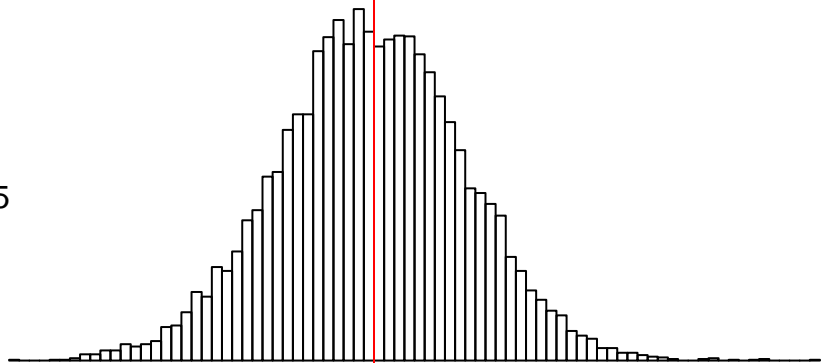

delta(C30<sup>5</sup> Sterol)

B224:240

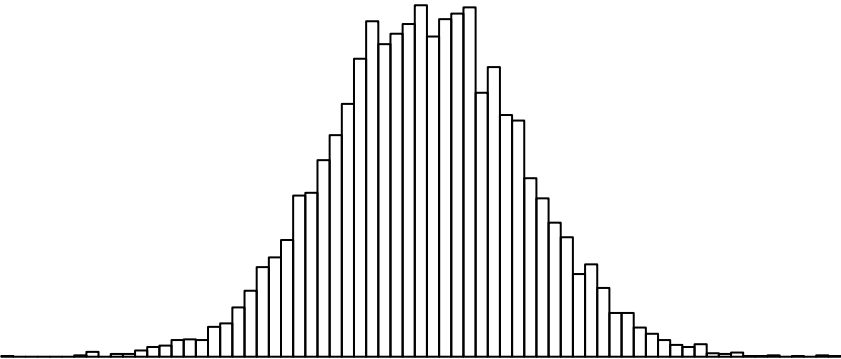

B224:120

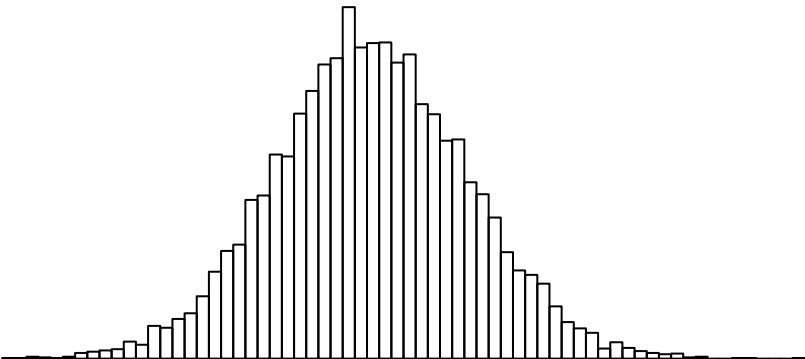

B224:45

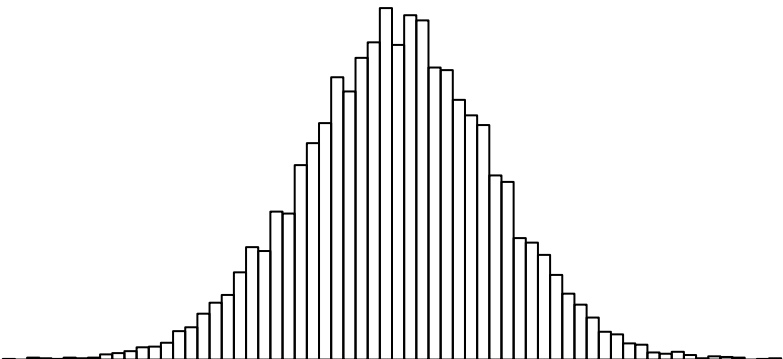

-10      -9      -8      -7      -6      -5

Open Hexose 1

B224:240 – B224:120

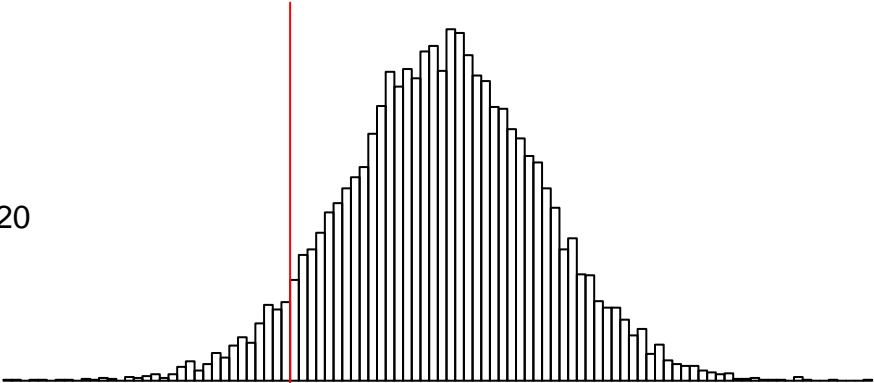

B224:240 – B224:45

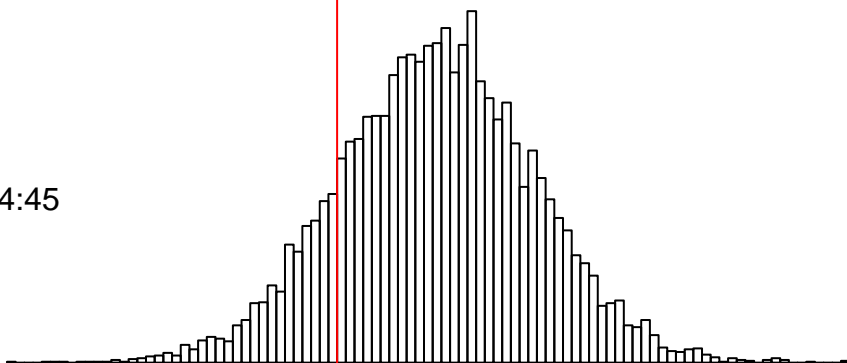

B224:120 – B224:45

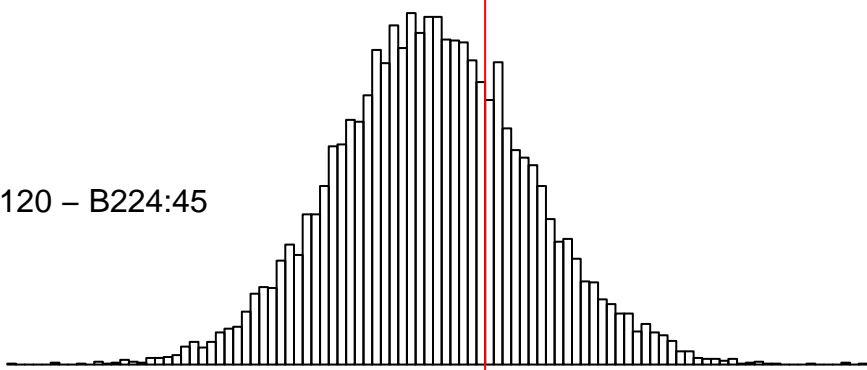

delta(Open Hexose 1)



B224:240

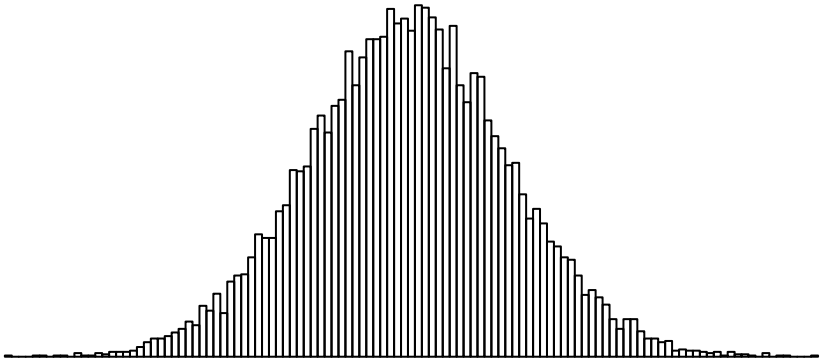

B224:120

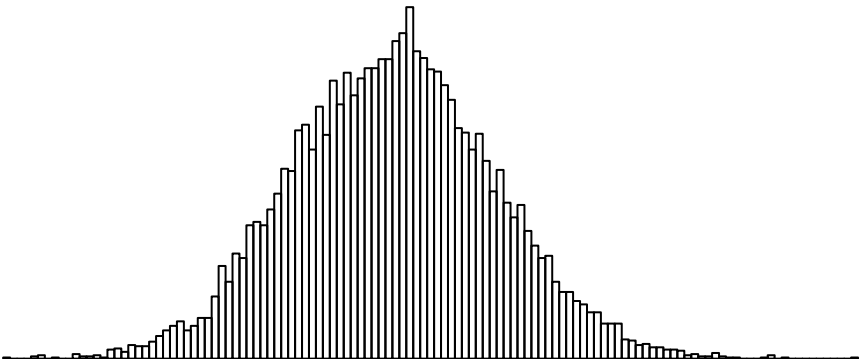

B224:45

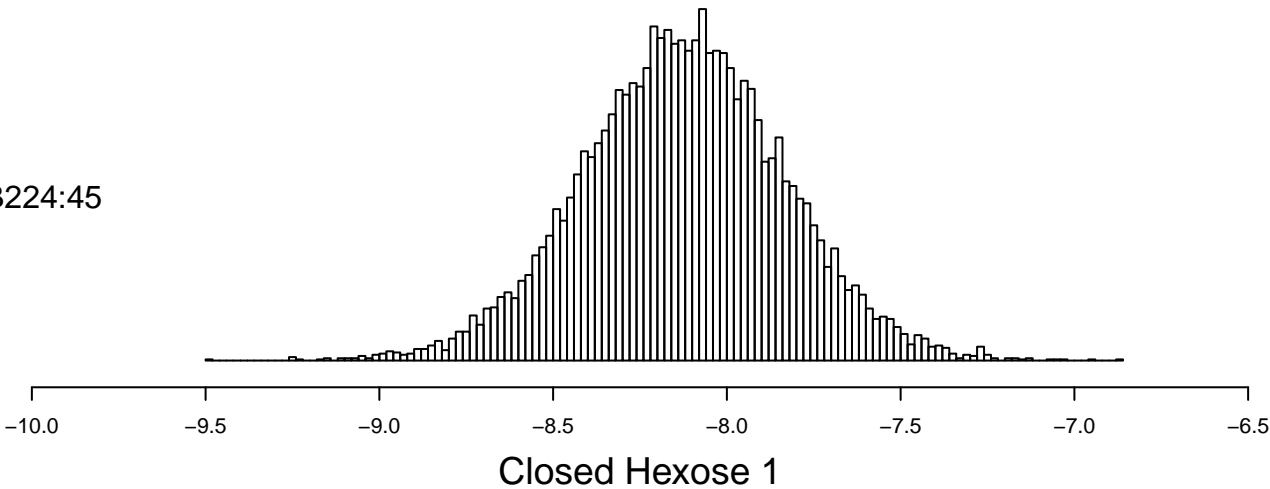

B224:240 – B224:120

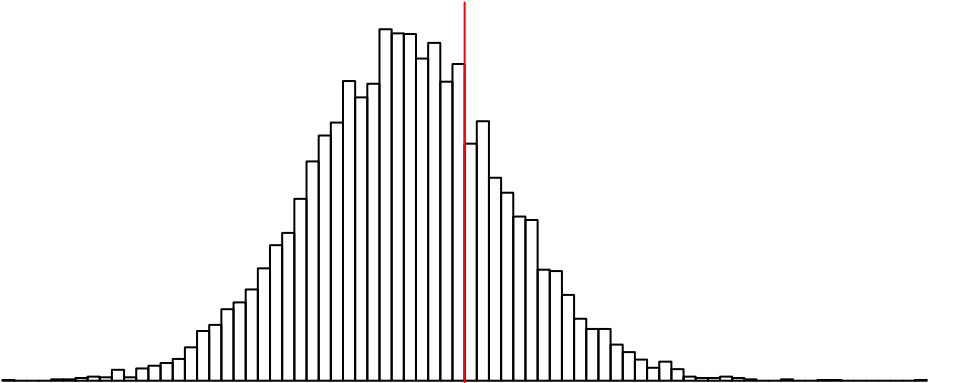

B224:240 – B224:45

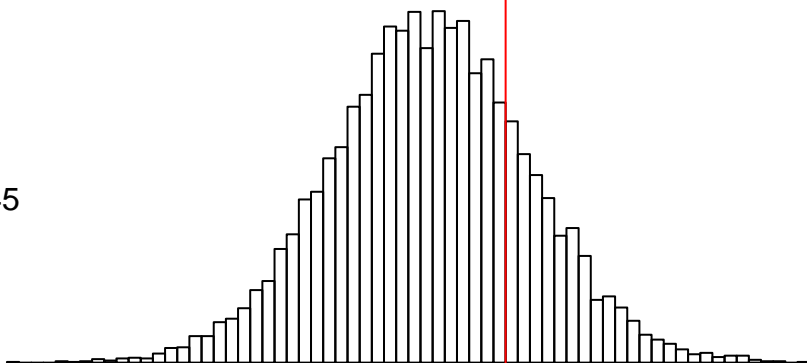

B224:120 – B224:45

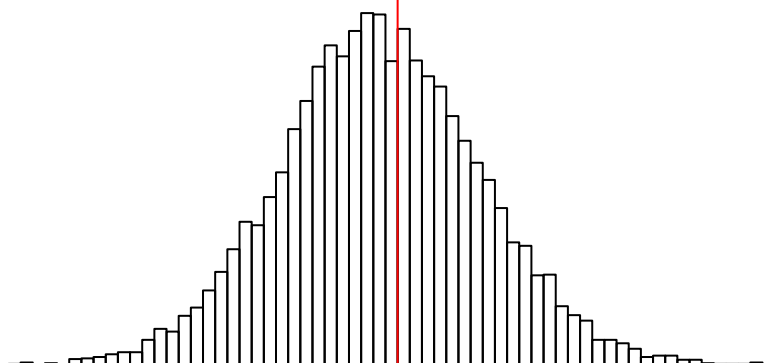

-3 -2 -1 0 1 2

delta(Closed Hexose 1)

B224:240

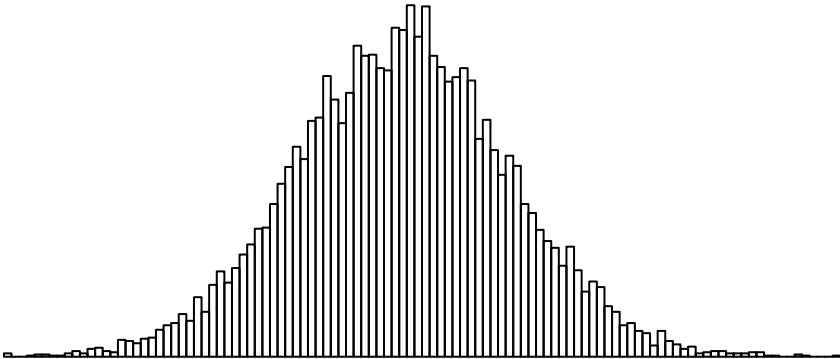

B224:120

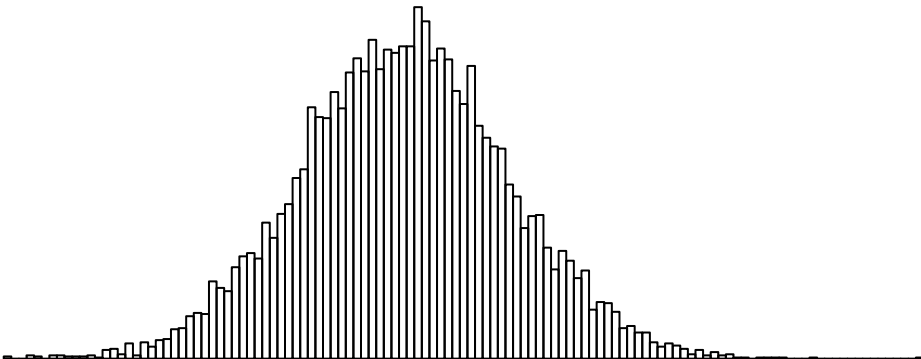

B224:45

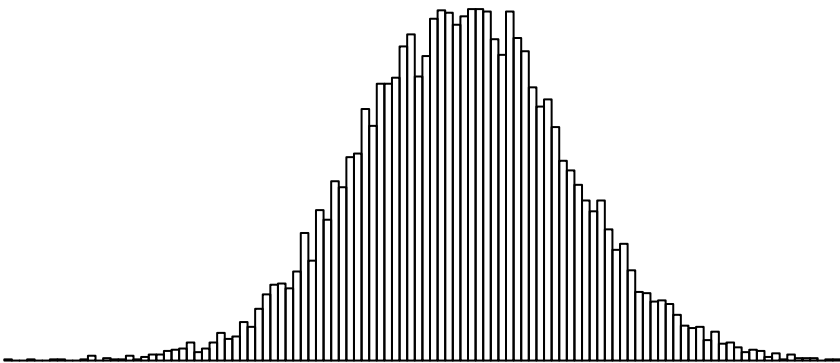

-8

-6

-4

-2

Closed Hexose 2

B224:240 – B224:120

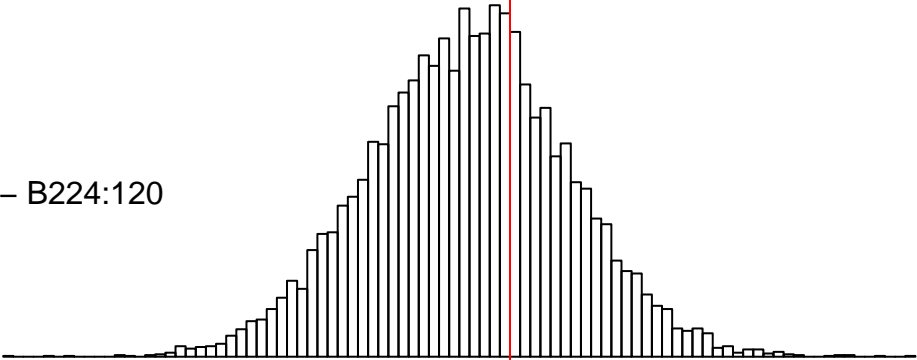

B224:240 – B224:45

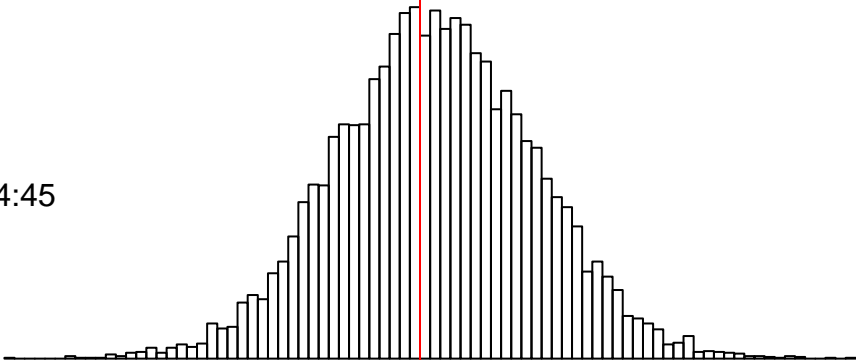

B224:120 – B224:45

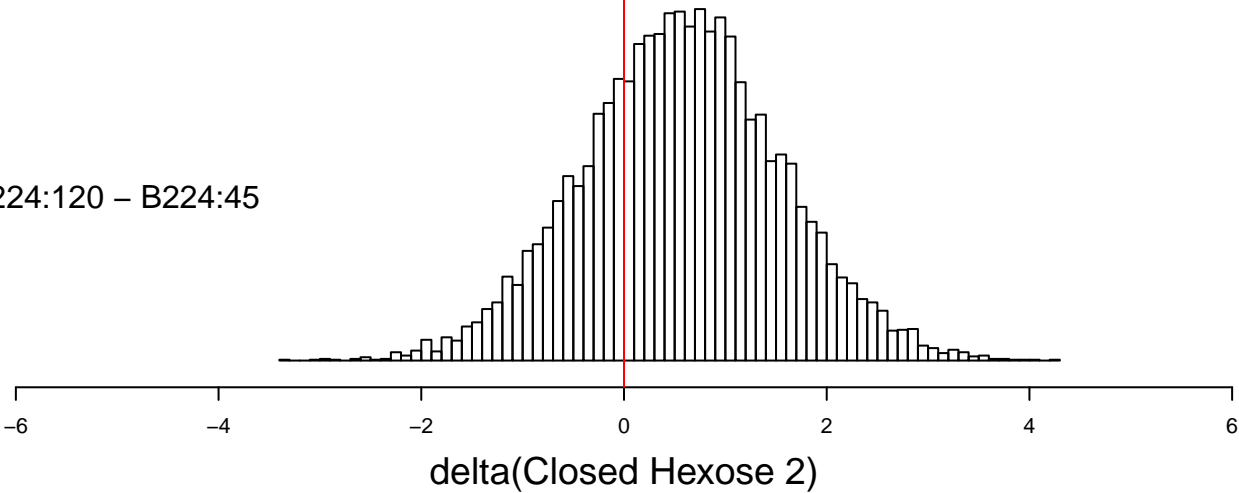

B224:240

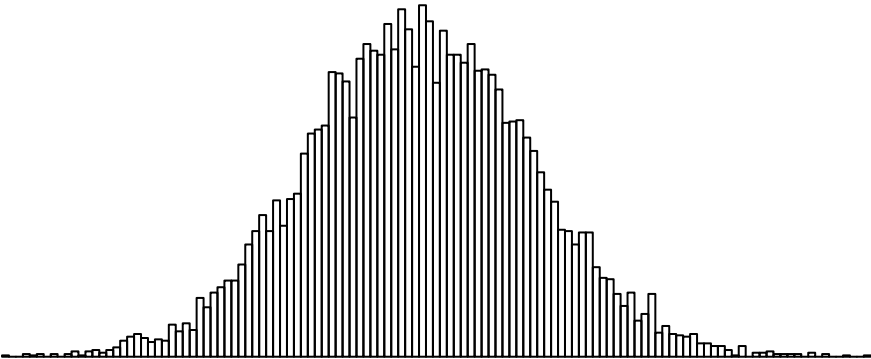

B224:120

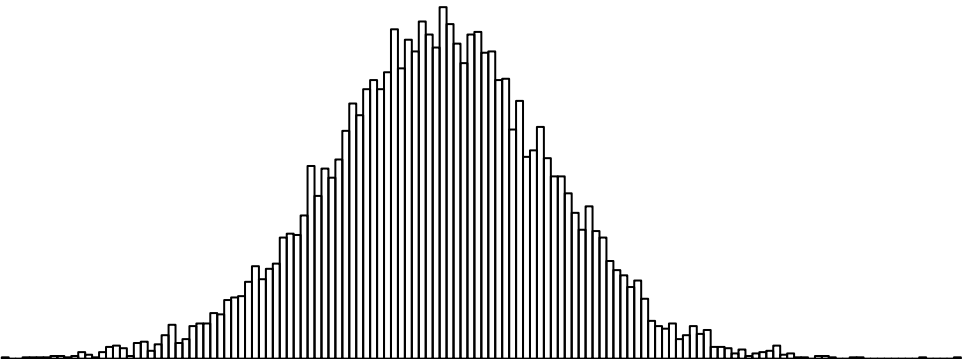

B224:45

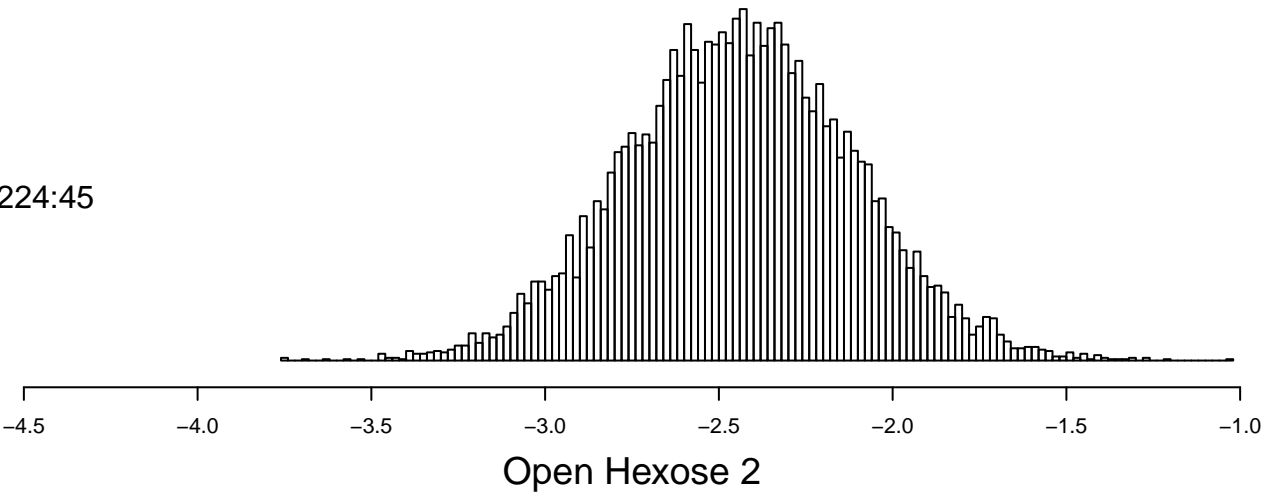

B224:240 – B224:120

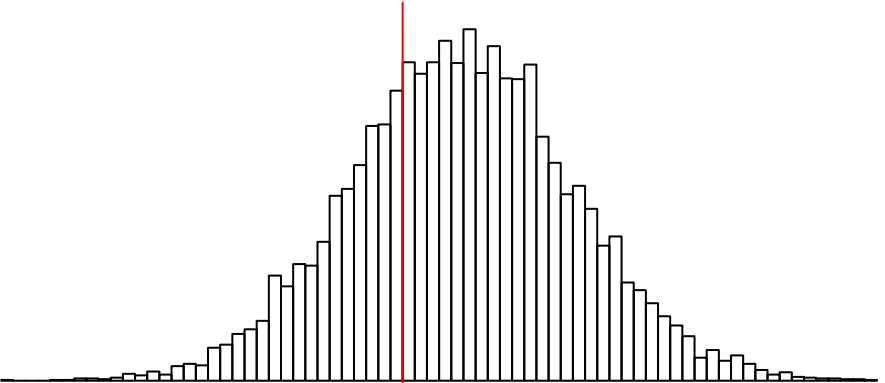

B224:240 – B224:45

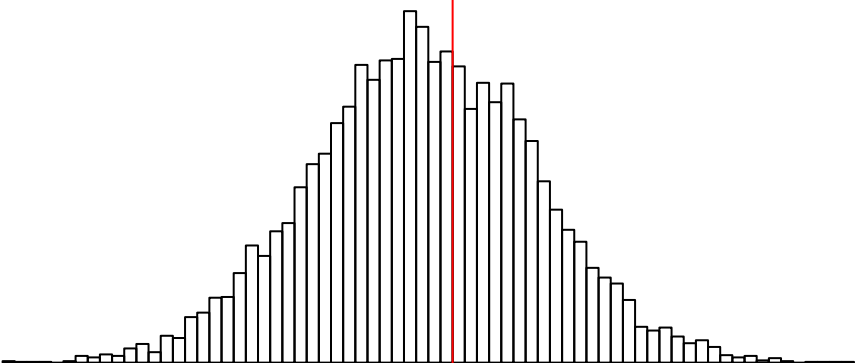

B224:120 – B224:45

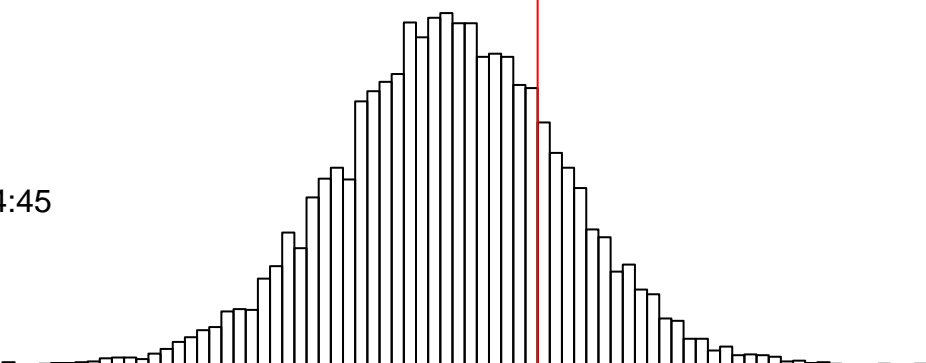

delta(Open Hexose 2)

B224:240

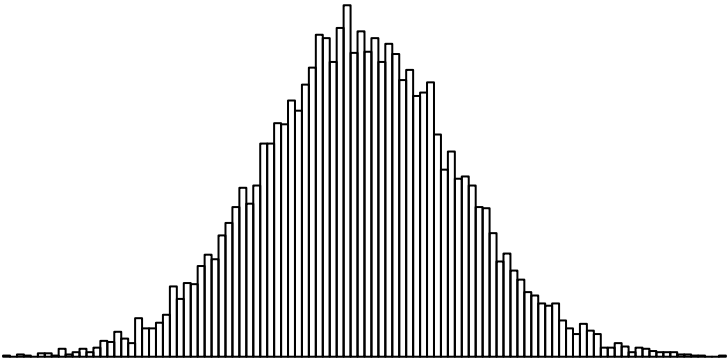

B224:120

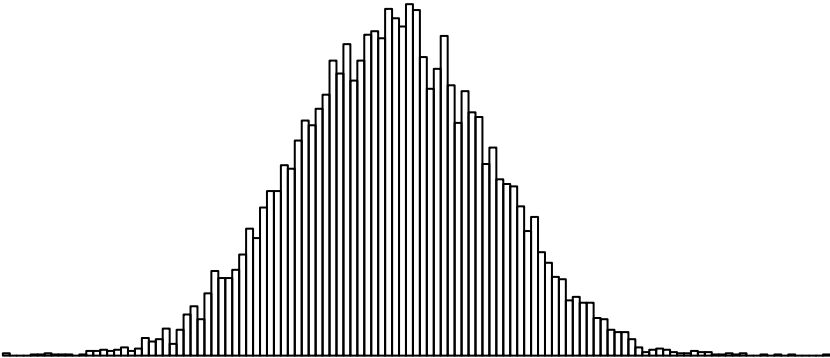

B224:45

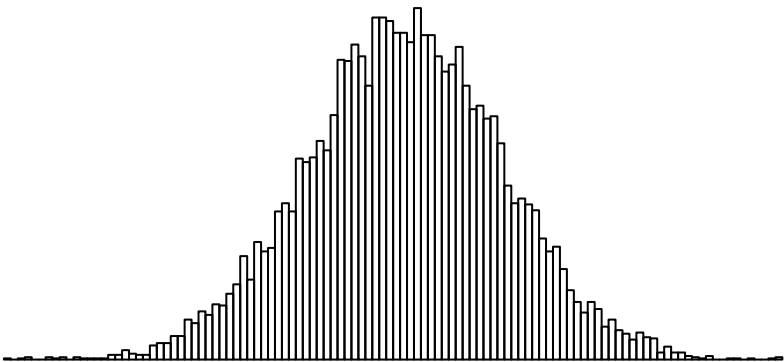

-6.0 -5.5 -5.0 -4.5 -4.0 -3.5 -3.0 -2.5

Open Hexose 3

B224:240 – B224:120

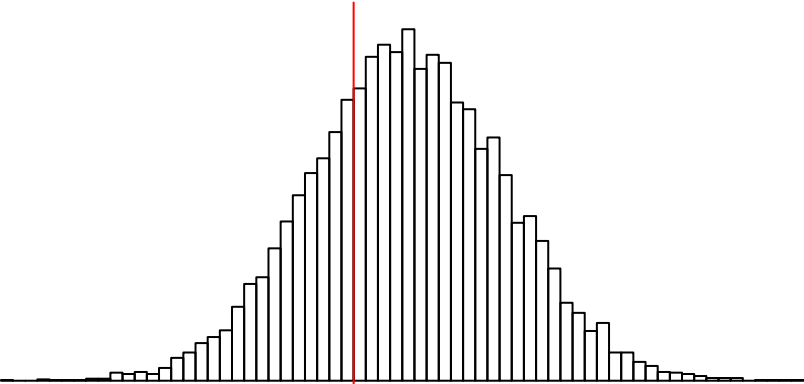

B224:240 – B224:45

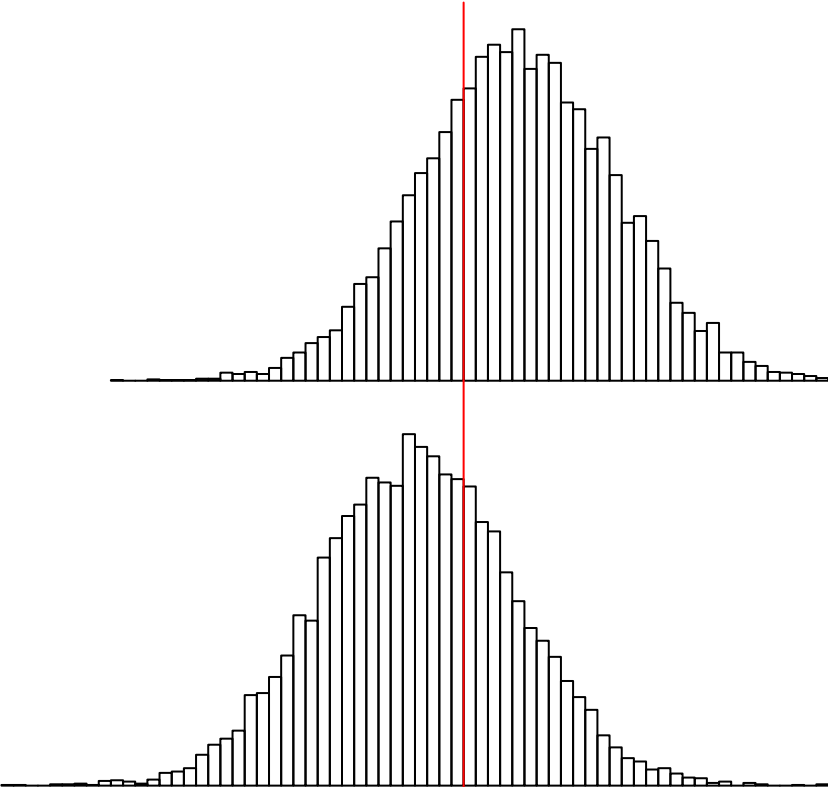

B224:120 – B224:45

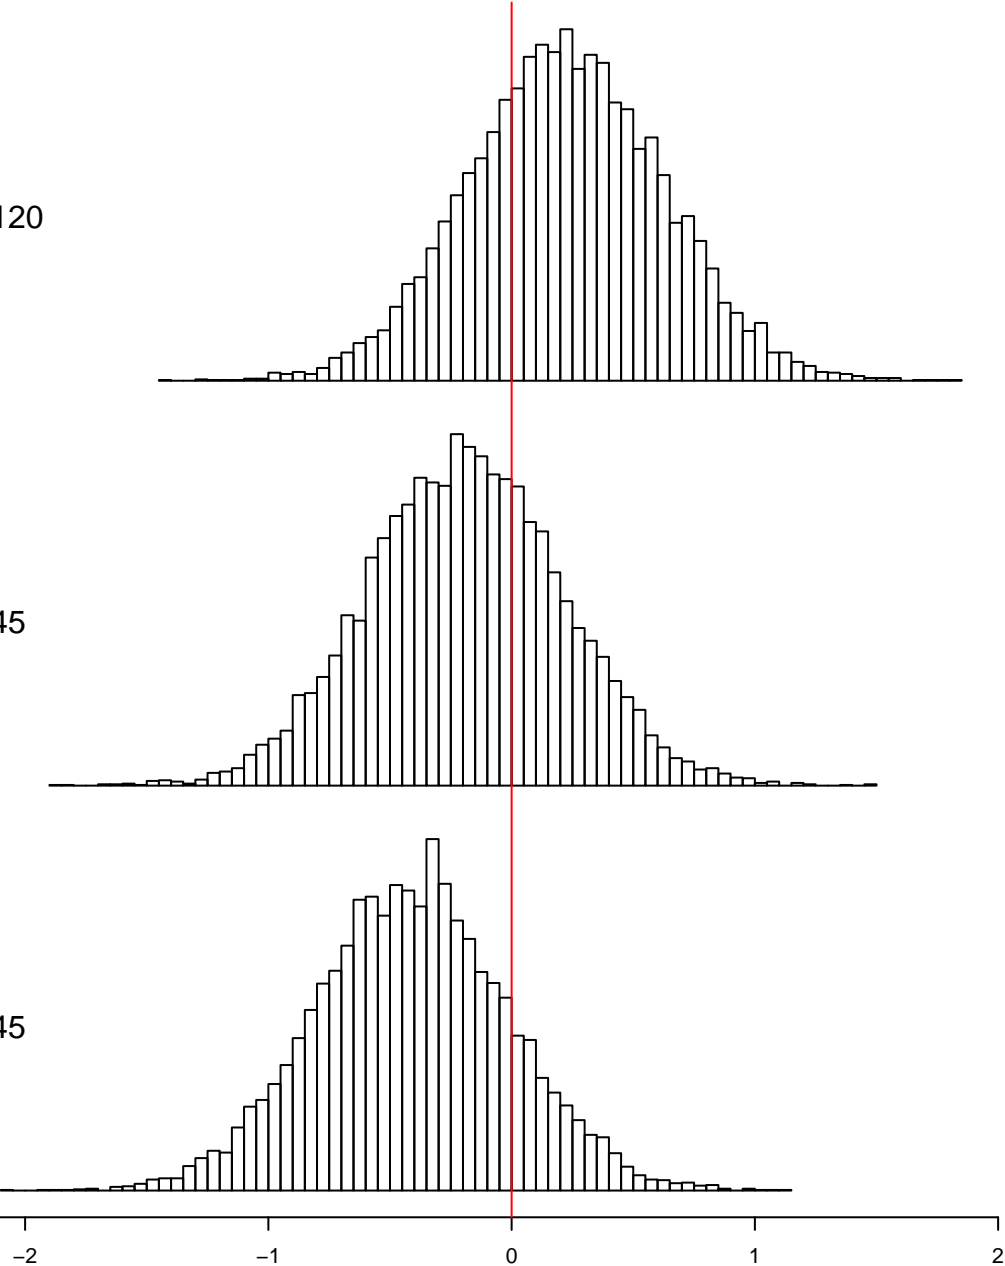

delta(Open Hexose 3)



B224:240

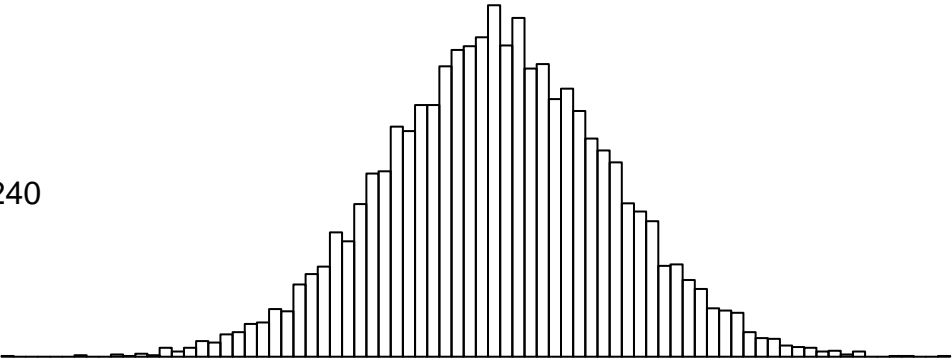

B224:120

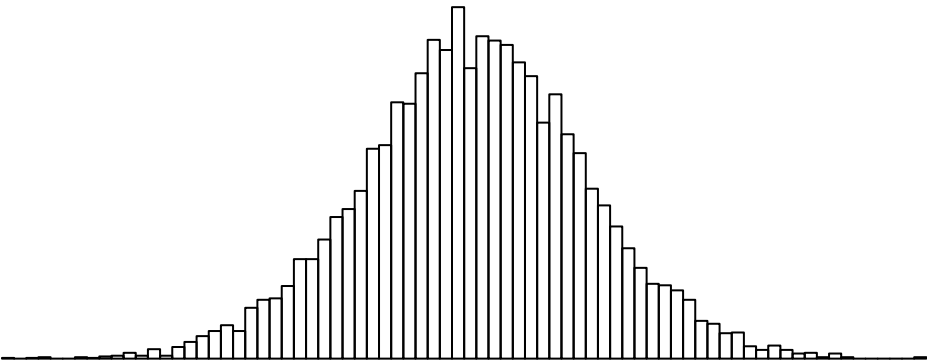

B224:45

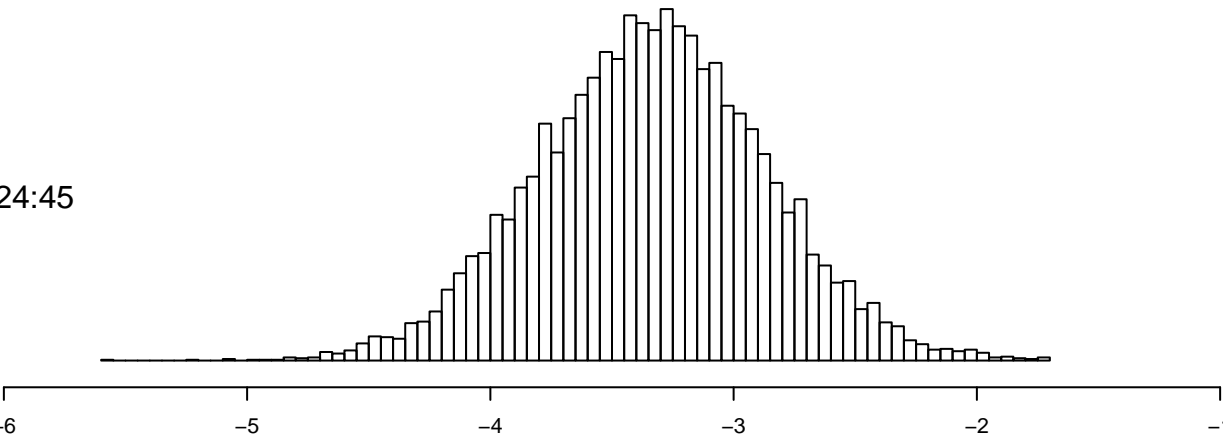

Closed Hexose 3

B224:240 – B224:120

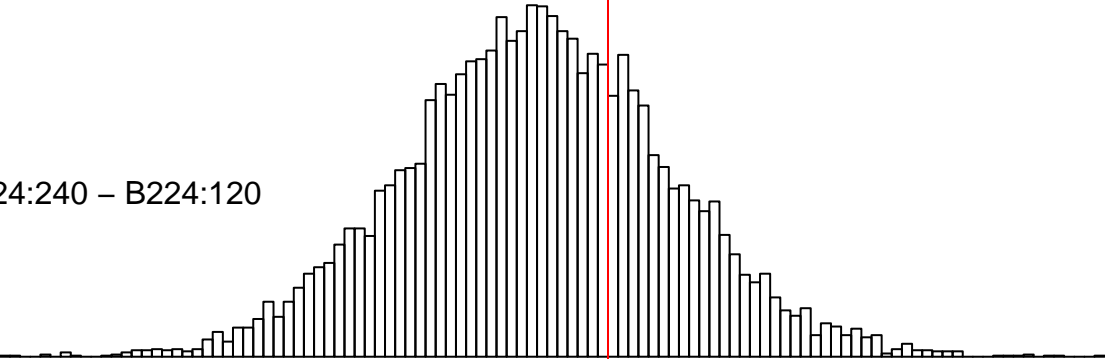

B224:240 – B224:45

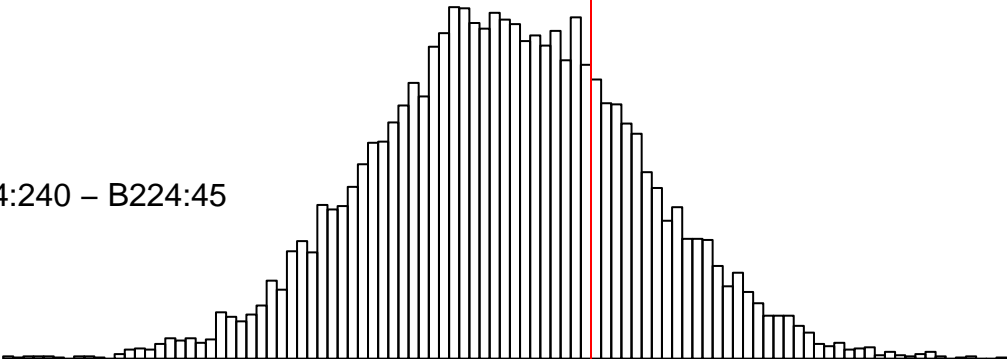

B224:120 – B224:45

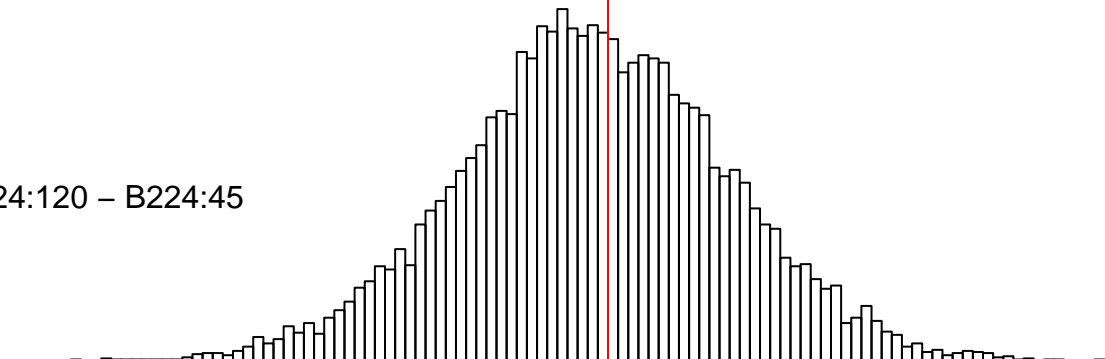

delta(Closed Hexose 3)

B224:240

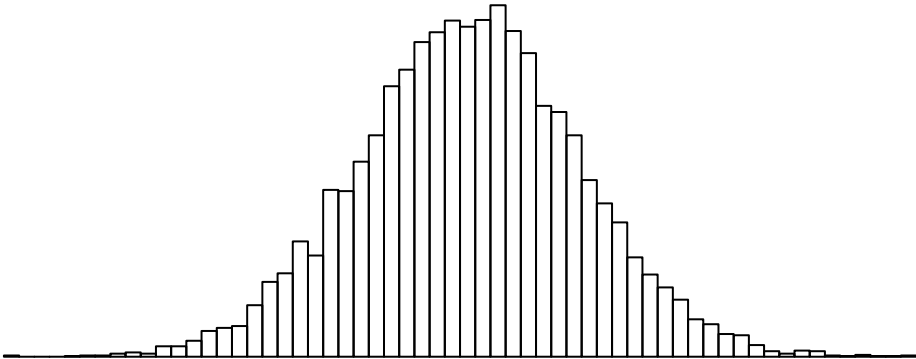

B224:120

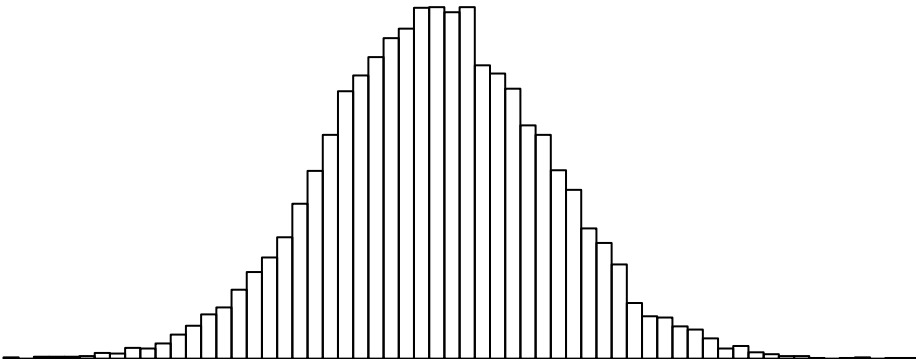

B224:45

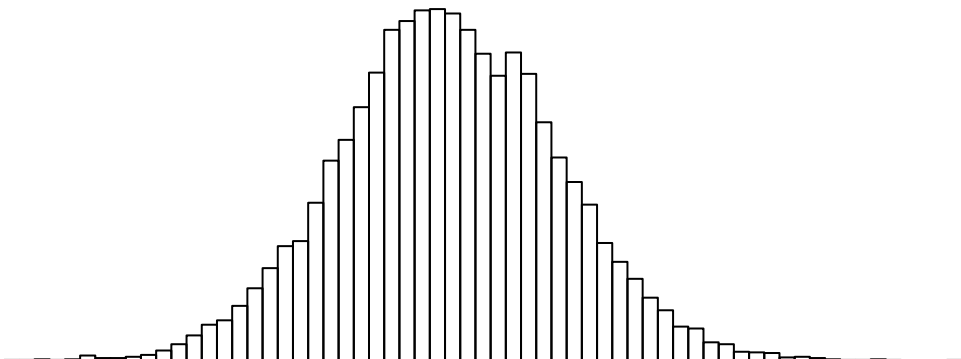

Closed Hexose 4

B224:240 – B224:120

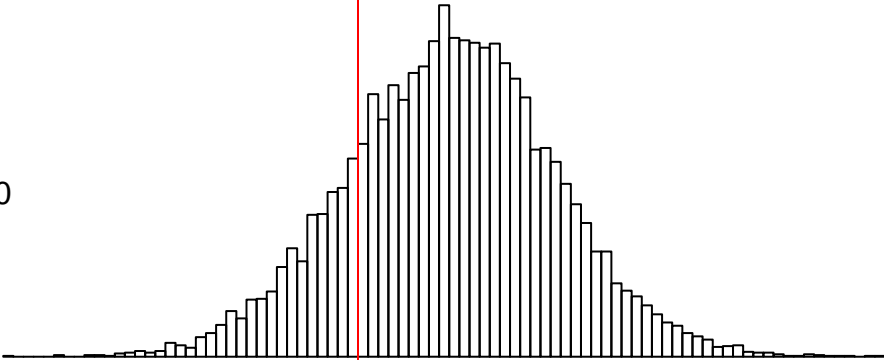

B224:240 – B224:45

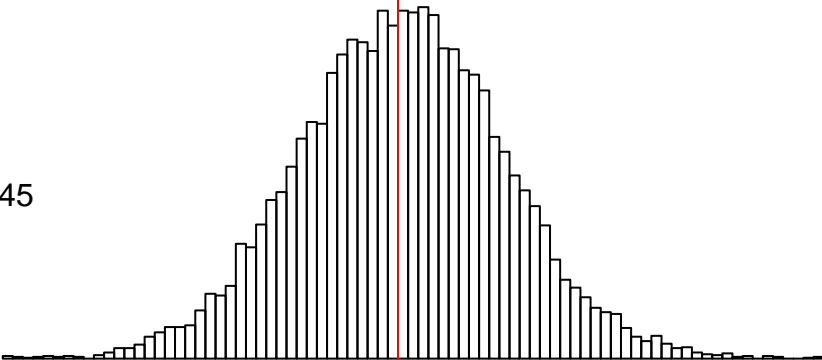

B224:120 – B224:45

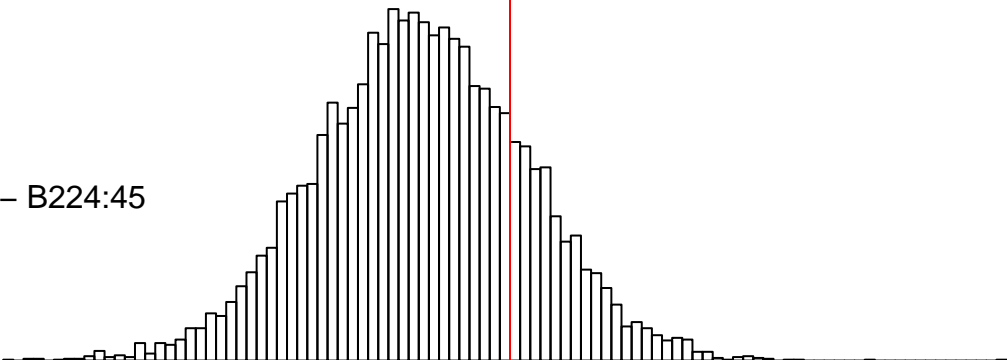

-3

-2

-1

0

1

2

3

delta(Closed Hexose 4)

B224:240

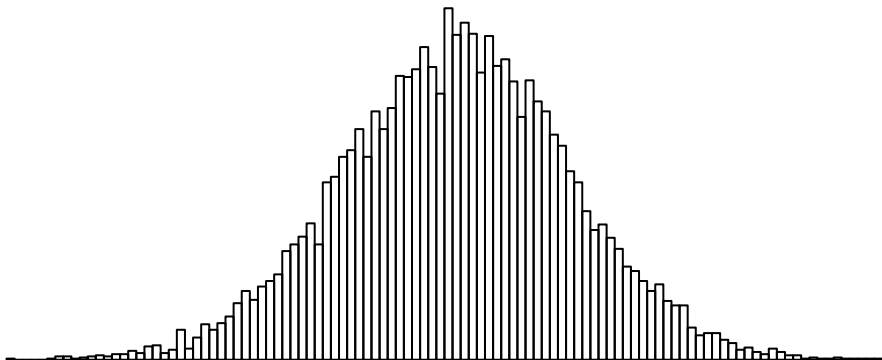

B224:120

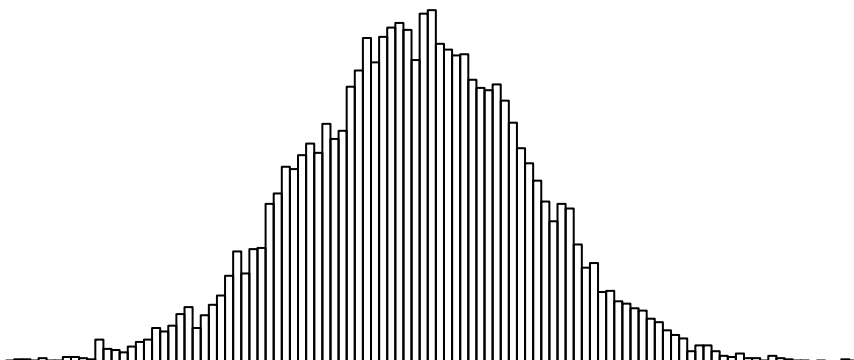

B224:45

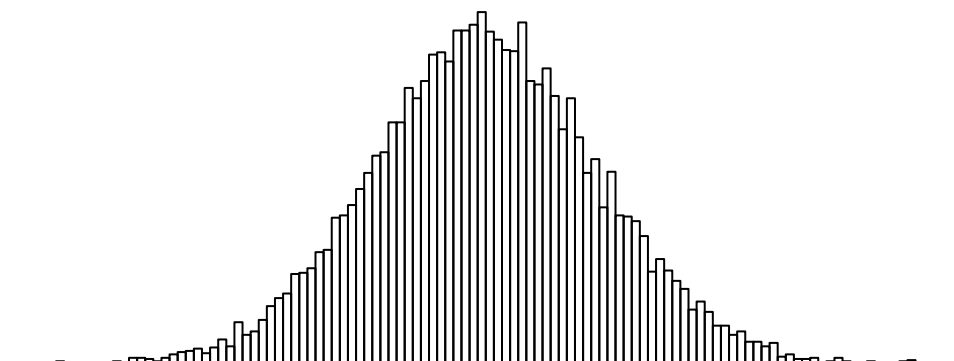

-7.5      -7.0      -6.5      -6.0      -5.5      -5.0      -4.5

Hexose 1

B224:240 – B224:120

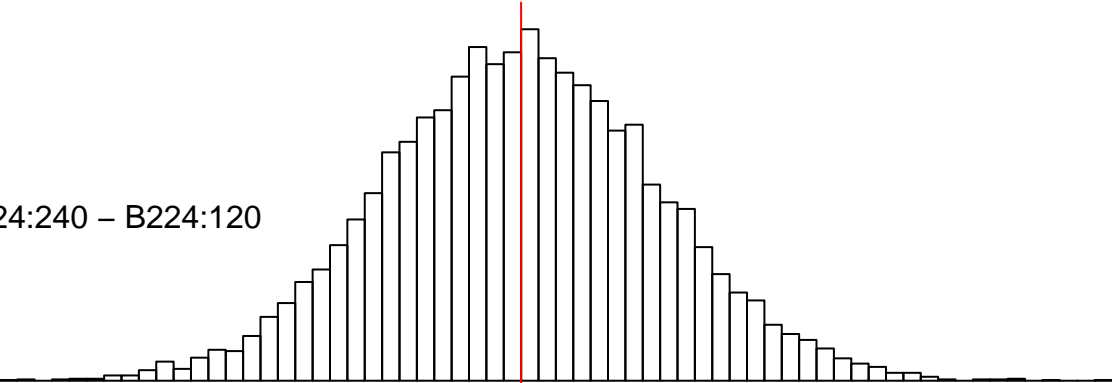

B224:240 – B224:45

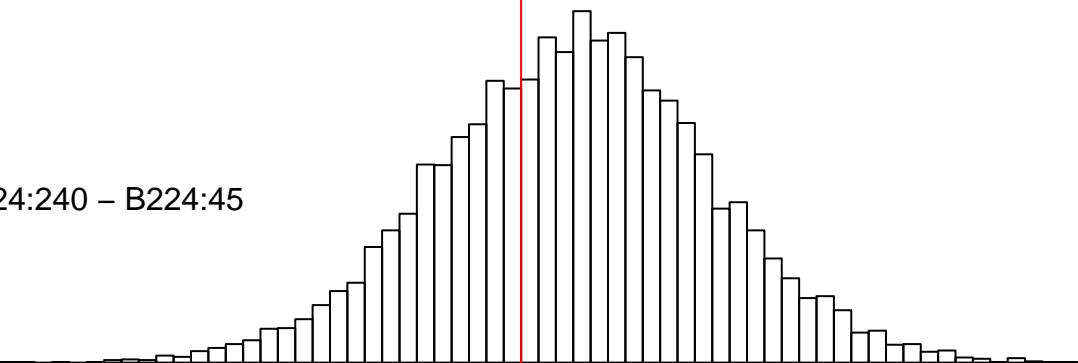

B224:120 – B224:45

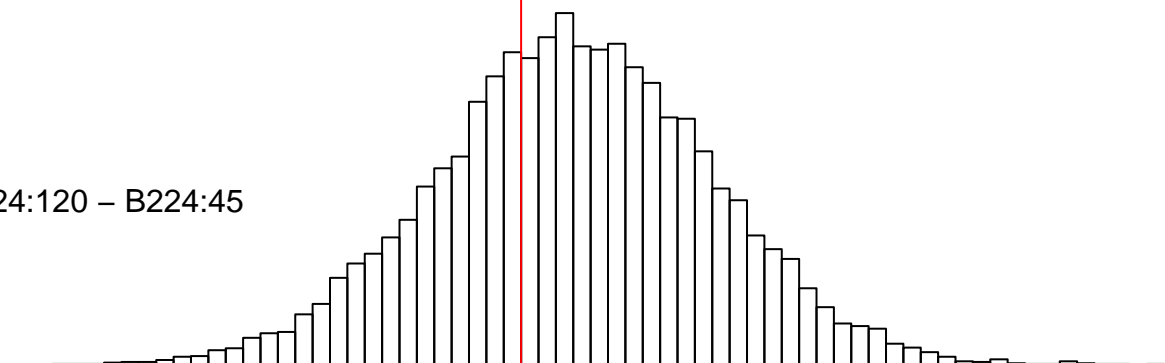

-1.5      -1.0      -0.5      0.0      0.5      1.0      1.5      2.0

delta(Hexose 1)

B224:240

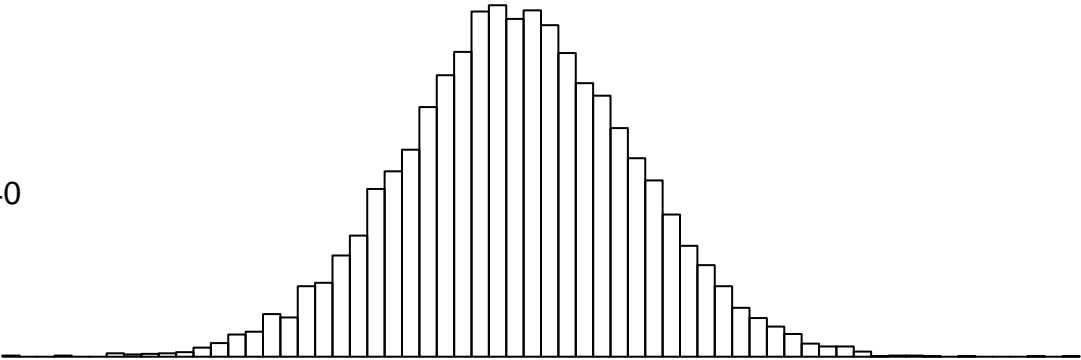

B224:120

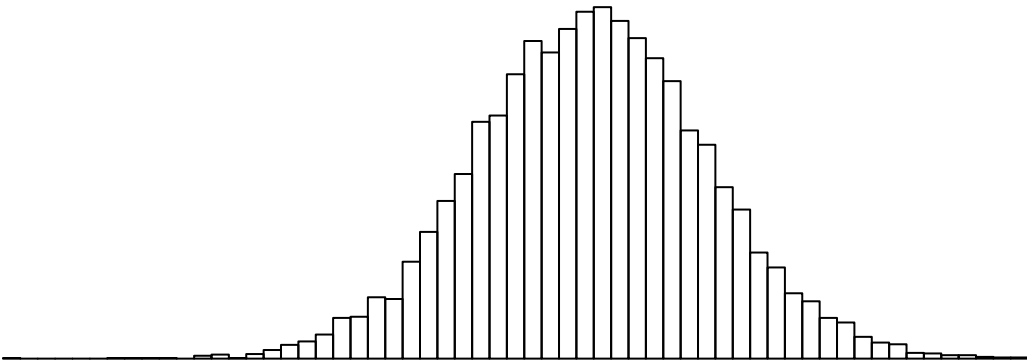

B224:45

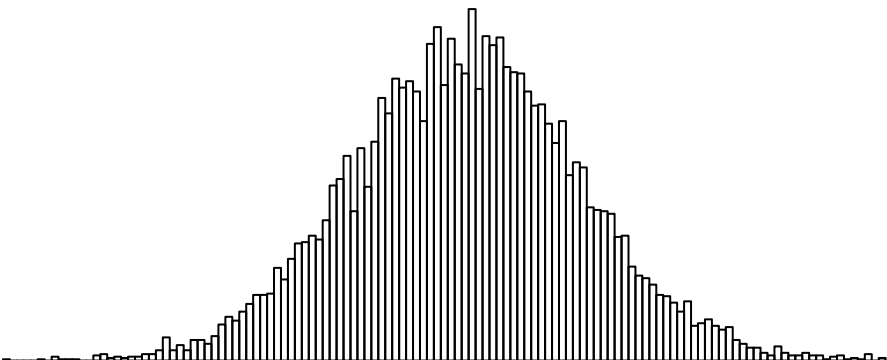

-7.5      -7.0      -6.5      -6.0      -5.5      -5.0      -4.5      -4.0

Closed Hexose 5

B224:240 – B224:120

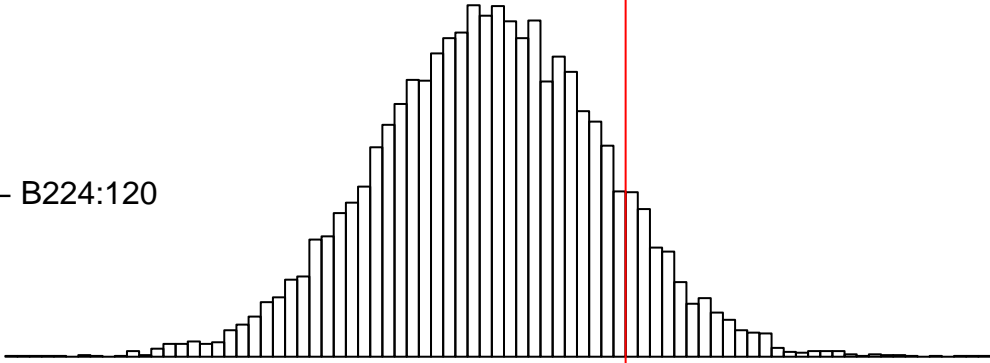

B224:240 – B224:45

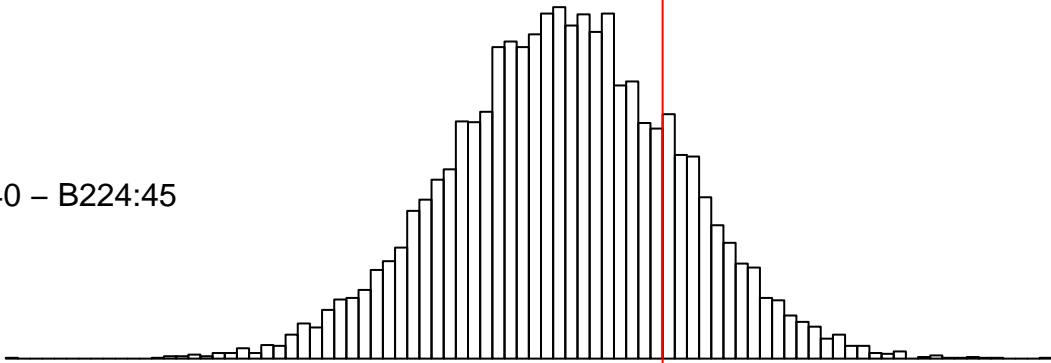

B224:120 – B224:45

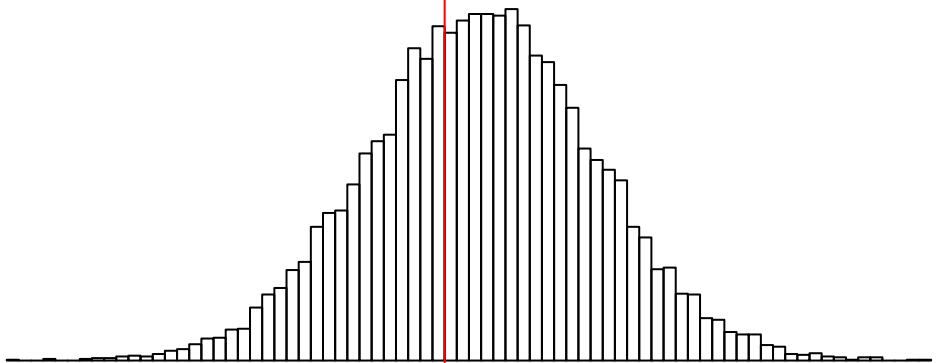

-3 -2 -1 0 1 2

delta(Closed Hexose 5)



B224:240

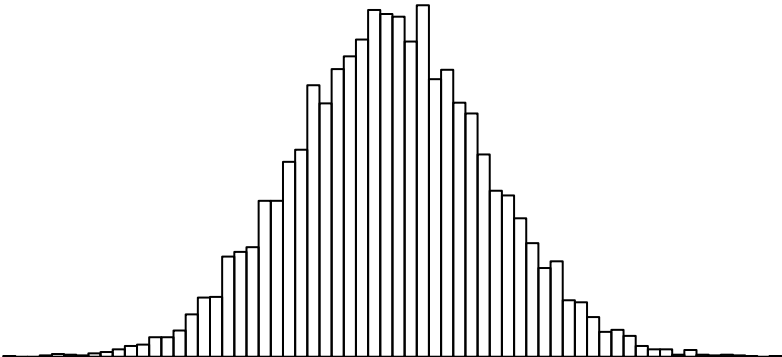

B224:120

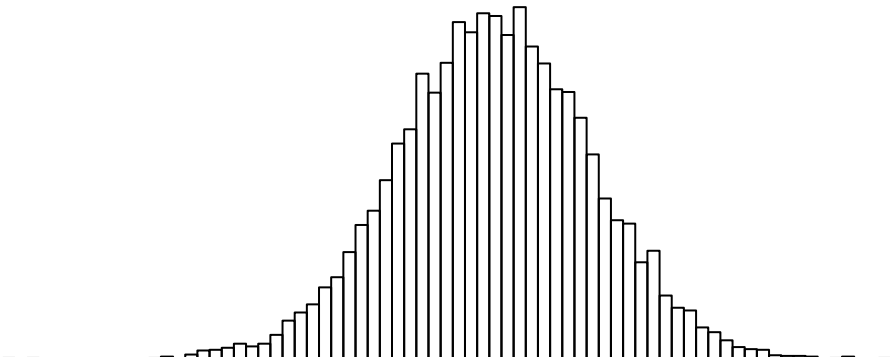

B224:45

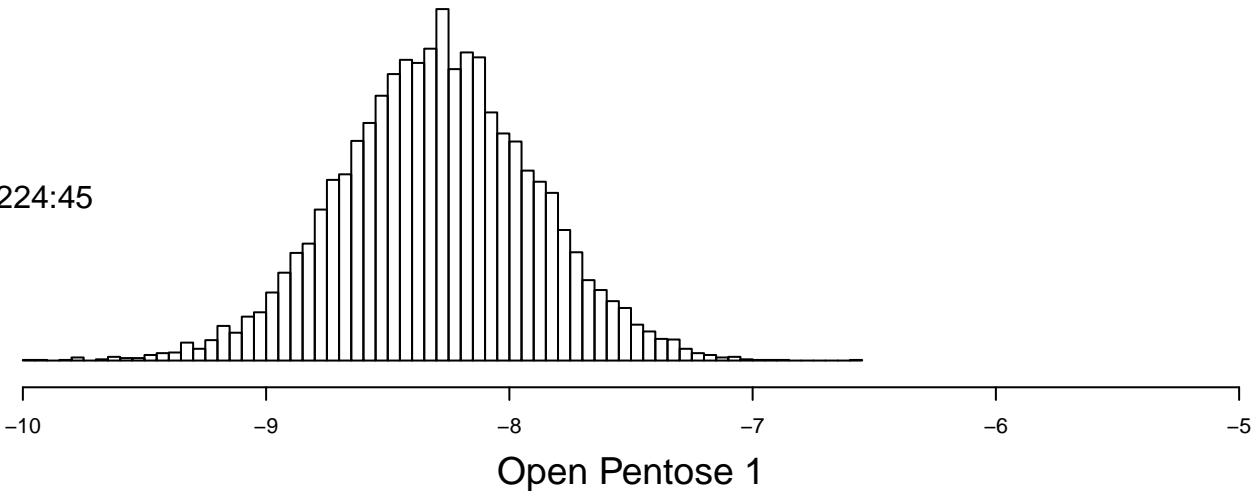

B224:240 – B224:120

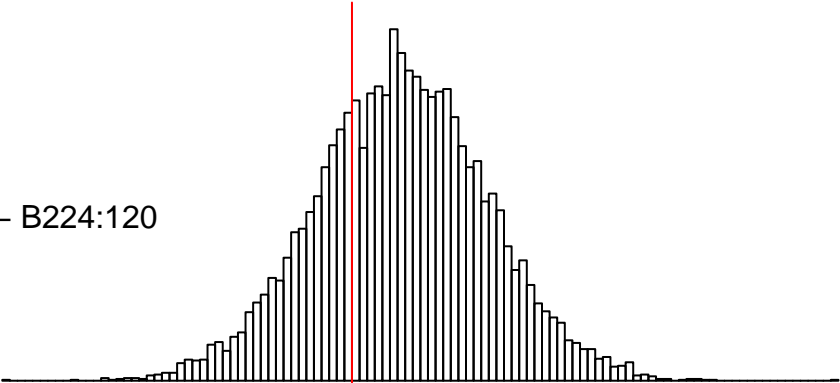

B224:240 – B224:45

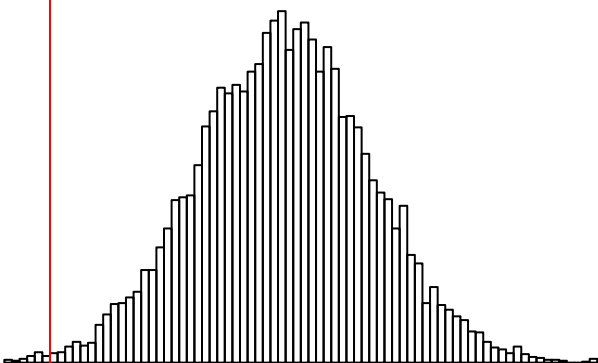

B224:120 – B224:45

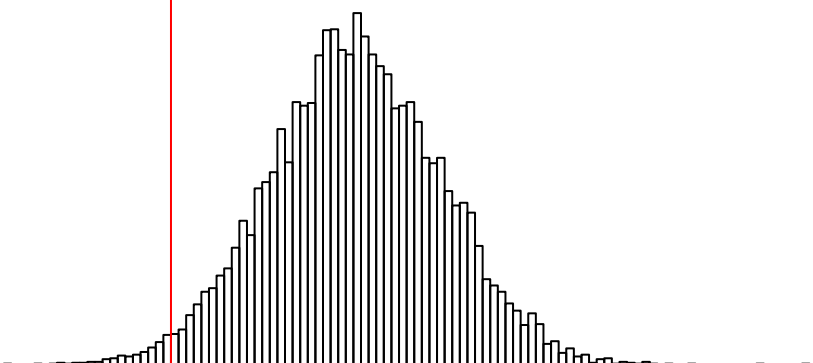

-2

0

2

4

delta(Open Pentose 1)

B224:240

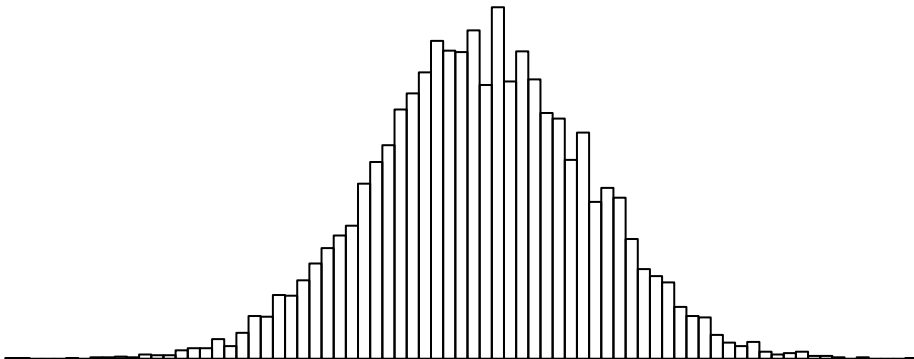

B224:120

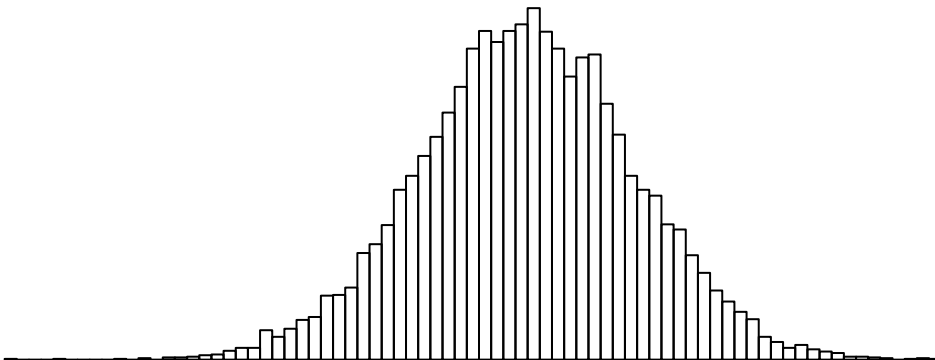

B224:45

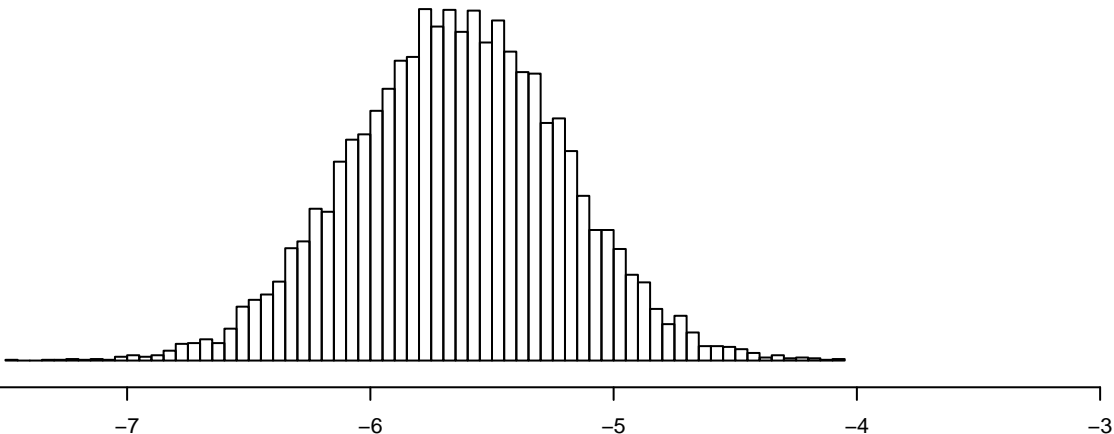

Open Pentose 2

B224:240 – B224:120

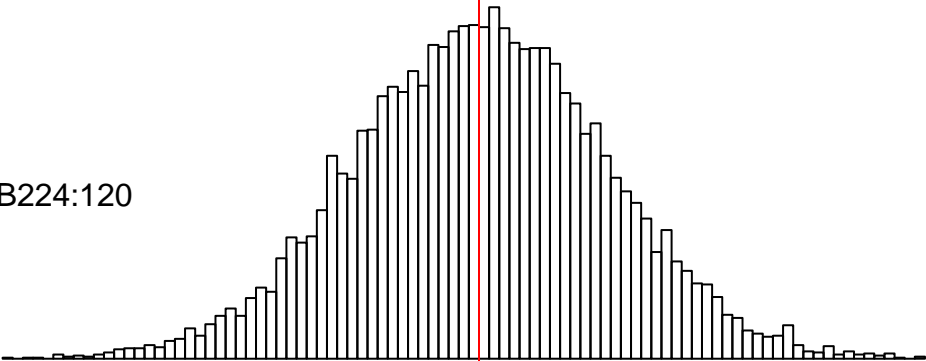

B224:240 – B224:45

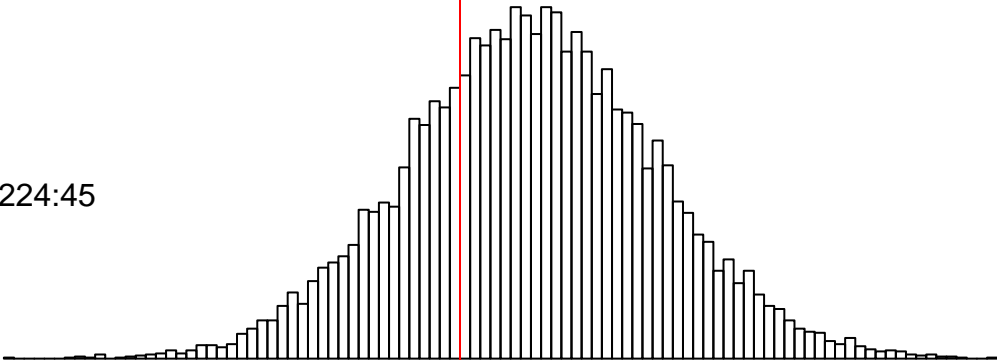

B224:120 – B224:45

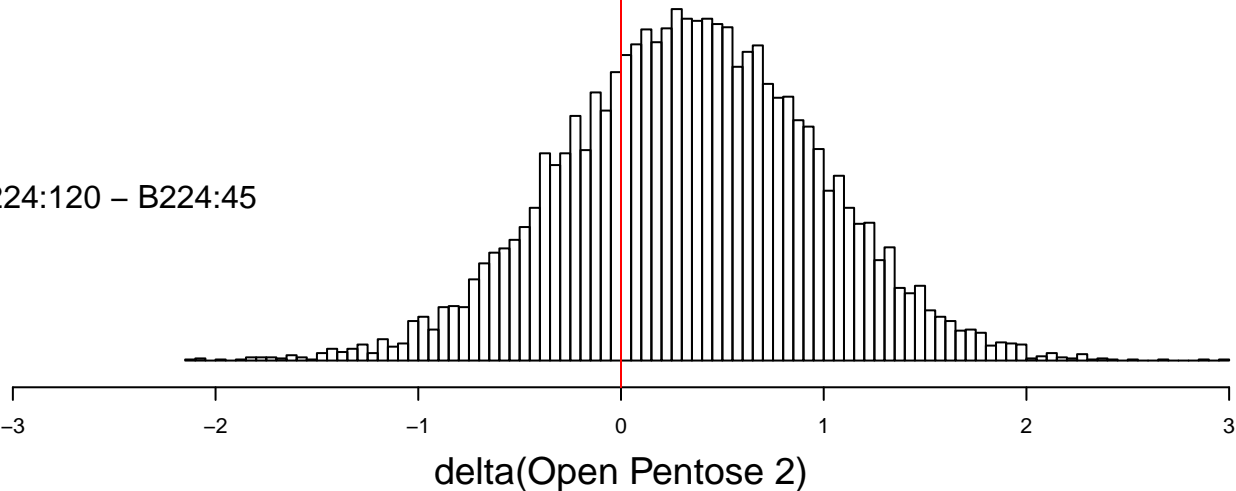

B224:240

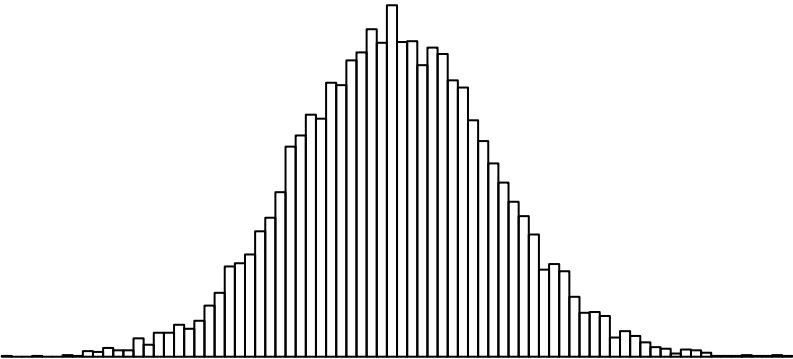

B224:120

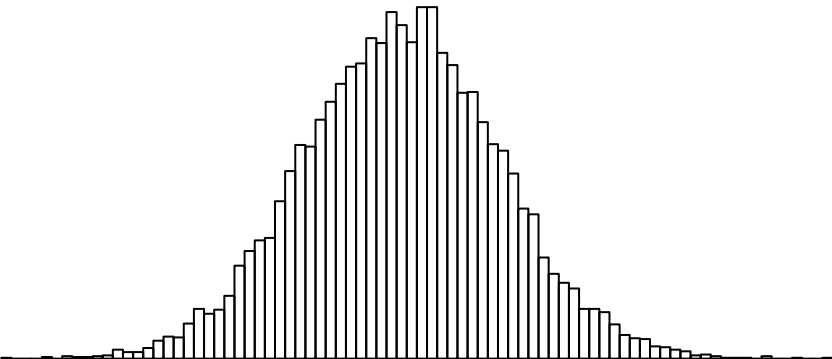

B224:45

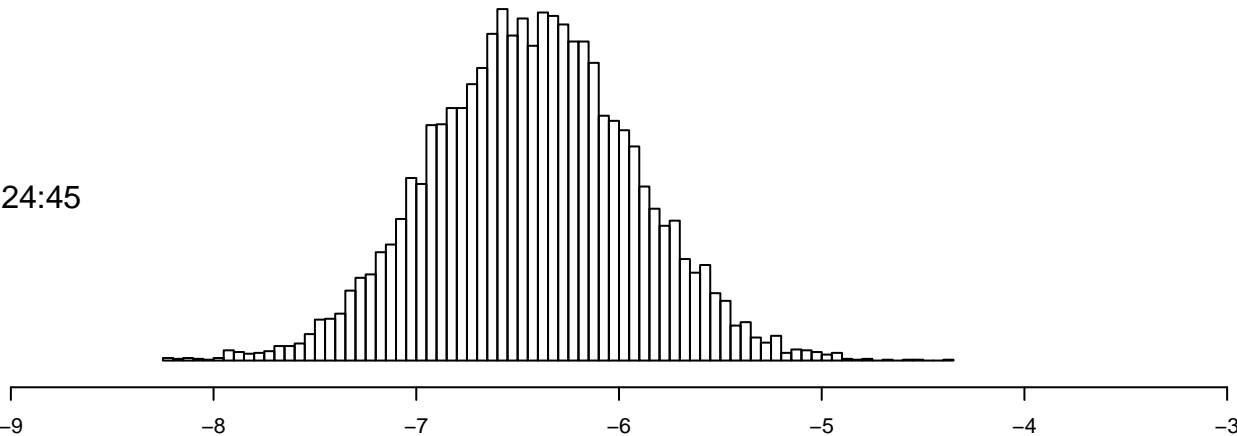

Closed Pentose 1

B224:240 – B224:120

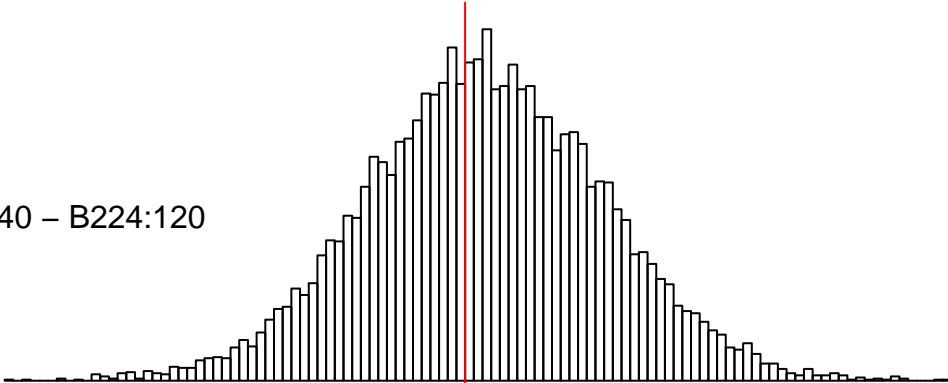

B224:240 – B224:45

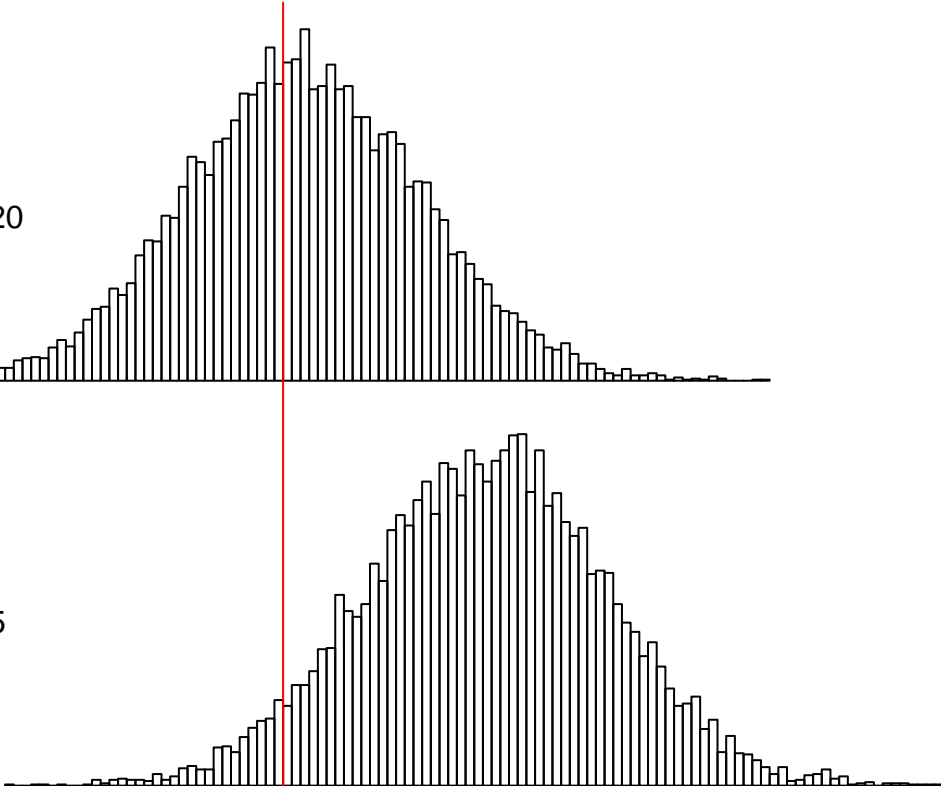

B224:120 – B224:45

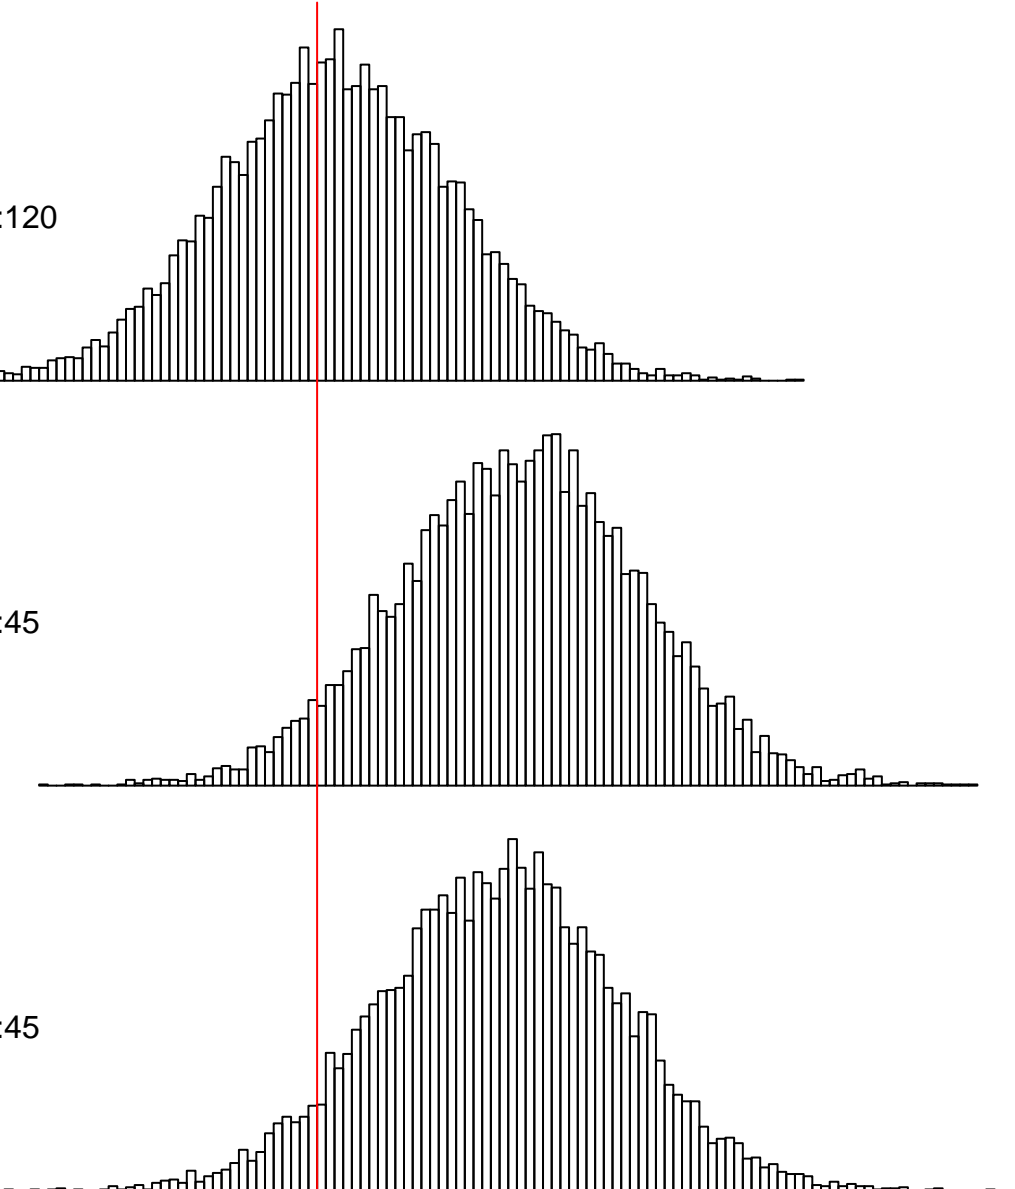

-3 -2 -1 0 1 2 3 4

delta(Closed Pentose 1)

B224:240

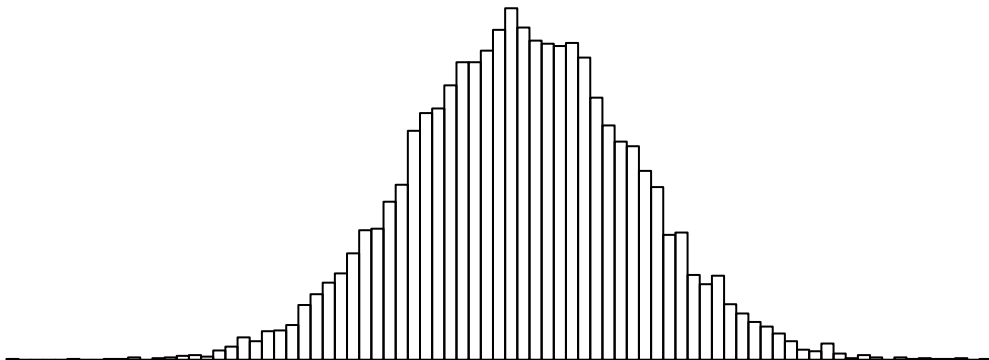

B224:120

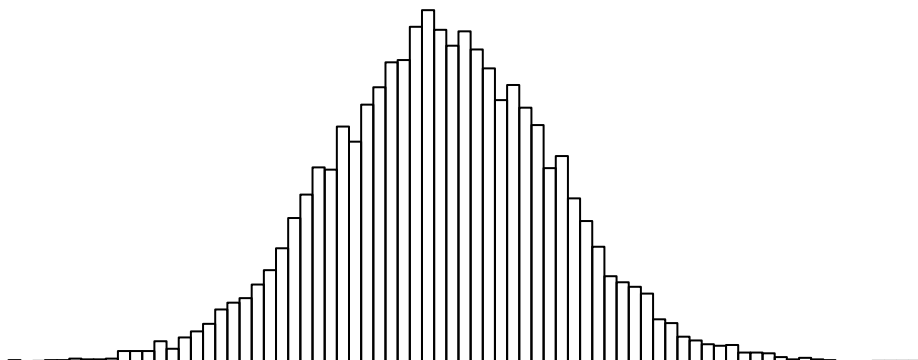

B224:45

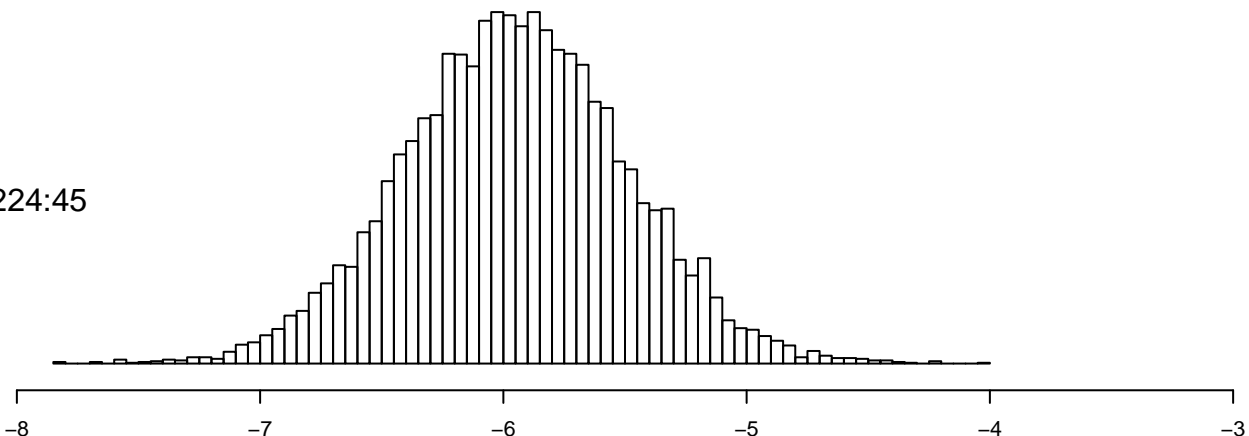

Closed Pentose 2

B224:240 – B224:120

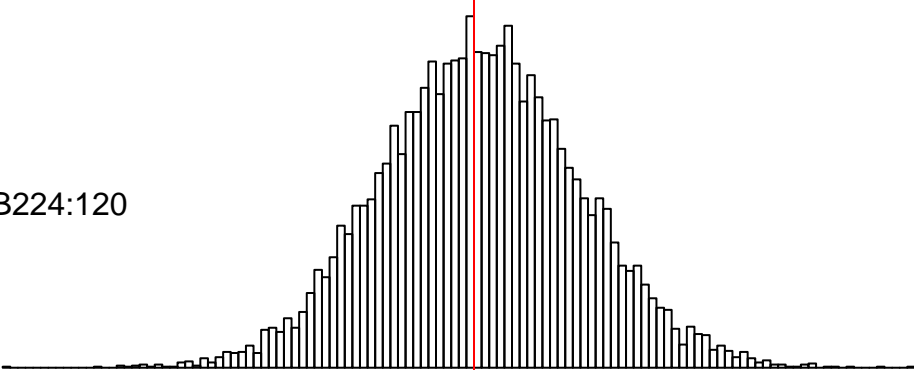

B224:240 – B224:45

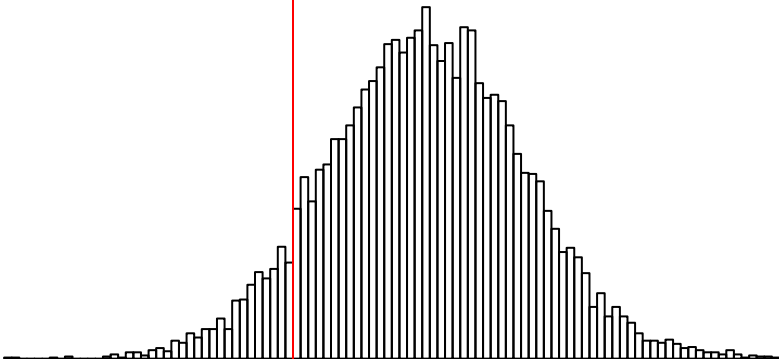

B224:120 – B224:45

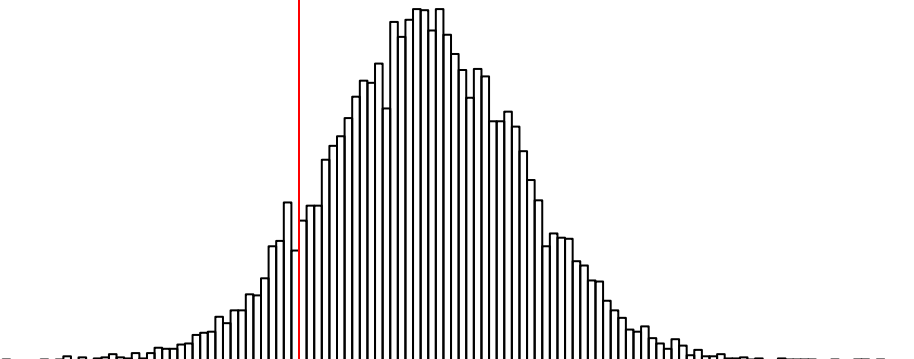

-4 -2 0 2 4

delta(Closed Pentose 2)



B224:240

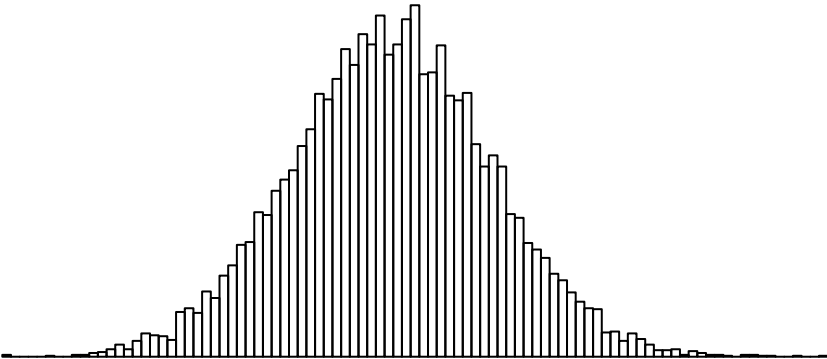

B224:120

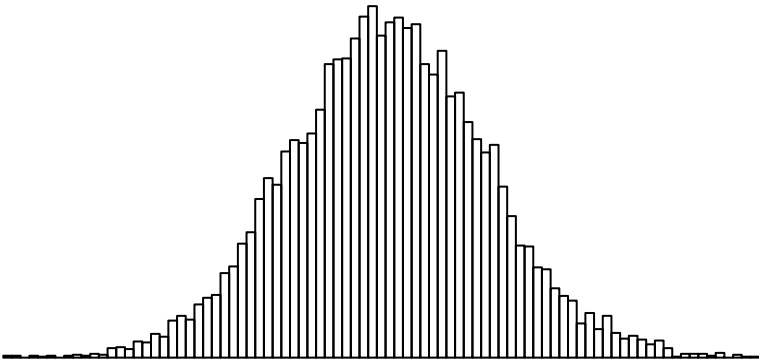

B224:45

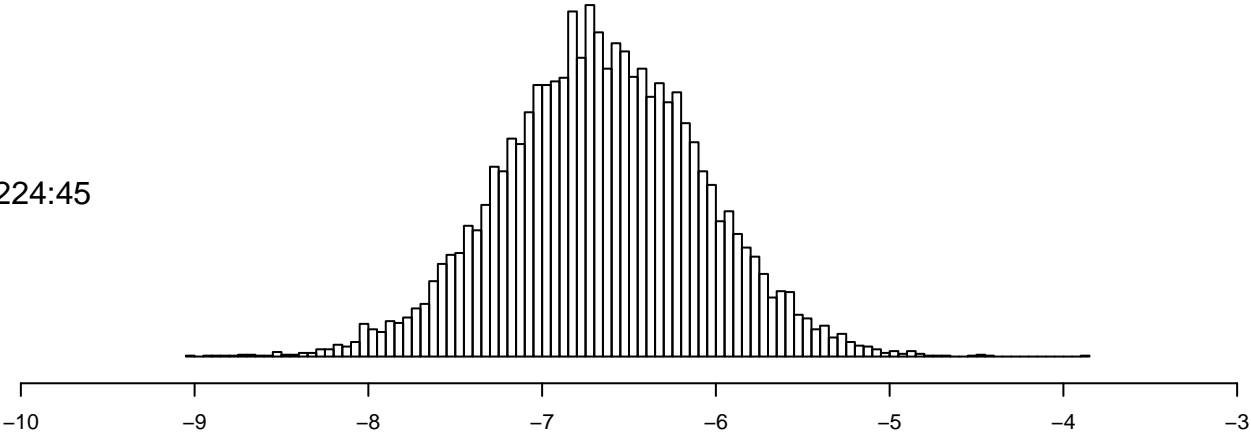

Pentose 1

B224:240 – B224:120

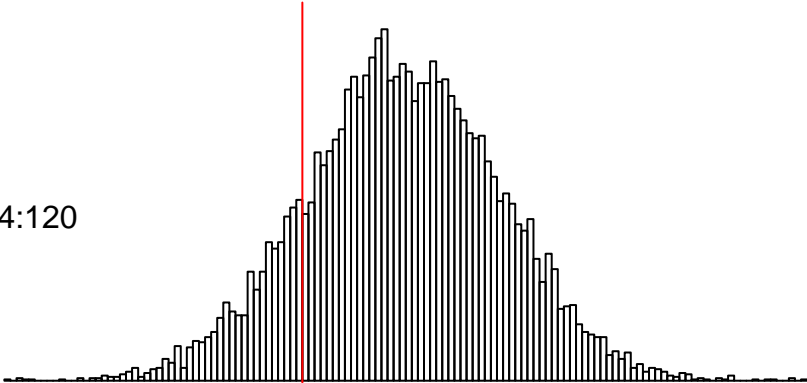

B224:240 – B224:45

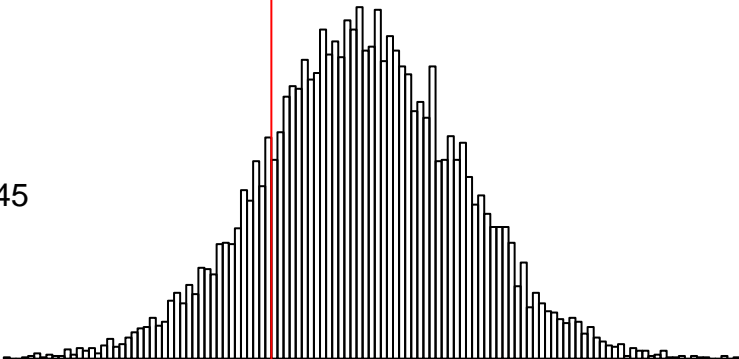

B224:120 – B224:45

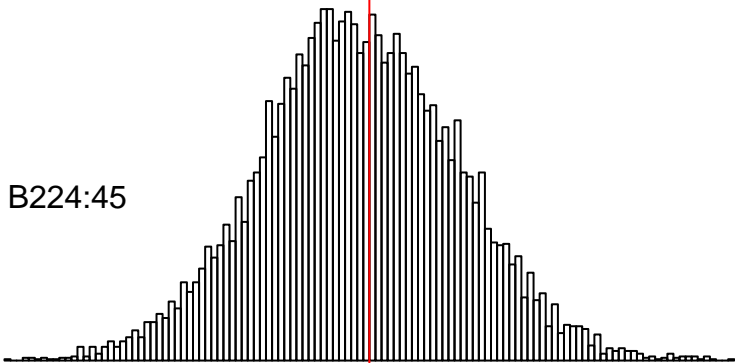

-4

-2

0

2

4

6

delta(Pentose 1)

B224:240

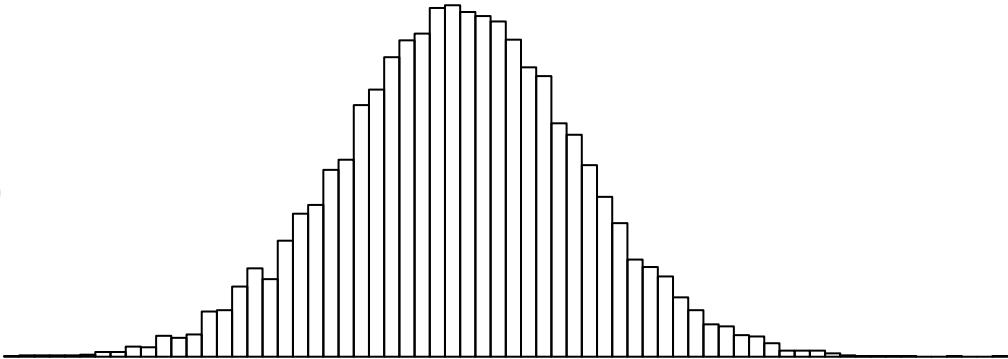

B224:120

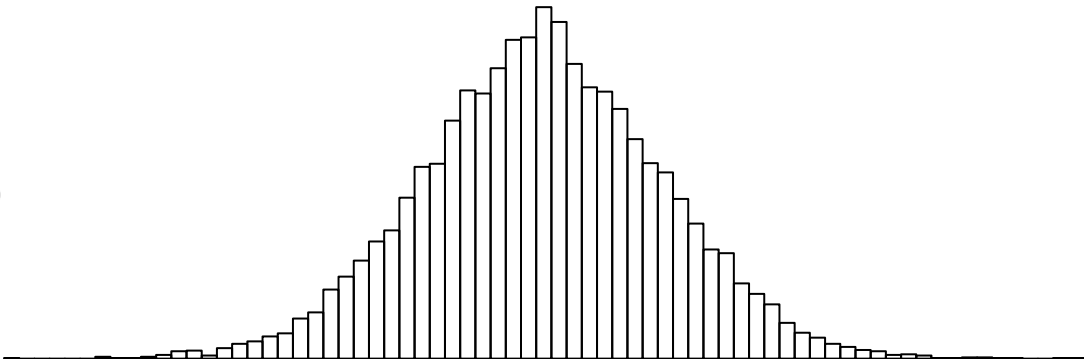

B224:45

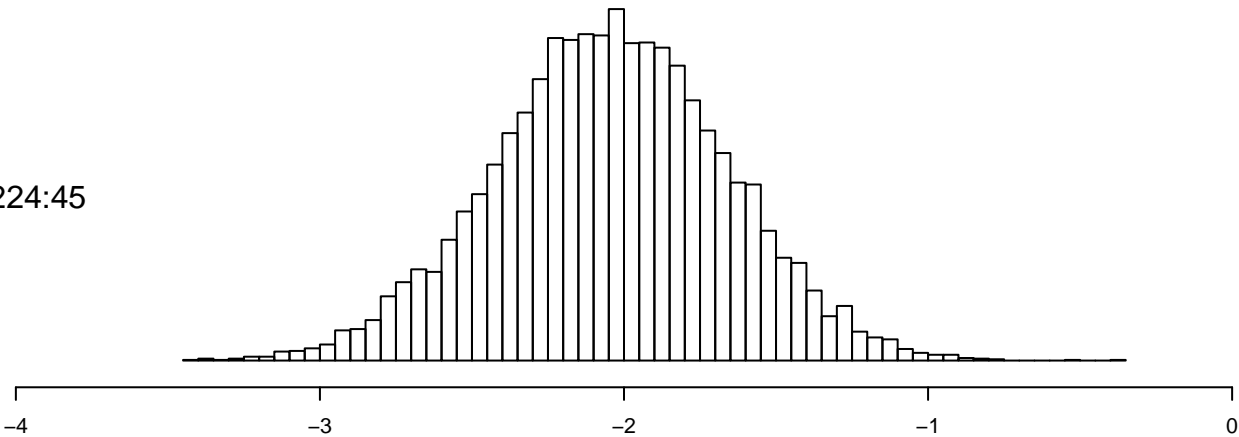

Open Pentose 3

B224:240 – B224:120

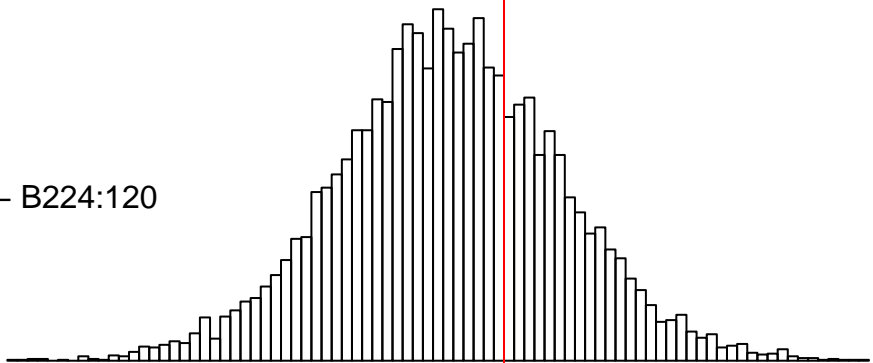

B224:240 – B224:45

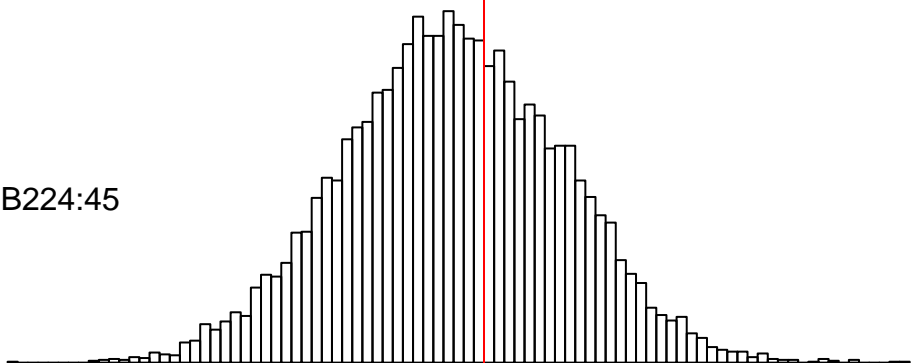

B224:120 – B224:45

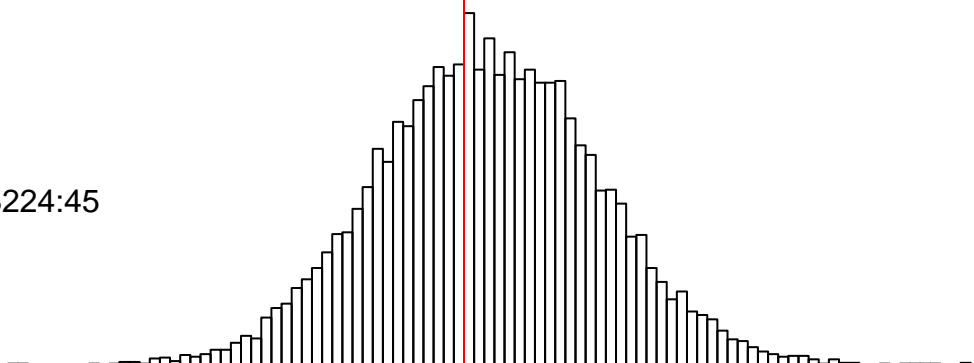

-3 -2 -1 0 1 2 3

delta(Open Pentose 3)

B224:240

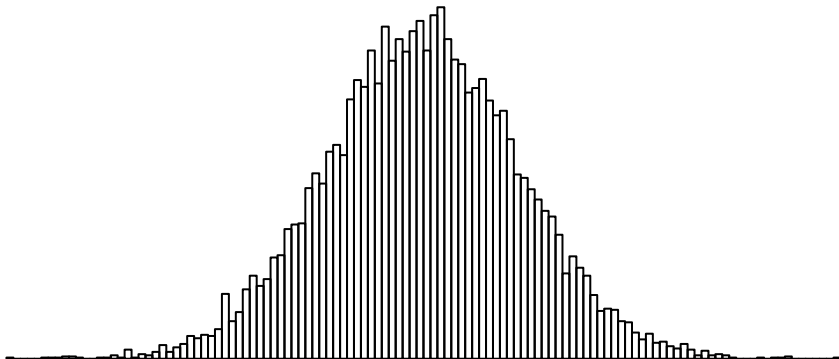

B224:120

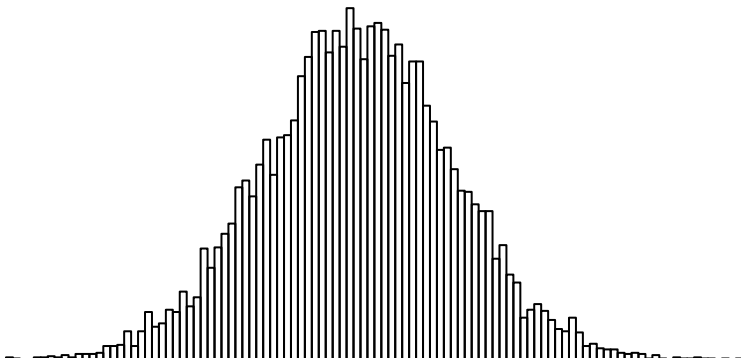

B224:45

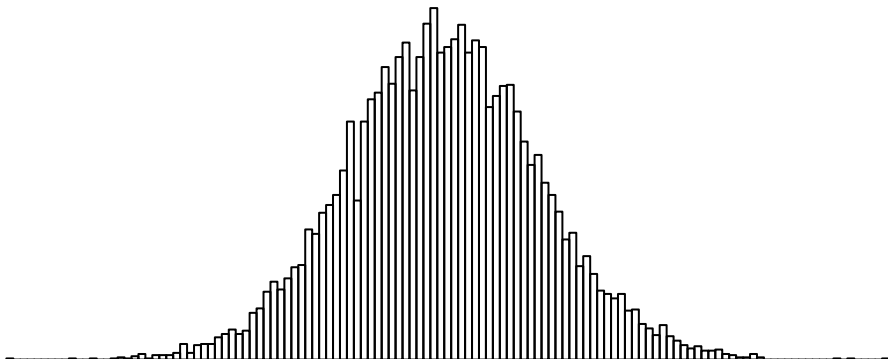

-9.5      -9.0      -8.5      -8.0      -7.5      -7.0      -6.5      -6.0

Sugar 1

B224:240 – B224:120

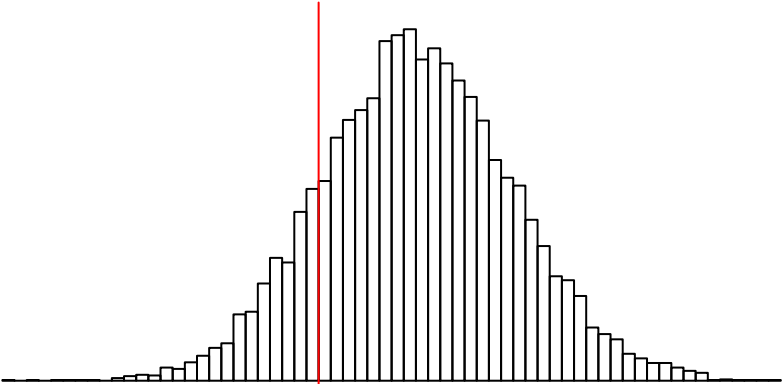

B224:240 – B224:45

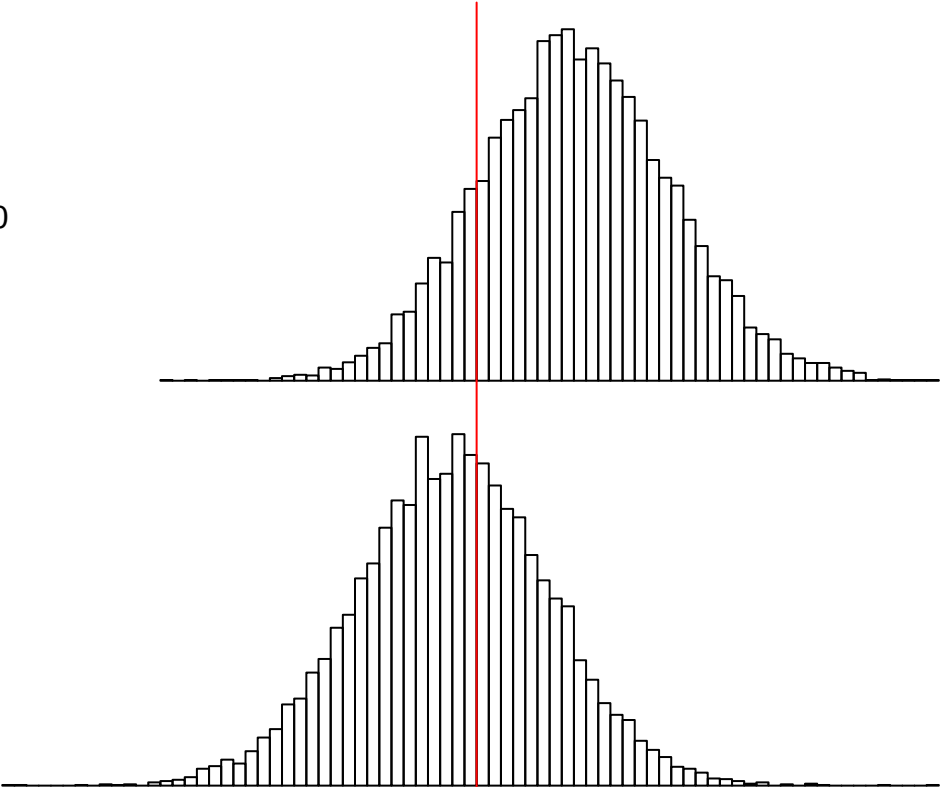

B224:120 – B224:45

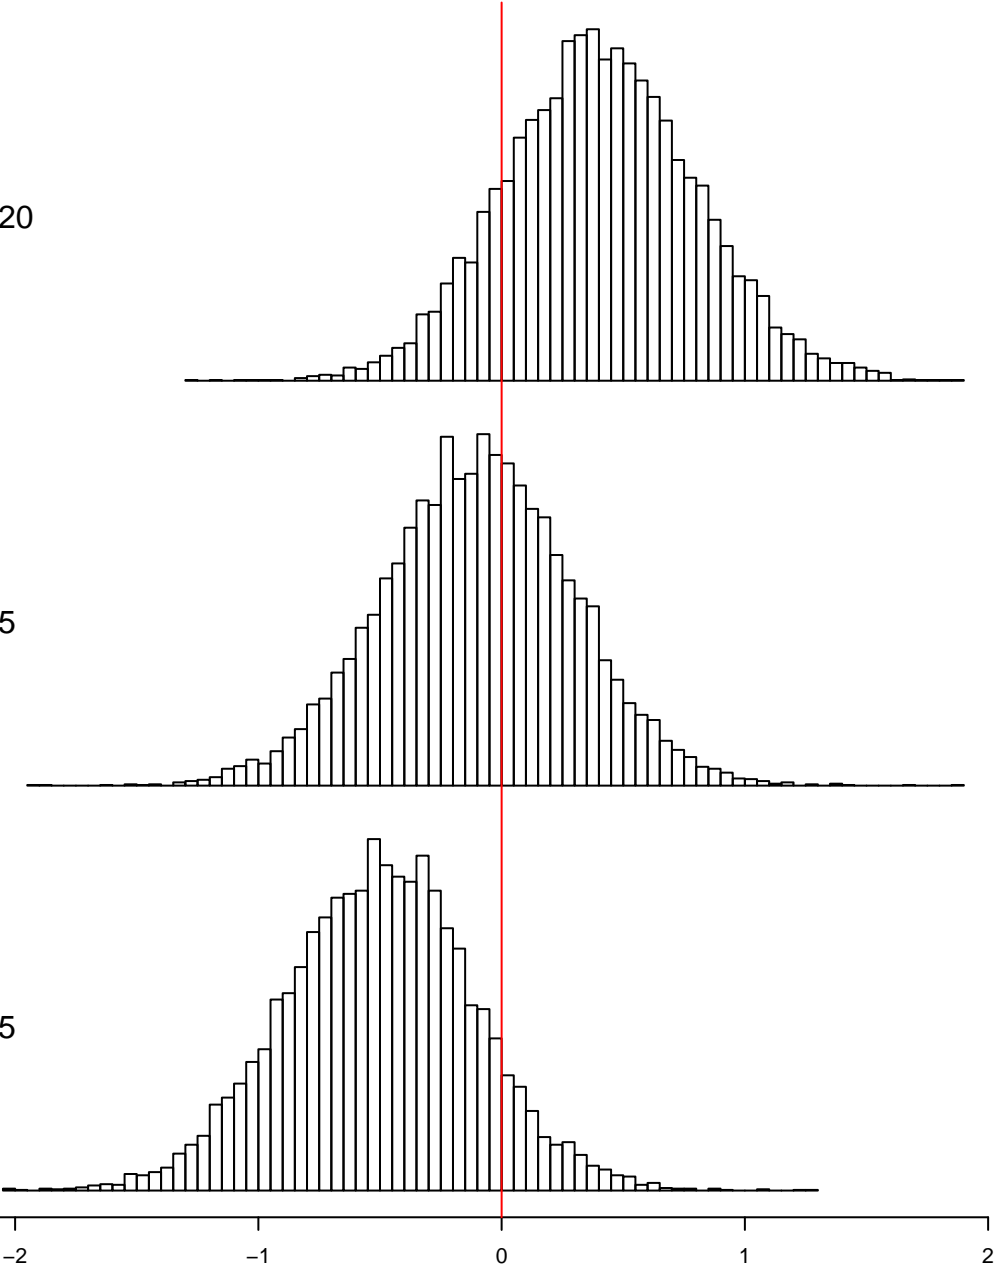

delta(Sugar 1)

B224:240

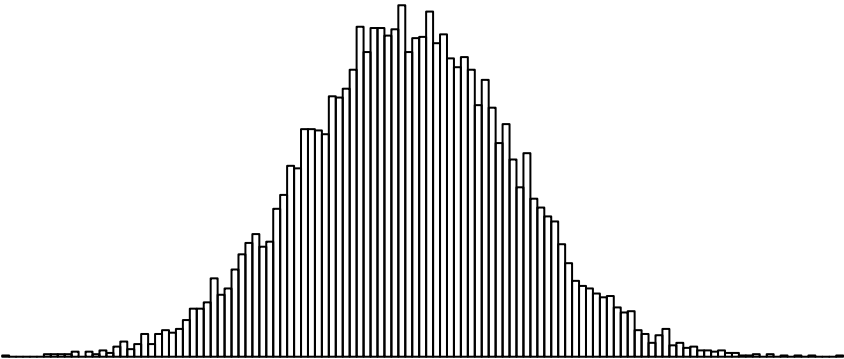

B224:120

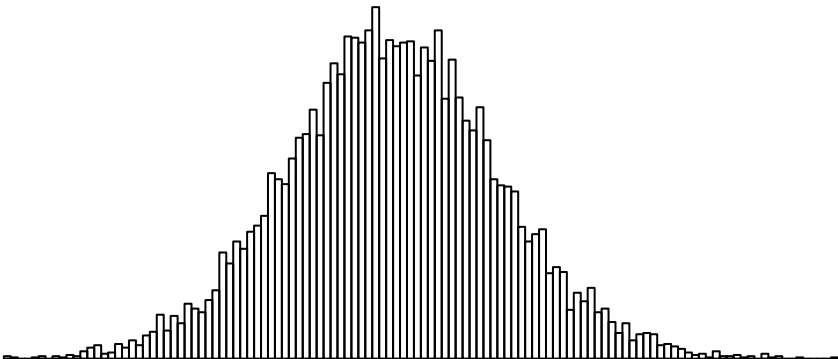

B224:45

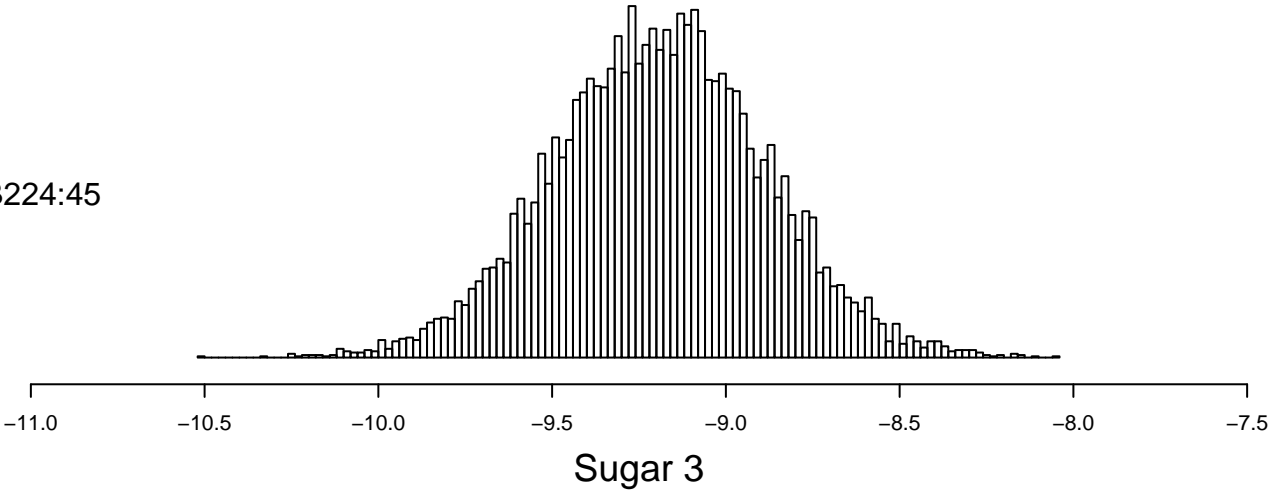

B224:240 – B224:120

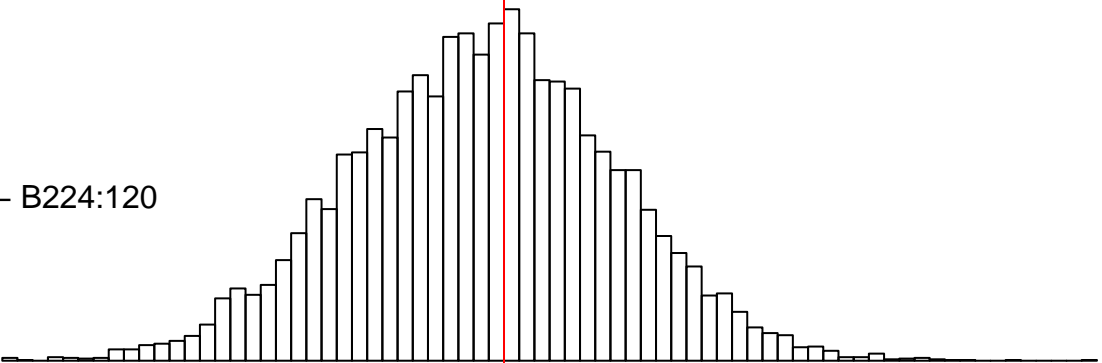

B224:240 – B224:45

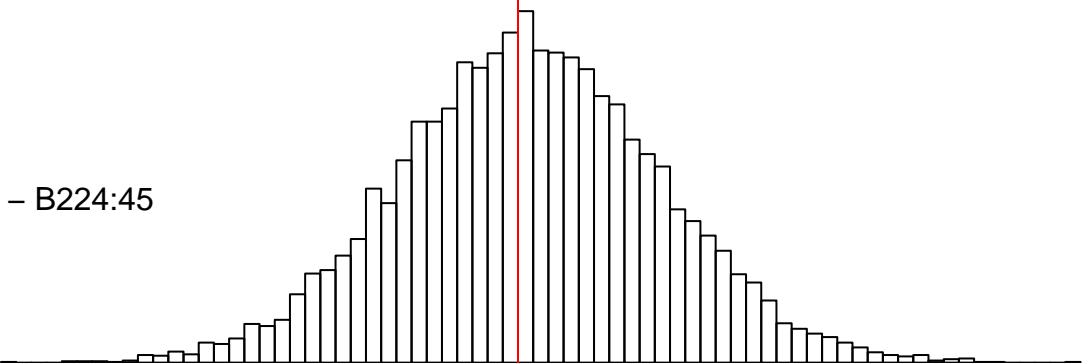

B224:120 – B224:45

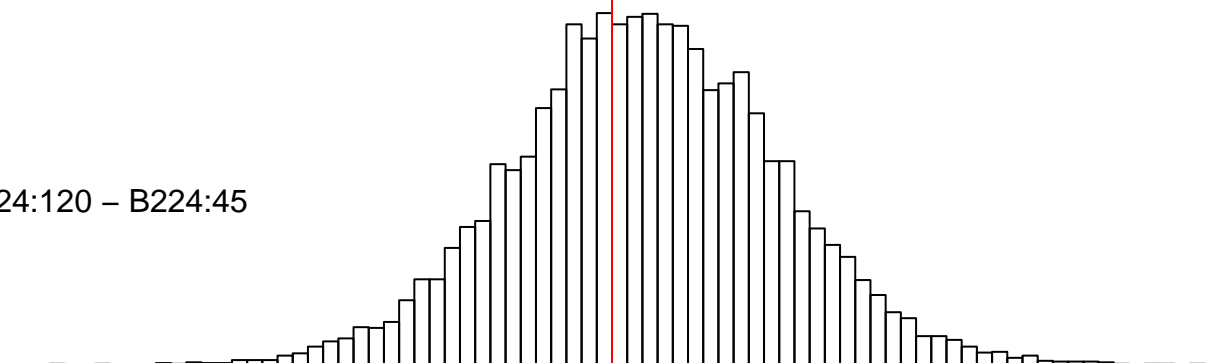

-2 -1 0 1 2

delta(Sugar 3)



B224:240

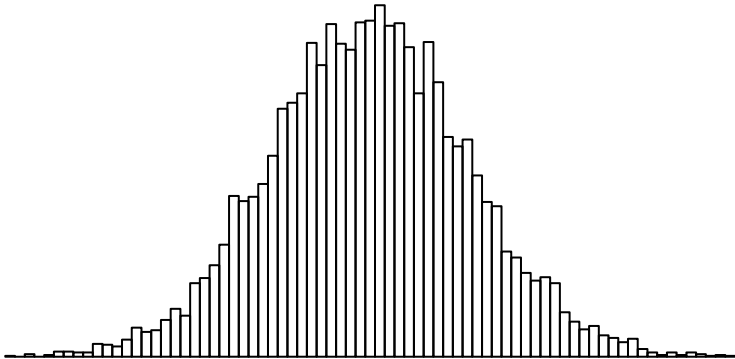

B224:120

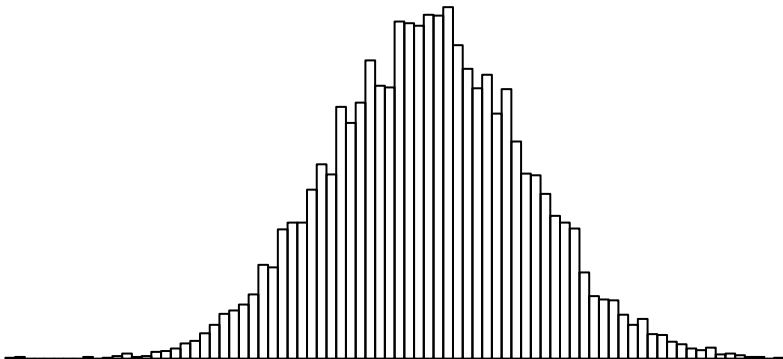

B224:45

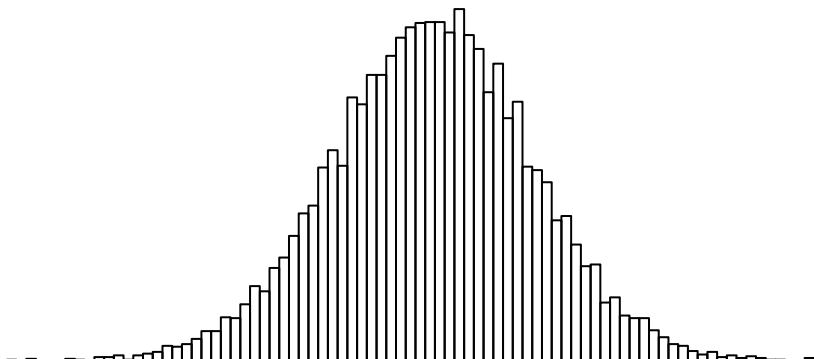

-10.0                      -9.5                      -9.0                      -8.5                      -8.0                      -7.5

Sugar 4

B224:240 – B224:120

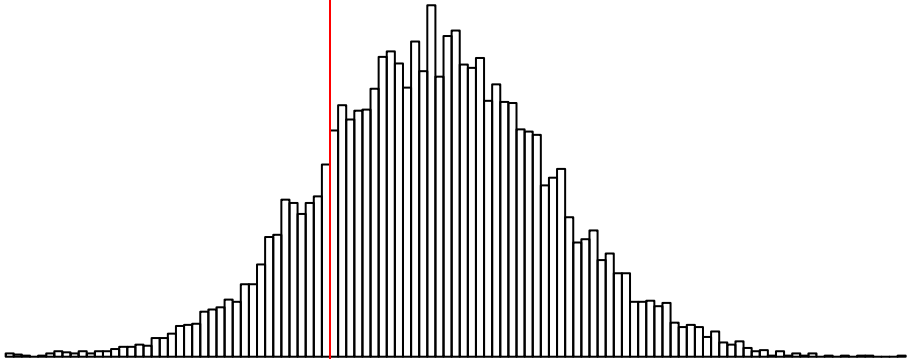

B224:240 – B224:45

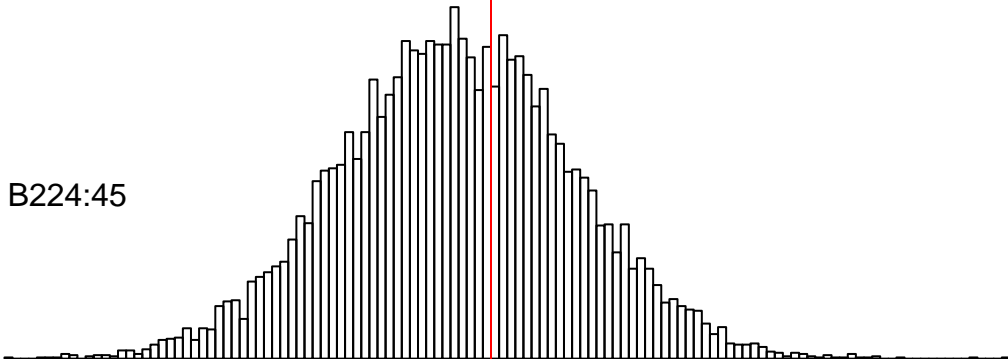

B224:120 – B224:45

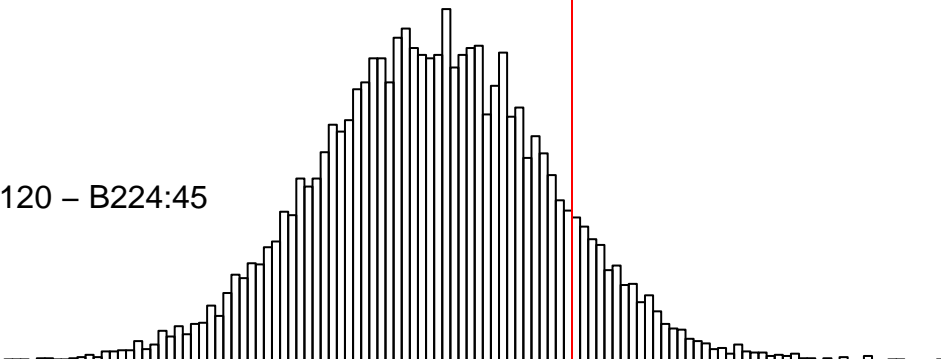

-1.5      -1.0      -0.5      0.0      0.5      1.0      1.5

delta(Sugar 4)

B224:240

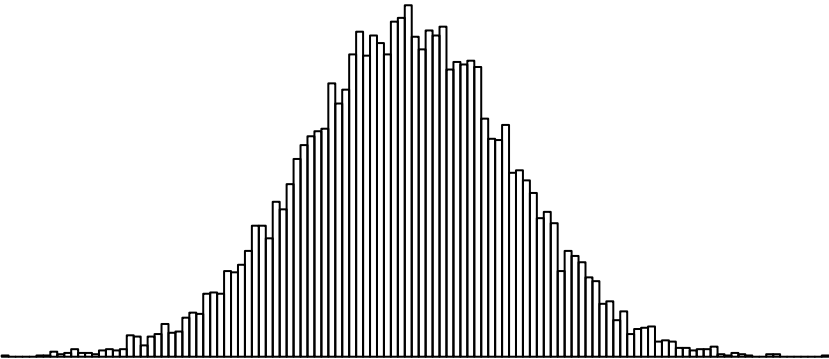

B224:120

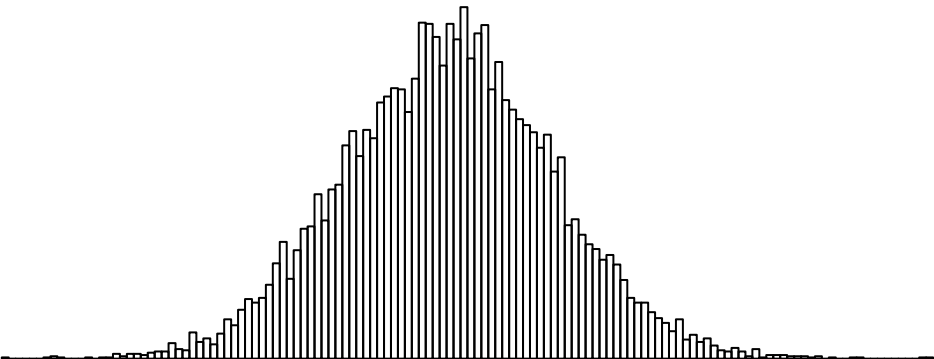

B224:45

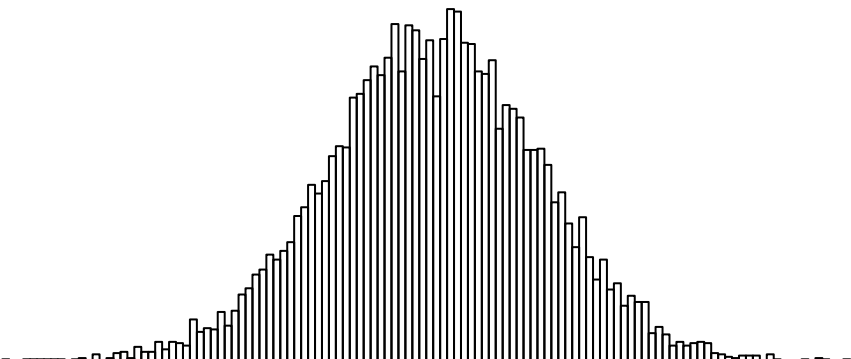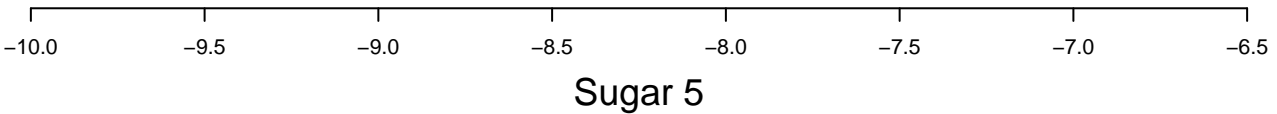

B224:240 – B224:120

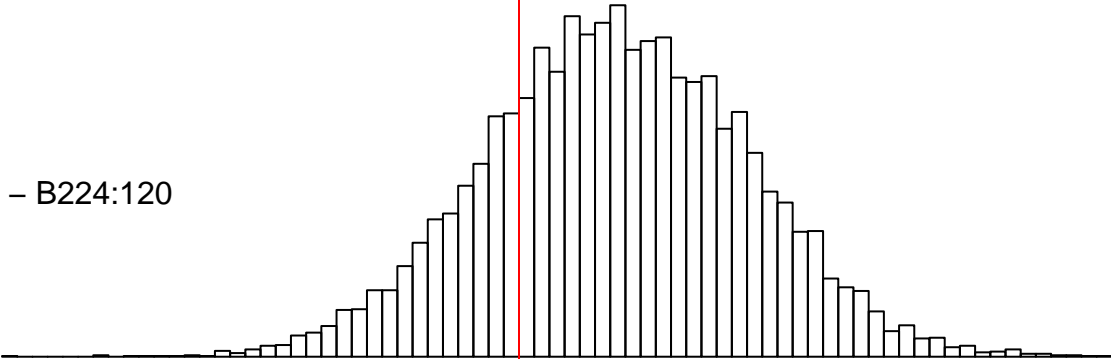

B224:240 – B224:45

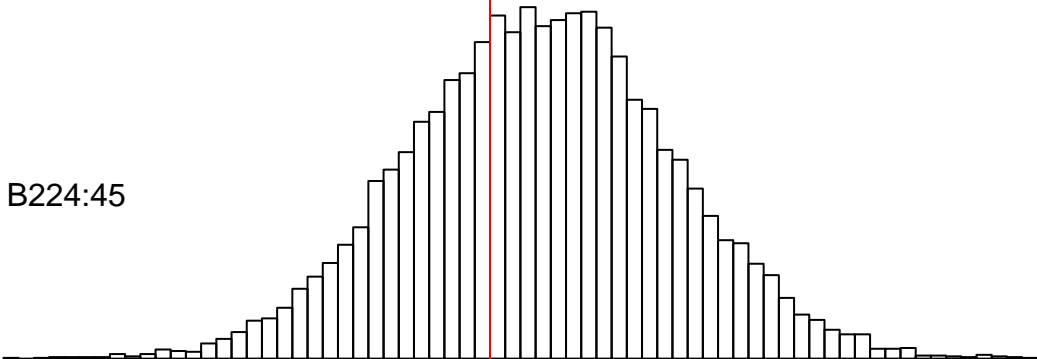

B224:120 – B224:45

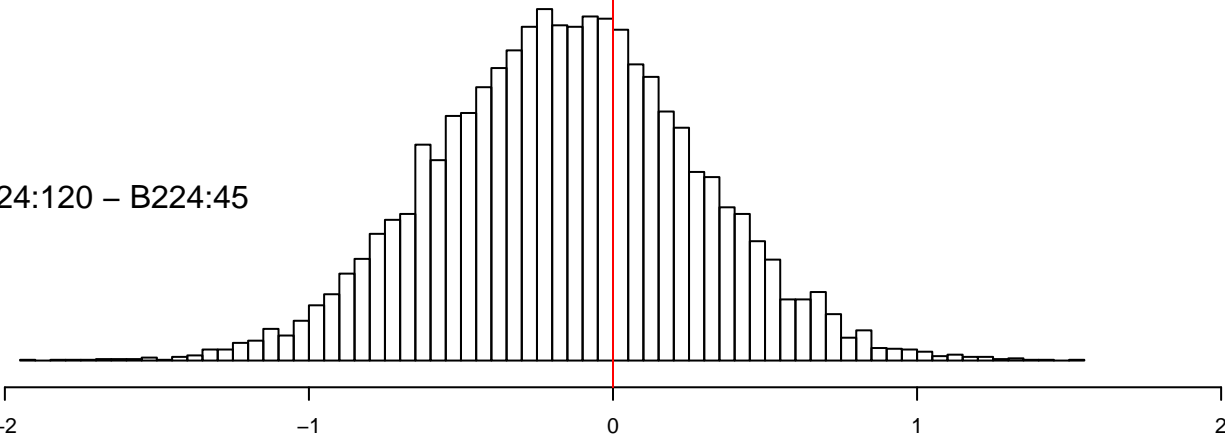

delta(Sugar 5)

B224:240

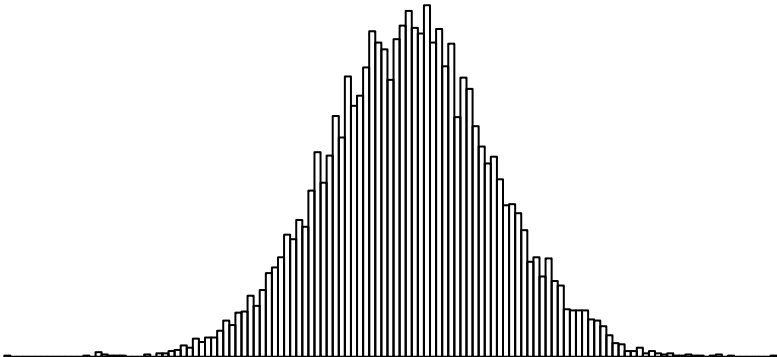

B224:120

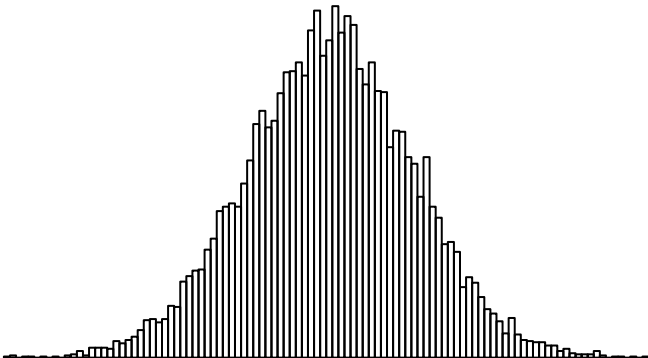

B224:45

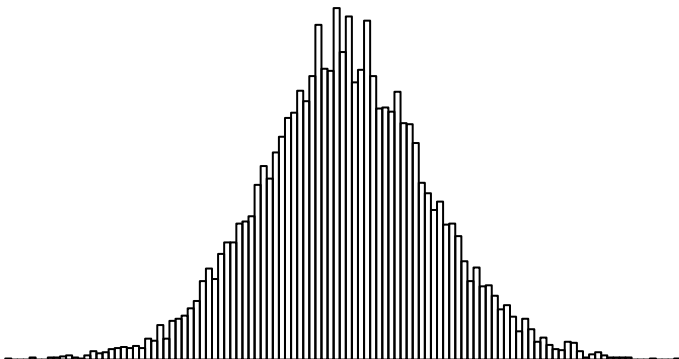

-10                      -9                      -8                      -7                      -6

Sugar 6

B224:240 – B224:120

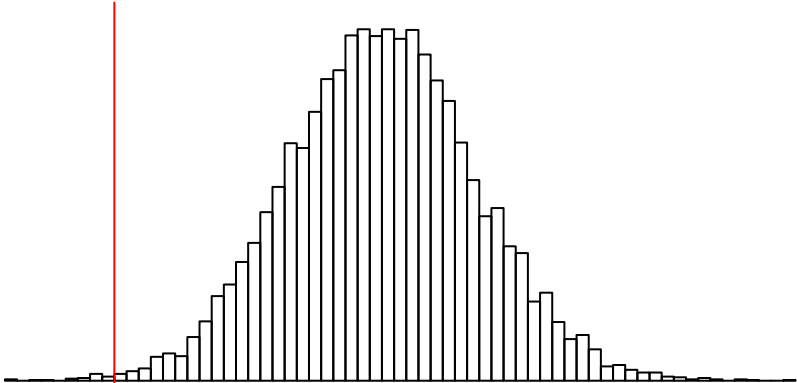

B224:240 – B224:45

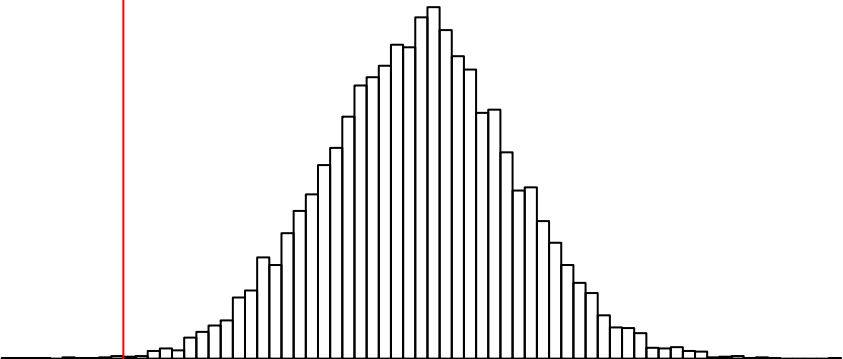

B224:120 – B224:45

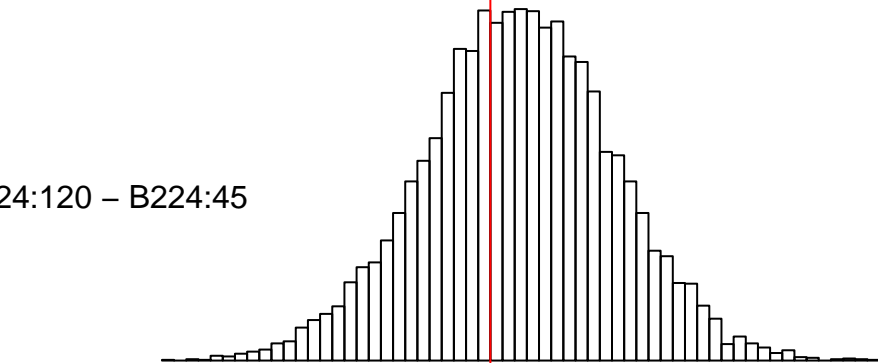

delta(Sugar 6)

B224:240

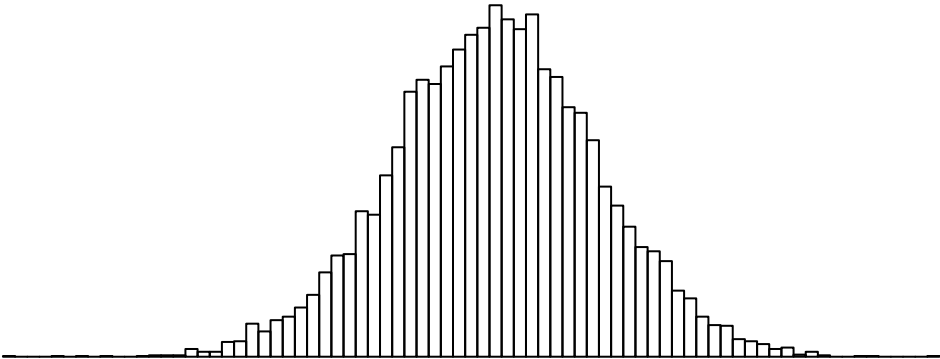

B224:120

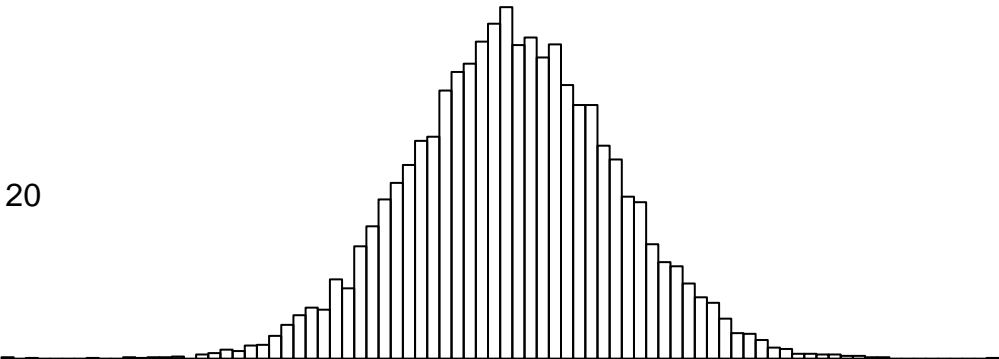

B224:45

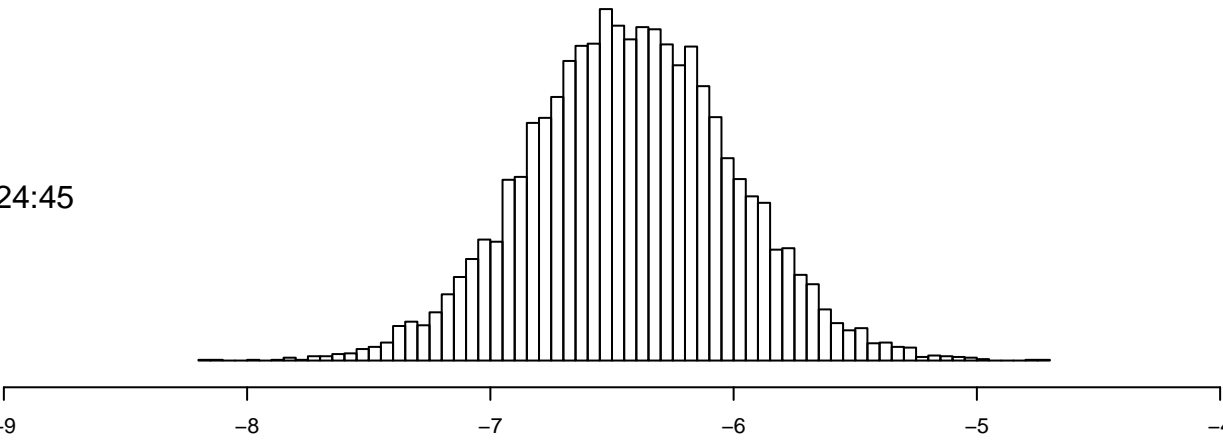

Sugar 7

B224:240 – B224:120

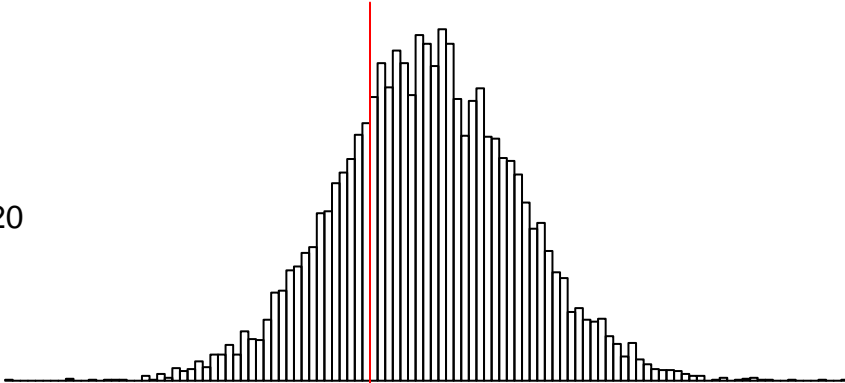

B224:240 – B224:45

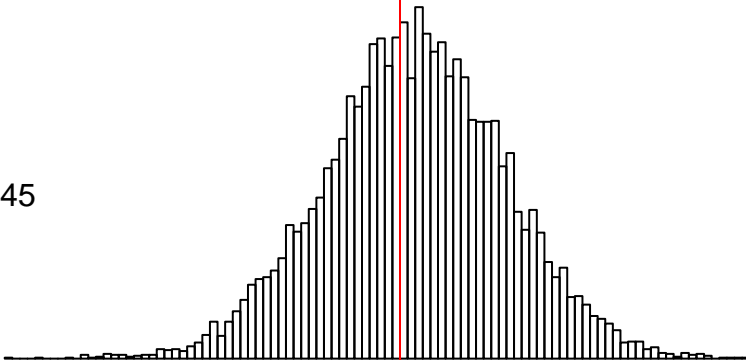

B224:120 – B224:45

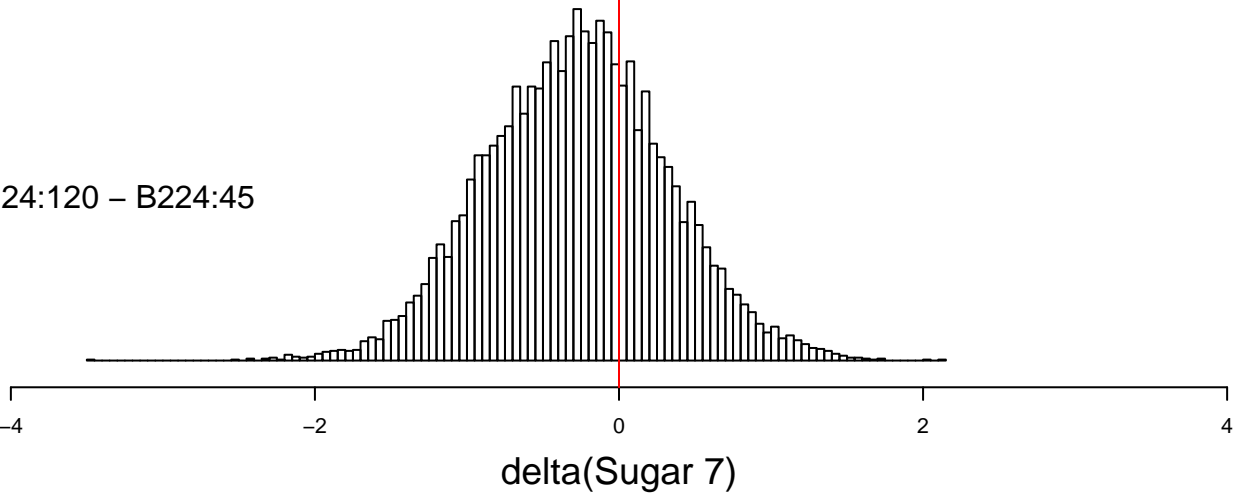



B224:240

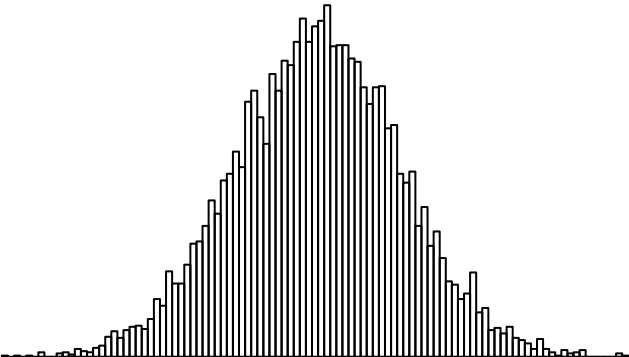

B224:120

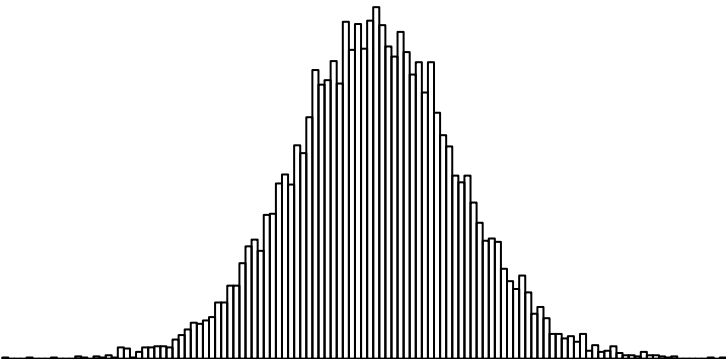

B224:45

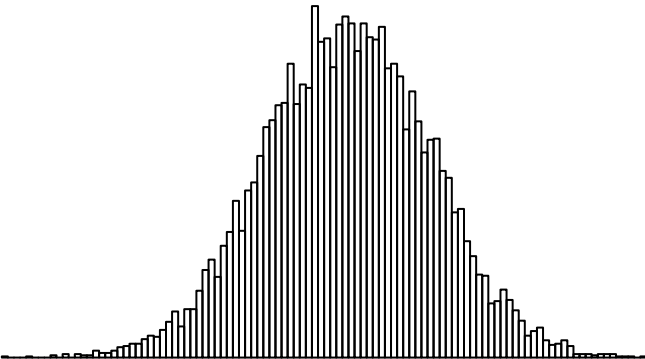

-12                      -10                      -8                      -6                      -4                      -2

Sugar 8

B224:240 – B224:120

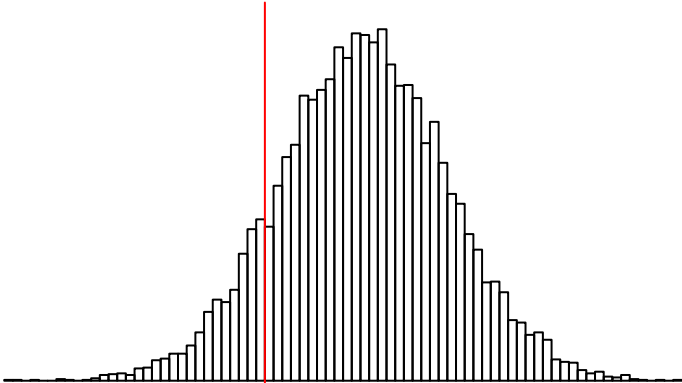

B224:240 – B224:45

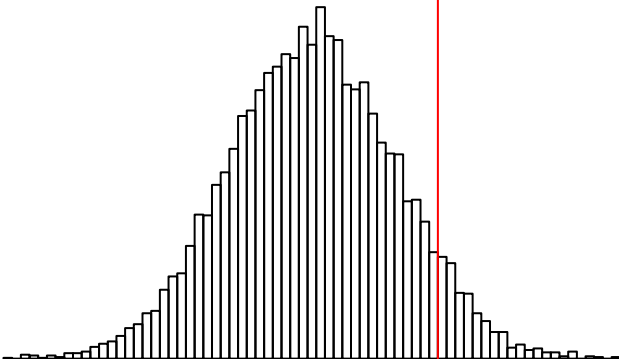

B224:120 – B224:45

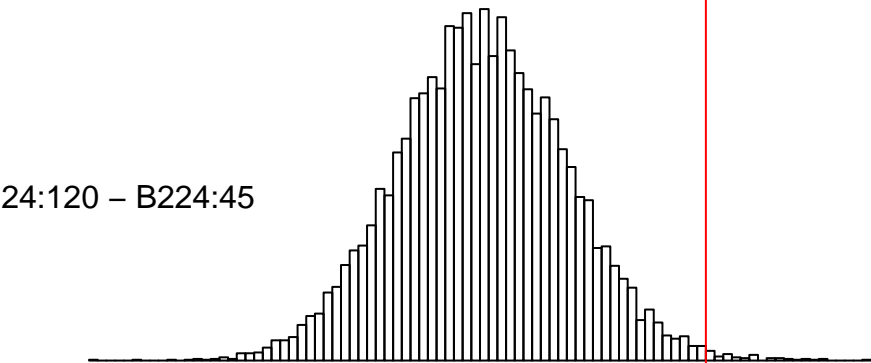

-8 -6 -4 -2 0 2 4 6

delta(Sugar 8)

B224:240

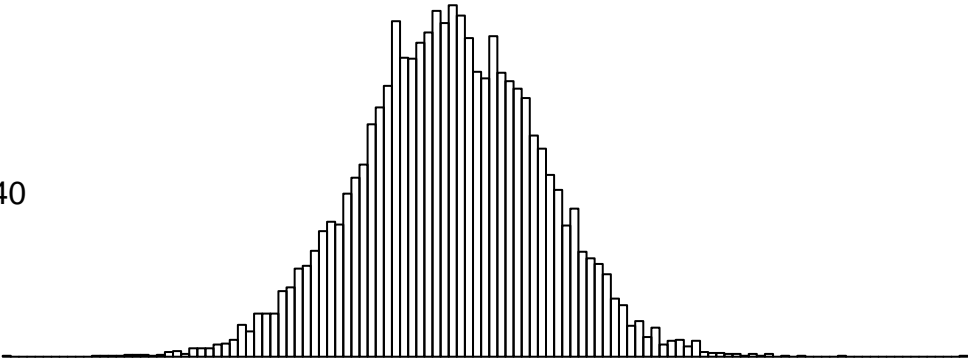

B224:120

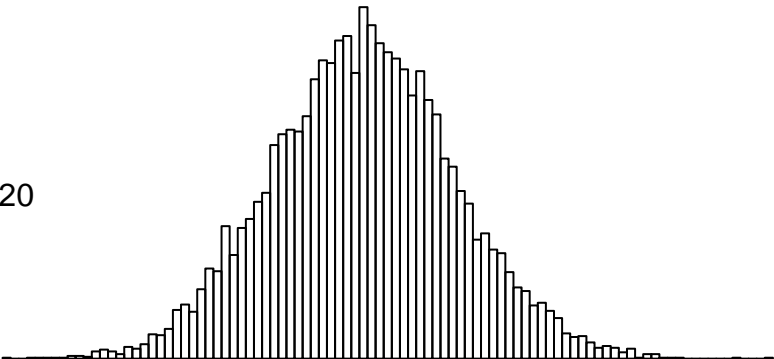

B224:45

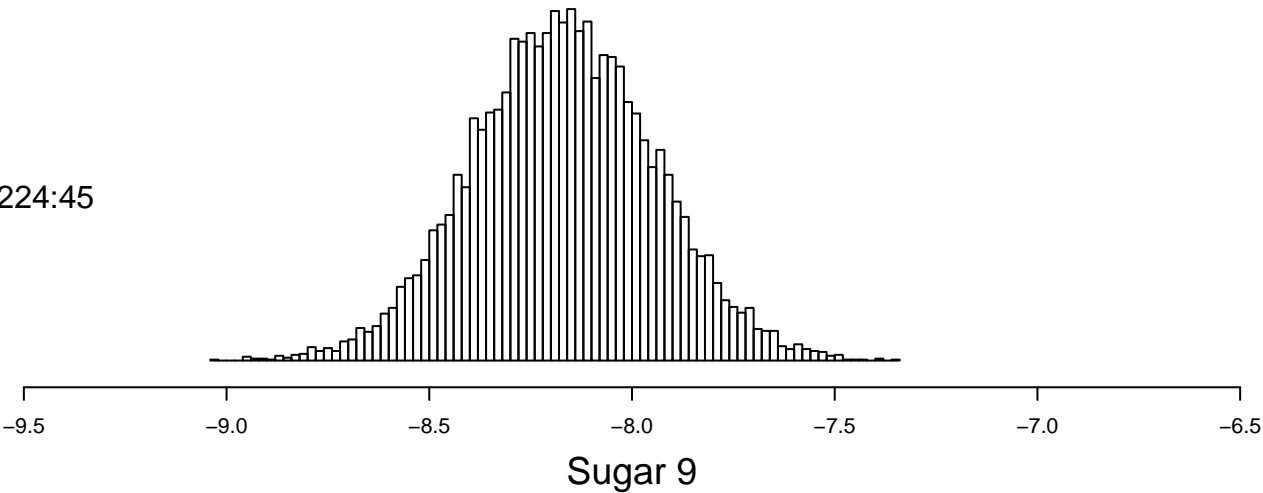

B224:240 – B224:120

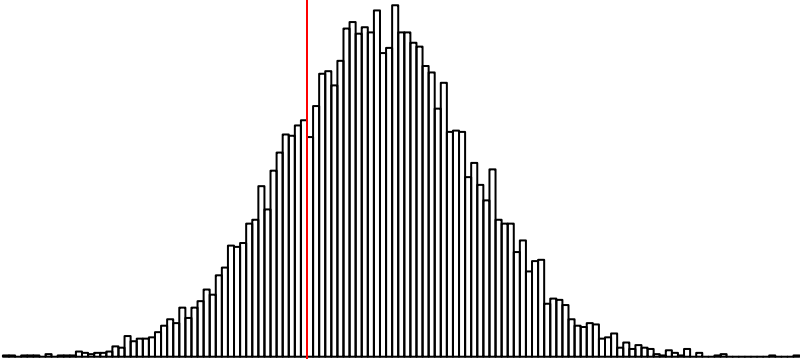

B224:240 – B224:45

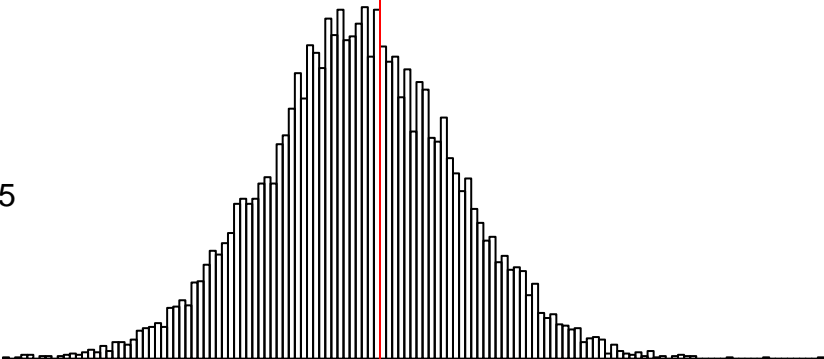

B224:120 – B224:45

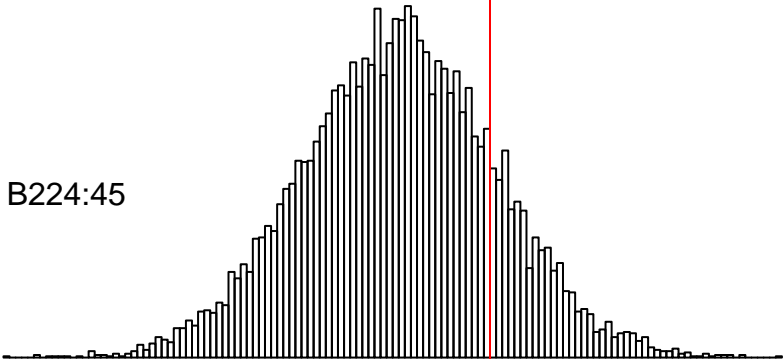

-2

-1

0

1

2

delta(Sugar 9)

B224:240

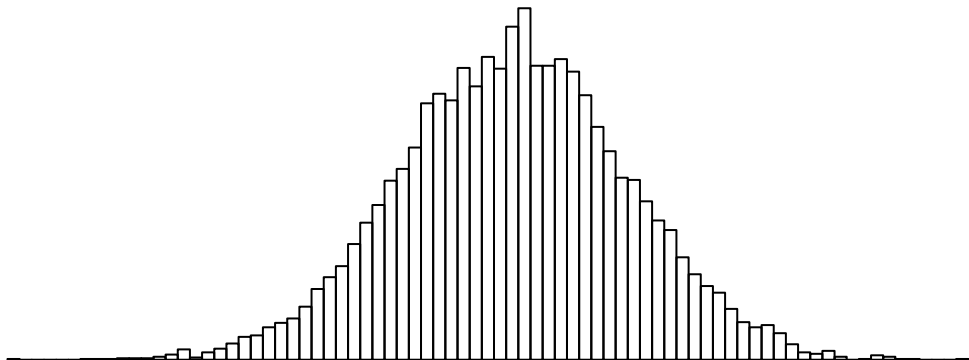

B224:120

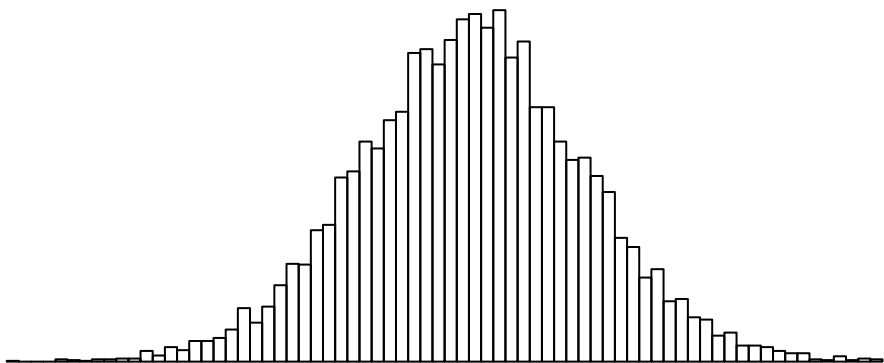

B224:45

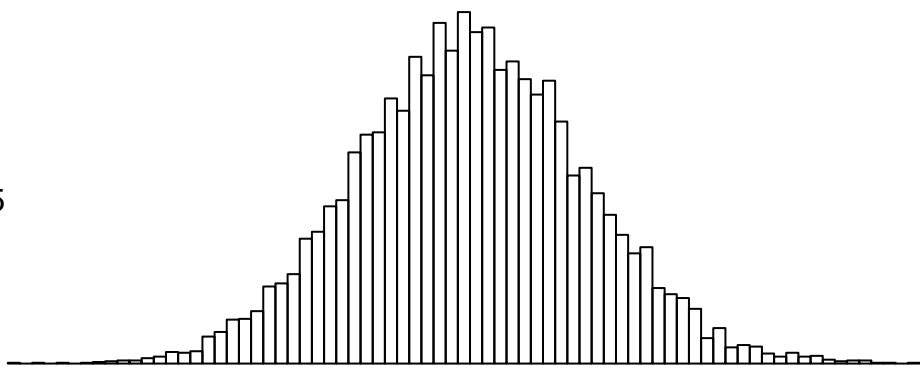

-10 -9 -8 -7 -6 -5

Sugar 10

B224:240 – B224:120

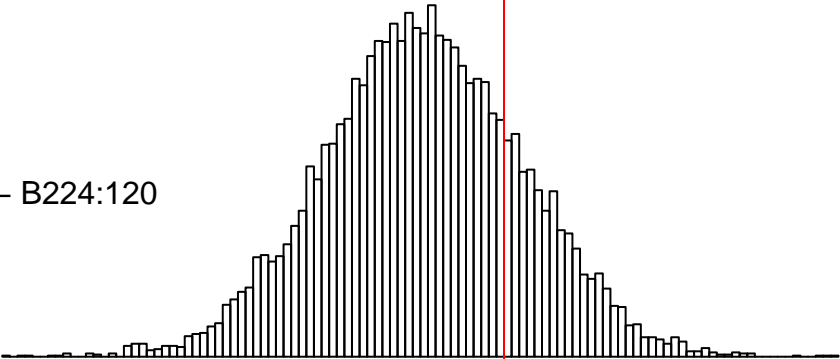

B224:240 – B224:45

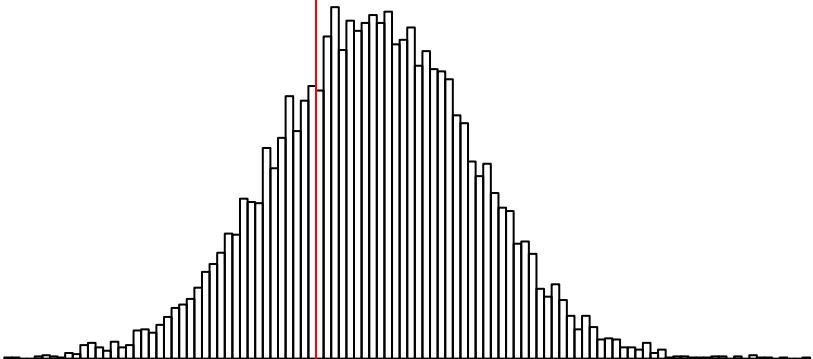

B224:120 – B224:45

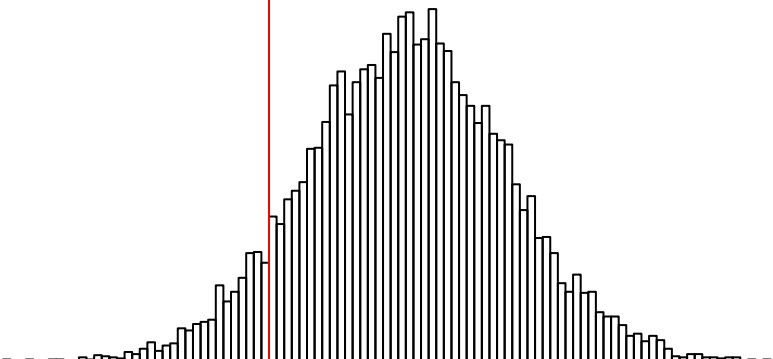

-4 -2 0 2 4

delta(Sugar 10)

B224:240

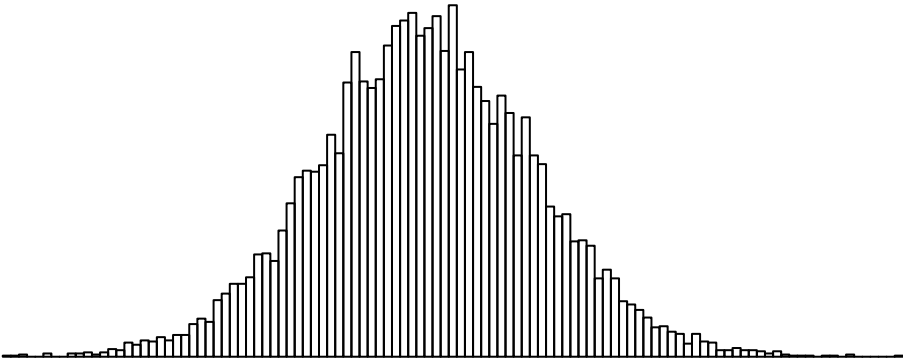

B224:120

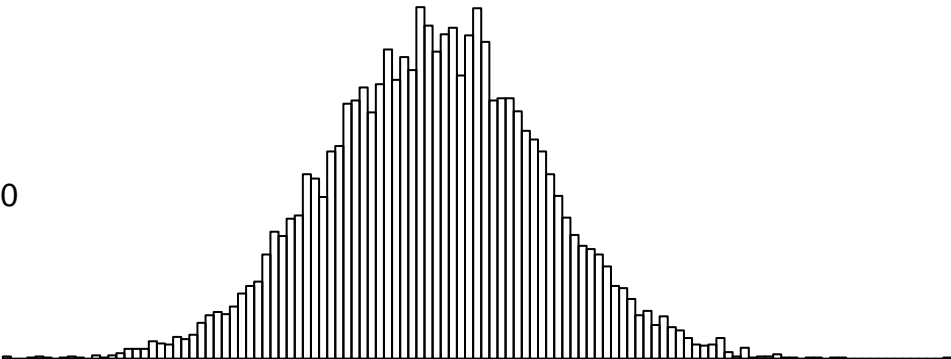

B224:45

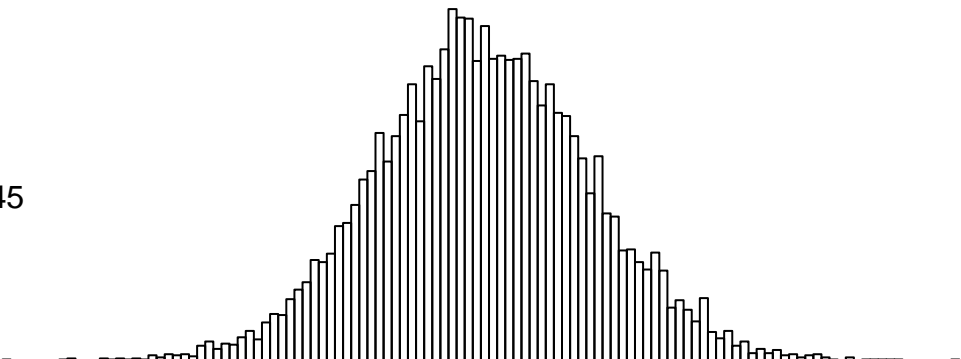

-9.5      -9.0      -8.5      -8.0      -7.5      -7.0      -6.5

Sugar 11

B224:240 – B224:120

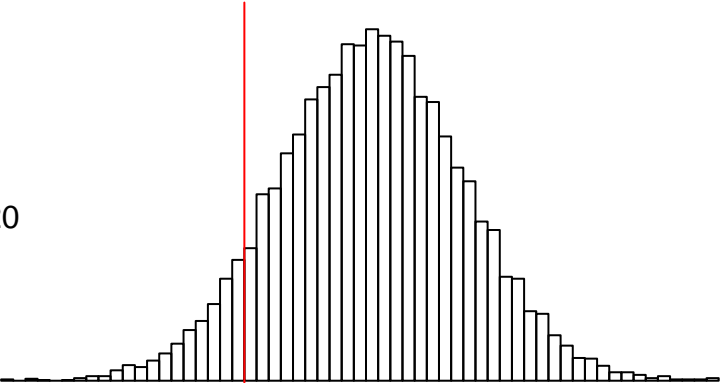

B224:240 – B224:45

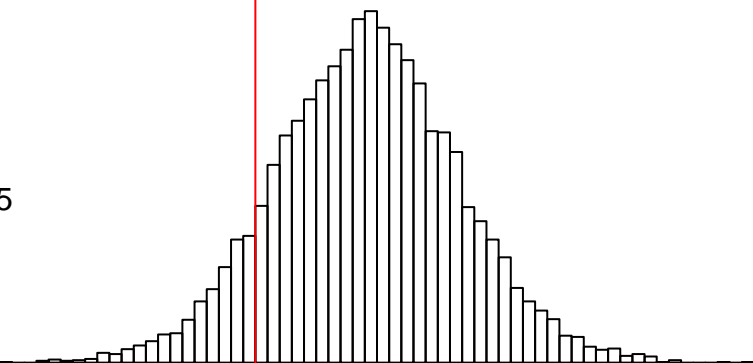

B224:120 – B224:45

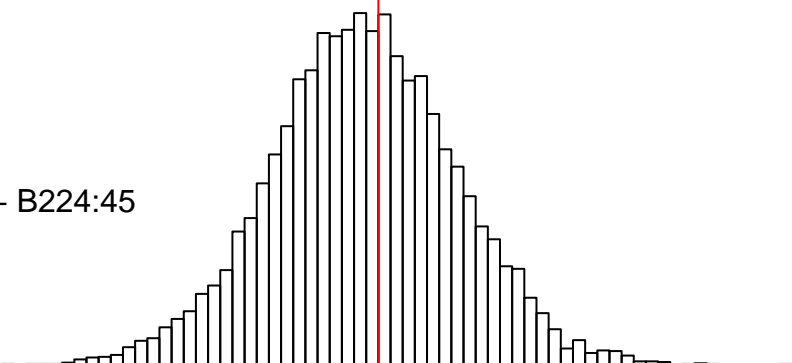

-2 -1 0 1 2 3

delta(Sugar 11)



B224:240

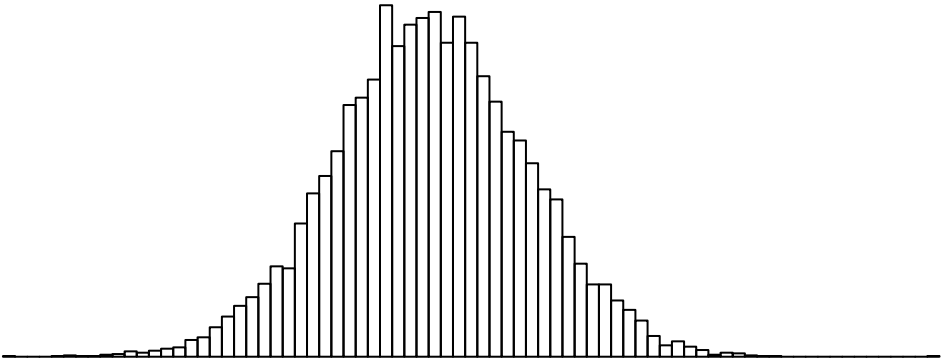

B224:120

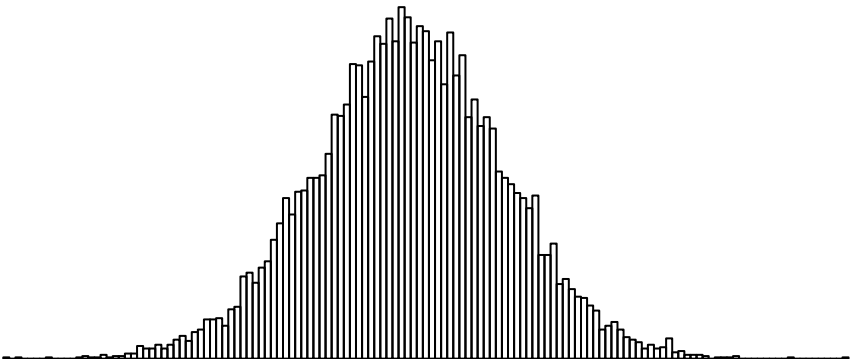

B224:45

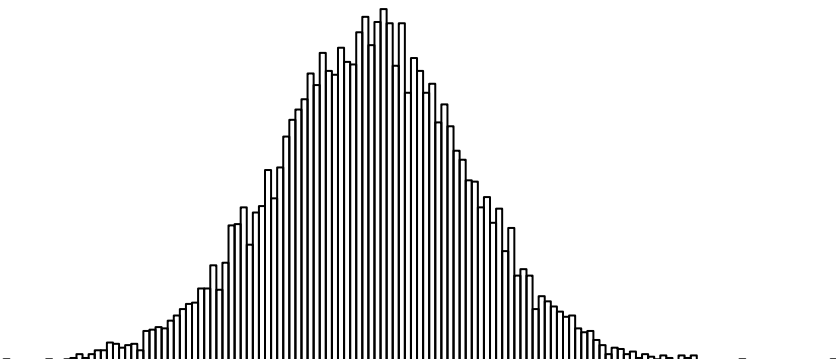

-10.0                      -9.5                      -9.0                      -8.5                      -8.0

Sugar 12

B224:240 – B224:120

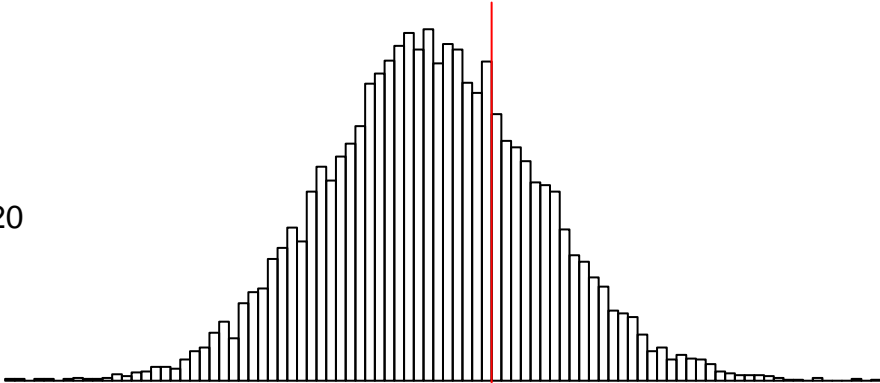

B224:240 – B224:45

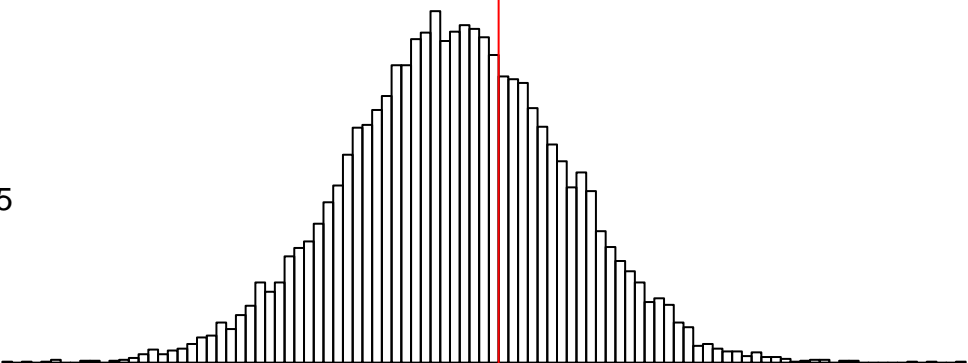

B224:120 – B224:45

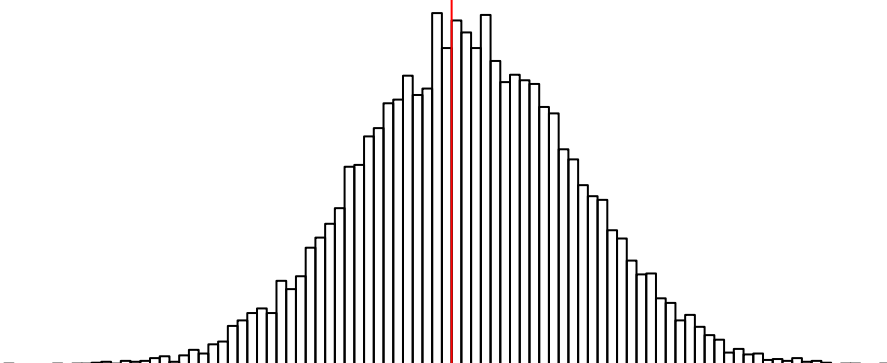

-1.5      -1.0      -0.5      0.0      0.5      1.0

delta(Sugar 12)

B224:240

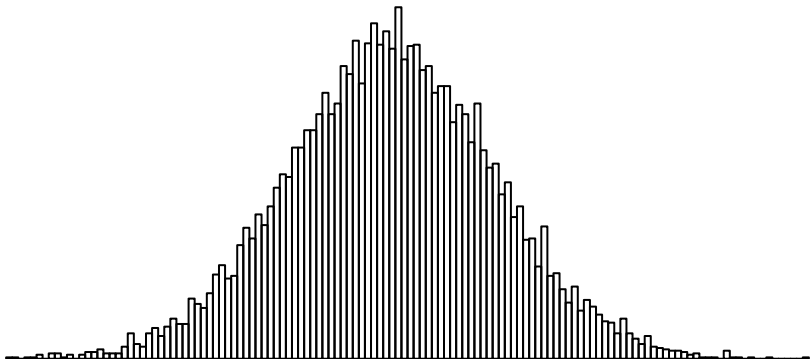

B224:120

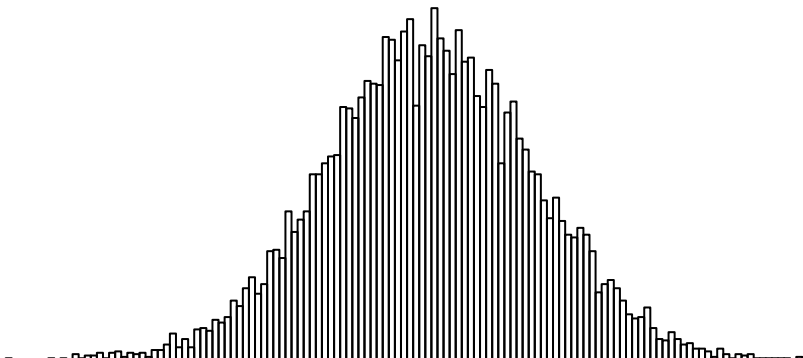

B224:45

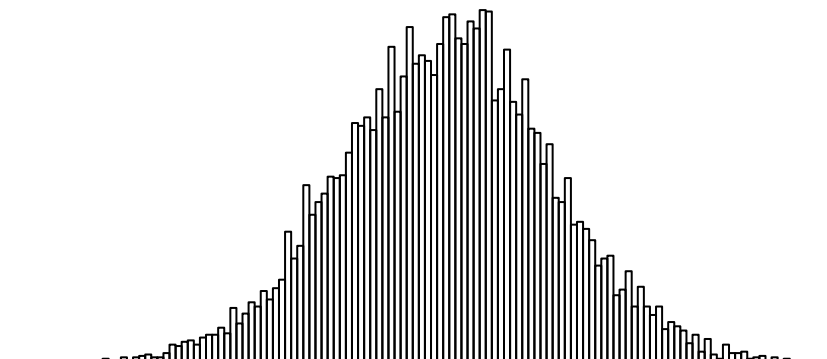

-10.0      -9.5      -9.0      -8.5      -8.0

Sugar 14

B224:240 – B224:120

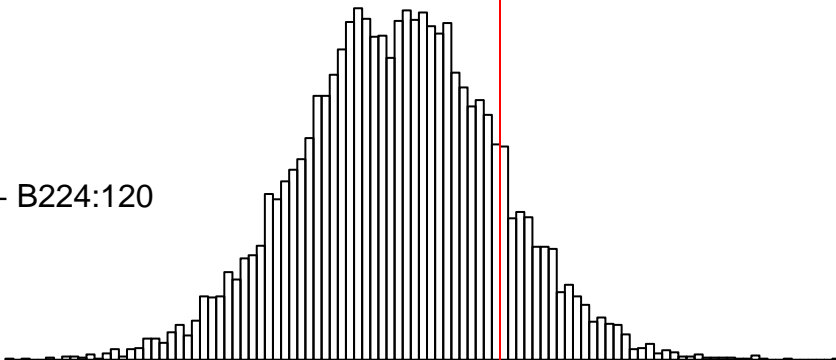

B224:240 – B224:45

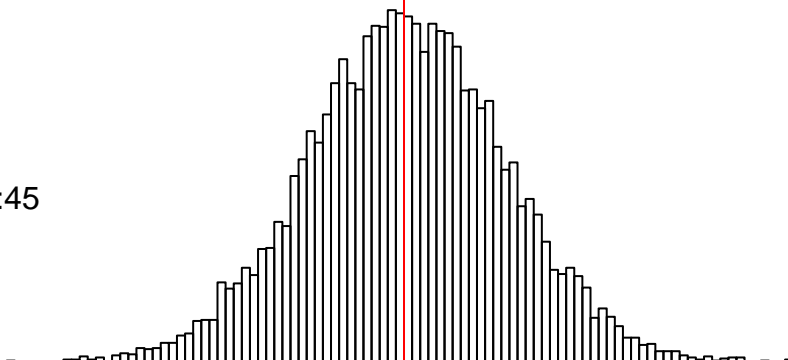

B224:120 – B224:45

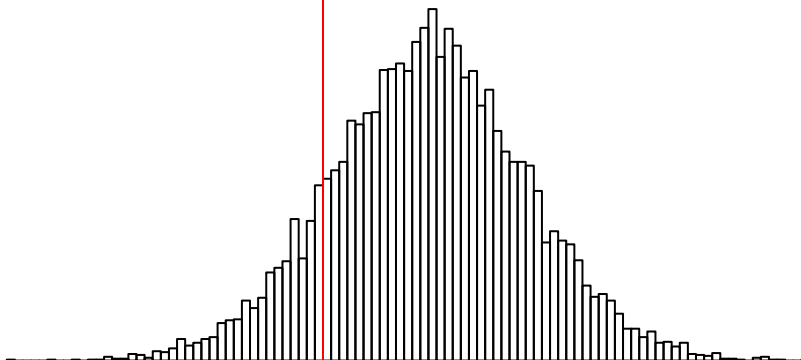

-1.5      -1.0      -0.5      0.0      0.5      1.0      1.5

delta(Sugar 14)

B224:240

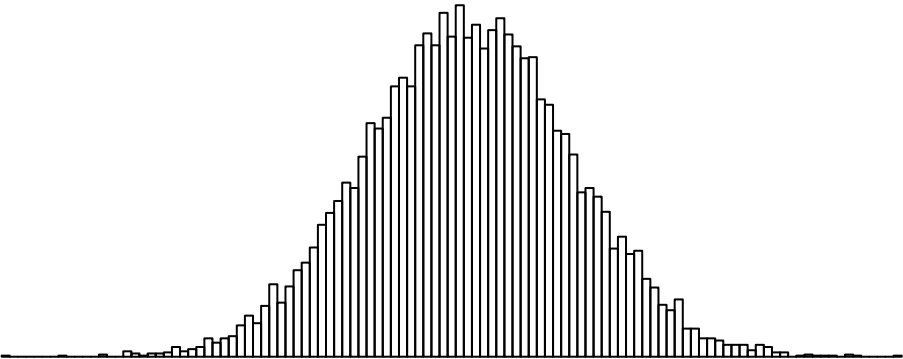

B224:120

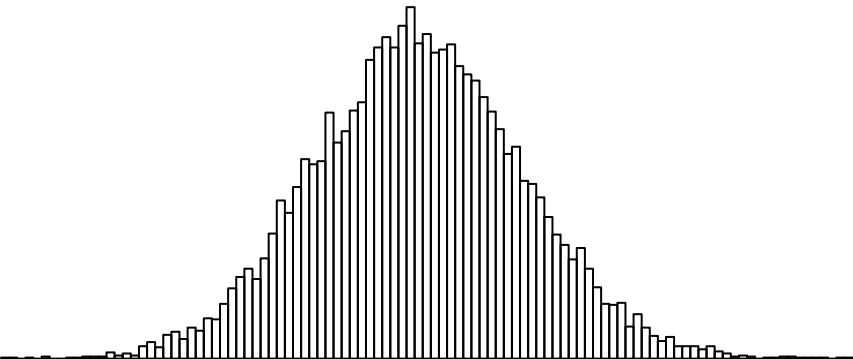

B224:45

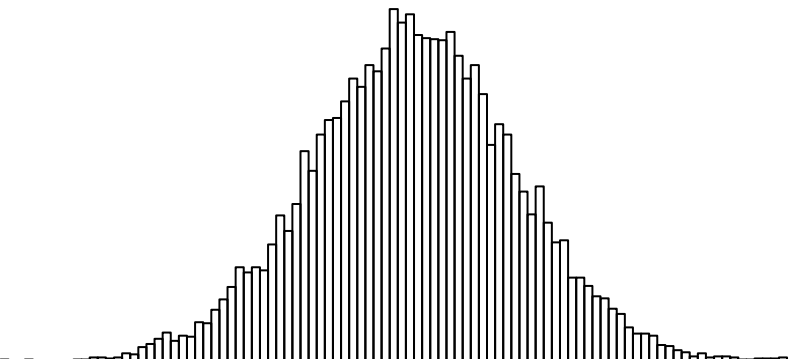

-10.5      -10.0      -9.5      -9.0      -8.5      -8.0      -7.5

Sugar 16

B224:240 – B224:120

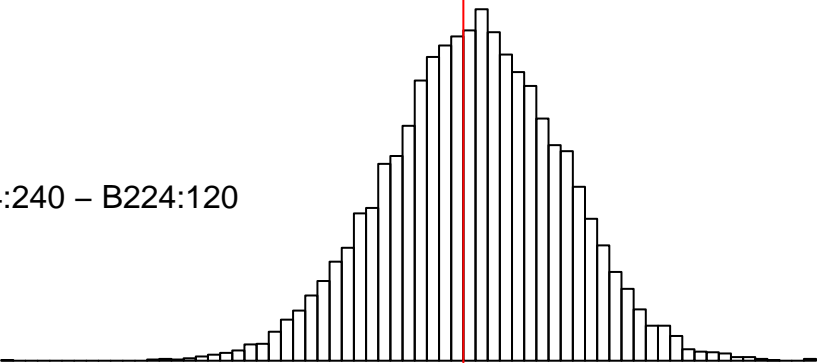

B224:240 – B224:45

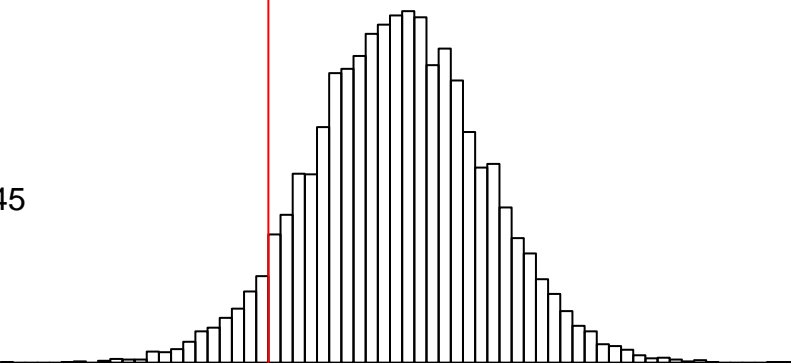

B224:120 – B224:45

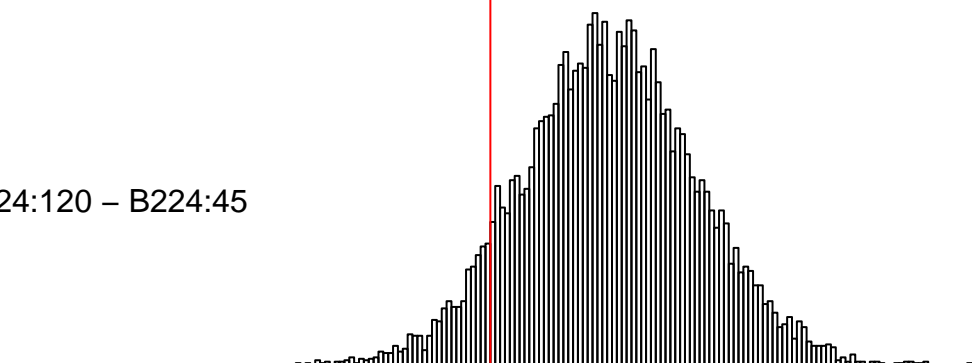

-2 -1 0 1 2 3

delta(Sugar 16)

B224:240

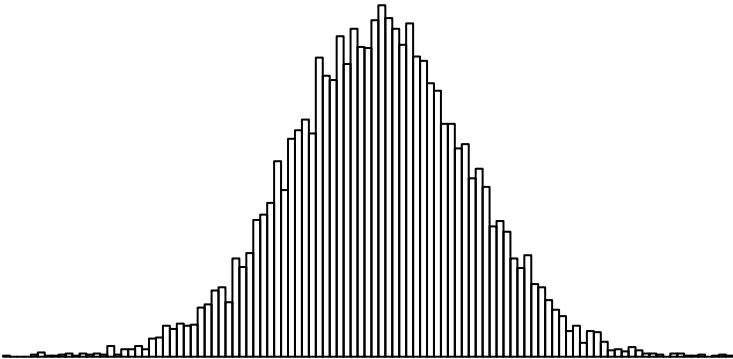

B224:120

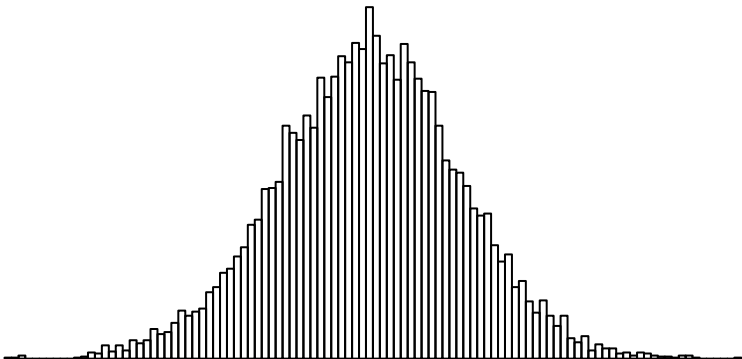

B224:45

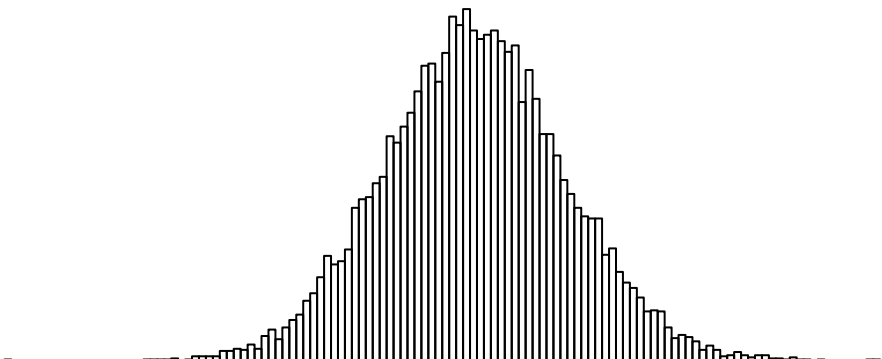

-3.0      -2.5      -2.0      -1.5      -1.0      -0.5      0.0      0.5

Sugar 17

B224:240 – B224:120

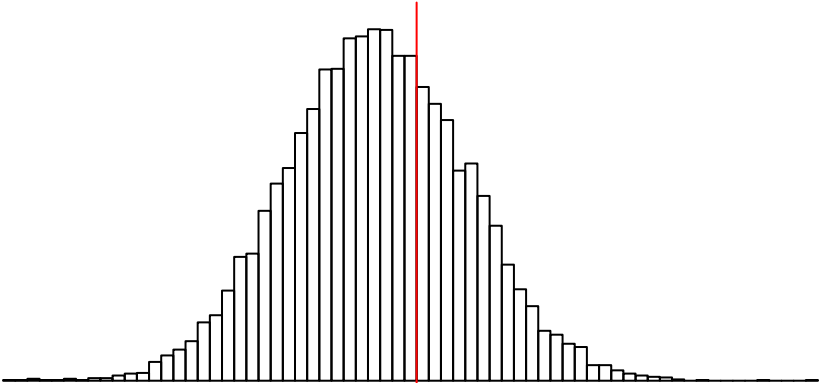

B224:240 – B224:45

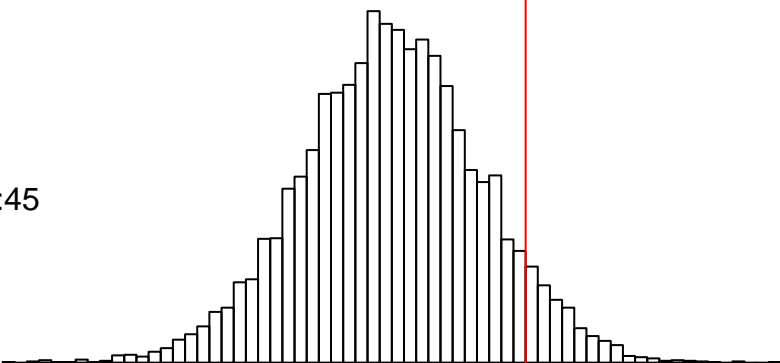

B224:120 – B224:45

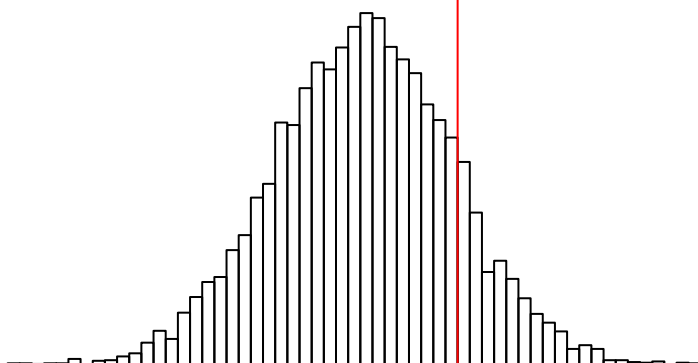

-3 -2 -1 0 1 2

delta(Sugar 17)



B224:240

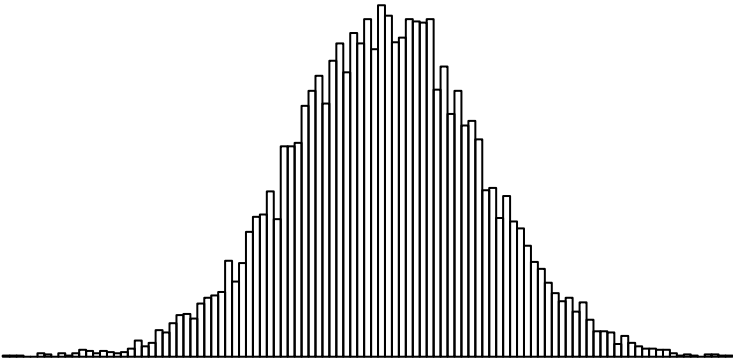

B224:120

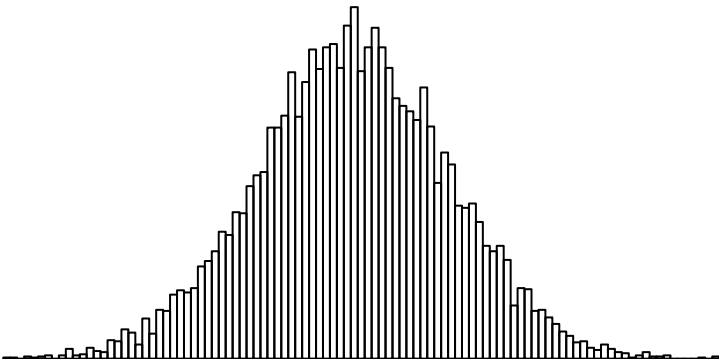

B224:45

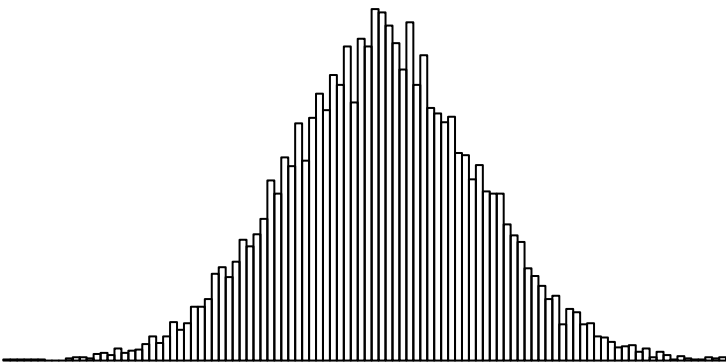

-8.5      -8.0      -7.5      -7.0      -6.5      -6.0      -5.5      -5.0

Sugar 18

B224:240 – B224:120

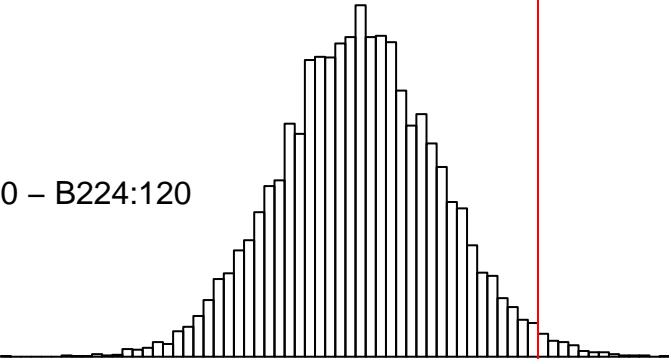

B224:240 – B224:45

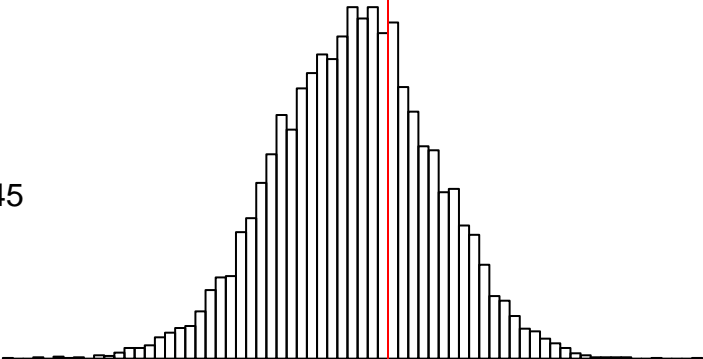

B224:120 – B224:45

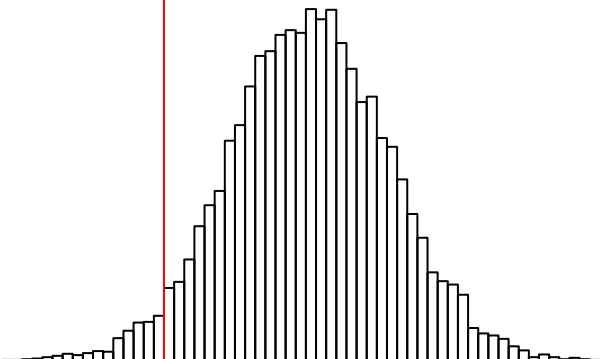

-3 -2 -1 0 1 2 3

delta(Sugar 18)

B224:240

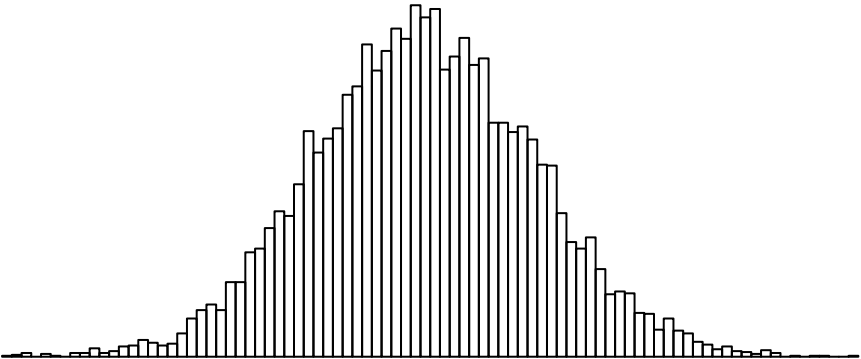

B224:120

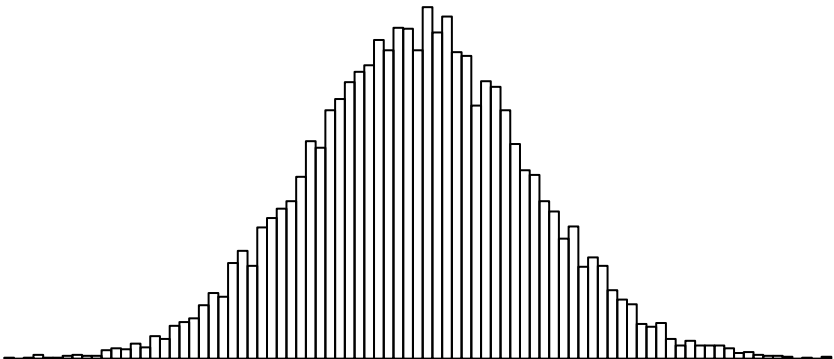

B224:45

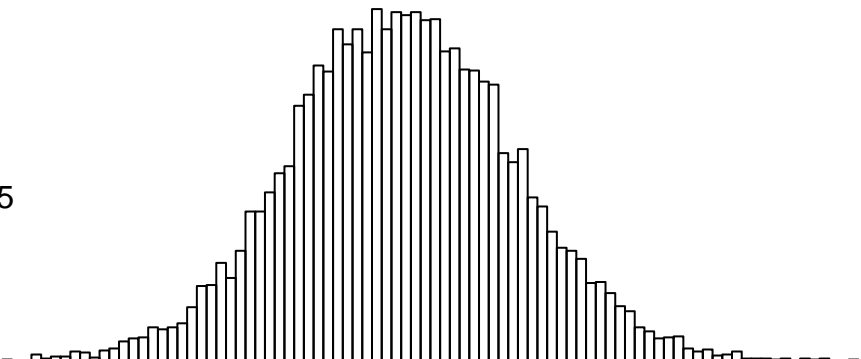

-10.0      -9.5      -9.0      -8.5      -8.0      -7.5

Sugar 20

B224:240 – B224:120

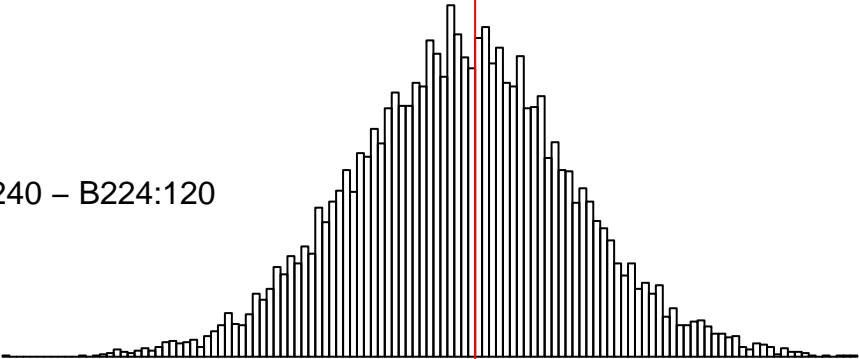

B224:240 – B224:45

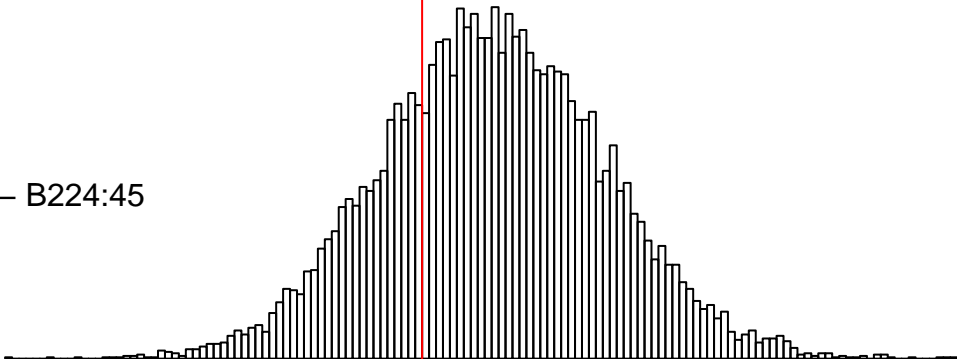

B224:120 – B224:45

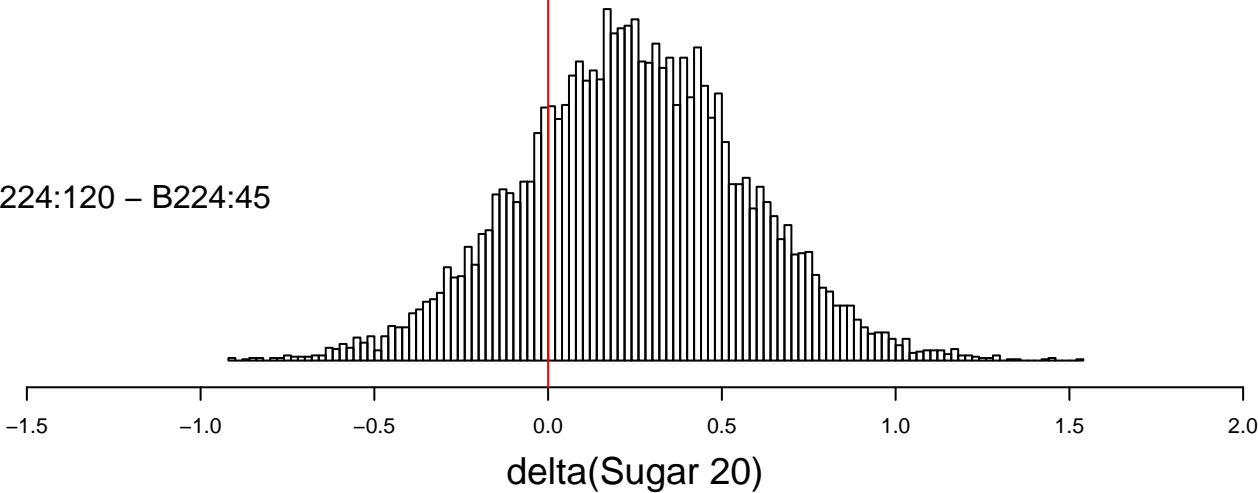

B224:240

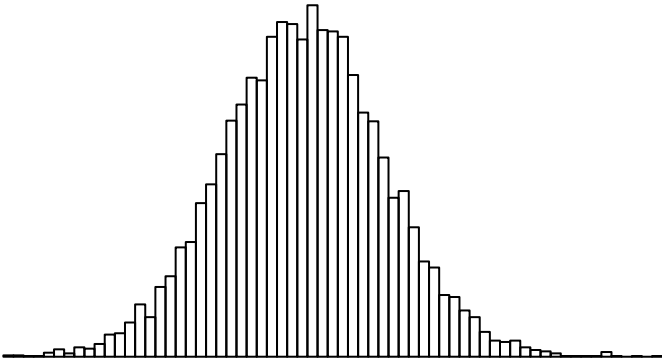

B224:120

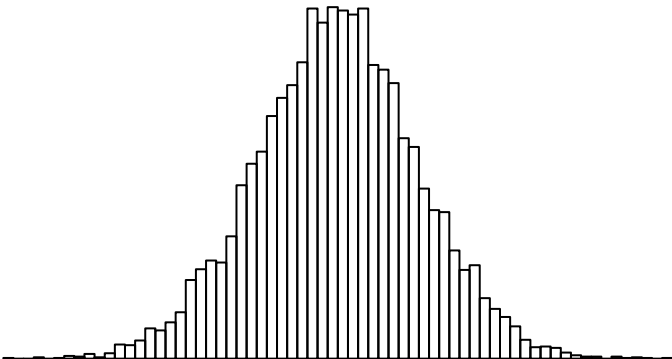

B224:45

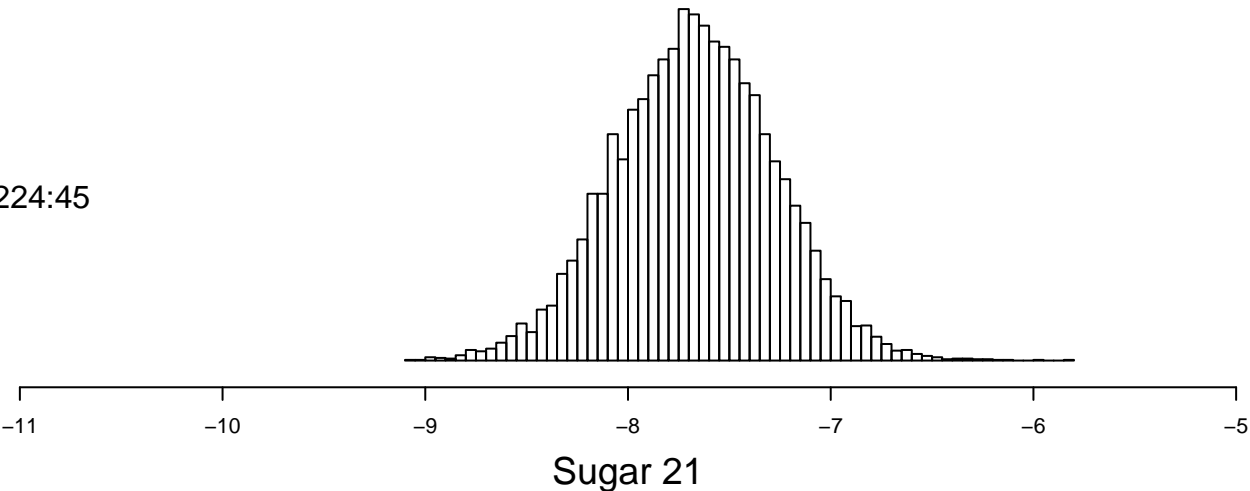

B224:240 – B224:120

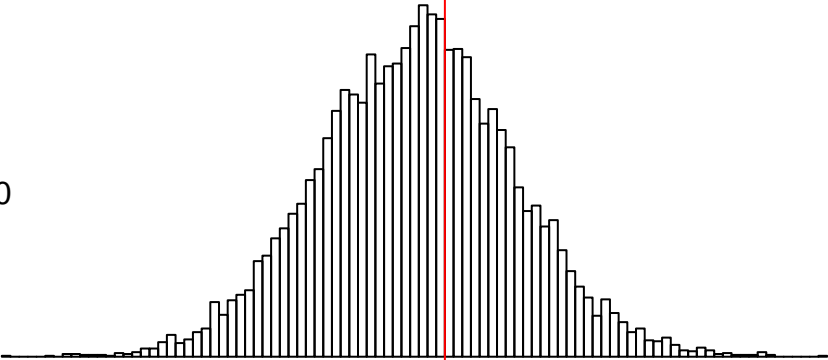

B224:240 – B224:45

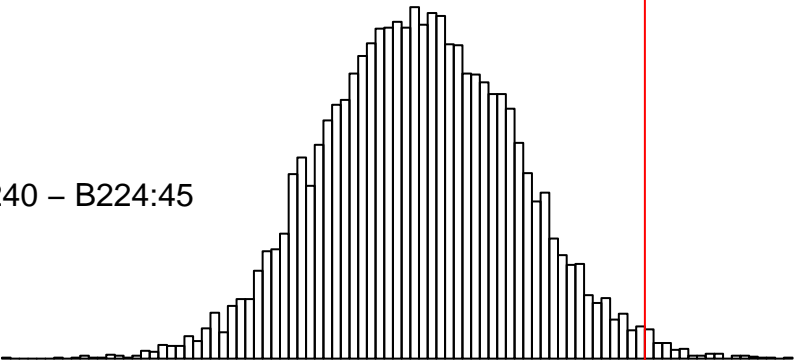

B224:120 – B224:45

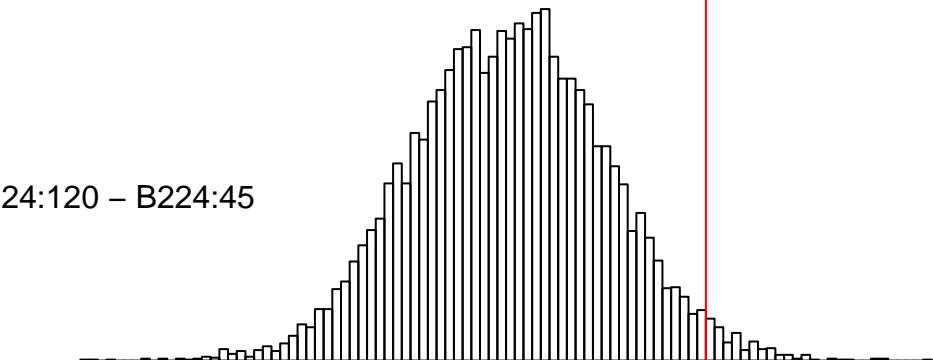

-4 -3 -2 -1 0 1 2 3

delta(Sugar 21)

B224:240

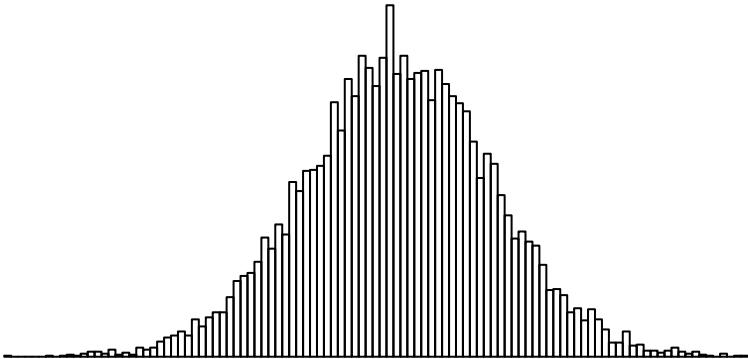

B224:120

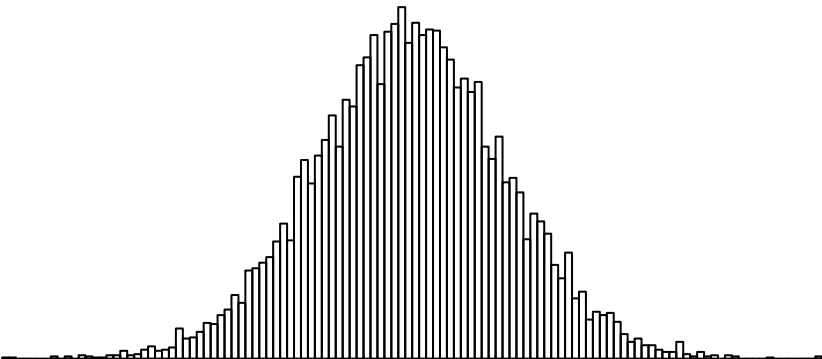

B224:45

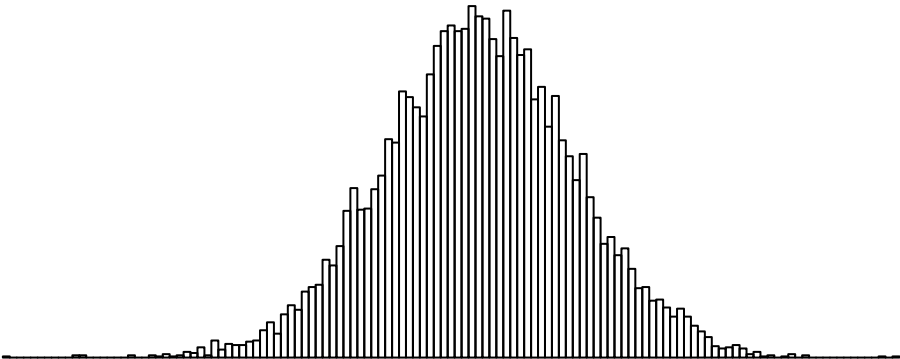

-8.5      -8.0      -7.5      -7.0      -6.5      -6.0      -5.5      -5.0

Sugar 22

B224:240 – B224:120

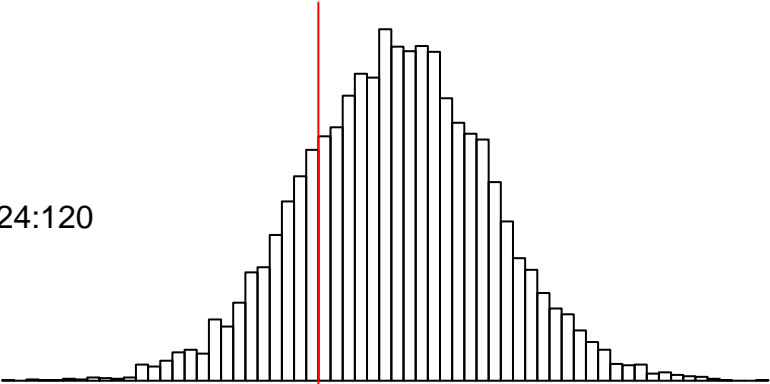

B224:240 – B224:45

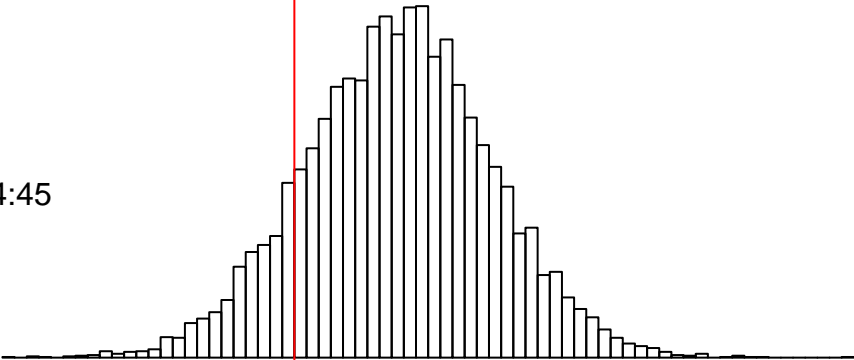

B224:120 – B224:45

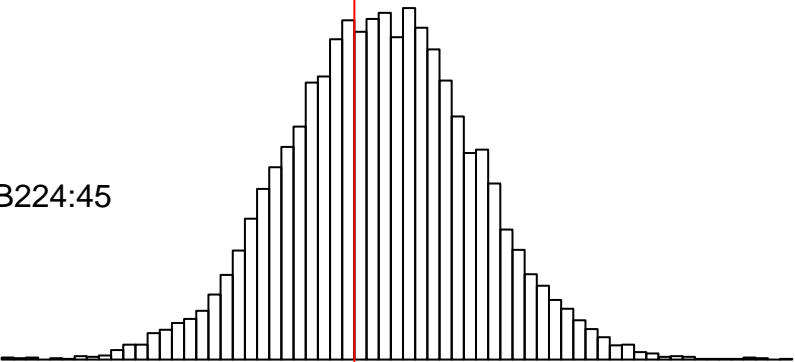

-2

-1

0

1

2

3

delta(Sugar 22)



B224:240

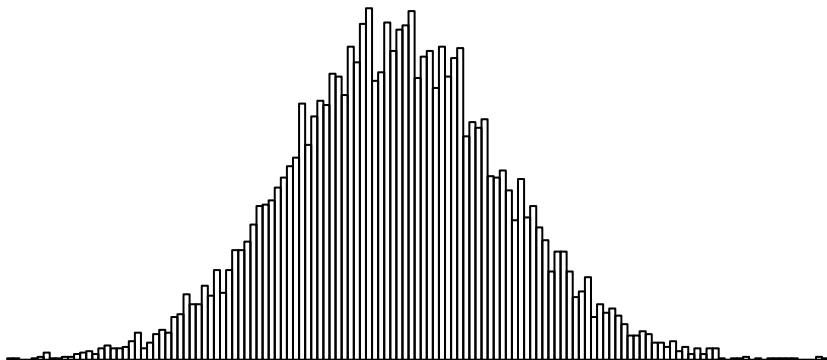

B224:120

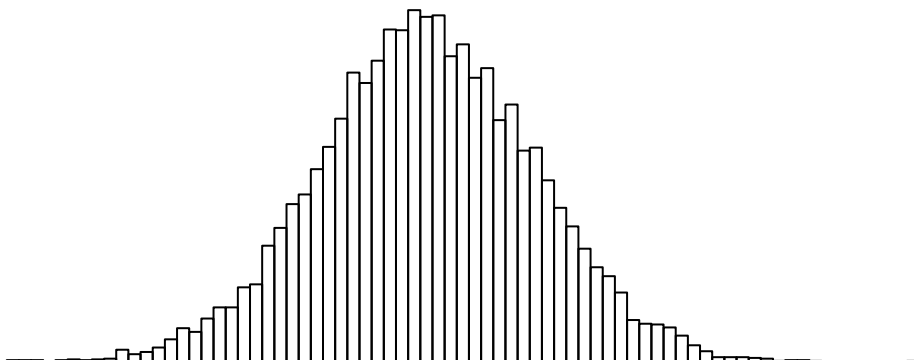

B224:45

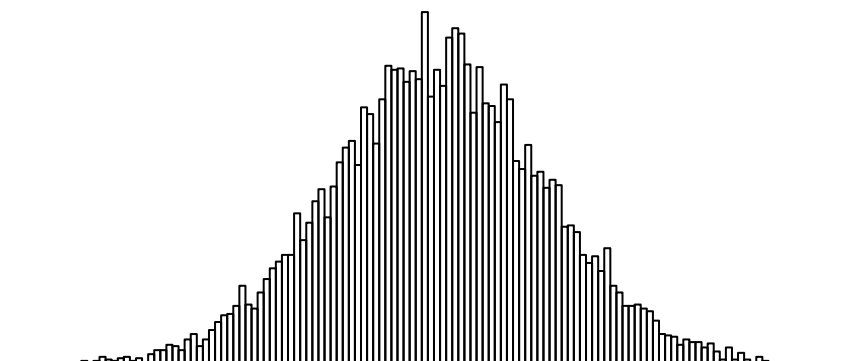

-8.5                      -8.0                      -7.5                      -7.0                      -6.5

Sugar 23

B224:240 – B224:120

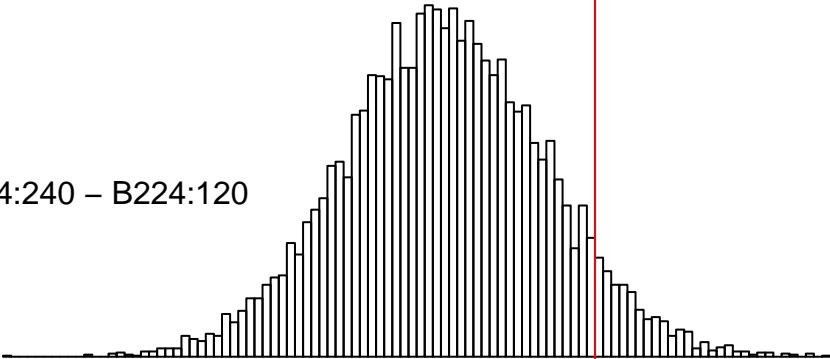

B224:240 – B224:45

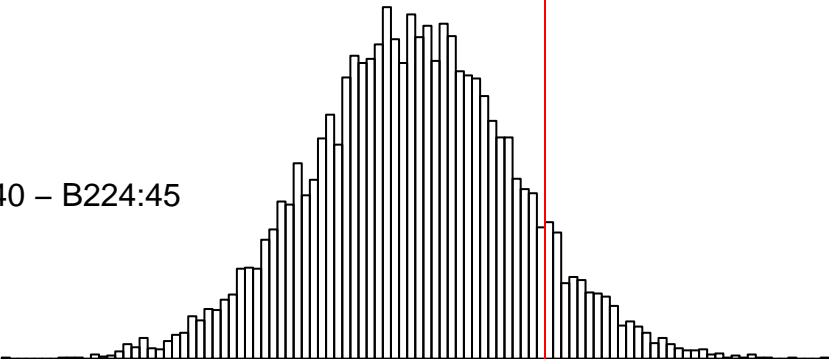

B224:120 – B224:45

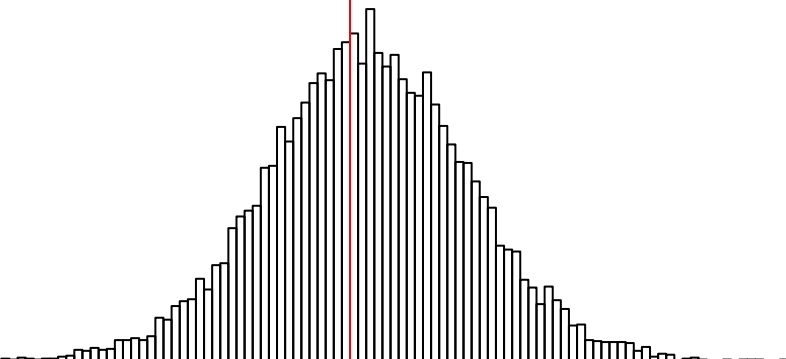

-1.5      -1.0      -0.5      0.0      0.5      1.0      1.5

delta(Sugar 23)

B224:240

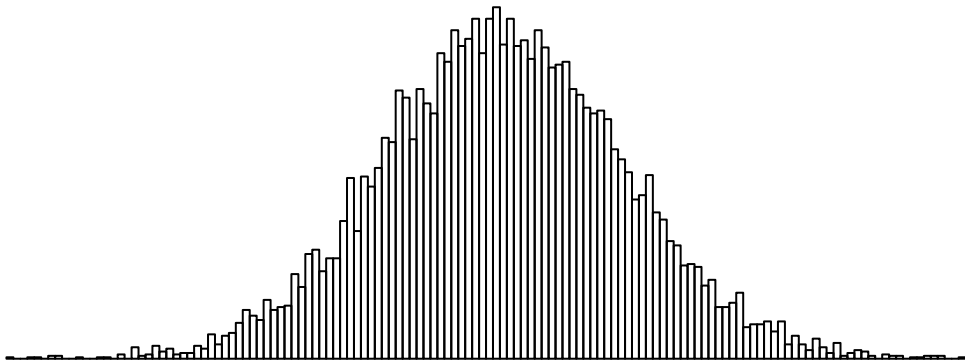

B224:120

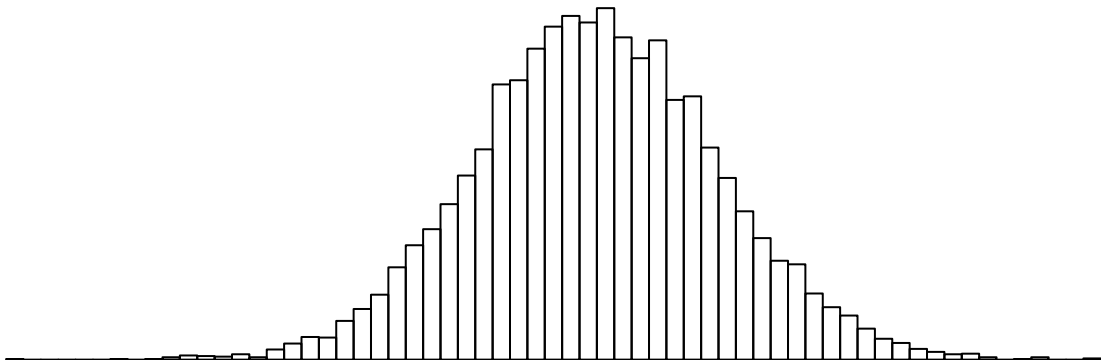

B224:45

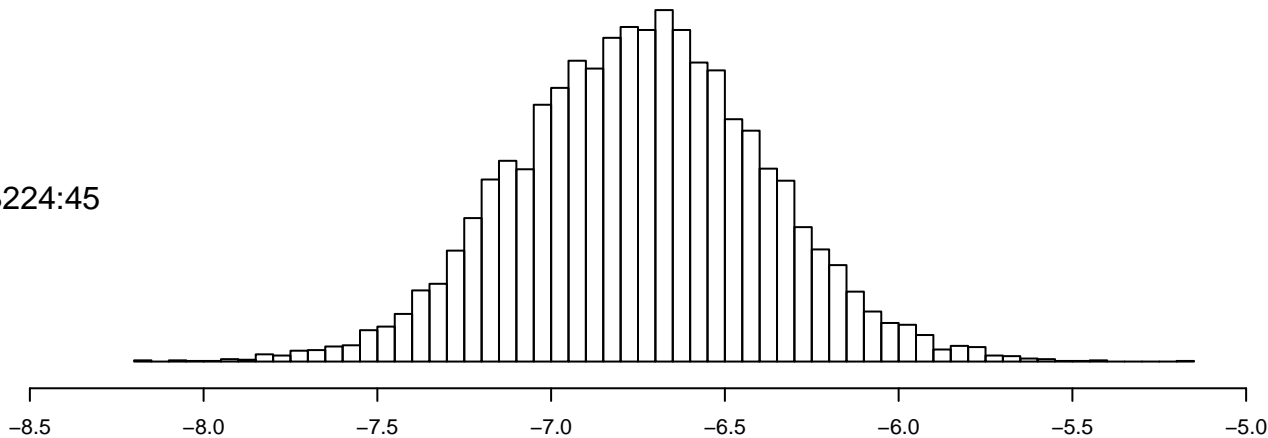

Sugar 24

B224:240 – B224:120

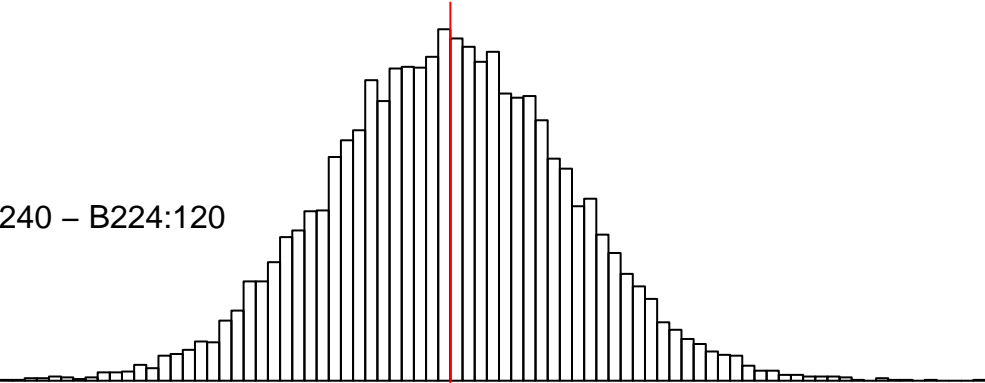

B224:240 – B224:45

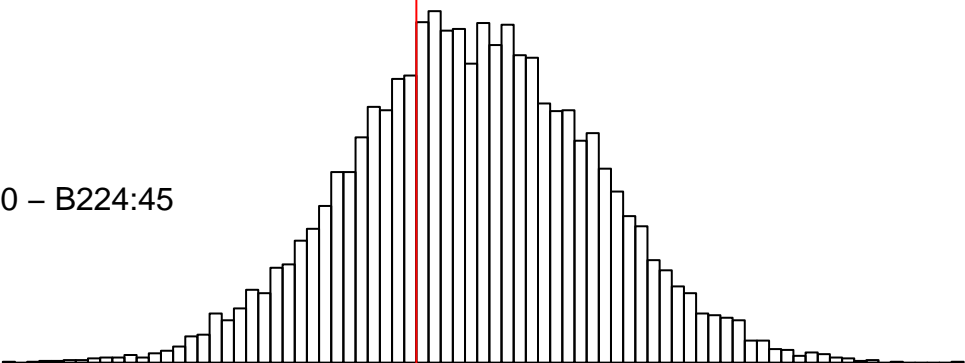

B224:120 – B224:45

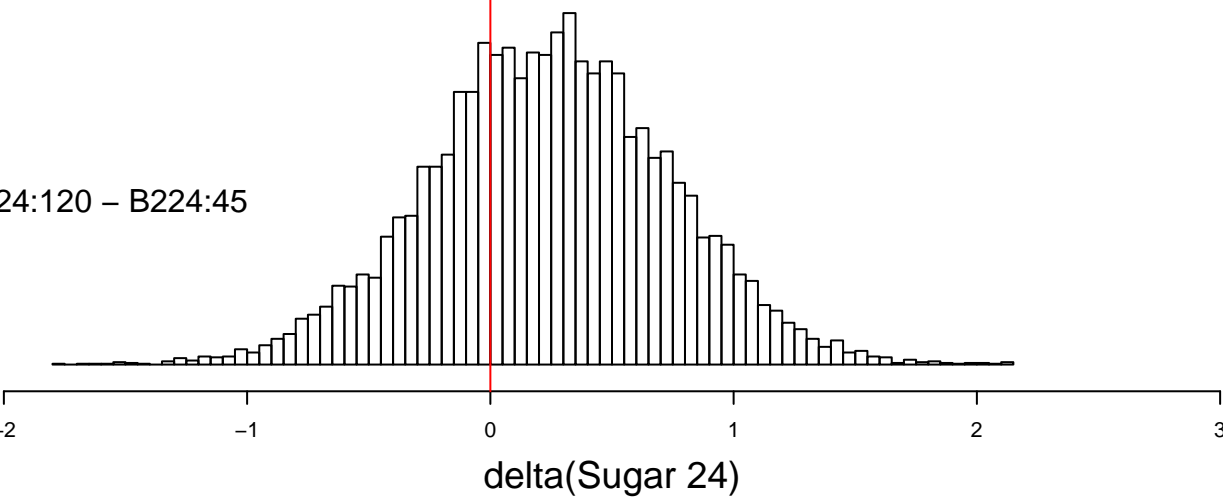

B224:240

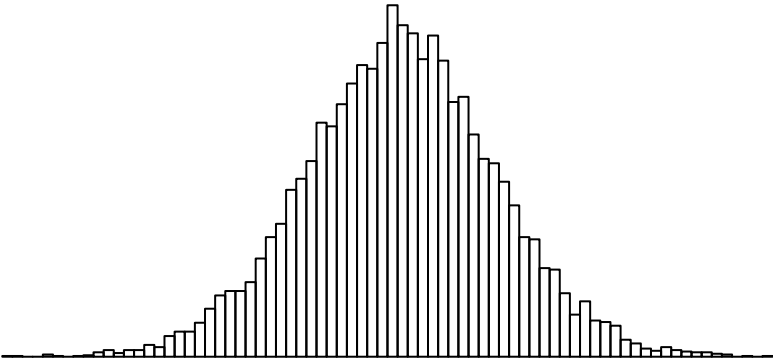

B224:120

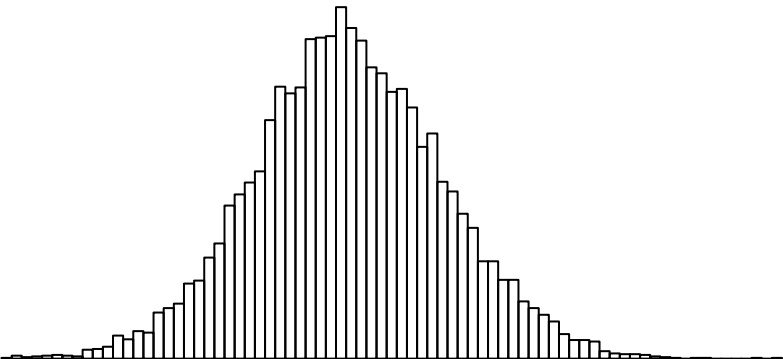

B224:45

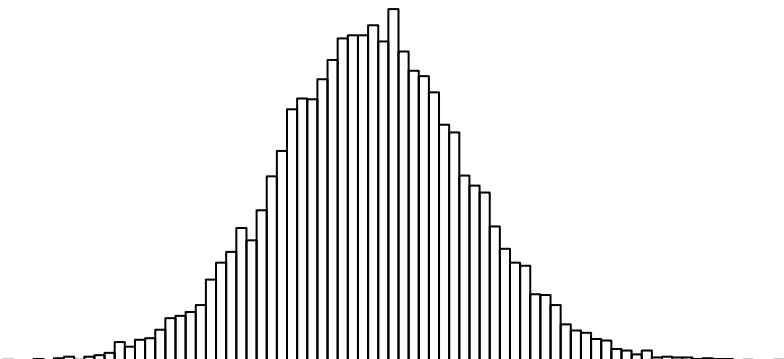

-11      -10      -9      -8      -7      -6      -5

Alcohol 1

B224:240 – B224:120

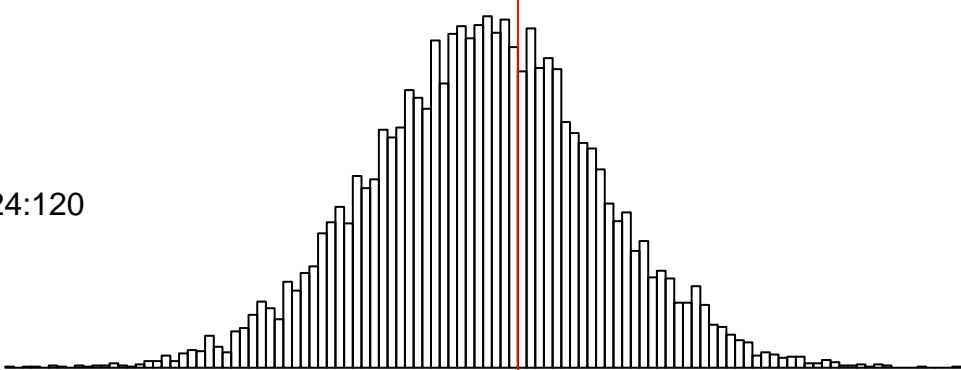

B224:240 – B224:45

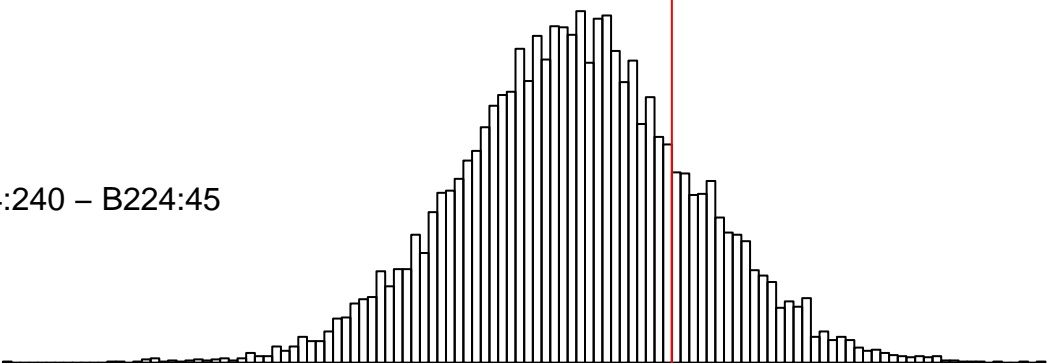

B224:120 – B224:45

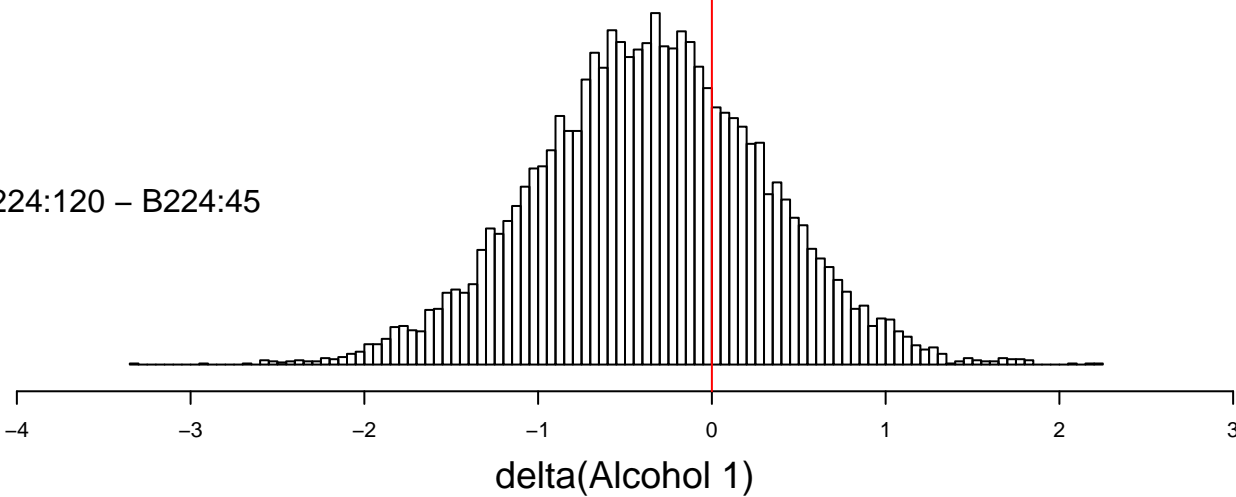

B224:240

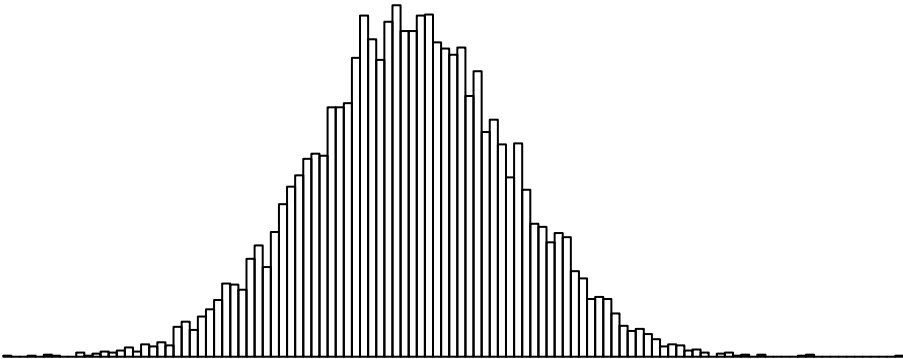

B224:120

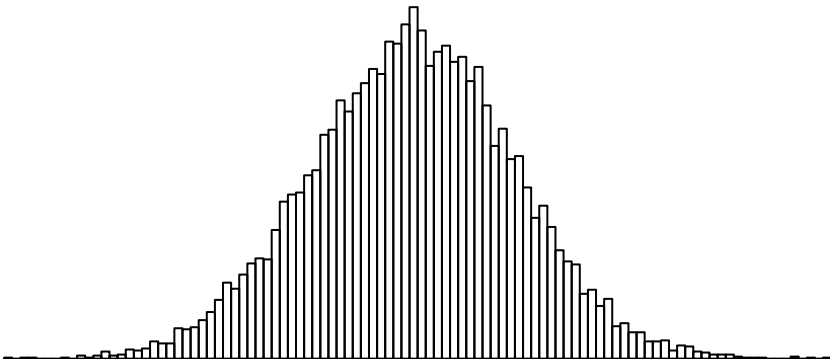

B224:45

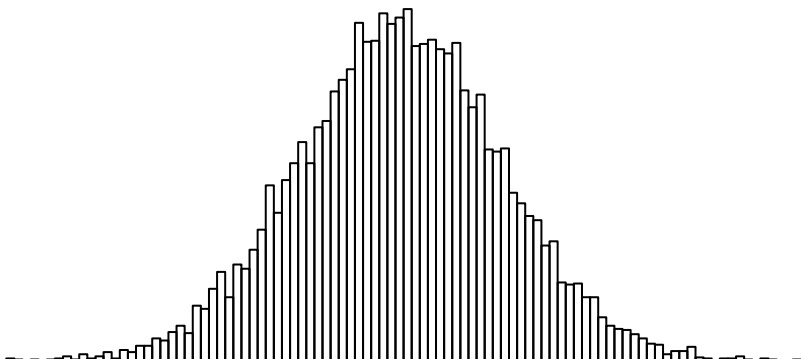

-9.5      -9.0      -8.5      -8.0      -7.5      -7.0      -6.5

Hydrocarbon 1

B224:240 – B224:120

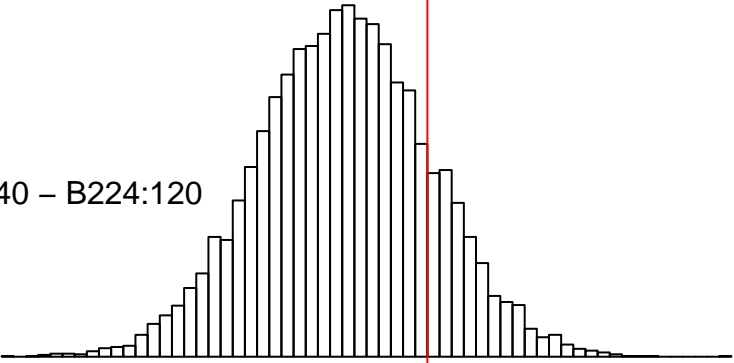

B224:240 – B224:45

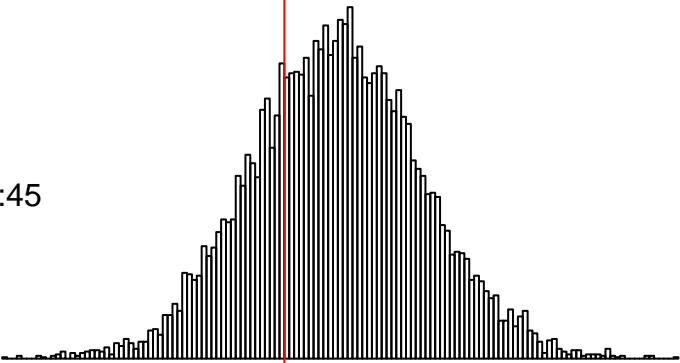

B224:120 – B224:45

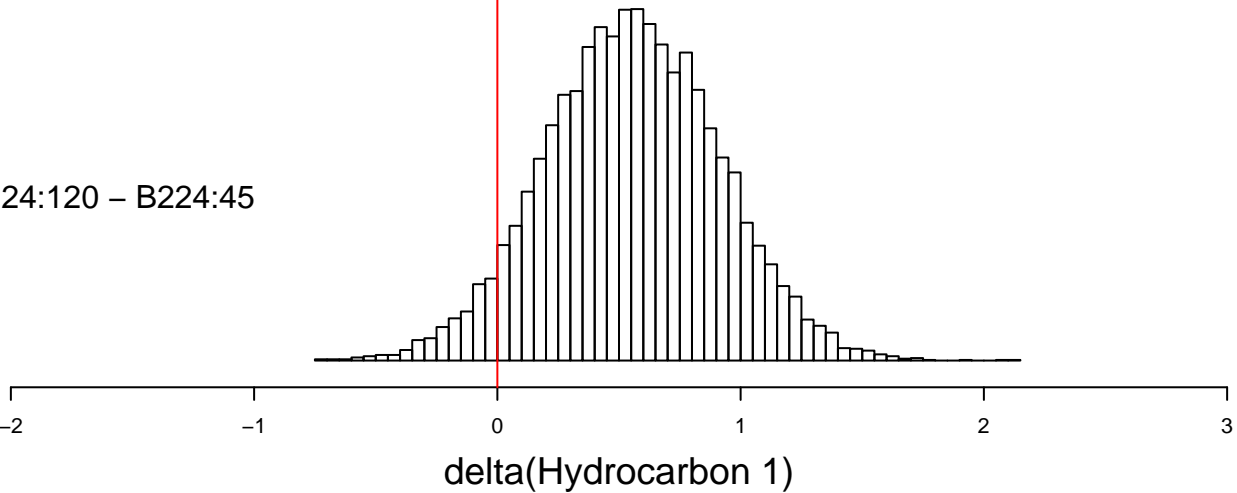



B224:240

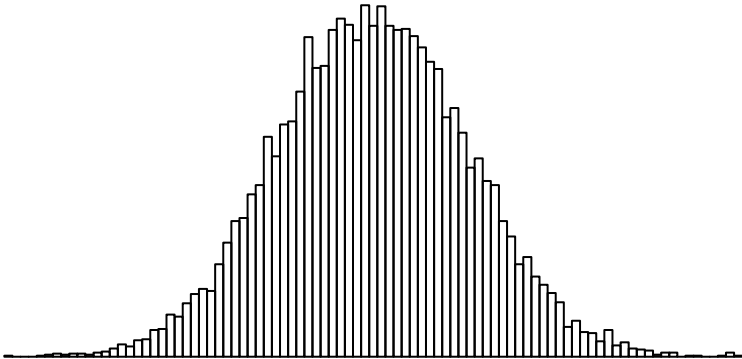

B224:120

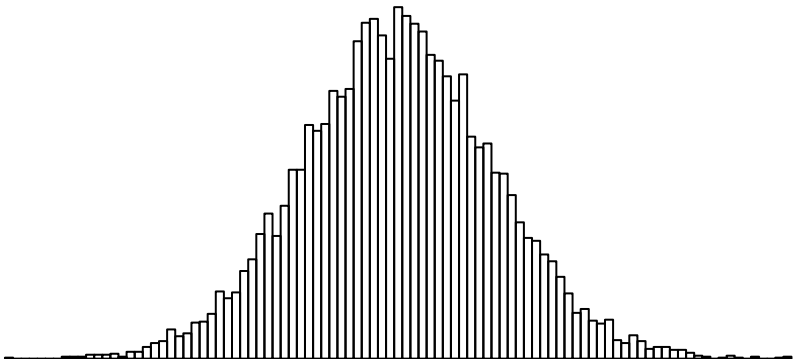

B224:45

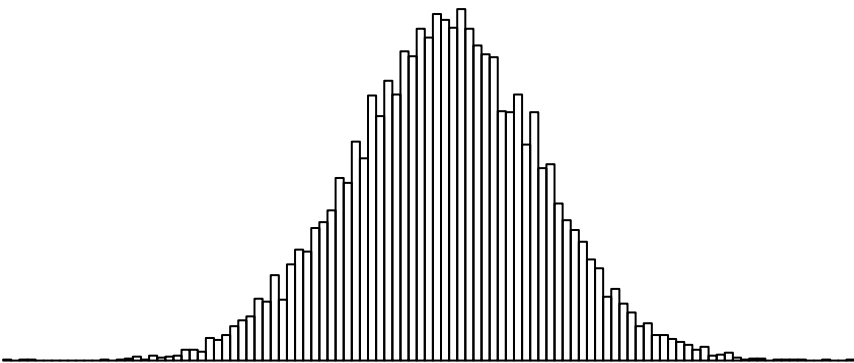

-9.0      -8.5      -8.0      -7.5      -7.0      -6.5      -6.0

Hydrocarbon 2

B224:240 – B224:120

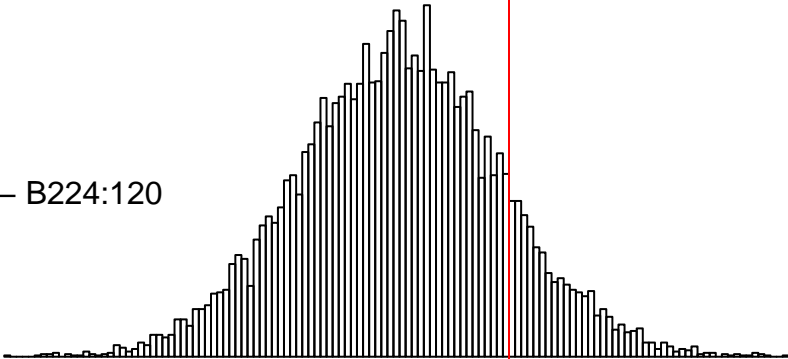

B224:240 – B224:45

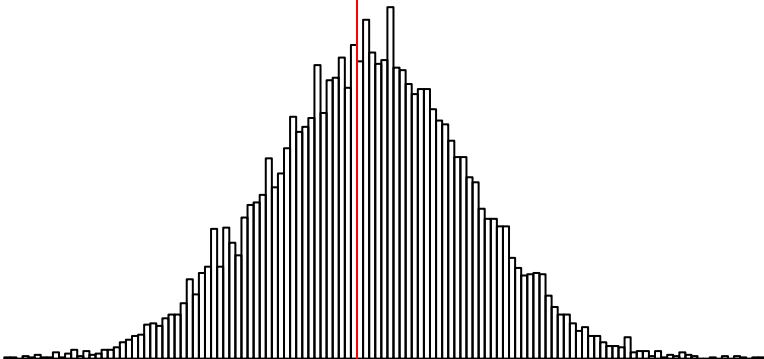

B224:120 – B224:45

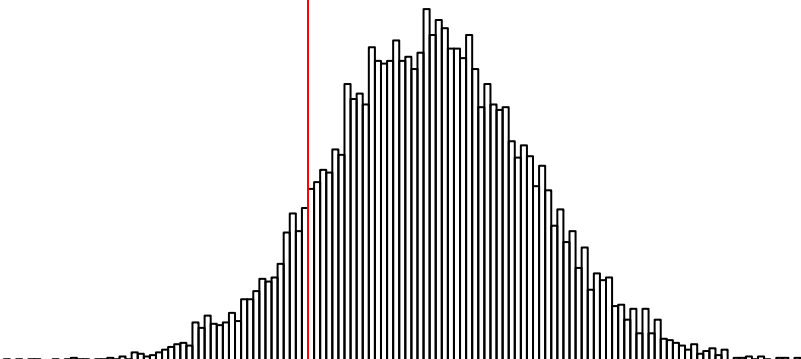

-2

-1

0

1

2

delta(Hydrocarbon 2)

B224:240

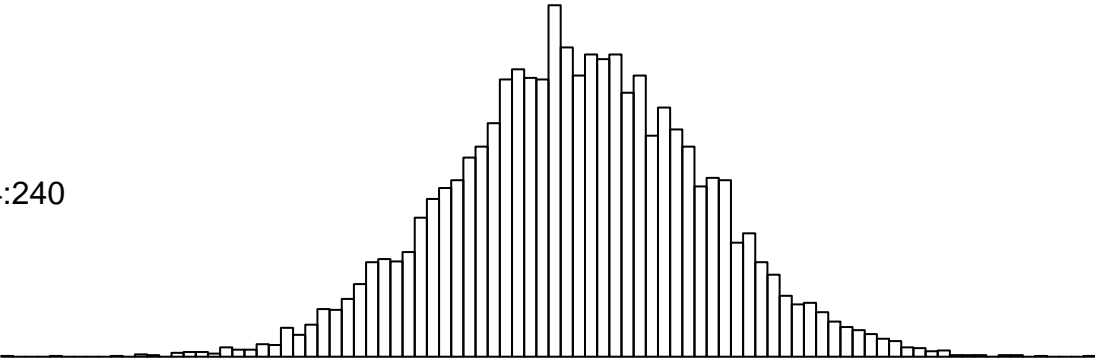

B224:120

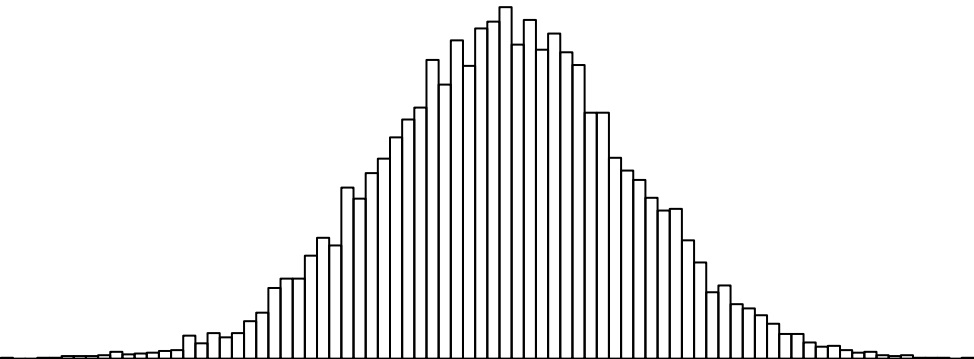

B224:45

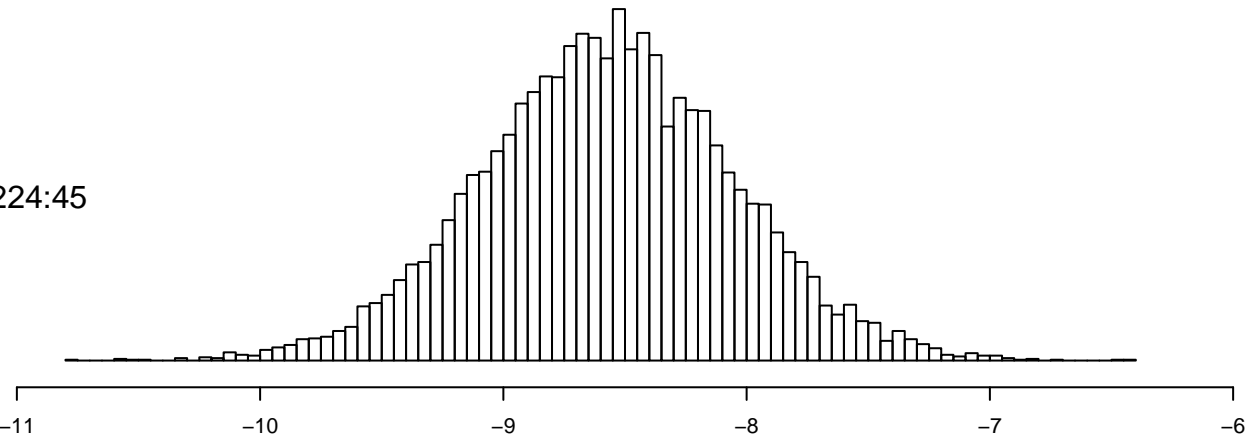

Hydrocarbon 3

B224:240 – B224:120

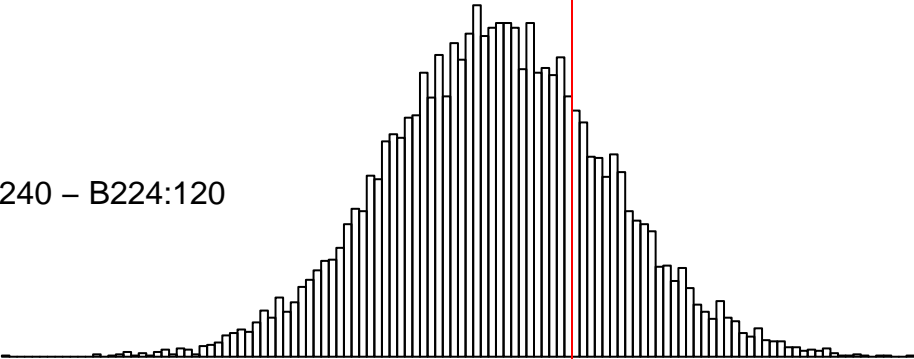

B224:240 – B224:45

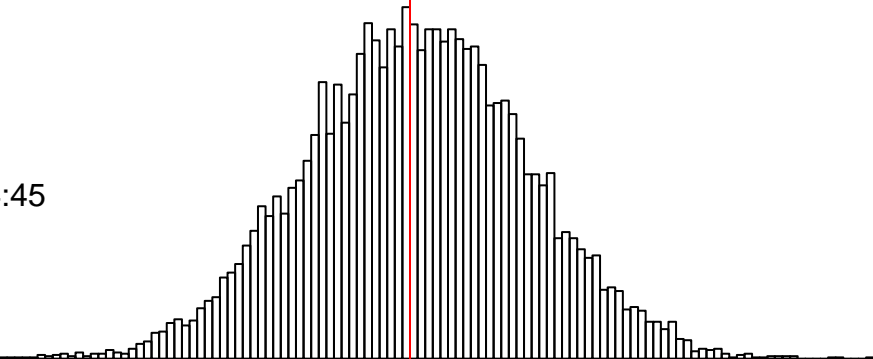

B224:120 – B224:45

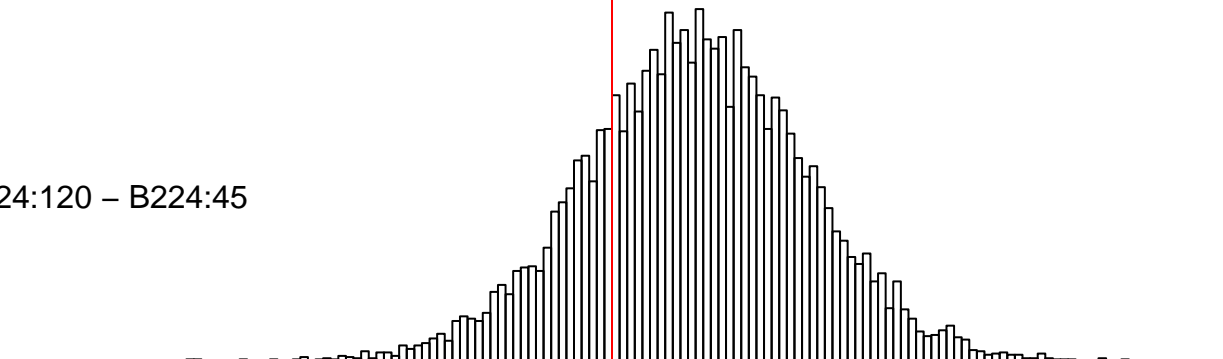

-4 -2 0 2 4

delta(Hydrocarbon 3)

B224:240

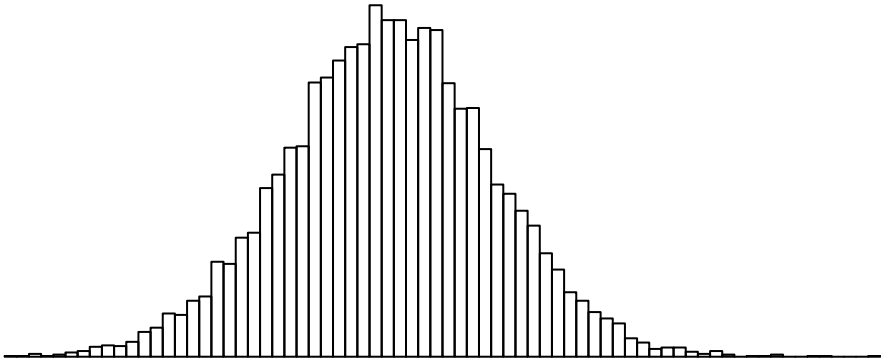

B224:120

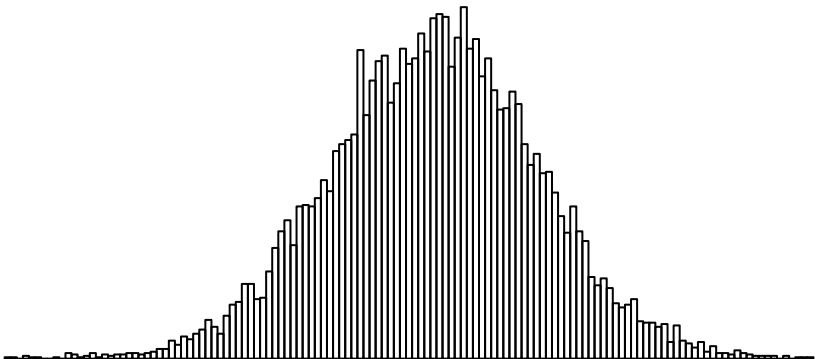

B224:45

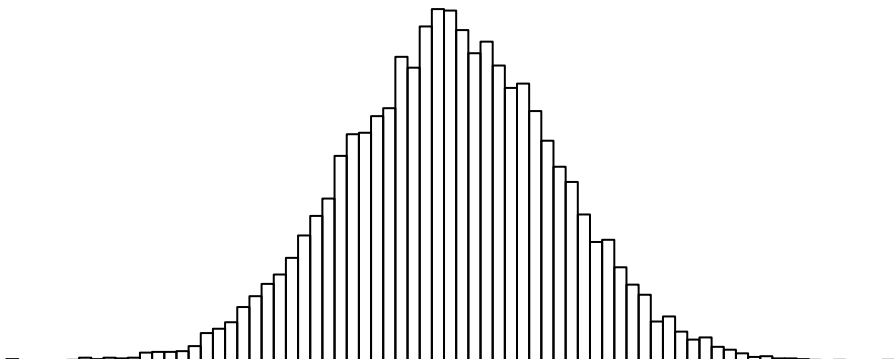

-10.0      -9.5      -9.0      -8.5      -8.0

Hydrocarbon 4

B224:240 – B224:120

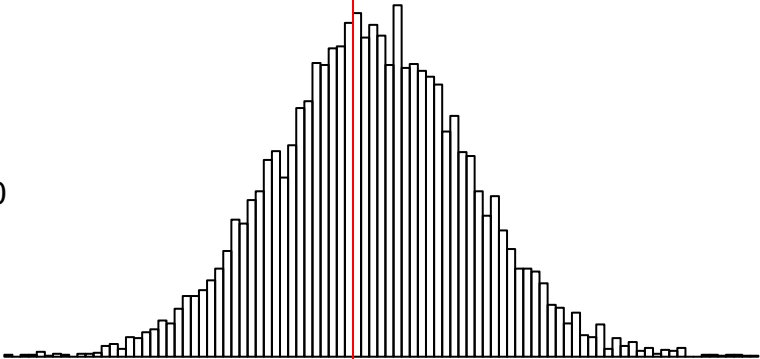

B224:240 – B224:45

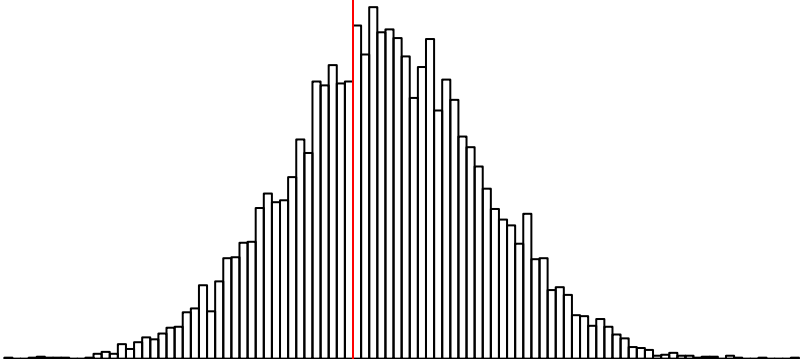

B224:120 – B224:45

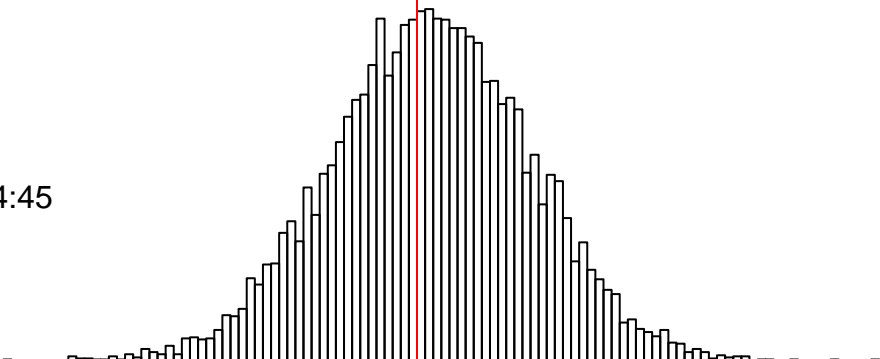

-1.5      -1.0      -0.5      0.0      0.5      1.0      1.5

delta(Hydrocarbon 4)

B224:240

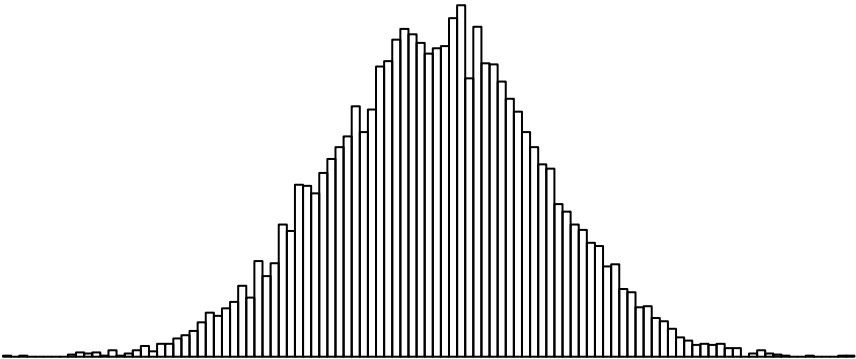

B224:120

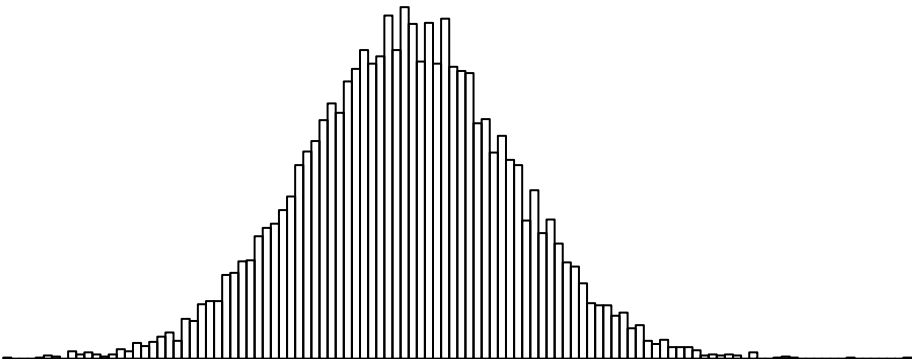

B224:45

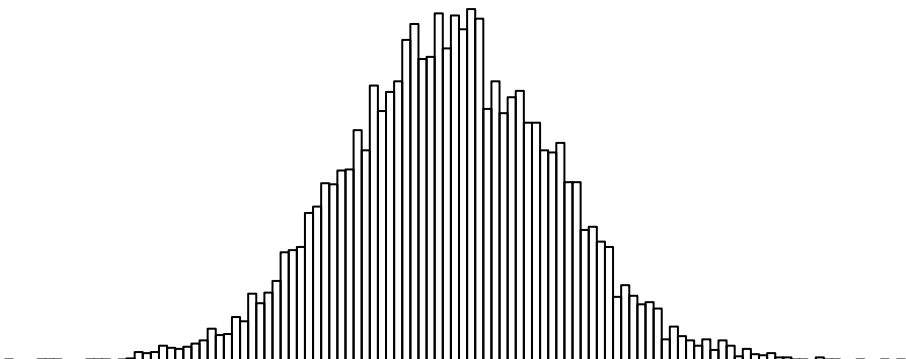

-10.0      -9.5      -9.0      -8.5      -8.0      -7.5      -7.0

Unidentified Metabolite 1

B224:240 – B224:120

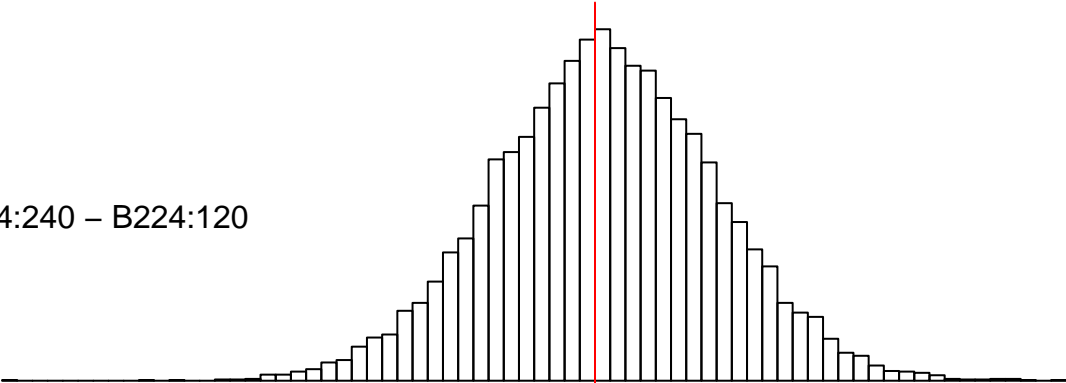

B224:240 – B224:45

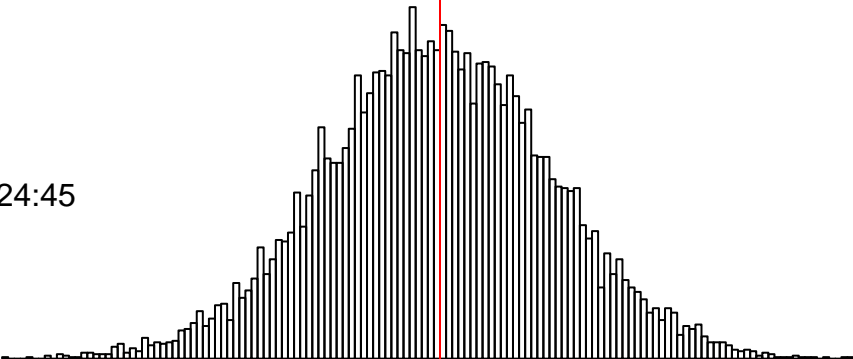

B224:120 – B224:45

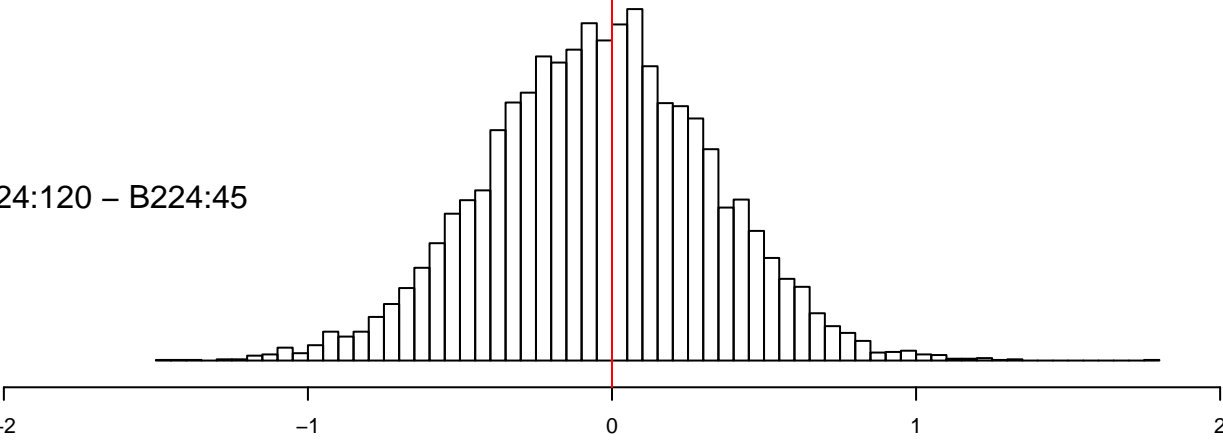

delta(Unidentified Metabolite 1)



B224:240

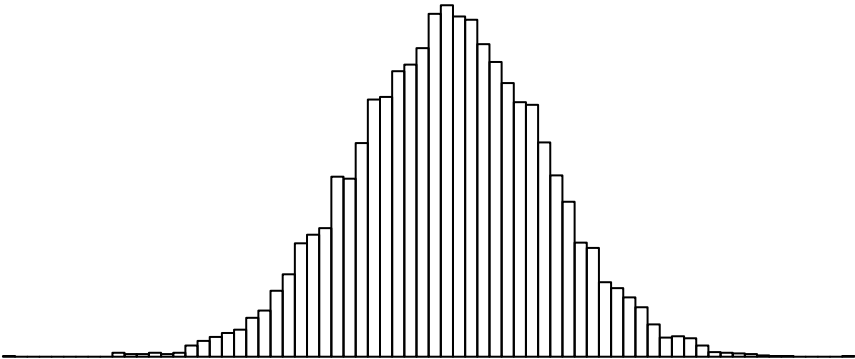

B224:120

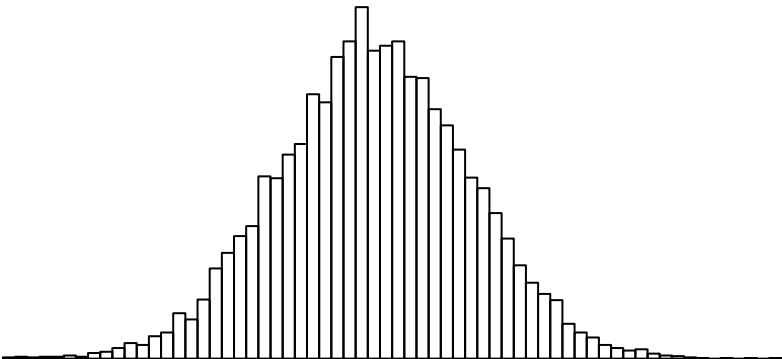

B224:45

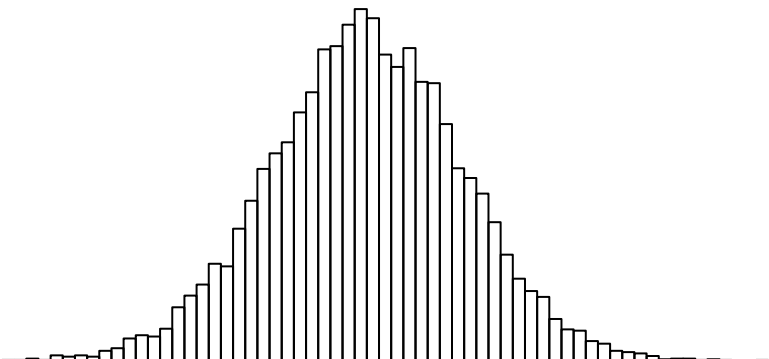

-11      -10      -9      -8      -7      -6

Unidentified Metabolite 2

B224:240 – B224:120

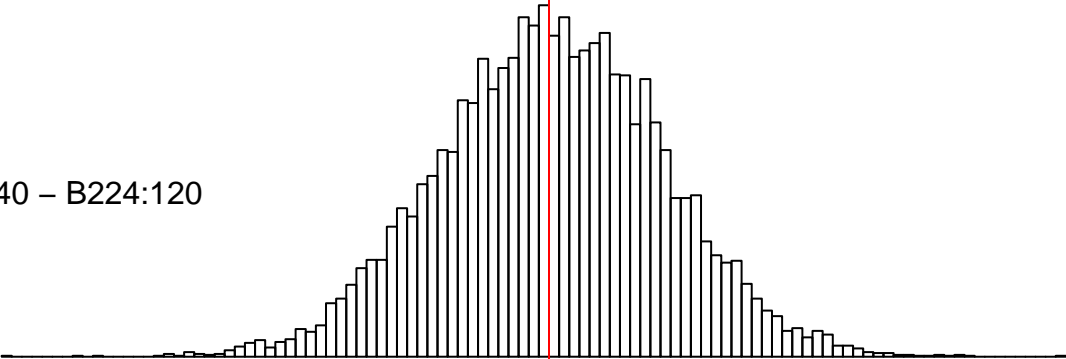

B224:240 – B224:45

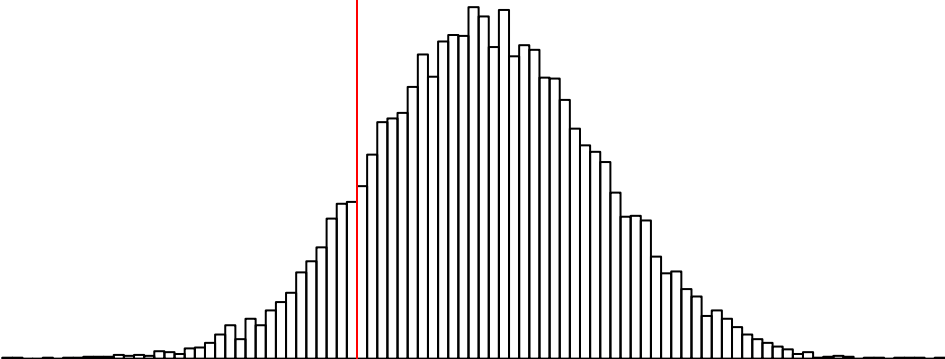

B224:120 – B224:45

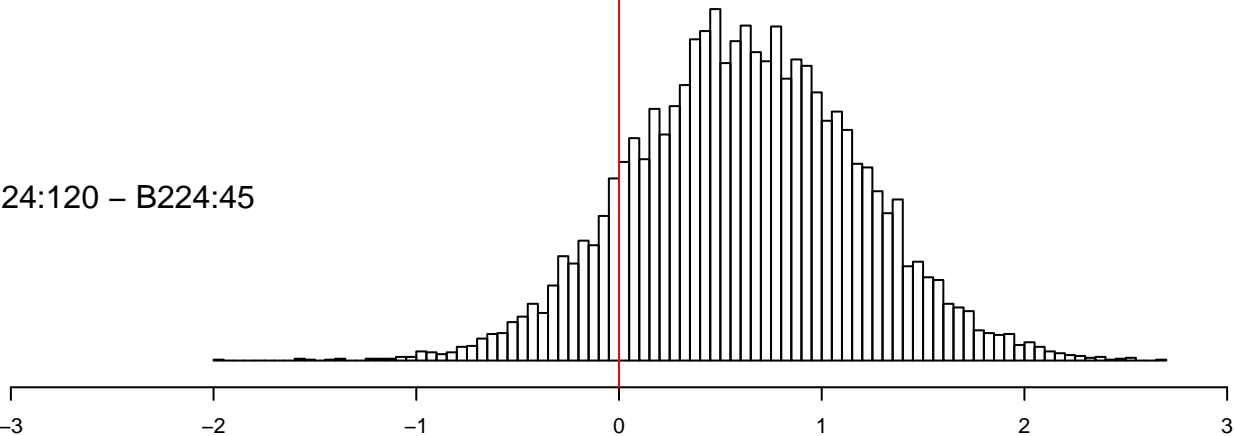

delta(Unidentified Metabolite 2)

B224:240

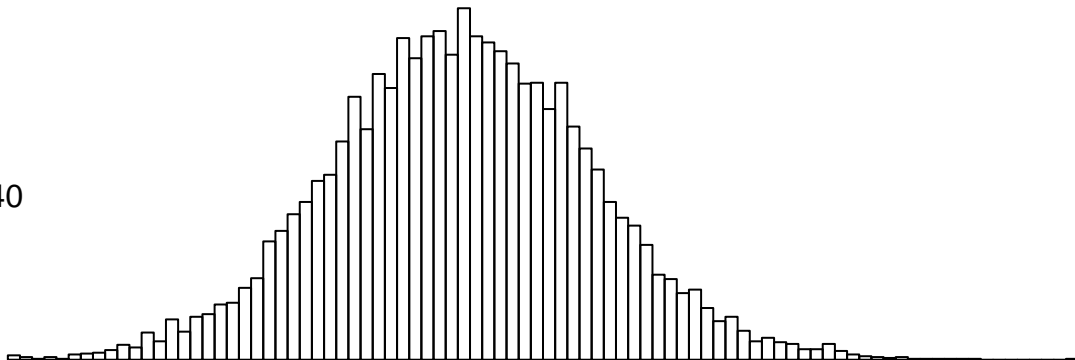

B224:120

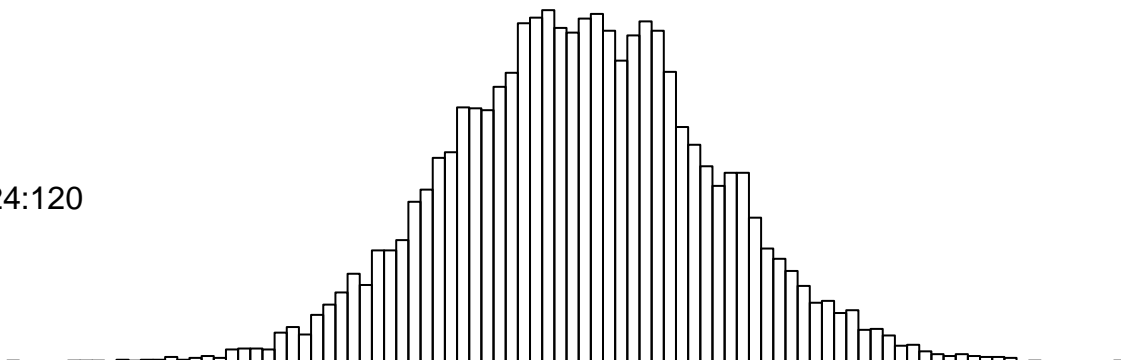

B224:45

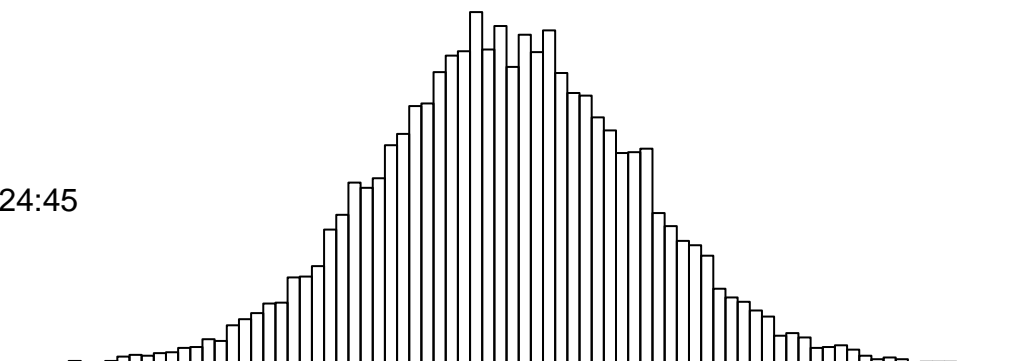

-11.0                      -10.5                      -10.0                      -9.5                      -9.0

Unidentified Metabolite 3

B224:240 – B224:120

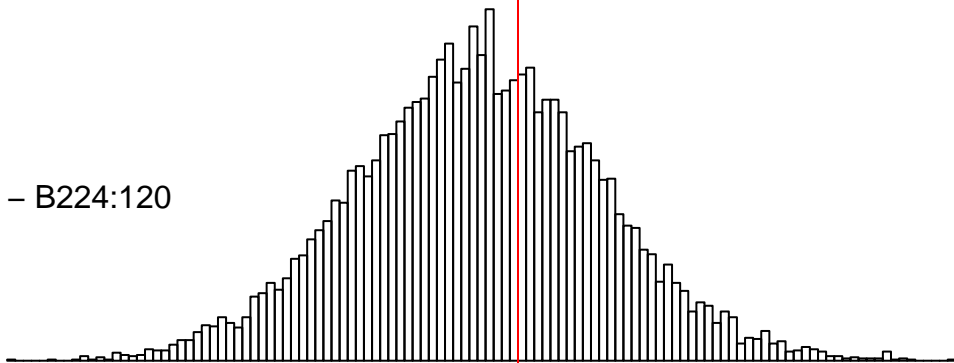

B224:240 – B224:45

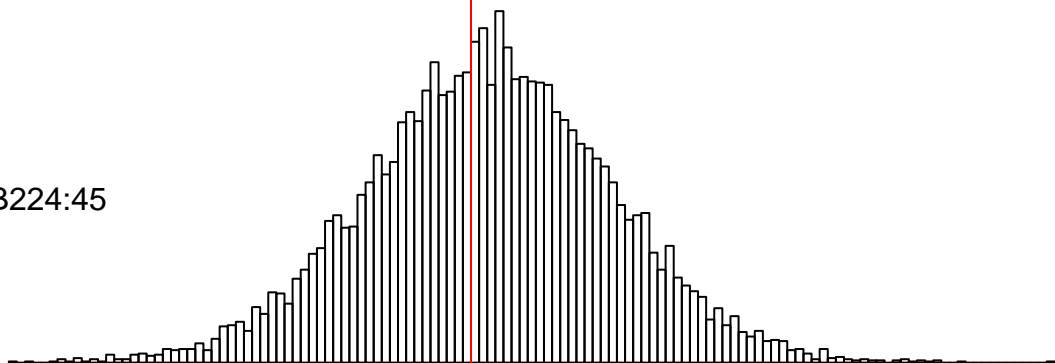

B224:120 – B224:45

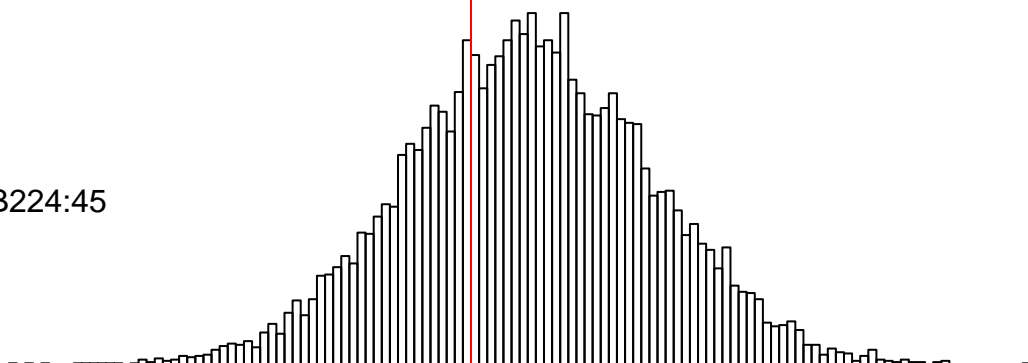

-1.5      -1.0      -0.5      0.0      0.5      1.0      1.5

delta(Unidentified Metabolite 3)

B224:240

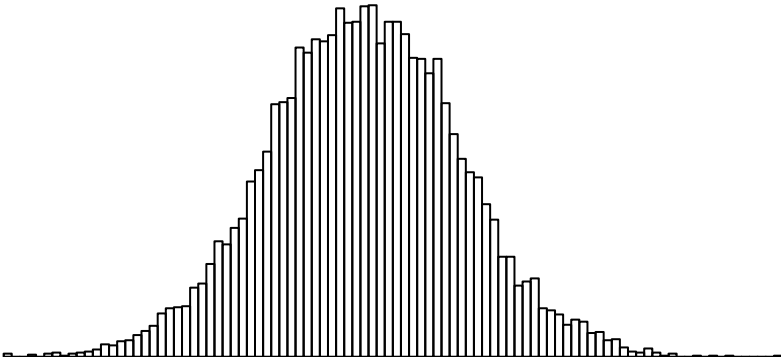

B224:120

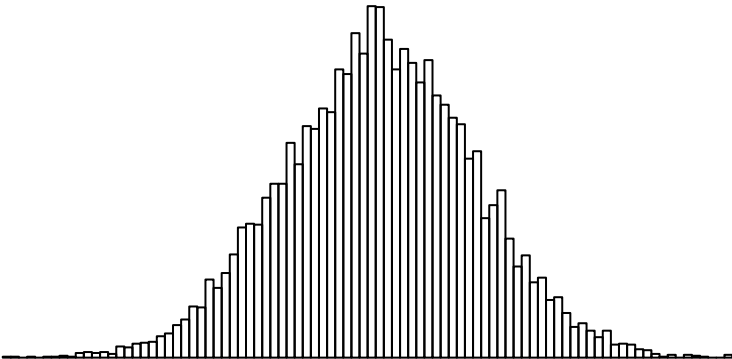

B224:45

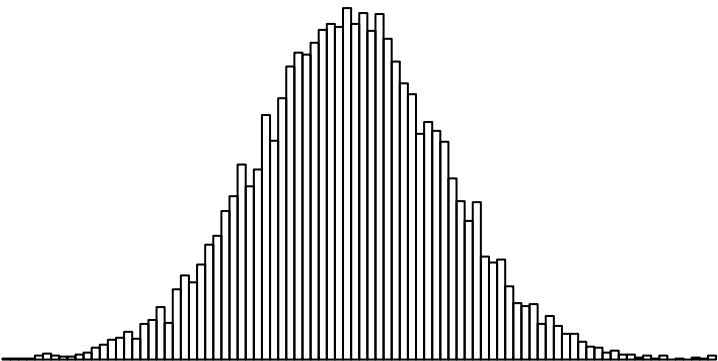

-10.5      -10.0      -9.5      -9.0      -8.5      -8.0      -7.5

Unidentified Metabolite 4

B224:240 – B224:120

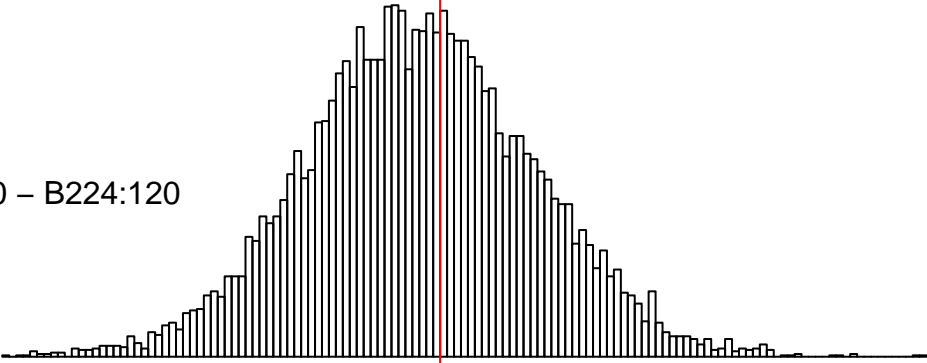

B224:240 – B224:45

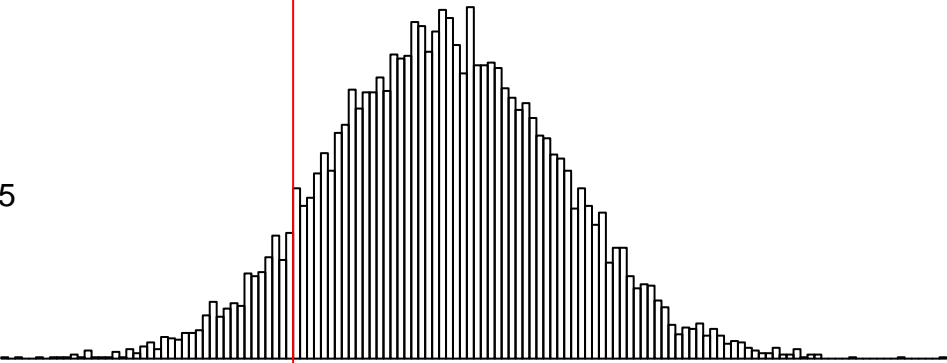

B224:120 – B224:45

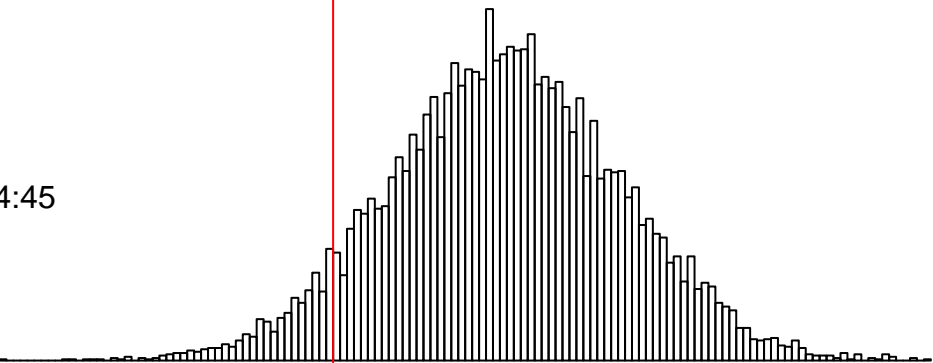

-1.5      -1.0      -0.5      0.0      0.5      1.0      1.5      2.0

delta(Unidentified Metabolite 4)

B224:240

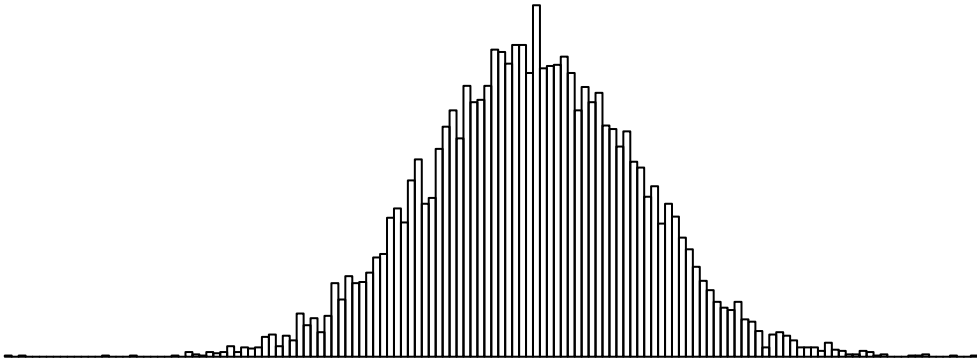

B224:120

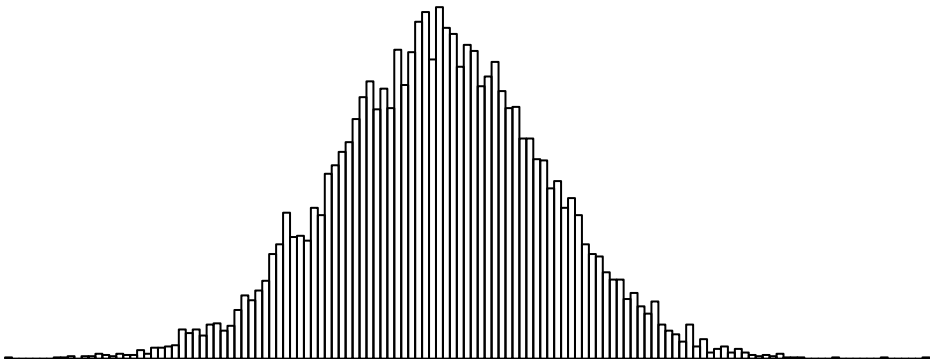

B224:45

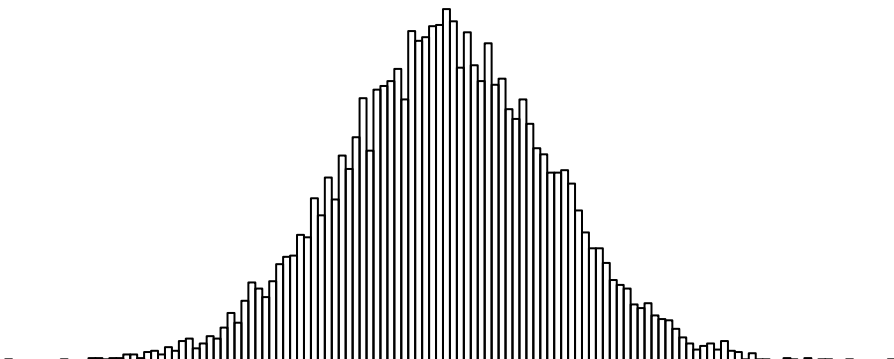

-10.5      -10.0      -9.5      -9.0      -8.5      -8.0      -7.5      -7.0

Unidentified Metabolite 5

B224:240 – B224:120

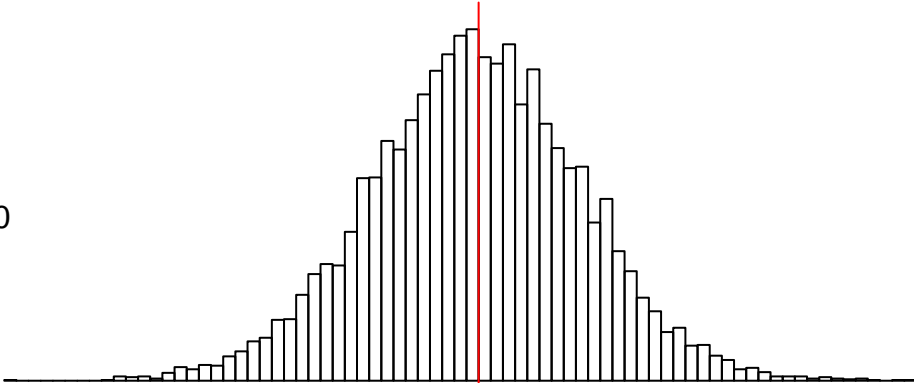

B224:240 – B224:45

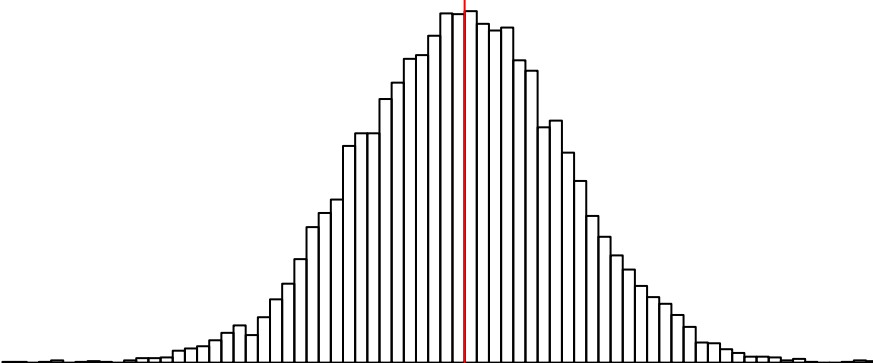

B224:120 – B224:45

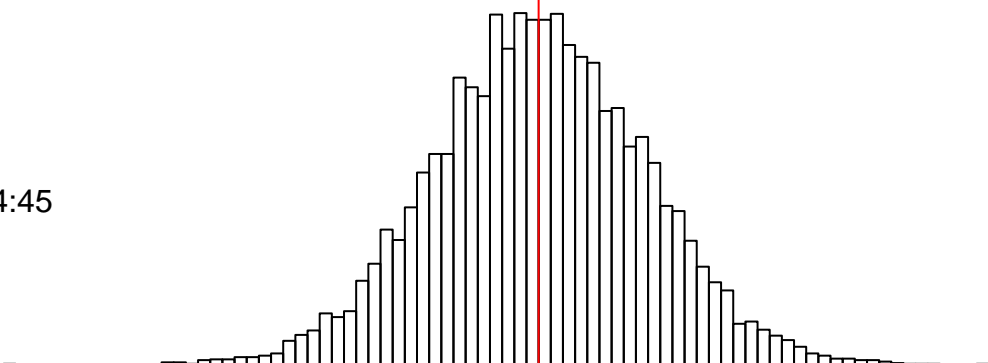

delta(Unidentified Metabolite 5)



B224:240

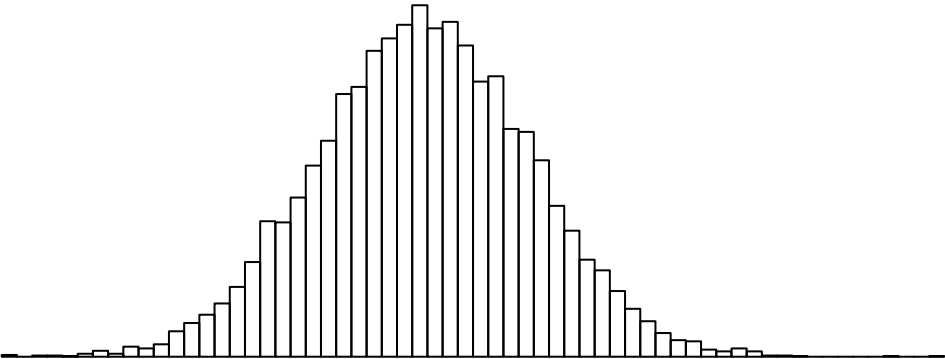

B224:120

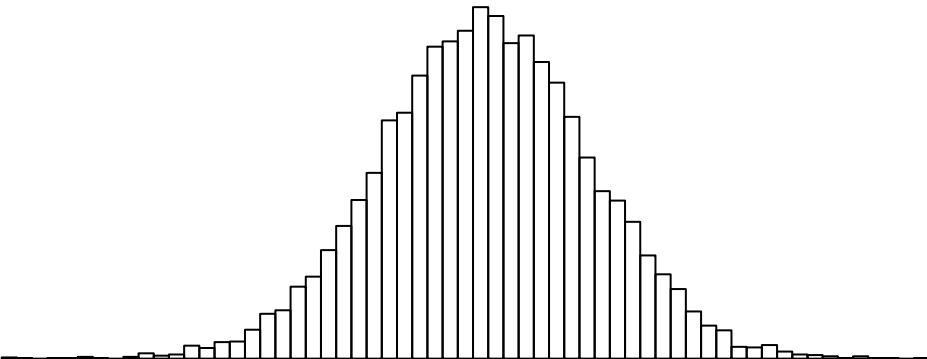

B224:45

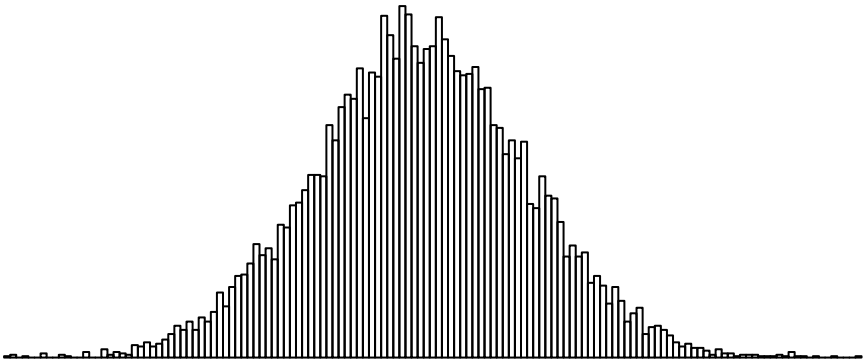

-8

-7

-6

-5

Unidentified Metabolite 6

B224:240 – B224:120

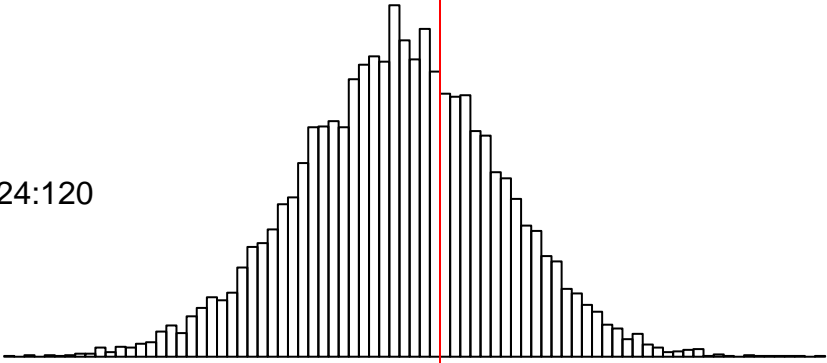

B224:240 – B224:45

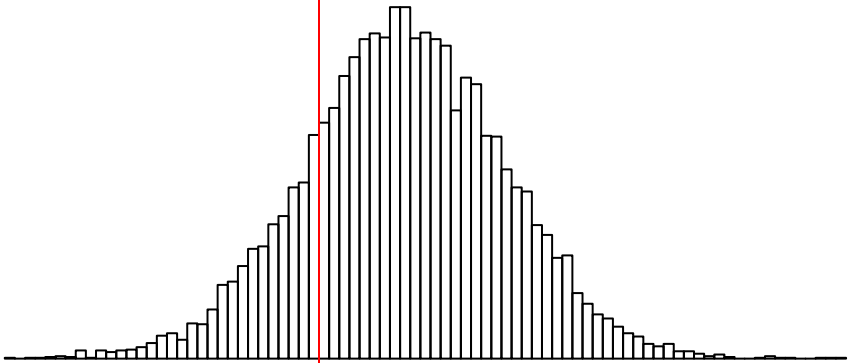

B224:120 – B224:45

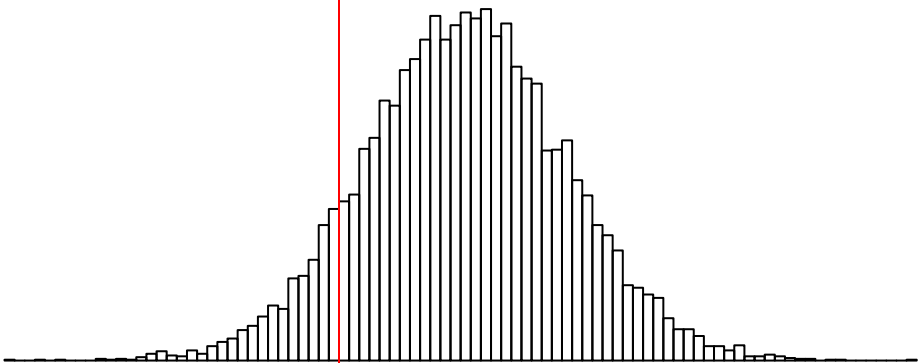

delta(Unidentified Metabolite 6)

B224:240

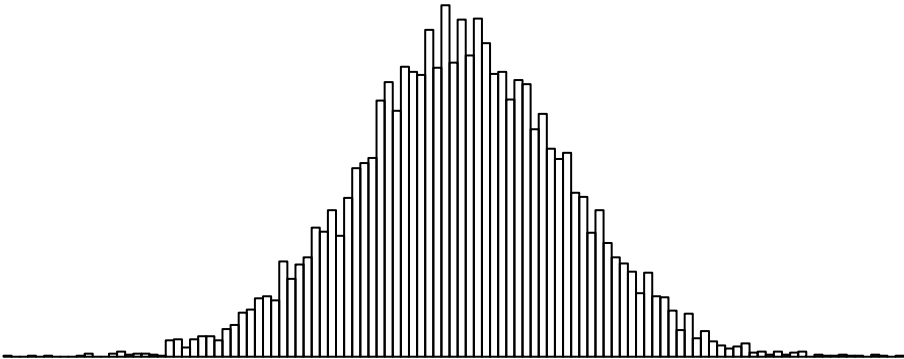

B224:120

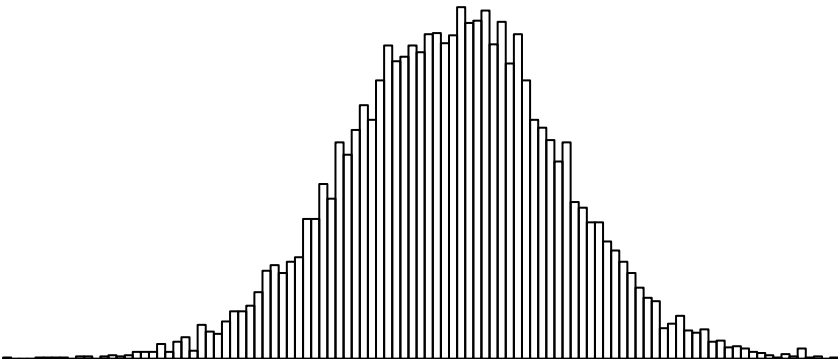

B224:45

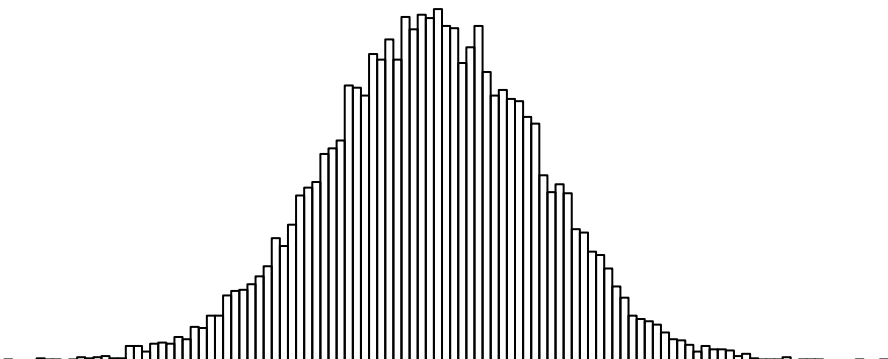

-9.0      -8.5      -8.0      -7.5      -7.0      -6.5      -6.0

Unidentified Metabolite 7

B224:240 – B224:120

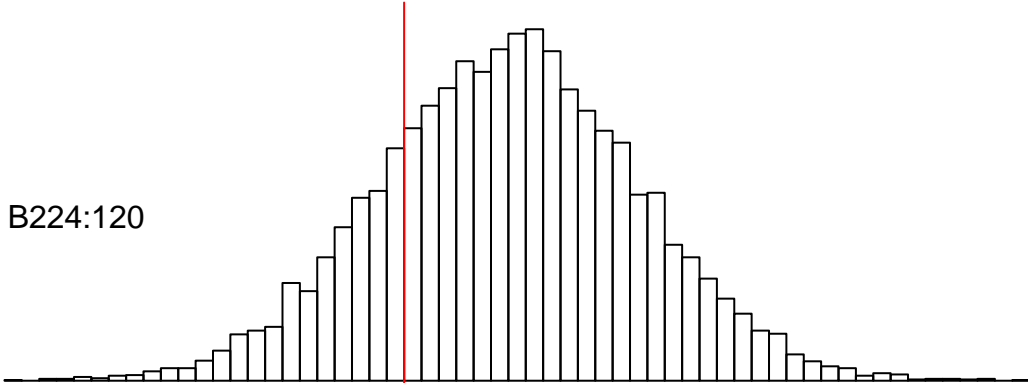

B224:240 – B224:45

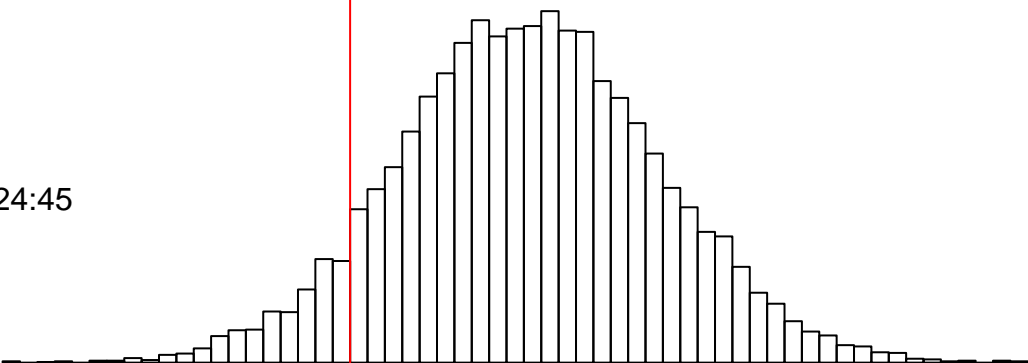

B224:120 – B224:45

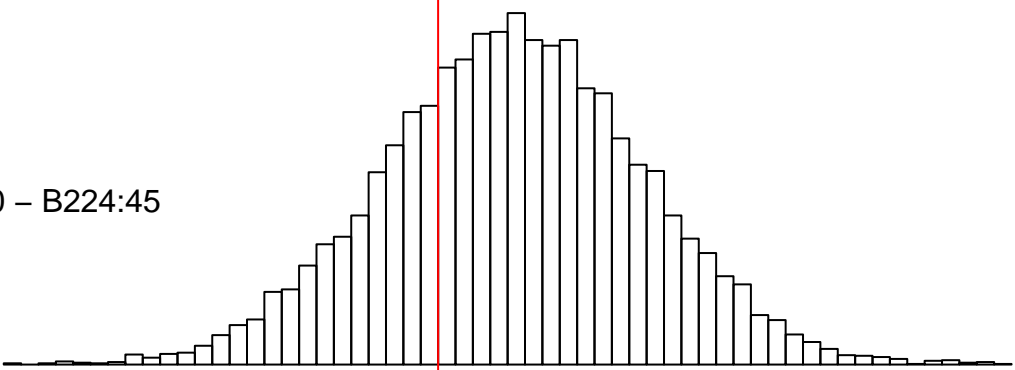

-1.5      -1.0      -0.5      0.0      0.5      1.0      1.5      2.0

delta(Unidentified Metabolite 7)

B224:240

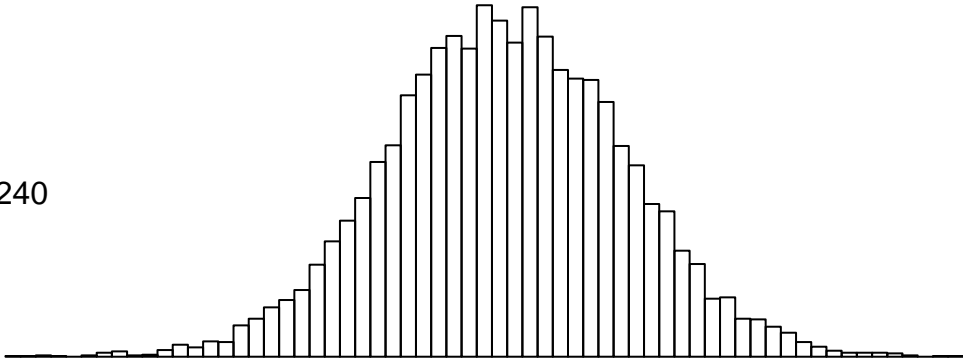

B224:120

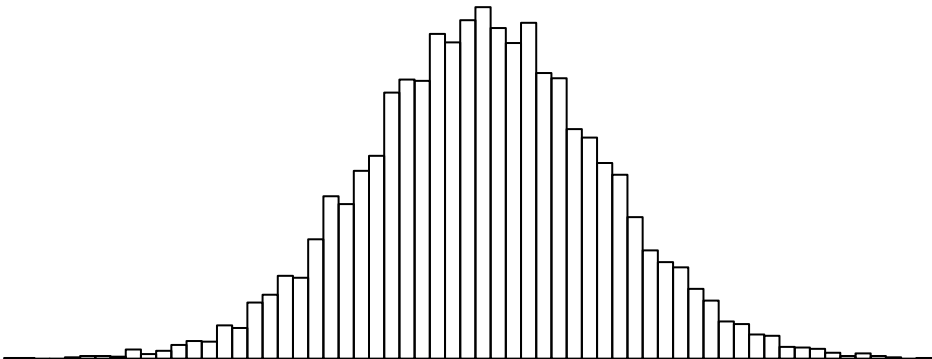

B224:45

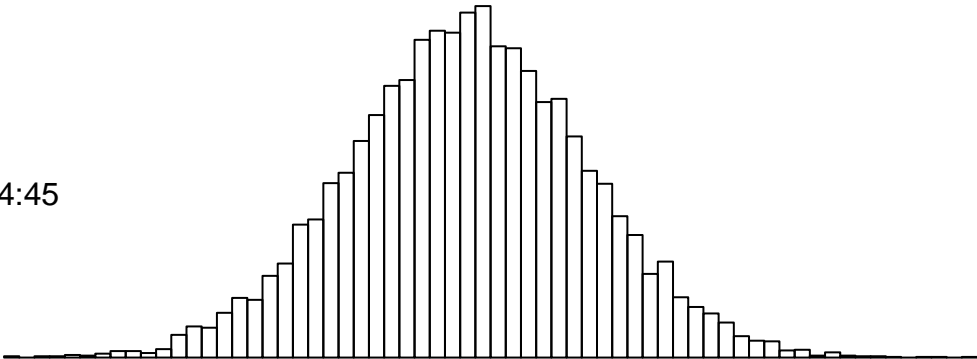

-8 -7 -6 -5 -4

Unidentified Metabolite 8

B224:240 – B224:120

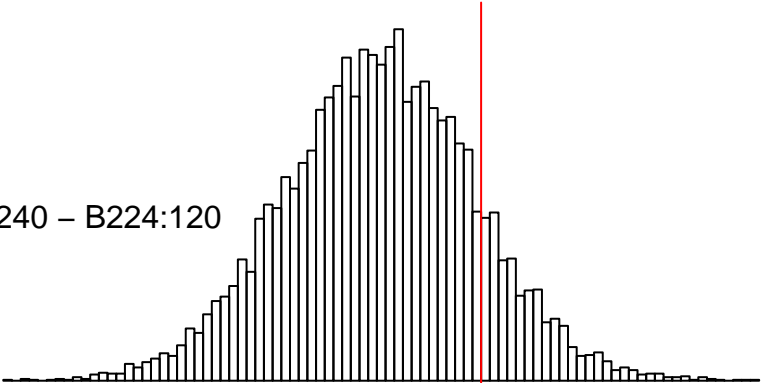

B224:240 – B224:45

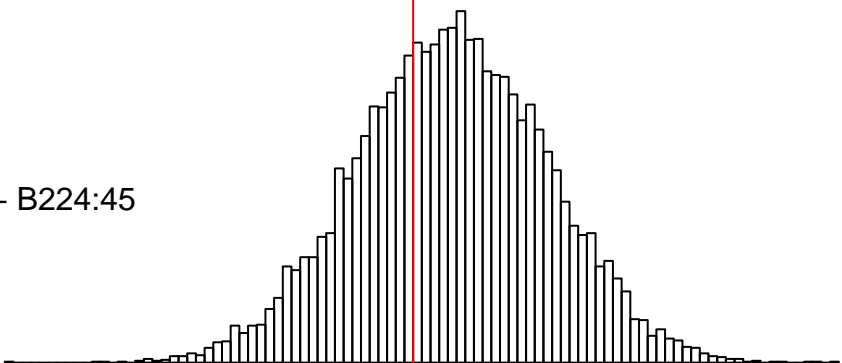

B224:120 – B224:45

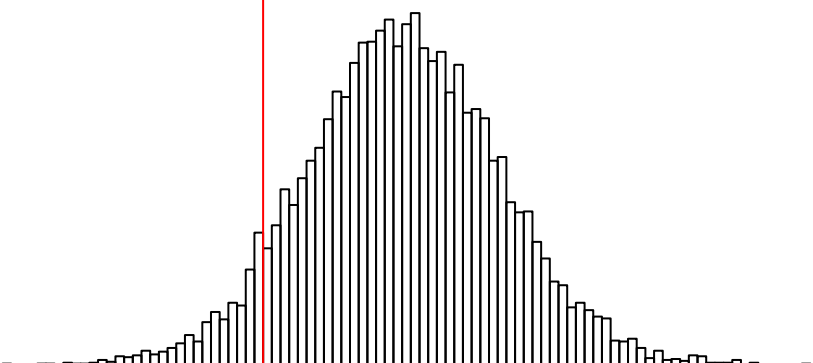

delta(Unidentified Metabolite 8)

B224:240

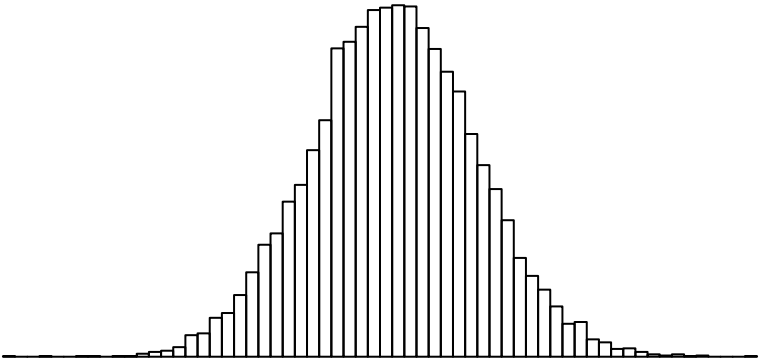

B224:120

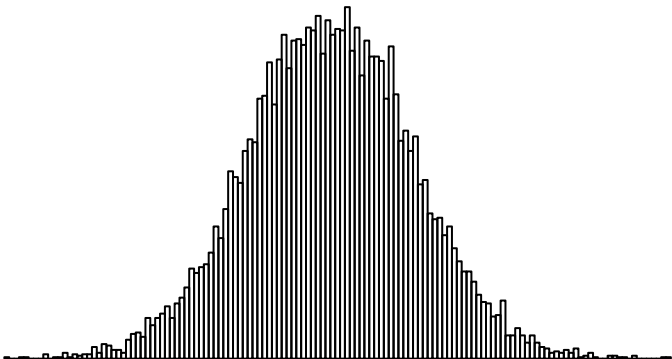

B224:45

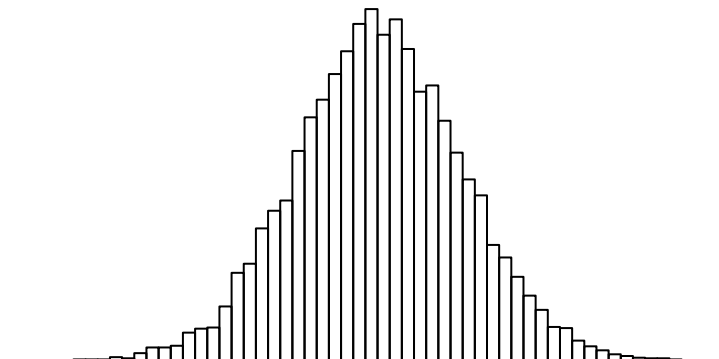

-10      -9      -8      -7      -6      -5

Unidentified Metabolite 9

B224:240 – B224:120

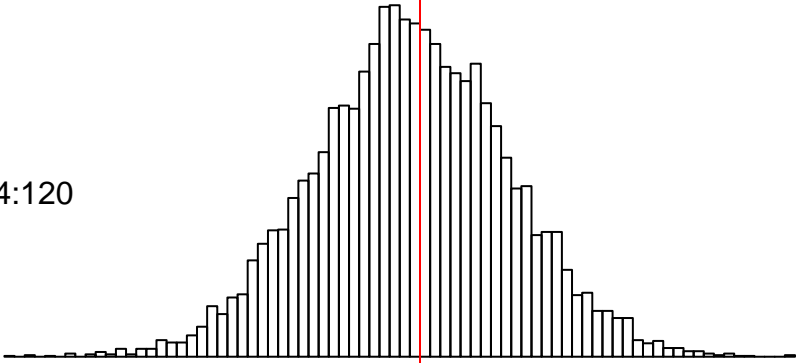

B224:240 – B224:45

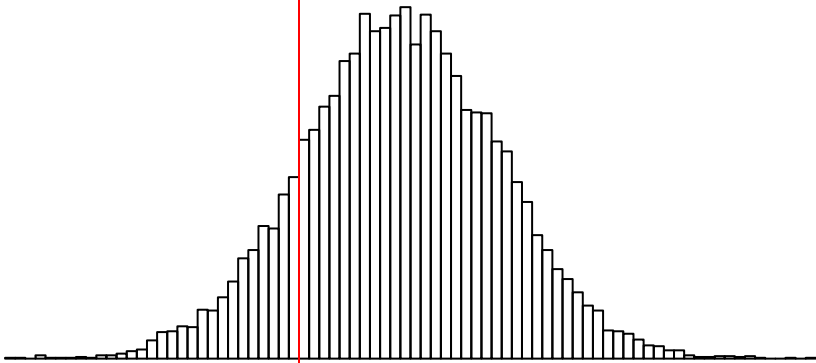

B224:120 – B224:45

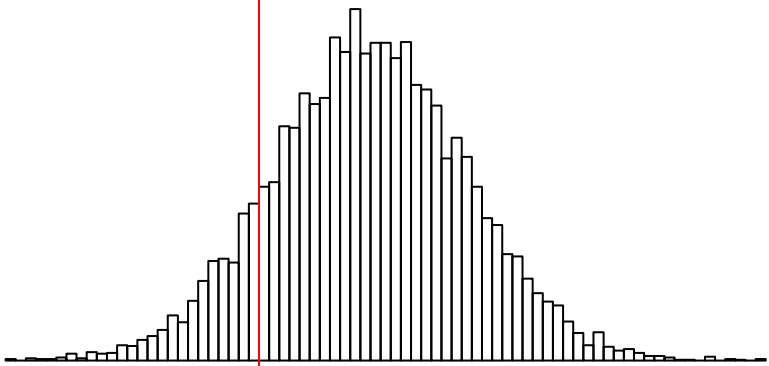

delta(Unidentified Metabolite 9)



B224:240

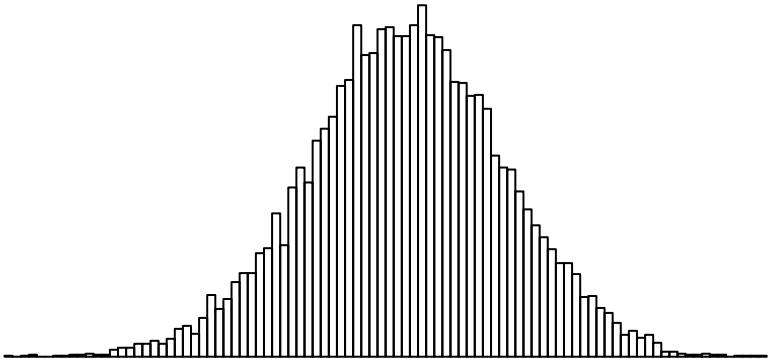

B224:120

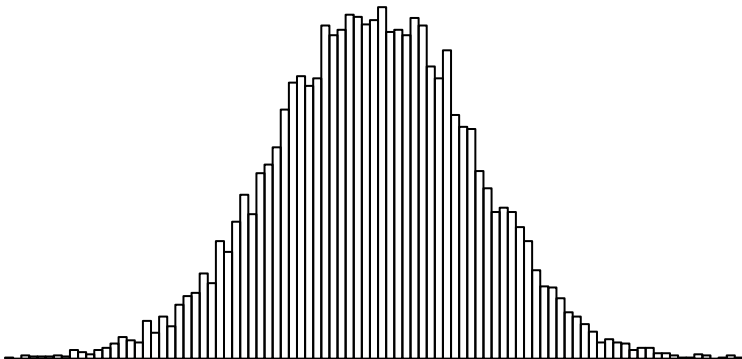

B224:45

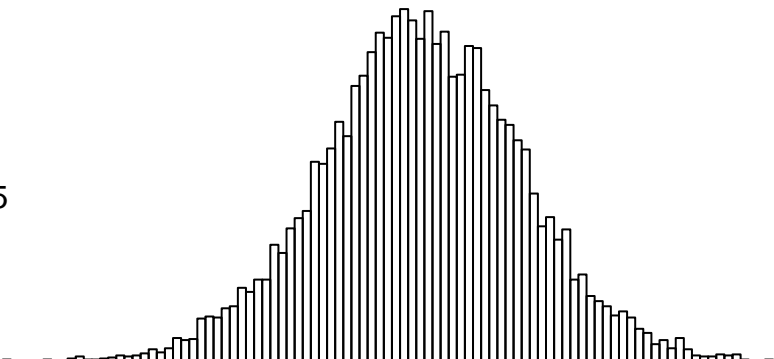

-10.0      -9.5      -9.0      -8.5      -8.0      -7.5      -7.0

Unidentified Metabolite 10

B224:240 – B224:120

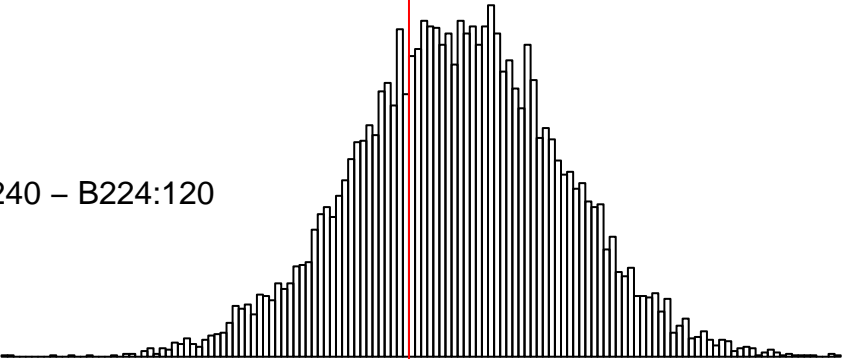

B224:240 – B224:45

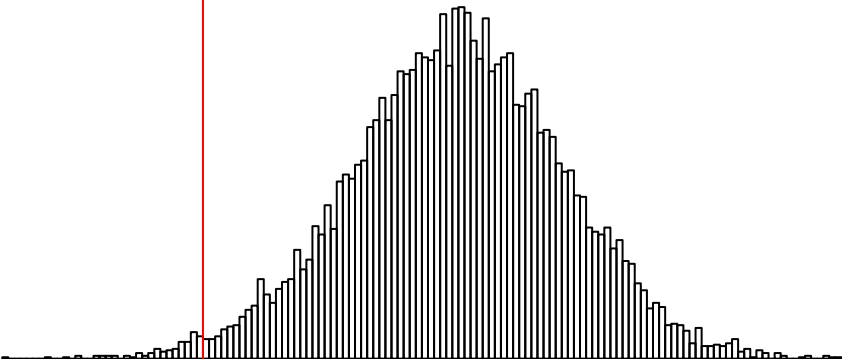

B224:120 – B224:45

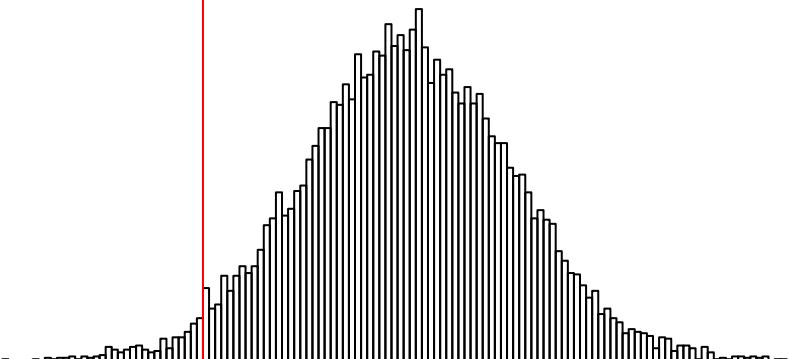

-1

0

1

2

delta(Unidentified Metabolite 10)

B224:240

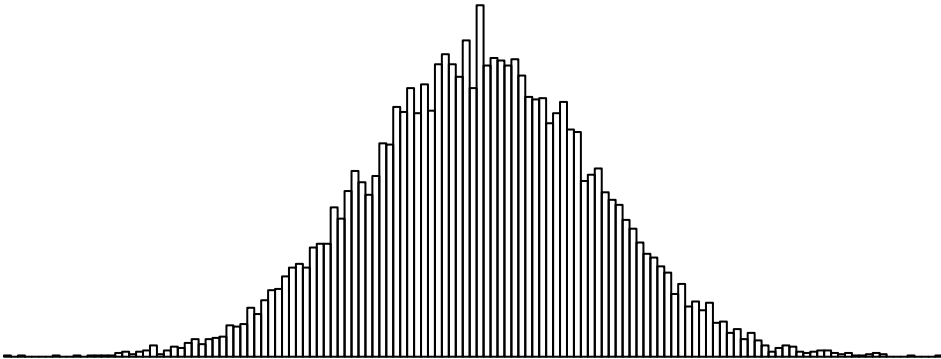

B224:120

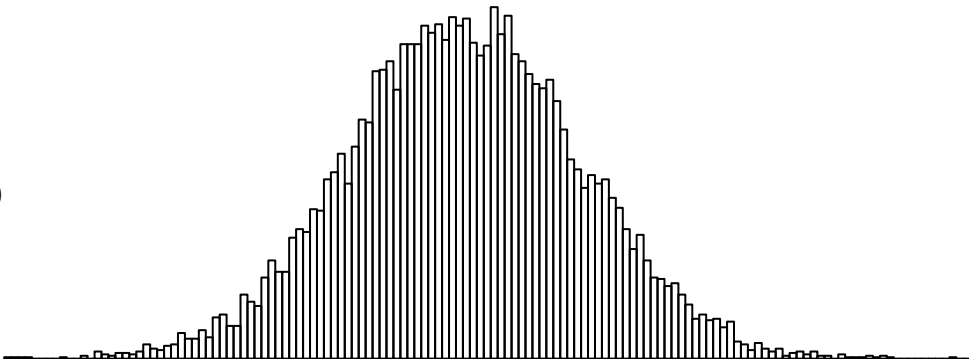

B224:45

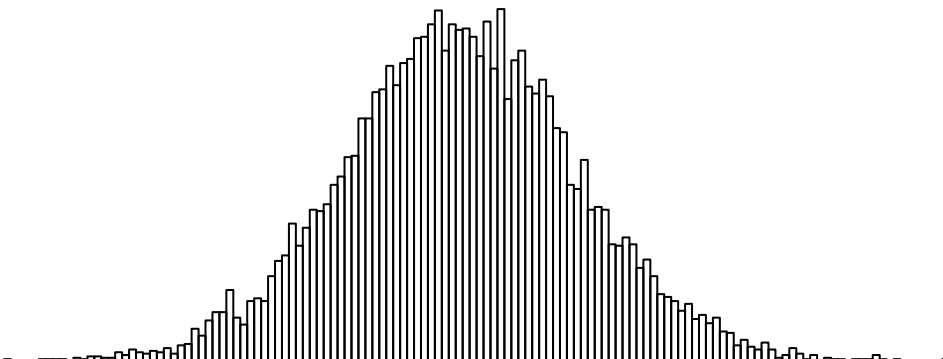

-7.5 -7.0 -6.5 -6.0 -5.5 -5.0 -4.5 -4.0

Unidentified Metabolite 11

B224:240 – B224:120

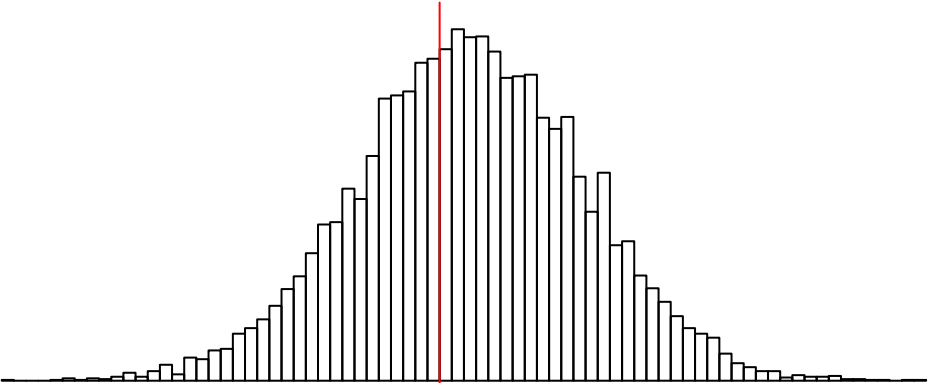

B224:240 – B224:45

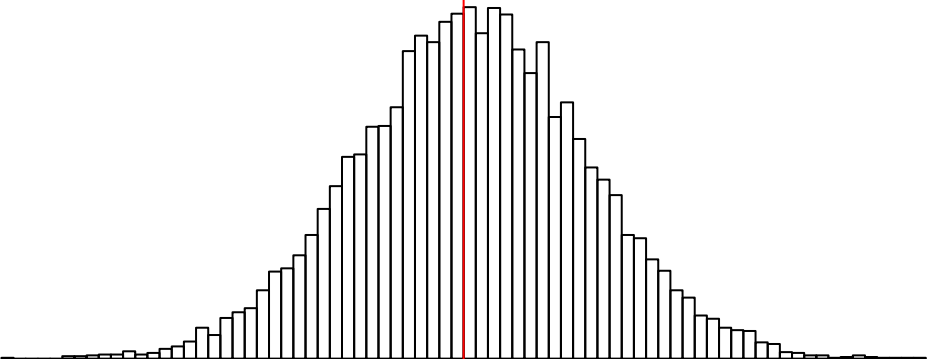

B224:120 – B224:45

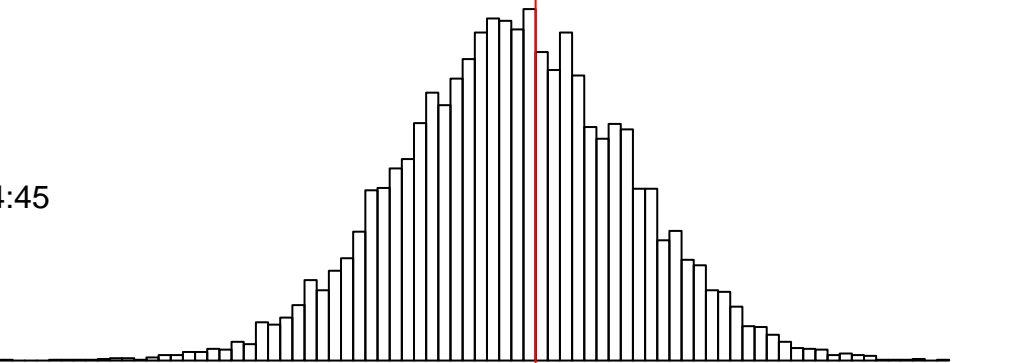

-3 -2 -1 0 1 2

delta(Unidentified Metabolite 11)

B224:240

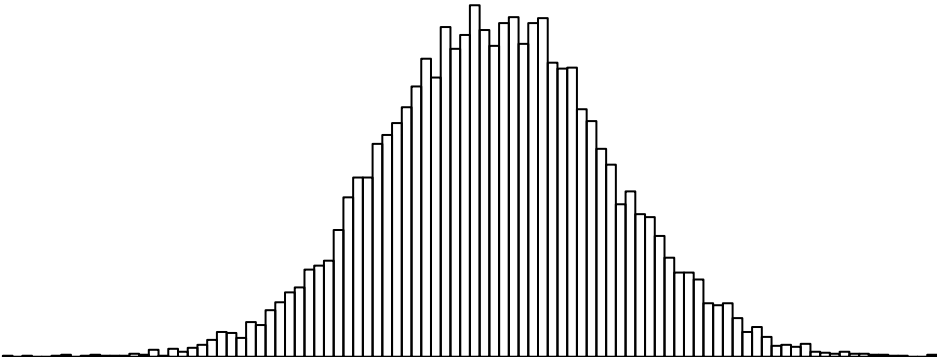

B224:120

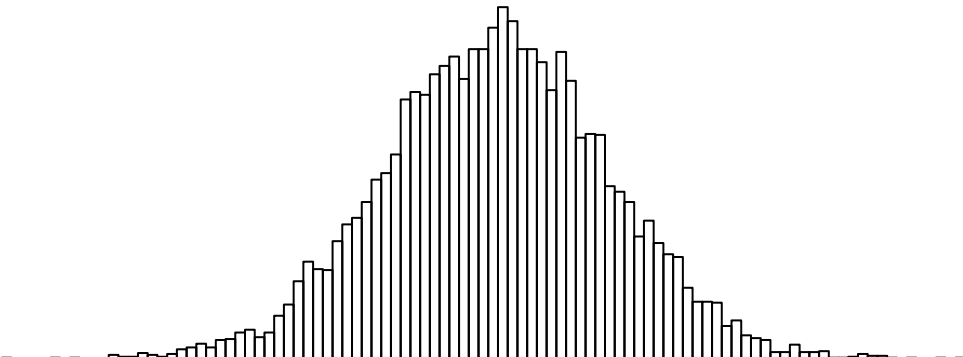

B224:45

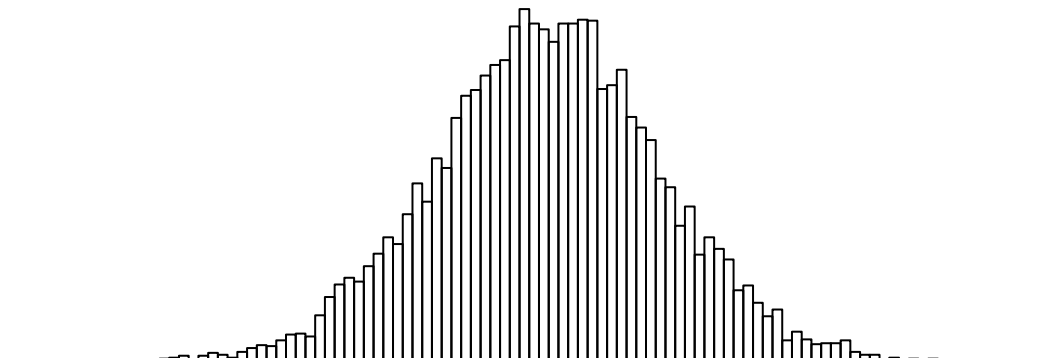

-10.5      -10.0      -9.5      -9.0      -8.5      -8.0

Unidentified Metabolite 12

B224:240 – B224:120

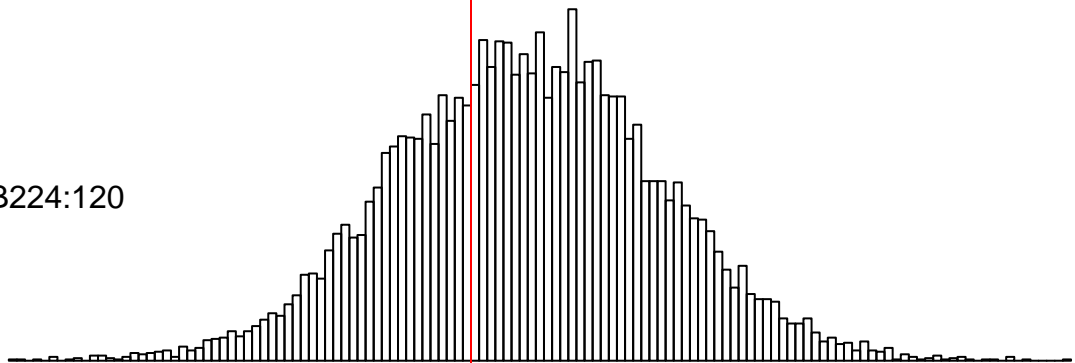

B224:240 – B224:45

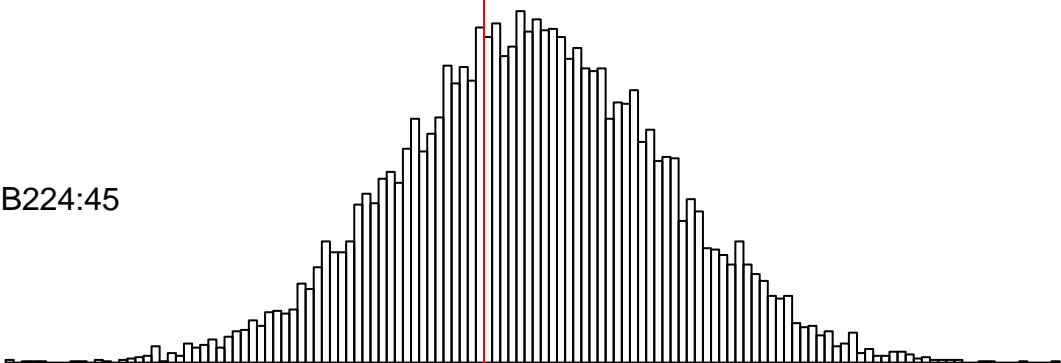

B224:120 – B224:45

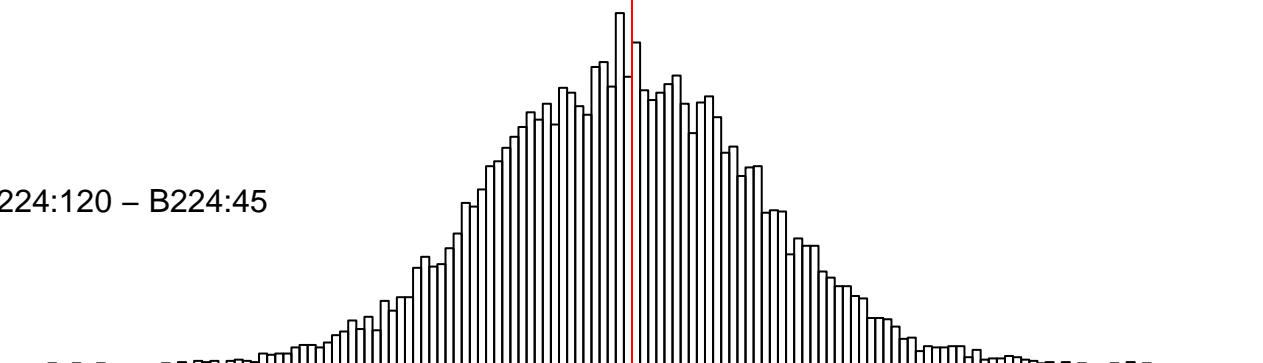

-1.5      -1.0      -0.5      0.0      0.5      1.0      1.5

delta(Unidentified Metabolite 12)

B224:240

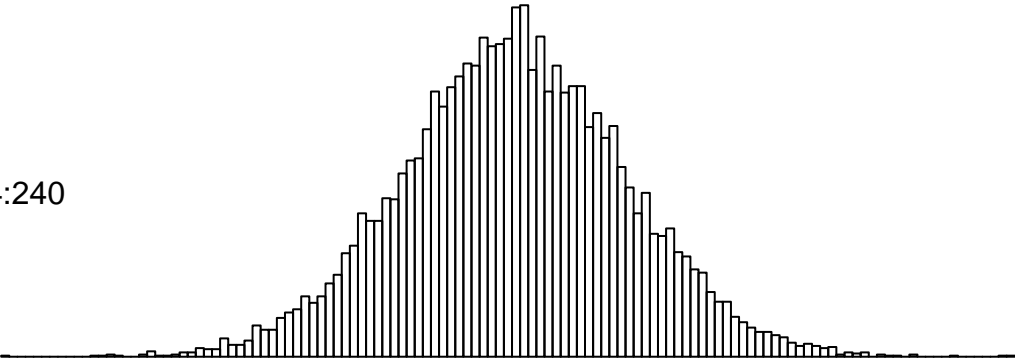

B224:120

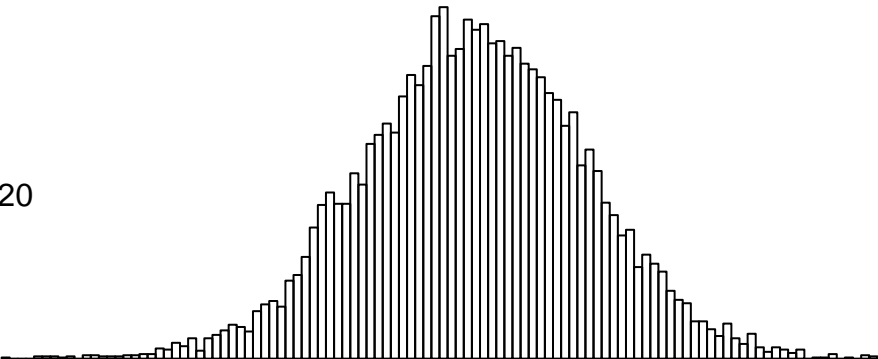

B224:45

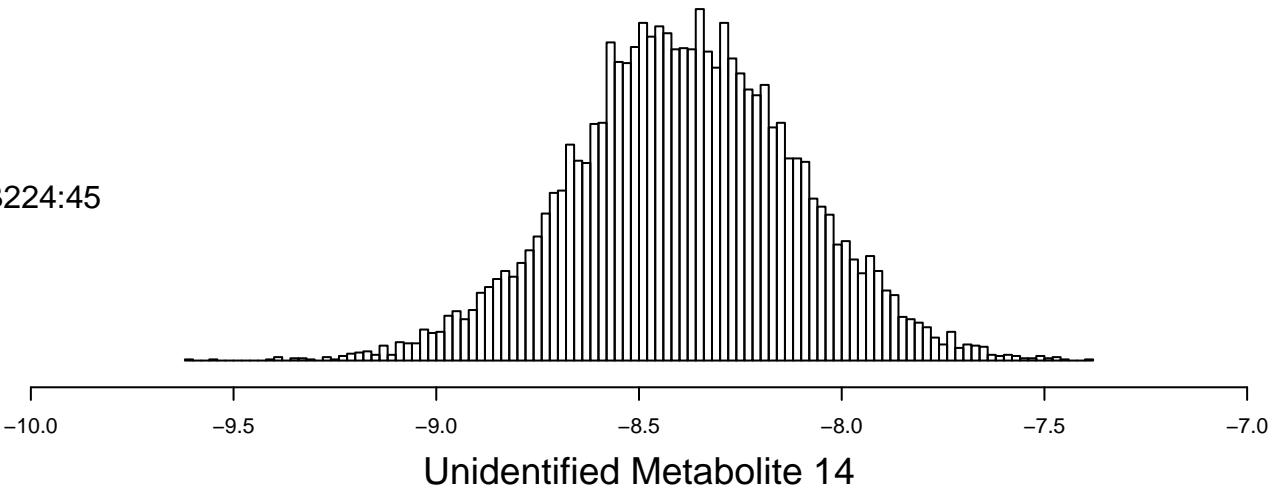

B224:240 – B224:120

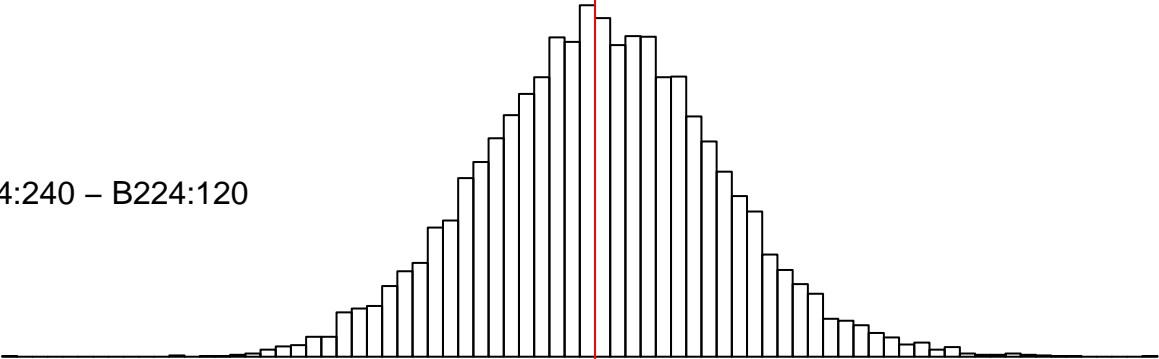

B224:240 – B224:45

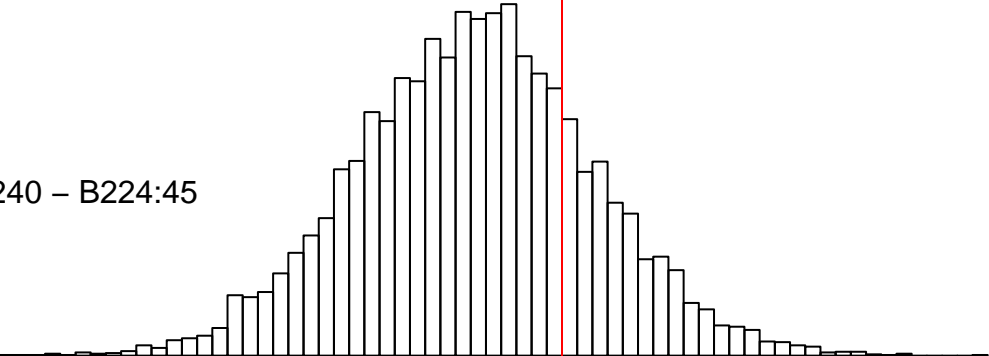

B224:120 – B224:45

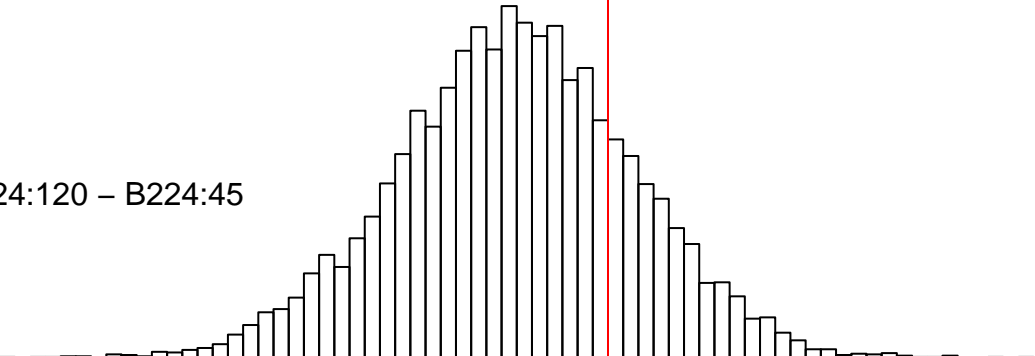

-2 -1 0 1 2

delta(Unidentified Metabolite 14)



B224:240

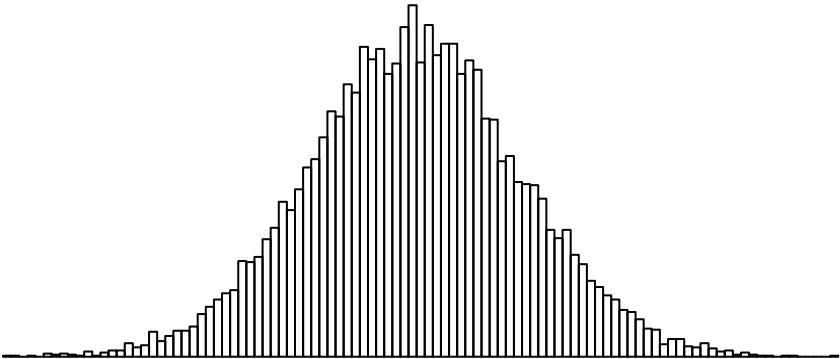

B224:120

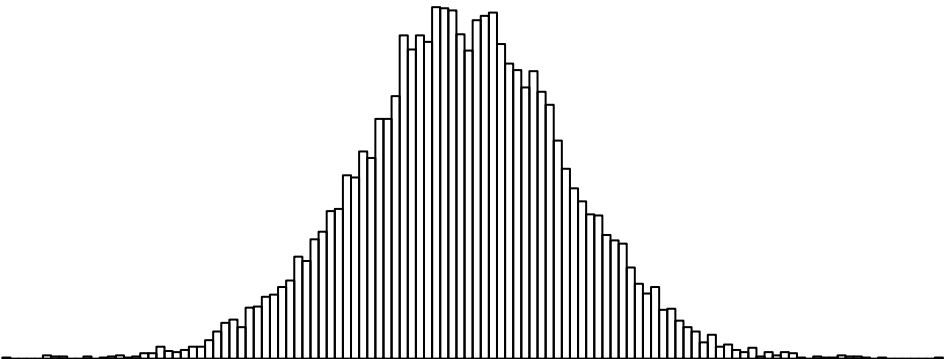

B224:45

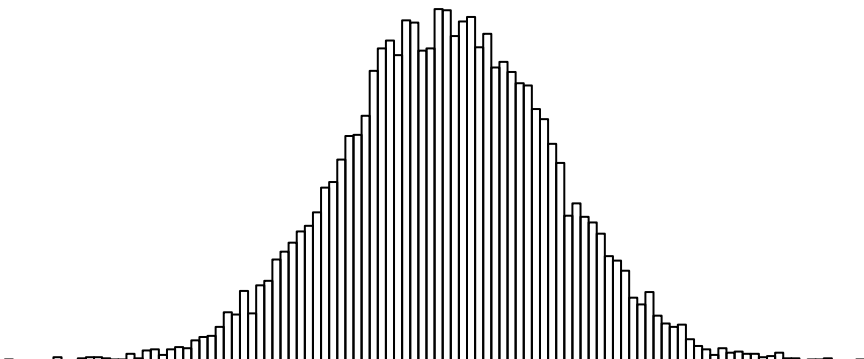

-9.5      -9.0      -8.5      -8.0      -7.5      -7.0      -6.5

Unidentified Metabolite 16

B224:240 – B224:120

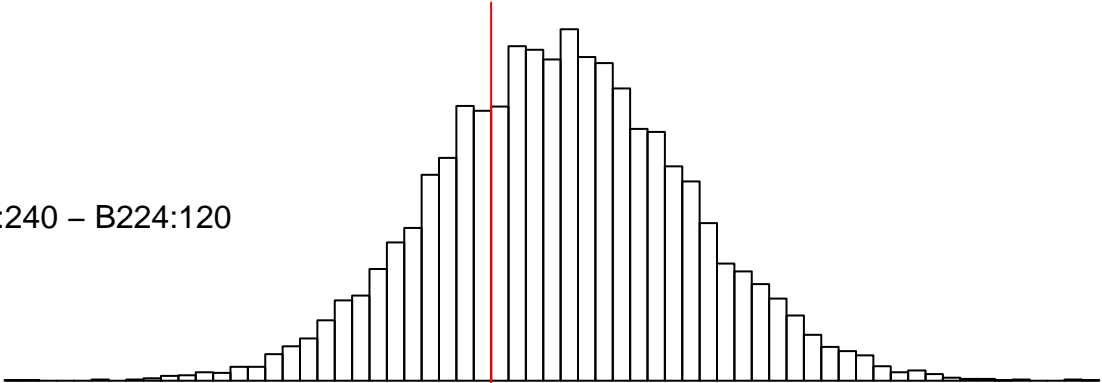

B224:240 – B224:45

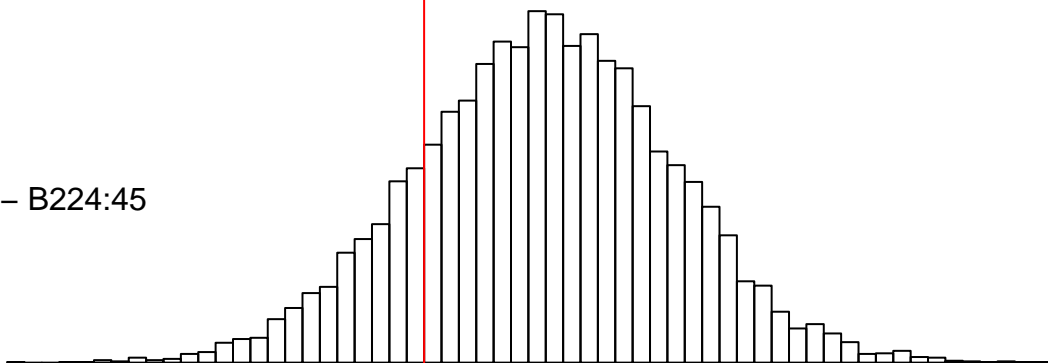

B224:120 – B224:45

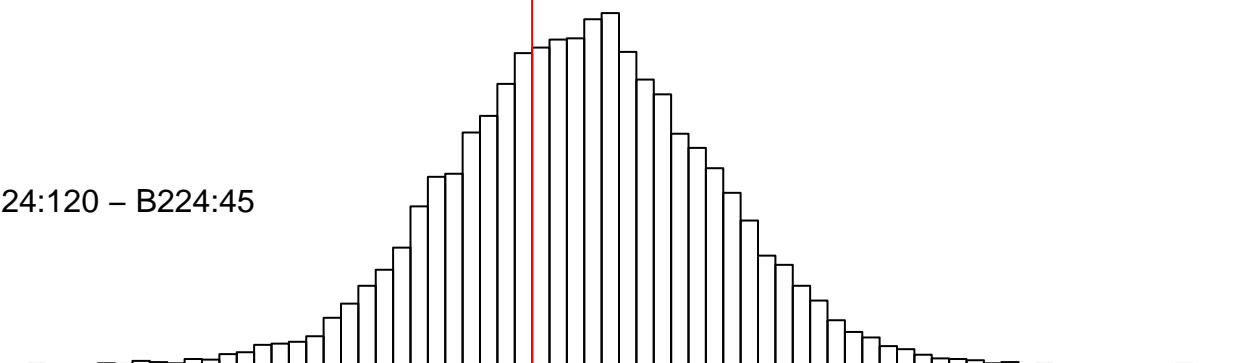

-1.5      -1.0      -0.5      0.0      0.5      1.0      1.5      2.0

delta(Unidentified Metabolite 16)

B224:240

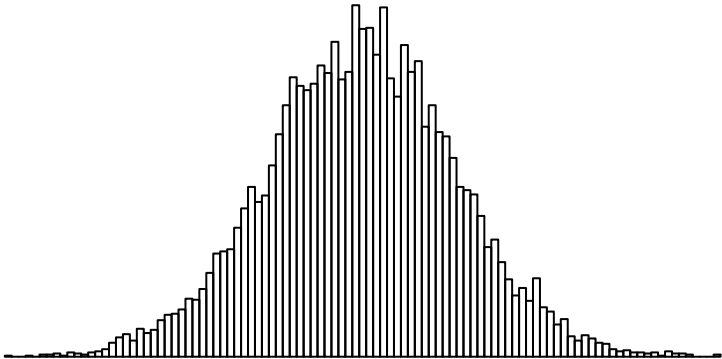

B224:120

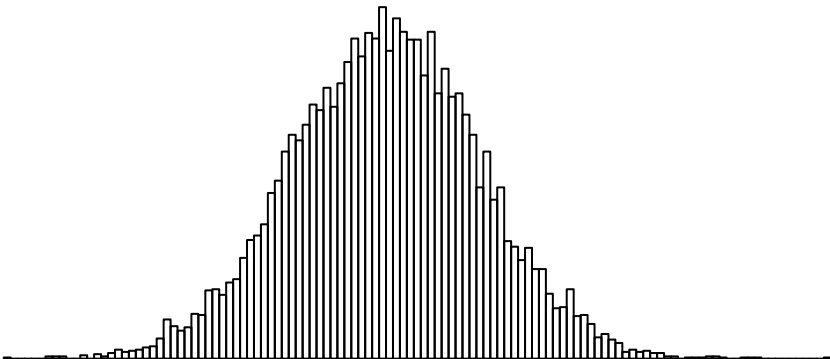

B224:45

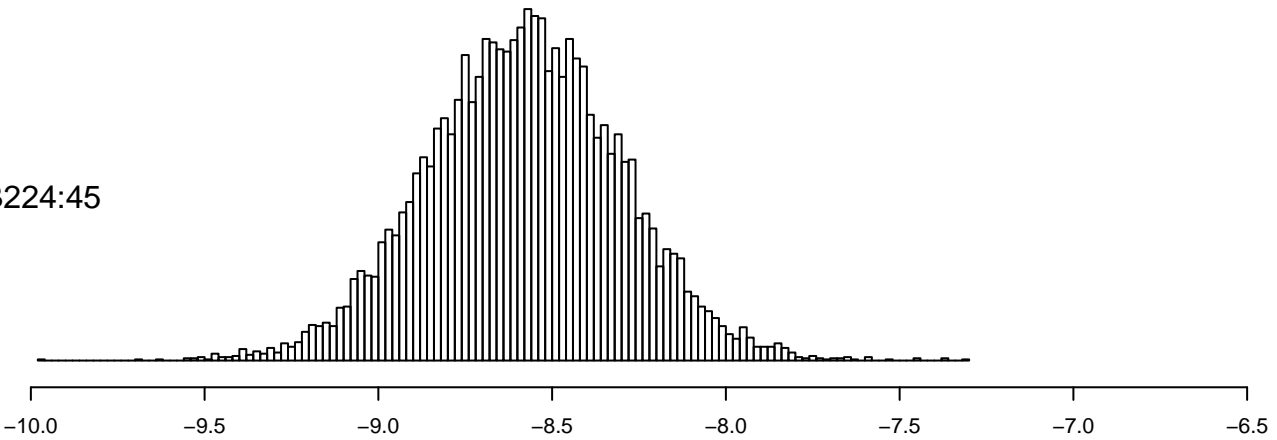

Unidentified Metabolite 17

B224:240 – B224:120

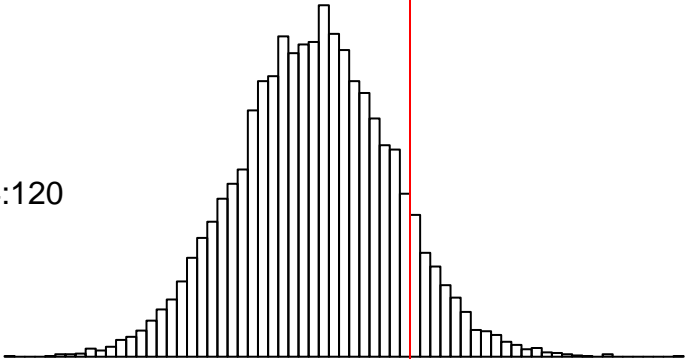

B224:240 – B224:45

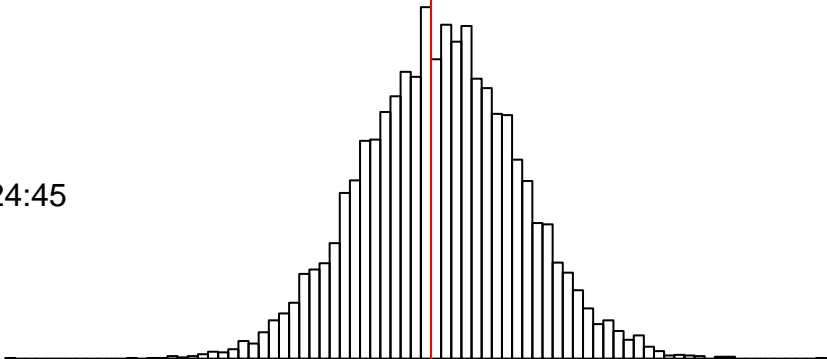

B224:120 – B224:45

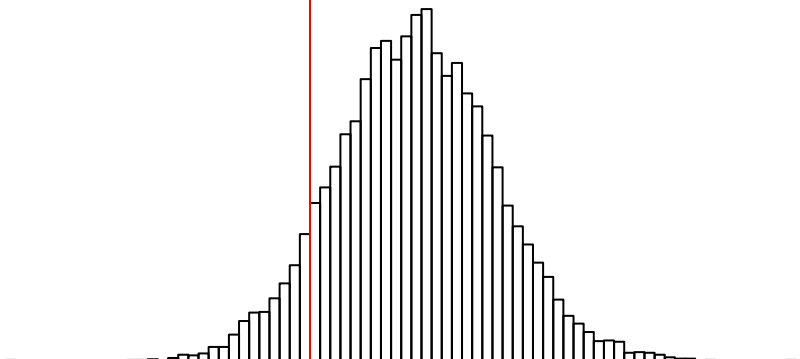

-3 -2 -1 0 1 2 3

delta(Unidentified Metabolite 17)

B224:240

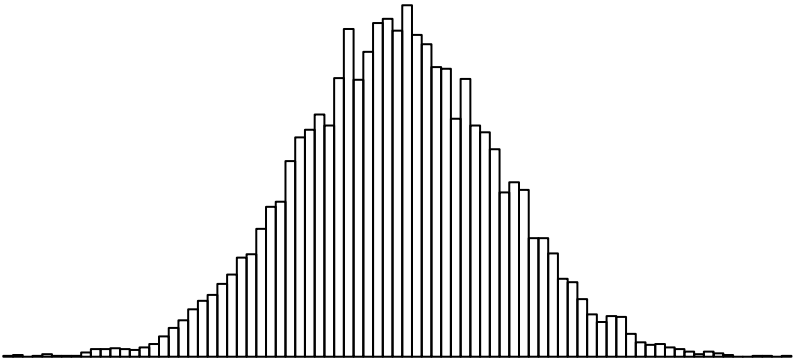

B224:120

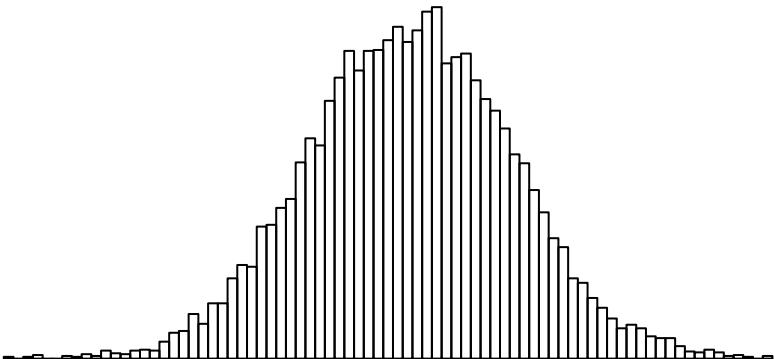

B224:45

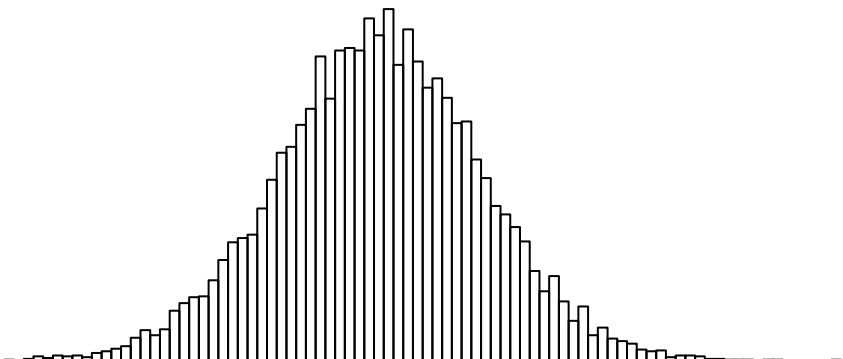

-8.5      -8.0      -7.5      -7.0      -6.5      -6.0

Unidentified Metabolite 18

B224:240 – B224:120

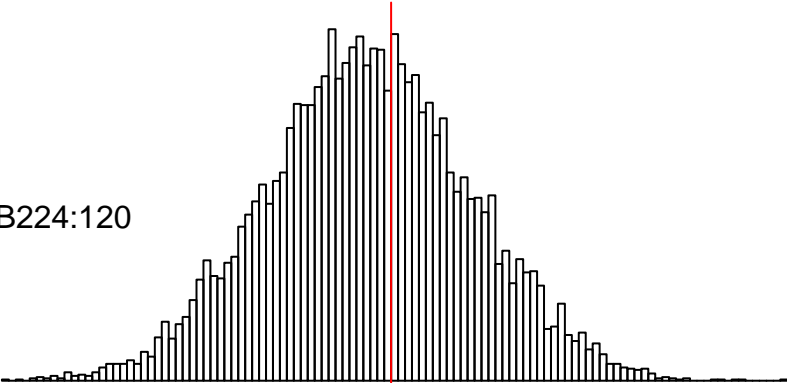

B224:240 – B224:45

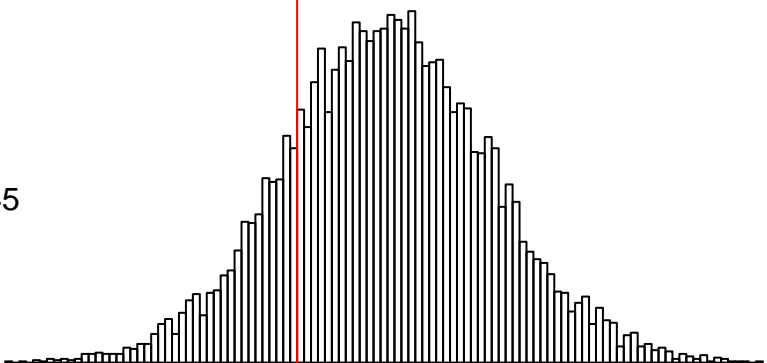

B224:120 – B224:45

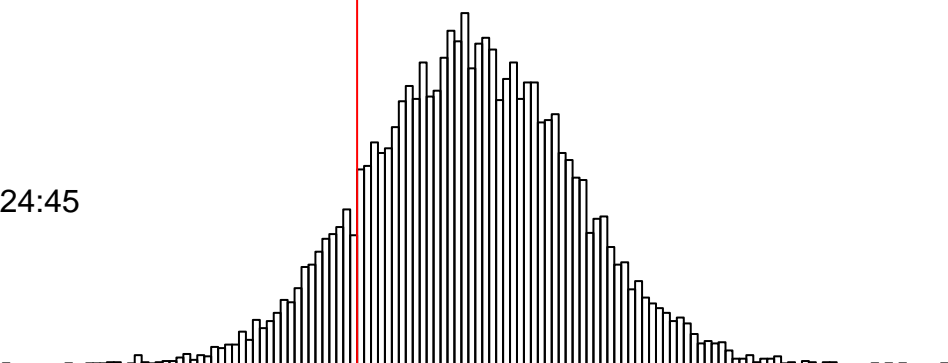

-1.5      -1.0      -0.5      0.0      0.5      1.0      1.5      2.0

delta(Unidentified Metabolite 18)

B224:240

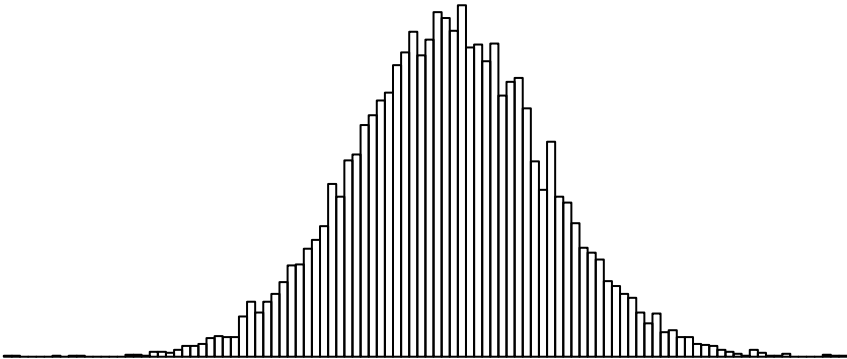

B224:120

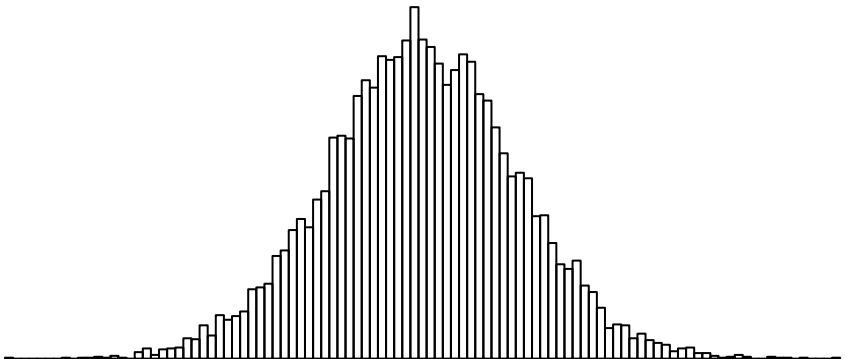

B224:45

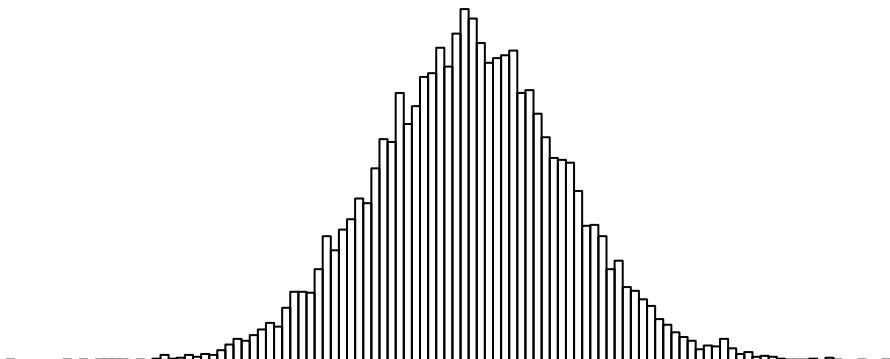

-8.5      -8.0      -7.5      -7.0      -6.5      -6.0      -5.5

Unidentified Metabolite 20

B224:240 – B224:120

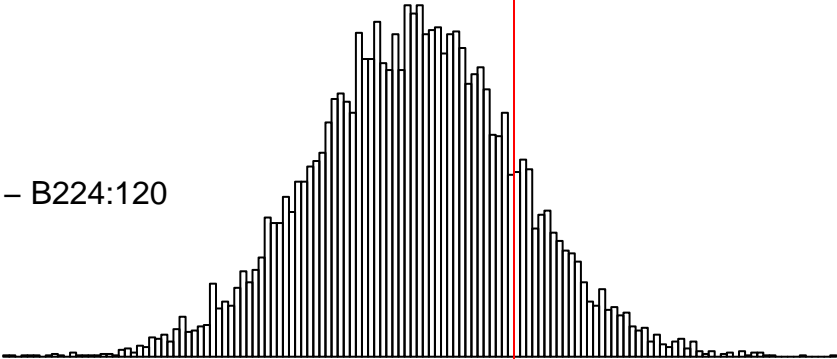

B224:240 – B224:45

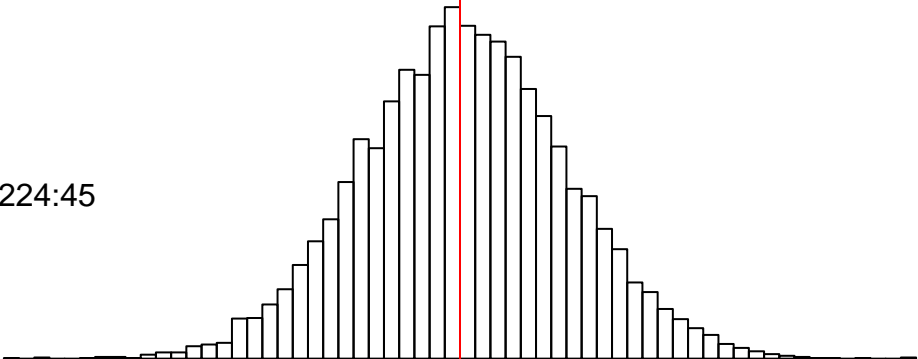

B224:120 – B224:45

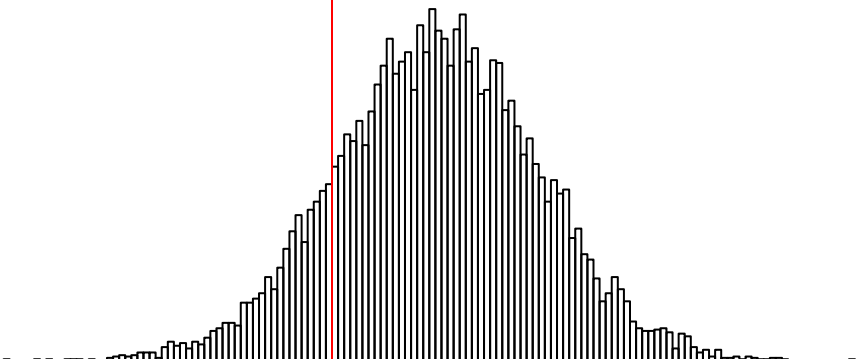

-2

-1

0

1

2

delta(Unidentified Metabolite 20)



B224:240

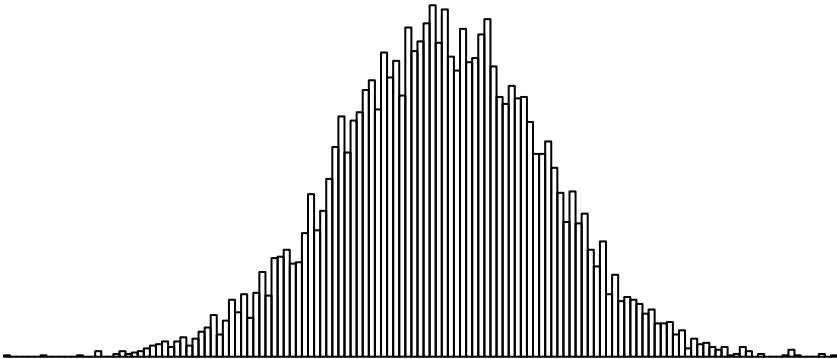

B224:120

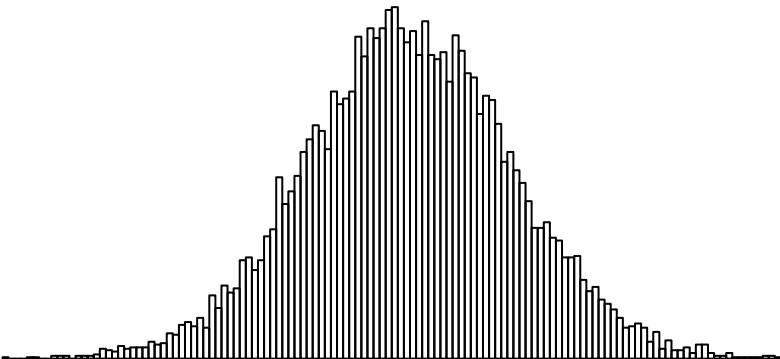

B224:45

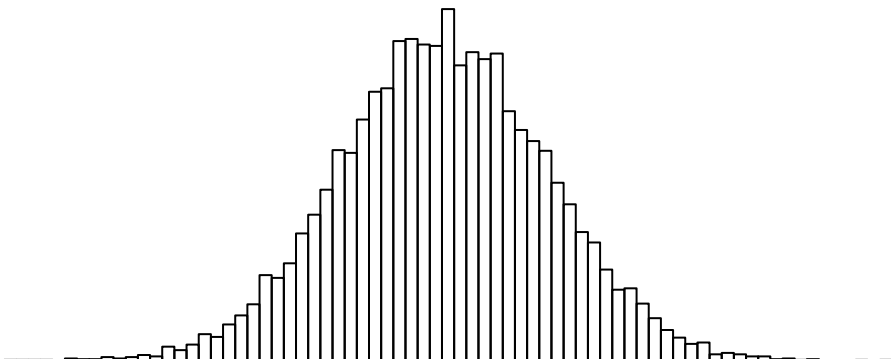

-10.0      -9.5      -9.0      -8.5      -8.0

Unidentified Metabolite 22

B224:240 – B224:120

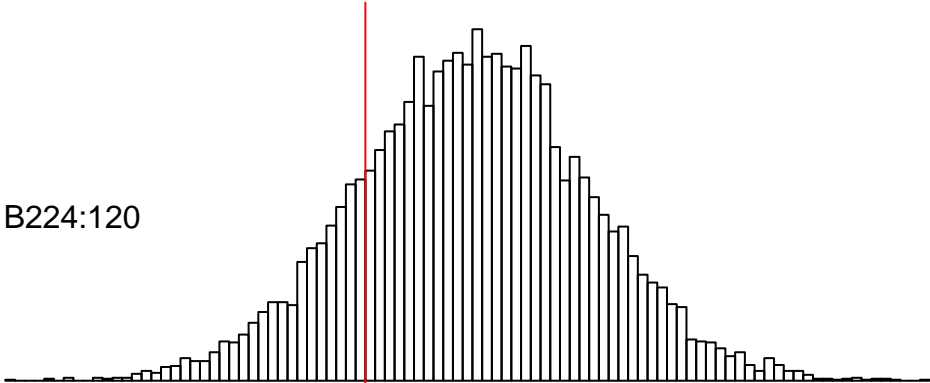

B224:240 – B224:45

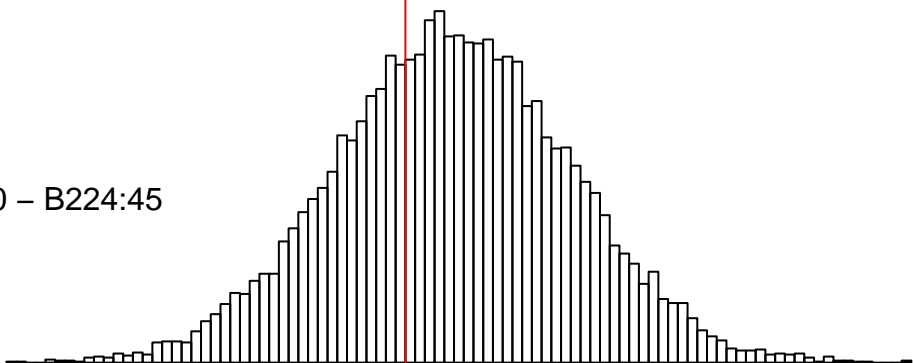

B224:120 – B224:45

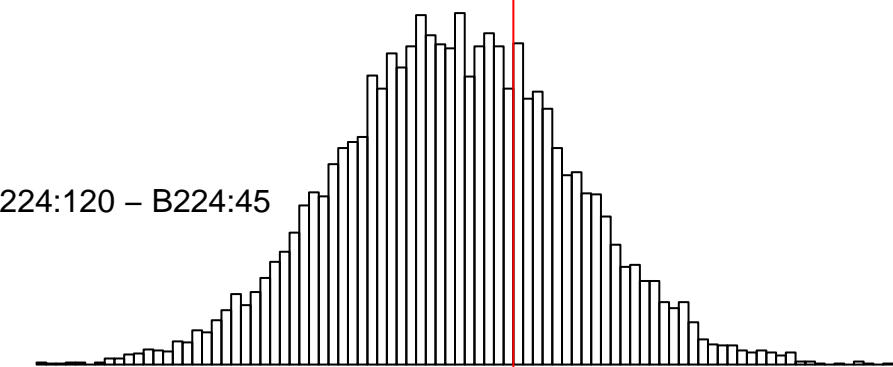

-1.0 -0.5 0.0 0.5 1.0 1.5

delta(Unidentified Metabolite 22)

B224:240

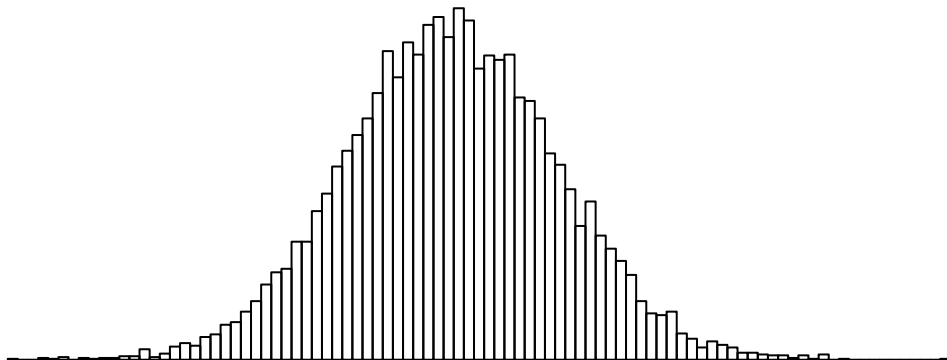

B224:120

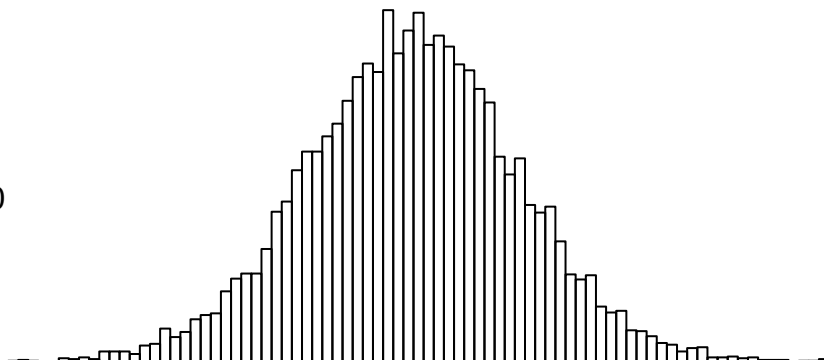

B224:45

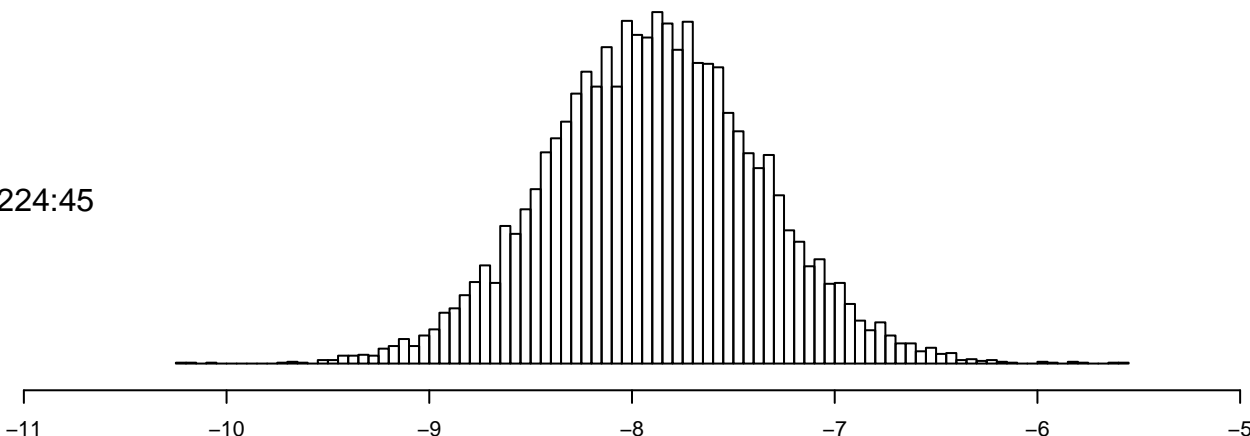

Unidentified Metabolite 23

B224:240 – B224:120

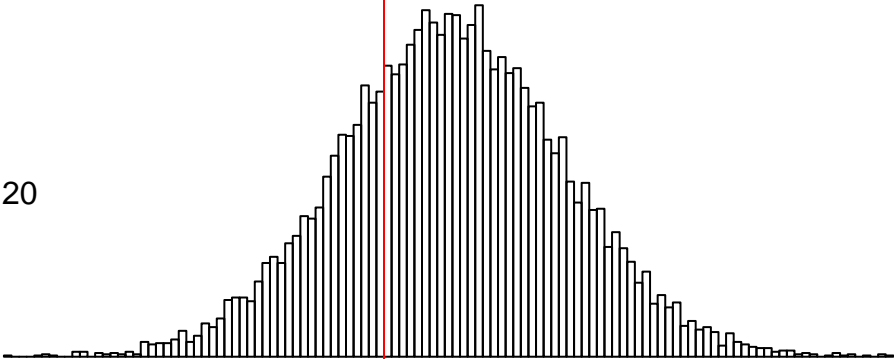

B224:240 – B224:45

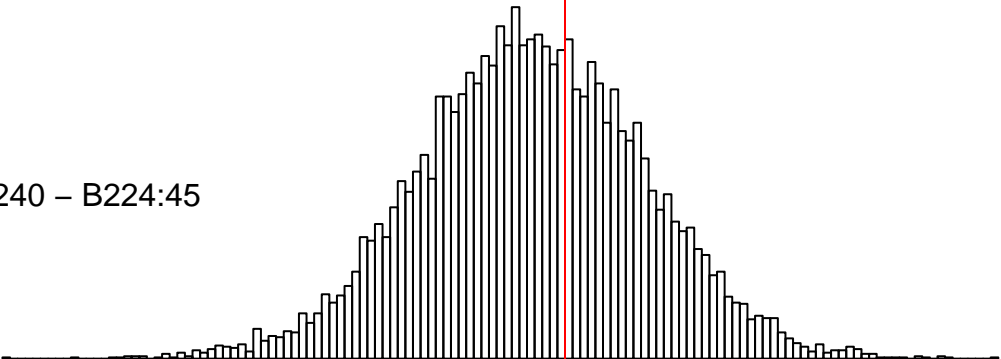

B224:120 – B224:45

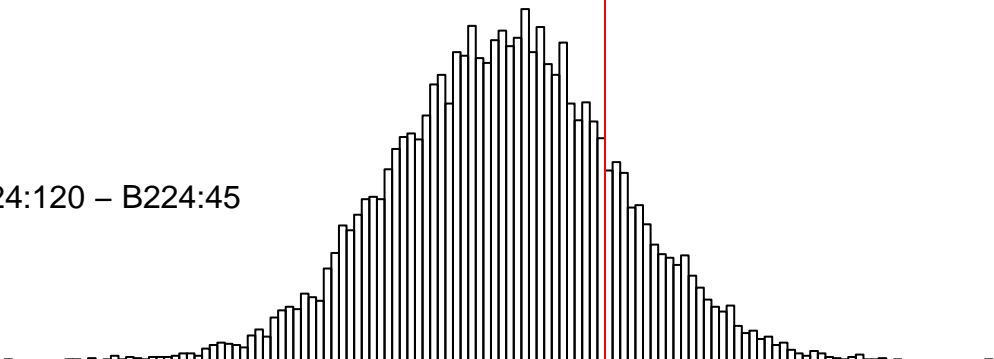

-4 -2 0 2 4

delta(Unidentified Metabolite 23)

B224:240

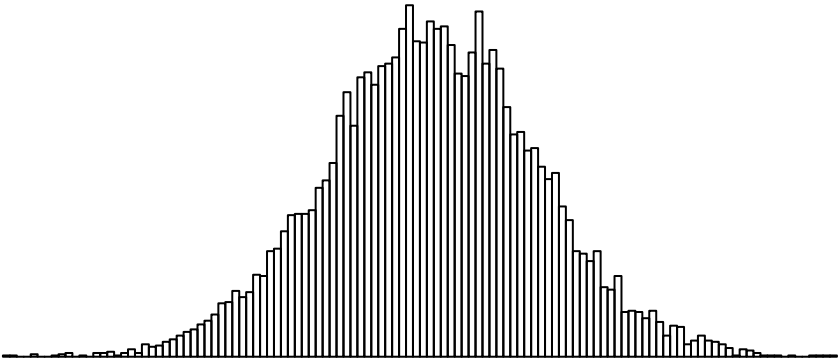

B224:120

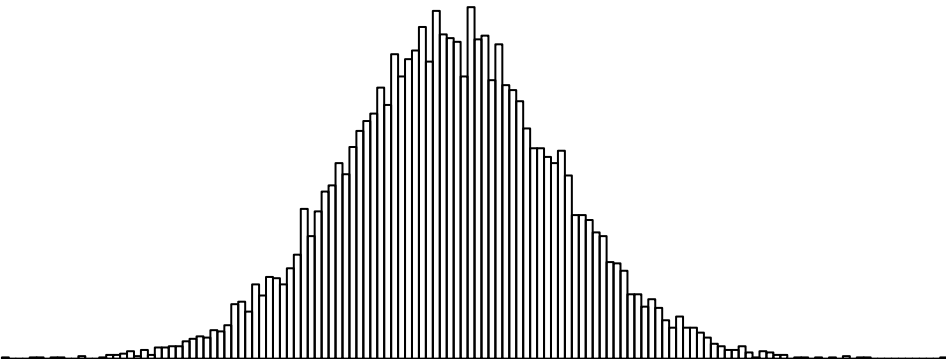

B224:45

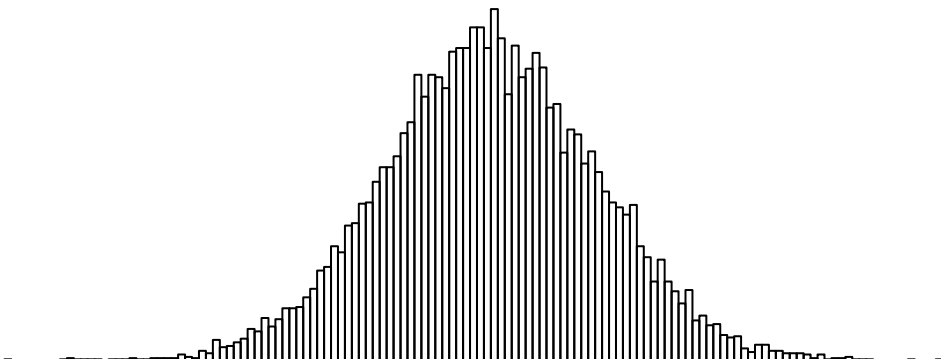

-8.5      -8.0      -7.5      -7.0      -6.5      -6.0      -5.5      -5.0

Unidentified Metabolite 24

B224:240 – B224:120

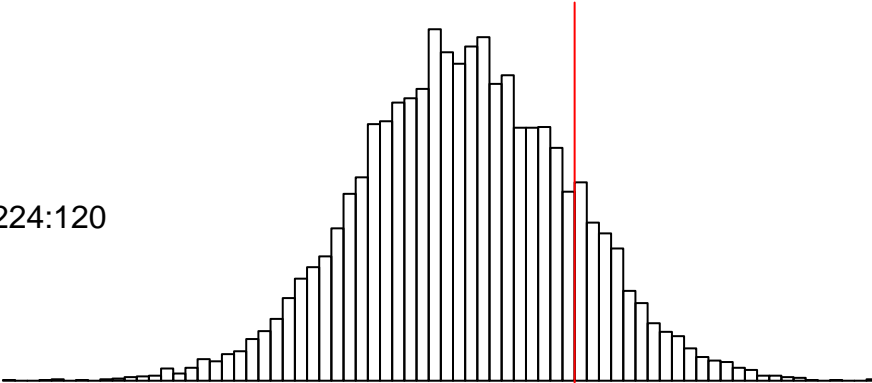

B224:240 – B224:45

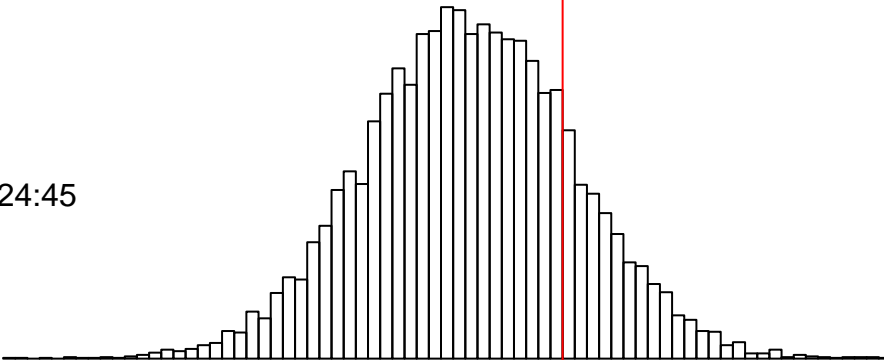

B224:120 – B224:45

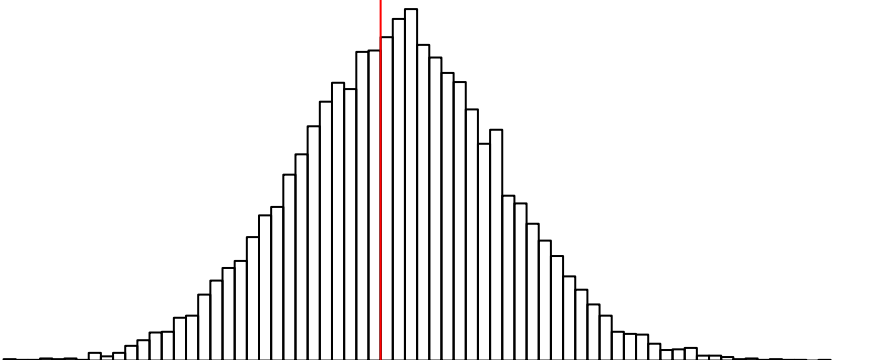

-3

-2

-1

0

1

2

delta(Unidentified Metabolite 24)

B224:240

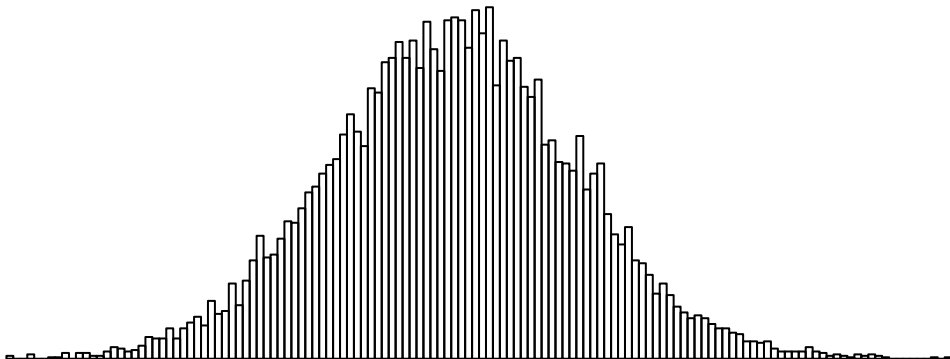

B224:120

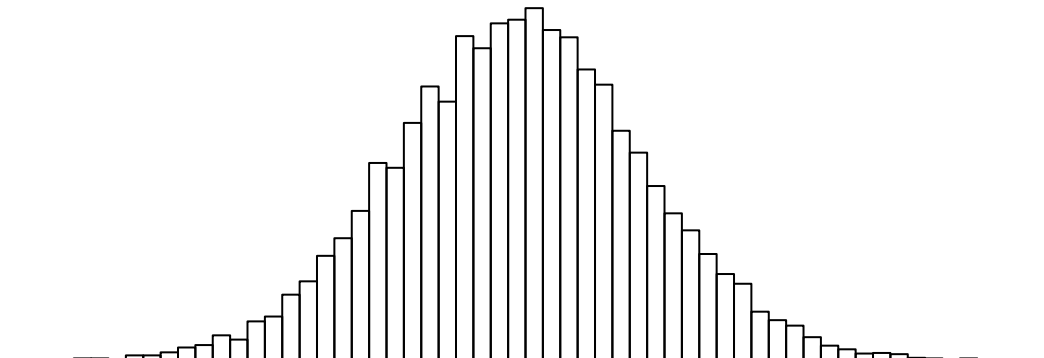

B224:45

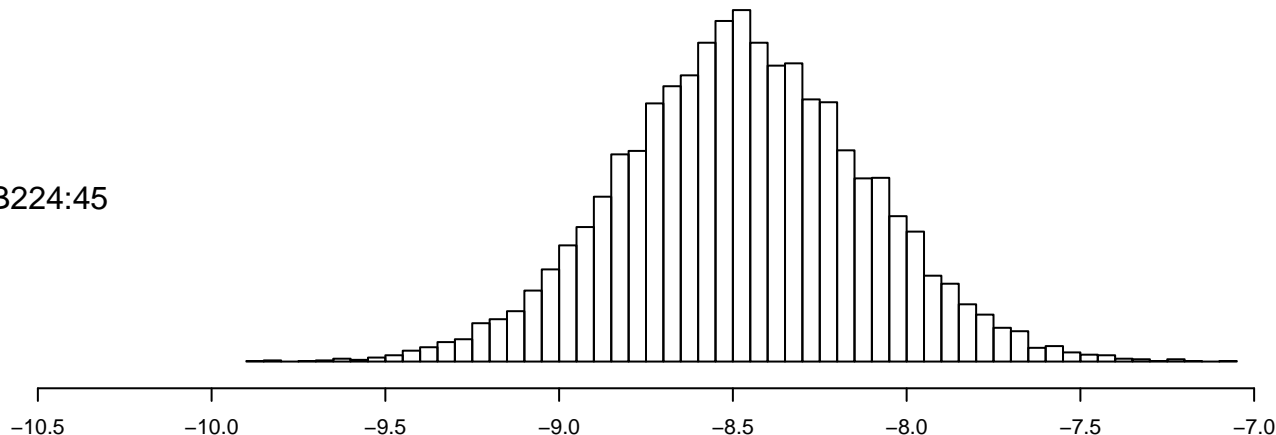

Unidentified Metabolite 25

B224:240 – B224:120

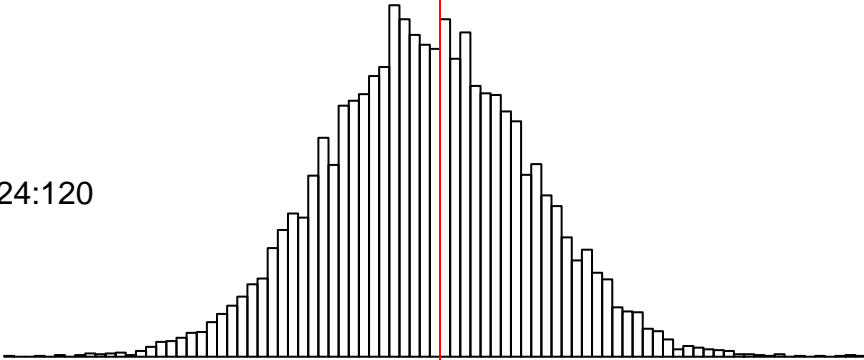

B224:240 – B224:45

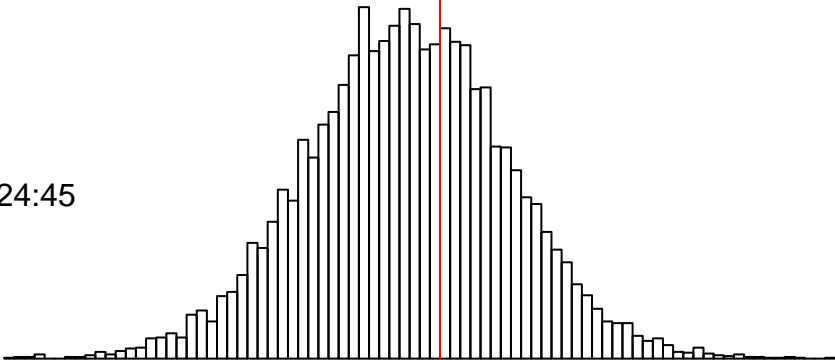

B224:120 – B224:45

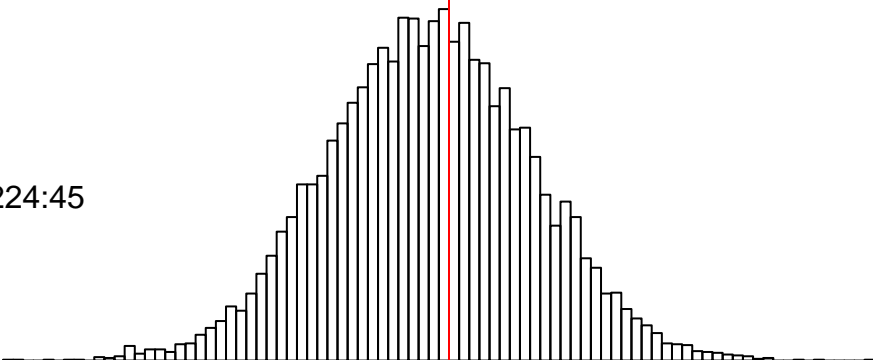

-3

-2

-1

0

1

2

3

delta(Unidentified Metabolite 25)



B224:240

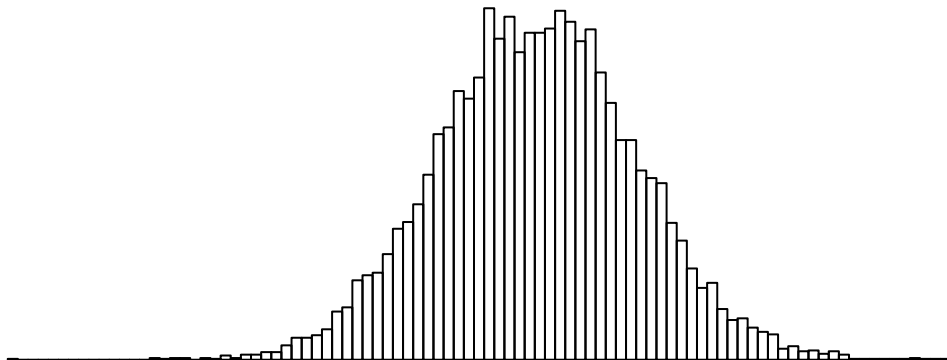

B224:120

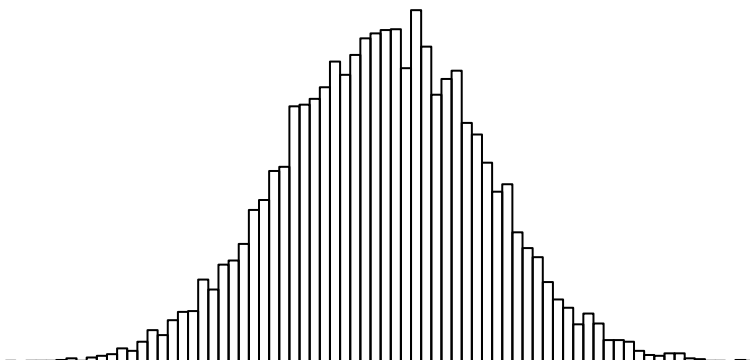

B224:45

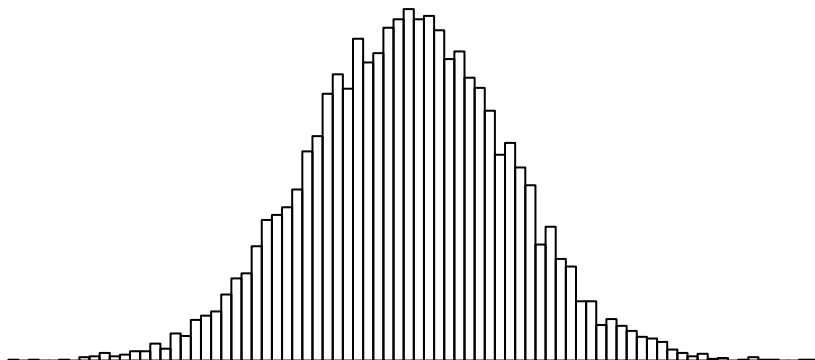

-10      -9      -8      -7      -6      -5      -4

Unidentified Metabolite 26

B224:240 – B224:120

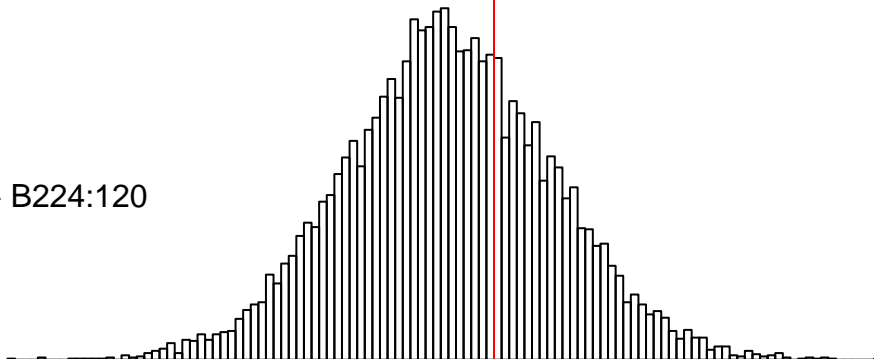

B224:240 – B224:45

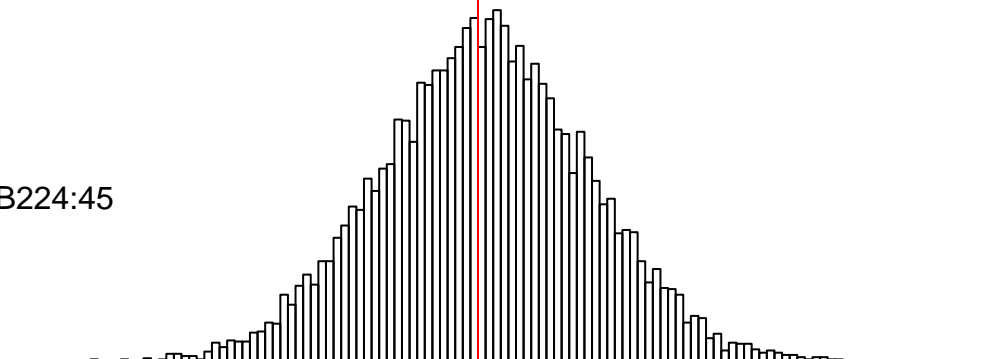

B224:120 – B224:45

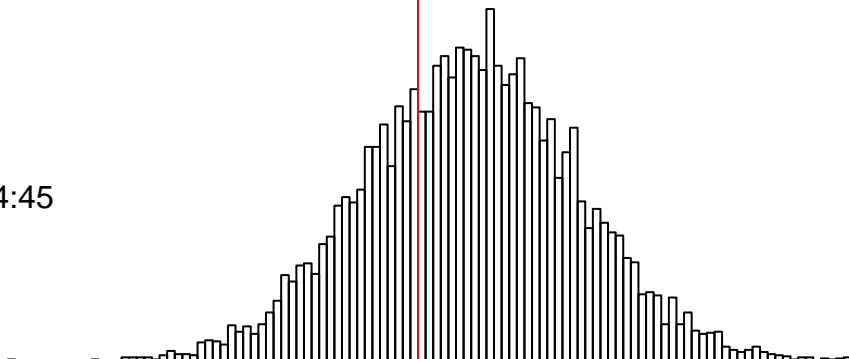

-4

-2

0

2

4

delta(Unidentified Metabolite 26)

B224:240

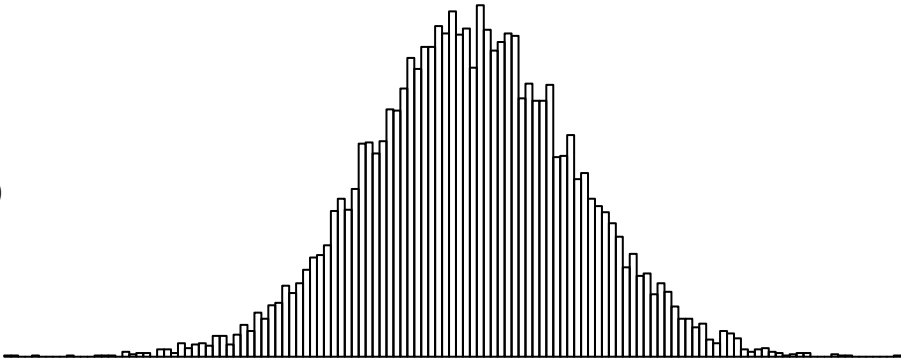

B224:120

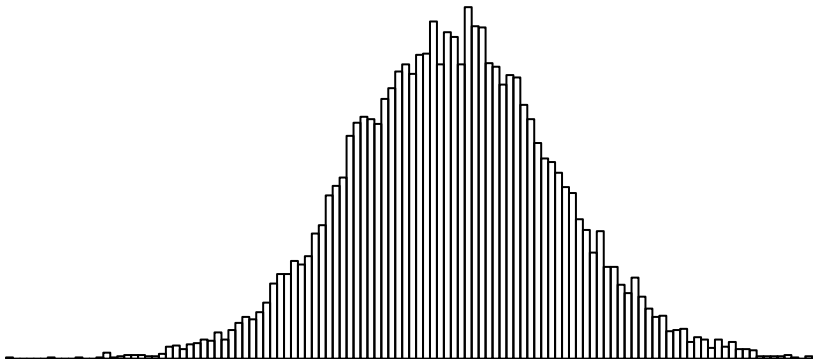

B224:45

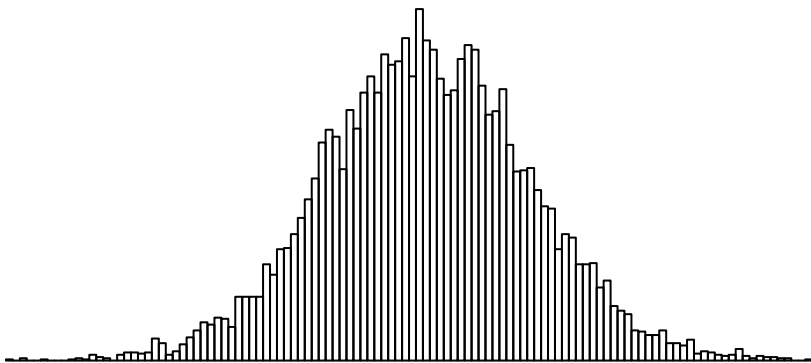

-8.5      -8.0      -7.5      -7.0      -6.5      -6.0      -5.5      -5.0

Unidentified Metabolite 27

B224:240 – B224:120

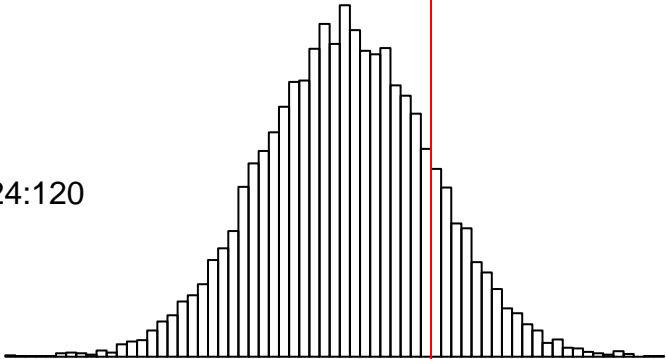

B224:240 – B224:45

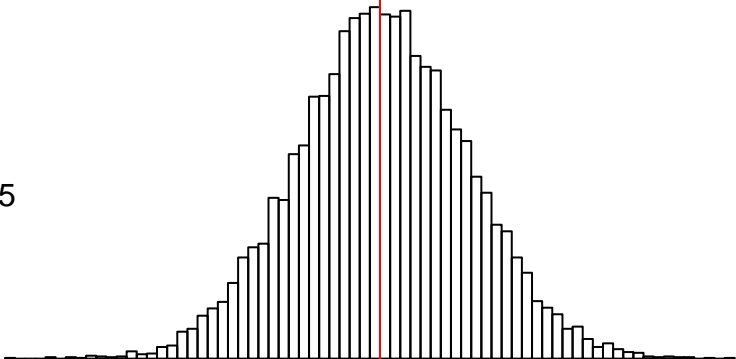

B224:120 – B224:45

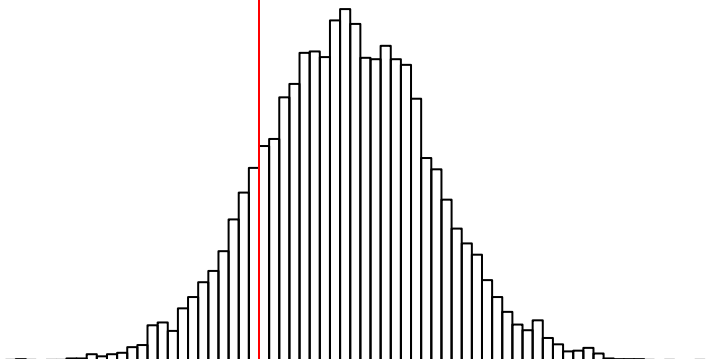

-3 -2 -1 0 1 2 3

delta(Unidentified Metabolite 27)

B224:240

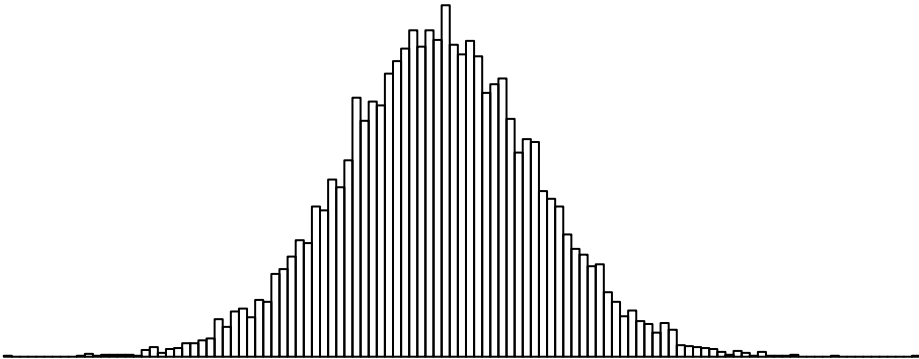

B224:120

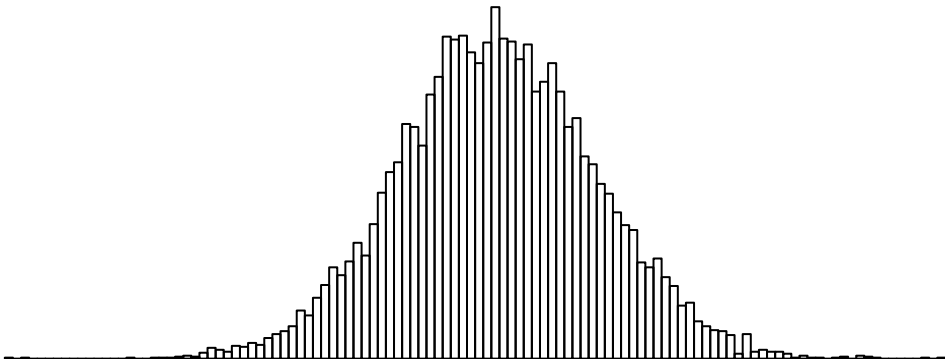

B224:45

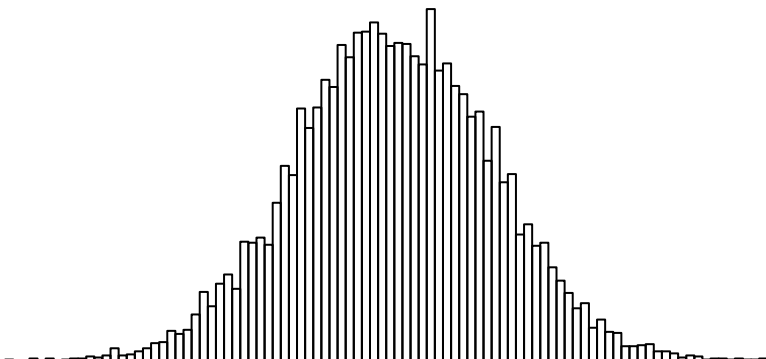

-10.0      -9.5      -9.0      -8.5      -8.0      -7.5      -7.0

Unidentified Metabolite 29

B224:240 – B224:120

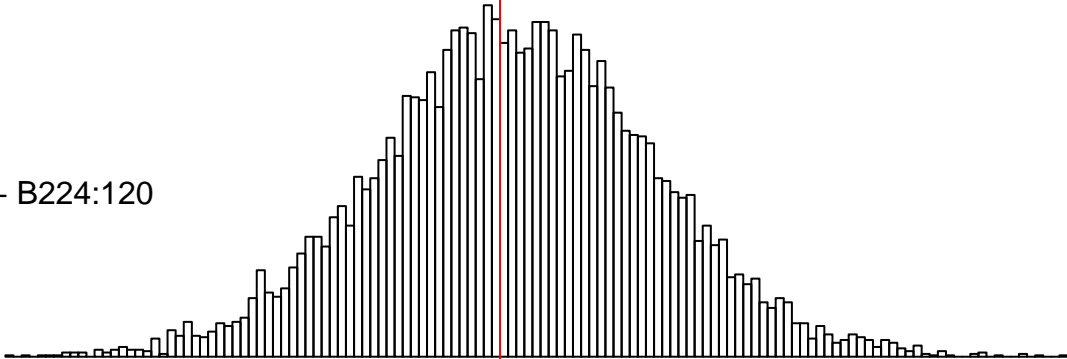

B224:240 – B224:45

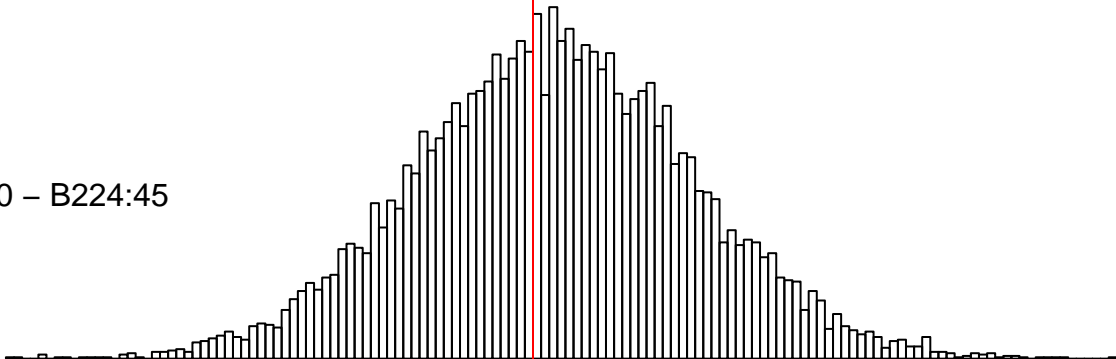

B224:120 – B224:45

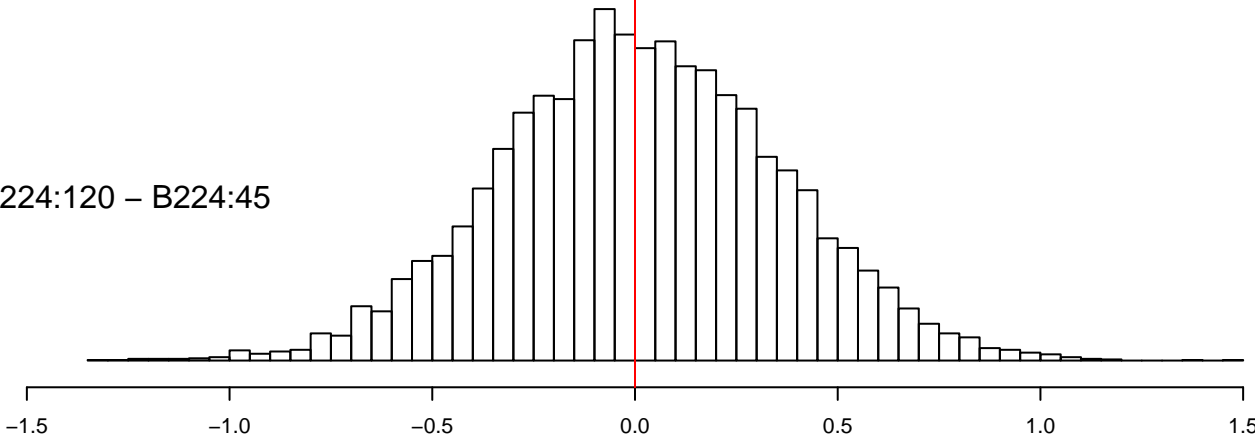

delta(Unidentified Metabolite 29)

B224:240

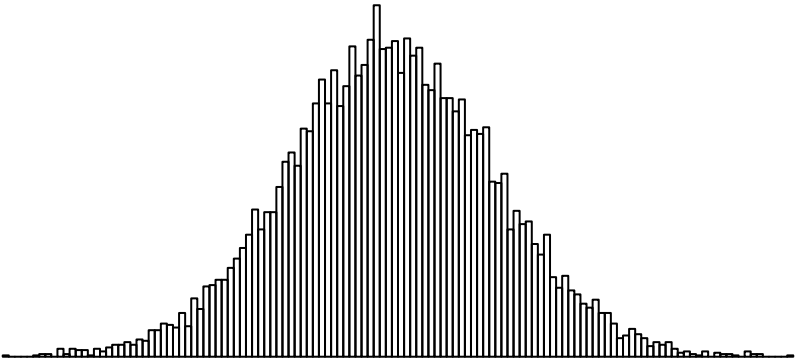

B224:120

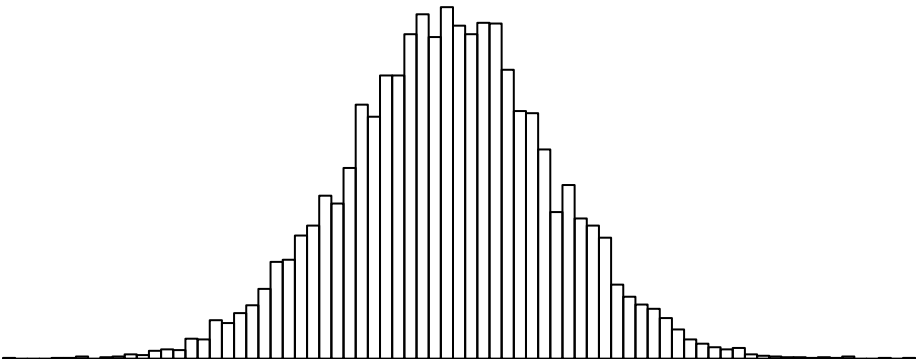

B224:45

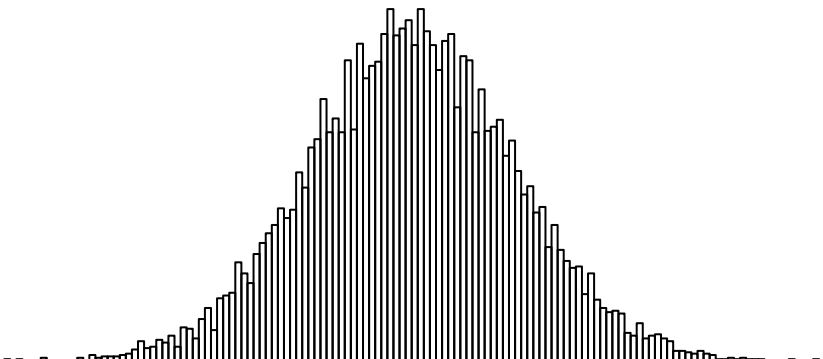

-10.5      -10.0      -9.5      -9.0      -8.5

Unidentified Metabolite 30

B224:240 – B224:120

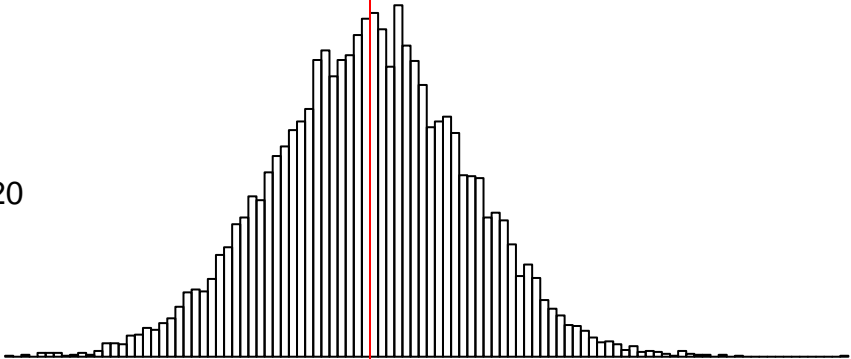

B224:240 – B224:45

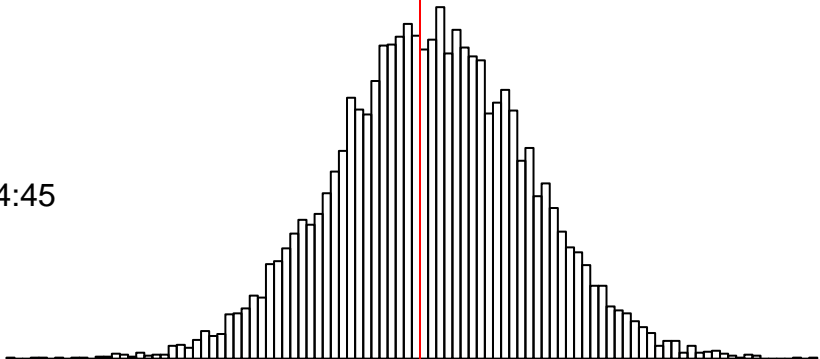

B224:120 – B224:45

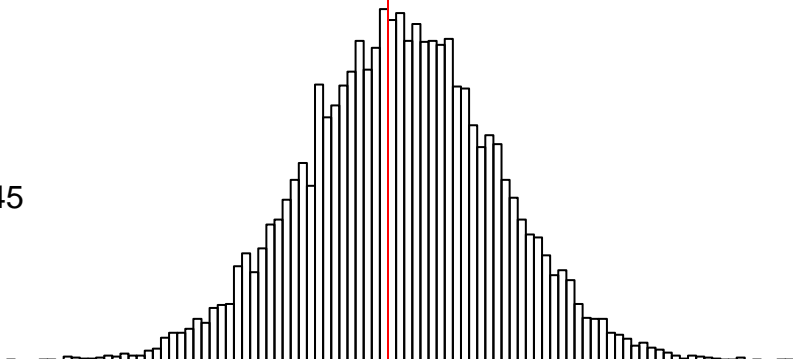

-1.5      -1.0      -0.5      0.0      0.5      1.0      1.5

delta(Unidentified Metabolite 30)



B224:240

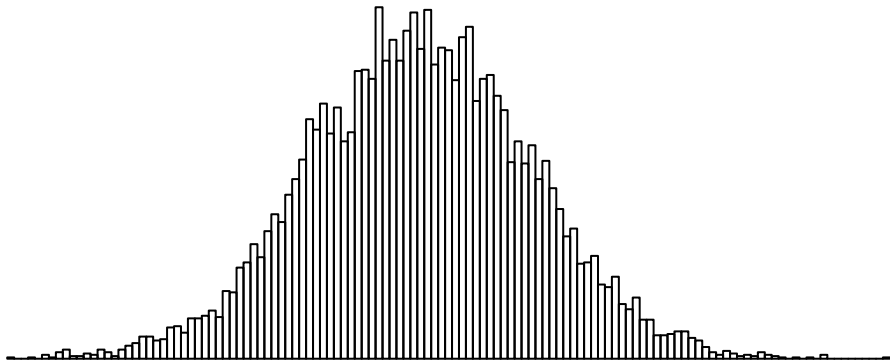

B224:120

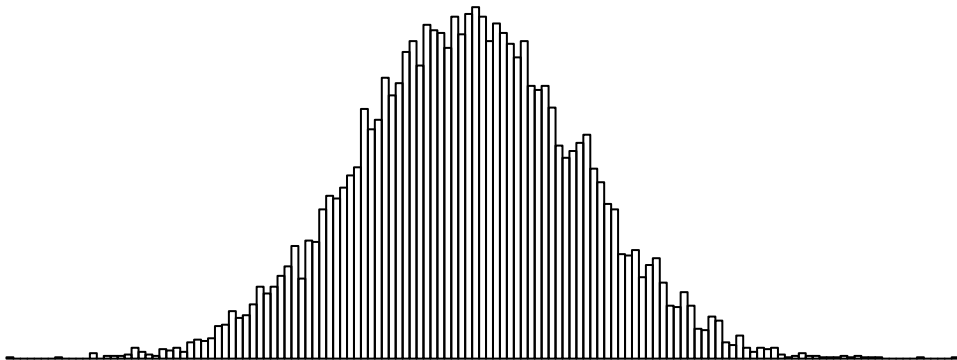

B224:45

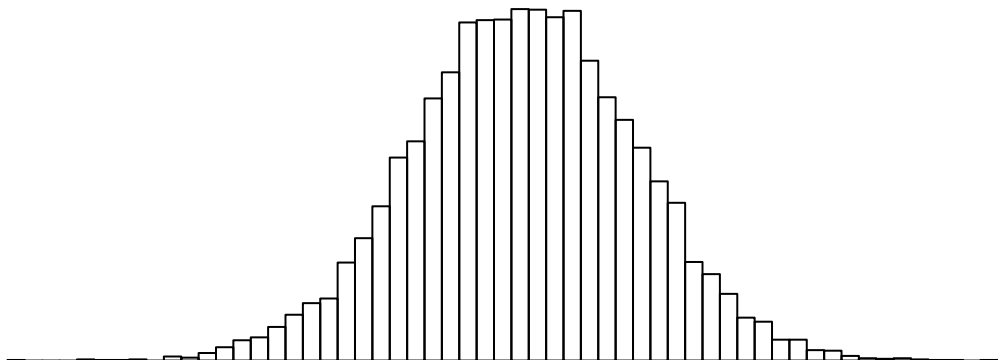

-11.5      -11.0      -10.5      -10.0      -9.5      -9.0      -8.5      -8.0

Unidentified Metabolite 31

B224:240 – B224:120

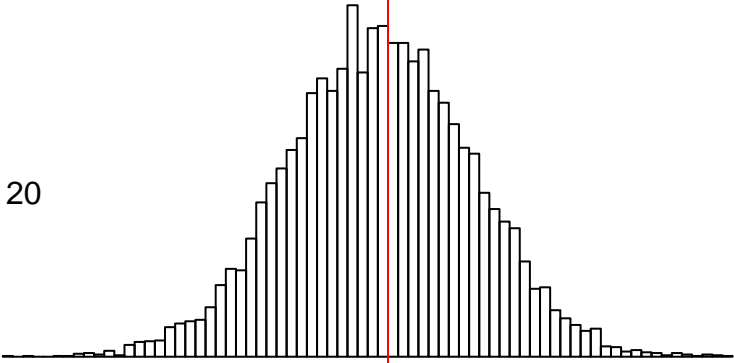

B224:240 – B224:45

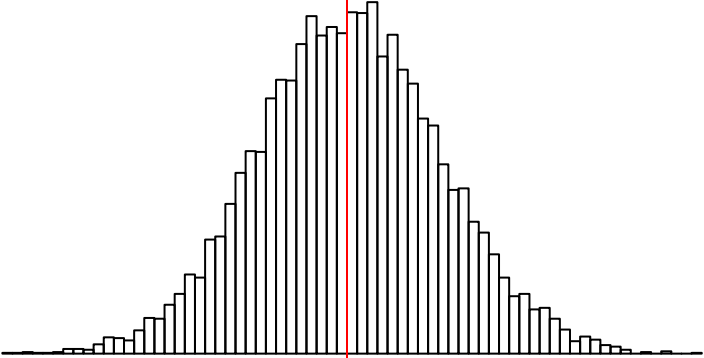

B224:120 – B224:45

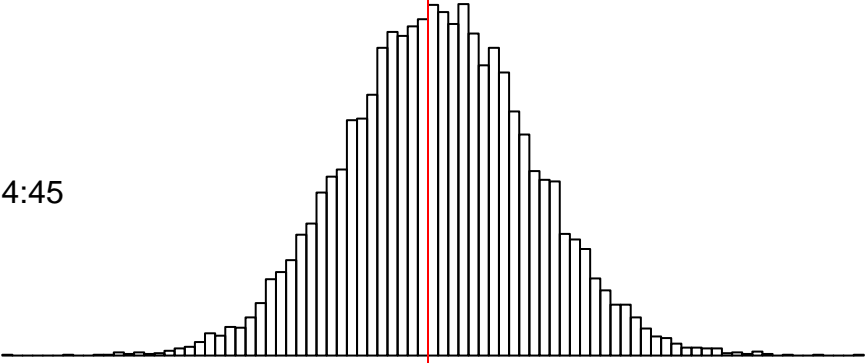

-3 -2 -1 0 1 2 3

delta(Unidentified Metabolite 31)

B224:240

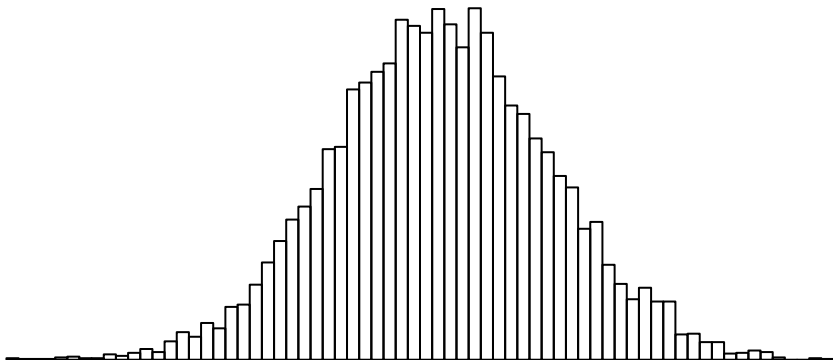

B224:120

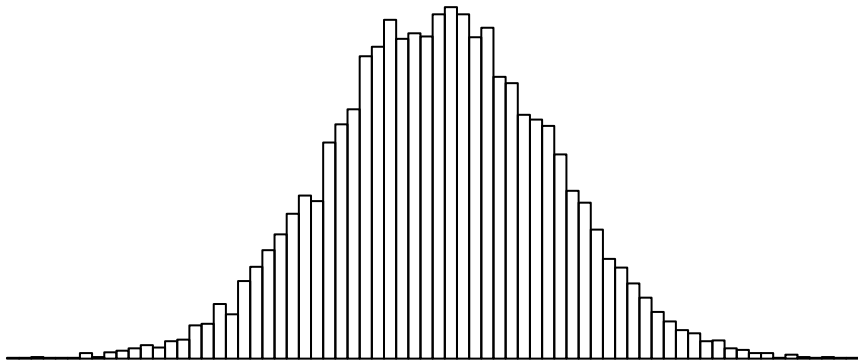

B224:45

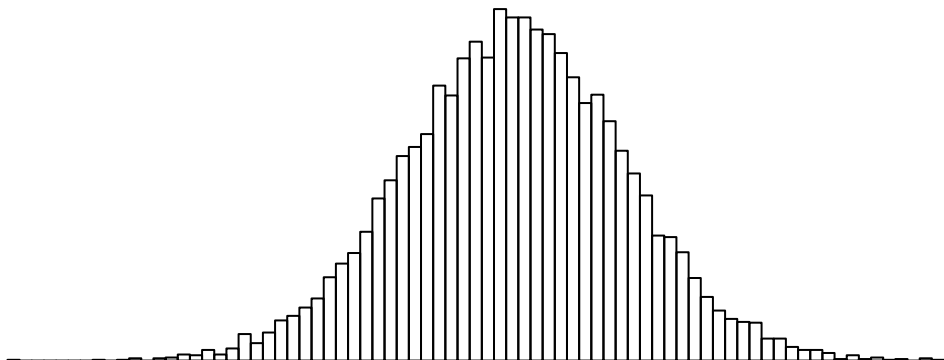

-13      -12      -11      -10      -9      -8

Unidentified Metabolite 32

B224:240 – B224:120

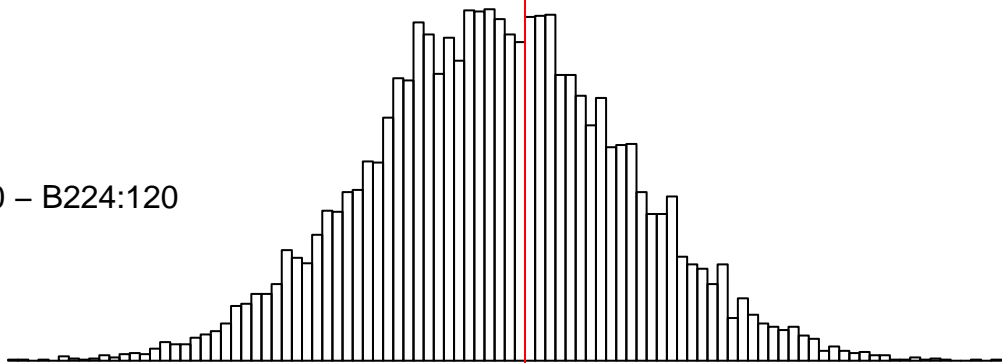

B224:240 – B224:45

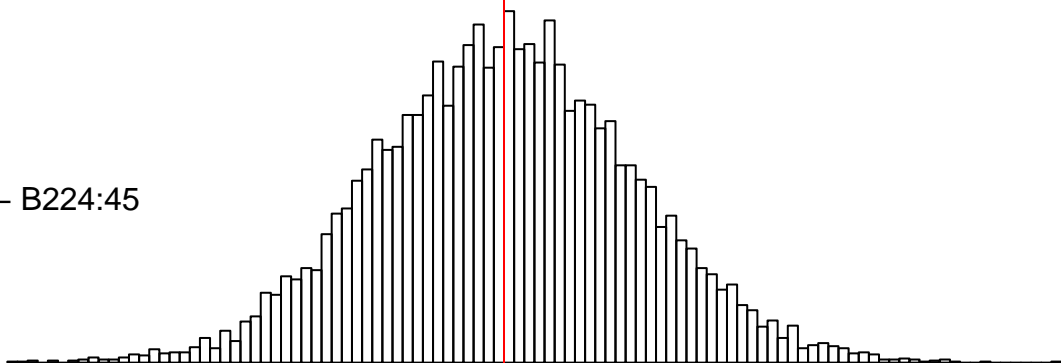

B224:120 – B224:45

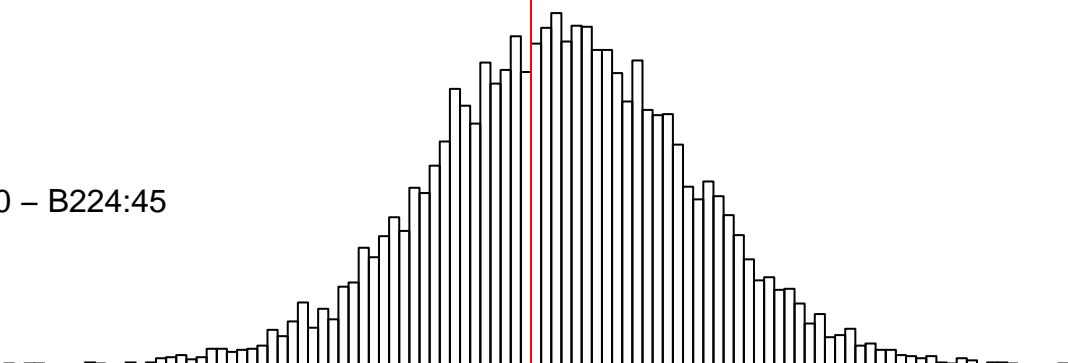

-3 -2 -1 0 1 2 3

delta(Unidentified Metabolite 32)

B224:240

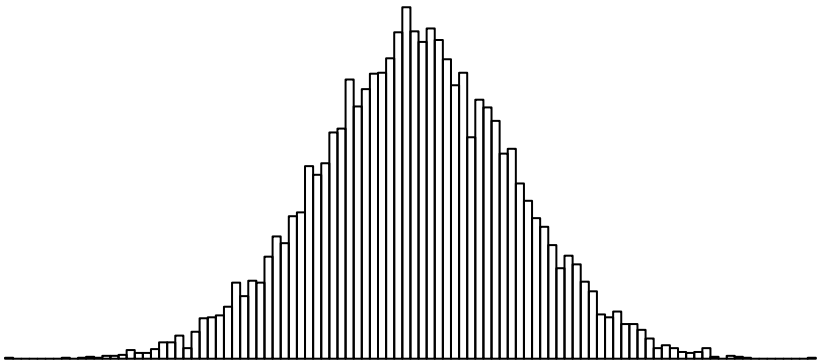

B224:120

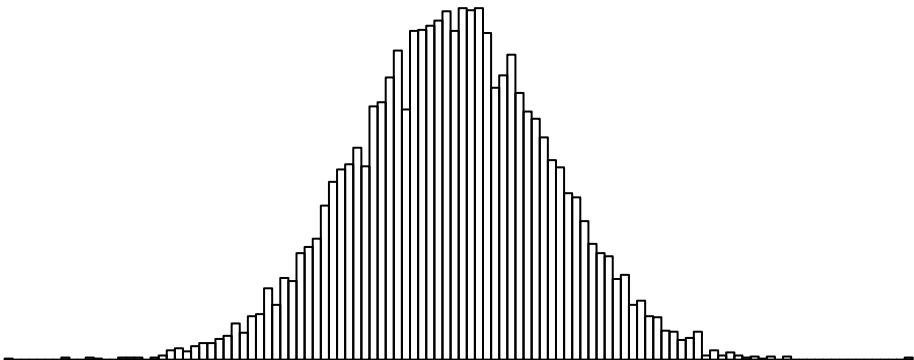

B224:45

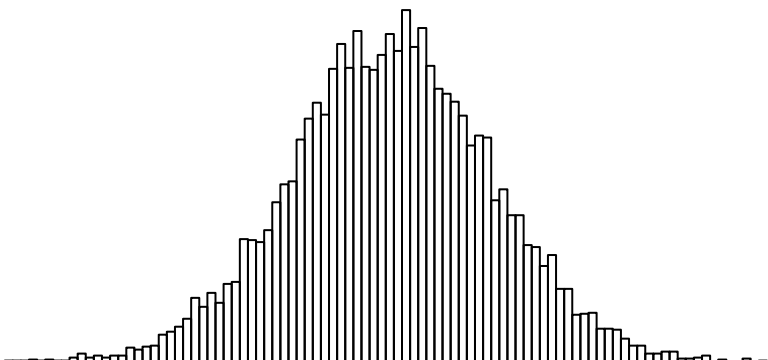

-10.0 -9.5 -9.0 -8.5 -8.0 -7.5 -7.0

Unidentified Metabolite 33

B224:240 – B224:120

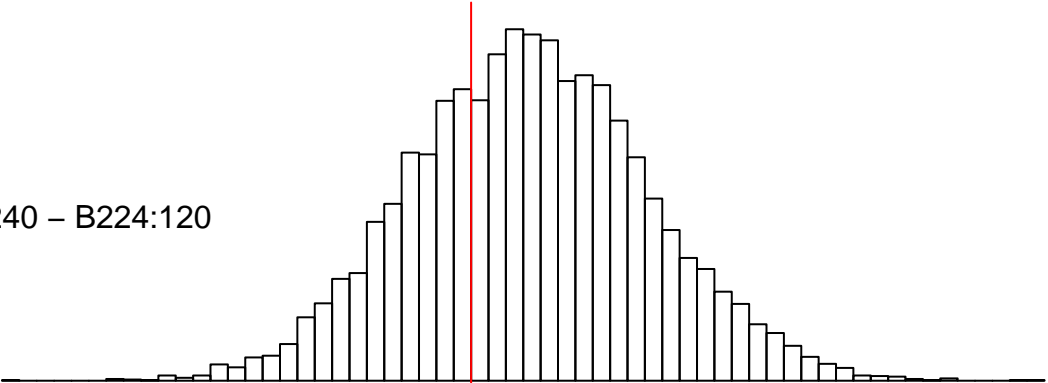

B224:240 – B224:45

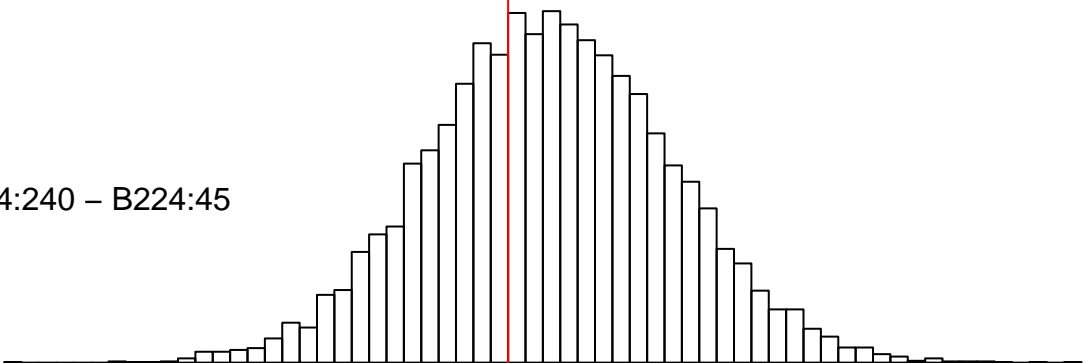

B224:120 – B224:45

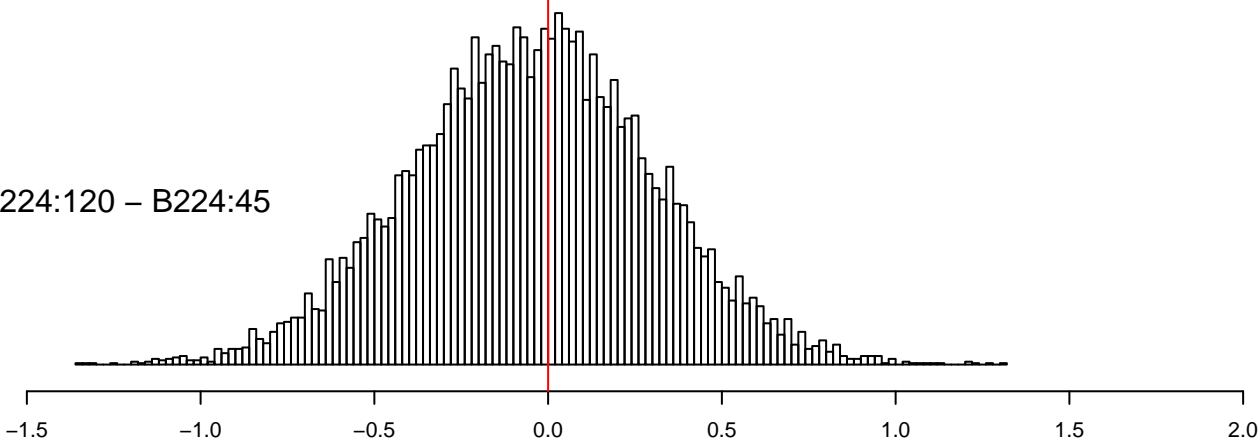

delta(Unidentified Metabolite 33)

B224:240

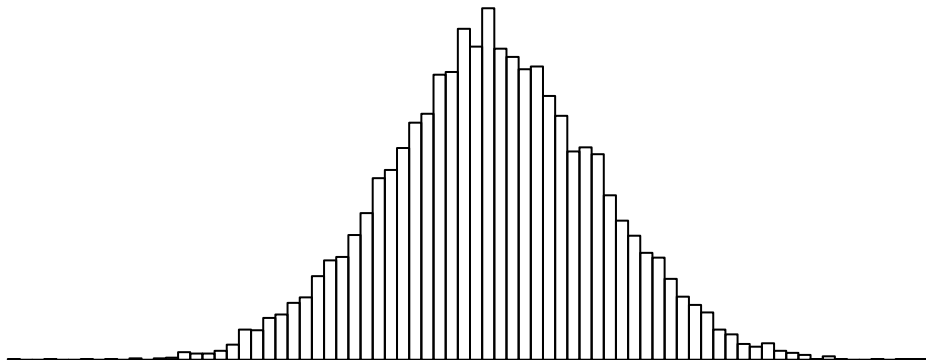

B224:120

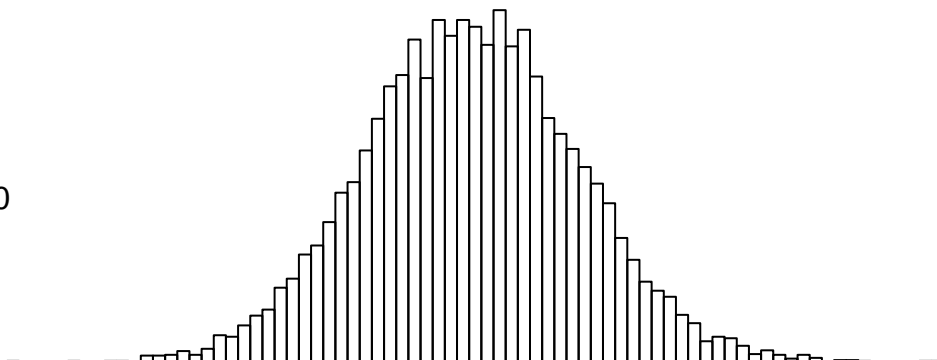

B224:45

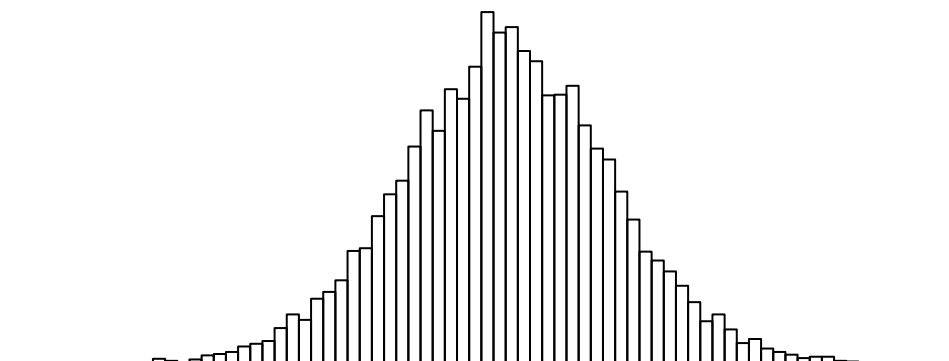

-10.5      -10.0      -9.5      -9.0      -8.5

Unidentified Metabolite 34

B224:240 – B224:120

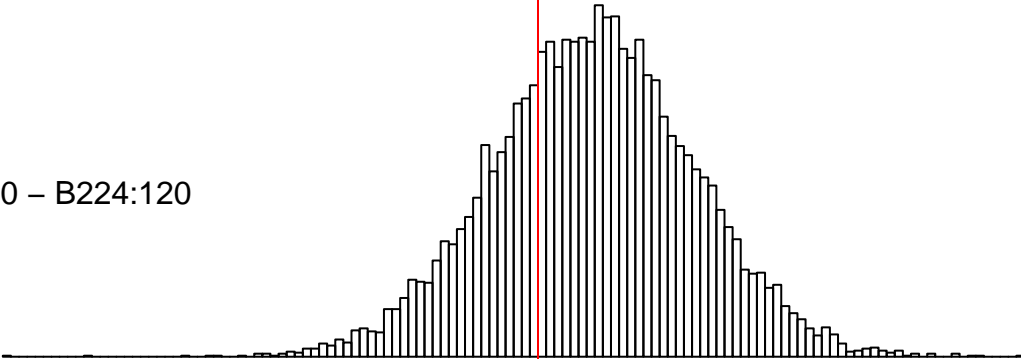

B224:240 – B224:45

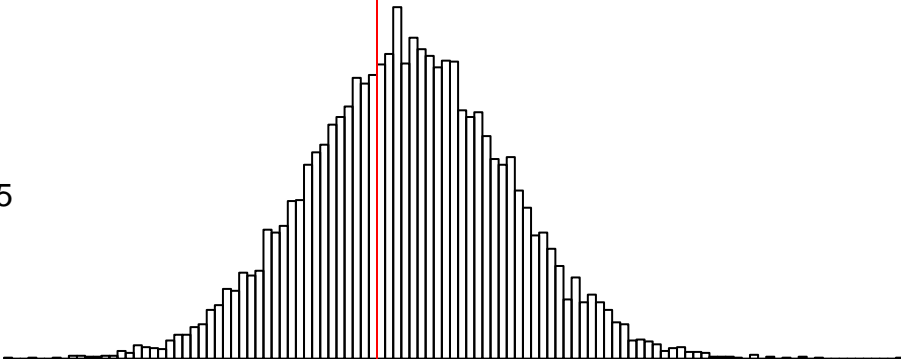

B224:120 – B224:45

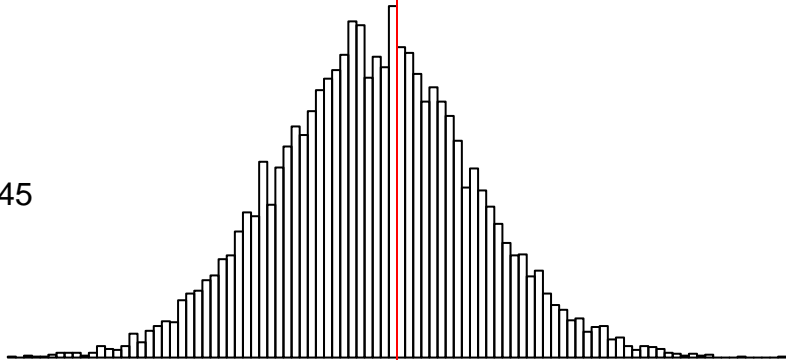

-1.5      -1.0      -0.5      0.0      0.5      1.0      1.5

delta(Unidentified Metabolite 34)



B224:240

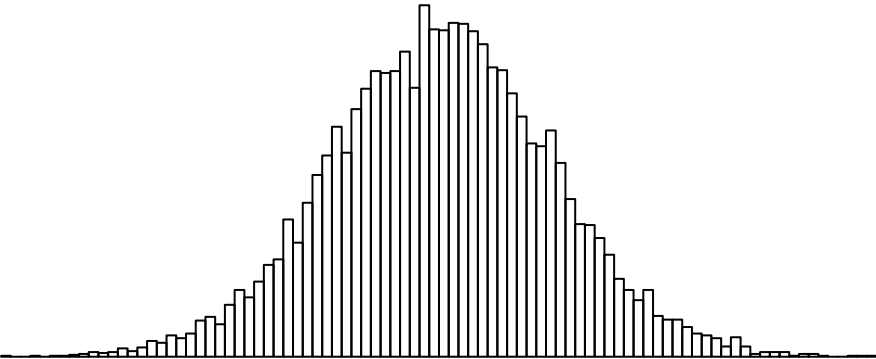

B224:120

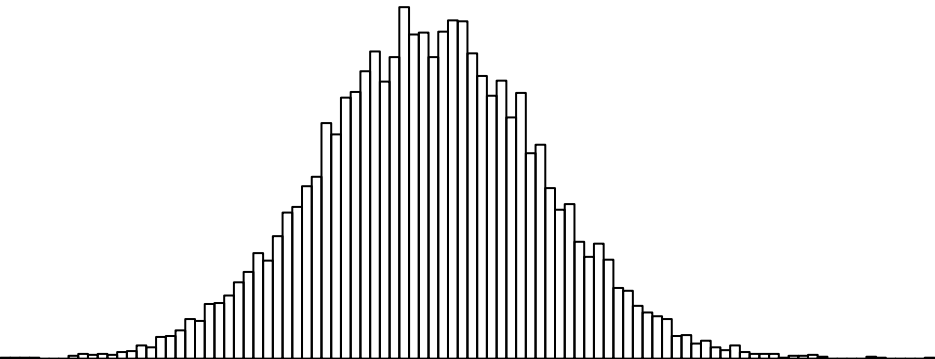

B224:45

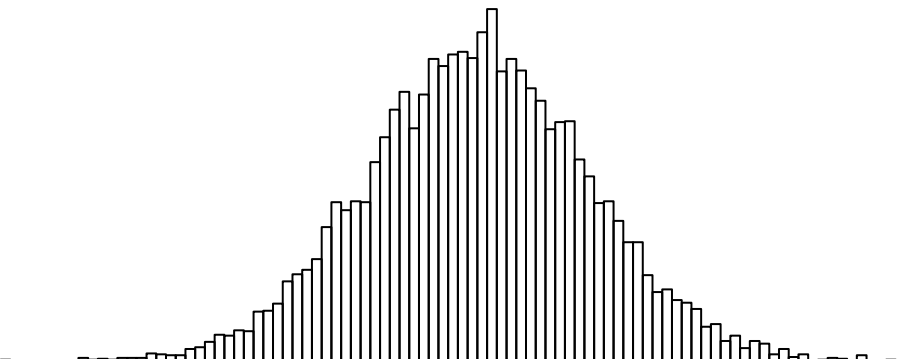

-9.0 -8.5 -8.0 -7.5 -7.0 -6.5

Unidentified Metabolite 35

B224:240 – B224:120

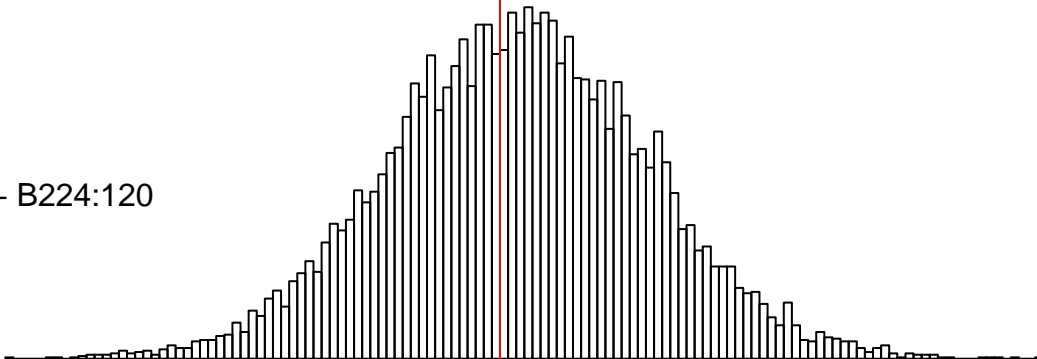

B224:240 – B224:45

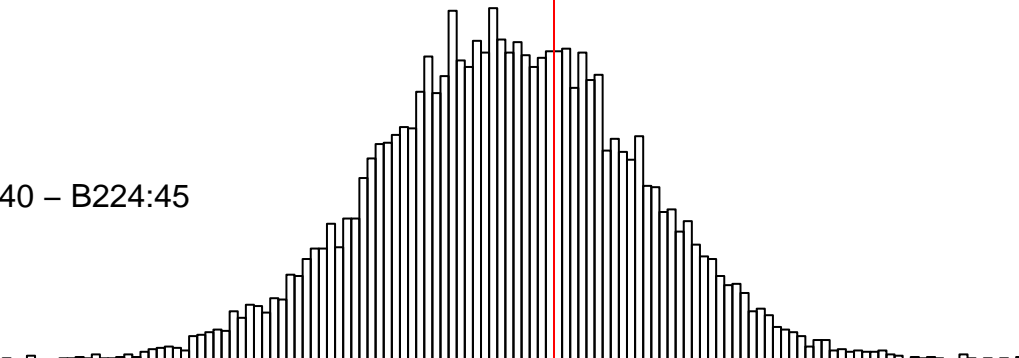

B224:120 – B224:45

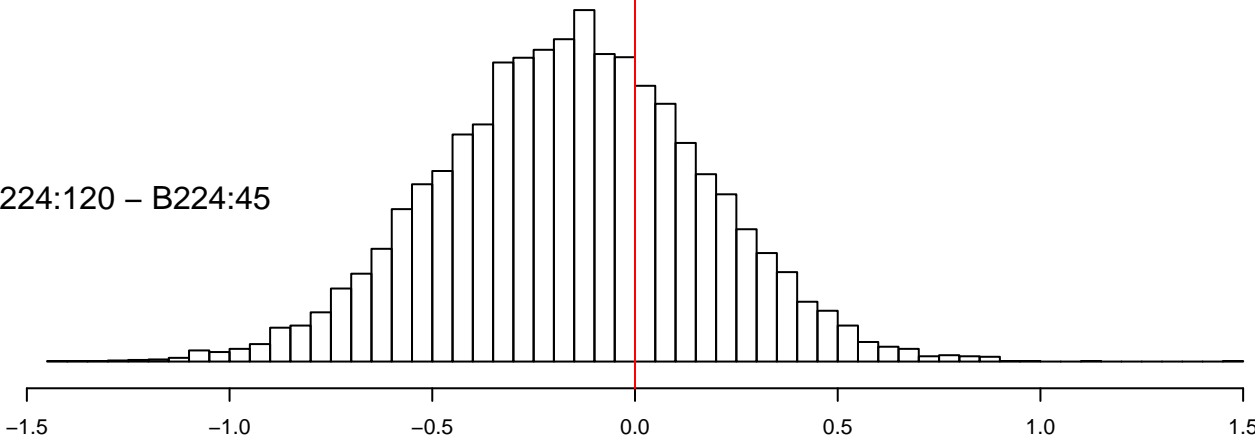

delta(Unidentified Metabolite 35)

B224:240

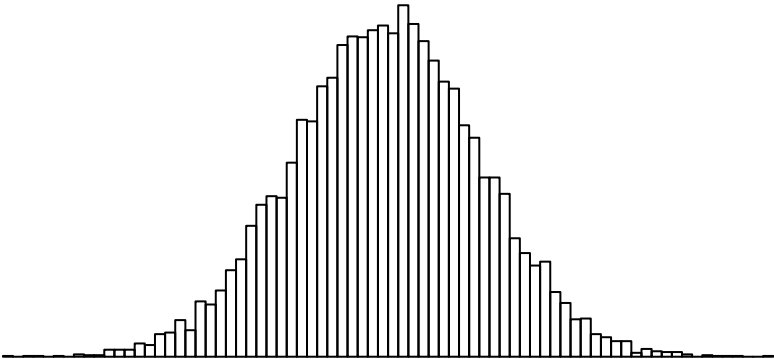

B224:120

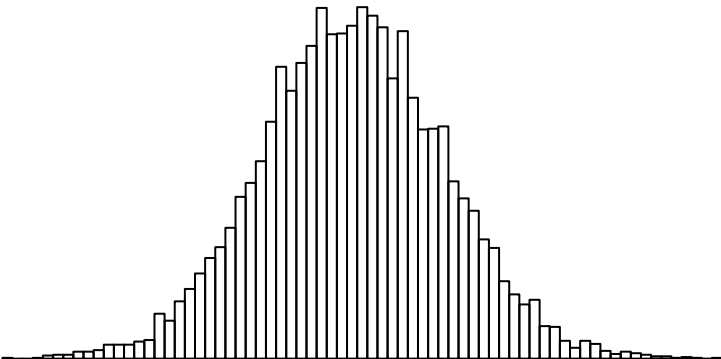

B224:45

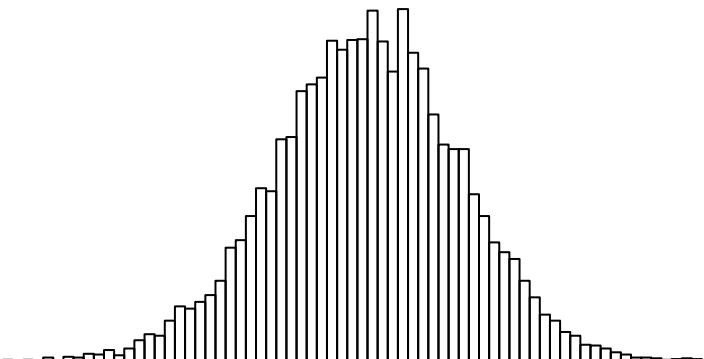

-9      -8      -7      -6      -5      -4      -3

Unidentified Metabolite 36

B224:240 – B224:120

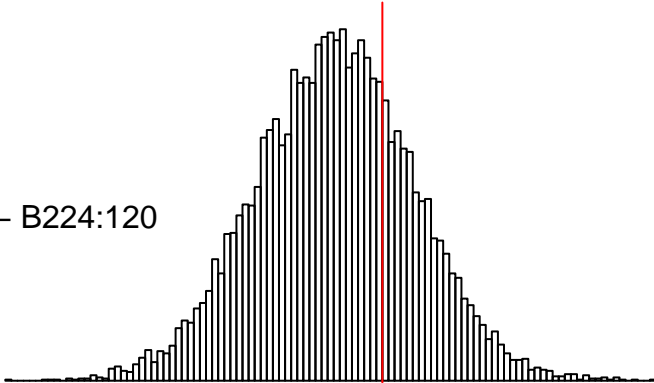

B224:240 – B224:45

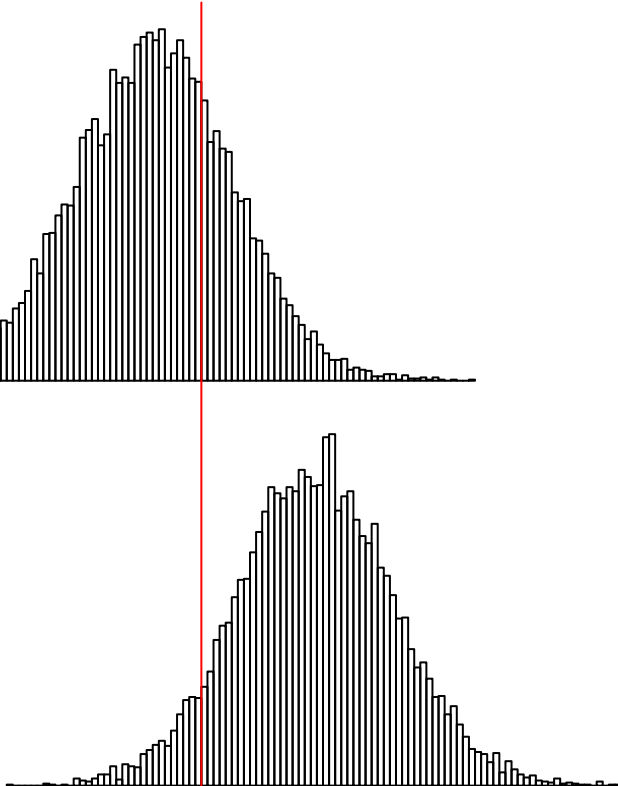

B224:120 – B224:45

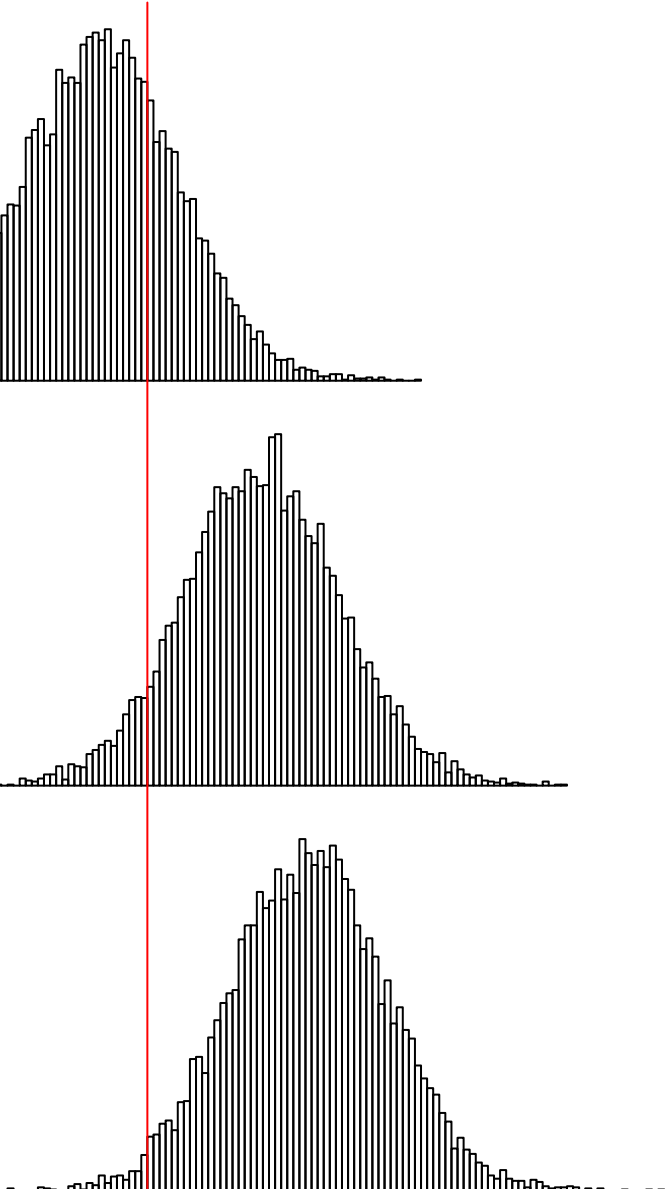

delta(Unidentified Metabolite 36)

B224:240

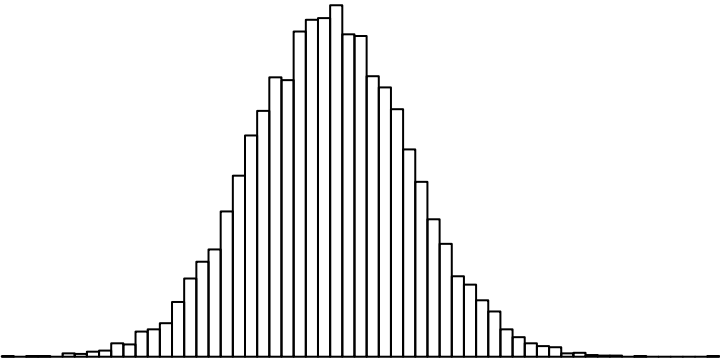

B224:120

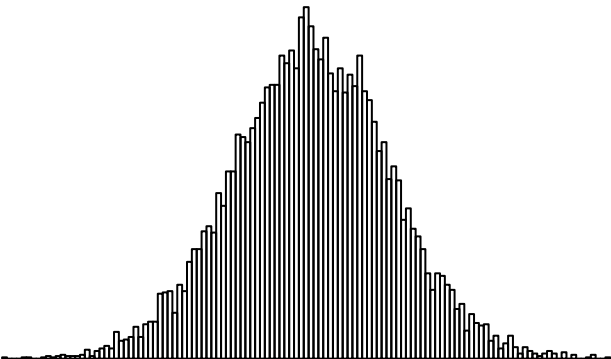

B224:45

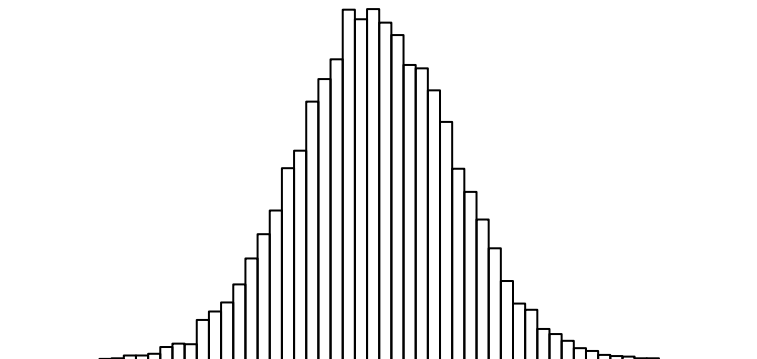

-9                      -8                      -7                      -6                      -5                      -4

Unidentified Metabolite 38

B224:240 – B224:120

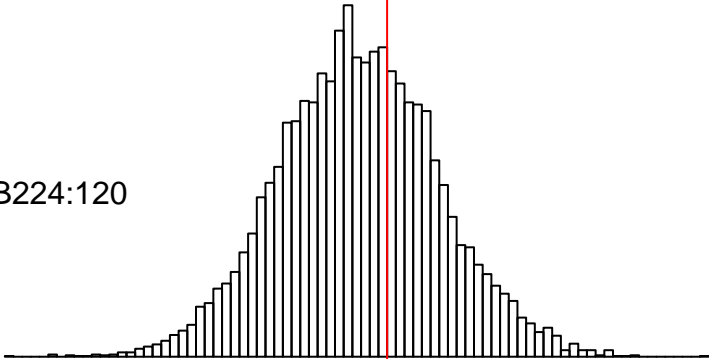

B224:240 – B224:45

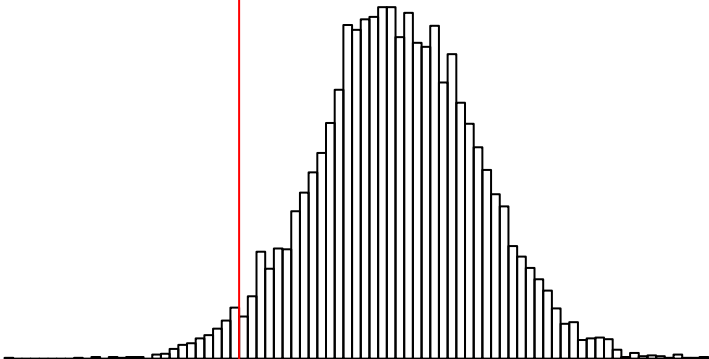

B224:120 – B224:45

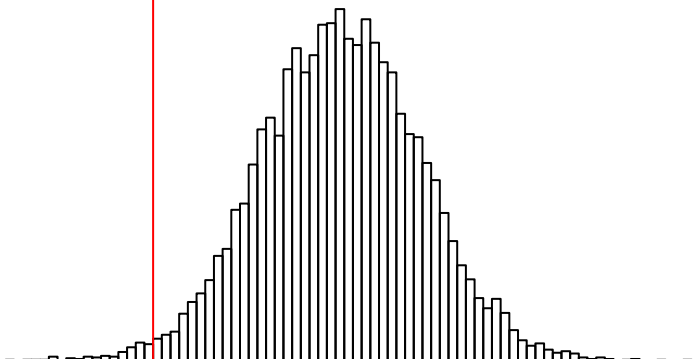

-3 -2 -1 0 1 2 3 4

delta(Unidentified Metabolite 38)

B224:240

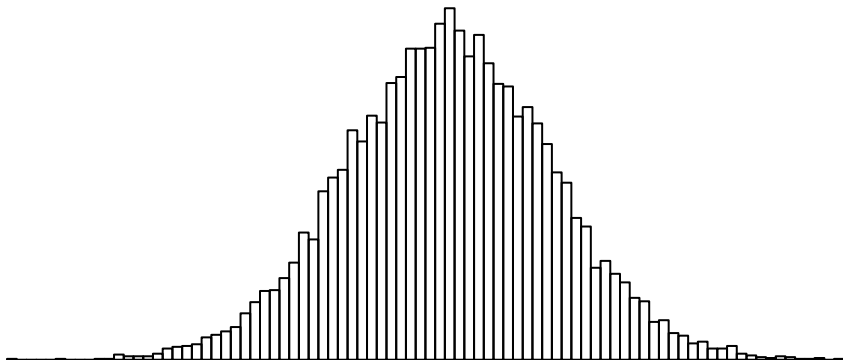

B224:120

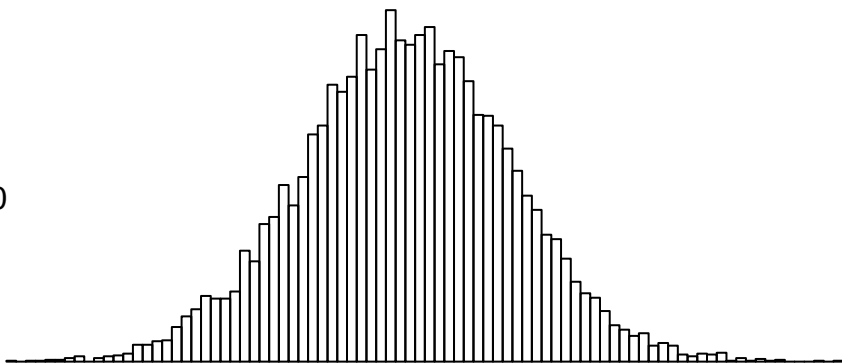

B224:45

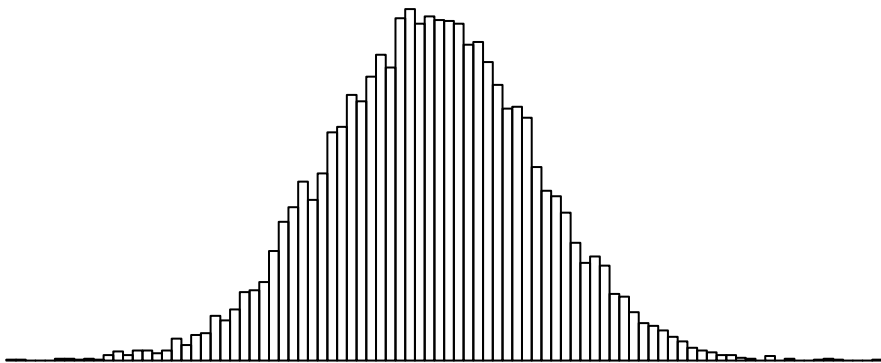

-10.0      -9.5      -9.0      -8.5      -8.0      -7.5

Unidentified Metabolite 39

B224:240 – B224:120

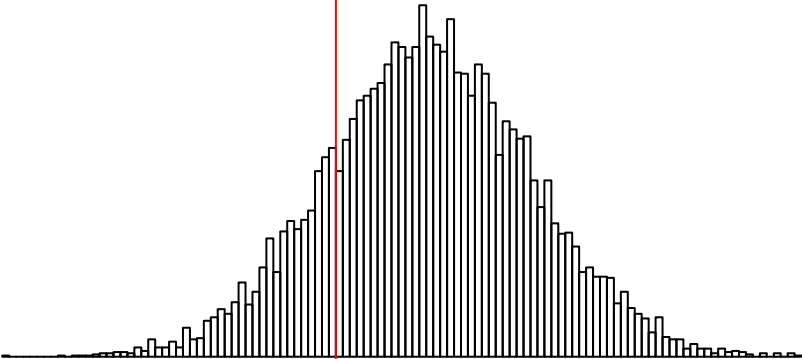

B224:240 – B224:45

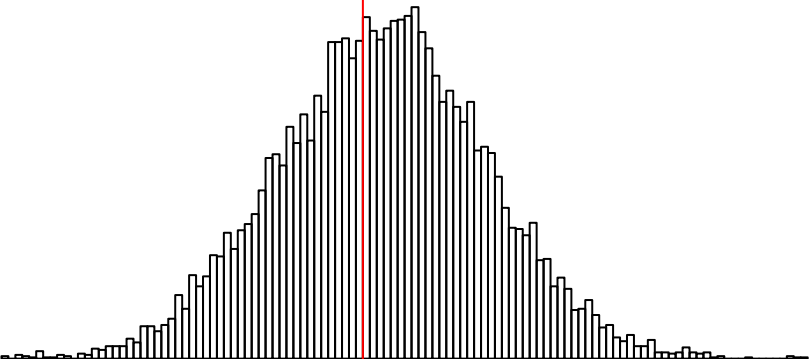

B224:120 – B224:45

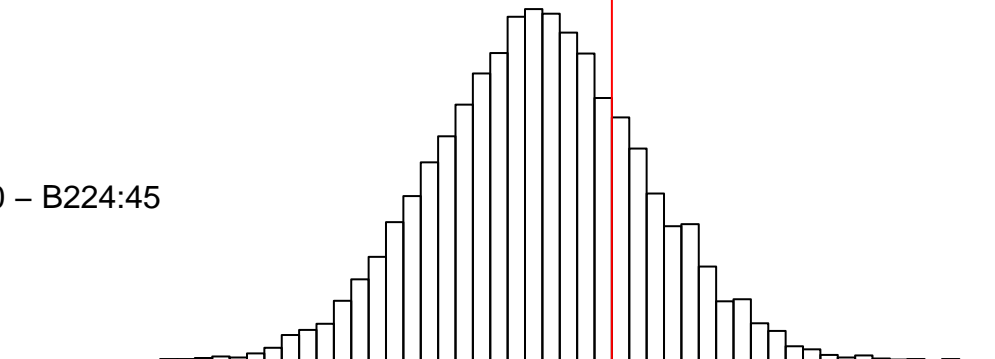

-2.0 -1.5 -1.0 -0.5 0.0 0.5 1.0 1.5

delta(Unidentified Metabolite 39)



B224:240

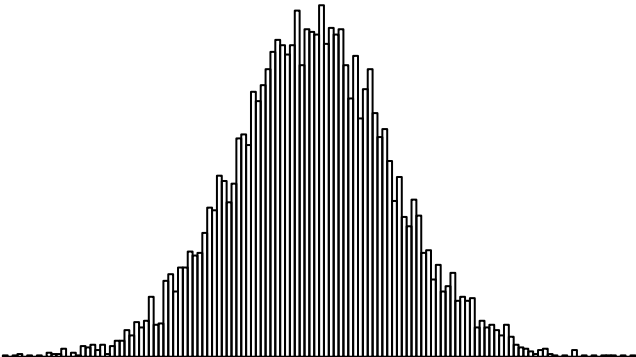

B224:120

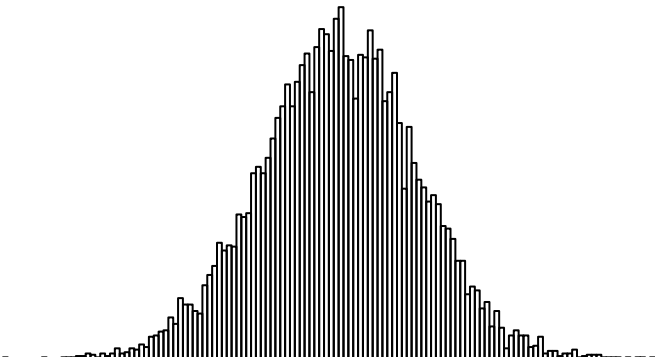

B224:45

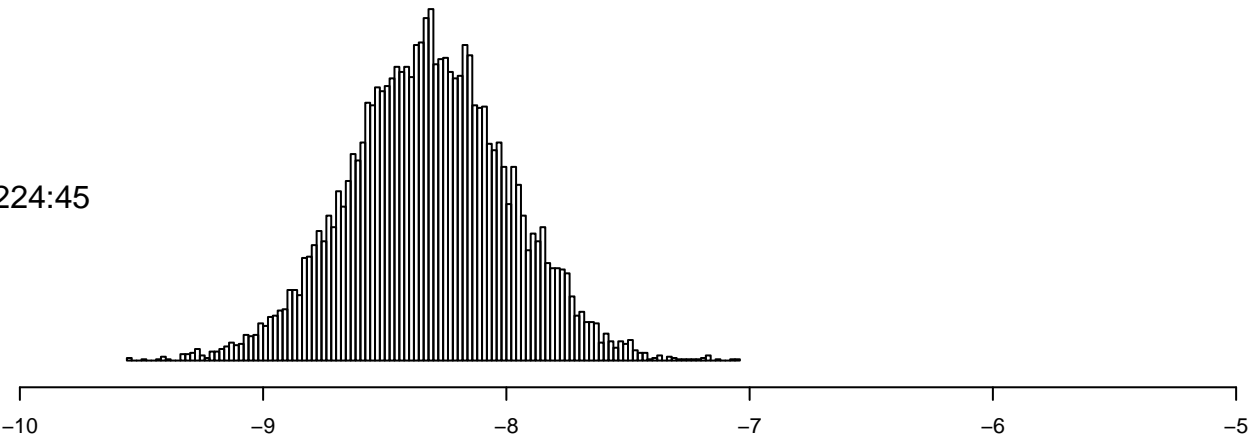

Unidentified Metabolite 42

B224:240 – B224:120

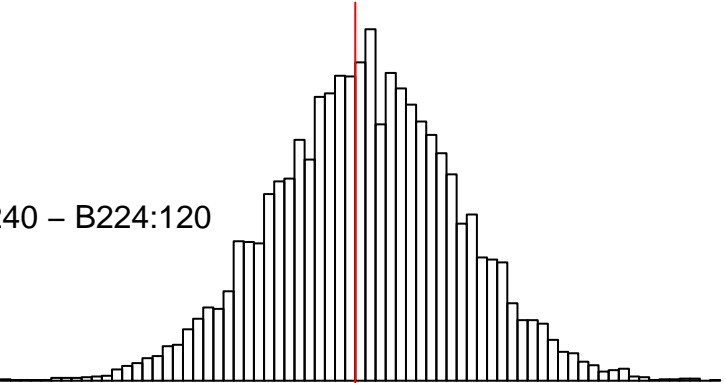

B224:240 – B224:45

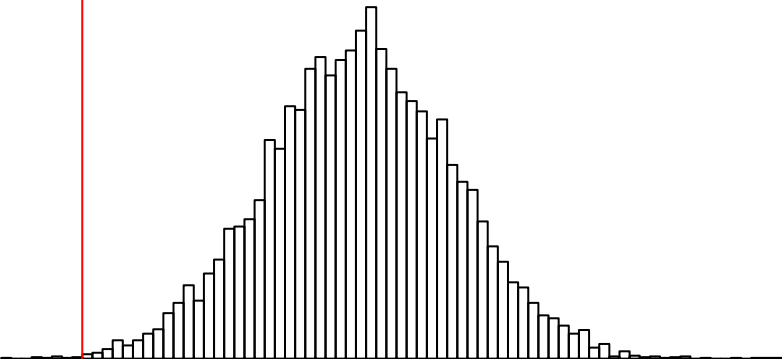

B224:120 – B224:45

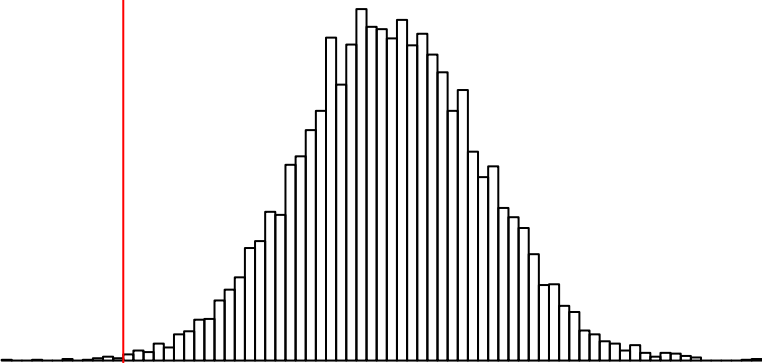

-2 -1 0 1 2 3 4

delta(Unidentified Metabolite 42)

B224:240

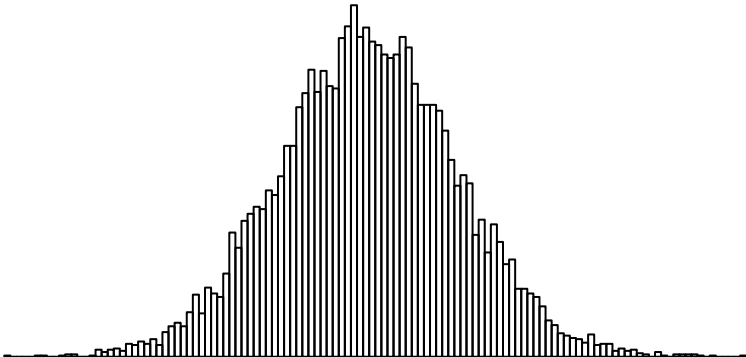

B224:120

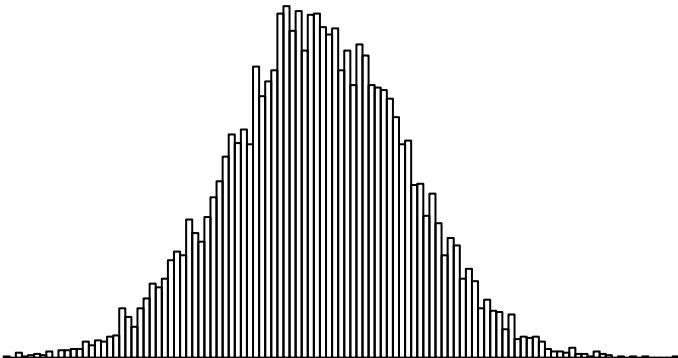

B224:45

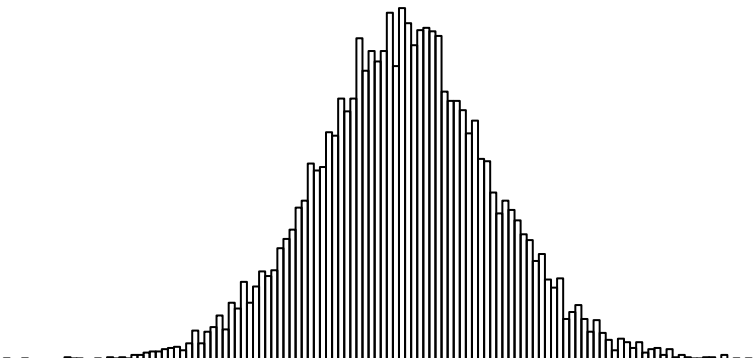

-10.0                      -9.5                      -9.0                      -8.5                      -8.0

Unidentified Metabolite 43

B224:240 – B224:120

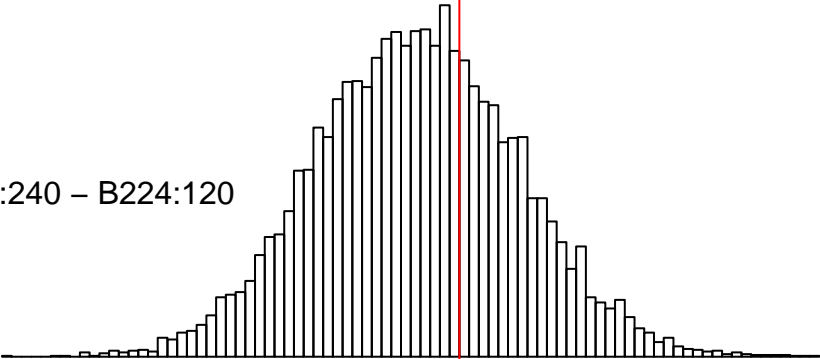

B224:240 – B224:45

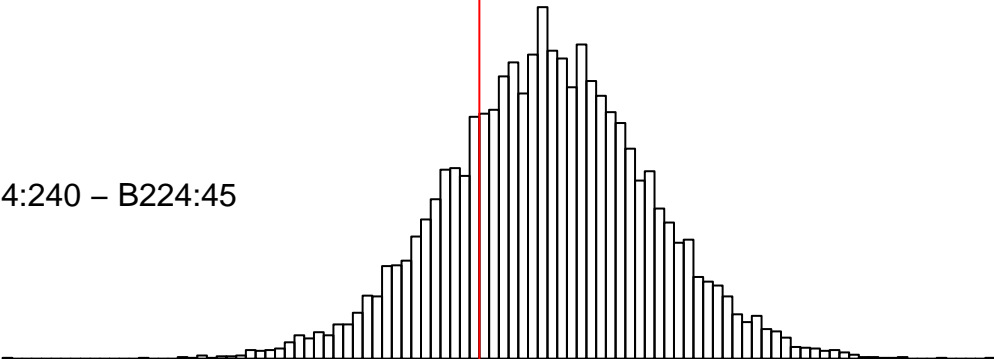

B224:120 – B224:45

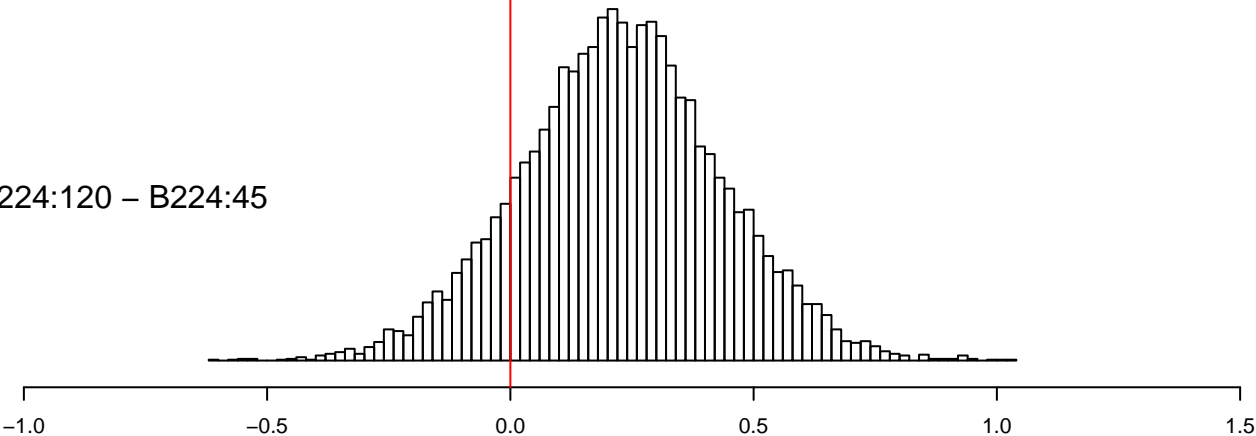

delta(Unidentified Metabolite 43)

B224:240

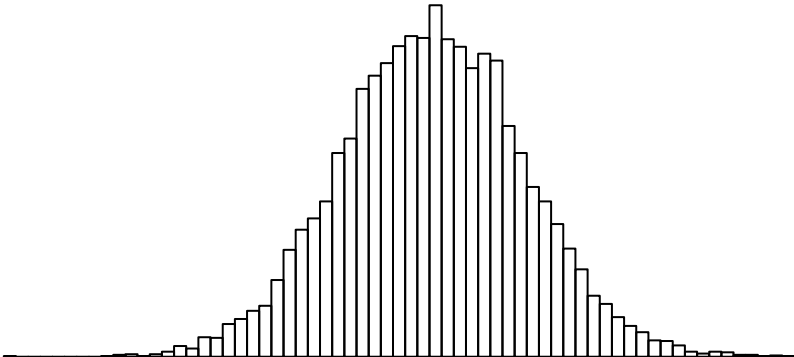

B224:120

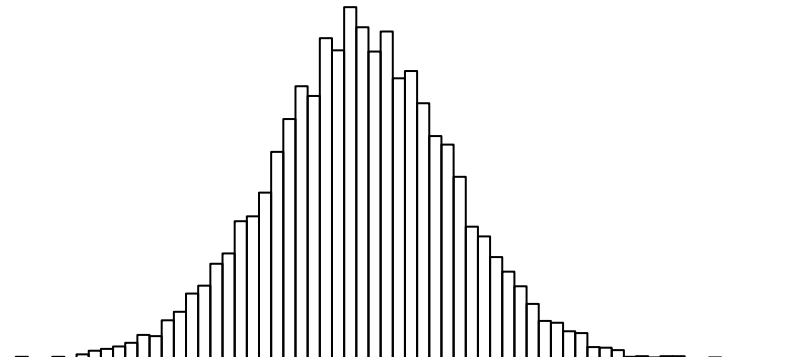

B224:45

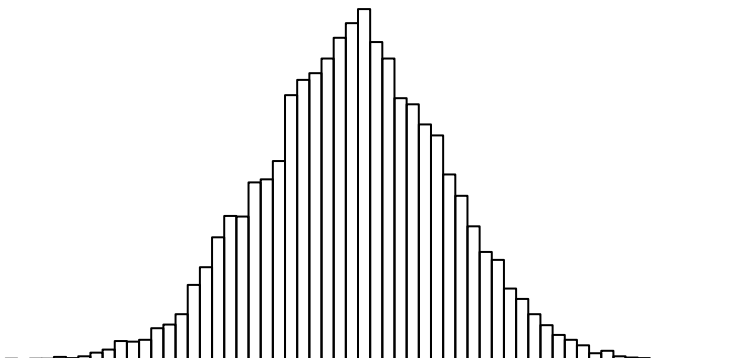

-11      -10      -9      -8      -7      -6

Unidentified Metabolite 45

B224:240 – B224:120

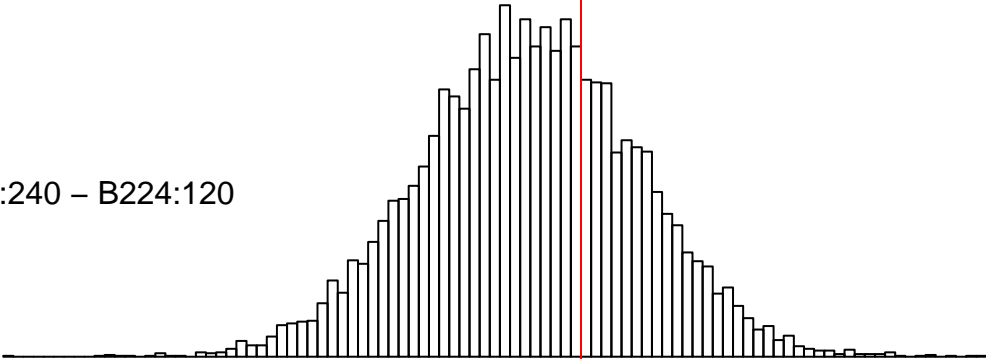

B224:240 – B224:45

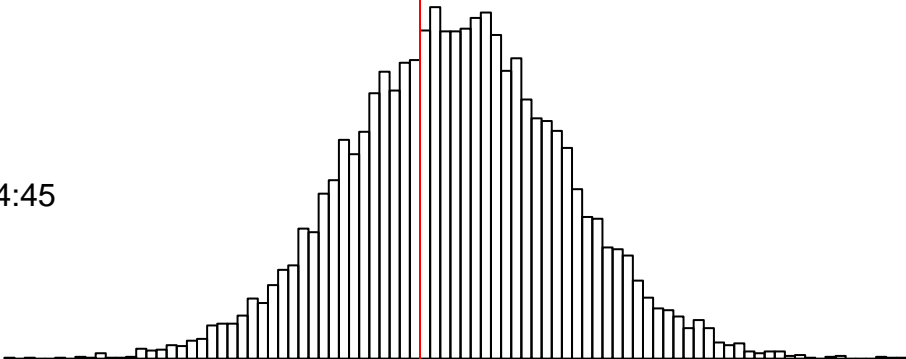

B224:120 – B224:45

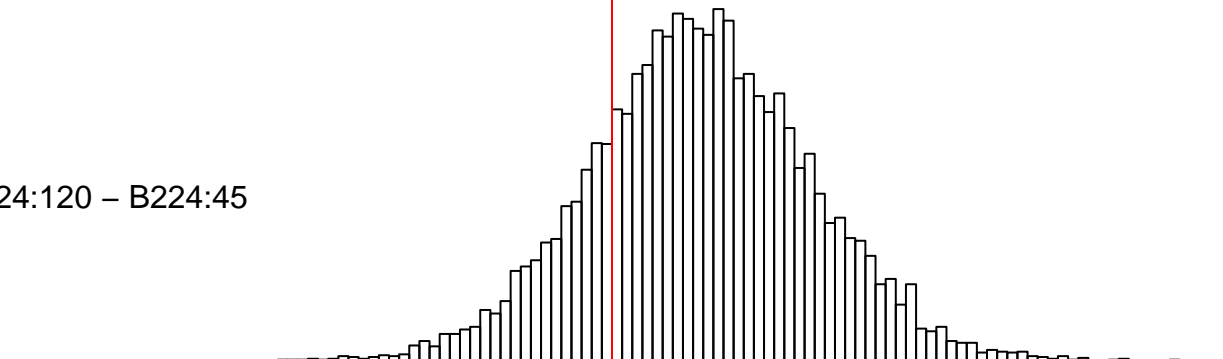

-3 -2 -1 0 1 2 3

delta(Unidentified Metabolite 45)

B224:240

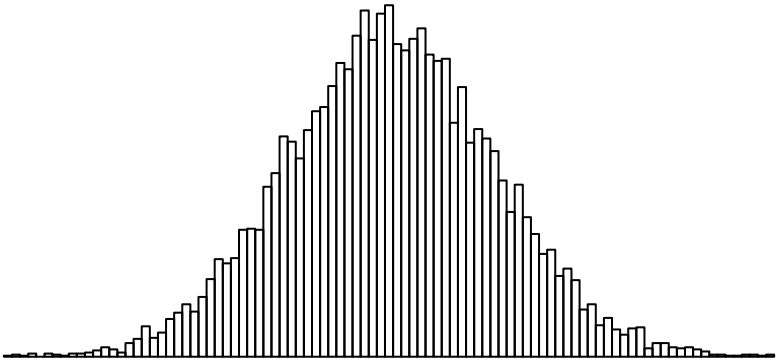

B224:120

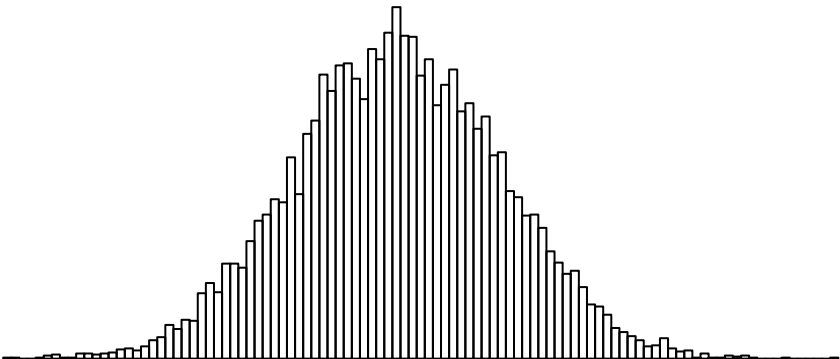

B224:45

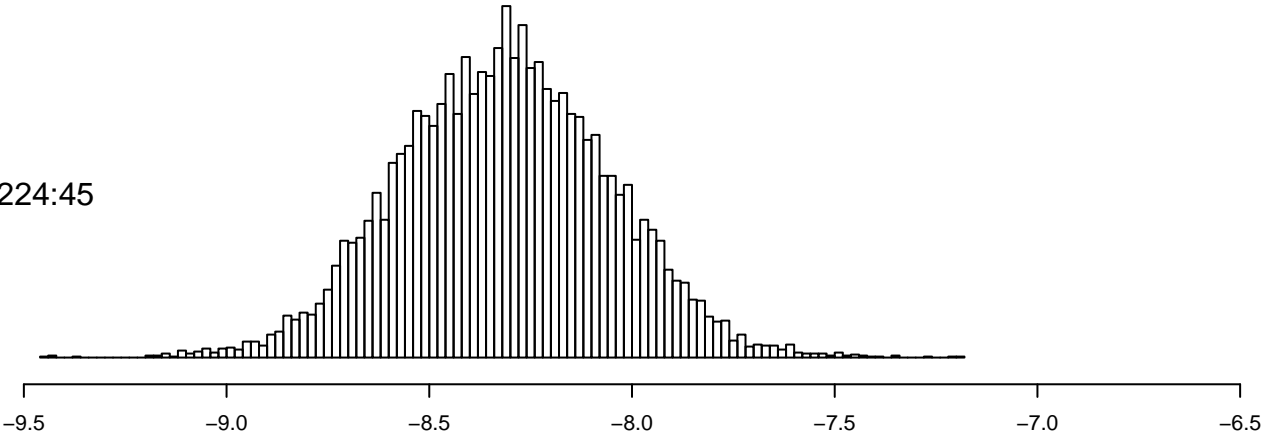

Unidentified Metabolite 47

B224:240 – B224:120

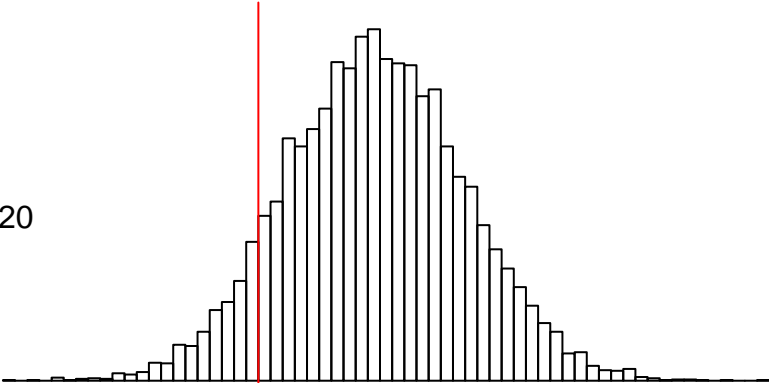

B224:240 – B224:45

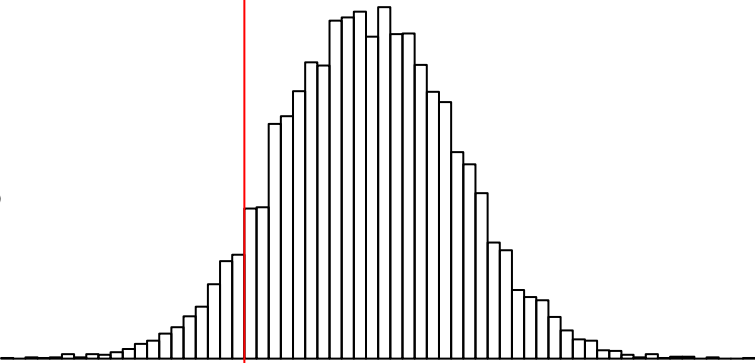

B224:120 – B224:45

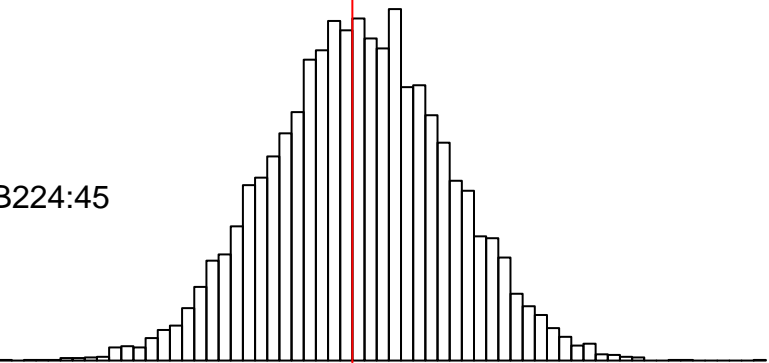

-2 -1 0 1 2 3

delta(Unidentified Metabolite 47)



B224:240

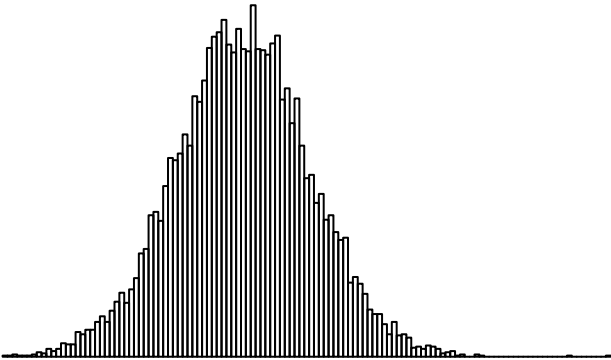

B224:120

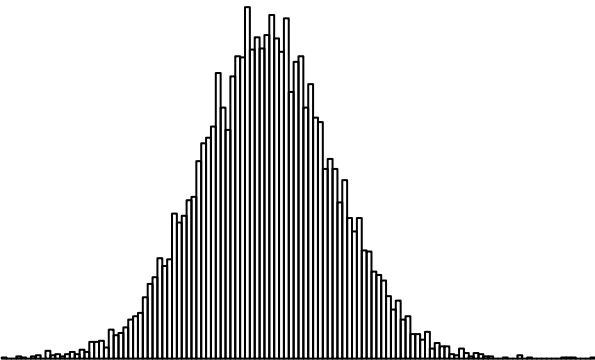

B224:45

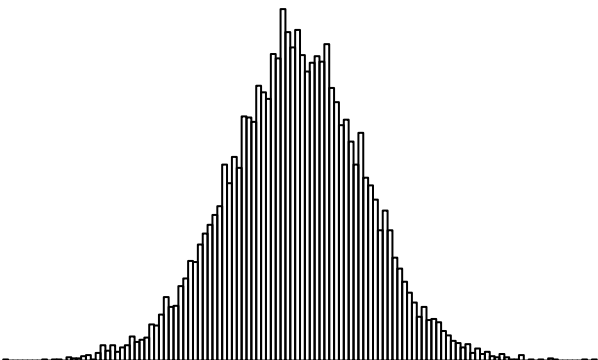

-10.0      -9.5      -9.0      -8.5      -8.0      -7.5

Unidentified Metabolite 48

B224:240 – B224:120

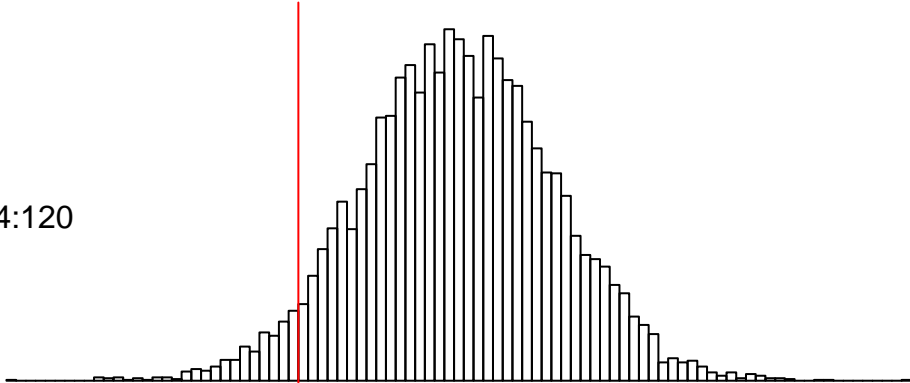

B224:240 – B224:45

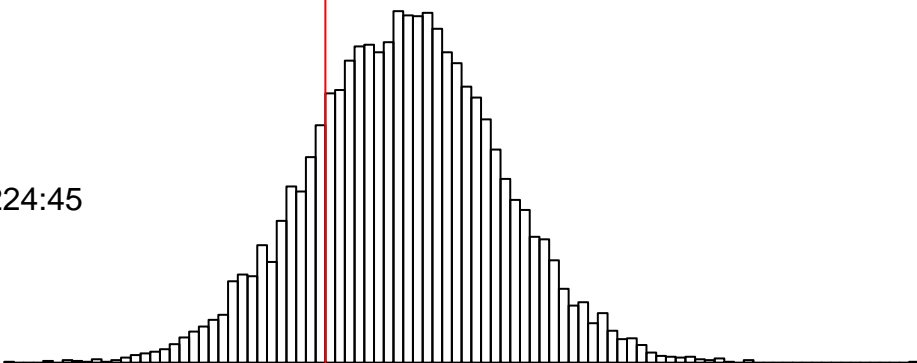

B224:120 – B224:45

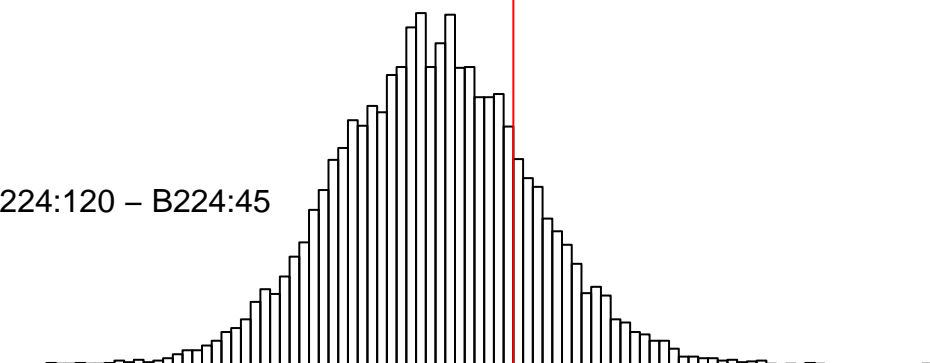

-1.0 -0.5 0.0 0.5 1.0 1.5

delta(Unidentified Metabolite 48)

B224:240

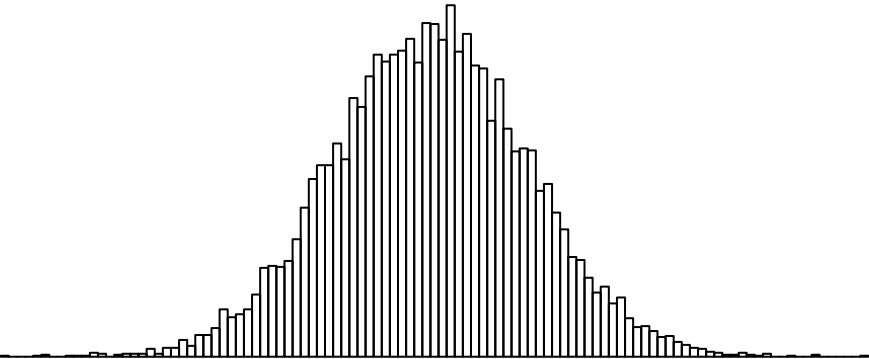

B224:120

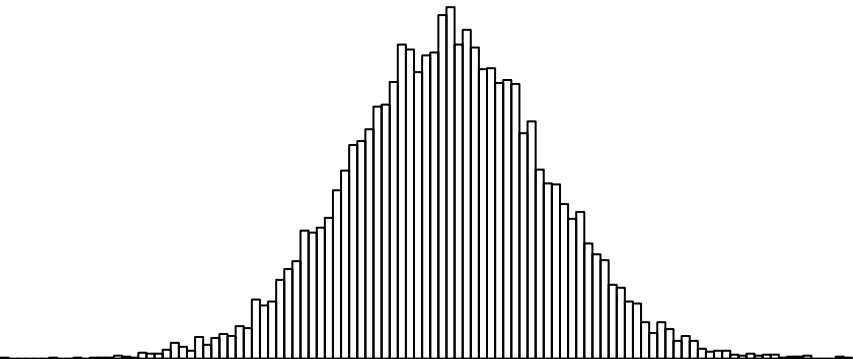

B224:45

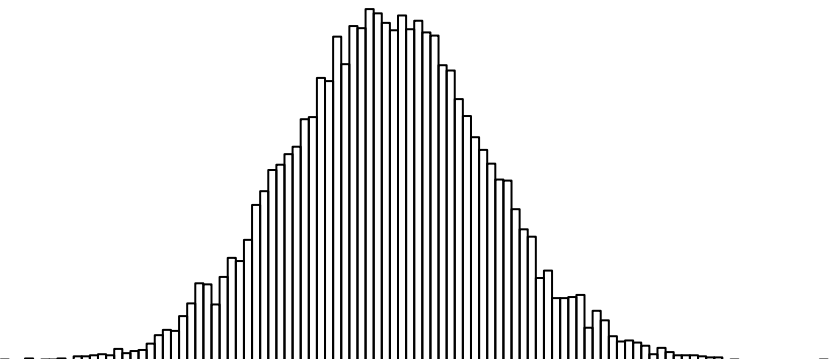

-11.0      -10.5      -10.0      -9.5      -9.0      -8.5      -8.0

Unidentified Metabolite 49

B224:240 – B224:120

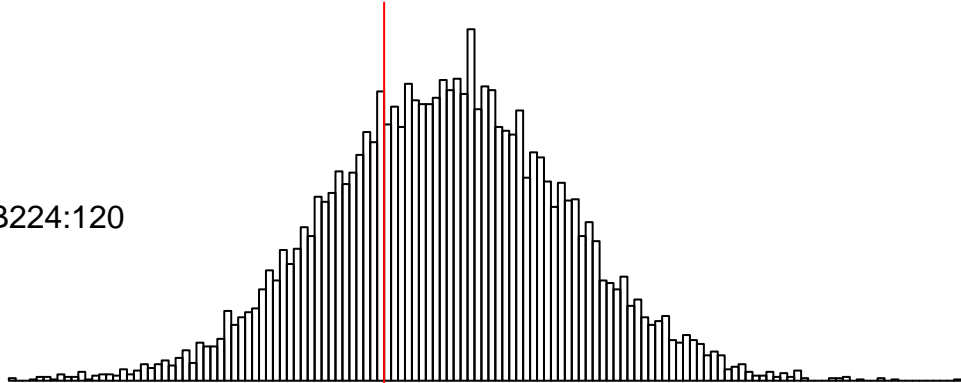

B224:240 – B224:45

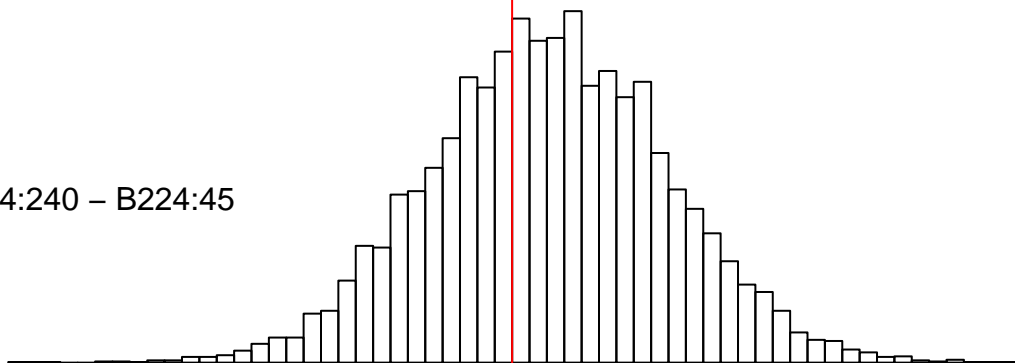

B224:120 – B224:45

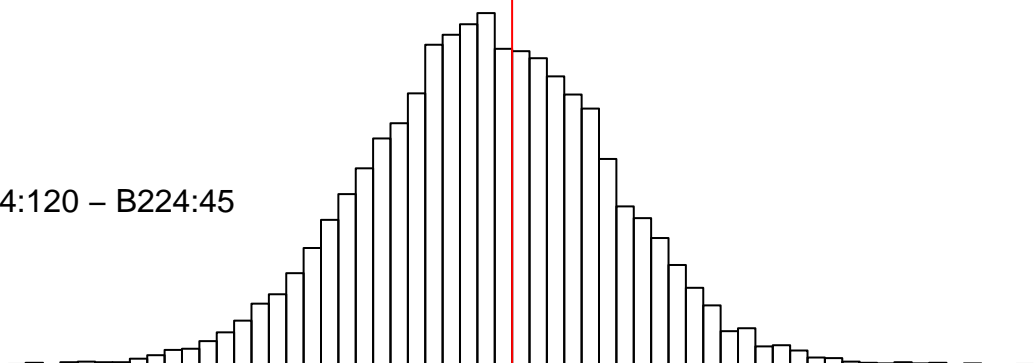

-1.5      -1.0      -0.5      0.0      0.5      1.0      1.5      2.0

delta(Unidentified Metabolite 49)

B224:240

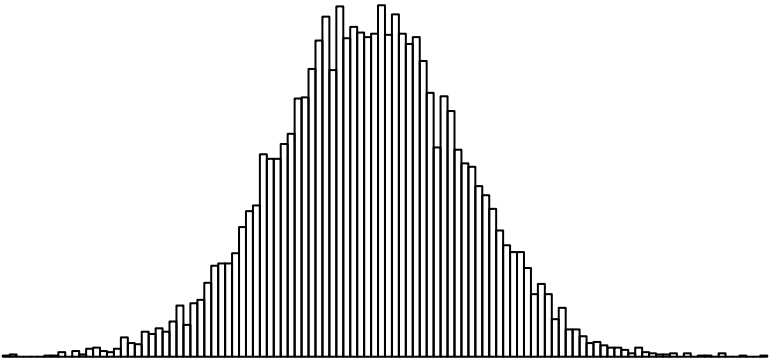

B224:120

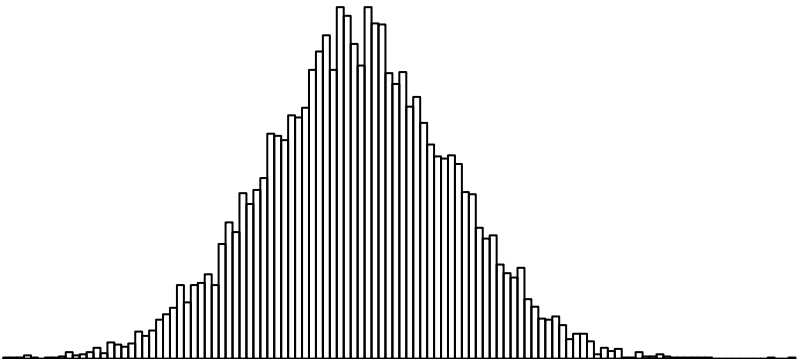

B224:45

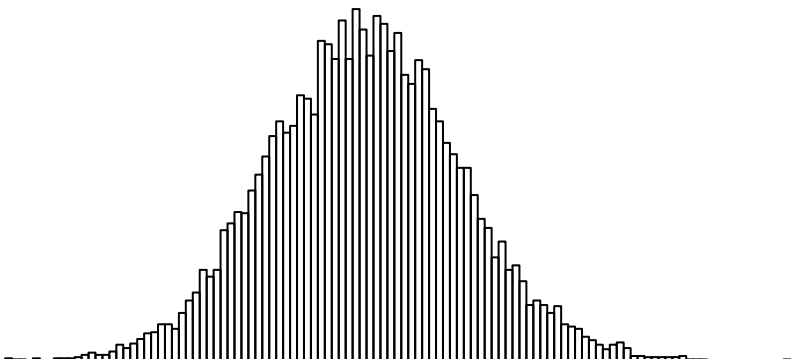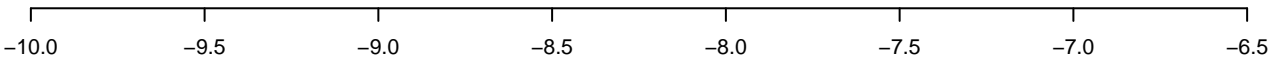

Unidentified Metabolite 50

B224:240 – B224:120

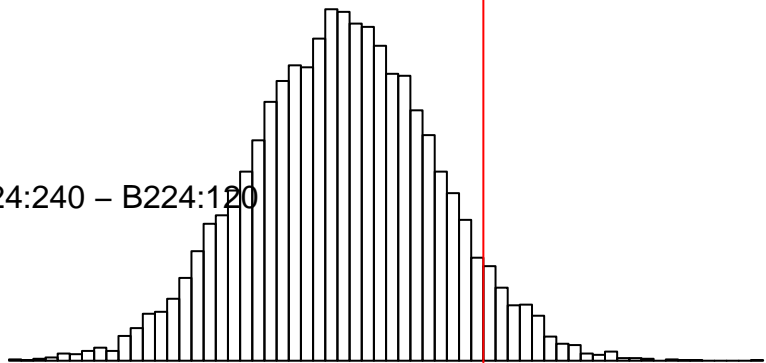

B224:240 – B224:45

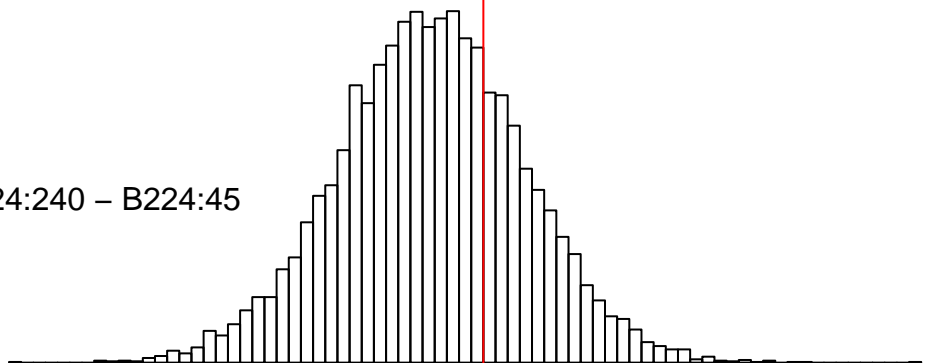

B224:120 – B224:45

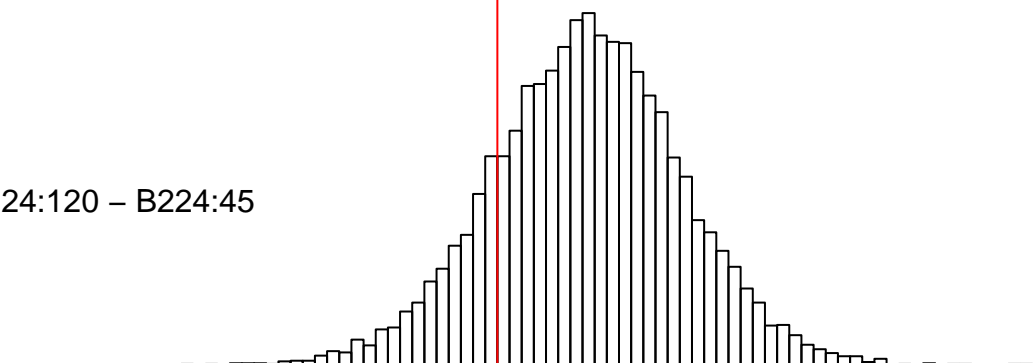

-2 -1 0 1 2 3

delta(Unidentified Metabolite 50)

B224:240

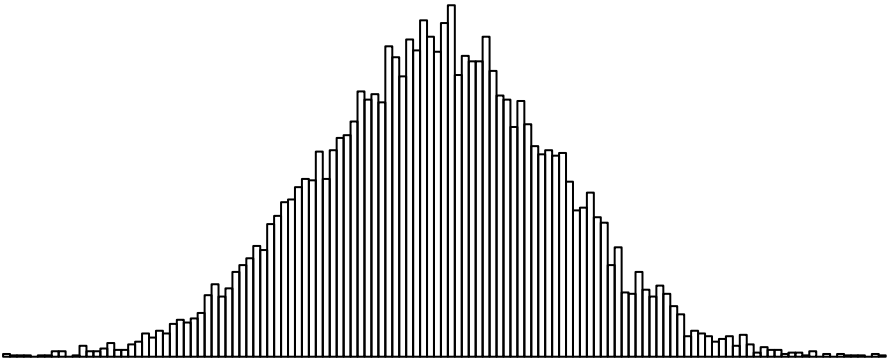

B224:120

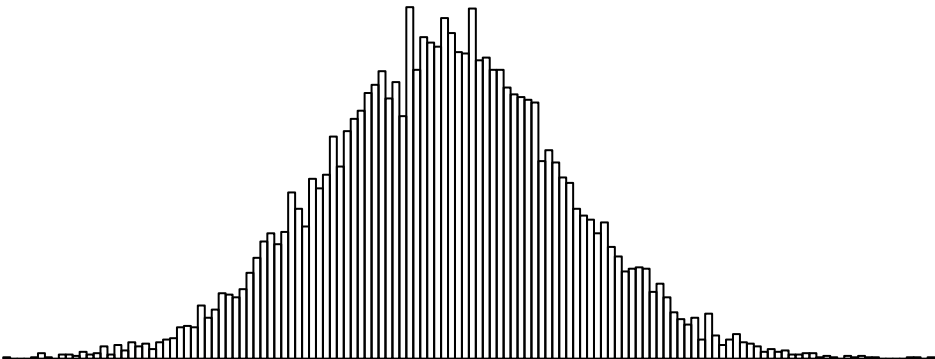

B224:45

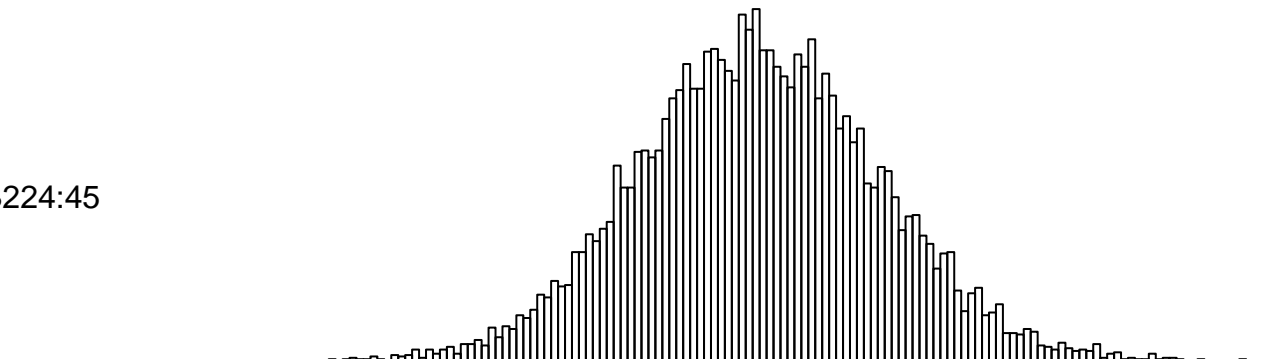

-10.0 -9.5 -9.0 -8.5 -8.0 -7.5 -7.0 -6.5

Unidentified Metabolite 51

B224:240 – B224:120

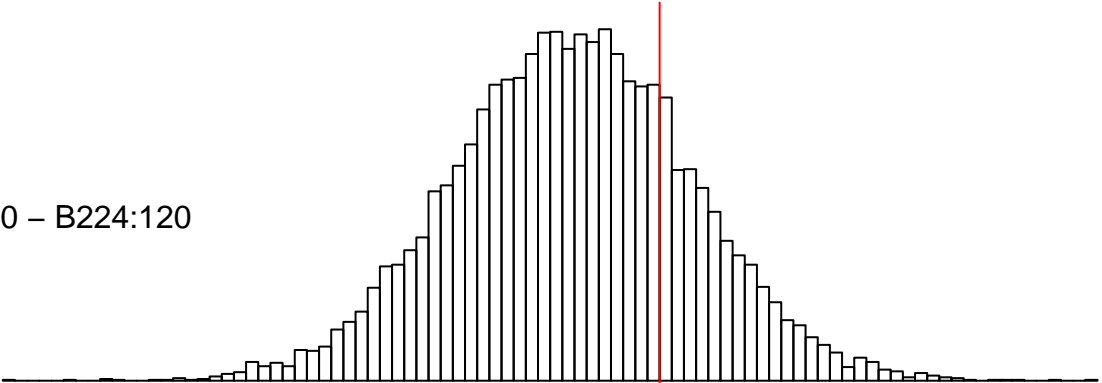

B224:240 – B224:45

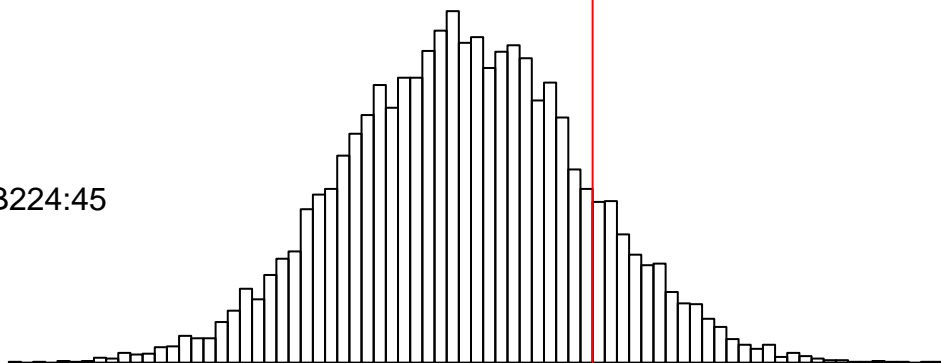

B224:120 – B224:45

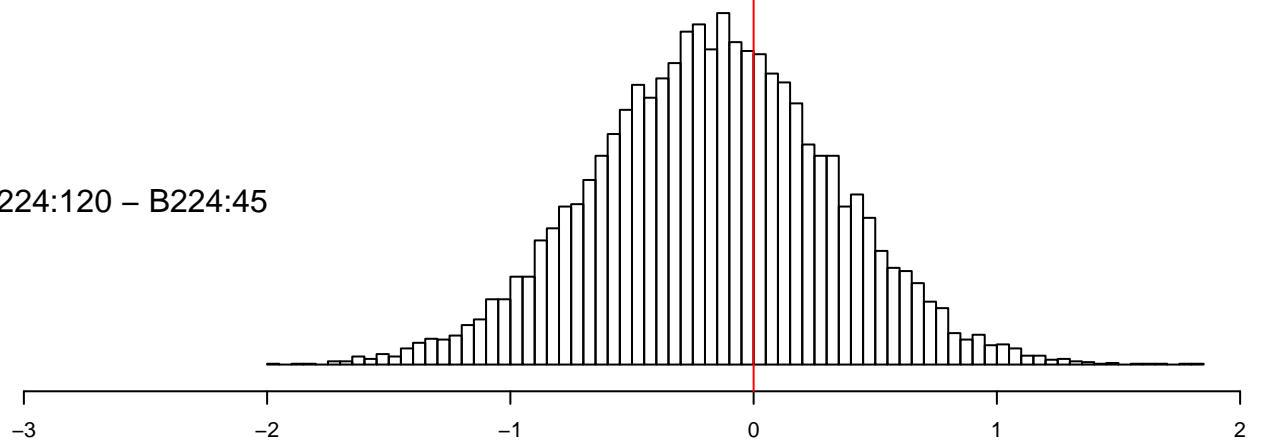

-3 -2 -1 0 1 2

delta(Unidentified Metabolite 51)



B224:240

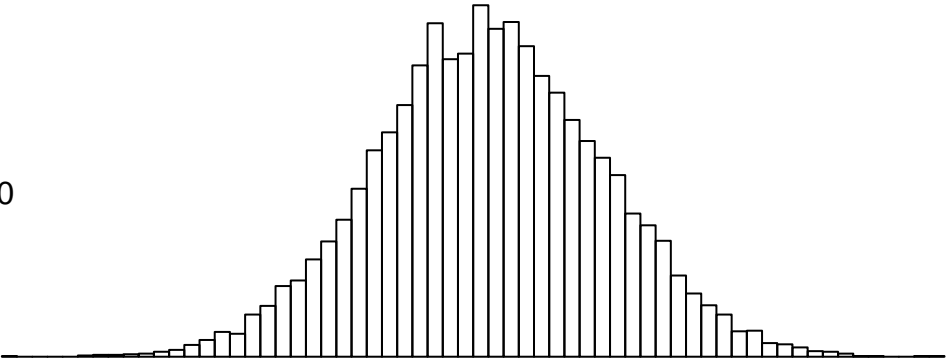

B224:120

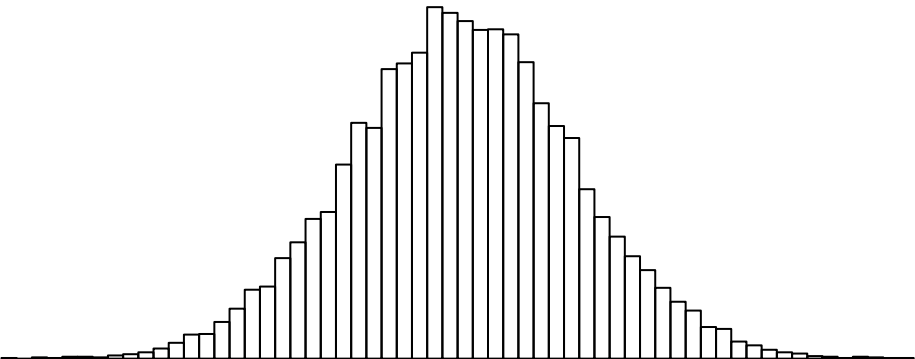

B224:45

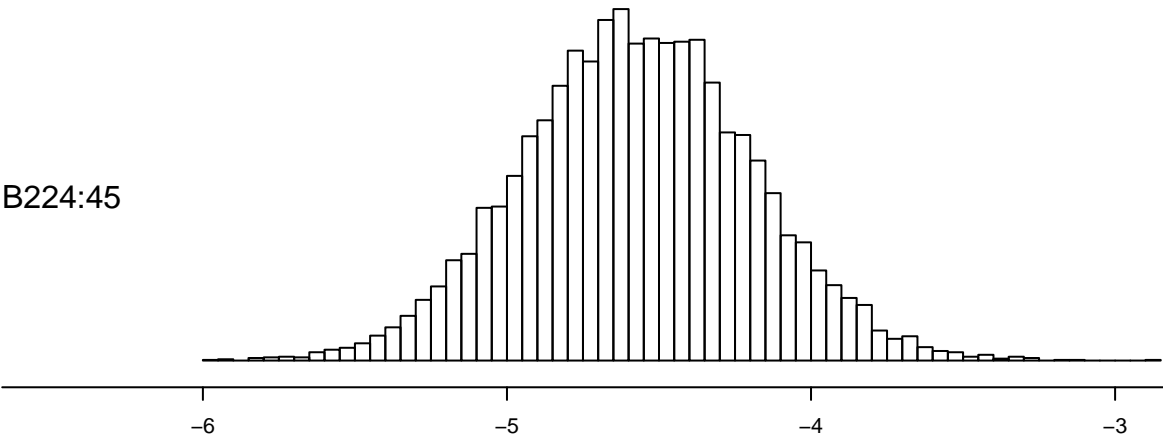

Unidentified Metabolite 55

B224:240 – B224:120

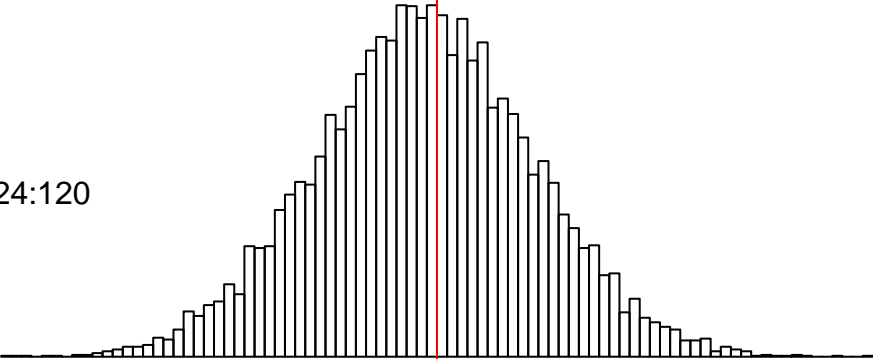

B224:240 – B224:45

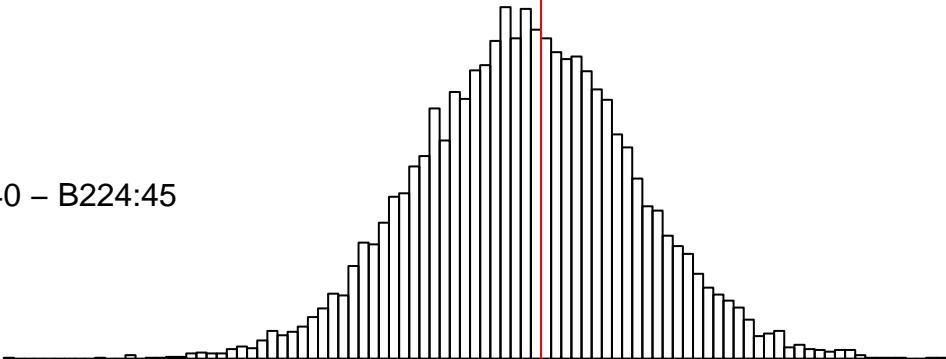

B224:120 – B224:45

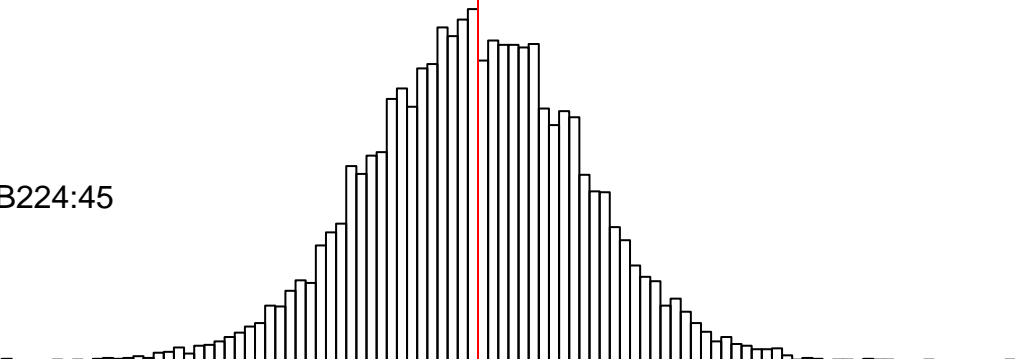

-3 -2 -1 0 1 2 3

delta(Unidentified Metabolite 55)

B224:240

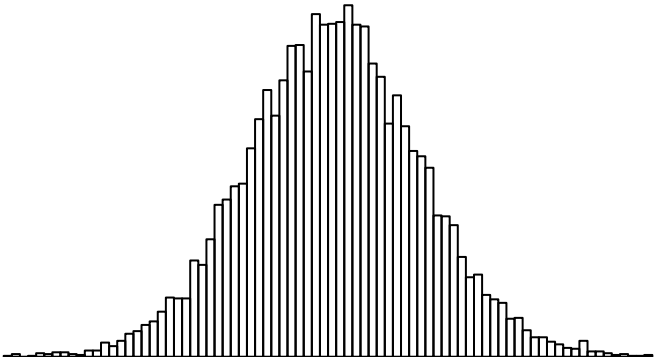

B224:120

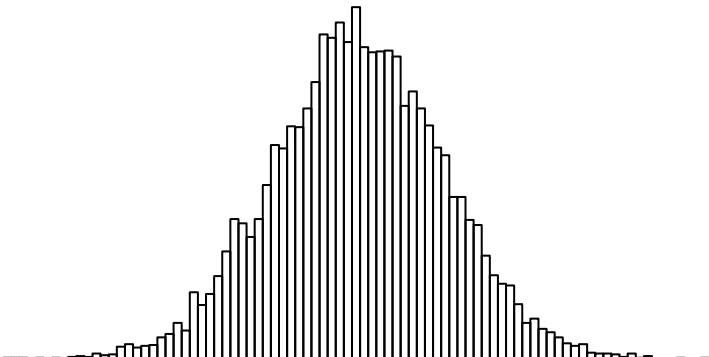

B224:45

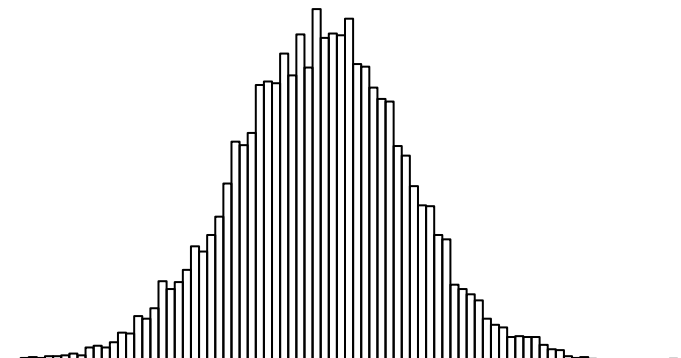

-10.5      -10.0      -9.5      -9.0      -8.5      -8.0      -7.5

Unidentified Metabolite 56

B224:240 – B224:120

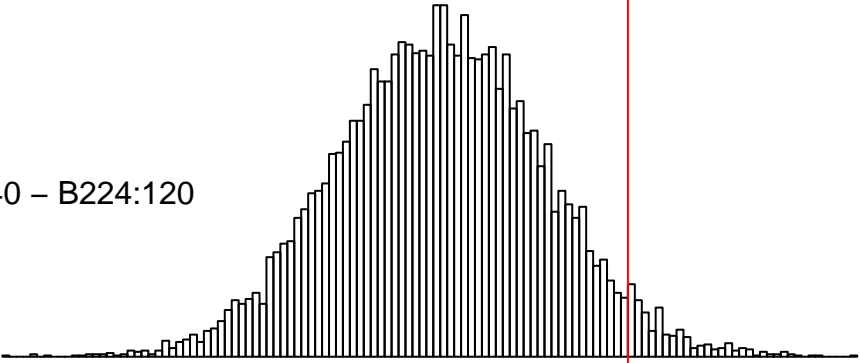

B224:240 – B224:45

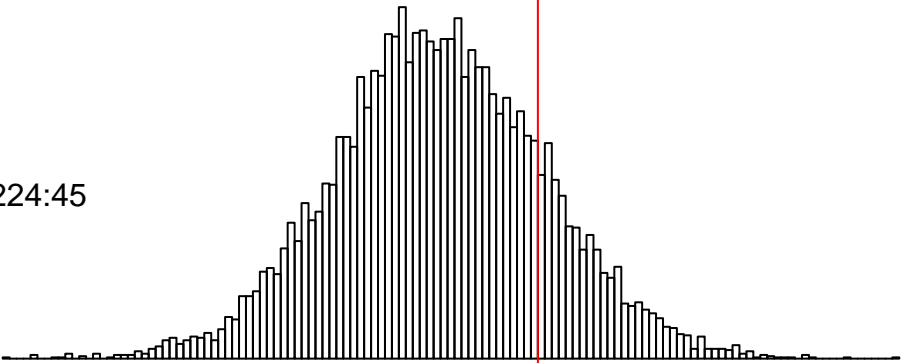

B224:120 – B224:45

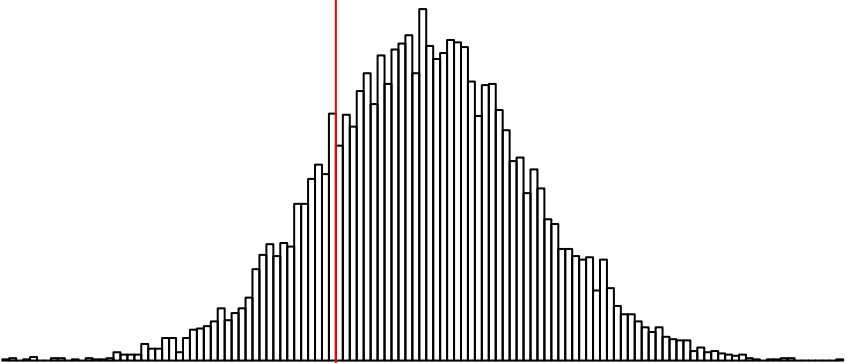

-2.0      -1.5      -1.0      -0.5      0.0      0.5      1.0      1.5

delta(Unidentified Metabolite 56)

B224:240

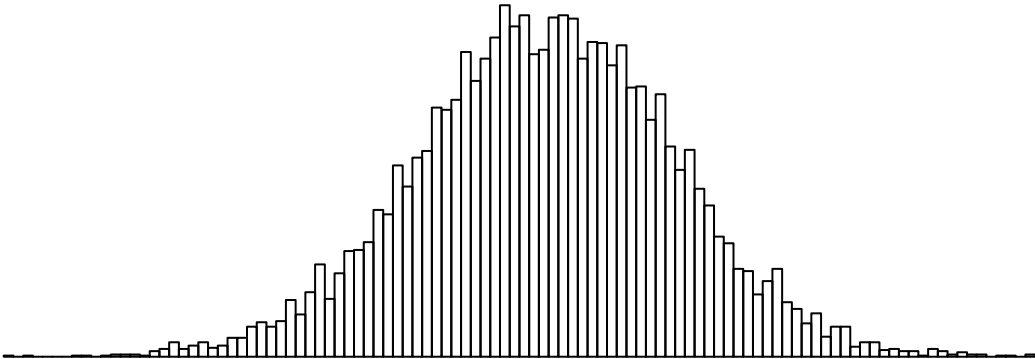

B224:120

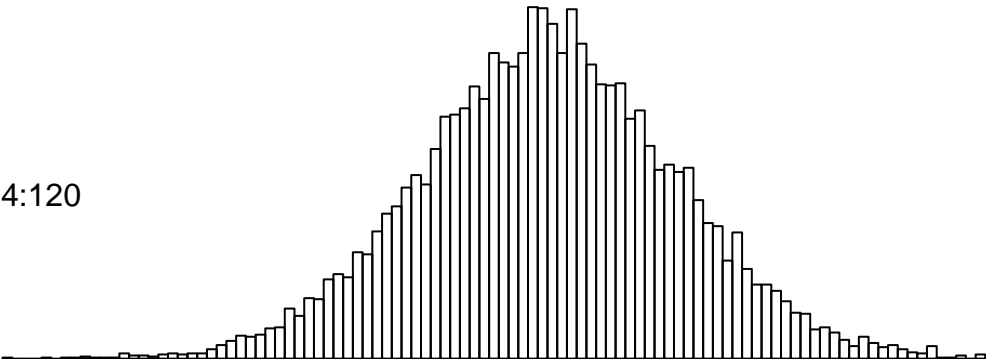

B224:45

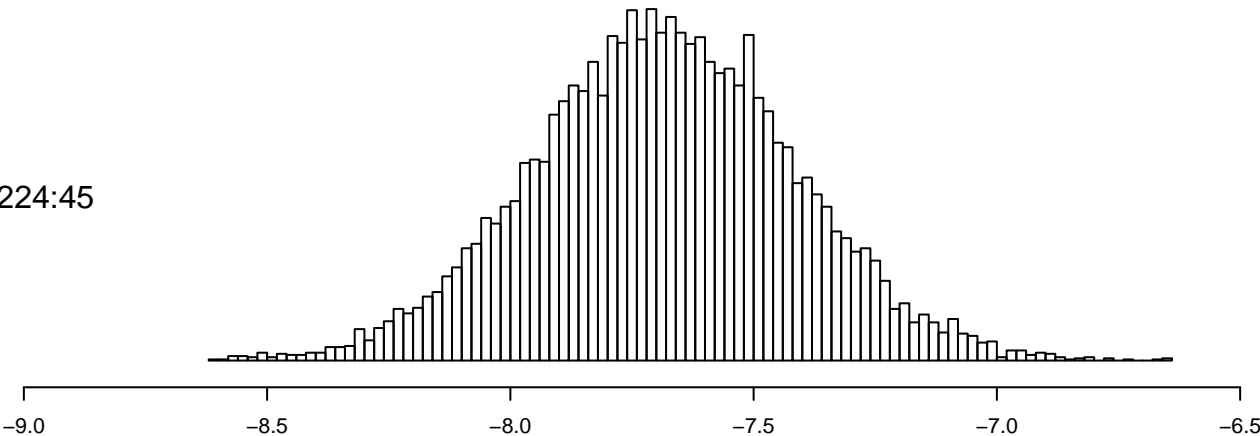

Unidentified Metabolite 58

B224:240 – B224:120

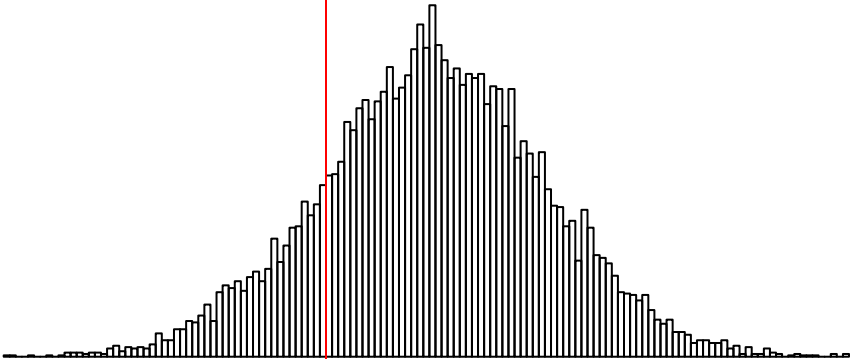

B224:240 – B224:45

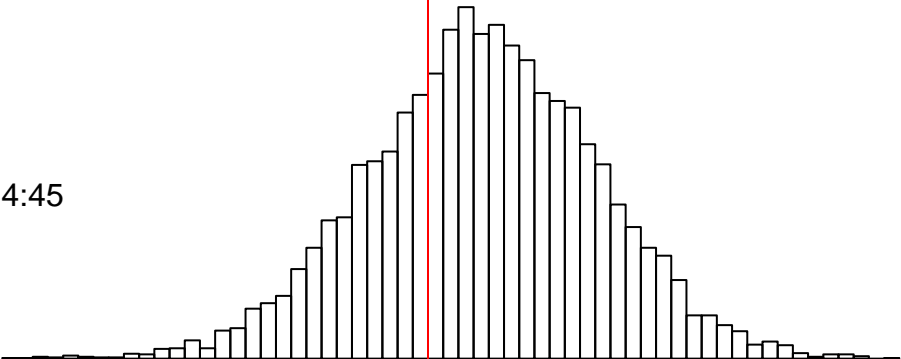

B224:120 – B224:45

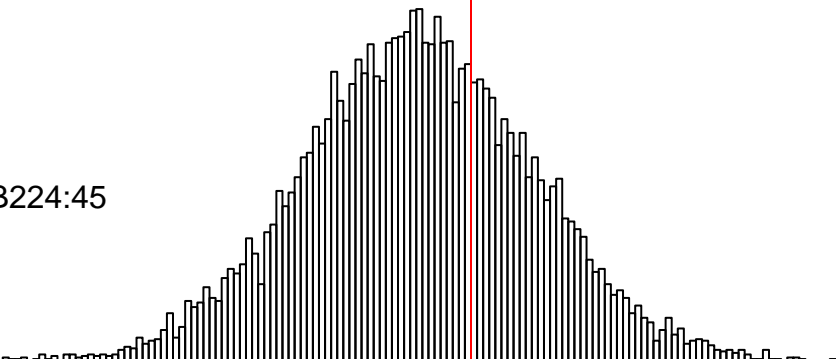

-2 -1 0 1 2

delta(Unidentified Metabolite 58)

B224:240

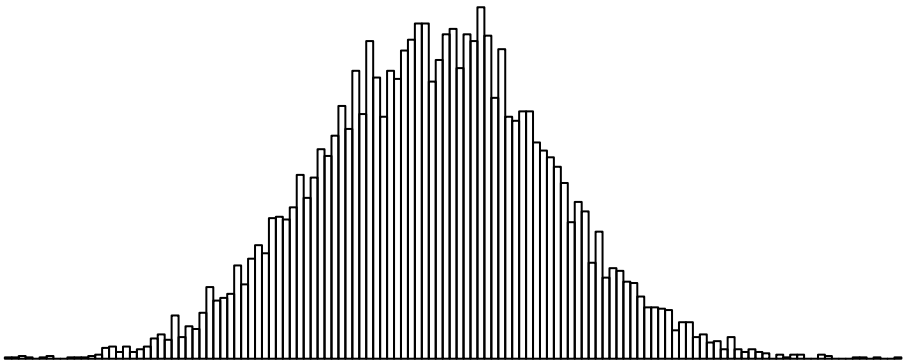

B224:120

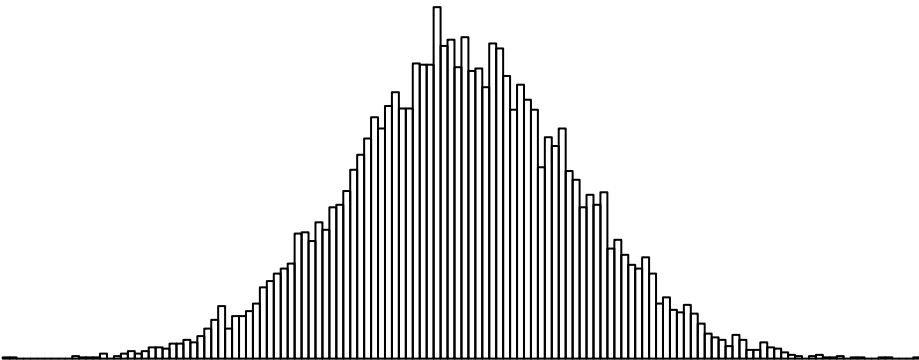

B224:45

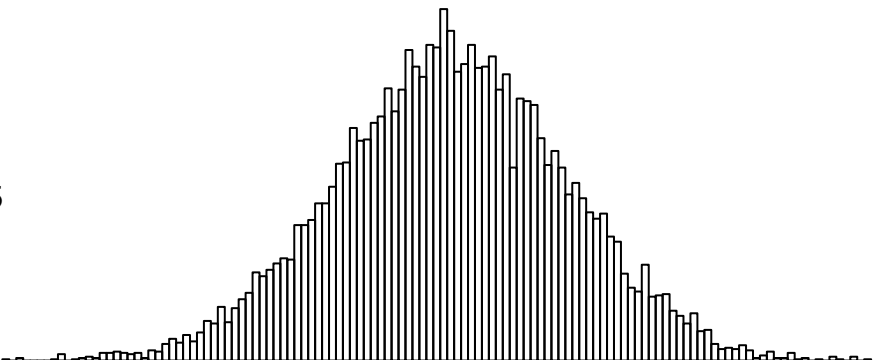

-8.5      -8.0      -7.5      -7.0      -6.5      -6.0      -5.5      -5.0

Unidentified Metabolite 59

B224:240 – B224:120

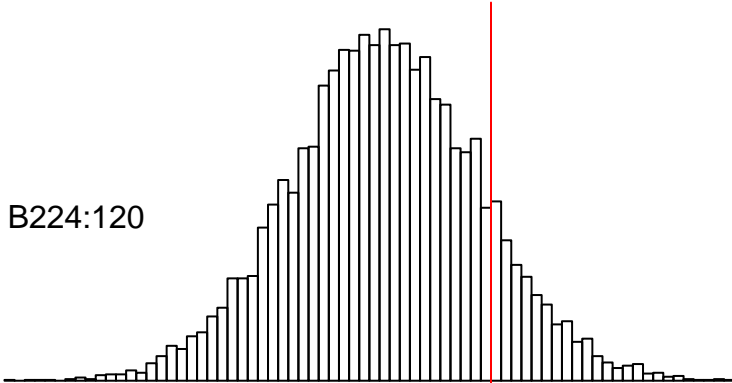

B224:240 – B224:45

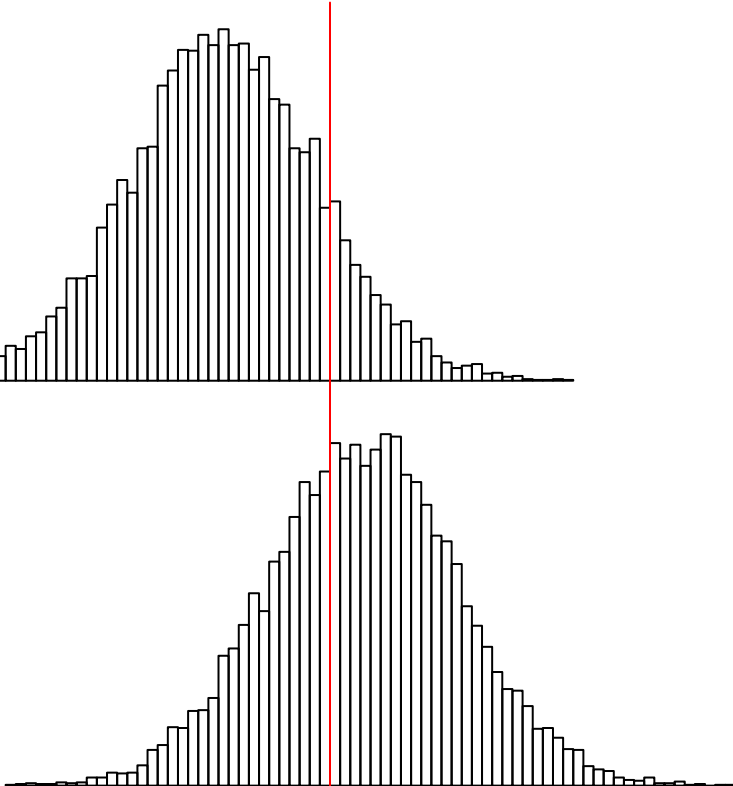

B224:120 – B224:45

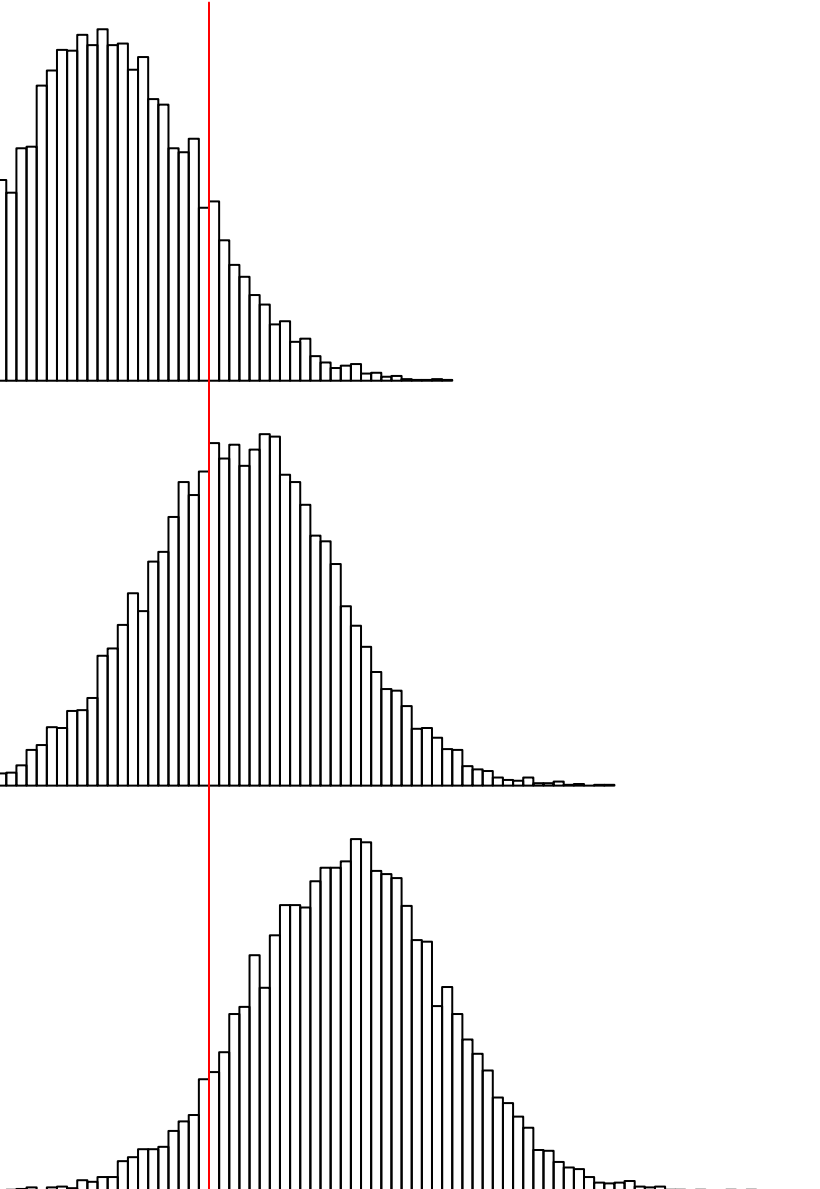

-3 -2 -1 0 1 2 3

delta(Unidentified Metabolite 59)



B224:240

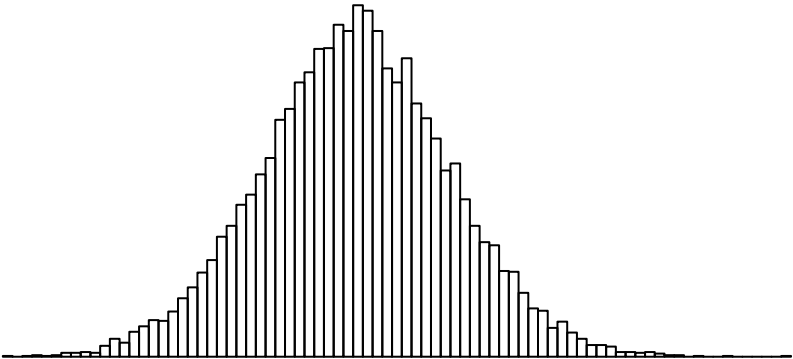

B224:120

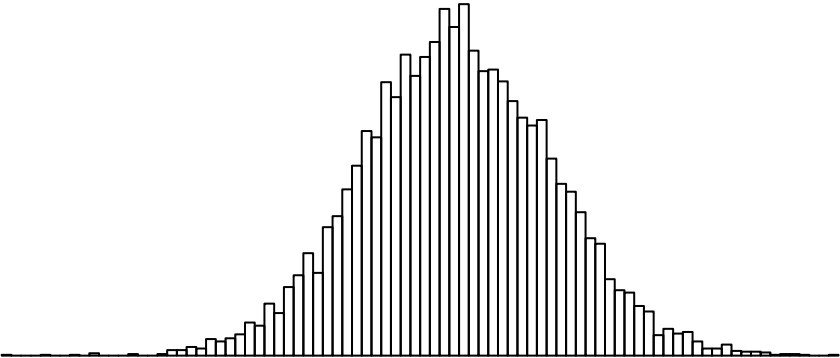

B224:45

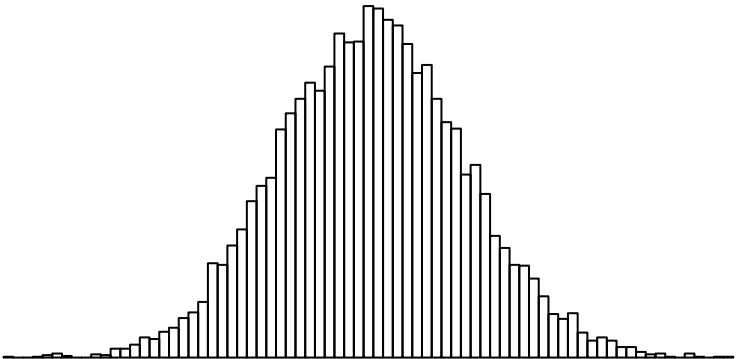

-10.5      -10.0      -9.5      -9.0      -8.5      -8.0

Unidentified Metabolite 60

B224:240 – B224:120

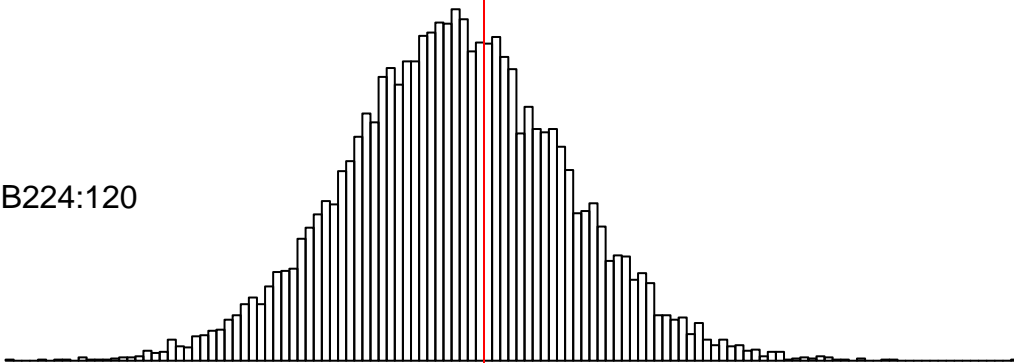

B224:240 – B224:45

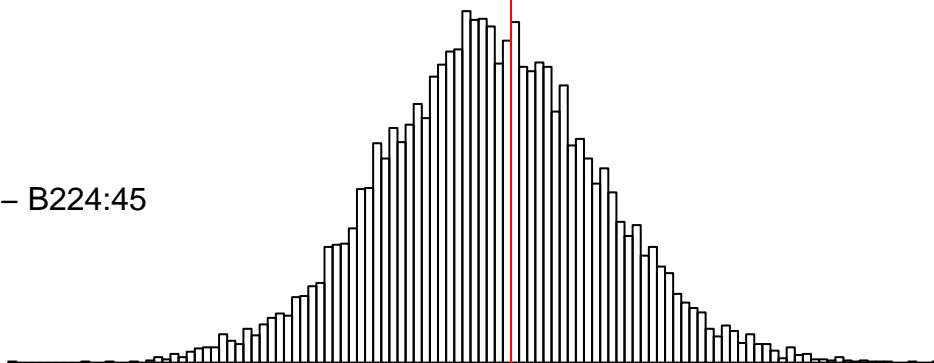

B224:120 – B224:45

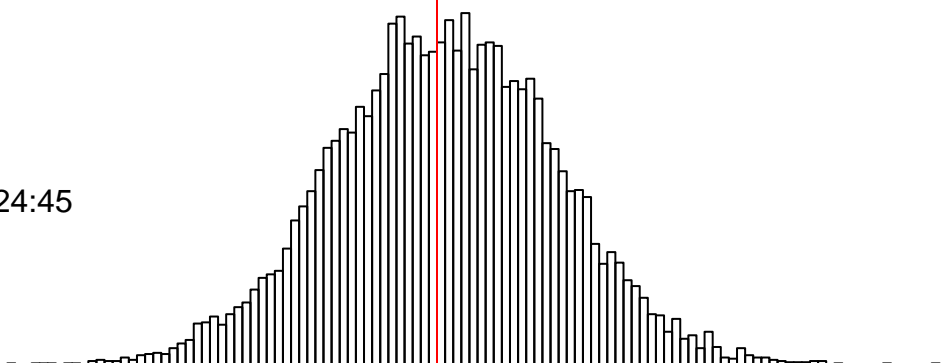

-1.5      -1.0      -0.5      0.0      0.5      1.0      1.5

delta(Unidentified Metabolite 60)

B224:240

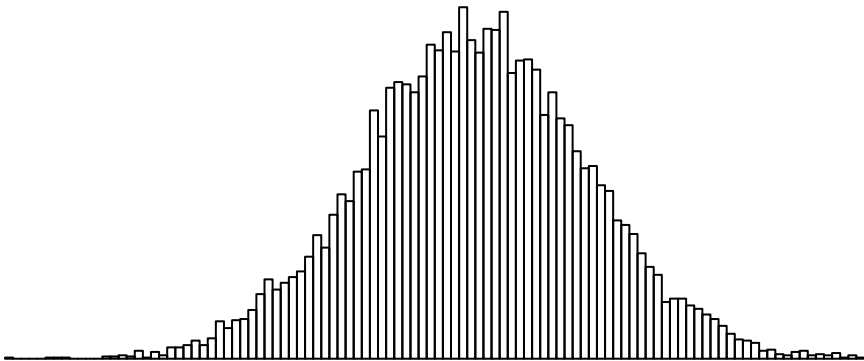

B224:120

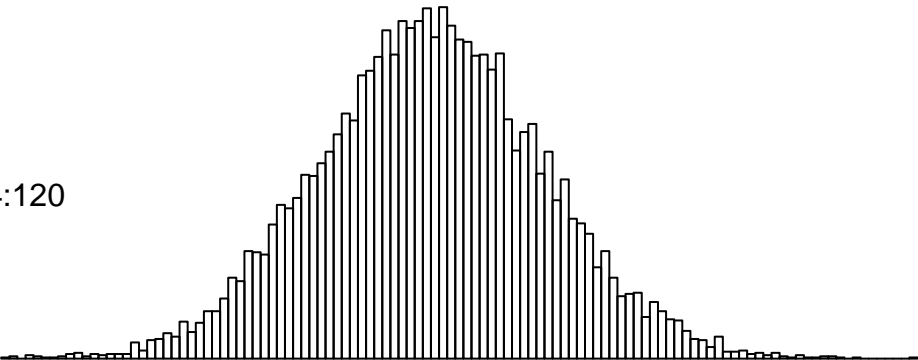

B224:45

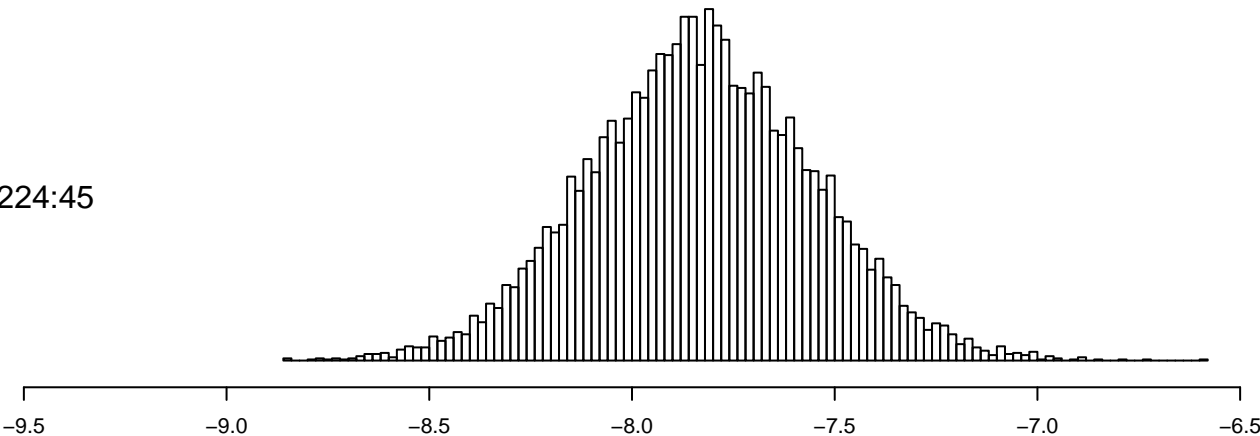

Unidentified Metabolite 61

B224:240 – B224:120

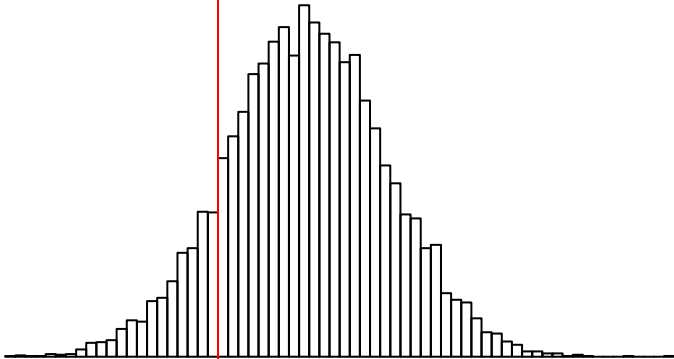

B224:240 – B224:45

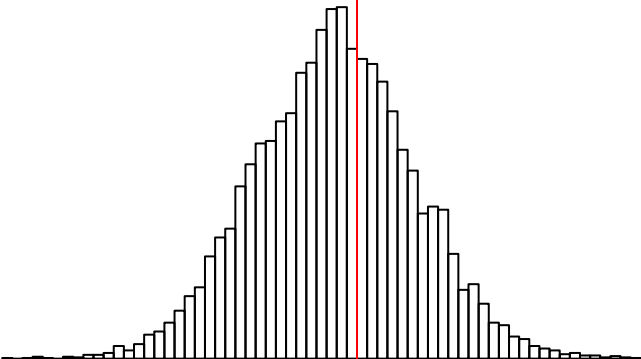

B224:120 – B224:45

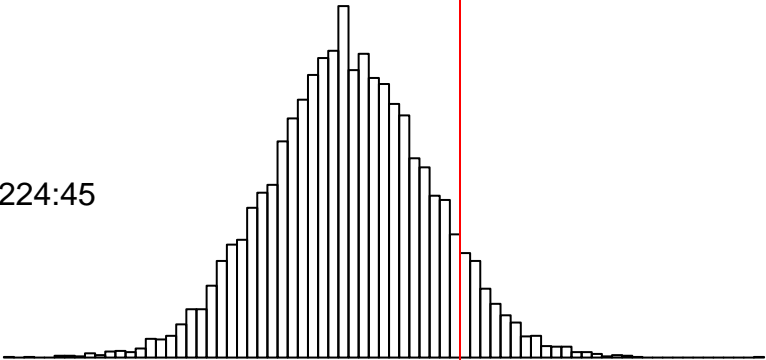

-3 -2 -1 0 1 2 3

delta(Unidentified Metabolite 61)

B224:240

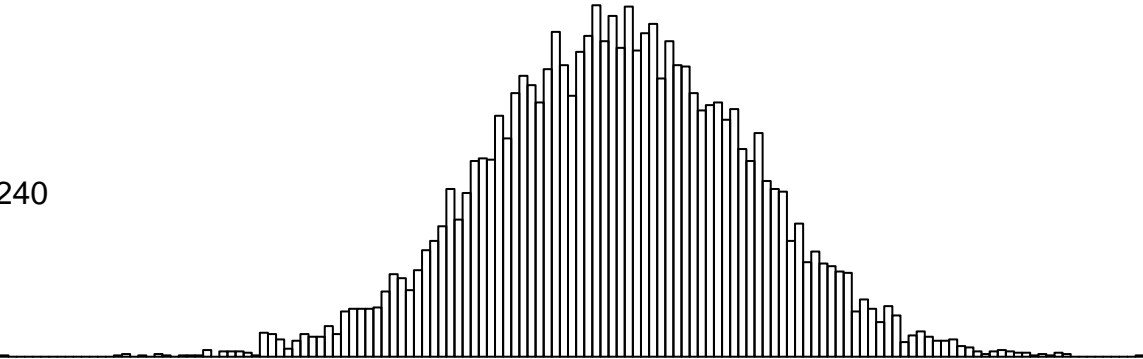

B224:120

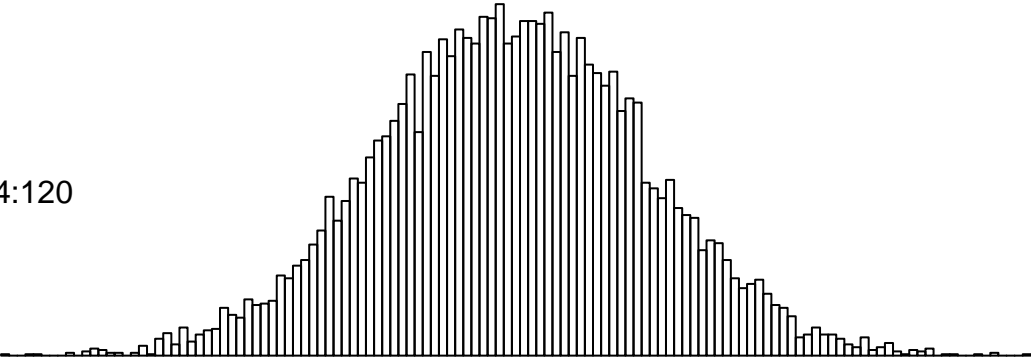

B224:45

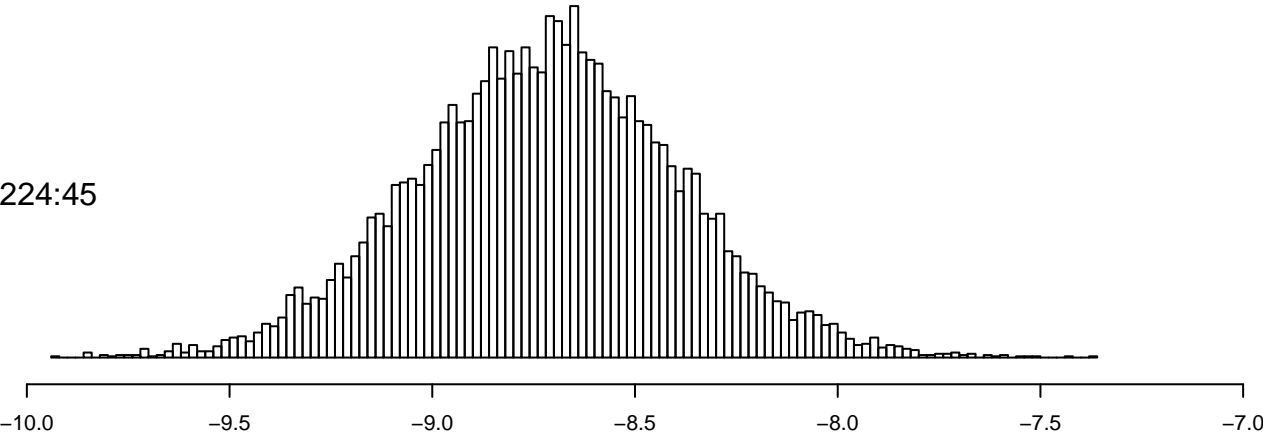

Unidentified Metabolite 62

B224:240 – B224:120

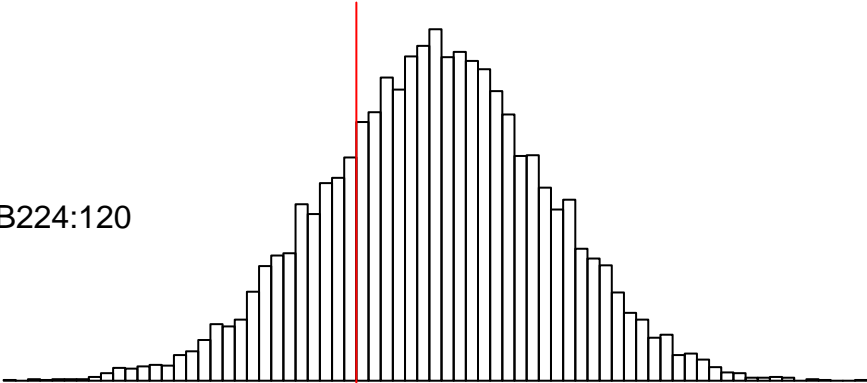

B224:240 – B224:45

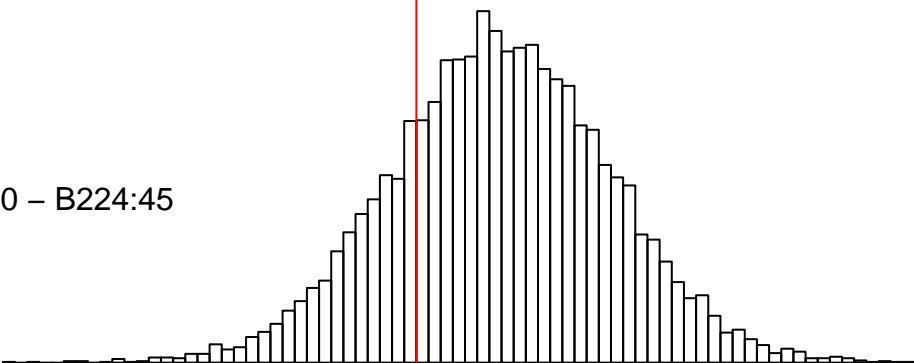

B224:120 – B224:45

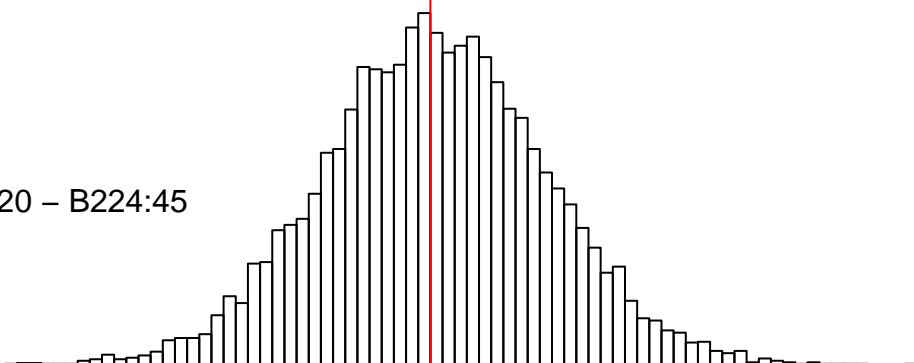

-2 -1 0 1 2 3

delta(Unidentified Metabolite 62)

B224:240

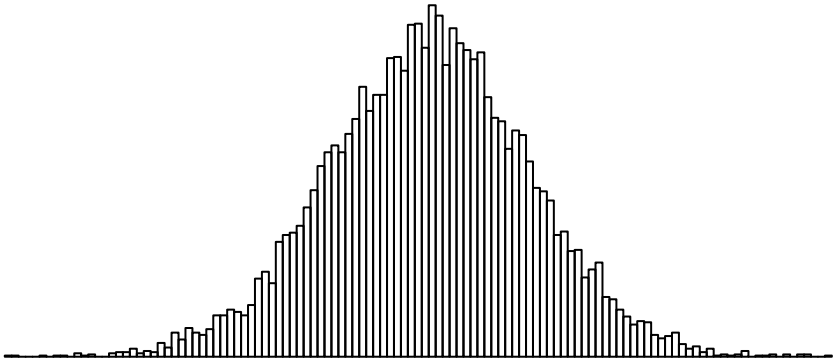

B224:120

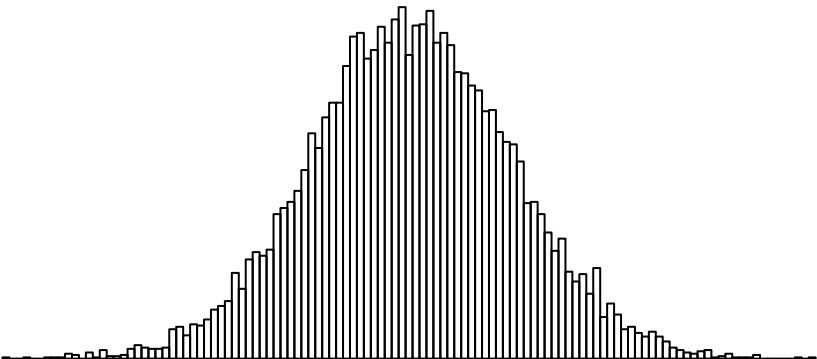

B224:45

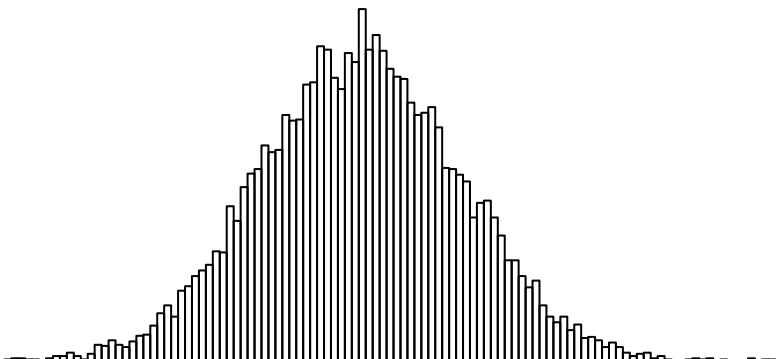

-9.0 -8.5 -8.0 -7.5 -7.0 -6.5 -6.0 -5.5

Unidentified Metabolite 63

B224:240 – B224:120

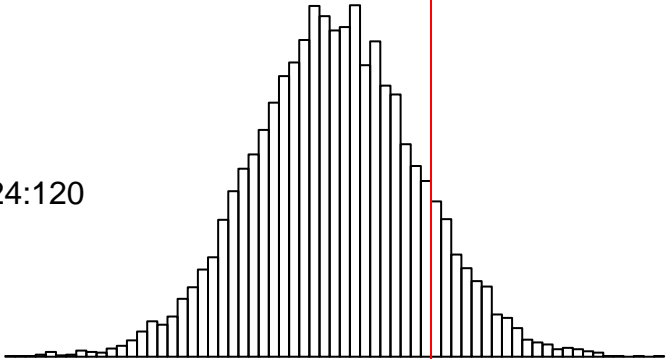

B224:240 – B224:45

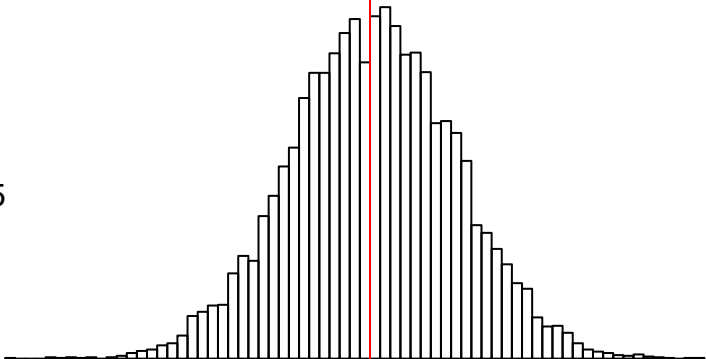

B224:120 – B224:45

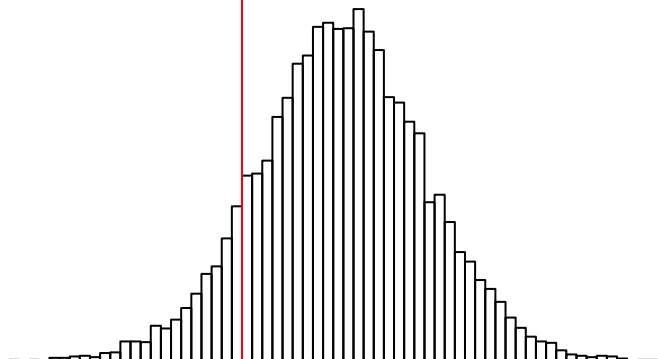

-3 -2 -1 0 1 2 3

delta(Unidentified Metabolite 63)



B224:240

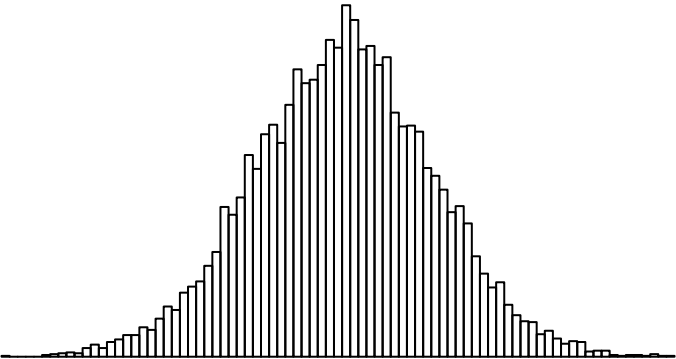

B224:120

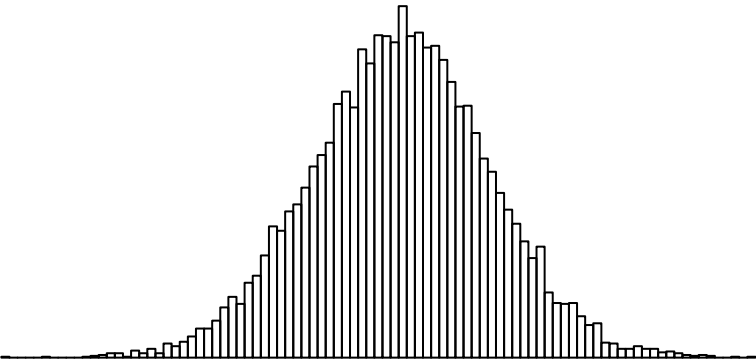

B224:45

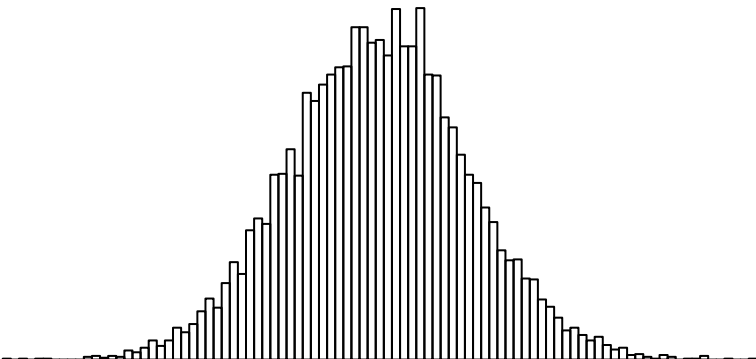

-10.5      -10.0      -9.5      -9.0      -8.5      -8.0      -7.5

Unidentified Metabolite 65

B224:240 – B224:120

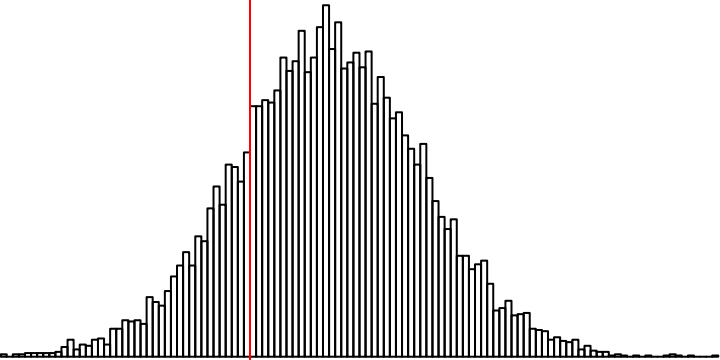

B224:240 – B224:45

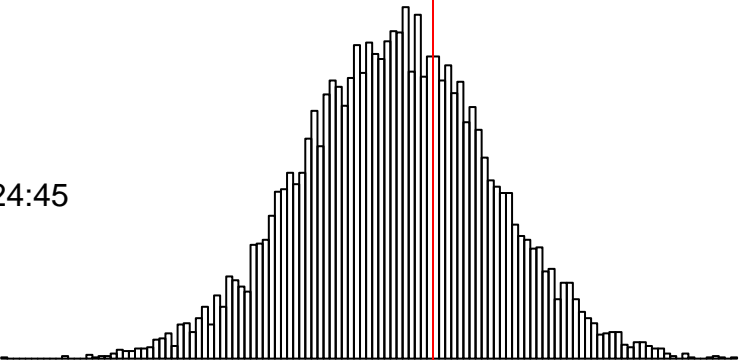

B224:120 – B224:45

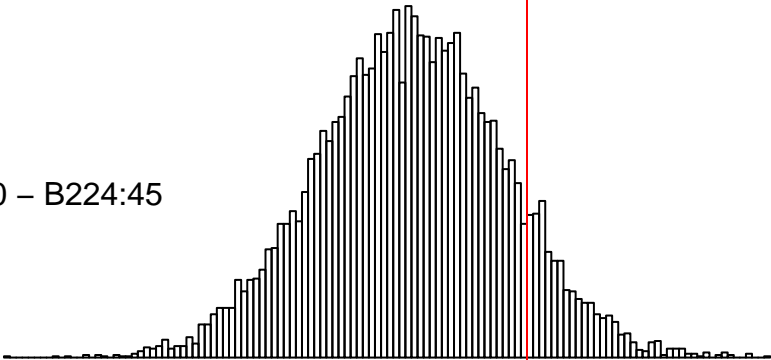

-2

-1

0

1

2

delta(Unidentified Metabolite 65)

B224:240

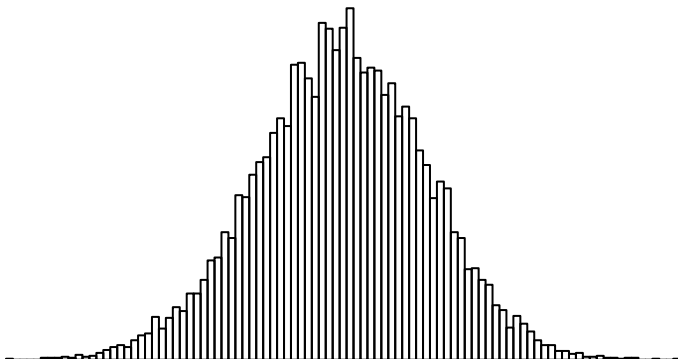

B224:120

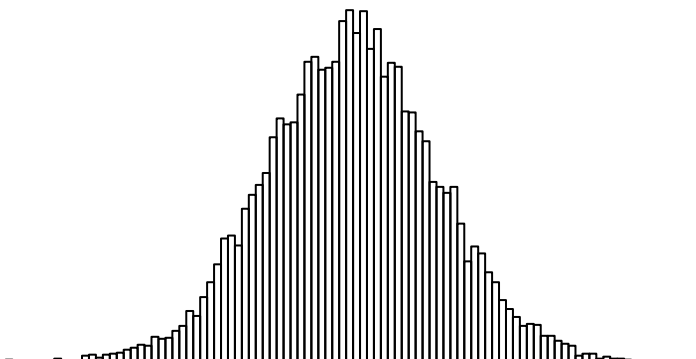

B224:45

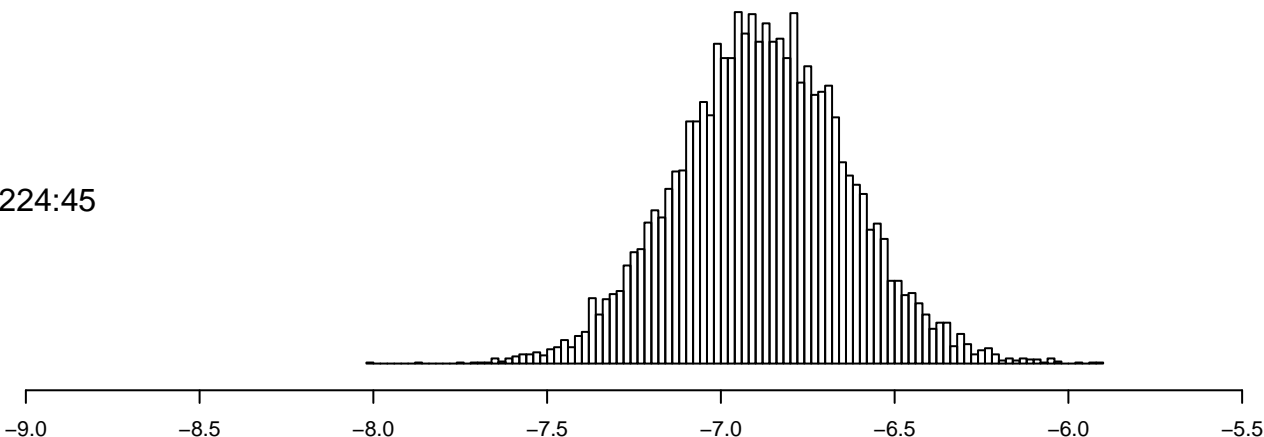

Unidentified Metabolite 68

B224:240 – B224:120

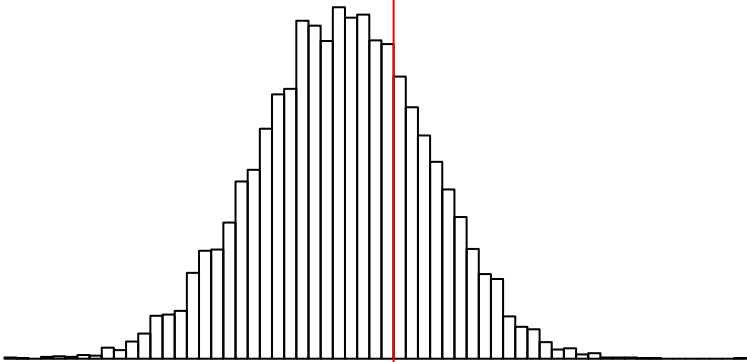

B224:240 – B224:45

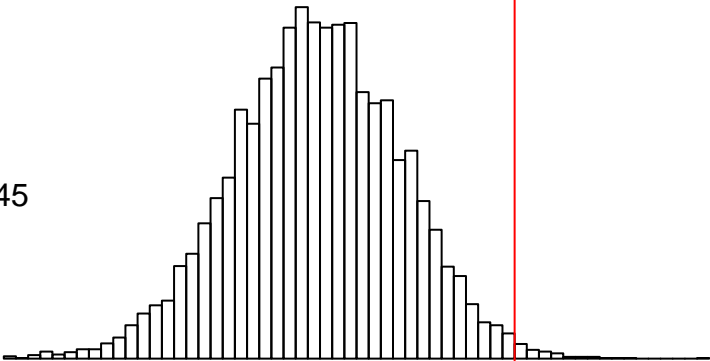

B224:120 – B224:45

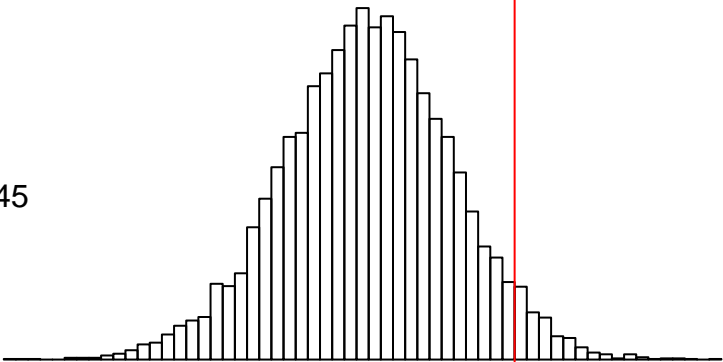

-3 -2 -1 0 1 2

delta(Unidentified Metabolite 68)

B224:240

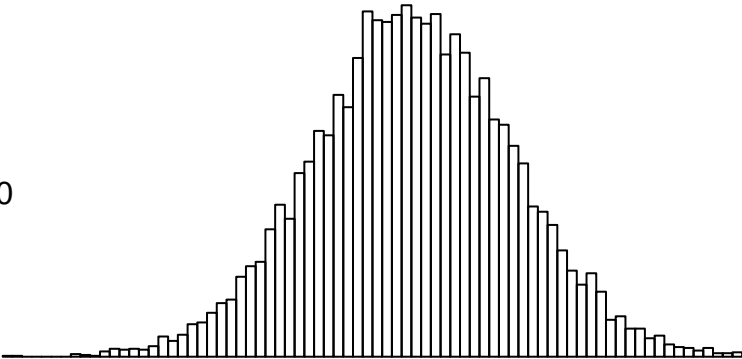

B224:120

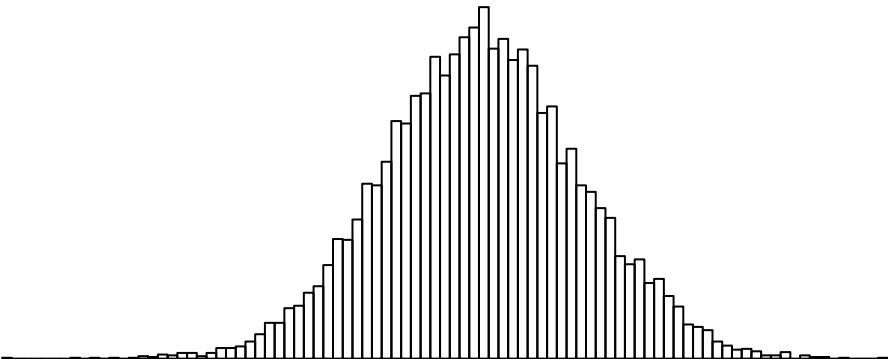

B224:45

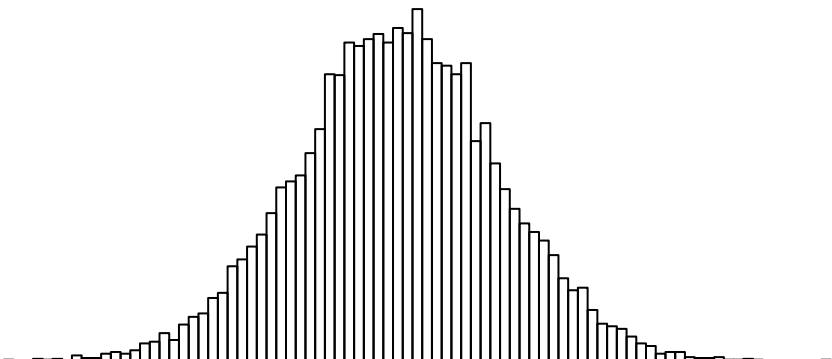

-8.5      -8.0      -7.5      -7.0      -6.5      -6.0

Unidentified Metabolite 69

B224:240 – B224:120

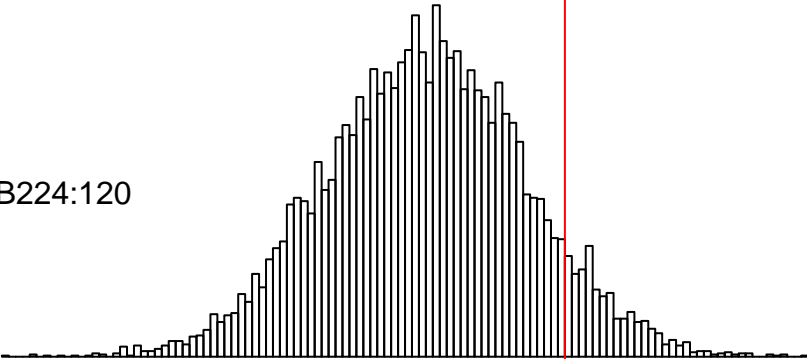

B224:240 – B224:45

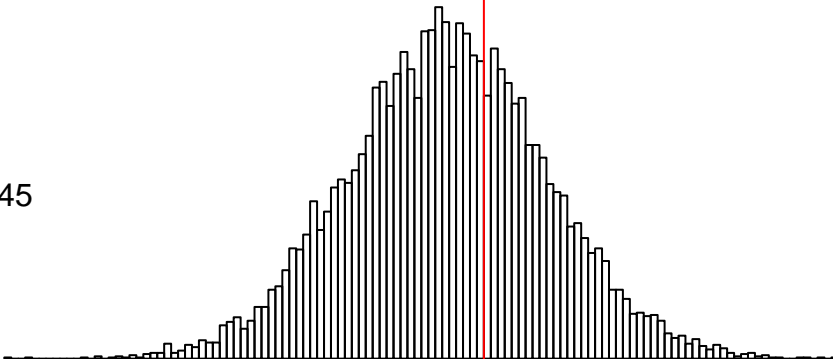

B224:120 – B224:45

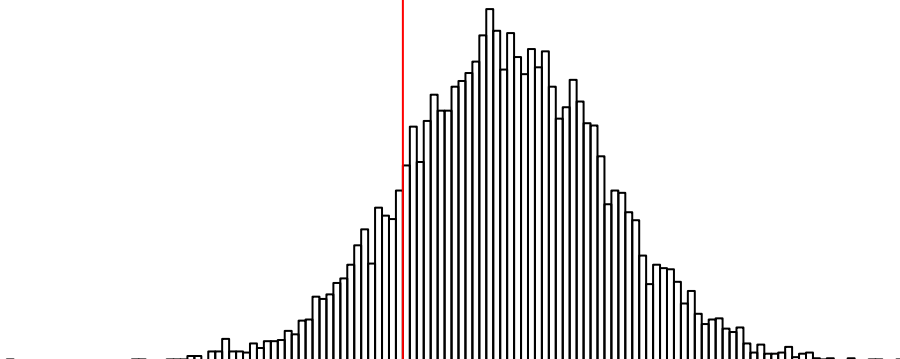

-2.0      -1.5      -1.0      -0.5      0.0      0.5      1.0      1.5

delta(Unidentified Metabolite 69)

B224:240

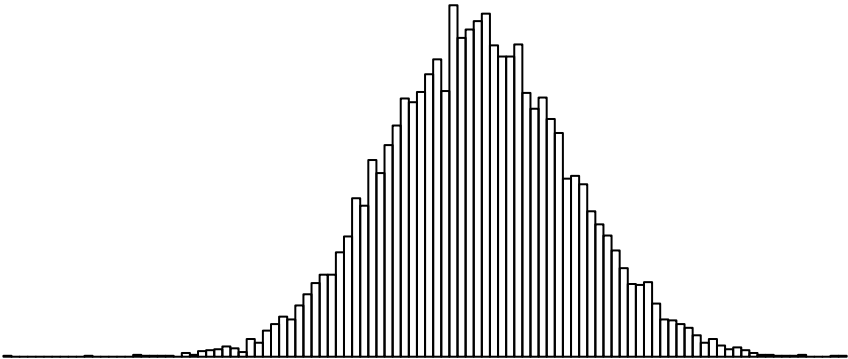

B224:120

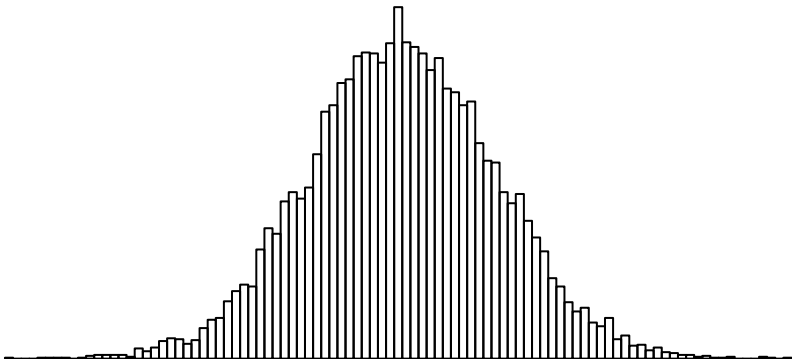

B224:45

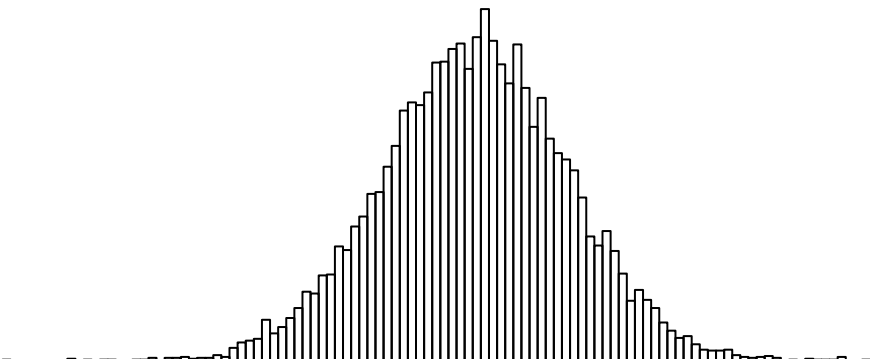

-10.5      -10.0      -9.5      -9.0      -8.5      -8.0      -7.5

Unidentified Metabolite 70

B224:240 – B224:120

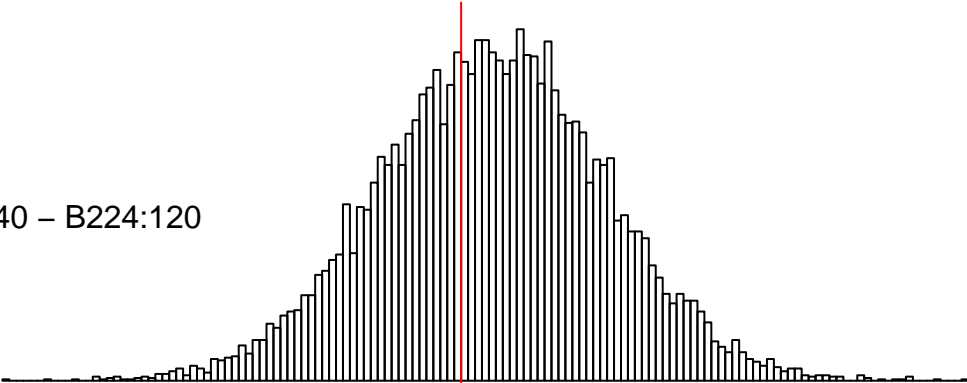

B224:240 – B224:45

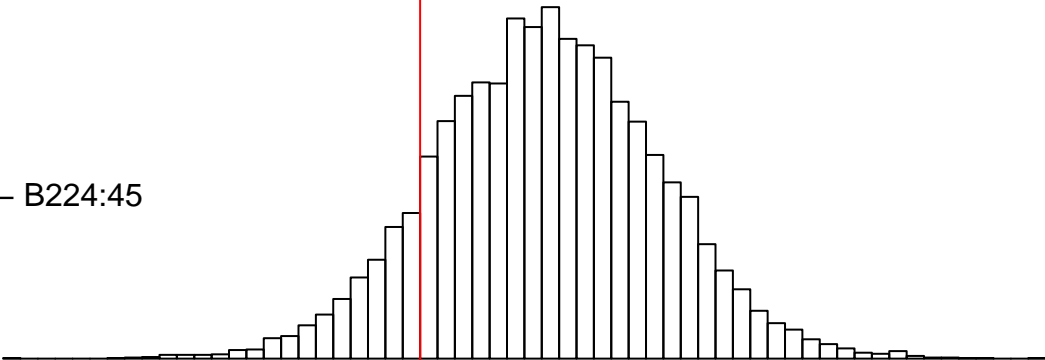

B224:120 – B224:45

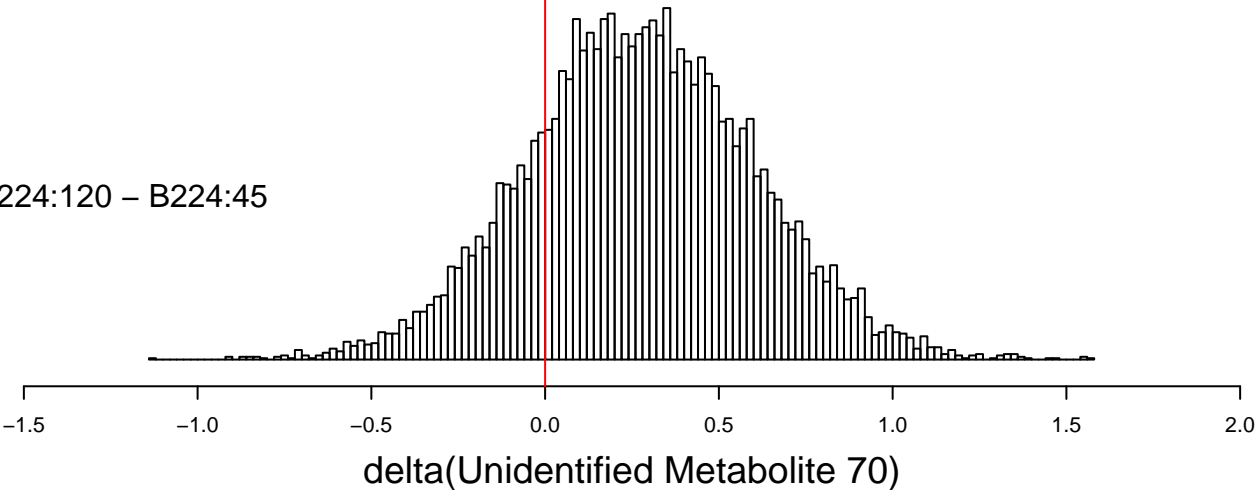



B224:240

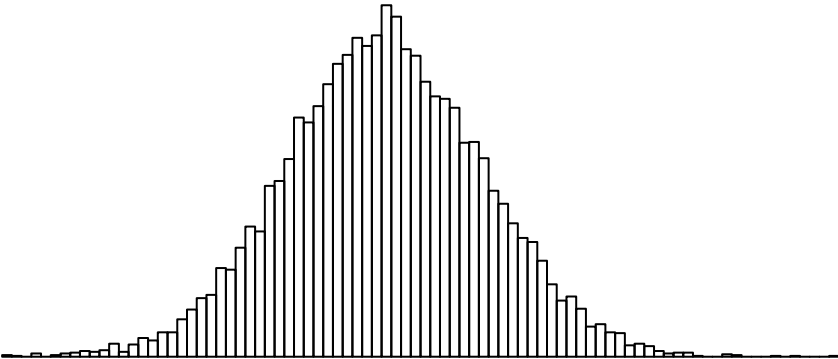

B224:120

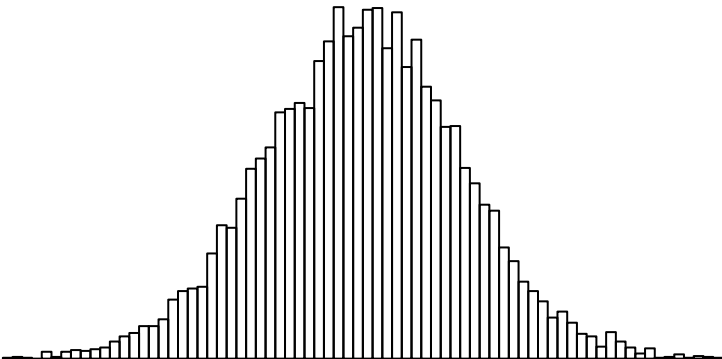

B224:45

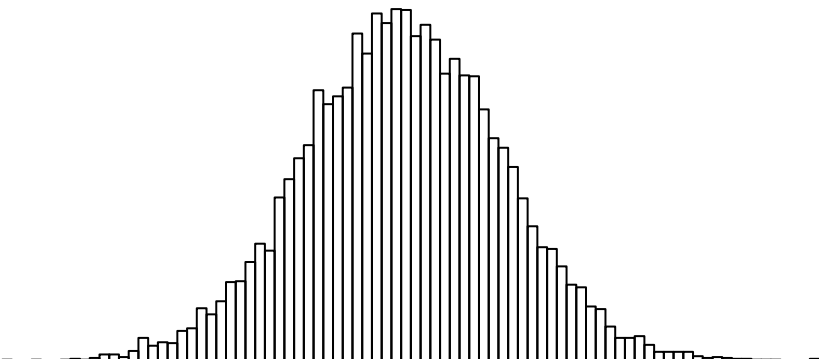

-11.0      -10.5      -10.0      -9.5      -9.0      -8.5

Unidentified Metabolite 71

B224:240 – B224:120

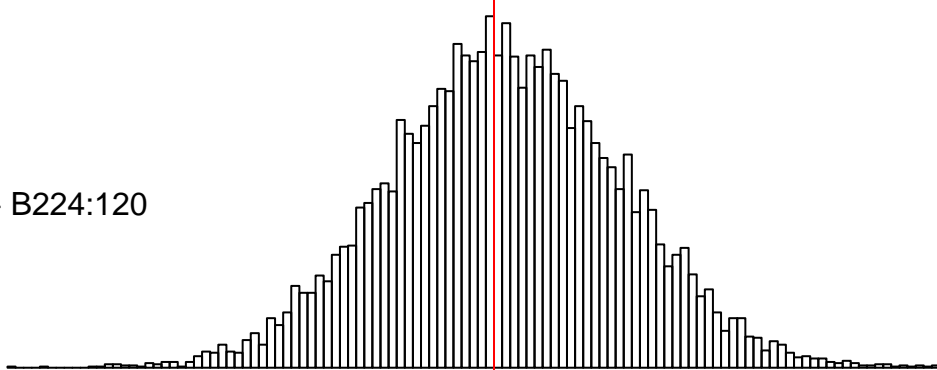

B224:240 – B224:45

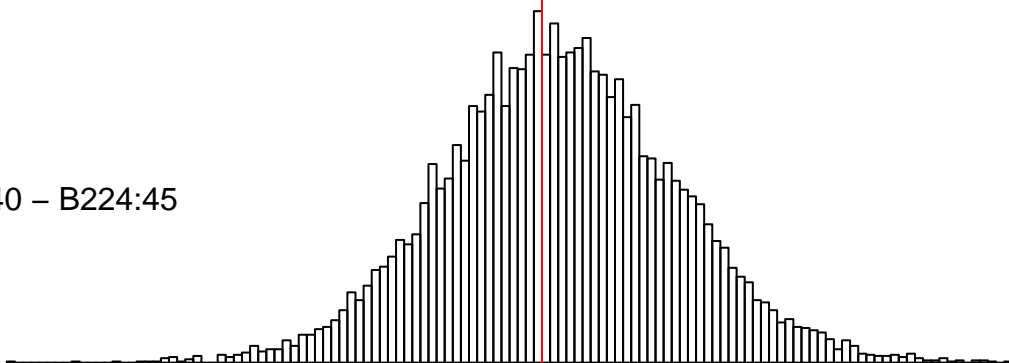

B224:120 – B224:45

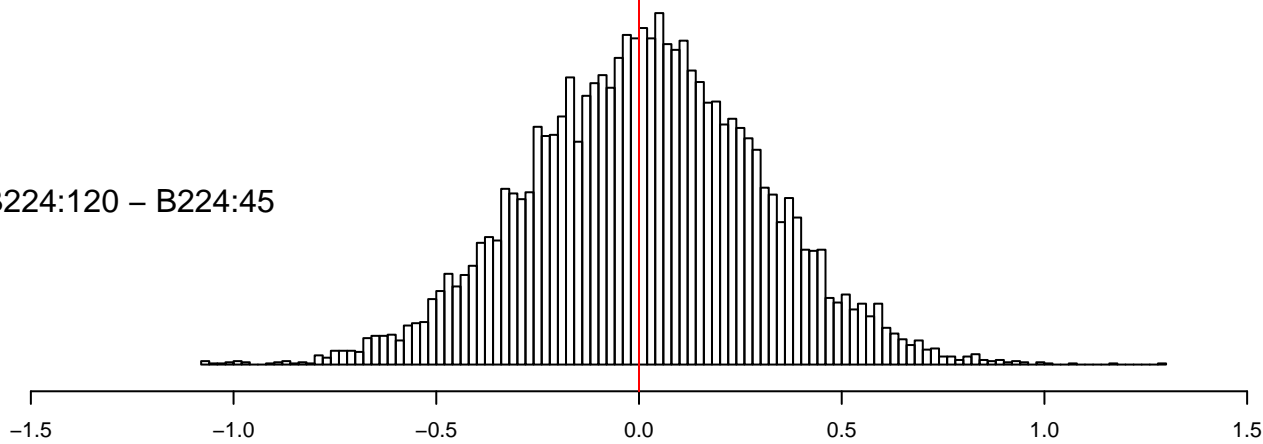

delta(Unidentified Metabolite 71)

B224:240

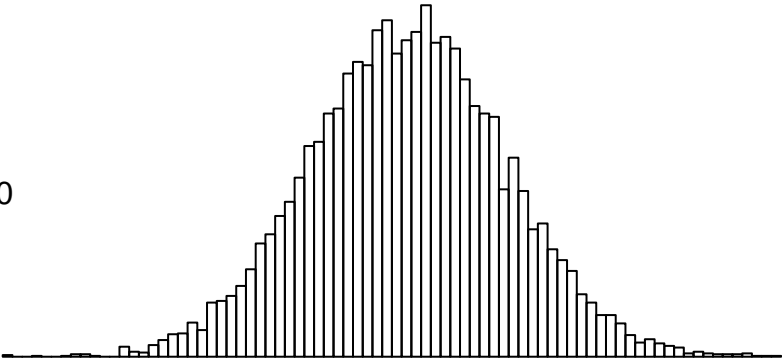

B224:120

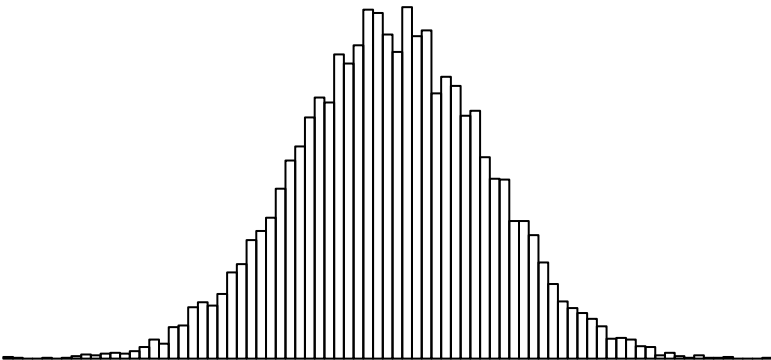

B224:45

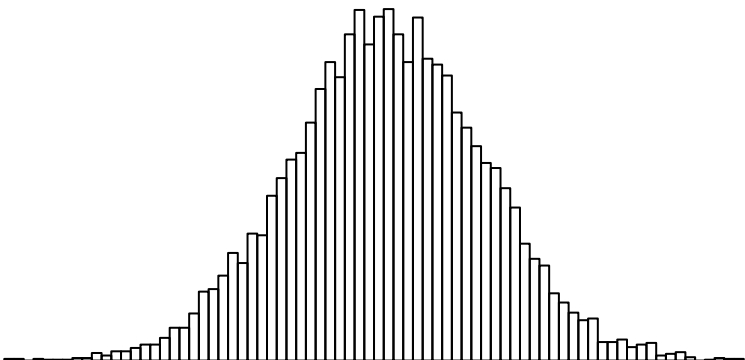

-8.5      -8.0      -7.5      -7.0      -6.5      -6.0

Unidentified Metabolite 72

B224:240 – B224:120

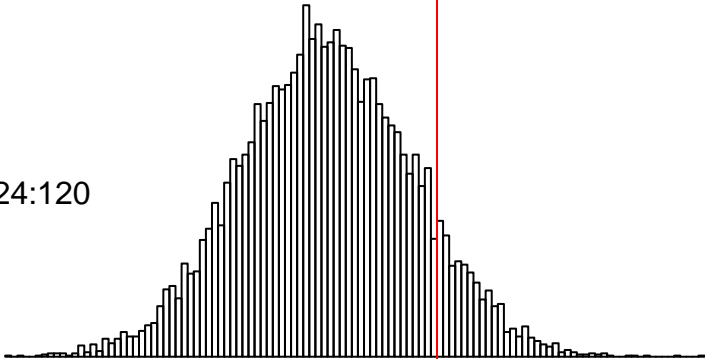

B224:240 – B224:45

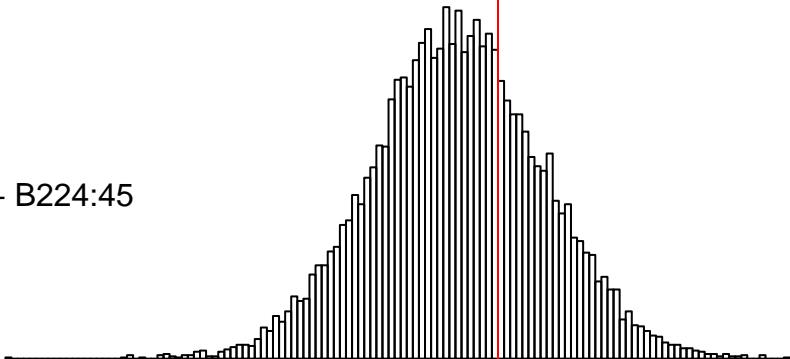

B224:120 – B224:45

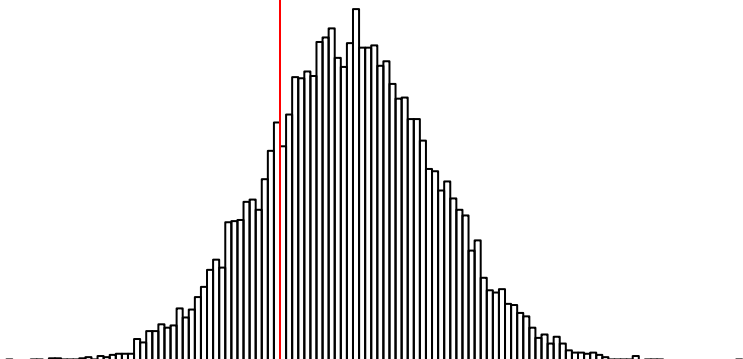

-2

-1

0

1

2

delta(Unidentified Metabolite 72)

B224:240

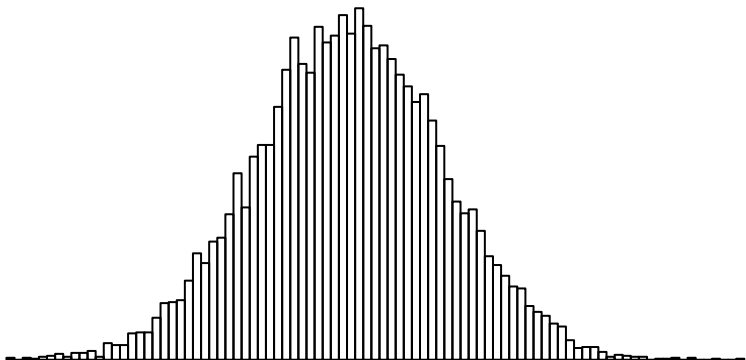

B224:120

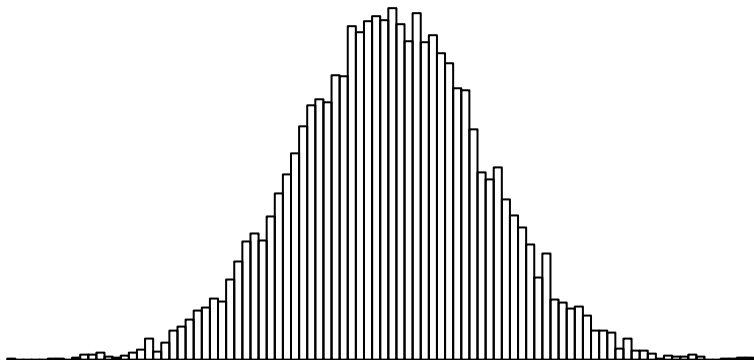

B224:45

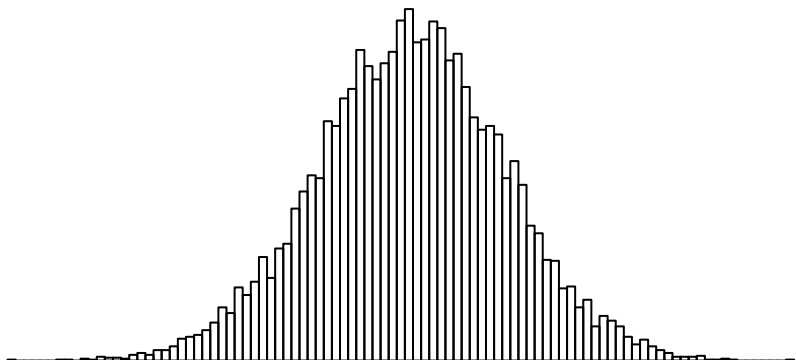

-10.0      -9.5      -9.0      -8.5      -8.0      -7.5      -7.0

Unidentified Metabolite 73

B224:240 – B224:120

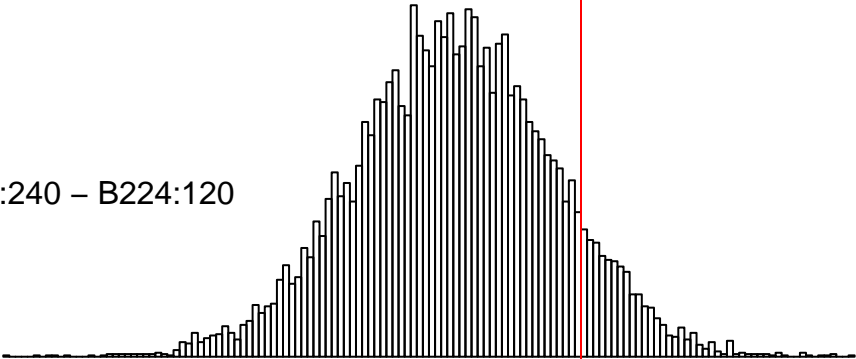

B224:240 – B224:45

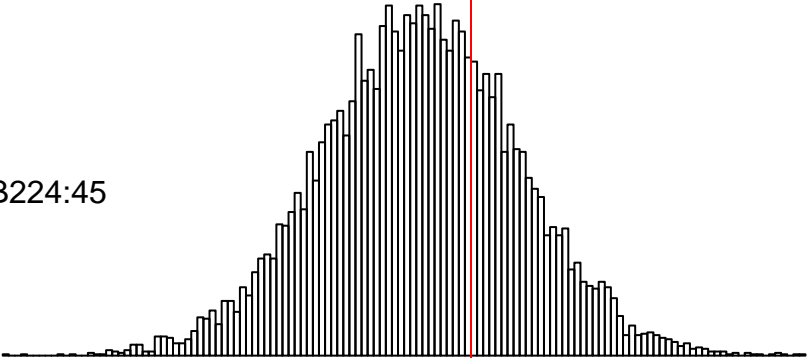

B224:120 – B224:45

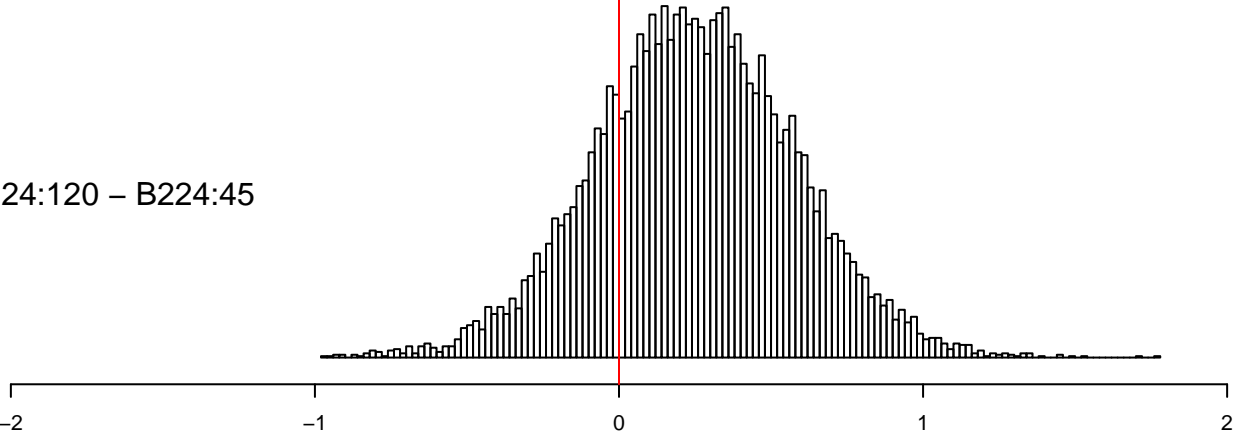

delta(Unidentified Metabolite 73)

B224:240

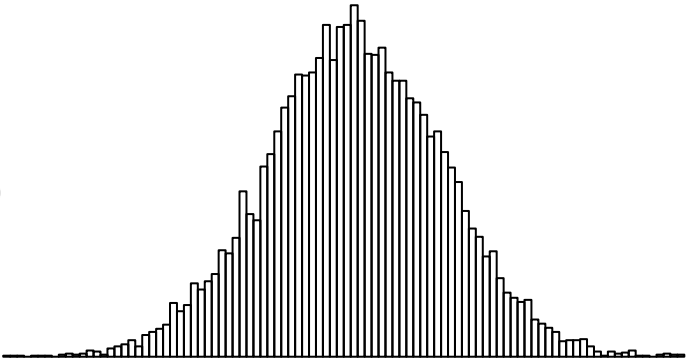

B224:120

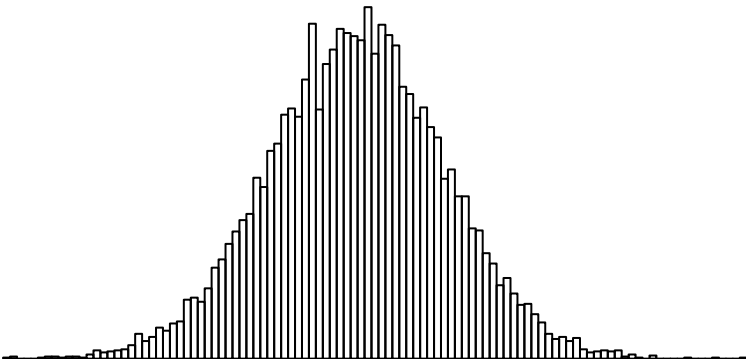

B224:45

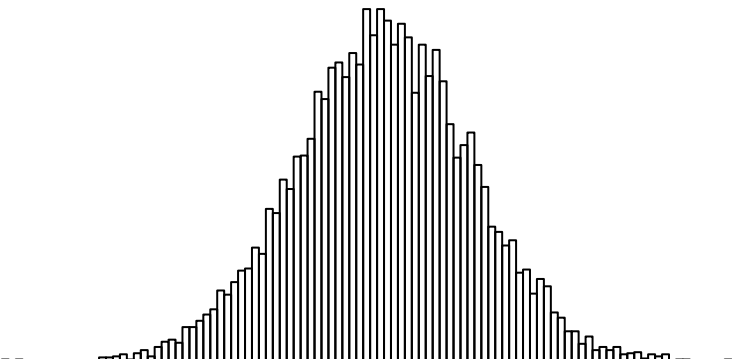

-11.5      -11.0      -10.5      -10.0      -9.5      -9.0      -8.5      -8.0

Unidentified Metabolite 74

B224:240 – B224:120

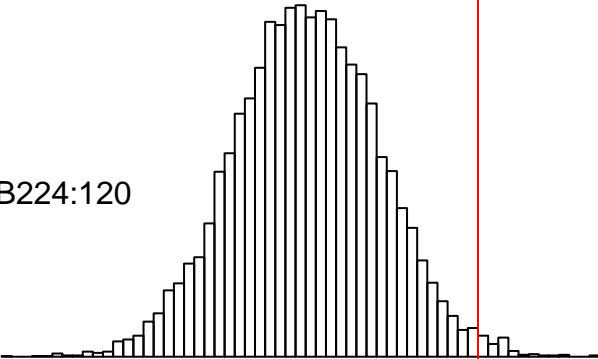

B224:240 – B224:45

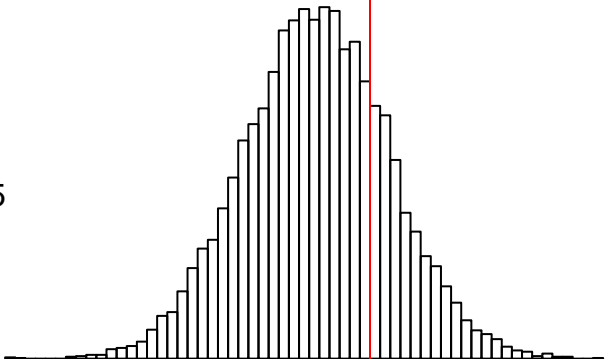

B224:120 – B224:45

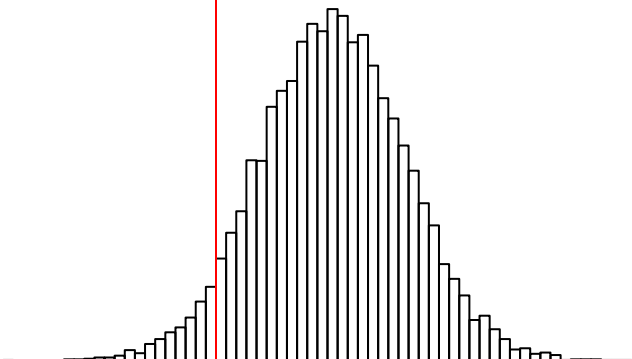

-3 -2 -1 0 1 2 3

delta(Unidentified Metabolite 74)



B224:240

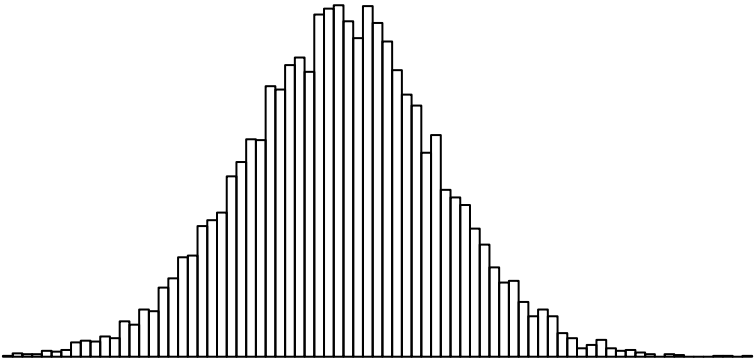

B224:120

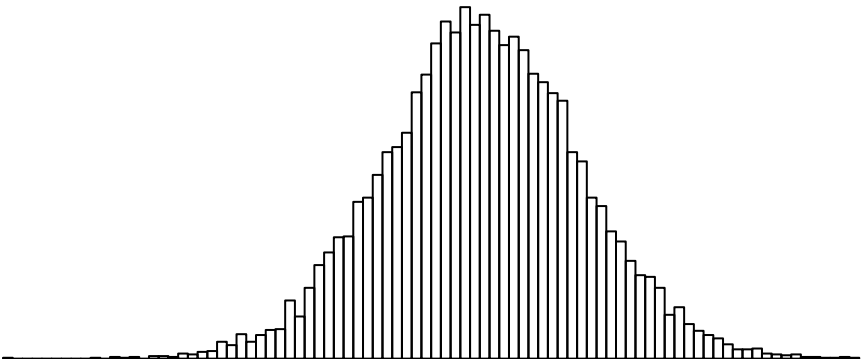

B224:45

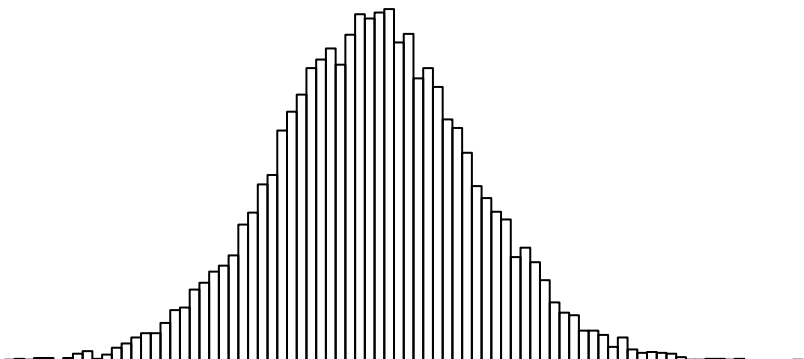

-12.0      -11.5      -11.0      -10.5      -10.0      -9.5

Unidentified Metabolite 75

B224:240 – B224:120

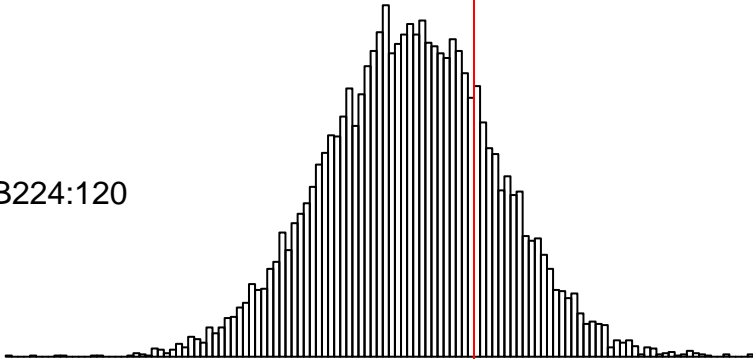

B224:240 – B224:45

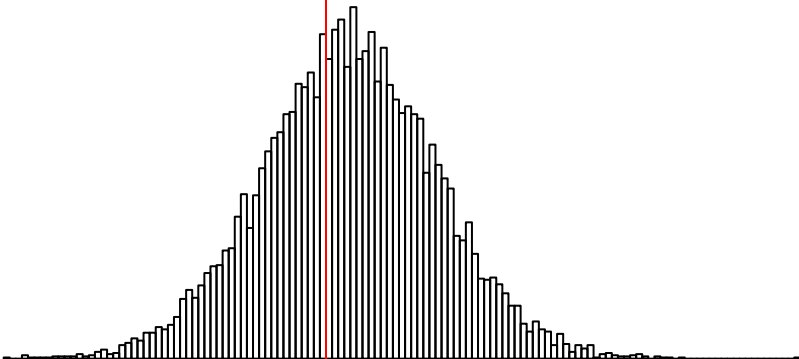

B224:120 – B224:45

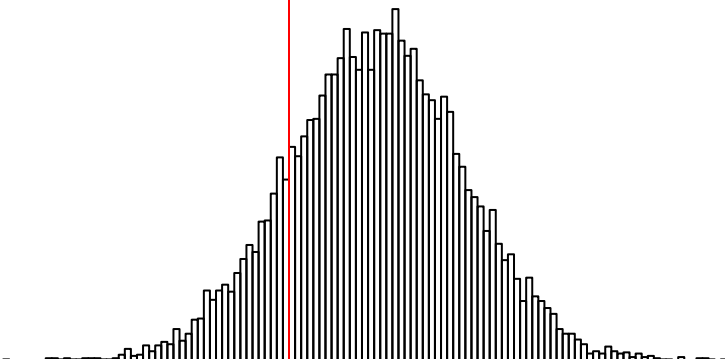

-2 -1 0 1 2

delta(Unidentified Metabolite 75)

B224:240

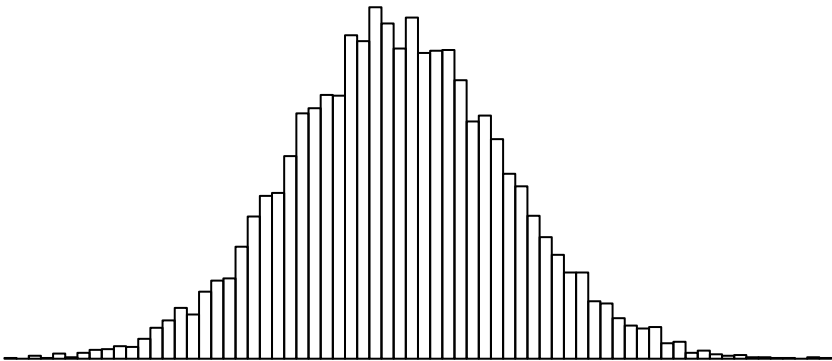

B224:120

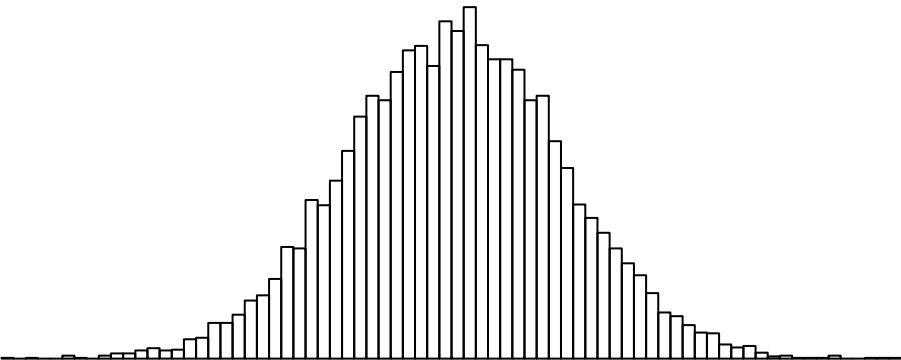

B224:45

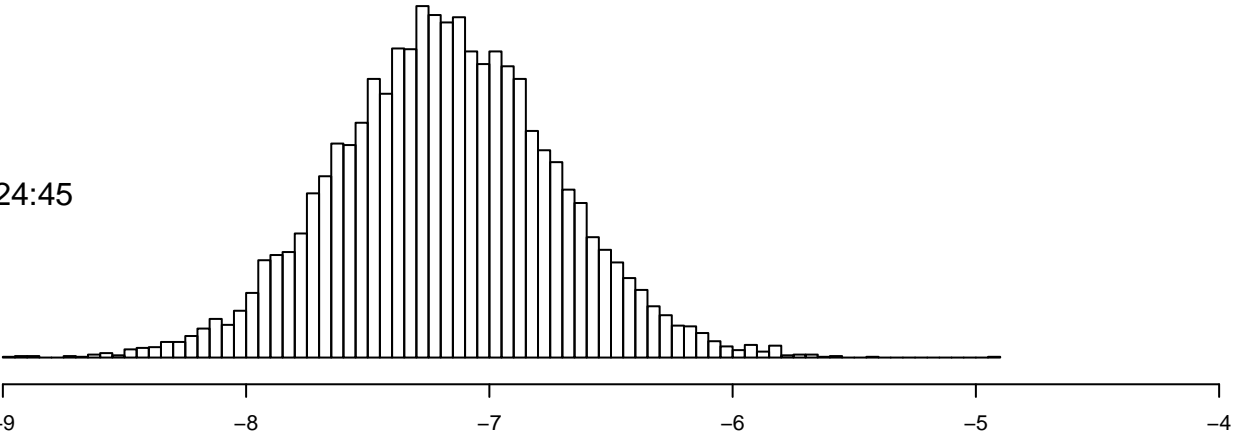

Unidentified Metabolite 76

B224:240 – B224:120

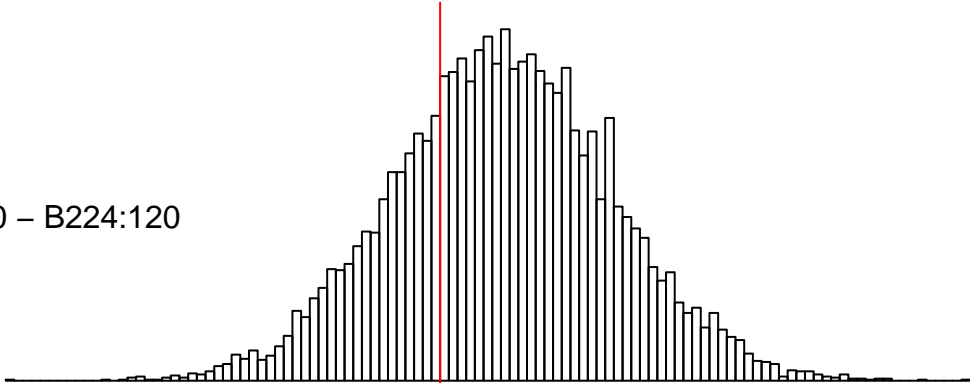

B224:240 – B224:45

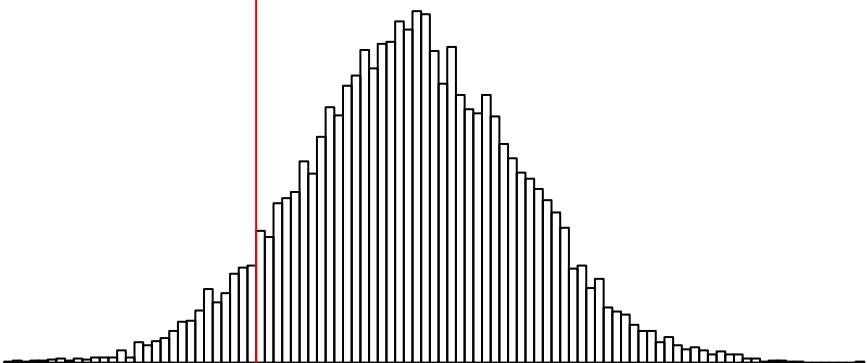

B224:120 – B224:45

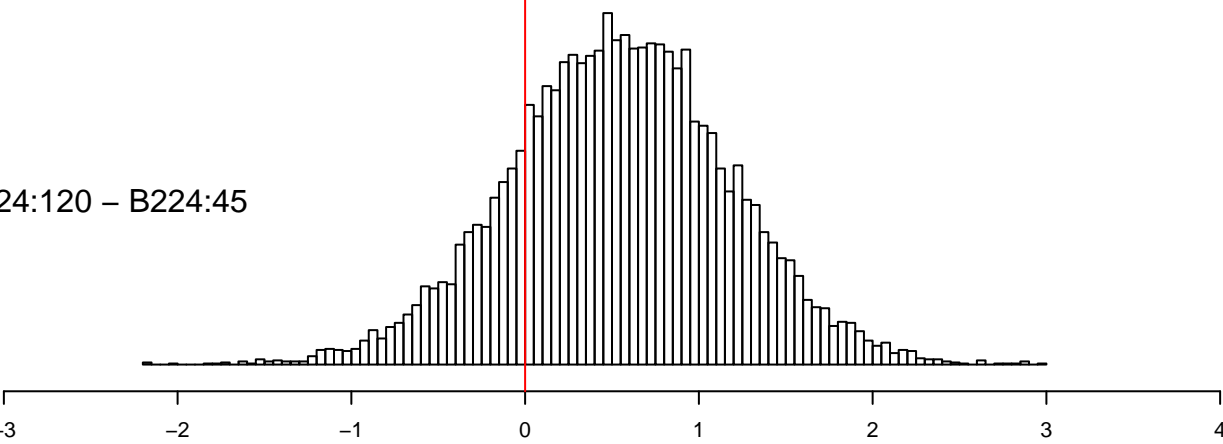

delta(Unidentified Metabolite 76)

B224:240

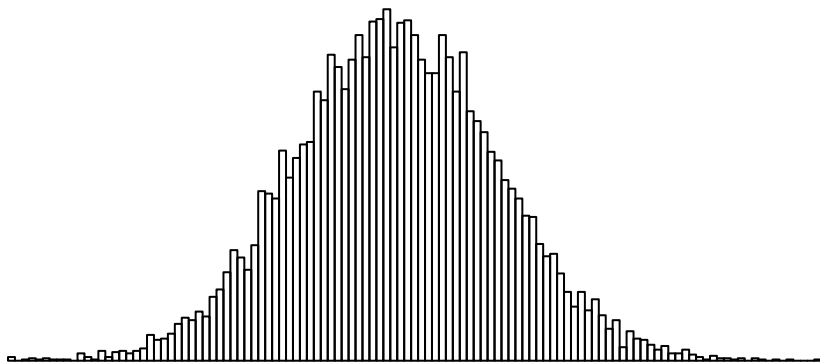

B224:120

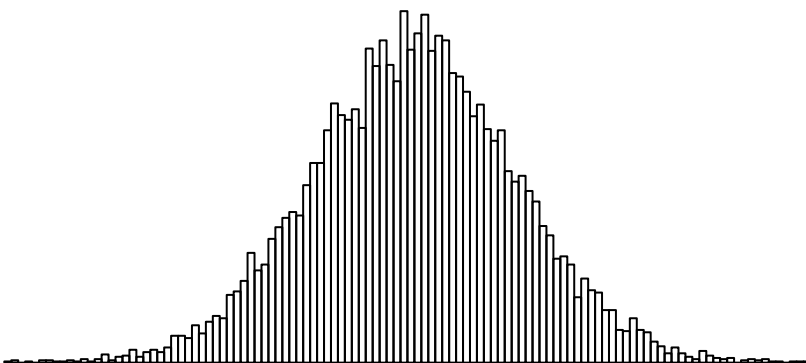

B224:45

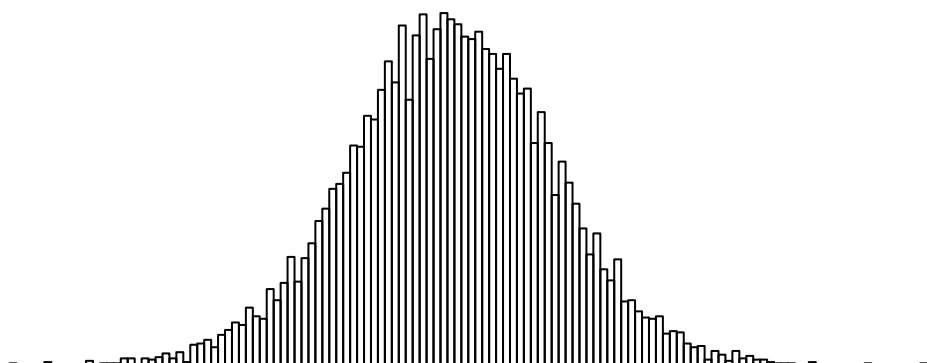

-10.0      -9.5      -9.0      -8.5      -8.0      -7.5      -7.0      -6.5

Unidentified Metabolite 77

B224:240 – B224:120

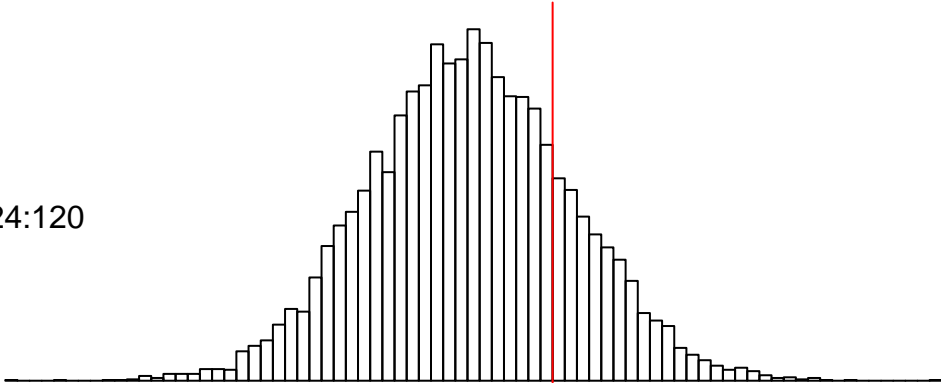

B224:240 – B224:45

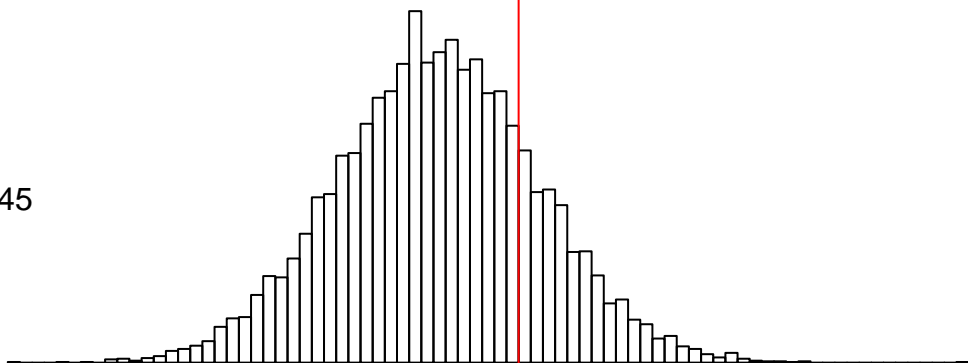

B224:120 – B224:45

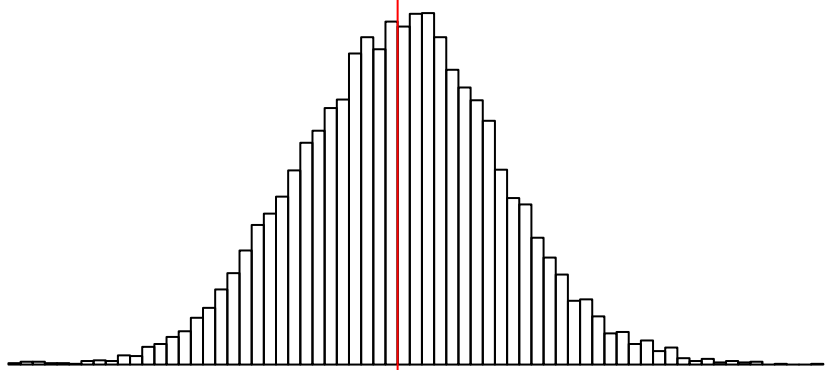

-3 -2 -1 0 1 2

delta(Unidentified Metabolite 77)

B224:240

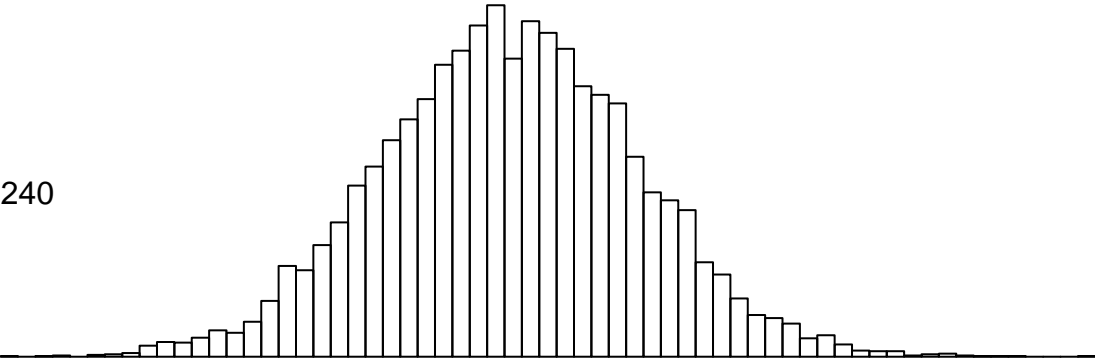

B224:120

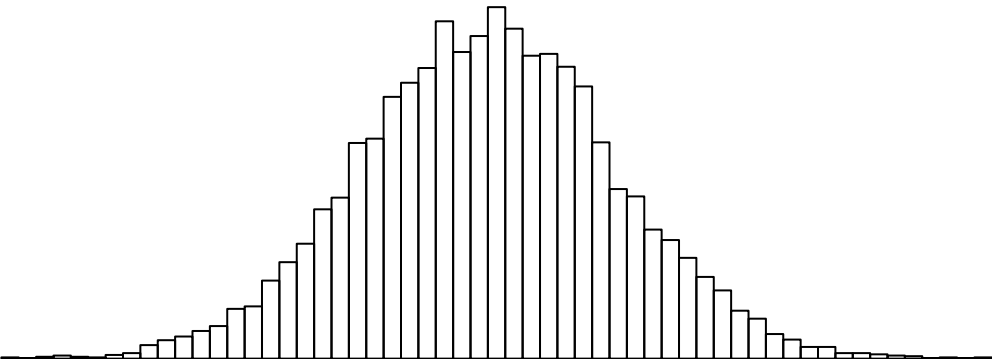

B224:45

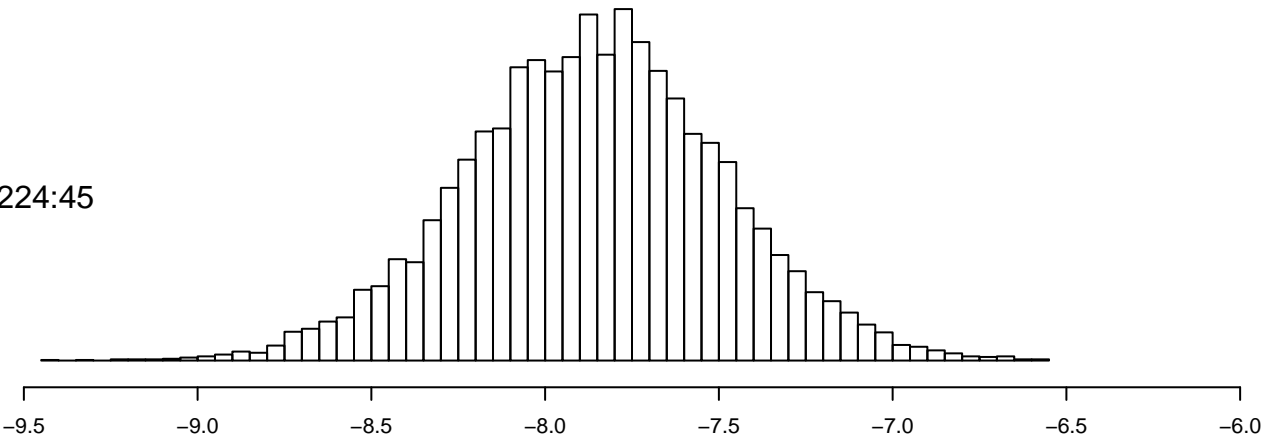

Unidentified Metabolite 78

B224:240 – B224:120

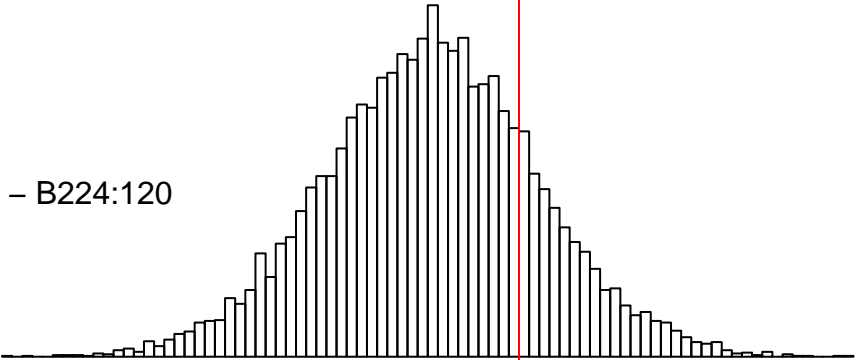

B224:240 – B224:45

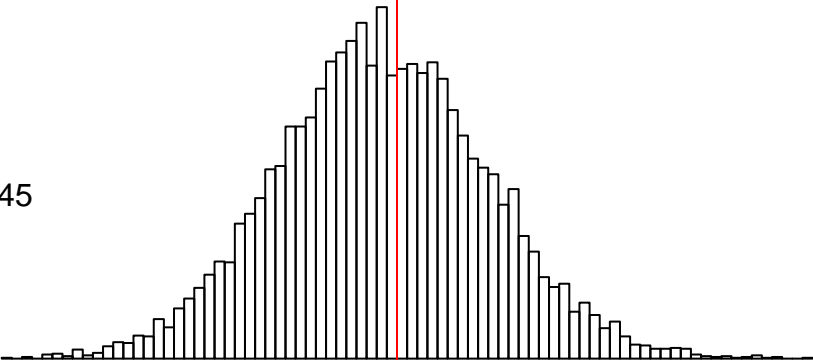

B224:120 – B224:45

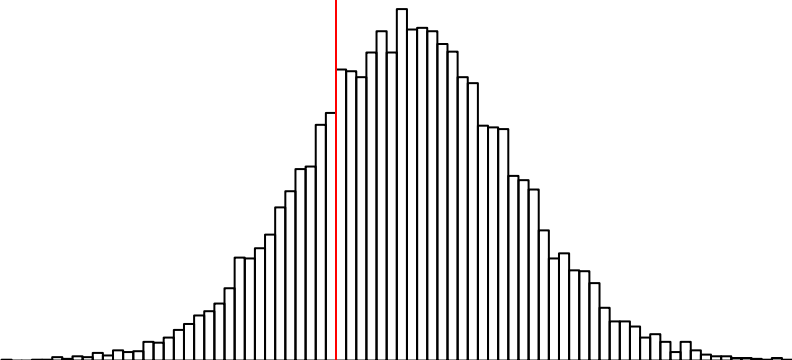

-3

-2

-1

0

1

2

3

delta(Unidentified Metabolite 78)



B224:240

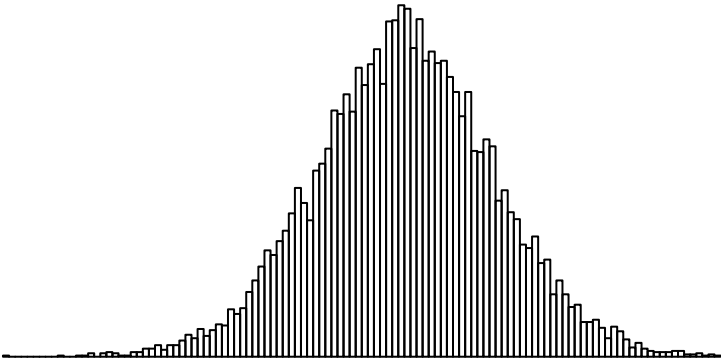

B224:120

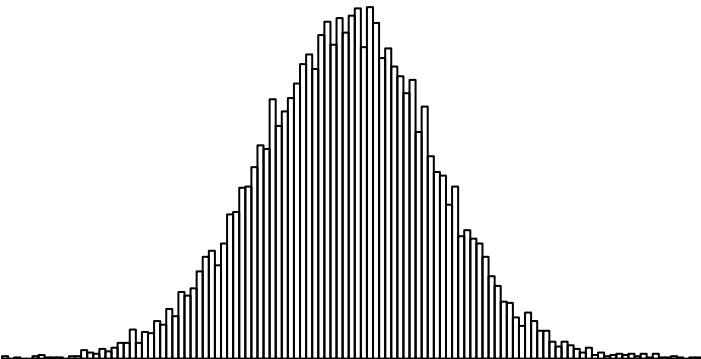

B224:45

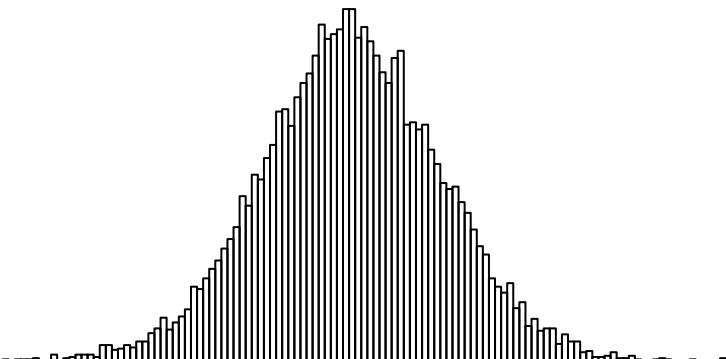

-10.0      -9.5      -9.0      -8.5      -8.0

Acid 2

B224:240 – B224:120

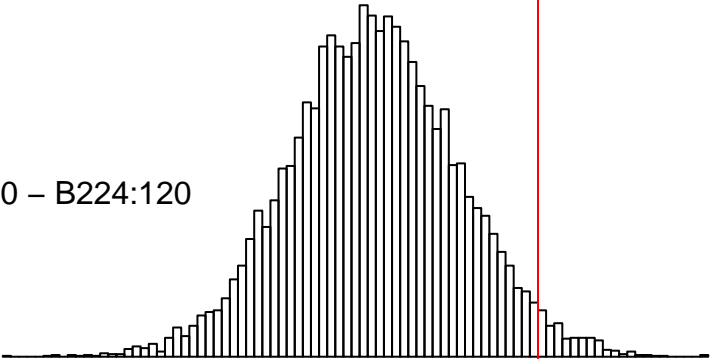

B224:240 – B224:45

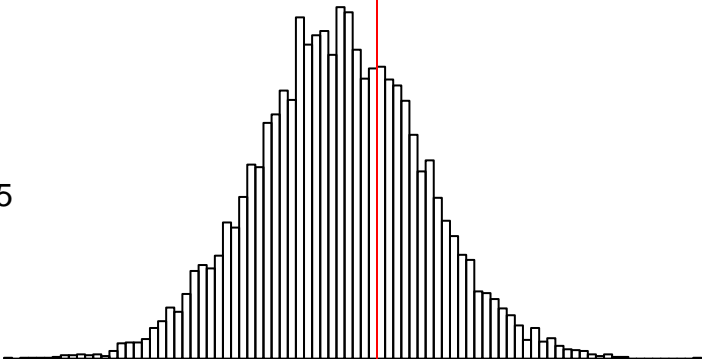

B224:120 – B224:45

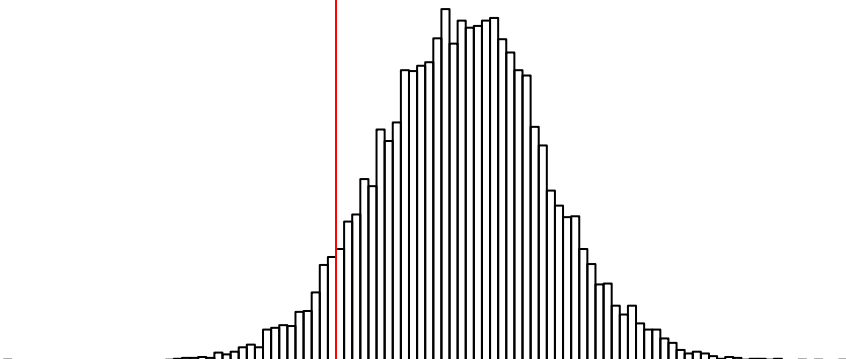

-1.5      -1.0      -0.5      0.0      0.5      1.0      1.5

delta(Acid 2)

B224:240

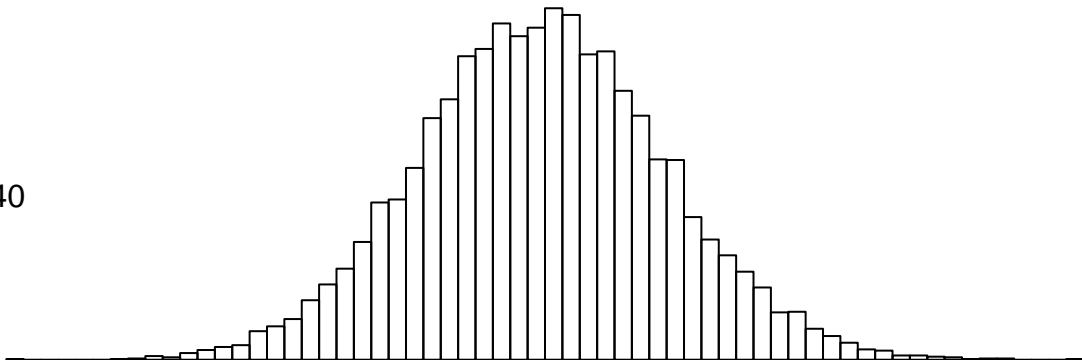

B224:120

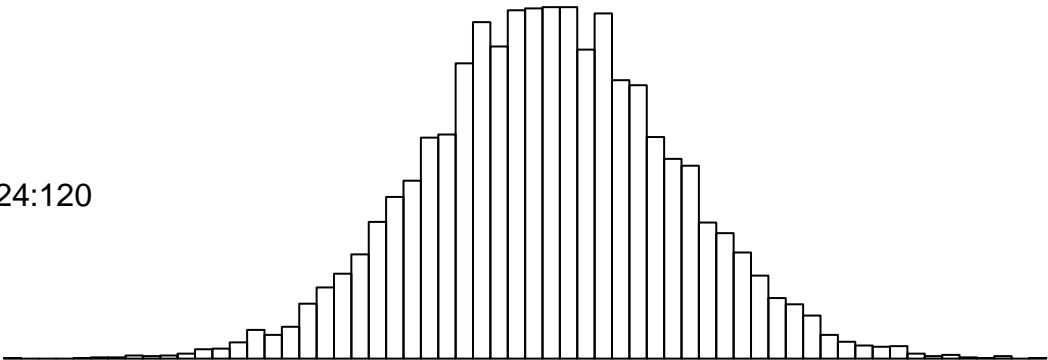

B224:45

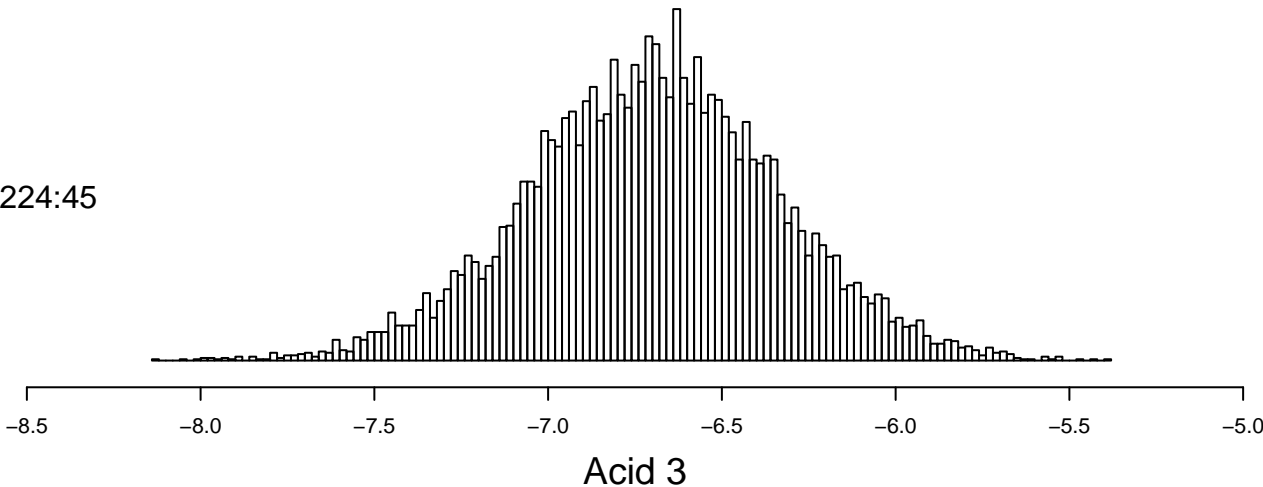

B224:240 – B224:120

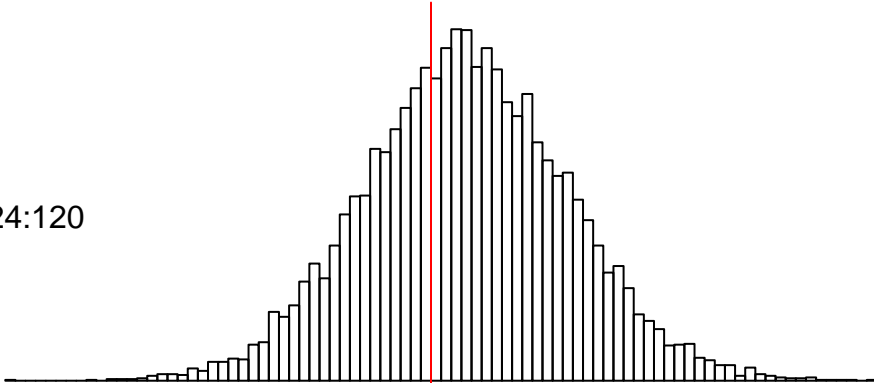

B224:240 – B224:45

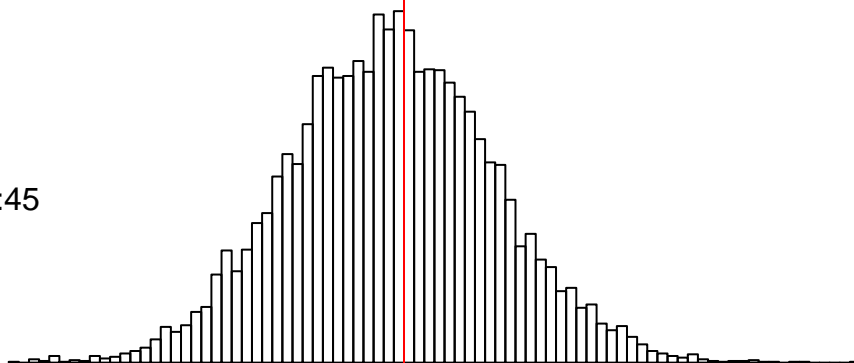

B224:120 – B224:45

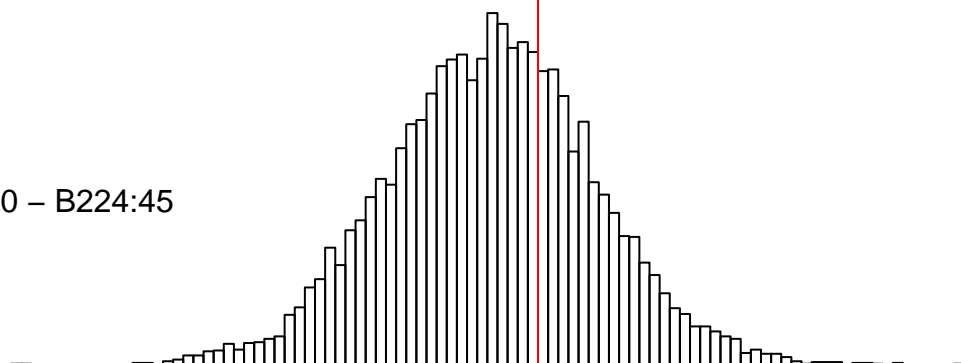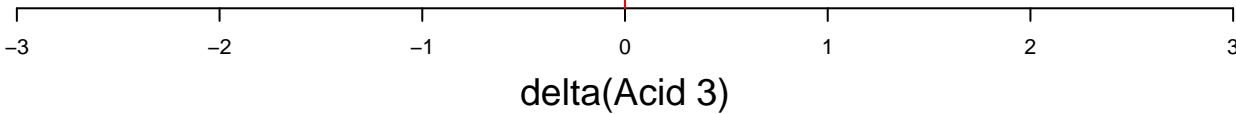

B224:240

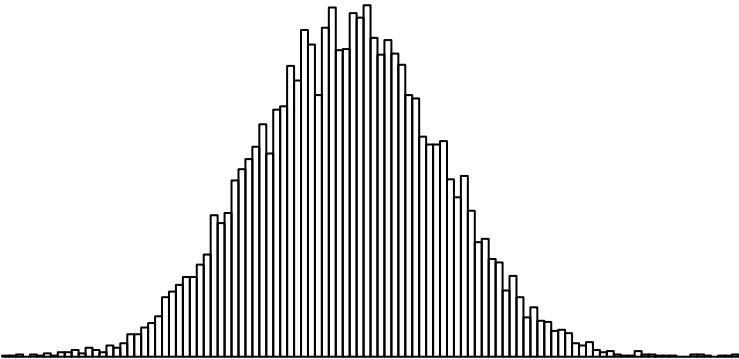

B224:120

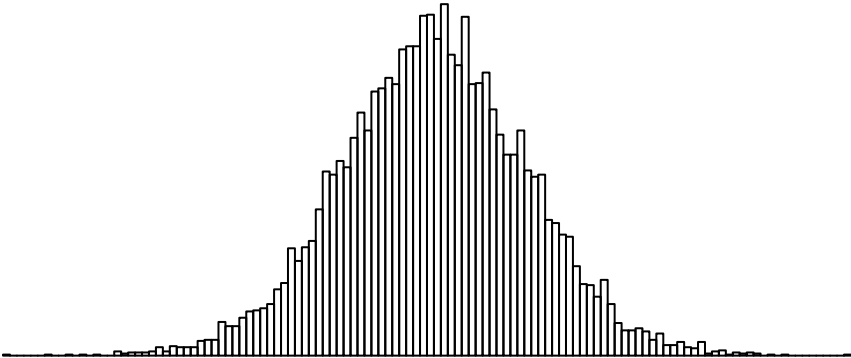

B224:45

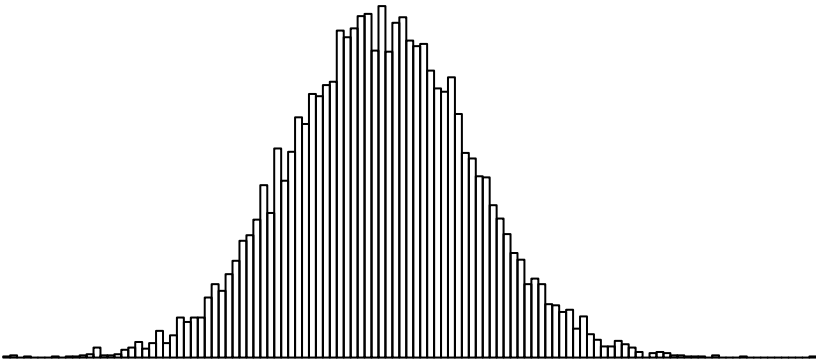

-9.5 -9.0 -8.5 -8.0 -7.5 -7.0 -6.5 -6.0

Acid 6

B224:240 – B224:120

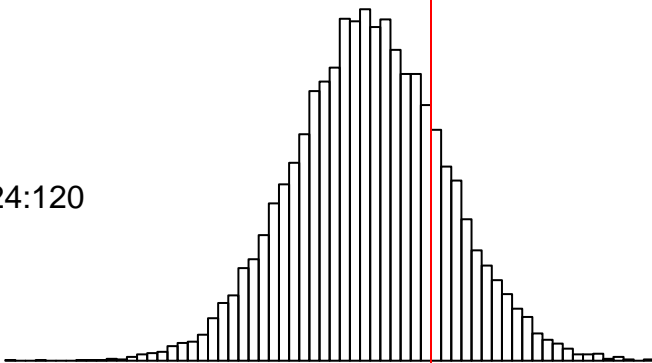

B224:240 – B224:45

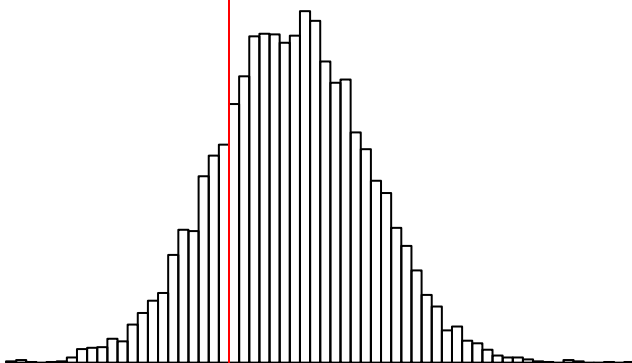

B224:120 – B224:45

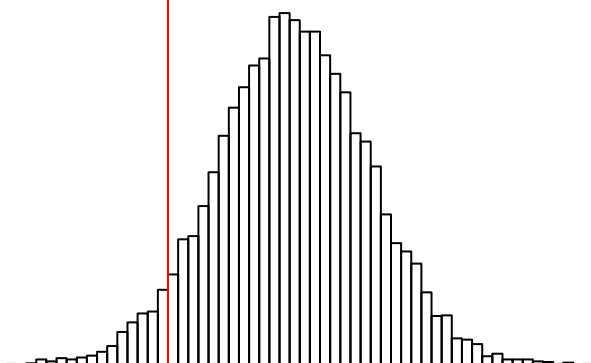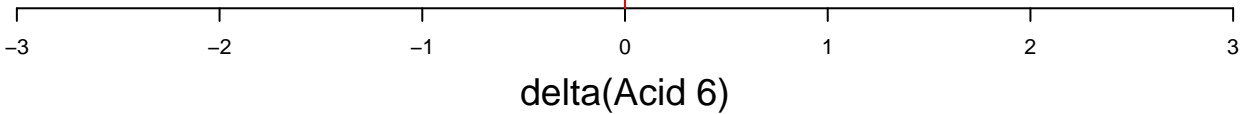

B224:240

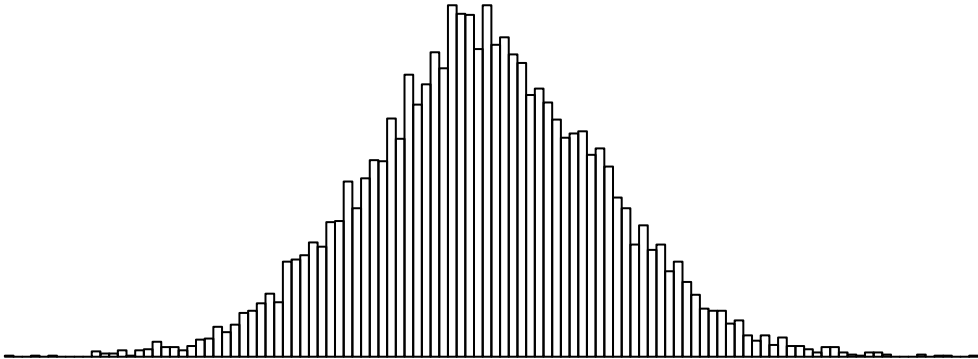

B224:120

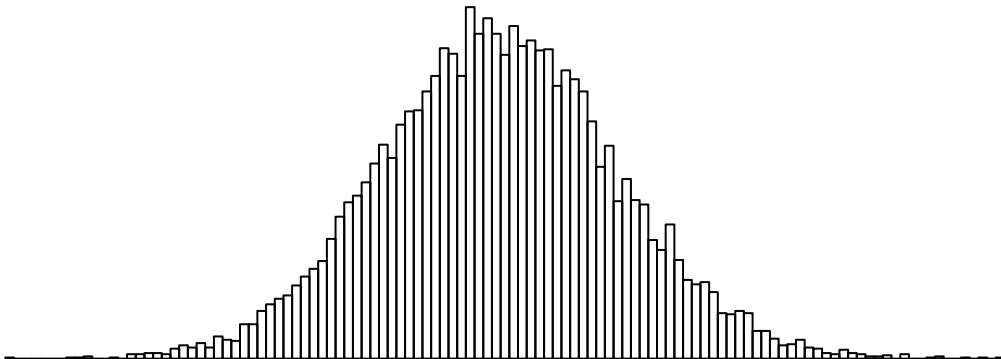

B224:45

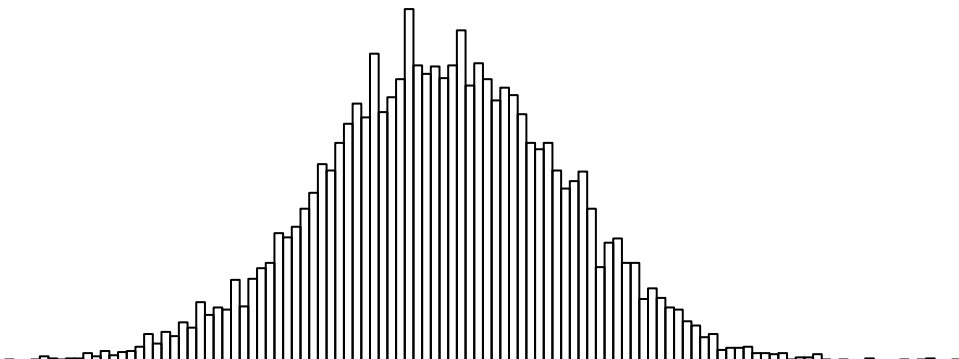

-8.5

-8.0

-7.5

Acid 7

B224:240 – B224:120

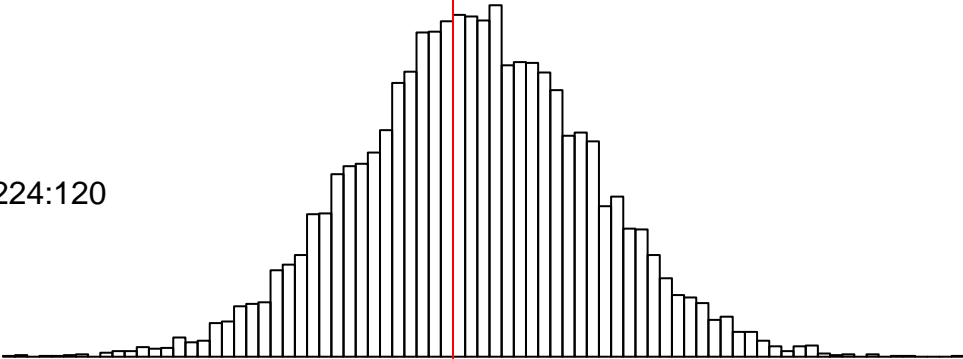

B224:240 – B224:45

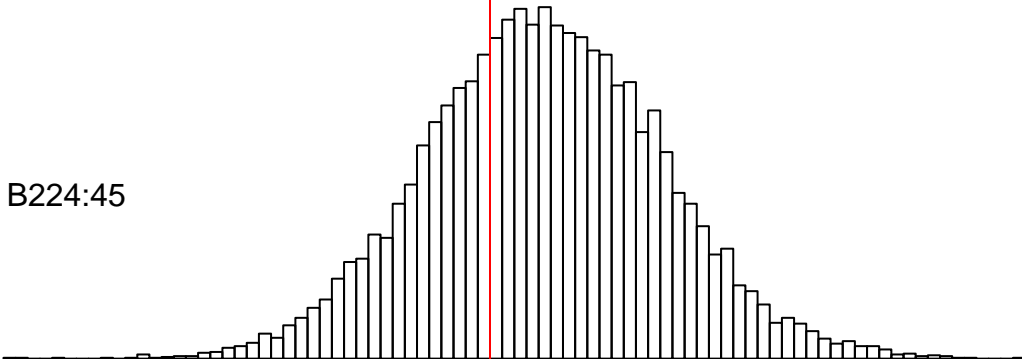

B224:120 – B224:45

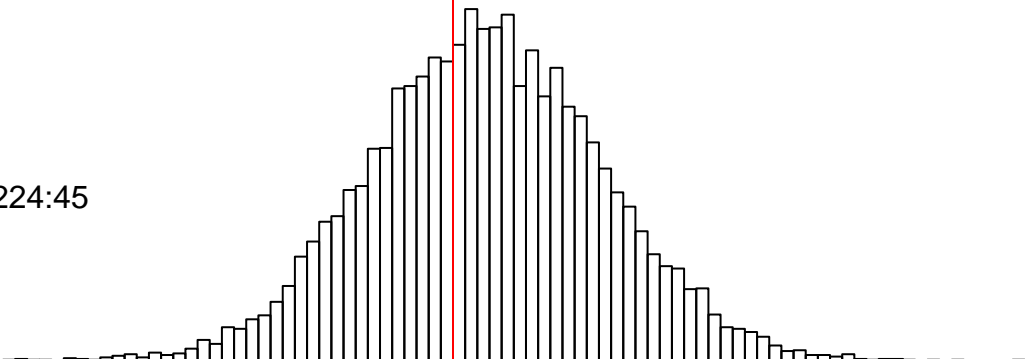

-1.0      -0.5      0.0      0.5      1.0

delta(Acid 7)



B224:240

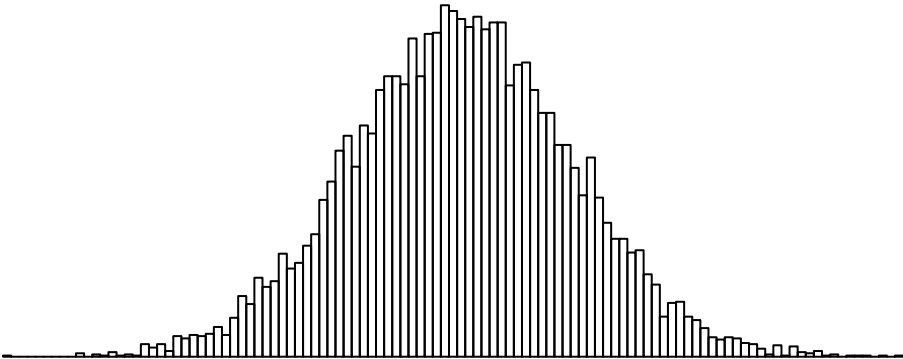

B224:120

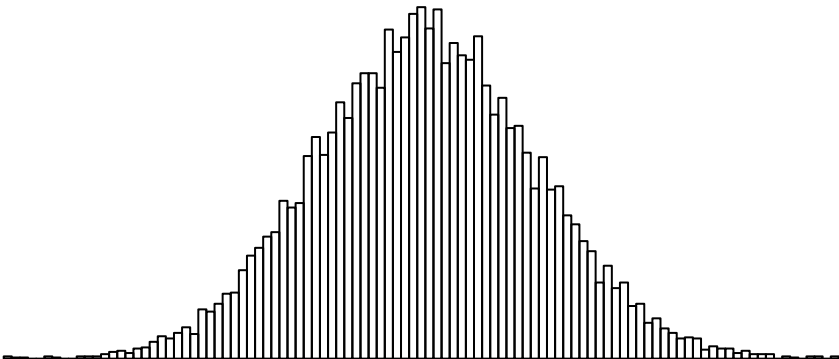

B224:45

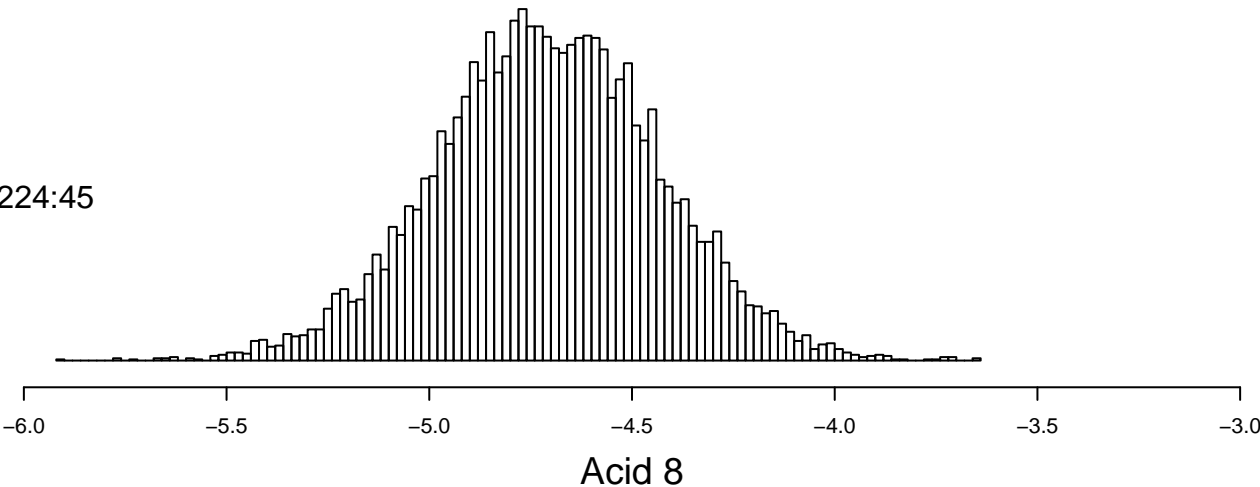

B224:240 – B224:120

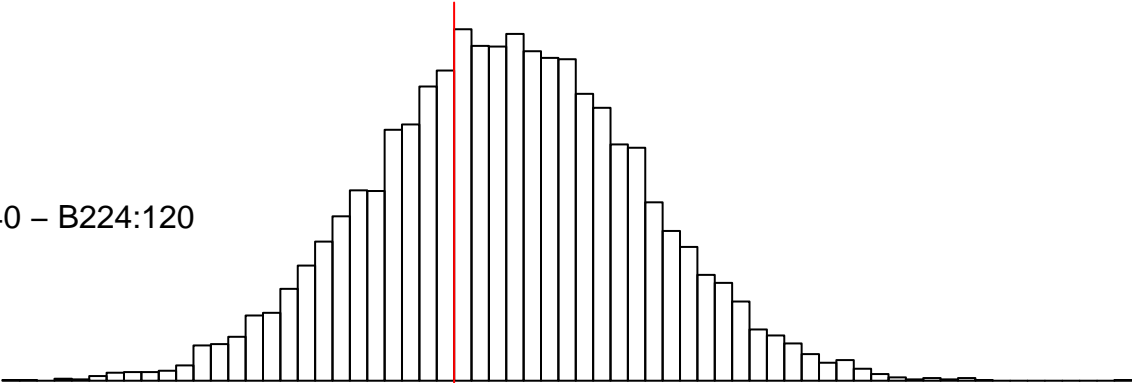

B224:240 – B224:45

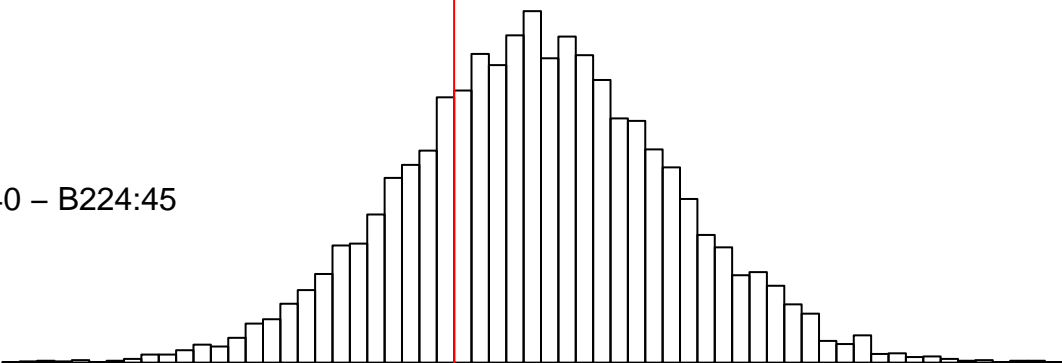

B224:120 – B224:45

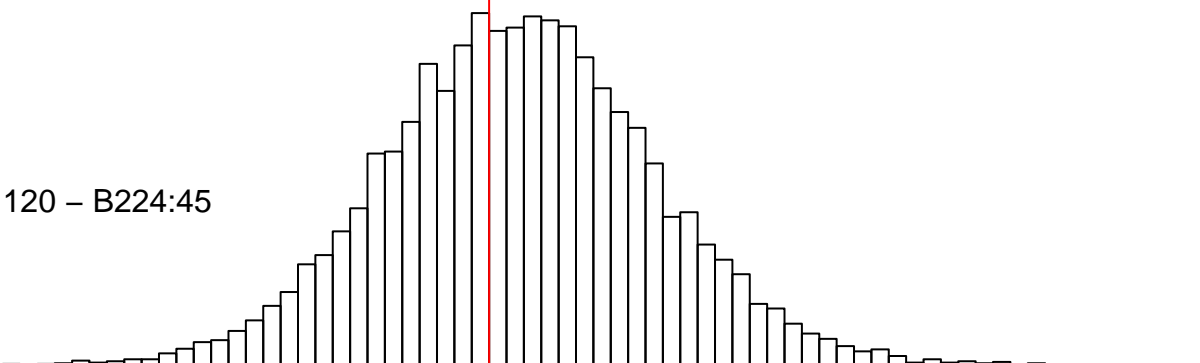

-1.5      -1.0      -0.5      0.0      0.5      1.0      1.5      2.0

delta(Acid 8)

B224:240

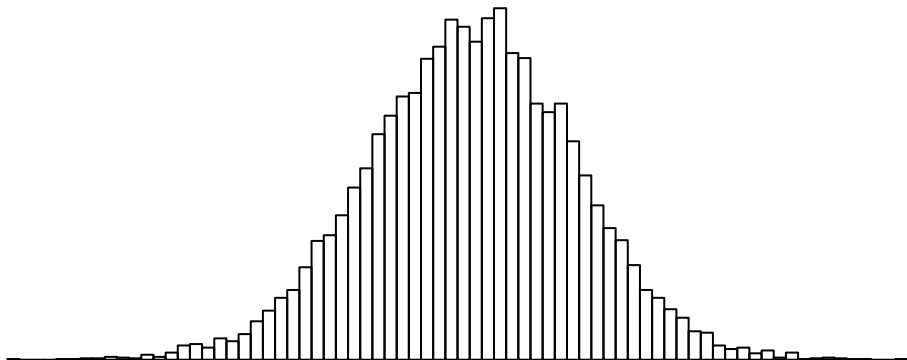

B224:120

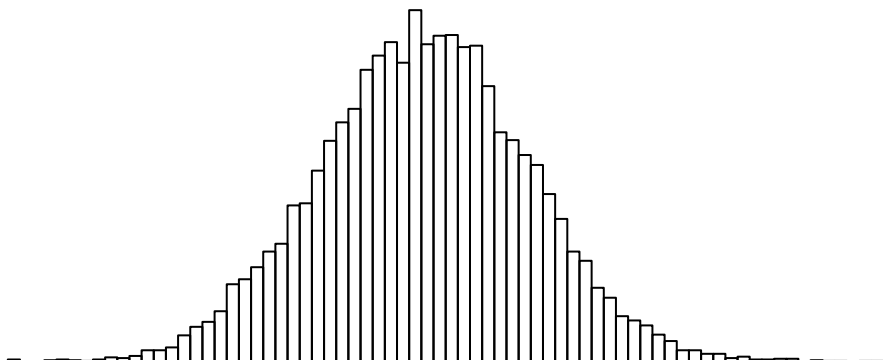

B224:45

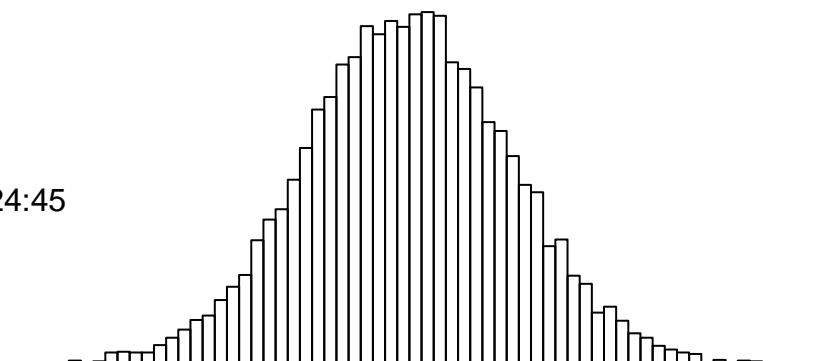

Acid 9

B224:240 – B224:120

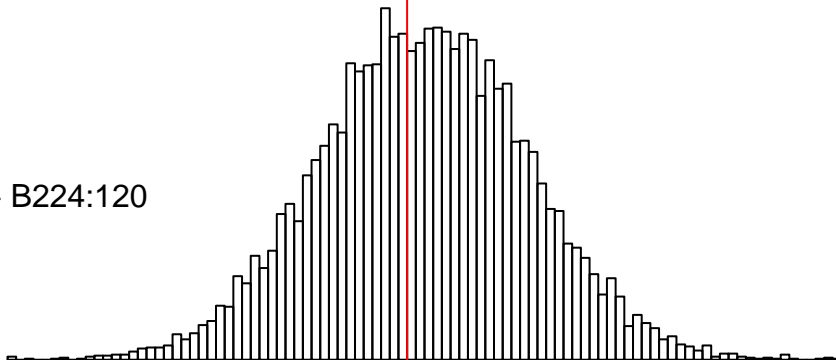

B224:240 – B224:45

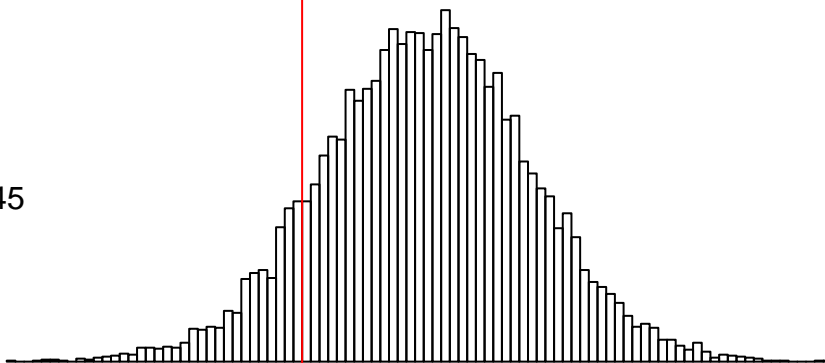

B224:120 – B224:45

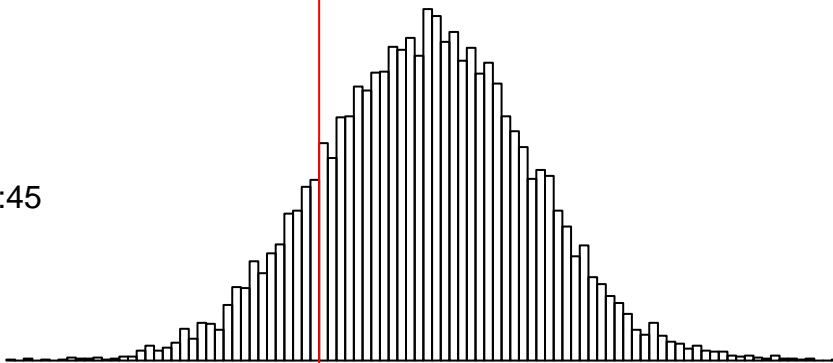

-3

-2

-1

0

1

2

3

4

delta(Acid 9)

B224:240

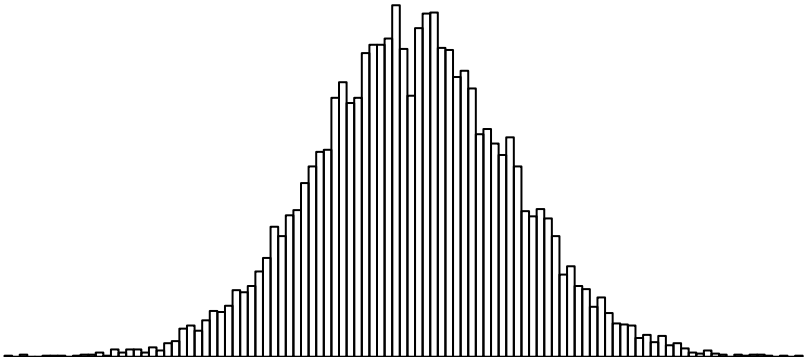

B224:120

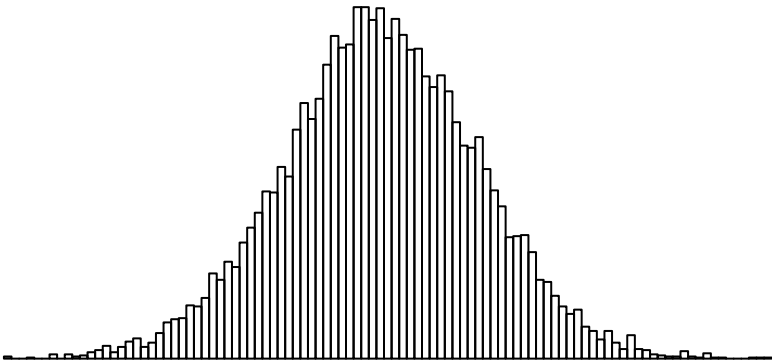

B224:45

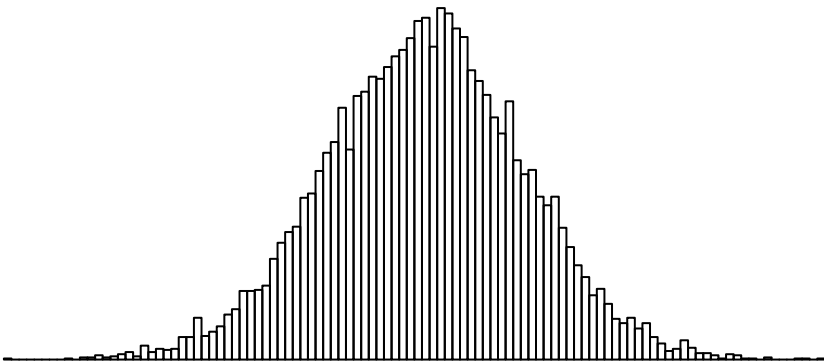

-10

-8

-6

-4

Acid 10

B224:240 – B224:120

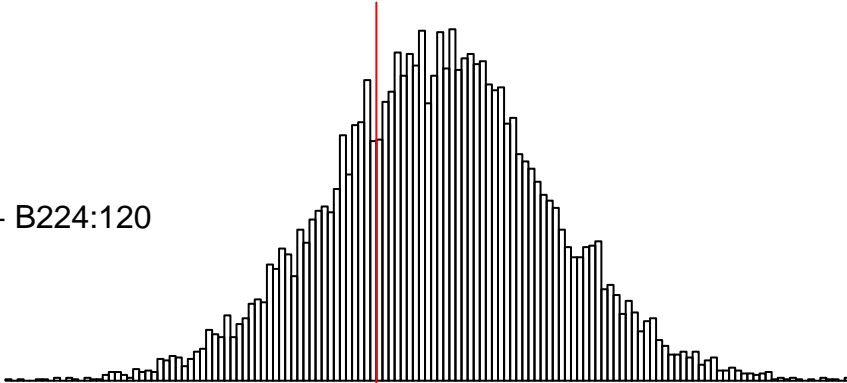

B224:240 – B224:45

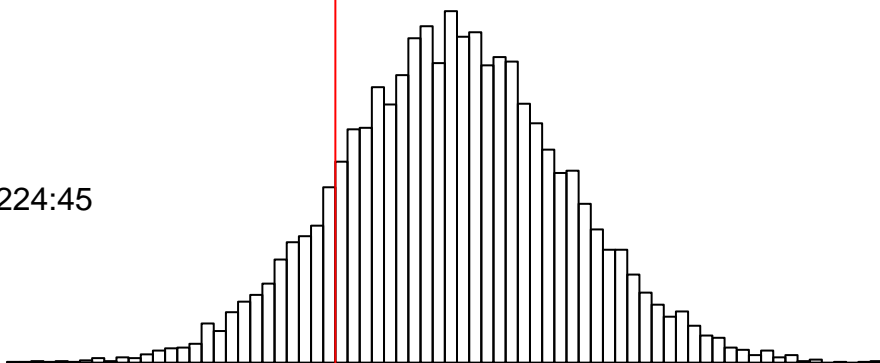

B224:120 – B224:45

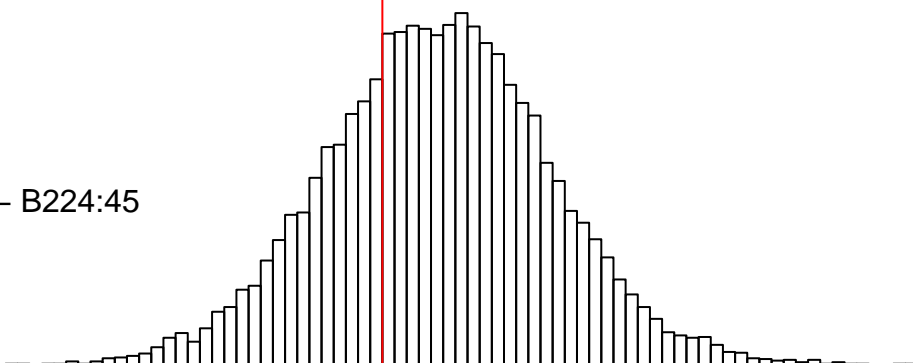

-4 -2 0 2 4 6

delta(Acid 10)

B224:240

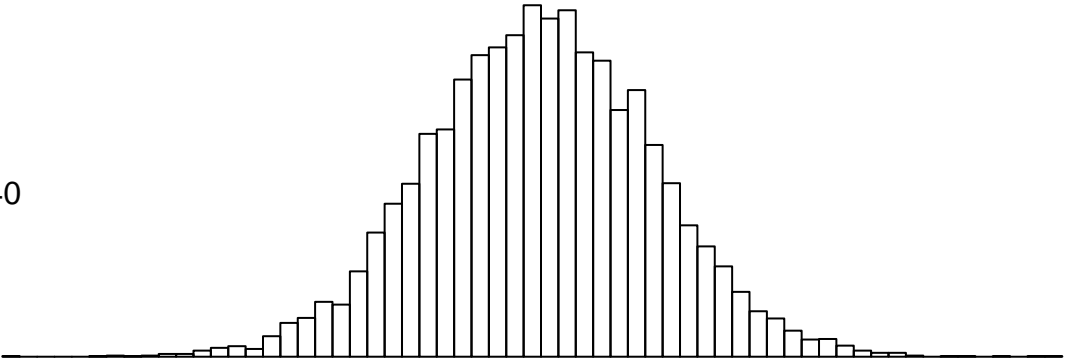

B224:120

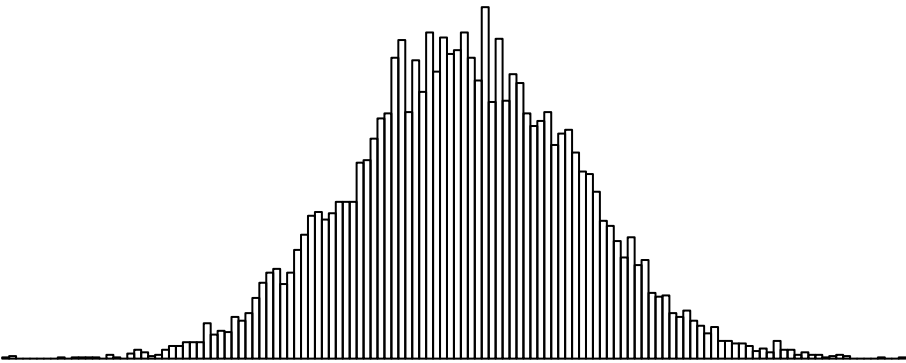

B224:45

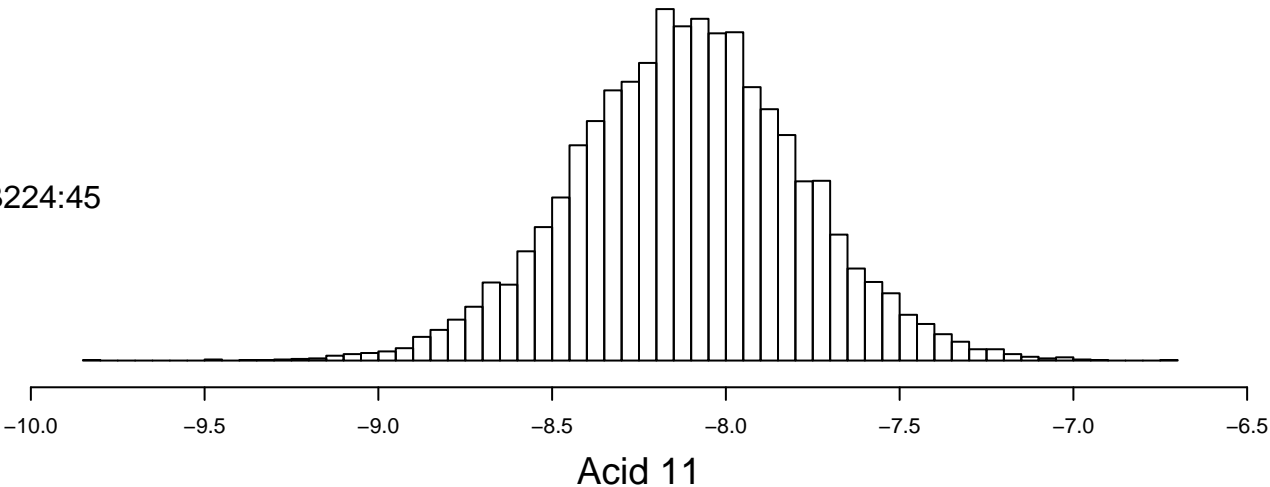

B224:240 – B224:120

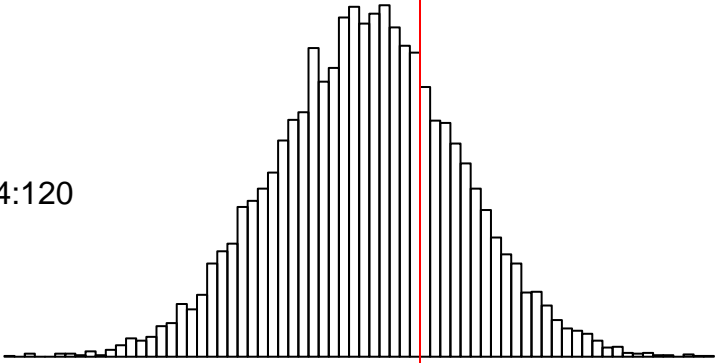

B224:240 – B224:45

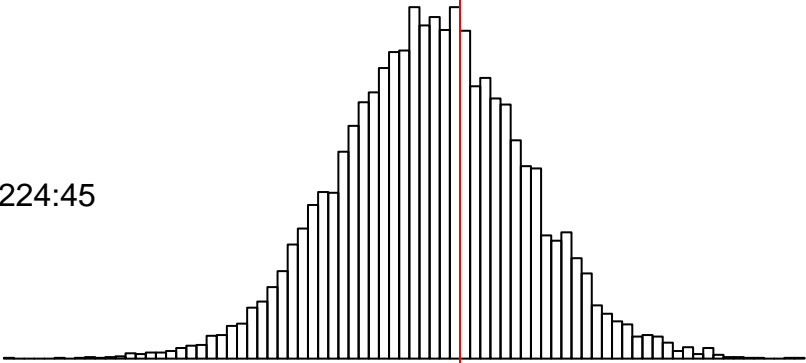

B224:120 – B224:45

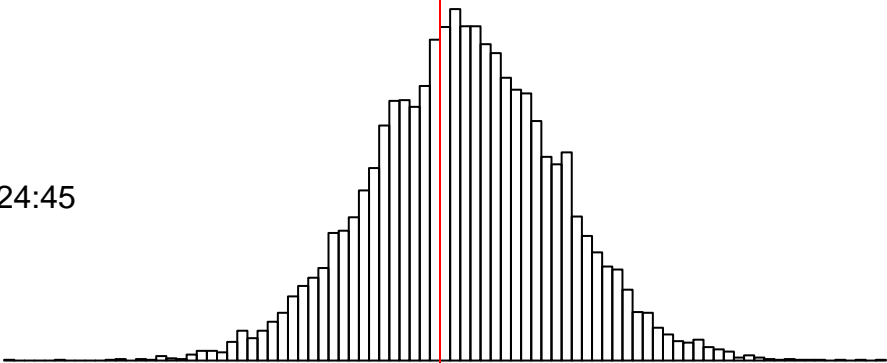

-3 -2 -1 0 1 2 3

delta(Acid 11)



B224:240

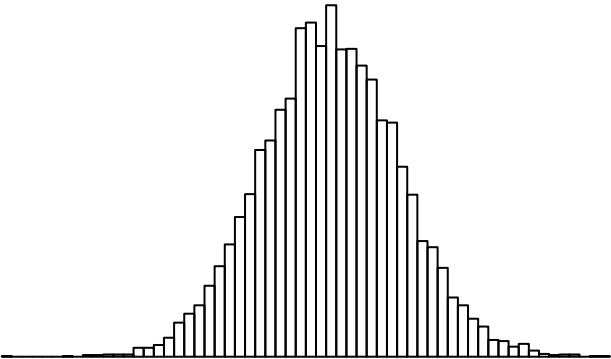

B224:120

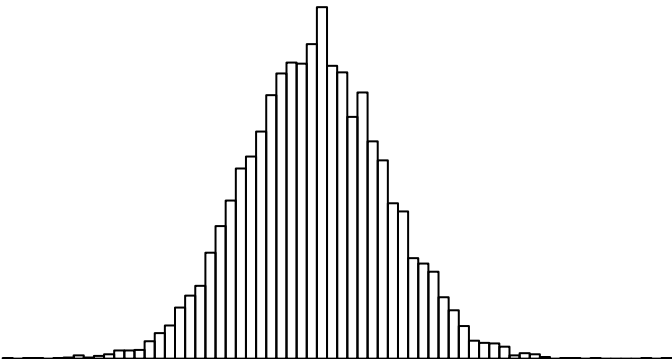

B224:45

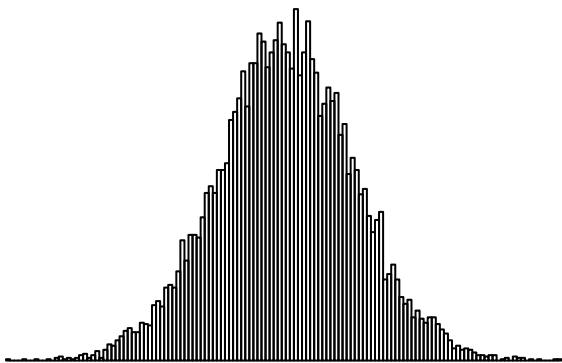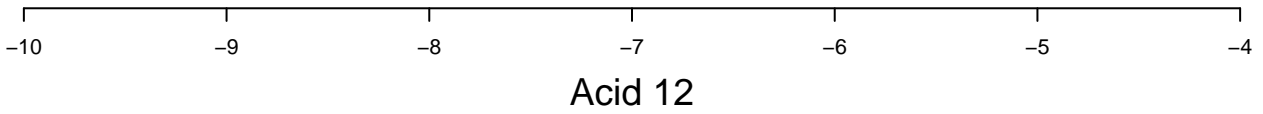

B224:240 – B224:120

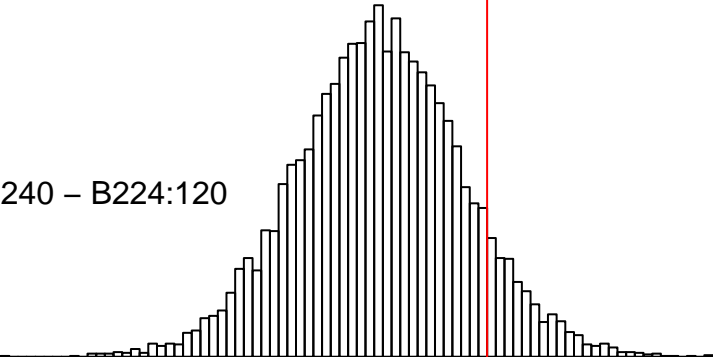

B224:240 – B224:45

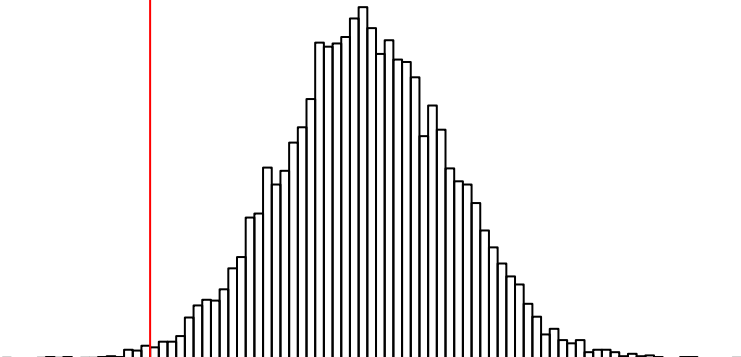

B224:120 – B224:45

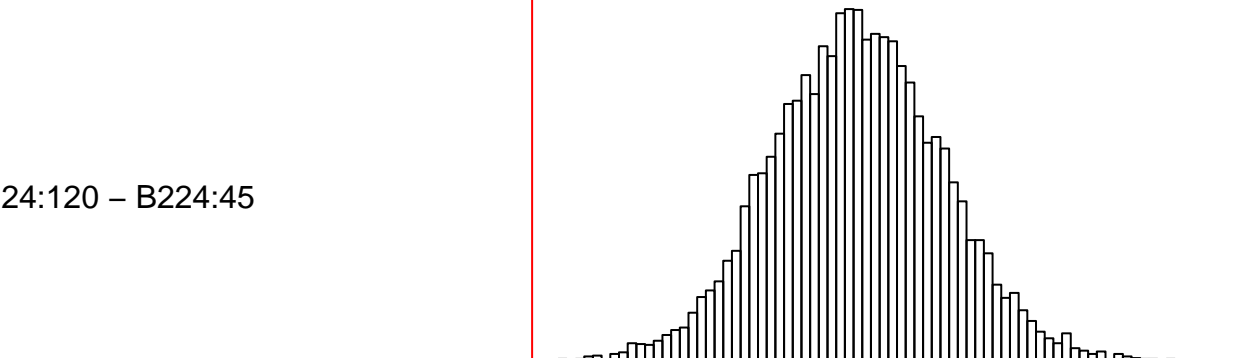

delta(Acid 12)

B224:240

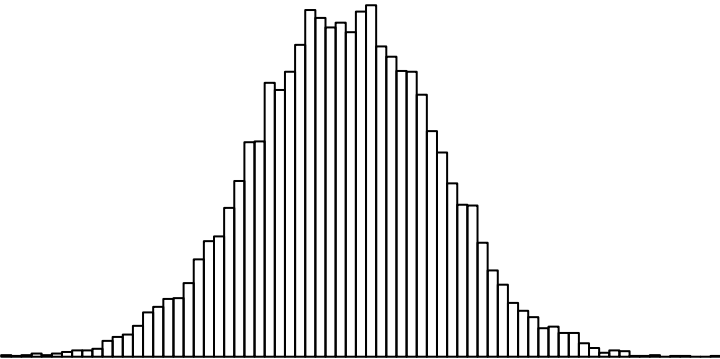

B224:120

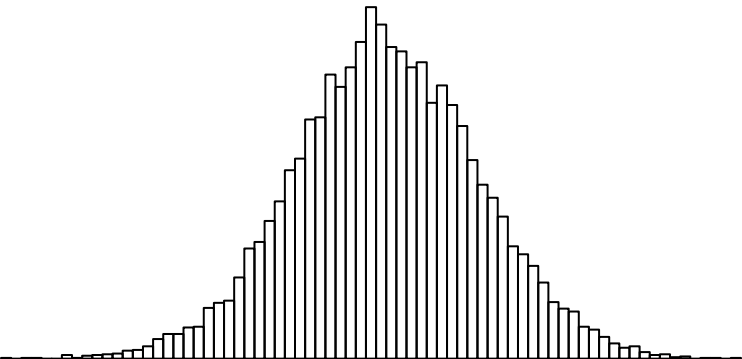

B224:45

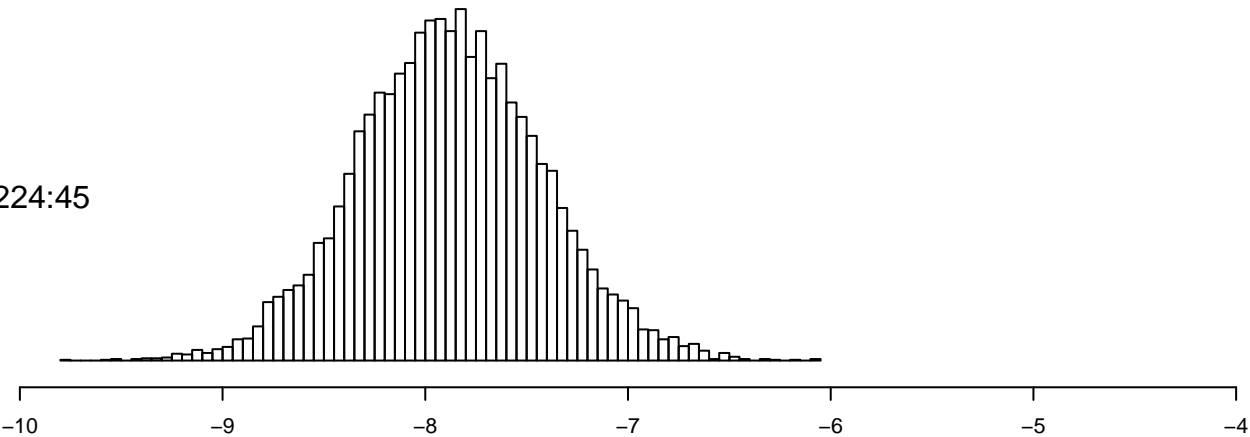

Acid 13

B224:240 – B224:120

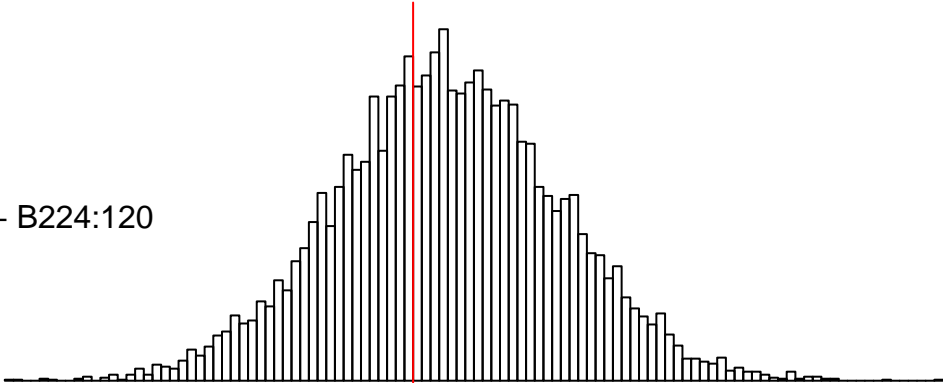

B224:240 – B224:45

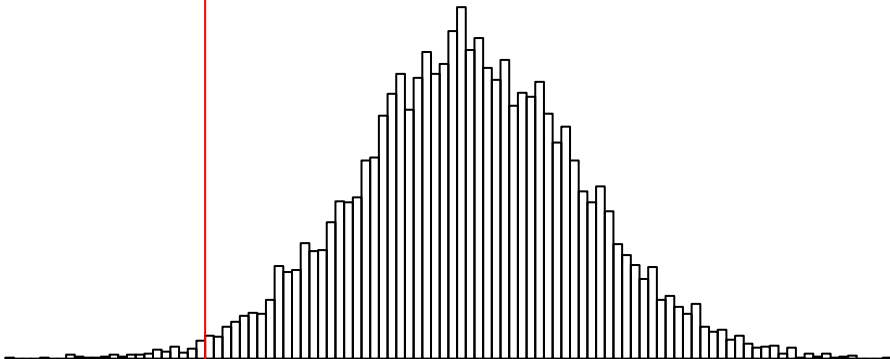

B224:120 – B224:45

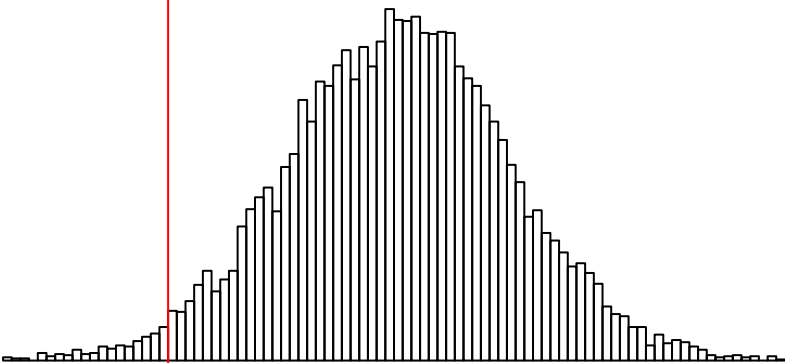

-3

-2

-1

0

1

2

3

4

delta(Acid 13)

B224:240

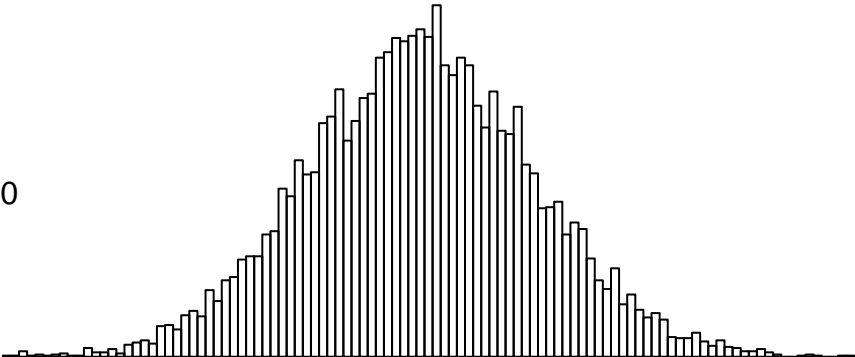

B224:120

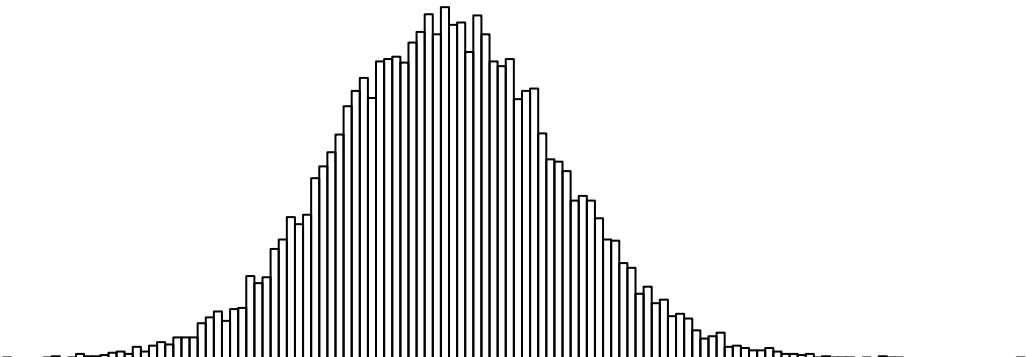

B224:45

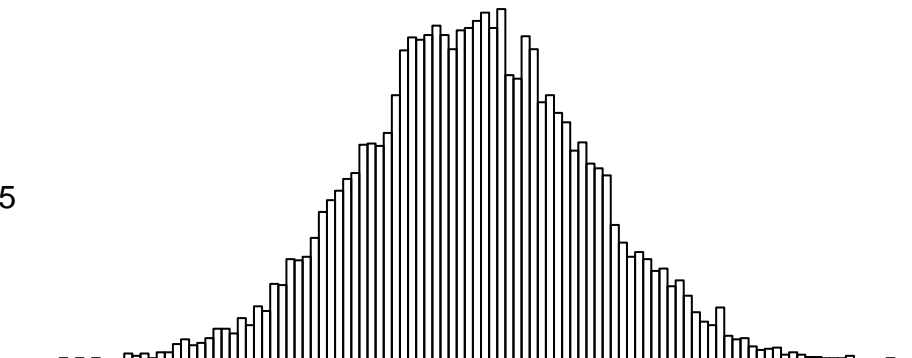

-9.0 -8.5 -8.0 -7.5 -7.0 -6.5 -6.0

Acid 14

B224:240 – B224:120

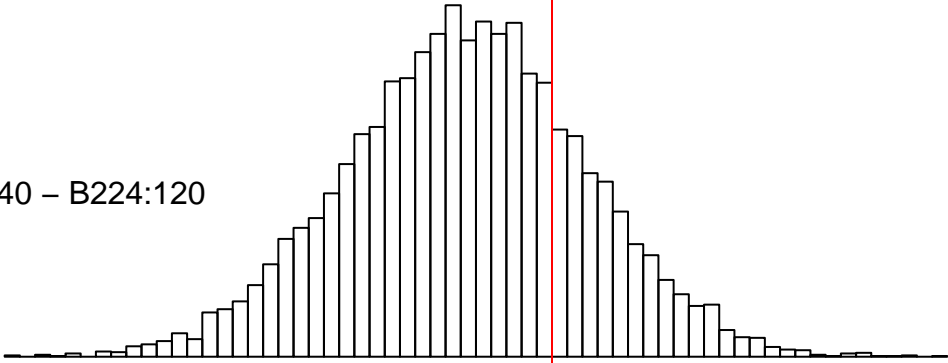

B224:240 – B224:45

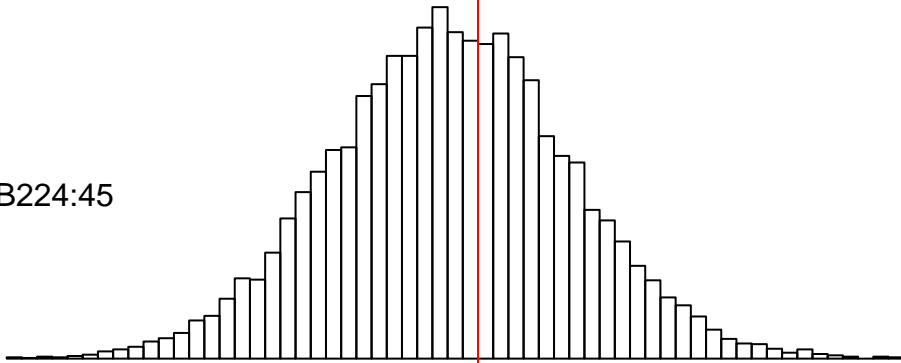

B224:120 – B224:45

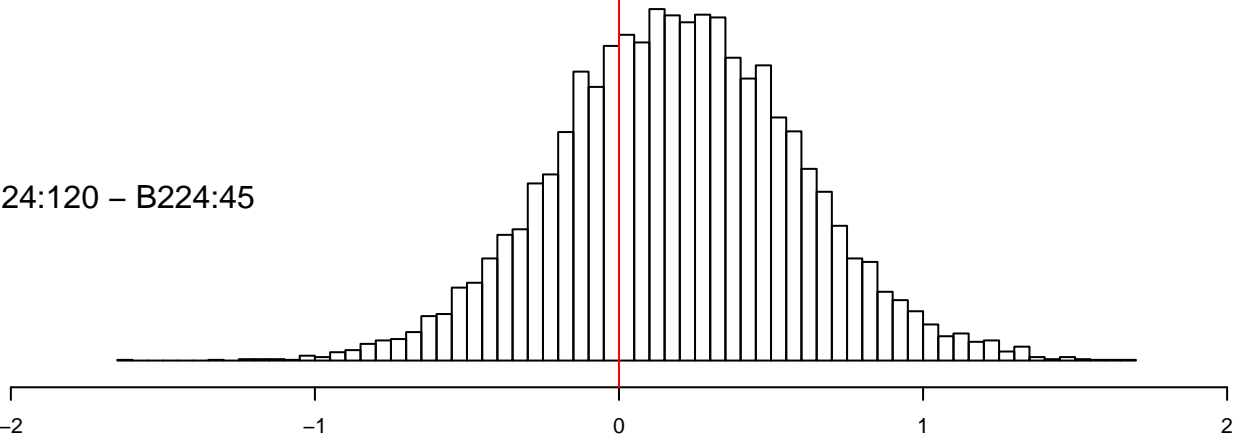

delta(Acid 14)
