# Supplementary material for: Taxonomic and Environmental Variation of Metabolite Profiles in Marine Dinoflagellates of the Genus Symbiodinium
Source: MDPI journal article supplement (doi:10.3390/metabo5010074), 2015-02-16
Supplement: s1 [file s1]

A194:26

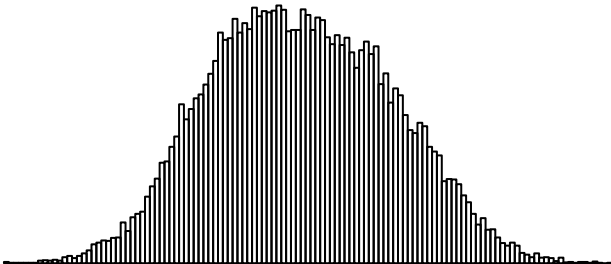

B184:26

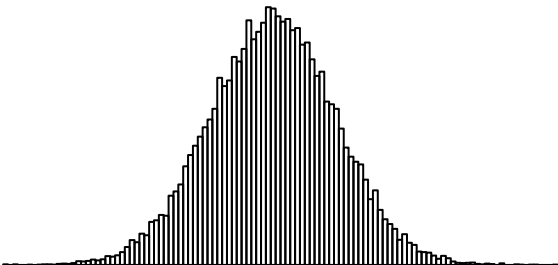

B224:26

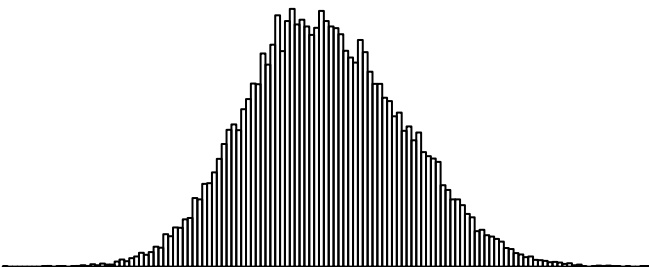

D206:26

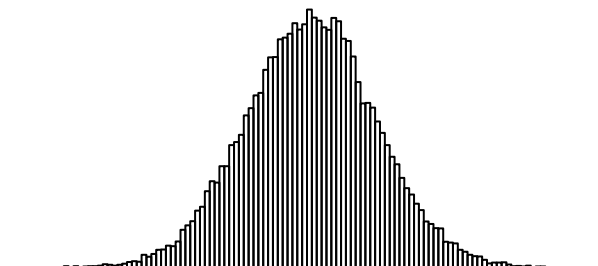

-7      -6      -5      -4      -3      -2

Amino Acid 2

A194:26 – B184:26

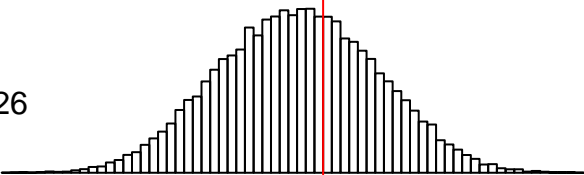

A194:26 – B224:26

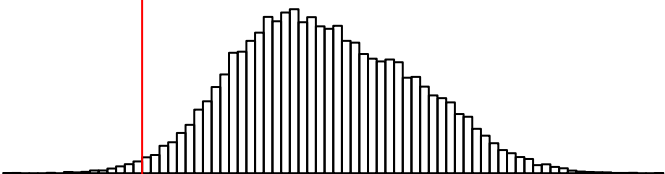

A194:26 – D206:26

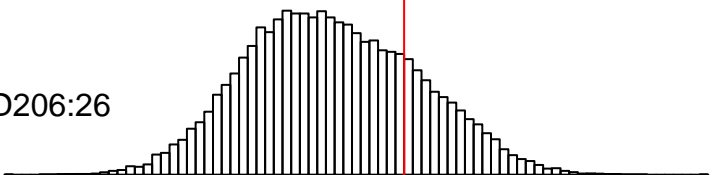

B184:26 – B224:26

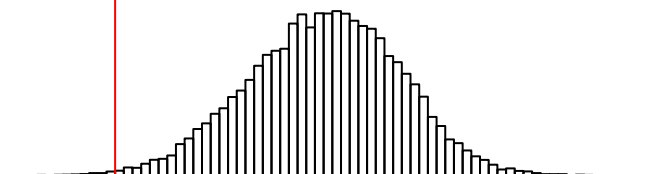

B184:26 – D206:26

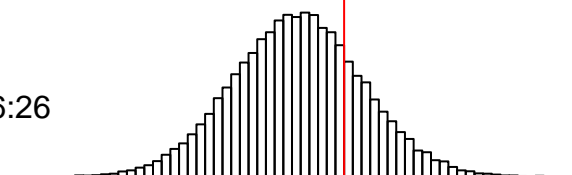

B224:26 – D206:26

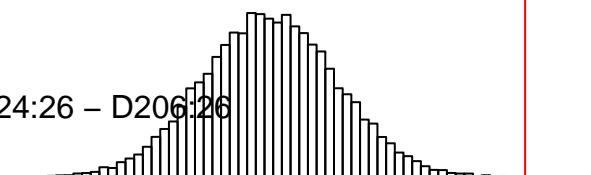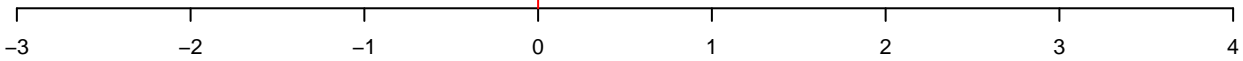

delta(Amino Acid 2)

A194:26

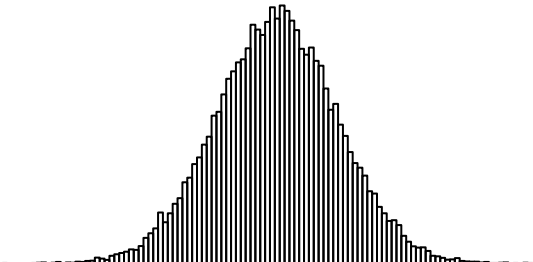

B184:26

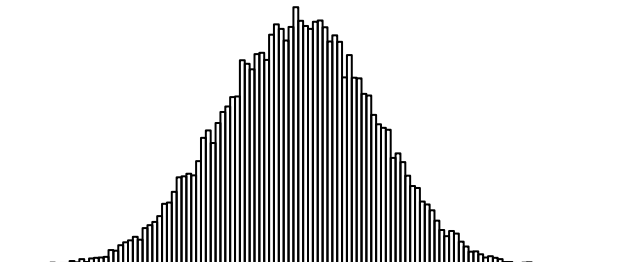

B224:26

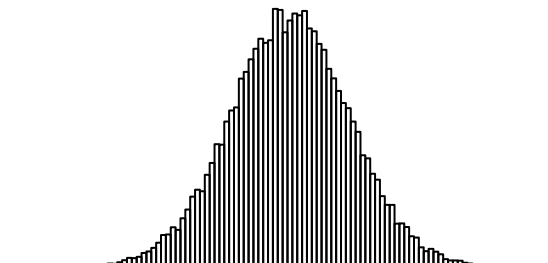

D206:26

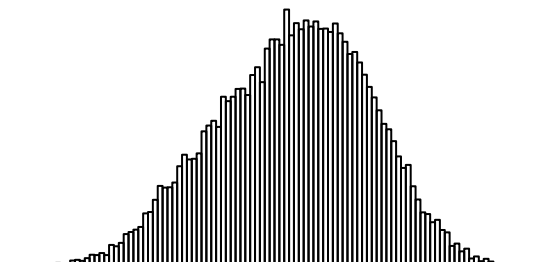

-9      -8      -7      -6      -5      -4

Amino Acid 3

A194:26 – B184:26

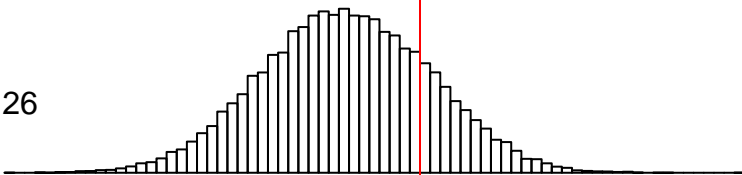

A194:26 – B224:26

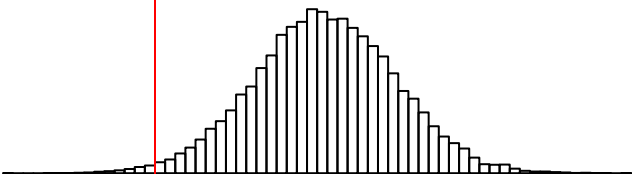

A194:26 – D206:26

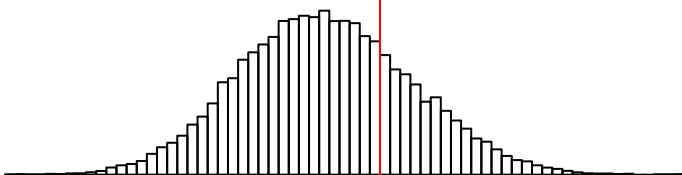

B184:26 – B224:26

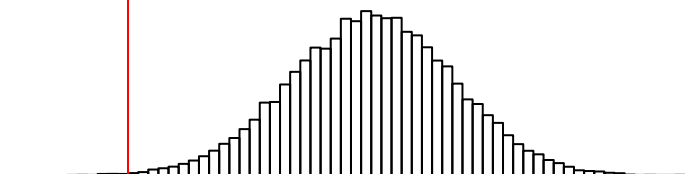

B184:26 – D206:26

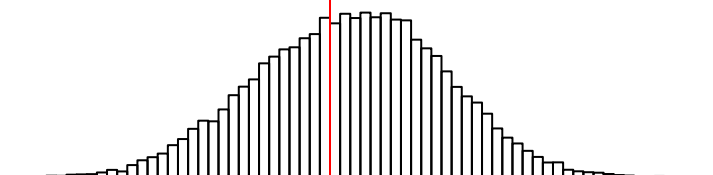

B224:26 – D206:26

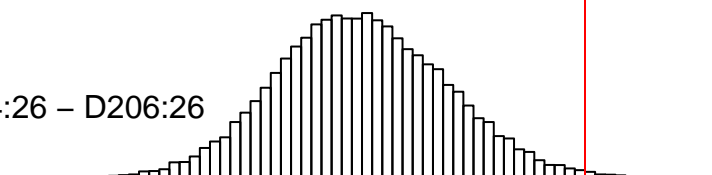

-3 -2 -1 0 1 2 3

delta(Amino Acid 3)

A194:26

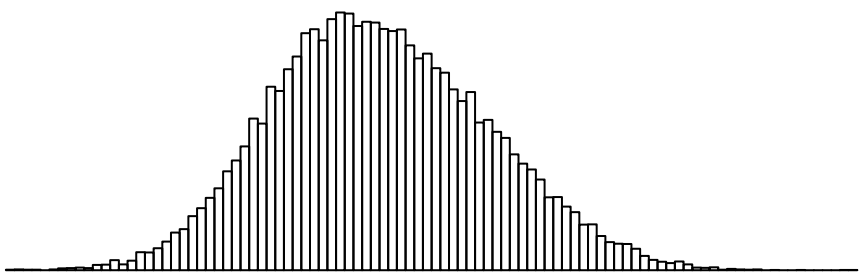

B184:26

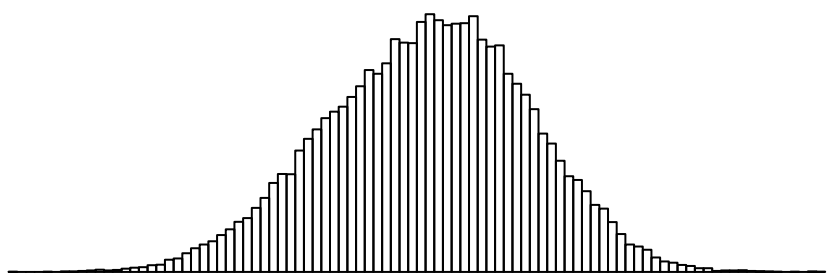

B224:26

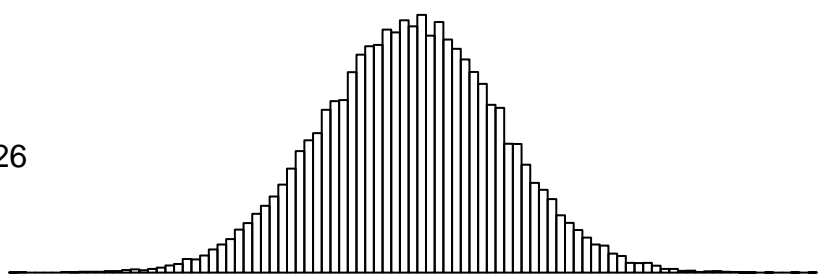

D206:26

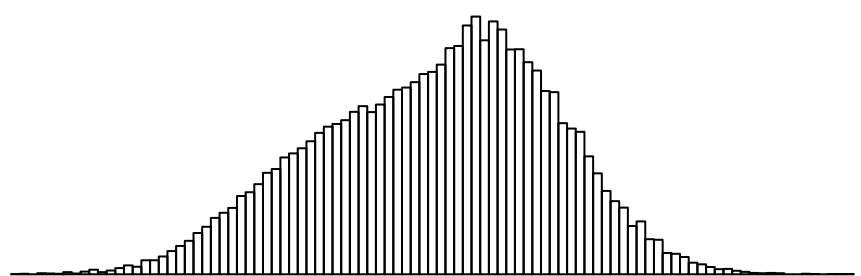

-10      -9      -8      -7      -6      -5      -4      -3

Alanine

A194:26 – B184:26

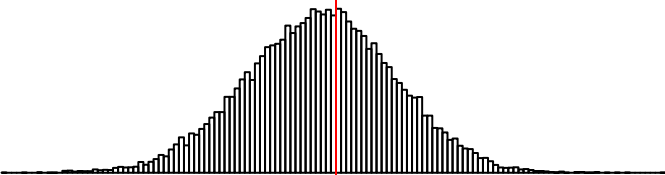

A194:26 – B224:26

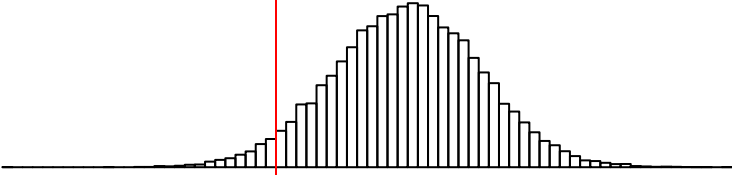

A194:26 – D206:26

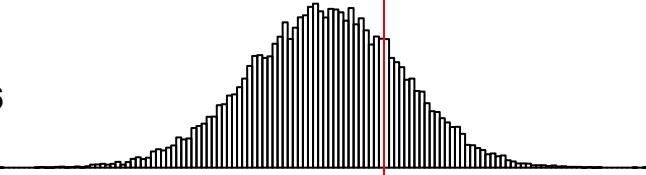

B184:26 – B224:26

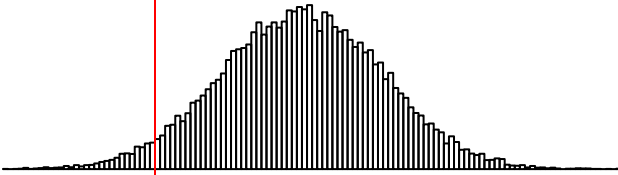

B184:26 – D206:26

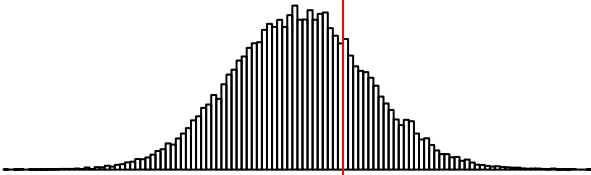

B224:26 – D206:26

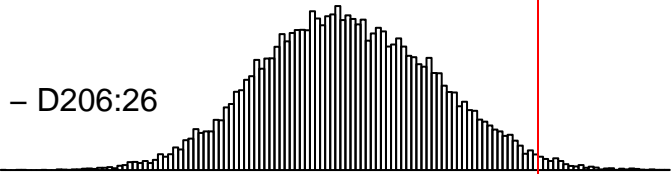

delta(Alanine)

A194:26

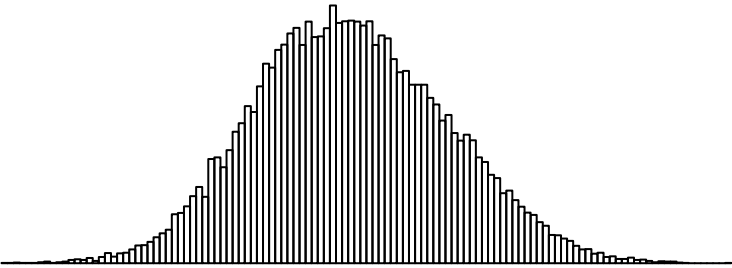

B184:26

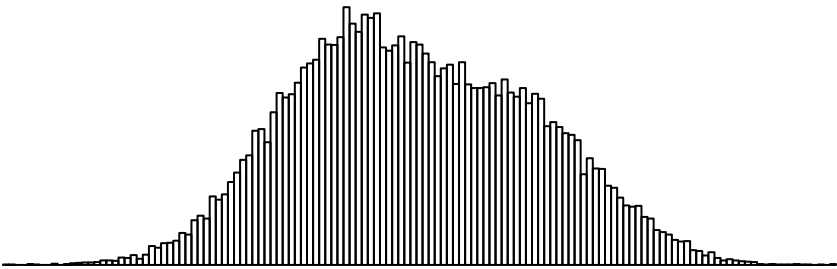

B224:26

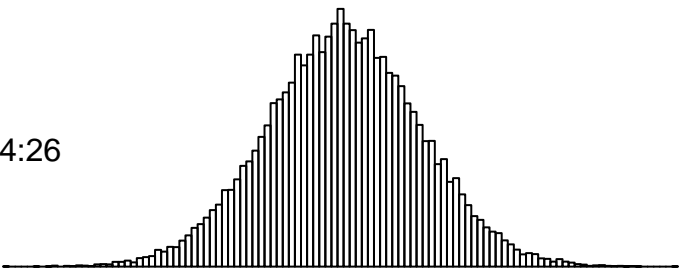

D206:26

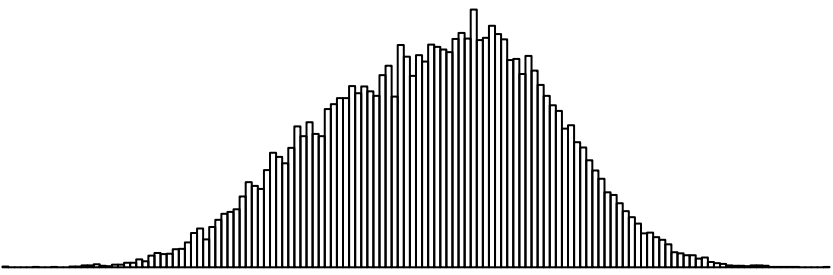

-9 -8 -7 -6 -5

Amino Acid 4

A194:26 – B184:26

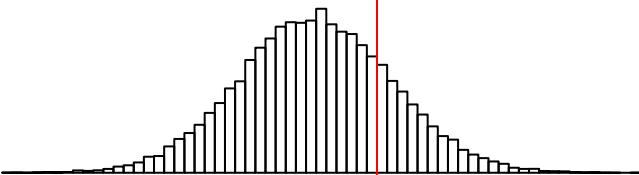

A194:26 – B224:26

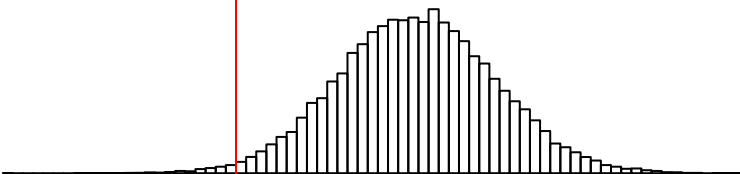

A194:26 – D206:26

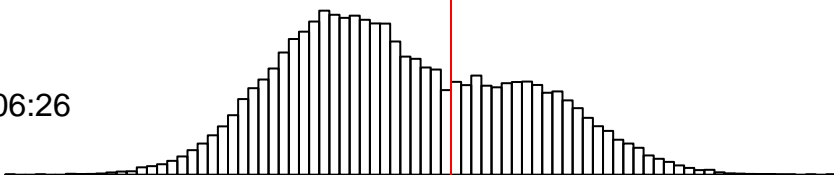

B184:26 – B224:26

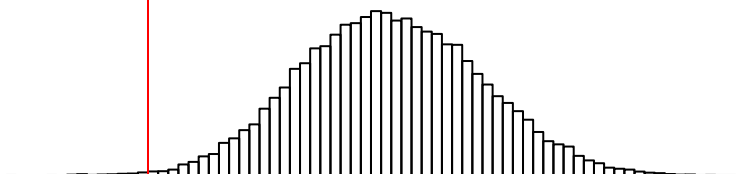

B184:26 – D206:26

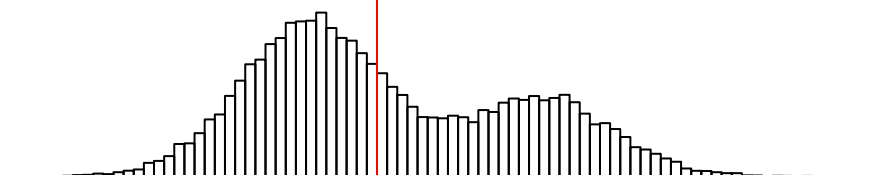

B224:26 – D206:26

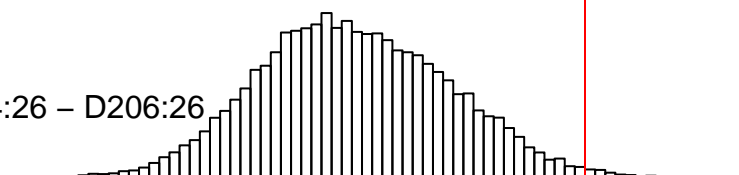

-3 -2 -1 0 1 2 3

delta(Amino Acid 4)



A194:26

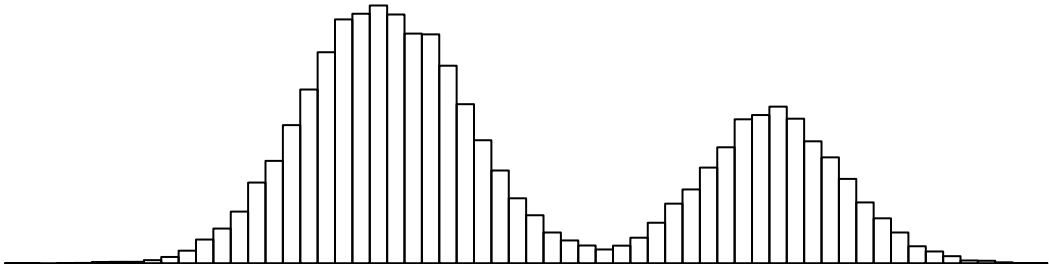

B184:26

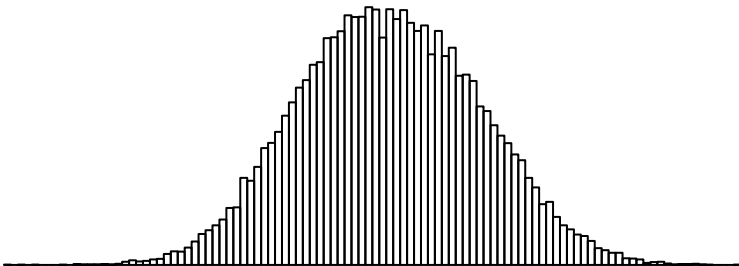

B224:26

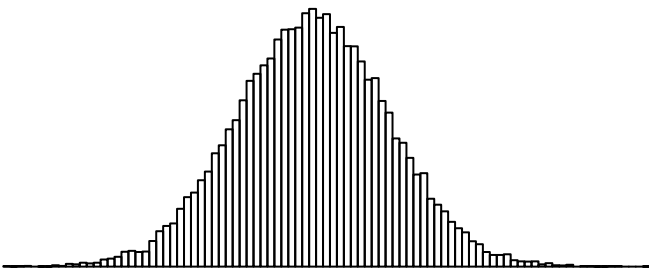

D206:26

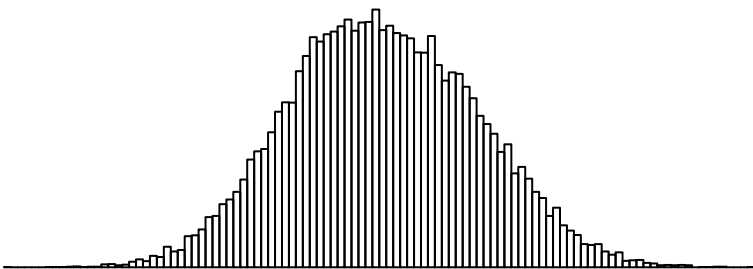

-9.0      -8.5      -8.0      -7.5      -7.0      -6.5      -6.0      -5.5

Amino Acid 6

A194:26 – B184:26

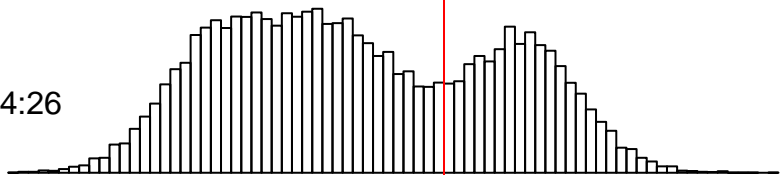

A194:26 – B224:26

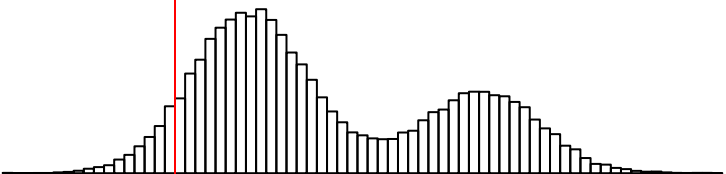

A194:26 – D206:26

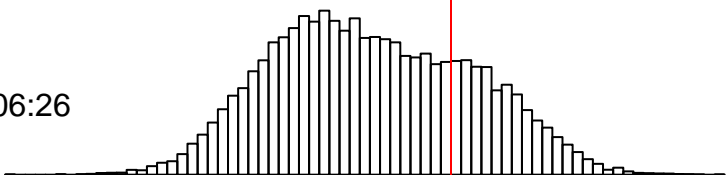

B184:26 – B224:26

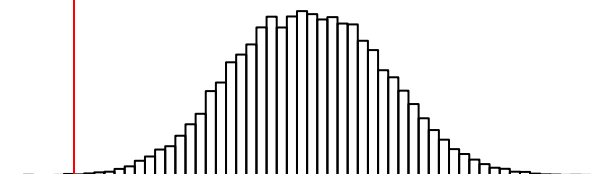

B184:26 – D206:26

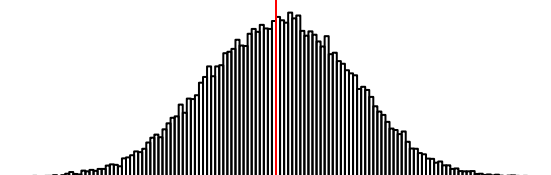

B224:26 – D206:26

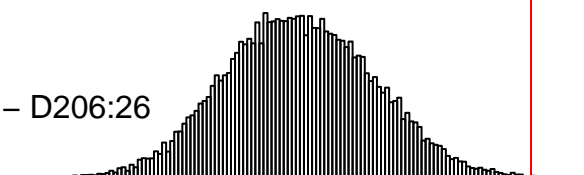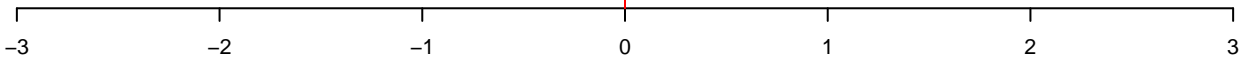

delta(Amino Acid 6)

A194:26

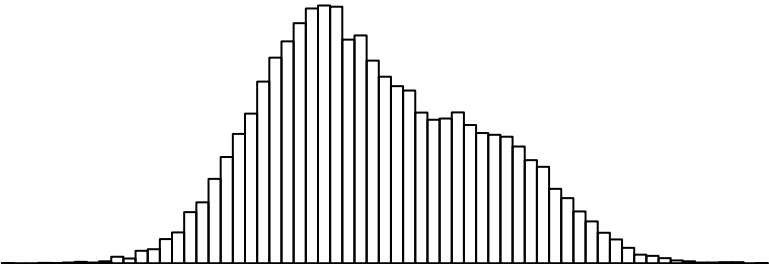

B184:26

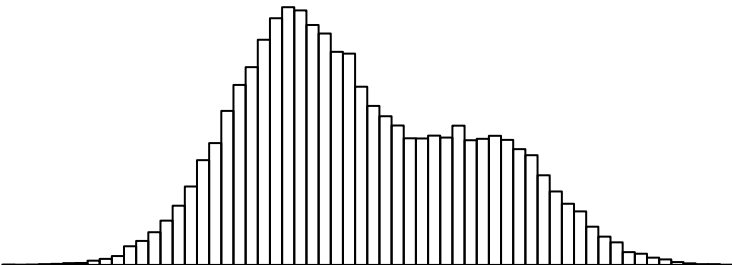

B224:26

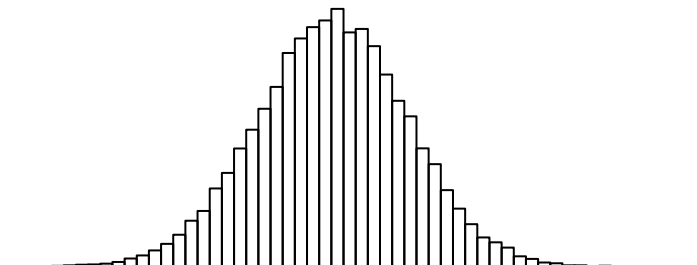

D206:26

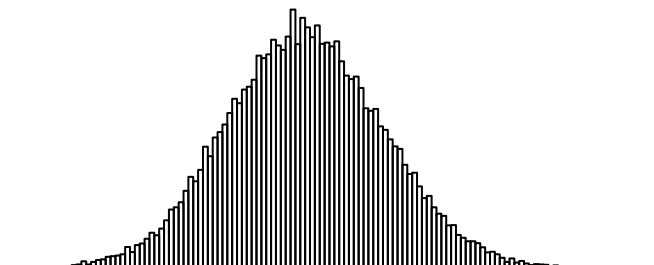

-11                      -10                      -9                      -8                      -7                      -6

Valine

A194:26 – B184:26

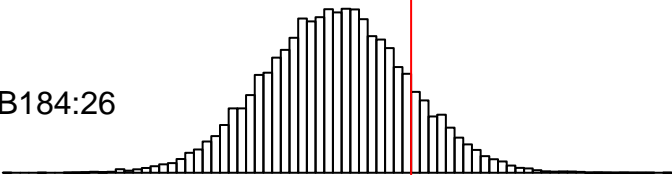

A194:26 – B224:26

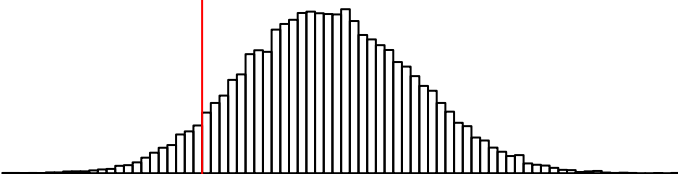

A194:26 – D206:26

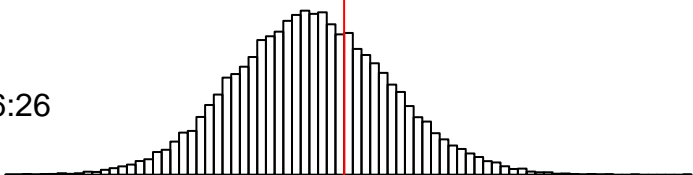

B184:26 – B224:26

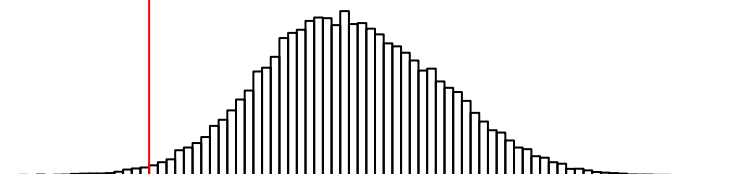

B184:26 – D206:26

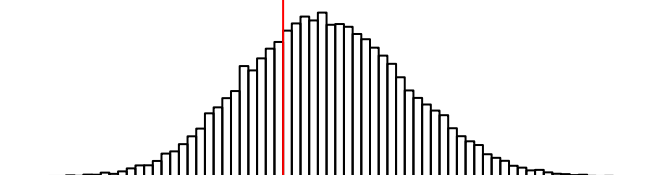

B224:26 – D206:26

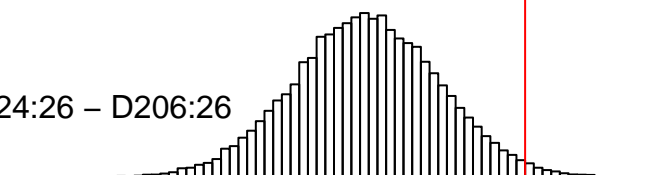

-3 -2 -1 0 1 2 3 4

delta(Valine)

A194:26

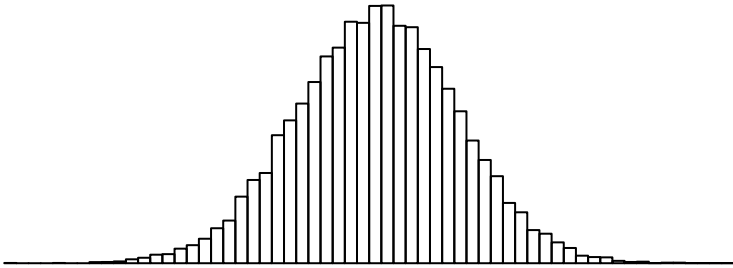

B184:26

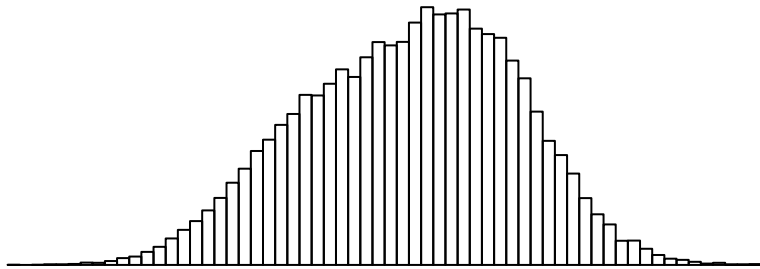

B224:26

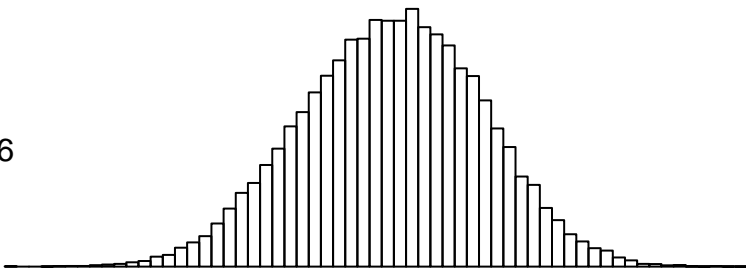

D206:26

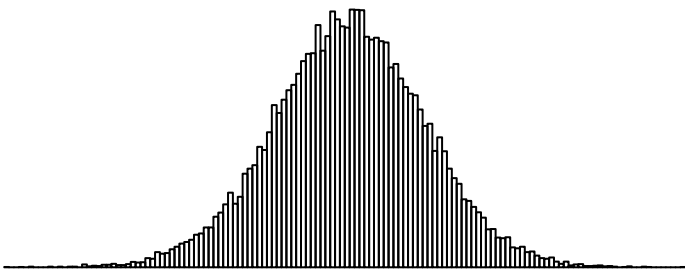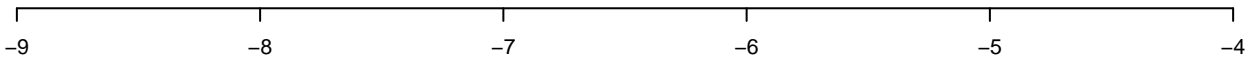

Amino Acid 7

A194:26 – B184:26

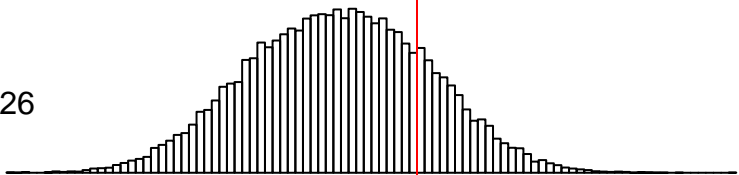

A194:26 – B224:26

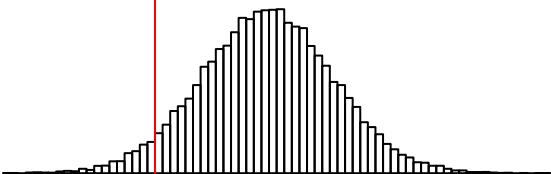

A194:26 – D206:26

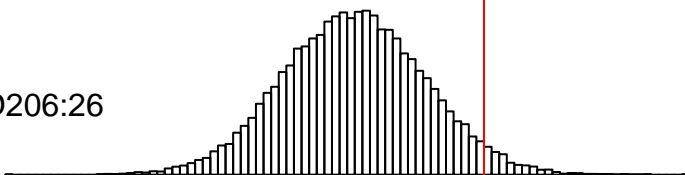

B184:26 – B224:26

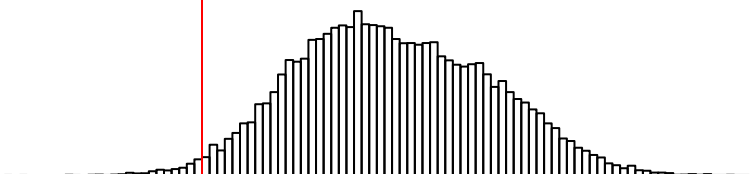

B184:26 – D206:26

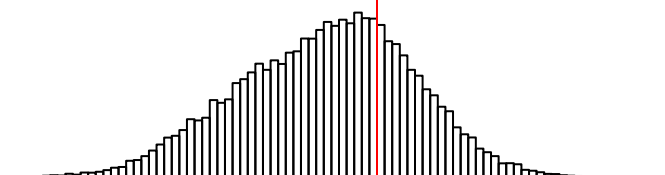

B224:26 – D206:26

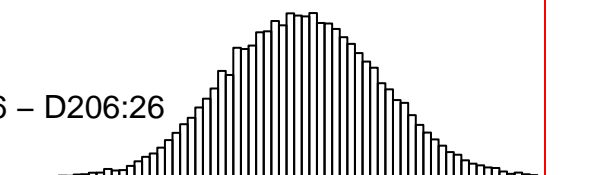

-4 -2 0 2 4

delta(Amino Acid 7)

A194:26

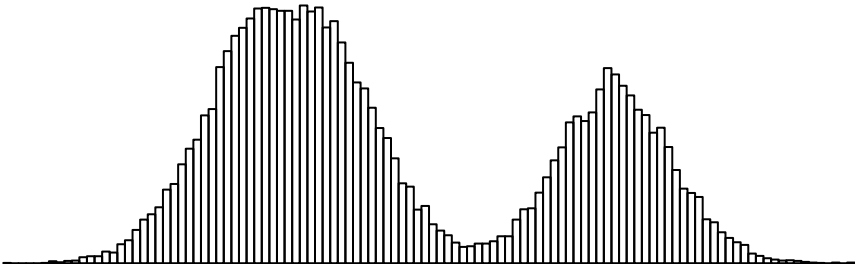

B184:26

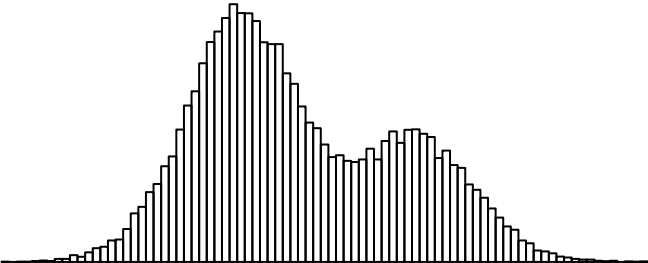

B224:26

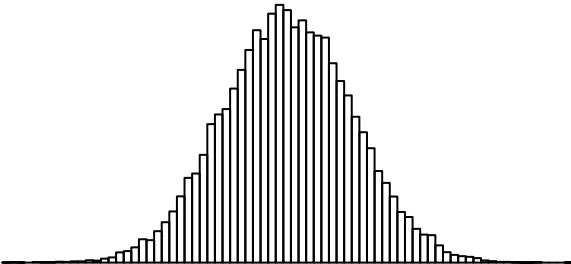

D206:26

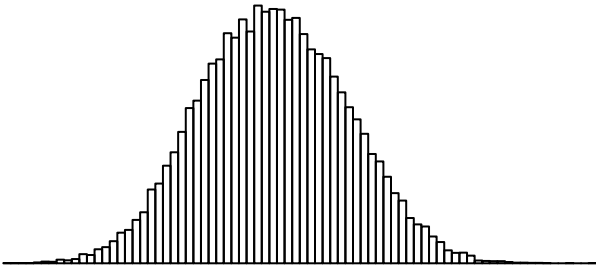

-10                      -8                      -6                      -4                      -2

Glycine

A194:26 – B184:26

A194:26 – B224:26

A194:26 – D206:26

B184:26 – B224:26

B184:26 – D206:26

B224:26 – D206:26

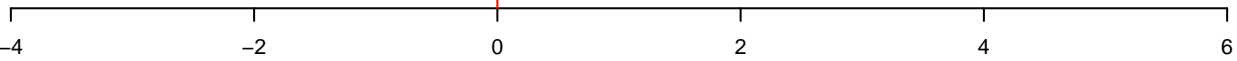

$\Delta(\text{Glycine})$



A194:26

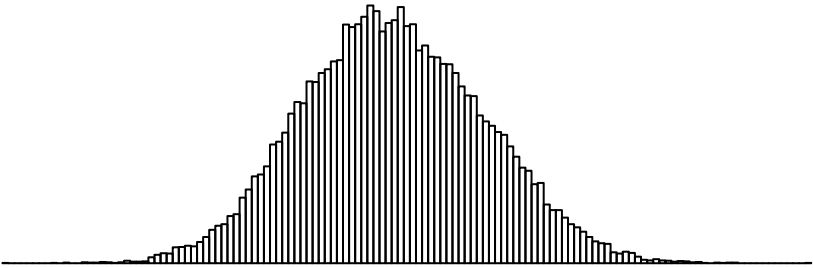

B184:26

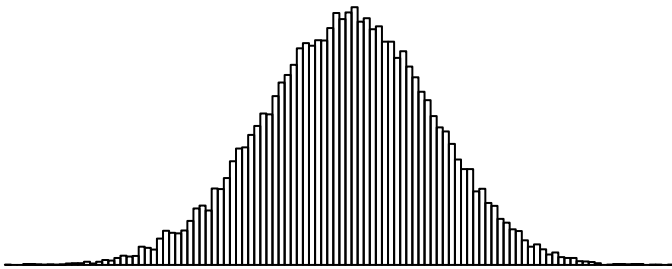

B224:26

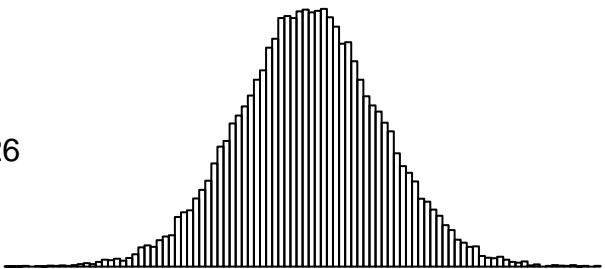

D206:26

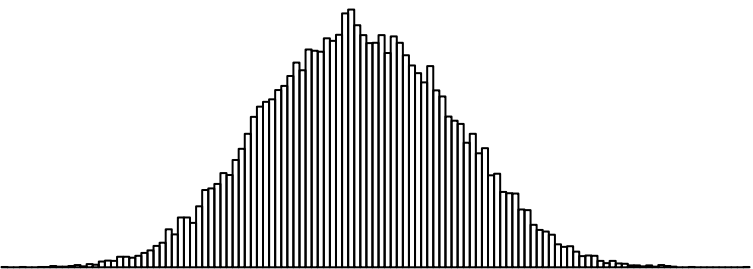

-10                      -9                      -8                      -7                      -6

Amino Acid 8

A194:26 – B184:26

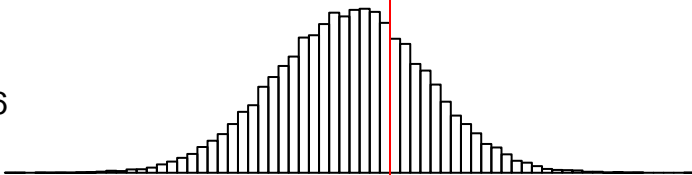

A194:26 – B224:26

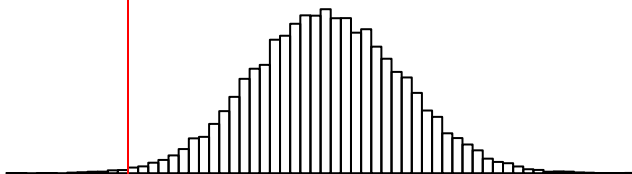

A194:26 – D206:26

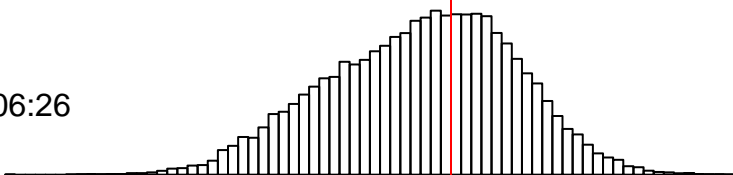

B184:26 – B224:26

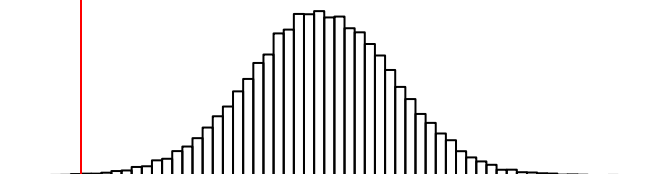

B184:26 – D206:26

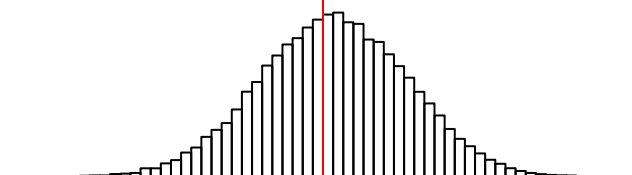

B224:26 – D206:26

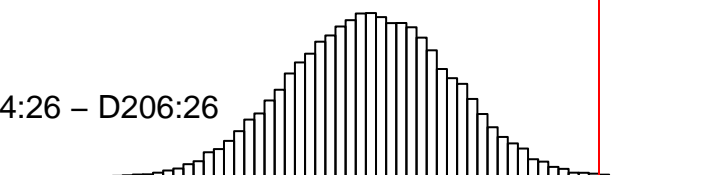

-3 -2 -1 0 1 2 3

delta(Amino Acid 8)

A194:26

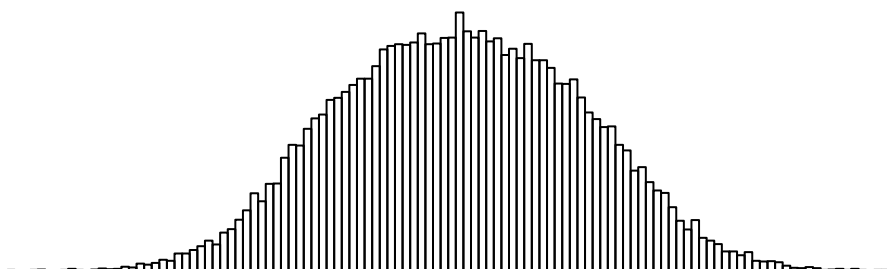

B184:26

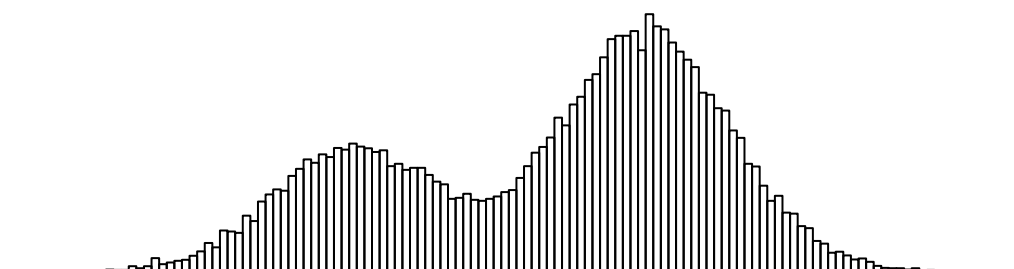

B224:26

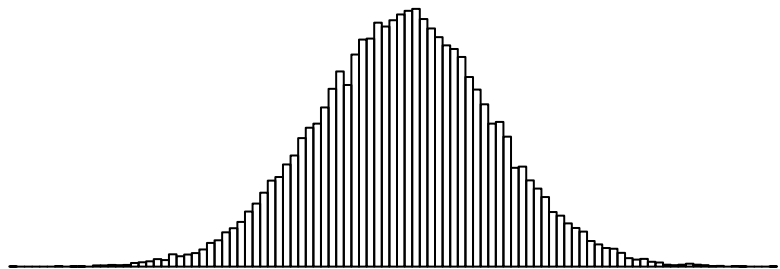

D206:26

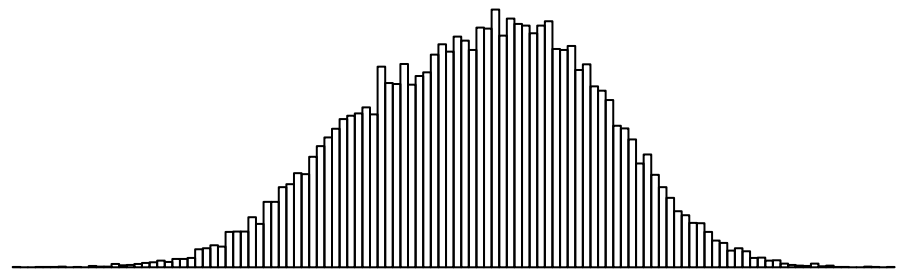

-10                      -8                      -6                      -4                      -2

Amino Acid 10

A194:26 – B184:26

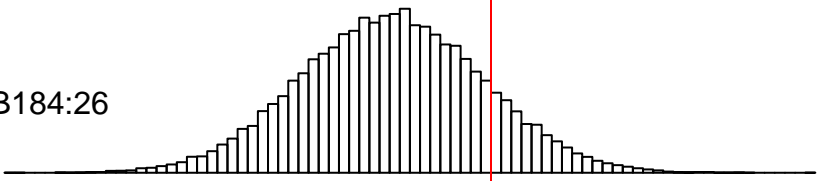

A194:26 – B224:26

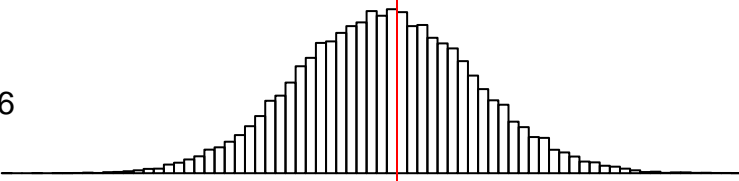

A194:26 – D206:26

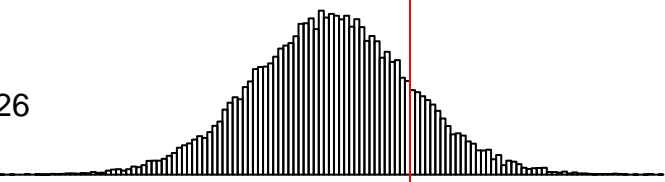

B184:26 – B224:26

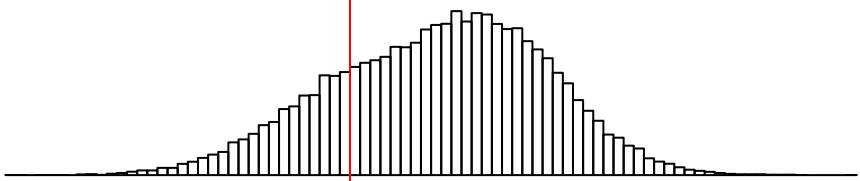

B184:26 – D206:26

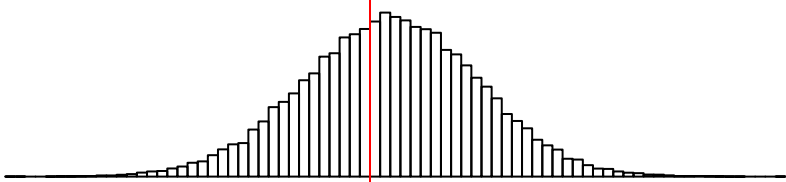

B224:26 – D206:26

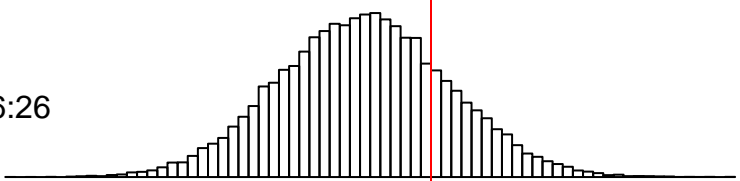

-6 -4 -2 0 2 4 6

delta(Amino Acid 10)

A194:26

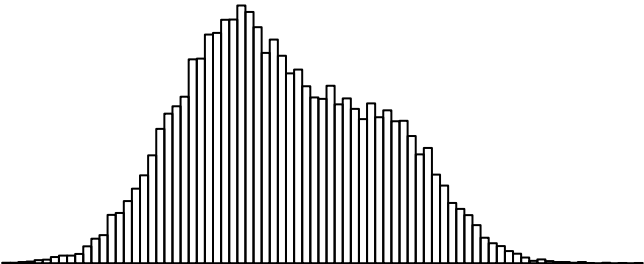

B184:26

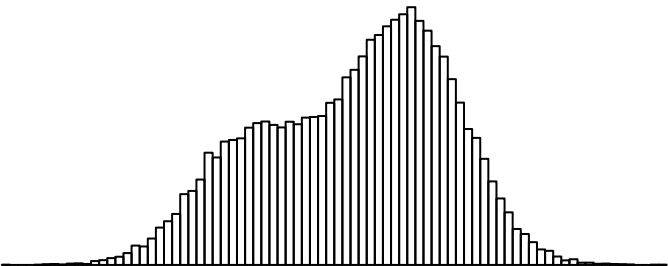

B224:26

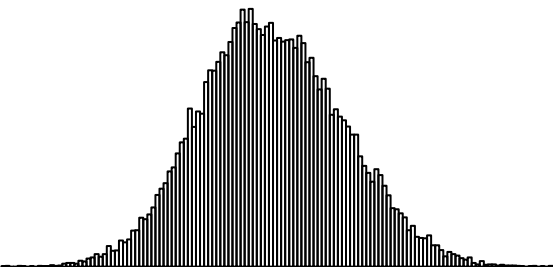

D206:26

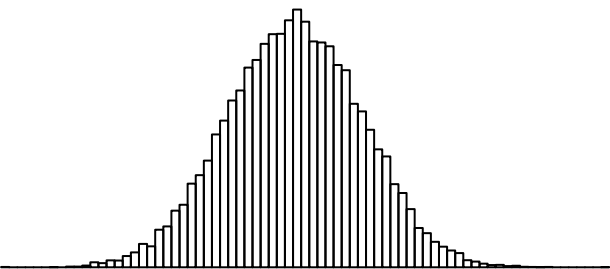

-8.0 -7.5 -7.0 -6.5 -6.0 -5.5 -5.0

Disaccharide 2

A194:26 – B184:26

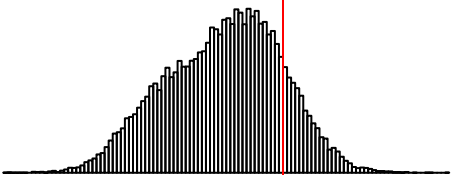

A194:26 – B224:26

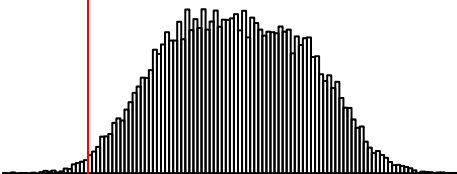

A194:26 – D206:26

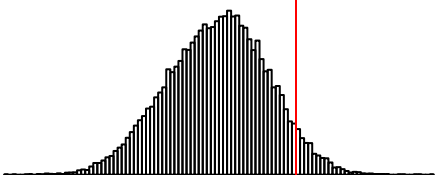

B184:26 – B224:26

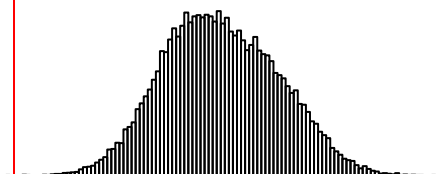

B184:26 – D206:26

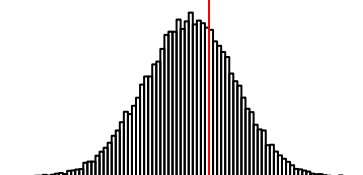

B224:26 – D206:26

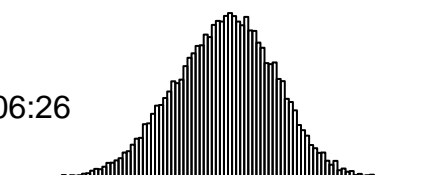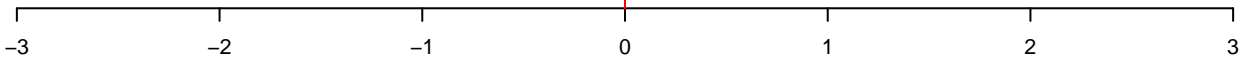

delta(Disaccharide 2)

A194:26

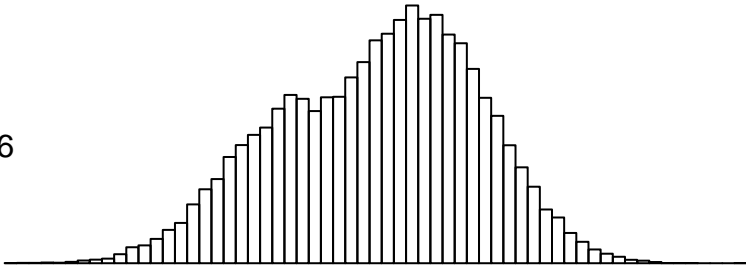

B184:26

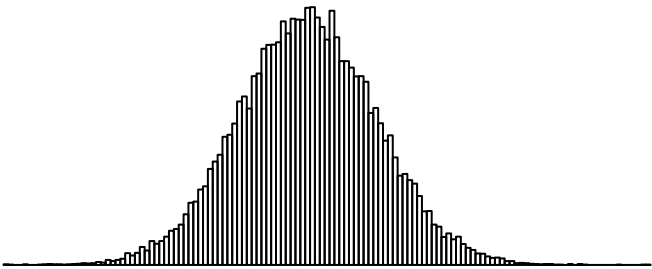

B224:26

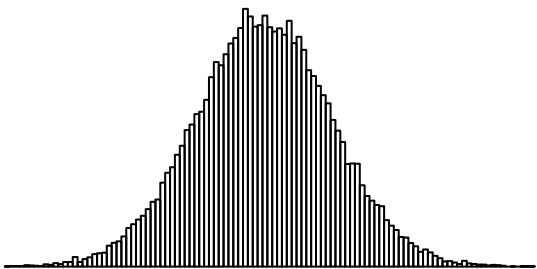

D206:26

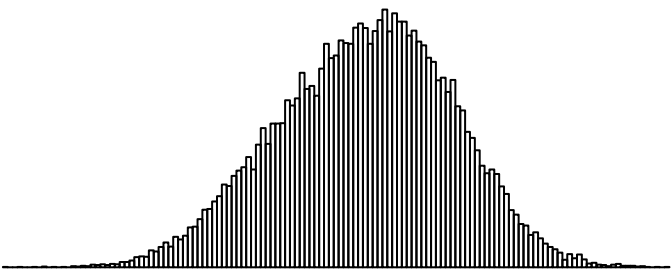

Disaccharide 3

A194:26 – B184:26

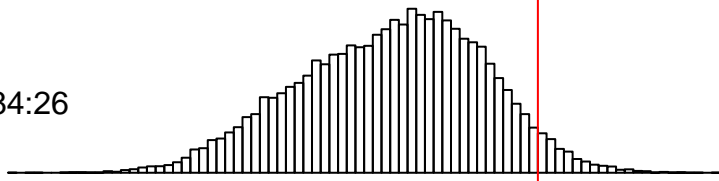

A194:26 – B224:26

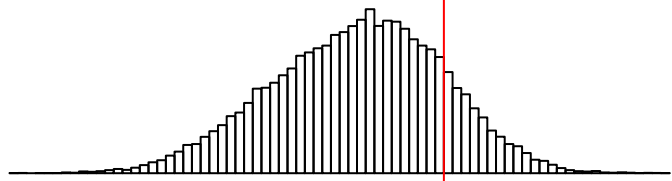

A194:26 – D206:26

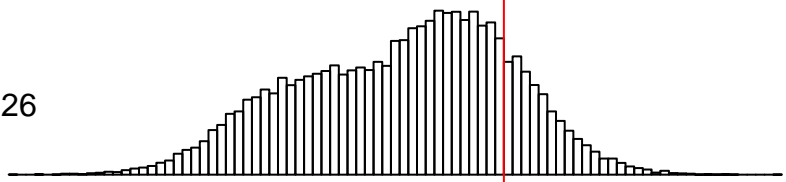

B184:26 – B224:26

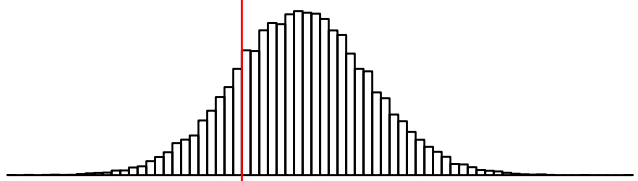

B184:26 – D206:26

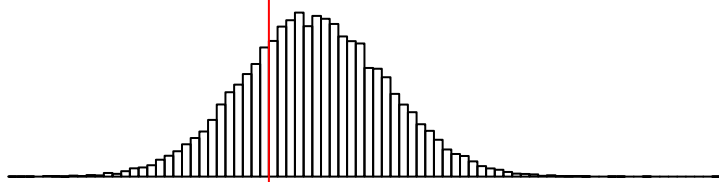

B224:26 – D206:26

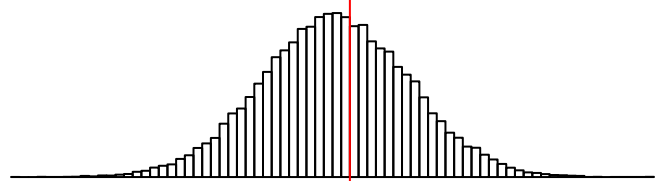

-4 -3 -2 -1 0 1 2 3

delta(Disaccharide 3)



A194:26

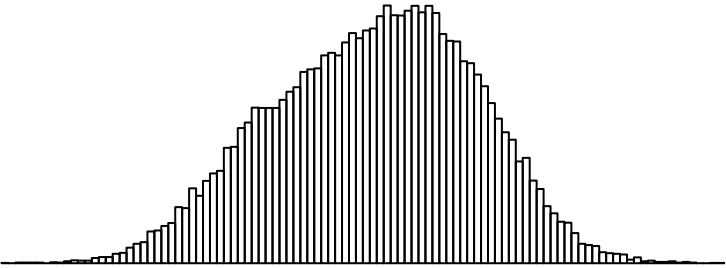

B184:26

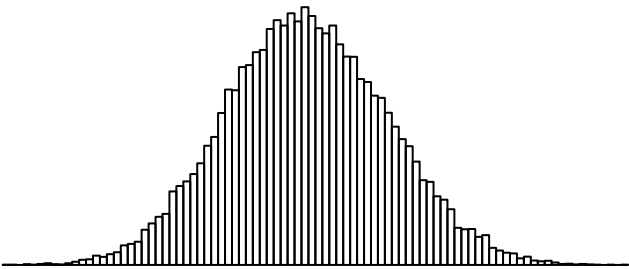

B224:26

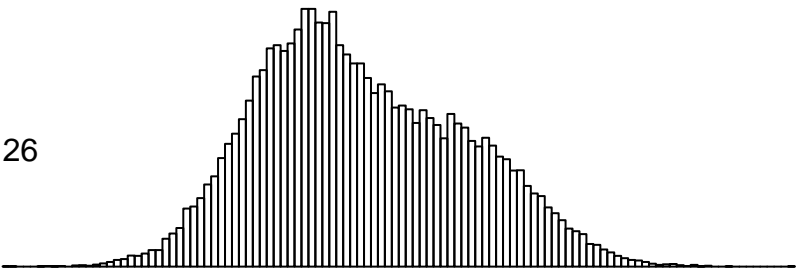

D206:26

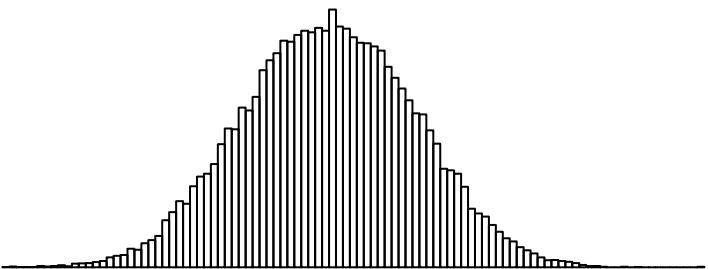

-8.5      -8.0      -7.5      -7.0      -6.5      -6.0      -5.5      -5.0

Disaccharide 4

A194:26 – B184:26

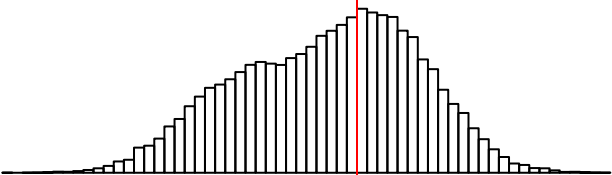

A194:26 – B224:26

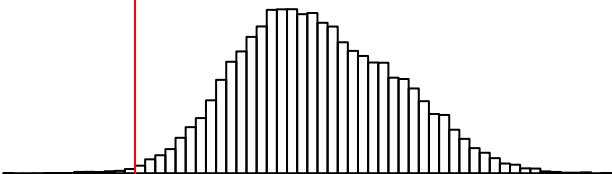

A194:26 – D206:26

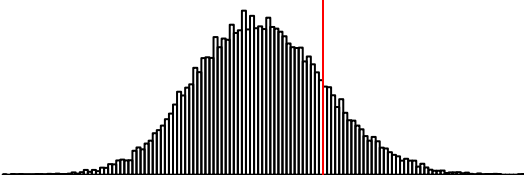

B184:26 – B224:26

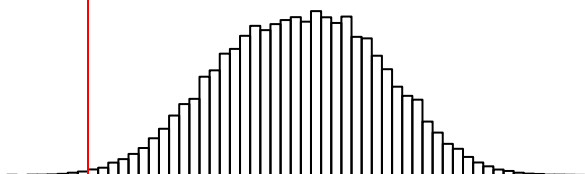

B184:26 – D206:26

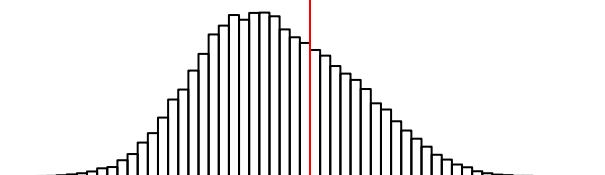

B224:26 – D206:26

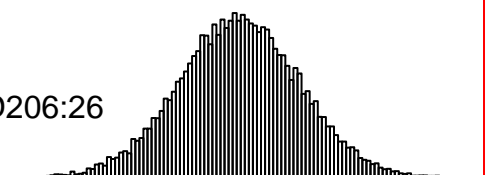

delta(Disaccharide 4)

A194:26

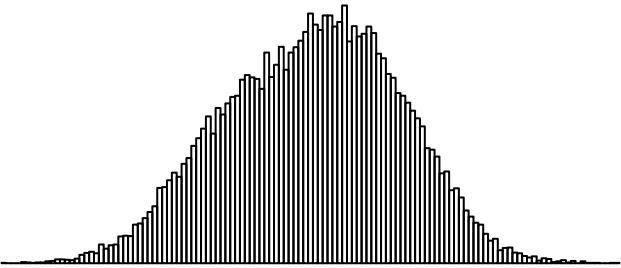

B184:26

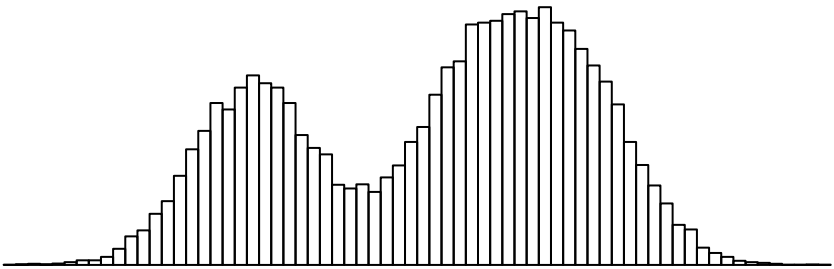

B224:26

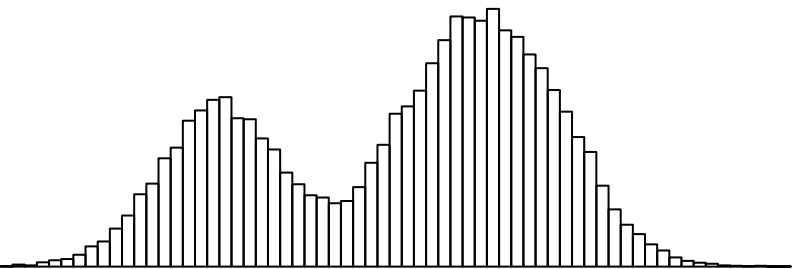

D206:26

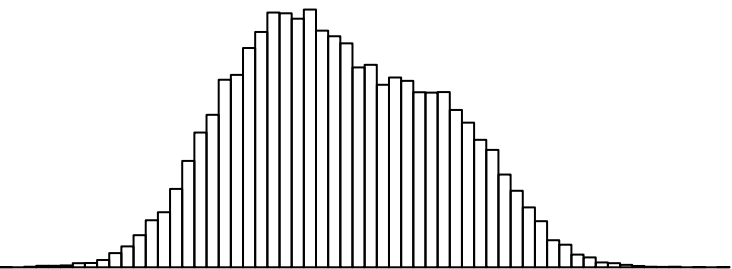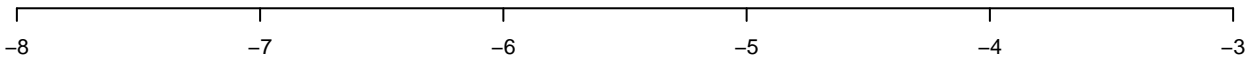

Disaccharide 5

A194:26 – B184:26

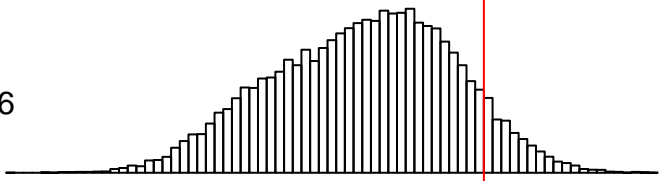

A194:26 – B224:26

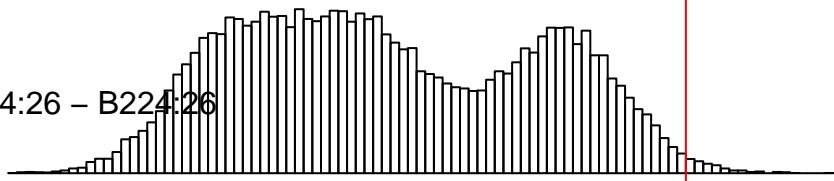

A194:26 – D206:26

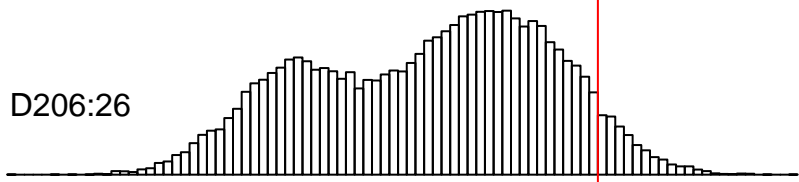

B184:26 – B224:26

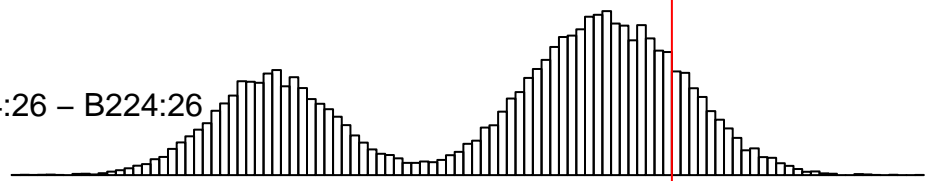

B184:26 – D206:26

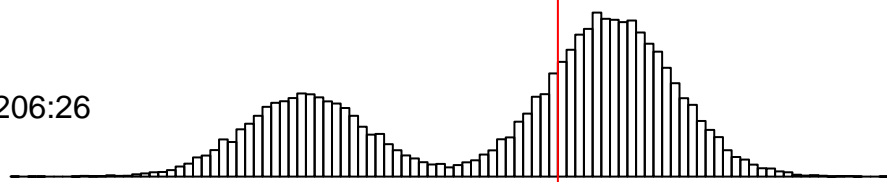

B224:26 – D206:26

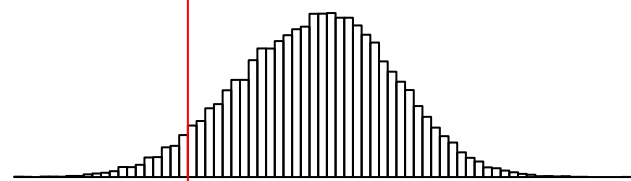

-4 -3 -2 -1 0 1 2 3

delta(Disaccharide 5)

A194:26

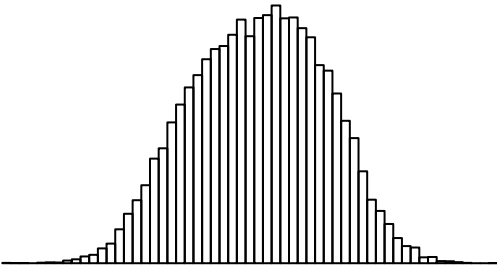

B184:26

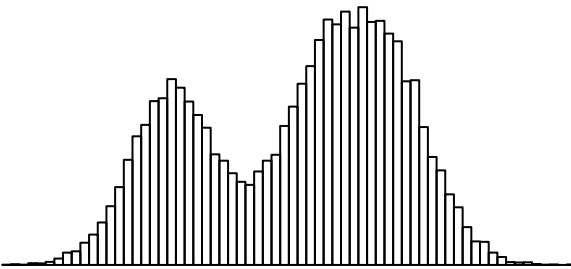

B224:26

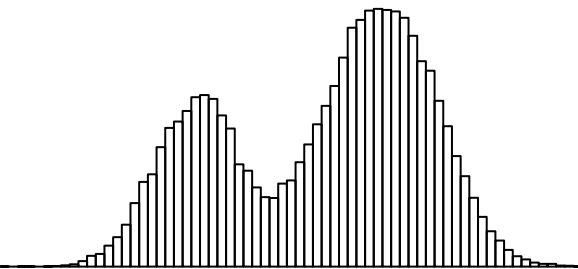

D206:26

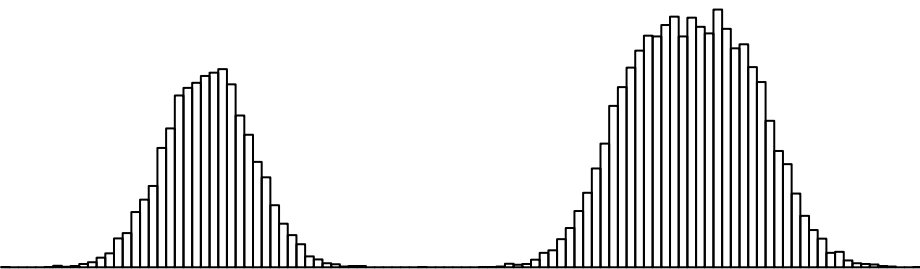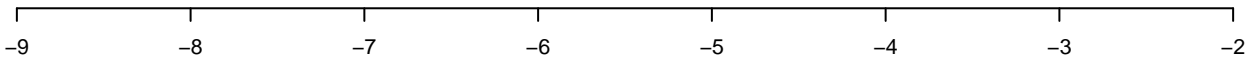

Disaccharide 6

A194:26 – B184:26

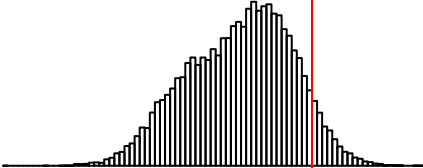

A194:26 – B224:26

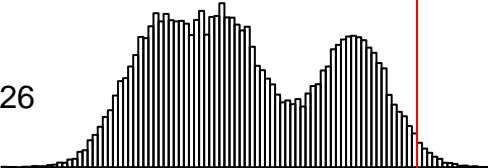

A194:26 – D206:26

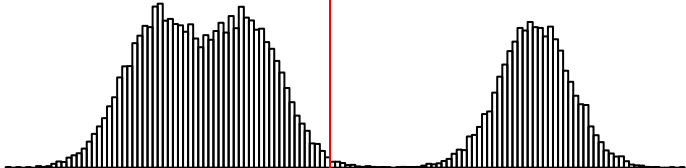

B184:26 – B224:26

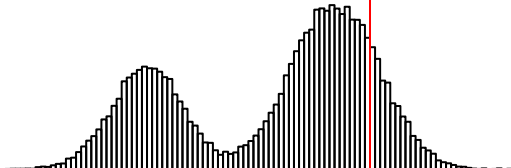

B184:26 – D206:26

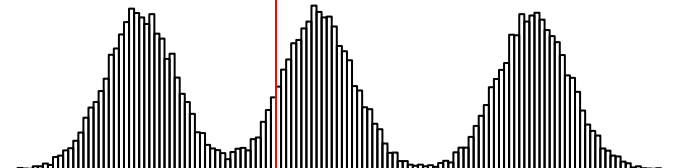

B224:26 – D206:26

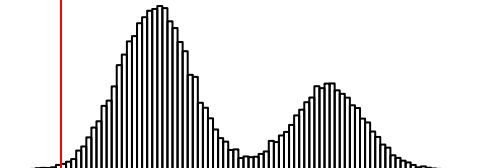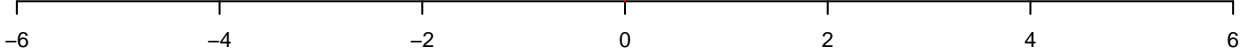

delta(Disaccharide 6)

A194:26

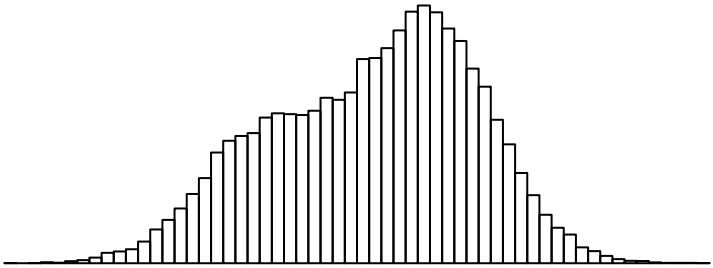

B184:26

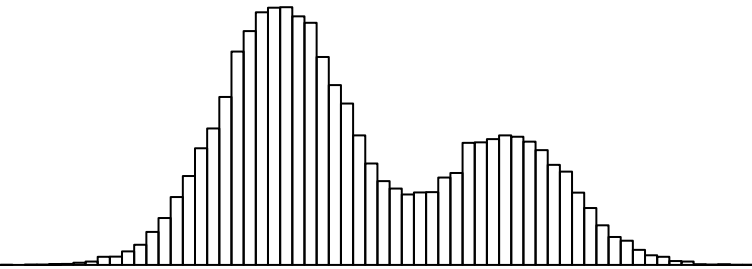

B224:26

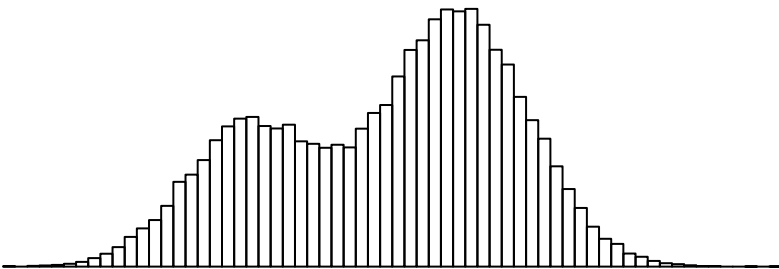

D206:26

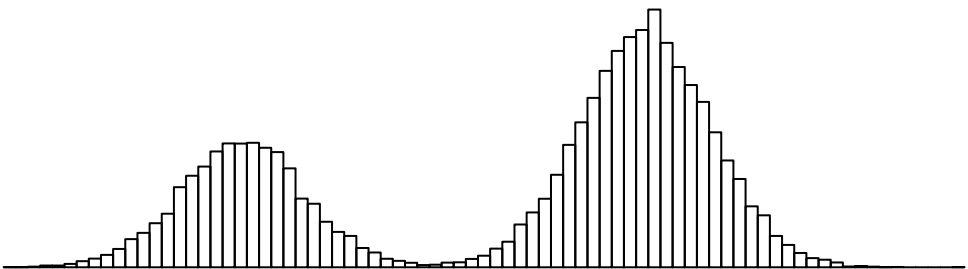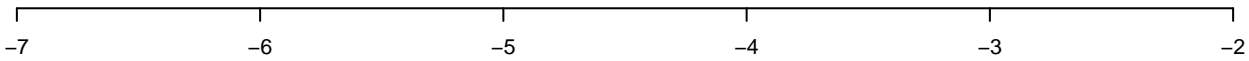

Disaccharide 7

A194:26 – B184:26

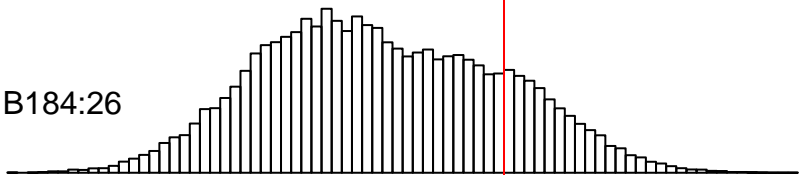

A194:26 – B224:26

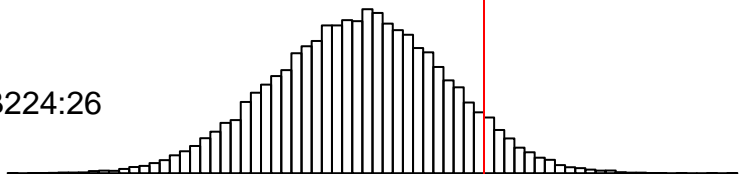

A194:26 – D206:26

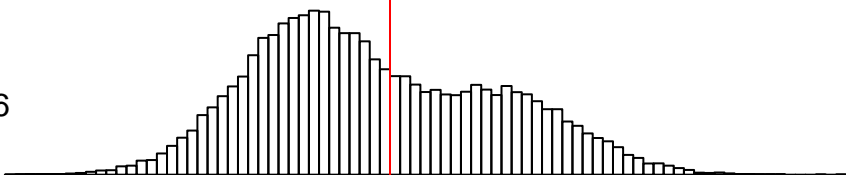

B184:26 – B224:26

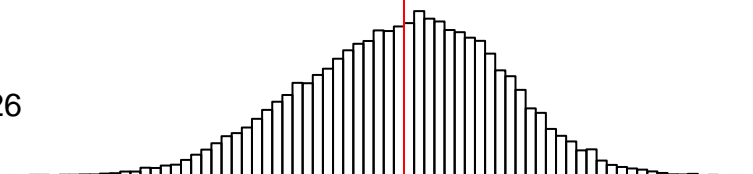

B184:26 – D206:26

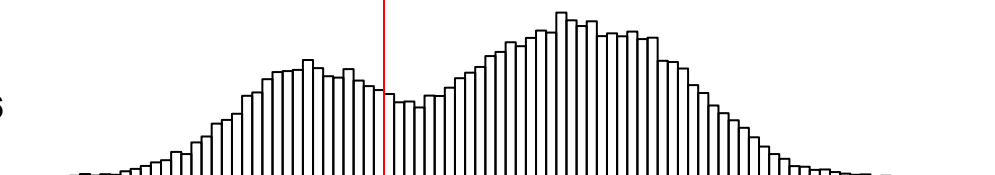

B224:26 – D206:26

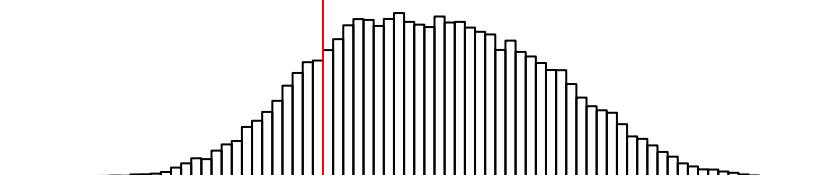

-3 -2 -1 0 1 2 3

delta(Disaccharide 7)



A194:26

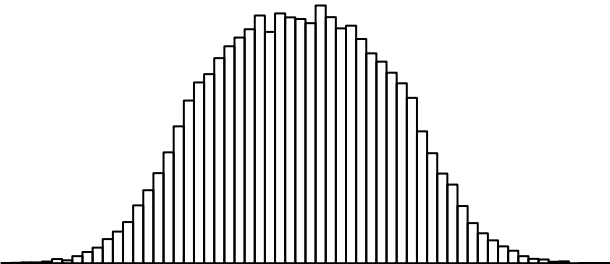

B184:26

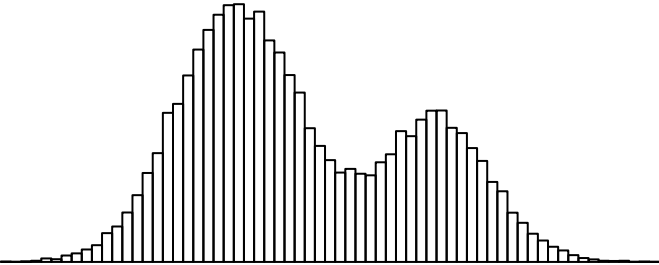

B224:26

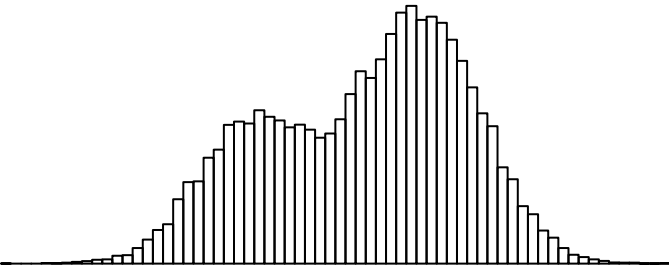

D206:26

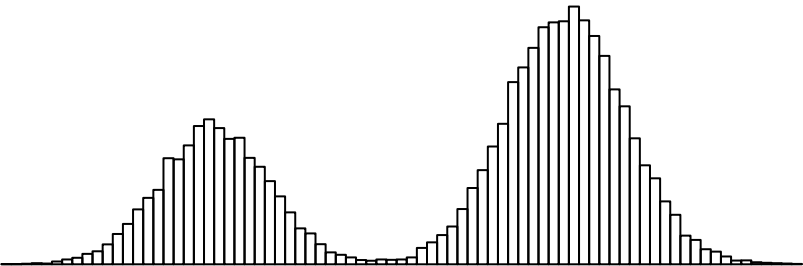

-9      -8      -7      -6      -5      -4      -3

Disaccharide 8

A194:26 – B184:26

A194:26 – B224:26

A194:26 – D206:26

B184:26 – B224:26

B184:26 – D206:26

B224:26 – D206:26

-3 -2 -1 0 1 2 3

delta(Disaccharide 8)

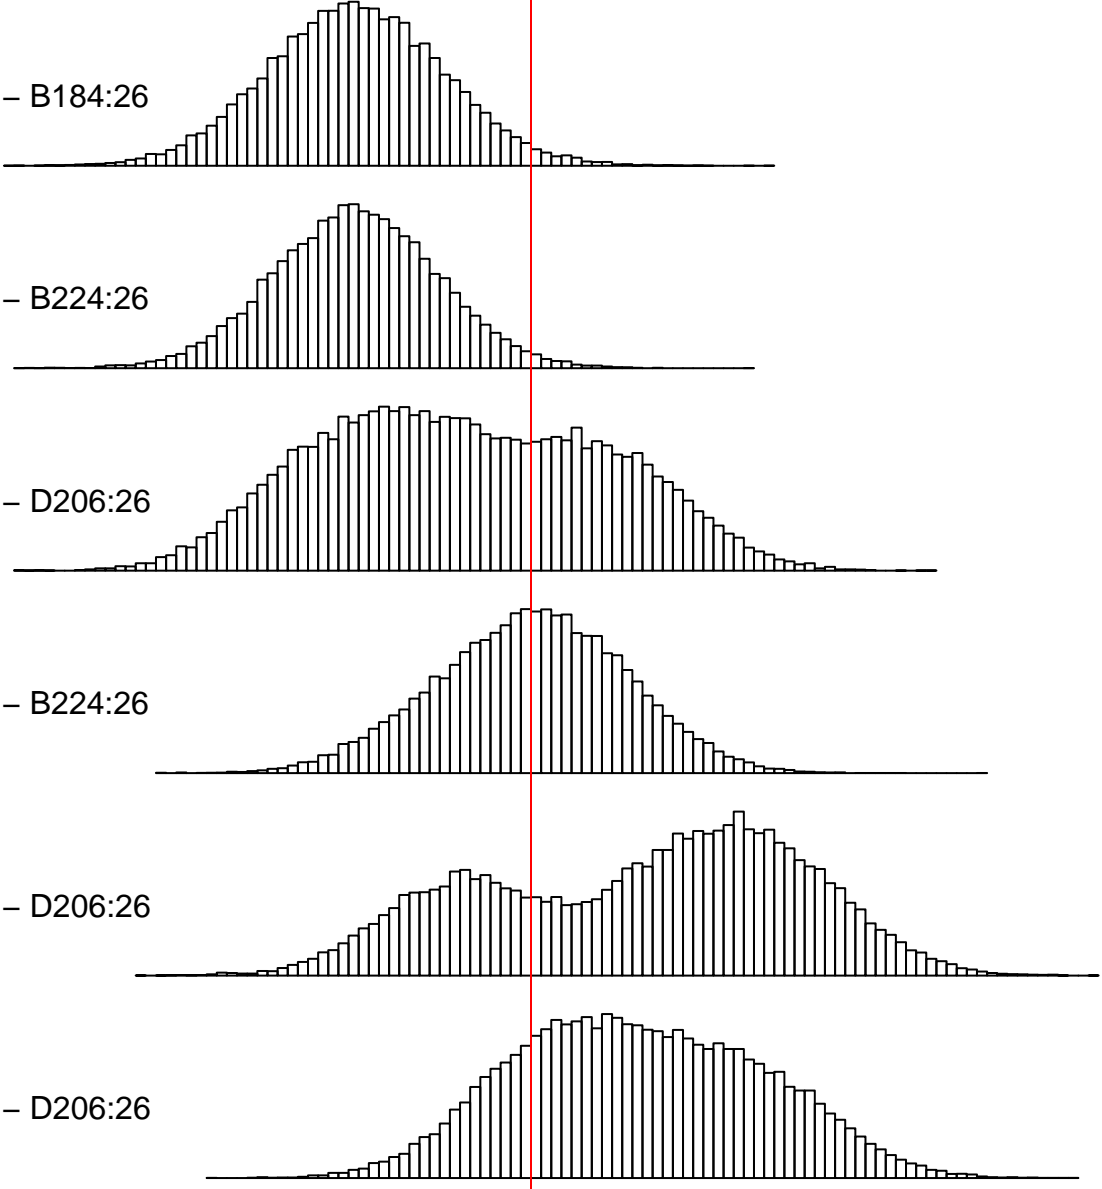

A194:26

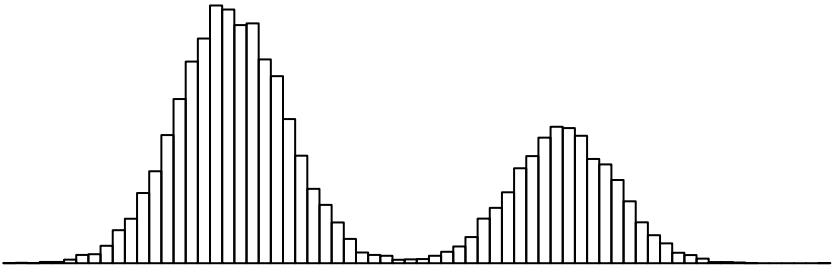

B184:26

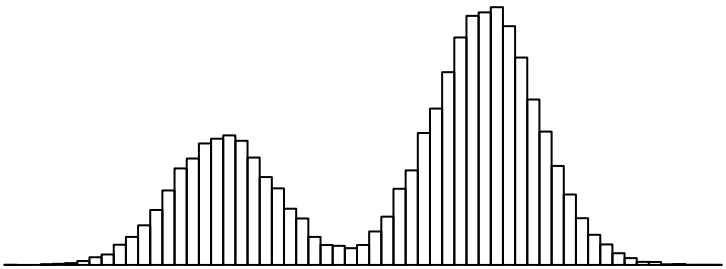

B224:26

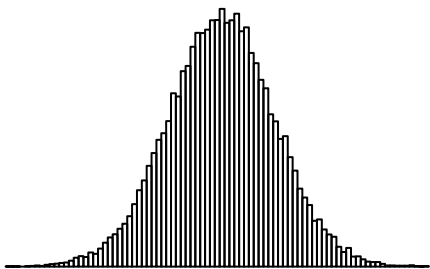

D206:26

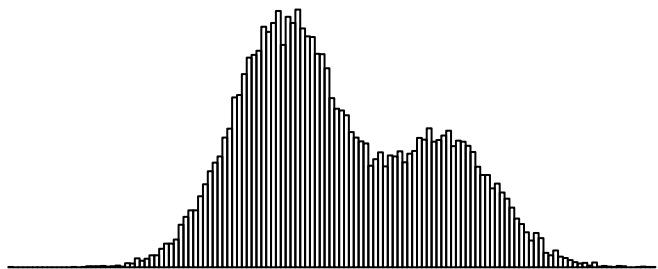

-10 -9 -8 -7 -6 -5

Disaccharide 9

A194:26 – B184:26

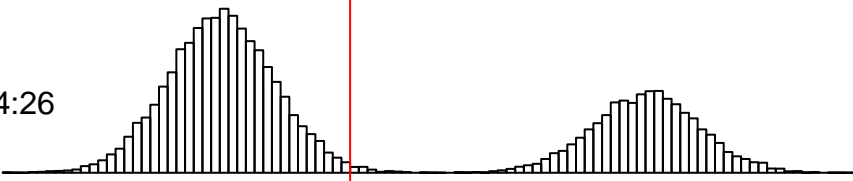

A194:26 – B224:26

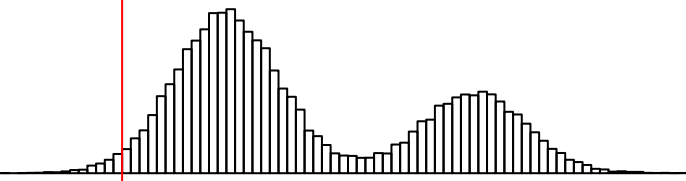

A194:26 – D206:26

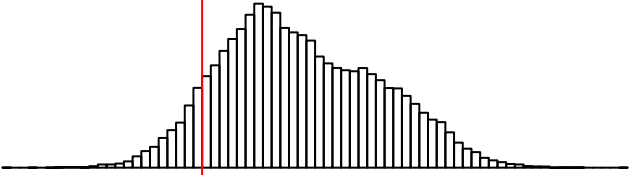

B184:26 – B224:26

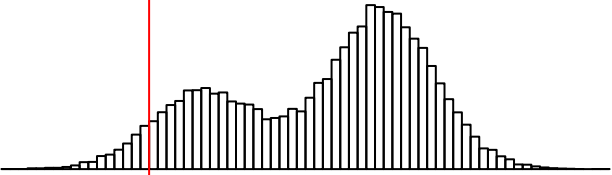

B184:26 – D206:26

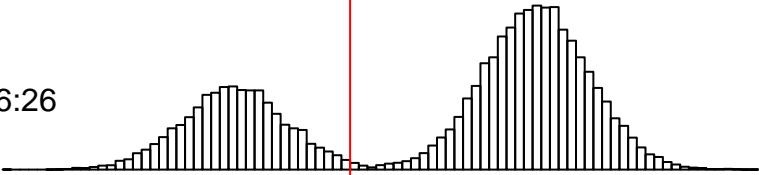

B224:26 – D206:26

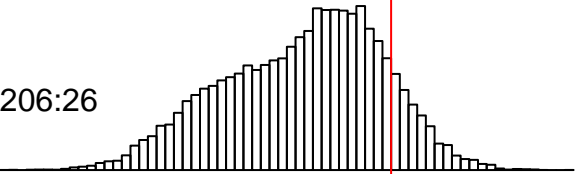

delta(Disaccharide 9)

A194:26

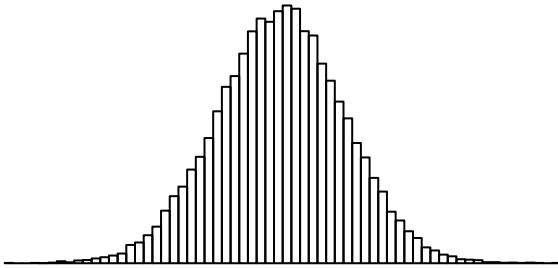

B184:26

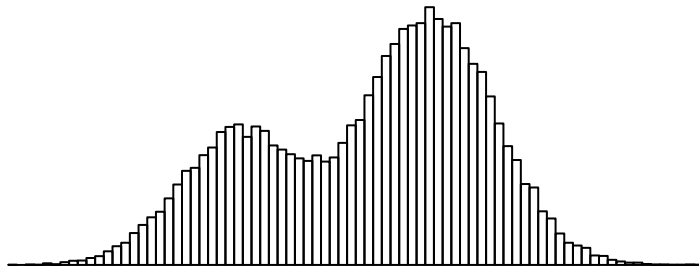

B224:26

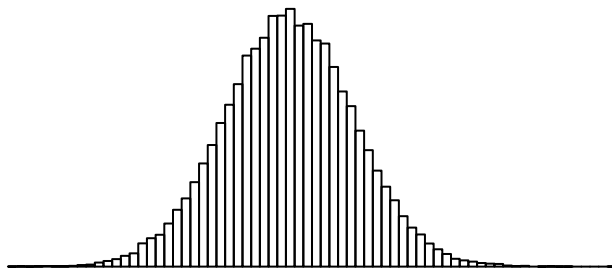

D206:26

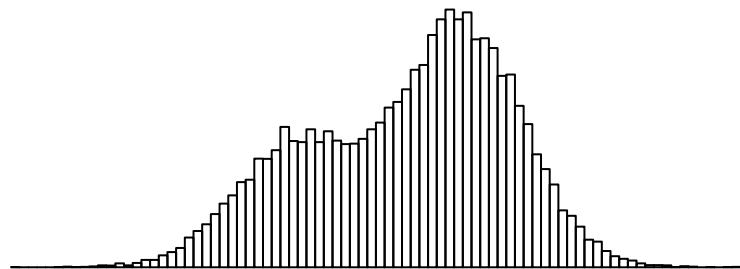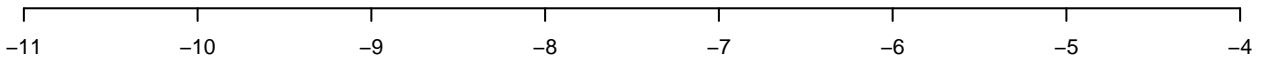

C12:0 Fatty Acid

A194:26 – B184:26

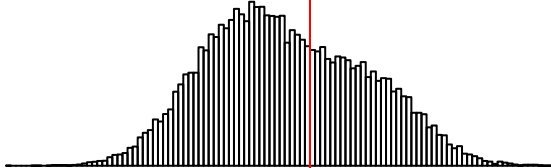

A194:26 – B224:26

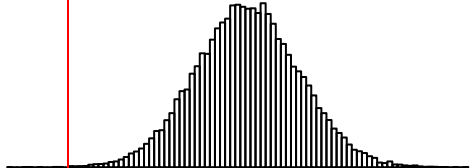

A194:26 – D206:26

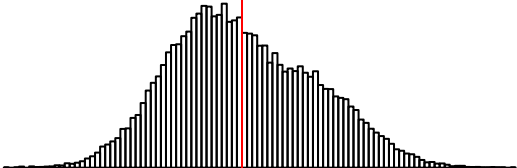

B184:26 – B224:26

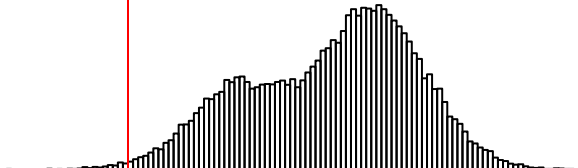

B184:26 – D206:26

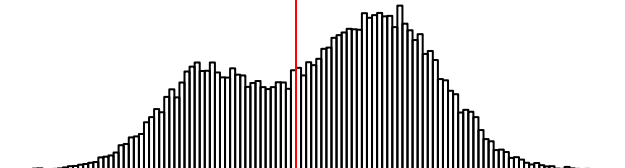

B224:26 – D206:26

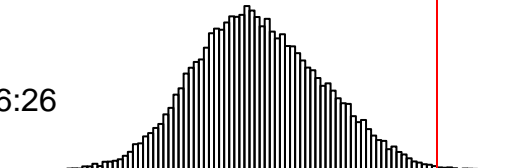

-6 -4 -2 0 2 4 6

delta(C12:0 Fatty Acid)

A194:26

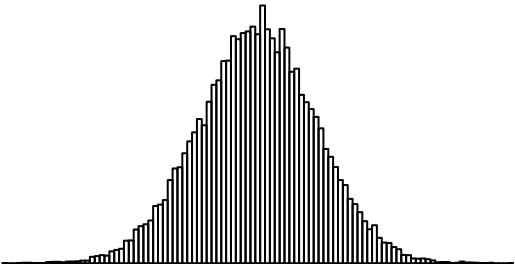

B184:26

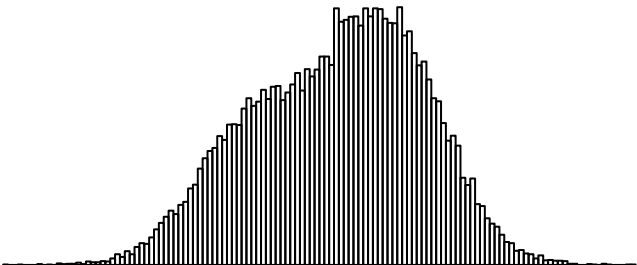

B224:26

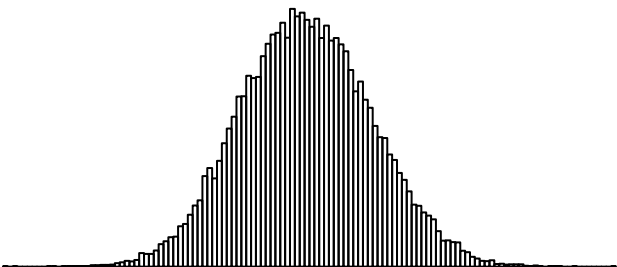

D206:26

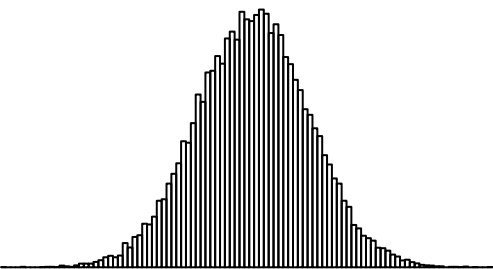

-10      -9      -8      -7      -6      -5

C14:1 Fatty Acid

A194:26 – B184:26

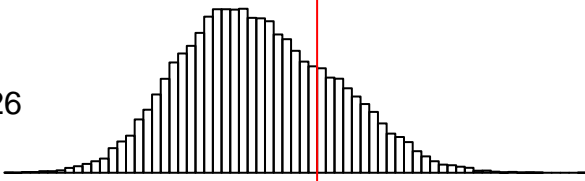

A194:26 – B224:26

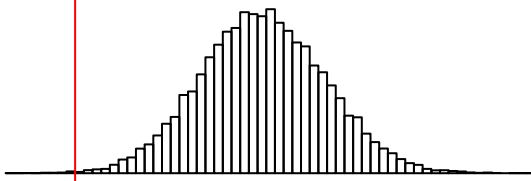

A194:26 – D206:26

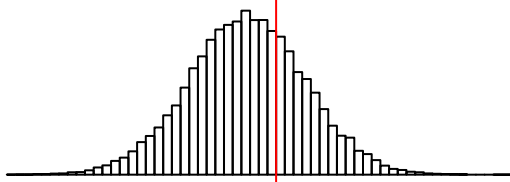

B184:26 – B224:26

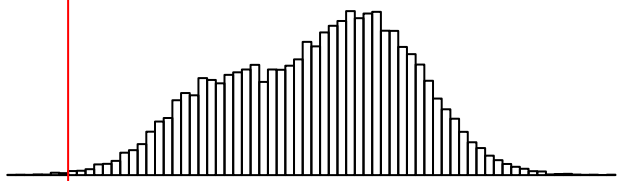

B184:26 – D206:26

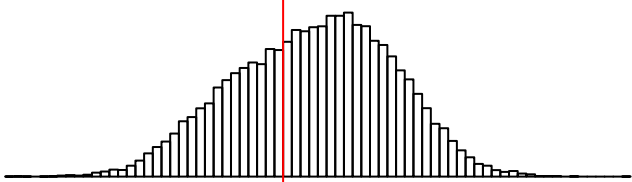

B224:26 – D206:26

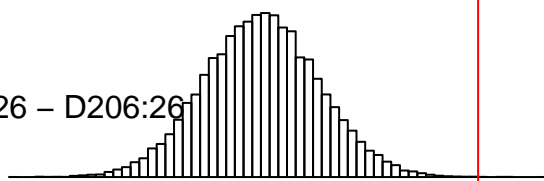

-3 -2 -1 0 1 2 3 4

delta(C14:1 Fatty Acid)



A194:26

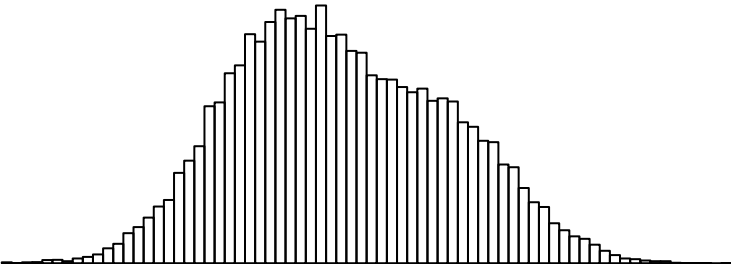

B184:26

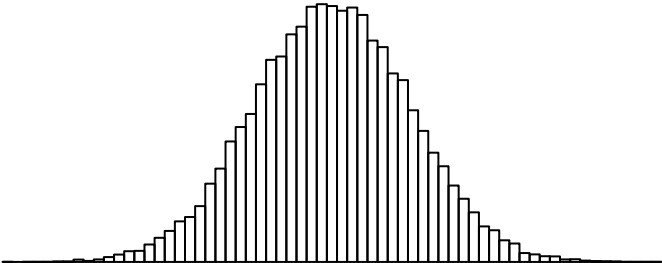

B224:26

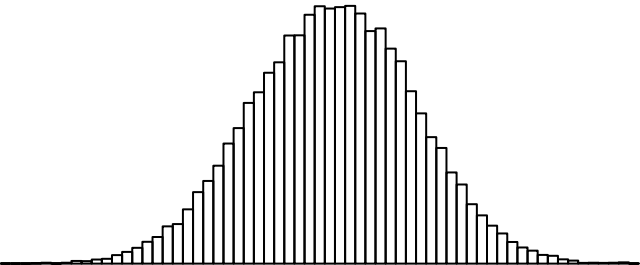

D206:26

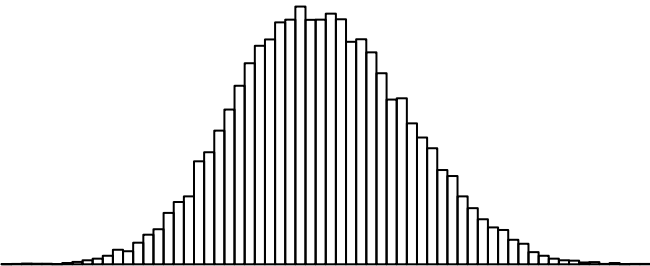

-9 -8 -7 -6 -5 -4 -3

C14:0 Fatty Acid

A194:26 – B184:26

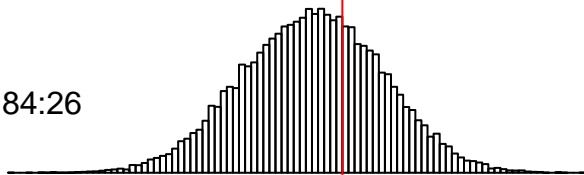

A194:26 – B224:26

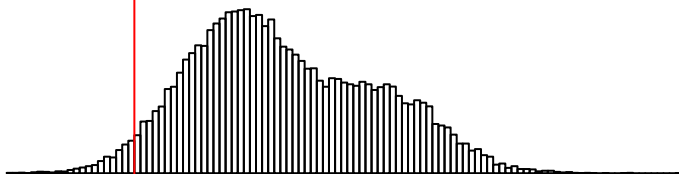

A194:26 – D206:26

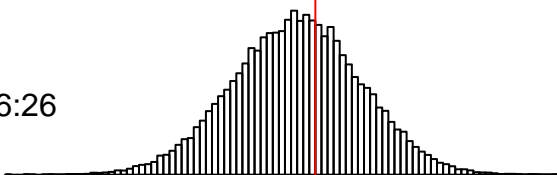

B184:26 – B224:26

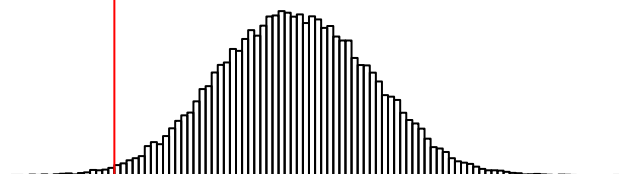

B184:26 – D206:26

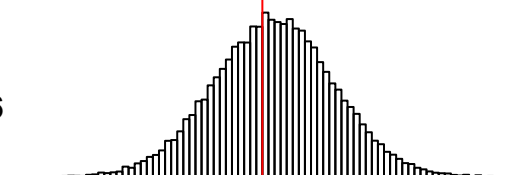

B224:26 – D206:26

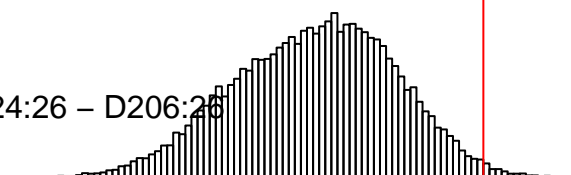

-4 -2 0 2 4 6

delta(C14:0 Fatty Acid)

A194:26

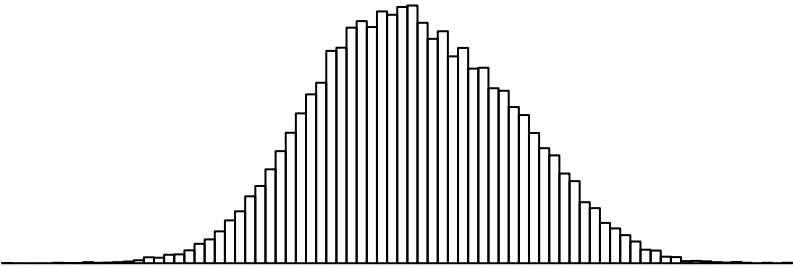

B184:26

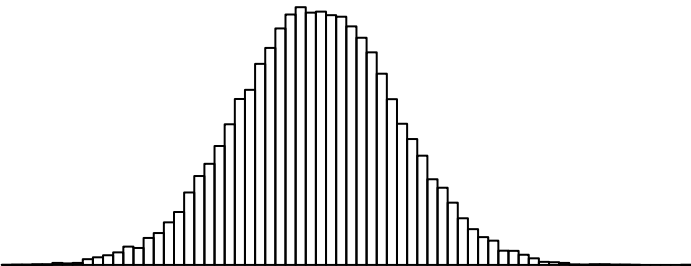

B224:26

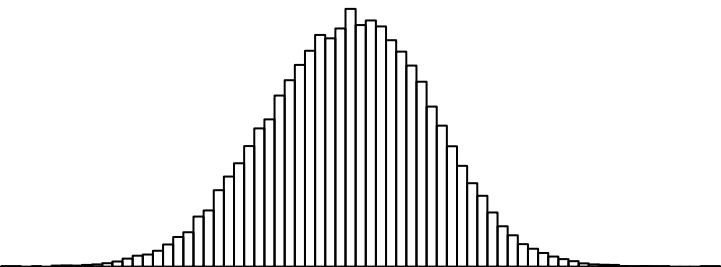

D206:26

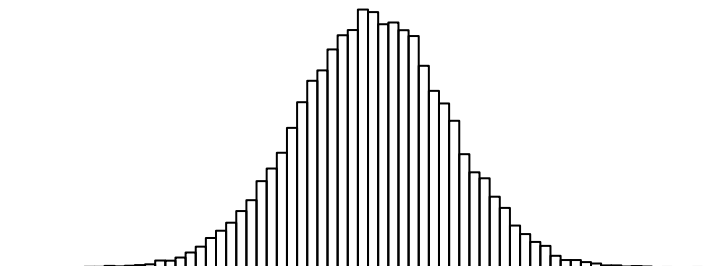

-10      -9      -8      -7      -6      -5      -4

C16:1 Fatty Acid

A194:26 – B184:26

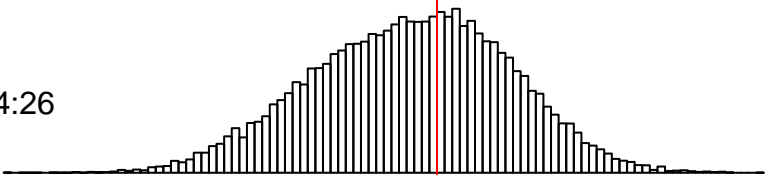

A194:26 – B224:26

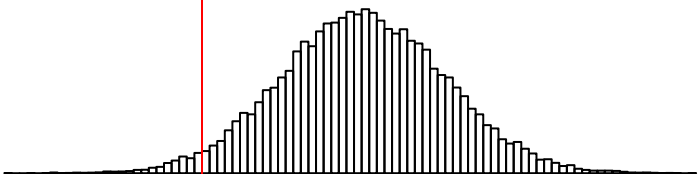

A194:26 – D206:26

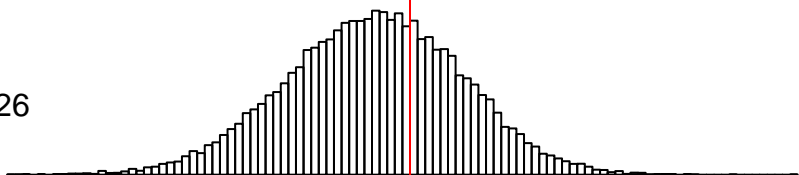

B184:26 – B224:26

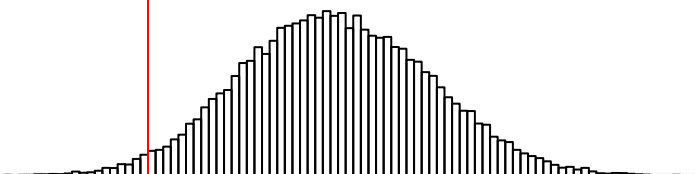

B184:26 – D206:26

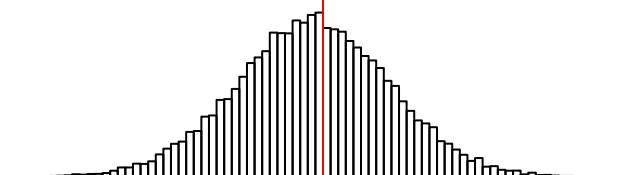

B224:26 – D206:26

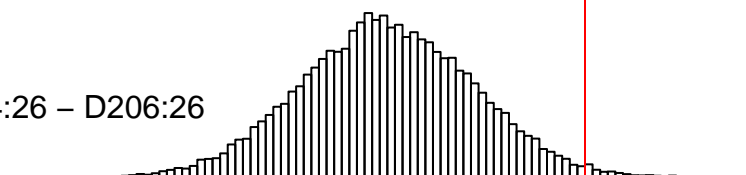

-4 -2 0 2 4

delta(C16:1 Fatty Acid)

A194:26

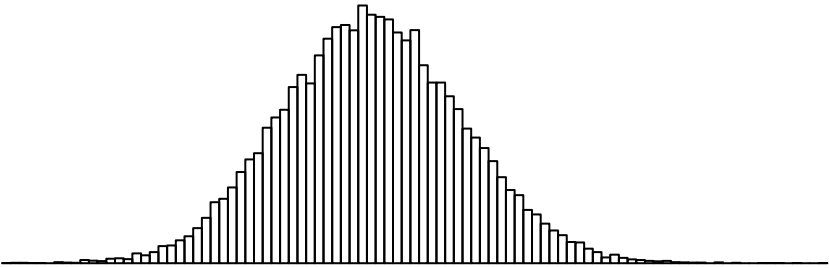

B184:26

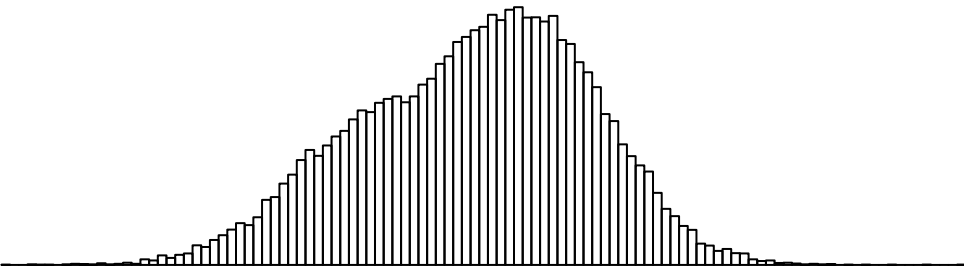

B224:26

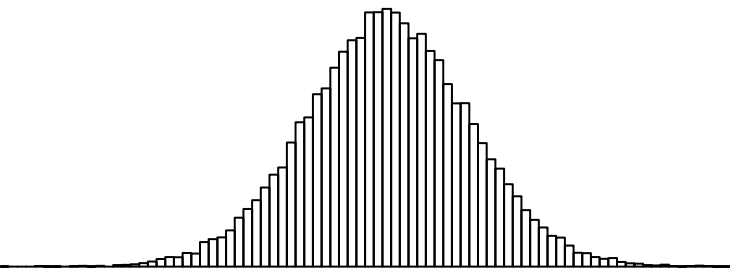

D206:26

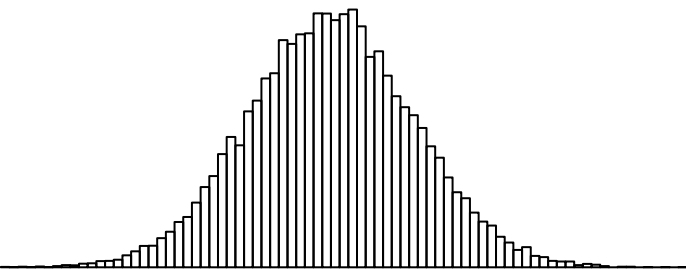

-10      -8      -6      -4      -2      0      2      4

C16:0 Fatty Acid

A194:26 – B184:26

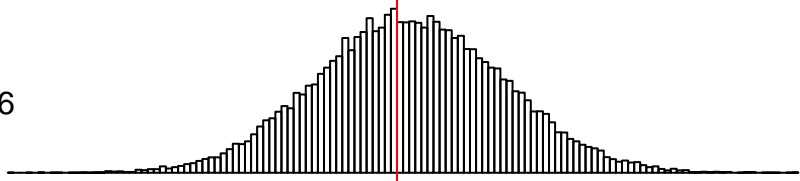

A194:26 – B224:26

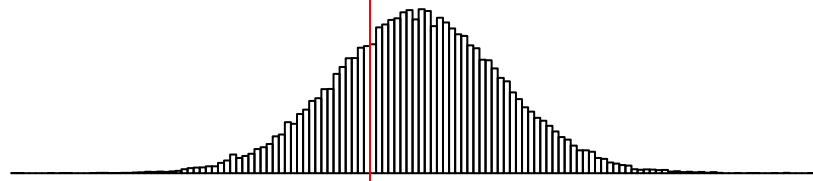

A194:26 – D206:26

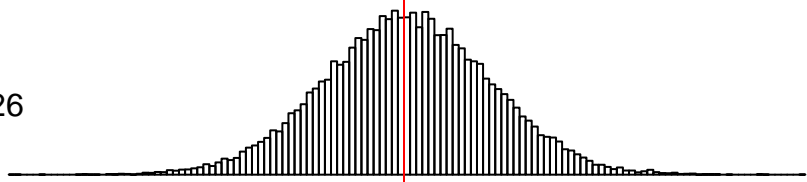

B184:26 – B224:26

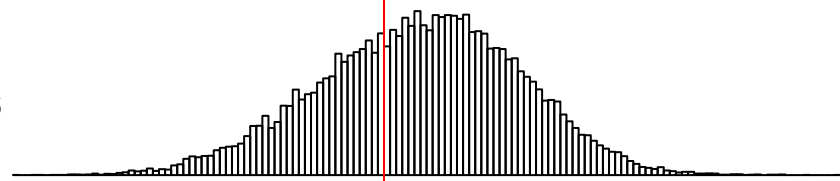

B184:26 – D206:26

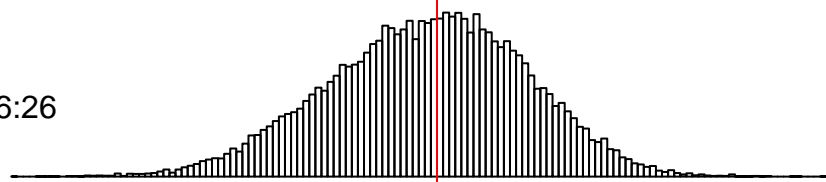

B224:26 – D206:26

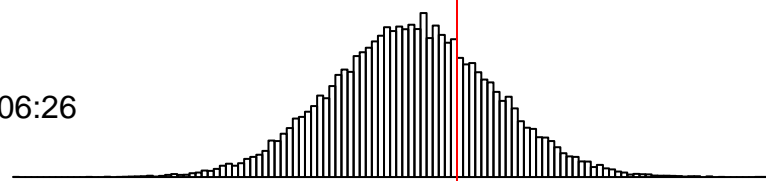

-10      -5      0      5      10

delta(C16:0 Fatty Acid)

A194:26

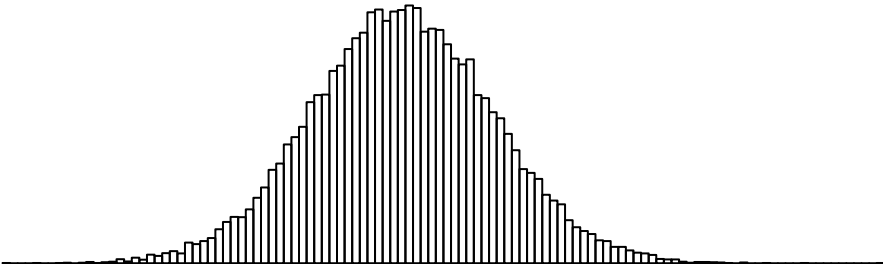

B184:26

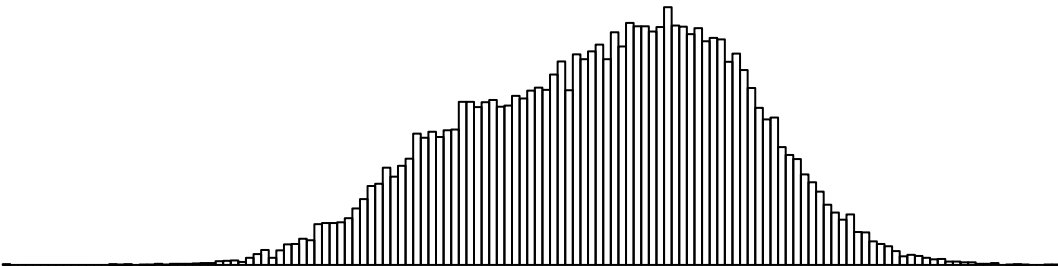

B224:26

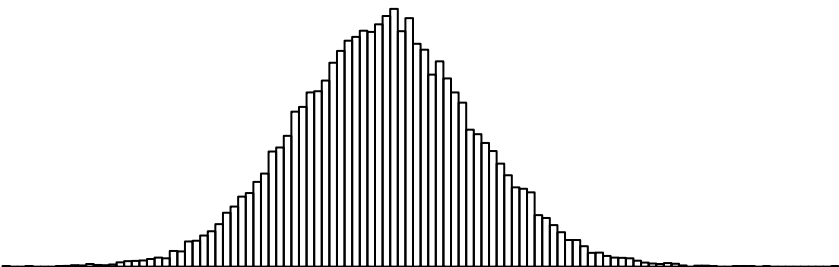

D206:26

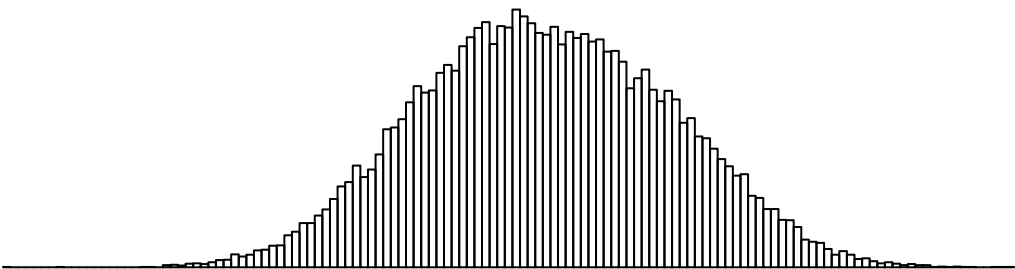

-10

-8

-6

-4

Polyunsaturated Fatty Acids 1

A194:26 – B184:26

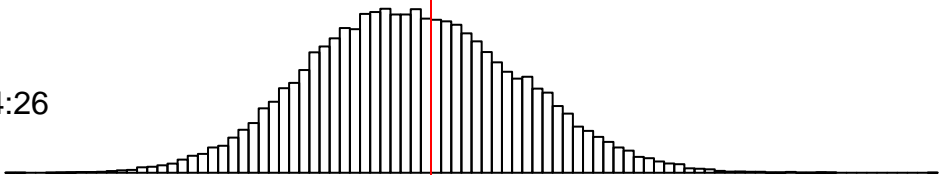

A194:26 – B224:26

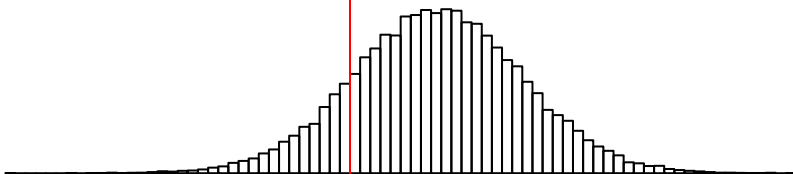

A194:26 – D206:26

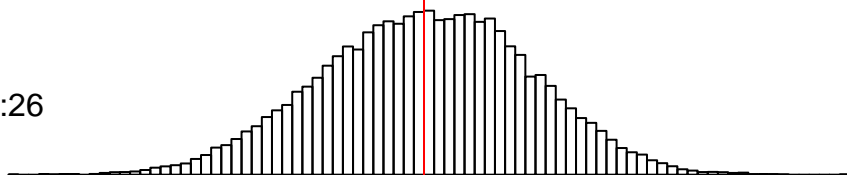

B184:26 – B224:26

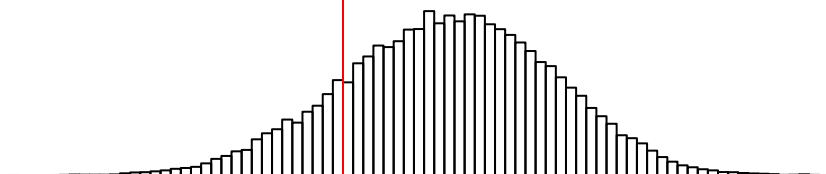

B184:26 – D206:26

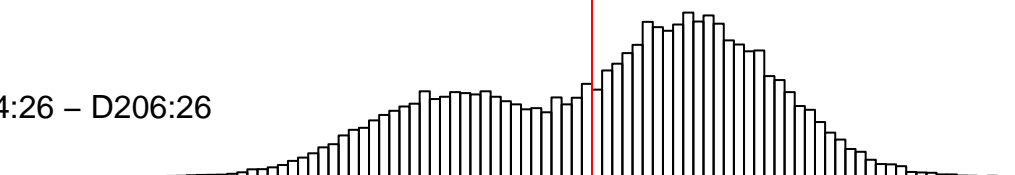

B224:26 – D206:26

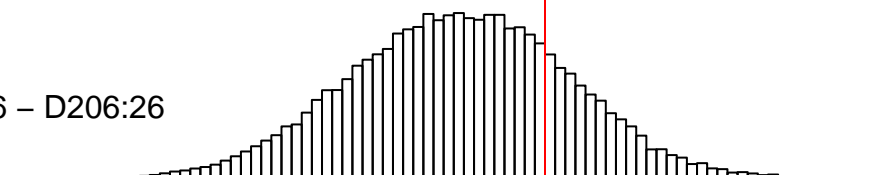

-6 -4 -2 0 2 4 6

delta(Polyunsaturated Fatty Acids 1)



A194:26

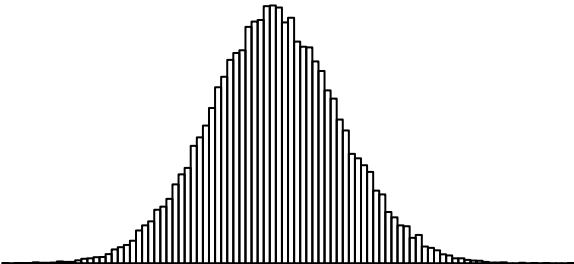

B184:26

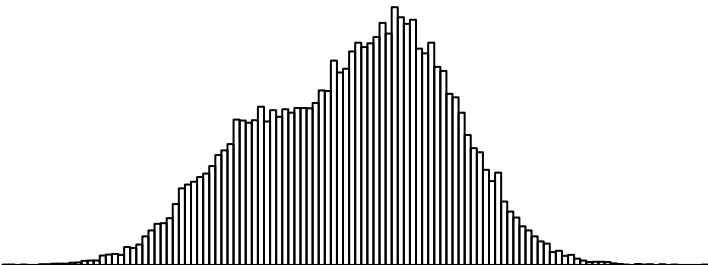

B224:26

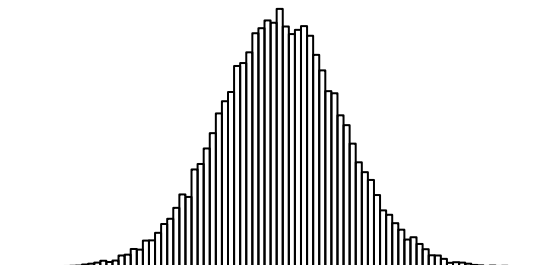

D206:26

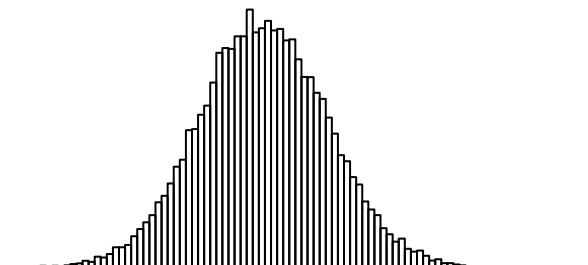

-10

-9

-8

-7

Polyunsaturated Fatty Acids 3

A194:26 – B184:26

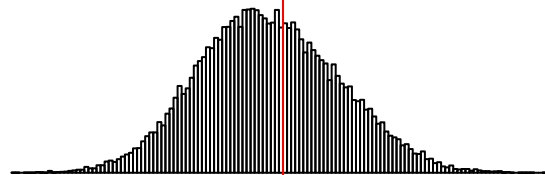

A194:26 – B224:26

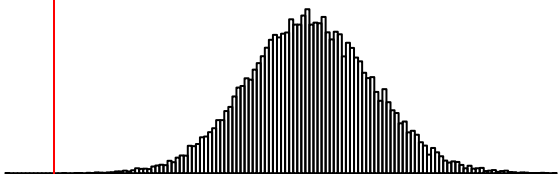

A194:26 – D206:26

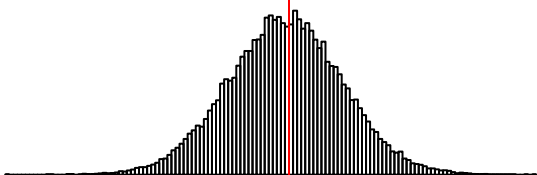

B184:26 – B224:26

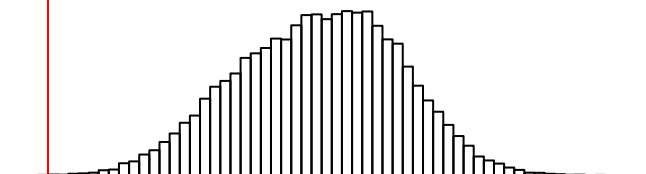

B184:26 – D206:26

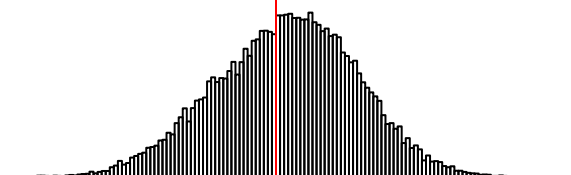

B224:26 – D206:26

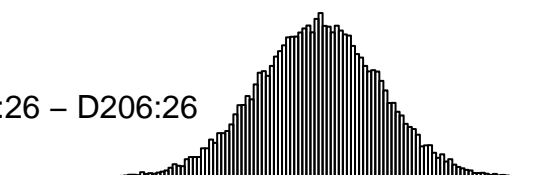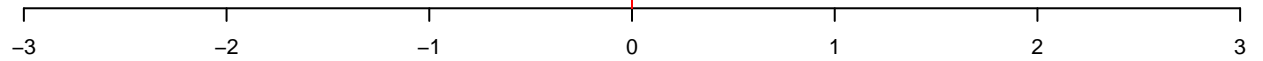

delta(Polyunsaturated Fatty Acids 3)

A194:26

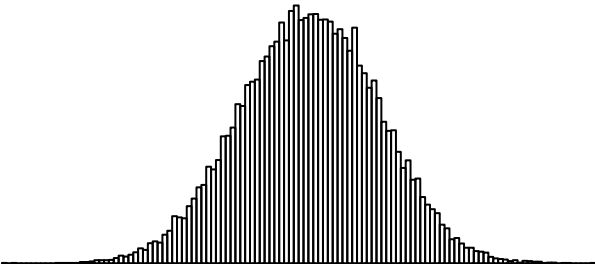

B184:26

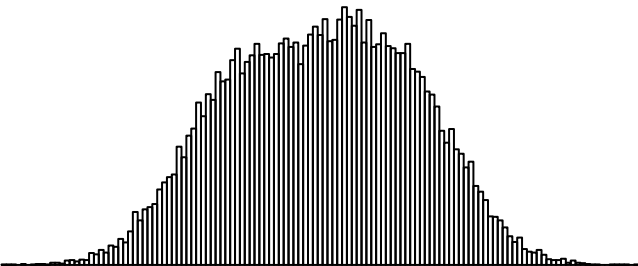

B224:26

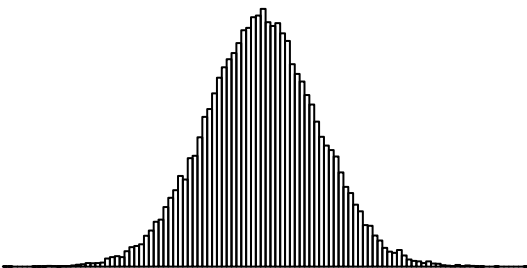

D206:26

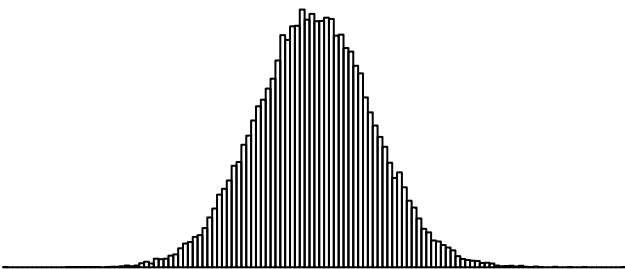

-11      -10      -9      -8      -7      -6

C18:2 Fatty Acid

A194:26 – B184:26

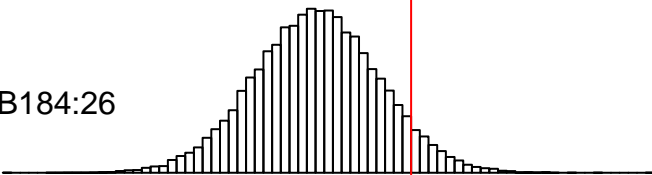

A194:26 – B224:26

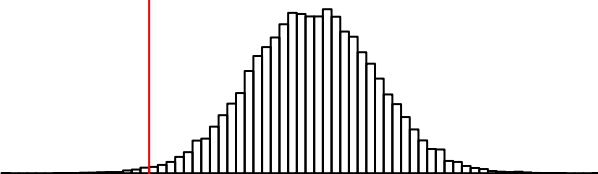

A194:26 – D206:26

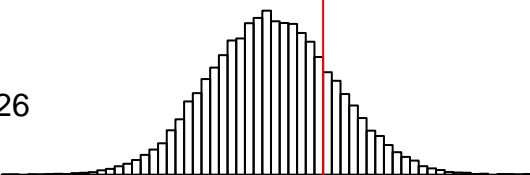

B184:26 – B224:26

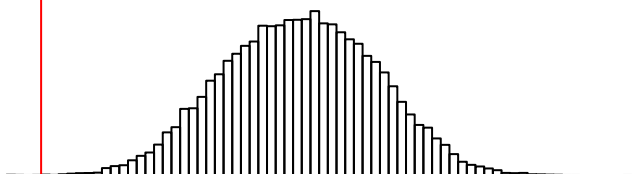

B184:26 – D206:26

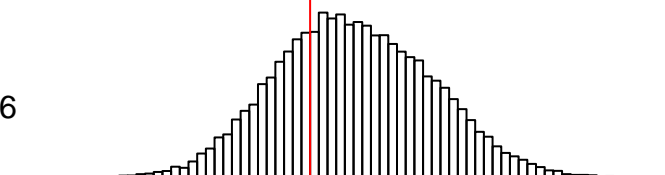

B224:26 – D206:26

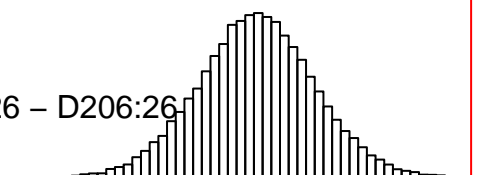

-3 -2 -1 0 1 2 3 4

delta(C18:2 Fatty Acid)

A194:26

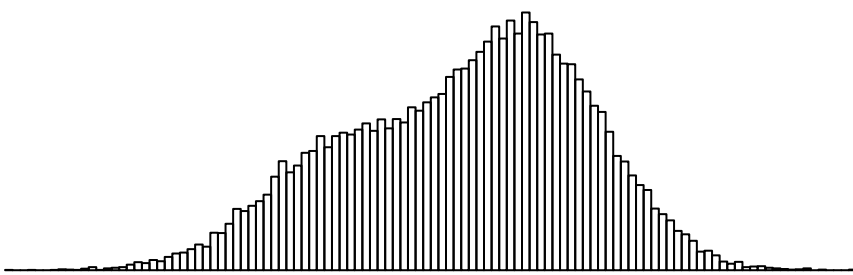

B184:26

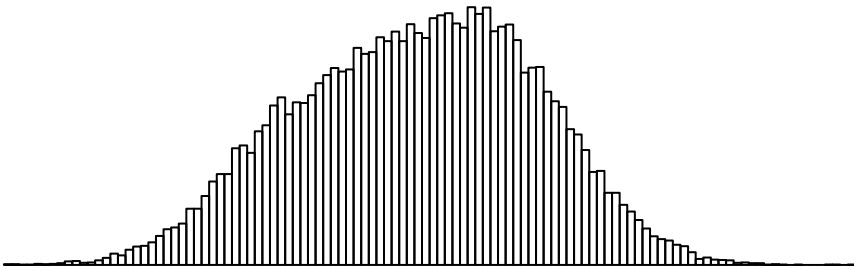

B224:26

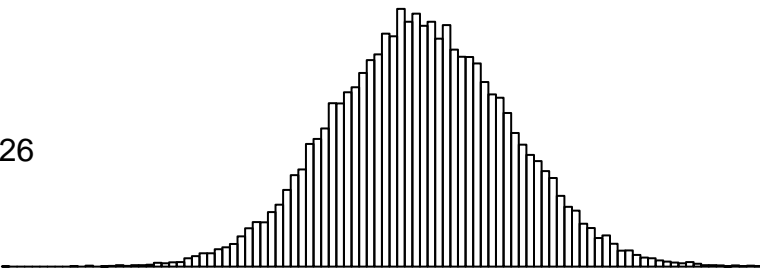

D206:26

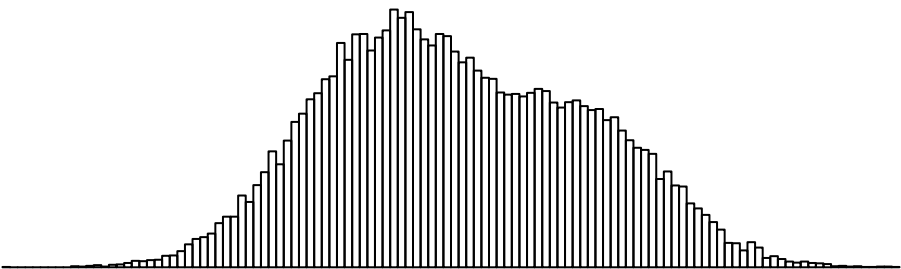

-8

-6

-4

-2

C18:0 Fatty Acid

A194:26 – B184:26

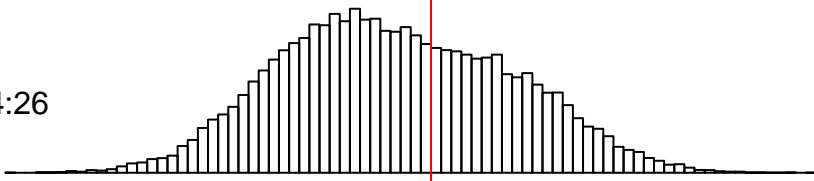

A194:26 – B224:26

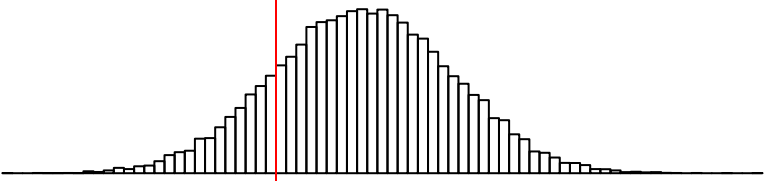

A194:26 – D206:26

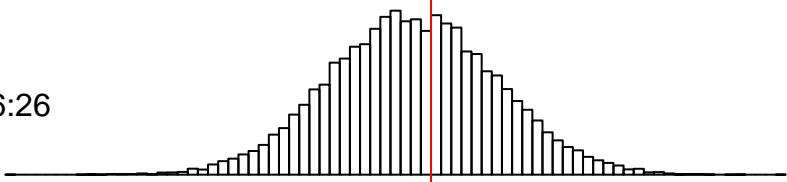

B184:26 – B224:26

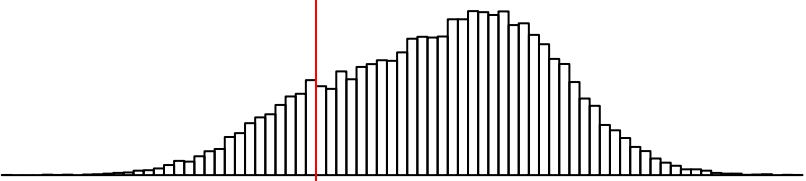

B184:26 – D206:26

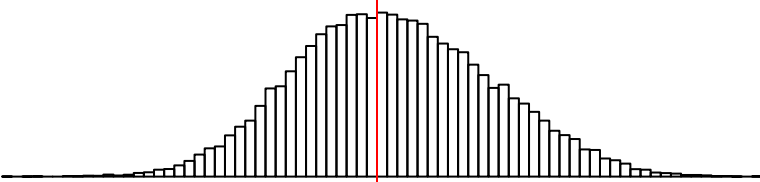

B224:26 – D206:26

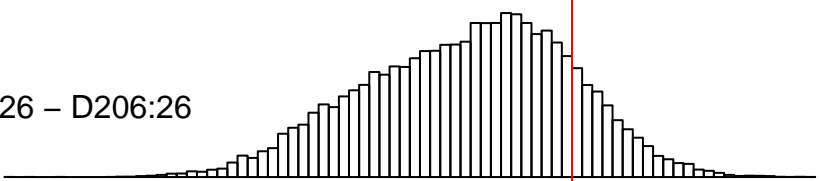

-6 -4 -2 0 2 4 6

delta(C18:0 Fatty Acid)

A194:26

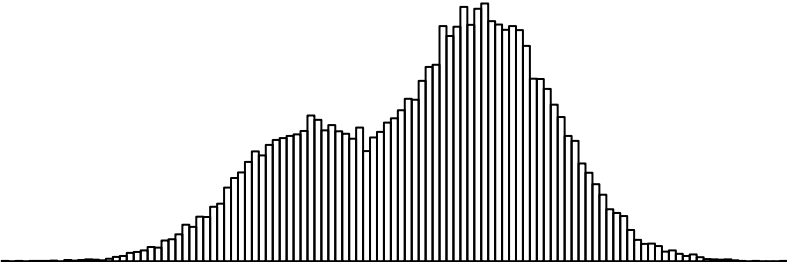

B184:26

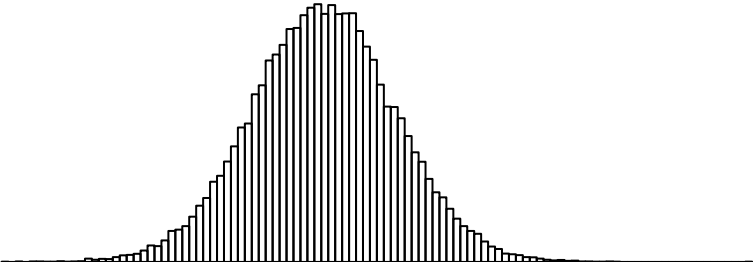

B224:26

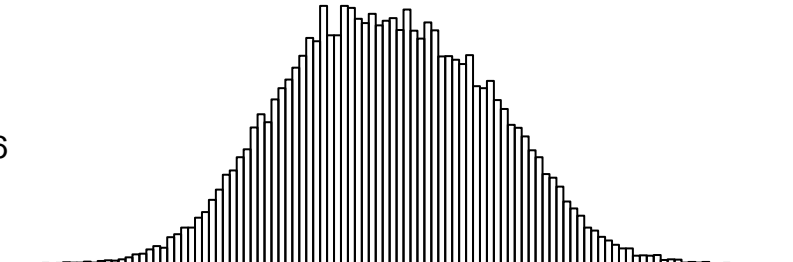

D206:26

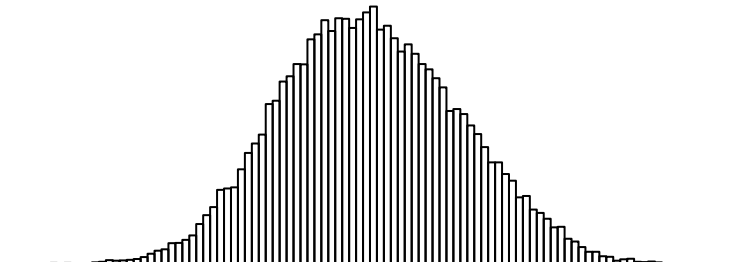

-9.5      -9.0      -8.5      -8.0      -7.5      -7.0      -6.5      -6.0

Unidentified Fatty Acid 2

A194:26 – B184:26

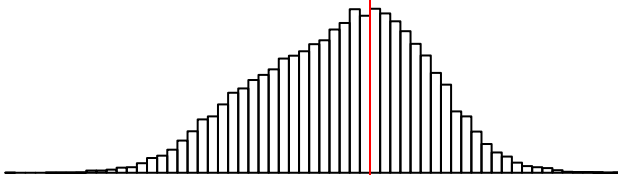

A194:26 – B224:26

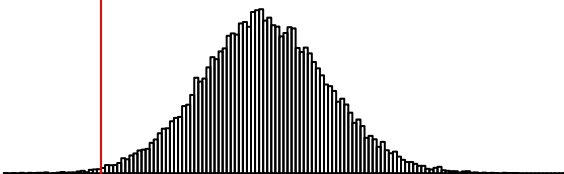

A194:26 – D206:26

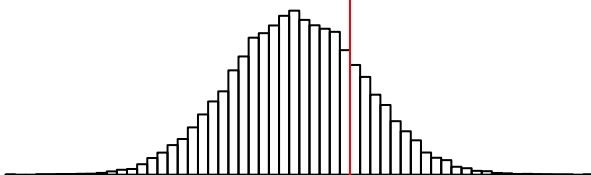

B184:26 – B224:26

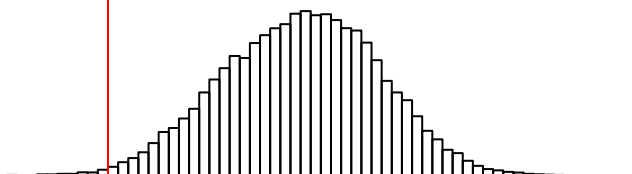

B184:26 – D206:26

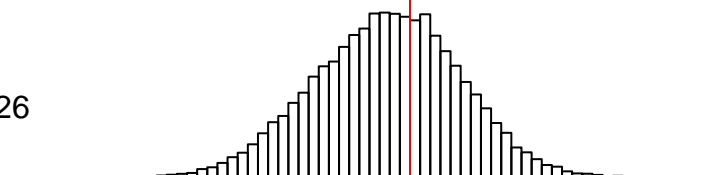

B224:26 – D206:26

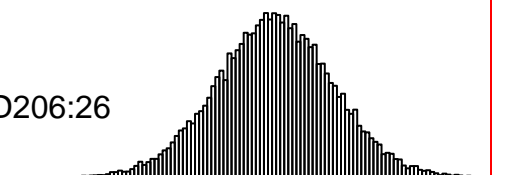

delta(Unidentified Fatty Acid 2)



A194:26

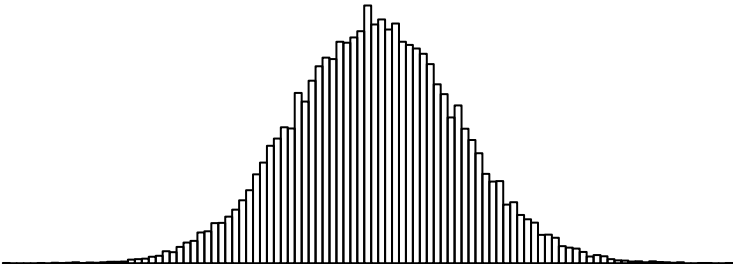

B184:26

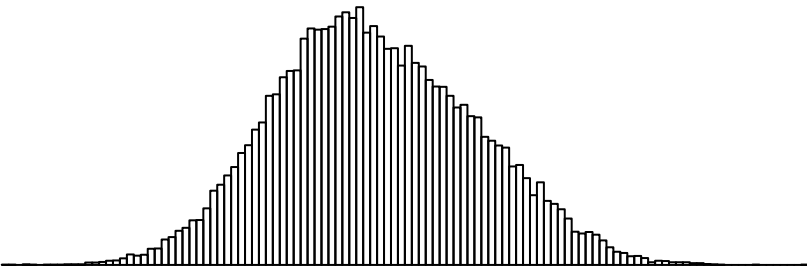

B224:26

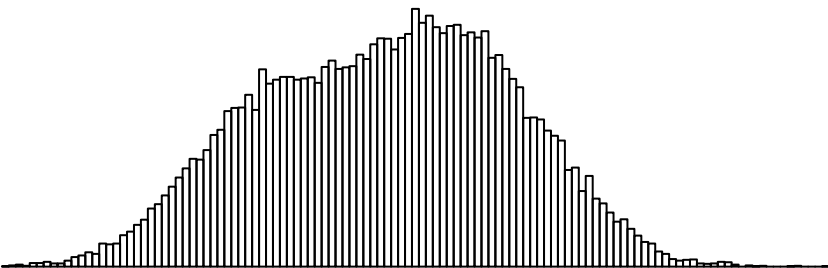

D206:26

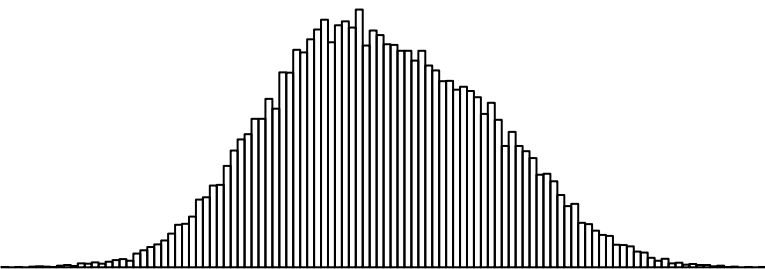

-5.0 -4.5 -4.0 -3.5 -3.0 -2.5 -2.0 -1.5

Glycerol

A194:26 – B184:26

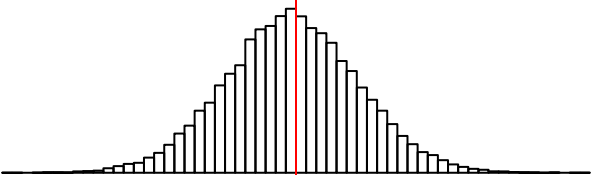

A194:26 – B224:26

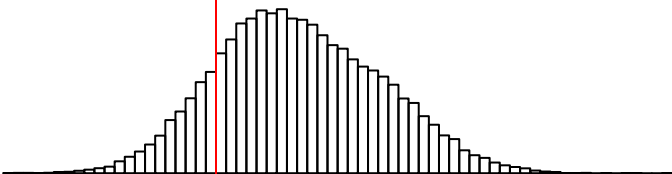

A194:26 – D206:26

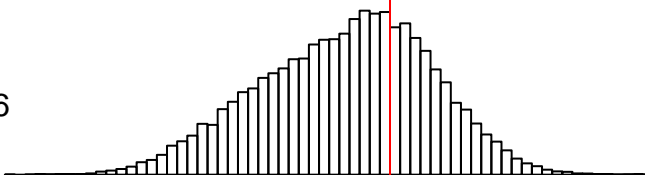

B184:26 – B224:26

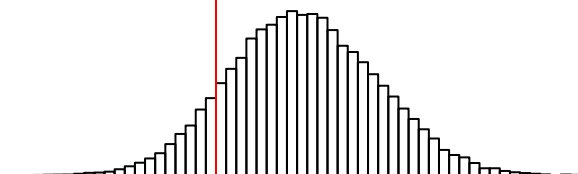

B184:26 – D206:26

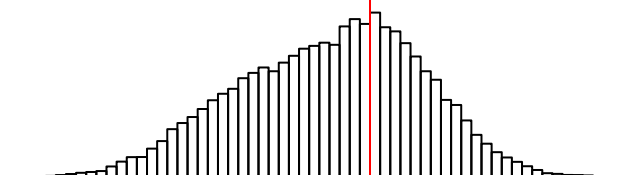

B224:26 – D206:26

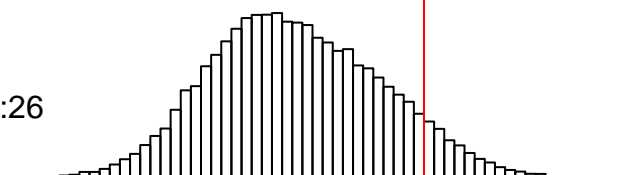

delta(Glycerol)

A194:26

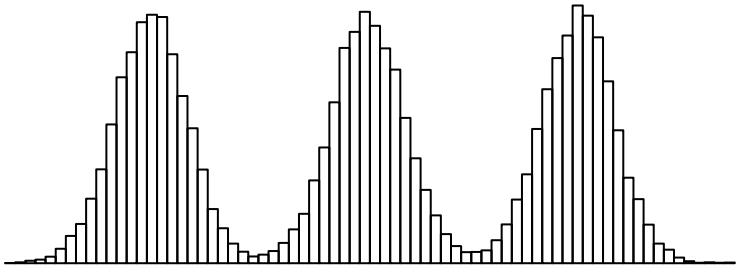

B184:26

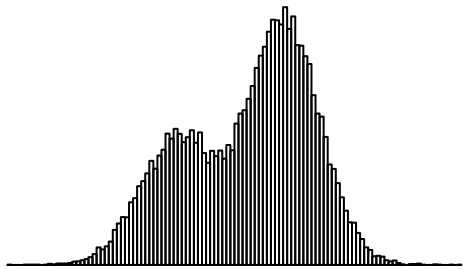

B224:26

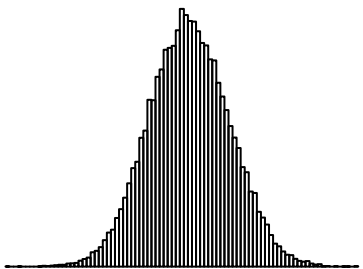

D206:26

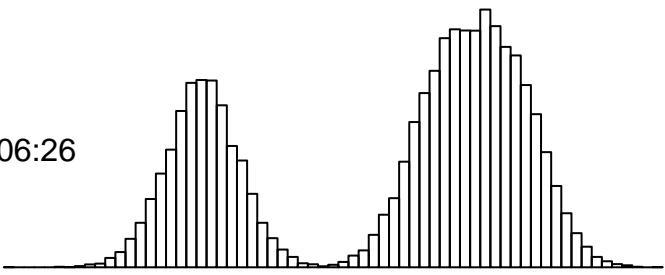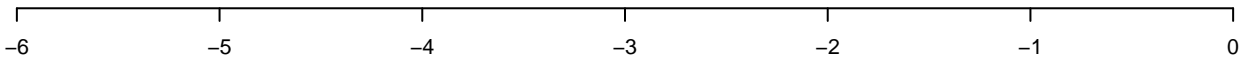

Inositol 1

A194:26 – B184:26

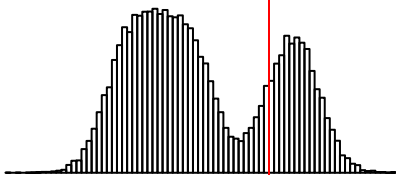

A194:26 – B224:26

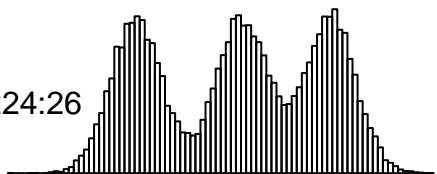

A194:26 – D206:26

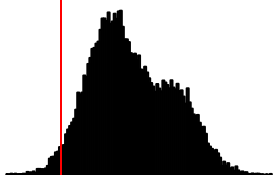

B184:26 – B224:26

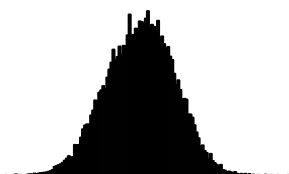

B184:26 – D206:26

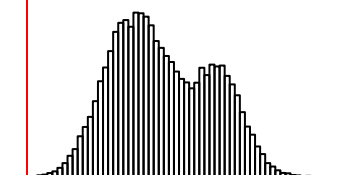

B224:26 – D206:26

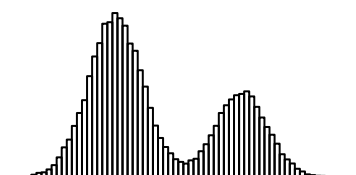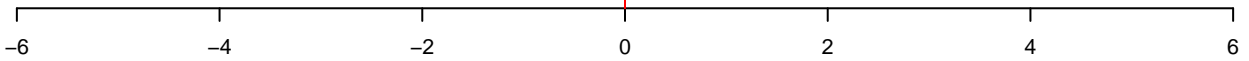

delta(Inositol 1)

A194:26

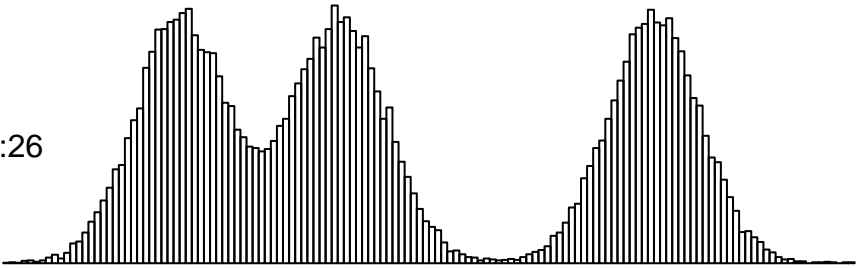

B184:26

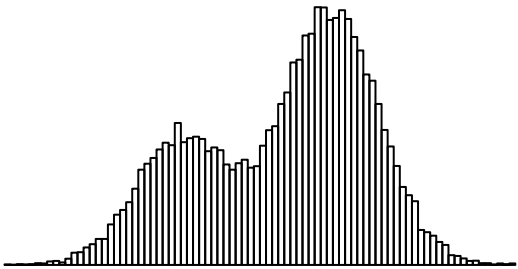

B224:26

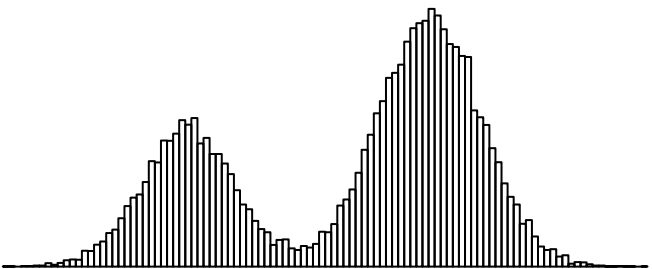

D206:26

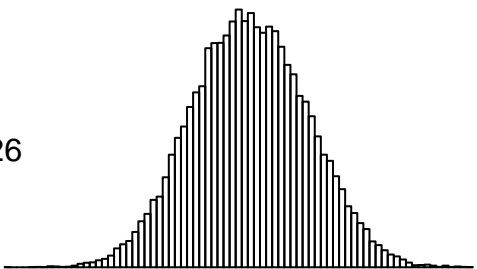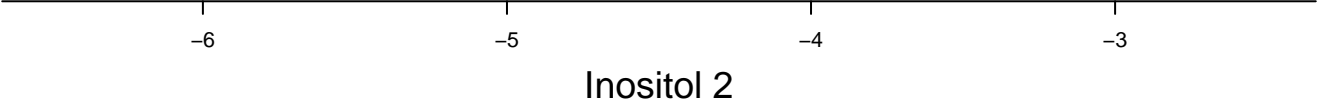

A194:26 – B184:26

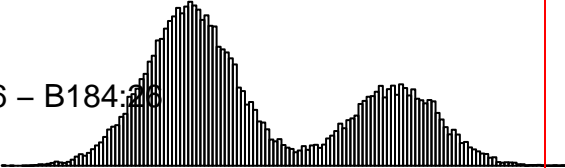

A194:26 – B224:26

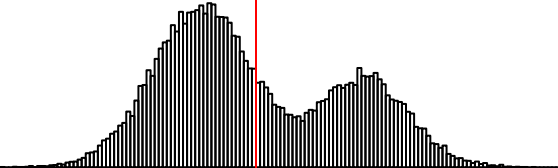

A194:26 – D206:26

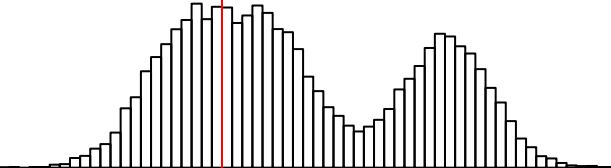

B184:26 – B224:26

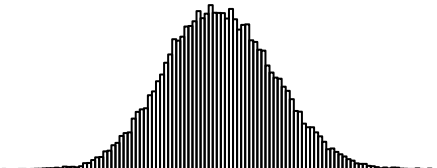

B184:26 – D206:26

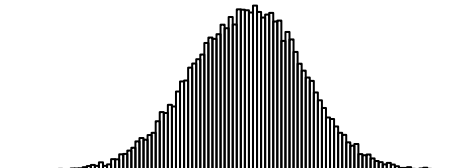

B224:26 – D206:26

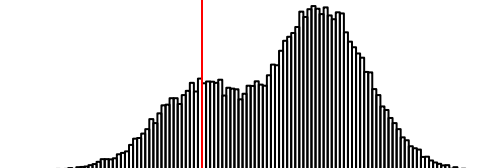

-3      -2      -1      0      1      2      3

delta(Inositol 2)

A194:26

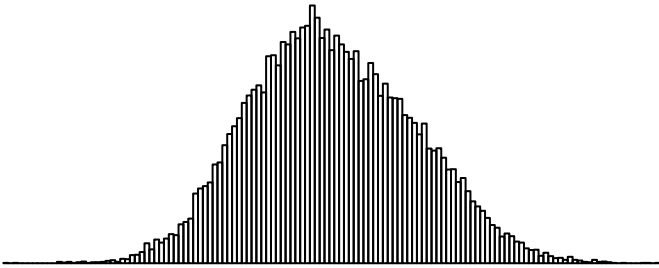

B184:26

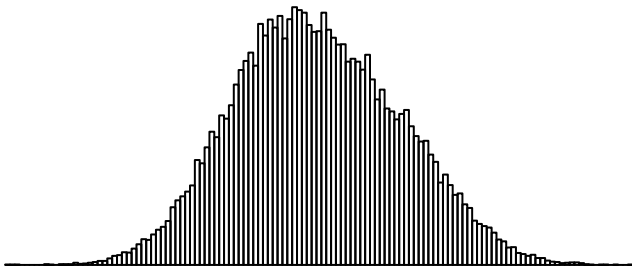

B224:26

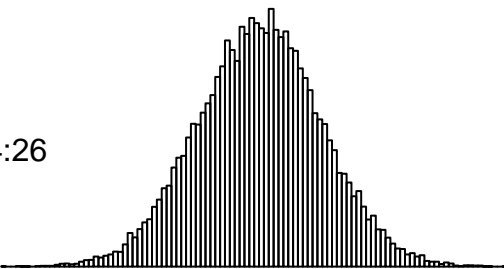

D206:26

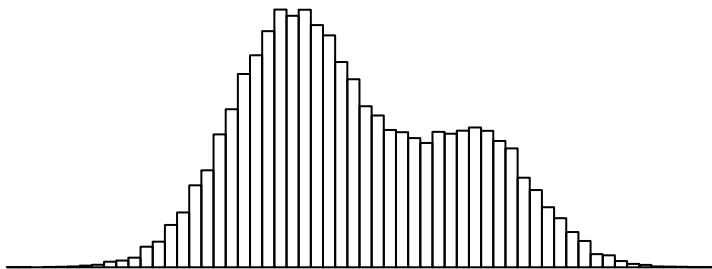

-11 -10 -9 -8 -7 -6

C29 Sterol 1

A194:26 – B184:26

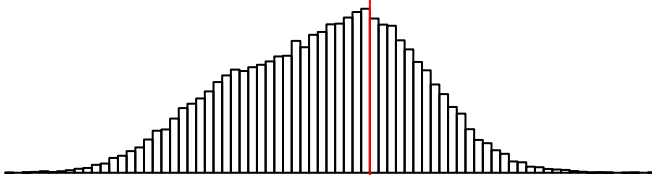

A194:26 – B224:26

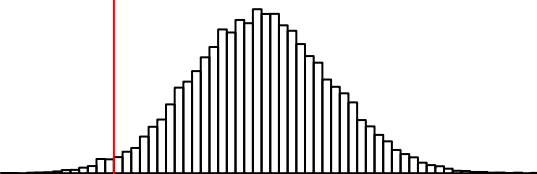

A194:26 – D206:26

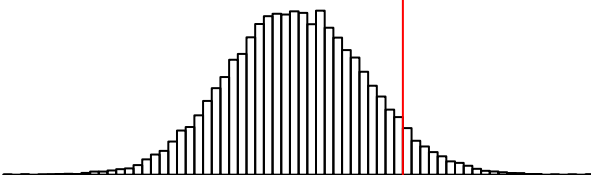

B184:26 – B224:26

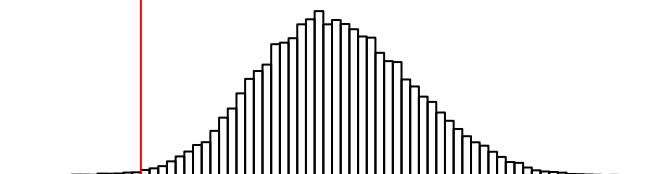

B184:26 – D206:26

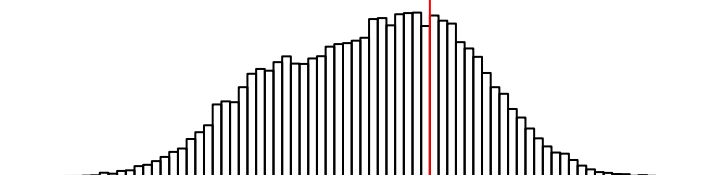

B224:26 – D206:26

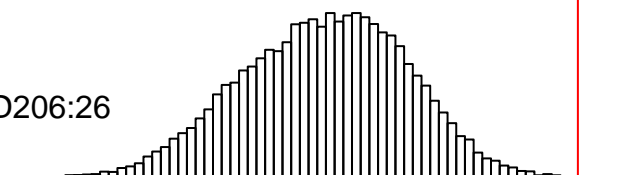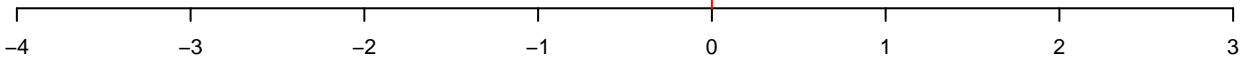

delta(C29 Sterol 1)



A194:26

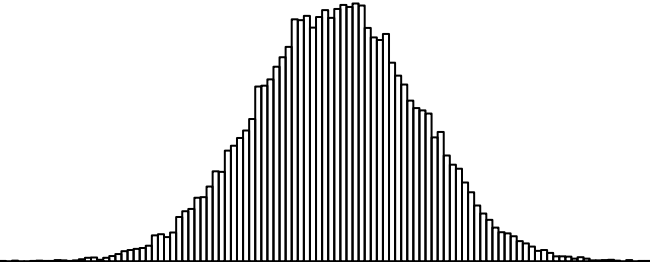

B184:26

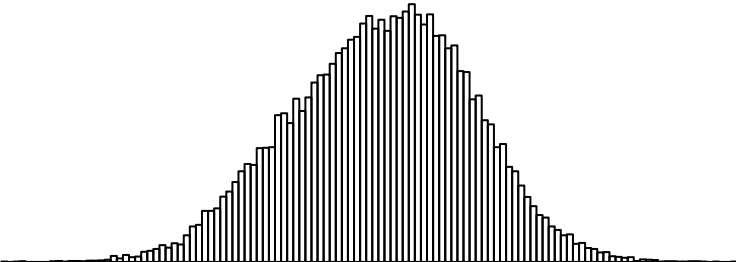

B224:26

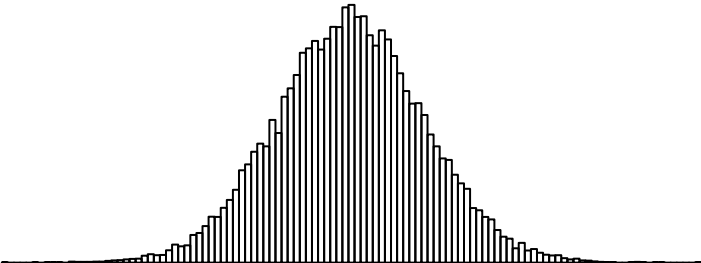

D206:26

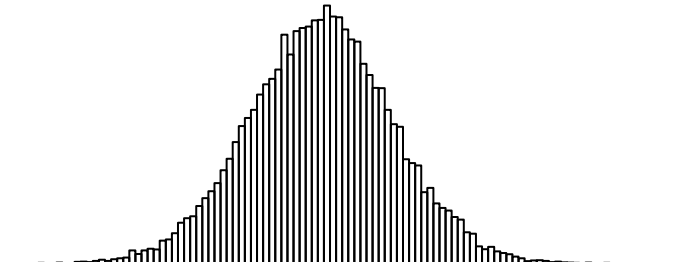

-11                      -10                      -9                      -8                      -7

C29 Stanol 1

A194:26 – B184:26

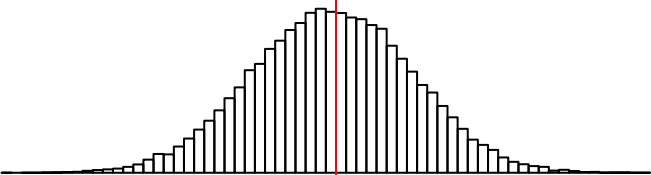

A194:26 – B224:26

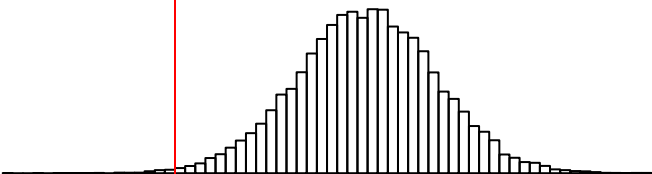

A194:26 – D206:26

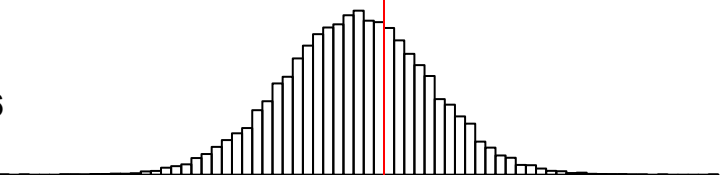

B184:26 – B224:26

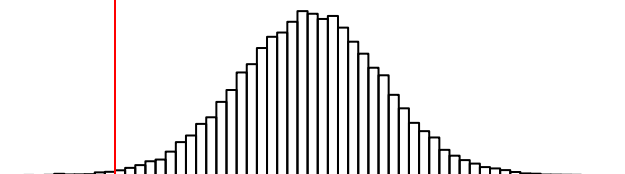

B184:26 – D206:26

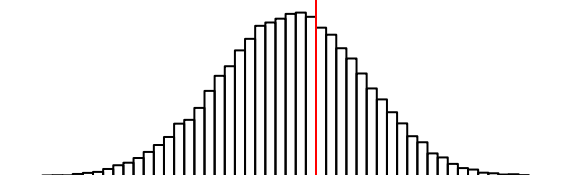

B224:26 – D206:26

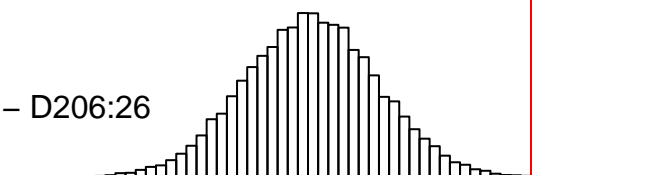

-3 -2 -1 0 1 2 3

delta(C29 Stanol 1)

A194:26

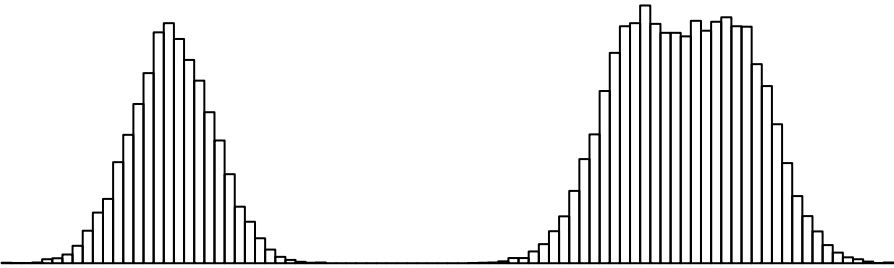

B184:26

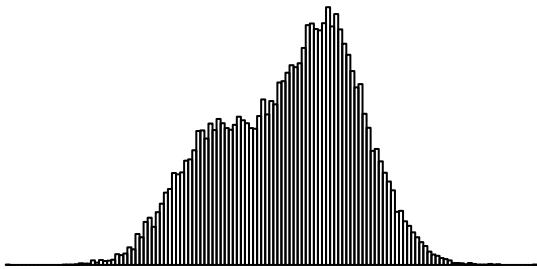

B224:26

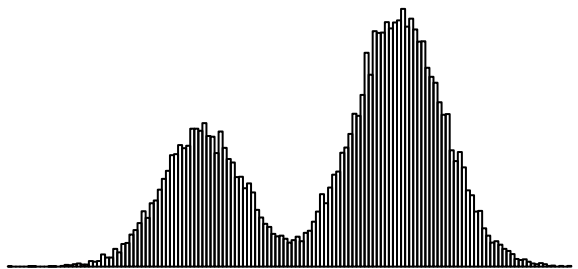

D206:26

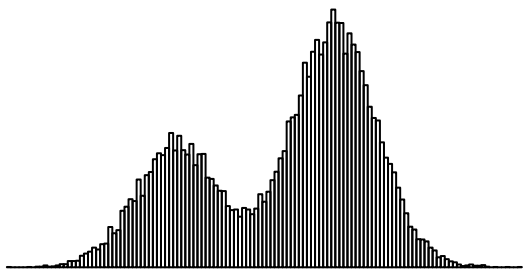

-11      -10      -9      -8      -7      -6      -5

C27"5,22 Sterol

A194:26 – B184:26

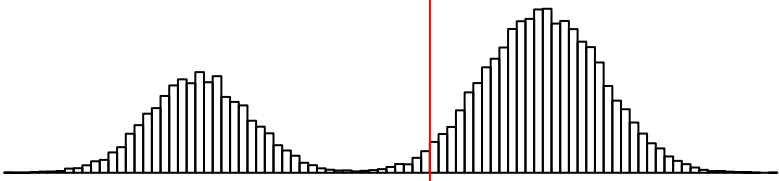

A194:26 – B224:26

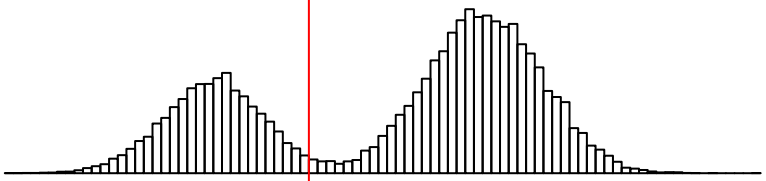

A194:26 – D206:26

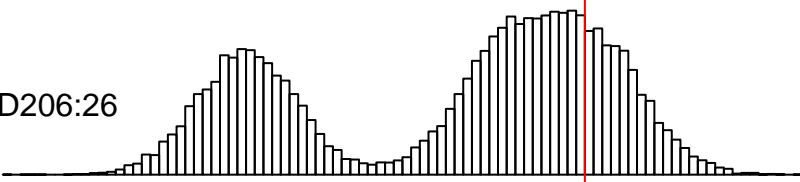

B184:26 – B224:26

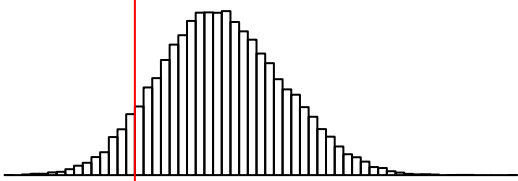

B184:26 – D206:26

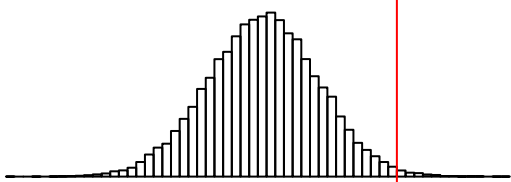

B224:26 – D206:26

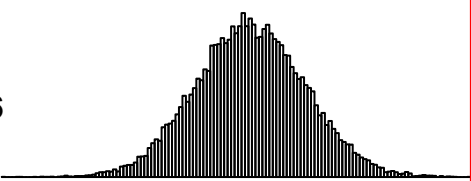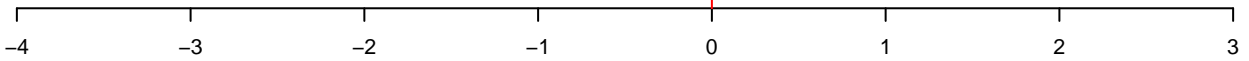

delta(C27"5,22 Sterol)

A194:26

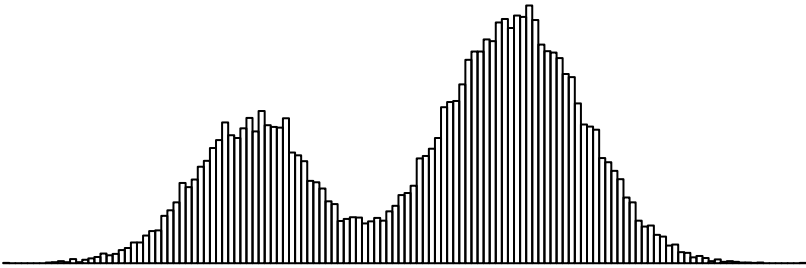

B184:26

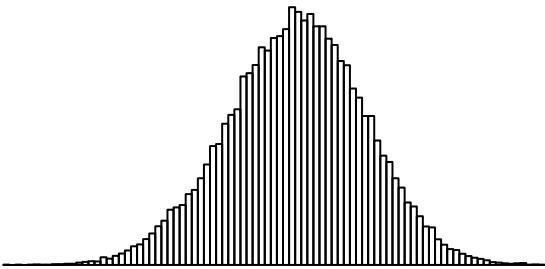

B224:26

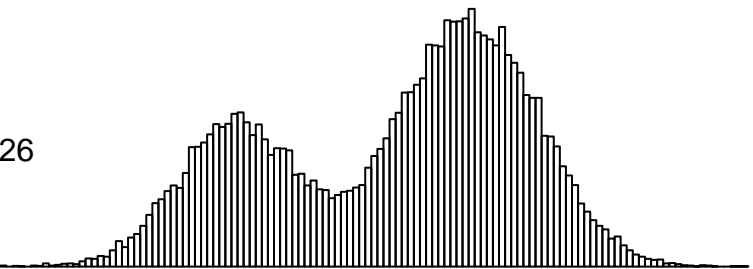

D206:26

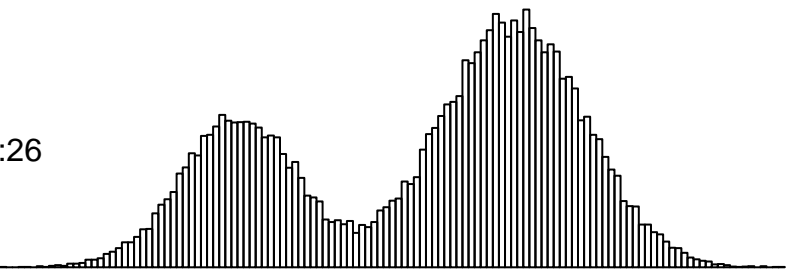

-8 -7 -6 -5 -4

C27<sup>5</sup> Sterol

A194:26 – B184:26

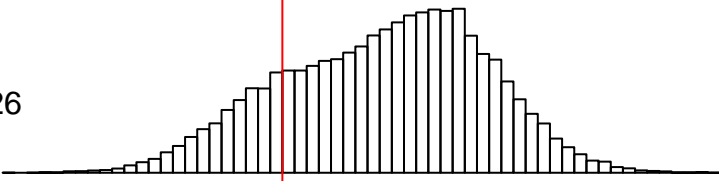

A194:26 – B224:26

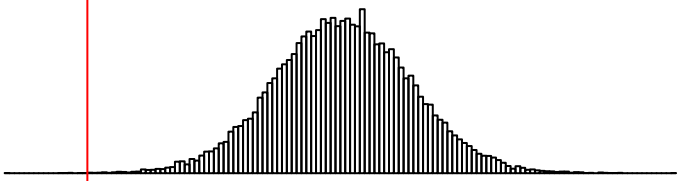

A194:26 – D206:26

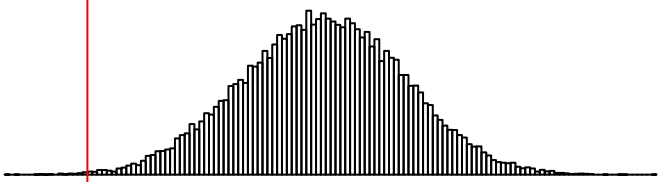

B184:26 – B224:26

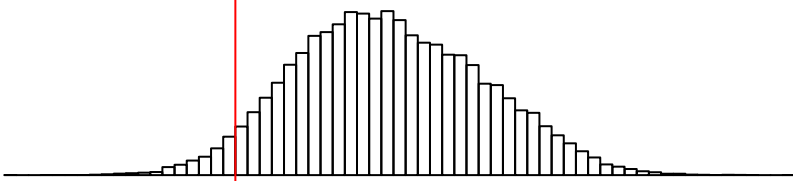

B184:26 – D206:26

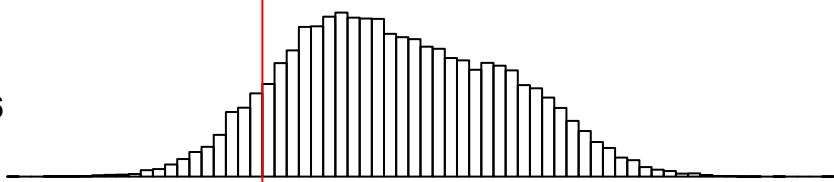

B224:26 – D206:26

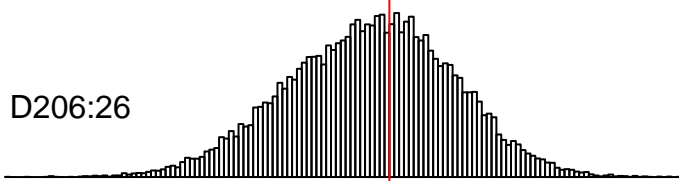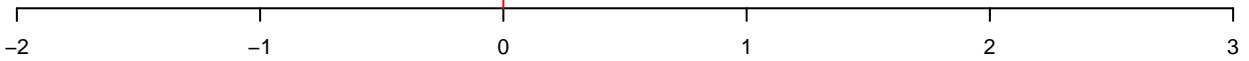

delta(C27"5 Sterol)

A194:26

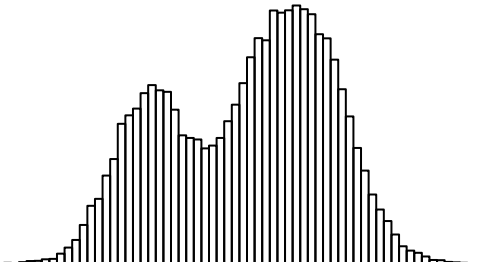

B184:26

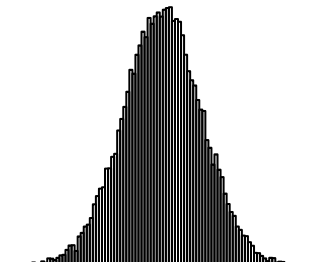

B224:26

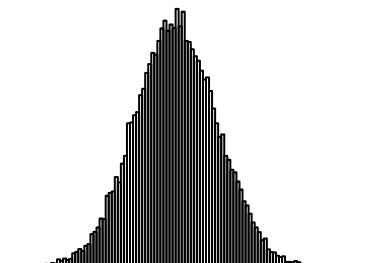

D206:26

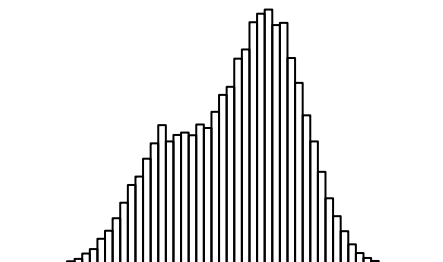

-10

-8

-6

-4

C28"5,22 Sterol

A194:26 – B184:26

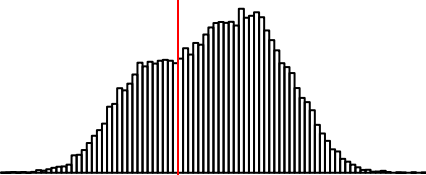

A194:26 – B224:26

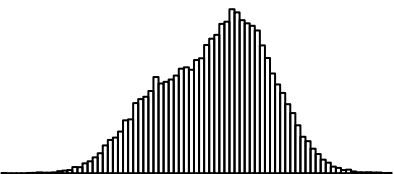

A194:26 – D206:26

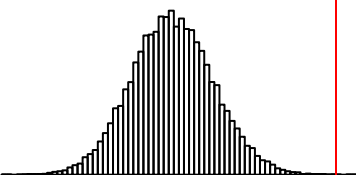

B184:26 – B224:26

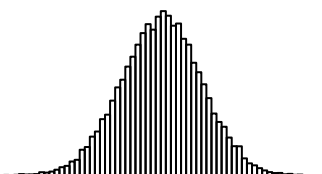

B184:26 – D206:26

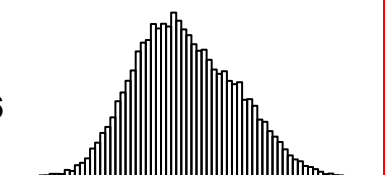

B224:26 – D206:26

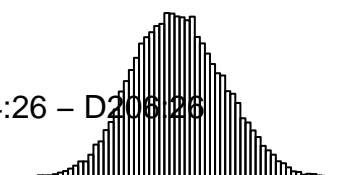

-6 -4 -2 0 2 4 6

delta(C28"5,22 Sterol)



A194:26

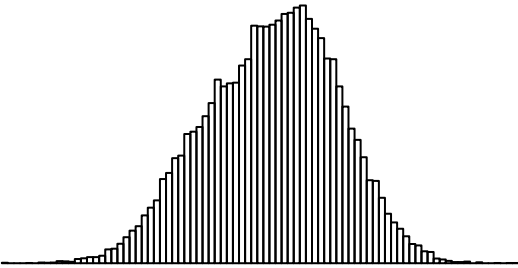

B184:26

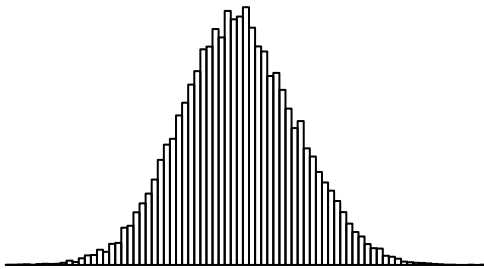

B224:26

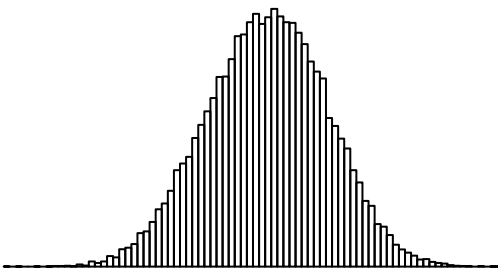

D206:26

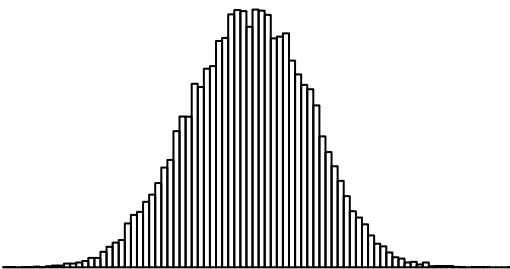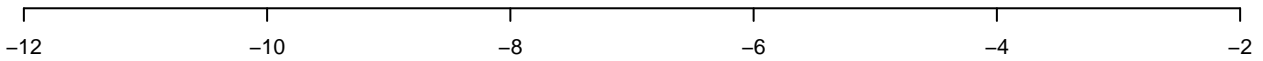

C28"5 Sterol

A194:26 – B184:26

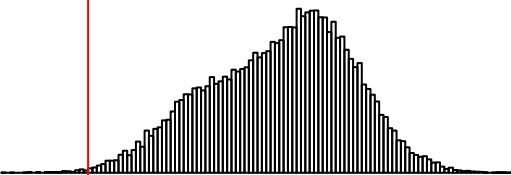

A194:26 – B224:26

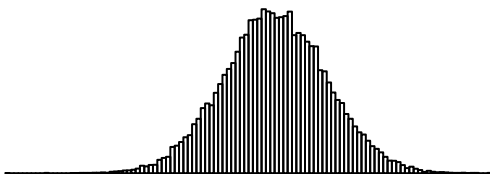

A194:26 – D206:26

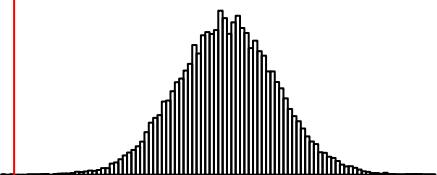

B184:26 – B224:26

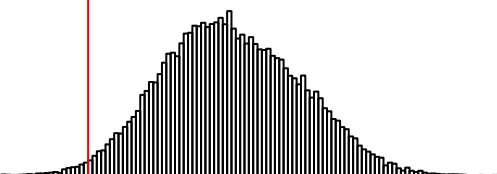

B184:26 – D206:26

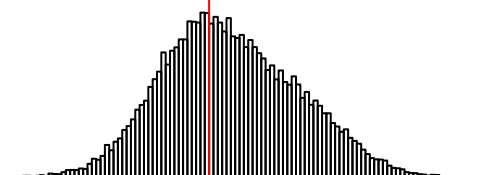

B224:26 – D206:26

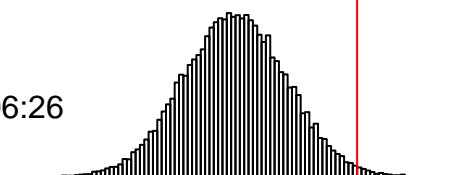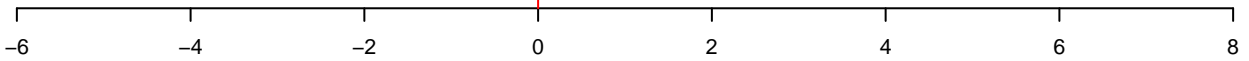

delta(C28"5 Sterol)

A194:26

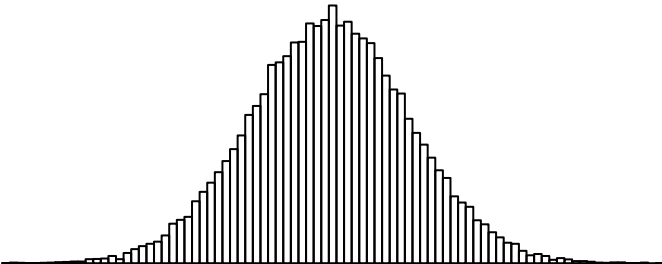

B184:26

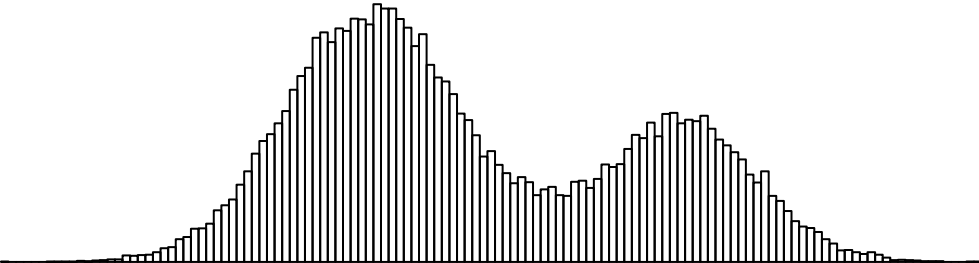

B224:26

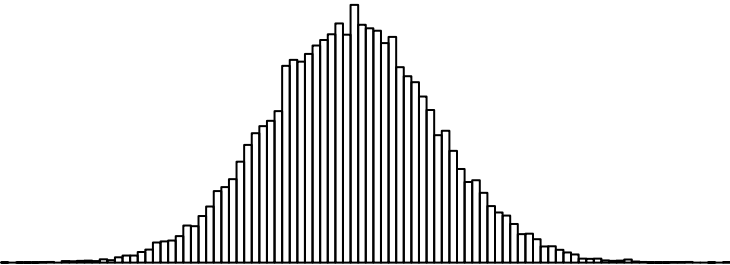

D206:26

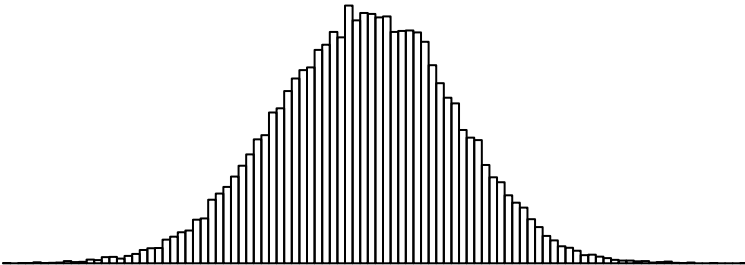

-12                      -10                      -8                      -6                      -4

C29<sup>5,22</sup> Sterol

A194:26 – B184:26

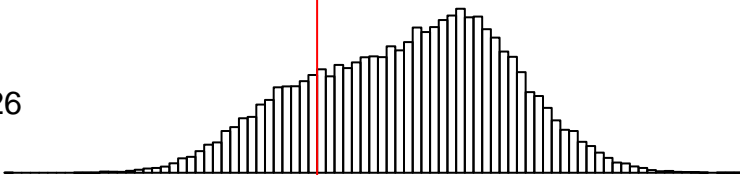

A194:26 – B224:26

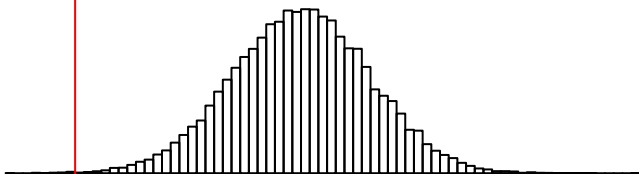

A194:26 – D206:26

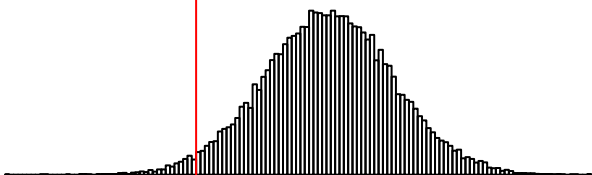

B184:26 – B224:26

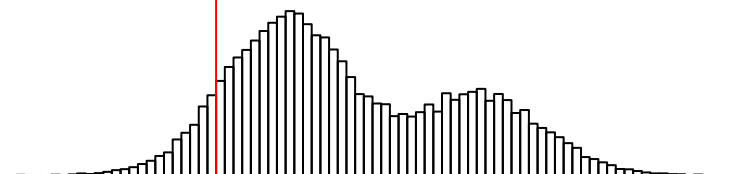

B184:26 – D206:26

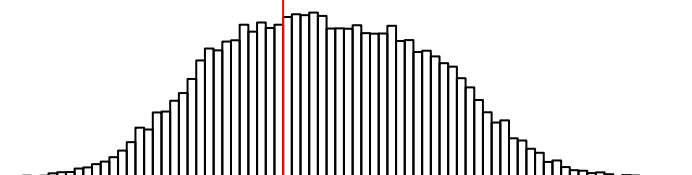

B224:26 – D206:26

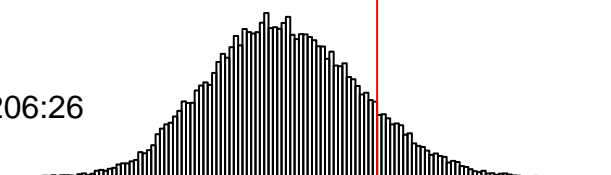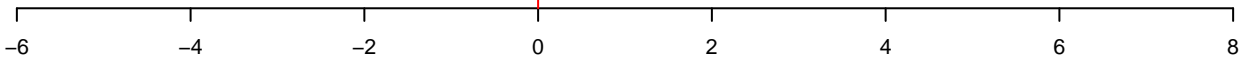

delta(C29"5,22 Sterol)

A194:26

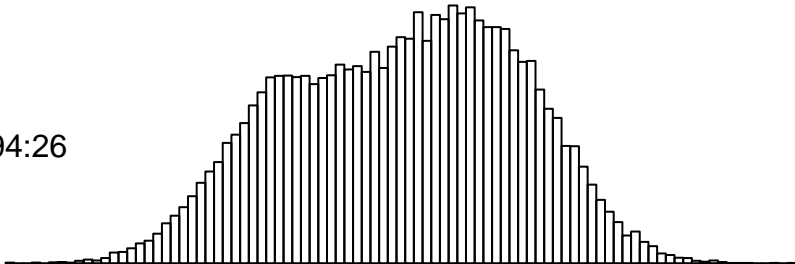

B184:26

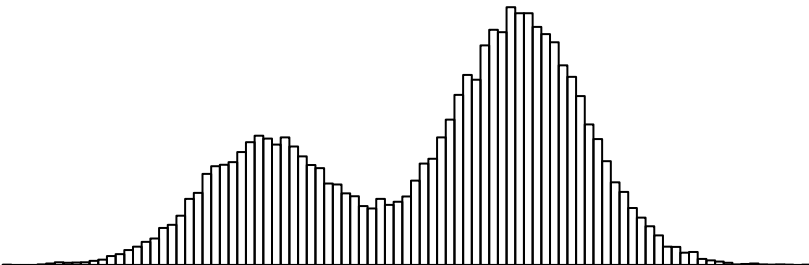

B224:26

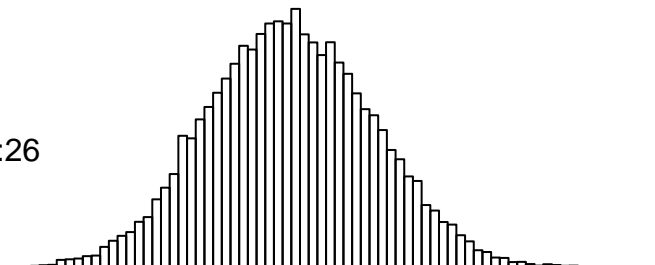

D206:26

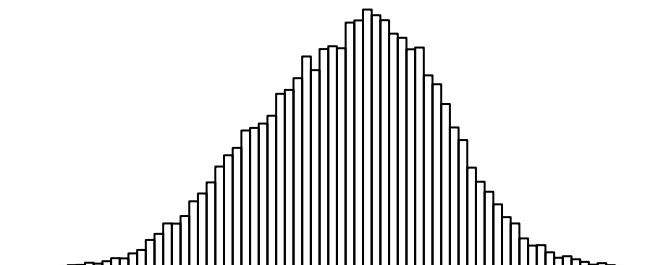

-9 -8 -7 -6 -5 -4 -3 -2

C29 Sterol 2

A194:26 – B184:26

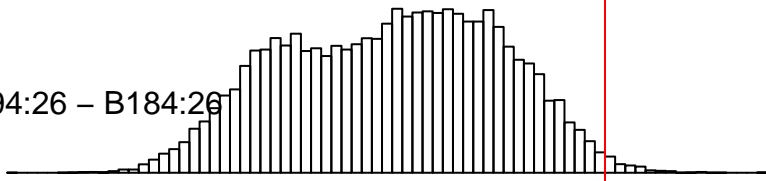

A194:26 – B224:26

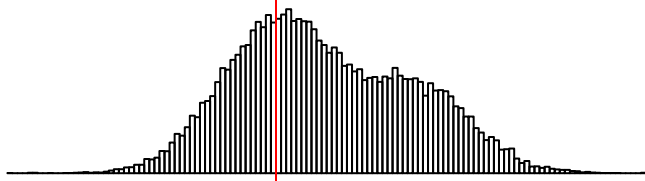

A194:26 – D206:26

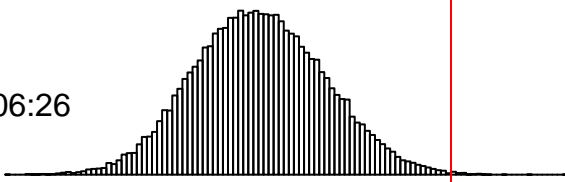

B184:26 – B224:26

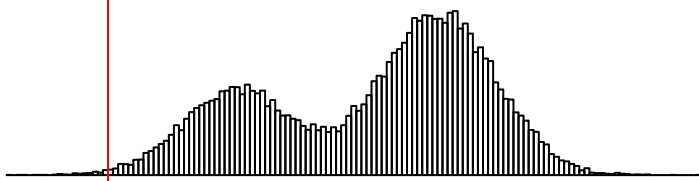

B184:26 – D206:26

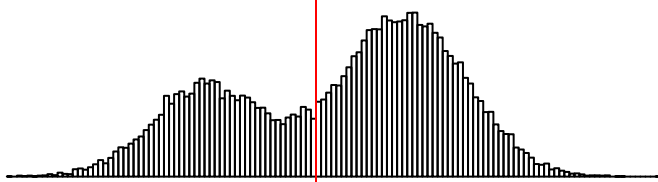

B224:26 – D206:26

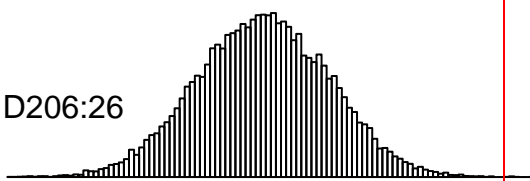

-6 -4 -2 0 2 4 6

delta(C29 Sterol 2)

A194:26

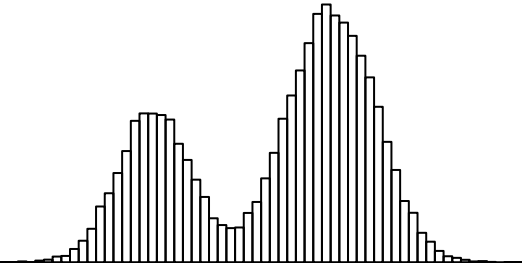

B184:26

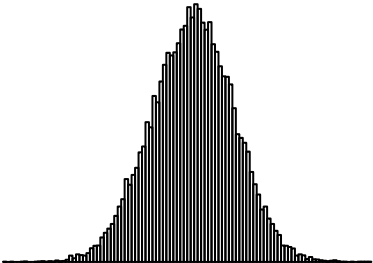

B224:26

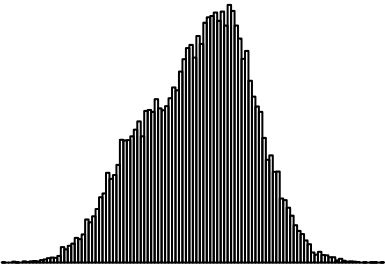

D206:26

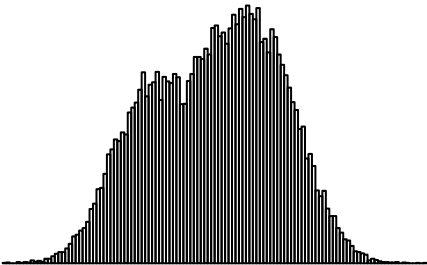

-8 -7 -6 -5 -4 -3 -2 -1

C29 Stanol 2

A194:26 – B184:26

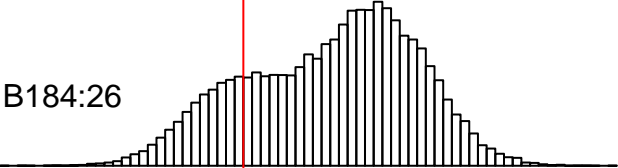

A194:26 – B224:26

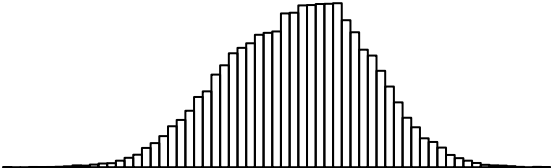

A194:26 – D206:26

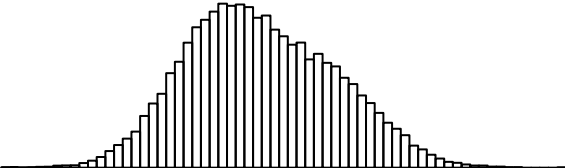

B184:26 – B224:26

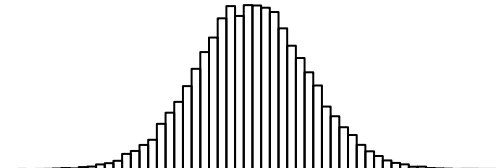

B184:26 – D206:26

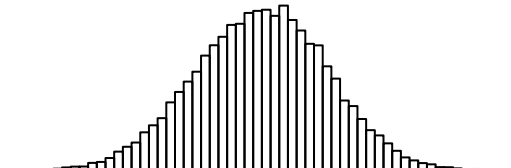

B224:26 – D206:26

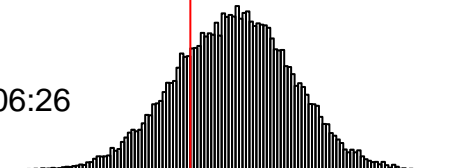

-2 -1 0 1 2 3 4 5

delta(C29 Stanol 2)



A194:26

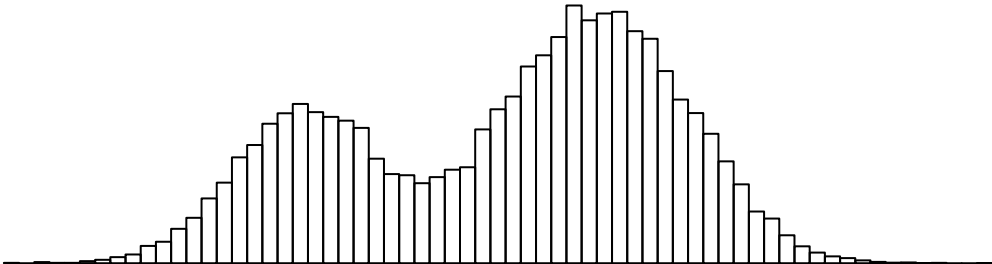

B184:26

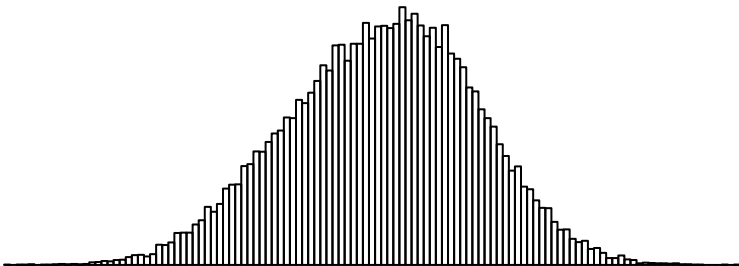

B224:26

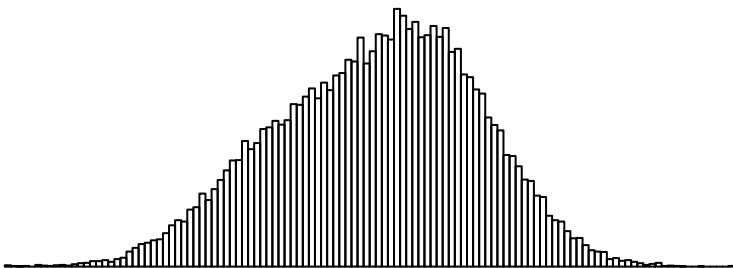

D206:26

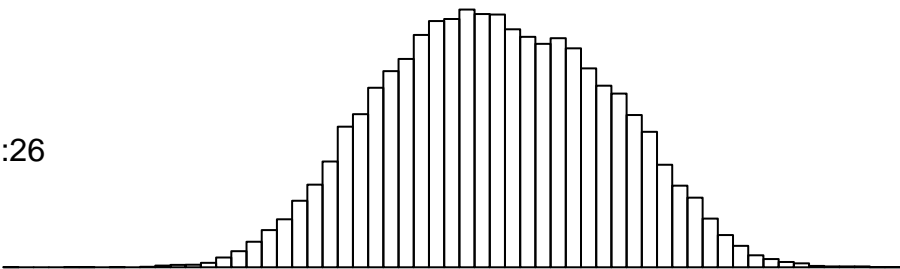

-7                      -6                      -5                      -4                      -3

C29 Sterol 3

A194:26 – B184:26

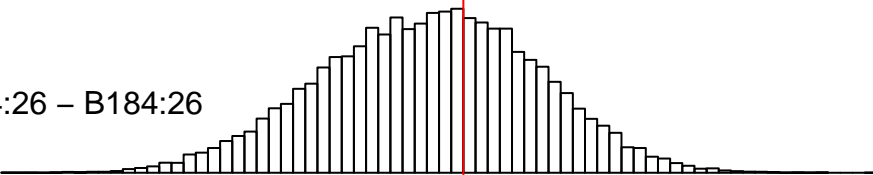

A194:26 – B224:26

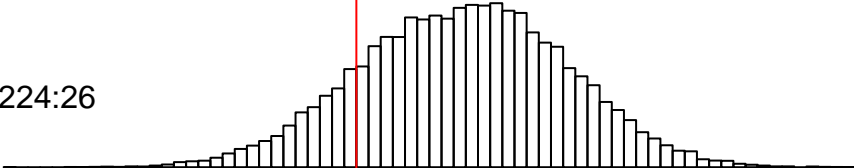

A194:26 – D206:26

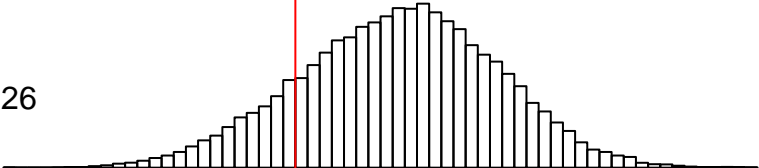

B184:26 – B224:26

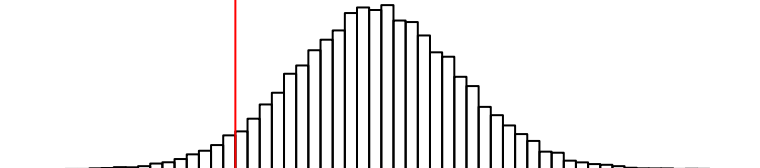

B184:26 – D206:26

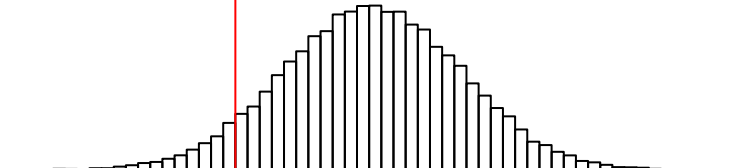

B224:26 – D206:26

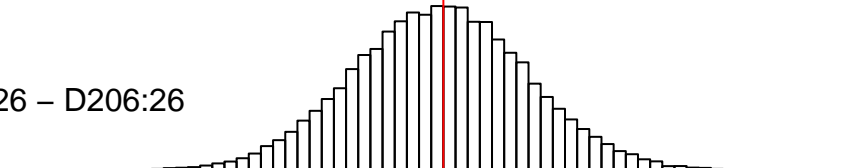

delta(C29 Sterol 3)

A194:26

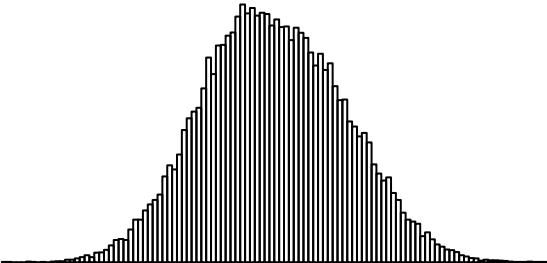

B184:26

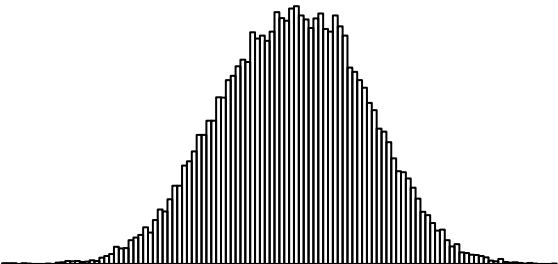

B224:26

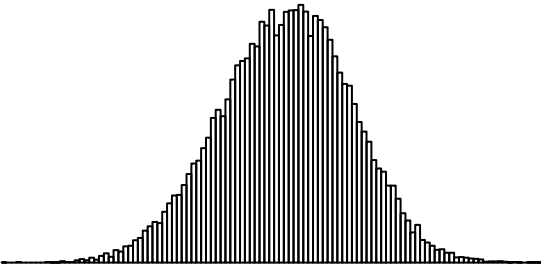

D206:26

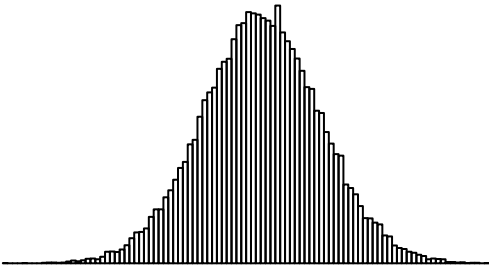

-12                      -11                      -10                      -9                      -8                      -7

C30 Sterol

A194:26 – B184:26

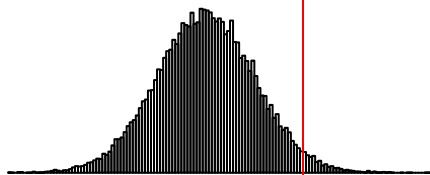

A194:26 – B224:26

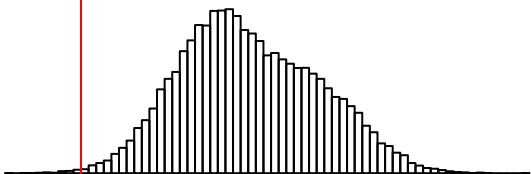

A194:26 – D206:26

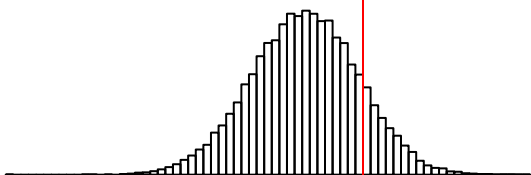

B184:26 – B224:26

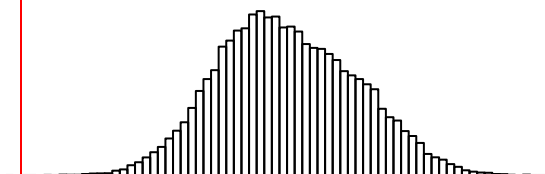

B184:26 – D206:26

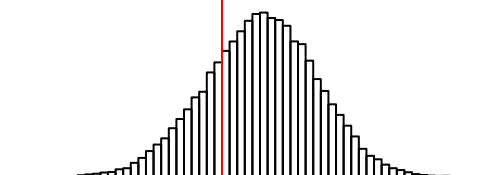

B224:26 – D206:26

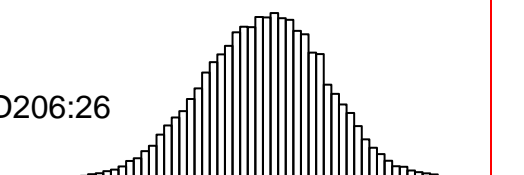

-4 -2 0 2 4

delta(C30 Sterol)

A194:26

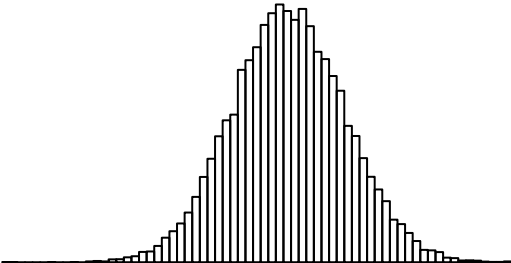

B184:26

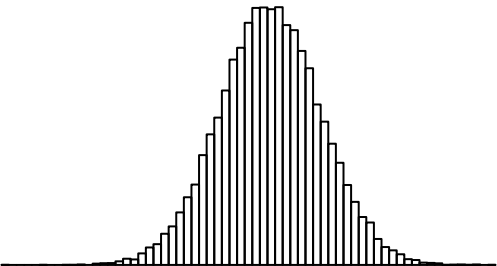

B224:26

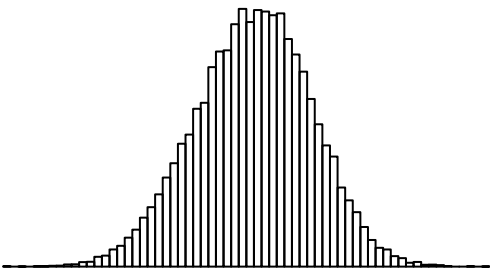

D206:26

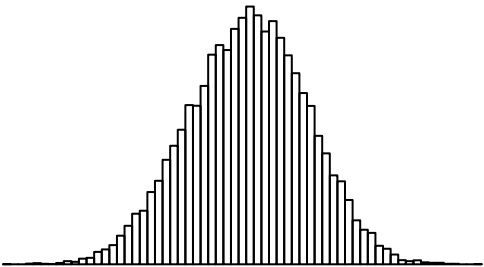

-12                      -10                      -8                      -6                      -4

C30"5 Sterol

A194:26 – B184:26

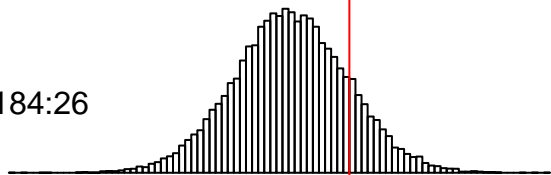

A194:26 – B224:26

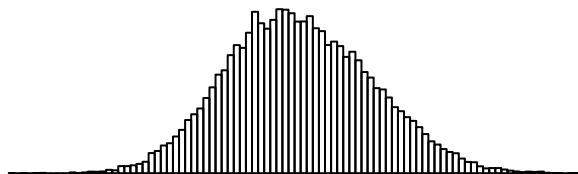

A194:26 – D206:26

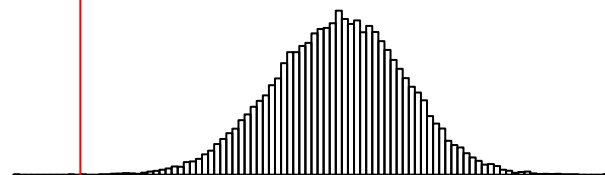

B184:26 – B224:26

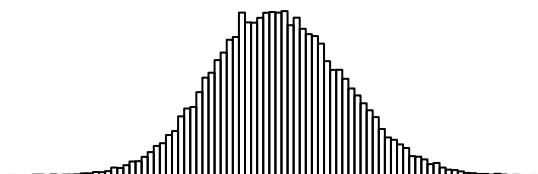

B184:26 – D206:26

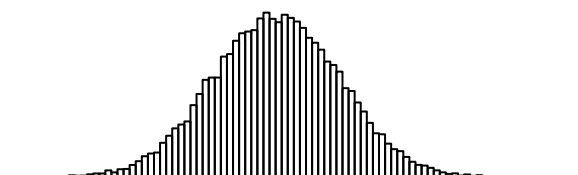

B224:26 – D206:26

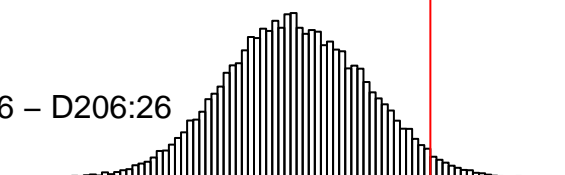

-4 -2 0 2 4 6

delta(C30"5 Sterol)

A194:26

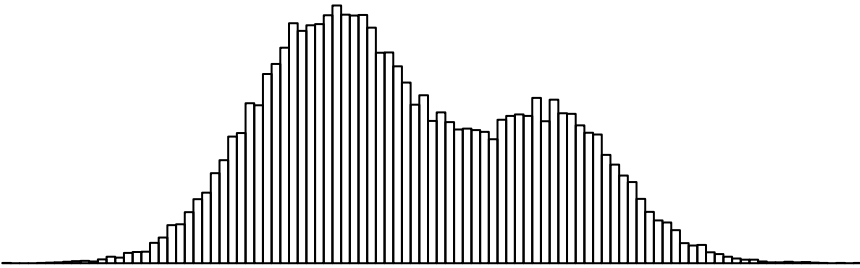

B184:26

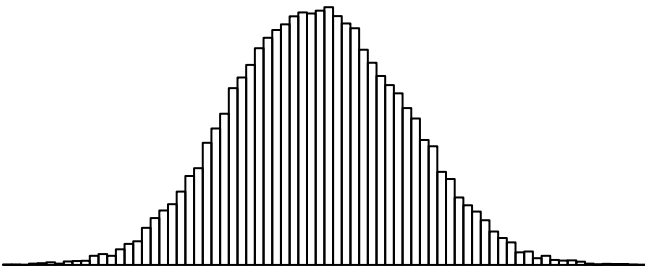

B224:26

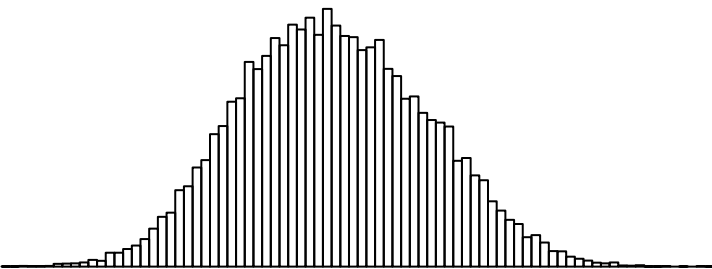

D206:26

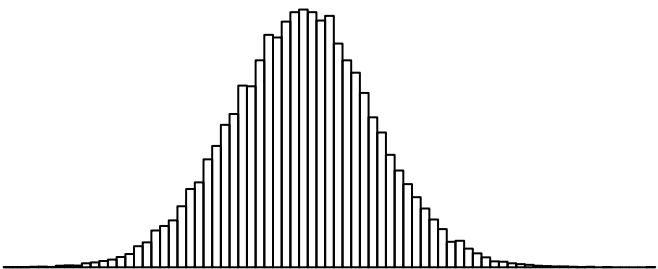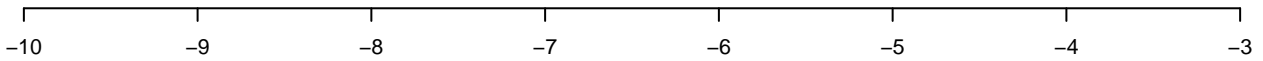

Open Hexose 1

A194:26 – B184:26

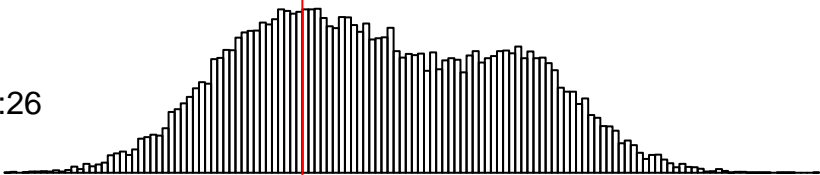

A194:26 – B224:26

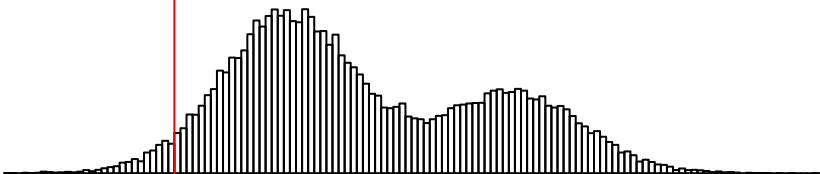

A194:26 – D206:26

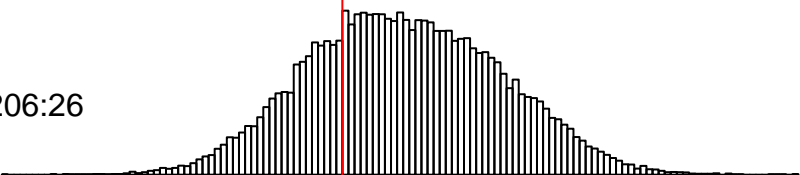

B184:26 – B224:26

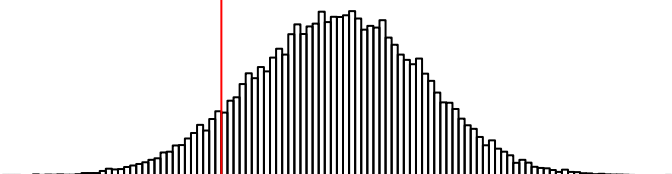

B184:26 – D206:26

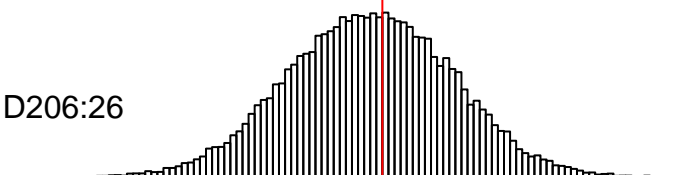

B224:26 – D206:26

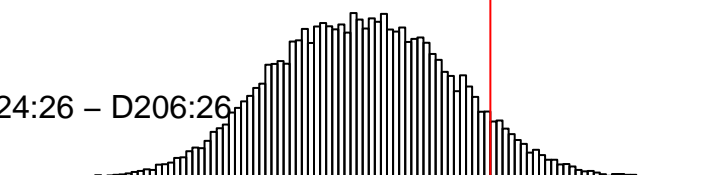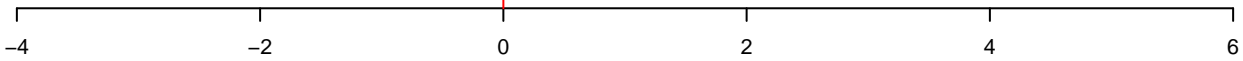

delta(Open Hexose 1)



A194:26

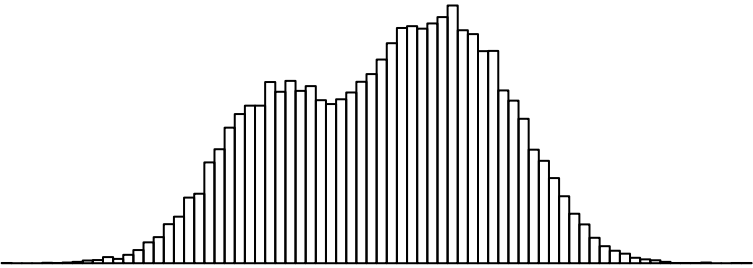

B184:26

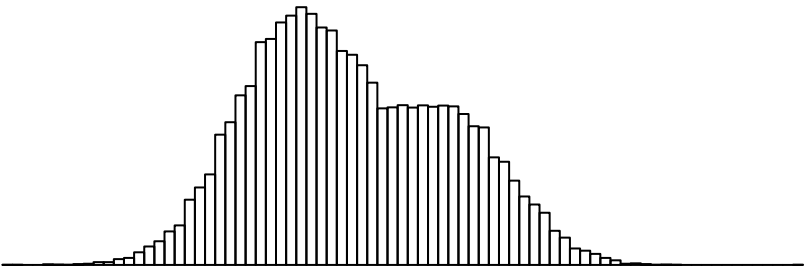

B224:26

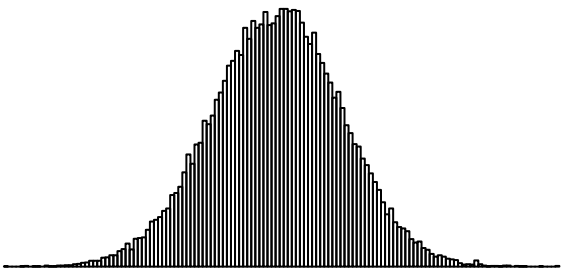

D206:26

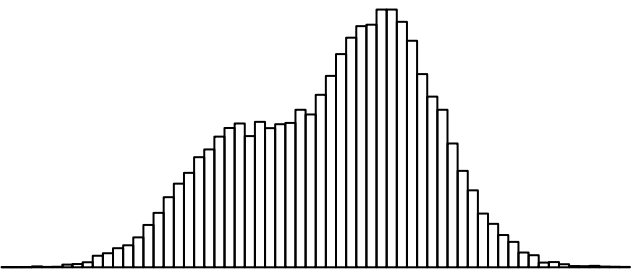

-10      -9      -8      -7      -6      -5      -4

Closed Hexose 1

A194:26 – B184:26

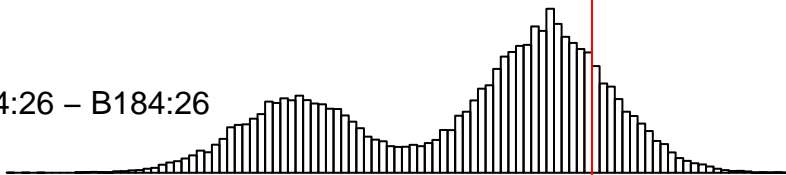

A194:26 – B224:26

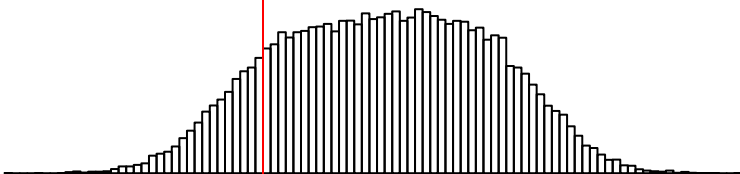

A194:26 – D206:26

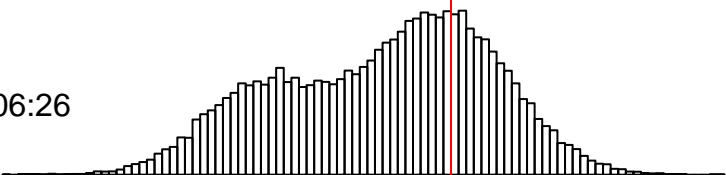

B184:26 – B224:26

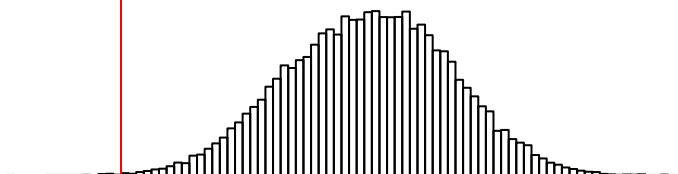

B184:26 – D206:26

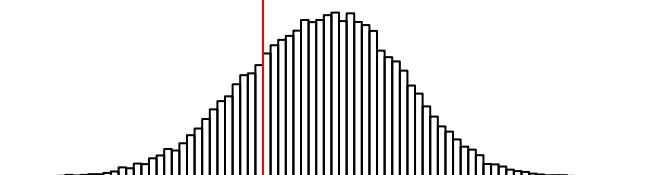

B224:26 – D206:26

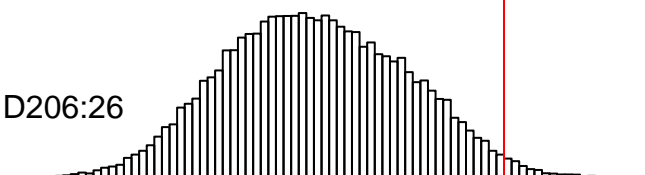

-4 -2 0 2 4

delta(Closed Hexose 1)

A194:26

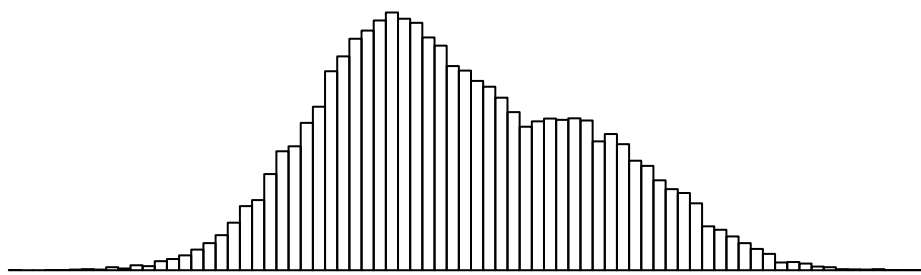

B184:26

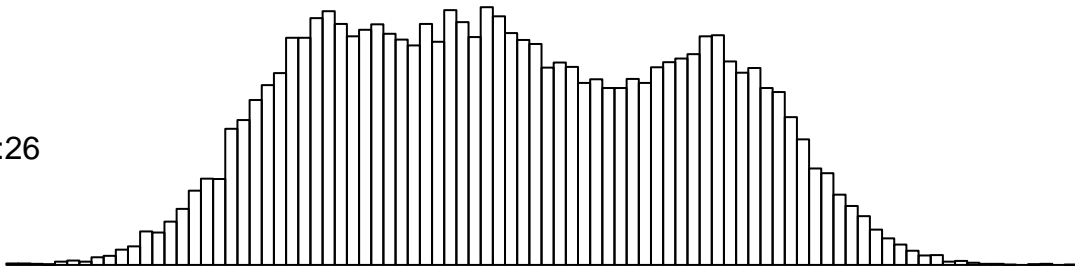

B224:26

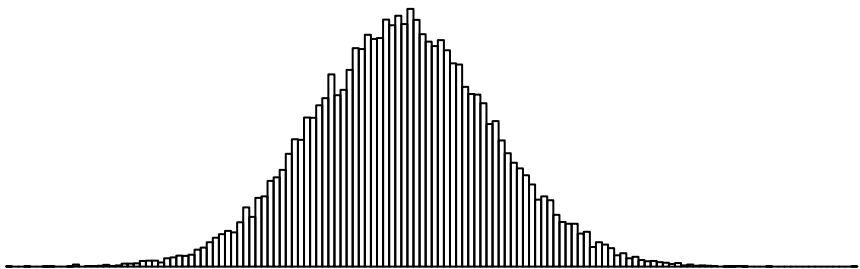

D206:26

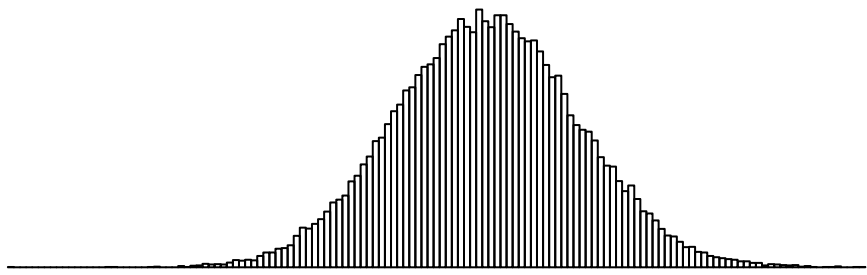

-10      -8      -6      -4      -2      0

Closed Hexose 2

A194:26 – B184:26

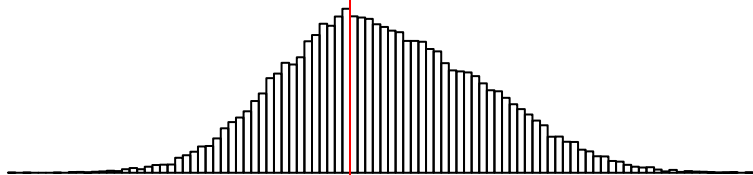

A194:26 – B224:26

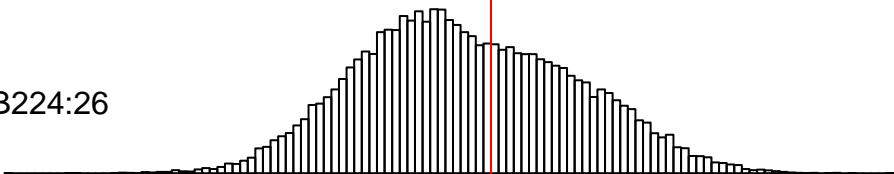

A194:26 – D206:26

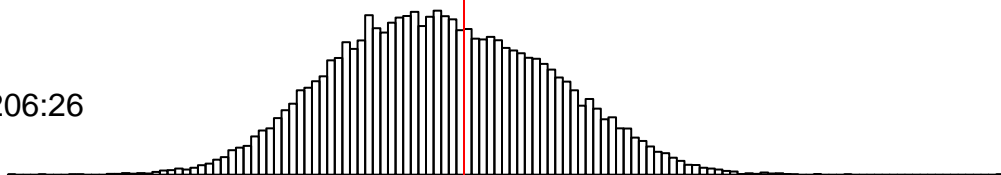

B184:26 – B224:26

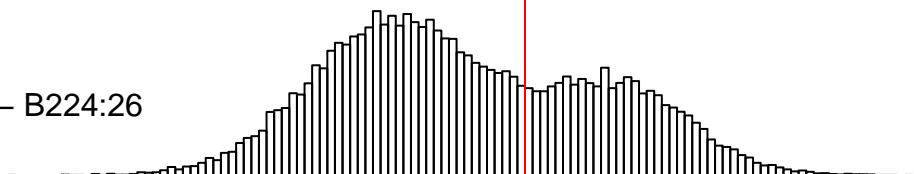

B184:26 – D206:26

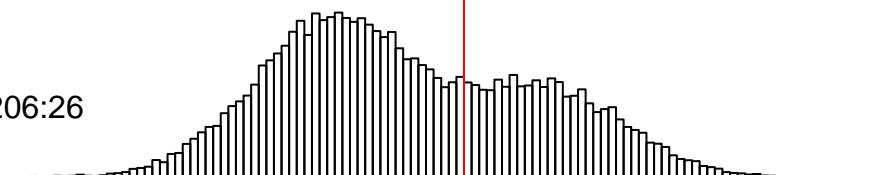

B224:26 – D206:26

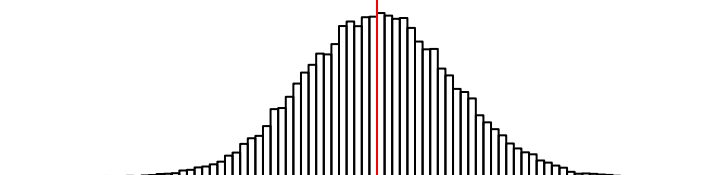

-5 0 5

delta(Closed Hexose 2)

A194:26

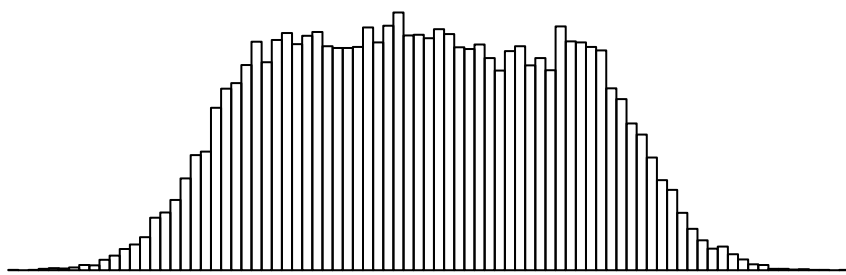

B184:26

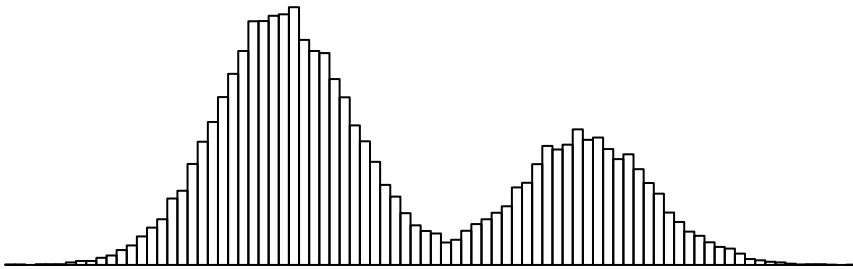

B224:26

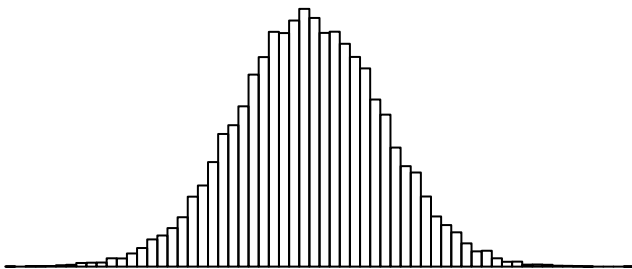

D206:26

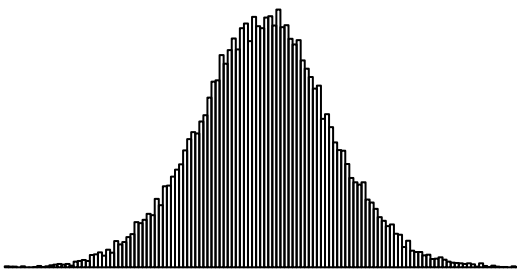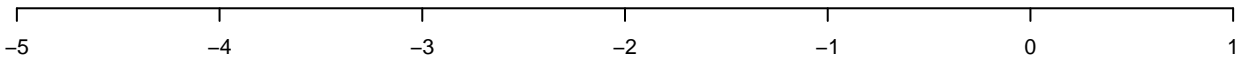

Open Hexose 2

A194:26 – B184:26

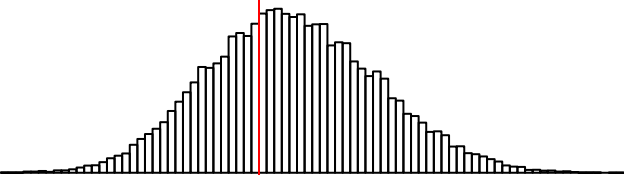

A194:26 – B224:26

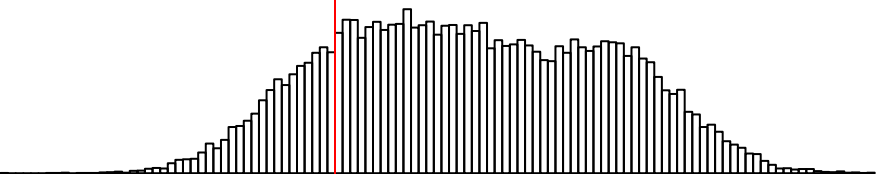

A194:26 – D206:26

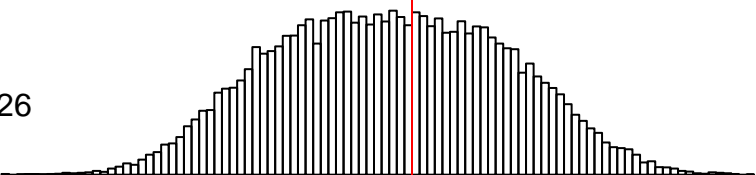

B184:26 – B224:26

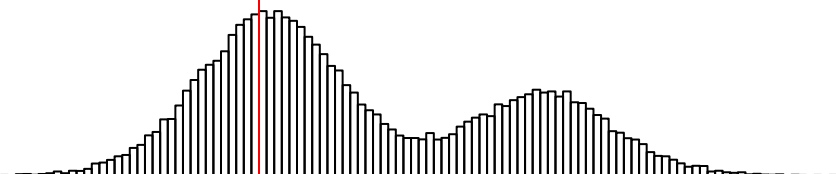

B184:26 – D206:26

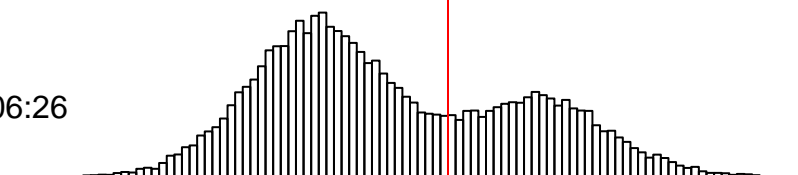

B224:26 – D206:26

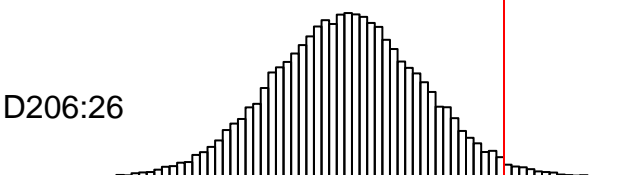

-4 -2 0 2 4

delta(Open Hexose 2)

A194:26

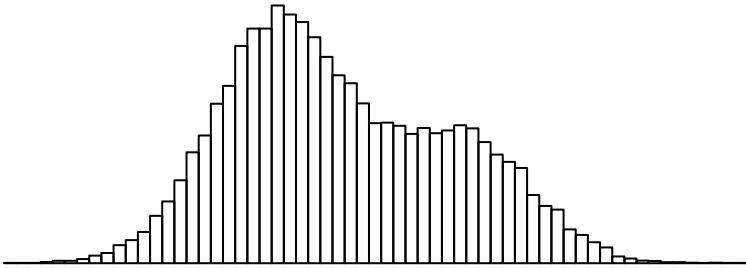

B184:26

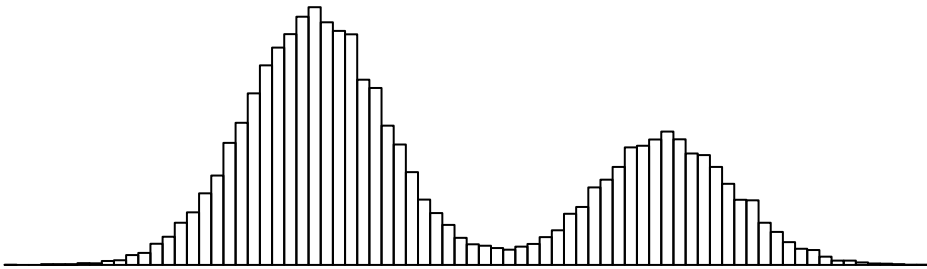

B224:26

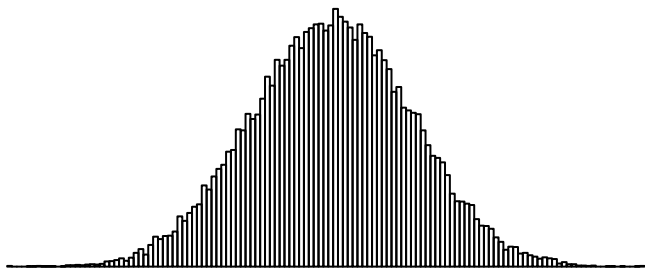

D206:26

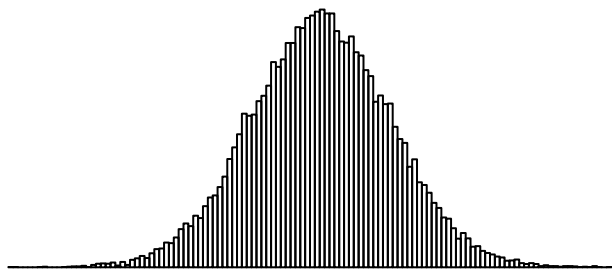

-6                      -5                      -4                      -3                      -2                      -1

Open Hexose 3

A194:26 – B184:26

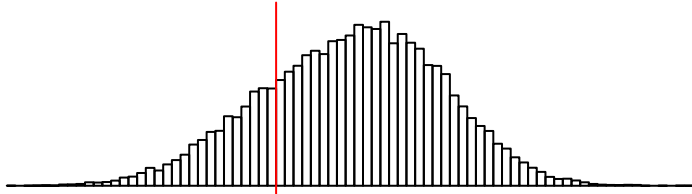

A194:26 – B224:26

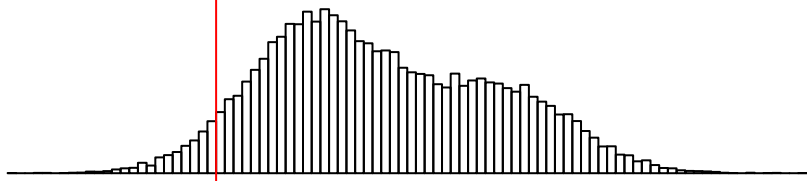

A194:26 – D206:26

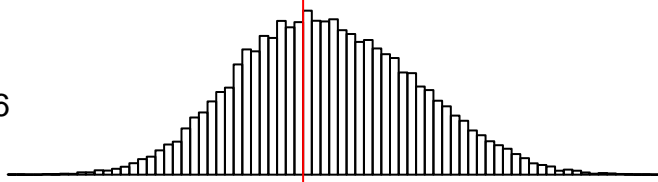

B184:26 – B224:26

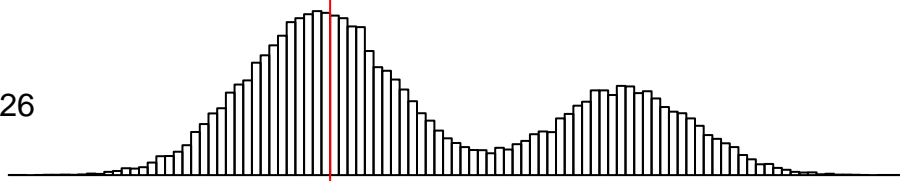

B184:26 – D206:26

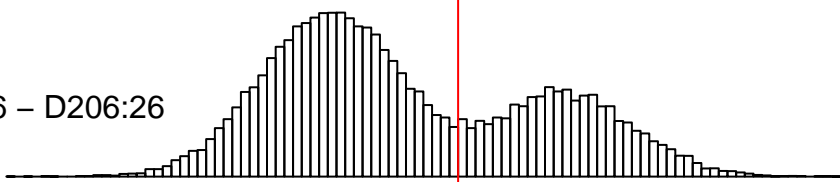

B224:26 – D206:26

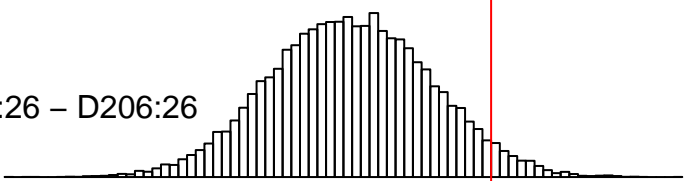

-3 -2 -1 0 1 2 3 4

delta(Open Hexose 3)



A194:26

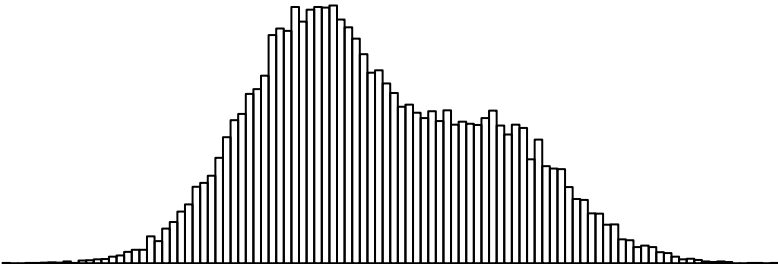

B184:26

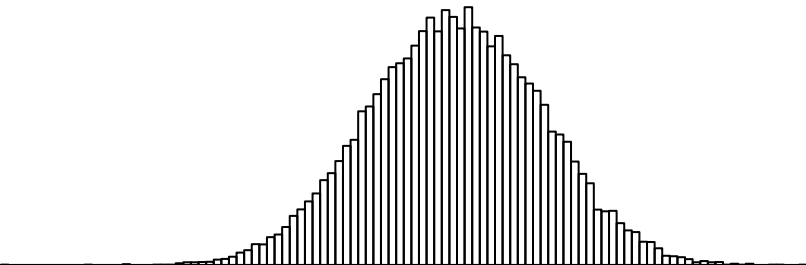

B224:26

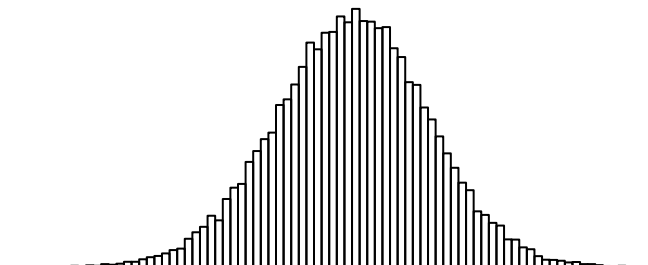

D206:26

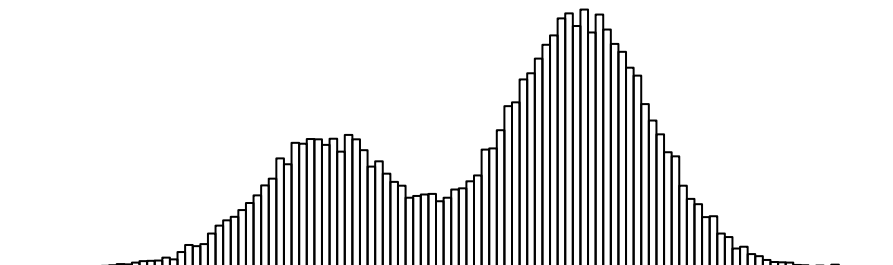

Closed Hexose 3

A194:26 – B184:26

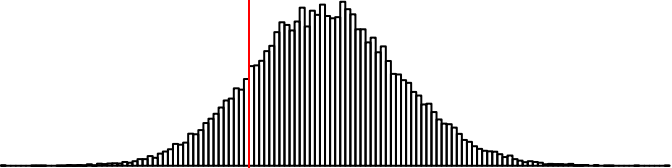

A194:26 – B224:26

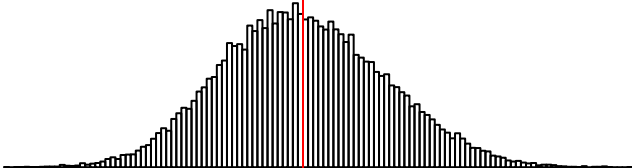

A194:26 – D206:26

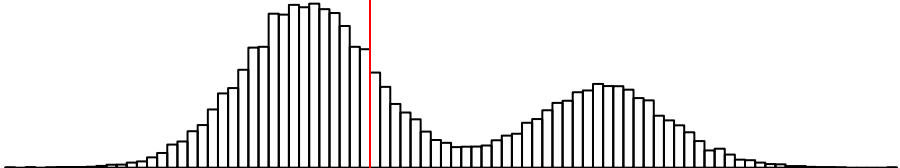

B184:26 – B224:26

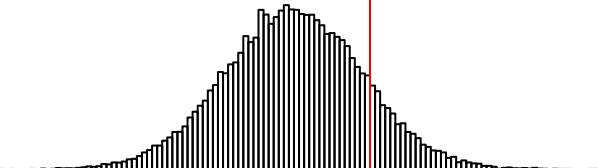

B184:26 – D206:26

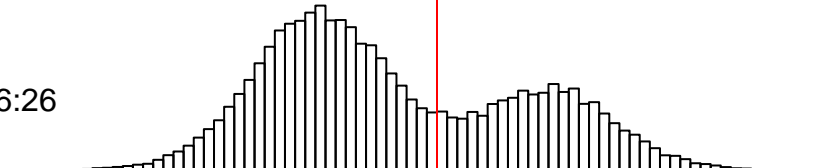

B224:26 – D206:26

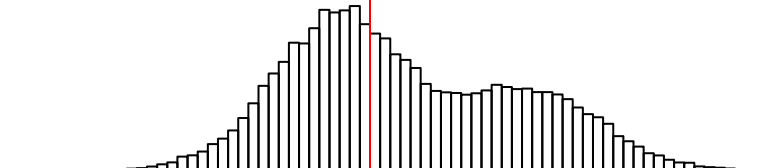

-6                      -4                      -2                      0                      2                      4                      6

delta(Closed Hexose 3)

A194:26

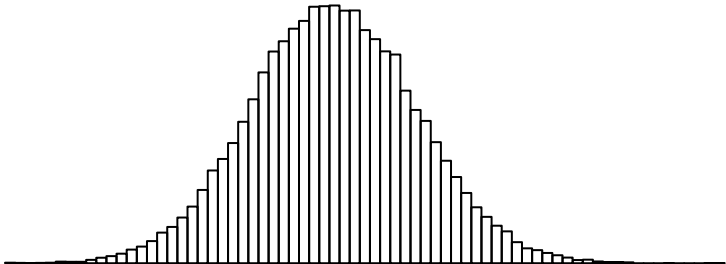

B184:26

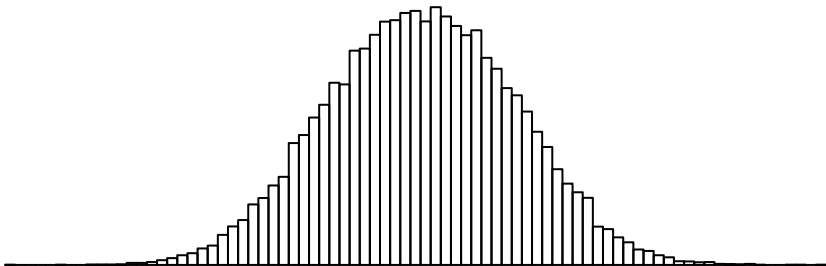

B224:26

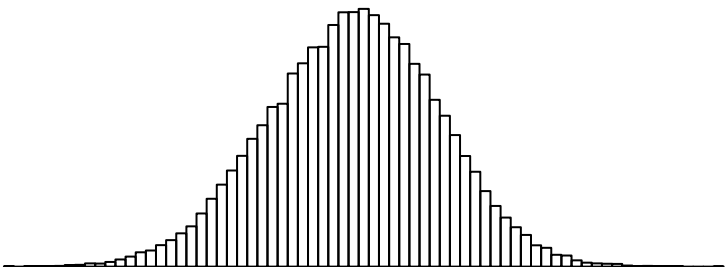

D206:26

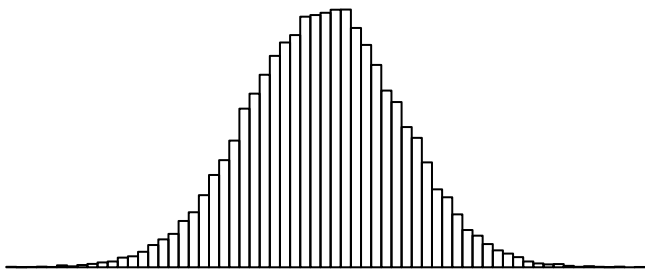

Closed Hexose 4

A194:26 – B184:26

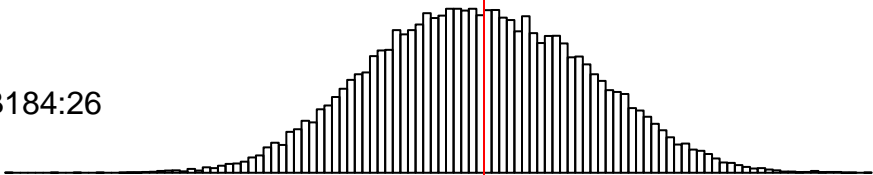

A194:26 – B224:26

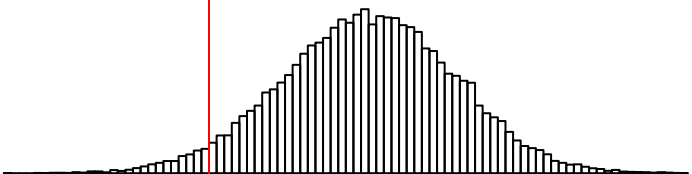

A194:26 – D206:26

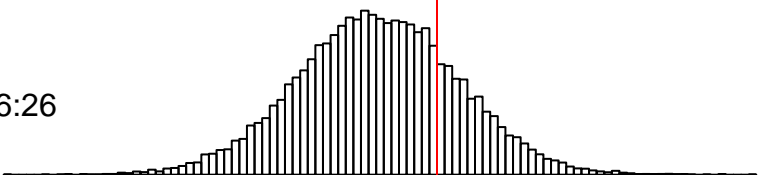

B184:26 – B224:26

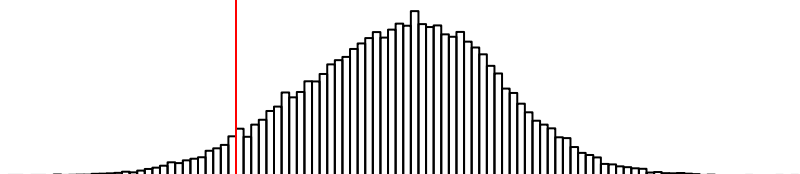

B184:26 – D206:26

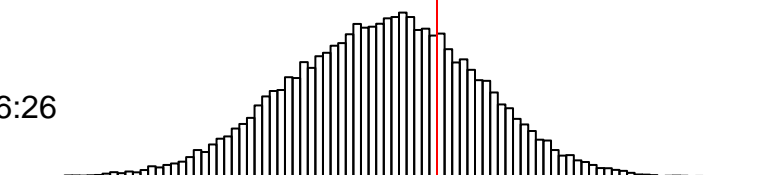

B224:26 – D206:26

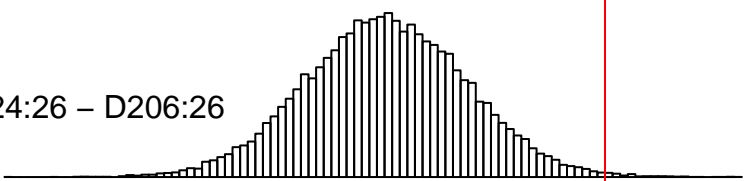

-4 -2 0 2 4

delta(Closed Hexose 4)

A194:26

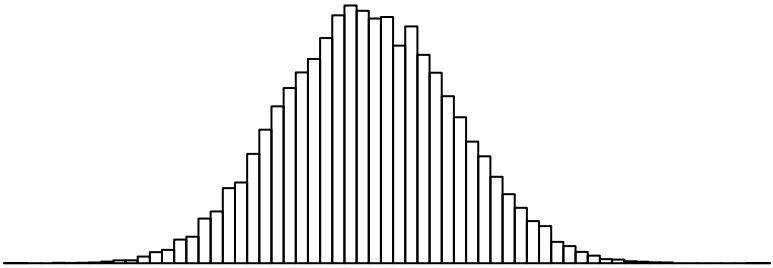

B184:26

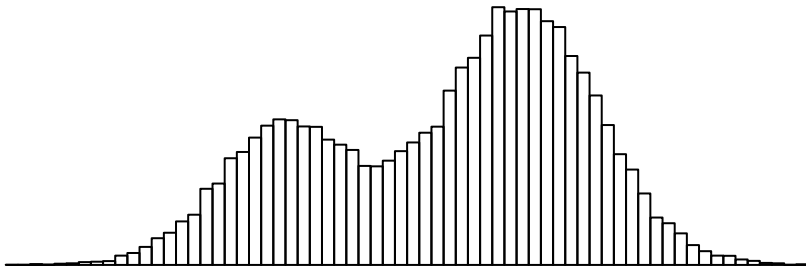

B224:26

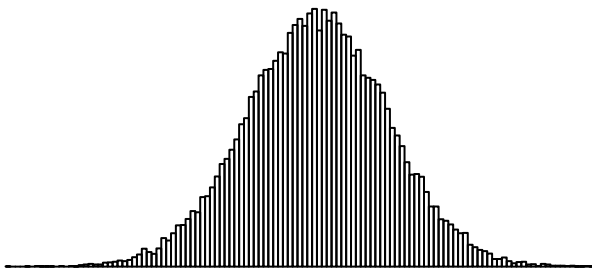

D206:26

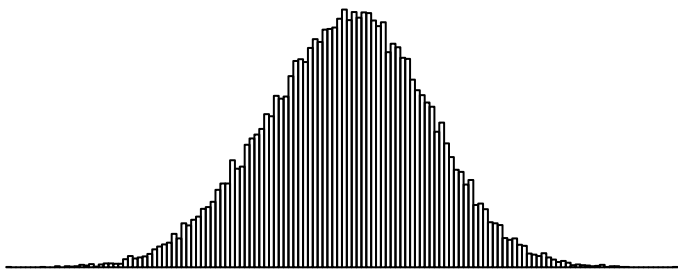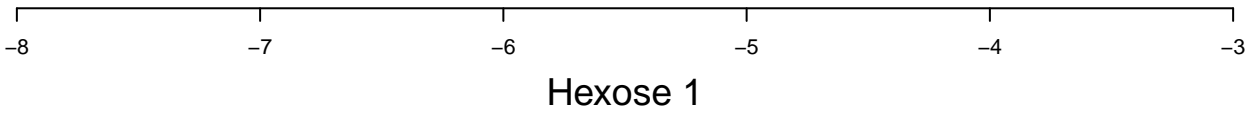

A194:26 – B184:26

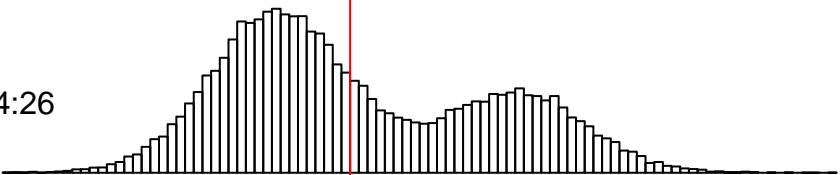

A194:26 – B224:26

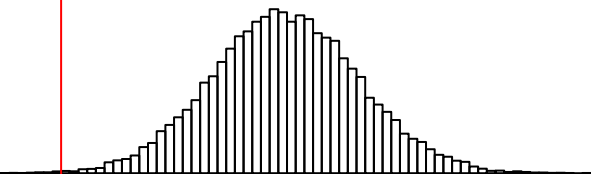

A194:26 – D206:26

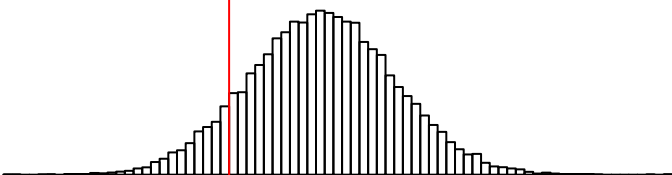

B184:26 – B224:26

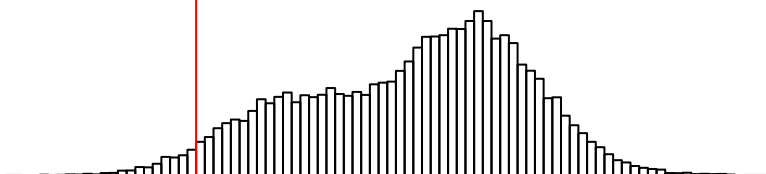

B184:26 – D206:26

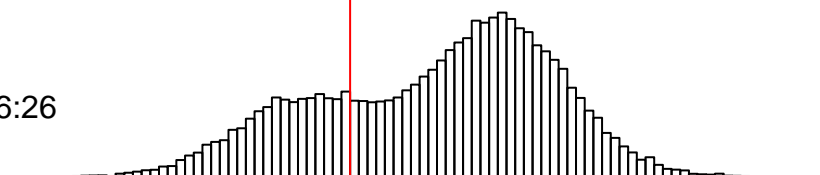

B224:26 – D206:26

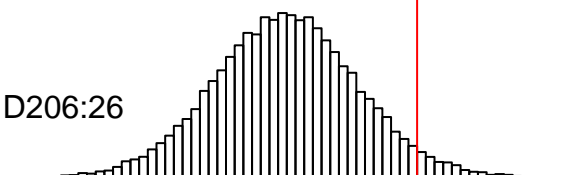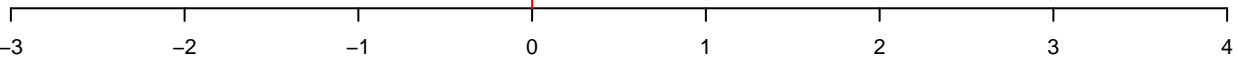

delta(Hexose 1)

A194:26

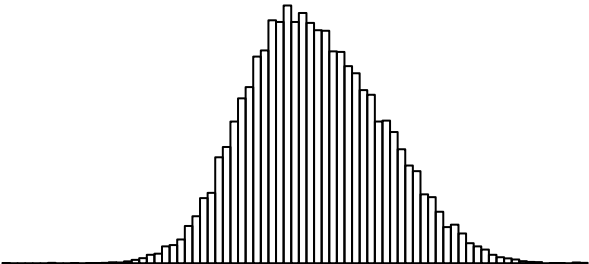

B184:26

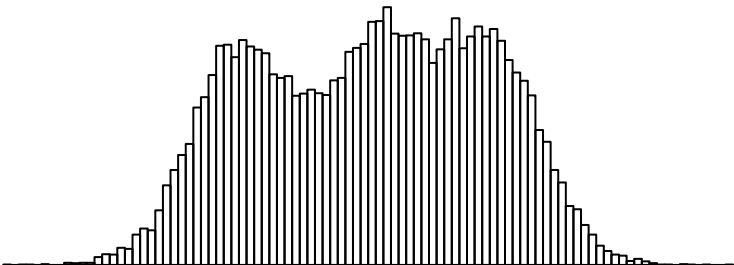

B224:26

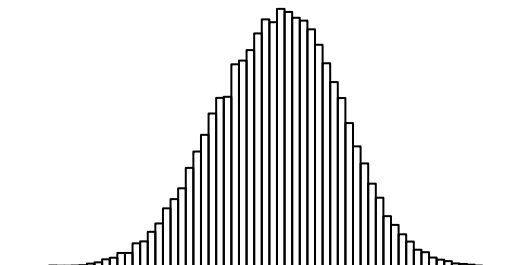

D206:26

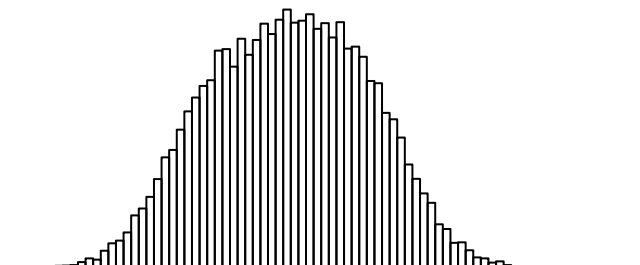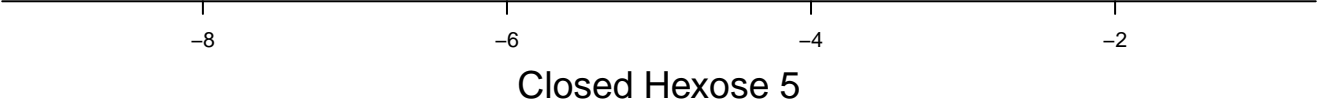

A194:26 – B184:26

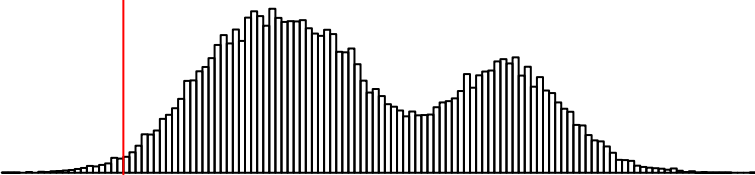

A194:26 – B224:26

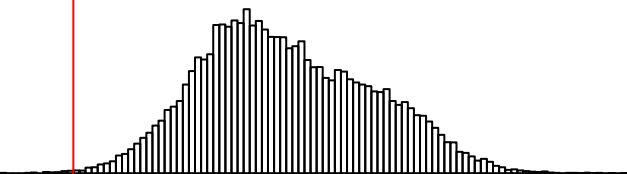

A194:26 – D206:26

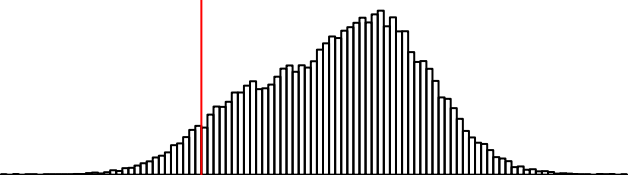

B184:26 – B224:26

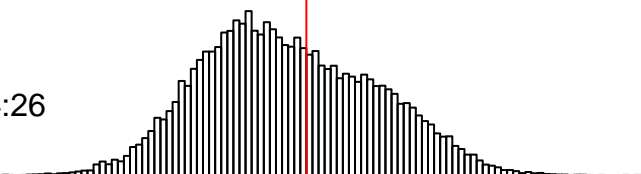

B184:26 – D206:26

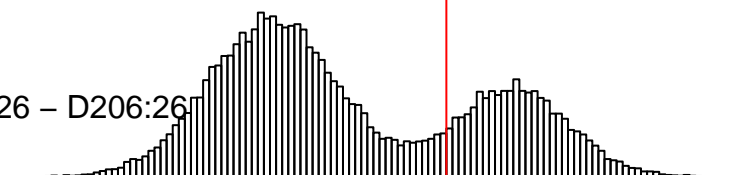

B224:26 – D206:26

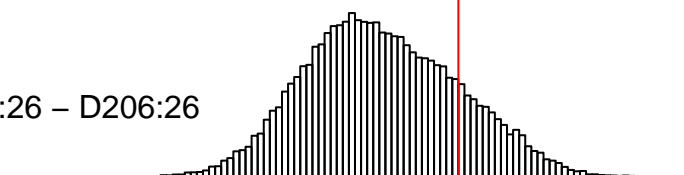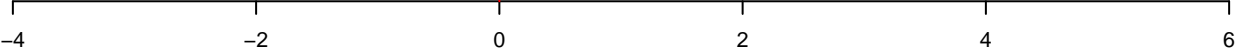

delta(Closed Hexose 5)



A194:26

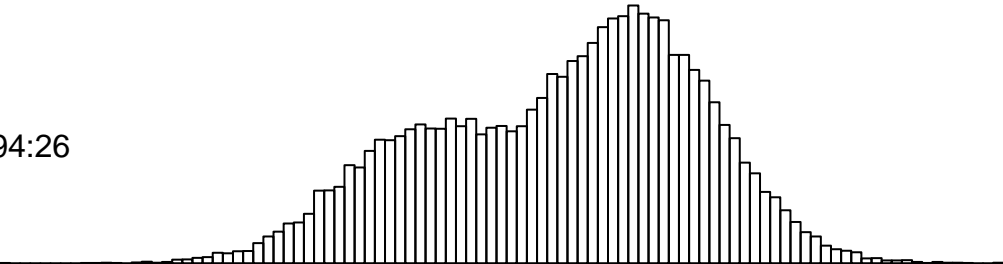

B184:26

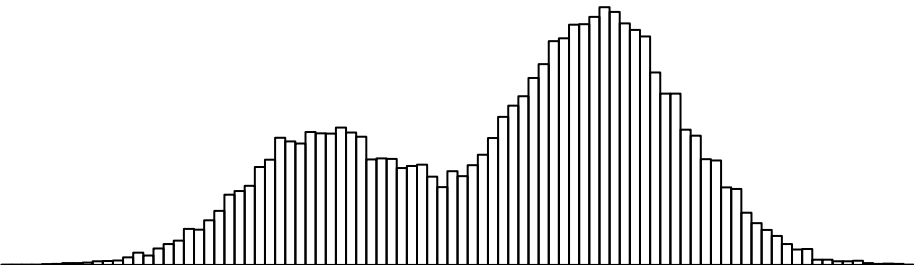

B224:26

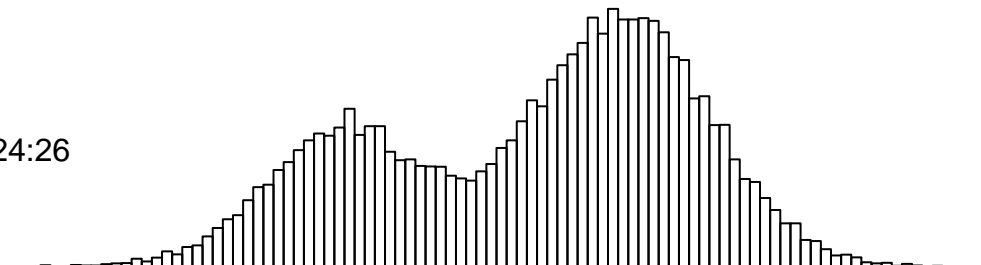

D206:26

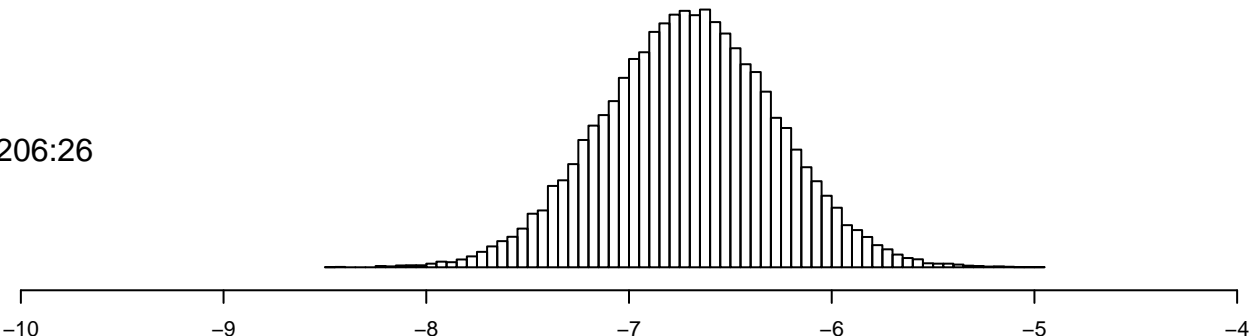

Open Pentose 1

A194:26 – B184:26

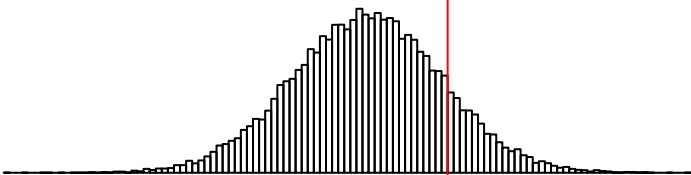

A194:26 – B224:26

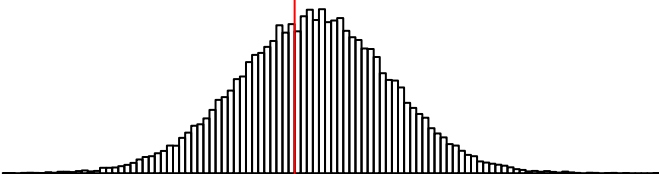

A194:26 – D206:26

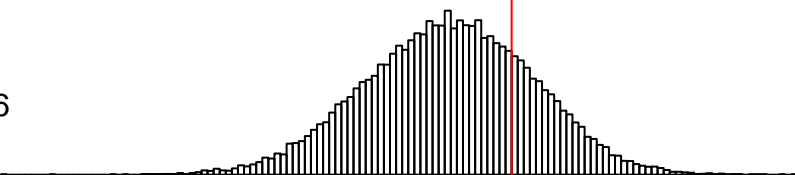

B184:26 – B224:26

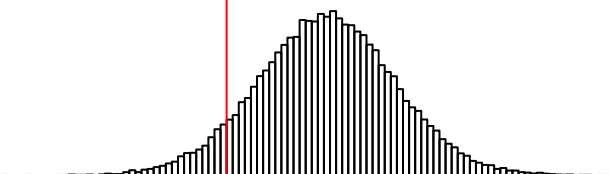

B184:26 – D206:26

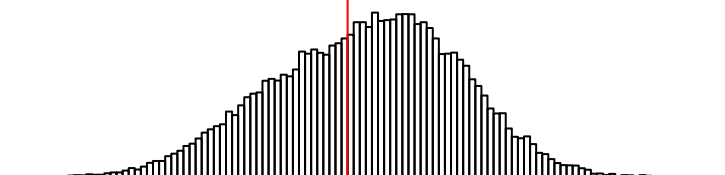

B224:26 – D206:26

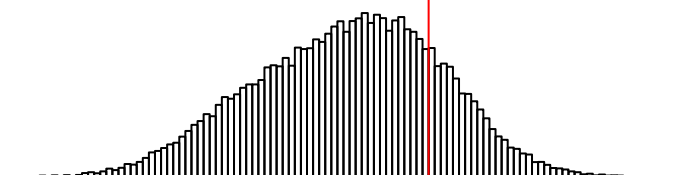

-6 -4 -2 0 2 4

delta(Open Pentose 1)

A194:26

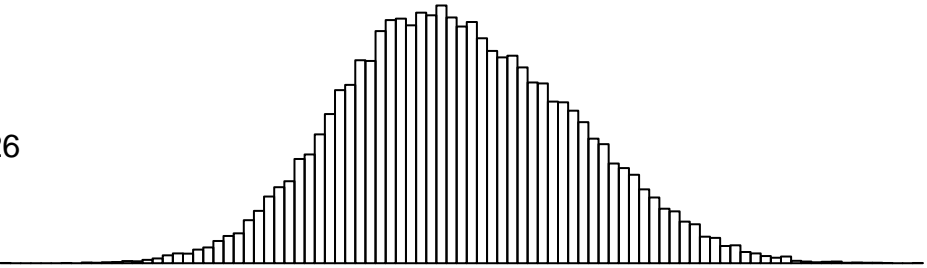

B184:26

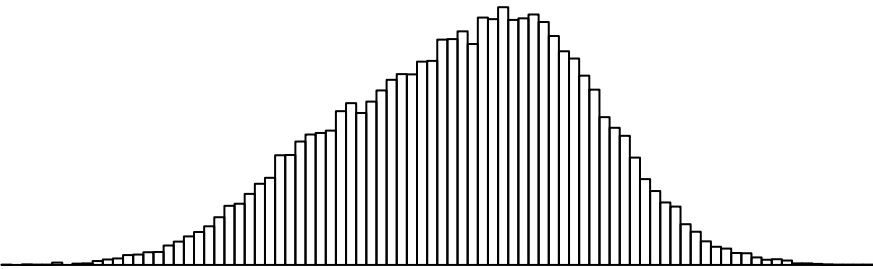

B224:26

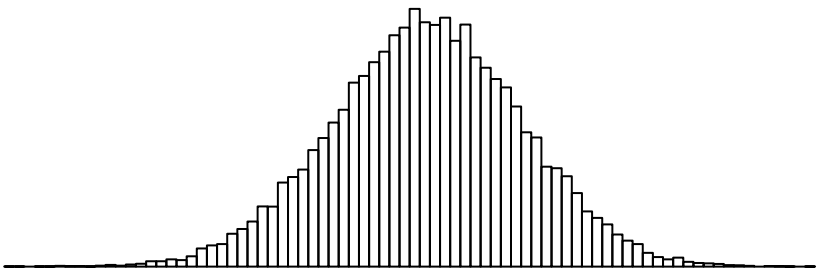

D206:26

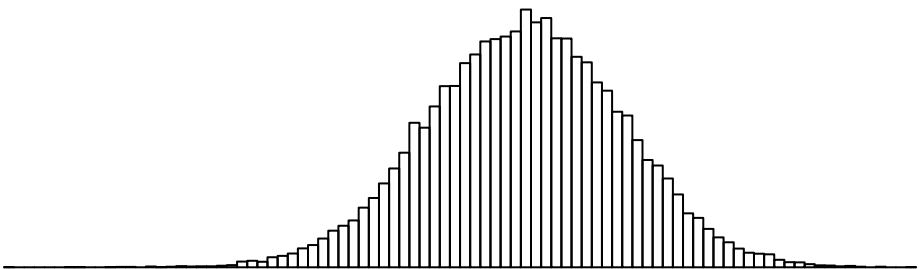

-8 -7 -6 -5 -4 -3 -2

Open Pentose 2

A194:26 – B184:26

A194:26 – B224:26

A194:26 – D206:26

B184:26 – B224:26

B184:26 – D206:26

B224:26 – D206:26



A194:26

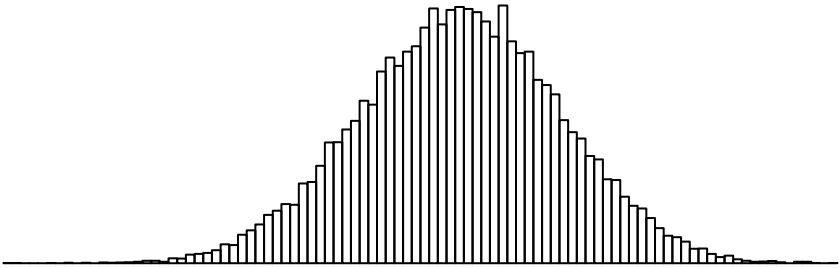

B184:26

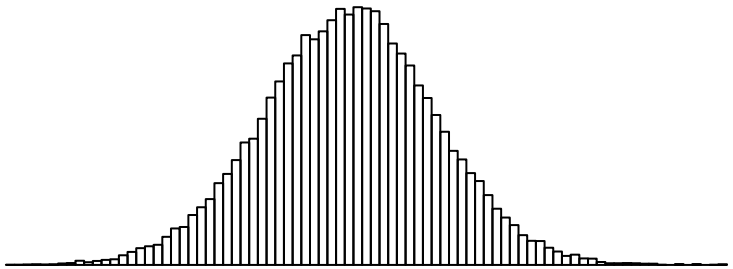

B224:26

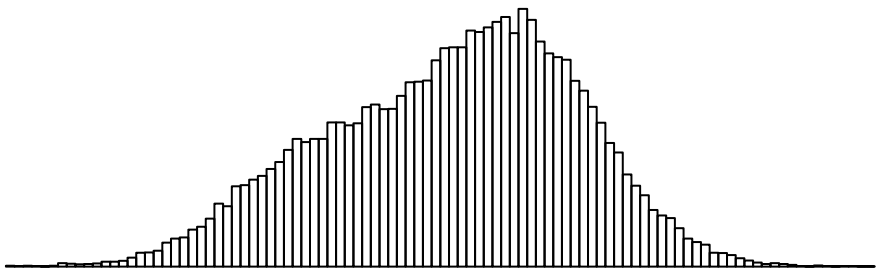

D206:26

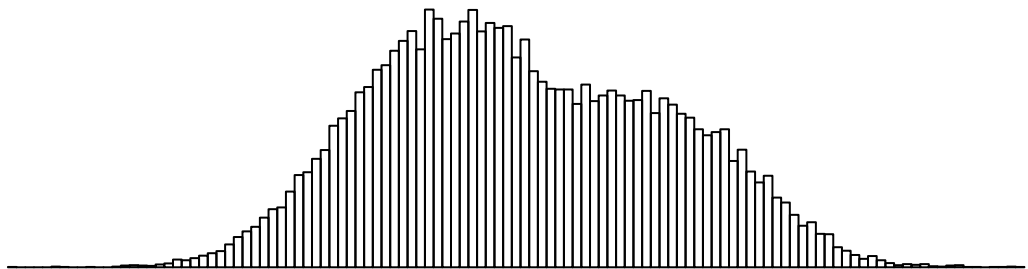

Closed Pentose 1

A194:26 – B184:26

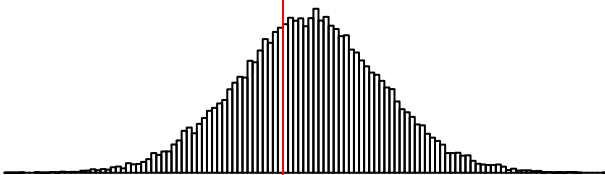

A194:26 – B224:26

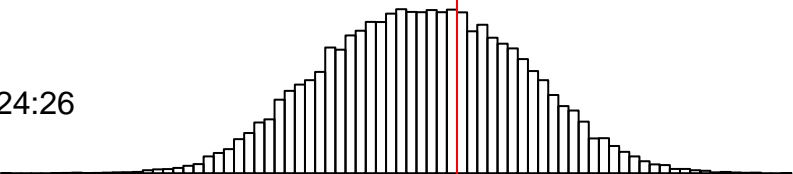

A194:26 – D206:26

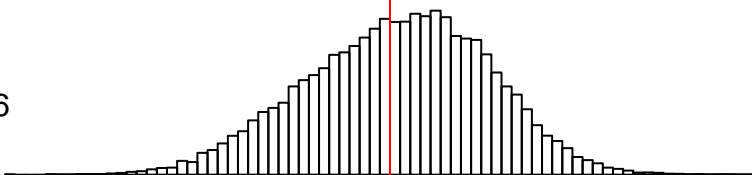

B184:26 – B224:26

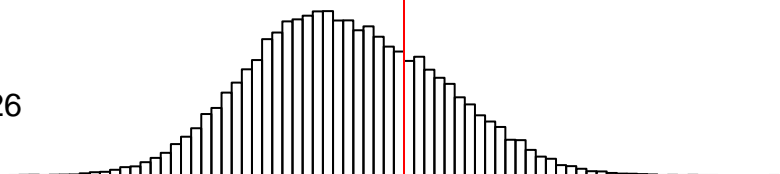

B184:26 – D206:26

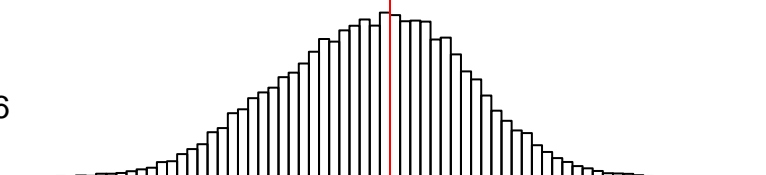

B224:26 – D206:26

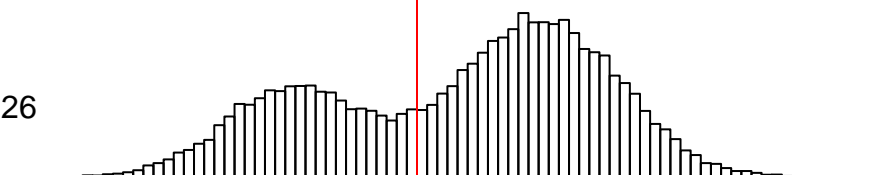

delta(Closed Pentose 1)

A194:26

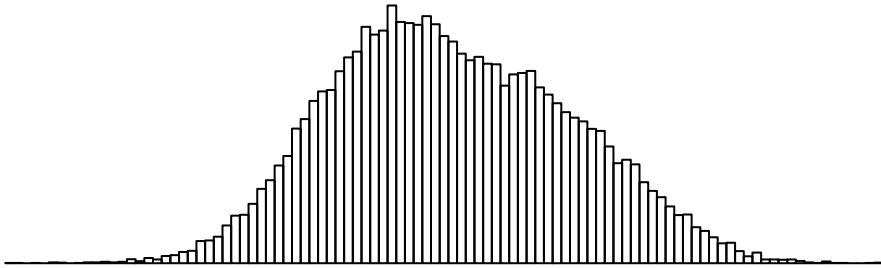

B184:26

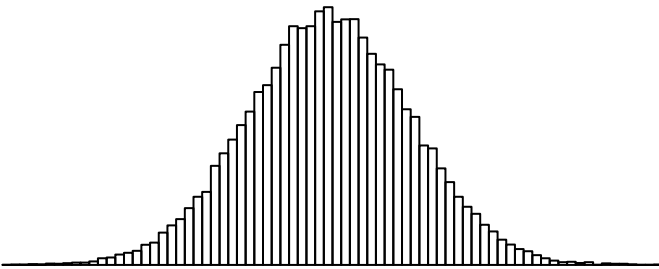

B224:26

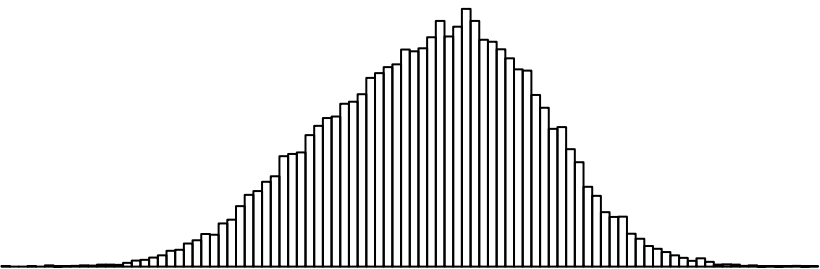

D206:26

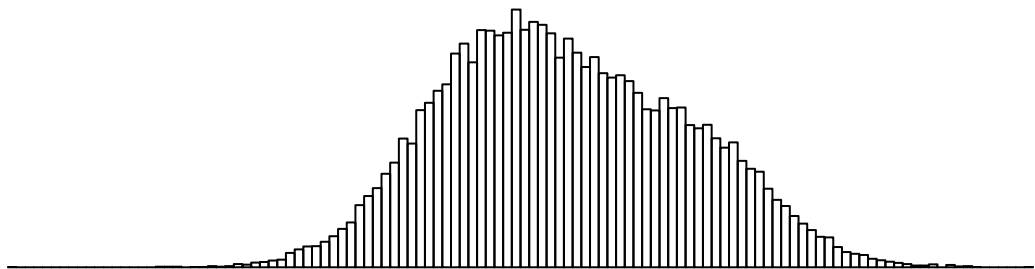

Closed Pentose 2

A194:26 – B184:26

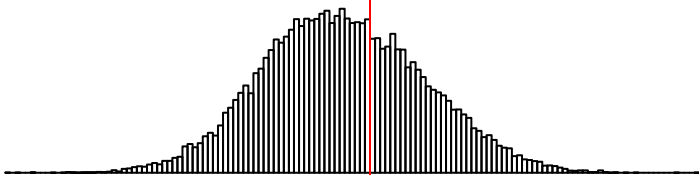

A194:26 – B224:26

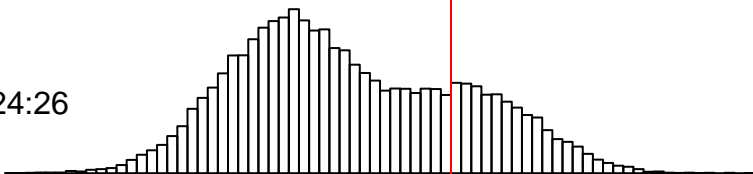

A194:26 – D206:26

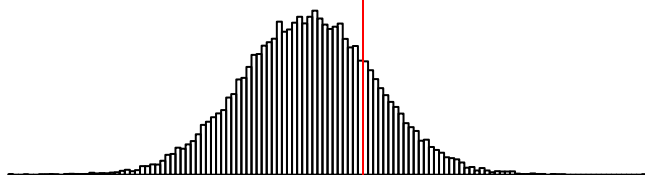

B184:26 – B224:26

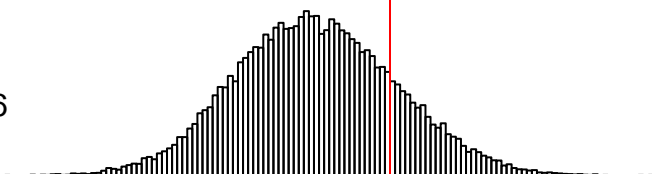

B184:26 – D206:26

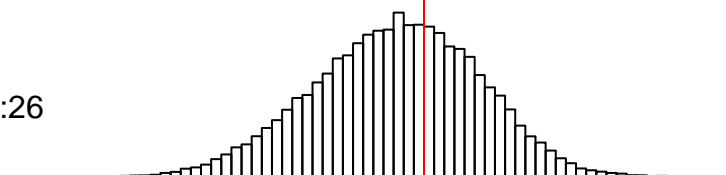

B224:26 – D206:26

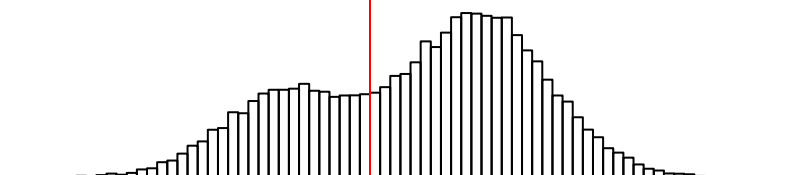

delta(Closed Pentose 2)



A194:26

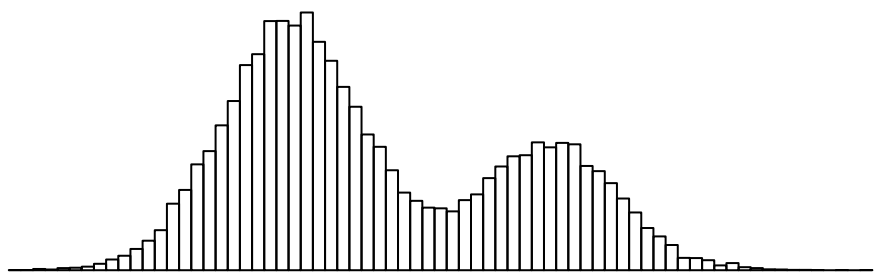

B184:26

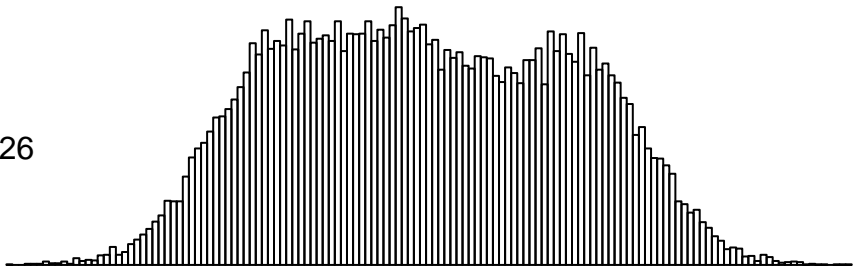

B224:26

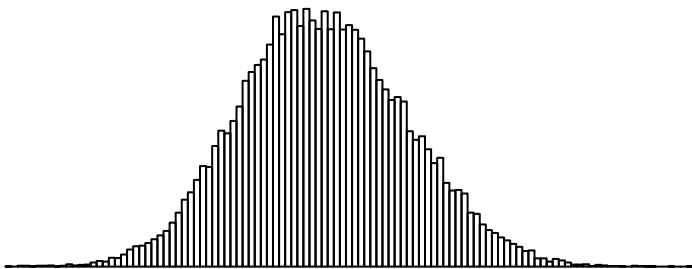

D206:26

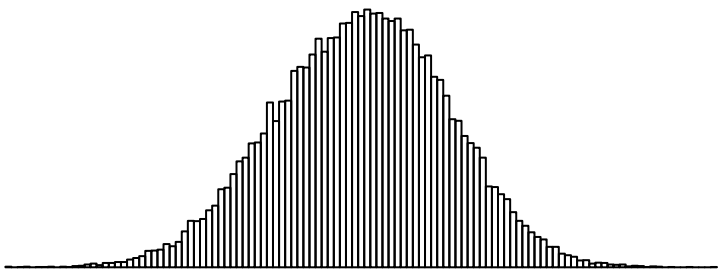

-10      -8      -6      -4      -2      0

Pentose 1

A194:26 – B184:26

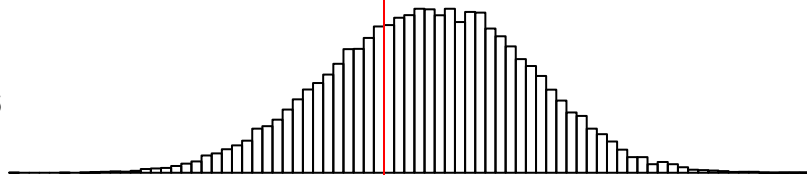

A194:26 – B224:26

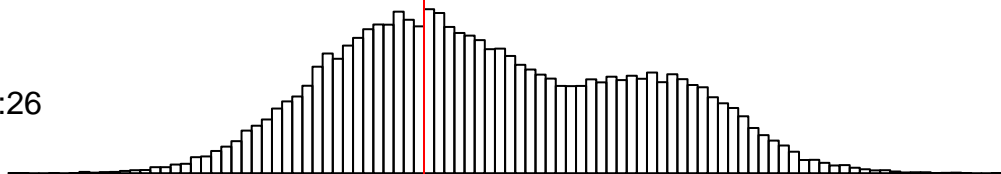

A194:26 – D206:26

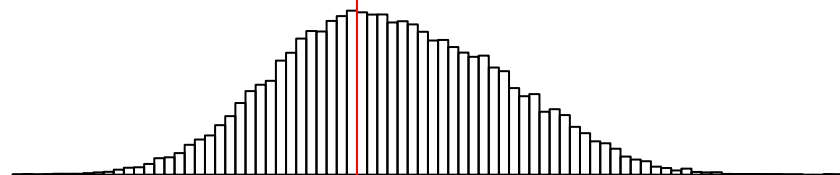

B184:26 – B224:26

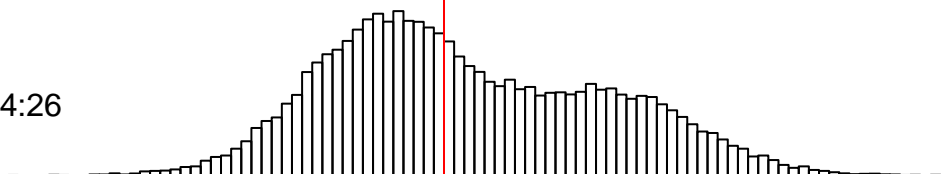

B184:26 – D206:26

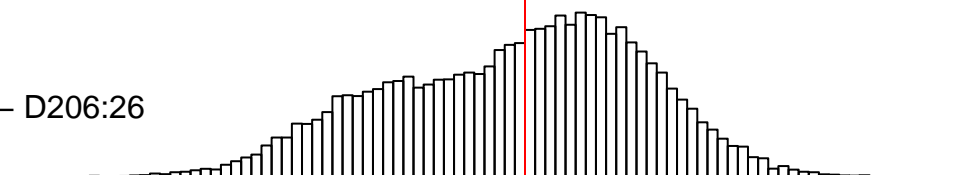

B224:26 – D206:26

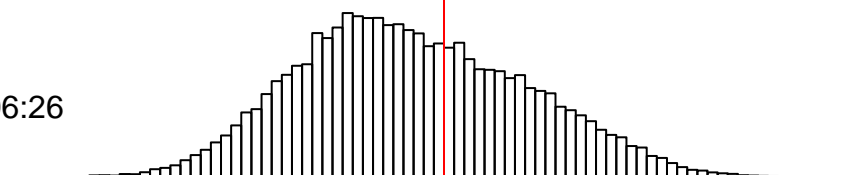

-6 -4 -2 0 2 4 6

delta(Pentose 1)

A194:26

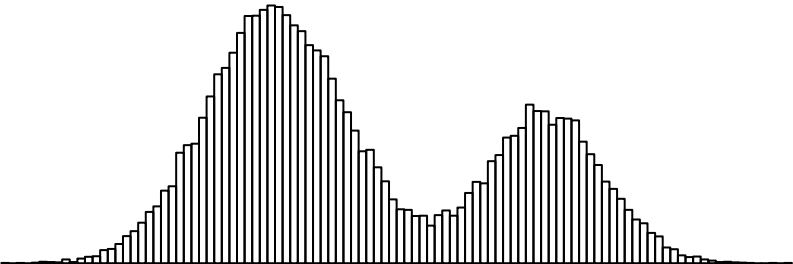

B184:26

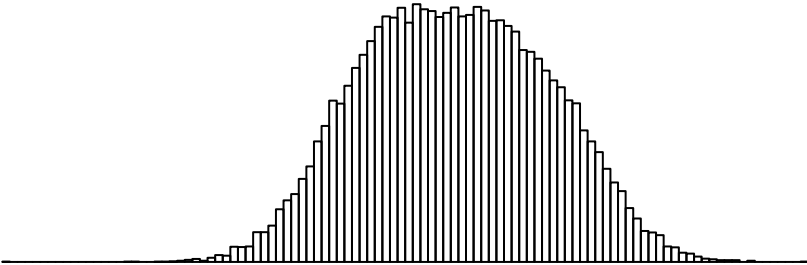

B224:26

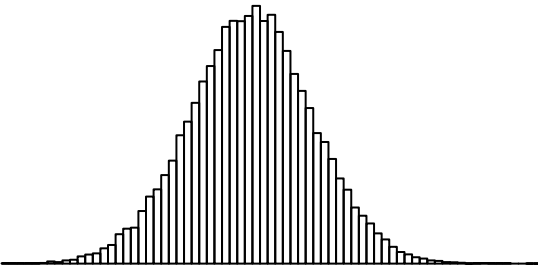

D206:26

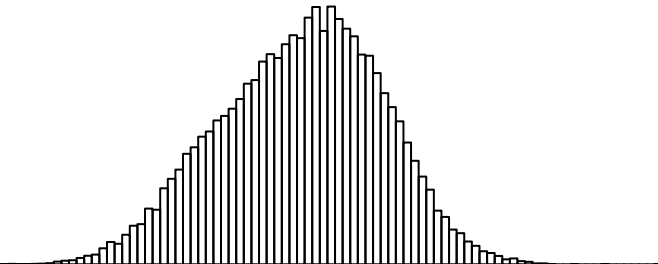

-6

-4

-2

0

Open Pentose 3

A194:26 – B184:26

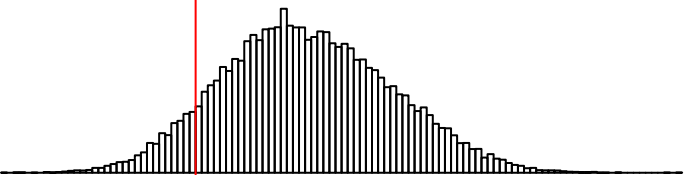

A194:26 – B224:26

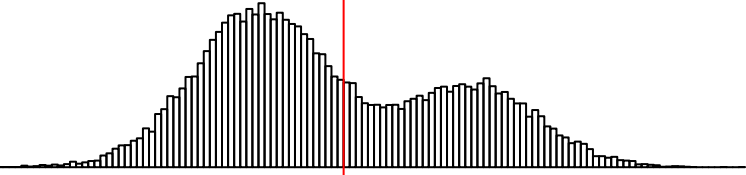

A194:26 – D206:26

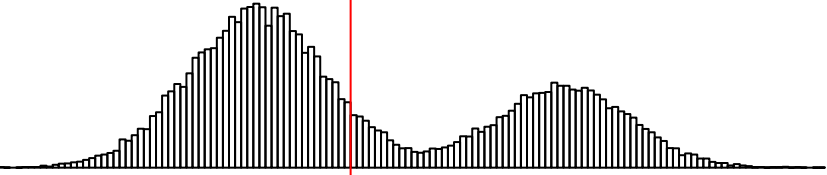

B184:26 – B224:26

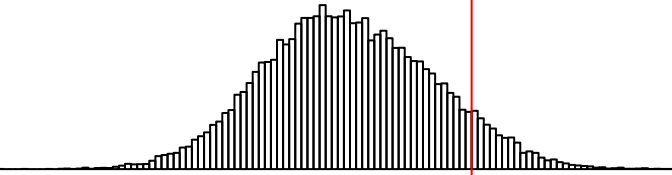

B184:26 – D206:26

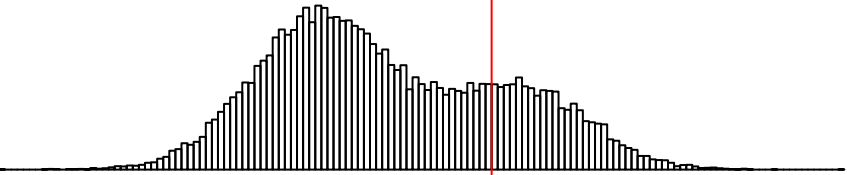

B224:26 – D206:26

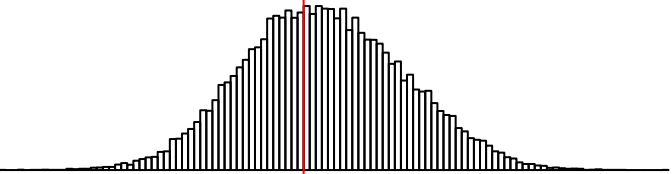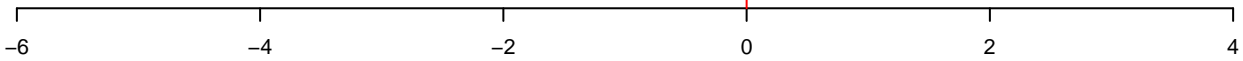

delta(Open Pentose 3)

A194:26

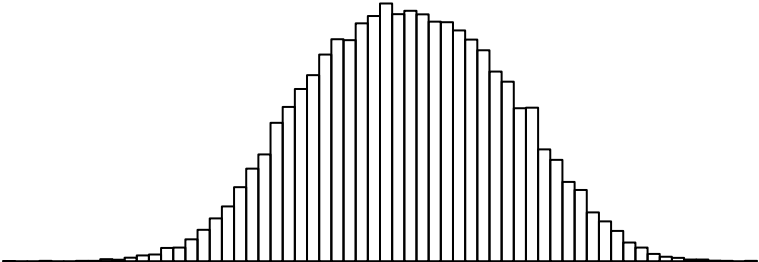

B184:26

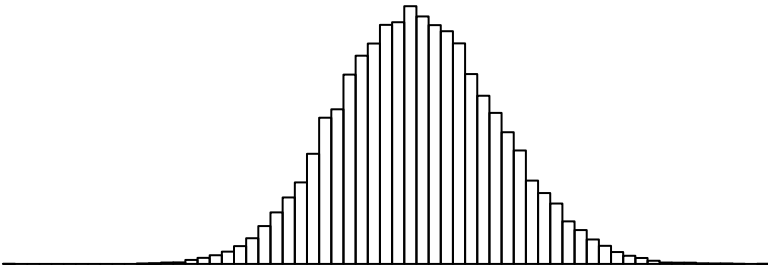

B224:26

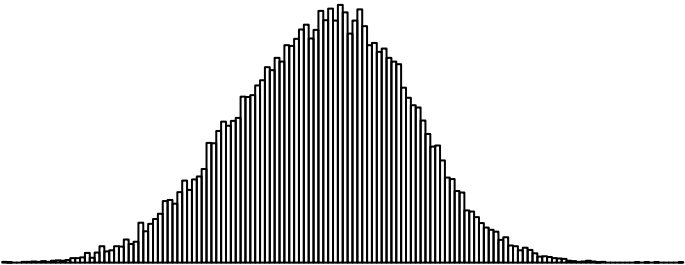

D206:26

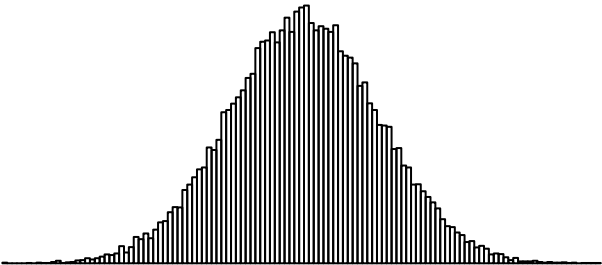

-10      -9      -8      -7      -6      -5

Sugar 1

A194:26 – B184:26

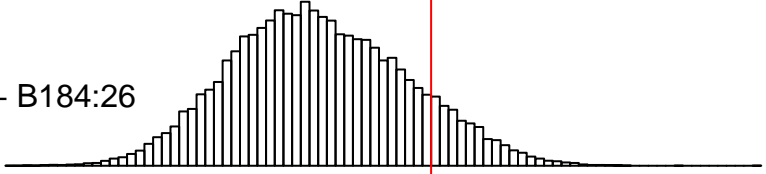

A194:26 – B224:26

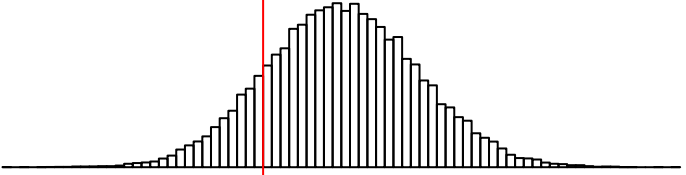

A194:26 – D206:26

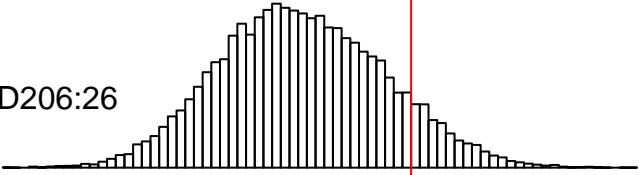

B184:26 – B224:26

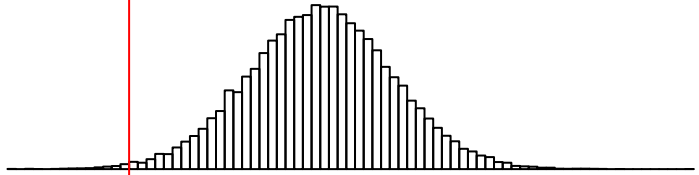

B184:26 – D206:26

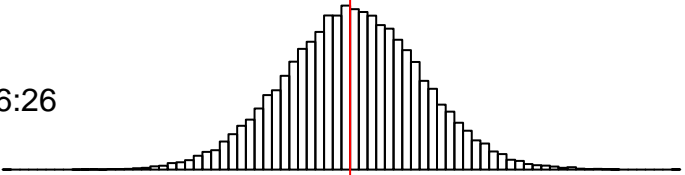

B224:26 – D206:26

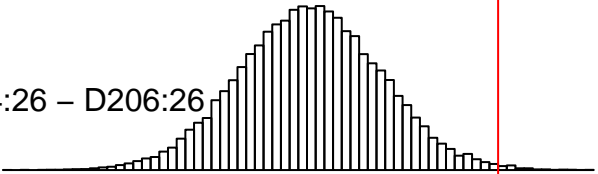

-3 -2 -1 0 1 2 3 4

delta(Sugar 1)

A194:26

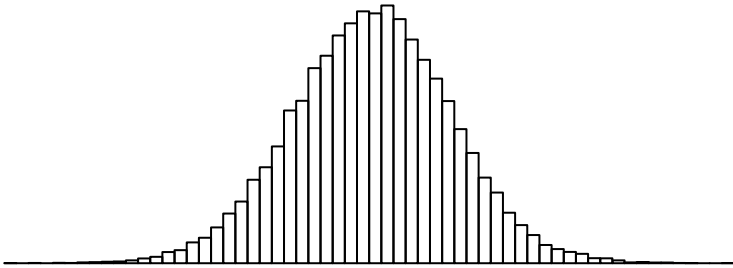

B184:26

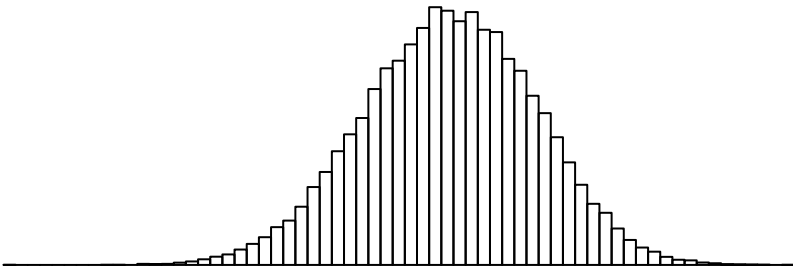

B224:26

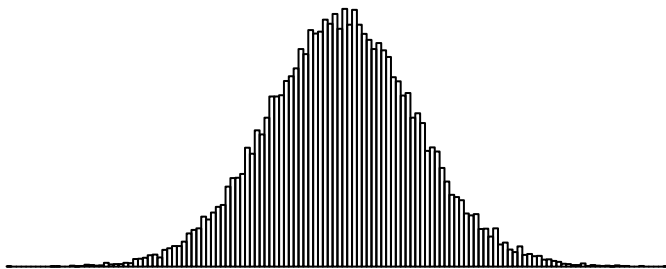

D206:26

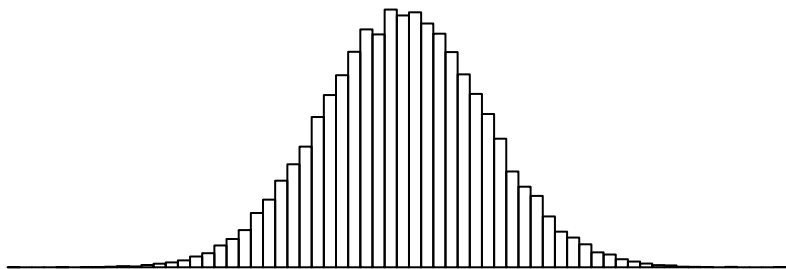

-11                      -10                      -9                      -8                      -7                      -6

Sugar 3

A194:26 – B184:26

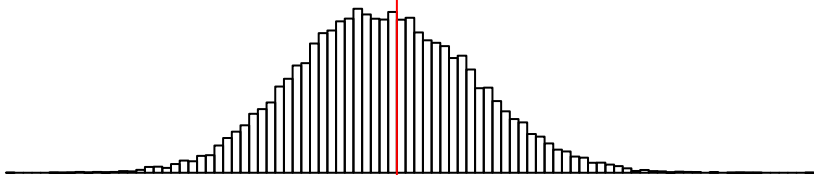

A194:26 – B224:26

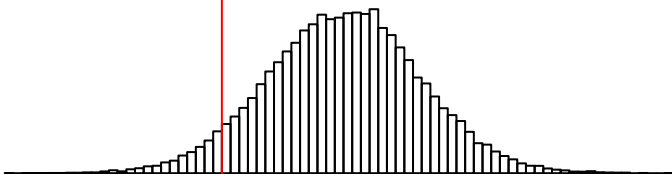

A194:26 – D206:26

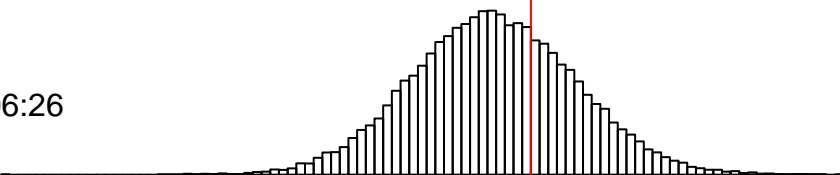

B184:26 – B224:26

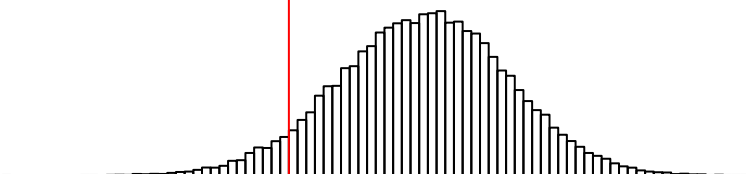

B184:26 – D206:26

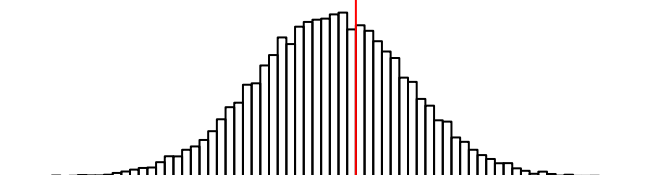

B224:26 – D206:26

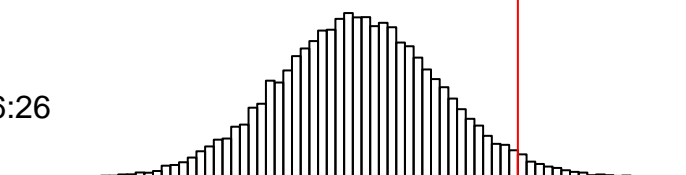

delta(Sugar 3)



A194:26

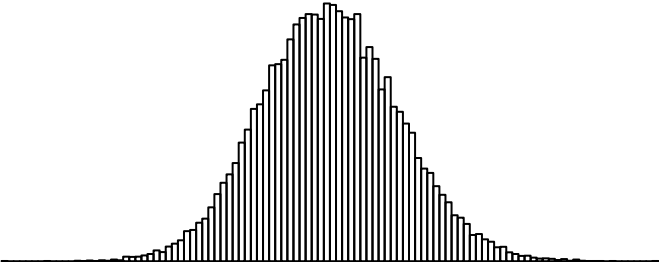

B184:26

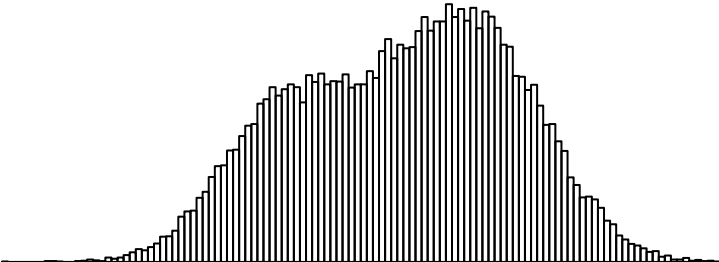

B224:26

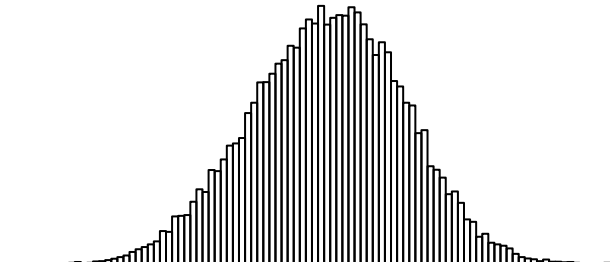

D206:26

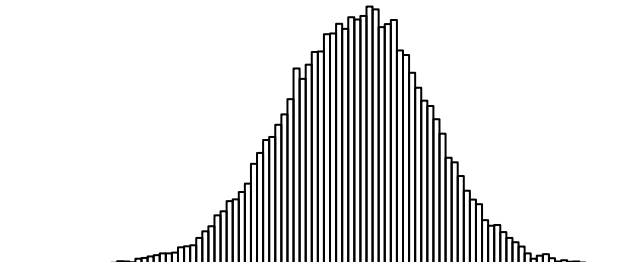

-10                      -9                      -8                      -7                      -6

Sugar 4

A194:26 – B184:26

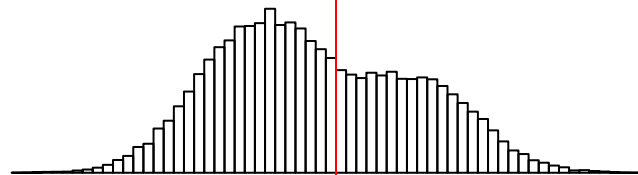

A194:26 – B224:26

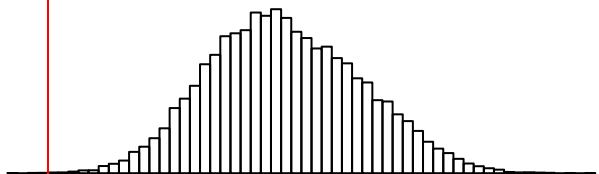

A194:26 – D206:26

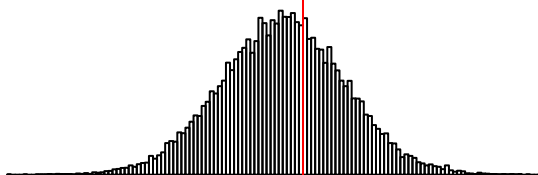

B184:26 – B224:26

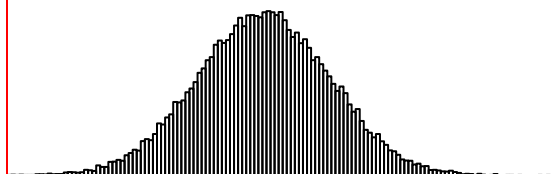

B184:26 – D206:26

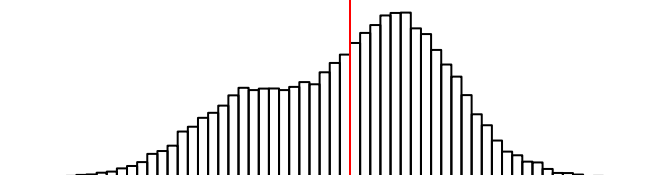

B224:26 – D206:26

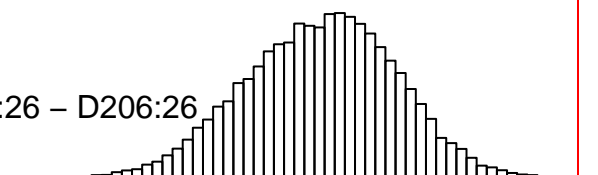

-3 -2 -1 0 1 2 3

delta(Sugar 4)

A194:26

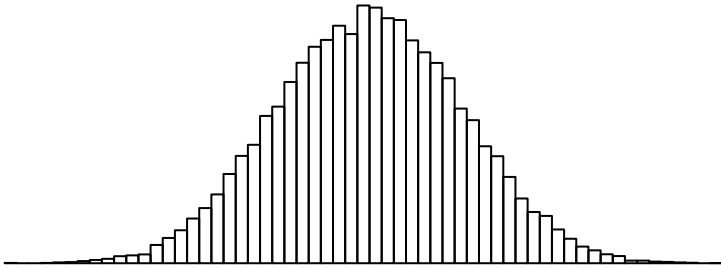

B184:26

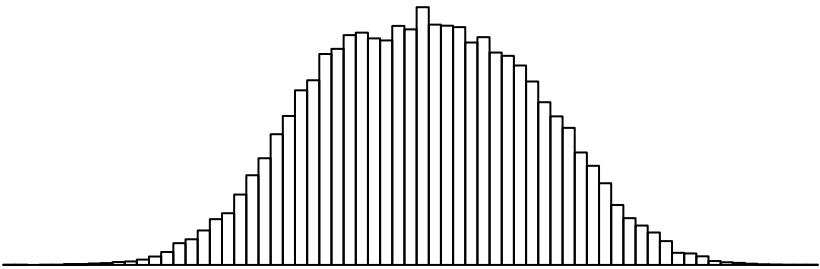

B224:26

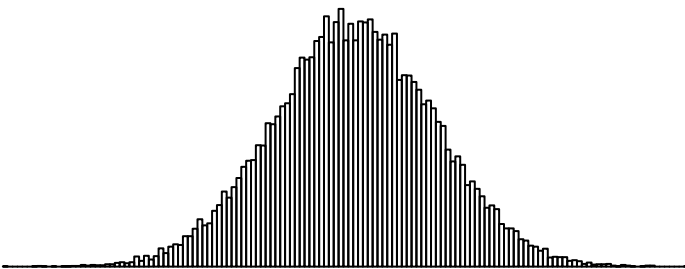

D206:26

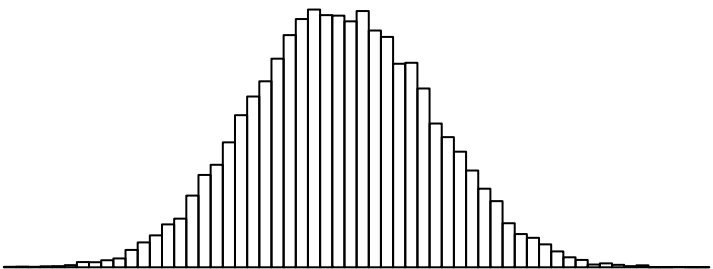

-10      -9      -8      -7      -6      -5

Sugar 5

A194:26 – B184:26

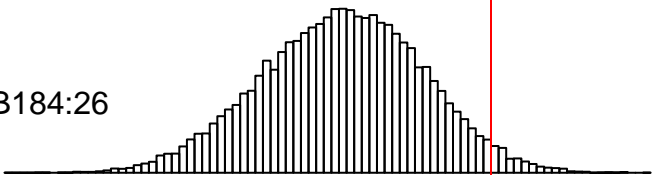

A194:26 – B224:26

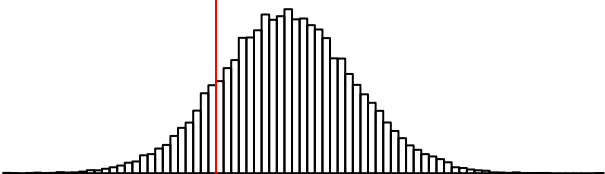

A194:26 – D206:26

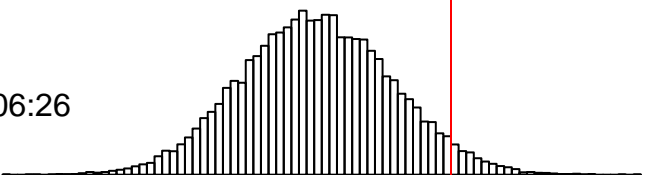

B184:26 – B224:26

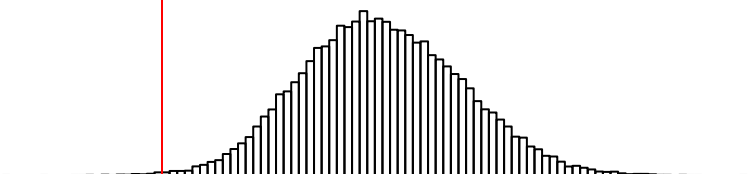

B184:26 – D206:26

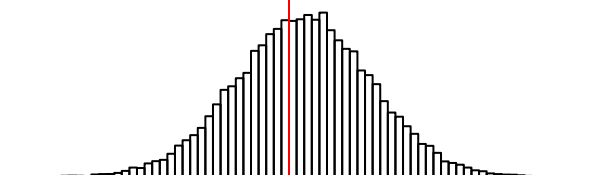

B224:26 – D206:26

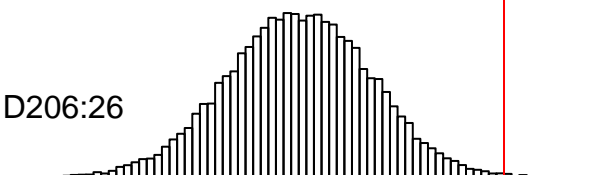

-4 -2 0 2 4

delta(Sugar 5)

A194:26

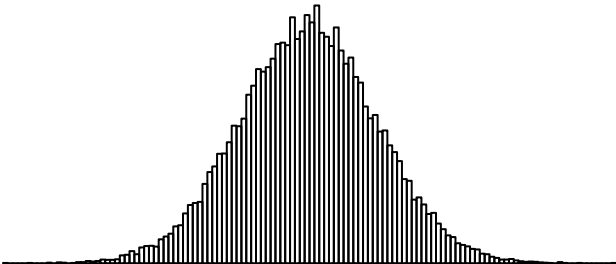

B184:26

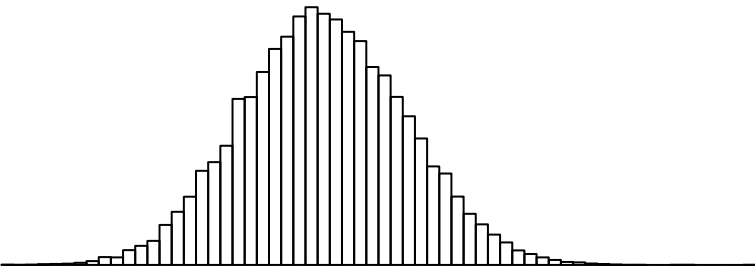

B224:26

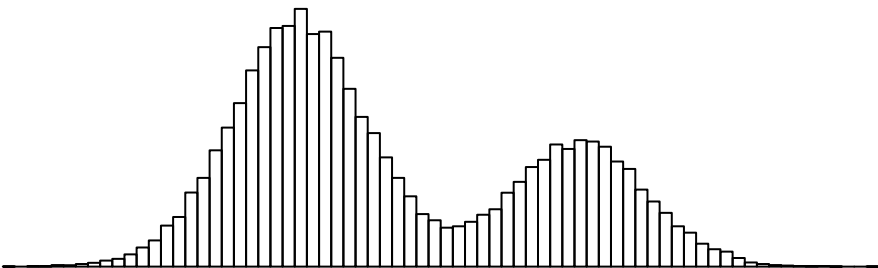

D206:26

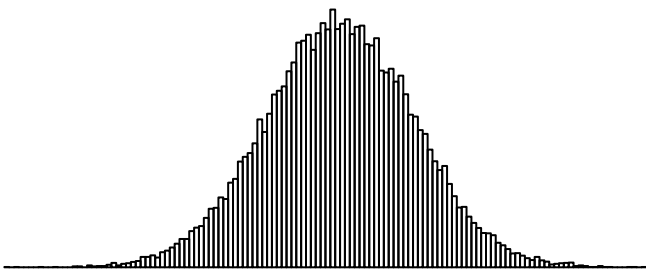

-10      -9      -8      -7      -6      -5

Sugar 6

A194:26 – B184:26

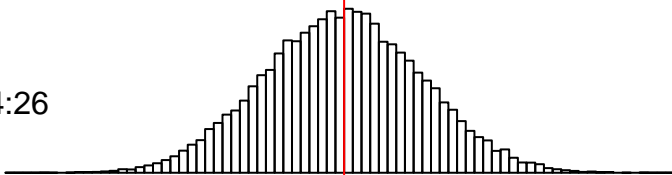

A194:26 – B224:26

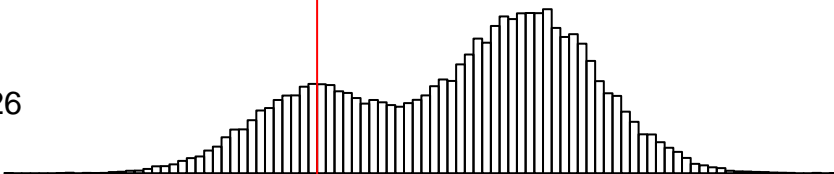

A194:26 – D206:26

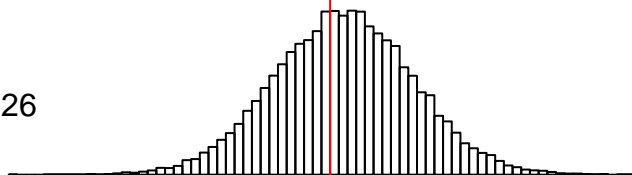

B184:26 – B224:26

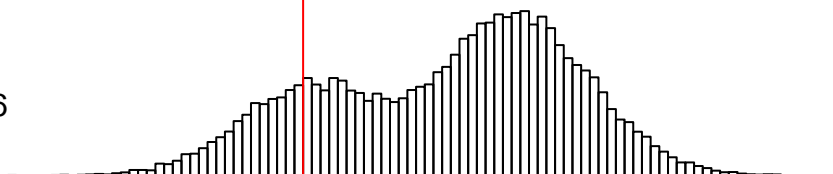

B184:26 – D206:26

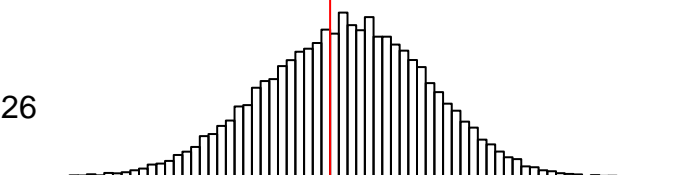

B224:26 – D206:26

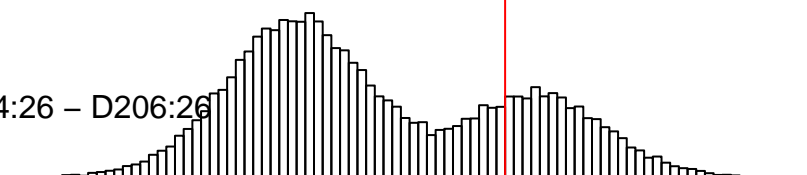

-3 -2 -1 0 1 2 3 4

delta(Sugar 6)

A194:26

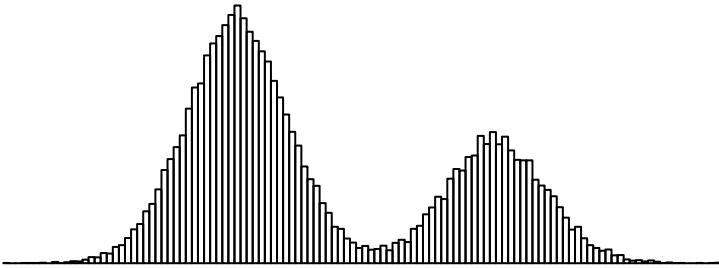

B184:26

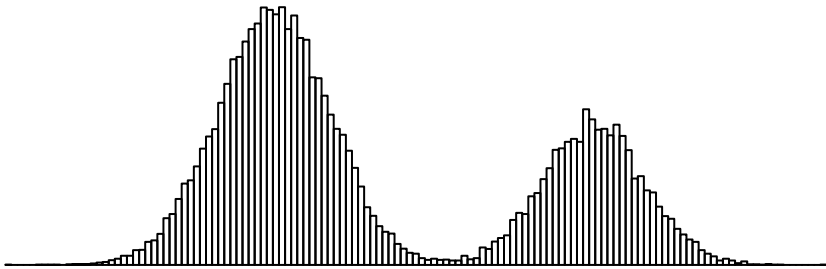

B224:26

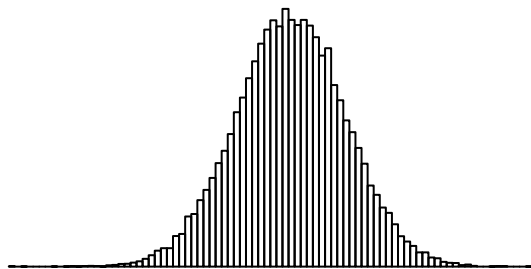

D206:26

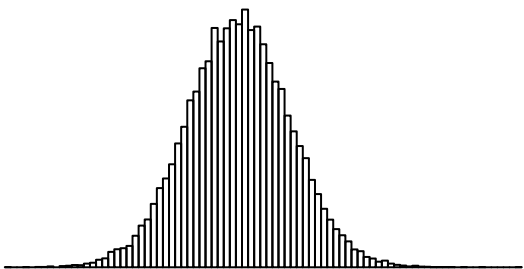

-10      -8      -6      -4      -2      0

Sugar 7

A194:26 – B184:26

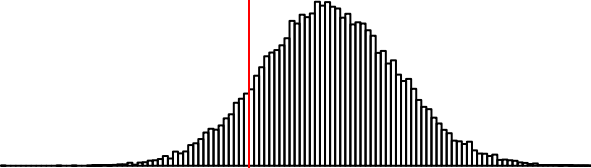

A194:26 – B224:26

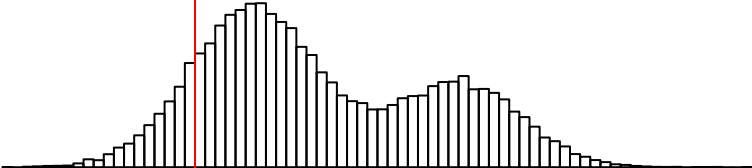

A194:26 – D206:26

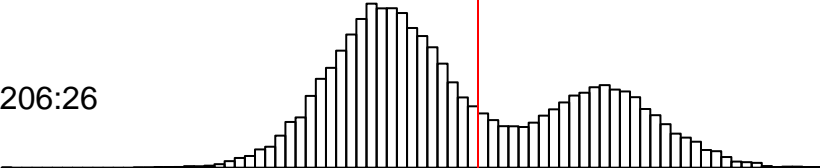

B184:26 – B224:26

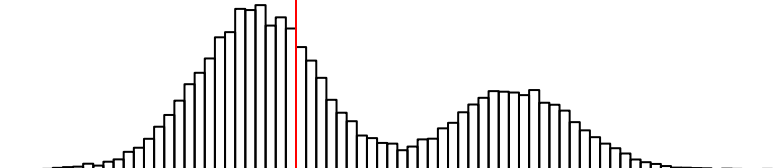

B184:26 – D206:26

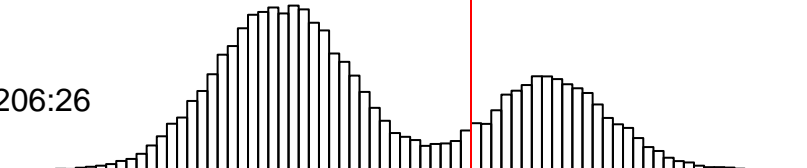

B224:26 – D206:26

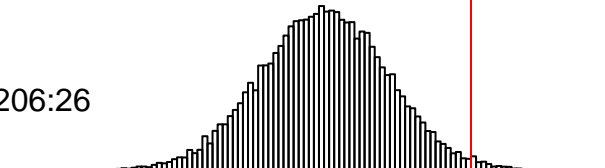

-6 -4 -2 0 2 4 6

delta(Sugar 7)



A194:26

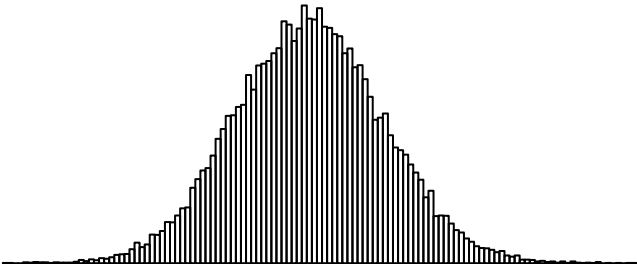

B184:26

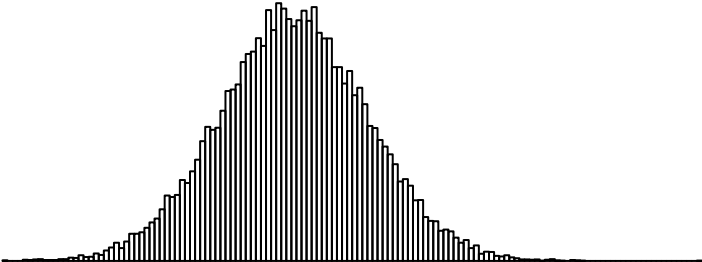

B224:26

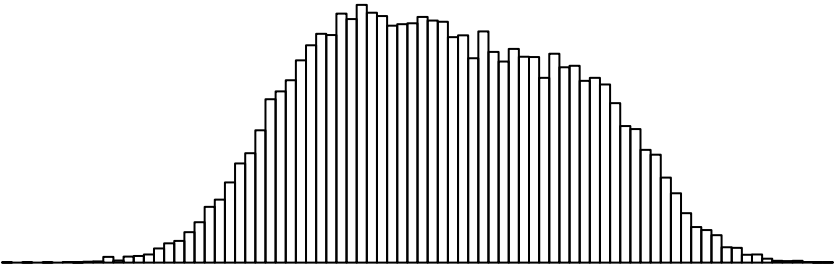

D206:26

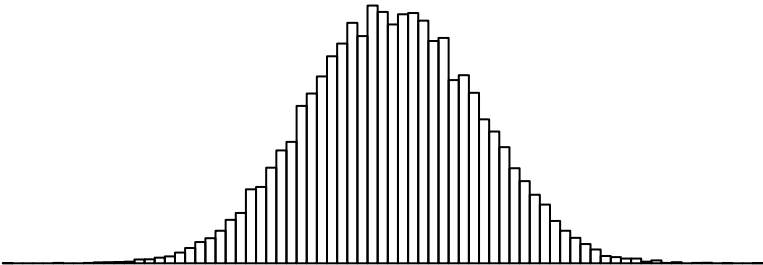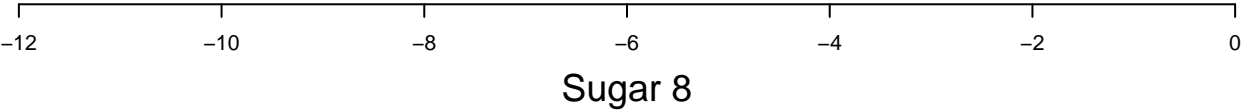

A194:26 – B184:26

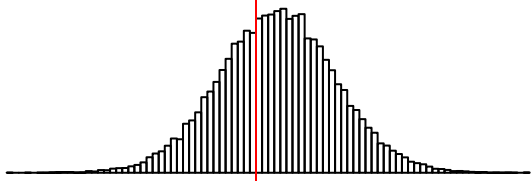

A194:26 – B224:26

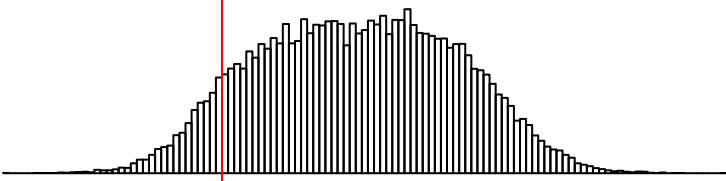

A194:26 – D206:26

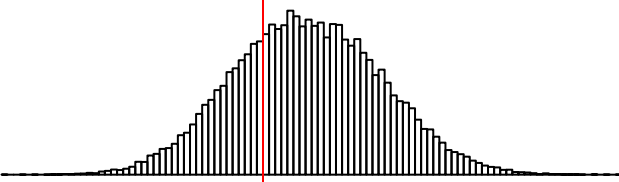

B184:26 – B224:26

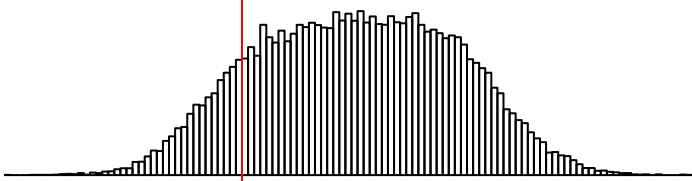

B184:26 – D206:26

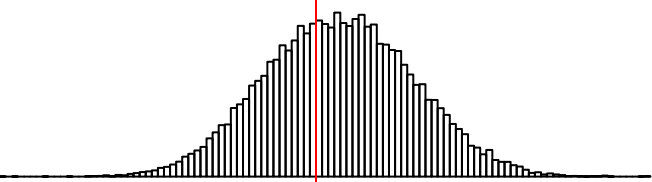

B224:26 – D206:26

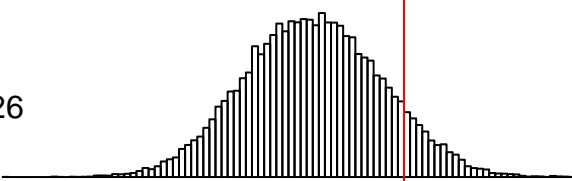

-10      -5      0      5      10

delta(Sugar 8)

A194:26

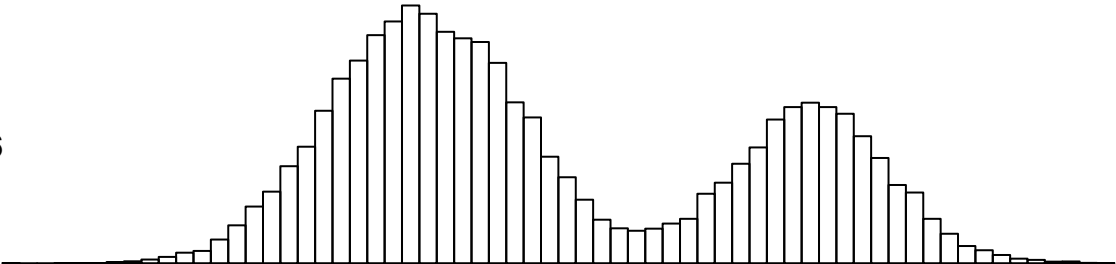

B184:26

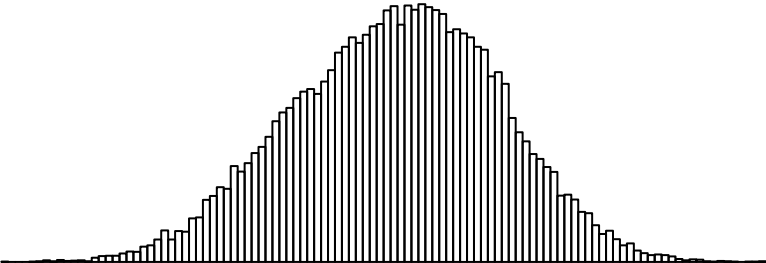

B224:26

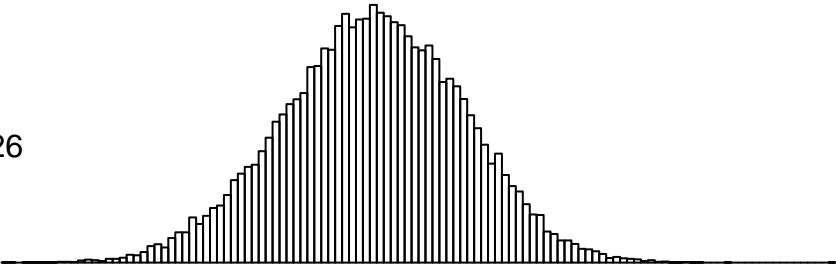

D206:26

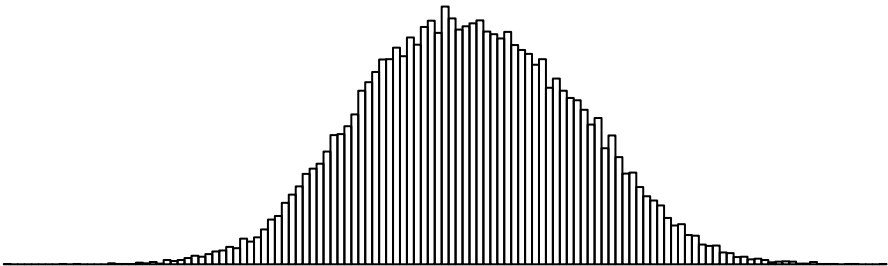

-9.5      -9.0      -8.5      -8.0      -7.5      -7.0      -6.5      -6.0

Sugar 9

A194:26 – B184:26

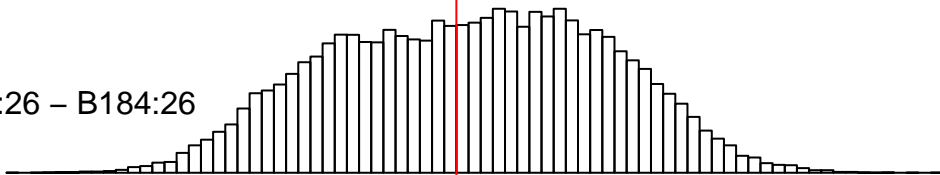

A194:26 – B224:26

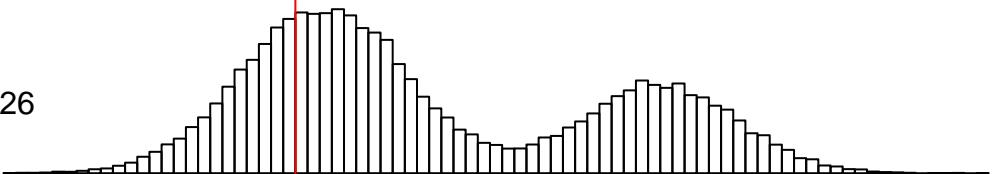

A194:26 – D206:26

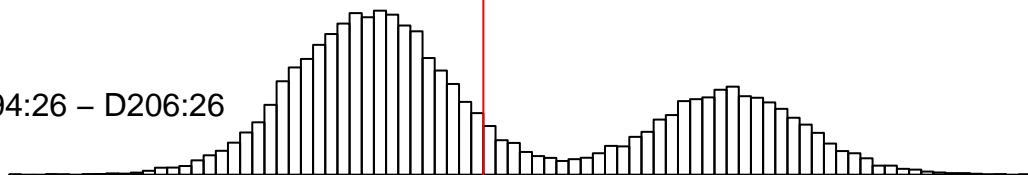

B184:26 – B224:26

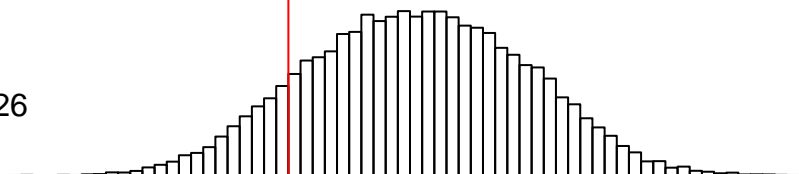

B184:26 – D206:26

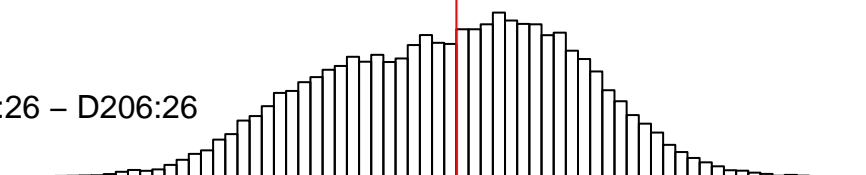

B224:26 – D206:26

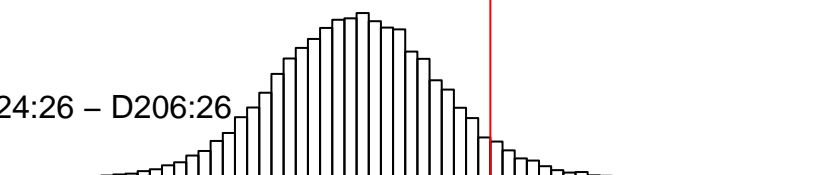

-2 -1 0 1 2 3

delta(Sugar 9)

A194:26

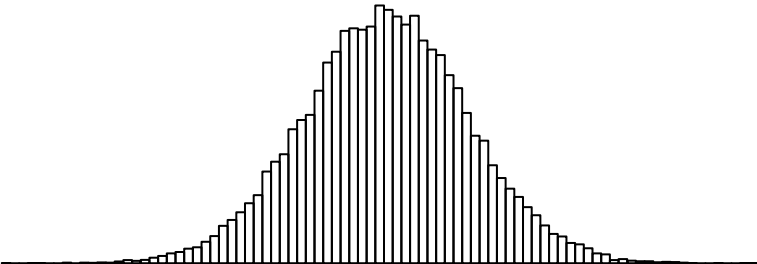

B184:26

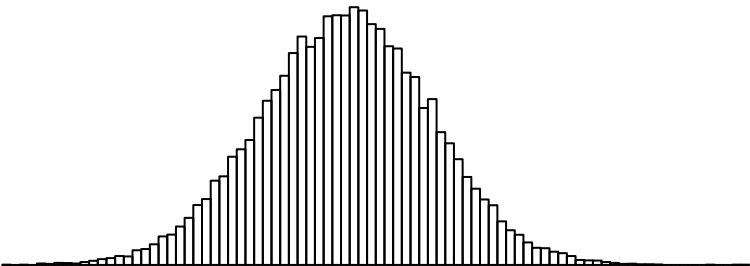

B224:26

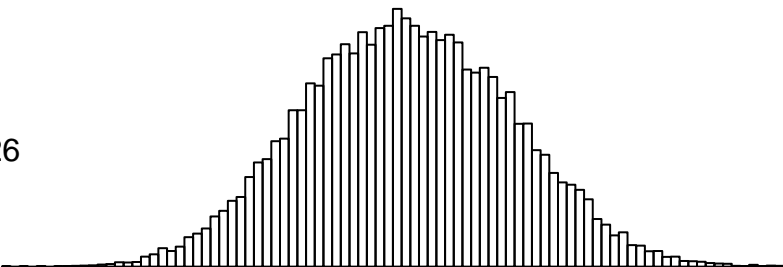

D206:26

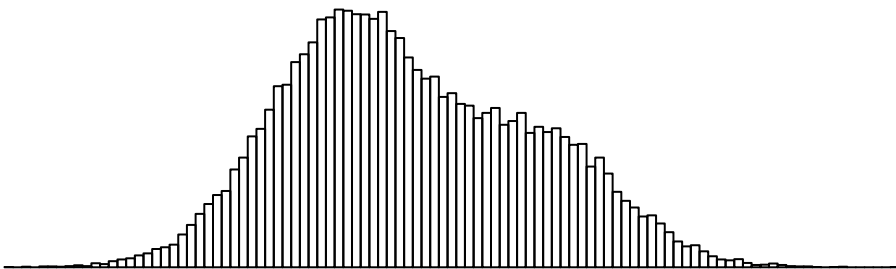

-10      -9      -8      -7      -6      -5      -4      -3

Sugar 10

A194:26 – B184:26

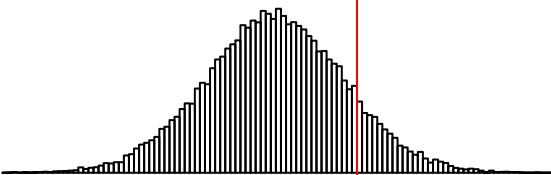

A194:26 – B224:26

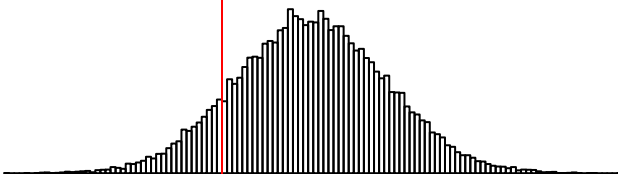

A194:26 – D206:26

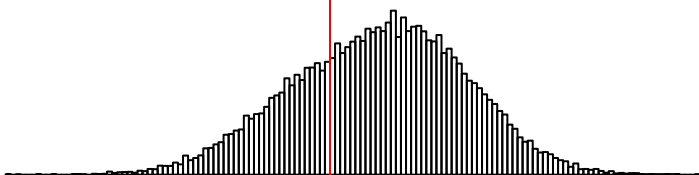

B184:26 – B224:26

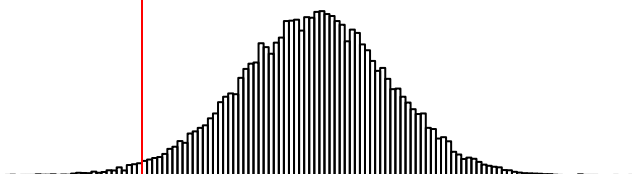

B184:26 – D206:26

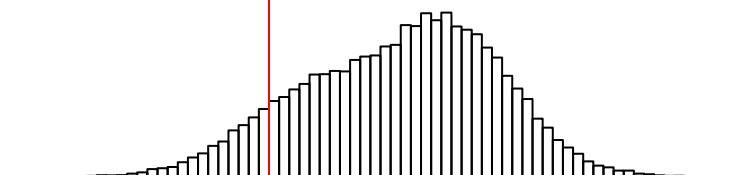

B224:26 – D206:26

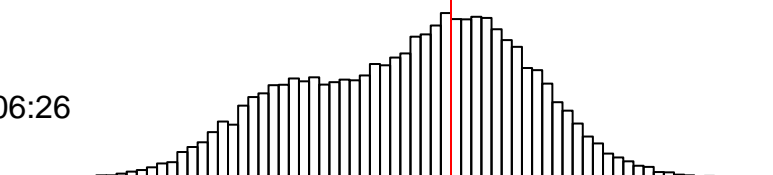

-6 -4 -2 0 2 4 6

delta(Sugar 10)

A194:26

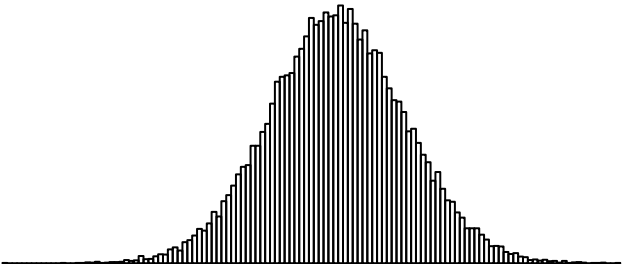

B184:26

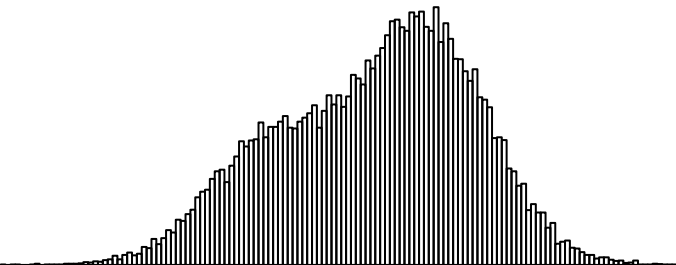

B224:26

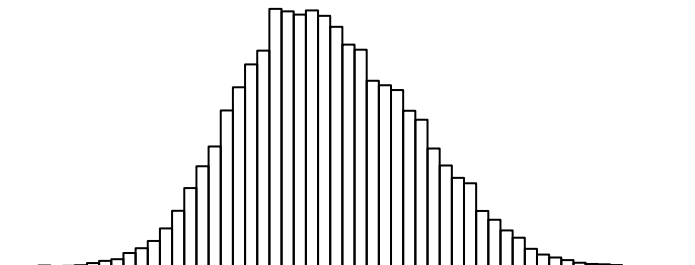

D206:26

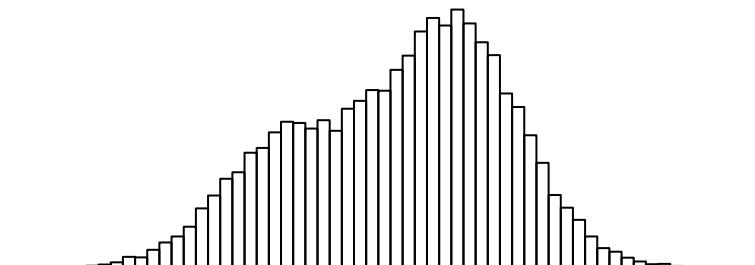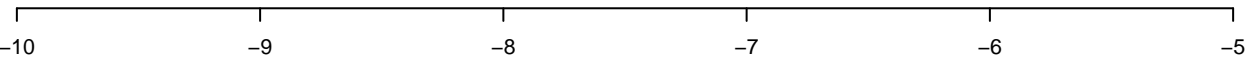

Sugar 11

A194:26 – B184:26

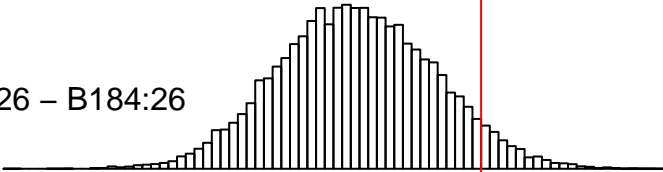

A194:26 – B224:26

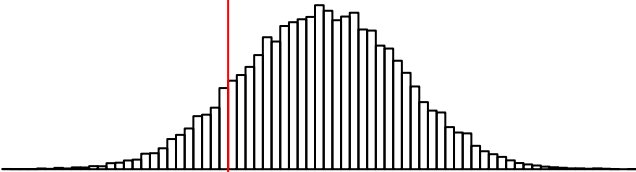

A194:26 – D206:26

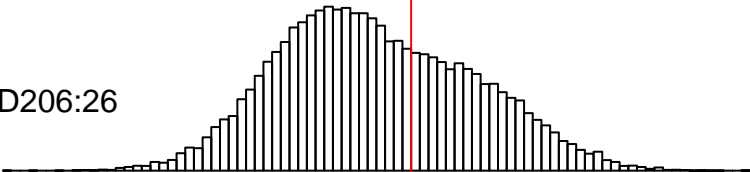

B184:26 – B224:26

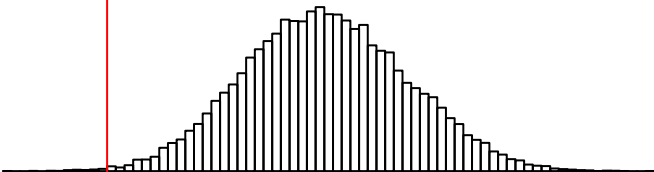

B184:26 – D206:26

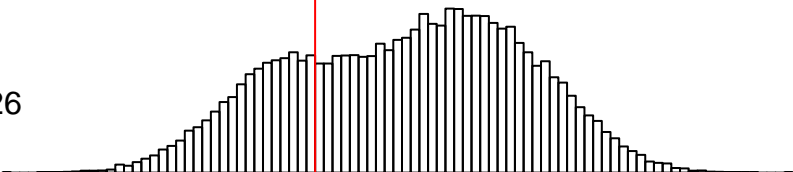

B224:26 – D206:26

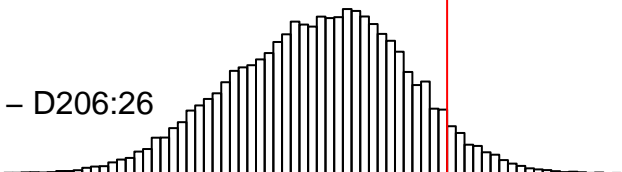

-3 -2 -1 0 1 2 3 4

delta(Sugar 11)



A194:26

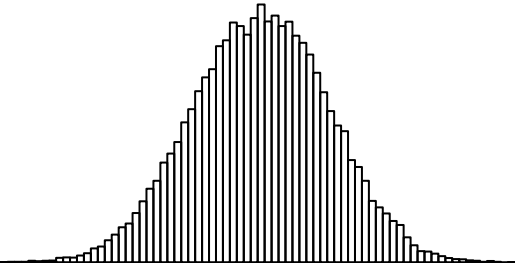

B184:26

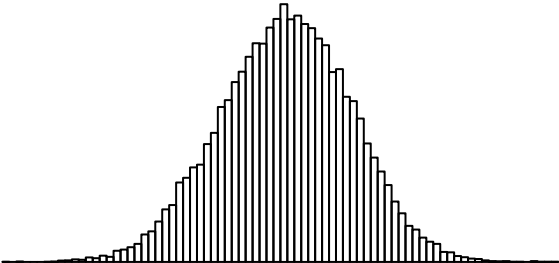

B224:26

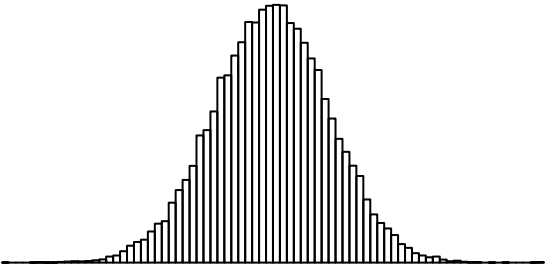

D206:26

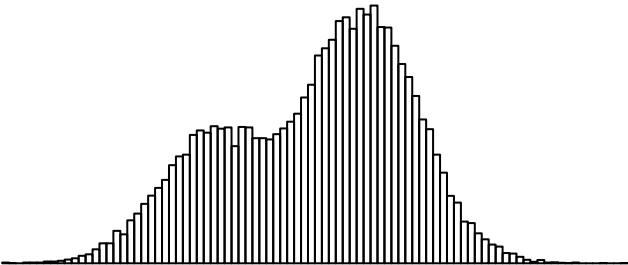

-10.0      -9.5      -9.0      -8.5      -8.0      -7.5      -7.0      -6.5

Sugar 12

A194:26 – B184:26

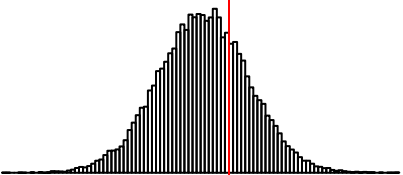

A194:26 – B224:26

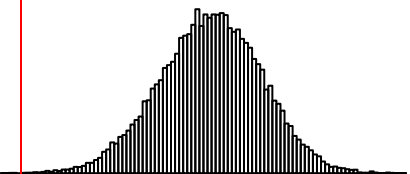

A194:26 – D206:26

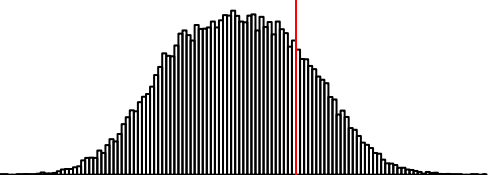

B184:26 – B224:26

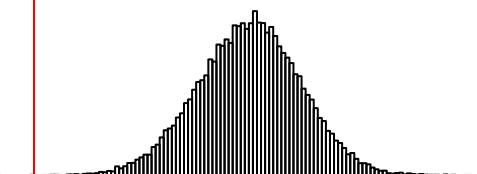

B184:26 – D206:26

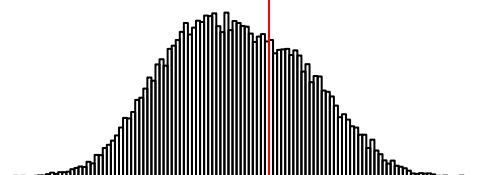

B224:26 – D206:26

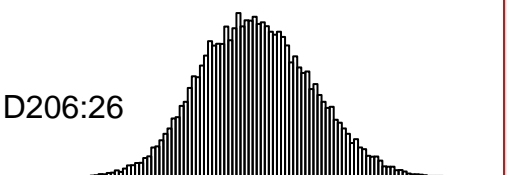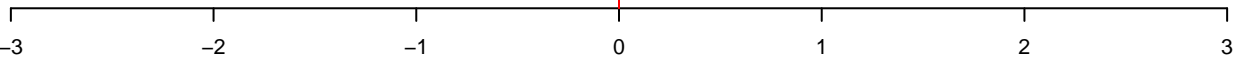

delta(Sugar 12)

A194:26

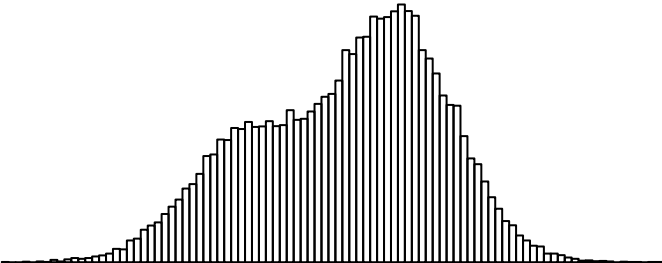

B184:26

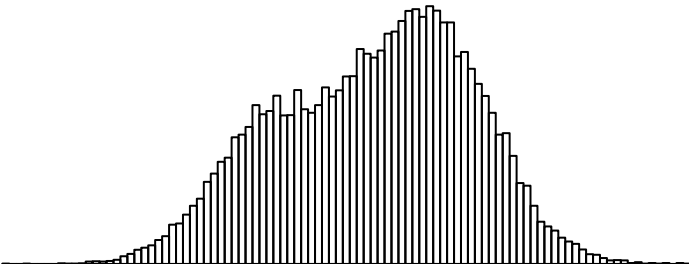

B224:26

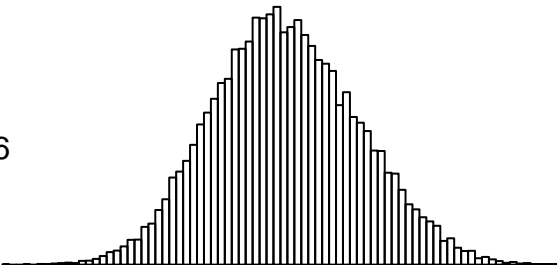

D206:26

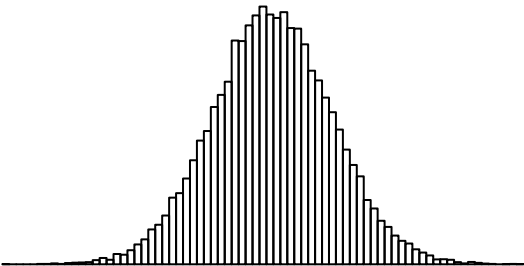

-10.0      -9.5      -9.0      -8.5      -8.0      -7.5      -7.0      -6.5

Sugar 14

A194:26 – B184:26

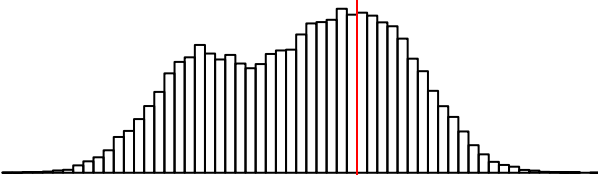

A194:26 – B224:26

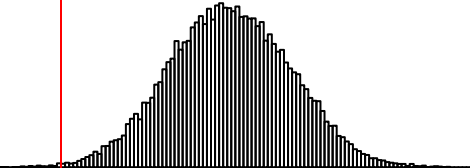

A194:26 – D206:26

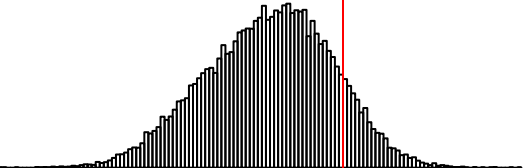

B184:26 – B224:26

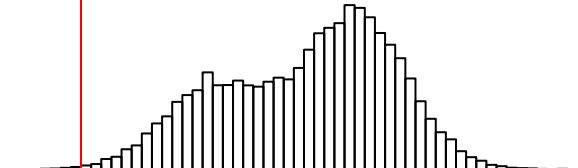

B184:26 – D206:26

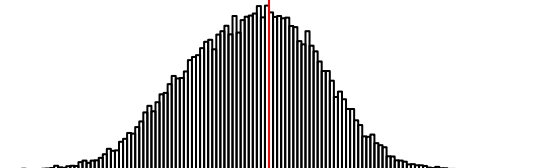

B224:26 – D206:26

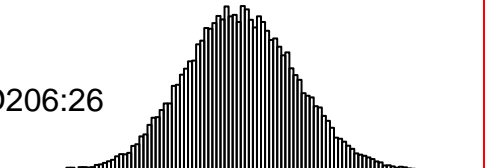

delta(Sugar 14)

A194:26

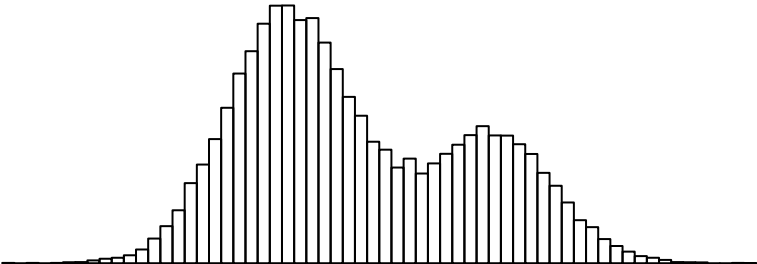

B184:26

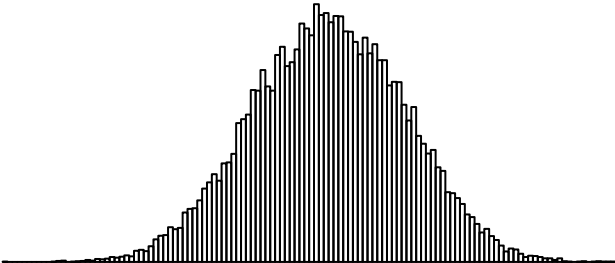

B224:26

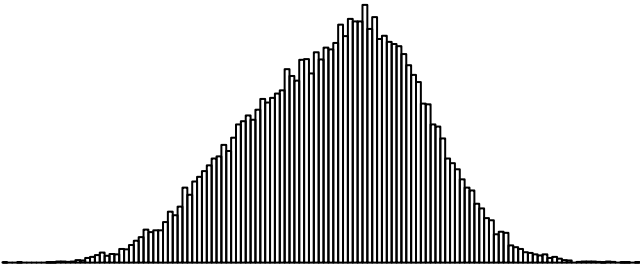

D206:26

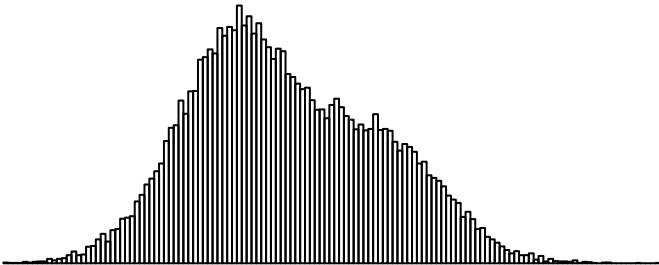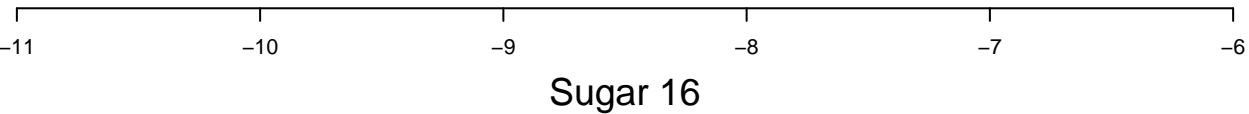

A194:26 – B184:26

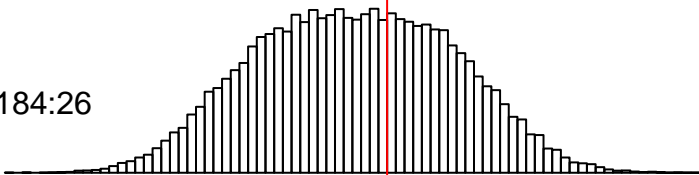

A194:26 – B224:26

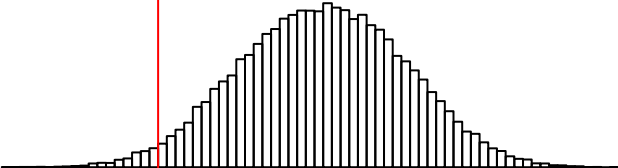

A194:26 – D206:26

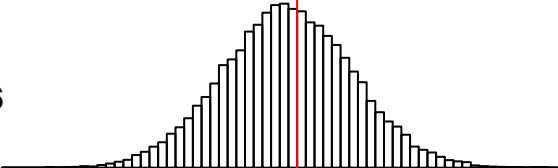

B184:26 – B224:26

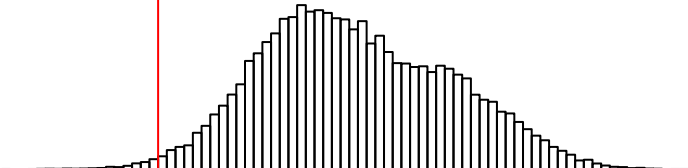

B184:26 – D206:26

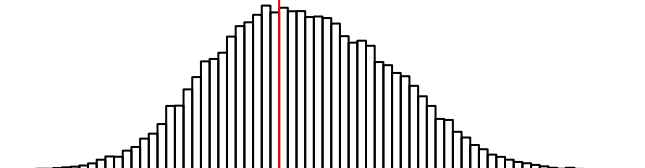

B224:26 – D206:26

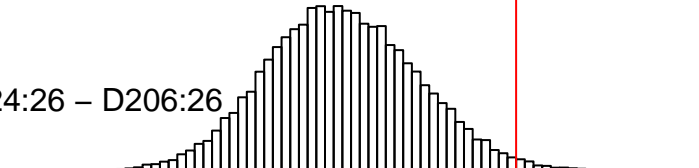

-3 -2 -1 0 1 2 3 4

delta(Sugar 16)

A194:26

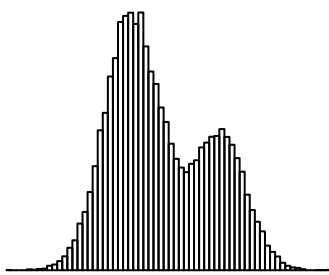

B184:26

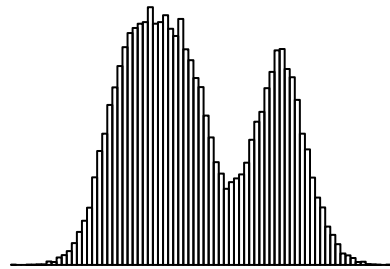

B224:26

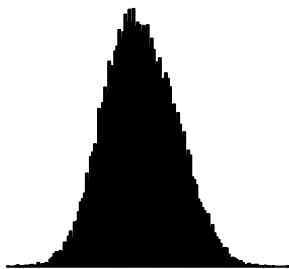

D206:26

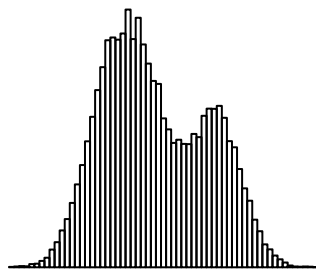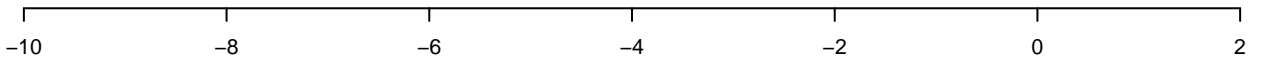

Sugar 17

A194:26 – B184:26

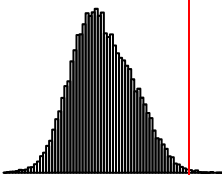

A194:26 – B224:26

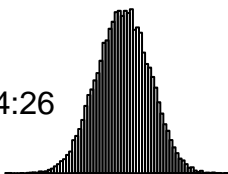

A194:26 – D206:26

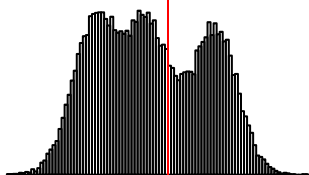

B184:26 – B224:26

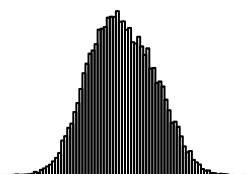

B184:26 – D206:26

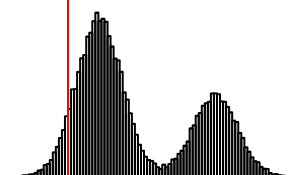

B224:26 – D206:26

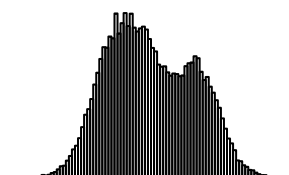

-10                      -5                      0                      5                      10

delta(Sugar 17)



A194:26

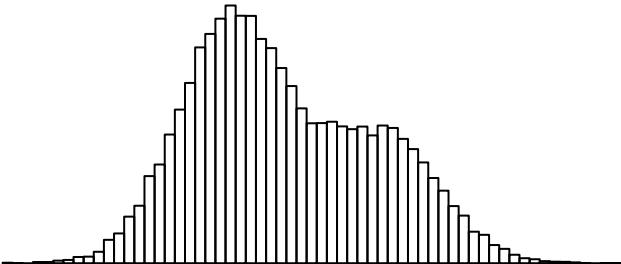

B184:26

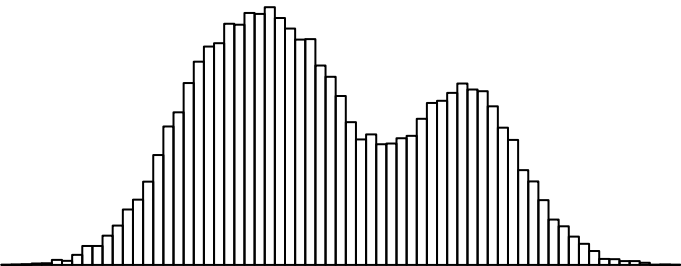

B224:26

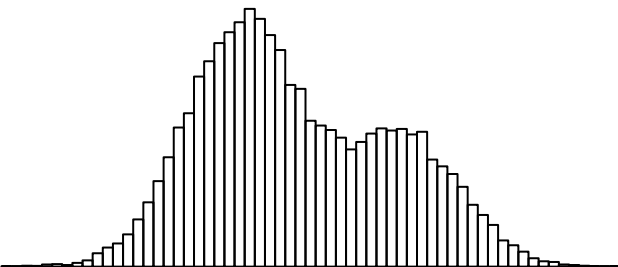

D206:26

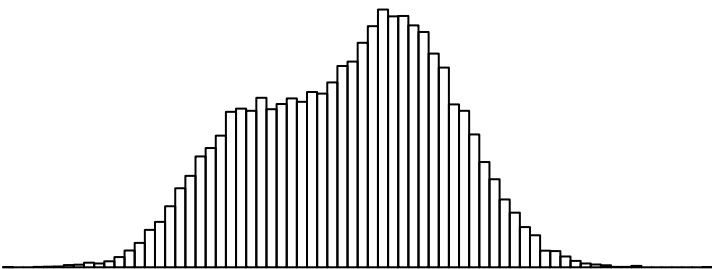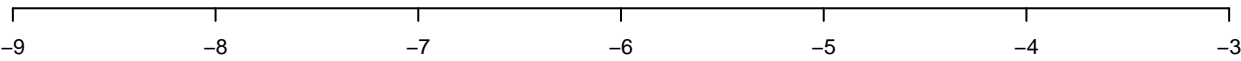

Sugar 18

A194:26 – B184:26

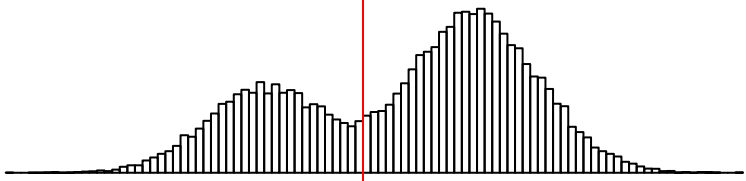

A194:26 – B224:26

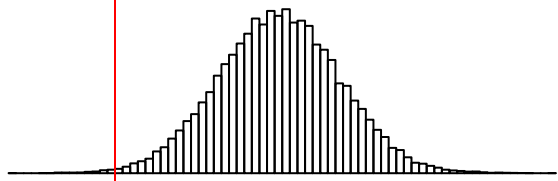

A194:26 – D206:26

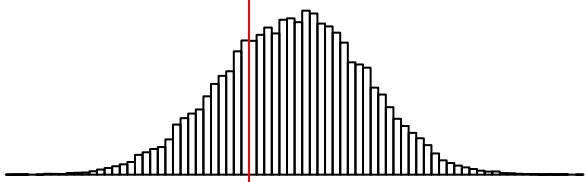

B184:26 – B224:26

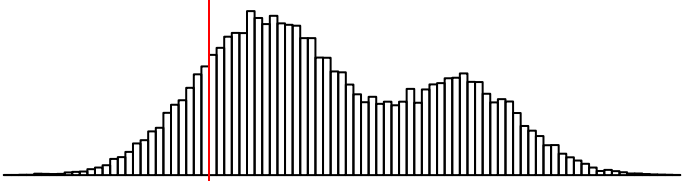

B184:26 – D206:26

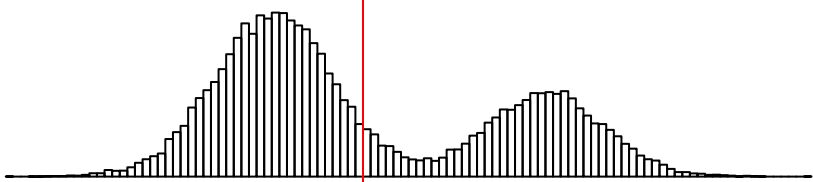

B224:26 – D206:26

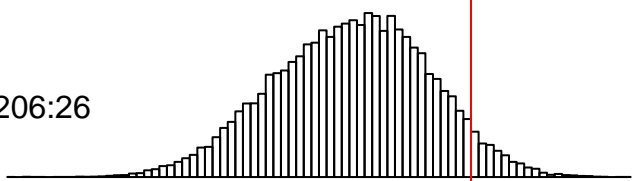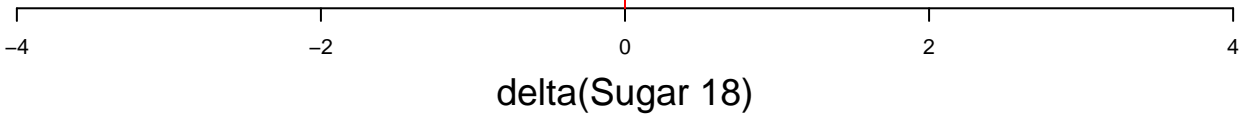

A194:26

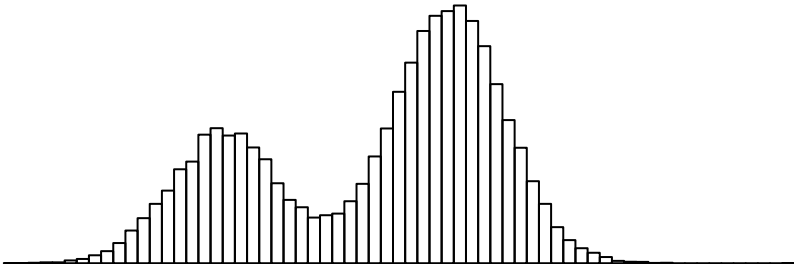

B184:26

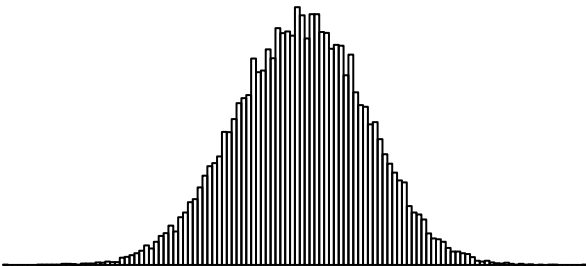

B224:26

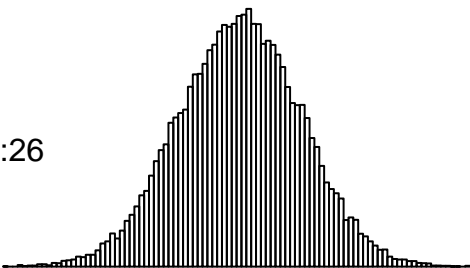

D206:26

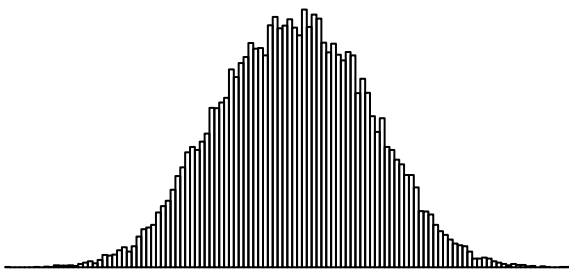

-10      -9      -8      -7      -6      -5

Sugar 20

A194:26 – B184:26

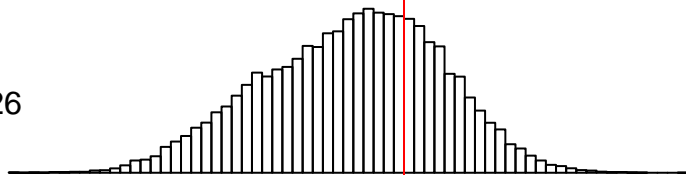

A194:26 – B224:26

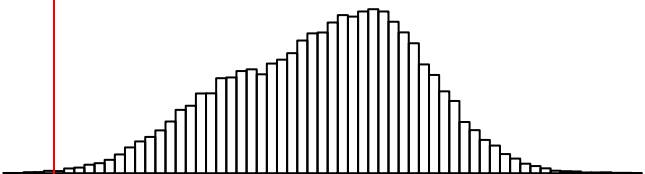

A194:26 – D206:26

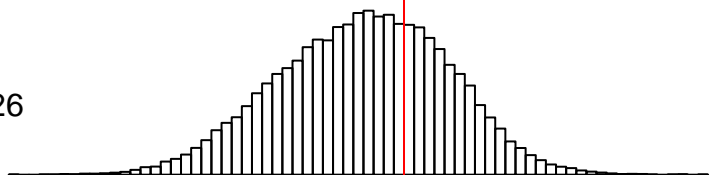

B184:26 – B224:26

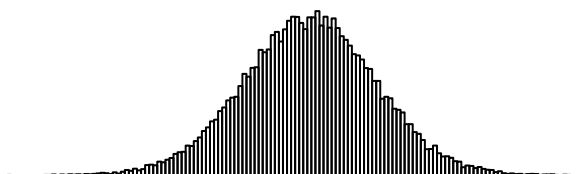

B184:26 – D206:26

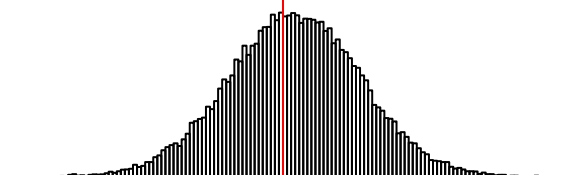

B224:26 – D206:26

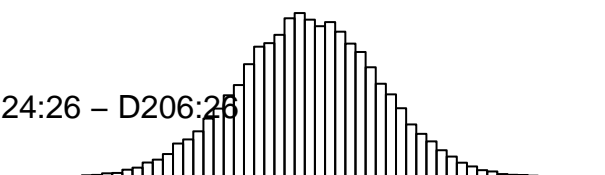

-3 -2 -1 0 1 2 3

delta(Sugar 20)

A194:26

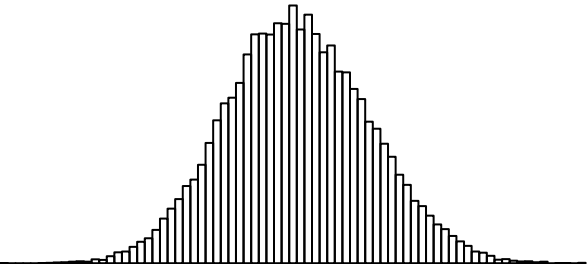

B184:26

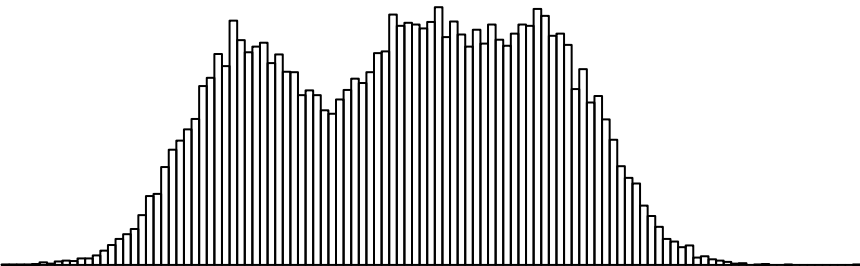

B224:26

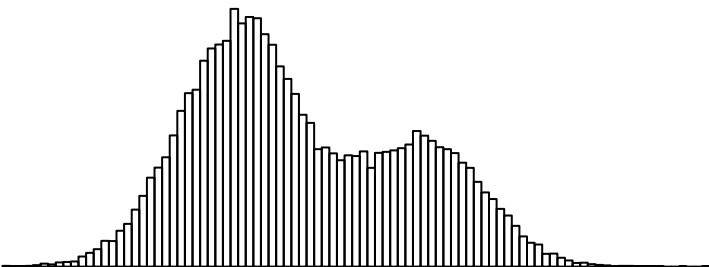

D206:26

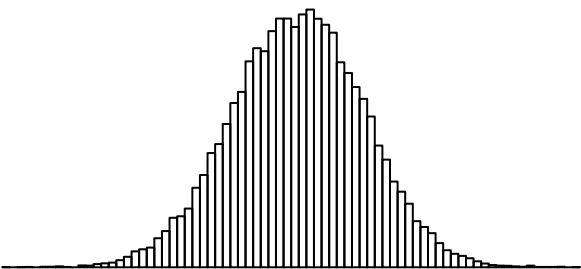

-10

-8

-6

-4

Sugar 21

A194:26 – B184:26

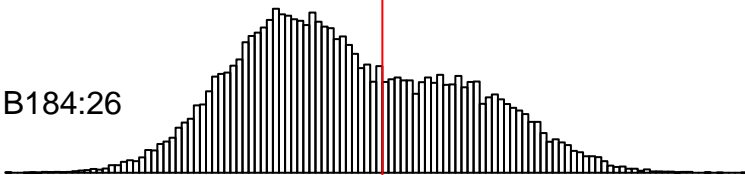

A194:26 – B224:26

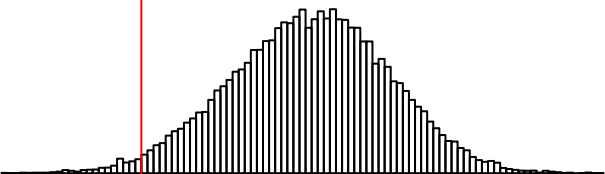

A194:26 – D206:26

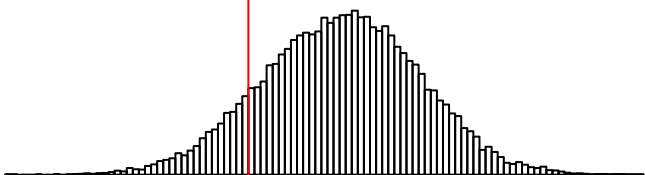

B184:26 – B224:26

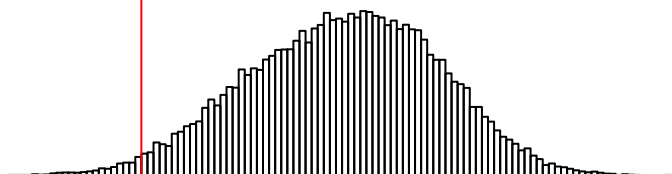

B184:26 – D206:26

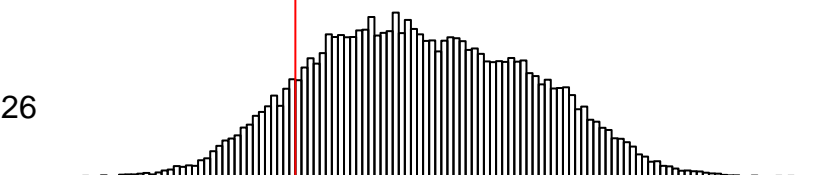

B224:26 – D206:26

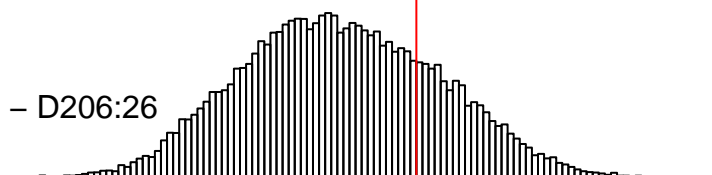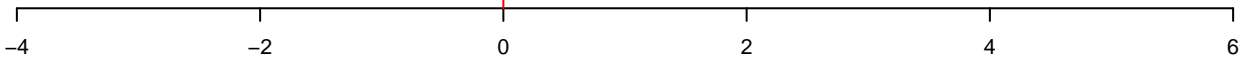

delta(Sugar 21)

A194:26

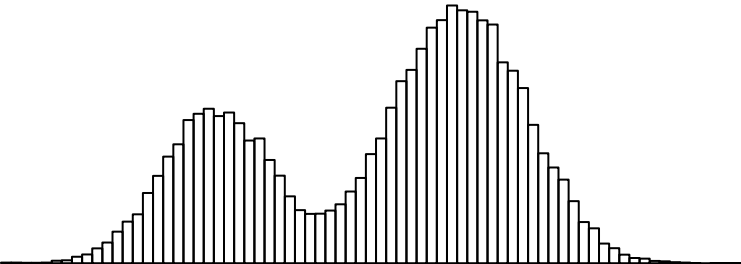

B184:26

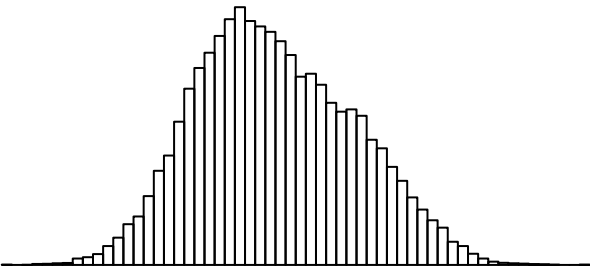

B224:26

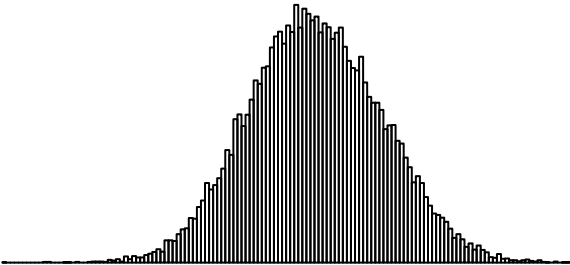

D206:26

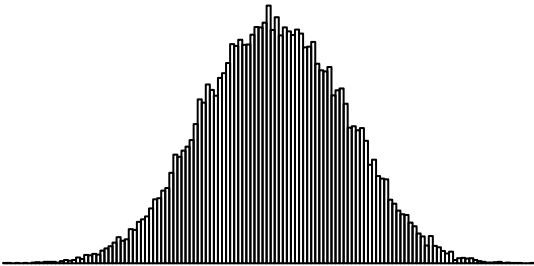

-9      -8      -7      -6      -5      -4      -3

Sugar 22

A194:26 – B184:26

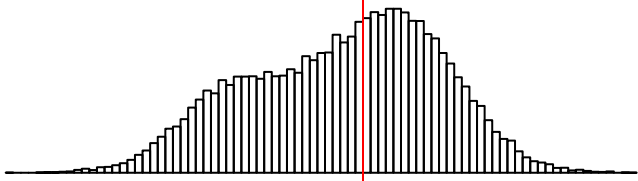

A194:26 – B224:26

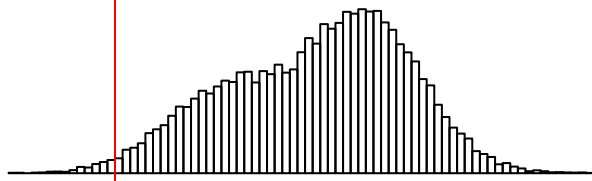

A194:26 – D206:26

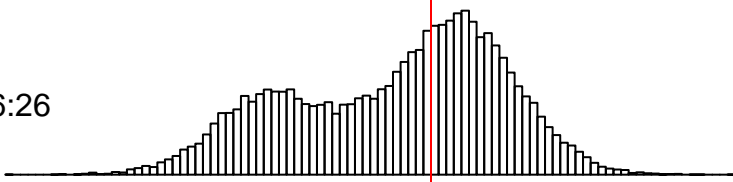

B184:26 – B224:26

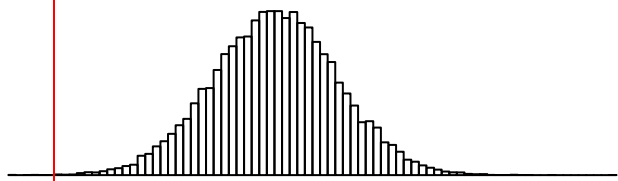

B184:26 – D206:26

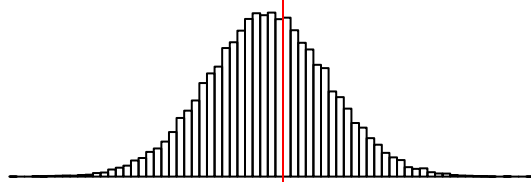

B224:26 – D206:26

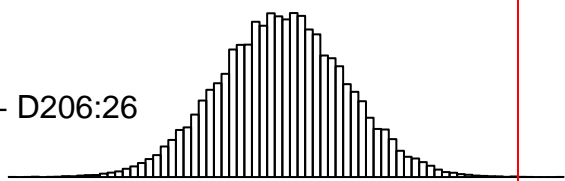

-4 -2 0 2 4

delta(Sugar 22)



A194:26

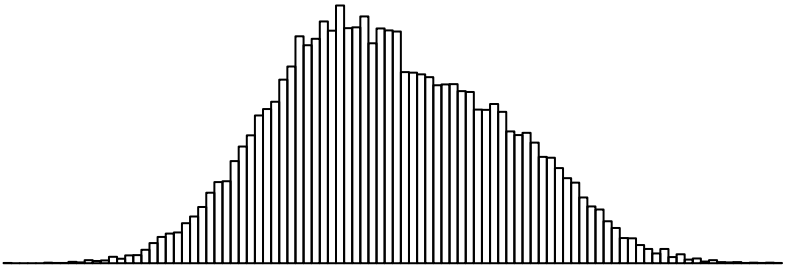

B184:26

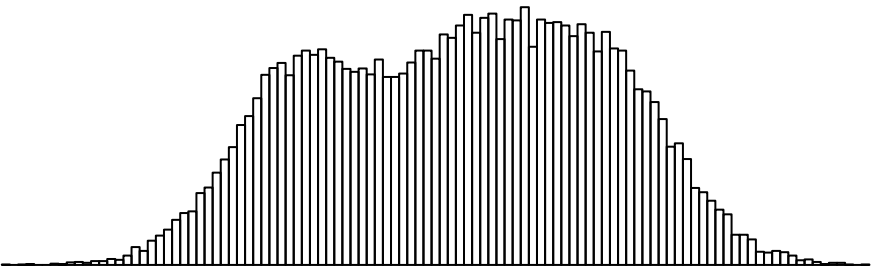

B224:26

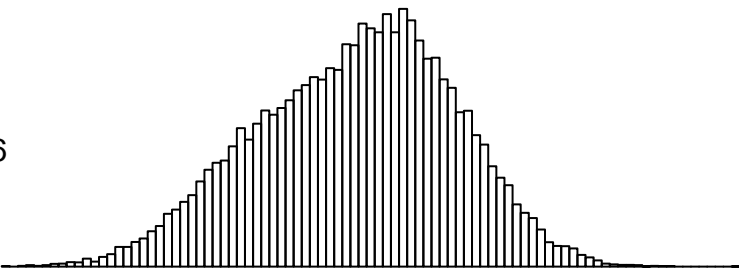

D206:26

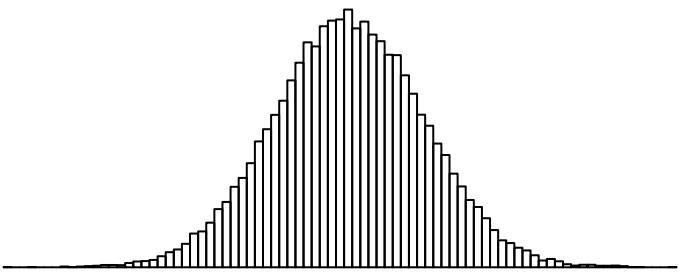

-8.5      -8.0      -7.5      -7.0      -6.5      -6.0      -5.5

Sugar 23

A194:26 – B184:26

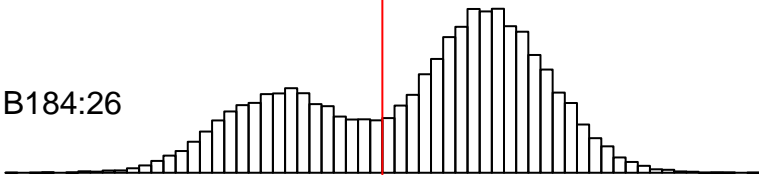

A194:26 – B224:26

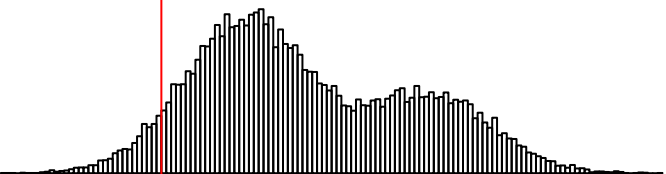

A194:26 – D206:26

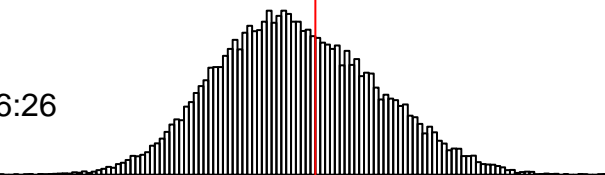

B184:26 – B224:26

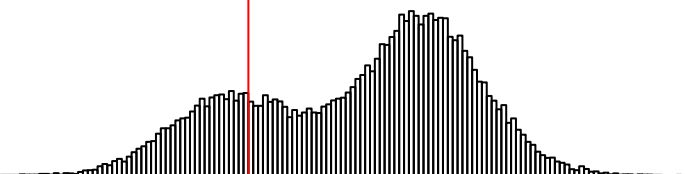

B184:26 – D206:26

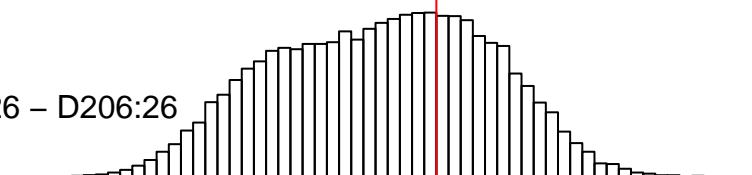

B224:26 – D206:26

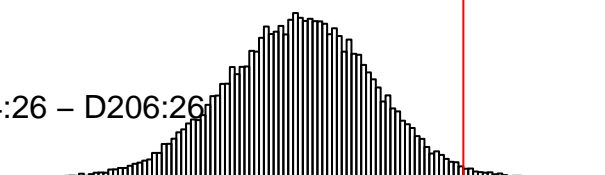

delta(Sugar 23)

A194:26

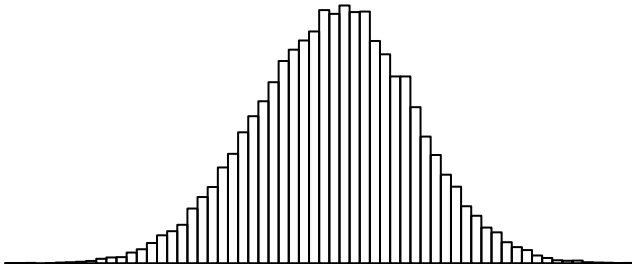

B184:26

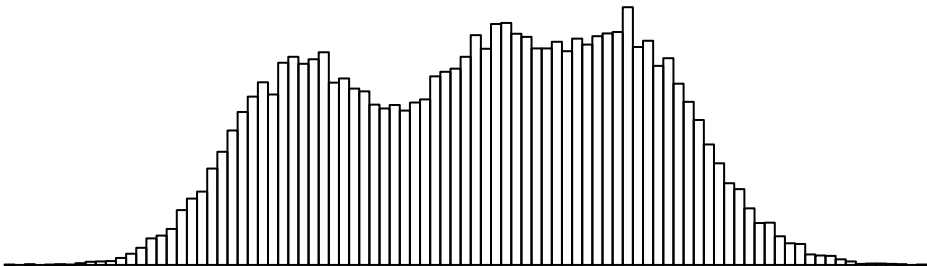

B224:26

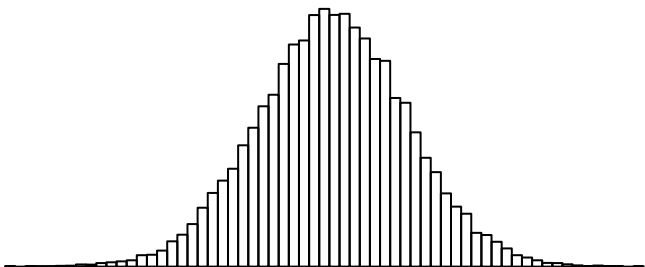

D206:26

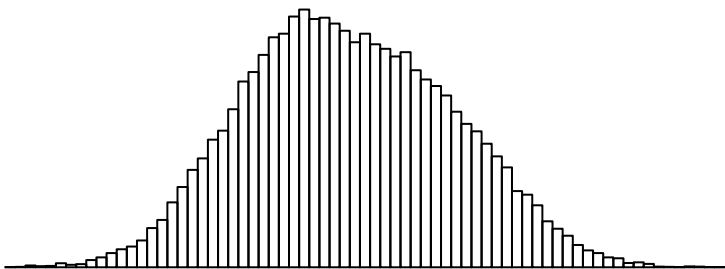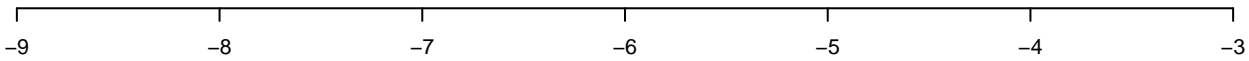

Sugar 24

A194:26 – B184:26

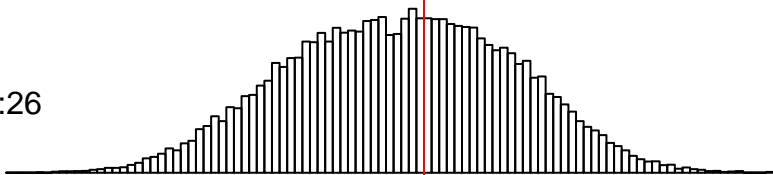

A194:26 – B224:26

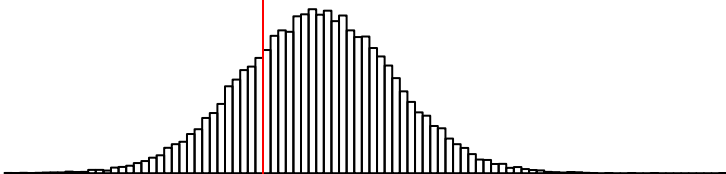

A194:26 – D206:26

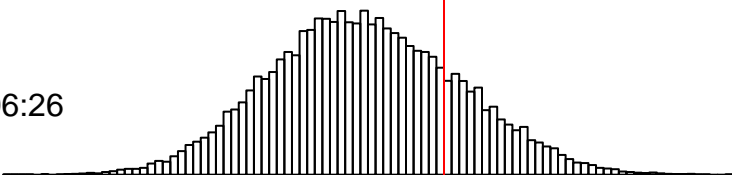

B184:26 – B224:26

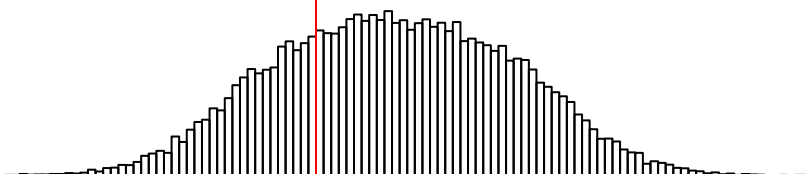

B184:26 – D206:26

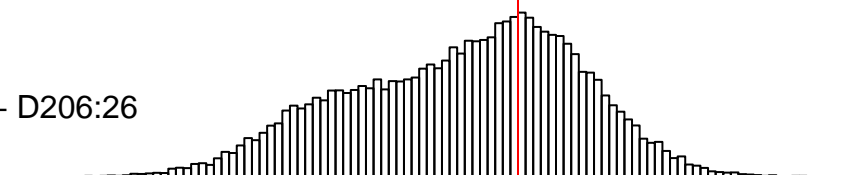

B224:26 – D206:26

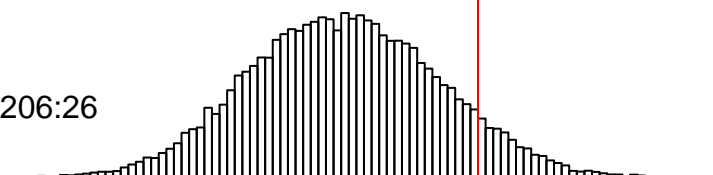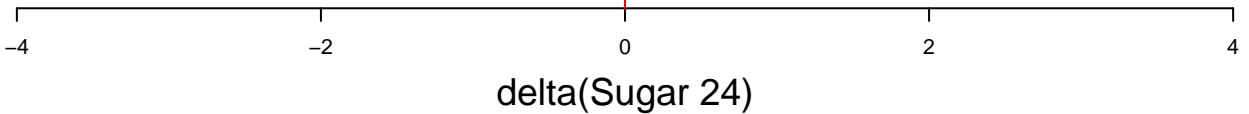

A194:26

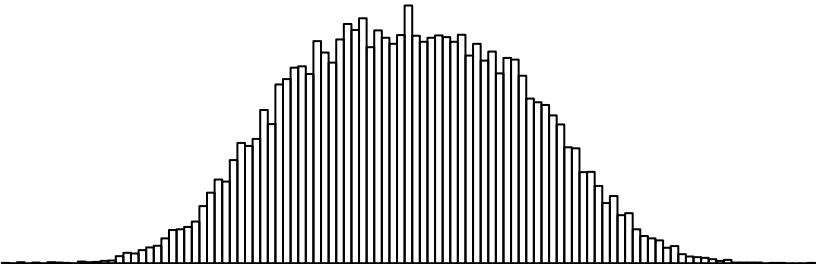

B184:26

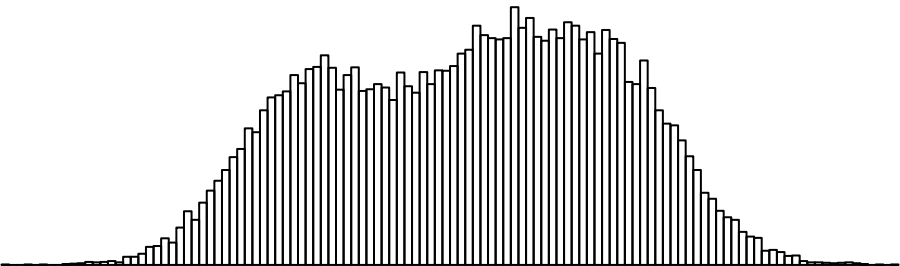

B224:26

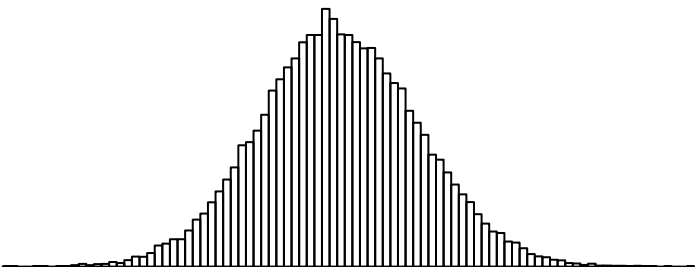

D206:26

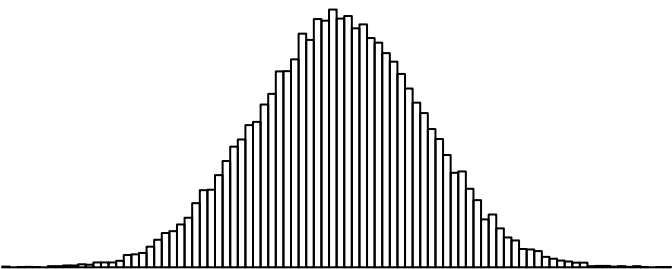

-10

-8

-6

-4

Alcohol 1

A194:26 – B184:26

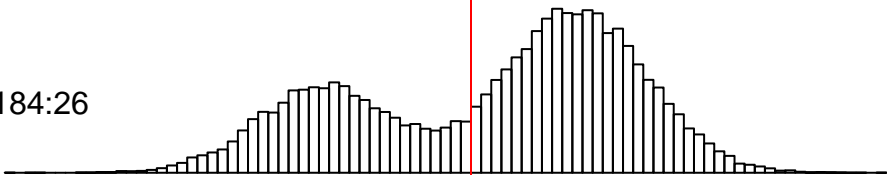

A194:26 – B224:26

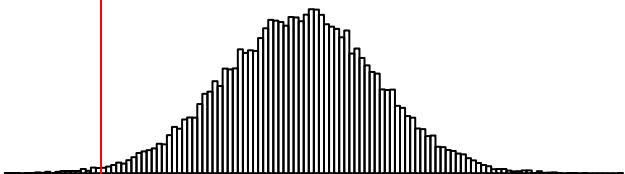

A194:26 – D206:26

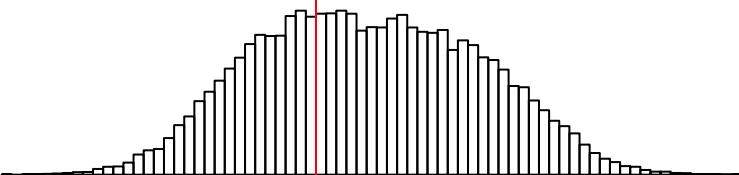

B184:26 – B224:26

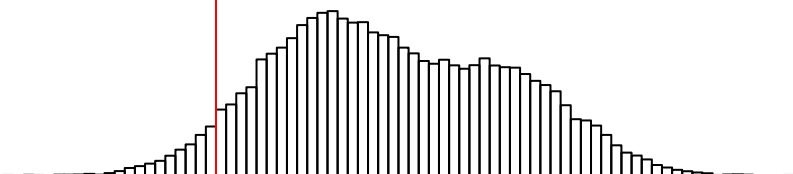

B184:26 – D206:26

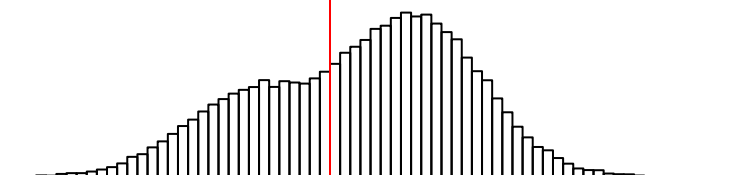

B224:26 – D206:26

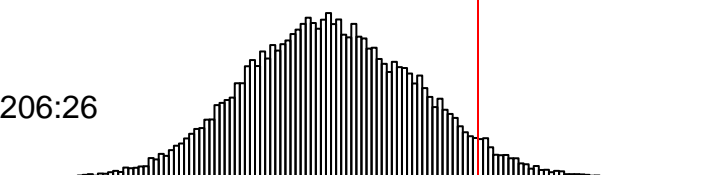

delta(Alcohol 1)

A194:26

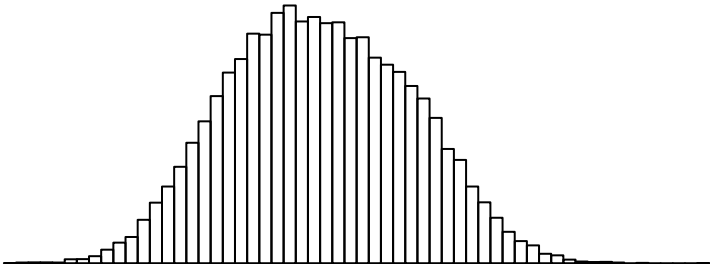

B184:26

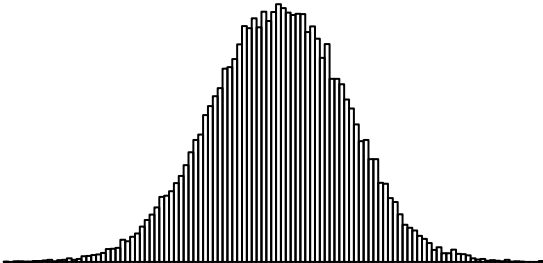

B224:26

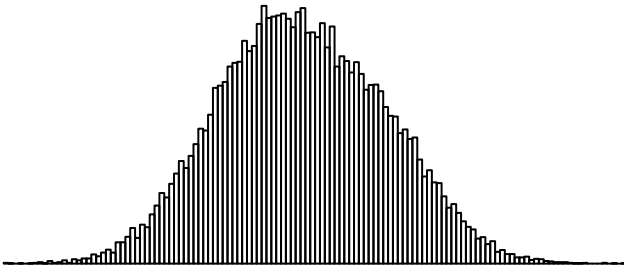

D206:26

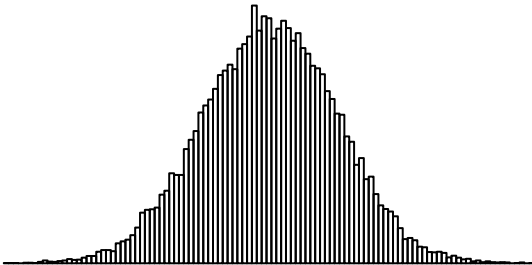

-10      -9      -8      -7      -6      -5

Hydrocarbon 1

A194:26 – B184:26

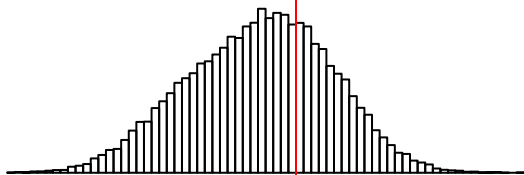

A194:26 – B224:26

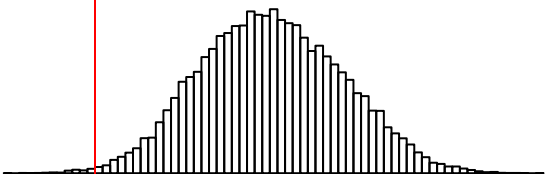

A194:26 – D206:26

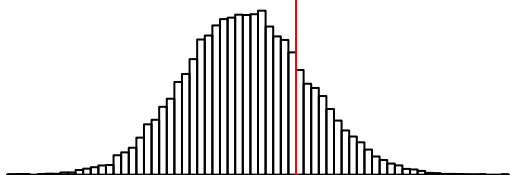

B184:26 – B224:26

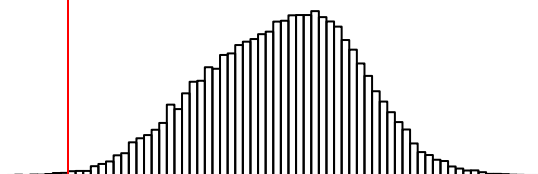

B184:26 – D206:26

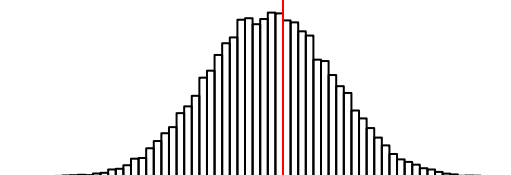

B224:26 – D206:26

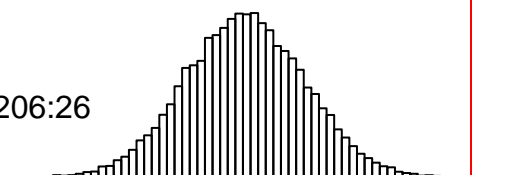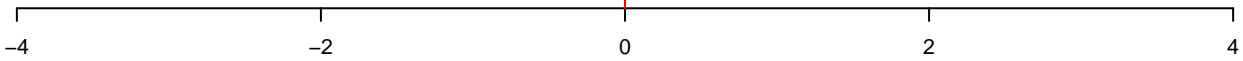

delta(Hydrocarbon 1)



A194:26

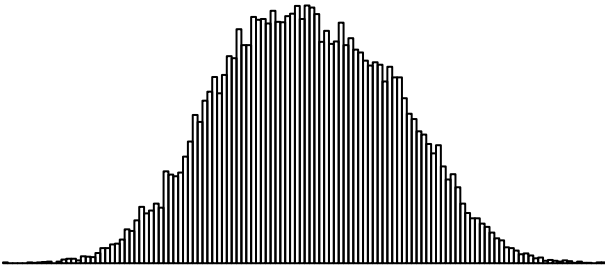

B184:26

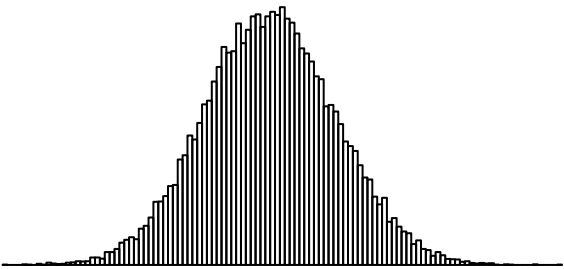

B224:26

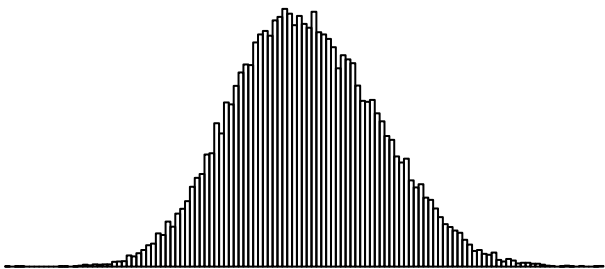

D206:26

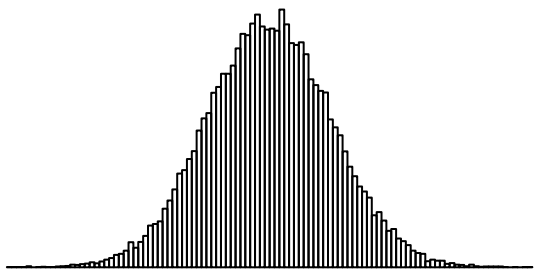

Hydrocarbon 2

A194:26 – B184:26

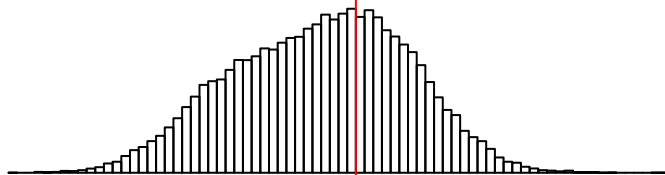

A194:26 – B224:26

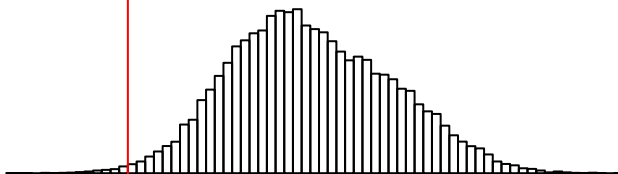

A194:26 – D206:26

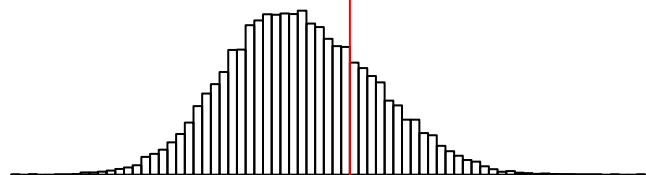

B184:26 – B224:26

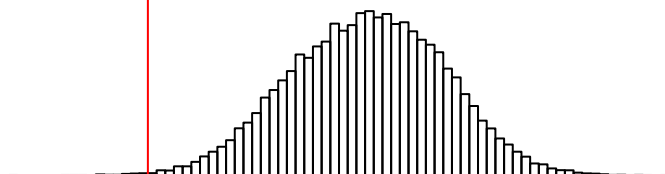

B184:26 – D206:26

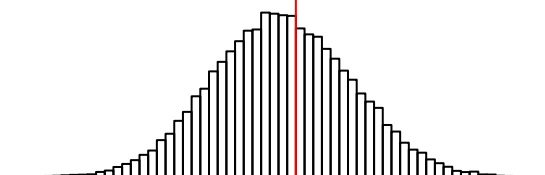

B224:26 – D206:26

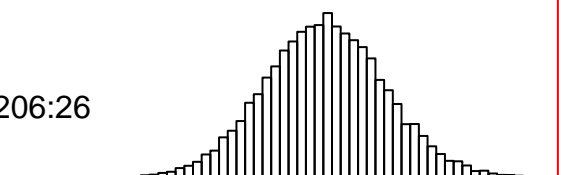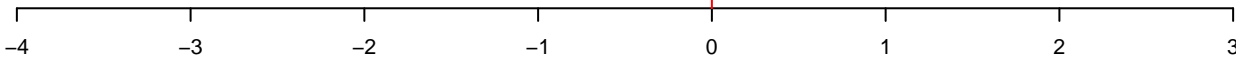

delta(Hydrocarbon 2)

A194:26

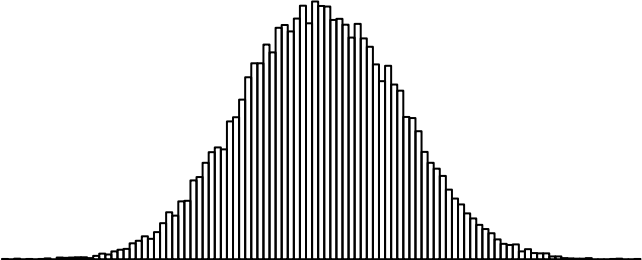

B184:26

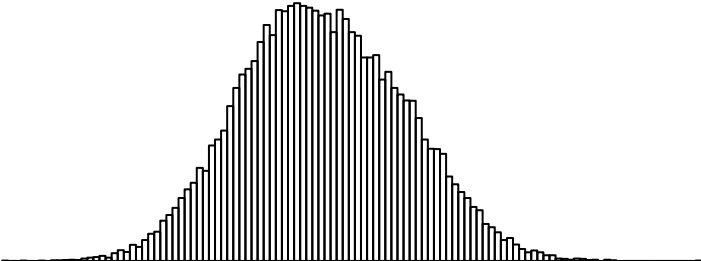

B224:26

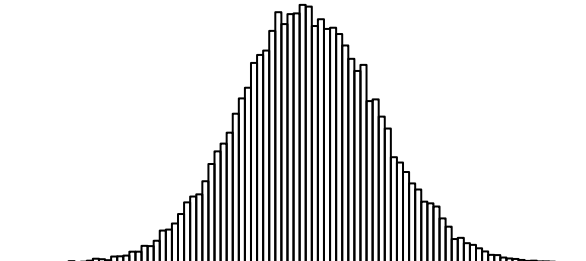

D206:26

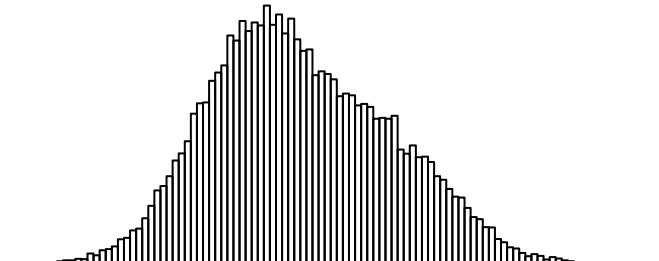

-12      -10      -8      -6      -4      -2

Hydrocarbon 3

A194:26 – B184:26

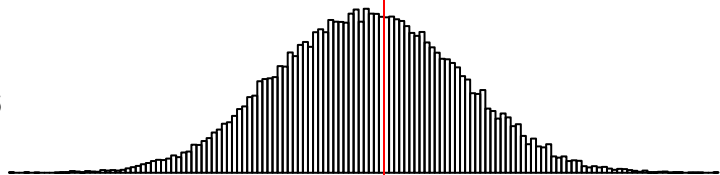

A194:26 – B224:26

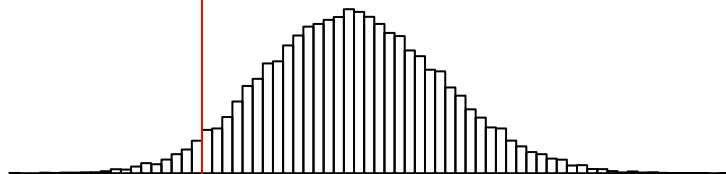

A194:26 – D206:26

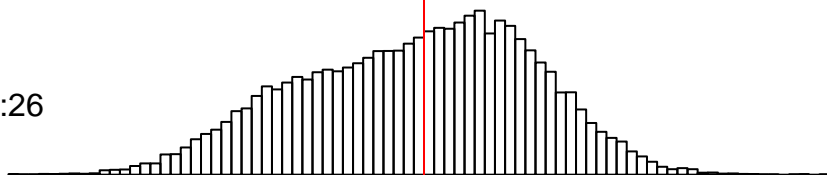

B184:26 – B224:26

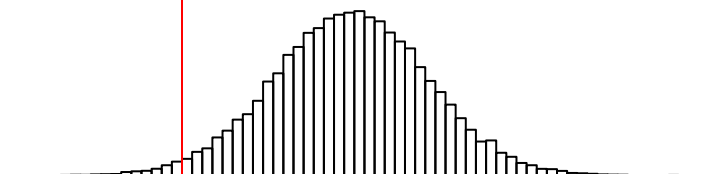

B184:26 – D206:26

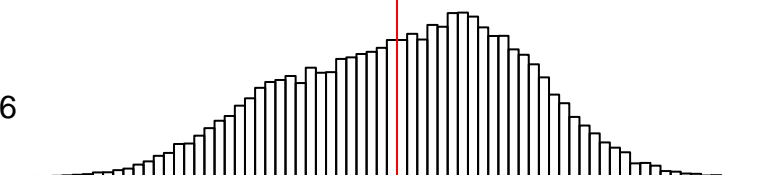

B224:26 – D206:26

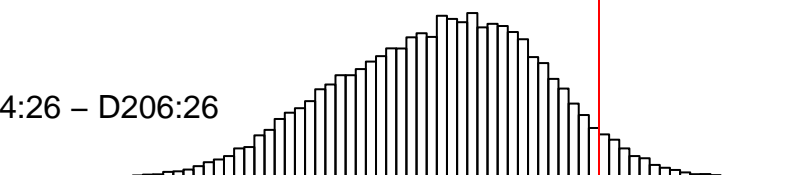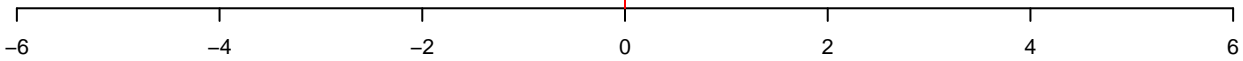

delta(Hydrocarbon 3)

A194:26

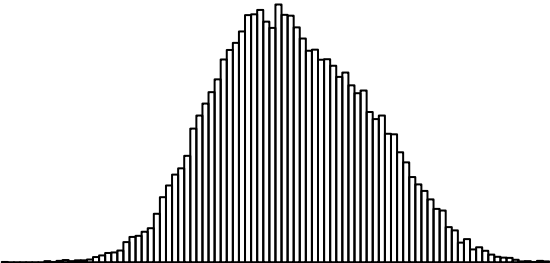

B184:26

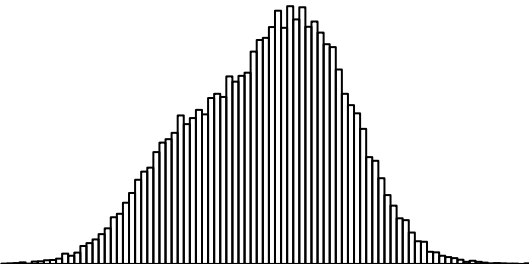

B224:26

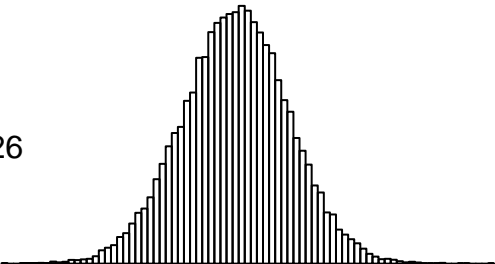

D206:26

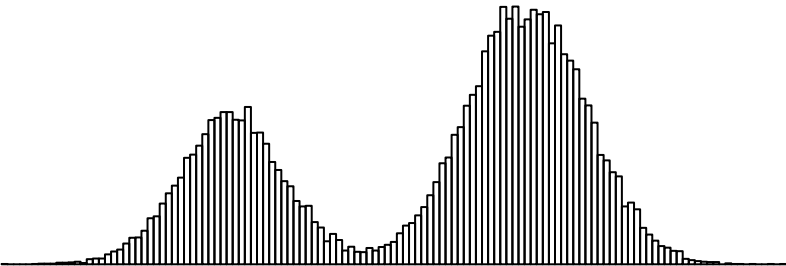

-10                      -9                      -8                      -7                      -6

Hydrocarbon 4

A194:26 – B184:26

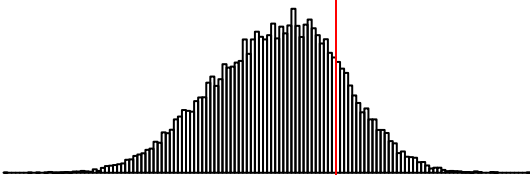

A194:26 – B224:26

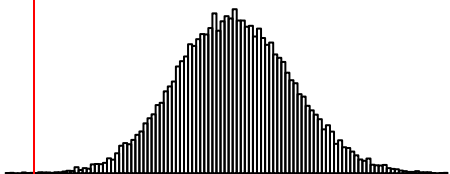

A194:26 – D206:26

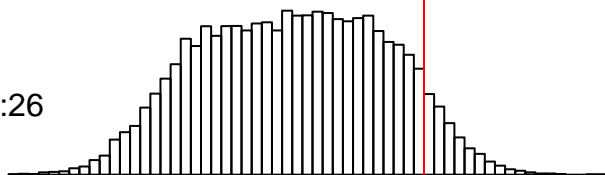

B184:26 – B224:26

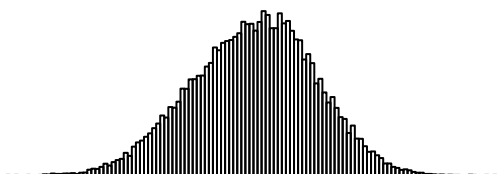

B184:26 – D206:26

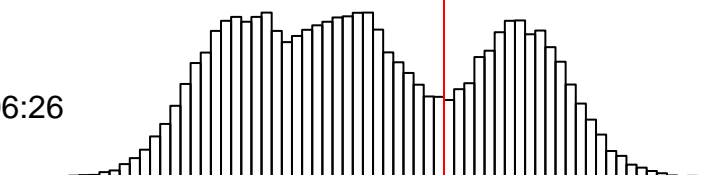

B224:26 – D206:26

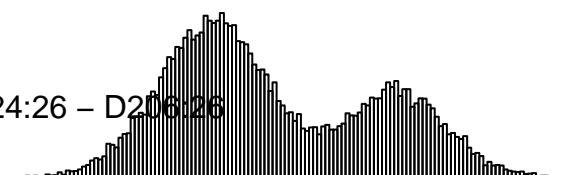

-3 -2 -1 0 1 2 3

delta(Hydrocarbon 4)

A194:26

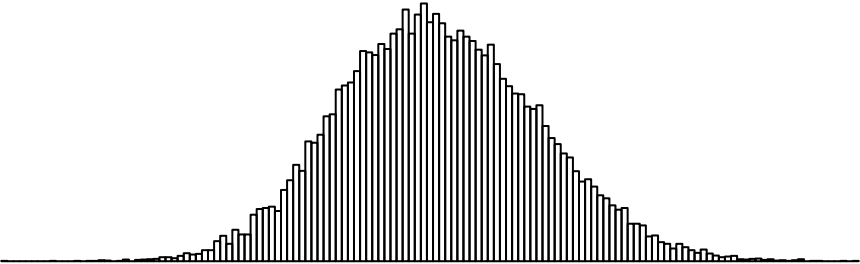

B184:26

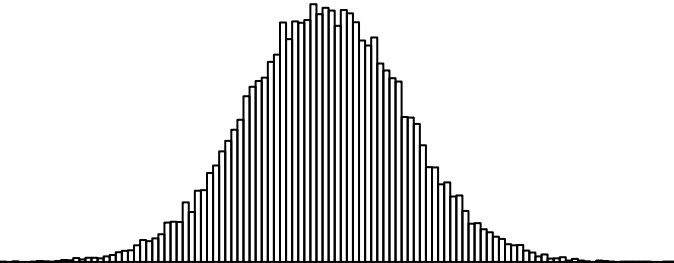

B224:26

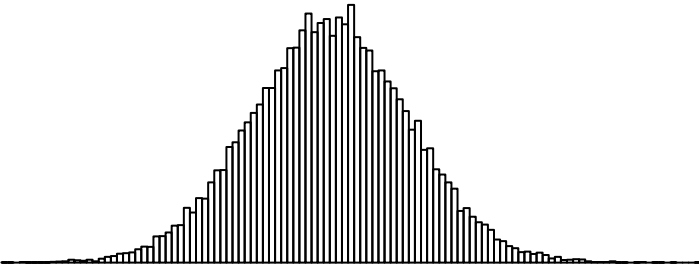

D206:26

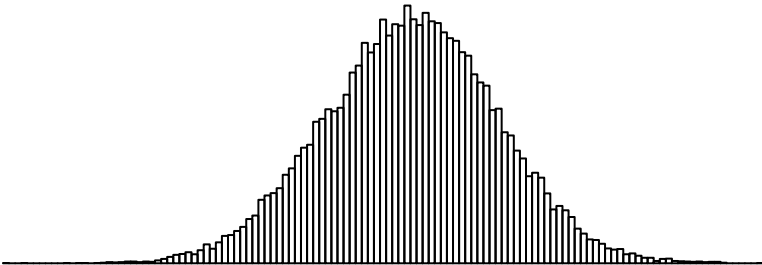

Unidentified Metabolite 1

A194:26 – B184:26

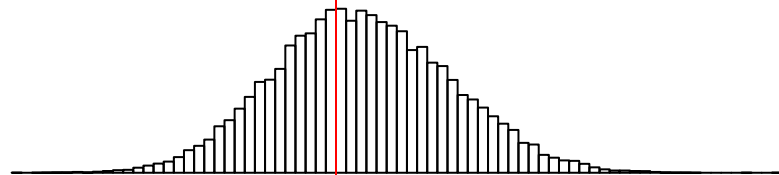

A194:26 – B224:26

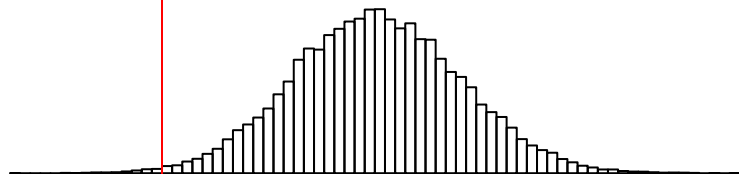

A194:26 – D206:26

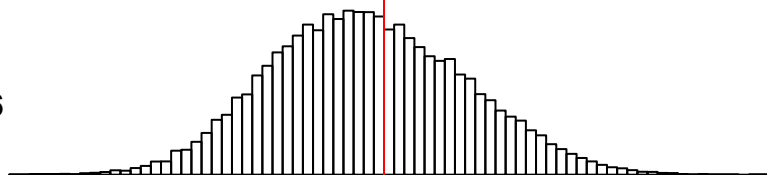

B184:26 – B224:26

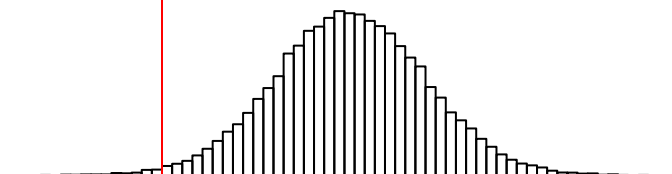

B184:26 – D206:26

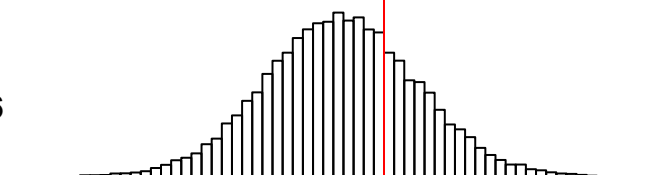

B224:26 – D206:26

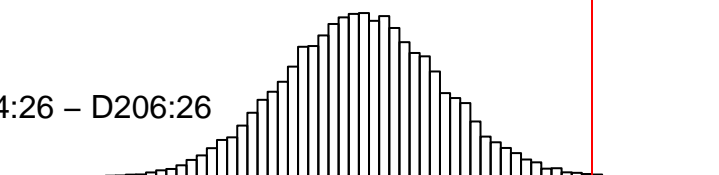

delta(Unidentified Metabolite 1)



A194:26

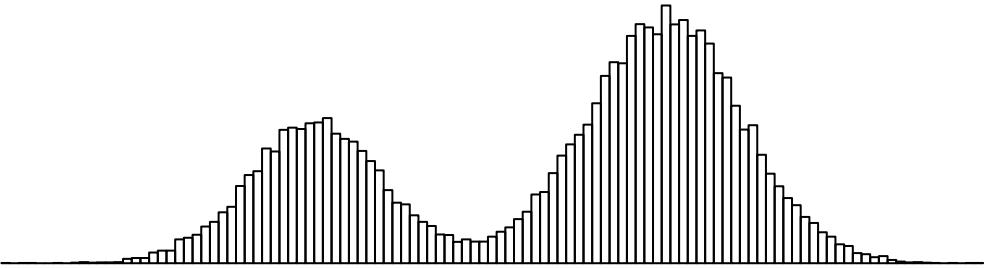

B184:26

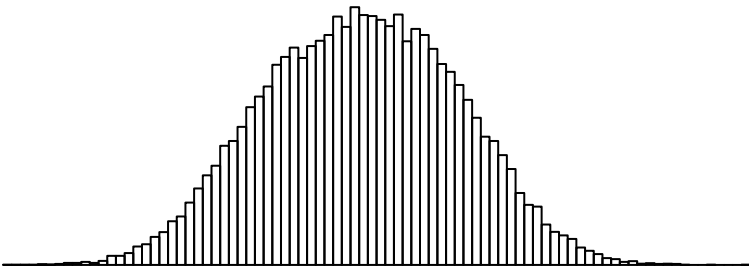

B224:26

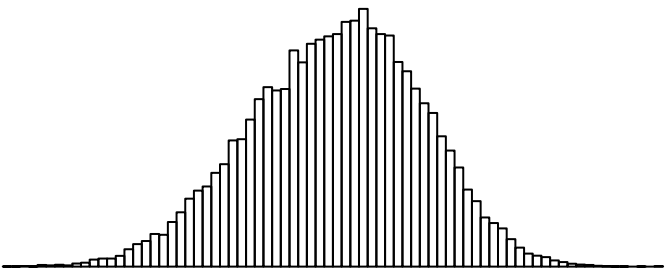

D206:26

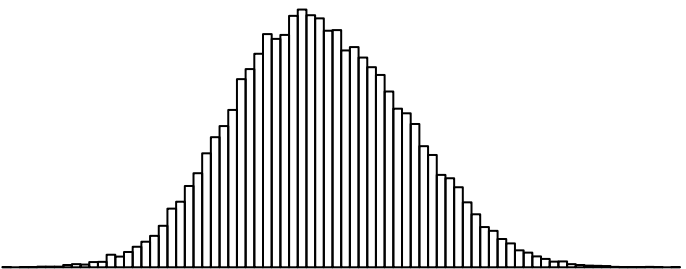

-11      -10      -9      -8      -7      -6      -5      -4

Unidentified Metabolite 2

A194:26 – B184:26

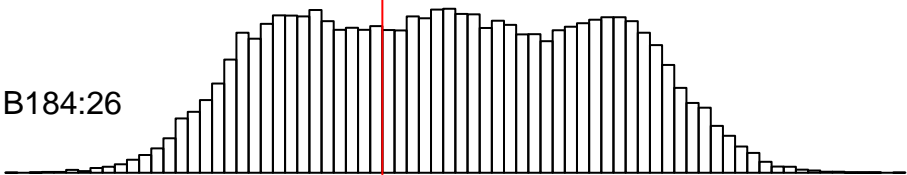

A194:26 – B224:26

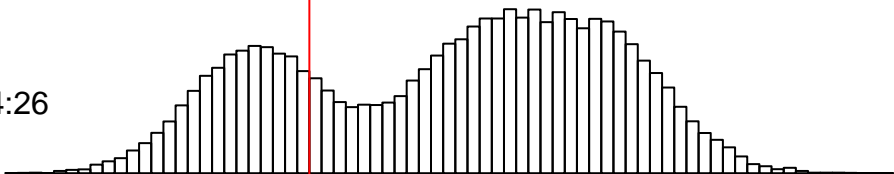

A194:26 – D206:26

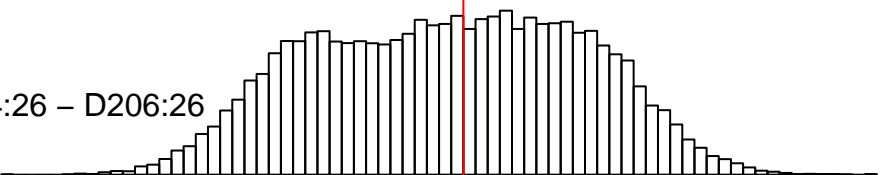

B184:26 – B224:26

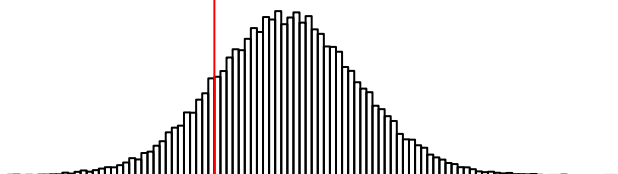

B184:26 – D206:26

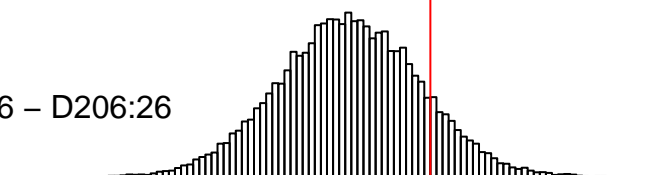

B224:26 – D206:26

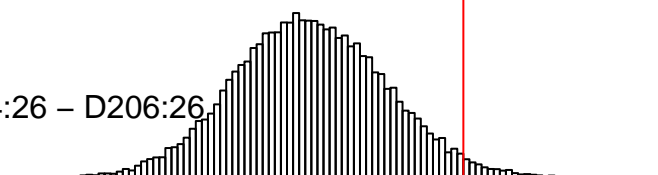

delta(Unidentified Metabolite 2)

A194:26

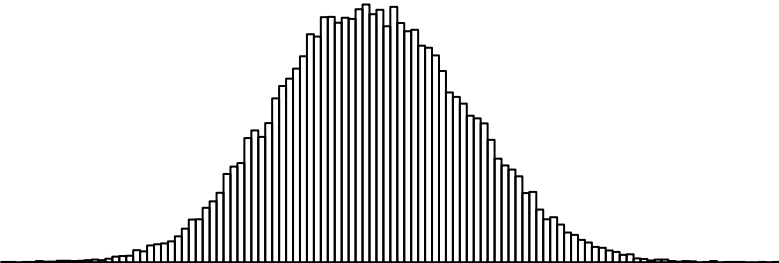

B184:26

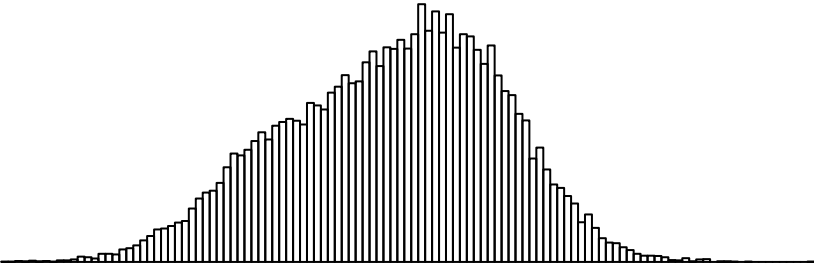

B224:26

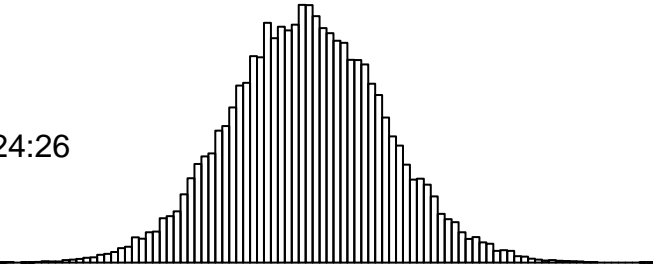

D206:26

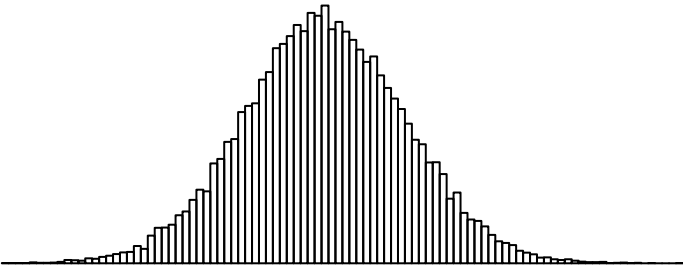

-11.0      -10.5      -10.0      -9.5      -9.0      -8.5      -8.0      -7.5

Unidentified Metabolite 3

A194:26 – B184:26

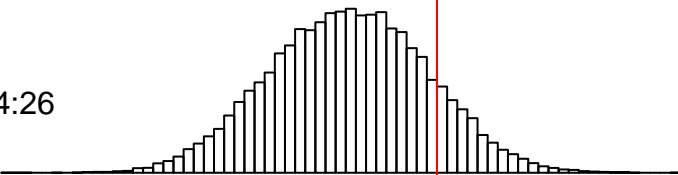

A194:26 – B224:26

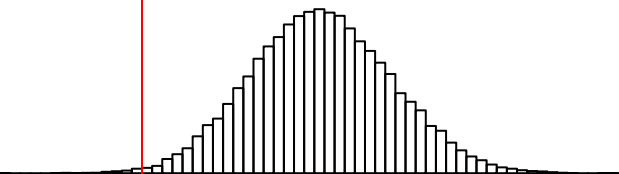

A194:26 – D206:26

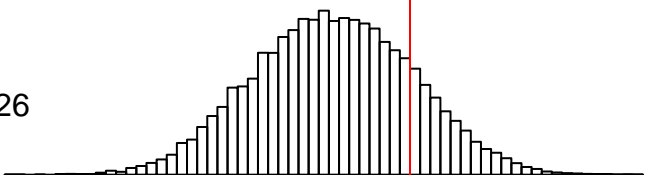

B184:26 – B224:26

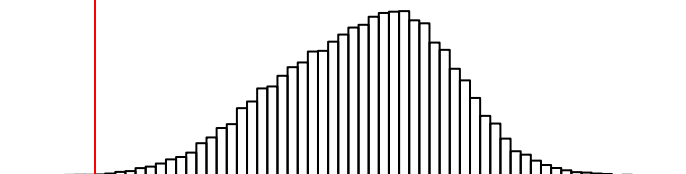

B184:26 – D206:26

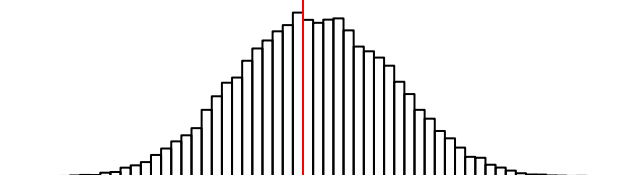

B224:26 – D206:26

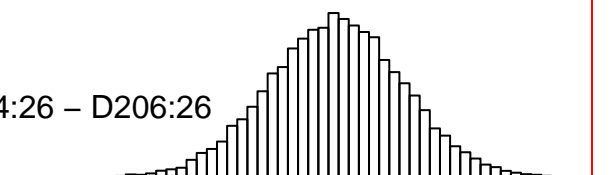

delta(Unidentified Metabolite 3)

A194:26

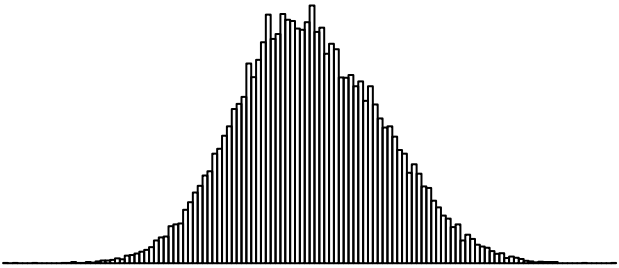

B184:26

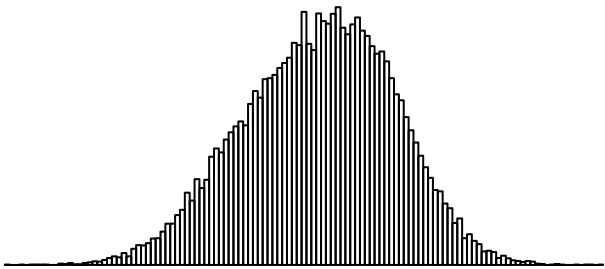

B224:26

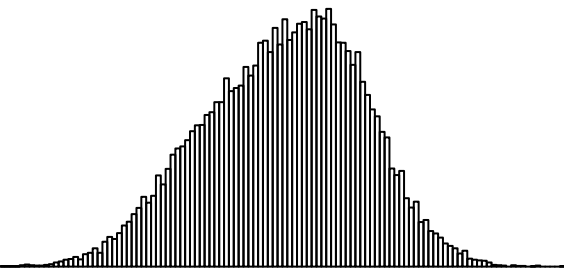

D206:26

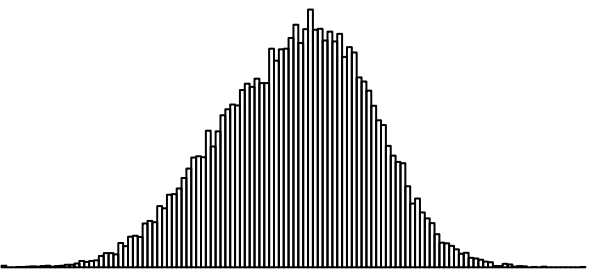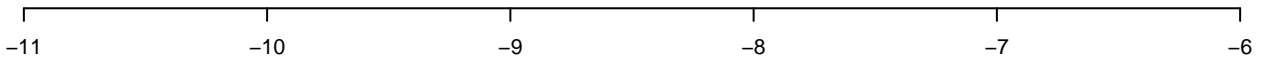

Unidentified Metabolite 4

A194:26 – B184:26

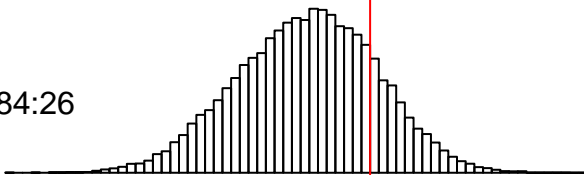

A194:26 – B224:26

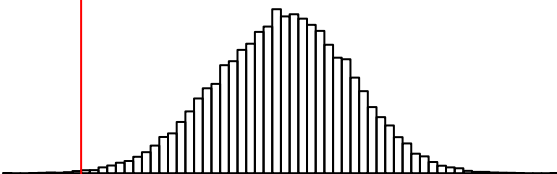

A194:26 – D206:26

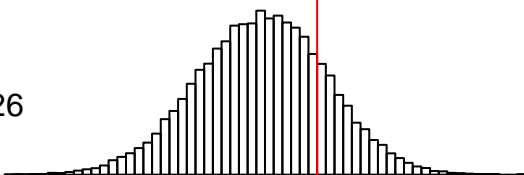

B184:26 – B224:26

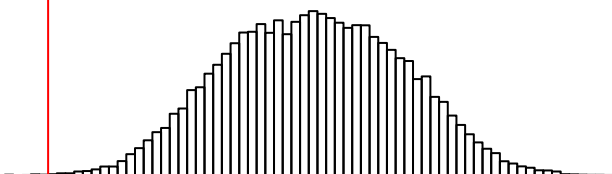

B184:26 – D206:26

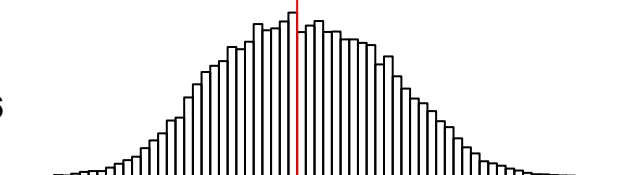

B224:26 – D206:26

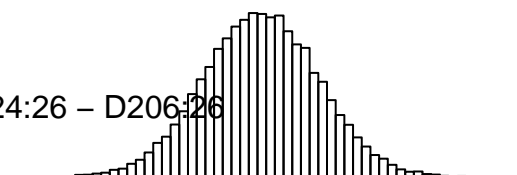

delta(Unidentified Metabolite 4)

A194:26

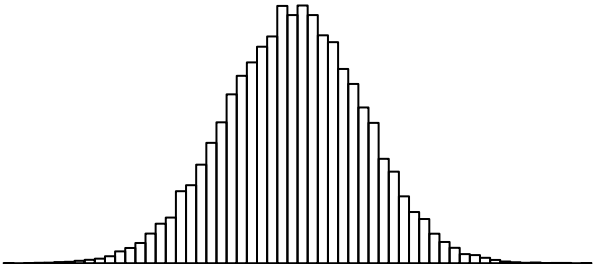

B184:26

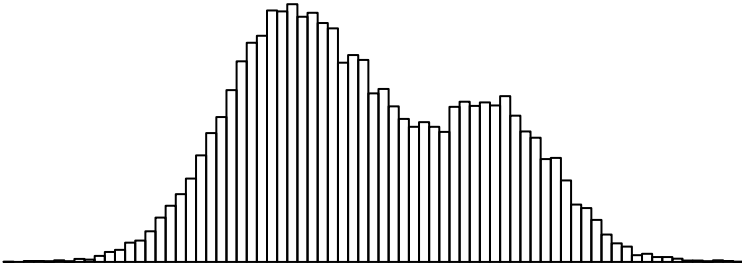

B224:26

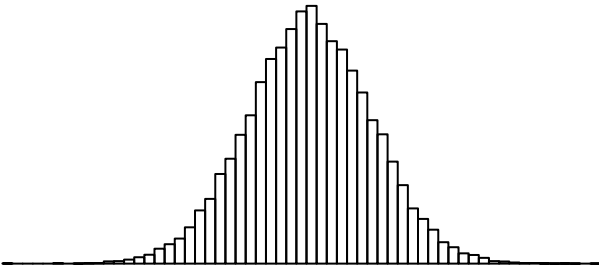

D206:26

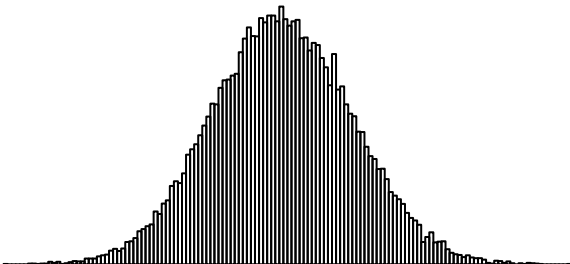

Unidentified Metabolite 5

A194:26 – B184:26

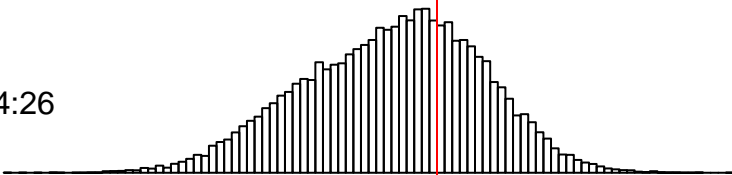

A194:26 – B224:26

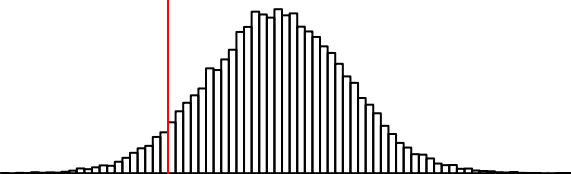

A194:26 – D206:26

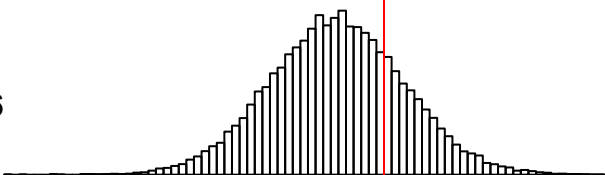

B184:26 – B224:26

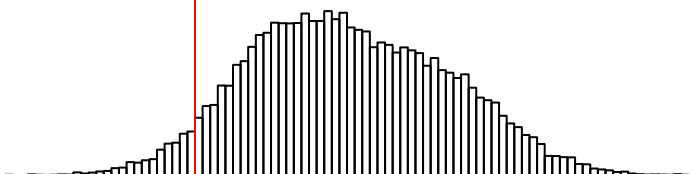

B184:26 – D206:26

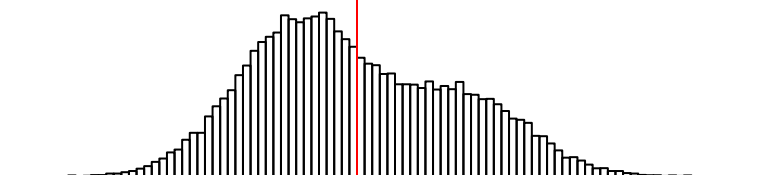

B224:26 – D206:26

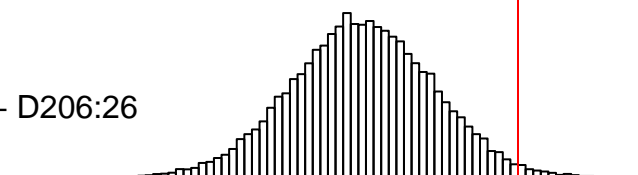

delta(Unidentified Metabolite 5)



A194:26

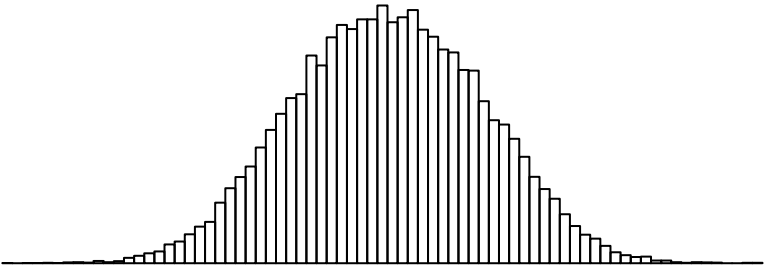

B184:26

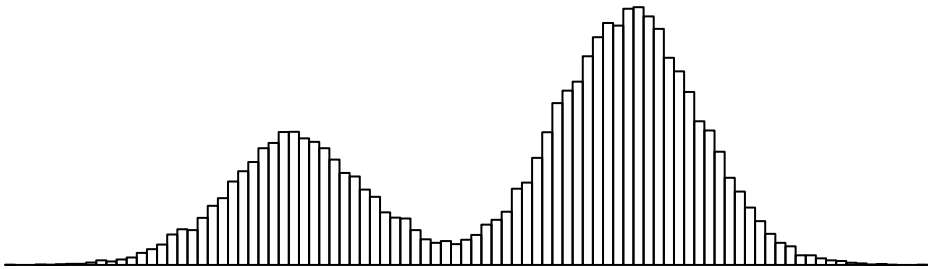

B224:26

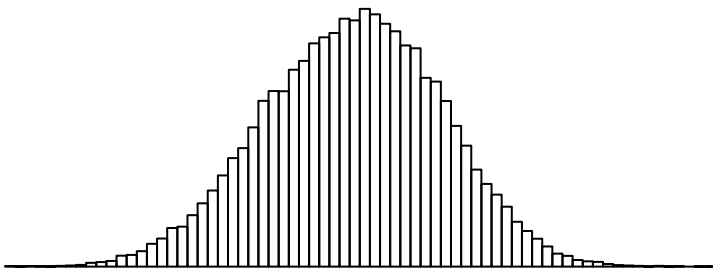

D206:26

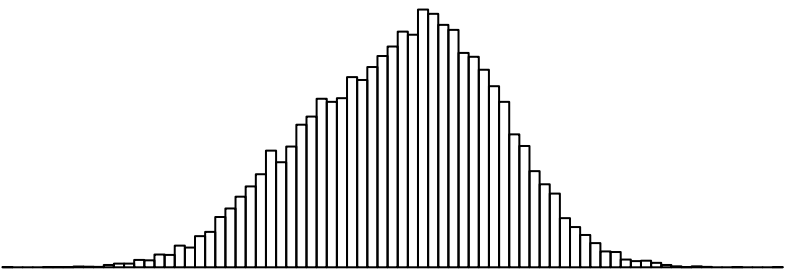

-9                      -8                      -7                      -6                      -5                      -4                      -3

Unidentified Metabolite 6

A194:26 – B184:26

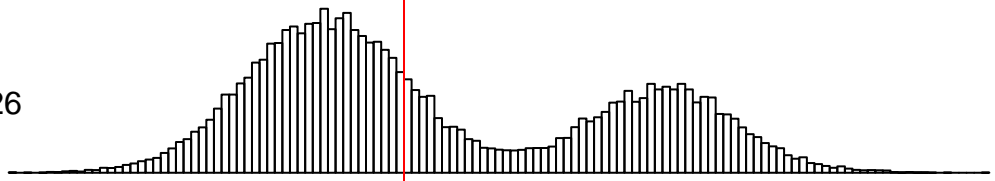

A194:26 – B224:26

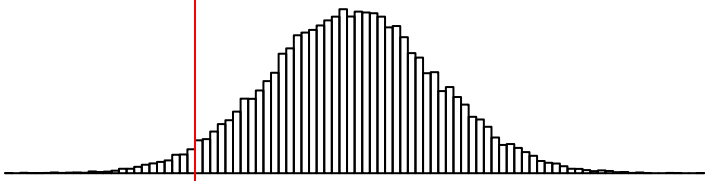

A194:26 – D206:26

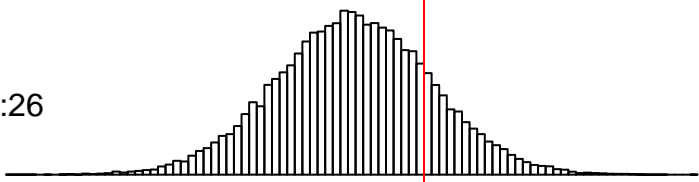

B184:26 – B224:26

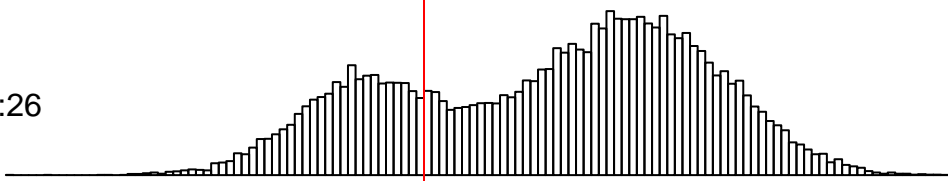

B184:26 – D206:26

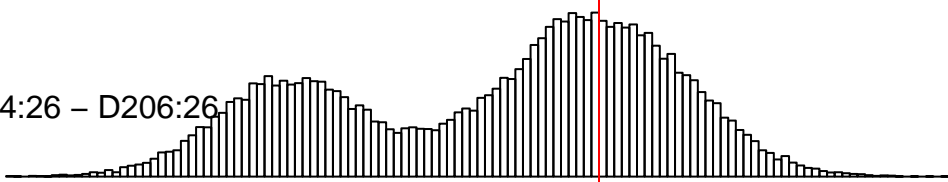

B224:26 – D206:26

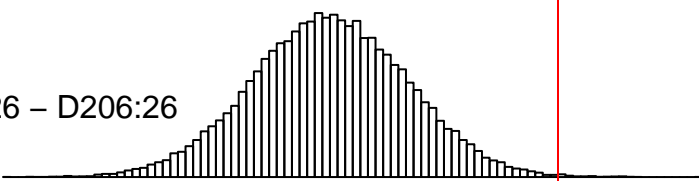

delta(Unidentified Metabolite 6)

A194:26

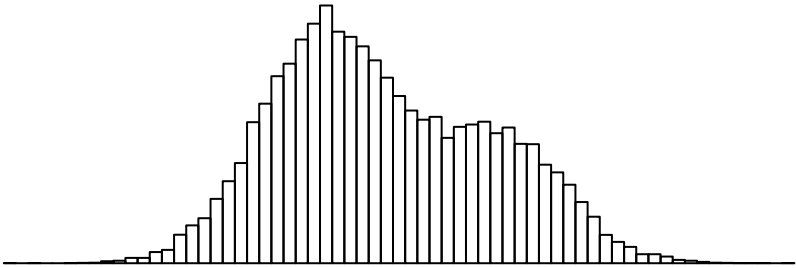

B184:26

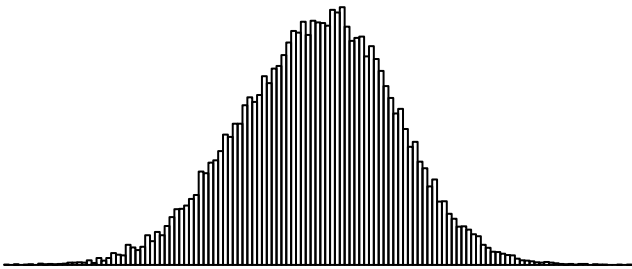

B224:26

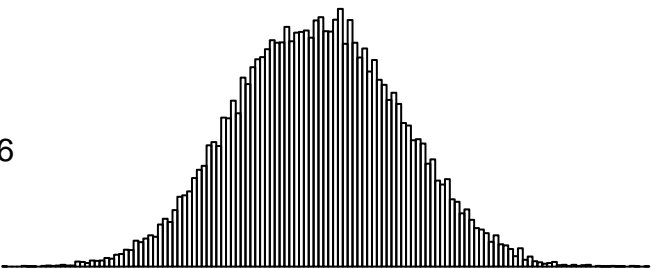

D206:26

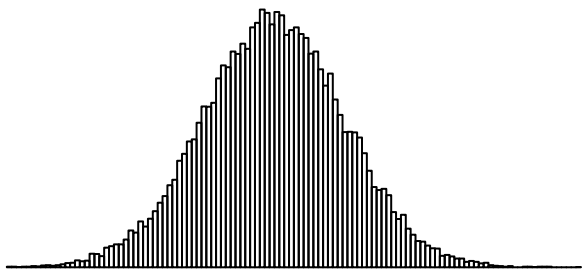

-9      -8      -7      -6      -5      -4

Unidentified Metabolite 7

A194:26 – B184:26

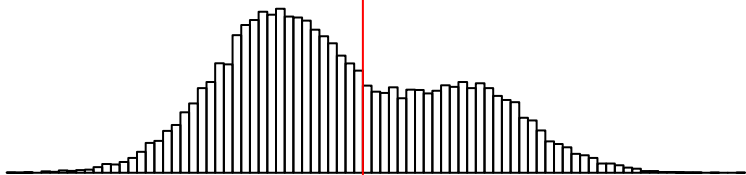

A194:26 – B224:26

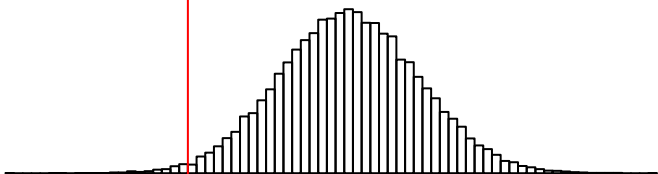

A194:26 – D206:26

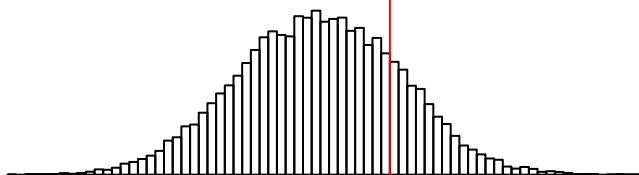

B184:26 – B224:26

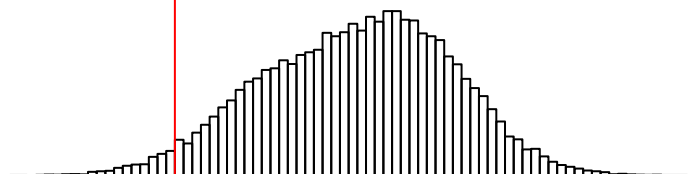

B184:26 – D206:26

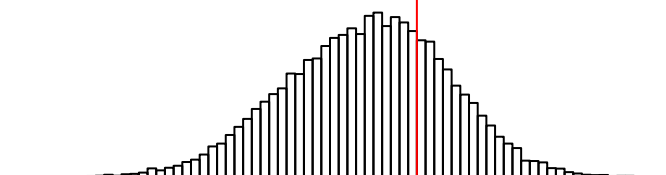

B224:26 – D206:26

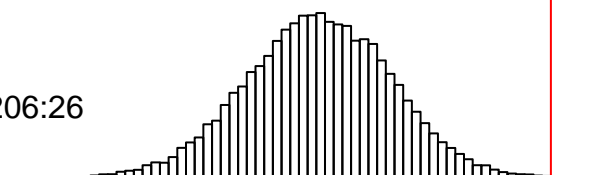

delta(Unidentified Metabolite 7)

A194:26

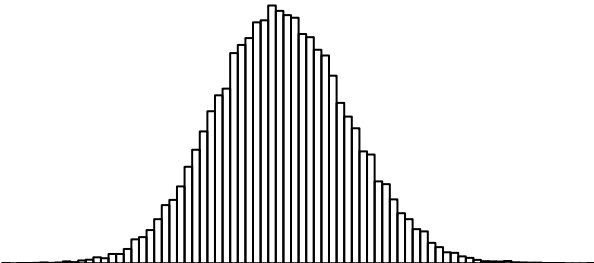

B184:26

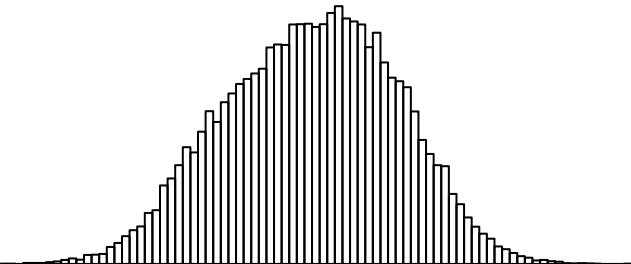

B224:26

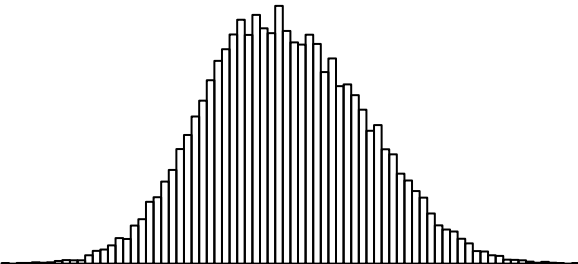

D206:26

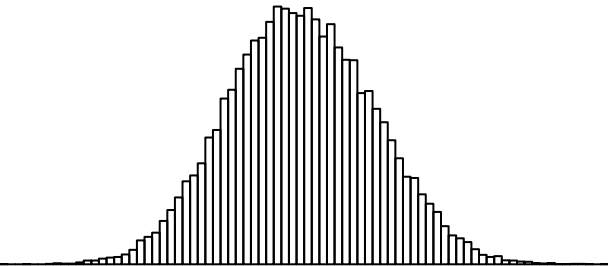

-10                      -8                      -6                      -4                      -2

Unidentified Metabolite 8

A194:26 – B184:26

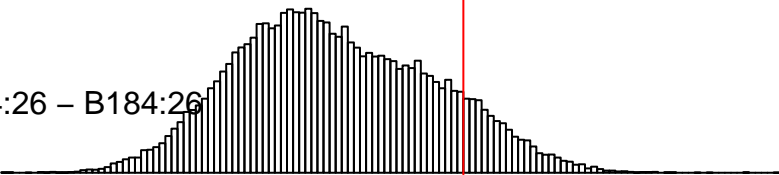

A194:26 – B224:26

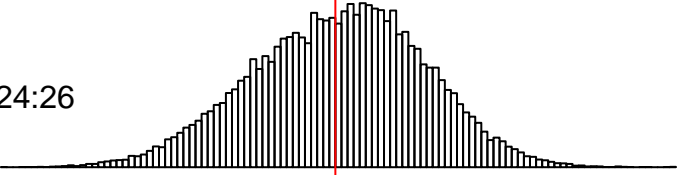

A194:26 – D206:26

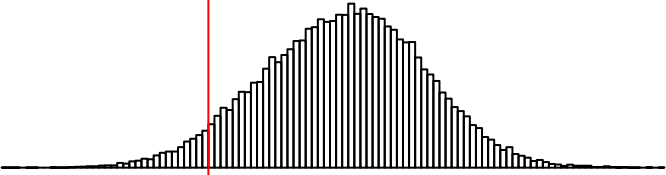

B184:26 – B224:26

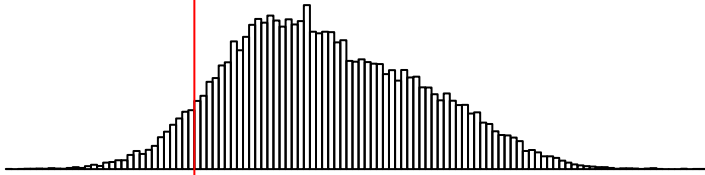

B184:26 – D206:26

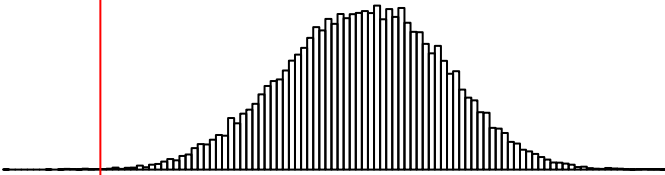

B224:26 – D206:26

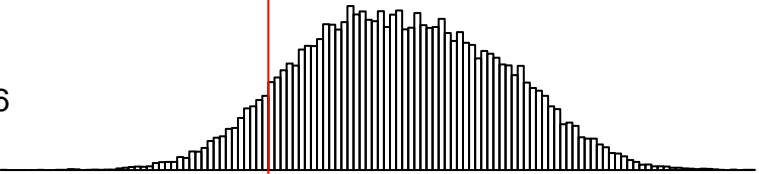

delta(Unidentified Metabolite 8)

A194:26

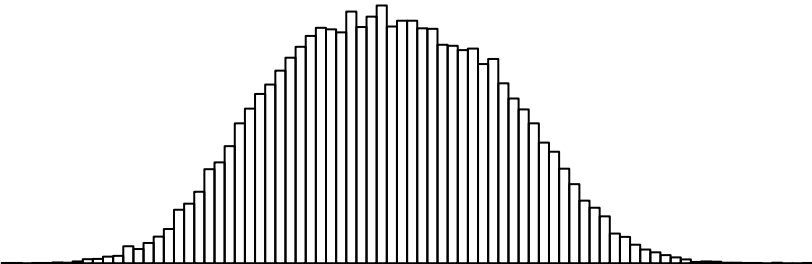

B184:26

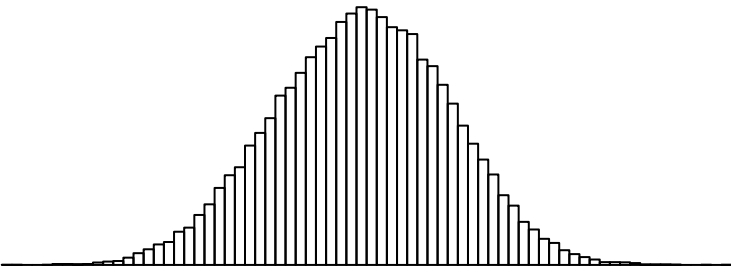

B224:26

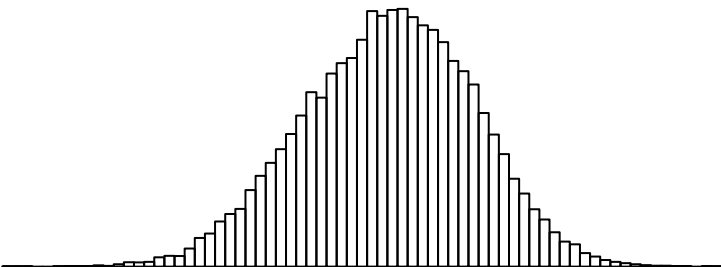

D206:26

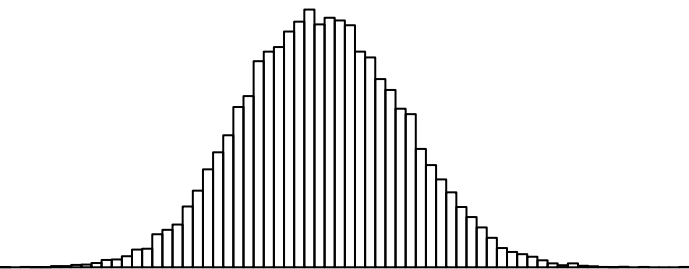

Unidentified Metabolite 9

A194:26 – B184:26

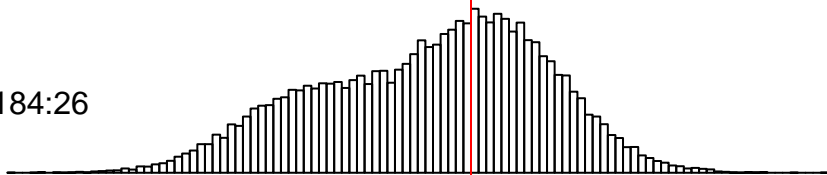

A194:26 – B224:26

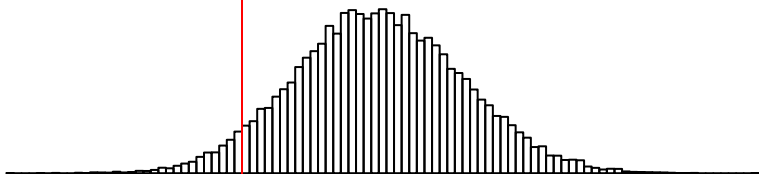

A194:26 – D206:26

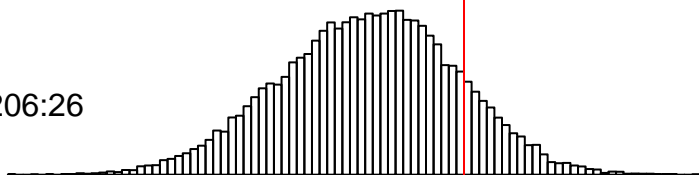

B184:26 – B224:26

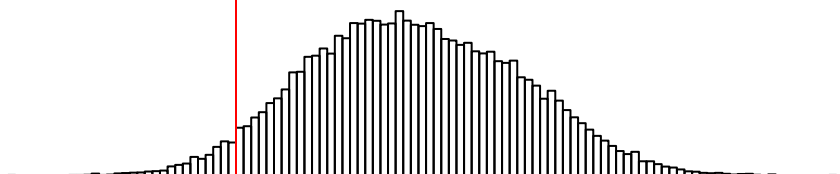

B184:26 – D206:26

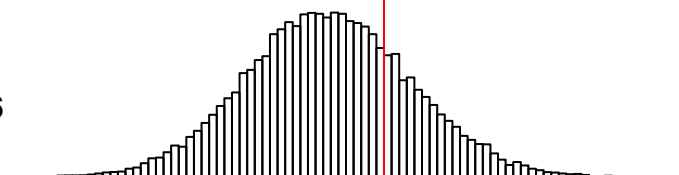

B224:26 – D206:26

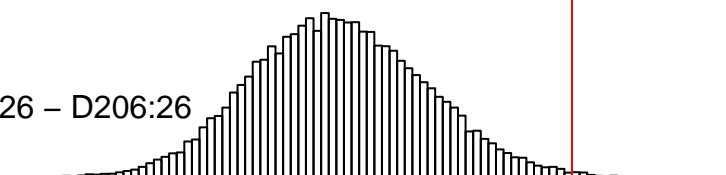

delta(Unidentified Metabolite 9)



A194:26

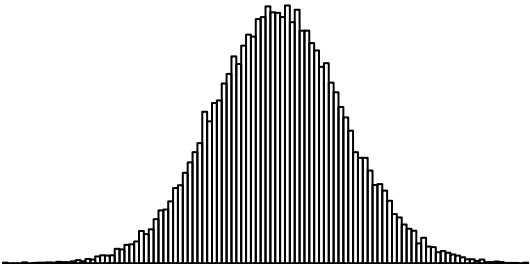

B184:26

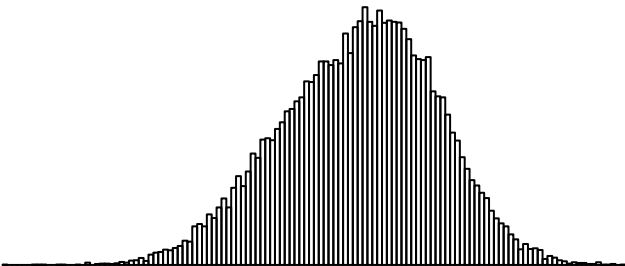

B224:26

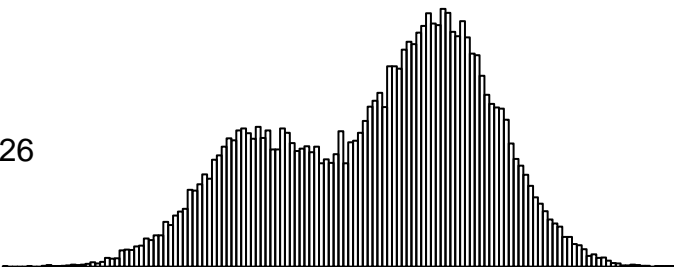

D206:26

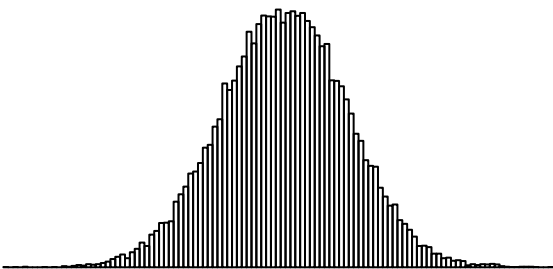

-10      -9      -8      -7      -6      -5

Unidentified Metabolite 10

A194:26 – B184:26

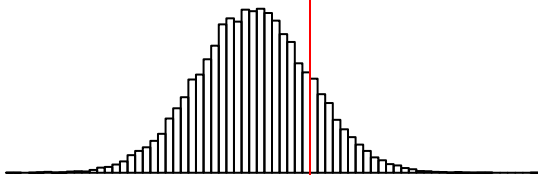

A194:26 – B224:26

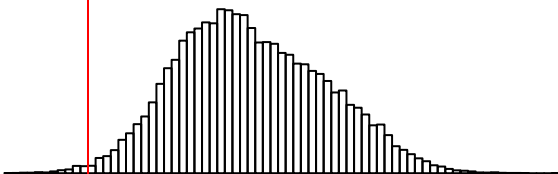

A194:26 – D206:26

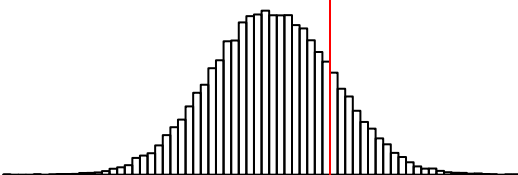

B184:26 – B224:26

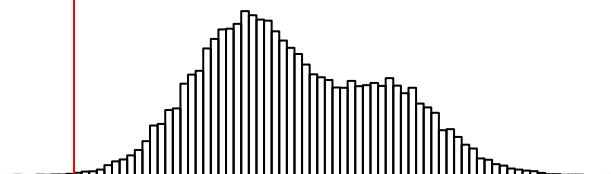

B184:26 – D206:26

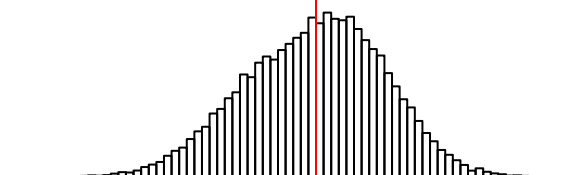

B224:26 – D206:26

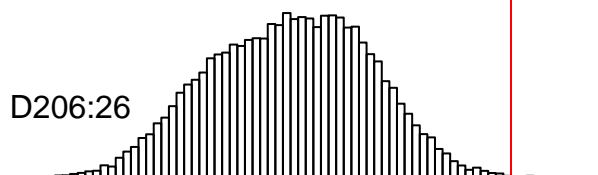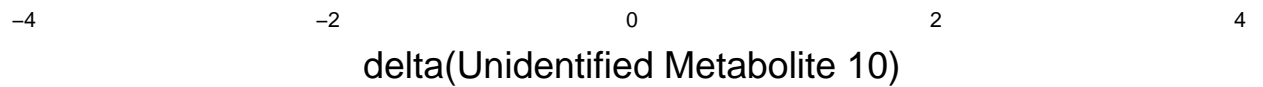

A194:26

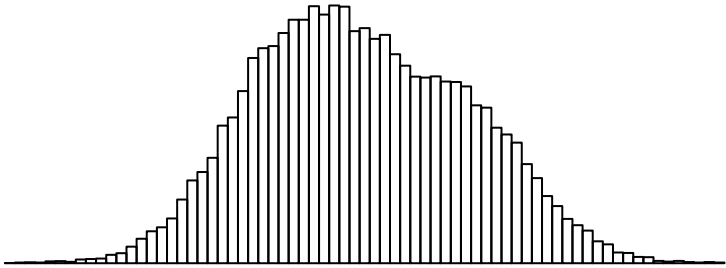

B184:26

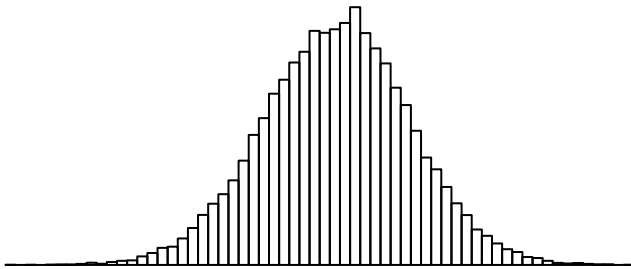

B224:26

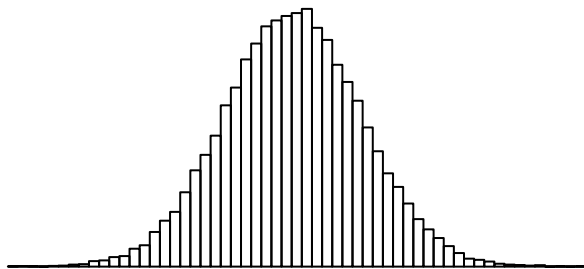

D206:26

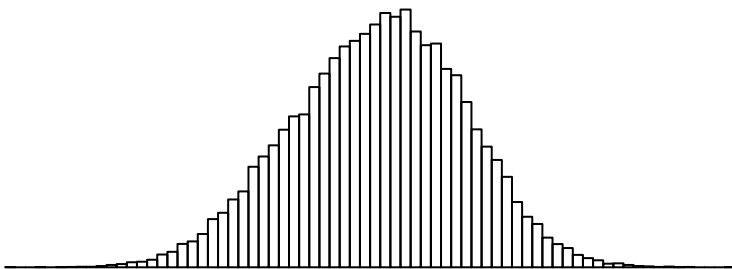

-8 -7 -6 -5 -4 -3 -2

Unidentified Metabolite 11

A194:26 – B184:26

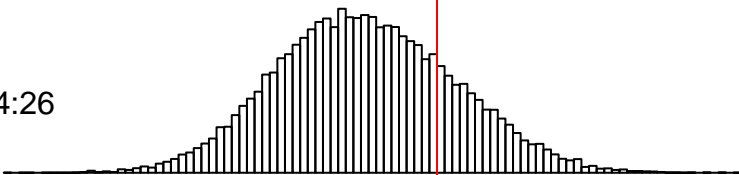

A194:26 – B224:26

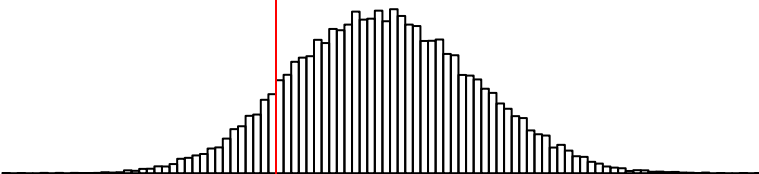

A194:26 – D206:26

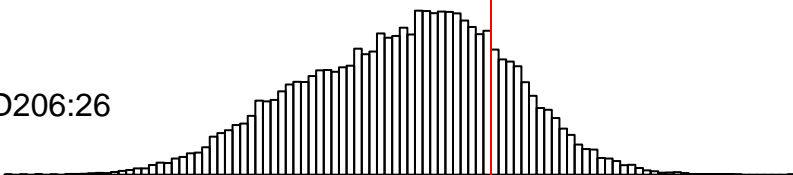

B184:26 – B224:26

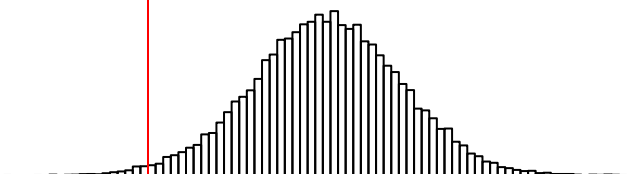

B184:26 – D206:26

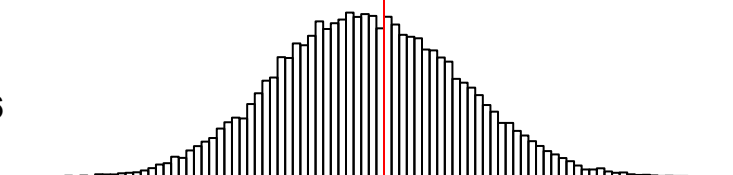

B224:26 – D206:26

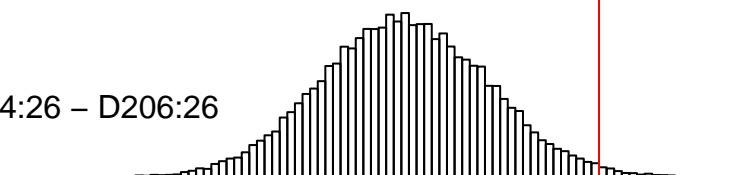

-4 -2 0 2 4

delta(Unidentified Metabolite 11)

A194:26

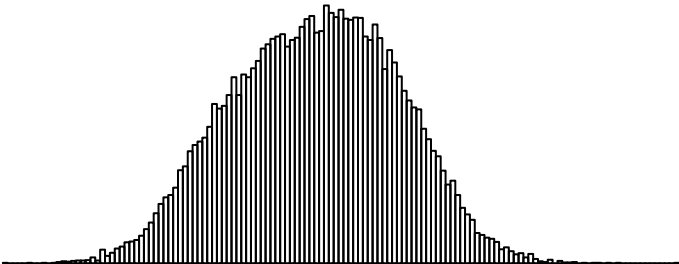

B184:26

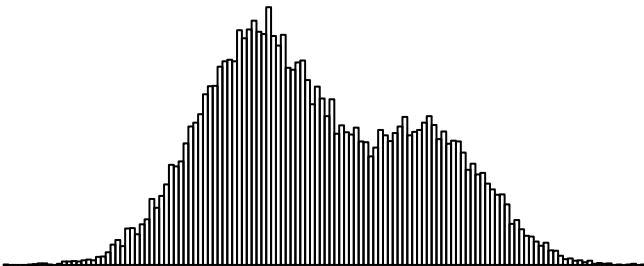

B224:26

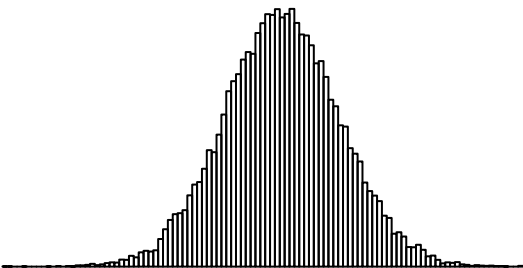

D206:26

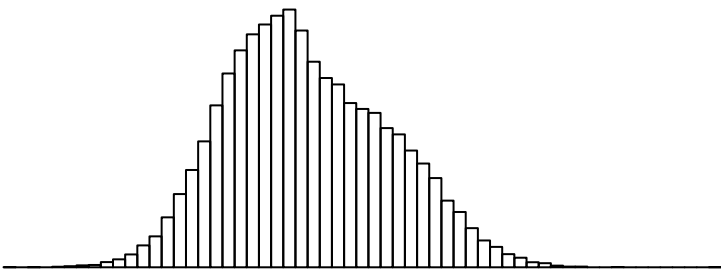

-11      -10      -9      -8      -7      -6

Unidentified Metabolite 12

A194:26 – B184:26

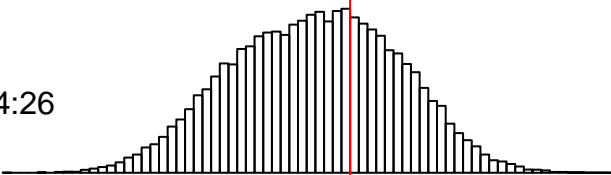

A194:26 – B224:26

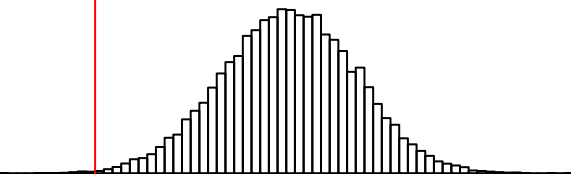

A194:26 – D206:26

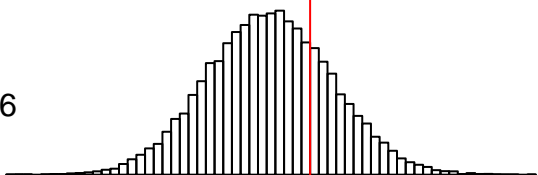

B184:26 – B224:26

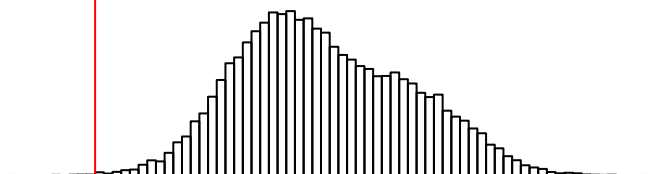

B184:26 – D206:26

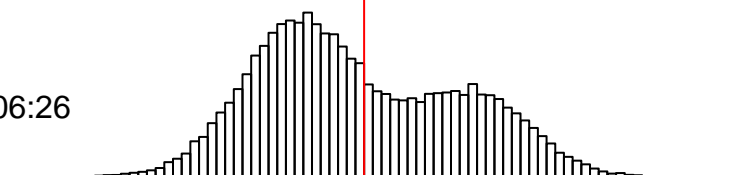

B224:26 – D206:26

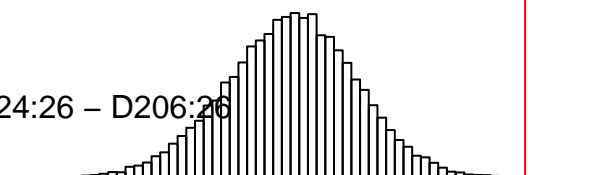

-3 -2 -1 0 1 2 3 4

delta(Unidentified Metabolite 12)

A194:26

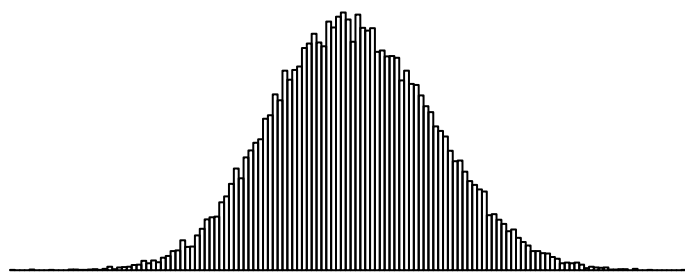

B184:26

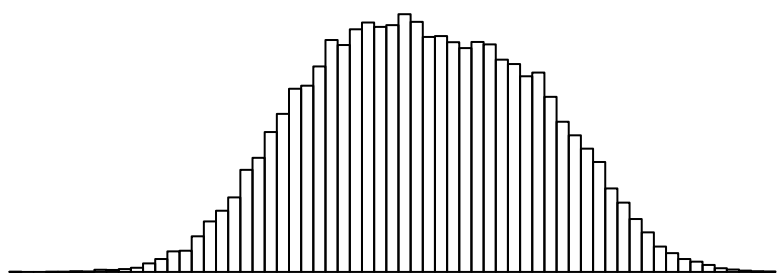

B224:26

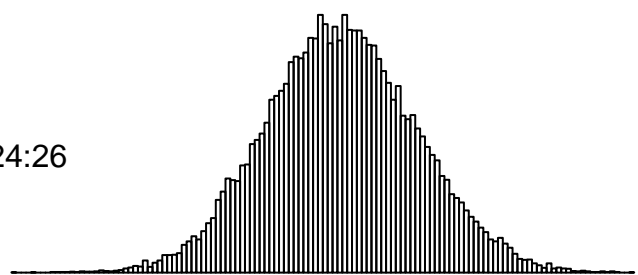

D206:26

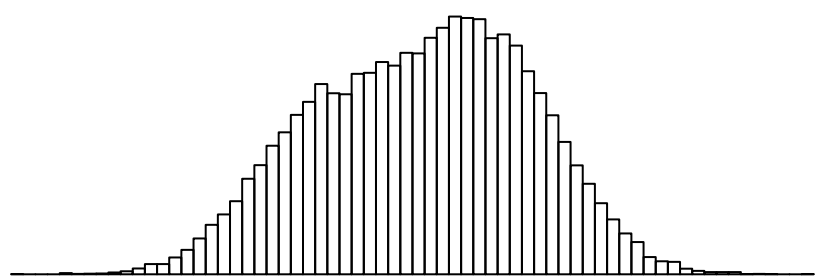

-10      -9      -8      -7      -6      -5

Unidentified Metabolite 14

A194:26 – B184:26

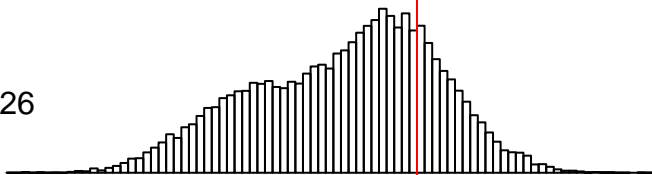

A194:26 – B224:26

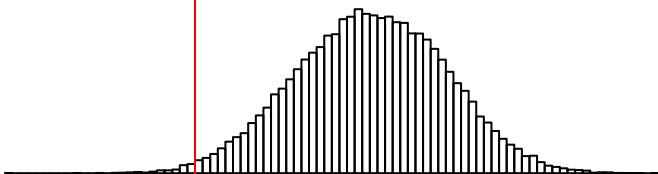

A194:26 – D206:26

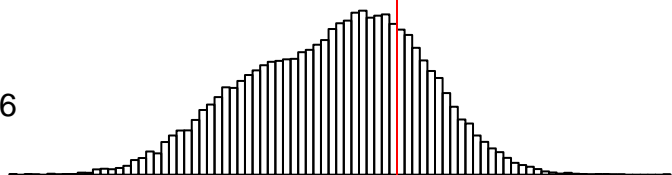

B184:26 – B224:26

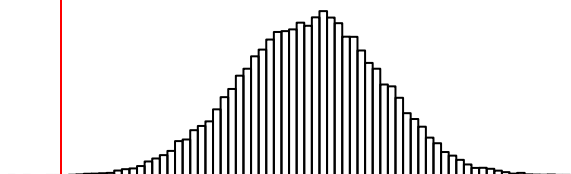

B184:26 – D206:26

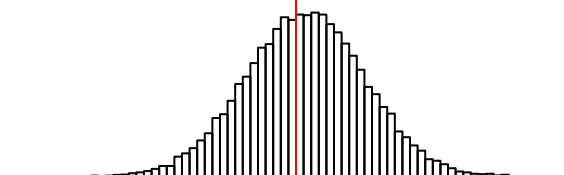

B224:26 – D206:26

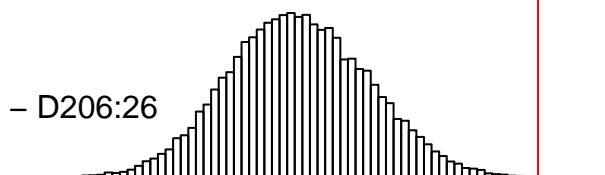

-4 -2 0 2 4

delta(Unidentified Metabolite 14)



A194:26

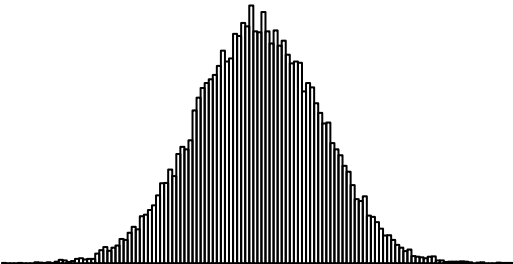

B184:26

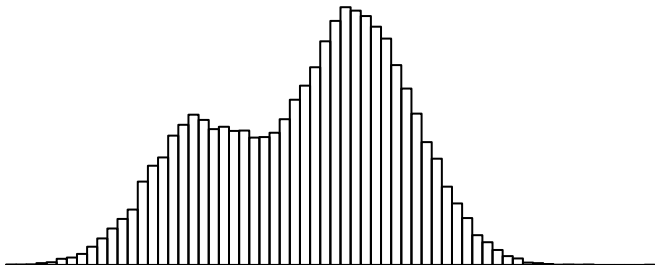

B224:26

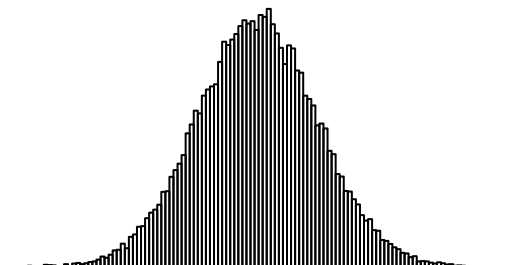

D206:26

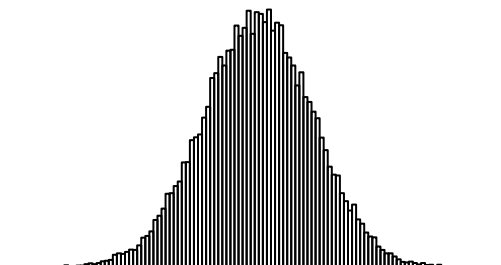

-10      -9      -8      -7      -6      -5      -4

Unidentified Metabolite 16

A194:26 – B184:26

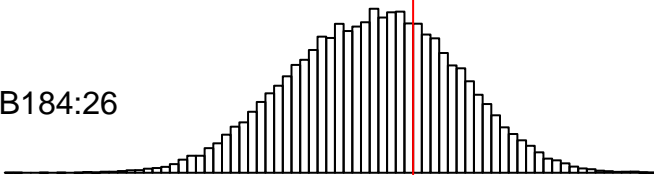

A194:26 – B224:26

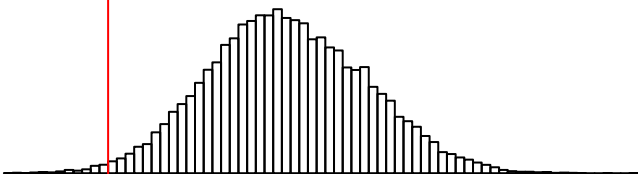

A194:26 – D206:26

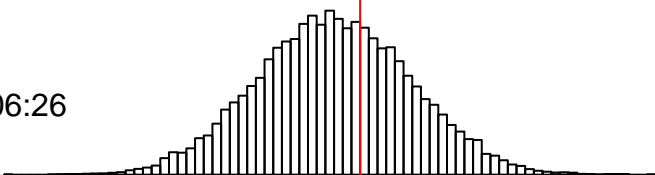

B184:26 – B224:26

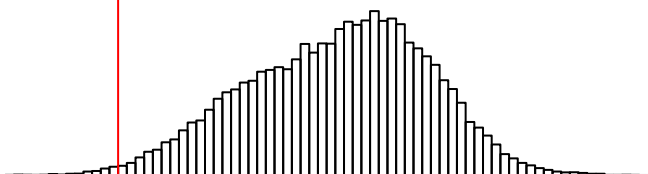

B184:26 – D206:26

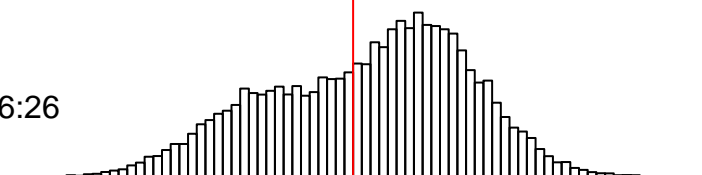

B224:26 – D206:26

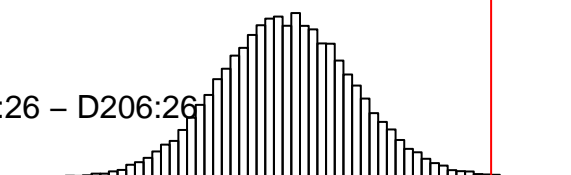

-3 -2 -1 0 1 2 3 4

delta(Unidentified Metabolite 16)

A194:26

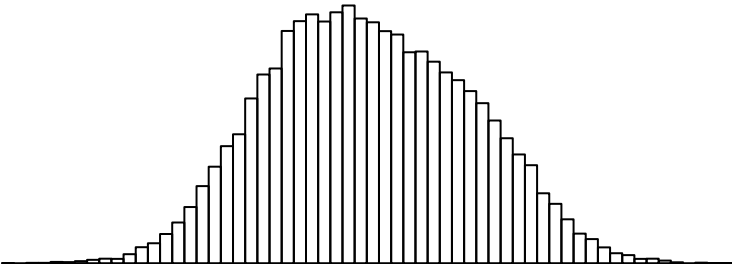

B184:26

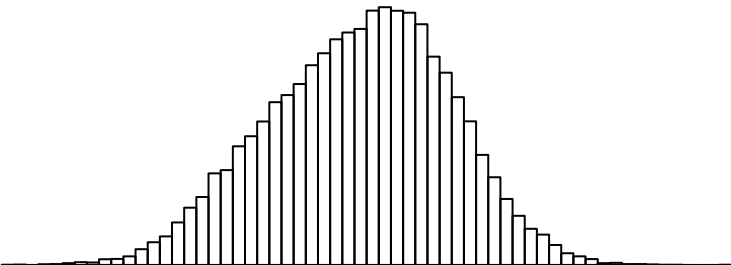

B224:26

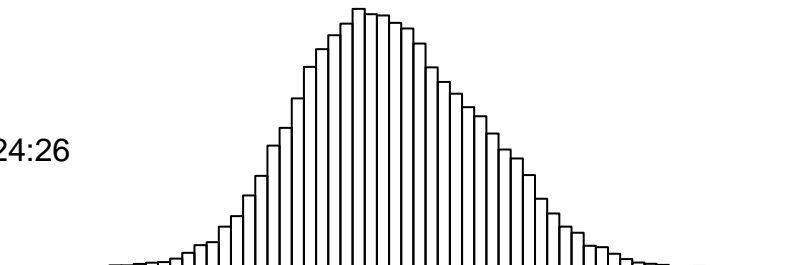

D206:26

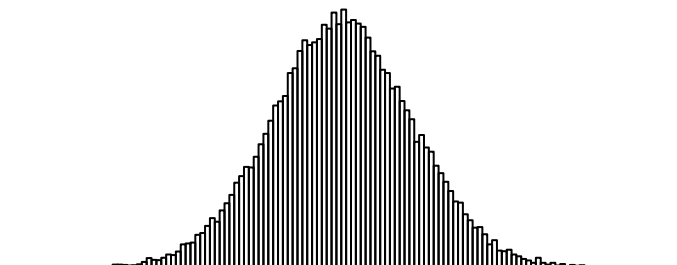

-10      -9      -8      -7      -6      -5

Unidentified Metabolite 17

A194:26 – B184:26

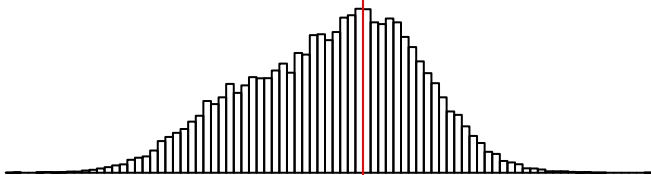

A194:26 – B224:26

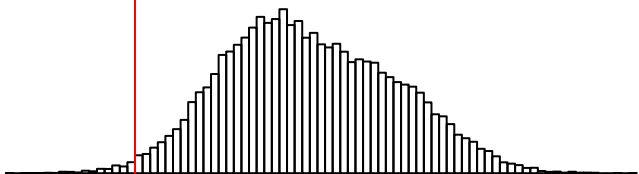

A194:26 – D206:26

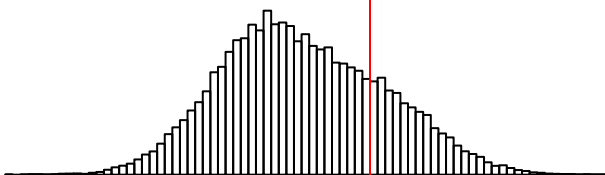

B184:26 – B224:26

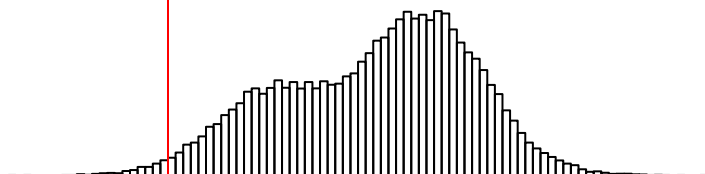

B184:26 – D206:26

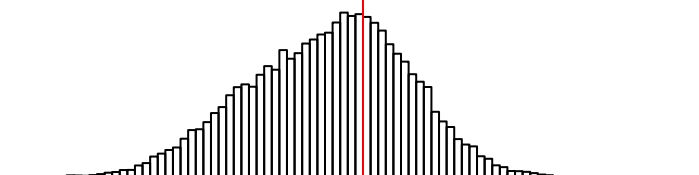

B224:26 – D206:26

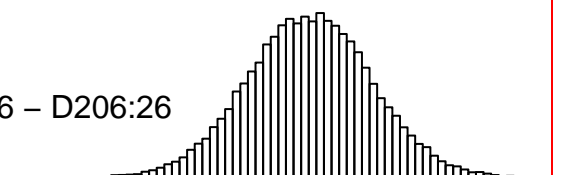

-4 -2 0 2 4

delta(Unidentified Metabolite 17)

A194:26

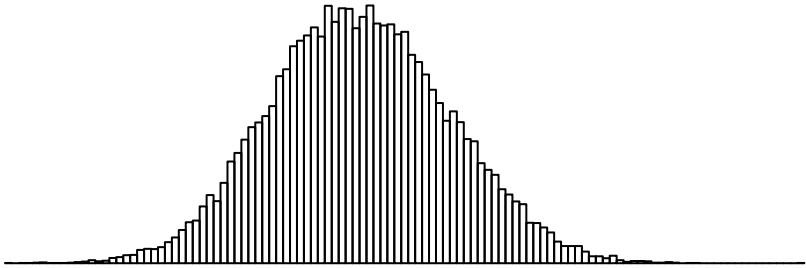

B184:26

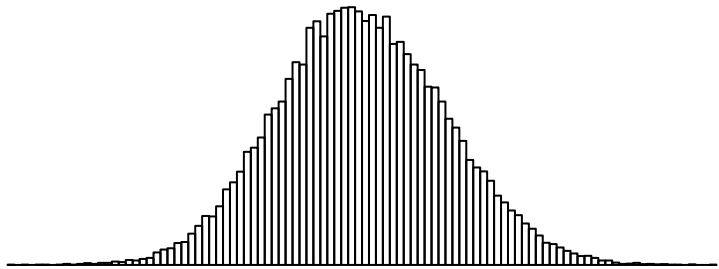

B224:26

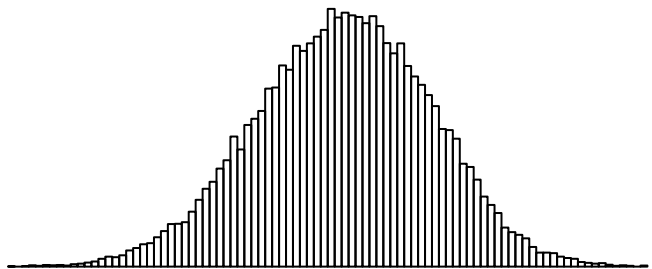

D206:26

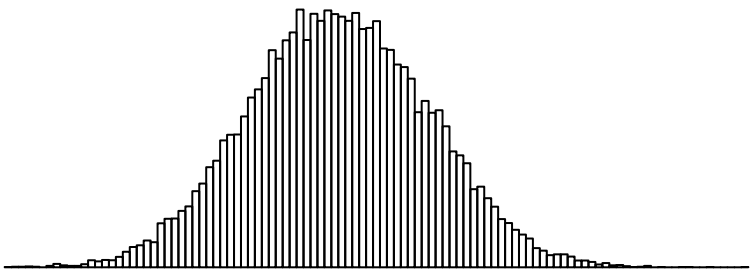

-8.5      -8.0      -7.5      -7.0      -6.5      -6.0      -5.5      -5.0

Unidentified Metabolite 18

A194:26 – B184:26

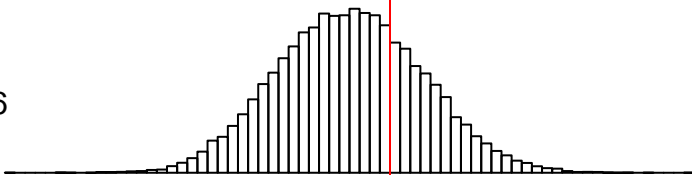

A194:26 – B224:26

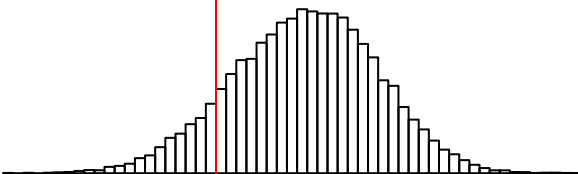

A194:26 – D206:26

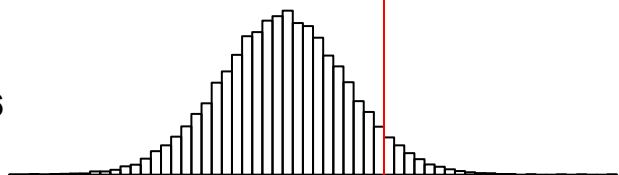

B184:26 – B224:26

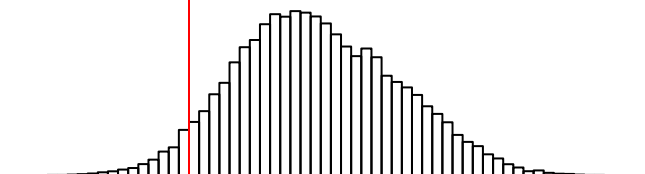

B184:26 – D206:26

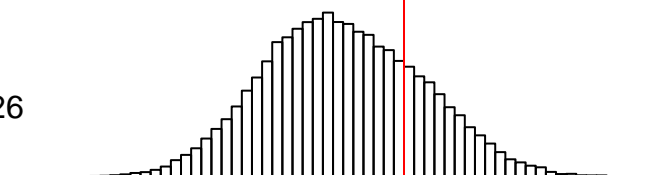

B224:26 – D206:26

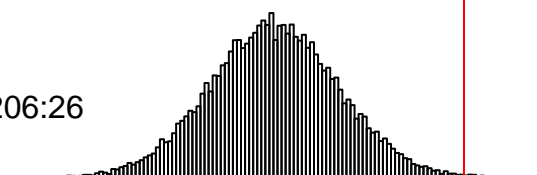

-3 -2 -1 0 1 2 3

delta(Unidentified Metabolite 18)

A194:26

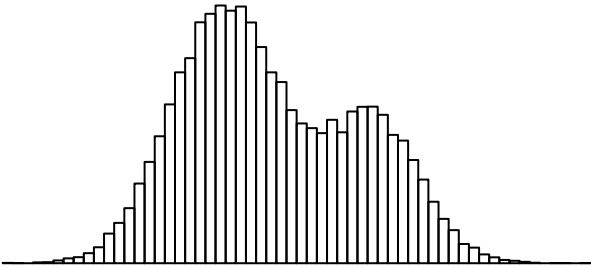

B184:26

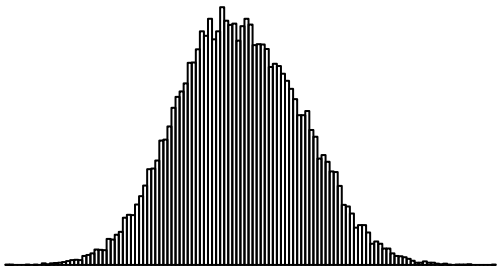

B224:26

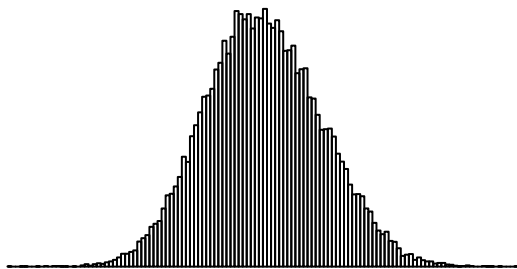

D206:26

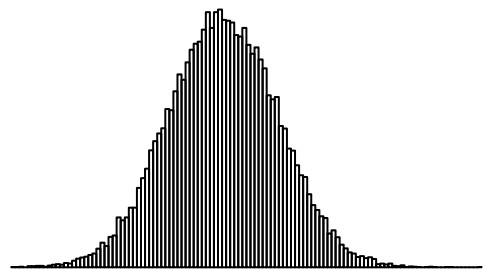

Unidentified Metabolite 20

A194:26 – B184:26

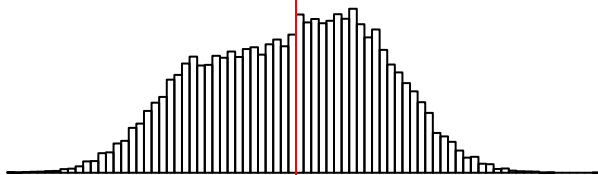

A194:26 – B224:26

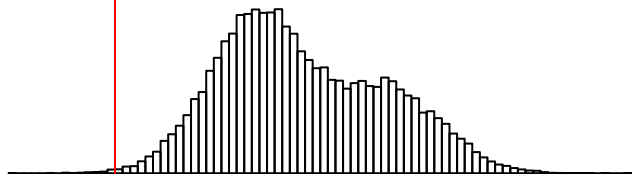

A194:26 – D206:26

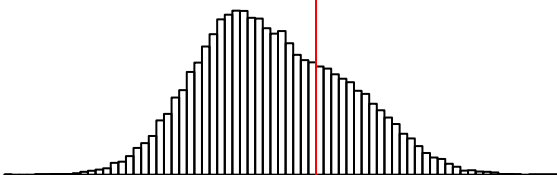

B184:26 – B224:26

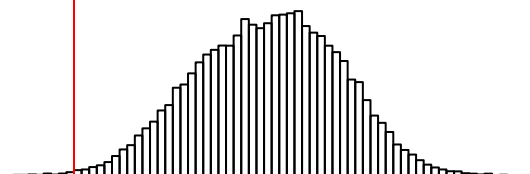

B184:26 – D206:26

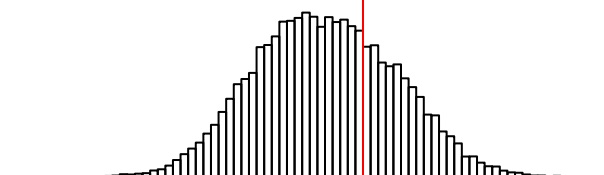

B224:26 – D206:26

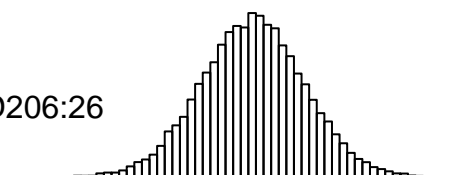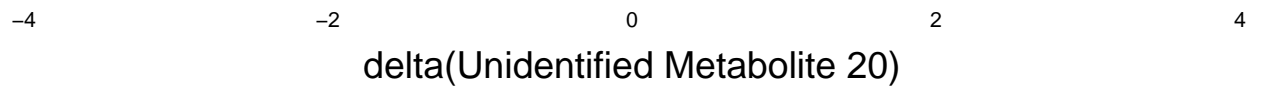



A194:26

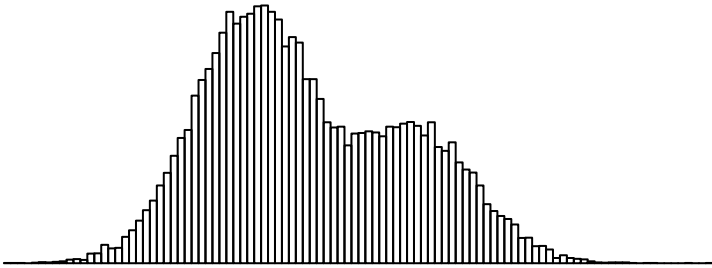

B184:26

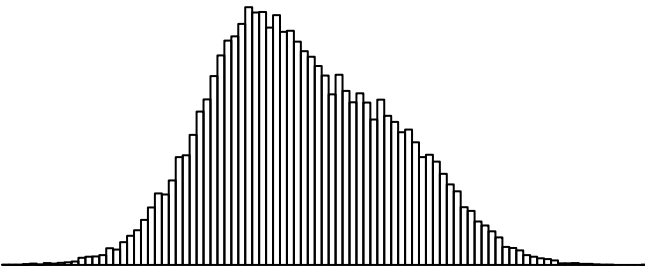

B224:26

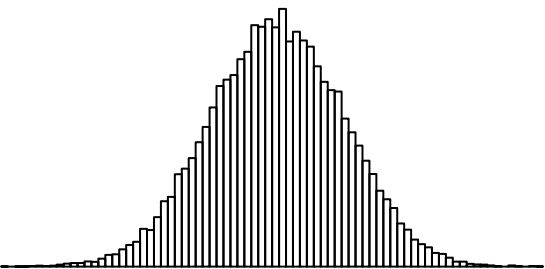

D206:26

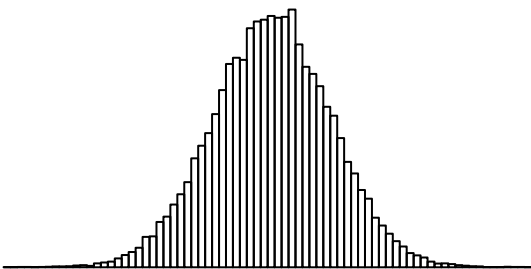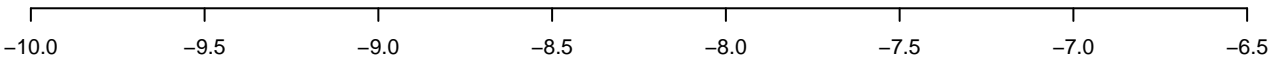

Unidentified Metabolite 22

A194:26 – B184:26

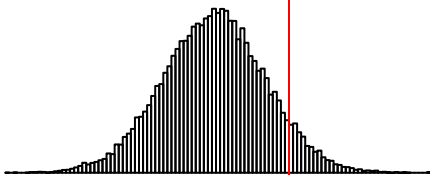

A194:26 – B224:26

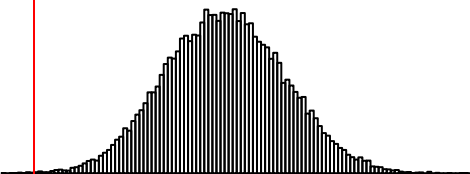

A194:26 – D206:26

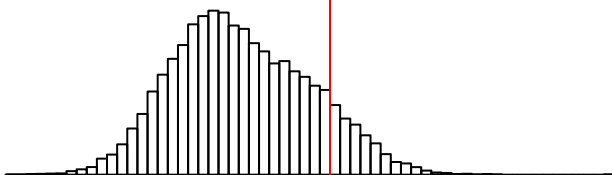

B184:26 – B224:26

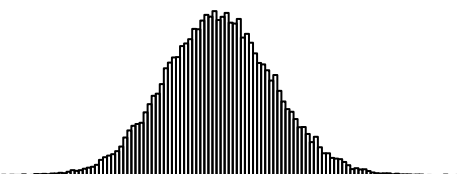

B184:26 – D206:26

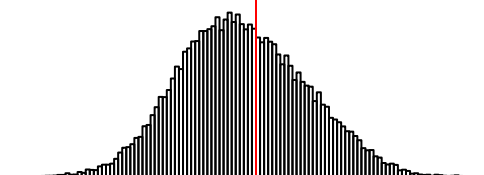

B224:26 – D206:26

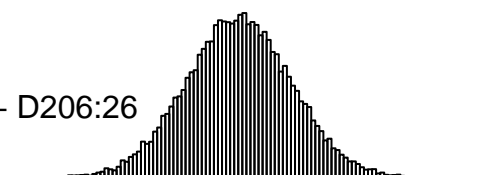

delta(Unidentified Metabolite 22)

A194:26

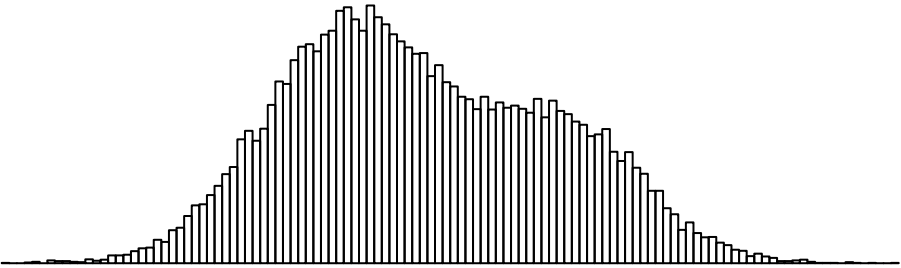

B184:26

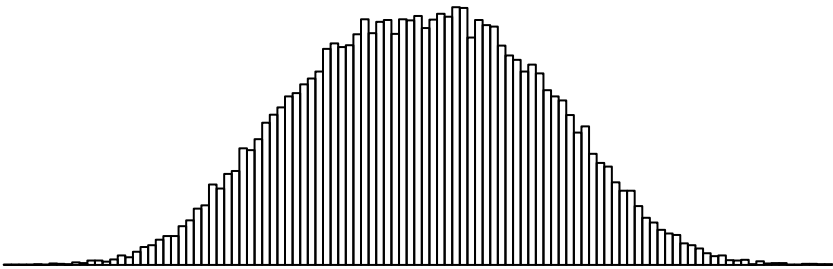

B224:26

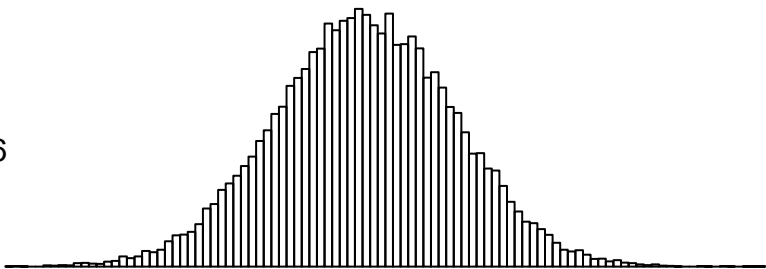

D206:26

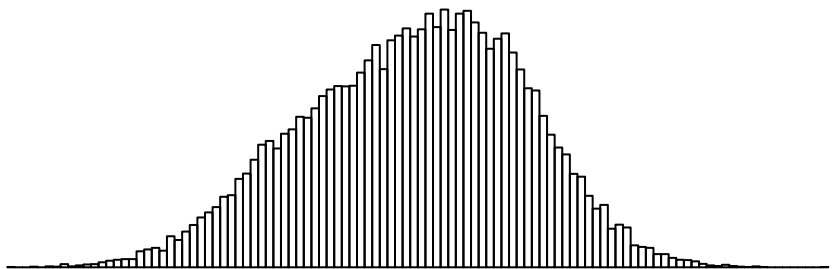

-10

-8

-6

-4

Unidentified Metabolite 23

A194:26 – B184:26

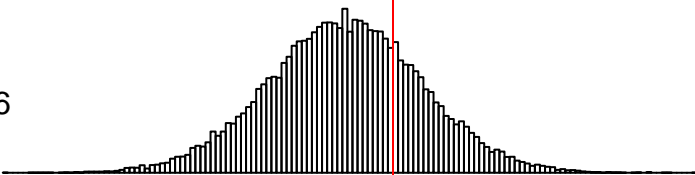

A194:26 – B224:26

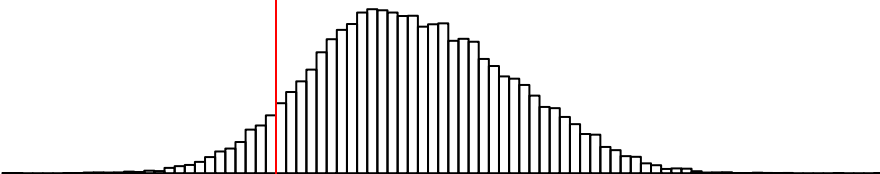

A194:26 – D206:26

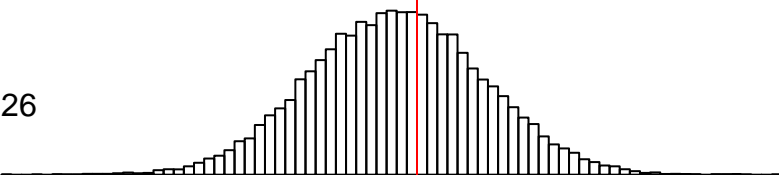

B184:26 – B224:26

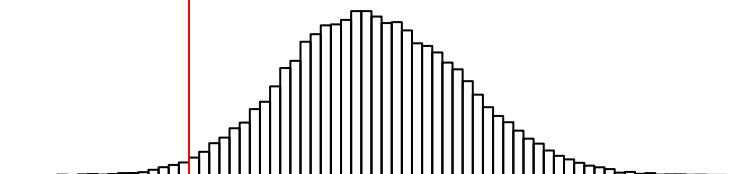

B184:26 – D206:26

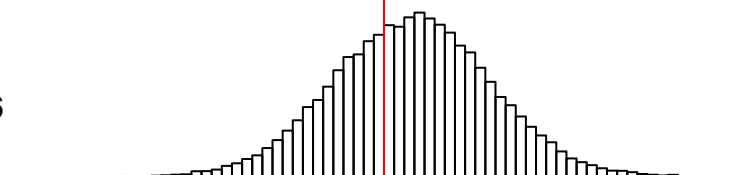

B224:26 – D206:26

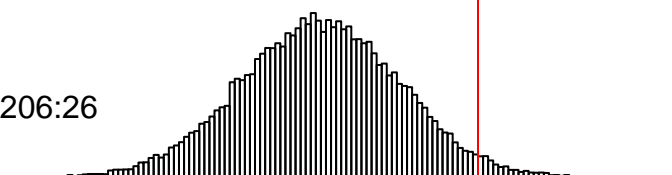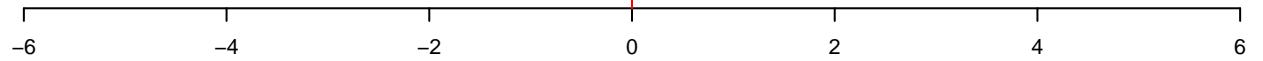

delta(Unidentified Metabolite 23)

A194:26

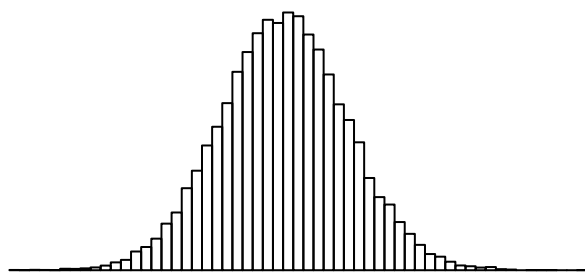

B184:26

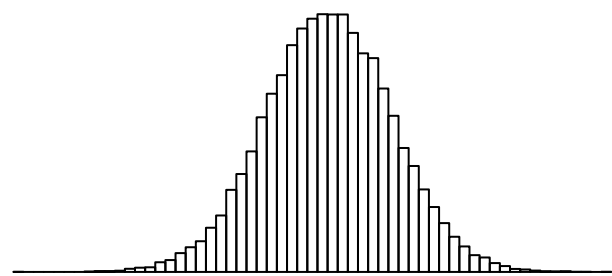

B224:26

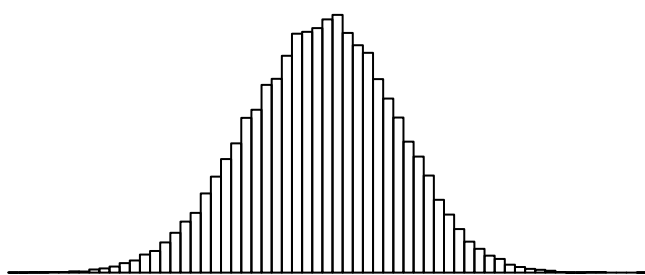

D206:26

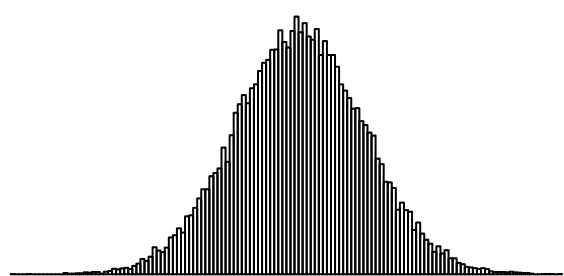

Unidentified Metabolite 24

A194:26 – B184:26

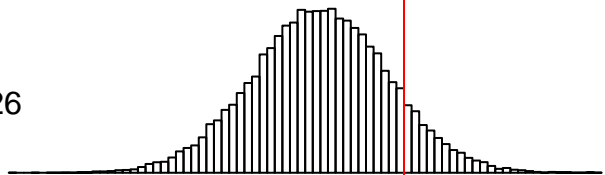

A194:26 – B224:26

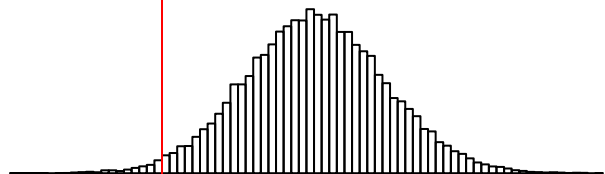

A194:26 – D206:26

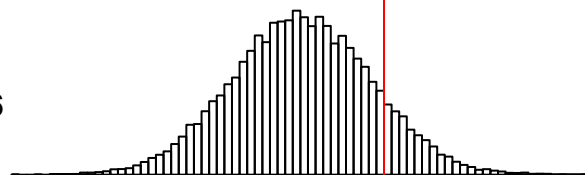

B184:26 – B224:26

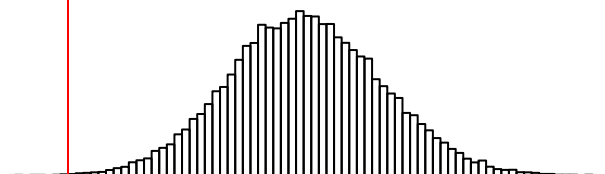

B184:26 – D206:26

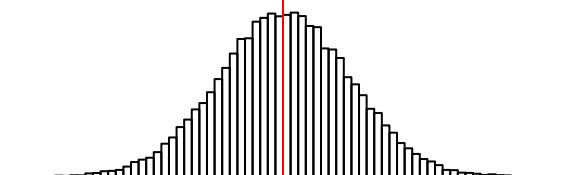

B224:26 – D206:26

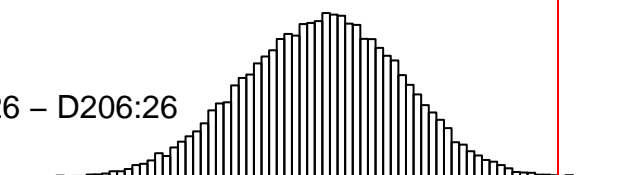

-4 -2 0 2 4

delta(Unidentified Metabolite 24)

A194:26

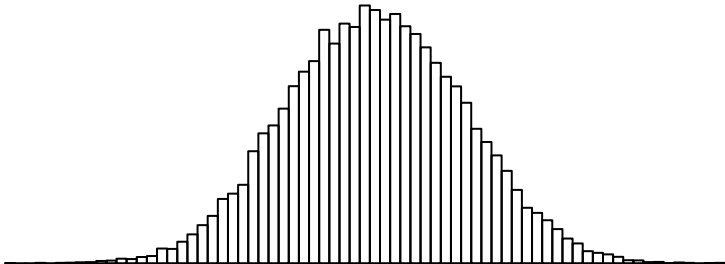

B184:26

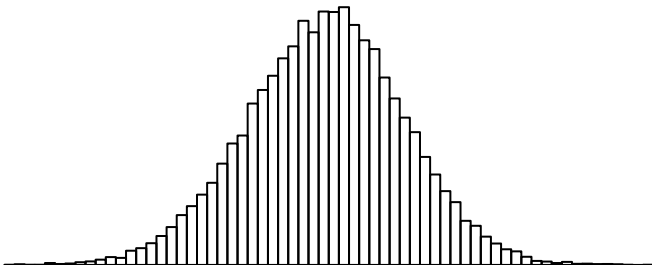

B224:26

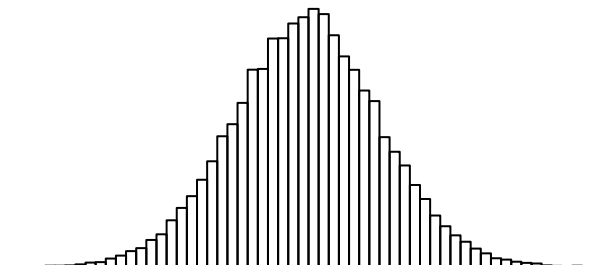

D206:26

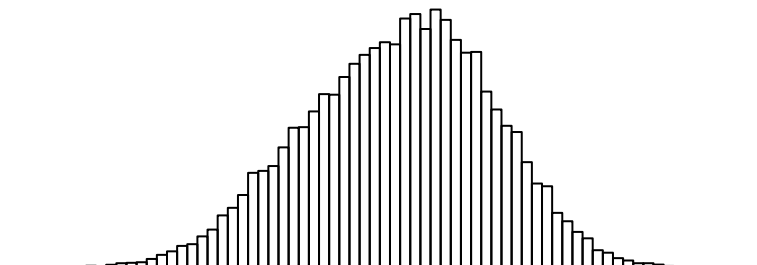

-11      -10      -9      -8      -7      -6      -5

Unidentified Metabolite 25

A194:26 – B184:26

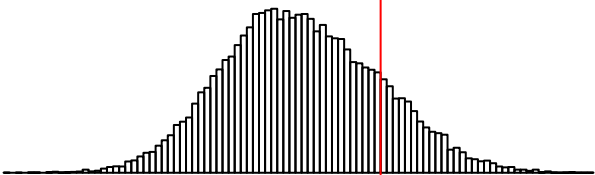

A194:26 – B224:26

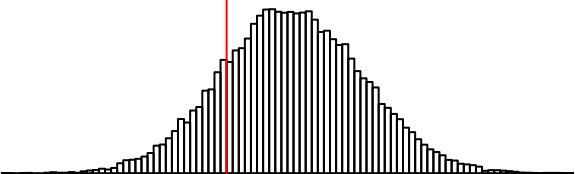

A194:26 – D206:26

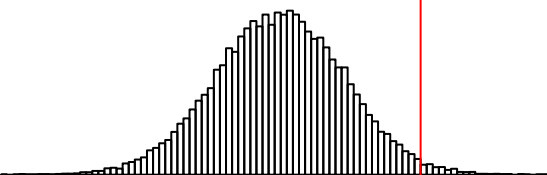

B184:26 – B224:26

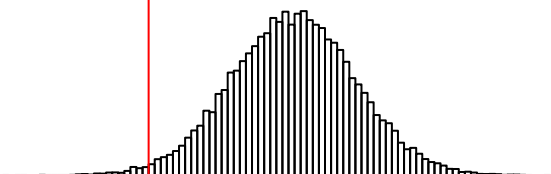

B184:26 – D206:26

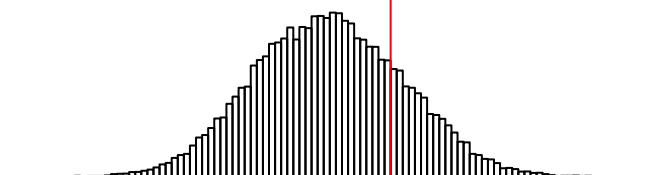

B224:26 – D206:26

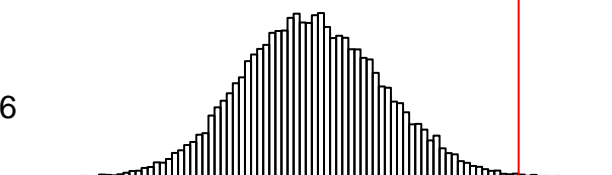

-6 -4 -2 0 2 4

delta(Unidentified Metabolite 25)



A194:26

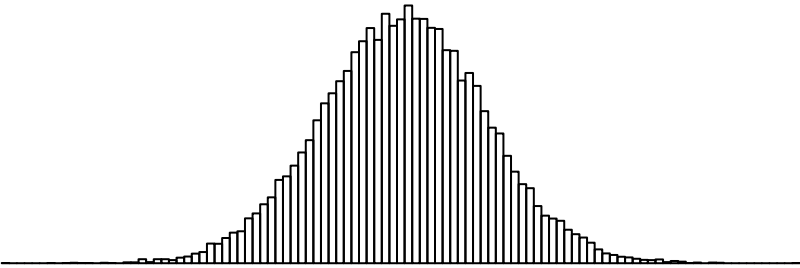

B184:26

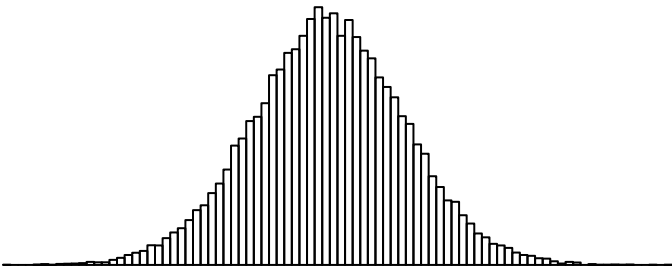

B224:26

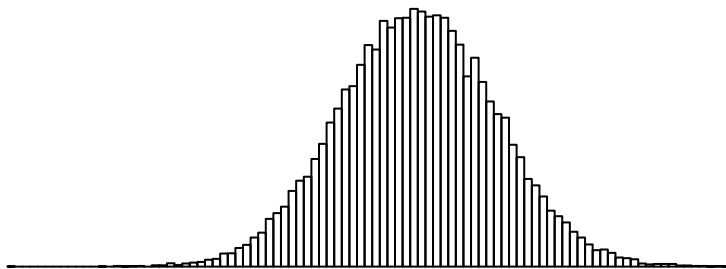

D206:26

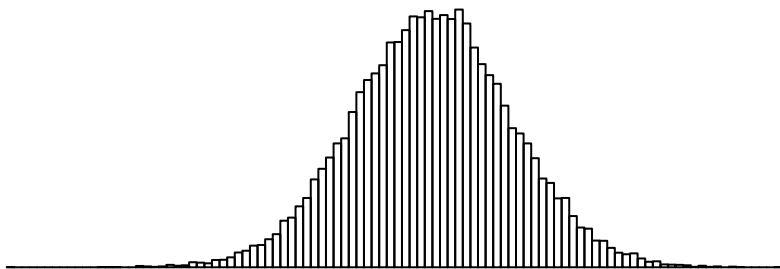

-10

-8

-6

-4

Unidentified Metabolite 26

A194:26 – B184:26

A194:26 – B224:26

A194:26 – D206:26

B184:26 – B224:26

B184:26 – D206:26

B224:26 – D206:26

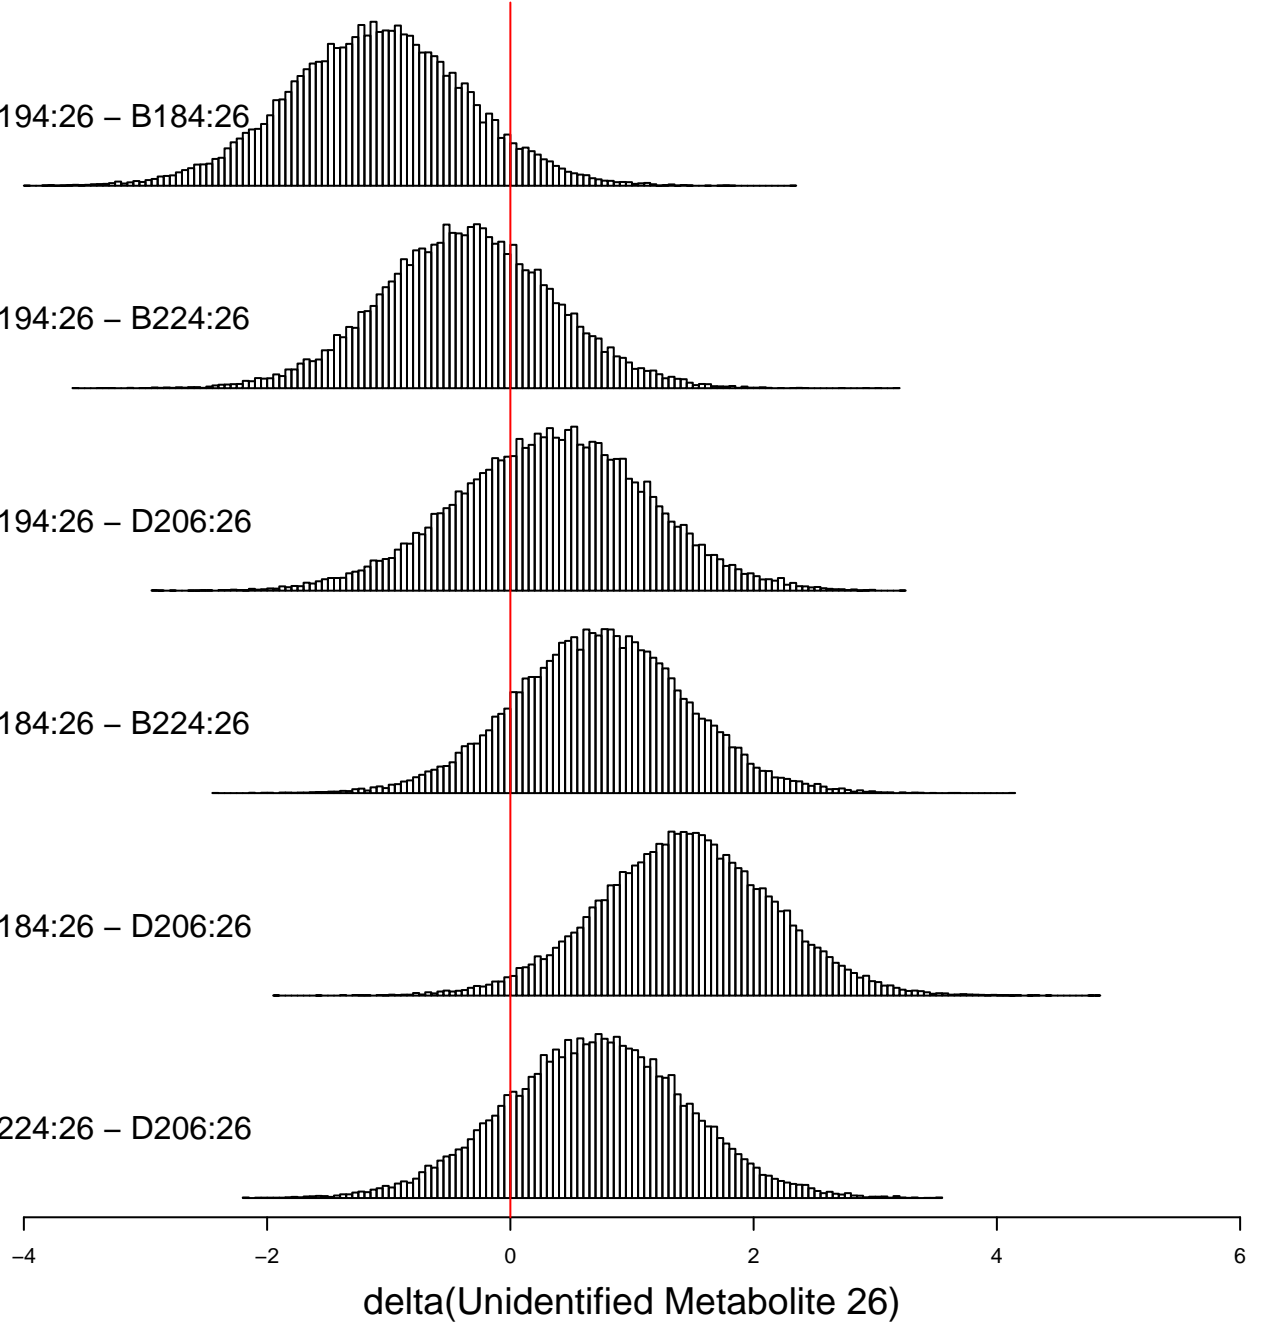

A194:26

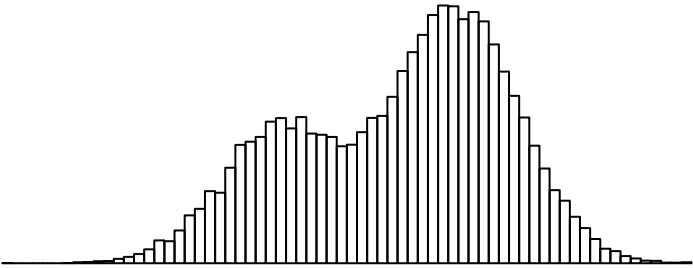

B184:26

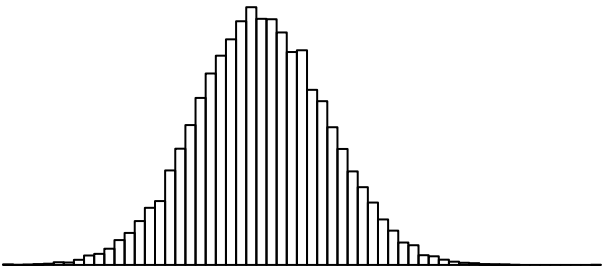

B224:26

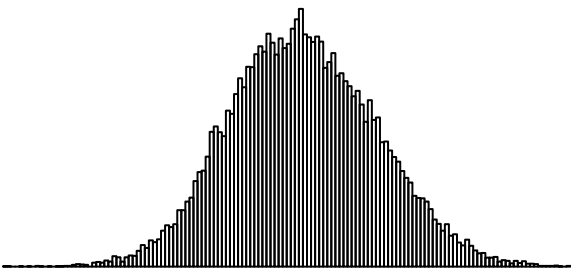

D206:26

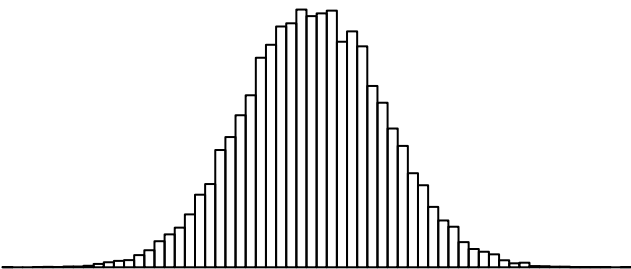

-9 -8 -7 -6 -5 -4 -3

Unidentified Metabolite 27

A194:26 – B184:26

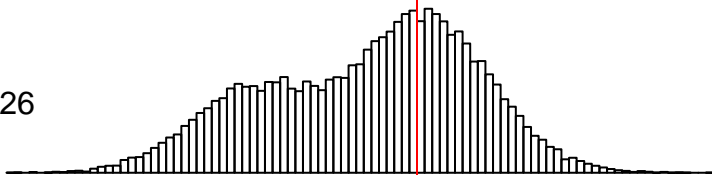

A194:26 – B224:26

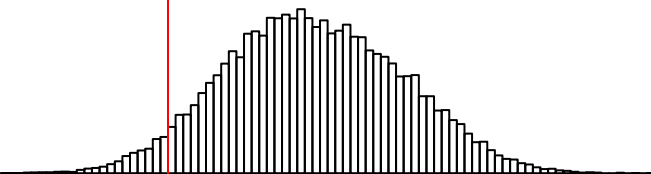

A194:26 – D206:26

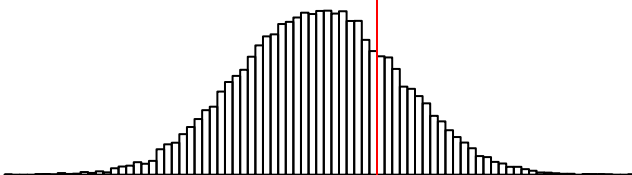

B184:26 – B224:26

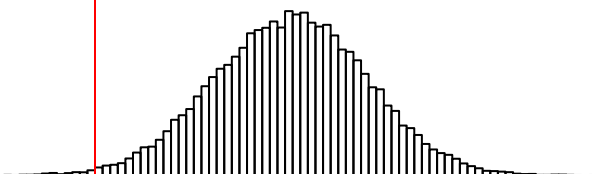

B184:26 – D206:26

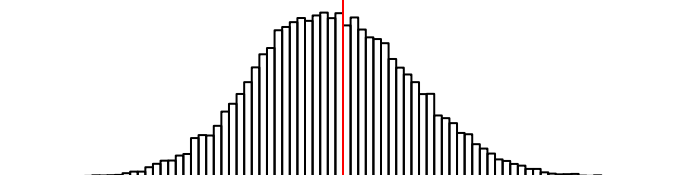

B224:26 – D206:26

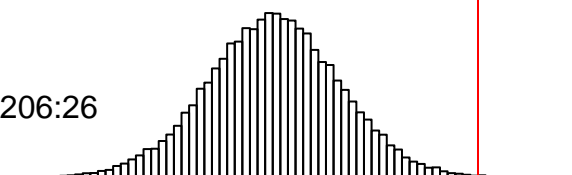

-4 -2 0 2 4

delta(Unidentified Metabolite 27)

A194:26

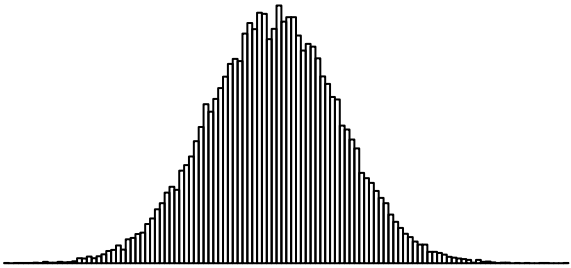

B184:26

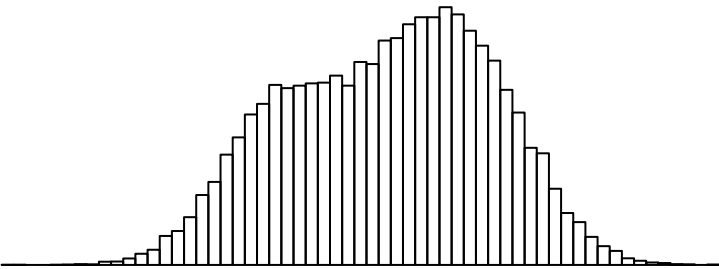

B224:26

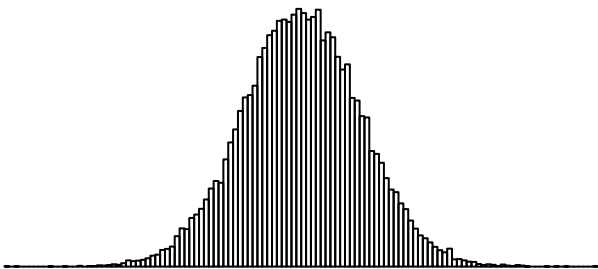

D206:26

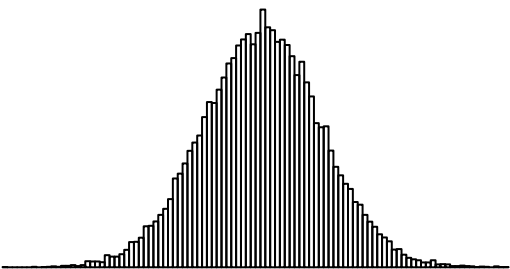

-10      -9      -8      -7      -6      -5

Unidentified Metabolite 29

A194:26 – B184:26

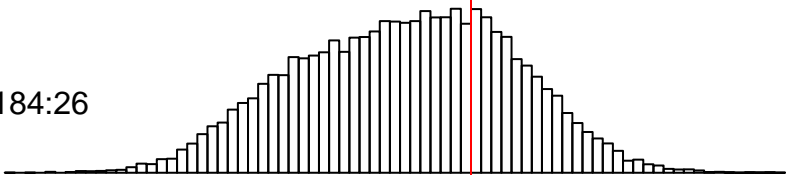

A194:26 – B224:26

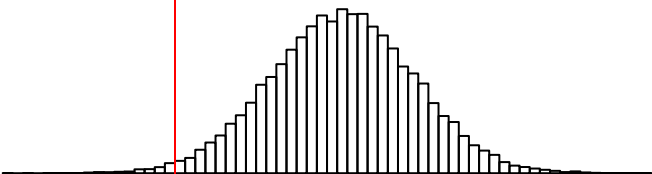

A194:26 – D206:26

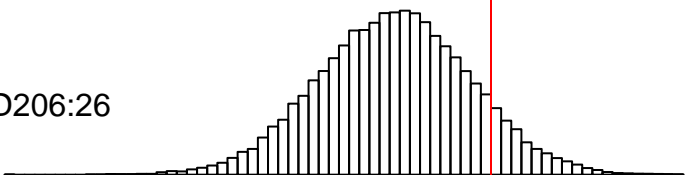

B184:26 – B224:26

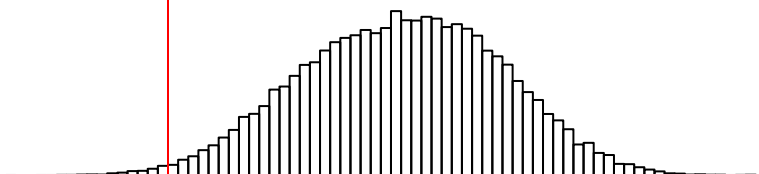

B184:26 – D206:26

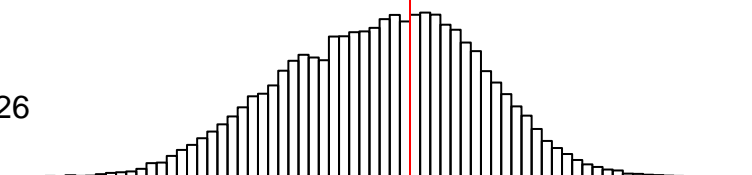

B224:26 – D206:26

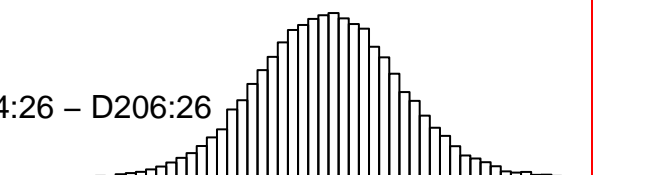

-3 -2 -1 0 1 2 3

delta(Unidentified Metabolite 29)

A194:26

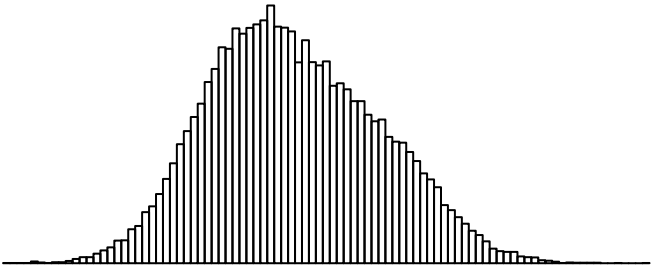

B184:26

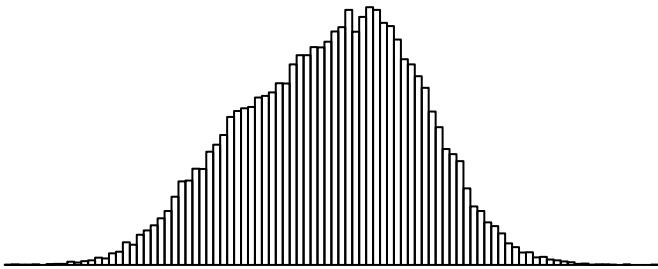

B224:26

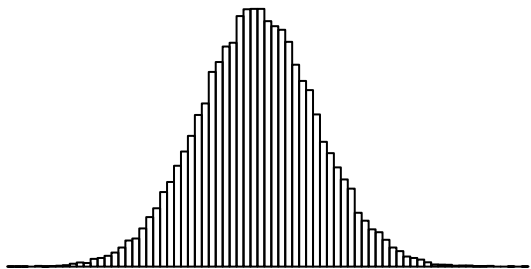

D206:26

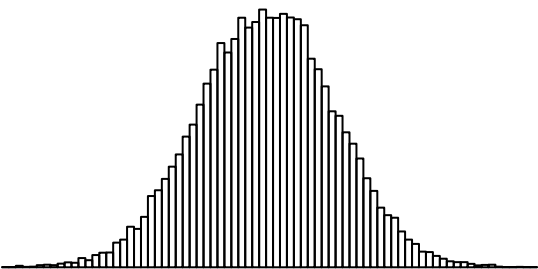

-10.5      -10.0      -9.5      -9.0      -8.5      -8.0      -7.5      -7.0

Unidentified Metabolite 30

A194:26 – B184:26

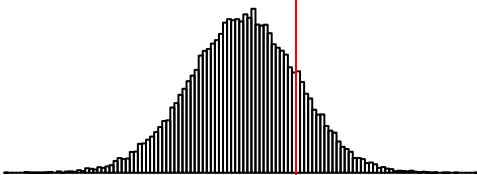

A194:26 – B224:26

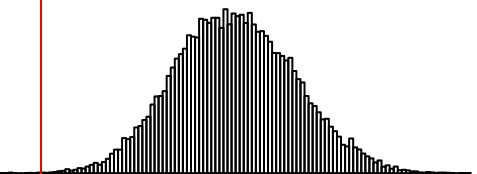

A194:26 – D206:26

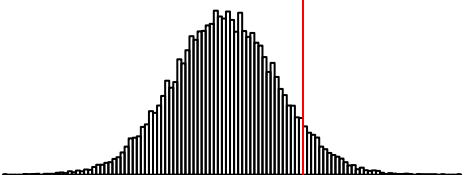

B184:26 – B224:26

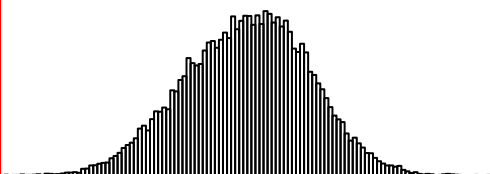

B184:26 – D206:26

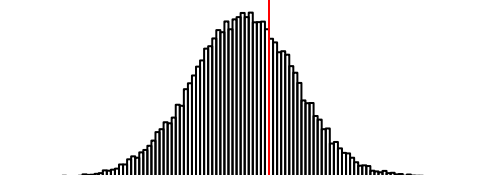

B224:26 – D206:26

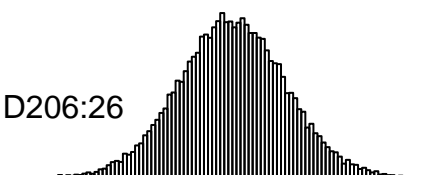

-3      -2      -1      0      1      2      3

delta(Unidentified Metabolite 30)



A194:26

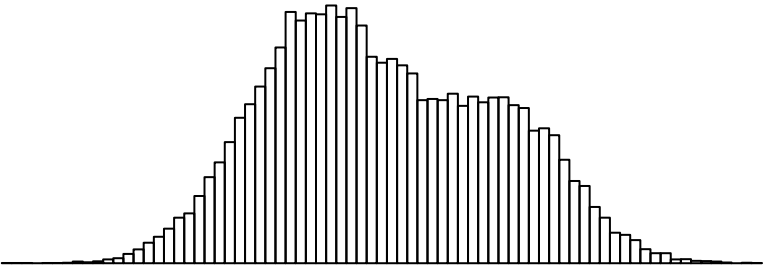

B184:26

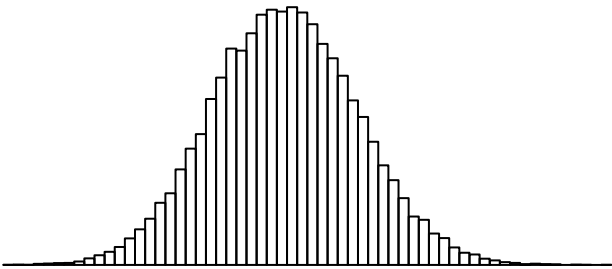

B224:26

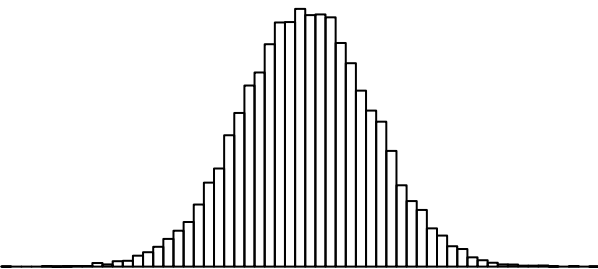

D206:26

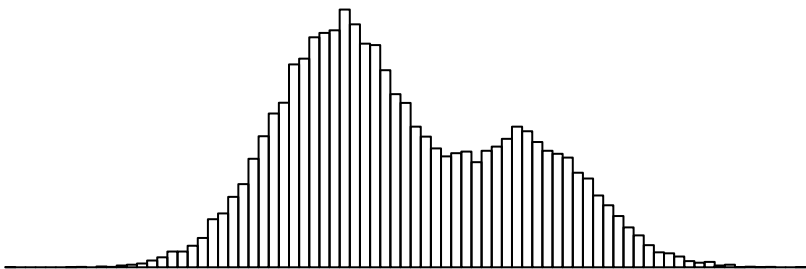

-12      -11      -10      -9      -8      -7      -6

Unidentified Metabolite 31

A194:26 – B184:26

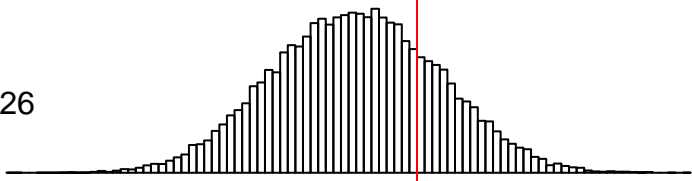

A194:26 – B224:26

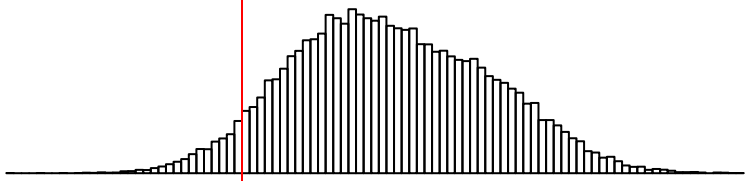

A194:26 – D206:26

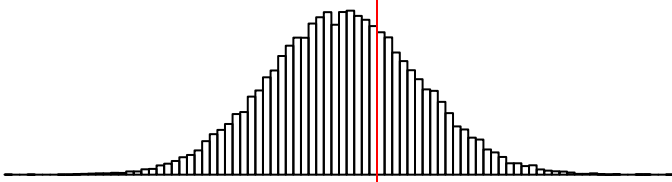

B184:26 – B224:26

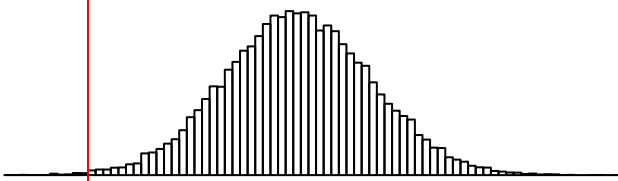

B184:26 – D206:26

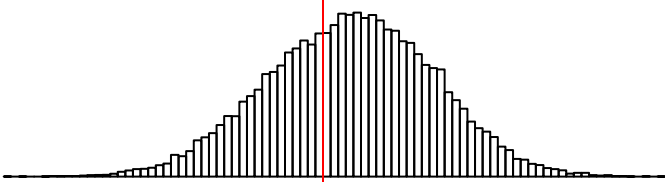

B224:26 – D206:26

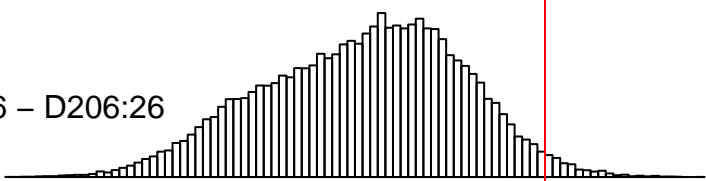

-4 -2 0 2 4

delta(Unidentified Metabolite 31)

A194:26

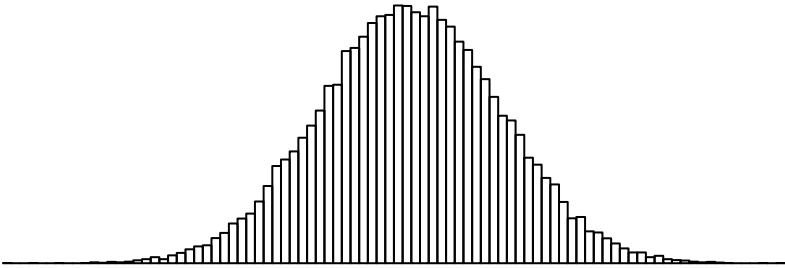

B184:26

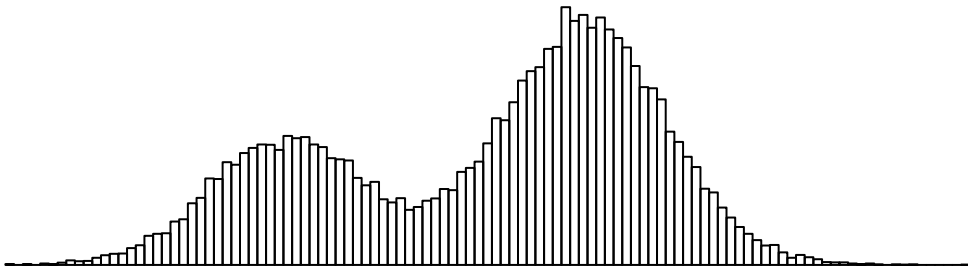

B224:26

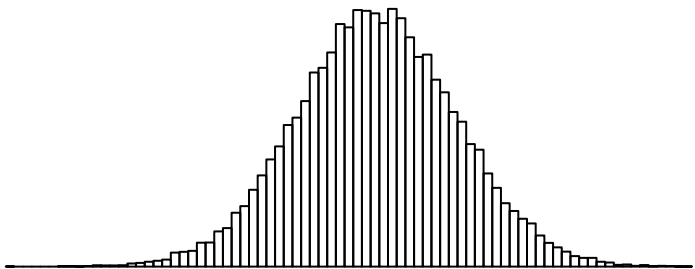

D206:26

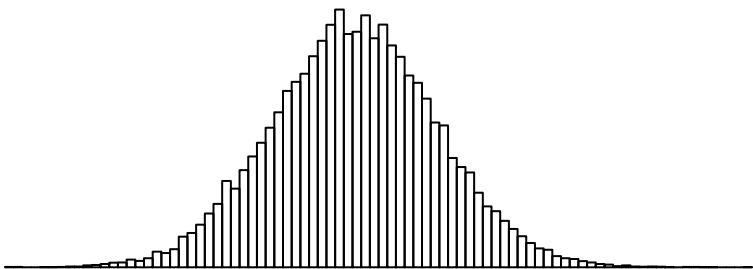

-13      -12      -11      -10      -9      -8      -7      -6

Unidentified Metabolite 32

A194:26 – B184:26

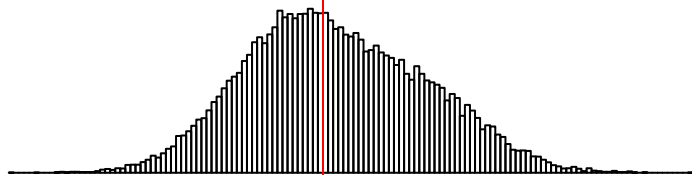

A194:26 – B224:26

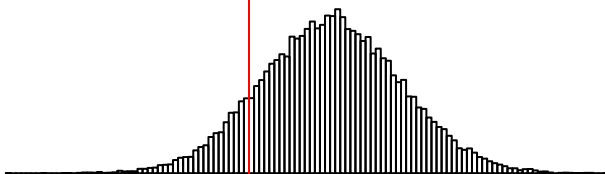

A194:26 – D206:26

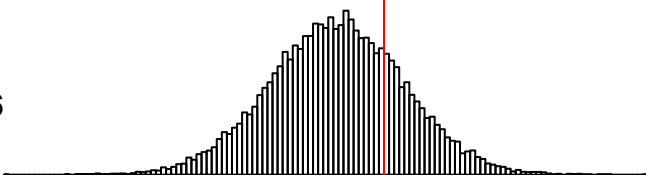

B184:26 – B224:26

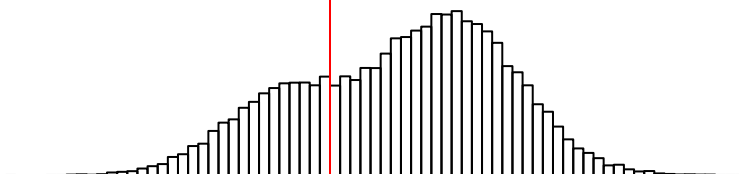

B184:26 – D206:26

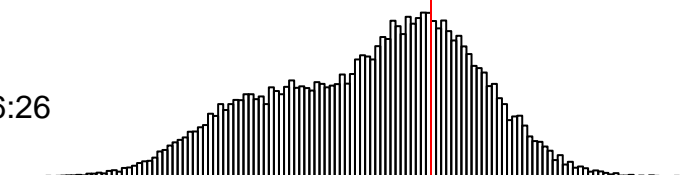

B224:26 – D206:26

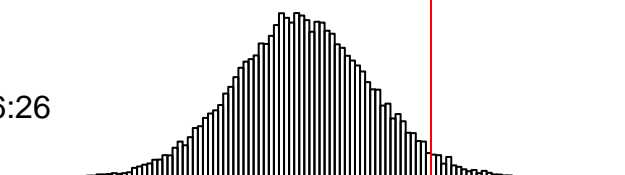

-6 -4 -2 0 2 4 6

delta(Unidentified Metabolite 32)

A194:26

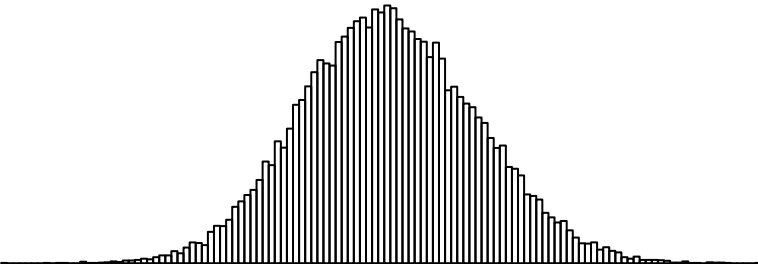

B184:26

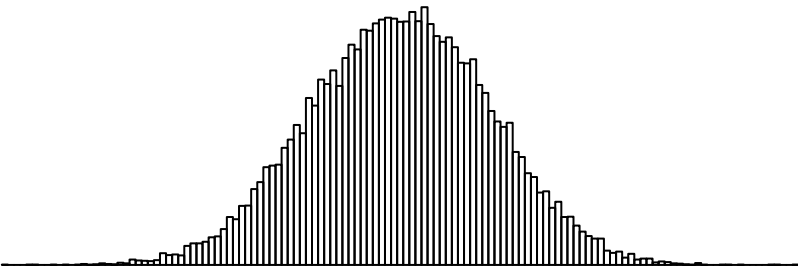

B224:26

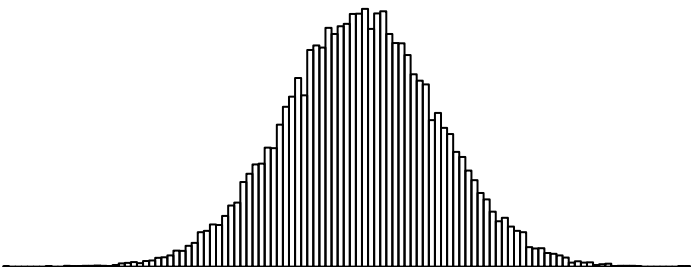

D206:26

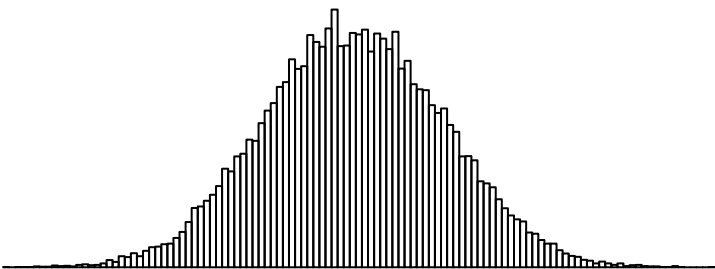

-10      -9      -8      -7      -6

Unidentified Metabolite 33

A194:26 – B184:26

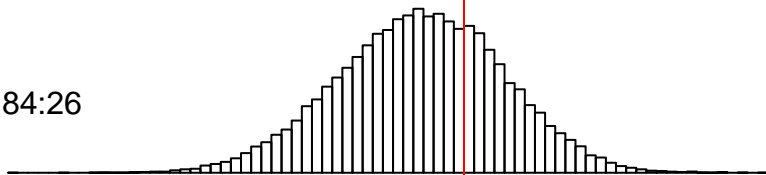

A194:26 – B224:26

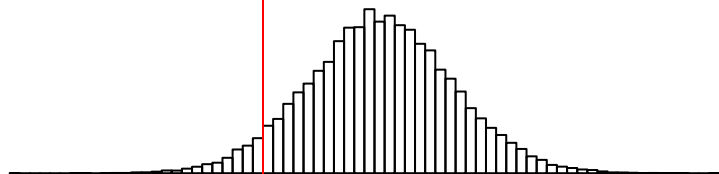

A194:26 – D206:26

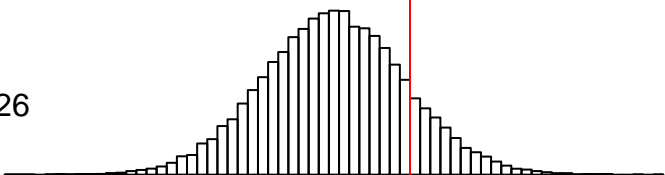

B184:26 – B224:26

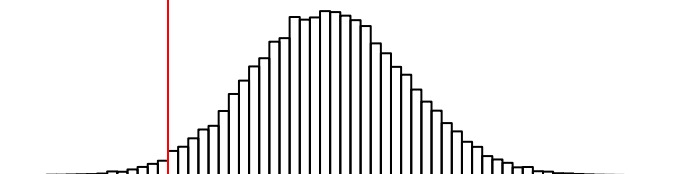

B184:26 – D206:26

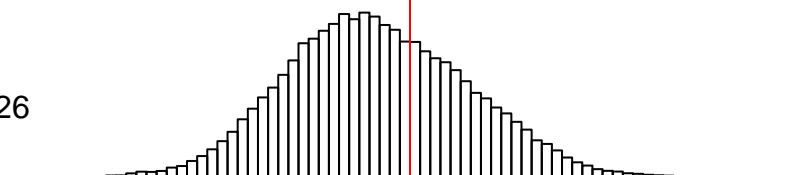

B224:26 – D206:26

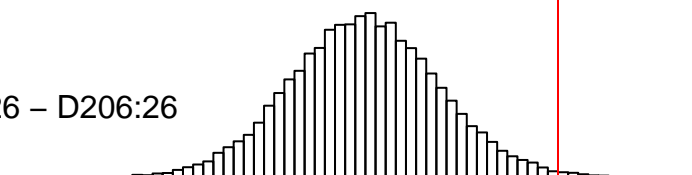

-3 -2 -1 0 1 2 3

delta(Unidentified Metabolite 33)

A194:26

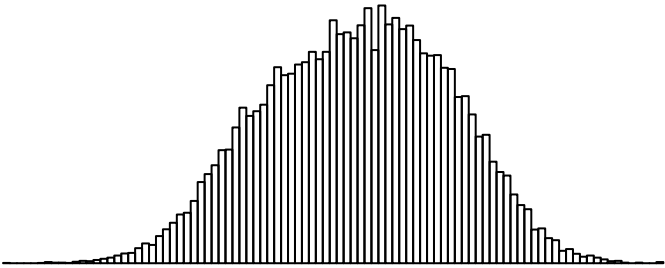

B184:26

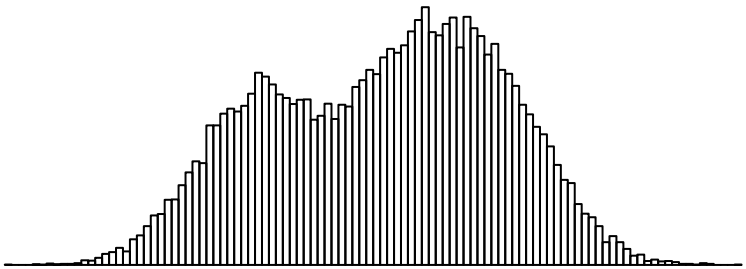

B224:26

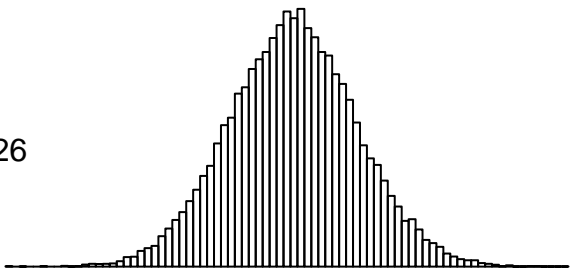

D206:26

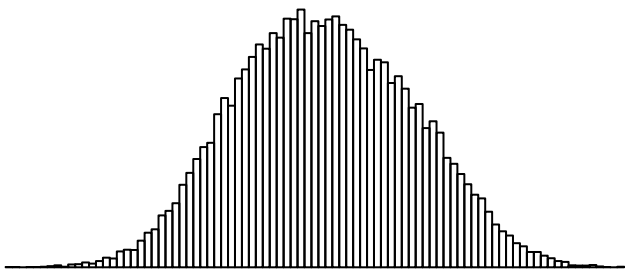

-10.5      -10.0      -9.5      -9.0      -8.5      -8.0      -7.5      -7.0

Unidentified Metabolite 34

A194:26 – B184:26

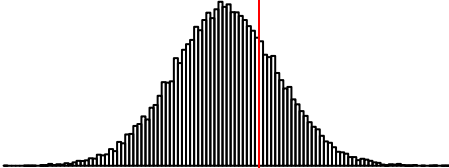

A194:26 – B224:26

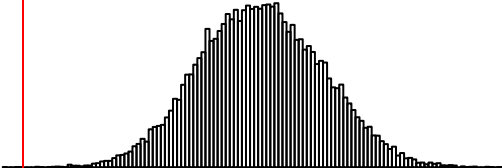

A194:26 – D206:26

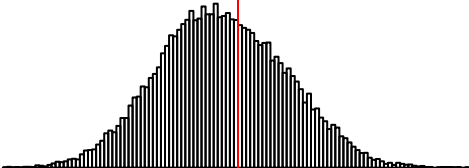

B184:26 – B224:26

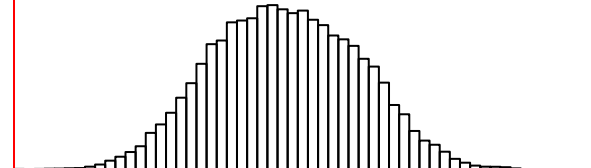

B184:26 – D206:26

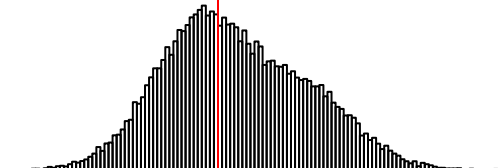

B224:26 – D206:26

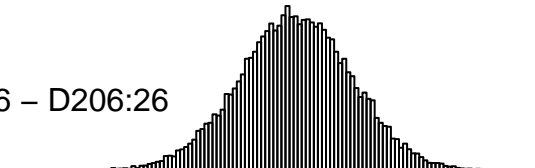

-3      -2      -1      0      1      2      3

delta(Unidentified Metabolite 34)



A194:26

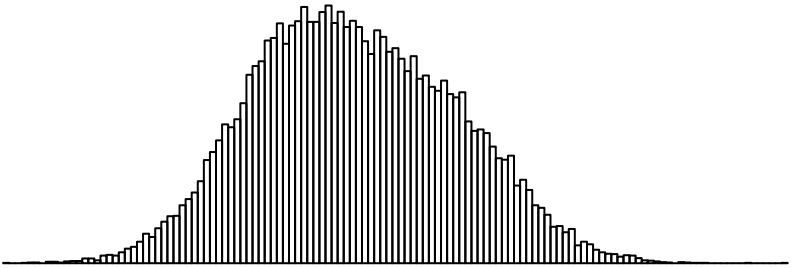

B184:26

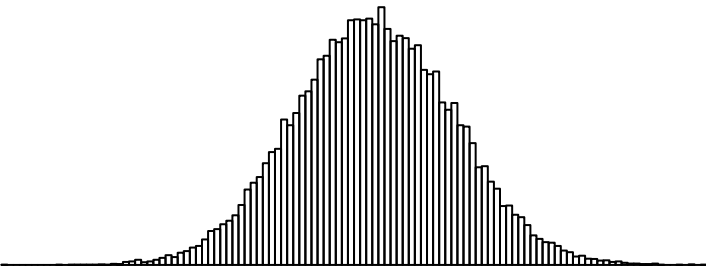

B224:26

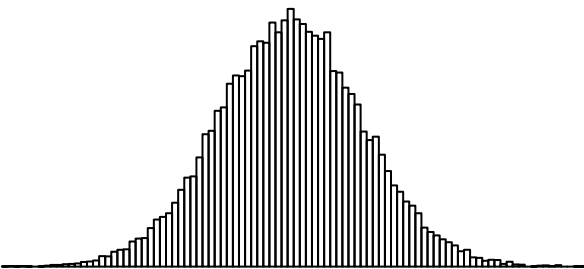

D206:26

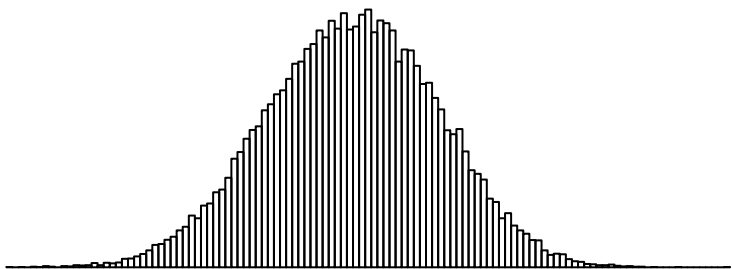

-9                      -8                      -7                      -6                      -5

Unidentified Metabolite 35

A194:26 – B184:26

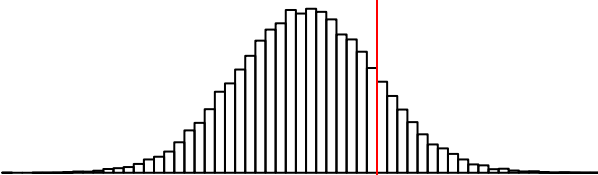

A194:26 – B224:26

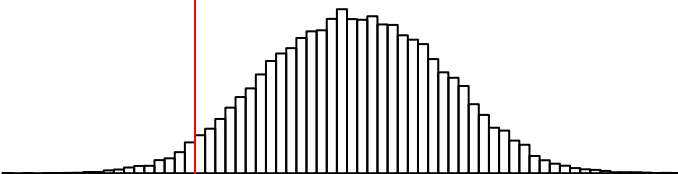

A194:26 – D206:26

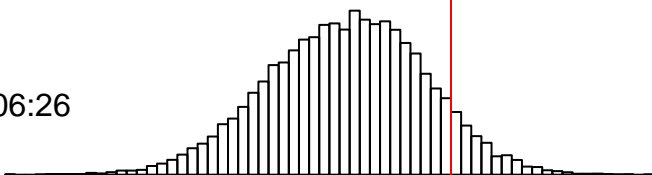

B184:26 – B224:26

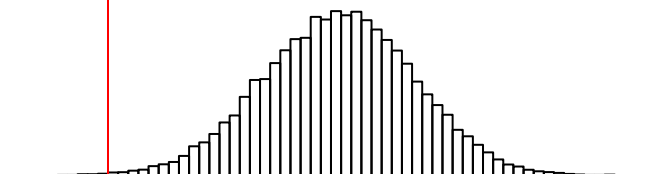

B184:26 – D206:26

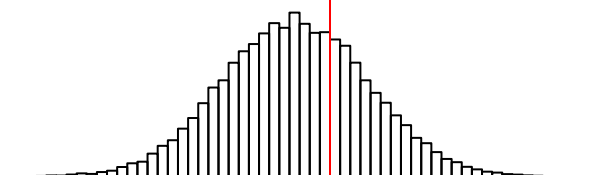

B224:26 – D206:26

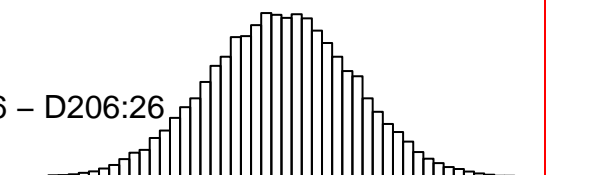

-3 -2 -1 0 1 2 3

delta(Unidentified Metabolite 35)

A194:26

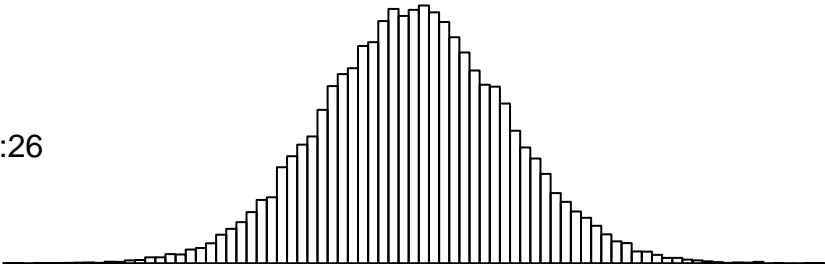

B184:26

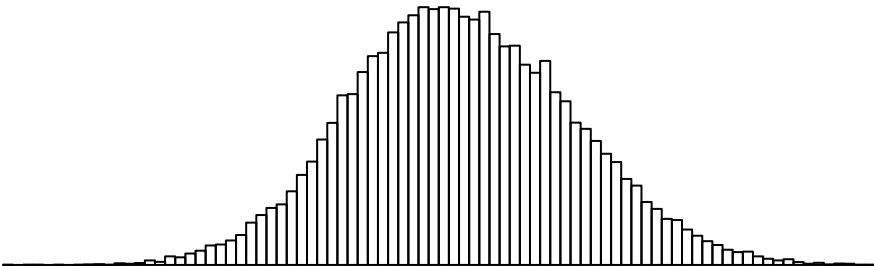

B224:26

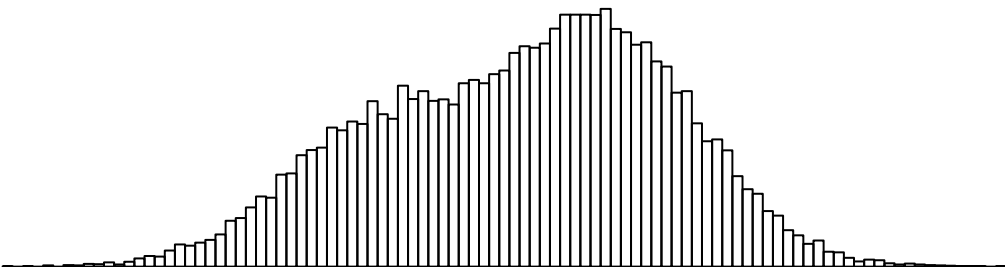

D206:26

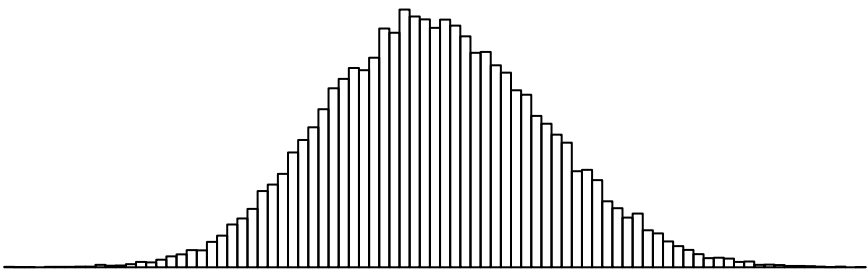

-9      -8      -7      -6      -5      -4      -3

Unidentified Metabolite 36

A194:26 – B184:26

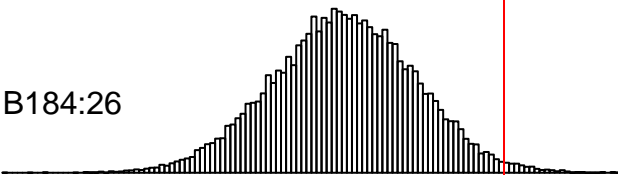

A194:26 – B224:26

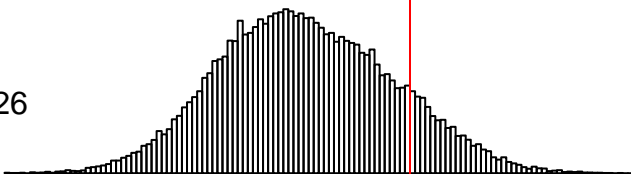

A194:26 – D206:26

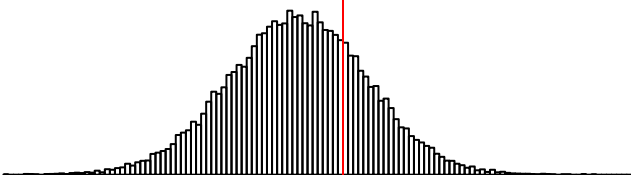

B184:26 – B224:26

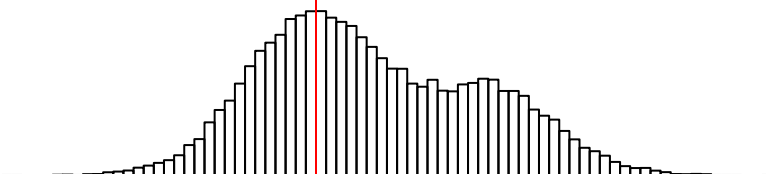

B184:26 – D206:26

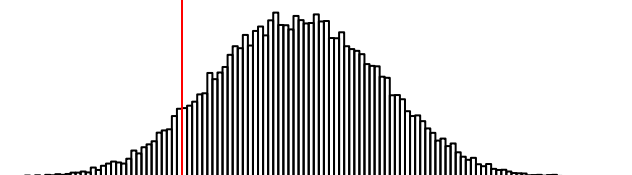

B224:26 – D206:26

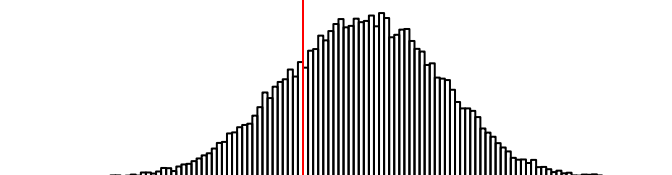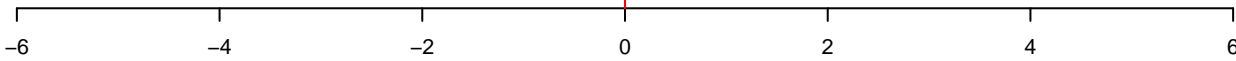

delta(Unidentified Metabolite 36)

A194:26

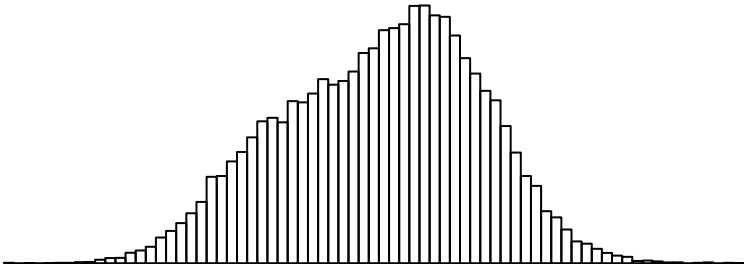

B184:26

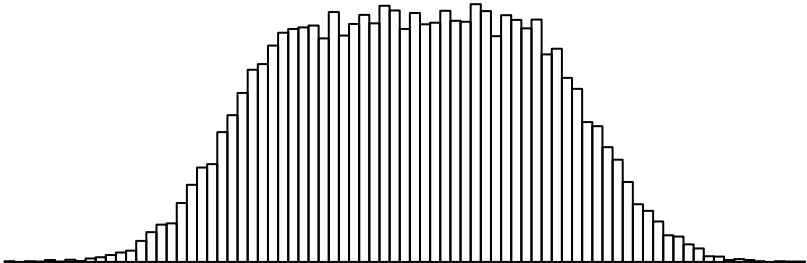

B224:26

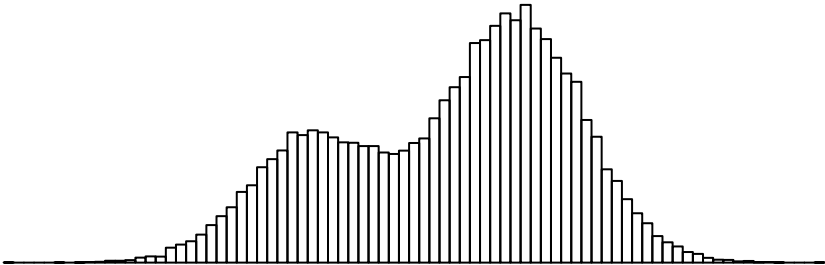

D206:26

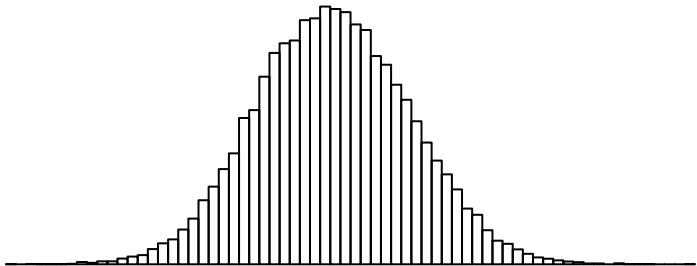

-10      -9      -8      -7      -6      -5      -4

Unidentified Metabolite 38

A194:26 – B184:26

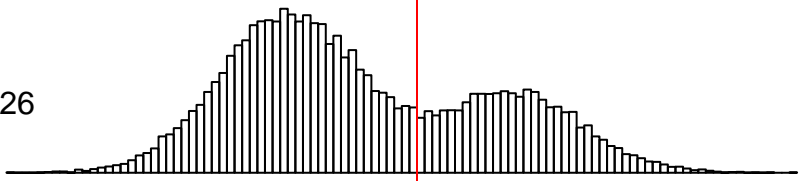

A194:26 – B224:26

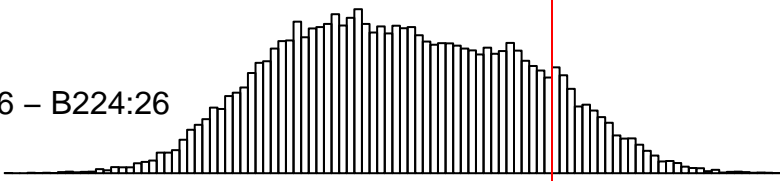

A194:26 – D206:26

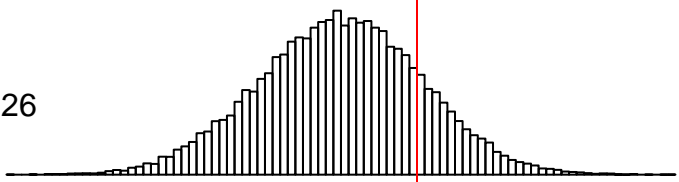

B184:26 – B224:26

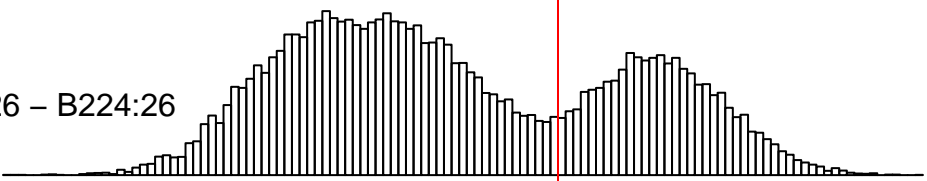

B184:26 – D206:26

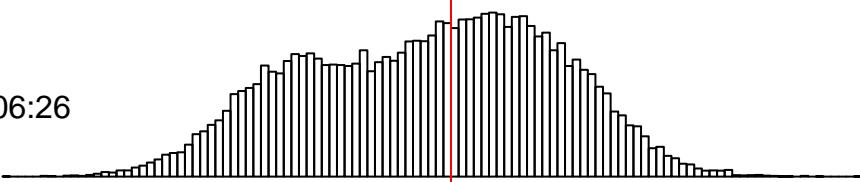

B224:26 – D206:26

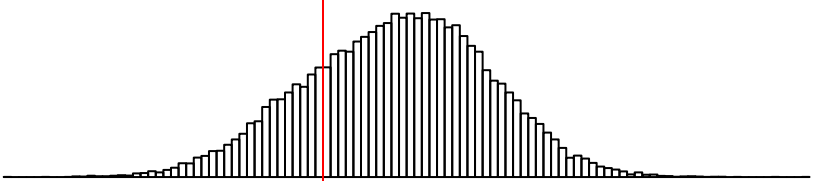

-4 -2 0 2 4

delta(Unidentified Metabolite 38)

A194:26

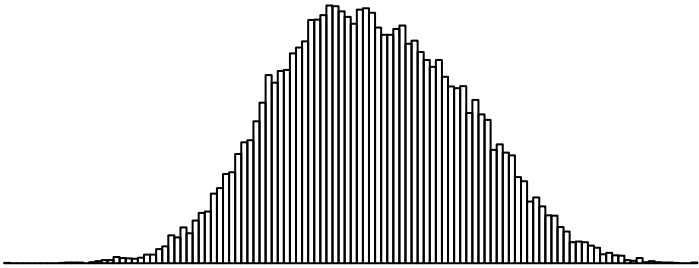

B184:26

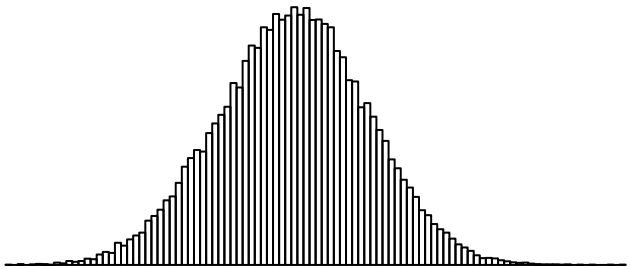

B224:26

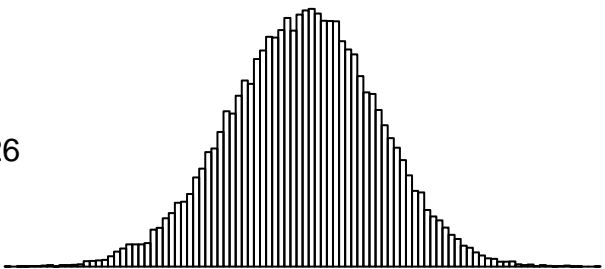

D206:26

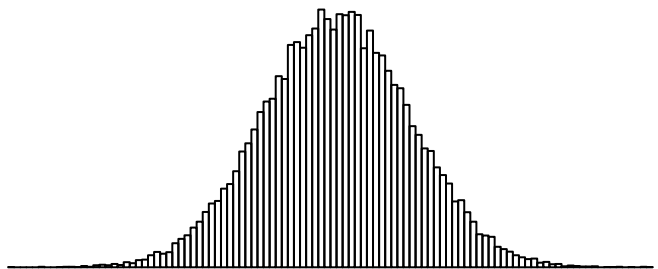

-10                      -9                      -8                      -7                      -6

Unidentified Metabolite 39

A194:26 – B184:26

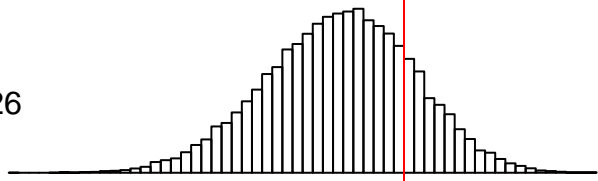

A194:26 – B224:26

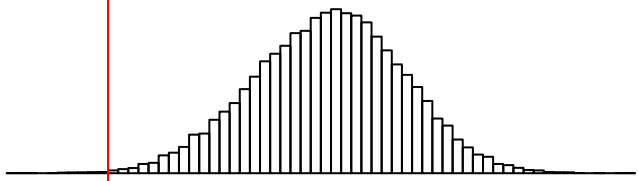

A194:26 – D206:26

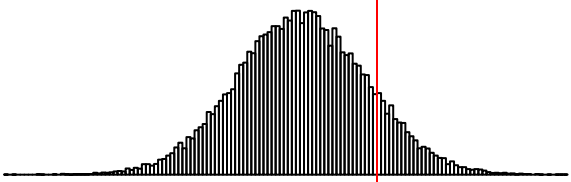

B184:26 – B224:26

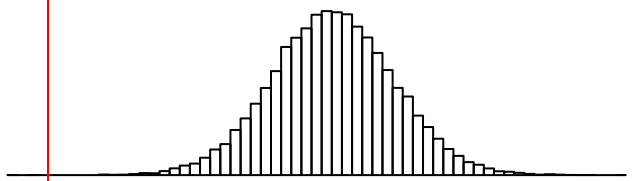

B184:26 – D206:26

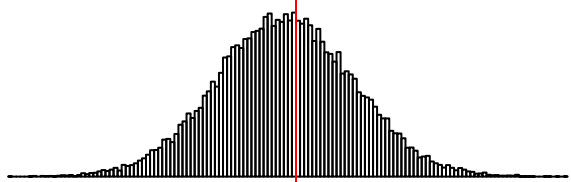

B224:26 – D206:26

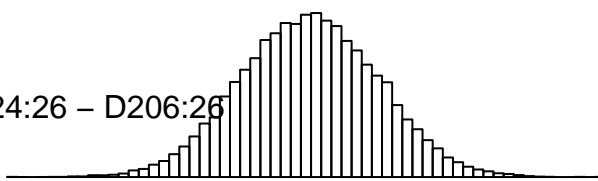

-3 -2 -1 0 1 2 3

delta(Unidentified Metabolite 39)



A194:26

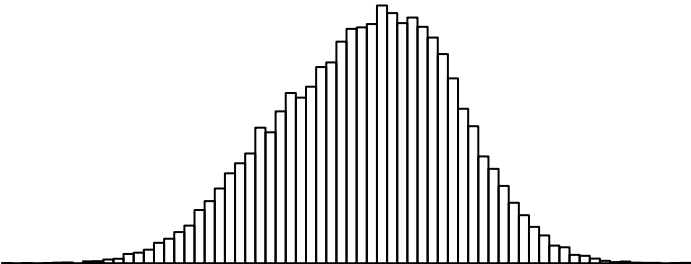

B184:26

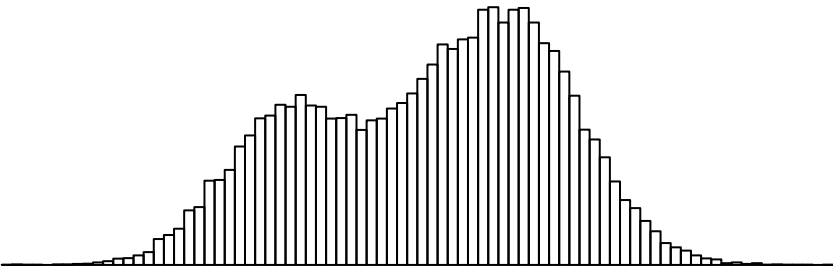

B224:26

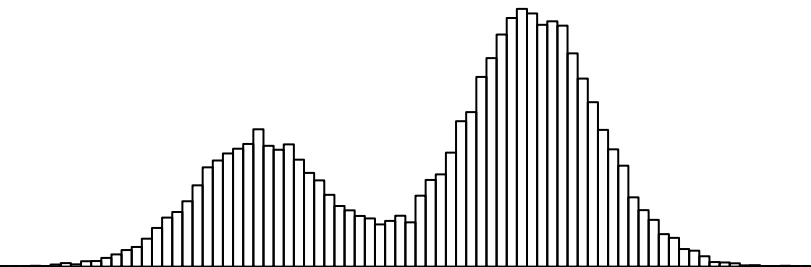

D206:26

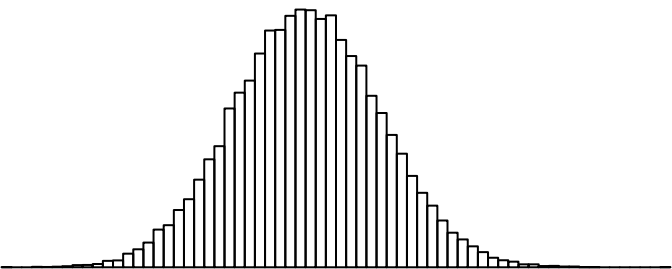

-10 -9 -8 -7 -6 -5 -4

Unidentified Metabolite 42

A194:26 – B184:26

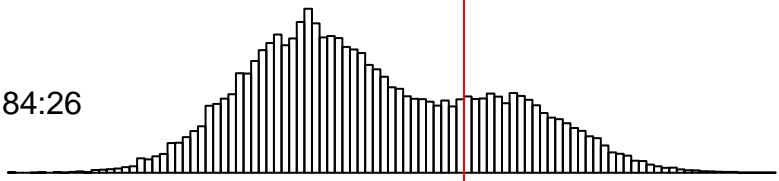

A194:26 – B224:26

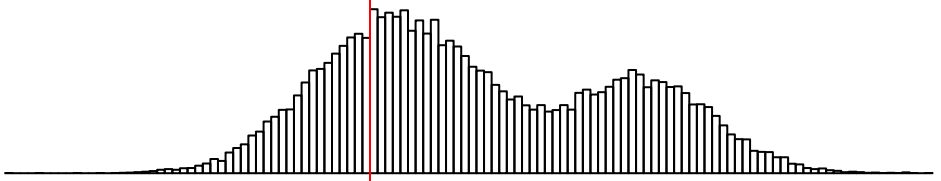

A194:26 – D206:26

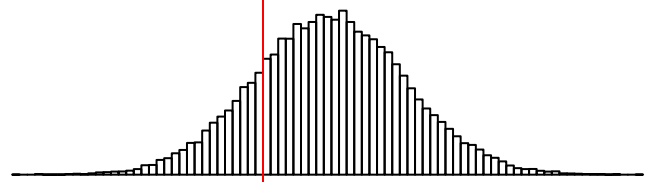

B184:26 – B224:26

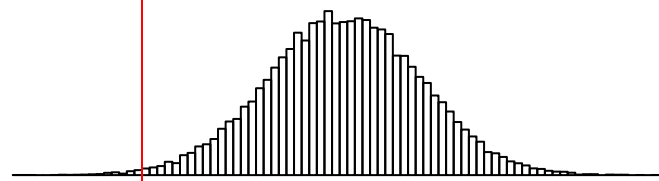

B184:26 – D206:26

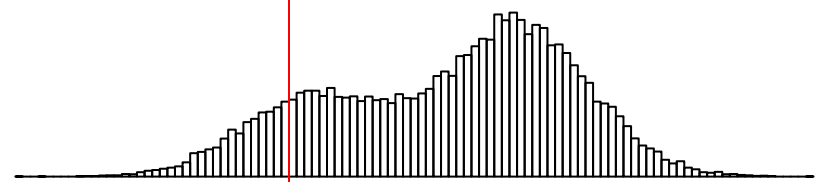

B224:26 – D206:26

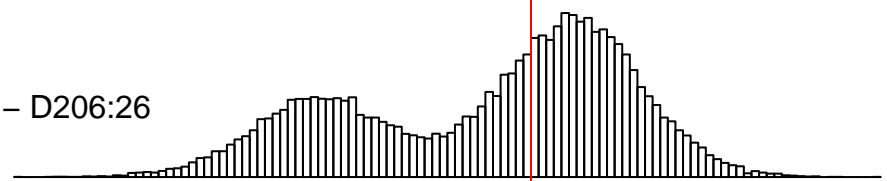

-4 -2 0 2 4

delta(Unidentified Metabolite 42)

A194:26

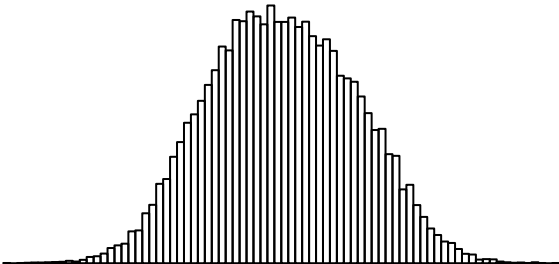

B184:26

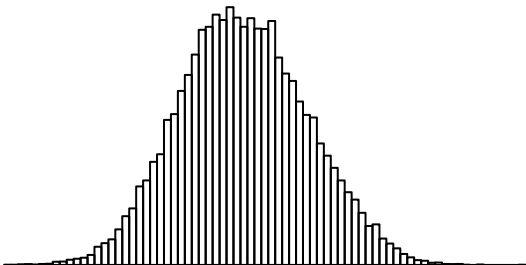

B224:26

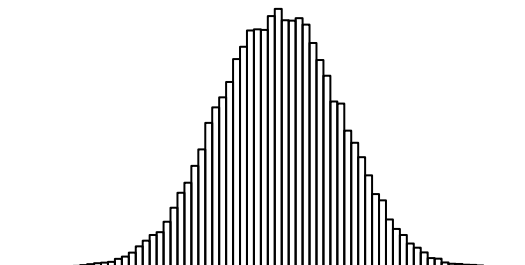

D206:26

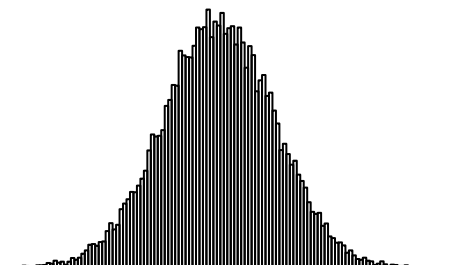

-10.0      -9.5      -9.0      -8.5      -8.0      -7.5      -7.0      -6.5

Unidentified Metabolite 43

A194:26 – B184:26

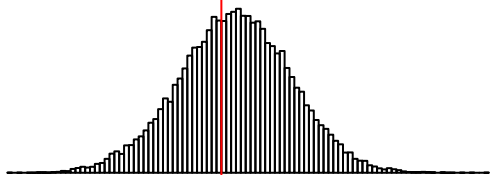

A194:26 – B224:26

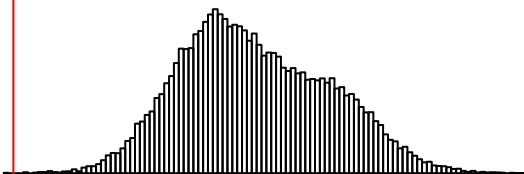

A194:26 – D206:26

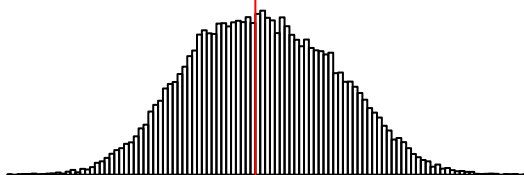

B184:26 – B224:26

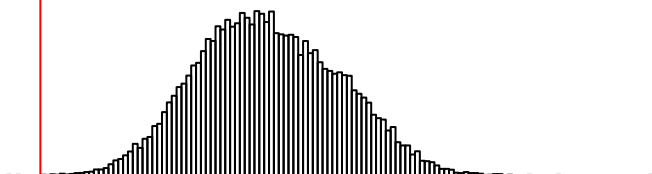

B184:26 – D206:26

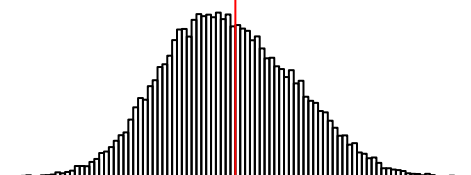

B224:26 – D206:26

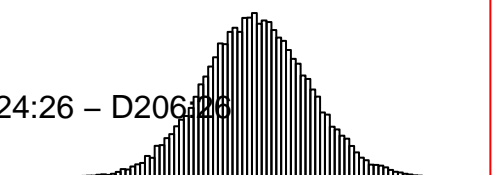

-2 -1 0 1 2 3

delta(Unidentified Metabolite 43)

A194:26

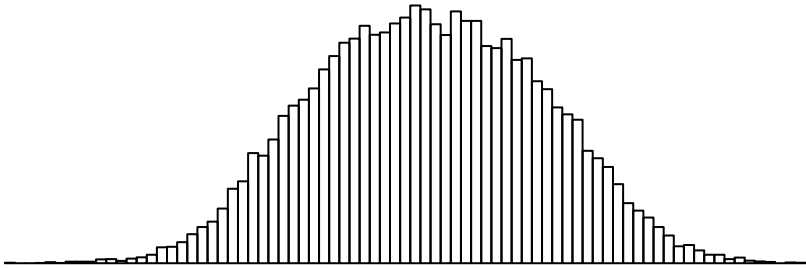

B184:26

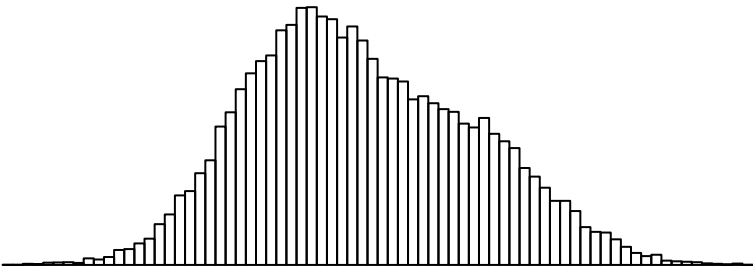

B224:26

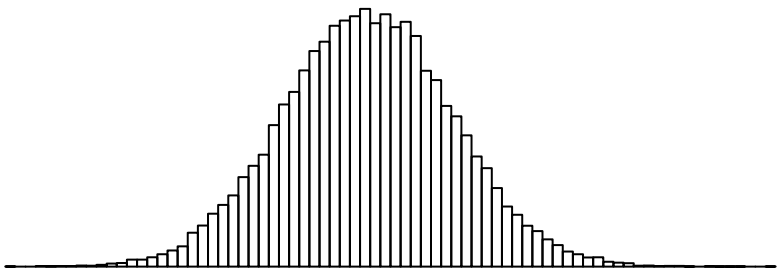

D206:26

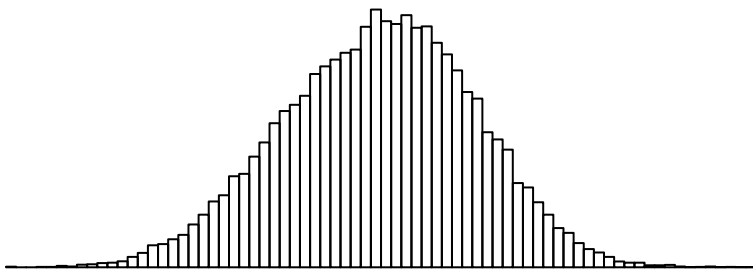

-11      -10      -9      -8      -7      -6      -5

Unidentified Metabolite 45

A194:26 – B184:26

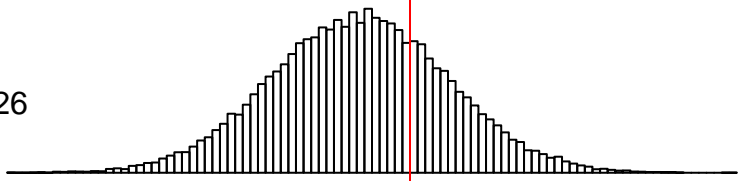

A194:26 – B224:26

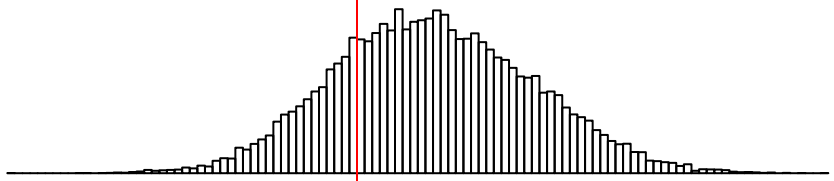

A194:26 – D206:26

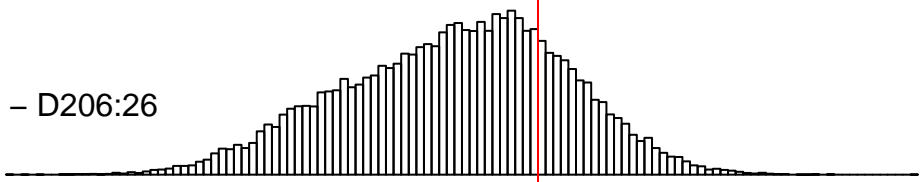

B184:26 – B224:26

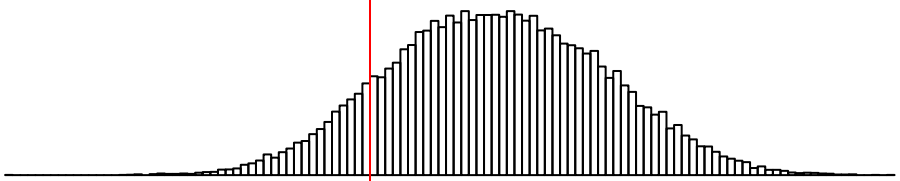

B184:26 – D206:26

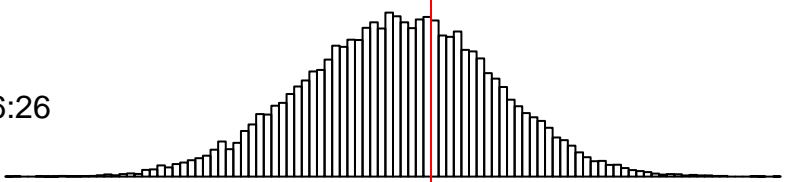

B224:26 – D206:26

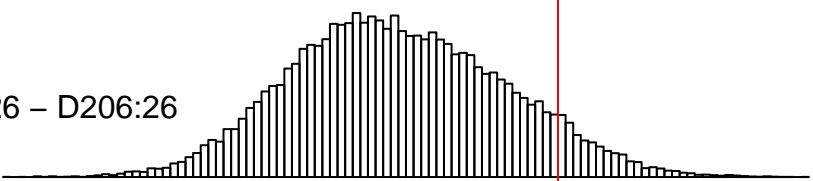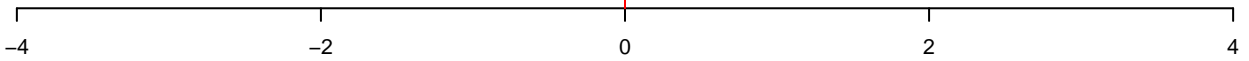

delta(Unidentified Metabolite 45)

A194:26

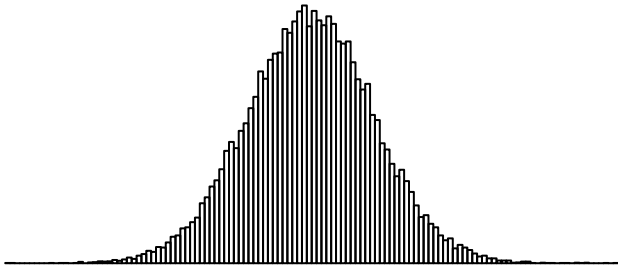

B184:26

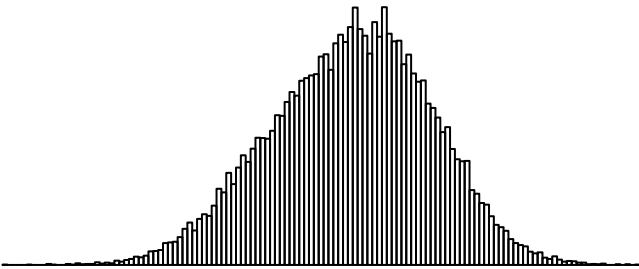

B224:26

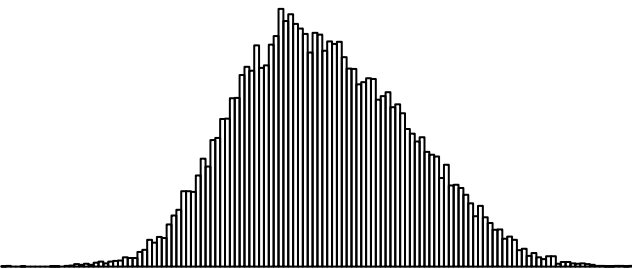

D206:26

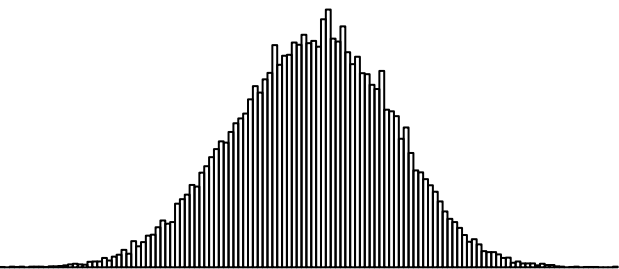

-10      -9      -8      -7      -6      -5

Unidentified Metabolite 47

A194:26 – B184:26

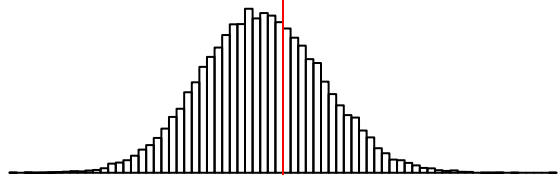

A194:26 – B224:26

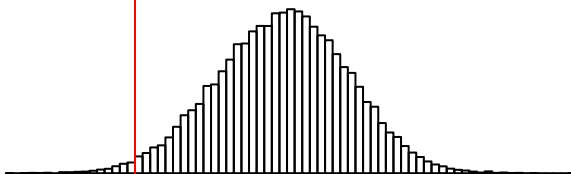

A194:26 – D206:26

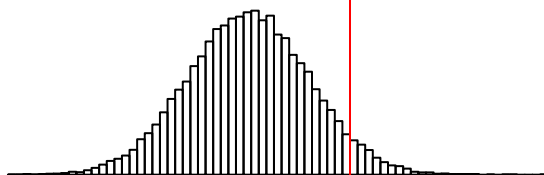

B184:26 – B224:26

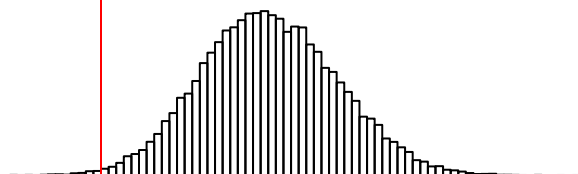

B184:26 – D206:26

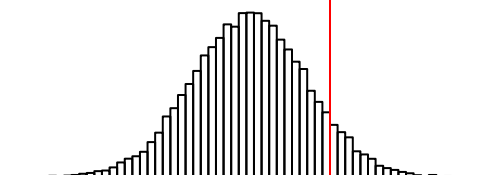

B224:26 – D206:26

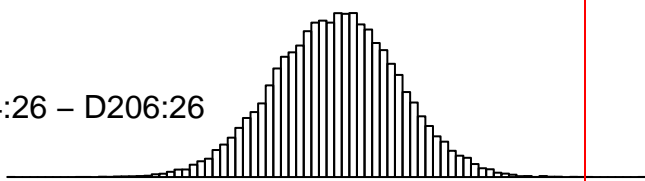

-4 -2 0 2 4

delta(Unidentified Metabolite 47)



A194:26

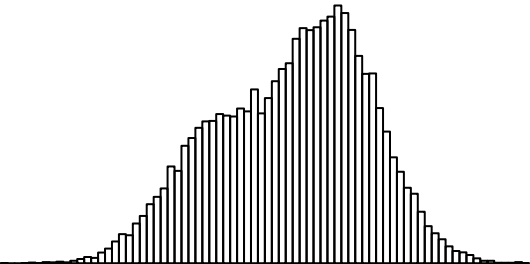

B184:26

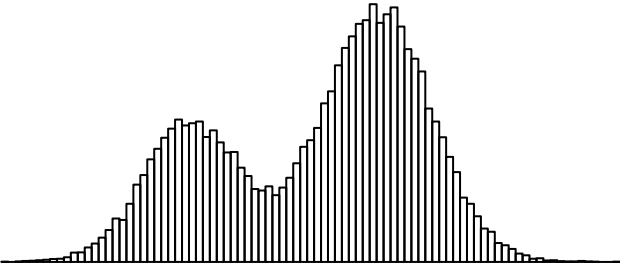

B224:26

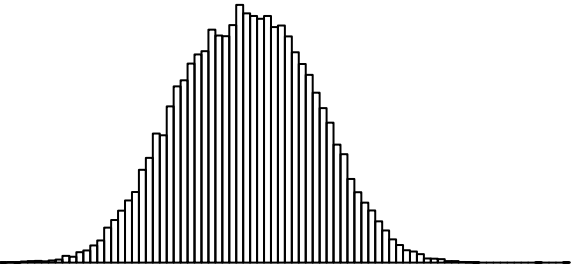

D206:26

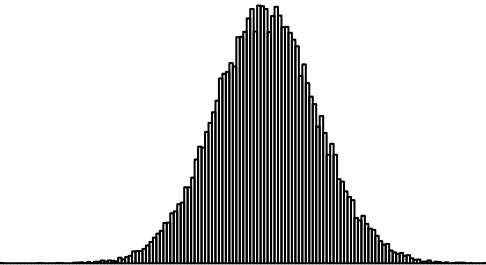

-10.0      -9.5      -9.0      -8.5      -8.0      -7.5      -7.0      -6.5

Unidentified Metabolite 48

A194:26 – B184:26

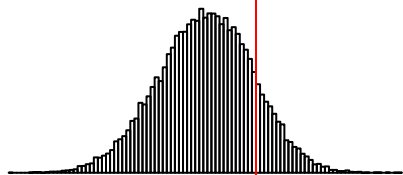

A194:26 – B224:26

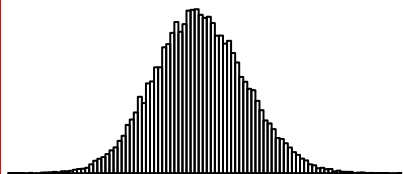

A194:26 – D206:26

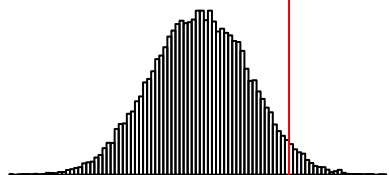

B184:26 – B224:26

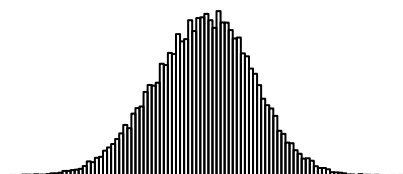

B184:26 – D206:26

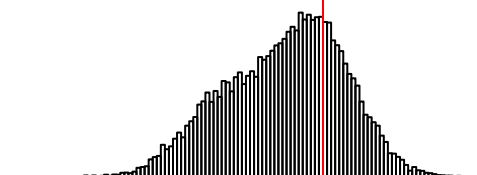

B224:26 – D206:26

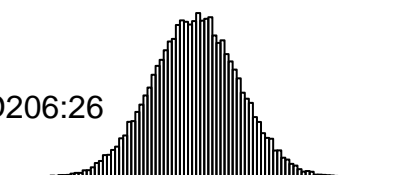

delta(Unidentified Metabolite 48)

A194:26

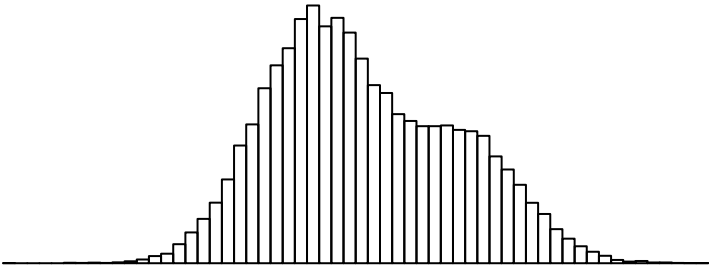

B184:26

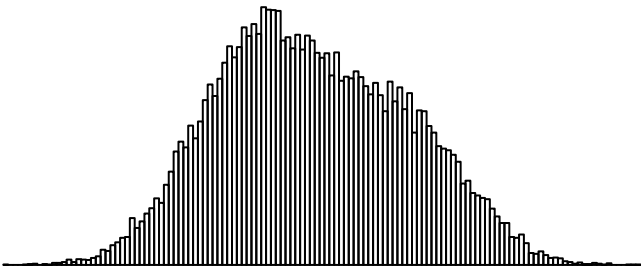

B224:26

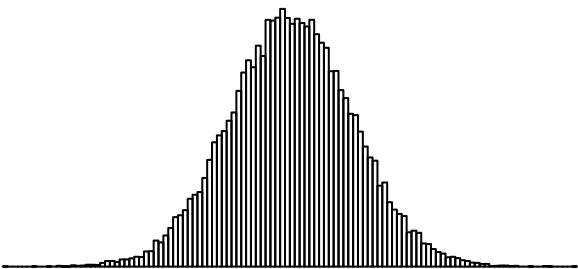

D206:26

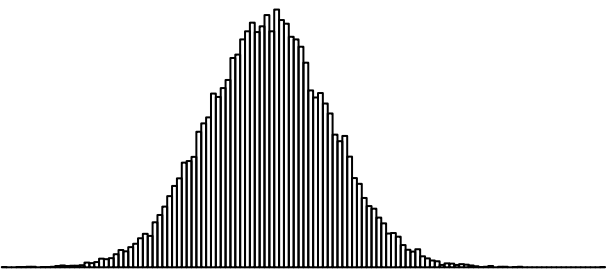

-11      -10      -9      -8      -7      -6

Unidentified Metabolite 49

A194:26 – B184:26

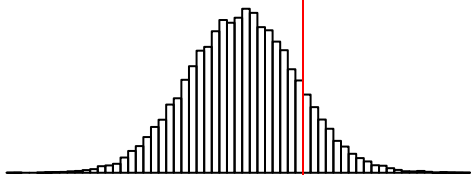

A194:26 – B224:26

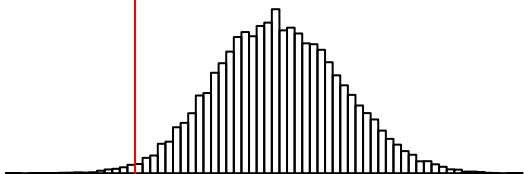

A194:26 – D206:26

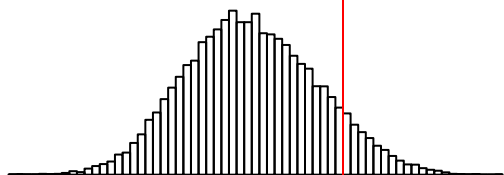

B184:26 – B224:26

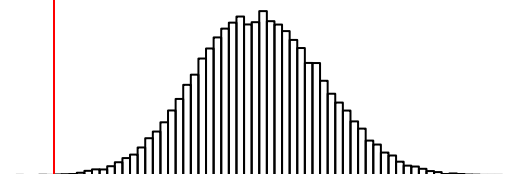

B184:26 – D206:26

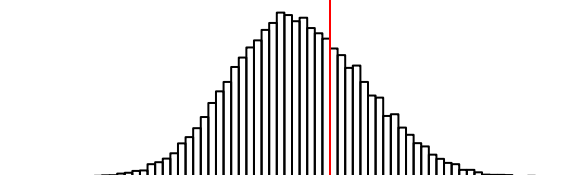

B224:26 – D206:26

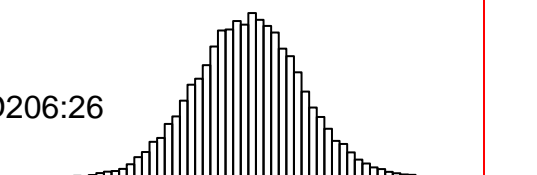

-4 -2 0 2 4

delta(Unidentified Metabolite 49)

A194:26

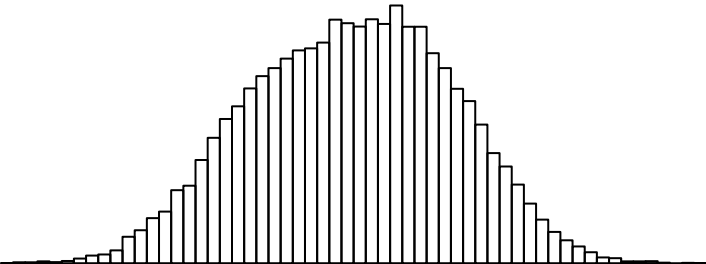

B184:26

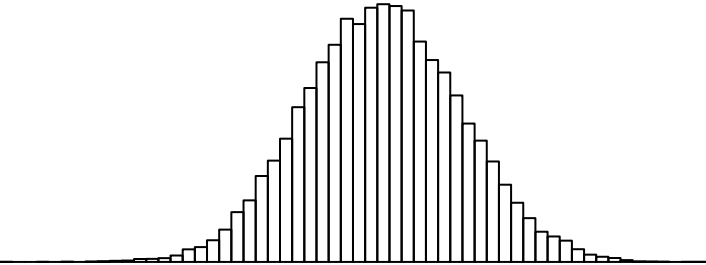

B224:26

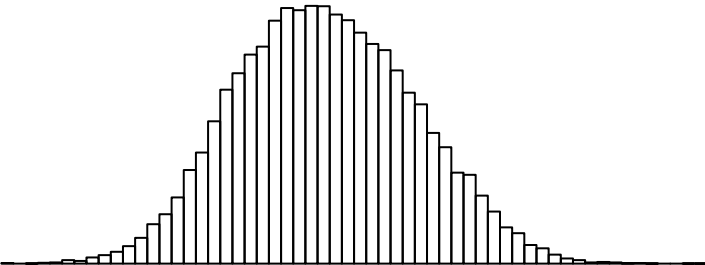

D206:26

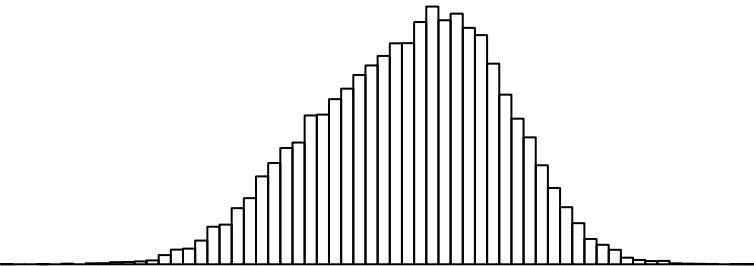

-10      -9      -8      -7      -6      -5

Unidentified Metabolite 50

A194:26 – B184:26

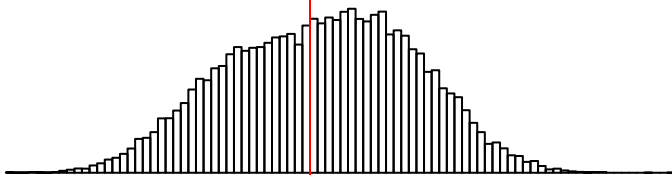

A194:26 – B224:26

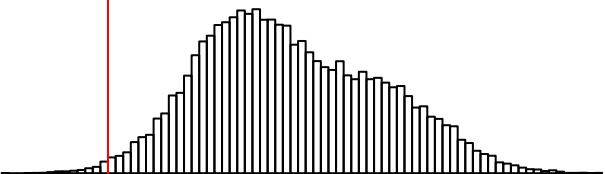

A194:26 – D206:26

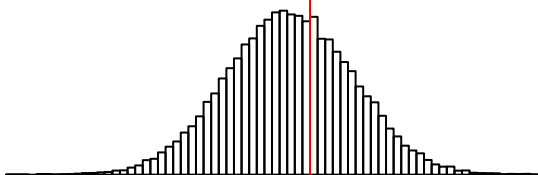

B184:26 – B224:26

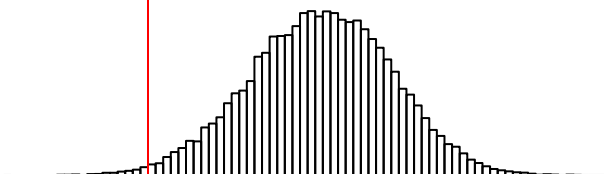

B184:26 – D206:26

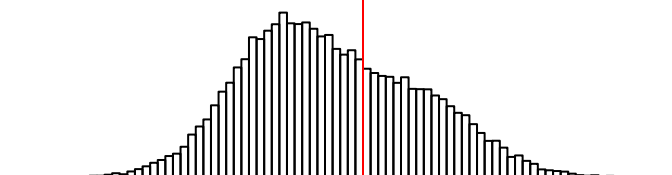

B224:26 – D206:26

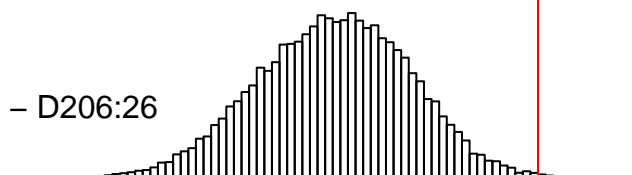

-4 -2 0 2 4

delta(Unidentified Metabolite 50)

A194:26

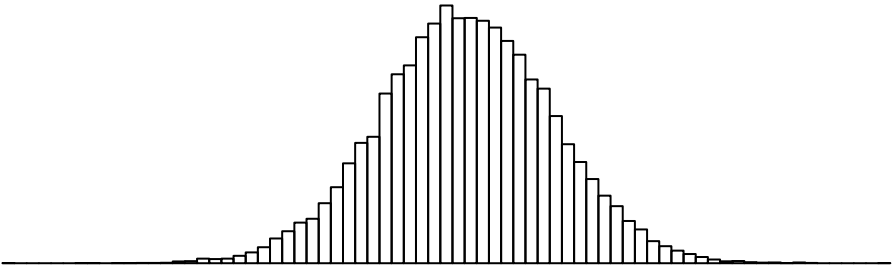

B184:26

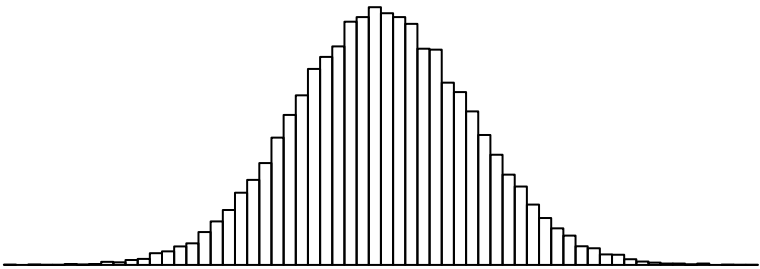

B224:26

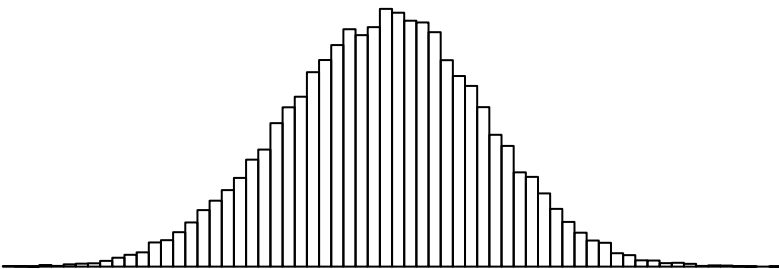

D206:26

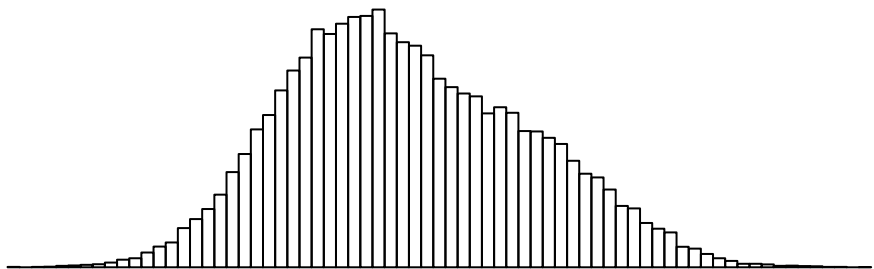

-10      -9      -8      -7      -6      -5

Unidentified Metabolite 51

A194:26 – B184:26

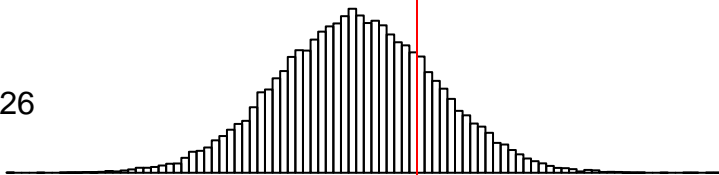

A194:26 – B224:26

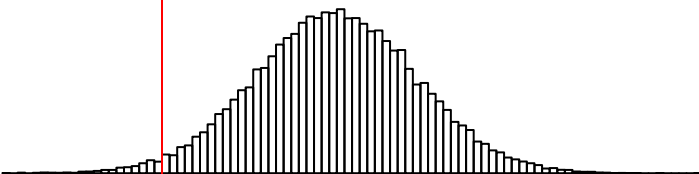

A194:26 – D206:26

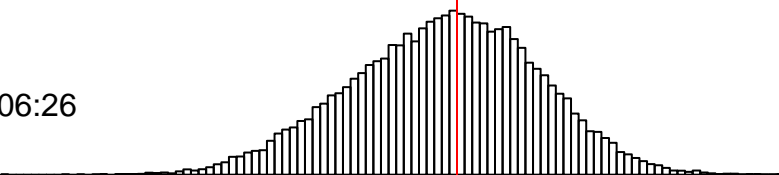

B184:26 – B224:26

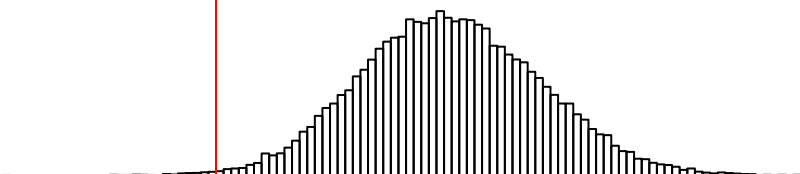

B184:26 – D206:26

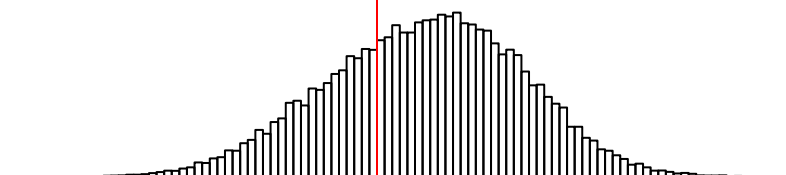

B224:26 – D206:26

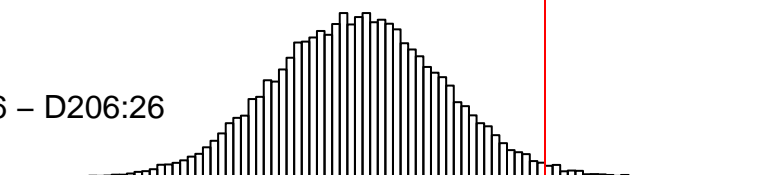

-4 -2 0 2 4

delta(Unidentified Metabolite 51)



A194:26

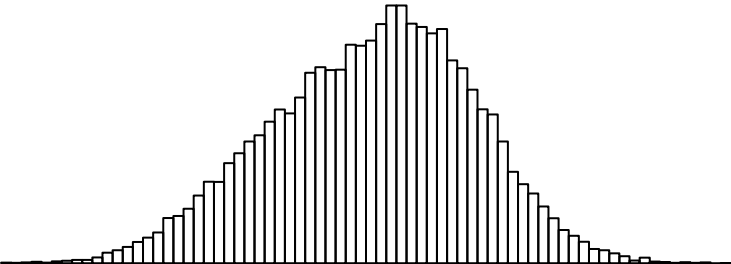

B184:26

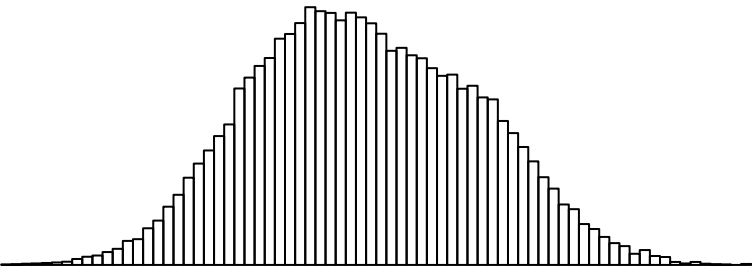

B224:26

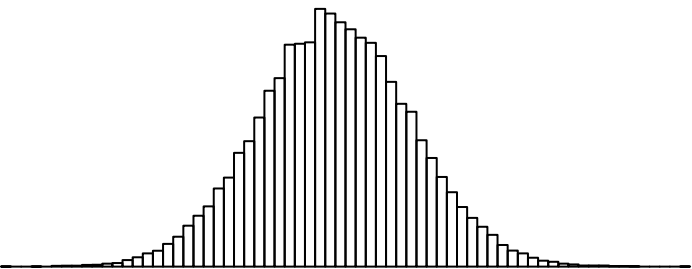

D206:26

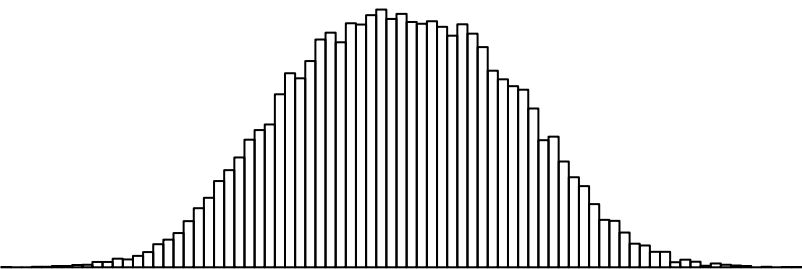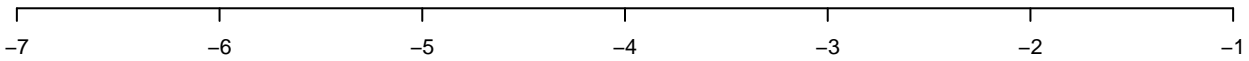

Unidentified Metabolite 55

A194:26 – B184:26

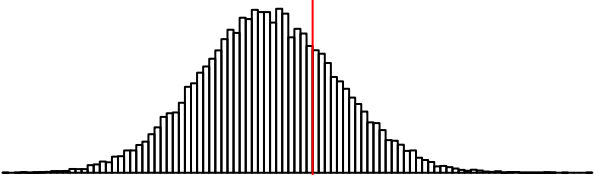

A194:26 – B224:26

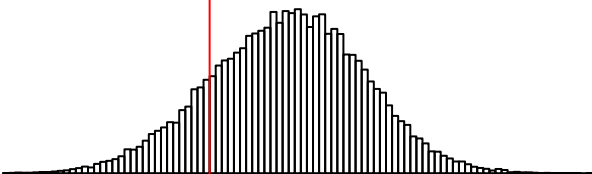

A194:26 – D206:26

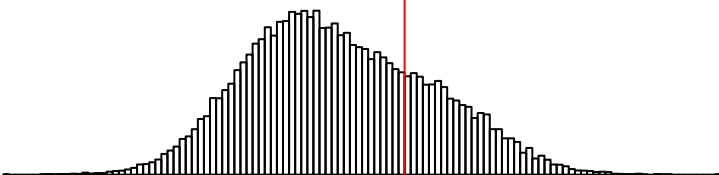

B184:26 – B224:26

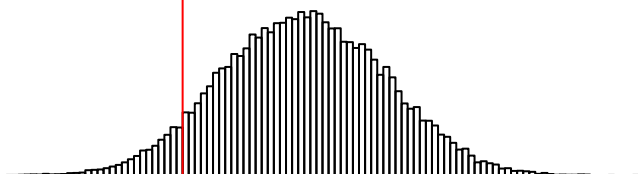

B184:26 – D206:26

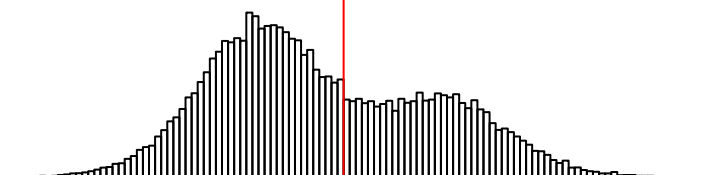

B224:26 – D206:26

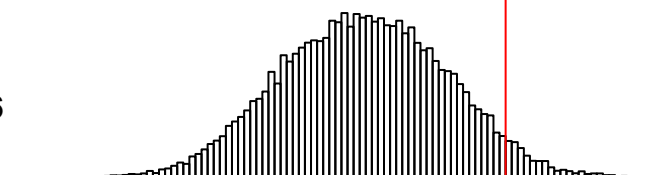

delta(Unidentified Metabolite 55)

A194:26

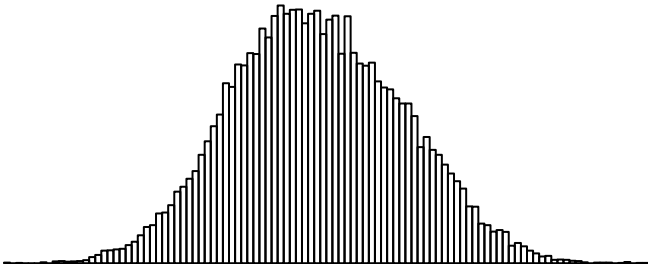

B184:26

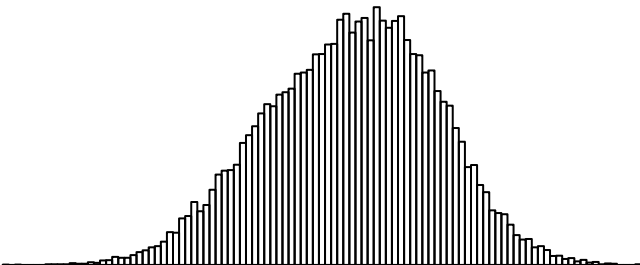

B224:26

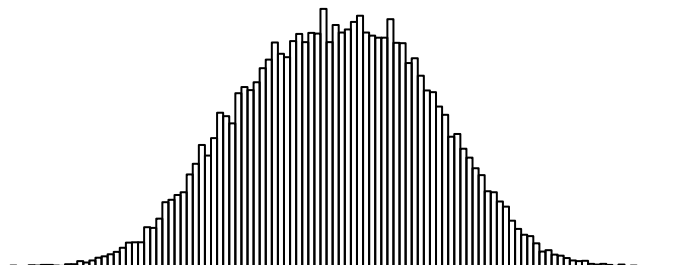

D206:26

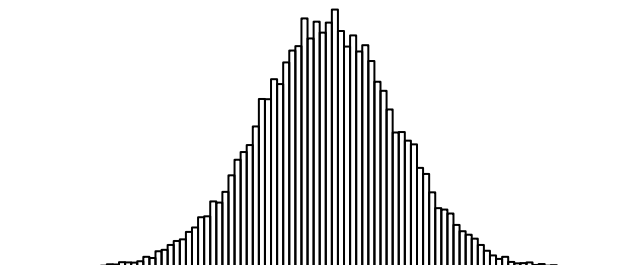

-10

-9

-8

-7

Unidentified Metabolite 56

A194:26 – B184:26

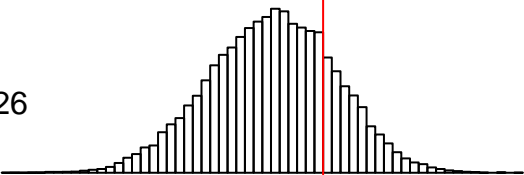

A194:26 – B224:26

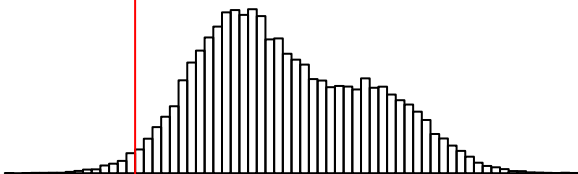

A194:26 – D206:26

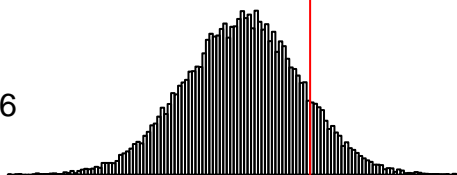

B184:26 – B224:26

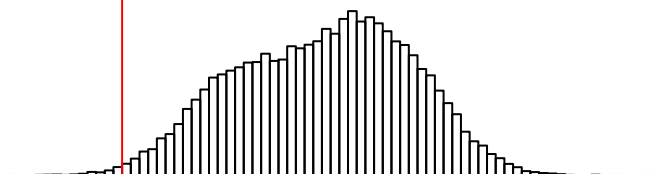

B184:26 – D206:26

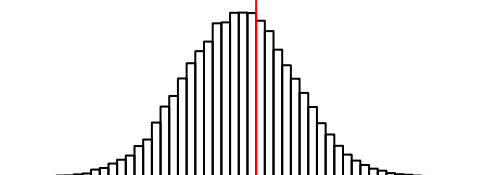

B224:26 – D206:26

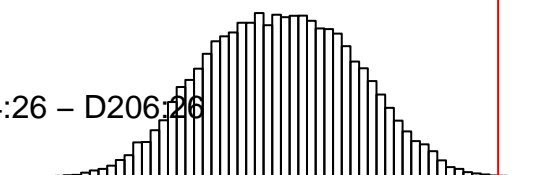

-3 -2 -1 0 1 2 3 4

delta(Unidentified Metabolite 56)

A194:26

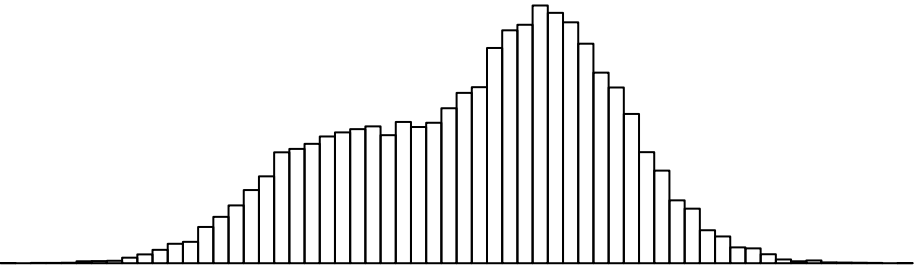

B184:26

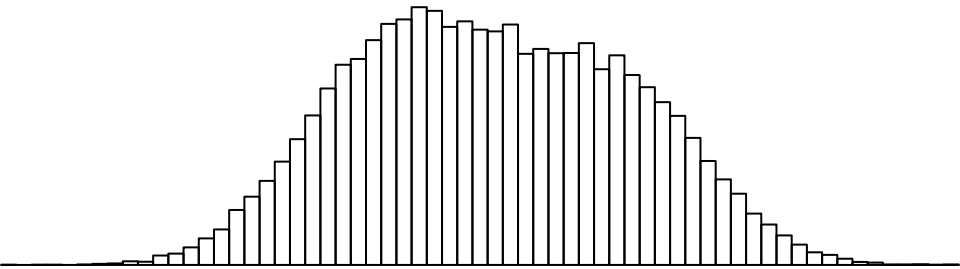

B224:26

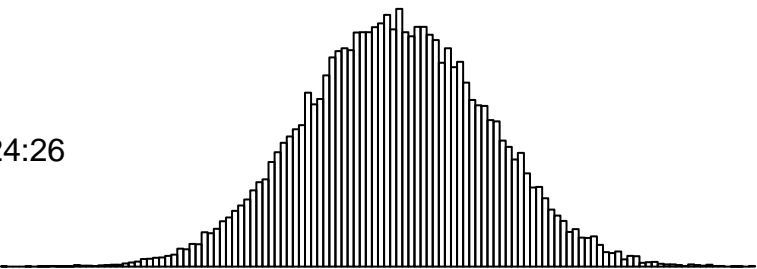

D206:26

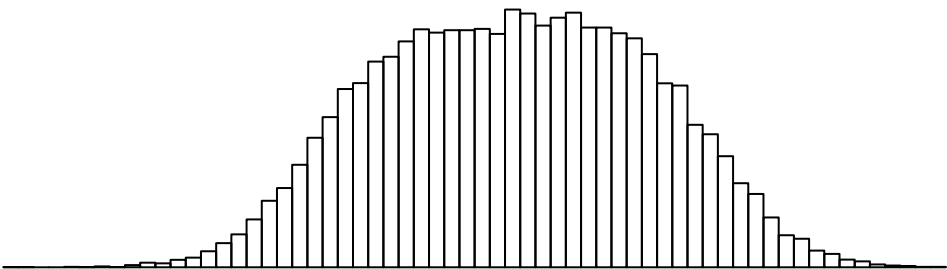

-9 -8 -7 -6 -5

Unidentified Metabolite 58

A194:26 – B184:26

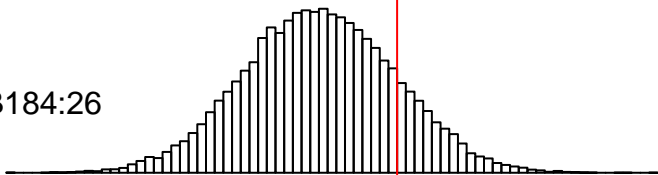

A194:26 – B224:26

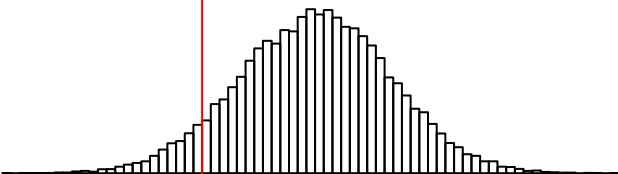

A194:26 – D206:26

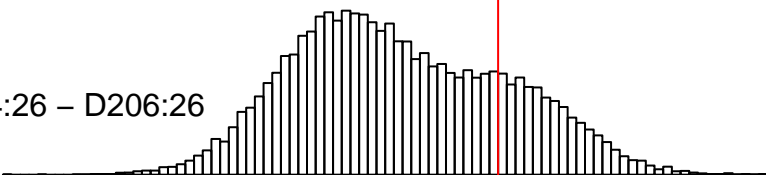

B184:26 – B224:26

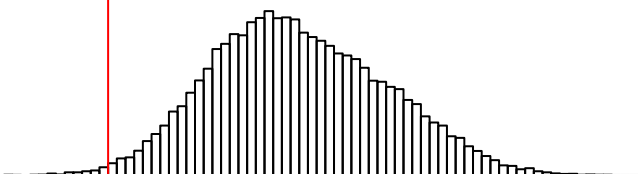

B184:26 – D206:26

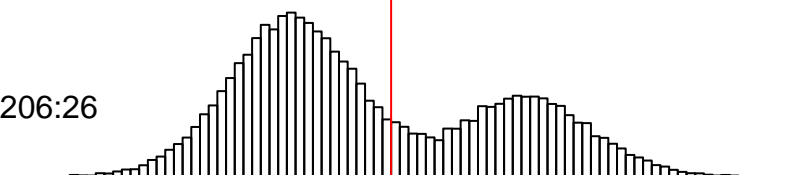

B224:26 – D206:26

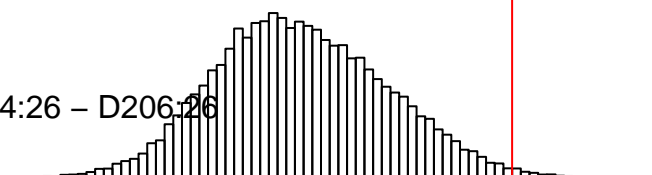

-3 -2 -1 0 1 2 3 4

delta(Unidentified Metabolite 58)

A194:26

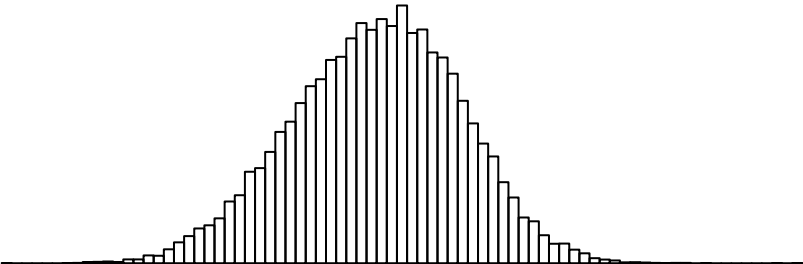

B184:26

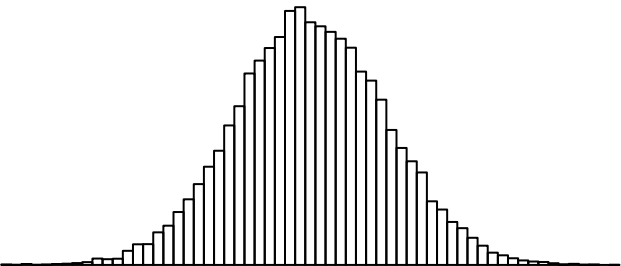

B224:26

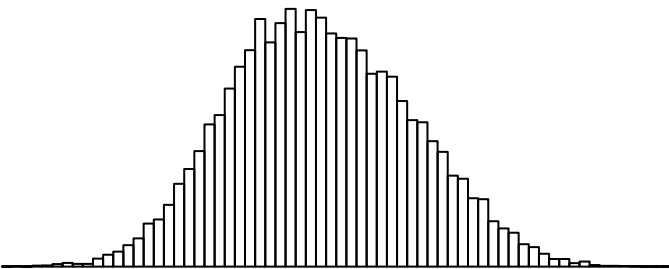

D206:26

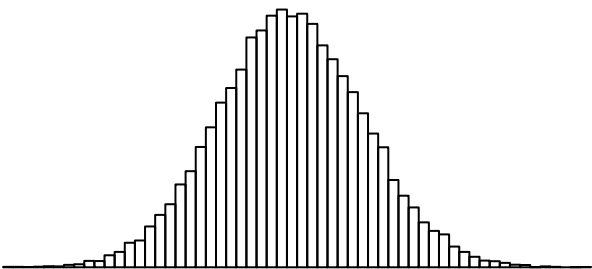

-9 -8 -7 -6 -5 -4

Unidentified Metabolite 59

A194:26 – B184:26

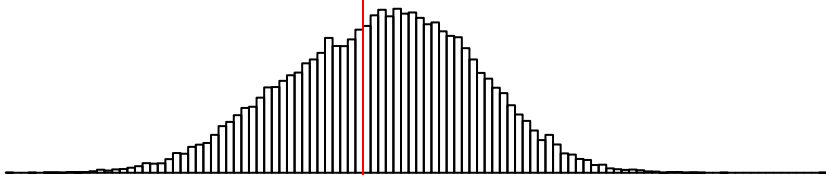

A194:26 – B224:26

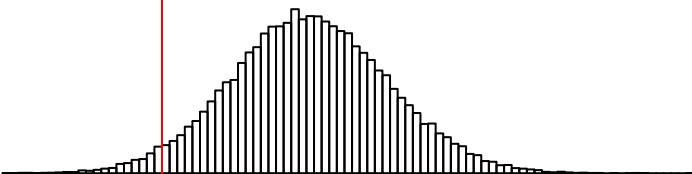

A194:26 – D206:26

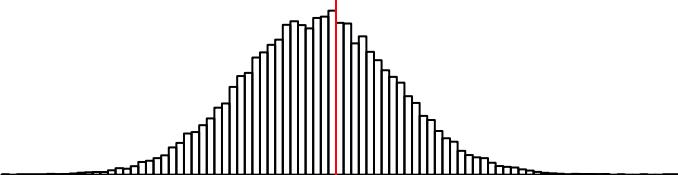

B184:26 – B224:26

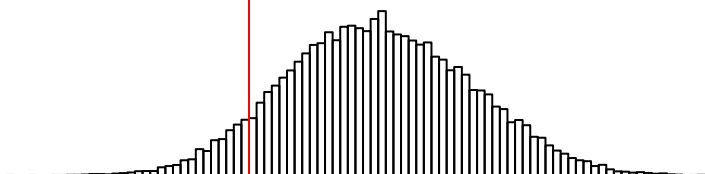

B184:26 – D206:26

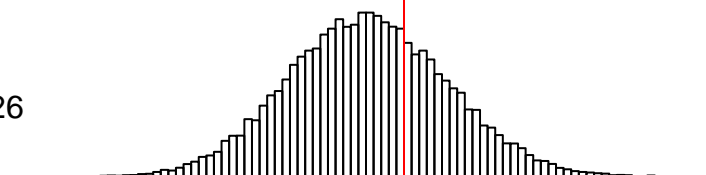

B224:26 – D206:26

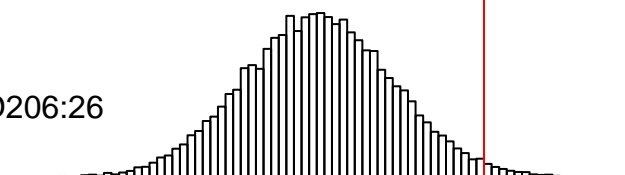

-4 -2 0 2 4

delta(Unidentified Metabolite 59)



A194:26

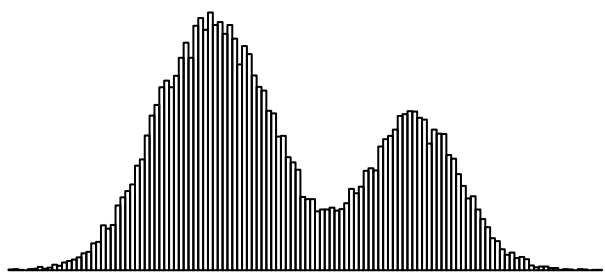

B184:26

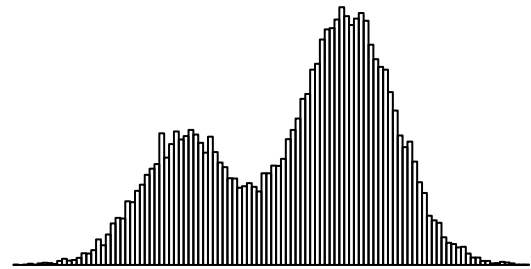

B224:26

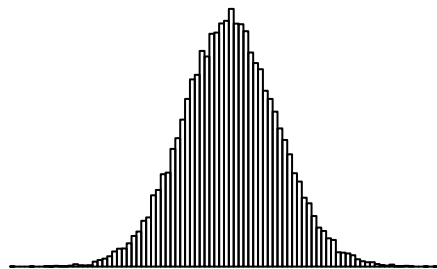

D206:26

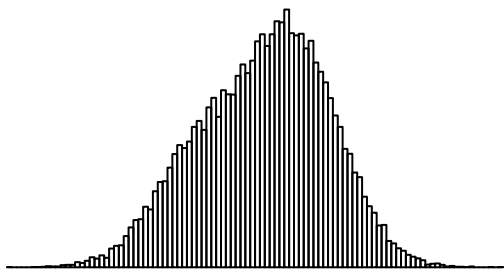

-11      -10      -9      -8      -7      -6

Unidentified Metabolite 60

A194:26 – B184:26

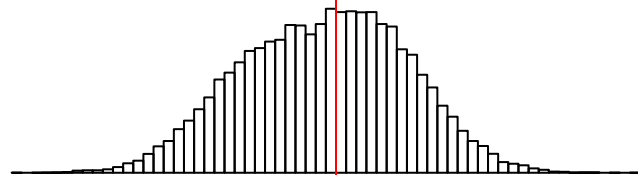

A194:26 – B224:26

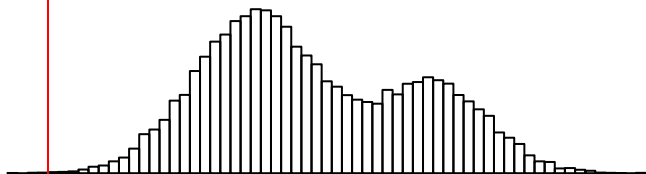

A194:26 – D206:26

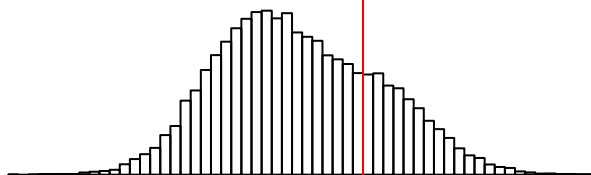

B184:26 – B224:26

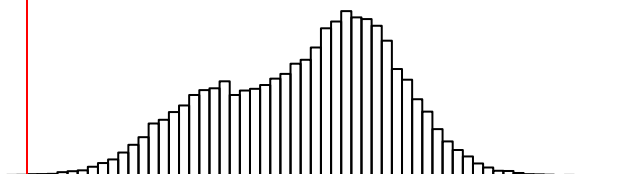

B184:26 – D206:26

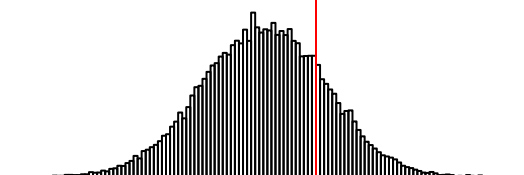

B224:26 – D206:26

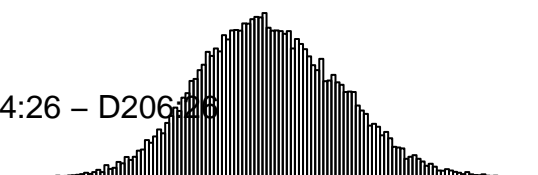

-3 -2 -1 0 1 2 3

delta(Unidentified Metabolite 60)

A194:26

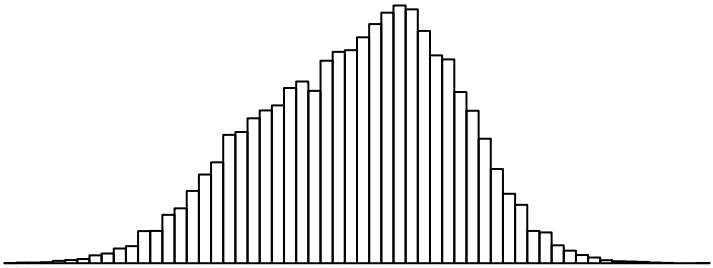

B184:26

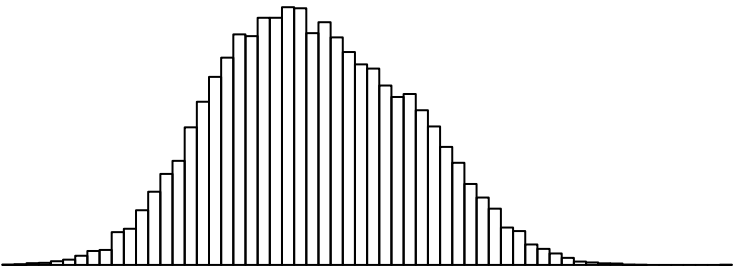

B224:26

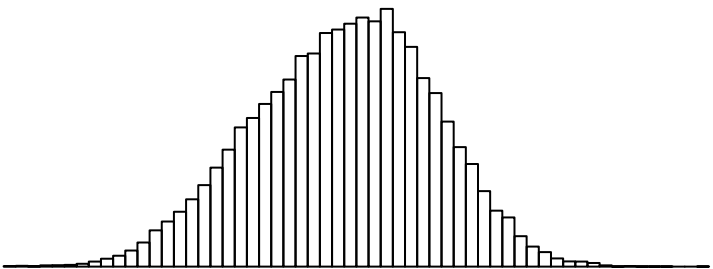

D206:26

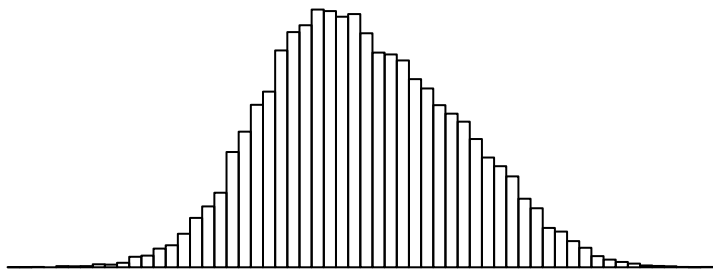

-10      -9      -8      -7      -6      -5

Unidentified Metabolite 61

A194:26 – B184:26

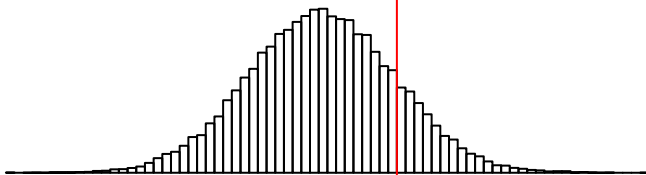

A194:26 – B224:26

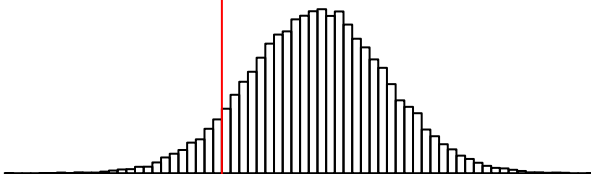

A194:26 – D206:26

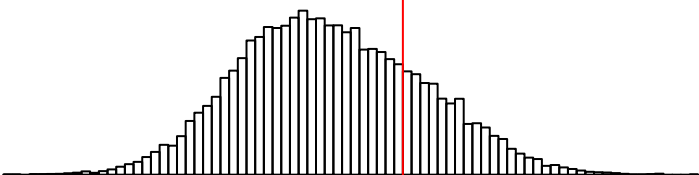

B184:26 – B224:26

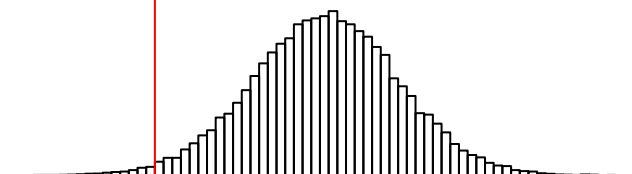

B184:26 – D206:26

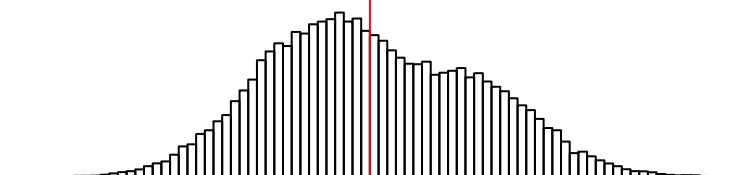

B224:26 – D206:26

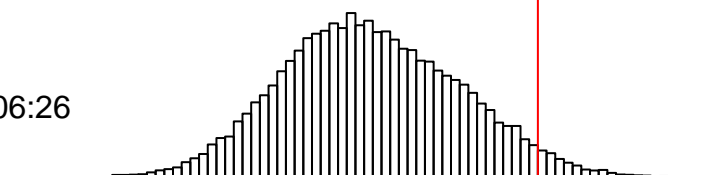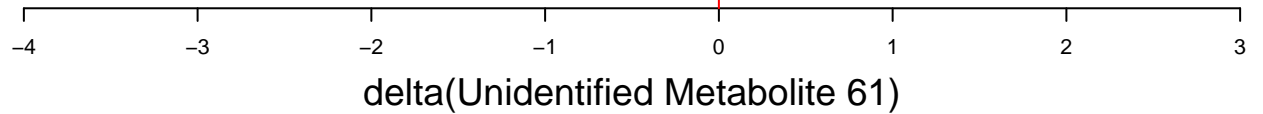

A194:26

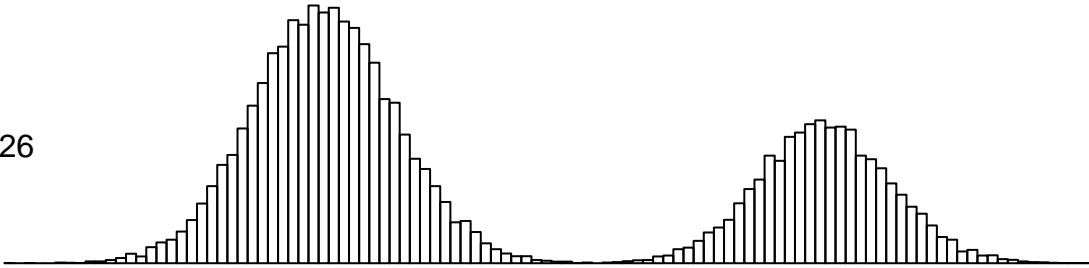

B184:26

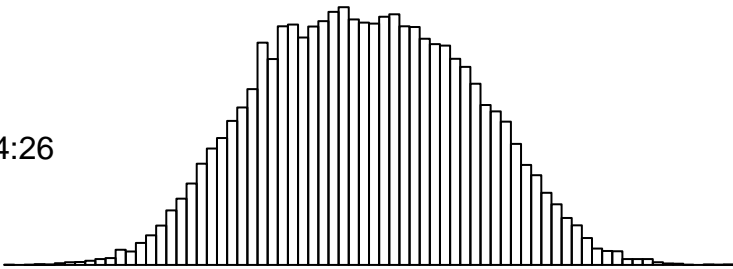

B224:26

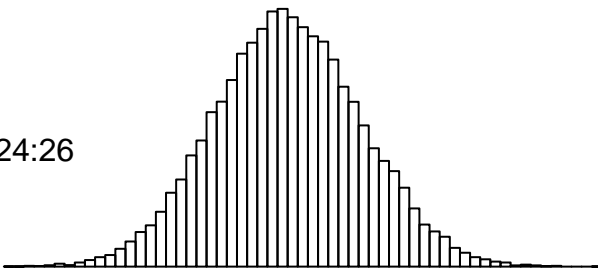

D206:26

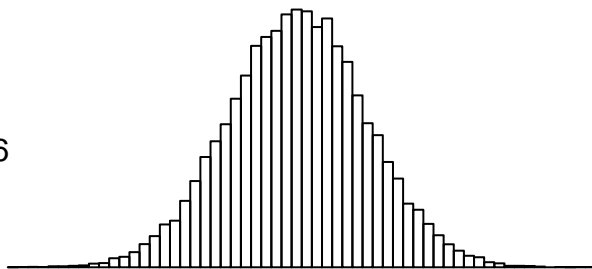

-10 -9 -8 -7 -6 -5 -4

Unidentified Metabolite 62

A194:26 – B184:26

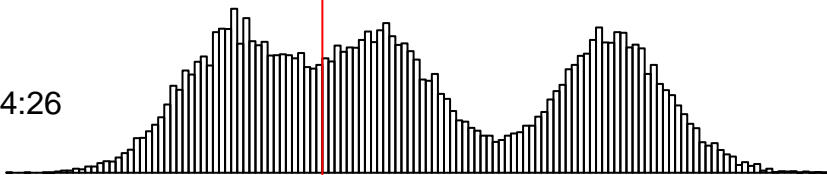

A194:26 – B224:26

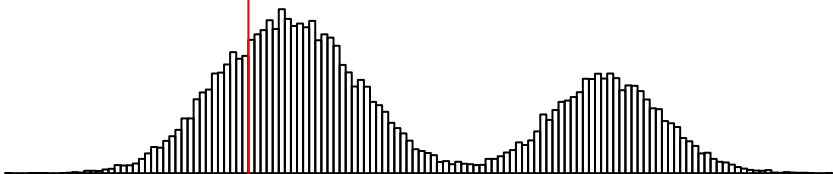

A194:26 – D206:26

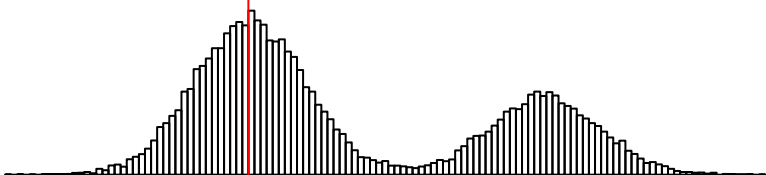

B184:26 – B224:26

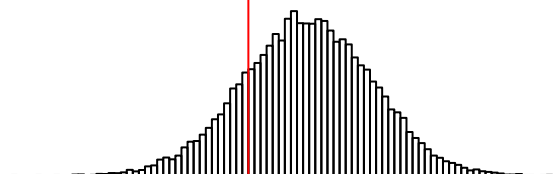

B184:26 – D206:26

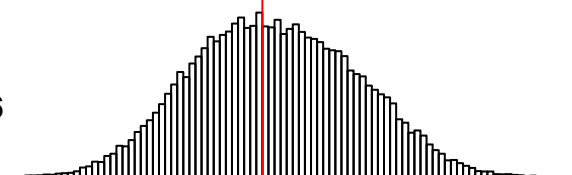

B224:26 – D206:26

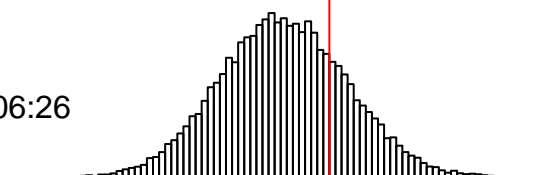

-4 -2 0 2 4 6

delta(Unidentified Metabolite 62)

A194:26

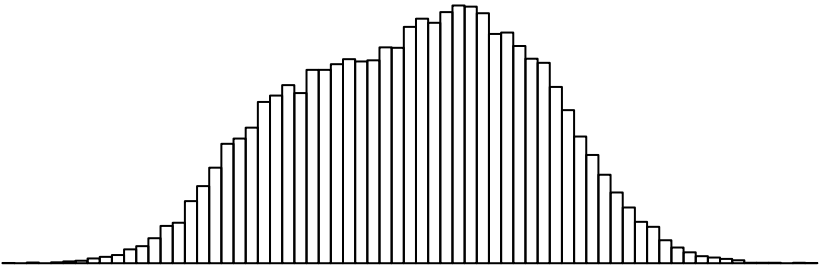

B184:26

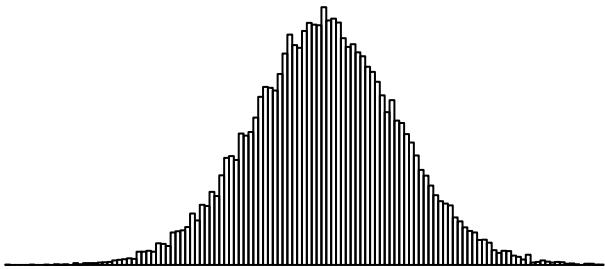

B224:26

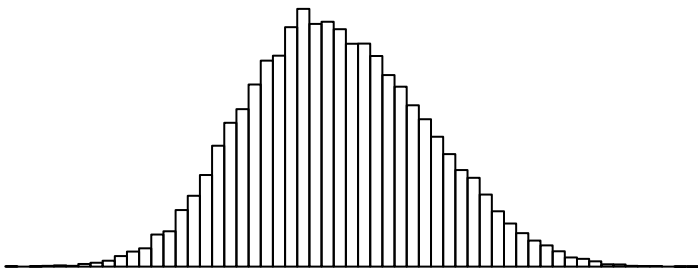

D206:26

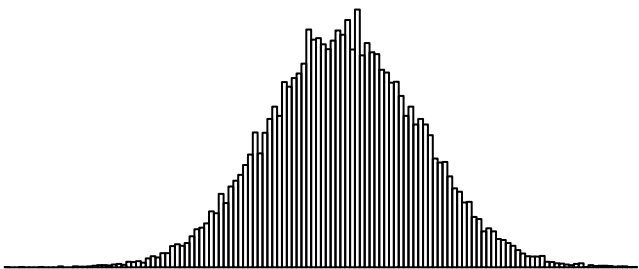

Unidentified Metabolite 63

A194:26 – B184:26

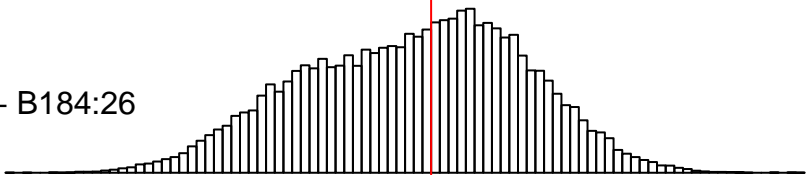

A194:26 – B224:26

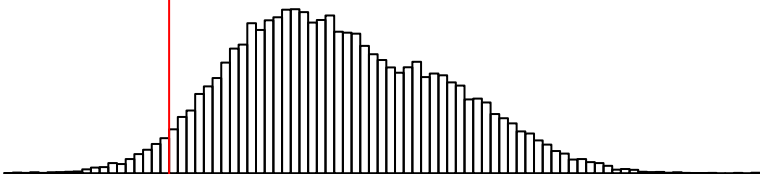

A194:26 – D206:26

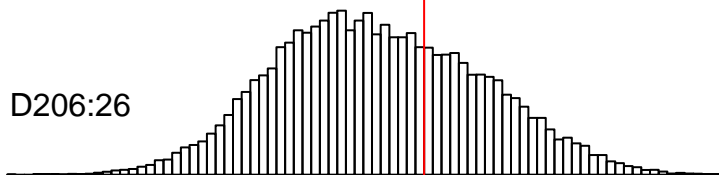

B184:26 – B224:26

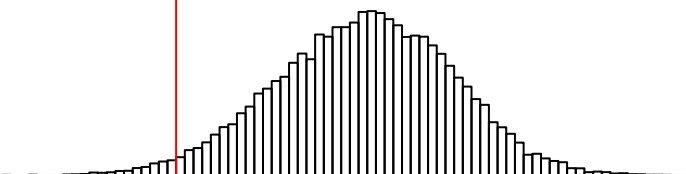

B184:26 – D206:26

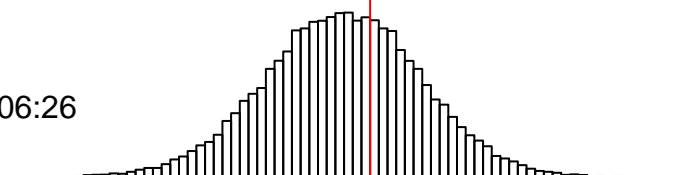

B224:26 – D206:26

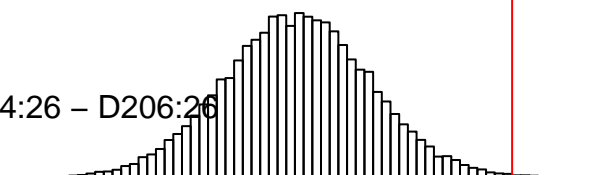

-3 -2 -1 0 1 2 3 4

delta(Unidentified Metabolite 63)



A194:26

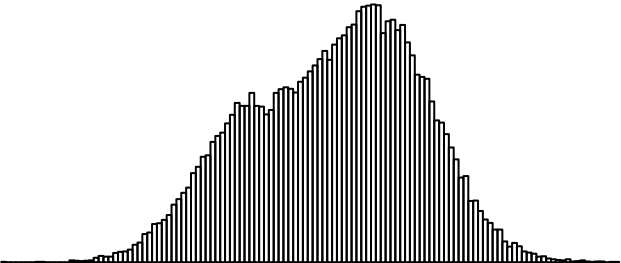

B184:26

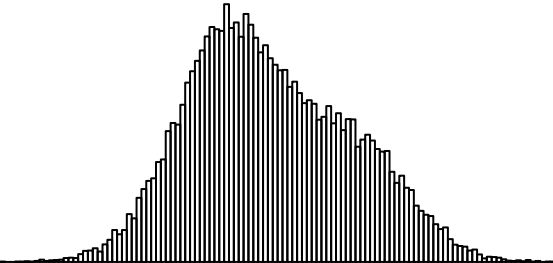

B224:26

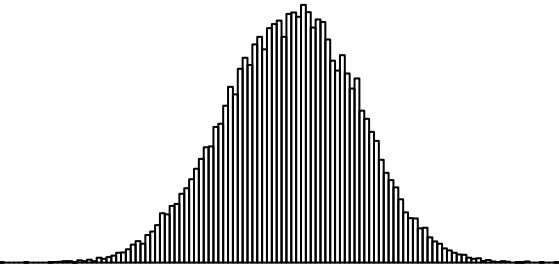

D206:26

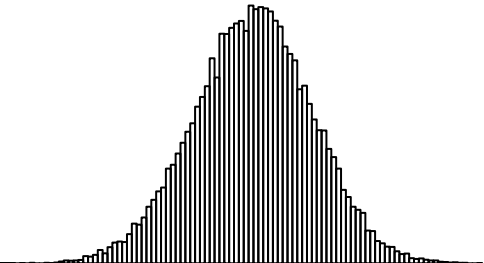

-11      -10      -9      -8      -7      -6

Unidentified Metabolite 65

A194:26 – B184:26

A194:26 – B224:26

A194:26 – D206:26

B184:26 – B224:26

B184:26 – D206:26

B224:26 – D206:26

-3 -2 -1 0 1 2 3 4

delta(Unidentified Metabolite 65)

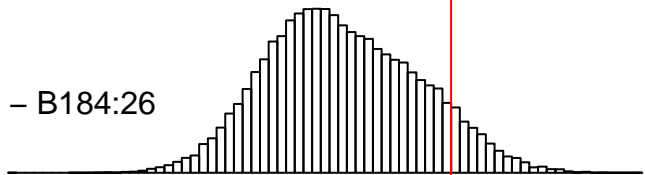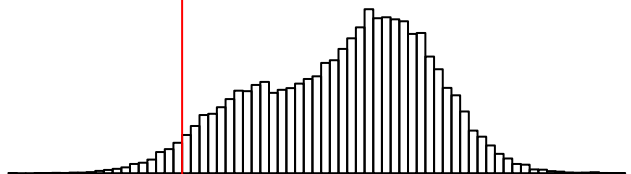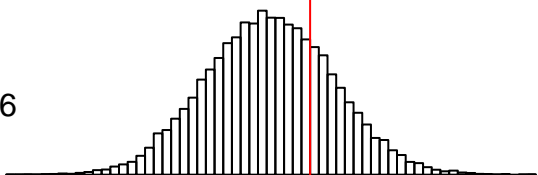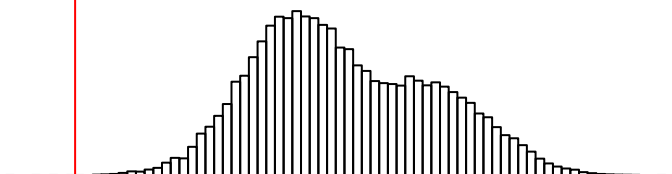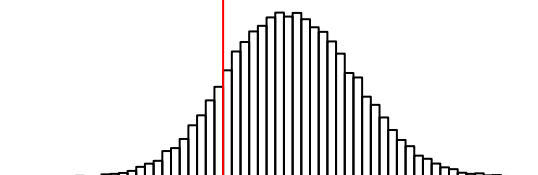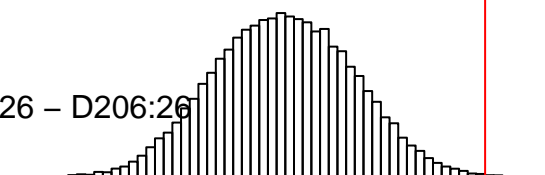

A194:26

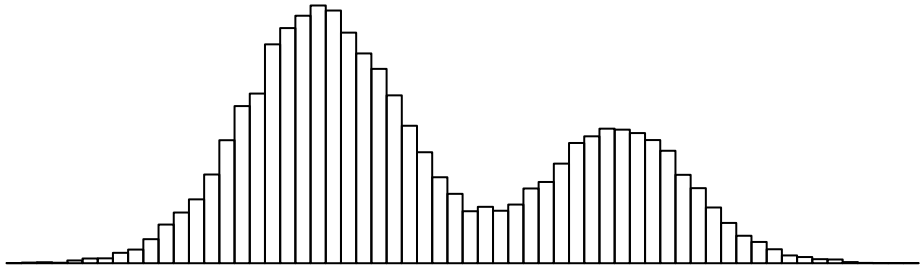

B184:26

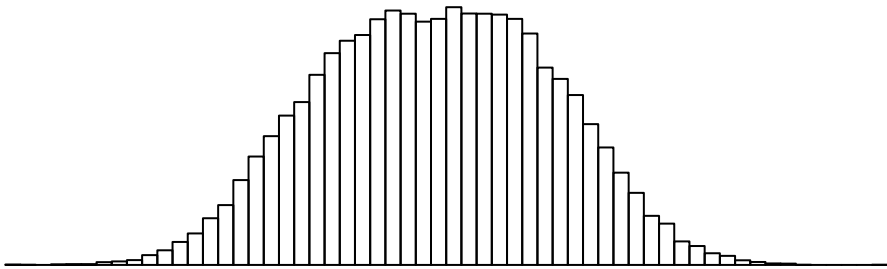

B224:26

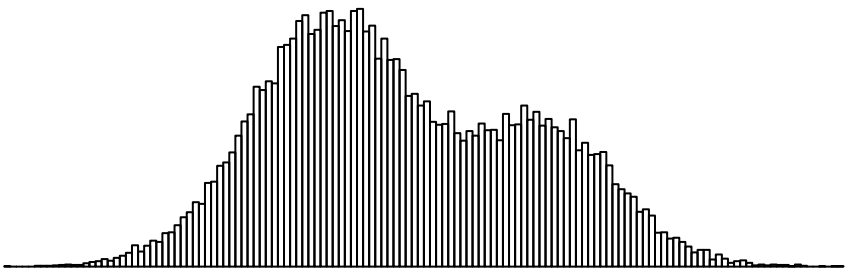

D206:26

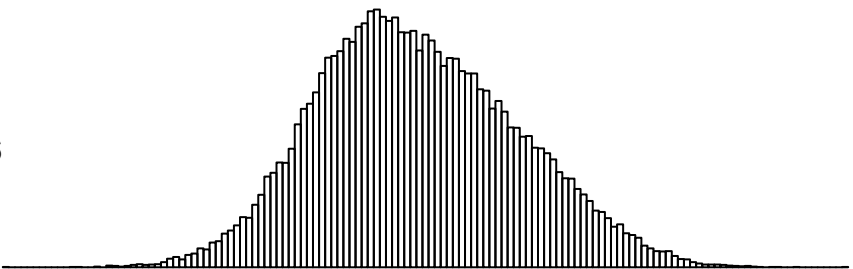

-9

-8

-7

-6

Unidentified Metabolite 68

A194:26 – B184:26

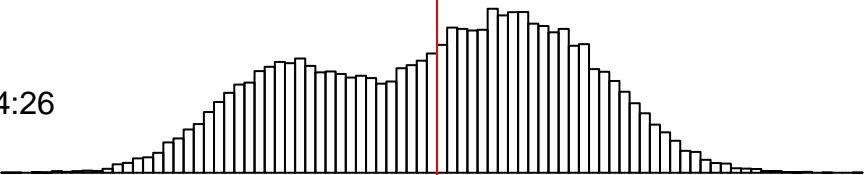

A194:26 – B224:26

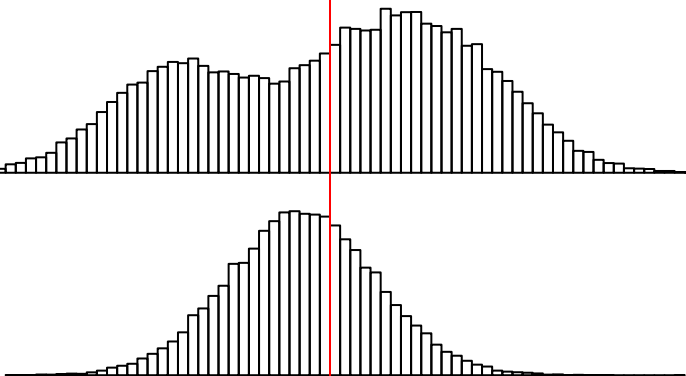

A194:26 – D206:26

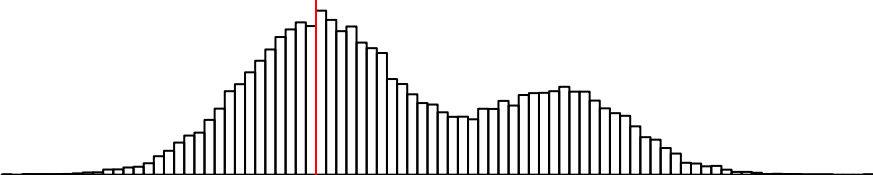

B184:26 – B224:26

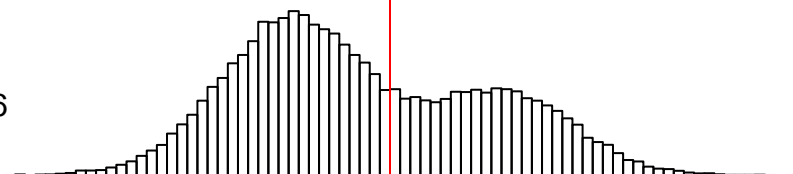

B184:26 – D206:26

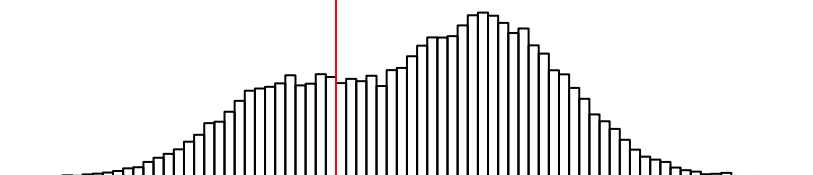

B224:26 – D206:26

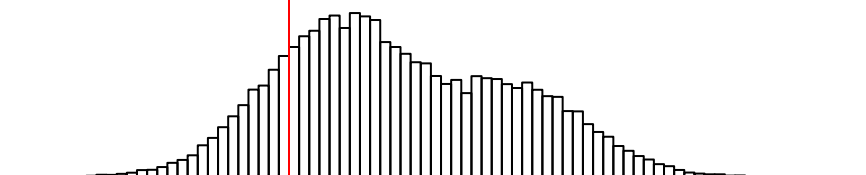

-3 -2 -1 0 1 2 3

delta(Unidentified Metabolite 68)

A194:26

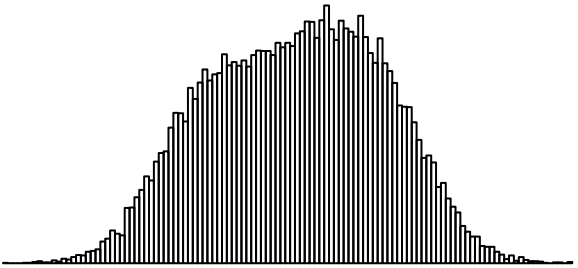

B184:26

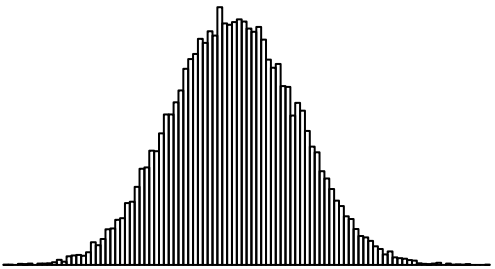

B224:26

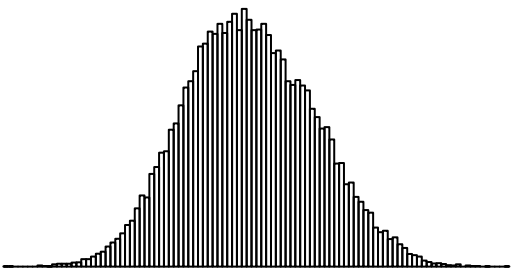

D206:26

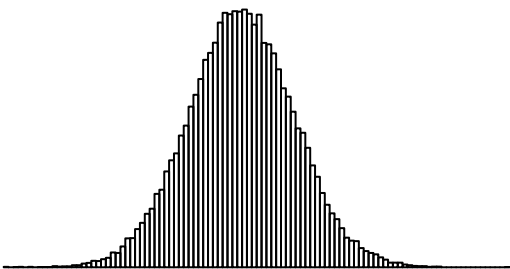

Unidentified Metabolite 69

A194:26 – B184:26

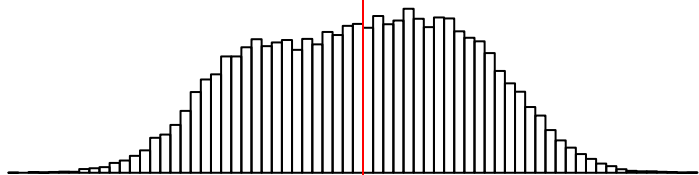

A194:26 – B224:26

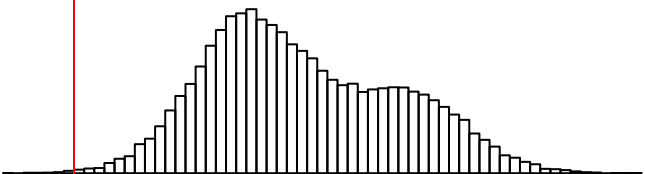

A194:26 – D206:26

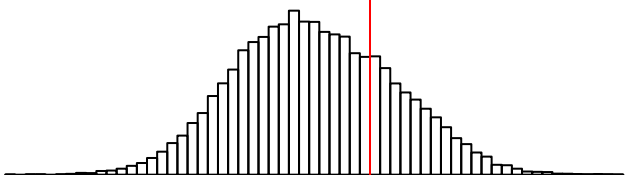

B184:26 – B224:26

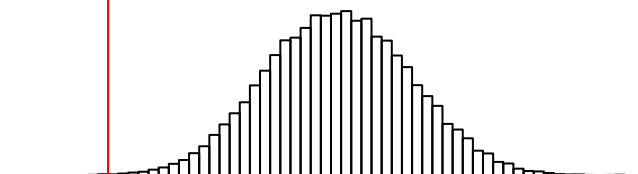

B184:26 – D206:26

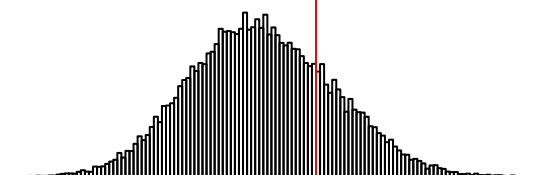

B224:26 – D206:26

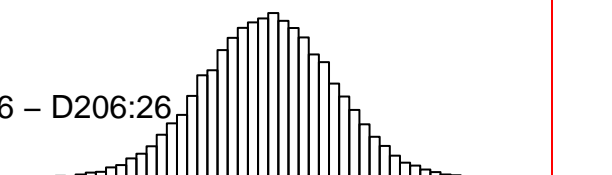

-3 -2 -1 0 1 2 3

delta(Unidentified Metabolite 69)

A194:26

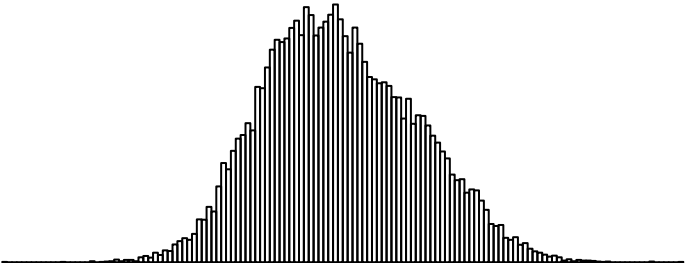

B184:26

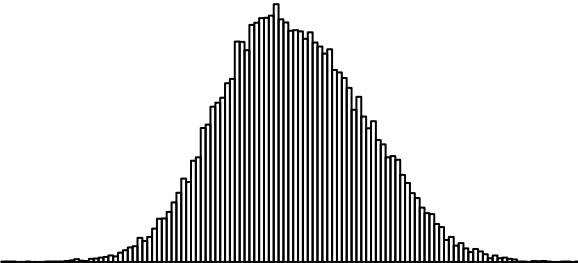

B224:26

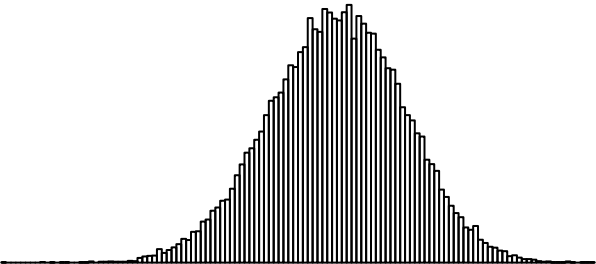

D206:26

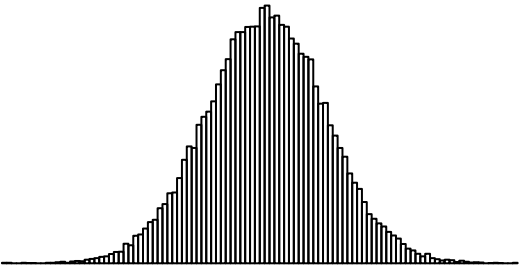

-11      -10      -9      -8      -7      -6

Unidentified Metabolite 70

A194:26 – B184:26

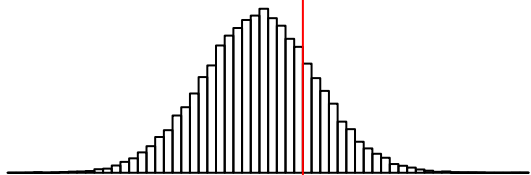

A194:26 – B224:26

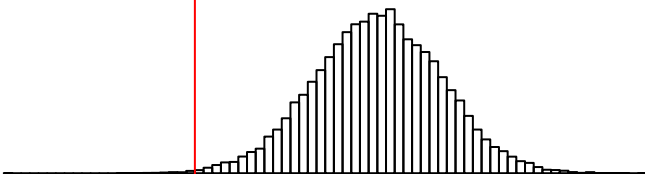

A194:26 – D206:26

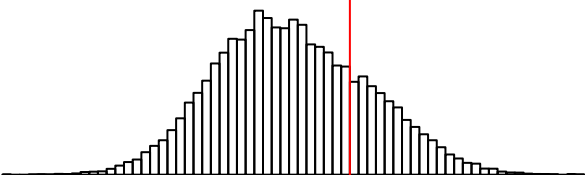

B184:26 – B224:26

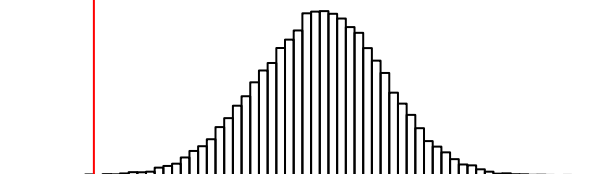

B184:26 – D206:26

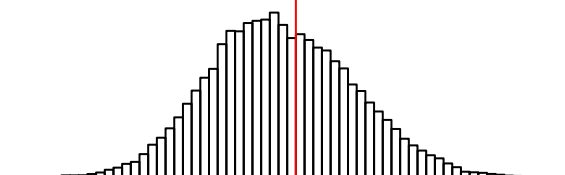

B224:26 – D206:26

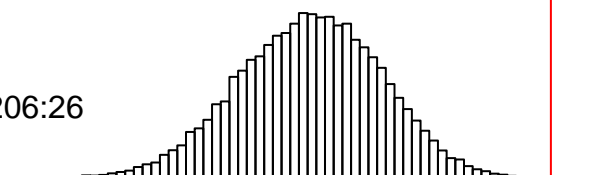

delta(Unidentified Metabolite 70)



A194:26

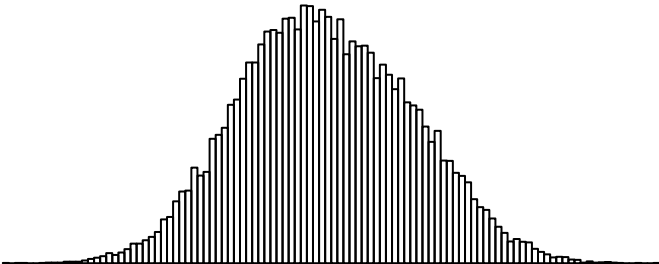

B184:26

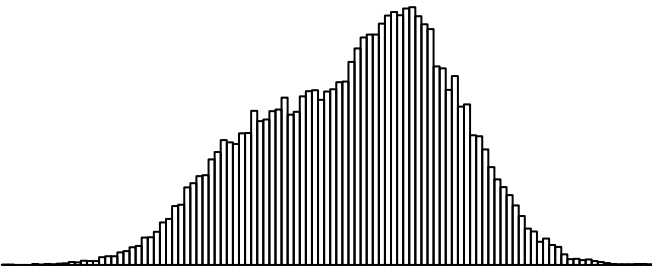

B224:26

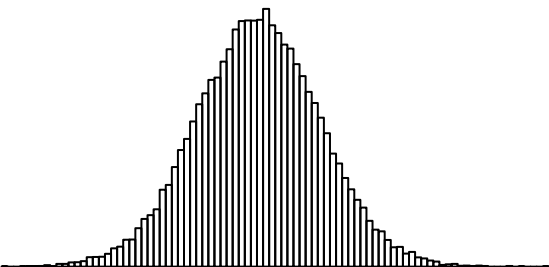

D206:26

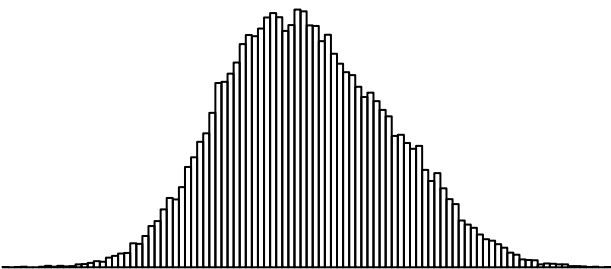

-11                      -10                      -9                      -8                      -7

Unidentified Metabolite 71

A194:26 – B184:26

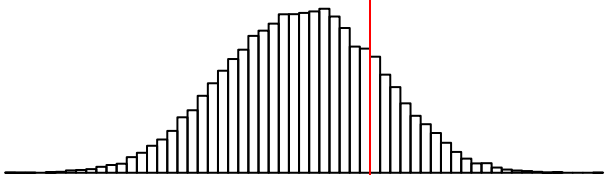

A194:26 – B224:26

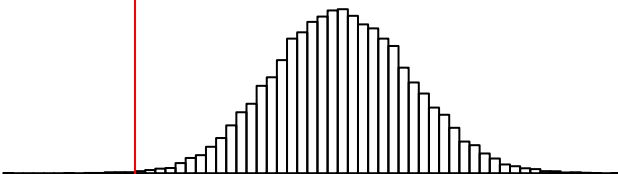

A194:26 – D206:26

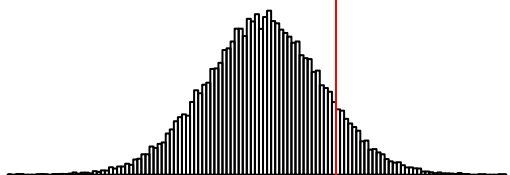

B184:26 – B224:26

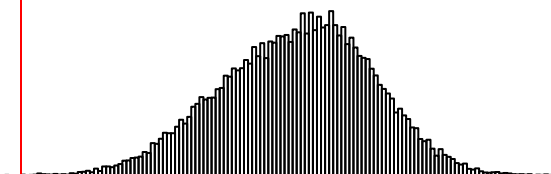

B184:26 – D206:26

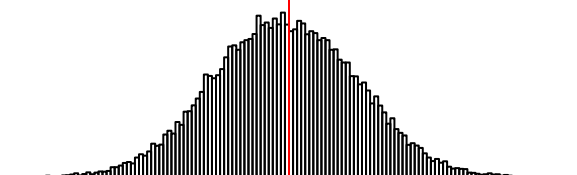

B224:26 – D206:26

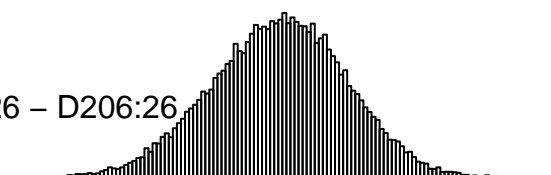

-3 -2 -1 0 1 2 3

delta(Unidentified Metabolite 71)

A194:26

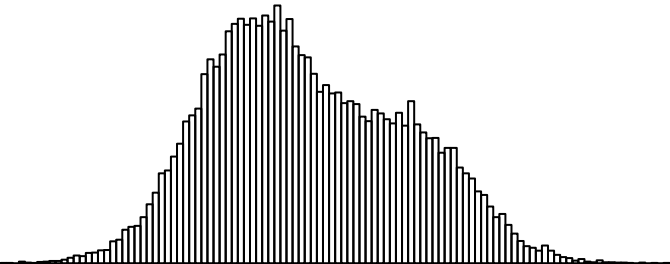

B184:26

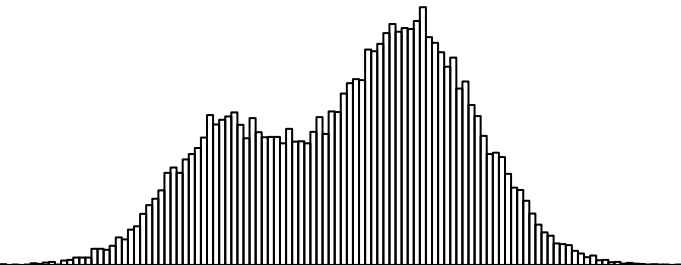

B224:26

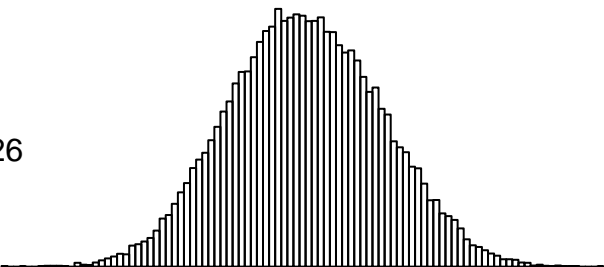

D206:26

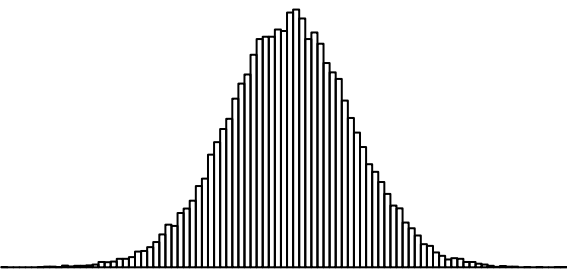

-8

-7

-6

-5

Unidentified Metabolite 72

A194:26 – B184:26

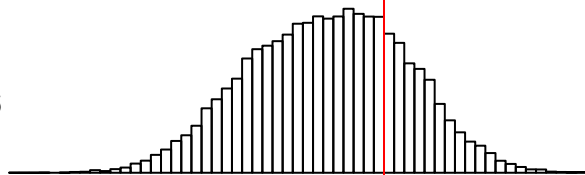

A194:26 – B224:26

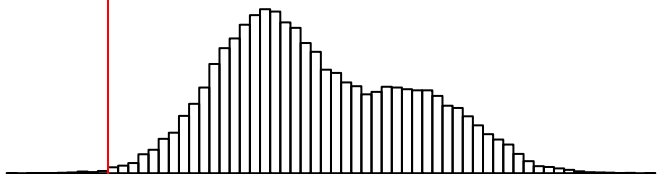

A194:26 – D206:26

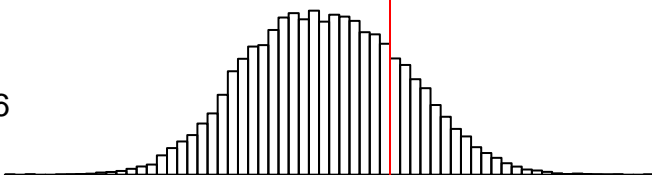

B184:26 – B224:26

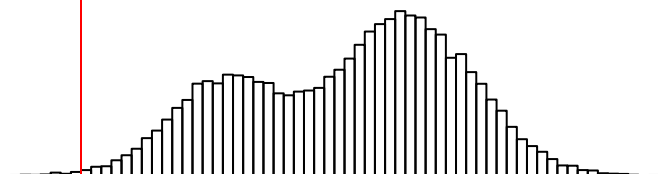

B184:26 – D206:26

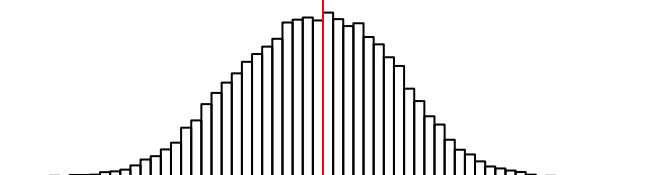

B224:26 – D206:26

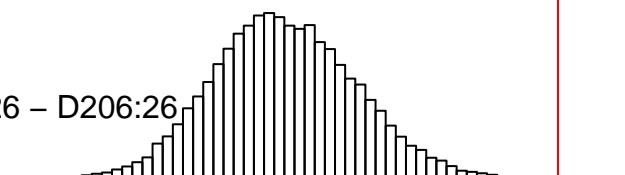

-3 -2 -1 0 1 2 3

delta(Unidentified Metabolite 72)

A194:26

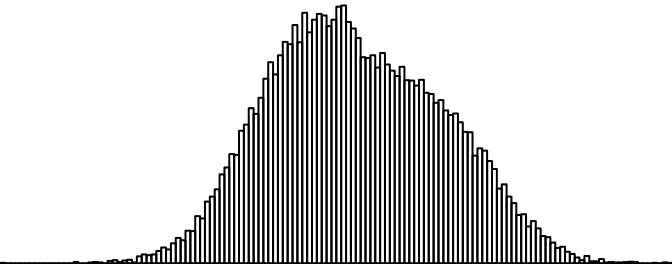

B184:26

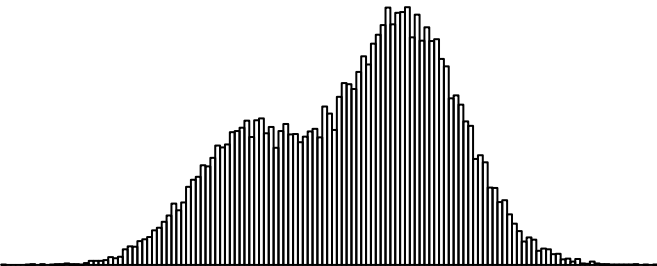

B224:26

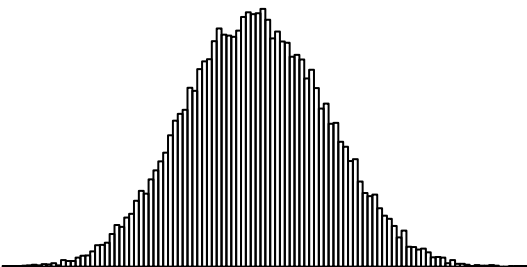

D206:26

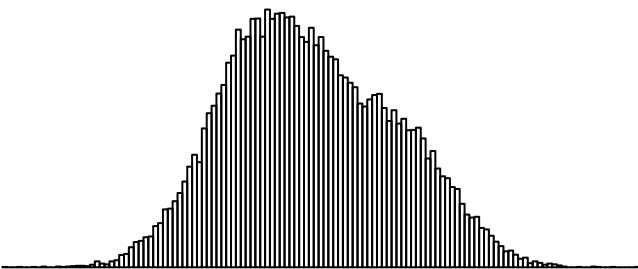

-10 -9 -8 -7 -6 -5

Unidentified Metabolite 73

A194:26 – B184:26

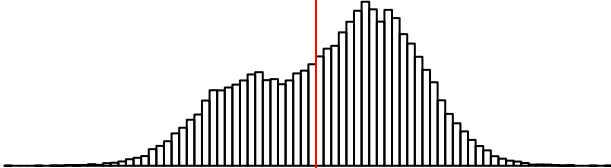

A194:26 – B224:26

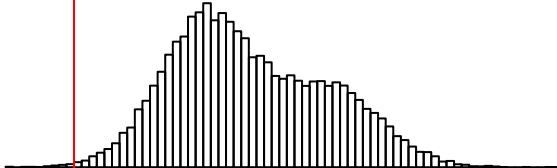

A194:26 – D206:26

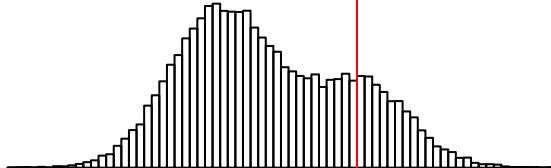

B184:26 – B224:26

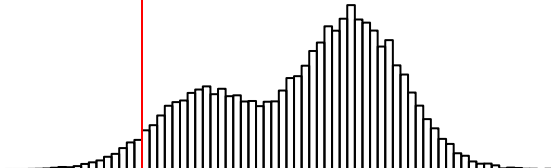

B184:26 – D206:26

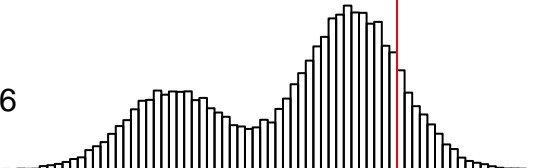

B224:26 – D206:26

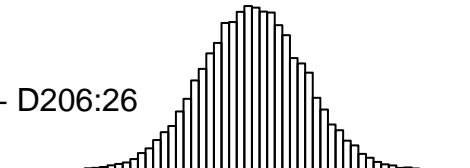

-4 -2 0 2 4

delta(Unidentified Metabolite 73)

A194:26

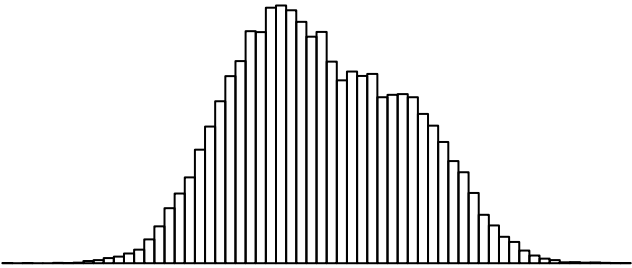

B184:26

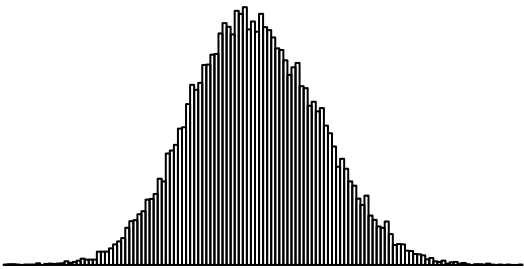

B224:26

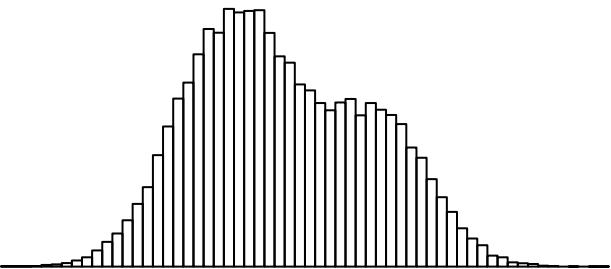

D206:26

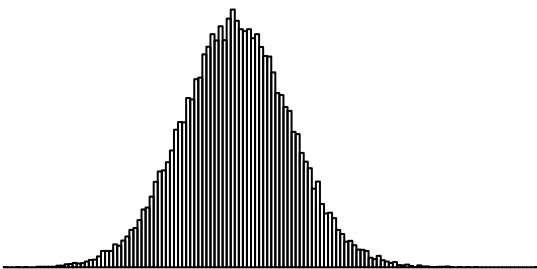

-12      -11      -10      -9      -8      -7      -6

Unidentified Metabolite 74

A194:26 – B184:26

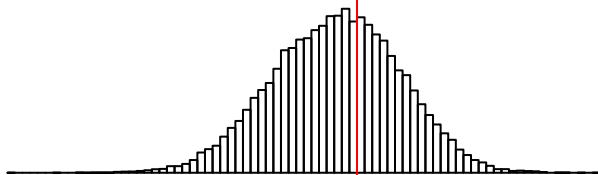

A194:26 – B224:26

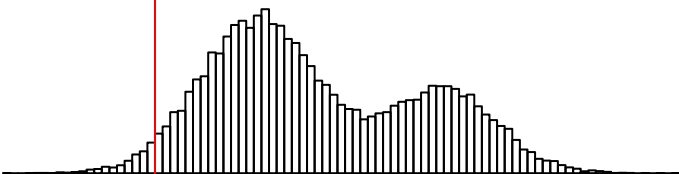

A194:26 – D206:26

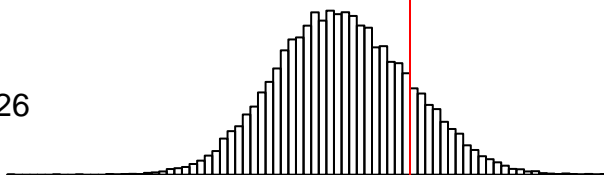

B184:26 – B224:26

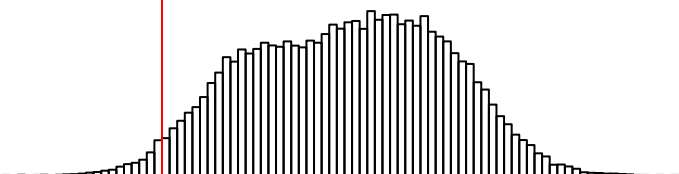

B184:26 – D206:26

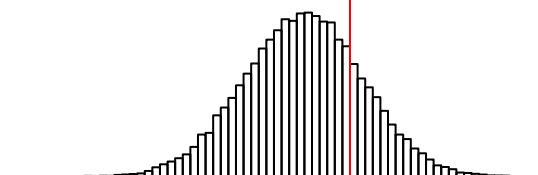

B224:26 – D206:26

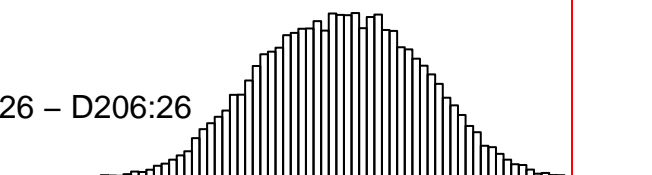

-4 -2 0 2 4

delta(Unidentified Metabolite 74)



A194:26

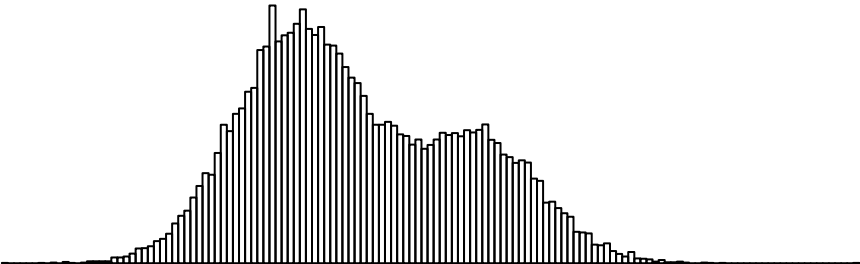

B184:26

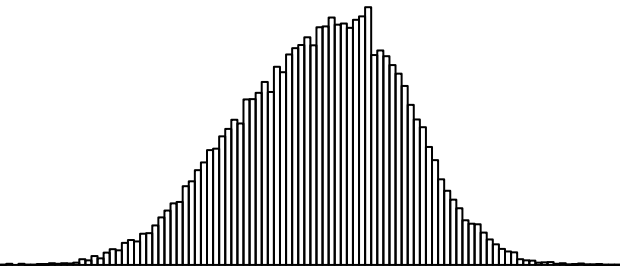

B224:26

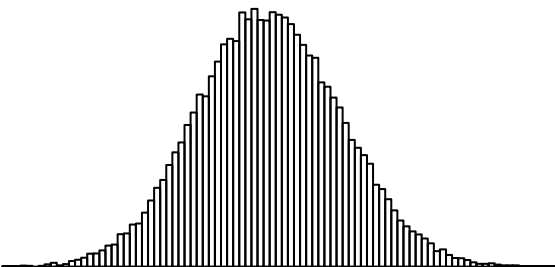

D206:26

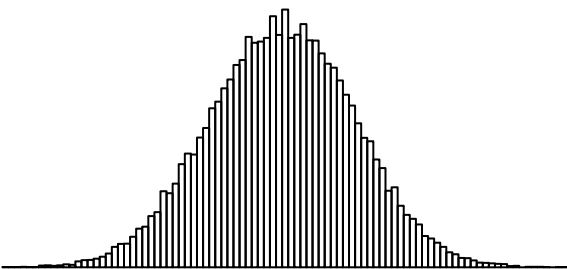

-12                      -11                      -10                      -9                      -8

Unidentified Metabolite 75

A194:26 – B184:26

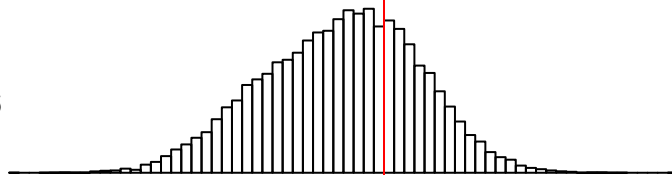

A194:26 – B224:26

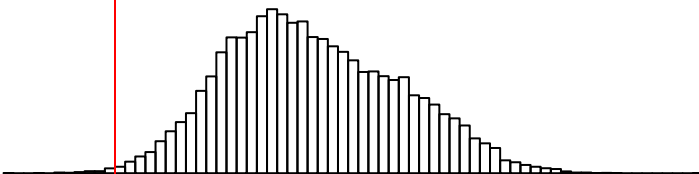

A194:26 – D206:26

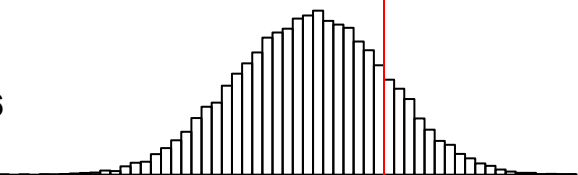

B184:26 – B224:26

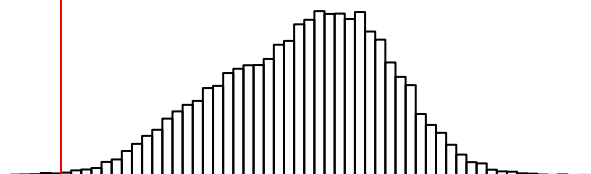

B184:26 – D206:26

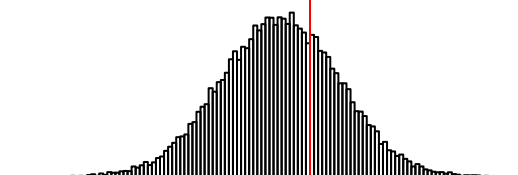

B224:26 – D206:26

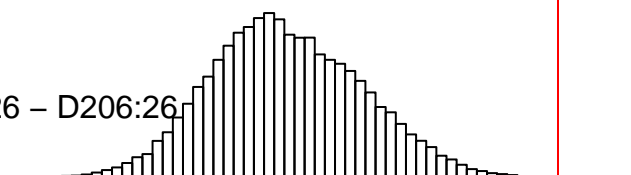

-3 -2 -1 0 1 2 3

delta(Unidentified Metabolite 75)

A194:26

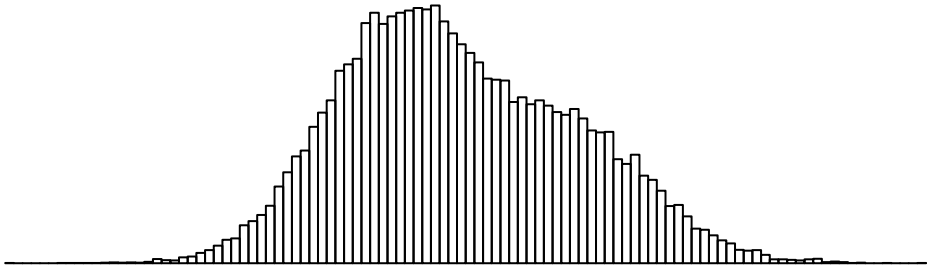

B184:26

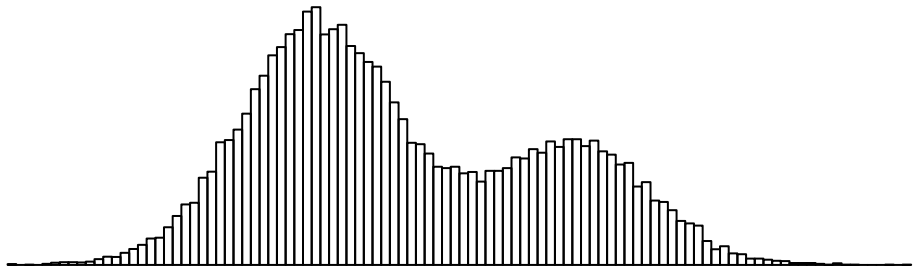

B224:26

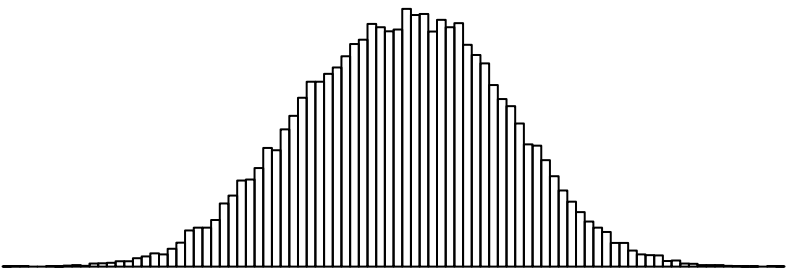

D206:26

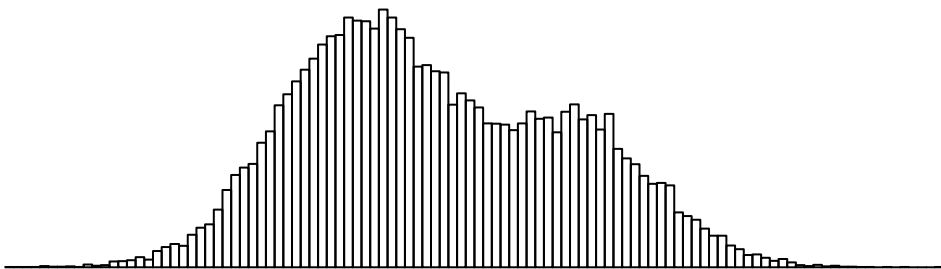

Unidentified Metabolite 76

A194:26 – B184:26

A194:26 – B224:26

A194:26 – D206:26

B184:26 – B224:26

B184:26 – D206:26

B224:26 – D206:26

-4 -2 0 2 4 6

delta(Unidentified Metabolite 76)

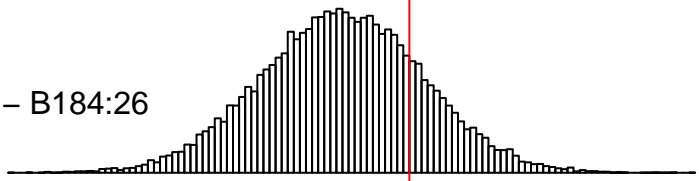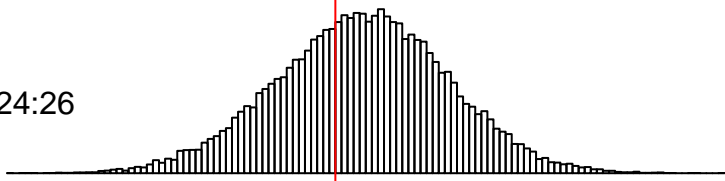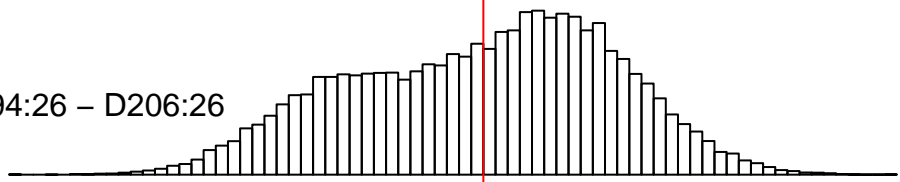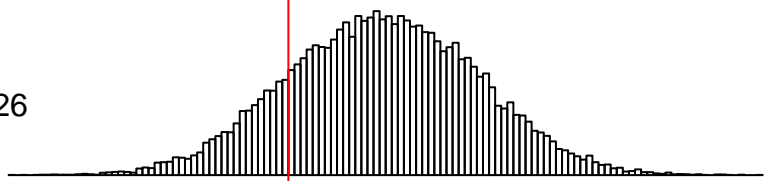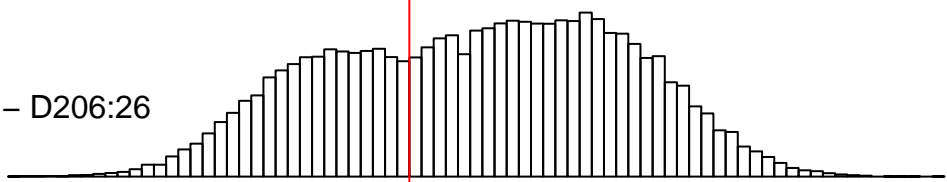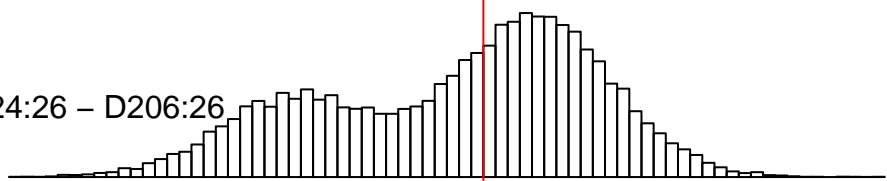

A194:26

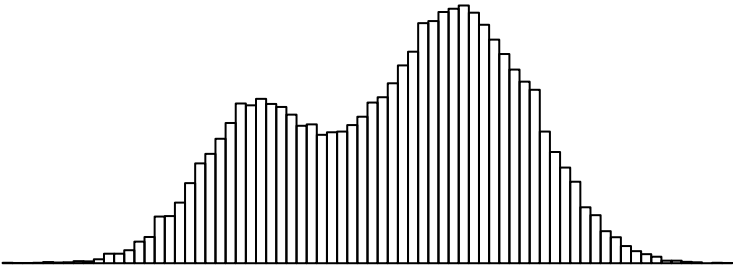

B184:26

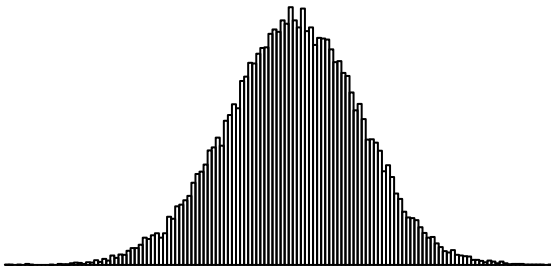

B224:26

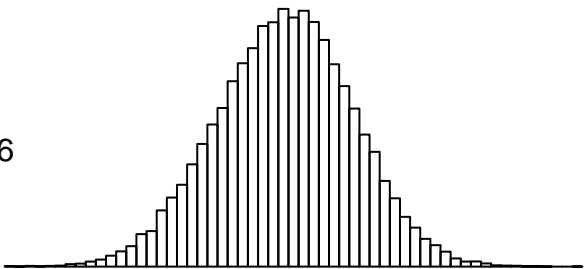

D206:26

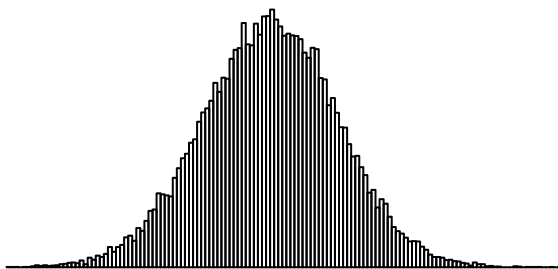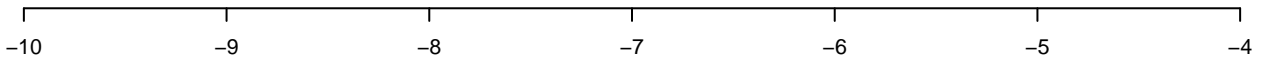

Unidentified Metabolite 77

A194:26 – B184:26

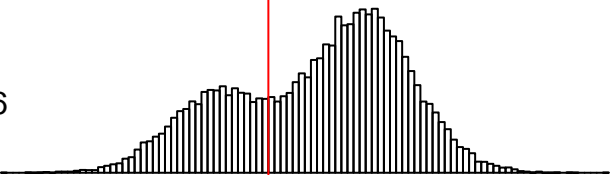

A194:26 – B224:26

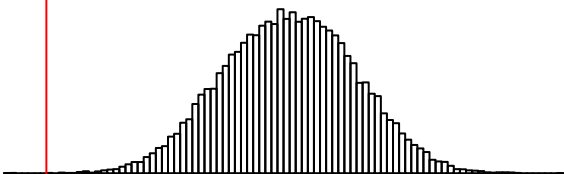

A194:26 – D206:26

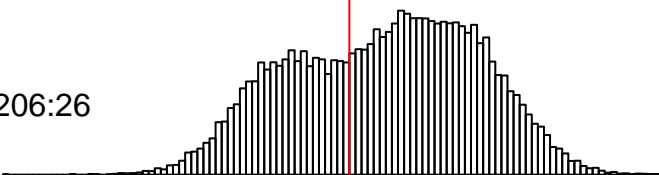

B184:26 – B224:26

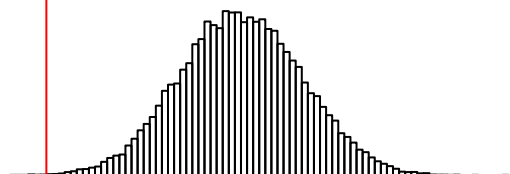

B184:26 – D206:26

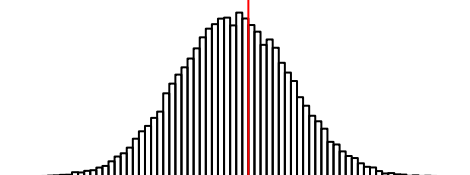

B224:26 – D206:26

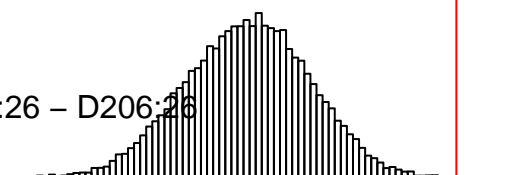

-4 -2 0 2 4 6

delta(Unidentified Metabolite 77)

A194:26

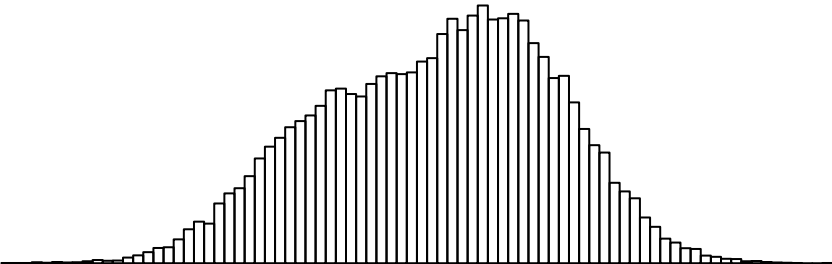

B184:26

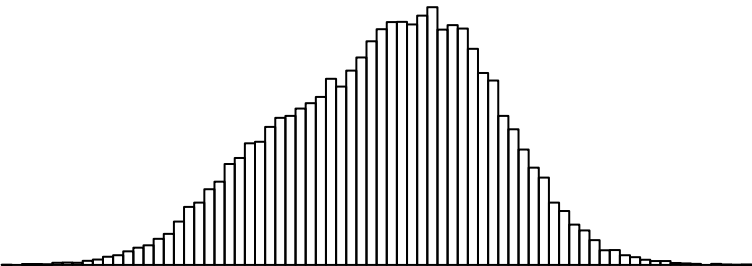

B224:26

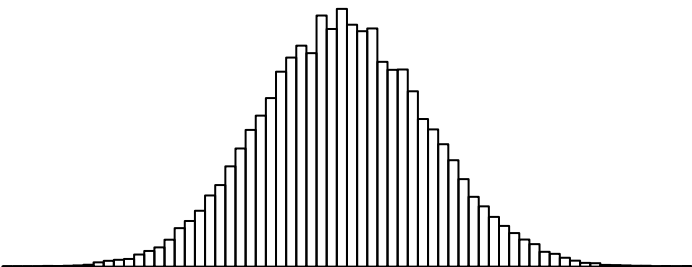

D206:26

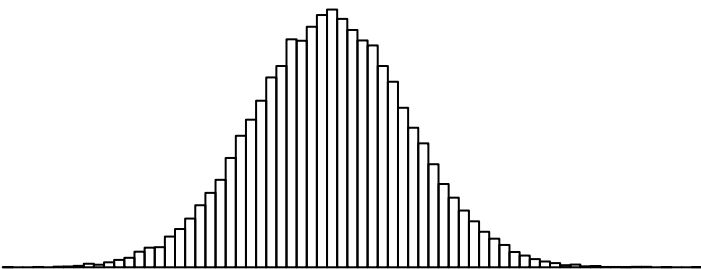

-10      -9      -8      -7      -6      -5      -4

Unidentified Metabolite 78

A194:26 – B184:26

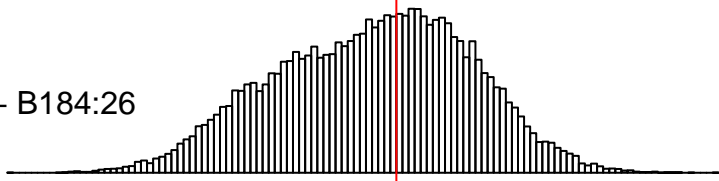

A194:26 – B224:26

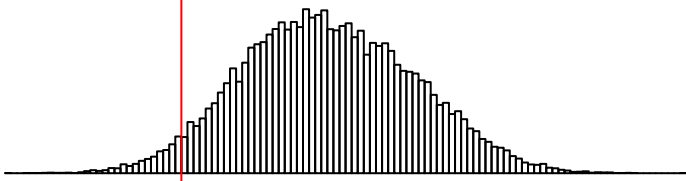

A194:26 – D206:26

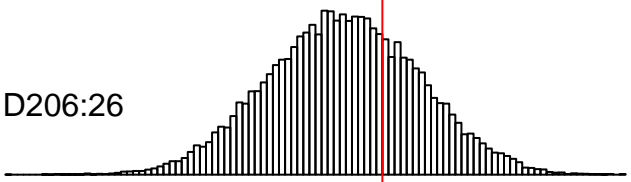

B184:26 – B224:26

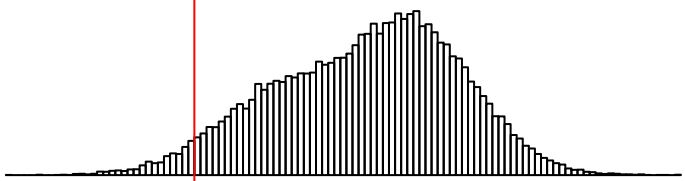

B184:26 – D206:26

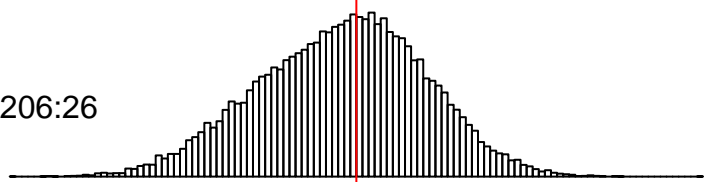

B224:26 – D206:26

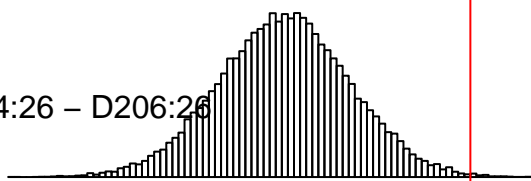

delta(Unidentified Metabolite 78)



A194:26

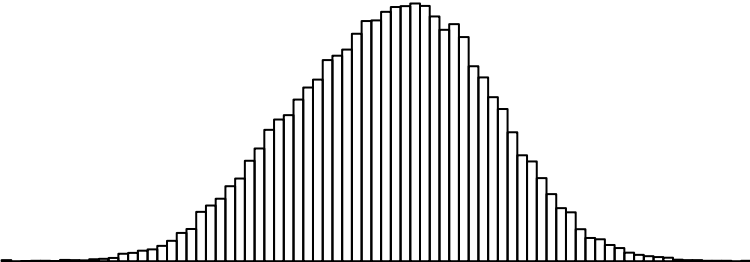

B184:26

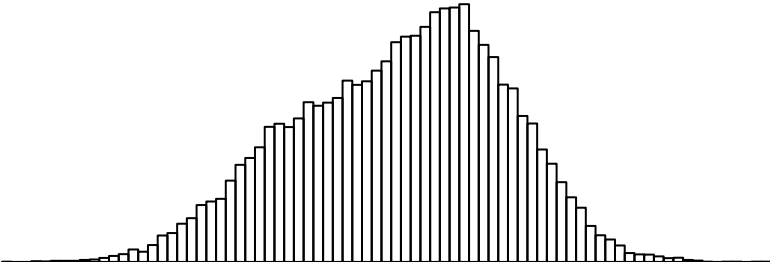

B224:26

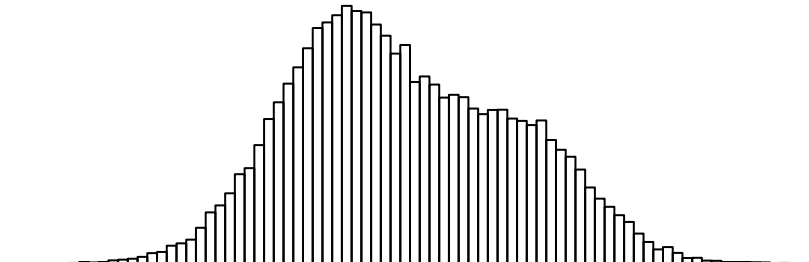

D206:26

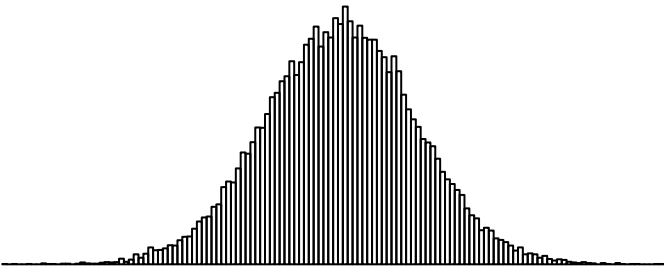

-10.0                      -9.5                      -9.0                      -8.5                      -8.0                      -7.5

Acid 2

A194:26 – B184:26

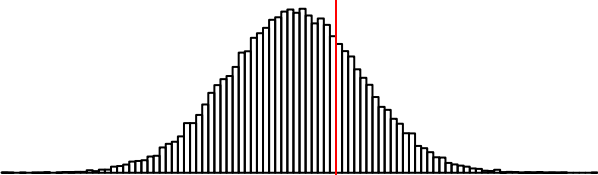

A194:26 – B224:26

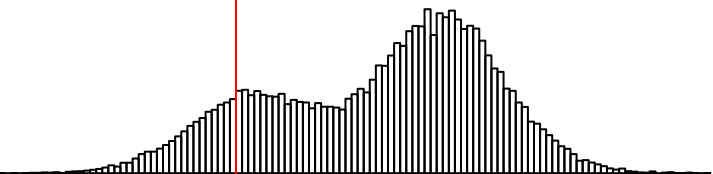

A194:26 – D206:26

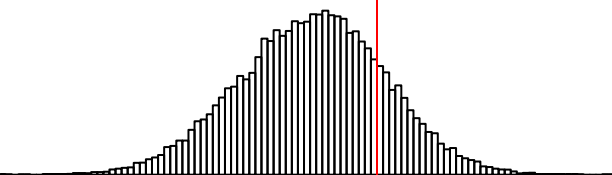

B184:26 – B224:26

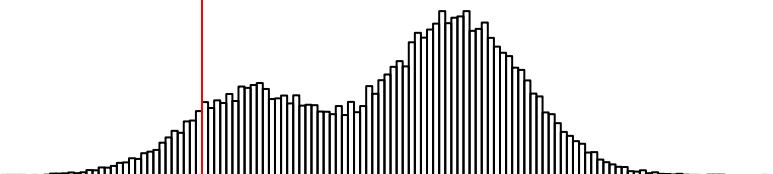

B184:26 – D206:26

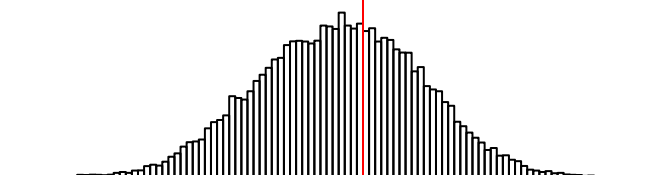

B224:26 – D206:26

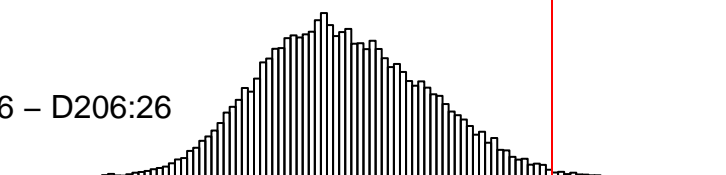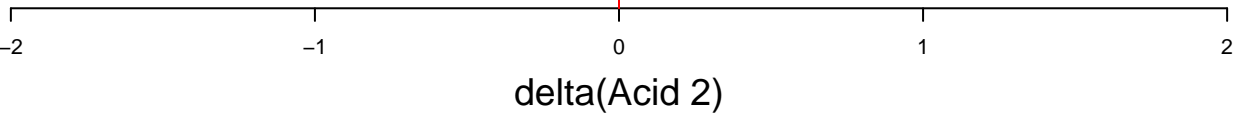

A194:26

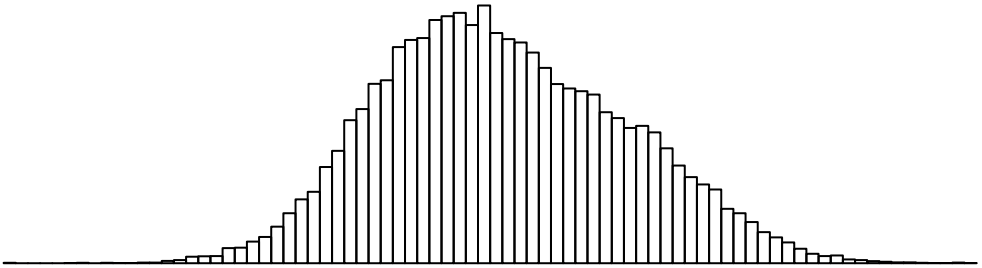

B184:26

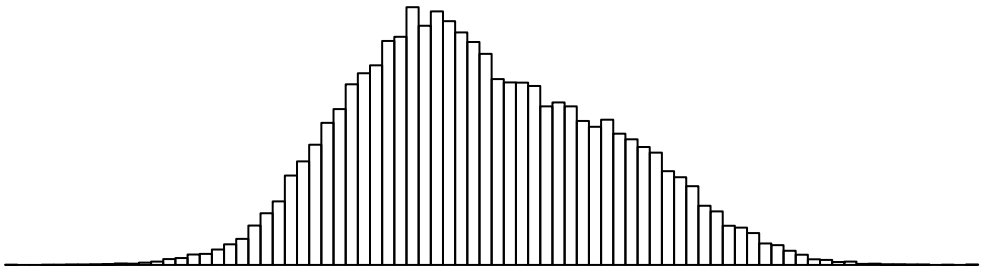

B224:26

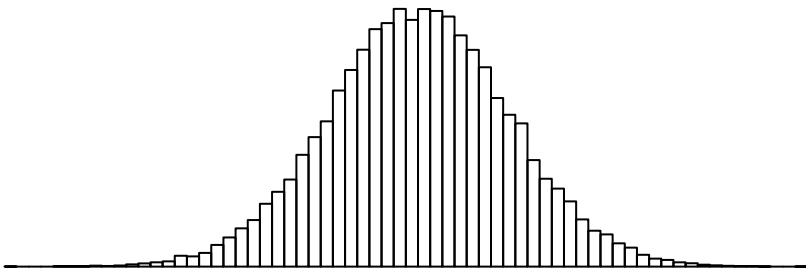

D206:26

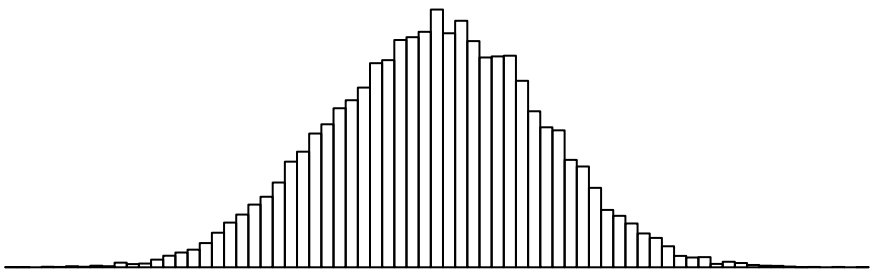

Acid 3

A194:26 – B184:26

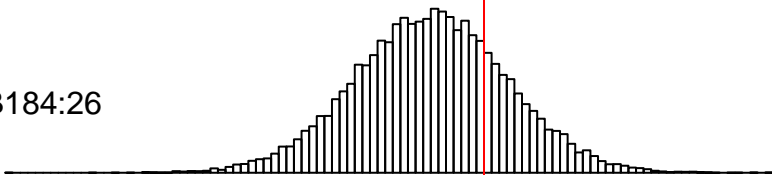

A194:26 – B224:26

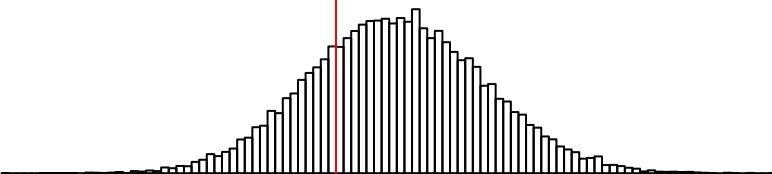

A194:26 – D206:26

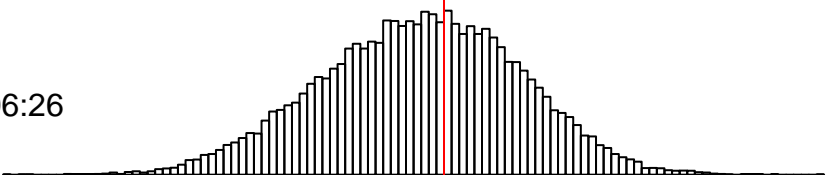

B184:26 – B224:26

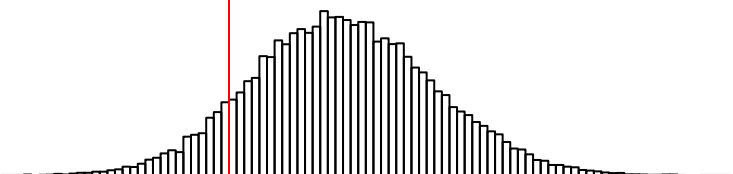

B184:26 – D206:26

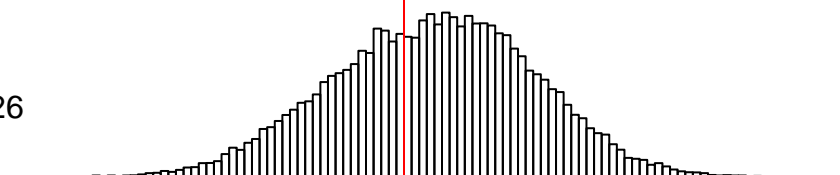

B224:26 – D206:26

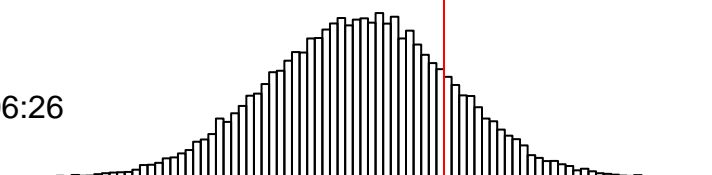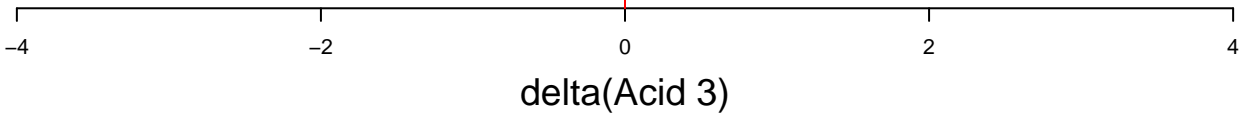

A194:26

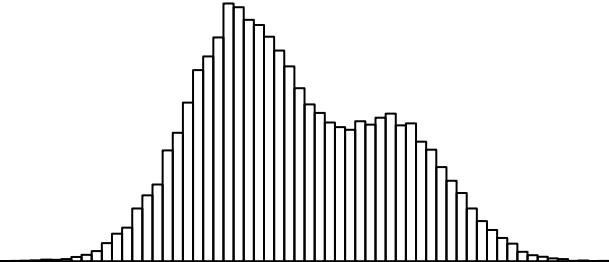

B184:26

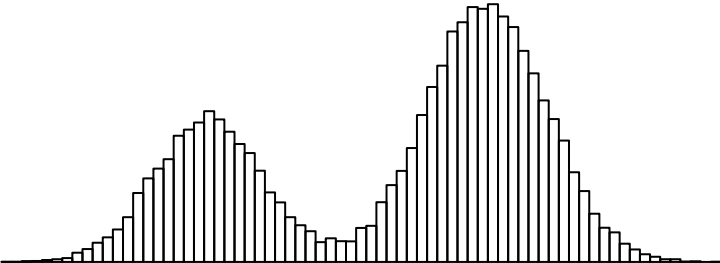

B224:26

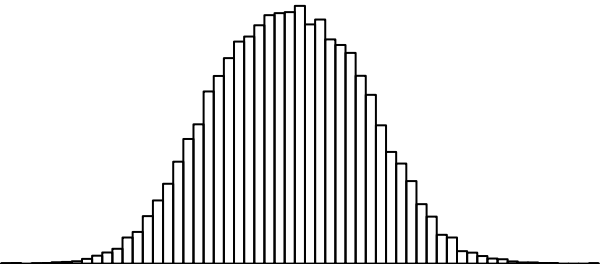

D206:26

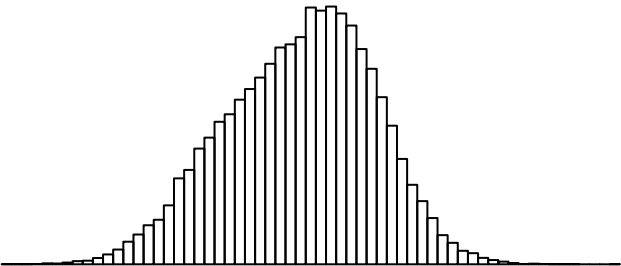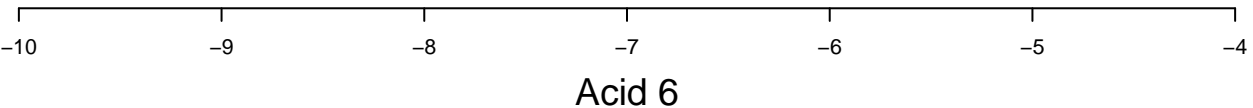

A194:26 – B184:26

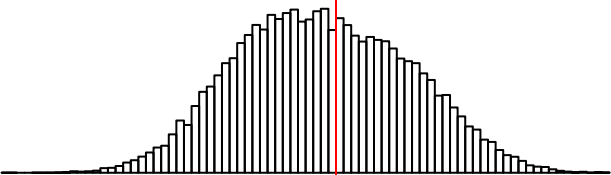

A194:26 – B224:26

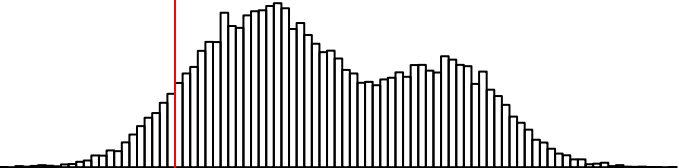

A194:26 – D206:26

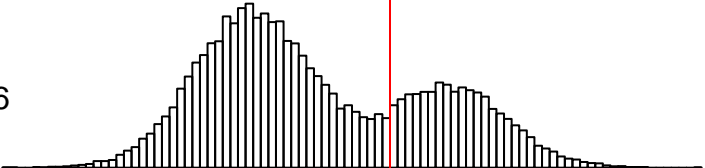

B184:26 – B224:26

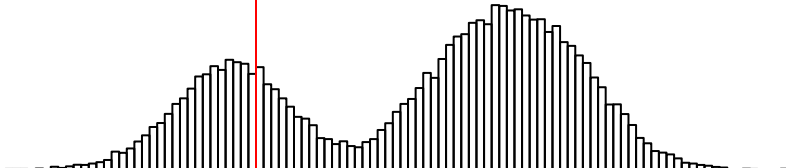

B184:26 – D206:26

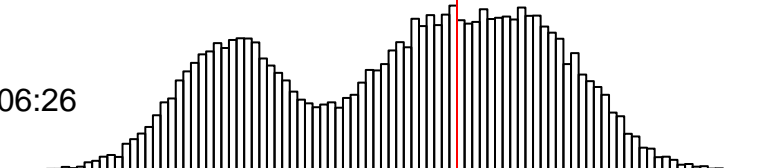

B224:26 – D206:26

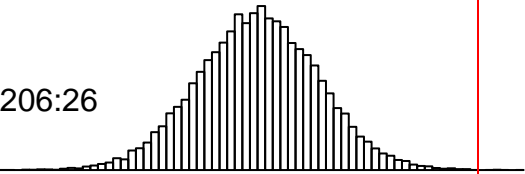

-4 -2 0 2 4

delta(Acid 6)

A194:26

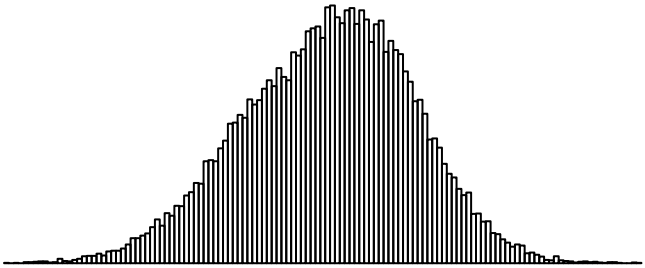

B184:26

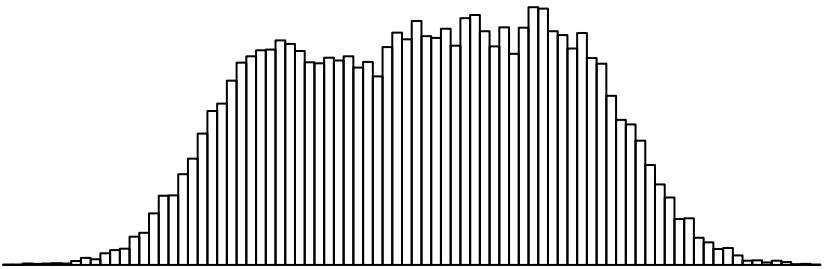

B224:26

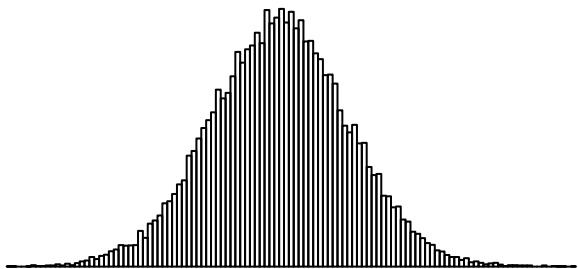

D206:26

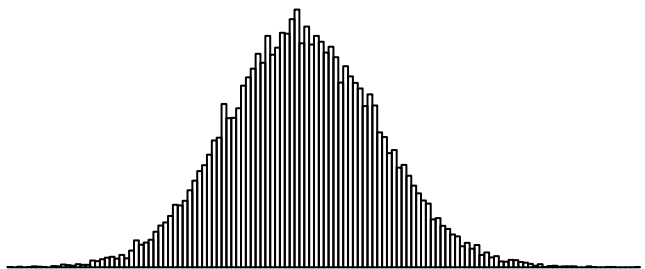

-9.0 -8.5 -8.0 -7.5 -7.0 -6.5

Acid 7

A194:26 – B184:26

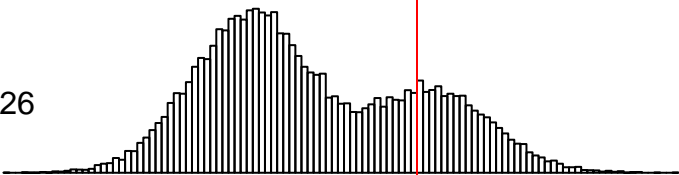

A194:26 – B224:26

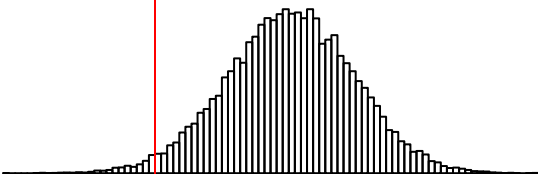

A194:26 – D206:26

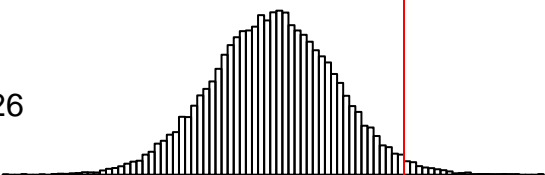

B184:26 – B224:26

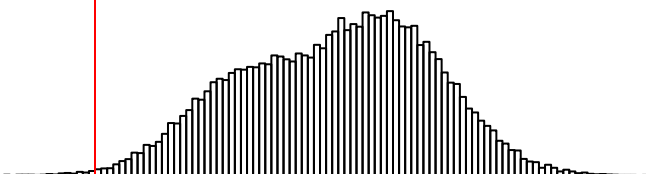

B184:26 – D206:26

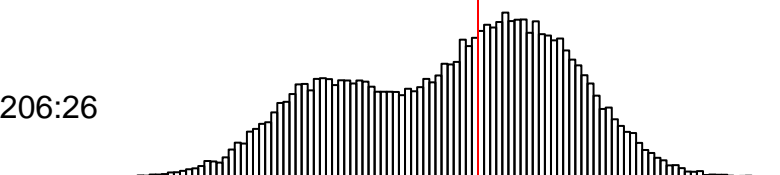

B224:26 – D206:26

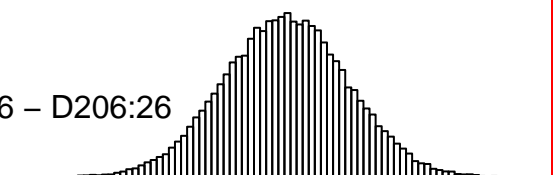

-2 -1 0 1 2

delta(Acid 7)



A194:26

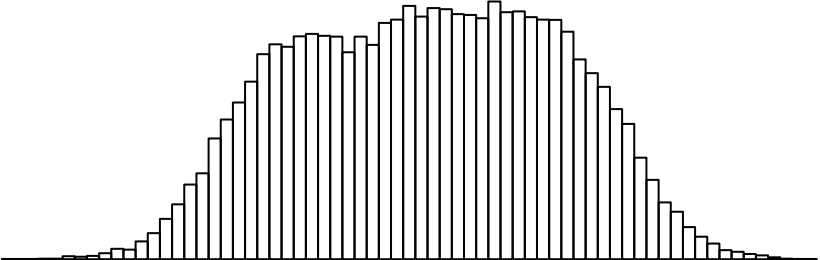

B184:26

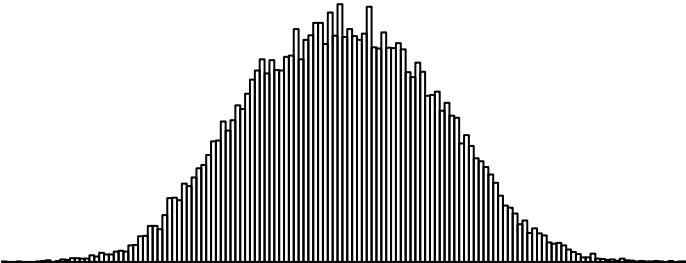

B224:26

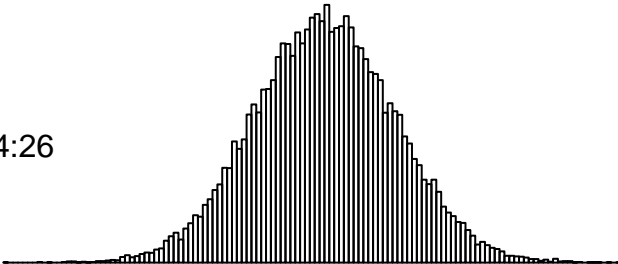

D206:26

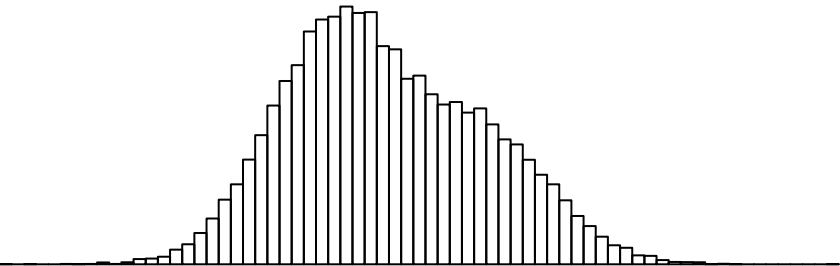

-6 -5 -4 -3 -2 -1

Acid 8

A194:26 – B184:26

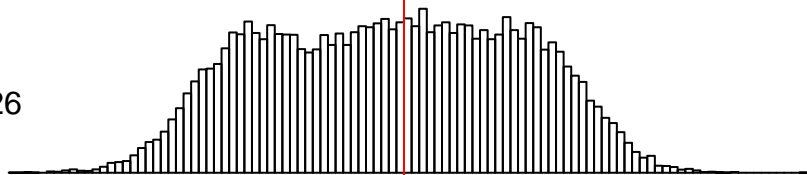

A194:26 – B224:26

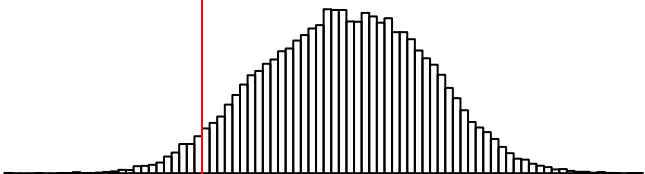

A194:26 – D206:26

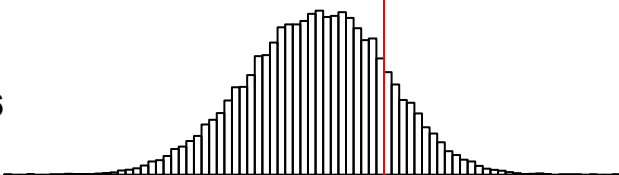

B184:26 – B224:26

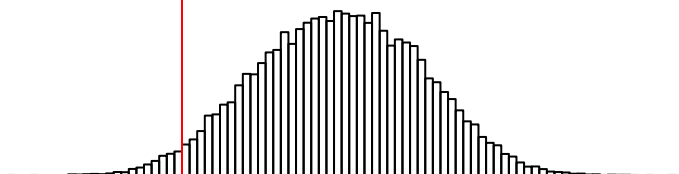

B184:26 – D206:26

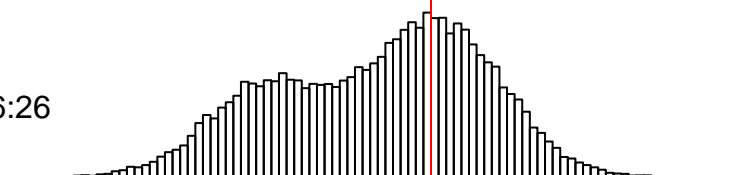

B224:26 – D206:26

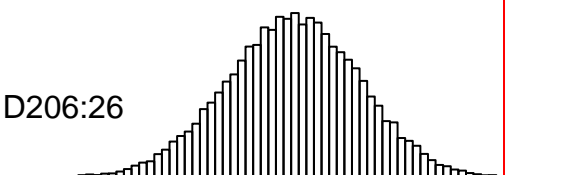

-4 -2 0 2 4

delta(Acid 8)

A194:26

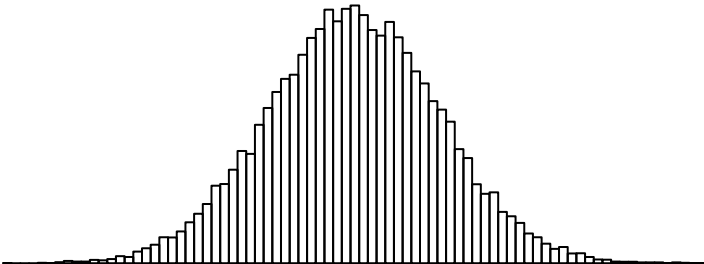

B184:26

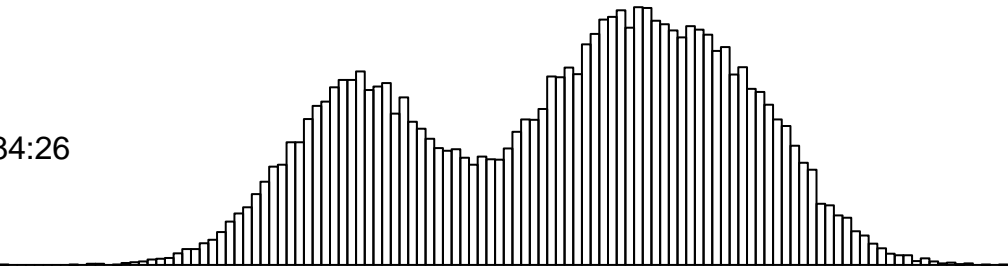

B224:26

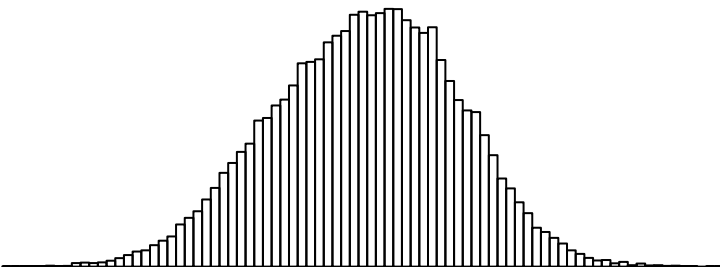

D206:26

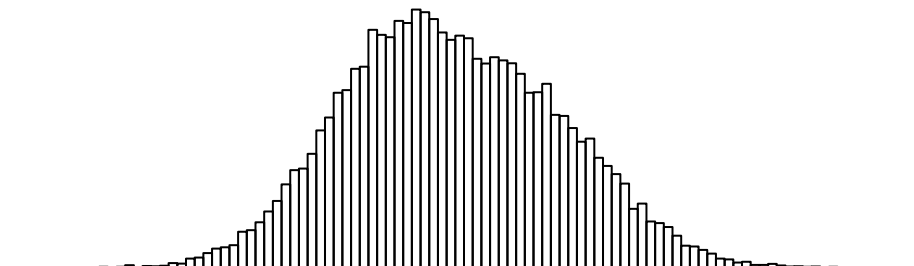

-9      -8      -7      -6      -5      -4      -3      -2

Acid 9

A194:26 – B184:26

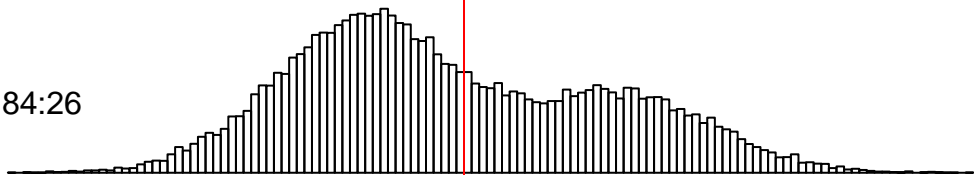

A194:26 – B224:26

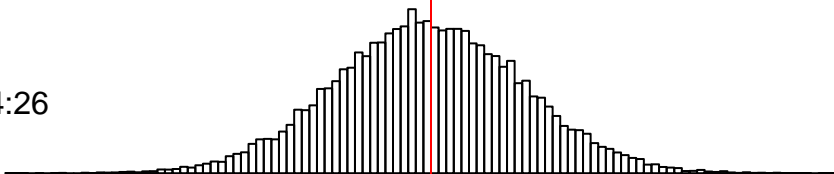

A194:26 – D206:26

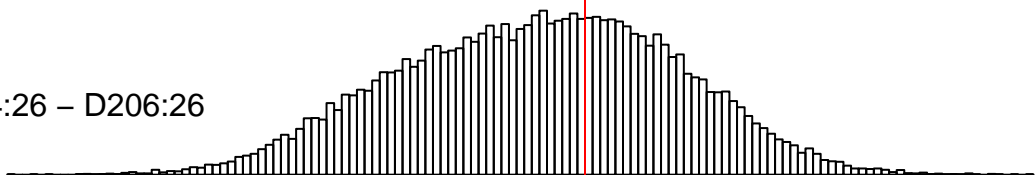

B184:26 – B224:26

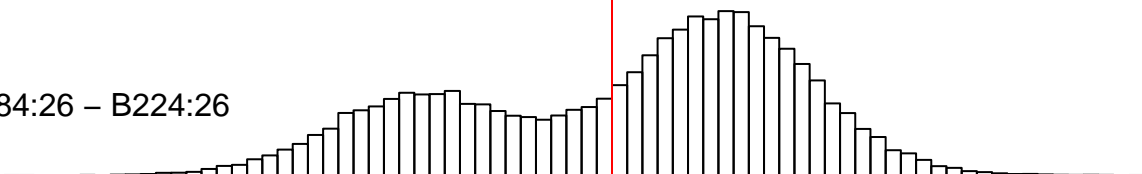

B184:26 – D206:26

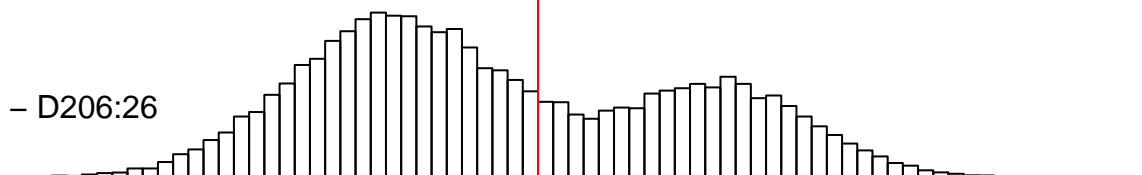

B224:26 – D206:26

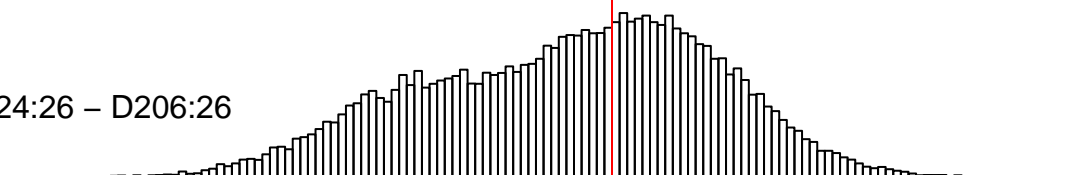

-4 -2 0 2 4

delta(Acid 9)

A194:26

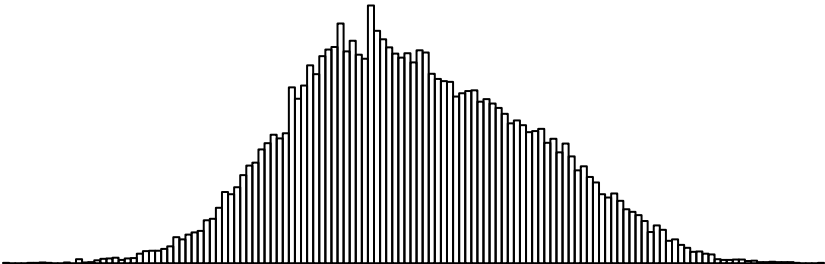

B184:26

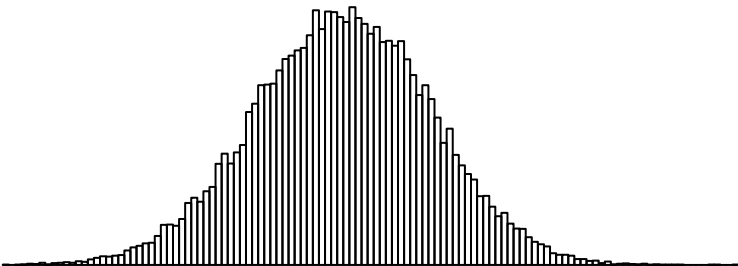

B224:26

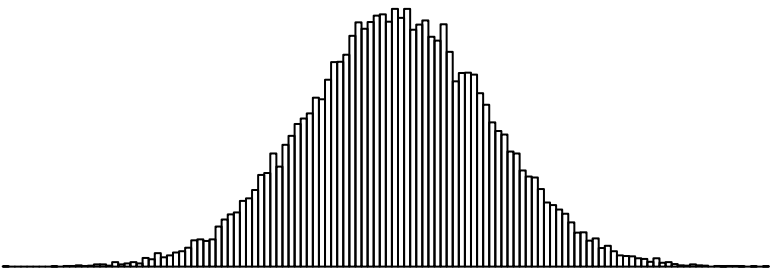

D206:26

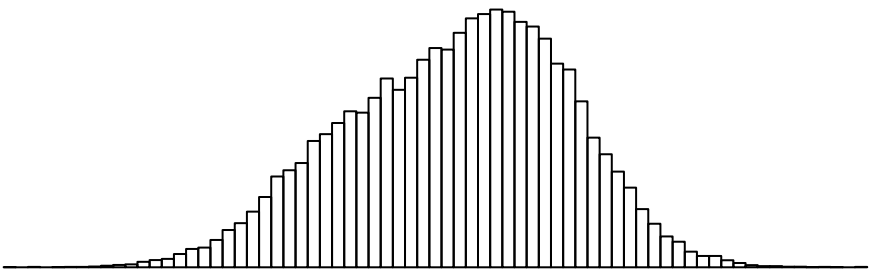

-12      -10      -8      -6      -4      -2

Acid 10

A194:26 – B184:26

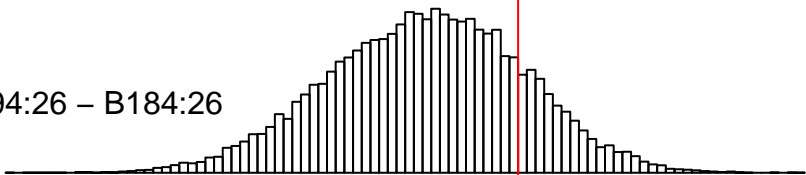

A194:26 – B224:26

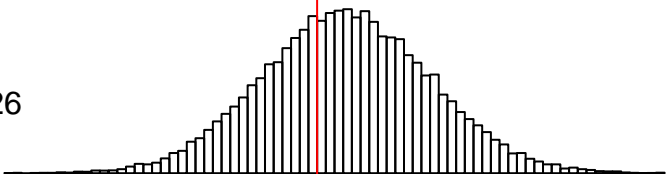

A194:26 – D206:26

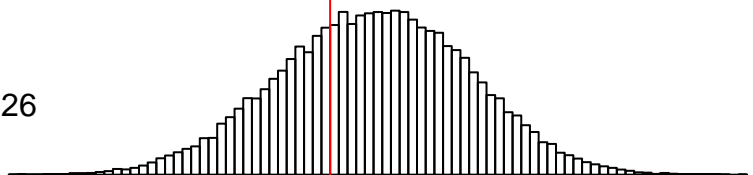

B184:26 – B224:26

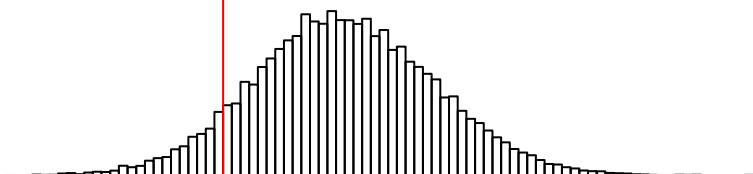

B184:26 – D206:26

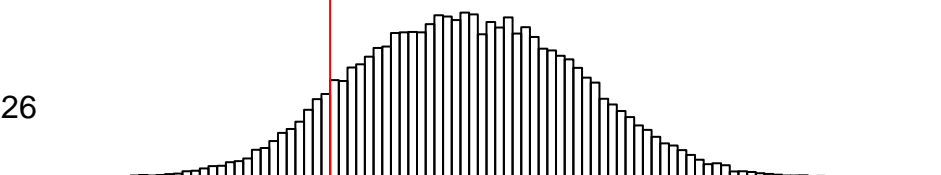

B224:26 – D206:26

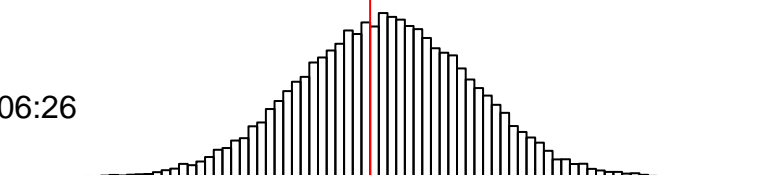

-6 -4 -2 0 2 4 6 8

delta(Acid 10)

A194:26

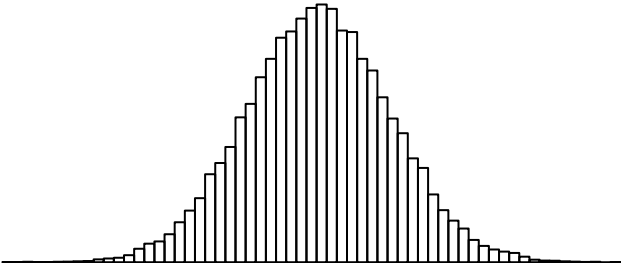

B184:26

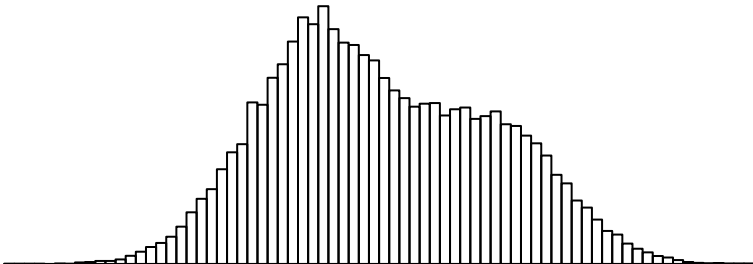

B224:26

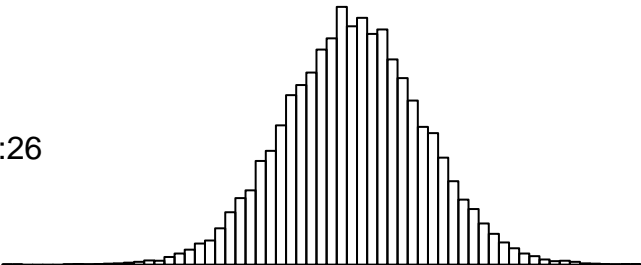

D206:26

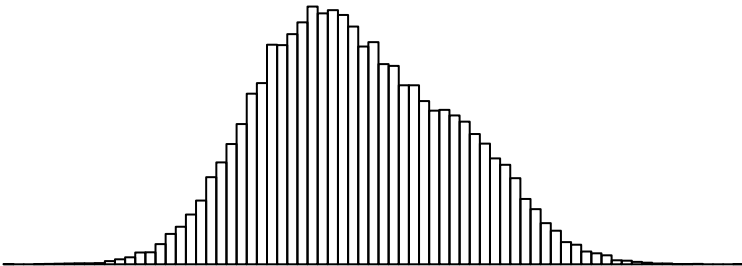

-10      -9      -8      -7      -6      -5      -4

Acid 11

A194:26 – B184:26

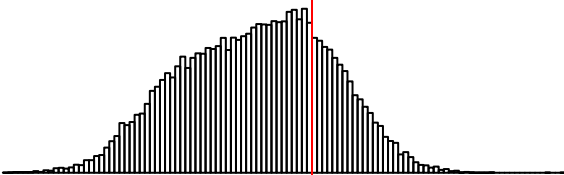

A194:26 – B224:26

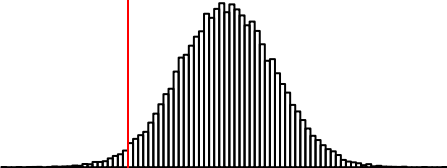

A194:26 – D206:26

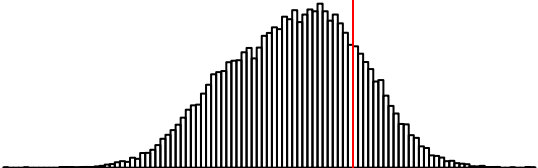

B184:26 – B224:26

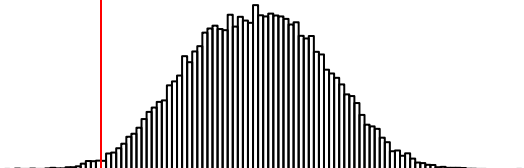

B184:26 – D206:26

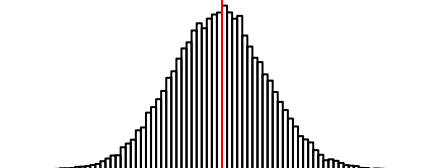

B224:26 – D206:26

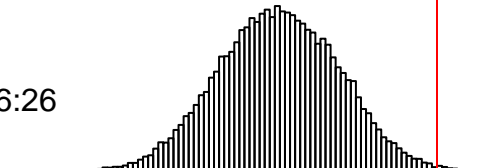

-6 -4 -2 0 2 4 6

delta(Acid 11)



A194:26

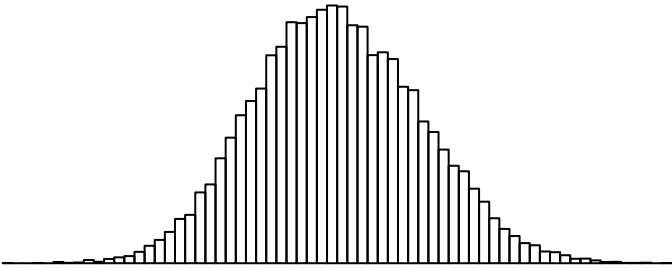

B184:26

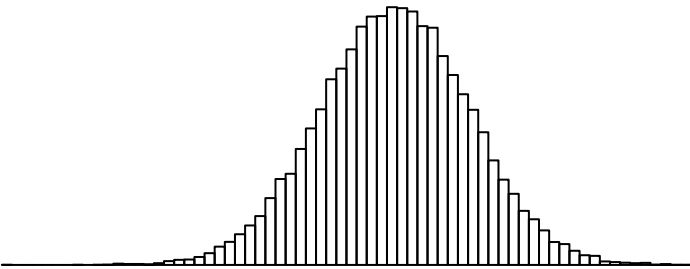

B224:26

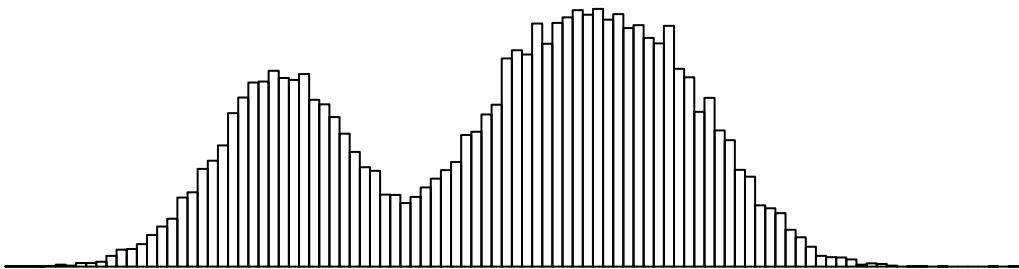

D206:26

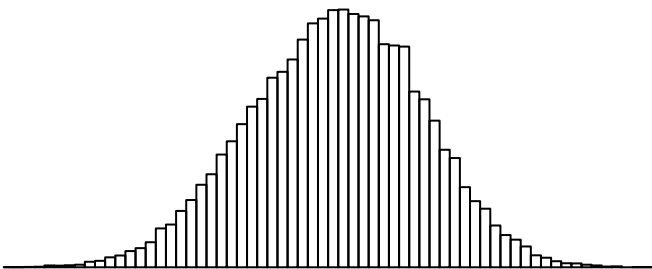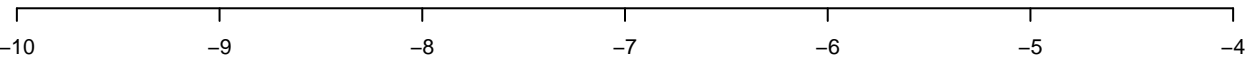

Acid 12

A194:26 – B184:26

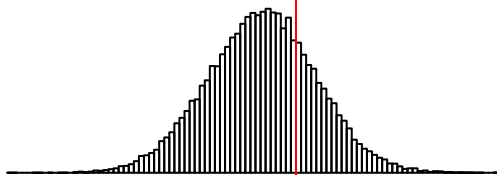

A194:26 – B224:26

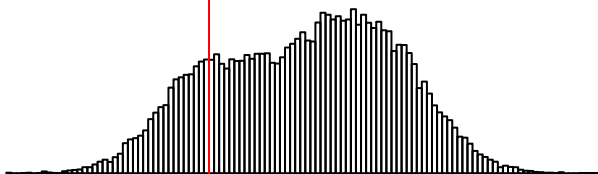

A194:26 – D206:26

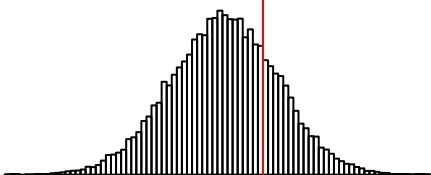

B184:26 – B224:26

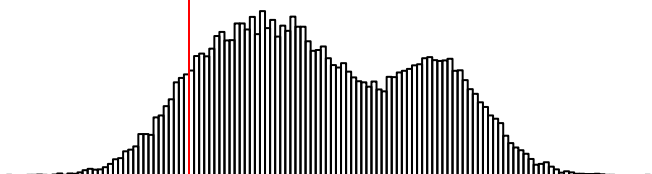

B184:26 – D206:26

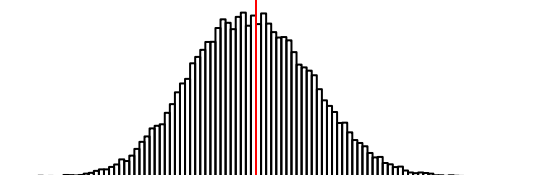

B224:26 – D206:26

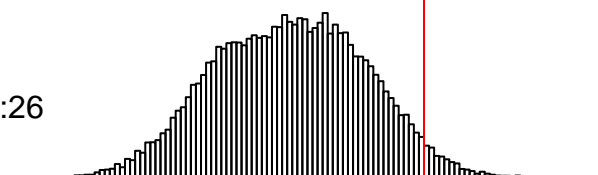

delta(Acid 12)

A194:26

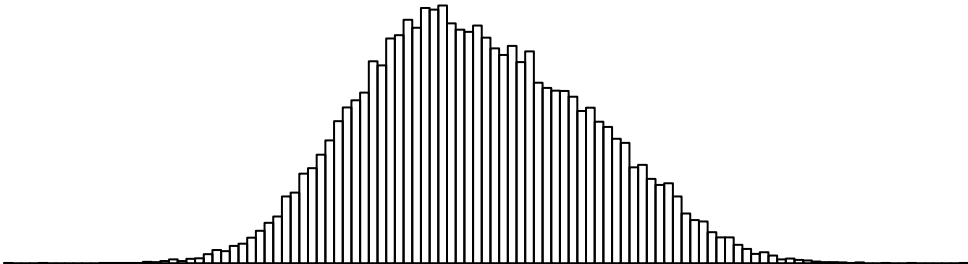

B184:26

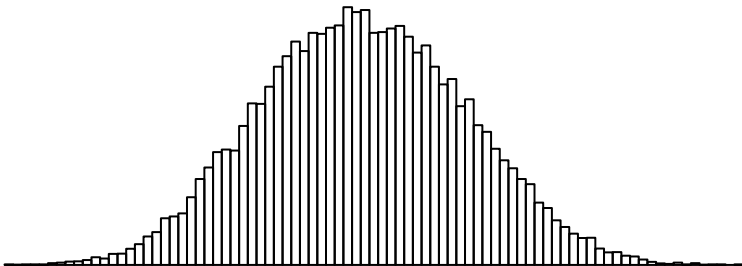

B224:26

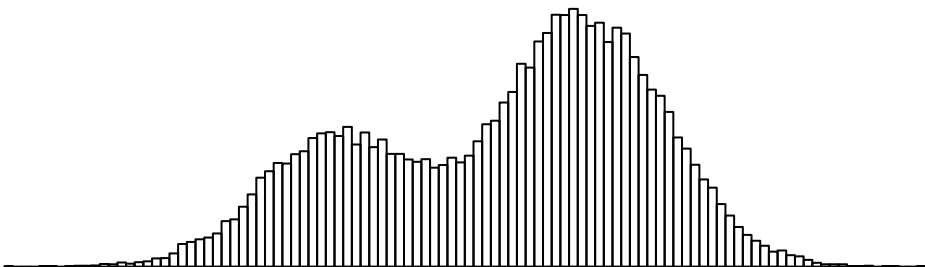

D206:26

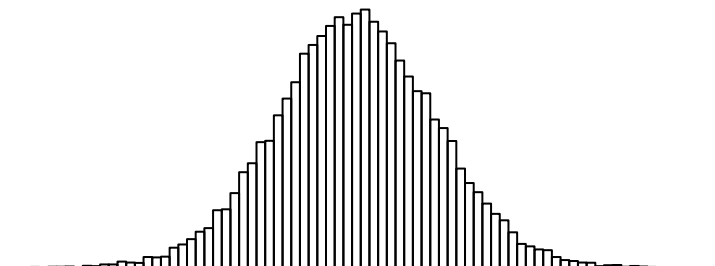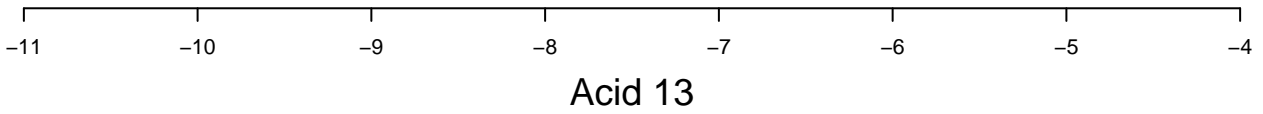

A194:26 – B184:26

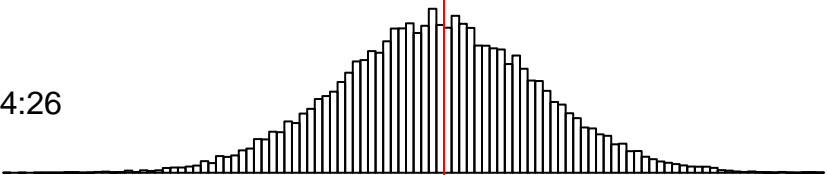

A194:26 – B224:26

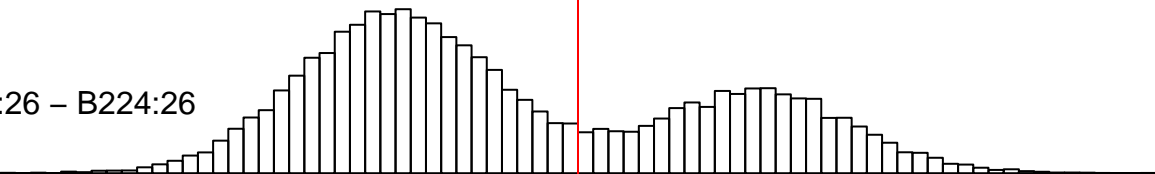

A194:26 – D206:26

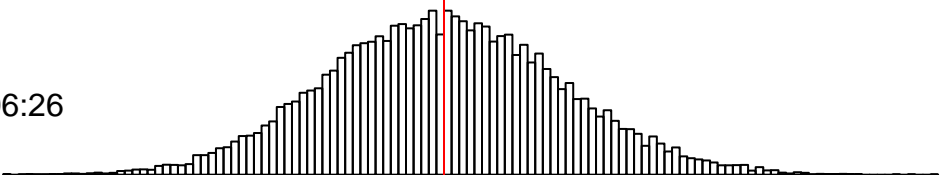

B184:26 – B224:26

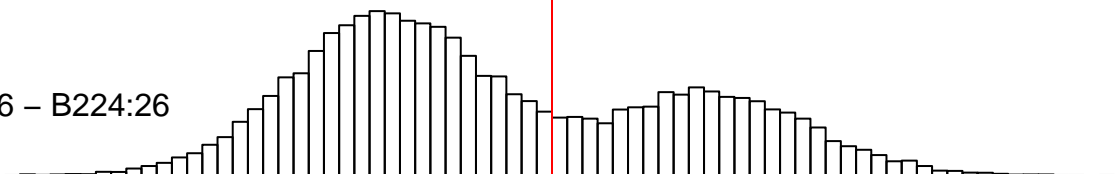

B184:26 – D206:26

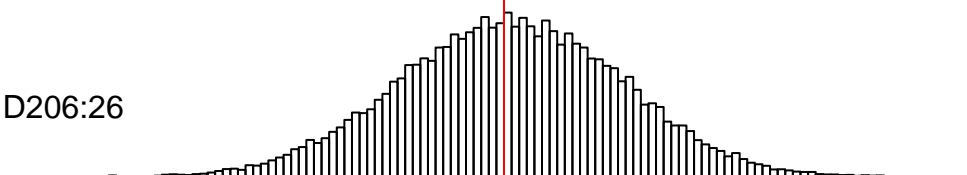

B224:26 – D206:26

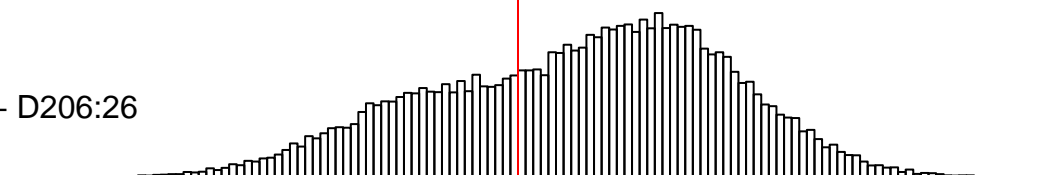

-4 -2 0 2 4

delta(Acid 13)

A194:26

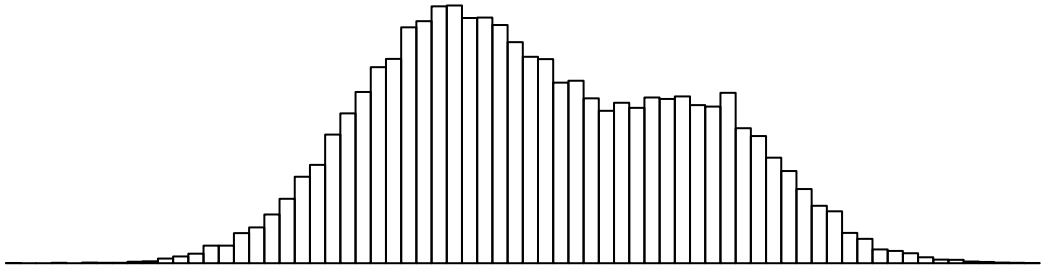

B184:26

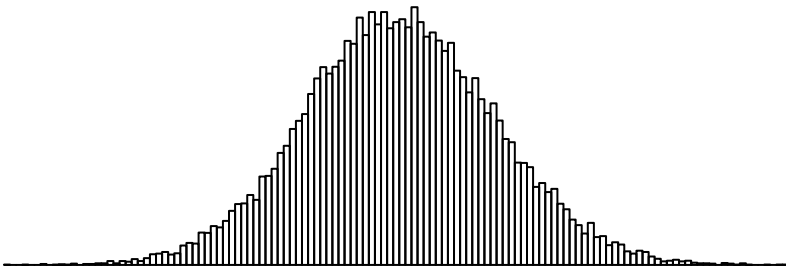

B224:26

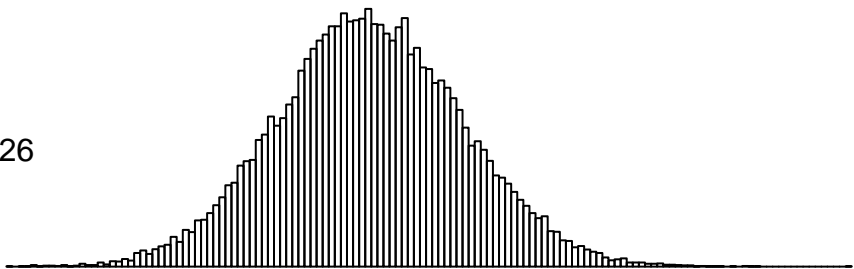

D206:26

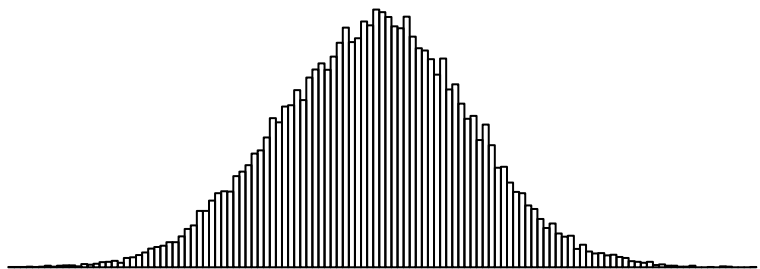

-9 -8 -7 -6 -5

Acid 14

A194:26 – B184:26

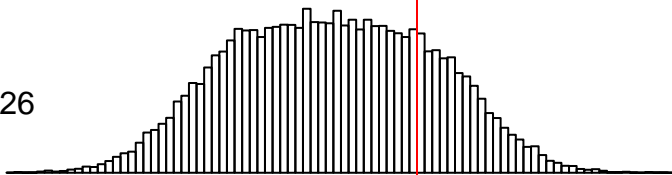

A194:26 – B224:26

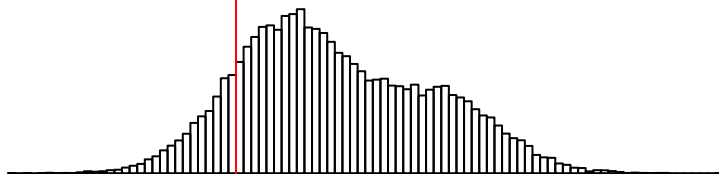

A194:26 – D206:26

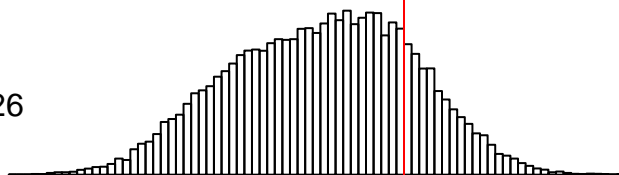

B184:26 – B224:26

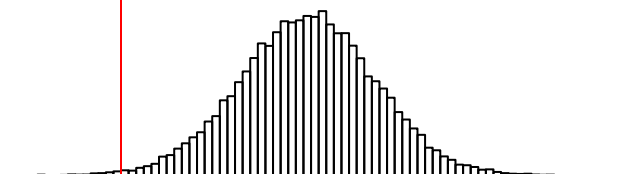

B184:26 – D206:26

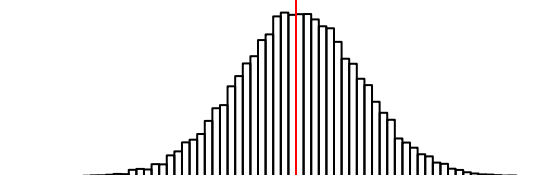

B224:26 – D206:26

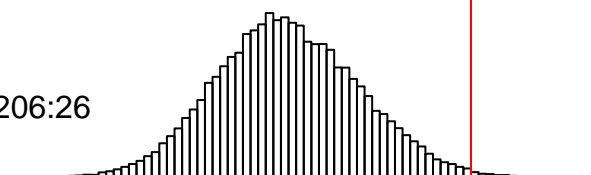

-4 -2 0 2 4

delta(Acid 14)
